# Supplementary material for: Draft Sequences of the Radish (Raphanus sativus L.) Genome
Source: PubMed Central journal article supplement (PMC4195494; doi:10.1093/dnares/dsu014), 2014-05-16
Supplement: supp_dsu014_dsu014supp_tables5.pdf [file supp_dsu014_dsu014supp_tables5.pdf]

Table S5 Gene prediction by Augustus 2.7  
with *A. thaliana* training set

| Groups                                           | Number of<br>CDSs |
|--------------------------------------------------|-------------------|
| Transposable Element<br>(partial, pseudo, short) | 15,545            |
| Intrinsic genes                                  | 45,002            |
| Partial                                          | 16,570            |
| Pseudo and short genes                           | 3,404             |
| Total                                            | 80,521            |

Table S6. Numbers of predicted tRNAs

|        | <i>R. sativus</i> | <i>B. rapa</i> | <i>A. thaliana</i> |
|--------|-------------------|----------------|--------------------|
|        | RSA_r1.0          | BRAD, v1.2     | TAIR10             |
| Ala    | 81                | 72             | 33                 |
| Arg    | 89                | 78             | 39                 |
| Asn    | 43                | 31             | 19                 |
| Asp    | 71                | 54             | 28                 |
| Cys    | 33                | 33             | 17                 |
| Gln    | 40                | 35             | 19                 |
| Glu    | 66                | 57             | 27                 |
| Gly    | 109               | 94             | 43                 |
| His    | 29                | 33             | 12                 |
| Ile    | 65                | 48             | 25                 |
| Leu    | 99                | 85             | 45                 |
| Lys    | 71                | 68             | 33                 |
| Met    | 54                | 52             | 31                 |
| Phe    | 42                | 36             | 17                 |
| Pro    | 112               | 101            | 68                 |
| Ser    | 83                | 75             | 72                 |
| Thr    | 48                | 53             | 26                 |
| Trp    | 28                | 30             | 16                 |
| Tyr    | 51                | 38             | 83                 |
| Val    | 66                | 65             | 32                 |
| Pseudo | 52                | 38             | 13                 |
| SeC    | 0                 | 1              | 0                  |
| Sup    | 0                 | 1              | 0                  |
| Undet  | 3                 | 2              | 1                  |
| Total  | 1,335             | 1,180          | 699                |

Pseudo; Predicted pseudogenes

SeC; Selenocysteine tRNAs

Sup; Possible suppressor tRNAs

Undet; tRNAs with undetermined/unknown isotypes

Table S7 Blast search of RSA\_r1.0 with RadishBase

| Query   | Subject        | Length (query) | Length (subject) | E-value   | Identity | Aligned length | Identity% | Strand | Start (query) | End (query) | Start (subject) | End (subject) |
|---------|----------------|----------------|------------------|-----------|----------|----------------|-----------|--------|---------------|-------------|-----------------|---------------|
| UN00001 | Rsa1.0_03223.1 | 853            | 24512            | 0         | 725      | 767            | 94 +      |        | 90            | 851         | 12771           | 13536         |
| UN00002 | #              | #              | #                | #         | #        | #              | #         | #      | #             | #           | #               | #             |
| UN00003 | Rsa1.0_04281.1 | 640            | 18107            | 0         | 443      | 467            | 94 +      |        | 175           | 640         | 14748           | 15204         |
| UN00004 | Rsa1.0_00773.1 | 848            | 64839            | 0         | 523      | 560            | 93 +      |        | 266           | 813         | 25939           | 26496         |
| UN00005 | Rsa1.0_00265.1 | 941            | 220635           | 0         | 421      | 428            | 98 -      |        | 6             | 433         | 162036          | 162463        |
| UN00006 | Rsa1.0_06990.1 | 988            | 10060            | 0         | 853      | 916            | 93 +      |        | 88            | 988         | 4389            | 5287          |
| UN00007 | Rsa1.0_01338.1 | 959            | 155644           | 1.00E-166 | 344      | 359            | 95 -      |        | 509           | 867         | 148865          | 149220        |
| UN00008 | Rsa1.0_00652.1 | 750            | 70089            | 0         | 727      | 742            | 97 +      |        | 3             | 744         | 34069           | 34809         |
| UN00009 | Rsa1.0_01278.1 | 1423           | 49370            | 0         | 1103     | 1231           | 89 +      |        | 195           | 1420        | 9095            | 10323         |
| UN00010 | Rsa1.0_00008.1 | 750            | 358124           | 5.00E-98  | 185      | 186            | 99 +      |        | 3             | 188         | 306470          | 306655        |
| UN00011 | Rsa1.0_02570.1 | 770            | 30000            | 0         | 743      | 769            | 96 -      |        | 5             | 770         | 5790            | 6551          |
| UN00012 | Rsa1.0_01561.1 | 770            | 43227            | 1.00E-166 | 303      | 305            | 99 +      |        | 214           | 518         | 30907           | 31211         |
| UN00013 | Rsa1.0_02039.1 | 1016           | 35699            | 1.00E-120 | 343      | 380            | 90 +      |        | 3             | 378         | 899             | 1259          |
| UN00014 | Rsa1.0_03440.1 | 863            | 22928            | 0         | 843      | 891            | 94 -      |        | 3             | 863         | 8551            | 9434          |
| UN00015 | Rsa1.0_02079.1 | 1084           | 35306            | 0         | 365      | 375            | 97 -      |        | 710           | 1084        | 3738            | 4111          |
| UN00016 | Rsa1.0_01502.1 | 947            | 44519            | 0         | 515      | 532            | 96 -      |        | 3             | 531         | 36621           | 37147         |
| UN00017 | Rsa1.0_00200.1 | 776            | 162016           | 0         | 440      | 463            | 95 +      |        | 2             | 464         | 113402          | 113852        |
| UN00018 | Rsa1.0_00655.1 | 804            | 195840           | 1.00E-67  | 161      | 171            | 94 +      |        | 387           | 557         | 164863          | 165033        |
| UN00019 | Rsa1.0_07105.1 | 654            | 9886             | 1.00E-167 | 329      | 338            | 97 -      |        | 317           | 654         | 1509            | 1845          |
| UN00020 | Rsa1.0_00556.1 | 788            | 207212           | 0         | 780      | 786            | 99 -      |        | 3             | 788         | 135257          | 136036        |
| UN00021 | Rsa1.0_03348.1 | 906            | 23559            | 0         | 601      | 637            | 94 +      |        | 285           | 906         | 9013            | 9640          |
| UN00022 | Rsa1.0_00254.1 | 1193           | 102600           | 1.00E-139 | 251      | 251            | 100 +     |        | 3             | 253         | 87897           | 88147         |
| UN00023 | Rsa1.0_04106.1 | 730            | 19018            | 1.00E-178 | 328      | 332            | 98 -      |        | 2             | 333         | 6894            | 7225          |
| UN00024 | Rsa1.0_01847.1 | 776            | 38346            | 0         | 392      | 393            | 99 +      |        | 1             | 393         | 985             | 1377          |
| UN00025 | Rsa1.0_39229.1 | 1069           | 573              | 1.00E-179 | 349      | 355            | 98 +      |        | 716           | 1069        | 57              | 409           |
| UN00026 | Rsa1.0_00651.1 | 714            | 247766           | 1.00E-108 | 216      | 219            | 98 +      |        | 460           | 677         | 200722          | 200939        |
| UN00027 | Rsa1.0_00108.1 | 700            | 478491           | 0         | 576      | 603            | 95 -      |        | 14            | 616         | 460317          | 460913        |
| UN00028 | Rsa1.0_01166.1 | 815            | 51877            | 0         | 423      | 438            | 96 +      |        | 379           | 815         | 26786           | 27222         |
| UN00029 | Rsa1.0_01251.1 | 911            | 49873            | 2.00E-88  | 256      | 286            | 89 +      |        | 628           | 911         | 33589           | 33856         |
| UN00030 | Rsa1.0_00385.1 | 476            | 89160            | 1.00E-122 | 238      | 242            | 98 +      |        | 3             | 244         | 30406           | 30646         |
| UN00031 | Rsa1.0_00824.1 | 1129           | 188447           | 0         | 473      | 478            | 98 -      |        | 650           | 1125        | 144181          | 144658        |
| UN00032 | Rsa1.0_00559.1 | 927            | 190486           | 0         | 378      | 389            | 97 -      |        | 392           | 779         | 2470            | 2858          |
| UN00033 | Rsa1.0_00676.1 | 1303           | 69166            | 0         | 489      | 519            | 94 -      |        | 166           | 669         | 54623           | 55138         |
| UN00034 | Rsa1.0_00707.1 | 1226           | 190112           | 0         | 622      | 660            | 94 -      |        | 587           | 1226        | 139912          | 140571        |
| UN00035 | Rsa1.0_01758.1 | 1169           | 39747            | 0         | 612      | 618            | 99 -      |        | 552           | 1169        | 34996           | 35612         |
| UN00036 | Rsa1.0_00066.1 | 871            | 152418           | 0         | 462      | 489            | 94 -      |        | 392           | 871         | 37136           | 37622         |
| UN00037 | Rsa1.0_00248.1 | 769            | 163568           | 0         | 359      | 366            | 98 -      |        | 389           | 754         | 40157           | 40522         |

|         |                |      |        |           |      |      |      |     |      |        |        |
|---------|----------------|------|--------|-----------|------|------|------|-----|------|--------|--------|
| UN00038 | Rsa1.0.03413.1 | 794  | 23137  | 0         | 684  | 740  | 92 + | 3   | 725  | 15902  | 16631  |
| UN00039 | Rsa1.0.16170.1 | 924  | 2258   | 0         | 333  | 335  | 99 - | 591 | 924  | 1208   | 1542   |
| UN00040 | Rsa1.0.01896.1 | 951  | 37512  | 0         | 917  | 951  | 96 - | 2   | 951  | 31690  | 32640  |
| UN00041 | Rsa1.0.00972.1 | 1053 | 57937  | 0         | 491  | 510  | 96 - | 549 | 1053 | 52689  | 53193  |
| UN00042 | Rsa1.0.00035.1 | 1355 | 176449 | 0         | 901  | 952  | 94 - | 4   | 952  | 125394 | 126333 |
| UN00043 | Rsa1.0.00418.1 | 1380 | 215377 | 0         | 1250 | 1296 | 96 - | 95  | 1380 | 24897  | 26192  |
| UN00044 | Rsa1.0.00031.1 | 1346 | 179862 | 0         | 486  | 504  | 96 - | 82  | 585  | 82448  | 82951  |
| UN00045 | Rsa1.0.00707.1 | 885  | 190112 | 0         | 874  | 885  | 98 - | 1   | 885  | 8145   | 9028   |
| UN00046 | Rsa1.0.00387.1 | 572  | 495407 | 0         | 413  | 431  | 95 + | 3   | 433  | 468202 | 468632 |
| UN00047 | Rsa1.0.00716.1 | 562  | 67078  | 0         | 417  | 426  | 97 - | 137 | 562  | 37489  | 37913  |
| UN00048 | Rsa1.0.01029.1 | 1045 | 256254 | 1.00E-133 | 308  | 329  | 93 + | 724 | 1042 | 245893 | 246219 |
| UN00049 | Rsa1.0.00104.1 | 1112 | 368722 | 0         | 1074 | 1111 | 96 - | 3   | 1112 | 71831  | 72940  |
| UN00050 | Rsa1.0.03944.1 | 661  | 19926  | 1.00E-140 | 331  | 356  | 92 + | 11  | 359  | 9333   | 9679   |
| UN00051 | Rsa1.0.29195.1 | 621  | 789    | 6.00E-57  | 129  | 133  | 96 + | 482 | 613  | 551    | 683    |
| UN00052 | Rsa1.0.20338.1 | 1125 | 1316   | 1.00E-139 | 355  | 387  | 91 - | 722 | 1106 | 930    | 1316   |
| UN00053 | Rsa1.0.04786.1 | 1088 | 15988  | 0         | 656  | 686  | 95 + | 2   | 687  | 11442  | 12126  |
| UN00054 | Rsa1.0.00816.1 | 988  | 403350 | 1.00E-120 | 283  | 301  | 94 + | 692 | 988  | 370202 | 370496 |
| UN00055 | Rsa1.0.07851.1 | 681  | 8423   | 1.00E-141 | 270  | 275  | 98 + | 407 | 681  | 4308   | 4582   |
| UN00056 | Rsa1.0.00876.1 | 1346 | 61328  | 1.00E-120 | 276  | 295  | 93 + | 73  | 361  | 49382  | 49676  |
| UN00057 | Rsa1.0.00390.1 | 1112 | 88681  | 1.00E-151 | 275  | 276  | 99 + | 787 | 1062 | 35462  | 35737  |
| UN00058 | Rsa1.0.00939.1 | 1462 | 185227 | 1.00E-175 | 321  | 324  | 99 - | 733 | 1056 | 178977 | 179300 |
| UN00059 | Rsa1.0.01245.1 | 1403 | 149868 | 0         | 593  | 635  | 93 - | 5   | 638  | 37644  | 38260  |
| UN00060 | Rsa1.0.00145.1 | 1500 | 261008 | 1.00E-124 | 248  | 255  | 97 - | 415 | 669  | 39995  | 40249  |
| UN00061 | Rsa1.0.02071.1 | 842  | 35409  | 1.00E-113 | 318  | 355  | 89 - | 1   | 355  | 33313  | 33667  |
| UN00062 | Rsa1.0.00079.1 | 791  | 606987 | 1.00E-102 | 214  | 221  | 96 - | 521 | 740  | 464325 | 464545 |
| UN00063 | Rsa1.0.35376.1 | 1129 | 640    | 1.00E-105 | 289  | 324  | 89 - | 420 | 722  | 164    | 487    |
| UN00064 | Rsa1.0.00278.1 | 1295 | 231896 | 1.00E-107 | 219  | 226  | 96 + | 808 | 1033 | 148696 | 148921 |
| UN00065 | Rsa1.0.10637.1 | 1028 | 5774   | 1.00E-180 | 374  | 392  | 95 + | 633 | 1024 | 2793   | 3184   |
| UN00066 | Rsa1.0.00090.1 | 825  | 273859 | 1.00E-126 | 273  | 287  | 95 - | 1   | 279  | 41355  | 41641  |
| UN00067 | Rsa1.0.06390.1 | 1239 | 11106  | 0         | 609  | 693  | 87 - | 73  | 765  | 6070   | 6756   |
| UN00068 | Rsa1.0.00229.1 | 798  | 105471 | 0         | 669  | 692  | 96 + | 114 | 798  | 82848  | 83539  |
| UN00069 | Rsa1.0.00203.1 | 1012 | 109129 | 0         | 632  | 667  | 94 + | 349 | 1011 | 38683  | 39345  |
| UN00070 | Rsa1.0.03295.1 | 508  | 23970  | 1.00E-152 | 282  | 285  | 98 + | 224 | 508  | 7379   | 7663   |
| UN00071 | Rsa1.0.01958.1 | 804  | 261128 | 1.00E-172 | 322  | 327  | 98 - | 57  | 383  | 131033 | 131359 |
| UN00072 | Rsa1.0.09116.1 | 1544 | 6637   | 0         | 1061 | 1071 | 99 - | 3   | 1073 | 182    | 1252   |
| UN00073 | Rsa1.0.02185.1 | 1181 | 34150  | 0         | 500  | 523  | 95 - | 199 | 716  | 21129  | 21651  |
| UN00074 | Rsa1.0.00466.1 | 860  | 82132  | 0         | 395  | 403  | 98 - | 459 | 860  | 21576  | 21978  |
| UN00075 | Rsa1.0.02241.1 | 1265 | 33520  | 1.00E-121 | 224  | 225  | 99 + | 793 | 1017 | 23921  | 24145  |
| UN00076 | Rsa1.0.01382.1 | 832  | 46877  | 0         | 483  | 514  | 93 + | 330 | 832  | 13890  | 14398  |

|         |                |      |        |           |      |      |       |      |      |        |        |
|---------|----------------|------|--------|-----------|------|------|-------|------|------|--------|--------|
| UN00077 | Rsa1.0.01466.1 | 750  | 45161  | 1.00E-111 | 252  | 260  | 96 +  | 497  | 749  | 28487  | 28746  |
| UN00078 | Rsa1.0.00048.1 | 914  | 167185 | 1.00E-92  | 224  | 237  | 94 +  | 672  | 906  | 33623  | 33858  |
| UN00079 | Rsa1.0.00454.1 | 1316 | 216970 | 0         | 384  | 395  | 97 -  | 615  | 1009 | 191029 | 191423 |
| UN00080 | Rsa1.0.03662.1 | 1284 | 21492  | 0         | 1209 | 1299 | 93 +  | 1    | 1284 | 12730  | 14005  |
| UN00081 | Rsa1.0.03740.1 | 1385 | 21065  | 0         | 413  | 418  | 98 -  | 466  | 883  | 9526   | 9943   |
| UN00082 | Rsa1.0.00944.1 | 539  | 58733  | 0         | 450  | 469  | 95 +  | 76   | 539  | 35701  | 36167  |
| UN00083 | Rsa1.0.00476.1 | 1330 | 280966 | 0         | 553  | 561  | 98 -  | 6    | 566  | 212345 | 212904 |
| UN00084 | Rsa1.0.00857.1 | 885  | 61904  | 0         | 526  | 555  | 94 -  | 331  | 885  | 44571  | 45114  |
| UN00085 | Rsa1.0.00115.1 | 1093 | 131321 | 1.00E-153 | 335  | 353  | 94 +  | 717  | 1066 | 48839  | 49191  |
| UN00086 | Rsa1.0.00218.1 | 694  | 201480 | 1.00E-134 | 246  | 247  | 99 +  | 1    | 247  | 52227  | 52473  |
| UN00087 | Rsa1.0.03646.1 | 1041 | 21598  | 1.00E-147 | 307  | 321  | 95 -  | 477  | 797  | 11101  | 11421  |
| UN00088 | Rsa1.0.00008.1 | 707  | 358124 | 0         | 491  | 534  | 91 +  | 122  | 644  | 142943 | 143470 |
| UN00089 | Rsa1.0.07479.1 | 948  | 9281   | 1.00E-154 | 277  | 277  | 100 + | 71   | 347  | 3570   | 3846   |
| UN00090 | Rsa1.0.00454.1 | 781  | 216970 | 0         | 586  | 604  | 97 +  | 119  | 722  | 155884 | 156487 |
| UN00091 | Rsa1.0.06124.1 | 1048 | 11681  | 0         | 997  | 1076 | 92 +  | 2    | 1041 | 6612   | 7678   |
| UN00092 | Rsa1.0.01002.1 | 1167 | 57063  | 0         | 505  | 513  | 98 +  | 655  | 1167 | 18269  | 18781  |
| UN00093 | Rsa1.0.00166.1 | 1071 | 240912 | 0         | 513  | 521  | 98 -  | 2    | 522  | 221531 | 222051 |
| UN00094 | Rsa1.0.00360.1 | 718  | 91190  | 2.00E-79  | 166  | 171  | 97 +  | 239  | 409  | 46323  | 46493  |
| UN00095 | Rsa1.0.00541.1 | 869  | 76863  | 1.00E-161 | 315  | 324  | 97 +  | 377  | 700  | 34580  | 34903  |
| UN00096 | Rsa1.0.04806.1 | 575  | 15898  | 0         | 355  | 356  | 99 +  | 220  | 575  | 7284   | 7639   |
| UN00097 | Rsa1.0.02173.1 | 784  | 34318  | 1.00E-110 | 219  | 223  | 98 +  | 1    | 223  | 15516  | 15737  |
| UN00098 | Rsa1.0.05367.1 | 479  | 14010  | 0         | 383  | 397  | 96 +  | 73   | 467  | 4072   | 4467   |
| UN00099 | Rsa1.0.00487.1 | 1298 | 80674  | 1.00E-161 | 343  | 359  | 95 -  | 938  | 1294 | 37993  | 38350  |
| UN00100 | Rsa1.0.01603.1 | 919  | 42468  | 0         | 858  | 945  | 90 +  | 3    | 917  | 8931   | 9856   |
| UN00101 | Rsa1.0.01905.1 | 694  | 37450  | 8.00E-63  | 204  | 233  | 87 +  | 181  | 413  | 21327  | 21543  |
| UN00102 | Rsa1.0.00115.1 | 1171 | 131321 | 1.00E-178 | 371  | 388  | 95 -  | 748  | 1134 | 49272  | 49653  |
| UN00103 | Rsa1.0.00009.1 | 802  | 232558 | 1.00E-137 | 262  | 267  | 98 -  | 145  | 411  | 132659 | 132925 |
| UN00104 | Rsa1.0.03404.1 | 1489 | 23177  | 0         | 939  | 967  | 97 +  | 2    | 962  | 10088  | 11054  |
| UN00105 | Rsa1.0.02028.1 | 780  | 35857  | 1.00E-140 | 317  | 336  | 94 -  | 9    | 344  | 5808   | 6140   |
| UN00106 | Rsa1.0.01867.1 | 698  | 37960  | 0         | 414  | 415  | 99 -  | 282  | 695  | 19649  | 20063  |
| UN00107 | Rsa1.0.00295.1 | 1412 | 152597 | 0         | 431  | 460  | 93 -  | 951  | 1410 | 48279  | 48731  |
| UN00108 | Rsa1.0.00881.1 | 966  | 61260  | 1.00E-178 | 693  | 810  | 85 +  | 160  | 961  | 47054  | 47857  |
| UN00109 | Rsa1.0.00245.1 | 1087 | 103569 | 0         | 433  | 436  | 99 +  | 653  | 1087 | 80498  | 80933  |
| UN00110 | Rsa1.0.01978.1 | 823  | 36546  | 0         | 390  | 398  | 97 -  | 1    | 398  | 5240   | 5637   |
| UN00111 | Rsa1.0.00451.1 | 768  | 322533 | 0         | 360  | 369  | 97 -  | 3    | 371  | 309261 | 309629 |
| UN00112 | Rsa1.0.00757.1 | 422  | 65559  | 1.00E-75  | 183  | 194  | 94 -  | 216  | 405  | 12485  | 12678  |
| UN00113 | Rsa1.0.40781.1 | 1447 | 550    | 2.33E-156 | 267  | 268  | 99 +  | 1180 | 1447 | 1      | 268    |
| UN00114 | Rsa1.0.06901.1 | 1047 | 10186  | 0         | 467  | 489  | 95 -  | 7    | 495  | 9698   | 10186  |
| UN00115 | Rsa1.0.01519.1 | 764  | 44144  | 1.00E-125 | 251  | 259  | 96 -  | 337  | 595  | 40675  | 40933  |

|         |                |      |        |           |      |      |       |      |      |        |        |
|---------|----------------|------|--------|-----------|------|------|-------|------|------|--------|--------|
| UN00116 | Rsa1.0_01666.1 | 874  | 173972 | 0         | 340  | 345  | 98 +  | 431  | 775  | 135570 | 135914 |
| UN00117 | Rsa1.0_01978.1 | 1397 | 36546  | 0         | 712  | 722  | 98 +  | 678  | 1397 | 28038  | 28759  |
| UN00118 | Rsa1.0_00734.1 | 825  | 66508  | 0         | 465  | 493  | 94 -  | 3    | 494  | 44653  | 45142  |
| UN00119 | Rsa1.0_03054.1 | 838  | 25738  | 0         | 501  | 501  | 100 + | 1    | 501  | 17279  | 17779  |
| UN00120 | Rsa1.0_01563.1 | 1372 | 170823 | 1.00E-161 | 289  | 289  | 100 + | 1084 | 1372 | 19906  | 20194  |
| UN00121 | Rsa1.0_00028.1 | 775  | 293984 | 1.00E-132 | 275  | 287  | 95 +  | 489  | 775  | 281443 | 281729 |
| UN00122 | Rsa1.0_00149.1 | 532  | 305196 | 1.00E-141 | 313  | 328  | 95 +  | 204  | 528  | 102071 | 102395 |
| UN00123 | Rsa1.0_01985.1 | 365  | 36491  | 2.00E-52  | 130  | 137  | 94 -  | 229  | 365  | 1883   | 2018   |
| UN00124 | Rsa1.0_12214.1 | 802  | 5287   | 1.00E-165 | 319  | 327  | 97 +  | 262  | 588  | 2639   | 2965   |
| UN00125 | Rsa1.0_00552.1 | 1160 | 206757 | 0         | 594  | 623  | 95 -  | 534  | 1149 | 67991  | 68611  |
| UN00126 | Rsa1.0_05632.1 | 801  | 13120  | 0         | 474  | 487  | 97 +  | 315  | 801  | 9527   | 10010  |
| UN00127 | Rsa1.0_04236.1 | 1562 | 18370  | 0         | 828  | 830  | 99 +  | 733  | 1562 | 5917   | 6746   |
| UN00128 | Rsa1.0_24457.1 | 1183 | 987    | 1.00E-105 | 264  | 284  | 92 -  | 321  | 595  | 647    | 928    |
| UN00129 | Rsa1.0_00856.1 | 1274 | 62037  | 7.00E-80  | 215  | 237  | 90 +  | 1017 | 1252 | 16952  | 17176  |
| UN00130 | Rsa1.0_00673.1 | 1299 | 69325  | 1.00E-150 | 378  | 410  | 92 -  | 897  | 1299 | 53354  | 53747  |
| UN00131 | Rsa1.0_00654.1 | 1356 | 70012  | 0         | 784  | 811  | 96 -  | 31   | 838  | 35270  | 36076  |
| UN00132 | Rsa1.0_00832.1 | 875  | 62622  | 0         | 363  | 376  | 96 +  | 500  | 875  | 33766  | 34139  |
| UN00133 | Rsa1.0_00075.1 | 253  | 146680 | 1.00E-120 | 242  | 249  | 97 -  | 7    | 253  | 69250  | 69498  |
| UN00134 | Rsa1.0_02949.1 | 918  | 26506  | 1.00E-111 | 212  | 213  | 99 +  | 707  | 918  | 4000   | 4212   |
| UN00135 | Rsa1.0_00061.1 | 975  | 218685 | 0         | 547  | 570  | 95 +  | 129  | 698  | 99303  | 99866  |
| UN00136 | Rsa1.0_05963.1 | 689  | 12090  | 1.00E-138 | 269  | 274  | 98 +  | 73   | 346  | 2744   | 3016   |
| UN00137 | Rsa1.0_00230.1 | 1357 | 105389 | 0         | 1169 | 1217 | 96 -  | 151  | 1357 | 82518  | 83733  |
| UN00138 | Rsa1.0_00237.1 | 809  | 235974 | 8.00E-94  | 175  | 175  | 100 - | 212  | 386  | 19068  | 19242  |
| UN00139 | Rsa1.0_01569.1 | 1312 | 43029  | 1.00E-129 | 262  | 271  | 96 +  | 426  | 696  | 37369  | 37639  |
| UN00140 | Rsa1.0_01393.1 | 1299 | 46661  | 1.00E-163 | 321  | 331  | 96 -  | 975  | 1299 | 41309  | 41639  |
| UN00141 | Rsa1.0_00911.1 | 1024 | 59943  | 0         | 986  | 1025 | 96 -  | 1    | 1023 | 56165  | 57185  |
| UN00142 | Rsa1.0_00111.1 | 1446 | 390088 | 7.00E-68  | 171  | 179  | 95 -  | 1273 | 1446 | 33632  | 33810  |
| UN00143 | Rsa1.0_01092.1 | 978  | 54348  | 1.00E-117 | 243  | 252  | 96 +  | 3    | 251  | 50206  | 50457  |
| UN00144 | Rsa1.0_02381.1 | 668  | 31972  | 1.00E-121 | 242  | 249  | 97 +  | 282  | 530  | 25042  | 25290  |
| UN00145 | Rsa1.0_04333.1 | 844  | 17865  | 4.00E-62  | 131  | 134  | 97 -  | 68   | 201  | 13294  | 13427  |
| UN00146 | Rsa1.0_07542.1 | 729  | 9160   | 5.00E-55  | 110  | 110  | 100 + | 511  | 620  | 2709   | 2818   |
| UN00147 | Rsa1.0_03747.1 | 796  | 21046  | 1.00E-126 | 252  | 260  | 96 -  | 1    | 254  | 20332  | 20591  |
| UN00148 | Rsa1.0_02068.1 | 587  | 35432  | 1.00E-133 | 348  | 383  | 90 -  | 188  | 558  | 15245  | 15611  |
| UN00149 | Rsa1.0_00469.1 | 610  | 82084  | 0         | 498  | 506  | 98 -  | 105  | 610  | 20497  | 21002  |
| UN00150 | Rsa1.0_01789.1 | 1325 | 39250  | 0         | 450  | 462  | 97 +  | 859  | 1319 | 5483   | 5943   |
| UN00151 | Rsa1.0_00092.1 | 736  | 659932 | 1.00E-86  | 249  | 276  | 90 -  | 463  | 736  | 627152 | 627409 |
| UN00152 | Rsa1.0_00416.1 | 954  | 86772  | 1.00E-110 | 209  | 211  | 99 -  | 743  | 953  | 47497  | 47707  |
| UN00153 | Rsa1.0_02958.1 | 885  | 26443  | 0         | 859  | 904  | 95 +  | 1    | 885  | 8747   | 9650   |
| UN00154 | Rsa1.0_02012.1 | 853  | 36084  | 3.00E-87  | 302  | 350  | 86 +  | 2    | 351  | 15973  | 16286  |

|         |                |      |        |           |      |      |       |      |      |        |        |
|---------|----------------|------|--------|-----------|------|------|-------|------|------|--------|--------|
| UN00155 | Rsa1.0.05140.1 | 756  | 14710  | 1.00E-111 | 227  | 233  | 97 -  | 48   | 280  | 12012  | 12243  |
| UN00156 | Rsa1.0.02079.1 | 747  | 35306  | 0         | 476  | 500  | 95 -  | 248  | 747  | 16731  | 17229  |
| UN00157 | Rsa1.0.01221.1 | 835  | 50421  | 9.00E-63  | 126  | 127  | 99 +  | 471  | 597  | 47186  | 47312  |
| UN00158 | Rsa1.0.00127.1 | 793  | 127446 | 3.00E-78  | 152  | 153  | 99 -  | 512  | 664  | 30829  | 30981  |
| UN00159 | Rsa1.0.01491.1 | 1342 | 44718  | 0         | 454  | 465  | 97 -  | 870  | 1334 | 42118  | 42580  |
| UN00160 | Rsa1.0.03228.1 | 784  | 24471  | 0         | 448  | 463  | 96 +  | 326  | 784  | 20972  | 21434  |
| UN00161 | Rsa1.0.00732.1 | 759  | 66631  | 1.00E-104 | 205  | 209  | 98 -  | 348  | 556  | 4101   | 4309   |
| UN00162 | Rsa1.0.00469.1 | 1126 | 82084  | 1.00E-144 | 272  | 275  | 98 +  | 850  | 1124 | 69947  | 70220  |
| UN00163 | Rsa1.0.01451.1 | 900  | 45459  | 0         | 800  | 812  | 98 +  | 1    | 811  | 15133  | 15944  |
| UN00164 | Rsa1.0.00545.1 | 912  | 189649 | 0         | 588  | 594  | 98 -  | 311  | 904  | 25078  | 25671  |
| UN00165 | Rsa1.0.00502.1 | 1430 | 204180 | 0         | 1182 | 1194 | 98 -  | 243  | 1430 | 32125  | 33318  |
| UN00166 | Rsa1.0.03488.1 | 874  | 22556  | 0         | 321  | 321  | 100 + | 112  | 432  | 13317  | 13637  |
| UN00167 | Rsa1.0.00651.1 | 706  | 247766 | 5.00E-67  | 293  | 337  | 86 -  | 352  | 681  | 90205  | 90524  |
| UN00168 | Rsa1.0.03434.1 | 587  | 22960  | 2.33E-156 | 310  | 323  | 95 -  | 272  | 587  | 12154  | 12476  |
| UN00169 | Rsa1.0.01234.1 | 744  | 50183  | 1.00E-104 | 226  | 237  | 95 -  | 9    | 245  | 11958  | 12194  |
| UN00170 | Rsa1.0.00380.1 | 1251 | 89748  | 0         | 528  | 582  | 90 -  | 669  | 1250 | 74642  | 75200  |
| UN00171 | Rsa1.0.06853.1 | 1391 | 10264  | 0         | 862  | 902  | 95 -  | 2    | 899  | 1      | 899    |
| UN00172 | Rsa1.0.16783.1 | 899  | 2037   | 0         | 392  | 393  | 99 +  | 507  | 899  | 1540   | 1932   |
| UN00173 | Rsa1.0.02688.1 | 789  | 28644  | 2.00E-60  | 148  | 157  | 94 -  | 3    | 156  | 13635  | 13791  |
| UN00174 | Rsa1.0.00133.1 | 670  | 123768 | 0         | 351  | 358  | 98 +  | 1    | 358  | 27299  | 27654  |
| UN00175 | Rsa1.0.00876.1 | 2855 | 61328  | 0         | 1086 | 1119 | 97 +  | 1574 | 2691 | 35058  | 36167  |
| UN00176 | Rsa1.0.39807.1 | 848  | 564    | 1.00E-61  | 162  | 172  | 94 -  | 675  | 846  | 296    | 463    |
| UN00177 | Rsa1.0.01422.1 | 1061 | 46172  | 1.00E-136 | 341  | 368  | 92 -  | 701  | 1056 | 24766  | 25133  |
| UN00178 | Rsa1.0.01674.1 | 2037 | 168300 | 1.00E-165 | 304  | 307  | 99 +  | 554  | 860  | 22938  | 23244  |
| UN00179 | Rsa1.0.21410.1 | 1030 | 1207   | 1.00E-103 | 376  | 434  | 86 +  | 484  | 913  | 340    | 768    |
| UN00180 | Rsa1.0.03573.1 | 1221 | 22013  | 1.00E-163 | 298  | 300  | 99 -  | 1    | 300  | 12429  | 12728  |
| UN00181 | Rsa1.0.00611.1 | 1055 | 72410  | 1.00E-111 | 286  | 311  | 91 +  | 736  | 1036 | 1963   | 2269   |
| UN00182 | Rsa1.0.03346.1 | 589  | 23589  | 0         | 562  | 586  | 95 +  | 1    | 586  | 10511  | 11095  |
| UN00183 | Rsa1.0.00017.1 | 1505 | 752458 | 5.00E-78  | 155  | 157  | 98 +  | 635  | 791  | 28933  | 29089  |
| UN00184 | Rsa1.0.01026.1 | 1301 | 171624 | 0         | 580  | 605  | 95 -  | 700  | 1299 | 30310  | 30906  |
| UN00185 | Rsa1.0.00238.1 | 608  | 193193 | 0         | 459  | 475  | 96 +  | 138  | 608  | 190030 | 190504 |
| UN00186 | Rsa1.0.01168.1 | 685  | 153765 | 1.00E-115 | 283  | 304  | 93 +  | 382  | 683  | 41780  | 42069  |
| UN00187 | #              | #    | #      | #         | #    | #    | #     | #    | #    | #      | #      |
| UN00188 | Rsa1.0.02223.1 | 717  | 152421 | 1.00E-141 | 311  | 326  | 95 +  | 392  | 715  | 129665 | 129988 |
| UN00189 | Rsa1.0.00608.1 | 980  | 172672 | 0         | 352  | 358  | 98 +  | 623  | 980  | 100163 | 100515 |
| UN00190 | Rsa1.0.00121.1 | 1289 | 278029 | 1.00E-87  | 171  | 173  | 98 +  | 489  | 661  | 77428  | 77600  |
| UN00191 | Rsa1.0.03467.1 | 1017 | 22687  | 0         | 636  | 668  | 95 +  | 352  | 1017 | 10718  | 11378  |
| UN00192 | Rsa1.0.00172.1 | 1357 | 115476 | 0         | 906  | 910  | 99 -  | 5    | 914  | 58471  | 59380  |
| UN00193 | Rsa1.0.00388.1 | 1138 | 88890  | 1.00E-96  | 205  | 212  | 96 -  | 882  | 1092 | 63459  | 63670  |

|         |                |      |        |           |      |      |       |     |      |        |        |
|---------|----------------|------|--------|-----------|------|------|-------|-----|------|--------|--------|
| UN00194 | Rsa1.0_00136.1 | 753  | 122464 | 1.00E-46  | 108  | 112  | 96 +  | 206 | 317  | 28826  | 28937  |
| UN00195 | Rsa1.0_01280.1 | 1024 | 49321  | 2.00E-64  | 132  | 134  | 98 -  | 550 | 683  | 38226  | 38359  |
| UN00196 | Rsa1.0_00203.1 | 915  | 109129 | 0         | 434  | 445  | 97 +  | 3   | 447  | 54534  | 54975  |
| UN00197 | Rsa1.0_00123.1 | 1110 | 325650 | 0         | 650  | 689  | 94 +  | 418 | 1105 | 240510 | 241183 |
| UN00198 | Rsa1.0_00127.1 | 783  | 127446 | 0         | 520  | 536  | 97 -  | 3   | 538  | 64912  | 65446  |
| UN00199 | Rsa1.0_04319.1 | 1323 | 17944  | 1.00E-145 | 264  | 265  | 99 +  | 66  | 330  | 16768  | 17032  |
| UN00200 | Rsa1.0_00954.1 | 890  | 189536 | 0         | 683  | 692  | 98 +  | 199 | 890  | 31151  | 31842  |
| UN00201 | Rsa1.0_03274.1 | 1106 | 24159  | 0         | 615  | 632  | 97 +  | 144 | 769  | 14951  | 15577  |
| UN00202 | Rsa1.0_00529.1 | 1193 | 77487  | 1.00E-115 | 229  | 235  | 97 +  | 609 | 843  | 71526  | 71760  |
| UN00203 | Rsa1.0_00042.1 | 783  | 171507 | 2.00E-73  | 153  | 157  | 97 -  | 386 | 542  | 88765  | 88921  |
| UN00204 | Rsa1.0_11811.1 | 529  | 5401   | 8.00E-84  | 176  | 182  | 96 +  | 48  | 229  | 2094   | 2275   |
| UN00205 | Rsa1.0_10543.1 | 1201 | 5808   | 1.00E-178 | 404  | 434  | 93 +  | 736 | 1169 | 4342   | 4767   |
| UN00206 | Rsa1.0_00018.1 | 1272 | 410899 | 0         | 360  | 366  | 98 +  | 275 | 640  | 67806  | 68169  |
| UN00207 | Rsa1.0_00211.1 | 1836 | 228189 | 0         | 563  | 599  | 93 -  | 432 | 1006 | 8748   | 9346   |
| UN00208 | Rsa1.0_00900.1 | 898  | 60367  | 0         | 475  | 479  | 99 -  | 420 | 898  | 19867  | 20345  |
| UN00209 | Rsa1.0_01322.1 | 1308 | 48166  | 0         | 568  | 598  | 94 -  | 710 | 1306 | 7334   | 7931   |
| UN00210 | Rsa1.0_03471.1 | 620  | 22678  | 1.00E-111 | 227  | 234  | 97 -  | 168 | 398  | 14969  | 15202  |
| UN00211 | Rsa1.0_01245.1 | 894  | 149868 | 0         | 570  | 587  | 97 +  | 309 | 894  | 45960  | 46539  |
| UN00212 | Rsa1.0_00437.1 | 1237 | 84879  | 3.00E-97  | 193  | 197  | 97 -  | 687 | 883  | 13824  | 14020  |
| UN00213 | Rsa1.0_02198.1 | 664  | 33989  | 2.00E-75  | 188  | 203  | 92 -  | 462 | 664  | 14016  | 14207  |
| UN00214 | Rsa1.0_01493.1 | 978  | 44670  | 1.00E-110 | 245  | 258  | 94 +  | 721 | 978  | 7846   | 8101   |
| UN00215 | Rsa1.0_03786.1 | 1361 | 20879  | 0         | 1305 | 1364 | 95 +  | 2   | 1361 | 13533  | 14896  |
| UN00216 | Rsa1.0_01768.1 | 1252 | 138463 | 1.00E-133 | 248  | 250  | 99 +  | 414 | 663  | 109251 | 109500 |
| UN00217 | Rsa1.0_00305.1 | 1035 | 97308  | 0         | 395  | 405  | 97 -  | 599 | 1003 | 63923  | 64326  |
| UN00218 | Rsa1.0_11906.1 | 784  | 5374   | 1.00E-133 | 241  | 241  | 100 - | 221 | 461  | 2650   | 2890   |
| UN00219 | Rsa1.0_00665.1 | 816  | 69539  | 0         | 621  | 627  | 99 -  | 135 | 756  | 64646  | 65272  |
| UN00220 | Rsa1.0_04200.1 | 1264 | 18490  | 1.00E-135 | 271  | 280  | 96 -  | 3   | 282  | 13777  | 14056  |
| UN00221 | Rsa1.0_00111.1 | 1784 | 390088 | 0         | 370  | 375  | 98 +  | 62  | 436  | 332775 | 333148 |
| UN00222 | Rsa1.0_00202.1 | 1086 | 185895 | 0         | 1040 | 1050 | 99 +  | 39  | 1086 | 84872  | 85920  |
| UN00223 | Rsa1.0_00020.1 | 1218 | 283099 | 0         | 1184 | 1221 | 96 +  | 3   | 1218 | 13362  | 14582  |
| UN00224 | Rsa1.0_00805.1 | 949  | 63724  | 1.00E-138 | 372  | 409  | 90 -  | 545 | 945  | 35477  | 35874  |
| UN00225 | Rsa1.0_04961.1 | 760  | 15316  | 0         | 737  | 762  | 96 +  | 4   | 760  | 1405   | 2163   |
| UN00226 | Rsa1.0_00053.1 | 1349 | 263459 | 1.00E-141 | 312  | 329  | 94 +  | 962 | 1288 | 62436  | 62762  |
| UN00227 | Rsa1.0_00222.1 | 776  | 172263 | 3.00E-84  | 171  | 175  | 97 -  | 170 | 344  | 59424  | 59598  |
| UN00228 | Rsa1.0_01762.1 | 1325 | 39682  | 1.00E-103 | 218  | 227  | 96 -  | 7   | 233  | 10878  | 11104  |
| UN00229 | Rsa1.0_00123.1 | 802  | 325650 | 0         | 605  | 624  | 96 -  | 2   | 625  | 295974 | 296597 |
| UN00230 | Rsa1.0_04553.1 | 873  | 16877  | 0         | 357  | 365  | 97 -  | 509 | 873  | 5964   | 6328   |
| UN00231 | Rsa1.0_01504.1 | 787  | 189978 | 1.00E-114 | 275  | 296  | 92 -  | 10  | 297  | 171988 | 172278 |
| UN00232 | Rsa1.0_00655.1 | 936  | 195840 | 0         | 387  | 397  | 97 +  | 541 | 936  | 174971 | 175367 |



|         |                |      |        |           |      |      |       |      |      |        |        |
|---------|----------------|------|--------|-----------|------|------|-------|------|------|--------|--------|
| UN00233 | Rsa1.0.01880.1 | 851  | 37745  | 0         | 815  | 852  | 95 -  | 4    | 849  | 35125  | 35976  |
| UN00234 | Rsa1.0.04307.1 | 1245 | 18001  | 0         | 563  | 572  | 98 +  | 4    | 575  | 8159   | 8730   |
| UN00235 | Rsa1.0.00327.1 | 719  | 94892  | 0         | 707  | 720  | 98 -  | 1    | 719  | 70658  | 71372  |
| UN00236 | Rsa1.0.01641.1 | 436  | 188213 | 0         | 420  | 449  | 93 -  | 2    | 436  | 161037 | 161478 |
| UN00237 | Rsa1.0.01562.1 | 921  | 43196  | 1.00E-77  | 148  | 148  | 100 + | 649  | 796  | 9608   | 9755   |
| UN00238 | Rsa1.0.00048.1 | 1011 | 167185 | 0         | 386  | 388  | 99 +  | 218  | 605  | 120284 | 120671 |
| UN00239 | Rsa1.0.00051.1 | 762  | 258225 | 0         | 414  | 426  | 97 -  | 340  | 762  | 47637  | 48062  |
| UN00240 | Rsa1.0.00190.1 | 1186 | 318240 | 1.00E-102 | 296  | 329  | 89 -  | 845  | 1169 | 196798 | 197113 |
| UN00241 | Rsa1.0.01559.1 | 755  | 43262  | 1.00E-148 | 309  | 322  | 95 +  | 3    | 324  | 3009   | 3329   |
| UN00242 | Rsa1.0.00306.1 | 990  | 146760 | 1.00E-139 | 390  | 438  | 89 -  | 166  | 573  | 133202 | 133639 |
| UN00243 | Rsa1.0.70420.1 | 1067 | 325    | 1.00E-109 | 220  | 224  | 98 -  | 845  | 1067 | 11     | 232    |
| UN00244 | Rsa1.0.00975.1 | 711  | 57865  | 0         | 439  | 456  | 96 +  | 123  | 578  | 55583  | 56038  |
| UN00245 | Rsa1.0.00198.1 | 652  | 222963 | 1.00E-155 | 326  | 340  | 95 +  | 296  | 631  | 107094 | 107433 |
| UN00246 | Rsa1.0.00017.1 | 1795 | 752458 | 0         | 600  | 657  | 91 +  | 3    | 658  | 158694 | 159335 |
| UN00247 | Rsa1.0.04533.1 | 1113 | 16953  | 0         | 607  | 617  | 98 +  | 497  | 1113 | 14028  | 14644  |
| UN00248 | Rsa1.0.00608.1 | 1087 | 172672 | 0         | 1019 | 1034 | 98 +  | 54   | 1087 | 111863 | 112896 |
| UN00249 | Rsa1.0.00358.1 | 1220 | 91293  | 0         | 552  | 554  | 99 -  | 223  | 776  | 56559  | 57112  |
| UN00250 | Rsa1.0.00254.1 | 1055 | 102600 | 0         | 389  | 408  | 95 -  | 126  | 533  | 12642  | 13039  |
| UN00251 | Rsa1.0.08831.1 | 680  | 6887   | 1.00E-95  | 226  | 242  | 93 -  | 109  | 350  | 5156   | 5397   |
| UN00252 | Rsa1.0.02600.1 | 767  | 29657  | 8.00E-63  | 156  | 167  | 93 -  | 493  | 659  | 1755   | 1921   |
| UN00253 | Rsa1.0.00080.1 | 876  | 190437 | 1.00E-133 | 265  | 273  | 97 -  | 152  | 424  | 34258  | 34530  |
| UN00254 | Rsa1.0.00792.1 | 591  | 64163  | 1.00E-79  | 226  | 247  | 91 -  | 14   | 248  | 7358   | 7603   |
| UN00255 | Rsa1.0.01567.1 | 321  | 43090  | 1.00E-115 | 228  | 234  | 97 +  | 88   | 321  | 26025  | 26258  |
| UN00256 | Rsa1.0.00037.1 | 1290 | 307838 | 0         | 477  | 501  | 95 +  | 1    | 499  | 241158 | 241654 |
| UN00257 | Rsa1.0.00067.1 | 1026 | 415055 | 1.00E-148 | 353  | 376  | 93 +  | 41   | 411  | 138300 | 138672 |
| UN00258 | Rsa1.0.03982.1 | 788  | 19723  | 1.00E-132 | 285  | 296  | 96 -  | 1    | 289  | 1      | 295    |
| UN00259 | Rsa1.0.00466.1 | 538  | 82132  | 0         | 521  | 532  | 97 +  | 1    | 532  | 17636  | 18163  |
| UN00260 | Rsa1.0.04298.1 | 909  | 147466 | 1.00E-125 | 258  | 267  | 96 +  | 52   | 318  | 5562   | 5827   |
| UN00261 | Rsa1.0.00007.1 | 840  | 239325 | 0         | 423  | 426  | 99 +  | 1    | 424  | 119516 | 119941 |
| UN00262 | Rsa1.0.00381.1 | 788  | 89718  | 0         | 400  | 420  | 95 +  | 367  | 786  | 75168  | 75586  |
| UN00263 | Rsa1.0.00087.1 | 1164 | 761073 | 1.00E-154 | 337  | 353  | 95 +  | 2    | 352  | 300618 | 300969 |
| UN00264 | Rsa1.0.00030.1 | 504  | 250988 | 3.00E-86  | 264  | 294  | 89 +  | 79   | 356  | 149353 | 149644 |
| UN00265 | Rsa1.0.02515.1 | 1364 | 30616  | 1.00E-151 | 322  | 340  | 94 +  | 1023 | 1362 | 29932  | 30258  |
| UN00266 | Rsa1.0.02386.1 | 742  | 31895  | 0         | 720  | 739  | 97 +  | 1    | 739  | 10448  | 11185  |
| UN00267 | Rsa1.0.03539.1 | 915  | 22199  | 9.00E-91  | 179  | 182  | 98 -  | 499  | 680  | 6376   | 6557   |
| UN00268 | Rsa1.0.00697.1 | 776  | 67913  | 0         | 752  | 775  | 97 -  | 3    | 774  | 46048  | 46821  |
| UN00269 | Rsa1.0.03413.1 | 732  | 23137  | 0         | 678  | 753  | 90 -  | 1    | 732  | 16105  | 16841  |
| UN00270 | Rsa1.0.00131.1 | 961  | 432233 | 1.00E-89  | 174  | 176  | 98 -  | 785  | 960  | 260552 | 260727 |
| UN00271 | Rsa1.0.02355.1 | 1099 | 32260  | 0         | 621  | 637  | 97 +  | 1    | 637  | 6910   | 7545   |

|         |                |      |        |           |      |      |       |     |      |        |        |
|---------|----------------|------|--------|-----------|------|------|-------|-----|------|--------|--------|
| UN00272 | Rsa1.0.00960.1 | 937  | 58199  | 0         | 540  | 562  | 96 -  | 254 | 812  | 19414  | 19969  |
| UN00273 | Rsa1.0.00253.1 | 717  | 231292 | 1.00E-140 | 428  | 485  | 88 +  | 1   | 476  | 210298 | 210760 |
| UN00274 | Rsa1.0.00288.1 | 933  | 98659  | 1.00E-132 | 307  | 328  | 93 -  | 523 | 845  | 51618  | 51944  |
| UN00275 | Rsa1.0.00045.1 | 1237 | 328694 | 1.00E-130 | 259  | 265  | 97 +  | 630 | 894  | 140951 | 141214 |
| UN00276 | Rsa1.0_01708.1 | 498  | 40622  | 0         | 495  | 497  | 99 +  | 2   | 498  | 19467  | 19963  |
| UN00277 | Rsa1.0_00420.1 | 1026 | 86496  | 0         | 807  | 858  | 94 +  | 1   | 833  | 39871  | 40728  |
| UN00278 | Rsa1.0.00093.1 | 1005 | 214962 | 1.00E-153 | 348  | 368  | 94 -  | 2   | 363  | 48722  | 49089  |
| UN00279 | Rsa1.0.00079.1 | 712  | 606987 | 0         | 700  | 712  | 98 -  | 1   | 712  | 57261  | 57972  |
| UN00280 | Rsa1.0.00477.1 | 901  | 81556  | 1.00E-160 | 299  | 302  | 99 +  | 13  | 314  | 40152  | 40452  |
| UN00281 | Rsa1.0.02004.1 | 1736 | 169138 | 0         | 1673 | 1741 | 96 +  | 1   | 1734 | 148491 | 150218 |
| UN00282 | Rsa1.0.00060.1 | 1175 | 502678 | 0         | 454  | 475  | 95 +  | 714 | 1173 | 144937 | 145411 |
| UN00283 | Rsa1.0.00195.1 | 1470 | 251884 | 0         | 666  | 673  | 98 -  | 803 | 1470 | 205123 | 205795 |
| UN00284 | Rsa1.0.03401.1 | 1265 | 23191  | 1.00E-152 | 294  | 301  | 97 +  | 575 | 875  | 5986   | 6286   |
| UN00285 | Rsa1.0.00281.1 | 565  | 99908  | 2.33E-156 | 287  | 295  | 97 +  | 269 | 563  | 71665  | 71959  |
| UN00286 | Rsa1.0.00339.1 | 807  | 222974 | 4.00E-80  | 158  | 160  | 98 +  | 566 | 725  | 63385  | 63544  |
| UN00287 | Rsa1.0.02585.1 | 944  | 29865  | 0         | 463  | 470  | 98 +  | 473 | 941  | 25874  | 26343  |
| UN00288 | Rsa1.0.06936.1 | 822  | 10143  | 0         | 804  | 826  | 97 -  | 1   | 822  | 77     | 901    |
| UN00289 | Rsa1.0.01149.1 | 699  | 160459 | 0         | 409  | 412  | 99 +  | 3   | 414  | 14501  | 14912  |
| UN00290 | Rsa1.0.01136.1 | 920  | 52724  | 0         | 636  | 665  | 95 -  | 1   | 665  | 35476  | 36140  |
| UN00291 | #              | #    | #      | #         | #    | #    | #     | #   | #    | #      | #      |
| UN00292 | Rsa1.0.03163.1 | 1401 | 24894  | 0         | 496  | 512  | 96 -  | 2   | 511  | 22793  | 23303  |
| UN00293 | Rsa1.0.01756.1 | 1015 | 39779  | 1.00E-120 | 255  | 267  | 95 +  | 1   | 262  | 8898   | 9164   |
| UN00294 | Rsa1.0.04146.1 | 900  | 18833  | 0         | 730  | 768  | 95 +  | 1   | 768  | 18073  | 18826  |
| UN00295 | Rsa1.0.03040.1 | 992  | 25812  | 7.00E-98  | 238  | 257  | 92 +  | 249 | 505  | 3854   | 4104   |
| UN00296 | Rsa1.0.00209.1 | 994  | 108531 | 0         | 470  | 470  | 100 - | 1   | 470  | 62516  | 62985  |
| UN00297 | Rsa1.0.00738.1 | 585  | 66322  | 1.00E-70  | 152  | 156  | 97 -  | 7   | 162  | 28985  | 29139  |
| UN00298 | Rsa1.0.00273.1 | 1060 | 326186 | 3.00E-97  | 202  | 209  | 96 +  | 514 | 722  | 132133 | 132341 |
| UN00299 | Rsa1.0.01151.1 | 572  | 52268  | 0         | 352  | 357  | 98 +  | 22  | 378  | 26285  | 26641  |
| UN00300 | Rsa1.0.00037.1 | 828  | 307838 | 1.00E-102 | 210  | 214  | 98 -  | 1   | 213  | 307235 | 307447 |
| UN00301 | Rsa1.0.00277.1 | 969  | 100132 | 0         | 958  | 969  | 98 +  | 1   | 967  | 31286  | 32254  |
| UN00302 | Rsa1.0.00734.1 | 1002 | 66508  | 1.00E-56  | 116  | 117  | 99 -  | 499 | 615  | 15185  | 15301  |
| UN00303 | Rsa1.0.00023.1 | 700  | 194764 | 0         | 678  | 698  | 97 +  | 5   | 700  | 37236  | 37933  |
| UN00304 | Rsa1.0.05266.1 | 1272 | 14320  | 0         | 333  | 333  | 100 - | 940 | 1272 | 7089   | 7421   |
| UN00305 | Rsa1.0.08430.1 | 829  | 7367   | 0         | 391  | 406  | 96 -  | 7   | 412  | 2169   | 2566   |
| UN00306 | Rsa1.0.00273.1 | 1326 | 326186 | 0         | 379  | 391  | 96 +  | 1   | 389  | 38763  | 39150  |
| UN00307 | Rsa1.0.01730.1 | 942  | 40223  | 0         | 896  | 944  | 94 -  | 3   | 941  | 35591  | 36517  |
| UN00308 | Rsa1.0.01482.1 | 805  | 44855  | 0         | 411  | 421  | 97 +  | 384 | 803  | 12466  | 12886  |
| UN00309 | Rsa1.0.00058.1 | 1308 | 159921 | 1.00E-140 | 253  | 253  | 100 + | 738 | 990  | 22511  | 22763  |
| UN00310 | Rsa1.0.02185.1 | 1202 | 34150  | 0         | 508  | 541  | 93 +  | 467 | 1006 | 21129  | 21651  |

|         |                |      |        |           |      |      |       |      |      |        |        |
|---------|----------------|------|--------|-----------|------|------|-------|------|------|--------|--------|
| UN00311 | Rsa1.0_00409.1 | 541  | 146788 | 0         | 358  | 368  | 97 +  | 170  | 537  | 1659   | 2026   |
| UN00312 | Rsa1.0_02496.1 | 757  | 30814  | 3.00E-78  | 158  | 161  | 98 -  | 514  | 674  | 10513  | 10673  |
| UN00313 | Rsa1.0_00055.1 | 1349 | 520193 | 1.00E-145 | 264  | 265  | 99 +  | 253  | 517  | 99465  | 99729  |
| UN00314 | Rsa1.0_01326.1 | 1763 | 48072  | 0         | 532  | 548  | 97 -  | 954  | 1501 | 38848  | 39389  |
| UN00315 | Rsa1.0_00228.1 | 736  | 105511 | 0         | 665  | 696  | 95 +  | 1    | 692  | 48976  | 49664  |
| UN00316 | Rsa1.0_00697.1 | 854  | 67913  | 1.00E-125 | 292  | 311  | 93 +  | 1    | 308  | 36874  | 37179  |
| UN00317 | Rsa1.0_00031.1 | 1321 | 179862 | 0         | 395  | 404  | 97 +  | 918  | 1321 | 161267 | 161670 |
| UN00318 | Rsa1.0_07695.1 | 1262 | 8770   | 0         | 422  | 433  | 97 -  | 283  | 715  | 2664   | 3095   |
| UN00319 | Rsa1.0_00457.1 | 1059 | 337301 | 1.00E-139 | 261  | 263  | 99 +  | 1    | 262  | 288149 | 288411 |
| UN00320 | Rsa1.0_00067.1 | 1095 | 415055 | 0         | 438  | 460  | 95 -  | 1    | 457  | 301029 | 301485 |
| UN00321 | Rsa1.0_00185.1 | 1085 | 248445 | 0         | 486  | 498  | 97 -  | 588  | 1085 | 215144 | 215641 |
| UN00322 | Rsa1.0_00278.1 | 1215 | 231896 | 0         | 364  | 372  | 97 -  | 10   | 379  | 60144  | 60512  |
| UN00323 | Rsa1.0_00453.1 | 1061 | 83031  | 1.00E-84  | 166  | 168  | 98 +  | 631  | 798  | 70878  | 71045  |
| UN00324 | Rsa1.0_00032.1 | 1317 | 306326 | 4.00E-60  | 142  | 149  | 95 +  | 25   | 173  | 177729 | 177874 |
| UN00325 | Rsa1.0_00104.1 | 779  | 368722 | 0         | 749  | 789  | 94 +  | 1    | 778  | 205882 | 206658 |
| UN00326 | Rsa1.0_00420.1 | 1540 | 86496  | 1.00E-127 | 294  | 314  | 93 +  | 1237 | 1538 | 45120  | 45433  |
| UN00327 | Rsa1.0_00015.1 | 736  | 561803 | 0         | 391  | 410  | 95 -  | 322  | 731  | 375314 | 375723 |
| UN00328 | Rsa1.0_06516.1 | 728  | 10866  | 0         | 398  | 409  | 97 -  | 6    | 411  | 8524   | 8932   |
| UN00329 | Rsa1.0_01026.1 | 996  | 171624 | 0         | 593  | 614  | 96 +  | 1    | 610  | 165278 | 165890 |
| UN00330 | Rsa1.0_07049.1 | 819  | 9983   | 0         | 749  | 793  | 94 -  | 36   | 819  | 308    | 1099   |
| UN00331 | Rsa1.0_00073.1 | 948  | 240924 | 1.00E-156 | 301  | 307  | 98 -  | 633  | 939  | 187854 | 188159 |
| UN00332 | Rsa1.0_04490.1 | 1224 | 17144  | 0         | 1127 | 1151 | 97 -  | 30   | 1176 | 12309  | 13459  |
| UN00333 | Rsa1.0_01087.1 | 746  | 54508  | 1.00E-154 | 311  | 321  | 96 -  | 5    | 324  | 19557  | 19877  |
| UN00334 | Rsa1.0_02954.1 | 1111 | 26485  | 0         | 1032 | 1073 | 96 +  | 52   | 1109 | 16486  | 17556  |
| UN00335 | Rsa1.0_21366.1 | 704  | 1211   | 1.00E-131 | 248  | 250  | 99 -  | 3    | 252  | 1      | 249    |
| UN00336 | Rsa1.0_00326.1 | 706  | 171955 | 0         | 415  | 431  | 96 +  | 2    | 431  | 66166  | 66589  |
| UN00337 | Rsa1.0_00077.1 | 870  | 145005 | 0         | 826  | 880  | 93 -  | 1    | 870  | 33244  | 34109  |
| UN00338 | Rsa1.0_00009.1 | 864  | 232558 | 0         | 422  | 430  | 98 -  | 162  | 591  | 129957 | 130386 |
| UN00339 | Rsa1.0_05815.1 | 988  | 12563  | 1.00E-115 | 253  | 267  | 94 -  | 409  | 675  | 8883   | 9149   |
| UN00340 | Rsa1.0_00546.1 | 756  | 76523  | 0         | 455  | 472  | 96 +  | 109  | 580  | 60591  | 61062  |
| UN00341 | Rsa1.0_00003.1 | 795  | 340054 | 0         | 427  | 430  | 99 -  | 1    | 430  | 87090  | 87517  |
| UN00342 | Rsa1.0_00171.1 | 903  | 115622 | 1.00E-157 | 282  | 282  | 100 - | 4    | 285  | 36495  | 36776  |
| UN00343 | Rsa1.0_14764.1 | 795  | 3084   | 0         | 583  | 602  | 96 +  | 3    | 603  | 281    | 882    |
| UN00344 | Rsa1.0_00038.1 | 984  | 314568 | 1.00E-132 | 246  | 248  | 99 +  | 37   | 284  | 47930  | 48177  |
| UN00345 | Rsa1.0_00078.1 | 1331 | 175053 | 0         | 405  | 428  | 94 -  | 444  | 868  | 101013 | 101438 |
| UN00346 | Rsa1.0_07456.1 | 837  | 9360   | 0         | 733  | 836  | 87 -  | 1    | 823  | 4378   | 5213   |
| UN00347 | Rsa1.0_01586.1 | 1053 | 42804  | 1.00E-119 | 245  | 254  | 96 -  | 615  | 868  | 28243  | 28496  |
| UN00348 | Rsa1.0_00733.1 | 804  | 66583  | 0         | 557  | 575  | 96 +  | 174  | 744  | 46236  | 46809  |
| UN00349 | Rsa1.0_41608.1 | 808  | 540    | 1.00E-155 | 296  | 302  | 98 -  | 431  | 732  | 1      | 302    |

|         |                |      |        |           |      |      |       |      |      |        |        |
|---------|----------------|------|--------|-----------|------|------|-------|------|------|--------|--------|
| UN00350 | Rsa1.0.03650.1 | 1309 | 21583  | 1.00E-159 | 294  | 297  | 98 -  | 1    | 297  | 9550   | 9846   |
| UN00351 | Rsa1.0.00965.1 | 1206 | 58139  | 1.00E-118 | 257  | 270  | 95 +  | 936  | 1204 | 9265   | 9527   |
| UN00352 | Rsa1.0.00129.1 | 759  | 126831 | 5.00E-92  | 175  | 176  | 99 +  | 3    | 178  | 43923  | 44098  |
| UN00353 | Rsa1.0.00067.1 | 1712 | 415055 | 0         | 418  | 418  | 100 - | 468  | 885  | 391301 | 391718 |
| UN00354 | Rsa1.0.01144.1 | 1287 | 52431  | 1.00E-174 | 362  | 376  | 96 +  | 8    | 378  | 22890  | 23265  |
| UN00355 | Rsa1.0.06373.1 | 1122 | 11138  | 0         | 960  | 1010 | 95 -  | 125  | 1120 | 3623   | 4618   |
| UN00356 | Rsa1.0.00964.1 | 711  | 316648 | 3.00E-93  | 223  | 237  | 94 +  | 477  | 711  | 165354 | 165589 |
| UN00357 | Rsa1.0.02673.1 | 1286 | 28877  | 3.00E-94  | 223  | 239  | 93 -  | 1046 | 1284 | 25637  | 25864  |
| UN00358 | Rsa1.0.04870.1 | 975  | 135142 | 0         | 386  | 392  | 98 -  | 584  | 975  | 164    | 554    |
| UN00359 | Rsa1.0.08339.1 | 1202 | 7509   | 0         | 960  | 985  | 97 -  | 121  | 1100 | 10     | 991    |
| UN00360 | Rsa1.0.00255.1 | 883  | 204967 | 0         | 699  | 731  | 95 -  | 3    | 729  | 178141 | 178870 |
| UN00361 | Rsa1.0.00006.1 | 759  | 396176 | 0         | 752  | 759  | 99 +  | 3    | 759  | 157555 | 158313 |
| UN00362 | Rsa1.0.00596.1 | 980  | 73578  | 0         | 541  | 596  | 90 -  | 370  | 944  | 39243  | 39833  |
| UN00363 | Rsa1.0.00140.1 | 436  | 121541 | 1.00E-155 | 288  | 290  | 99 -  | 147  | 436  | 56161  | 56449  |
| UN00364 | Rsa1.0.02585.1 | 1079 | 29865  | 0         | 404  | 411  | 98 +  | 3    | 413  | 7721   | 8131   |
| UN00365 | Rsa1.0.00542.1 | 959  | 76831  | 0         | 473  | 503  | 94 -  | 457  | 959  | 36174  | 36661  |
| UN00366 | Rsa1.0.01626.1 | 1193 | 41989  | 0         | 526  | 527  | 99 +  | 667  | 1193 | 12907  | 13433  |
| UN00367 | Rsa1.0.02467.1 | 990  | 31141  | 0         | 375  | 388  | 96 -  | 4    | 388  | 7529   | 7915   |
| UN00368 | Rsa1.0.03348.1 | 921  | 23559  | 0         | 593  | 630  | 94 +  | 292  | 921  | 9013   | 9618   |
| UN00369 | Rsa1.0.03318.1 | 820  | 23780  | 0         | 473  | 492  | 96 -  | 3    | 493  | 4296   | 4786   |
| UN00370 | Rsa1.0.03743.1 | 1285 | 21062  | 0         | 692  | 709  | 97 -  | 411  | 1119 | 18007  | 18714  |
| UN00371 | Rsa1.0.03501.1 | 980  | 22458  | 0         | 531  | 532  | 99 +  | 1    | 532  | 18907  | 19438  |
| UN00372 | Rsa1.0.03097.1 | 939  | 25434  | 1.00E-142 | 312  | 331  | 94 +  | 361  | 679  | 19280  | 19610  |
| UN00373 | Rsa1.0.04369.1 | 1760 | 17703  | 0         | 423  | 429  | 98 +  | 1    | 428  | 1707   | 2134   |
| UN00374 | Rsa1.0.03162.1 | 992  | 24895  | 0         | 398  | 401  | 99 +  | 592  | 992  | 19790  | 20190  |
| UN00375 | Rsa1.0.25520.1 | 935  | 933    | 5.00E-71  | 143  | 145  | 98 +  | 650  | 794  | 4      | 148    |
| UN00376 | Rsa1.0.11859.1 | 808  | 5389   | 0         | 627  | 629  | 99 +  | 4    | 632  | 4393   | 5021   |
| UN00377 | Rsa1.0.00389.1 | 779  | 88795  | 1.00E-111 | 205  | 205  | 100 + | 3    | 207  | 74105  | 74309  |
| UN00378 | Rsa1.0.00087.1 | 1368 | 761073 | 0         | 1289 | 1371 | 94 +  | 2    | 1368 | 94677  | 96043  |
| UN00379 | Rsa1.0.00161.1 | 1231 | 116891 | 0         | 356  | 360  | 98 -  | 626  | 985  | 25631  | 25990  |
| UN00380 | Rsa1.0.00377.1 | 977  | 90038  | 0         | 732  | 772  | 94 -  | 34   | 804  | 80774  | 81545  |
| UN00381 | Rsa1.0.00341.1 | 784  | 249309 | 1.00E-77  | 166  | 172  | 96 -  | 249  | 420  | 103263 | 103434 |
| UN00382 | Rsa1.0.03297.1 | 566  | 23969  | 1.00E-120 | 309  | 336  | 91 -  | 226  | 559  | 14221  | 14552  |
| UN00383 | Rsa1.0.00123.1 | 799  | 325650 | 0         | 632  | 649  | 97 -  | 2    | 650  | 176132 | 176780 |
| UN00384 | Rsa1.0.00301.1 | 1218 | 365315 | 0         | 495  | 527  | 93 -  | 268  | 776  | 194651 | 195173 |
| UN00385 | Rsa1.0.08511.1 | 922  | 7252   | 0         | 440  | 473  | 93 -  | 457  | 916  | 1797   | 2266   |
| UN00386 | Rsa1.0.00141.1 | 1222 | 121494 | 0         | 1065 | 1101 | 96 -  | 2    | 1102 | 60110  | 61210  |
| UN00387 | Rsa1.0.04325.1 | 1417 | 17885  | 1.00E-133 | 260  | 266  | 97 +  | 460  | 725  | 14508  | 14773  |
| UN00388 | Rsa1.0.02281.1 | 933  | 292576 | 1.00E-117 | 253  | 263  | 96 -  | 510  | 771  | 264132 | 264388 |

|         |                |      |        |           |      |      |       |      |      |        |        |
|---------|----------------|------|--------|-----------|------|------|-------|------|------|--------|--------|
| UN00389 | Rsa1.0.05389.1 | 1165 | 13943  | 0         | 455  | 475  | 95 +  | 690  | 1162 | 8760   | 9230   |
| UN00390 | Rsa1.0.00336.1 | 1169 | 445051 | 0         | 364  | 367  | 99 +  | 698  | 1064 | 156223 | 156589 |
| UN00391 | Rsa1.0.04342.1 | 1184 | 17828  | 0         | 499  | 509  | 98 -  | 70   | 578  | 355    | 863    |
| UN00392 | Rsa1.0.01403.1 | 815  | 46453  | 0         | 414  | 428  | 96 +  | 1    | 426  | 2564   | 2987   |
| UN00393 | Rsa1.0.00447.1 | 1071 | 84051  | 1.00E-169 | 332  | 341  | 97 +  | 733  | 1071 | 33914  | 34254  |
| UN00394 | Rsa1.0.04065.1 | 974  | 19275  | 1.00E-167 | 317  | 323  | 98 -  | 6    | 328  | 8566   | 8888   |
| UN00395 | Rsa1.0.00002.1 | 1331 | 601661 | 4.00E-29  | 88   | 95   | 92 -  | 994  | 1088 | 140996 | 141090 |
| UN00396 | Rsa1.0.00671.1 | 1151 | 397884 | 0         | 608  | 628  | 96 +  | 3    | 624  | 184881 | 185506 |
| UN00397 | Rsa1.0.03191.1 | 842  | 145762 | 1.00E-150 | 361  | 386  | 93 +  | 463  | 842  | 16325  | 16698  |
| UN00398 | Rsa1.0.03809.1 | 1092 | 20731  | 0         | 738  | 787  | 93 +  | 312  | 1092 | 19080  | 19863  |
| UN00399 | Rsa1.0.01373.1 | 564  | 47052  | 0         | 391  | 397  | 98 +  | 1    | 397  | 31451  | 31847  |
| UN00400 | Rsa1.0.00745.1 | 961  | 66067  | 1.00E-129 | 251  | 256  | 98 -  | 75   | 327  | 23665  | 23920  |
| UN00401 | Rsa1.0.04200.1 | 761  | 18490  | 1.00E-142 | 268  | 272  | 98 -  | 3    | 274  | 10181  | 10452  |
| UN00402 | Rsa1.0.00671.1 | 1937 | 397884 | 0         | 504  | 504  | 100 - | 1433 | 1936 | 267940 | 268443 |
| UN00403 | Rsa1.0.00322.1 | 1231 | 212233 | 1.00E-123 | 231  | 233  | 99 -  | 833  | 1065 | 80161  | 80393  |
| UN00404 | Rsa1.0.23843.1 | 1155 | 1022   | 0         | 610  | 633  | 96 +  | 524  | 1155 | 93     | 723    |
| UN00405 | Rsa1.0.00083.1 | 970  | 442773 | 1.00E-99  | 197  | 201  | 98 -  | 770  | 970  | 361205 | 361405 |
| UN00406 | Rsa1.0.25269.1 | 983  | 944    | 0         | 400  | 411  | 97 -  | 450  | 860  | 1      | 408    |
| UN00407 | Rsa1.0.00516.1 | 1458 | 78417  | 0         | 1243 | 1308 | 95 +  | 151  | 1453 | 73599  | 74901  |
| UN00408 | Rsa1.0.00040.1 | 779  | 324196 | 0         | 627  | 666  | 94 +  | 113  | 777  | 166240 | 166904 |
| UN00409 | Rsa1.0.00446.1 | 617  | 167829 | 0         | 608  | 612  | 99 +  | 5    | 616  | 153047 | 153658 |
| UN00410 | Rsa1.0.01437.1 | 1226 | 45887  | 0         | 548  | 552  | 99 -  | 675  | 1226 | 31902  | 32453  |
| UN00411 | Rsa1.0.29875.1 | 1145 | 769    | 0         | 412  | 417  | 98 -  | 727  | 1143 | 23     | 439    |
| UN00412 | Rsa1.0.05874.1 | 693  | 12351  | 0         | 548  | 562  | 97 -  | 3    | 564  | 9390   | 9951   |
| UN00413 | Rsa1.0.10218.1 | 1032 | 5935   | 0         | 637  | 640  | 99 +  | 393  | 1032 | 3887   | 4526   |
| UN00414 | Rsa1.0.00134.1 | 766  | 390219 | 1.00E-150 | 298  | 306  | 97 -  | 1    | 305  | 157266 | 157571 |
| UN00415 | Rsa1.0.00828.1 | 1206 | 62744  | 0         | 389  | 402  | 96 -  | 2    | 403  | 60815  | 61216  |
| UN00416 | Rsa1.0.11943.1 | 709  | 5365   | 1.00E-158 | 348  | 367  | 94 +  | 351  | 707  | 570    | 934    |
| UN00417 | Rsa1.0.37225.1 | 1293 | 605    | 0         | 560  | 563  | 99 -  | 731  | 1293 | 28     | 590    |
| UN00418 | Rsa1.0.00694.1 | 826  | 68074  | 0         | 735  | 759  | 96 -  | 44   | 794  | 61705  | 62461  |
| UN00419 | Rsa1.0.00296.1 | 1094 | 97854  | 0         | 330  | 330  | 100 + | 765  | 1094 | 89589  | 89918  |
| UN00420 | Rsa1.0.05324.1 | 935  | 14145  | 0         | 397  | 411  | 96 +  | 197  | 607  | 11922  | 12332  |
| UN00421 | Rsa1.0.00037.1 | 1353 | 307838 | 0         | 478  | 494  | 96 -  | 810  | 1301 | 268658 | 269150 |
| UN00422 | Rsa1.0.00026.1 | 943  | 327835 | 1.00E-136 | 261  | 266  | 98 -  | 678  | 943  | 177093 | 177358 |
| UN00423 | Rsa1.0.00387.1 | 819  | 495407 | 1.00E-169 | 366  | 388  | 94 +  | 393  | 780  | 410022 | 410403 |
| UN00424 | Rsa1.0.00027.1 | 835  | 283362 | 0         | 792  | 839  | 94 -  | 2    | 835  | 42794  | 43629  |
| UN00425 | Rsa1.0.00032.1 | 933  | 306326 | 0         | 375  | 386  | 97 -  | 549  | 933  | 265504 | 265888 |
| UN00426 | Rsa1.0.37242.1 | 954  | 605    | 1.00E-163 | 328  | 339  | 96 -  | 589  | 923  | 1      | 337    |
| UN00427 | Rsa1.0.02052.1 | 1007 | 35555  | 0         | 449  | 469  | 95 -  | 546  | 1007 | 32962  | 33429  |

|         |                |      |        |           |      |      |       |      |      |        |        |
|---------|----------------|------|--------|-----------|------|------|-------|------|------|--------|--------|
| UN00428 | Rsa1.0_00107.1 | 970  | 431659 | 4.00E-96  | 191  | 195  | 97 -  | 442  | 636  | 8283   | 8477   |
| UN00429 | Rsa1.0_16726.1 | 1174 | 2053   | 3.00E-85  | 329  | 389  | 84 +  | 259  | 647  | 306    | 652    |
| UN00430 | Rsa1.0_03547.1 | 927  | 22167  | 0         | 489  | 493  | 99 +  | 4    | 495  | 815    | 1307   |
| UN00431 | Rsa1.0_00679.1 | 1184 | 68971  | 1.00E-149 | 272  | 273  | 99 +  | 912  | 1184 | 34534  | 34806  |
| UN00432 | Rsa1.0_02180.1 | 1307 | 34176  | 1.00E-154 | 287  | 289  | 99 +  | 3    | 290  | 15721  | 16009  |
| UN00433 | Rsa1.0_00375.1 | 787  | 90207  | 1.00E-176 | 362  | 377  | 96 +  | 411  | 787  | 2405   | 2780   |
| UN00434 | Rsa1.0_04243.1 | 1344 | 18321  | 3.00E-82  | 180  | 188  | 95 -  | 791  | 978  | 3909   | 4096   |
| UN00435 | Rsa1.0_03631.1 | 1038 | 21647  | 0         | 509  | 540  | 94 +  | 433  | 972  | 9124   | 9638   |
| UN00436 | Rsa1.0_00243.1 | 1682 | 103651 | 0         | 1156 | 1207 | 95 +  | 442  | 1642 | 85850  | 87048  |
| UN00437 | Rsa1.0_00089.1 | 523  | 406142 | 1.00E-177 | 357  | 369  | 96 -  | 157  | 523  | 210291 | 210658 |
| UN00438 | Rsa1.0_00367.1 | 872  | 90750  | 1.00E-137 | 262  | 266  | 98 +  | 3    | 265  | 25507  | 25772  |
| UN00439 | Rsa1.0_00469.1 | 1207 | 82084  | 0         | 676  | 710  | 95 +  | 489  | 1182 | 40678  | 41385  |
| UN00440 | Rsa1.0_01435.1 | 763  | 45942  | 1.00E-123 | 267  | 276  | 96 +  | 492  | 763  | 40444  | 40719  |
| UN00441 | Rsa1.0_06179.1 | 1537 | 11548  | 0         | 527  | 538  | 97 -  | 415  | 952  | 9266   | 9803   |
| UN00442 | Rsa1.0_07104.1 | 1146 | 9889   | 0         | 681  | 693  | 98 -  | 227  | 919  | 7558   | 8249   |
| UN00443 | Rsa1.0_04213.1 | 1382 | 18437  | 7.00E-77  | 153  | 155  | 98 +  | 531  | 685  | 18130  | 18284  |
| UN00444 | Rsa1.0_00027.1 | 878  | 283362 | 0         | 330  | 333  | 99 +  | 374  | 706  | 101858 | 102190 |
| UN00445 | Rsa1.0_00017.1 | 1381 | 752458 | 4.00E-94  | 191  | 196  | 97 +  | 391  | 586  | 38117  | 38312  |
| UN00446 | Rsa1.0_41660.1 | 1207 | 539    | 0         | 380  | 383  | 99 +  | 203  | 585  | 157    | 539    |
| UN00447 | Rsa1.0_01356.1 | 1440 | 47287  | 0         | 750  | 751  | 99 +  | 689  | 1439 | 8186   | 8936   |
| UN00448 | Rsa1.0_01570.1 | 1487 | 43015  | 0         | 337  | 340  | 99 -  | 1148 | 1486 | 10785  | 11124  |
| UN00449 | Rsa1.0_00113.1 | 1357 | 131574 | 0         | 770  | 774  | 99 -  | 583  | 1356 | 123303 | 124076 |
| UN00450 | Rsa1.0_01613.1 | 718  | 182542 | 1.00E-165 | 300  | 302  | 99 +  | 250  | 551  | 28807  | 29108  |
| UN00451 | Rsa1.0_00211.1 | 774  | 228189 | 1.00E-105 | 223  | 232  | 96 -  | 465  | 693  | 146603 | 146834 |
| UN00452 | Rsa1.0_01803.1 | 631  | 173846 | 1.00E-177 | 315  | 315  | 100 - | 317  | 631  | 18839  | 19153  |
| UN00453 | Rsa1.0_01282.1 | 1058 | 49304  | 4.00E-87  | 287  | 329  | 87 -  | 746  | 1056 | 28018  | 28331  |
| UN00454 | Rsa1.0_00891.1 | 1362 | 60724  | 1.00E-130 | 323  | 346  | 93 +  | 1021 | 1362 | 22254  | 22596  |
| UN00455 | Rsa1.0_01423.1 | 779  | 46170  | 2.00E-57  | 142  | 150  | 94 -  | 3    | 151  | 4788   | 4937   |
| UN00456 | Rsa1.0_04395.1 | 486  | 17570  | 1.00E-144 | 271  | 275  | 98 +  | 212  | 486  | 9572   | 9846   |
| UN00457 | Rsa1.0_00154.1 | 1306 | 189461 | 1.00E-180 | 344  | 352  | 97 +  | 396  | 747  | 165258 | 165609 |
| UN00458 | Rsa1.0_02810.1 | 1690 | 27671  | 1.00E-100 | 240  | 261  | 91 -  | 1444 | 1689 | 23912  | 24172  |
| UN00459 | Rsa1.0_02126.1 | 701  | 34765  | 0         | 473  | 480  | 98 +  | 222  | 701  | 1828   | 2307   |
| UN00460 | Rsa1.0_00015.1 | 822  | 561803 | 1.00E-157 | 344  | 365  | 94 +  | 451  | 806  | 401951 | 402314 |
| UN00461 | Rsa1.0_00425.1 | 1000 | 147080 | 0         | 623  | 669  | 93 -  | 347  | 990  | 125711 | 126375 |
| UN00462 | Rsa1.0_00483.1 | 1333 | 81102  | 0         | 467  | 467  | 100 + | 94   | 560  | 75313  | 75779  |
| UN00463 | Rsa1.0_14932.1 | 543  | 2956   | 1.00E-121 | 224  | 225  | 99 +  | 318  | 542  | 620    | 844    |
| UN00464 | Rsa1.0_01634.1 | 1030 | 41865  | 1.00E-172 | 413  | 442  | 93 -  | 589  | 1028 | 1124   | 1551   |
| UN00465 | Rsa1.0_02169.1 | 1055 | 34367  | 0         | 800  | 839  | 95 -  | 188  | 1009 | 21213  | 22051  |
| UN00466 | Rsa1.0_04080.1 | 1227 | 19198  | 0         | 676  | 741  | 91 +  | 362  | 1097 | 9176   | 9912   |

|         |                |      |        |           |      |      |       |      |      |        |        |
|---------|----------------|------|--------|-----------|------|------|-------|------|------|--------|--------|
| UN00467 | Rsa1.0_03894.1 | 830  | 20207  | 1.00E-140 | 259  | 261  | 99 -  | 1    | 261  | 19453  | 19713  |
| UN00468 | Rsa1.0_13384.1 | 867  | 4873   | 7.00E-73  | 140  | 140  | 100 + | 92   | 231  | 573    | 712    |
| UN00469 | Rsa1.0_00294.1 | 1381 | 144860 | 1.00E-139 | 289  | 299  | 96 +  | 1035 | 1333 | 23941  | 24237  |
| UN00470 | Rsa1.0_02518.1 | 553  | 30586  | 1.00E-147 | 274  | 277  | 98 -  | 277  | 553  | 25561  | 25837  |
| UN00471 | Rsa1.0_08511.1 | 934  | 7252   | 0         | 448  | 472  | 94 -  | 461  | 921  | 1798   | 2266   |
| UN00472 | Rsa1.0_05457.1 | 1219 | 13687  | 1.00E-169 | 367  | 388  | 94 +  | 17   | 401  | 2461   | 2848   |
| UN00473 | Rsa1.0_01595.1 | 981  | 175383 | 1.00E-135 | 262  | 268  | 97 -  | 313  | 580  | 2704   | 2971   |
| UN00474 | Rsa1.0_00273.1 | 699  | 326186 | 1.00E-161 | 347  | 366  | 94 -  | 282  | 644  | 113973 | 114338 |
| UN00475 | Rsa1.0_01696.1 | 928  | 301850 | 4.00E-68  | 141  | 144  | 97 +  | 97   | 240  | 291366 | 291509 |
| UN00476 | Rsa1.0_00057.1 | 855  | 160473 | 2.33E-156 | 266  | 267  | 99 +  | 3    | 269  | 69734  | 70000  |
| UN00477 | Rsa1.0_02946.1 | 1479 | 26537  | 0         | 938  | 967  | 97 +  | 515  | 1475 | 857    | 1821   |
| UN00478 | Rsa1.0_00018.1 | 905  | 410899 | 0         | 481  | 483  | 99 -  | 423  | 905  | 57046  | 57528  |
| UN00479 | Rsa1.0_02120.1 | 1178 | 34819  | 0         | 1117 | 1159 | 96 +  | 2    | 1159 | 19889  | 21046  |
| UN00480 | Rsa1.0_00523.1 | 617  | 178770 | 1.00E-161 | 288  | 288  | 100 + | 3    | 290  | 141283 | 141570 |
| UN00481 | Rsa1.0_02494.1 | 903  | 132923 | 0         | 576  | 593  | 97 -  | 311  | 903  | 6102   | 6692   |
| UN00482 | Rsa1.0_01719.1 | 902  | 40388  | 8.00E-82  | 206  | 218  | 94 -  | 690  | 902  | 27252  | 27464  |
| UN00483 | Rsa1.0_00397.1 | 1364 | 88189  | 0         | 1007 | 1061 | 94 -  | 1    | 1035 | 4783   | 5838   |
| UN00484 | Rsa1.0_00049.1 | 1161 | 167018 | 0         | 420  | 425  | 98 -  | 688  | 1112 | 146693 | 147117 |
| UN00485 | Rsa1.0_03209.1 | 859  | 24592  | 0         | 386  | 404  | 95 +  | 5    | 408  | 16842  | 17241  |
| UN00486 | Rsa1.0_02749.1 | 1117 | 28241  | 0         | 695  | 716  | 97 -  | 3    | 713  | 26791  | 27506  |
| UN00487 | Rsa1.0_00145.1 | 991  | 261008 | 0         | 827  | 936  | 88 +  | 57   | 958  | 75205  | 76105  |
| UN00488 | Rsa1.0_03682.1 | 1550 | 21396  | 0         | 368  | 380  | 96 +  | 579  | 958  | 12324  | 12703  |
| UN00489 | Rsa1.0_00749.1 | 841  | 65933  | 0         | 824  | 840  | 98 -  | 2    | 841  | 27966  | 28805  |
| UN00490 | Rsa1.0_03015.1 | 1510 | 26006  | 0         | 499  | 508  | 98 +  | 1003 | 1510 | 20793  | 21300  |
| UN00491 | Rsa1.0_00262.1 | 716  | 101906 | 1.00E-176 | 322  | 325  | 99 +  | 391  | 715  | 46959  | 47283  |
| UN00492 | Rsa1.0_00366.1 | 969  | 90880  | 0         | 939  | 967  | 97 -  | 2    | 966  | 51559  | 52525  |
| UN00493 | Rsa1.0_07021.1 | 1067 | 10016  | 1.00E-172 | 327  | 334  | 97 +  | 339  | 672  | 7093   | 7426   |
| UN00494 | Rsa1.0_00338.1 | 612  | 94109  | 8.00E-81  | 261  | 293  | 89 -  | 320  | 612  | 34848  | 35117  |
| UN00495 | Rsa1.0_00219.1 | 993  | 106983 | 1.00E-132 | 267  | 274  | 97 -  | 721  | 992  | 29590  | 29862  |
| UN00496 | Rsa1.0_06683.1 | 1029 | 10549  | 1.00E-179 | 321  | 322  | 99 +  | 1    | 322  | 7871   | 8192   |
| UN00497 | Rsa1.0_00039.1 | 865  | 296927 | 0         | 771  | 789  | 97 -  | 75   | 863  | 133718 | 134505 |
| UN00498 | Rsa1.0_03790.1 | 825  | 20844  | 0         | 638  | 667  | 95 -  | 89   | 745  | 8413   | 9071   |
| UN00499 | Rsa1.0_04881.1 | 1266 | 15608  | 0         | 869  | 934  | 93 -  | 305  | 1228 | 8384   | 9311   |
| UN00500 | Rsa1.0_02235.1 | 1031 | 33615  | 0         | 473  | 474  | 99 -  | 558  | 1031 | 17608  | 18081  |
| UN00501 | Rsa1.0_00654.1 | 983  | 70012  | 0         | 921  | 944  | 97 +  | 5    | 937  | 9140   | 10081  |
| UN00502 | Rsa1.0_01071.1 | 1090 | 166914 | 0         | 1032 | 1092 | 94 +  | 3    | 1085 | 12837  | 13926  |
| UN00503 | Rsa1.0_18158.1 | 1114 | 1655   | 0         | 721  | 735  | 98 -  | 379  | 1113 | 921    | 1655   |
| UN00504 | Rsa1.0_05522.1 | 1130 | 13441  | 1.00E-161 | 445  | 500  | 89 +  | 279  | 754  | 12962  | 13441  |
| UN00505 | Rsa1.0_00247.1 | 850  | 103408 | 1.00E-128 | 298  | 316  | 94 -  | 290  | 604  | 8483   | 8796   |

|         |                |      |        |           |      |      |       |      |      |        |        |
|---------|----------------|------|--------|-----------|------|------|-------|------|------|--------|--------|
| UN00506 | Rsa1.0.01685.1 | 1024 | 175033 | 0         | 449  | 465  | 96 +  | 560  | 1023 | 15769  | 16230  |
| UN00507 | Rsa1.0.02265.1 | 1279 | 33233  | 0         | 1106 | 1116 | 99 -  | 163  | 1277 | 10854  | 11969  |
| UN00508 | Rsa1.0.01285.1 | 1341 | 172709 | 0         | 1321 | 1338 | 98 +  | 2    | 1339 | 39423  | 40760  |
| UN00509 | Rsa1.0.00398.1 | 812  | 88007  | 1.00E-169 | 346  | 360  | 96 -  | 2    | 358  | 42461  | 42820  |
| UN00510 | Rsa1.0.02518.1 | 1001 | 30586  | 1.00E-118 | 279  | 296  | 94 -  | 687  | 981  | 27798  | 28091  |
| UN00511 | Rsa1.0.02536.1 | 829  | 30368  | 0         | 793  | 824  | 96 +  | 8    | 827  | 28663  | 29486  |
| UN00512 | Rsa1.0.02579.1 | 830  | 29923  | 0         | 401  | 403  | 99 -  | 377  | 779  | 14697  | 15099  |
| UN00513 | Rsa1.0.00251.1 | 509  | 303968 | 2.00E-90  | 253  | 276  | 91 -  | 242  | 509  | 120948 | 121221 |
| UN00514 | Rsa1.0.00819.1 | 1226 | 62918  | 0         | 359  | 366  | 98 -  | 861  | 1225 | 46856  | 47221  |
| UN00515 | Rsa1.0.20310.1 | 858  | 1318   | 0         | 378  | 389  | 97 -  | 473  | 857  | 904    | 1292   |
| UN00516 | Rsa1.0.02266.1 | 1216 | 33195  | 0         | 1159 | 1227 | 94 +  | 3    | 1210 | 28532  | 29757  |
| UN00517 | Rsa1.0.07232.1 | 1804 | 9684   | 1.00E-168 | 353  | 365  | 96 +  | 1436 | 1799 | 1213   | 1570   |
| UN00518 | Rsa1.0.00121.1 | 937  | 278029 | 0         | 367  | 369  | 99 -  | 569  | 937  | 9592   | 9960   |
| UN00519 | Rsa1.0.00017.1 | 395  | 752458 | 1.00E-78  | 217  | 238  | 91 +  | 156  | 391  | 271555 | 271789 |
| UN00520 | Rsa1.0.02286.1 | 1199 | 32993  | 0         | 868  | 868  | 100 - | 332  | 1199 | 24136  | 25003  |
| UN00521 | Rsa1.0.06814.1 | 1250 | 10309  | 0         | 660  | 678  | 97 -  | 572  | 1249 | 6129   | 6806   |
| UN00522 | Rsa1.0.01718.1 | 541  | 40389  | 1.00E-136 | 294  | 309  | 95 -  | 236  | 538  | 35336  | 35644  |
| UN00523 | Rsa1.0.00119.1 | 2101 | 467509 | 0         | 863  | 901  | 95 -  | 119  | 1010 | 346643 | 347543 |
| UN00524 | Rsa1.0.00818.1 | 997  | 62939  | 1.00E-178 | 388  | 410  | 94 -  | 95   | 504  | 40497  | 40902  |
| UN00525 | Rsa1.0.00036.1 | 1453 | 176186 | 0         | 783  | 789  | 99 +  | 652  | 1440 | 3281   | 4069   |
| UN00526 | Rsa1.0.09945.1 | 882  | 6076   | 0         | 444  | 456  | 97 +  | 427  | 882  | 303    | 758    |
| UN00527 | Rsa1.0.03207.1 | 969  | 24604  | 0         | 503  | 510  | 98 +  | 454  | 962  | 15790  | 16299  |
| UN00528 | Rsa1.0.00037.1 | 839  | 307838 | 0         | 380  | 381  | 99 -  | 459  | 839  | 266929 | 267309 |
| UN00529 | Rsa1.0.01373.1 | 875  | 47052  | 7.00E-76  | 162  | 167  | 97 +  | 223  | 389  | 2046   | 2209   |
| UN00530 | Rsa1.0.02269.1 | 1068 | 33168  | 0         | 555  | 566  | 98 -  | 109  | 674  | 23759  | 24324  |
| UN00531 | Rsa1.0.00065.1 | 1504 | 454616 | 0         | 439  | 454  | 96 -  | 2    | 450  | 213563 | 214016 |
| UN00532 | Rsa1.0.00208.1 | 983  | 108565 | 0         | 513  | 524  | 97 -  | 3    | 526  | 104420 | 104943 |
| UN00533 | Rsa1.0.06900.1 | 604  | 131268 | 1.00E-140 | 312  | 324  | 96 -  | 280  | 598  | 129932 | 130254 |
| UN00534 | Rsa1.0.02622.1 | 879  | 142402 | 1.00E-150 | 322  | 338  | 95 +  | 3    | 329  | 6671   | 7008   |
| UN00535 | Rsa1.0.00784.1 | 1090 | 64359  | 0         | 582  | 589  | 98 +  | 2    | 589  | 52062  | 52650  |
| UN00536 | Rsa1.0.00192.1 | 1234 | 278200 | 0         | 572  | 587  | 97 +  | 364  | 950  | 73828  | 74414  |
| UN00537 | Rsa1.0.27704.1 | 1449 | 842    | 1.00E-179 | 319  | 319  | 100 + | 640  | 958  | 47     | 365    |
| UN00538 | Rsa1.0.03722.1 | 1032 | 21184  | 0         | 641  | 689  | 93 +  | 3    | 679  | 19983  | 20668  |
| UN00539 | Rsa1.0.00145.1 | 1267 | 261008 | 1.00E-140 | 253  | 253  | 100 - | 1015 | 1267 | 93718  | 93970  |
| UN00540 | Rsa1.0.05241.1 | 1057 | 14405  | 0         | 356  | 364  | 97 -  | 687  | 1046 | 3058   | 3421   |
| UN00541 | Rsa1.0.02252.1 | 981  | 33375  | 0         | 376  | 383  | 98 -  | 179  | 561  | 31510  | 31892  |
| UN00542 | Rsa1.0.00032.1 | 866  | 306326 | 1.00E-121 | 251  | 263  | 95 +  | 615  | 866  | 279058 | 279320 |
| UN00543 | Rsa1.0.01105.1 | 886  | 53958  | 1.00E-92  | 185  | 189  | 97 +  | 102  | 290  | 10357  | 10545  |
| UN00544 | Rsa1.0.00383.1 | 1148 | 398431 | 0         | 761  | 816  | 93 +  | 286  | 1083 | 147000 | 147797 |



|         |                |      |        |           |      |      |       |      |      |        |        |
|---------|----------------|------|--------|-----------|------|------|-------|------|------|--------|--------|
| UN00545 | Rsa1.0_00220.1 | 842  | 192936 | 5.00E-92  | 231  | 248  | 93 -  | 594  | 829  | 143213 | 143460 |
| UN00546 | Rsa1.0_05691.1 | 1729 | 12918  | 0         | 1716 | 1728 | 99 -  | 2    | 1729 | 351    | 2071   |
| UN00547 | Rsa1.0_02310.1 | 1284 | 32735  | 0         | 379  | 382  | 99 +  | 4    | 385  | 27360  | 27741  |
| UN00548 | Rsa1.0_04057.1 | 849  | 19333  | 1.00E-156 | 291  | 295  | 98 +  | 128  | 422  | 1571   | 1865   |
| UN00549 | Rsa1.0_02758.1 | 1059 | 28186  | 0         | 463  | 473  | 97 +  | 591  | 1059 | 13847  | 14319  |
| UN00550 | Rsa1.0_00572.1 | 925  | 74969  | 0         | 856  | 899  | 95 +  | 12   | 904  | 41155  | 42039  |
| UN00551 | Rsa1.0_01285.1 | 811  | 172709 | 3.00E-84  | 192  | 202  | 95 -  | 256  | 455  | 123780 | 123981 |
| UN00552 | Rsa1.0_00105.1 | 910  | 134138 | 0         | 829  | 853  | 97 +  | 2    | 852  | 62588  | 63440  |
| UN00553 | Rsa1.0_00782.1 | 805  | 64468  | 0         | 579  | 616  | 93 +  | 187  | 793  | 18764  | 19376  |
| UN00554 | Rsa1.0_15748.1 | 987  | 2448   | 9.00E-45  | 96   | 97   | 98 -  | 421  | 517  | 1488   | 1584   |
| UN00555 | Rsa1.0_01186.1 | 799  | 51418  | 0         | 794  | 806  | 98 +  | 1    | 799  | 31990  | 32795  |
| UN00556 | Rsa1.0_02725.1 | 807  | 28404  | 0         | 533  | 552  | 96 +  | 256  | 807  | 1939   | 2490   |
| UN00557 | Rsa1.0_00227.1 | 552  | 105849 | 0         | 514  | 536  | 95 +  | 2    | 534  | 35727  | 36258  |
| UN00558 | Rsa1.0_00017.1 | 816  | 752458 | 0         | 540  | 579  | 93 -  | 3    | 579  | 474193 | 474755 |
| UN00559 | Rsa1.0_00971.1 | 802  | 57973  | 9.00E-23  | 59   | 60   | 98 +  | 18   | 77   | 43498  | 43557  |
| UN00560 | Rsa1.0_00293.1 | 936  | 339294 | 1.00E-74  | 229  | 254  | 90 -  | 430  | 683  | 307382 | 307621 |
| UN00561 | Rsa1.0_00273.1 | 972  | 326186 | 1.00E-102 | 214  | 221  | 96 -  | 646  | 866  | 9437   | 9656   |
| UN00562 | Rsa1.0_01998.1 | 1086 | 36276  | 0         | 804  | 854  | 94 +  | 234  | 1082 | 10886  | 11722  |
| UN00563 | Rsa1.0_01141.1 | 799  | 52530  | 0         | 653  | 711  | 91 -  | 2    | 711  | 42680  | 43390  |
| UN00564 | Rsa1.0_00224.1 | 1015 | 327530 | 0         | 986  | 1020 | 96 +  | 1    | 1012 | 184453 | 185471 |
| UN00565 | Rsa1.0_00347.1 | 946  | 93048  | 1.00E-167 | 411  | 448  | 91 +  | 3    | 438  | 90999  | 91440  |
| UN00566 | Rsa1.0_00190.1 | 1017 | 318240 | 0         | 690  | 714  | 96 +  | 286  | 994  | 191430 | 192143 |
| UN00567 | Rsa1.0_21317.1 | 780  | 1216   | 0         | 602  | 623  | 96 -  | 145  | 764  | 183    | 805    |
| UN00568 | Rsa1.0_00277.1 | 1492 | 100132 | 1.00E-114 | 236  | 245  | 96 -  | 199  | 443  | 90130  | 90374  |
| UN00569 | Rsa1.0_04819.1 | 1785 | 140505 | 1.00E-160 | 320  | 331  | 96 -  | 1332 | 1662 | 5636   | 5966   |
| UN00570 | Rsa1.0_00925.1 | 649  | 59481  | 1.00E-142 | 286  | 296  | 96 +  | 290  | 585  | 38881  | 39176  |
| UN00571 | Rsa1.0_08285.1 | 1449 | 7606   | 0         | 548  | 563  | 97 -  | 382  | 944  | 2625   | 3187   |
| UN00572 | Rsa1.0_01435.1 | 891  | 45942  | 1.00E-136 | 277  | 285  | 97 +  | 3    | 287  | 24555  | 24835  |
| UN00573 | Rsa1.0_00087.1 | 1222 | 761073 | 1.00E-133 | 279  | 289  | 96 +  | 934  | 1220 | 223283 | 223571 |
| UN00574 | Rsa1.0_04126.1 | 1038 | 18939  | 0         | 384  | 386  | 99 +  | 3    | 388  | 18318  | 18703  |
| UN00575 | Rsa1.0_02682.1 | 546  | 28711  | 1.00E-128 | 257  | 261  | 98 -  | 287  | 546  | 9616   | 9874   |
| UN00576 | Rsa1.0_00539.1 | 1119 | 76926  | 1.00E-137 | 287  | 298  | 96 +  | 822  | 1118 | 28381  | 28675  |
| UN00577 | Rsa1.0_05848.1 | 875  | 12432  | 0         | 435  | 436  | 99 -  | 439  | 874  | 10367  | 10802  |
| UN00578 | Rsa1.0_02874.1 | 1542 | 27070  | 0         | 941  | 948  | 99 +  | 65   | 1009 | 4410   | 5357   |
| UN00579 | Rsa1.0_00336.1 | 847  | 445051 | 0         | 825  | 845  | 97 +  | 3    | 846  | 146873 | 147717 |
| UN00580 | Rsa1.0_01286.1 | 839  | 49209  | 1.00E-148 | 278  | 282  | 98 -  | 102  | 383  | 41233  | 41514  |
| UN00581 | Rsa1.0_03750.1 | 1314 | 21027  | 0         | 704  | 753  | 93 +  | 2    | 747  | 5247   | 5988   |
| UN00582 | Rsa1.0_00979.1 | 1416 | 57733  | 1.00E-178 | 371  | 384  | 96 -  | 1027 | 1405 | 40233  | 40616  |
| UN00583 | Rsa1.0_07865.1 | 1118 | 8400   | 1.00E-140 | 253  | 253  | 100 - | 760  | 1012 | 3836   | 4088   |

|         |                |      |        |           |     |     |       |      |      |        |        |
|---------|----------------|------|--------|-----------|-----|-----|-------|------|------|--------|--------|
| UN00584 | Rsa1.0_00017.1 | 1526 | 752458 | 0         | 409 | 428 | 95 +  | 2    | 426  | 412620 | 413043 |
| UN00585 | Rsa1.0_04415.1 | 1041 | 147889 | 1.00E-120 | 238 | 244 | 97 -  | 254  | 497  | 141887 | 142130 |
| UN00586 | Rsa1.0_00577.1 | 1329 | 174827 | 0         | 438 | 473 | 92 +  | 112  | 566  | 149759 | 150231 |
| UN00587 | Rsa1.0_03216.1 | 828  | 24540  | 1.00E-138 | 276 | 284 | 97 -  | 3    | 286  | 13319  | 13600  |
| UN00588 | Rsa1.0_00595.1 | 1310 | 341648 | 0         | 575 | 585 | 98 +  | 6    | 590  | 2389   | 2973   |
| UN00589 | Rsa1.0_00100.1 | 1225 | 249232 | 0         | 337 | 338 | 99 -  | 3    | 340  | 180836 | 181173 |
| UN00590 | Rsa1.0_00014.1 | 927  | 348985 | 0         | 679 | 707 | 96 -  | 208  | 909  | 36913  | 37612  |
| UN00591 | Rsa1.0_00727.1 | 890  | 66724  | 0         | 390 | 401 | 97 +  | 3    | 396  | 4925   | 5325   |
| UN00592 | Rsa1.0_00419.1 | 973  | 86562  | 0         | 451 | 454 | 99 +  | 380  | 833  | 79787  | 80240  |
| UN00593 | Rsa1.0_00224.1 | 708  | 327530 | 0         | 687 | 724 | 94 +  | 1    | 707  | 192374 | 193096 |
| UN00594 | Rsa1.0_00200.1 | 853  | 162016 | 1.00E-68  | 164 | 173 | 94 -  | 1    | 173  | 103491 | 103657 |
| UN00595 | Rsa1.0_01046.1 | 673  | 152989 | 1.00E-163 | 333 | 347 | 95 -  | 327  | 673  | 116451 | 116797 |
| UN00596 | Rsa1.0_01751.1 | 587  | 39806  | 1.00E-116 | 275 | 296 | 92 -  | 291  | 586  | 30350  | 30634  |
| UN00597 | Rsa1.0_00381.1 | 755  | 89718  | 1.00E-175 | 392 | 417 | 94 -  | 6    | 418  | 75167  | 75583  |
| UN00598 | #              | #    | #      | #         | #   | #   | #     | #    | #    | #      | #      |
| UN00599 | Rsa1.0_19257.1 | 1552 | 1455   | 0         | 433 | 433 | 100 - | 1117 | 1549 | 699    | 1131   |
| UN00600 | Rsa1.0_03583.1 | 857  | 21946  | 0         | 494 | 505 | 97 +  | 361  | 855  | 20939  | 21443  |
| UN00601 | Rsa1.0_02179.1 | 1358 | 34188  | 0         | 479 | 482 | 99 +  | 877  | 1358 | 7052   | 7533   |
| UN00602 | Rsa1.0_00371.1 | 1126 | 90463  | 1.00E-119 | 239 | 246 | 97 -  | 153  | 398  | 13675  | 13920  |
| UN00603 | Rsa1.0_09236.1 | 899  | 6540   | 0         | 868 | 874 | 99 -  | 26   | 899  | 88     | 961    |
| UN00604 | Rsa1.0_13240.1 | 1547 | 4960   | 0         | 337 | 337 | 100 - | 1164 | 1500 | 1      | 337    |
| UN00605 | Rsa1.0_04005.1 | 1015 | 19586  | 0         | 551 | 566 | 97 +  | 454  | 1015 | 18748  | 19313  |
| UN00606 | Rsa1.0_00046.1 | 2328 | 320315 | 0         | 668 | 691 | 96 +  | 1637 | 2327 | 67411  | 68101  |
| UN00607 | Rsa1.0_00960.1 | 778  | 58199  | 0         | 491 | 515 | 95 +  | 3    | 502  | 20997  | 21510  |
| UN00608 | Rsa1.0_00061.1 | 800  | 218685 | 0         | 774 | 809 | 95 -  | 1    | 800  | 856    | 1660   |
| UN00609 | Rsa1.0_13693.1 | 769  | 4469   | 0         | 706 | 782 | 90 +  | 2    | 769  | 2608   | 3362   |
| UN00610 | Rsa1.0_02723.1 | 1202 | 28408  | 0         | 627 | 656 | 95 -  | 546  | 1201 | 7665   | 8303   |
| UN00611 | Rsa1.0_01509.1 | 1131 | 44258  | 0         | 836 | 858 | 97 -  | 278  | 1131 | 35523  | 36380  |
| UN00612 | Rsa1.0_03746.1 | 1083 | 21050  | 0         | 490 | 505 | 97 +  | 160  | 664  | 19838  | 20342  |
| UN00613 | Rsa1.0_00131.1 | 598  | 432233 | 1.00E-85  | 176 | 181 | 97 -  | 122  | 302  | 274061 | 274241 |
| UN00614 | Rsa1.0_00440.1 | 1234 | 84723  | 1.00E-171 | 314 | 317 | 99 +  | 761  | 1077 | 24477  | 24793  |
| UN00615 | Rsa1.0_00067.1 | 1257 | 415055 | 0         | 820 | 820 | 100 - | 438  | 1257 | 38266  | 39085  |
| UN00616 | Rsa1.0_01026.1 | 702  | 171624 | 0         | 606 | 606 | 100 - | 97   | 702  | 14047  | 14652  |
| UN00617 | Rsa1.0_52552.1 | 855  | 433    | 0         | 431 | 433 | 99 -  | 333  | 765  | 1      | 433    |
| UN00618 | Rsa1.0_02658.1 | 1191 | 28978  | 0         | 355 | 362 | 98 -  | 832  | 1190 | 21972  | 22330  |
| UN00619 | Rsa1.0_03524.1 | 1283 | 22297  | 0         | 760 | 769 | 98 -  | 517  | 1283 | 4388   | 5155   |
| UN00620 | Rsa1.0_00146.1 | 1211 | 149343 | 1.00E-172 | 364 | 380 | 95 -  | 3    | 378  | 73067  | 73445  |
| UN00621 | Rsa1.0_01537.1 | 1554 | 187285 | 0         | 422 | 434 | 97 +  | 883  | 1316 | 16266  | 16699  |
| UN00622 | Rsa1.0_00354.1 | 937  | 232005 | 1.00E-115 | 267 | 281 | 95 -  | 659  | 937  | 192326 | 192602 |

|         |                |      |        |           |      |      |       |      |      |        |        |
|---------|----------------|------|--------|-----------|------|------|-------|------|------|--------|--------|
| UN00623 | Rsa1.0_00006.1 | 1147 | 396176 | 0         | 417  | 423  | 98 +  | 725  | 1147 | 201166 | 201588 |
| UN00624 | Rsa1.0_00837.1 | 1411 | 62568  | 1.00E-136 | 247  | 247  | 100 - | 3    | 249  | 53363  | 53609  |
| UN00625 | Rsa1.0_00271.1 | 920  | 101125 | 0         | 622  | 657  | 94 +  | 268  | 920  | 75163  | 75818  |
| UN00626 | Rsa1.0_01121.1 | 880  | 53407  | 0         | 840  | 871  | 96 +  | 1    | 865  | 7235   | 8105   |
| UN00627 | Rsa1.0_00740.1 | 1092 | 215972 | 0         | 857  | 865  | 99 -  | 228  | 1092 | 199540 | 200404 |
| UN00628 | Rsa1.0_00079.1 | 815  | 606987 | 2.33E-156 | 312  | 327  | 95 -  | 494  | 815  | 464220 | 464545 |
| UN00629 | Rsa1.0_06419.1 | 832  | 11055  | 0         | 670  | 767  | 87 -  | 9    | 774  | 1489   | 2253   |
| UN00630 | Rsa1.0_00129.1 | 748  | 126831 | 1.00E-147 | 402  | 443  | 90 +  | 316  | 741  | 113976 | 114410 |
| UN00631 | Rsa1.0_00129.1 | 760  | 126831 | 1.00E-156 | 301  | 307  | 98 -  | 83   | 389  | 45712  | 46016  |
| UN00632 | Rsa1.0_01955.1 | 1176 | 36850  | 1.00E-144 | 415  | 463  | 89 -  | 474  | 917  | 13073  | 13535  |
| UN00633 | Rsa1.0_02616.1 | 1364 | 29542  | 0         | 613  | 662  | 92 +  | 668  | 1317 | 1279   | 1931   |
| UN00634 | Rsa1.0_00046.1 | 578  | 320315 | 3.00E-52  | 135  | 144  | 93 +  | 435  | 576  | 75134  | 75277  |
| UN00635 | Rsa1.0_01373.1 | 1046 | 47052  | 0         | 396  | 400  | 99 -  | 336  | 732  | 21559  | 21958  |
| UN00636 | Rsa1.0_00190.1 | 1026 | 318240 | 1.00E-167 | 365  | 383  | 95 +  | 43   | 421  | 134842 | 135221 |
| UN00637 | Rsa1.0_02322.1 | 682  | 32555  | 1.00E-107 | 225  | 233  | 96 -  | 1    | 233  | 26970  | 27201  |
| UN00638 | Rsa1.0_02634.1 | 1041 | 29299  | 0         | 439  | 470  | 93 -  | 582  | 1039 | 1428   | 1897   |
| UN00639 | Rsa1.0_04169.1 | 1133 | 18712  | 1.00E-139 | 327  | 347  | 94 +  | 790  | 1129 | 2537   | 2880   |
| UN00640 | Rsa1.0_00097.1 | 1355 | 138858 | 0         | 636  | 643  | 98 +  | 710  | 1352 | 34058  | 34700  |
| UN00641 | Rsa1.0_01974.1 | 1221 | 36583  | 0         | 419  | 437  | 95 -  | 778  | 1211 | 11606  | 12039  |
| UN00642 | Rsa1.0_02694.1 | 1055 | 28610  | 0         | 503  | 528  | 95 -  | 4    | 528  | 5002   | 5524   |
| UN00643 | Rsa1.0_00228.1 | 1396 | 105511 | 0         | 1345 | 1404 | 95 +  | 1    | 1394 | 27844  | 29218  |
| UN00644 | Rsa1.0_00714.1 | 1000 | 67187  | 3.00E-91  | 338  | 390  | 86 -  | 5    | 384  | 14248  | 14623  |
| UN00645 | Rsa1.0_00250.1 | 1176 | 273771 | 2.00E-86  | 199  | 211  | 94 +  | 1    | 211  | 60373  | 60583  |
| UN00646 | Rsa1.0_01857.1 | 1304 | 38103  | 0         | 392  | 405  | 96 +  | 851  | 1254 | 22856  | 23259  |
| UN00647 | Rsa1.0_03005.1 | 1654 | 26082  | 1.00E-104 | 243  | 260  | 93 -  | 1    | 254  | 10402  | 10656  |
| UN00648 | Rsa1.0_00294.1 | 845  | 144860 | 0         | 809  | 837  | 96 -  | 2    | 838  | 81600  | 82431  |
| UN00649 | Rsa1.0_00180.1 | 762  | 114581 | 1.00E-111 | 240  | 250  | 96 +  | 1    | 245  | 16501  | 16750  |
| UN00650 | Rsa1.0_03477.1 | 841  | 22635  | 0         | 813  | 832  | 97 +  | 1    | 832  | 6174   | 7005   |
| UN00651 | Rsa1.0_05874.1 | 990  | 12351  | 0         | 880  | 906  | 97 +  | 1    | 906  | 9254   | 10158  |
| UN00652 | Rsa1.0_00151.1 | 1441 | 119541 | 0         | 545  | 575  | 94 +  | 1    | 567  | 55775  | 56339  |
| UN00653 | Rsa1.0_00068.1 | 857  | 151813 | 1.00E-121 | 280  | 298  | 93 +  | 1    | 296  | 112707 | 113001 |
| UN00654 | Rsa1.0_04238.1 | 717  | 18352  | 0         | 410  | 417  | 98 -  | 1    | 415  | 8709   | 9123   |
| UN00655 | Rsa1.0_00548.1 | 1079 | 76518  | 1.00E-113 | 239  | 249  | 95 +  | 7    | 252  | 60513  | 60761  |
| UN00656 | Rsa1.0_00344.1 | 787  | 191774 | 0         | 367  | 371  | 98 -  | 2    | 372  | 182012 | 182382 |
| UN00657 | Rsa1.0_20130.1 | 386  | 1337   | 1.00E-144 | 361  | 391  | 92 -  | 1    | 383  | 217    | 607    |
| UN00658 | Rsa1.0_00752.1 | 1495 | 65756  | 0         | 452  | 469  | 96 +  | 1032 | 1494 | 21393  | 21855  |
| UN00659 | Rsa1.0_00040.1 | 959  | 324196 | 1.00E-133 | 254  | 258  | 98 +  | 252  | 509  | 154828 | 155085 |
| UN00660 | Rsa1.0_00868.1 | 1386 | 61630  | 0         | 736  | 736  | 100 + | 1    | 736  | 43876  | 44611  |
| UN00661 | Rsa1.0_00151.1 | 1617 | 119541 | 1.00E-141 | 362  | 399  | 90 -  | 2    | 383  | 45328  | 45719  |

|         |                |      |        |           |      |      |       |     |      |        |        |
|---------|----------------|------|--------|-----------|------|------|-------|-----|------|--------|--------|
| UN00662 | Rsa1.0.00130.1 | 899  | 125737 | 0         | 716  | 716  | 100 - | 2   | 717  | 8316   | 9031   |
| UN00663 | Rsa1.0.02413.1 | 2322 | 31628  | 0         | 469  | 469  | 100 - | 831 | 1299 | 16457  | 16925  |
| UN00664 | Rsa1.0.00279.1 | 864  | 100039 | 1.00E-174 | 325  | 330  | 98 -  | 1   | 330  | 25208  | 25537  |
| UN00665 | Rsa1.0.03238.1 | 708  | 24432  | 1.00E-109 | 254  | 265  | 95 -  | 1   | 261  | 18219  | 18482  |
| UN00666 | Rsa1.0.05074.1 | 972  | 14925  | 0         | 380  | 383  | 99 +  | 2   | 384  | 10125  | 10506  |
| UN00667 | Rsa1.0.00140.1 | 720  | 121541 | 1.00E-136 | 298  | 314  | 94 -  | 405 | 718  | 21983  | 22295  |
| UN00668 | Rsa1.0.04126.1 | 1099 | 18939  | 0         | 488  | 489  | 99 -  | 1   | 489  | 17402  | 17890  |
| UN00669 | Rsa1.0.00597.1 | 499  | 73445  | 1.00E-166 | 347  | 363  | 95 -  | 144 | 499  | 10945  | 11307  |
| UN00670 | Rsa1.0.00901.1 | 1518 | 60363  | 0         | 1509 | 1516 | 99 -  | 1   | 1516 | 57966  | 59481  |
| UN00671 | Rsa1.0.00108.1 | 1007 | 478491 | 1.00E-147 | 292  | 300  | 97 -  | 1   | 299  | 277523 | 277822 |
| UN00672 | Rsa1.0.00271.1 | 1223 | 101125 | 1.00E-155 | 330  | 341  | 96 -  | 16  | 351  | 49646  | 49985  |
| UN00673 | Rsa1.0.03847.1 | 758  | 20479  | 0         | 740  | 759  | 97 -  | 1   | 758  | 5002   | 5760   |
| UN00674 | Rsa1.0.06482.1 | 713  | 10937  | 1.00E-132 | 296  | 315  | 93 +  | 388 | 702  | 8153   | 8456   |
| UN00675 | Rsa1.0.00848.1 | 724  | 152362 | 7.00E-94  | 205  | 215  | 95 +  | 1   | 215  | 39215  | 39429  |
| UN00676 | Rsa1.0.04375.1 | 610  | 141717 | 0         | 606  | 608  | 99 -  | 1   | 608  | 8395   | 9002   |
| UN00677 | Rsa1.0.05173.1 | 796  | 14606  | 0         | 583  | 606  | 96 +  | 4   | 608  | 8132   | 8730   |
| UN00678 | Rsa1.0.26431.1 | 793  | 892    | 0         | 496  | 506  | 98 -  | 2   | 507  | 370    | 872    |
| UN00679 | Rsa1.0.02248.1 | 1060 | 33414  | 0         | 467  | 470  | 99 +  | 356 | 825  | 12478  | 12947  |
| UN00680 | Rsa1.0.00176.1 | 970  | 240984 | 1.00E-43  | 121  | 131  | 92 +  | 812 | 942  | 18131  | 18261  |
| UN00681 | Rsa1.0.00039.1 | 1296 | 296927 | 0         | 685  | 691  | 99 +  | 1   | 691  | 254847 | 255531 |
| UN00682 | Rsa1.0.00716.1 | 801  | 67078  | 4.00E-65  | 291  | 343  | 84 +  | 1   | 341  | 51491  | 51833  |
| UN00683 | Rsa1.0.00880.1 | 616  | 61271  | 0         | 599  | 616  | 97 -  | 1   | 616  | 47645  | 48256  |
| UN00684 | Rsa1.0.00112.1 | 1320 | 132199 | 0         | 719  | 746  | 96 +  | 4   | 749  | 83967  | 84710  |
| UN00685 | Rsa1.0.00633.1 | 809  | 71250  | 0         | 468  | 471  | 99 -  | 1   | 471  | 5178   | 5648   |
| UN00686 | Rsa1.0.00782.1 | 955  | 64468  | 0         | 805  | 835  | 96 +  | 123 | 954  | 47530  | 48364  |
| UN00687 | Rsa1.0.00070.1 | 831  | 150321 | 0         | 509  | 527  | 96 +  | 1   | 520  | 59090  | 59616  |
| UN00688 | Rsa1.0.00458.1 | 911  | 82717  | 1.00E-126 | 248  | 254  | 97 +  | 412 | 665  | 68138  | 68391  |
| UN00689 | Rsa1.0.01506.1 | 471  | 44370  | 1.00E-115 | 274  | 293  | 93 -  | 183 | 471  | 17888  | 18180  |
| UN00690 | Rsa1.0.01549.1 | 754  | 43543  | 1.00E-175 | 338  | 347  | 97 -  | 408 | 754  | 696    | 1042   |
| UN00691 | Rsa1.0.02867.1 | 889  | 27121  | 0         | 887  | 887  | 100 + | 1   | 887  | 705    | 1591   |
| UN00692 | Rsa1.0.00486.1 | 529  | 80875  | 1.00E-85  | 227  | 249  | 91 -  | 249 | 497  | 34925  | 35163  |
| UN00693 | Rsa1.0.00037.1 | 1426 | 307838 | 0         | 457  | 461  | 99 +  | 1   | 458  | 193408 | 193868 |
| UN00694 | Rsa1.0.00464.1 | 995  | 82253  | 1.00E-105 | 219  | 227  | 96 +  | 135 | 361  | 37374  | 37600  |
| UN00695 | Rsa1.0.04819.1 | 930  | 140505 | 0         | 353  | 354  | 99 +  | 1   | 354  | 5613   | 5966   |
| UN00696 | Rsa1.0.00387.1 | 1269 | 495407 | 0         | 422  | 441  | 95 +  | 1   | 439  | 401061 | 401493 |
| UN00697 | Rsa1.0.08190.1 | 736  | 7764   | 1.00E-167 | 317  | 322  | 98 -  | 1   | 322  | 4617   | 4937   |
| UN00698 | Rsa1.0.00205.1 | 551  | 193401 | 1.00E-133 | 283  | 293  | 96 +  | 1   | 291  | 79344  | 79635  |
| UN00699 | Rsa1.0.39485.1 | 817  | 569    | 1.00E-132 | 239  | 239  | 100 - | 1   | 239  | 1      | 239    |
| UN00700 | Rsa1.0.02239.1 | 536  | 33534  | 1.00E-125 | 349  | 387  | 90 +  | 1   | 376  | 28368  | 28743  |

|         |                |      |        |           |      |      |       |     |      |        |        |
|---------|----------------|------|--------|-----------|------|------|-------|-----|------|--------|--------|
| UN00701 | Rsa1.0.00157.1 | 485  | 245832 | 2.00E-47  | 141  | 154  | 91 -  | 15  | 163  | 136953 | 137106 |
| UN00702 | Rsa1.0.00032.1 | 826  | 306326 | 0         | 596  | 627  | 95 +  | 1   | 625  | 284776 | 285401 |
| UN00703 | Rsa1.0.21164.1 | 779  | 1229   | 1.00E-178 | 353  | 363  | 97 -  | 3   | 365  | 836    | 1194   |
| UN00704 | Rsa1.0.02650.1 | 1187 | 29047  | 1.00E-169 | 310  | 313  | 99 +  | 578 | 890  | 11720  | 12032  |
| UN00705 | Rsa1.0.00116.1 | 1180 | 365886 | 1.00E-179 | 324  | 326  | 99 +  | 6   | 331  | 36657  | 36982  |
| UN00706 | Rsa1.0.03873.1 | 157  | 20360  | 6.00E-57  | 121  | 124  | 97 +  | 1   | 124  | 9834   | 9957   |
| UN00707 | Rsa1.0.46918.1 | 658  | 481    | 1.00E-165 | 301  | 303  | 99 -  | 356 | 658  | 176    | 478    |
| UN00708 | Rsa1.0.03664.1 | 539  | 21487  | 1.00E-116 | 219  | 221  | 99 -  | 296 | 516  | 7043   | 7263   |
| UN00709 | Rsa1.0.00714.1 | 159  | 67187  | 3.00E-68  | 150  | 155  | 96 -  | 1   | 155  | 3659   | 3812   |
| UN00710 | Rsa1.0.00320.1 | 831  | 95784  | 0         | 446  | 477  | 93 +  | 361 | 824  | 36827  | 37294  |
| UN00711 | Rsa1.0.01825.1 | 715  | 38725  | 0         | 356  | 363  | 98 +  | 304 | 666  | 27981  | 28343  |
| UN00712 | Rsa1.0.00556.1 | 1317 | 207212 | 0         | 549  | 597  | 91 +  | 4   | 590  | 37977  | 38572  |
| UN00713 | Rsa1.0.01683.1 | 757  | 41059  | 0         | 680  | 744  | 91 -  | 1   | 732  | 24130  | 24844  |
| UN00714 | Rsa1.0.00664.1 | 1010 | 69573  | 0         | 429  | 451  | 95 +  | 1   | 440  | 16651  | 17101  |
| UN00715 | Rsa1.0.01118.1 | 1323 | 53460  | 1.00E-135 | 244  | 244  | 100 + | 486 | 729  | 13629  | 13872  |
| UN00716 | Rsa1.0.17967.1 | 939  | 1699   | 0         | 930  | 944  | 98 -  | 1   | 937  | 517    | 1460   |
| UN00717 | Rsa1.0.00837.1 | 1267 | 62568  | 0         | 346  | 349  | 99 +  | 1   | 349  | 50675  | 51023  |
| UN00718 | Rsa1.0.03606.1 | 704  | 21818  | 1.00E-124 | 277  | 291  | 95 -  | 5   | 294  | 4426   | 4706   |
| UN00719 | Rsa1.0.00018.1 | 797  | 410899 | 0         | 399  | 406  | 98 +  | 393 | 797  | 403692 | 404095 |
| UN00720 | Rsa1.0.01704.1 | 1340 | 40711  | 0         | 1268 | 1337 | 94 -  | 1   | 1311 | 31433  | 32769  |
| UN00721 | Rsa1.0.00928.1 | 711  | 59293  | 1.00E-151 | 287  | 291  | 98 -  | 419 | 709  | 29451  | 29740  |
| UN00722 | Rsa1.0.00113.1 | 642  | 131574 | 0         | 439  | 477  | 92 +  | 160 | 630  | 4781   | 5256   |
| UN00723 | Rsa1.0.19822.1 | 890  | 1378   | 0         | 790  | 828  | 95 -  | 72  | 890  | 336    | 1163   |
| UN00724 | Rsa1.0.03073.1 | 1222 | 25574  | 0         | 780  | 816  | 95 -  | 120 | 935  | 86     | 897    |
| UN00725 | Rsa1.0.10486.1 | 821  | 5830   | 4.00E-74  | 157  | 162  | 96 +  | 553 | 714  | 393    | 554    |
| UN00726 | Rsa1.0.00265.1 | 855  | 220635 | 1.00E-89  | 174  | 176  | 98 -  | 306 | 481  | 172356 | 172531 |
| UN00727 | Rsa1.0.02703.1 | 1305 | 28544  | 1.00E-138 | 283  | 294  | 96 +  | 620 | 913  | 9049   | 9342   |
| UN00728 | Rsa1.0.00233.1 | 749  | 104918 | 1.00E-115 | 246  | 255  | 96 -  | 497 | 749  | 86427  | 86681  |
| UN00729 | Rsa1.0.00027.1 | 854  | 283362 | 1.00E-128 | 248  | 253  | 98 -  | 132 | 384  | 169310 | 169562 |
| UN00730 | Rsa1.0.00253.1 | 1325 | 231292 | 1.00E-119 | 236  | 242  | 97 +  | 846 | 1087 | 123819 | 124060 |
| UN00731 | Rsa1.0.03396.1 | 821  | 23242  | 0         | 586  | 624  | 93 +  | 175 | 795  | 8871   | 9471   |
| UN00732 | Rsa1.0.00424.1 | 1715 | 86005  | 0         | 681  | 697  | 97 +  | 374 | 1070 | 66771  | 67467  |
| UN00733 | Rsa1.0.03393.1 | 455  | 23247  | 1.00E-120 | 270  | 287  | 94 -  | 179 | 455  | 946    | 1232   |
| UN00734 | Rsa1.0.04753.1 | 1361 | 16124  | 0         | 566  | 589  | 96 +  | 753 | 1339 | 15339  | 15924  |
| UN00735 | Rsa1.0.01986.1 | 611  | 36489  | 1.00E-95  | 206  | 214  | 96 -  | 398 | 611  | 27726  | 27938  |
| UN00736 | Rsa1.0.00631.1 | 838  | 71277  | 0         | 414  | 439  | 94 -  | 2   | 426  | 18179  | 18617  |
| UN00737 | Rsa1.0.03001.1 | 924  | 26108  | 1.00E-122 | 229  | 231  | 99 -  | 272 | 502  | 13258  | 13488  |
| UN00738 | Rsa1.0.00087.1 | 880  | 761073 | 1.00E-154 | 343  | 359  | 95 +  | 526 | 879  | 225356 | 225712 |
| UN00739 | Rsa1.0.00049.1 | 1151 | 167018 | 0         | 594  | 597  | 99 -  | 2   | 598  | 49432  | 50028  |

|         |                |      |        |           |      |      |       |      |      |        |        |
|---------|----------------|------|--------|-----------|------|------|-------|------|------|--------|--------|
| UN00740 | Rsa1.0_00253.1 | 715  | 231292 | 1.00E-129 | 428  | 493  | 86 -  | 73   | 565  | 196884 | 197364 |
| UN00741 | Rsa1.0_00006.1 | 1193 | 396176 | 0         | 348  | 352  | 98 +  | 624  | 975  | 83435  | 83786  |
| UN00742 | Rsa1.0_08042.1 | 776  | 8020   | 0         | 743  | 777  | 95 +  | 5    | 776  | 1090   | 1865   |
| UN00743 | Rsa1.0_16567.1 | 850  | 2109   | 1.00E-101 | 196  | 199  | 98 +  | 414  | 612  | 1316   | 1514   |
| UN00744 | Rsa1.0_02224.1 | 937  | 33758  | 1.00E-132 | 243  | 244  | 99 -  | 263  | 506  | 30415  | 30658  |
| UN00745 | Rsa1.0_00454.1 | 629  | 216970 | 1.00E-101 | 326  | 366  | 89 +  | 270  | 629  | 142994 | 143349 |
| UN00746 | Rsa1.0_00970.1 | 1084 | 57994  | 0         | 491  | 517  | 94 -  | 582  | 1084 | 30952  | 31466  |
| UN00747 | Rsa1.0_07208.1 | 2156 | 9719   | 0         | 1314 | 1374 | 95 -  | 788  | 2155 | 6630   | 7993   |
| UN00748 | Rsa1.0_02247.1 | 920  | 33427  | 1.00E-118 | 267  | 282  | 94 +  | 584  | 864  | 28646  | 28924  |
| UN00749 | Rsa1.0_02234.1 | 873  | 33618  | 0         | 482  | 508  | 94 -  | 366  | 873  | 4042   | 4534   |
| UN00750 | Rsa1.0_01246.1 | 726  | 49968  | 0         | 704  | 722  | 97 -  | 3    | 723  | 34409  | 35125  |
| UN00751 | Rsa1.0_00713.1 | 554  | 158017 | 1.00E-137 | 341  | 368  | 92 +  | 152  | 511  | 153615 | 153982 |
| UN00752 | Rsa1.0_09117.1 | 1005 | 6637   | 1.00E-169 | 333  | 346  | 96 -  | 132  | 465  | 2458   | 2803   |
| UN00753 | Rsa1.0_02658.1 | 1841 | 28978  | 0         | 393  | 413  | 95 -  | 1447 | 1841 | 5435   | 5846   |
| UN00754 | Rsa1.0_00697.1 | 1320 | 67913  | 0         | 953  | 988  | 96 -  | 330  | 1313 | 37664  | 38651  |
| UN00755 | Rsa1.0_04301.1 | 831  | 18022  | 0         | 478  | 520  | 91 +  | 3    | 517  | 3138   | 3629   |
| UN00756 | Rsa1.0_00100.1 | 472  | 249232 | 0         | 434  | 468  | 92 -  | 4    | 458  | 181624 | 182082 |
| UN00757 | Rsa1.0_16374.1 | 961  | 2173   | 0         | 734  | 776  | 94 -  | 29   | 804  | 976    | 1735   |
| UN00758 | Rsa1.0_00566.1 | 755  | 75325  | 1.00E-145 | 371  | 404  | 91 -  | 38   | 427  | 25336  | 25729  |
| UN00759 | Rsa1.0_00609.1 | 1158 | 72785  | 0         | 435  | 449  | 96 +  | 568  | 1015 | 70202  | 70650  |
| UN00760 | Rsa1.0_01136.1 | 598  | 52724  | 1.00E-127 | 268  | 277  | 96 +  | 321  | 596  | 22713  | 22985  |
| UN00761 | Rsa1.0_00921.1 | 1057 | 59599  | 1.00E-125 | 240  | 244  | 98 +  | 738  | 981  | 2810   | 3053   |
| UN00762 | Rsa1.0_01309.1 | 1294 | 48556  | 0         | 533  | 543  | 98 -  | 755  | 1292 | 16161  | 16703  |
| UN00763 | Rsa1.0_00388.1 | 654  | 88890  | 1.00E-134 | 243  | 243  | 100 + | 125  | 367  | 54976  | 55218  |
| UN00764 | Rsa1.0_01080.1 | 747  | 54752  | 0         | 539  | 544  | 99 -  | 203  | 745  | 7932   | 8475   |
| UN00765 | Rsa1.0_02269.1 | 1395 | 33168  | 1.00E-177 | 355  | 367  | 96 +  | 628  | 993  | 3346   | 3712   |
| UN00766 | Rsa1.0_00457.1 | 638  | 337301 | 7.00E-66  | 131  | 132  | 99 +  | 394  | 525  | 179228 | 179359 |
| UN00767 | Rsa1.0_00833.1 | 791  | 62621  | 4.00E-68  | 164  | 174  | 94 -  | 1    | 171  | 7472   | 7645   |
| UN00768 | Rsa1.0_00001.1 | 895  | 363028 | 1.00E-106 | 199  | 200  | 99 -  | 2    | 201  | 305974 | 306173 |
| UN00769 | Rsa1.0_01669.1 | 763  | 41286  | 0         | 737  | 775  | 95 +  | 1    | 756  | 38600  | 39374  |
| UN00770 | Rsa1.0_00055.1 | 1112 | 520193 | 0         | 680  | 689  | 98 +  | 424  | 1112 | 98332  | 99020  |
| UN00771 | Rsa1.0_25516.1 | 1015 | 933    | 0         | 619  | 627  | 98 -  | 391  | 1013 | 23     | 649    |
| UN00772 | Rsa1.0_00300.1 | 1432 | 97747  | 1.00E-114 | 306  | 338  | 90 -  | 1079 | 1416 | 43860  | 44197  |
| UN00773 | Rsa1.0_00173.1 | 779  | 288743 | 0         | 388  | 401  | 96 +  | 380  | 779  | 203686 | 204082 |
| UN00774 | Rsa1.0_20572.1 | 1248 | 1292   | 0         | 1111 | 1141 | 97 +  | 108  | 1248 | 1      | 1139   |
| UN00775 | Rsa1.0_01119.1 | 1240 | 53459  | 0         | 1116 | 1179 | 94 +  | 11   | 1178 | 3953   | 5114   |
| UN00776 | Rsa1.0_05583.1 | 655  | 13268  | 1.00E-79  | 169  | 175  | 96 -  | 124  | 298  | 1012   | 1186   |
| UN00777 | Rsa1.0_00069.1 | 1658 | 403561 | 0         | 1195 | 1226 | 97 -  | 1    | 1224 | 208564 | 209779 |
| UN00778 | Rsa1.0_02916.1 | 838  | 26809  | 1.00E-161 | 406  | 444  | 91 +  | 407  | 838  | 5584   | 6013   |

|         |                |      |        |           |      |      |       |      |      |        |        |
|---------|----------------|------|--------|-----------|------|------|-------|------|------|--------|--------|
| UN00779 | Rsa1.0_00391.1 | 1095 | 183853 | 0         | 465  | 481  | 96 -  | 615  | 1093 | 45950  | 46427  |
| UN00780 | Rsa1.0_00188.1 | 1125 | 112020 | 0         | 449  | 463  | 96 -  | 221  | 683  | 74179  | 74638  |
| UN00781 | Rsa1.0_02907.1 | 1191 | 26861  | 0         | 549  | 593  | 92 -  | 610  | 1191 | 15213  | 15794  |
| UN00782 | Rsa1.0_03034.1 | 1359 | 157864 | 0         | 939  | 942  | 99 -  | 158  | 1099 | 3881   | 4822   |
| UN00783 | Rsa1.0_00060.1 | 1338 | 502678 | 0         | 325  | 325  | 100 - | 1014 | 1338 | 252641 | 252965 |
| UN00784 | Rsa1.0_07676.1 | 1040 | 8827   | 0         | 496  | 498  | 99 +  | 544  | 1040 | 763    | 1260   |
| UN00785 | Rsa1.0_00392.1 | 1128 | 88523  | 0         | 569  | 621  | 91 +  | 493  | 1088 | 65484  | 66095  |
| UN00786 | Rsa1.0_02600.1 | 1109 | 29657  | 1.00E-118 | 341  | 383  | 89 -  | 740  | 1097 | 1277   | 1658   |
| UN00787 | Rsa1.0_00421.1 | 734  | 86365  | 1.00E-104 | 280  | 310  | 90 -  | 437  | 734  | 14724  | 15033  |
| UN00788 | Rsa1.0_00127.1 | 1182 | 127446 | 1.00E-130 | 352  | 384  | 91 +  | 423  | 800  | 36967  | 37345  |
| UN00789 | Rsa1.0_00979.1 | 1043 | 57733  | 1.00E-115 | 261  | 277  | 94 -  | 167  | 440  | 41925  | 42201  |
| UN00790 | Rsa1.0_00002.1 | 945  | 601661 | 0         | 541  | 554  | 97 +  | 278  | 831  | 231774 | 232327 |
| UN00791 | Rsa1.0_00731.1 | 716  | 66638  | 0         | 705  | 711  | 99 -  | 5    | 715  | 12893  | 13603  |
| UN00792 | Rsa1.0_04689.1 | 697  | 16376  | 0         | 450  | 461  | 97 +  | 1    | 461  | 715    | 1175   |
| UN00793 | Rsa1.0_05153.1 | 894  | 14663  | 1.00E-115 | 269  | 285  | 94 +  | 600  | 878  | 2743   | 3023   |
| UN00794 | Rsa1.0_04920.1 | 1237 | 15434  | 0         | 1182 | 1206 | 98 -  | 44   | 1237 | 412    | 1617   |
| UN00795 | Rsa1.0_06553.1 | 772  | 10795  | 1.00E-122 | 229  | 231  | 99 -  | 196  | 426  | 5503   | 5733   |
| UN00796 | Rsa1.0_01239.1 | 713  | 50107  | 1.00E-136 | 270  | 276  | 97 +  | 3    | 278  | 17129  | 17400  |
| UN00797 | Rsa1.0_00092.1 | 1077 | 659932 | 1.00E-119 | 230  | 234  | 98 -  | 253  | 486  | 444940 | 445173 |
| UN00798 | Rsa1.0_00965.1 | 233  | 58139  | 6.00E-30  | 81   | 85   | 95 +  | 89   | 173  | 7327   | 7408   |
| UN00799 | Rsa1.0_03395.1 | 1084 | 23243  | 0         | 428  | 450  | 95 +  | 642  | 1084 | 21042  | 21487  |
| UN00800 | Rsa1.0_33048.1 | 764  | 687    | 7.00E-79  | 294  | 338  | 86 -  | 373  | 707  | 239    | 576    |
| UN00801 | Rsa1.0_00085.1 | 1052 | 142226 | 0         | 371  | 384  | 96 -  | 670  | 1052 | 62439  | 62819  |
| UN00802 | Rsa1.0_00102.1 | 1295 | 135497 | 2.00E-46  | 102  | 104  | 98 +  | 882  | 985  | 8020   | 8123   |
| UN00803 | Rsa1.0_21386.1 | 1044 | 1209   | 0         | 835  | 876  | 95 -  | 172  | 1044 | 131    | 1006   |
| UN00804 | Rsa1.0_01245.1 | 850  | 149868 | 0         | 516  | 544  | 94 +  | 326  | 850  | 45960  | 46503  |
| UN00805 | Rsa1.0_00003.1 | 1665 | 340054 | 0         | 750  | 766  | 97 -  | 898  | 1663 | 8201   | 8966   |
| UN00806 | Rsa1.0_00103.1 | 720  | 135304 | 0         | 697  | 718  | 97 -  | 3    | 720  | 22154  | 22869  |
| UN00807 | Rsa1.0_00981.1 | 803  | 57700  | 1.00E-141 | 360  | 396  | 90 -  | 4    | 372  | 50690  | 51085  |
| UN00808 | Rsa1.0_00673.1 | 736  | 69325  | 0         | 732  | 736  | 99 -  | 3    | 736  | 32994  | 33729  |
| UN00809 | Rsa1.0_43878.1 | 832  | 512    | 0         | 503  | 511  | 98 +  | 1    | 508  | 2      | 511    |
| UN00810 | Rsa1.0_00451.1 | 503  | 322533 | 1.00E-119 | 284  | 300  | 94 +  | 205  | 500  | 301659 | 301956 |
| UN00811 | Rsa1.0_01523.1 | 793  | 43959  | 1.00E-159 | 285  | 285  | 100 - | 508  | 792  | 2751   | 3035   |
| UN00812 | Rsa1.0_00374.1 | 1043 | 165738 | 0         | 402  | 418  | 96 +  | 630  | 1043 | 5585   | 5999   |
| UN00813 | Rsa1.0_00092.1 | 1192 | 659932 | 0         | 399  | 416  | 95 +  | 784  | 1191 | 505878 | 506292 |
| UN00814 | Rsa1.0_00255.1 | 1400 | 204967 | 0         | 836  | 844  | 99 +  | 557  | 1399 | 70989  | 71832  |
| UN00815 | Rsa1.0_02492.1 | 571  | 30859  | 1.00E-120 | 291  | 309  | 94 +  | 264  | 571  | 12178  | 12480  |
| UN00816 | Rsa1.0_00012.1 | 917  | 222148 | 0         | 586  | 603  | 97 +  | 319  | 917  | 130843 | 131441 |
| UN00817 | Rsa1.0_00273.1 | 765  | 326186 | 1.00E-166 | 419  | 450  | 93 -  | 322  | 765  | 26633  | 27078  |

|         |                |      |        |           |      |      |      |     |      |        |        |
|---------|----------------|------|--------|-----------|------|------|------|-----|------|--------|--------|
| UN00818 | Rsa1.0.00625.1 | 739  | 71672  | 5.00E-89  | 188  | 195  | 96 - | 476 | 670  | 31476  | 31670  |
| UN00819 | Rsa1.0.11393.1 | 1290 | 5521   | 0         | 397  | 418  | 94 - | 3   | 419  | 205    | 619    |
| UN00820 | Rsa1.0.01804.1 | 797  | 39038  | 0         | 420  | 430  | 97 + | 370 | 797  | 34084  | 34510  |
| UN00821 | Rsa1.0.00467.1 | 832  | 156542 | 0         | 785  | 815  | 96 + | 3   | 810  | 92931  | 93745  |
| UN00822 | Rsa1.0.00022.1 | 1166 | 200461 | 0         | 815  | 856  | 95 + | 18  | 873  | 43338  | 44178  |
| UN00823 | Rsa1.0.00082.1 | 857  | 237584 | 1.00E-117 | 259  | 274  | 94 - | 48  | 315  | 56446  | 56719  |
| UN00824 | Rsa1.0.00778.1 | 1031 | 196751 | 9.00E-82  | 158  | 159  | 99 - | 400 | 558  | 7426   | 7584   |
| UN00825 | Rsa1.0.02625.1 | 885  | 139104 | 1.00E-160 | 367  | 393  | 93 + | 2   | 388  | 11405  | 11796  |
| UN00826 | Rsa1.0.00023.1 | 785  | 194764 | 6.00E-67  | 133  | 134  | 99 + | 218 | 351  | 69517  | 69650  |
| UN00827 | Rsa1.0.26169.1 | 1063 | 903    | 1.00E-150 | 272  | 273  | 99 + | 200 | 472  | 551    | 823    |
| UN00828 | Rsa1.0.01545.1 | 908  | 43599  | 0         | 518  | 533  | 97 - | 3   | 535  | 27015  | 27539  |
| UN00829 | Rsa1.0.00544.1 | 409  | 76787  | 0         | 380  | 394  | 96 - | 2   | 392  | 8466   | 8859   |
| UN00830 | Rsa1.0.00136.1 | 947  | 122464 | 0         | 393  | 398  | 98 - | 3   | 400  | 68244  | 68638  |
| UN00831 | Rsa1.0.00045.1 | 1033 | 328694 | 0         | 495  | 514  | 96 - | 525 | 1032 | 184204 | 184717 |
| UN00832 | Rsa1.0.00087.1 | 1216 | 761073 | 0         | 643  | 693  | 92 - | 536 | 1215 | 733567 | 734242 |
| UN00833 | Rsa1.0.03005.1 | 1721 | 26082  | 1.00E-112 | 215  | 218  | 98 + | 17  | 234  | 7720   | 7937   |
| UN00834 | Rsa1.0.02362.1 | 799  | 32190  | 1.00E-176 | 348  | 356  | 97 - | 434 | 785  | 24790  | 25145  |
| UN00835 | Rsa1.0.21931.1 | 1369 | 1162   | 0         | 665  | 682  | 97 - | 599 | 1280 | 4      | 685    |
| UN00836 | Rsa1.0.02473.1 | 621  | 31083  | 0         | 600  | 623  | 96 - | 3   | 621  | 9004   | 9620   |
| UN00837 | Rsa1.0.01061.1 | 1052 | 55349  | 1.00E-156 | 283  | 284  | 99 + | 769 | 1052 | 38814  | 39097  |
| UN00838 | Rsa1.0.01412.1 | 433  | 46311  | 1.00E-94  | 306  | 348  | 87 - | 119 | 433  | 10270  | 10614  |
| UN00839 | Rsa1.0.41478.1 | 1734 | 542    | 0         | 398  | 416  | 95 + | 545 | 960  | 35     | 450    |
| UN00840 | Rsa1.0.00277.1 | 1042 | 100132 | 0         | 478  | 516  | 92 + | 437 | 946  | 2808   | 3323   |
| UN00841 | Rsa1.0.01168.1 | 1317 | 153765 | 0         | 1117 | 1181 | 94 + | 159 | 1317 | 20893  | 22072  |
| UN00842 | Rsa1.0.01390.1 | 831  | 46695  | 0         | 434  | 449  | 96 + | 387 | 831  | 24733  | 25181  |
| UN00843 | Rsa1.0.02041.1 | 867  | 163634 | 0         | 830  | 867  | 95 + | 1   | 867  | 157069 | 157935 |
| UN00844 | Rsa1.0.02358.1 | 949  | 32213  | 1.00E-166 | 325  | 335  | 97 - | 427 | 761  | 384    | 712    |
| UN00845 | Rsa1.0.00179.1 | 1918 | 393324 | 0         | 387  | 391  | 98 - | 715 | 1105 | 51783  | 52173  |
| UN00846 | Rsa1.0.00035.1 | 769  | 176449 | 1.00E-128 | 241  | 244  | 98 - | 3   | 246  | 5459   | 5702   |
| UN00847 | Rsa1.0.04230.1 | 903  | 18384  | 0         | 461  | 474  | 97 + | 4   | 474  | 10531  | 11003  |
| UN00848 | Rsa1.0.00644.1 | 750  | 136881 | 2.00E-57  | 123  | 126  | 97 + | 231 | 356  | 30581  | 30706  |
| UN00849 | Rsa1.0.04945.1 | 972  | 15370  | 0         | 877  | 891  | 98 + | 81  | 971  | 8767   | 9656   |
| UN00850 | Rsa1.0.00051.1 | 684  | 258225 | 0         | 491  | 513  | 95 + | 3   | 515  | 113688 | 114193 |
| UN00851 | Rsa1.0.00262.1 | 680  | 101906 | 1.00E-112 | 227  | 234  | 97 + | 7   | 240  | 46434  | 46663  |
| UN00852 | Rsa1.0.00362.1 | 798  | 299497 | 1.00E-154 | 292  | 297  | 98 - | 3   | 299  | 270726 | 271022 |
| UN00853 | Rsa1.0.03982.1 | 884  | 19723  | 0         | 682  | 719  | 94 - | 176 | 884  | 11052  | 11767  |
| UN00854 | Rsa1.0.00354.1 | 1409 | 232005 | 0         | 561  | 563  | 99 - | 342 | 904  | 230428 | 230990 |
| UN00855 | Rsa1.0.00457.1 | 939  | 337301 | 1.00E-155 | 296  | 302  | 98 + | 637 | 938  | 2588   | 2889   |
| UN00856 | Rsa1.0.00393.1 | 1032 | 158674 | 0         | 569  | 588  | 96 + | 1   | 588  | 135770 | 136351 |



|         |                |      |        |           |      |      |       |     |      |        |        |
|---------|----------------|------|--------|-----------|------|------|-------|-----|------|--------|--------|
| UN00857 | Rsa1.0_00740.1 | 897  | 215972 | 0         | 887  | 913  | 97 +  | 4   | 897  | 43427  | 44336  |
| UN00858 | Rsa1.0_01601.1 | 1230 | 42519  | 1.00E-124 | 236  | 238  | 99 -  | 991 | 1227 | 17159  | 17396  |
| UN00859 | Rsa1.0_01989.1 | 1568 | 36439  | 1.00E-173 | 345  | 355  | 97 +  | 7   | 357  | 8731   | 9085   |
| UN00860 | Rsa1.0_03887.1 | 1064 | 20247  | 0         | 394  | 396  | 99 -  | 3   | 398  | 4347   | 4742   |
| UN00861 | Rsa1.0_00273.1 | 928  | 326186 | 5.00E-83  | 166  | 169  | 98 -  | 6   | 174  | 162185 | 162353 |
| UN00862 | Rsa1.0_01000.1 | 765  | 57140  | 1.00E-64  | 129  | 130  | 99 -  | 69  | 198  | 39653  | 39782  |
| UN00863 | Rsa1.0_00308.1 | 798  | 96915  | 0         | 385  | 405  | 95 +  | 357 | 760  | 81326  | 81724  |
| UN00864 | Rsa1.0_04160.1 | 929  | 18795  | 0         | 454  | 456  | 99 +  | 474 | 928  | 9896   | 10351  |
| UN00865 | Rsa1.0_02794.1 | 772  | 27820  | 1.00E-148 | 267  | 267  | 100 - | 1   | 267  | 2429   | 2695   |
| UN00866 | Rsa1.0_01116.1 | 1140 | 142088 | 1.00E-167 | 308  | 310  | 99 -  | 831 | 1140 | 119147 | 119455 |
| UN00867 | Rsa1.0_20459.1 | 814  | 1303   | 0         | 455  | 483  | 94 -  | 334 | 811  | 349    | 828    |
| UN00868 | Rsa1.0_00895.1 | 1366 | 60615  | 2.33E-156 | 293  | 303  | 96 -  | 245 | 547  | 41770  | 42072  |
| UN00869 | Rsa1.0_00245.1 | 1209 | 103569 | 0         | 662  | 687  | 96 +  | 528 | 1209 | 100778 | 101459 |
| UN00870 | Rsa1.0_00017.1 | 1126 | 752458 | 1.00E-111 | 238  | 248  | 95 +  | 882 | 1125 | 450189 | 450434 |
| UN00871 | Rsa1.0_00790.1 | 733  | 148693 | 1.00E-136 | 267  | 274  | 97 -  | 10  | 283  | 57272  | 57545  |
| UN00872 | Rsa1.0_00139.1 | 751  | 357786 | 1.00E-171 | 449  | 492  | 91 -  | 241 | 730  | 45669  | 46158  |
| UN00873 | Rsa1.0_13182.1 | 1247 | 4980   | 0         | 499  | 538  | 92 -  | 704 | 1240 | 3911   | 4436   |
| UN00874 | Rsa1.0_02573.1 | 1228 | 29955  | 0         | 1216 | 1231 | 98 +  | 5   | 1227 | 10723  | 11953  |
| UN00875 | Rsa1.0_05319.1 | 957  | 14158  | 0         | 677  | 685  | 98 -  | 6   | 690  | 5065   | 5749   |
| UN00876 | Rsa1.0_00878.1 | 1109 | 330303 | 1.00E-154 | 348  | 372  | 93 -  | 741 | 1109 | 9130   | 9489   |
| UN00877 | Rsa1.0_00727.1 | 856  | 66724  | 5.00E-89  | 167  | 167  | 100 + | 690 | 856  | 33639  | 33805  |
| UN00878 | Rsa1.0_17985.1 | 1279 | 1695   | 1.00E-106 | 219  | 225  | 97 -  | 4   | 228  | 540    | 763    |
| UN00879 | Rsa1.0_00033.1 | 881  | 515811 | 0         | 421  | 439  | 95 -  | 354 | 792  | 485172 | 485610 |
| UN00880 | Rsa1.0_01896.1 | 914  | 37512  | 0         | 883  | 934  | 94 +  | 1   | 914  | 19194  | 20127  |
| UN00881 | Rsa1.0_00074.1 | 947  | 147591 | 0         | 922  | 930  | 99 +  | 2   | 930  | 90669  | 91598  |
| UN00882 | Rsa1.0_01170.1 | 763  | 161131 | 0         | 452  | 485  | 93 -  | 304 | 761  | 117423 | 117907 |
| UN00883 | Rsa1.0_00748.1 | 824  | 65983  | 1.00E-147 | 277  | 281  | 98 +  | 413 | 693  | 58948  | 59228  |
| UN00884 | Rsa1.0_02039.1 | 1113 | 35699  | 1.00E-147 | 350  | 377  | 92 +  | 2   | 358  | 883    | 1259   |
| UN00885 | Rsa1.0_00999.1 | 658  | 57162  | 0         | 507  | 533  | 95 +  | 1   | 530  | 24609  | 25141  |
| UN00886 | Rsa1.0_03305.1 | 1167 | 147552 | 0         | 467  | 486  | 96 +  | 683 | 1165 | 141859 | 142342 |
| UN00887 | Rsa1.0_06160.1 | 1293 | 11596  | 0         | 473  | 485  | 97 +  | 184 | 668  | 10937  | 11421  |
| UN00888 | Rsa1.0_00224.1 | 630  | 327530 | 1.00E-161 | 287  | 287  | 100 + | 343 | 629  | 195632 | 195918 |
| UN00889 | Rsa1.0_00030.1 | 1300 | 250988 | 0         | 626  | 684  | 91 -  | 650 | 1299 | 124921 | 125598 |
| UN00890 | Rsa1.0_06032.1 | 906  | 11886  | 1.00E-151 | 284  | 288  | 98 -  | 619 | 906  | 9059   | 9346   |
| UN00891 | Rsa1.0_00974.1 | 927  | 57893  | 0         | 361  | 361  | 100 - | 225 | 585  | 38890  | 39250  |
| UN00892 | Rsa1.0_00240.1 | 1197 | 104175 | 0         | 383  | 395  | 96 +  | 802 | 1196 | 18059  | 18453  |
| UN00893 | Rsa1.0_03640.1 | 1018 | 21624  | 0         | 487  | 506  | 96 -  | 438 | 933  | 15487  | 15992  |
| UN00894 | Rsa1.0_00200.1 | 1500 | 162016 | 0         | 379  | 394  | 96 -  | 98  | 488  | 150563 | 150956 |
| UN00895 | Rsa1.0_01478.1 | 685  | 44991  | 1.00E-73  | 144  | 145  | 99 +  | 42  | 186  | 13009  | 13153  |

|         |                |      |        |           |     |     |       |      |      |        |        |
|---------|----------------|------|--------|-----------|-----|-----|-------|------|------|--------|--------|
| UN00896 | Rsa1.0_10601.1 | 951  | 5789   | 1.00E-143 | 316 | 332 | 95 -  | 625  | 951  | 5284   | 5615   |
| UN00897 | Rsa1.0_01339.1 | 724  | 47813  | 1.00E-123 | 310 | 336 | 92 +  | 238  | 573  | 14806  | 15133  |
| UN00898 | Rsa1.0_00123.1 | 1180 | 325650 | 1.00E-142 | 256 | 256 | 100 + | 925  | 1180 | 175498 | 175753 |
| UN00899 | Rsa1.0_01454.1 | 716  | 45440  | 1.00E-101 | 344 | 400 | 86 -  | 20   | 417  | 23564  | 23938  |
| UN00900 | Rsa1.0_00491.1 | 769  | 80219  | 1.00E-148 | 340 | 364 | 93 +  | 408  | 769  | 78437  | 78794  |
| UN00901 | Rsa1.0_01042.1 | 1227 | 293264 | 0         | 615 | 631 | 97 +  | 604  | 1225 | 137345 | 137974 |
| UN00902 | Rsa1.0_00447.1 | 793  | 84051  | 1.00E-113 | 223 | 228 | 97 -  | 293  | 520  | 57123  | 57350  |
| UN00903 | Rsa1.0_01233.1 | 802  | 50184  | 1.00E-157 | 285 | 286 | 99 -  | 3    | 288  | 30435  | 30720  |
| UN00904 | Rsa1.0_00437.1 | 785  | 84879  | 0         | 380 | 386 | 98 +  | 354  | 739  | 39662  | 40047  |
| UN00905 | Rsa1.0_01389.1 | 1094 | 46716  | 3.00E-97  | 190 | 193 | 98 +  | 536  | 728  | 26528  | 26720  |
| UN00906 | Rsa1.0_01971.1 | 1355 | 36641  | 1.00E-122 | 238 | 243 | 97 -  | 1104 | 1346 | 25146  | 25388  |
| UN00907 | Rsa1.0_00275.1 | 568  | 210104 | 1.00E-159 | 301 | 304 | 99 -  | 263  | 566  | 154366 | 154667 |
| UN00908 | #              | #    | #      | #         | #   | #   | #     | #    | #    | #      | #      |
| UN00909 | Rsa1.0_00018.1 | 713  | 410899 | 2.00E-97  | 184 | 185 | 99 +  | 124  | 308  | 258616 | 258800 |
| UN00910 | Rsa1.0_00632.1 | 684  | 183777 | 0         | 653 | 693 | 94 -  | 2    | 684  | 145375 | 146055 |
| UN00911 | Rsa1.0_02212.1 | 1018 | 33840  | 1.00E-83  | 164 | 166 | 98 -  | 446  | 611  | 28024  | 28189  |
| UN00912 | Rsa1.0_09577.1 | 1325 | 6275   | 0         | 929 | 975 | 95 -  | 303  | 1265 | 961    | 1935   |
| UN00913 | Rsa1.0_02550.1 | 910  | 291051 | 0         | 370 | 371 | 99 -  | 540  | 910  | 18189  | 18559  |
| UN00914 | Rsa1.0_02041.1 | 731  | 163634 | 0         | 430 | 443 | 97 -  | 3    | 445  | 14539  | 14972  |
| UN00915 | Rsa1.0_00013.1 | 1788 | 292129 | 0         | 633 | 635 | 99 +  | 1153 | 1787 | 168710 | 169343 |
| UN00916 | Rsa1.0_00411.1 | 1282 | 86944  | 0         | 497 | 508 | 97 +  | 1    | 508  | 3204   | 3711   |
| UN00917 | Rsa1.0_35196.1 | 1023 | 643    | 0         | 412 | 417 | 98 +  | 151  | 567  | 227    | 643    |
| UN00918 | Rsa1.0_01668.1 | 975  | 41299  | 1.00E-113 | 355 | 401 | 88 +  | 587  | 975  | 19391  | 19783  |
| UN00919 | Rsa1.0_05662.1 | 804  | 13011  | 0         | 367 | 371 | 98 -  | 434  | 804  | 5288   | 5658   |
| UN00920 | Rsa1.0_01096.1 | 814  | 54266  | 1.00E-170 | 309 | 311 | 99 -  | 3    | 313  | 10256  | 10566  |
| UN00921 | Rsa1.0_00690.1 | 739  | 140527 | 1.00E-128 | 256 | 264 | 96 +  | 3    | 266  | 57035  | 57298  |
| UN00922 | Rsa1.0_03239.1 | 403  | 24430  | 1.00E-136 | 249 | 250 | 99 +  | 2    | 251  | 12175  | 12424  |
| UN00923 | Rsa1.0_00093.1 | 921  | 214962 | 0         | 402 | 409 | 98 +  | 518  | 921  | 13902  | 14310  |
| UN00924 | Rsa1.0_00893.1 | 1062 | 60626  | 0         | 388 | 395 | 98 -  | 2    | 396  | 4394   | 4788   |
| UN00925 | Rsa1.0_00512.1 | 1193 | 200277 | 0         | 399 | 400 | 99 +  | 794  | 1193 | 30514  | 30913  |
| UN00926 | Rsa1.0_01503.1 | 624  | 44467  | 1.00E-152 | 293 | 300 | 97 +  | 190  | 489  | 43714  | 44013  |
| UN00927 | Rsa1.0_02872.1 | 831  | 27080  | 1.00E-145 | 302 | 313 | 96 -  | 519  | 831  | 9164   | 9469   |
| UN00928 | Rsa1.0_13514.1 | 1059 | 4757   | 0         | 701 | 723 | 96 +  | 341  | 1059 | 836    | 1552   |
| UN00929 | Rsa1.0_05522.1 | 517  | 13441  | 4.00E-76  | 168 | 175 | 96 +  | 1    | 175  | 8265   | 8436   |
| UN00930 | #              | #    | #      | #         | #   | #   | #     | #    | #    | #      | #      |
| UN00931 | Rsa1.0_04404.1 | 866  | 17510  | 0         | 614 | 626 | 98 +  | 147  | 772  | 9475   | 10100  |
| UN00932 | Rsa1.0_00538.1 | 827  | 77149  | 0         | 373 | 381 | 97 +  | 163  | 543  | 65814  | 66194  |
| UN00933 | Rsa1.0_00714.1 | 1002 | 67187  | 1.00E-129 | 260 | 269 | 96 +  | 4    | 272  | 22282  | 22544  |
| UN00934 | Rsa1.0_00214.1 | 1030 | 107508 | 1.00E-126 | 350 | 391 | 89 -  | 644  | 1030 | 28880  | 29247  |

|         |                |      |        |           |      |      |       |      |      |        |        |
|---------|----------------|------|--------|-----------|------|------|-------|------|------|--------|--------|
| UN00935 | Rsa1.0.01504.1 | 779  | 189978 | 1.00E-147 | 285  | 291  | 97 -  | 8    | 296  | 171988 | 172278 |
| UN00936 | Rsa1.0.01561.1 | 525  | 43227  | 0         | 489  | 524  | 93 +  | 1    | 524  | 33388  | 33880  |
| UN00937 | Rsa1.0.00327.1 | 939  | 94892  | 0         | 662  | 686  | 96 -  | 261  | 939  | 70626  | 71308  |
| UN00938 | Rsa1.0.17015.1 | 1049 | 1953   | 1.00E-103 | 237  | 251  | 94 -  | 2    | 244  | 874    | 1121   |
| UN00939 | Rsa1.0.00121.1 | 998  | 278029 | 0         | 982  | 999  | 98 +  | 2    | 998  | 103336 | 104334 |
| UN00940 | Rsa1.0.00924.1 | 1636 | 59524  | 1.00E-137 | 254  | 256  | 99 -  | 1020 | 1275 | 38046  | 38301  |
| UN00941 | Rsa1.0.01946.1 | 852  | 36982  | 1.00E-120 | 219  | 219  | 100 + | 246  | 464  | 31309  | 31527  |
| UN00942 | Rsa1.0.03034.1 | 1501 | 157864 | 0         | 496  | 516  | 96 +  | 982  | 1496 | 134541 | 135055 |
| UN00943 | Rsa1.0.01416.1 | 1273 | 46262  | 1.00E-131 | 281  | 293  | 95 -  | 980  | 1272 | 28739  | 29028  |
| UN00944 | Rsa1.0.00251.1 | 760  | 303968 | 1.00E-138 | 316  | 338  | 93 +  | 3    | 339  | 130075 | 130403 |
| UN00945 | Rsa1.0.00078.1 | 1032 | 175053 | 1.00E-172 | 378  | 401  | 94 +  | 608  | 1008 | 139900 | 140298 |
| UN00946 | #              | #    | #      | #         | #    | #    | #     | #    | #    | #      | #      |
| UN00947 | Rsa1.0.00136.1 | 959  | 122464 | 0         | 347  | 353  | 98 -  | 385  | 737  | 112510 | 112862 |
| UN00948 | Rsa1.0.01803.1 | 801  | 173846 | 8.00E-91  | 182  | 185  | 98 +  | 116  | 300  | 136431 | 136613 |
| UN00949 | Rsa1.0.00038.1 | 775  | 314568 | 1.00E-144 | 259  | 259  | 100 + | 49   | 307  | 166217 | 166475 |
| UN00950 | Rsa1.0.08124.1 | 1017 | 7869   | 0         | 723  | 729  | 99 -  | 142  | 870  | 5      | 733    |
| UN00951 | Rsa1.0.00008.1 | 874  | 358124 | 1.00E-130 | 239  | 240  | 99 -  | 7    | 246  | 200510 | 200749 |
| UN00952 | Rsa1.0.00632.1 | 603  | 183777 | 1.00E-141 | 285  | 293  | 97 -  | 309  | 601  | 149149 | 149438 |
| UN00953 | Rsa1.0.00467.1 | 1143 | 156542 | 0         | 1086 | 1135 | 95 -  | 3    | 1137 | 118192 | 119311 |
| UN00954 | Rsa1.0.00105.1 | 1189 | 134138 | 0         | 568  | 624  | 91 -  | 279  | 879  | 1925   | 2540   |
| UN00955 | Rsa1.0.00119.1 | 888  | 467509 | 1.00E-121 | 277  | 293  | 94 +  | 592  | 882  | 332175 | 332467 |
| UN00956 | Rsa1.0.01696.1 | 749  | 301850 | 1.00E-77  | 154  | 156  | 98 -  | 359  | 514  | 299403 | 299558 |
| UN00957 | Rsa1.0.01329.1 | 862  | 47982  | 0         | 857  | 862  | 99 +  | 2    | 862  | 6363   | 7222   |
| UN00958 | Rsa1.0.25074.1 | 943  | 952    | 1.00E-163 | 297  | 299  | 99 -  | 645  | 943  | 654    | 952    |
| UN00959 | Rsa1.0.00253.1 | 851  | 231292 | 0         | 668  | 716  | 93 -  | 120  | 823  | 79564  | 80274  |
| UN00960 | Rsa1.0.00304.1 | 948  | 97429  | 0         | 542  | 565  | 95 +  | 398  | 946  | 57550  | 58113  |
| UN00961 | Rsa1.0.03323.1 | 523  | 23751  | 2.00E-75  | 159  | 164  | 96 -  | 230  | 393  | 15045  | 15208  |
| UN00962 | Rsa1.0.00117.1 | 850  | 213118 | 0         | 835  | 846  | 98 -  | 5    | 850  | 128766 | 129611 |
| UN00963 | Rsa1.0.01179.1 | 131  | 51549  | 2.00E-16  | 80   | 92   | 86 +  | 1    | 92   | 42489  | 42580  |
| UN00964 | Rsa1.0.06333.1 | 902  | 11217  | 1.00E-139 | 255  | 256  | 99 +  | 520  | 775  | 224    | 479    |
| UN00965 | Rsa1.0.00073.1 | 1480 | 240924 | 0         | 736  | 748  | 98 -  | 1    | 743  | 109830 | 110575 |
| UN00966 | Rsa1.0.00365.1 | 1222 | 90902  | 1.00E-129 | 247  | 251  | 98 -  | 971  | 1221 | 41879  | 42129  |
| UN00967 | Rsa1.0.01862.1 | 671  | 38030  | 1.00E-125 | 227  | 227  | 100 - | 1    | 227  | 14590  | 14816  |
| UN00968 | Rsa1.0.01060.1 | 1285 | 55368  | 1.00E-162 | 319  | 326  | 97 -  | 957  | 1281 | 20960  | 21284  |
| UN00969 | Rsa1.0.01411.1 | 964  | 46326  | 1.00E-164 | 326  | 337  | 96 +  | 626  | 962  | 7472   | 7808   |
| UN00970 | Rsa1.0.02252.1 | 921  | 33375  | 0         | 378  | 383  | 98 +  | 368  | 750  | 31510  | 31892  |
| UN00971 | Rsa1.0.00089.1 | 137  | 406142 | 4.00E-42  | 123  | 135  | 91 -  | 3    | 137  | 163364 | 163498 |
| UN00972 | Rsa1.0.01997.1 | 892  | 158416 | 5.00E-89  | 167  | 167  | 100 - | 1    | 167  | 16696  | 16862  |
| UN00973 | Rsa1.0.00744.1 | 827  | 66084  | 1.00E-102 | 211  | 218  | 96 +  | 601  | 818  | 58901  | 59118  |

|         |                |      |        |           |      |      |       |      |      |        |        |
|---------|----------------|------|--------|-----------|------|------|-------|------|------|--------|--------|
| UN00974 | Rsa1.0.00129.1 | 1023 | 126831 | 0         | 416  | 441  | 94 +  | 1    | 439  | 113601 | 114039 |
| UN00975 | Rsa1.0.01000.1 | 880  | 57140  | 1.00E-104 | 268  | 289  | 92 +  | 3    | 290  | 16819  | 17100  |
| UN00976 | Rsa1.0.00307.1 | 1006 | 199003 | 0         | 762  | 825  | 92 +  | 8    | 832  | 155929 | 156753 |
| UN00977 | Rsa1.0.41025.1 | 1303 | 547    | 0         | 402  | 402  | 100 - | 17   | 418  | 146    | 547    |
| UN00978 | Rsa1.0.00350.1 | 906  | 92346  | 6.00E-89  | 251  | 276  | 90 -  | 5    | 278  | 10176  | 10447  |
| UN00979 | Rsa1.0.03354.1 | 1067 | 23491  | 0         | 852  | 869  | 98 -  | 1    | 869  | 17878  | 18737  |
| UN00980 | Rsa1.0.09141.1 | 1687 | 6612   | 0         | 498  | 498  | 100 + | 73   | 570  | 974    | 1471   |
| UN00981 | Rsa1.0.54193.1 | 1349 | 421    | 0         | 420  | 421  | 99 -  | 797  | 1217 | 1      | 421    |
| UN00982 | Rsa1.0.00131.1 | 686  | 432233 | 1.00E-149 | 268  | 268  | 100 + | 419  | 686  | 395234 | 395501 |
| UN00983 | Rsa1.0.00900.1 | 719  | 60367  | 1.00E-144 | 301  | 312  | 96 +  | 7    | 318  | 25861  | 26170  |
| UN00984 | Rsa1.0.00327.1 | 922  | 94892  | 0         | 526  | 528  | 99 +  | 290  | 817  | 70549  | 71076  |
| UN00985 | Rsa1.0.03962.1 | 1152 | 19860  | 0         | 566  | 598  | 94 +  | 1    | 584  | 14046  | 14639  |
| UN00986 | Rsa1.0.02496.1 | 786  | 30814  | 0         | 427  | 443  | 96 +  | 347  | 786  | 28985  | 29425  |
| UN00987 | Rsa1.0.07000.1 | 903  | 10049  | 6.00E-92  | 220  | 232  | 94 -  | 3    | 232  | 8619   | 8844   |
| UN00988 | Rsa1.0.00179.1 | 1197 | 393324 | 5.00E-90  | 214  | 229  | 93 -  | 1    | 229  | 218140 | 218368 |
| UN00989 | Rsa1.0.05618.1 | 461  | 13165  | 3.00E-98  | 254  | 274  | 92 +  | 7    | 278  | 6819   | 7091   |
| UN00990 | Rsa1.0.02859.1 | 1104 | 162118 | 0         | 377  | 380  | 99 -  | 1    | 380  | 144252 | 144631 |
| UN00991 | Rsa1.0.00006.1 | 949  | 396176 | 0         | 474  | 518  | 91 +  | 7    | 508  | 368527 | 369036 |
| UN00992 | Rsa1.0.04450.1 | 824  | 17297  | 1.00E-166 | 348  | 364  | 95 -  | 462  | 824  | 12622  | 12985  |
| UN00993 | Rsa1.0.01091.1 | 865  | 54383  | 0         | 506  | 516  | 98 +  | 286  | 801  | 8775   | 9290   |
| UN00994 | Rsa1.0.02990.1 | 1046 | 26180  | 1.00E-141 | 266  | 269  | 98 +  | 1    | 269  | 18344  | 18610  |
| UN00995 | Rsa1.0.01014.1 | 751  | 56762  | 7.00E-82  | 218  | 240  | 90 +  | 1    | 238  | 39994  | 40217  |
| UN00996 | Rsa1.0.02438.1 | 1187 | 31392  | 1.00E-118 | 222  | 224  | 99 +  | 644  | 867  | 5578   | 5801   |
| UN00997 | Rsa1.0.00079.1 | 1554 | 606987 | 0         | 509  | 518  | 98 +  | 1034 | 1548 | 190876 | 191388 |
| UN00998 | Rsa1.0.00322.1 | 1460 | 212233 | 1.00E-122 | 229  | 231  | 99 -  | 1    | 231  | 73895  | 74125  |
| UN00999 | Rsa1.0.00160.1 | 751  | 346678 | 1.00E-117 | 251  | 263  | 95 -  | 452  | 714  | 32107  | 32369  |
| UN01000 | Rsa1.0.13949.1 | 748  | 4028   | 1.00E-169 | 347  | 361  | 96 -  | 387  | 746  | 1108   | 1468   |
| UN01001 | Rsa1.0.00089.1 | 1147 | 406142 | 0         | 424  | 434  | 97 +  | 1    | 431  | 390229 | 390659 |
| UN01002 | Rsa1.0.01779.1 | 871  | 39448  | 0         | 422  | 430  | 98 -  | 1    | 430  | 25472  | 25897  |
| UN01003 | Rsa1.0.01392.1 | 1569 | 46665  | 0         | 1301 | 1309 | 99 -  | 2    | 1310 | 24719  | 26026  |
| UN01004 | Rsa1.0.05359.1 | 1385 | 14054  | 1.00E-176 | 329  | 333  | 98 +  | 1    | 333  | 10246  | 10577  |
| UN01005 | Rsa1.0.04819.1 | 738  | 140505 | 0         | 703  | 749  | 93 +  | 1    | 738  | 10808  | 11547  |
| UN01006 | Rsa1.0.00387.1 | 1154 | 495407 | 1.00E-136 | 309  | 327  | 94 -  | 827  | 1152 | 384412 | 384737 |
| UN01007 | Rsa1.0.02575.1 | 841  | 29944  | 0         | 499  | 503  | 99 -  | 2    | 504  | 3747   | 4249   |
| UN01008 | Rsa1.0.01545.1 | 432  | 43599  | 2.00E-77  | 187  | 199  | 93 +  | 1    | 198  | 25184  | 25382  |
| UN01009 | Rsa1.0.02274.1 | 845  | 33109  | 1.00E-174 | 338  | 345  | 97 -  | 3    | 345  | 22370  | 22714  |
| UN01010 | Rsa1.0.16067.1 | 1002 | 2300   | 0         | 383  | 393  | 97 -  | 611  | 998  | 311    | 703    |
| UN01011 | Rsa1.0.01489.1 | 1489 | 44764  | 0         | 433  | 434  | 99 -  | 1    | 433  | 1590   | 2023   |
| UN01012 | Rsa1.0.00332.1 | 903  | 94575  | 0         | 492  | 504  | 97 -  | 335  | 838  | 54514  | 55017  |

|         |                |      |        |           |      |      |       |     |      |        |        |
|---------|----------------|------|--------|-----------|------|------|-------|-----|------|--------|--------|
| UN01013 | Rsa1.0.05581.1 | 935  | 13272  | 0         | 652  | 659  | 98 -  | 1   | 659  | 5335   | 5990   |
| UN01014 | Rsa1.0.00375.1 | 200  | 90207  | 8.00E-63  | 180  | 198  | 90 -  | 3   | 200  | 2417   | 2613   |
| UN01015 | Rsa1.0.00092.1 | 680  | 659932 | 0         | 420  | 444  | 94 +  | 16  | 457  | 242851 | 243294 |
| UN01016 | Rsa1.0.09594.1 | 681  | 6263   | 1.00E-115 | 230  | 235  | 97 +  | 447 | 681  | 872    | 1105   |
| UN01017 | Rsa1.0.01190.1 | 1264 | 194501 | 0         | 733  | 770  | 95 +  | 7   | 757  | 44595  | 45363  |
| UN01018 | Rsa1.0.01071.1 | 984  | 166914 | 0         | 364  | 367  | 99 +  | 617 | 983  | 27109  | 27475  |
| UN01019 | Rsa1.0.00925.1 | 675  | 59481  | 0         | 638  | 674  | 94 -  | 1   | 669  | 21081  | 21749  |
| UN01020 | Rsa1.0.01308.1 | 778  | 48596  | 0         | 385  | 387  | 99 -  | 389 | 775  | 21408  | 21794  |
| UN01021 | Rsa1.0.00332.1 | 1080 | 94575  | 0         | 379  | 381  | 99 -  | 1   | 381  | 73577  | 73957  |
| UN01022 | Rsa1.0.00016.1 | 945  | 831256 | 2.00E-67  | 195  | 211  | 92 +  | 25  | 234  | 265984 | 266181 |
| UN01023 | Rsa1.0.05025.1 | 657  | 15097  | 0         | 651  | 654  | 99 +  | 1   | 654  | 13034  | 13687  |
| UN01024 | Rsa1.0.03867.1 | 461  | 20369  | 0         | 435  | 457  | 95 -  | 1   | 457  | 15318  | 15773  |
| UN01025 | Rsa1.0.00047.1 | 1222 | 168582 | 0         | 460  | 494  | 93 -  | 2   | 493  | 67922  | 68415  |
| UN01026 | Rsa1.0.01803.1 | 834  | 173846 | 1.00E-136 | 270  | 278  | 97 -  | 113 | 390  | 34629  | 34906  |
| UN01027 | Rsa1.0.03904.1 | 898  | 20162  | 0         | 498  | 503  | 99 +  | 396 | 898  | 4565   | 5067   |
| UN01028 | Rsa1.0.00202.1 | 778  | 185895 | 0         | 568  | 587  | 96 +  | 191 | 775  | 136773 | 137356 |
| UN01029 | Rsa1.0.00045.1 | 1331 | 328694 | 0         | 1323 | 1330 | 99 +  | 3   | 1330 | 35877  | 37206  |
| UN01030 | Rsa1.0.00338.1 | 902  | 94109  | 0         | 852  | 884  | 96 +  | 3   | 885  | 89856  | 90736  |
| UN01031 | Rsa1.0.00200.1 | 894  | 162016 | 1.00E-132 | 267  | 275  | 97 +  | 4   | 278  | 148988 | 149260 |
| UN01032 | Rsa1.0.01478.1 | 760  | 44991  | 3.00E-65  | 127  | 127  | 100 - | 221 | 347  | 15709  | 15835  |
| UN01033 | Rsa1.0.00579.1 | 702  | 148308 | 0         | 410  | 423  | 96 +  | 1   | 415  | 63787  | 64208  |
| UN01034 | Rsa1.0.00290.1 | 788  | 225096 | 1.00E-158 | 301  | 307  | 98 -  | 482 | 788  | 3869   | 4175   |
| UN01035 | Rsa1.0.21578.1 | 1399 | 1190   | 1.00E-166 | 302  | 304  | 99 +  | 1   | 304  | 526    | 829    |
| UN01036 | Rsa1.0.05431.1 | 597  | 13780  | 1.00E-147 | 286  | 293  | 97 +  | 4   | 296  | 8196   | 8488   |
| UN01037 | Rsa1.0.02018.1 | 729  | 35994  | 0         | 711  | 730  | 97 -  | 4   | 729  | 30090  | 30817  |
| UN01038 | Rsa1.0.02275.1 | 1015 | 33107  | 0         | 496  | 502  | 98 -  | 2   | 500  | 30103  | 30604  |
| UN01039 | Rsa1.0.02144.1 | 1246 | 34630  | 0         | 376  | 383  | 98 +  | 862 | 1244 | 23103  | 23484  |
| UN01040 | Rsa1.0.01803.1 | 560  | 173846 | 0         | 354  | 360  | 98 -  | 31  | 390  | 37469  | 37825  |
| UN01041 | Rsa1.0.02183.1 | 773  | 34170  | 0         | 389  | 392  | 99 +  | 381 | 771  | 13946  | 14337  |
| UN01042 | Rsa1.0.00263.1 | 1250 | 224968 | 0         | 490  | 506  | 96 +  | 5   | 510  | 186882 | 187381 |
| UN01043 | Rsa1.0.00296.1 | 753  | 97854  | 1.00E-118 | 237  | 244  | 97 -  | 1   | 244  | 53004  | 53247  |
| UN01044 | Rsa1.0.03834.1 | 1407 | 20572  | 0         | 1385 | 1409 | 98 -  | 1   | 1407 | 18529  | 19937  |
| UN01045 | Rsa1.0.02955.1 | 454  | 26484  | 2.00E-77  | 159  | 163  | 97 -  | 237 | 399  | 13393  | 13555  |
| UN01046 | Rsa1.0.01763.1 | 774  | 39659  | 8.00E-57  | 223  | 257  | 86 -  | 298 | 548  | 37646  | 37901  |
| UN01047 | Rsa1.0.02412.1 | 923  | 31643  | 0         | 741  | 760  | 97 -  | 4   | 759  | 6107   | 6862   |
| UN01048 | Rsa1.0.01286.1 | 584  | 49209  | 0         | 516  | 534  | 96 +  | 1   | 533  | 3993   | 4521   |
| UN01049 | Rsa1.0.00602.1 | 1263 | 73302  | 0         | 630  | 648  | 97 -  | 1   | 647  | 29630  | 30276  |
| UN01050 | Rsa1.0.02209.1 | 1066 | 33873  | 1.00E-169 | 337  | 347  | 97 +  | 1   | 344  | 26612  | 26957  |
| UN01051 | Rsa1.0.02803.1 | 840  | 27715  | 1.00E-162 | 299  | 302  | 99 -  | 180 | 481  | 3172   | 3473   |

|         |                |      |        |           |      |      |       |      |      |        |        |
|---------|----------------|------|--------|-----------|------|------|-------|------|------|--------|--------|
| UN01052 | Rsa1.0_04762.1 | 1454 | 16101  | 0         | 934  | 939  | 99 +  | 510  | 1448 | 4259   | 5197   |
| UN01053 | Rsa1.0_05160.1 | 1400 | 14637  | 0         | 594  | 600  | 99 +  | 613  | 1212 | 13452  | 14051  |
| UN01054 | Rsa1.0_01536.1 | 872  | 43747  | 0         | 857  | 873  | 98 +  | 1    | 870  | 18854  | 19724  |
| UN01055 | Rsa1.0_17015.1 | 1148 | 1953   | 1.00E-130 | 237  | 237  | 100 + | 912  | 1148 | 874    | 1110   |
| UN01056 | Rsa1.0_03735.1 | 681  | 21087  | 0         | 549  | 566  | 96 -  | 1    | 561  | 5153   | 5715   |
| UN01057 | Rsa1.0_00035.1 | 795  | 176449 | 0         | 510  | 513  | 99 +  | 1    | 513  | 41112  | 41624  |
| UN01058 | Rsa1.0_00288.1 | 954  | 98659  | 0         | 384  | 398  | 96 +  | 155  | 551  | 82911  | 83305  |
| UN01059 | Rsa1.0_00131.1 | 1366 | 432233 | 1.00E-118 | 325  | 351  | 92 -  | 20   | 359  | 412408 | 412754 |
| UN01060 | Rsa1.0_00167.1 | 628  | 116000 | 1.00E-116 | 246  | 257  | 95 -  | 1    | 257  | 14352  | 14608  |
| UN01061 | Rsa1.0_02928.1 | 788  | 26680  | 0         | 386  | 400  | 96 +  | 387  | 783  | 20709  | 21108  |
| UN01062 | Rsa1.0_02780.1 | 1140 | 27965  | 0         | 588  | 589  | 99 -  | 552  | 1140 | 24650  | 25238  |
| UN01063 | Rsa1.0_02564.1 | 1378 | 30047  | 0         | 508  | 513  | 99 -  | 538  | 1048 | 5427   | 5939   |
| UN01064 | Rsa1.0_00152.1 | 1369 | 257730 | 0         | 646  | 663  | 97 -  | 4    | 665  | 230931 | 231593 |
| UN01065 | Rsa1.0_00312.1 | 1606 | 96765  | 1.00E-131 | 241  | 242  | 99 -  | 1365 | 1606 | 77943  | 78184  |
| UN01066 | Rsa1.0_02496.1 | 710  | 30814  | 1.00E-151 | 308  | 318  | 96 -  | 392  | 708  | 14669  | 14984  |
| UN01067 | Rsa1.0_00248.1 | 1100 | 163568 | 2.00E-89  | 197  | 207  | 95 +  | 90   | 290  | 52500  | 52706  |
| UN01068 | Rsa1.0_02553.1 | 633  | 30190  | 1.00E-118 | 235  | 240  | 97 +  | 395  | 633  | 18667  | 18906  |
| UN01069 | Rsa1.0_04385.1 | 694  | 17627  | 1.00E-135 | 245  | 245  | 100 - | 450  | 694  | 16884  | 17128  |
| UN01070 | Rsa1.0_04955.1 | 771  | 15337  | 0         | 614  | 646  | 95 +  | 125  | 767  | 8724   | 9366   |
| UN01071 | Rsa1.0_00577.1 | 1337 | 174827 | 1.00E-164 | 320  | 330  | 96 +  | 1015 | 1336 | 118729 | 119058 |
| UN01072 | Rsa1.0_02114.1 | 909  | 34873  | 1.00E-113 | 211  | 212  | 99 +  | 207  | 418  | 664    | 875    |
| UN01073 | Rsa1.0_00548.1 | 1483 | 76518  | 0         | 809  | 841  | 96 -  | 645  | 1478 | 63650  | 64478  |
| UN01074 | Rsa1.0_00402.1 | 1360 | 385315 | 0         | 628  | 661  | 95 +  | 3    | 643  | 119044 | 119698 |
| UN01075 | Rsa1.0_00098.1 | 1033 | 349239 | 0         | 446  | 447  | 99 +  | 3    | 449  | 292716 | 293162 |
| UN01076 | Rsa1.0_01168.1 | 930  | 153765 | 1.00E-168 | 392  | 423  | 92 +  | 63   | 479  | 38497  | 38919  |
| UN01077 | Rsa1.0_00115.1 | 777  | 131321 | 0         | 592  | 610  | 97 +  | 169  | 777  | 34041  | 34648  |
| UN01078 | Rsa1.0_00385.1 | 912  | 89160  | 0         | 368  | 372  | 98 +  | 541  | 912  | 9411   | 9779   |
| UN01079 | Rsa1.0_02811.1 | 1293 | 27669  | 0         | 478  | 482  | 99 -  | 812  | 1293 | 7890   | 8371   |
| UN01080 | Rsa1.0_02976.1 | 589  | 26315  | 1.00E-178 | 341  | 349  | 97 -  | 240  | 588  | 15693  | 16041  |
| UN01081 | Rsa1.0_03385.1 | 769  | 23280  | 1.00E-167 | 305  | 306  | 99 +  | 465  | 769  | 13870  | 14175  |
| UN01082 | Rsa1.0_04250.1 | 1193 | 18264  | 0         | 827  | 828  | 99 +  | 1    | 828  | 13122  | 13949  |
| UN01083 | Rsa1.0_01168.1 | 1525 | 153765 | 0         | 849  | 902  | 94 +  | 45   | 934  | 38497  | 39389  |
| UN01084 | Rsa1.0_02677.1 | 1470 | 167801 | 1.00E-66  | 159  | 169  | 94 -  | 1302 | 1470 | 11977  | 12139  |
| UN01085 | Rsa1.0_12087.1 | 882  | 5317   | 0         | 858  | 887  | 96 -  | 3    | 882  | 4202   | 5088   |
| UN01086 | Rsa1.0_00108.1 | 1380 | 478491 | 1.00E-109 | 224  | 230  | 97 +  | 1147 | 1375 | 420682 | 420911 |
| UN01087 | Rsa1.0_00008.1 | 812  | 358124 | 0         | 618  | 639  | 96 -  | 177  | 812  | 50867  | 51499  |
| UN01088 | Rsa1.0_00272.1 | 572  | 447836 | 1.00E-152 | 284  | 288  | 98 +  | 285  | 572  | 83843  | 84130  |
| UN01089 | Rsa1.0_06073.1 | 772  | 11807  | 0         | 385  | 386  | 99 +  | 279  | 664  | 3893   | 4278   |
| UN01090 | Rsa1.0_01732.1 | 1346 | 40194  | 0         | 1215 | 1279 | 94 -  | 80   | 1344 | 24250  | 25521  |

|         |                |      |        |           |      |      |       |      |      |        |        |
|---------|----------------|------|--------|-----------|------|------|-------|------|------|--------|--------|
| UN01091 | Rsa1.0_00048.1 | 1136 | 167185 | 0         | 1125 | 1136 | 99 +  | 5    | 1136 | 125219 | 126354 |
| UN01092 | Rsa1.0_07134.1 | 1328 | 9854   | 7.00E-77  | 153  | 155  | 98 -  | 673  | 827  | 7276   | 7430   |
| UN01093 | Rsa1.0_05467.1 | 725  | 13649  | 3.00E-84  | 174  | 179  | 97 -  | 544  | 722  | 9353   | 9531   |
| UN01094 | Rsa1.0_00223.1 | 746  | 106231 | 1.00E-145 | 267  | 269  | 99 -  | 303  | 571  | 79400  | 79668  |
| UN01095 | Rsa1.0_00420.1 | 1222 | 86496  | 2.33E-156 | 296  | 306  | 96 +  | 919  | 1222 | 11931  | 12236  |
| UN01096 | Rsa1.0_00483.1 | 1061 | 81102  | 0         | 504  | 523  | 96 -  | 539  | 1059 | 27457  | 27970  |
| UN01097 | Rsa1.0_02053.1 | 507  | 35554  | 0         | 376  | 382  | 98 +  | 127  | 507  | 32532  | 32910  |
| UN01098 | Rsa1.0_00307.1 | 1156 | 199003 | 1.00E-124 | 265  | 277  | 95 -  | 24   | 300  | 184304 | 184577 |
| UN01099 | Rsa1.0_00016.1 | 1257 | 831256 | 1.00E-142 | 284  | 294  | 96 -  | 964  | 1257 | 522418 | 522704 |
| UN01100 | Rsa1.0_00191.1 | 872  | 316976 | 1.00E-156 | 279  | 279  | 100 + | 333  | 611  | 145775 | 146053 |
| UN01101 | Rsa1.0_03257.1 | 1268 | 24305  | 0         | 388  | 393  | 98 -  | 3    | 395  | 15536  | 15928  |
| UN01102 | Rsa1.0_01933.1 | 817  | 37172  | 1.00E-132 | 274  | 282  | 97 +  | 207  | 488  | 11409  | 11685  |
| UN01103 | Rsa1.0_00017.1 | 863  | 752458 | 1.00E-61  | 220  | 246  | 89 +  | 622  | 863  | 462733 | 462968 |
| UN01104 | Rsa1.0_00104.1 | 1133 | 368722 | 5.00E-93  | 183  | 186  | 98 -  | 3    | 188  | 336882 | 337067 |
| UN01105 | Rsa1.0_01960.1 | 648  | 36766  | 1.00E-103 | 214  | 222  | 96 +  | 128  | 349  | 8003   | 8224   |
| UN01106 | Rsa1.0_00697.1 | 1104 | 67913  | 1.00E-135 | 248  | 249  | 99 +  | 488  | 736  | 57657  | 57905  |
| UN01107 | Rsa1.0_00098.1 | 959  | 349239 | 0         | 365  | 373  | 97 -  | 17   | 384  | 269214 | 269585 |
| UN01108 | Rsa1.0_02045.1 | 964  | 35650  | 0         | 922  | 961  | 95 -  | 2    | 962  | 15172  | 16104  |
| UN01109 | Rsa1.0_00944.1 | 870  | 58733  | 0         | 503  | 512  | 98 -  | 1    | 512  | 12555  | 13066  |
| UN01110 | Rsa1.0_02939.1 | 1114 | 26595  | 1.00E-164 | 372  | 397  | 93 -  | 693  | 1083 | 20157  | 20553  |
| UN01111 | Rsa1.0_00614.1 | 659  | 72276  | 1.00E-131 | 280  | 293  | 95 -  | 3    | 295  | 44076  | 44366  |
| UN01112 | Rsa1.0_00323.1 | 1035 | 159650 | 0         | 1030 | 1035 | 99 -  | 3    | 1035 | 53000  | 54034  |
| UN01113 | Rsa1.0_00658.1 | 881  | 69740  | 1.00E-123 | 224  | 224  | 100 - | 188  | 411  | 18542  | 18765  |
| UN01114 | Rsa1.0_00293.1 | 1395 | 339294 | 0         | 749  | 761  | 98 -  | 635  | 1395 | 318346 | 319106 |
| UN01115 | Rsa1.0_00501.1 | 804  | 79545  | 0         | 548  | 602  | 91 -  | 219  | 800  | 41893  | 42484  |
| UN01116 | Rsa1.0_01537.1 | 860  | 187285 | 0         | 464  | 470  | 98 +  | 1    | 469  | 14844  | 15313  |
| UN01117 | Rsa1.0_00069.1 | 1219 | 403561 | 1.00E-102 | 219  | 229  | 95 +  | 515  | 743  | 224222 | 224450 |
| UN01118 | Rsa1.0_02711.1 | 768  | 28475  | 1.00E-129 | 290  | 303  | 95 +  | 462  | 761  | 24537  | 24838  |
| UN01119 | Rsa1.0_00226.1 | 609  | 105884 | 1.00E-165 | 310  | 315  | 98 -  | 2    | 316  | 22862  | 23176  |
| UN01120 | Rsa1.0_02606.1 | 1074 | 29635  | 1.00E-115 | 217  | 219  | 99 -  | 142  | 360  | 19085  | 19303  |
| UN01121 | Rsa1.0_00185.1 | 1298 | 248445 | 0         | 724  | 771  | 93 -  | 48   | 812  | 241787 | 242545 |
| UN01122 | Rsa1.0_03811.1 | 1622 | 20721  | 1.00E-157 | 284  | 285  | 99 +  | 1338 | 1622 | 19707  | 19991  |
| UN01123 | Rsa1.0_00914.1 | 1379 | 59880  | 1.00E-152 | 305  | 313  | 97 +  | 1067 | 1379 | 41830  | 42140  |
| UN01124 | Rsa1.0_00566.1 | 772  | 75325  | 0         | 363  | 365  | 99 -  | 409  | 772  | 24496  | 24860  |
| UN01125 | Rsa1.0_03900.1 | 800  | 133221 | 0         | 762  | 784  | 97 -  | 1    | 777  | 12231  | 13006  |
| UN01126 | Rsa1.0_04168.1 | 1746 | 18712  | 0         | 853  | 857  | 99 +  | 890  | 1746 | 13950  | 14806  |
| UN01127 | Rsa1.0_00658.1 | 827  | 69740  | 1.00E-165 | 309  | 313  | 98 -  | 515  | 827  | 15719  | 16029  |
| UN01128 | Rsa1.0_04823.1 | 689  | 15840  | 9.00E-75  | 152  | 155  | 98 +  | 197  | 351  | 13954  | 14108  |
| UN01129 | Rsa1.0_00049.1 | 1395 | 167018 | 1.00E-134 | 322  | 350  | 92 +  | 1    | 347  | 131911 | 132243 |

|         |                |      |        |           |     |     |       |      |      |        |        |
|---------|----------------|------|--------|-----------|-----|-----|-------|------|------|--------|--------|
| UN01130 | Rsa1.0.05978.1 | 1182 | 12053  | 1.00E-139 | 297 | 309 | 96 -  | 872  | 1175 | 1955   | 2262   |
| UN01131 | Rsa1.0.00342.1 | 819  | 93695  | 1.00E-130 | 236 | 236 | 100 - | 184  | 419  | 32256  | 32491  |
| UN01132 | Rsa1.0.00108.1 | 1183 | 478491 | 0         | 382 | 400 | 95 +  | 582  | 981  | 283803 | 284202 |
| UN01133 | Rsa1.0.00092.1 | 484  | 659932 | 1.00E-126 | 286 | 304 | 94 -  | 163  | 466  | 190047 | 190338 |
| UN01134 | Rsa1.0.01654.1 | 880  | 41532  | 0         | 845 | 898 | 94 -  | 1    | 880  | 20338  | 21226  |
| UN01135 | Rsa1.0.10332.1 | 876  | 5886   | 1.00E-43  | 97  | 99  | 97 -  | 623  | 721  | 1004   | 1102   |
| UN01136 | Rsa1.0.01393.1 | 944  | 46661  | 0         | 561 | 588 | 95 -  | 369  | 944  | 25512  | 26099  |
| UN01137 | Rsa1.0.02630.1 | 605  | 29349  | 0         | 428 | 448 | 95 +  | 155  | 602  | 28217  | 28664  |
| UN01138 | Rsa1.0.00571.1 | 917  | 329018 | 0         | 910 | 915 | 99 -  | 3    | 917  | 173859 | 174771 |
| UN01139 | Rsa1.0.61778.1 | 1083 | 371    | 3.00E-88  | 173 | 174 | 99 -  | 852  | 1024 | 130    | 303    |
| UN01140 | Rsa1.0.45370.1 | 745  | 497    | 1.00E-109 | 234 | 243 | 96 -  | 101  | 339  | 251    | 493    |
| UN01141 | Rsa1.0.03450.1 | 922  | 22835  | 0         | 396 | 398 | 99 -  | 9    | 406  | 6175   | 6572   |
| UN01142 | Rsa1.0.12096.1 | 701  | 5315   | 0         | 371 | 382 | 97 +  | 318  | 699  | 456    | 837    |
| UN01143 | Rsa1.0.00705.1 | 943  | 67505  | 1.00E-175 | 393 | 415 | 94 +  | 530  | 943  | 30393  | 30799  |
| UN01144 | Rsa1.0.03728.1 | 1443 | 21147  | 0         | 438 | 467 | 93 -  | 980  | 1443 | 631    | 1092   |
| UN01145 | Rsa1.0.01076.1 | 841  | 54835  | 0         | 836 | 839 | 99 -  | 3    | 841  | 19165  | 20003  |
| UN01146 | Rsa1.0.07330.1 | 1035 | 9548   | 0         | 653 | 656 | 99 -  | 160  | 815  | 1      | 656    |
| UN01147 | Rsa1.0.00471.1 | 1345 | 81897  | 0         | 713 | 735 | 97 -  | 609  | 1343 | 36591  | 37325  |
| UN01148 | Rsa1.0.00055.1 | 1173 | 520193 | 1.00E-174 | 354 | 366 | 96 +  | 809  | 1173 | 106239 | 106603 |
| UN01149 | Rsa1.0.13970.1 | 772  | 3973   | 1.00E-164 | 393 | 422 | 93 +  | 145  | 559  | 3553   | 3969   |
| UN01150 | Rsa1.0.00171.1 | 603  | 115622 | 1.00E-155 | 287 | 290 | 98 +  | 2    | 291  | 58910  | 59199  |
| UN01151 | Rsa1.0.00381.1 | 473  | 89718  | 0         | 463 | 474 | 97 +  | 1    | 472  | 79917  | 80390  |
| UN01152 | Rsa1.0.00241.1 | 1097 | 104000 | 0         | 588 | 593 | 99 +  | 506  | 1097 | 88938  | 89530  |
| UN01153 | Rsa1.0.00134.1 | 1003 | 390219 | 1.00E-177 | 439 | 480 | 91 -  | 524  | 1000 | 45226  | 45694  |
| UN01154 | Rsa1.0.01785.1 | 2011 | 39368  | 0         | 748 | 759 | 98 +  | 3    | 758  | 19322  | 20080  |
| UN01155 | Rsa1.0.00006.1 | 882  | 396176 | 1.00E-145 | 267 | 269 | 99 +  | 270  | 538  | 222130 | 222398 |
| UN01156 | Rsa1.0.00009.1 | 854  | 232558 | 1.00E-71  | 165 | 175 | 94 +  | 670  | 844  | 231969 | 232135 |
| UN01157 | Rsa1.0.03319.1 | 722  | 23767  | 0         | 514 | 526 | 97 -  | 2    | 527  | 1513   | 2037   |
| UN01158 | Rsa1.0.01340.1 | 1093 | 47805  | 0         | 560 | 560 | 100 + | 534  | 1093 | 32618  | 33177  |
| UN01159 | Rsa1.0.00145.1 | 1151 | 261008 | 0         | 431 | 445 | 96 -  | 637  | 1081 | 27389  | 27833  |
| UN01160 | Rsa1.0.00299.1 | 938  | 97770  | 1.00E-117 | 259 | 273 | 94 +  | 142  | 414  | 26265  | 26534  |
| UN01161 | Rsa1.0.00197.1 | 1349 | 109714 | 0         | 433 | 437 | 99 -  | 914  | 1349 | 99274  | 99709  |
| UN01162 | Rsa1.0.05090.1 | 1372 | 14879  | 0         | 808 | 851 | 94 +  | 215  | 1065 | 2190   | 3027   |
| UN01163 | Rsa1.0.01424.1 | 472  | 46139  | 1.00E-115 | 271 | 291 | 93 +  | 25   | 315  | 42149  | 42439  |
| UN01164 | Rsa1.0.02545.1 | 1307 | 30286  | 0         | 464 | 479 | 96 -  | 828  | 1303 | 13644  | 14116  |
| UN01165 | Rsa1.0.03935.1 | 1356 | 19983  | 1.00E-135 | 291 | 303 | 96 -  | 1055 | 1355 | 7778   | 8078   |
| UN01166 | Rsa1.0.00086.1 | 897  | 439854 | 0         | 557 | 562 | 99 +  | 178  | 739  | 282513 | 283074 |
| UN01167 | Rsa1.0.00473.1 | 778  | 212204 | 1.00E-167 | 346 | 361 | 95 +  | 7    | 365  | 6968   | 7328   |
| UN01168 | Rsa1.0.00092.1 | 1367 | 659932 | 0         | 751 | 754 | 99 +  | 306  | 1059 | 198767 | 199520 |



|         |                |      |        |           |      |      |       |      |      |        |        |
|---------|----------------|------|--------|-----------|------|------|-------|------|------|--------|--------|
| UN01169 | Rsa1.0.02872.1 | 817  | 27080  | 1.00E-137 | 290  | 300  | 96 -  | 520  | 817  | 9175   | 9469   |
| UN01170 | Rsa1.0.03100.1 | 1003 | 25411  | 0         | 423  | 428  | 98 +  | 577  | 1003 | 1871   | 2297   |
| UN01171 | Rsa1.0.00409.1 | 735  | 146788 | 0         | 582  | 632  | 92 +  | 118  | 735  | 80588  | 81199  |
| UN01172 | Rsa1.0.26747.1 | 1287 | 879    | 0         | 447  | 449  | 99 -  | 2    | 449  | 1      | 449    |
| UN01173 | Rsa1.0.00991.1 | 1376 | 143101 | 0         | 682  | 702  | 97 +  | 678  | 1376 | 137872 | 138569 |
| UN01174 | Rsa1.0.00001.1 | 1099 | 363028 | 0         | 1022 | 1022 | 100 - | 7    | 1028 | 77607  | 78628  |
| UN01175 | Rsa1.0.01348.1 | 1102 | 47569  | 0         | 610  | 687  | 88 -  | 419  | 1098 | 45195  | 45867  |
| UN01176 | Rsa1.0.01631.1 | 575  | 41882  | 0         | 567  | 570  | 99 +  | 6    | 575  | 11514  | 12081  |
| UN01177 | Rsa1.0.02688.1 | 273  | 28644  | 7.00E-64  | 133  | 136  | 97 -  | 3    | 138  | 13636  | 13771  |
| UN01178 | Rsa1.0.00964.1 | 613  | 316648 | 0         | 597  | 613  | 97 -  | 1    | 613  | 277546 | 278158 |
| UN01179 | Rsa1.0.01592.1 | 780  | 42685  | 1.00E-165 | 313  | 318  | 98 +  | 138  | 453  | 25582  | 25899  |
| UN01180 | Rsa1.0.01156.1 | 1422 | 52147  | 0         | 376  | 376  | 100 + | 1047 | 1422 | 32397  | 32772  |
| UN01181 | Rsa1.0.00686.1 | 615  | 68511  | 0         | 611  | 614  | 99 -  | 4    | 615  | 52392  | 53004  |
| UN01182 | Rsa1.0.04065.1 | 1206 | 19275  | 1.00E-137 | 281  | 292  | 96 +  | 146  | 437  | 745    | 1036   |
| UN01183 | Rsa1.0.00017.1 | 1162 | 752458 | 1.00E-123 | 257  | 265  | 96 +  | 902  | 1162 | 450189 | 450450 |
| UN01184 | Rsa1.0.00213.1 | 1235 | 108167 | 0         | 431  | 450  | 95 -  | 784  | 1225 | 36364  | 36811  |
| UN01185 | Rsa1.0.06450.1 | 930  | 10998  | 1.00E-173 | 314  | 316  | 99 -  | 261  | 576  | 5882   | 6197   |
| UN01186 | Rsa1.0.03209.1 | 1326 | 24592  | 0         | 1182 | 1226 | 96 -  | 118  | 1326 | 21123  | 22348  |
| UN01187 | Rsa1.0.00006.1 | 787  | 396176 | 1.00E-140 | 256  | 257  | 99 -  | 326  | 582  | 107662 | 107918 |
| UN01188 | Rsa1.0.00453.1 | 777  | 83031  | 2.00E-94  | 194  | 200  | 97 +  | 246  | 445  | 72257  | 72456  |
| UN01189 | Rsa1.0.04646.1 | 1337 | 16541  | 0         | 421  | 423  | 99 +  | 506  | 928  | 929    | 1351   |
| UN01190 | Rsa1.0.13353.1 | 720  | 4894   | 3.00E-99  | 208  | 216  | 96 +  | 117  | 332  | 561    | 776    |
| UN01191 | Rsa1.0.03544.1 | 1413 | 22182  | 0         | 592  | 606  | 97 -  | 199  | 803  | 3965   | 4567   |
| UN01192 | Rsa1.0.04004.1 | 1273 | 19594  | 0         | 494  | 495  | 99 -  | 29   | 523  | 4915   | 5409   |
| UN01193 | Rsa1.0.00003.1 | 766  | 340054 | 0         | 399  | 416  | 95 +  | 6    | 421  | 163906 | 164311 |
| UN01194 | Rsa1.0.01966.1 | 1305 | 36681  | 1.00E-164 | 324  | 333  | 97 -  | 979  | 1305 | 33698  | 34029  |
| UN01195 | Rsa1.0.02671.1 | 813  | 28887  | 0         | 424  | 427  | 99 +  | 226  | 652  | 7972   | 8398   |
| UN01196 | Rsa1.0.01387.1 | 864  | 46745  | 4.00E-68  | 144  | 148  | 97 -  | 614  | 761  | 31423  | 31570  |
| UN01197 | Rsa1.0.03350.1 | 1444 | 23522  | 0         | 358  | 367  | 97 -  | 1028 | 1394 | 19941  | 20307  |
| UN01198 | Rsa1.0.02053.1 | 773  | 35554  | 0         | 381  | 395  | 96 +  | 6    | 396  | 31827  | 32221  |
| UN01199 | Rsa1.0.01313.1 | 1005 | 48387  | 0         | 384  | 386  | 99 -  | 621  | 1005 | 1418   | 1803   |
| UN01200 | Rsa1.0.14712.1 | 879  | 3134   | 1.00E-138 | 341  | 367  | 92 -  | 516  | 877  | 1514   | 1869   |
| UN01201 | Rsa1.0.00837.1 | 811  | 62568  | 0         | 402  | 423  | 95 -  | 396  | 811  | 57200  | 57622  |
| UN01202 | Rsa1.0.01552.1 | 476  | 43396  | 0         | 369  | 371  | 99 +  | 106  | 476  | 24239  | 24607  |
| UN01203 | Rsa1.0.03390.1 | 1044 | 23270  | 0         | 433  | 438  | 98 -  | 163  | 600  | 17528  | 17965  |
| UN01204 | Rsa1.0.04193.1 | 667  | 18571  | 1.00E-167 | 342  | 354  | 96 -  | 316  | 667  | 9142   | 9495   |
| UN01205 | Rsa1.0.00001.1 | 1223 | 363028 | 0         | 538  | 601  | 89 -  | 3    | 596  | 266567 | 267140 |
| UN01206 | Rsa1.0.01539.1 | 495  | 43698  | 0         | 488  | 495  | 98 -  | 3    | 495  | 29264  | 29758  |
| UN01207 | Rsa1.0.03336.1 | 1212 | 23648  | 0         | 1134 | 1165 | 97 -  | 48   | 1212 | 13919  | 15064  |

|         |                |      |        |           |     |     |       |      |      |        |        |
|---------|----------------|------|--------|-----------|-----|-----|-------|------|------|--------|--------|
| UN01208 | Rsa1.0.08437.1 | 798  | 7357   | 0         | 749 | 770 | 97 -  | 3    | 771  | 2852   | 3618   |
| UN01209 | Rsa1.0.00851.1 | 805  | 62181  | 0         | 789 | 812 | 97 -  | 2    | 805  | 20274  | 21085  |
| UN01210 | Rsa1.0.00127.1 | 475  | 127446 | 1.00E-148 | 290 | 297 | 97 +  | 179  | 475  | 35697  | 35992  |
| UN01211 | Rsa1.0.04402.1 | 973  | 17511  | 1.00E-160 | 322 | 333 | 96 +  | 1    | 333  | 14790  | 15119  |
| UN01212 | Rsa1.0.01443.1 | 1132 | 45705  | 2.00E-30  | 160 | 188 | 85 +  | 912  | 1098 | 34823  | 35008  |
| UN01213 | Rsa1.0.00134.1 | 1345 | 390219 | 0         | 346 | 348 | 99 -  | 998  | 1345 | 230194 | 230541 |
| UN01214 | Rsa1.0.00213.1 | 1009 | 108167 | 1.00E-144 | 274 | 279 | 98 +  | 244  | 522  | 44341  | 44619  |
| UN01215 | Rsa1.0.03156.1 | 933  | 24956  | 0         | 358 | 364 | 98 -  | 570  | 932  | 3524   | 3887   |
| UN01216 | Rsa1.0.00392.1 | 1244 | 88523  | 0         | 552 | 564 | 97 -  | 678  | 1239 | 6450   | 7011   |
| UN01217 | Rsa1.0.00351.1 | 1012 | 413096 | 0         | 790 | 814 | 97 +  | 158  | 971  | 124165 | 124977 |
| UN01218 | Rsa1.0.04118.1 | 1375 | 18968  | 0         | 348 | 348 | 100 - | 61   | 408  | 4094   | 4441   |
| UN01219 | Rsa1.0.14327.1 | 626  | 3518   | 0         | 400 | 415 | 96 +  | 212  | 626  | 233    | 641    |
| UN01220 | Rsa1.0.05321.1 | 1958 | 14154  | 0         | 343 | 349 | 98 +  | 1244 | 1592 | 6131   | 6479   |
| UN01221 | Rsa1.0.00453.1 | 588  | 83031  | 1.00E-160 | 299 | 302 | 99 +  | 287  | 588  | 1355   | 1655   |
| UN01222 | Rsa1.0.05019.1 | 1575 | 15114  | 1.00E-161 | 294 | 296 | 99 -  | 3    | 298  | 14348  | 14643  |
| UN01223 | Rsa1.0.00485.1 | 1094 | 80937  | 0         | 845 | 877 | 96 -  | 52   | 925  | 71868  | 72738  |
| UN01224 | Rsa1.0.01340.1 | 1286 | 47805  | 0         | 409 | 416 | 98 -  | 871  | 1286 | 24298  | 24712  |
| UN01225 | Rsa1.0.00381.1 | 741  | 89718  | 0         | 351 | 351 | 100 - | 3    | 353  | 75167  | 75517  |
| UN01226 | Rsa1.0.01848.1 | 1244 | 38312  | 0         | 600 | 602 | 99 +  | 255  | 856  | 25724  | 26325  |
| UN01227 | Rsa1.0.01760.1 | 857  | 39730  | 1.00E-118 | 370 | 416 | 88 +  | 3    | 402  | 11016  | 11423  |
| UN01228 | Rsa1.0.00222.1 | 1330 | 172263 | 3.00E-85  | 167 | 169 | 98 -  | 608  | 776  | 58615  | 58783  |
| UN01229 | Rsa1.0.00075.1 | 614  | 146680 | 1.00E-139 | 326 | 346 | 94 -  | 268  | 612  | 82352  | 82688  |
| UN01230 | Rsa1.0.02841.1 | 1270 | 27383  | 1.00E-119 | 227 | 230 | 98 +  | 1041 | 1270 | 8321   | 8550   |
| UN01231 | Rsa1.0.02377.1 | 635  | 31994  | 0         | 594 | 632 | 93 -  | 13   | 633  | 19526  | 20157  |
| UN01232 | Rsa1.0.08285.1 | 766  | 7606   | 0         | 726 | 786 | 92 -  | 3    | 759  | 2983   | 3764   |
| UN01233 | Rsa1.0.00788.1 | 858  | 64237  | 1.00E-130 | 248 | 251 | 98 +  | 3    | 253  | 32049  | 32297  |
| UN01234 | Rsa1.0.00383.1 | 1020 | 398431 | 0         | 379 | 380 | 99 +  | 1    | 380  | 25098  | 25477  |
| UN01235 | Rsa1.0.01719.1 | 886  | 40388  | 8.00E-85  | 182 | 187 | 97 -  | 698  | 883  | 27280  | 27464  |
| UN01236 | Rsa1.0.00111.1 | 716  | 390088 | 0         | 472 | 480 | 98 -  | 237  | 716  | 200994 | 201473 |
| UN01237 | Rsa1.0.02128.1 | 1399 | 34758  | 1.00E-151 | 328 | 345 | 95 -  | 6    | 345  | 16324  | 16668  |
| UN01238 | Rsa1.0.00067.1 | 1218 | 415055 | 0         | 695 | 715 | 97 -  | 437  | 1151 | 38371  | 39085  |
| UN01239 | Rsa1.0.05162.1 | 1158 | 14631  | 0         | 474 | 525 | 90 -  | 480  | 984  | 5857   | 6369   |
| UN01240 | Rsa1.0.07471.1 | 1311 | 9307   | 0         | 711 | 744 | 95 -  | 125  | 867  | 2      | 745    |
| UN01241 | Rsa1.0.08622.1 | 863  | 7122   | 1.00E-132 | 239 | 239 | 100 + | 3    | 241  | 3836   | 4074   |
| UN01242 | Rsa1.0.00016.1 | 1195 | 831256 | 0         | 457 | 477 | 95 -  | 349  | 822  | 253037 | 253513 |
| UN01243 | Rsa1.0.03303.1 | 1102 | 23890  | 0         | 628 | 628 | 100 - | 475  | 1102 | 9623   | 10250  |
| UN01244 | Rsa1.0.00104.1 | 1278 | 368722 | 1.00E-161 | 322 | 331 | 97 +  | 940  | 1270 | 205076 | 205402 |
| UN01245 | Rsa1.0.02191.1 | 929  | 34078  | 0         | 493 | 494 | 99 -  | 3    | 496  | 23661  | 24154  |
| UN01246 | Rsa1.0.00041.1 | 1243 | 186197 | 0         | 449 | 452 | 99 -  | 793  | 1243 | 56655  | 57106  |

|         |                |      |        |           |      |      |       |     |      |        |        |
|---------|----------------|------|--------|-----------|------|------|-------|-----|------|--------|--------|
| UN01247 | Rsa1.0.06803.1 | 1169 | 10330  | 3.00E-85  | 170  | 173  | 98 -  | 537 | 709  | 7999   | 8171   |
| UN01248 | Rsa1.0.01504.1 | 1938 | 189978 | 0         | 712  | 749  | 95 -  | 282 | 1011 | 25772  | 26517  |
| UN01249 | Rsa1.0.00426.1 | 1329 | 85668  | 0         | 593  | 626  | 94 -  | 3   | 615  | 73386  | 74001  |
| UN01250 | Rsa1.0.01540.1 | 825  | 151890 | 1.00E-176 | 322  | 325  | 99 +  | 198 | 522  | 149398 | 149722 |
| UN01251 | Rsa1.0.09692.1 | 577  | 6209   | 0         | 430  | 440  | 97 +  | 3   | 440  | 689    | 1128   |
| UN01252 | Rsa1.0.16459.1 | 758  | 2148   | 0         | 460  | 469  | 98 +  | 292 | 758  | 1564   | 2032   |
| UN01253 | Rsa1.0.02637.1 | 761  | 29244  | 0         | 462  | 477  | 96 -  | 1   | 477  | 24077  | 24553  |
| UN01254 | Rsa1.0.00144.1 | 851  | 120708 | 0         | 804  | 830  | 96 -  | 5   | 831  | 63828  | 64653  |
| UN01255 | Rsa1.0.00769.1 | 763  | 64911  | 1.00E-141 | 261  | 263  | 99 -  | 327 | 589  | 21293  | 21555  |
| UN01256 | Rsa1.0.13641.1 | 931  | 4588   | 0         | 878  | 897  | 97 -  | 1   | 896  | 2306   | 3202   |
| UN01257 | Rsa1.0.00079.1 | 1181 | 606987 | 1.00E-173 | 309  | 309  | 100 - | 871 | 1179 | 551378 | 551686 |
| UN01258 | Rsa1.0.02212.1 | 1088 | 33840  | 0         | 1041 | 1084 | 96 -  | 2   | 1084 | 25081  | 26159  |
| UN01259 | Rsa1.0.00251.1 | 816  | 303968 | 1.00E-144 | 263  | 264  | 99 +  | 1   | 264  | 111514 | 111777 |
| UN01260 | Rsa1.0.00353.1 | 928  | 92242  | 0         | 511  | 512  | 99 -  | 1   | 512  | 83624  | 84135  |
| UN01261 | Rsa1.0.02097.1 | 1078 | 35036  | 1.00E-150 | 277  | 278  | 99 +  | 802 | 1078 | 10310  | 10587  |
| UN01262 | Rsa1.0.00045.1 | 617  | 328694 | 1.00E-132 | 293  | 311  | 94 -  | 172 | 482  | 131911 | 132215 |
| UN01263 | Rsa1.0.00004.1 | 1081 | 253996 | 0         | 656  | 687  | 95 -  | 392 | 1075 | 69089  | 69773  |
| UN01264 | Rsa1.0.01104.1 | 1319 | 285480 | 0         | 511  | 542  | 94 +  | 776 | 1316 | 274158 | 274692 |
| UN01265 | Rsa1.0.00026.1 | 1418 | 327835 | 0         | 821  | 833  | 98 -  | 588 | 1418 | 100567 | 101399 |
| UN01266 | Rsa1.0.00761.1 | 856  | 65133  | 1.00E-128 | 313  | 335  | 93 -  | 1   | 325  | 62157  | 62485  |
| UN01267 | Rsa1.0.00571.1 | 585  | 329018 | 1.00E-143 | 274  | 277  | 98 -  | 114 | 389  | 35755  | 36030  |
| UN01268 | Rsa1.0.00621.1 | 1589 | 71840  | 1.00E-148 | 273  | 275  | 99 -  | 294 | 568  | 50769  | 51043  |
| UN01269 | Rsa1.0.00741.1 | 718  | 66117  | 0         | 698  | 729  | 95 -  | 3   | 718  | 33724  | 34452  |
| UN01270 | Rsa1.0.00159.1 | 909  | 431686 | 0         | 901  | 902  | 99 -  | 3   | 904  | 244943 | 245843 |
| UN01271 | Rsa1.0.02939.1 | 813  | 26595  | 0         | 555  | 608  | 91 +  | 25  | 623  | 19909  | 20492  |
| UN01272 | Rsa1.0.00454.1 | 783  | 216970 | 0         | 729  | 766  | 95 +  | 3   | 761  | 187143 | 187900 |
| UN01273 | Rsa1.0.02820.1 | 603  | 27629  | 0         | 598  | 602  | 99 +  | 2   | 603  | 22422  | 23023  |
| UN01274 | Rsa1.0.00977.1 | 806  | 198001 | 0         | 768  | 782  | 98 -  | 3   | 776  | 189713 | 190494 |
| UN01275 | Rsa1.0.00017.1 | 724  | 752458 | 0         | 455  | 458  | 99 +  | 1   | 458  | 409133 | 409589 |
| UN01276 | Rsa1.0.00686.1 | 404  | 68511  | 2.00E-99  | 187  | 188  | 99 +  | 157 | 344  | 61089  | 61276  |
| UN01277 | Rsa1.0.03925.1 | 728  | 20025  | 1.00E-135 | 324  | 344  | 94 -  | 2   | 338  | 3816   | 4155   |
| UN01278 | Rsa1.0.05473.1 | 942  | 13628  | 0         | 660  | 704  | 93 -  | 9   | 700  | 11376  | 12077  |
| UN01279 | Rsa1.0.00913.1 | 815  | 59914  | 1.00E-123 | 280  | 300  | 93 -  | 1   | 291  | 32123  | 32422  |
| UN01280 | Rsa1.0.03253.1 | 858  | 24321  | 0         | 744  | 804  | 92 +  | 88  | 858  | 13179  | 13977  |
| UN01281 | Rsa1.0.00343.1 | 683  | 93570  | 0         | 449  | 482  | 93 -  | 1   | 472  | 2493   | 2967   |
| UN01282 | Rsa1.0.01992.1 | 783  | 36424  | 0         | 750  | 781  | 96 +  | 4   | 782  | 5477   | 6257   |
| UN01283 | Rsa1.0.02780.1 | 977  | 27965  | 0         | 458  | 474  | 96 +  | 1   | 469  | 8341   | 8809   |
| UN01284 | Rsa1.0.03356.1 | 1839 | 23487  | 0         | 706  | 742  | 95 -  | 434 | 1166 | 6339   | 7080   |
| UN01285 | Rsa1.0.01071.1 | 714  | 166914 | 0         | 433  | 433  | 100 - | 7   | 439  | 24488  | 24920  |

|         |                |      |        |           |      |      |       |     |      |        |        |
|---------|----------------|------|--------|-----------|------|------|-------|-----|------|--------|--------|
| UN01286 | Rsa1.0.03058.1 | 833  | 25715  | 0         | 728  | 746  | 97 +  | 88  | 831  | 4691   | 5436   |
| UN01287 | Rsa1.0.00711.1 | 776  | 67223  | 0         | 434  | 434  | 100 + | 2   | 435  | 23860  | 24293  |
| UN01288 | Rsa1.0.01491.1 | 568  | 44718  | 0         | 563  | 566  | 99 -  | 3   | 568  | 33365  | 33930  |
| UN01289 | Rsa1.0.00772.1 | 767  | 64856  | 5.00E-64  | 163  | 175  | 93 -  | 55  | 229  | 7619   | 7790   |
| UN01290 | Rsa1.0.03294.1 | 757  | 23971  | 0         | 473  | 497  | 95 -  | 148 | 635  | 17160  | 17653  |
| UN01291 | Rsa1.0.00269.1 | 816  | 341668 | 0         | 449  | 455  | 98 -  | 312 | 764  | 291208 | 291662 |
| UN01292 | Rsa1.0.01701.1 | 1079 | 162121 | 1.00E-173 | 312  | 313  | 99 +  | 1   | 313  | 20618  | 20930  |
| UN01293 | Rsa1.0.02684.1 | 740  | 28676  | 0         | 448  | 453  | 98 -  | 1   | 453  | 27458  | 27909  |
| UN01294 | Rsa1.0.07290.1 | 921  | 9608   | 0         | 425  | 435  | 97 +  | 4   | 438  | 2139   | 2570   |
| UN01295 | Rsa1.0.07534.1 | 585  | 9184   | 1.00E-177 | 349  | 358  | 97 -  | 222 | 578  | 7359   | 7714   |
| UN01296 | Rsa1.0.04380.1 | 1025 | 17644  | 8.00E-76  | 226  | 253  | 89 +  | 568 | 820  | 9371   | 9623   |
| UN01297 | Rsa1.0.02299.1 | 611  | 32857  | 0         | 423  | 430  | 98 -  | 183 | 611  | 13717  | 14146  |
| UN01298 | Rsa1.0.01519.1 | 1419 | 44144  | 0         | 815  | 850  | 95 +  | 571 | 1419 | 37306  | 38141  |
| UN01299 | Rsa1.0.00193.1 | 1257 | 194198 | 0         | 493  | 505  | 97 +  | 11  | 515  | 2816   | 3320   |
| UN01300 | Rsa1.0.09702.1 | 1031 | 6201   | 0         | 703  | 746  | 94 -  | 299 | 1031 | 830    | 1573   |
| UN01301 | Rsa1.0.02550.1 | 1527 | 291051 | 0         | 1340 | 1377 | 97 -  | 3   | 1370 | 2209   | 3585   |
| UN01302 | Rsa1.0.32375.1 | 770  | 703    | 1.00E-143 | 264  | 265  | 99 -  | 8   | 271  | 7      | 271    |
| UN01303 | Rsa1.0.00686.1 | 896  | 68511  | 0         | 356  | 357  | 99 +  | 1   | 356  | 53125  | 53481  |
| UN01304 | Rsa1.0.00158.1 | 686  | 117999 | 0         | 567  | 600  | 94 +  | 17  | 611  | 101331 | 101928 |
| UN01305 | Rsa1.0.00421.1 | 621  | 86365  | 1.00E-73  | 165  | 172  | 95 +  | 448 | 619  | 34765  | 34934  |
| UN01306 | Rsa1.0.00344.1 | 364  | 191774 | 1.00E-159 | 342  | 360  | 95 -  | 1   | 360  | 155630 | 155988 |
| UN01307 | Rsa1.0.12579.1 | 997  | 5185   | 0         | 462  | 467  | 98 +  | 125 | 591  | 1      | 467    |
| UN01308 | Rsa1.0.00197.1 | 931  | 109714 | 0         | 355  | 359  | 98 +  | 158 | 514  | 99351  | 99709  |
| UN01309 | Rsa1.0.00118.1 | 809  | 130637 | 0         | 461  | 468  | 98 +  | 287 | 753  | 90339  | 90806  |
| UN01310 | Rsa1.0.03209.1 | 1041 | 24592  | 0         | 478  | 478  | 100 + | 563 | 1040 | 20232  | 20709  |
| UN01311 | Rsa1.0.01016.1 | 924  | 181422 | 9.00E-88  | 207  | 221  | 93 -  | 276 | 496  | 3576   | 3796   |
| UN01312 | Rsa1.0.04646.1 | 1380 | 16541  | 0         | 411  | 423  | 97 -  | 918 | 1340 | 929    | 1351   |
| UN01313 | Rsa1.0.01468.1 | 914  | 45146  | 0         | 585  | 591  | 98 -  | 1   | 591  | 15030  | 15619  |
| UN01314 | Rsa1.0.02481.1 | 584  | 31035  | 0         | 558  | 586  | 95 +  | 1   | 584  | 17753  | 18335  |
| UN01315 | Rsa1.0.01222.1 | 735  | 50398  | 0         | 555  | 577  | 96 +  | 1   | 574  | 2217   | 2793   |
| UN01316 | Rsa1.0.00121.1 | 1128 | 278029 | 0         | 486  | 495  | 98 +  | 1   | 495  | 37383  | 37875  |
| UN01317 | Rsa1.0.00773.1 | 691  | 64839  | 0         | 680  | 691  | 98 -  | 1   | 691  | 20228  | 20915  |
| UN01318 | Rsa1.0.00832.1 | 830  | 62622  | 1.00E-157 | 331  | 341  | 97 -  | 3   | 341  | 41378  | 41715  |
| UN01319 | Rsa1.0.00048.1 | 718  | 167185 | 0         | 676  | 678  | 99 -  | 1   | 678  | 125701 | 126378 |
| UN01320 | Rsa1.0.01503.1 | 762  | 44467  | 0         | 759  | 761  | 99 -  | 3   | 761  | 26720  | 27480  |
| UN01321 | Rsa1.0.01774.1 | 1852 | 39528  | 0         | 982  | 1004 | 97 -  | 37  | 1037 | 7477   | 8477   |
| UN01322 | Rsa1.0.02690.1 | 910  | 28629  | 1.00E-132 | 249  | 251  | 99 -  | 2   | 252  | 17941  | 18190  |
| UN01323 | Rsa1.0.02681.1 | 1218 | 28711  | 0         | 917  | 936  | 97 +  | 1   | 935  | 12438  | 13370  |
| UN01324 | Rsa1.0.07695.1 | 1244 | 8770   | 0         | 423  | 435  | 97 -  | 311 | 745  | 2661   | 3095   |

|         |                |      |        |           |      |      |       |     |      |        |        |
|---------|----------------|------|--------|-----------|------|------|-------|-----|------|--------|--------|
| UN01325 | Rsa1.0.00005.1 | 857  | 353093 | 0         | 618  | 620  | 99 +  | 1   | 620  | 143656 | 144275 |
| UN01326 | Rsa1.0.00678.1 | 825  | 193163 | 0         | 360  | 366  | 98 -  | 406 | 771  | 165336 | 165700 |
| UN01327 | Rsa1.0.04273.1 | 522  | 18144  | 1.00E-106 | 238  | 252  | 94 -  | 5   | 256  | 12147  | 12398  |
| UN01328 | Rsa1.0.02668.1 | 1497 | 28895  | 1.00E-174 | 390  | 414  | 94 -  | 1   | 413  | 12485  | 12892  |
| UN01329 | Rsa1.0.03638.1 | 543  | 21634  | 0         | 366  | 369  | 99 +  | 1   | 367  | 20034  | 20402  |
| UN01330 | Rsa1.0.01779.1 | 1254 | 39448  | 0         | 555  | 557  | 99 +  | 2   | 558  | 33270  | 33826  |
| UN01331 | Rsa1.0.00079.1 | 875  | 606987 | 0         | 449  | 465  | 96 +  | 1   | 457  | 186517 | 186977 |
| UN01332 | Rsa1.0.01835.1 | 562  | 38542  | 0         | 369  | 372  | 99 +  | 190 | 561  | 20857  | 21228  |
| UN01333 | Rsa1.0.00284.1 | 1593 | 323267 | 1.00E-107 | 266  | 289  | 92 +  | 3   | 280  | 237070 | 237358 |
| UN01334 | Rsa1.0.00260.1 | 855  | 102021 | 1.00E-169 | 304  | 305  | 99 -  | 454 | 758  | 3365   | 3669   |
| UN01335 | #              | #    | #      | #         | #    | #    | #     | #   | #    | #      | #      |
| UN01336 | Rsa1.0.21616.1 | 1592 | 1186   | 0         | 727  | 727  | 100 - | 674 | 1400 | 265    | 991    |
| UN01337 | Rsa1.0.00060.1 | 1471 | 502678 | 0         | 608  | 610  | 99 -  | 6   | 615  | 41528  | 42137  |
| UN01338 | Rsa1.0.00304.1 | 1094 | 97429  | 0         | 331  | 333  | 99 -  | 1   | 333  | 8237   | 8569   |
| UN01339 | Rsa1.0.04193.1 | 1113 | 18571  | 1.00E-107 | 220  | 225  | 97 +  | 3   | 225  | 6657   | 6881   |
| UN01340 | Rsa1.0.00467.1 | 840  | 156542 | 0         | 448  | 475  | 94 +  | 2   | 472  | 125592 | 126061 |
| UN01341 | Rsa1.0.01569.1 | 1164 | 43029  | 1.00E-105 | 210  | 215  | 97 -  | 2   | 216  | 9452   | 9666   |
| UN01342 | Rsa1.0.00001.1 | 863  | 363028 | 0         | 410  | 434  | 94 +  | 19  | 448  | 314832 | 315259 |
| UN01343 | Rsa1.0.00429.1 | 717  | 85559  | 0         | 697  | 717  | 97 -  | 2   | 717  | 20481  | 21197  |
| UN01344 | Rsa1.0.00111.1 | 694  | 390088 | 0         | 669  | 697  | 95 +  | 1   | 694  | 200286 | 200979 |
| UN01345 | Rsa1.0.00722.1 | 1443 | 66840  | 0         | 353  | 356  | 99 +  | 1   | 356  | 35937  | 36290  |
| UN01346 | Rsa1.0.08230.1 | 161  | 7688   | 3.00E-49  | 141  | 155  | 90 -  | 3   | 157  | 5431   | 5585   |
| UN01347 | Rsa1.0.00275.1 | 780  | 210104 | 0         | 765  | 785  | 97 -  | 1   | 779  | 16930  | 17714  |
| UN01348 | Rsa1.0.00205.1 | 1436 | 193401 | 0         | 331  | 331  | 100 - | 10  | 340  | 33441  | 33771  |
| UN01349 | Rsa1.0.04275.1 | 830  | 18136  | 1.00E-121 | 274  | 289  | 94 +  | 57  | 345  | 9487   | 9773   |
| UN01350 | Rsa1.0.00134.1 | 1309 | 390219 | 1.00E-176 | 342  | 349  | 97 +  | 1   | 348  | 230194 | 230541 |
| UN01351 | Rsa1.0.00213.1 | 974  | 108167 | 1.00E-164 | 367  | 389  | 94 -  | 29  | 414  | 46415  | 46798  |
| UN01352 | Rsa1.0.00196.1 | 737  | 109960 | 0         | 576  | 588  | 97 +  | 153 | 735  | 28104  | 28691  |
| UN01353 | Rsa1.0.00040.1 | 472  | 324196 | 3.00E-89  | 232  | 251  | 92 -  | 37  | 286  | 17904  | 18153  |
| UN01354 | Rsa1.0.00285.1 | 1236 | 149638 | 1.00E-178 | 350  | 361  | 96 +  | 1   | 361  | 143051 | 143411 |
| UN01355 | Rsa1.0.05618.1 | 945  | 13165  | 1.00E-114 | 218  | 221  | 98 +  | 471 | 691  | 7388   | 7608   |
| UN01356 | Rsa1.0.01848.1 | 708  | 38312  | 0         | 700  | 707  | 99 -  | 2   | 708  | 26830  | 27536  |
| UN01357 | Rsa1.0.01760.1 | 928  | 39730  | 1.00E-114 | 219  | 222  | 98 -  | 1   | 222  | 13353  | 13574  |
| UN01358 | Rsa1.0.00331.1 | 761  | 176754 | 1.00E-177 | 333  | 339  | 98 +  | 1   | 339  | 107341 | 107679 |
| UN01359 | Rsa1.0.10134.1 | 1029 | 5984   | 1.00E-139 | 252  | 252  | 100 - | 254 | 505  | 3960   | 4211   |
| UN01360 | Rsa1.0.00069.1 | 717  | 403561 | 1.00E-136 | 267  | 273  | 97 +  | 36  | 308  | 185324 | 185594 |
| UN01361 | Rsa1.0.02997.1 | 1119 | 26150  | 0         | 1101 | 1116 | 98 +  | 5   | 1119 | 3288   | 4403   |
| UN01362 | Rsa1.0.00195.1 | 884  | 251884 | 1.00E-89  | 210  | 221  | 95 -  | 1   | 215  | 241757 | 241977 |
| UN01363 | Rsa1.0.06160.1 | 1371 | 11596  | 0         | 474  | 485  | 97 +  | 245 | 729  | 10937  | 11421  |

|         |                |      |        |           |      |      |       |      |      |        |        |
|---------|----------------|------|--------|-----------|------|------|-------|------|------|--------|--------|
| UN01364 | Rsa1.0_04029.1 | 1552 | 19491  | 0         | 582  | 592  | 98 -  | 962  | 1552 | 8373   | 8963   |
| UN01365 | Rsa1.0_02222.1 | 1396 | 152798 | 1.00E-166 | 302  | 304  | 99 -  | 1093 | 1396 | 122191 | 122494 |
| UN01366 | Rsa1.0_00090.1 | 1142 | 273859 | 0         | 1067 | 1114 | 95 -  | 35   | 1142 | 87904  | 89002  |
| UN01367 | Rsa1.0_02215.1 | 1382 | 33822  | 0         | 541  | 584  | 92 -  | 3    | 586  | 9505   | 10064  |
| UN01368 | Rsa1.0_01303.1 | 832  | 48853  | 0         | 405  | 426  | 95 +  | 249  | 674  | 15257  | 15682  |
| UN01369 | Rsa1.0_00079.1 | 1200 | 606987 | 1.00E-165 | 332  | 343  | 96 +  | 859  | 1200 | 71467  | 71809  |
| UN01370 | Rsa1.0_03408.1 | 1081 | 23154  | 0         | 663  | 679  | 97 +  | 405  | 1081 | 12765  | 13442  |
| UN01371 | Rsa1.0_00321.1 | 1037 | 95671  | 0         | 1021 | 1040 | 98 -  | 1    | 1037 | 56895  | 57927  |
| UN01372 | Rsa1.0_03878.1 | 988  | 20305  | 0         | 581  | 597  | 97 +  | 386  | 980  | 1652   | 2244   |
| UN01373 | Rsa1.0_00087.1 | 808  | 761073 | 1.00E-166 | 318  | 324  | 98 +  | 486  | 808  | 83067  | 83390  |
| UN01374 | Rsa1.0_00008.1 | 1265 | 358124 | 1.00E-106 | 222  | 228  | 97 +  | 1037 | 1261 | 308529 | 308756 |
| UN01375 | Rsa1.0_05344.1 | 971  | 14103  | 0         | 727  | 729  | 99 +  | 237  | 965  | 4842   | 5570   |
| UN01376 | Rsa1.0_00744.1 | 941  | 66084  | 0         | 511  | 517  | 98 -  | 426  | 941  | 3356   | 3872   |
| UN01377 | Rsa1.0_00847.1 | 640  | 62270  | 1.00E-116 | 227  | 232  | 97 +  | 141  | 372  | 52454  | 52685  |
| UN01378 | Rsa1.0_00060.1 | 410  | 502678 | 1.00E-159 | 287  | 288  | 99 +  | 123  | 410  | 54986  | 55273  |
| UN01379 | Rsa1.0_01510.1 | 918  | 44237  | 1.00E-119 | 362  | 402  | 90 +  | 525  | 918  | 19080  | 19474  |
| UN01380 | Rsa1.0_00033.1 | 1285 | 515811 | 0         | 533  | 538  | 99 +  | 741  | 1278 | 135945 | 136481 |
| UN01381 | Rsa1.0_16075.1 | 1310 | 2295   | 2.00E-58  | 125  | 128  | 97 -  | 1183 | 1310 | 2065   | 2192   |
| UN01382 | Rsa1.0_00798.1 | 931  | 63945  | 1.00E-178 | 429  | 463  | 92 +  | 473  | 931  | 43764  | 44220  |
| UN01383 | Rsa1.0_00118.1 | 621  | 130637 | 0         | 547  | 574  | 95 +  | 2    | 575  | 27468  | 28041  |
| UN01384 | Rsa1.0_00217.1 | 829  | 107079 | 1.00E-176 | 322  | 325  | 99 -  | 9    | 333  | 95136  | 95460  |
| UN01385 | Rsa1.0_00016.1 | 765  | 831256 | 0         | 372  | 381  | 97 -  | 385  | 765  | 570152 | 570531 |
| UN01386 | Rsa1.0_00245.1 | 962  | 103569 | 0         | 544  | 557  | 97 -  | 407  | 962  | 52410  | 52966  |
| UN01387 | Rsa1.0_01209.1 | 916  | 50668  | 1.00E-121 | 251  | 260  | 96 -  | 23   | 280  | 47015  | 47274  |
| UN01388 | Rsa1.0_02872.1 | 842  | 27080  | 1.00E-160 | 340  | 358  | 94 -  | 18   | 375  | 12112  | 12463  |
| UN01389 | Rsa1.0_00142.1 | 852  | 121474 | 0         | 429  | 447  | 95 +  | 374  | 815  | 62984  | 63430  |
| UN01390 | Rsa1.0_47641.1 | 778  | 475    | 1.00E-179 | 389  | 410  | 94 -  | 376  | 778  | 66     | 475    |
| UN01391 | Rsa1.0_00163.1 | 844  | 116847 | 1.00E-135 | 268  | 276  | 97 -  | 545  | 820  | 25937  | 26212  |
| UN01392 | Rsa1.0_04111.1 | 887  | 18991  | 2.33E-156 | 308  | 321  | 95 -  | 3    | 323  | 13843  | 14159  |
| UN01393 | Rsa1.0_00839.1 | 909  | 62533  | 0         | 552  | 591  | 93 -  | 278  | 867  | 46420  | 47010  |
| UN01394 | Rsa1.0_01413.1 | 891  | 46275  | 0         | 398  | 398  | 100 - | 494  | 891  | 28609  | 29006  |
| UN01395 | Rsa1.0_00207.1 | 1289 | 248736 | 0         | 335  | 335  | 100 + | 3    | 337  | 216909 | 217243 |
| UN01396 | Rsa1.0_00384.1 | 1342 | 89278  | 0         | 441  | 450  | 98 -  | 350  | 799  | 88013  | 88461  |
| UN01397 | Rsa1.0_00263.1 | 1158 | 224968 | 0         | 405  | 413  | 98 -  | 747  | 1157 | 47421  | 47832  |
| UN01398 | Rsa1.0_01234.1 | 993  | 50183  | 0         | 941  | 997  | 94 +  | 1    | 991  | 15511  | 16507  |
| UN01399 | Rsa1.0_00651.1 | 993  | 247766 | 1.00E-126 | 281  | 296  | 94 -  | 699  | 993  | 90236  | 90524  |
| UN01400 | Rsa1.0_00092.1 | 950  | 659932 | 1.00E-148 | 287  | 294  | 97 +  | 373  | 666  | 358012 | 358305 |
| UN01401 | Rsa1.0_19998.1 | 757  | 1354   | 1.00E-178 | 319  | 320  | 99 +  | 3    | 322  | 141    | 460    |
| UN01402 | Rsa1.0_03418.1 | 822  | 147293 | 1.00E-80  | 162  | 165  | 98 -  | 3    | 167  | 11737  | 11901  |

|         |                |      |        |           |      |      |       |      |      |        |        |
|---------|----------------|------|--------|-----------|------|------|-------|------|------|--------|--------|
| UN01403 | Rsa1.0_00065.1 | 1076 | 454616 | 0         | 355  | 355  | 100 - | 422  | 776  | 417752 | 418106 |
| UN01404 | Rsa1.0_00101.1 | 978  | 267193 | 1.00E-114 | 280  | 306  | 91 +  | 648  | 936  | 208637 | 208942 |
| UN01405 | Rsa1.0_01089.1 | 751  | 142191 | 0         | 339  | 339  | 100 - | 306  | 644  | 101822 | 102160 |
| UN01406 | Rsa1.0_00065.1 | 956  | 454616 | 0         | 602  | 627  | 96 +  | 322  | 948  | 254496 | 255122 |
| UN01407 | Rsa1.0_00577.1 | 789  | 174827 | 0         | 746  | 778  | 95 +  | 4    | 772  | 494    | 1269   |
| UN01408 | Rsa1.0_00273.1 | 1180 | 326186 | 0         | 587  | 620  | 94 +  | 579  | 1180 | 1356   | 1975   |
| UN01409 | Rsa1.0_00879.1 | 754  | 61297  | 1.00E-114 | 221  | 225  | 98 -  | 40   | 264  | 29418  | 29642  |
| UN01410 | Rsa1.0_00342.1 | 682  | 93695  | 4.00E-49  | 119  | 124  | 95 +  | 388  | 511  | 32256  | 32378  |
| UN01411 | Rsa1.0_01461.1 | 817  | 45240  | 0         | 422  | 423  | 99 +  | 396  | 817  | 7012   | 7434   |
| UN01412 | Rsa1.0_07113.1 | 1318 | 9877   | 1.00E-109 | 224  | 232  | 96 -  | 27   | 251  | 228    | 459    |
| UN01413 | Rsa1.0_01012.1 | 928  | 56836  | 0         | 486  | 525  | 92 -  | 168  | 689  | 30849  | 31372  |
| UN01414 | Rsa1.0_02694.1 | 1275 | 28610  | 0         | 392  | 402  | 97 +  | 423  | 821  | 6542   | 6943   |
| UN01415 | Rsa1.0_03366.1 | 734  | 23401  | 0         | 415  | 417  | 99 -  | 3    | 419  | 12024  | 12440  |
| UN01416 | Rsa1.0_04855.1 | 1433 | 15708  | 0         | 419  | 423  | 99 -  | 1009 | 1431 | 10580  | 10999  |
| UN01417 | Rsa1.0_00341.1 | 1027 | 249309 | 0         | 807  | 883  | 91 +  | 62   | 932  | 179827 | 180671 |
| UN01418 | Rsa1.0_00960.1 | 1373 | 58199  | 0         | 462  | 487  | 94 -  | 889  | 1373 | 14526  | 15007  |
| UN01419 | Rsa1.0_00002.1 | 981  | 601661 | 1.00E-138 | 304  | 324  | 93 +  | 670  | 981  | 270307 | 270627 |
| UN01420 | Rsa1.0_02376.1 | 912  | 32011  | 0         | 456  | 494  | 92 +  | 222  | 706  | 13930  | 14420  |
| UN01421 | Rsa1.0_03475.1 | 803  | 22653  | 9.00E-60  | 153  | 161  | 95 -  | 3    | 159  | 22098  | 22258  |
| UN01422 | Rsa1.0_00243.1 | 729  | 103651 | 1.00E-116 | 243  | 250  | 97 -  | 479  | 728  | 35555  | 35799  |
| UN01423 | Rsa1.0_01146.1 | 1034 | 163455 | 0         | 592  | 594  | 99 +  | 441  | 1034 | 148849 | 149442 |
| UN01424 | Rsa1.0_01026.1 | 964  | 171624 | 0         | 643  | 662  | 97 -  | 302  | 962  | 165230 | 165890 |
| UN01425 | Rsa1.0_02191.1 | 786  | 34078  | 0         | 425  | 425  | 100 + | 362  | 786  | 17613  | 18037  |
| UN01426 | Rsa1.0_00017.1 | 627  | 752458 | 0         | 477  | 499  | 95 +  | 132  | 627  | 537785 | 538275 |
| UN01427 | Rsa1.0_01188.1 | 1209 | 51362  | 0         | 504  | 514  | 98 +  | 3    | 516  | 17186  | 17699  |
| UN01428 | Rsa1.0_01591.1 | 887  | 42718  | 0         | 870  | 883  | 98 +  | 2    | 883  | 5393   | 6275   |
| UN01429 | Rsa1.0_00127.1 | 640  | 127446 | 1.00E-116 | 236  | 244  | 96 -  | 154  | 397  | 4782   | 5025   |
| UN01430 | Rsa1.0_00966.1 | 984  | 58136  | 1.00E-120 | 294  | 312  | 94 -  | 19   | 324  | 53466  | 53774  |
| UN01431 | Rsa1.0_00077.1 | 1270 | 145005 | 0         | 535  | 537  | 99 -  | 591  | 1127 | 89653  | 90189  |
| UN01432 | Rsa1.0_00437.1 | 959  | 84879  | 0         | 444  | 446  | 99 -  | 514  | 959  | 70164  | 70609  |
| UN01433 | Rsa1.0_00089.1 | 851  | 406142 | 0         | 575  | 576  | 99 +  | 276  | 851  | 275428 | 276003 |
| UN01434 | Rsa1.0_00096.1 | 719  | 198773 | 1.00E-108 | 231  | 241  | 95 +  | 1    | 241  | 171687 | 171924 |
| UN01435 | Rsa1.0_01156.1 | 1690 | 52147  | 1.00E-130 | 280  | 292  | 95 +  | 1401 | 1690 | 38895  | 39186  |
| UN01436 | Rsa1.0_07694.1 | 941  | 8776   | 0         | 385  | 399  | 96 +  | 543  | 941  | 8243   | 8636   |
| UN01437 | Rsa1.0_04744.1 | 1193 | 16154  | 1.00E-145 | 336  | 354  | 94 +  | 847  | 1193 | 7259   | 7609   |
| UN01438 | Rsa1.0_00055.1 | 736  | 520193 | 1.00E-171 | 316  | 320  | 98 -  | 417  | 736  | 211371 | 211690 |
| UN01439 | Rsa1.0_00048.1 | 711  | 167185 | 1.00E-101 | 222  | 231  | 96 +  | 280  | 507  | 148073 | 148303 |
| UN01440 | Rsa1.0_01008.1 | 1393 | 56924  | 0         | 1374 | 1391 | 98 -  | 3    | 1391 | 14315  | 15703  |
| UN01441 | Rsa1.0_02825.1 | 945  | 27568  | 0         | 879  | 911  | 96 -  | 1    | 902  | 17441  | 18345  |

|         |                |      |        |           |      |      |       |      |      |        |        |
|---------|----------------|------|--------|-----------|------|------|-------|------|------|--------|--------|
| UN01442 | Rsa1.0.00838.1 | 884  | 153820 | 0         | 357  | 359  | 99 -  | 527  | 884  | 147715 | 148073 |
| UN01443 | Rsa1.0.00131.1 | 1326 | 432233 | 0         | 1158 | 1202 | 96 +  | 123  | 1324 | 44958  | 46158  |
| UN01444 | Rsa1.0.20002.1 | 1054 | 1353   | 0         | 333  | 336  | 99 +  | 3    | 338  | 612    | 944    |
| UN01445 | Rsa1.0.10275.1 | 722  | 5907   | 3.00E-81  | 169  | 174  | 97 +  | 251  | 424  | 887    | 1060   |
| UN01446 | Rsa1.0.03543.1 | 1291 | 22185  | 0         | 493  | 509  | 96 -  | 130  | 634  | 3871   | 4379   |
| UN01447 | Rsa1.0.00199.1 | 849  | 249604 | 0         | 557  | 562  | 99 -  | 3    | 563  | 13361  | 13921  |
| UN01448 | Rsa1.0.00318.1 | 788  | 96094  | 1.00E-133 | 251  | 253  | 99 +  | 301  | 553  | 75462  | 75713  |
| UN01449 | Rsa1.0.03469.1 | 857  | 22681  | 1.00E-148 | 285  | 291  | 97 +  | 337  | 627  | 20324  | 20614  |
| UN01450 | Rsa1.0.01971.1 | 267  | 36641  | 7.00E-95  | 243  | 268  | 90 -  | 2    | 254  | 23472  | 23736  |
| UN01451 | Rsa1.0.01429.1 | 988  | 46061  | 0         | 967  | 987  | 97 -  | 3    | 988  | 17004  | 17987  |
| UN01452 | Rsa1.0.02091.1 | 1421 | 35157  | 0         | 1292 | 1360 | 95 +  | 58   | 1414 | 4073   | 5413   |
| UN01453 | Rsa1.0.04538.1 | 1293 | 16940  | 0         | 1278 | 1296 | 98 +  | 1    | 1293 | 5887   | 7181   |
| UN01454 | Rsa1.0.00213.1 | 1205 | 108167 | 1.00E-161 | 439  | 483  | 90 -  | 741  | 1204 | 36347  | 36811  |
| UN01455 | Rsa1.0.04450.1 | 1093 | 17297  | 0         | 697  | 710  | 98 +  | 1    | 710  | 13778  | 14487  |
| UN01456 | Rsa1.0.00156.1 | 897  | 118383 | 0         | 361  | 368  | 98 -  | 1    | 368  | 13496  | 13863  |
| UN01457 | Rsa1.0.02999.1 | 913  | 26135  | 0         | 908  | 915  | 99 +  | 3    | 913  | 13715  | 14629  |
| UN01458 | Rsa1.0.00642.1 | 912  | 201230 | 0         | 391  | 391  | 100 - | 520  | 910  | 162508 | 162898 |
| UN01459 | Rsa1.0.00866.1 | 681  | 61676  | 1.00E-64  | 129  | 130  | 99 +  | 194  | 323  | 56046  | 56175  |
| UN01460 | Rsa1.0.10126.1 | 805  | 5987   | 0         | 760  | 806  | 94 +  | 5    | 800  | 3716   | 4506   |
| UN01461 | Rsa1.0.09588.1 | 772  | 6267   | 1.00E-121 | 227  | 229  | 99 +  | 313  | 541  | 5405   | 5633   |
| UN01462 | Rsa1.0.00340.1 | 644  | 305782 | 0         | 628  | 642  | 97 +  | 3    | 644  | 289427 | 290068 |
| UN01463 | Rsa1.0.03281.1 | 827  | 143349 | 0         | 445  | 452  | 98 +  | 379  | 827  | 136448 | 136899 |
| UN01464 | Rsa1.0.00507.1 | 812  | 79074  | 1.00E-131 | 331  | 362  | 91 -  | 28   | 385  | 20321  | 20676  |
| UN01465 | Rsa1.0.01360.1 | 994  | 47246  | 0         | 582  | 615  | 94 -  | 389  | 992  | 23905  | 24514  |
| UN01466 | Rsa1.0.03464.1 | 947  | 22715  | 8.00E-79  | 150  | 150  | 100 + | 798  | 947  | 12662  | 12811  |
| UN01467 | Rsa1.0.00185.1 | 1424 | 248445 | 0         | 907  | 920  | 98 -  | 504  | 1423 | 233983 | 234902 |
| UN01468 | Rsa1.0.04029.1 | 894  | 19491  | 0         | 383  | 396  | 96 -  | 470  | 859  | 10003  | 10398  |
| UN01469 | Rsa1.0.00111.1 | 1017 | 390088 | 0         | 466  | 472  | 98 -  | 546  | 1017 | 197737 | 198208 |
| UN01470 | Rsa1.0.00001.1 | 752  | 363028 | 3.00E-78  | 155  | 157  | 98 -  | 248  | 404  | 29910  | 30066  |
| UN01471 | Rsa1.0.00021.1 | 1555 | 263655 | 1.00E-136 | 437  | 496  | 88 +  | 1014 | 1506 | 199080 | 199572 |
| UN01472 | Rsa1.0.00744.1 | 698  | 66084  | 8.00E-69  | 148  | 153  | 96 +  | 345  | 497  | 48388  | 48540  |
| UN01473 | Rsa1.0.00946.1 | 1557 | 58666  | 1.00E-133 | 283  | 294  | 96 +  | 1266 | 1553 | 52830  | 53122  |
| UN01474 | Rsa1.0.01728.1 | 1258 | 40239  | 0         | 921  | 962  | 95 +  | 310  | 1258 | 3010   | 3970   |
| UN01475 | Rsa1.0.00108.1 | 1222 | 478491 | 2.33E-156 | 269  | 271  | 99 +  | 534  | 804  | 463378 | 463648 |
| UN01476 | Rsa1.0.06421.1 | 958  | 11053  | 1.00E-177 | 381  | 399  | 95 -  | 560  | 958  | 3836   | 4231   |
| UN01477 | Rsa1.0.54086.1 | 827  | 422    | 2.00E-60  | 128  | 131  | 97 -  | 362  | 492  | 147    | 277    |
| UN01478 | Rsa1.0.00708.1 | 1301 | 67366  | 0         | 460  | 492  | 93 +  | 343  | 831  | 41786  | 42277  |
| UN01479 | Rsa1.0.04098.1 | 802  | 19078  | 1.00E-134 | 306  | 326  | 93 +  | 488  | 802  | 10291  | 10616  |
| UN01480 | Rsa1.0.00123.1 | 1318 | 325650 | 0         | 794  | 848  | 93 +  | 466  | 1310 | 109752 | 110582 |



|         |                |      |        |           |      |      |       |      |      |        |        |
|---------|----------------|------|--------|-----------|------|------|-------|------|------|--------|--------|
| UN01481 | Rsa1.0_02029.1 | 1362 | 35857  | 0         | 713  | 762  | 93 +  | 3    | 764  | 25120  | 25866  |
| UN01482 | Rsa1.0_00676.1 | 707  | 69166  | 1.00E-175 | 312  | 312  | 100 + | 396  | 707  | 19280  | 19591  |
| UN01483 | Rsa1.0_00216.1 | 1240 | 197563 | 0         | 674  | 685  | 98 +  | 1    | 685  | 99017  | 99700  |
| UN01484 | Rsa1.0_02269.1 | 772  | 33168  | 5.00E-55  | 123  | 126  | 97 +  | 288  | 412  | 15955  | 16080  |
| UN01485 | Rsa1.0_00741.1 | 801  | 66117  | 3.00E-75  | 293  | 342  | 85 -  | 180  | 521  | 32766  | 33104  |
| UN01486 | Rsa1.0_00439.1 | 787  | 142776 | 0         | 412  | 423  | 97 +  | 3    | 422  | 57722  | 58144  |
| UN01487 | Rsa1.0_04591.1 | 1306 | 16717  | 0         | 1217 | 1223 | 99 +  | 85   | 1306 | 2892   | 4113   |
| UN01488 | Rsa1.0_30952.1 | 1394 | 740    | 2.00E-80  | 242  | 269  | 89 -  | 966  | 1233 | 383    | 650    |
| UN01489 | Rsa1.0_00512.1 | 824  | 200277 | 1.00E-108 | 228  | 236  | 96 +  | 4    | 238  | 194177 | 194412 |
| UN01490 | Rsa1.0_06369.1 | 913  | 11141  | 0         | 394  | 399  | 98 +  | 343  | 741  | 6231   | 6629   |
| UN01491 | Rsa1.0_07149.1 | 1107 | 9824   | 0         | 387  | 402  | 96 -  | 716  | 1107 | 844    | 1245   |
| UN01492 | Rsa1.0_05947.1 | 983  | 12142  | 0         | 401  | 419  | 95 +  | 263  | 678  | 2699   | 3111   |
| UN01493 | Rsa1.0_00247.1 | 1173 | 103408 | 0         | 530  | 531  | 99 -  | 1    | 531  | 95495  | 96025  |
| UN01494 | Rsa1.0_01835.1 | 859  | 38542  | 1.00E-124 | 226  | 226  | 100 - | 632  | 857  | 17025  | 17250  |
| UN01495 | Rsa1.0_03141.1 | 985  | 25061  | 0         | 698  | 755  | 92 +  | 263  | 985  | 12076  | 12827  |
| UN01496 | Rsa1.0_00458.1 | 1253 | 82717  | 0         | 417  | 436  | 95 -  | 818  | 1253 | 75544  | 75964  |
| UN01497 | Rsa1.0_05159.1 | 997  | 14642  | 0         | 559  | 576  | 97 -  | 422  | 997  | 7615   | 8179   |
| UN01498 | Rsa1.0_00631.1 | 466  | 71277  | 1.00E-122 | 251  | 258  | 97 -  | 209  | 466  | 59025  | 59280  |
| UN01499 | Rsa1.0_00414.1 | 1564 | 202190 | 0         | 516  | 534  | 96 +  | 862  | 1392 | 172207 | 172734 |
| UN01500 | Rsa1.0_03132.1 | 1250 | 25142  | 0         | 604  | 639  | 94 -  | 615  | 1250 | 7901   | 8530   |
| UN01501 | Rsa1.0_04189.1 | 1012 | 18584  | 1.00E-116 | 272  | 290  | 93 +  | 730  | 1010 | 4224   | 4512   |
| UN01502 | Rsa1.0_04510.1 | 845  | 17033  | 2.00E-94  | 208  | 216  | 96 +  | 548  | 762  | 12403  | 12617  |
| UN01503 | Rsa1.0_01591.1 | 1536 | 42718  | 1.00E-162 | 406  | 447  | 90 -  | 1099 | 1517 | 26831  | 27277  |
| UN01504 | Rsa1.0_00048.1 | 840  | 167185 | 5.00E-80  | 167  | 172  | 97 +  | 139  | 310  | 71654  | 71825  |
| UN01505 | Rsa1.0_01731.1 | 1425 | 40208  | 0         | 1097 | 1141 | 96 -  | 295  | 1425 | 30987  | 32114  |
| UN01506 | Rsa1.0_00495.1 | 777  | 79934  | 3.00E-62  | 150  | 158  | 94 +  | 151  | 308  | 9240   | 9396   |
| UN01507 | Rsa1.0_00518.1 | 765  | 78360  | 5.00E-98  | 194  | 198  | 97 -  | 395  | 592  | 19614  | 19811  |
| UN01508 | Rsa1.0_02036.1 | 1094 | 35731  | 0         | 1090 | 1105 | 98 -  | 3    | 1094 | 2907   | 4011   |
| UN01509 | Rsa1.0_00163.1 | 1125 | 116847 | 1.00E-174 | 340  | 350  | 97 -  | 308  | 657  | 30602  | 30951  |
| UN01510 | Rsa1.0_00092.1 | 1233 | 659932 | 1.00E-62  | 123  | 123  | 100 + | 1    | 123  | 439120 | 439242 |
| UN01511 | Rsa1.0_01601.1 | 765  | 42519  | 0         | 415  | 434  | 95 -  | 146  | 579  | 12367  | 12797  |
| UN01512 | Rsa1.0_00913.1 | 744  | 59914  | 1.00E-67  | 140  | 143  | 97 -  | 415  | 557  | 20658  | 20800  |
| UN01513 | Rsa1.0_00759.1 | 1220 | 65465  | 0         | 839  | 873  | 96 +  | 358  | 1220 | 55681  | 56553  |
| UN01514 | Rsa1.0_15043.1 | 1231 | 2872   | 1.00E-117 | 227  | 230  | 98 -  | 3    | 232  | 323    | 550    |
| UN01515 | Rsa1.0_00513.1 | 1455 | 78579  | 0         | 401  | 402  | 99 -  | 1054 | 1455 | 46560  | 46961  |
| UN01516 | Rsa1.0_02574.1 | 1230 | 29954  | 0         | 596  | 600  | 99 +  | 629  | 1228 | 7851   | 8450   |
| UN01517 | Rsa1.0_00603.1 | 1172 | 73299  | 2.00E-76  | 249  | 285  | 87 -  | 852  | 1136 | 18990  | 19254  |
| UN01518 | Rsa1.0_03471.1 | 1147 | 22678  | 0         | 976  | 991  | 98 +  | 121  | 1105 | 296    | 1284   |
| UN01519 | Rsa1.0_00336.1 | 1380 | 445051 | 1.00E-162 | 296  | 298  | 99 -  | 2    | 299  | 441311 | 441608 |

|         |                |      |        |           |      |      |       |     |      |        |        |
|---------|----------------|------|--------|-----------|------|------|-------|-----|------|--------|--------|
| UN01520 | Rsa1.0_11496.1 | 1355 | 5485   | 0         | 1327 | 1366 | 97 +  | 2   | 1355 | 1374   | 2739   |
| UN01521 | Rsa1.0_00047.1 | 956  | 168582 | 1.00E-124 | 229  | 230  | 99 -  | 726 | 955  | 53787  | 54016  |
| UN01522 | Rsa1.0_00112.1 | 703  | 132199 | 0         | 423  | 442  | 95 +  | 257 | 693  | 55783  | 56220  |
| UN01523 | Rsa1.0_02299.1 | 1220 | 32857  | 0         | 441  | 441  | 100 - | 1   | 441  | 4421   | 4861   |
| UN01524 | Rsa1.0_00139.1 | 841  | 357786 | 2.00E-63  | 153  | 164  | 93 -  | 1   | 164  | 292098 | 292252 |
| UN01525 | Rsa1.0_00006.1 | 858  | 396176 | 0         | 818  | 845  | 96 -  | 2   | 842  | 376370 | 377214 |
| UN01526 | Rsa1.0_00108.1 | 668  | 478491 | 1.00E-176 | 316  | 317  | 99 +  | 352 | 668  | 270627 | 270943 |
| UN01527 | Rsa1.0_06488.1 | 963  | 141774 | 0         | 381  | 383  | 99 +  | 582 | 963  | 2452   | 2834   |
| UN01528 | Rsa1.0_00085.1 | 674  | 142226 | 0         | 375  | 379  | 98 +  | 297 | 674  | 56009  | 56387  |
| UN01529 | Rsa1.0_01220.1 | 1310 | 161775 | 2.00E-92  | 193  | 199  | 96 -  | 949 | 1144 | 122655 | 122853 |
| UN01530 | Rsa1.0_00884.1 | 794  | 61150  | 1.00E-141 | 261  | 262  | 99 +  | 485 | 745  | 19478  | 19739  |
| UN01531 | Rsa1.0_00602.1 | 1437 | 73302  | 0         | 968  | 975  | 99 +  | 465 | 1437 | 33512  | 34486  |
| UN01532 | Rsa1.0_05593.1 | 777  | 13235  | 0         | 592  | 616  | 96 +  | 148 | 759  | 1134   | 1748   |
| UN01533 | Rsa1.0_02181.1 | 809  | 34172  | 1.00E-137 | 273  | 279  | 97 +  | 192 | 470  | 18160  | 18435  |
| UN01534 | Rsa1.0_00439.1 | 892  | 142776 | 0         | 882  | 892  | 98 +  | 2   | 892  | 123194 | 124083 |
| UN01535 | Rsa1.0_00415.1 | 748  | 86795  | 1.00E-134 | 246  | 247  | 99 +  | 332 | 578  | 72219  | 72465  |
| UN01536 | Rsa1.0_08366.1 | 735  | 7466   | 0         | 383  | 401  | 95 +  | 335 | 735  | 5695   | 6081   |
| UN01537 | Rsa1.0_00361.1 | 836  | 91181  | 1.00E-150 | 273  | 274  | 99 -  | 423 | 696  | 12177  | 12450  |
| UN01538 | Rsa1.0_00364.1 | 846  | 90951  | 0         | 829  | 856  | 96 -  | 1   | 846  | 76974  | 77829  |
| UN01539 | Rsa1.0_01043.1 | 1181 | 55893  | 0         | 523  | 552  | 94 -  | 631 | 1181 | 34936  | 35473  |
| UN01540 | Rsa1.0_00145.1 | 1041 | 261008 | 0         | 653  | 661  | 98 +  | 368 | 1028 | 17556  | 18215  |
| UN01541 | Rsa1.0_12370.1 | 935  | 5243   | 0         | 597  | 597  | 100 - | 1   | 597  | 878    | 1474   |
| UN01542 | Rsa1.0_00301.1 | 974  | 365315 | 0         | 966  | 967  | 99 -  | 8   | 974  | 25981  | 26947  |
| UN01543 | Rsa1.0_00653.1 | 699  | 70029  | 0         | 384  | 390  | 98 +  | 3   | 392  | 33896  | 34283  |
| UN01544 | Rsa1.0_02625.1 | 799  | 139104 | 0         | 525  | 525  | 100 + | 20  | 544  | 138580 | 139104 |
| UN01545 | Rsa1.0_02454.1 | 1164 | 31263  | 0         | 893  | 896  | 99 +  | 3   | 897  | 6909   | 7804   |
| UN01546 | Rsa1.0_00327.1 | 1451 | 94892  | 0         | 550  | 568  | 96 -  | 674 | 1240 | 62360  | 62927  |
| UN01547 | Rsa1.0_00105.1 | 653  | 134138 | 7.00E-94  | 190  | 195  | 97 +  | 221 | 415  | 91498  | 91692  |
| UN01548 | Rsa1.0_00024.1 | 1304 | 188018 | 1.00E-141 | 267  | 271  | 98 -  | 844 | 1114 | 5016   | 5286   |
| UN01549 | Rsa1.0_01459.1 | 1233 | 45277  | 0         | 1171 | 1243 | 94 -  | 2   | 1231 | 35841  | 37070  |
| UN01550 | Rsa1.0_01411.1 | 1030 | 46326  | 0         | 350  | 351  | 99 +  | 3   | 353  | 22913  | 23263  |
| UN01551 | Rsa1.0_00739.1 | 1606 | 66155  | 1.00E-120 | 237  | 243  | 97 -  | 757 | 999  | 42962  | 43204  |
| UN01552 | Rsa1.0_14912.1 | 793  | 2970   | 6.00E-73  | 177  | 189  | 93 +  | 567 | 751  | 1944   | 2132   |
| UN01553 | Rsa1.0_00360.1 | 1017 | 91190  | 0         | 522  | 536  | 97 +  | 31  | 566  | 75819  | 76354  |
| UN01554 | Rsa1.0_00041.1 | 835  | 186197 | 0         | 493  | 513  | 96 +  | 3   | 514  | 71394  | 71906  |
| UN01555 | Rsa1.0_00520.1 | 814  | 78226  | 0         | 376  | 378  | 99 -  | 1   | 378  | 37747  | 38124  |
| UN01556 | Rsa1.0_14737.1 | 940  | 3115   | 0         | 321  | 321  | 100 + | 275 | 595  | 2055   | 2375   |
| UN01557 | Rsa1.0_02091.1 | 647  | 35157  | 0         | 625  | 646  | 96 -  | 4   | 647  | 4771   | 5413   |
| UN01558 | Rsa1.0_01175.1 | 739  | 51674  | 1.00E-101 | 187  | 187  | 100 - | 1   | 187  | 38400  | 38586  |

|         |                |      |        |           |      |      |       |      |      |        |        |
|---------|----------------|------|--------|-----------|------|------|-------|------|------|--------|--------|
| UN01559 | Rsa1.0_00949.1 | 1408 | 58549  | 0         | 437  | 440  | 99 +  | 747  | 1185 | 15414  | 15851  |
| UN01560 | Rsa1.0_00893.1 | 982  | 60626  | 2.00E-15  | 63   | 70   | 90 -  | 913  | 982  | 24296  | 24358  |
| UN01561 | Rsa1.0_04415.1 | 816  | 147889 | 0         | 575  | 579  | 99 +  | 2    | 580  | 137359 | 137935 |
| UN01562 | Rsa1.0_00167.1 | 606  | 116000 | 1.00E-122 | 244  | 250  | 97 +  | 1    | 249  | 90120  | 90369  |
| UN01563 | Rsa1.0_01712.1 | 1206 | 154210 | 1.00E-149 | 272  | 273  | 99 +  | 682  | 954  | 2819   | 3091   |
| UN01564 | Rsa1.0_01434.1 | 1473 | 45951  | 0         | 1144 | 1182 | 96 -  | 3    | 1174 | 5302   | 6480   |
| UN01565 | Rsa1.0_13979.1 | 828  | 3964   | 1.00E-145 | 264  | 265  | 99 -  | 386  | 650  | 2589   | 2853   |
| UN01566 | Rsa1.0_00260.1 | 908  | 102021 | 0         | 415  | 419  | 99 +  | 249  | 667  | 72077  | 72495  |
| UN01567 | Rsa1.0_03055.1 | 261  | 25730  | 1.00E-123 | 247  | 255  | 96 -  | 3    | 257  | 2665   | 2919   |
| UN01568 | Rsa1.0_00698.1 | 1074 | 67816  | 1.00E-119 | 263  | 278  | 94 -  | 464  | 741  | 46344  | 46616  |
| UN01569 | Rsa1.0_06603.1 | 923  | 10682  | 1.00E-137 | 301  | 320  | 94 -  | 1    | 307  | 5476   | 5794   |
| UN01570 | Rsa1.0_00245.1 | 718  | 103569 | 0         | 685  | 686  | 99 -  | 34   | 718  | 11734  | 12419  |
| UN01571 | Rsa1.0_02179.1 | 708  | 34188  | 0         | 687  | 710  | 96 -  | 1    | 707  | 20218  | 20927  |
| UN01572 | Rsa1.0_00028.1 | 1413 | 293984 | 1.00E-130 | 240  | 241  | 99 -  | 1    | 241  | 44903  | 45143  |
| UN01573 | Rsa1.0_01377.1 | 1135 | 46967  | 1.00E-117 | 292  | 315  | 92 -  | 1    | 309  | 21582  | 21895  |
| UN01574 | Rsa1.0_13250.1 | 676  | 4955   | 1.00E-129 | 235  | 235  | 100 + | 58   | 292  | 1      | 235    |
| UN01575 | Rsa1.0_00497.1 | 813  | 79830  | 0         | 472  | 472  | 100 - | 1    | 472  | 76695  | 77166  |
| UN01576 | Rsa1.0_01530.1 | 1069 | 43820  | 1.00E-132 | 266  | 273  | 97 -  | 1    | 272  | 5090   | 5359   |
| UN01577 | Rsa1.0_02041.1 | 1060 | 163634 | 1.00E-153 | 318  | 331  | 96 +  | 1    | 330  | 18706  | 19032  |
| UN01578 | Rsa1.0_00075.1 | 995  | 146680 | 1.00E-117 | 220  | 222  | 99 +  | 1    | 222  | 66201  | 66422  |
| UN01579 | Rsa1.0_00087.1 | 708  | 761073 | 0         | 664  | 708  | 93 -  | 2    | 708  | 182815 | 183499 |
| UN01580 | Rsa1.0_00254.1 | 1149 | 102600 | 1.00E-148 | 306  | 318  | 96 +  | 10   | 326  | 74046  | 74363  |
| UN01581 | Rsa1.0_00034.1 | 762  | 260119 | 1.00E-122 | 262  | 275  | 95 +  | 116  | 390  | 246416 | 246690 |
| UN01582 | Rsa1.0_00632.1 | 860  | 183777 | 1.00E-136 | 298  | 312  | 95 -  | 3    | 310  | 3462   | 3772   |
| UN01583 | Rsa1.0_17297.1 | 1704 | 1867   | 0         | 494  | 524  | 94 +  | 1144 | 1667 | 1344   | 1867   |
| UN01584 | Rsa1.0_02377.1 | 622  | 31994  | 0         | 576  | 625  | 92 +  | 8    | 615  | 19545  | 20165  |
| UN01585 | Rsa1.0_02654.1 | 1228 | 29028  | 0         | 1018 | 1059 | 96 -  | 1    | 1053 | 21338  | 22382  |
| UN01586 | Rsa1.0_16075.1 | 426  | 2295   | 8.00E-37  | 97   | 103  | 94 +  | 3    | 105  | 2090   | 2192   |
| UN01587 | Rsa1.0_01725.1 | 1059 | 40290  | 0         | 579  | 590  | 98 -  | 412  | 1001 | 1697   | 2286   |
| UN01588 | Rsa1.0_00051.1 | 750  | 258225 | 0         | 505  | 507  | 99 +  | 3    | 509  | 2656   | 3162   |
| UN01589 | Rsa1.0_00044.1 | 451  | 271658 | 1.00E-127 | 297  | 319  | 93 +  | 1    | 319  | 176730 | 177048 |
| UN01590 | Rsa1.0_00646.1 | 1319 | 70473  | 1.00E-129 | 238  | 239  | 99 -  | 807  | 1045 | 8478   | 8716   |
| UN01591 | Rsa1.0_02481.1 | 810  | 31035  | 0         | 375  | 384  | 97 +  | 198  | 581  | 18627  | 19010  |
| UN01592 | Rsa1.0_08805.1 | 825  | 6906   | 0         | 643  | 650  | 98 +  | 176  | 822  | 531    | 1180   |
| UN01593 | Rsa1.0_00649.1 | 1283 | 70263  | 0         | 1261 | 1282 | 98 +  | 2    | 1282 | 4280   | 5561   |
| UN01594 | Rsa1.0_03001.1 | 883  | 26108  | 0         | 441  | 442  | 99 +  | 7    | 448  | 5384   | 5824   |
| UN01595 | Rsa1.0_00269.1 | 764  | 341668 | 0         | 734  | 764  | 96 -  | 1    | 764  | 17129  | 17884  |
| UN01596 | Rsa1.0_02299.1 | 659  | 32857  | 0         | 434  | 435  | 99 +  | 1    | 435  | 1464   | 1898   |
| UN01597 | Rsa1.0_00005.1 | 1237 | 353093 | 1.00E-135 | 247  | 248  | 99 +  | 3    | 250  | 116631 | 116878 |

|         |                |      |        |           |      |      |       |      |      |        |        |
|---------|----------------|------|--------|-----------|------|------|-------|------|------|--------|--------|
| UN01598 | Rsa1.0_00006.1 | 1220 | 396176 | 0         | 740  | 750  | 98 +  | 1    | 750  | 375321 | 376070 |
| UN01599 | Rsa1.0_01313.1 | 951  | 48387  | 1.00E-142 | 299  | 313  | 95 -  | 1    | 313  | 16151  | 16463  |
| UN01600 | Rsa1.0_00398.1 | 1080 | 88007  | 0         | 670  | 697  | 96 +  | 2    | 698  | 70672  | 71367  |
| UN01601 | Rsa1.0_00884.1 | 836  | 61150  | 0         | 694  | 714  | 97 -  | 3    | 715  | 20224  | 20935  |
| UN01602 | Rsa1.0_00976.1 | 866  | 57809  | 1.00E-170 | 303  | 303  | 100 - | 1    | 303  | 49516  | 49818  |
| UN01603 | Rsa1.0_13975.1 | 936  | 3968   | 0         | 801  | 807  | 99 -  | 1    | 807  | 2406   | 3209   |
| UN01604 | Rsa1.0_02433.1 | 338  | 158318 | 1.00E-148 | 323  | 338  | 95 +  | 1    | 337  | 20008  | 20343  |
| UN01605 | Rsa1.0_14458.1 | 1233 | 3368   | 1.00E-160 | 295  | 298  | 98 +  | 821  | 1118 | 1277   | 1574   |
| UN01606 | Rsa1.0_02874.1 | 802  | 27070  | 2.00E-97  | 195  | 199  | 97 -  | 602  | 800  | 1695   | 1890   |
| UN01607 | Rsa1.0_00576.1 | 771  | 178949 | 0         | 376  | 380  | 98 -  | 2    | 381  | 23674  | 24053  |
| UN01608 | Rsa1.0_03469.1 | 826  | 22681  | 1.00E-137 | 302  | 319  | 94 -  | 9    | 325  | 21947  | 22265  |
| UN01609 | Rsa1.0_00285.1 | 1157 | 149638 | 1.00E-157 | 309  | 316  | 97 -  | 1    | 315  | 97144  | 97457  |
| UN01610 | Rsa1.0_03471.1 | 821  | 22678  | 0         | 803  | 820  | 97 -  | 3    | 821  | 915    | 1731   |
| UN01611 | Rsa1.0_00892.1 | 775  | 60703  | 0         | 448  | 457  | 98 -  | 5    | 460  | 21370  | 21826  |
| UN01612 | Rsa1.0_02130.1 | 826  | 34755  | 0         | 492  | 515  | 95 +  | 318  | 825  | 30534  | 31048  |
| UN01613 | Rsa1.0_01572.1 | 1004 | 42995  | 0         | 812  | 828  | 98 -  | 190  | 1004 | 6475   | 7302   |
| UN01614 | Rsa1.0_00234.1 | 1193 | 197060 | 0         | 401  | 415  | 96 +  | 367  | 781  | 144150 | 144564 |
| UN01615 | Rsa1.0_00275.1 | 838  | 210104 | 1.00E-108 | 233  | 247  | 94 +  | 391  | 637  | 119346 | 119579 |
| UN01616 | Rsa1.0_00131.1 | 1453 | 432233 | 0         | 490  | 545  | 89 -  | 380  | 915  | 395234 | 395750 |
| UN01617 | Rsa1.0_00001.1 | 919  | 363028 | 0         | 462  | 474  | 97 +  | 448  | 919  | 209188 | 209657 |
| UN01618 | Rsa1.0_02772.1 | 1247 | 28047  | 0         | 389  | 390  | 99 -  | 858  | 1247 | 17226  | 17615  |
| UN01619 | Rsa1.0_00105.1 | 922  | 134138 | 0         | 491  | 492  | 99 -  | 429  | 920  | 10801  | 11292  |
| UN01620 | Rsa1.0_01387.1 | 1005 | 46745  | 1.00E-154 | 309  | 319  | 96 -  | 435  | 753  | 39359  | 39675  |
| UN01621 | Rsa1.0_40505.1 | 869  | 554    | 1.00E-166 | 306  | 309  | 99 -  | 392  | 700  | 1      | 309    |
| UN01622 | Rsa1.0_00179.1 | 430  | 393324 | 1.00E-156 | 323  | 336  | 96 -  | 103  | 430  | 352408 | 352740 |
| UN01623 | Rsa1.0_00388.1 | 1184 | 88890  | 1.00E-138 | 261  | 265  | 98 -  | 918  | 1182 | 85714  | 85978  |
| UN01624 | Rsa1.0_00005.1 | 1602 | 353093 | 1.00E-151 | 423  | 476  | 88 -  | 1138 | 1591 | 71259  | 71734  |
| UN01625 | Rsa1.0_00010.1 | 874  | 294827 | 1.00E-124 | 226  | 226  | 100 - | 67   | 292  | 248372 | 248597 |
| UN01626 | Rsa1.0_01569.1 | 883  | 43029  | 0         | 609  | 613  | 99 -  | 260  | 872  | 24201  | 24811  |
| UN01627 | Rsa1.0_01465.1 | 881  | 45175  | 0         | 605  | 615  | 98 +  | 206  | 817  | 28909  | 29523  |
| UN01628 | Rsa1.0_02325.1 | 1485 | 160025 | 0         | 508  | 514  | 98 -  | 970  | 1483 | 140806 | 141319 |
| UN01629 | Rsa1.0_00542.1 | 915  | 76831  | 0         | 391  | 400  | 97 +  | 118  | 517  | 71903  | 72302  |
| UN01630 | Rsa1.0_01134.1 | 1478 | 52829  | 0         | 1022 | 1052 | 97 -  | 420  | 1470 | 25945  | 26996  |
| UN01631 | Rsa1.0_03473.1 | 816  | 22665  | 0         | 812  | 814  | 99 -  | 3    | 816  | 9420   | 10233  |
| UN01632 | Rsa1.0_00251.1 | 636  | 303968 | 0         | 566  | 573  | 98 +  | 67   | 636  | 139709 | 140281 |
| UN01633 | Rsa1.0_00872.1 | 1169 | 61495  | 1.00E-172 | 390  | 415  | 93 +  | 746  | 1159 | 17030  | 17443  |
| UN01634 | Rsa1.0_01717.1 | 1162 | 143162 | 0         | 380  | 387  | 98 -  | 1    | 385  | 6372   | 6758   |
| UN01635 | Rsa1.0_03375.1 | 1022 | 23332  | 2.00E-82  | 191  | 199  | 95 +  | 3    | 198  | 13164  | 13361  |
| UN01636 | Rsa1.0_04065.1 | 1308 | 19275  | 0         | 659  | 660  | 99 +  | 3    | 661  | 15393  | 16052  |

|         |                |      |        |           |      |      |       |     |      |        |        |
|---------|----------------|------|--------|-----------|------|------|-------|-----|------|--------|--------|
| UN01637 | Rsa1.0_12729.1 | 1084 | 5142   | 1.00E-154 | 292  | 296  | 98 +  | 2   | 297  | 2468   | 2762   |
| UN01638 | Rsa1.0_01357.1 | 1030 | 47280  | 0         | 460  | 463  | 99 -  | 567 | 1029 | 2522   | 2983   |
| UN01639 | Rsa1.0_07003.1 | 963  | 10045  | 1.00E-165 | 301  | 303  | 99 +  | 661 | 963  | 1      | 303    |
| UN01640 | Rsa1.0_00278.1 | 1089 | 231896 | 1.00E-121 | 225  | 226  | 99 +  | 59  | 284  | 148696 | 148921 |
| UN01641 | Rsa1.0_04646.1 | 780  | 16541  | 0         | 749  | 779  | 96 +  | 1   | 779  | 10792  | 11564  |
| UN01642 | Rsa1.0_00773.1 | 1573 | 64839  | 0         | 622  | 642  | 96 -  | 656 | 1297 | 22429  | 23070  |
| UN01643 | Rsa1.0_00001.1 | 1059 | 363028 | 0         | 909  | 945  | 96 -  | 13  | 947  | 173735 | 174678 |
| UN01644 | Rsa1.0_00067.1 | 737  | 415055 | 0         | 431  | 440  | 97 +  | 2   | 439  | 313442 | 313881 |
| UN01645 | Rsa1.0_01565.1 | 2035 | 155447 | 0         | 1721 | 1754 | 98 -  | 265 | 2010 | 147188 | 148935 |
| UN01646 | Rsa1.0_00759.1 | 664  | 65465  | 0         | 401  | 403  | 99 +  | 1   | 402  | 53702  | 54104  |
| UN01647 | Rsa1.0_00525.1 | 761  | 78030  | 0         | 469  | 470  | 99 +  | 1   | 470  | 46658  | 47127  |
| UN01648 | Rsa1.0_02428.1 | 1400 | 31542  | 0         | 334  | 334  | 100 - | 37  | 370  | 17805  | 18138  |
| UN01649 | Rsa1.0_00012.1 | 1126 | 222148 | 0         | 974  | 978  | 99 +  | 145 | 1121 | 110290 | 111267 |
| UN01650 | Rsa1.0_01595.1 | 801  | 175383 | 0         | 750  | 766  | 97 -  | 27  | 791  | 37756  | 38520  |
| UN01651 | Rsa1.0_01095.1 | 724  | 54276  | 3.00E-84  | 224  | 246  | 91 -  | 3   | 240  | 35225  | 35462  |
| UN01652 | Rsa1.0_00383.1 | 946  | 398431 | 1.00E-142 | 335  | 360  | 93 -  | 598 | 943  | 182048 | 182404 |
| UN01653 | Rsa1.0_00092.1 | 832  | 659932 | 1.00E-177 | 330  | 335  | 98 +  | 246 | 580  | 13028  | 13362  |
| UN01654 | Rsa1.0_00012.1 | 996  | 222148 | 0         | 601  | 635  | 94 +  | 270 | 898  | 110484 | 111109 |
| UN01655 | Rsa1.0_02110.1 | 998  | 34919  | 4.00E-93  | 222  | 239  | 92 -  | 773 | 998  | 23653  | 23891  |
| UN01656 | Rsa1.0_00301.1 | 1328 | 365315 | 0         | 533  | 539  | 98 +  | 788 | 1326 | 275569 | 276107 |
| UN01657 | Rsa1.0_00913.1 | 1185 | 59914  | 0         | 414  | 415  | 99 -  | 2   | 416  | 32123  | 32537  |
| UN01658 | Rsa1.0_04479.1 | 792  | 17181  | 4.00E-31  | 73   | 74   | 98 -  | 719 | 792  | 7907   | 7980   |
| UN01659 | Rsa1.0_00541.1 | 932  | 76863  | 0         | 428  | 431  | 99 -  | 4   | 434  | 74721  | 75151  |
| UN01660 | Rsa1.0_00105.1 | 894  | 134138 | 4.00E-99  | 196  | 200  | 98 +  | 148 | 347  | 67944  | 68143  |
| UN01661 | Rsa1.0_01154.1 | 901  | 52249  | 0         | 445  | 446  | 99 -  | 456 | 901  | 9037   | 9482   |
| UN01662 | Rsa1.0_01530.1 | 951  | 43820  | 0         | 474  | 491  | 96 +  | 212 | 702  | 5965   | 6455   |
| UN01663 | Rsa1.0_01141.1 | 636  | 52530  | 0         | 615  | 634  | 97 +  | 3   | 636  | 38330  | 38960  |
| UN01664 | Rsa1.0_05599.1 | 1358 | 143653 | 0         | 401  | 412  | 97 +  | 914 | 1320 | 4266   | 4677   |
| UN01665 | Rsa1.0_00914.1 | 1334 | 59880  | 0         | 767  | 772  | 99 -  | 3   | 774  | 53485  | 54256  |
| UN01666 | Rsa1.0_00286.1 | 704  | 98709  | 1.00E-102 | 237  | 252  | 94 +  | 404 | 655  | 13001  | 13250  |
| UN01667 | Rsa1.0_02867.1 | 825  | 27121  | 0         | 471  | 490  | 96 +  | 338 | 825  | 12695  | 13183  |
| UN01668 | Rsa1.0_02398.1 | 1044 | 31766  | 0         | 1038 | 1046 | 99 -  | 1   | 1043 | 16724  | 17769  |
| UN01669 | Rsa1.0_00749.1 | 923  | 65933  | 0         | 609  | 630  | 96 -  | 302 | 923  | 44807  | 45434  |
| UN01670 | Rsa1.0_00678.1 | 808  | 193163 | 1.00E-137 | 310  | 330  | 93 -  | 489 | 805  | 129966 | 130295 |
| UN01671 | Rsa1.0_00116.1 | 941  | 365886 | 0         | 543  | 544  | 99 +  | 398 | 941  | 144907 | 145450 |
| UN01672 | Rsa1.0_05897.1 | 1098 | 12302  | 0         | 864  | 868  | 99 -  | 3   | 870  | 4216   | 5083   |
| UN01673 | Rsa1.0_00066.1 | 1444 | 152418 | 0         | 496  | 499  | 99 +  | 946 | 1444 | 83634  | 84132  |
| UN01674 | Rsa1.0_02449.1 | 1219 | 31292  | 0         | 1219 | 1219 | 100 + | 1   | 1219 | 23811  | 25029  |
| UN01675 | Rsa1.0_01246.1 | 873  | 49968  | 0         | 495  | 499  | 99 +  | 43  | 541  | 26897  | 27395  |

|         |                |      |        |           |      |      |       |      |      |        |        |
|---------|----------------|------|--------|-----------|------|------|-------|------|------|--------|--------|
| UN01676 | Rsa1.0.02226.1 | 768  | 33726  | 2.00E-54  | 115  | 117  | 98 -  | 311  | 427  | 11062  | 11178  |
| UN01677 | Rsa1.0.00621.1 | 1222 | 71840  | 0         | 725  | 752  | 96 -  | 1    | 743  | 52315  | 53061  |
| UN01678 | Rsa1.0.00816.1 | 994  | 403350 | 0         | 974  | 996  | 97 +  | 1    | 994  | 394006 | 394999 |
| UN01679 | Rsa1.0.00363.1 | 1084 | 90968  | 0         | 521  | 521  | 100 - | 563  | 1083 | 9260   | 9780   |
| UN01680 | Rsa1.0.02947.1 | 574  | 26531  | 1.00E-106 | 280  | 313  | 89 +  | 172  | 456  | 22870  | 23181  |
| UN01681 | Rsa1.0.03413.1 | 1170 | 23137  | 0         | 542  | 543  | 99 +  | 628  | 1170 | 8284   | 8826   |
| UN01682 | Rsa1.0.02095.1 | 897  | 35071  | 2.00E-98  | 538  | 645  | 83 +  | 255  | 895  | 6233   | 6865   |
| UN01683 | Rsa1.0.02032.1 | 1159 | 35830  | 0         | 783  | 801  | 97 +  | 2    | 802  | 2941   | 3741   |
| UN01684 | Rsa1.0.00070.1 | 770  | 150321 | 0         | 731  | 790  | 92 +  | 5    | 770  | 53680  | 54460  |
| UN01685 | Rsa1.0.03943.1 | 1175 | 19931  | 0         | 405  | 407  | 99 +  | 578  | 984  | 8436   | 8842   |
| UN01686 | Rsa1.0.00131.1 | 990  | 432233 | 0         | 697  | 714  | 97 +  | 181  | 893  | 205248 | 205959 |
| UN01687 | Rsa1.0.00019.1 | 1936 | 301669 | 0         | 480  | 502  | 95 +  | 1448 | 1936 | 99010  | 99510  |
| UN01688 | Rsa1.0.01105.1 | 742  | 53958  | 1.00E-73  | 147  | 149  | 98 -  | 378  | 526  | 22860  | 23008  |
| UN01689 | Rsa1.0.00193.1 | 1209 | 194198 | 0         | 1149 | 1162 | 98 +  | 51   | 1208 | 10121  | 11282  |
| UN01690 | Rsa1.0.16268.1 | 613  | 2219   | 0         | 571  | 610  | 93 +  | 1    | 600  | 42     | 636    |
| UN01691 | Rsa1.0.05623.1 | 1248 | 13141  | 2.00E-33  | 220  | 266  | 82 -  | 823  | 1081 | 1359   | 1624   |
| UN01692 | Rsa1.0.03529.1 | 665  | 22277  | 0         | 392  | 403  | 97 -  | 1    | 403  | 15606  | 16008  |
| UN01693 | Rsa1.0.00471.1 | 1029 | 81897  | 0         | 473  | 478  | 98 -  | 550  | 1027 | 72216  | 72693  |
| UN01694 | Rsa1.0.01682.1 | 1385 | 41090  | 1.00E-180 | 412  | 439  | 93 +  | 949  | 1385 | 10171  | 10607  |
| UN01695 | Rsa1.0.00123.1 | 1140 | 325650 | 1.00E-140 | 253  | 253  | 100 - | 655  | 907  | 216452 | 216704 |
| UN01696 | Rsa1.0.05545.1 | 896  | 13379  | 0         | 866  | 892  | 97 -  | 3    | 894  | 11086  | 11969  |
| UN01697 | Rsa1.0.03833.1 | 829  | 20575  | 2.00E-67  | 140  | 143  | 97 +  | 591  | 733  | 9936   | 10078  |
| UN01698 | Rsa1.0.06630.1 | 825  | 10633  | 0         | 419  | 438  | 95 -  | 5    | 442  | 2463   | 2896   |
| UN01699 | Rsa1.0.01976.1 | 1401 | 36570  | 0         | 653  | 656  | 99 -  | 2    | 657  | 9059   | 9714   |
| UN01700 | Rsa1.0.06705.1 | 1337 | 10507  | 1.00E-126 | 281  | 301  | 93 -  | 1038 | 1337 | 5994   | 6277   |
| UN01701 | Rsa1.0.01112.1 | 807  | 310601 | 1.00E-156 | 305  | 313  | 97 +  | 16   | 328  | 174755 | 175064 |
| UN01702 | Rsa1.0.00030.1 | 1523 | 250988 | 0         | 1498 | 1527 | 98 -  | 3    | 1523 | 12137  | 13662  |
| UN01703 | Rsa1.0.00044.1 | 1430 | 271658 | 0         | 429  | 438  | 97 -  | 993  | 1430 | 176611 | 177048 |
| UN01704 | Rsa1.0.04616.1 | 922  | 16627  | 1.00E-163 | 362  | 383  | 94 +  | 447  | 827  | 342    | 723    |
| UN01705 | Rsa1.0.02748.1 | 700  | 28242  | 0         | 690  | 701  | 98 +  | 3    | 700  | 17531  | 18229  |
| UN01706 | Rsa1.0.00094.1 | 1097 | 139042 | 0         | 513  | 515  | 99 -  | 583  | 1097 | 25949  | 26463  |
| UN01707 | Rsa1.0.00140.1 | 1317 | 121541 | 0         | 496  | 497  | 99 -  | 820  | 1316 | 30925  | 31421  |
| UN01708 | Rsa1.0.07243.1 | 742  | 9673   | 1.00E-109 | 207  | 209  | 99 +  | 234  | 442  | 979    | 1187   |
| UN01709 | Rsa1.0.31900.1 | 1396 | 715    | 0         | 703  | 716  | 98 -  | 317  | 1032 | 1      | 715    |
| UN01710 | Rsa1.0.00205.1 | 809  | 193401 | 1.00E-114 | 238  | 246  | 96 +  | 324  | 569  | 98206  | 98450  |
| UN01711 | Rsa1.0.00200.1 | 1342 | 162016 | 0         | 783  | 808  | 96 +  | 3    | 810  | 145180 | 145987 |
| UN01712 | Rsa1.0.03460.1 | 1319 | 22747  | 0         | 650  | 682  | 95 -  | 640  | 1316 | 12216  | 12897  |
| UN01713 | Rsa1.0.00049.1 | 1489 | 167018 | 0         | 589  | 614  | 95 +  | 574  | 1187 | 81876  | 82477  |
| UN01714 | Rsa1.0.06213.1 | 527  | 11478  | 4.00E-79  | 174  | 181  | 96 +  | 15   | 195  | 9833   | 10006  |

|         |                |      |        |           |      |      |       |      |      |        |        |
|---------|----------------|------|--------|-----------|------|------|-------|------|------|--------|--------|
| UN01715 | Rsa1.0.00632.1 | 652  | 183777 | 0         | 340  | 345  | 98 -  | 307  | 650  | 149094 | 149438 |
| UN01716 | Rsa1.0.01076.1 | 759  | 54835  | 0         | 346  | 346  | 100 - | 87   | 432  | 5707   | 6052   |
| UN01717 | Rsa1.0.09709.1 | 600  | 6198   | 0         | 572  | 600  | 95 -  | 3    | 597  | 238    | 825    |
| UN01718 | Rsa1.0.00383.1 | 1252 | 398431 | 0         | 592  | 607  | 97 -  | 3    | 607  | 271063 | 271668 |
| UN01719 | Rsa1.0.01146.1 | 770  | 163455 | 1.00E-122 | 241  | 247  | 97 -  | 524  | 770  | 20552  | 20793  |
| UN01720 | Rsa1.0.00017.1 | 1403 | 752458 | 0         | 388  | 397  | 97 -  | 4    | 398  | 455551 | 455945 |
| UN01721 | Rsa1.0.02003.1 | 1498 | 36171  | 1.00E-117 | 273  | 291  | 93 -  | 45   | 335  | 33665  | 33949  |
| UN01722 | Rsa1.0.14158.1 | 1216 | 3726   | 0         | 1206 | 1217 | 99 +  | 1    | 1216 | 713    | 1925   |
| UN01723 | Rsa1.0.10555.1 | 609  | 5802   | 1.00E-103 | 389  | 456  | 85 +  | 163  | 606  | 3361   | 3816   |
| UN01724 | Rsa1.0.00805.1 | 1263 | 63724  | 1.00E-164 | 320  | 325  | 98 -  | 1    | 323  | 45608  | 45930  |
| UN01725 | Rsa1.0.00049.1 | 927  | 167018 | 1.00E-147 | 352  | 377  | 93 +  | 3    | 378  | 131874 | 132243 |
| UN01726 | Rsa1.0.04580.1 | 1188 | 16773  | 1.00E-175 | 346  | 356  | 97 -  | 834  | 1188 | 7350   | 7705   |
| UN01727 | Rsa1.0.00281.1 | 1496 | 99908  | 0         | 429  | 449  | 95 +  | 4    | 449  | 24092  | 24539  |
| UN01728 | Rsa1.0.06872.1 | 662  | 10231  | 1.00E-112 | 231  | 237  | 97 -  | 4    | 240  | 755    | 989    |
| UN01729 | Rsa1.0.02008.1 | 917  | 36109  | 1.00E-89  | 240  | 262  | 91 -  | 671  | 917  | 16939  | 17196  |
| UN01730 | Rsa1.0.01326.1 | 758  | 48072  | 0         | 410  | 415  | 98 -  | 345  | 757  | 43752  | 44166  |
| UN01731 | Rsa1.0.00008.1 | 1319 | 358124 | 0         | 770  | 793  | 97 +  | 528  | 1319 | 81     | 864    |
| UN01732 | Rsa1.0.01400.1 | 720  | 46560  | 0         | 350  | 354  | 98 +  | 6    | 357  | 11245  | 11598  |
| UN01733 | Rsa1.0.06807.1 | 1045 | 10324  | 1.00E-148 | 269  | 270  | 99 -  | 32   | 301  | 7844   | 8113   |
| UN01734 | Rsa1.0.00100.1 | 599  | 249232 | 5.00E-79  | 206  | 222  | 92 +  | 380  | 599  | 115618 | 115834 |
| UN01735 | Rsa1.0.07373.1 | 1338 | 9503   | 0         | 731  | 734  | 99 -  | 605  | 1338 | 8770   | 9503   |
| UN01736 | Rsa1.0.37707.1 | 888  | 597    | 0         | 596  | 597  | 99 -  | 201  | 797  | 1      | 597    |
| UN01737 | Rsa1.0.00062.1 | 1069 | 299291 | 1.00E-118 | 216  | 216  | 100 + | 853  | 1068 | 283841 | 284056 |
| UN01738 | Rsa1.0.01456.1 | 695  | 45372  | 0         | 481  | 498  | 96 -  | 198  | 695  | 27565  | 28060  |
| UN01739 | Rsa1.0.02788.1 | 870  | 27852  | 0         | 852  | 870  | 97 -  | 1    | 870  | 1460   | 2329   |
| UN01740 | Rsa1.0.00049.1 | 1108 | 167018 | 1.00E-157 | 288  | 289  | 99 -  | 821  | 1108 | 7082   | 7370   |
| UN01741 | Rsa1.0.00437.1 | 1260 | 84879  | 0         | 477  | 483  | 98 +  | 3    | 485  | 22654  | 23136  |
| UN01742 | Rsa1.0.04518.1 | 919  | 17005  | 1.00E-108 | 236  | 247  | 95 -  | 609  | 855  | 11964  | 12209  |
| UN01743 | Rsa1.0.00476.1 | 1064 | 280966 | 0         | 748  | 776  | 96 -  | 22   | 794  | 221860 | 222633 |
| UN01744 | Rsa1.0.00716.1 | 1275 | 67078  | 1.00E-123 | 233  | 236  | 98 -  | 1040 | 1275 | 27760  | 27995  |
| UN01745 | Rsa1.0.00407.1 | 1281 | 191544 | 0         | 426  | 426  | 100 - | 418  | 843  | 52956  | 53381  |
| UN01746 | Rsa1.0.01617.1 | 1213 | 42127  | 0         | 1210 | 1213 | 99 -  | 2    | 1213 | 2288   | 3500   |
| UN01747 | Rsa1.0.01985.1 | 782  | 36491  | 5.00E-61  | 202  | 228  | 88 -  | 291  | 506  | 1795   | 2018   |
| UN01748 | Rsa1.0.00778.1 | 853  | 196751 | 0         | 365  | 371  | 98 +  | 2    | 372  | 177849 | 178219 |
| UN01749 | Rsa1.0.00382.1 | 1051 | 251946 | 0         | 659  | 665  | 99 -  | 388  | 1051 | 172909 | 173573 |
| UN01750 | Rsa1.0.01143.1 | 1305 | 52456  | 0         | 496  | 503  | 98 +  | 86   | 588  | 44825  | 45327  |
| UN01751 | Rsa1.0.00168.1 | 1241 | 115870 | 0         | 1239 | 1239 | 100 + | 3    | 1241 | 16028  | 17266  |
| UN01752 | Rsa1.0.00029.1 | 1177 | 272992 | 0         | 614  | 640  | 95 +  | 560  | 1177 | 96813  | 97452  |
| UN01753 | Rsa1.0.02282.1 | 1021 | 163951 | 0         | 509  | 512  | 99 +  | 27   | 538  | 149562 | 150072 |

|         |                |      |        |           |      |      |       |      |      |        |        |
|---------|----------------|------|--------|-----------|------|------|-------|------|------|--------|--------|
| UN01754 | Rsa1.0_12341.1 | 848  | 5250   | 0         | 488  | 497  | 98 -  | 141  | 635  | 2120   | 2615   |
| UN01755 | Rsa1.0_01485.1 | 721  | 44797  | 1.00E-112 | 221  | 225  | 98 -  | 495  | 719  | 1279   | 1502   |
| UN01756 | Rsa1.0_00278.1 | 1441 | 231896 | 1.00E-167 | 312  | 314  | 99 -  | 562  | 873  | 71054  | 71367  |
| UN01757 | Rsa1.0_00101.1 | 843  | 267193 | 0         | 785  | 787  | 99 +  | 3    | 787  | 88976  | 89762  |
| UN01758 | Rsa1.0_01310.1 | 1069 | 164719 | 1.00E-141 | 270  | 275  | 98 +  | 2    | 272  | 11679  | 11953  |
| UN01759 | Rsa1.0_00002.1 | 1907 | 601661 | 0         | 433  | 440  | 98 -  | 1466 | 1905 | 124252 | 124691 |
| UN01760 | Rsa1.0_08220.1 | 918  | 7701   | 0         | 858  | 887  | 96 +  | 29   | 914  | 767    | 1653   |
| UN01761 | Rsa1.0_21221.1 | 1166 | 1224   | 0         | 572  | 601  | 95 -  | 413  | 1010 | 552    | 1149   |
| UN01762 | Rsa1.0_06581.1 | 774  | 10722  | 0         | 463  | 474  | 97 +  | 306  | 774  | 1      | 474    |
| UN01763 | Rsa1.0_01604.1 | 840  | 42461  | 0         | 457  | 476  | 96 -  | 359  | 821  | 40151  | 40626  |
| UN01764 | Rsa1.0_00101.1 | 1177 | 267193 | 0         | 1123 | 1132 | 99 -  | 2    | 1133 | 253253 | 254383 |
| UN01765 | Rsa1.0_01199.1 | 820  | 163576 | 0         | 439  | 444  | 98 -  | 3    | 446  | 154725 | 155168 |
| UN01766 | Rsa1.0_03953.1 | 1092 | 19889  | 1.00E-114 | 246  | 260  | 94 -  | 824  | 1083 | 220    | 469    |
| UN01767 | Rsa1.0_00269.1 | 1047 | 341668 | 0         | 503  | 519  | 96 +  | 528  | 1045 | 18901  | 19419  |
| UN01768 | Rsa1.0_02910.1 | 835  | 26843  | 0         | 831  | 835  | 99 +  | 1    | 834  | 15208  | 16042  |
| UN01769 | Rsa1.0_04059.1 | 812  | 19323  | 1.00E-178 | 338  | 345  | 97 +  | 2    | 346  | 13812  | 14156  |
| UN01770 | Rsa1.0_00053.1 | 1056 | 263459 | 1.00E-126 | 274  | 288  | 95 +  | 3    | 283  | 49103  | 49390  |
| UN01771 | Rsa1.0_02071.1 | 800  | 35409  | 1.00E-154 | 280  | 281  | 99 +  | 3    | 283  | 5478   | 5758   |
| UN01772 | Rsa1.0_00714.1 | 1082 | 67187  | 0         | 525  | 536  | 97 +  | 352  | 886  | 19675  | 20210  |
| UN01773 | Rsa1.0_00296.1 | 729  | 97854  | 1.00E-128 | 260  | 269  | 96 -  | 131  | 399  | 46769  | 47037  |
| UN01774 | Rsa1.0_08595.1 | 720  | 7147   | 0         | 719  | 719  | 100 - | 2    | 720  | 4709   | 5427   |
| UN01775 | Rsa1.0_01070.1 | 1033 | 55099  | 6.00E-49  | 100  | 100  | 100 - | 391  | 490  | 33925  | 34024  |
| UN01776 | Rsa1.0_02609.1 | 745  | 29600  | 0         | 668  | 728  | 91 +  | 20   | 735  | 3130   | 3857   |
| UN01777 | Rsa1.0_00128.1 | 1256 | 228675 | 1.00E-169 | 372  | 395  | 94 +  | 3    | 397  | 1241   | 1626   |
| UN01778 | Rsa1.0_00484.1 | 789  | 203294 | 1.00E-156 | 283  | 284  | 99 -  | 48   | 331  | 154484 | 154767 |
| UN01779 | Rsa1.0_02562.1 | 988  | 30061  | 1.00E-160 | 329  | 342  | 96 +  | 645  | 986  | 27953  | 28293  |
| UN01780 | Rsa1.0_11318.1 | 720  | 5544   | 0         | 714  | 719  | 99 +  | 2    | 720  | 661    | 1379   |
| UN01781 | Rsa1.0_03341.1 | 872  | 23604  | 0         | 487  | 498  | 97 -  | 2    | 499  | 2950   | 3447   |
| UN01782 | Rsa1.0_02711.1 | 1599 | 28475  | 0         | 845  | 883  | 95 -  | 713  | 1595 | 8767   | 9649   |
| UN01783 | Rsa1.0_10304.1 | 919  | 5896   | 1.00E-163 | 321  | 330  | 97 -  | 22   | 348  | 4798   | 5127   |
| UN01784 | Rsa1.0_00554.1 | 786  | 150953 | 0         | 769  | 781  | 98 -  | 3    | 778  | 53260  | 54040  |
| UN01785 | Rsa1.0_00341.1 | 1139 | 249309 | 0         | 546  | 557  | 98 +  | 3    | 557  | 21522  | 22077  |
| UN01786 | Rsa1.0_03890.1 | 1010 | 20223  | 0         | 983  | 1016 | 96 +  | 3    | 1010 | 1388   | 2400   |
| UN01787 | Rsa1.0_00701.1 | 1282 | 67691  | 0         | 632  | 636  | 99 -  | 646  | 1281 | 40825  | 41457  |
| UN01788 | Rsa1.0_00859.1 | 836  | 61795  | 0         | 468  | 483  | 96 +  | 292  | 774  | 19663  | 20145  |
| UN01789 | Rsa1.0_07524.1 | 1319 | 9199   | 1.00E-123 | 275  | 292  | 94 +  | 362  | 653  | 7175   | 7466   |
| UN01790 | Rsa1.0_00010.1 | 1099 | 294827 | 0         | 1094 | 1100 | 99 -  | 2    | 1099 | 195490 | 196589 |
| UN01791 | Rsa1.0_32202.1 | 1090 | 707    | 0         | 436  | 442  | 98 -  | 98   | 537  | 266    | 707    |
| UN01792 | Rsa1.0_00896.1 | 524  | 60509  | 1.00E-102 | 189  | 189  | 100 + | 336  | 524  | 52074  | 52262  |



|         |                |      |        |           |      |      |       |     |      |        |        |
|---------|----------------|------|--------|-----------|------|------|-------|-----|------|--------|--------|
| UN01793 | Rsa1.0_00740.1 | 606  | 215972 | 1.00E-135 | 316  | 337  | 93 +  | 1   | 334  | 48443  | 48776  |
| UN01794 | Rsa1.0_05762.1 | 1335 | 12715  | 0         | 1294 | 1329 | 97 +  | 8   | 1335 | 8820   | 10148  |
| UN01795 | Rsa1.0_04027.1 | 1480 | 19501  | 0         | 935  | 983  | 95 +  | 510 | 1479 | 14735  | 15716  |
| UN01796 | Rsa1.0_00029.1 | 1077 | 272992 | 0         | 587  | 591  | 99 +  | 487 | 1077 | 3110   | 3700   |
| UN01797 | Rsa1.0_05611.1 | 711  | 13193  | 1.00E-107 | 217  | 222  | 97 -  | 7   | 228  | 8443   | 8663   |
| UN01798 | Rsa1.0_00165.1 | 665  | 116466 | 1.00E-86  | 196  | 205  | 95 -  | 5   | 205  | 27427  | 27631  |
| UN01799 | Rsa1.0_02053.1 | 1226 | 35554  | 0         | 1225 | 1226 | 99 -  | 1   | 1226 | 6025   | 7250   |
| UN01800 | Rsa1.0_01951.1 | 772  | 36941  | 9.00E-69  | 133  | 133  | 100 + | 1   | 133  | 8473   | 8605   |
| UN01801 | Rsa1.0_00015.1 | 639  | 561803 | 1.00E-155 | 498  | 579  | 86 +  | 79  | 635  | 483083 | 483641 |
| UN01802 | Rsa1.0_00758.1 | 1280 | 65477  | 0         | 1264 | 1284 | 98 -  | 2   | 1280 | 38804  | 40087  |
| UN01803 | Rsa1.0_02054.1 | 690  | 35548  | 0         | 526  | 565  | 93 +  | 11  | 563  | 32519  | 33062  |
| UN01804 | Rsa1.0_00122.1 | 824  | 265937 | 1.00E-165 | 322  | 329  | 97 -  | 6   | 331  | 223063 | 223390 |
| UN01805 | Rsa1.0_00060.1 | 785  | 502678 | 9.00E-63  | 126  | 127  | 99 +  | 248 | 374  | 493391 | 493517 |
| UN01806 | Rsa1.0_00454.1 | 876  | 216970 | 0         | 676  | 684  | 98 +  | 193 | 876  | 155884 | 156567 |
| UN01807 | Rsa1.0_01193.1 | 951  | 51147  | 0         | 324  | 324  | 100 + | 628 | 951  | 18602  | 18925  |
| UN01808 | Rsa1.0_04934.1 | 521  | 143962 | 0         | 459  | 494  | 92 -  | 3   | 494  | 141943 | 142435 |
| UN01809 | Rsa1.0_01762.1 | 1039 | 39682  | 0         | 399  | 412  | 96 -  | 519 | 928  | 6859   | 7267   |
| UN01810 | Rsa1.0_13863.1 | 838  | 4186   | 0         | 561  | 579  | 96 +  | 261 | 837  | 3143   | 3719   |
| UN01811 | Rsa1.0_05013.1 | 803  | 15131  | 0         | 390  | 396  | 98 -  | 364 | 756  | 6261   | 6656   |
| UN01812 | Rsa1.0_00387.1 | 817  | 495407 | 1.00E-125 | 233  | 235  | 99 -  | 471 | 705  | 340053 | 340287 |
| UN01813 | Rsa1.0_01211.1 | 1292 | 50646  | 0         | 692  | 697  | 99 +  | 596 | 1292 | 41800  | 42496  |
| UN01814 | Rsa1.0_05162.1 | 798  | 14631  | 1.00E-122 | 254  | 263  | 96 +  | 516 | 778  | 4180   | 4441   |
| UN01815 | Rsa1.0_05293.1 | 764  | 14237  | 1.00E-168 | 321  | 327  | 98 -  | 3   | 329  | 8559   | 8884   |
| UN01816 | Rsa1.0_00825.1 | 730  | 62855  | 0         | 616  | 624  | 98 +  | 110 | 730  | 940    | 1563   |
| UN01817 | Rsa1.0_19408.1 | 676  | 1436   | 1.00E-104 | 241  | 257  | 93 +  | 418 | 674  | 391    | 638    |
| UN01818 | Rsa1.0_00747.1 | 775  | 66030  | 1.00E-143 | 267  | 270  | 98 -  | 206 | 475  | 36804  | 37073  |
| UN01819 | Rsa1.0_05428.1 | 1246 | 13789  | 1.00E-135 | 273  | 281  | 97 -  | 967 | 1246 | 7932   | 8212   |
| UN01820 | Rsa1.0_00108.1 | 890  | 478491 | 0         | 427  | 441  | 96 +  | 34  | 471  | 458911 | 459346 |
| UN01821 | Rsa1.0_02802.1 | 1323 | 27736  | 0         | 665  | 705  | 94 +  | 1   | 696  | 9984   | 10678  |
| UN01822 | Rsa1.0_03985.1 | 904  | 19704  | 0         | 879  | 909  | 96 -  | 1   | 903  | 15045  | 15953  |
| UN01823 | Rsa1.0_02939.1 | 1974 | 26595  | 0         | 559  | 604  | 92 +  | 989 | 1592 | 13646  | 14222  |
| UN01824 | Rsa1.0_00128.1 | 1143 | 228675 | 0         | 467  | 477  | 97 +  | 283 | 759  | 69485  | 69961  |
| UN01825 | Rsa1.0_00321.1 | 770  | 95671  | 0         | 767  | 769  | 99 +  | 2   | 770  | 9617   | 10384  |
| UN01826 | Rsa1.0_06164.1 | 1281 | 11584  | 0         | 440  | 444  | 99 -  | 1   | 442  | 3193   | 3635   |
| UN01827 | Rsa1.0_01134.1 | 800  | 52829  | 0         | 778  | 799  | 97 +  | 2   | 800  | 25944  | 26739  |
| UN01828 | Rsa1.0_02320.1 | 815  | 32575  | 9.00E-66  | 143  | 148  | 96 -  | 83  | 230  | 24899  | 25046  |
| UN01829 | Rsa1.0_00286.1 | 787  | 98709  | 1.00E-102 | 237  | 252  | 94 -  | 50  | 301  | 13001  | 13250  |
| UN01830 | Rsa1.0_00025.1 | 1282 | 277312 | 0         | 495  | 495  | 100 + | 301 | 795  | 97736  | 98230  |
| UN01831 | Rsa1.0_20851.1 | 1200 | 1263   | 6.00E-40  | 181  | 212  | 85 +  | 809 | 1011 | 616    | 824    |

|         |                |      |        |           |     |     |       |      |      |        |        |
|---------|----------------|------|--------|-----------|-----|-----|-------|------|------|--------|--------|
| UN01832 | Rsa1.0.22307.1 | 802  | 1132   | 0         | 342 | 344 | 99 +  | 459  | 802  | 26     | 369    |
| UN01833 | Rsa1.0.01517.1 | 1201 | 44170  | 0         | 850 | 866 | 98 -  | 1    | 866  | 16545  | 17410  |
| UN01834 | Rsa1.0.00157.1 | 1444 | 245832 | 1.00E-167 | 342 | 352 | 97 -  | 2    | 351  | 16951  | 17298  |
| UN01835 | Rsa1.0.06803.1 | 866  | 10330  | 0         | 412 | 423 | 97 +  | 9    | 430  | 9670   | 10084  |
| UN01836 | Rsa1.0.00300.1 | 1286 | 97747  | 0         | 539 | 562 | 95 -  | 662  | 1214 | 81513  | 82074  |
| UN01837 | Rsa1.0.00374.1 | 848  | 165738 | 0         | 361 | 369 | 97 -  | 1    | 369  | 131321 | 131684 |
| UN01838 | Rsa1.0.00007.1 | 795  | 239325 | 1.00E-120 | 222 | 223 | 99 +  | 530  | 752  | 117634 | 117856 |
| UN01839 | Rsa1.0.00011.1 | 827  | 225044 | 0         | 660 | 662 | 99 +  | 2    | 661  | 213213 | 213874 |
| UN01840 | Rsa1.0.00320.1 | 285  | 95784  | 3.00E-85  | 163 | 164 | 99 -  | 121  | 284  | 37735  | 37898  |
| UN01841 | Rsa1.0.00034.1 | 1469 | 260119 | 0         | 456 | 459 | 99 +  | 1008 | 1466 | 28435  | 28892  |
| UN01842 | Rsa1.0.00198.1 | 1035 | 222963 | 0         | 428 | 429 | 99 -  | 605  | 1033 | 139103 | 139531 |
| UN01843 | Rsa1.0.00276.1 | 1243 | 100160 | 0         | 407 | 410 | 99 +  | 348  | 757  | 61194  | 61603  |
| UN01844 | Rsa1.0.01020.1 | 1147 | 56619  | 1.00E-122 | 248 | 255 | 97 +  | 894  | 1147 | 20374  | 20628  |
| UN01845 | Rsa1.0.01515.1 | 726  | 170864 | 0         | 690 | 744 | 92 +  | 1    | 725  | 126735 | 127470 |
| UN01846 | Rsa1.0.00069.1 | 884  | 403561 | 0         | 879 | 892 | 98 -  | 1    | 884  | 48378  | 49269  |
| UN01847 | Rsa1.0.00210.1 | 1027 | 108424 | 0         | 429 | 432 | 99 -  | 594  | 1025 | 50678  | 51109  |
| UN01848 | Rsa1.0.03391.1 | 828  | 23251  | 1.00E-165 | 300 | 302 | 99 +  | 1    | 302  | 7096   | 7397   |
| UN01849 | Rsa1.0.00793.1 | 985  | 64103  | 1.00E-132 | 242 | 243 | 99 -  | 743  | 985  | 13030  | 13272  |
| UN01850 | Rsa1.0.04845.1 | 1405 | 15747  | 1.00E-111 | 220 | 225 | 97 +  | 171  | 395  | 4169   | 4393   |
| UN01851 | Rsa1.0.00185.1 | 979  | 248445 | 3.00E-60  | 122 | 123 | 99 +  | 701  | 823  | 2901   | 3023   |
| UN01852 | Rsa1.0.31152.1 | 1022 | 735    | 0         | 615 | 620 | 99 -  | 307  | 925  | 116    | 735    |
| UN01853 | Rsa1.0.00442.1 | 1086 | 84596  | 0         | 359 | 360 | 99 -  | 3    | 362  | 63588  | 63947  |
| UN01854 | Rsa1.0.00675.1 | 725  | 145590 | 0         | 445 | 449 | 99 +  | 4    | 452  | 45278  | 45726  |
| UN01855 | Rsa1.0.14950.1 | 843  | 2940   | 0         | 835 | 851 | 98 +  | 1    | 843  | 1295   | 2144   |
| UN01856 | Rsa1.0.02474.1 | 862  | 31076  | 1.00E-178 | 363 | 374 | 97 -  | 1    | 372  | 29475  | 29844  |
| UN01857 | Rsa1.0.00190.1 | 751  | 318240 | 0         | 521 | 551 | 94 -  | 3    | 549  | 20540  | 21082  |
| UN01858 | Rsa1.0.02314.1 | 798  | 32642  | 0         | 781 | 799 | 97 +  | 3    | 797  | 18742  | 19540  |
| UN01859 | Rsa1.0.02946.1 | 672  | 26537  | 0         | 470 | 472 | 99 +  | 185  | 656  | 26012  | 26483  |
| UN01860 | Rsa1.0.01136.1 | 678  | 52724  | 1.00E-115 | 213 | 214 | 99 -  | 249  | 462  | 49049  | 49262  |
| UN01861 | Rsa1.0.05122.1 | 1149 | 14791  | 0         | 379 | 379 | 100 - | 411  | 789  | 7708   | 8086   |
| UN01862 | Rsa1.0.00133.1 | 785  | 123768 | 0         | 464 | 468 | 99 -  | 3    | 470  | 25129  | 25596  |
| UN01863 | Rsa1.0.00361.1 | 924  | 91181  | 1.00E-138 | 270 | 277 | 97 +  | 161  | 437  | 12174  | 12450  |
| UN01864 | Rsa1.0.01134.1 | 1198 | 52829  | 0         | 402 | 404 | 99 +  | 793  | 1196 | 43276  | 43679  |
| UN01865 | Rsa1.0.00363.1 | 494  | 90968  | 1.00E-149 | 298 | 308 | 96 -  | 10   | 317  | 22565  | 22872  |
| UN01866 | Rsa1.0.01319.1 | 979  | 48273  | 1.00E-157 | 355 | 382 | 92 -  | 596  | 977  | 10916  | 11279  |
| UN01867 | Rsa1.0.18598.1 | 763  | 1567   | 0         | 566 | 629 | 89 -  | 63   | 666  | 258    | 885    |
| UN01868 | Rsa1.0.02303.1 | 1333 | 32818  | 4.00E-32  | 198 | 240 | 82 +  | 111  | 350  | 3298   | 3537   |
| UN01869 | Rsa1.0.04247.1 | 1083 | 18295  | 0         | 898 | 971 | 92 +  | 112  | 1078 | 378    | 1334   |
| UN01870 | Rsa1.0.01388.1 | 1256 | 46741  | 0         | 472 | 474 | 99 -  | 362  | 835  | 20000  | 20473  |

|         |                |      |        |           |      |      |       |     |      |        |        |
|---------|----------------|------|--------|-----------|------|------|-------|-----|------|--------|--------|
| UN01871 | Rsa1.0.03767.1 | 1410 | 20969  | 0         | 1405 | 1409 | 99 -  | 1   | 1409 | 9206   | 10610  |
| UN01872 | Rsa1.0.00029.1 | 1124 | 272992 | 0         | 719  | 721  | 99 -  | 112 | 832  | 248566 | 249286 |
| UN01873 | Rsa1.0.00107.1 | 1038 | 431659 | 1.00E-154 | 291  | 295  | 98 +  | 742 | 1036 | 355792 | 356084 |
| UN01874 | Rsa1.0.05880.1 | 740  | 12343  | 0         | 434  | 446  | 97 -  | 1   | 446  | 5495   | 5940   |
| UN01875 | Rsa1.0.29122.1 | 1537 | 792    | 0         | 394  | 397  | 99 +  | 988 | 1384 | 396    | 792    |
| UN01876 | Rsa1.0.02787.1 | 922  | 27872  | 0         | 907  | 931  | 97 -  | 2   | 922  | 542    | 1466   |
| UN01877 | Rsa1.0.01768.1 | 774  | 138463 | 1.00E-174 | 313  | 314  | 99 -  | 1   | 314  | 119313 | 119626 |
| UN01878 | Rsa1.0.00556.1 | 1233 | 207212 | 1.00E-145 | 406  | 454  | 89 +  | 3   | 439  | 33418  | 33859  |
| UN01879 | Rsa1.0.00875.1 | 827  | 61371  | 0         | 825  | 844  | 97 -  | 3   | 827  | 3319   | 4162   |
| UN01880 | Rsa1.0.03781.1 | 826  | 20891  | 1.00E-119 | 255  | 267  | 95 -  | 307 | 570  | 13363  | 13629  |
| UN01881 | Rsa1.0.00185.1 | 1067 | 248445 | 0         | 906  | 970  | 93 -  | 1   | 960  | 204443 | 205411 |
| UN01882 | Rsa1.0.05611.1 | 819  | 13193  | 0         | 574  | 575  | 99 +  | 2   | 576  | 5087   | 5661   |
| UN01883 | Rsa1.0.01296.1 | 458  | 49035  | 1.00E-51  | 150  | 167  | 89 -  | 87  | 253  | 8439   | 8595   |
| UN01884 | Rsa1.0.00377.1 | 788  | 90038  | 0         | 423  | 434  | 97 -  | 3   | 434  | 12014  | 12443  |
| UN01885 | Rsa1.0.03964.1 | 1193 | 19835  | 0         | 873  | 907  | 96 -  | 293 | 1193 | 7210   | 8113   |
| UN01886 | Rsa1.0.01303.1 | 899  | 48853  | 1.00E-125 | 333  | 367  | 90 +  | 179 | 544  | 16242  | 16598  |
| UN01887 | Rsa1.0.00536.1 | 827  | 77199  | 1.00E-150 | 330  | 351  | 94 +  | 7   | 357  | 42224  | 42557  |
| UN01888 | Rsa1.0.00835.1 | 891  | 278058 | 0         | 574  | 574  | 100 + | 3   | 576  | 138159 | 138732 |
| UN01889 | Rsa1.0.06253.1 | 911  | 11385  | 0         | 367  | 373  | 98 +  | 539 | 911  | 7588   | 7960   |
| UN01890 | Rsa1.0.00813.1 | 855  | 63202  | 1.00E-129 | 289  | 306  | 94 +  | 1   | 300  | 10858  | 11162  |
| UN01891 | Rsa1.0.00807.1 | 790  | 63607  | 7.00E-85  | 169  | 172  | 98 -  | 494 | 665  | 46630  | 46801  |
| UN01892 | Rsa1.0.03524.1 | 720  | 22297  | 0         | 351  | 353  | 99 +  | 1   | 353  | 18608  | 18959  |
| UN01893 | Rsa1.0.18047.1 | 1313 | 1682   | 0         | 370  | 371  | 99 -  | 1   | 370  | 162    | 532    |
| UN01894 | Rsa1.0.03602.1 | 777  | 21847  | 0         | 376  | 385  | 97 -  | 42  | 425  | 6953   | 7336   |
| UN01895 | Rsa1.0.00527.1 | 1119 | 77733  | 1.00E-134 | 345  | 375  | 92 +  | 228 | 598  | 54819  | 55189  |
| UN01896 | Rsa1.0.00157.1 | 542  | 245832 | 1.00E-126 | 241  | 244  | 98 -  | 1   | 244  | 5489   | 5730   |
| UN01897 | Rsa1.0.00481.1 | 709  | 81316  | 1.00E-112 | 236  | 245  | 96 +  | 20  | 260  | 36809  | 37051  |
| UN01898 | Rsa1.0.03236.1 | 732  | 24441  | 0         | 518  | 531  | 97 +  | 202 | 732  | 5413   | 5943   |
| UN01899 | Rsa1.0.01719.1 | 860  | 40388  | 0         | 789  | 810  | 97 +  | 2   | 810  | 31928  | 32737  |
| UN01900 | Rsa1.0.00066.1 | 1277 | 152418 | 1.00E-133 | 244  | 245  | 99 +  | 1   | 245  | 98253  | 98497  |
| UN01901 | Rsa1.0.00652.1 | 1111 | 70089  | 0         | 554  | 582  | 95 -  | 1   | 582  | 47920  | 48498  |
| UN01902 | Rsa1.0.01937.1 | 716  | 37147  | 1.00E-103 | 197  | 199  | 98 +  | 1   | 199  | 30210  | 30408  |
| UN01903 | Rsa1.0.00431.1 | 516  | 85391  | 0         | 489  | 509  | 96 -  | 8   | 516  | 6275   | 6783   |
| UN01904 | Rsa1.0.03774.1 | 529  | 20932  | 1.00E-123 | 310  | 335  | 92 +  | 1   | 323  | 9822   | 10154  |
| UN01905 | Rsa1.0.05110.1 | 1119 | 14814  | 1.00E-154 | 303  | 312  | 97 +  | 242 | 553  | 5291   | 5602   |
| UN01906 | Rsa1.0.00367.1 | 1076 | 90750  | 0         | 1068 | 1075 | 99 +  | 1   | 1075 | 80559  | 81633  |
| UN01907 | Rsa1.0.00306.1 | 1108 | 146760 | 0         | 509  | 519  | 98 -  | 1   | 517  | 126933 | 127445 |
| UN01908 | Rsa1.0.02398.1 | 704  | 31766  | 0         | 394  | 394  | 100 + | 309 | 702  | 9658   | 10051  |
| UN01909 | Rsa1.0.01416.1 | 988  | 46262  | 0         | 442  | 448  | 98 +  | 3   | 449  | 21659  | 22105  |

|         |                |      |        |           |      |      |       |      |      |        |        |
|---------|----------------|------|--------|-----------|------|------|-------|------|------|--------|--------|
| UN01910 | Rsa1.0.00182.1 | 1380 | 142305 | 0         | 1045 | 1061 | 98 -  | 317  | 1377 | 52241  | 53301  |
| UN01911 | Rsa1.0.01371.1 | 942  | 47079  | 0         | 917  | 942  | 97 +  | 1    | 942  | 19897  | 20838  |
| UN01912 | Rsa1.0.00140.1 | 765  | 121541 | 0         | 638  | 640  | 99 -  | 8    | 647  | 60097  | 60736  |
| UN01913 | Rsa1.0.00007.1 | 737  | 239325 | 1.00E-180 | 338  | 344  | 98 -  | 360  | 703  | 118158 | 118501 |
| UN01914 | Rsa1.0.00045.1 | 891  | 328694 | 1.00E-140 | 277  | 285  | 97 -  | 434  | 718  | 162174 | 162458 |
| UN01915 | Rsa1.0.00016.1 | 989  | 831256 | 1.00E-161 | 311  | 318  | 97 -  | 100  | 414  | 429113 | 429430 |
| UN01916 | Rsa1.0.00673.1 | 1072 | 69325  | 1.00E-16  | 68   | 74   | 91 -  | 98   | 171  | 15476  | 15548  |
| UN01917 | Rsa1.0.02050.1 | 724  | 35570  | 1.00E-141 | 325  | 346  | 93 -  | 377  | 721  | 9337   | 9675   |
| UN01918 | Rsa1.0.01675.1 | 1576 | 41155  | 1.00E-177 | 327  | 331  | 98 +  | 1242 | 1572 | 9381   | 9711   |
| UN01919 | Rsa1.0.06125.1 | 817  | 11680  | 1.00E-27  | 154  | 182  | 84 +  | 1    | 179  | 3542   | 3722   |
| UN01920 | Rsa1.0.00132.1 | 1185 | 124299 | 0         | 731  | 755  | 96 +  | 434  | 1185 | 89996  | 90747  |
| UN01921 | Rsa1.0.00047.1 | 458  | 168582 | 1.00E-91  | 202  | 211  | 95 +  | 247  | 456  | 166425 | 166635 |
| UN01922 | Rsa1.0.05278.1 | 1409 | 14282  | 0         | 467  | 475  | 98 +  | 3    | 476  | 8860   | 9330   |
| UN01923 | Rsa1.0.01184.1 | 1255 | 51452  | 1.00E-167 | 365  | 387  | 94 -  | 12   | 391  | 42359  | 42732  |
| UN01924 | Rsa1.0.00221.1 | 958  | 106972 | 4.00E-90  | 172  | 173  | 99 -  | 195  | 367  | 64560  | 64732  |
| UN01925 | Rsa1.0.00251.1 | 1004 | 303968 | 2.00E-89  | 177  | 180  | 98 -  | 707  | 886  | 126181 | 126360 |
| UN01926 | Rsa1.0.03809.1 | 1178 | 20731  | 0         | 771  | 823  | 93 -  | 1    | 816  | 19080  | 19901  |
| UN01927 | Rsa1.0.00273.1 | 769  | 326186 | 5.00E-98  | 212  | 222  | 95 +  | 286  | 507  | 308381 | 308602 |
| UN01928 | Rsa1.0.00139.1 | 946  | 357786 | 0         | 325  | 325  | 100 + | 620  | 944  | 275224 | 275548 |
| UN01929 | Rsa1.0.02764.1 | 920  | 28142  | 0         | 429  | 439  | 97 -  | 3    | 439  | 24175  | 24610  |
| UN01930 | Rsa1.0.01293.1 | 1259 | 49139  | 1.00E-136 | 250  | 251  | 99 +  | 388  | 638  | 32799  | 33049  |
| UN01931 | Rsa1.0.00041.1 | 611  | 186197 | 1.00E-147 | 273  | 276  | 98 -  | 2    | 277  | 33784  | 34059  |
| UN01932 | Rsa1.0.00175.1 | 732  | 166121 | 0         | 451  | 461  | 97 -  | 1    | 461  | 67110  | 67569  |
| UN01933 | Rsa1.0.03711.1 | 1285 | 21237  | 1.00E-118 | 228  | 232  | 98 -  | 667  | 898  | 12134  | 12365  |
| UN01934 | Rsa1.0.00377.1 | 779  | 90038  | 0         | 511  | 528  | 96 +  | 6    | 530  | 79430  | 79953  |
| UN01935 | Rsa1.0.00706.1 | 1097 | 291570 | 0         | 521  | 528  | 98 -  | 1    | 527  | 182172 | 182699 |
| UN01936 | Rsa1.0.01080.1 | 1528 | 54752  | 0         | 1281 | 1305 | 98 +  | 1    | 1303 | 33269  | 34573  |
| UN01937 | Rsa1.0.05267.1 | 842  | 14319  | 1.00E-166 | 315  | 321  | 98 +  | 254  | 574  | 1130   | 1450   |
| UN01938 | Rsa1.0.00687.1 | 808  | 68494  | 0         | 686  | 696  | 98 +  | 3    | 698  | 42407  | 43102  |
| UN01939 | Rsa1.0.17040.1 | 568  | 1944   | 0         | 400  | 417  | 95 +  | 154  | 566  | 1207   | 1623   |
| UN01940 | Rsa1.0.03738.1 | 742  | 21071  | 0         | 710  | 749  | 94 -  | 6    | 742  | 19581  | 20321  |
| UN01941 | Rsa1.0.00861.1 | 571  | 61759  | 1.00E-126 | 251  | 256  | 98 +  | 49   | 302  | 1779   | 2033   |
| UN01942 | Rsa1.0.05412.1 | 573  | 13836  | 0         | 568  | 573  | 99 -  | 1    | 573  | 10164  | 10736  |
| UN01943 | Rsa1.0.33576.1 | 713  | 675    | 0         | 428  | 434  | 98 +  | 196  | 626  | 1      | 434    |
| UN01944 | Rsa1.0.00693.1 | 476  | 161311 | 0         | 460  | 479  | 96 +  | 1    | 476  | 47054  | 47526  |
| UN01945 | Rsa1.0.03488.1 | 1154 | 22556  | 1.00E-179 | 318  | 318  | 100 - | 681  | 998  | 13813  | 14130  |
| UN01946 | Rsa1.0.05700.1 | 539  | 12886  | 0         | 376  | 390  | 96 +  | 80   | 464  | 3841   | 4229   |
| UN01947 | Rsa1.0.01174.1 | 863  | 51696  | 0         | 511  | 530  | 96 -  | 132  | 654  | 12826  | 13354  |
| UN01948 | Rsa1.0.00449.1 | 1296 | 83863  | 0         | 760  | 787  | 96 -  | 510  | 1295 | 40367  | 41153  |

|         |                |      |        |           |      |      |       |     |      |        |        |
|---------|----------------|------|--------|-----------|------|------|-------|-----|------|--------|--------|
| UN01949 | Rsa1.0.02431.1 | 689  | 31504  | 0         | 410  | 415  | 98 -  | 7   | 418  | 26607  | 27021  |
| UN01950 | Rsa1.0.03565.1 | 955  | 22062  | 1.00E-105 | 234  | 246  | 95 +  | 709 | 954  | 3911   | 4154   |
| UN01951 | Rsa1.0.00518.1 | 1246 | 78360  | 0         | 635  | 681  | 93 -  | 1   | 666  | 76228  | 76895  |
| UN01952 | Rsa1.0.05815.1 | 295  | 12563  | 5.00E-93  | 219  | 231  | 94 -  | 41  | 266  | 9748   | 9978   |
| UN01953 | Rsa1.0.20439.1 | 1148 | 1305   | 0         | 464  | 488  | 95 +  | 1   | 488  | 696    | 1167   |
| UN01954 | Rsa1.0.00083.1 | 1083 | 442773 | 0         | 836  | 839  | 99 -  | 1   | 839  | 319657 | 320495 |
| UN01955 | Rsa1.0.04714.1 | 867  | 146738 | 0         | 513  | 528  | 97 -  | 46  | 573  | 139509 | 140034 |
| UN01956 | Rsa1.0.00796.1 | 808  | 63997  | 1.00E-125 | 239  | 242  | 98 +  | 145 | 386  | 58148  | 58387  |
| UN01957 | Rsa1.0.01595.1 | 1160 | 175383 | 1.00E-161 | 291  | 292  | 99 -  | 1   | 292  | 40568  | 40859  |
| UN01958 | Rsa1.0.00040.1 | 1034 | 324196 | 0         | 598  | 640  | 93 -  | 1   | 629  | 246545 | 247183 |
| UN01959 | Rsa1.0.02345.1 | 472  | 32337  | 2.00E-77  | 187  | 200  | 93 -  | 8   | 198  | 17017  | 17216  |
| UN01960 | Rsa1.0.02803.1 | 441  | 27715  | 2.00E-56  | 143  | 152  | 94 -  | 197 | 347  | 26242  | 26393  |
| UN01961 | Rsa1.0.00106.1 | 728  | 133916 | 0         | 438  | 454  | 96 +  | 7   | 460  | 5590   | 6037   |
| UN01962 | Rsa1.0.00689.1 | 1570 | 68305  | 0         | 1539 | 1572 | 97 +  | 1   | 1570 | 33607  | 35176  |
| UN01963 | Rsa1.0.01046.1 | 966  | 152989 | 1.00E-127 | 280  | 296  | 94 -  | 71  | 366  | 139680 | 139965 |
| UN01964 | Rsa1.0.00039.1 | 892  | 296927 | 0         | 574  | 585  | 98 +  | 311 | 886  | 229887 | 230470 |
| UN01965 | Rsa1.0.01243.1 | 738  | 50061  | 0         | 366  | 366  | 100 - | 373 | 738  | 49696  | 50061  |
| UN01966 | Rsa1.0.00848.1 | 607  | 152362 | 0         | 590  | 601  | 98 +  | 6   | 606  | 31053  | 31653  |
| UN01967 | Rsa1.0.00175.1 | 1183 | 166121 | 1.00E-158 | 353  | 374  | 94 +  | 3   | 373  | 139880 | 140253 |
| UN01968 | Rsa1.0.02872.1 | 415  | 27080  | 1.00E-133 | 295  | 312  | 94 +  | 1   | 312  | 9164   | 9469   |
| UN01969 | Rsa1.0.01910.1 | 1062 | 37405  | 0         | 547  | 555  | 98 -  | 2   | 555  | 9739   | 10292  |
| UN01970 | Rsa1.0.00322.1 | 1130 | 212233 | 1.00E-132 | 322  | 347  | 92 +  | 5   | 349  | 92240  | 92586  |
| UN01971 | Rsa1.0.37242.1 | 697  | 605    | 1.00E-156 | 325  | 337  | 96 +  | 83  | 413  | 1      | 337    |
| UN01972 | Rsa1.0.02146.1 | 781  | 34625  | 1.00E-129 | 318  | 343  | 92 +  | 1   | 342  | 30083  | 30420  |
| UN01973 | Rsa1.0.06482.1 | 911  | 10937  | 0         | 580  | 604  | 96 +  | 287 | 889  | 8154   | 8752   |
| UN01974 | Rsa1.0.02017.1 | 1442 | 35999  | 0         | 557  | 585  | 95 -  | 5   | 565  | 24178  | 24762  |
| UN01975 | Rsa1.0.00472.1 | 958  | 398134 | 1.00E-148 | 333  | 354  | 94 +  | 7   | 356  | 306510 | 306856 |
| UN01976 | Rsa1.0.13353.1 | 798  | 4894   | 1.00E-125 | 257  | 267  | 96 -  | 202 | 468  | 2419   | 2685   |
| UN01977 | Rsa1.0.01172.1 | 1197 | 51734  | 0         | 676  | 747  | 90 -  | 469 | 1191 | 42903  | 43637  |
| UN01978 | Rsa1.0.00162.1 | 1627 | 239935 | 0         | 502  | 514  | 97 +  | 822 | 1332 | 19100  | 19613  |
| UN01979 | Rsa1.0.03415.1 | 885  | 23117  | 0         | 844  | 887  | 95 +  | 1   | 884  | 20176  | 21060  |
| UN01980 | Rsa1.0.00281.1 | 587  | 99908  | 1.00E-158 | 323  | 335  | 96 +  | 5   | 339  | 68711  | 69044  |
| UN01981 | Rsa1.0.00022.1 | 884  | 200461 | 0         | 472  | 497  | 94 +  | 1   | 494  | 86012  | 86504  |
| UN01982 | Rsa1.0.00265.1 | 1175 | 220635 | 0         | 419  | 438  | 95 +  | 78  | 514  | 126859 | 127296 |
| UN01983 | Rsa1.0.04789.1 | 987  | 15981  | 0         | 929  | 969  | 95 -  | 1   | 962  | 14387  | 15354  |
| UN01984 | Rsa1.0.00010.1 | 1595 | 294827 | 0         | 749  | 833  | 89 +  | 15  | 825  | 210886 | 211689 |
| UN01985 | Rsa1.0.03521.1 | 1271 | 396204 | 1.00E-133 | 318  | 336  | 94 -  | 4   | 337  | 136464 | 136793 |
| UN01986 | Rsa1.0.00451.1 | 765  | 322533 | 1.00E-118 | 267  | 286  | 93 +  | 6   | 290  | 48180  | 48450  |
| UN01987 | Rsa1.0.00019.1 | 413  | 301669 | 1.00E-130 | 307  | 328  | 93 +  | 89  | 408  | 286292 | 286616 |

|         |                |      |        |           |      |      |      |      |      |        |        |
|---------|----------------|------|--------|-----------|------|------|------|------|------|--------|--------|
| UN01988 | Rsa1.0.01377.1 | 900  | 46967  | 0         | 545  | 558  | 97 + | 2    | 557  | 10095  | 10647  |
| UN01989 | Rsa1.0.00454.1 | 852  | 216970 | 0         | 842  | 852  | 98 - | 1    | 851  | 10432  | 11280  |
| UN01990 | Rsa1.0.00942.1 | 894  | 58873  | 0         | 442  | 474  | 93 + | 1    | 452  | 21602  | 22075  |
| UN01991 | Rsa1.0.00017.1 | 1410 | 752458 | 1.00E-152 | 294  | 301  | 97 - | 449  | 749  | 542268 | 542568 |
| UN01992 | Rsa1.0.03609.1 | 1047 | 21798  | 0         | 676  | 696  | 97 + | 360  | 1046 | 17383  | 18078  |
| UN01993 | Rsa1.0.01220.1 | 1079 | 161775 | 1.00E-116 | 312  | 348  | 89 - | 8    | 355  | 7326   | 7649   |
| UN01994 | Rsa1.0.00090.1 | 631  | 273859 | 0         | 589  | 641  | 91 - | 6    | 631  | 232559 | 233183 |
| UN01995 | Rsa1.0.00895.1 | 645  | 60615  | 1.00E-168 | 327  | 335  | 97 - | 7    | 341  | 39714  | 40047  |
| UN01996 | Rsa1.0.00018.1 | 1179 | 410899 | 0         | 544  | 549  | 99 - | 340  | 887  | 83637  | 84184  |
| UN01997 | Rsa1.0.02766.1 | 673  | 28128  | 0         | 502  | 528  | 95 - | 146  | 673  | 13420  | 13947  |
| UN01998 | Rsa1.0.04399.1 | 938  | 17543  | 0         | 414  | 417  | 99 - | 13   | 429  | 12162  | 12578  |
| UN01999 | Rsa1.0.00119.1 | 876  | 467509 | 4.00E-68  | 159  | 168  | 94 - | 464  | 631  | 403899 | 404066 |
| UN02000 | Rsa1.0.00175.1 | 1525 | 166121 | 1.00E-103 | 251  | 270  | 92 - | 3    | 272  | 28735  | 28992  |
| UN02001 | Rsa1.0.00046.1 | 1540 | 320315 | 1.00E-136 | 369  | 406  | 90 - | 1136 | 1538 | 124579 | 124974 |
| UN02002 | Rsa1.0.00130.1 | 1249 | 125737 | 0         | 586  | 588  | 99 + | 661  | 1247 | 88567  | 89154  |
| UN02003 | Rsa1.0.00602.1 | 1394 | 73302  | 0         | 951  | 996  | 95 + | 95   | 1086 | 30579  | 31574  |
| UN02004 | Rsa1.0.02481.1 | 651  | 31035  | 1.00E-128 | 301  | 324  | 92 + | 1    | 324  | 17776  | 18099  |
| UN02005 | Rsa1.0.00205.1 | 1122 | 193401 | 1.00E-113 | 226  | 231  | 97 + | 8    | 237  | 130115 | 130345 |
| UN02006 | Rsa1.0.04319.1 | 974  | 17944  | 9.00E-82  | 158  | 159  | 99 + | 814  | 972  | 16954  | 17112  |
| UN02007 | Rsa1.0.00144.1 | 962  | 120708 | 0         | 404  | 411  | 98 - | 1    | 407  | 68637  | 69047  |
| UN02008 | Rsa1.0.02280.1 | 894  | 33063  | 0         | 389  | 403  | 96 - | 490  | 892  | 106    | 508    |
| UN02009 | Rsa1.0.02911.1 | 1463 | 142461 | 0         | 618  | 632  | 97 - | 1    | 627  | 23404  | 24034  |
| UN02010 | Rsa1.0.00505.1 | 1239 | 79323  | 1.00E-125 | 237  | 240  | 98 - | 839  | 1078 | 74685  | 74924  |
| UN02011 | Rsa1.0.03088.1 | 545  | 25476  | 0         | 400  | 411  | 97 - | 1    | 409  | 507    | 917    |
| UN02012 | Rsa1.0.06720.1 | 907  | 10473  | 0         | 698  | 719  | 97 + | 145  | 860  | 3962   | 4677   |
| UN02013 | Rsa1.0.03436.1 | 671  | 22958  | 0         | 500  | 526  | 95 + | 48   | 573  | 3709   | 4216   |
| UN02014 | Rsa1.0.07381.1 | 913  | 9488   | 0         | 906  | 912  | 99 + | 1    | 911  | 8152   | 9063   |
| UN02015 | Rsa1.0.00923.1 | 1052 | 153678 | 1.00E-159 | 297  | 301  | 98 - | 3    | 303  | 21396  | 21696  |
| UN02016 | Rsa1.0.01700.1 | 944  | 40745  | 0         | 920  | 942  | 97 - | 3    | 943  | 18560  | 19501  |
| UN02017 | Rsa1.0.00077.1 | 1067 | 145005 | 1.00E-150 | 308  | 321  | 95 + | 2    | 317  | 75404  | 75724  |
| UN02018 | Rsa1.0.00773.1 | 1403 | 64839  | 0         | 1272 | 1334 | 95 - | 73   | 1395 | 8132   | 9456   |
| UN02019 | Rsa1.0.00009.1 | 2096 | 232558 | 0         | 658  | 676  | 97 + | 1281 | 1956 | 164054 | 164723 |
| UN02020 | Rsa1.0.14271.1 | 1381 | 3591   | 0         | 1012 | 1055 | 95 + | 2    | 1056 | 2537   | 3591   |
| UN02021 | Rsa1.0.00056.1 | 866  | 332604 | 1.00E-159 | 395  | 433  | 91 + | 451  | 866  | 206057 | 206478 |
| UN02022 | Rsa1.0.04734.1 | 349  | 16184  | 1.00E-177 | 342  | 350  | 97 - | 1    | 349  | 4018   | 4367   |
| UN02023 | Rsa1.0.00330.1 | 1251 | 94666  | 0         | 1202 | 1263 | 95 - | 1    | 1247 | 34830  | 36092  |
| UN02024 | Rsa1.0.05730.1 | 1127 | 12798  | 1.00E-34  | 153  | 178  | 85 - | 439  | 616  | 12287  | 12461  |
| UN02025 | Rsa1.0.00240.1 | 2114 | 104175 | 0         | 1039 | 1045 | 99 - | 1075 | 2113 | 72543  | 73587  |
| UN02026 | Rsa1.0.00321.1 | 917  | 95671  | 0         | 352  | 354  | 99 - | 1    | 353  | 40671  | 41024  |

|         |                |      |        |           |     |     |       |      |      |        |        |
|---------|----------------|------|--------|-----------|-----|-----|-------|------|------|--------|--------|
| UN02027 | Rsa1.0.01140.1 | 1288 | 52586  | 1.00E-172 | 336 | 344 | 97 +  | 946  | 1286 | 33897  | 34238  |
| UN02028 | Rsa1.0.00059.1 | 1127 | 159650 | 1.00E-119 | 252 | 260 | 96 -  | 869  | 1127 | 147770 | 148025 |
| UN02029 | Rsa1.0.00870.1 | 548  | 61606  | 0         | 451 | 470 | 95 +  | 3    | 470  | 26357  | 26825  |
| UN02030 | Rsa1.0.01269.1 | 720  | 49622  | 0         | 673 | 693 | 97 +  | 28   | 720  | 13153  | 13844  |
| UN02031 | Rsa1.0.00071.1 | 972  | 345714 | 1.00E-172 | 365 | 382 | 95 -  | 591  | 972  | 71154  | 71533  |
| UN02032 | Rsa1.0.11907.1 | 830  | 5374   | 0         | 437 | 455 | 96 -  | 1    | 455  | 1101   | 1551   |
| UN02033 | Rsa1.0.02051.1 | 748  | 35564  | 1.00E-129 | 305 | 324 | 94 +  | 3    | 319  | 22594  | 22913  |
| UN02034 | Rsa1.0.00102.1 | 1121 | 135497 | 0         | 946 | 975 | 97 -  | 154  | 1120 | 60039  | 61013  |
| UN02035 | Rsa1.0.00294.1 | 1119 | 144860 | 0         | 360 | 367 | 98 -  | 2    | 368  | 68768  | 69134  |
| UN02036 | Rsa1.0.00123.1 | 1022 | 325650 | 0         | 633 | 647 | 97 +  | 296  | 942  | 272132 | 272778 |
| UN02037 | Rsa1.0.06019.1 | 1433 | 11916  | 0         | 567 | 571 | 99 +  | 171  | 740  | 1918   | 2488   |
| UN02038 | Rsa1.0.01228.1 | 545  | 50238  | 0         | 349 | 352 | 99 -  | 194  | 545  | 1700   | 2051   |
| UN02039 | Rsa1.0.03394.1 | 731  | 23247  | 0         | 375 | 391 | 95 -  | 54   | 443  | 1931   | 2321   |
| UN02040 | Rsa1.0.28959.1 | 789  | 798    | 0         | 513 | 530 | 96 +  | 3    | 532  | 273    | 798    |
| UN02041 | Rsa1.0.00703.1 | 1158 | 67597  | 0         | 412 | 421 | 97 -  | 738  | 1158 | 30616  | 31035  |
| UN02042 | Rsa1.0.00857.1 | 972  | 61904  | 0         | 607 | 640 | 94 +  | 2    | 638  | 44482  | 45110  |
| UN02043 | Rsa1.0.02159.1 | 634  | 34471  | 0         | 535 | 540 | 99 -  | 1    | 540  | 32493  | 33028  |
| UN02044 | Rsa1.0.00121.1 | 589  | 278029 | 6.00E-88  | 171 | 173 | 98 +  | 240  | 412  | 263661 | 263833 |
| UN02045 | Rsa1.0.03297.1 | 680  | 23969  | 0         | 473 | 478 | 98 +  | 3    | 476  | 8203   | 8680   |
| UN02046 | Rsa1.0.02400.1 | 555  | 31750  | 0         | 541 | 555 | 97 +  | 1    | 555  | 12369  | 12910  |
| UN02047 | Rsa1.0.01431.1 | 1140 | 167877 | 2.00E-79  | 163 | 167 | 97 +  | 445  | 611  | 16242  | 16408  |
| UN02048 | Rsa1.0.04139.1 | 707  | 18883  | 1.00E-110 | 375 | 429 | 87 -  | 287  | 704  | 13205  | 13619  |
| UN02049 | Rsa1.0.02347.1 | 1355 | 32332  | 0         | 355 | 356 | 99 -  | 2    | 356  | 25631  | 25986  |
| UN02050 | Rsa1.0.05547.1 | 1159 | 13369  | 0         | 564 | 583 | 96 +  | 578  | 1159 | 919    | 1489   |
| UN02051 | Rsa1.0.06578.1 | 1545 | 10726  | 0         | 486 | 486 | 100 - | 1060 | 1545 | 1059   | 1544   |
| UN02052 | Rsa1.0.00142.1 | 867  | 121474 | 0         | 430 | 450 | 95 +  | 368  | 812  | 62984  | 63430  |
| UN02053 | Rsa1.0.05737.1 | 813  | 12778  | 1.00E-174 | 442 | 474 | 93 +  | 349  | 813  | 307    | 776    |
| UN02054 | Rsa1.0.00336.1 | 764  | 445051 | 0         | 392 | 412 | 95 -  | 3    | 413  | 161052 | 161459 |
| UN02055 | Rsa1.0.34294.1 | 1470 | 660    | 1.00E-173 | 318 | 321 | 99 -  | 1075 | 1395 | 1      | 321    |
| UN02056 | Rsa1.0.03028.1 | 1061 | 25872  | 1.00E-159 | 285 | 285 | 100 - | 704  | 988  | 20174  | 20458  |
| UN02057 | Rsa1.0.00694.1 | 1454 | 68074  | 1.00E-125 | 228 | 228 | 100 + | 1227 | 1454 | 4300   | 4527   |
| UN02058 | Rsa1.0.00377.1 | 958  | 90038  | 0         | 490 | 503 | 97 -  | 1    | 502  | 80774  | 81276  |
| UN02059 | Rsa1.0.00088.1 | 1076 | 141341 | 0         | 694 | 716 | 96 +  | 1    | 711  | 45804  | 46517  |
| UN02060 | Rsa1.0.00039.1 | 1265 | 296927 | 8.00E-86  | 180 | 186 | 96 +  | 842  | 1027 | 113194 | 113379 |
| UN02061 | Rsa1.0.00119.1 | 1103 | 467509 | 0         | 377 | 377 | 100 - | 727  | 1103 | 107065 | 107441 |
| UN02062 | Rsa1.0.16460.1 | 739  | 2148   | 0         | 564 | 582 | 96 +  | 151  | 729  | 1      | 582    |
| UN02063 | Rsa1.0.03024.1 | 841  | 25931  | 1.00E-119 | 295 | 322 | 91 +  | 125  | 437  | 25281  | 25593  |
| UN02064 | Rsa1.0.03357.1 | 1598 | 23478  | 0         | 554 | 560 | 98 +  | 1042 | 1598 | 19472  | 20031  |
| UN02065 | Rsa1.0.00291.1 | 774  | 172129 | 0         | 739 | 773 | 95 +  | 1    | 770  | 31588  | 32350  |

|         |                |      |        |           |      |      |       |     |      |        |        |
|---------|----------------|------|--------|-----------|------|------|-------|-----|------|--------|--------|
| UN02066 | Rsa1.0.02012.1 | 651  | 36084  | 0         | 531  | 537  | 98 -  | 3   | 539  | 20591  | 21127  |
| UN02067 | Rsa1.0.14744.1 | 834  | 3111   | 1.00E-151 | 426  | 475  | 89 -  | 337 | 809  | 724    | 1198   |
| UN02068 | Rsa1.0.01431.1 | 720  | 167877 | 1.00E-178 | 371  | 386  | 96 +  | 340 | 720  | 12009  | 12393  |
| UN02069 | Rsa1.0.00100.1 | 1287 | 249232 | 1.00E-173 | 373  | 392  | 95 +  | 896 | 1286 | 179062 | 179452 |
| UN02070 | Rsa1.0.00449.1 | 701  | 83863  | 0         | 693  | 700  | 99 +  | 2   | 701  | 40332  | 41031  |
| UN02071 | Rsa1.0.13356.1 | 335  | 4890   | 2.00E-12  | 89   | 106  | 83 -  | 65  | 170  | 110    | 215    |
| UN02072 | Rsa1.0.01154.1 | 623  | 52249  | 0         | 348  | 351  | 99 -  | 274 | 623  | 3672   | 4022   |
| UN02073 | Rsa1.0.00437.1 | 553  | 84879  | 1.00E-128 | 253  | 260  | 97 +  | 294 | 553  | 54610  | 54869  |
| UN02074 | Rsa1.0.03191.1 | 1128 | 145762 | 0         | 902  | 910  | 99 +  | 222 | 1128 | 137789 | 138697 |
| UN02075 | Rsa1.0.27709.1 | 1537 | 842    | 0         | 834  | 841  | 99 -  | 630 | 1468 | 2      | 842    |
| UN02076 | Rsa1.0.01104.1 | 1112 | 285480 | 1.00E-166 | 402  | 439  | 91 +  | 3   | 426  | 266546 | 266983 |
| UN02077 | Rsa1.0.00998.1 | 1118 | 57168  | 0         | 368  | 373  | 98 +  | 747 | 1118 | 31843  | 32214  |
| UN02078 | Rsa1.0.00492.1 | 1382 | 80178  | 0         | 400  | 406  | 98 +  | 694 | 1099 | 70497  | 70900  |
| UN02079 | Rsa1.0.01081.1 | 466  | 499226 | 0         | 460  | 465  | 98 -  | 2   | 466  | 42806  | 43270  |
| UN02080 | Rsa1.0.08143.1 | 1233 | 7836   | 0         | 1166 | 1266 | 92 -  | 5   | 1232 | 3715   | 4965   |
| UN02081 | Rsa1.0.00094.1 | 722  | 139042 | 0         | 365  | 372  | 98 -  | 353 | 722  | 77038  | 77409  |
| UN02082 | Rsa1.0.00373.1 | 1218 | 90296  | 0         | 780  | 802  | 97 -  | 415 | 1216 | 79717  | 80516  |
| UN02083 | Rsa1.0.01071.1 | 1113 | 166914 | 0         | 358  | 366  | 97 -  | 748 | 1113 | 14042  | 14407  |
| UN02084 | Rsa1.0.03439.1 | 651  | 22930  | 1.00E-152 | 320  | 333  | 96 +  | 327 | 651  | 21322  | 21650  |
| UN02085 | Rsa1.0.00342.1 | 1571 | 93695  | 0         | 1550 | 1575 | 98 +  | 3   | 1571 | 49202  | 50776  |
| UN02086 | Rsa1.0.02675.1 | 724  | 28852  | 2.00E-72  | 142  | 143  | 99 -  | 334 | 476  | 17929  | 18071  |
| UN02087 | Rsa1.0.05815.1 | 1039 | 12563  | 0         | 458  | 493  | 92 +  | 150 | 631  | 8659   | 9149   |
| UN02088 | Rsa1.0.01539.1 | 1248 | 43698  | 0         | 653  | 692  | 94 +  | 563 | 1247 | 4615   | 5296   |
| UN02089 | Rsa1.0.00968.1 | 1106 | 58020  | 0         | 423  | 432  | 97 -  | 295 | 726  | 51850  | 52281  |
| UN02090 | Rsa1.0.00905.1 | 997  | 60110  | 0         | 931  | 941  | 98 -  | 56  | 996  | 7778   | 8718   |
| UN02091 | Rsa1.0.34683.1 | 956  | 653    | 1.00E-108 | 199  | 199  | 100 + | 758 | 956  | 270    | 468    |
| UN02092 | Rsa1.0.01034.1 | 1294 | 56046  | 0         | 730  | 757  | 96 +  | 238 | 994  | 19416  | 20172  |
| UN02093 | Rsa1.0.09707.1 | 697  | 6199   | 1.00E-156 | 304  | 311  | 97 +  | 389 | 697  | 946    | 1256   |
| UN02094 | Rsa1.0.02803.1 | 738  | 27715  | 1.00E-106 | 309  | 346  | 89 -  | 181 | 523  | 8863   | 9208   |
| UN02095 | Rsa1.0.00273.1 | 758  | 326186 | 0         | 440  | 458  | 96 +  | 3   | 449  | 123679 | 124133 |
| UN02096 | Rsa1.0.01682.1 | 699  | 41090  | 1.00E-123 | 260  | 268  | 97 +  | 3   | 270  | 38026  | 38290  |
| UN02097 | Rsa1.0.02513.1 | 816  | 30643  | 0         | 418  | 424  | 98 +  | 3   | 426  | 9835   | 10256  |
| UN02098 | Rsa1.0.01719.1 | 576  | 40388  | 1.00E-109 | 209  | 212  | 98 +  | 365 | 576  | 30549  | 30760  |
| UN02099 | Rsa1.0.02548.1 | 1096 | 30228  | 0         | 366  | 372  | 98 +  | 729 | 1096 | 10107  | 10478  |
| UN02100 | Rsa1.0.11534.1 | 1079 | 5477   | 0         | 1006 | 1047 | 96 +  | 2   | 1039 | 674    | 1720   |
| UN02101 | Rsa1.0.01592.1 | 938  | 42685  | 1.00E-150 | 277  | 278  | 99 +  | 661 | 938  | 40225  | 40501  |
| UN02102 | Rsa1.0.01263.1 | 947  | 49703  | 1.00E-113 | 280  | 301  | 93 -  | 628 | 922  | 30578  | 30878  |
| UN02103 | Rsa1.0.00055.1 | 839  | 520193 | 1.00E-86  | 189  | 197  | 95 +  | 2   | 195  | 87168  | 87364  |
| UN02104 | Rsa1.0.01339.1 | 1347 | 47813  | 0         | 375  | 388  | 96 +  | 965 | 1347 | 29690  | 30077  |



|         |                |      |        |           |     |     |       |      |      |        |        |
|---------|----------------|------|--------|-----------|-----|-----|-------|------|------|--------|--------|
| UN02105 | Rsa1.0.00420.1 | 864  | 86496  | 1.00E-154 | 276 | 276 | 100 + | 1    | 276  | 42749  | 43024  |
| UN02106 | Rsa1.0.02345.1 | 785  | 32337  | 1.00E-104 | 293 | 324 | 90 +  | 465  | 785  | 15392  | 15705  |
| UN02107 | Rsa1.0.01792.1 | 505  | 39227  | 1.00E-152 | 339 | 359 | 94 -  | 150  | 505  | 7076   | 7434   |
| UN02108 | Rsa1.0.02851.1 | 1199 | 27295  | 0         | 354 | 362 | 97 -  | 844  | 1197 | 8835   | 9196   |
| UN02109 | Rsa1.0.04784.1 | 849  | 15995  | 0         | 642 | 665 | 96 -  | 192  | 848  | 9057   | 9721   |
| UN02110 | Rsa1.0.00628.1 | 1618 | 214360 | 0         | 453 | 459 | 98 +  | 263  | 721  | 201979 | 202437 |
| UN02111 | Rsa1.0.00097.1 | 758  | 138858 | 0         | 655 | 678 | 96 +  | 68   | 742  | 29953  | 30621  |
| UN02112 | Rsa1.0.02660.1 | 691  | 28969  | 0         | 682 | 691 | 98 -  | 1    | 690  | 17619  | 18309  |
| UN02113 | Rsa1.0.00676.1 | 1228 | 69166  | 0         | 496 | 519 | 95 -  | 184  | 699  | 54623  | 55138  |
| UN02114 | Rsa1.0.00336.1 | 1016 | 445051 | 1.00E-117 | 318 | 354 | 89 -  | 667  | 1016 | 162016 | 162354 |
| UN02115 | Rsa1.0.00949.1 | 1471 | 58549  | 1.00E-173 | 415 | 446 | 93 -  | 284  | 720  | 15414  | 15851  |
| UN02116 | Rsa1.0.03418.1 | 919  | 147293 | 1.00E-143 | 258 | 258 | 100 - | 660  | 917  | 10080  | 10337  |
| UN02117 | Rsa1.0.01591.1 | 878  | 42718  | 0         | 452 | 452 | 100 - | 3    | 454  | 24117  | 24568  |
| UN02118 | Rsa1.0.04065.1 | 1834 | 19275  | 0         | 379 | 382 | 99 +  | 1452 | 1833 | 3173   | 3553   |
| UN02119 | Rsa1.0.01081.1 | 916  | 499226 | 1.00E-162 | 310 | 316 | 98 -  | 604  | 916  | 16506  | 16821  |
| UN02120 | Rsa1.0.00512.1 | 639  | 200277 | 1.00E-107 | 225 | 234 | 96 +  | 4    | 237  | 194182 | 194415 |
| UN02121 | Rsa1.0.01282.1 | 1084 | 49304  | 2.00E-49  | 119 | 125 | 95 -  | 513  | 637  | 33427  | 33551  |
| UN02122 | Rsa1.0.07504.1 | 879  | 9237   | 1.00E-173 | 311 | 312 | 99 -  | 568  | 879  | 7983   | 8294   |
| UN02123 | Rsa1.0.14203.1 | 1181 | 3670   | 0         | 433 | 441 | 98 +  | 336  | 776  | 1903   | 2342   |
| UN02124 | Rsa1.0.16020.1 | 1461 | 2321   | 1.00E-173 | 350 | 361 | 96 -  | 1    | 359  | 1410   | 1770   |
| UN02125 | Rsa1.0.03415.1 | 1169 | 23117  | 0         | 762 | 798 | 95 -  | 385  | 1169 | 21162  | 21959  |
| UN02126 | Rsa1.0.00088.1 | 957  | 141341 | 1.00E-136 | 274 | 282 | 97 +  | 675  | 956  | 108001 | 108281 |
| UN02127 | Rsa1.0.02221.1 | 991  | 33796  | 0         | 526 | 541 | 97 -  | 3    | 543  | 18658  | 19197  |
| UN02128 | Rsa1.0.01836.1 | 722  | 38503  | 0         | 368 | 377 | 97 +  | 3    | 379  | 1705   | 2078   |
| UN02129 | Rsa1.0.00836.1 | 1058 | 185968 | 1.00E-132 | 297 | 313 | 94 -  | 747  | 1053 | 17849  | 18161  |
| UN02130 | Rsa1.0.03569.1 | 614  | 22041  | 2.00E-75  | 212 | 228 | 92 +  | 388  | 614  | 10002  | 10225  |
| UN02131 | Rsa1.0.09769.1 | 1185 | 6159   | 0         | 487 | 531 | 91 -  | 530  | 1059 | 3945   | 4475   |
| UN02132 | Rsa1.0.00082.1 | 1033 | 237584 | 1.00E-131 | 310 | 330 | 93 -  | 705  | 1032 | 14748  | 15066  |
| UN02133 | Rsa1.0.00226.1 | 816  | 105884 | 1.00E-175 | 321 | 324 | 99 -  | 151  | 474  | 22862  | 23185  |
| UN02134 | Rsa1.0.00206.1 | 479  | 109040 | 1.00E-125 | 293 | 312 | 93 -  | 171  | 479  | 74215  | 74522  |
| UN02135 | Rsa1.0.01413.1 | 941  | 46275  | 1.00E-139 | 514 | 602 | 85 +  | 82   | 677  | 20235  | 20836  |
| UN02136 | Rsa1.0.04282.1 | 750  | 18100  | 0         | 437 | 450 | 97 +  | 302  | 750  | 17329  | 17778  |
| UN02137 | Rsa1.0.00965.1 | 552  | 58139  | 8.00E-53  | 112 | 114 | 98 +  | 98   | 211  | 9005   | 9118   |
| UN02138 | Rsa1.0.05890.1 | 625  | 12317  | 5.00E-70  | 215 | 240 | 89 -  | 404  | 625  | 739    | 976    |
| UN02139 | Rsa1.0.02471.1 | 797  | 31104  | 1.00E-122 | 244 | 250 | 97 +  | 200  | 449  | 17799  | 18047  |
| UN02140 | Rsa1.0.00706.1 | 1068 | 291570 | 0         | 432 | 451 | 95 +  | 3    | 453  | 244671 | 245121 |
| UN02141 | Rsa1.0.02605.1 | 634  | 29637  | 1.00E-67  | 223 | 247 | 90 +  | 396  | 633  | 13844  | 14084  |
| UN02142 | Rsa1.0.00090.1 | 612  | 273859 | 0         | 420 | 444 | 94 +  | 169  | 612  | 231858 | 232289 |
| UN02143 | Rsa1.0.04203.1 | 960  | 18479  | 0         | 445 | 461 | 96 -  | 3    | 463  | 17886  | 18342  |

|         |                |      |        |           |      |      |       |      |      |        |        |
|---------|----------------|------|--------|-----------|------|------|-------|------|------|--------|--------|
| UN02144 | Rsa1.0_00416.1 | 943  | 86772  | 1.00E-166 | 366  | 387  | 94 +  | 556  | 941  | 50850  | 51234  |
| UN02145 | Rsa1.0_10577.1 | 834  | 5796   | 0         | 486  | 488  | 99 +  | 346  | 833  | 535    | 1022   |
| UN02146 | Rsa1.0_05864.1 | 1150 | 12387  | 1.00E-147 | 354  | 381  | 92 -  | 11   | 383  | 11077  | 11443  |
| UN02147 | Rsa1.0_04188.1 | 1184 | 18586  | 0         | 1183 | 1185 | 99 -  | 1    | 1184 | 6452   | 7636   |
| UN02148 | Rsa1.0_54279.1 | 1189 | 420    | 0         | 420  | 420  | 100 + | 514  | 933  | 1      | 420    |
| UN02149 | Rsa1.0_01895.1 | 1247 | 37512  | 0         | 1027 | 1050 | 97 +  | 198  | 1247 | 23772  | 24821  |
| UN02150 | Rsa1.0_02099.1 | 652  | 35030  | 0         | 640  | 643  | 99 +  | 4    | 646  | 9869   | 10511  |
| UN02151 | Rsa1.0_00067.1 | 1742 | 415055 | 0         | 421  | 443  | 95 -  | 1313 | 1742 | 46411  | 46853  |
| UN02152 | Rsa1.0_00451.1 | 949  | 322533 | 0         | 925  | 950  | 97 -  | 1    | 949  | 153403 | 154352 |
| UN02153 | Rsa1.0_01293.1 | 1217 | 49139  | 0         | 997  | 1029 | 96 +  | 172  | 1200 | 2686   | 3713   |
| UN02154 | Rsa1.0_00296.1 | 711  | 97854  | 0         | 710  | 711  | 99 +  | 1    | 711  | 80056  | 80766  |
| UN02155 | Rsa1.0_00082.1 | 896  | 237584 | 0         | 485  | 497  | 97 +  | 123  | 619  | 227517 | 228013 |
| UN02156 | Rsa1.0_00163.1 | 1101 | 116847 | 1.00E-149 | 268  | 268  | 100 + | 693  | 960  | 62264  | 62531  |
| UN02157 | Rsa1.0_00530.1 | 1009 | 77389  | 0         | 516  | 524  | 98 -  | 3    | 524  | 15978  | 16501  |
| UN02158 | Rsa1.0_03292.1 | 600  | 23977  | 1.00E-161 | 319  | 328  | 97 +  | 2    | 329  | 7755   | 8081   |
| UN02159 | Rsa1.0_02222.1 | 682  | 152798 | 0         | 381  | 386  | 98 -  | 3    | 388  | 12231  | 12613  |
| UN02160 | Rsa1.0_00810.1 | 490  | 63289  | 1.00E-88  | 239  | 268  | 89 -  | 222  | 489  | 18821  | 19064  |
| UN02161 | Rsa1.0_00600.1 | 745  | 73395  | 0         | 463  | 472  | 98 +  | 274  | 745  | 68561  | 69025  |
| UN02162 | Rsa1.0_02080.1 | 735  | 35297  | 0         | 598  | 615  | 97 -  | 10   | 620  | 13926  | 14540  |
| UN02163 | Rsa1.0_03672.1 | 856  | 21452  | 1.00E-61  | 148  | 157  | 94 +  | 248  | 404  | 6740   | 6896   |
| UN02164 | Rsa1.0_01924.1 | 927  | 37226  | 0         | 442  | 446  | 99 +  | 482  | 927  | 23204  | 23649  |
| UN02165 | Rsa1.0_06720.1 | 1379 | 10473  | 0         | 837  | 886  | 94 -  | 470  | 1349 | 4306   | 5191   |
| UN02166 | Rsa1.0_00911.1 | 1392 | 59943  | 0         | 635  | 636  | 99 +  | 3    | 637  | 14801  | 15436  |
| UN02167 | Rsa1.0_00341.1 | 1406 | 249309 | 0         | 1007 | 1054 | 95 -  | 363  | 1405 | 209413 | 210459 |
| UN02168 | Rsa1.0_00031.1 | 1214 | 179862 | 0         | 492  | 492  | 100 + | 723  | 1214 | 72788  | 73279  |
| UN02169 | Rsa1.0_00306.1 | 973  | 146760 | 0         | 428  | 459  | 93 -  | 533  | 973  | 5781   | 6239   |
| UN02170 | Rsa1.0_00325.1 | 1232 | 95371  | 1.00E-105 | 256  | 276  | 92 +  | 288  | 563  | 79215  | 79487  |
| UN02171 | Rsa1.0_02446.1 | 823  | 31330  | 0         | 662  | 670  | 98 -  | 2    | 671  | 3867   | 4536   |
| UN02172 | Rsa1.0_02365.1 | 670  | 32118  | 1.00E-83  | 222  | 239  | 92 +  | 425  | 660  | 16962  | 17196  |
| UN02173 | Rsa1.0_00016.1 | 931  | 831256 | 0         | 447  | 463  | 96 +  | 3    | 458  | 264139 | 264600 |
| UN02174 | Rsa1.0_04243.1 | 991  | 18321  | 0         | 658  | 679  | 96 -  | 314  | 990  | 12991  | 13668  |
| UN02175 | Rsa1.0_00016.1 | 921  | 831256 | 1.00E-167 | 340  | 353  | 96 +  | 1    | 350  | 809657 | 810009 |
| UN02176 | Rsa1.0_00171.1 | 1218 | 115622 | 0         | 941  | 977  | 96 +  | 2    | 966  | 78507  | 79481  |
| UN02177 | Rsa1.0_01182.1 | 1046 | 167304 | 0         | 503  | 504  | 99 +  | 369  | 872  | 165655 | 166158 |
| UN02178 | Rsa1.0_00782.1 | 958  | 64468  | 1.00E-113 | 298  | 328  | 90 -  | 1    | 328  | 53873  | 54200  |
| UN02179 | Rsa1.0_13580.1 | 688  | 4711   | 2.00E-81  | 166  | 170  | 97 -  | 228  | 397  | 4004   | 4173   |
| UN02180 | Rsa1.0_00245.1 | 1250 | 103569 | 0         | 511  | 527  | 96 -  | 722  | 1248 | 100095 | 100620 |
| UN02181 | Rsa1.0_00607.1 | 1500 | 73146  | 0         | 574  | 574  | 100 - | 564  | 1137 | 21023  | 21596  |
| UN02182 | Rsa1.0_00065.1 | 495  | 454616 | 1.00E-165 | 315  | 319  | 98 -  | 11   | 329  | 448185 | 448501 |

|         |                |      |        |           |      |      |       |      |      |        |        |
|---------|----------------|------|--------|-----------|------|------|-------|------|------|--------|--------|
| UN02183 | Rsa1.0.00168.1 | 485  | 115870 | 1.00E-167 | 356  | 374  | 95 +  | 2    | 374  | 90845  | 91213  |
| UN02184 | Rsa1.0.00237.1 | 945  | 235974 | 2.00E-88  | 202  | 214  | 94 -  | 625  | 838  | 4758   | 4971   |
| UN02185 | Rsa1.0.02365.1 | 1134 | 32118  | 0         | 567  | 607  | 93 +  | 2    | 607  | 29263  | 29863  |
| UN02186 | Rsa1.0.00867.1 | 686  | 61635  | 1.00E-104 | 225  | 233  | 96 +  | 39   | 270  | 24840  | 25071  |
| UN02187 | Rsa1.0.05127.1 | 829  | 147533 | 0         | 828  | 829  | 99 -  | 1    | 829  | 8292   | 9119   |
| UN02188 | Rsa1.0.00817.1 | 1163 | 62961  | 0         | 424  | 431  | 98 -  | 1    | 431  | 37547  | 37977  |
| UN02189 | Rsa1.0.00838.1 | 761  | 153820 | 0         | 573  | 600  | 95 -  | 95   | 691  | 32152  | 32748  |
| UN02190 | Rsa1.0.04835.1 | 1049 | 15766  | 0         | 427  | 438  | 97 +  | 1    | 438  | 9141   | 9578   |
| UN02191 | Rsa1.0.00878.1 | 978  | 330303 | 1.00E-116 | 212  | 212  | 100 + | 765  | 976  | 327480 | 327691 |
| UN02192 | Rsa1.0.00131.1 | 1229 | 432233 | 0         | 488  | 513  | 95 -  | 79   | 591  | 289092 | 289601 |
| UN02193 | Rsa1.0.44391.1 | 839  | 507    | 1.00E-137 | 322  | 341  | 94 -  | 1    | 329  | 1      | 340    |
| UN02194 | Rsa1.0.00773.1 | 997  | 64839  | 1.00E-121 | 300  | 322  | 93 -  | 660  | 972  | 10122  | 10440  |
| UN02195 | Rsa1.0.04085.1 | 824  | 19168  | 7.00E-76  | 195  | 205  | 95 +  | 10   | 209  | 1697   | 1901   |
| UN02196 | Rsa1.0.02012.1 | 1338 | 36084  | 1.00E-149 | 309  | 325  | 95 -  | 1012 | 1336 | 15975  | 16286  |
| UN02197 | Rsa1.0.01674.1 | 867  | 168300 | 0         | 820  | 864  | 94 -  | 1    | 864  | 17121  | 17984  |
| UN02198 | Rsa1.0.04110.1 | 718  | 18998  | 1.00E-111 | 249  | 264  | 94 -  | 453  | 716  | 4839   | 5102   |
| UN02199 | Rsa1.0.05766.1 | 838  | 12708  | 1.00E-152 | 282  | 285  | 98 +  | 3    | 287  | 7055   | 7339   |
| UN02200 | Rsa1.0.00006.1 | 1406 | 396176 | 6.00E-28  | 137  | 161  | 85 -  | 1089 | 1249 | 17231  | 17391  |
| UN02201 | Rsa1.0.00211.1 | 1007 | 228189 | 0         | 990  | 1012 | 97 -  | 1    | 1006 | 168784 | 169795 |
| UN02202 | Rsa1.0.01907.1 | 841  | 37431  | 1.00E-126 | 259  | 268  | 96 -  | 452  | 719  | 22948  | 23212  |
| UN02203 | Rsa1.0.05382.1 | 1001 | 13963  | 0         | 394  | 411  | 95 +  | 447  | 857  | 423    | 833    |
| UN02204 | Rsa1.0.00876.1 | 1249 | 61328  | 0         | 1023 | 1079 | 94 +  | 1    | 1073 | 8255   | 9332   |
| UN02205 | Rsa1.0.03366.1 | 416  | 23401  | 2.00E-65  | 151  | 158  | 95 -  | 142  | 299  | 21234  | 21389  |
| UN02206 | Rsa1.0.00527.1 | 1027 | 77733  | 1.00E-126 | 284  | 301  | 94 +  | 437  | 734  | 58084  | 58381  |
| UN02207 | Rsa1.0.01674.1 | 826  | 168300 | 1.00E-142 | 283  | 291  | 97 +  | 30   | 320  | 3324   | 3611   |
| UN02208 | Rsa1.0.00744.1 | 683  | 66084  | 1.00E-157 | 367  | 390  | 94 -  | 1    | 374  | 53238  | 53625  |
| UN02209 | Rsa1.0.00043.1 | 832  | 264937 | 0         | 788  | 822  | 95 +  | 12   | 830  | 88499  | 89313  |
| UN02210 | Rsa1.0.00111.1 | 1078 | 390088 | 1.00E-138 | 253  | 254  | 99 +  | 723  | 976  | 349143 | 349396 |
| UN02211 | Rsa1.0.00018.1 | 1269 | 410899 | 0         | 898  | 940  | 95 +  | 1    | 936  | 79091  | 80027  |
| UN02212 | Rsa1.0.00517.1 | 826  | 142790 | 3.00E-81  | 208  | 224  | 92 -  | 606  | 825  | 113495 | 113713 |
| UN02213 | Rsa1.0.01294.1 | 1280 | 49090  | 1.00E-172 | 356  | 371  | 95 +  | 10   | 379  | 42100  | 42470  |
| UN02214 | Rsa1.0.02969.1 | 1126 | 26390  | 0         | 498  | 532  | 93 -  | 5    | 523  | 6035   | 6560   |
| UN02215 | Rsa1.0.00030.1 | 974  | 250988 | 0         | 504  | 549  | 91 +  | 234  | 768  | 212998 | 213530 |
| UN02216 | Rsa1.0.00706.1 | 1269 | 291570 | 0         | 1221 | 1262 | 96 +  | 6    | 1267 | 60183  | 61440  |
| UN02217 | Rsa1.0.00505.1 | 1206 | 79323  | 1.00E-118 | 282  | 298  | 94 -  | 2    | 297  | 76389  | 76680  |
| UN02218 | Rsa1.0.07450.1 | 1062 | 9373   | 0         | 497  | 543  | 91 -  | 1    | 532  | 2274   | 2813   |
| UN02219 | Rsa1.0.07213.1 | 869  | 9711   | 0         | 837  | 864  | 96 +  | 12   | 869  | 4293   | 5156   |
| UN02220 | Rsa1.0.00257.1 | 828  | 102407 | 1.00E-171 | 367  | 388  | 94 -  | 5    | 392  | 57801  | 58188  |
| UN02221 | Rsa1.0.04323.1 | 1059 | 17915  | 1.00E-99  | 260  | 281  | 92 +  | 9    | 287  | 13905  | 14184  |

|         |                |      |        |           |     |      |       |      |      |        |        |
|---------|----------------|------|--------|-----------|-----|------|-------|------|------|--------|--------|
| UN02222 | Rsa1.0.01371.1 | 1241 | 47079  | 0         | 865 | 960  | 90 -  | 28   | 985  | 42892  | 43850  |
| UN02223 | Rsa1.0.01563.1 | 913  | 170823 | 1.00E-119 | 241 | 249  | 96 -  | 376  | 624  | 38793  | 39041  |
| UN02224 | Rsa1.0.00253.1 | 1081 | 231292 | 0         | 404 | 419  | 96 +  | 55   | 473  | 204548 | 204960 |
| UN02225 | Rsa1.0.04224.1 | 906  | 18402  | 1.00E-168 | 334 | 343  | 97 -  | 1    | 342  | 704    | 1045   |
| UN02226 | Rsa1.0.06762.1 | 1173 | 10401  | 0         | 535 | 546  | 97 +  | 451  | 996  | 4911   | 5456   |
| UN02227 | Rsa1.0.01341.1 | 1176 | 47764  | 0         | 383 | 398  | 96 +  | 1    | 398  | 226    | 618    |
| UN02228 | Rsa1.0.00017.1 | 361  | 752458 | 1.00E-139 | 333 | 359  | 92 +  | 3    | 361  | 369612 | 369969 |
| UN02229 | Rsa1.0.04161.1 | 590  | 18788  | 1.00E-144 | 268 | 271  | 98 -  | 183  | 453  | 9629   | 9899   |
| UN02230 | Rsa1.0.01375.1 | 854  | 47038  | 2.00E-94  | 199 | 204  | 97 +  | 113  | 316  | 11241  | 11442  |
| UN02231 | Rsa1.0.02586.1 | 793  | 29856  | 0         | 661 | 675  | 97 -  | 62   | 736  | 15528  | 16201  |
| UN02232 | Rsa1.0.06073.1 | 1337 | 11807  | 0         | 647 | 664  | 97 -  | 12   | 675  | 4362   | 5024   |
| UN02233 | Rsa1.0.74475.1 | 1479 | 308    | 1.00E-114 | 266 | 285  | 93 +  | 5    | 285  | 30     | 308    |
| UN02234 | Rsa1.0.00009.1 | 701  | 232558 | 0         | 684 | 696  | 98 +  | 6    | 701  | 130900 | 131595 |
| UN02235 | Rsa1.0.09048.1 | 746  | 6683   | 0         | 640 | 670  | 95 +  | 76   | 738  | 5245   | 5913   |
| UN02236 | Rsa1.0.07909.1 | 535  | 8315   | 1.00E-156 | 313 | 324  | 96 -  | 209  | 532  | 6038   | 6361   |
| UN02237 | Rsa1.0.04411.1 | 1115 | 142979 | 1.00E-145 | 261 | 261  | 100 + | 852  | 1112 | 137462 | 137722 |
| UN02238 | Rsa1.0.04563.1 | 590  | 16837  | 1.00E-152 | 327 | 344  | 95 +  | 1    | 344  | 1547   | 1889   |
| UN02239 | Rsa1.0.04651.1 | 963  | 16516  | 1.00E-101 | 206 | 212  | 97 +  | 708  | 919  | 14952  | 15163  |
| UN02240 | Rsa1.0.00301.1 | 642  | 365315 | 0         | 468 | 490  | 95 -  | 123  | 612  | 27314  | 27803  |
| UN02241 | Rsa1.0.01236.1 | 607  | 50156  | 1.00E-101 | 279 | 309  | 90 -  | 7    | 297  | 1967   | 2275   |
| UN02242 | Rsa1.0.03290.1 | 1271 | 24011  | 1.00E-176 | 351 | 363  | 96 +  | 3    | 362  | 7193   | 7555   |
| UN02243 | Rsa1.0.00283.1 | 1076 | 183797 | 1.00E-122 | 334 | 376  | 88 -  | 720  | 1074 | 10947  | 11313  |
| UN02244 | Rsa1.0.00079.1 | 1270 | 606987 | 0         | 770 | 771  | 99 +  | 500  | 1270 | 4648   | 5418   |
| UN02245 | Rsa1.0.02871.1 | 761  | 27085  | 3.00E-99  | 187 | 188  | 99 -  | 227  | 414  | 17885  | 18072  |
| UN02246 | Rsa1.0.00469.1 | 625  | 82084  | 0         | 494 | 506  | 97 +  | 35   | 539  | 20501  | 21002  |
| UN02247 | Rsa1.0.04455.1 | 1214 | 17266  | 1.00E-166 | 392 | 419  | 93 +  | 805  | 1212 | 12968  | 13386  |
| UN02248 | Rsa1.0.00187.1 | 1585 | 393093 | 0         | 448 | 456  | 98 -  | 1134 | 1585 | 155736 | 156191 |
| UN02249 | Rsa1.0.00526.1 | 562  | 169279 | 1.00E-149 | 321 | 339  | 94 -  | 224  | 562  | 148192 | 148530 |
| UN02250 | Rsa1.0.05653.1 | 1062 | 13043  | 0         | 982 | 1048 | 93 +  | 16   | 1060 | 11416  | 12437  |
| UN02251 | Rsa1.0.00633.1 | 948  | 71250  | 0         | 524 | 524  | 100 - | 1    | 524  | 24436  | 24959  |
| UN02252 | Rsa1.0.08154.1 | 609  | 7823   | 1.00E-92  | 194 | 201  | 96 -  | 255  | 455  | 5891   | 6091   |
| UN02253 | Rsa1.0.01265.1 | 1165 | 49686  | 0         | 979 | 1124 | 87 +  | 5    | 1120 | 36157  | 37250  |
| UN02254 | Rsa1.0.00377.1 | 1034 | 90038  | 1.00E-148 | 332 | 353  | 94 +  | 121  | 473  | 46253  | 46603  |
| UN02255 | Rsa1.0.00219.1 | 721  | 106983 | 1.00E-110 | 243 | 254  | 95 +  | 1    | 252  | 29610  | 29862  |
| UN02256 | Rsa1.0.00342.1 | 1415 | 93695  | 0         | 686 | 736  | 93 +  | 11   | 732  | 12438  | 13164  |
| UN02257 | Rsa1.0.00344.1 | 815  | 191774 | 0         | 746 | 812  | 91 +  | 20   | 810  | 128705 | 129513 |
| UN02258 | Rsa1.0.14565.1 | 674  | 3261   | 4.00E-18  | 164 | 199  | 82 -  | 414  | 610  | 1394   | 1585   |
| UN02259 | Rsa1.0.00855.1 | 454  | 62047  | 0         | 434 | 453  | 95 -  | 1    | 453  | 42812  | 43250  |
| UN02260 | Rsa1.0.00376.1 | 925  | 90101  | 0         | 323 | 323  | 100 + | 603  | 925  | 34364  | 34686  |

|         |                |      |        |           |     |      |       |      |      |        |        |
|---------|----------------|------|--------|-----------|-----|------|-------|------|------|--------|--------|
| UN02261 | Rsa1.0.00065.1 | 920  | 454616 | 1.00E-130 | 296 | 312  | 94 -  | 1    | 309  | 414187 | 414497 |
| UN02262 | Rsa1.0.03244.1 | 937  | 24413  | 0         | 412 | 439  | 93 -  | 500  | 926  | 10841  | 11276  |
| UN02263 | Rsa1.0.06102.1 | 1395 | 11740  | 1.00E-118 | 264 | 280  | 94 +  | 452  | 720  | 5202   | 5481   |
| UN02264 | Rsa1.0.00111.1 | 1670 | 390088 | 0         | 921 | 984  | 93 -  | 248  | 1212 | 56276  | 57249  |
| UN02265 | Rsa1.0.15326.1 | 738  | 2683   | 0         | 678 | 680  | 99 +  | 14   | 693  | 659    | 1338   |
| UN02266 | Rsa1.0.09314.1 | 1036 | 6461   | 0         | 603 | 629  | 95 -  | 412  | 1036 | 4153   | 4776   |
| UN02267 | Rsa1.0.01143.1 | 777  | 52456  | 0         | 387 | 392  | 98 -  | 1    | 392  | 6081   | 6472   |
| UN02268 | Rsa1.0.00556.1 | 785  | 207212 | 0         | 352 | 360  | 97 -  | 337  | 696  | 52529  | 52888  |
| UN02269 | Rsa1.0.00616.1 | 933  | 195713 | 0         | 346 | 351  | 98 -  | 448  | 798  | 158877 | 159227 |
| UN02270 | Rsa1.0.07208.1 | 1237 | 9719   | 0         | 389 | 393  | 98 -  | 845  | 1237 | 7601   | 7993   |
| UN02271 | Rsa1.0.00387.1 | 1290 | 495407 | 0         | 688 | 718  | 95 +  | 573  | 1287 | 377227 | 377943 |
| UN02272 | Rsa1.0.02660.1 | 988  | 28969  | 0         | 459 | 464  | 98 -  | 1    | 464  | 26558  | 27021  |
| UN02273 | Rsa1.0.00064.1 | 686  | 240927 | 1.00E-124 | 264 | 272  | 97 -  | 1    | 266  | 60195  | 60466  |
| UN02274 | Rsa1.0.76117.1 | 608  | 301    | 1.00E-113 | 264 | 279  | 94 +  | 1    | 271  | 24     | 301    |
| UN02275 | Rsa1.0.00179.1 | 799  | 393324 | 0         | 481 | 489  | 98 +  | 302  | 790  | 360380 | 360868 |
| UN02276 | Rsa1.0.00446.1 | 921  | 167829 | 0         | 611 | 630  | 96 +  | 4    | 620  | 104797 | 105424 |
| UN02277 | Rsa1.0.01300.1 | 717  | 48942  | 1.00E-131 | 274 | 285  | 96 +  | 13   | 297  | 47254  | 47536  |
| UN02278 | Rsa1.0.24087.1 | 1030 | 1008   | 0         | 502 | 544  | 92 +  | 494  | 1028 | 238    | 781    |
| UN02279 | Rsa1.0.02939.1 | 1115 | 26595  | 1.00E-114 | 219 | 222  | 98 -  | 681  | 902  | 3410   | 3631   |
| UN02280 | Rsa1.0.18568.1 | 1185 | 1573   | 8.00E-92  | 256 | 285  | 89 -  | 817  | 1084 | 453    | 736    |
| UN02281 | Rsa1.0.03241.1 | 1116 | 24423  | 0         | 924 | 1014 | 91 +  | 43   | 1041 | 5633   | 6646   |
| UN02282 | Rsa1.0.10032.1 | 890  | 6032   | 0         | 490 | 490  | 100 - | 1    | 490  | 4495   | 4984   |
| UN02283 | Rsa1.0.01411.1 | 909  | 46326  | 0         | 383 | 397  | 96 +  | 2    | 398  | 6377   | 6771   |
| UN02284 | Rsa1.0.09091.1 | 796  | 6656   | 0         | 783 | 797  | 98 -  | 1    | 796  | 2338   | 3134   |
| UN02285 | Rsa1.0.02210.1 | 1303 | 33857  | 0         | 460 | 489  | 94 -  | 837  | 1303 | 22536  | 23023  |
| UN02286 | Rsa1.0.00446.1 | 1179 | 167829 | 2.00E-61  | 121 | 121  | 100 - | 724  | 844  | 159190 | 159310 |
| UN02287 | Rsa1.0.00178.1 | 983  | 114861 | 0         | 936 | 988  | 94 +  | 1    | 980  | 82214  | 83200  |
| UN02288 | Rsa1.0.00007.1 | 971  | 239325 | 2.00E-70  | 160 | 167  | 95 -  | 687  | 853  | 12607  | 12771  |
| UN02289 | Rsa1.0.00096.1 | 1606 | 198773 | 0         | 786 | 787  | 99 -  | 737  | 1523 | 117615 | 118401 |
| UN02290 | Rsa1.0.00010.1 | 1025 | 294827 | 1.00E-165 | 447 | 491  | 91 -  | 537  | 1024 | 81154  | 81627  |
| UN02291 | Rsa1.0.00453.1 | 1355 | 83031  | 1.00E-127 | 274 | 286  | 95 -  | 1069 | 1353 | 79184  | 79466  |
| UN02292 | Rsa1.0.00070.1 | 864  | 150321 | 0         | 443 | 448  | 98 -  | 14   | 461  | 55838  | 56285  |
| UN02293 | Rsa1.0.01945.1 | 1083 | 36989  | 1.00E-169 | 359 | 373  | 96 -  | 1    | 368  | 6140   | 6507   |
| UN02294 | Rsa1.0.37056.1 | 1146 | 608    | 0         | 390 | 406  | 96 -  | 748  | 1144 | 34     | 439    |
| UN02295 | Rsa1.0.02937.1 | 937  | 26605  | 1.00E-159 | 310 | 317  | 97 -  | 61   | 377  | 26140  | 26455  |
| UN02296 | Rsa1.0.07693.1 | 890  | 8776   | 0         | 367 | 376  | 97 +  | 206  | 581  | 7062   | 7437   |
| UN02297 | Rsa1.0.02622.1 | 1162 | 142402 | 0         | 647 | 669  | 96 -  | 3    | 670  | 9528   | 10196  |
| UN02298 | Rsa1.0.00476.1 | 463  | 280966 | 1.00E-111 | 287 | 311  | 92 +  | 5    | 312  | 236919 | 237223 |
| UN02299 | Rsa1.0.00470.1 | 657  | 81968  | 1.00E-159 | 359 | 381  | 94 +  | 1    | 381  | 27995  | 28369  |

|         |                |      |        |           |      |      |       |      |      |        |        |
|---------|----------------|------|--------|-----------|------|------|-------|------|------|--------|--------|
| UN02300 | Rsa1.0_01987.1 | 947  | 36446  | 0         | 895  | 949  | 94 -  | 5    | 945  | 14414  | 15341  |
| UN02301 | Rsa1.0_00419.1 | 1085 | 86562  | 1.00E-148 | 321  | 338  | 94 -  | 1    | 333  | 53124  | 53460  |
| UN02302 | Rsa1.0_00079.1 | 536  | 606987 | 1.00E-135 | 341  | 370  | 92 +  | 11   | 370  | 83974  | 84338  |
| UN02303 | Rsa1.0_03566.1 | 1072 | 22050  | 0         | 605  | 628  | 96 -  | 2    | 621  | 7757   | 8382   |
| UN02304 | Rsa1.0_13204.1 | 891  | 4970   | 1.00E-161 | 321  | 330  | 97 -  | 3    | 331  | 777    | 1103   |
| UN02305 | Rsa1.0_00571.1 | 970  | 329018 | 0         | 488  | 500  | 97 -  | 469  | 968  | 156814 | 157313 |
| UN02306 | Rsa1.0_03016.1 | 406  | 26000  | 1.00E-177 | 386  | 408  | 94 +  | 1    | 404  | 5053   | 5460   |
| UN02307 | Rsa1.0_01046.1 | 1018 | 152989 | 1.00E-160 | 311  | 319  | 97 +  | 213  | 531  | 127932 | 128250 |
| UN02308 | Rsa1.0_01679.1 | 1021 | 146876 | 4.00E-87  | 230  | 249  | 92 +  | 80   | 323  | 135000 | 135247 |
| UN02309 | Rsa1.0_02456.1 | 706  | 31222  | 9.00E-78  | 218  | 237  | 91 +  | 21   | 249  | 23772  | 24004  |
| UN02310 | Rsa1.0_02400.1 | 738  | 31750  | 1.00E-132 | 268  | 276  | 97 -  | 253  | 527  | 4467   | 4742   |
| UN02311 | Rsa1.0_02922.1 | 1370 | 26753  | 0         | 1198 | 1215 | 98 -  | 1    | 1208 | 1658   | 2872   |
| UN02312 | Rsa1.0_03149.1 | 448  | 24983  | 1.00E-117 | 256  | 270  | 94 +  | 1    | 270  | 15431  | 15700  |
| UN02313 | Rsa1.0_14292.1 | 1355 | 3569   | 0         | 486  | 500  | 97 -  | 832  | 1331 | 1      | 500    |
| UN02314 | Rsa1.0_00227.1 | 991  | 105849 | 1.00E-178 | 327  | 329  | 99 +  | 661  | 989  | 2883   | 3210   |
| UN02315 | Rsa1.0_00341.1 | 779  | 249309 | 1.00E-106 | 218  | 224  | 97 -  | 541  | 763  | 122671 | 122894 |
| UN02316 | Rsa1.0_01357.1 | 987  | 47280  | 1.00E-142 | 272  | 277  | 98 -  | 706  | 982  | 2515   | 2791   |
| UN02317 | Rsa1.0_06701.1 | 1054 | 10514  | 0         | 508  | 526  | 96 -  | 466  | 986  | 707    | 1232   |
| UN02318 | Rsa1.0_01453.1 | 990  | 45449  | 1.00E-110 | 318  | 361  | 88 -  | 650  | 981  | 25082  | 25442  |
| UN02319 | Rsa1.0_01042.1 | 941  | 293264 | 0         | 532  | 557  | 95 +  | 364  | 917  | 141476 | 142031 |
| UN02320 | Rsa1.0_00094.1 | 1177 | 139042 | 1.00E-175 | 354  | 364  | 97 -  | 1    | 363  | 5876   | 6237   |
| UN02321 | Rsa1.0_00642.1 | 764  | 201230 | 1.00E-107 | 213  | 218  | 97 +  | 48   | 265  | 196262 | 196479 |
| UN02322 | Rsa1.0_02444.1 | 1482 | 31350  | 0         | 1446 | 1481 | 97 -  | 5    | 1479 | 21304  | 22778  |
| UN02323 | Rsa1.0_71705.1 | 1079 | 320    | 4.00E-84  | 226  | 245  | 92 +  | 1    | 235  | 80     | 319    |
| UN02324 | Rsa1.0_00197.1 | 1384 | 109714 | 0         | 860  | 893  | 96 -  | 491  | 1382 | 22224  | 23109  |
| UN02325 | Rsa1.0_00016.1 | 1214 | 831256 | 1.00E-139 | 306  | 321  | 95 +  | 157  | 475  | 353893 | 354210 |
| UN02326 | Rsa1.0_06955.1 | 811  | 10111  | 0         | 381  | 391  | 97 +  | 230  | 620  | 7836   | 8226   |
| UN02327 | Rsa1.0_00002.1 | 1362 | 601661 | 0         | 872  | 908  | 96 +  | 445  | 1349 | 145814 | 146721 |
| UN02328 | Rsa1.0_02070.1 | 1238 | 158516 | 0         | 622  | 641  | 97 +  | 3    | 636  | 8444   | 9081   |
| UN02329 | Rsa1.0_00265.1 | 878  | 220635 | 1.00E-105 | 194  | 194  | 100 + | 504  | 697  | 147088 | 147281 |
| UN02330 | Rsa1.0_13580.1 | 791  | 4711   | 3.00E-84  | 168  | 171  | 98 -  | 619  | 789  | 2294   | 2464   |
| UN02331 | Rsa1.0_02400.1 | 899  | 31750  | 0         | 675  | 724  | 93 -  | 19   | 711  | 4467   | 5190   |
| UN02332 | Rsa1.0_11795.1 | 926  | 5406   | 1.00E-110 | 235  | 246  | 95 -  | 246  | 491  | 5051   | 5296   |
| UN02333 | Rsa1.0_02041.1 | 548  | 163634 | 0         | 424  | 434  | 97 -  | 115  | 548  | 157407 | 157838 |
| UN02334 | Rsa1.0_01123.1 | 893  | 53359  | 0         | 461  | 486  | 94 -  | 42   | 526  | 21946  | 22422  |
| UN02335 | Rsa1.0_00131.1 | 1174 | 432233 | 0         | 393  | 396  | 99 +  | 360  | 755  | 194264 | 194659 |
| UN02336 | Rsa1.0_00971.1 | 1049 | 57973  | 0         | 676  | 703  | 96 +  | 352  | 1047 | 14832  | 15533  |
| UN02337 | Rsa1.0_00007.1 | 1310 | 239325 | 0         | 554  | 580  | 95 +  | 733  | 1309 | 58424  | 58999  |
| UN02338 | Rsa1.0_01819.1 | 1604 | 38834  | 1.00E-134 | 247  | 248  | 99 -  | 1357 | 1604 | 26434  | 26681  |

|         |                |      |        |           |      |      |      |     |      |        |        |
|---------|----------------|------|--------|-----------|------|------|------|-----|------|--------|--------|
| UN02339 | Rsa1.0.00657.1 | 1236 | 69858  | 1.00E-157 | 307  | 313  | 98 + | 925 | 1236 | 9457   | 9768   |
| UN02340 | Rsa1.0.04128.1 | 820  | 18927  | 1.00E-80  | 197  | 208  | 94 + | 4   | 208  | 10980  | 11186  |
| UN02341 | Rsa1.0.00181.1 | 1967 | 114269 | 0         | 961  | 990  | 97 - | 6   | 994  | 94058  | 95036  |
| UN02342 | Rsa1.0.00017.1 | 887  | 752458 | 1.00E-173 | 361  | 377  | 95 + | 5   | 380  | 40792  | 41168  |
| UN02343 | Rsa1.0.01245.1 | 1363 | 149868 | 0         | 539  | 578  | 93 - | 3   | 577  | 37644  | 38206  |
| UN02344 | Rsa1.0.03880.1 | 1213 | 20293  | 1.00E-136 | 307  | 322  | 95 + | 816 | 1132 | 19678  | 19999  |
| UN02345 | Rsa1.0.01405.1 | 811  | 46445  | 1.00E-103 | 205  | 210  | 97 - | 219 | 428  | 39329  | 39538  |
| UN02346 | Rsa1.0.04456.1 | 709  | 17260  | 7.00E-91  | 213  | 225  | 94 + | 426 | 649  | 7706   | 7928   |
| UN02347 | Rsa1.0.03069.1 | 1256 | 25615  | 0         | 539  | 568  | 94 - | 355 | 921  | 18568  | 19131  |
| UN02348 | Rsa1.0.03490.1 | 1177 | 22545  | 0         | 681  | 706  | 96 - | 149 | 853  | 13983  | 14688  |
| UN02349 | Rsa1.0.00108.1 | 925  | 478491 | 1.00E-65  | 140  | 144  | 97 - | 607 | 750  | 81949  | 82092  |
| UN02350 | Rsa1.0.02246.1 | 891  | 33435  | 0         | 861  | 894  | 96 - | 1   | 891  | 8821   | 9705   |
| UN02351 | Rsa1.0.01405.1 | 722  | 46445  | 0         | 699  | 727  | 96 - | 3   | 721  | 14749  | 15472  |
| UN02352 | Rsa1.0.02222.1 | 795  | 152798 | 1.00E-108 | 260  | 279  | 93 - | 14  | 292  | 124886 | 125157 |
| UN02353 | Rsa1.0.01270.1 | 1103 | 49574  | 0         | 535  | 549  | 97 - | 5   | 553  | 29988  | 30536  |
| UN02354 | Rsa1.0.01536.1 | 1071 | 43747  | 0         | 757  | 802  | 94 - | 289 | 1071 | 31883  | 32683  |
| UN02355 | Rsa1.0.01016.1 | 1051 | 181422 | 0         | 502  | 508  | 98 + | 358 | 863  | 18736  | 19243  |
| UN02356 | Rsa1.0.01843.1 | 722  | 265131 | 1.00E-135 | 289  | 304  | 95 + | 100 | 403  | 9831   | 10134  |
| UN02357 | Rsa1.0.00394.1 | 801  | 148426 | 1.00E-131 | 326  | 353  | 92 - | 3   | 344  | 137048 | 137399 |
| UN02358 | Rsa1.0.01104.1 | 977  | 285480 | 0         | 504  | 512  | 98 + | 442 | 952  | 14355  | 14866  |
| UN02359 | Rsa1.0.00303.1 | 1454 | 97468  | 0         | 518  | 558  | 92 + | 911 | 1454 | 30230  | 30776  |
| UN02360 | Rsa1.0.01633.1 | 1220 | 41868  | 0         | 715  | 763  | 93 + | 11  | 764  | 18063  | 18813  |
| UN02361 | Rsa1.0.00758.1 | 636  | 65477  | 0         | 589  | 596  | 98 - | 3   | 598  | 36765  | 37359  |
| UN02362 | Rsa1.0.01531.1 | 1421 | 43778  | 0         | 515  | 531  | 96 + | 883 | 1413 | 12110  | 12639  |
| UN02363 | Rsa1.0.00196.1 | 1123 | 109960 | 1.00E-179 | 373  | 389  | 95 + | 736 | 1123 | 77908  | 78294  |
| UN02364 | Rsa1.0.03813.1 | 1031 | 20708  | 6.00E-83  | 193  | 204  | 94 + | 3   | 206  | 170    | 371    |
| UN02365 | Rsa1.0.10936.1 | 712  | 5671   | 1.00E-110 | 211  | 214  | 98 + | 322 | 535  | 5458   | 5671   |
| UN02366 | Rsa1.0.01561.1 | 832  | 43227  | 0         | 527  | 546  | 96 - | 4   | 549  | 20971  | 21516  |
| UN02367 | Rsa1.0.01675.1 | 1537 | 41155  | 1.00E-161 | 327  | 338  | 96 - | 2   | 336  | 9381   | 9717   |
| UN02368 | Rsa1.0.00055.1 | 1173 | 520193 | 0         | 686  | 720  | 95 - | 459 | 1173 | 385953 | 386668 |
| UN02369 | #              | #    | #      | #         | #    | #    | #    | #   | #    | #      | #      |
| UN02370 | Rsa1.0.03408.1 | 966  | 23154  | 0         | 672  | 694  | 96 + | 272 | 965  | 12750  | 13442  |
| UN02371 | Rsa1.0.00034.1 | 1433 | 260119 | 1.00E-165 | 332  | 343  | 96 + | 240 | 581  | 233596 | 233938 |
| UN02372 | Rsa1.0.01416.1 | 1080 | 46262  | 0         | 1046 | 1084 | 96 + | 3   | 1080 | 44990  | 46072  |
| UN02373 | Rsa1.0.04040.1 | 1145 | 19439  | 0         | 402  | 415  | 96 - | 2   | 414  | 9830   | 10244  |
| UN02374 | Rsa1.0.02079.1 | 953  | 35306  | 1.00E-138 | 268  | 274  | 97 - | 611 | 884  | 21522  | 21795  |
| UN02375 | Rsa1.0.04886.1 | 1742 | 15597  | 0         | 1106 | 1111 | 99 + | 73  | 1182 | 6460   | 7570   |
| UN02376 | Rsa1.0.00031.1 | 1018 | 179862 | 0         | 483  | 504  | 95 - | 94  | 597  | 82448  | 82951  |
| UN02377 | Rsa1.0.01959.1 | 420  | 36798  | 0         | 417  | 418  | 99 - | 3   | 420  | 31362  | 31779  |

|         |                |      |        |           |      |      |       |     |      |        |        |
|---------|----------------|------|--------|-----------|------|------|-------|-----|------|--------|--------|
| UN02378 | Rsa1.0.01433.1 | 1426 | 45976  | 0         | 520  | 569  | 91 -  | 325 | 893  | 6422   | 6990   |
| UN02379 | Rsa1.0.01214.1 | 1272 | 50599  | 1.00E-158 | 389  | 420  | 92 +  | 868 | 1272 | 46274  | 46685  |
| UN02380 | Rsa1.0.02831.1 | 1116 | 27533  | 0         | 906  | 916  | 98 +  | 37  | 950  | 13241  | 14156  |
| UN02381 | Rsa1.0.00008.1 | 628  | 358124 | 1.00E-101 | 259  | 282  | 91 +  | 276 | 554  | 29181  | 29462  |
| UN02382 | Rsa1.0.00724.1 | 806  | 66789  | 0         | 600  | 625  | 96 +  | 2   | 613  | 4424   | 5045   |
| UN02383 | Rsa1.0.00583.1 | 741  | 74309  | 1.00E-168 | 312  | 316  | 98 -  | 281 | 596  | 13328  | 13643  |
| UN02384 | Rsa1.0.02722.1 | 893  | 28417  | 4.00E-90  | 211  | 225  | 93 +  | 669 | 893  | 16664  | 16888  |
| UN02385 | Rsa1.0.07440.1 | 1309 | 9389   | 0         | 1193 | 1259 | 94 +  | 32  | 1285 | 4094   | 5348   |
| UN02386 | Rsa1.0.02831.1 | 978  | 27533  | 0         | 554  | 574  | 96 +  | 405 | 978  | 13977  | 14548  |
| UN02387 | Rsa1.0.13713.1 | 934  | 4437   | 1.00E-170 | 319  | 324  | 98 +  | 611 | 934  | 1      | 319    |
| UN02388 | Rsa1.0.00142.1 | 743  | 121474 | 1.00E-140 | 261  | 264  | 98 -  | 140 | 403  | 64267  | 64530  |
| UN02389 | Rsa1.0.00034.1 | 723  | 260119 | 0         | 632  | 655  | 96 -  | 69  | 723  | 32921  | 33569  |
| UN02390 | Rsa1.0.00502.1 | 779  | 204180 | 0         | 529  | 550  | 96 -  | 231 | 779  | 181101 | 181649 |
| UN02391 | Rsa1.0.00179.1 | 829  | 393324 | 6.00E-70  | 162  | 171  | 94 +  | 305 | 475  | 210557 | 210727 |
| UN02392 | Rsa1.0.00044.1 | 1087 | 271658 | 0         | 479  | 513  | 93 -  | 590 | 1087 | 68722  | 69225  |
| UN02393 | Rsa1.0.00332.1 | 1182 | 94575  | 0         | 546  | 558  | 97 +  | 625 | 1182 | 37359  | 37915  |
| UN02394 | Rsa1.0.00123.1 | 767  | 325650 | 1.00E-127 | 285  | 298  | 95 +  | 470 | 766  | 153387 | 153680 |
| UN02395 | Rsa1.0.03672.1 | 1774 | 21452  | 1.00E-115 | 229  | 235  | 97 +  | 3   | 237  | 4200   | 4434   |
| UN02396 | Rsa1.0.28582.1 | 762  | 810    | 2.00E-97  | 181  | 181  | 100 - | 49  | 229  | 630    | 810    |
| UN02397 | Rsa1.0.00020.1 | 743  | 283099 | 0         | 715  | 738  | 96 +  | 3   | 737  | 197113 | 197847 |
| UN02398 | Rsa1.0.02871.1 | 479  | 27085  | 7.00E-90  | 180  | 184  | 97 +  | 39  | 222  | 17889  | 18072  |
| UN02399 | Rsa1.0.04563.1 | 1275 | 16837  | 0         | 654  | 673  | 97 -  | 258 | 930  | 1988   | 2660   |
| UN02400 | Rsa1.0.00183.1 | 1354 | 113277 | 0         | 1288 | 1367 | 94 -  | 2   | 1352 | 96744  | 98100  |
| UN02401 | Rsa1.0.01991.1 | 560  | 36425  | 2.00E-50  | 147  | 163  | 90 -  | 76  | 229  | 8629   | 8787   |
| UN02402 | Rsa1.0.00979.1 | 1232 | 57733  | 3.00E-97  | 251  | 275  | 91 -  | 84  | 346  | 41925  | 42199  |
| UN02403 | Rsa1.0.09645.1 | 846  | 6234   | 1.00E-108 | 248  | 258  | 96 +  | 1   | 255  | 5803   | 6056   |
| UN02404 | Rsa1.0.00454.1 | 793  | 216970 | 1.00E-132 | 326  | 349  | 93 -  | 454 | 792  | 184249 | 184595 |
| UN02405 | Rsa1.0.02043.1 | 306  | 163754 | 8.00E-61  | 177  | 195  | 90 +  | 3   | 196  | 136195 | 136374 |
| UN02406 | Rsa1.0.09270.1 | 799  | 6513   | 0         | 748  | 800  | 93 -  | 6   | 792  | 5397   | 6177   |
| UN02407 | Rsa1.0.07616.1 | 573  | 9016   | 0         | 538  | 572  | 94 -  | 1   | 570  | 5317   | 5870   |
| UN02408 | Rsa1.0.05168.1 | 1316 | 14621  | 0         | 653  | 689  | 94 -  | 90  | 773  | 8801   | 9486   |
| UN02409 | Rsa1.0.00131.1 | 798  | 432233 | 1.00E-125 | 282  | 298  | 94 +  | 503 | 797  | 409494 | 409791 |
| UN02410 | Rsa1.0.25015.1 | 1235 | 956    | 0         | 471  | 485  | 97 -  | 409 | 893  | 475    | 956    |
| UN02411 | Rsa1.0.05271.1 | 715  | 14306  | 1.00E-108 | 217  | 223  | 97 +  | 359 | 581  | 14071  | 14293  |
| UN02412 | Rsa1.0.01559.1 | 696  | 43262  | 1.00E-139 | 281  | 291  | 96 +  | 392 | 682  | 2268   | 2558   |
| UN02413 | Rsa1.0.02353.1 | 806  | 32300  | 1.00E-159 | 312  | 321  | 97 -  | 239 | 559  | 31549  | 31869  |
| UN02414 | Rsa1.0.10792.1 | 752  | 5719   | 1.00E-107 | 213  | 217  | 98 -  | 304 | 520  | 2743   | 2958   |
| UN02415 | Rsa1.0.01580.1 | 1256 | 42852  | 1.00E-149 | 305  | 314  | 97 +  | 945 | 1253 | 37442  | 37755  |
| UN02416 | Rsa1.0.02946.1 | 1495 | 26537  | 0         | 918  | 938  | 97 -  | 74  | 1010 | 857    | 1790   |



|         |                |      |        |           |      |      |       |     |      |        |        |
|---------|----------------|------|--------|-----------|------|------|-------|-----|------|--------|--------|
| UN02417 | Rsa1.0.01516.1 | 710  | 44196  | 6.00E-79  | 156  | 158  | 98 -  | 5   | 162  | 26319  | 26476  |
| UN02418 | Rsa1.0.01273.1 | 955  | 49464  | 0         | 439  | 439  | 100 - | 465 | 903  | 41505  | 41943  |
| UN02419 | Rsa1.0.16547.1 | 547  | 2117   | 0         | 438  | 473  | 92 +  | 58  | 529  | 973    | 1445   |
| UN02420 | Rsa1.0.00059.1 | 1560 | 159650 | 0         | 1317 | 1330 | 99 -  | 231 | 1560 | 38603  | 39932  |
| UN02421 | Rsa1.0.15326.1 | 871  | 2683   | 0         | 706  | 727  | 97 -  | 145 | 866  | 611    | 1334   |
| UN02422 | Rsa1.0.07877.1 | 1047 | 8373   | 3.00E-72  | 148  | 151  | 98 -  | 474 | 624  | 5171   | 5321   |
| UN02423 | Rsa1.0.00790.1 | 776  | 148693 | 1.00E-157 | 343  | 362  | 94 -  | 1   | 348  | 58714  | 59073  |
| UN02424 | Rsa1.0.01967.1 | 1119 | 36672  | 0         | 555  | 568  | 97 -  | 513 | 1080 | 24386  | 24953  |
| UN02425 | Rsa1.0.05900.1 | 1234 | 12295  | 1.00E-163 | 359  | 377  | 95 -  | 3   | 370  | 5008   | 5381   |
| UN02426 | Rsa1.0.08961.1 | 814  | 6750   | 1.00E-108 | 233  | 244  | 95 -  | 13  | 256  | 5289   | 5532   |
| UN02427 | Rsa1.0.00403.1 | 848  | 87701  | 0         | 432  | 447  | 96 -  | 3   | 449  | 44934  | 45371  |
| UN02428 | Rsa1.0.03783.1 | 1133 | 20890  | 1.00E-150 | 316  | 326  | 96 -  | 804 | 1128 | 17825  | 18147  |
| UN02429 | Rsa1.0.01169.1 | 612  | 51829  | 0         | 514  | 528  | 97 +  | 4   | 531  | 23073  | 23598  |
| UN02430 | Rsa1.0.00145.1 | 812  | 261008 | 0         | 493  | 508  | 97 +  | 304 | 806  | 244127 | 244628 |
| UN02431 | Rsa1.0.00571.1 | 1146 | 329018 | 0         | 1108 | 1170 | 94 -  | 1   | 1145 | 173584 | 174742 |
| UN02432 | Rsa1.0.01434.1 | 1637 | 45951  | 0         | 450  | 474  | 94 -  | 16  | 483  | 39461  | 39934  |
| UN02433 | Rsa1.0.02812.1 | 1109 | 27660  | 0         | 364  | 374  | 97 -  | 3   | 376  | 16559  | 16931  |
| UN02434 | Rsa1.0.02846.1 | 1200 | 27338  | 0         | 822  | 860  | 95 -  | 235 | 1094 | 20814  | 21673  |
| UN02435 | Rsa1.0.05352.1 | 889  | 14079  | 1.00E-175 | 318  | 320  | 99 +  | 63  | 382  | 1030   | 1349   |
| UN02436 | Rsa1.0.00451.1 | 800  | 322533 | 1.00E-104 | 202  | 205  | 98 -  | 216 | 420  | 23958  | 24162  |
| UN02437 | Rsa1.0.01203.1 | 1162 | 50848  | 1.00E-110 | 220  | 226  | 97 +  | 608 | 833  | 39552  | 39777  |
| UN02438 | Rsa1.0.00487.1 | 1175 | 80674  | 0         | 672  | 673  | 99 +  | 503 | 1175 | 24259  | 24930  |
| UN02439 | Rsa1.0.01570.1 | 832  | 43015  | 2.00E-57  | 123  | 126  | 97 -  | 424 | 549  | 12707  | 12832  |
| UN02440 | Rsa1.0.00977.1 | 552  | 198001 | 0         | 406  | 429  | 94 +  | 79  | 507  | 50790  | 51216  |
| UN02441 | Rsa1.0.01789.1 | 937  | 39250  | 0         | 580  | 581  | 99 -  | 357 | 937  | 6028   | 6607   |
| UN02442 | Rsa1.0.02045.1 | 596  | 35650  | 6.00E-97  | 186  | 188  | 98 -  | 208 | 395  | 23658  | 23845  |
| UN02443 | Rsa1.0.01015.1 | 691  | 56752  | 0         | 466  | 505  | 92 -  | 25  | 518  | 45893  | 46396  |
| UN02444 | Rsa1.0.00129.1 | 908  | 126831 | 1.00E-144 | 301  | 310  | 97 +  | 2   | 306  | 113574 | 113883 |
| UN02445 | Rsa1.0.01169.1 | 1126 | 51829  | 0         | 502  | 510  | 98 -  | 618 | 1126 | 49042  | 49551  |
| UN02446 | Rsa1.0.07914.1 | 775  | 8294   | 0         | 717  | 781  | 91 +  | 8   | 775  | 472    | 1250   |
| UN02447 | Rsa1.0.16978.1 | 973  | 1964   | 3.00E-81  | 163  | 166  | 98 +  | 330 | 495  | 206    | 371    |
| UN02448 | Rsa1.0.01371.1 | 775  | 47079  | 0         | 676  | 681  | 99 -  | 97  | 775  | 43553  | 44233  |
| UN02449 | Rsa1.0.00301.1 | 1245 | 365315 | 1.00E-154 | 305  | 313  | 97 -  | 463 | 774  | 276755 | 277067 |
| UN02450 | Rsa1.0.01140.1 | 850  | 52586  | 7.00E-76  | 145  | 145  | 100 + | 4   | 148  | 3354   | 3498   |
| UN02451 | Rsa1.0.00963.1 | 601  | 58176  | 0         | 584  | 601  | 97 -  | 1   | 601  | 776    | 1367   |
| UN02452 | Rsa1.0.01144.1 | 1342 | 52431  | 1.00E-149 | 322  | 339  | 94 +  | 54  | 389  | 22927  | 23265  |
| UN02453 | Rsa1.0.25755.1 | 665  | 922    | 0         | 554  | 562  | 98 +  | 100 | 661  | 1      | 562    |
| UN02454 | Rsa1.0.00190.1 | 1208 | 318240 | 0         | 381  | 390  | 97 +  | 32  | 421  | 116678 | 117067 |
| UN02455 | Rsa1.0.00600.1 | 919  | 73395  | 0         | 807  | 887  | 90 -  | 43  | 917  | 9873   | 10759  |

|         |                |      |        |           |      |      |       |      |      |        |        |
|---------|----------------|------|--------|-----------|------|------|-------|------|------|--------|--------|
| UN02456 | Rsa1.0.00144.1 | 1012 | 120708 | 0         | 617  | 637  | 96 -  | 323  | 957  | 47699  | 48335  |
| UN02457 | Rsa1.0.02896.1 | 721  | 26970  | 1.00E-167 | 487  | 555  | 87 +  | 3    | 530  | 11184  | 11720  |
| UN02458 | Rsa1.0.00002.1 | 951  | 601661 | 1.00E-93  | 184  | 187  | 98 +  | 505  | 691  | 255311 | 255497 |
| UN02459 | Rsa1.0.02499.1 | 940  | 30774  | 1.00E-114 | 235  | 242  | 97 -  | 624  | 864  | 1181   | 1422   |
| UN02460 | Rsa1.0.02611.1 | 1346 | 29586  | 1.00E-118 | 308  | 338  | 91 -  | 1012 | 1346 | 19152  | 19473  |
| UN02461 | Rsa1.0.01146.1 | 664  | 163455 | 3.00E-90  | 220  | 234  | 94 -  | 433  | 664  | 41256  | 41485  |
| UN02462 | Rsa1.0.02043.1 | 1306 | 163754 | 1.00E-164 | 338  | 353  | 95 +  | 1    | 353  | 140832 | 141184 |
| UN02463 | Rsa1.0.00050.1 | 817  | 237174 | 1.00E-168 | 306  | 308  | 99 -  | 510  | 817  | 188989 | 189296 |
| UN02464 | Rsa1.0.00003.1 | 785  | 340054 | 1.00E-106 | 201  | 203  | 99 +  | 219  | 421  | 85507  | 85709  |
| UN02465 | Rsa1.0.00955.1 | 1355 | 58358  | 0         | 505  | 510  | 99 -  | 846  | 1355 | 8320   | 8826   |
| UN02466 | Rsa1.0.00324.1 | 964  | 218805 | 1.00E-141 | 314  | 331  | 94 +  | 633  | 963  | 182790 | 183113 |
| UN02467 | Rsa1.0.00007.1 | 1006 | 239325 | 1.00E-159 | 347  | 365  | 95 +  | 642  | 1004 | 13416  | 13780  |
| UN02468 | Rsa1.0.00684.1 | 1382 | 141701 | 0         | 1002 | 1043 | 96 -  | 2    | 1044 | 9100   | 10142  |
| UN02469 | Rsa1.0.05482.1 | 1022 | 13595  | 1.00E-161 | 328  | 341  | 96 -  | 199  | 539  | 12266  | 12606  |
| UN02470 | Rsa1.0.00093.1 | 1357 | 214962 | 0         | 368  | 377  | 97 +  | 395  | 771  | 133459 | 133835 |
| UN02471 | Rsa1.0.00748.1 | 884  | 65983  | 0         | 497  | 544  | 91 -  | 3    | 542  | 63996  | 64525  |
| UN02472 | Rsa1.0.01371.1 | 733  | 47079  | 0         | 713  | 737  | 96 +  | 3    | 732  | 30775  | 31511  |
| UN02473 | Rsa1.0.04118.1 | 777  | 18968  | 0         | 564  | 566  | 99 -  | 212  | 777  | 15468  | 16033  |
| UN02474 | Rsa1.0.03994.1 | 1448 | 19659  | 0         | 351  | 357  | 98 +  | 1091 | 1446 | 1755   | 2110   |
| UN02475 | Rsa1.0.00419.1 | 1108 | 86562  | 1.00E-121 | 315  | 350  | 90 +  | 766  | 1108 | 53124  | 53454  |
| UN02476 | Rsa1.0.03795.1 | 1035 | 20818  | 1.00E-115 | 263  | 274  | 95 +  | 756  | 1027 | 15481  | 15750  |
| UN02477 | Rsa1.0.00280.1 | 1479 | 99966  | 0         | 468  | 470  | 99 -  | 1010 | 1479 | 15032  | 15501  |
| UN02478 | Rsa1.0.00243.1 | 927  | 103651 | 0         | 768  | 807  | 95 -  | 5    | 808  | 79074  | 79880  |
| UN02479 | Rsa1.0.04323.1 | 1086 | 17915  | 1.00E-142 | 284  | 293  | 96 -  | 794  | 1086 | 13892  | 14184  |
| UN02480 | Rsa1.0.00803.1 | 1140 | 144228 | 1.00E-173 | 341  | 351  | 97 +  | 790  | 1140 | 15466  | 15813  |
| UN02481 | Rsa1.0.00653.1 | 717  | 70029  | 1.00E-173 | 357  | 372  | 95 -  | 309  | 680  | 37130  | 37500  |
| UN02482 | Rsa1.0.00281.1 | 1101 | 99908  | 1.00E-151 | 316  | 328  | 96 +  | 775  | 1101 | 6793   | 7119   |
| UN02483 | Rsa1.0.00311.1 | 1296 | 96847  | 0         | 507  | 519  | 97 -  | 7    | 523  | 35682  | 36200  |
| UN02484 | Rsa1.0.00122.1 | 849  | 265937 | 0         | 473  | 477  | 99 -  | 373  | 849  | 49369  | 49845  |
| UN02485 | Rsa1.0.00128.1 | 817  | 228675 | 0         | 745  | 764  | 97 -  | 45   | 806  | 203869 | 204627 |
| UN02486 | Rsa1.0.00623.1 | 1283 | 207630 | 0         | 850  | 888  | 95 -  | 340  | 1212 | 152309 | 153196 |
| UN02487 | Rsa1.0.00697.1 | 1112 | 67913  | 1.00E-159 | 307  | 313  | 98 +  | 617  | 928  | 58544  | 58856  |
| UN02488 | Rsa1.0.09946.1 | 955  | 6076   | 1.00E-178 | 316  | 316  | 100 + | 3    | 318  | 493    | 808    |
| UN02489 | Rsa1.0.00021.1 | 855  | 263655 | 1.00E-169 | 326  | 333  | 97 +  | 209  | 540  | 179134 | 179466 |
| UN02490 | Rsa1.0.19149.1 | 791  | 1472   | 1.00E-117 | 281  | 309  | 90 -  | 235  | 521  | 257    | 565    |
| UN02491 | Rsa1.0.00642.1 | 1291 | 201230 | 1.00E-173 | 415  | 452  | 91 -  | 840  | 1268 | 62521  | 62971  |
| UN02492 | Rsa1.0.01060.1 | 850  | 55368  | 1.00E-162 | 315  | 322  | 97 -  | 8    | 328  | 50250  | 50571  |
| UN02493 | Rsa1.0.04561.1 | 677  | 16849  | 3.00E-65  | 136  | 139  | 97 +  | 147  | 285  | 9223   | 9361   |
| UN02494 | Rsa1.0.01184.1 | 1135 | 51452  | 1.00E-179 | 378  | 400  | 94 +  | 741  | 1135 | 50577  | 50965  |

|         |                |      |        |           |      |      |       |     |      |        |        |
|---------|----------------|------|--------|-----------|------|------|-------|-----|------|--------|--------|
| UN02495 | Rsa1.0_00326.1 | 1054 | 171955 | 1.00E-105 | 238  | 251  | 94 -  | 532 | 777  | 62166  | 62416  |
| UN02496 | Rsa1.0_03572.1 | 574  | 146346 | 1.00E-70  | 207  | 231  | 89 -  | 69  | 293  | 137177 | 137407 |
| UN02497 | Rsa1.0_00032.1 | 931  | 306326 | 0         | 896  | 956  | 93 +  | 1   | 931  | 144544 | 145489 |
| UN02498 | Rsa1.0_00699.1 | 1238 | 184398 | 1.00E-163 | 328  | 339  | 96 +  | 886 | 1224 | 11508  | 11844  |
| UN02499 | Rsa1.0_00028.1 | 1427 | 293984 | 1.00E-60  | 126  | 128  | 98 -  | 907 | 1034 | 21632  | 21759  |
| UN02500 | Rsa1.0_00664.1 | 1006 | 69573  | 0         | 387  | 398  | 97 -  | 608 | 1004 | 16704  | 17101  |
| UN02501 | Rsa1.0_00086.1 | 685  | 439854 | 1.00E-148 | 307  | 320  | 95 -  | 366 | 685  | 296403 | 296719 |
| UN02502 | Rsa1.0_04622.1 | 1281 | 16618  | 0         | 614  | 638  | 96 -  | 644 | 1281 | 13865  | 14502  |
| UN02503 | Rsa1.0_01244.1 | 1262 | 50061  | 0         | 498  | 499  | 99 -  | 759 | 1257 | 4518   | 5016   |
| UN02504 | Rsa1.0_03953.1 | 1025 | 19889  | 0         | 795  | 831  | 95 -  | 209 | 1023 | 6197   | 7021   |
| UN02505 | Rsa1.0_00471.1 | 832  | 81897  | 0         | 384  | 395  | 97 -  | 3   | 396  | 4146   | 4539   |
| UN02506 | Rsa1.0_01422.1 | 1155 | 46172  | 1.00E-172 | 328  | 334  | 98 +  | 814 | 1147 | 28595  | 28926  |
| UN02507 | Rsa1.0_20596.1 | 797  | 1289   | 1.00E-175 | 330  | 335  | 98 +  | 325 | 659  | 12     | 345    |
| UN02508 | Rsa1.0_00301.1 | 1139 | 365315 | 0         | 489  | 513  | 95 +  | 604 | 1116 | 304665 | 305171 |
| UN02509 | Rsa1.0_00163.1 | 1443 | 116847 | 0         | 1172 | 1218 | 96 -  | 226 | 1443 | 7919   | 9130   |
| UN02510 | Rsa1.0_37892.1 | 1578 | 595    | 1.00E-116 | 213  | 213  | 100 - | 473 | 685  | 374    | 586    |
| UN02511 | Rsa1.0_00045.1 | 997  | 328694 | 0         | 700  | 705  | 99 +  | 293 | 997  | 229947 | 230651 |
| UN02512 | Rsa1.0_14656.1 | 875  | 3183   | 1.00E-122 | 261  | 274  | 95 -  | 592 | 865  | 1368   | 1641   |
| UN02513 | Rsa1.0_03765.1 | 1261 | 20971  | 0         | 757  | 762  | 99 +  | 1   | 762  | 14012  | 14773  |
| UN02514 | Rsa1.0_01464.1 | 1043 | 45193  | 3.00E-94  | 214  | 226  | 94 -  | 623 | 848  | 16256  | 16478  |
| UN02515 | Rsa1.0_00162.1 | 1266 | 239935 | 0         | 707  | 751  | 94 +  | 1   | 735  | 38536  | 39286  |
| UN02516 | Rsa1.0_03613.1 | 801  | 21773  | 1.00E-134 | 281  | 292  | 96 +  | 1   | 291  | 16649  | 16932  |
| UN02517 | Rsa1.0_01833.1 | 992  | 38555  | 1.00E-107 | 211  | 214  | 98 -  | 76  | 289  | 16525  | 16737  |
| UN02518 | Rsa1.0_07757.1 | 1038 | 8633   | 0         | 910  | 971  | 93 +  | 46  | 1011 | 4136   | 5094   |
| UN02519 | Rsa1.0_01113.1 | 1125 | 53616  | 1.00E-115 | 263  | 278  | 94 -  | 849 | 1123 | 2899   | 3171   |
| UN02520 | Rsa1.0_00286.1 | 1232 | 98709  | 1.00E-159 | 425  | 469  | 90 -  | 9   | 450  | 26258  | 26726  |
| UN02521 | Rsa1.0_00944.1 | 791  | 58733  | 0         | 708  | 766  | 92 -  | 1   | 756  | 32281  | 33034  |
| UN02522 | Rsa1.0_00020.1 | 482  | 283099 | 0         | 466  | 482  | 96 -  | 1   | 482  | 74904  | 75385  |
| UN02523 | Rsa1.0_00544.1 | 684  | 76787  | 1.00E-135 | 244  | 244  | 100 + | 1   | 244  | 57829  | 58072  |
| UN02524 | Rsa1.0_02157.1 | 1432 | 149652 | 0         | 531  | 533  | 99 -  | 901 | 1432 | 130569 | 131101 |
| UN02525 | Rsa1.0_00039.1 | 1240 | 296927 | 0         | 639  | 650  | 98 +  | 1   | 650  | 254868 | 255508 |
| UN02526 | Rsa1.0_00017.1 | 1184 | 752458 | 0         | 1030 | 1064 | 96 -  | 1   | 1063 | 317267 | 318329 |
| UN02527 | Rsa1.0_00353.1 | 842  | 92242  | 1.00E-58  | 119  | 120  | 99 +  | 243 | 362  | 56357  | 56476  |
| UN02528 | Rsa1.0_00046.1 | 770  | 320315 | 1.00E-159 | 369  | 396  | 93 -  | 1   | 374  | 29574  | 29969  |
| UN02529 | Rsa1.0_00275.1 | 650  | 210104 | 0         | 554  | 602  | 92 +  | 53  | 650  | 189716 | 190316 |
| UN02530 | Rsa1.0_00318.1 | 752  | 96094  | 0         | 443  | 447  | 99 -  | 209 | 655  | 20836  | 21282  |
| UN02531 | Rsa1.0_00243.1 | 1328 | 103651 | 0         | 1224 | 1281 | 95 -  | 3   | 1281 | 85850  | 87116  |
| UN02532 | Rsa1.0_00306.1 | 1214 | 146760 | 3.00E-82  | 198  | 212  | 93 -  | 626 | 837  | 101654 | 101865 |
| UN02533 | Rsa1.0_00170.1 | 402  | 179538 | 1.00E-118 | 261  | 276  | 94 +  | 1   | 276  | 20767  | 21038  |

|         |                |      |        |           |      |      |      |     |      |        |        |
|---------|----------------|------|--------|-----------|------|------|------|-----|------|--------|--------|
| UN02534 | Rsa1.0.03955.1 | 968  | 19884  | 1.00E-164 | 324  | 335  | 96 + | 1   | 327  | 5792   | 6126   |
| UN02535 | Rsa1.0.02955.1 | 729  | 26484  | 1.00E-120 | 280  | 298  | 93 - | 1   | 290  | 21585  | 21882  |
| UN02536 | Rsa1.0.16489.1 | 996  | 2137   | 0         | 915  | 921  | 99 + | 75  | 993  | 7      | 927    |
| UN02537 | Rsa1.0.02648.1 | 810  | 29073  | 1.00E-172 | 340  | 350  | 97 + | 74  | 423  | 25877  | 26225  |
| UN02538 | Rsa1.0.02157.1 | 535  | 149652 | 1.00E-180 | 370  | 387  | 95 - | 65  | 451  | 11588  | 11963  |
| UN02539 | Rsa1.0.01281.1 | 1388 | 49313  | 0         | 1318 | 1351 | 97 - | 36  | 1386 | 4296   | 5645   |
| UN02540 | Rsa1.0.00816.1 | 1235 | 403350 | 0         | 668  | 682  | 97 + | 1   | 682  | 139120 | 139801 |
| UN02541 | Rsa1.0.01322.1 | 301  | 48166  | 9.00E-76  | 238  | 263  | 90 + | 45  | 301  | 28203  | 28460  |
| UN02542 | Rsa1.0.26227.1 | 1143 | 900    | 0         | 531  | 551  | 96 - | 212 | 759  | 351    | 900    |
| UN02543 | Rsa1.0.07011.1 | 840  | 10034  | 0         | 511  | 525  | 97 - | 314 | 838  | 9512   | 10034  |
| UN02544 | Rsa1.0.00127.1 | 1359 | 127446 | 1.00E-160 | 368  | 390  | 94 + | 1   | 385  | 110336 | 110716 |
| UN02545 | Rsa1.0.20596.1 | 1459 | 1289   | 1.00E-173 | 329  | 336  | 97 - | 802 | 1137 | 12     | 347    |
| UN02546 | Rsa1.0.01818.1 | 1269 | 38837  | 1.00E-175 | 331  | 337  | 98 - | 2   | 338  | 31247  | 31580  |
| UN02547 | Rsa1.0.01405.1 | 995  | 46445  | 0         | 574  | 614  | 93 + | 11  | 611  | 32628  | 33235  |
| UN02548 | Rsa1.0.06109.1 | 1337 | 11728  | 0         | 596  | 623  | 95 - | 1   | 620  | 5921   | 6539   |
| UN02549 | Rsa1.0.04836.1 | 1335 | 15765  | 0         | 550  | 585  | 94 - | 5   | 589  | 13779  | 14363  |
| UN02550 | Rsa1.0.03299.1 | 1273 | 23949  | 0         | 631  | 654  | 96 + | 1   | 654  | 15163  | 15816  |
| UN02551 | Rsa1.0.00114.1 | 716  | 131330 | 0         | 480  | 488  | 98 - | 3   | 490  | 62925  | 63412  |
| UN02552 | Rsa1.0.00065.1 | 1417 | 454616 | 1.00E-112 | 229  | 235  | 97 - | 3   | 237  | 448185 | 448418 |
| UN02553 | Rsa1.0.04379.1 | 665  | 17646  | 0         | 550  | 568  | 96 + | 100 | 665  | 4214   | 4780   |
| UN02554 | Rsa1.0.00075.1 | 623  | 146680 | 9.00E-81  | 197  | 209  | 94 + | 173 | 379  | 29535  | 29743  |
| UN02555 | Rsa1.0.01281.1 | 896  | 49313  | 0         | 502  | 553  | 90 - | 1   | 532  | 30590  | 31131  |
| UN02556 | Rsa1.0.02321.1 | 1079 | 32572  | 0         | 712  | 776  | 91 - | 1   | 770  | 20709  | 21466  |
| UN02557 | Rsa1.0.02266.1 | 794  | 33195  | 0         | 351  | 355  | 98 + | 1   | 355  | 16287  | 16637  |
| UN02558 | Rsa1.0.00706.1 | 524  | 291570 | 1.00E-106 | 277  | 305  | 90 + | 4   | 308  | 229288 | 229580 |
| UN02559 | Rsa1.0.00568.1 | 877  | 75219  | 1.00E-170 | 312  | 315  | 99 + | 8   | 322  | 16072  | 16386  |
| UN02560 | Rsa1.0.00273.1 | 916  | 326186 | 0         | 487  | 504  | 96 + | 3   | 506  | 8093   | 8595   |
| UN02561 | Rsa1.0.00272.1 | 972  | 447836 | 1.00E-171 | 363  | 377  | 96 + | 1   | 371  | 425350 | 425723 |
| UN02562 | Rsa1.0.00985.1 | 811  | 161950 | 0         | 768  | 787  | 97 + | 2   | 783  | 27018  | 27802  |
| UN02563 | Rsa1.0.00107.1 | 987  | 431659 | 0         | 414  | 418  | 99 - | 88  | 504  | 369243 | 369659 |
| UN02564 | Rsa1.0.00636.1 | 621  | 71113  | 0         | 616  | 621  | 99 + | 1   | 621  | 7710   | 8329   |
| UN02565 | Rsa1.0.00002.1 | 1238 | 601661 | 0         | 1231 | 1237 | 99 - | 1   | 1237 | 490426 | 491662 |
| UN02566 | Rsa1.0.01959.1 | 844  | 36798  | 0         | 787  | 839  | 93 + | 5   | 836  | 4352   | 5187   |
| UN02567 | Rsa1.0.05748.1 | 784  | 12749  | 0         | 399  | 407  | 98 + | 1   | 400  | 6545   | 6951   |
| UN02568 | Rsa1.0.00744.1 | 682  | 66084  | 1.00E-167 | 377  | 402  | 93 - | 1   | 392  | 53238  | 53638  |
| UN02569 | Rsa1.0.00377.1 | 1071 | 90038  | 0         | 917  | 936  | 97 - | 1   | 936  | 33637  | 34569  |
| UN02570 | Rsa1.0.01882.1 | 633  | 37697  | 9.00E-84  | 223  | 242  | 92 - | 67  | 302  | 20903  | 21138  |
| UN02571 | Rsa1.0.09069.1 | 1422 | 6671   | 0         | 469  | 480  | 97 + | 415 | 894  | 2813   | 3292   |
| UN02572 | Rsa1.0.01696.1 | 992  | 301850 | 0         | 585  | 615  | 95 + | 1   | 615  | 160677 | 161284 |

|         |                |      |        |           |      |      |      |     |      |        |        |
|---------|----------------|------|--------|-----------|------|------|------|-----|------|--------|--------|
| UN02573 | Rsa1.0.00019.1 | 1033 | 301669 | 0         | 1011 | 1036 | 97 - | 1   | 1031 | 83127  | 84162  |
| UN02574 | Rsa1.0.02789.1 | 1136 | 27850  | 1.00E-129 | 248  | 251  | 98 - | 1   | 250  | 24794  | 25044  |
| UN02575 | Rsa1.0.00108.1 | 964  | 478491 | 1.00E-104 | 267  | 286  | 93 + | 125 | 402  | 67382  | 67663  |
| UN02576 | Rsa1.0.10698.1 | 831  | 5753   | 1.00E-120 | 248  | 257  | 96 + | 156 | 412  | 217    | 470    |
| UN02577 | Rsa1.0.05683.1 | 1084 | 12944  | 0         | 461  | 474  | 97 + | 610 | 1083 | 4930   | 5394   |
| UN02578 | Rsa1.0.07922.1 | 1045 | 8254   | 2.00E-45  | 118  | 126  | 93 + | 211 | 336  | 4202   | 4327   |
| UN02579 | Rsa1.0.01103.1 | 1149 | 53974  | 0         | 480  | 488  | 98 - | 138 | 618  | 37812  | 38299  |
| UN02580 | Rsa1.0.00604.1 | 1132 | 146282 | 0         | 649  | 656  | 98 + | 263 | 916  | 86846  | 87500  |
| UN02581 | Rsa1.0.06861.1 | 1160 | 10246  | 0         | 727  | 729  | 99 + | 1   | 729  | 4901   | 5629   |
| UN02582 | Rsa1.0.02157.1 | 1207 | 149652 | 6.00E-31  | 111  | 122  | 90 + | 144 | 265  | 143782 | 143901 |
| UN02583 | Rsa1.0.02078.1 | 1325 | 35308  | 0         | 492  | 508  | 96 + | 817 | 1324 | 22705  | 23212  |
| UN02584 | Rsa1.0.01724.1 | 954  | 40292  | 0         | 485  | 488  | 99 + | 1   | 486  | 356    | 843    |
| UN02585 | Rsa1.0.05229.1 | 812  | 14437  | 0         | 780  | 818  | 95 + | 2   | 808  | 8166   | 8983   |
| UN02586 | Rsa1.0.00154.1 | 690  | 189461 | 0         | 497  | 524  | 94 - | 1   | 511  | 171027 | 171548 |
| UN02587 | Rsa1.0.06869.1 | 838  | 10234  | 1.00E-135 | 251  | 253  | 99 + | 586 | 838  | 448    | 700    |
| UN02588 | Rsa1.0.06169.1 | 1617 | 11578  | 0         | 675  | 678  | 99 + | 940 | 1617 | 7905   | 8581   |
| UN02589 | Rsa1.0.03695.1 | 1325 | 21329  | 6.00E-99  | 233  | 246  | 94 + | 89  | 332  | 9883   | 10125  |
| UN02590 | Rsa1.0.00494.1 | 1304 | 79967  | 0         | 711  | 720  | 98 - | 326 | 1045 | 20834  | 21553  |
| UN02591 | Rsa1.0.01516.1 | 934  | 44196  | 1.00E-160 | 341  | 358  | 95 + | 492 | 848  | 24091  | 24448  |
| UN02592 | Rsa1.0.10606.1 | 1145 | 5787   | 0         | 1075 | 1149 | 93 + | 1   | 1143 | 838    | 1969   |
| UN02593 | Rsa1.0.01064.1 | 1286 | 55295  | 0         | 495  | 518  | 95 + | 619 | 1133 | 51704  | 52221  |
| UN02594 | Rsa1.0.01355.1 | 1362 | 47303  | 0         | 1257 | 1398 | 89 - | 1   | 1361 | 39411  | 40772  |
| UN02595 | Rsa1.0.00331.1 | 1339 | 176754 | 0         | 836  | 878  | 95 - | 477 | 1336 | 22215  | 23092  |
| UN02596 | Rsa1.0.00123.1 | 796  | 325650 | 0         | 594  | 628  | 94 - | 14  | 641  | 240510 | 241126 |
| UN02597 | Rsa1.0.01601.1 | 1154 | 42519  | 1.00E-128 | 236  | 237  | 99 + | 5   | 241  | 17160  | 17396  |
| UN02598 | Rsa1.0.00015.1 | 1300 | 561803 | 0         | 404  | 417  | 96 - | 1   | 417  | 371807 | 372219 |
| UN02599 | Rsa1.0.00886.1 | 871  | 167350 | 0         | 841  | 877  | 95 + | 2   | 871  | 41687  | 42545  |
| UN02600 | Rsa1.0.01343.1 | 554  | 47735  | 1.00E-138 | 284  | 293  | 96 - | 15  | 305  | 30311  | 30602  |
| UN02601 | Rsa1.0.00015.1 | 1341 | 561803 | 0         | 1031 | 1038 | 99 + | 306 | 1340 | 254336 | 255373 |
| UN02602 | Rsa1.0.00111.1 | 867  | 390088 | 1.00E-123 | 331  | 363  | 91 - | 335 | 685  | 55562  | 55911  |
| UN02603 | Rsa1.0.04458.1 | 1215 | 17255  | 1.00E-167 | 314  | 319  | 98 + | 666 | 984  | 7725   | 8043   |
| UN02604 | Rsa1.0.07606.1 | 695  | 9035   | 0         | 642  | 653  | 98 + | 1   | 650  | 1974   | 2623   |
| UN02605 | Rsa1.0.00122.1 | 733  | 265937 | 0         | 700  | 722  | 96 - | 8   | 728  | 30875  | 31593  |
| UN02606 | Rsa1.0.01088.1 | 1205 | 54416  | 0         | 857  | 881  | 97 - | 329 | 1204 | 7393   | 8259   |
| UN02607 | Rsa1.0.02348.1 | 787  | 32316  | 0         | 513  | 530  | 96 + | 255 | 782  | 5536   | 6062   |
| UN02608 | Rsa1.0.00644.1 | 1416 | 136881 | 1.00E-178 | 332  | 337  | 98 - | 1   | 337  | 27149  | 27485  |
| UN02609 | Rsa1.0.00327.1 | 895  | 94892  | 0         | 463  | 472  | 98 + | 1   | 472  | 24984  | 25448  |
| UN02610 | Rsa1.0.01492.1 | 914  | 44704  | 1.00E-105 | 249  | 266  | 93 - | 8   | 261  | 35636  | 35901  |
| UN02611 | Rsa1.0.00608.1 | 1075 | 172672 | 0         | 755  | 807  | 93 - | 2   | 787  | 113434 | 114240 |

|         |                |      |        |           |      |      |      |      |      |        |        |
|---------|----------------|------|--------|-----------|------|------|------|------|------|--------|--------|
| UN02612 | Rsa1.0_00027.1 | 1022 | 283362 | 1.00E-175 | 327  | 332  | 98 - | 321  | 652  | 99118  | 99449  |
| UN02613 | Rsa1.0_02585.1 | 1090 | 29865  | 0         | 382  | 397  | 96 - | 685  | 1078 | 7735   | 8131   |
| UN02614 | Rsa1.0_00518.1 | 1284 | 78360  | 0         | 708  | 731  | 96 - | 1    | 729  | 76155  | 76882  |
| UN02615 | Rsa1.0_09359.1 | 1419 | 6427   | 0         | 751  | 769  | 97 - | 650  | 1418 | 305    | 1073   |
| UN02616 | Rsa1.0_00504.1 | 1454 | 79334  | 0         | 1453 | 1454 | 99 - | 1    | 1454 | 70259  | 71712  |
| UN02617 | Rsa1.0_00035.1 | 1223 | 176449 | 0         | 557  | 562  | 99 - | 1    | 562  | 98646  | 99207  |
| UN02618 | Rsa1.0_01298.1 | 793  | 48999  | 1.00E-127 | 275  | 294  | 93 + | 3    | 296  | 6696   | 6971   |
| UN02619 | Rsa1.0_00457.1 | 780  | 337301 | 1.00E-155 | 287  | 290  | 98 + | 161  | 450  | 9577   | 9866   |
| UN02620 | Rsa1.0_04958.1 | 1292 | 15327  | 0         | 407  | 409  | 99 + | 1    | 409  | 12484  | 12892  |
| UN02621 | Rsa1.0_01450.1 | 1020 | 144251 | 0         | 523  | 556  | 94 + | 48   | 603  | 41518  | 42073  |
| UN02622 | Rsa1.0_21131.1 | 1339 | 1232   | 1.00E-133 | 251  | 254  | 98 - | 1084 | 1337 | 228    | 481    |
| UN02623 | Rsa1.0_00660.1 | 875  | 69688  | 1.00E-71  | 141  | 142  | 99 + | 502  | 643  | 53034  | 53175  |
| UN02624 | Rsa1.0_00306.1 | 1483 | 146760 | 0         | 748  | 804  | 93 - | 662  | 1459 | 88781  | 89563  |
| UN02625 | Rsa1.0_02606.1 | 1014 | 29635  | 1.00E-105 | 204  | 207  | 98 - | 637  | 843  | 10487  | 10693  |
| UN02626 | Rsa1.0_01897.1 | 1419 | 37499  | 0         | 824  | 865  | 95 - | 483  | 1338 | 8386   | 9249   |
| UN02627 | Rsa1.0_01803.1 | 762  | 173846 | 1.00E-175 | 395  | 416  | 94 - | 1    | 413  | 137460 | 137869 |
| UN02628 | Rsa1.0_03694.1 | 867  | 21336  | 0         | 748  | 771  | 97 - | 96   | 866  | 20089  | 20858  |
| UN02629 | Rsa1.0_00067.1 | 757  | 415055 | 0         | 534  | 536  | 99 - | 16   | 551  | 220023 | 220558 |
| UN02630 | Rsa1.0_00341.1 | 679  | 249309 | 4.00E-77  | 153  | 155  | 98 - | 377  | 531  | 122984 | 123138 |
| UN02631 | Rsa1.0_01537.1 | 636  | 187285 | 1.00E-163 | 357  | 375  | 95 - | 1    | 373  | 839    | 1207   |
| UN02632 | Rsa1.0_00111.1 | 230  | 390088 | 2.00E-85  | 200  | 212  | 94 + | 4    | 215  | 45742  | 45952  |
| UN02633 | Rsa1.0_00714.1 | 1448 | 67187  | 9.00E-92  | 242  | 262  | 92 - | 1122 | 1376 | 13175  | 13433  |
| UN02634 | Rsa1.0_00127.1 | 1163 | 127446 | 0         | 1003 | 1087 | 92 + | 1    | 1068 | 16351  | 17408  |
| UN02635 | #              | #    | #      | #         | #    | #    | #    | #    | #    | #      | #      |
| UN02636 | Rsa1.0_01184.1 | 953  | 51452  | 0         | 381  | 383  | 99 - | 345  | 727  | 26949  | 27331  |
| UN02637 | Rsa1.0_02257.1 | 1159 | 33318  | 1.00E-115 | 229  | 235  | 97 + | 728  | 962  | 21475  | 21709  |
| UN02638 | Rsa1.0_02791.1 | 1277 | 27832  | 0         | 529  | 540  | 97 - | 2    | 539  | 7700   | 8234   |
| UN02639 | Rsa1.0_01517.1 | 1181 | 44170  | 3.00E-94  | 218  | 230  | 94 + | 3    | 223  | 25298  | 25527  |
| UN02640 | Rsa1.0_04450.1 | 771  | 17297  | 1.00E-143 | 288  | 298  | 96 - | 474  | 771  | 12688  | 12985  |
| UN02641 | Rsa1.0_03828.1 | 1226 | 20588  | 0         | 382  | 399  | 95 + | 1    | 392  | 5984   | 6381   |
| UN02642 | Rsa1.0_01039.1 | 753  | 55946  | 1.00E-147 | 271  | 273  | 99 + | 481  | 753  | 3862   | 4134   |
| UN02643 | Rsa1.0_03001.1 | 717  | 26108  | 0         | 482  | 492  | 97 + | 1    | 492  | 11731  | 12222  |
| UN02644 | Rsa1.0_02820.1 | 1128 | 27629  | 0         | 506  | 527  | 96 - | 590  | 1104 | 19486  | 20011  |
| UN02645 | Rsa1.0_09273.1 | 1036 | 6511   | 7.00E-98  | 226  | 239  | 94 + | 790  | 1024 | 1960   | 2197   |
| UN02646 | Rsa1.0_00583.1 | 703  | 74309  | 1.00E-165 | 324  | 333  | 97 + | 250  | 579  | 71950  | 72282  |
| UN02647 | Rsa1.0_04428.1 | 1123 | 17399  | 0         | 1059 | 1126 | 94 + | 1    | 1123 | 8438   | 9531   |
| UN02648 | Rsa1.0_02270.1 | 505  | 249821 | 0         | 499  | 505  | 98 - | 1    | 505  | 6888   | 7392   |
| UN02649 | Rsa1.0_00056.1 | 1211 | 332604 | 0         | 1121 | 1146 | 97 + | 70   | 1211 | 306623 | 307767 |
| UN02650 | Rsa1.0_00376.1 | 1240 | 90101  | 1.00E-118 | 309  | 338  | 91 - | 870  | 1203 | 2720   | 3057   |

|         |                |      |        |           |     |     |       |      |      |        |        |
|---------|----------------|------|--------|-----------|-----|-----|-------|------|------|--------|--------|
| UN02651 | Rsa1.0.02086.1 | 860  | 35198  | 0         | 841 | 861 | 97 +  | 1    | 860  | 27642  | 28502  |
| UN02652 | Rsa1.0.01099.1 | 689  | 158481 | 1.00E-117 | 289 | 312 | 92 -  | 1    | 303  | 132505 | 132816 |
| UN02653 | Rsa1.0.00332.1 | 1311 | 94575  | 6.00E-68  | 197 | 220 | 89 -  | 1098 | 1308 | 40447  | 40666  |
| UN02654 | Rsa1.0.00060.1 | 912  | 502678 | 1.00E-150 | 295 | 302 | 97 +  | 1    | 302  | 252665 | 252965 |
| UN02655 | Rsa1.0.04741.1 | 667  | 16164  | 0         | 514 | 542 | 94 -  | 1    | 541  | 6532   | 7070   |
| UN02656 | Rsa1.0.01139.1 | 619  | 52601  | 0         | 381 | 390 | 97 -  | 1    | 389  | 50365  | 50754  |
| UN02657 | Rsa1.0.01389.1 | 744  | 46716  | 1.00E-106 | 258 | 278 | 92 +  | 421  | 695  | 13119  | 13396  |
| UN02658 | Rsa1.0.36749.1 | 892  | 613    | 1.00E-168 | 331 | 340 | 97 +  | 174  | 512  | 186    | 525    |
| UN02659 | Rsa1.0.00582.1 | 818  | 74333  | 3.00E-81  | 157 | 158 | 99 -  | 268  | 425  | 18123  | 18280  |
| UN02660 | Rsa1.0.00910.1 | 1092 | 59975  | 0         | 509 | 534 | 95 +  | 1    | 532  | 55819  | 56351  |
| UN02661 | Rsa1.0.02064.1 | 1017 | 35476  | 0         | 473 | 492 | 96 +  | 1    | 491  | 16539  | 17023  |
| UN02662 | Rsa1.0.58913.1 | 784  | 388    | 5.00E-95  | 198 | 205 | 96 +  | 117  | 321  | 26     | 230    |
| UN02663 | #              | #    | #      | #         | #   | #   | #     | #    | #    | #      | #      |
| UN02664 | Rsa1.0.00286.1 | 1238 | 98709  | 0         | 421 | 439 | 95 +  | 800  | 1237 | 26258  | 26691  |
| UN02665 | Rsa1.0.04271.1 | 923  | 18148  | 0         | 911 | 922 | 98 +  | 2    | 923  | 14139  | 15060  |
| UN02666 | Rsa1.0.05847.1 | 1303 | 12433  | 0         | 432 | 444 | 97 -  | 429  | 872  | 2039   | 2478   |
| UN02667 | Rsa1.0.01146.1 | 631  | 163455 | 1.00E-85  | 204 | 215 | 94 +  | 329  | 538  | 162766 | 162980 |
| UN02668 | Rsa1.0.02287.1 | 982  | 32986  | 0         | 961 | 981 | 97 +  | 1    | 981  | 23736  | 24715  |
| UN02669 | Rsa1.0.14741.1 | 807  | 3112   | 0         | 462 | 470 | 98 +  | 336  | 805  | 1341   | 1810   |
| UN02670 | Rsa1.0.00011.1 | 811  | 225044 | 1.00E-175 | 386 | 412 | 93 +  | 412  | 809  | 207085 | 207496 |
| UN02671 | Rsa1.0.00296.1 | 633  | 97854  | 1.00E-132 | 295 | 309 | 95 +  | 1    | 303  | 70450  | 70757  |
| UN02672 | Rsa1.0.01081.1 | 986  | 499226 | 0         | 884 | 904 | 97 +  | 84   | 986  | 42018  | 42920  |
| UN02673 | Rsa1.0.04455.1 | 1210 | 17266  | 0         | 407 | 423 | 96 +  | 780  | 1198 | 12968  | 13390  |
| UN02674 | Rsa1.0.07870.1 | 979  | 8384   | 0         | 365 | 369 | 98 +  | 168  | 535  | 5013   | 5381   |
| UN02675 | Rsa1.0.00311.1 | 733  | 96847  | 1.00E-112 | 235 | 245 | 95 +  | 87   | 331  | 33654  | 33892  |
| UN02676 | Rsa1.0.00111.1 | 688  | 390088 | 0         | 597 | 626 | 95 +  | 7    | 624  | 338227 | 338850 |
| UN02677 | Rsa1.0.01434.1 | 1374 | 45951  | 1.00E-176 | 338 | 346 | 97 -  | 505  | 850  | 28843  | 29188  |
| UN02678 | Rsa1.0.00703.1 | 983  | 67597  | 0         | 952 | 981 | 97 +  | 3    | 983  | 40091  | 41071  |
| UN02679 | Rsa1.0.05230.1 | 728  | 14437  | 7.00E-51  | 109 | 111 | 98 +  | 339  | 449  | 14327  | 14437  |
| UN02680 | Rsa1.0.00552.1 | 1300 | 206757 | 8.00E-92  | 202 | 212 | 95 +  | 859  | 1070 | 187055 | 187266 |
| UN02681 | Rsa1.0.00607.1 | 963  | 73146  | 4.00E-93  | 235 | 258 | 91 +  | 2    | 241  | 69522  | 69779  |
| UN02682 | Rsa1.0.01061.1 | 1442 | 55349  | 1.00E-104 | 217 | 223 | 97 +  | 6    | 227  | 40608  | 40827  |
| UN02683 | Rsa1.0.00549.1 | 1679 | 76473  | 0         | 547 | 594 | 92 +  | 3    | 593  | 23871  | 24461  |
| UN02684 | Rsa1.0.02959.1 | 1244 | 26441  | 0         | 374 | 374 | 100 + | 35   | 408  | 20224  | 20597  |
| UN02685 | Rsa1.0.01247.1 | 706  | 49934  | 0         | 671 | 699 | 95 +  | 3    | 701  | 24345  | 25034  |
| UN02686 | Rsa1.0.00348.1 | 1385 | 92818  | 0         | 365 | 377 | 96 -  | 12   | 380  | 65410  | 65786  |
| UN02687 | Rsa1.0.00066.1 | 1410 | 152418 | 1.00E-137 | 372 | 411 | 90 +  | 853  | 1252 | 66553  | 66951  |
| UN02688 | Rsa1.0.00236.1 | 1376 | 104771 | 0         | 643 | 649 | 99 +  | 728  | 1376 | 58279  | 58927  |
| UN02689 | Rsa1.0.00251.1 | 897  | 303968 | 0         | 333 | 337 | 98 +  | 561  | 897  | 66488  | 66824  |

|         |                |      |        |           |      |      |      |      |      |        |        |
|---------|----------------|------|--------|-----------|------|------|------|------|------|--------|--------|
| UN02690 | Rsa1.0_00128.1 | 973  | 228675 | 3.00E-57  | 120  | 122  | 98 - | 522  | 643  | 151246 | 151367 |
| UN02691 | Rsa1.0_11463.1 | 494  | 5500   | 0         | 345  | 346  | 99 + | 149  | 494  | 258    | 602    |
| UN02692 | Rsa1.0_02991.1 | 933  | 26178  | 1.00E-109 | 287  | 309  | 92 - | 619  | 921  | 6920   | 7224   |
| UN02693 | Rsa1.0_00867.1 | 673  | 61635  | 1.00E-108 | 297  | 329  | 90 - | 3    | 325  | 27352  | 27668  |
| UN02694 | Rsa1.0_00077.1 | 1917 | 145005 | 1.00E-141 | 311  | 326  | 95 + | 1595 | 1917 | 31241  | 31565  |
| UN02695 | Rsa1.0_25195.1 | 1039 | 947    | 1.00E-148 | 286  | 292  | 97 + | 745  | 1036 | 261    | 548    |
| UN02696 | Rsa1.0_01587.1 | 1364 | 42789  | 0         | 378  | 384  | 98 - | 731  | 1114 | 29407  | 29790  |
| UN02697 | Rsa1.0_01420.1 | 1412 | 46210  | 1.00E-163 | 295  | 296  | 99 + | 3    | 298  | 6598   | 6893   |
| UN02698 | Rsa1.0_00745.1 | 1433 | 66067  | 0         | 490  | 513  | 95 + | 927  | 1432 | 52944  | 53451  |
| UN02699 | Rsa1.0_01306.1 | 1348 | 48720  | 0         | 710  | 728  | 97 - | 2    | 729  | 3824   | 4551   |
| UN02700 | Rsa1.0_01016.1 | 873  | 181422 | 0         | 469  | 497  | 94 + | 378  | 873  | 177066 | 177557 |
| UN02701 | Rsa1.0_00512.1 | 842  | 200277 | 0         | 349  | 350  | 99 - | 491  | 840  | 18455  | 18804  |
| UN02702 | Rsa1.0_00092.1 | 1106 | 659932 | 0         | 1079 | 1137 | 94 - | 3    | 1106 | 175633 | 176766 |
| UN02703 | Rsa1.0_02506.1 | 1215 | 30700  | 1.00E-165 | 345  | 361  | 95 - | 416  | 773  | 6452   | 6812   |
| UN02704 | Rsa1.0_09897.1 | 1063 | 6100   | 0         | 981  | 1048 | 93 + | 49   | 1059 | 3765   | 4797   |
| UN02705 | Rsa1.0_01513.1 | 878  | 44234  | 1.00E-122 | 337  | 366  | 92 - | 497  | 858  | 17141  | 17498  |
| UN02706 | Rsa1.0_00398.1 | 1280 | 88007  | 1.00E-150 | 594  | 697  | 85 - | 8    | 683  | 76377  | 77049  |
| UN02707 | Rsa1.0_00844.1 | 1190 | 62403  | 0         | 530  | 545  | 97 - | 463  | 1006 | 20009  | 20553  |
| UN02708 | Rsa1.0_00218.1 | 1033 | 201480 | 0         | 441  | 456  | 96 - | 578  | 1033 | 101432 | 101883 |
| UN02709 | Rsa1.0_01958.1 | 829  | 261128 | 0         | 401  | 416  | 96 - | 51   | 463  | 131033 | 131446 |
| UN02710 | Rsa1.0_00371.1 | 942  | 90463  | 0         | 367  | 372  | 98 - | 571  | 942  | 73399  | 73770  |
| UN02711 | Rsa1.0_07397.1 | 1276 | 9464   | 0         | 1021 | 1025 | 99 + | 241  | 1263 | 636    | 1659   |
| UN02712 | Rsa1.0_00305.1 | 787  | 97308  | 1.00E-122 | 275  | 289  | 95 - | 500  | 784  | 39294  | 39582  |
| UN02713 | Rsa1.0_00077.1 | 1153 | 145005 | 0         | 1127 | 1156 | 97 + | 2    | 1153 | 129159 | 130314 |
| UN02714 | Rsa1.0_00829.1 | 678  | 158305 | 1.00E-101 | 206  | 211  | 97 + | 467  | 676  | 40842  | 41052  |
| UN02715 | Rsa1.0_00522.1 | 779  | 78103  | 0         | 421  | 435  | 96 - | 29   | 457  | 38920  | 39354  |
| UN02716 | Rsa1.0_00300.1 | 1330 | 97747  | 0         | 554  | 577  | 96 + | 78   | 654  | 81510  | 82074  |
| UN02717 | Rsa1.0_00699.1 | 697  | 184398 | 1.00E-76  | 302  | 355  | 85 + | 246  | 592  | 127771 | 128125 |
| UN02718 | Rsa1.0_01248.1 | 699  | 154103 | 1.00E-125 | 234  | 236  | 99 + | 274  | 509  | 49463  | 49698  |
| UN02719 | Rsa1.0_04218.1 | 633  | 18423  | 0         | 450  | 482  | 93 - | 164  | 633  | 15799  | 16280  |
| UN02720 | Rsa1.0_03125.1 | 1398 | 147978 | 0         | 389  | 391  | 99 - | 35   | 424  | 143840 | 144230 |
| UN02721 | Rsa1.0_00930.1 | 802  | 59224  | 2.00E-85  | 201  | 209  | 96 + | 555  | 759  | 48406  | 48614  |
| UN02722 | Rsa1.0_00107.1 | 1515 | 431659 | 1.00E-151 | 280  | 283  | 98 - | 516  | 798  | 330676 | 330958 |
| UN02723 | Rsa1.0_01037.1 | 1343 | 55969  | 0         | 577  | 581  | 99 + | 764  | 1343 | 36234  | 36814  |
| UN02724 | Rsa1.0_05634.1 | 1032 | 13114  | 0         | 997  | 1033 | 96 + | 3    | 1032 | 7011   | 8043   |
| UN02725 | Rsa1.0_07056.1 | 1026 | 9969   | 0         | 715  | 766  | 93 + | 280  | 1026 | 6091   | 6849   |
| UN02726 | Rsa1.0_00130.1 | 739  | 125737 | 1.00E-126 | 250  | 254  | 98 - | 487  | 739  | 103390 | 103642 |
| UN02727 | Rsa1.0_07657.1 | 1047 | 8896   | 0         | 358  | 362  | 98 + | 684  | 1044 | 3658   | 4019   |
| UN02728 | Rsa1.0_00595.1 | 1411 | 341648 | 0         | 1354 | 1414 | 95 - | 9    | 1405 | 25673  | 27084  |



|         |                |      |        |           |      |      |       |     |      |        |        |
|---------|----------------|------|--------|-----------|------|------|-------|-----|------|--------|--------|
| UN02729 | Rsa1.0_00951.1 | 714  | 164588 | 0         | 688  | 724  | 95 -  | 3   | 714  | 122835 | 123556 |
| UN02730 | Rsa1.0_00702.1 | 1291 | 67600  | 1.00E-105 | 307  | 343  | 89 -  | 32  | 373  | 28141  | 28483  |
| UN02731 | Rsa1.0_00581.1 | 1038 | 163575 | 0         | 365  | 365  | 100 + | 247 | 611  | 26641  | 27005  |
| UN02732 | Rsa1.0_00092.1 | 816  | 659932 | 0         | 513  | 519  | 98 +  | 65  | 583  | 199002 | 199520 |
| UN02733 | Rsa1.0_01447.1 | 600  | 45654  | 1.00E-171 | 311  | 312  | 99 -  | 288 | 598  | 4527   | 4838   |
| UN02734 | Rsa1.0_00202.1 | 608  | 185895 | 9.00E-87  | 215  | 231  | 93 +  | 3   | 227  | 11683  | 11913  |
| UN02735 | Rsa1.0_00372.1 | 1016 | 90418  | 1.00E-171 | 351  | 363  | 96 +  | 653 | 1014 | 45301  | 45659  |
| UN02736 | Rsa1.0_00019.1 | 1103 | 301669 | 1.00E-119 | 262  | 276  | 94 -  | 416 | 691  | 238714 | 238986 |
| UN02737 | Rsa1.0_02707.1 | 751  | 28520  | 0         | 330  | 332  | 99 +  | 416 | 747  | 11082  | 11413  |
| UN02738 | Rsa1.0_05036.1 | 1369 | 15058  | 0         | 1339 | 1394 | 96 +  | 3   | 1368 | 13114  | 14503  |
| UN02739 | Rsa1.0_06403.1 | 1667 | 11078  | 0         | 547  | 589  | 92 +  | 16  | 584  | 5658   | 6237   |
| UN02740 | Rsa1.0_01440.1 | 695  | 45807  | 0         | 353  | 357  | 98 -  | 339 | 695  | 31768  | 32121  |
| UN02741 | Rsa1.0_02528.1 | 841  | 30452  | 0         | 839  | 841  | 99 -  | 1   | 841  | 22261  | 23101  |
| UN02742 | Rsa1.0_13940.1 | 1009 | 4047   | 0         | 961  | 1007 | 95 +  | 2   | 1008 | 433    | 1430   |
| UN02743 | Rsa1.0_00907.1 | 1074 | 60062  | 0         | 850  | 887  | 95 +  | 3   | 884  | 17643  | 18520  |
| UN02744 | Rsa1.0_00343.1 | 949  | 93570  | 1.00E-31  | 83   | 87   | 95 +  | 1   | 87   | 11039  | 11125  |
| UN02745 | Rsa1.0_03264.1 | 756  | 145959 | 1.00E-180 | 366  | 381  | 96 +  | 2   | 382  | 141562 | 141939 |
| UN02746 | Rsa1.0_00131.1 | 739  | 432233 | 1.00E-149 | 284  | 288  | 98 -  | 432 | 719  | 189370 | 189656 |
| UN02747 | Rsa1.0_02705.1 | 1234 | 28535  | 0         | 1117 | 1203 | 92 +  | 41  | 1231 | 1566   | 2742   |
| UN02748 | Rsa1.0_02710.1 | 1397 | 28492  | 1.00E-150 | 294  | 302  | 97 -  | 1   | 302  | 25405  | 25706  |
| UN02749 | Rsa1.0_00734.1 | 1207 | 66508  | 0         | 370  | 370  | 100 + | 837 | 1206 | 6510   | 6879   |
| UN02750 | Rsa1.0_00350.1 | 741  | 92346  | 1.00E-103 | 223  | 230  | 96 +  | 1   | 227  | 12235  | 12464  |
| UN02751 | Rsa1.0_01989.1 | 1012 | 36439  | 0         | 471  | 500  | 94 +  | 3   | 494  | 12040  | 12536  |
| UN02752 | Rsa1.0_06728.1 | 1007 | 10455  | 1.00E-138 | 357  | 391  | 91 -  | 625 | 1000 | 9062   | 9448   |
| UN02753 | Rsa1.0_00121.1 | 942  | 278029 | 1.00E-132 | 277  | 288  | 96 +  | 3   | 289  | 5597   | 5884   |
| UN02754 | Rsa1.0_09314.1 | 996  | 6461   | 0         | 510  | 529  | 96 +  | 9   | 535  | 5586   | 6112   |
| UN02755 | Rsa1.0_00005.1 | 895  | 353093 | 1.00E-151 | 284  | 288  | 98 +  | 509 | 796  | 129667 | 129954 |
| UN02756 | Rsa1.0_00057.1 | 1252 | 160473 | 1.00E-122 | 338  | 373  | 90 +  | 889 | 1248 | 143476 | 143836 |
| UN02757 | Rsa1.0_02329.1 | 1133 | 32474  | 0         | 749  | 769  | 97 +  | 368 | 1132 | 10253  | 11017  |
| UN02758 | Rsa1.0_24740.1 | 783  | 969    | 1.00E-137 | 355  | 391  | 90 +  | 393 | 783  | 476    | 866    |
| UN02759 | Rsa1.0_05940.1 | 934  | 12169  | 0         | 440  | 440  | 100 - | 1   | 440  | 9960   | 10399  |
| UN02760 | Rsa1.0_00010.1 | 941  | 294827 | 0         | 362  | 375  | 96 -  | 484 | 858  | 132283 | 132657 |
| UN02761 | Rsa1.0_00442.1 | 763  | 84596  | 0         | 647  | 661  | 97 +  | 46  | 706  | 9550   | 10210  |
| UN02762 | Rsa1.0_00157.1 | 1091 | 245832 | 1.00E-115 | 227  | 231  | 98 +  | 663 | 893  | 185692 | 185921 |
| UN02763 | Rsa1.0_02314.1 | 1038 | 32642  | 0         | 516  | 533  | 96 -  | 508 | 1037 | 4774   | 5305   |
| UN02764 | Rsa1.0_05204.1 | 635  | 14516  | 0         | 619  | 638  | 97 +  | 3   | 635  | 2020   | 2657   |
| UN02765 | Rsa1.0_00015.1 | 804  | 561803 | 1.00E-112 | 308  | 345  | 89 +  | 28  | 348  | 370530 | 370874 |
| UN02766 | Rsa1.0_00706.1 | 1019 | 291570 | 1.00E-138 | 294  | 309  | 95 -  | 712 | 1019 | 229281 | 229580 |
| UN02767 | Rsa1.0_00437.1 | 1147 | 84879  | 0         | 505  | 521  | 96 +  | 583 | 1101 | 50510  | 51028  |

|         |                |      |        |           |      |      |      |      |      |        |        |
|---------|----------------|------|--------|-----------|------|------|------|------|------|--------|--------|
| UN02768 | Rsa1.0_00092.1 | 1073 | 659932 | 1.00E-120 | 241  | 248  | 97 - | 409  | 656  | 127591 | 127838 |
| UN02769 | Rsa1.0_01931.1 | 806  | 37187  | 1.00E-114 | 248  | 258  | 96 - | 550  | 806  | 28491  | 28747  |
| UN02770 | Rsa1.0_00190.1 | 720  | 318240 | 0         | 371  | 374  | 99 - | 345  | 717  | 91428  | 91801  |
| UN02771 | Rsa1.0_04741.1 | 957  | 16164  | 1.00E-103 | 200  | 203  | 98 + | 467  | 669  | 5949   | 6151   |
| UN02772 | Rsa1.0_00057.1 | 1661 | 160473 | 0         | 535  | 552  | 96 - | 3    | 548  | 101205 | 101756 |
| UN02773 | Rsa1.0_01376.1 | 1345 | 47004  | 1.00E-174 | 385  | 410  | 93 + | 936  | 1340 | 21956  | 22349  |
| UN02774 | Rsa1.0_04450.1 | 1368 | 17297  | 0         | 1333 | 1374 | 97 + | 2    | 1368 | 11747  | 13119  |
| UN02775 | Rsa1.0_00487.1 | 1641 | 80674  | 0         | 429  | 442  | 97 - | 1202 | 1640 | 12797  | 13238  |
| UN02776 | Rsa1.0_03252.1 | 1118 | 24338  | 1.00E-151 | 287  | 292  | 98 - | 23   | 314  | 2166   | 2457   |
| UN02777 | Rsa1.0_36775.1 | 1002 | 613    | 1.00E-116 | 231  | 237  | 97 - | 751  | 987  | 184    | 420    |
| UN02778 | Rsa1.0_14183.1 | 901  | 132309 | 0         | 749  | 773  | 96 + | 2    | 768  | 1473   | 2245   |
| UN02779 | Rsa1.0_06603.1 | 783  | 10682  | 1.00E-125 | 271  | 285  | 95 + | 3    | 287  | 6408   | 6684   |
| UN02780 | Rsa1.0_29978.1 | 1306 | 766    | 1.00E-129 | 297  | 315  | 94 + | 993  | 1306 | 160    | 473    |
| UN02781 | Rsa1.0_01285.1 | 900  | 172709 | 0         | 522  | 525  | 99 - | 376  | 900  | 153445 | 153969 |
| UN02782 | Rsa1.0_08192.1 | 967  | 7762   | 1.00E-142 | 294  | 304  | 96 + | 630  | 931  | 6351   | 6654   |
| UN02783 | Rsa1.0_02490.1 | 1170 | 30885  | 0         | 376  | 377  | 99 - | 794  | 1170 | 5484   | 5860   |
| UN02784 | Rsa1.0_00152.1 | 985  | 257730 | 0         | 948  | 983  | 96 - | 3    | 985  | 201916 | 202890 |
| UN02785 | Rsa1.0_01502.1 | 1180 | 44519  | 0         | 480  | 493  | 97 - | 4    | 496  | 36621  | 37111  |
| UN02786 | Rsa1.0_00218.1 | 927  | 201480 | 0         | 492  | 543  | 90 + | 3    | 540  | 152508 | 153020 |
| UN02787 | Rsa1.0_01464.1 | 1006 | 45193  | 1.00E-166 | 360  | 381  | 94 + | 50   | 424  | 25050  | 25427  |
| UN02788 | Rsa1.0_02532.1 | 1238 | 30403  | 0         | 905  | 924  | 97 + | 52   | 973  | 26787  | 27710  |
| UN02789 | Rsa1.0_00213.1 | 1190 | 108167 | 1.00E-172 | 423  | 455  | 92 - | 748  | 1189 | 36360  | 36807  |
| UN02790 | Rsa1.0_00648.1 | 907  | 70351  | 3.00E-87  | 225  | 244  | 92 + | 622  | 865  | 24878  | 25115  |
| UN02791 | Rsa1.0_01523.1 | 921  | 43959  | 6.00E-15  | 109  | 131  | 83 + | 330  | 460  | 20026  | 20156  |
| UN02792 | Rsa1.0_00074.1 | 1111 | 147591 | 1.00E-137 | 270  | 276  | 97 - | 836  | 1111 | 135631 | 135905 |
| UN02793 | Rsa1.0_01458.1 | 603  | 175719 | 2.00E-81  | 177  | 184  | 96 - | 6    | 186  | 415    | 598    |
| UN02794 | Rsa1.0_00045.1 | 1723 | 328694 | 0         | 621  | 634  | 97 + | 1000 | 1633 | 289123 | 289756 |
| UN02795 | Rsa1.0_02756.1 | 659  | 28202  | 1.00E-70  | 148  | 152  | 97 + | 508  | 659  | 17942  | 18093  |
| UN02796 | Rsa1.0_03155.1 | 1727 | 24958  | 0         | 461  | 472  | 97 + | 1252 | 1723 | 508    | 978    |
| UN02797 | Rsa1.0_02188.1 | 999  | 34104  | 0         | 497  | 517  | 96 - | 486  | 999  | 2422   | 2933   |
| UN02798 | Rsa1.0_30387.1 | 893  | 755    | 4.00E-90  | 175  | 177  | 98 - | 261  | 437  | 313    | 489    |
| UN02799 | Rsa1.0_01829.1 | 717  | 166063 | 0         | 457  | 474  | 96 + | 247  | 717  | 154869 | 155339 |
| UN02800 | Rsa1.0_00050.1 | 1130 | 237174 | 0         | 390  | 391  | 99 + | 740  | 1130 | 19315  | 19705  |
| UN02801 | Rsa1.0_01306.1 | 1751 | 48720  | 0         | 402  | 424  | 94 + | 1336 | 1751 | 755    | 1178   |
| UN02802 | Rsa1.0_00323.1 | 939  | 159650 | 1.00E-158 | 410  | 446  | 91 + | 509  | 939  | 43841  | 44285  |
| UN02803 | Rsa1.0_00007.1 | 1024 | 239325 | 8.00E-70  | 296  | 344  | 86 - | 653  | 993  | 14222  | 14555  |
| UN02804 | Rsa1.0_03132.1 | 845  | 25142  | 0         | 415  | 427  | 97 - | 64   | 490  | 22052  | 22478  |
| UN02805 | Rsa1.0_01899.1 | 1007 | 37474  | 0         | 819  | 837  | 97 + | 172  | 1007 | 3081   | 3916   |
| UN02806 | Rsa1.0_00751.1 | 877  | 65759  | 0         | 385  | 403  | 95 + | 280  | 679  | 41458  | 41860  |

|         |                |      |        |           |      |      |      |     |      |        |        |
|---------|----------------|------|--------|-----------|------|------|------|-----|------|--------|--------|
| UN02807 | Rsa1.0.39553.1 | 729  | 568    | 0         | 423  | 438  | 96 + | 236 | 672  | 1      | 438    |
| UN02808 | Rsa1.0.00071.1 | 760  | 345714 | 1.00E-150 | 289  | 293  | 98 - | 470 | 760  | 324444 | 324736 |
| UN02809 | Rsa1.0.00618.1 | 522  | 72195  | 0         | 514  | 517  | 99 - | 4   | 520  | 20170  | 20686  |
| UN02810 | Rsa1.0.00101.1 | 789  | 267193 | 0         | 616  | 670  | 91 + | 76  | 728  | 89099  | 89762  |
| UN02811 | Rsa1.0.00008.1 | 1476 | 358124 | 0         | 423  | 434  | 97 - | 13  | 446  | 56542  | 56975  |
| UN02812 | Rsa1.0.00577.1 | 893  | 174827 | 2.00E-94  | 248  | 269  | 92 - | 626 | 893  | 168313 | 168571 |
| UN02813 | Rsa1.0.02358.1 | 908  | 32213  | 0         | 453  | 485  | 93 - | 426 | 908  | 247    | 712    |
| UN02814 | Rsa1.0.20008.1 | 827  | 1353   | 0         | 490  | 505  | 97 - | 330 | 827  | 849    | 1353   |
| UN02815 | Rsa1.0.00429.1 | 1831 | 85559  | 0         | 816  | 945  | 86 - | 670 | 1607 | 44086  | 45014  |
| UN02816 | Rsa1.0.16459.1 | 818  | 2148   | 1.00E-142 | 412  | 464  | 88 + | 22  | 485  | 1642   | 2105   |
| UN02817 | Rsa1.0.03264.1 | 1158 | 145959 | 1.00E-139 | 275  | 283  | 97 + | 376 | 658  | 134142 | 134424 |
| UN02818 | Rsa1.0.13693.1 | 875  | 4469   | 0         | 594  | 650  | 91 + | 235 | 875  | 2608   | 3233   |
| UN02819 | Rsa1.0.02494.1 | 1606 | 132923 | 0         | 922  | 928  | 99 + | 450 | 1377 | 4498   | 5425   |
| UN02820 | Rsa1.0.00960.1 | 1344 | 58199  | 0         | 476  | 478  | 99 - | 860 | 1337 | 14530  | 15007  |
| UN02821 | Rsa1.0.00682.1 | 766  | 68680  | 1.00E-159 | 291  | 293  | 99 + | 7   | 299  | 14059  | 14351  |
| UN02822 | Rsa1.0.00513.1 | 879  | 78579  | 1.00E-127 | 246  | 251  | 98 + | 142 | 392  | 57763  | 58013  |
| UN02823 | Rsa1.0.04831.1 | 1043 | 15799  | 1.00E-28  | 127  | 146  | 86 + | 392 | 536  | 12656  | 12801  |
| UN02824 | Rsa1.0.21334.1 | 1130 | 1214   | 0         | 688  | 746  | 92 + | 307 | 1052 | 236    | 981    |
| UN02825 | Rsa1.0.00030.1 | 931  | 250988 | 0         | 547  | 573  | 95 + | 2   | 573  | 157138 | 157688 |
| UN02826 | Rsa1.0.14984.1 | 1088 | 2912   | 1.00E-153 | 290  | 294  | 98 + | 205 | 498  | 2296   | 2588   |
| UN02827 | Rsa1.0.10606.1 | 1151 | 5787   | 0         | 1118 | 1169 | 95 + | 1   | 1149 | 838    | 2005   |
| UN02828 | Rsa1.0.00611.1 | 915  | 72410  | 0         | 544  | 587  | 92 + | 335 | 912  | 7150   | 7732   |
| UN02829 | Rsa1.0.11079.1 | 1008 | 5624   | 0         | 408  | 409  | 99 - | 359 | 767  | 4076   | 4484   |
| UN02830 | Rsa1.0.00671.1 | 1051 | 397884 | 0         | 1022 | 1064 | 96 + | 2   | 1049 | 245073 | 246135 |
| UN02831 | Rsa1.0.02023.1 | 937  | 35922  | 0         | 552  | 583  | 94 - | 1   | 581  | 26292  | 26874  |
| UN02832 | Rsa1.0.08686.1 | 667  | 7041   | 0         | 650  | 665  | 97 - | 3   | 667  | 4483   | 5147   |
| UN02833 | Rsa1.0.04126.1 | 834  | 18939  | 0         | 460  | 480  | 95 - | 1   | 478  | 17402  | 17876  |
| UN02834 | Rsa1.0.00436.1 | 1130 | 85008  | 1.00E-154 | 292  | 297  | 98 + | 2   | 298  | 7435   | 7731   |
| UN02835 | Rsa1.0.01924.1 | 1071 | 37226  | 1.00E-116 | 324  | 358  | 90 - | 407 | 752  | 1369   | 1723   |
| UN02836 | Rsa1.0.00001.1 | 1434 | 363028 | 0         | 969  | 1022 | 94 - | 1   | 1003 | 144755 | 145776 |
| UN02837 | Rsa1.0.03785.1 | 1120 | 20883  | 0         | 379  | 380  | 99 - | 7   | 386  | 15659  | 16038  |
| UN02838 | Rsa1.0.00865.1 | 1616 | 61686  | 0         | 580  | 586  | 98 - | 605 | 1190 | 45315  | 45900  |
| UN02839 | Rsa1.0.00009.1 | 657  | 232558 | 2.33E-156 | 271  | 274  | 98 + | 384 | 657  | 207990 | 208263 |
| UN02840 | Rsa1.0.00192.1 | 877  | 278200 | 1.00E-138 | 261  | 265  | 98 - | 122 | 386  | 231729 | 231993 |
| UN02841 | Rsa1.0.00390.1 | 632  | 88681  | 1.00E-116 | 296  | 325  | 91 + | 247 | 569  | 41294  | 41596  |
| UN02842 | Rsa1.0.01835.1 | 1232 | 38542  | 0         | 765  | 812  | 94 - | 430 | 1220 | 15417  | 16222  |
| UN02843 | Rsa1.0.00148.1 | 1677 | 120234 | 0         | 865  | 895  | 96 - | 1   | 878  | 63550  | 64444  |
| UN02844 | Rsa1.0.04646.1 | 1111 | 16541  | 0         | 655  | 665  | 98 + | 1   | 665  | 4309   | 4973   |
| UN02845 | Rsa1.0.02006.1 | 633  | 36135  | 8.00E-78  | 233  | 260  | 89 - | 76  | 334  | 7421   | 7680   |

|         |                |      |        |           |     |     |       |      |      |        |        |
|---------|----------------|------|--------|-----------|-----|-----|-------|------|------|--------|--------|
| UN02846 | Rsa1.0_01220.1 | 595  | 161775 | 1.00E-136 | 322 | 351 | 91 -  | 3    | 353  | 7326   | 7660   |
| UN02847 | Rsa1.0_02254.1 | 1007 | 33344  | 1.00E-165 | 313 | 319 | 98 +  | 684  | 1002 | 12021  | 12339  |
| UN02848 | Rsa1.0_02641.1 | 1208 | 29191  | 0         | 459 | 472 | 97 -  | 735  | 1206 | 21757  | 22219  |
| UN02849 | Rsa1.0_01286.1 | 856  | 49209  | 0         | 453 | 484 | 93 +  | 377  | 854  | 25577  | 26059  |
| UN02850 | Rsa1.0_00789.1 | 1222 | 64233  | 0         | 526 | 546 | 96 -  | 2    | 542  | 34406  | 34951  |
| UN02851 | Rsa1.0_00712.1 | 1008 | 67217  | 0         | 504 | 523 | 96 -  | 484  | 1006 | 46782  | 47304  |
| UN02852 | Rsa1.0_00973.1 | 1368 | 57913  | 1.00E-152 | 273 | 273 | 100 - | 933  | 1205 | 5428   | 5700   |
| UN02853 | Rsa1.0_00197.1 | 898  | 109714 | 0         | 701 | 706 | 99 +  | 194  | 897  | 84124  | 84829  |
| UN02854 | Rsa1.0_00041.1 | 762  | 186197 | 2.00E-75  | 175 | 184 | 95 +  | 509  | 691  | 175346 | 175529 |
| UN02855 | Rsa1.0_01808.1 | 891  | 39007  | 0         | 533 | 547 | 97 +  | 347  | 889  | 29595  | 30141  |
| UN02856 | Rsa1.0_00157.1 | 611  | 245832 | 0         | 412 | 412 | 100 - | 1    | 412  | 160498 | 160909 |
| UN02857 | Rsa1.0_09577.1 | 792  | 6275   | 1.00E-131 | 309 | 334 | 92 +  | 468  | 792  | 1281   | 1614   |
| UN02858 | Rsa1.0_00471.1 | 599  | 81897  | 0         | 591 | 601 | 98 -  | 1    | 599  | 23991  | 24591  |
| UN02859 | Rsa1.0_07814.1 | 1463 | 8487   | 1.00E-117 | 214 | 214 | 100 + | 1250 | 1463 | 1175   | 1388   |
| UN02860 | Rsa1.0_06303.1 | 1289 | 11268  | 0         | 591 | 615 | 96 -  | 137  | 751  | 1748   | 2362   |
| UN02861 | Rsa1.0_00016.1 | 1202 | 831256 | 1.00E-168 | 336 | 348 | 96 -  | 577  | 924  | 428671 | 429018 |
| UN02862 | Rsa1.0_02265.1 | 1295 | 33233  | 0         | 359 | 362 | 99 +  | 1    | 361  | 17366  | 17727  |
| UN02863 | Rsa1.0_26026.1 | 1127 | 909    | 0         | 779 | 801 | 97 -  | 1    | 801  | 1      | 800    |
| UN02864 | Rsa1.0_06092.1 | 1015 | 11756  | 0         | 412 | 425 | 96 -  | 7    | 430  | 2681   | 3104   |
| UN02865 | Rsa1.0_00027.1 | 1213 | 283362 | 1.00E-118 | 235 | 241 | 97 -  | 564  | 804  | 90878  | 91118  |
| UN02866 | Rsa1.0_00713.1 | 805  | 158017 | 0         | 788 | 805 | 97 +  | 1    | 805  | 24033  | 24837  |
| UN02867 | Rsa1.0_00027.1 | 889  | 283362 | 0         | 599 | 601 | 99 +  | 2    | 602  | 56405  | 57005  |
| UN02868 | Rsa1.0_00188.1 | 167  | 112020 | 8.00E-75  | 160 | 165 | 96 -  | 1    | 163  | 23385  | 23549  |
| UN02869 | Rsa1.0_71754.1 | 809  | 319    | 1.00E-162 | 306 | 310 | 98 -  | 1    | 310  | 1      | 309    |
| UN02870 | Rsa1.0_00833.1 | 1538 | 62621  | 0         | 511 | 543 | 94 -  | 574  | 1104 | 28121  | 28663  |
| UN02871 | Rsa1.0_04557.1 | 1183 | 145048 | 1.00E-129 | 364 | 397 | 91 +  | 2    | 379  | 135337 | 135723 |
| UN02872 | Rsa1.0_41904.1 | 1663 | 536    | 0         | 524 | 536 | 97 +  | 139  | 663  | 1      | 536    |
| UN02873 | #              | #    | #      | #         | #   | #   | #     | #    | #    | #      | #      |
| UN02874 | Rsa1.0_00829.1 | 1782 | 158305 | 0         | 938 | 954 | 98 +  | 829  | 1782 | 29034  | 29986  |
| UN02875 | Rsa1.0_00876.1 | 649  | 61328  | 0         | 375 | 376 | 99 -  | 26   | 401  | 28187  | 28562  |
| UN02876 | Rsa1.0_00671.1 | 934  | 397884 | 3.00E-81  | 248 | 281 | 88 +  | 4    | 260  | 192679 | 192958 |
| UN02877 | Rsa1.0_00220.1 | 710  | 192936 | 0         | 573 | 594 | 96 -  | 1    | 586  | 4428   | 5020   |
| UN02878 | Rsa1.0_35031.1 | 707  | 646    | 0         | 447 | 449 | 99 +  | 65   | 513  | 1      | 449    |
| UN02879 | Rsa1.0_00762.1 | 990  | 165246 | 0         | 357 | 360 | 99 +  | 2    | 361  | 28941  | 29300  |
| UN02880 | Rsa1.0_01363.1 | 1321 | 47195  | 1.00E-170 | 334 | 344 | 97 -  | 976  | 1319 | 20177  | 20520  |
| UN02881 | Rsa1.0_05324.1 | 1138 | 14145  | 0         | 438 | 456 | 96 -  | 1    | 454  | 13120  | 13569  |
| UN02882 | Rsa1.0_17832.1 | 1125 | 1729   | 0         | 329 | 329 | 100 - | 1    | 329  | 123    | 451    |
| UN02883 | Rsa1.0_02988.1 | 1131 | 26190  | 0         | 366 | 372 | 98 +  | 253  | 624  | 17445  | 17812  |
| UN02884 | Rsa1.0_05168.1 | 596  | 14621  | 0         | 566 | 607 | 93 +  | 2    | 596  | 8077   | 8675   |

|         |                |      |        |           |      |      |       |     |      |        |        |
|---------|----------------|------|--------|-----------|------|------|-------|-----|------|--------|--------|
| UN02885 | Rsa1.0.00387.1 | 762  | 495407 | 0         | 745  | 747  | 99 -  | 16  | 762  | 349647 | 350393 |
| UN02886 | Rsa1.0.01401.1 | 1189 | 142441 | 0         | 640  | 667  | 95 +  | 368 | 1034 | 132155 | 132821 |
| UN02887 | Rsa1.0.07385.1 | 1027 | 9485   | 1.00E-170 | 321  | 326  | 98 +  | 702 | 1027 | 5009   | 5332   |
| UN02888 | Rsa1.0.00409.1 | 1385 | 146788 | 0         | 1330 | 1396 | 95 -  | 1   | 1383 | 123784 | 125176 |
| UN02889 | Rsa1.0.00236.1 | 839  | 104771 | 0         | 835  | 839  | 99 -  | 1   | 839  | 70007  | 70844  |
| UN02890 | Rsa1.0.00408.1 | 1548 | 176752 | 0         | 420  | 426  | 98 +  | 457 | 882  | 133299 | 133724 |
| UN02891 | Rsa1.0.05618.1 | 1018 | 13165  | 1.00E-114 | 218  | 221  | 98 +  | 471 | 691  | 7388   | 7608   |
| UN02892 | Rsa1.0.00660.1 | 743  | 69688  | 0         | 396  | 400  | 99 +  | 1   | 398  | 52547  | 52946  |
| UN02893 | Rsa1.0.00122.1 | 522  | 265937 | 0         | 438  | 473  | 92 -  | 56  | 522  | 224808 | 225273 |
| UN02894 | Rsa1.0.00359.1 | 497  | 91256  | 0         | 445  | 470  | 94 -  | 27  | 496  | 22278  | 22733  |
| UN02895 | Rsa1.0.03137.1 | 500  | 25105  | 1.00E-169 | 322  | 327  | 98 -  | 1   | 323  | 9465   | 9791   |
| UN02896 | Rsa1.0.03237.1 | 797  | 24434  | 0         | 718  | 734  | 97 -  | 10  | 743  | 1749   | 2480   |
| UN02897 | Rsa1.0.00193.1 | 1181 | 194198 | 1.00E-150 | 297  | 306  | 97 +  | 530 | 835  | 103702 | 104007 |
| UN02898 | Rsa1.0.12558.1 | 1137 | 5193   | 0         | 1008 | 1058 | 95 -  | 1   | 1050 | 1      | 1056   |
| UN02899 | Rsa1.0.00039.1 | 650  | 296927 | 0         | 529  | 579  | 91 +  | 1   | 575  | 75433  | 75994  |
| UN02900 | Rsa1.0.00895.1 | 1079 | 60615  | 3.00E-35  | 108  | 117  | 92 +  | 309 | 425  | 19320  | 19435  |
| UN02901 | Rsa1.0.00297.1 | 1185 | 97836  | 1.00E-169 | 348  | 361  | 96 +  | 113 | 473  | 33840  | 34198  |
| UN02902 | Rsa1.0.02294.1 | 1206 | 32940  | 1.00E-164 | 300  | 302  | 99 +  | 836 | 1137 | 15437  | 15738  |
| UN02903 | Rsa1.0.00280.1 | 1368 | 99966  | 0         | 408  | 408  | 100 + | 876 | 1283 | 1487   | 1894   |
| UN02904 | Rsa1.0.00405.1 | 434  | 202864 | 0         | 377  | 385  | 97 +  | 2   | 386  | 59823  | 60207  |
| UN02905 | Rsa1.0.00068.1 | 544  | 151813 | 0         | 527  | 547  | 96 -  | 1   | 544  | 104387 | 104931 |
| UN02906 | Rsa1.0.27174.1 | 1130 | 863    | 0         | 483  | 486  | 99 -  | 1   | 486  | 132    | 617    |
| UN02907 | Rsa1.0.01943.1 | 759  | 37042  | 1.00E-103 | 249  | 262  | 95 +  | 1   | 259  | 4846   | 5105   |
| UN02908 | Rsa1.0.01296.1 | 845  | 49035  | 1.00E-137 | 248  | 248  | 100 - | 1   | 248  | 13384  | 13631  |
| UN02909 | Rsa1.0.00595.1 | 1247 | 341648 | 1.00E-123 | 243  | 249  | 97 +  | 1   | 249  | 142025 | 142273 |
| UN02910 | Rsa1.0.00180.1 | 219  | 114581 | 4.00E-80  | 200  | 215  | 93 +  | 5   | 219  | 34742  | 34950  |
| UN02911 | Rsa1.0.00441.1 | 1105 | 84607  | 0         | 620  | 627  | 98 -  | 1   | 627  | 61230  | 61856  |
| UN02912 | Rsa1.0.03347.1 | 662  | 23588  | 4.00E-92  | 183  | 186  | 98 +  | 2   | 187  | 20400  | 20582  |
| UN02913 | Rsa1.0.00175.1 | 1512 | 166121 | 0         | 686  | 705  | 97 +  | 808 | 1511 | 85418  | 86122  |
| UN02914 | Rsa1.0.03246.1 | 399  | 24379  | 1.00E-151 | 274  | 275  | 99 +  | 1   | 275  | 9287   | 9561   |
| UN02915 | Rsa1.0.02406.1 | 820  | 145276 | 1.00E-170 | 332  | 339  | 97 -  | 1   | 338  | 1739   | 2076   |
| UN02916 | Rsa1.0.01775.1 | 1134 | 39519  | 1.00E-166 | 306  | 309  | 99 +  | 431 | 739  | 2567   | 2875   |
| UN02917 | Rsa1.0.01243.1 | 1243 | 50061  | 0         | 777  | 790  | 98 +  | 279 | 1064 | 33078  | 33867  |
| UN02918 | Rsa1.0.01768.1 | 1169 | 138463 | 0         | 1082 | 1114 | 97 +  | 3   | 1111 | 112732 | 113845 |
| UN02919 | Rsa1.0.00025.1 | 888  | 277312 | 0         | 853  | 885  | 96 +  | 3   | 886  | 67909  | 68787  |
| UN02920 | Rsa1.0.01121.1 | 874  | 53407  | 0         | 750  | 753  | 99 +  | 121 | 873  | 19076  | 19828  |
| UN02921 | Rsa1.0.15052.1 | 954  | 2866   | 0         | 948  | 952  | 99 -  | 1   | 952  | 582    | 1532   |
| UN02922 | Rsa1.0.01190.1 | 571  | 194501 | 1.00E-113 | 207  | 207  | 100 + | 202 | 408  | 5041   | 5247   |
| UN02923 | Rsa1.0.05546.1 | 859  | 13379  | 1.00E-163 | 301  | 303  | 99 +  | 375 | 676  | 7592   | 7894   |

|         |                |      |        |           |      |      |      |     |      |        |        |
|---------|----------------|------|--------|-----------|------|------|------|-----|------|--------|--------|
| UN02924 | Rsa1.0_03037.1 | 956  | 25825  | 1.00E-173 | 343  | 353  | 97 + | 603 | 954  | 5163   | 5515   |
| UN02925 | Rsa1.0_25367.1 | 1276 | 939    | 1.00E-170 | 310  | 312  | 99 + | 628 | 939  | 457    | 768    |
| UN02926 | Rsa1.0_00021.1 | 1366 | 263655 | 0         | 733  | 747  | 98 - | 621 | 1366 | 30406  | 31146  |
| UN02927 | #              | #    | #      | #         | #    | #    | #    | #   | #    | #      | #      |
| UN02928 | Rsa1.0_03341.1 | 1230 | 23604  | 0         | 793  | 815  | 97 + | 345 | 1159 | 2950   | 3752   |
| UN02929 | Rsa1.0_39619.1 | 778  | 567    | 0         | 444  | 459  | 96 - | 310 | 768  | 1      | 459    |
| UN02930 | Rsa1.0_01722.1 | 699  | 40320  | 0         | 651  | 724  | 89 + | 1   | 697  | 36420  | 37139  |
| UN02931 | Rsa1.0_01763.1 | 857  | 39659  | 0         | 440  | 444  | 99 - | 416 | 857  | 38145  | 38588  |
| UN02932 | Rsa1.0_03364.1 | 893  | 23446  | 0         | 781  | 800  | 97 + | 2   | 800  | 18681  | 19479  |
| UN02933 | Rsa1.0_01294.1 | 860  | 49090  | 1.00E-114 | 328  | 365  | 89 - | 7   | 352  | 26968  | 27329  |
| UN02934 | Rsa1.0_02114.1 | 752  | 34873  | 0         | 499  | 509  | 98 - | 2   | 505  | 16049  | 16557  |
| UN02935 | Rsa1.0_01791.1 | 1083 | 160383 | 0         | 750  | 759  | 98 + | 1   | 758  | 13646  | 14404  |
| UN02936 | Rsa1.0_00015.1 | 866  | 561803 | 1.00E-145 | 279  | 284  | 98 - | 3   | 283  | 363481 | 363764 |
| UN02937 | Rsa1.0_00761.1 | 1407 | 65133  | 0         | 865  | 870  | 99 - | 327 | 1196 | 12489  | 13358  |
| UN02938 | Rsa1.0_18025.1 | 1368 | 1687   | 1.00E-178 | 482  | 533  | 90 - | 147 | 663  | 1162   | 1687   |
| UN02939 | Rsa1.0_03822.1 | 1386 | 20640  | 0         | 659  | 666  | 98 + | 3   | 668  | 6396   | 7060   |
| UN02940 | Rsa1.0_00828.1 | 1218 | 62744  | 0         | 757  | 785  | 96 + | 434 | 1218 | 15688  | 16470  |
| UN02941 | Rsa1.0_00149.1 | 1369 | 305196 | 0         | 550  | 562  | 97 - | 208 | 769  | 200113 | 200674 |
| UN02942 | Rsa1.0_13838.1 | 746  | 4236   | 0         | 618  | 648  | 95 - | 1   | 644  | 3281   | 3920   |
| UN02943 | Rsa1.0_00080.1 | 964  | 190437 | 0         | 642  | 654  | 98 - | 4   | 657  | 112626 | 113277 |
| UN02944 | Rsa1.0_00538.1 | 1131 | 77149  | 7.00E-15  | 73   | 83   | 87 + | 501 | 583  | 11743  | 11825  |
| UN02945 | Rsa1.0_01989.1 | 900  | 36439  | 0         | 869  | 898  | 96 - | 4   | 899  | 25043  | 25939  |
| UN02946 | Rsa1.0_02493.1 | 797  | 30854  | 0         | 581  | 594  | 97 + | 1   | 589  | 26849  | 27442  |
| UN02947 | Rsa1.0_00796.1 | 830  | 63997  | 7.00E-39  | 95   | 99   | 95 + | 407 | 505  | 2078   | 2176   |
| UN02948 | Rsa1.0_00237.1 | 681  | 235974 | 0         | 616  | 621  | 99 - | 61  | 679  | 14746  | 15366  |
| UN02949 | Rsa1.0_09517.1 | 1084 | 6319   | 0         | 688  | 708  | 97 - | 70  | 777  | 2293   | 3000   |
| UN02950 | Rsa1.0_00681.1 | 591  | 68779  | 0         | 386  | 401  | 96 + | 1   | 398  | 42467  | 42866  |
| UN02951 | Rsa1.0_00034.1 | 1240 | 260119 | 1.00E-118 | 229  | 233  | 98 + | 510 | 742  | 30072  | 30304  |
| UN02952 | Rsa1.0_00125.1 | 661  | 253043 | 1.00E-168 | 329  | 336  | 97 - | 4   | 339  | 168487 | 168820 |
| UN02953 | Rsa1.0_00135.1 | 1396 | 178077 | 0         | 694  | 757  | 91 - | 296 | 1029 | 165548 | 166298 |
| UN02954 | Rsa1.0_00371.1 | 1139 | 90463  | 0         | 742  | 774  | 95 + | 365 | 1137 | 11545  | 12312  |
| UN02955 | Rsa1.0_06041.1 | 871  | 11861  | 0         | 741  | 787  | 94 + | 87  | 870  | 9352   | 10120  |
| UN02956 | Rsa1.0_03952.1 | 1127 | 19891  | 0         | 415  | 420  | 98 + | 213 | 632  | 19139  | 19558  |
| UN02957 | Rsa1.0_00054.1 | 1049 | 162053 | 0         | 705  | 716  | 98 + | 209 | 924  | 140724 | 141439 |
| UN02958 | Rsa1.0_00290.1 | 1182 | 225096 | 1.00E-127 | 246  | 251  | 98 - | 930 | 1180 | 188600 | 188850 |
| UN02959 | Rsa1.0_39984.1 | 1177 | 562    | 0         | 380  | 397  | 95 + | 141 | 536  | 7      | 402    |
| UN02960 | Rsa1.0_00087.1 | 1048 | 761073 | 0         | 494  | 505  | 97 + | 1   | 496  | 56053  | 56557  |
| UN02961 | Rsa1.0_01352.1 | 693  | 47443  | 0         | 658  | 689  | 95 - | 6   | 692  | 45244  | 45924  |
| UN02962 | Rsa1.0_01617.1 | 1224 | 42127  | 0         | 1115 | 1227 | 90 + | 4   | 1217 | 2291   | 3498   |

|         |                |      |        |           |      |      |       |      |      |        |        |
|---------|----------------|------|--------|-----------|------|------|-------|------|------|--------|--------|
| UN02963 | Rsa1.0.01480.1 | 607  | 44926  | 0         | 439  | 452  | 97 +  | 1    | 451  | 36814  | 37264  |
| UN02964 | Rsa1.0.00180.1 | 997  | 114581 | 1.00E-139 | 318  | 337  | 94 +  | 1    | 334  | 34738  | 35066  |
| UN02965 | Rsa1.0.00826.1 | 1007 | 166736 | 1.00E-115 | 292  | 317  | 92 -  | 1    | 305  | 156527 | 156841 |
| UN02966 | Rsa1.0.19085.1 | 1262 | 1482   | 0         | 603  | 642  | 93 -  | 573  | 1199 | 843    | 1482   |
| UN02967 | Rsa1.0.06482.1 | 840  | 10937  | 0         | 768  | 814  | 94 +  | 2    | 805  | 7954   | 8752   |
| UN02968 | Rsa1.0.02028.1 | 792  | 35857  | 1.00E-111 | 223  | 229  | 97 -  | 450  | 678  | 34453  | 34681  |
| UN02969 | Rsa1.0.00096.1 | 1032 | 198773 | 0         | 1005 | 1030 | 97 -  | 1    | 1030 | 97540  | 98569  |
| UN02970 | Rsa1.0.03046.1 | 1048 | 25784  | 1.00E-144 | 291  | 303  | 96 +  | 751  | 1043 | 15386  | 15688  |
| UN02971 | Rsa1.0.02865.1 | 1339 | 27133  | 0         | 467  | 480  | 97 +  | 867  | 1339 | 12296  | 12774  |
| UN02972 | Rsa1.0.00462.1 | 782  | 82288  | 1.00E-151 | 278  | 280  | 99 -  | 318  | 597  | 37812  | 38091  |
| UN02973 | Rsa1.0.04882.1 | 1000 | 15606  | 1.00E-175 | 314  | 315  | 99 -  | 345  | 659  | 7553   | 7867   |
| UN02974 | Rsa1.0.00891.1 | 1092 | 60724  | 0         | 1036 | 1063 | 97 -  | 2    | 1063 | 50532  | 51594  |
| UN02975 | Rsa1.0.00002.1 | 766  | 601661 | 1.00E-134 | 272  | 282  | 96 +  | 325  | 606  | 555743 | 556024 |
| UN02976 | Rsa1.0.04881.1 | 821  | 15608  | 0         | 651  | 667  | 97 -  | 1    | 663  | 8460   | 9126   |
| UN02977 | Rsa1.0.00973.1 | 1369 | 57913  | 0         | 838  | 842  | 99 +  | 524  | 1365 | 5808   | 6648   |
| UN02978 | Rsa1.0.00056.1 | 1142 | 332604 | 0         | 351  | 353  | 99 +  | 790  | 1142 | 313940 | 314292 |
| UN02979 | Rsa1.0.03529.1 | 2000 | 22277  | 0         | 1010 | 1010 | 100 - | 728  | 1737 | 15606  | 16615  |
| UN02980 | Rsa1.0.00960.1 | 792  | 58199  | 1.00E-160 | 299  | 303  | 98 +  | 490  | 792  | 29999  | 30301  |
| UN02981 | Rsa1.0.00821.1 | 1066 | 62891  | 0         | 615  | 630  | 97 +  | 31   | 660  | 54395  | 55021  |
| UN02982 | Rsa1.0.00659.1 | 657  | 69733  | 1.00E-128 | 296  | 321  | 92 +  | 356  | 655  | 20560  | 20879  |
| UN02983 | Rsa1.0.00169.1 | 1813 | 274298 | 0         | 1773 | 1812 | 97 -  | 17   | 1810 | 68797  | 70605  |
| UN02984 | Rsa1.0.03367.1 | 1574 | 23387  | 1.00E-173 | 308  | 308  | 100 - | 243  | 550  | 147    | 454    |
| UN02985 | Rsa1.0.02245.1 | 965  | 33478  | 0         | 887  | 904  | 98 -  | 16   | 919  | 11294  | 12191  |
| UN02986 | Rsa1.0.03005.1 | 923  | 26082  | 1.00E-160 | 353  | 373  | 94 +  | 559  | 923  | 10402  | 10774  |
| UN02987 | Rsa1.0.01859.1 | 1360 | 38073  | 0         | 645  | 682  | 94 +  | 685  | 1350 | 6242   | 6911   |
| UN02988 | Rsa1.0.00740.1 | 725  | 215972 | 1.00E-164 | 342  | 357  | 95 -  | 370  | 725  | 11871  | 12222  |
| UN02989 | Rsa1.0.00480.1 | 1077 | 81325  | 0         | 382  | 383  | 99 +  | 3    | 385  | 3549   | 3931   |
| UN02990 | Rsa1.0.08192.1 | 990  | 7762   | 1.00E-126 | 289  | 309  | 93 +  | 664  | 958  | 6351   | 6658   |
| UN02991 | Rsa1.0.00416.1 | 1265 | 86772  | 2.00E-77  | 161  | 164  | 98 -  | 1102 | 1264 | 4755   | 4918   |
| UN02992 | Rsa1.0.01124.1 | 1739 | 53295  | 0         | 1005 | 1027 | 97 +  | 509  | 1534 | 33250  | 34276  |
| UN02993 | Rsa1.0.00414.1 | 1384 | 202190 | 0         | 1064 | 1084 | 98 -  | 1    | 1081 | 187714 | 188797 |
| UN02994 | Rsa1.0.00069.1 | 933  | 403561 | 0         | 891  | 920  | 96 -  | 2    | 921  | 231100 | 232012 |
| UN02995 | Rsa1.0.02551.1 | 1300 | 30196  | 1.00E-130 | 246  | 249  | 98 -  | 348  | 596  | 26138  | 26386  |
| UN02996 | Rsa1.0.00336.1 | 1391 | 445051 | 0         | 843  | 854  | 98 -  | 538  | 1391 | 159561 | 160414 |
| UN02997 | Rsa1.0.00360.1 | 1742 | 91190  | 1.00E-122 | 242  | 248  | 97 -  | 152  | 399  | 7457   | 7704   |
| UN02998 | Rsa1.0.18326.1 | 508  | 1620   | 0         | 413  | 430  | 96 +  | 38   | 467  | 1196   | 1620   |
| UN02999 | Rsa1.0.30513.1 | 1302 | 752    | 0         | 550  | 565  | 97 -  | 692  | 1256 | 1      | 558    |
| UN03000 | Rsa1.0.02174.1 | 1318 | 34316  | 1.00E-126 | 278  | 294  | 94 +  | 1036 | 1316 | 13678  | 13970  |
| UN03001 | Rsa1.0.03590.1 | 1549 | 21889  | 0         | 1020 | 1088 | 93 +  | 3    | 1063 | 2552   | 3634   |

|         |                |      |        |           |      |      |       |     |      |        |        |
|---------|----------------|------|--------|-----------|------|------|-------|-----|------|--------|--------|
| UN03002 | Rsa1.0_01696.1 | 765  | 301850 | 0         | 516  | 541  | 95 -  | 199 | 730  | 159111 | 159651 |
| UN03003 | Rsa1.0_00564.1 | 1286 | 75428  | 0         | 501  | 526  | 95 -  | 712 | 1236 | 46259  | 46784  |
| UN03004 | Rsa1.0_08617.1 | 688  | 7124   | 0         | 665  | 701  | 94 -  | 1   | 688  | 313    | 1013   |
| UN03005 | Rsa1.0_30865.1 | 810  | 742    | 9.00E-97  | 228  | 242  | 94 +  | 553 | 792  | 1      | 240    |
| UN03006 | Rsa1.0_00197.1 | 638  | 109714 | 1.00E-124 | 247  | 254  | 97 +  | 5   | 258  | 78041  | 78294  |
| UN03007 | Rsa1.0_03946.1 | 988  | 19912  | 0         | 447  | 463  | 96 +  | 530 | 988  | 16589  | 17051  |
| UN03008 | Rsa1.0_00549.1 | 774  | 76473  | 1.00E-178 | 334  | 339  | 98 +  | 1   | 339  | 26156  | 26492  |
| UN03009 | Rsa1.0_01696.1 | 1001 | 301850 | 2.33E-156 | 263  | 263  | 100 - | 3   | 265  | 32637  | 32899  |
| UN03010 | Rsa1.0_08644.1 | 1595 | 7095   | 1.00E-123 | 240  | 245  | 97 -  | 236 | 480  | 150    | 394    |
| UN03011 | Rsa1.0_01724.1 | 1072 | 40292  | 1.00E-105 | 210  | 215  | 97 -  | 510 | 724  | 10412  | 10626  |
| UN03012 | Rsa1.0_06869.1 | 821  | 10234  | 1.00E-103 | 207  | 210  | 98 +  | 614 | 821  | 448    | 657    |
| UN03013 | Rsa1.0_20968.1 | 927  | 1249   | 0         | 340  | 346  | 98 -  | 159 | 504  | 904    | 1249   |
| UN03014 | Rsa1.0_00078.1 | 1221 | 175053 | 0         | 400  | 407  | 98 +  | 815 | 1221 | 93430  | 93835  |
| UN03015 | Rsa1.0_00234.1 | 1122 | 197060 | 0         | 404  | 413  | 97 +  | 395 | 807  | 144150 | 144562 |
| UN03016 | Rsa1.0_00480.1 | 775  | 81325  | 0         | 768  | 776  | 98 +  | 3   | 775  | 3543   | 4318   |
| UN03017 | Rsa1.0_52639.1 | 795  | 433    | 0         | 432  | 433  | 99 -  | 103 | 535  | 1      | 433    |
| UN03018 | Rsa1.0_03606.1 | 685  | 21818  | 1.00E-110 | 237  | 247  | 95 -  | 58  | 304  | 4426   | 4666   |
| UN03019 | Rsa1.0_04209.1 | 1373 | 18442  | 0         | 443  | 447  | 99 +  | 926 | 1372 | 2017   | 2463   |
| UN03020 | Rsa1.0_00019.1 | 969  | 301669 | 1.00E-134 | 255  | 259  | 98 +  | 480 | 738  | 25352  | 25610  |
| UN03021 | Rsa1.0_03603.1 | 809  | 21845  | 0         | 404  | 421  | 95 +  | 49  | 463  | 21425  | 21845  |
| UN03022 | Rsa1.0_00284.1 | 658  | 323267 | 0         | 596  | 631  | 94 -  | 3   | 630  | 232430 | 233057 |
| UN03023 | Rsa1.0_00546.1 | 1327 | 76523  | 0         | 384  | 384  | 100 + | 944 | 1327 | 51920  | 52303  |
| UN03024 | Rsa1.0_00075.1 | 581  | 146680 | 1.00E-161 | 287  | 287  | 100 - | 295 | 581  | 82402  | 82688  |
| UN03025 | Rsa1.0_00902.1 | 909  | 60241  | 0         | 484  | 489  | 98 -  | 421 | 909  | 15521  | 16009  |
| UN03026 | Rsa1.0_00586.1 | 727  | 163802 | 0         | 439  | 452  | 97 -  | 284 | 727  | 154651 | 155101 |
| UN03027 | Rsa1.0_02505.1 | 1129 | 30703  | 0         | 905  | 923  | 98 +  | 205 | 1117 | 14331  | 15252  |
| UN03028 | Rsa1.0_15081.1 | 1398 | 2848   | 0         | 490  | 516  | 94 -  | 801 | 1315 | 728    | 1238   |
| UN03029 | Rsa1.0_00674.1 | 1203 | 193753 | 0         | 571  | 574  | 99 +  | 631 | 1202 | 181840 | 182413 |
| UN03030 | Rsa1.0_01121.1 | 889  | 53407  | 0         | 708  | 747  | 94 +  | 153 | 881  | 19076  | 19822  |
| UN03031 | Rsa1.0_13997.1 | 807  | 3934   | 1.00E-126 | 248  | 254  | 97 +  | 14  | 267  | 2399   | 2652   |
| UN03032 | Rsa1.0_04625.1 | 1189 | 16613  | 0         | 1142 | 1184 | 96 +  | 3   | 1186 | 8427   | 9603   |
| UN03033 | Rsa1.0_02859.1 | 999  | 162118 | 1.00E-101 | 227  | 242  | 93 +  | 2   | 243  | 142766 | 142996 |
| UN03034 | Rsa1.0_01385.1 | 1474 | 46782  | 0         | 795  | 797  | 99 -  | 673 | 1467 | 13282  | 14078  |
| UN03035 | Rsa1.0_04022.1 | 870  | 19534  | 0         | 629  | 633  | 99 -  | 194 | 825  | 7539   | 8171   |
| UN03036 | Rsa1.0_03885.1 | 1496 | 20256  | 0         | 709  | 724  | 97 +  | 772 | 1494 | 9632   | 10353  |
| UN03037 | Rsa1.0_00470.1 | 622  | 81968  | 1.00E-119 | 217  | 217  | 100 - | 405 | 621  | 7043   | 7259   |
| UN03038 | Rsa1.0_03632.1 | 1140 | 21645  | 2.33E-156 | 303  | 315  | 96 -  | 792 | 1106 | 2985   | 3298   |
| UN03039 | Rsa1.0_10922.1 | 1109 | 5677   | 0         | 392  | 399  | 98 +  | 665 | 1063 | 1      | 399    |
| UN03040 | Rsa1.0_03665.1 | 1142 | 21487  | 2.00E-61  | 192  | 217  | 88 -  | 745 | 952  | 12880  | 13096  |



|         |                |      |        |           |     |     |       |      |      |        |        |
|---------|----------------|------|--------|-----------|-----|-----|-------|------|------|--------|--------|
| UN03041 | Rsa1.0.04517.1 | 1818 | 17015  | 1.00E-155 | 306 | 314 | 97 -  | 1503 | 1815 | 16702  | 17015  |
| UN03042 | Rsa1.0.05690.1 | 990  | 12921  | 0         | 573 | 601 | 95 -  | 306  | 897  | 12321  | 12921  |
| UN03043 | Rsa1.0.00088.1 | 432  | 141341 | 0         | 423 | 436 | 97 -  | 1    | 432  | 47375  | 47810  |
| UN03044 | Rsa1.0.07868.1 | 1573 | 8387   | 0         | 765 | 767 | 99 +  | 805  | 1571 | 6215   | 6981   |
| UN03045 | Rsa1.0.06127.1 | 1324 | 11675  | 0         | 364 | 370 | 98 -  | 3    | 369  | 3128   | 3497   |
| UN03046 | Rsa1.0.01158.1 | 1338 | 52121  | 0         | 575 | 615 | 93 +  | 506  | 1120 | 31439  | 32053  |
| UN03047 | Rsa1.0.00504.1 | 815  | 79334  | 0         | 458 | 461 | 99 +  | 3    | 461  | 55826  | 56286  |
| UN03048 | Rsa1.0.00420.1 | 1488 | 86496  | 1.00E-152 | 277 | 278 | 99 +  | 358  | 635  | 10516  | 10793  |
| UN03049 | Rsa1.0.00685.1 | 651  | 68515  | 4.00E-89  | 209 | 223 | 93 +  | 311  | 533  | 8208   | 8430   |
| UN03050 | Rsa1.0.07898.1 | 1098 | 8339   | 0         | 565 | 578 | 97 +  | 521  | 1098 | 6826   | 7403   |
| UN03051 | Rsa1.0.00350.1 | 903  | 92346  | 1.00E-103 | 197 | 199 | 98 -  | 705  | 903  | 79680  | 79878  |
| UN03052 | Rsa1.0.00427.1 | 1878 | 189678 | 0         | 573 | 593 | 96 -  | 1    | 590  | 110678 | 111270 |
| UN03053 | Rsa1.0.01668.1 | 1748 | 41299  | 0         | 459 | 465 | 98 -  | 1285 | 1748 | 33632  | 34096  |
| UN03054 | Rsa1.0.00277.1 | 568  | 100132 | 1.00E-124 | 320 | 349 | 91 +  | 237  | 568  | 10173  | 10521  |
| UN03055 | Rsa1.0.09363.1 | 516  | 6425   | 2.00E-81  | 154 | 154 | 100 + | 361  | 514  | 3801   | 3954   |
| UN03056 | Rsa1.0.00224.1 | 834  | 327530 | 1.00E-141 | 270 | 275 | 98 +  | 380  | 654  | 208584 | 208858 |
| UN03057 | Rsa1.0.05063.1 | 1119 | 14951  | 1.00E-152 | 295 | 302 | 97 -  | 2    | 303  | 12766  | 13067  |
| UN03058 | Rsa1.0.00180.1 | 965  | 114581 | 1.00E-129 | 280 | 294 | 95 -  | 674  | 964  | 34776  | 35066  |
| UN03059 | Rsa1.0.46705.1 | 754  | 483    | 1.00E-121 | 231 | 233 | 99 +  | 469  | 700  | 235    | 467    |
| UN03060 | Rsa1.0.00655.1 | 833  | 195840 | 2.00E-57  | 114 | 114 | 100 - | 5    | 118  | 134770 | 134883 |
| UN03061 | Rsa1.0.00097.1 | 1404 | 138858 | 0         | 352 | 352 | 100 + | 161  | 512  | 50294  | 50645  |
| UN03062 | Rsa1.0.00190.1 | 1600 | 318240 | 0         | 983 | 987 | 99 -  | 72   | 1058 | 126608 | 127594 |
| UN03063 | Rsa1.0.00101.1 | 1183 | 267193 | 0         | 357 | 357 | 100 + | 825  | 1181 | 235547 | 235903 |
| UN03064 | Rsa1.0.00901.1 | 1152 | 60363  | 0         | 618 | 618 | 100 - | 533  | 1150 | 15440  | 16057  |
| UN03065 | Rsa1.0.00253.1 | 1146 | 231292 | 1.00E-151 | 302 | 311 | 97 -  | 837  | 1146 | 208323 | 208633 |
| UN03066 | Rsa1.0.01147.1 | 1194 | 52391  | 0         | 372 | 379 | 98 +  | 269  | 647  | 37794  | 38171  |
| UN03067 | Rsa1.0.03638.1 | 818  | 21634  | 0         | 392 | 397 | 98 +  | 422  | 817  | 1353   | 1748   |
| UN03068 | Rsa1.0.00974.1 | 1335 | 57893  | 0         | 418 | 427 | 97 +  | 907  | 1333 | 32774  | 33200  |
| UN03069 | Rsa1.0.08348.1 | 777  | 7495   | 1.00E-107 | 200 | 201 | 99 -  | 577  | 777  | 1921   | 2121   |
| UN03070 | Rsa1.0.00152.1 | 803  | 257730 | 0         | 341 | 344 | 99 +  | 3    | 346  | 244035 | 244378 |
| UN03071 | Rsa1.0.05139.1 | 1398 | 14718  | 1.00E-134 | 270 | 279 | 96 +  | 596  | 874  | 5752   | 6030   |
| UN03072 | Rsa1.0.01061.1 | 1010 | 55349  | 0         | 499 | 505 | 98 -  | 328  | 832  | 29738  | 30241  |
| UN03073 | Rsa1.0.06041.1 | 1089 | 11861  | 0         | 675 | 709 | 95 -  | 381  | 1089 | 9861   | 10551  |
| UN03074 | Rsa1.0.01570.1 | 1275 | 43015  | 2.00E-95  | 287 | 323 | 88 -  | 972  | 1275 | 10807  | 11124  |
| UN03075 | Rsa1.0.00192.1 | 1374 | 278200 | 0         | 846 | 892 | 94 -  | 490  | 1374 | 98204  | 99091  |
| UN03076 | Rsa1.0.01156.1 | 1590 | 52147  | 1.00E-174 | 326 | 331 | 98 +  | 40   | 370  | 18198  | 18528  |
| UN03077 | Rsa1.0.02717.1 | 843  | 28458  | 1.00E-130 | 245 | 247 | 99 -  | 420  | 664  | 13199  | 13445  |
| UN03078 | Rsa1.0.00678.1 | 643  | 193163 | 2.00E-78  | 163 | 167 | 97 +  | 477  | 640  | 24101  | 24267  |
| UN03079 | Rsa1.0.00040.1 | 1209 | 324196 | 1.00E-164 | 414 | 451 | 91 -  | 1    | 441  | 175165 | 175594 |

|         |                |      |        |           |      |      |      |     |      |        |        |
|---------|----------------|------|--------|-----------|------|------|------|-----|------|--------|--------|
| UN03080 | Rsa1.0_00336.1 | 582  | 445051 | 0         | 502  | 526  | 95 - | 1   | 522  | 221235 | 221748 |
| UN03081 | Rsa1.0_00198.1 | 1069 | 222963 | 1.00E-167 | 328  | 338  | 97 - | 609 | 946  | 139194 | 139531 |
| UN03082 | Rsa1.0_00336.1 | 813  | 445051 | 1.00E-103 | 213  | 219  | 97 - | 503 | 720  | 164725 | 164943 |
| UN03083 | Rsa1.0_01679.1 | 882  | 146876 | 1.00E-179 | 372  | 390  | 95 + | 2   | 381  | 132696 | 133080 |
| UN03084 | Rsa1.0_00191.1 | 955  | 316976 | 1.00E-174 | 322  | 326  | 98 + | 3   | 328  | 140937 | 141262 |
| UN03085 | Rsa1.0_00698.1 | 1382 | 67816  | 0         | 479  | 488  | 98 - | 2   | 489  | 65744  | 66230  |
| UN03086 | Rsa1.0_02356.1 | 1199 | 141500 | 0         | 1046 | 1078 | 97 - | 118 | 1194 | 128737 | 129811 |
| UN03087 | Rsa1.0_00420.1 | 946  | 86496  | 1.00E-65  | 137  | 140  | 97 - | 499 | 638  | 67496  | 67635  |
| UN03088 | Rsa1.0_02157.1 | 1260 | 149652 | 0         | 447  | 449  | 99 + | 731 | 1179 | 147090 | 147538 |
| UN03089 | Rsa1.0_08562.1 | 919  | 7193   | 0         | 374  | 379  | 98 + | 5   | 380  | 333    | 711    |
| UN03090 | Rsa1.0_00018.1 | 1324 | 410899 | 0         | 436  | 457  | 95 + | 872 | 1318 | 68738  | 69191  |
| UN03091 | Rsa1.0_01321.1 | 1234 | 48248  | 0         | 375  | 389  | 96 + | 33  | 419  | 34818  | 35202  |
| UN03092 | Rsa1.0_02682.1 | 907  | 28711  | 0         | 861  | 906  | 95 + | 4   | 901  | 9620   | 10525  |
| UN03093 | Rsa1.0_01882.1 | 1265 | 37697  | 0         | 919  | 956  | 96 - | 1   | 949  | 23907  | 24859  |
| UN03094 | Rsa1.0_07850.1 | 1634 | 8423   | 0         | 1630 | 1636 | 99 - | 1   | 1634 | 3704   | 5339   |
| UN03095 | Rsa1.0_00534.1 | 917  | 77361  | 0         | 338  | 340  | 99 + | 1   | 340  | 28353  | 28692  |
| UN03096 | Rsa1.0_00184.1 | 960  | 218748 | 0         | 461  | 464  | 99 - | 496 | 959  | 51747  | 52210  |
| UN03097 | Rsa1.0_00027.1 | 813  | 283362 | 1.00E-154 | 295  | 301  | 98 - | 415 | 715  | 115850 | 116150 |
| UN03098 | Rsa1.0_00048.1 | 937  | 167185 | 1.00E-96  | 234  | 248  | 94 - | 8   | 254  | 33623  | 33868  |
| UN03099 | Rsa1.0_01313.1 | 1243 | 48387  | 1.00E-111 | 217  | 221  | 98 + | 930 | 1150 | 19753  | 19973  |
| UN03100 | Rsa1.0_03870.1 | 864  | 20362  | 0         | 815  | 860  | 94 - | 1   | 859  | 266    | 1097   |
| UN03101 | Rsa1.0_10304.1 | 1227 | 5896   | 0         | 507  | 510  | 99 + | 2   | 511  | 5359   | 5868   |
| UN03102 | Rsa1.0_03873.1 | 841  | 20360  | 1.00E-159 | 293  | 296  | 98 + | 546 | 841  | 4285   | 4580   |
| UN03103 | Rsa1.0_01580.1 | 1242 | 42852  | 1.00E-175 | 354  | 364  | 97 - | 170 | 531  | 31149  | 31511  |
| UN03104 | Rsa1.0_01521.1 | 995  | 142147 | 1.00E-145 | 281  | 286  | 98 + | 8   | 292  | 6842   | 7127   |
| UN03105 | Rsa1.0_00323.1 | 787  | 159650 | 0         | 411  | 413  | 99 - | 6   | 418  | 148152 | 148564 |
| UN03106 | Rsa1.0_02755.1 | 1098 | 28212  | 0         | 1006 | 1109 | 90 - | 1   | 1089 | 2152   | 3258   |
| UN03107 | Rsa1.0_00191.1 | 549  | 316976 | 1.00E-162 | 309  | 314  | 98 - | 6   | 318  | 142530 | 142843 |
| UN03108 | Rsa1.0_02015.1 | 1218 | 36008  | 0         | 467  | 482  | 96 + | 499 | 980  | 3355   | 3836   |
| UN03109 | Rsa1.0_04425.1 | 1925 | 17406  | 0         | 859  | 861  | 99 - | 1   | 861  | 1      | 861    |
| UN03110 | Rsa1.0_01309.1 | 513  | 48556  | 3.00E-21  | 56   | 57   | 98 - | 26  | 82   | 35344  | 35400  |
| UN03111 | Rsa1.0_01016.1 | 831  | 181422 | 0         | 649  | 653  | 99 - | 178 | 829  | 158103 | 158755 |
| UN03112 | Rsa1.0_04140.1 | 1034 | 18879  | 0         | 1013 | 1033 | 98 - | 1   | 1032 | 14391  | 15423  |
| UN03113 | Rsa1.0_01579.1 | 826  | 42860  | 0         | 485  | 500  | 97 - | 16  | 514  | 23243  | 23733  |
| UN03114 | Rsa1.0_08630.1 | 478  | 7104   | 0         | 453  | 482  | 93 - | 2   | 478  | 5852   | 6333   |
| UN03115 | Rsa1.0_04540.1 | 1317 | 16934  | 0         | 1290 | 1322 | 97 - | 1   | 1317 | 7370   | 8690   |
| UN03116 | Rsa1.0_01282.1 | 1263 | 49304  | 1.00E-126 | 291  | 313  | 92 - | 39  | 351  | 8878   | 9176   |
| UN03117 | Rsa1.0_41755.1 | 1391 | 538    | 2.00E-96  | 200  | 206  | 97 - | 164 | 366  | 333    | 538    |
| UN03118 | Rsa1.0_01448.1 | 481  | 45645  | 0         | 442  | 468  | 94 - | 3   | 460  | 16268  | 16734  |

|         |                |      |        |           |      |      |       |     |      |        |        |
|---------|----------------|------|--------|-----------|------|------|-------|-----|------|--------|--------|
| UN03119 | Rsa1.0_01101.1 | 890  | 54031  | 1.00E-132 | 260  | 267  | 97 -  | 4   | 270  | 41580  | 41846  |
| UN03120 | Rsa1.0_02201.1 | 1208 | 33981  | 0         | 339  | 342  | 99 -  | 1   | 342  | 23386  | 23727  |
| UN03121 | Rsa1.0_02836.1 | 1332 | 27481  | 0         | 519  | 538  | 96 +  | 527 | 1064 | 5020   | 5556   |
| UN03122 | Rsa1.0_07823.1 | 885  | 8468   | 1.00E-144 | 296  | 308  | 96 -  | 225 | 532  | 4793   | 5100   |
| UN03123 | Rsa1.0_00595.1 | 270  | 341648 | 7.00E-61  | 192  | 218  | 88 +  | 62  | 269  | 193427 | 193634 |
| UN03124 | Rsa1.0_00125.1 | 1000 | 253043 | 0         | 778  | 808  | 96 +  | 186 | 983  | 203048 | 203854 |
| UN03125 | Rsa1.0_01147.1 | 784  | 52391  | 0         | 549  | 565  | 97 +  | 1   | 558  | 17652  | 18214  |
| UN03126 | Rsa1.0_11641.1 | 1171 | 5453   | 0         | 482  | 486  | 99 -  | 2   | 487  | 230    | 715    |
| UN03127 | Rsa1.0_04181.1 | 960  | 18615  | 0         | 950  | 960  | 98 -  | 1   | 959  | 16411  | 17370  |
| UN03128 | Rsa1.0_00005.1 | 1395 | 353093 | 0         | 672  | 713  | 94 +  | 336 | 1046 | 275726 | 276436 |
| UN03129 | Rsa1.0_00038.1 | 927  | 314568 | 1.00E-144 | 331  | 358  | 92 -  | 1   | 340  | 176457 | 176813 |
| UN03130 | Rsa1.0_00564.1 | 1303 | 75428  | 1.00E-149 | 298  | 308  | 96 +  | 63  | 370  | 46351  | 46658  |
| UN03131 | Rsa1.0_04109.1 | 615  | 19000  | 0         | 552  | 571  | 96 -  | 1   | 569  | 8583   | 9150   |
| UN03132 | Rsa1.0_00020.1 | 1407 | 283099 | 0         | 1389 | 1407 | 98 -  | 1   | 1407 | 176342 | 177745 |
| UN03133 | Rsa1.0_01732.1 | 1462 | 40194  | 0         | 1276 | 1277 | 99 -  | 186 | 1462 | 24245  | 25520  |
| UN03134 | Rsa1.0_02705.1 | 670  | 28535  | 0         | 643  | 660  | 97 -  | 3   | 662  | 2205   | 2861   |
| UN03135 | Rsa1.0_03247.1 | 1145 | 24371  | 0         | 808  | 838  | 96 +  | 1   | 836  | 11707  | 12544  |
| UN03136 | Rsa1.0_00329.1 | 1249 | 222544 | 0         | 539  | 569  | 94 +  | 22  | 589  | 72488  | 73053  |
| UN03137 | Rsa1.0_11201.1 | 565  | 5585   | 1.00E-131 | 332  | 361  | 91 -  | 19  | 375  | 3824   | 4181   |
| UN03138 | Rsa1.0_01269.1 | 1335 | 49622  | 1.00E-132 | 281  | 294  | 95 +  | 1   | 294  | 14013  | 14304  |
| UN03139 | Rsa1.0_00068.1 | 1043 | 151813 | 1.00E-116 | 248  | 260  | 95 -  | 782 | 1041 | 147810 | 148063 |
| UN03140 | Rsa1.0_24850.1 | 458  | 964    | 1.00E-167 | 343  | 358  | 95 -  | 5   | 362  | 261    | 618    |
| UN03141 | Rsa1.0_00012.1 | 965  | 222148 | 0         | 355  | 355  | 100 - | 2   | 356  | 210339 | 210693 |
| UN03142 | Rsa1.0_02064.1 | 1058 | 35476  | 1.00E-158 | 320  | 332  | 96 +  | 283 | 614  | 5466   | 5797   |
| UN03143 | Rsa1.0_00503.1 | 779  | 79468  | 0         | 684  | 687  | 99 -  | 3   | 688  | 3854   | 4540   |
| UN03144 | Rsa1.0_00013.1 | 1151 | 292129 | 0         | 799  | 903  | 88 -  | 12  | 904  | 22577  | 23477  |
| UN03145 | Rsa1.0_06720.1 | 1156 | 10473  | 0         | 1122 | 1156 | 97 +  | 1   | 1155 | 3867   | 5009   |
| UN03146 | Rsa1.0_00273.1 | 962  | 326186 | 1.00E-154 | 276  | 276  | 100 + | 1   | 276  | 249003 | 249278 |
| UN03147 | Rsa1.0_05384.1 | 123  | 13960  | 2.00E-49  | 111  | 115  | 96 +  | 9   | 123  | 1088   | 1202   |
| UN03148 | Rsa1.0_00238.1 | 1007 | 193193 | 0         | 537  | 555  | 96 +  | 2   | 548  | 192075 | 192627 |
| UN03149 | Rsa1.0_00152.1 | 897  | 257730 | 0         | 458  | 462  | 99 +  | 1   | 462  | 85532  | 85993  |
| UN03150 | Rsa1.0_01124.1 | 1298 | 53295  | 0         | 1205 | 1256 | 95 +  | 1   | 1243 | 50470  | 51721  |
| UN03151 | Rsa1.0_11740.1 | 752  | 5423   | 0         | 539  | 570  | 94 +  | 188 | 751  | 4551   | 5119   |
| UN03152 | Rsa1.0_02142.1 | 1114 | 34633  | 0         | 446  | 464  | 96 +  | 652 | 1112 | 20960  | 21423  |
| UN03153 | Rsa1.0_01768.1 | 950  | 138463 | 1.00E-163 | 439  | 480  | 91 -  | 1   | 465  | 123667 | 124145 |
| UN03154 | Rsa1.0_01147.1 | 1001 | 52391  | 0         | 641  | 651  | 98 -  | 1   | 651  | 1559   | 2209   |
| UN03155 | Rsa1.0_01316.1 | 844  | 48325  | 0         | 843  | 844  | 99 -  | 1   | 843  | 5709   | 6552   |
| UN03156 | Rsa1.0_02750.1 | 893  | 28239  | 1.00E-145 | 262  | 262  | 100 + | 3   | 264  | 22863  | 23124  |
| UN03157 | Rsa1.0_00413.1 | 1566 | 86921  | 0         | 762  | 791  | 96 -  | 758 | 1548 | 71434  | 72224  |

|         |                |      |        |           |      |      |       |      |      |        |        |
|---------|----------------|------|--------|-----------|------|------|-------|------|------|--------|--------|
| UN03158 | Rsa1.0.00844.1 | 562  | 62403  | 0         | 364  | 375  | 97 -  | 189  | 562  | 19081  | 19455  |
| UN03159 | Rsa1.0.00037.1 | 1459 | 307838 | 0         | 679  | 691  | 98 -  | 3    | 685  | 261462 | 262152 |
| UN03160 | Rsa1.0.01190.1 | 1014 | 194501 | 0         | 822  | 876  | 93 +  | 1    | 863  | 37247  | 38111  |
| UN03161 | Rsa1.0.00207.1 | 1447 | 248736 | 0         | 849  | 850  | 99 -  | 3    | 852  | 194940 | 195789 |
| UN03162 | Rsa1.0.00020.1 | 1162 | 283099 | 0         | 450  | 459  | 98 +  | 3    | 461  | 102867 | 103322 |
| UN03163 | Rsa1.0.00972.1 | 672  | 57937  | 9.00E-75  | 165  | 171  | 96 -  | 183  | 352  | 52543  | 52713  |
| UN03164 | Rsa1.0.00419.1 | 777  | 86562  | 0         | 753  | 767  | 98 -  | 11   | 777  | 56772  | 57535  |
| UN03165 | Rsa1.0.02038.1 | 1822 | 35715  | 0         | 631  | 631  | 100 - | 1086 | 1716 | 7868   | 8498   |
| UN03166 | Rsa1.0.07875.1 | 1321 | 8374   | 0         | 562  | 563  | 99 +  | 434  | 996  | 2487   | 3049   |
| UN03167 | Rsa1.0.00673.1 | 750  | 69325  | 1.00E-148 | 272  | 274  | 99 +  | 3    | 276  | 48658  | 48931  |
| UN03168 | Rsa1.0.00275.1 | 1050 | 210104 | 0         | 605  | 618  | 97 -  | 411  | 1028 | 154998 | 155614 |
| UN03169 | Rsa1.0.00207.1 | 1463 | 248736 | 0         | 939  | 948  | 99 +  | 1    | 948  | 52530  | 53477  |
| UN03170 | Rsa1.0.01951.1 | 1331 | 36941  | 0         | 1330 | 1333 | 99 -  | 1    | 1331 | 5929   | 7261   |
| UN03171 | Rsa1.0.00139.1 | 1021 | 357786 | 1.00E-114 | 280  | 301  | 93 +  | 726  | 1018 | 275224 | 275524 |
| UN03172 | Rsa1.0.00991.1 | 420  | 143101 | 1.00E-123 | 224  | 224  | 100 - | 1    | 224  | 138346 | 138569 |
| UN03173 | Rsa1.0.00491.1 | 1134 | 80219  | 0         | 1023 | 1093 | 93 -  | 1    | 1076 | 75459  | 76542  |
| UN03174 | Rsa1.0.00223.1 | 1157 | 106231 | 0         | 572  | 578  | 98 +  | 440  | 1017 | 71134  | 71711  |
| UN03175 | Rsa1.0.06564.1 | 1393 | 10765  | 0         | 836  | 870  | 96 -  | 523  | 1387 | 9799   | 10659  |
| UN03176 | Rsa1.0.03728.1 | 898  | 21147  | 0         | 492  | 522  | 94 +  | 2    | 523  | 3494   | 4003   |
| UN03177 | Rsa1.0.00910.1 | 885  | 59975  | 0         | 860  | 893  | 96 -  | 2    | 883  | 27250  | 28142  |
| UN03178 | Rsa1.0.00197.1 | 834  | 109714 | 0         | 358  | 360  | 99 -  | 1    | 360  | 93155  | 93514  |
| UN03179 | Rsa1.0.01098.1 | 1035 | 54215  | 2.00E-52  | 142  | 154  | 92 -  | 880  | 1033 | 40131  | 40284  |
| UN03180 | Rsa1.0.01696.1 | 1087 | 301850 | 1.00E-129 | 250  | 254  | 98 -  | 1    | 253  | 293333 | 293586 |
| UN03181 | Rsa1.0.03452.1 | 1008 | 22817  | 0         | 1002 | 1010 | 99 -  | 1    | 1007 | 2642   | 3651   |
| UN03182 | Rsa1.0.02239.1 | 707  | 33534  | 0         | 397  | 410  | 96 +  | 1    | 407  | 14846  | 15252  |
| UN03183 | Rsa1.0.00044.1 | 1064 | 271658 | 0         | 550  | 571  | 96 -  | 1    | 570  | 6694   | 7258   |
| UN03184 | Rsa1.0.13906.1 | 377  | 4114   | 1.00E-100 | 262  | 284  | 92 +  | 2    | 285  | 1190   | 1469   |
| UN03185 | Rsa1.0.00631.1 | 1004 | 71277  | 0         | 539  | 552  | 97 -  | 1    | 552  | 48255  | 48806  |
| UN03186 | Rsa1.0.06133.1 | 1068 | 11663  | 0         | 1013 | 1026 | 98 +  | 43   | 1067 | 8486   | 9501   |
| UN03187 | Rsa1.0.20514.1 | 2228 | 1297   | 1.00E-135 | 246  | 246  | 100 + | 67   | 312  | 50     | 295    |
| UN03188 | Rsa1.0.01739.1 | 2010 | 40068  | 0         | 1144 | 1204 | 95 +  | 821  | 2010 | 8211   | 9405   |
| UN03189 | Rsa1.0.00628.1 | 1169 | 214360 | 0         | 904  | 906  | 99 +  | 264  | 1169 | 8480   | 9385   |
| UN03190 | Rsa1.0.04066.1 | 812  | 19262  | 1.00E-24  | 68   | 71   | 95 -  | 1    | 71   | 8483   | 8553   |
| UN03191 | Rsa1.0.00523.1 | 735  | 178770 | 0         | 507  | 524  | 96 +  | 2    | 522  | 29584  | 30106  |
| UN03192 | Rsa1.0.00222.1 | 1381 | 172263 | 0         | 606  | 625  | 96 -  | 763  | 1381 | 39667  | 40291  |
| UN03193 | Rsa1.0.00225.1 | 1166 | 105892 | 1.00E-173 | 324  | 329  | 98 -  | 811  | 1139 | 53905  | 54233  |
| UN03194 | Rsa1.0.01933.1 | 1336 | 37172  | 1.00E-169 | 311  | 314  | 99 -  | 3    | 316  | 13625  | 13938  |
| UN03195 | Rsa1.0.06932.1 | 825  | 10145  | 1.00E-165 | 294  | 294  | 100 + | 532  | 825  | 142    | 435    |
| UN03196 | Rsa1.0.00469.1 | 1036 | 82084  | 1.00E-179 | 328  | 331  | 99 -  | 320  | 650  | 66858  | 67188  |

|         |                |      |        |           |      |      |       |      |      |        |        |
|---------|----------------|------|--------|-----------|------|------|-------|------|------|--------|--------|
| UN03197 | Rsa1.0_00475.1 | 722  | 81678  | 2.00E-35  | 148  | 167  | 88 +  | 63   | 224  | 674    | 839    |
| UN03198 | Rsa1.0_30366.1 | 1311 | 756    | 0         | 732  | 756  | 96 -  | 302  | 1055 | 1      | 756    |
| UN03199 | Rsa1.0_01527.1 | 803  | 43905  | 1.00E-163 | 292  | 292  | 100 - | 511  | 802  | 19317  | 19608  |
| UN03200 | Rsa1.0_06309.1 | 811  | 11263  | 1.00E-135 | 268  | 275  | 97 -  | 3    | 275  | 7759   | 8033   |
| UN03201 | Rsa1.0_18610.1 | 1195 | 1565   | 1.00E-103 | 229  | 240  | 95 +  | 555  | 791  | 1220   | 1457   |
| UN03202 | Rsa1.0_00082.1 | 925  | 237584 | 1.00E-175 | 374  | 390  | 95 +  | 1    | 376  | 55282  | 55670  |
| UN03203 | Rsa1.0_00237.1 | 750  | 235974 | 0         | 387  | 392  | 98 +  | 2    | 393  | 214301 | 214689 |
| UN03204 | Rsa1.0_00034.1 | 1805 | 260119 | 0         | 453  | 473  | 95 +  | 1335 | 1805 | 28435  | 28901  |
| UN03205 | Rsa1.0_00033.1 | 1385 | 515811 | 0         | 763  | 836  | 91 +  | 1    | 816  | 36184  | 36994  |
| UN03206 | Rsa1.0_00587.1 | 1494 | 73982  | 0         | 867  | 892  | 97 -  | 2    | 886  | 22418  | 23307  |
| UN03207 | Rsa1.0_00060.1 | 714  | 502678 | 1.00E-109 | 265  | 286  | 92 -  | 423  | 705  | 499397 | 499682 |
| UN03208 | Rsa1.0_02970.1 | 404  | 26372  | 0         | 398  | 404  | 98 -  | 1    | 404  | 8468   | 8870   |
| UN03209 | Rsa1.0_00032.1 | 1096 | 306326 | 0         | 605  | 635  | 95 -  | 463  | 1085 | 284767 | 285401 |
| UN03210 | Rsa1.0_01634.1 | 1098 | 41865  | 0         | 434  | 452  | 96 -  | 647  | 1096 | 1106   | 1551   |
| UN03211 | Rsa1.0_08019.1 | 998  | 8075   | 0         | 355  | 355  | 100 + | 304  | 658  | 3265   | 3619   |
| UN03212 | Rsa1.0_02955.1 | 1398 | 26484  | 0         | 618  | 651  | 94 -  | 756  | 1395 | 17256  | 17899  |
| UN03213 | Rsa1.0_04744.1 | 1216 | 16154  | 1.00E-142 | 332  | 352  | 94 +  | 869  | 1216 | 7259   | 7609   |
| UN03214 | Rsa1.0_01140.1 | 1265 | 52586  | 0         | 633  | 656  | 96 +  | 167  | 822  | 31183  | 31838  |
| UN03215 | Rsa1.0_00337.1 | 818  | 143174 | 3.00E-90  | 221  | 240  | 92 -  | 187  | 426  | 141486 | 141710 |
| UN03216 | Rsa1.0_00065.1 | 1605 | 454616 | 0         | 1026 | 1032 | 99 -  | 527  | 1558 | 443700 | 444731 |
| UN03217 | Rsa1.0_00241.1 | 1245 | 104000 | 0         | 1041 | 1051 | 99 -  | 1    | 1051 | 89741  | 90788  |
| UN03218 | Rsa1.0_00040.1 | 1182 | 324196 | 0         | 864  | 900  | 96 +  | 288  | 1182 | 230200 | 231098 |
| UN03219 | Rsa1.0_01110.1 | 706  | 195852 | 0         | 409  | 424  | 96 -  | 1    | 424  | 185543 | 185966 |
| UN03220 | Rsa1.0_01936.1 | 533  | 37151  | 2.00E-99  | 449  | 532  | 84 -  | 22   | 533  | 18243  | 18755  |
| UN03221 | Rsa1.0_01462.1 | 571  | 45231  | 1.00E-134 | 278  | 292  | 95 -  | 280  | 571  | 25445  | 25725  |
| UN03222 | Rsa1.0_00507.1 | 958  | 79074  | 0         | 935  | 961  | 97 +  | 2    | 958  | 77176  | 78135  |
| UN03223 | Rsa1.0_00065.1 | 928  | 454616 | 0         | 424  | 431  | 98 -  | 498  | 928  | 444301 | 444731 |
| UN03224 | Rsa1.0_01249.1 | 191  | 188432 | 6.00E-45  | 147  | 163  | 90 +  | 29   | 191  | 150849 | 151008 |
| UN03225 | Rsa1.0_00738.1 | 687  | 66322  | 0         | 390  | 393  | 99 -  | 1    | 393  | 26036  | 26428  |
| UN03226 | Rsa1.0_00104.1 | 826  | 368722 | 1.00E-147 | 264  | 264  | 100 + | 1    | 264  | 333196 | 333459 |
| UN03227 | Rsa1.0_15193.1 | 802  | 2768   | 0         | 371  | 371  | 100 + | 3    | 373  | 1298   | 1668   |
| UN03228 | Rsa1.0_02203.1 | 1038 | 164532 | 0         | 548  | 588  | 93 +  | 349  | 935  | 148518 | 149102 |
| UN03229 | Rsa1.0_02523.1 | 585  | 30527  | 6.00E-88  | 171  | 173  | 98 -  | 3    | 175  | 10966  | 11138  |
| UN03230 | Rsa1.0_02074.1 | 733  | 35370  | 0         | 433  | 445  | 97 -  | 289  | 733  | 12083  | 12527  |
| UN03231 | Rsa1.0_00645.1 | 1431 | 189716 | 0         | 420  | 421  | 99 +  | 2    | 422  | 33293  | 33713  |
| UN03232 | Rsa1.0_01245.1 | 1034 | 149868 | 0         | 475  | 493  | 96 -  | 541  | 1033 | 40921  | 41413  |
| UN03233 | Rsa1.0_01791.1 | 1182 | 160383 | 0         | 455  | 463  | 98 -  | 719  | 1181 | 155276 | 155735 |
| UN03234 | Rsa1.0_11079.1 | 454  | 5624   | 0         | 432  | 451  | 95 -  | 4    | 454  | 5077   | 5525   |
| UN03235 | Rsa1.0_03315.1 | 692  | 23797  | 1.00E-107 | 198  | 198  | 100 + | 3    | 200  | 924    | 1121   |

|         |                |      |        |           |      |      |       |     |      |        |        |
|---------|----------------|------|--------|-----------|------|------|-------|-----|------|--------|--------|
| UN03236 | Rsa1.0_01039.1 | 912  | 55946  | 1.00E-106 | 202  | 204  | 99 +  | 3   | 206  | 26961  | 27164  |
| UN03237 | Rsa1.0_00094.1 | 913  | 139042 | 0         | 506  | 531  | 95 -  | 2   | 532  | 25774  | 26304  |
| UN03238 | Rsa1.0_02550.1 | 538  | 291051 | 0         | 531  | 537  | 98 -  | 2   | 537  | 282468 | 283001 |
| UN03239 | Rsa1.0_04948.1 | 1050 | 15356  | 0         | 721  | 753  | 95 -  | 4   | 756  | 12946  | 13698  |
| UN03240 | Rsa1.0_00304.1 | 818  | 97429  | 0         | 393  | 402  | 97 -  | 417 | 818  | 31748  | 32145  |
| UN03241 | Rsa1.0_00706.1 | 796  | 291570 | 4.00E-80  | 174  | 180  | 96 +  | 3   | 182  | 160967 | 161145 |
| UN03242 | Rsa1.0_04191.1 | 1011 | 18578  | 0         | 435  | 439  | 99 -  | 3   | 441  | 7426   | 7864   |
| UN03243 | Rsa1.0_01101.1 | 1366 | 54031  | 1.00E-141 | 264  | 267  | 98 -  | 883 | 1149 | 22500  | 22766  |
| UN03244 | Rsa1.0_00497.1 | 1134 | 79830  | 0         | 904  | 936  | 96 -  | 3   | 934  | 6527   | 7459   |
| UN03245 | Rsa1.0_00711.1 | 984  | 67223  | 0         | 354  | 354  | 100 - | 1   | 354  | 59902  | 60255  |
| UN03246 | Rsa1.0_06274.1 | 688  | 11343  | 1.00E-174 | 369  | 385  | 95 +  | 172 | 554  | 7108   | 7486   |
| UN03247 | Rsa1.0_11186.1 | 969  | 5590   | 0         | 394  | 397  | 99 +  | 146 | 542  | 436    | 832    |
| UN03248 | Rsa1.0_00127.1 | 941  | 127446 | 0         | 449  | 480  | 93 -  | 462 | 926  | 56170  | 56649  |
| UN03249 | Rsa1.0_03074.1 | 1134 | 25568  | 0         | 426  | 426  | 100 - | 426 | 851  | 16751  | 17176  |
| UN03250 | Rsa1.0_00205.1 | 606  | 193401 | 0         | 348  | 353  | 98 +  | 254 | 606  | 38432  | 38784  |
| UN03251 | Rsa1.0_00115.1 | 1378 | 131321 | 1.00E-169 | 379  | 399  | 94 +  | 845 | 1238 | 68836  | 69232  |
| UN03252 | Rsa1.0_00427.1 | 839  | 189678 | 2.00E-91  | 177  | 179  | 98 -  | 257 | 435  | 183909 | 184087 |
| UN03253 | Rsa1.0_16916.1 | 718  | 1990   | 0         | 623  | 639  | 97 -  | 64  | 702  | 8      | 641    |
| UN03254 | Rsa1.0_03169.1 | 1000 | 24826  | 1.00E-147 | 302  | 314  | 96 -  | 16  | 325  | 18033  | 18346  |
| UN03255 | Rsa1.0_01377.1 | 1069 | 46967  | 4.00E-81  | 169  | 174  | 97 +  | 776 | 949  | 21582  | 21755  |
| UN03256 | Rsa1.0_13611.1 | 1410 | 4641   | 0         | 621  | 642  | 96 -  | 742 | 1364 | 4000   | 4641   |
| UN03257 | Rsa1.0_04203.1 | 755  | 18479  | 0         | 450  | 460  | 97 -  | 3   | 462  | 17886  | 18342  |
| UN03258 | Rsa1.0_01530.1 | 921  | 43820  | 0         | 710  | 718  | 98 -  | 2   | 719  | 18245  | 18961  |
| UN03259 | Rsa1.0_00740.1 | 780  | 215972 | 0         | 669  | 702  | 95 -  | 4   | 705  | 9972   | 10664  |
| UN03260 | Rsa1.0_03569.1 | 1416 | 22041  | 0         | 352  | 356  | 98 -  | 4   | 359  | 14787  | 15142  |
| UN03261 | Rsa1.0_00529.1 | 438  | 77487  | 1.00E-69  | 186  | 199  | 93 -  | 240 | 436  | 25100  | 25293  |
| UN03262 | Rsa1.0_01105.1 | 682  | 53958  | 1.00E-119 | 244  | 252  | 96 -  | 410 | 659  | 7729   | 7980   |
| UN03263 | Rsa1.0_00816.1 | 711  | 403350 | 2.00E-88  | 169  | 170  | 99 +  | 541 | 710  | 273442 | 273611 |
| UN03264 | Rsa1.0_05339.1 | 1731 | 14114  | 0         | 1670 | 1746 | 95 -  | 1   | 1731 | 7135   | 8879   |
| UN03265 | Rsa1.0_00329.1 | 1092 | 222544 | 1.00E-160 | 302  | 307  | 98 -  | 784 | 1090 | 79574  | 79880  |
| UN03266 | Rsa1.0_00271.1 | 1305 | 101125 | 1.00E-127 | 249  | 255  | 97 +  | 787 | 1041 | 25866  | 26120  |
| UN03267 | Rsa1.0_00176.1 | 981  | 240984 | 0         | 973  | 981  | 99 +  | 1   | 981  | 1936   | 2915   |
| UN03268 | Rsa1.0_00268.1 | 1048 | 101470 | 1.00E-101 | 312  | 360  | 86 -  | 4   | 344  | 61574  | 61913  |
| UN03269 | Rsa1.0_00121.1 | 1606 | 278029 | 0         | 413  | 421  | 98 +  | 284 | 704  | 41474  | 41894  |
| UN03270 | Rsa1.0_01879.1 | 959  | 37748  | 0         | 362  | 373  | 97 +  | 587 | 959  | 23051  | 23422  |
| UN03271 | Rsa1.0_02344.1 | 1916 | 32369  | 0         | 1764 | 1881 | 93 +  | 2   | 1880 | 27164  | 29041  |
| UN03272 | Rsa1.0_00094.1 | 1801 | 139042 | 0         | 553  | 578  | 95 +  | 12  | 588  | 90538  | 91115  |
| UN03273 | Rsa1.0_00998.1 | 1140 | 57168  | 1.00E-149 | 290  | 297  | 97 +  | 422 | 718  | 9918   | 10214  |
| UN03274 | Rsa1.0_00048.1 | 817  | 167185 | 0         | 722  | 724  | 99 -  | 2   | 725  | 44608  | 45331  |

|         |                |      |        |           |      |      |       |      |      |        |        |
|---------|----------------|------|--------|-----------|------|------|-------|------|------|--------|--------|
| UN03275 | Rsa1.0.00306.1 | 1073 | 146760 | 0         | 546  | 552  | 98 -  | 1    | 552  | 136226 | 136777 |
| UN03276 | Rsa1.0.00009.1 | 1017 | 232558 | 0         | 449  | 461  | 97 +  | 1    | 460  | 121559 | 122019 |
| UN03277 | Rsa1.0.00017.1 | 781  | 752458 | 0         | 661  | 672  | 98 +  | 110  | 781  | 695063 | 695734 |
| UN03278 | Rsa1.0.05618.1 | 1145 | 13165  | 1.00E-116 | 219  | 221  | 99 -  | 516  | 736  | 7388   | 7608   |
| UN03279 | Rsa1.0.02518.1 | 459  | 30586  | 8.00E-59  | 122  | 124  | 98 -  | 119  | 242  | 25939  | 26062  |
| UN03280 | Rsa1.0.01200.1 | 740  | 50895  | 0         | 390  | 407  | 95 -  | 337  | 740  | 30781  | 31187  |
| UN03281 | Rsa1.0.01493.1 | 881  | 44670  | 0         | 491  | 502  | 97 +  | 3    | 504  | 5423   | 5924   |
| UN03282 | Rsa1.0.00067.1 | 992  | 415055 | 0         | 884  | 917  | 96 -  | 78   | 992  | 152049 | 152965 |
| UN03283 | Rsa1.0.00042.1 | 766  | 171507 | 1.00E-149 | 316  | 332  | 95 -  | 1    | 332  | 144822 | 145153 |
| UN03284 | Rsa1.0.06247.1 | 607  | 11395  | 1.00E-73  | 156  | 161  | 96 +  | 3    | 163  | 8715   | 8875   |
| UN03285 | Rsa1.0.01161.1 | 739  | 52029  | 1.00E-150 | 288  | 294  | 97 +  | 446  | 739  | 19876  | 20169  |
| UN03286 | Rsa1.0.00314.1 | 721  | 96472  | 1.00E-123 | 248  | 256  | 96 -  | 466  | 721  | 15658  | 15913  |
| UN03287 | Rsa1.0.00683.1 | 396  | 68638  | 3.00E-79  | 182  | 192  | 94 -  | 25   | 213  | 59008  | 59199  |
| UN03288 | Rsa1.0.00350.1 | 1339 | 92346  | 0         | 1321 | 1351 | 97 +  | 1    | 1339 | 57739  | 59086  |
| UN03289 | Rsa1.0.00821.1 | 944  | 62891  | 0         | 379  | 381  | 99 +  | 565  | 944  | 18256  | 18636  |
| UN03290 | Rsa1.0.05289.1 | 1357 | 14259  | 0         | 1182 | 1195 | 98 -  | 165  | 1356 | 2088   | 3281   |
| UN03291 | Rsa1.0.07208.1 | 792  | 9719   | 0         | 762  | 786  | 96 +  | 3    | 785  | 6506   | 7291   |
| UN03292 | Rsa1.0.00025.1 | 843  | 277312 | 4.00E-99  | 281  | 308  | 91 -  | 527  | 820  | 134694 | 134996 |
| UN03293 | Rsa1.0.00387.1 | 1236 | 495407 | 0         | 486  | 490  | 99 -  | 747  | 1236 | 354494 | 354981 |
| UN03294 | Rsa1.0.00336.1 | 1020 | 445051 | 1.00E-111 | 242  | 253  | 95 -  | 504  | 756  | 164694 | 164945 |
| UN03295 | Rsa1.0.07006.1 | 1527 | 10043  | 2.00E-86  | 166  | 167  | 99 +  | 1135 | 1301 | 9174   | 9340   |
| UN03296 | Rsa1.0.00979.1 | 1390 | 57733  | 0         | 713  | 713  | 100 - | 676  | 1388 | 1000   | 1712   |
| UN03297 | Rsa1.0.00894.1 | 664  | 269700 | 0         | 650  | 664  | 97 -  | 2    | 664  | 101028 | 101688 |
| UN03298 | Rsa1.0.00855.1 | 808  | 62047  | 0         | 417  | 420  | 99 -  | 82   | 501  | 5071   | 5490   |
| UN03299 | Rsa1.0.00246.1 | 1129 | 103541 | 4.00E-87  | 170  | 172  | 98 +  | 618  | 789  | 75837  | 76008  |
| UN03300 | Rsa1.0.00360.1 | 765  | 91190  | 1.00E-162 | 302  | 306  | 98 -  | 460  | 765  | 49982  | 50287  |
| UN03301 | Rsa1.0.00341.1 | 1138 | 249309 | 1.00E-139 | 338  | 364  | 92 -  | 750  | 1110 | 125794 | 126149 |
| UN03302 | Rsa1.0.04594.1 | 771  | 16713  | 0         | 526  | 532  | 98 -  | 237  | 765  | 4770   | 5301   |
| UN03303 | Rsa1.0.00097.1 | 844  | 138858 | 0         | 344  | 347  | 99 -  | 493  | 839  | 113687 | 114033 |
| UN03304 | Rsa1.0.01224.1 | 921  | 50388  | 9.00E-20  | 110  | 127  | 86 -  | 26   | 150  | 39776  | 39902  |
| UN03305 | Rsa1.0.01980.1 | 1330 | 36544  | 0         | 645  | 650  | 99 +  | 6    | 655  | 15880  | 16529  |
| UN03306 | Rsa1.0.00115.1 | 680  | 131321 | 1.00E-175 | 343  | 351  | 97 -  | 332  | 680  | 97416  | 97765  |
| UN03307 | Rsa1.0.00310.1 | 796  | 96852  | 1.00E-114 | 212  | 213  | 99 -  | 584  | 796  | 39207  | 39419  |
| UN03308 | Rsa1.0.03105.1 | 1164 | 25373  | 0         | 663  | 671  | 98 -  | 3    | 670  | 17351  | 18021  |
| UN03309 | Rsa1.0.00867.1 | 918  | 61635  | 0         | 449  | 451  | 99 -  | 1    | 451  | 33487  | 33937  |
| UN03310 | Rsa1.0.01924.1 | 965  | 37226  | 1.00E-163 | 344  | 355  | 96 +  | 449  | 798  | 1369   | 1723   |
| UN03311 | Rsa1.0.01389.1 | 1061 | 46716  | 0         | 816  | 850  | 96 +  | 213  | 1061 | 45323  | 46169  |
| UN03312 | Rsa1.0.00594.1 | 1248 | 73729  | 0         | 488  | 501  | 97 +  | 744  | 1242 | 36888  | 37386  |
| UN03313 | Rsa1.0.05755.1 | 789  | 12730  | 0         | 622  | 623  | 99 +  | 83   | 705  | 11775  | 12397  |

|         |                |      |        |           |      |      |       |      |      |        |        |
|---------|----------------|------|--------|-----------|------|------|-------|------|------|--------|--------|
| UN03314 | Rsa1.0.00159.1 | 866  | 431686 | 1.00E-176 | 352  | 364  | 96 -  | 15   | 378  | 210507 | 210867 |
| UN03315 | Rsa1.0.00748.1 | 754  | 65983  | 2.00E-75  | 156  | 160  | 97 -  | 332  | 491  | 16394  | 16553  |
| UN03316 | Rsa1.0.01844.1 | 1023 | 38421  | 1.00E-168 | 309  | 312  | 99 +  | 153  | 464  | 8557   | 8868   |
| UN03317 | Rsa1.0.00808.1 | 1132 | 63351  | 0         | 1120 | 1130 | 99 -  | 3    | 1131 | 29216  | 30345  |
| UN03318 | Rsa1.0.01767.1 | 1012 | 39615  | 4.00E-87  | 182  | 188  | 96 -  | 461  | 648  | 14604  | 14791  |
| UN03319 | Rsa1.0.02224.1 | 1060 | 33758  | 1.00E-135 | 245  | 245  | 100 - | 203  | 447  | 23489  | 23733  |
| UN03320 | Rsa1.0.00169.1 | 1426 | 274298 | 0         | 909  | 949  | 95 -  | 473  | 1414 | 62059  | 63006  |
| UN03321 | Rsa1.0.00380.1 | 845  | 89748  | 1.00E-113 | 237  | 248  | 95 -  | 226  | 464  | 78451  | 78698  |
| UN03322 | Rsa1.0.04652.1 | 960  | 16515  | 3.00E-97  | 196  | 201  | 97 +  | 109  | 309  | 2822   | 3022   |
| UN03323 | Rsa1.0.06549.1 | 896  | 10800  | 0         | 575  | 591  | 97 -  | 289  | 874  | 5361   | 5951   |
| UN03324 | Rsa1.0.04080.1 | 1934 | 19198  | 0         | 752  | 814  | 92 +  | 1124 | 1933 | 9679   | 10485  |
| UN03325 | Rsa1.0.02935.1 | 548  | 26621  | 1.00E-112 | 228  | 234  | 97 -  | 3    | 235  | 25753  | 25981  |
| UN03326 | Rsa1.0.00324.1 | 1182 | 218805 | 0         | 382  | 382  | 100 - | 444  | 825  | 168953 | 169334 |
| UN03327 | Rsa1.0.01236.1 | 811  | 50156  | 1.00E-101 | 196  | 199  | 98 -  | 611  | 809  | 40403  | 40601  |
| UN03328 | Rsa1.0.00714.1 | 669  | 67187  | 0         | 514  | 514  | 100 + | 3    | 516  | 58147  | 58660  |
| UN03329 | Rsa1.0.01206.1 | 784  | 50772  | 0         | 681  | 703  | 96 -  | 89   | 783  | 27319  | 28020  |
| UN03330 | Rsa1.0.00018.1 | 761  | 410899 | 0         | 751  | 765  | 98 +  | 1    | 761  | 228726 | 229488 |
| UN03331 | Rsa1.0.04134.1 | 906  | 149811 | 0         | 725  | 746  | 97 +  | 3    | 747  | 5762   | 6507   |
| UN03332 | Rsa1.0.00566.1 | 781  | 75325  | 1.00E-139 | 276  | 283  | 97 +  | 491  | 772  | 23290  | 23572  |
| UN03333 | Rsa1.0.02071.1 | 1216 | 35409  | 0         | 640  | 659  | 97 +  | 561  | 1205 | 15282  | 15940  |
| UN03334 | Rsa1.0.06412.1 | 1509 | 11060  | 0         | 346  | 347  | 99 -  | 767  | 1113 | 1969   | 2315   |
| UN03335 | Rsa1.0.04323.1 | 928  | 17915  | 2.00E-94  | 206  | 216  | 95 -  | 3    | 218  | 15646  | 15861  |
| UN03336 | Rsa1.0.03448.1 | 1744 | 22844  | 1.00E-166 | 312  | 317  | 98 -  | 1148 | 1464 | 9284   | 9600   |
| UN03337 | Rsa1.0.00570.1 | 2162 | 75002  | 0         | 634  | 637  | 99 -  | 1526 | 2162 | 14738  | 15374  |
| UN03338 | Rsa1.0.01011.1 | 802  | 56883  | 0         | 800  | 802  | 99 -  | 3    | 802  | 7360   | 8161   |
| UN03339 | Rsa1.0.04254.1 | 1311 | 18258  | 0         | 1178 | 1209 | 97 -  | 85   | 1290 | 15216  | 16420  |
| UN03340 | Rsa1.0.02803.1 | 750  | 27715  | 0         | 342  | 342  | 100 - | 199  | 540  | 10374  | 10715  |
| UN03341 | Rsa1.0.01249.1 | 1405 | 188432 | 0         | 399  | 406  | 98 -  | 7    | 410  | 174715 | 175117 |
| UN03342 | Rsa1.0.02666.1 | 1207 | 28915  | 0         | 859  | 867  | 99 -  | 341  | 1207 | 5610   | 6476   |
| UN03343 | Rsa1.0.01747.1 | 797  | 39881  | 2.33E-156 | 294  | 303  | 97 -  | 491  | 792  | 23641  | 23943  |
| UN03344 | Rsa1.0.00104.1 | 1047 | 368722 | 0         | 400  | 407  | 98 +  | 235  | 641  | 279741 | 280147 |
| UN03345 | Rsa1.0.03565.1 | 1168 | 22062  | 1.00E-170 | 355  | 371  | 95 -  | 2    | 372  | 3775   | 4143   |
| UN03346 | Rsa1.0.01049.1 | 380  | 55655  | 1.00E-125 | 248  | 255  | 97 +  | 1    | 255  | 39587  | 39841  |
| UN03347 | Rsa1.0.01695.1 | 742  | 40848  | 0         | 471  | 478  | 98 -  | 267  | 742  | 9080   | 9557   |
| UN03348 | Rsa1.0.00086.1 | 1663 | 439854 | 0         | 401  | 412  | 97 +  | 641  | 1052 | 241976 | 242387 |
| UN03349 | Rsa1.0.00302.1 | 1000 | 97521  | 0         | 425  | 432  | 98 +  | 104  | 535  | 86355  | 86785  |
| UN03350 | Rsa1.0.00122.1 | 1494 | 265937 | 0         | 467  | 502  | 93 -  | 988  | 1482 | 247379 | 247866 |
| UN03351 | Rsa1.0.00654.1 | 902  | 70012  | 1.00E-150 | 329  | 348  | 94 +  | 295  | 639  | 41118  | 41465  |
| UN03352 | Rsa1.0.02070.1 | 885  | 158516 | 0         | 405  | 420  | 96 +  | 7    | 426  | 138395 | 138814 |



|         |                |      |        |           |      |      |       |      |      |        |        |
|---------|----------------|------|--------|-----------|------|------|-------|------|------|--------|--------|
| UN03353 | Rsa1.0_00259.1 | 1202 | 163204 | 0         | 1188 | 1204 | 98 -  | 1    | 1202 | 154262 | 155465 |
| UN03354 | Rsa1.0_00661.1 | 619  | 213041 | 2.00E-94  | 265  | 291  | 91 -  | 37   | 323  | 195844 | 196134 |
| UN03355 | Rsa1.0_13906.1 | 786  | 4114   | 1.00E-153 | 408  | 452  | 90 -  | 228  | 661  | 1932   | 2377   |
| UN03356 | Rsa1.0_00007.1 | 1449 | 239325 | 0         | 462  | 486  | 95 +  | 972  | 1449 | 29997  | 30482  |
| UN03357 | Rsa1.0_00031.1 | 592  | 179862 | 1.00E-130 | 265  | 274  | 96 -  | 305  | 578  | 73545  | 73816  |
| UN03358 | Rsa1.0_07133.1 | 766  | 9856   | 0         | 713  | 728  | 97 +  | 1    | 728  | 7050   | 7765   |
| UN03359 | Rsa1.0_00258.1 | 710  | 102381 | 1.00E-106 | 220  | 227  | 96 -  | 482  | 708  | 45419  | 45643  |
| UN03360 | Rsa1.0_18647.1 | 847  | 1560   | 0         | 347  | 348  | 99 -  | 498  | 845  | 585    | 932    |
| UN03361 | Rsa1.0_00684.1 | 1800 | 141701 | 0         | 902  | 925  | 97 -  | 432  | 1356 | 9291   | 10215  |
| UN03362 | Rsa1.0_00176.1 | 1426 | 240984 | 1.00E-111 | 217  | 221  | 98 -  | 713  | 933  | 4524   | 4744   |
| UN03363 | Rsa1.0_02462.1 | 1412 | 31158  | 0         | 839  | 840  | 99 +  | 3    | 841  | 5537   | 6376   |
| UN03364 | Rsa1.0_00134.1 | 922  | 390219 | 1.00E-133 | 300  | 313  | 95 -  | 22   | 328  | 154581 | 154893 |
| UN03365 | Rsa1.0_05713.1 | 1233 | 12855  | 1.00E-114 | 209  | 209  | 100 + | 1024 | 1232 | 1      | 209    |
| UN03366 | Rsa1.0_01585.1 | 1122 | 42806  | 0         | 473  | 481  | 98 +  | 593  | 1065 | 15623  | 16103  |
| UN03367 | Rsa1.0_01154.1 | 732  | 52249  | 0         | 443  | 465  | 95 -  | 41   | 504  | 38105  | 38568  |
| UN03368 | Rsa1.0_02570.1 | 842  | 30000  | 0         | 822  | 837  | 98 +  | 5    | 840  | 5724   | 6556   |
| UN03369 | Rsa1.0_01182.1 | 758  | 167304 | 1.00E-163 | 317  | 324  | 97 -  | 1    | 324  | 14177  | 14499  |
| UN03370 | Rsa1.0_02514.1 | 1274 | 30642  | 0         | 980  | 989  | 99 -  | 286  | 1274 | 8753   | 9739   |
| UN03371 | Rsa1.0_00153.1 | 1255 | 192931 | 0         | 367  | 369  | 99 +  | 889  | 1255 | 170695 | 171063 |
| UN03372 | Rsa1.0_00010.1 | 1200 | 294827 | 0         | 614  | 634  | 96 -  | 568  | 1200 | 116378 | 116996 |
| UN03373 | Rsa1.0_00359.1 | 1528 | 91256  | 0         | 703  | 734  | 95 -  | 794  | 1527 | 76255  | 76982  |
| UN03374 | Rsa1.0_17830.1 | 1017 | 1729   | 0         | 611  | 620  | 98 -  | 104  | 720  | 904    | 1523   |
| UN03375 | #              | #    | #      | #         | #    | #    | #     | #    | #    | #      | #      |
| UN03376 | Rsa1.0_00017.1 | 1028 | 752458 | 0         | 490  | 499  | 98 +  | 363  | 861  | 392621 | 393119 |
| UN03377 | Rsa1.0_00577.1 | 1244 | 174827 | 1.00E-173 | 309  | 309  | 100 + | 3    | 311  | 136416 | 136724 |
| UN03378 | Rsa1.0_00363.1 | 1305 | 90968  | 0         | 563  | 603  | 93 -  | 1    | 598  | 63275  | 63876  |
| UN03379 | Rsa1.0_02733.1 | 1068 | 28354  | 0         | 494  | 507  | 97 -  | 18   | 524  | 21873  | 22377  |
| UN03380 | Rsa1.0_03446.1 | 1003 | 22876  | 0         | 372  | 374  | 99 +  | 1    | 374  | 18481  | 18854  |
| UN03381 | Rsa1.0_01305.1 | 1366 | 48730  | 1.00E-129 | 237  | 238  | 99 +  | 352  | 589  | 12354  | 12591  |
| UN03382 | Rsa1.0_05900.1 | 1087 | 12295  | 1.00E-104 | 216  | 223  | 96 +  | 671  | 891  | 4712   | 4934   |
| UN03383 | Rsa1.0_00186.1 | 967  | 112669 | 0         | 497  | 503  | 98 +  | 3    | 503  | 58882  | 59382  |
| UN03384 | Rsa1.0_00779.1 | 1371 | 64568  | 0         | 461  | 466  | 98 +  | 2    | 467  | 20592  | 21057  |
| UN03385 | Rsa1.0_00457.1 | 531  | 337301 | 0         | 422  | 434  | 97 -  | 6    | 439  | 197550 | 197983 |
| UN03386 | Rsa1.0_00438.1 | 714  | 84861  | 0         | 420  | 420  | 100 - | 10   | 429  | 76921  | 77340  |
| UN03387 | Rsa1.0_00568.1 | 1057 | 75219  | 0         | 719  | 720  | 99 +  | 2    | 721  | 26634  | 27353  |
| UN03388 | Rsa1.0_54382.1 | 1336 | 419    | 0         | 406  | 424  | 95 +  | 307  | 720  | 1      | 419    |
| UN03389 | Rsa1.0_00049.1 | 1257 | 167018 | 0         | 878  | 915  | 95 -  | 347  | 1257 | 78769  | 79681  |
| UN03390 | Rsa1.0_02238.1 | 893  | 33540  | 0         | 887  | 892  | 99 +  | 1    | 890  | 17205  | 18096  |
| UN03391 | Rsa1.0_00566.1 | 151  | 75325  | 8.00E-47  | 119  | 127  | 93 -  | 23   | 149  | 61498  | 61624  |

|         |                |      |        |           |      |      |      |      |      |        |        |
|---------|----------------|------|--------|-----------|------|------|------|------|------|--------|--------|
| UN03392 | Rsa1.0.03728.1 | 1236 | 21147  | 0         | 407  | 427  | 95 + | 9    | 435  | 3578   | 4003   |
| UN03393 | Rsa1.0.05969.1 | 1290 | 12072  | 0         | 617  | 656  | 94 - | 243  | 895  | 6377   | 7011   |
| UN03394 | Rsa1.0.00755.1 | 1330 | 192559 | 0         | 589  | 621  | 94 - | 1    | 610  | 138958 | 139563 |
| UN03395 | Rsa1.0.08807.1 | 746  | 6906   | 0         | 736  | 746  | 98 - | 1    | 746  | 2629   | 3374   |
| UN03396 | Rsa1.0.00864.1 | 1412 | 61702  | 0         | 459  | 460  | 99 - | 953  | 1412 | 6569   | 7028   |
| UN03397 | Rsa1.0.00571.1 | 841  | 329018 | 3.00E-90  | 231  | 245  | 94 - | 374  | 614  | 39794  | 40037  |
| UN03398 | Rsa1.0.00001.1 | 804  | 363028 | 0         | 781  | 807  | 96 - | 1    | 804  | 147907 | 148708 |
| UN03399 | Rsa1.0.00222.1 | 763  | 172263 | 0         | 427  | 448  | 95 + | 287  | 734  | 85716  | 86157  |
| UN03400 | Rsa1.0.01420.1 | 1214 | 46210  | 0         | 756  | 777  | 97 + | 435  | 1211 | 10987  | 11754  |
| UN03401 | Rsa1.0.02812.1 | 917  | 27660  | 1.00E-173 | 349  | 361  | 96 + | 540  | 899  | 16559  | 16919  |
| UN03402 | Rsa1.0.01260.1 | 762  | 49750  | 0         | 396  | 414  | 95 - | 1    | 411  | 33751  | 34164  |
| UN03403 | Rsa1.0.00284.1 | 909  | 323267 | 1.00E-136 | 427  | 492  | 86 - | 3    | 471  | 275018 | 275487 |
| UN03404 | Rsa1.0.01115.1 | 1077 | 183545 | 0         | 1003 | 1069 | 93 + | 8    | 1069 | 168083 | 169149 |
| UN03405 | Rsa1.0.02029.1 | 487  | 35857  | 0         | 472  | 518  | 91 - | 1    | 487  | 26144  | 26661  |
| UN03406 | Rsa1.0.03639.1 | 1022 | 21629  | 6.00E-80  | 195  | 211  | 92 - | 3    | 203  | 4990   | 5200   |
| UN03407 | Rsa1.0.02931.1 | 1212 | 26654  | 0         | 1177 | 1214 | 96 - | 1    | 1212 | 19523  | 20730  |
| UN03408 | Rsa1.0.01027.1 | 858  | 56402  | 0         | 439  | 441  | 99 + | 1    | 440  | 44990  | 45430  |
| UN03409 | Rsa1.0.00576.1 | 1146 | 178949 | 0         | 1078 | 1116 | 96 + | 30   | 1145 | 28622  | 29735  |
| UN03410 | Rsa1.0.00097.1 | 624  | 138858 | 6.00E-14  | 98   | 117  | 83 - | 185  | 301  | 106303 | 106419 |
| UN03411 | Rsa1.0.01054.1 | 973  | 55470  | 0         | 960  | 989  | 97 + | 1    | 971  | 23570  | 24556  |
| UN03412 | Rsa1.0.00738.1 | 1030 | 66322  | 1.00E-136 | 294  | 308  | 95 - | 722  | 1027 | 27060  | 27359  |
| UN03413 | Rsa1.0.17682.1 | 976  | 1765   | 0         | 862  | 943  | 91 - | 55   | 973  | 37     | 971    |
| UN03414 | Rsa1.0.04026.1 | 3219 | 19508  | 0         | 865  | 866  | 99 + | 1    | 866  | 6275   | 7140   |
| UN03415 | Rsa1.0.00415.1 | 692  | 86795  | 0         | 600  | 621  | 96 + | 72   | 692  | 8987   | 9607   |
| UN03416 | Rsa1.0.02981.1 | 672  | 26285  | 1.00E-140 | 274  | 280  | 97 + | 4    | 283  | 5774   | 6052   |
| UN03417 | Rsa1.0.00231.1 | 943  | 105381 | 0         | 377  | 378  | 99 - | 1    | 377  | 26766  | 27143  |
| UN03418 | Rsa1.0.03427.1 | 822  | 22992  | 0         | 425  | 434  | 97 + | 107  | 540  | 1      | 434    |
| UN03419 | Rsa1.0.01724.1 | 535  | 40292  | 1.00E-130 | 301  | 322  | 93 + | 1    | 312  | 10005  | 10323  |
| UN03420 | Rsa1.0.01007.1 | 534  | 56933  | 0         | 520  | 524  | 99 - | 10   | 533  | 46916  | 47439  |
| UN03421 | Rsa1.0.05572.1 | 510  | 13291  | 1.00E-124 | 232  | 234  | 99 + | 250  | 483  | 11854  | 12087  |
| UN03422 | Rsa1.0.00190.1 | 1777 | 318240 | 1.00E-179 | 405  | 431  | 93 - | 1349 | 1777 | 300505 | 300925 |
| UN03423 | Rsa1.0.00173.1 | 727  | 288743 | 0         | 455  | 496  | 91 - | 3    | 495  | 64738  | 65232  |
| UN03424 | Rsa1.0.00382.1 | 762  | 251946 | 0         | 541  | 549  | 98 - | 1    | 546  | 155766 | 156313 |
| UN03425 | Rsa1.0.06136.1 | 1342 | 11659  | 0         | 1335 | 1346 | 99 + | 1    | 1342 | 3199   | 4544   |
| UN03426 | Rsa1.0.01523.1 | 736  | 43959  | 0         | 589  | 615  | 95 + | 4    | 616  | 26567  | 27173  |
| UN03427 | Rsa1.0.00635.1 | 648  | 175826 | 1.00E-135 | 329  | 354  | 92 + | 1    | 352  | 123372 | 123721 |
| UN03428 | Rsa1.0.01951.1 | 690  | 36941  | 0         | 363  | 367  | 98 + | 3    | 369  | 2054   | 2418   |
| UN03429 | Rsa1.0.00064.1 | 1436 | 240927 | 0         | 1265 | 1280 | 98 - | 2    | 1277 | 7959   | 9238   |
| UN03430 | Rsa1.0.23614.1 | 838  | 1037   | 0         | 731  | 808  | 90 + | 1    | 800  | 20     | 821    |

|         |                |      |        |           |      |      |       |     |      |        |        |
|---------|----------------|------|--------|-----------|------|------|-------|-----|------|--------|--------|
| UN03431 | Rsa1.0_00203.1 | 875  | 109129 | 1.00E-125 | 286  | 303  | 94 +  | 2   | 302  | 27426  | 27728  |
| UN03432 | Rsa1.0_16058.1 | 758  | 2302   | 1.00E-152 | 285  | 289  | 98 +  | 177 | 465  | 1139   | 1427   |
| UN03433 | Rsa1.0_00108.1 | 729  | 478491 | 1.00E-109 | 224  | 232  | 96 +  | 116 | 347  | 119259 | 119490 |
| UN03434 | Rsa1.0_03951.1 | 1035 | 19894  | 1.00E-158 | 291  | 292  | 99 +  | 2   | 292  | 2811   | 3102   |
| UN03435 | Rsa1.0_00734.1 | 829  | 66508  | 1.00E-150 | 321  | 336  | 95 +  | 2   | 335  | 50875  | 51209  |
| UN03436 | Rsa1.0_01642.1 | 789  | 41772  | 1.00E-117 | 228  | 232  | 98 +  | 3   | 230  | 20716  | 20947  |
| UN03437 | Rsa1.0_00451.1 | 1092 | 322533 | 1.00E-134 | 249  | 251  | 99 -  | 1   | 251  | 293086 | 293336 |
| UN03438 | Rsa1.0_00453.1 | 791  | 83031  | 1.00E-177 | 358  | 371  | 96 +  | 6   | 370  | 54730  | 55100  |
| UN03439 | Rsa1.0_04355.1 | 761  | 146733 | 0         | 555  | 582  | 95 +  | 3   | 579  | 3253   | 3831   |
| UN03440 | Rsa1.0_01735.1 | 1100 | 40128  | 0         | 736  | 765  | 96 +  | 336 | 1099 | 33599  | 34351  |
| UN03441 | Rsa1.0_08548.1 | 1379 | 7212   | 0         | 796  | 810  | 98 -  | 573 | 1379 | 2923   | 3732   |
| UN03442 | Rsa1.0_03036.1 | 811  | 25826  | 5.00E-95  | 193  | 197  | 97 -  | 616 | 811  | 13406  | 13602  |
| UN03443 | Rsa1.0_01485.1 | 824  | 44797  | 0         | 382  | 387  | 98 -  | 3   | 386  | 11613  | 11999  |
| UN03444 | Rsa1.0_00056.1 | 914  | 332604 | 0         | 445  | 470  | 94 -  | 4   | 468  | 96611  | 97079  |
| UN03445 | Rsa1.0_02353.1 | 1344 | 32300  | 0         | 603  | 639  | 94 +  | 1   | 633  | 30075  | 30701  |
| UN03446 | Rsa1.0_00453.1 | 835  | 83031  | 0         | 731  | 777  | 94 -  | 8   | 782  | 75551  | 76302  |
| UN03447 | Rsa1.0_01806.1 | 1065 | 39021  | 0         | 1060 | 1066 | 99 -  | 1   | 1065 | 34815  | 35880  |
| UN03448 | Rsa1.0_02865.1 | 861  | 27133  | 0         | 390  | 408  | 95 -  | 2   | 399  | 12296  | 12703  |
| UN03449 | Rsa1.0_02080.1 | 1366 | 35297  | 0         | 1360 | 1366 | 99 -  | 1   | 1366 | 13168  | 14533  |
| UN03450 | Rsa1.0_00740.1 | 1345 | 215972 | 0         | 612  | 629  | 97 +  | 716 | 1344 | 198503 | 199128 |
| UN03451 | Rsa1.0_00284.1 | 956  | 323267 | 0         | 581  | 612  | 94 +  | 1   | 612  | 287184 | 287792 |
| UN03452 | Rsa1.0_00471.1 | 1670 | 81897  | 0         | 329  | 329  | 100 - | 1   | 329  | 10228  | 10556  |
| UN03453 | Rsa1.0_02957.1 | 897  | 26479  | 1.00E-25  | 178  | 213  | 83 +  | 416 | 626  | 14087  | 14298  |
| UN03454 | Rsa1.0_03093.1 | 892  | 25445  | 1.00E-111 | 234  | 243  | 96 -  | 1   | 238  | 3055   | 3295   |
| UN03455 | Rsa1.0_10193.1 | 1565 | 5950   | 0         | 384  | 392  | 97 +  | 510 | 901  | 661    | 1052   |
| UN03456 | Rsa1.0_01232.1 | 1301 | 155185 | 1.00E-112 | 219  | 223  | 98 -  | 288 | 510  | 131817 | 132039 |
| UN03457 | Rsa1.0_00067.1 | 1193 | 415055 | 0         | 1185 | 1192 | 99 -  | 1   | 1192 | 156898 | 158088 |
| UN03458 | Rsa1.0_00345.1 | 1169 | 93226  | 0         | 557  | 594  | 93 -  | 578 | 1168 | 54790  | 55365  |
| UN03459 | Rsa1.0_00380.1 | 789  | 89748  | 0         | 777  | 791  | 98 +  | 2   | 789  | 56563  | 57353  |
| UN03460 | Rsa1.0_00167.1 | 705  | 116000 | 0         | 541  | 559  | 96 +  | 114 | 672  | 33824  | 34381  |
| UN03461 | Rsa1.0_05669.1 | 705  | 12993  | 1.00E-178 | 347  | 356  | 97 -  | 39  | 394  | 6854   | 7208   |
| UN03462 | Rsa1.0_00065.1 | 926  | 454616 | 1.00E-126 | 291  | 306  | 95 -  | 3   | 306  | 173385 | 173684 |
| UN03463 | Rsa1.0_00409.1 | 1268 | 146788 | 0         | 762  | 804  | 94 -  | 5   | 808  | 9529   | 10325  |
| UN03464 | Rsa1.0_07567.1 | 1665 | 9117   | 0         | 595  | 604  | 98 +  | 3   | 606  | 837    | 1439   |
| UN03465 | Rsa1.0_00708.1 | 905  | 67366  | 0         | 488  | 492  | 99 -  | 1   | 492  | 63092  | 63580  |
| UN03466 | Rsa1.0_04126.1 | 772  | 18939  | 0         | 387  | 393  | 98 -  | 4   | 396  | 17496  | 17888  |
| UN03467 | Rsa1.0_00510.1 | 1366 | 78718  | 2.33E-156 | 347  | 375  | 92 -  | 87  | 446  | 28307  | 28681  |
| UN03468 | Rsa1.0_48789.1 | 1352 | 464    | 0         | 356  | 357  | 99 -  | 426 | 782  | 73     | 429    |
| UN03469 | Rsa1.0_00009.1 | 978  | 232558 | 0         | 460  | 463  | 99 +  | 1   | 462  | 29413  | 29875  |

|         |                |      |        |           |      |      |       |     |      |        |        |
|---------|----------------|------|--------|-----------|------|------|-------|-----|------|--------|--------|
| UN03470 | Rsa1.0.02787.1 | 786  | 27872  | 0         | 776  | 785  | 98 -  | 1   | 785  | 684    | 1467   |
| UN03471 | Rsa1.0.00391.1 | 819  | 183853 | 9.00E-66  | 140  | 144  | 97 +  | 1   | 144  | 30672  | 30815  |
| UN03472 | Rsa1.0.00922.1 | 1292 | 59588  | 5.00E-59  | 150  | 161  | 93 -  | 824 | 984  | 20072  | 20232  |
| UN03473 | Rsa1.0.02805.1 | 988  | 27698  | 1.00E-110 | 208  | 210  | 99 -  | 2   | 211  | 2636   | 2845   |
| UN03474 | Rsa1.0.03636.1 | 654  | 21638  | 1.00E-104 | 208  | 213  | 97 -  | 1   | 213  | 17912  | 18124  |
| UN03475 | Rsa1.0.00190.1 | 733  | 318240 | 0         | 636  | 691  | 92 +  | 3   | 677  | 286420 | 287104 |
| UN03476 | Rsa1.0.06102.1 | 530  | 11740  | 1.00E-173 | 320  | 323  | 99 +  | 1   | 321  | 4421   | 4743   |
| UN03477 | Rsa1.0.00658.1 | 936  | 69740  | 1.00E-162 | 322  | 328  | 98 +  | 11  | 336  | 15706  | 16029  |
| UN03478 | Rsa1.0.00071.1 | 435  | 345714 | 1.00E-125 | 258  | 267  | 96 +  | 2   | 267  | 324470 | 324736 |
| UN03479 | Rsa1.0.00377.1 | 1388 | 90038  | 0         | 424  | 428  | 99 -  | 8   | 435  | 47697  | 48124  |
| UN03480 | Rsa1.0.05701.1 | 764  | 12884  | 0         | 758  | 764  | 99 +  | 3   | 764  | 9899   | 10662  |
| UN03481 | Rsa1.0.00111.1 | 899  | 390088 | 0         | 419  | 440  | 95 -  | 453 | 892  | 4781   | 5217   |
| UN03482 | Rsa1.0.10645.1 | 1038 | 5771   | 1.00E-147 | 275  | 277  | 99 +  | 1   | 276  | 5495   | 5771   |
| UN03483 | Rsa1.0.01024.1 | 768  | 56569  | 3.00E-44  | 111  | 116  | 95 -  | 651 | 766  | 6288   | 6402   |
| UN03484 | Rsa1.0.03225.1 | 1070 | 24500  | 0         | 475  | 509  | 93 -  | 6   | 512  | 14578  | 15068  |
| UN03485 | Rsa1.0.00224.1 | 969  | 327530 | 1.00E-177 | 324  | 327  | 99 +  | 1   | 327  | 228495 | 228821 |
| UN03486 | Rsa1.0.00015.1 | 1357 | 561803 | 0         | 455  | 456  | 99 +  | 1   | 456  | 178658 | 179113 |
| UN03487 | Rsa1.0.11431.1 | 993  | 5510   | 0         | 392  | 407  | 96 +  | 2   | 404  | 839    | 1245   |
| UN03488 | Rsa1.0.02513.1 | 1031 | 30643  | 0         | 1021 | 1028 | 99 -  | 3   | 1029 | 18779  | 19806  |
| UN03489 | Rsa1.0.02411.1 | 914  | 31655  | 0         | 466  | 472  | 98 +  | 356 | 827  | 27638  | 28109  |
| UN03490 | Rsa1.0.02681.1 | 690  | 28711  | 1.00E-158 | 307  | 315  | 97 -  | 58  | 372  | 20439  | 20753  |
| UN03491 | Rsa1.0.02296.1 | 886  | 32920  | 9.00E-57  | 181  | 200  | 90 -  | 640 | 839  | 12164  | 12359  |
| UN03492 | Rsa1.0.11032.1 | 928  | 5640   | 0         | 569  | 571  | 99 +  | 71  | 641  | 5070   | 5640   |
| UN03493 | Rsa1.0.01403.1 | 743  | 46453  | 0         | 730  | 743  | 98 -  | 1   | 743  | 24737  | 25479  |
| UN03494 | Rsa1.0.02091.1 | 1408 | 35157  | 0         | 1213 | 1275 | 95 -  | 98  | 1367 | 4066   | 5322   |
| UN03495 | Rsa1.0.01327.1 | 975  | 48033  | 0         | 963  | 968  | 99 +  | 1   | 968  | 47066  | 48033  |
| UN03496 | Rsa1.0.00644.1 | 958  | 136881 | 0         | 367  | 368  | 99 -  | 1   | 368  | 31373  | 31740  |
| UN03497 | Rsa1.0.05354.1 | 801  | 14073  | 1.00E-148 | 310  | 324  | 95 +  | 341 | 661  | 5027   | 5350   |
| UN03498 | Rsa1.0.02622.1 | 1153 | 142402 | 0         | 652  | 666  | 97 +  | 488 | 1151 | 9528   | 10193  |
| UN03499 | Rsa1.0.05795.1 | 1070 | 12609  | 0         | 604  | 605  | 99 +  | 2   | 606  | 7660   | 8264   |
| UN03500 | Rsa1.0.14886.1 | 1306 | 2991   | 0         | 1116 | 1146 | 97 -  | 1   | 1143 | 1501   | 2637   |
| UN03501 | Rsa1.0.01139.1 | 1273 | 52601  | 0         | 468  | 470  | 99 +  | 802 | 1271 | 18673  | 19142  |
| UN03502 | Rsa1.0.00054.1 | 1419 | 162053 | 0         | 734  | 772  | 95 +  | 516 | 1272 | 15265  | 16036  |
| UN03503 | Rsa1.0.02099.1 | 1379 | 35030  | 0         | 450  | 450  | 100 + | 925 | 1374 | 2291   | 2740   |
| UN03504 | Rsa1.0.01213.1 | 973  | 50616  | 0         | 967  | 971  | 99 -  | 1   | 971  | 6836   | 7806   |
| UN03505 | Rsa1.0.09522.1 | 835  | 6316   | 0         | 809  | 822  | 98 -  | 1   | 822  | 1      | 819    |
| UN03506 | Rsa1.0.04444.1 | 2120 | 17320  | 0         | 488  | 532  | 91 +  | 1   | 518  | 8362   | 8888   |
| UN03507 | Rsa1.0.00014.1 | 1213 | 348985 | 0         | 552  | 618  | 89 -  | 596 | 1213 | 331473 | 332065 |
| UN03508 | Rsa1.0.01073.1 | 1235 | 55030  | 0         | 1173 | 1235 | 94 -  | 2   | 1231 | 6030   | 7237   |

|         |                |      |        |           |      |      |       |      |      |        |        |
|---------|----------------|------|--------|-----------|------|------|-------|------|------|--------|--------|
| UN03509 | Rsa1.0.00098.1 | 937  | 349239 | 2.00E-67  | 137  | 139  | 98 -  | 276  | 414  | 314363 | 314501 |
| UN03510 | Rsa1.0.00548.1 | 1070 | 76518  | 1.00E-120 | 232  | 236  | 98 -  | 3    | 238  | 62227  | 62462  |
| UN03511 | Rsa1.0.00112.1 | 944  | 132199 | 0         | 944  | 945  | 99 +  | 1    | 944  | 98359  | 99303  |
| UN03512 | Rsa1.0.01800.1 | 1037 | 39109  | 0         | 395  | 397  | 99 +  | 11   | 407  | 28395  | 28791  |
| UN03513 | Rsa1.0.27162.1 | 1448 | 863    | 1.00E-117 | 267  | 286  | 93 +  | 1170 | 1446 | 506    | 791    |
| UN03514 | Rsa1.0.07466.1 | 1149 | 9321   | 8.00E-24  | 100  | 114  | 87 +  | 1009 | 1122 | 4059   | 4172   |
| UN03515 | Rsa1.0.13685.1 | 1238 | 4481   | 3.00E-14  | 77   | 86   | 89 -  | 617  | 700  | 3795   | 3880   |
| UN03516 | Rsa1.0.00128.1 | 960  | 228675 | 1.00E-164 | 315  | 322  | 97 +  | 211  | 532  | 116359 | 116680 |
| UN03517 | Rsa1.0.00088.1 | 645  | 141341 | 1.00E-100 | 195  | 198  | 98 +  | 7    | 204  | 56606  | 56803  |
| UN03518 | Rsa1.0.12091.1 | 1148 | 5316   | 0         | 366  | 381  | 96 -  | 1    | 381  | 3852   | 4232   |
| UN03519 | Rsa1.0.00577.1 | 792  | 174827 | 0         | 426  | 447  | 95 +  | 148  | 591  | 149759 | 150199 |
| UN03520 | Rsa1.0.00152.1 | 1056 | 257730 | 0         | 528  | 541  | 97 +  | 519  | 1055 | 240049 | 240585 |
| UN03521 | Rsa1.0.02869.1 | 1279 | 27109  | 0         | 1275 | 1279 | 99 +  | 1    | 1279 | 13911  | 15189  |
| UN03522 | Rsa1.0.02722.1 | 849  | 28417  | 5.00E-92  | 175  | 176  | 99 +  | 241  | 416  | 15840  | 16015  |
| UN03523 | Rsa1.0.00875.1 | 792  | 61371  | 0         | 350  | 357  | 98 -  | 4    | 360  | 60272  | 60628  |
| UN03524 | Rsa1.0.05900.1 | 1400 | 12295  | 0         | 402  | 415  | 96 -  | 692  | 1103 | 3737   | 4151   |
| UN03525 | Rsa1.0.00484.1 | 1606 | 203294 | 0         | 364  | 365  | 99 -  | 1243 | 1606 | 135710 | 136074 |
| UN03526 | Rsa1.0.00048.1 | 629  | 167185 | 5.00E-79  | 237  | 267  | 88 +  | 2    | 263  | 32133  | 32381  |
| UN03527 | Rsa1.0.05413.1 | 1147 | 13834  | 0         | 750  | 759  | 98 -  | 182  | 940  | 4335   | 5093   |
| UN03528 | Rsa1.0.01400.1 | 696  | 46560  | 1.00E-147 | 311  | 325  | 95 +  | 3    | 322  | 11274  | 11598  |
| UN03529 | Rsa1.0.03148.1 | 1638 | 24989  | 1.00E-171 | 377  | 400  | 94 +  | 1177 | 1576 | 21012  | 21408  |
| UN03530 | Rsa1.0.01184.1 | 1236 | 51452  | 0         | 496  | 502  | 98 +  | 737  | 1236 | 50577  | 51078  |
| UN03531 | Rsa1.0.00022.1 | 1202 | 200461 | 0         | 740  | 766  | 96 +  | 189  | 951  | 162335 | 163100 |
| UN03532 | Rsa1.0.01228.1 | 1181 | 50238  | 0         | 437  | 443  | 98 -  | 2    | 444  | 2671   | 3113   |
| UN03533 | Rsa1.0.11552.1 | 1460 | 5472   | 0         | 942  | 944  | 99 -  | 517  | 1460 | 4529   | 5472   |
| UN03534 | Rsa1.0.02969.1 | 592  | 26390  | 1.00E-167 | 329  | 338  | 97 -  | 255  | 592  | 10013  | 10349  |
| UN03535 | Rsa1.0.00312.1 | 1334 | 96765  | 1.00E-124 | 236  | 239  | 98 +  | 1093 | 1331 | 67188  | 67426  |
| UN03536 | Rsa1.0.12829.1 | 780  | 5111   | 1.00E-148 | 336  | 358  | 93 -  | 3    | 348  | 1801   | 2158   |
| UN03537 | Rsa1.0.00833.1 | 899  | 62621  | 1.00E-173 | 308  | 308  | 100 - | 592  | 899  | 8598   | 8905   |
| UN03538 | Rsa1.0.00222.1 | 1271 | 172263 | 0         | 1189 | 1259 | 94 -  | 32   | 1271 | 22592  | 23839  |
| UN03539 | Rsa1.0.02882.1 | 1144 | 27039  | 1.00E-161 | 313  | 320  | 97 -  | 824  | 1143 | 3418   | 3736   |
| UN03540 | Rsa1.0.02860.1 | 956  | 27207  | 9.00E-54  | 114  | 116  | 98 -  | 602  | 717  | 9938   | 10053  |
| UN03541 | Rsa1.0.02682.1 | 1218 | 28711  | 0         | 935  | 971  | 96 -  | 129  | 1096 | 9789   | 10759  |
| UN03542 | Rsa1.0.03728.1 | 1468 | 21147  | 1.00E-157 | 360  | 387  | 93 -  | 976  | 1349 | 3617   | 4003   |
| UN03543 | Rsa1.0.00487.1 | 1739 | 80674  | 0         | 1017 | 1046 | 97 -  | 93   | 1138 | 4125   | 5170   |
| UN03544 | Rsa1.0.00593.1 | 964  | 143463 | 1.00E-175 | 312  | 312  | 100 - | 653  | 964  | 57024  | 57335  |
| UN03545 | Rsa1.0.01866.1 | 620  | 37961  | 1.00E-141 | 283  | 291  | 97 -  | 1    | 290  | 1850   | 2140   |
| UN03546 | Rsa1.0.05278.1 | 778  | 14282  | 2.00E-85  | 167  | 169  | 98 -  | 456  | 624  | 9732   | 9900   |
| UN03547 | Rsa1.0.01143.1 | 899  | 52456  | 0         | 739  | 755  | 97 -  | 137  | 891  | 20604  | 21352  |

|         |                |      |        |           |      |      |       |      |      |        |        |
|---------|----------------|------|--------|-----------|------|------|-------|------|------|--------|--------|
| UN03548 | Rsa1.0.00042.1 | 938  | 171507 | 0         | 428  | 442  | 96 -  | 483  | 923  | 143977 | 144412 |
| UN03549 | Rsa1.0.02320.1 | 787  | 32575  | 1.00E-164 | 355  | 375  | 94 +  | 1    | 375  | 22073  | 22444  |
| UN03550 | Rsa1.0.00350.1 | 1052 | 92346  | 4.00E-87  | 164  | 164  | 100 - | 651  | 814  | 79954  | 80117  |
| UN03551 | Rsa1.0.00770.1 | 612  | 64900  | 0         | 603  | 609  | 99 +  | 4    | 612  | 3697   | 4304   |
| UN03552 | Rsa1.0.00363.1 | 685  | 90968  | 0         | 424  | 437  | 97 -  | 249  | 685  | 13482  | 13913  |
| UN03553 | Rsa1.0.02750.1 | 984  | 28239  | 2.00E-82  | 190  | 198  | 95 -  | 59   | 252  | 23986  | 24182  |
| UN03554 | Rsa1.0.06701.1 | 886  | 10514  | 0         | 436  | 447  | 97 +  | 3    | 449  | 5788   | 6234   |
| UN03555 | Rsa1.0.00016.1 | 861  | 831256 | 1.00E-109 | 233  | 242  | 96 -  | 618  | 859  | 204654 | 204890 |
| UN03556 | Rsa1.0.06535.1 | 1411 | 10827  | 0         | 1340 | 1406 | 95 +  | 6    | 1410 | 2660   | 4045   |
| UN03557 | Rsa1.0.03790.1 | 1652 | 20844  | 1.00E-178 | 336  | 341  | 98 -  | 51   | 390  | 8731   | 9071   |
| UN03558 | Rsa1.0.00273.1 | 897  | 326186 | 0         | 547  | 547  | 100 - | 350  | 896  | 26532  | 27078  |
| UN03559 | Rsa1.0.00183.1 | 1464 | 113277 | 0         | 749  | 781  | 95 +  | 695  | 1464 | 24804  | 25583  |
| UN03560 | Rsa1.0.02754.1 | 1058 | 28213  | 4.00E-87  | 189  | 197  | 95 -  | 1    | 193  | 2089   | 2285   |
| UN03561 | Rsa1.0.00055.1 | 811  | 520193 | 1.00E-165 | 388  | 409  | 94 +  | 387  | 785  | 163773 | 164181 |
| UN03562 | Rsa1.0.01923.1 | 820  | 37233  | 3.00E-84  | 168  | 171  | 98 +  | 98   | 268  | 35356  | 35526  |
| UN03563 | Rsa1.0.05026.1 | 1474 | 15095  | 0         | 432  | 436  | 99 +  | 1039 | 1474 | 9795   | 10230  |
| UN03564 | Rsa1.0.02523.1 | 1336 | 30527  | 0         | 921  | 928  | 99 -  | 221  | 1145 | 8432   | 9359   |
| UN03565 | Rsa1.0.00163.1 | 884  | 116847 | 1.00E-120 | 251  | 262  | 95 -  | 254  | 515  | 11140  | 11395  |
| UN03566 | Rsa1.0.00113.1 | 1251 | 131574 | 0         | 518  | 533  | 97 +  | 719  | 1251 | 130815 | 131338 |
| UN03567 | Rsa1.0.01092.1 | 910  | 54348  | 1.00E-155 | 281  | 282  | 99 +  | 628  | 909  | 51572  | 51853  |
| UN03568 | Rsa1.0.00556.1 | 1299 | 207212 | 0         | 466  | 489  | 95 +  | 822  | 1297 | 47334  | 47820  |
| UN03569 | Rsa1.0.21301.1 | 932  | 1217   | 1.00E-152 | 273  | 273  | 100 + | 3    | 275  | 105    | 377    |
| UN03570 | Rsa1.0.00100.1 | 862  | 249232 | 1.00E-137 | 301  | 319  | 94 +  | 1    | 313  | 11198  | 11516  |
| UN03571 | Rsa1.0.20105.1 | 1006 | 1340   | 0         | 388  | 390  | 99 +  | 618  | 1006 | 457    | 846    |
| UN03572 | Rsa1.0.03420.1 | 1365 | 23090  | 0         | 627  | 632  | 99 -  | 734  | 1365 | 18006  | 18637  |
| UN03573 | Rsa1.0.02139.1 | 813  | 34686  | 1.00E-114 | 241  | 246  | 97 -  | 535  | 776  | 5667   | 5912   |
| UN03574 | Rsa1.0.19040.1 | 737  | 1491   | 1.00E-147 | 361  | 392  | 92 +  | 284  | 674  | 953    | 1344   |
| UN03575 | Rsa1.0.02686.1 | 1411 | 28666  | 2.00E-28  | 102  | 114  | 89 -  | 129  | 242  | 24224  | 24337  |
| UN03576 | Rsa1.0.01344.1 | 1075 | 142535 | 0         | 1027 | 1032 | 99 +  | 3    | 1033 | 127388 | 128419 |
| UN03577 | Rsa1.0.00107.1 | 543  | 431659 | 1.00E-141 | 258  | 259  | 99 +  | 79   | 337  | 84232  | 84490  |
| UN03578 | Rsa1.0.00033.1 | 1054 | 515811 | 0         | 564  | 570  | 98 +  | 2    | 571  | 144223 | 144788 |
| UN03579 | Rsa1.0.01556.1 | 1223 | 163858 | 0         | 614  | 640  | 95 -  | 288  | 927  | 142924 | 143557 |
| UN03580 | Rsa1.0.13949.1 | 731  | 4028   | 1.00E-144 | 268  | 271  | 98 +  | 461  | 731  | 2439   | 2709   |
| UN03581 | Rsa1.0.16086.1 | 917  | 2289   | 1.00E-124 | 238  | 242  | 98 +  | 676  | 917  | 1078   | 1319   |
| UN03582 | Rsa1.0.20678.1 | 1212 | 1280   | 1.00E-105 | 198  | 199  | 99 +  | 521  | 719  | 372    | 570    |
| UN03583 | Rsa1.0.07475.1 | 697  | 9292   | 0         | 457  | 463  | 98 +  | 3    | 462  | 6531   | 6993   |
| UN03584 | Rsa1.0.03280.1 | 877  | 145083 | 0         | 446  | 446  | 100 - | 432  | 877  | 1611   | 2056   |
| UN03585 | Rsa1.0.01634.1 | 1318 | 41865  | 0         | 358  | 362  | 98 +  | 958  | 1318 | 34189  | 34550  |
| UN03586 | Rsa1.0.00566.1 | 820  | 75325  | 1.00E-132 | 276  | 283  | 97 +  | 495  | 773  | 23290  | 23572  |

|         |                |      |        |           |     |     |       |     |      |        |        |
|---------|----------------|------|--------|-----------|-----|-----|-------|-----|------|--------|--------|
| UN03587 | Rsa1.0_01975.1 | 1184 | 36578  | 1.00E-118 | 223 | 225 | 99 -  | 2   | 226  | 34503  | 34727  |
| UN03588 | Rsa1.0_00049.1 | 1100 | 167018 | 3.00E-17  | 230 | 291 | 79 +  | 129 | 419  | 19574  | 19864  |
| UN03589 | Rsa1.0_00929.1 | 1322 | 137796 | 1.00E-133 | 248 | 249 | 99 -  | 1   | 249  | 99706  | 99953  |
| UN03590 | Rsa1.0_28856.1 | 635  | 801    | 0         | 504 | 544 | 92 +  | 81  | 620  | 255    | 797    |
| UN03591 | Rsa1.0_04557.1 | 1117 | 145048 | 7.00E-58  | 127 | 131 | 96 -  | 136 | 266  | 137585 | 137715 |
| UN03592 | Rsa1.0_07444.1 | 710  | 9386   | 0         | 704 | 709 | 99 +  | 2   | 710  | 8109   | 8817   |
| UN03593 | Rsa1.0_01719.1 | 914  | 40388  | 1.00E-107 | 198 | 198 | 100 - | 717 | 914  | 27267  | 27464  |
| UN03594 | Rsa1.0_00018.1 | 1536 | 410899 | 2.00E-96  | 199 | 204 | 97 +  | 57  | 259  | 122671 | 122874 |
| UN03595 | Rsa1.0_00066.1 | 1171 | 152418 | 0         | 496 | 539 | 92 -  | 635 | 1171 | 14990  | 15508  |
| UN03596 | Rsa1.0_00111.1 | 873  | 390088 | 1.00E-127 | 280 | 291 | 96 -  | 577 | 863  | 76129  | 76419  |
| UN03597 | Rsa1.0_01506.1 | 1419 | 44370  | 0         | 351 | 356 | 98 +  | 4   | 358  | 28343  | 28698  |
| UN03598 | Rsa1.0_01845.1 | 1234 | 38415  | 1.00E-155 | 284 | 286 | 99 +  | 949 | 1234 | 8035   | 8320   |
| UN03599 | Rsa1.0_00108.1 | 1168 | 478491 | 0         | 552 | 576 | 95 +  | 583 | 1151 | 77201  | 77775  |
| UN03600 | Rsa1.0_00019.1 | 737  | 301669 | 0         | 717 | 733 | 97 -  | 6   | 737  | 192346 | 193078 |
| UN03601 | Rsa1.0_31506.1 | 1191 | 725    | 0         | 700 | 745 | 93 +  | 382 | 1117 | 1      | 725    |
| UN03602 | Rsa1.0_00571.1 | 1199 | 329018 | 0         | 656 | 676 | 97 +  | 446 | 1119 | 204751 | 205423 |
| UN03603 | Rsa1.0_03465.1 | 1840 | 22700  | 0         | 941 | 982 | 95 -  | 186 | 1163 | 16546  | 17526  |
| UN03604 | Rsa1.0_00960.1 | 738  | 58199  | 0         | 454 | 454 | 100 + | 3   | 456  | 21057  | 21510  |
| UN03605 | Rsa1.0_00713.1 | 1310 | 158017 | 0         | 473 | 489 | 96 -  | 725 | 1213 | 1180   | 1668   |
| UN03606 | Rsa1.0_02165.1 | 728  | 34423  | 1.00E-159 | 300 | 305 | 98 -  | 239 | 543  | 23089  | 23393  |
| UN03607 | Rsa1.0_01232.1 | 1207 | 155185 | 1.00E-112 | 219 | 223 | 98 +  | 678 | 900  | 131817 | 132039 |
| UN03608 | Rsa1.0_00088.1 | 742  | 141341 | 0         | 452 | 469 | 96 +  | 3   | 468  | 10088  | 10550  |
| UN03609 | Rsa1.0_01614.1 | 804  | 42238  | 1.00E-157 | 305 | 312 | 97 -  | 493 | 804  | 18880  | 19189  |
| UN03610 | Rsa1.0_00566.1 | 989  | 75325  | 1.00E-161 | 303 | 308 | 98 +  | 265 | 572  | 66997  | 67304  |
| UN03611 | Rsa1.0_00213.1 | 538  | 108167 | 7.00E-81  | 261 | 294 | 88 +  | 255 | 523  | 39818  | 40110  |
| UN03612 | Rsa1.0_00532.1 | 880  | 77384  | 0         | 432 | 433 | 99 -  | 1   | 432  | 52841  | 53273  |
| UN03613 | Rsa1.0_02631.1 | 1514 | 29343  | 0         | 416 | 419 | 99 +  | 826 | 1244 | 22559  | 22977  |
| UN03614 | Rsa1.0_00110.1 | 1271 | 132719 | 0         | 691 | 772 | 89 -  | 501 | 1269 | 49779  | 50543  |
| UN03615 | Rsa1.0_02826.1 | 959  | 27560  | 1.00E-143 | 286 | 294 | 97 -  | 666 | 959  | 14788  | 15075  |
| UN03616 | Rsa1.0_00678.1 | 600  | 193163 | 4.00E-24  | 73  | 78  | 93 -  | 160 | 237  | 26963  | 27040  |
| UN03617 | Rsa1.0_03761.1 | 760  | 20982  | 0         | 697 | 711 | 98 -  | 56  | 760  | 11391  | 12101  |
| UN03618 | Rsa1.0_00056.1 | 1319 | 332604 | 1.00E-176 | 479 | 531 | 90 -  | 800 | 1319 | 114291 | 114791 |
| UN03619 | Rsa1.0_00567.1 | 1991 | 75260  | 0         | 412 | 413 | 99 -  | 1   | 413  | 60996  | 61408  |
| UN03620 | Rsa1.0_64105.1 | 720  | 358    | 1.00E-104 | 211 | 217 | 97 -  | 291 | 507  | 120    | 336    |
| UN03621 | Rsa1.0_00243.1 | 1285 | 103651 | 0         | 893 | 921 | 96 -  | 368 | 1284 | 20396  | 21316  |
| UN03622 | Rsa1.0_00610.1 | 1963 | 72740  | 0         | 734 | 763 | 96 -  | 28  | 790  | 44345  | 45104  |
| UN03623 | Rsa1.0_00289.1 | 1249 | 98620  | 0         | 537 | 543 | 98 +  | 707 | 1249 | 25075  | 25617  |
| UN03624 | Rsa1.0_11393.1 | 1317 | 5521   | 0         | 417 | 420 | 99 -  | 4   | 423  | 205    | 624    |
| UN03625 | Rsa1.0_00270.1 | 848  | 101236 | 3.00E-75  | 153 | 156 | 98 -  | 89  | 244  | 1852   | 2007   |

|         |                |      |        |           |      |      |       |      |      |        |        |
|---------|----------------|------|--------|-----------|------|------|-------|------|------|--------|--------|
| UN03626 | Rsa1.0.02389.1 | 2050 | 146428 | 0         | 1028 | 1040 | 98 +  | 1008 | 2047 | 128372 | 129411 |
| UN03627 | Rsa1.0.00516.1 | 1357 | 78417  | 0         | 538  | 555  | 96 -  | 24   | 578  | 7335   | 7889   |
| UN03628 | Rsa1.0.00337.1 | 795  | 143174 | 1.00E-92  | 229  | 247  | 92 -  | 179  | 425  | 141486 | 141719 |
| UN03629 | Rsa1.0.01156.1 | 1401 | 52147  | 0         | 540  | 581  | 92 -  | 776  | 1347 | 48765  | 49327  |
| UN03630 | Rsa1.0.01539.1 | 879  | 43698  | 6.00E-98  | 197  | 202  | 97 -  | 524  | 725  | 38016  | 38217  |
| UN03631 | Rsa1.0.00338.1 | 873  | 94109  | 0         | 671  | 685  | 97 -  | 3    | 687  | 90088  | 90771  |
| UN03632 | Rsa1.0.01095.1 | 1302 | 54276  | 0         | 439  | 451  | 97 -  | 2    | 449  | 27903  | 28353  |
| UN03633 | Rsa1.0.47443.1 | 1179 | 476    | 1.00E-71  | 197  | 222  | 88 +  | 1    | 222  | 264    | 464    |
| UN03634 | Rsa1.0.01146.1 | 576  | 163455 | 4.00E-70  | 165  | 175  | 94 -  | 158  | 332  | 41964  | 42138  |
| UN03635 | Rsa1.0.04040.1 | 778  | 19439  | 0         | 437  | 451  | 96 -  | 214  | 664  | 9830   | 10280  |
| UN03636 | Rsa1.0.02611.1 | 1136 | 29586  | 0         | 408  | 411  | 99 -  | 335  | 745  | 1337   | 1747   |
| UN03637 | Rsa1.0.00196.1 | 834  | 109960 | 1.00E-176 | 365  | 382  | 95 +  | 4    | 385  | 10148  | 10529  |
| UN03638 | Rsa1.0.12445.1 | 1651 | 5224   | 0         | 524  | 527  | 99 +  | 1125 | 1651 | 3411   | 3937   |
| UN03639 | Rsa1.0.01360.1 | 1178 | 47246  | 1.00E-162 | 321  | 330  | 97 -  | 848  | 1177 | 21073  | 21401  |
| UN03640 | #              | #    | #      | #         | #    | #    | #     | #    | #    | #      | #      |
| UN03641 | Rsa1.0.53010.1 | 1212 | 430    | 4.00E-81  | 173  | 178  | 97 -  | 915  | 1091 | 1      | 178    |
| UN03642 | Rsa1.0.08072.1 | 857  | 7955   | 0         | 695  | 730  | 95 -  | 131  | 857  | 2130   | 2858   |
| UN03643 | Rsa1.0.01640.1 | 1056 | 41822  | 0         | 504  | 518  | 97 +  | 2    | 516  | 36325  | 36839  |
| UN03644 | Rsa1.0.03506.1 | 1552 | 22416  | 0         | 684  | 711  | 96 +  | 3    | 710  | 7178   | 7878   |
| UN03645 | Rsa1.0.02093.1 | 793  | 35125  | 0         | 395  | 406  | 97 +  | 131  | 536  | 20234  | 20639  |
| UN03646 | Rsa1.0.00125.1 | 1197 | 253043 | 0         | 532  | 597  | 89 -  | 227  | 823  | 770    | 1363   |
| UN03647 | Rsa1.0.01363.1 | 1109 | 47195  | 0         | 764  | 793  | 96 -  | 324  | 1107 | 11032  | 11818  |
| UN03648 | Rsa1.0.02707.1 | 1338 | 28520  | 0         | 777  | 787  | 98 -  | 552  | 1338 | 16576  | 17360  |
| UN03649 | Rsa1.0.02411.1 | 791  | 31655  | 0         | 419  | 430  | 97 -  | 3    | 432  | 29042  | 29469  |
| UN03650 | Rsa1.0.00625.1 | 1294 | 71672  | 1.00E-142 | 308  | 321  | 95 -  | 975  | 1294 | 30706  | 31024  |
| UN03651 | Rsa1.0.00116.1 | 815  | 365886 | 0         | 751  | 802  | 93 +  | 3    | 796  | 211736 | 212531 |
| UN03652 | Rsa1.0.01799.1 | 1456 | 39127  | 0         | 580  | 612  | 94 +  | 1    | 597  | 2429   | 3040   |
| UN03653 | Rsa1.0.03028.1 | 996  | 25872  | 0         | 442  | 447  | 98 +  | 2    | 448  | 2851   | 3296   |
| UN03654 | Rsa1.0.04379.1 | 1338 | 17646  | 0         | 581  | 590  | 98 -  | 663  | 1249 | 4214   | 4803   |
| UN03655 | Rsa1.0.00039.1 | 995  | 296927 | 0         | 369  | 378  | 97 +  | 589  | 966  | 290916 | 291293 |
| UN03656 | Rsa1.0.00920.1 | 1256 | 601703 | 0         | 840  | 844  | 99 +  | 1    | 844  | 436590 | 437433 |
| UN03657 | Rsa1.0.00436.1 | 875  | 85008  | 1.00E-102 | 328  | 369  | 88 -  | 1    | 358  | 34234  | 34599  |
| UN03658 | Rsa1.0.00361.1 | 1318 | 91181  | 0         | 484  | 484  | 100 + | 835  | 1318 | 79919  | 80402  |
| UN03659 | Rsa1.0.01559.1 | 642  | 43262  | 1.00E-120 | 253  | 262  | 96 -  | 1    | 260  | 2270   | 2530   |
| UN03660 | Rsa1.0.00816.1 | 720  | 403350 | 1.00E-134 | 267  | 273  | 97 -  | 1    | 273  | 154309 | 154578 |
| UN03661 | Rsa1.0.00661.1 | 879  | 213041 | 1.00E-144 | 295  | 307  | 96 +  | 573  | 879  | 203672 | 203978 |
| UN03662 | Rsa1.0.01333.1 | 1009 | 47929  | 0         | 563  | 563  | 100 - | 3    | 565  | 29681  | 30243  |
| UN03663 | Rsa1.0.00412.1 | 1270 | 86935  | 1.00E-126 | 316  | 342  | 92 -  | 5    | 343  | 49294  | 49631  |
| UN03664 | Rsa1.0.00075.1 | 953  | 146680 | 0         | 916  | 953  | 96 -  | 1    | 950  | 28329  | 29281  |



|         |                |      |        |           |      |      |       |      |      |        |        |
|---------|----------------|------|--------|-----------|------|------|-------|------|------|--------|--------|
| UN03665 | Rsa1.0_00839.1 | 939  | 62533  | 0         | 467  | 469  | 99 +  | 3    | 470  | 29345  | 29813  |
| UN03666 | Rsa1.0_01580.1 | 1091 | 42852  | 1.00E-166 | 387  | 416  | 93 -  | 1    | 405  | 40018  | 40433  |
| UN03667 | Rsa1.0_02914.1 | 519  | 26815  | 0         | 352  | 358  | 98 -  | 160  | 517  | 26110  | 26467  |
| UN03668 | Rsa1.0_04374.1 | 191  | 17670  | 4.00E-80  | 178  | 187  | 95 -  | 1    | 187  | 8052   | 8238   |
| UN03669 | Rsa1.0_02939.1 | 829  | 26595  | 0         | 479  | 510  | 93 +  | 1    | 498  | 16774  | 17273  |
| UN03670 | Rsa1.0_00006.1 | 1700 | 396176 | 1.00E-155 | 298  | 302  | 98 +  | 1398 | 1698 | 305844 | 306143 |
| UN03671 | Rsa1.0_03007.1 | 938  | 26070  | 3.00E-66  | 181  | 195  | 92 -  | 16   | 205  | 17499  | 17693  |
| UN03672 | Rsa1.0_01230.1 | 1150 | 50221  | 1.00E-121 | 230  | 233  | 98 +  | 1    | 233  | 22666  | 22898  |
| UN03673 | Rsa1.0_00417.1 | 685  | 395068 | 1.00E-152 | 300  | 309  | 97 +  | 369  | 677  | 221978 | 222286 |
| UN03674 | Rsa1.0_04588.1 | 1089 | 16739  | 1.00E-153 | 274  | 274  | 100 - | 1    | 274  | 15917  | 16190  |
| UN03675 | Rsa1.0_00094.1 | 947  | 139042 | 1.00E-120 | 310  | 341  | 90 -  | 11   | 344  | 41073  | 41398  |
| UN03676 | Rsa1.0_04482.1 | 1709 | 17175  | 0         | 1313 | 1356 | 96 -  | 3    | 1353 | 6014   | 7358   |
| UN03677 | Rsa1.0_01825.1 | 1426 | 38725  | 0         | 361  | 362  | 99 -  | 1063 | 1424 | 21288  | 21649  |
| UN03678 | Rsa1.0_07638.1 | 1240 | 8967   | 1.00E-114 | 209  | 209  | 100 - | 1031 | 1239 | 4347   | 4555   |
| UN03679 | Rsa1.0_00039.1 | 1043 | 296927 | 0         | 750  | 827  | 90 +  | 216  | 1042 | 219101 | 219927 |
| UN03680 | Rsa1.0_01344.1 | 946  | 142535 | 0         | 456  | 461  | 98 -  | 3    | 461  | 130981 | 131441 |
| UN03681 | Rsa1.0_01221.1 | 949  | 50421  | 0         | 890  | 949  | 93 -  | 3    | 948  | 18208  | 19152  |
| UN03682 | Rsa1.0_00592.1 | 954  | 73788  | 1.00E-118 | 294  | 318  | 92 +  | 62   | 370  | 22125  | 22442  |
| UN03683 | Rsa1.0_01111.1 | 947  | 53669  | 0         | 360  | 361  | 99 +  | 3    | 363  | 31370  | 31730  |
| UN03684 | Rsa1.0_02295.1 | 1034 | 149884 | 2.00E-98  | 186  | 187  | 99 -  | 1    | 187  | 146923 | 147109 |
| UN03685 | Rsa1.0_00092.1 | 849  | 659932 | 0         | 641  | 649  | 98 +  | 1    | 647  | 126051 | 126699 |
| UN03686 | Rsa1.0_02654.1 | 1208 | 29028  | 0         | 460  | 469  | 98 -  | 741  | 1207 | 22466  | 22934  |
| UN03687 | Rsa1.0_02513.1 | 1035 | 30643  | 0         | 580  | 602  | 96 +  | 439  | 1031 | 29577  | 30178  |
| UN03688 | Rsa1.0_02942.1 | 904  | 26577  | 0         | 595  | 626  | 95 -  | 1    | 620  | 5773   | 6396   |
| UN03689 | Rsa1.0_00232.1 | 1024 | 104936 | 1.00E-156 | 311  | 322  | 96 -  | 2    | 323  | 38388  | 38703  |
| UN03690 | Rsa1.0_08740.1 | 1008 | 6980   | 0         | 779  | 781  | 99 +  | 1    | 781  | 6200   | 6980   |
| UN03691 | Rsa1.0_01123.1 | 1137 | 53359  | 0         | 407  | 425  | 95 -  | 712  | 1136 | 29822  | 30246  |
| UN03692 | Rsa1.0_00145.1 | 813  | 261008 | 0         | 813  | 813  | 100 - | 1    | 813  | 233358 | 234170 |
| UN03693 | Rsa1.0_00410.1 | 1633 | 86957  | 0         | 475  | 491  | 96 +  | 1150 | 1632 | 69069  | 69559  |
| UN03694 | Rsa1.0_02555.1 | 1180 | 30146  | 2.33E-156 | 341  | 365  | 93 -  | 6    | 368  | 2219   | 2571   |
| UN03695 | Rsa1.0_00077.1 | 1219 | 145005 | 0         | 1184 | 1212 | 97 -  | 10   | 1217 | 105855 | 107065 |
| UN03696 | Rsa1.0_16602.1 | 1123 | 2094   | 0         | 680  | 683  | 99 +  | 442  | 1123 | 1      | 683    |
| UN03697 | Rsa1.0_03553.1 | 1044 | 22150  | 1.00E-166 | 320  | 327  | 97 +  | 1    | 324  | 14901  | 15227  |
| UN03698 | Rsa1.0_00329.1 | 1366 | 222544 | 0         | 1326 | 1361 | 97 +  | 3    | 1363 | 60715  | 62072  |
| UN03699 | Rsa1.0_00116.1 | 868  | 365886 | 1.00E-122 | 238  | 242  | 98 +  | 19   | 260  | 239019 | 239259 |
| UN03700 | Rsa1.0_00336.1 | 1229 | 445051 | 0         | 780  | 795  | 98 -  | 434  | 1228 | 224609 | 225403 |
| UN03701 | Rsa1.0_01156.1 | 879  | 52147  | 0         | 433  | 436  | 99 +  | 4    | 439  | 18093  | 18528  |
| UN03702 | Rsa1.0_00476.1 | 548  | 280966 | 0         | 398  | 398  | 100 + | 1    | 398  | 223006 | 223403 |
| UN03703 | Rsa1.0_00001.1 | 923  | 363028 | 0         | 533  | 537  | 99 -  | 6    | 542  | 333079 | 333615 |

|         |                |      |        |           |      |      |       |      |      |        |        |
|---------|----------------|------|--------|-----------|------|------|-------|------|------|--------|--------|
| UN03704 | Rsa1.0_01803.1 | 841  | 173846 | 0         | 444  | 451  | 98 -  | 1    | 451  | 37469  | 37915  |
| UN03705 | Rsa1.0_02442.1 | 563  | 31355  | 0         | 398  | 398  | 100 + | 1    | 398  | 24462  | 24859  |
| UN03706 | Rsa1.0_00061.1 | 635  | 218685 | 1.00E-158 | 304  | 310  | 98 -  | 2    | 309  | 100416 | 100725 |
| UN03707 | Rsa1.0_00079.1 | 814  | 606987 | 0         | 694  | 712  | 97 +  | 3    | 713  | 53242  | 53953  |
| UN03708 | Rsa1.0_02630.1 | 1087 | 29349  | 0         | 625  | 677  | 92 -  | 5    | 676  | 26496  | 27172  |
| UN03709 | Rsa1.0_00437.1 | 1349 | 84879  | 0         | 478  | 501  | 95 -  | 1    | 486  | 37648  | 38148  |
| UN03710 | Rsa1.0_06225.1 | 1301 | 11443  | 0         | 363  | 363  | 100 + | 275  | 637  | 8432   | 8794   |
| UN03711 | Rsa1.0_01302.1 | 1264 | 48907  | 1.00E-158 | 293  | 296  | 98 -  | 5    | 300  | 2932   | 3227   |
| UN03712 | Rsa1.0_03345.1 | 847  | 23590  | 0         | 447  | 448  | 99 -  | 7    | 454  | 21924  | 22371  |
| UN03713 | Rsa1.0_02274.1 | 581  | 33109  | 0         | 356  | 361  | 98 -  | 2    | 360  | 22370  | 22730  |
| UN03714 | Rsa1.0_01753.1 | 1650 | 39794  | 0         | 602  | 624  | 96 +  | 111  | 734  | 21547  | 22170  |
| UN03715 | Rsa1.0_00307.1 | 1351 | 199003 | 1.00E-172 | 310  | 311  | 99 +  | 1040 | 1350 | 184644 | 184954 |
| UN03716 | Rsa1.0_00875.1 | 1327 | 61371  | 0         | 469  | 471  | 99 +  | 1    | 471  | 58161  | 58631  |
| UN03717 | Rsa1.0_03686.1 | 778  | 21387  | 1.00E-110 | 206  | 207  | 99 +  | 229  | 435  | 9134   | 9340   |
| UN03718 | Rsa1.0_02265.1 | 834  | 33233  | 0         | 574  | 591  | 97 +  | 2    | 585  | 9638   | 10228  |
| UN03719 | Rsa1.0_00322.1 | 716  | 212233 | 0         | 359  | 362  | 99 +  | 355  | 716  | 208091 | 208452 |
| UN03720 | Rsa1.0_04411.1 | 1468 | 142979 | 0         | 412  | 418  | 98 +  | 1    | 418  | 134958 | 135375 |
| UN03721 | Rsa1.0_02702.1 | 1175 | 28572  | 1.00E-152 | 353  | 381  | 92 -  | 3    | 364  | 6909   | 7288   |
| UN03722 | Rsa1.0_00502.1 | 1305 | 204180 | 0         | 431  | 440  | 97 -  | 865  | 1304 | 72582  | 73021  |
| UN03723 | Rsa1.0_00505.1 | 877  | 79323  | 0         | 864  | 875  | 98 -  | 2    | 876  | 27550  | 28424  |
| UN03724 | Rsa1.0_00005.1 | 889  | 353093 | 0         | 393  | 399  | 98 -  | 1    | 398  | 347680 | 348076 |
| UN03725 | Rsa1.0_00532.1 | 1197 | 77384  | 0         | 565  | 566  | 99 -  | 1    | 566  | 7546   | 8111   |
| UN03726 | Rsa1.0_05117.1 | 1096 | 14801  | 0         | 411  | 413  | 99 +  | 682  | 1094 | 13785  | 14197  |
| UN03727 | Rsa1.0_00069.1 | 971  | 403561 | 1.00E-159 | 291  | 293  | 99 +  | 593  | 885  | 179274 | 179566 |
| UN03728 | Rsa1.0_04411.1 | 861  | 142979 | 1.00E-150 | 280  | 282  | 99 -  | 1    | 282  | 128710 | 128990 |
| UN03729 | Rsa1.0_02045.1 | 1394 | 35650  | 0         | 334  | 335  | 99 -  | 1    | 335  | 22741  | 23075  |
| UN03730 | Rsa1.0_01069.1 | 1023 | 55113  | 0         | 1016 | 1020 | 99 +  | 3    | 1021 | 16393  | 17410  |
| UN03731 | Rsa1.0_00355.1 | 556  | 92038  | 0         | 493  | 499  | 98 +  | 1    | 499  | 77899  | 78397  |
| UN03732 | Rsa1.0_03393.1 | 801  | 23247  | 0         | 567  | 577  | 98 -  | 224  | 800  | 22595  | 23169  |
| UN03733 | Rsa1.0_00050.1 | 927  | 237174 | 0         | 805  | 819  | 98 +  | 1    | 819  | 85006  | 85823  |
| UN03734 | Rsa1.0_00639.1 | 1726 | 165873 | 0         | 526  | 542  | 97 +  | 842  | 1383 | 144584 | 145125 |
| UN03735 | Rsa1.0_13762.1 | 820  | 4370   | 0         | 533  | 534  | 99 +  | 1    | 534  | 3837   | 4370   |
| UN03736 | Rsa1.0_02798.1 | 886  | 27792  | 0         | 591  | 612  | 96 -  | 3    | 606  | 26142  | 26750  |
| UN03737 | Rsa1.0_00121.1 | 597  | 278029 | 1.00E-132 | 257  | 263  | 97 -  | 273  | 535  | 114461 | 114723 |
| UN03738 | Rsa1.0_09471.1 | 722  | 6345   | 1.00E-121 | 224  | 225  | 99 -  | 498  | 722  | 522    | 746    |
| UN03739 | Rsa1.0_00595.1 | 911  | 341648 | 1.00E-148 | 272  | 274  | 99 +  | 2    | 275  | 142000 | 142273 |
| UN03740 | Rsa1.0_08741.1 | 719  | 6977   | 1.00E-103 | 249  | 270  | 92 -  | 449  | 718  | 5630   | 5884   |
| UN03741 | Rsa1.0_00130.1 | 875  | 125737 | 0         | 530  | 572  | 92 -  | 2    | 557  | 28245  | 28815  |
| UN03742 | Rsa1.0_02902.1 | 1239 | 26907  | 1.00E-176 | 325  | 328  | 99 -  | 1    | 326  | 1      | 328    |

|         |                |      |        |           |      |      |       |     |      |        |        |
|---------|----------------|------|--------|-----------|------|------|-------|-----|------|--------|--------|
| UN03743 | Rsa1.0_00039.1 | 1389 | 296927 | 1.00E-124 | 257  | 266  | 96 +  | 8   | 271  | 210823 | 211088 |
| UN03744 | Rsa1.0_00282.1 | 1477 | 177799 | 0         | 611  | 614  | 99 -  | 4   | 617  | 172464 | 173077 |
| UN03745 | Rsa1.0_00931.1 | 727  | 59210  | 0         | 451  | 475  | 94 +  | 1   | 474  | 26244  | 26698  |
| UN03746 | Rsa1.0_03281.1 | 1332 | 143349 | 0         | 419  | 424  | 98 +  | 7   | 430  | 2518   | 2941   |
| UN03747 | Rsa1.0_00276.1 | 836  | 100160 | 0         | 819  | 822  | 99 +  | 1   | 822  | 13658  | 14479  |
| UN03748 | Rsa1.0_00646.1 | 944  | 70473  | 1.00E-154 | 284  | 285  | 99 +  | 1   | 284  | 5970   | 6254   |
| UN03749 | Rsa1.0_06696.1 | 567  | 10526  | 0         | 497  | 502  | 99 +  | 1   | 502  | 10025  | 10526  |
| UN03750 | Rsa1.0_03256.1 | 812  | 24305  | 0         | 486  | 486  | 100 + | 4   | 489  | 22632  | 23117  |
| UN03751 | Rsa1.0_00116.1 | 864  | 365886 | 0         | 588  | 631  | 93 -  | 250 | 859  | 323520 | 324147 |
| UN03752 | Rsa1.0_00092.1 | 1218 | 659932 | 0         | 650  | 658  | 98 -  | 561 | 1218 | 510944 | 511601 |
| UN03753 | Rsa1.0_00381.1 | 572  | 89718  | 0         | 507  | 507  | 100 + | 1   | 507  | 75991  | 76497  |
| UN03754 | Rsa1.0_01553.1 | 889  | 43379  | 0         | 499  | 515  | 96 -  | 26  | 538  | 2477   | 2991   |
| UN03755 | Rsa1.0_00510.1 | 895  | 78718  | 0         | 787  | 887  | 88 +  | 8   | 885  | 37753  | 38626  |
| UN03756 | Rsa1.0_00002.1 | 954  | 601661 | 1.00E-130 | 237  | 237  | 100 - | 3   | 239  | 255585 | 255821 |
| UN03757 | Rsa1.0_00726.1 | 699  | 66734  | 0         | 681  | 701  | 97 -  | 1   | 698  | 4113   | 4813   |
| UN03758 | Rsa1.0_00305.1 | 1733 | 97308  | 0         | 1695 | 1729 | 98 -  | 5   | 1733 | 15688  | 17402  |
| UN03759 | Rsa1.0_36697.1 | 942  | 614    | 0         | 406  | 411  | 98 -  | 8   | 418  | 2      | 411    |
| UN03760 | Rsa1.0_08593.1 | 1441 | 7148   | 0         | 998  | 1006 | 99 +  | 2   | 1005 | 110    | 1114   |
| UN03761 | Rsa1.0_00377.1 | 1164 | 90038  | 0         | 701  | 707  | 99 -  | 456 | 1162 | 13288  | 13994  |
| UN03762 | Rsa1.0_00974.1 | 766  | 57893  | 1.00E-172 | 332  | 340  | 97 +  | 186 | 525  | 50839  | 51175  |
| UN03763 | Rsa1.0_00037.1 | 751  | 307838 | 0         | 745  | 750  | 99 +  | 1   | 750  | 33032  | 33781  |
| UN03764 | Rsa1.0_00268.1 | 1013 | 101470 | 0         | 835  | 840  | 99 -  | 1   | 836  | 52913  | 53752  |
| UN03765 | Rsa1.0_00913.1 | 878  | 59914  | 0         | 537  | 540  | 99 -  | 341 | 878  | 10711  | 11250  |
| UN03766 | Rsa1.0_00636.1 | 685  | 71113  | 7.00E-94  | 197  | 203  | 97 +  | 26  | 228  | 14419  | 14620  |
| UN03767 | Rsa1.0_64289.1 | 960  | 357    | 0         | 357  | 357  | 100 + | 348 | 704  | 1      | 357    |
| UN03768 | Rsa1.0_00979.1 | 1245 | 57733  | 0         | 338  | 338  | 100 + | 685 | 1022 | 31552  | 31889  |
| UN03769 | Rsa1.0_00012.1 | 1146 | 222148 | 0         | 338  | 339  | 99 -  | 806 | 1144 | 206533 | 206871 |
| UN03770 | Rsa1.0_00071.1 | 748  | 345714 | 0         | 685  | 689  | 99 +  | 1   | 689  | 214892 | 215579 |
| UN03771 | Rsa1.0_00026.1 | 996  | 327835 | 3.00E-94  | 211  | 219  | 96 +  | 2   | 216  | 3987   | 4205   |
| UN03772 | Rsa1.0_00190.1 | 863  | 318240 | 6.00E-98  | 188  | 190  | 98 -  | 372 | 561  | 119860 | 120049 |
| UN03773 | Rsa1.0_00589.1 | 141  | 209965 | 1.00E-51  | 130  | 139  | 93 +  | 1   | 139  | 196776 | 196914 |
| UN03774 | Rsa1.0_00059.1 | 1027 | 159650 | 1.00E-123 | 251  | 259  | 96 +  | 2   | 260  | 147993 | 148249 |
| UN03775 | Rsa1.0_01005.1 | 849  | 56967  | 1.00E-142 | 262  | 264  | 99 -  | 399 | 662  | 19291  | 19554  |
| UN03776 | Rsa1.0_00799.1 | 1214 | 63918  | 1.00E-149 | 268  | 268  | 100 - | 945 | 1212 | 18668  | 18935  |
| UN03777 | Rsa1.0_02335.1 | 1285 | 32400  | 0         | 677  | 693  | 97 +  | 3   | 695  | 19673  | 20362  |
| UN03778 | Rsa1.0_00520.1 | 779  | 78226  | 0         | 747  | 774  | 96 -  | 4   | 777  | 19282  | 20045  |
| UN03779 | Rsa1.0_00157.1 | 1168 | 245832 | 0         | 786  | 789  | 99 +  | 379 | 1167 | 21355  | 22143  |
| UN03780 | Rsa1.0_01114.1 | 573  | 53602  | 0         | 553  | 556  | 99 -  | 11  | 564  | 14620  | 15175  |
| UN03781 | Rsa1.0_00327.1 | 526  | 94892  | 0         | 357  | 365  | 97 +  | 3   | 367  | 42263  | 42627  |

|         |                |      |        |           |      |      |       |     |      |        |        |
|---------|----------------|------|--------|-----------|------|------|-------|-----|------|--------|--------|
| UN03782 | Rsa1.0.00201.1 | 755  | 232851 | 2.00E-91  | 171  | 171  | 100 + | 562 | 732  | 71075  | 71245  |
| UN03783 | Rsa1.0.02171.1 | 837  | 167557 | 0         | 407  | 421  | 96 -  | 416 | 836  | 11696  | 12116  |
| UN03784 | Rsa1.0.00136.1 | 987  | 122464 | 0         | 609  | 610  | 99 -  | 267 | 876  | 15000  | 15609  |
| UN03785 | Rsa1.0.14130.1 | 896  | 3769   | 5.00E-80  | 207  | 230  | 90 -  | 395 | 624  | 2861   | 3071   |
| UN03786 | Rsa1.0.00028.1 | 848  | 293984 | 0         | 813  | 853  | 95 -  | 1   | 848  | 71978  | 72812  |
| UN03787 | Rsa1.0.02547.1 | 916  | 30255  | 9.00E-91  | 193  | 200  | 96 -  | 717 | 916  | 24858  | 25054  |
| UN03788 | Rsa1.0.23467.1 | 1140 | 1047   | 0         | 350  | 352  | 99 -  | 787 | 1138 | 696    | 1047   |
| UN03789 | Rsa1.0.01029.1 | 1052 | 256254 | 0         | 466  | 484  | 96 -  | 1   | 480  | 32633  | 33116  |
| UN03790 | Rsa1.0.00240.1 | 808  | 104175 | 0         | 548  | 553  | 99 +  | 1   | 553  | 46919  | 47471  |
| UN03791 | Rsa1.0.00215.1 | 1328 | 201775 | 0         | 600  | 603  | 99 -  | 722 | 1324 | 62205  | 62807  |
| UN03792 | Rsa1.0.07810.1 | 1259 | 8503   | 0         | 736  | 744  | 98 +  | 1   | 744  | 149    | 892    |
| UN03793 | Rsa1.0.07849.1 | 1013 | 8425   | 0         | 532  | 552  | 96 +  | 461 | 1011 | 4228   | 4776   |
| UN03794 | Rsa1.0.01390.1 | 902  | 46695  | 0         | 426  | 426  | 100 + | 477 | 902  | 16856  | 17281  |
| UN03795 | Rsa1.0.01771.1 | 1031 | 172709 | 1.00E-152 | 320  | 335  | 95 -  | 3   | 334  | 33281  | 33615  |
| UN03796 | Rsa1.0.00303.1 | 1319 | 97468  | 0         | 574  | 641  | 89 +  | 687 | 1319 | 43995  | 44598  |
| UN03797 | Rsa1.0.00017.1 | 706  | 752458 | 0         | 692  | 707  | 97 -  | 1   | 706  | 416279 | 416985 |
| UN03798 | Rsa1.0.00070.1 | 1403 | 150321 | 1.00E-124 | 226  | 226  | 100 + | 422 | 647  | 30421  | 30646  |
| UN03799 | Rsa1.0.00273.1 | 878  | 326186 | 0         | 529  | 550  | 96 +  | 14  | 557  | 8056   | 8597   |
| UN03800 | Rsa1.0.02201.1 | 957  | 33981  | 1.00E-127 | 238  | 240  | 99 +  | 272 | 511  | 30288  | 30527  |
| UN03801 | Rsa1.0.02234.1 | 709  | 33618  | 0         | 371  | 378  | 98 +  | 332 | 709  | 1295   | 1672   |
| UN03802 | Rsa1.0.01924.1 | 993  | 37226  | 7.00E-95  | 195  | 201  | 97 +  | 367 | 567  | 1523   | 1723   |
| UN03803 | Rsa1.0.46626.1 | 653  | 484    | 2.33E-156 | 266  | 267  | 99 +  | 348 | 614  | 215    | 481    |
| UN03804 | Rsa1.0.00092.1 | 930  | 659932 | 0         | 537  | 606  | 88 +  | 267 | 869  | 502432 | 503004 |
| UN03805 | Rsa1.0.01600.1 | 853  | 42537  | 1.00E-142 | 260  | 261  | 99 +  | 2   | 262  | 24281  | 24541  |
| UN03806 | Rsa1.0.00838.1 | 1040 | 153820 | 2.00E-58  | 208  | 235  | 88 -  | 181 | 414  | 144717 | 144948 |
| UN03807 | Rsa1.0.06482.1 | 1319 | 10937  | 1.00E-157 | 365  | 396  | 92 -  | 943 | 1319 | 4040   | 4434   |
| UN03808 | Rsa1.0.00060.1 | 767  | 502678 | 0         | 411  | 417  | 98 +  | 1   | 417  | 390371 | 390786 |
| UN03809 | Rsa1.0.01012.1 | 1216 | 56836  | 0         | 487  | 524  | 92 -  | 418 | 938  | 30849  | 31372  |
| UN03810 | Rsa1.0.05877.1 | 768  | 12345  | 1.00E-147 | 274  | 277  | 98 +  | 47  | 323  | 10511  | 10787  |
| UN03811 | Rsa1.0.00943.1 | 642  | 58862  | 0         | 437  | 449  | 97 -  | 194 | 642  | 6634   | 7081   |
| UN03812 | Rsa1.0.04937.1 | 1297 | 15401  | 0         | 575  | 605  | 95 +  | 3   | 597  | 10428  | 11032  |
| UN03813 | Rsa1.0.00056.1 | 1291 | 332604 | 0         | 1084 | 1086 | 99 +  | 206 | 1291 | 47781  | 48865  |
| UN03814 | Rsa1.0.00414.1 | 815  | 202190 | 3.00E-78  | 202  | 219  | 92 -  | 160 | 366  | 79780  | 79997  |
| UN03815 | Rsa1.0.01026.1 | 1381 | 171624 | 0         | 500  | 500  | 100 - | 3   | 502  | 155677 | 156176 |
| UN03816 | Rsa1.0.00482.1 | 1354 | 81162  | 0         | 402  | 430  | 93 -  | 773 | 1202 | 30959  | 31372  |
| UN03817 | Rsa1.0.00806.1 | 967  | 63674  | 1.00E-130 | 236  | 236  | 100 + | 254 | 489  | 21955  | 22190  |
| UN03818 | Rsa1.0.00192.1 | 830  | 278200 | 0         | 340  | 342  | 99 -  | 261 | 602  | 226553 | 226894 |
| UN03819 | Rsa1.0.00911.1 | 1363 | 59943  | 0         | 1139 | 1155 | 98 -  | 211 | 1363 | 56165  | 57318  |
| UN03820 | Rsa1.0.08182.1 | 1754 | 7776   | 0         | 390  | 390  | 100 - | 3   | 392  | 5212   | 5601   |

|         |                |      |        |           |      |      |       |      |      |        |        |
|---------|----------------|------|--------|-----------|------|------|-------|------|------|--------|--------|
| UN03821 | Rsa1.0.02777.1 | 948  | 27986  | 1.00E-149 | 268  | 268  | 100 - | 311  | 578  | 6968   | 7235   |
| UN03822 | Rsa1.0.22896.1 | 1267 | 1085   | 0         | 370  | 373  | 99 +  | 172  | 544  | 1      | 373    |
| UN03823 | Rsa1.0.00786.1 | 1000 | 64285  | 7.00E-95  | 195  | 201  | 97 +  | 366  | 566  | 41596  | 41796  |
| UN03824 | Rsa1.0.00403.1 | 1064 | 87701  | 0         | 488  | 498  | 97 +  | 159  | 656  | 26353  | 26847  |
| UN03825 | Rsa1.0.01803.1 | 811  | 173846 | 0         | 396  | 396  | 100 + | 3    | 398  | 35610  | 36005  |
| UN03826 | Rsa1.0.00382.1 | 881  | 251946 | 0         | 387  | 394  | 98 +  | 4    | 397  | 155225 | 155618 |
| UN03827 | Rsa1.0.03059.1 | 1111 | 25711  | 1.00E-158 | 312  | 319  | 97 -  | 716  | 1031 | 6699   | 7017   |
| UN03828 | Rsa1.0.05081.1 | 1520 | 136103 | 1.00E-169 | 308  | 310  | 99 -  | 1211 | 1520 | 1453   | 1762   |
| UN03829 | Rsa1.0.00272.1 | 528  | 447836 | 1.00E-171 | 346  | 358  | 96 +  | 172  | 528  | 83797  | 84151  |
| UN03830 | Rsa1.0.01786.1 | 1062 | 133324 | 1.00E-99  | 247  | 267  | 92 -  | 803  | 1062 | 106779 | 107039 |
| UN03831 | Rsa1.0.02446.1 | 844  | 31330  | 0         | 735  | 818  | 89 -  | 27   | 844  | 5783   | 6587   |
| UN03832 | Rsa1.0.00116.1 | 1104 | 365886 | 1.00E-127 | 238  | 240  | 99 -  | 321  | 560  | 37389  | 37628  |
| UN03833 | Rsa1.0.01881.1 | 548  | 37721  | 0         | 536  | 543  | 98 -  | 3    | 545  | 8551   | 9093   |
| UN03834 | Rsa1.0.00484.1 | 1957 | 203294 | 1.00E-148 | 279  | 283  | 98 +  | 604  | 886  | 41096  | 41378  |
| UN03835 | Rsa1.0.00001.1 | 660  | 363028 | 0         | 345  | 346  | 99 +  | 304  | 649  | 119840 | 120185 |
| UN03836 | Rsa1.0.14712.1 | 848  | 3134   | 0         | 361  | 362  | 99 -  | 487  | 848  | 1508   | 1869   |
| UN03837 | Rsa1.0.01506.1 | 1133 | 44370  | 1.00E-172 | 319  | 323  | 98 -  | 810  | 1132 | 20975  | 21297  |
| UN03838 | Rsa1.0.04957.1 | 793  | 15330  | 1.00E-153 | 308  | 315  | 97 -  | 482  | 793  | 1601   | 1915   |
| UN03839 | Rsa1.0.04991.1 | 1181 | 15215  | 0         | 797  | 797  | 100 + | 385  | 1181 | 9687   | 10483  |
| UN03840 | Rsa1.0.26193.1 | 1260 | 902    | 0         | 394  | 395  | 99 +  | 863  | 1257 | 1      | 395    |
| UN03841 | Rsa1.0.00148.1 | 1688 | 120234 | 0         | 1258 | 1283 | 98 -  | 417  | 1686 | 30640  | 31922  |
| UN03842 | Rsa1.0.00953.1 | 1339 | 145012 | 0         | 993  | 1159 | 85 -  | 188  | 1338 | 113868 | 115012 |
| UN03843 | Rsa1.0.00148.1 | 536  | 120234 | 0         | 526  | 537  | 97 +  | 3    | 534  | 30665  | 31201  |
| UN03844 | Rsa1.0.00405.1 | 1085 | 202864 | 0         | 392  | 399  | 98 -  | 400  | 794  | 185736 | 186134 |
| UN03845 | Rsa1.0.00323.1 | 1245 | 159650 | 0         | 441  | 441  | 100 + | 804  | 1244 | 43841  | 44281  |
| UN03846 | Rsa1.0.00032.1 | 896  | 306326 | 0         | 894  | 894  | 100 - | 3    | 896  | 267495 | 268388 |
| UN03847 | Rsa1.0.03410.1 | 792  | 23147  | 0         | 566  | 573  | 98 +  | 218  | 790  | 10247  | 10816  |
| UN03848 | Rsa1.0.00581.1 | 1758 | 163575 | 1.00E-112 | 215  | 218  | 98 +  | 296  | 513  | 33184  | 33401  |
| UN03849 | Rsa1.0.00847.1 | 1543 | 62270  | 0         | 478  | 481  | 99 +  | 1032 | 1509 | 50627  | 51107  |
| UN03850 | Rsa1.0.00745.1 | 799  | 66067  | 0         | 770  | 805  | 95 +  | 3    | 799  | 19659  | 20447  |
| UN03851 | Rsa1.0.00423.1 | 1670 | 86138  | 0         | 672  | 672  | 100 - | 123  | 794  | 39541  | 40212  |
| UN03852 | Rsa1.0.00737.1 | 1132 | 66432  | 1.00E-151 | 365  | 396  | 92 -  | 745  | 1130 | 61662  | 62048  |
| UN03853 | Rsa1.0.00054.1 | 1265 | 162053 | 0         | 464  | 479  | 96 +  | 789  | 1265 | 136337 | 136815 |
| UN03854 | Rsa1.0.01476.1 | 1121 | 172928 | 1.00E-170 | 309  | 311  | 99 +  | 811  | 1121 | 9187   | 9497   |
| UN03855 | Rsa1.0.04474.1 | 711  | 17191  | 2.00E-88  | 176  | 178  | 98 -  | 535  | 711  | 15334  | 15511  |
| UN03856 | Rsa1.0.01419.1 | 1219 | 167402 | 0         | 1020 | 1052 | 96 -  | 171  | 1219 | 159720 | 160768 |
| UN03857 | Rsa1.0.00087.1 | 1725 | 761073 | 0         | 689  | 689  | 100 - | 1036 | 1724 | 527869 | 528557 |
| UN03858 | Rsa1.0.00342.1 | 1599 | 93695  | 0         | 764  | 764  | 100 - | 44   | 807  | 14710  | 15473  |
| UN03859 | Rsa1.0.01247.1 | 1202 | 49934  | 5.00E-96  | 203  | 211  | 96 +  | 992  | 1202 | 31079  | 31289  |

|         |                |      |        |           |      |      |      |      |      |        |        |
|---------|----------------|------|--------|-----------|------|------|------|------|------|--------|--------|
| UN03860 | Rsa1.0_00356.1 | 1101 | 91521  | 0         | 545  | 547  | 99 - | 1    | 547  | 39827  | 40373  |
| UN03861 | Rsa1.0_00848.1 | 1309 | 152362 | 1.00E-113 | 248  | 259  | 95 - | 50   | 306  | 19591  | 19848  |
| UN03862 | Rsa1.0_02254.1 | 809  | 33344  | 0         | 417  | 418  | 99 + | 392  | 809  | 4778   | 5194   |
| UN03863 | Rsa1.0_01296.1 | 805  | 49035  | 1.00E-102 | 201  | 205  | 98 - | 562  | 766  | 9970   | 10174  |
| UN03864 | Rsa1.0_00301.1 | 715  | 365315 | 0         | 414  | 430  | 96 - | 18   | 443  | 57406  | 57835  |
| UN03865 | Rsa1.0_01130.1 | 746  | 52929  | 1.00E-111 | 216  | 220  | 98 + | 281  | 500  | 33004  | 33223  |
| UN03866 | Rsa1.0_00421.1 | 1561 | 86365  | 1.00E-145 | 331  | 350  | 94 - | 1203 | 1552 | 75833  | 76174  |
| UN03867 | Rsa1.0_02978.1 | 736  | 26304  | 0         | 519  | 566  | 91 + | 1    | 564  | 21308  | 21873  |
| UN03868 | Rsa1.0_00024.1 | 790  | 188018 | 1.00E-165 | 347  | 367  | 94 + | 21   | 375  | 84731  | 85097  |
| UN03869 | Rsa1.0_00234.1 | 1061 | 197060 | 0         | 593  | 611  | 97 + | 2    | 611  | 3831   | 4441   |
| UN03870 | Rsa1.0_00010.1 | 883  | 294827 | 8.00E-85  | 245  | 272  | 90 - | 606  | 867  | 135567 | 135837 |
| UN03871 | Rsa1.0_02914.1 | 506  | 26815  | 0         | 352  | 359  | 98 - | 148  | 504  | 26109  | 26467  |
| UN03872 | Rsa1.0_03399.1 | 843  | 23204  | 0         | 840  | 841  | 99 - | 3    | 843  | 11022  | 11862  |
| UN03873 | Rsa1.0_00200.1 | 1004 | 162016 | 1.00E-111 | 210  | 212  | 99 - | 97   | 308  | 80374  | 80585  |
| UN03874 | Rsa1.0_08791.1 | 790  | 6918   | 1.00E-140 | 267  | 271  | 98 - | 512  | 782  | 4600   | 4867   |
| UN03875 | Rsa1.0_06032.1 | 732  | 11886  | 2.00E-78  | 239  | 269  | 88 - | 16   | 275  | 10750  | 11012  |
| UN03876 | Rsa1.0_00345.1 | 1543 | 93226  | 0         | 415  | 430  | 96 - | 549  | 978  | 25584  | 26013  |
| UN03877 | Rsa1.0_02128.1 | 1068 | 34758  | 0         | 451  | 496  | 90 - | 3    | 469  | 25609  | 26104  |
| UN03878 | Rsa1.0_13838.1 | 1807 | 4236   | 0         | 524  | 528  | 99 + | 3    | 528  | 1110   | 1637   |
| UN03879 | Rsa1.0_02528.1 | 958  | 30452  | 1.00E-163 | 307  | 311  | 98 - | 650  | 958  | 136    | 446    |
| UN03880 | Rsa1.0_00472.1 | 503  | 398134 | 0         | 493  | 502  | 98 + | 1    | 502  | 283481 | 283978 |
| UN03881 | Rsa1.0_01412.1 | 743  | 46311  | 0         | 370  | 373  | 99 - | 363  | 735  | 10246  | 10616  |
| UN03882 | Rsa1.0_00101.1 | 831  | 267193 | 1.00E-149 | 303  | 312  | 97 - | 480  | 789  | 194779 | 195090 |
| UN03883 | Rsa1.0_25317.1 | 1455 | 941    | 0         | 626  | 644  | 97 - | 813  | 1455 | 296    | 939    |
| UN03884 | Rsa1.0_03100.1 | 882  | 25411  | 0         | 656  | 660  | 99 - | 223  | 882  | 19524  | 20183  |
| UN03885 | Rsa1.0_03543.1 | 1222 | 22185  | 0         | 614  | 625  | 98 - | 469  | 1093 | 15844  | 16464  |
| UN03886 | Rsa1.0_00094.1 | 1335 | 139042 | 1.00E-103 | 218  | 226  | 96 + | 263  | 485  | 134442 | 134667 |
| UN03887 | Rsa1.0_06990.1 | 878  | 10060  | 0         | 829  | 874  | 94 + | 7    | 861  | 4341   | 5204   |
| UN03888 | Rsa1.0_01204.1 | 1436 | 50843  | 0         | 1406 | 1428 | 98 + | 10   | 1436 | 7030   | 8457   |
| UN03889 | Rsa1.0_02874.1 | 786  | 27070  | 1.00E-117 | 221  | 223  | 99 - | 110  | 332  | 770    | 992    |
| UN03890 | Rsa1.0_02276.1 | 786  | 33098  | 0         | 525  | 540  | 97 - | 239  | 773  | 23905  | 24441  |
| UN03891 | Rsa1.0_00016.1 | 1012 | 831256 | 0         | 579  | 586  | 98 - | 21   | 606  | 6600   | 7183   |
| UN03892 | Rsa1.0_00419.1 | 771  | 86562  | 0         | 412  | 414  | 99 - | 358  | 771  | 15419  | 15832  |
| UN03893 | Rsa1.0_02210.1 | 1339 | 33857  | 0         | 476  | 490  | 97 - | 854  | 1339 | 22539  | 23023  |
| UN03894 | Rsa1.0_02141.1 | 1238 | 34677  | 0         | 711  | 714  | 99 + | 527  | 1238 | 13105  | 13818  |
| UN03895 | Rsa1.0_00630.1 | 1049 | 71281  | 1.00E-126 | 262  | 273  | 95 - | 777  | 1049 | 34386  | 34658  |
| UN03896 | Rsa1.0_00079.1 | 1181 | 606987 | 0         | 645  | 660  | 97 - | 3    | 662  | 4651   | 5310   |
| UN03897 | Rsa1.0_01929.1 | 1109 | 37191  | 0         | 339  | 341  | 99 + | 251  | 591  | 9108   | 9448   |
| UN03898 | Rsa1.0_00092.1 | 1231 | 659932 | 0         | 1068 | 1078 | 99 - | 125  | 1199 | 21129  | 22206  |

|         |                |      |        |           |      |      |       |      |      |        |        |
|---------|----------------|------|--------|-----------|------|------|-------|------|------|--------|--------|
| UN03899 | Rsa1.0_01768.1 | 1201 | 138463 | 1.00E-120 | 257  | 268  | 95 -  | 932  | 1199 | 120034 | 120300 |
| UN03900 | Rsa1.0_02375.1 | 832  | 32026  | 1.00E-77  | 211  | 232  | 90 +  | 1    | 232  | 29150  | 29381  |
| UN03901 | Rsa1.0_04387.1 | 1204 | 17625  | 1.00E-148 | 267  | 267  | 100 + | 495  | 761  | 15904  | 16170  |
| UN03902 | Rsa1.0_00777.1 | 1820 | 191865 | 0         | 402  | 403  | 99 +  | 119  | 521  | 180529 | 180931 |
| UN03903 | Rsa1.0_02070.1 | 856  | 158516 | 3.00E-87  | 176  | 180  | 97 -  | 677  | 856  | 140096 | 140275 |
| UN03904 | Rsa1.0_08426.1 | 717  | 7373   | 1.00E-129 | 235  | 235  | 100 + | 483  | 717  | 6644   | 6878   |
| UN03905 | Rsa1.0_19744.1 | 1089 | 1389   | 1.00E-105 | 209  | 211  | 99 -  | 22   | 230  | 1179   | 1389   |
| UN03906 | Rsa1.0_02478.1 | 1195 | 150183 | 0         | 918  | 957  | 95 -  | 249  | 1193 | 28837  | 29791  |
| UN03907 | Rsa1.0_02232.1 | 1331 | 33659  | 0         | 674  | 695  | 96 +  | 643  | 1331 | 15141  | 15835  |
| UN03908 | Rsa1.0_01882.1 | 827  | 37697  | 0         | 642  | 651  | 98 -  | 178  | 825  | 13442  | 14092  |
| UN03909 | Rsa1.0_00250.1 | 696  | 273771 | 0         | 415  | 436  | 95 -  | 261  | 696  | 231503 | 231935 |
| UN03910 | Rsa1.0_01727.1 | 640  | 40243  | 1.00E-172 | 313  | 315  | 99 +  | 221  | 535  | 23645  | 23959  |
| UN03911 | Rsa1.0_00265.1 | 853  | 220635 | 0         | 510  | 510  | 100 + | 337  | 846  | 176079 | 176588 |
| UN03912 | Rsa1.0_05384.1 | 2023 | 13960  | 0         | 841  | 841  | 100 - | 3    | 843  | 2553   | 3393   |
| UN03913 | Rsa1.0_00628.1 | 775  | 214360 | 1.00E-130 | 239  | 240  | 99 -  | 202  | 441  | 66081  | 66320  |
| UN03914 | Rsa1.0_00045.1 | 1166 | 328694 | 1.00E-123 | 311  | 342  | 90 +  | 3    | 340  | 91541  | 91864  |
| UN03915 | Rsa1.0_03109.1 | 1268 | 25336  | 0         | 678  | 702  | 96 +  | 567  | 1268 | 3130   | 3818   |
| UN03916 | Rsa1.0_00178.1 | 1201 | 114861 | 5.00E-93  | 226  | 243  | 93 -  | 31   | 273  | 32804  | 33037  |
| UN03917 | Rsa1.0_00039.1 | 1292 | 296927 | 0         | 372  | 372  | 100 - | 321  | 692  | 16707  | 17078  |
| UN03918 | Rsa1.0_02314.1 | 1189 | 32642  | 0         | 651  | 661  | 98 -  | 4    | 660  | 5396   | 6056   |
| UN03919 | Rsa1.0_00497.1 | 816  | 79830  | 0         | 373  | 373  | 100 + | 3    | 375  | 75694  | 76066  |
| UN03920 | Rsa1.0_02765.1 | 1474 | 28141  | 0         | 408  | 416  | 98 -  | 1065 | 1474 | 16290  | 16705  |
| UN03921 | Rsa1.0_00025.1 | 1264 | 277312 | 3.00E-45  | 106  | 110  | 96 -  | 1058 | 1167 | 47859  | 47968  |
| UN03922 | Rsa1.0_00175.1 | 1530 | 166121 | 3.00E-70  | 142  | 144  | 98 +  | 1029 | 1172 | 28296  | 28439  |
| UN03923 | Rsa1.0_06075.1 | 818  | 11805  | 0         | 440  | 445  | 98 -  | 374  | 818  | 3939   | 4383   |
| UN03924 | Rsa1.0_01104.1 | 1653 | 285480 | 0         | 414  | 417  | 99 +  | 1238 | 1653 | 268402 | 268818 |
| UN03925 | Rsa1.0_42244.1 | 1694 | 531    | 1.00E-116 | 213  | 213  | 100 + | 12   | 224  | 319    | 531    |
| UN03926 | Rsa1.0_00974.1 | 1151 | 57893  | 1.00E-158 | 327  | 342  | 95 -  | 514  | 849  | 6312   | 6653   |
| UN03927 | Rsa1.0_01495.1 | 1358 | 44613  | 0         | 1270 | 1320 | 96 +  | 3    | 1314 | 15583  | 16900  |
| UN03928 | Rsa1.0_00133.1 | 1024 | 123768 | 0         | 331  | 331  | 100 + | 205  | 535  | 33145  | 33475  |
| UN03929 | Rsa1.0_00727.1 | 651  | 66724  | 1.00E-122 | 270  | 281  | 96 -  | 367  | 641  | 14960  | 15240  |
| UN03930 | Rsa1.0_00789.1 | 1322 | 64233  | 0         | 519  | 548  | 94 +  | 781  | 1320 | 34406  | 34948  |
| UN03931 | Rsa1.0_35196.1 | 731  | 643    | 0         | 405  | 427  | 94 +  | 148  | 555  | 217    | 643    |
| UN03932 | Rsa1.0_00196.1 | 893  | 109960 | 1.00E-107 | 234  | 244  | 95 +  | 607  | 849  | 72827  | 73068  |
| UN03933 | Rsa1.0_00706.1 | 865  | 291570 | 1.00E-160 | 305  | 311  | 98 +  | 135  | 445  | 32346  | 32656  |
| UN03934 | Rsa1.0_00751.1 | 1184 | 65759  | 0         | 487  | 493  | 98 -  | 222  | 714  | 46552  | 47044  |
| UN03935 | Rsa1.0_01586.1 | 1077 | 42804  | 0         | 407  | 426  | 95 +  | 1    | 420  | 30183  | 30604  |
| UN03936 | Rsa1.0_00975.1 | 890  | 57865  | 0         | 855  | 894  | 95 -  | 1    | 890  | 55313  | 56203  |
| UN03937 | Rsa1.0_00964.1 | 716  | 316648 | 0         | 700  | 716  | 97 +  | 1    | 716  | 304594 | 305309 |

|         |                |      |        |           |      |      |       |      |      |        |        |
|---------|----------------|------|--------|-----------|------|------|-------|------|------|--------|--------|
| UN03938 | Rsa1.0.00451.1 | 1266 | 322533 | 5.00E-87  | 211  | 229  | 92 +  | 754  | 982  | 284872 | 285088 |
| UN03939 | Rsa1.0.00409.1 | 860  | 146788 | 0         | 459  | 461  | 99 -  | 398  | 858  | 84601  | 85061  |
| UN03940 | Rsa1.0.01707.1 | 933  | 40686  | 0         | 388  | 390  | 99 -  | 330  | 719  | 18514  | 18903  |
| UN03941 | Rsa1.0.00016.1 | 879  | 831256 | 0         | 409  | 417  | 98 +  | 461  | 877  | 795321 | 795737 |
| UN03942 | Rsa1.0.00152.1 | 1277 | 257730 | 0         | 583  | 618  | 94 -  | 1    | 618  | 118021 | 118629 |
| UN03943 | Rsa1.0.00013.1 | 571  | 292129 | 1.00E-150 | 369  | 396  | 93 +  | 160  | 548  | 2789   | 3180   |
| UN03944 | Rsa1.0.00383.1 | 670  | 398431 | 0         | 663  | 665  | 99 -  | 4    | 668  | 186021 | 186685 |
| UN03945 | Rsa1.0.00044.1 | 1272 | 271658 | 0         | 445  | 452  | 98 +  | 434  | 885  | 270014 | 270465 |
| UN03946 | Rsa1.0.00437.1 | 1024 | 84879  | 0         | 607  | 614  | 98 -  | 14   | 627  | 39452  | 40065  |
| UN03947 | Rsa1.0.00354.1 | 919  | 232005 | 1.00E-122 | 265  | 278  | 95 -  | 643  | 919  | 192325 | 192602 |
| UN03948 | Rsa1.0.01434.1 | 2901 | 45951  | 0         | 1149 | 1191 | 96 -  | 3    | 1189 | 5302   | 6491   |
| UN03949 | Rsa1.0.04067.1 | 715  | 19256  | 1.00E-118 | 222  | 224  | 99 +  | 155  | 378  | 17557  | 17780  |
| UN03950 | Rsa1.0.02434.1 | 806  | 31464  | 1.00E-159 | 312  | 317  | 98 -  | 2    | 316  | 6189   | 6504   |
| UN03951 | Rsa1.0.00890.1 | 830  | 323870 | 0         | 826  | 832  | 99 -  | 1    | 830  | 216005 | 216836 |
| UN03952 | Rsa1.0.03633.1 | 1345 | 21644  | 1.00E-162 | 326  | 333  | 97 +  | 947  | 1275 | 4854   | 5185   |
| UN03953 | Rsa1.0.01625.1 | 724  | 42019  | 1.00E-147 | 274  | 277  | 98 -  | 448  | 724  | 20456  | 20732  |
| UN03954 | Rsa1.0.02020.1 | 1115 | 173211 | 0         | 1071 | 1111 | 96 -  | 5    | 1113 | 156792 | 157898 |
| UN03955 | Rsa1.0.02179.1 | 736  | 34188  | 0         | 690  | 727  | 94 +  | 12   | 734  | 15454  | 16176  |
| UN03956 | Rsa1.0.07104.1 | 876  | 9889   | 0         | 365  | 366  | 99 +  | 1    | 366  | 4549   | 4914   |
| UN03957 | Rsa1.0.00994.1 | 1252 | 165189 | 5.00E-96  | 205  | 211  | 97 -  | 79   | 287  | 316    | 526    |
| UN03958 | Rsa1.0.18896.1 | 838  | 1515   | 0         | 819  | 841  | 97 -  | 1    | 838  | 64     | 896    |
| UN03959 | Rsa1.0.00910.1 | 745  | 59975  | 1.00E-159 | 284  | 284  | 100 + | 1    | 284  | 16201  | 16484  |
| UN03960 | Rsa1.0.01626.1 | 718  | 41989  | 0         | 692  | 711  | 97 +  | 8    | 718  | 15832  | 16537  |
| UN03961 | Rsa1.0.17750.1 | 1028 | 1750   | 0         | 374  | 385  | 97 -  | 141  | 525  | 1366   | 1750   |
| UN03962 | Rsa1.0.01511.1 | 981  | 44235  | 0         | 680  | 687  | 98 +  | 2    | 686  | 29365  | 30051  |
| UN03963 | Rsa1.0.00450.1 | 629  | 139397 | 1.00E-147 | 288  | 295  | 97 -  | 3    | 297  | 22106  | 22397  |
| UN03964 | Rsa1.0.09306.1 | 1091 | 6468   | 0         | 902  | 910  | 99 -  | 127  | 1036 | 436    | 1345   |
| UN03965 | Rsa1.0.00201.1 | 383  | 232851 | 4.00E-94  | 215  | 224  | 95 -  | 162  | 383  | 109854 | 110072 |
| UN03966 | Rsa1.0.00075.1 | 1334 | 146680 | 0         | 692  | 728  | 95 -  | 1    | 723  | 141185 | 141903 |
| UN03967 | Rsa1.0.08421.1 | 1076 | 7380   | 0         | 350  | 356  | 98 -  | 1    | 354  | 4123   | 4478   |
| UN03968 | Rsa1.0.00709.1 | 1673 | 67329  | 0         | 566  | 577  | 98 -  | 901  | 1477 | 9314   | 9890   |
| UN03969 | Rsa1.0.02692.1 | 831  | 28626  | 1.00E-138 | 330  | 357  | 92 +  | 437  | 793  | 21962  | 22318  |
| UN03970 | Rsa1.0.03614.1 | 665  | 21773  | 0         | 585  | 589  | 99 +  | 1    | 589  | 15021  | 15609  |
| UN03971 | Rsa1.0.00199.1 | 829  | 249604 | 1.00E-156 | 332  | 346  | 95 -  | 1    | 339  | 13561  | 13904  |
| UN03972 | Rsa1.0.01239.1 | 2645 | 50107  | 0         | 1569 | 1603 | 97 +  | 1043 | 2645 | 18949  | 20546  |
| UN03973 | Rsa1.0.01026.1 | 789  | 171624 | 0         | 579  | 625  | 92 +  | 21   | 624  | 159949 | 160566 |
| UN03974 | Rsa1.0.02205.1 | 1107 | 33923  | 0         | 979  | 1056 | 92 +  | 50   | 1103 | 26261  | 27298  |
| UN03975 | Rsa1.0.01717.1 | 1279 | 143162 | 0         | 1270 | 1282 | 99 -  | 1    | 1278 | 127661 | 128942 |
| UN03976 | Rsa1.0.00464.1 | 1370 | 82253  | 0         | 968  | 978  | 98 +  | 396  | 1370 | 5075   | 6051   |



|         |                |      |        |           |      |      |       |      |      |        |        |
|---------|----------------|------|--------|-----------|------|------|-------|------|------|--------|--------|
| UN03977 | Rsa1.0.01460.1 | 1456 | 45255  | 0         | 490  | 507  | 96 +  | 2    | 502  | 32136  | 32642  |
| UN03978 | Rsa1.0.00293.1 | 1263 | 339294 | 0         | 1203 | 1217 | 98 +  | 3    | 1219 | 170623 | 171838 |
| UN03979 | Rsa1.0.02573.1 | 1081 | 29955  | 0         | 352  | 355  | 99 +  | 717  | 1071 | 19028  | 19382  |
| UN03980 | Rsa1.0.02707.1 | 563  | 28520  | 0         | 500  | 531  | 94 +  | 32   | 562  | 9469   | 9995   |
| UN03981 | Rsa1.0.01380.1 | 937  | 155003 | 0         | 539  | 541  | 99 -  | 237  | 777  | 25543  | 26083  |
| UN03982 | Rsa1.0.14764.1 | 980  | 3084   | 0         | 412  | 434  | 94 -  | 11   | 433  | 1483   | 1916   |
| UN03983 | Rsa1.0.37757.1 | 1561 | 597    | 0         | 478  | 478  | 100 - | 303  | 780  | 1      | 478    |
| UN03984 | Rsa1.0.00560.1 | 964  | 75685  | 0         | 359  | 365  | 98 -  | 297  | 661  | 58221  | 58584  |
| UN03985 | Rsa1.0.03074.1 | 600  | 25568  | 1.00E-152 | 383  | 416  | 92 -  | 182  | 594  | 16245  | 16644  |
| UN03986 | Rsa1.0.00792.1 | 669  | 64163  | 0         | 497  | 529  | 93 -  | 147  | 669  | 3293   | 3821   |
| UN03987 | Rsa1.0.00343.1 | 1427 | 93570  | 0         | 391  | 392  | 99 -  | 1034 | 1425 | 30764  | 31155  |
| UN03988 | Rsa1.0.00668.1 | 993  | 69421  | 0         | 587  | 610  | 96 -  | 1    | 598  | 23289  | 23898  |
| UN03989 | Rsa1.0.00154.1 | 1390 | 189461 | 1.00E-123 | 294  | 314  | 93 +  | 2    | 313  | 129855 | 130164 |
| UN03990 | Rsa1.0.00537.1 | 1298 | 186980 | 0         | 835  | 891  | 93 -  | 346  | 1233 | 16481  | 17354  |
| UN03991 | Rsa1.0.03267.1 | 756  | 24230  | 2.00E-94  | 179  | 180  | 99 +  | 10   | 189  | 13680  | 13859  |
| UN03992 | Rsa1.0.01573.1 | 854  | 42964  | 1.00E-163 | 368  | 390  | 94 -  | 7    | 388  | 4044   | 4431   |
| UN03993 | Rsa1.0.00741.1 | 998  | 66117  | 1.00E-170 | 325  | 331  | 98 -  | 12   | 341  | 50868  | 51198  |
| UN03994 | Rsa1.0.00169.1 | 1392 | 274298 | 0         | 1297 | 1383 | 93 +  | 10   | 1369 | 270701 | 272079 |
| UN03995 | Rsa1.0.03999.1 | 1428 | 19645  | 0         | 405  | 412  | 98 +  | 725  | 1136 | 8850   | 9261   |
| UN03996 | Rsa1.0.16067.1 | 929  | 2300   | 0         | 380  | 382  | 99 -  | 292  | 673  | 783    | 1164   |
| UN03997 | Rsa1.0.00539.1 | 1308 | 76926  | 0         | 661  | 669  | 98 -  | 1    | 669  | 15980  | 16647  |
| UN03998 | Rsa1.0.00032.1 | 1860 | 306326 | 0         | 468  | 482  | 97 +  | 438  | 919  | 238497 | 238972 |
| UN03999 | Rsa1.0.01182.1 | 1067 | 167304 | 1.00E-103 | 254  | 267  | 95 -  | 782  | 1044 | 145    | 409    |
| UN04000 | Rsa1.0.04563.1 | 1696 | 16837  | 1.00E-128 | 258  | 263  | 98 +  | 1438 | 1696 | 16117  | 16378  |
| UN04001 | Rsa1.0.00058.1 | 669  | 159921 | 0         | 353  | 359  | 98 -  | 1    | 359  | 89801  | 90155  |
| UN04002 | Rsa1.0.10423.1 | 953  | 5854   | 0         | 733  | 753  | 97 -  | 7    | 759  | 1      | 752    |
| UN04003 | Rsa1.0.11593.1 | 1041 | 5464   | 0         | 1010 | 1041 | 97 +  | 1    | 1041 | 1942   | 2965   |
| UN04004 | Rsa1.0.01460.1 | 1069 | 45255  | 0         | 1048 | 1066 | 98 +  | 3    | 1068 | 41716  | 42776  |
| UN04005 | Rsa1.0.02858.1 | 1367 | 27246  | 0         | 1154 | 1205 | 95 -  | 1    | 1205 | 22920  | 24115  |
| UN04006 | Rsa1.0.00211.1 | 913  | 228189 | 1.00E-154 | 276  | 276  | 100 + | 636  | 911  | 5857   | 6132   |
| UN04007 | Rsa1.0.00260.1 | 962  | 102021 | 0         | 622  | 633  | 98 -  | 328  | 960  | 40005  | 40637  |
| UN04008 | Rsa1.0.03162.1 | 782  | 24895  | 1.00E-100 | 197  | 200  | 98 -  | 17   | 214  | 19790  | 19989  |
| UN04009 | Rsa1.0.01292.1 | 843  | 175783 | 1.00E-133 | 251  | 253  | 99 +  | 590  | 841  | 149086 | 149338 |
| UN04010 | Rsa1.0.00224.1 | 513  | 327530 | 2.00E-84  | 181  | 187  | 96 -  | 1    | 186  | 195632 | 195818 |
| UN04011 | Rsa1.0.00108.1 | 1367 | 478491 | 0         | 628  | 631  | 99 +  | 494  | 1124 | 305436 | 306066 |
| UN04012 | Rsa1.0.00487.1 | 885  | 80674  | 2.33E-156 | 343  | 371  | 92 +  | 523  | 883  | 75851  | 76212  |
| UN04013 | Rsa1.0.00728.1 | 1140 | 66704  | 0         | 486  | 515  | 94 -  | 502  | 1016 | 32892  | 33389  |
| UN04014 | Rsa1.0.00770.1 | 1060 | 64900  | 0         | 972  | 1005 | 96 -  | 3    | 1005 | 53553  | 54555  |
| UN04015 | Rsa1.0.01538.1 | 837  | 43733  | 1.00E-159 | 297  | 301  | 98 -  | 105  | 405  | 40507  | 40807  |

|         |                |      |        |           |      |      |       |      |      |        |        |
|---------|----------------|------|--------|-----------|------|------|-------|------|------|--------|--------|
| UN04016 | Rsa1.0_00435.1 | 576  | 317579 | 1.00E-169 | 352  | 369  | 95 -  | 218  | 576  | 70712  | 71080  |
| UN04017 | Rsa1.0_02621.1 | 1631 | 156120 | 0         | 548  | 548  | 100 - | 1084 | 1631 | 12899  | 13446  |
| UN04018 | Rsa1.0_01396.1 | 1053 | 151624 | 0         | 428  | 447  | 95 +  | 608  | 1053 | 141509 | 141952 |
| UN04019 | Rsa1.0_01001.1 | 970  | 57077  | 1.00E-86  | 178  | 183  | 97 +  | 422  | 604  | 24046  | 24228  |
| UN04020 | Rsa1.0_07129.1 | 1056 | 9861   | 0         | 828  | 865  | 95 -  | 9    | 856  | 5653   | 6517   |
| UN04021 | Rsa1.0_01626.1 | 1365 | 41989  | 1.00E-103 | 281  | 303  | 92 -  | 1029 | 1317 | 8489   | 8789   |
| UN04022 | Rsa1.0_00136.1 | 1498 | 122464 | 0         | 469  | 491  | 95 +  | 1007 | 1497 | 65300  | 65784  |
| UN04023 | Rsa1.0_01326.1 | 1207 | 48072  | 0         | 784  | 812  | 96 +  | 405  | 1205 | 44398  | 45204  |
| UN04024 | Rsa1.0_01309.1 | 1463 | 48556  | 0         | 566  | 567  | 99 +  | 897  | 1463 | 41209  | 41775  |
| UN04025 | Rsa1.0_00198.1 | 1158 | 222963 | 0         | 450  | 456  | 98 +  | 3    | 458  | 128659 | 129114 |
| UN04026 | Rsa1.0_03216.1 | 944  | 24540  | 0         | 939  | 945  | 99 +  | 1    | 944  | 19438  | 20382  |
| UN04027 | Rsa1.0_01724.1 | 783  | 40292  | 1.00E-77  | 151  | 152  | 99 -  | 1    | 152  | 13121  | 13272  |
| UN04028 | Rsa1.0_00303.1 | 604  | 97468  | 3.00E-74  | 154  | 158  | 97 +  | 220  | 377  | 57321  | 57478  |
| UN04029 | Rsa1.0_00134.1 | 1154 | 390219 | 0         | 561  | 597  | 93 +  | 8    | 599  | 45107  | 45694  |
| UN04030 | Rsa1.0_04422.1 | 598  | 17423  | 0         | 577  | 597  | 96 -  | 2    | 598  | 8953   | 9544   |
| UN04031 | Rsa1.0_00392.1 | 870  | 88523  | 7.00E-70  | 147  | 151  | 97 -  | 364  | 514  | 15492  | 15642  |
| UN04032 | Rsa1.0_04297.1 | 752  | 18030  | 1.00E-125 | 292  | 310  | 94 +  | 359  | 665  | 17379  | 17687  |
| UN04033 | Rsa1.0_13850.1 | 1325 | 4205   | 0         | 559  | 560  | 99 +  | 1    | 560  | 2896   | 3455   |
| UN04034 | Rsa1.0_00107.1 | 1227 | 431659 | 0         | 670  | 673  | 99 +  | 1    | 672  | 251010 | 251682 |
| UN04035 | Rsa1.0_00265.1 | 1051 | 220635 | 1.00E-119 | 217  | 217  | 100 + | 818  | 1034 | 190433 | 190649 |
| UN04036 | Rsa1.0_05168.1 | 987  | 14621  | 0         | 632  | 648  | 97 -  | 1    | 648  | 12471  | 13117  |
| UN04037 | Rsa1.0_01422.1 | 1197 | 46172  | 0         | 492  | 511  | 96 -  | 688  | 1197 | 10154  | 10663  |
| UN04038 | Rsa1.0_00386.1 | 1177 | 89134  | 0         | 450  | 458  | 98 +  | 437  | 894  | 53821  | 54278  |
| UN04039 | Rsa1.0_01674.1 | 798  | 168300 | 0         | 439  | 445  | 98 +  | 3    | 444  | 1848   | 2289   |
| UN04040 | Rsa1.0_02060.1 | 943  | 35528  | 0         | 535  | 563  | 95 +  | 388  | 941  | 17139  | 17694  |
| UN04041 | Rsa1.0_00005.1 | 1547 | 353093 | 0         | 368  | 368  | 100 + | 1178 | 1545 | 121587 | 121954 |
| UN04042 | Rsa1.0_00579.1 | 1369 | 148308 | 1.00E-172 | 361  | 379  | 95 +  | 1    | 379  | 66641  | 67019  |
| UN04043 | Rsa1.0_33464.1 | 963  | 678    | 1.00E-148 | 278  | 282  | 98 +  | 437  | 718  | 154    | 435    |
| UN04044 | Rsa1.0_04016.1 | 731  | 19570  | 0         | 492  | 498  | 98 -  | 3    | 499  | 18111  | 18608  |
| UN04045 | Rsa1.0_00051.1 | 364  | 258225 | 7.00E-34  | 204  | 238  | 85 +  | 18   | 244  | 119357 | 119588 |
| UN04046 | Rsa1.0_00524.1 | 1342 | 169613 | 0         | 1138 | 1142 | 99 +  | 201  | 1341 | 17154  | 18295  |
| UN04047 | Rsa1.0_00094.1 | 1442 | 139042 | 0         | 556  | 557  | 99 -  | 884  | 1440 | 60519  | 61075  |
| UN04048 | Rsa1.0_01223.1 | 1312 | 50392  | 0         | 634  | 665  | 95 +  | 1    | 665  | 29039  | 29700  |
| UN04049 | #              | #    | #      | #         | #    | #    | #     | #    | #    | #      | #      |
| UN04050 | Rsa1.0_07908.1 | 753  | 8319   | 0         | 517  | 517  | 100 + | 1    | 517  | 206    | 722    |
| UN04051 | Rsa1.0_00473.1 | 1217 | 212204 | 0         | 445  | 465  | 95 +  | 2    | 458  | 64237  | 64697  |
| UN04052 | Rsa1.0_00879.1 | 958  | 61297  | 0         | 412  | 427  | 96 -  | 533  | 958  | 34194  | 34620  |
| UN04053 | Rsa1.0_00001.1 | 1436 | 363028 | 0         | 938  | 964  | 97 +  | 476  | 1436 | 147746 | 148704 |
| UN04054 | Rsa1.0_00757.1 | 1677 | 65559  | 0         | 679  | 724  | 93 -  | 957  | 1677 | 34361  | 35065  |

|         |                |      |        |           |      |      |       |      |      |        |        |
|---------|----------------|------|--------|-----------|------|------|-------|------|------|--------|--------|
| UN04055 | Rsa1.0.01602.1 | 696  | 42503  | 1.00E-130 | 269  | 279  | 96 +  | 416  | 694  | 1873   | 2144   |
| UN04056 | Rsa1.0.02817.1 | 1679 | 27644  | 0         | 1291 | 1370 | 94 -  | 179  | 1530 | 9695   | 11043  |
| UN04057 | Rsa1.0.01171.1 | 953  | 51752  | 0         | 448  | 466  | 96 -  | 467  | 932  | 35729  | 36194  |
| UN04058 | Rsa1.0.01146.1 | 630  | 163455 | 2.00E-78  | 196  | 208  | 94 -  | 424  | 630  | 41281  | 41485  |
| UN04059 | Rsa1.0.04835.1 | 925  | 15766  | 0         | 584  | 592  | 98 +  | 329  | 920  | 2483   | 3074   |
| UN04060 | Rsa1.0.02409.1 | 885  | 31663  | 1.00E-150 | 374  | 405  | 92 -  | 486  | 879  | 8883   | 9279   |
| UN04061 | Rsa1.0.10722.1 | 1317 | 5745   | 0         | 699  | 701  | 99 -  | 617  | 1317 | 4278   | 4977   |
| UN04062 | Rsa1.0.00278.1 | 1557 | 231896 | 0         | 587  | 603  | 97 +  | 711  | 1313 | 205275 | 205877 |
| UN04063 | Rsa1.0.00871.1 | 1005 | 61539  | 1.00E-127 | 327  | 354  | 92 +  | 3    | 346  | 8039   | 8382   |
| UN04064 | Rsa1.0.01981.1 | 662  | 36537  | 0         | 591  | 600  | 98 -  | 42   | 637  | 3891   | 4487   |
| UN04065 | Rsa1.0.00782.1 | 1067 | 64468  | 0         | 401  | 420  | 95 +  | 560  | 979  | 30043  | 30462  |
| UN04066 | Rsa1.0.00561.1 | 467  | 75653  | 1.00E-103 | 257  | 279  | 92 -  | 190  | 467  | 16292  | 16556  |
| UN04067 | Rsa1.0.03119.1 | 504  | 25270  | 0         | 499  | 508  | 98 +  | 2    | 504  | 15752  | 16257  |
| UN04068 | Rsa1.0.02528.1 | 1166 | 30452  | 1.00E-130 | 305  | 326  | 93 +  | 5    | 324  | 18618  | 18940  |
| UN04069 | Rsa1.0.08988.1 | 1382 | 6732   | 0         | 479  | 531  | 90 -  | 854  | 1369 | 727    | 1243   |
| UN04070 | Rsa1.0.00136.1 | 927  | 122464 | 6.00E-89  | 182  | 187  | 97 -  | 2    | 188  | 70440  | 70626  |
| UN04071 | Rsa1.0.02756.1 | 998  | 28202  | 4.00E-62  | 125  | 126  | 99 +  | 300  | 425  | 13570  | 13695  |
| UN04072 | Rsa1.0.01214.1 | 1257 | 50599  | 0         | 397  | 414  | 95 +  | 855  | 1257 | 46274  | 46685  |
| UN04073 | Rsa1.0.03114.1 | 1049 | 25318  | 0         | 608  | 624  | 97 -  | 387  | 1008 | 10053  | 10676  |
| UN04074 | Rsa1.0.02506.1 | 871  | 30700  | 1.00E-105 | 209  | 213  | 98 -  | 1    | 211  | 26272  | 26484  |
| UN04075 | Rsa1.0.00262.1 | 1196 | 101906 | 1.00E-135 | 245  | 245  | 100 + | 86   | 330  | 48780  | 49024  |
| UN04076 | Rsa1.0.01127.1 | 1406 | 53124  | 0         | 450  | 450  | 100 + | 600  | 1049 | 51280  | 51729  |
| UN04077 | Rsa1.0.00101.1 | 823  | 267193 | 0         | 710  | 763  | 93 +  | 64   | 819  | 89099  | 89846  |
| UN04078 | Rsa1.0.00027.1 | 805  | 283362 | 1.00E-141 | 338  | 368  | 91 -  | 450  | 802  | 279797 | 280163 |
| UN04079 | Rsa1.0.03544.1 | 2702 | 22182  | 1.00E-160 | 453  | 504  | 89 +  | 1001 | 1501 | 11920  | 12409  |
| UN04080 | Rsa1.0.00045.1 | 1211 | 328694 | 0         | 355  | 360  | 98 +  | 1    | 360  | 160663 | 161022 |
| UN04081 | Rsa1.0.02268.1 | 577  | 33172  | 2.00E-38  | 98   | 102  | 96 -  | 334  | 435  | 32461  | 32561  |
| UN04082 | Rsa1.0.01149.1 | 1334 | 160459 | 1.00E-149 | 274  | 276  | 99 -  | 1059 | 1334 | 149685 | 149960 |
| UN04083 | Rsa1.0.00278.1 | 1493 | 231896 | 0         | 401  | 408  | 98 +  | 491  | 898  | 23233  | 23640  |
| UN04084 | Rsa1.0.00915.1 | 958  | 194446 | 0         | 535  | 552  | 96 -  | 3    | 546  | 181873 | 182421 |
| UN04085 | Rsa1.0.02402.1 | 1294 | 31710  | 0         | 429  | 441  | 97 +  | 833  | 1273 | 30607  | 31044  |
| UN04086 | Rsa1.0.39987.1 | 764  | 562    | 1.00E-136 | 249  | 250  | 99 +  | 365  | 614  | 313    | 562    |
| UN04087 | Rsa1.0.00038.1 | 1381 | 314568 | 0         | 767  | 814  | 94 -  | 2    | 781  | 239043 | 239856 |
| UN04088 | Rsa1.0.00715.1 | 1046 | 67116  | 0         | 413  | 422  | 97 -  | 127  | 548  | 17550  | 17969  |
| UN04089 | Rsa1.0.01283.1 | 1075 | 49257  | 1.00E-172 | 327  | 334  | 97 -  | 181  | 514  | 19047  | 19380  |
| UN04090 | Rsa1.0.00773.1 | 957  | 64839  | 0         | 672  | 714  | 94 +  | 260  | 957  | 50259  | 50967  |
| UN04091 | Rsa1.0.01705.1 | 1038 | 40710  | 1.00E-68  | 220  | 247  | 89 +  | 746  | 991  | 38585  | 38823  |
| UN04092 | Rsa1.0.00305.1 | 980  | 97308  | 1.00E-142 | 273  | 277  | 98 -  | 704  | 979  | 65771  | 66047  |
| UN04093 | Rsa1.0.00599.1 | 1356 | 73418  | 0         | 351  | 353  | 99 +  | 322  | 674  | 46750  | 47102  |

|         |                |      |        |           |      |      |       |      |      |        |        |
|---------|----------------|------|--------|-----------|------|------|-------|------|------|--------|--------|
| UN04094 | Rsa1.0_00773.1 | 1205 | 64839  | 0         | 471  | 481  | 97 -  | 1    | 480  | 53064  | 53544  |
| UN04095 | Rsa1.0_01281.1 | 713  | 49313  | 0         | 678  | 712  | 95 +  | 3    | 712  | 26768  | 27468  |
| UN04096 | Rsa1.0_01220.1 | 1188 | 161775 | 0         | 454  | 456  | 99 -  | 2    | 457  | 147689 | 148144 |
| UN04097 | Rsa1.0_00254.1 | 1169 | 102600 | 0         | 593  | 618  | 95 -  | 543  | 1159 | 52242  | 52845  |
| UN04098 | Rsa1.0_00123.1 | 1044 | 325650 | 1.00E-99  | 223  | 235  | 94 +  | 3    | 234  | 173067 | 173301 |
| UN04099 | Rsa1.0_00579.1 | 799  | 148308 | 6.00E-70  | 141  | 143  | 98 -  | 57   | 199  | 68688  | 68830  |
| UN04100 | Rsa1.0_03185.1 | 944  | 24739  | 0         | 436  | 448  | 97 -  | 49   | 496  | 11026  | 11473  |
| UN04101 | Rsa1.0_01115.1 | 1196 | 183545 | 0         | 703  | 705  | 99 -  | 4    | 708  | 168513 | 169217 |
| UN04102 | Rsa1.0_60278.1 | 1238 | 380    | 1.00E-109 | 202  | 202  | 100 - | 3    | 204  | 85     | 286    |
| UN04103 | Rsa1.0_03833.1 | 1008 | 20575  | 0         | 893  | 905  | 98 -  | 104  | 1007 | 17249  | 18153  |
| UN04104 | Rsa1.0_06443.1 | 810  | 11008  | 1.00E-135 | 320  | 343  | 93 +  | 3    | 342  | 5740   | 6081   |
| UN04105 | Rsa1.0_00149.1 | 839  | 305196 | 2.00E-51  | 140  | 152  | 92 -  | 511  | 662  | 11665  | 11816  |
| UN04106 | Rsa1.0_00370.1 | 864  | 90472  | 0         | 378  | 395  | 95 -  | 357  | 751  | 4902   | 5296   |
| UN04107 | Rsa1.0_00318.1 | 1138 | 96094  | 1.00E-133 | 277  | 288  | 96 +  | 853  | 1138 | 70330  | 70617  |
| UN04108 | Rsa1.0_00041.1 | 675  | 186197 | 1.00E-107 | 248  | 264  | 93 +  | 415  | 675  | 150099 | 150358 |
| UN04109 | Rsa1.0_01172.1 | 1024 | 51734  | 0         | 371  | 381  | 97 -  | 9    | 386  | 6903   | 7283   |
| UN04110 | Rsa1.0_03007.1 | 507  | 26070  | 1.00E-116 | 227  | 232  | 97 +  | 276  | 507  | 22442  | 22673  |
| UN04111 | Rsa1.0_00208.1 | 1265 | 108565 | 0         | 788  | 795  | 99 -  | 2    | 796  | 21769  | 22563  |
| UN04112 | Rsa1.0_00108.1 | 1025 | 478491 | 1.00E-160 | 295  | 298  | 98 +  | 728  | 1025 | 51602  | 51899  |
| UN04113 | Rsa1.0_00275.1 | 1203 | 210104 | 1.00E-109 | 207  | 209  | 99 +  | 31   | 239  | 176533 | 176741 |
| UN04114 | Rsa1.0_00033.1 | 1167 | 515811 | 0         | 545  | 555  | 98 +  | 613  | 1167 | 135945 | 136498 |
| UN04115 | Rsa1.0_03964.1 | 685  | 19835  | 4.00E-55  | 189  | 216  | 87 -  | 481  | 685  | 13128  | 13337  |
| UN04116 | Rsa1.0_02041.1 | 681  | 163634 | 1.00E-126 | 307  | 330  | 93 -  | 17   | 346  | 20074  | 20401  |
| UN04117 | Rsa1.0_00842.1 | 1300 | 62493  | 1.00E-114 | 215  | 217  | 99 +  | 1084 | 1300 | 32618  | 32834  |
| UN04118 | Rsa1.0_00978.1 | 673  | 57739  | 1.00E-175 | 526  | 596  | 88 +  | 30   | 611  | 26146  | 26730  |
| UN04119 | Rsa1.0_00372.1 | 866  | 90418  | 0         | 452  | 460  | 98 -  | 3    | 462  | 25938  | 26392  |
| UN04120 | Rsa1.0_00216.1 | 1119 | 197563 | 0         | 424  | 434  | 97 +  | 295  | 728  | 24584  | 25017  |
| UN04121 | Rsa1.0_06683.1 | 1577 | 10549  | 0         | 446  | 451  | 98 +  | 253  | 703  | 7742   | 8192   |
| UN04122 | Rsa1.0_03310.1 | 781  | 23851  | 0         | 372  | 374  | 99 +  | 3    | 376  | 7955   | 8328   |
| UN04123 | Rsa1.0_02896.1 | 827  | 26970  | 0         | 350  | 361  | 96 +  | 322  | 672  | 16798  | 17158  |
| UN04124 | Rsa1.0_02540.1 | 745  | 30344  | 0         | 658  | 678  | 97 -  | 2    | 678  | 22062  | 22739  |
| UN04125 | Rsa1.0_00030.1 | 591  | 250988 | 1.00E-135 | 247  | 248  | 99 +  | 343  | 590  | 124651 | 124898 |
| UN04126 | Rsa1.0_00963.1 | 1072 | 58176  | 0         | 998  | 1054 | 94 -  | 6    | 1051 | 31115  | 32148  |
| UN04127 | Rsa1.0_10636.1 | 1021 | 5774   | 0         | 863  | 868  | 99 +  | 154  | 1021 | 3793   | 4660   |
| UN04128 | Rsa1.0_00001.1 | 1127 | 363028 | 1.00E-131 | 259  | 265  | 97 -  | 862  | 1126 | 253441 | 253703 |
| UN04129 | Rsa1.0_06323.1 | 1801 | 11236  | 0         | 623  | 642  | 97 -  | 1160 | 1800 | 7497   | 8138   |
| UN04130 | Rsa1.0_00190.1 | 867  | 318240 | 0         | 813  | 830  | 97 -  | 30   | 859  | 179081 | 179909 |
| UN04131 | Rsa1.0_00483.1 | 1114 | 81102  | 0         | 1087 | 1113 | 97 -  | 3    | 1114 | 17104  | 18206  |
| UN04132 | Rsa1.0_11690.1 | 942  | 5440   | 1.00E-116 | 367  | 415  | 88 +  | 3    | 417  | 5021   | 5421   |

|         |                |      |        |           |      |      |       |     |      |        |        |
|---------|----------------|------|--------|-----------|------|------|-------|-----|------|--------|--------|
| UN04133 | Rsa1.0_00190.1 | 997  | 318240 | 1.00E-167 | 362  | 378  | 95 -  | 623 | 997  | 134846 | 135221 |
| UN04134 | Rsa1.0_01397.1 | 699  | 183276 | 0         | 520  | 541  | 96 -  | 3   | 543  | 11118  | 11658  |
| UN04135 | Rsa1.0_00925.1 | 773  | 59481  | 0         | 520  | 522  | 99 -  | 3   | 524  | 25571  | 26092  |
| UN04136 | Rsa1.0_06062.1 | 890  | 11836  | 1.00E-152 | 317  | 329  | 96 -  | 556 | 881  | 5210   | 5534   |
| UN04137 | Rsa1.0_00744.1 | 1425 | 66084  | 0         | 338  | 338  | 100 - | 1   | 338  | 50865  | 51202  |
| UN04138 | Rsa1.0_04709.1 | 1363 | 16285  | 0         | 714  | 719  | 99 -  | 1   | 718  | 6049   | 6764   |
| UN04139 | Rsa1.0_00759.1 | 765  | 65465  | 0         | 371  | 378  | 98 +  | 392 | 765  | 54383  | 54759  |
| UN04140 | Rsa1.0_00205.1 | 868  | 193401 | 0         | 386  | 401  | 96 +  | 467 | 867  | 77712  | 78101  |
| UN04141 | Rsa1.0_00396.1 | 1572 | 88242  | 0         | 380  | 385  | 98 -  | 3   | 387  | 32410  | 32794  |
| UN04142 | Rsa1.0_01045.1 | 656  | 55853  | 0         | 393  | 404  | 97 -  | 253 | 656  | 34043  | 34443  |
| UN04143 | Rsa1.0_00679.1 | 1202 | 68971  | 1.00E-118 | 275  | 293  | 93 -  | 1   | 287  | 34537  | 34829  |
| UN04144 | Rsa1.0_00310.1 | 1352 | 96852  | 0         | 413  | 419  | 98 -  | 2   | 418  | 36360  | 36778  |
| UN04145 | Rsa1.0_05547.1 | 1206 | 13369  | 0         | 501  | 519  | 96 -  | 683 | 1201 | 12677  | 13195  |
| UN04146 | Rsa1.0_00994.1 | 457  | 165189 | 0         | 453  | 455  | 99 +  | 3   | 457  | 12459  | 12913  |
| UN04147 | Rsa1.0_00541.1 | 1191 | 76863  | 3.00E-45  | 278  | 342  | 81 +  | 846 | 1174 | 1692   | 2033   |
| UN04148 | Rsa1.0_05679.1 | 785  | 12958  | 1.00E-106 | 199  | 200  | 99 +  | 253 | 452  | 917    | 1116   |
| UN04149 | Rsa1.0_00160.1 | 1058 | 346678 | 0         | 826  | 848  | 97 +  | 22  | 863  | 28090  | 28936  |
| UN04150 | Rsa1.0_04667.1 | 901  | 16460  | 0         | 341  | 341  | 100 - | 2   | 342  | 15632  | 15972  |
| UN04151 | Rsa1.0_14624.1 | 956  | 3217   | 1.00E-110 | 289  | 312  | 92 +  | 652 | 956  | 1334   | 1639   |
| UN04152 | Rsa1.0_02289.1 | 926  | 32981  | 7.00E-64  | 148  | 155  | 95 -  | 225 | 376  | 21690  | 21844  |
| UN04153 | Rsa1.0_15662.1 | 1086 | 2495   | 2.00E-73  | 194  | 211  | 91 -  | 730 | 940  | 2257   | 2459   |
| UN04154 | Rsa1.0_00012.1 | 1340 | 222148 | 0         | 1306 | 1309 | 99 -  | 4   | 1312 | 194825 | 196133 |
| UN04155 | Rsa1.0_05596.1 | 853  | 137912 | 4.00E-22  | 64   | 67   | 95 -  | 9   | 75   | 6636   | 6702   |
| UN04156 | Rsa1.0_00816.1 | 1157 | 403350 | 0         | 559  | 585  | 95 +  | 571 | 1155 | 133188 | 133770 |
| UN04157 | Rsa1.0_02118.1 | 842  | 34839  | 0         | 496  | 503  | 98 -  | 18  | 519  | 8900   | 9402   |
| UN04158 | Rsa1.0_02411.1 | 1024 | 31655  | 1.00E-135 | 458  | 534  | 85 +  | 123 | 656  | 27947  | 28456  |
| UN04159 | Rsa1.0_01860.1 | 762  | 38057  | 0         | 467  | 491  | 95 -  | 282 | 760  | 567    | 1057   |
| UN04160 | Rsa1.0_00148.1 | 921  | 120234 | 0         | 516  | 537  | 96 -  | 386 | 919  | 36560  | 37093  |
| UN04161 | Rsa1.0_00896.1 | 1223 | 60509  | 6.00E-34  | 160  | 187  | 85 -  | 534 | 720  | 3275   | 3460   |
| UN04162 | Rsa1.0_03860.1 | 1202 | 20407  | 0         | 420  | 444  | 94 +  | 16  | 445  | 15873  | 16316  |
| UN04163 | Rsa1.0_00548.1 | 1252 | 76518  | 0         | 1129 | 1208 | 93 +  | 1   | 1200 | 18922  | 20114  |
| UN04164 | Rsa1.0_02207.1 | 961  | 33914  | 0         | 510  | 513  | 99 +  | 3   | 515  | 18537  | 19049  |
| UN04165 | Rsa1.0_02396.1 | 926  | 31783  | 1.00E-106 | 231  | 242  | 95 -  | 597 | 838  | 18648  | 18886  |
| UN04166 | Rsa1.0_00015.1 | 791  | 561803 | 1.00E-159 | 321  | 331  | 96 -  | 1   | 331  | 304577 | 304904 |
| UN04167 | Rsa1.0_00517.1 | 874  | 142790 | 0         | 419  | 431  | 97 -  | 2   | 432  | 113059 | 113487 |
| UN04168 | Rsa1.0_00228.1 | 506  | 105511 | 0         | 379  | 393  | 96 +  | 49  | 439  | 13156  | 13545  |
| UN04169 | Rsa1.0_01060.1 | 1236 | 55368  | 1.00E-109 | 222  | 229  | 96 -  | 925 | 1153 | 38736  | 38964  |
| UN04170 | Rsa1.0_07823.1 | 1171 | 8468   | 0         | 1012 | 1061 | 95 -  | 3   | 1060 | 4559   | 5615   |
| UN04171 | Rsa1.0_02173.1 | 1136 | 34318  | 0         | 470  | 491  | 95 -  | 382 | 872  | 30684  | 31174  |

|         |                |      |        |           |      |      |      |     |      |        |        |
|---------|----------------|------|--------|-----------|------|------|------|-----|------|--------|--------|
| UN04172 | Rsa1.0.00101.1 | 1384 | 267193 | 0         | 1212 | 1284 | 94 - | 3   | 1273 | 89099  | 90372  |
| UN04173 | Rsa1.0.07877.1 | 1048 | 8373   | 3.00E-72  | 145  | 147  | 98 - | 696 | 842  | 4515   | 4661   |
| UN04174 | Rsa1.0.02161.1 | 1078 | 34459  | 0         | 435  | 467  | 93 - | 589 | 1052 | 32620  | 33077  |
| UN04175 | Rsa1.0.00297.1 | 1151 | 97836  | 0         | 441  | 477  | 92 + | 7   | 478  | 26263  | 26734  |
| UN04176 | Rsa1.0.01102.1 | 907  | 53987  | 0         | 669  | 697  | 95 - | 1   | 695  | 51418  | 52114  |
| UN04177 | Rsa1.0.01173.1 | 979  | 51727  | 0         | 397  | 411  | 96 - | 415 | 825  | 29674  | 30084  |
| UN04178 | Rsa1.0.10201.1 | 1282 | 5946   | 0         | 1170 | 1210 | 96 + | 86  | 1278 | 389    | 1597   |
| UN04179 | Rsa1.0.00377.1 | 879  | 90038  | 1.00E-101 | 291  | 315  | 92 + | 31  | 340  | 28082  | 28387  |
| UN04180 | Rsa1.0.00100.1 | 1142 | 249232 | 0         | 743  | 788  | 94 - | 2   | 773  | 126923 | 127710 |
| UN04181 | Rsa1.0.00121.1 | 715  | 278029 | 0         | 707  | 711  | 99 + | 5   | 715  | 269852 | 270562 |
| UN04182 | Rsa1.0.00675.1 | 1041 | 145590 | 1.00E-163 | 428  | 469  | 91 + | 1   | 463  | 45279  | 45726  |
| UN04183 | Rsa1.0.00351.1 | 1314 | 413096 | 1.00E-155 | 281  | 282  | 99 + | 587 | 868  | 133363 | 133644 |
| UN04184 | Rsa1.0.02920.1 | 1195 | 26779  | 1.00E-109 | 246  | 257  | 95 + | 1   | 254  | 20299  | 20554  |
| UN04185 | Rsa1.0.03981.1 | 433  | 19724  | 1.00E-81  | 255  | 285  | 89 - | 39  | 319  | 17580  | 17854  |
| UN04186 | Rsa1.0.00427.1 | 933  | 189678 | 0         | 927  | 929  | 99 + | 1   | 929  | 129289 | 130217 |
| UN04187 | Rsa1.0.01156.1 | 606  | 52147  | 1.00E-118 | 278  | 302  | 92 + | 1   | 284  | 33024  | 33324  |
| UN04188 | Rsa1.0.03634.1 | 593  | 145192 | 1.00E-135 | 350  | 388  | 90 + | 1   | 374  | 133529 | 133901 |
| UN04189 | Rsa1.0.01112.1 | 1144 | 310601 | 0         | 534  | 569  | 93 - | 2   | 569  | 31685  | 32250  |
| UN04190 | Rsa1.0.00078.1 | 801  | 175053 | 0         | 781  | 828  | 94 + | 1   | 801  | 78730  | 79556  |
| UN04191 | Rsa1.0.00376.1 | 1053 | 90101  | 1.00E-134 | 252  | 255  | 98 - | 797 | 1051 | 46615  | 46869  |
| UN04192 | Rsa1.0.00800.1 | 1222 | 63868  | 1.00E-107 | 219  | 226  | 96 - | 648 | 873  | 60809  | 61034  |
| UN04193 | Rsa1.0.06795.1 | 1134 | 10346  | 0         | 371  | 383  | 96 - | 502 | 884  | 5026   | 5408   |
| UN04194 | Rsa1.0.14298.1 | 993  | 3561   | 2.00E-89  | 183  | 188  | 97 + | 641 | 828  | 3278   | 3465   |
| UN04195 | Rsa1.0.00299.1 | 1203 | 97770  | 0         | 468  | 499  | 93 - | 3   | 501  | 58798  | 59284  |
| UN04196 | Rsa1.0.01151.1 | 1287 | 52268  | 1.00E-151 | 328  | 346  | 94 - | 207 | 549  | 25416  | 25761  |
| UN04197 | Rsa1.0.00630.1 | 850  | 71281  | 0         | 511  | 534  | 95 + | 1   | 528  | 63615  | 64143  |
| UN04198 | Rsa1.0.00339.1 | 1059 | 222974 | 1.00E-102 | 202  | 206  | 98 - | 2   | 207  | 18437  | 18642  |
| UN04199 | Rsa1.0.01381.1 | 909  | 46908  | 1.00E-132 | 252  | 256  | 98 - | 1   | 256  | 36596  | 36851  |
| UN04200 | Rsa1.0.02329.1 | 703  | 32474  | 0         | 678  | 709  | 95 - | 1   | 703  | 10329  | 11034  |
| UN04201 | Rsa1.0.00589.1 | 685  | 209965 | 1.00E-119 | 243  | 250  | 97 + | 240 | 488  | 200359 | 200608 |
| UN04202 | Rsa1.0.00451.1 | 746  | 322533 | 0         | 722  | 749  | 96 + | 1   | 746  | 9191   | 9929   |
| UN04203 | Rsa1.0.18598.1 | 794  | 1567   | 0         | 653  | 687  | 95 - | 1   | 670  | 258    | 943    |
| UN04204 | Rsa1.0.01790.1 | 1224 | 39248  | 0         | 429  | 431  | 99 + | 1   | 431  | 17097  | 17526  |
| UN04205 | Rsa1.0.00147.1 | 1468 | 249503 | 0         | 978  | 1060 | 92 - | 408 | 1467 | 240267 | 241326 |
| UN04206 | Rsa1.0.09223.1 | 741  | 6545   | 0         | 500  | 511  | 97 - | 229 | 739  | 5163   | 5669   |
| UN04207 | Rsa1.0.08700.1 | 1160 | 7028   | 0         | 797  | 807  | 98 - | 1   | 806  | 4858   | 5664   |
| UN04208 | Rsa1.0.11740.1 | 1253 | 5423   | 3.00E-88  | 312  | 356  | 87 + | 761 | 1112 | 4636   | 4989   |
| UN04209 | Rsa1.0.01398.1 | 1209 | 149922 | 1.00E-161 | 340  | 354  | 96 - | 9   | 360  | 139454 | 139803 |
| UN04210 | Rsa1.0.00048.1 | 1095 | 167185 | 0         | 1011 | 1090 | 92 - | 8   | 1089 | 97236  | 98284  |

|         |                |      |        |           |      |      |      |     |      |        |        |
|---------|----------------|------|--------|-----------|------|------|------|-----|------|--------|--------|
| UN04211 | Rsa1.0.02582.1 | 754  | 29889  | 0         | 735  | 754  | 97 + | 1   | 754  | 4209   | 4962   |
| UN04212 | Rsa1.0.03916.1 | 1541 | 20117  | 0         | 574  | 582  | 98 + | 557 | 1138 | 18468  | 19049  |
| UN04213 | Rsa1.0.01745.1 | 1457 | 39905  | 0         | 531  | 547  | 97 + | 923 | 1455 | 13001  | 13547  |
| UN04214 | Rsa1.0.00058.1 | 889  | 159921 | 0         | 602  | 627  | 96 + | 1   | 627  | 153366 | 153990 |
| UN04215 | Rsa1.0.10503.1 | 1069 | 5824   | 1.00E-130 | 262  | 269  | 97 + | 3   | 270  | 1994   | 2262   |
| UN04216 | Rsa1.0.00542.1 | 1036 | 76831  | 0         | 553  | 584  | 94 + | 15  | 597  | 74742  | 75324  |
| UN04217 | Rsa1.0.00039.1 | 879  | 296927 | 2.00E-61  | 195  | 221  | 88 - | 196 | 414  | 223486 | 223694 |
| UN04218 | Rsa1.0.01005.1 | 882  | 56967  | 0         | 715  | 752  | 95 + | 1   | 737  | 4934   | 5682   |
| UN04219 | Rsa1.0.07757.1 | 1052 | 8633   | 0         | 626  | 649  | 96 + | 53  | 700  | 864    | 1512   |
| UN04220 | Rsa1.0.05305.1 | 1681 | 14207  | 0         | 570  | 589  | 96 + | 306 | 891  | 2999   | 3582   |
| UN04221 | Rsa1.0.00409.1 | 858  | 146788 | 0         | 533  | 545  | 97 - | 312 | 856  | 86809  | 87353  |
| UN04222 | Rsa1.0.00420.1 | 1152 | 86496  | 0         | 1011 | 1068 | 94 + | 2   | 1064 | 39871  | 40930  |
| UN04223 | Rsa1.0.61123.1 | 669  | 375    | 1.00E-158 | 323  | 335  | 96 - | 339 | 667  | 41     | 375    |
| UN04224 | Rsa1.0.00296.1 | 1117 | 97854  | 0         | 486  | 515  | 94 - | 1   | 514  | 17737  | 18250  |
| UN04225 | Rsa1.0.03187.1 | 1412 | 24726  | 0         | 545  | 593  | 91 - | 829 | 1398 | 19186  | 19770  |
| UN04226 | Rsa1.0.01081.1 | 952  | 499226 | 1.00E-99  | 269  | 294  | 91 + | 1   | 291  | 323186 | 323476 |
| UN04227 | Rsa1.0.00002.1 | 1055 | 601661 | 0         | 883  | 930  | 94 - | 127 | 1054 | 536726 | 537655 |
| UN04228 | Rsa1.0.00058.1 | 898  | 159921 | 0         | 522  | 548  | 95 - | 2   | 549  | 71365  | 71895  |
| UN04229 | Rsa1.0.00092.1 | 1130 | 659932 | 1.00E-120 | 285  | 308  | 92 + | 821 | 1128 | 340621 | 340915 |
| UN04230 | Rsa1.0.08902.1 | 910  | 6805   | 0         | 519  | 536  | 96 + | 262 | 796  | 4643   | 5178   |
| UN04231 | Rsa1.0.00004.1 | 1026 | 253996 | 0         | 615  | 646  | 95 + | 1   | 636  | 69131  | 69773  |
| UN04232 | Rsa1.0.27229.1 | 820  | 861    | 0         | 397  | 420  | 94 + | 8   | 414  | 108    | 527    |
| UN04233 | Rsa1.0.00528.1 | 862  | 164755 | 0         | 626  | 646  | 96 + | 1   | 646  | 109377 | 110022 |
| UN04234 | Rsa1.0.34634.1 | 846  | 654    | 3.00E-16  | 81   | 93   | 87 - | 354 | 446  | 167    | 259    |
| UN04235 | Rsa1.0.05360.1 | 1049 | 14053  | 0         | 588  | 589  | 99 - | 456 | 1044 | 4843   | 5431   |
| UN04236 | Rsa1.0.00035.1 | 836  | 176449 | 1.00E-176 | 417  | 457  | 91 - | 378 | 834  | 158955 | 159389 |
| UN04237 | Rsa1.0.03981.1 | 369  | 19724  | 5.00E-81  | 332  | 390  | 85 + | 2   | 365  | 18253  | 18628  |
| UN04238 | Rsa1.0.00713.1 | 1013 | 158017 | 0         | 466  | 489  | 95 + | 437 | 925  | 1180   | 1668   |
| UN04239 | Rsa1.0.00561.1 | 1298 | 75653  | 0         | 864  | 926  | 93 + | 1   | 921  | 4139   | 5053   |
| UN04240 | Rsa1.0.02281.1 | 478  | 292576 | 1.00E-112 | 230  | 238  | 96 + | 228 | 465  | 263640 | 263877 |
| UN04241 | Rsa1.0.00420.1 | 280  | 86496  | 2.00E-55  | 131  | 138  | 94 + | 119 | 256  | 37486  | 37623  |
| UN04242 | Rsa1.0.00044.1 | 844  | 271658 | 0         | 545  | 550  | 99 - | 1   | 550  | 22375  | 22924  |
| UN04243 | Rsa1.0.00221.1 | 842  | 106972 | 0         | 555  | 563  | 98 - | 72  | 633  | 53911  | 54473  |
| UN04244 | Rsa1.0.00569.1 | 982  | 75060  | 0         | 546  | 548  | 99 + | 1   | 548  | 72168  | 72715  |
| UN04245 | Rsa1.0.03606.1 | 922  | 21818  | 1.00E-113 | 210  | 211  | 99 - | 472 | 682  | 847    | 1057   |
| UN04246 | Rsa1.0.00082.1 | 968  | 237584 | 1.00E-118 | 296  | 321  | 92 + | 663 | 968  | 38549  | 38864  |
| UN04247 | Rsa1.0.00227.1 | 514  | 105849 | 0         | 510  | 511  | 99 - | 2   | 512  | 35727  | 36237  |
| UN04248 | Rsa1.0.00556.1 | 822  | 207212 | 0         | 516  | 540  | 95 + | 180 | 717  | 51917  | 52456  |
| UN04249 | Rsa1.0.00551.1 | 1263 | 76227  | 0         | 520  | 545  | 95 - | 723 | 1261 | 54753  | 55293  |

|         |                |      |        |           |      |      |       |      |      |        |        |
|---------|----------------|------|--------|-----------|------|------|-------|------|------|--------|--------|
| UN04250 | Rsa1.0.00122.1 | 691  | 265937 | 1.00E-110 | 258  | 275  | 93 -  | 39   | 312  | 223063 | 223337 |
| UN04251 | Rsa1.0.00120.1 | 863  | 277288 | 1.00E-153 | 296  | 302  | 98 +  | 562  | 863  | 216704 | 217003 |
| UN04252 | Rsa1.0.02240.1 | 681  | 153768 | 1.00E-135 | 257  | 260  | 98 -  | 141  | 399  | 145616 | 145875 |
| UN04253 | Rsa1.0.02478.1 | 1008 | 150183 | 0         | 911  | 967  | 94 +  | 42   | 994  | 28834  | 29791  |
| UN04254 | Rsa1.0.03767.1 | 738  | 20969  | 0         | 659  | 684  | 96 +  | 4    | 684  | 9886   | 10566  |
| UN04255 | Rsa1.0.01638.1 | 1411 | 41857  | 0         | 810  | 860  | 94 -  | 1    | 848  | 2718   | 3576   |
| UN04256 | Rsa1.0.00813.1 | 741  | 63202  | 5.00E-98  | 200  | 206  | 97 -  | 411  | 616  | 14295  | 14500  |
| UN04257 | Rsa1.0.00623.1 | 1280 | 207630 | 0         | 493  | 502  | 98 -  | 648  | 1149 | 164086 | 164587 |
| UN04258 | Rsa1.0.05570.1 | 980  | 13301  | 0         | 448  | 473  | 94 +  | 1    | 473  | 10572  | 11032  |
| UN04259 | Rsa1.0.03981.1 | 1133 | 19724  | 1.00E-118 | 448  | 512  | 87 +  | 4    | 495  | 18219  | 18729  |
| UN04260 | Rsa1.0.00899.1 | 1491 | 60404  | 1.00E-145 | 290  | 298  | 97 +  | 1197 | 1491 | 10658  | 10952  |
| UN04261 | Rsa1.0.05267.1 | 916  | 14319  | 1.00E-159 | 398  | 430  | 92 +  | 11   | 439  | 7441   | 7863   |
| UN04262 | Rsa1.0.03257.1 | 1566 | 24305  | 0         | 1164 | 1166 | 99 +  | 3    | 1168 | 17594  | 18759  |
| UN04263 | Rsa1.0.00152.1 | 1068 | 257730 | 0         | 334  | 335  | 99 -  | 734  | 1068 | 200189 | 200523 |
| UN04264 | Rsa1.0.04772.1 | 968  | 16040  | 6.00E-86  | 194  | 201  | 96 -  | 2    | 198  | 13400  | 13600  |
| UN04265 | Rsa1.0.00997.1 | 1114 | 57190  | 0         | 436  | 440  | 99 -  | 1    | 439  | 52204  | 52640  |
| UN04266 | Rsa1.0.14744.1 | 1327 | 3111   | 0         | 457  | 475  | 96 +  | 853  | 1327 | 724    | 1198   |
| UN04267 | Rsa1.0.01012.1 | 946  | 56836  | 0         | 828  | 834  | 99 -  | 2    | 835  | 51667  | 52500  |
| UN04268 | Rsa1.0.00374.1 | 1501 | 165738 | 0         | 969  | 1015 | 95 -  | 502  | 1500 | 100943 | 101952 |
| UN04269 | Rsa1.0.02490.1 | 619  | 30885  | 1.00E-121 | 249  | 258  | 96 -  | 362  | 619  | 13643  | 13896  |
| UN04270 | Rsa1.0.00201.1 | 1405 | 232851 | 0         | 571  | 586  | 97 -  | 820  | 1405 | 81190  | 81766  |
| UN04271 | Rsa1.0.01309.1 | 483  | 48556  | 4.00E-82  | 215  | 235  | 91 -  | 115  | 349  | 2155   | 2389   |
| UN04272 | Rsa1.0.00437.1 | 1179 | 84879  | 1.00E-99  | 194  | 197  | 98 -  | 654  | 850  | 13824  | 14020  |
| UN04273 | Rsa1.0.01035.1 | 958  | 56019  | 0         | 420  | 435  | 96 +  | 4    | 433  | 33719  | 34153  |
| UN04274 | Rsa1.0.04563.1 | 1190 | 16837  | 8.00E-95  | 180  | 181  | 99 +  | 3    | 183  | 12914  | 13094  |
| UN04275 | Rsa1.0.00193.1 | 966  | 194198 | 0         | 812  | 853  | 95 -  | 125  | 965  | 23793  | 24642  |
| UN04276 | Rsa1.0.03319.1 | 1426 | 23767  | 0         | 481  | 481  | 100 - | 5    | 485  | 18145  | 18625  |
| UN04277 | Rsa1.0.05217.1 | 607  | 142938 | 0         | 591  | 615  | 96 -  | 3    | 604  | 134906 | 135520 |
| UN04278 | Rsa1.0.00990.1 | 788  | 57445  | 1.00E-107 | 198  | 198  | 100 - | 211  | 408  | 10576  | 10773  |
| UN04279 | Rsa1.0.01691.1 | 655  | 40921  | 0         | 600  | 657  | 91 +  | 1    | 655  | 29173  | 29823  |
| UN04280 | Rsa1.0.00089.1 | 885  | 406142 | 1.00E-180 | 366  | 380  | 96 -  | 506  | 885  | 233428 | 233806 |
| UN04281 | Rsa1.0.01778.1 | 920  | 39509  | 1.00E-101 | 251  | 267  | 94 +  | 657  | 920  | 9400   | 9660   |
| UN04282 | Rsa1.0.31020.1 | 772  | 738    | 1.00E-92  | 219  | 231  | 94 +  | 1    | 229  | 108    | 335    |
| UN04283 | Rsa1.0.06229.1 | 906  | 11439  | 0         | 467  | 490  | 95 +  | 421  | 905  | 8749   | 9238   |
| UN04284 | Rsa1.0.00491.1 | 1167 | 80219  | 0         | 1032 | 1141 | 90 -  | 58   | 1165 | 64152  | 65277  |
| UN04285 | Rsa1.0.00089.1 | 1054 | 406142 | 1.00E-160 | 330  | 342  | 96 +  | 22   | 362  | 161996 | 162336 |
| UN04286 | Rsa1.0.00047.1 | 1022 | 168582 | 1.00E-120 | 241  | 248  | 97 -  | 6    | 253  | 166424 | 166671 |
| UN04287 | Rsa1.0.01078.1 | 846  | 316910 | 0         | 753  | 754  | 99 -  | 93   | 846  | 280152 | 280905 |
| UN04288 | Rsa1.0.00398.1 | 1096 | 88007  | 0         | 661  | 709  | 93 -  | 403  | 1096 | 70663  | 71367  |



|         |                |      |        |           |      |      |       |      |      |        |        |
|---------|----------------|------|--------|-----------|------|------|-------|------|------|--------|--------|
| UN04289 | Rsa1.0.08617.1 | 1339 | 7124   | 0         | 1167 | 1240 | 94 -  | 143  | 1339 | 309    | 1548   |
| UN04290 | Rsa1.0.01890.1 | 1297 | 37542  | 0         | 335  | 337  | 99 +  | 748  | 1084 | 12677  | 13013  |
| UN04291 | Rsa1.0.00044.1 | 556  | 271658 | 0         | 546  | 555  | 98 -  | 3    | 556  | 109390 | 109944 |
| UN04292 | Rsa1.0.02377.1 | 631  | 31994  | 0         | 604  | 648  | 93 -  | 3    | 631  | 19525  | 20171  |
| UN04293 | Rsa1.0.00228.1 | 1210 | 105511 | 0         | 399  | 400  | 99 -  | 537  | 936  | 81684  | 82083  |
| UN04294 | Rsa1.0.02966.1 | 952  | 135126 | 0         | 460  | 475  | 96 -  | 22   | 487  | 17972  | 18446  |
| UN04295 | Rsa1.0.02748.1 | 1013 | 28242  | 0         | 394  | 406  | 97 +  | 606  | 1011 | 11199  | 11604  |
| UN04296 | Rsa1.0.01414.1 | 755  | 149508 | 2.00E-85  | 161  | 161  | 100 + | 69   | 229  | 8113   | 8273   |
| UN04297 | Rsa1.0.00889.1 | 621  | 60978  | 0         | 616  | 629  | 97 -  | 3    | 621  | 55959  | 56587  |
| UN04298 | Rsa1.0.00825.1 | 663  | 62855  | 1.00E-108 | 211  | 215  | 98 +  | 155  | 369  | 53331  | 53545  |
| UN04299 | Rsa1.0.12642.1 | 1382 | 5165   | 0         | 493  | 506  | 97 -  | 161  | 664  | 18     | 523    |
| UN04300 | Rsa1.0.00153.1 | 1140 | 192931 | 1.00E-101 | 263  | 289  | 91 -  | 3    | 276  | 170695 | 170981 |
| UN04301 | Rsa1.0.00467.1 | 1867 | 156542 | 0         | 580  | 581  | 99 +  | 8    | 587  | 142267 | 142847 |
| UN04302 | Rsa1.0.00135.1 | 1079 | 178077 | 1.00E-161 | 291  | 292  | 99 +  | 380  | 671  | 103755 | 104046 |
| UN04303 | Rsa1.0.01273.1 | 880  | 49464  | 1.00E-103 | 194  | 195  | 99 +  | 74   | 268  | 30606  | 30800  |
| UN04304 | Rsa1.0.00354.1 | 690  | 232005 | 1.00E-107 | 221  | 229  | 96 -  | 184  | 412  | 198867 | 199095 |
| UN04305 | Rsa1.0.00655.1 | 727  | 195840 | 1.00E-92  | 185  | 189  | 97 +  | 155  | 343  | 131412 | 131600 |
| UN04306 | Rsa1.0.02748.1 | 966  | 28242  | 1.00E-142 | 300  | 314  | 95 -  | 480  | 793  | 10342  | 10652  |
| UN04307 | Rsa1.0.03443.1 | 1892 | 22917  | 0         | 965  | 982  | 98 -  | 11   | 991  | 5065   | 6035   |
| UN04308 | Rsa1.0.41105.1 | 1313 | 546    | 1.00E-123 | 287  | 307  | 93 +  | 3    | 298  | 164    | 469    |
| UN04309 | Rsa1.0.03252.1 | 1498 | 24338  | 0         | 437  | 443  | 98 -  | 1056 | 1498 | 391    | 833    |
| UN04310 | Rsa1.0.00363.1 | 674  | 90968  | 1.00E-121 | 260  | 271  | 95 -  | 15   | 285  | 31971  | 32237  |
| UN04311 | Rsa1.0.01611.1 | 907  | 42269  | 1.00E-114 | 339  | 386  | 87 -  | 3    | 377  | 17493  | 17863  |
| UN04312 | Rsa1.0.28787.1 | 931  | 803    | 0         | 365  | 371  | 98 -  | 561  | 931  | 269    | 639    |
| UN04313 | Rsa1.0.15993.1 | 631  | 2329   | 1.00E-134 | 377  | 421  | 89 +  | 217  | 622  | 1900   | 2308   |
| UN04314 | Rsa1.0.04155.1 | 674  | 134772 | 0         | 462  | 464  | 99 +  | 210  | 673  | 119046 | 119509 |
| UN04315 | Rsa1.0.00071.1 | 728  | 345714 | 1.00E-178 | 344  | 353  | 97 +  | 34   | 386  | 102837 | 103189 |
| UN04316 | Rsa1.0.02004.1 | 1117 | 169138 | 0         | 882  | 911  | 96 +  | 2    | 912  | 167715 | 168625 |
| UN04317 | Rsa1.0.06892.1 | 981  | 10197  | 1.00E-136 | 313  | 335  | 93 -  | 645  | 975  | 9719   | 10053  |
| UN04318 | Rsa1.0.01435.1 | 695  | 45942  | 0         | 417  | 441  | 94 +  | 259  | 695  | 28028  | 28467  |
| UN04319 | Rsa1.0.00060.1 | 1273 | 502678 | 0         | 921  | 965  | 95 +  | 154  | 1110 | 484225 | 485189 |
| UN04320 | Rsa1.0.00211.1 | 756  | 228189 | 1.00E-113 | 228  | 235  | 97 -  | 143  | 377  | 149262 | 149496 |
| UN04321 | Rsa1.0.01220.1 | 1514 | 161775 | 0         | 446  | 470  | 94 -  | 1032 | 1500 | 122390 | 122853 |
| UN04322 | Rsa1.0.01338.1 | 1038 | 155644 | 0         | 404  | 418  | 96 -  | 350  | 767  | 143018 | 143435 |
| UN04323 | Rsa1.0.00110.1 | 1150 | 132719 | 0         | 468  | 494  | 94 +  | 660  | 1150 | 6856   | 7340   |
| UN04324 | Rsa1.0.00017.1 | 952  | 752458 | 9.00E-85  | 184  | 192  | 95 +  | 597  | 788  | 3792   | 3983   |
| UN04325 | Rsa1.0.02120.1 | 738  | 34819  | 1.00E-125 | 286  | 304  | 94 +  | 55   | 358  | 10757  | 11055  |
| UN04326 | Rsa1.0.00301.1 | 1318 | 365315 | 0         | 1309 | 1320 | 99 -  | 1    | 1318 | 47664  | 48983  |
| UN04327 | Rsa1.0.06303.1 | 989  | 11268  | 1.00E-112 | 236  | 246  | 95 +  | 544  | 789  | 9882   | 10127  |

|         |                |      |        |           |     |      |       |      |      |        |        |
|---------|----------------|------|--------|-----------|-----|------|-------|------|------|--------|--------|
| UN04328 | Rsa1.0_03085.1 | 1520 | 25500  | 0         | 693 | 712  | 97 +  | 812  | 1520 | 18211  | 18922  |
| UN04329 | Rsa1.0_00056.1 | 1231 | 332604 | 0         | 998 | 1071 | 93 -  | 167  | 1229 | 84538  | 85600  |
| UN04330 | Rsa1.0_01142.1 | 1756 | 52464  | 0         | 358 | 361  | 99 +  | 1396 | 1756 | 50939  | 51297  |
| UN04331 | Rsa1.0_03643.1 | 1161 | 21607  | 1.00E-168 | 300 | 300  | 100 - | 3    | 302  | 1398   | 1697   |
| UN04332 | Rsa1.0_00347.1 | 803  | 93048  | 1.00E-108 | 262 | 281  | 93 +  | 427  | 704  | 86405  | 86679  |
| UN04333 | Rsa1.0_00699.1 | 1591 | 184398 | 0         | 637 | 662  | 96 -  | 929  | 1589 | 31005  | 31665  |
| UN04334 | Rsa1.0_01110.1 | 735  | 195852 | 0         | 399 | 410  | 97 -  | 325  | 733  | 185048 | 185457 |
| UN04335 | Rsa1.0_14734.1 | 1376 | 3116   | 0         | 505 | 505  | 100 - | 5    | 509  | 139    | 643    |
| UN04336 | Rsa1.0_03463.1 | 1319 | 22724  | 0         | 410 | 413  | 99 +  | 1    | 411  | 18384  | 18796  |
| UN04337 | Rsa1.0_00127.1 | 1060 | 127446 | 1.00E-137 | 286 | 296  | 96 -  | 1    | 293  | 78175  | 78466  |
| UN04338 | Rsa1.0_00440.1 | 841  | 84723  | 1.00E-140 | 281 | 289  | 97 +  | 3    | 291  | 25111  | 25398  |
| UN04339 | Rsa1.0_16337.1 | 468  | 2191   | 1.00E-137 | 259 | 263  | 98 -  | 206  | 468  | 574    | 836    |
| UN04340 | Rsa1.0_04405.1 | 699  | 17508  | 1.00E-180 | 405 | 429  | 94 -  | 269  | 694  | 14200  | 14619  |
| UN04341 | Rsa1.0_00306.1 | 862  | 146760 | 0         | 453 | 479  | 94 +  | 24   | 501  | 122222 | 122685 |
| UN04342 | Rsa1.0_00062.1 | 1269 | 299291 | 0         | 986 | 1020 | 96 -  | 204  | 1220 | 266762 | 267781 |
| UN04343 | Rsa1.0_00596.1 | 793  | 73578  | 5.00E-95  | 210 | 220  | 95 +  | 575  | 793  | 28854  | 29067  |
| UN04344 | Rsa1.0_00611.1 | 1358 | 72410  | 0         | 898 | 899  | 99 -  | 1    | 899  | 6791   | 7689   |
| UN04345 | Rsa1.0_35196.1 | 1325 | 643    | 0         | 627 | 649  | 96 +  | 113  | 761  | 1      | 643    |
| UN04346 | Rsa1.0_01412.1 | 794  | 46311  | 0         | 458 | 482  | 95 -  | 1    | 465  | 9158   | 9634   |
| UN04347 | Rsa1.0_03166.1 | 870  | 24863  | 1.00E-122 | 240 | 246  | 97 -  | 467  | 712  | 6047   | 6292   |
| UN04348 | Rsa1.0_22732.1 | 644  | 1099   | 6.00E-82  | 173 | 179  | 96 -  | 152  | 330  | 916    | 1094   |
| UN04349 | Rsa1.0_01387.1 | 844  | 46745  | 1.00E-144 | 271 | 275  | 98 -  | 18   | 292  | 46152  | 46426  |
| UN04350 | Rsa1.0_00069.1 | 1331 | 403561 | 1.00E-160 | 305 | 310  | 98 +  | 1    | 310  | 185286 | 185594 |
| UN04351 | Rsa1.0_00002.1 | 768  | 601661 | 1.00E-112 | 215 | 218  | 98 +  | 303  | 520  | 149395 | 149612 |
| UN04352 | Rsa1.0_00951.1 | 1227 | 164588 | 1.00E-93  | 178 | 179  | 99 -  | 377  | 555  | 50502  | 50680  |
| UN04353 | Rsa1.0_05945.1 | 1146 | 12149  | 0         | 376 | 376  | 100 + | 3    | 378  | 11742  | 12117  |
| UN04354 | Rsa1.0_22443.1 | 1306 | 1120   | 0         | 330 | 332  | 99 +  | 412  | 743  | 750    | 1081   |
| UN04355 | Rsa1.0_04288.1 | 1411 | 18077  | 2.00E-86  | 163 | 163  | 100 - | 802  | 964  | 9680   | 9842   |
| UN04356 | Rsa1.0_03172.1 | 1235 | 24816  | 0         | 492 | 492  | 100 + | 652  | 1143 | 13722  | 14213  |
| UN04357 | Rsa1.0_00068.1 | 1013 | 151813 | 0         | 489 | 494  | 98 -  | 520  | 1013 | 97326  | 97819  |
| UN04358 | Rsa1.0_06757.1 | 921  | 10411  | 0         | 540 | 555  | 97 -  | 3    | 555  | 4331   | 4882   |
| UN04359 | Rsa1.0_04282.1 | 1502 | 18100  | 1.00E-138 | 366 | 401  | 91 +  | 946  | 1340 | 8780   | 9167   |
| UN04360 | Rsa1.0_00328.1 | 940  | 224661 | 0         | 860 | 880  | 97 -  | 6    | 879  | 140444 | 141323 |
| UN04361 | Rsa1.0_00341.1 | 1137 | 249309 | 0         | 414 | 418  | 99 -  | 1    | 418  | 227346 | 227763 |
| UN04362 | Rsa1.0_00440.1 | 777  | 84723  | 5.00E-86  | 203 | 213  | 95 -  | 541  | 750  | 25187  | 25398  |
| UN04363 | Rsa1.0_01292.1 | 781  | 175783 | 2.00E-79  | 193 | 207  | 93 +  | 534  | 735  | 2295   | 2501   |
| UN04364 | Rsa1.0_00124.1 | 586  | 262503 | 0         | 442 | 451  | 98 +  | 5    | 455  | 27047  | 27497  |
| UN04365 | Rsa1.0_01585.1 | 1034 | 42806  | 1.00E-157 | 287 | 289  | 99 +  | 590  | 878  | 15623  | 15911  |
| UN04366 | Rsa1.0_00037.1 | 858  | 307838 | 2.00E-70  | 170 | 179  | 94 -  | 680  | 856  | 181437 | 181614 |

|         |                |      |        |           |     |      |      |      |      |        |        |
|---------|----------------|------|--------|-----------|-----|------|------|------|------|--------|--------|
| UN04367 | Rsa1.0_20133.1 | 687  | 1337   | 1.00E-98  | 246 | 269  | 91 - | 432  | 687  | 1072   | 1337   |
| UN04368 | Rsa1.0_00731.1 | 1560 | 66638  | 1.00E-176 | 323 | 326  | 99 - | 867  | 1192 | 1000   | 1325   |
| UN04369 | Rsa1.0_12457.1 | 1064 | 5222   | 7.00E-98  | 194 | 198  | 97 - | 2    | 199  | 4765   | 4962   |
| UN04370 | Rsa1.0_00545.1 | 821  | 189649 | 1.00E-124 | 266 | 277  | 96 + | 515  | 791  | 2122   | 2390   |
| UN04371 | Rsa1.0_03263.1 | 524  | 24268  | 1.00E-154 | 365 | 390  | 93 - | 135  | 524  | 15033  | 15411  |
| UN04372 | Rsa1.0_00205.1 | 1066 | 193401 | 0         | 433 | 462  | 93 + | 543  | 1000 | 127625 | 128084 |
| UN04373 | Rsa1.0_00739.1 | 1362 | 66155  | 0         | 338 | 341  | 99 - | 3    | 343  | 61085  | 61424  |
| UN04374 | Rsa1.0_00509.1 | 689  | 78829  | 0         | 676 | 687  | 98 - | 1    | 687  | 8715   | 9400   |
| UN04375 | Rsa1.0_02167.1 | 816  | 34401  | 0         | 561 | 573  | 97 + | 204  | 775  | 26786  | 27358  |
| UN04376 | Rsa1.0_00155.1 | 770  | 118465 | 1.00E-106 | 217 | 224  | 96 + | 283  | 506  | 104178 | 104401 |
| UN04377 | Rsa1.0_01000.1 | 1237 | 57140  | 0         | 392 | 413  | 94 - | 804  | 1212 | 2343   | 2750   |
| UN04378 | Rsa1.0_00483.1 | 959  | 81102  | 0         | 550 | 555  | 99 + | 340  | 894  | 2359   | 2913   |
| UN04379 | Rsa1.0_00275.1 | 1225 | 210104 | 0         | 550 | 580  | 94 + | 3    | 577  | 206418 | 206995 |
| UN04380 | Rsa1.0_00042.1 | 816  | 171507 | 1.00E-123 | 252 | 260  | 96 - | 1    | 260  | 157980 | 158238 |
| UN04381 | Rsa1.0_00341.1 | 829  | 249309 | 0         | 551 | 557  | 98 + | 2    | 558  | 80699  | 81254  |
| UN04382 | Rsa1.0_00007.1 | 904  | 239325 | 1.00E-162 | 310 | 317  | 97 + | 583  | 899  | 108872 | 109188 |
| UN04383 | Rsa1.0_00066.1 | 461  | 152418 | 0         | 438 | 457  | 95 + | 3    | 458  | 90303  | 90755  |
| UN04384 | Rsa1.0_39148.1 | 828  | 575    | 0         | 553 | 577  | 95 + | 28   | 603  | 1      | 575    |
| UN04385 | Rsa1.0_00159.1 | 887  | 431686 | 1.00E-131 | 249 | 253  | 98 + | 635  | 887  | 427719 | 427971 |
| UN04386 | Rsa1.0_00077.1 | 897  | 145005 | 1.00E-178 | 323 | 325  | 99 + | 573  | 897  | 31241  | 31565  |
| UN04387 | Rsa1.0_00633.1 | 846  | 71250  | 0         | 431 | 436  | 98 + | 306  | 741  | 23460  | 23895  |
| UN04388 | Rsa1.0_00021.1 | 1633 | 263655 | 1.00E-154 | 280 | 281  | 99 - | 3    | 283  | 19978  | 20258  |
| UN04389 | Rsa1.0_39426.1 | 1036 | 570    | 0         | 389 | 392  | 99 - | 3    | 394  | 57     | 448    |
| UN04390 | Rsa1.0_00028.1 | 775  | 293984 | 0         | 752 | 781  | 96 + | 1    | 775  | 71401  | 72175  |
| UN04391 | Rsa1.0_02884.1 | 953  | 27034  | 1.00E-169 | 410 | 444  | 92 + | 517  | 953  | 12730  | 13172  |
| UN04392 | Rsa1.0_00163.1 | 1491 | 116847 | 0         | 446 | 476  | 93 + | 1018 | 1490 | 83512  | 83979  |
| UN04393 | Rsa1.0_01434.1 | 766  | 45951  | 0         | 453 | 476  | 95 - | 13   | 482  | 39461  | 39934  |
| UN04394 | Rsa1.0_00522.1 | 1477 | 78103  | 1.00E-152 | 314 | 325  | 96 + | 63   | 384  | 48418  | 48742  |
| UN04395 | Rsa1.0_09223.1 | 1125 | 6545   | 0         | 796 | 823  | 96 + | 280  | 1094 | 4476   | 5298   |
| UN04396 | Rsa1.0_02888.1 | 1220 | 27020  | 0         | 993 | 1029 | 96 + | 3    | 1030 | 5412   | 6438   |
| UN04397 | Rsa1.0_01092.1 | 1474 | 54348  | 0         | 532 | 550  | 96 - | 934  | 1474 | 22694  | 23240  |
| UN04398 | Rsa1.0_02943.1 | 1227 | 153598 | 0         | 510 | 525  | 97 - | 632  | 1156 | 128989 | 129513 |
| UN04399 | Rsa1.0_06581.1 | 834  | 10722  | 1.00E-95  | 199 | 206  | 96 - | 294  | 499  | 8954   | 9159   |
| UN04400 | Rsa1.0_07576.1 | 1071 | 9098   | 0         | 589 | 607  | 97 + | 467  | 1071 | 2476   | 3081   |
| UN04401 | Rsa1.0_00289.1 | 1332 | 98620  | 1.00E-140 | 273 | 277  | 98 + | 1054 | 1330 | 97044  | 97318  |
| UN04402 | Rsa1.0_04511.1 | 998  | 17032  | 1.00E-115 | 329 | 368  | 89 + | 652  | 997  | 4974   | 5339   |
| UN04403 | Rsa1.0_01177.1 | 753  | 51572  | 0         | 386 | 392  | 98 - | 162  | 553  | 9103   | 9494   |
| UN04404 | Rsa1.0_04646.1 | 868  | 16541  | 0         | 843 | 872  | 96 + | 2    | 866  | 10692  | 11563  |
| UN04405 | Rsa1.0_01964.1 | 944  | 36702  | 0         | 560 | 602  | 93 - | 361  | 944  | 35629  | 36221  |

|         |                |      |        |           |      |      |       |     |      |        |        |
|---------|----------------|------|--------|-----------|------|------|-------|-----|------|--------|--------|
| UN04406 | Rsa1.0.00037.1 | 1397 | 307838 | 0         | 804  | 804  | 100 - | 587 | 1390 | 296672 | 297475 |
| UN04407 | Rsa1.0.00163.1 | 847  | 116847 | 1.00E-145 | 292  | 302  | 96 +  | 80  | 381  | 66573  | 66874  |
| UN04408 | Rsa1.0.03808.1 | 837  | 20732  | 0         | 797  | 818  | 97 -  | 2   | 814  | 715    | 1529   |
| UN04409 | Rsa1.0.00065.1 | 1369 | 454616 | 1.00E-151 | 366  | 394  | 92 -  | 984 | 1369 | 417285 | 417667 |
| UN04410 | Rsa1.0.02562.1 | 789  | 30061  | 4.00E-83  | 175  | 181  | 96 +  | 609 | 789  | 27886  | 28066  |
| UN04411 | Rsa1.0.00016.1 | 1385 | 831256 | 0         | 465  | 468  | 99 -  | 1   | 468  | 202082 | 202547 |
| UN04412 | Rsa1.0.00028.1 | 798  | 293984 | 0         | 428  | 451  | 94 +  | 71  | 521  | 111859 | 112305 |
| UN04413 | Rsa1.0.03916.1 | 1044 | 20117  | 0         | 458  | 464  | 98 -  | 583 | 1043 | 13461  | 13924  |
| UN04414 | Rsa1.0.00104.1 | 1065 | 368722 | 0         | 373  | 377  | 98 +  | 3   | 376  | 3957   | 4333   |
| UN04415 | Rsa1.0.04387.1 | 1228 | 17625  | 0         | 524  | 531  | 98 +  | 703 | 1228 | 7587   | 8117   |
| UN04416 | Rsa1.0.04142.1 | 1242 | 18861  | 0         | 499  | 541  | 92 +  | 416 | 954  | 1699   | 2239   |
| UN04417 | Rsa1.0.00585.1 | 964  | 74164  | 0         | 431  | 447  | 96 -  | 3   | 445  | 53696  | 54141  |
| UN04418 | Rsa1.0.00744.1 | 1049 | 66084  | 0         | 368  | 379  | 97 -  | 3   | 381  | 58901  | 59277  |
| UN04419 | Rsa1.0.01789.1 | 899  | 39250  | 0         | 520  | 536  | 97 -  | 365 | 898  | 6077   | 6607   |
| UN04420 | Rsa1.0.00006.1 | 1535 | 396176 | 0         | 1447 | 1481 | 97 -  | 55  | 1535 | 298181 | 299661 |
| UN04421 | Rsa1.0.00990.1 | 935  | 57445  | 4.00E-62  | 125  | 126  | 99 -  | 764 | 889  | 27028  | 27153  |
| UN04422 | Rsa1.0.01411.1 | 948  | 46326  | 1.00E-179 | 334  | 339  | 98 -  | 610 | 948  | 6419   | 6757   |
| UN04423 | Rsa1.0.00143.1 | 858  | 121313 | 0         | 828  | 857  | 96 +  | 1   | 856  | 32761  | 33608  |
| UN04424 | Rsa1.0.00037.1 | 1663 | 307838 | 0         | 387  | 403  | 96 +  | 245 | 647  | 218766 | 219165 |
| UN04425 | Rsa1.0.00175.1 | 929  | 166121 | 1.00E-107 | 237  | 246  | 96 +  | 1   | 245  | 56315  | 56558  |
| UN04426 | Rsa1.0.00379.1 | 1029 | 89865  | 1.00E-84  | 166  | 168  | 98 +  | 239 | 406  | 51509  | 51676  |
| UN04427 | Rsa1.0.53918.1 | 702  | 423    | 6.00E-48  | 98   | 98   | 100 + | 369 | 466  | 1      | 98     |
| UN04428 | Rsa1.0.02056.1 | 1138 | 35543  | 0         | 577  | 593  | 97 +  | 399 | 991  | 34959  | 35543  |
| UN04429 | Rsa1.0.07885.1 | 1023 | 8359   | 0         | 712  | 772  | 92 +  | 1   | 765  | 6554   | 7323   |
| UN04430 | Rsa1.0.00453.1 | 339  | 83031  | 1.00E-148 | 325  | 340  | 95 -  | 1   | 336  | 73800  | 74138  |
| UN04431 | Rsa1.0.00181.1 | 1177 | 114269 | 1.00E-179 | 325  | 327  | 99 -  | 697 | 1023 | 43259  | 43585  |
| UN04432 | Rsa1.0.00042.1 | 1246 | 171507 | 1.00E-166 | 329  | 338  | 97 +  | 901 | 1234 | 159615 | 159952 |
| UN04433 | Rsa1.0.00338.1 | 1401 | 94109  | 1.00E-103 | 245  | 260  | 94 -  | 3   | 261  | 85638  | 85896  |
| UN04434 | Rsa1.0.02675.1 | 795  | 28852  | 1.00E-138 | 310  | 326  | 95 -  | 471 | 795  | 18809  | 19132  |
| UN04435 | Rsa1.0.01814.1 | 1273 | 38917  | 0         | 416  | 432  | 96 +  | 8   | 434  | 5754   | 6180   |
| UN04436 | Rsa1.0.02020.1 | 710  | 173211 | 1.00E-109 | 209  | 212  | 98 -  | 470 | 681  | 168234 | 168445 |
| UN04437 | Rsa1.0.01668.1 | 838  | 41299  | 0         | 468  | 473  | 98 +  | 365 | 837  | 30426  | 30898  |
| UN04438 | Rsa1.0.14737.1 | 801  | 3115   | 1.00E-164 | 314  | 321  | 97 -  | 352 | 672  | 2055   | 2375   |
| UN04439 | Rsa1.0.00374.1 | 1034 | 165738 | 0         | 422  | 439  | 96 +  | 595 | 1033 | 95144  | 95576  |
| UN04440 | Rsa1.0.02181.1 | 1207 | 34172  | 0         | 467  | 469  | 99 +  | 740 | 1206 | 20277  | 20745  |
| UN04441 | Rsa1.0.00100.1 | 806  | 249232 | 1.00E-169 | 310  | 313  | 99 -  | 2   | 314  | 176030 | 176342 |
| UN04442 | Rsa1.0.00096.1 | 930  | 198773 | 0         | 482  | 483  | 99 +  | 2   | 484  | 106464 | 106946 |
| UN04443 | Rsa1.0.03702.1 | 1082 | 21292  | 0         | 501  | 503  | 99 -  | 1   | 503  | 8205   | 8707   |
| UN04444 | Rsa1.0.00223.1 | 1713 | 106231 | 0         | 441  | 462  | 95 -  | 3   | 457  | 6079   | 6540   |

|         |                |      |        |           |      |      |       |      |      |        |        |
|---------|----------------|------|--------|-----------|------|------|-------|------|------|--------|--------|
| UN04445 | Rsa1.0_01098.1 | 1098 | 54215  | 0         | 341  | 346  | 98 +  | 1    | 344  | 9648   | 9990   |
| UN04446 | Rsa1.0_00015.1 | 791  | 561803 | 0         | 520  | 546  | 95 -  | 61   | 601  | 13424  | 13965  |
| UN04447 | Rsa1.0_00051.1 | 927  | 258225 | 0         | 921  | 927  | 99 -  | 1    | 927  | 143003 | 143929 |
| UN04448 | Rsa1.0_00290.1 | 827  | 225096 | 1.00E-141 | 295  | 306  | 96 -  | 5    | 309  | 190482 | 190785 |
| UN04449 | Rsa1.0_00166.1 | 1452 | 240912 | 0         | 726  | 727  | 99 +  | 726  | 1452 | 129055 | 129781 |
| UN04450 | Rsa1.0_02139.1 | 688  | 34686  | 5.00E-70  | 230  | 256  | 89 +  | 1    | 250  | 5578   | 5831   |
| UN04451 | Rsa1.0_00197.1 | 840  | 109714 | 0         | 518  | 540  | 95 -  | 165  | 704  | 64829  | 65368  |
| UN04452 | Rsa1.0_01629.1 | 1364 | 41917  | 0         | 1362 | 1365 | 99 -  | 1    | 1363 | 5375   | 6739   |
| UN04453 | Rsa1.0_03380.1 | 897  | 23320  | 1.00E-153 | 287  | 291  | 98 +  | 2    | 292  | 6043   | 6333   |
| UN04454 | Rsa1.0_00325.1 | 774  | 95371  | 0         | 371  | 371  | 100 - | 369  | 739  | 57594  | 57964  |
| UN04455 | Rsa1.0_01007.1 | 784  | 56933  | 0         | 765  | 781  | 97 +  | 4    | 784  | 6770   | 7540   |
| UN04456 | Rsa1.0_00589.1 | 1107 | 209965 | 0         | 1077 | 1107 | 97 -  | 1    | 1105 | 207003 | 208109 |
| UN04457 | Rsa1.0_03746.1 | 1092 | 21050  | 0         | 489  | 505  | 96 -  | 428  | 932  | 19838  | 20342  |
| UN04458 | Rsa1.0_10313.1 | 611  | 5892   | 0         | 590  | 610  | 96 +  | 1    | 609  | 2653   | 3261   |
| UN04459 | Rsa1.0_00250.1 | 775  | 273771 | 0         | 497  | 545  | 91 +  | 4    | 524  | 4460   | 5000   |
| UN04460 | Rsa1.0_00695.1 | 1237 | 68019  | 0         | 564  | 590  | 95 +  | 2    | 589  | 58750  | 59336  |
| UN04461 | Rsa1.0_00648.1 | 1110 | 70351  | 1.00E-148 | 345  | 375  | 92 +  | 64   | 420  | 12134  | 12505  |
| UN04462 | Rsa1.0_07749.1 | 452  | 8648   | 0         | 445  | 452  | 98 -  | 1    | 450  | 5793   | 6244   |
| UN04463 | Rsa1.0_00089.1 | 878  | 406142 | 1.00E-127 | 246  | 251  | 98 -  | 161  | 411  | 360701 | 360951 |
| UN04464 | Rsa1.0_01277.1 | 1295 | 49375  | 0         | 375  | 376  | 99 +  | 918  | 1293 | 8346   | 8721   |
| UN04465 | #              | #    | #      | #         | #    | #    | #     | #    | #    | #      | #      |
| UN04466 | Rsa1.0_00621.1 | 724  | 71840  | 0         | 337  | 340  | 99 +  | 1    | 340  | 41500  | 41839  |
| UN04467 | Rsa1.0_01588.1 | 763  | 42724  | 6.00E-73  | 165  | 173  | 95 -  | 17   | 185  | 41412  | 41584  |
| UN04468 | Rsa1.0_00030.1 | 377  | 250988 | 7.00E-74  | 192  | 204  | 94 +  | 31   | 229  | 149441 | 149644 |
| UN04469 | Rsa1.0_00258.1 | 1692 | 102381 | 0         | 1100 | 1100 | 100 + | 2    | 1101 | 93318  | 94417  |
| UN04470 | Rsa1.0_02133.1 | 1101 | 34726  | 1.00E-93  | 228  | 245  | 93 +  | 181  | 422  | 31515  | 31759  |
| UN04471 | Rsa1.0_05162.1 | 971  | 14631  | 1.00E-167 | 350  | 366  | 95 -  | 611  | 971  | 5143   | 5507   |
| UN04472 | Rsa1.0_31253.1 | 1228 | 732    | 0         | 711  | 732  | 97 -  | 50   | 781  | 1      | 732    |
| UN04473 | Rsa1.0_00006.1 | 1109 | 396176 | 0         | 615  | 631  | 97 -  | 51   | 681  | 299033 | 299663 |
| UN04474 | Rsa1.0_00588.1 | 1259 | 73939  | 0         | 496  | 537  | 92 -  | 54   | 582  | 54483  | 55005  |
| UN04475 | Rsa1.0_01172.1 | 304  | 51734  | 3.00E-48  | 116  | 122  | 95 -  | 182  | 303  | 49798  | 49919  |
| UN04476 | Rsa1.0_00975.1 | 883  | 57865  | 0         | 824  | 857  | 96 -  | 1    | 854  | 55325  | 56177  |
| UN04477 | Rsa1.0_00378.1 | 1252 | 89892  | 0         | 685  | 721  | 95 +  | 8    | 722  | 47722  | 48441  |
| UN04478 | Rsa1.0_01727.1 | 530  | 40243  | 0         | 390  | 408  | 95 -  | 1    | 406  | 27900  | 28306  |
| UN04479 | Rsa1.0_00964.1 | 2062 | 316648 | 0         | 553  | 584  | 94 -  | 1483 | 2062 | 261721 | 262289 |
| UN04480 | Rsa1.0_02564.1 | 810  | 30047  | 1.00E-111 | 242  | 252  | 96 -  | 60   | 310  | 6841   | 7091   |
| UN04481 | Rsa1.0_01077.1 | 678  | 54772  | 0         | 417  | 417  | 100 + | 3    | 419  | 51213  | 51629  |
| UN04482 | Rsa1.0_00120.1 | 870  | 277288 | 1.00E-77  | 239  | 266  | 89 +  | 605  | 865  | 119581 | 119846 |
| UN04483 | Rsa1.0_00273.1 | 966  | 326186 | 1.00E-148 | 307  | 319  | 96 +  | 22   | 340  | 46018  | 46335  |

|         |                |      |        |           |      |      |       |      |      |        |        |
|---------|----------------|------|--------|-----------|------|------|-------|------|------|--------|--------|
| UN04484 | Rsa1.0.05505.1 | 1162 | 13500  | 0         | 969  | 1014 | 95 -  | 157  | 1162 | 12418  | 13420  |
| UN04485 | Rsa1.0.03727.1 | 931  | 21158  | 0         | 598  | 653  | 91 -  | 254  | 891  | 2879   | 3516   |
| UN04486 | Rsa1.0.00008.1 | 1218 | 358124 | 0         | 926  | 991  | 93 +  | 77   | 1064 | 28476  | 29460  |
| UN04487 | Rsa1.0.00037.1 | 1012 | 307838 | 1.00E-175 | 409  | 446  | 91 +  | 587  | 1012 | 239665 | 240101 |
| UN04488 | Rsa1.0_10770.1 | 1214 | 5723   | 2.00E-92  | 234  | 256  | 91 -  | 961  | 1213 | 570    | 813    |
| UN04489 | Rsa1.0_00341.1 | 914  | 249309 | 0         | 436  | 445  | 97 +  | 1    | 445  | 118056 | 118500 |
| UN04490 | Rsa1.0_21219.1 | 901  | 1224   | 1.00E-178 | 362  | 374  | 96 -  | 32   | 400  | 138    | 511    |
| UN04491 | Rsa1.0.00111.1 | 1924 | 390088 | 0         | 378  | 391  | 96 -  | 1218 | 1608 | 381110 | 381500 |
| UN04492 | Rsa1.0.00706.1 | 1127 | 291570 | 0         | 628  | 657  | 95 -  | 474  | 1125 | 23308  | 23961  |
| UN04493 | Rsa1.0.00299.1 | 719  | 97770  | 1.00E-150 | 272  | 273  | 99 -  | 294  | 566  | 19658  | 19930  |
| UN04494 | Rsa1.0.00018.1 | 1449 | 410899 | 0         | 1259 | 1288 | 97 +  | 167  | 1449 | 6100   | 7387   |
| UN04495 | Rsa1.0.00008.1 | 789  | 358124 | 1.00E-178 | 319  | 320  | 99 +  | 468  | 787  | 277916 | 278235 |
| UN04496 | Rsa1.0.03618.1 | 1540 | 21744  | 0         | 681  | 681  | 100 - | 860  | 1540 | 5900   | 6580   |
| UN04497 | Rsa1.0_14912.1 | 927  | 2970   | 1.00E-131 | 319  | 342  | 93 +  | 594  | 927  | 1944   | 2285   |
| UN04498 | Rsa1.0.00016.1 | 1001 | 831256 | 0         | 451  | 462  | 97 -  | 91   | 552  | 569300 | 569761 |
| UN04499 | Rsa1.0.00335.1 | 1144 | 94371  | 1.00E-164 | 353  | 373  | 94 +  | 29   | 401  | 42163  | 42535  |
| UN04500 | Rsa1.0.00037.1 | 769  | 307838 | 2.00E-94  | 185  | 188  | 98 +  | 505  | 692  | 21411  | 21598  |
| UN04501 | Rsa1.0.02402.1 | 1803 | 31710  | 0         | 727  | 763  | 95 -  | 1045 | 1803 | 23950  | 24706  |
| UN04502 | Rsa1.0.00792.1 | 1073 | 64163  | 1.00E-116 | 251  | 261  | 96 -  | 1    | 260  | 7358   | 7617   |
| UN04503 | Rsa1.0.02769.1 | 888  | 28107  | 1.00E-150 | 301  | 309  | 97 -  | 228  | 534  | 20934  | 21241  |
| UN04504 | Rsa1.0_11276.1 | 1016 | 5560   | 1.00E-167 | 346  | 362  | 95 +  | 92   | 453  | 3      | 364    |
| UN04505 | Rsa1.0.00307.1 | 983  | 199003 | 2.00E-89  | 258  | 280  | 92 +  | 3    | 278  | 87390  | 87662  |
| UN04506 | Rsa1.0_01144.1 | 1028 | 52431  | 0         | 590  | 638  | 92 -  | 87   | 718  | 36426  | 37057  |
| UN04507 | Rsa1.0_05124.1 | 995  | 14790  | 0         | 954  | 995  | 95 -  | 2    | 993  | 307    | 1294   |
| UN04508 | Rsa1.0_01192.1 | 1376 | 51150  | 0         | 829  | 846  | 97 +  | 7    | 850  | 5907   | 6748   |
| UN04509 | Rsa1.0.00928.1 | 639  | 59293  | 1.00E-111 | 225  | 232  | 96 +  | 406  | 637  | 30313  | 30544  |
| UN04510 | Rsa1.0.00187.1 | 1046 | 393093 | 0         | 924  | 972  | 95 +  | 76   | 1044 | 212078 | 213045 |
| UN04511 | Rsa1.0.00183.1 | 1188 | 113277 | 0         | 439  | 453  | 96 -  | 724  | 1176 | 62771  | 63223  |
| UN04512 | Rsa1.0.00086.1 | 1541 | 439854 | 1.00E-144 | 266  | 268  | 99 -  | 1    | 268  | 373324 | 373591 |
| UN04513 | Rsa1.0.01487.1 | 1357 | 44784  | 0         | 372  | 388  | 95 -  | 330  | 717  | 27939  | 28326  |
| UN04514 | Rsa1.0.00323.1 | 967  | 159650 | 0         | 486  | 494  | 98 -  | 474  | 967  | 138320 | 138813 |
| UN04515 | Rsa1.0.04610.1 | 831  | 16653  | 1.00E-113 | 274  | 294  | 93 +  | 513  | 803  | 995    | 1288   |
| UN04516 | Rsa1.0.00698.1 | 283  | 67816  | 1.00E-111 | 243  | 255  | 95 -  | 35   | 283  | 12515  | 12769  |
| UN04517 | Rsa1.0.00374.1 | 877  | 165738 | 0         | 446  | 465  | 95 -  | 413  | 873  | 154901 | 155362 |
| UN04518 | Rsa1.0.00301.1 | 735  | 365315 | 1.00E-166 | 325  | 332  | 97 -  | 3    | 334  | 215181 | 215509 |
| UN04519 | Rsa1.0.05442.1 | 1287 | 13741  | 0         | 399  | 418  | 95 -  | 1    | 415  | 1778   | 2184   |
| UN04520 | Rsa1.0.01151.1 | 1192 | 52268  | 1.00E-147 | 271  | 273  | 99 +  | 600  | 872  | 10761  | 11033  |
| UN04521 | Rsa1.0.01244.1 | 1519 | 50061  | 1.00E-177 | 384  | 406  | 94 -  | 1    | 392  | 30687  | 31088  |
| UN04522 | Rsa1.0_04422.1 | 1373 | 17423  | 0         | 507  | 520  | 97 +  | 5    | 524  | 10123  | 10641  |

|         |                |      |        |           |      |      |       |      |      |        |        |
|---------|----------------|------|--------|-----------|------|------|-------|------|------|--------|--------|
| UN04523 | Rsa1.0.00476.1 | 1069 | 280966 | 1.00E-179 | 343  | 351  | 97 -  | 3    | 353  | 220252 | 220602 |
| UN04524 | Rsa1.0.00235.1 | 749  | 154696 | 1.00E-150 | 272  | 273  | 99 +  | 346  | 618  | 98741  | 99013  |
| UN04525 | Rsa1.0.01560.1 | 833  | 43256  | 1.00E-118 | 288  | 306  | 94 +  | 525  | 824  | 30828  | 31132  |
| UN04526 | Rsa1.0.02036.1 | 732  | 35731  | 0         | 528  | 533  | 99 -  | 198  | 730  | 9713   | 10242  |
| UN04527 | Rsa1.0.00414.1 | 1128 | 202190 | 1.00E-169 | 351  | 365  | 96 -  | 423  | 785  | 200762 | 201126 |
| UN04528 | Rsa1.0.00160.1 | 779  | 346678 | 8.00E-97  | 180  | 180  | 100 - | 398  | 577  | 318676 | 318855 |
| UN04529 | Rsa1.0.02569.1 | 916  | 30002  | 0         | 565  | 571  | 98 +  | 215  | 785  | 2463   | 3032   |
| UN04530 | Rsa1.0.01477.1 | 1212 | 45008  | 0         | 827  | 844  | 97 -  | 369  | 1212 | 42698  | 43540  |
| UN04531 | Rsa1.0.01081.1 | 835  | 499226 | 0         | 786  | 818  | 96 +  | 33   | 835  | 315447 | 316264 |
| UN04532 | Rsa1.0.11694.1 | 1255 | 131228 | 0         | 764  | 807  | 94 -  | 460  | 1255 | 127881 | 128687 |
| UN04533 | Rsa1.0.05076.1 | 1107 | 14916  | 0         | 1092 | 1108 | 98 -  | 1    | 1107 | 12234  | 13341  |
| UN04534 | Rsa1.0.02215.1 | 806  | 33822  | 1.00E-153 | 281  | 283  | 99 +  | 522  | 804  | 20760  | 21042  |
| UN04535 | Rsa1.0.02735.1 | 722  | 28344  | 0         | 405  | 423  | 95 +  | 12   | 427  | 11423  | 11845  |
| UN04536 | Rsa1.0.00246.1 | 800  | 103541 | 0         | 770  | 811  | 94 -  | 2    | 800  | 30122  | 30932  |
| UN04537 | Rsa1.0.00230.1 | 781  | 105389 | 1.00E-144 | 299  | 312  | 95 -  | 1    | 307  | 88061  | 88372  |
| UN04538 | Rsa1.0.01077.1 | 1185 | 54772  | 0         | 722  | 750  | 96 +  | 3    | 747  | 37847  | 38596  |
| UN04539 | Rsa1.0.00092.1 | 814  | 659932 | 0         | 503  | 538  | 93 -  | 291  | 814  | 313009 | 313534 |
| UN04540 | Rsa1.0.00067.1 | 1153 | 415055 | 1.00E-150 | 279  | 282  | 98 +  | 863  | 1144 | 244191 | 244472 |
| UN04541 | Rsa1.0.12731.1 | 1349 | 5142   | 1.00E-168 | 346  | 361  | 95 -  | 1    | 352  | 130    | 490    |
| UN04542 | Rsa1.0.00921.1 | 1246 | 59599  | 0         | 1186 | 1237 | 95 -  | 33   | 1244 | 4232   | 5464   |
| UN04543 | Rsa1.0.02128.1 | 1066 | 34758  | 0         | 434  | 458  | 94 -  | 83   | 540  | 23212  | 23665  |
| UN04544 | Rsa1.0.03792.1 | 778  | 20835  | 5.00E-98  | 251  | 274  | 91 -  | 418  | 691  | 10857  | 11130  |
| UN04545 | Rsa1.0.00015.1 | 1021 | 561803 | 1.00E-150 | 389  | 430  | 90 -  | 53   | 478  | 526505 | 526905 |
| UN04546 | Rsa1.0.01755.1 | 943  | 155581 | 0         | 884  | 930  | 95 -  | 1    | 929  | 11036  | 11959  |
| UN04547 | Rsa1.0.05347.1 | 670  | 14096  | 0         | 498  | 526  | 94 -  | 7    | 530  | 9260   | 9767   |
| UN04548 | Rsa1.0.00284.1 | 1062 | 323267 | 1.00E-157 | 329  | 340  | 96 +  | 4    | 339  | 281438 | 281775 |
| UN04549 | Rsa1.0.01606.1 | 962  | 42432  | 0         | 500  | 518  | 96 +  | 440  | 957  | 9028   | 9545   |
| UN04550 | Rsa1.0.00002.1 | 1603 | 601661 | 0         | 1492 | 1492 | 100 - | 1    | 1492 | 367891 | 369382 |
| UN04551 | Rsa1.0.20494.1 | 1449 | 1299   | 0         | 524  | 550  | 95 +  | 351  | 892  | 356    | 899    |
| UN04552 | Rsa1.0.04762.1 | 1357 | 16101  | 0         | 400  | 412  | 97 +  | 1    | 410  | 9039   | 9450   |
| UN04553 | Rsa1.0.01154.1 | 1420 | 52249  | 1.00E-173 | 311  | 312  | 99 -  | 1004 | 1315 | 997    | 1308   |
| UN04554 | Rsa1.0.26696.1 | 826  | 881    | 0         | 501  | 514  | 97 +  | 2    | 514  | 368    | 881    |
| UN04555 | Rsa1.0.02383.1 | 792  | 31931  | 0         | 555  | 601  | 92 +  | 3    | 591  | 15278  | 15878  |
| UN04556 | Rsa1.0.01387.1 | 1106 | 46745  | 0         | 510  | 543  | 93 -  | 1    | 543  | 41689  | 42216  |
| UN04557 | Rsa1.0.04418.1 | 1120 | 17434  | 0         | 358  | 358  | 100 - | 692  | 1049 | 11947  | 12304  |
| UN04558 | Rsa1.0.02641.1 | 1355 | 29191  | 0         | 429  | 429  | 100 - | 1    | 429  | 16435  | 16863  |
| UN04559 | Rsa1.0.00010.1 | 815  | 294827 | 0         | 459  | 464  | 98 -  | 5    | 468  | 65435  | 65898  |
| UN04560 | Rsa1.0.00040.1 | 641  | 324196 | 1.00E-107 | 291  | 322  | 90 -  | 23   | 344  | 261455 | 261757 |
| UN04561 | Rsa1.0.00944.1 | 1143 | 58733  | 1.00E-149 | 271  | 272  | 99 +  | 283  | 554  | 34376  | 34647  |

|         |                |      |        |           |      |      |       |      |      |        |        |
|---------|----------------|------|--------|-----------|------|------|-------|------|------|--------|--------|
| UN04562 | Rsa1.0.07695.1 | 1168 | 8770   | 0         | 458  | 477  | 96 +  | 3    | 479  | 1421   | 1897   |
| UN04563 | Rsa1.0.07066.1 | 707  | 9954   | 5.00E-70  | 144  | 147  | 97 -  | 160  | 306  | 8112   | 8258   |
| UN04564 | Rsa1.0.00051.1 | 1133 | 258225 | 0         | 518  | 551  | 94 -  | 592  | 1133 | 47526  | 48062  |
| UN04565 | Rsa1.0.00660.1 | 1390 | 69688  | 1.00E-126 | 242  | 245  | 98 -  | 1146 | 1390 | 61247  | 61490  |
| UN04566 | Rsa1.0.00356.1 | 1133 | 91521  | 0         | 386  | 405  | 95 -  | 372  | 776  | 80712  | 81097  |
| UN04567 | Rsa1.0.02900.1 | 731  | 26928  | 1.00E-104 | 286  | 313  | 91 +  | 413  | 723  | 16858  | 17165  |
| UN04568 | Rsa1.0.01696.1 | 1074 | 301850 | 7.00E-55  | 116  | 118  | 98 +  | 112  | 229  | 291386 | 291503 |
| UN04569 | Rsa1.0.00005.1 | 943  | 353093 | 0         | 484  | 505  | 95 +  | 415  | 919  | 260758 | 261250 |
| UN04570 | Rsa1.0.03296.1 | 1463 | 23969  | 0         | 705  | 710  | 99 -  | 454  | 1163 | 7643   | 8352   |
| UN04571 | Rsa1.0.00189.1 | 841  | 111830 | 0         | 594  | 595  | 99 +  | 247  | 841  | 110540 | 111134 |
| UN04572 | Rsa1.0.00139.1 | 1281 | 357786 | 0         | 392  | 410  | 95 +  | 1    | 404  | 257345 | 257754 |
| UN04573 | Rsa1.0.03122.1 | 504  | 25207  | 0         | 363  | 373  | 97 -  | 1    | 373  | 22678  | 23050  |
| UN04574 | Rsa1.0.00048.1 | 830  | 167185 | 1.00E-133 | 271  | 280  | 96 +  | 443  | 720  | 8087   | 8366   |
| UN04575 | Rsa1.0.00909.1 | 903  | 59976  | 1.00E-151 | 347  | 375  | 92 +  | 1    | 374  | 38203  | 38554  |
| UN04576 | Rsa1.0.03367.1 | 1657 | 23387  | 3.00E-86  | 196  | 207  | 94 +  | 257  | 463  | 1583   | 1789   |
| UN04577 | Rsa1.0.36749.1 | 919  | 613    | 1.00E-180 | 335  | 340  | 98 +  | 237  | 576  | 186    | 525    |
| UN04578 | Rsa1.0.01269.1 | 1103 | 49622  | 0         | 493  | 503  | 98 +  | 1    | 502  | 32580  | 33079  |
| UN04579 | Rsa1.0.20566.1 | 828  | 1292   | 1.00E-107 | 234  | 246  | 95 +  | 513  | 758  | 809    | 1054   |
| UN04580 | Rsa1.0.00054.1 | 938  | 162053 | 0         | 458  | 469  | 97 +  | 4    | 472  | 40324  | 40792  |
| UN04581 | Rsa1.0.01569.1 | 1092 | 43029  | 0         | 978  | 1001 | 97 +  | 88   | 1088 | 23798  | 24798  |
| UN04582 | Rsa1.0.01223.1 | 956  | 50392  | 1.00E-130 | 270  | 281  | 96 -  | 675  | 955  | 32546  | 32826  |
| UN04583 | Rsa1.0.00132.1 | 768  | 124299 | 1.00E-120 | 243  | 248  | 97 +  | 1    | 247  | 108496 | 108742 |
| UN04584 | Rsa1.0.01016.1 | 635  | 181422 | 1.00E-138 | 288  | 301  | 95 +  | 264  | 564  | 44377  | 44671  |
| UN04585 | Rsa1.0.00067.1 | 991  | 415055 | 0         | 984  | 984  | 100 + | 6    | 989  | 400763 | 401746 |
| UN04586 | Rsa1.0.02429.1 | 717  | 31527  | 0         | 493  | 542  | 90 -  | 144  | 679  | 9754   | 10295  |
| UN04587 | Rsa1.0.01594.1 | 1282 | 42612  | 0         | 406  | 415  | 97 -  | 3    | 414  | 9290   | 9704   |
| UN04588 | Rsa1.0.05769.1 | 1416 | 12694  | 1.00E-168 | 309  | 312  | 99 -  | 447  | 758  | 8306   | 8617   |
| UN04589 | Rsa1.0.00007.1 | 757  | 239325 | 1.00E-100 | 204  | 210  | 97 -  | 541  | 750  | 41360  | 41569  |
| UN04590 | Rsa1.0.14767.1 | 538  | 3079   | 0         | 387  | 402  | 96 +  | 1    | 402  | 2511   | 2909   |
| UN04591 | Rsa1.0.05398.1 | 1146 | 13885  | 0         | 1110 | 1161 | 95 +  | 2    | 1144 | 9272   | 10420  |
| UN04592 | Rsa1.0.00307.1 | 1399 | 199003 | 1.00E-161 | 306  | 312  | 98 -  | 1    | 312  | 50440  | 50746  |
| UN04593 | Rsa1.0.01006.1 | 930  | 163670 | 0         | 489  | 503  | 97 +  | 3    | 491  | 135844 | 136346 |
| UN04594 | Rsa1.0.01442.1 | 734  | 45776  | 0         | 555  | 567  | 97 -  | 168  | 734  | 26177  | 26743  |
| UN04595 | Rsa1.0.02157.1 | 1026 | 149652 | 1.00E-121 | 289  | 313  | 92 +  | 1    | 310  | 143023 | 143319 |
| UN04596 | Rsa1.0.05621.1 | 654  | 13145  | 0         | 642  | 652  | 98 +  | 3    | 654  | 2047   | 2696   |
| UN04597 | Rsa1.0.00073.1 | 1260 | 240924 | 0         | 1255 | 1261 | 99 -  | 1    | 1260 | 79248  | 80508  |
| UN04598 | Rsa1.0.00111.1 | 1238 | 390088 | 0         | 410  | 426  | 96 -  | 505  | 930  | 199287 | 199712 |
| UN04599 | Rsa1.0.00816.1 | 844  | 403350 | 2.00E-91  | 171  | 171  | 100 + | 542  | 712  | 271244 | 271414 |
| UN04600 | Rsa1.0.11057.1 | 639  | 5631   | 0         | 588  | 600  | 98 -  | 40   | 639  | 4116   | 4715   |



|         |                |      |        |           |      |      |       |     |      |        |        |
|---------|----------------|------|--------|-----------|------|------|-------|-----|------|--------|--------|
| UN04601 | Rsa1.0_00104.1 | 980  | 368722 | 3.00E-94  | 239  | 260  | 91 +  | 590 | 849  | 201374 | 201633 |
| UN04602 | Rsa1.0_01569.1 | 661  | 43029  | 0         | 458  | 462  | 99 -  | 200 | 661  | 19163  | 19624  |
| UN04603 | Rsa1.0_05701.1 | 1157 | 12884  | 0         | 604  | 604  | 100 - | 1   | 604  | 1      | 604    |
| UN04604 | Rsa1.0_15024.1 | 976  | 2885   | 1.00E-142 | 289  | 298  | 96 -  | 679 | 974  | 2298   | 2592   |
| UN04605 | Rsa1.0_01806.1 | 1231 | 39021  | 0         | 516  | 541  | 95 -  | 1   | 535  | 24515  | 25049  |
| UN04606 | Rsa1.0_00094.1 | 903  | 139042 | 0         | 694  | 734  | 94 +  | 5   | 724  | 119268 | 119990 |
| UN04607 | Rsa1.0_04910.1 | 877  | 15484  | 1.00E-151 | 286  | 291  | 98 -  | 581 | 871  | 1909   | 2199   |
| UN04608 | Rsa1.0_05704.1 | 954  | 12883  | 0         | 591  | 623  | 94 +  | 2   | 624  | 2517   | 3136   |
| UN04609 | Rsa1.0_02246.1 | 1726 | 33435  | 0         | 598  | 598  | 100 - | 810 | 1407 | 23284  | 23881  |
| UN04610 | Rsa1.0_05776.1 | 1269 | 12664  | 0         | 866  | 889  | 97 +  | 304 | 1192 | 132    | 1018   |
| UN04611 | Rsa1.0_00274.1 | 1070 | 210119 | 1.00E-140 | 278  | 286  | 97 -  | 1   | 286  | 98748  | 99029  |
| UN04612 | Rsa1.0_01656.1 | 1538 | 41494  | 0         | 548  | 569  | 96 -  | 769 | 1337 | 35614  | 36181  |
| UN04613 | Rsa1.0_00161.1 | 862  | 116891 | 0         | 773  | 809  | 95 +  | 58  | 862  | 54521  | 55311  |
| UN04614 | Rsa1.0_00057.1 | 1161 | 160473 | 0         | 396  | 408  | 97 -  | 55  | 462  | 100728 | 101135 |
| UN04615 | Rsa1.0_00960.1 | 713  | 58199  | 2.00E-94  | 188  | 192  | 97 -  | 265 | 456  | 13844  | 14035  |
| UN04616 | Rsa1.0_00391.1 | 299  | 183853 | 1.00E-139 | 287  | 299  | 95 -  | 1   | 299  | 87034  | 87332  |
| UN04617 | Rsa1.0_01730.1 | 952  | 40223  | 0         | 916  | 951  | 96 -  | 2   | 952  | 35582  | 36519  |
| UN04618 | Rsa1.0_00707.1 | 987  | 190112 | 0         | 354  | 364  | 97 +  | 621 | 984  | 55985  | 56346  |
| UN04619 | Rsa1.0_00293.1 | 991  | 339294 | 0         | 425  | 435  | 97 -  | 556 | 990  | 300404 | 300837 |
| UN04620 | Rsa1.0_01285.1 | 944  | 172709 | 0         | 915  | 947  | 96 -  | 1   | 944  | 150287 | 151230 |
| UN04621 | Rsa1.0_00833.1 | 980  | 62621  | 1.00E-132 | 249  | 252  | 98 -  | 1   | 252  | 7472   | 7723   |
| UN04622 | Rsa1.0_00201.1 | 1790 | 232851 | 1.00E-173 | 344  | 352  | 97 +  | 3   | 354  | 122097 | 122444 |
| UN04623 | Rsa1.0_00212.1 | 756  | 108350 | 1.00E-134 | 318  | 338  | 94 +  | 1   | 334  | 59942  | 60278  |
| UN04624 | Rsa1.0_00628.1 | 756  | 214360 | 1.00E-116 | 270  | 289  | 93 -  | 467 | 755  | 202724 | 203012 |
| UN04625 | Rsa1.0_00119.1 | 1341 | 467509 | 1.00E-153 | 324  | 339  | 95 -  | 1   | 339  | 302973 | 303310 |
| UN04626 | Rsa1.0_00789.1 | 751  | 64233  | 1.00E-70  | 152  | 155  | 98 -  | 3   | 157  | 44999  | 45150  |
| UN04627 | Rsa1.0_00758.1 | 603  | 65477  | 1.00E-135 | 260  | 265  | 98 -  | 334 | 598  | 11258  | 11522  |
| UN04628 | Rsa1.0_00276.1 | 1144 | 100160 | 0         | 736  | 749  | 98 +  | 393 | 1141 | 65711  | 66459  |
| UN04629 | Rsa1.0_02139.1 | 1204 | 34686  | 0         | 535  | 545  | 98 -  | 661 | 1204 | 24870  | 25414  |
| UN04630 | Rsa1.0_04786.1 | 1336 | 15988  | 0         | 632  | 663  | 95 -  | 73  | 725  | 14357  | 15007  |
| UN04631 | Rsa1.0_00247.1 | 761  | 103408 | 0         | 744  | 757  | 98 -  | 3   | 758  | 2156   | 2910   |
| UN04632 | Rsa1.0_21931.1 | 1702 | 1162   | 0         | 1147 | 1155 | 99 -  | 459 | 1613 | 1      | 1155   |
| UN04633 | Rsa1.0_03756.1 | 1032 | 143061 | 0         | 360  | 362  | 99 -  | 2   | 362  | 138726 | 139087 |
| UN04634 | Rsa1.0_08255.1 | 646  | 7652   | 1.00E-171 | 354  | 371  | 95 -  | 274 | 638  | 3887   | 4257   |
| UN04635 | Rsa1.0_03943.1 | 1164 | 19931  | 0         | 429  | 455  | 94 +  | 3   | 454  | 9444   | 9893   |
| UN04636 | Rsa1.0_00059.1 | 629  | 159650 | 1.00E-112 | 281  | 301  | 93 -  | 331 | 626  | 123662 | 123957 |
| UN04637 | Rsa1.0_13662.1 | 1111 | 4542   | 0         | 914  | 942  | 97 +  | 169 | 1107 | 3404   | 4345   |
| UN04638 | Rsa1.0_03244.1 | 796  | 24413  | 1.00E-168 | 402  | 439  | 91 +  | 12  | 429  | 10841  | 11276  |
| UN04639 | Rsa1.0_05241.1 | 1391 | 14405  | 0         | 528  | 545  | 96 +  | 851 | 1391 | 918    | 1461   |

|         |                |      |        |           |      |      |       |     |      |        |        |
|---------|----------------|------|--------|-----------|------|------|-------|-----|------|--------|--------|
| UN04640 | Rsa1.0.00159.1 | 1504 | 431686 | 0         | 804  | 808  | 99 -  | 691 | 1498 | 232519 | 233326 |
| UN04641 | Rsa1.0.02044.1 | 690  | 35651  | 1.00E-117 | 273  | 296  | 92 -  | 211 | 503  | 10568  | 10845  |
| UN04642 | Rsa1.0.01167.1 | 791  | 51859  | 0         | 756  | 787  | 96 -  | 3   | 789  | 48979  | 49746  |
| UN04643 | Rsa1.0.07017.1 | 768  | 10024  | 1.00E-129 | 272  | 282  | 96 -  | 3   | 283  | 5214   | 5489   |
| UN04644 | Rsa1.0.00955.1 | 1327 | 58358  | 1.00E-117 | 214  | 214  | 100 - | 214 | 427  | 35701  | 35914  |
| UN04645 | Rsa1.0.22781.1 | 929  | 1095   | 1.00E-132 | 240  | 240  | 100 - | 689 | 928  | 386    | 625    |
| UN04646 | Rsa1.0.02289.1 | 1361 | 32981  | 0         | 892  | 892  | 100 - | 470 | 1361 | 11023  | 11914  |
| UN04647 | Rsa1.0.01730.1 | 1725 | 40223  | 0         | 1400 | 1436 | 97 +  | 295 | 1725 | 35176  | 36595  |
| UN04648 | Rsa1.0.07590.1 | 775  | 9068   | 0         | 756  | 777  | 97 +  | 1   | 775  | 2421   | 3184   |
| UN04649 | Rsa1.0.13893.1 | 661  | 4139   | 0         | 637  | 658  | 96 +  | 4   | 661  | 789    | 1446   |
| UN04650 | Rsa1.0.04428.1 | 748  | 17399  | 1.00E-170 | 326  | 331  | 98 -  | 3   | 332  | 11778  | 12107  |
| UN04651 | Rsa1.0.00894.1 | 605  | 269700 | 0         | 598  | 604  | 99 +  | 2   | 605  | 6004   | 6604   |
| UN04652 | Rsa1.0.01539.1 | 473  | 43698  | 0         | 354  | 357  | 99 -  | 117 | 473  | 29321  | 29677  |
| UN04653 | Rsa1.0.04411.1 | 1247 | 142979 | 1.00E-139 | 267  | 271  | 98 -  | 976 | 1245 | 6356   | 6626   |
| UN04654 | Rsa1.0.01343.1 | 1376 | 47735  | 0         | 356  | 357  | 99 -  | 8   | 364  | 9134   | 9490   |
| UN04655 | Rsa1.0.00385.1 | 2654 | 89160  | 9.00E-81  | 169  | 174  | 97 +  | 250 | 423  | 50842  | 51015  |
| UN04656 | Rsa1.0.01701.1 | 412  | 162121 | 1.00E-165 | 328  | 339  | 96 +  | 74  | 412  | 13837  | 14175  |
| UN04657 | Rsa1.0.00059.1 | 1279 | 159650 | 0         | 782  | 829  | 94 +  | 435 | 1240 | 63397  | 64222  |
| UN04658 | Rsa1.0.00468.1 | 1063 | 82095  | 0         | 1047 | 1054 | 99 +  | 2   | 1055 | 16354  | 17407  |
| UN04659 | Rsa1.0.01344.1 | 626  | 142535 | 4.00E-98  | 191  | 194  | 98 -  | 12  | 205  | 112174 | 112367 |
| UN04660 | Rsa1.0.00138.1 | 1321 | 247040 | 0         | 343  | 343  | 100 + | 309 | 651  | 228322 | 228664 |
| UN04661 | Rsa1.0.00380.1 | 947  | 89748  | 1.00E-106 | 234  | 248  | 94 -  | 223 | 461  | 78451  | 78698  |
| UN04662 | Rsa1.0.03001.1 | 844  | 26108  | 1.00E-161 | 320  | 331  | 96 -  | 520 | 844  | 9377   | 9707   |
| UN04663 | Rsa1.0.00037.1 | 817  | 307838 | 1.00E-160 | 318  | 326  | 97 +  | 1   | 324  | 291540 | 291864 |
| UN04664 | Rsa1.0.00798.1 | 845  | 63945  | 0         | 425  | 438  | 97 -  | 154 | 591  | 45476  | 45913  |
| UN04665 | Rsa1.0.00886.1 | 1317 | 167350 | 1.00E-173 | 330  | 337  | 97 -  | 567 | 903  | 33611  | 33947  |
| UN04666 | Rsa1.0.00899.1 | 1489 | 60404  | 0         | 367  | 377  | 97 +  | 3   | 376  | 49106  | 49480  |
| UN04667 | Rsa1.0.07091.1 | 1017 | 9907   | 1.00E-129 | 262  | 271  | 96 -  | 60  | 330  | 1444   | 1714   |
| UN04668 | Rsa1.0.01115.1 | 1037 | 183545 | 1.00E-154 | 381  | 411  | 92 +  | 640 | 1037 | 6514   | 6921   |
| UN04669 | Rsa1.0.00052.1 | 1393 | 162771 | 0         | 471  | 477  | 98 +  | 476 | 952  | 119971 | 120447 |
| UN04670 | Rsa1.0.01220.1 | 1160 | 161775 | 1.00E-155 | 307  | 316  | 97 -  | 574 | 889  | 151183 | 151495 |
| UN04671 | Rsa1.0.00828.1 | 1047 | 62744  | 0         | 363  | 365  | 99 -  | 3   | 367  | 9576   | 9940   |
| UN04672 | Rsa1.0.00045.1 | 1154 | 328694 | 1.00E-137 | 266  | 271  | 98 +  | 885 | 1153 | 93515  | 93785  |
| UN04673 | Rsa1.0.00019.1 | 1209 | 301669 | 0         | 508  | 514  | 98 -  | 444 | 954  | 55803  | 56316  |
| UN04674 | Rsa1.0.00039.1 | 807  | 296927 | 1.00E-160 | 315  | 323  | 97 -  | 452 | 774  | 12676  | 12997  |
| UN04675 | Rsa1.0.00339.1 | 1429 | 222974 | 0         | 768  | 800  | 96 -  | 3   | 779  | 81609  | 82408  |
| UN04676 | Rsa1.0.00152.1 | 849  | 257730 | 0         | 742  | 795  | 93 -  | 44  | 824  | 41453  | 42242  |
| UN04677 | Rsa1.0.01186.1 | 1832 | 51418  | 0         | 748  | 766  | 97 -  | 828 | 1593 | 10845  | 11609  |
| UN04678 | Rsa1.0.00979.1 | 1152 | 57733  | 1.00E-130 | 266  | 275  | 96 -  | 180 | 451  | 41925  | 42199  |

|         |                |      |        |           |      |      |       |     |      |        |        |
|---------|----------------|------|--------|-----------|------|------|-------|-----|------|--------|--------|
| UN04679 | Rsa1.0.02950.1 | 977  | 26506  | 1.00E-123 | 266  | 280  | 95 -  | 462 | 741  | 6577   | 6856   |
| UN04680 | Rsa1.0.00253.1 | 1004 | 231292 | 0         | 642  | 659  | 97 +  | 348 | 1004 | 97765  | 98413  |
| UN04681 | Rsa1.0.01575.1 | 985  | 42924  | 0         | 531  | 545  | 97 -  | 263 | 807  | 32336  | 32880  |
| UN04682 | Rsa1.0.03450.1 | 927  | 22835  | 0         | 385  | 398  | 96 -  | 14  | 411  | 6175   | 6569   |
| UN04683 | Rsa1.0.00124.1 | 1227 | 262503 | 0         | 782  | 841  | 92 -  | 173 | 1006 | 194245 | 195065 |
| UN04684 | Rsa1.0.00037.1 | 818  | 307838 | 1.00E-113 | 225  | 231  | 97 -  | 215 | 445  | 290183 | 290413 |
| UN04685 | Rsa1.0.00582.1 | 714  | 74333  | 1.00E-126 | 257  | 264  | 97 +  | 3   | 262  | 61533  | 61796  |
| UN04686 | Rsa1.0.00533.1 | 770  | 77375  | 1.00E-130 | 271  | 282  | 96 -  | 223 | 504  | 66091  | 66369  |
| UN04687 | Rsa1.0.00528.1 | 1187 | 164755 | 0         | 612  | 624  | 98 +  | 1   | 621  | 100715 | 101332 |
| UN04688 | Rsa1.0.04284.1 | 920  | 18085  | 1.00E-138 | 328  | 350  | 93 -  | 23  | 366  | 10452  | 10800  |
| UN04689 | Rsa1.0.03789.1 | 683  | 20847  | 0         | 659  | 680  | 96 -  | 2   | 681  | 15957  | 16632  |
| UN04690 | Rsa1.0.29592.1 | 847  | 778    | 0         | 764  | 772  | 98 +  | 2   | 773  | 7      | 778    |
| UN04691 | Rsa1.0.00253.1 | 1540 | 231292 | 0         | 469  | 483  | 97 +  | 954 | 1431 | 161204 | 161686 |
| UN04692 | Rsa1.0.00009.1 | 924  | 232558 | 0         | 867  | 871  | 99 -  | 54  | 924  | 12145  | 13013  |
| UN04693 | Rsa1.0.00386.1 | 428  | 89134  | 0         | 420  | 427  | 98 +  | 2   | 428  | 62834  | 63256  |
| UN04694 | Rsa1.0.06803.1 | 1153 | 10330  | 2.00E-83  | 164  | 166  | 98 -  | 257 | 422  | 8465   | 8630   |
| UN04695 | Rsa1.0.00006.1 | 989  | 396176 | 0         | 932  | 999  | 93 +  | 2   | 983  | 385740 | 386718 |
| UN04696 | Rsa1.0.04214.1 | 1153 | 18437  | 0         | 566  | 568  | 99 +  | 3   | 570  | 2964   | 3530   |
| UN04697 | Rsa1.0.01606.1 | 837  | 42432  | 1.00E-142 | 263  | 265  | 99 -  | 1   | 265  | 7853   | 8117   |
| UN04698 | Rsa1.0.00131.1 | 1268 | 432233 | 0         | 427  | 434  | 98 -  | 1   | 431  | 11596  | 12029  |
| UN04699 | Rsa1.0.01375.1 | 792  | 47038  | 1.00E-122 | 293  | 322  | 90 +  | 3   | 324  | 11143  | 11442  |
| UN04700 | Rsa1.0.01673.1 | 1228 | 41197  | 0         | 405  | 410  | 98 +  | 211 | 620  | 8507   | 8916   |
| UN04701 | Rsa1.0.14756.1 | 1316 | 3096   | 8.00E-86  | 184  | 190  | 96 +  | 1   | 190  | 1777   | 1965   |
| UN04702 | Rsa1.0.00846.1 | 1208 | 62342  | 0         | 393  | 394  | 99 +  | 10  | 402  | 44296  | 44689  |
| UN04703 | Rsa1.0.00627.1 | 919  | 71566  | 0         | 535  | 605  | 88 +  | 184 | 776  | 25176  | 25747  |
| UN04704 | Rsa1.0.02599.1 | 1021 | 29660  | 0         | 605  | 633  | 95 -  | 6   | 631  | 4092   | 4721   |
| UN04705 | Rsa1.0.00562.1 | 1314 | 75565  | 0         | 1156 | 1187 | 97 +  | 1   | 1172 | 23864  | 25047  |
| UN04706 | Rsa1.0.21131.1 | 1317 | 1232   | 1.00E-115 | 212  | 212  | 100 - | 965 | 1176 | 482    | 693    |
| UN04707 | Rsa1.0.00051.1 | 969  | 258225 | 0         | 936  | 991  | 94 -  | 1   | 967  | 113691 | 114675 |
| UN04708 | Rsa1.0.04537.1 | 1027 | 16946  | 1.00E-122 | 226  | 227  | 99 -  | 799 | 1025 | 129    | 355    |
| UN04709 | Rsa1.0.00221.1 | 925  | 106972 | 1.00E-174 | 459  | 510  | 90 -  | 391 | 876  | 96286  | 96790  |
| UN04710 | Rsa1.0.00027.1 | 1285 | 283362 | 0         | 1074 | 1110 | 96 +  | 37  | 1146 | 37638  | 38735  |
| UN04711 | Rsa1.0.00745.1 | 253  | 66067  | 1.00E-52  | 225  | 260  | 86 +  | 1   | 253  | 46551  | 46802  |
| UN04712 | Rsa1.0.00019.1 | 1147 | 301669 | 0         | 463  | 492  | 94 +  | 464 | 952  | 283135 | 283626 |
| UN04713 | Rsa1.0.00317.1 | 1158 | 218290 | 0         | 401  | 415  | 96 +  | 742 | 1156 | 93301  | 93715  |
| UN04714 | Rsa1.0.02792.1 | 1196 | 27829  | 6.00E-77  | 240  | 269  | 89 -  | 481 | 746  | 18518  | 18785  |
| UN04715 | Rsa1.0.00640.1 | 584  | 70979  | 0         | 531  | 553  | 96 -  | 1   | 553  | 49402  | 49953  |
| UN04716 | Rsa1.0.02171.1 | 1047 | 167557 | 9.00E-39  | 241  | 291  | 82 -  | 535 | 824  | 11741  | 12030  |
| UN04717 | Rsa1.0.00498.1 | 1063 | 79746  | 0         | 379  | 394  | 96 -  | 677 | 1061 | 65592  | 65985  |

|         |                |      |        |           |     |     |       |     |      |        |        |
|---------|----------------|------|--------|-----------|-----|-----|-------|-----|------|--------|--------|
| UN04718 | Rsa1.0.02360.1 | 776  | 32203  | 0         | 531 | 562 | 94 -  | 6   | 555  | 28271  | 28827  |
| UN04719 | Rsa1.0.00051.1 | 1313 | 258225 | 0         | 656 | 665 | 98 +  | 649 | 1313 | 56038  | 56702  |
| UN04720 | Rsa1.0.31253.1 | 1176 | 732    | 0         | 715 | 732 | 97 -  | 35  | 766  | 1      | 732    |
| UN04721 | Rsa1.0.00451.1 | 1042 | 322533 | 0         | 559 | 590 | 94 +  | 19  | 607  | 261509 | 262097 |
| UN04722 | Rsa1.0.02448.1 | 926  | 31315  | 0         | 592 | 614 | 96 -  | 1   | 609  | 24478  | 25090  |
| UN04723 | Rsa1.0.00661.1 | 1089 | 213041 | 0         | 502 | 516 | 97 +  | 11  | 525  | 57222  | 57737  |
| UN04724 | Rsa1.0.04557.1 | 764  | 145048 | 0         | 397 | 419 | 94 +  | 25  | 439  | 135308 | 135723 |
| UN04725 | Rsa1.0.00551.1 | 1194 | 76227  | 1.00E-125 | 228 | 228 | 100 - | 593 | 820  | 49962  | 50189  |
| UN04726 | Rsa1.0.49294.1 | 988  | 460    | 0         | 427 | 428 | 99 +  | 560 | 987  | 1      | 428    |
| UN04727 | Rsa1.0.00087.1 | 988  | 761073 | 4.00E-96  | 185 | 187 | 98 -  | 173 | 359  | 50644  | 50830  |
| UN04728 | Rsa1.0.00265.1 | 642  | 220635 | 1.00E-172 | 348 | 362 | 96 +  | 279 | 640  | 158595 | 158956 |
| UN04729 | Rsa1.0.00369.1 | 736  | 266462 | 4.00E-83  | 209 | 224 | 93 -  | 108 | 331  | 10326  | 10541  |
| UN04730 | Rsa1.0.18758.1 | 843  | 1540   | 0         | 617 | 633 | 97 -  | 213 | 838  | 902    | 1532   |
| UN04731 | Rsa1.0.00173.1 | 799  | 288743 | 1.00E-108 | 257 | 277 | 92 +  | 162 | 424  | 41089  | 41362  |
| UN04732 | Rsa1.0.01411.1 | 383  | 46326  | 0         | 378 | 381 | 99 -  | 1   | 381  | 29718  | 30098  |
| UN04733 | Rsa1.0.00466.1 | 1073 | 82132  | 0         | 689 | 697 | 98 +  | 3   | 698  | 7931   | 8624   |
| UN04734 | Rsa1.0.02754.1 | 1494 | 28213  | 0         | 500 | 500 | 100 - | 1   | 500  | 14522  | 15021  |
| UN04735 | Rsa1.0.00140.1 | 1033 | 121541 | 0         | 536 | 541 | 99 -  | 7   | 545  | 60172  | 60712  |
| UN04736 | Rsa1.0.00394.1 | 1218 | 148426 | 0         | 560 | 561 | 99 +  | 3   | 563  | 135130 | 135689 |
| UN04737 | Rsa1.0.09922.1 | 1338 | 6089   | 0         | 759 | 765 | 99 +  | 1   | 765  | 1229   | 1993   |
| UN04738 | Rsa1.0.07613.1 | 1278 | 9021   | 0         | 724 | 726 | 99 -  | 4   | 729  | 2805   | 3530   |
| UN04739 | Rsa1.0.00016.1 | 1132 | 831256 | 0         | 496 | 531 | 93 -  | 532 | 1061 | 356909 | 357430 |
| UN04740 | Rsa1.0.00014.1 | 961  | 348985 | 0         | 582 | 590 | 98 +  | 1   | 587  | 282720 | 283307 |
| UN04741 | Rsa1.0.00237.1 | 928  | 235974 | 1.00E-103 | 261 | 281 | 92 -  | 650 | 926  | 4692   | 4971   |
| UN04742 | Rsa1.0.01397.1 | 563  | 183276 | 2.00E-81  | 169 | 174 | 97 -  | 325 | 498  | 171632 | 171805 |
| UN04743 | Rsa1.0.00104.1 | 1001 | 368722 | 1.00E-59  | 271 | 322 | 84 +  | 15  | 336  | 186977 | 187298 |
| UN04744 | Rsa1.0.00018.1 | 1070 | 410899 | 1.00E-136 | 276 | 286 | 96 -  | 114 | 399  | 68738  | 69023  |
| UN04745 | Rsa1.0.01110.1 | 1007 | 195852 | 0         | 437 | 447 | 97 +  | 1   | 447  | 31836  | 32280  |
| UN04746 | Rsa1.0.00408.1 | 1216 | 176752 | 0         | 705 | 732 | 96 +  | 1   | 728  | 105869 | 106593 |
| UN04747 | Rsa1.0.06607.1 | 983  | 10674  | 0         | 406 | 424 | 95 +  | 562 | 983  | 10219  | 10636  |
| UN04748 | Rsa1.0.03826.1 | 1320 | 20614  | 1.00E-151 | 287 | 292 | 98 -  | 232 | 523  | 14877  | 15168  |
| UN04749 | Rsa1.0.00451.1 | 850  | 322533 | 1.00E-165 | 335 | 346 | 96 -  | 224 | 568  | 156753 | 157097 |
| UN04750 | Rsa1.0.04235.1 | 839  | 18373  | 0         | 835 | 842 | 99 -  | 2   | 839  | 16353  | 17194  |
| UN04751 | Rsa1.0.01377.1 | 1302 | 46967  | 0         | 803 | 817 | 98 -  | 1   | 817  | 9190   | 10006  |
| UN04752 | Rsa1.0.01544.1 | 1120 | 185602 | 1.00E-113 | 368 | 420 | 87 -  | 12  | 430  | 165822 | 166241 |
| UN04753 | Rsa1.0.00191.1 | 571  | 316976 | 2.33E-156 | 302 | 310 | 97 -  | 2   | 308  | 293050 | 293358 |
| UN04754 | Rsa1.0.00092.1 | 675  | 659932 | 1.00E-177 | 363 | 374 | 97 +  | 77  | 448  | 457311 | 457682 |
| UN04755 | Rsa1.0.07292.1 | 1082 | 9605   | 1.00E-131 | 247 | 249 | 99 +  | 364 | 610  | 2153   | 2401   |
| UN04756 | Rsa1.0.00387.1 | 1243 | 495407 | 1.00E-161 | 325 | 337 | 96 -  | 906 | 1242 | 396974 | 397310 |

|         |                |      |        |           |     |     |       |      |      |        |        |
|---------|----------------|------|--------|-----------|-----|-----|-------|------|------|--------|--------|
| UN04757 | Rsa1.0.02696.1 | 900  | 28600  | 1.00E-166 | 312 | 317 | 98 +  | 1    | 317  | 17258  | 17574  |
| UN04758 | Rsa1.0.00039.1 | 944  | 296927 | 9.00E-54  | 342 | 420 | 81 +  | 439  | 858  | 229897 | 230316 |
| UN04759 | Rsa1.0.01293.1 | 1214 | 49139  | 1.00E-158 | 283 | 283 | 100 - | 244  | 526  | 23051  | 23333  |
| UN04760 | Rsa1.0.00484.1 | 788  | 203294 | 0         | 680 | 689 | 98 +  | 1    | 689  | 156462 | 157147 |
| UN04761 | Rsa1.0.15815.1 | 1018 | 2409   | 0         | 474 | 511 | 92 -  | 38   | 526  | 1687   | 2196   |
| UN04762 | Rsa1.0.04199.1 | 1016 | 18501  | 0         | 519 | 530 | 97 +  | 1    | 528  | 5304   | 5833   |
| UN04763 | Rsa1.0.04250.1 | 944  | 18264  | 1.00E-179 | 325 | 327 | 99 -  | 1    | 327  | 37     | 363    |
| UN04764 | Rsa1.0.00652.1 | 905  | 70089  | 0         | 431 | 431 | 100 - | 475  | 905  | 46873  | 47303  |
| UN04765 | Rsa1.0.00632.1 | 653  | 183777 | 1.00E-121 | 309 | 340 | 90 -  | 307  | 633  | 149100 | 149438 |
| UN04766 | Rsa1.0.01769.1 | 756  | 39568  | 1.00E-142 | 352 | 384 | 91 +  | 190  | 573  | 30783  | 31166  |
| UN04767 | Rsa1.0.00305.1 | 778  | 97308  | 1.00E-166 | 296 | 296 | 100 + | 2    | 297  | 94401  | 94696  |
| UN04768 | Rsa1.0.00652.1 | 1305 | 70089  | 0         | 580 | 586 | 98 +  | 49   | 632  | 18064  | 18649  |
| UN04769 | Rsa1.0.18699.1 | 771  | 1549   | 0         | 444 | 451 | 98 +  | 2    | 451  | 778    | 1228   |
| UN04770 | Rsa1.0.00596.1 | 665  | 73578  | 0         | 661 | 665 | 99 +  | 1    | 665  | 70145  | 70809  |
| UN04771 | Rsa1.0.00724.1 | 949  | 66789  | 0         | 769 | 782 | 98 -  | 13   | 792  | 58679  | 59460  |
| UN04772 | Rsa1.0.00519.1 | 753  | 197864 | 0         | 739 | 754 | 98 +  | 1    | 752  | 35029  | 35782  |
| UN04773 | Rsa1.0.00527.1 | 857  | 77733  | 0         | 408 | 417 | 97 +  | 441  | 857  | 54019  | 54435  |
| UN04774 | Rsa1.0.02649.1 | 833  | 29072  | 0         | 809 | 846 | 95 -  | 2    | 831  | 12637  | 13481  |
| UN04775 | Rsa1.0.02753.1 | 669  | 28215  | 0         | 633 | 688 | 92 +  | 1    | 667  | 8048   | 8728   |
| UN04776 | Rsa1.0.03586.1 | 1069 | 21913  | 0         | 888 | 923 | 96 -  | 149  | 1069 | 11244  | 12161  |
| UN04777 | Rsa1.0.01121.1 | 846  | 53407  | 0         | 662 | 699 | 94 -  | 6    | 698  | 19076  | 19773  |
| UN04778 | Rsa1.0.00038.1 | 827  | 314568 | 1.00E-100 | 266 | 289 | 92 -  | 23   | 301  | 16997  | 17282  |
| UN04779 | Rsa1.0.03837.1 | 591  | 20559  | 1.00E-152 | 434 | 478 | 90 -  | 125  | 591  | 14785  | 15242  |
| UN04780 | Rsa1.0.00473.1 | 1078 | 212204 | 0         | 400 | 402 | 99 +  | 1    | 402  | 66299  | 66700  |
| UN04781 | Rsa1.0.01112.1 | 1012 | 310601 | 0         | 531 | 552 | 96 -  | 20   | 569  | 31685  | 32233  |
| UN04782 | Rsa1.0.00038.1 | 1500 | 314568 | 0         | 359 | 362 | 99 -  | 2    | 362  | 45790  | 46151  |
| UN04783 | Rsa1.0.00017.1 | 1148 | 752458 | 4.00E-50  | 239 | 282 | 84 -  | 122  | 396  | 647716 | 647997 |
| UN04784 | Rsa1.0.17407.1 | 895  | 1838   | 1.00E-15  | 146 | 175 | 83 -  | 369  | 541  | 1277   | 1448   |
| UN04785 | Rsa1.0.04039.1 | 962  | 19467  | 0         | 560 | 573 | 97 -  | 3    | 568  | 18509  | 19081  |
| UN04786 | Rsa1.0.01373.1 | 638  | 47052  | 0         | 637 | 638 | 99 -  | 1    | 638  | 31440  | 32077  |
| UN04787 | Rsa1.0.00058.1 | 867  | 159921 | 0         | 419 | 445 | 94 -  | 428  | 867  | 118367 | 118804 |
| UN04788 | Rsa1.0.01679.1 | 1260 | 146876 | 2.00E-80  | 232 | 257 | 90 +  | 18   | 272  | 135000 | 135247 |
| UN04789 | Rsa1.0.02744.1 | 329  | 28268  | 1.00E-160 | 322 | 331 | 97 -  | 3    | 329  | 21574  | 21903  |
| UN04790 | Rsa1.0.02347.1 | 1332 | 32332  | 0         | 538 | 544 | 98 +  | 1    | 542  | 18586  | 19129  |
| UN04791 | Rsa1.0.01719.1 | 1177 | 40388  | 0         | 529 | 548 | 96 +  | 4    | 551  | 31915  | 32459  |
| UN04792 | Rsa1.0.10873.1 | 1205 | 5694   | 1.00E-169 | 421 | 457 | 92 +  | 1    | 440  | 2548   | 3002   |
| UN04793 | Rsa1.0.02474.1 | 1116 | 31076  | 1.00E-144 | 282 | 289 | 97 +  | 831  | 1116 | 21211  | 21499  |
| UN04794 | Rsa1.0.01644.1 | 1385 | 41754  | 2.00E-68  | 143 | 145 | 98 -  | 1132 | 1275 | 32706  | 32850  |
| UN04795 | Rsa1.0.44152.1 | 1301 | 509    | 1.00E-160 | 317 | 326 | 97 +  | 865  | 1189 | 184    | 509    |

|         |                |      |        |           |      |      |       |      |      |        |        |
|---------|----------------|------|--------|-----------|------|------|-------|------|------|--------|--------|
| UN04796 | Rsa1.0_01809.1 | 1282 | 39004  | 0         | 427  | 438  | 97 +  | 1    | 438  | 27652  | 28085  |
| UN04797 | Rsa1.0_32801.1 | 1052 | 694    | 0         | 418  | 423  | 98 +  | 406  | 828  | 1      | 423    |
| UN04798 | Rsa1.0_02955.1 | 1353 | 26484  | 1.00E-155 | 308  | 315  | 97 -  | 1038 | 1351 | 1308   | 1621   |
| UN04799 | Rsa1.0_03860.1 | 1377 | 20407  | 1.00E-143 | 273  | 278  | 98 +  | 653  | 930  | 16711  | 16988  |
| UN04800 | Rsa1.0_00002.1 | 1468 | 601661 | 0         | 322  | 322  | 100 + | 1    | 322  | 398039 | 398360 |
| UN04801 | Rsa1.0_03974.1 | 802  | 19770  | 0         | 787  | 803  | 98 -  | 1    | 802  | 703    | 1505   |
| UN04802 | Rsa1.0_00015.1 | 1571 | 561803 | 0         | 1121 | 1191 | 94 +  | 2    | 1163 | 412690 | 413872 |
| UN04803 | Rsa1.0_02950.1 | 1207 | 26506  | 0         | 536  | 538  | 99 -  | 247  | 784  | 5272   | 5809   |
| UN04804 | Rsa1.0_00109.1 | 1601 | 132735 | 0         | 612  | 612  | 100 + | 986  | 1597 | 87248  | 87859  |
| UN04805 | Rsa1.0_00180.1 | 1041 | 114581 | 1.00E-113 | 270  | 289  | 93 +  | 1    | 283  | 34782  | 35066  |
| UN04806 | Rsa1.0_02182.1 | 907  | 34172  | 0         | 501  | 505  | 99 +  | 1    | 505  | 21484  | 21987  |
| UN04807 | Rsa1.0_00116.1 | 1097 | 365886 | 0         | 595  | 661  | 90 +  | 438  | 1091 | 28071  | 28706  |
| UN04808 | Rsa1.0_01511.1 | 1506 | 44235  | 0         | 674  | 680  | 99 +  | 1    | 678  | 18470  | 19149  |
| UN04809 | Rsa1.0_04203.1 | 1295 | 18479  | 0         | 477  | 501  | 95 -  | 1    | 500  | 14421  | 14915  |
| UN04810 | Rsa1.0_02223.1 | 1301 | 152421 | 0         | 387  | 387  | 100 - | 915  | 1301 | 152035 | 152421 |
| UN04811 | Rsa1.0_02085.1 | 1307 | 35198  | 0         | 1184 | 1254 | 94 +  | 1    | 1244 | 18331  | 19557  |
| UN04812 | Rsa1.0_01604.1 | 1345 | 42461  | 0         | 800  | 808  | 99 -  | 538  | 1345 | 38433  | 39240  |
| UN04813 | Rsa1.0_00016.1 | 1437 | 831256 | 0         | 511  | 558  | 91 -  | 805  | 1349 | 17399  | 17944  |
| UN04814 | Rsa1.0_01042.1 | 817  | 293264 | 1.00E-172 | 306  | 306  | 100 - | 223  | 528  | 152814 | 153119 |
| UN04815 | Rsa1.0_00271.1 | 907  | 101125 | 1.00E-178 | 455  | 501  | 90 +  | 107  | 591  | 26584  | 27065  |
| UN04816 | Rsa1.0_00026.1 | 810  | 327835 | 0         | 649  | 655  | 99 +  | 155  | 809  | 145834 | 146488 |
| UN04817 | Rsa1.0_05586.1 | 1072 | 13263  | 1.00E-153 | 288  | 291  | 98 +  | 647  | 936  | 2007   | 2297   |
| UN04818 | Rsa1.0_00036.1 | 1106 | 176186 | 0         | 360  | 369  | 97 +  | 308  | 676  | 102434 | 102802 |
| UN04819 | Rsa1.0_02178.1 | 922  | 156197 | 0         | 753  | 802  | 93 -  | 31   | 821  | 150274 | 151074 |
| UN04820 | Rsa1.0_00916.1 | 1162 | 59789  | 1.00E-144 | 363  | 394  | 92 +  | 700  | 1082 | 30361  | 30751  |
| UN04821 | Rsa1.0_00473.1 | 1206 | 212204 | 0         | 607  | 634  | 95 -  | 20   | 652  | 81059  | 81682  |
| UN04822 | Rsa1.0_00179.1 | 825  | 393324 | 0         | 747  | 752  | 99 -  | 1    | 752  | 390831 | 391582 |
| UN04823 | Rsa1.0_02215.1 | 1099 | 33822  | 0         | 587  | 610  | 96 -  | 38   | 643  | 9505   | 10108  |
| UN04824 | Rsa1.0_05800.1 | 734  | 141392 | 0         | 394  | 400  | 98 -  | 100  | 499  | 134991 | 135390 |
| UN04825 | Rsa1.0_00585.1 | 675  | 74164  | 0         | 589  | 591  | 99 -  | 84   | 674  | 52712  | 53302  |
| UN04826 | Rsa1.0_59968.1 | 695  | 382    | 1.00E-143 | 273  | 278  | 98 +  | 358  | 635  | 104    | 381    |
| UN04827 | Rsa1.0_00297.1 | 1147 | 97836  | 0         | 450  | 470  | 95 -  | 678  | 1147 | 26265  | 26734  |
| UN04828 | Rsa1.0_00731.1 | 1263 | 66638  | 0         | 554  | 577  | 96 -  | 680  | 1256 | 14123  | 14699  |
| UN04829 | Rsa1.0_01537.1 | 676  | 187285 | 1.00E-162 | 407  | 445  | 91 +  | 235  | 676  | 839    | 1260   |
| UN04830 | Rsa1.0_00683.1 | 1526 | 68638  | 0         | 1376 | 1400 | 98 -  | 129  | 1524 | 31148  | 32547  |
| UN04831 | Rsa1.0_02210.1 | 1112 | 33857  | 1.00E-175 | 311  | 311  | 100 - | 802  | 1112 | 12095  | 12405  |
| UN04832 | Rsa1.0_19209.1 | 1231 | 1464   | 0         | 377  | 391  | 96 +  | 834  | 1223 | 927    | 1317   |
| UN04833 | Rsa1.0_01133.1 | 1357 | 52916  | 1.00E-164 | 300  | 302  | 99 +  | 1056 | 1357 | 49183  | 49484  |
| UN04834 | Rsa1.0_00339.1 | 1401 | 222974 | 1.00E-177 | 424  | 454  | 93 +  | 955  | 1401 | 66593  | 67042  |

|         |                |      |        |           |      |      |       |      |      |        |        |
|---------|----------------|------|--------|-----------|------|------|-------|------|------|--------|--------|
| UN04835 | Rsa1.0.00634.1 | 947  | 71222  | 0         | 323  | 323  | 100 - | 3    | 325  | 70500  | 70822  |
| UN04836 | Rsa1.0.01077.1 | 993  | 54772  | 1.00E-87  | 168  | 169  | 99 +  | 563  | 731  | 18326  | 18494  |
| UN04837 | Rsa1.0.03091.1 | 1272 | 25454  | 0         | 426  | 437  | 97 -  | 837  | 1272 | 417    | 853    |
| UN04838 | Rsa1.0.02248.1 | 787  | 33414  | 0         | 753  | 783  | 96 -  | 3    | 771  | 32009  | 32788  |
| UN04839 | Rsa1.0.02020.1 | 700  | 173211 | 1.00E-126 | 248  | 254  | 97 -  | 3    | 256  | 21498  | 21751  |
| UN04840 | Rsa1.0.01920.1 | 1727 | 158533 | 0         | 470  | 490  | 95 +  | 1202 | 1687 | 128072 | 128554 |
| UN04841 | Rsa1.0.00398.1 | 1691 | 88007  | 0         | 535  | 554  | 96 -  | 1138 | 1691 | 10261  | 10807  |
| UN04842 | Rsa1.0.06775.1 | 606  | 10379  | 1.00E-121 | 280  | 297  | 94 -  | 4    | 300  | 3644   | 3938   |
| UN04843 | Rsa1.0.02433.1 | 1236 | 158318 | 1.00E-161 | 294  | 296  | 99 -  | 939  | 1234 | 13335  | 13630  |
| UN04844 | Rsa1.0.00187.1 | 1039 | 393093 | 1.00E-141 | 270  | 275  | 98 -  | 592  | 866  | 34497  | 34771  |
| UN04845 | Rsa1.0.05338.1 | 768  | 144511 | 1.00E-116 | 241  | 249  | 96 -  | 8    | 256  | 10748  | 10995  |
| UN04846 | Rsa1.0.00538.1 | 1023 | 77149  | 1.00E-87  | 165  | 165  | 100 + | 772  | 936  | 69811  | 69975  |
| UN04847 | Rsa1.0.01512.1 | 1584 | 44234  | 0         | 500  | 516  | 96 +  | 596  | 1111 | 17477  | 17992  |
| UN04848 | Rsa1.0.04603.1 | 1095 | 16682  | 0         | 568  | 572  | 99 +  | 524  | 1095 | 7586   | 8157   |
| UN04849 | Rsa1.0.02266.1 | 1006 | 33195  | 1.00E-99  | 195  | 197  | 98 -  | 811  | 1006 | 30769  | 30965  |
| UN04850 | Rsa1.0.04735.1 | 1109 | 16180  | 0         | 703  | 704  | 99 +  | 407  | 1109 | 8132   | 8835   |
| UN04851 | Rsa1.0.00012.1 | 1103 | 222148 | 0         | 402  | 423  | 95 -  | 685  | 1103 | 10177  | 10599  |
| UN04852 | Rsa1.0.01026.1 | 801  | 171624 | 1.00E-123 | 269  | 281  | 95 +  | 11   | 289  | 158746 | 159026 |
| UN04853 | Rsa1.0.00325.1 | 1406 | 95371  | 1.00E-128 | 263  | 273  | 96 +  | 303  | 575  | 79215  | 79487  |
| UN04854 | Rsa1.0.09720.1 | 1475 | 6190   | 0         | 359  | 360  | 99 -  | 1116 | 1475 | 4163   | 4522   |
| UN04855 | Rsa1.0.03027.1 | 833  | 25883  | 8.00E-48  | 134  | 146  | 91 -  | 609  | 754  | 11931  | 12076  |
| UN04856 | Rsa1.0.02128.1 | 1150 | 34758  | 0         | 344  | 345  | 99 +  | 806  | 1150 | 16324  | 16668  |
| UN04857 | Rsa1.0.02224.1 | 729  | 33758  | 0         | 362  | 364  | 99 -  | 366  | 729  | 4588   | 4951   |
| UN04858 | Rsa1.0.02725.1 | 844  | 28404  | 1.00E-125 | 227  | 227  | 100 + | 3    | 229  | 6530   | 6756   |
| UN04859 | Rsa1.0.01762.1 | 744  | 39682  | 1.00E-180 | 359  | 372  | 96 +  | 165  | 536  | 1493   | 1864   |
| UN04860 | Rsa1.0.08776.1 | 840  | 6932   | 1.00E-142 | 275  | 281  | 97 +  | 559  | 839  | 2706   | 2986   |
| UN04861 | Rsa1.0.02720.1 | 732  | 28427  | 0         | 456  | 480  | 95 +  | 253  | 732  | 11937  | 12408  |
| UN04862 | Rsa1.0.00008.1 | 1202 | 358124 | 0         | 571  | 575  | 99 +  | 16   | 589  | 293999 | 294573 |
| UN04863 | Rsa1.0.00377.1 | 1417 | 90038  | 1.00E-133 | 348  | 384  | 90 -  | 1047 | 1417 | 51756  | 52136  |
| UN04864 | Rsa1.0.01091.1 | 1006 | 54383  | 0         | 416  | 441  | 94 -  | 514  | 954  | 11466  | 11894  |
| UN04865 | Rsa1.0.01951.1 | 1070 | 36941  | 1.00E-149 | 333  | 354  | 94 -  | 509  | 862  | 11135  | 11485  |
| UN04866 | Rsa1.0.01092.1 | 830  | 54348  | 6.00E-67  | 136  | 138  | 98 +  | 430  | 567  | 51202  | 51339  |
| UN04867 | Rsa1.0.00813.1 | 1114 | 63202  | 0         | 530  | 550  | 96 -  | 520  | 1063 | 23119  | 23668  |
| UN04868 | Rsa1.0.04238.1 | 1164 | 18352  | 0         | 399  | 413  | 96 +  | 751  | 1160 | 8709   | 9119   |
| UN04869 | Rsa1.0.00967.1 | 1149 | 58049  | 0         | 801  | 850  | 94 -  | 99   | 945  | 18214  | 19035  |
| UN04870 | Rsa1.0.00360.1 | 1240 | 91190  | 0         | 1201 | 1241 | 96 +  | 1    | 1240 | 60201  | 61423  |
| UN04871 | Rsa1.0.00925.1 | 1087 | 59481  | 0         | 446  | 464  | 96 +  | 2    | 464  | 5621   | 6084   |
| UN04872 | Rsa1.0.00657.1 | 1227 | 69858  | 8.00E-95  | 192  | 197  | 97 -  | 1029 | 1225 | 58014  | 58210  |
| UN04873 | Rsa1.0.09414.1 | 830  | 6386   | 0         | 692  | 744  | 93 -  | 3    | 737  | 607    | 1349   |

|         |                |      |        |           |      |      |       |      |      |        |        |
|---------|----------------|------|--------|-----------|------|------|-------|------|------|--------|--------|
| UN04874 | Rsa1.0.00122.1 | 822  | 265937 | 0         | 807  | 822  | 98 -  | 1    | 822  | 258766 | 259575 |
| UN04875 | Rsa1.0.00740.1 | 1135 | 215972 | 0         | 425  | 427  | 99 +  | 709  | 1134 | 212344 | 212769 |
| UN04876 | Rsa1.0.00632.1 | 790  | 183777 | 1.00E-126 | 230  | 230  | 100 + | 431  | 660  | 156932 | 157161 |
| UN04877 | Rsa1.0.00482.1 | 1668 | 81162  | 0         | 657  | 680  | 96 -  | 1    | 672  | 41277  | 41955  |
| UN04878 | Rsa1.0.00585.1 | 784  | 74164  | 1.00E-177 | 323  | 326  | 99 -  | 335  | 660  | 49228  | 49553  |
| UN04879 | Rsa1.0.00985.1 | 836  | 161950 | 1.00E-163 | 319  | 327  | 97 -  | 3    | 328  | 28899  | 29225  |
| UN04880 | Rsa1.0.00004.1 | 1076 | 253996 | 0         | 660  | 683  | 96 -  | 399  | 1076 | 69092  | 69773  |
| UN04881 | Rsa1.0.01263.1 | 782  | 49703  | 7.00E-48  | 111  | 114  | 97 -  | 627  | 739  | 30765  | 30878  |
| UN04882 | Rsa1.0.15481.1 | 1444 | 2582   | 0         | 603  | 626  | 96 -  | 835  | 1443 | 1066   | 1691   |
| UN04883 | Rsa1.0.04065.1 | 805  | 19275  | 2.33E-156 | 358  | 381  | 93 +  | 425  | 801  | 3173   | 3543   |
| UN04884 | Rsa1.0.08862.1 | 1435 | 6847   | 0         | 406  | 408  | 99 +  | 691  | 1098 | 6440   | 6847   |
| UN04885 | Rsa1.0.06164.1 | 1347 | 11584  | 1.00E-148 | 322  | 338  | 95 +  | 5    | 340  | 1546   | 1882   |
| UN04886 | Rsa1.0.04957.1 | 812  | 15330  | 1.00E-104 | 204  | 208  | 98 -  | 259  | 466  | 563    | 770    |
| UN04887 | Rsa1.0.00260.1 | 902  | 102021 | 1.00E-166 | 401  | 436  | 91 +  | 282  | 711  | 63807  | 64242  |
| UN04888 | Rsa1.0.01273.1 | 756  | 49464  | 1.00E-104 | 214  | 221  | 96 -  | 186  | 406  | 40519  | 40739  |
| UN04889 | Rsa1.0.03166.1 | 1901 | 24863  | 0         | 1254 | 1306 | 96 -  | 3    | 1305 | 2873   | 4176   |
| UN04890 | Rsa1.0.00218.1 | 1603 | 201480 | 0         | 456  | 479  | 95 +  | 1122 | 1600 | 180348 | 180822 |
| UN04891 | Rsa1.0.00646.1 | 1193 | 70473  | 0         | 430  | 445  | 96 +  | 26   | 470  | 22394  | 22838  |
| UN04892 | #              | #    | #      | #         | #    | #    | #     | #    | #    | #      | #      |
| UN04893 | Rsa1.0.02171.1 | 805  | 167557 | 1.00E-177 | 325  | 327  | 99 -  | 479  | 805  | 12971  | 13296  |
| UN04894 | Rsa1.0.04197.1 | 888  | 18515  | 0         | 639  | 642  | 99 +  | 247  | 888  | 7981   | 8621   |
| UN04895 | Rsa1.0.00190.1 | 808  | 318240 | 1.00E-160 | 289  | 290  | 99 +  | 2    | 291  | 10015  | 10304  |
| UN04896 | Rsa1.0.00506.1 | 1551 | 79106  | 1.00E-105 | 204  | 207  | 98 -  | 433  | 639  | 13459  | 13665  |
| UN04897 | Rsa1.0.01302.1 | 998  | 48907  | 0         | 590  | 613  | 96 +  | 180  | 792  | 1159   | 1767   |
| UN04898 | Rsa1.0.00203.1 | 1482 | 109129 | 0         | 790  | 815  | 96 +  | 2    | 816  | 37274  | 38088  |
| UN04899 | Rsa1.0.00377.1 | 1220 | 90038  | 1.00E-107 | 224  | 233  | 96 -  | 982  | 1214 | 85916  | 86148  |
| UN04900 | Rsa1.0.07815.1 | 1573 | 8487   | 1.00E-100 | 186  | 186  | 100 + | 1388 | 1573 | 1245   | 1430   |
| UN04901 | Rsa1.0.02575.1 | 1734 | 29944  | 0         | 1243 | 1306 | 95 -  | 20   | 1303 | 19483  | 20787  |
| UN04902 | Rsa1.0.02220.1 | 1096 | 176031 | 0         | 1090 | 1096 | 99 -  | 1    | 1096 | 146    | 1241   |
| UN04903 | Rsa1.0.00744.1 | 813  | 66084  | 1.00E-148 | 307  | 319  | 96 -  | 316  | 633  | 3557   | 3875   |
| UN04904 | Rsa1.0.08511.1 | 891  | 7252   | 0         | 459  | 469  | 97 -  | 411  | 878  | 1798   | 2266   |
| UN04905 | Rsa1.0.08961.1 | 961  | 6750   | 0         | 398  | 414  | 96 -  | 551  | 961  | 4341   | 4752   |
| UN04906 | Rsa1.0.23397.1 | 983  | 1052   | 0         | 505  | 521  | 96 -  | 108  | 628  | 492    | 1012   |
| UN04907 | Rsa1.0.02200.1 | 697  | 33981  | 0         | 442  | 449  | 98 +  | 203  | 651  | 24074  | 24522  |
| UN04908 | Rsa1.0.00178.1 | 1893 | 114861 | 0         | 1059 | 1065 | 99 -  | 829  | 1893 | 93333  | 94397  |
| UN04909 | Rsa1.0.01149.1 | 726  | 160459 | 0         | 543  | 554  | 98 -  | 3    | 556  | 17137  | 17680  |
| UN04910 | Rsa1.0.00092.1 | 1165 | 659932 | 2.33E-156 | 275  | 279  | 98 -  | 3    | 281  | 340621 | 340899 |
| UN04911 | Rsa1.0.13911.1 | 481  | 4104   | 1.00E-123 | 245  | 252  | 97 -  | 230  | 481  | 2642   | 2893   |
| UN04912 | Rsa1.0.00051.1 | 1112 | 258225 | 0         | 397  | 398  | 99 -  | 715  | 1112 | 151335 | 151732 |



|         |                |      |        |           |      |      |       |      |      |        |        |
|---------|----------------|------|--------|-----------|------|------|-------|------|------|--------|--------|
| UN04913 | Rsa1.0_01100.1 | 1570 | 54113  | 0         | 436  | 436  | 100 - | 1125 | 1560 | 171    | 606    |
| UN04914 | Rsa1.0_00189.1 | 683  | 111830 | 0         | 385  | 397  | 96 -  | 288  | 683  | 71029  | 71425  |
| UN04915 | Rsa1.0_01595.1 | 1501 | 175383 | 0         | 412  | 423  | 97 -  | 1079 | 1501 | 17815  | 18237  |
| UN04916 | Rsa1.0_00078.1 | 817  | 175053 | 1.00E-123 | 225  | 225  | 100 + | 120  | 344  | 54810  | 55034  |
| UN04917 | Rsa1.0_01016.1 | 883  | 181422 | 0         | 355  | 362  | 98 +  | 396  | 755  | 26071  | 26432  |
| UN04918 | Rsa1.0_70187.1 | 1128 | 326    | 1.00E-170 | 304  | 304  | 100 - | 742  | 1045 | 1      | 304    |
| UN04919 | Rsa1.0_01121.1 | 854  | 53407  | 0         | 849  | 852  | 99 -  | 1    | 852  | 28959  | 29810  |
| UN04920 | Rsa1.0_00768.1 | 678  | 64969  | 1.00E-73  | 159  | 165  | 96 -  | 289  | 453  | 52219  | 52383  |
| UN04921 | Rsa1.0_05482.1 | 943  | 13595  | 0         | 366  | 366  | 100 - | 104  | 469  | 12266  | 12631  |
| UN04922 | Rsa1.0_00055.1 | 952  | 520193 | 0         | 426  | 438  | 97 -  | 1    | 435  | 58688  | 59125  |
| UN04923 | Rsa1.0_00089.1 | 554  | 406142 | 0         | 355  | 363  | 97 +  | 3    | 365  | 80796  | 81158  |
| UN04924 | Rsa1.0_26100.1 | 913  | 906    | 0         | 645  | 647  | 99 -  | 240  | 885  | 1      | 647    |
| UN04925 | Rsa1.0_22847.1 | 836  | 1089   | 0         | 378  | 384  | 98 -  | 453  | 835  | 706    | 1089   |
| UN04926 | Rsa1.0_00061.1 | 1372 | 218685 | 1.00E-134 | 320  | 347  | 92 -  | 1026 | 1372 | 84200  | 84527  |
| UN04927 | Rsa1.0_33701.1 | 819  | 673    | 0         | 388  | 398  | 97 -  | 1    | 398  | 2      | 397    |
| UN04928 | Rsa1.0_01649.1 | 766  | 41624  | 7.00E-88  | 174  | 177  | 98 +  | 262  | 438  | 36122  | 36298  |
| UN04929 | Rsa1.0_01920.1 | 787  | 158533 | 0         | 390  | 394  | 98 -  | 10   | 403  | 25105  | 25497  |
| UN04930 | Rsa1.0_01606.1 | 747  | 42432  | 1.00E-107 | 223  | 230  | 96 +  | 4    | 233  | 3851   | 4075   |
| UN04931 | Rsa1.0_00330.1 | 725  | 94666  | 1.00E-138 | 337  | 364  | 92 +  | 3    | 366  | 85362  | 85721  |
| UN04932 | Rsa1.0_11786.1 | 880  | 5409   | 0         | 876  | 876  | 100 - | 3    | 878  | 3020   | 3895   |
| UN04933 | Rsa1.0_00302.1 | 902  | 97521  | 0         | 892  | 899  | 99 -  | 4    | 902  | 91995  | 92892  |
| UN04934 | Rsa1.0_00017.1 | 975  | 752458 | 0         | 706  | 759  | 93 -  | 216  | 965  | 510949 | 511702 |
| UN04935 | Rsa1.0_03487.1 | 596  | 22564  | 0         | 593  | 594  | 99 +  | 3    | 596  | 8625   | 9218   |
| UN04936 | Rsa1.0_00035.1 | 862  | 176449 | 2.00E-76  | 152  | 154  | 98 +  | 223  | 376  | 155795 | 155948 |
| UN04937 | Rsa1.0_04342.1 | 1487 | 17828  | 1.00E-137 | 269  | 276  | 97 -  | 1207 | 1482 | 7828   | 8103   |
| UN04938 | Rsa1.0_00037.1 | 965  | 307838 | 1.00E-142 | 277  | 284  | 97 +  | 546  | 829  | 239665 | 239948 |
| UN04939 | Rsa1.0_02205.1 | 1174 | 33923  | 1.00E-167 | 307  | 310  | 99 -  | 733  | 1042 | 14306  | 14615  |
| UN04940 | Rsa1.0_08097.1 | 651  | 7914   | 1.00E-110 | 227  | 234  | 97 -  | 2    | 234  | 1390   | 1623   |
| UN04941 | Rsa1.0_01663.1 | 780  | 168589 | 0         | 499  | 517  | 96 +  | 3    | 516  | 69     | 582    |
| UN04942 | Rsa1.0_01779.1 | 1167 | 39448  | 0         | 1010 | 1062 | 95 -  | 3    | 1063 | 16345  | 17394  |
| UN04943 | Rsa1.0_00808.1 | 1185 | 63351  | 0         | 640  | 673  | 95 -  | 534  | 1185 | 39465  | 40137  |
| UN04944 | Rsa1.0_00192.1 | 861  | 278200 | 0         | 380  | 380  | 100 + | 482  | 861  | 223102 | 223481 |
| UN04945 | Rsa1.0_01275.1 | 512  | 49405  | 1.00E-132 | 266  | 275  | 96 -  | 238  | 512  | 8117   | 8391   |
| UN04946 | Rsa1.0_00087.1 | 950  | 761073 | 1.00E-148 | 377  | 407  | 92 -  | 531  | 932  | 615104 | 615505 |
| UN04947 | Rsa1.0_01660.1 | 864  | 41400  | 0         | 380  | 394  | 96 +  | 440  | 833  | 27246  | 27639  |
| UN04948 | Rsa1.0_00074.1 | 1099 | 147591 | 0         | 1001 | 1094 | 91 +  | 2    | 1094 | 13948  | 15017  |
| UN04949 | Rsa1.0_06047.1 | 994  | 11854  | 0         | 384  | 400  | 96 -  | 593  | 987  | 305    | 704    |
| UN04950 | Rsa1.0_02722.1 | 1167 | 28417  | 1.00E-152 | 301  | 310  | 97 +  | 513  | 822  | 959    | 1268   |
| UN04951 | Rsa1.0_02895.1 | 982  | 26979  | 0         | 959  | 979  | 97 +  | 3    | 981  | 6988   | 7966   |

|         |                |      |        |           |      |      |       |      |      |        |        |
|---------|----------------|------|--------|-----------|------|------|-------|------|------|--------|--------|
| UN04952 | Rsa1.0_00752.1 | 870  | 65756  | 1.00E-148 | 324  | 339  | 95 +  | 533  | 870  | 14186  | 14522  |
| UN04953 | Rsa1.0_00011.1 | 914  | 225044 | 0         | 437  | 449  | 97 -  | 3    | 449  | 146662 | 147109 |
| UN04954 | Rsa1.0_10147.1 | 1216 | 5976   | 0         | 440  | 446  | 98 +  | 3    | 448  | 658    | 1103   |
| UN04955 | Rsa1.0_01388.1 | 1130 | 46741  | 0         | 429  | 442  | 97 +  | 283  | 724  | 8787   | 9225   |
| UN04956 | Rsa1.0_01400.1 | 1313 | 46560  | 0         | 403  | 417  | 96 +  | 898  | 1312 | 13162  | 13575  |
| UN04957 | Rsa1.0_03330.1 | 861  | 23671  | 1.00E-123 | 230  | 232  | 99 -  | 3    | 234  | 20283  | 20514  |
| UN04958 | Rsa1.0_00416.1 | 963  | 86772  | 0         | 502  | 517  | 97 +  | 453  | 963  | 43593  | 44109  |
| UN04959 | Rsa1.0_11046.1 | 1311 | 5635   | 1.00E-151 | 324  | 339  | 95 +  | 978  | 1309 | 3092   | 3429   |
| UN04960 | Rsa1.0_06039.1 | 1157 | 11867  | 7.00E-86  | 237  | 260  | 91 -  | 890  | 1145 | 11496  | 11750  |
| UN04961 | Rsa1.0_01760.1 | 1269 | 39730  | 0         | 553  | 573  | 96 -  | 700  | 1269 | 5789   | 6361   |
| UN04962 | Rsa1.0_12094.1 | 1502 | 5316   | 1.00E-91  | 172  | 172  | 100 - | 1288 | 1459 | 1      | 172    |
| UN04963 | Rsa1.0_01216.1 | 1424 | 50580  | 0         | 1422 | 1427 | 99 -  | 2    | 1424 | 3394   | 4820   |
| UN04964 | Rsa1.0_03838.1 | 1389 | 20544  | 0         | 1384 | 1391 | 99 +  | 1    | 1389 | 4478   | 5868   |
| UN04965 | Rsa1.0_02681.1 | 667  | 28711  | 1.00E-157 | 294  | 298  | 98 -  | 225  | 522  | 14013  | 14310  |
| UN04966 | Rsa1.0_04735.1 | 1017 | 16180  | 0         | 482  | 513  | 93 +  | 495  | 999  | 10738  | 11242  |
| UN04967 | Rsa1.0_00015.1 | 1182 | 561803 | 0         | 595  | 606  | 98 -  | 34   | 638  | 478288 | 478892 |
| UN04968 | Rsa1.0_00626.1 | 1328 | 71582  | 0         | 412  | 417  | 98 +  | 914  | 1328 | 32116  | 32532  |
| UN04969 | Rsa1.0_01543.1 | 670  | 43645  | 0         | 652  | 670  | 97 +  | 3    | 669  | 5907   | 6576   |
| UN04970 | Rsa1.0_00745.1 | 424  | 66067  | 2.00E-49  | 235  | 272  | 86 +  | 97   | 359  | 51155  | 51410  |
| UN04971 | Rsa1.0_01811.1 | 1258 | 38977  | 1.00E-145 | 866  | 1050 | 82 -  | 213  | 1254 | 28552  | 29592  |
| UN04972 | Rsa1.0_00045.1 | 748  | 328694 | 0         | 359  | 366  | 98 -  | 383  | 748  | 133097 | 133462 |
| UN04973 | Rsa1.0_03502.1 | 1088 | 22446  | 0         | 384  | 391  | 98 -  | 696  | 1086 | 4184   | 4574   |
| UN04974 | Rsa1.0_00907.1 | 1008 | 60062  | 0         | 919  | 953  | 96 +  | 55   | 1007 | 48727  | 49679  |
| UN04975 | Rsa1.0_02550.1 | 1116 | 291051 | 1.00E-151 | 281  | 283  | 99 +  | 1    | 282  | 19916  | 20198  |
| UN04976 | Rsa1.0_04142.1 | 1460 | 18861  | 0         | 512  | 541  | 94 -  | 401  | 941  | 1699   | 2239   |
| UN04977 | Rsa1.0_03972.1 | 781  | 19787  | 0         | 770  | 782  | 98 -  | 2    | 781  | 33     | 812    |
| UN04978 | Rsa1.0_00058.1 | 1591 | 159921 | 0         | 454  | 472  | 96 +  | 1121 | 1591 | 119077 | 119545 |
| UN04979 | Rsa1.0_01633.1 | 611  | 41868  | 0         | 395  | 411  | 96 -  | 1    | 411  | 3039   | 3448   |
| UN04980 | Rsa1.0_00332.1 | 671  | 94575  | 0         | 651  | 671  | 97 -  | 3    | 671  | 38899  | 39561  |
| UN04981 | Rsa1.0_01913.1 | 594  | 37363  | 0         | 476  | 481  | 98 -  | 1    | 480  | 4208   | 4688   |
| UN04982 | Rsa1.0_00299.1 | 2246 | 97770  | 0         | 1786 | 1829 | 97 +  | 432  | 2245 | 42542  | 44370  |
| UN04983 | Rsa1.0_08114.1 | 1328 | 7883   | 0         | 476  | 502  | 94 +  | 534  | 1035 | 6483   | 6984   |
| UN04984 | Rsa1.0_03846.1 | 651  | 20481  | 0         | 644  | 644  | 100 + | 3    | 646  | 19667  | 20310  |
| UN04985 | Rsa1.0_00131.1 | 1161 | 432233 | 0         | 359  | 361  | 99 +  | 4    | 364  | 151892 | 152252 |
| UN04986 | Rsa1.0_16514.1 | 828  | 2127   | 0         | 453  | 469  | 96 -  | 373  | 828  | 1245   | 1713   |
| UN04987 | Rsa1.0_47414.1 | 699  | 477    | 0         | 472  | 477  | 98 -  | 207  | 683  | 1      | 477    |
| UN04988 | Rsa1.0_13708.1 | 808  | 4447   | 1.00E-131 | 271  | 281  | 96 -  | 528  | 808  | 3599   | 3877   |
| UN04989 | Rsa1.0_00417.1 | 656  | 395068 | 0         | 484  | 496  | 97 -  | 4    | 499  | 239633 | 240126 |
| UN04990 | Rsa1.0_02207.1 | 1504 | 33914  | 0         | 952  | 954  | 99 -  | 79   | 1032 | 29585  | 30538  |

|         |                |      |        |           |     |      |       |     |      |        |        |
|---------|----------------|------|--------|-----------|-----|------|-------|-----|------|--------|--------|
| UN04991 | Rsa1.0.01543.1 | 1024 | 43645  | 0         | 984 | 1025 | 96 -  | 2   | 1022 | 24614  | 25625  |
| UN04992 | Rsa1.0.00836.1 | 795  | 185968 | 0         | 707 | 710  | 99 +  | 3   | 712  | 7908   | 8617   |
| UN04993 | Rsa1.0.00033.1 | 805  | 515811 | 0         | 780 | 813  | 95 +  | 2   | 804  | 355685 | 356491 |
| UN04994 | Rsa1.0.00079.1 | 1276 | 606987 | 0         | 805 | 836  | 96 +  | 2   | 837  | 450551 | 451377 |
| UN04995 | Rsa1.0.02300.1 | 775  | 32847  | 1.00E-174 | 315 | 317  | 99 -  | 459 | 775  | 15424  | 15740  |
| UN04996 | Rsa1.0.04121.1 | 738  | 18951  | 0         | 475 | 499  | 95 -  | 5   | 503  | 13882  | 14379  |
| UN04997 | Rsa1.0.00314.1 | 793  | 96472  | 0         | 495 | 513  | 96 +  | 282 | 793  | 63022  | 63534  |
| UN04998 | Rsa1.0.00306.1 | 707  | 146760 | 0         | 399 | 413  | 96 +  | 295 | 707  | 87667  | 88079  |
| UN04999 | Rsa1.0.16246.1 | 489  | 2228   | 0         | 454 | 481  | 94 -  | 8   | 488  | 1133   | 1611   |
| UN05000 | Rsa1.0.01593.1 | 1064 | 150996 | 0         | 509 | 523  | 97 +  | 1   | 515  | 126016 | 126538 |
| UN05001 | Rsa1.0.00410.1 | 815  | 86957  | 1.00E-169 | 357 | 372  | 95 -  | 1   | 362  | 21084  | 21455  |
| UN05002 | Rsa1.0.03842.1 | 865  | 20503  | 0         | 474 | 495  | 95 -  | 1   | 493  | 17620  | 18107  |
| UN05003 | Rsa1.0.01116.1 | 870  | 142088 | 0         | 416 | 419  | 99 +  | 450 | 868  | 102212 | 102630 |
| UN05004 | Rsa1.0.06035.1 | 300  | 11874  | 1.00E-104 | 191 | 191  | 100 - | 109 | 299  | 8517   | 8707   |
| UN05005 | Rsa1.0.02343.1 | 920  | 32374  | 0         | 903 | 934  | 96 +  | 3   | 920  | 24183  | 25116  |
| UN05006 | Rsa1.0.07345.1 | 791  | 9526   | 0         | 423 | 425  | 99 +  | 1   | 424  | 6237   | 6661   |
| UN05007 | Rsa1.0.00210.1 | 767  | 108424 | 0         | 480 | 484  | 99 -  | 283 | 766  | 55835  | 56318  |
| UN05008 | Rsa1.0.00118.1 | 951  | 130637 | 0         | 901 | 964  | 93 +  | 3   | 951  | 39945  | 40908  |
| UN05009 | Rsa1.0.00581.1 | 927  | 163575 | 0         | 404 | 404  | 100 - | 192 | 595  | 142441 | 142844 |
| UN05010 | Rsa1.0.06546.1 | 995  | 10801  | 1.00E-107 | 237 | 250  | 94 +  | 498 | 747  | 4874   | 5123   |
| UN05011 | Rsa1.0.00069.1 | 848  | 403561 | 0         | 837 | 848  | 98 -  | 3   | 847  | 29695  | 30541  |
| UN05012 | Rsa1.0.00083.1 | 1107 | 442773 | 2.00E-89  | 177 | 180  | 98 -  | 577 | 756  | 138429 | 138608 |
| UN05013 | Rsa1.0.00116.1 | 775  | 365886 | 7.00E-79  | 181 | 190  | 95 +  | 3   | 191  | 314582 | 314771 |
| UN05014 | Rsa1.0.03568.1 | 912  | 22048  | 0         | 679 | 700  | 97 +  | 214 | 912  | 18563  | 19251  |
| UN05015 | Rsa1.0.04153.1 | 477  | 18807  | 1.00E-150 | 269 | 269  | 100 + | 209 | 477  | 16149  | 16417  |
| UN05016 | Rsa1.0.01834.1 | 709  | 38550  | 0         | 588 | 598  | 98 +  | 112 | 709  | 24064  | 24654  |
| UN05017 | Rsa1.0.03501.1 | 969  | 22458  | 0         | 841 | 847  | 99 +  | 122 | 968  | 21034  | 21880  |
| UN05018 | Rsa1.0.00708.1 | 864  | 67366  | 0         | 358 | 358  | 100 + | 1   | 358  | 60723  | 61080  |
| UN05019 | Rsa1.0.13204.1 | 997  | 4970   | 0         | 697 | 699  | 99 -  | 299 | 997  | 1453   | 2151   |
| UN05020 | Rsa1.0.00305.1 | 1204 | 97308  | 0         | 718 | 745  | 96 -  | 465 | 1204 | 92432  | 93174  |
| UN05021 | Rsa1.0.01176.1 | 848  | 51638  | 1.00E-111 | 210 | 212  | 99 -  | 89  | 300  | 48438  | 48649  |
| UN05022 | Rsa1.0.00271.1 | 1357 | 101125 | 0         | 778 | 795  | 97 +  | 2   | 794  | 13400  | 14193  |
| UN05023 | Rsa1.0.00909.1 | 637  | 59976  | 0         | 545 | 601  | 90 +  | 50  | 637  | 55626  | 56224  |
| UN05024 | Rsa1.0.02099.1 | 853  | 35030  | 0         | 366 | 368  | 99 -  | 3   | 370  | 18345  | 18712  |
| UN05025 | Rsa1.0.00171.1 | 607  | 115622 | 1.00E-143 | 301 | 314  | 95 +  | 3   | 316  | 50108  | 50420  |
| UN05026 | Rsa1.0.00085.1 | 745  | 142226 | 0         | 488 | 515  | 94 -  | 11  | 517  | 15550  | 16061  |
| UN05027 | Rsa1.0.00013.1 | 818  | 292129 | 0         | 614 | 632  | 97 +  | 189 | 818  | 177634 | 178263 |
| UN05028 | Rsa1.0.02248.1 | 1131 | 33414  | 1.00E-169 | 301 | 301  | 100 - | 3   | 303  | 9846   | 10146  |
| UN05029 | Rsa1.0.04399.1 | 1041 | 17543  | 1.00E-165 | 391 | 418  | 93 +  | 623 | 1036 | 9928   | 10344  |

|         |                |      |        |           |      |      |       |      |      |        |        |
|---------|----------------|------|--------|-----------|------|------|-------|------|------|--------|--------|
| UN05030 | Rsa1.0.00071.1 | 1149 | 345714 | 1.00E-53  | 238  | 277  | 85 -  | 2    | 274  | 137828 | 138101 |
| UN05031 | Rsa1.0.00247.1 | 1510 | 103408 | 0         | 714  | 826  | 86 -  | 716  | 1486 | 19877  | 20689  |
| UN05032 | Rsa1.0.01206.1 | 2019 | 50772  | 0         | 798  | 830  | 96 +  | 1183 | 2009 | 25627  | 26453  |
| UN05033 | Rsa1.0.00131.1 | 1373 | 432233 | 0         | 521  | 530  | 98 +  | 3    | 531  | 70980  | 71509  |
| UN05034 | Rsa1.0.00023.1 | 1471 | 194764 | 0         | 474  | 488  | 97 +  | 518  | 996  | 117583 | 118070 |
| UN05035 | Rsa1.0.00244.1 | 1629 | 103590 | 0         | 570  | 573  | 99 -  | 1058 | 1627 | 83585  | 84157  |
| UN05036 | Rsa1.0.00339.1 | 1019 | 222974 | 0         | 540  | 547  | 98 +  | 467  | 1013 | 66593  | 67135  |
| UN05037 | Rsa1.0.00649.1 | 1720 | 70263  | 0         | 1692 | 1720 | 98 +  | 1    | 1719 | 13699  | 15416  |
| UN05038 | Rsa1.0.07588.1 | 776  | 9070   | 1.00E-111 | 205  | 205  | 100 + | 7    | 211  | 3496   | 3700   |
| UN05039 | Rsa1.0.01034.1 | 1420 | 56046  | 0         | 1165 | 1202 | 96 -  | 220  | 1420 | 20989  | 22188  |
| UN05040 | Rsa1.0.01075.1 | 1124 | 156953 | 1.00E-143 | 258  | 258  | 100 + | 700  | 957  | 144150 | 144407 |
| UN05041 | Rsa1.0.18589.1 | 1036 | 1570   | 0         | 914  | 1005 | 90 +  | 50   | 1036 | 1      | 999    |
| UN05042 | Rsa1.0.03132.1 | 780  | 25142  | 0         | 399  | 416  | 95 -  | 57   | 472  | 22052  | 22467  |
| UN05043 | Rsa1.0.00568.1 | 1124 | 75219  | 0         | 544  | 547  | 99 +  | 564  | 1110 | 42305  | 42851  |
| UN05044 | Rsa1.0.23954.1 | 1342 | 1015   | 0         | 542  | 548  | 98 +  | 129  | 676  | 1      | 548    |
| UN05045 | Rsa1.0.32404.1 | 1495 | 703    | 0         | 596  | 598  | 99 -  | 581  | 1177 | 81     | 677    |
| UN05046 | Rsa1.0.00556.1 | 818  | 207212 | 0         | 508  | 528  | 96 +  | 212  | 737  | 51917  | 52444  |
| UN05047 | Rsa1.0.00451.1 | 1358 | 322533 | 1.00E-118 | 219  | 220  | 99 -  | 269  | 488  | 284872 | 285091 |
| UN05048 | Rsa1.0.16475.1 | 804  | 2143   | 1.00E-110 | 221  | 226  | 97 +  | 519  | 743  | 1084   | 1309   |
| UN05049 | Rsa1.0.00448.1 | 1362 | 84048  | 1.00E-165 | 298  | 299  | 99 -  | 1064 | 1362 | 62168  | 62466  |
| UN05050 | Rsa1.0.02192.1 | 1273 | 171291 | 0         | 916  | 935  | 97 -  | 2    | 933  | 152494 | 153423 |
| UN05051 | Rsa1.0.00112.1 | 602  | 132199 | 1.00E-124 | 254  | 263  | 96 +  | 224  | 486  | 71227  | 71486  |
| UN05052 | Rsa1.0.00411.1 | 857  | 86944  | 0         | 592  | 610  | 97 +  | 1    | 609  | 64634  | 65237  |
| UN05053 | Rsa1.0.02283.1 | 1019 | 33024  | 0         | 399  | 401  | 99 -  | 292  | 692  | 30355  | 30755  |
| UN05054 | Rsa1.0.01017.1 | 1168 | 56714  | 0         | 455  | 459  | 99 -  | 237  | 692  | 33346  | 33804  |
| UN05055 | Rsa1.0.00382.1 | 987  | 251946 | 0         | 950  | 989  | 96 -  | 1    | 987  | 108610 | 109598 |
| UN05056 | Rsa1.0.05047.1 | 1264 | 15032  | 0         | 653  | 653  | 100 - | 5    | 657  | 11264  | 11916  |
| UN05057 | Rsa1.0.00863.1 | 1046 | 254535 | 0         | 1008 | 1042 | 96 +  | 5    | 1046 | 209268 | 210288 |
| UN05058 | Rsa1.0.02881.1 | 1236 | 27041  | 0         | 861  | 873  | 98 +  | 364  | 1235 | 20939  | 21810  |
| UN05059 | Rsa1.0.03671.1 | 1078 | 21459  | 1.00E-117 | 295  | 316  | 93 +  | 724  | 1026 | 9842   | 10157  |
| UN05060 | Rsa1.0.02790.1 | 872  | 27844  | 0         | 866  | 872  | 99 +  | 1    | 872  | 11309  | 12180  |
| UN05061 | Rsa1.0.01452.1 | 386  | 45459  | 0         | 364  | 371  | 98 -  | 3    | 373  | 44828  | 45198  |
| UN05062 | Rsa1.0.05733.1 | 739  | 12785  | 1.00E-166 | 322  | 328  | 98 +  | 412  | 738  | 4105   | 4430   |
| UN05063 | Rsa1.0.00173.1 | 1018 | 288743 | 0         | 418  | 419  | 99 +  | 3    | 421  | 109178 | 109596 |
| UN05064 | Rsa1.0.02602.1 | 904  | 29653  | 0         | 763  | 802  | 95 -  | 1    | 801  | 28254  | 29055  |
| UN05065 | Rsa1.0.00269.1 | 1108 | 341668 | 1.00E-47  | 101  | 102  | 99 -  | 29   | 130  | 42739  | 42840  |
| UN05066 | Rsa1.0.00410.1 | 1160 | 86957  | 1.00E-157 | 287  | 289  | 99 -  | 872  | 1160 | 16810  | 17098  |
| UN05067 | Rsa1.0.02645.1 | 955  | 29158  | 0         | 882  | 903  | 97 -  | 51   | 949  | 17506  | 18408  |
| UN05068 | Rsa1.0.05969.1 | 791  | 12072  | 1.00E-114 | 218  | 221  | 98 +  | 3    | 223  | 4249   | 4469   |

|         |                |      |        |           |      |      |       |      |      |        |        |
|---------|----------------|------|--------|-----------|------|------|-------|------|------|--------|--------|
| UN05069 | Rsa1.0.00527.1 | 814  | 77733  | 1.00E-100 | 271  | 298  | 90 -  | 274  | 565  | 58084  | 58381  |
| UN05070 | Rsa1.0.00097.1 | 704  | 138858 | 0         | 369  | 380  | 97 -  | 325  | 704  | 16249  | 16628  |
| UN05071 | Rsa1.0.00706.1 | 994  | 291570 | 0         | 441  | 461  | 95 -  | 264  | 721  | 14249  | 14709  |
| UN05072 | Rsa1.0.00007.1 | 893  | 239325 | 1.00E-113 | 226  | 231  | 97 -  | 628  | 857  | 65927  | 66157  |
| UN05073 | Rsa1.0.01571.1 | 1091 | 43000  | 1.00E-158 | 284  | 284  | 100 + | 401  | 684  | 12885  | 13168  |
| UN05074 | Rsa1.0.00064.1 | 1249 | 240927 | 1.00E-148 | 273  | 275  | 99 -  | 598  | 872  | 125727 | 126001 |
| UN05075 | Rsa1.0.00139.1 | 1001 | 357786 | 0         | 353  | 353  | 100 - | 649  | 1001 | 284190 | 284542 |
| UN05076 | Rsa1.0.02550.1 | 758  | 291051 | 1.00E-178 | 320  | 321  | 99 +  | 100  | 420  | 4853   | 5173   |
| UN05077 | Rsa1.0.01930.1 | 1072 | 37189  | 0         | 346  | 350  | 98 +  | 1    | 350  | 18743  | 19092  |
| UN05078 | Rsa1.0.00285.1 | 1989 | 149638 | 0         | 573  | 578  | 99 +  | 799  | 1375 | 141606 | 142183 |
| UN05079 | Rsa1.0.23508.1 | 1032 | 1043   | 0         | 519  | 530  | 97 +  | 1    | 530  | 3      | 525    |
| UN05080 | Rsa1.0.13891.1 | 423  | 4144   | 1.00E-141 | 384  | 423  | 90 -  | 6    | 423  | 765    | 1175   |
| UN05081 | Rsa1.0.00137.1 | 1081 | 122457 | 0         | 724  | 754  | 96 +  | 162  | 915  | 90926  | 91667  |
| UN05082 | Rsa1.0.00707.1 | 878  | 190112 | 1.00E-142 | 269  | 273  | 98 -  | 172  | 444  | 188378 | 188650 |
| UN05083 | Rsa1.0.00092.1 | 757  | 659932 | 0         | 458  | 468  | 97 +  | 297  | 757  | 503777 | 504244 |
| UN05084 | Rsa1.0.00146.1 | 704  | 149343 | 1.00E-131 | 243  | 245  | 99 +  | 460  | 704  | 82075  | 82319  |
| UN05085 | Rsa1.0.14850.1 | 1348 | 3014   | 0         | 549  | 555  | 98 +  | 511  | 1065 | 542    | 1094   |
| UN05086 | Rsa1.0.01785.1 | 837  | 39368  | 0         | 420  | 431  | 97 +  | 4    | 432  | 24586  | 25016  |
| UN05087 | Rsa1.0.00105.1 | 810  | 134138 | 1.00E-167 | 386  | 413  | 93 +  | 403  | 810  | 91785  | 92184  |
| UN05088 | Rsa1.0.16170.1 | 407  | 2258   | 1.00E-102 | 200  | 204  | 98 -  | 204  | 407  | 1771   | 1974   |
| UN05089 | Rsa1.0.01612.1 | 1124 | 42255  | 0         | 1113 | 1124 | 99 -  | 3    | 1124 | 34901  | 36023  |
| UN05090 | Rsa1.0.00441.1 | 893  | 84607  | 9.00E-88  | 177  | 181  | 97 +  | 65   | 245  | 67739  | 67919  |
| UN05091 | Rsa1.0.00802.1 | 1259 | 63846  | 0         | 858  | 862  | 99 -  | 398  | 1259 | 49603  | 50463  |
| UN05092 | Rsa1.0.00732.1 | 1302 | 66631  | 0         | 396  | 408  | 97 +  | 896  | 1302 | 59691  | 60098  |
| UN05093 | Rsa1.0.08902.1 | 1157 | 6805   | 0         | 1096 | 1137 | 96 -  | 5    | 1129 | 4688   | 5824   |
| UN05094 | Rsa1.0.01365.1 | 1358 | 47142  | 0         | 730  | 741  | 98 -  | 128  | 865  | 6938   | 7678   |
| UN05095 | Rsa1.0.06346.1 | 1209 | 11203  | 0         | 1169 | 1189 | 98 -  | 23   | 1209 | 2204   | 3392   |
| UN05096 | #              | #    | #      | #         | #    | #    | #     | #    | #    | #      | #      |
| UN05097 | Rsa1.0.00065.1 | 729  | 454616 | 1.00E-144 | 290  | 300  | 96 -  | 111  | 410  | 231797 | 232096 |
| UN05098 | Rsa1.0.01384.1 | 1490 | 46803  | 0         | 445  | 456  | 97 +  | 1038 | 1490 | 20756  | 21208  |
| UN05099 | Rsa1.0.00381.1 | 965  | 89718  | 1.00E-102 | 199  | 202  | 98 +  | 363  | 564  | 16185  | 16386  |
| UN05100 | Rsa1.0.00107.1 | 1197 | 431659 | 0         | 658  | 669  | 98 -  | 4    | 672  | 257715 | 258382 |
| UN05101 | Rsa1.0.00037.1 | 1691 | 307838 | 0         | 422  | 429  | 98 +  | 1264 | 1690 | 46810  | 47238  |
| UN05102 | Rsa1.0.00502.1 | 548  | 204180 | 0         | 473  | 482  | 98 -  | 68   | 548  | 63892  | 64372  |
| UN05103 | Rsa1.0.00351.1 | 524  | 413096 | 1.00E-153 | 347  | 369  | 94 -  | 3    | 363  | 234781 | 235143 |
| UN05104 | Rsa1.0.03380.1 | 870  | 23320  | 1.00E-142 | 269  | 273  | 98 +  | 458  | 730  | 6687   | 6959   |
| UN05105 | Rsa1.0.08078.1 | 839  | 7944   | 1.00E-125 | 316  | 344  | 91 +  | 500  | 839  | 2693   | 3025   |
| UN05106 | Rsa1.0.01059.1 | 1165 | 55410  | 1.00E-176 | 348  | 359  | 96 -  | 104  | 462  | 14840  | 15195  |
| UN05107 | Rsa1.0.03943.1 | 1086 | 19931  | 0         | 413  | 429  | 96 -  | 1    | 425  | 5337   | 5765   |

|         |                |      |        |           |      |      |       |      |      |        |        |
|---------|----------------|------|--------|-----------|------|------|-------|------|------|--------|--------|
| UN05108 | Rsa1.0.00352.1 | 1158 | 92266  | 0         | 724  | 749  | 96 -  | 24   | 772  | 65700  | 66445  |
| UN05109 | Rsa1.0.00059.1 | 1128 | 159650 | 0         | 1117 | 1127 | 99 -  | 3    | 1128 | 1405   | 2531   |
| UN05110 | Rsa1.0.03327.1 | 647  | 23707  | 0         | 331  | 331  | 100 + | 3    | 333  | 16577  | 16907  |
| UN05111 | Rsa1.0.03985.1 | 982  | 19704  | 0         | 976  | 981  | 99 +  | 2    | 982  | 3902   | 4880   |
| UN05112 | Rsa1.0.01619.1 | 1123 | 42117  | 1.00E-106 | 225  | 232  | 96 +  | 893  | 1122 | 1      | 232    |
| UN05113 | Rsa1.0.00539.1 | 1406 | 76926  | 1.00E-151 | 275  | 276  | 99 -  | 1131 | 1406 | 32802  | 33077  |
| UN05114 | Rsa1.0.01734.1 | 1592 | 40183  | 0         | 1582 | 1589 | 99 +  | 6    | 1592 | 17248  | 18836  |
| UN05115 | Rsa1.0.00683.1 | 884  | 68638  | 0         | 878  | 884  | 99 -  | 1    | 884  | 66525  | 67408  |
| UN05116 | Rsa1.0.00645.1 | 519  | 189716 | 0         | 483  | 499  | 96 +  | 21   | 518  | 31549  | 32047  |
| UN05117 | Rsa1.0.03209.1 | 925  | 24592  | 0         | 380  | 395  | 96 -  | 534  | 924  | 19393  | 19778  |
| UN05118 | Rsa1.0.03674.1 | 827  | 21442  | 0         | 822  | 828  | 99 -  | 2    | 826  | 5200   | 6026   |
| UN05119 | Rsa1.0.00522.1 | 1166 | 78103  | 0         | 1132 | 1181 | 95 +  | 1    | 1164 | 38671  | 39840  |
| UN05120 | Rsa1.0.02678.1 | 1215 | 135053 | 1.00E-161 | 298  | 301  | 99 +  | 908  | 1208 | 112508 | 112808 |
| UN05121 | Rsa1.0.00018.1 | 1055 | 410899 | 1.00E-104 | 263  | 285  | 92 +  | 778  | 1055 | 262610 | 262890 |
| UN05122 | Rsa1.0.03413.1 | 1005 | 23137  | 0         | 499  | 544  | 91 +  | 497  | 1005 | 8284   | 8826   |
| UN05123 | Rsa1.0.00725.1 | 949  | 66757  | 0         | 944  | 947  | 99 +  | 3    | 949  | 45579  | 46524  |
| UN05124 | Rsa1.0.04194.1 | 1170 | 132734 | 2.00E-36  | 97   | 103  | 94 -  | 644  | 746  | 118157 | 118259 |
| UN05125 | Rsa1.0.25669.1 | 1034 | 926    | 0         | 599  | 602  | 99 -  | 433  | 1034 | 76     | 677    |
| UN05126 | Rsa1.0.00030.1 | 1041 | 250988 | 0         | 984  | 1039 | 94 +  | 3    | 1041 | 64475  | 65512  |
| UN05127 | Rsa1.0.16090.1 | 882  | 2289   | 0         | 708  | 739  | 95 -  | 8    | 743  | 941    | 1678   |
| UN05128 | Rsa1.0.00306.1 | 680  | 146760 | 0         | 580  | 632  | 91 +  | 3    | 631  | 75343  | 75968  |
| UN05129 | Rsa1.0.00081.1 | 816  | 143261 | 0         | 459  | 463  | 99 -  | 1    | 461  | 87969  | 88431  |
| UN05130 | Rsa1.0.00081.1 | 1251 | 143261 | 0         | 1145 | 1174 | 97 -  | 78   | 1251 | 77391  | 78564  |
| UN05131 | Rsa1.0.00410.1 | 889  | 86957  | 0         | 388  | 402  | 96 +  | 3    | 404  | 19648  | 20045  |
| UN05132 | Rsa1.0.05774.1 | 913  | 12667  | 0         | 714  | 746  | 95 -  | 2    | 747  | 3452   | 4190   |
| UN05133 | Rsa1.0.00651.1 | 1039 | 247766 | 0         | 355  | 355  | 100 + | 1    | 355  | 90170  | 90524  |
| UN05134 | Rsa1.0.00745.1 | 1486 | 66067  | 0         | 492  | 520  | 94 +  | 971  | 1485 | 52944  | 53451  |
| UN05135 | Rsa1.0.03623.1 | 807  | 21714  | 0         | 483  | 504  | 95 -  | 303  | 805  | 3310   | 3803   |
| UN05136 | Rsa1.0.00881.1 | 917  | 61260  | 0         | 631  | 636  | 99 +  | 246  | 881  | 18614  | 19248  |
| UN05137 | Rsa1.0.01608.1 | 978  | 170540 | 0         | 361  | 366  | 98 -  | 347  | 712  | 35343  | 35708  |
| UN05138 | Rsa1.0.03792.1 | 1356 | 20835  | 1.00E-126 | 263  | 274  | 95 -  | 447  | 720  | 10857  | 11130  |
| UN05139 | Rsa1.0.00126.1 | 485  | 127534 | 1.00E-118 | 295  | 319  | 92 -  | 176  | 485  | 113999 | 114314 |
| UN05140 | Rsa1.0.02802.1 | 1463 | 27736  | 0         | 703  | 714  | 98 -  | 337  | 1050 | 13800  | 14513  |
| UN05141 | Rsa1.0.00916.1 | 2213 | 59789  | 0         | 1292 | 1333 | 96 +  | 469  | 1795 | 31531  | 32860  |
| UN05142 | Rsa1.0.00173.1 | 998  | 288743 | 1.00E-86  | 197  | 207  | 95 -  | 301  | 507  | 284813 | 285018 |
| UN05143 | Rsa1.0.00016.1 | 814  | 831256 | 0         | 414  | 419  | 98 +  | 395  | 813  | 681896 | 682314 |
| UN05144 | Rsa1.0.13514.1 | 916  | 4757   | 0         | 563  | 587  | 95 +  | 330  | 916  | 836    | 1419   |
| UN05145 | Rsa1.0.04358.1 | 1444 | 17759  | 0         | 1417 | 1455 | 97 -  | 3    | 1444 | 10686  | 12133  |
| UN05146 | Rsa1.0.04273.1 | 915  | 18144  | 1.00E-106 | 199  | 200  | 99 +  | 399  | 598  | 11608  | 11807  |

|         |                |      |        |           |      |      |       |     |      |        |        |
|---------|----------------|------|--------|-----------|------|------|-------|-----|------|--------|--------|
| UN05147 | Rsa1.0.01102.1 | 1400 | 53987  | 0         | 1382 | 1396 | 98 +  | 6   | 1400 | 10087  | 11482  |
| UN05148 | Rsa1.0.00071.1 | 865  | 345714 | 0         | 375  | 382  | 98 +  | 143 | 524  | 311950 | 312331 |
| UN05149 | Rsa1.0.07588.1 | 997  | 9070   | 0         | 832  | 870  | 95 -  | 23  | 880  | 5044   | 5913   |
| UN05150 | Rsa1.0.00045.1 | 829  | 328694 | 1.00E-112 | 259  | 273  | 94 +  | 1   | 272  | 245137 | 245406 |
| UN05151 | Rsa1.0.09157.1 | 644  | 6602   | 1.00E-121 | 238  | 244  | 97 +  | 5   | 248  | 5288   | 5531   |
| UN05152 | Rsa1.0.01061.1 | 891  | 55349  | 1.00E-167 | 406  | 432  | 93 +  | 1   | 423  | 21819  | 22249  |
| UN05153 | Rsa1.0.02673.1 | 1358 | 28877  | 1.00E-112 | 254  | 269  | 94 +  | 9   | 269  | 25599  | 25867  |
| UN05154 | Rsa1.0.06194.1 | 739  | 11516  | 0         | 663  | 688  | 96 +  | 67  | 736  | 5194   | 5878   |
| UN05155 | Rsa1.0.07636.1 | 868  | 8971   | 0         | 526  | 535  | 98 +  | 3   | 537  | 7136   | 7668   |
| UN05156 | Rsa1.0.00867.1 | 720  | 61635  | 0         | 362  | 370  | 97 -  | 5   | 374  | 31869  | 32235  |
| UN05157 | Rsa1.0.06407.1 | 1076 | 11071  | 0         | 858  | 884  | 97 +  | 190 | 1073 | 9341   | 10224  |
| UN05158 | Rsa1.0.05849.1 | 1463 | 12425  | 0         | 433  | 434  | 99 -  | 447 | 880  | 8382   | 8815   |
| UN05159 | Rsa1.0.01620.1 | 1121 | 42091  | 1.00E-160 | 295  | 298  | 98 -  | 1   | 298  | 22880  | 23177  |
| UN05160 | Rsa1.0.00240.1 | 931  | 104175 | 1.00E-118 | 265  | 278  | 95 +  | 24  | 296  | 53559  | 53836  |
| UN05161 | Rsa1.0.02987.1 | 736  | 26196  | 1.00E-162 | 330  | 341  | 96 -  | 396 | 732  | 25859  | 26196  |
| UN05162 | Rsa1.0.08293.1 | 749  | 7593   | 0         | 363  | 364  | 99 +  | 386 | 749  | 2270   | 2633   |
| UN05163 | Rsa1.0.00017.1 | 812  | 752458 | 0         | 760  | 784  | 96 -  | 1   | 778  | 555179 | 555948 |
| UN05164 | Rsa1.0.08617.1 | 774  | 7124   | 0         | 756  | 773  | 97 +  | 1   | 773  | 291    | 1063   |
| UN05165 | Rsa1.0.08707.1 | 1319 | 7018   | 0         | 734  | 749  | 97 +  | 501 | 1249 | 1      | 749    |
| UN05166 | Rsa1.0.00284.1 | 797  | 323267 | 1.00E-151 | 287  | 291  | 98 +  | 1   | 291  | 134882 | 135170 |
| UN05167 | Rsa1.0.00056.1 | 723  | 332604 | 0         | 430  | 439  | 97 +  | 2   | 440  | 19450  | 19888  |
| UN05168 | Rsa1.0.68740.1 | 985  | 334    | 1.00E-164 | 311  | 317  | 98 +  | 1   | 317  | 18     | 334    |
| UN05169 | Rsa1.0.02855.1 | 961  | 27271  | 0         | 455  | 492  | 92 -  | 2   | 480  | 10770  | 11254  |
| UN05170 | Rsa1.0.04611.1 | 1139 | 16647  | 0         | 471  | 482  | 97 -  | 1   | 477  | 2562   | 3043   |
| UN05171 | Rsa1.0.14400.1 | 1003 | 3430   | 0         | 594  | 637  | 93 -  | 15  | 645  | 1      | 634    |
| UN05172 | Rsa1.0.00810.1 | 934  | 63289  | 0         | 922  | 930  | 99 +  | 2   | 931  | 60504  | 61430  |
| UN05173 | Rsa1.0.00247.1 | 219  | 103408 | 6.00E-33  | 109  | 120  | 90 +  | 100 | 219  | 66830  | 66948  |
| UN05174 | Rsa1.0.00369.1 | 1380 | 266462 | 0         | 1351 | 1405 | 96 -  | 3   | 1376 | 263081 | 264481 |
| UN05175 | Rsa1.0.02700.1 | 1067 | 28584  | 0         | 383  | 384  | 99 -  | 1   | 383  | 15011  | 15394  |
| UN05176 | Rsa1.0.00416.1 | 1116 | 86772  | 0         | 394  | 402  | 98 -  | 519 | 916  | 43719  | 44120  |
| UN05177 | Rsa1.0.00253.1 | 1045 | 231292 | 1.00E-144 | 325  | 343  | 94 +  | 24  | 360  | 126609 | 126949 |
| UN05178 | Rsa1.0.01306.1 | 1860 | 48720  | 0         | 572  | 594  | 96 -  | 2   | 590  | 33628  | 34220  |
| UN05179 | Rsa1.0.61642.1 | 579  | 372    | 1.00E-169 | 313  | 317  | 98 -  | 137 | 453  | 56     | 372    |
| UN05180 | Rsa1.0.00137.1 | 1213 | 122457 | 0         | 1003 | 1009 | 99 -  | 205 | 1213 | 90659  | 91667  |
| UN05181 | Rsa1.0.03284.1 | 652  | 24069  | 0         | 641  | 649  | 98 -  | 7   | 652  | 7230   | 7878   |
| UN05182 | Rsa1.0.00001.1 | 748  | 363028 | 0         | 730  | 749  | 97 -  | 5   | 746  | 33667  | 34414  |
| UN05183 | Rsa1.0.02276.1 | 745  | 33098  | 0         | 733  | 752  | 97 +  | 3   | 745  | 22945  | 23696  |
| UN05184 | Rsa1.0.00012.1 | 843  | 222148 | 0         | 710  | 710  | 100 + | 2   | 711  | 85333  | 86042  |
| UN05185 | Rsa1.0.00119.1 | 1209 | 467509 | 0         | 422  | 426  | 99 +  | 1   | 426  | 46341  | 46766  |

|         |                |      |        |           |      |      |       |      |      |        |        |
|---------|----------------|------|--------|-----------|------|------|-------|------|------|--------|--------|
| UN05186 | Rsa1.0.00344.1 | 1317 | 191774 | 0         | 758  | 769  | 98 +  | 548  | 1315 | 120085 | 120853 |
| UN05187 | Rsa1.0.06042.1 | 740  | 11860  | 0         | 737  | 739  | 99 -  | 2    | 740  | 661    | 1399   |
| UN05188 | Rsa1.0.03133.1 | 815  | 25135  | 8.00E-91  | 179  | 182  | 98 +  | 357  | 538  | 9682   | 9863   |
| UN05189 | Rsa1.0.04028.1 | 395  | 19493  | 7.00E-99  | 198  | 203  | 97 +  | 1    | 203  | 2386   | 2588   |
| UN05190 | Rsa1.0.00070.1 | 694  | 150321 | 0         | 692  | 694  | 99 +  | 2    | 694  | 47124  | 47817  |
| UN05191 | Rsa1.0.05979.1 | 1499 | 12051  | 0         | 503  | 503  | 100 - | 1    | 503  | 10020  | 10522  |
| UN05192 | Rsa1.0.15269.1 | 779  | 2719   | 1.00E-155 | 317  | 330  | 96 -  | 6    | 325  | 296    | 625    |
| UN05193 | Rsa1.0.00157.1 | 1405 | 245832 | 1.00E-176 | 320  | 321  | 99 -  | 1086 | 1405 | 188327 | 188647 |
| UN05194 | Rsa1.0.00016.1 | 833  | 831256 | 3.00E-87  | 220  | 235  | 93 +  | 92   | 317  | 809775 | 810009 |
| UN05195 | Rsa1.0.00955.1 | 683  | 58358  | 0         | 484  | 492  | 98 -  | 1    | 492  | 42045  | 42534  |
| UN05196 | Rsa1.0.00214.1 | 889  | 107508 | 3.00E-87  | 342  | 394  | 86 +  | 5    | 373  | 28862  | 29247  |
| UN05197 | Rsa1.0.04372.1 | 1397 | 17692  | 0         | 854  | 856  | 99 -  | 3    | 858  | 9661   | 10516  |
| UN05198 | Rsa1.0.00421.1 | 725  | 86365  | 0         | 701  | 726  | 96 +  | 1    | 725  | 11839  | 12562  |
| UN05199 | Rsa1.0.00044.1 | 784  | 271658 | 1.00E-118 | 219  | 220  | 99 +  | 422  | 641  | 57062  | 57281  |
| UN05200 | Rsa1.0.01438.1 | 598  | 45882  | 0         | 402  | 408  | 98 -  | 189  | 596  | 32813  | 33220  |
| UN05201 | Rsa1.0.00870.1 | 1141 | 61606  | 0         | 851  | 860  | 98 +  | 280  | 1139 | 9589   | 10448  |
| UN05202 | Rsa1.0.00516.1 | 857  | 78417  | 1.00E-105 | 195  | 195  | 100 + | 588  | 782  | 31115  | 31309  |
| UN05203 | Rsa1.0.01675.1 | 898  | 41155  | 0         | 357  | 364  | 98 -  | 535  | 898  | 30271  | 30634  |
| UN05204 | Rsa1.0.00069.1 | 1548 | 403561 | 0         | 1497 | 1540 | 97 +  | 2    | 1536 | 247195 | 248731 |
| UN05205 | Rsa1.0.01602.1 | 650  | 42503  | 0         | 565  | 585  | 96 -  | 50   | 633  | 39978  | 40562  |
| UN05206 | Rsa1.0.00065.1 | 1197 | 454616 | 0         | 361  | 361  | 100 - | 837  | 1197 | 190404 | 190764 |
| UN05207 | Rsa1.0.00253.1 | 1263 | 231292 | 0         | 838  | 849  | 98 +  | 36   | 883  | 193624 | 194472 |
| UN05208 | Rsa1.0.00076.1 | 958  | 146021 | 1.00E-180 | 329  | 332  | 99 +  | 625  | 956  | 35148  | 35479  |
| UN05209 | Rsa1.0.00342.1 | 1701 | 93695  | 0         | 817  | 827  | 98 +  | 876  | 1701 | 35879  | 36705  |
| UN05210 | Rsa1.0.00347.1 | 1220 | 93048  | 0         | 440  | 442  | 99 +  | 3    | 444  | 90999  | 91440  |
| UN05211 | Rsa1.0.00237.1 | 691  | 235974 | 0         | 430  | 438  | 98 -  | 255  | 691  | 188285 | 188722 |
| UN05212 | Rsa1.0.00387.1 | 711  | 495407 | 1.00E-111 | 250  | 265  | 94 -  | 351  | 615  | 342037 | 342297 |
| UN05213 | Rsa1.0.10607.1 | 1197 | 5786   | 0         | 382  | 385  | 99 +  | 813  | 1197 | 2758   | 3142   |
| UN05214 | Rsa1.0.06774.1 | 921  | 10381  | 0         | 506  | 525  | 96 +  | 393  | 917  | 7069   | 7593   |
| UN05215 | Rsa1.0.00001.1 | 1292 | 363028 | 0         | 355  | 358  | 99 +  | 937  | 1292 | 329335 | 329691 |
| UN05216 | Rsa1.0.04848.1 | 756  | 15727  | 0         | 679  | 692  | 98 +  | 3    | 694  | 5785   | 6475   |
| UN05217 | Rsa1.0.00100.1 | 1070 | 249232 | 0         | 719  | 738  | 97 -  | 2    | 739  | 195789 | 196523 |
| UN05218 | Rsa1.0.00019.1 | 743  | 301669 | 7.00E-85  | 208  | 222  | 93 -  | 2    | 219  | 107363 | 107584 |
| UN05219 | Rsa1.0.00649.1 | 1509 | 70263  | 1.00E-129 | 253  | 259  | 97 +  | 209  | 467  | 24617  | 24875  |
| UN05220 | Rsa1.0.00552.1 | 1290 | 206757 | 0         | 594  | 623  | 95 -  | 651  | 1263 | 67991  | 68611  |
| UN05221 | Rsa1.0.03390.1 | 738  | 23270  | 0         | 459  | 473  | 97 -  | 265  | 734  | 6595   | 7066   |
| UN05222 | Rsa1.0.02807.1 | 946  | 27680  | 1.00E-136 | 255  | 258  | 98 +  | 389  | 646  | 10903  | 11160  |
| UN05223 | Rsa1.0.01104.1 | 945  | 285480 | 1.00E-148 | 289  | 294  | 98 +  | 651  | 942  | 9410   | 9703   |
| UN05224 | Rsa1.0.01296.1 | 703  | 49035  | 0         | 426  | 438  | 97 +  | 236  | 671  | 12562  | 12999  |



|         |                |      |        |           |      |      |       |      |      |        |        |
|---------|----------------|------|--------|-----------|------|------|-------|------|------|--------|--------|
| UN05225 | Rsa1.0.00224.1 | 1289 | 327530 | 1.00E-141 | 270  | 275  | 98 +  | 340  | 614  | 208584 | 208858 |
| UN05226 | Rsa1.0.00529.1 | 416  | 77487  | 0         | 387  | 396  | 97 -  | 19   | 414  | 10180  | 10575  |
| UN05227 | Rsa1.0.01407.1 | 1655 | 46425  | 0         | 900  | 906  | 99 -  | 2    | 907  | 19638  | 20543  |
| UN05228 | Rsa1.0.01971.1 | 1229 | 36641  | 0         | 1203 | 1230 | 97 -  | 3    | 1229 | 23421  | 24649  |
| UN05229 | Rsa1.0.00383.1 | 1443 | 398431 | 1.00E-124 | 242  | 247  | 97 +  | 727  | 973  | 2510   | 2756   |
| UN05230 | Rsa1.0.01537.1 | 1675 | 187285 | 1.00E-160 | 294  | 295  | 99 +  | 234  | 527  | 19498  | 19792  |
| UN05231 | Rsa1.0.00615.1 | 820  | 72235  | 1.00E-175 | 320  | 323  | 99 -  | 351  | 673  | 55080  | 55402  |
| UN05232 | Rsa1.0.01351.1 | 1154 | 47498  | 0         | 1074 | 1105 | 97 -  | 2    | 1106 | 2865   | 3969   |
| UN05233 | Rsa1.0.06797.1 | 2285 | 10342  | 0         | 735  | 774  | 94 +  | 598  | 1370 | 4651   | 5406   |
| UN05234 | Rsa1.0.00585.1 | 950  | 74164  | 0         | 906  | 933  | 97 -  | 1    | 930  | 60726  | 61655  |
| UN05235 | Rsa1.0.05267.1 | 827  | 14319  | 0         | 775  | 798  | 97 +  | 1    | 798  | 6606   | 7402   |
| UN05236 | Rsa1.0.03491.1 | 719  | 22541  | 4.00E-86  | 357  | 422  | 84 -  | 52   | 473  | 9114   | 9535   |
| UN05237 | Rsa1.0.03544.1 | 1071 | 22182  | 0         | 1019 | 1074 | 94 +  | 2    | 1070 | 19603  | 20669  |
| UN05238 | Rsa1.0.02909.1 | 661  | 26856  | 0         | 641  | 652  | 98 +  | 7    | 658  | 10343  | 10994  |
| UN05239 | Rsa1.0.00313.1 | 1101 | 96745  | 0         | 569  | 573  | 99 -  | 529  | 1101 | 59603  | 60174  |
| UN05240 | Rsa1.0.07236.1 | 851  | 9680   | 0         | 457  | 458  | 99 +  | 388  | 845  | 2988   | 3445   |
| UN05241 | Rsa1.0.01397.1 | 883  | 183276 | 1.00E-147 | 264  | 264  | 100 - | 618  | 881  | 164309 | 164572 |
| UN05242 | Rsa1.0.16218.1 | 955  | 2240   | 1.00E-166 | 297  | 297  | 100 - | 632  | 928  | 78     | 374    |
| UN05243 | Rsa1.0.14974.1 | 689  | 2919   | 0         | 404  | 404  | 100 + | 3    | 406  | 1485   | 1888   |
| UN05244 | Rsa1.0.00184.1 | 834  | 218748 | 0         | 537  | 537  | 100 - | 298  | 834  | 2634   | 3170   |
| UN05245 | Rsa1.0.00090.1 | 1348 | 273859 | 0         | 560  | 604  | 92 +  | 737  | 1334 | 138997 | 139590 |
| UN05246 | Rsa1.0.00973.1 | 1278 | 57913  | 0         | 1140 | 1167 | 97 +  | 113  | 1278 | 40860  | 42025  |
| UN05247 | Rsa1.0.00168.1 | 851  | 115870 | 0         | 394  | 400  | 98 -  | 104  | 503  | 111590 | 111989 |
| UN05248 | Rsa1.0.00047.1 | 1268 | 168582 | 0         | 434  | 434  | 100 + | 835  | 1268 | 4911   | 5344   |
| UN05249 | Rsa1.0.04981.1 | 753  | 15250  | 0         | 386  | 399  | 96 -  | 3    | 400  | 7395   | 7793   |
| UN05250 | Rsa1.0.00149.1 | 486  | 305196 | 1.00E-105 | 208  | 212  | 98 +  | 278  | 486  | 8505   | 8716   |
| UN05251 | Rsa1.0.00802.1 | 770  | 63846  | 0         | 372  | 383  | 97 +  | 3    | 382  | 56821  | 57203  |
| UN05252 | Rsa1.0.02231.1 | 1317 | 33661  | 0         | 1185 | 1269 | 93 -  | 3    | 1264 | 18252  | 19507  |
| UN05253 | Rsa1.0.00141.1 | 941  | 121494 | 2.00E-95  | 270  | 304  | 88 -  | 647  | 941  | 29536  | 29823  |
| UN05254 | Rsa1.0.00390.1 | 779  | 88681  | 1.00E-121 | 227  | 229  | 99 +  | 252  | 480  | 35102  | 35330  |
| UN05255 | Rsa1.0.00128.1 | 2312 | 228675 | 0         | 1363 | 1371 | 99 -  | 1    | 1371 | 159174 | 160544 |
| UN05256 | Rsa1.0.01779.1 | 803  | 39448  | 0         | 601  | 693  | 86 -  | 98   | 790  | 9732   | 10424  |
| UN05257 | Rsa1.0.17997.1 | 1149 | 1693   | 0         | 886  | 890  | 99 +  | 2    | 889  | 804    | 1693   |
| UN05258 | Rsa1.0.09698.1 | 1077 | 6203   | 0         | 383  | 399  | 95 -  | 435  | 833  | 1296   | 1694   |
| UN05259 | Rsa1.0.00589.1 | 1391 | 209965 | 1.00E-139 | 317  | 335  | 94 -  | 1033 | 1365 | 162792 | 163124 |
| UN05260 | Rsa1.0.00006.1 | 720  | 396176 | 0         | 441  | 465  | 94 -  | 255  | 719  | 307636 | 308096 |
| UN05261 | Rsa1.0.05093.1 | 1262 | 14876  | 1.00E-149 | 298  | 307  | 97 -  | 958  | 1262 | 11047  | 11353  |
| UN05262 | Rsa1.0.00792.1 | 871  | 64163  | 9.00E-57  | 167  | 185  | 90 -  | 314  | 498  | 4551   | 4735   |
| UN05263 | Rsa1.0.01043.1 | 895  | 55893  | 0         | 385  | 385  | 100 + | 511  | 895  | 48633  | 49017  |

|         |                |      |        |           |     |      |       |      |      |        |        |
|---------|----------------|------|--------|-----------|-----|------|-------|------|------|--------|--------|
| UN05264 | Rsa1.0_23922.1 | 1152 | 1017   | 0         | 769 | 770  | 99 -  | 2    | 771  | 1      | 770    |
| UN05265 | Rsa1.0_01750.1 | 1433 | 39816  | 0         | 611 | 627  | 97 -  | 1    | 626  | 24343  | 24969  |
| UN05266 | Rsa1.0_01586.1 | 838  | 42804  | 1.00E-171 | 357 | 373  | 95 -  | 16   | 388  | 29493  | 29864  |
| UN05267 | Rsa1.0_00821.1 | 675  | 62891  | 0         | 561 | 563  | 99 -  | 114  | 675  | 5065   | 5627   |
| UN05268 | Rsa1.0_01209.1 | 795  | 50668  | 0         | 772 | 794  | 97 -  | 1    | 794  | 24794  | 25570  |
| UN05269 | Rsa1.0_00018.1 | 694  | 410899 | 0         | 373 | 385  | 96 +  | 311  | 694  | 193614 | 193997 |
| UN05270 | Rsa1.0_02991.1 | 817  | 26178  | 0         | 796 | 847  | 93 +  | 3    | 816  | 8733   | 9573   |
| UN05271 | Rsa1.0_00817.1 | 1425 | 62961  | 1.00E-148 | 284 | 290  | 97 -  | 446  | 735  | 39075  | 39364  |
| UN05272 | Rsa1.0_01888.1 | 1535 | 37563  | 1.00E-151 | 283 | 287  | 98 -  | 236  | 522  | 17199  | 17485  |
| UN05273 | Rsa1.0_00675.1 | 910  | 145590 | 0         | 469 | 480  | 97 -  | 431  | 910  | 67441  | 67920  |
| UN05274 | Rsa1.0_02165.1 | 1041 | 34423  | 0         | 545 | 604  | 90 -  | 375  | 962  | 3037   | 3636   |
| UN05275 | Rsa1.0_00239.1 | 939  | 104332 | 0         | 462 | 482  | 95 -  | 458  | 939  | 34699  | 35180  |
| UN05276 | Rsa1.0_02879.1 | 875  | 27047  | 1.00E-114 | 219 | 221  | 99 -  | 3    | 222  | 26493  | 26713  |
| UN05277 | Rsa1.0_00033.1 | 1060 | 515811 | 0         | 914 | 937  | 97 -  | 125  | 1060 | 485085 | 486009 |
| UN05278 | Rsa1.0_04794.1 | 802  | 15960  | 0         | 383 | 383  | 100 + | 80   | 462  | 6544   | 6926   |
| UN05279 | Rsa1.0_00985.1 | 657  | 161950 | 1.00E-98  | 220 | 231  | 95 +  | 427  | 657  | 39464  | 39693  |
| UN05280 | Rsa1.0_01141.1 | 969  | 52530  | 1.00E-166 | 318 | 324  | 98 -  | 643  | 965  | 39275  | 39598  |
| UN05281 | Rsa1.0_00001.1 | 821  | 363028 | 1.00E-108 | 200 | 200  | 100 + | 203  | 402  | 318208 | 318407 |
| UN05282 | Rsa1.0_01467.1 | 994  | 45161  | 0         | 959 | 994  | 96 -  | 1    | 991  | 23856  | 24849  |
| UN05283 | Rsa1.0_02873.1 | 1248 | 27077  | 7.00E-43  | 103 | 106  | 97 +  | 1140 | 1244 | 15909  | 16014  |
| UN05284 | Rsa1.0_01382.1 | 1387 | 46877  | 0         | 513 | 520  | 98 -  | 867  | 1386 | 24876  | 25394  |
| UN05285 | Rsa1.0_00107.1 | 888  | 431659 | 0         | 558 | 584  | 95 +  | 300  | 876  | 337025 | 337604 |
| UN05286 | Rsa1.0_22717.1 | 1016 | 1101   | 1.00E-164 | 299 | 301  | 99 +  | 716  | 1016 | 773    | 1073   |
| UN05287 | Rsa1.0_13819.1 | 971  | 4264   | 0         | 424 | 434  | 97 +  | 2    | 435  | 1006   | 1439   |
| UN05288 | Rsa1.0_18379.1 | 866  | 1611   | 0         | 773 | 777  | 99 -  | 90   | 866  | 271    | 1047   |
| UN05289 | Rsa1.0_00146.1 | 808  | 149343 | 0         | 794 | 808  | 98 +  | 1    | 808  | 67589  | 68396  |
| UN05290 | Rsa1.0_00522.1 | 980  | 78103  | 0         | 949 | 1000 | 94 -  | 3    | 980  | 38739  | 39734  |
| UN05291 | Rsa1.0_00284.1 | 1038 | 323267 | 0         | 463 | 507  | 91 +  | 527  | 1033 | 275018 | 275498 |
| UN05292 | Rsa1.0_00067.1 | 1434 | 415055 | 0         | 516 | 541  | 95 -  | 302  | 839  | 252590 | 253130 |
| UN05293 | Rsa1.0_00777.1 | 751  | 191865 | 1.00E-125 | 256 | 264  | 96 +  | 486  | 749  | 182543 | 182805 |
| UN05294 | Rsa1.0_15050.1 | 1547 | 2868   | 1.00E-159 | 345 | 359  | 96 -  | 1195 | 1547 | 454    | 811    |
| UN05295 | Rsa1.0_03256.1 | 898  | 24305  | 1.00E-147 | 306 | 321  | 95 -  | 3    | 315  | 23203  | 23523  |
| UN05296 | Rsa1.0_00010.1 | 974  | 294827 | 1.00E-117 | 228 | 231  | 98 +  | 744  | 974  | 243062 | 243291 |
| UN05297 | Rsa1.0_03028.1 | 978  | 25872  | 0         | 696 | 715  | 97 -  | 3    | 713  | 18683  | 19391  |
| UN05298 | Rsa1.0_00154.1 | 1796 | 189461 | 0         | 517 | 546  | 94 +  | 5    | 536  | 127025 | 127570 |
| UN05299 | Rsa1.0_00544.1 | 693  | 76787  | 1.00E-109 | 204 | 205  | 99 -  | 5    | 209  | 60369  | 60573  |
| UN05300 | Rsa1.0_03490.1 | 1055 | 22545  | 0         | 483 | 488  | 98 -  | 1    | 488  | 20433  | 20919  |
| UN05301 | Rsa1.0_00133.1 | 1409 | 123768 | 0         | 698 | 720  | 96 -  | 666  | 1385 | 13416  | 14134  |
| UN05302 | Rsa1.0_01516.1 | 1118 | 44196  | 0         | 530 | 556  | 95 -  | 3    | 558  | 36762  | 37315  |

|         |                |      |        |           |      |      |       |      |      |        |        |
|---------|----------------|------|--------|-----------|------|------|-------|------|------|--------|--------|
| UN05303 | Rsa1.0_01827.1 | 1644 | 143321 | 1.00E-170 | 383  | 409  | 93 +  | 937  | 1342 | 114713 | 115121 |
| UN05304 | Rsa1.0_03451.1 | 934  | 22828  | 1.00E-156 | 298  | 304  | 98 -  | 1    | 304  | 18258  | 18561  |
| UN05305 | Rsa1.0_01094.1 | 979  | 167285 | 0         | 621  | 644  | 96 +  | 346  | 977  | 49222  | 49865  |
| UN05306 | Rsa1.0_00697.1 | 1027 | 67913  | 0         | 879  | 962  | 91 +  | 10   | 960  | 40876  | 41807  |
| UN05307 | Rsa1.0_01063.1 | 1024 | 55301  | 1.00E-153 | 300  | 306  | 98 -  | 720  | 1024 | 54642  | 54946  |
| UN05308 | Rsa1.0_01626.1 | 1040 | 41989  | 1.00E-143 | 264  | 266  | 99 +  | 775  | 1040 | 2329   | 2594   |
| UN05309 | Rsa1.0_00072.1 | 1355 | 148743 | 1.00E-179 | 353  | 362  | 97 +  | 995  | 1355 | 72748  | 73107  |
| UN05310 | Rsa1.0_00301.1 | 1203 | 365315 | 0         | 1166 | 1211 | 96 +  | 2    | 1203 | 354111 | 355307 |
| UN05311 | Rsa1.0_14363.1 | 2202 | 3477   | 0         | 764  | 772  | 98 -  | 1432 | 2202 | 608    | 1375   |
| UN05312 | Rsa1.0_00125.1 | 876  | 253043 | 0         | 459  | 464  | 98 -  | 268  | 731  | 4714   | 5177   |
| UN05313 | Rsa1.0_00526.1 | 766  | 169279 | 0         | 761  | 762  | 99 -  | 3    | 764  | 126150 | 126911 |
| UN05314 | Rsa1.0_02397.1 | 637  | 31778  | 4.00E-21  | 68   | 73   | 93 -  | 511  | 583  | 19073  | 19145  |
| UN05315 | Rsa1.0_00891.1 | 1323 | 60724  | 0         | 882  | 915  | 96 +  | 267  | 1177 | 46240  | 47142  |
| UN05316 | Rsa1.0_01634.1 | 858  | 41865  | 1.00E-102 | 204  | 209  | 97 -  | 396  | 604  | 39398  | 39606  |
| UN05317 | Rsa1.0_01593.1 | 849  | 150996 | 0         | 404  | 430  | 93 -  | 55   | 484  | 5028   | 5454   |
| UN05318 | Rsa1.0_00762.1 | 793  | 165246 | 1.00E-172 | 322  | 327  | 98 -  | 467  | 793  | 51055  | 51381  |
| UN05319 | Rsa1.0_00781.1 | 979  | 64480  | 1.00E-148 | 267  | 267  | 100 + | 576  | 842  | 31184  | 31450  |
| UN05320 | Rsa1.0_02199.1 | 1220 | 33982  | 0         | 1158 | 1176 | 98 +  | 4    | 1175 | 25722  | 26897  |
| UN05321 | Rsa1.0_00722.1 | 1635 | 66840  | 0         | 1013 | 1047 | 96 -  | 259  | 1301 | 15926  | 16966  |
| UN05322 | Rsa1.0_00303.1 | 1016 | 97468  | 0         | 574  | 594  | 96 -  | 2    | 595  | 13792  | 14382  |
| UN05323 | Rsa1.0_56486.1 | 1035 | 405    | 1.00E-108 | 199  | 199  | 100 + | 201  | 399  | 63     | 261    |
| UN05324 | Rsa1.0_03916.1 | 801  | 20117  | 0         | 567  | 582  | 97 -  | 147  | 728  | 18468  | 19049  |
| UN05325 | Rsa1.0_05890.1 | 760  | 12317  | 1.00E-111 | 253  | 272  | 93 -  | 497  | 753  | 708    | 976    |
| UN05326 | Rsa1.0_00097.1 | 1071 | 138858 | 0         | 559  | 566  | 98 -  | 502  | 1067 | 92732  | 93297  |
| UN05327 | Rsa1.0_00651.1 | 2198 | 247766 | 1.00E-169 | 309  | 311  | 99 -  | 1887 | 2197 | 92723  | 93033  |
| UN05328 | Rsa1.0_00022.1 | 834  | 200461 | 0         | 449  | 472  | 95 -  | 364  | 833  | 86036  | 86504  |
| UN05329 | Rsa1.0_00387.1 | 825  | 495407 | 1.00E-120 | 229  | 232  | 98 -  | 473  | 704  | 344428 | 344659 |
| UN05330 | Rsa1.0_21508.1 | 1059 | 1197   | 1.00E-112 | 212  | 214  | 99 -  | 846  | 1059 | 936    | 1149   |
| UN05331 | Rsa1.0_00307.1 | 1245 | 199003 | 0         | 341  | 341  | 100 - | 905  | 1245 | 80051  | 80391  |
| UN05332 | Rsa1.0_26044.1 | 657  | 908    | 0         | 426  | 452  | 94 -  | 3    | 450  | 1      | 452    |
| UN05333 | Rsa1.0_07000.1 | 886  | 10049  | 1.00E-139 | 275  | 283  | 97 +  | 310  | 592  | 5676   | 5958   |
| UN05334 | Rsa1.0_00384.1 | 1551 | 89278  | 0         | 471  | 482  | 97 +  | 250  | 731  | 82326  | 82807  |
| UN05335 | Rsa1.0_00377.1 | 1118 | 90038  | 0         | 411  | 412  | 99 -  | 707  | 1118 | 27976  | 28387  |
| UN05336 | Rsa1.0_03613.1 | 981  | 21773  | 0         | 527  | 528  | 99 -  | 454  | 981  | 19514  | 20041  |
| UN05337 | Rsa1.0_05102.1 | 1585 | 14843  | 0         | 1144 | 1209 | 94 +  | 2    | 1203 | 4089   | 5277   |
| UN05338 | Rsa1.0_00073.1 | 1047 | 240924 | 1.00E-160 | 306  | 311  | 98 +  | 33   | 343  | 187846 | 188155 |
| UN05339 | Rsa1.0_00003.1 | 1009 | 340054 | 0         | 934  | 949  | 98 -  | 60   | 1008 | 266950 | 267897 |
| UN05340 | Rsa1.0_01262.1 | 970  | 178815 | 0         | 441  | 451  | 97 -  | 523  | 970  | 10475  | 10924  |
| UN05341 | Rsa1.0_01783.1 | 883  | 39383  | 0         | 483  | 515  | 93 +  | 380  | 881  | 24517  | 25025  |

|         |                |      |        |           |      |      |       |      |      |        |        |
|---------|----------------|------|--------|-----------|------|------|-------|------|------|--------|--------|
| UN05342 | Rsa1.0_21881.1 | 877  | 1167   | 0         | 337  | 341  | 98 -  | 4    | 343  | 13     | 353    |
| UN05343 | Rsa1.0_05506.1 | 1167 | 13495  | 0         | 903  | 914  | 98 +  | 39   | 952  | 1      | 914    |
| UN05344 | Rsa1.0_10669.1 | 1006 | 5762   | 0         | 357  | 363  | 98 -  | 644  | 1006 | 58     | 420    |
| UN05345 | Rsa1.0_45087.1 | 816  | 500    | 0         | 492  | 500  | 98 -  | 12   | 511  | 1      | 500    |
| UN05346 | Rsa1.0_01995.1 | 690  | 36347  | 2.33E-156 | 292  | 302  | 96 +  | 8    | 309  | 25096  | 25397  |
| UN05347 | Rsa1.0_01064.1 | 1423 | 55295  | 1.00E-177 | 329  | 332  | 99 -  | 391  | 721  | 15482  | 15813  |
| UN05348 | Rsa1.0_00146.1 | 967  | 149343 | 0         | 374  | 375  | 99 -  | 3    | 376  | 55443  | 55817  |
| UN05349 | Rsa1.0_00327.1 | 738  | 94892  | 2.00E-66  | 141  | 145  | 97 -  | 87   | 231  | 27389  | 27533  |
| UN05350 | Rsa1.0_02341.1 | 1453 | 32387  | 1.00E-154 | 295  | 301  | 98 -  | 1153 | 1453 | 31192  | 31492  |
| UN05351 | Rsa1.0_07340.1 | 1023 | 9530   | 0         | 508  | 524  | 96 -  | 326  | 847  | 5003   | 5523   |
| UN05352 | Rsa1.0_01199.1 | 1087 | 163576 | 1.00E-173 | 396  | 422  | 93 +  | 675  | 1086 | 20827  | 21247  |
| UN05353 | Rsa1.0_00190.1 | 1083 | 318240 | 0         | 1022 | 1083 | 94 +  | 3    | 1083 | 288624 | 289705 |
| UN05354 | Rsa1.0_00339.1 | 997  | 222974 | 6.00E-83  | 197  | 209  | 94 +  | 1    | 209  | 176118 | 176325 |
| UN05355 | Rsa1.0_07811.1 | 1037 | 8496   | 1.00E-160 | 286  | 286  | 100 + | 310  | 595  | 4751   | 5036   |
| UN05356 | Rsa1.0_02562.1 | 1061 | 30061  | 0         | 1039 | 1059 | 98 +  | 3    | 1061 | 9155   | 10206  |
| UN05357 | Rsa1.0_04387.1 | 1022 | 17625  | 0         | 342  | 346  | 98 +  | 671  | 1016 | 16703  | 17048  |
| UN05358 | Rsa1.0_19257.1 | 705  | 1455   | 0         | 379  | 380  | 99 -  | 5    | 384  | 108    | 487    |
| UN05359 | Rsa1.0_01417.1 | 1106 | 46252  | 0         | 406  | 417  | 97 +  | 690  | 1106 | 20533  | 20945  |
| UN05360 | Rsa1.0_03107.1 | 1255 | 25349  | 0         | 594  | 601  | 98 -  | 4    | 604  | 17268  | 17868  |
| UN05361 | Rsa1.0_02874.1 | 870  | 27070  | 0         | 696  | 696  | 100 + | 175  | 870  | 16196  | 16891  |
| UN05362 | Rsa1.0_00111.1 | 935  | 390088 | 0         | 331  | 332  | 99 +  | 598  | 929  | 7100   | 7431   |
| UN05363 | Rsa1.0_00451.1 | 1430 | 322533 | 0         | 383  | 385  | 99 -  | 1046 | 1430 | 283300 | 283684 |
| UN05364 | Rsa1.0_00278.1 | 1211 | 231896 | 0         | 415  | 426  | 97 +  | 276  | 701  | 35432  | 35856  |
| UN05365 | Rsa1.0_03396.1 | 1052 | 23242  | 0         | 369  | 378  | 97 -  | 657  | 1034 | 931    | 1306   |
| UN05366 | Rsa1.0_00470.1 | 1101 | 81968  | 1.00E-117 | 250  | 261  | 95 -  | 838  | 1098 | 30120  | 30377  |
| UN05367 | Rsa1.0_00079.1 | 765  | 606987 | 0         | 505  | 514  | 98 +  | 20   | 533  | 15767  | 16280  |
| UN05368 | Rsa1.0_03278.1 | 1054 | 24125  | 1.00E-132 | 322  | 348  | 92 -  | 709  | 1050 | 1924   | 2271   |
| UN05369 | Rsa1.0_00233.1 | 1280 | 104918 | 7.00E-40  | 364  | 456  | 79 -  | 17   | 463  | 49472  | 49924  |
| UN05370 | Rsa1.0_02878.1 | 1956 | 27048  | 0         | 454  | 475  | 95 +  | 988  | 1451 | 21455  | 21929  |
| UN05371 | Rsa1.0_00608.1 | 810  | 172672 | 1.00E-101 | 202  | 207  | 97 +  | 319  | 525  | 116504 | 116710 |
| UN05372 | Rsa1.0_02074.1 | 845  | 35370  | 3.00E-87  | 185  | 188  | 98 -  | 635  | 819  | 12340  | 12527  |
| UN05373 | Rsa1.0_03725.1 | 1812 | 21170  | 0         | 1039 | 1061 | 97 -  | 1    | 1061 | 15948  | 17005  |
| UN05374 | Rsa1.0_04366.1 | 994  | 17731  | 0         | 668  | 724  | 92 +  | 105  | 822  | 11946  | 12661  |
| UN05375 | Rsa1.0_00169.1 | 982  | 274298 | 0         | 433  | 436  | 99 -  | 337  | 772  | 20667  | 21102  |
| UN05376 | Rsa1.0_07063.1 | 489  | 9958   | 0         | 487  | 489  | 99 +  | 1    | 489  | 5007   | 5495   |
| UN05377 | Rsa1.0_00351.1 | 1392 | 413096 | 0         | 364  | 367  | 99 +  | 1026 | 1392 | 148179 | 148544 |
| UN05378 | Rsa1.0_00010.1 | 1451 | 294827 | 0         | 416  | 425  | 97 -  | 930  | 1354 | 121889 | 122313 |
| UN05379 | Rsa1.0_08961.1 | 937  | 6750   | 1.00E-126 | 275  | 288  | 95 -  | 585  | 871  | 4467   | 4752   |
| UN05380 | Rsa1.0_00002.1 | 1163 | 601661 | 0         | 414  | 427  | 96 +  | 3    | 426  | 97407  | 97833  |

|         |                |      |        |           |      |      |       |      |      |        |        |
|---------|----------------|------|--------|-----------|------|------|-------|------|------|--------|--------|
| UN05381 | Rsa1.0_02585.1 | 964  | 29865  | 0         | 494  | 509  | 97 +  | 1    | 506  | 25269  | 25776  |
| UN05382 | Rsa1.0_18581.1 | 811  | 1571   | 0         | 540  | 554  | 97 -  | 163  | 715  | 862    | 1413   |
| UN05383 | Rsa1.0_00079.1 | 762  | 606987 | 0         | 677  | 704  | 96 -  | 63   | 760  | 814    | 1512   |
| UN05384 | Rsa1.0_00116.1 | 972  | 365886 | 0         | 441  | 448  | 98 -  | 13   | 460  | 205570 | 206017 |
| UN05385 | Rsa1.0_19954.1 | 1224 | 1360   | 1.00E-145 | 277  | 281  | 98 -  | 1    | 279  | 541    | 821    |
| UN05386 | Rsa1.0_00342.1 | 1406 | 93695  | 1.00E-171 | 412  | 438  | 94 +  | 975  | 1406 | 57424  | 57856  |
| UN05387 | Rsa1.0_00632.1 | 732  | 183777 | 4.00E-89  | 210  | 221  | 95 +  | 514  | 732  | 97     | 314    |
| UN05388 | Rsa1.0_01366.1 | 1444 | 47139  | 0         | 1066 | 1068 | 99 -  | 371  | 1438 | 33506  | 34573  |
| UN05389 | Rsa1.0_00293.1 | 1795 | 339294 | 0         | 456  | 466  | 97 -  | 1289 | 1754 | 82364  | 82829  |
| UN05390 | Rsa1.0_03401.1 | 691  | 23191  | 6.00E-42  | 124  | 136  | 91 -  | 553  | 688  | 5987   | 6122   |
| UN05391 | Rsa1.0_00098.1 | 858  | 349239 | 0         | 457  | 458  | 99 -  | 3    | 460  | 237652 | 238108 |
| UN05392 | Rsa1.0_05262.1 | 1268 | 14334  | 0         | 552  | 580  | 95 +  | 689  | 1268 | 5964   | 6531   |
| UN05393 | Rsa1.0_08083.1 | 1108 | 7936   | 3.00E-60  | 196  | 221  | 88 -  | 3    | 222  | 7372   | 7575   |
| UN05394 | Rsa1.0_01888.1 | 1873 | 37563  | 1.00E-178 | 317  | 317  | 100 - | 2    | 318  | 19119  | 19435  |
| UN05395 | Rsa1.0_03416.1 | 1188 | 23112  | 1.00E-172 | 318  | 322  | 98 +  | 186  | 507  | 13423  | 13744  |
| UN05396 | Rsa1.0_00191.1 | 984  | 316976 | 0         | 942  | 984  | 95 -  | 2    | 984  | 172092 | 173064 |
| UN05397 | Rsa1.0_00236.1 | 1223 | 104771 | 1.00E-138 | 345  | 373  | 92 +  | 856  | 1220 | 82285  | 82651  |
| UN05398 | Rsa1.0_02165.1 | 1025 | 34423  | 0         | 509  | 527  | 96 +  | 121  | 647  | 3110   | 3636   |
| UN05399 | Rsa1.0_01070.1 | 535  | 55099  | 1.00E-161 | 314  | 323  | 97 -  | 3    | 325  | 28010  | 28332  |
| UN05400 | Rsa1.0_14298.1 | 854  | 3561   | 4.00E-99  | 187  | 188  | 99 +  | 493  | 680  | 3278   | 3465   |
| UN05401 | Rsa1.0_05978.1 | 1322 | 12053  | 0         | 1223 | 1253 | 97 +  | 59   | 1311 | 477    | 1729   |
| UN05402 | Rsa1.0_01380.1 | 754  | 155003 | 0         | 582  | 585  | 99 +  | 1    | 585  | 8894   | 9478   |
| UN05403 | Rsa1.0_01717.1 | 830  | 143162 | 1.00E-147 | 273  | 276  | 98 +  | 398  | 673  | 15704  | 15979  |
| UN05404 | Rsa1.0_00187.1 | 1383 | 393093 | 1.00E-157 | 324  | 338  | 95 +  | 1043 | 1380 | 211557 | 211889 |
| UN05405 | Rsa1.0_12341.1 | 941  | 5250   | 1.00E-169 | 320  | 325  | 98 +  | 3    | 327  | 113    | 436    |
| UN05406 | Rsa1.0_00031.1 | 1481 | 179862 | 0         | 896  | 898  | 99 +  | 585  | 1481 | 60443  | 61340  |
| UN05407 | Rsa1.0_02039.1 | 661  | 35699  | 1.00E-125 | 264  | 274  | 96 -  | 8    | 279  | 10945  | 11212  |
| UN05408 | Rsa1.0_00166.1 | 1178 | 240912 | 0         | 756  | 785  | 96 +  | 346  | 1130 | 153565 | 154342 |
| UN05409 | Rsa1.0_03321.1 | 743  | 23755  | 0         | 731  | 733  | 99 +  | 9    | 741  | 22453  | 23184  |
| UN05410 | Rsa1.0_00004.1 | 993  | 253996 | 0         | 480  | 480  | 100 + | 1    | 480  | 196461 | 196940 |
| UN05411 | Rsa1.0_00224.1 | 865  | 327530 | 1.00E-173 | 314  | 316  | 99 -  | 1    | 316  | 210516 | 210831 |
| UN05412 | Rsa1.0_00140.1 | 435  | 121541 | 1.00E-132 | 284  | 301  | 94 +  | 3    | 288  | 56150  | 56449  |
| UN05413 | Rsa1.0_38780.1 | 787  | 580    | 1.00E-141 | 254  | 254  | 100 + | 534  | 787  | 1      | 254    |
| UN05414 | Rsa1.0_00190.1 | 761  | 318240 | 0         | 723  | 738  | 97 -  | 1    | 738  | 289380 | 290117 |
| UN05415 | Rsa1.0_01904.1 | 711  | 37450  | 0         | 613  | 637  | 96 -  | 86   | 710  | 1915   | 2548   |
| UN05416 | Rsa1.0_00301.1 | 760  | 365315 | 0         | 345  | 345  | 100 + | 414  | 758  | 346680 | 347024 |
| UN05417 | Rsa1.0_68490.1 | 856  | 335    | 1.00E-177 | 321  | 323  | 99 +  | 42   | 364  | 1      | 323    |
| UN05418 | Rsa1.0_00541.1 | 736  | 76863  | 1.00E-180 | 323  | 324  | 99 -  | 169  | 492  | 34580  | 34903  |
| UN05419 | Rsa1.0_00995.1 | 1453 | 57243  | 0         | 626  | 662  | 94 -  | 2    | 662  | 21109  | 21751  |

|         |                |      |        |           |      |      |       |     |      |        |        |
|---------|----------------|------|--------|-----------|------|------|-------|-----|------|--------|--------|
| UN05420 | Rsa1.0_01739.1 | 1065 | 40068  | 0         | 989  | 1047 | 94 -  | 38  | 1065 | 8378   | 9413   |
| UN05421 | Rsa1.0_05920.1 | 1062 | 12239  | 0         | 584  | 586  | 99 +  | 1   | 586  | 1252   | 1837   |
| UN05422 | Rsa1.0_00075.1 | 1126 | 146680 | 1.00E-105 | 349  | 392  | 89 +  | 1   | 381  | 141869 | 142242 |
| UN05423 | Rsa1.0_12933.1 | 1216 | 5071   | 0         | 579  | 622  | 93 +  | 1   | 619  | 3333   | 3941   |
| UN05424 | Rsa1.0_00034.1 | 750  | 260119 | 0         | 406  | 416  | 97 +  | 1   | 416  | 154035 | 154449 |
| UN05425 | Rsa1.0_02136.1 | 801  | 34707  | 1.00E-102 | 198  | 201  | 98 -  | 237 | 437  | 2798   | 2998   |
| UN05426 | Rsa1.0_00019.1 | 897  | 301669 | 0         | 515  | 520  | 99 +  | 1   | 519  | 218714 | 219233 |
| UN05427 | Rsa1.0_00302.1 | 845  | 97521  | 0         | 362  | 368  | 98 -  | 1   | 368  | 85022  | 85388  |
| UN05428 | Rsa1.0_04773.1 | 1040 | 16037  | 0         | 657  | 659  | 99 +  | 1   | 659  | 10630  | 11288  |
| UN05429 | Rsa1.0_00275.1 | 403  | 210104 | 1.00E-153 | 313  | 324  | 96 -  | 3   | 326  | 178612 | 178931 |
| UN05430 | Rsa1.0_07813.1 | 961  | 8493   | 0         | 806  | 827  | 97 +  | 3   | 827  | 918    | 1744   |
| UN05431 | Rsa1.0_00333.1 | 657  | 94500  | 0         | 559  | 559  | 100 - | 2   | 560  | 61826  | 62384  |
| UN05432 | Rsa1.0_00695.1 | 1020 | 68019  | 0         | 365  | 366  | 99 +  | 655 | 1020 | 53951  | 54316  |
| UN05433 | Rsa1.0_00608.1 | 805  | 172672 | 1.00E-165 | 307  | 311  | 98 -  | 1   | 311  | 118055 | 118365 |
| UN05434 | Rsa1.0_03241.1 | 1101 | 24423  | 0         | 487  | 489  | 99 -  | 1   | 487  | 14637  | 15125  |
| UN05435 | Rsa1.0_00139.1 | 1099 | 357786 | 1.00E-176 | 612  | 711  | 86 -  | 93  | 802  | 59566  | 60264  |
| UN05436 | Rsa1.0_15250.1 | 746  | 2727   | 0         | 450  | 450  | 100 - | 3   | 452  | 1092   | 1541   |
| UN05437 | Rsa1.0_19592.1 | 734  | 1410   | 0         | 458  | 487  | 94 +  | 30  | 513  | 1      | 480    |
| UN05438 | Rsa1.0_03282.1 | 901  | 24107  | 0         | 552  | 568  | 97 -  | 3   | 566  | 10595  | 11159  |
| UN05439 | Rsa1.0_00971.1 | 838  | 57973  | 1.00E-12  | 39   | 39   | 100 - | 783 | 821  | 43519  | 43557  |
| UN05440 | Rsa1.0_00241.1 | 678  | 104000 | 1.00E-127 | 276  | 290  | 95 +  | 3   | 290  | 65527  | 65816  |
| UN05441 | Rsa1.0_00159.1 | 721  | 431686 | 0         | 437  | 441  | 99 -  | 1   | 440  | 15770  | 16210  |
| UN05442 | Rsa1.0_01876.1 | 812  | 37800  | 0         | 677  | 691  | 97 -  | 16  | 706  | 34625  | 35314  |
| UN05443 | Rsa1.0_05262.1 | 769  | 14334  | 0         | 551  | 578  | 95 -  | 1   | 577  | 5964   | 6532   |
| UN05444 | Rsa1.0_05689.1 | 1457 | 12927  | 1.00E-124 | 226  | 226  | 100 - | 1   | 226  | 9560   | 9785   |
| UN05445 | Rsa1.0_00201.1 | 511  | 232851 | 1.00E-129 | 327  | 355  | 92 +  | 3   | 356  | 17967  | 18311  |
| UN05446 | Rsa1.0_02020.1 | 1475 | 173211 | 0         | 1028 | 1045 | 98 +  | 124 | 1168 | 137400 | 138444 |
| UN05447 | Rsa1.0_03503.1 | 718  | 22445  | 0         | 441  | 458  | 96 +  | 2   | 458  | 19857  | 20313  |
| UN05448 | Rsa1.0_00646.1 | 796  | 70473  | 4.00E-71  | 149  | 153  | 97 +  | 4   | 156  | 6102   | 6254   |
| UN05449 | Rsa1.0_00708.1 | 733  | 67366  | 0         | 696  | 704  | 98 -  | 3   | 706  | 43756  | 44459  |
| UN05450 | Rsa1.0_01135.1 | 948  | 52799  | 0         | 762  | 765  | 99 -  | 186 | 948  | 24295  | 25059  |
| UN05451 | Rsa1.0_02020.1 | 1021 | 173211 | 1.00E-124 | 292  | 312  | 93 -  | 708 | 1019 | 171655 | 171962 |
| UN05452 | Rsa1.0_00040.1 | 1320 | 324196 | 0         | 1220 | 1230 | 99 -  | 3   | 1232 | 127997 | 129223 |
| UN05453 | Rsa1.0_02589.1 | 560  | 300828 | 1.00E-159 | 288  | 289  | 99 -  | 6   | 294  | 16343  | 16631  |
| UN05454 | Rsa1.0_01724.1 | 935  | 40292  | 1.00E-109 | 204  | 205  | 99 +  | 51  | 255  | 6838   | 7042   |
| UN05455 | Rsa1.0_01061.1 | 799  | 55349  | 1.00E-154 | 429  | 475  | 90 +  | 7   | 472  | 4834   | 5306   |
| UN05456 | Rsa1.0_02142.1 | 983  | 34633  | 0         | 351  | 356  | 98 -  | 1   | 356  | 16828  | 17183  |
| UN05457 | Rsa1.0_02746.1 | 890  | 28256  | 0         | 688  | 698  | 98 -  | 3   | 700  | 3134   | 3831   |
| UN05458 | Rsa1.0_02661.1 | 1288 | 28964  | 0         | 1283 | 1288 | 99 +  | 1   | 1288 | 19277  | 20564  |

|         |                |      |        |           |      |      |       |      |      |        |        |
|---------|----------------|------|--------|-----------|------|------|-------|------|------|--------|--------|
| UN05459 | Rsa1.0.07559.1 | 986  | 9131   | 0         | 981  | 984  | 99 +  | 1    | 984  | 1423   | 2406   |
| UN05460 | Rsa1.0.03191.1 | 456  | 145762 | 0         | 346  | 348  | 99 -  | 1    | 348  | 21630  | 21976  |
| UN05461 | Rsa1.0.02811.1 | 921  | 27669  | 1.00E-120 | 269  | 282  | 95 +  | 1    | 281  | 1244   | 1521   |
| UN05462 | Rsa1.0.26967.1 | 641  | 871    | 1.00E-156 | 357  | 381  | 93 -  | 2    | 375  | 308    | 680    |
| UN05463 | Rsa1.0.03927.1 | 1296 | 19997  | 0         | 549  | 549  | 100 + | 1    | 549  | 16154  | 16702  |
| UN05464 | Rsa1.0.03624.1 | 815  | 21706  | 0         | 474  | 486  | 97 +  | 4    | 486  | 15700  | 16181  |
| UN05465 | Rsa1.0.00269.1 | 1126 | 341668 | 0         | 571  | 575  | 99 -  | 30   | 603  | 18901  | 19475  |
| UN05466 | Rsa1.0.00122.1 | 1423 | 265937 | 1.00E-114 | 309  | 337  | 91 +  | 681  | 1015 | 124131 | 124459 |
| UN05467 | Rsa1.0.03506.1 | 1095 | 22416  | 0         | 490  | 491  | 99 +  | 2    | 491  | 7388   | 7878   |
| UN05468 | Rsa1.0.00740.1 | 923  | 215972 | 0         | 662  | 691  | 95 +  | 2    | 682  | 2956   | 3643   |
| UN05469 | Rsa1.0.00821.1 | 1036 | 62891  | 0         | 365  | 365  | 100 - | 671  | 1035 | 42502  | 42866  |
| UN05470 | Rsa1.0.02513.1 | 967  | 30643  | 0         | 926  | 964  | 96 +  | 2    | 965  | 10829  | 11789  |
| UN05471 | Rsa1.0.21366.1 | 1446 | 1211   | 0         | 846  | 856  | 98 -  | 591  | 1446 | 356    | 1211   |
| UN05472 | Rsa1.0.00130.1 | 788  | 125737 | 0         | 443  | 445  | 99 -  | 2    | 446  | 42201  | 42645  |
| UN05473 | Rsa1.0.01923.1 | 875  | 37233  | 0         | 831  | 877  | 94 -  | 1    | 875  | 23234  | 24106  |
| UN05474 | Rsa1.0.01261.1 | 829  | 49744  | 0         | 809  | 826  | 97 -  | 3    | 826  | 30840  | 31660  |
| UN05475 | Rsa1.0.00710.1 | 985  | 67325  | 0         | 691  | 691  | 100 + | 295  | 985  | 5338   | 6028   |
| UN05476 | Rsa1.0.02929.1 | 838  | 26673  | 0         | 333  | 334  | 99 +  | 505  | 838  | 20275  | 20608  |
| UN05477 | Rsa1.0.00203.1 | 1127 | 109129 | 0         | 947  | 958  | 98 +  | 172  | 1127 | 46993  | 47950  |
| UN05478 | Rsa1.0.41744.1 | 742  | 538    | 1.00E-167 | 334  | 346  | 96 +  | 367  | 712  | 193    | 538    |
| UN05479 | Rsa1.0.00030.1 | 954  | 250988 | 0         | 688  | 698  | 98 +  | 2    | 698  | 15958  | 16655  |
| UN05480 | Rsa1.0.08655.1 | 836  | 7078   | 1.00E-129 | 235  | 235  | 100 - | 237  | 471  | 5600   | 5834   |
| UN05481 | Rsa1.0.00920.1 | 755  | 601703 | 1.00E-114 | 212  | 213  | 99 -  | 543  | 755  | 443622 | 443834 |
| UN05482 | Rsa1.0.00096.1 | 611  | 198773 | 1.00E-180 | 341  | 347  | 98 +  | 266  | 611  | 159088 | 159434 |
| UN05483 | Rsa1.0.00107.1 | 857  | 431659 | 0         | 479  | 482  | 99 -  | 376  | 857  | 135950 | 136431 |
| UN05484 | Rsa1.0.00788.1 | 1371 | 64237  | 0         | 888  | 891  | 99 +  | 481  | 1371 | 22869  | 23759  |
| UN05485 | Rsa1.0.02179.1 | 1165 | 34188  | 0         | 609  | 626  | 97 -  | 66   | 691  | 24331  | 24956  |
| UN05486 | Rsa1.0.04235.1 | 1295 | 18373  | 0         | 822  | 866  | 94 -  | 434  | 1295 | 11442  | 12303  |
| UN05487 | Rsa1.0.00930.1 | 1219 | 59224  | 1.00E-122 | 270  | 283  | 95 -  | 925  | 1206 | 52016  | 52297  |
| UN05488 | Rsa1.0.00323.1 | 1115 | 159650 | 0         | 1108 | 1114 | 99 +  | 3    | 1115 | 148992 | 150105 |
| UN05489 | Rsa1.0.02113.1 | 847  | 34890  | 0         | 790  | 823  | 95 +  | 4    | 825  | 22694  | 23509  |
| UN05490 | Rsa1.0.00085.1 | 1125 | 142226 | 0         | 1048 | 1123 | 93 -  | 4    | 1125 | 121841 | 122954 |
| UN05491 | Rsa1.0.00040.1 | 1272 | 324196 | 0         | 545  | 558  | 97 +  | 715  | 1272 | 114552 | 115108 |
| UN05492 | Rsa1.0.03384.1 | 744  | 23291  | 0         | 740  | 743  | 99 -  | 2    | 744  | 12671  | 13413  |
| UN05493 | Rsa1.0.00017.1 | 927  | 752458 | 0         | 367  | 380  | 96 -  | 3    | 379  | 292600 | 292977 |
| UN05494 | Rsa1.0.03780.1 | 1072 | 20899  | 0         | 1051 | 1070 | 98 +  | 2    | 1068 | 15890  | 16959  |
| UN05495 | Rsa1.0.03081.1 | 877  | 25523  | 1.00E-153 | 274  | 274  | 100 - | 1    | 274  | 21472  | 21745  |
| UN05496 | Rsa1.0.00184.1 | 734  | 218748 | 4.00E-83  | 157  | 157  | 100 - | 185  | 341  | 212050 | 212206 |
| UN05497 | Rsa1.0.02433.1 | 1446 | 158318 | 0         | 393  | 397  | 98 -  | 1036 | 1432 | 20016  | 20411  |

|         |                |      |        |           |      |      |       |      |      |        |        |
|---------|----------------|------|--------|-----------|------|------|-------|------|------|--------|--------|
| UN05498 | Rsa1.0.07515.1 | 1072 | 9221   | 0         | 1042 | 1075 | 96 +  | 3    | 1070 | 5653   | 6727   |
| UN05499 | Rsa1.0.14881.1 | 1128 | 2995   | 0         | 468  | 483  | 96 +  | 647  | 1128 | 2323   | 2804   |
| UN05500 | Rsa1.0.00890.1 | 651  | 323870 | 0         | 451  | 496  | 90 +  | 78   | 555  | 215367 | 215859 |
| UN05501 | Rsa1.0.00135.1 | 917  | 178077 | 0         | 456  | 457  | 99 -  | 4    | 460  | 82825  | 83281  |
| UN05502 | Rsa1.0.00046.1 | 842  | 320315 | 0         | 803  | 841  | 95 -  | 2    | 836  | 30017  | 30857  |
| UN05503 | Rsa1.0.00742.1 | 1548 | 66106  | 0         | 435  | 459  | 94 -  | 1092 | 1548 | 25739  | 26188  |
| UN05504 | Rsa1.0.00100.1 | 1402 | 249232 | 0         | 421  | 430  | 97 -  | 971  | 1400 | 140938 | 141367 |
| UN05505 | Rsa1.0.08717.1 | 1549 | 7008   | 1.00E-120 | 286  | 305  | 93 +  | 1250 | 1549 | 1261   | 1564   |
| UN05506 | Rsa1.0.12805.1 | 1140 | 5121   | 2.00E-40  | 116  | 126  | 92 +  | 438  | 563  | 4576   | 4701   |
| UN05507 | Rsa1.0.01191.1 | 1137 | 51235  | 0         | 469  | 471  | 99 +  | 13   | 483  | 12138  | 12608  |
| UN05508 | Rsa1.0.01339.1 | 1261 | 47813  | 0         | 386  | 388  | 99 +  | 874  | 1261 | 29690  | 30077  |
| UN05509 | Rsa1.0.02266.1 | 1335 | 33195  | 0         | 782  | 796  | 98 +  | 4    | 798  | 19496  | 20280  |
| UN05510 | Rsa1.0.15580.1 | 974  | 2535   | 0         | 321  | 321  | 100 - | 3    | 323  | 1727   | 2047   |
| UN05511 | Rsa1.0.29122.1 | 756  | 792    | 0         | 431  | 438  | 98 -  | 235  | 672  | 360    | 792    |
| UN05512 | Rsa1.0.02903.1 | 2033 | 26901  | 0         | 912  | 932  | 97 -  | 452  | 1383 | 12531  | 13462  |
| UN05513 | Rsa1.0.00211.1 | 848  | 228189 | 1.00E-151 | 283  | 287  | 98 -  | 156  | 442  | 213634 | 213920 |
| UN05514 | Rsa1.0.32341.1 | 1372 | 704    | 1.00E-173 | 309  | 309  | 100 + | 1064 | 1372 | 330    | 638    |
| UN05515 | Rsa1.0.12541.1 | 758  | 5198   | 0         | 361  | 370  | 97 +  | 1    | 370  | 375    | 744    |
| UN05516 | Rsa1.0.05305.1 | 1141 | 14207  | 0         | 503  | 527  | 95 -  | 3    | 518  | 13315  | 13835  |
| UN05517 | Rsa1.0.02355.1 | 1329 | 32260  | 0         | 612  | 633  | 96 -  | 697  | 1329 | 6912   | 7544   |
| UN05518 | Rsa1.0.01389.1 | 1413 | 46716  | 0         | 368  | 375  | 98 -  | 1038 | 1412 | 20717  | 21090  |
| UN05519 | Rsa1.0.01287.1 | 1517 | 49195  | 0         | 836  | 836  | 100 + | 1    | 836  | 2346   | 3181   |
| UN05520 | Rsa1.0.03369.1 | 1314 | 23381  | 0         | 1001 | 1006 | 99 -  | 305  | 1309 | 10307  | 11312  |
| UN05521 | Rsa1.0.01553.1 | 755  | 43379  | 1.00E-165 | 294  | 294  | 100 + | 462  | 755  | 26451  | 26744  |
| UN05522 | Rsa1.0.02707.1 | 676  | 28520  | 2.00E-84  | 213  | 229  | 93 -  | 451  | 675  | 172    | 400    |
| UN05523 | Rsa1.0.06775.1 | 1043 | 10379  | 0         | 457  | 463  | 98 +  | 583  | 1043 | 6834   | 7296   |
| UN05524 | Rsa1.0.01514.1 | 742  | 44222  | 0         | 723  | 740  | 97 +  | 3    | 740  | 3978   | 4717   |
| UN05525 | Rsa1.0.08606.1 | 931  | 7133   | 0         | 439  | 451  | 97 -  | 8    | 458  | 6441   | 6891   |
| UN05526 | Rsa1.0.01469.1 | 878  | 45139  | 0         | 453  | 455  | 99 +  | 422  | 876  | 14247  | 14701  |
| UN05527 | Rsa1.0.01452.1 | 1114 | 45459  | 0         | 465  | 497  | 93 +  | 619  | 1113 | 9485   | 9973   |
| UN05528 | Rsa1.0.01085.1 | 869  | 54539  | 0         | 392  | 400  | 98 +  | 2    | 401  | 9663   | 10062  |
| UN05529 | Rsa1.0.00001.1 | 1268 | 363028 | 0         | 476  | 476  | 100 + | 569  | 1044 | 357923 | 358398 |
| UN05530 | Rsa1.0.51330.1 | 1229 | 443    | 2.00E-77  | 187  | 200  | 93 -  | 1030 | 1229 | 143    | 342    |
| UN05531 | Rsa1.0.00092.1 | 672  | 659932 | 0         | 660  | 674  | 97 +  | 3    | 672  | 353793 | 354465 |
| UN05532 | Rsa1.0.00016.1 | 881  | 831256 | 0         | 449  | 449  | 100 + | 1    | 449  | 264152 | 264600 |
| UN05533 | Rsa1.0.03693.1 | 1461 | 21337  | 0         | 738  | 742  | 99 +  | 174  | 915  | 563    | 1303   |
| UN05534 | Rsa1.0.00321.1 | 1132 | 95671  | 0         | 777  | 789  | 98 +  | 353  | 1132 | 48387  | 49175  |
| UN05535 | Rsa1.0.02402.1 | 1236 | 31710  | 0         | 956  | 961  | 99 -  | 276  | 1236 | 10375  | 11335  |
| UN05536 | Rsa1.0.02099.1 | 1141 | 35030  | 1.00E-139 | 264  | 268  | 98 +  | 797  | 1064 | 2291   | 2558   |



|         |                |      |        |           |      |      |       |     |      |        |        |
|---------|----------------|------|--------|-----------|------|------|-------|-----|------|--------|--------|
| UN05537 | Rsa1.0.00105.1 | 772  | 134138 | 0         | 627  | 639  | 98 -  | 3   | 631  | 123747 | 124385 |
| UN05538 | Rsa1.0.06345.1 | 1486 | 11205  | 0         | 948  | 951  | 99 -  | 276 | 1226 | 2128   | 3078   |
| UN05539 | Rsa1.0.02368.1 | 864  | 32096  | 1.00E-119 | 239  | 245  | 97 +  | 5   | 248  | 4841   | 5085   |
| UN05540 | Rsa1.0.05150.1 | 804  | 14673  | 1.00E-177 | 351  | 363  | 96 -  | 283 | 645  | 6013   | 6375   |
| UN05541 | Rsa1.0.00077.1 | 1851 | 145005 | 0         | 1548 | 1603 | 96 +  | 4   | 1604 | 134272 | 135871 |
| UN05542 | Rsa1.0.01608.1 | 1153 | 170540 | 0         | 361  | 366  | 98 -  | 361 | 726  | 35343  | 35708  |
| UN05543 | Rsa1.0.00765.1 | 945  | 65029  | 0         | 817  | 827  | 98 -  | 3   | 828  | 30048  | 30874  |
| UN05544 | Rsa1.0.03216.1 | 967  | 24540  | 1.00E-163 | 292  | 292  | 100 - | 676 | 967  | 12039  | 12330  |
| UN05545 | Rsa1.0.01636.1 | 935  | 41863  | 1.00E-135 | 251  | 252  | 99 -  | 684 | 935  | 36754  | 37004  |
| UN05546 | Rsa1.0.01114.1 | 803  | 53602  | 0         | 790  | 807  | 97 +  | 3   | 803  | 49683  | 50489  |
| UN05547 | #              | #    | #      | #         | #    | #    | #     | #   | #    | #      | #      |
| UN05548 | Rsa1.0.00533.1 | 774  | 77375  | 0         | 545  | 562  | 96 -  | 212 | 773  | 54830  | 55391  |
| UN05549 | Rsa1.0.06049.1 | 1093 | 11851  | 0         | 415  | 417  | 99 +  | 677 | 1093 | 9709   | 10125  |
| UN05550 | Rsa1.0.11824.1 | 467  | 5396   | 1.00E-102 | 235  | 253  | 92 +  | 232 | 466  | 3655   | 3907   |
| UN05551 | Rsa1.0.08507.1 | 591  | 7257   | 0         | 501  | 504  | 99 +  | 3   | 506  | 4584   | 5087   |
| UN05552 | Rsa1.0.00114.1 | 815  | 131330 | 1.00E-129 | 298  | 315  | 94 -  | 12  | 325  | 86104  | 86416  |
| UN05553 | Rsa1.0.00181.1 | 1139 | 114269 | 0         | 1090 | 1136 | 95 -  | 3   | 1135 | 91480  | 92614  |
| UN05554 | Rsa1.0.01957.1 | 614  | 36844  | 1.00E-121 | 238  | 244  | 97 -  | 371 | 614  | 13022  | 13265  |
| UN05555 | Rsa1.0.08811.1 | 793  | 6904   | 1.00E-123 | 245  | 252  | 97 +  | 168 | 419  | 3280   | 3531   |
| UN05556 | Rsa1.0.02858.1 | 1006 | 27246  | 0         | 980  | 1002 | 97 +  | 3   | 1004 | 14127  | 15128  |
| UN05557 | Rsa1.0.00153.1 | 1102 | 192931 | 0         | 508  | 552  | 92 +  | 548 | 1092 | 26879  | 27421  |
| UN05558 | Rsa1.0.01690.1 | 751  | 40939  | 0         | 437  | 438  | 99 +  | 313 | 750  | 23468  | 23905  |
| UN05559 | Rsa1.0.00132.1 | 1277 | 124299 | 0         | 327  | 327  | 100 - | 3   | 329  | 104645 | 104971 |
| UN05560 | Rsa1.0.00395.1 | 1206 | 214466 | 1.00E-151 | 278  | 280  | 99 -  | 12  | 291  | 5892   | 6171   |
| UN05561 | Rsa1.0.00299.1 | 1432 | 97770  | 0         | 1427 | 1429 | 99 +  | 3   | 1431 | 41871  | 43299  |
| UN05562 | Rsa1.0.10577.1 | 597  | 5796   | 1.00E-164 | 380  | 408  | 93 +  | 190 | 597  | 621    | 1027   |
| UN05563 | Rsa1.0.00157.1 | 462  | 245832 | 0         | 406  | 415  | 97 +  | 48  | 462  | 239149 | 239563 |
| UN05564 | Rsa1.0.01376.1 | 926  | 47004  | 0         | 728  | 738  | 98 -  | 1   | 738  | 33259  | 33993  |
| UN05565 | Rsa1.0.01489.1 | 1012 | 44764  | 0         | 484  | 497  | 97 -  | 519 | 1010 | 16344  | 16834  |
| UN05566 | Rsa1.0.00714.1 | 644  | 67187  | 1.00E-174 | 312  | 313  | 99 -  | 1   | 313  | 3535   | 3847   |
| UN05567 | Rsa1.0.05199.1 | 527  | 14529  | 1.00E-145 | 301  | 313  | 96 +  | 2   | 314  | 6772   | 7083   |
| UN05568 | Rsa1.0.17607.1 | 1258 | 1785   | 1.00E-173 | 308  | 308  | 100 - | 951 | 1258 | 1416   | 1723   |
| UN05569 | Rsa1.0.03736.1 | 1199 | 21081  | 1.00E-113 | 316  | 348  | 90 -  | 850 | 1189 | 9918   | 10265  |
| UN05570 | Rsa1.0.01523.1 | 813  | 43959  | 1.00E-168 | 302  | 303  | 99 +  | 511 | 813  | 20541  | 20843  |
| UN05571 | Rsa1.0.00493.1 | 805  | 80007  | 1.00E-133 | 250  | 253  | 98 +  | 205 | 457  | 75604  | 75856  |
| UN05572 | Rsa1.0.02870.1 | 1016 | 27102  | 0         | 643  | 644  | 99 +  | 3   | 646  | 26052  | 26694  |
| UN05573 | Rsa1.0.15516.1 | 1159 | 2563   | 1.00E-178 | 345  | 352  | 98 +  | 810 | 1159 | 1144   | 1495   |
| UN05574 | Rsa1.0.00825.1 | 783  | 62855  | 0         | 356  | 356  | 100 - | 223 | 578  | 38368  | 38723  |
| UN05575 | Rsa1.0.00043.1 | 659  | 264937 | 2.00E-51  | 135  | 144  | 93 +  | 413 | 556  | 8948   | 9085   |

|         |                |      |        |           |      |      |       |      |      |        |        |
|---------|----------------|------|--------|-----------|------|------|-------|------|------|--------|--------|
| UN05576 | Rsa1.0.00770.1 | 952  | 64900  | 0         | 949  | 952  | 99 +  | 3    | 952  | 53371  | 54322  |
| UN05577 | Rsa1.0.01732.1 | 1029 | 40194  | 0         | 404  | 404  | 100 - | 1    | 404  | 15549  | 15952  |
| UN05578 | Rsa1.0.00016.1 | 1047 | 831256 | 1.00E-162 | 311  | 317  | 98 +  | 448  | 764  | 752718 | 753032 |
| UN05579 | Rsa1.0.14170.1 | 1158 | 3709   | 0         | 1154 | 1158 | 99 +  | 2    | 1157 | 1690   | 2847   |
| UN05580 | Rsa1.0.02377.1 | 996  | 31994  | 0         | 502  | 521  | 96 +  | 476  | 996  | 3419   | 3939   |
| UN05581 | Rsa1.0.00010.1 | 1507 | 294827 | 1.00E-114 | 221  | 225  | 98 -  | 208  | 432  | 219087 | 219311 |
| UN05582 | Rsa1.0.00463.1 | 751  | 189177 | 1.00E-165 | 327  | 337  | 97 -  | 413  | 749  | 169663 | 169997 |
| UN05583 | Rsa1.0.00035.1 | 1609 | 176449 | 0         | 998  | 1006 | 99 +  | 404  | 1409 | 125394 | 126399 |
| UN05584 | Rsa1.0.02107.1 | 517  | 34940  | 1.00E-135 | 361  | 395  | 91 +  | 134  | 514  | 9809   | 10197  |
| UN05585 | Rsa1.0.00850.1 | 1358 | 62193  | 0         | 694  | 718  | 96 -  | 1    | 718  | 25983  | 26700  |
| UN05586 | Rsa1.0.00101.1 | 988  | 267193 | 0         | 939  | 946  | 99 -  | 3    | 948  | 131119 | 132063 |
| UN05587 | Rsa1.0.00939.1 | 1057 | 185227 | 1.00E-130 | 237  | 237  | 100 - | 435  | 671  | 39141  | 39377  |
| UN05588 | Rsa1.0.02247.1 | 1246 | 33427  | 0         | 508  | 529  | 96 -  | 240  | 765  | 2209   | 2737   |
| UN05589 | Rsa1.0.00005.1 | 800  | 353093 | 1.00E-142 | 307  | 321  | 95 +  | 482  | 800  | 130794 | 131114 |
| UN05590 | Rsa1.0.00805.1 | 1683 | 63724  | 0         | 634  | 654  | 96 -  | 1025 | 1678 | 13362  | 14012  |
| UN05591 | Rsa1.0.00971.1 | 1209 | 57973  | 0         | 766  | 783  | 97 +  | 2    | 779  | 16351  | 17127  |
| UN05592 | Rsa1.0.01687.1 | 929  | 40979  | 0         | 927  | 929  | 99 -  | 1    | 929  | 33077  | 34005  |
| UN05593 | Rsa1.0.02664.1 | 569  | 28917  | 0         | 509  | 541  | 94 +  | 1    | 540  | 7482   | 8022   |
| UN05594 | Rsa1.0.02105.1 | 1160 | 156953 | 0         | 392  | 395  | 99 +  | 1    | 395  | 26596  | 26990  |
| UN05595 | Rsa1.0.02065.1 | 1021 | 35467  | 0         | 379  | 382  | 99 +  | 236  | 617  | 15310  | 15691  |
| UN05596 | Rsa1.0.00102.1 | 765  | 135497 | 1.00E-135 | 331  | 361  | 91 -  | 3    | 359  | 44767  | 45107  |
| UN05597 | Rsa1.0.00037.1 | 1177 | 307838 | 1.00E-169 | 304  | 305  | 99 +  | 541  | 845  | 284445 | 284749 |
| UN05598 | Rsa1.0.04055.1 | 649  | 19354  | 0         | 629  | 649  | 96 -  | 1    | 647  | 11125  | 11773  |
| UN05599 | Rsa1.0.12966.1 | 1503 | 5062   | 0         | 813  | 855  | 95 -  | 663  | 1502 | 780    | 1628   |
| UN05600 | Rsa1.0.00090.1 | 875  | 273859 | 0         | 653  | 660  | 98 -  | 217  | 875  | 38868  | 39527  |
| UN05601 | Rsa1.0.00276.1 | 984  | 100160 | 4.00E-25  | 111  | 128  | 86 -  | 400  | 527  | 33975  | 34102  |
| UN05602 | Rsa1.0.02605.1 | 881  | 29637  | 0         | 872  | 879  | 99 -  | 4    | 881  | 1808   | 2685   |
| UN05603 | Rsa1.0.00904.1 | 816  | 180594 | 1.00E-174 | 316  | 317  | 99 -  | 26   | 341  | 149577 | 149893 |
| UN05604 | Rsa1.0.00414.1 | 1232 | 202190 | 0         | 467  | 492  | 94 -  | 3    | 494  | 201313 | 201804 |
| UN05605 | Rsa1.0.00479.1 | 1377 | 81377  | 0         | 685  | 695  | 98 +  | 684  | 1377 | 27298  | 27992  |
| UN05606 | Rsa1.0.01882.1 | 603  | 37697  | 0         | 589  | 601  | 98 +  | 1    | 601  | 24263  | 24860  |
| UN05607 | Rsa1.0.02651.1 | 1255 | 29046  | 0         | 502  | 502  | 100 + | 20   | 521  | 25001  | 25502  |
| UN05608 | Rsa1.0.04210.1 | 717  | 18442  | 1.00E-179 | 362  | 370  | 97 -  | 353  | 717  | 3764   | 4133   |
| UN05609 | Rsa1.0.00308.1 | 870  | 96915  | 0         | 386  | 387  | 99 -  | 484  | 870  | 70984  | 71370  |
| UN05610 | Rsa1.0.00087.1 | 861  | 761073 | 1.00E-176 | 334  | 341  | 97 -  | 515  | 855  | 533426 | 533766 |
| UN05611 | Rsa1.0.00656.1 | 935  | 69968  | 0         | 537  | 551  | 97 +  | 381  | 931  | 36888  | 37434  |
| UN05612 | Rsa1.0.00061.1 | 1105 | 218685 | 0         | 561  | 566  | 99 +  | 118  | 683  | 99301  | 99866  |
| UN05613 | Rsa1.0.02213.1 | 1480 | 33824  | 0         | 880  | 908  | 96 -  | 576  | 1480 | 16450  | 17357  |
| UN05614 | Rsa1.0.02730.1 | 969  | 28385  | 0         | 456  | 501  | 91 +  | 347  | 823  | 391    | 891    |

|         |                |      |        |           |      |      |       |      |      |        |        |
|---------|----------------|------|--------|-----------|------|------|-------|------|------|--------|--------|
| UN05615 | Rsa1.0.00347.1 | 1213 | 93048  | 0         | 354  | 357  | 99 +  | 858  | 1212 | 92076  | 92432  |
| UN05616 | Rsa1.0.01220.1 | 1405 | 161775 | 0         | 1037 | 1046 | 99 +  | 4    | 1048 | 115795 | 116839 |
| UN05617 | Rsa1.0.02927.1 | 1047 | 26698  | 0         | 531  | 556  | 95 +  | 1    | 550  | 8585   | 9136   |
| UN05618 | Rsa1.0.00525.1 | 761  | 78030  | 0         | 753  | 764  | 98 -  | 3    | 761  | 65524  | 66287  |
| UN05619 | Rsa1.0.12999.1 | 3539 | 5050   | 0         | 563  | 563  | 100 - | 2535 | 3097 | 1      | 563    |
| UN05620 | Rsa1.0.01656.1 | 896  | 41494  | 0         | 413  | 413  | 100 - | 419  | 831  | 36323  | 36735  |
| UN05621 | Rsa1.0.00997.1 | 1210 | 57190  | 0         | 725  | 726  | 99 -  | 485  | 1210 | 44267  | 44992  |
| UN05622 | Rsa1.0.02910.1 | 1579 | 26843  | 0         | 398  | 400  | 99 -  | 649  | 1047 | 24197  | 24596  |
| UN05623 | Rsa1.0.01153.1 | 607  | 52264  | 0         | 601  | 604  | 99 +  | 1    | 604  | 7807   | 8410   |
| UN05624 | Rsa1.0.52761.1 | 827  | 432    | 4.00E-28  | 115  | 130  | 88 +  | 3    | 132  | 184    | 308    |
| UN05625 | Rsa1.0.02069.1 | 1099 | 35425  | 0         | 386  | 400  | 96 -  | 704  | 1098 | 748    | 1146   |
| UN05626 | Rsa1.0.02490.1 | 1672 | 30885  | 0         | 409  | 418  | 97 +  | 1255 | 1672 | 28607  | 29023  |
| UN05627 | Rsa1.0.00472.1 | 1058 | 398134 | 1.00E-131 | 247  | 250  | 98 +  | 433  | 682  | 271666 | 271915 |
| UN05628 | Rsa1.0.09404.1 | 513  | 6392   | 0         | 499  | 512  | 97 -  | 2    | 513  | 854    | 1365   |
| UN05629 | Rsa1.0.01075.1 | 760  | 156953 | 1.00E-123 | 237  | 241  | 98 +  | 473  | 713  | 23131  | 23371  |
| UN05630 | Rsa1.0.04293.1 | 835  | 18046  | 1.00E-145 | 335  | 357  | 93 +  | 3    | 356  | 12294  | 12640  |
| UN05631 | Rsa1.0.01249.1 | 831  | 188432 | 0         | 677  | 683  | 99 +  | 149  | 831  | 157690 | 158372 |
| UN05632 | Rsa1.0.03964.1 | 723  | 19835  | 9.00E-72  | 217  | 244  | 88 -  | 491  | 723  | 13100  | 13337  |
| UN05633 | Rsa1.0.03981.1 | 1356 | 19724  | 1.00E-139 | 335  | 359  | 93 -  | 1003 | 1356 | 18184  | 18533  |
| UN05634 | Rsa1.0.00476.1 | 1693 | 280966 | 0         | 346  | 347  | 99 +  | 1347 | 1692 | 156495 | 156841 |
| UN05635 | Rsa1.0.00341.1 | 1147 | 249309 | 0         | 347  | 354  | 98 +  | 3    | 353  | 9179   | 9532   |
| UN05636 | Rsa1.0.02923.1 | 1364 | 26736  | 0         | 655  | 697  | 93 +  | 631  | 1316 | 10816  | 11508  |
| UN05637 | Rsa1.0.67954.1 | 1060 | 337    | 0         | 327  | 328  | 99 +  | 140  | 467  | 10     | 337    |
| UN05638 | Rsa1.0.00028.1 | 718  | 293984 | 0         | 362  | 370  | 97 +  | 350  | 718  | 173266 | 173635 |
| UN05639 | Rsa1.0.34876.1 | 759  | 649    | 3.00E-93  | 174  | 174  | 100 - | 194  | 367  | 122    | 295    |
| UN05640 | Rsa1.0.01861.1 | 954  | 38031  | 1.00E-170 | 347  | 361  | 96 +  | 17   | 377  | 29580  | 29937  |
| UN05641 | Rsa1.0.04611.1 | 1254 | 16647  | 1.00E-169 | 307  | 309  | 99 -  | 17   | 325  | 14537  | 14845  |
| UN05642 | Rsa1.0.10881.1 | 1583 | 5691   | 0         | 739  | 742  | 99 -  | 844  | 1583 | 4950   | 5691   |
| UN05643 | Rsa1.0.00092.1 | 1513 | 659932 | 0         | 509  | 514  | 99 -  | 364  | 877  | 348844 | 349357 |
| UN05644 | Rsa1.0.00629.1 | 1062 | 71381  | 0         | 396  | 405  | 97 -  | 3    | 407  | 38665  | 39066  |
| UN05645 | Rsa1.0.04297.1 | 507  | 18030  | 1.00E-121 | 220  | 220  | 100 + | 1    | 220  | 16488  | 16707  |
| UN05646 | Rsa1.0.00283.1 | 1180 | 183797 | 1.00E-144 | 265  | 267  | 99 -  | 1    | 267  | 174880 | 175146 |
| UN05647 | Rsa1.0.01492.1 | 986  | 44704  | 2.33E-156 | 312  | 326  | 95 +  | 1    | 320  | 26463  | 26786  |
| UN05648 | Rsa1.0.01476.1 | 1235 | 172928 | 1.00E-112 | 276  | 299  | 92 +  | 1    | 291  | 137462 | 137754 |
| UN05649 | Rsa1.0.00108.1 | 1014 | 478491 | 0         | 639  | 680  | 93 +  | 1    | 677  | 144384 | 145050 |
| UN05650 | Rsa1.0.00461.1 | 781  | 82509  | 0         | 431  | 439  | 98 -  | 332  | 769  | 19933  | 20371  |
| UN05651 | Rsa1.0.01606.1 | 718  | 42432  | 0         | 560  | 572  | 97 +  | 18   | 588  | 37724  | 38292  |
| UN05652 | Rsa1.0.01971.1 | 844  | 36641  | 0         | 419  | 428  | 97 -  | 1    | 423  | 10966  | 11391  |
| UN05653 | Rsa1.0.01191.1 | 1154 | 51235  | 0         | 551  | 555  | 99 -  | 1    | 555  | 19276  | 19827  |

|         |                |      |        |           |      |      |       |      |      |        |        |
|---------|----------------|------|--------|-----------|------|------|-------|------|------|--------|--------|
| UN05654 | Rsa1.0.02229.1 | 787  | 33672  | 0         | 345  | 345  | 100 - | 3    | 347  | 26818  | 27162  |
| UN05655 | Rsa1.0.01537.1 | 716  | 187285 | 0         | 519  | 520  | 99 +  | 2    | 521  | 165458 | 165977 |
| UN05656 | Rsa1.0.04934.1 | 641  | 143962 | 1.00E-174 | 367  | 385  | 95 +  | 255  | 639  | 142052 | 142435 |
| UN05657 | Rsa1.0.08675.1 | 474  | 7054   | 0         | 474  | 474  | 100 + | 1    | 474  | 2185   | 2658   |
| UN05658 | Rsa1.0.00383.1 | 837  | 398431 | 1.00E-117 | 294  | 318  | 92 +  | 2    | 303  | 182089 | 182404 |
| UN05659 | Rsa1.0.00294.1 | 797  | 144860 | 0         | 575  | 583  | 98 -  | 1    | 583  | 67251  | 67833  |
| UN05660 | Rsa1.0.03437.1 | 868  | 22947  | 0         | 380  | 383  | 99 +  | 484  | 866  | 18572  | 18954  |
| UN05661 | Rsa1.0.04848.1 | 1211 | 15727  | 0         | 855  | 869  | 98 +  | 342  | 1210 | 6563   | 7431   |
| UN05662 | Rsa1.0.00262.1 | 734  | 101906 | 0         | 377  | 380  | 99 -  | 2    | 381  | 51801  | 52180  |
| UN05663 | Rsa1.0.00136.1 | 1759 | 122464 | 0         | 502  | 502  | 100 - | 1258 | 1759 | 31374  | 31875  |
| UN05664 | Rsa1.0.01779.1 | 774  | 39448  | 0         | 392  | 404  | 97 -  | 2    | 405  | 25472  | 25871  |
| UN05665 | Rsa1.0.00045.1 | 704  | 328694 | 1.00E-142 | 269  | 272  | 98 -  | 3    | 274  | 232551 | 232821 |
| UN05666 | Rsa1.0.00354.1 | 983  | 232005 | 0         | 958  | 983  | 97 -  | 1    | 982  | 180229 | 181205 |
| UN05667 | Rsa1.0.00546.1 | 783  | 76523  | 0         | 444  | 472  | 94 +  | 100  | 571  | 60591  | 61062  |
| UN05668 | Rsa1.0.00589.1 | 985  | 209965 | 0         | 535  | 560  | 95 -  | 427  | 985  | 9746   | 10294  |
| UN05669 | Rsa1.0.00366.1 | 1360 | 90880  | 1.00E-154 | 277  | 277  | 100 + | 1070 | 1346 | 7884   | 8160   |
| UN05670 | Rsa1.0.00026.1 | 782  | 327835 | 0         | 570  | 593  | 96 +  | 5    | 595  | 27208  | 27800  |
| UN05671 | Rsa1.0.01892.1 | 751  | 37526  | 0         | 641  | 650  | 98 -  | 1    | 650  | 26443  | 27091  |
| UN05672 | Rsa1.0.04997.1 | 540  | 15182  | 0         | 525  | 539  | 97 +  | 1    | 539  | 3486   | 4023   |
| UN05673 | Rsa1.0.00517.1 | 1323 | 142790 | 0         | 1220 | 1287 | 94 +  | 1    | 1280 | 65140  | 66425  |
| UN05674 | Rsa1.0.01024.1 | 811  | 56569  | 0         | 761  | 770  | 98 -  | 43   | 811  | 32275  | 33044  |
| UN05675 | Rsa1.0.01750.1 | 814  | 39816  | 1.00E-120 | 252  | 261  | 96 -  | 1    | 261  | 22530  | 22786  |
| UN05676 | Rsa1.0.00211.1 | 1051 | 228189 | 1.00E-118 | 303  | 332  | 91 +  | 739  | 1050 | 147827 | 148158 |
| UN05677 | Rsa1.0.24113.1 | 845  | 1006   | 0         | 481  | 487  | 98 +  | 1    | 485  | 507    | 993    |
| UN05678 | Rsa1.0.01248.1 | 1057 | 154103 | 0         | 425  | 428  | 99 -  | 125  | 552  | 11605  | 12032  |
| UN05679 | Rsa1.0.00767.1 | 746  | 64980  | 0         | 605  | 611  | 99 -  | 1    | 611  | 14548  | 15158  |
| UN05680 | Rsa1.0.00279.1 | 750  | 100039 | 0         | 544  | 544  | 100 - | 1    | 544  | 39261  | 39804  |
| UN05681 | Rsa1.0.01796.1 | 1140 | 39154  | 0         | 1125 | 1139 | 98 -  | 2    | 1140 | 19170  | 20307  |
| UN05682 | Rsa1.0.00430.1 | 1291 | 85453  | 1.00E-178 | 335  | 341  | 98 -  | 231  | 571  | 42843  | 43183  |
| UN05683 | Rsa1.0.00531.1 | 954  | 77387  | 0         | 945  | 954  | 99 +  | 1    | 954  | 61149  | 62100  |
| UN05684 | Rsa1.0.00040.1 | 949  | 324196 | 0         | 595  | 605  | 98 -  | 1    | 605  | 246545 | 247147 |
| UN05685 | Rsa1.0.13693.1 | 857  | 4469   | 0         | 772  | 805  | 95 -  | 58   | 857  | 3195   | 3997   |
| UN05686 | Rsa1.0.02319.1 | 1408 | 32580  | 0         | 1354 | 1434 | 94 -  | 1    | 1408 | 401    | 1807   |
| UN05687 | Rsa1.0.00050.1 | 1172 | 237174 | 0         | 888  | 891  | 99 +  | 281  | 1170 | 186179 | 187069 |
| UN05688 | Rsa1.0.01829.1 | 1349 | 166063 | 0         | 438  | 440  | 99 -  | 910  | 1349 | 128650 | 129089 |
| UN05689 | Rsa1.0.00069.1 | 670  | 403561 | 0         | 377  | 388  | 97 +  | 269  | 656  | 86497  | 86884  |
| UN05690 | Rsa1.0.15510.1 | 1091 | 2565   | 0         | 724  | 731  | 99 +  | 1    | 731  | 1333   | 2063   |
| UN05691 | Rsa1.0.00035.1 | 994  | 176449 | 0         | 393  | 396  | 99 -  | 599  | 994  | 37380  | 37775  |
| UN05692 | Rsa1.0.00281.1 | 1109 | 99908  | 1.00E-147 | 316  | 336  | 94 -  | 1    | 322  | 6793   | 7128   |

|         |                |      |        |           |      |      |       |      |      |        |        |
|---------|----------------|------|--------|-----------|------|------|-------|------|------|--------|--------|
| UN05693 | Rsa1.0.03183.1 | 1241 | 24755  | 0         | 589  | 590  | 99 -  | 652  | 1241 | 15263  | 15852  |
| UN05694 | Rsa1.0.00866.1 | 672  | 61676  | 1.00E-123 | 247  | 254  | 97 -  | 1    | 251  | 56474  | 56727  |
| UN05695 | Rsa1.0.02672.1 | 761  | 28884  | 1.00E-106 | 208  | 212  | 98 -  | 394  | 605  | 15855  | 16066  |
| UN05696 | Rsa1.0.01173.1 | 1229 | 51727  | 0         | 386  | 402  | 96 -  | 39   | 439  | 1555   | 1955   |
| UN05697 | Rsa1.0.01580.1 | 1177 | 42852  | 0         | 400  | 417  | 95 -  | 1    | 414  | 31149  | 31563  |
| UN05698 | Rsa1.0.03309.1 | 1069 | 23852  | 0         | 519  | 524  | 99 +  | 3    | 526  | 16961  | 17479  |
| UN05699 | Rsa1.0.14703.1 | 763  | 3143   | 1.00E-104 | 251  | 267  | 94 +  | 1    | 264  | 1017   | 1282   |
| UN05700 | Rsa1.0.00990.1 | 1342 | 57445  | 0         | 414  | 416  | 99 +  | 579  | 993  | 15812  | 16227  |
| UN05701 | Rsa1.0.01340.1 | 909  | 47805  | 0         | 466  | 477  | 97 +  | 2    | 478  | 24238  | 24712  |
| UN05702 | Rsa1.0.01630.1 | 677  | 41913  | 1.00E-133 | 259  | 264  | 98 +  | 1    | 264  | 943    | 1204   |
| UN05703 | Rsa1.0.01280.1 | 1466 | 49321  | 0         | 1013 | 1051 | 96 -  | 6    | 1048 | 36579  | 37629  |
| UN05704 | Rsa1.0.00662.1 | 1255 | 192183 | 0         | 585  | 598  | 97 -  | 1    | 598  | 189833 | 190426 |
| UN05705 | Rsa1.0.03402.1 | 1032 | 23188  | 1.00E-112 | 296  | 333  | 88 +  | 5    | 321  | 11297  | 11614  |
| UN05706 | Rsa1.0.18038.1 | 995  | 1684   | 1.00E-174 | 316  | 318  | 99 -  | 1    | 318  | 735    | 1052   |
| UN05707 | Rsa1.0.00787.1 | 821  | 64239  | 0         | 814  | 819  | 99 -  | 5    | 821  | 32330  | 33148  |
| UN05708 | Rsa1.0.01234.1 | 570  | 50183  | 0         | 556  | 574  | 96 -  | 1    | 570  | 43259  | 43831  |
| UN05709 | Rsa1.0.00673.1 | 1195 | 69325  | 0         | 395  | 405  | 97 -  | 1    | 402  | 50953  | 51357  |
| UN05710 | Rsa1.0.12663.1 | 588  | 5160   | 1.00E-133 | 314  | 338  | 92 +  | 1    | 336  | 935    | 1260   |
| UN05711 | Rsa1.0.01825.1 | 774  | 38725  | 1.00E-164 | 349  | 363  | 96 +  | 1    | 358  | 13989  | 14350  |
| UN05712 | Rsa1.0.02655.1 | 859  | 29027  | 1.00E-176 | 331  | 337  | 98 -  | 1    | 337  | 16785  | 17121  |
| UN05713 | Rsa1.0.00111.1 | 477  | 390088 | 1.00E-111 | 304  | 336  | 90 -  | 129  | 459  | 174813 | 175148 |
| UN05714 | Rsa1.0.06170.1 | 851  | 11575  | 0         | 394  | 396  | 99 -  | 456  | 851  | 6714   | 7109   |
| UN05715 | Rsa1.0.00039.1 | 631  | 296927 | 4.00E-92  | 188  | 192  | 97 -  | 440  | 630  | 18136  | 18327  |
| UN05716 | Rsa1.0.00438.1 | 1294 | 84861  | 1.00E-156 | 324  | 337  | 96 +  | 110  | 445  | 15680  | 16012  |
| UN05717 | Rsa1.0.12454.1 | 1346 | 5222   | 0         | 1128 | 1203 | 93 +  | 13   | 1215 | 1326   | 2526   |
| UN05718 | Rsa1.0.08691.1 | 880  | 7034   | 0         | 427  | 431  | 99 -  | 3    | 433  | 5704   | 6133   |
| UN05719 | Rsa1.0.00651.1 | 785  | 247766 | 1.00E-137 | 259  | 263  | 98 -  | 415  | 677  | 218653 | 218915 |
| UN05720 | Rsa1.0.32832.1 | 756  | 693    | 0         | 337  | 341  | 98 -  | 1    | 341  | 325    | 665    |
| UN05721 | Rsa1.0.00055.1 | 1374 | 520193 | 1.00E-149 | 380  | 422  | 90 +  | 315  | 736  | 395420 | 395817 |
| UN05722 | Rsa1.0.00075.1 | 1668 | 146680 | 0         | 1316 | 1318 | 99 +  | 1    | 1318 | 127832 | 129149 |
| UN05723 | Rsa1.0.00106.1 | 1629 | 133916 | 0         | 858  | 873  | 98 +  | 1    | 870  | 5576   | 6445   |
| UN05724 | Rsa1.0.13332.1 | 729  | 4911   | 1.00E-155 | 285  | 286  | 99 +  | 1    | 285  | 4122   | 4407   |
| UN05725 | Rsa1.0.00009.1 | 1097 | 232558 | 0         | 337  | 340  | 99 -  | 1    | 340  | 142538 | 142876 |
| UN05726 | Rsa1.0.00427.1 | 496  | 189678 | 0         | 448  | 482  | 92 -  | 2    | 476  | 41004  | 41464  |
| UN05727 | Rsa1.0.01526.1 | 1633 | 43919  | 0         | 574  | 576  | 99 +  | 1058 | 1631 | 23866  | 24441  |
| UN05728 | Rsa1.0.00524.1 | 392  | 169613 | 1.00E-136 | 354  | 390  | 90 -  | 5    | 391  | 152026 | 152398 |
| UN05729 | Rsa1.0.07704.1 | 935  | 8754   | 0         | 663  | 682  | 97 +  | 2    | 680  | 3432   | 4101   |
| UN05730 | Rsa1.0.08717.1 | 1486 | 7008   | 1.00E-123 | 292  | 310  | 94 -  | 3    | 304  | 1261   | 1566   |
| UN05731 | Rsa1.0.00001.1 | 866  | 363028 | 0         | 370  | 370  | 100 - | 1    | 370  | 130696 | 131065 |

|         |                |      |        |           |      |      |       |     |      |        |        |
|---------|----------------|------|--------|-----------|------|------|-------|-----|------|--------|--------|
| UN05732 | Rsa1.0.02796.1 | 1336 | 27805  | 0         | 1323 | 1334 | 99 -  | 2   | 1335 | 22972  | 24304  |
| UN05733 | Rsa1.0.01044.1 | 1248 | 55861  | 0         | 1214 | 1249 | 97 +  | 1   | 1247 | 16741  | 17989  |
| UN05734 | Rsa1.0.00744.1 | 951  | 66084  | 2.00E-85  | 179  | 185  | 96 +  | 424 | 608  | 58549  | 58733  |
| UN05735 | Rsa1.0.00604.1 | 1198 | 146282 | 0         | 1180 | 1187 | 99 -  | 3   | 1189 | 21925  | 23111  |
| UN05736 | Rsa1.0.02903.1 | 1304 | 26901  | 0         | 734  | 750  | 97 +  | 471 | 1220 | 19384  | 20133  |
| UN05737 | Rsa1.0.00119.1 | 407  | 467509 | 1.00E-103 | 218  | 227  | 96 +  | 178 | 404  | 361786 | 362012 |
| UN05738 | Rsa1.0.00018.1 | 1086 | 410899 | 1.00E-155 | 322  | 333  | 96 -  | 679 | 1011 | 70285  | 70612  |
| UN05739 | Rsa1.0.00701.1 | 1164 | 67691  | 0         | 389  | 401  | 97 -  | 2   | 402  | 23226  | 23626  |
| UN05740 | Rsa1.0.03853.1 | 641  | 20447  | 1.00E-174 | 374  | 391  | 95 -  | 1   | 385  | 10994  | 11384  |
| UN05741 | Rsa1.0.02404.1 | 850  | 31702  | 0         | 577  | 580  | 99 +  | 1   | 579  | 5090   | 5669   |
| UN05742 | Rsa1.0.02374.1 | 1431 | 32043  | 1.00E-106 | 326  | 367  | 88 +  | 4   | 365  | 25644  | 25991  |
| UN05743 | Rsa1.0.00656.1 | 1270 | 69968  | 0         | 411  | 413  | 99 +  | 237 | 649  | 49589  | 50001  |
| UN05744 | Rsa1.0.00395.1 | 966  | 214466 | 1.00E-117 | 330  | 367  | 89 +  | 4   | 370  | 62452  | 62817  |
| UN05745 | Rsa1.0.00555.1 | 719  | 75920  | 0         | 567  | 600  | 94 +  | 34  | 632  | 51205  | 51801  |
| UN05746 | Rsa1.0.00842.1 | 1331 | 62493  | 0         | 393  | 410  | 95 -  | 250 | 659  | 3019   | 3428   |
| UN05747 | Rsa1.0.00988.1 | 690  | 57525  | 1.00E-158 | 283  | 283  | 100 + | 1   | 283  | 49551  | 49833  |
| UN05748 | Rsa1.0.05689.1 | 766  | 12927  | 1.00E-123 | 240  | 245  | 97 -  | 29  | 273  | 12604  | 12848  |
| UN05749 | Rsa1.0.00838.1 | 1299 | 153820 | 0         | 1268 | 1300 | 97 +  | 1   | 1298 | 59940  | 61238  |
| UN05750 | Rsa1.0.00583.1 | 1062 | 74309  | 1.00E-168 | 312  | 316  | 98 +  | 496 | 811  | 13328  | 13643  |
| UN05751 | Rsa1.0.00525.1 | 962  | 78030  | 0         | 375  | 376  | 99 +  | 1   | 376  | 4852   | 5227   |
| UN05752 | Rsa1.0.04470.1 | 808  | 17204  | 0         | 700  | 704  | 99 -  | 1   | 704  | 14662  | 15364  |
| UN05753 | Rsa1.0.14201.1 | 400  | 3670   | 1.00E-173 | 378  | 400  | 94 +  | 4   | 400  | 573    | 969    |
| UN05754 | Rsa1.0.00071.1 | 1462 | 345714 | 0         | 1131 | 1152 | 98 -  | 1   | 1149 | 75943  | 77091  |
| UN05755 | Rsa1.0.04516.1 | 1618 | 17018  | 0         | 620  | 635  | 97 +  | 794 | 1428 | 2760   | 3394   |
| UN05756 | Rsa1.0.00509.1 | 1315 | 78829  | 0         | 441  | 444  | 99 +  | 643 | 1086 | 57392  | 57835  |
| UN05757 | Rsa1.0.00427.1 | 978  | 189678 | 1.00E-145 | 272  | 274  | 99 -  | 1   | 274  | 171614 | 171886 |
| UN05758 | Rsa1.0.00120.1 | 884  | 277288 | 1.00E-116 | 213  | 213  | 100 + | 672 | 884  | 93711  | 93923  |
| UN05759 | Rsa1.0.02648.1 | 847  | 29073  | 0         | 425  | 441  | 96 +  | 1   | 441  | 25785  | 26225  |
| UN05760 | Rsa1.0.03360.1 | 712  | 23459  | 0         | 430  | 436  | 98 +  | 3   | 438  | 21550  | 21984  |
| UN05761 | Rsa1.0.00564.1 | 511  | 75428  | 1.00E-143 | 257  | 257  | 100 - | 255 | 511  | 33555  | 33811  |
| UN05762 | Rsa1.0.00172.1 | 1184 | 115476 | 0         | 722  | 728  | 99 +  | 1   | 728  | 68378  | 69105  |
| UN05763 | Rsa1.0.00220.1 | 919  | 192936 | 1.00E-142 | 268  | 272  | 98 -  | 2   | 273  | 183983 | 184254 |
| UN05764 | Rsa1.0.00387.1 | 791  | 495407 | 0         | 399  | 405  | 98 -  | 3   | 407  | 146424 | 146826 |
| UN05765 | Rsa1.0.32744.1 | 951  | 695    | 9.00E-17  | 95   | 110  | 86 +  | 489 | 598  | 486    | 594    |
| UN05766 | Rsa1.0.00091.1 | 1197 | 139699 | 1.00E-173 | 384  | 404  | 95 +  | 7   | 408  | 15256  | 15657  |
| UN05767 | Rsa1.0.01140.1 | 556  | 52586  | 1.00E-94  | 229  | 243  | 94 +  | 8   | 250  | 6447   | 6685   |
| UN05768 | Rsa1.0.06004.1 | 1299 | 11961  | 1.00E-177 | 361  | 376  | 96 +  | 856 | 1231 | 5996   | 6371   |
| UN05769 | Rsa1.0.05878.1 | 1095 | 12344  | 1.00E-171 | 373  | 390  | 95 +  | 1   | 387  | 8117   | 8501   |
| UN05770 | Rsa1.0.01061.1 | 874  | 55349  | 1.00E-119 | 220  | 221  | 99 -  | 1   | 221  | 48481  | 48701  |

|         |                |      |        |           |      |      |      |     |      |        |        |
|---------|----------------|------|--------|-----------|------|------|------|-----|------|--------|--------|
| UN05771 | Rsa1.0_00239.1 | 671  | 104332 | 0         | 407  | 409  | 99 + | 4   | 412  | 97175  | 97583  |
| UN05772 | Rsa1.0_00417.1 | 1118 | 395068 | 0         | 927  | 985  | 94 + | 9   | 987  | 386665 | 387638 |
| UN05773 | Rsa1.0_03263.1 | 406  | 24268  | 0         | 376  | 389  | 96 - | 17  | 405  | 21178  | 21563  |
| UN05774 | Rsa1.0_06056.1 | 586  | 137271 | 1.00E-145 | 335  | 359  | 93 - | 199 | 554  | 128419 | 128777 |
| UN05775 | Rsa1.0_00438.1 | 886  | 84861  | 0         | 518  | 550  | 94 + | 355 | 886  | 69255  | 69798  |
| UN05776 | Rsa1.0_00301.1 | 822  | 365315 | 1.00E-102 | 204  | 209  | 97 - | 427 | 635  | 327848 | 328056 |
| UN05777 | Rsa1.0_00123.1 | 1022 | 325650 | 1.00E-132 | 257  | 263  | 97 - | 460 | 722  | 216442 | 216704 |
| UN05778 | Rsa1.0_00832.1 | 1309 | 62622  | 0         | 368  | 377  | 97 - | 672 | 1048 | 42284  | 42660  |
| UN05779 | Rsa1.0_00246.1 | 1478 | 103541 | 0         | 1193 | 1250 | 95 - | 1   | 1241 | 29514  | 30762  |
| UN05780 | Rsa1.0_00277.1 | 1046 | 100132 | 0         | 607  | 615  | 98 - | 41  | 654  | 7609   | 8223   |
| UN05781 | Rsa1.0_01006.1 | 664  | 163670 | 1.00E-160 | 290  | 291  | 99 + | 243 | 533  | 138108 | 138398 |
| UN05782 | Rsa1.0_00602.1 | 1044 | 73302  | 0         | 565  | 566  | 99 - | 477 | 1042 | 28645  | 29210  |
| UN05783 | Rsa1.0_00201.1 | 1399 | 232851 | 1.00E-148 | 284  | 289  | 98 - | 1   | 286  | 72009  | 72297  |
| UN05784 | Rsa1.0_03833.1 | 1061 | 20575  | 0         | 551  | 559  | 98 - | 5   | 563  | 19050  | 19608  |
| UN05785 | Rsa1.0_01060.1 | 1144 | 55368  | 0         | 1140 | 1143 | 99 - | 1   | 1143 | 25007  | 26148  |
| UN05786 | Rsa1.0_00441.1 | 1124 | 84607  | 0         | 631  | 650  | 97 + | 7   | 656  | 31044  | 31687  |
| UN05787 | Rsa1.0_01285.1 | 938  | 172709 | 1.00E-142 | 259  | 260  | 99 + | 677 | 936  | 158476 | 158735 |
| UN05788 | Rsa1.0_01801.1 | 755  | 39094  | 0         | 524  | 554  | 94 - | 215 | 754  | 292    | 845    |
| UN05789 | Rsa1.0_00019.1 | 984  | 301669 | 1.00E-159 | 294  | 297  | 98 + | 2   | 298  | 112749 | 113045 |
| UN05790 | Rsa1.0_00502.1 | 1183 | 204180 | 0         | 369  | 375  | 98 + | 1   | 375  | 9295   | 9665   |
| UN05791 | Rsa1.0_02198.1 | 1384 | 33989  | 0         | 824  | 851  | 96 + | 466 | 1316 | 6893   | 7743   |
| UN05792 | Rsa1.0_00324.1 | 1033 | 218805 | 1.00E-139 | 254  | 255  | 99 - | 2   | 256  | 154604 | 154858 |
| UN05793 | Rsa1.0_00093.1 | 834  | 214962 | 0         | 417  | 418  | 99 + | 3   | 420  | 206576 | 206993 |
| UN05794 | Rsa1.0_03998.1 | 1071 | 19651  | 4.00E-47  | 128  | 137  | 93 + | 884 | 1020 | 12404  | 12539  |
| UN05795 | Rsa1.0_06133.1 | 1121 | 11663  | 1.00E-169 | 305  | 306  | 99 - | 309 | 614  | 8879   | 9184   |
| UN05796 | Rsa1.0_00319.1 | 1469 | 167331 | 0         | 560  | 589  | 95 - | 3   | 591  | 60716  | 61293  |
| UN05797 | Rsa1.0_03883.1 | 1358 | 20282  | 0         | 1030 | 1065 | 96 - | 203 | 1261 | 9507   | 10562  |
| UN05798 | Rsa1.0_00446.1 | 846  | 167829 | 0         | 824  | 856  | 96 - | 3   | 844  | 149433 | 150288 |
| UN05799 | Rsa1.0_00394.1 | 933  | 148426 | 1.00E-139 | 299  | 313  | 95 + | 1   | 311  | 122830 | 123140 |
| UN05800 | Rsa1.0_01896.1 | 1428 | 37512  | 0         | 1049 | 1061 | 98 - | 1   | 1059 | 30506  | 31566  |
| UN05801 | Rsa1.0_00448.1 | 1796 | 84048  | 0         | 1754 | 1796 | 97 + | 1   | 1795 | 40467  | 42259  |
| UN05802 | Rsa1.0_02247.1 | 627  | 33427  | 1.00E-143 | 321  | 341  | 94 + | 1   | 330  | 8468   | 8807   |
| UN05803 | Rsa1.0_04482.1 | 1014 | 17175  | 0         | 905  | 956  | 94 + | 3   | 953  | 14962  | 15912  |
| UN05804 | Rsa1.0_06911.1 | 1374 | 10178  | 0         | 732  | 758  | 96 - | 630 | 1374 | 4913   | 5669   |
| UN05805 | Rsa1.0_03289.1 | 870  | 24011  | 1.00E-172 | 318  | 322  | 98 - | 1   | 322  | 20280  | 20601  |
| UN05806 | #              | #    | #      | #         | #    | #    | #    | #   | #    | #      | #      |
| UN05807 | Rsa1.0_01024.1 | 900  | 56569  | 0         | 894  | 900  | 99 + | 1   | 900  | 31281  | 32180  |
| UN05808 | Rsa1.0_02841.1 | 576  | 27383  | 0         | 348  | 351  | 99 + | 2   | 352  | 4965   | 5314   |
| UN05809 | Rsa1.0_00362.1 | 1341 | 299497 | 0         | 775  | 793  | 97 + | 79  | 871  | 220963 | 221755 |

|         |                |      |        |           |      |      |       |      |      |        |        |
|---------|----------------|------|--------|-----------|------|------|-------|------|------|--------|--------|
| UN05810 | Rsa1.0.02473.1 | 598  | 31083  | 0         | 596  | 598  | 99 -  | 1    | 598  | 8040   | 8637   |
| UN05811 | Rsa1.0.00679.1 | 2011 | 68971  | 0         | 499  | 518  | 96 +  | 1323 | 1840 | 51892  | 52409  |
| UN05812 | Rsa1.0.00067.1 | 1184 | 415055 | 0         | 740  | 769  | 96 -  | 414  | 1182 | 247368 | 248130 |
| UN05813 | Rsa1.0.01727.1 | 1014 | 40243  | 1.00E-132 | 304  | 322  | 94 -  | 1    | 319  | 7333   | 7652   |
| UN05814 | Rsa1.0.01471.1 | 855  | 45101  | 1.00E-168 | 367  | 387  | 94 +  | 1    | 387  | 18491  | 18874  |
| UN05815 | Rsa1.0.00570.1 | 1069 | 75002  | 0         | 580  | 585  | 99 +  | 1    | 584  | 34605  | 35189  |
| UN05816 | Rsa1.0.02174.1 | 849  | 34316  | 0         | 826  | 848  | 97 -  | 2    | 849  | 4385   | 5231   |
| UN05817 | Rsa1.0.00117.1 | 1244 | 213118 | 0         | 815  | 918  | 88 -  | 207  | 1112 | 211681 | 212592 |
| UN05818 | Rsa1.0.00816.1 | 843  | 403350 | 1.00E-129 | 259  | 266  | 97 -  | 17   | 282  | 391532 | 391796 |
| UN05819 | Rsa1.0.01635.1 | 998  | 41865  | 1.00E-172 | 307  | 307  | 100 - | 692  | 998  | 38710  | 39016  |
| UN05820 | Rsa1.0.00589.1 | 1190 | 209965 | 1.00E-154 | 277  | 277  | 100 - | 396  | 672  | 189295 | 189571 |
| UN05821 | Rsa1.0.02871.1 | 859  | 27085  | 0         | 464  | 464  | 100 - | 2    | 465  | 6285   | 6748   |
| UN05822 | Rsa1.0.00058.1 | 668  | 159921 | 1.00E-110 | 212  | 214  | 99 -  | 456  | 668  | 83148  | 83361  |
| UN05823 | Rsa1.0.01895.1 | 939  | 37512  | 1.00E-152 | 357  | 384  | 92 +  | 558  | 934  | 10218  | 10601  |
| UN05824 | Rsa1.0.05457.1 | 784  | 13687  | 0         | 431  | 438  | 98 +  | 3    | 440  | 2411   | 2848   |
| UN05825 | Rsa1.0.00881.1 | 768  | 61260  | 0         | 727  | 770  | 94 -  | 3    | 760  | 21610  | 22372  |
| UN05826 | Rsa1.0.05039.1 | 1015 | 15056  | 0         | 573  | 573  | 100 - | 443  | 1015 | 4260   | 4832   |
| UN05827 | Rsa1.0.00596.1 | 1816 | 73578  | 0         | 640  | 646  | 99 -  | 221  | 863  | 52467  | 53112  |
| UN05828 | Rsa1.0.01175.1 | 887  | 51674  | 0         | 617  | 637  | 96 +  | 2    | 638  | 18537  | 19173  |
| UN05829 | Rsa1.0.01247.1 | 704  | 49934  | 1.00E-171 | 349  | 364  | 95 +  | 6    | 369  | 25027  | 25390  |
| UN05830 | Rsa1.0.15314.1 | 493  | 2690   | 1.00E-111 | 207  | 208  | 99 +  | 3    | 210  | 354    | 561    |
| UN05831 | Rsa1.0.00157.1 | 588  | 245832 | 1.00E-159 | 291  | 293  | 99 +  | 296  | 588  | 51058  | 51350  |
| UN05832 | Rsa1.0.01595.1 | 766  | 175383 | 1.00E-134 | 283  | 295  | 95 +  | 7    | 296  | 38730  | 39024  |
| UN05833 | Rsa1.0.01405.1 | 953  | 46445  | 0         | 685  | 717  | 95 +  | 244  | 948  | 8905   | 9621   |
| UN05834 | Rsa1.0.00921.1 | 710  | 59599  | 0         | 347  | 349  | 99 +  | 362  | 710  | 9703   | 10051  |
| UN05835 | Rsa1.0.00871.1 | 587  | 61539  | 0         | 445  | 474  | 93 +  | 126  | 587  | 4048   | 4516   |
| UN05836 | Rsa1.0.00259.1 | 818  | 163204 | 3.00E-78  | 167  | 173  | 96 +  | 514  | 686  | 149484 | 149656 |
| UN05837 | Rsa1.0.01232.1 | 871  | 155185 | 0         | 413  | 419  | 98 -  | 453  | 871  | 108745 | 109163 |
| UN05838 | Rsa1.0.01414.1 | 1482 | 149508 | 1.00E-169 | 363  | 382  | 95 +  | 1106 | 1477 | 115743 | 116123 |
| UN05839 | Rsa1.0.00999.1 | 917  | 57162  | 0         | 459  | 461  | 99 +  | 2    | 462  | 24939  | 25399  |
| UN05840 | Rsa1.0.00087.1 | 1079 | 761073 | 0         | 354  | 360  | 98 -  | 720  | 1079 | 730624 | 730983 |
| UN05841 | Rsa1.0.01249.1 | 1939 | 188432 | 0         | 1134 | 1182 | 95 +  | 770  | 1938 | 149233 | 150411 |
| UN05842 | Rsa1.0.20900.1 | 1506 | 1257   | 0         | 532  | 548  | 97 +  | 287  | 834  | 5      | 552    |
| UN05843 | Rsa1.0.03565.1 | 1059 | 22062  | 1.00E-166 | 362  | 383  | 94 -  | 13   | 395  | 3775   | 4155   |
| UN05844 | Rsa1.0.13838.1 | 721  | 4236   | 0         | 489  | 539  | 90 +  | 8    | 543  | 1128   | 1640   |
| UN05845 | Rsa1.0.00081.1 | 1277 | 143261 | 0         | 353  | 353  | 100 - | 925  | 1277 | 108963 | 109315 |
| UN05846 | Rsa1.0.03853.1 | 1236 | 20447  | 0         | 465  | 502  | 92 +  | 759  | 1236 | 10994  | 11494  |
| UN05847 | Rsa1.0.08338.1 | 534  | 7511   | 0         | 488  | 520  | 93 -  | 3    | 521  | 490    | 989    |
| UN05848 | Rsa1.0.03843.1 | 1088 | 20496  | 0         | 401  | 427  | 93 +  | 6    | 418  | 6097   | 6521   |



|         |                |      |        |           |      |      |       |      |      |        |        |
|---------|----------------|------|--------|-----------|------|------|-------|------|------|--------|--------|
| UN05849 | Rsa1.0_24098.1 | 944  | 1007   | 0         | 354  | 355  | 99 -  | 589  | 943  | 597    | 951    |
| UN05850 | Rsa1.0_02662.1 | 732  | 28956  | 0         | 501  | 514  | 97 +  | 5    | 518  | 9090   | 9603   |
| UN05851 | Rsa1.0_00427.1 | 1066 | 189678 | 0         | 356  | 361  | 98 +  | 697  | 1057 | 110951 | 111311 |
| UN05852 | Rsa1.0_05604.1 | 934  | 13204  | 0         | 778  | 782  | 99 +  | 102  | 883  | 11682  | 12463  |
| UN05853 | Rsa1.0_00288.1 | 813  | 98659  | 0         | 492  | 519  | 94 +  | 310  | 811  | 89851  | 90368  |
| UN05854 | Rsa1.0_00684.1 | 972  | 141701 | 0         | 510  | 547  | 93 -  | 5    | 532  | 66962  | 67507  |
| UN05855 | Rsa1.0_00998.1 | 851  | 57168  | 1.00E-142 | 287  | 297  | 96 +  | 378  | 674  | 9918   | 10214  |
| UN05856 | Rsa1.0_01368.1 | 781  | 47129  | 0         | 404  | 408  | 99 +  | 54   | 461  | 25973  | 26380  |
| UN05857 | Rsa1.0_00630.1 | 1050 | 71281  | 1.00E-150 | 272  | 273  | 99 -  | 778  | 1050 | 34386  | 34658  |
| UN05858 | Rsa1.0_00124.1 | 1061 | 262503 | 1.00E-116 | 260  | 276  | 94 -  | 13   | 288  | 21650  | 21919  |
| UN05859 | Rsa1.0_06463.1 | 1192 | 10968  | 0         | 412  | 419  | 98 +  | 774  | 1192 | 8511   | 8928   |
| UN05860 | Rsa1.0_00019.1 | 1594 | 301669 | 0         | 1584 | 1596 | 99 +  | 3    | 1594 | 229403 | 230997 |
| UN05861 | Rsa1.0_00419.1 | 1283 | 86562  | 1.00E-137 | 271  | 276  | 98 -  | 1009 | 1283 | 39968  | 40242  |
| UN05862 | Rsa1.0_31661.1 | 1224 | 722    | 0         | 407  | 408  | 99 +  | 818  | 1224 | 1      | 408    |
| UN05863 | Rsa1.0_01943.1 | 934  | 37042  | 0         | 835  | 844  | 98 -  | 91   | 934  | 14217  | 15060  |
| UN05864 | Rsa1.0_00025.1 | 957  | 277312 | 1.00E-173 | 315  | 317  | 99 +  | 387  | 703  | 112270 | 112586 |
| UN05865 | Rsa1.0_00688.1 | 995  | 68396  | 2.00E-76  | 210  | 232  | 90 +  | 769  | 995  | 14822  | 15046  |
| UN05866 | Rsa1.0_02111.1 | 1337 | 34913  | 1.00E-121 | 237  | 242  | 97 +  | 9    | 250  | 833    | 1074   |
| UN05867 | Rsa1.0_03390.1 | 780  | 23270  | 1.00E-174 | 400  | 430  | 93 -  | 156  | 585  | 17528  | 17957  |
| UN05868 | Rsa1.0_00374.1 | 886  | 165738 | 0         | 390  | 392  | 99 +  | 1    | 392  | 128271 | 128662 |
| UN05869 | Rsa1.0_03199.1 | 690  | 24640  | 0         | 459  | 466  | 98 +  | 227  | 690  | 16239  | 16704  |
| UN05870 | Rsa1.0_06289.1 | 1372 | 11298  | 0         | 511  | 530  | 96 +  | 200  | 725  | 4493   | 5021   |
| UN05871 | Rsa1.0_01701.1 | 532  | 162121 | 0         | 487  | 493  | 98 +  | 4    | 496  | 1466   | 1956   |
| UN05872 | Rsa1.0_02120.1 | 1070 | 34819  | 1.00E-81  | 170  | 175  | 97 +  | 896  | 1070 | 9297   | 9471   |
| UN05873 | Rsa1.0_00079.1 | 2225 | 606987 | 0         | 1161 | 1204 | 96 +  | 1031 | 2224 | 56834  | 58031  |
| UN05874 | Rsa1.0_00070.1 | 712  | 150321 | 1.00E-156 | 289  | 292  | 98 -  | 384  | 675  | 59726  | 60017  |
| UN05875 | Rsa1.0_02783.1 | 1075 | 27927  | 0         | 1036 | 1075 | 96 -  | 2    | 1075 | 21274  | 22327  |
| UN05876 | Rsa1.0_13789.1 | 1442 | 4332   | 0         | 1029 | 1045 | 98 -  | 113  | 1154 | 3288   | 4332   |
| UN05877 | Rsa1.0_02508.1 | 1314 | 30675  | 0         | 545  | 563  | 96 +  | 3    | 557  | 20162  | 20724  |
| UN05878 | Rsa1.0_11525.1 | 1241 | 5479   | 0         | 836  | 910  | 91 +  | 76   | 985  | 4434   | 5343   |
| UN05879 | Rsa1.0_00348.1 | 1200 | 92818  | 2.00E-49  | 110  | 113  | 97 +  | 137  | 249  | 10541  | 10653  |
| UN05880 | Rsa1.0_06362.1 | 1377 | 11154  | 0         | 826  | 870  | 94 -  | 95   | 951  | 7607   | 8460   |
| UN05881 | Rsa1.0_00161.1 | 957  | 116891 | 1.00E-149 | 284  | 288  | 98 +  | 671  | 957  | 8114   | 8401   |
| UN05882 | Rsa1.0_00342.1 | 648  | 93695  | 2.00E-87  | 164  | 164  | 100 + | 485  | 648  | 32258  | 32421  |
| UN05883 | Rsa1.0_04510.1 | 1118 | 17033  | 1.00E-145 | 306  | 321  | 95 +  | 806  | 1116 | 12403  | 12723  |
| UN05884 | Rsa1.0_00612.1 | 800  | 72376  | 0         | 593  | 607  | 97 +  | 192  | 797  | 34827  | 35433  |
| UN05885 | Rsa1.0_00191.1 | 1293 | 316976 | 0         | 729  | 818  | 89 +  | 27   | 844  | 8982   | 9799   |
| UN05886 | Rsa1.0_08768.1 | 850  | 6941   | 1.00E-158 | 323  | 334  | 96 -  | 453  | 786  | 1      | 326    |
| UN05887 | Rsa1.0_01295.1 | 1162 | 49040  | 0         | 540  | 561  | 96 -  | 100  | 654  | 8398   | 8958   |

|         |                |      |        |           |      |      |       |     |      |        |        |
|---------|----------------|------|--------|-----------|------|------|-------|-----|------|--------|--------|
| UN05888 | Rsa1.0.00417.1 | 1015 | 395068 | 0         | 477  | 506  | 94 +  | 510 | 1015 | 259259 | 259761 |
| UN05889 | Rsa1.0.00017.1 | 1351 | 752458 | 1.00E-160 | 364  | 387  | 94 -  | 972 | 1351 | 661836 | 662218 |
| UN05890 | Rsa1.0.01042.1 | 1033 | 293264 | 0         | 993  | 1038 | 95 -  | 3   | 1032 | 141035 | 142066 |
| UN05891 | Rsa1.0.09029.1 | 1233 | 6700   | 1.00E-114 | 275  | 293  | 93 -  | 942 | 1233 | 176    | 461    |
| UN05892 | Rsa1.0.02358.1 | 945  | 32213  | 1.00E-167 | 314  | 319  | 98 -  | 426 | 744  | 394    | 712    |
| UN05893 | Rsa1.0.01192.1 | 1429 | 51150  | 0         | 930  | 953  | 97 +  | 476 | 1428 | 7058   | 8003   |
| UN05894 | Rsa1.0.02840.1 | 1049 | 27386  | 0         | 745  | 779  | 95 -  | 3   | 772  | 26285  | 27061  |
| UN05895 | Rsa1.0.01159.1 | 825  | 52115  | 1.00E-126 | 241  | 245  | 98 +  | 313 | 557  | 32156  | 32400  |
| UN05896 | Rsa1.0.06072.1 | 1427 | 11811  | 0         | 516  | 547  | 94 -  | 178 | 718  | 11099  | 11641  |
| UN05897 | Rsa1.0.00364.1 | 1471 | 90951  | 1.00E-157 | 290  | 293  | 98 +  | 683 | 975  | 25324  | 25616  |
| UN05898 | Rsa1.0.03298.1 | 791  | 23956  | 0         | 395  | 396  | 99 +  | 396 | 791  | 16319  | 16714  |
| UN05899 | Rsa1.0.00136.1 | 730  | 122464 | 0         | 397  | 411  | 96 +  | 18  | 428  | 83043  | 83453  |
| UN05900 | Rsa1.0.05614.1 | 1163 | 13191  | 5.00E-93  | 174  | 174  | 100 - | 23  | 196  | 6971   | 7144   |
| UN05901 | Rsa1.0.03982.1 | 1086 | 19723  | 1.00E-131 | 262  | 270  | 97 +  | 3   | 272  | 836    | 1105   |
| UN05902 | Rsa1.0.00092.1 | 1073 | 659932 | 0         | 643  | 673  | 95 -  | 417 | 1073 | 141021 | 141690 |
| UN05903 | Rsa1.0.00525.1 | 948  | 78030  | 1.00E-178 | 352  | 363  | 96 -  | 586 | 948  | 4873   | 5227   |
| UN05904 | Rsa1.0.03828.1 | 1315 | 20588  | 0         | 1267 | 1300 | 97 +  | 1   | 1300 | 14279  | 15572  |
| UN05905 | Rsa1.0.03731.1 | 894  | 21136  | 1.00E-130 | 242  | 244  | 99 +  | 648 | 891  | 1440   | 1683   |
| UN05906 | Rsa1.0.01581.1 | 506  | 42833  | 1.00E-161 | 346  | 361  | 95 -  | 114 | 472  | 27739  | 28095  |
| UN05907 | Rsa1.0.00157.1 | 1502 | 245832 | 0         | 1118 | 1170 | 95 -  | 343 | 1490 | 224410 | 225579 |
| UN05908 | Rsa1.0.01052.1 | 1192 | 55548  | 1.00E-166 | 318  | 325  | 97 -  | 268 | 592  | 45259  | 45583  |
| UN05909 | Rsa1.0.00967.1 | 673  | 58049  | 0         | 424  | 440  | 96 -  | 3   | 438  | 49368  | 49803  |
| UN05910 | Rsa1.0.01537.1 | 1413 | 187285 | 3.00E-14  | 141  | 174  | 81 -  | 247 | 420  | 17912  | 18085  |
| UN05911 | Rsa1.0.01296.1 | 1052 | 49035  | 0         | 656  | 677  | 96 +  | 377 | 1052 | 19219  | 19890  |
| UN05912 | Rsa1.0.00515.1 | 1053 | 78417  | 9.00E-76  | 145  | 145  | 100 + | 1   | 145  | 57299  | 57443  |
| UN05913 | Rsa1.0.01174.1 | 720  | 51696  | 0         | 396  | 406  | 97 -  | 3   | 408  | 35988  | 36393  |
| UN05914 | Rsa1.0.00466.1 | 1023 | 82132  | 0         | 717  | 740  | 96 -  | 284 | 1023 | 23508  | 24246  |
| UN05915 | Rsa1.0.03612.1 | 1285 | 21784  | 0         | 1134 | 1191 | 95 +  | 109 | 1285 | 9263   | 10439  |
| UN05916 | Rsa1.0.01773.1 | 909  | 39546  | 0         | 874  | 910  | 96 +  | 1   | 909  | 17788  | 18693  |
| UN05917 | Rsa1.0.05842.1 | 1177 | 12461  | 0         | 1138 | 1179 | 96 -  | 1   | 1175 | 10198  | 11375  |
| UN05918 | Rsa1.0.01210.1 | 1126 | 50663  | 0         | 402  | 412  | 97 -  | 3   | 410  | 34618  | 35029  |
| UN05919 | Rsa1.0.09388.1 | 728  | 6405   | 2.00E-94  | 286  | 322  | 88 -  | 10  | 313  | 4675   | 4991   |
| UN05920 | Rsa1.0.01996.1 | 550  | 36327  | 1.00E-116 | 282  | 300  | 94 +  | 9   | 304  | 28087  | 28381  |
| UN05921 | Rsa1.0.08020.1 | 1023 | 8075   | 0         | 808  | 823  | 98 -  | 203 | 1022 | 1041   | 1863   |
| UN05922 | Rsa1.0.00276.1 | 431  | 100160 | 0         | 426  | 431  | 98 +  | 1   | 431  | 3828   | 4258   |
| UN05923 | Rsa1.0.00087.1 | 959  | 761073 | 0         | 954  | 960  | 99 -  | 1   | 959  | 322147 | 323106 |
| UN05924 | Rsa1.0.00632.1 | 821  | 183777 | 0         | 668  | 695  | 96 -  | 1   | 694  | 10503  | 11197  |
| UN05925 | Rsa1.0.01884.1 | 1102 | 37659  | 1.00E-108 | 282  | 309  | 91 +  | 641 | 949  | 25528  | 25833  |
| UN05926 | Rsa1.0.05260.1 | 1403 | 14337  | 0         | 923  | 935  | 98 -  | 470 | 1403 | 3508   | 4442   |

|         |                |      |        |           |      |      |       |      |      |        |        |
|---------|----------------|------|--------|-----------|------|------|-------|------|------|--------|--------|
| UN05927 | Rsa1.0_00092.1 | 1006 | 659932 | 0         | 871  | 906  | 96 +  | 3    | 902  | 531020 | 531925 |
| UN05928 | Rsa1.0_03147.1 | 706  | 25001  | 0         | 699  | 706  | 99 +  | 1    | 706  | 13626  | 14331  |
| UN05929 | Rsa1.0_02606.1 | 1411 | 29635  | 0         | 385  | 387  | 99 -  | 1    | 387  | 7554   | 7940   |
| UN05930 | Rsa1.0_00461.1 | 904  | 82509  | 0         | 591  | 607  | 97 -  | 309  | 903  | 48011  | 48617  |
| UN05931 | Rsa1.0_00205.1 | 855  | 193401 | 1.00E-107 | 328  | 364  | 90 -  | 4    | 364  | 77712  | 78060  |
| UN05932 | Rsa1.0_00160.1 | 1299 | 346678 | 0         | 884  | 925  | 95 +  | 2    | 920  | 137671 | 138591 |
| UN05933 | Rsa1.0_00348.1 | 1482 | 92818  | 0         | 1478 | 1486 | 99 -  | 1    | 1481 | 32351  | 33836  |
| UN05934 | Rsa1.0_02544.1 | 1224 | 30290  | 0         | 339  | 342  | 99 +  | 1    | 342  | 28816  | 29157  |
| UN05935 | Rsa1.0_04892.1 | 839  | 15573  | 1.00E-133 | 253  | 257  | 98 +  | 449  | 705  | 10170  | 10426  |
| UN05936 | Rsa1.0_00015.1 | 1373 | 561803 | 0         | 468  | 468  | 100 + | 1    | 468  | 373914 | 374381 |
| UN05937 | Rsa1.0_00447.1 | 1231 | 84051  | 0         | 1179 | 1241 | 95 -  | 1    | 1229 | 56648  | 57874  |
| UN05938 | Rsa1.0_58400.1 | 1022 | 392    | 0         | 330  | 330  | 100 - | 1    | 330  | 8      | 337    |
| UN05939 | Rsa1.0_00625.1 | 1454 | 71672  | 0         | 643  | 674  | 95 +  | 1    | 655  | 12121  | 12794  |
| UN05940 | Rsa1.0_01294.1 | 1486 | 49090  | 0         | 791  | 808  | 97 +  | 365  | 1171 | 705    | 1512   |
| UN05941 | Rsa1.0_00083.1 | 849  | 442773 | 0         | 772  | 804  | 96 +  | 50   | 849  | 359544 | 360342 |
| UN05942 | Rsa1.0_02267.1 | 1213 | 33194  | 1.00E-138 | 265  | 270  | 98 -  | 768  | 1032 | 26825  | 27094  |
| UN05943 | Rsa1.0_00920.1 | 1198 | 601703 | 0         | 1006 | 1023 | 98 -  | 53   | 1068 | 296388 | 297410 |
| UN05944 | Rsa1.0_00546.1 | 881  | 76523  | 0         | 592  | 632  | 93 -  | 248  | 879  | 2622   | 3233   |
| UN05945 | Rsa1.0_03487.1 | 1074 | 22564  | 0         | 1070 | 1070 | 100 + | 3    | 1072 | 3850   | 4919   |
| UN05946 | Rsa1.0_00112.1 | 1029 | 132199 | 0         | 524  | 525  | 99 +  | 440  | 964  | 45141  | 45665  |
| UN05947 | Rsa1.0_00456.1 | 563  | 82826  | 0         | 545  | 561  | 97 -  | 1    | 561  | 19174  | 19733  |
| UN05948 | Rsa1.0_09755.1 | 1325 | 6166   | 0         | 492  | 514  | 95 -  | 1    | 510  | 1225   | 1733   |
| UN05949 | Rsa1.0_02858.1 | 1046 | 27246  | 0         | 375  | 380  | 98 +  | 666  | 1044 | 1688   | 2064   |
| UN05950 | Rsa1.0_01883.1 | 1551 | 37661  | 1.00E-130 | 307  | 326  | 94 -  | 1221 | 1539 | 13162  | 13482  |
| UN05951 | Rsa1.0_06073.1 | 1345 | 11807  | 0         | 653  | 677  | 96 +  | 663  | 1339 | 4362   | 5024   |
| UN05952 | Rsa1.0_00423.1 | 761  | 86138  | 0         | 408  | 419  | 97 +  | 33   | 451  | 38231  | 38646  |
| UN05953 | Rsa1.0_05181.1 | 1265 | 14574  | 0         | 861  | 899  | 95 +  | 147  | 1035 | 234    | 1132   |
| UN05954 | Rsa1.0_00567.1 | 1179 | 75260  | 0         | 378  | 399  | 94 -  | 767  | 1148 | 31710  | 32108  |
| UN05955 | Rsa1.0_01286.1 | 781  | 49209  | 0         | 749  | 780  | 96 +  | 1    | 780  | 6167   | 6928   |
| UN05956 | Rsa1.0_00163.1 | 964  | 116847 | 0         | 843  | 869  | 97 -  | 3    | 869  | 28990  | 29855  |
| UN05957 | Rsa1.0_00472.1 | 1070 | 398134 | 1.00E-166 | 319  | 325  | 98 -  | 1    | 325  | 3801   | 4124   |
| UN05958 | Rsa1.0_01898.1 | 931  | 37491  | 0         | 465  | 476  | 97 +  | 10   | 484  | 1562   | 2036   |
| UN05959 | Rsa1.0_06485.1 | 1386 | 10929  | 0         | 359  | 365  | 98 +  | 579  | 943  | 2190   | 2554   |
| UN05960 | Rsa1.0_00549.1 | 357  | 76473  | 1.00E-47  | 141  | 155  | 90 -  | 5    | 159  | 34751  | 34897  |
| UN05961 | Rsa1.0_02961.1 | 997  | 26435  | 0         | 881  | 888  | 99 -  | 1    | 888  | 15306  | 16193  |
| UN05962 | Rsa1.0_29119.1 | 1244 | 792    | 0         | 474  | 488  | 97 -  | 601  | 1088 | 143    | 630    |
| UN05963 | Rsa1.0_01081.1 | 1340 | 499226 | 0         | 1115 | 1180 | 94 -  | 177  | 1338 | 18453  | 19620  |
| UN05964 | Rsa1.0_01857.1 | 807  | 38103  | 0         | 617  | 632  | 97 +  | 4    | 635  | 25188  | 25815  |
| UN05965 | Rsa1.0_02529.1 | 881  | 30437  | 8.00E-79  | 168  | 174  | 96 -  | 424  | 597  | 22816  | 22989  |

|         |                |      |        |           |      |      |       |      |      |        |        |
|---------|----------------|------|--------|-----------|------|------|-------|------|------|--------|--------|
| UN05966 | Rsa1.0_00251.1 | 1708 | 303968 | 3.00E-64  | 126  | 126  | 100 - | 143  | 268  | 102992 | 103117 |
| UN05967 | Rsa1.0_00286.1 | 696  | 98709  | 1.00E-103 | 190  | 190  | 100 - | 303  | 492  | 12496  | 12685  |
| UN05968 | Rsa1.0_07396.1 | 852  | 9465   | 0         | 569  | 572  | 99 +  | 2    | 573  | 68     | 639    |
| UN05969 | Rsa1.0_02276.1 | 1308 | 33098  | 0         | 1123 | 1184 | 94 -  | 1    | 1177 | 12207  | 13388  |
| UN05970 | Rsa1.0_00069.1 | 919  | 403561 | 0         | 665  | 666  | 99 +  | 252  | 917  | 22792  | 23457  |
| UN05971 | Rsa1.0_01895.1 | 767  | 37512  | 0         | 753  | 771  | 97 +  | 1    | 765  | 25882  | 26651  |
| UN05972 | Rsa1.0_00316.1 | 984  | 96264  | 0         | 464  | 488  | 95 +  | 24   | 504  | 30625  | 31108  |
| UN05973 | Rsa1.0_02358.1 | 1631 | 32213  | 1.00E-168 | 349  | 370  | 94 +  | 1281 | 1631 | 12217  | 12586  |
| UN05974 | Rsa1.0_01389.1 | 1267 | 46716  | 5.00E-53  | 128  | 135  | 94 +  | 613  | 747  | 16433  | 16567  |
| UN05975 | Rsa1.0_03728.1 | 1366 | 21147  | 1.00E-174 | 403  | 433  | 93 +  | 1    | 427  | 667    | 1092   |
| UN05976 | Rsa1.0_00504.1 | 683  | 79334  | 0         | 638  | 650  | 98 -  | 7    | 655  | 62846  | 63494  |
| UN05977 | Rsa1.0_03520.1 | 753  | 22327  | 1.00E-106 | 275  | 299  | 91 +  | 455  | 752  | 10242  | 10539  |
| UN05978 | Rsa1.0_00190.1 | 577  | 318240 | 2.00E-87  | 177  | 180  | 98 +  | 43   | 222  | 280521 | 280699 |
| UN05979 | Rsa1.0_03588.1 | 837  | 21908  | 1.00E-161 | 335  | 350  | 95 -  | 489  | 835  | 3145   | 3494   |
| UN05980 | Rsa1.0_00179.1 | 1149 | 393324 | 1.00E-123 | 256  | 265  | 96 -  | 1    | 265  | 218140 | 218403 |
| UN05981 | Rsa1.0_03711.1 | 799  | 21237  | 0         | 464  | 470  | 98 -  | 1    | 466  | 20005  | 20473  |
| UN05982 | Rsa1.0_02257.1 | 837  | 33318  | 0         | 322  | 322  | 100 - | 346  | 667  | 7615   | 7936   |
| UN05983 | Rsa1.0_02855.1 | 809  | 27271  | 0         | 375  | 383  | 97 -  | 333  | 715  | 10359  | 10741  |
| UN05984 | Rsa1.0_00088.1 | 769  | 141341 | 1.00E-124 | 274  | 288  | 95 +  | 76   | 359  | 19012  | 19299  |
| UN05985 | Rsa1.0_01112.1 | 1482 | 310601 | 0         | 344  | 348  | 98 +  | 1135 | 1482 | 176919 | 177266 |
| UN05986 | Rsa1.0_00741.1 | 1056 | 66117  | 0         | 1021 | 1079 | 94 -  | 1    | 1054 | 33376  | 34444  |
| UN05987 | Rsa1.0_56800.1 | 523  | 403    | 0         | 403  | 403  | 100 - | 10   | 412  | 1      | 403    |
| UN05988 | Rsa1.0_00899.1 | 1445 | 60404  | 0         | 1437 | 1441 | 99 -  | 5    | 1444 | 17545  | 18984  |
| UN05989 | Rsa1.0_00578.1 | 1227 | 74581  | 0         | 357  | 357  | 100 + | 871  | 1227 | 18938  | 19294  |
| UN05990 | Rsa1.0_02515.1 | 1299 | 30616  | 1.00E-138 | 249  | 249  | 100 + | 1049 | 1297 | 3055   | 3303   |
| UN05991 | Rsa1.0_02404.1 | 1077 | 31702  | 0         | 1040 | 1086 | 95 -  | 1    | 1075 | 12816  | 13901  |
| UN05992 | Rsa1.0_03567.1 | 2251 | 22049  | 0         | 401  | 416  | 96 -  | 40   | 455  | 21196  | 21602  |
| UN05993 | Rsa1.0_42819.1 | 866  | 525    | 0         | 451  | 456  | 98 +  | 1    | 456  | 70     | 525    |
| UN05994 | Rsa1.0_00301.1 | 1104 | 365315 | 0         | 1098 | 1101 | 99 +  | 3    | 1103 | 85605  | 86705  |
| UN05995 | Rsa1.0_00604.1 | 730  | 146282 | 0         | 423  | 436  | 97 -  | 2    | 434  | 16045  | 16478  |
| UN05996 | Rsa1.0_00944.1 | 1076 | 58733  | 0         | 379  | 381  | 99 -  | 1    | 381  | 54332  | 54712  |
| UN05997 | Rsa1.0_00471.1 | 1514 | 81897  | 0         | 737  | 746  | 98 +  | 3    | 744  | 34504  | 35249  |
| UN05998 | Rsa1.0_00633.1 | 1514 | 71250  | 0         | 497  | 519  | 95 -  | 1    | 519  | 24438  | 24938  |
| UN05999 | Rsa1.0_00743.1 | 823  | 177459 | 0         | 785  | 838  | 93 -  | 2    | 823  | 6117   | 6942   |
| UN06000 | Rsa1.0_18177.1 | 834  | 1651   | 1.00E-126 | 266  | 276  | 96 -  | 562  | 834  | 744    | 1019   |
| UN06001 | Rsa1.0_01090.1 | 1283 | 54385  | 0         | 558  | 596  | 93 -  | 2    | 583  | 45269  | 45856  |
| UN06002 | Rsa1.0_13438.1 | 806  | 4828   | 0         | 657  | 678  | 96 -  | 110  | 784  | 4127   | 4802   |
| UN06003 | Rsa1.0_38359.1 | 1126 | 587    | 0         | 393  | 397  | 98 +  | 193  | 589  | 1      | 397    |
| UN06004 | Rsa1.0_04018.1 | 914  | 19551  | 0         | 449  | 454  | 98 -  | 423  | 875  | 2468   | 2921   |

|         |                |      |        |           |      |      |       |     |      |        |        |
|---------|----------------|------|--------|-----------|------|------|-------|-----|------|--------|--------|
| UN06005 | Rsa1.0.06008.1 | 779  | 11950  | 1.00E-117 | 218  | 219  | 99 -  | 538 | 756  | 1917   | 2135   |
| UN06006 | Rsa1.0.00098.1 | 1086 | 349239 | 0         | 636  | 651  | 97 -  | 3   | 653  | 344507 | 345157 |
| UN06007 | Rsa1.0.00938.1 | 1104 | 193891 | 0         | 596  | 596  | 100 - | 1   | 596  | 188142 | 188737 |
| UN06008 | Rsa1.0.01046.1 | 1211 | 152989 | 0         | 470  | 471  | 99 +  | 476 | 946  | 142322 | 142791 |
| UN06009 | Rsa1.0.00767.1 | 828  | 64980  | 1.00E-92  | 176  | 177  | 99 +  | 1   | 177  | 12733  | 12909  |
| UN06010 | Rsa1.0.01402.1 | 1199 | 46509  | 0         | 950  | 1033 | 91 -  | 2   | 1034 | 18403  | 19435  |
| UN06011 | Rsa1.0.01249.1 | 1380 | 188432 | 0         | 404  | 415  | 97 -  | 3   | 416  | 174715 | 175126 |
| UN06012 | Rsa1.0.01904.1 | 549  | 37450  | 0         | 540  | 543  | 99 +  | 2   | 543  | 1918   | 2460   |
| UN06013 | Rsa1.0.07446.1 | 1198 | 9384   | 0         | 1027 | 1056 | 97 -  | 3   | 1056 | 1226   | 2273   |
| UN06014 | Rsa1.0.02003.1 | 1053 | 36171  | 0         | 719  | 752  | 95 -  | 140 | 891  | 19755  | 20506  |
| UN06015 | Rsa1.0.00017.1 | 1398 | 752458 | 0         | 560  | 584  | 95 +  | 815 | 1398 | 416373 | 416956 |
| UN06016 | Rsa1.0.01958.1 | 808  | 261128 | 1.00E-129 | 304  | 330  | 92 -  | 3   | 326  | 1802   | 2119   |
| UN06017 | Rsa1.0.02027.1 | 900  | 35869  | 0         | 784  | 784  | 100 + | 1   | 784  | 27289  | 28072  |
| UN06018 | Rsa1.0.07304.1 | 937  | 9579   | 0         | 791  | 813  | 97 -  | 4   | 815  | 7455   | 8264   |
| UN06019 | Rsa1.0.03292.1 | 768  | 23977  | 0         | 743  | 768  | 96 -  | 2   | 768  | 13615  | 14374  |
| UN06020 | Rsa1.0.00250.1 | 705  | 273771 | 0         | 535  | 535  | 100 - | 170 | 704  | 223434 | 223968 |
| UN06021 | Rsa1.0.00065.1 | 1247 | 454616 | 0         | 1215 | 1244 | 97 +  | 7   | 1246 | 414610 | 415847 |
| UN06022 | Rsa1.0.00350.1 | 1236 | 92346  | 0         | 406  | 425  | 95 -  | 2   | 421  | 51776  | 52197  |
| UN06023 | Rsa1.0.00552.1 | 862  | 206757 | 0         | 398  | 418  | 95 +  | 3   | 417  | 195140 | 195549 |
| UN06024 | Rsa1.0.00287.1 | 1016 | 98687  | 1.00E-175 | 513  | 574  | 89 -  | 398 | 964  | 29725  | 30293  |
| UN06025 | Rsa1.0.00689.1 | 851  | 68305  | 1.00E-180 | 347  | 356  | 97 +  | 395 | 750  | 42469  | 42824  |
| UN06026 | Rsa1.0.00154.1 | 938  | 189461 | 1.00E-115 | 252  | 262  | 96 +  | 3   | 262  | 20401  | 20660  |
| UN06027 | Rsa1.0.00067.1 | 1335 | 415055 | 0         | 474  | 474  | 100 + | 862 | 1335 | 250853 | 251326 |
| UN06028 | Rsa1.0.02860.1 | 1035 | 27207  | 1.00E-169 | 305  | 306  | 99 +  | 2   | 307  | 24990  | 25295  |
| UN06029 | Rsa1.0.00351.1 | 1599 | 413096 | 0         | 459  | 473  | 97 +  | 412 | 884  | 393233 | 393705 |
| UN06030 | Rsa1.0.07861.1 | 740  | 8406   | 0         | 472  | 487  | 96 -  | 255 | 740  | 4280   | 4758   |
| UN06031 | Rsa1.0.02430.1 | 879  | 31506  | 0         | 559  | 598  | 93 +  | 92  | 685  | 12980  | 13576  |
| UN06032 | Rsa1.0.00387.1 | 942  | 495407 | 1.00E-100 | 204  | 210  | 97 -  | 600 | 809  | 337148 | 337357 |
| UN06033 | Rsa1.0.00278.1 | 1385 | 231896 | 1.00E-124 | 288  | 303  | 95 +  | 3   | 298  | 152569 | 152870 |
| UN06034 | Rsa1.0.00584.1 | 615  | 74295  | 0         | 590  | 593  | 99 +  | 22  | 613  | 31159  | 31751  |
| UN06035 | Rsa1.0.20534.1 | 1508 | 1295   | 1.00E-112 | 215  | 218  | 98 +  | 951 | 1168 | 813    | 1030   |
| UN06036 | Rsa1.0.05878.1 | 1110 | 12344  | 1.00E-156 | 337  | 350  | 96 -  | 759 | 1108 | 8159   | 8501   |
| UN06037 | Rsa1.0.01335.1 | 965  | 47894  | 1.00E-133 | 244  | 245  | 99 +  | 309 | 553  | 423    | 667    |
| UN06038 | Rsa1.0.14042.1 | 933  | 3881   | 0         | 901  | 910  | 99 -  | 25  | 933  | 2972   | 3881   |
| UN06039 | Rsa1.0.00044.1 | 1232 | 271658 | 0         | 752  | 803  | 93 +  | 452 | 1229 | 164316 | 165117 |
| UN06040 | Rsa1.0.00414.1 | 770  | 202190 | 1.00E-113 | 238  | 247  | 96 -  | 180 | 426  | 79780  | 80020  |
| UN06041 | Rsa1.0.00911.1 | 1307 | 59943  | 0         | 548  | 574  | 95 +  | 578 | 1150 | 51133  | 51703  |
| UN06042 | Rsa1.0.07831.1 | 784  | 8461   | 0         | 514  | 518  | 99 +  | 267 | 784  | 5029   | 5546   |
| UN06043 | Rsa1.0.00112.1 | 1351 | 132199 | 0         | 539  | 539  | 100 + | 773 | 1311 | 84794  | 85332  |

|         |                |      |        |           |      |      |       |      |      |        |        |
|---------|----------------|------|--------|-----------|------|------|-------|------|------|--------|--------|
| UN06044 | Rsa1.0_14881.1 | 1178 | 2995   | 1.00E-120 | 420  | 481  | 87 -  | 15   | 490  | 2323   | 2786   |
| UN06045 | Rsa1.0_03345.1 | 1285 | 23590  | 1.00E-108 | 291  | 326  | 89 -  | 5    | 322  | 21924  | 22228  |
| UN06046 | Rsa1.0_00073.1 | 1612 | 240924 | 1.00E-161 | 336  | 350  | 96 -  | 3    | 349  | 183586 | 183929 |
| UN06047 | Rsa1.0_19964.1 | 1724 | 1359   | 0         | 440  | 447  | 98 +  | 194  | 638  | 371    | 817    |
| UN06048 | Rsa1.0_00092.1 | 1297 | 659932 | 1.00E-138 | 303  | 317  | 95 -  | 1    | 317  | 626655 | 626968 |
| UN06049 | Rsa1.0_01651.1 | 1039 | 41586  | 0         | 1005 | 1034 | 97 -  | 6    | 1039 | 31227  | 32257  |
| UN06050 | Rsa1.0_01422.1 | 848  | 46172  | 1.00E-107 | 210  | 214  | 98 -  | 1    | 214  | 36174  | 36387  |
| UN06051 | Rsa1.0_01581.1 | 1046 | 42833  | 0         | 1016 | 1031 | 98 +  | 16   | 1046 | 5053   | 6082   |
| UN06052 | Rsa1.0_20335.1 | 922  | 1316   | 0         | 526  | 528  | 99 -  | 395  | 922  | 671    | 1198   |
| UN06053 | Rsa1.0_06542.1 | 851  | 10805  | 0         | 412  | 413  | 99 +  | 439  | 851  | 8536   | 8948   |
| UN06054 | Rsa1.0_00409.1 | 966  | 146788 | 1.00E-115 | 214  | 215  | 99 +  | 525  | 739  | 95483  | 95697  |
| UN06055 | Rsa1.0_01444.1 | 503  | 169539 | 0         | 496  | 501  | 99 +  | 3    | 503  | 12619  | 13119  |
| UN06056 | Rsa1.0_40774.1 | 1325 | 550    | 1.00E-167 | 356  | 369  | 96 -  | 924  | 1286 | 182    | 550    |
| UN06057 | Rsa1.0_00722.1 | 1008 | 66840  | 1.00E-179 | 327  | 330  | 99 -  | 293  | 622  | 50627  | 50956  |
| UN06058 | Rsa1.0_00480.1 | 709  | 81325  | 1.00E-154 | 276  | 276  | 100 - | 282  | 557  | 53555  | 53830  |
| UN06059 | Rsa1.0_05630.1 | 799  | 13129  | 0         | 751  | 763  | 98 -  | 37   | 799  | 4058   | 4820   |
| UN06060 | Rsa1.0_01021.1 | 1838 | 56610  | 0         | 1673 | 1731 | 96 -  | 114  | 1838 | 38654  | 40384  |
| UN06061 | Rsa1.0_05153.1 | 860  | 14663  | 1.00E-129 | 249  | 253  | 98 +  | 611  | 860  | 2743   | 2995   |
| UN06062 | Rsa1.0_00302.1 | 587  | 97521  | 1.00E-143 | 276  | 282  | 97 -  | 306  | 587  | 82334  | 82615  |
| UN06063 | Rsa1.0_04032.1 | 1245 | 19489  | 0         | 476  | 495  | 96 -  | 751  | 1245 | 6286   | 6776   |
| UN06064 | Rsa1.0_00014.1 | 1285 | 348985 | 0         | 640  | 644  | 99 +  | 644  | 1283 | 164648 | 165291 |
| UN06065 | Rsa1.0_00128.1 | 911  | 228675 | 0         | 870  | 924  | 94 -  | 1    | 911  | 68778  | 69684  |
| UN06066 | Rsa1.0_00149.1 | 1509 | 305196 | 0         | 389  | 397  | 97 -  | 1114 | 1509 | 26603  | 26998  |
| UN06067 | Rsa1.0_00758.1 | 975  | 65477  | 0         | 342  | 345  | 99 -  | 628  | 972  | 33817  | 34160  |
| UN06068 | Rsa1.0_01903.1 | 2190 | 37451  | 0         | 842  | 852  | 98 +  | 1338 | 2189 | 34532  | 35383  |
| UN06069 | Rsa1.0_01192.1 | 1529 | 51150  | 0         | 396  | 414  | 95 +  | 1061 | 1473 | 23563  | 23976  |
| UN06070 | Rsa1.0_00038.1 | 1472 | 314568 | 1.00E-141 | 258  | 259  | 99 +  | 576  | 834  | 166217 | 166475 |
| UN06071 | Rsa1.0_01761.1 | 1161 | 39717  | 4.00E-35  | 122  | 137  | 89 -  | 905  | 1041 | 1436   | 1572   |
| UN06072 | Rsa1.0_08002.1 | 851  | 8094   | 0         | 701  | 735  | 95 -  | 2    | 724  | 4197   | 4931   |
| UN06073 | Rsa1.0_01850.1 | 1214 | 162224 | 0         | 457  | 467  | 97 +  | 1    | 467  | 10270  | 10736  |
| UN06074 | Rsa1.0_01739.1 | 1547 | 40068  | 1.00E-112 | 210  | 211  | 99 +  | 263  | 473  | 9878   | 10088  |
| UN06075 | Rsa1.0_03581.1 | 1299 | 21965  | 1.00E-165 | 298  | 299  | 99 +  | 3    | 301  | 14211  | 14509  |
| UN06076 | Rsa1.0_00817.1 | 677  | 62961  | 1.00E-152 | 288  | 293  | 98 -  | 385  | 677  | 37013  | 37305  |
| UN06077 | Rsa1.0_00152.1 | 687  | 257730 | 1.00E-98  | 233  | 249  | 93 +  | 32   | 280  | 200278 | 200523 |
| UN06078 | Rsa1.0_01029.1 | 1067 | 256254 | 0         | 368  | 375  | 98 +  | 3    | 377  | 241022 | 241396 |
| UN06079 | Rsa1.0_00519.1 | 1712 | 197864 | 0         | 526  | 529  | 99 +  | 358  | 885  | 53017  | 53545  |
| UN06080 | Rsa1.0_01234.1 | 1474 | 50183  | 1.00E-171 | 308  | 309  | 99 -  | 1166 | 1474 | 25998  | 26306  |
| UN06081 | Rsa1.0_00608.1 | 1446 | 172672 | 0         | 774  | 786  | 98 -  | 627  | 1404 | 163174 | 163958 |
| UN06082 | Rsa1.0_00469.1 | 615  | 82084  | 0         | 613  | 613  | 100 + | 3    | 615  | 56540  | 57152  |

|         |                |      |        |           |      |      |       |      |      |        |        |
|---------|----------------|------|--------|-----------|------|------|-------|------|------|--------|--------|
| UN06083 | Rsa1.0_00089.1 | 1219 | 406142 | 0         | 1032 | 1063 | 97 -  | 159  | 1219 | 299835 | 300895 |
| UN06084 | Rsa1.0_00289.1 | 797  | 98620  | 1.00E-150 | 286  | 290  | 98 +  | 508  | 797  | 97044  | 97332  |
| UN06085 | Rsa1.0_00382.1 | 791  | 251946 | 0         | 731  | 761  | 96 -  | 3    | 762  | 63466  | 64225  |
| UN06086 | Rsa1.0_01206.1 | 1504 | 50772  | 0         | 779  | 826  | 94 -  | 106  | 902  | 27195  | 28020  |
| UN06087 | Rsa1.0_02955.1 | 2188 | 26484  | 0         | 1229 | 1254 | 98 +  | 249  | 1500 | 16651  | 17899  |
| UN06088 | Rsa1.0_08762.1 | 952  | 6947   | 1.00E-142 | 280  | 288  | 97 +  | 1    | 288  | 2440   | 2727   |
| UN06089 | Rsa1.0_03671.1 | 1146 | 21459  | 0         | 387  | 387  | 100 - | 2    | 388  | 9838   | 10224  |
| UN06090 | Rsa1.0_00136.1 | 626  | 122464 | 1.00E-101 | 247  | 264  | 93 +  | 20   | 282  | 110531 | 110793 |
| UN06091 | Rsa1.0_01042.1 | 1006 | 293264 | 0         | 927  | 958  | 96 -  | 50   | 1006 | 137012 | 137961 |
| UN06092 | Rsa1.0_03572.1 | 1108 | 146346 | 0         | 873  | 886  | 98 -  | 3    | 888  | 141058 | 141943 |
| UN06093 | Rsa1.0_00476.1 | 1522 | 280966 | 0         | 626  | 634  | 98 -  | 3    | 636  | 214536 | 215169 |
| UN06094 | Rsa1.0_00100.1 | 650  | 249232 | 4.00E-98  | 256  | 279  | 91 -  | 375  | 643  | 21279  | 21557  |
| UN06095 | Rsa1.0_01990.1 | 775  | 36431  | 0         | 490  | 490  | 100 + | 286  | 775  | 3552   | 4041   |
| UN06096 | Rsa1.0_01070.1 | 816  | 55099  | 1.00E-110 | 203  | 203  | 100 - | 612  | 814  | 31368  | 31570  |
| UN06097 | Rsa1.0_03298.1 | 924  | 23956  | 0         | 466  | 490  | 95 +  | 435  | 924  | 20879  | 21362  |
| UN06098 | Rsa1.0_02922.1 | 711  | 26753  | 1.00E-132 | 274  | 285  | 96 +  | 1    | 285  | 8804   | 9084   |
| UN06099 | Rsa1.0_03241.1 | 1226 | 24423  | 1.00E-141 | 272  | 277  | 98 +  | 3    | 279  | 3186   | 3459   |
| UN06100 | Rsa1.0_08933.1 | 656  | 6772   | 1.00E-152 | 273  | 273  | 100 - | 382  | 654  | 5565   | 5837   |
| UN06101 | Rsa1.0_00165.1 | 685  | 116466 | 0         | 523  | 554  | 94 +  | 1    | 548  | 93786  | 94339  |
| UN06102 | Rsa1.0_01588.1 | 1117 | 42724  | 5.00E-96  | 196  | 199  | 98 -  | 62   | 260  | 33164  | 33360  |
| UN06103 | Rsa1.0_01116.1 | 1158 | 142088 | 0         | 380  | 394  | 96 -  | 763  | 1154 | 119063 | 119455 |
| UN06104 | Rsa1.0_00087.1 | 1482 | 761073 | 0         | 1069 | 1095 | 97 +  | 1    | 1093 | 214392 | 215486 |
| UN06105 | Rsa1.0_00492.1 | 927  | 80178  | 0         | 774  | 796  | 97 -  | 132  | 927  | 63645  | 64433  |
| UN06106 | Rsa1.0_00281.1 | 1474 | 99908  | 0         | 1001 | 1113 | 89 +  | 350  | 1448 | 96671  | 97757  |
| UN06107 | Rsa1.0_00043.1 | 951  | 264937 | 1.00E-176 | 317  | 318  | 99 -  | 634  | 951  | 142234 | 142551 |
| UN06108 | Rsa1.0_00734.1 | 1785 | 66508  | 1.00E-169 | 336  | 346  | 97 +  | 1440 | 1785 | 6513   | 6857   |
| UN06109 | Rsa1.0_01411.1 | 437  | 46326  | 0         | 431  | 442  | 97 +  | 3    | 437  | 29720  | 30161  |
| UN06110 | Rsa1.0_01081.1 | 821  | 499226 | 1.00E-167 | 304  | 306  | 99 +  | 516  | 821  | 473293 | 473598 |
| UN06111 | Rsa1.0_00894.1 | 1396 | 269700 | 0         | 842  | 854  | 98 +  | 542  | 1395 | 124967 | 125816 |
| UN06112 | Rsa1.0_09661.1 | 883  | 6226   | 1.00E-134 | 243  | 243  | 100 - | 635  | 877  | 761    | 1003   |
| UN06113 | Rsa1.0_00012.1 | 1164 | 222148 | 0         | 429  | 429  | 100 - | 736  | 1164 | 12400  | 12828  |
| UN06114 | Rsa1.0_00123.1 | 1149 | 325650 | 0         | 590  | 613  | 96 +  | 3    | 603  | 246068 | 246680 |
| UN06115 | Rsa1.0_20598.1 | 1540 | 1289   | 0         | 486  | 496  | 97 -  | 3    | 498  | 1      | 490    |
| UN06116 | Rsa1.0_01535.1 | 985  | 43750  | 0         | 530  | 537  | 98 +  | 446  | 981  | 23633  | 24169  |
| UN06117 | Rsa1.0_05633.1 | 1128 | 13118  | 0         | 703  | 712  | 98 -  | 418  | 1128 | 4525   | 5236   |
| UN06118 | Rsa1.0_01139.1 | 1095 | 52601  | 0         | 407  | 410  | 99 -  | 3    | 410  | 1259   | 1668   |
| UN06119 | Rsa1.0_00071.1 | 767  | 345714 | 1.00E-129 | 235  | 235  | 100 + | 458  | 692  | 19342  | 19576  |
| UN06120 | Rsa1.0_02362.1 | 774  | 32190  | 0         | 355  | 360  | 98 -  | 408  | 765  | 24786  | 25145  |
| UN06121 | Rsa1.0_02041.1 | 1238 | 163634 | 0         | 750  | 796  | 94 +  | 216  | 1011 | 30110  | 30889  |

|         |                |      |        |           |      |      |       |     |      |        |        |
|---------|----------------|------|--------|-----------|------|------|-------|-----|------|--------|--------|
| UN06122 | Rsa1.0.07660.1 | 1424 | 8891   | 0         | 827  | 833  | 99 +  | 594 | 1424 | 7634   | 8466   |
| UN06123 | Rsa1.0.01234.1 | 1255 | 50183  | 0         | 883  | 889  | 99 +  | 1   | 889  | 19600  | 20488  |
| UN06124 | Rsa1.0.24918.1 | 1457 | 961    | 0         | 641  | 672  | 95 -  | 790 | 1457 | 290    | 961    |
| UN06125 | Rsa1.0.00026.1 | 976  | 327835 | 2.00E-82  | 159  | 160  | 99 -  | 117 | 276  | 5346   | 5505   |
| UN06126 | Rsa1.0.02919.1 | 1160 | 26780  | 0         | 377  | 384  | 98 +  | 774 | 1155 | 7688   | 8071   |
| UN06127 | Rsa1.0.00067.1 | 992  | 415055 | 0         | 759  | 822  | 92 -  | 163 | 953  | 175393 | 176214 |
| UN06128 | Rsa1.0.00030.1 | 755  | 250988 | 1.00E-131 | 240  | 241  | 99 +  | 509 | 749  | 156217 | 156457 |
| UN06129 | Rsa1.0.00016.1 | 959  | 831256 | 1.00E-83  | 167  | 170  | 98 -  | 785 | 954  | 436547 | 436716 |
| UN06130 | Rsa1.0.01435.1 | 751  | 45942  | 3.00E-78  | 203  | 221  | 91 -  | 127 | 347  | 44559  | 44779  |
| UN06131 | Rsa1.0.01179.1 | 927  | 51549  | 0         | 807  | 862  | 93 +  | 77  | 927  | 17298  | 18151  |
| UN06132 | Rsa1.0.02003.1 | 697  | 36171  | 0         | 692  | 695  | 99 +  | 1   | 695  | 20698  | 21391  |
| UN06133 | Rsa1.0.00162.1 | 1119 | 239935 | 1.00E-114 | 251  | 262  | 95 -  | 842 | 1100 | 23302  | 23559  |
| UN06134 | Rsa1.0.04192.1 | 1058 | 18572  | 0         | 1051 | 1057 | 99 +  | 1   | 1056 | 12192  | 13248  |
| UN06135 | Rsa1.0.14434.1 | 1161 | 3394   | 8.00E-58  | 184  | 206  | 89 -  | 782 | 985  | 2574   | 2779   |
| UN06136 | Rsa1.0.07837.1 | 830  | 8449   | 0         | 419  | 433  | 96 +  | 1   | 433  | 6439   | 6870   |
| UN06137 | Rsa1.0.00277.1 | 1478 | 100132 | 0         | 1304 | 1305 | 99 +  | 1   | 1305 | 16011  | 17315  |
| UN06138 | Rsa1.0.02396.1 | 744  | 31783  | 0         | 533  | 561  | 95 -  | 183 | 742  | 18385  | 18945  |
| UN06139 | Rsa1.0.01502.1 | 677  | 44519  | 0         | 362  | 368  | 98 +  | 1   | 368  | 8033   | 8397   |
| UN06140 | Rsa1.0.63151.1 | 842  | 363    | 0         | 322  | 322  | 100 + | 519 | 840  | 8      | 329    |
| UN06141 | Rsa1.0.00069.1 | 957  | 403561 | 1.00E-152 | 288  | 293  | 98 +  | 601 | 893  | 179274 | 179566 |
| UN06142 | Rsa1.0.00284.1 | 785  | 323267 | 0         | 760  | 801  | 94 +  | 3   | 785  | 261441 | 262240 |
| UN06143 | Rsa1.0.16332.1 | 824  | 2195   | 0         | 819  | 822  | 99 -  | 1   | 822  | 568    | 1387   |
| UN06144 | Rsa1.0.00206.1 | 1358 | 109040 | 0         | 632  | 633  | 99 -  | 724 | 1356 | 95667  | 96299  |
| UN06145 | Rsa1.0.00048.1 | 1115 | 167185 | 1.00E-154 | 285  | 288  | 98 +  | 1   | 288  | 4871   | 5158   |
| UN06146 | Rsa1.0.10067.1 | 410  | 6015   | 1.00E-139 | 254  | 255  | 99 +  | 2   | 256  | 707    | 961    |
| UN06147 | Rsa1.0.02987.1 | 1482 | 26196  | 0         | 628  | 645  | 97 -  | 21  | 665  | 21354  | 21998  |
| UN06148 | Rsa1.0.01581.1 | 931  | 42833  | 0         | 396  | 400  | 99 -  | 531 | 929  | 32418  | 32815  |
| UN06149 | Rsa1.0.06892.1 | 1223 | 10197  | 0         | 744  | 754  | 98 +  | 468 | 1221 | 1      | 746    |
| UN06150 | Rsa1.0.00050.1 | 807  | 237174 | 0         | 573  | 573  | 100 + | 1   | 573  | 28502  | 29074  |
| UN06151 | Rsa1.0.00382.1 | 642  | 251946 | 1.00E-171 | 307  | 308  | 99 +  | 1   | 308  | 34541  | 34848  |
| UN06152 | Rsa1.0.05614.1 | 819  | 13191  | 0         | 804  | 823  | 97 -  | 3   | 819  | 2077   | 2898   |
| UN06153 | Rsa1.0.00190.1 | 896  | 318240 | 0         | 476  | 501  | 95 +  | 3   | 499  | 314286 | 314786 |
| UN06154 | Rsa1.0.02097.1 | 983  | 35036  | 0         | 375  | 376  | 99 -  | 607 | 982  | 4257   | 4632   |
| UN06155 | Rsa1.0.01565.1 | 800  | 155447 | 0         | 795  | 798  | 99 +  | 3   | 800  | 146476 | 147272 |
| UN06156 | Rsa1.0.00339.1 | 1301 | 222974 | 0         | 618  | 627  | 98 +  | 589 | 1215 | 74938  | 75564  |
| UN06157 | Rsa1.0.37661.1 | 1294 | 598    | 0         | 585  | 598  | 97 -  | 455 | 1050 | 1      | 598    |
| UN06158 | Rsa1.0.01077.1 | 905  | 54772  | 1.00E-141 | 299  | 311  | 96 +  | 1   | 310  | 10739  | 11048  |
| UN06159 | Rsa1.0.01590.1 | 1241 | 42719  | 0         | 633  | 636  | 99 -  | 2   | 637  | 26643  | 27278  |
| UN06160 | Rsa1.0.00637.1 | 1326 | 71038  | 7.00E-80  | 357  | 421  | 84 +  | 885 | 1303 | 17759  | 18174  |



|         |                |      |        |           |      |      |       |      |      |        |        |
|---------|----------------|------|--------|-----------|------|------|-------|------|------|--------|--------|
| UN06161 | Rsa1.0.00277.1 | 1374 | 100132 | 1.00E-174 | 372  | 391  | 95 -  | 3    | 392  | 76194  | 76584  |
| UN06162 | Rsa1.0.00125.1 | 1244 | 253043 | 0         | 635  | 646  | 98 +  | 131  | 775  | 232140 | 232785 |
| UN06163 | Rsa1.0.03843.1 | 1074 | 20496  | 1.00E-102 | 293  | 327  | 89 -  | 35   | 361  | 4472   | 4790   |
| UN06164 | Rsa1.0.00058.1 | 907  | 159921 | 0         | 902  | 906  | 99 +  | 1    | 906  | 81117  | 82022  |
| UN06165 | Rsa1.0.00127.1 | 864  | 127446 | 0         | 417  | 423  | 98 -  | 442  | 864  | 105773 | 106195 |
| UN06166 | Rsa1.0.03290.1 | 982  | 24011  | 1.00E-147 | 276  | 280  | 98 +  | 703  | 982  | 4892   | 5171   |
| UN06167 | Rsa1.0.03167.1 | 926  | 24858  | 0         | 402  | 402  | 100 - | 1    | 402  | 5682   | 6083   |
| UN06168 | Rsa1.0.13724.1 | 816  | 4420   | 0         | 776  | 828  | 93 +  | 2    | 816  | 992    | 1814   |
| UN06169 | Rsa1.0.01835.1 | 562  | 38542  | 1.00E-169 | 360  | 375  | 96 -  | 1    | 372  | 20857  | 21228  |
| UN06170 | Rsa1.0.00048.1 | 890  | 167185 | 1.00E-149 | 328  | 347  | 94 +  | 1    | 347  | 7215   | 7559   |
| UN06171 | Rsa1.0.00697.1 | 514  | 67913  | 7.00E-75  | 143  | 143  | 100 + | 247  | 389  | 43648  | 43790  |
| UN06172 | Rsa1.0.02309.1 | 1215 | 32744  | 0         | 715  | 719  | 99 +  | 2    | 720  | 18637  | 19353  |
| UN06173 | Rsa1.0.23904.1 | 1453 | 1018   | 0         | 802  | 812  | 98 -  | 1    | 812  | 53     | 861    |
| UN06174 | Rsa1.0.00802.1 | 1255 | 63846  | 0         | 1237 | 1254 | 98 -  | 1    | 1254 | 24183  | 25436  |
| UN06175 | Rsa1.0.03560.1 | 1417 | 22092  | 0         | 463  | 467  | 99 +  | 949  | 1415 | 11897  | 12363  |
| UN06176 | Rsa1.0.00154.1 | 1033 | 189461 | 1.00E-114 | 228  | 232  | 98 +  | 804  | 1033 | 169282 | 169512 |
| UN06177 | Rsa1.0.00341.1 | 850  | 249309 | 0         | 464  | 470  | 98 +  | 385  | 850  | 178139 | 178608 |
| UN06178 | Rsa1.0.06671.1 | 1235 | 10563  | 1.00E-171 | 311  | 313  | 99 -  | 3    | 315  | 6199   | 6511   |
| UN06179 | Rsa1.0.00616.1 | 660  | 195713 | 0         | 449  | 472  | 95 -  | 1    | 467  | 181777 | 182245 |
| UN06180 | Rsa1.0.01119.1 | 1340 | 53459  | 0         | 353  | 355  | 99 +  | 1    | 355  | 43241  | 43594  |
| UN06181 | Rsa1.0.00531.1 | 1809 | 77387  | 0         | 684  | 708  | 96 +  | 1105 | 1805 | 11646  | 12353  |
| UN06182 | Rsa1.0.07882.1 | 770  | 8363   | 1.00E-178 | 424  | 458  | 92 +  | 1    | 457  | 7179   | 7618   |
| UN06183 | Rsa1.0.02116.1 | 1097 | 34853  | 0         | 380  | 380  | 100 + | 1    | 380  | 30559  | 30938  |
| UN06184 | Rsa1.0.05367.1 | 892  | 14010  | 0         | 359  | 359  | 100 - | 531  | 889  | 864    | 1222   |
| UN06185 | Rsa1.0.75173.1 | 728  | 305    | 4.00E-34  | 75   | 75   | 100 - | 652  | 726  | 231    | 305    |
| UN06186 | Rsa1.0.02599.1 | 1202 | 29660  | 1.00E-152 | 277  | 278  | 99 -  | 622  | 899  | 6935   | 7212   |
| UN06187 | Rsa1.0.02439.1 | 1425 | 31379  | 0         | 1407 | 1421 | 99 -  | 3    | 1423 | 8711   | 10131  |
| UN06188 | Rsa1.0.03172.1 | 1330 | 24816  | 0         | 452  | 453  | 99 +  | 877  | 1329 | 16988  | 17440  |
| UN06189 | Rsa1.0.00159.1 | 498  | 431686 | 0         | 480  | 486  | 98 -  | 12   | 497  | 228703 | 229188 |
| UN06190 | Rsa1.0.01487.1 | 1302 | 44784  | 1.00E-158 | 340  | 355  | 95 -  | 1    | 351  | 2584   | 2934   |
| UN06191 | Rsa1.0.00906.1 | 1411 | 178966 | 0         | 540  | 550  | 98 -  | 1    | 547  | 131974 | 132523 |
| UN06192 | Rsa1.0.02777.1 | 738  | 27986  | 0         | 391  | 408  | 95 -  | 5    | 411  | 18410  | 18817  |
| UN06193 | Rsa1.0.02146.1 | 1430 | 34625  | 1.00E-101 | 259  | 283  | 91 -  | 1156 | 1428 | 10460  | 10736  |
| UN06194 | Rsa1.0.01409.1 | 1047 | 151595 | 1.00E-162 | 339  | 354  | 95 -  | 382  | 734  | 133502 | 133855 |
| UN06195 | Rsa1.0.02269.1 | 762  | 33168  | 1.00E-176 | 325  | 328  | 99 -  | 1    | 326  | 16204  | 16531  |
| UN06196 | Rsa1.0.01539.1 | 1412 | 43698  | 0         | 669  | 678  | 98 -  | 2    | 677  | 4616   | 5293   |
| UN06197 | Rsa1.0.00087.1 | 789  | 761073 | 1.00E-161 | 321  | 330  | 97 -  | 1    | 330  | 190659 | 190984 |
| UN06198 | Rsa1.0.00092.1 | 996  | 659932 | 0         | 366  | 366  | 100 - | 1    | 366  | 192222 | 192587 |
| UN06199 | Rsa1.0.00087.1 | 1015 | 761073 | 0         | 387  | 388  | 99 -  | 626  | 1013 | 621049 | 621436 |

|         |                |      |        |           |      |      |       |     |      |        |        |
|---------|----------------|------|--------|-----------|------|------|-------|-----|------|--------|--------|
| UN06200 | Rsa1.0.05870.1 | 1263 | 146055 | 0         | 593  | 608  | 97 -  | 5   | 611  | 6380   | 6985   |
| UN06201 | Rsa1.0.00016.1 | 1297 | 831256 | 0         | 943  | 963  | 97 +  | 3   | 960  | 375561 | 376517 |
| UN06202 | Rsa1.0.00077.1 | 769  | 145005 | 1.00E-169 | 307  | 309  | 99 -  | 3   | 311  | 71685  | 71993  |
| UN06203 | Rsa1.0.11811.1 | 909  | 5401   | 0         | 889  | 899  | 98 +  | 2   | 899  | 3772   | 4668   |
| UN06204 | Rsa1.0.04254.1 | 969  | 18258  | 0         | 675  | 698  | 96 -  | 275 | 969  | 13998  | 14695  |
| UN06205 | Rsa1.0.30865.1 | 892  | 742    | 1.00E-151 | 272  | 272  | 100 - | 2   | 273  | 1      | 272    |
| UN06206 | Rsa1.0.00601.1 | 947  | 177045 | 0         | 694  | 712  | 97 -  | 2   | 709  | 168330 | 169041 |
| UN06207 | Rsa1.0.02435.1 | 1062 | 31454  | 0         | 1015 | 1062 | 95 -  | 1   | 1062 | 27541  | 28602  |
| UN06208 | Rsa1.0.05842.1 | 1174 | 12461  | 0         | 1100 | 1131 | 97 -  | 44  | 1172 | 10200  | 11328  |
| UN06209 | Rsa1.0.00542.1 | 1079 | 76831  | 0         | 478  | 495  | 96 -  | 17  | 511  | 35582  | 36076  |
| UN06210 | Rsa1.0.04102.1 | 995  | 19048  | 0         | 364  | 366  | 99 +  | 1   | 366  | 18258  | 18623  |
| UN06211 | Rsa1.0.02991.1 | 1264 | 26178  | 0         | 811  | 812  | 99 -  | 1   | 812  | 12893  | 13704  |
| UN06212 | Rsa1.0.01674.1 | 1005 | 168300 | 0         | 640  | 660  | 96 -  | 21  | 678  | 19673  | 20330  |
| UN06213 | Rsa1.0.01137.1 | 630  | 52655  | 1.00E-123 | 230  | 232  | 99 -  | 256 | 487  | 51348  | 51579  |
| UN06214 | Rsa1.0.02319.1 | 566  | 32580  | 1.00E-145 | 261  | 261  | 100 + | 1   | 261  | 6481   | 6741   |
| UN06215 | Rsa1.0.02142.1 | 1331 | 34633  | 0         | 352  | 361  | 97 +  | 914 | 1274 | 27753  | 28110  |
| UN06216 | Rsa1.0.01857.1 | 632  | 38103  | 0         | 411  | 434  | 94 -  | 25  | 448  | 4693   | 5124   |
| UN06217 | Rsa1.0.01591.1 | 1129 | 42718  | 0         | 893  | 896  | 99 -  | 1   | 896  | 25166  | 26061  |
| UN06218 | Rsa1.0.00577.1 | 1198 | 174827 | 1.00E-114 | 213  | 214  | 99 +  | 716 | 929  | 137715 | 137928 |
| UN06219 | Rsa1.0.14881.1 | 1093 | 2995   | 0         | 457  | 466  | 98 -  | 1   | 465  | 2323   | 2787   |
| UN06220 | Rsa1.0.01646.1 | 1009 | 41735  | 1.00E-101 | 229  | 243  | 94 -  | 1   | 243  | 16887  | 17129  |
| UN06221 | Rsa1.0.00040.1 | 709  | 324196 | 0         | 425  | 430  | 98 +  | 94  | 523  | 51764  | 52192  |
| UN06222 | Rsa1.0.12205.1 | 598  | 5289   | 1.00E-149 | 302  | 311  | 97 +  | 2   | 312  | 331    | 634    |
| UN06223 | Rsa1.0.01386.1 | 855  | 46765  | 0         | 474  | 486  | 97 -  | 368 | 853  | 19943  | 20427  |
| UN06224 | Rsa1.0.00964.1 | 1351 | 316648 | 0         | 847  | 853  | 99 -  | 500 | 1349 | 311189 | 312041 |
| UN06225 | Rsa1.0.02212.1 | 689  | 33840  | 1.00E-144 | 263  | 264  | 99 -  | 3   | 266  | 30764  | 31027  |
| UN06226 | Rsa1.0.01513.1 | 1044 | 44234  | 0         | 895  | 904  | 99 +  | 141 | 1044 | 41225  | 42128  |
| UN06227 | Rsa1.0.00104.1 | 976  | 368722 | 3.00E-78  | 223  | 245  | 91 -  | 189 | 431  | 201374 | 201618 |
| UN06228 | Rsa1.0.00323.1 | 1069 | 159650 | 0         | 582  | 588  | 98 -  | 1   | 588  | 114114 | 114701 |
| UN06229 | Rsa1.0.00897.1 | 1135 | 60498  | 0         | 560  | 574  | 97 -  | 1   | 574  | 38106  | 38677  |
| UN06230 | Rsa1.0.00215.1 | 1489 | 201775 | 0         | 495  | 522  | 94 -  | 1   | 519  | 50928  | 51434  |
| UN06231 | Rsa1.0.01667.1 | 1198 | 41315  | 1.00E-35  | 105  | 114  | 92 -  | 336 | 449  | 1948   | 2061   |
| UN06232 | Rsa1.0.00816.1 | 1318 | 403350 | 1.00E-148 | 300  | 310  | 96 +  | 20  | 328  | 398603 | 398912 |
| UN06233 | Rsa1.0.00045.1 | 791  | 328694 | 0         | 493  | 498  | 98 +  | 1   | 498  | 131720 | 132215 |
| UN06234 | Rsa1.0.06488.1 | 816  | 141774 | 0         | 607  | 662  | 91 -  | 69  | 720  | 5997   | 6651   |
| UN06235 | Rsa1.0.00504.1 | 1353 | 79334  | 0         | 765  | 783  | 97 -  | 3   | 781  | 24076  | 24857  |
| UN06236 | Rsa1.0.01520.1 | 1002 | 44087  | 0         | 946  | 958  | 98 +  | 5   | 960  | 39576  | 40532  |
| UN06237 | Rsa1.0.02394.1 | 925  | 31789  | 3.00E-32  | 84   | 88   | 95 +  | 290 | 377  | 5746   | 5833   |
| UN06238 | Rsa1.0.02565.1 | 1150 | 30046  | 1.00E-132 | 314  | 341  | 92 +  | 1   | 337  | 25157  | 25485  |

|         |                |      |        |           |      |      |       |     |      |        |        |
|---------|----------------|------|--------|-----------|------|------|-------|-----|------|--------|--------|
| UN06239 | Rsa1.0.00009.1 | 1031 | 232558 | 0         | 958  | 996  | 96 -  | 24  | 1016 | 138126 | 139110 |
| UN06240 | Rsa1.0.00237.1 | 1347 | 235974 | 1.00E-166 | 296  | 296  | 100 - | 3   | 298  | 192337 | 192632 |
| UN06241 | Rsa1.0.00151.1 | 1318 | 119541 | 0         | 645  | 658  | 98 -  | 1   | 658  | 13346  | 14003  |
| UN06242 | Rsa1.0.04646.1 | 814  | 16541  | 0         | 399  | 415  | 96 +  | 106 | 520  | 443    | 857    |
| UN06243 | Rsa1.0.04123.1 | 721  | 18947  | 0         | 687  | 721  | 95 +  | 3   | 721  | 11838  | 12545  |
| UN06244 | Rsa1.0.00570.1 | 1395 | 75002  | 0         | 728  | 728  | 100 - | 3   | 730  | 31697  | 32424  |
| UN06245 | Rsa1.0.01898.1 | 956  | 37491  | 0         | 460  | 474  | 97 +  | 483 | 956  | 6437   | 6910   |
| UN06246 | Rsa1.0.04076.1 | 1404 | 19209  | 1.00E-179 | 321  | 322  | 99 +  | 2   | 323  | 8158   | 8479   |
| UN06247 | Rsa1.0.16298.1 | 1315 | 2209   | 0         | 551  | 562  | 98 -  | 656 | 1217 | 473    | 1034   |
| UN06248 | Rsa1.0.03044.1 | 928  | 25791  | 0         | 468  | 476  | 98 -  | 453 | 927  | 5744   | 6219   |
| UN06249 | Rsa1.0.01403.1 | 783  | 46453  | 0         | 407  | 407  | 100 - | 1   | 407  | 3064   | 3470   |
| UN06250 | Rsa1.0.05867.1 | 1055 | 12375  | 0         | 1048 | 1065 | 98 +  | 1   | 1052 | 10454  | 11518  |
| UN06251 | Rsa1.0.00362.1 | 521  | 299497 | 0         | 512  | 519  | 98 -  | 3   | 521  | 9630   | 10145  |
| UN06252 | Rsa1.0.00201.1 | 631  | 232851 | 0         | 390  | 396  | 98 -  | 237 | 631  | 72600  | 72994  |
| UN06253 | Rsa1.0.00906.1 | 785  | 178966 | 1.00E-163 | 309  | 314  | 98 +  | 1   | 312  | 135566 | 135879 |
| UN06254 | Rsa1.0.02889.1 | 764  | 27019  | 0         | 599  | 605  | 99 -  | 160 | 764  | 8081   | 8685   |
| UN06255 | Rsa1.0.67781.1 | 1248 | 338    | 3.00E-94  | 176  | 176  | 100 - | 316 | 491  | 160    | 335    |
| UN06256 | Rsa1.0.01441.1 | 1198 | 45790  | 0         | 339  | 341  | 99 -  | 858 | 1198 | 26449  | 26789  |
| UN06257 | Rsa1.0.00632.1 | 895  | 183777 | 1.00E-177 | 315  | 315  | 100 - | 4   | 318  | 152593 | 152907 |
| UN06258 | Rsa1.0.02779.1 | 897  | 27968  | 0         | 614  | 616  | 99 -  | 282 | 897  | 10303  | 10918  |
| UN06259 | Rsa1.0.16628.1 | 813  | 2085   | 0         | 752  | 760  | 98 -  | 1   | 760  | 1322   | 2081   |
| UN06260 | Rsa1.0.00476.1 | 999  | 280966 | 0         | 357  | 358  | 99 -  | 641 | 998  | 236866 | 237223 |
| UN06261 | Rsa1.0.10516.1 | 418  | 5818   | 1.00E-109 | 217  | 221  | 98 -  | 110 | 329  | 4536   | 4756   |
| UN06262 | Rsa1.0.04528.1 | 1278 | 16958  | 1.00E-168 | 300  | 300  | 100 + | 454 | 753  | 14192  | 14491  |
| UN06263 | Rsa1.0.00387.1 | 365  | 495407 | 0         | 346  | 353  | 98 -  | 12  | 364  | 389014 | 389366 |
| UN06264 | Rsa1.0.00077.1 | 1511 | 145005 | 0         | 1462 | 1498 | 97 -  | 2   | 1497 | 19276  | 20768  |
| UN06265 | Rsa1.0.05594.1 | 1177 | 13229  | 0         | 1167 | 1175 | 99 -  | 2   | 1176 | 4045   | 5219   |
| UN06266 | Rsa1.0.02306.1 | 910  | 32776  | 0         | 822  | 827  | 99 -  | 85  | 910  | 21208  | 22034  |
| UN06267 | Rsa1.0.01126.1 | 811  | 53127  | 1.00E-178 | 332  | 336  | 98 +  | 443 | 777  | 50776  | 51111  |
| UN06268 | Rsa1.0.00347.1 | 520  | 93048  | 0         | 517  | 521  | 99 -  | 3   | 520  | 66841  | 67361  |
| UN06269 | Rsa1.0.00067.1 | 1096 | 415055 | 0         | 740  | 758  | 97 +  | 3   | 748  | 247373 | 248130 |
| UN06270 | Rsa1.0.00453.1 | 1323 | 83031  | 1.00E-158 | 284  | 284  | 100 + | 3   | 286  | 79184  | 79467  |
| UN06271 | Rsa1.0.05023.1 | 582  | 15105  | 0         | 580  | 580  | 100 + | 3   | 582  | 8579   | 9158   |
| UN06272 | Rsa1.0.03435.1 | 659  | 22958  | 1.00E-143 | 284  | 293  | 96 +  | 274 | 566  | 21985  | 22277  |
| UN06273 | Rsa1.0.00378.1 | 1161 | 89892  | 0         | 419  | 420  | 99 +  | 742 | 1161 | 81481  | 81900  |
| UN06274 | Rsa1.0.00748.1 | 891  | 65983  | 1.00E-125 | 263  | 276  | 95 +  | 1   | 267  | 14299  | 14574  |
| UN06275 | Rsa1.0.01276.1 | 648  | 49384  | 0         | 645  | 648  | 99 -  | 1   | 648  | 24952  | 25599  |
| UN06276 | Rsa1.0.05221.1 | 947  | 14452  | 1.00E-77  | 148  | 148  | 100 - | 1   | 148  | 8530   | 8677   |
| UN06277 | Rsa1.0.02753.1 | 613  | 28215  | 0         | 580  | 620  | 93 +  | 1   | 611  | 8121   | 8728   |

|         |                |      |        |           |      |      |       |      |      |        |        |
|---------|----------------|------|--------|-----------|------|------|-------|------|------|--------|--------|
| UN06278 | Rsa1.0_00425.1 | 1735 | 147080 | 0         | 701  | 722  | 97 +  | 615  | 1327 | 106336 | 107057 |
| UN06279 | Rsa1.0_00454.1 | 1960 | 216970 | 0         | 508  | 519  | 97 +  | 1444 | 1956 | 10708  | 11226  |
| UN06280 | Rsa1.0_00154.1 | 694  | 189461 | 0         | 501  | 525  | 95 +  | 180  | 694  | 171027 | 171546 |
| UN06281 | Rsa1.0_00044.1 | 1371 | 271658 | 0         | 444  | 452  | 98 +  | 54   | 505  | 44363  | 44814  |
| UN06282 | Rsa1.0_00479.1 | 1363 | 81377  | 0         | 1002 | 1021 | 98 -  | 1    | 1021 | 80363  | 81371  |
| UN06283 | Rsa1.0_02421.1 | 1372 | 31579  | 0         | 517  | 535  | 96 -  | 806  | 1340 | 8466   | 9000   |
| UN06284 | Rsa1.0_07474.1 | 1332 | 9294   | 0         | 1219 | 1224 | 99 +  | 111  | 1331 | 4914   | 6137   |
| UN06285 | Rsa1.0_02928.1 | 776  | 26680  | 1.00E-180 | 360  | 371  | 97 -  | 391  | 761  | 17090  | 17458  |
| UN06286 | Rsa1.0_00678.1 | 714  | 193163 | 0         | 377  | 383  | 98 +  | 334  | 714  | 164828 | 165210 |
| UN06287 | Rsa1.0_01092.1 | 815  | 54348  | 2.00E-69  | 137  | 138  | 99 +  | 402  | 539  | 51202  | 51339  |
| UN06288 | Rsa1.0_41382.1 | 1059 | 543    | 0         | 366  | 369  | 99 +  | 209  | 577  | 1      | 369    |
| UN06289 | Rsa1.0_00304.1 | 1176 | 97429  | 1.00E-118 | 232  | 237  | 97 -  | 426  | 662  | 25354  | 25590  |
| UN06290 | Rsa1.0_21578.1 | 1458 | 1190   | 1.00E-173 | 317  | 319  | 99 -  | 1142 | 1458 | 526    | 844    |
| UN06291 | Rsa1.0_00440.1 | 883  | 84723  | 1.00E-164 | 325  | 335  | 97 -  | 548  | 882  | 25067  | 25398  |
| UN06292 | Rsa1.0_00549.1 | 1257 | 76473  | 0         | 804  | 823  | 97 -  | 2    | 815  | 42366  | 43188  |
| UN06293 | Rsa1.0_02077.1 | 794  | 35328  | 1.00E-111 | 219  | 224  | 97 +  | 367  | 590  | 19971  | 20194  |
| UN06294 | Rsa1.0_01171.1 | 1108 | 51752  | 1.00E-110 | 210  | 211  | 99 +  | 3    | 212  | 51542  | 51752  |
| UN06295 | Rsa1.0_00742.1 | 846  | 66106  | 0         | 328  | 328  | 100 - | 519  | 846  | 16522  | 16849  |
| UN06296 | Rsa1.0_01567.1 | 970  | 43090  | 0         | 965  | 968  | 99 -  | 3    | 970  | 25446  | 26413  |
| UN06297 | Rsa1.0_00921.1 | 1019 | 59599  | 0         | 1014 | 1021 | 99 +  | 3    | 1019 | 29788  | 30808  |
| UN06298 | Rsa1.0_00168.1 | 563  | 115870 | 0         | 427  | 450  | 94 -  | 115  | 563  | 90769  | 91213  |
| UN06299 | Rsa1.0_00425.1 | 1575 | 147080 | 0         | 728  | 728  | 100 + | 2    | 729  | 110296 | 111023 |
| UN06300 | Rsa1.0_00655.1 | 742  | 195840 | 0         | 354  | 361  | 98 -  | 11   | 371  | 168054 | 168412 |
| UN06301 | Rsa1.0_00369.1 | 499  | 266462 | 0         | 381  | 381  | 100 + | 119  | 499  | 136393 | 136773 |
| UN06302 | Rsa1.0_00007.1 | 939  | 239325 | 1.00E-123 | 261  | 272  | 95 +  | 585  | 854  | 13415  | 13686  |
| UN06303 | Rsa1.0_10792.1 | 827  | 5719   | 1.00E-166 | 330  | 340  | 97 -  | 487  | 826  | 1327   | 1664   |
| UN06304 | Rsa1.0_01940.1 | 754  | 37073  | 1.00E-159 | 324  | 334  | 97 +  | 420  | 752  | 9146   | 9475   |
| UN06305 | Rsa1.0_00522.1 | 1145 | 78103  | 1.00E-101 | 200  | 204  | 98 +  | 307  | 510  | 35226  | 35429  |
| UN06306 | Rsa1.0_00616.1 | 1134 | 195713 | 0         | 471  | 472  | 99 -  | 663  | 1134 | 183059 | 183530 |
| UN06307 | Rsa1.0_05526.1 | 954  | 13431  | 0         | 697  | 706  | 98 +  | 230  | 935  | 5038   | 5741   |
| UN06308 | Rsa1.0_03728.1 | 1409 | 21147  | 0         | 405  | 408  | 99 -  | 1002 | 1409 | 687    | 1092   |
| UN06309 | Rsa1.0_01832.1 | 806  | 38581  | 0         | 708  | 715  | 99 -  | 91   | 800  | 31912  | 32625  |
| UN06310 | Rsa1.0_00497.1 | 898  | 79830  | 0         | 398  | 400  | 99 +  | 499  | 898  | 67322  | 67720  |
| UN06311 | Rsa1.0_05623.1 | 1813 | 13141  | 0         | 981  | 1019 | 96 -  | 1    | 1004 | 10323  | 11339  |
| UN06312 | Rsa1.0_01131.1 | 1047 | 52928  | 1.00E-117 | 246  | 255  | 96 +  | 228  | 482  | 685    | 938    |
| UN06313 | Rsa1.0_00095.1 | 611  | 283384 | 0         | 609  | 609  | 100 + | 3    | 611  | 23215  | 23823  |
| UN06314 | Rsa1.0_00762.1 | 1328 | 165246 | 0         | 424  | 425  | 99 +  | 904  | 1328 | 25166  | 25590  |
| UN06315 | Rsa1.0_00077.1 | 1151 | 145005 | 0         | 773  | 773  | 100 - | 2    | 774  | 109765 | 110537 |
| UN06316 | Rsa1.0_01928.1 | 1289 | 37192  | 0         | 391  | 395  | 98 -  | 896  | 1289 | 6981   | 7375   |

|         |                |      |        |           |      |      |       |      |      |        |        |
|---------|----------------|------|--------|-----------|------|------|-------|------|------|--------|--------|
| UN06317 | Rsa1.0.00645.1 | 1556 | 189716 | 0         | 325  | 325  | 100 + | 703  | 1027 | 150795 | 151119 |
| UN06318 | Rsa1.0.01008.1 | 1022 | 56924  | 0         | 416  | 433  | 96 -  | 519  | 951  | 12453  | 12875  |
| UN06319 | Rsa1.0.00104.1 | 1131 | 368722 | 2.00E-89  | 217  | 232  | 93 -  | 860  | 1080 | 334705 | 334936 |
| UN06320 | Rsa1.0.00100.1 | 1469 | 249232 | 0         | 1057 | 1078 | 98 -  | 347  | 1424 | 195789 | 196862 |
| UN06321 | Rsa1.0.02975.1 | 738  | 26322  | 1.00E-145 | 304  | 315  | 96 +  | 3    | 317  | 16518  | 16827  |
| UN06322 | Rsa1.0.01261.1 | 704  | 49744  | 2.00E-79  | 176  | 184  | 95 -  | 349  | 532  | 43082  | 43261  |
| UN06323 | Rsa1.0.00284.1 | 1572 | 323267 | 0         | 1240 | 1285 | 96 -  | 295  | 1570 | 261975 | 263256 |
| UN06324 | Rsa1.0.00377.1 | 788  | 90038  | 0         | 447  | 449  | 99 +  | 3    | 451  | 25239  | 25686  |
| UN06325 | Rsa1.0.03750.1 | 1550 | 21027  | 0         | 352  | 354  | 99 +  | 1196 | 1549 | 5932   | 6285   |
| UN06326 | Rsa1.0.08439.1 | 1204 | 7353   | 0         | 813  | 814  | 99 +  | 391  | 1204 | 6315   | 7128   |
| UN06327 | Rsa1.0.00403.1 | 1246 | 87701  | 0         | 484  | 501  | 96 -  | 416  | 916  | 26353  | 26847  |
| UN06328 | Rsa1.0.04059.1 | 1037 | 19323  | 0         | 337  | 342  | 98 -  | 256  | 597  | 12352  | 12693  |
| UN06329 | Rsa1.0.00115.1 | 882  | 131321 | 0         | 330  | 332  | 99 +  | 551  | 882  | 36126  | 36457  |
| UN06330 | Rsa1.0.00356.1 | 836  | 91521  | 0         | 473  | 486  | 97 +  | 353  | 836  | 5207   | 5691   |
| UN06331 | Rsa1.0.00201.1 | 774  | 232851 | 0         | 756  | 767  | 98 -  | 8    | 774  | 140321 | 141087 |
| UN06332 | Rsa1.0.00479.1 | 1634 | 81377  | 0         | 1080 | 1131 | 95 -  | 502  | 1632 | 62298  | 63422  |
| UN06333 | Rsa1.0.00079.1 | 879  | 606987 | 1.00E-168 | 334  | 344  | 97 -  | 532  | 875  | 464203 | 464545 |
| UN06334 | Rsa1.0.00024.1 | 862  | 188018 | 0         | 853  | 862  | 98 +  | 1    | 862  | 37289  | 38149  |
| UN06335 | Rsa1.0.00034.1 | 681  | 260119 | 3.00E-90  | 245  | 273  | 89 -  | 115  | 387  | 157135 | 157389 |
| UN06336 | Rsa1.0.00016.1 | 668  | 831256 | 0         | 584  | 635  | 91 +  | 27   | 660  | 766975 | 767589 |
| UN06337 | Rsa1.0.01220.1 | 1441 | 161775 | 0         | 1374 | 1438 | 95 +  | 2    | 1436 | 112913 | 114349 |
| UN06338 | Rsa1.0.01606.1 | 1510 | 42432  | 0         | 662  | 672  | 98 -  | 840  | 1510 | 39525  | 40195  |
| UN06339 | Rsa1.0.05338.1 | 1368 | 144511 | 0         | 424  | 440  | 96 -  | 145  | 584  | 6891   | 7318   |
| UN06340 | Rsa1.0.01382.1 | 1573 | 46877  | 0         | 462  | 476  | 97 +  | 3    | 466  | 11323  | 11798  |
| UN06341 | Rsa1.0.19648.1 | 1442 | 1403   | 0         | 626  | 631  | 99 +  | 3    | 633  | 773    | 1403   |
| UN06342 | Rsa1.0.01185.1 | 1067 | 149842 | 0         | 1048 | 1066 | 98 -  | 2    | 1066 | 7338   | 8401   |
| UN06343 | Rsa1.0.00215.1 | 958  | 201775 | 0         | 383  | 388  | 98 +  | 19   | 403  | 25528  | 25915  |
| UN06344 | Rsa1.0.01252.1 | 1322 | 49847  | 0         | 402  | 403  | 99 -  | 918  | 1320 | 35397  | 35799  |
| UN06345 | Rsa1.0.02345.1 | 537  | 32337  | 1.00E-144 | 269  | 271  | 99 +  | 267  | 535  | 17017  | 17287  |
| UN06346 | Rsa1.0.00003.1 | 1482 | 340054 | 0         | 519  | 525  | 98 -  | 6    | 529  | 278263 | 278787 |
| UN06347 | Rsa1.0.01559.1 | 666  | 43262  | 1.00E-172 | 342  | 353  | 96 -  | 315  | 664  | 28796  | 29148  |
| UN06348 | Rsa1.0.00999.1 | 1412 | 57162  | 0         | 1406 | 1415 | 99 +  | 2    | 1412 | 38126  | 39540  |
| UN06349 | Rsa1.0.09504.1 | 956  | 6328   | 0         | 670  | 670  | 100 - | 287  | 956  | 4335   | 5004   |
| UN06350 | Rsa1.0.00710.1 | 986  | 67325  | 1.00E-105 | 235  | 247  | 95 +  | 4    | 245  | 25381  | 25627  |
| UN06351 | Rsa1.0.00037.1 | 1251 | 307838 | 0         | 462  | 465  | 99 -  | 788  | 1251 | 241190 | 241654 |
| UN06352 | Rsa1.0.01779.1 | 713  | 39448  | 0         | 691  | 692  | 99 -  | 22   | 713  | 16688  | 17379  |
| UN06353 | Rsa1.0.05569.1 | 954  | 13311  | 1.00E-142 | 265  | 268  | 98 -  | 382  | 649  | 5786   | 6053   |
| UN06354 | Rsa1.0.01611.1 | 939  | 42269  | 0         | 367  | 370  | 99 -  | 571  | 939  | 24989  | 25358  |
| UN06355 | Rsa1.0.04166.1 | 752  | 18757  | 0         | 387  | 394  | 98 +  | 3    | 394  | 6382   | 6771   |

|         |                |      |        |           |      |      |       |     |      |        |        |
|---------|----------------|------|--------|-----------|------|------|-------|-----|------|--------|--------|
| UN06356 | Rsa1.0_02812.1 | 977  | 27660  | 1.00E-25  | 136  | 161  | 84 -  | 270 | 430  | 13956  | 14116  |
| UN06357 | Rsa1.0_03906.1 | 1489 | 20161  | 0         | 1008 | 1011 | 99 -  | 479 | 1489 | 10588  | 11598  |
| UN06358 | Rsa1.0_00216.1 | 701  | 197563 | 0         | 626  | 640  | 97 +  | 65  | 701  | 91238  | 91877  |
| UN06359 | Rsa1.0_00087.1 | 1022 | 761073 | 0         | 389  | 405  | 96 -  | 278 | 682  | 731598 | 732002 |
| UN06360 | Rsa1.0_02180.1 | 825  | 34176  | 0         | 458  | 479  | 95 +  | 353 | 825  | 8790   | 9268   |
| UN06361 | Rsa1.0_00758.1 | 1074 | 65477  | 0         | 461  | 464  | 99 +  | 611 | 1074 | 18698  | 19161  |
| UN06362 | Rsa1.0_04064.1 | 1248 | 19297  | 0         | 1090 | 1117 | 97 +  | 129 | 1245 | 16324  | 17435  |
| UN06363 | Rsa1.0_02808.1 | 1073 | 27677  | 1.00E-176 | 359  | 373  | 96 +  | 626 | 998  | 22072  | 22437  |
| UN06364 | Rsa1.0_04397.1 | 991  | 17555  | 0         | 951  | 1021 | 93 -  | 2   | 991  | 4497   | 5513   |
| UN06365 | Rsa1.0_08380.1 | 901  | 7446   | 1.00E-135 | 244  | 244  | 100 - | 658 | 901  | 2655   | 2898   |
| UN06366 | Rsa1.0_03241.1 | 797  | 24423  | 1.00E-92  | 173  | 173  | 100 + | 3   | 175  | 13639  | 13811  |
| UN06367 | Rsa1.0_01276.1 | 1204 | 49384  | 0         | 552  | 552  | 100 + | 3   | 554  | 23020  | 23571  |
| UN06368 | Rsa1.0_01373.1 | 764  | 47052  | 0         | 741  | 758  | 97 -  | 2   | 755  | 9293   | 10050  |
| UN06369 | Rsa1.0_00803.1 | 1306 | 144228 | 3.00E-91  | 187  | 191  | 97 -  | 890 | 1080 | 2731   | 2920   |
| UN06370 | Rsa1.0_00139.1 | 1337 | 357786 | 0         | 421  | 422  | 99 -  | 916 | 1337 | 24405  | 24826  |
| UN06371 | Rsa1.0_09320.1 | 836  | 6457   | 1.00E-160 | 307  | 314  | 97 +  | 521 | 834  | 1368   | 1681   |
| UN06372 | Rsa1.0_07311.1 | 1436 | 9567   | 0         | 1419 | 1433 | 99 -  | 3   | 1435 | 4643   | 6075   |
| UN06373 | Rsa1.0_00155.1 | 1374 | 118465 | 1.00E-160 | 286  | 286  | 100 + | 611 | 896  | 104732 | 105017 |
| UN06374 | Rsa1.0_00708.1 | 888  | 67366  | 0         | 553  | 554  | 99 +  | 86  | 639  | 23908  | 24461  |
| UN06375 | Rsa1.0_01471.1 | 1212 | 45101  | 0         | 485  | 500  | 97 -  | 717 | 1212 | 18495  | 18994  |
| UN06376 | Rsa1.0_01883.1 | 931  | 37661  | 2.00E-73  | 173  | 185  | 93 -  | 481 | 665  | 32860  | 33035  |
| UN06377 | Rsa1.0_01727.1 | 1196 | 40243  | 1.00E-167 | 343  | 355  | 96 +  | 17  | 369  | 11162  | 11516  |
| UN06378 | Rsa1.0_03216.1 | 1321 | 24540  | 0         | 881  | 918  | 95 +  | 1   | 915  | 21424  | 22339  |
| UN06379 | Rsa1.0_02874.1 | 957  | 27070  | 4.00E-62  | 168  | 181  | 92 -  | 766 | 943  | 1710   | 1890   |
| UN06380 | Rsa1.0_02114.1 | 1299 | 34873  | 1.00E-113 | 221  | 224  | 98 -  | 1   | 224  | 13073  | 13295  |
| UN06381 | Rsa1.0_00981.1 | 1010 | 57700  | 1.00E-137 | 257  | 260  | 98 -  | 3   | 262  | 15605  | 15864  |
| UN06382 | Rsa1.0_01254.1 | 1611 | 49801  | 0         | 821  | 822  | 99 -  | 1   | 821  | 15174  | 15995  |
| UN06383 | Rsa1.0_01214.1 | 1314 | 50599  | 0         | 860  | 915  | 93 +  | 24  | 924  | 2332   | 3228   |
| UN06384 | Rsa1.0_00207.1 | 606  | 248736 | 0         | 600  | 604  | 99 -  | 1   | 604  | 14991  | 15594  |
| UN06385 | Rsa1.0_03561.1 | 830  | 22089  | 1.00E-119 | 231  | 234  | 98 +  | 200 | 432  | 10198  | 10431  |
| UN06386 | Rsa1.0_01483.1 | 1716 | 44826  | 0         | 398  | 405  | 98 +  | 1   | 403  | 22082  | 22486  |
| UN06387 | Rsa1.0_00007.1 | 725  | 239325 | 0         | 344  | 344  | 100 - | 347 | 690  | 118158 | 118501 |
| UN06388 | Rsa1.0_01464.1 | 1066 | 45193  | 4.00E-87  | 211  | 226  | 93 -  | 675 | 900  | 16256  | 16478  |
| UN06389 | Rsa1.0_00044.1 | 1647 | 271658 | 0         | 970  | 1071 | 90 +  | 566 | 1634 | 69278  | 70308  |
| UN06390 | Rsa1.0_00123.1 | 972  | 325650 | 0         | 591  | 626  | 94 -  | 68  | 678  | 262756 | 263381 |
| UN06391 | Rsa1.0_00089.1 | 538  | 406142 | 0         | 500  | 517  | 96 -  | 26  | 536  | 80693  | 81207  |
| UN06392 | Rsa1.0_14037.1 | 1372 | 3887   | 0         | 894  | 928  | 96 -  | 1   | 928  | 1      | 926    |
| UN06393 | Rsa1.0_06166.1 | 1276 | 11583  | 0         | 532  | 540  | 98 +  | 354 | 888  | 7173   | 7711   |
| UN06394 | Rsa1.0_01248.1 | 772  | 154103 | 0         | 752  | 770  | 97 -  | 2   | 767  | 7034   | 7803   |

|         |                |      |        |           |      |      |       |      |      |        |        |
|---------|----------------|------|--------|-----------|------|------|-------|------|------|--------|--------|
| UN06395 | Rsa1.0_00076.1 | 648  | 146021 | 0         | 618  | 671  | 92 -  | 2    | 648  | 76062  | 76718  |
| UN06396 | Rsa1.0_02457.1 | 989  | 31208  | 0         | 441  | 465  | 94 +  | 1    | 456  | 12457  | 12914  |
| UN06397 | Rsa1.0_00180.1 | 881  | 114581 | 0         | 373  | 383  | 97 +  | 1    | 379  | 89956  | 90335  |
| UN06398 | Rsa1.0_01173.1 | 847  | 51727  | 1.00E-129 | 360  | 395  | 91 -  | 1    | 390  | 27024  | 27409  |
| UN06399 | Rsa1.0_00396.1 | 606  | 88242  | 1.00E-118 | 311  | 341  | 91 -  | 144  | 484  | 65465  | 65795  |
| UN06400 | Rsa1.0_02503.1 | 577  | 30709  | 4.00E-67  | 136  | 138  | 98 -  | 254  | 391  | 26114  | 26251  |
| UN06401 | Rsa1.0_03019.1 | 1476 | 25987  | 0         | 636  | 648  | 98 -  | 525  | 1172 | 575    | 1222   |
| UN06402 | Rsa1.0_02930.1 | 1362 | 26668  | 0         | 1305 | 1362 | 95 -  | 3    | 1362 | 8680   | 10020  |
| UN06403 | Rsa1.0_00273.1 | 1027 | 326186 | 1.00E-104 | 335  | 378  | 88 +  | 488  | 855  | 34780  | 35151  |
| UN06404 | Rsa1.0_08655.1 | 1159 | 7078   | 1.00E-135 | 287  | 301  | 95 +  | 3    | 303  | 4143   | 4443   |
| UN06405 | Rsa1.0_00240.1 | 982  | 104175 | 0         | 896  | 940  | 95 -  | 1    | 938  | 72298  | 73237  |
| UN06406 | Rsa1.0_00019.1 | 937  | 301669 | 0         | 663  | 696  | 95 +  | 4    | 682  | 88347  | 89039  |
| UN06407 | Rsa1.0_00457.1 | 1766 | 337301 | 0         | 499  | 569  | 87 +  | 102  | 652  | 302544 | 303076 |
| UN06408 | Rsa1.0_00033.1 | 917  | 515811 | 1.00E-128 | 306  | 326  | 93 -  | 1    | 326  | 469201 | 469519 |
| UN06409 | Rsa1.0_00571.1 | 1267 | 329018 | 0         | 772  | 803  | 96 -  | 321  | 1120 | 145042 | 145844 |
| UN06410 | Rsa1.0_00536.1 | 1427 | 77199  | 0         | 375  | 390  | 96 +  | 1042 | 1427 | 23555  | 23944  |
| UN06411 | Rsa1.0_03521.1 | 1578 | 396204 | 0         | 481  | 488  | 98 -  | 450  | 937  | 15137  | 15624  |
| UN06412 | Rsa1.0_02099.1 | 1344 | 35030  | 1.00E-147 | 376  | 412  | 91 +  | 936  | 1343 | 2291   | 2689   |
| UN06413 | Rsa1.0_01081.1 | 798  | 499226 | 0         | 776  | 802  | 96 -  | 2    | 798  | 318588 | 319386 |
| UN06414 | Rsa1.0_01262.1 | 1106 | 178815 | 0         | 610  | 626  | 97 -  | 1    | 623  | 11265  | 11890  |
| UN06415 | Rsa1.0_00118.1 | 572  | 130637 | 0         | 560  | 566  | 98 -  | 1    | 566  | 36394  | 36959  |
| UN06416 | Rsa1.0_00739.1 | 1586 | 66155  | 0         | 508  | 509  | 99 -  | 3    | 511  | 6859   | 7367   |
| UN06417 | Rsa1.0_00582.1 | 1182 | 74333  | 0         | 1126 | 1162 | 96 +  | 23   | 1169 | 39429  | 40587  |
| UN06418 | Rsa1.0_01061.1 | 874  | 55349  | 1.00E-155 | 287  | 290  | 98 +  | 585  | 874  | 28685  | 28974  |
| UN06419 | Rsa1.0_03752.1 | 1195 | 21022  | 1.00E-134 | 246  | 247  | 99 +  | 946  | 1192 | 1341   | 1587   |
| UN06420 | Rsa1.0_01382.1 | 770  | 46877  | 0         | 424  | 424  | 100 - | 1    | 424  | 13890  | 14313  |
| UN06421 | Rsa1.0_01039.1 | 1334 | 55946  | 0         | 1265 | 1299 | 97 +  | 1    | 1293 | 37312  | 38608  |
| UN06422 | Rsa1.0_00114.1 | 1084 | 131330 | 0         | 706  | 711  | 99 +  | 373  | 1082 | 85728  | 86436  |
| UN06423 | Rsa1.0_00136.1 | 729  | 122464 | 1.00E-109 | 365  | 417  | 87 +  | 3    | 410  | 81360  | 81754  |
| UN06424 | Rsa1.0_00658.1 | 1296 | 69740  | 0         | 770  | 806  | 95 +  | 3    | 802  | 11737  | 12534  |
| UN06425 | Rsa1.0_01945.1 | 792  | 36989  | 0         | 771  | 793  | 97 -  | 1    | 791  | 31362  | 32153  |
| UN06426 | Rsa1.0_03992.1 | 1086 | 19675  | 0         | 1071 | 1088 | 98 -  | 1    | 1084 | 14276  | 15356  |
| UN06427 | Rsa1.0_01359.1 | 851  | 47271  | 0         | 361  | 368  | 98 -  | 1    | 362  | 21247  | 21614  |
| UN06428 | Rsa1.0_00341.1 | 1530 | 249309 | 0         | 440  | 447  | 98 -  | 3    | 446  | 243047 | 243493 |
| UN06429 | Rsa1.0_00136.1 | 753  | 122464 | 0         | 429  | 444  | 96 +  | 7    | 449  | 60388  | 60829  |
| UN06430 | Rsa1.0_00208.1 | 1035 | 108565 | 1.00E-163 | 300  | 303  | 99 +  | 93   | 395  | 7689   | 7991   |
| UN06431 | Rsa1.0_00326.1 | 922  | 171955 | 0         | 574  | 579  | 99 -  | 1    | 577  | 16257  | 16834  |
| UN06432 | Rsa1.0_03517.1 | 1412 | 22337  | 0         | 1207 | 1226 | 98 +  | 2    | 1222 | 2988   | 4213   |
| UN06433 | Rsa1.0_00806.1 | 1129 | 63674  | 0         | 1082 | 1128 | 95 -  | 3    | 1128 | 47284  | 48407  |

|         |                |      |        |           |      |      |      |      |      |        |        |
|---------|----------------|------|--------|-----------|------|------|------|------|------|--------|--------|
| UN06434 | Rsa1.0.05709.1 | 713  | 12867  | 0         | 391  | 399  | 97 - | 6    | 403  | 327    | 724    |
| UN06435 | Rsa1.0.00215.1 | 1685 | 201775 | 0         | 887  | 900  | 98 - | 3    | 902  | 78157  | 79055  |
| UN06436 | Rsa1.0.00419.1 | 1106 | 86562  | 1.00E-120 | 329  | 365  | 90 - | 751  | 1104 | 13956  | 14303  |
| UN06437 | Rsa1.0.02209.1 | 913  | 33873  | 1.00E-172 | 330  | 337  | 97 + | 1    | 334  | 26621  | 26957  |
| UN06438 | Rsa1.0_38359.1 | 949  | 587    | 1.00E-128 | 238  | 240  | 99 - | 608  | 847  | 1      | 240    |
| UN06439 | Rsa1.0_07377.1 | 841  | 9494   | 1.00E-174 | 321  | 325  | 98 + | 461  | 785  | 6338   | 6662   |
| UN06440 | Rsa1.0.08080.1 | 695  | 137363 | 1.00E-129 | 273  | 283  | 96 + | 414  | 695  | 1006   | 1283   |
| UN06441 | Rsa1.0.00018.1 | 1344 | 410899 | 0         | 832  | 930  | 89 - | 329  | 1245 | 144212 | 145136 |
| UN06442 | Rsa1.0.00002.1 | 752  | 601661 | 0         | 731  | 754  | 96 - | 2    | 752  | 177388 | 178141 |
| UN06443 | Rsa1.0.00888.1 | 729  | 60978  | 0         | 534  | 595  | 89 - | 9    | 571  | 50445  | 51030  |
| UN06444 | Rsa1.0.01144.1 | 856  | 52431  | 3.00E-41  | 90   | 91   | 98 - | 380  | 470  | 17706  | 17796  |
| UN06445 | Rsa1.0.08215.1 | 1057 | 7711   | 0         | 517  | 527  | 98 + | 22   | 545  | 3655   | 4181   |
| UN06446 | Rsa1.0.01272.1 | 748  | 49553  | 1.00E-159 | 319  | 329  | 96 - | 1    | 329  | 12117  | 12444  |
| UN06447 | Rsa1.0.00019.1 | 579  | 301669 | 1.00E-130 | 239  | 240  | 99 + | 1    | 240  | 53770  | 54009  |
| UN06448 | Rsa1.0.00278.1 | 1159 | 231896 | 0         | 750  | 770  | 97 - | 327  | 1092 | 25555  | 26321  |
| UN06449 | Rsa1.0.01173.1 | 1454 | 51727  | 0         | 390  | 392  | 99 - | 1065 | 1454 | 25002  | 25393  |
| UN06450 | Rsa1.0.00156.1 | 837  | 118383 | 0         | 522  | 540  | 96 - | 85   | 623  | 56991  | 57529  |
| UN06451 | Rsa1.0_14725.1 | 908  | 3125   | 0         | 538  | 552  | 97 + | 356  | 906  | 1471   | 2022   |
| UN06452 | Rsa1.0.02317.1 | 750  | 32600  | 0         | 737  | 746  | 98 + | 3    | 748  | 12707  | 13451  |
| UN06453 | Rsa1.0.00369.1 | 1065 | 266462 | 0         | 519  | 562  | 92 - | 1    | 553  | 180846 | 181403 |
| UN06454 | Rsa1.0.01139.1 | 839  | 52601  | 1.00E-108 | 387  | 444  | 87 - | 1    | 423  | 50365  | 50805  |
| UN06455 | Rsa1.0.00267.1 | 562  | 101509 | 0         | 415  | 419  | 99 - | 1    | 419  | 32068  | 32486  |
| UN06456 | Rsa1.0_72343.1 | 1034 | 317    | 2.00E-67  | 134  | 135  | 99 - | 423  | 557  | 29     | 163    |
| UN06457 | Rsa1.0.00451.1 | 1585 | 322533 | 0         | 527  | 548  | 96 - | 1018 | 1565 | 261558 | 262097 |
| UN06458 | Rsa1.0_17324.1 | 797  | 1861   | 1.00E-147 | 271  | 273  | 99 + | 525  | 797  | 379    | 651    |
| UN06459 | Rsa1.0.00909.1 | 1486 | 59976  | 0         | 372  | 381  | 97 + | 1104 | 1484 | 34722  | 35102  |
| UN06460 | Rsa1.0.01949.1 | 1061 | 36960  | 1.00E-172 | 357  | 375  | 95 - | 695  | 1060 | 16875  | 17249  |
| UN06461 | Rsa1.0.00221.1 | 136  | 106972 | 6.00E-38  | 96   | 100  | 96 - | 38   | 136  | 106735 | 106834 |
| UN06462 | Rsa1.0.00243.1 | 1011 | 103651 | 1.00E-139 | 299  | 313  | 95 + | 61   | 369  | 46401  | 46713  |
| UN06463 | Rsa1.0.00332.1 | 1246 | 94575  | 0         | 447  | 478  | 93 - | 97   | 561  | 59905  | 60380  |
| UN06464 | Rsa1.0.00083.1 | 1007 | 442773 | 0         | 858  | 905  | 94 + | 22   | 926  | 359544 | 360429 |
| UN06465 | Rsa1.0.02268.1 | 1320 | 33172  | 1.00E-154 | 318  | 329  | 96 - | 2    | 329  | 16898  | 17225  |
| UN06466 | Rsa1.0.02494.1 | 786  | 132923 | 0         | 438  | 450  | 97 - | 3    | 451  | 132101 | 132548 |
| UN06467 | Rsa1.0.03005.1 | 1104 | 26082  | 0         | 1097 | 1108 | 99 + | 2    | 1104 | 12260  | 13364  |
| UN06468 | Rsa1.0.03860.1 | 705  | 20407  | 3.00E-93  | 238  | 260  | 91 + | 52   | 311  | 14095  | 14347  |
| UN06469 | Rsa1.0.01315.1 | 840  | 48361  | 0         | 623  | 645  | 96 + | 2    | 643  | 45698  | 46341  |
| UN06470 | Rsa1.0.00487.1 | 960  | 80674  | 0         | 516  | 525  | 98 + | 230  | 752  | 70783  | 71306  |
| UN06471 | Rsa1.0.00048.1 | 694  | 167185 | 0         | 453  | 457  | 99 - | 1    | 457  | 37243  | 37699  |
| UN06472 | Rsa1.0.00058.1 | 891  | 159921 | 0         | 867  | 876  | 98 + | 15   | 890  | 104481 | 105356 |



|         |                |      |        |           |      |      |       |      |      |        |        |
|---------|----------------|------|--------|-----------|------|------|-------|------|------|--------|--------|
| UN06473 | Rsa1.0.00037.1 | 1197 | 307838 | 0         | 663  | 678  | 97 -  | 1    | 678  | 192289 | 192964 |
| UN06474 | Rsa1.0.22665.1 | 716  | 1104   | 0         | 688  | 728  | 94 +  | 2    | 715  | 106    | 833    |
| UN06475 | Rsa1.0.01198.1 | 1056 | 51029  | 0         | 862  | 903  | 95 +  | 17   | 912  | 40402  | 41300  |
| UN06476 | Rsa1.0.00002.1 | 828  | 601661 | 0         | 490  | 521  | 94 +  | 283  | 793  | 177153 | 177673 |
| UN06477 | Rsa1.0.00115.1 | 1430 | 131321 | 0         | 401  | 418  | 95 -  | 1020 | 1430 | 49236  | 49653  |
| UN06478 | Rsa1.0.04247.1 | 1174 | 18295  | 0         | 587  | 634  | 92 -  | 465  | 1097 | 5069   | 5696   |
| UN06479 | Rsa1.0.00300.1 | 293  | 97747  | 1.00E-148 | 283  | 289  | 97 -  | 3    | 291  | 67357  | 67645  |
| UN06480 | Rsa1.0.00130.1 | 755  | 125737 | 1.00E-137 | 311  | 332  | 93 +  | 3    | 330  | 10704  | 11029  |
| UN06481 | Rsa1.0.00289.1 | 946  | 98620  | 0         | 894  | 909  | 98 +  | 39   | 946  | 58254  | 59161  |
| UN06482 | Rsa1.0.04229.1 | 1023 | 18389  | 0         | 966  | 1020 | 94 -  | 3    | 993  | 13747  | 14762  |
| UN06483 | Rsa1.0.19257.1 | 750  | 1455   | 1.00E-178 | 365  | 379  | 96 -  | 4    | 381  | 108    | 484    |
| UN06484 | Rsa1.0.10893.1 | 978  | 5687   | 0         | 523  | 523  | 100 + | 455  | 977  | 236    | 758    |
| UN06485 | Rsa1.0.04210.1 | 741  | 18442  | 1.00E-163 | 294  | 295  | 99 -  | 439  | 733  | 1610   | 1904   |
| UN06486 | Rsa1.0.02211.1 | 1312 | 33857  | 1.00E-155 | 355  | 380  | 93 +  | 942  | 1312 | 32613  | 32992  |
| UN06487 | Rsa1.0.00873.1 | 982  | 61459  | 0         | 492  | 502  | 98 +  | 480  | 981  | 46323  | 46824  |
| UN06488 | Rsa1.0.37263.1 | 1033 | 605    | 0         | 581  | 606  | 95 -  | 371  | 973  | 1      | 605    |
| UN06489 | Rsa1.0.00976.1 | 1479 | 57809  | 0         | 1000 | 1016 | 98 -  | 197  | 1212 | 15917  | 16932  |
| UN06490 | Rsa1.0.00568.1 | 586  | 75219  | 1.00E-153 | 275  | 275  | 100 + | 312  | 586  | 63277  | 63551  |
| UN06491 | Rsa1.0.00300.1 | 835  | 97747  | 1.00E-164 | 296  | 297  | 99 +  | 531  | 827  | 30484  | 30780  |
| UN06492 | Rsa1.0.01240.1 | 1221 | 50075  | 0         | 410  | 418  | 98 -  | 807  | 1221 | 40593  | 41009  |
| UN06493 | Rsa1.0.00298.1 | 1233 | 349131 | 0         | 472  | 477  | 98 +  | 2    | 478  | 331436 | 331912 |
| UN06494 | Rsa1.0.00679.1 | 766  | 68971  | 3.00E-96  | 194  | 199  | 97 +  | 358  | 556  | 33672  | 33870  |
| UN06495 | Rsa1.0.36989.1 | 616  | 610    | 1.00E-129 | 240  | 242  | 99 +  | 375  | 616  | 1      | 242    |
| UN06496 | Rsa1.0.00001.1 | 876  | 363028 | 1.00E-157 | 318  | 329  | 96 +  | 287  | 609  | 323550 | 323878 |
| UN06497 | Rsa1.0.00470.1 | 1240 | 81968  | 0         | 340  | 340  | 100 + | 901  | 1240 | 50852  | 51191  |
| UN06498 | Rsa1.0.02161.1 | 1434 | 34459  | 0         | 1014 | 1060 | 95 -  | 2    | 1060 | 21364  | 22423  |
| UN06499 | Rsa1.0.00329.1 | 1288 | 222544 | 1.00E-156 | 292  | 296  | 98 +  | 993  | 1288 | 149718 | 150013 |
| UN06500 | Rsa1.0.00639.1 | 911  | 165873 | 0         | 556  | 565  | 98 +  | 15   | 572  | 107996 | 108560 |
| UN06501 | Rsa1.0.00464.1 | 1090 | 82253  | 0         | 452  | 453  | 99 -  | 636  | 1088 | 37148  | 37600  |
| UN06502 | Rsa1.0.00017.1 | 779  | 752458 | 1.00E-108 | 221  | 227  | 97 +  | 1    | 225  | 26740  | 26966  |
| UN06503 | Rsa1.0.06149.1 | 1345 | 11615  | 0         | 390  | 406  | 96 +  | 76   | 475  | 5349   | 5754   |
| UN06504 | Rsa1.0.00067.1 | 621  | 415055 | 1.00E-145 | 264  | 265  | 99 -  | 357  | 621  | 142400 | 142664 |
| UN06505 | Rsa1.0.02707.1 | 1075 | 28520  | 0         | 532  | 549  | 96 +  | 220  | 768  | 15178  | 15726  |
| UN06506 | Rsa1.0.00136.1 | 603  | 122464 | 9.00E-87  | 169  | 171  | 98 +  | 47   | 217  | 54790  | 54960  |
| UN06507 | Rsa1.0.00374.1 | 2524 | 165738 | 0         | 916  | 942  | 97 +  | 100  | 1039 | 101017 | 101952 |
| UN06508 | Rsa1.0.00218.1 | 841  | 201480 | 0         | 800  | 828  | 96 -  | 17   | 841  | 157964 | 158790 |
| UN06509 | Rsa1.0.00358.1 | 1047 | 91293  | 0         | 1034 | 1043 | 99 +  | 1    | 1043 | 88945  | 89987  |
| UN06510 | Rsa1.0.08929.1 | 1504 | 6777   | 0         | 451  | 458  | 98 -  | 1047 | 1504 | 368    | 825    |
| UN06511 | Rsa1.0.00055.1 | 1735 | 520193 | 1.00E-162 | 290  | 290  | 100 + | 1446 | 1735 | 70791  | 71080  |

|         |                |      |        |           |      |      |      |     |      |        |        |
|---------|----------------|------|--------|-----------|------|------|------|-----|------|--------|--------|
| UN06512 | Rsa1.0.00540.1 | 1241 | 76895  | 0         | 1225 | 1238 | 98 + | 2   | 1239 | 62828  | 64065  |
| UN06513 | Rsa1.0.00086.1 | 601  | 439854 | 0         | 355  | 360  | 98 + | 2   | 361  | 362071 | 362430 |
| UN06514 | Rsa1.0.01546.1 | 1341 | 43586  | 0         | 771  | 801  | 96 - | 540 | 1339 | 33997  | 34797  |
| UN06515 | Rsa1.0.00043.1 | 1462 | 264937 | 0         | 1411 | 1461 | 96 - | 1   | 1461 | 165208 | 166648 |
| UN06516 | Rsa1.0.04022.1 | 288  | 19534  | 6.00E-74  | 180  | 192  | 93 + | 93  | 282  | 18148  | 18339  |
| UN06517 | Rsa1.0.01006.1 | 1340 | 163670 | 0         | 586  | 608  | 96 + | 735 | 1340 | 119738 | 120336 |
| UN06518 | Rsa1.0.03168.1 | 928  | 24827  | 0         | 652  | 653  | 99 + | 1   | 652  | 4395   | 5047   |
| UN06519 | Rsa1.0.02540.1 | 874  | 30344  | 1.00E-168 | 310  | 312  | 99 - | 563 | 874  | 18312  | 18622  |
| UN06520 | Rsa1.0.01217.1 | 1202 | 50554  | 0         | 893  | 899  | 99 - | 293 | 1191 | 22108  | 23006  |
| UN06521 | Rsa1.0.05221.1 | 979  | 14452  | 1.00E-145 | 277  | 282  | 98 - | 698 | 979  | 9177   | 9458   |
| UN06522 | Rsa1.0.04478.1 | 845  | 17183  | 0         | 710  | 712  | 99 - | 134 | 845  | 10162  | 10873  |
| UN06523 | Rsa1.0.00207.1 | 627  | 248736 | 0         | 546  | 548  | 99 - | 81  | 627  | 194289 | 194836 |
| UN06524 | Rsa1.0.00015.1 | 937  | 561803 | 0         | 691  | 711  | 97 + | 8   | 715  | 447119 | 447823 |
| UN06525 | Rsa1.0.02996.1 | 2544 | 26152  | 0         | 578  | 591  | 97 - | 396 | 983  | 20697  | 21285  |
| UN06526 | Rsa1.0.11525.1 | 816  | 5479   | 0         | 566  | 630  | 89 + | 1   | 630  | 4715   | 5343   |
| UN06527 | Rsa1.0.06127.1 | 1051 | 11675  | 0         | 623  | 629  | 99 - | 374 | 1002 | 2866   | 3492   |
| UN06528 | Rsa1.0.00079.1 | 779  | 606987 | 0         | 761  | 780  | 97 - | 1   | 779  | 187718 | 188494 |
| UN06529 | Rsa1.0.00789.1 | 497  | 64233  | 0         | 480  | 514  | 93 - | 3   | 497  | 13047  | 13560  |
| UN06530 | Rsa1.0.08553.1 | 793  | 7210   | 1.00E-114 | 212  | 213  | 99 - | 3   | 215  | 2666   | 2878   |
| UN06531 | Rsa1.0.00326.1 | 969  | 171955 | 0         | 389  | 403  | 96 - | 568 | 969  | 66188  | 66589  |
| UN06532 | Rsa1.0.02851.1 | 1157 | 27295  | 0         | 375  | 391  | 95 - | 23  | 413  | 18959  | 19346  |
| UN06533 | Rsa1.0.00630.1 | 1044 | 71281  | 1.00E-114 | 254  | 265  | 95 - | 782 | 1044 | 34396  | 34658  |
| UN06534 | Rsa1.0.02310.1 | 659  | 32735  | 0         | 428  | 455  | 94 - | 3   | 452  | 13010  | 13454  |
| UN06535 | Rsa1.0.00110.1 | 963  | 132719 | 0         | 637  | 655  | 97 - | 1   | 655  | 115774 | 116428 |
| UN06536 | Rsa1.0.00165.1 | 535  | 116466 | 1.00E-151 | 292  | 299  | 97 - | 237 | 535  | 4445   | 4743   |
| UN06537 | Rsa1.0.65061.1 | 792  | 352    | 1.00E-160 | 333  | 352  | 94 + | 42  | 378  | 1      | 352    |
| UN06538 | Rsa1.0.00722.1 | 1463 | 66840  | 1.00E-151 | 307  | 315  | 97 + | 851 | 1162 | 41419  | 41733  |
| UN06539 | Rsa1.0.01063.1 | 1417 | 55301  | 0         | 500  | 535  | 93 - | 886 | 1414 | 16258  | 16779  |
| UN06540 | Rsa1.0.02392.1 | 1017 | 152517 | 1.00E-153 | 297  | 302  | 98 - | 717 | 1017 | 25844  | 26143  |
| UN06541 | Rsa1.0.00132.1 | 1536 | 124299 | 0         | 498  | 518  | 96 + | 276 | 791  | 99696  | 100209 |
| UN06542 | Rsa1.0.00816.1 | 1113 | 403350 | 1.00E-126 | 235  | 237  | 99 + | 1   | 237  | 109947 | 110183 |
| UN06543 | Rsa1.0.01801.1 | 806  | 39094  | 0         | 510  | 535  | 95 - | 1   | 529  | 20432  | 20966  |
| UN06544 | Rsa1.0.01529.1 | 606  | 43871  | 1.00E-147 | 350  | 381  | 91 - | 226 | 606  | 38315  | 38678  |
| UN06545 | Rsa1.0.00065.1 | 971  | 454616 | 0         | 621  | 650  | 95 + | 326 | 968  | 254496 | 255145 |
| UN06546 | Rsa1.0.09407.1 | 1284 | 6390   | 2.33E-156 | 269  | 271  | 99 - | 2   | 272  | 4676   | 4946   |
| UN06547 | Rsa1.0.00964.1 | 1018 | 316648 | 0         | 396  | 408  | 97 - | 611 | 1018 | 18327  | 18732  |
| UN06548 | Rsa1.0.01325.1 | 952  | 48131  | 5.00E-46  | 191  | 223  | 85 + | 537 | 759  | 17631  | 17853  |
| UN06549 | Rsa1.0.00087.1 | 1384 | 761073 | 0         | 455  | 460  | 98 + | 112 | 571  | 439545 | 440004 |
| UN06550 | Rsa1.0.01652.1 | 854  | 41579  | 0         | 705  | 708  | 99 - | 5   | 712  | 1692   | 2399   |

|         |                |      |        |           |      |      |       |     |      |        |        |
|---------|----------------|------|--------|-----------|------|------|-------|-----|------|--------|--------|
| UN06551 | Rsa1.0.07604.1 | 600  | 9041   | 0         | 582  | 592  | 98 -  | 3   | 594  | 3098   | 3689   |
| UN06552 | Rsa1.0.00275.1 | 691  | 210104 | 4.00E-83  | 210  | 228  | 92 -  | 238 | 465  | 155730 | 155951 |
| UN06553 | Rsa1.0.00262.1 | 1356 | 101906 | 0         | 1222 | 1248 | 97 +  | 118 | 1356 | 44451  | 45698  |
| UN06554 | Rsa1.0.04552.1 | 886  | 16878  | 0         | 849  | 893  | 95 +  | 1   | 886  | 10057  | 10935  |
| UN06555 | Rsa1.0.03271.1 | 1165 | 24187  | 0         | 445  | 469  | 94 -  | 697 | 1163 | 1265   | 1716   |
| UN06556 | Rsa1.0.00201.1 | 620  | 232851 | 1.00E-177 | 329  | 334  | 98 +  | 4   | 337  | 92986  | 93319  |
| UN06557 | Rsa1.0.01360.1 | 864  | 47246  | 0         | 348  | 357  | 97 +  | 508 | 864  | 37242  | 37598  |
| UN06558 | Rsa1.0.00329.1 | 1203 | 222544 | 0         | 403  | 404  | 99 -  | 3   | 406  | 84859  | 85262  |
| UN06559 | Rsa1.0.00002.1 | 1475 | 601661 | 0         | 652  | 668  | 97 -  | 397 | 1064 | 278342 | 279009 |
| UN06560 | Rsa1.0.01608.1 | 1195 | 170540 | 0         | 366  | 366  | 100 - | 385 | 750  | 35343  | 35708  |
| UN06561 | Rsa1.0.02069.1 | 713  | 35425  | 1.00E-141 | 335  | 360  | 93 -  | 293 | 642  | 20713  | 21072  |
| UN06562 | Rsa1.0.00231.1 | 642  | 105381 | 0         | 384  | 406  | 94 -  | 1   | 406  | 28173  | 28569  |
| UN06563 | Rsa1.0.05576.1 | 1471 | 13287  | 0         | 743  | 748  | 99 +  | 617 | 1364 | 7059   | 7805   |
| UN06564 | Rsa1.0.00589.1 | 1333 | 209965 | 0         | 466  | 482  | 96 +  | 852 | 1333 | 152952 | 153431 |
| UN06565 | Rsa1.0.00460.1 | 457  | 206387 | 1.00E-130 | 248  | 252  | 98 +  | 153 | 404  | 187529 | 187780 |
| UN06566 | Rsa1.0.05122.1 | 949  | 14791  | 0         | 573  | 584  | 98 +  | 2   | 584  | 4823   | 5406   |
| UN06567 | Rsa1.0.00810.1 | 443  | 63289  | 1.00E-75  | 177  | 188  | 94 -  | 14  | 201  | 19139  | 19326  |
| UN06568 | Rsa1.0.00842.1 | 737  | 62493  | 0         | 419  | 442  | 94 +  | 7   | 439  | 37528  | 37969  |
| UN06569 | Rsa1.0.01137.1 | 595  | 52655  | 1.00E-121 | 229  | 232  | 98 -  | 221 | 452  | 51348  | 51579  |
| UN06570 | Rsa1.0.00354.1 | 844  | 232005 | 0         | 410  | 428  | 95 +  | 25  | 452  | 194557 | 194983 |
| UN06571 | Rsa1.0.00104.1 | 1522 | 368722 | 0         | 1465 | 1484 | 98 +  | 41  | 1522 | 350829 | 352312 |
| UN06572 | Rsa1.0.00251.1 | 1096 | 303968 | 0         | 1039 | 1093 | 95 +  | 2   | 1093 | 10565  | 11655  |
| UN06573 | Rsa1.0.01847.1 | 777  | 38346  | 0         | 653  | 667  | 97 +  | 1   | 663  | 10548  | 11214  |
| UN06574 | Rsa1.0.01338.1 | 1301 | 155644 | 0         | 1067 | 1073 | 99 +  | 219 | 1291 | 123367 | 124439 |
| UN06575 | Rsa1.0.00037.1 | 1376 | 307838 | 0         | 415  | 432  | 96 +  | 555 | 982  | 148174 | 148601 |
| UN06576 | Rsa1.0.00048.1 | 763  | 167185 | 0         | 343  | 344  | 99 -  | 280 | 623  | 115727 | 116070 |
| UN06577 | Rsa1.0.04679.1 | 1245 | 16430  | 0         | 747  | 765  | 97 +  | 471 | 1229 | 1561   | 2319   |
| UN06578 | Rsa1.0.00382.1 | 1064 | 251946 | 0         | 628  | 639  | 98 +  | 383 | 1021 | 19589  | 20226  |
| UN06579 | Rsa1.0.69554.1 | 765  | 329    | 1.00E-162 | 318  | 325  | 97 +  | 275 | 598  | 6      | 329    |
| UN06580 | Rsa1.0.00384.1 | 903  | 89278  | 1.00E-162 | 322  | 333  | 96 -  | 1   | 333  | 62852  | 63184  |
| UN06581 | Rsa1.0.03000.1 | 843  | 26125  | 1.00E-166 | 408  | 445  | 91 +  | 278 | 707  | 7874   | 8318   |
| UN06582 | Rsa1.0.02808.1 | 1009 | 27677  | 0         | 946  | 1050 | 90 +  | 3   | 1008 | 16385  | 17416  |
| UN06583 | Rsa1.0.00262.1 | 861  | 101906 | 1.00E-147 | 368  | 401  | 91 -  | 13  | 398  | 33151  | 33551  |
| UN06584 | Rsa1.0.00813.1 | 892  | 63202  | 0         | 819  | 859  | 95 +  | 31  | 888  | 18471  | 19313  |
| UN06585 | Rsa1.0.02479.1 | 1152 | 31038  | 2.00E-95  | 216  | 228  | 94 -  | 458 | 682  | 15298  | 15525  |
| UN06586 | Rsa1.0.02288.1 | 1189 | 32984  | 0         | 472  | 481  | 98 -  | 708 | 1187 | 29812  | 30292  |
| UN06587 | Rsa1.0.05354.1 | 811  | 14073  | 0         | 569  | 599  | 94 +  | 68  | 660  | 4752   | 5350   |
| UN06588 | Rsa1.0.05161.1 | 779  | 14631  | 1.00E-138 | 321  | 345  | 93 +  | 13  | 357  | 8351   | 8695   |
| UN06589 | Rsa1.0.00673.1 | 1047 | 69325  | 0         | 421  | 435  | 96 +  | 613 | 1047 | 10045  | 10479  |

|         |                |      |        |           |      |      |       |      |      |        |        |
|---------|----------------|------|--------|-----------|------|------|-------|------|------|--------|--------|
| UN06590 | Rsa1.0.03517.1 | 772  | 22337  | 1.00E-155 | 288  | 290  | 99 +  | 2    | 290  | 14570  | 14859  |
| UN06591 | Rsa1.0.01274.1 | 787  | 49419  | 1.00E-112 | 212  | 214  | 99 +  | 247  | 460  | 39937  | 40150  |
| UN06592 | Rsa1.0.04051.1 | 1551 | 19375  | 0         | 443  | 464  | 95 +  | 1090 | 1549 | 8731   | 9188   |
| UN06593 | Rsa1.0.05160.1 | 1465 | 14637  | 0         | 581  | 618  | 94 -  | 211  | 828  | 13452  | 14051  |
| UN06594 | Rsa1.0.00100.1 | 998  | 249232 | 3.00E-91  | 206  | 217  | 94 +  | 69   | 282  | 139414 | 139630 |
| UN06595 | Rsa1.0.00679.1 | 801  | 68971  | 1.00E-130 | 302  | 324  | 93 +  | 1    | 306  | 65779  | 66100  |
| UN06596 | Rsa1.0.13662.1 | 1181 | 4542   | 0         | 729  | 757  | 96 +  | 14   | 759  | 3398   | 4154   |
| UN06597 | Rsa1.0.07541.1 | 1288 | 9167   | 1.00E-134 | 519  | 611  | 84 -  | 140  | 750  | 5749   | 6359   |
| UN06598 | Rsa1.0.02496.1 | 618  | 30814  | 0         | 520  | 575  | 90 -  | 43   | 616  | 21060  | 21622  |
| UN06599 | Rsa1.0.00081.1 | 807  | 143261 | 0         | 638  | 668  | 95 -  | 17   | 666  | 136892 | 137559 |
| UN06600 | Rsa1.0.00224.1 | 902  | 327530 | 0         | 378  | 391  | 96 +  | 1    | 388  | 38875  | 39264  |
| UN06601 | Rsa1.0.08309.1 | 1169 | 7565   | 0         | 582  | 605  | 96 -  | 566  | 1169 | 5445   | 6039   |
| UN06602 | Rsa1.0.00916.1 | 767  | 59789  | 0         | 508  | 529  | 96 -  | 3    | 524  | 15473  | 15998  |
| UN06603 | Rsa1.0.03162.1 | 844  | 24895  | 0         | 801  | 834  | 96 +  | 9    | 842  | 20685  | 21508  |
| UN06604 | Rsa1.0.02681.1 | 688  | 28711  | 1.00E-124 | 294  | 312  | 94 -  | 75   | 384  | 20446  | 20753  |
| UN06605 | Rsa1.0.00301.1 | 863  | 365315 | 6.00E-98  | 215  | 226  | 95 +  | 8    | 228  | 165177 | 165402 |
| UN06606 | Rsa1.0.01303.1 | 930  | 48853  | 0         | 511  | 533  | 95 -  | 14   | 543  | 15249  | 15781  |
| UN06607 | Rsa1.0.04019.1 | 760  | 19550  | 0         | 737  | 757  | 97 -  | 4    | 760  | 14445  | 15199  |
| UN06608 | Rsa1.0.00344.1 | 785  | 191774 | 0         | 401  | 418  | 95 -  | 77   | 492  | 108987 | 109402 |
| UN06609 | Rsa1.0.01556.1 | 495  | 163858 | 0         | 476  | 515  | 92 -  | 1    | 495  | 160813 | 161316 |
| UN06610 | Rsa1.0.00690.1 | 787  | 140527 | 0         | 532  | 566  | 93 -  | 3    | 565  | 33220  | 33781  |
| UN06611 | Rsa1.0.00121.1 | 949  | 278029 | 1.00E-139 | 315  | 335  | 94 +  | 1    | 335  | 43403  | 43735  |
| UN06612 | Rsa1.0.08919.1 | 1332 | 6788   | 0         | 538  | 538  | 100 - | 781  | 1318 | 5898   | 6435   |
| UN06613 | Rsa1.0.28998.1 | 1192 | 796    | 0         | 346  | 347  | 99 -  | 495  | 840  | 435    | 781    |
| UN06614 | Rsa1.0.01049.1 | 705  | 55655  | 1.00E-176 | 365  | 380  | 96 -  | 327  | 703  | 21138  | 21517  |
| UN06615 | Rsa1.0.05702.1 | 761  | 12884  | 1.00E-144 | 285  | 293  | 97 -  | 1    | 293  | 712    | 1001   |
| UN06616 | Rsa1.0.03738.1 | 1152 | 21071  | 1.00E-140 | 265  | 269  | 98 +  | 570  | 838  | 12425  | 12693  |
| UN06617 | Rsa1.0.02626.1 | 757  | 29387  | 0         | 427  | 451  | 94 +  | 1    | 444  | 22846  | 23293  |
| UN06618 | Rsa1.0.00087.1 | 994  | 761073 | 1.00E-138 | 389  | 431  | 90 +  | 32   | 448  | 98823  | 99250  |
| UN06619 | Rsa1.0.03581.1 | 1743 | 21965  | 0         | 413  | 420  | 98 +  | 3    | 422  | 21095  | 21514  |
| UN06620 | Rsa1.0.03981.1 | 1413 | 19724  | 0         | 1114 | 1159 | 96 +  | 10   | 1166 | 14310  | 15464  |
| UN06621 | Rsa1.0.03565.1 | 1360 | 22062  | 0         | 1102 | 1143 | 96 +  | 81   | 1223 | 17456  | 18590  |
| UN06622 | Rsa1.0.00988.1 | 846  | 57525  | 1.00E-123 | 257  | 264  | 97 +  | 1    | 263  | 27411  | 27672  |
| UN06623 | Rsa1.0.00705.1 | 1245 | 67505  | 1.00E-127 | 250  | 256  | 97 -  | 603  | 858  | 29792  | 30047  |
| UN06624 | Rsa1.0.00019.1 | 604  | 301669 | 0         | 597  | 600  | 99 +  | 3    | 601  | 43414  | 44013  |
| UN06625 | Rsa1.0.00825.1 | 670  | 62855  | 0         | 581  | 601  | 96 -  | 1    | 599  | 35580  | 36171  |
| UN06626 | Rsa1.0.01388.1 | 705  | 46741  | 0         | 658  | 676  | 97 -  | 7    | 681  | 7147   | 7820   |
| UN06627 | Rsa1.0.00947.1 | 859  | 58664  | 0         | 543  | 581  | 93 +  | 4    | 567  | 47242  | 47811  |
| UN06628 | Rsa1.0.02312.1 | 1539 | 32675  | 0         | 526  | 544  | 96 -  | 421  | 952  | 21111  | 21654  |

|         |                |      |        |           |      |      |       |     |      |        |        |
|---------|----------------|------|--------|-----------|------|------|-------|-----|------|--------|--------|
| UN06629 | Rsa1.0.01104.1 | 1504 | 285480 | 0         | 577  | 577  | 100 - | 928 | 1504 | 283733 | 284309 |
| UN06630 | Rsa1.0.02282.1 | 896  | 163951 | 1.00E-114 | 216  | 218  | 99 +  | 287 | 504  | 149855 | 150072 |
| UN06631 | Rsa1.0.01969.1 | 1303 | 153351 | 1.00E-151 | 274  | 275  | 99 +  | 835 | 1109 | 13008  | 13282  |
| UN06632 | Rsa1.0.00758.1 | 986  | 65477  | 0         | 513  | 525  | 97 +  | 464 | 986  | 38591  | 39115  |
| UN06633 | Rsa1.0.04632.1 | 1250 | 16589  | 0         | 1218 | 1254 | 97 -  | 6   | 1250 | 10093  | 11343  |
| UN06634 | Rsa1.0.02835.1 | 1402 | 27491  | 2.33E-156 | 300  | 312  | 96 +  | 18  | 329  | 21937  | 22243  |
| UN06635 | Rsa1.0.04835.1 | 820  | 15766  | 1.00E-180 | 360  | 372  | 96 -  | 3   | 374  | 4608   | 4978   |
| UN06636 | Rsa1.0.18005.1 | 915  | 1691   | 1.00E-126 | 245  | 250  | 98 -  | 231 | 480  | 1      | 250    |
| UN06637 | Rsa1.0.03624.1 | 615  | 21706  | 0         | 494  | 514  | 96 -  | 1   | 509  | 12386  | 12899  |
| UN06638 | Rsa1.0.00107.1 | 728  | 431659 | 0         | 523  | 554  | 94 -  | 7   | 542  | 337025 | 337578 |
| UN06639 | Rsa1.0.00807.1 | 1008 | 63607  | 1.00E-103 | 200  | 203  | 98 -  | 688 | 890  | 46342  | 46544  |
| UN06640 | Rsa1.0.03029.1 | 1788 | 25858  | 0         | 535  | 557  | 96 -  | 537 | 1090 | 19494  | 20050  |
| UN06641 | Rsa1.0.00521.1 | 844  | 78191  | 0         | 423  | 452  | 93 -  | 1   | 450  | 64098  | 64531  |
| UN06642 | Rsa1.0.00675.1 | 728  | 145590 | 4.00E-52  | 209  | 246  | 84 +  | 472 | 705  | 140335 | 140580 |
| UN06643 | Rsa1.0.00001.1 | 983  | 363028 | 1.00E-110 | 265  | 285  | 92 -  | 671 | 952  | 190868 | 191142 |
| UN06644 | Rsa1.0.01949.1 | 845  | 36960  | 1.00E-137 | 280  | 291  | 96 +  | 555 | 845  | 21094  | 21384  |
| UN06645 | Rsa1.0.00365.1 | 905  | 90902  | 0         | 565  | 579  | 97 +  | 2   | 577  | 73446  | 74022  |
| UN06646 | Rsa1.0.00122.1 | 767  | 265937 | 0         | 749  | 760  | 98 -  | 1   | 760  | 9573   | 10332  |
| UN06647 | Rsa1.0.03569.1 | 1354 | 22041  | 1.00E-164 | 349  | 365  | 95 +  | 985 | 1348 | 14787  | 15149  |
| UN06648 | Rsa1.0.01710.1 | 865  | 40586  | 0         | 799  | 824  | 96 +  | 2   | 824  | 3521   | 4338   |
| UN06649 | Rsa1.0.04600.1 | 933  | 16694  | 1.00E-133 | 268  | 275  | 97 -  | 590 | 860  | 11338  | 11612  |
| UN06650 | Rsa1.0.00409.1 | 1428 | 146788 | 0         | 930  | 949  | 97 +  | 480 | 1427 | 90871  | 91819  |
| UN06651 | Rsa1.0.00019.1 | 947  | 301669 | 0         | 445  | 461  | 96 -  | 5   | 460  | 272068 | 272528 |
| UN06652 | Rsa1.0.02179.1 | 1487 | 34188  | 0         | 673  | 692  | 97 +  | 416 | 1107 | 24265  | 24956  |
| UN06653 | Rsa1.0.02625.1 | 754  | 139104 | 2.00E-91  | 225  | 238  | 94 -  | 6   | 242  | 8676   | 8909   |
| UN06654 | Rsa1.0.00215.1 | 1063 | 201775 | 1.00E-157 | 306  | 314  | 97 +  | 739 | 1052 | 19770  | 20083  |
| UN06655 | Rsa1.0.09067.1 | 1260 | 6672   | 1.00E-109 | 220  | 225  | 97 +  | 3   | 227  | 2354   | 2577   |
| UN06656 | #              | #    | #      | #         | #    | #    | #     | #   | #    | #      | #      |
| UN06657 | Rsa1.0.00187.1 | 1848 | 393093 | 0         | 649  | 677  | 95 -  | 9   | 685  | 208971 | 209647 |
| UN06658 | Rsa1.0.00541.1 | 907  | 76863  | 1.00E-77  | 208  | 227  | 91 -  | 668 | 892  | 9120   | 9341   |
| UN06659 | Rsa1.0.01419.1 | 985  | 167402 | 0         | 937  | 974  | 96 +  | 1   | 970  | 159804 | 160768 |
| UN06660 | Rsa1.0.00938.1 | 1119 | 193891 | 0         | 421  | 433  | 97 +  | 540 | 972  | 50229  | 50661  |
| UN06661 | Rsa1.0.01938.1 | 850  | 264018 | 0         | 577  | 609  | 94 +  | 2   | 606  | 159667 | 160265 |
| UN06662 | Rsa1.0.00982.1 | 641  | 57640  | 0         | 639  | 640  | 99 -  | 1   | 640  | 34050  | 34689  |
| UN06663 | Rsa1.0.14436.1 | 942  | 3393   | 0         | 537  | 562  | 95 +  | 7   | 560  | 2230   | 2791   |
| UN06664 | Rsa1.0.00198.1 | 860  | 222963 | 1.00E-179 | 358  | 369  | 97 +  | 3   | 367  | 17917  | 18285  |
| UN06665 | Rsa1.0.00175.1 | 1045 | 166121 | 0         | 356  | 362  | 98 -  | 683 | 1044 | 37710  | 38071  |
| UN06666 | Rsa1.0.19050.1 | 946  | 1488   | 1.00E-165 | 321  | 330  | 97 -  | 464 | 793  | 976    | 1305   |
| UN06667 | Rsa1.0.01466.1 | 786  | 45161  | 1.00E-160 | 303  | 307  | 98 -  | 1   | 307  | 28487  | 28792  |

|         |                |      |        |           |      |      |      |      |      |        |        |
|---------|----------------|------|--------|-----------|------|------|------|------|------|--------|--------|
| UN06668 | Rsa1.0.00512.1 | 1319 | 200277 | 1.00E-101 | 199  | 202  | 98 + | 1116 | 1317 | 66192  | 66390  |
| UN06669 | Rsa1.0.00190.1 | 895  | 318240 | 0         | 395  | 413  | 95 + | 1    | 410  | 211843 | 212253 |
| UN06670 | Rsa1.0.04064.1 | 695  | 19297  | 0         | 435  | 451  | 96 - | 37   | 481  | 18501  | 18951  |
| UN06671 | Rsa1.0.01435.1 | 647  | 45942  | 0         | 377  | 392  | 96 - | 1    | 388  | 28028  | 28419  |
| UN06672 | Rsa1.0.02367.1 | 1042 | 32106  | 0         | 806  | 839  | 96 + | 1    | 838  | 11160  | 11995  |
| UN06673 | Rsa1.0.00330.1 | 910  | 94666  | 0         | 869  | 926  | 93 + | 1    | 908  | 33158  | 34077  |
| UN06674 | Rsa1.0.01924.1 | 1384 | 37226  | 1.00E-145 | 271  | 274  | 98 - | 841  | 1114 | 15462  | 15735  |
| UN06675 | Rsa1.0.07232.1 | 1544 | 9684   | 0         | 376  | 382  | 98 + | 1164 | 1544 | 1213   | 1593   |
| UN06676 | Rsa1.0.00728.1 | 1055 | 66704  | 0         | 404  | 415  | 97 - | 1    | 415  | 5094   | 5508   |
| UN06677 | Rsa1.0.01896.1 | 814  | 37512  | 0         | 457  | 478  | 95 - | 344  | 813  | 6000   | 6477   |
| UN06678 | Rsa1.0.13705.1 | 592  | 4452   | 2.00E-93  | 232  | 249  | 93 + | 2    | 247  | 2560   | 2803   |
| UN06679 | Rsa1.0.00592.1 | 1065 | 73788  | 3.00E-75  | 159  | 164  | 96 + | 328  | 491  | 10983  | 11146  |
| UN06680 | Rsa1.0.00838.1 | 564  | 153820 | 0         | 510  | 524  | 97 + | 1    | 522  | 52223  | 52744  |
| UN06681 | Rsa1.0.01707.1 | 1285 | 40686  | 0         | 641  | 659  | 97 + | 482  | 1140 | 4816   | 5474   |
| UN06682 | Rsa1.0.02073.1 | 1263 | 35386  | 0         | 951  | 991  | 95 - | 1    | 988  | 20440  | 21430  |
| UN06683 | Rsa1.0.11073.1 | 785  | 5625   | 1.00E-166 | 335  | 348  | 96 + | 437  | 784  | 4853   | 5200   |
| UN06684 | Rsa1.0.05986.1 | 1031 | 12027  | 0         | 364  | 374  | 97 + | 460  | 833  | 5450   | 5823   |
| UN06685 | Rsa1.0.00108.1 | 1201 | 478491 | 2.33E-156 | 372  | 402  | 92 - | 2    | 397  | 463726 | 464122 |
| UN06686 | Rsa1.0.00802.1 | 786  | 63846  | 2.00E-73  | 147  | 149  | 98 + | 4    | 152  | 14297  | 14445  |
| UN06687 | Rsa1.0.02490.1 | 821  | 30885  | 0         | 423  | 425  | 99 - | 2    | 426  | 28607  | 29031  |
| UN06688 | Rsa1.0.01949.1 | 922  | 36960  | 1.00E-164 | 405  | 435  | 93 - | 1    | 431  | 27763  | 28188  |
| UN06689 | Rsa1.0.01997.1 | 857  | 158416 | 0         | 631  | 644  | 97 - | 4    | 644  | 145646 | 146287 |
| UN06690 | Rsa1.0.02710.1 | 1299 | 28492  | 1.00E-138 | 302  | 317  | 95 + | 982  | 1297 | 25405  | 25715  |
| UN06691 | Rsa1.0.00171.1 | 754  | 115622 | 1.00E-162 | 334  | 347  | 96 + | 410  | 752  | 52232  | 52578  |
| UN06692 | Rsa1.0.00622.1 | 906  | 71822  | 0         | 709  | 748  | 94 - | 1    | 746  | 60939  | 61677  |
| UN06693 | Rsa1.0.01415.1 | 445  | 46263  | 1.00E-111 | 268  | 287  | 93 + | 1    | 276  | 19591  | 19876  |
| UN06694 | Rsa1.0.01271.1 | 847  | 49569  | 0         | 470  | 484  | 97 - | 354  | 836  | 27299  | 27781  |
| UN06695 | Rsa1.0.01064.1 | 896  | 55295  | 1.00E-137 | 291  | 304  | 95 + | 2    | 304  | 43782  | 44085  |
| UN06696 | Rsa1.0.00087.1 | 1020 | 761073 | 0         | 955  | 956  | 99 - | 7    | 962  | 35915  | 36870  |
| UN06697 | Rsa1.0.00951.1 | 1212 | 164588 | 1.00E-151 | 289  | 295  | 97 - | 323  | 617  | 116154 | 116448 |
| UN06698 | Rsa1.0.02320.1 | 1460 | 32575  | 6.00E-99  | 253  | 276  | 91 - | 1038 | 1313 | 22169  | 22444  |
| UN06699 | Rsa1.0.00866.1 | 1605 | 61676  | 0         | 1045 | 1049 | 99 + | 559  | 1605 | 30351  | 31399  |
| UN06700 | Rsa1.0.01285.1 | 447  | 172709 | 0         | 438  | 447  | 97 - | 3    | 447  | 156762 | 157208 |
| UN06701 | Rsa1.0.05418.1 | 499  | 13816  | 1.00E-94  | 242  | 265  | 91 - | 245  | 497  | 1462   | 1725   |
| UN06702 | Rsa1.0.01612.1 | 849  | 42255  | 0         | 793  | 804  | 98 - | 3    | 795  | 35219  | 36022  |
| UN06703 | Rsa1.0.01313.1 | 858  | 48387  | 0         | 554  | 569  | 97 - | 2    | 570  | 2100   | 2666   |
| UN06704 | Rsa1.0.00879.1 | 796  | 61297  | 3.00E-93  | 259  | 279  | 92 + | 528  | 796  | 38364  | 38642  |
| UN06705 | Rsa1.0.00312.1 | 1414 | 96765  | 0         | 359  | 363  | 98 - | 1    | 363  | 25817  | 26178  |
| UN06706 | Rsa1.0.00576.1 | 737  | 178949 | 4.00E-83  | 178  | 185  | 96 - | 253  | 437  | 3257   | 3441   |

|         |                |      |        |           |      |      |       |      |      |        |        |
|---------|----------------|------|--------|-----------|------|------|-------|------|------|--------|--------|
| UN06707 | Rsa1.0.00620.1 | 1551 | 71985  | 0         | 487  | 502  | 97 -  | 213  | 714  | 55327  | 55828  |
| UN06708 | Rsa1.0.00269.1 | 789  | 341668 | 1.00E-155 | 293  | 298  | 98 +  | 241  | 538  | 18359  | 18656  |
| UN06709 | Rsa1.0.00596.1 | 782  | 73578  | 0         | 340  | 343  | 99 -  | 441  | 782  | 29144  | 29486  |
| UN06710 | Rsa1.0.07073.1 | 822  | 9944   | 0         | 817  | 822  | 99 +  | 1    | 822  | 66     | 887    |
| UN06711 | Rsa1.0.04768.1 | 1095 | 16066  | 0         | 1057 | 1094 | 96 +  | 2    | 1095 | 4357   | 5447   |
| UN06712 | Rsa1.0.14615.1 | 821  | 3224   | 0         | 799  | 812  | 98 -  | 10   | 821  | 2391   | 3202   |
| UN06713 | Rsa1.0.61124.1 | 935  | 375    | 4.00E-87  | 279  | 318  | 87 -  | 435  | 745  | 58     | 375    |
| UN06714 | Rsa1.0.00336.1 | 633  | 445051 | 0         | 572  | 595  | 96 -  | 40   | 633  | 174757 | 175351 |
| UN06715 | Rsa1.0.03995.1 | 1016 | 19654  | 1.00E-153 | 280  | 282  | 99 -  | 2    | 283  | 3701   | 3982   |
| UN06716 | Rsa1.0.00618.1 | 1240 | 72195  | 0         | 372  | 373  | 99 -  | 864  | 1236 | 3305   | 3677   |
| UN06717 | Rsa1.0.00286.1 | 1136 | 98709  | 0         | 642  | 691  | 92 -  | 350  | 1040 | 27069  | 27739  |
| UN06718 | Rsa1.0.01065.1 | 670  | 55264  | 0         | 500  | 519  | 96 -  | 153  | 669  | 30878  | 31396  |
| UN06719 | Rsa1.0.00023.1 | 1074 | 194764 | 1.00E-126 | 239  | 242  | 98 +  | 833  | 1074 | 70561  | 70802  |
| UN06720 | Rsa1.0.00026.1 | 1448 | 327835 | 1.00E-162 | 368  | 394  | 93 +  | 1041 | 1434 | 176398 | 176786 |
| UN06721 | Rsa1.0.00376.1 | 931  | 90101  | 0         | 880  | 929  | 94 +  | 12   | 931  | 13151  | 14076  |
| UN06722 | Rsa1.0.00324.1 | 1280 | 218805 | 0         | 540  | 547  | 98 +  | 1    | 544  | 864    | 1408   |
| UN06723 | Rsa1.0.00620.1 | 1943 | 71985  | 0         | 632  | 636  | 99 -  | 1    | 636  | 13154  | 13787  |
| UN06724 | Rsa1.0.06052.1 | 1107 | 11848  | 1.00E-145 | 358  | 390  | 91 -  | 614  | 1003 | 7486   | 7875   |
| UN06725 | Rsa1.0.01377.1 | 1096 | 46967  | 1.00E-173 | 352  | 363  | 96 +  | 735  | 1094 | 21581  | 21941  |
| UN06726 | Rsa1.0.07780.1 | 1612 | 8589   | 0         | 605  | 661  | 91 -  | 13   | 665  | 748    | 1386   |
| UN06727 | Rsa1.0.05751.1 | 1300 | 12733  | 0         | 566  | 568  | 99 -  | 733  | 1300 | 2681   | 3248   |
| UN06728 | Rsa1.0.00157.1 | 739  | 245832 | 0         | 721  | 745  | 96 -  | 2    | 738  | 216614 | 217358 |
| UN06729 | Rsa1.0.01749.1 | 1119 | 39822  | 1.00E-176 | 382  | 405  | 94 +  | 2    | 397  | 430    | 833    |
| UN06730 | Rsa1.0.35192.1 | 647  | 643    | 1.00E-104 | 243  | 256  | 94 -  | 6    | 259  | 40     | 293    |
| UN06731 | Rsa1.0.01147.1 | 928  | 52391  | 1.00E-110 | 272  | 300  | 90 -  | 633  | 928  | 46084  | 46362  |
| UN06732 | Rsa1.0.01051.1 | 934  | 55577  | 0         | 400  | 420  | 95 +  | 513  | 923  | 3695   | 4114   |
| UN06733 | Rsa1.0.01079.1 | 1381 | 54753  | 1.00E-143 | 299  | 312  | 95 -  | 1    | 309  | 24471  | 24782  |
| UN06734 | Rsa1.0.05051.1 | 1414 | 15018  | 1.00E-163 | 368  | 390  | 94 -  | 1039 | 1414 | 13927  | 14315  |
| UN06735 | Rsa1.0.00743.1 | 1606 | 177459 | 0         | 1287 | 1347 | 95 -  | 269  | 1605 | 6082   | 7416   |
| UN06736 | Rsa1.0.03356.1 | 686  | 23487  | 0         | 370  | 381  | 97 +  | 307  | 686  | 1225   | 1605   |
| UN06737 | Rsa1.0.07636.1 | 1205 | 8971   | 0         | 674  | 716  | 94 -  | 1    | 709  | 3559   | 4258   |
| UN06738 | Rsa1.0.01878.1 | 824  | 37768  | 0         | 481  | 486  | 98 +  | 340  | 824  | 27356  | 27841  |
| UN06739 | Rsa1.0.01674.1 | 931  | 168300 | 0         | 581  | 601  | 96 +  | 332  | 930  | 19673  | 20265  |
| UN06740 | Rsa1.0.00140.1 | 926  | 121541 | 0         | 698  | 707  | 98 +  | 172  | 878  | 83368  | 84074  |
| UN06741 | Rsa1.0.00360.1 | 764  | 91190  | 1.00E-153 | 296  | 303  | 97 -  | 4    | 306  | 78998  | 79300  |
| UN06742 | Rsa1.0.11556.1 | 1128 | 5471   | 1.00E-127 | 231  | 231  | 100 + | 8    | 238  | 1100   | 1330   |
| UN06743 | Rsa1.0.00306.1 | 828  | 146760 | 0         | 350  | 354  | 98 -  | 100  | 453  | 136637 | 136990 |
| UN06744 | Rsa1.0.00661.1 | 679  | 213041 | 0         | 515  | 535  | 96 +  | 145  | 678  | 66549  | 67079  |
| UN06745 | Rsa1.0.02855.1 | 882  | 27271  | 0         | 540  | 573  | 94 +  | 319  | 881  | 10684  | 11254  |

|         |                |      |        |           |      |      |       |     |      |        |        |
|---------|----------------|------|--------|-----------|------|------|-------|-----|------|--------|--------|
| UN06746 | Rsa1.0_00241.1 | 1325 | 104000 | 0         | 428  | 441  | 97 +  | 249 | 689  | 11604  | 12041  |
| UN06747 | Rsa1.0_01121.1 | 885  | 53407  | 0         | 732  | 774  | 94 +  | 121 | 884  | 19076  | 19846  |
| UN06748 | Rsa1.0_03309.1 | 1880 | 23852  | 0         | 481  | 482  | 99 +  | 1   | 482  | 6302   | 6783   |
| UN06749 | Rsa1.0_02553.1 | 1732 | 30190  | 0         | 430  | 445  | 96 +  | 5   | 447  | 16579  | 17023  |
| UN06750 | Rsa1.0_00248.1 | 1447 | 163568 | 0         | 548  | 563  | 97 -  | 335 | 897  | 42448  | 43010  |
| UN06751 | Rsa1.0_02170.1 | 976  | 34352  | 0         | 488  | 493  | 98 -  | 6   | 497  | 18484  | 18976  |
| UN06752 | Rsa1.0_00922.1 | 771  | 59588  | 0         | 601  | 611  | 98 +  | 82  | 691  | 39245  | 39854  |
| UN06753 | Rsa1.0_17884.1 | 1297 | 1718   | 1.00E-109 | 265  | 286  | 92 -  | 886 | 1171 | 1433   | 1718   |
| UN06754 | Rsa1.0_00556.1 | 790  | 207212 | 0         | 403  | 418  | 96 -  | 339 | 746  | 147815 | 148232 |
| UN06755 | Rsa1.0_00002.1 | 1210 | 601661 | 3.00E-76  | 251  | 286  | 87 -  | 324 | 609  | 1864   | 2149   |
| UN06756 | Rsa1.0_00480.1 | 666  | 81325  | 0         | 371  | 375  | 98 +  | 291 | 665  | 1280   | 1653   |
| UN06757 | Rsa1.0_02650.1 | 513  | 29047  | 0         | 508  | 510  | 99 -  | 3   | 512  | 25808  | 26317  |
| UN06758 | Rsa1.0_02284.1 | 1217 | 33011  | 0         | 696  | 725  | 96 +  | 489 | 1213 | 13022  | 13731  |
| UN06759 | Rsa1.0_05943.1 | 1171 | 12158  | 0         | 361  | 374  | 96 +  | 275 | 648  | 1366   | 1739   |
| UN06760 | Rsa1.0_08388.1 | 1686 | 7436   | 0         | 1019 | 1086 | 93 +  | 2   | 1062 | 4673   | 5748   |
| UN06761 | Rsa1.0_01474.1 | 1195 | 45070  | 0         | 404  | 405  | 99 -  | 791 | 1195 | 197    | 601    |
| UN06762 | Rsa1.0_13748.1 | 860  | 4388   | 0         | 471  | 477  | 98 +  | 386 | 860  | 2775   | 3251   |
| UN06763 | Rsa1.0_01563.1 | 1024 | 170823 | 0         | 498  | 516  | 96 +  | 290 | 801  | 38791  | 39306  |
| UN06764 | Rsa1.0_01468.1 | 1039 | 45146  | 1.00E-80  | 162  | 165  | 98 +  | 645 | 809  | 13817  | 13981  |
| UN06765 | Rsa1.0_02474.1 | 1442 | 31076  | 0         | 692  | 693  | 99 +  | 1   | 692  | 164    | 856    |
| UN06766 | Rsa1.0_00101.1 | 1078 | 267193 | 0         | 929  | 932  | 99 -  | 147 | 1078 | 18795  | 19726  |
| UN06767 | Rsa1.0_01970.1 | 1163 | 36648  | 0         | 1124 | 1174 | 95 +  | 3   | 1163 | 30243  | 31413  |
| UN06768 | Rsa1.0_52123.1 | 751  | 436    | 1.00E-174 | 333  | 341  | 97 -  | 1   | 341  | 35     | 375    |
| UN06769 | Rsa1.0_00533.1 | 869  | 77375  | 0         | 824  | 872  | 94 -  | 1   | 866  | 49047  | 49917  |
| UN06770 | Rsa1.0_02513.1 | 977  | 30643  | 0         | 964  | 990  | 97 +  | 3   | 973  | 18771  | 19757  |
| UN06771 | Rsa1.0_00006.1 | 1370 | 396176 | 1.00E-170 | 404  | 436  | 92 +  | 675 | 1109 | 312060 | 312481 |
| UN06772 | Rsa1.0_07149.1 | 826  | 9824   | 0         | 415  | 426  | 97 -  | 408 | 824  | 820    | 1245   |
| UN06773 | Rsa1.0_00223.1 | 1425 | 106231 | 0         | 1059 | 1095 | 96 +  | 331 | 1421 | 2967   | 4060   |
| UN06774 | Rsa1.0_00065.1 | 949  | 454616 | 1.00E-131 | 259  | 266  | 97 -  | 2   | 267  | 144340 | 144605 |
| UN06775 | Rsa1.0_00342.1 | 849  | 93695  | 0         | 724  | 741  | 97 +  | 1   | 737  | 62330  | 63070  |
| UN06776 | Rsa1.0_01000.1 | 950  | 57140  | 1.00E-101 | 188  | 188  | 100 - | 574 | 761  | 3798   | 3985   |
| UN06777 | Rsa1.0_02177.1 | 910  | 34262  | 0         | 433  | 441  | 98 +  | 389 | 829  | 10037  | 10474  |
| UN06778 | Rsa1.0_00078.1 | 742  | 175053 | 1.00E-129 | 251  | 255  | 98 -  | 3   | 256  | 46017  | 46271  |
| UN06779 | Rsa1.0_00134.1 | 826  | 390219 | 1.00E-123 | 258  | 269  | 95 +  | 211 | 479  | 4759   | 5027   |
| UN06780 | Rsa1.0_00046.1 | 741  | 320315 | 0         | 681  | 708  | 96 -  | 45  | 737  | 193705 | 194412 |
| UN06781 | Rsa1.0_07441.1 | 1036 | 9388   | 1.00E-154 | 285  | 288  | 98 +  | 748 | 1035 | 1725   | 2012   |
| UN06782 | Rsa1.0_00035.1 | 1491 | 176449 | 0         | 508  | 536  | 94 -  | 954 | 1487 | 41092  | 41624  |
| UN06783 | Rsa1.0_00058.1 | 1070 | 159921 | 0         | 482  | 520  | 92 +  | 555 | 1070 | 119077 | 119584 |
| UN06784 | Rsa1.0_00167.1 | 1550 | 116000 | 0         | 1066 | 1103 | 96 -  | 1   | 1103 | 33824  | 34925  |



|         |                |      |        |           |      |      |       |      |      |        |        |
|---------|----------------|------|--------|-----------|------|------|-------|------|------|--------|--------|
| UN06785 | Rsa1.0.02931.1 | 987  | 26654  | 0         | 542  | 562  | 96 +  | 431  | 986  | 5953   | 6508   |
| UN06786 | Rsa1.0.02236.1 | 1006 | 33558  | 0         | 531  | 541  | 98 +  | 3    | 543  | 11373  | 11913  |
| UN06787 | Rsa1.0.00096.1 | 1491 | 198773 | 1.00E-157 | 284  | 285  | 99 +  | 1207 | 1491 | 173724 | 174008 |
| UN06788 | Rsa1.0.00033.1 | 760  | 515811 | 2.00E-73  | 206  | 226  | 91 -  | 7    | 223  | 35164  | 35388  |
| UN06789 | Rsa1.0.00157.1 | 1267 | 245832 | 0         | 641  | 649  | 98 -  | 613  | 1261 | 146800 | 147446 |
| UN06790 | Rsa1.0.03487.1 | 1518 | 22564  | 1.00E-156 | 299  | 304  | 98 +  | 1140 | 1443 | 1708   | 2010   |
| UN06791 | Rsa1.0.01179.1 | 743  | 51549  | 5.00E-27  | 81   | 87   | 93 -  | 642  | 728  | 42459  | 42545  |
| UN06792 | Rsa1.0.03990.1 | 557  | 19676  | 1.00E-102 | 227  | 236  | 96 -  | 48   | 283  | 8885   | 9116   |
| UN06793 | Rsa1.0.03773.1 | 914  | 20937  | 1.00E-112 | 377  | 434  | 86 +  | 36   | 469  | 7161   | 7594   |
| UN06794 | Rsa1.0.00025.1 | 826  | 277312 | 1.00E-138 | 267  | 273  | 97 +  | 156  | 428  | 115742 | 116014 |
| UN06795 | Rsa1.0.04323.1 | 1024 | 17915  | 5.00E-99  | 208  | 216  | 96 -  | 3    | 218  | 15646  | 15861  |
| UN06796 | Rsa1.0.01198.1 | 804  | 51029  | 0         | 432  | 453  | 95 -  | 341  | 793  | 43871  | 44312  |
| UN06797 | Rsa1.0.00016.1 | 1027 | 831256 | 0         | 583  | 583  | 100 + | 1    | 583  | 17362  | 17944  |
| UN06798 | Rsa1.0.00237.1 | 1143 | 235974 | 1.00E-147 | 337  | 356  | 94 -  | 788  | 1143 | 17780  | 18131  |
| UN06799 | Rsa1.0.00054.1 | 1485 | 162053 | 0         | 1076 | 1107 | 97 +  | 320  | 1423 | 105351 | 106456 |
| UN06800 | Rsa1.0.07439.1 | 1097 | 9392   | 1.00E-149 | 268  | 268  | 100 + | 329  | 596  | 4581   | 4848   |
| UN06801 | Rsa1.0.02074.1 | 1149 | 35370  | 0         | 461  | 496  | 92 -  | 655  | 1145 | 12043  | 12527  |
| UN06802 | Rsa1.0.00482.1 | 845  | 81162  | 3.00E-78  | 179  | 189  | 94 -  | 1    | 189  | 6470   | 6658   |
| UN06803 | Rsa1.0.03077.1 | 952  | 25558  | 1.00E-93  | 212  | 223  | 95 -  | 36   | 257  | 8108   | 8330   |
| UN06804 | Rsa1.0.00041.1 | 799  | 186197 | 5.00E-92  | 295  | 335  | 88 -  | 466  | 798  | 114770 | 115104 |
| UN06805 | Rsa1.0.01947.1 | 659  | 36977  | 0         | 399  | 409  | 97 +  | 1    | 407  | 23160  | 23567  |
| UN06806 | Rsa1.0.11621.1 | 1183 | 5457   | 0         | 824  | 876  | 94 +  | 250  | 1116 | 1      | 865    |
| UN06807 | Rsa1.0.00724.1 | 984  | 66789  | 1.00E-83  | 249  | 272  | 91 +  | 716  | 982  | 54634  | 54897  |
| UN06808 | Rsa1.0.00453.1 | 1345 | 83031  | 4.00E-94  | 194  | 200  | 97 -  | 900  | 1099 | 72257  | 72456  |
| UN06809 | Rsa1.0.00339.1 | 885  | 222974 | 0         | 503  | 533  | 94 -  | 351  | 883  | 202302 | 202834 |
| UN06810 | Rsa1.0.18657.1 | 1059 | 1558   | 1.00E-151 | 286  | 291  | 98 -  | 645  | 935  | 559    | 849    |
| UN06811 | Rsa1.0.16460.1 | 1270 | 2148   | 0         | 1060 | 1085 | 97 -  | 27   | 1107 | 1      | 1081   |
| UN06812 | Rsa1.0.00323.1 | 1345 | 159650 | 0         | 1281 | 1330 | 96 +  | 3    | 1330 | 154434 | 155762 |
| UN06813 | Rsa1.0.00977.1 | 935  | 198001 | 0         | 724  | 732  | 98 -  | 48   | 779  | 180527 | 181258 |
| UN06814 | Rsa1.0.00545.1 | 1119 | 189649 | 1.00E-164 | 328  | 337  | 97 +  | 374  | 707  | 35589  | 35925  |
| UN06815 | Rsa1.0.01289.1 | 236  | 49181  | 8.00E-45  | 101  | 104  | 97 +  | 130  | 233  | 6324   | 6427   |
| UN06816 | Rsa1.0.00498.1 | 1026 | 79746  | 0         | 708  | 727  | 97 +  | 300  | 1026 | 10335  | 11058  |
| UN06817 | Rsa1.0.07863.1 | 1112 | 8404   | 0         | 424  | 451  | 94 -  | 661  | 1110 | 961    | 1395   |
| UN06818 | Rsa1.0.00253.1 | 764  | 231292 | 0         | 404  | 434  | 93 +  | 1    | 434  | 16533  | 16942  |
| UN06819 | Rsa1.0.00301.1 | 645  | 365315 | 0         | 445  | 481  | 92 +  | 183  | 645  | 320945 | 321420 |
| UN06820 | Rsa1.0.04034.1 | 1162 | 19481  | 1.00E-137 | 257  | 260  | 98 -  | 691  | 950  | 12812  | 13071  |
| UN06821 | Rsa1.0.13604.1 | 1094 | 4657   | 2.00E-61  | 127  | 129  | 98 +  | 897  | 1025 | 4058   | 4186   |
| UN06822 | Rsa1.0.00645.1 | 1120 | 189716 | 0         | 1079 | 1122 | 96 -  | 1    | 1119 | 29581  | 30696  |
| UN06823 | Rsa1.0.00252.1 | 1254 | 102760 | 1.00E-141 | 325  | 347  | 93 -  | 8    | 351  | 64920  | 65253  |

|         |                |      |        |           |      |      |       |     |      |        |        |
|---------|----------------|------|--------|-----------|------|------|-------|-----|------|--------|--------|
| UN06824 | Rsa1.0_00524.1 | 1334 | 169613 | 2.00E-95  | 237  | 254  | 93 -  | 1   | 252  | 155579 | 155827 |
| UN06825 | Rsa1.0_01459.1 | 879  | 45277  | 0         | 835  | 878  | 95 +  | 1   | 875  | 35841  | 36705  |
| UN06826 | Rsa1.0_01416.1 | 768  | 46262  | 0         | 740  | 775  | 95 +  | 1   | 766  | 26511  | 27276  |
| UN06827 | Rsa1.0_03302.1 | 1073 | 23898  | 0         | 370  | 386  | 95 +  | 1   | 382  | 11619  | 11999  |
| UN06828 | Rsa1.0_00656.1 | 1275 | 69968  | 0         | 365  | 367  | 99 +  | 1   | 367  | 61879  | 62245  |
| UN06829 | Rsa1.0_03264.1 | 359  | 145959 | 1.00E-53  | 148  | 159  | 93 -  | 201 | 359  | 134684 | 134840 |
| UN06830 | Rsa1.0_01058.1 | 1161 | 55430  | 1.00E-118 | 236  | 240  | 98 -  | 487 | 724  | 28778  | 29017  |
| UN06831 | Rsa1.0_00149.1 | 1376 | 305196 | 1.00E-164 | 323  | 333  | 96 +  | 20  | 352  | 107014 | 107346 |
| UN06832 | Rsa1.0_03242.1 | 866  | 24415  | 0         | 411  | 424  | 96 +  | 26  | 448  | 1652   | 2074   |
| UN06833 | Rsa1.0_00825.1 | 1565 | 62855  | 0         | 880  | 947  | 92 -  | 590 | 1517 | 948    | 1894   |
| UN06834 | Rsa1.0_11435.1 | 1148 | 5508   | 0         | 585  | 600  | 97 -  | 7   | 605  | 4766   | 5359   |
| UN06835 | Rsa1.0_00400.1 | 1237 | 87858  | 0         | 378  | 384  | 98 +  | 1   | 384  | 54696  | 55078  |
| UN06836 | Rsa1.0_00615.1 | 912  | 72235  | 1.00E-129 | 277  | 291  | 95 +  | 7   | 297  | 45703  | 45993  |
| UN06837 | Rsa1.0_00244.1 | 1386 | 103590 | 0         | 1191 | 1251 | 95 +  | 1   | 1237 | 77047  | 78290  |
| UN06838 | Rsa1.0_01729.1 | 1631 | 304246 | 0         | 1065 | 1067 | 99 -  | 1   | 1067 | 283966 | 285032 |
| UN06839 | Rsa1.0_00760.1 | 1396 | 65267  | 0         | 614  | 668  | 91 -  | 164 | 818  | 36639  | 37296  |
| UN06840 | Rsa1.0_00329.1 | 736  | 222544 | 0         | 732  | 735  | 99 -  | 1   | 735  | 20350  | 21084  |
| UN06841 | Rsa1.0_01245.1 | 1087 | 149868 | 0         | 731  | 755  | 96 -  | 141 | 895  | 21270  | 22024  |
| UN06842 | Rsa1.0_02480.1 | 959  | 31036  | 0         | 401  | 407  | 98 -  | 1   | 405  | 4946   | 5351   |
| UN06843 | Rsa1.0_00483.1 | 1354 | 81102  | 1.00E-180 | 366  | 380  | 96 +  | 7   | 386  | 37176  | 37553  |
| UN06844 | Rsa1.0_02756.1 | 1161 | 28202  | 1.00E-106 | 220  | 227  | 96 -  | 82  | 306  | 15023  | 15249  |
| UN06845 | Rsa1.0_06770.1 | 1252 | 10389  | 0         | 705  | 728  | 96 +  | 5   | 732  | 4761   | 5487   |
| UN06846 | Rsa1.0_00770.1 | 842  | 64900  | 1.00E-149 | 323  | 340  | 95 -  | 501 | 840  | 9382   | 9720   |
| UN06847 | Rsa1.0_01559.1 | 1337 | 43262  | 0         | 687  | 703  | 97 -  | 333 | 1035 | 18985  | 19686  |
| UN06848 | Rsa1.0_00593.1 | 998  | 143463 | 0         | 502  | 502  | 100 + | 1   | 502  | 59459  | 59960  |
| UN06849 | Rsa1.0_06054.1 | 677  | 11847  | 1.00E-157 | 329  | 340  | 96 -  | 1   | 340  | 1351   | 1685   |
| UN06850 | Rsa1.0_02605.1 | 1327 | 29637  | 1.00E-103 | 207  | 211  | 98 -  | 89  | 298  | 8473   | 8683   |
| UN06851 | Rsa1.0_03362.1 | 1220 | 23453  | 0         | 801  | 806  | 99 -  | 1   | 806  | 11300  | 12105  |
| UN06852 | Rsa1.0_02435.1 | 1342 | 31454  | 1.00E-154 | 346  | 367  | 94 -  | 1   | 366  | 17710  | 18074  |
| UN06853 | Rsa1.0_00215.1 | 789  | 201775 | 0         | 380  | 386  | 98 -  | 399 | 784  | 162468 | 162853 |
| UN06854 | Rsa1.0_06218.1 | 1341 | 11461  | 0         | 1316 | 1340 | 98 +  | 1   | 1340 | 5583   | 6919   |
| UN06855 | Rsa1.0_01844.1 | 744  | 38421  | 0         | 533  | 535  | 99 -  | 1   | 535  | 10289  | 10823  |
| UN06856 | Rsa1.0_02608.1 | 645  | 29613  | 0         | 458  | 482  | 95 -  | 164 | 645  | 23961  | 24438  |
| UN06857 | Rsa1.0_00131.1 | 861  | 432233 | 1.00E-128 | 279  | 289  | 96 -  | 8   | 293  | 412408 | 412695 |
| UN06858 | Rsa1.0_05618.1 | 1081 | 13165  | 1.00E-141 | 332  | 352  | 94 +  | 737 | 1079 | 7995   | 8343   |
| UN06859 | Rsa1.0_00084.1 | 1346 | 142338 | 1.00E-172 | 316  | 318  | 99 -  | 262 | 578  | 72082  | 72399  |
| UN06860 | Rsa1.0_00119.1 | 1361 | 467509 | 1.00E-129 | 268  | 278  | 96 -  | 2   | 279  | 390249 | 390525 |
| UN06861 | Rsa1.0_05061.1 | 1442 | 14960  | 0         | 560  | 581  | 96 -  | 855 | 1435 | 12558  | 13132  |
| UN06862 | Rsa1.0_04318.1 | 574  | 17947  | 1.00E-150 | 272  | 273  | 99 +  | 1   | 273  | 7746   | 8018   |

|         |                |      |        |           |      |      |       |      |      |        |        |
|---------|----------------|------|--------|-----------|------|------|-------|------|------|--------|--------|
| UN06863 | Rsa1.0.03826.1 | 939  | 20614  | 0         | 442  | 446  | 99 +  | 38   | 483  | 10707  | 11152  |
| UN06864 | Rsa1.0.01129.1 | 963  | 52949  | 0         | 380  | 381  | 99 -  | 583  | 963  | 15840  | 16220  |
| UN06865 | Rsa1.0.00928.1 | 1918 | 59293  | 0         | 710  | 730  | 97 +  | 606  | 1334 | 8481   | 9207   |
| UN06866 | Rsa1.0.00507.1 | 1424 | 79074  | 0         | 409  | 416  | 98 -  | 525  | 940  | 59354  | 59769  |
| UN06867 | Rsa1.0.02784.1 | 1410 | 27881  | 0         | 800  | 820  | 97 +  | 591  | 1410 | 12596  | 13409  |
| UN06868 | Rsa1.0.49161.1 | 798  | 461    | 1.00E-113 | 248  | 259  | 95 +  | 42   | 295  | 6      | 262    |
| UN06869 | Rsa1.0.00721.1 | 1153 | 66918  | 1.00E-170 | 331  | 340  | 97 -  | 571  | 910  | 1020   | 1359   |
| UN06870 | Rsa1.0.00341.1 | 1228 | 249309 | 1.00E-168 | 384  | 407  | 94 +  | 1    | 404  | 125750 | 126149 |
| UN06871 | Rsa1.0.00122.1 | 1232 | 265937 | 1.00E-169 | 334  | 342  | 97 -  | 1    | 341  | 41203  | 41543  |
| UN06872 | Rsa1.0.00165.1 | 1192 | 116466 | 0         | 514  | 541  | 95 +  | 2    | 530  | 93799  | 94339  |
| UN06873 | Rsa1.0.00325.1 | 915  | 95371  | 1.00E-140 | 278  | 285  | 97 -  | 559  | 842  | 73729  | 74013  |
| UN06874 | Rsa1.0.00506.1 | 1452 | 79106  | 0         | 369  | 375  | 98 -  | 852  | 1226 | 19513  | 19887  |
| UN06875 | Rsa1.0.04250.1 | 1720 | 18264  | 0         | 1152 | 1157 | 99 -  | 1    | 1157 | 14687  | 15843  |
| UN06876 | Rsa1.0.06967.1 | 759  | 10093  | 0         | 479  | 492  | 97 +  | 262  | 753  | 7110   | 7601   |
| UN06877 | Rsa1.0.00064.1 | 1025 | 240927 | 2.00E-88  | 202  | 214  | 94 -  | 12   | 225  | 60195  | 60408  |
| UN06878 | Rsa1.0.00975.1 | 860  | 57865  | 0         | 414  | 424  | 97 -  | 1    | 424  | 6741   | 7161   |
| UN06879 | Rsa1.0.00605.1 | 1570 | 73199  | 1.00E-162 | 313  | 320  | 97 -  | 1251 | 1570 | 68945  | 69261  |
| UN06880 | Rsa1.0.00271.1 | 886  | 101125 | 0         | 455  | 498  | 91 +  | 38   | 519  | 26584  | 27065  |
| UN06881 | Rsa1.0.00429.1 | 1278 | 85559  | 1.00E-179 | 358  | 369  | 97 +  | 314  | 678  | 13508  | 13876  |
| UN06882 | Rsa1.0.01461.1 | 733  | 45240  | 0         | 703  | 733  | 95 -  | 1    | 733  | 27346  | 28074  |
| UN06883 | Rsa1.0.00324.1 | 1004 | 218805 | 2.00E-95  | 187  | 190  | 98 -  | 498  | 687  | 188774 | 188963 |
| UN06884 | Rsa1.0.00964.1 | 1349 | 316648 | 0         | 622  | 639  | 97 -  | 576  | 1214 | 158869 | 159501 |
| UN06885 | Rsa1.0.03090.1 | 963  | 25464  | 0         | 534  | 548  | 97 -  | 3    | 550  | 17603  | 18150  |
| UN06886 | Rsa1.0.00055.1 | 1370 | 520193 | 0         | 672  | 705  | 95 +  | 1    | 700  | 385970 | 386668 |
| UN06887 | Rsa1.0.01750.1 | 1106 | 39816  | 1.00E-135 | 254  | 257  | 98 +  | 66   | 322  | 25486  | 25742  |
| UN06888 | Rsa1.0.03927.1 | 1603 | 19997  | 0         | 452  | 455  | 99 +  | 1    | 455  | 10302  | 10756  |
| UN06889 | Rsa1.0.06643.1 | 1445 | 10615  | 0         | 542  | 545  | 99 +  | 308  | 852  | 8723   | 9267   |
| UN06890 | Rsa1.0.00125.1 | 953  | 253043 | 1.00E-119 | 238  | 242  | 98 +  | 712  | 953  | 183436 | 183675 |
| UN06891 | Rsa1.0.01701.1 | 908  | 162121 | 0         | 355  | 367  | 96 -  | 2    | 357  | 145137 | 145503 |
| UN06892 | Rsa1.0.00040.1 | 1139 | 324196 | 1.00E-177 | 415  | 451  | 92 -  | 286  | 736  | 171584 | 172016 |
| UN06893 | Rsa1.0.03081.1 | 1102 | 25523  | 0         | 485  | 495  | 97 +  | 362  | 856  | 19744  | 20238  |
| UN06894 | Rsa1.0.01230.1 | 1254 | 50221  | 0         | 441  | 441  | 100 + | 2    | 442  | 20322  | 20762  |
| UN06895 | Rsa1.0.00265.1 | 1229 | 220635 | 1.00E-163 | 363  | 389  | 93 +  | 1    | 384  | 188871 | 189247 |
| UN06896 | Rsa1.0.00011.1 | 638  | 225044 | 0         | 613  | 637  | 96 -  | 1    | 637  | 222385 | 223003 |
| UN06897 | Rsa1.0.02128.1 | 1408 | 34758  | 1.00E-155 | 328  | 347  | 94 -  | 1    | 347  | 16324  | 16657  |
| UN06898 | Rsa1.0.01967.1 | 1012 | 36672  | 0         | 683  | 710  | 96 -  | 314  | 1012 | 15881  | 16589  |
| UN06899 | Rsa1.0.01378.1 | 1228 | 46959  | 0         | 543  | 550  | 98 +  | 1    | 550  | 12611  | 13159  |
| UN06900 | Rsa1.0.05509.1 | 637  | 13472  | 1.00E-166 | 566  | 641  | 88 +  | 23   | 637  | 12079  | 12705  |
| UN06901 | Rsa1.0.00055.1 | 1185 | 520193 | 0         | 952  | 1015 | 93 -  | 204  | 1185 | 168945 | 169959 |

|         |                |      |        |           |      |      |       |      |      |        |        |
|---------|----------------|------|--------|-----------|------|------|-------|------|------|--------|--------|
| UN06902 | Rsa1.0_00705.1 | 1049 | 67505  | 1.00E-130 | 242  | 244  | 99 -  | 445  | 688  | 25656  | 25899  |
| UN06903 | Rsa1.0_00720.1 | 525  | 66931  | 1.00E-131 | 251  | 253  | 99 +  | 1    | 251  | 18491  | 18743  |
| UN06904 | Rsa1.0_47151.1 | 1197 | 479    | 1.00E-122 | 245  | 253  | 96 +  | 1    | 253  | 106    | 351    |
| UN06905 | Rsa1.0_00039.1 | 1102 | 296927 | 2.00E-82  | 187  | 196  | 95 +  | 103  | 297  | 210893 | 211088 |
| UN06906 | Rsa1.0_00777.1 | 844  | 191865 | 1.00E-169 | 373  | 394  | 94 +  | 72   | 462  | 129755 | 130145 |
| UN06907 | Rsa1.0_00362.1 | 1881 | 299497 | 0         | 740  | 754  | 98 +  | 602  | 1355 | 19860  | 20612  |
| UN06908 | Rsa1.0_01803.1 | 793  | 173846 | 0         | 415  | 415  | 100 - | 2    | 416  | 143938 | 144352 |
| UN06909 | Rsa1.0_04166.1 | 869  | 18757  | 1.00E-162 | 347  | 371  | 93 -  | 1    | 371  | 8039   | 8389   |
| UN06910 | Rsa1.0_02041.1 | 1172 | 163634 | 0         | 942  | 1005 | 93 -  | 2    | 984  | 30110  | 31107  |
| UN06911 | Rsa1.0_03778.1 | 541  | 20908  | 1.00E-165 | 307  | 310  | 99 -  | 232  | 540  | 8218   | 8527   |
| UN06912 | Rsa1.0_04753.1 | 838  | 16124  | 1.00E-92  | 182  | 185  | 98 +  | 63   | 247  | 3064   | 3248   |
| UN06913 | Rsa1.0_00251.1 | 1214 | 303968 | 0         | 548  | 564  | 97 +  | 559  | 1120 | 142909 | 143472 |
| UN06914 | Rsa1.0_00072.1 | 1154 | 148743 | 1.00E-156 | 301  | 308  | 97 -  | 845  | 1152 | 101731 | 102038 |
| UN06915 | Rsa1.0_01313.1 | 874  | 48387  | 1.00E-141 | 303  | 319  | 94 +  | 556  | 874  | 16151  | 16469  |
| UN06916 | Rsa1.0_00855.1 | 817  | 62047  | 1.00E-134 | 288  | 303  | 95 +  | 14   | 312  | 15749  | 16051  |
| UN06917 | Rsa1.0_02362.1 | 764  | 32190  | 1.00E-74  | 152  | 155  | 98 +  | 233  | 387  | 3474   | 3628   |
| UN06918 | Rsa1.0_00124.1 | 1081 | 262503 | 0         | 651  | 654  | 99 -  | 3    | 656  | 65540  | 66193  |
| UN06919 | Rsa1.0_00632.1 | 952  | 183777 | 0         | 679  | 692  | 98 -  | 1    | 692  | 65729  | 66418  |
| UN06920 | Rsa1.0_00917.1 | 1357 | 182012 | 0         | 725  | 731  | 99 -  | 254  | 983  | 128772 | 129502 |
| UN06921 | Rsa1.0_02219.1 | 1115 | 33798  | 1.00E-177 | 315  | 315  | 100 + | 431  | 745  | 13598  | 13912  |
| UN06922 | Rsa1.0_08143.1 | 1529 | 7836   | 1.00E-126 | 300  | 320  | 93 +  | 1203 | 1521 | 4649   | 4964   |
| UN06923 | Rsa1.0_08592.1 | 1211 | 7150   | 0         | 1178 | 1204 | 97 -  | 3    | 1202 | 1471   | 2670   |
| UN06924 | Rsa1.0_00015.1 | 889  | 561803 | 0         | 515  | 522  | 98 -  | 3    | 524  | 259145 | 259663 |
| UN06925 | Rsa1.0_07812.1 | 865  | 8496   | 0         | 585  | 588  | 99 -  | 1    | 588  | 2402   | 2989   |
| UN06926 | Rsa1.0_00990.1 | 1485 | 57445  | 0         | 809  | 899  | 89 +  | 163  | 1030 | 18057  | 18934  |
| UN06927 | Rsa1.0_00287.1 | 706  | 98687  | 0         | 462  | 493  | 93 +  | 203  | 682  | 15492  | 15982  |
| UN06928 | Rsa1.0_00009.1 | 1182 | 232558 | 1.00E-111 | 211  | 213  | 99 +  | 523  | 735  | 142063 | 142275 |
| UN06929 | Rsa1.0_00211.1 | 1115 | 228189 | 1.00E-139 | 260  | 263  | 98 -  | 3    | 265  | 14336  | 14598  |
| UN06930 | Rsa1.0_09960.1 | 1207 | 6065   | 0         | 358  | 358  | 100 - | 850  | 1207 | 755    | 1112   |
| UN06931 | Rsa1.0_04497.1 | 1346 | 17103  | 0         | 394  | 402  | 98 +  | 3    | 404  | 6213   | 6614   |
| UN06932 | Rsa1.0_14168.1 | 768  | 3714   | 0         | 722  | 760  | 95 +  | 2    | 749  | 764    | 1522   |
| UN06933 | Rsa1.0_00886.1 | 792  | 167350 | 0         | 625  | 656  | 95 -  | 145  | 786  | 13047  | 13702  |
| UN06934 | Rsa1.0_00119.1 | 908  | 467509 | 0         | 459  | 502  | 91 -  | 32   | 527  | 386218 | 386716 |
| UN06935 | Rsa1.0_00178.1 | 1419 | 114861 | 0         | 1016 | 1067 | 95 -  | 354  | 1413 | 93342  | 94397  |
| UN06936 | Rsa1.0_01126.1 | 909  | 53127  | 0         | 523  | 547  | 95 +  | 334  | 878  | 7555   | 8096   |
| UN06937 | Rsa1.0_03005.1 | 761  | 26082  | 1.00E-108 | 215  | 219  | 98 +  | 17   | 235  | 7720   | 7937   |
| UN06938 | Rsa1.0_00817.1 | 1490 | 62961  | 0         | 386  | 386  | 100 + | 1101 | 1486 | 20948  | 21333  |
| UN06939 | Rsa1.0_01193.1 | 1154 | 51147  | 0         | 774  | 807  | 95 -  | 330  | 1124 | 27510  | 28312  |
| UN06940 | Rsa1.0_01540.1 | 1292 | 151890 | 0         | 1203 | 1285 | 93 -  | 21   | 1292 | 142475 | 143746 |

|         |                |      |        |           |      |      |       |     |      |        |        |
|---------|----------------|------|--------|-----------|------|------|-------|-----|------|--------|--------|
| UN06941 | Rsa1.0_00112.1 | 699  | 132199 | 1.00E-132 | 289  | 303  | 95 +  | 367 | 665  | 118993 | 119292 |
| UN06942 | Rsa1.0_03666.1 | 1344 | 21485  | 0         | 434  | 435  | 99 +  | 1   | 434  | 12813  | 13247  |
| UN06943 | Rsa1.0_00673.1 | 1049 | 69325  | 1.00E-173 | 379  | 403  | 94 -  | 652 | 1049 | 53356  | 53747  |
| UN06944 | Rsa1.0_06165.1 | 838  | 11584  | 0         | 822  | 831  | 98 +  | 9   | 838  | 9166   | 9996   |
| UN06945 | Rsa1.0_00015.1 | 875  | 561803 | 0         | 855  | 883  | 96 +  | 2   | 875  | 349586 | 350465 |
| UN06946 | Rsa1.0_02486.1 | 1025 | 30965  | 1.00E-101 | 219  | 231  | 94 +  | 18  | 248  | 9757   | 9978   |
| UN06947 | Rsa1.0_00052.1 | 1117 | 162771 | 0         | 1000 | 1038 | 96 -  | 2   | 1032 | 81968  | 83003  |
| UN06948 | Rsa1.0_00439.1 | 761  | 142776 | 0         | 367  | 379  | 96 +  | 27  | 405  | 57766  | 58144  |
| UN06949 | Rsa1.0_00128.1 | 799  | 228675 | 0         | 629  | 667  | 94 -  | 27  | 690  | 204000 | 204660 |
| UN06950 | Rsa1.0_03643.1 | 1959 | 21607  | 0         | 1265 | 1286 | 98 -  | 674 | 1959 | 20324  | 21607  |
| UN06951 | Rsa1.0_09607.1 | 914  | 6256   | 0         | 866  | 874  | 99 +  | 39  | 911  | 1      | 874    |
| UN06952 | Rsa1.0_01801.1 | 768  | 39094  | 1.00E-131 | 238  | 238  | 100 - | 357 | 594  | 21087  | 21324  |
| UN06953 | Rsa1.0_00078.1 | 976  | 175053 | 1.00E-147 | 273  | 276  | 98 -  | 1   | 276  | 32901  | 33176  |
| UN06954 | Rsa1.0_00876.1 | 726  | 61328  | 0         | 709  | 725  | 97 -  | 2   | 726  | 23612  | 24336  |
| UN06955 | Rsa1.0_01209.1 | 931  | 50668  | 1.00E-107 | 250  | 269  | 92 -  | 20  | 273  | 47015  | 47283  |
| UN06956 | Rsa1.0_00035.1 | 1155 | 176449 | 1.00E-175 | 348  | 357  | 97 +  | 800 | 1155 | 156806 | 157158 |
| UN06957 | Rsa1.0_04629.1 | 731  | 16595  | 1.00E-86  | 173  | 175  | 98 +  | 531 | 705  | 8842   | 9015   |
| UN06958 | Rsa1.0_00197.1 | 1193 | 109714 | 0         | 365  | 373  | 97 +  | 820 | 1192 | 13353  | 13725  |
| UN06959 | Rsa1.0_00568.1 | 1106 | 75219  | 0         | 822  | 834  | 98 -  | 273 | 1106 | 58649  | 59479  |
| UN06960 | Rsa1.0_00080.1 | 814  | 190437 | 0         | 471  | 480  | 98 +  | 1   | 477  | 84985  | 85464  |
| UN06961 | Rsa1.0_00127.1 | 1085 | 127446 | 1.00E-145 | 355  | 388  | 91 +  | 33  | 411  | 113030 | 113405 |
| UN06962 | Rsa1.0_05124.1 | 1528 | 14790  | 1.00E-127 | 234  | 235  | 99 -  | 938 | 1172 | 2110   | 2344   |
| UN06963 | Rsa1.0_14327.1 | 659  | 3518   | 0         | 404  | 421  | 95 +  | 238 | 658  | 231    | 645    |
| UN06964 | Rsa1.0_00244.1 | 1308 | 103590 | 0         | 957  | 960  | 99 +  | 349 | 1308 | 333    | 1292   |
| UN06965 | Rsa1.0_01635.1 | 631  | 41865  | 0         | 459  | 495  | 92 -  | 146 | 625  | 7307   | 7801   |
| UN06966 | Rsa1.0_46011.1 | 544  | 490    | 0         | 402  | 411  | 97 +  | 141 | 544  | 1      | 409    |
| UN06967 | Rsa1.0_01185.1 | 1566 | 149842 | 0         | 1537 | 1567 | 98 +  | 1   | 1566 | 1682   | 3247   |
| UN06968 | Rsa1.0_00390.1 | 622  | 88681  | 0         | 417  | 422  | 98 -  | 171 | 592  | 10838  | 11259  |
| UN06969 | Rsa1.0_00642.1 | 1332 | 201230 | 0         | 436  | 463  | 94 -  | 877 | 1332 | 62514  | 62971  |
| UN06970 | Rsa1.0_03267.1 | 1274 | 24230  | 0         | 705  | 727  | 96 +  | 548 | 1274 | 16677  | 17399  |
| UN06971 | Rsa1.0_00350.1 | 1087 | 92346  | 1.00E-137 | 288  | 301  | 95 -  | 764 | 1064 | 53956  | 54252  |
| UN06972 | Rsa1.0_02212.1 | 1414 | 33840  | 1.00E-149 | 289  | 295  | 97 +  | 101 | 392  | 18328  | 18622  |
| UN06973 | Rsa1.0_02662.1 | 695  | 28956  | 1.00E-109 | 200  | 200  | 100 - | 496 | 695  | 10374  | 10573  |
| UN06974 | Rsa1.0_00206.1 | 902  | 109040 | 0         | 470  | 476  | 98 -  | 427 | 902  | 45612  | 46086  |
| UN06975 | Rsa1.0_00326.1 | 1202 | 171955 | 0         | 443  | 454  | 97 -  | 3   | 454  | 22464  | 22915  |
| UN06976 | Rsa1.0_02566.1 | 758  | 30039  | 0         | 753  | 756  | 99 +  | 3   | 758  | 13221  | 13976  |
| UN06977 | Rsa1.0_00065.1 | 1093 | 454616 | 0         | 659  | 745  | 88 +  | 394 | 1091 | 240790 | 241531 |
| UN06978 | Rsa1.0_01707.1 | 758  | 40686  | 0         | 395  | 403  | 98 +  | 1   | 400  | 11784  | 12186  |
| UN06979 | Rsa1.0_01034.1 | 854  | 56046  | 1.00E-140 | 268  | 272  | 98 +  | 1   | 270  | 24544  | 24815  |

|         |                |      |        |           |      |      |       |     |      |        |        |
|---------|----------------|------|--------|-----------|------|------|-------|-----|------|--------|--------|
| UN06980 | Rsa1.0_00623.1 | 1357 | 207630 | 1.00E-123 | 233  | 236  | 98 -  | 172 | 407  | 172010 | 172245 |
| UN06981 | Rsa1.0_03785.1 | 553  | 20883  | 0         | 391  | 398  | 98 +  | 5   | 400  | 11311  | 11708  |
| UN06982 | Rsa1.0_00355.1 | 1178 | 92038  | 0         | 503  | 504  | 99 -  | 50  | 553  | 64491  | 64994  |
| UN06983 | Rsa1.0_00731.1 | 971  | 66638  | 2.00E-70  | 139  | 140  | 99 -  | 831 | 970  | 1186   | 1325   |
| UN06984 | Rsa1.0_04910.1 | 1315 | 15484  | 0         | 740  | 786  | 94 +  | 1   | 785  | 6509   | 7282   |
| UN06985 | Rsa1.0_00002.1 | 862  | 601661 | 0         | 413  | 413  | 100 - | 448 | 860  | 561832 | 562244 |
| UN06986 | Rsa1.0_00455.1 | 739  | 224823 | 2.00E-82  | 203  | 217  | 93 +  | 1   | 217  | 183334 | 183545 |
| UN06987 | Rsa1.0_00518.1 | 775  | 78360  | 1.00E-114 | 213  | 214  | 99 +  | 560 | 773  | 20635  | 20848  |
| UN06988 | Rsa1.0_00022.1 | 729  | 200461 | 2.00E-94  | 256  | 287  | 89 +  | 3   | 266  | 123609 | 123895 |
| UN06989 | Rsa1.0_00017.1 | 955  | 752458 | 0         | 559  | 568  | 98 -  | 1   | 567  | 696586 | 697153 |
| UN06990 | Rsa1.0_08910.1 | 1236 | 6798   | 5.00E-84  | 171  | 175  | 97 +  | 374 | 548  | 1064   | 1238   |
| UN06991 | Rsa1.0_03673.1 | 1078 | 21448  | 1.00E-163 | 317  | 325  | 97 +  | 756 | 1077 | 2710   | 3034   |
| UN06992 | Rsa1.0_00280.1 | 814  | 99966  | 1.00E-180 | 572  | 655  | 87 -  | 5   | 643  | 38104  | 38752  |
| UN06993 | Rsa1.0_02170.1 | 1107 | 34352  | 0         | 604  | 639  | 94 +  | 2   | 639  | 30209  | 30835  |
| UN06994 | Rsa1.0_00005.1 | 1318 | 353093 | 0         | 402  | 408  | 98 +  | 1   | 407  | 50638  | 51041  |
| UN06995 | Rsa1.0_02797.1 | 757  | 27800  | 0         | 442  | 458  | 96 +  | 3   | 459  | 8978   | 9435   |
| UN06996 | Rsa1.0_01781.1 | 896  | 39410  | 0         | 382  | 382  | 100 + | 515 | 896  | 22750  | 23131  |
| UN06997 | Rsa1.0_00616.1 | 660  | 195713 | 0         | 601  | 607  | 99 -  | 3   | 609  | 144445 | 145049 |
| UN06998 | Rsa1.0_00319.1 | 864  | 167331 | 0         | 852  | 863  | 98 +  | 3   | 864  | 91306  | 92168  |
| UN06999 | Rsa1.0_00010.1 | 1203 | 294827 | 2.00E-21  | 60   | 62   | 96 -  | 950 | 1011 | 207266 | 207327 |
| UN07000 | Rsa1.0_15767.1 | 1084 | 2435   | 0         | 454  | 459  | 98 +  | 1   | 459  | 91     | 549    |
| UN07001 | Rsa1.0_00699.1 | 1044 | 184398 | 0         | 375  | 378  | 99 +  | 402 | 779  | 121768 | 122145 |
| UN07002 | Rsa1.0_00301.1 | 1335 | 365315 | 0         | 413  | 414  | 99 +  | 923 | 1335 | 57406  | 57819  |
| UN07003 | Rsa1.0_01811.1 | 871  | 38977  | 1.00E-145 | 366  | 394  | 92 -  | 1   | 387  | 1187   | 1577   |
| UN07004 | Rsa1.0_01824.1 | 877  | 38733  | 1.00E-122 | 279  | 294  | 94 +  | 1   | 294  | 7738   | 8023   |
| UN07005 | Rsa1.0_00124.1 | 1785 | 262503 | 0         | 803  | 837  | 95 +  | 53  | 885  | 56753  | 57579  |
| UN07006 | Rsa1.0_01779.1 | 969  | 39448  | 0         | 737  | 753  | 97 -  | 1   | 750  | 11033  | 11785  |
| UN07007 | Rsa1.0_02208.1 | 427  | 33875  | 1.00E-105 | 209  | 214  | 97 -  | 2   | 215  | 17960  | 18173  |
| UN07008 | Rsa1.0_02858.1 | 954  | 27246  | 1.00E-128 | 300  | 318  | 94 +  | 641 | 951  | 1699   | 2016   |
| UN07009 | Rsa1.0_00053.1 | 911  | 263459 | 1.00E-137 | 266  | 272  | 97 -  | 401 | 672  | 63729  | 64000  |
| UN07010 | Rsa1.0_01403.1 | 986  | 46453  | 1.00E-154 | 394  | 431  | 91 +  | 454 | 876  | 25846  | 26261  |
| UN07011 | Rsa1.0_02330.1 | 1234 | 32452  | 0         | 495  | 498  | 99 +  | 736 | 1233 | 1503   | 2000   |
| UN07012 | Rsa1.0_02064.1 | 1015 | 35476  | 0         | 332  | 332  | 100 + | 240 | 571  | 5466   | 5797   |
| UN07013 | Rsa1.0_00017.1 | 1396 | 752458 | 0         | 734  | 734  | 100 + | 1   | 734  | 391644 | 392377 |
| UN07014 | Rsa1.0_00892.1 | 924  | 60703  | 0         | 441  | 454  | 97 +  | 471 | 922  | 21370  | 21823  |
| UN07015 | Rsa1.0_01422.1 | 1049 | 46172  | 1.00E-162 | 340  | 354  | 96 +  | 1   | 353  | 24781  | 25133  |
| UN07016 | Rsa1.0_00986.1 | 1038 | 57571  | 0         | 586  | 589  | 99 -  | 2   | 589  | 31853  | 32441  |
| UN07017 | Rsa1.0_02646.1 | 1207 | 29123  | 0         | 553  | 605  | 91 -  | 601 | 1205 | 13903  | 14507  |
| UN07018 | Rsa1.0_00273.1 | 1165 | 326186 | 0         | 1147 | 1163 | 98 -  | 3   | 1165 | 144767 | 145929 |

|         |                |      |        |           |      |      |       |     |      |        |        |
|---------|----------------|------|--------|-----------|------|------|-------|-----|------|--------|--------|
| UN07019 | Rsa1.0.01512.1 | 810  | 44234  | 0         | 527  | 559  | 94 -  | 3   | 559  | 34074  | 34615  |
| UN07020 | Rsa1.0.02816.1 | 976  | 27649  | 0         | 947  | 979  | 96 +  | 1   | 976  | 944    | 1909   |
| UN07021 | Rsa1.0.00194.1 | 1735 | 110851 | 0         | 1679 | 1740 | 96 +  | 1   | 1735 | 60250  | 61989  |
| UN07022 | Rsa1.0.05311.1 | 786  | 14181  | 0         | 640  | 661  | 96 -  | 1   | 660  | 6590   | 7245   |
| UN07023 | Rsa1.0.02345.1 | 824  | 32337  | 1.00E-119 | 326  | 360  | 90 -  | 1   | 348  | 15392  | 15744  |
| UN07024 | Rsa1.0.00066.1 | 654  | 152418 | 1.00E-116 | 252  | 265  | 95 +  | 4   | 268  | 91382  | 91646  |
| UN07025 | Rsa1.0.00187.1 | 924  | 393093 | 0         | 408  | 421  | 96 +  | 14  | 433  | 212110 | 212530 |
| UN07026 | Rsa1.0.00694.1 | 909  | 68074  | 1.00E-122 | 223  | 223  | 100 + | 443 | 665  | 5480   | 5702   |
| UN07027 | Rsa1.0.12291.1 | 947  | 5264   | 0         | 455  | 456  | 99 +  | 1   | 456  | 4166   | 4621   |
| UN07028 | Rsa1.0.00437.1 | 961  | 84879  | 0         | 382  | 397  | 96 -  | 87  | 483  | 39669  | 40065  |
| UN07029 | Rsa1.0.00013.1 | 1191 | 292129 | 1.00E-169 | 317  | 322  | 98 -  | 1   | 322  | 281575 | 281896 |
| UN07030 | Rsa1.0.00114.1 | 1160 | 131330 | 0         | 603  | 634  | 95 -  | 1   | 631  | 34658  | 35291  |
| UN07031 | Rsa1.0.35417.1 | 1222 | 639    | 0         | 607  | 620  | 97 -  | 550 | 1169 | 20     | 639    |
| UN07032 | Rsa1.0.04458.1 | 959  | 17255  | 0         | 913  | 968  | 94 +  | 1   | 955  | 9436   | 10395  |
| UN07033 | Rsa1.0.00550.1 | 775  | 210790 | 0         | 360  | 362  | 99 +  | 2   | 363  | 188722 | 189083 |
| UN07034 | Rsa1.0.10607.1 | 1802 | 5786   | 0         | 1050 | 1116 | 94 +  | 206 | 1312 | 693    | 1790   |
| UN07035 | Rsa1.0.00248.1 | 925  | 163568 | 1.00E-163 | 316  | 324  | 97 +  | 2   | 325  | 1050   | 1373   |
| UN07036 | Rsa1.0.05077.1 | 1289 | 14913  | 0         | 604  | 612  | 98 +  | 682 | 1287 | 2341   | 2952   |
| UN07037 | Rsa1.0.03997.1 | 1116 | 19652  | 0         | 394  | 410  | 96 -  | 700 | 1109 | 2468   | 2877   |
| UN07038 | Rsa1.0.02171.1 | 731  | 167557 | 1.00E-140 | 283  | 292  | 96 +  | 1   | 292  | 13006  | 13296  |
| UN07039 | Rsa1.0.00522.1 | 795  | 78103  | 1.00E-131 | 241  | 242  | 99 -  | 2   | 243  | 68506  | 68747  |
| UN07040 | Rsa1.0.02384.1 | 868  | 31917  | 0         | 548  | 602  | 91 +  | 272 | 867  | 13168  | 13751  |
| UN07041 | Rsa1.0.01082.1 | 1305 | 54640  | 0         | 472  | 479  | 98 +  | 825 | 1303 | 15720  | 16198  |
| UN07042 | Rsa1.0.18032.1 | 662  | 1686   | 1.00E-108 | 205  | 207  | 99 -  | 314 | 520  | 1291   | 1497   |
| UN07043 | Rsa1.0.02365.1 | 1008 | 32118  | 1.00E-123 | 234  | 237  | 98 +  | 772 | 1008 | 10500  | 10736  |
| UN07044 | Rsa1.0.00849.1 | 1198 | 62212  | 1.00E-170 | 328  | 336  | 97 -  | 862 | 1197 | 21303  | 21638  |
| UN07045 | Rsa1.0.00721.1 | 1265 | 66918  | 0         | 423  | 442  | 95 -  | 517 | 958  | 918    | 1359   |
| UN07046 | Rsa1.0.15757.1 | 631  | 2442   | 0         | 524  | 531  | 98 -  | 1   | 529  | 1463   | 1993   |
| UN07047 | Rsa1.0.00506.1 | 1449 | 79106  | 1.00E-144 | 303  | 318  | 95 -  | 1   | 311  | 6009   | 6326   |
| UN07048 | Rsa1.0.00629.1 | 1938 | 71381  | 0         | 800  | 831  | 96 +  | 694 | 1523 | 45375  | 46186  |
| UN07049 | #              | #    | #      | #         | #    | #    | #     | #   | #    | #      | #      |
| UN07050 | Rsa1.0.01029.1 | 933  | 256254 | 0         | 886  | 904  | 98 +  | 30  | 933  | 230191 | 231088 |
| UN07051 | Rsa1.0.00515.1 | 549  | 78417  | 1.00E-158 | 304  | 311  | 97 -  | 1   | 306  | 55788  | 56098  |
| UN07052 | Rsa1.0.00009.1 | 1060 | 232558 | 0         | 519  | 547  | 94 +  | 10  | 546  | 117345 | 117890 |
| UN07053 | Rsa1.0.01613.1 | 1226 | 182542 | 0         | 499  | 503  | 99 -  | 1   | 502  | 162642 | 163144 |
| UN07054 | Rsa1.0.03391.1 | 764  | 23251  | 0         | 727  | 767  | 94 -  | 1   | 762  | 1652   | 2408   |
| UN07055 | Rsa1.0.00001.1 | 945  | 363028 | 0         | 762  | 775  | 98 +  | 171 | 945  | 238678 | 239452 |
| UN07056 | Rsa1.0.00211.1 | 585  | 228189 | 0         | 565  | 568  | 99 -  | 18  | 585  | 179347 | 179912 |
| UN07057 | Rsa1.0.00522.1 | 912  | 78103  | 1.00E-116 | 238  | 246  | 96 -  | 626 | 871  | 57158  | 57399  |

|         |                |      |        |           |      |      |       |      |      |        |        |
|---------|----------------|------|--------|-----------|------|------|-------|------|------|--------|--------|
| UN07058 | Rsa1.0.00516.1 | 1322 | 78417  | 1.00E-155 | 295  | 298  | 98 +  | 2    | 299  | 45139  | 45433  |
| UN07059 | Rsa1.0.05978.1 | 509  | 12053  | 1.00E-103 | 212  | 219  | 96 -  | 278  | 496  | 5919   | 6137   |
| UN07060 | Rsa1.0.00605.1 | 1141 | 73199  | 0         | 484  | 490  | 98 +  | 1    | 488  | 49637  | 50124  |
| UN07061 | Rsa1.0.01504.1 | 2073 | 189978 | 0         | 463  | 490  | 94 -  | 1582 | 2071 | 36465  | 36941  |
| UN07062 | Rsa1.0.00624.1 | 757  | 71773  | 1.00E-121 | 230  | 233  | 98 -  | 170  | 402  | 20764  | 20996  |
| UN07063 | Rsa1.0.01006.1 | 1148 | 163670 | 0         | 520  | 530  | 98 +  | 27   | 554  | 25599  | 26128  |
| UN07064 | Rsa1.0.01251.1 | 1142 | 49873  | 1.00E-133 | 253  | 257  | 98 -  | 486  | 742  | 29907  | 30163  |
| UN07065 | #              | #    | #      | #         | #    | #    | #     | #    | #    | #      | #      |
| UN07066 | Rsa1.0.00163.1 | 1415 | 116847 | 0         | 558  | 578  | 96 +  | 844  | 1415 | 37091  | 37665  |
| UN07067 | Rsa1.0.00201.1 | 1025 | 232851 | 6.00E-86  | 168  | 170  | 98 -  | 567  | 736  | 3232   | 3401   |
| UN07068 | Rsa1.0.00167.1 | 1204 | 116000 | 0         | 1089 | 1140 | 95 +  | 1    | 1122 | 87398  | 88534  |
| UN07069 | Rsa1.0.00029.1 | 1096 | 272992 | 0         | 1057 | 1094 | 96 +  | 4    | 1095 | 230488 | 231574 |
| UN07070 | Rsa1.0.26999.1 | 751  | 870    | 0         | 332  | 332  | 100 - | 1    | 332  | 154    | 485    |
| UN07071 | Rsa1.0.01284.1 | 1356 | 49231  | 0         | 389  | 391  | 99 +  | 518  | 908  | 45549  | 45939  |
| UN07072 | Rsa1.0.01667.1 | 1151 | 41315  | 1.00E-136 | 280  | 288  | 97 -  | 867  | 1151 | 8241   | 8526   |
| UN07073 | Rsa1.0.00424.1 | 1442 | 86005  | 0         | 360  | 365  | 98 -  | 343  | 707  | 76607  | 76971  |
| UN07074 | Rsa1.0.02110.1 | 1615 | 34919  | 0         | 760  | 812  | 93 +  | 2    | 800  | 23093  | 23891  |
| UN07075 | Rsa1.0.03856.1 | 498  | 20429  | 3.00E-95  | 215  | 225  | 95 -  | 275  | 498  | 15618  | 15841  |
| UN07076 | Rsa1.0.00827.1 | 758  | 62790  | 0         | 743  | 757  | 98 -  | 2    | 758  | 46407  | 47163  |
| UN07077 | Rsa1.0.01218.1 | 643  | 50536  | 0         | 640  | 643  | 99 +  | 1    | 641  | 12503  | 13145  |
| UN07078 | Rsa1.0.00087.1 | 1088 | 761073 | 0         | 719  | 749  | 95 -  | 5    | 751  | 731598 | 732345 |
| UN07079 | Rsa1.0.01477.1 | 1211 | 45008  | 0         | 1003 | 1044 | 96 +  | 175  | 1209 | 42412  | 43455  |
| UN07080 | Rsa1.0.02379.1 | 1244 | 150705 | 0         | 1224 | 1244 | 98 +  | 3    | 1244 | 146234 | 147476 |
| UN07081 | Rsa1.0.00803.1 | 1249 | 144228 | 1.00E-139 | 278  | 286  | 97 +  | 226  | 508  | 12208  | 12493  |
| UN07082 | Rsa1.0.00545.1 | 1483 | 189649 | 0         | 783  | 813  | 96 -  | 1    | 804  | 55735  | 56545  |
| UN07083 | Rsa1.0.00051.1 | 1706 | 258225 | 0         | 391  | 398  | 98 -  | 1    | 395  | 18495  | 18892  |
| UN07084 | Rsa1.0.00532.1 | 1058 | 77384  | 1.00E-131 | 247  | 250  | 98 -  | 684  | 933  | 12854  | 13103  |
| UN07085 | Rsa1.0.02358.1 | 984  | 32213  | 1.00E-168 | 326  | 335  | 97 -  | 460  | 794  | 384    | 712    |
| UN07086 | Rsa1.0.05320.1 | 1298 | 14158  | 0         | 383  | 384  | 99 -  | 215  | 598  | 3179   | 3562   |
| UN07087 | Rsa1.0.06253.1 | 972  | 11385  | 0         | 426  | 430  | 99 -  | 3    | 431  | 7588   | 8017   |
| UN07088 | Rsa1.0.04411.1 | 1340 | 142979 | 1.00E-124 | 263  | 274  | 95 -  | 11   | 284  | 137399 | 137671 |
| UN07089 | Rsa1.0.00326.1 | 994  | 171955 | 1.00E-116 | 301  | 331  | 90 +  | 649  | 979  | 65824  | 66133  |
| UN07090 | Rsa1.0.03193.1 | 1265 | 24690  | 0         | 487  | 540  | 90 -  | 7    | 538  | 21087  | 21602  |
| UN07091 | Rsa1.0.00005.1 | 1253 | 353093 | 1.00E-178 | 317  | 317  | 100 - | 162  | 478  | 51852  | 52168  |
| UN07092 | Rsa1.0.00254.1 | 680  | 102600 | 1.00E-126 | 280  | 297  | 94 +  | 9    | 305  | 73233  | 73523  |
| UN07093 | Rsa1.0.02236.1 | 1257 | 33558  | 1.00E-179 | 386  | 408  | 94 -  | 830  | 1237 | 13202  | 13605  |
| UN07094 | Rsa1.0.01143.1 | 689  | 52456  | 4.00E-77  | 165  | 171  | 96 +  | 383  | 553  | 46053  | 46223  |
| UN07095 | Rsa1.0.03545.1 | 917  | 147543 | 1.00E-125 | 273  | 287  | 95 -  | 621  | 907  | 147220 | 147505 |
| UN07096 | Rsa1.0.00055.1 | 747  | 520193 | 1.00E-117 | 249  | 260  | 95 -  | 416  | 675  | 211435 | 211690 |



|         |                |      |        |           |      |      |       |      |      |        |        |
|---------|----------------|------|--------|-----------|------|------|-------|------|------|--------|--------|
| UN07097 | Rsa1.0_01769.1 | 901  | 39568  | 1.00E-133 | 244  | 245  | 99 -  | 104  | 348  | 33607  | 33851  |
| UN07098 | Rsa1.0_00893.1 | 1027 | 60626  | 0         | 501  | 510  | 98 +  | 15   | 522  | 46398  | 46907  |
| UN07099 | Rsa1.0_00332.1 | 1232 | 94575  | 0         | 500  | 521  | 95 -  | 716  | 1230 | 62006  | 62524  |
| UN07100 | Rsa1.0_00047.1 | 1505 | 168582 | 0         | 495  | 498  | 99 +  | 2    | 499  | 124961 | 125458 |
| UN07101 | Rsa1.0_03057.1 | 820  | 25724  | 2.00E-73  | 156  | 161  | 96 -  | 534  | 694  | 139    | 299    |
| UN07102 | Rsa1.0_00121.1 | 750  | 278029 | 1.00E-154 | 290  | 292  | 99 +  | 1    | 291  | 112289 | 112579 |
| UN07103 | Rsa1.0_00845.1 | 853  | 62346  | 1.00E-128 | 240  | 241  | 99 +  | 542  | 781  | 12049  | 12289  |
| UN07104 | Rsa1.0_00040.1 | 859  | 324196 | 0         | 526  | 565  | 93 -  | 271  | 826  | 36385  | 36939  |
| UN07105 | Rsa1.0_00194.1 | 1509 | 110851 | 0         | 1240 | 1297 | 95 -  | 184  | 1471 | 60327  | 61623  |
| UN07106 | Rsa1.0_00107.1 | 980  | 431659 | 0         | 513  | 546  | 93 -  | 442  | 980  | 165615 | 166159 |
| UN07107 | Rsa1.0_01853.1 | 1218 | 147800 | 1.00E-157 | 303  | 310  | 97 +  | 498  | 807  | 128102 | 128411 |
| UN07108 | Rsa1.0_55790.1 | 545  | 410    | 1.00E-122 | 273  | 290  | 94 -  | 90   | 379  | 1      | 290    |
| UN07109 | Rsa1.0_01382.1 | 1317 | 46877  | 0         | 406  | 426  | 95 +  | 1    | 423  | 11373  | 11798  |
| UN07110 | Rsa1.0_00213.1 | 1552 | 108167 | 0         | 363  | 363  | 100 - | 3    | 365  | 99017  | 99379  |
| UN07111 | Rsa1.0_03111.1 | 1074 | 25327  | 0         | 401  | 419  | 95 -  | 658  | 1074 | 3066   | 3481   |
| UN07112 | Rsa1.0_00001.1 | 1442 | 363028 | 0         | 955  | 980  | 97 +  | 469  | 1442 | 280589 | 281568 |
| UN07113 | Rsa1.0_00435.1 | 1269 | 317579 | 0         | 402  | 404  | 99 -  | 394  | 797  | 54645  | 55047  |
| UN07114 | Rsa1.0_02726.1 | 1547 | 28404  | 1.00E-133 | 301  | 320  | 94 -  | 1230 | 1547 | 25547  | 25866  |
| UN07115 | Rsa1.0_00976.1 | 837  | 57809  | 1.00E-89  | 177  | 180  | 98 +  | 516  | 695  | 7053   | 7232   |
| UN07116 | Rsa1.0_02179.1 | 972  | 34188  | 1.00E-177 | 393  | 417  | 94 -  | 543  | 947  | 23623  | 24037  |
| UN07117 | Rsa1.0_00114.1 | 1001 | 131330 | 0         | 702  | 713  | 98 -  | 79   | 791  | 95546  | 96258  |
| UN07118 | Rsa1.0_01476.1 | 1118 | 172928 | 1.00E-123 | 281  | 297  | 94 +  | 819  | 1111 | 9187   | 9481   |
| UN07119 | Rsa1.0_00104.1 | 918  | 368722 | 0         | 915  | 915  | 100 - | 1    | 915  | 155070 | 155984 |
| UN07120 | Rsa1.0_03668.1 | 412  | 21483  | 4.00E-63  | 135  | 139  | 97 +  | 73   | 211  | 19585  | 19723  |
| UN07121 | Rsa1.0_03209.1 | 1190 | 24592  | 0         | 538  | 546  | 98 +  | 3    | 547  | 5163   | 5708   |
| UN07122 | Rsa1.0_00179.1 | 955  | 393324 | 0         | 751  | 778  | 96 -  | 179  | 951  | 241686 | 242456 |
| UN07123 | Rsa1.0_00720.1 | 957  | 66931  | 0         | 516  | 517  | 99 +  | 439  | 955  | 2953   | 3469   |
| UN07124 | Rsa1.0_12814.1 | 1197 | 5119   | 0         | 553  | 561  | 98 +  | 638  | 1197 | 3092   | 3652   |
| UN07125 | Rsa1.0_04111.1 | 1035 | 18991  | 1.00E-106 | 251  | 268  | 93 -  | 17   | 283  | 13843  | 14110  |
| UN07126 | Rsa1.0_01749.1 | 1103 | 39822  | 0         | 391  | 400  | 97 +  | 704  | 1103 | 7472   | 7869   |
| UN07127 | Rsa1.0_01728.1 | 633  | 40239  | 0         | 484  | 510  | 94 -  | 1    | 509  | 21789  | 22295  |
| UN07128 | Rsa1.0_06010.1 | 1552 | 11944  | 0         | 885  | 895  | 98 +  | 656  | 1550 | 7741   | 8635   |
| UN07129 | Rsa1.0_01860.1 | 1387 | 38057  | 2.00E-89  | 168  | 168  | 100 - | 414  | 581  | 23461  | 23628  |
| UN07130 | Rsa1.0_00324.1 | 1225 | 218805 | 1.00E-167 | 305  | 307  | 99 +  | 919  | 1225 | 182825 | 183131 |
| UN07131 | Rsa1.0_00322.1 | 1297 | 212233 | 1.00E-120 | 222  | 223  | 99 -  | 838  | 1060 | 80171  | 80393  |
| UN07132 | Rsa1.0_06677.1 | 940  | 10560  | 0         | 911  | 941  | 96 -  | 3    | 940  | 2190   | 3124   |
| UN07133 | Rsa1.0_00243.1 | 748  | 103651 | 1.00E-136 | 334  | 366  | 91 +  | 403  | 748  | 23261  | 23623  |
| UN07134 | Rsa1.0_03577.1 | 862  | 143993 | 0         | 451  | 454  | 99 -  | 409  | 862  | 7984   | 8437   |
| UN07135 | Rsa1.0_00162.1 | 1175 | 239935 | 1.00E-126 | 258  | 264  | 97 +  | 913  | 1174 | 25199  | 25460  |

|         |                |      |        |           |      |      |       |      |      |        |        |
|---------|----------------|------|--------|-----------|------|------|-------|------|------|--------|--------|
| UN07136 | Rsa1.0.02247.1 | 963  | 33427  | 1.00E-118 | 267  | 282  | 94 +  | 590  | 870  | 28646  | 28924  |
| UN07137 | Rsa1.0.00229.1 | 1198 | 105471 | 0         | 1078 | 1094 | 98 -  | 1    | 1094 | 82850  | 83941  |
| UN07138 | Rsa1.0.00477.1 | 845  | 81556  | 1.00E-125 | 242  | 247  | 97 +  | 132  | 378  | 21683  | 21929  |
| UN07139 | Rsa1.0.00473.1 | 1069 | 212204 | 0         | 653  | 672  | 97 +  | 233  | 904  | 31308  | 31979  |
| UN07140 | Rsa1.0.00044.1 | 804  | 271658 | 0         | 788  | 798  | 98 +  | 7    | 804  | 24744  | 25540  |
| UN07141 | Rsa1.0.00737.1 | 982  | 66432  | 3.00E-97  | 261  | 284  | 91 -  | 713  | 982  | 31720  | 32003  |
| UN07142 | Rsa1.0.00522.1 | 957  | 78103  | 1.00E-110 | 233  | 242  | 96 +  | 86   | 326  | 57158  | 57399  |
| UN07143 | Rsa1.0.01589.1 | 815  | 42721  | 1.00E-150 | 300  | 310  | 96 +  | 209  | 518  | 29072  | 29381  |
| UN07144 | Rsa1.0.03138.1 | 1115 | 25092  | 0         | 554  | 558  | 99 -  | 556  | 1113 | 9101   | 9658   |
| UN07145 | Rsa1.0.00190.1 | 1268 | 318240 | 0         | 405  | 406  | 99 -  | 863  | 1268 | 196708 | 197113 |
| UN07146 | Rsa1.0.02304.1 | 869  | 32793  | 0         | 404  | 405  | 99 -  | 240  | 644  | 15443  | 15847  |
| UN07147 | Rsa1.0.01034.1 | 667  | 56046  | 0         | 359  | 367  | 97 -  | 60   | 426  | 35993  | 36359  |
| UN07148 | Rsa1.0.00218.1 | 1322 | 201480 | 1.00E-108 | 206  | 208  | 99 -  | 370  | 577  | 114870 | 115077 |
| UN07149 | Rsa1.0.00447.1 | 963  | 84051  | 0         | 379  | 379  | 100 - | 552  | 930  | 56160  | 56538  |
| UN07150 | Rsa1.0.03166.1 | 1525 | 24863  | 0         | 468  | 468  | 100 + | 1058 | 1525 | 19446  | 19913  |
| UN07151 | Rsa1.0.00423.1 | 352  | 86138  | 1.00E-141 | 266  | 270  | 98 -  | 83   | 352  | 10887  | 11156  |
| UN07152 | Rsa1.0.01837.1 | 1162 | 38502  | 0         | 1141 | 1162 | 98 -  | 2    | 1161 | 27628  | 28789  |
| UN07153 | Rsa1.0.01059.1 | 1468 | 55410  | 0         | 1228 | 1281 | 95 -  | 195  | 1468 | 28279  | 29538  |
| UN07154 | Rsa1.0.00065.1 | 1786 | 454616 | 0         | 1711 | 1767 | 96 -  | 3    | 1769 | 132950 | 134713 |
| UN07155 | Rsa1.0.01245.1 | 862  | 149868 | 0         | 554  | 562  | 98 +  | 302  | 862  | 45970  | 46531  |
| UN07156 | Rsa1.0.00013.1 | 1262 | 292129 | 0         | 441  | 444  | 99 +  | 818  | 1261 | 90182  | 90625  |
| UN07157 | Rsa1.0.06497.1 | 1061 | 10890  | 0         | 768  | 782  | 98 -  | 2    | 782  | 351    | 1131   |
| UN07158 | Rsa1.0.05864.1 | 1466 | 12387  | 0         | 340  | 340  | 100 - | 1    | 340  | 7543   | 7882   |
| UN07159 | Rsa1.0.04299.1 | 1157 | 18027  | 0         | 712  | 713  | 99 -  | 1    | 713  | 11917  | 12629  |
| UN07160 | Rsa1.0.03475.1 | 1055 | 22653  | 1.00E-158 | 308  | 316  | 97 +  | 418  | 733  | 16055  | 16370  |
| UN07161 | Rsa1.0.03790.1 | 958  | 20844  | 0         | 412  | 426  | 96 -  | 345  | 770  | 8657   | 9074   |
| UN07162 | Rsa1.0.03552.1 | 817  | 22151  | 3.00E-84  | 168  | 171  | 98 +  | 456  | 626  | 14663  | 14833  |
| UN07163 | Rsa1.0.00523.1 | 1556 | 178770 | 0         | 409  | 411  | 99 +  | 1144 | 1554 | 166967 | 167377 |
| UN07164 | Rsa1.0.01282.1 | 1657 | 49304  | 0         | 1605 | 1655 | 96 -  | 6    | 1654 | 30123  | 31768  |
| UN07165 | Rsa1.0.02852.1 | 691  | 27287  | 0         | 635  | 668  | 95 +  | 3    | 670  | 15228  | 15884  |
| UN07166 | Rsa1.0.00378.1 | 1179 | 89892  | 0         | 415  | 436  | 95 -  | 3    | 436  | 81481  | 81900  |
| UN07167 | Rsa1.0.00033.1 | 1490 | 515811 | 0         | 1169 | 1179 | 99 -  | 315  | 1490 | 497657 | 498835 |
| UN07168 | Rsa1.0.00529.1 | 851  | 77487  | 1.00E-105 | 300  | 333  | 90 +  | 521  | 851  | 65173  | 65489  |
| UN07169 | Rsa1.0.01249.1 | 1038 | 188432 | 0         | 1016 | 1038 | 97 +  | 1    | 1036 | 182099 | 183129 |
| UN07170 | Rsa1.0.00750.1 | 2061 | 190548 | 0         | 654  | 661  | 98 +  | 288  | 948  | 16410  | 17070  |
| UN07171 | Rsa1.0.00888.1 | 852  | 60978  | 0         | 392  | 398  | 98 -  | 229  | 626  | 23903  | 24300  |
| UN07172 | Rsa1.0.02295.1 | 742  | 149884 | 1.00E-150 | 270  | 270  | 100 - | 473  | 742  | 13556  | 13825  |
| UN07173 | Rsa1.0.00012.1 | 1120 | 222148 | 0         | 448  | 465  | 96 -  | 656  | 1118 | 28069  | 28530  |
| UN07174 | Rsa1.0.00754.1 | 927  | 65689  | 0         | 405  | 413  | 98 +  | 1    | 407  | 59411  | 59822  |

| UN07175 | #              | #    | #      | #         | #    | #    | #     | #   | #    | #      | #      | # |
|---------|----------------|------|--------|-----------|------|------|-------|-----|------|--------|--------|---|
| UN07176 | Rsa1.0_19503.1 | 1655 | 1422   | 0         | 870  | 927  | 93 -  | 74  | 1000 | 218    | 1144   |   |
| UN07177 | Rsa1.0_01586.1 | 1088 | 42804  | 1.00E-178 | 398  | 420  | 94 -  | 672 | 1088 | 28079  | 28496  |   |
| UN07178 | Rsa1.0_00051.1 | 1240 | 258225 | 0         | 651  | 667  | 97 -  | 574 | 1240 | 52532  | 53198  |   |
| UN07179 | Rsa1.0_03381.1 | 811  | 23306  | 1.00E-142 | 263  | 265  | 99 -  | 3   | 267  | 5379   | 5643   |   |
| UN07180 | Rsa1.0_04817.1 | 601  | 15869  | 0         | 595  | 598  | 99 +  | 1   | 597  | 12103  | 12700  |   |
| UN07181 | Rsa1.0_00651.1 | 1165 | 247766 | 0         | 722  | 730  | 98 +  | 436 | 1165 | 98435  | 99164  |   |
| UN07182 | Rsa1.0_08401.1 | 1565 | 7418   | 0         | 681  | 684  | 99 -  | 1   | 683  | 678    | 1361   |   |
| UN07183 | Rsa1.0_13478.1 | 1204 | 4790   | 0         | 1081 | 1105 | 97 +  | 6   | 1109 | 2571   | 3668   |   |
| UN07184 | Rsa1.0_00028.1 | 769  | 293984 | 0         | 574  | 576  | 99 -  | 195 | 769  | 71347  | 71922  |   |
| UN07185 | Rsa1.0_00471.1 | 1078 | 81897  | 0         | 870  | 885  | 98 +  | 198 | 1078 | 76439  | 77323  |   |
| UN07186 | Rsa1.0_00389.1 | 872  | 88795  | 0         | 862  | 862  | 100 - | 11  | 872  | 44597  | 45458  |   |
| UN07187 | Rsa1.0_03192.1 | 1797 | 24695  | 0         | 1063 | 1100 | 96 +  | 659 | 1745 | 11044  | 12142  |   |
| UN07188 | Rsa1.0_05553.1 | 1132 | 13344  | 0         | 1115 | 1130 | 98 +  | 2   | 1131 | 10865  | 11994  |   |
| UN07189 | Rsa1.0_02566.1 | 763  | 30039  | 0         | 730  | 760  | 96 -  | 3   | 761  | 13189  | 13940  |   |
| UN07190 | Rsa1.0_00092.1 | 867  | 659932 | 1.00E-150 | 273  | 274  | 99 -  | 129 | 402  | 14484  | 14757  |   |
| UN07191 | Rsa1.0_05676.1 | 967  | 12969  | 0         | 493  | 509  | 96 +  | 447 | 954  | 9434   | 9937   |   |
| UN07192 | Rsa1.0_01789.1 | 1185 | 39250  | 0         | 452  | 463  | 97 +  | 717 | 1178 | 5483   | 5943   |   |
| UN07193 | Rsa1.0_01901.1 | 805  | 37472  | 0         | 484  | 489  | 98 -  | 3   | 491  | 26858  | 27346  |   |
| UN07194 | Rsa1.0_02846.1 | 814  | 27338  | 0         | 790  | 815  | 96 +  | 1   | 814  | 19909  | 20722  |   |
| UN07195 | Rsa1.0_00021.1 | 1253 | 263655 | 0         | 621  | 621  | 100 + | 129 | 749  | 10057  | 10677  |   |
| UN07196 | Rsa1.0_00552.1 | 598  | 206757 | 1.00E-105 | 271  | 291  | 93 -  | 300 | 588  | 72818  | 73102  |   |
| UN07197 | Rsa1.0_00108.1 | 1144 | 478491 | 0         | 1001 | 1049 | 95 +  | 3   | 1051 | 70429  | 71470  |   |
| UN07198 | Rsa1.0_02505.1 | 968  | 30703  | 1.00E-135 | 245  | 245  | 100 - | 149 | 393  | 8840   | 9084   |   |
| UN07199 | Rsa1.0_02150.1 | 1784 | 34580  | 0         | 792  | 797  | 99 -  | 990 | 1784 | 17993  | 18789  |   |
| UN07200 | Rsa1.0_00711.1 | 746  | 67223  | 0         | 520  | 520  | 100 + | 227 | 746  | 15004  | 15523  |   |
| UN07201 | Rsa1.0_00152.1 | 1375 | 257730 | 0         | 645  | 663  | 97 -  | 3   | 665  | 230931 | 231593 |   |
| UN07202 | Rsa1.0_00551.1 | 1404 | 76227  | 1.00E-177 | 430  | 464  | 92 -  | 10  | 465  | 20659  | 21118  |   |
| UN07203 | Rsa1.0_01416.1 | 896  | 46262  | 0         | 543  | 556  | 97 -  | 7   | 562  | 16597  | 17152  |   |
| UN07204 | Rsa1.0_05401.1 | 957  | 13876  | 0         | 526  | 564  | 93 +  | 413 | 957  | 1410   | 1973   |   |
| UN07205 | Rsa1.0_00632.1 | 1457 | 183777 | 0         | 1422 | 1463 | 97 +  | 13  | 1457 | 144872 | 146327 |   |
| UN07206 | Rsa1.0_00344.1 | 1204 | 191774 | 0         | 1168 | 1202 | 97 -  | 1   | 1200 | 127033 | 128233 |   |
| UN07207 | Rsa1.0_00886.1 | 998  | 167350 | 0         | 493  | 500  | 98 +  | 7   | 506  | 11220  | 11719  |   |
| UN07208 | Rsa1.0_00414.1 | 1176 | 202190 | 0         | 967  | 997  | 96 -  | 140 | 1134 | 56594  | 57589  |   |
| UN07209 | Rsa1.0_00976.1 | 897  | 57809  | 0         | 326  | 326  | 100 - | 571 | 896  | 48272  | 48597  |   |
| UN07210 | Rsa1.0_01835.1 | 722  | 38542  | 0         | 656  | 703  | 93 +  | 1   | 695  | 12839  | 13536  |   |
| UN07211 | Rsa1.0_01753.1 | 1558 | 39794  | 1.00E-103 | 198  | 200  | 99 +  | 440 | 639  | 19842  | 20041  |   |
| UN07212 | Rsa1.0_00278.1 | 632  | 231896 | 0         | 566  | 602  | 94 +  | 5   | 603  | 183530 | 184118 |   |
| UN07213 | Rsa1.0_00108.1 | 889  | 478491 | 1.00E-132 | 240  | 240  | 100 + | 650 | 889  | 51602  | 51841  |   |

|         |                |      |        |           |      |      |       |     |      |        |        |
|---------|----------------|------|--------|-----------|------|------|-------|-----|------|--------|--------|
| UN07214 | Rsa1.0.00017.1 | 840  | 752458 | 1.00E-150 | 314  | 325  | 96 -  | 3   | 320  | 11197  | 11519  |
| UN07215 | Rsa1.0.05320.1 | 810  | 14158  | 0         | 809  | 810  | 99 +  | 1   | 810  | 8531   | 9339   |
| UN07216 | Rsa1.0.07444.1 | 585  | 9386   | 1.00E-149 | 276  | 279  | 98 +  | 68  | 346  | 7105   | 7383   |
| UN07217 | Rsa1.0.01203.1 | 1080 | 50848  | 0         | 848  | 882  | 96 +  | 103 | 974  | 1079   | 1960   |
| UN07218 | Rsa1.0.00877.1 | 1323 | 61305  | 0         | 1300 | 1317 | 98 +  | 10  | 1323 | 40786  | 42096  |
| UN07219 | Rsa1.0.00392.1 | 1950 | 88523  | 0         | 685  | 721  | 95 -  | 976 | 1691 | 13962  | 14671  |
| UN07220 | Rsa1.0.00731.1 | 912  | 66638  | 0         | 515  | 528  | 97 -  | 5   | 531  | 55615  | 56140  |
| UN07221 | Rsa1.0.00028.1 | 745  | 293984 | 0         | 653  | 662  | 98 -  | 84  | 745  | 86862  | 87523  |
| UN07222 | Rsa1.0.09779.1 | 1070 | 6154   | 1.00E-121 | 231  | 233  | 99 +  | 5   | 236  | 734    | 966    |
| UN07223 | Rsa1.0.02589.1 | 1491 | 300828 | 0         | 746  | 841  | 88 -  | 476 | 1316 | 151178 | 152018 |
| UN07224 | Rsa1.0.20721.1 | 1550 | 1276   | 0         | 488  | 501  | 97 +  | 355 | 853  | 406    | 906    |
| UN07225 | Rsa1.0.02192.1 | 1145 | 171291 | 0         | 517  | 538  | 96 +  | 571 | 1104 | 9538   | 10075  |
| UN07226 | Rsa1.0.00064.1 | 875  | 240927 | 0         | 869  | 880  | 98 -  | 1   | 875  | 232180 | 233059 |
| UN07227 | Rsa1.0.01417.1 | 1031 | 46252  | 0         | 409  | 413  | 99 -  | 1   | 412  | 20533  | 20944  |
| UN07228 | Rsa1.0.05254.1 | 1378 | 14362  | 0         | 1358 | 1379 | 98 -  | 1   | 1378 | 3811   | 5189   |
| UN07229 | Rsa1.0.00497.1 | 460  | 79830  | 1.00E-130 | 236  | 236  | 100 + | 1   | 236  | 43623  | 43858  |
| UN07230 | Rsa1.0.15414.1 | 1349 | 2620   | 0         | 663  | 675  | 98 +  | 179 | 853  | 1      | 674    |
| UN07231 | Rsa1.0.01570.1 | 880  | 43015  | 1.00E-159 | 288  | 289  | 99 -  | 377 | 665  | 32273  | 32561  |
| UN07232 | Rsa1.0.01352.1 | 1268 | 47443  | 1.00E-109 | 216  | 221  | 97 +  | 618 | 838  | 12792  | 13012  |
| UN07233 | Rsa1.0.02648.1 | 1059 | 29073  | 0         | 629  | 647  | 97 +  | 422 | 1058 | 11052  | 11698  |
| UN07234 | Rsa1.0.01984.1 | 855  | 36491  | 0         | 850  | 851  | 99 +  | 5   | 855  | 31611  | 32461  |
| UN07235 | Rsa1.0.00494.1 | 676  | 79967  | 0         | 498  | 521  | 95 -  | 2   | 521  | 3932   | 4449   |
| UN07236 | Rsa1.0.00029.1 | 535  | 272992 | 0         | 526  | 547  | 96 +  | 3   | 535  | 124469 | 125015 |
| UN07237 | Rsa1.0.00100.1 | 1583 | 249232 | 0         | 455  | 470  | 96 +  | 1   | 470  | 13957  | 14423  |
| UN07238 | Rsa1.0.02706.1 | 1106 | 28522  | 0         | 470  | 476  | 98 -  | 3   | 478  | 14012  | 14483  |
| UN07239 | Rsa1.0.04456.1 | 1567 | 17260  | 0         | 762  | 763  | 99 +  | 804 | 1566 | 15708  | 16469  |
| UN07240 | Rsa1.0.00025.1 | 641  | 277312 | 0         | 373  | 377  | 98 +  | 265 | 639  | 17353  | 17728  |
| UN07241 | Rsa1.0.06355.1 | 686  | 11180  | 0         | 592  | 601  | 98 -  | 1   | 598  | 515    | 1115   |
| UN07242 | Rsa1.0.02245.1 | 644  | 33478  | 0         | 394  | 410  | 96 -  | 235 | 642  | 6316   | 6725   |
| UN07243 | Rsa1.0.05530.1 | 732  | 13409  | 0         | 721  | 730  | 98 +  | 2   | 730  | 11827  | 12556  |
| UN07244 | Rsa1.0.00233.1 | 847  | 104918 | 1.00E-31  | 83   | 87   | 95 -  | 723 | 809  | 1959   | 2045   |
| UN07245 | Rsa1.0.10012.1 | 1233 | 6039   | 0         | 451  | 457  | 98 -  | 778 | 1233 | 341    | 797    |
| UN07246 | Rsa1.0.05984.1 | 1167 | 12031  | 0         | 454  | 469  | 96 -  | 677 | 1139 | 2482   | 2947   |
| UN07247 | Rsa1.0.00939.1 | 887  | 185227 | 0         | 423  | 442  | 95 -  | 451 | 887  | 51026  | 51466  |
| UN07248 | Rsa1.0.04116.1 | 635  | 18971  | 0         | 405  | 415  | 97 +  | 1   | 415  | 18340  | 18754  |
| UN07249 | Rsa1.0.00090.1 | 1736 | 273859 | 1.00E-149 | 268  | 268  | 100 + | 456 | 723  | 143363 | 143630 |
| UN07250 | Rsa1.0.00551.1 | 1290 | 76227  | 0         | 530  | 538  | 98 -  | 753 | 1290 | 54758  | 55293  |
| UN07251 | Rsa1.0.00022.1 | 1234 | 200461 | 0         | 1220 | 1236 | 98 -  | 1   | 1233 | 141333 | 142562 |
| UN07252 | Rsa1.0.00469.1 | 797  | 82084  | 0         | 483  | 510  | 94 +  | 292 | 796  | 77636  | 78139  |

|         |                |      |        |           |      |      |       |      |      |        |        |
|---------|----------------|------|--------|-----------|------|------|-------|------|------|--------|--------|
| UN07253 | Rsa1.0.00837.1 | 917  | 62568  | 0         | 505  | 505  | 100 + | 1    | 505  | 19284  | 19788  |
| UN07254 | Rsa1.0.02836.1 | 949  | 27481  | 1.00E-150 | 280  | 282  | 99 -  | 667  | 948  | 12895  | 13175  |
| UN07255 | Rsa1.0.25015.1 | 1133 | 956    | 0         | 467  | 482  | 96 +  | 319  | 800  | 475    | 956    |
| UN07256 | Rsa1.0.06200.1 | 1449 | 11506  | 0         | 920  | 922  | 99 +  | 176  | 1096 | 10585  | 11506  |
| UN07257 | Rsa1.0.06990.1 | 880  | 10060  | 0         | 848  | 879  | 96 +  | 1    | 868  | 4363   | 5235   |
| UN07258 | Rsa1.0.02944.1 | 1181 | 26553  | 1.00E-172 | 310  | 311  | 99 +  | 1    | 311  | 9056   | 9366   |
| UN07259 | Rsa1.0.00893.1 | 1262 | 60626  | 0         | 717  | 756  | 94 +  | 33   | 783  | 43045  | 43797  |
| UN07260 | Rsa1.0.00419.1 | 845  | 86562  | 0         | 427  | 429  | 99 +  | 2    | 429  | 39883  | 40311  |
| UN07261 | Rsa1.0.00233.1 | 1456 | 104918 | 0         | 639  | 640  | 99 -  | 1    | 640  | 40246  | 40885  |
| UN07262 | Rsa1.0.17196.1 | 1023 | 1893   | 0         | 843  | 868  | 97 +  | 158  | 1023 | 1      | 862    |
| UN07263 | Rsa1.0.00639.1 | 1023 | 165873 | 0         | 1011 | 1011 | 100 + | 13   | 1023 | 128422 | 129432 |
| UN07264 | Rsa1.0.01920.1 | 859  | 158533 | 0         | 575  | 593  | 96 -  | 12   | 598  | 135428 | 136016 |
| UN07265 | Rsa1.0.00821.1 | 1457 | 62891  | 1.00E-170 | 347  | 361  | 96 -  | 1105 | 1457 | 55683  | 56042  |
| UN07266 | Rsa1.0.00092.1 | 1340 | 659932 | 0         | 479  | 482  | 99 -  | 1    | 480  | 42020  | 42501  |
| UN07267 | Rsa1.0.00978.1 | 1290 | 57739  | 0         | 891  | 891  | 100 - | 400  | 1290 | 24460  | 25350  |
| UN07268 | Rsa1.0.00166.1 | 971  | 240912 | 1.00E-175 | 317  | 319  | 99 +  | 653  | 971  | 224857 | 225175 |
| UN07269 | Rsa1.0.00393.1 | 1013 | 158674 | 0         | 511  | 511  | 100 + | 63   | 573  | 135841 | 136351 |
| UN07270 | Rsa1.0.00108.1 | 1072 | 478491 | 0         | 976  | 996  | 97 -  | 78   | 1072 | 448266 | 449256 |
| UN07271 | Rsa1.0.00004.1 | 1025 | 253996 | 0         | 1015 | 1025 | 99 +  | 1    | 1024 | 158833 | 159856 |
| UN07272 | Rsa1.0.00420.1 | 1395 | 86496  | 1.00E-127 | 232  | 232  | 100 - | 11   | 242  | 11931  | 12162  |
| UN07273 | Rsa1.0.01494.1 | 716  | 44641  | 0         | 429  | 431  | 99 -  | 3    | 432  | 14397  | 14827  |
| UN07274 | Rsa1.0.08811.1 | 854  | 6904   | 0         | 437  | 437  | 100 + | 168  | 604  | 3266   | 3702   |
| UN07275 | Rsa1.0.00128.1 | 658  | 228675 | 1.00E-162 | 298  | 300  | 99 +  | 358  | 657  | 139177 | 139474 |
| UN07276 | Rsa1.0.03185.1 | 755  | 24739  | 5.00E-89  | 179  | 183  | 97 -  | 242  | 424  | 9033   | 9215   |
| UN07277 | Rsa1.0.00748.1 | 1141 | 65983  | 0         | 523  | 534  | 97 -  | 365  | 898  | 45626  | 46159  |
| UN07278 | Rsa1.0.01198.1 | 1039 | 51029  | 0         | 873  | 897  | 97 +  | 1    | 896  | 40408  | 41300  |
| UN07279 | Rsa1.0.00387.1 | 692  | 495407 | 0         | 692  | 693  | 99 +  | 1    | 692  | 143940 | 144632 |
| UN07280 | Rsa1.0.07439.1 | 316  | 9392   | 1.00E-81  | 154  | 154  | 100 - | 41   | 194  | 9239   | 9392   |
| UN07281 | Rsa1.0.00194.1 | 1156 | 110851 | 1.00E-157 | 292  | 295  | 98 -  | 862  | 1156 | 96169  | 96460  |
| UN07282 | Rsa1.0.00075.1 | 1344 | 146680 | 0         | 515  | 526  | 97 -  | 1    | 525  | 19296  | 19815  |
| UN07283 | Rsa1.0.02289.1 | 1461 | 32981  | 0         | 582  | 604  | 96 +  | 858  | 1461 | 17563  | 18154  |
| UN07284 | Rsa1.0.00088.1 | 1452 | 141341 | 0         | 632  | 649  | 97 -  | 810  | 1452 | 97198  | 97835  |
| UN07285 | Rsa1.0.17335.1 | 903  | 1857   | 0         | 702  | 713  | 98 +  | 109  | 819  | 1146   | 1857   |
| UN07286 | Rsa1.0.10108.1 | 497  | 5996   | 1.00E-116 | 255  | 266  | 95 +  | 216  | 478  | 111    | 374    |
| UN07287 | Rsa1.0.00173.1 | 771  | 288743 | 0         | 395  | 403  | 98 +  | 371  | 770  | 203683 | 204082 |
| UN07288 | Rsa1.0.01750.1 | 932  | 39816  | 8.00E-42  | 107  | 112  | 95 +  | 429  | 539  | 18559  | 18670  |
| UN07289 | Rsa1.0.01203.1 | 1190 | 50848  | 1.00E-140 | 256  | 257  | 99 +  | 1    | 257  | 38676  | 38932  |
| UN07290 | Rsa1.0.00110.1 | 905  | 132719 | 0         | 878  | 905  | 97 -  | 4    | 905  | 49653  | 50556  |
| UN07291 | Rsa1.0.01521.1 | 886  | 142147 | 0         | 448  | 448  | 100 + | 1    | 448  | 137675 | 138122 |

|         |                |      |        |           |      |      |       |     |      |        |        |
|---------|----------------|------|--------|-----------|------|------|-------|-----|------|--------|--------|
| UN07292 | Rsa1.0.00124.1 | 761  | 262503 | 0         | 444  | 446  | 99 +  | 1   | 446  | 16138  | 16583  |
| UN07293 | Rsa1.0.02929.1 | 740  | 26673  | 1.00E-119 | 251  | 261  | 96 -  | 474 | 734  | 21072  | 21330  |
| UN07294 | Rsa1.0.00807.1 | 450  | 63607  | 5.00E-60  | 153  | 162  | 94 -  | 292 | 450  | 40888  | 41045  |
| UN07295 | Rsa1.0.00359.1 | 1336 | 91256  | 0         | 570  | 574  | 99 +  | 563 | 1136 | 22160  | 22733  |
| UN07296 | Rsa1.0.00784.1 | 1513 | 64359  | 0         | 921  | 922  | 99 -  | 593 | 1513 | 2126   | 3047   |
| UN07297 | Rsa1.0.00027.1 | 897  | 283362 | 0         | 357  | 366  | 97 +  | 282 | 645  | 20864  | 21229  |
| UN07298 | Rsa1.0.02120.1 | 559  | 34819  | 1.00E-175 | 347  | 359  | 96 -  | 1   | 359  | 9113   | 9471   |
| UN07299 | Rsa1.0.00657.1 | 886  | 69858  | 0         | 859  | 883  | 97 +  | 8   | 884  | 17707  | 18583  |
| UN07300 | Rsa1.0.02969.1 | 1138 | 26390  | 0         | 585  | 587  | 99 +  | 550 | 1136 | 6035   | 6621   |
| UN07301 | Rsa1.0.00086.1 | 981  | 439854 | 1.00E-155 | 284  | 286  | 99 +  | 696 | 981  | 284247 | 284532 |
| UN07302 | Rsa1.0.00168.1 | 687  | 115870 | 1.00E-168 | 299  | 299  | 100 + | 389 | 687  | 38162  | 38460  |
| UN07303 | Rsa1.0.00214.1 | 631  | 107508 | 1.00E-140 | 300  | 314  | 95 -  | 309 | 621  | 36818  | 37127  |
| UN07304 | Rsa1.0.00067.1 | 1145 | 415055 | 0         | 524  | 525  | 99 -  | 621 | 1145 | 34474  | 34997  |
| UN07305 | Rsa1.0.08572.1 | 597  | 7184   | 0         | 405  | 416  | 97 +  | 180 | 595  | 6112   | 6523   |
| UN07306 | Rsa1.0.00385.1 | 1199 | 89160  | 0         | 409  | 426  | 96 -  | 1   | 424  | 12113  | 12538  |
| UN07307 | Rsa1.0.00299.1 | 1228 | 97770  | 0         | 1185 | 1228 | 96 +  | 1   | 1228 | 9212   | 10432  |
| UN07308 | Rsa1.0.00469.1 | 1097 | 82084  | 0         | 758  | 765  | 99 +  | 1   | 765  | 46985  | 47748  |
| UN07309 | Rsa1.0.02916.1 | 1535 | 26809  | 0         | 372  | 382  | 97 +  | 1   | 373  | 6047   | 6428   |
| UN07310 | Rsa1.0.05758.1 | 1129 | 12721  | 0         | 988  | 1004 | 98 +  | 125 | 1128 | 442    | 1445   |
| UN07311 | Rsa1.0.18041.1 | 843  | 1683   | 0         | 521  | 522  | 99 -  | 322 | 843  | 1162   | 1683   |
| UN07312 | Rsa1.0.00111.1 | 1630 | 390088 | 0         | 723  | 746  | 96 -  | 1   | 742  | 178097 | 178842 |
| UN07313 | Rsa1.0.01137.1 | 1296 | 52655  | 0         | 1291 | 1297 | 99 +  | 1   | 1296 | 43969  | 45262  |
| UN07314 | Rsa1.0.02908.1 | 1308 | 26859  | 0         | 817  | 826  | 98 -  | 482 | 1307 | 26034  | 26859  |
| UN07315 | Rsa1.0.00821.1 | 1148 | 62891  | 1.00E-173 | 318  | 320  | 99 +  | 829 | 1148 | 32814  | 33131  |
| UN07316 | Rsa1.0.00286.1 | 1057 | 98709  | 1.00E-177 | 384  | 409  | 93 -  | 658 | 1057 | 54908  | 55309  |
| UN07317 | Rsa1.0.01698.1 | 800  | 40830  | 1.00E-161 | 288  | 288  | 100 - | 1   | 288  | 30279  | 30566  |
| UN07318 | Rsa1.0.00100.1 | 1299 | 249232 | 1.00E-175 | 385  | 412  | 93 +  | 284 | 695  | 174836 | 175235 |
| UN07319 | Rsa1.0.01855.1 | 1643 | 38204  | 0         | 1043 | 1077 | 96 -  | 554 | 1630 | 26509  | 27583  |
| UN07320 | Rsa1.0.37875.1 | 1802 | 595    | 0         | 593  | 595  | 99 -  | 758 | 1352 | 1      | 595    |
| UN07321 | Rsa1.0.03538.1 | 1678 | 22204  | 0         | 506  | 506  | 100 + | 199 | 704  | 2685   | 3190   |
| UN07322 | Rsa1.0.00092.1 | 1933 | 659932 | 1.00E-136 | 272  | 279  | 97 +  | 283 | 560  | 630024 | 630302 |
| UN07323 | Rsa1.0.00121.1 | 1290 | 278029 | 1.00E-171 | 314  | 317  | 99 -  | 974 | 1290 | 34412  | 34728  |
| UN07324 | Rsa1.0.01397.1 | 1378 | 183276 | 0         | 654  | 671  | 97 +  | 412 | 1082 | 639    | 1309   |
| UN07325 | Rsa1.0.02076.1 | 772  | 153121 | 0         | 485  | 489  | 99 +  | 1   | 489  | 14561  | 15048  |
| UN07326 | Rsa1.0.05577.1 | 904  | 13284  | 0         | 878  | 905  | 97 +  | 1   | 903  | 11449  | 12352  |
| UN07327 | Rsa1.0.14327.1 | 1395 | 3518   | 0         | 1065 | 1068 | 99 +  | 239 | 1306 | 231    | 1297   |
| UN07328 | Rsa1.0.00073.1 | 1099 | 240924 | 0         | 656  | 667  | 98 -  | 1   | 667  | 96789  | 97449  |
| UN07329 | Rsa1.0.05498.1 | 1449 | 13523  | 7.00E-65  | 127  | 127  | 100 - | 590 | 716  | 2975   | 3101   |
| UN07330 | Rsa1.0.03900.1 | 804  | 133221 | 0         | 705  | 745  | 94 -  | 3   | 746  | 6943   | 7663   |

|         |                |      |        |           |      |      |       |      |      |        |        |
|---------|----------------|------|--------|-----------|------|------|-------|------|------|--------|--------|
| UN07331 | Rsa1.0_04438.1 | 573  | 17361  | 1.00E-143 | 267  | 270  | 98 -  | 304  | 573  | 14944  | 15213  |
| UN07332 | Rsa1.0_02274.1 | 1360 | 33109  | 0         | 492  | 494  | 99 -  | 334  | 827  | 8221   | 8714   |
| UN07333 | Rsa1.0_00006.1 | 877  | 396176 | 0         | 857  | 878  | 97 +  | 3    | 877  | 296014 | 296891 |
| UN07334 | Rsa1.0_16677.1 | 135  | 2069   | 2.00E-68  | 134  | 135  | 99 -  | 1    | 135  | 999    | 1133   |
| UN07335 | Rsa1.0_00059.1 | 1437 | 159650 | 0         | 795  | 833  | 95 -  | 628  | 1437 | 63397  | 64229  |
| UN07336 | Rsa1.0_03610.1 | 859  | 21797  | 1.00E-127 | 245  | 249  | 98 -  | 38   | 283  | 2138   | 2386   |
| UN07337 | Rsa1.0_04080.1 | 1676 | 19198  | 0         | 519  | 556  | 93 +  | 505  | 1060 | 4470   | 5023   |
| UN07338 | Rsa1.0_02642.1 | 1625 | 29181  | 0         | 1073 | 1092 | 98 +  | 335  | 1423 | 13097  | 14188  |
| UN07339 | Rsa1.0_01496.1 | 994  | 44595  | 0         | 982  | 994  | 98 +  | 2    | 994  | 1641   | 2634   |
| UN07340 | Rsa1.0_43703.1 | 746  | 514    | 1.00E-162 | 293  | 294  | 99 -  | 451  | 744  | 221    | 514    |
| UN07341 | Rsa1.0_00392.1 | 1078 | 88523  | 0         | 911  | 1003 | 90 +  | 18   | 1003 | 63833  | 64811  |
| UN07342 | Rsa1.0_01493.1 | 1183 | 44670  | 0         | 754  | 786  | 95 +  | 217  | 998  | 32666  | 33447  |
| UN07343 | Rsa1.0_00848.1 | 981  | 152362 | 0         | 658  | 676  | 97 -  | 3    | 677  | 14944  | 15619  |
| UN07344 | Rsa1.0_09912.1 | 1195 | 6092   | 0         | 604  | 614  | 98 -  | 1    | 613  | 1      | 614    |
| UN07345 | Rsa1.0_33453.1 | 1436 | 678    | 0         | 466  | 467  | 99 +  | 572  | 1038 | 212    | 678    |
| UN07346 | Rsa1.0_00139.1 | 972  | 357786 | 0         | 877  | 900  | 97 +  | 3    | 895  | 263046 | 263942 |
| UN07347 | Rsa1.0_00703.1 | 810  | 67597  | 0         | 789  | 805  | 98 -  | 6    | 810  | 26615  | 27419  |
| UN07348 | Rsa1.0_01400.1 | 1313 | 46560  | 0         | 815  | 845  | 96 -  | 479  | 1308 | 26212  | 27056  |
| UN07349 | Rsa1.0_03434.1 | 948  | 22960  | 0         | 601  | 611  | 98 +  | 2    | 612  | 20817  | 21423  |
| UN07350 | Rsa1.0_01119.1 | 603  | 53459  | 1.00E-162 | 322  | 333  | 96 +  | 63   | 395  | 42022  | 42348  |
| UN07351 | Rsa1.0_00985.1 | 781  | 161950 | 1.00E-134 | 305  | 324  | 94 -  | 7    | 330  | 54597  | 54915  |
| UN07352 | Rsa1.0_00143.1 | 680  | 121313 | 0         | 642  | 677  | 94 -  | 2    | 665  | 31003  | 31679  |
| UN07353 | Rsa1.0_00197.1 | 1256 | 109714 | 0         | 596  | 601  | 99 -  | 14   | 614  | 47701  | 48301  |
| UN07354 | Rsa1.0_00118.1 | 999  | 130637 | 2.00E-89  | 168  | 168  | 100 - | 1    | 168  | 114153 | 114320 |
| UN07355 | Rsa1.0_00002.1 | 1308 | 601661 | 0         | 1285 | 1301 | 98 +  | 4    | 1304 | 19784  | 21084  |
| UN07356 | Rsa1.0_00831.1 | 928  | 62673  | 0         | 415  | 421  | 98 -  | 510  | 928  | 22690  | 23110  |
| UN07357 | Rsa1.0_01322.1 | 768  | 48166  | 0         | 403  | 403  | 100 - | 362  | 764  | 28212  | 28614  |
| UN07358 | Rsa1.0_01591.1 | 853  | 42718  | 1.00E-134 | 345  | 379  | 91 -  | 20   | 398  | 24117  | 24486  |
| UN07359 | Rsa1.0_00038.1 | 874  | 314568 | 1.00E-159 | 319  | 328  | 97 +  | 3    | 329  | 46501  | 46827  |
| UN07360 | Rsa1.0_01414.1 | 653  | 149508 | 0         | 554  | 575  | 96 -  | 79   | 651  | 143134 | 143701 |
| UN07361 | Rsa1.0_01481.1 | 952  | 184562 | 0         | 949  | 951  | 99 +  | 4    | 952  | 2409   | 3359   |
| UN07362 | Rsa1.0_01882.1 | 742  | 37697  | 1.00E-155 | 294  | 298  | 98 -  | 446  | 742  | 12510  | 12807  |
| UN07363 | Rsa1.0_07270.1 | 1100 | 9634   | 0         | 561  | 582  | 96 -  | 8    | 578  | 4435   | 5013   |
| UN07364 | Rsa1.0_67954.1 | 1082 | 337    | 1.00E-178 | 325  | 328  | 99 +  | 225  | 552  | 10     | 337    |
| UN07365 | Rsa1.0_00661.1 | 684  | 213041 | 0         | 415  | 437  | 94 -  | 104  | 539  | 66549  | 66981  |
| UN07366 | Rsa1.0_03915.1 | 1409 | 20117  | 0         | 398  | 414  | 96 -  | 982  | 1390 | 19463  | 19872  |
| UN07367 | Rsa1.0_01091.1 | 873  | 54383  | 0         | 758  | 758  | 100 - | 116  | 873  | 50727  | 51484  |
| UN07368 | Rsa1.0_00605.1 | 1151 | 73199  | 0         | 1105 | 1141 | 96 -  | 11   | 1151 | 33796  | 34936  |
| UN07369 | Rsa1.0_43429.1 | 1372 | 517    | 1.00E-118 | 225  | 228  | 98 +  | 1126 | 1353 | 290    | 517    |

|         |                |      |        |           |      |      |       |      |      |        |        |
|---------|----------------|------|--------|-----------|------|------|-------|------|------|--------|--------|
| UN07370 | Rsa1.0.00753.1 | 1266 | 65705  | 0         | 603  | 603  | 100 - | 1    | 603  | 64071  | 64673  |
| UN07371 | Rsa1.0.01430.1 | 838  | 46034  | 0         | 615  | 615  | 100 - | 224  | 838  | 40473  | 41087  |
| UN07372 | Rsa1.0.11525.1 | 1125 | 5479   | 0         | 797  | 910  | 87 +  | 30   | 939  | 4434   | 5343   |
| UN07373 | Rsa1.0.00429.1 | 802  | 85559  | 1.00E-177 | 357  | 369  | 96 +  | 277  | 641  | 13508  | 13876  |
| UN07374 | Rsa1.0.02471.1 | 1182 | 31104  | 0         | 1153 | 1182 | 97 -  | 1    | 1182 | 8870   | 10049  |
| UN07375 | Rsa1.0.02142.1 | 943  | 34633  | 0         | 377  | 384  | 98 -  | 560  | 943  | 6294   | 6677   |
| UN07376 | Rsa1.0.01220.1 | 951  | 161775 | 0         | 947  | 951  | 99 -  | 1    | 951  | 113660 | 114610 |
| UN07377 | Rsa1.0.04218.1 | 413  | 18423  | 1.00E-106 | 215  | 219  | 98 +  | 1    | 217  | 13440  | 13658  |
| UN07378 | Rsa1.0.02621.1 | 921  | 156120 | 0         | 593  | 614  | 96 +  | 3    | 614  | 12833  | 13446  |
| UN07379 | Rsa1.0.00350.1 | 551  | 92346  | 0         | 347  | 348  | 99 -  | 204  | 551  | 73658  | 74005  |
| UN07380 | Rsa1.0.02201.1 | 1271 | 33981  | 1.00E-170 | 333  | 343  | 97 +  | 3    | 345  | 21928  | 22270  |
| UN07381 | Rsa1.0.00051.1 | 869  | 258225 | 0         | 868  | 868  | 100 + | 2    | 869  | 113729 | 114596 |
| UN07382 | Rsa1.0.16652.1 | 1143 | 2078   | 6.00E-71  | 189  | 204  | 92 -  | 543  | 745  | 568    | 769    |
| UN07383 | Rsa1.0.01866.1 | 880  | 37961  | 0         | 479  | 492  | 97 -  | 389  | 880  | 10742  | 11233  |
| UN07384 | Rsa1.0.09755.1 | 2100 | 6166   | 0         | 585  | 586  | 99 -  | 985  | 1570 | 1      | 586    |
| UN07385 | Rsa1.0.05823.1 | 2071 | 12521  | 0         | 1430 | 1465 | 97 -  | 1    | 1464 | 1      | 1458   |
| UN07386 | Rsa1.0.00596.1 | 595  | 73578  | 0         | 577  | 591  | 97 +  | 5    | 593  | 25972  | 26562  |
| UN07387 | Rsa1.0.00635.1 | 1461 | 175826 | 0         | 1110 | 1164 | 95 -  | 3    | 1165 | 106336 | 107492 |
| UN07388 | Rsa1.0.02415.1 | 1100 | 31609  | 0         | 362  | 369  | 98 -  | 3    | 369  | 14     | 382    |
| UN07389 | Rsa1.0.01160.1 | 2380 | 52068  | 0         | 1058 | 1108 | 95 -  | 1273 | 2380 | 24440  | 25545  |
| UN07390 | Rsa1.0.00578.1 | 521  | 74581  | 0         | 504  | 522  | 96 +  | 3    | 519  | 57295  | 57811  |
| UN07391 | Rsa1.0.02207.1 | 951  | 33914  | 0         | 461  | 468  | 98 +  | 487  | 951  | 12982  | 13449  |
| UN07392 | Rsa1.0.07214.1 | 666  | 9708   | 0         | 423  | 436  | 97 +  | 1    | 436  | 2079   | 2514   |
| UN07393 | Rsa1.0.00713.1 | 983  | 158017 | 0         | 481  | 491  | 97 -  | 493  | 983  | 49880  | 50365  |
| UN07394 | Rsa1.0.00911.1 | 1606 | 59943  | 0         | 1563 | 1597 | 97 +  | 7    | 1602 | 40315  | 41908  |
| UN07395 | Rsa1.0.01295.1 | 655  | 49040  | 0         | 615  | 647  | 95 -  | 3    | 647  | 48351  | 48997  |
| UN07396 | Rsa1.0.02670.1 | 823  | 28887  | 0         | 435  | 441  | 98 +  | 1    | 438  | 15754  | 16192  |
| UN07397 | Rsa1.0.01832.1 | 1110 | 38581  | 0         | 1100 | 1106 | 99 -  | 4    | 1108 | 35770  | 36874  |
| UN07398 | Rsa1.0.00681.1 | 1505 | 68779  | 1.00E-121 | 280  | 297  | 94 +  | 1    | 296  | 52436  | 52730  |
| UN07399 | Rsa1.0.00902.1 | 765  | 60241  | 0         | 754  | 766  | 98 -  | 1    | 765  | 16025  | 16790  |
| UN07400 | Rsa1.0.00123.1 | 1487 | 325650 | 0         | 625  | 672  | 93 -  | 821  | 1487 | 27406  | 28056  |
| UN07401 | Rsa1.0.01179.1 | 820  | 51549  | 0         | 702  | 707  | 99 +  | 114  | 820  | 16747  | 17450  |
| UN07402 | Rsa1.0.15831.1 | 1473 | 2398   | 0         | 578  | 580  | 99 -  | 650  | 1229 | 1      | 580    |
| UN07403 | Rsa1.0.00748.1 | 596  | 65983  | 1.00E-120 | 250  | 257  | 97 +  | 341  | 596  | 65464  | 65716  |
| UN07404 | Rsa1.0.02586.1 | 2148 | 29856  | 0         | 965  | 971  | 99 -  | 1    | 971  | 3551   | 4521   |
| UN07405 | Rsa1.0.00131.1 | 795  | 432233 | 0         | 774  | 796  | 97 -  | 1    | 795  | 79118  | 79913  |
| UN07406 | Rsa1.0.00220.1 | 1012 | 192936 | 0         | 573  | 587  | 97 +  | 427  | 1012 | 28752  | 29333  |
| UN07407 | Rsa1.0.01247.1 | 1508 | 49934  | 0         | 621  | 622  | 99 +  | 513  | 1134 | 31079  | 31700  |
| UN07408 | Rsa1.0.00178.1 | 836  | 114861 | 0         | 813  | 839  | 96 +  | 1    | 836  | 90963  | 91790  |



|         |                |      |        |           |      |      |       |      |      |        |        |
|---------|----------------|------|--------|-----------|------|------|-------|------|------|--------|--------|
| UN07409 | Rsa1.0.00136.1 | 949  | 122464 | 0         | 594  | 602  | 98 -  | 1    | 602  | 77555  | 78155  |
| UN07410 | Rsa1.0.00105.1 | 1219 | 134138 | 0         | 614  | 628  | 97 -  | 1    | 625  | 107748 | 108366 |
| UN07411 | Rsa1.0.02823.1 | 1189 | 27588  | 0         | 720  | 736  | 97 +  | 1    | 736  | 8563   | 9298   |
| UN07412 | Rsa1.0.00418.1 | 1108 | 215377 | 0         | 1098 | 1112 | 98 -  | 1    | 1108 | 24292  | 25403  |
| UN07413 | Rsa1.0.01481.1 | 1668 | 184562 | 0         | 1655 | 1669 | 99 -  | 2    | 1668 | 166739 | 168407 |
| UN07414 | Rsa1.0.01302.1 | 738  | 48907  | 0         | 370  | 370  | 100 - | 140  | 509  | 4012   | 4381   |
| UN07415 | Rsa1.0.00583.1 | 1488 | 74309  | 1.00E-152 | 392  | 433  | 90 -  | 1056 | 1487 | 23689  | 24093  |
| UN07416 | Rsa1.0.01735.1 | 737  | 40128  | 0         | 546  | 546  | 100 - | 189  | 734  | 32412  | 32957  |
| UN07417 | Rsa1.0.02251.1 | 1752 | 33404  | 0         | 1630 | 1688 | 96 -  | 1    | 1673 | 19974  | 21656  |
| UN07418 | Rsa1.0.00087.1 | 1182 | 761073 | 0         | 511  | 545  | 93 +  | 645  | 1181 | 213537 | 214070 |
| UN07419 | Rsa1.0.00384.1 | 827  | 89278  | 0         | 791  | 796  | 99 -  | 34   | 827  | 24218  | 25013  |
| UN07420 | Rsa1.0.00144.1 | 1073 | 120708 | 4.00E-78  | 155  | 157  | 98 +  | 340  | 496  | 66013  | 66169  |
| UN07421 | Rsa1.0.04184.1 | 1663 | 18598  | 5.00E-75  | 158  | 160  | 98 +  | 3    | 160  | 3488   | 3647   |
| UN07422 | Rsa1.0.01207.1 | 813  | 141053 | 0         | 526  | 526  | 100 + | 7    | 532  | 116977 | 117502 |
| UN07423 | Rsa1.0.00213.1 | 1319 | 108167 | 0         | 644  | 659  | 97 -  | 661  | 1319 | 81596  | 82254  |
| UN07424 | Rsa1.0.00512.1 | 987  | 200277 | 0         | 987  | 988  | 99 +  | 1    | 987  | 32090  | 33077  |
| UN07425 | Rsa1.0.04554.1 | 1138 | 16876  | 0         | 763  | 777  | 98 -  | 1    | 774  | 3567   | 4343   |
| UN07426 | Rsa1.0.03176.1 | 1290 | 24801  | 1.00E-138 | 287  | 299  | 95 +  | 635  | 930  | 14352  | 14650  |
| UN07427 | Rsa1.0.00116.1 | 1393 | 365886 | 0         | 1356 | 1390 | 97 +  | 1    | 1389 | 211992 | 213375 |
| UN07428 | Rsa1.0.02810.1 | 921  | 27671  | 1.00E-160 | 287  | 287  | 100 + | 296  | 582  | 17019  | 17305  |
| UN07429 | Rsa1.0.00636.1 | 1428 | 71113  | 0         | 441  | 454  | 97 +  | 905  | 1358 | 11206  | 11659  |
| UN07430 | Rsa1.0.01440.1 | 1291 | 45807  | 0         | 661  | 661  | 100 - | 1    | 661  | 24779  | 25439  |
| UN07431 | Rsa1.0.00104.1 | 1232 | 368722 | 0         | 843  | 881  | 95 +  | 362  | 1232 | 213055 | 213934 |
| UN07432 | Rsa1.0.01016.1 | 1701 | 181422 | 2.33E-156 | 347  | 371  | 93 +  | 399  | 768  | 47315  | 47677  |
| UN07433 | Rsa1.0.00154.1 | 1391 | 189461 | 0         | 835  | 854  | 97 -  | 2    | 855  | 105326 | 106176 |
| UN07434 | Rsa1.0.00018.1 | 1445 | 410899 | 1.00E-111 | 238  | 250  | 95 +  | 1195 | 1444 | 244894 | 245136 |
| UN07435 | Rsa1.0.00583.1 | 1116 | 74309  | 0         | 422  | 423  | 99 +  | 441  | 862  | 19134  | 19556  |
| UN07436 | Rsa1.0.00019.1 | 1407 | 301669 | 0         | 1388 | 1405 | 98 +  | 1    | 1403 | 204380 | 205784 |
| UN07437 | Rsa1.0.02810.1 | 1192 | 27671  | 0         | 639  | 639  | 100 + | 3    | 641  | 13145  | 13783  |
| UN07438 | Rsa1.0.01361.1 | 1173 | 47226  | 1.00E-132 | 249  | 252  | 98 -  | 241  | 492  | 19655  | 19906  |
| UN07439 | Rsa1.0.00293.1 | 1667 | 339294 | 0         | 447  | 448  | 99 -  | 1    | 447  | 306995 | 307442 |
| UN07440 | Rsa1.0.00978.1 | 926  | 57739  | 1.00E-170 | 516  | 586  | 88 +  | 25   | 601  | 42017  | 42599  |
| UN07441 | Rsa1.0.00015.1 | 1492 | 561803 | 0         | 1478 | 1480 | 99 -  | 11   | 1488 | 478247 | 479726 |
| UN07442 | Rsa1.0.01232.1 | 558  | 155185 | 0         | 374  | 384  | 97 -  | 4    | 386  | 150401 | 150783 |
| UN07443 | Rsa1.0.01467.1 | 804  | 45161  | 0         | 560  | 568  | 98 +  | 6    | 572  | 39833  | 40400  |
| UN07444 | Rsa1.0.00710.1 | 608  | 67325  | 1.00E-143 | 383  | 425  | 90 +  | 10   | 434  | 43826  | 44250  |
| UN07445 | Rsa1.0.00653.1 | 1183 | 70029  | 0         | 581  | 601  | 96 -  | 585  | 1172 | 54979  | 55579  |
| UN07446 | Rsa1.0.02303.1 | 1496 | 32818  | 0         | 556  | 558  | 99 +  | 11   | 566  | 22242  | 22799  |
| UN07447 | Rsa1.0.00182.1 | 1210 | 142305 | 0         | 1208 | 1208 | 100 + | 3    | 1210 | 35081  | 36288  |

|         |                |      |        |           |      |      |       |      |      |        |        |
|---------|----------------|------|--------|-----------|------|------|-------|------|------|--------|--------|
| UN07448 | Rsa1.0.05498.1 | 771  | 13523  | 7.00E-79  | 218  | 238  | 91 -  | 536  | 771  | 3005   | 3242   |
| UN07449 | Rsa1.0.01444.1 | 1586 | 169539 | 0         | 1240 | 1273 | 97 -  | 321  | 1586 | 132361 | 133633 |
| UN07450 | Rsa1.0.05687.1 | 1379 | 12932  | 0         | 576  | 583  | 98 +  | 798  | 1376 | 3372   | 3954   |
| UN07451 | Rsa1.0.06124.1 | 1423 | 11681  | 0         | 1418 | 1421 | 99 +  | 1    | 1421 | 6262   | 7682   |
| UN07452 | Rsa1.0.01170.1 | 1185 | 161131 | 1.00E-176 | 313  | 313  | 100 + | 464  | 776  | 131509 | 131821 |
| UN07453 | Rsa1.0.00243.1 | 1304 | 103651 | 0         | 922  | 922  | 100 - | 383  | 1304 | 20395  | 21316  |
| UN07454 | Rsa1.0.00091.1 | 1107 | 139699 | 0         | 1083 | 1107 | 97 +  | 1    | 1107 | 51334  | 52440  |
| UN07455 | Rsa1.0.33295.1 | 871  | 682    | 1.00E-142 | 257  | 257  | 100 - | 582  | 838  | 112    | 368    |
| UN07456 | Rsa1.0.04236.1 | 917  | 18370  | 0         | 670  | 694  | 96 +  | 30   | 723  | 14257  | 14950  |
| UN07457 | Rsa1.0.00058.1 | 1538 | 159921 | 0         | 1112 | 1161 | 95 -  | 388  | 1534 | 81157  | 82313  |
| UN07458 | Rsa1.0.00175.1 | 623  | 166121 | 0         | 611  | 624  | 97 +  | 1    | 623  | 82963  | 83580  |
| UN07459 | Rsa1.0.13183.1 | 835  | 4979   | 1.00E-154 | 282  | 284  | 99 -  | 1    | 284  | 4420   | 4703   |
| UN07460 | Rsa1.0.02867.1 | 1095 | 27121  | 1.00E-178 | 317  | 317  | 100 - | 2    | 318  | 17565  | 17881  |
| UN07461 | Rsa1.0.00188.1 | 661  | 112020 | 1.00E-128 | 300  | 321  | 93 -  | 1    | 321  | 72058  | 72377  |
| UN07462 | Rsa1.0.00421.1 | 1488 | 86365  | 4.00E-91  | 180  | 183  | 98 -  | 531  | 713  | 37110  | 37292  |
| UN07463 | Rsa1.0.00051.1 | 1209 | 258225 | 0         | 400  | 402  | 99 -  | 1    | 401  | 104805 | 105206 |
| UN07464 | Rsa1.0.01204.1 | 1750 | 50843  | 0         | 876  | 903  | 97 +  | 477  | 1378 | 28520  | 29422  |
| UN07465 | Rsa1.0.00110.1 | 890  | 132719 | 0         | 758  | 758  | 100 + | 1    | 758  | 131239 | 131996 |
| UN07466 | Rsa1.0.00305.1 | 1232 | 97308  | 0         | 761  | 761  | 100 + | 1    | 761  | 92414  | 93174  |
| UN07467 | Rsa1.0.00071.1 | 939  | 345714 | 0         | 866  | 875  | 98 +  | 65   | 939  | 141582 | 142456 |
| UN07468 | Rsa1.0.00397.1 | 1295 | 88189  | 0         | 709  | 709  | 100 - | 587  | 1295 | 64534  | 65242  |
| UN07469 | Rsa1.0.04794.1 | 666  | 15960  | 0         | 665  | 665  | 100 + | 2    | 666  | 4544   | 5208   |
| UN07470 | Rsa1.0.00075.1 | 1116 | 146680 | 0         | 1058 | 1128 | 93 +  | 1    | 1116 | 140486 | 141604 |
| UN07471 | Rsa1.0.00011.1 | 1249 | 225044 | 0         | 1224 | 1243 | 98 +  | 8    | 1249 | 40734  | 41976  |
| UN07472 | Rsa1.0.00096.1 | 1330 | 198773 | 1.00E-148 | 270  | 271  | 99 +  | 3    | 273  | 171654 | 171924 |
| UN07473 | Rsa1.0.00275.1 | 1401 | 210104 | 1.00E-169 | 339  | 349  | 97 +  | 3    | 350  | 176395 | 176741 |
| UN07474 | Rsa1.0.02228.1 | 880  | 33688  | 0         | 793  | 793  | 100 - | 88   | 880  | 13513  | 14305  |
| UN07475 | Rsa1.0.00105.1 | 1597 | 134138 | 0         | 715  | 773  | 92 -  | 829  | 1597 | 62079  | 62819  |
| UN07476 | Rsa1.0.03280.1 | 1374 | 145083 | 0         | 1334 | 1384 | 96 -  | 1    | 1374 | 3      | 1383   |
| UN07477 | Rsa1.0.00071.1 | 1101 | 345714 | 0         | 1085 | 1101 | 98 +  | 4    | 1101 | 147814 | 148914 |
| UN07478 | Rsa1.0.00087.1 | 1327 | 761073 | 0         | 472  | 492  | 95 -  | 838  | 1327 | 119142 | 119633 |
| UN07479 | Rsa1.0.00531.1 | 1718 | 77387  | 0         | 886  | 898  | 98 -  | 1    | 898  | 9144   | 10037  |
| UN07480 | Rsa1.0.00758.1 | 1811 | 65477  | 0         | 627  | 628  | 99 +  | 1184 | 1811 | 2037   | 2664   |
| UN07481 | Rsa1.0.02867.1 | 1517 | 27121  | 0         | 737  | 789  | 93 -  | 710  | 1492 | 9763   | 10535  |
| UN07482 | Rsa1.0.01873.1 | 1851 | 37903  | 0         | 566  | 566  | 100 + | 4    | 569  | 5295   | 5860   |
| UN07483 | Rsa1.0.00913.1 | 1312 | 59914  | 0         | 749  | 796  | 94 -  | 520  | 1312 | 726    | 1495   |
| UN07484 | Rsa1.0.00046.1 | 1162 | 320315 | 0         | 1066 | 1091 | 97 +  | 72   | 1162 | 23945  | 25035  |
| UN07485 | Rsa1.0.01403.1 | 1335 | 46453  | 0         | 698  | 714  | 97 -  | 74   | 787  | 39504  | 40217  |
| UN07486 | Rsa1.0.00361.1 | 1292 | 91181  | 0         | 769  | 779  | 98 +  | 176  | 951  | 23667  | 24445  |

|         |                |      |        |           |      |      |       |     |      |        |        |
|---------|----------------|------|--------|-----------|------|------|-------|-----|------|--------|--------|
| UN07487 | Rsa1.0.03387.1 | 1479 | 23278  | 0         | 593  | 593  | 100 + | 1   | 593  | 336    | 928    |
| UN07488 | Rsa1.0.06489.1 | 1232 | 10917  | 0         | 888  | 899  | 98 +  | 334 | 1232 | 3538   | 4436   |
| UN07489 | #              | #    | #      | #         | #    | #    | #     | #   | #    | #      | #      |
| UN07490 | Rsa1.0.00017.1 | 1457 | 752458 | 0         | 661  | 681  | 97 -  | 3   | 683  | 368688 | 369367 |
| UN07491 | Rsa1.0.15995.1 | 1189 | 2328   | 0         | 836  | 841  | 99 -  | 349 | 1189 | 1171   | 2011   |
| UN07492 | Rsa1.0.00635.1 | 1609 | 175826 | 0         | 1053 | 1062 | 99 +  | 114 | 1174 | 106336 | 107397 |
| UN07493 | Rsa1.0.07618.1 | 938  | 9015   | 2.00E-82  | 159  | 160  | 99 +  | 1   | 160  | 4938   | 5097   |
| UN07494 | Rsa1.0.00222.1 | 929  | 172263 | 1.00E-174 | 316  | 318  | 99 -  | 3   | 320  | 131334 | 131651 |
| UN07495 | Rsa1.0.00565.1 | 1157 | 75420  | 0         | 1138 | 1171 | 97 +  | 9   | 1155 | 47886  | 49056  |
| UN07496 | Rsa1.0.04032.1 | 1040 | 19489  | 0         | 406  | 422  | 96 +  | 2   | 423  | 6359   | 6776   |
| UN07497 | Rsa1.0.00286.1 | 1189 | 98709  | 0         | 380  | 383  | 99 +  | 807 | 1189 | 61172  | 61554  |
| UN07498 | Rsa1.0.01524.1 | 988  | 43949  | 0         | 356  | 361  | 98 -  | 629 | 987  | 43079  | 43439  |
| UN07499 | Rsa1.0.01400.1 | 930  | 46560  | 0         | 357  | 363  | 98 -  | 191 | 553  | 822    | 1184   |
| UN07500 | Rsa1.0.00642.1 | 1083 | 201230 | 0         | 644  | 646  | 99 +  | 2   | 647  | 173316 | 173961 |
| UN07501 | Rsa1.0.03200.1 | 1111 | 24634  | 0         | 581  | 581  | 100 - | 529 | 1109 | 3607   | 4187   |
| UN07502 | Rsa1.0.00022.1 | 1236 | 200461 | 0         | 959  | 962  | 99 +  | 275 | 1236 | 139496 | 140457 |
| UN07503 | Rsa1.0.00218.1 | 1344 | 201480 | 1.00E-144 | 263  | 264  | 99 +  | 1   | 264  | 109770 | 110033 |
| UN07504 | Rsa1.0.00402.1 | 1271 | 385315 | 0         | 1214 | 1256 | 96 -  | 3   | 1252 | 228250 | 229499 |
| UN07505 | Rsa1.0.00065.1 | 585  | 454616 | 1.00E-178 | 361  | 373  | 96 -  | 1   | 367  | 439453 | 439824 |
| UN07506 | Rsa1.0.01117.1 | 901  | 53465  | 0         | 380  | 381  | 99 +  | 1   | 381  | 10874  | 11254  |
| UN07507 | Rsa1.0.38494.1 | 753  | 585    | 0         | 581  | 585  | 99 +  | 39  | 623  | 1      | 584    |
| UN07508 | Rsa1.0.00001.1 | 829  | 363028 | 0         | 807  | 838  | 96 -  | 3   | 829  | 281745 | 282569 |
| UN07509 | Rsa1.0.00650.1 | 1741 | 70235  | 1.00E-155 | 314  | 326  | 96 +  | 756 | 1081 | 2442   | 2767   |
| UN07510 | Rsa1.0.00061.1 | 698  | 218685 | 1.00E-108 | 309  | 341  | 90 +  | 16  | 352  | 118933 | 119266 |
| UN07511 | Rsa1.0.03420.1 | 1449 | 23090  | 1.00E-151 | 274  | 275  | 99 +  | 7   | 281  | 4797   | 5071   |
| UN07512 | Rsa1.0.45543.1 | 1579 | 495    | 0         | 494  | 495  | 99 +  | 470 | 964  | 1      | 495    |
| UN07513 | Rsa1.0.10284.1 | 1453 | 5904   | 0         | 457  | 471  | 97 +  | 984 | 1453 | 1260   | 1730   |
| UN07514 | Rsa1.0.03075.1 | 1365 | 25560  | 0         | 493  | 510  | 96 -  | 857 | 1365 | 16382  | 16890  |
| UN07515 | Rsa1.0.00033.1 | 694  | 515811 | 0         | 638  | 670  | 95 +  | 1   | 661  | 352589 | 353258 |
| UN07516 | Rsa1.0.01767.1 | 1020 | 39615  | 0         | 458  | 466  | 98 -  | 365 | 830  | 32312  | 32777  |
| UN07517 | Rsa1.0.16049.1 | 1464 | 2306   | 0         | 1289 | 1292 | 99 -  | 1   | 1291 | 695    | 1986   |
| UN07518 | Rsa1.0.02345.1 | 1491 | 32337  | 0         | 519  | 551  | 94 -  | 854 | 1400 | 21144  | 21688  |
| UN07519 | Rsa1.0.00606.1 | 1564 | 73150  | 0         | 567  | 569  | 99 +  | 286 | 854  | 64517  | 65085  |
| UN07520 | Rsa1.0.00017.1 | 782  | 752458 | 0         | 391  | 393  | 99 +  | 388 | 780  | 444997 | 445389 |
| UN07521 | Rsa1.0.01655.1 | 1309 | 41508  | 0         | 481  | 481  | 100 + | 829 | 1309 | 6342   | 6822   |
| UN07522 | Rsa1.0.04057.1 | 1750 | 19333  | 0         | 634  | 649  | 97 +  | 395 | 1043 | 16812  | 17460  |
| UN07523 | Rsa1.0.00114.1 | 844  | 131330 | 0         | 840  | 843  | 99 +  | 1   | 842  | 88134  | 88976  |
| UN07524 | Rsa1.0.07440.1 | 1212 | 9389   | 0         | 1180 | 1214 | 97 +  | 3   | 1211 | 4099   | 5312   |
| UN07525 | Rsa1.0.00372.1 | 1710 | 90418  | 0         | 780  | 815  | 95 -  | 1   | 814  | 47277  | 48069  |

|         |                |      |        |           |      |      |       |      |      |        |        |
|---------|----------------|------|--------|-----------|------|------|-------|------|------|--------|--------|
| UN07526 | Rsa1.0_12214.1 | 2682 | 5287   | 0         | 1053 | 1073 | 98 -  | 558  | 1624 | 4153   | 5225   |
| UN07527 | Rsa1.0_19376.1 | 1061 | 1441   | 2.00E-85  | 167  | 169  | 98 +  | 445  | 613  | 633    | 801    |
| UN07528 | Rsa1.0_07157.1 | 1064 | 9805   | 1.00E-176 | 313  | 313  | 100 - | 127  | 439  | 4990   | 5302   |
| UN07529 | Rsa1.0_01498.1 | 2048 | 44558  | 0         | 452  | 453  | 99 +  | 1    | 453  | 38005  | 38457  |
| UN07530 | Rsa1.0_00060.1 | 1554 | 502678 | 0         | 1544 | 1560 | 98 +  | 1    | 1553 | 483821 | 485380 |
| UN07531 | Rsa1.0_00128.1 | 834  | 228675 | 1.00E-162 | 314  | 322  | 97 -  | 392  | 713  | 116359 | 116680 |
| UN07532 | Rsa1.0_00740.1 | 2092 | 215972 | 0         | 860  | 861  | 99 +  | 2    | 862  | 29410  | 30270  |
| UN07533 | Rsa1.0_00452.1 | 1186 | 83201  | 1.00E-119 | 224  | 226  | 99 +  | 662  | 887  | 77985  | 78210  |
| UN07534 | Rsa1.0_00322.1 | 1092 | 212233 | 1.00E-142 | 314  | 328  | 95 -  | 745  | 1068 | 92264  | 92586  |
| UN07535 | Rsa1.0_02191.1 | 1323 | 34078  | 0         | 455  | 455  | 100 + | 869  | 1323 | 23641  | 24095  |
| UN07536 | Rsa1.0_08388.1 | 1168 | 7436   | 0         | 1059 | 1114 | 95 +  | 1    | 1093 | 4633   | 5745   |
| UN07537 | Rsa1.0_06004.1 | 931  | 11961  | 1.00E-93  | 175  | 175  | 100 - | 110  | 284  | 8503   | 8677   |
| UN07538 | Rsa1.0_02659.1 | 1431 | 28971  | 0         | 549  | 560  | 98 -  | 867  | 1426 | 22635  | 23193  |
| UN07539 | Rsa1.0_00349.1 | 852  | 92621  | 1.00E-157 | 351  | 373  | 94 +  | 484  | 850  | 45076  | 45447  |
| UN07540 | Rsa1.0_00211.1 | 1409 | 228189 | 0         | 570  | 603  | 94 +  | 718  | 1311 | 8747   | 9346   |
| UN07541 | Rsa1.0_00322.1 | 1220 | 212233 | 0         | 614  | 635  | 96 -  | 583  | 1211 | 63652  | 64286  |
| UN07542 | Rsa1.0_04630.1 | 1131 | 16595  | 0         | 778  | 785  | 99 +  | 2    | 783  | 13109  | 13893  |
| UN07543 | Rsa1.0_01855.1 | 1845 | 38204  | 0         | 486  | 510  | 95 +  | 1314 | 1820 | 12699  | 13208  |
| UN07544 | Rsa1.0_01035.1 | 1031 | 56019  | 0         | 531  | 540  | 98 +  | 490  | 1029 | 34973  | 35511  |
| UN07545 | Rsa1.0_03706.1 | 1742 | 21255  | 0         | 354  | 361  | 98 +  | 627  | 987  | 10986  | 11346  |
| UN07546 | Rsa1.0_01785.1 | 2003 | 39368  | 0         | 641  | 644  | 99 -  | 1    | 644  | 21165  | 21805  |
| UN07547 | Rsa1.0_17771.1 | 1421 | 1744   | 0         | 886  | 913  | 97 +  | 3    | 915  | 281    | 1193   |
| UN07548 | Rsa1.0_06341.1 | 1058 | 11209  | 1.00E-180 | 345  | 352  | 98 +  | 1    | 351  | 2347   | 2698   |
| UN07549 | Rsa1.0_04292.1 | 1044 | 18050  | 1.00E-121 | 233  | 237  | 98 +  | 1    | 237  | 7886   | 8122   |
| UN07550 | Rsa1.0_55259.1 | 1466 | 413    | 0         | 407  | 413  | 98 +  | 30   | 442  | 1      | 413    |
| UN07551 | Rsa1.0_16602.1 | 1350 | 2094   | 0         | 782  | 808  | 96 -  | 74   | 876  | 1      | 800    |
| UN07552 | Rsa1.0_00196.1 | 1198 | 109960 | 0         | 762  | 786  | 96 +  | 420  | 1196 | 90095  | 90880  |
| UN07553 | Rsa1.0_02039.1 | 2447 | 35699  | 0         | 1437 | 1501 | 95 +  | 608  | 2098 | 2375   | 3859   |
| UN07554 | Rsa1.0_02374.1 | 847  | 32043  | 0         | 772  | 806  | 95 +  | 46   | 847  | 24237  | 25038  |
| UN07555 | Rsa1.0_00835.1 | 1065 | 278058 | 0         | 792  | 807  | 98 +  | 254  | 1053 | 265120 | 265926 |
| UN07556 | Rsa1.0_00825.1 | 1071 | 62855  | 0         | 456  | 494  | 92 +  | 1    | 484  | 49159  | 49643  |
| UN07557 | Rsa1.0_00817.1 | 536  | 62961  | 0         | 534  | 537  | 99 -  | 1    | 536  | 44954  | 45490  |
| UN07558 | Rsa1.0_01220.1 | 1188 | 161775 | 0         | 566  | 568  | 99 -  | 1    | 568  | 27217  | 27784  |
| UN07559 | Rsa1.0_00228.1 | 1009 | 105511 | 0         | 419  | 427  | 98 -  | 2    | 425  | 77923  | 78349  |
| UN07560 | Rsa1.0_02186.1 | 1247 | 34150  | 1.00E-162 | 337  | 349  | 96 -  | 899  | 1246 | 13886  | 14231  |
| UN07561 | Rsa1.0_06048.1 | 1162 | 11854  | 1.00E-148 | 270  | 271  | 99 -  | 626  | 896  | 2079   | 2349   |
| UN07562 | Rsa1.0_00081.1 | 1259 | 143261 | 0         | 759  | 760  | 99 +  | 346  | 1105 | 118585 | 119344 |
| UN07563 | Rsa1.0_00302.1 | 1076 | 97521  | 0         | 552  | 552  | 100 + | 2    | 553  | 32203  | 32754  |
| UN07564 | Rsa1.0_00177.1 | 1717 | 143394 | 0         | 765  | 804  | 95 +  | 362  | 1165 | 36345  | 37135  |

|         |                |      |        |           |      |      |      |      |      |        |        |
|---------|----------------|------|--------|-----------|------|------|------|------|------|--------|--------|
| UN07565 | Rsa1.0.00323.1 | 1150 | 159650 | 0         | 512  | 526  | 97 + | 3    | 528  | 99362  | 99878  |
| UN07566 | Rsa1.0.04664.1 | 973  | 16471  | 1.00E-131 | 253  | 258  | 98 + | 10   | 267  | 2331   | 2588   |
| UN07567 | Rsa1.0.00012.1 | 1017 | 222148 | 0         | 357  | 360  | 99 + | 658  | 1017 | 189098 | 189457 |
| UN07568 | Rsa1.0.00413.1 | 994  | 86921  | 2.33E-156 | 316  | 330  | 95 + | 1    | 329  | 37460  | 37781  |
| UN07569 | Rsa1.0.24496.1 | 1435 | 985    | 0         | 526  | 530  | 99 - | 2    | 531  | 216    | 744    |
| UN07570 | Rsa1.0.01540.1 | 2276 | 151890 | 0         | 1294 | 1371 | 94 - | 86   | 1431 | 139025 | 140386 |
| UN07571 | Rsa1.0.00250.1 | 728  | 273771 | 0         | 686  | 699  | 98 + | 3    | 700  | 249892 | 250590 |
| UN07572 | Rsa1.0.00651.1 | 1050 | 247766 | 1.00E-158 | 302  | 307  | 98 + | 744  | 1050 | 219195 | 219500 |
| UN07573 | Rsa1.0.00481.1 | 990  | 81316  | 1.00E-77  | 154  | 156  | 98 - | 3    | 158  | 24855  | 25010  |
| UN07574 | Rsa1.0.03755.1 | 1643 | 21000  | 0         | 1619 | 1640 | 98 - | 3    | 1642 | 9663   | 11298  |
| UN07575 | Rsa1.0.00296.1 | 948  | 97854  | 0         | 559  | 566  | 98 - | 384  | 948  | 70192  | 70757  |
| UN07576 | Rsa1.0.00064.1 | 1233 | 240927 | 0         | 677  | 698  | 96 - | 535  | 1232 | 48554  | 49243  |
| UN07577 | Rsa1.0.00058.1 | 698  | 159921 | 0         | 425  | 430  | 98 - | 3    | 432  | 135516 | 135945 |
| UN07578 | Rsa1.0.00676.1 | 971  | 69166  | 0         | 489  | 504  | 97 + | 470  | 971  | 53234  | 53736  |
| UN07579 | Rsa1.0.00069.1 | 1438 | 403561 | 0         | 473  | 495  | 95 - | 950  | 1438 | 190538 | 191025 |
| UN07580 | Rsa1.0.03379.1 | 1201 | 23321  | 0         | 596  | 620  | 96 - | 583  | 1201 | 13593  | 14204  |
| UN07581 | Rsa1.0.00548.1 | 1067 | 76518  | 0         | 473  | 488  | 96 - | 1    | 488  | 35530  | 36017  |
| UN07582 | Rsa1.0.03029.1 | 1477 | 25858  | 0         | 1064 | 1083 | 98 + | 1    | 1080 | 1296   | 2378   |
| UN07583 | Rsa1.0.00937.1 | 908  | 59061  | 0         | 350  | 357  | 98 - | 545  | 897  | 6816   | 7172   |
| UN07584 | Rsa1.0.00050.1 | 1463 | 237174 | 0         | 587  | 609  | 96 + | 1    | 609  | 28676  | 29282  |
| UN07585 | Rsa1.0.00440.1 | 1621 | 84723  | 0         | 379  | 385  | 98 + | 120  | 504  | 56532  | 56916  |
| UN07586 | Rsa1.0.00181.1 | 1052 | 114269 | 1.00E-128 | 431  | 493  | 87 - | 227  | 719  | 31685  | 32174  |
| UN07587 | Rsa1.0.02404.1 | 1188 | 31702  | 5.00E-16  | 123  | 149  | 82 + | 843  | 991  | 5901   | 6049   |
| UN07588 | Rsa1.0.00055.1 | 1488 | 520193 | 0         | 808  | 813  | 99 + | 1    | 813  | 289692 | 290503 |
| UN07589 | Rsa1.0.09932.1 | 1373 | 6085   | 0         | 1289 | 1355 | 95 + | 2    | 1339 | 927    | 2264   |
| UN07590 | Rsa1.0.01625.1 | 866  | 42019  | 1.00E-102 | 319  | 361  | 88 + | 482  | 842  | 34139  | 34483  |
| UN07591 | Rsa1.0.00208.1 | 1100 | 108565 | 0         | 531  | 545  | 97 + | 559  | 1100 | 12221  | 12761  |
| UN07592 | Rsa1.0.00127.1 | 1278 | 127446 | 1.00E-136 | 260  | 263  | 98 - | 1015 | 1277 | 48690  | 48951  |
| UN07593 | Rsa1.0.01855.1 | 1281 | 38204  | 0         | 625  | 638  | 97 - | 647  | 1281 | 30495  | 31132  |
| UN07594 | Rsa1.0.01452.1 | 1089 | 45459  | 1.00E-139 | 254  | 255  | 99 + | 834  | 1088 | 38660  | 38914  |
| UN07595 | Rsa1.0.02941.1 | 1264 | 26583  | 0         | 580  | 592  | 97 + | 673  | 1264 | 13703  | 14294  |
| UN07596 | Rsa1.0.00558.1 | 1447 | 75819  | 0         | 1218 | 1266 | 96 + | 1    | 1264 | 34745  | 35995  |
| UN07597 | Rsa1.0.00426.1 | 1104 | 85668  | 0         | 396  | 405  | 97 - | 1    | 405  | 59558  | 59959  |
| UN07598 | Rsa1.0.02654.1 | 1561 | 29028  | 0         | 893  | 908  | 98 - | 5    | 912  | 23477  | 24384  |
| UN07599 | Rsa1.0.00026.1 | 1125 | 327835 | 1.00E-108 | 216  | 221  | 97 + | 1    | 221  | 183744 | 183961 |
| UN07600 | Rsa1.0.02259.1 | 1354 | 33299  | 0         | 749  | 758  | 98 - | 284  | 1041 | 25779  | 26536  |
| UN07601 | Rsa1.0.00516.1 | 1429 | 78417  | 0         | 728  | 739  | 98 - | 2    | 740  | 40369  | 41107  |
| UN07602 | Rsa1.0.00022.1 | 1237 | 200461 | 0         | 1206 | 1236 | 97 - | 1    | 1236 | 193769 | 194985 |
| UN07603 | Rsa1.0.07630.1 | 1972 | 8988   | 0         | 417  | 418  | 99 + | 1555 | 1972 | 4066   | 4483   |

|         |                |      |        |           |      |      |       |      |      |        |        |
|---------|----------------|------|--------|-----------|------|------|-------|------|------|--------|--------|
| UN07604 | Rsa1.0_00012.1 | 2446 | 222148 | 0         | 598  | 600  | 99 -  | 789  | 1388 | 88471  | 89069  |
| UN07605 | Rsa1.0_01614.1 | 953  | 42238  | 0         | 411  | 427  | 96 -  | 527  | 953  | 33551  | 33966  |
| UN07606 | Rsa1.0_00915.1 | 1588 | 194446 | 0         | 1270 | 1330 | 95 +  | 2    | 1331 | 180468 | 181796 |
| UN07607 | Rsa1.0_05628.1 | 959  | 13130  | 0         | 513  | 524  | 97 +  | 439  | 959  | 11862  | 12383  |
| UN07608 | Rsa1.0_00027.1 | 1341 | 283362 | 0         | 353  | 357  | 98 -  | 1    | 357  | 153443 | 153798 |
| UN07609 | Rsa1.0_00440.1 | 2093 | 84723  | 0         | 487  | 522  | 93 +  | 1031 | 1549 | 24888  | 25398  |
| UN07610 | Rsa1.0_08424.1 | 941  | 7375   | 0         | 612  | 625  | 97 +  | 1    | 624  | 782    | 1406   |
| UN07611 | Rsa1.0_00164.1 | 1081 | 116642 | 0         | 1061 | 1078 | 98 +  | 3    | 1080 | 6177   | 7251   |
| UN07612 | Rsa1.0_00038.1 | 1394 | 314568 | 0         | 571  | 580  | 98 -  | 814  | 1392 | 240906 | 241485 |
| UN07613 | Rsa1.0_25563.1 | 2195 | 931    | 0         | 779  | 779  | 100 - | 511  | 1289 | 153    | 931    |
| UN07614 | Rsa1.0_07827.1 | 1410 | 8466   | 0         | 746  | 754  | 98 +  | 10   | 762  | 4273   | 5025   |
| UN07615 | Rsa1.0_02514.1 | 928  | 30642  | 0         | 882  | 926  | 95 -  | 1    | 925  | 8822   | 9737   |
| UN07616 | Rsa1.0_00072.1 | 1186 | 148743 | 1.00E-129 | 344  | 381  | 90 +  | 807  | 1186 | 68937  | 69307  |
| UN07617 | Rsa1.0_00049.1 | 1245 | 167018 | 0         | 370  | 373  | 99 -  | 873  | 1245 | 57777  | 58149  |
| UN07618 | Rsa1.0_00627.1 | 1090 | 71566  | 0         | 697  | 719  | 96 +  | 118  | 835  | 60232  | 60950  |
| UN07619 | Rsa1.0_00537.1 | 807  | 186980 | 0         | 700  | 734  | 95 -  | 49   | 765  | 173882 | 174614 |
| UN07620 | Rsa1.0_00017.1 | 1324 | 752458 | 0         | 974  | 1021 | 95 -  | 297  | 1302 | 56037  | 57054  |
| UN07621 | Rsa1.0_00096.1 | 1397 | 198773 | 0         | 617  | 617  | 100 - | 781  | 1397 | 119398 | 120014 |
| UN07622 | Rsa1.0_03721.1 | 1551 | 21185  | 1.00E-141 | 258  | 259  | 99 -  | 1260 | 1518 | 20888  | 21146  |
| UN07623 | Rsa1.0_00001.1 | 1391 | 363028 | 0         | 554  | 558  | 99 -  | 833  | 1390 | 139974 | 140531 |
| UN07624 | Rsa1.0_06130.1 | 1300 | 11667  | 0         | 656  | 660  | 99 +  | 124  | 783  | 680    | 1339   |
| UN07625 | Rsa1.0_01004.1 | 1180 | 56975  | 0         | 488  | 489  | 99 +  | 692  | 1180 | 3551   | 4039   |
| UN07626 | Rsa1.0_00211.1 | 563  | 228189 | 1.00E-114 | 228  | 233  | 97 -  | 326  | 558  | 134586 | 134817 |
| UN07627 | Rsa1.0_22066.1 | 884  | 1152   | 1.00E-173 | 338  | 348  | 97 -  | 516  | 863  | 805    | 1152   |
| UN07628 | Rsa1.0_00019.1 | 1073 | 301669 | 0         | 932  | 949  | 98 -  | 135  | 1072 | 57759  | 58707  |
| UN07629 | Rsa1.0_00359.1 | 1297 | 91256  | 0         | 1081 | 1089 | 99 +  | 210  | 1297 | 21708  | 22796  |
| UN07630 | Rsa1.0_01480.1 | 1713 | 44926  | 0         | 432  | 436  | 99 -  | 1278 | 1713 | 31947  | 32382  |
| UN07631 | Rsa1.0_00188.1 | 1171 | 112020 | 0         | 445  | 460  | 96 +  | 529  | 985  | 74179  | 74638  |
| UN07632 | Rsa1.0_08437.1 | 914  | 7357   | 0         | 909  | 914  | 99 -  | 2    | 914  | 1867   | 2780   |
| UN07633 | Rsa1.0_00201.1 | 1095 | 232851 | 1.00E-169 | 316  | 320  | 98 +  | 1    | 320  | 212076 | 212392 |
| UN07634 | Rsa1.0_01586.1 | 1267 | 42804  | 0         | 658  | 658  | 100 + | 140  | 797  | 20465  | 21122  |
| UN07635 | Rsa1.0_04552.1 | 1133 | 16878  | 0         | 1130 | 1135 | 99 +  | 3    | 1133 | 1775   | 2909   |
| UN07636 | Rsa1.0_00668.1 | 1625 | 69421  | 0         | 394  | 399  | 98 +  | 1227 | 1625 | 47385  | 47782  |
| UN07637 | Rsa1.0_04739.1 | 975  | 16167  | 0         | 476  | 479  | 99 +  | 1    | 478  | 12747  | 13224  |
| UN07638 | Rsa1.0_02544.1 | 1264 | 30290  | 0         | 398  | 404  | 98 -  | 860  | 1263 | 5350   | 5753   |
| UN07639 | Rsa1.0_00341.1 | 804  | 249309 | 5.00E-86  | 177  | 182  | 97 +  | 418  | 599  | 121074 | 121255 |
| UN07640 | Rsa1.0_00692.1 | 1298 | 68151  | 0         | 561  | 571  | 98 +  | 123  | 693  | 27013  | 27583  |
| UN07641 | Rsa1.0_24802.1 | 1002 | 967    | 0         | 641  | 646  | 99 +  | 4    | 649  | 325    | 967    |
| UN07642 | Rsa1.0_00127.1 | 1068 | 127446 | 0         | 522  | 523  | 99 -  | 546  | 1068 | 16886  | 17408  |

|         |                |      |        |           |      |      |      |      |      |        |        |
|---------|----------------|------|--------|-----------|------|------|------|------|------|--------|--------|
| UN07643 | Rsa1.0.01189.1 | 415  | 51358  | 0         | 327  | 328  | 99 + | 88   | 415  | 42574  | 42901  |
| UN07644 | Rsa1.0.02515.1 | 1467 | 30616  | 0         | 450  | 452  | 99 + | 1016 | 1467 | 9025   | 9476   |
| UN07645 | Rsa1.0.00860.1 | 1248 | 61789  | 0         | 785  | 806  | 97 - | 451  | 1248 | 30854  | 31659  |
| UN07646 | Rsa1.0.01233.1 | 1451 | 50184  | 0         | 1419 | 1451 | 97 - | 3    | 1449 | 7711   | 9159   |
| UN07647 | Rsa1.0.00146.1 | 1047 | 149343 | 0         | 525  | 547  | 95 + | 501  | 1047 | 63621  | 64163  |
| UN07648 | Rsa1.0.00925.1 | 949  | 59481  | 0         | 782  | 827  | 94 - | 39   | 857  | 3312   | 4137   |
| UN07649 | Rsa1.0.00013.1 | 1528 | 292129 | 0         | 540  | 547  | 98 + | 3    | 549  | 194728 | 195272 |
| UN07650 | Rsa1.0.00822.1 | 925  | 62891  | 0         | 739  | 787  | 93 + | 2    | 785  | 4892   | 5678   |
| UN07651 | Rsa1.0.00013.1 | 1188 | 292129 | 1.00E-62  | 204  | 229  | 89 + | 709  | 937  | 199158 | 199382 |
| UN07652 | Rsa1.0.02165.1 | 916  | 34423  | 0         | 913  | 920  | 99 - | 3    | 915  | 15019  | 15938  |
| UN07653 | Rsa1.0.01930.1 | 735  | 37189  | 0         | 727  | 737  | 98 - | 6    | 735  | 1049   | 1785   |
| UN07654 | Rsa1.0.00733.1 | 1300 | 66583  | 0         | 660  | 661  | 99 - | 639  | 1299 | 53663  | 54323  |
| UN07655 | Rsa1.0.00168.1 | 1645 | 115870 | 1.00E-140 | 263  | 266  | 98 + | 1379 | 1644 | 51784  | 52049  |
| UN07656 | Rsa1.0.01286.1 | 764  | 49209  | 7.00E-82  | 161  | 163  | 98 - | 294  | 456  | 11594  | 11756  |
| UN07657 | Rsa1.0.03302.1 | 659  | 23898  | 1.00E-149 | 354  | 381  | 92 - | 288  | 659  | 11619  | 11999  |
| UN07658 | Rsa1.0.03959.1 | 884  | 19866  | 0         | 345  | 349  | 98 - | 5    | 353  | 165    | 512    |
| UN07659 | Rsa1.0.05570.1 | 1120 | 13301  | 1.00E-128 | 243  | 245  | 99 + | 876  | 1120 | 6286   | 6529   |
| UN07660 | Rsa1.0.00123.1 | 1950 | 325650 | 0         | 1372 | 1373 | 99 - | 230  | 1602 | 94779  | 96151  |
| UN07661 | Rsa1.0.00194.1 | 958  | 110851 | 0         | 550  | 553  | 99 - | 1    | 553  | 85703  | 86255  |
| UN07662 | Rsa1.0.00172.1 | 1498 | 115476 | 0         | 870  | 882  | 98 - | 200  | 1080 | 48895  | 49775  |
| UN07663 | Rsa1.0.00581.1 | 1241 | 163575 | 1.00E-108 | 251  | 262  | 95 - | 982  | 1240 | 28074  | 28332  |
| UN07664 | Rsa1.0.08563.1 | 945  | 7193   | 0         | 929  | 941  | 98 - | 4    | 944  | 632    | 1571   |
| UN07665 | Rsa1.0.00071.1 | 1016 | 345714 | 0         | 394  | 401  | 98 - | 616  | 1016 | 5731   | 6127   |
| UN07666 | Rsa1.0.08979.1 | 919  | 6739   | 0         | 889  | 919  | 96 - | 2    | 919  | 4259   | 5177   |
| UN07667 | Rsa1.0.01011.1 | 1765 | 56883  | 0         | 839  | 847  | 99 + | 917  | 1763 | 22128  | 22974  |
| UN07668 | Rsa1.0.00221.1 | 839  | 106972 | 0         | 327  | 329  | 99 + | 1    | 329  | 62498  | 62826  |
| UN07669 | Rsa1.0.01148.1 | 933  | 52375  | 0         | 514  | 522  | 98 - | 415  | 933  | 27927  | 28448  |
| UN07670 | Rsa1.0.00016.1 | 661  | 831256 | 1.00E-64  | 210  | 238  | 88 - | 159  | 396  | 685024 | 685261 |
| UN07671 | Rsa1.0.01311.1 | 1184 | 48456  | 0         | 543  | 553  | 98 - | 632  | 1184 | 46824  | 47376  |
| UN07672 | Rsa1.0.00352.1 | 1328 | 92266  | 0         | 741  | 750  | 98 - | 581  | 1328 | 13887  | 14636  |
| UN07673 | Rsa1.0.00575.1 | 896  | 74791  | 0         | 885  | 901  | 98 - | 2    | 896  | 29333  | 30232  |
| UN07674 | Rsa1.0.02499.1 | 668  | 30774  | 0         | 343  | 347  | 98 - | 1    | 347  | 21561  | 21907  |
| UN07675 | Rsa1.0.01560.1 | 1073 | 43256  | 0         | 1060 | 1072 | 98 - | 1    | 1072 | 19325  | 20396  |
| UN07676 | Rsa1.0.00714.1 | 1188 | 67187  | 0         | 1003 | 1010 | 99 + | 179  | 1188 | 41615  | 42624  |
| UN07677 | Rsa1.0.00046.1 | 1798 | 320315 | 0         | 695  | 723  | 96 + | 1080 | 1798 | 52012  | 52728  |
| UN07678 | Rsa1.0.01384.1 | 1093 | 46803  | 0         | 364  | 372  | 97 - | 721  | 1092 | 29348  | 29719  |
| UN07679 | Rsa1.0.00128.1 | 1088 | 228675 | 0         | 578  | 597  | 96 + | 2    | 597  | 188508 | 189104 |
| UN07680 | Rsa1.0.01776.1 | 1097 | 39511  | 0         | 539  | 579  | 93 - | 518  | 1095 | 26754  | 27327  |
| UN07681 | Rsa1.0.00963.1 | 804  | 58176  | 0         | 342  | 348  | 98 - | 18   | 365  | 44669  | 45016  |

|         |                |      |        |           |      |      |      |      |      |        |        |
|---------|----------------|------|--------|-----------|------|------|------|------|------|--------|--------|
| UN07682 | Rsa1.0.02160.1 | 1758 | 34468  | 1.00E-177 | 349  | 360  | 96 + | 912  | 1271 | 20593  | 20952  |
| UN07683 | Rsa1.0.00025.1 | 1134 | 277312 | 0         | 461  | 464  | 99 + | 3    | 466  | 121941 | 122403 |
| UN07684 | Rsa1.0.00053.1 | 1119 | 263459 | 0         | 375  | 391  | 95 + | 729  | 1119 | 207739 | 208128 |
| UN07685 | Rsa1.0.03885.1 | 657  | 20256  | 0         | 435  | 442  | 98 - | 214  | 655  | 10316  | 10756  |
| UN07686 | Rsa1.0_10685.1 | 1557 | 5756   | 0         | 439  | 440  | 99 + | 25   | 464  | 354    | 793    |
| UN07687 | Rsa1.0_00100.1 | 984  | 249232 | 1.00E-143 | 359  | 392  | 91 + | 523  | 907  | 8737   | 9127   |
| UN07688 | Rsa1.0.00372.1 | 1175 | 90418  | 0         | 503  | 526  | 95 + | 642  | 1160 | 20630  | 21154  |
| UN07689 | Rsa1.0.00675.1 | 1132 | 145590 | 0         | 460  | 490  | 93 - | 644  | 1132 | 45253  | 45726  |
| UN07690 | Rsa1.0.01884.1 | 697  | 37659  | 0         | 350  | 354  | 98 + | 1    | 354  | 32322  | 32675  |
| UN07691 | Rsa1.0.01171.1 | 1421 | 51752  | 0         | 449  | 470  | 95 + | 6    | 464  | 35724  | 36193  |
| UN07692 | Rsa1.0.00808.1 | 1099 | 63351  | 0         | 349  | 354  | 98 - | 542  | 895  | 60275  | 60627  |
| UN07693 | Rsa1.0.00653.1 | 726  | 70029  | 0         | 716  | 734  | 97 - | 1    | 725  | 41924  | 42656  |
| UN07694 | Rsa1.0.34912.1 | 1156 | 648    | 0         | 647  | 648  | 99 - | 54   | 701  | 1      | 648    |
| UN07695 | Rsa1.0.04356.1 | 796  | 17764  | 0         | 707  | 772  | 91 - | 32   | 796  | 10449  | 11204  |
| UN07696 | Rsa1.0.04364.1 | 1094 | 17734  | 0         | 1051 | 1091 | 96 + | 3    | 1093 | 4195   | 5278   |
| UN07697 | Rsa1.0.01798.1 | 1146 | 173909 | 1.00E-174 | 313  | 314  | 99 - | 665  | 978  | 162337 | 162650 |
| UN07698 | Rsa1.0.00092.1 | 1044 | 659932 | 0         | 468  | 471  | 99 - | 3    | 472  | 173928 | 174396 |
| UN07699 | Rsa1.0.02492.1 | 1140 | 30859  | 0         | 596  | 610  | 97 - | 534  | 1140 | 18258  | 18867  |
| UN07700 | Rsa1.0.02382.1 | 1323 | 31969  | 0         | 1300 | 1318 | 98 - | 2    | 1319 | 18123  | 19440  |
| UN07701 | Rsa1.0.05554.1 | 316  | 13343  | 1.00E-147 | 304  | 316  | 96 - | 2    | 316  | 12366  | 12681  |
| UN07702 | Rsa1.0.00810.1 | 715  | 63289  | 0         | 547  | 577  | 94 - | 129  | 699  | 26680  | 27247  |
| UN07703 | Rsa1.0_14690.1 | 961  | 3155   | 0         | 390  | 396  | 98 - | 26   | 417  | 137    | 532    |
| UN07704 | Rsa1.0_05931.1 | 845  | 12210  | 0         | 482  | 494  | 97 + | 2    | 491  | 7419   | 7912   |
| UN07705 | Rsa1.0.22303.1 | 1496 | 1132   | 0         | 619  | 634  | 97 + | 749  | 1382 | 499    | 1132   |
| UN07706 | Rsa1.0.00050.1 | 1037 | 237174 | 0         | 775  | 799  | 96 - | 1    | 799  | 165538 | 166334 |
| UN07707 | Rsa1.0.00234.1 | 728  | 197060 | 0         | 555  | 601  | 92 - | 135  | 728  | 14744  | 15331  |
| UN07708 | Rsa1.0.00146.1 | 1378 | 149343 | 0         | 1268 | 1308 | 96 + | 2    | 1309 | 138139 | 139422 |
| UN07709 | Rsa1.0.13606.1 | 684  | 4648   | 0         | 480  | 482  | 99 + | 202  | 683  | 369    | 850    |
| UN07710 | Rsa1.0.00325.1 | 1268 | 95371  | 0         | 1259 | 1268 | 99 - | 1    | 1268 | 10700  | 11967  |
| UN07711 | Rsa1.0.02995.1 | 930  | 26163  | 1.00E-89  | 433  | 514  | 84 - | 201  | 709  | 9948   | 10458  |
| UN07712 | Rsa1.0.00139.1 | 1429 | 357786 | 0         | 731  | 745  | 98 + | 679  | 1422 | 7572   | 8316   |
| UN07713 | Rsa1.0.02903.1 | 655  | 26901  | 1.00E-106 | 202  | 204  | 99 - | 452  | 655  | 3348   | 3551   |
| UN07714 | Rsa1.0.00113.1 | 1657 | 131574 | 0         | 410  | 411  | 99 - | 1240 | 1650 | 69445  | 69855  |
| UN07715 | Rsa1.0.01069.1 | 1516 | 55113  | 0         | 642  | 644  | 99 + | 250  | 893  | 52790  | 53433  |
| UN07716 | Rsa1.0.00178.1 | 963  | 114861 | 0         | 408  | 420  | 97 + | 547  | 963  | 88533  | 88950  |
| UN07717 | Rsa1.0.03836.1 | 880  | 20564  | 0         | 864  | 881  | 98 + | 2    | 878  | 16989  | 17868  |
| UN07718 | Rsa1.0.01385.1 | 1131 | 46782  | 0         | 1112 | 1128 | 98 - | 2    | 1129 | 25913  | 27040  |
| UN07719 | Rsa1.0.00797.1 | 610  | 63959  | 0         | 380  | 381  | 99 + | 176  | 556  | 17835  | 18215  |
| UN07720 | Rsa1.0.03376.1 | 1274 | 23326  | 0         | 371  | 376  | 98 - | 2    | 377  | 14936  | 15311  |



|         |                |      |        |           |      |      |       |      |      |        |        |
|---------|----------------|------|--------|-----------|------|------|-------|------|------|--------|--------|
| UN07721 | Rsa1.0_04224.1 | 1220 | 18402  | 0         | 494  | 521  | 94 -  | 696  | 1204 | 10838  | 11357  |
| UN07722 | Rsa1.0_00152.1 | 1435 | 257730 | 0         | 1261 | 1293 | 97 +  | 142  | 1434 | 68322  | 69602  |
| UN07723 | Rsa1.0_00056.1 | 1777 | 332604 | 0         | 493  | 503  | 98 +  | 1275 | 1777 | 141016 | 141512 |
| UN07724 | Rsa1.0_08186.1 | 1041 | 7770   | 1.00E-56  | 125  | 128  | 97 -  | 894  | 1019 | 7038   | 7165   |
| UN07725 | Rsa1.0_01817.1 | 952  | 38849  | 1.00E-164 | 297  | 298  | 99 -  | 1    | 298  | 34315  | 34612  |
| UN07726 | Rsa1.0_00175.1 | 653  | 166121 | 1.00E-133 | 299  | 317  | 94 -  | 3    | 319  | 104859 | 105174 |
| UN07727 | Rsa1.0_00706.1 | 1137 | 291570 | 0         | 458  | 461  | 99 +  | 280  | 740  | 14249  | 14709  |
| UN07728 | Rsa1.0_00078.1 | 1216 | 175053 | 0         | 1156 | 1223 | 94 +  | 16   | 1215 | 8988   | 10201  |
| UN07729 | Rsa1.0_02057.1 | 782  | 35540  | 1.00E-105 | 216  | 222  | 97 +  | 4    | 224  | 22336  | 22557  |
| UN07730 | Rsa1.0_00305.1 | 516  | 97308  | 1.00E-169 | 336  | 344  | 97 -  | 1    | 342  | 91981  | 92322  |
| UN07731 | Rsa1.0_00339.1 | 1082 | 222974 | 0         | 541  | 548  | 98 +  | 3    | 550  | 202288 | 202834 |
| UN07732 | Rsa1.0_01997.1 | 830  | 158416 | 0         | 808  | 857  | 94 -  | 1    | 830  | 3758   | 4612   |
| UN07733 | Rsa1.0_04358.1 | 1288 | 17759  | 0         | 399  | 399  | 100 + | 890  | 1288 | 2339   | 2737   |
| UN07734 | Rsa1.0_02276.1 | 1641 | 33098  | 0         | 1456 | 1462 | 99 -  | 180  | 1641 | 22981  | 24442  |
| UN07735 | Rsa1.0_00626.1 | 1661 | 71582  | 0         | 1020 | 1022 | 99 +  | 1    | 1022 | 51792  | 52813  |
| UN07736 | Rsa1.0_00402.1 | 1156 | 385315 | 0         | 623  | 659  | 94 +  | 514  | 1155 | 233226 | 233884 |
| UN07737 | Rsa1.0_00980.1 | 1915 | 57729  | 0         | 1064 | 1066 | 99 +  | 1    | 1064 | 3677   | 4742   |
| UN07738 | Rsa1.0_01636.1 | 881  | 41863  | 0         | 570  | 583  | 97 -  | 299  | 881  | 24299  | 24878  |
| UN07739 | Rsa1.0_00089.1 | 977  | 406142 | 0         | 434  | 455  | 95 +  | 524  | 977  | 351768 | 352214 |
| UN07740 | Rsa1.0_00048.1 | 650  | 167185 | 1.00E-132 | 255  | 260  | 98 +  | 391  | 650  | 4502   | 4761   |
| UN07741 | Rsa1.0_00049.1 | 1728 | 167018 | 0         | 1152 | 1193 | 96 -  | 84   | 1276 | 45113  | 46302  |
| UN07742 | Rsa1.0_00433.1 | 948  | 85381  | 0         | 869  | 889  | 97 -  | 46   | 933  | 10340  | 11228  |
| UN07743 | Rsa1.0_00476.1 | 728  | 280966 | 1.00E-104 | 219  | 228  | 96 -  | 267  | 494  | 165837 | 166064 |
| UN07744 | Rsa1.0_06010.1 | 1522 | 11944  | 0         | 666  | 750  | 88 +  | 627  | 1375 | 4866   | 5615   |
| UN07745 | Rsa1.0_00359.1 | 1528 | 91256  | 0         | 491  | 493  | 99 +  | 354  | 846  | 3010   | 3502   |
| UN07746 | Rsa1.0_00108.1 | 1106 | 478491 | 1.00E-132 | 245  | 247  | 99 +  | 860  | 1106 | 43807  | 44053  |
| UN07747 | Rsa1.0_00017.1 | 1862 | 752458 | 0         | 416  | 416  | 100 - | 1020 | 1435 | 627344 | 627759 |
| UN07748 | Rsa1.0_00052.1 | 503  | 162771 | 0         | 497  | 501  | 99 +  | 3    | 503  | 72079  | 72578  |
| UN07749 | Rsa1.0_02685.1 | 1361 | 28669  | 0         | 1216 | 1257 | 96 -  | 63   | 1319 | 6968   | 8219   |
| UN07750 | Rsa1.0_00911.1 | 744  | 59943  | 1.00E-126 | 250  | 257  | 97 -  | 488  | 744  | 11489  | 11745  |
| UN07751 | Rsa1.0_01609.1 | 1659 | 42280  | 0         | 1327 | 1331 | 99 +  | 3    | 1333 | 34645  | 35975  |
| UN07752 | Rsa1.0_08503.1 | 659  | 7259   | 0         | 645  | 647  | 99 +  | 13   | 659  | 749    | 1395   |
| UN07753 | Rsa1.0_01092.1 | 2800 | 54348  | 0         | 769  | 828  | 92 +  | 1955 | 2761 | 43979  | 44800  |
| UN07754 | Rsa1.0_01722.1 | 675  | 40320  | 0         | 427  | 429  | 99 +  | 246  | 673  | 36699  | 37126  |
| UN07755 | Rsa1.0_14798.1 | 430  | 3060   | 1.00E-106 | 209  | 212  | 98 +  | 2    | 212  | 135    | 346    |
| UN07756 | Rsa1.0_04210.1 | 1385 | 18442  | 1.00E-153 | 292  | 297  | 98 -  | 1085 | 1381 | 1611   | 1904   |
| UN07757 | Rsa1.0_02645.1 | 1457 | 29158  | 0         | 918  | 918  | 100 - | 540  | 1457 | 20181  | 21098  |
| UN07758 | Rsa1.0_00896.1 | 816  | 60509  | 1.00E-174 | 319  | 322  | 99 +  | 270  | 591  | 16503  | 16824  |
| UN07759 | Rsa1.0_00124.1 | 1109 | 262503 | 1.00E-172 | 309  | 310  | 99 +  | 1    | 310  | 91257  | 91566  |

|         |                |      |        |           |      |      |       |      |      |        |        |
|---------|----------------|------|--------|-----------|------|------|-------|------|------|--------|--------|
| UN07760 | Rsa1.0_00782.1 | 1068 | 64468  | 0         | 385  | 390  | 98 +  | 3    | 392  | 58826  | 59215  |
| UN07761 | Rsa1.0_00576.1 | 765  | 178949 | 0         | 714  | 749  | 95 +  | 3    | 747  | 61942  | 62672  |
| UN07762 | Rsa1.0_00706.1 | 1454 | 291570 | 1.00E-151 | 284  | 288  | 98 +  | 1167 | 1454 | 163168 | 163455 |
| UN07763 | Rsa1.0_02299.1 | 1218 | 32857  | 0         | 775  | 779  | 99 -  | 1    | 779  | 28565  | 29343  |
| UN07764 | Rsa1.0_15710.1 | 1463 | 2468   | 0         | 659  | 667  | 98 -  | 258  | 924  | 820    | 1486   |
| UN07765 | Rsa1.0_00564.1 | 1950 | 75428  | 0         | 1441 | 1478 | 97 +  | 39   | 1516 | 34347  | 35821  |
| UN07766 | Rsa1.0_08046.1 | 859  | 8014   | 0         | 465  | 511  | 90 +  | 371  | 859  | 472    | 970    |
| UN07767 | Rsa1.0_02714.1 | 1556 | 28470  | 0         | 442  | 442  | 100 - | 1    | 442  | 1989   | 2430   |
| UN07768 | #              | #    | #      | #         | #    | #    | #     | #    | #    | #      | #      |
| UN07769 | Rsa1.0_00061.1 | 972  | 218685 | 0         | 344  | 344  | 100 - | 629  | 972  | 166142 | 166485 |
| UN07770 | Rsa1.0_00273.1 | 1659 | 326186 | 0         | 837  | 843  | 99 -  | 817  | 1658 | 274597 | 275439 |
| UN07771 | Rsa1.0_00548.1 | 962  | 76518  | 0         | 351  | 352  | 99 +  | 281  | 632  | 30215  | 30566  |
| UN07772 | Rsa1.0_02541.1 | 1434 | 30342  | 1.00E-177 | 318  | 319  | 99 +  | 68   | 386  | 24690  | 25008  |
| UN07773 | Rsa1.0_00145.1 | 468  | 261008 | 0         | 390  | 395  | 98 +  | 72   | 466  | 77467  | 77861  |
| UN07774 | Rsa1.0_01323.1 | 1643 | 48152  | 0         | 561  | 563  | 99 +  | 411  | 973  | 1420   | 1982   |
| UN07775 | Rsa1.0_00368.1 | 1536 | 90669  | 0         | 853  | 884  | 96 +  | 610  | 1480 | 8923   | 9804   |
| UN07776 | Rsa1.0_00266.1 | 942  | 163932 | 0         | 935  | 946  | 98 -  | 3    | 942  | 128758 | 129703 |
| UN07777 | Rsa1.0_00102.1 | 1071 | 135497 | 0         | 1060 | 1070 | 99 -  | 3    | 1070 | 60039  | 61108  |
| UN07778 | Rsa1.0_00078.1 | 1357 | 175053 | 0         | 1004 | 1013 | 99 +  | 345  | 1357 | 119583 | 120595 |
| UN07779 | Rsa1.0_01961.1 | 1086 | 36761  | 0         | 1083 | 1084 | 99 +  | 1    | 1084 | 27368  | 28451  |
| UN07780 | Rsa1.0_00025.1 | 750  | 277312 | 0         | 737  | 749  | 98 +  | 2    | 750  | 242719 | 243464 |
| UN07781 | Rsa1.0_01104.1 | 661  | 285480 | 6.00E-17  | 118  | 141  | 83 +  | 118  | 258  | 277247 | 277380 |
| UN07782 | Rsa1.0_24258.1 | 1399 | 997    | 0         | 512  | 518  | 98 +  | 857  | 1374 | 374    | 891    |
| UN07783 | Rsa1.0_00026.1 | 738  | 327835 | 0         | 731  | 736  | 99 -  | 3    | 738  | 8175   | 8910   |
| UN07784 | Rsa1.0_00564.1 | 555  | 75428  | 0         | 541  | 547  | 98 -  | 10   | 555  | 9198   | 9744   |
| UN07785 | Rsa1.0_25842.1 | 703  | 917    | 0         | 456  | 459  | 99 -  | 245  | 703  | 460    | 917    |
| UN07786 | Rsa1.0_00457.1 | 788  | 337301 | 4.00E-77  | 150  | 151  | 99 +  | 3    | 153  | 297696 | 297846 |
| UN07787 | Rsa1.0_00019.1 | 731  | 301669 | 0         | 719  | 730  | 98 +  | 3    | 731  | 44469  | 45197  |
| UN07788 | Rsa1.0_00131.1 | 1354 | 432233 | 9.00E-98  | 185  | 186  | 99 -  | 366  | 551  | 416768 | 416953 |
| UN07789 | Rsa1.0_00498.1 | 1355 | 79746  | 0         | 863  | 890  | 96 +  | 2    | 891  | 44460  | 45349  |
| UN07790 | Rsa1.0_07127.1 | 601  | 9863   | 0         | 432  | 446  | 96 -  | 130  | 574  | 8986   | 9430   |
| UN07791 | Rsa1.0_00382.1 | 2203 | 251946 | 1.00E-147 | 297  | 305  | 97 -  | 1826 | 2128 | 113820 | 114124 |
| UN07792 | Rsa1.0_05428.1 | 1128 | 13789  | 1.00E-154 | 286  | 289  | 98 -  | 828  | 1116 | 6198   | 6486   |
| UN07793 | Rsa1.0_03842.1 | 861  | 20503  | 0         | 832  | 863  | 96 -  | 1    | 861  | 8206   | 9064   |
| UN07794 | Rsa1.0_00236.1 | 1571 | 104771 | 0         | 1103 | 1162 | 94 -  | 127  | 1284 | 73950  | 75085  |
| UN07795 | Rsa1.0_00250.1 | 1456 | 273771 | 1.00E-155 | 279  | 279  | 100 + | 536  | 814  | 241495 | 241773 |
| UN07796 | Rsa1.0_00131.1 | 995  | 432233 | 0         | 452  | 452  | 100 - | 1    | 452  | 73557  | 74008  |
| UN07797 | Rsa1.0_09746.1 | 729  | 6174   | 0         | 554  | 557  | 99 +  | 173  | 729  | 86     | 642    |
| UN07798 | Rsa1.0_00122.1 | 1625 | 265937 | 0         | 580  | 607  | 95 -  | 1    | 596  | 233492 | 234097 |

|         |                |      |        |           |      |      |       |      |      |        |        |
|---------|----------------|------|--------|-----------|------|------|-------|------|------|--------|--------|
| UN07799 | Rsa1.0.00159.1 | 1157 | 431686 | 1.00E-141 | 295  | 306  | 96 +  | 854  | 1157 | 418639 | 418943 |
| UN07800 | Rsa1.0.00793.1 | 1148 | 64103  | 1.00E-178 | 367  | 381  | 96 +  | 1    | 380  | 38945  | 39324  |
| UN07801 | Rsa1.0.01361.1 | 1312 | 47226  | 0         | 1090 | 1112 | 98 +  | 12   | 1106 | 36939  | 38050  |
| UN07802 | Rsa1.0.00381.1 | 1025 | 89718  | 0         | 394  | 414  | 95 +  | 619  | 1024 | 29797  | 30210  |
| UN07803 | Rsa1.0.00319.1 | 1187 | 167331 | 0         | 947  | 1079 | 87 -  | 6    | 1073 | 91408  | 92486  |
| UN07804 | Rsa1.0.00332.1 | 1293 | 94575  | 1.00E-174 | 332  | 337  | 98 -  | 958  | 1291 | 77800  | 78136  |
| UN07805 | Rsa1.0.03353.1 | 1285 | 23496  | 0         | 540  | 586  | 92 -  | 668  | 1251 | 18990  | 19561  |
| UN07806 | Rsa1.0.01431.1 | 1273 | 167877 | 0         | 346  | 350  | 98 +  | 345  | 694  | 23662  | 24011  |
| UN07807 | Rsa1.0.04463.1 | 1730 | 17247  | 0         | 553  | 569  | 97 -  | 2    | 569  | 15847  | 16407  |
| UN07808 | Rsa1.0.00512.1 | 1509 | 200277 | 2.33E-156 | 276  | 280  | 98 +  | 1230 | 1509 | 71604  | 71883  |
| UN07809 | Rsa1.0.03101.1 | 786  | 25410  | 0         | 709  | 717  | 98 -  | 4    | 720  | 390    | 1105   |
| UN07810 | Rsa1.0.03090.1 | 841  | 25464  | 0         | 432  | 449  | 96 +  | 5    | 450  | 21757  | 22205  |
| UN07811 | Rsa1.0.00327.1 | 1101 | 94892  | 0         | 493  | 513  | 96 +  | 2    | 508  | 24938  | 25448  |
| UN07812 | Rsa1.0.00215.1 | 1222 | 201775 | 0         | 602  | 609  | 98 -  | 612  | 1220 | 10591  | 11197  |
| UN07813 | Rsa1.0.01539.1 | 1344 | 43698  | 0         | 461  | 461  | 100 - | 135  | 595  | 23834  | 24294  |
| UN07814 | Rsa1.0.10233.1 | 1456 | 5928   | 0         | 484  | 511  | 94 -  | 2    | 512  | 2369   | 2861   |
| UN07815 | Rsa1.0.00131.1 | 903  | 432233 | 1.00E-122 | 249  | 254  | 98 +  | 3    | 254  | 6381   | 6632   |
| UN07816 | Rsa1.0.00152.1 | 1161 | 257730 | 0         | 424  | 440  | 96 +  | 725  | 1161 | 38296  | 38735  |
| UN07817 | Rsa1.0.00040.1 | 988  | 324196 | 1.00E-107 | 201  | 202  | 99 +  | 403  | 604  | 320994 | 321195 |
| UN07818 | Rsa1.0.56101.1 | 929  | 408    | 0         | 361  | 369  | 97 -  | 33   | 399  | 40     | 408    |
| UN07819 | Rsa1.0.00321.1 | 1031 | 95671  | 1.00E-111 | 277  | 298  | 92 +  | 626  | 923  | 60426  | 60718  |
| UN07820 | Rsa1.0.00089.1 | 960  | 406142 | 1.00E-175 | 435  | 475  | 91 -  | 482  | 934  | 352489 | 352958 |
| UN07821 | Rsa1.0.01696.1 | 1169 | 301850 | 1.00E-169 | 399  | 423  | 94 -  | 751  | 1167 | 298765 | 299179 |
| UN07822 | Rsa1.0.03084.1 | 1082 | 25506  | 0         | 595  | 607  | 98 +  | 471  | 1077 | 12462  | 13060  |
| UN07823 | Rsa1.0.00123.1 | 1389 | 325650 | 0         | 389  | 389  | 100 - | 54   | 442  | 4758   | 5146   |
| UN07824 | Rsa1.0.11626.1 | 1118 | 5456   | 0         | 481  | 511  | 94 -  | 603  | 1105 | 3158   | 3663   |
| UN07825 | Rsa1.0.02587.1 | 862  | 156090 | 0         | 443  | 448  | 98 -  | 38   | 485  | 16390  | 16837  |
| UN07826 | Rsa1.0.23327.1 | 1184 | 1056   | 0         | 519  | 535  | 97 +  | 654  | 1182 | 1      | 533    |
| UN07827 | Rsa1.0.00065.1 | 1037 | 454616 | 0         | 456  | 472  | 96 +  | 132  | 600  | 207651 | 208122 |
| UN07828 | Rsa1.0.00207.1 | 1362 | 248736 | 1.00E-108 | 288  | 313  | 92 +  | 282  | 590  | 24166  | 24475  |
| UN07829 | Rsa1.0.28441.1 | 1606 | 815    | 0         | 782  | 815  | 95 -  | 564  | 1376 | 1      | 815    |
| UN07830 | Rsa1.0.07336.1 | 1803 | 9540   | 0         | 405  | 406  | 99 +  | 544  | 949  | 1      | 406    |
| UN07831 | Rsa1.0.01093.1 | 879  | 54312  | 0         | 551  | 553  | 99 +  | 324  | 876  | 26466  | 27018  |
| UN07832 | Rsa1.0.01198.1 | 1449 | 51029  | 1.00E-166 | 380  | 406  | 93 -  | 1039 | 1442 | 803    | 1196   |
| UN07833 | Rsa1.0.00016.1 | 1198 | 831256 | 0         | 644  | 662  | 97 +  | 543  | 1198 | 809000 | 809661 |
| UN07834 | Rsa1.0.00245.1 | 684  | 103569 | 0         | 663  | 682  | 97 +  | 1    | 682  | 97557  | 98232  |
| UN07835 | Rsa1.0.00040.1 | 1272 | 324196 | 0         | 918  | 927  | 99 -  | 342  | 1268 | 93894  | 94820  |
| UN07836 | Rsa1.0.02677.1 | 924  | 167801 | 0         | 438  | 444  | 98 -  | 3    | 446  | 153778 | 154218 |
| UN07837 | Rsa1.0.00146.1 | 1293 | 149343 | 0         | 657  | 662  | 99 -  | 6    | 664  | 86415  | 87076  |

|         |                |      |        |           |      |      |       |     |      |        |        |
|---------|----------------|------|--------|-----------|------|------|-------|-----|------|--------|--------|
| UN07838 | Rsa1.0_01783.1 | 1803 | 39383  | 0         | 719  | 743  | 96 +  | 438 | 1180 | 33735  | 34475  |
| UN07839 | Rsa1.0_13382.1 | 1014 | 4874   | 3.00E-66  | 141  | 145  | 97 -  | 257 | 401  | 1445   | 1589   |
| UN07840 | Rsa1.0_00057.1 | 788  | 160473 | 1.00E-86  | 163  | 163  | 100 - | 565 | 727  | 146663 | 146825 |
| UN07841 | Rsa1.0_00898.1 | 1268 | 202772 | 0         | 536  | 559  | 95 -  | 43  | 599  | 182006 | 182562 |
| UN07842 | Rsa1.0_00040.1 | 774  | 324196 | 2.00E-76  | 146  | 146  | 100 - | 85  | 230  | 264034 | 264179 |
| UN07843 | Rsa1.0_01997.1 | 1765 | 158416 | 0         | 1694 | 1787 | 94 -  | 3   | 1765 | 19326  | 21081  |
| UN07844 | Rsa1.0_00107.1 | 840  | 431659 | 0         | 595  | 597  | 99 +  | 1   | 596  | 69339  | 69935  |
| UN07845 | Rsa1.0_12910.1 | 1138 | 5081   | 0         | 353  | 357  | 98 +  | 3   | 356  | 2347   | 2703   |
| UN07846 | Rsa1.0_04955.1 | 1408 | 15337  | 0         | 1023 | 1046 | 97 +  | 88  | 1130 | 8163   | 9205   |
| UN07847 | Rsa1.0_03576.1 | 476  | 21986  | 0         | 469  | 476  | 98 -  | 1   | 476  | 3383   | 3855   |
| UN07848 | Rsa1.0_00057.1 | 718  | 160473 | 0         | 709  | 718  | 98 +  | 2   | 718  | 24327  | 25043  |
| UN07849 | Rsa1.0_03125.1 | 1287 | 147978 | 0         | 649  | 671  | 96 -  | 76  | 743  | 131472 | 132131 |
| UN07850 | Rsa1.0_01099.1 | 1238 | 158481 | 0         | 363  | 363  | 100 - | 380 | 742  | 131327 | 131689 |
| UN07851 | Rsa1.0_00014.1 | 1236 | 348985 | 0         | 364  | 367  | 99 +  | 1   | 367  | 343861 | 344224 |
| UN07852 | Rsa1.0_00056.1 | 838  | 332604 | 0         | 566  | 582  | 97 -  | 253 | 831  | 291284 | 291863 |
| UN07853 | Rsa1.0_00642.1 | 714  | 201230 | 0         | 709  | 714  | 99 +  | 2   | 714  | 165129 | 165842 |
| UN07854 | Rsa1.0_00090.1 | 1394 | 273859 | 0         | 512  | 530  | 96 +  | 868 | 1394 | 138994 | 139519 |
| UN07855 | Rsa1.0_00555.1 | 1945 | 75920  | 0         | 592  | 611  | 96 -  | 874 | 1482 | 1049   | 1652   |
| UN07856 | Rsa1.0_01753.1 | 848  | 39794  | 0         | 766  | 787  | 97 -  | 11  | 791  | 23080  | 23866  |
| UN07857 | Rsa1.0_00410.1 | 1248 | 86957  | 0         | 1246 | 1251 | 99 +  | 1   | 1248 | 52544  | 53794  |
| UN07858 | Rsa1.0_04772.1 | 552  | 16040  | 0         | 500  | 519  | 96 +  | 1   | 515  | 13563  | 14079  |
| UN07859 | Rsa1.0_00882.1 | 848  | 61249  | 0         | 844  | 846  | 99 -  | 3   | 848  | 28143  | 28988  |
| UN07860 | Rsa1.0_00525.1 | 886  | 78030  | 0         | 424  | 426  | 99 -  | 461 | 886  | 10815  | 11240  |
| UN07861 | Rsa1.0_00053.1 | 714  | 263459 | 0         | 686  | 703  | 97 -  | 10  | 712  | 78527  | 79226  |
| UN07862 | Rsa1.0_30434.1 | 1233 | 754    | 0         | 559  | 577  | 96 -  | 1   | 577  | 3      | 579    |
| UN07863 | Rsa1.0_00940.1 | 780  | 179946 | 0         | 775  | 788  | 98 +  | 1   | 780  | 24188  | 24975  |
| UN07864 | Rsa1.0_00549.1 | 1381 | 76473  | 0         | 1023 | 1059 | 96 +  | 326 | 1381 | 33161  | 34211  |
| UN07865 | Rsa1.0_00405.1 | 819  | 202864 | 0         | 642  | 672  | 95 -  | 3   | 656  | 85752  | 86423  |
| UN07866 | Rsa1.0_00827.1 | 771  | 62790  | 4.00E-80  | 174  | 180  | 96 -  | 153 | 332  | 42331  | 42509  |
| UN07867 | Rsa1.0_00983.1 | 1353 | 57586  | 0         | 863  | 900  | 95 +  | 2   | 901  | 10494  | 11393  |
| UN07868 | Rsa1.0_04060.1 | 559  | 19313  | 1.00E-156 | 300  | 307  | 97 +  | 253 | 559  | 16471  | 16777  |
| UN07869 | Rsa1.0_02374.1 | 846  | 32043  | 0         | 826  | 853  | 96 -  | 2   | 846  | 4803   | 5650   |
| UN07870 | Rsa1.0_05180.1 | 1422 | 14575  | 0         | 725  | 790  | 91 -  | 409 | 1187 | 4725   | 5479   |
| UN07871 | Rsa1.0_16653.1 | 1160 | 2077   | 0         | 976  | 1017 | 95 -  | 126 | 1133 | 99     | 1115   |
| UN07872 | Rsa1.0_20177.1 | 1131 | 1331   | 0         | 687  | 700  | 98 -  | 370 | 1069 | 130    | 829    |
| UN07873 | Rsa1.0_00140.1 | 1813 | 121541 | 0         | 999  | 1004 | 99 +  | 3   | 1006 | 81953  | 82956  |
| UN07874 | Rsa1.0_05874.1 | 1756 | 12351  | 0         | 1149 | 1202 | 95 +  | 2   | 1200 | 6996   | 8185   |
| UN07875 | Rsa1.0_00401.1 | 1343 | 244410 | 0         | 400  | 409  | 97 +  | 939 | 1343 | 243012 | 243420 |
| UN07876 | Rsa1.0_00015.1 | 600  | 561803 | 0         | 364  | 370  | 98 +  | 3   | 372  | 200435 | 200804 |

|         |                |      |        |           |      |      |       |      |      |        |        |
|---------|----------------|------|--------|-----------|------|------|-------|------|------|--------|--------|
| UN07877 | Rsa1.0_00201.1 | 917  | 232851 | 0         | 387  | 399  | 96 +  | 3    | 399  | 22034  | 22432  |
| UN07878 | Rsa1.0_01927.1 | 1665 | 37199  | 0         | 1109 | 1155 | 96 +  | 118  | 1271 | 23470  | 24616  |
| UN07879 | Rsa1.0_02279.1 | 1343 | 33069  | 0         | 736  | 755  | 97 -  | 332  | 1086 | 1      | 755    |
| UN07880 | Rsa1.0_02367.1 | 1058 | 32106  | 0         | 984  | 996  | 98 +  | 63   | 1058 | 7291   | 8282   |
| UN07881 | Rsa1.0_03754.1 | 1261 | 21005  | 0         | 1114 | 1215 | 91 -  | 14   | 1218 | 8962   | 10176  |
| UN07882 | Rsa1.0_02527.1 | 1886 | 177225 | 0         | 863  | 897  | 96 +  | 3    | 886  | 148129 | 149024 |
| UN07883 | Rsa1.0_16318.1 | 535  | 2202   | 0         | 356  | 360  | 98 +  | 176  | 535  | 1839   | 2196   |
| UN07884 | Rsa1.0_00827.1 | 1562 | 62790  | 1.00E-155 | 348  | 370  | 94 -  | 1193 | 1559 | 52062  | 52427  |
| UN07885 | Rsa1.0_00807.1 | 868  | 63607  | 1.00E-135 | 280  | 289  | 96 -  | 438  | 725  | 19934  | 20221  |
| UN07886 | Rsa1.0_02080.1 | 1236 | 35297  | 0         | 627  | 652  | 96 +  | 17   | 667  | 13243  | 13891  |
| UN07887 | Rsa1.0_00676.1 | 972  | 69166  | 1.00E-105 | 198  | 199  | 99 +  | 1    | 199  | 15584  | 15782  |
| UN07888 | Rsa1.0_00373.1 | 680  | 90296  | 1.00E-165 | 318  | 324  | 98 -  | 357  | 680  | 19124  | 19442  |
| UN07889 | Rsa1.0_00486.1 | 1634 | 80875  | 0         | 548  | 553  | 99 +  | 479  | 1031 | 13173  | 13724  |
| UN07890 | Rsa1.0_00588.1 | 847  | 73939  | 0         | 549  | 565  | 97 -  | 1    | 560  | 54483  | 55041  |
| UN07891 | Rsa1.0_00709.1 | 1553 | 67329  | 0         | 694  | 730  | 95 +  | 810  | 1527 | 30393  | 31121  |
| UN07892 | Rsa1.0_00411.1 | 1570 | 86944  | 0         | 583  | 605  | 96 +  | 969  | 1566 | 46561  | 47165  |
| UN07893 | Rsa1.0_00727.1 | 1096 | 66724  | 1.00E-150 | 291  | 298  | 97 +  | 553  | 850  | 24666  | 24963  |
| UN07894 | Rsa1.0_02139.1 | 1369 | 34686  | 0         | 381  | 387  | 98 -  | 979  | 1365 | 7615   | 8000   |
| UN07895 | Rsa1.0_22870.1 | 1910 | 1087   | 0         | 827  | 839  | 98 +  | 462  | 1300 | 1      | 839    |
| UN07896 | Rsa1.0_00675.1 | 1617 | 145590 | 0         | 516  | 531  | 97 +  | 995  | 1524 | 58355  | 58881  |
| UN07897 | Rsa1.0_04739.1 | 1413 | 16167  | 0         | 372  | 381  | 97 +  | 9    | 387  | 6309   | 6689   |
| UN07898 | Rsa1.0_00275.1 | 1771 | 210104 | 0         | 490  | 491  | 99 +  | 4    | 494  | 184311 | 184801 |
| UN07899 | Rsa1.0_01485.1 | 1043 | 44797  | 0         | 430  | 430  | 100 - | 614  | 1043 | 22104  | 22533  |
| UN07900 | Rsa1.0_00392.1 | 1714 | 88523  | 0         | 564  | 594  | 94 +  | 1109 | 1692 | 65484  | 66072  |
| UN07901 | Rsa1.0_00069.1 | 1013 | 403561 | 0         | 863  | 880  | 98 -  | 135  | 1013 | 206030 | 206905 |
| UN07902 | Rsa1.0_01338.1 | 1643 | 155644 | 0         | 1224 | 1230 | 99 -  | 1    | 1230 | 133631 | 134860 |
| UN07903 | Rsa1.0_00086.1 | 700  | 439854 | 0         | 690  | 699  | 98 +  | 3    | 700  | 129698 | 130396 |
| UN07904 | Rsa1.0_00015.1 | 1861 | 561803 | 0         | 1352 | 1515 | 89 -  | 186  | 1700 | 222002 | 223516 |
| UN07905 | Rsa1.0_00065.1 | 890  | 454616 | 1.00E-101 | 205  | 211  | 97 +  | 50   | 260  | 159767 | 159977 |
| UN07906 | Rsa1.0_00093.1 | 977  | 214962 | 0         | 666  | 690  | 96 -  | 238  | 927  | 173992 | 174680 |
| UN07907 | Rsa1.0_03697.1 | 971  | 21304  | 1.00E-59  | 142  | 150  | 94 -  | 266  | 415  | 5454   | 5603   |
| UN07908 | Rsa1.0_01363.1 | 617  | 47195  | 1.00E-137 | 270  | 276  | 97 +  | 341  | 616  | 8682   | 8956   |
| UN07909 | Rsa1.0_03671.1 | 1574 | 21459  | 0         | 360  | 364  | 98 +  | 3    | 363  | 11189  | 11552  |
| UN07910 | Rsa1.0_00037.1 | 967  | 307838 | 1.00E-137 | 270  | 276  | 97 +  | 3    | 278  | 286938 | 287212 |
| UN07911 | Rsa1.0_08969.1 | 718  | 6744   | 0         | 701  | 720  | 97 -  | 2    | 718  | 3090   | 3808   |
| UN07912 | Rsa1.0_06663.1 | 1436 | 10576  | 1.00E-159 | 323  | 335  | 96 -  | 1102 | 1436 | 10093  | 10424  |
| UN07913 | Rsa1.0_03406.1 | 1342 | 23159  | 1.00E-163 | 456  | 510  | 89 -  | 634  | 1128 | 5534   | 6031   |
| UN07914 | Rsa1.0_00189.1 | 1260 | 111830 | 0         | 371  | 372  | 99 +  | 1    | 372  | 42070  | 42441  |
| UN07915 | Rsa1.0_01354.1 | 745  | 47342  | 0         | 654  | 669  | 97 -  | 3    | 671  | 30879  | 31547  |

|         |                |      |        |           |      |      |      |      |      |        |        |
|---------|----------------|------|--------|-----------|------|------|------|------|------|--------|--------|
| UN07916 | Rsa1.0.00002.1 | 858  | 601661 | 0         | 837  | 856  | 97 + | 2    | 856  | 416755 | 417610 |
| UN07917 | Rsa1.0.01663.1 | 1598 | 168589 | 0         | 525  | 526  | 99 + | 1    | 526  | 138820 | 139345 |
| UN07918 | Rsa1.0.00768.1 | 958  | 64969  | 1.00E-133 | 282  | 292  | 96 + | 85   | 375  | 49455  | 49743  |
| UN07919 | Rsa1.0.00494.1 | 1004 | 79967  | 0         | 458  | 462  | 99 + | 543  | 1004 | 68676  | 69137  |
| UN07920 | Rsa1.0.00938.1 | 581  | 193891 | 0         | 570  | 580  | 98 + | 3    | 581  | 175161 | 175740 |
| UN07921 | Rsa1.0.17254.1 | 973  | 1878   | 0         | 470  | 474  | 99 + | 258  | 728  | 1405   | 1878   |
| UN07922 | Rsa1.0.01308.1 | 868  | 48596  | 0         | 537  | 548  | 97 + | 108  | 655  | 17350  | 17896  |
| UN07923 | Rsa1.0.00773.1 | 966  | 64839  | 0         | 567  | 583  | 97 + | 384  | 966  | 6287   | 6869   |
| UN07924 | Rsa1.0.00919.1 | 505  | 59675  | 0         | 496  | 505  | 98 + | 1    | 505  | 33437  | 33932  |
| UN07925 | Rsa1.0.00180.1 | 596  | 114581 | 1.00E-129 | 257  | 262  | 98 + | 331  | 591  | 98334  | 98594  |
| UN07926 | Rsa1.0.00061.1 | 864  | 218685 | 0         | 841  | 862  | 97 - | 3    | 862  | 958    | 1815   |
| UN07927 | Rsa1.0.01875.1 | 1008 | 37849  | 0         | 798  | 821  | 97 - | 1    | 814  | 18314  | 19131  |
| UN07928 | Rsa1.0.00464.1 | 1463 | 82253  | 0         | 464  | 475  | 97 + | 114  | 587  | 67303  | 67777  |
| UN07929 | Rsa1.0.30865.1 | 850  | 742    | 9.00E-97  | 273  | 300  | 91 + | 552  | 850  | 1      | 288    |
| UN07930 | Rsa1.0.02525.1 | 736  | 30489  | 0         | 427  | 429  | 99 + | 307  | 734  | 14810  | 15237  |
| UN07931 | Rsa1.0.02043.1 | 1281 | 163754 | 1.00E-166 | 333  | 343  | 97 + | 940  | 1280 | 23393  | 23734  |
| UN07932 | Rsa1.0.00213.1 | 1703 | 108167 | 0         | 470  | 485  | 96 + | 1218 | 1698 | 86924  | 87405  |
| UN07933 | Rsa1.0.00992.1 | 806  | 57419  | 0         | 468  | 487  | 96 + | 320  | 806  | 25453  | 25928  |
| UN07934 | Rsa1.0.00085.1 | 1574 | 142226 | 0         | 1465 | 1558 | 94 - | 3    | 1553 | 121914 | 123453 |
| UN07935 | Rsa1.0.02162.1 | 1273 | 34431  | 0         | 1023 | 1025 | 99 + | 3    | 1025 | 8263   | 9287   |
| UN07936 | Rsa1.0.01883.1 | 951  | 37661  | 1.00E-157 | 288  | 290  | 99 + | 2    | 291  | 10628  | 10917  |
| UN07937 | Rsa1.0.00550.1 | 764  | 210790 | 1.00E-116 | 298  | 319  | 93 + | 455  | 764  | 31765  | 32080  |
| UN07938 | Rsa1.0.01221.1 | 1236 | 50421  | 0         | 744  | 770  | 96 + | 188  | 957  | 44672  | 45438  |
| UN07939 | Rsa1.0.00002.1 | 1226 | 601661 | 0         | 918  | 951  | 96 + | 279  | 1226 | 177153 | 178101 |
| UN07940 | Rsa1.0.00582.1 | 596  | 74333  | 0         | 569  | 596  | 95 - | 3    | 588  | 50361  | 50955  |
| UN07941 | Rsa1.0.00930.1 | 945  | 59224  | 0         | 387  | 395  | 97 - | 2    | 396  | 52811  | 53204  |
| UN07942 | Rsa1.0.01838.1 | 1404 | 38500  | 0         | 422  | 442  | 95 - | 6    | 443  | 17537  | 17978  |
| UN07943 | Rsa1.0.00015.1 | 817  | 561803 | 0         | 474  | 475  | 99 + | 6    | 480  | 257369 | 257843 |
| UN07944 | Rsa1.0.03724.1 | 1525 | 21171  | 0         | 502  | 504  | 99 - | 1022 | 1525 | 16463  | 16966  |
| UN07945 | Rsa1.0.02456.1 | 702  | 31222  | 1.00E-122 | 303  | 327  | 92 + | 378  | 700  | 26023  | 26337  |
| UN07946 | Rsa1.0.03974.1 | 740  | 19770  | 0         | 591  | 604  | 97 - | 137  | 740  | 1460   | 2061   |
| UN07947 | Rsa1.0.01483.1 | 1241 | 44826  | 1.00E-147 | 271  | 273  | 99 - | 546  | 818  | 22727  | 22999  |
| UN07948 | Rsa1.0.00241.1 | 1122 | 104000 | 1.00E-176 | 319  | 321  | 99 + | 801  | 1121 | 27774  | 28094  |
| UN07949 | Rsa1.0.00193.1 | 1081 | 194198 | 1.00E-145 | 315  | 333  | 94 + | 753  | 1081 | 102472 | 102797 |
| UN07950 | Rsa1.0.00978.1 | 808  | 57739  | 0         | 783  | 817  | 95 + | 2    | 807  | 23545  | 24354  |
| UN07951 | Rsa1.0.00527.1 | 1047 | 77733  | 0         | 1026 | 1059 | 96 - | 3    | 1047 | 12296  | 13352  |
| UN07952 | Rsa1.0.02711.1 | 1169 | 28475  | 1.00E-153 | 338  | 359  | 94 + | 729  | 1087 | 20055  | 20413  |
| UN07953 | Rsa1.0.00651.1 | 844  | 247766 | 1.00E-133 | 326  | 360  | 90 - | 485  | 844  | 92697  | 93034  |
| UN07954 | Rsa1.0.00720.1 | 871  | 66931  | 0         | 360  | 368  | 97 + | 5    | 371  | 55086  | 55453  |

|         |                |      |        |           |      |      |       |      |      |        |        |
|---------|----------------|------|--------|-----------|------|------|-------|------|------|--------|--------|
| UN07955 | Rsa1.0.02387.1 | 573  | 31890  | 1.00E-54  | 136  | 145  | 93 -  | 3    | 147  | 30227  | 30371  |
| UN07956 | Rsa1.0.00562.1 | 590  | 75565  | 0         | 583  | 588  | 99 +  | 3    | 590  | 65791  | 66378  |
| UN07957 | Rsa1.0.03861.1 | 1239 | 20402  | 0         | 450  | 459  | 98 -  | 723  | 1181 | 12424  | 12882  |
| UN07958 | Rsa1.0.01752.1 | 758  | 39805  | 0         | 612  | 629  | 97 +  | 50   | 675  | 23241  | 23869  |
| UN07959 | Rsa1.0.00070.1 | 1387 | 150321 | 1.00E-119 | 224  | 226  | 99 -  | 943  | 1168 | 119907 | 120132 |
| UN07960 | Rsa1.0.13893.1 | 744  | 4139   | 0         | 434  | 437  | 99 -  | 3    | 439  | 2358   | 2794   |
| UN07961 | Rsa1.0.00190.1 | 1322 | 318240 | 0         | 567  | 585  | 96 +  | 129  | 713  | 82     | 662    |
| UN07962 | Rsa1.0.02410.1 | 788  | 31659  | 0         | 403  | 419  | 96 -  | 236  | 654  | 20565  | 20983  |
| UN07963 | Rsa1.0.05547.1 | 915  | 13369  | 0         | 574  | 582  | 98 -  | 1    | 581  | 919    | 1500   |
| UN07964 | Rsa1.0.00581.1 | 1581 | 163575 | 0         | 874  | 878  | 99 +  | 704  | 1581 | 15342  | 16219  |
| UN07965 | Rsa1.0.00664.1 | 902  | 69573  | 0         | 563  | 566  | 99 +  | 1    | 566  | 55264  | 55829  |
| UN07966 | Rsa1.0.00524.1 | 760  | 169613 | 0         | 474  | 494  | 95 -  | 4    | 493  | 141781 | 142271 |
| UN07967 | Rsa1.0.02329.1 | 891  | 32474  | 0         | 856  | 869  | 98 +  | 1    | 867  | 882    | 1747   |
| UN07968 | Rsa1.0.00740.1 | 876  | 215972 | 2.00E-98  | 230  | 245  | 93 -  | 2    | 246  | 32317  | 32558  |
| UN07969 | Rsa1.0.00169.1 | 1286 | 274298 | 1.00E-166 | 331  | 341  | 97 +  | 1    | 340  | 229363 | 229703 |
| UN07970 | Rsa1.0.00476.1 | 477  | 280966 | 1.00E-131 | 296  | 312  | 94 -  | 39   | 347  | 150634 | 150943 |
| UN07971 | Rsa1.0.00847.1 | 1447 | 62270  | 0         | 491  | 493  | 99 -  | 1    | 491  | 50627  | 51119  |
| UN07972 | Rsa1.0.01326.1 | 1379 | 48072  | 0         | 333  | 333  | 100 + | 915  | 1247 | 34414  | 34746  |
| UN07973 | Rsa1.0.36762.1 | 1330 | 613    | 0         | 608  | 613  | 99 +  | 533  | 1145 | 1      | 613    |
| UN07974 | Rsa1.0.07655.1 | 520  | 8913   | 0         | 513  | 515  | 99 +  | 4    | 518  | 6354   | 6868   |
| UN07975 | Rsa1.0.25166.1 | 1294 | 949    | 0         | 520  | 521  | 99 +  | 1    | 521  | 429    | 949    |
| UN07976 | Rsa1.0.09317.1 | 1944 | 6459   | 0         | 696  | 732  | 95 +  | 1217 | 1942 | 1016   | 1741   |
| UN07977 | Rsa1.0.10540.1 | 648  | 5811   | 0         | 642  | 646  | 99 -  | 3    | 648  | 3651   | 4296   |
| UN07978 | Rsa1.0.02628.1 | 1110 | 29369  | 1.00E-149 | 277  | 280  | 98 +  | 503  | 782  | 7499   | 7778   |
| UN07979 | Rsa1.0.02082.1 | 868  | 35228  | 0         | 528  | 558  | 94 -  | 149  | 705  | 17741  | 18297  |
| UN07980 | Rsa1.0.02900.1 | 1339 | 26928  | 0         | 728  | 746  | 97 -  | 593  | 1338 | 25075  | 25819  |
| UN07981 | Rsa1.0.00222.1 | 1285 | 172263 | 0         | 597  | 605  | 98 -  | 3    | 605  | 4258   | 4862   |
| UN07982 | Rsa1.0.00106.1 | 1638 | 133916 | 0         | 1080 | 1103 | 97 +  | 2    | 1103 | 19192  | 20291  |
| UN07983 | Rsa1.0.04411.1 | 1009 | 142979 | 0         | 809  | 817  | 99 +  | 1    | 814  | 137806 | 138622 |
| UN07984 | Rsa1.0.00308.1 | 1116 | 96915  | 0         | 446  | 461  | 96 +  | 30   | 484  | 13156  | 13615  |
| UN07985 | Rsa1.0.01880.1 | 1141 | 37745  | 0         | 927  | 941  | 98 -  | 4    | 943  | 26258  | 27198  |
| UN07986 | Rsa1.0.00205.1 | 2138 | 193401 | 0         | 661  | 682  | 96 +  | 1456 | 2137 | 55100  | 55778  |
| UN07987 | Rsa1.0.01356.1 | 522  | 47287  | 2.00E-81  | 160  | 162  | 98 -  | 1    | 162  | 3539   | 3700   |
| UN07988 | Rsa1.0.00285.1 | 970  | 149638 | 0         | 563  | 590  | 95 -  | 1    | 590  | 142472 | 143050 |
| UN07989 | Rsa1.0.00099.1 | 1154 | 159619 | 0         | 586  | 592  | 98 -  | 3    | 593  | 136397 | 136988 |
| UN07990 | Rsa1.0.01082.1 | 1186 | 54640  | 0         | 433  | 433  | 100 + | 752  | 1184 | 15720  | 16152  |
| UN07991 | Rsa1.0.06108.1 | 809  | 11730  | 0         | 457  | 462  | 98 -  | 2    | 463  | 2383   | 2844   |
| UN07992 | Rsa1.0.00197.1 | 1417 | 109714 | 1.00E-159 | 342  | 360  | 95 +  | 206  | 559  | 99351  | 99709  |
| UN07993 | Rsa1.0.00472.1 | 895  | 398134 | 0         | 464  | 493  | 94 -  | 410  | 895  | 314464 | 314947 |

|         |                |      |        |           |      |      |      |     |      |        |        |
|---------|----------------|------|--------|-----------|------|------|------|-----|------|--------|--------|
| UN07994 | Rsa1.0_03073.1 | 1225 | 25574  | 0         | 817  | 818  | 99 - | 101 | 917  | 82     | 899    |
| UN07995 | Rsa1.0_00533.1 | 1814 | 77375  | 0         | 769  | 789  | 97 + | 1   | 789  | 32030  | 32815  |
| UN07996 | Rsa1.0_02841.1 | 1379 | 27383  | 0         | 750  | 764  | 98 - | 138 | 901  | 18551  | 19314  |
| UN07997 | Rsa1.0_29367.1 | 912  | 785    | 0         | 780  | 786  | 99 - | 125 | 910  | 1      | 785    |
| UN07998 | Rsa1.0_01782.1 | 738  | 39384  | 0         | 681  | 691  | 98 - | 13  | 703  | 33047  | 33737  |
| UN07999 | Rsa1.0_00735.1 | 911  | 66503  | 0         | 907  | 910  | 99 - | 1   | 910  | 60231  | 61140  |
| UN08000 | Rsa1.0_02609.1 | 1166 | 29600  | 0         | 406  | 412  | 98 - | 1   | 411  | 21111  | 21522  |
| UN08001 | Rsa1.0_00303.1 | 2053 | 97468  | 0         | 644  | 651  | 98 - | 431 | 1081 | 26781  | 27431  |
| UN08002 | Rsa1.0_00588.1 | 600  | 73939  | 0         | 386  | 393  | 98 + | 1   | 391  | 44020  | 44411  |
| UN08003 | Rsa1.0_01015.1 | 1338 | 56752  | 2.33E-156 | 291  | 300  | 97 + | 666 | 965  | 6238   | 6537   |
| UN08004 | Rsa1.0_03511.1 | 711  | 22373  | 0         | 442  | 445  | 99 - | 1   | 444  | 806    | 1249   |
| UN08005 | Rsa1.0_01108.1 | 923  | 53865  | 1.00E-141 | 263  | 266  | 98 + | 657 | 922  | 15154  | 15419  |
| UN08006 | Rsa1.0_01422.1 | 1239 | 46172  | 1.00E-118 | 222  | 224  | 99 + | 832 | 1055 | 35856  | 36079  |
| UN08007 | Rsa1.0_15660.1 | 912  | 2496   | 0         | 827  | 842  | 98 + | 44  | 883  | 563    | 1401   |
| UN08008 | Rsa1.0_02030.1 | 591  | 179909 | 0         | 575  | 592  | 97 + | 1   | 590  | 27041  | 27632  |
| UN08009 | Rsa1.0_01251.1 | 768  | 49873  | 0         | 496  | 505  | 98 + | 2   | 506  | 27199  | 27701  |
| UN08010 | Rsa1.0_01091.1 | 1285 | 54383  | 0         | 1123 | 1124 | 99 + | 160 | 1283 | 20814  | 21937  |
| UN08011 | Rsa1.0_07458.1 | 985  | 9352   | 0         | 693  | 706  | 98 - | 36  | 741  | 8647   | 9352   |
| UN08012 | Rsa1.0_17302.1 | 1551 | 1865   | 0         | 739  | 741  | 99 - | 811 | 1551 | 1125   | 1865   |
| UN08013 | Rsa1.0_00045.1 | 630  | 328694 | 0         | 478  | 492  | 97 + | 112 | 602  | 192774 | 193265 |
| UN08014 | Rsa1.0_01117.1 | 1305 | 53465  | 0         | 531  | 534  | 99 + | 2   | 535  | 45563  | 46096  |
| UN08015 | Rsa1.0_00055.1 | 781  | 520193 | 0         | 574  | 577  | 99 + | 204 | 780  | 422501 | 423077 |
| UN08016 | Rsa1.0_01740.1 | 1031 | 39986  | 0         | 367  | 376  | 97 + | 4   | 376  | 22135  | 22509  |
| UN08017 | Rsa1.0_08538.1 | 1861 | 7220   | 0         | 969  | 1049 | 92 - | 374 | 1397 | 1434   | 2455   |
| UN08018 | Rsa1.0_03940.1 | 1273 | 19962  | 0         | 433  | 450  | 96 - | 779 | 1225 | 1      | 444    |
| UN08019 | Rsa1.0_03292.1 | 1253 | 23977  | 0         | 439  | 440  | 99 + | 812 | 1251 | 3716   | 4155   |
| UN08020 | Rsa1.0_01781.1 | 765  | 39410  | 0         | 551  | 561  | 98 + | 162 | 722  | 6978   | 7538   |
| UN08021 | Rsa1.0_06522.1 | 1040 | 10856  | 1.00E-119 | 243  | 251  | 96 + | 19  | 269  | 2538   | 2784   |
| UN08022 | Rsa1.0_03566.1 | 929  | 22050  | 0         | 891  | 930  | 95 + | 1   | 928  | 15859  | 16780  |
| UN08023 | Rsa1.0_11280.1 | 982  | 5558   | 0         | 374  | 380  | 98 + | 483 | 862  | 4869   | 5248   |
| UN08024 | Rsa1.0_00536.1 | 1075 | 77199  | 0         | 871  | 910  | 95 - | 4   | 908  | 23937  | 24846  |
| UN08025 | Rsa1.0_02039.1 | 879  | 35699  | 1.00E-176 | 343  | 352  | 97 - | 528 | 879  | 31463  | 31812  |
| UN08026 | Rsa1.0_00570.1 | 1529 | 75002  | 0         | 549  | 560  | 98 + | 496 | 1055 | 70246  | 70805  |
| UN08027 | Rsa1.0_14736.1 | 734  | 3116   | 1.00E-168 | 339  | 351  | 96 + | 382 | 732  | 1970   | 2319   |
| UN08028 | Rsa1.0_00116.1 | 1164 | 365886 | 0         | 862  | 872  | 98 - | 3   | 874  | 21612  | 22483  |
| UN08029 | Rsa1.0_06230.1 | 855  | 11435  | 0         | 821  | 855  | 96 - | 1   | 855  | 4439   | 5280   |
| UN08030 | Rsa1.0_00184.1 | 1144 | 218748 | 0         | 376  | 393  | 95 - | 2   | 394  | 17859  | 18241  |
| UN08031 | Rsa1.0_00862.1 | 887  | 61715  | 0         | 481  | 485  | 99 - | 403 | 887  | 28518  | 29002  |
| UN08032 | Rsa1.0_00059.1 | 922  | 159650 | 0         | 477  | 529  | 90 + | 225 | 732  | 134007 | 134528 |



|         |                |      |        |           |      |      |       |      |      |        |        |
|---------|----------------|------|--------|-----------|------|------|-------|------|------|--------|--------|
| UN08033 | Rsa1.0_01536.1 | 1372 | 43747  | 0         | 658  | 668  | 98 +  | 704  | 1371 | 16387  | 17054  |
| UN08034 | Rsa1.0_02181.1 | 428  | 34172  | 0         | 414  | 429  | 96 +  | 3    | 425  | 1019   | 1443   |
| UN08035 | Rsa1.0_02829.1 | 910  | 27541  | 2.00E-45  | 273  | 331  | 82 +  | 194  | 522  | 19828  | 20140  |
| UN08036 | Rsa1.0_02927.1 | 1231 | 26698  | 0         | 1207 | 1234 | 97 +  | 2    | 1231 | 23078  | 24309  |
| UN08037 | Rsa1.0_01890.1 | 953  | 37542  | 0         | 336  | 340  | 98 -  | 584  | 923  | 12677  | 13016  |
| UN08038 | Rsa1.0_02221.1 | 1065 | 106972 | 1.00E-156 | 329  | 344  | 95 -  | 3    | 340  | 93919  | 94262  |
| UN08039 | Rsa1.0_00446.1 | 844  | 167829 | 0         | 833  | 843  | 98 -  | 1    | 843  | 149439 | 150280 |
| UN08040 | Rsa1.0_00584.1 | 1287 | 74295  | 0         | 791  | 824  | 95 +  | 2    | 825  | 44010  | 44833  |
| UN08041 | Rsa1.0_05767.1 | 1329 | 12701  | 0         | 1299 | 1326 | 97 -  | 3    | 1328 | 3398   | 4718   |
| UN08042 | Rsa1.0_01102.1 | 455  | 53987  | 0         | 450  | 453  | 99 -  | 1    | 453  | 8658   | 9110   |
| UN08043 | Rsa1.0_00576.1 | 2144 | 178949 | 0         | 437  | 439  | 99 +  | 166  | 604  | 63282  | 63720  |
| UN08044 | Rsa1.0_00497.1 | 1772 | 79830  | 0         | 777  | 784  | 99 +  | 989  | 1771 | 48252  | 49035  |
| UN08045 | Rsa1.0_04014.1 | 1238 | 19572  | 0         | 484  | 490  | 98 -  | 749  | 1238 | 13584  | 14073  |
| UN08046 | Rsa1.0_00373.1 | 1346 | 90296  | 0         | 683  | 698  | 97 -  | 2    | 696  | 42120  | 42817  |
| UN08047 | Rsa1.0_02677.1 | 989  | 167801 | 0         | 685  | 719  | 95 -  | 277  | 989  | 10875  | 11581  |
| UN08048 | Rsa1.0_05577.1 | 975  | 13284  | 0         | 938  | 955  | 98 -  | 21   | 975  | 11449  | 12403  |
| UN08049 | Rsa1.0_00626.1 | 753  | 71582  | 2.33E-156 | 279  | 284  | 98 +  | 1    | 280  | 69542  | 69825  |
| UN08050 | Rsa1.0_00282.1 | 1835 | 177799 | 1.00E-109 | 201  | 201  | 100 + | 1304 | 1504 | 116639 | 116839 |
| UN08051 | Rsa1.0_01352.1 | 1091 | 47443  | 5.00E-99  | 219  | 229  | 95 +  | 102  | 326  | 9356   | 9583   |
| UN08052 | Rsa1.0_31125.1 | 1132 | 735    | 0         | 670  | 677  | 98 -  | 52   | 727  | 59     | 735    |
| UN08053 | Rsa1.0_03756.1 | 925  | 143061 | 0         | 647  | 649  | 99 +  | 3    | 649  | 10358  | 11006  |
| UN08054 | Rsa1.0_01199.1 | 1251 | 163576 | 0         | 561  | 577  | 97 -  | 673  | 1249 | 126967 | 127541 |
| UN08055 | Rsa1.0_00674.1 | 1054 | 193753 | 1.00E-141 | 279  | 287  | 97 -  | 467  | 753  | 188457 | 188743 |
| UN08056 | Rsa1.0_15443.1 | 491  | 2603   | 0         | 490  | 494  | 99 -  | 1    | 490  | 1965   | 2458   |
| UN08057 | Rsa1.0_04760.1 | 575  | 16105  | 0         | 353  | 356  | 99 +  | 3    | 358  | 10661  | 11013  |
| UN08058 | Rsa1.0_00156.1 | 992  | 118383 | 0         | 685  | 704  | 97 +  | 1    | 702  | 54333  | 55035  |
| UN08059 | Rsa1.0_01979.1 | 788  | 36545  | 0         | 424  | 437  | 97 -  | 5    | 438  | 36007  | 36441  |
| UN08060 | Rsa1.0_01119.1 | 968  | 53459  | 0         | 434  | 449  | 96 -  | 2    | 444  | 19591  | 20037  |
| UN08061 | Rsa1.0_03081.1 | 851  | 25523  | 5.00E-83  | 169  | 173  | 97 +  | 169  | 341  | 13289  | 13461  |
| UN08062 | Rsa1.0_00485.1 | 1223 | 80937  | 0         | 413  | 414  | 99 +  | 1    | 413  | 6623   | 7036   |
| UN08063 | Rsa1.0_02711.1 | 1495 | 28475  | 1.00E-150 | 320  | 336  | 95 -  | 1158 | 1492 | 16349  | 16672  |
| UN08064 | Rsa1.0_00087.1 | 886  | 761073 | 0         | 511  | 536  | 95 +  | 1    | 531  | 312461 | 312993 |
| UN08065 | Rsa1.0_00362.1 | 1012 | 299497 | 0         | 561  | 570  | 98 -  | 1    | 570  | 281999 | 282568 |
| UN08066 | Rsa1.0_01009.1 | 621  | 56922  | 1.00E-151 | 283  | 287  | 98 +  | 1    | 287  | 29237  | 29523  |
| UN08067 | Rsa1.0_00107.1 | 595  | 431659 | 1.00E-137 | 256  | 259  | 98 -  | 253  | 511  | 84232  | 84490  |
| UN08068 | Rsa1.0_00352.1 | 1441 | 92266  | 0         | 558  | 573  | 97 +  | 868  | 1439 | 26252  | 26824  |
| UN08069 | Rsa1.0_00278.1 | 1036 | 231896 | 0         | 532  | 537  | 99 +  | 2    | 537  | 150871 | 151407 |
| UN08070 | Rsa1.0_00066.1 | 1245 | 152418 | 1.00E-151 | 278  | 279  | 99 +  | 1    | 278  | 40911  | 41189  |
| UN08071 | Rsa1.0_00107.1 | 1093 | 431659 | 0         | 474  | 504  | 94 -  | 12   | 510  | 342550 | 343050 |

|         |                |      |        |           |      |      |       |      |      |        |        |
|---------|----------------|------|--------|-----------|------|------|-------|------|------|--------|--------|
| UN08072 | Rsa1.0_00071.1 | 667  | 345714 | 1.00E-123 | 260  | 269  | 96 -  | 371  | 637  | 66097  | 66365  |
| UN08073 | Rsa1.0_00080.1 | 971  | 190437 | 0         | 432  | 440  | 98 -  | 534  | 971  | 19235  | 19674  |
| UN08074 | Rsa1.0_00103.1 | 830  | 135304 | 0         | 805  | 830  | 96 -  | 1    | 830  | 30695  | 31509  |
| UN08075 | Rsa1.0_01507.1 | 903  | 44361  | 2.00E-91  | 184  | 187  | 98 -  | 551  | 736  | 24828  | 25014  |
| UN08076 | Rsa1.0_00550.1 | 1380 | 210790 | 1.00E-169 | 356  | 373  | 95 -  | 14   | 385  | 184237 | 184609 |
| UN08077 | Rsa1.0_00143.1 | 1392 | 121313 | 1.00E-167 | 340  | 353  | 96 -  | 1039 | 1388 | 97993  | 98345  |
| UN08078 | Rsa1.0_00940.1 | 461  | 179946 | 0         | 417  | 422  | 98 +  | 38   | 459  | 17311  | 17732  |
| UN08079 | Rsa1.0_00488.1 | 689  | 80490  | 0         | 368  | 372  | 98 +  | 1    | 372  | 77214  | 77585  |
| UN08080 | Rsa1.0_02687.1 | 900  | 28648  | 0         | 869  | 908  | 95 +  | 3    | 900  | 13257  | 14153  |
| UN08081 | Rsa1.0_00703.1 | 875  | 67597  | 4.00E-71  | 155  | 161  | 96 +  | 500  | 660  | 22981  | 23141  |
| UN08082 | Rsa1.0_01194.1 | 1305 | 51113  | 0         | 675  | 689  | 97 -  | 517  | 1205 | 26678  | 27366  |
| UN08083 | Rsa1.0_00382.1 | 1252 | 251946 | 0         | 345  | 346  | 99 -  | 3    | 348  | 168724 | 169069 |
| UN08084 | Rsa1.0_00022.1 | 1444 | 200461 | 0         | 751  | 771  | 97 +  | 2    | 772  | 93920  | 94690  |
| UN08085 | Rsa1.0_00002.1 | 775  | 601661 | 1.00E-134 | 242  | 242  | 100 - | 384  | 625  | 455292 | 455533 |
| UN08086 | Rsa1.0_00595.1 | 1869 | 341648 | 0         | 387  | 387  | 100 - | 1308 | 1694 | 12663  | 13049  |
| UN08087 | Rsa1.0_01503.1 | 1286 | 44467  | 0         | 448  | 473  | 94 -  | 821  | 1286 | 35739  | 36210  |
| UN08088 | Rsa1.0_00356.1 | 1267 | 91521  | 0         | 550  | 553  | 99 -  | 714  | 1266 | 25417  | 25969  |
| UN08089 | Rsa1.0_00124.1 | 1796 | 262503 | 0         | 820  | 822  | 99 +  | 976  | 1796 | 64100  | 64921  |
| UN08090 | Rsa1.0_00018.1 | 915  | 410899 | 1.00E-131 | 244  | 246  | 99 -  | 1    | 246  | 125814 | 126059 |
| UN08091 | Rsa1.0_00243.1 | 990  | 103651 | 1.00E-120 | 253  | 265  | 95 -  | 2    | 266  | 12271  | 12527  |
| UN08092 | Rsa1.0_00016.1 | 1567 | 831256 | 0         | 509  | 512  | 99 +  | 1    | 512  | 244882 | 245392 |
| UN08093 | Rsa1.0_00305.1 | 1589 | 97308  | 1.00E-143 | 312  | 328  | 95 -  | 1262 | 1587 | 94377  | 94696  |
| UN08094 | Rsa1.0_00108.1 | 1045 | 478491 | 2.33E-156 | 312  | 328  | 95 -  | 621  | 939  | 7747   | 8074   |
| UN08095 | Rsa1.0_04334.1 | 1326 | 17852  | 0         | 395  | 400  | 98 +  | 927  | 1326 | 10377  | 10776  |
| UN08096 | Rsa1.0_00775.1 | 1404 | 64793  | 0         | 656  | 701  | 93 -  | 4    | 685  | 5368   | 6068   |
| UN08097 | Rsa1.0_09074.1 | 1371 | 6670   | 0         | 459  | 474  | 96 +  | 614  | 1084 | 4110   | 4577   |
| UN08098 | Rsa1.0_00566.1 | 1481 | 75325  | 0         | 438  | 470  | 93 -  | 415  | 880  | 24398  | 24860  |
| UN08099 | Rsa1.0_02703.1 | 1384 | 28544  | 0         | 1081 | 1148 | 94 -  | 1    | 1143 | 9801   | 10920  |
| UN08100 | Rsa1.0_00006.1 | 1704 | 396176 | 0         | 577  | 629  | 91 -  | 396  | 1010 | 223817 | 224437 |
| UN08101 | Rsa1.0_00254.1 | 1626 | 102600 | 0         | 440  | 449  | 97 +  | 696  | 1142 | 20119  | 20567  |
| UN08102 | Rsa1.0_02524.1 | 1235 | 30496  | 0         | 410  | 418  | 98 -  | 183  | 599  | 16107  | 16524  |
| UN08103 | Rsa1.0_03867.1 | 725  | 20369  | 0         | 402  | 413  | 97 -  | 302  | 712  | 15803  | 16215  |
| UN08104 | Rsa1.0_25507.1 | 796  | 933    | 0         | 380  | 389  | 97 -  | 3    | 391  | 454    | 839    |
| UN08105 | Rsa1.0_00454.1 | 1084 | 216970 | 0         | 704  | 736  | 95 -  | 349  | 1084 | 187174 | 187900 |
| UN08106 | Rsa1.0_01330.1 | 1006 | 47960  | 0         | 350  | 356  | 98 +  | 1    | 356  | 43076  | 43431  |
| UN08107 | Rsa1.0_11505.1 | 1432 | 5483   | 0         | 924  | 940  | 98 +  | 456  | 1388 | 1      | 940    |
| UN08108 | Rsa1.0_00160.1 | 1186 | 346678 | 0         | 387  | 400  | 96 +  | 3    | 398  | 145891 | 146290 |
| UN08109 | Rsa1.0_00469.1 | 473  | 82084  | 0         | 401  | 420  | 95 -  | 1    | 420  | 3747   | 4163   |
| UN08110 | Rsa1.0_01986.1 | 1297 | 36489  | 0         | 834  | 867  | 96 -  | 447  | 1295 | 23438  | 24301  |

|         |                |      |        |           |      |      |       |      |      |        |        |
|---------|----------------|------|--------|-----------|------|------|-------|------|------|--------|--------|
| UN08111 | Rsa1.0.01750.1 | 1321 | 39816  | 0         | 409  | 411  | 99 +  | 2    | 411  | 22856  | 23266  |
| UN08112 | Rsa1.0.02557.1 | 1455 | 30127  | 0         | 685  | 697  | 98 +  | 759  | 1455 | 10172  | 10867  |
| UN08113 | Rsa1.0.03943.1 | 598  | 19931  | 1.00E-157 | 323  | 335  | 96 -  | 268  | 598  | 8508   | 8842   |
| UN08114 | Rsa1.0.01749.1 | 1325 | 39822  | 0         | 426  | 440  | 96 -  | 1    | 440  | 28271  | 28706  |
| UN08115 | Rsa1.0.00525.1 | 587  | 78030  | 1.00E-130 | 236  | 236  | 100 + | 352  | 587  | 23409  | 23644  |
| UN08116 | Rsa1.0.01442.1 | 1429 | 45776  | 1.00E-160 | 286  | 286  | 100 + | 84   | 369  | 20988  | 21273  |
| UN08117 | Rsa1.0.00027.1 | 738  | 283362 | 0         | 466  | 472  | 98 +  | 4    | 475  | 18991  | 19462  |
| UN08118 | Rsa1.0.00421.1 | 1552 | 86365  | 1.00E-140 | 324  | 344  | 94 -  | 1207 | 1548 | 75833  | 76174  |
| UN08119 | Rsa1.0.00165.1 | 1741 | 116466 | 0         | 1082 | 1083 | 99 +  | 660  | 1741 | 47654  | 48736  |
| UN08120 | Rsa1.0.01368.1 | 1404 | 47129  | 0         | 1377 | 1398 | 98 +  | 17   | 1402 | 29056  | 30453  |
| UN08121 | Rsa1.0.03385.1 | 1654 | 23280  | 0         | 701  | 714  | 98 +  | 888  | 1601 | 3669   | 4381   |
| UN08122 | Rsa1.0.01768.1 | 932  | 138463 | 1.00E-176 | 314  | 314  | 100 - | 617  | 930  | 122648 | 122961 |
| UN08123 | Rsa1.0.03081.1 | 1446 | 25523  | 0         | 1155 | 1179 | 97 -  | 126  | 1303 | 3706   | 4884   |
| UN08124 | Rsa1.0.01772.1 | 1247 | 39557  | 0         | 1040 | 1096 | 94 -  | 169  | 1247 | 160    | 1238   |
| UN08125 | Rsa1.0.01129.1 | 973  | 52949  | 0         | 927  | 938  | 98 +  | 1    | 936  | 13920  | 14857  |
| UN08126 | Rsa1.0.00111.1 | 1529 | 390088 | 0         | 917  | 1006 | 91 -  | 216  | 1173 | 60205  | 61189  |
| UN08127 | Rsa1.0.00076.1 | 1132 | 146021 | 0         | 1119 | 1130 | 99 +  | 3    | 1132 | 258    | 1387   |
| UN08128 | Rsa1.0.00303.1 | 1371 | 97468  | 0         | 357  | 359  | 99 -  | 2    | 360  | 9636   | 9994   |
| UN08129 | Rsa1.0.00011.1 | 1248 | 225044 | 0         | 646  | 662  | 97 +  | 587  | 1248 | 26245  | 26906  |
| UN08130 | Rsa1.0.00013.1 | 1380 | 292129 | 0         | 400  | 414  | 96 -  | 2    | 414  | 281575 | 281981 |
| UN08131 | Rsa1.0.05668.1 | 867  | 12994  | 0         | 864  | 867  | 99 +  | 1    | 867  | 6164   | 7029   |
| UN08132 | Rsa1.0.43462.1 | 1208 | 517    | 3.00E-23  | 75   | 81   | 92 +  | 990  | 1070 | 348    | 428    |
| UN08133 | Rsa1.0.01424.1 | 1211 | 46139  | 0         | 597  | 622  | 95 -  | 411  | 1032 | 43607  | 44228  |
| UN08134 | Rsa1.0.01111.1 | 1101 | 53669  | 1.00E-142 | 337  | 360  | 93 -  | 746  | 1101 | 39889  | 40244  |
| UN08135 | Rsa1.0.00251.1 | 1101 | 303968 | 0         | 360  | 372  | 96 +  | 160  | 531  | 140959 | 141330 |
| UN08136 | Rsa1.0.00980.1 | 820  | 57729  | 0         | 770  | 795  | 96 -  | 28   | 820  | 39709  | 40492  |
| UN08137 | Rsa1.0.02575.1 | 1018 | 29944  | 1.00E-170 | 357  | 374  | 95 +  | 648  | 1018 | 24000  | 24369  |
| UN08138 | Rsa1.0.01932.1 | 1217 | 37177  | 1.00E-110 | 274  | 293  | 93 -  | 928  | 1215 | 10948  | 11239  |
| UN08139 | Rsa1.0.00002.1 | 1150 | 601661 | 1.00E-166 | 340  | 352  | 96 +  | 800  | 1150 | 98981  | 99331  |
| UN08140 | Rsa1.0.05862.1 | 1520 | 12390  | 1.00E-148 | 270  | 271  | 99 -  | 1250 | 1520 | 3824   | 4094   |
| UN08141 | Rsa1.0.00427.1 | 1106 | 189678 | 0         | 870  | 916  | 94 -  | 194  | 1106 | 32890  | 33793  |
| UN08142 | Rsa1.0.00021.1 | 1045 | 263655 | 1.00E-107 | 255  | 275  | 92 +  | 25   | 287  | 14051  | 14325  |
| UN08143 | Rsa1.0.00131.1 | 1064 | 432233 | 0         | 712  | 729  | 97 +  | 280  | 1008 | 205231 | 205959 |
| UN08144 | Rsa1.0.01242.1 | 1572 | 50066  | 0         | 1377 | 1397 | 98 -  | 3    | 1393 | 48281  | 49677  |
| UN08145 | Rsa1.0.00033.1 | 1192 | 515811 | 0         | 564  | 591  | 95 -  | 4    | 584  | 432520 | 433107 |
| UN08146 | Rsa1.0.00064.1 | 1348 | 240927 | 0         | 529  | 539  | 98 +  | 379  | 916  | 132115 | 132653 |
| UN08147 | Rsa1.0.01998.1 | 1112 | 36276  | 0         | 649  | 677  | 95 +  | 283  | 959  | 10886  | 11561  |
| UN08148 | Rsa1.0.00043.1 | 1412 | 264937 | 0         | 407  | 424  | 95 +  | 766  | 1189 | 143187 | 143609 |
| UN08149 | Rsa1.0.00017.1 | 1210 | 752458 | 0         | 544  | 599  | 90 +  | 621  | 1206 | 268430 | 269007 |

| UN08150 | #              | #    | #      | #         | #    | #    | #     | #    | #    | #      | #      | # |
|---------|----------------|------|--------|-----------|------|------|-------|------|------|--------|--------|---|
| UN08151 | Rsa1.0.00065.1 | 900  | 454616 | 0         | 426  | 433  | 98 -  | 468  | 900  | 248976 | 249408 |   |
| UN08152 | Rsa1.0.00103.1 | 1251 | 135304 | 0         | 352  | 352  | 100 + | 338  | 689  | 77912  | 78263  |   |
| UN08153 | Rsa1.0.03242.1 | 947  | 24415  | 0         | 355  | 359  | 98 +  | 1    | 359  | 3770   | 4128   |   |
| UN08154 | Rsa1.0.01328.1 | 2200 | 48021  | 0         | 583  | 613  | 95 +  | 1591 | 2196 | 23421  | 24026  |   |
| UN08155 | Rsa1.0.00013.1 | 745  | 292129 | 1.00E-168 | 335  | 348  | 96 +  | 3    | 350  | 279714 | 280052 |   |
| UN08156 | Rsa1.0.00498.1 | 1175 | 79746  | 0         | 410  | 422  | 97 -  | 1    | 419  | 49512  | 49931  |   |
| UN08157 | Rsa1.0.00380.1 | 1460 | 89748  | 0         | 1004 | 1021 | 98 -  | 429  | 1449 | 25550  | 26570  |   |
| UN08158 | Rsa1.0.00030.1 | 1237 | 250988 | 1.00E-140 | 268  | 273  | 98 +  | 5    | 277  | 104240 | 104512 |   |
| UN08159 | Rsa1.0.00071.1 | 1591 | 345714 | 1.00E-155 | 319  | 329  | 96 -  | 1268 | 1591 | 39307  | 39635  |   |
| UN08160 | Rsa1.0.00517.1 | 1182 | 142790 | 0         | 438  | 443  | 98 +  | 739  | 1181 | 101484 | 101925 |   |
| UN08161 | Rsa1.0.01100.1 | 1210 | 54113  | 1.00E-123 | 277  | 293  | 94 -  | 829  | 1113 | 313    | 603    |   |
| UN08162 | Rsa1.0.00647.1 | 960  | 70440  | 0         | 923  | 962  | 95 -  | 3    | 951  | 44495  | 45455  |   |
| UN08163 | Rsa1.0.00387.1 | 1194 | 495407 | 0         | 335  | 336  | 99 +  | 3    | 338  | 384402 | 384737 |   |
| UN08164 | Rsa1.0.03552.1 | 881  | 22151  | 1.00E-107 | 206  | 209  | 98 +  | 390  | 598  | 4290   | 4498   |   |
| UN08165 | Rsa1.0.14340.1 | 973  | 3501   | 0         | 449  | 472  | 95 -  | 498  | 965  | 300    | 770    |   |
| UN08166 | Rsa1.0.00192.1 | 1107 | 278200 | 0         | 445  | 456  | 97 +  | 214  | 669  | 260592 | 261047 |   |
| UN08167 | Rsa1.0.14791.1 | 651  | 3064   | 0         | 412  | 414  | 99 +  | 232  | 645  | 1427   | 1840   |   |
| UN08168 | Rsa1.0.00055.1 | 1249 | 520193 | 0         | 417  | 419  | 99 -  | 64   | 482  | 349414 | 349832 |   |
| UN08169 | Rsa1.0.04943.1 | 1000 | 15376  | 0         | 892  | 916  | 97 -  | 8    | 920  | 5795   | 6708   |   |
| UN08170 | Rsa1.0.01506.1 | 1338 | 44370  | 0         | 453  | 454  | 99 -  | 1    | 453  | 3669   | 4122   |   |
| UN08171 | Rsa1.0.00616.1 | 1601 | 195713 | 0         | 518  | 524  | 98 -  | 534  | 1057 | 175996 | 176519 |   |
| UN08172 | Rsa1.0.01017.1 | 1271 | 56714  | 0         | 456  | 459  | 99 -  | 333  | 791  | 33346  | 33804  |   |
| UN08173 | Rsa1.0.01537.1 | 1161 | 187285 | 0         | 425  | 434  | 97 -  | 264  | 697  | 16266  | 16699  |   |
| UN08174 | Rsa1.0.00574.1 | 1152 | 74797  | 0         | 499  | 508  | 98 -  | 2    | 508  | 70561  | 71068  |   |
| UN08175 | Rsa1.0.00909.1 | 1018 | 59976  | 0         | 426  | 442  | 96 +  | 1    | 431  | 38115  | 38554  |   |
| UN08176 | Rsa1.0.02192.1 | 1839 | 171291 | 0         | 444  | 463  | 95 -  | 92   | 548  | 12268  | 12724  |   |
| UN08177 | Rsa1.0.00497.1 | 1256 | 79830  | 1.00E-150 | 270  | 270  | 100 + | 986  | 1255 | 65567  | 65836  |   |
| UN08178 | Rsa1.0.00970.1 | 2042 | 57994  | 0         | 1348 | 1414 | 95 -  | 637  | 2042 | 22385  | 23798  |   |
| UN08179 | Rsa1.0.00191.1 | 1350 | 316976 | 0         | 554  | 560  | 98 +  | 258  | 817  | 145135 | 145694 |   |
| UN08180 | Rsa1.0.01872.1 | 721  | 37908  | 1.00E-103 | 225  | 235  | 95 +  | 483  | 717  | 16040  | 16268  |   |
| UN08181 | Rsa1.0.01300.1 | 951  | 48942  | 0         | 638  | 684  | 93 +  | 1    | 664  | 46859  | 47536  |   |
| UN08182 | Rsa1.0.10575.1 | 1946 | 5797   | 1.00E-125 | 257  | 264  | 97 +  | 842  | 1103 | 21     | 284    |   |
| UN08183 | Rsa1.0.05605.1 | 724  | 13202  | 0         | 423  | 424  | 99 -  | 1    | 424  | 12770  | 13193  |   |
| UN08184 | Rsa1.0.00167.1 | 1158 | 116000 | 1.00E-155 | 323  | 337  | 95 +  | 721  | 1057 | 17177  | 17511  |   |
| UN08185 | Rsa1.0.00207.1 | 736  | 248736 | 0         | 373  | 384  | 97 -  | 2    | 385  | 11395  | 11778  |   |
| UN08186 | Rsa1.0.00233.1 | 1474 | 104918 | 0         | 631  | 643  | 98 +  | 691  | 1332 | 9694   | 10336  |   |
| UN08187 | Rsa1.0.06009.1 | 1046 | 11950  | 0         | 833  | 834  | 99 -  | 210  | 1043 | 8494   | 9326   |   |
| UN08188 | Rsa1.0.16140.1 | 1743 | 2268   | 0         | 974  | 1008 | 96 -  | 744  | 1742 | 1274   | 2268   |   |

|         |                |      |        |           |      |      |       |      |      |        |        |
|---------|----------------|------|--------|-----------|------|------|-------|------|------|--------|--------|
| UN08189 | Rsa1.0.01435.1 | 1422 | 45942  | 1.00E-149 | 282  | 285  | 98 +  | 3    | 286  | 15970  | 16254  |
| UN08190 | Rsa1.0.00045.1 | 1370 | 328694 | 0         | 521  | 551  | 94 +  | 256  | 803  | 168766 | 169302 |
| UN08191 | Rsa1.0.07809.1 | 1906 | 8503   | 0         | 1064 | 1132 | 93 +  | 23   | 1120 | 1020   | 2144   |
| UN08192 | Rsa1.0.01727.1 | 1258 | 40243  | 1.00E-141 | 378  | 409  | 92 -  | 846  | 1244 | 11118  | 11516  |
| UN08193 | Rsa1.0.20689.1 | 2192 | 1279   | 0         | 389  | 393  | 98 +  | 879  | 1271 | 15     | 407    |
| UN08194 | Rsa1.0.01522.1 | 1721 | 157436 | 0         | 973  | 997  | 97 +  | 727  | 1719 | 145054 | 146047 |
| UN08195 | Rsa1.0.00722.1 | 825  | 66840  | 0         | 430  | 444  | 96 -  | 352  | 795  | 20493  | 20936  |
| UN08196 | Rsa1.0.00282.1 | 953  | 177799 | 1.00E-170 | 546  | 627  | 87 +  | 316  | 942  | 119453 | 120079 |
| UN08197 | Rsa1.0.00467.1 | 1316 | 156542 | 1.00E-130 | 268  | 277  | 96 -  | 183  | 458  | 127047 | 127323 |
| UN08198 | Rsa1.0.00447.1 | 1050 | 84051  | 1.00E-150 | 270  | 270  | 100 + | 781  | 1050 | 12107  | 12376  |
| UN08199 | Rsa1.0.01719.1 | 1335 | 40388  | 0         | 761  | 789  | 96 -  | 543  | 1331 | 31932  | 32716  |
| UN08200 | Rsa1.0.02478.1 | 1897 | 150183 | 0         | 597  | 642  | 92 +  | 596  | 1223 | 136567 | 137203 |
| UN08201 | Rsa1.0.00516.1 | 1000 | 78417  | 1.00E-158 | 283  | 283  | 100 + | 1    | 283  | 6069   | 6351   |
| UN08202 | Rsa1.0.00017.1 | 1134 | 752458 | 0         | 664  | 688  | 96 +  | 449  | 1134 | 617269 | 617938 |
| UN08203 | Rsa1.0.00108.1 | 1716 | 478491 | 0         | 793  | 826  | 96 -  | 903  | 1716 | 284903 | 285727 |
| UN08204 | Rsa1.0.26911.1 | 914  | 873    | 1.00E-113 | 207  | 207  | 100 + | 408  | 614  | 248    | 454    |
| UN08205 | Rsa1.0.04340.1 | 1192 | 17831  | 0         | 615  | 655  | 93 +  | 32   | 681  | 12631  | 13260  |
| UN08206 | Rsa1.0.00251.1 | 2207 | 303968 | 1.00E-135 | 254  | 257  | 98 +  | 732  | 988  | 87950  | 88206  |
| UN08207 | Rsa1.0.01675.1 | 1467 | 41155  | 1.00E-112 | 207  | 207  | 100 - | 391  | 597  | 8774   | 8980   |
| UN08208 | Rsa1.0.00219.1 | 951  | 106983 | 0         | 946  | 951  | 99 +  | 2    | 951  | 51023  | 51973  |
| UN08209 | Rsa1.0.51591.1 | 1355 | 441    | 0         | 441  | 441  | 100 + | 792  | 1232 | 1      | 441    |
| UN08210 | Rsa1.0.00552.1 | 719  | 206757 | 1.00E-151 | 282  | 284  | 99 +  | 3    | 285  | 51528  | 51811  |
| UN08211 | Rsa1.0.01440.1 | 1653 | 45807  | 1.00E-137 | 248  | 248  | 100 + | 1406 | 1653 | 30644  | 30891  |
| UN08212 | Rsa1.0.00143.1 | 988  | 121313 | 1.00E-143 | 313  | 329  | 95 -  | 18   | 343  | 87223  | 87551  |
| UN08213 | Rsa1.0.00396.1 | 1759 | 88242  | 0         | 700  | 706  | 99 +  | 584  | 1288 | 5961   | 6666   |
| UN08214 | Rsa1.0.14273.1 | 1421 | 3588   | 1.00E-135 | 289  | 301  | 96 -  | 1113 | 1413 | 2208   | 2506   |
| UN08215 | Rsa1.0.01506.1 | 1494 | 44370  | 1.00E-173 | 317  | 319  | 99 -  | 1178 | 1494 | 31429  | 31747  |
| UN08216 | Rsa1.0.00108.1 | 1640 | 478491 | 0         | 1623 | 1641 | 98 +  | 1    | 1640 | 113582 | 115219 |
| UN08217 | Rsa1.0.00320.1 | 769  | 95784  | 0         | 732  | 752  | 97 +  | 13   | 764  | 3267   | 4015   |
| UN08218 | Rsa1.0.00152.1 | 1358 | 257730 | 0         | 704  | 739  | 95 -  | 2    | 736  | 84804  | 85538  |
| UN08219 | Rsa1.0.01419.1 | 1456 | 167402 | 0         | 1020 | 1052 | 96 +  | 1    | 1046 | 159720 | 160768 |
| UN08220 | Rsa1.0.00179.1 | 875  | 393324 | 1.00E-128 | 241  | 244  | 98 -  | 498  | 741  | 49376  | 49619  |
| UN08221 | Rsa1.0.01100.1 | 2037 | 54113  | 0         | 491  | 518  | 94 -  | 1432 | 1948 | 28675  | 29180  |
| UN08222 | Rsa1.0.04649.1 | 1199 | 16538  | 0         | 409  | 424  | 96 +  | 1    | 424  | 10581  | 11001  |
| UN08223 | Rsa1.0.00851.1 | 1194 | 62181  | 1.00E-172 | 321  | 326  | 98 -  | 558  | 883  | 11159  | 11484  |
| UN08224 | Rsa1.0.15352.1 | 1261 | 2663   | 0         | 656  | 668  | 98 -  | 7    | 670  | 1335   | 2002   |
| UN08225 | Rsa1.0.00285.1 | 1399 | 149638 | 0         | 373  | 380  | 98 -  | 1022 | 1399 | 146432 | 146811 |
| UN08226 | Rsa1.0.02477.1 | 936  | 31058  | 0         | 580  | 590  | 98 -  | 347  | 935  | 13066  | 13654  |
| UN08227 | Rsa1.0.00062.1 | 1105 | 299291 | 2.00E-83  | 759  | 941  | 80 -  | 109  | 1036 | 37611  | 38534  |

|         |                |      |        |           |      |      |       |     |      |        |        |
|---------|----------------|------|--------|-----------|------|------|-------|-----|------|--------|--------|
| UN08228 | Rsa1.0.02043.1 | 1310 | 163754 | 0         | 332  | 332  | 100 + | 2   | 333  | 140853 | 141184 |
| UN08229 | Rsa1.0.01025.1 | 1108 | 56471  | 1.00E-37  | 357  | 433  | 82 -  | 112 | 537  | 7410   | 7832   |
| UN08230 | Rsa1.0.00537.1 | 1416 | 186980 | 0         | 1415 | 1415 | 100 + | 2   | 1416 | 164734 | 166148 |
| UN08231 | Rsa1.0.22522.1 | 1455 | 1114   | 0         | 936  | 1007 | 92 +  | 122 | 1125 | 121    | 1114   |
| UN08232 | Rsa1.0.04342.1 | 934  | 17828  | 0         | 430  | 447  | 96 +  | 16  | 459  | 7660   | 8103   |
| UN08233 | Rsa1.0.00663.1 | 979  | 164969 | 1.00E-120 | 268  | 284  | 94 -  | 699 | 978  | 126421 | 126704 |
| UN08234 | Rsa1.0.06471.1 | 1619 | 10954  | 0         | 1186 | 1221 | 97 +  | 279 | 1499 | 776    | 1984   |
| UN08235 | Rsa1.0.00049.1 | 1702 | 167018 | 0         | 546  | 579  | 94 -  | 1   | 579  | 134071 | 134636 |
| UN08236 | Rsa1.0.00425.1 | 1275 | 147080 | 0         | 1167 | 1207 | 96 -  | 29  | 1235 | 95758  | 96961  |
| UN08237 | Rsa1.0.00873.1 | 1098 | 61459  | 0         | 564  | 572  | 98 +  | 530 | 1098 | 46323  | 46894  |
| UN08238 | Rsa1.0.04079.1 | 522  | 19202  | 1.00E-54  | 146  | 159  | 91 -  | 7   | 165  | 15519  | 15670  |
| UN08239 | Rsa1.0.01704.1 | 1031 | 40711  | 0         | 532  | 541  | 98 +  | 4   | 543  | 21920  | 22459  |
| UN08240 | Rsa1.0.03292.1 | 965  | 23977  | 0         | 939  | 963  | 97 -  | 3   | 965  | 11234  | 12194  |
| UN08241 | Rsa1.0.00190.1 | 1019 | 318240 | 0         | 378  | 378  | 100 + | 1   | 378  | 134844 | 135221 |
| UN08242 | Rsa1.0.00339.1 | 730  | 222974 | 0         | 374  | 389  | 96 -  | 342 | 730  | 52010  | 52386  |
| UN08243 | Rsa1.0.00111.1 | 884  | 390088 | 1.00E-100 | 228  | 237  | 96 -  | 643 | 875  | 77424  | 77659  |
| UN08244 | Rsa1.0.00079.1 | 966  | 606987 | 1.00E-132 | 292  | 307  | 95 -  | 4   | 304  | 41618  | 41923  |
| UN08245 | Rsa1.0.01326.1 | 765  | 48072  | 0         | 413  | 419  | 98 -  | 342 | 760  | 43752  | 44166  |
| UN08246 | Rsa1.0.02157.1 | 522  | 149652 | 0         | 366  | 376  | 97 +  | 85  | 457  | 11588  | 11963  |
| UN08247 | Rsa1.0.04121.1 | 747  | 18951  | 0         | 477  | 499  | 95 -  | 7   | 505  | 13882  | 14379  |
| UN08248 | Rsa1.0.01743.1 | 1014 | 39926  | 1.00E-132 | 265  | 272  | 97 -  | 1   | 271  | 15993  | 16264  |
| UN08249 | Rsa1.0.02316.1 | 837  | 32608  | 0         | 474  | 491  | 96 +  | 345 | 834  | 6330   | 6817   |
| UN08250 | Rsa1.0.00904.1 | 1239 | 180594 | 0         | 439  | 448  | 97 +  | 788 | 1234 | 177571 | 178018 |
| UN08251 | Rsa1.0.00417.1 | 1024 | 395068 | 0         | 480  | 487  | 98 +  | 535 | 1017 | 235258 | 235744 |
| UN08252 | Rsa1.0.00963.1 | 975  | 58176  | 1.00E-134 | 246  | 247  | 99 -  | 729 | 975  | 26299  | 26545  |
| UN08253 | Rsa1.0.02867.1 | 735  | 27121  | 2.00E-78  | 283  | 331  | 85 -  | 11  | 327  | 3466   | 3780   |
| UN08254 | Rsa1.0.00356.1 | 822  | 91521  | 1.00E-154 | 300  | 308  | 97 +  | 321 | 628  | 34979  | 35286  |
| UN08255 | Rsa1.0.00079.1 | 694  | 606987 | 1.00E-122 | 275  | 291  | 94 -  | 404 | 694  | 198839 | 199128 |
| UN08256 | Rsa1.0.00381.1 | 763  | 89718  | 1.00E-165 | 391  | 421  | 92 -  | 3   | 420  | 75167  | 75586  |
| UN08257 | Rsa1.0.00800.1 | 640  | 63868  | 0         | 402  | 402  | 100 - | 239 | 640  | 19287  | 19688  |
| UN08258 | Rsa1.0.00888.1 | 595  | 60978  | 0         | 386  | 386  | 100 - | 202 | 587  | 54469  | 54854  |
| UN08259 | Rsa1.0.07379.1 | 709  | 9492   | 2.00E-91  | 215  | 227  | 94 -  | 1   | 226  | 3308   | 3533   |
| UN08260 | Rsa1.0.00737.1 | 843  | 66432  | 1.00E-126 | 293  | 319  | 91 -  | 525 | 843  | 11909  | 12208  |
| UN08261 | Rsa1.0.00273.1 | 819  | 326186 | 1.00E-165 | 394  | 420  | 93 +  | 13  | 427  | 38743  | 39154  |
| UN08262 | Rsa1.0.00252.1 | 1117 | 102760 | 0         | 398  | 406  | 98 -  | 1   | 405  | 44777  | 45179  |
| UN08263 | Rsa1.0.00105.1 | 757  | 134138 | 1.00E-100 | 324  | 366  | 88 +  | 13  | 376  | 10943  | 11292  |
| UN08264 | Rsa1.0.01586.1 | 1168 | 42804  | 1.00E-172 | 397  | 425  | 93 -  | 746 | 1168 | 28079  | 28496  |
| UN08265 | Rsa1.0.00715.1 | 447  | 67116  | 1.00E-69  | 198  | 213  | 92 -  | 226 | 434  | 40371  | 40581  |
| UN08266 | Rsa1.0.00833.1 | 984  | 62621  | 2.00E-92  | 245  | 272  | 90 -  | 3   | 255  | 9801   | 10072  |

|         |                |      |        |           |      |      |       |      |      |        |        |
|---------|----------------|------|--------|-----------|------|------|-------|------|------|--------|--------|
| UN08267 | Rsa1.0.02735.1 | 1221 | 28344  | 0         | 522  | 553  | 94 +  | 7    | 557  | 2745   | 3290   |
| UN08268 | Rsa1.0.01754.1 | 709  | 39792  | 0         | 656  | 671  | 97 -  | 40   | 707  | 13161  | 13827  |
| UN08269 | Rsa1.0.02125.1 | 1283 | 34775  | 1.00E-161 | 292  | 293  | 99 +  | 498  | 790  | 1907   | 2199   |
| UN08270 | Rsa1.0.00545.1 | 1010 | 189649 | 1.00E-71  | 153  | 157  | 97 -  | 760  | 914  | 35141  | 35297  |
| UN08271 | Rsa1.0.02183.1 | 1288 | 34170  | 0         | 1258 | 1286 | 97 -  | 2    | 1286 | 20423  | 21705  |
| UN08272 | Rsa1.0.06443.1 | 970  | 11008  | 1.00E-148 | 279  | 283  | 98 -  | 3    | 285  | 6909   | 7191   |
| UN08273 | Rsa1.0.02922.1 | 945  | 26753  | 1.00E-178 | 374  | 395  | 94 +  | 1    | 395  | 12310  | 12689  |
| UN08274 | Rsa1.0.19257.1 | 902  | 1455   | 0         | 381  | 383  | 99 -  | 3    | 385  | 108    | 490    |
| UN08275 | Rsa1.0.02340.1 | 1109 | 32388  | 1.00E-154 | 276  | 276  | 100 + | 834  | 1109 | 23880  | 24155  |
| UN08276 | Rsa1.0.00615.1 | 1050 | 72235  | 1.00E-173 | 321  | 325  | 98 -  | 562  | 886  | 25400  | 25724  |
| UN08277 | Rsa1.0.00651.1 | 558  | 247766 | 1.00E-107 | 223  | 231  | 96 -  | 177  | 407  | 81983  | 82210  |
| UN08278 | Rsa1.0.02901.1 | 1262 | 26909  | 1.00E-136 | 261  | 266  | 98 +  | 266  | 531  | 20016  | 20281  |
| UN08279 | Rsa1.0.06373.1 | 928  | 11138  | 1.00E-151 | 280  | 283  | 98 -  | 601  | 883  | 751    | 1033   |
| UN08280 | Rsa1.0.01116.1 | 771  | 142088 | 0         | 680  | 712  | 95 -  | 62   | 765  | 129752 | 130462 |
| UN08281 | Rsa1.0.01580.1 | 1291 | 42852  | 0         | 491  | 495  | 99 -  | 1    | 494  | 31149  | 31642  |
| UN08282 | Rsa1.0.00118.1 | 874  | 130637 | 0         | 455  | 468  | 97 +  | 353  | 817  | 90339  | 90806  |
| UN08283 | Rsa1.0.01585.1 | 925  | 42806  | 0         | 546  | 546  | 100 - | 1    | 546  | 15623  | 16168  |
| UN08284 | Rsa1.0.01031.1 | 1104 | 56236  | 1.00E-135 | 262  | 268  | 97 +  | 649  | 916  | 18106  | 18373  |
| UN08285 | Rsa1.0.06535.1 | 1397 | 10827  | 0         | 1325 | 1398 | 94 +  | 11   | 1387 | 2629   | 4010   |
| UN08286 | Rsa1.0.00018.1 | 1446 | 410899 | 0         | 336  | 339  | 99 +  | 1108 | 1446 | 189085 | 189421 |
| UN08287 | Rsa1.0.03184.1 | 1222 | 24750  | 1.00E-135 | 290  | 307  | 94 +  | 926  | 1221 | 21274  | 21580  |
| UN08288 | Rsa1.0.04961.1 | 644  | 15316  | 1.00E-165 | 294  | 294  | 100 + | 350  | 643  | 13226  | 13519  |
| UN08289 | Rsa1.0.04988.1 | 1058 | 15221  | 0         | 352  | 352  | 100 - | 632  | 983  | 499    | 850    |
| UN08290 | Rsa1.0.00016.1 | 1638 | 831256 | 0         | 546  | 554  | 98 -  | 887  | 1440 | 509054 | 509606 |
| UN08291 | Rsa1.0.03388.1 | 1078 | 23277  | 0         | 389  | 401  | 97 -  | 662  | 1062 | 17445  | 17845  |
| UN08292 | Rsa1.0.04524.1 | 1258 | 16981  | 0         | 507  | 511  | 99 +  | 750  | 1258 | 5653   | 6163   |
| UN08293 | Rsa1.0.00543.1 | 1527 | 76788  | 0         | 350  | 357  | 98 +  | 1173 | 1527 | 43302  | 43658  |
| UN08294 | Rsa1.0.00805.1 | 936  | 63724  | 1.00E-165 | 361  | 379  | 95 -  | 548  | 925  | 35498  | 35874  |
| UN08295 | Rsa1.0.38361.1 | 1729 | 587    | 0         | 569  | 602  | 94 -  | 284  | 884  | 1      | 587    |
| UN08296 | Rsa1.0.01630.1 | 598  | 41913  | 0         | 593  | 597  | 99 -  | 3    | 598  | 34843  | 35439  |
| UN08297 | Rsa1.0.00438.1 | 738  | 84861  | 1.00E-174 | 408  | 439  | 92 -  | 16   | 445  | 76921  | 77354  |
| UN08298 | Rsa1.0.02148.1 | 392  | 34610  | 1.00E-35  | 95   | 101  | 94 +  | 97   | 197  | 22799  | 22899  |
| UN08299 | Rsa1.0.03122.1 | 581  | 25207  | 0         | 576  | 577  | 99 +  | 3    | 579  | 12843  | 13419  |
| UN08300 | Rsa1.0.02431.1 | 679  | 31504  | 0         | 441  | 456  | 96 +  | 1    | 456  | 29916  | 30368  |
| UN08301 | Rsa1.0.00339.1 | 1609 | 222974 | 0         | 805  | 921  | 87 -  | 398  | 1318 | 28076  | 28996  |
| UN08302 | Rsa1.0.04282.1 | 677  | 18100  | 0         | 513  | 522  | 98 +  | 1    | 520  | 12088  | 12609  |
| UN08303 | Rsa1.0.00028.1 | 1212 | 293984 | 0         | 449  | 477  | 94 +  | 728  | 1204 | 281443 | 281904 |
| UN08304 | Rsa1.0.00311.1 | 1800 | 96847  | 0         | 541  | 552  | 98 +  | 1245 | 1796 | 35682  | 36229  |
| UN08305 | Rsa1.0.01022.1 | 1967 | 56606  | 1.00E-176 | 392  | 415  | 94 +  | 332  | 740  | 27924  | 28338  |

|         |                |      |        |           |     |     |       |      |      |        |        |
|---------|----------------|------|--------|-----------|-----|-----|-------|------|------|--------|--------|
| UN08306 | Rsa1.0_00651.1 | 589  | 247766 | 1.00E-109 | 224 | 231 | 96 +  | 152  | 382  | 81983  | 82210  |
| UN08307 | Rsa1.0_00124.1 | 743  | 262503 | 1.00E-177 | 401 | 424 | 94 -  | 305  | 726  | 16165  | 16583  |
| UN08308 | Rsa1.0_00197.1 | 699  | 109714 | 1.00E-177 | 314 | 314 | 100 - | 83   | 396  | 78615  | 78928  |
| UN08309 | Rsa1.0_00025.1 | 834  | 277312 | 1.00E-137 | 310 | 328 | 94 +  | 1    | 327  | 149589 | 149915 |
| UN08310 | Rsa1.0_00636.1 | 743  | 71113  | 1.00E-114 | 237 | 245 | 96 -  | 459  | 703  | 14377  | 14620  |
| UN08311 | Rsa1.0_00317.1 | 983  | 218290 | 2.00E-95  | 245 | 266 | 92 +  | 53   | 310  | 72659  | 72921  |
| UN08312 | Rsa1.0_01188.1 | 1046 | 51362  | 0         | 328 | 328 | 100 - | 1    | 328  | 31071  | 31398  |
| UN08313 | Rsa1.0_00002.1 | 861  | 601661 | 0         | 426 | 429 | 99 -  | 413  | 840  | 140251 | 140677 |
| UN08314 | Rsa1.0_00131.1 | 1196 | 432233 | 1.00E-167 | 310 | 314 | 98 -  | 532  | 845  | 408531 | 408844 |
| UN08315 | Rsa1.0_00457.1 | 996  | 337301 | 0         | 379 | 384 | 98 -  | 6    | 389  | 128787 | 129170 |
| UN08316 | Rsa1.0_09097.1 | 696  | 6650   | 0         | 448 | 448 | 100 + | 249  | 696  | 4943   | 5390   |
| UN08317 | Rsa1.0_00480.1 | 1207 | 81325  | 0         | 497 | 501 | 99 +  | 385  | 885  | 4323   | 4823   |
| UN08318 | Rsa1.0_05494.1 | 1007 | 13547  | 0         | 448 | 469 | 95 +  | 1    | 461  | 7633   | 8101   |
| UN08319 | Rsa1.0_25755.1 | 694  | 922    | 0         | 513 | 531 | 96 +  | 138  | 660  | 1      | 531    |
| UN08320 | Rsa1.0_00742.1 | 847  | 66106  | 1.00E-145 | 311 | 325 | 95 -  | 525  | 847  | 16526  | 16849  |
| UN08321 | Rsa1.0_00190.1 | 1903 | 318240 | 0         | 748 | 749 | 99 -  | 400  | 1148 | 105023 | 105771 |
| UN08322 | Rsa1.0_08364.1 | 811  | 7472   | 0         | 453 | 454 | 99 -  | 1    | 454  | 5218   | 5671   |
| UN08323 | Rsa1.0_03114.1 | 787  | 25318  | 0         | 527 | 527 | 100 - | 1    | 527  | 6565   | 7091   |
| UN08324 | Rsa1.0_02652.1 | 1472 | 29038  | 0         | 353 | 355 | 99 -  | 1    | 355  | 21682  | 22036  |
| UN08325 | Rsa1.0_00150.1 | 847  | 154416 | 0         | 390 | 407 | 95 +  | 432  | 837  | 60307  | 60710  |
| UN08326 | Rsa1.0_04876.1 | 1321 | 15631  | 1.00E-126 | 242 | 246 | 98 +  | 948  | 1193 | 3072   | 3317   |
| UN08327 | Rsa1.0_01561.1 | 1176 | 43227  | 0         | 907 | 914 | 99 -  | 6    | 918  | 20971  | 21884  |
| UN08328 | Rsa1.0_00001.1 | 1112 | 363028 | 0         | 959 | 966 | 99 -  | 32   | 996  | 173735 | 174700 |
| UN08329 | Rsa1.0_00131.1 | 882  | 432233 | 0         | 569 | 582 | 97 -  | 301  | 882  | 259017 | 259598 |
| UN08330 | Rsa1.0_00869.1 | 1804 | 61627  | 0         | 556 | 581 | 95 +  | 1196 | 1767 | 16008  | 16585  |
| UN08331 | Rsa1.0_01382.1 | 1331 | 46877  | 0         | 357 | 357 | 100 - | 975  | 1331 | 16729  | 17085  |
| UN08332 | Rsa1.0_05293.1 | 1478 | 14237  | 0         | 414 | 416 | 99 -  | 1065 | 1478 | 9512   | 9927   |
| UN08333 | Rsa1.0_08361.1 | 1747 | 7477   | 0         | 811 | 812 | 99 -  | 937  | 1747 | 5189   | 6000   |
| UN08334 | Rsa1.0_06438.1 | 659  | 11017  | 0         | 460 | 492 | 93 +  | 141  | 625  | 1531   | 2018   |
| UN08335 | Rsa1.0_00087.1 | 1210 | 761073 | 1.00E-145 | 265 | 266 | 99 -  | 271  | 536  | 274293 | 274558 |
| UN08336 | Rsa1.0_00079.1 | 673  | 606987 | 1.00E-171 | 304 | 304 | 100 + | 1    | 304  | 198825 | 199128 |
| UN08337 | Rsa1.0_03694.1 | 924  | 21336  | 0         | 713 | 730 | 97 +  | 200  | 924  | 549    | 1278   |
| UN08338 | Rsa1.0_00235.1 | 845  | 154696 | 0         | 633 | 633 | 100 + | 213  | 845  | 139087 | 139719 |
| UN08339 | Rsa1.0_00009.1 | 660  | 232558 | 1.00E-124 | 261 | 272 | 95 -  | 5    | 276  | 207990 | 208258 |
| UN08340 | Rsa1.0_01754.1 | 707  | 39792  | 0         | 685 | 705 | 97 +  | 3    | 699  | 13161  | 13863  |
| UN08341 | Rsa1.0_00545.1 | 1323 | 189649 | 0         | 525 | 530 | 99 +  | 9    | 538  | 37254  | 37783  |
| UN08342 | Rsa1.0_00786.1 | 822  | 64285  | 2.00E-97  | 196 | 201 | 97 +  | 396  | 596  | 41596  | 41796  |
| UN08343 | Rsa1.0_04415.1 | 1105 | 147889 | 1.00E-152 | 309 | 321 | 96 -  | 786  | 1100 | 141040 | 141355 |
| UN08344 | Rsa1.0_00234.1 | 1332 | 197060 | 0         | 400 | 415 | 96 +  | 502  | 915  | 144150 | 144564 |



|         |                |      |        |           |      |      |       |     |      |        |        |
|---------|----------------|------|--------|-----------|------|------|-------|-----|------|--------|--------|
| UN08345 | Rsa1.0.00505.1 | 1635 | 79323  | 0         | 1564 | 1576 | 99 -  | 57  | 1632 | 38536  | 40111  |
| UN08346 | Rsa1.0.00118.1 | 779  | 130637 | 0         | 513  | 513  | 100 - | 2   | 514  | 95060  | 95572  |
| UN08347 | Rsa1.0.06303.1 | 1169 | 11268  | 0         | 746  | 793  | 94 -  | 255 | 1045 | 4869   | 5657   |
| UN08348 | Rsa1.0.01595.1 | 670  | 175383 | 1.00E-171 | 331  | 342  | 96 +  | 2   | 343  | 41001  | 41331  |
| UN08349 | Rsa1.0.00096.1 | 1581 | 198773 | 0         | 1576 | 1579 | 99 +  | 4   | 1580 | 40964  | 42542  |
| UN08350 | Rsa1.0.01414.1 | 900  | 149508 | 1.00E-170 | 348  | 361  | 96 -  | 2   | 359  | 115743 | 116102 |
| UN08351 | Rsa1.0.02675.1 | 562  | 28852  | 7.00E-75  | 143  | 143  | 100 - | 183 | 325  | 17929  | 18071  |
| UN08352 | Rsa1.0.00031.1 | 1353 | 179862 | 0         | 399  | 410  | 97 -  | 3   | 412  | 161267 | 161676 |
| UN08353 | Rsa1.0.00079.1 | 660  | 606987 | 1.00E-138 | 279  | 288  | 96 -  | 373 | 658  | 198841 | 199128 |
| UN08354 | Rsa1.0.03956.1 | 684  | 19872  | 1.00E-180 | 331  | 335  | 98 +  | 317 | 651  | 16858  | 17192  |
| UN08355 | Rsa1.0.00340.1 | 802  | 305782 | 0         | 784  | 800  | 98 +  | 3   | 802  | 173358 | 174157 |
| UN08356 | Rsa1.0.00010.1 | 901  | 294827 | 1.00E-114 | 222  | 226  | 98 -  | 61  | 286  | 248372 | 248597 |
| UN08357 | Rsa1.0.01294.1 | 1107 | 49090  | 0         | 348  | 348  | 100 + | 755 | 1102 | 40470  | 40817  |
| UN08358 | Rsa1.0.00480.1 | 772  | 81325  | 0         | 484  | 486  | 99 +  | 281 | 765  | 18939  | 19424  |
| UN08359 | Rsa1.0.29902.1 | 973  | 768    | 0         | 423  | 423  | 100 + | 551 | 973  | 291    | 713    |
| UN08360 | Rsa1.0.03959.1 | 899  | 19866  | 0         | 871  | 914  | 95 +  | 1   | 899  | 14869  | 15769  |
| UN08361 | Rsa1.0.00179.1 | 770  | 393324 | 2.00E-72  | 252  | 284  | 88 +  | 483 | 752  | 250660 | 250934 |
| UN08362 | Rsa1.0.01534.1 | 2179 | 43764  | 0         | 1122 | 1127 | 99 +  | 3   | 1127 | 9347   | 10472  |
| UN08363 | Rsa1.0.00055.1 | 477  | 520193 | 1.00E-106 | 196  | 196  | 100 - | 282 | 477  | 324254 | 324449 |
| UN08364 | Rsa1.0.02675.1 | 582  | 28852  | 6.00E-88  | 177  | 181  | 97 -  | 3   | 183  | 18163  | 18343  |
| UN08365 | Rsa1.0.04275.1 | 779  | 18136  | 1.00E-124 | 263  | 274  | 95 -  | 503 | 776  | 9501   | 9773   |
| UN08366 | Rsa1.0.00068.1 | 876  | 151813 | 1.00E-157 | 348  | 368  | 94 +  | 1   | 364  | 121729 | 122096 |
| UN08367 | Rsa1.0.00651.1 | 1054 | 247766 | 1.00E-65  | 176  | 188  | 93 -  | 867 | 1052 | 90200  | 90386  |
| UN08368 | Rsa1.0.05653.1 | 1028 | 13043  | 0         | 1004 | 1028 | 97 -  | 1   | 1028 | 11373  | 12394  |
| UN08369 | Rsa1.0.18647.1 | 885  | 1560   | 1.00E-170 | 386  | 412  | 93 -  | 485 | 885  | 521    | 932    |
| UN08370 | Rsa1.0.02797.1 | 732  | 27800  | 1.00E-150 | 300  | 310  | 96 +  | 9   | 318  | 652    | 961    |
| UN08371 | Rsa1.0.00528.1 | 1086 | 164755 | 0         | 540  | 564  | 95 -  | 524 | 1084 | 100787 | 101332 |
| UN08372 | Rsa1.0.01196.1 | 773  | 51097  | 1.00E-123 | 224  | 224  | 100 - | 2   | 225  | 33470  | 33693  |
| UN08373 | Rsa1.0.02593.1 | 712  | 29744  | 1.00E-100 | 246  | 262  | 93 -  | 450 | 706  | 2905   | 3164   |
| UN08374 | Rsa1.0.03175.1 | 1202 | 24802  | 0         | 558  | 560  | 99 +  | 642 | 1201 | 4236   | 4793   |
| UN08375 | Rsa1.0.02673.1 | 1275 | 28877  | 2.00E-86  | 175  | 179  | 97 -  | 483 | 661  | 26953  | 27131  |
| UN08376 | Rsa1.0.01454.1 | 894  | 45440  | 1.00E-116 | 213  | 213  | 100 - | 2   | 214  | 16053  | 16265  |
| UN08377 | Rsa1.0.05049.1 | 1024 | 15025  | 0         | 487  | 503  | 96 -  | 1   | 503  | 4126   | 4624   |
| UN08378 | Rsa1.0.05260.1 | 1975 | 14337  | 0         | 904  | 942  | 95 +  | 570 | 1508 | 3507   | 4442   |
| UN08379 | Rsa1.0.00327.1 | 1297 | 94892  | 0         | 1074 | 1118 | 96 -  | 209 | 1297 | 69964  | 71076  |
| UN08380 | Rsa1.0.01410.1 | 1810 | 46345  | 0         | 791  | 793  | 99 +  | 134 | 926  | 44531  | 45323  |
| UN08381 | Rsa1.0.06392.1 | 649  | 11104  | 0         | 466  | 480  | 97 -  | 1   | 479  | 10528  | 11005  |
| UN08382 | Rsa1.0.02774.1 | 665  | 28038  | 0         | 642  | 679  | 94 -  | 3   | 663  | 13469  | 14147  |
| UN08383 | Rsa1.0.01876.1 | 868  | 37800  | 0         | 685  | 717  | 95 +  | 174 | 868  | 36310  | 37026  |

|         |                |      |        |           |      |      |       |      |      |        |        |
|---------|----------------|------|--------|-----------|------|------|-------|------|------|--------|--------|
| UN08384 | Rsa1.0.02658.1 | 1332 | 28978  | 0         | 387  | 405  | 95 -  | 888  | 1291 | 11639  | 12043  |
| UN08385 | Rsa1.0.00178.1 | 1469 | 114861 | 0         | 643  | 661  | 97 +  | 364  | 1021 | 42445  | 43105  |
| UN08386 | Rsa1.0.02953.1 | 866  | 26487  | 1.00E-156 | 295  | 300  | 98 +  | 567  | 866  | 2339   | 2638   |
| UN08387 | Rsa1.0.02432.1 | 1340 | 31499  | 0         | 1336 | 1340 | 99 +  | 1    | 1340 | 7301   | 8640   |
| UN08388 | Rsa1.0.00030.1 | 611  | 250988 | 1.00E-151 | 277  | 279  | 99 +  | 333  | 611  | 124651 | 124929 |
| UN08389 | Rsa1.0.01506.1 | 464  | 44370  | 2.00E-47  | 244  | 287  | 85 -  | 178  | 456  | 17898  | 18180  |
| UN08390 | Rsa1.0.00059.1 | 622  | 159650 | 1.00E-126 | 298  | 318  | 93 -  | 310  | 621  | 123646 | 123957 |
| UN08391 | Rsa1.0.20105.1 | 983  | 1340   | 0         | 395  | 401  | 98 +  | 584  | 981  | 457    | 857    |
| UN08392 | Rsa1.0.00088.1 | 775  | 141341 | 1.00E-131 | 253  | 258  | 98 -  | 411  | 668  | 19042  | 19299  |
| UN08393 | Rsa1.0.04098.1 | 750  | 19078  | 1.00E-95  | 304  | 341  | 89 +  | 17   | 337  | 11218  | 11553  |
| UN08394 | Rsa1.0.00660.1 | 808  | 69688  | 1.00E-101 | 233  | 247  | 94 -  | 568  | 808  | 52535  | 52781  |
| UN08395 | Rsa1.0.07826.1 | 1671 | 8466   | 0         | 1530 | 1543 | 99 -  | 131  | 1671 | 6924   | 8466   |
| UN08396 | Rsa1.0.05741.1 | 586  | 12773  | 0         | 364  | 364  | 100 + | 1    | 364  | 3068   | 3431   |
| UN08397 | Rsa1.0.00179.1 | 1057 | 393324 | 1.00E-132 | 273  | 283  | 96 -  | 693  | 974  | 51891  | 52173  |
| UN08398 | Rsa1.0.00104.1 | 1572 | 368722 | 0         | 482  | 482  | 100 - | 796  | 1277 | 278715 | 279196 |
| UN08399 | Rsa1.0.01857.1 | 650  | 38103  | 1.00E-140 | 363  | 399  | 90 +  | 178  | 554  | 4693   | 5090   |
| UN08400 | Rsa1.0.04518.1 | 1820 | 17005  | 0         | 517  | 536  | 96 +  | 680  | 1215 | 11675  | 12209  |
| UN08401 | Rsa1.0.00247.1 | 926  | 103408 | 1.00E-147 | 332  | 352  | 94 -  | 3    | 351  | 9307   | 9653   |
| UN08402 | Rsa1.0.00041.1 | 685  | 186197 | 1.00E-158 | 286  | 287  | 99 -  | 32   | 318  | 27167  | 27453  |
| UN08403 | Rsa1.0.03860.1 | 730  | 20407  | 0         | 330  | 330  | 100 + | 1    | 330  | 14018  | 14347  |
| UN08404 | Rsa1.0.00745.1 | 1459 | 66067  | 0         | 701  | 726  | 96 +  | 207  | 932  | 42176  | 42898  |
| UN08405 | Rsa1.0.00001.1 | 1425 | 363028 | 1.00E-103 | 212  | 216  | 98 -  | 600  | 813  | 285546 | 285761 |
| UN08406 | Rsa1.0.00490.1 | 1731 | 186713 | 6.00E-41  | 87   | 87   | 100 + | 1495 | 1581 | 33066  | 33152  |
| UN08407 | Rsa1.0.00888.1 | 603  | 60978  | 1.00E-172 | 335  | 343  | 97 +  | 76   | 417  | 54512  | 54854  |
| UN08408 | Rsa1.0.19230.1 | 972  | 1460   | 1.00E-154 | 298  | 305  | 97 -  | 667  | 971  | 967    | 1271   |
| UN08409 | Rsa1.0.04352.1 | 665  | 17779  | 0         | 530  | 557  | 95 -  | 16   | 572  | 12118  | 12667  |
| UN08410 | Rsa1.0.03001.1 | 697  | 26108  | 1.00E-103 | 211  | 218  | 96 +  | 41   | 253  | 9490   | 9707   |
| UN08411 | Rsa1.0.01888.1 | 1779 | 37563  | 0         | 771  | 772  | 99 -  | 1007 | 1777 | 14893  | 15664  |
| UN08412 | Rsa1.0.00760.1 | 924  | 65267  | 1.00E-154 | 277  | 277  | 100 + | 1    | 277  | 51840  | 52116  |
| UN08413 | Rsa1.0.02316.1 | 813  | 32608  | 0         | 782  | 805  | 97 +  | 6    | 807  | 6017   | 6817   |
| UN08414 | Rsa1.0.00097.1 | 1141 | 138858 | 0         | 353  | 353  | 100 + | 789  | 1141 | 120893 | 121245 |
| UN08415 | Rsa1.0.00978.1 | 973  | 57739  | 1.00E-166 | 516  | 588  | 87 +  | 49   | 627  | 42015  | 42599  |
| UN08416 | Rsa1.0.01460.1 | 1322 | 45255  | 0         | 617  | 640  | 96 +  | 51   | 689  | 34289  | 34925  |
| UN08417 | Rsa1.0.00048.1 | 1105 | 167185 | 1.00E-164 | 329  | 340  | 96 +  | 772  | 1105 | 159151 | 159489 |
| UN08418 | Rsa1.0.00394.1 | 932  | 148426 | 1.00E-132 | 276  | 286  | 96 +  | 3    | 286  | 122856 | 123140 |
| UN08419 | Rsa1.0.00383.1 | 435  | 398431 | 1.00E-174 | 336  | 346  | 97 -  | 90   | 435  | 211813 | 212149 |
| UN08420 | Rsa1.0.02319.1 | 839  | 32580  | 1.00E-145 | 280  | 285  | 98 +  | 556  | 839  | 19826  | 20110  |
| UN08421 | Rsa1.0.36118.1 | 694  | 625    | 1.00E-141 | 277  | 283  | 97 -  | 413  | 694  | 14     | 296    |
| UN08422 | Rsa1.0.00087.1 | 929  | 761073 | 1.00E-125 | 283  | 301  | 94 +  | 1    | 301  | 291671 | 291957 |

|         |                |      |        |           |      |      |       |     |      |        |        |
|---------|----------------|------|--------|-----------|------|------|-------|-----|------|--------|--------|
| UN08423 | Rsa1.0.00524.1 | 777  | 169613 | 1.00E-137 | 353  | 391  | 90 +  | 14  | 385  | 161710 | 162096 |
| UN08424 | Rsa1.0.03605.1 | 795  | 21827  | 1.00E-150 | 371  | 397  | 93 +  | 17  | 408  | 14371  | 14765  |
| UN08425 | Rsa1.0.01563.1 | 1132 | 170823 | 0         | 370  | 379  | 97 +  | 3   | 381  | 14874  | 15252  |
| UN08426 | Rsa1.0.03491.1 | 755  | 22541  | 0         | 573  | 599  | 95 -  | 49  | 640  | 8983   | 9580   |
| UN08427 | Rsa1.0.07261.1 | 762  | 9648   | 0         | 761  | 762  | 99 +  | 1   | 762  | 2696   | 3457   |
| UN08428 | Rsa1.0.02105.1 | 960  | 156953 | 0         | 467  | 487  | 95 +  | 3   | 485  | 150681 | 151165 |
| UN08429 | Rsa1.0.01635.1 | 713  | 41865  | 0         | 674  | 717  | 94 -  | 3   | 713  | 15907  | 16610  |
| UN08430 | Rsa1.0.00972.1 | 1190 | 57937  | 2.00E-98  | 196  | 199  | 98 +  | 3   | 201  | 45886  | 46083  |
| UN08431 | Rsa1.0.00552.1 | 1277 | 206757 | 2.00E-89  | 201  | 212  | 94 -  | 212 | 423  | 187055 | 187266 |
| UN08432 | Rsa1.0.08717.1 | 864  | 7008   | 0         | 413  | 423  | 97 +  | 311 | 733  | 2884   | 3306   |
| UN08433 | Rsa1.0.02139.1 | 821  | 34686  | 0         | 371  | 371  | 100 + | 1   | 371  | 5542   | 5912   |
| UN08434 | Rsa1.0.02143.1 | 690  | 34632  | 0         | 415  | 416  | 99 +  | 275 | 690  | 13042  | 13457  |
| UN08435 | Rsa1.0.00344.1 | 611  | 191774 | 1.00E-101 | 190  | 191  | 99 -  | 213 | 403  | 156563 | 156753 |
| UN08436 | Rsa1.0.02662.1 | 741  | 28956  | 8.00E-97  | 186  | 188  | 98 -  | 301 | 488  | 10660  | 10847  |
| UN08437 | Rsa1.0.00115.1 | 759  | 131321 | 0         | 575  | 593  | 96 +  | 169 | 759  | 34041  | 34619  |
| UN08438 | Rsa1.0.01659.1 | 1857 | 164577 | 0         | 615  | 630  | 97 -  | 154 | 780  | 143506 | 144135 |
| UN08439 | Rsa1.0.01687.1 | 2159 | 40979  | 0         | 1937 | 1939 | 99 -  | 221 | 2159 | 1391   | 3329   |
| UN08440 | Rsa1.0.00807.1 | 1322 | 63607  | 0         | 725  | 740  | 97 +  | 562 | 1299 | 61983  | 62721  |
| UN08441 | Rsa1.0.05482.1 | 939  | 13595  | 1.00E-164 | 329  | 341  | 96 -  | 131 | 471  | 12266  | 12606  |
| UN08442 | Rsa1.0.04651.1 | 1478 | 16516  | 0         | 551  | 573  | 96 -  | 349 | 921  | 13816  | 14388  |
| UN08443 | Rsa1.0.00577.1 | 892  | 174827 | 0         | 458  | 461  | 99 -  | 2   | 462  | 126027 | 126487 |
| UN08444 | Rsa1.0.00472.1 | 1338 | 398134 | 0         | 394  | 403  | 97 +  | 359 | 761  | 166818 | 167220 |
| UN08445 | Rsa1.0.00092.1 | 612  | 659932 | 0         | 606  | 611  | 99 -  | 1   | 610  | 650842 | 651448 |
| UN08446 | Rsa1.0.01484.1 | 1071 | 44806  | 0         | 558  | 585  | 95 +  | 430 | 1012 | 40748  | 41326  |
| UN08447 | Rsa1.0.05631.1 | 802  | 13127  | 1.00E-143 | 327  | 346  | 94 -  | 41  | 384  | 4477   | 4821   |
| UN08448 | Rsa1.0.05631.1 | 800  | 13127  | 1.00E-143 | 323  | 342  | 94 +  | 418 | 757  | 4477   | 4818   |
| UN08449 | Rsa1.0.01887.1 | 1023 | 37564  | 0         | 502  | 509  | 98 +  | 514 | 1022 | 26538  | 27046  |
| UN08450 | Rsa1.0.27679.1 | 468  | 843    | 1.00E-171 | 317  | 320  | 99 -  | 119 | 437  | 208    | 527    |
| UN08451 | Rsa1.0.00178.1 | 655  | 114861 | 1.00E-114 | 276  | 296  | 93 -  | 1   | 284  | 12165  | 12459  |
| UN08452 | Rsa1.0.00111.1 | 648  | 390088 | 0         | 379  | 381  | 99 -  | 1   | 380  | 75630  | 76010  |
| UN08453 | Rsa1.0.00571.1 | 1694 | 329018 | 0         | 587  | 614  | 95 +  | 2   | 612  | 13286  | 13899  |
| UN08454 | Rsa1.0.08223.1 | 760  | 7700   | 0         | 469  | 492  | 95 +  | 263 | 753  | 6338   | 6820   |
| UN08455 | Rsa1.0.02064.1 | 999  | 35476  | 1.00E-171 | 372  | 391  | 95 -  | 542 | 929  | 16635  | 17023  |
| UN08456 | Rsa1.0.01536.1 | 863  | 43747  | 0         | 416  | 436  | 95 -  | 292 | 727  | 18915  | 19349  |
| UN08457 | Rsa1.0.00139.1 | 1077 | 357786 | 1.00E-147 | 264  | 264  | 100 - | 181 | 444  | 265190 | 265453 |
| UN08458 | Rsa1.0.00343.1 | 1291 | 93570  | 0         | 765  | 781  | 97 +  | 457 | 1237 | 90963  | 91743  |
| UN08459 | Rsa1.0.00888.1 | 997  | 60978  | 1.00E-151 | 300  | 307  | 97 -  | 676 | 980  | 13819  | 14124  |
| UN08460 | Rsa1.0.00940.1 | 1081 | 179946 | 0         | 611  | 629  | 97 -  | 4   | 631  | 175916 | 176544 |
| UN08461 | Rsa1.0.01811.1 | 847  | 38977  | 1.00E-159 | 368  | 390  | 94 -  | 2   | 385  | 1187   | 1575   |

|         |                |      |        |           |      |      |       |      |      |        |        |
|---------|----------------|------|--------|-----------|------|------|-------|------|------|--------|--------|
| UN08462 | Rsa1.0_00002.1 | 1520 | 601661 | 0         | 349  | 351  | 99 +  | 1    | 350  | 55273  | 55623  |
| UN08463 | Rsa1.0_00230.1 | 885  | 105389 | 1.00E-166 | 343  | 356  | 96 -  | 456  | 810  | 2571   | 2925   |
| UN08464 | Rsa1.0_02434.1 | 455  | 31464  | 0         | 451  | 453  | 99 -  | 3    | 455  | 1745   | 2197   |
| UN08465 | Rsa1.0_02508.1 | 1233 | 30675  | 0         | 823  | 831  | 99 -  | 1    | 831  | 13374  | 14204  |
| UN08466 | Rsa1.0_00026.1 | 1192 | 327835 | 0         | 1173 | 1191 | 98 +  | 2    | 1191 | 2422   | 3612   |
| UN08467 | Rsa1.0_07877.1 | 1030 | 8373   | 2.00E-79  | 151  | 151  | 100 + | 429  | 579  | 5171   | 5321   |
| UN08468 | Rsa1.0_07344.1 | 1149 | 9528   | 0         | 396  | 408  | 97 -  | 17   | 423  | 523    | 930    |
| UN08469 | Rsa1.0_03236.1 | 1345 | 24441  | 0         | 1158 | 1177 | 98 +  | 150  | 1326 | 5427   | 6602   |
| UN08470 | Rsa1.0_00512.1 | 1572 | 200277 | 0         | 539  | 548  | 98 -  | 3    | 550  | 66192  | 66734  |
| UN08471 | Rsa1.0_05878.1 | 1065 | 12344  | 1.00E-165 | 336  | 346  | 97 -  | 721  | 1065 | 8157   | 8499   |
| UN08472 | Rsa1.0_00248.1 | 1377 | 163568 | 1.00E-177 | 327  | 331  | 98 +  | 1045 | 1375 | 71990  | 72320  |
| UN08473 | Rsa1.0_00126.1 | 921  | 127534 | 1.00E-154 | 306  | 316  | 96 +  | 497  | 812  | 37046  | 37361  |
| UN08474 | Rsa1.0_00017.1 | 953  | 752458 | 1.00E-139 | 318  | 339  | 93 -  | 618  | 950  | 719238 | 719576 |
| UN08475 | Rsa1.0_01145.1 | 1043 | 149247 | 0         | 502  | 519  | 96 -  | 527  | 1043 | 123235 | 123750 |
| UN08476 | Rsa1.0_00638.1 | 953  | 71037  | 1.00E-111 | 258  | 275  | 93 +  | 341  | 613  | 9032   | 9306   |
| UN08477 | Rsa1.0_00065.1 | 907  | 454616 | 0         | 561  | 561  | 100 - | 347  | 907  | 452719 | 453279 |
| UN08478 | Rsa1.0_09218.1 | 1196 | 6550   | 0         | 519  | 541  | 95 +  | 2    | 530  | 276    | 816    |
| UN08479 | Rsa1.0_00464.1 | 869  | 82253  | 1.00E-162 | 305  | 309  | 98 -  | 563  | 869  | 14642  | 14950  |
| UN08480 | Rsa1.0_02532.1 | 1219 | 30403  | 0         | 854  | 859  | 99 -  | 321  | 1178 | 6583   | 7440   |
| UN08481 | Rsa1.0_09169.1 | 1026 | 6589   | 0         | 381  | 400  | 95 -  | 5    | 404  | 5660   | 6059   |
| UN08482 | Rsa1.0_08358.1 | 1473 | 7484   | 0         | 452  | 467  | 96 +  | 334  | 793  | 6492   | 6958   |
| UN08483 | Rsa1.0_00939.1 | 1959 | 185227 | 0         | 685  | 732  | 93 +  | 346  | 1058 | 37737  | 38465  |
| UN08484 | Rsa1.0_01882.1 | 1279 | 37697  | 0         | 938  | 971  | 96 +  | 326  | 1278 | 23907  | 24875  |
| UN08485 | Rsa1.0_01789.1 | 1192 | 39250  | 0         | 456  | 473  | 96 +  | 721  | 1188 | 19826  | 20296  |
| UN08486 | Rsa1.0_00147.1 | 1188 | 249503 | 0         | 545  | 575  | 94 -  | 612  | 1186 | 155695 | 156259 |
| UN08487 | Rsa1.0_00016.1 | 1164 | 831256 | 1.00E-152 | 317  | 328  | 96 +  | 25   | 350  | 370678 | 371003 |
| UN08488 | Rsa1.0_02139.1 | 1184 | 34686  | 0         | 494  | 510  | 96 +  | 3    | 509  | 24905  | 25414  |
| UN08489 | Rsa1.0_00165.1 | 1453 | 116466 | 1.00E-149 | 318  | 332  | 95 +  | 9    | 338  | 5412   | 5742   |
| UN08490 | Rsa1.0_03097.1 | 1338 | 25434  | 1.00E-139 | 273  | 279  | 97 +  | 893  | 1169 | 20254  | 20532  |
| UN08491 | Rsa1.0_02670.1 | 1353 | 28887  | 0         | 422  | 423  | 99 -  | 931  | 1353 | 3782   | 4204   |
| UN08492 | Rsa1.0_00026.1 | 1713 | 327835 | 0         | 464  | 468  | 99 -  | 1246 | 1713 | 240917 | 241382 |
| UN08493 | Rsa1.0_01975.1 | 1081 | 36578  | 0         | 399  | 422  | 94 -  | 671  | 1080 | 13994  | 14415  |
| UN08494 | Rsa1.0_00821.1 | 981  | 62891  | 0         | 570  | 574  | 99 -  | 407  | 979  | 46782  | 47355  |
| UN08495 | Rsa1.0_02481.1 | 1361 | 31035  | 0         | 735  | 768  | 95 +  | 2    | 760  | 17765  | 18531  |
| UN08496 | Rsa1.0_00938.1 | 994  | 193891 | 0         | 507  | 526  | 96 +  | 443  | 966  | 172122 | 172647 |
| UN08497 | Rsa1.0_00320.1 | 1115 | 95784  | 1.00E-133 | 379  | 426  | 88 +  | 297  | 710  | 37469  | 37882  |
| UN08498 | Rsa1.0_00251.1 | 537  | 303968 | 1.00E-101 | 276  | 299  | 92 -  | 242  | 532  | 120925 | 121221 |
| UN08499 | Rsa1.0_01328.1 | 1587 | 48021  | 2.00E-74  | 149  | 151  | 98 +  | 916  | 1066 | 43897  | 44047  |
| UN08500 | Rsa1.0_02177.1 | 914  | 34262  | 3.00E-75  | 168  | 176  | 95 -  | 434  | 609  | 14545  | 14720  |

|         |                |      |        |           |      |      |       |      |      |        |        |
|---------|----------------|------|--------|-----------|------|------|-------|------|------|--------|--------|
| UN08501 | Rsa1.0.00589.1 | 1473 | 209965 | 0         | 403  | 415  | 97 +  | 1004 | 1418 | 152952 | 153365 |
| UN08502 | Rsa1.0.01185.1 | 1479 | 149842 | 0         | 779  | 779  | 100 + | 232  | 1010 | 12499  | 13277  |
| UN08503 | Rsa1.0.00015.1 | 1086 | 561803 | 1.00E-114 | 245  | 257  | 95 -  | 376  | 621  | 186923 | 187179 |
| UN08504 | Rsa1.0.00104.1 | 1174 | 368722 | 0         | 425  | 441  | 96 -  | 740  | 1174 | 41579  | 42018  |
| UN08505 | Rsa1.0.00144.1 | 1009 | 120708 | 0         | 449  | 464  | 96 -  | 542  | 1005 | 45107  | 45567  |
| UN08506 | Rsa1.0.00552.1 | 868  | 206757 | 0         | 390  | 410  | 95 +  | 3    | 400  | 195140 | 195549 |
| UN08507 | Rsa1.0.00047.1 | 1192 | 168582 | 0         | 436  | 455  | 95 +  | 734  | 1188 | 67922  | 68376  |
| UN08508 | Rsa1.0.02840.1 | 1006 | 27386  | 0         | 710  | 736  | 96 -  | 4    | 729  | 26285  | 27020  |
| UN08509 | Rsa1.0.00430.1 | 1133 | 85453  | 0         | 860  | 887  | 96 -  | 247  | 1133 | 44137  | 45023  |
| UN08510 | Rsa1.0.02474.1 | 1324 | 31076  | 0         | 423  | 424  | 99 +  | 1    | 424  | 19878  | 20301  |
| UN08511 | Rsa1.0.03267.1 | 1321 | 24230  | 0         | 748  | 776  | 96 +  | 549  | 1321 | 16677  | 17444  |
| UN08512 | Rsa1.0.00069.1 | 1055 | 403561 | 1.00E-179 | 358  | 371  | 96 -  | 441  | 811  | 395707 | 396077 |
| UN08513 | Rsa1.0.00064.1 | 1271 | 240927 | 0         | 859  | 900  | 95 +  | 381  | 1271 | 232169 | 233058 |
| UN08514 | Rsa1.0.02163.1 | 1711 | 34427  | 1.00E-167 | 299  | 299  | 100 - | 1    | 299  | 12765  | 13063  |
| UN08515 | Rsa1.0.04524.1 | 1142 | 16981  | 0         | 402  | 417  | 96 +  | 698  | 1105 | 5653   | 6069   |
| UN08516 | Rsa1.0.01773.1 | 919  | 39546  | 1.00E-108 | 229  | 239  | 95 -  | 213  | 451  | 28417  | 28655  |
| UN08517 | Rsa1.0.00269.1 | 1635 | 341668 | 0         | 540  | 541  | 99 +  | 1095 | 1635 | 190483 | 191023 |
| UN08518 | Rsa1.0.33279.1 | 1031 | 682    | 0         | 409  | 420  | 97 +  | 1    | 419  | 263    | 682    |
| UN08519 | Rsa1.0.00355.1 | 1061 | 92038  | 0         | 482  | 488  | 98 -  | 1    | 488  | 64491  | 64978  |
| UN08520 | Rsa1.0.04466.1 | 1281 | 17236  | 0         | 1196 | 1196 | 100 + | 84   | 1279 | 7946   | 9141   |
| UN08521 | Rsa1.0.02053.1 | 785  | 35554  | 0         | 379  | 380  | 99 +  | 406  | 785  | 32532  | 32910  |
| UN08522 | Rsa1.0.01946.1 | 1343 | 36982  | 1.00E-176 | 414  | 449  | 92 +  | 877  | 1311 | 33540  | 33982  |
| UN08523 | Rsa1.0.02851.1 | 1207 | 27295  | 2.33E-156 | 317  | 332  | 95 +  | 1    | 325  | 8869   | 9196   |
| UN08524 | Rsa1.0.00080.1 | 1268 | 190437 | 0         | 502  | 520  | 96 +  | 406  | 925  | 84945  | 85464  |
| UN08525 | Rsa1.0.02072.1 | 992  | 35401  | 1.00E-132 | 278  | 289  | 96 +  | 7    | 292  | 5412   | 5699   |
| UN08526 | Rsa1.0.00048.1 | 1290 | 167185 | 1.00E-175 | 345  | 356  | 96 +  | 3    | 358  | 96417  | 96772  |
| UN08527 | Rsa1.0.00646.1 | 923  | 70473  | 6.00E-61  | 158  | 168  | 94 -  | 659  | 825  | 6088   | 6254   |
| UN08528 | Rsa1.0.00295.1 | 887  | 152597 | 6.00E-95  | 270  | 298  | 90 +  | 569  | 855  | 140727 | 141019 |
| UN08529 | Rsa1.0.00523.1 | 617  | 178770 | 0         | 533  | 548  | 97 -  | 3    | 550  | 101654 | 102201 |
| UN08530 | Rsa1.0.11519.1 | 828  | 5480   | 0         | 375  | 391  | 95 -  | 3    | 390  | 4924   | 5308   |
| UN08531 | Rsa1.0.01229.1 | 1130 | 50235  | 0         | 1115 | 1130 | 98 -  | 1    | 1129 | 3374   | 4502   |
| UN08532 | Rsa1.0.00656.1 | 1225 | 69968  | 0         | 614  | 615  | 99 -  | 8    | 622  | 46621  | 47235  |
| UN08533 | Rsa1.0.00025.1 | 1537 | 277312 | 0         | 789  | 853  | 92 +  | 9    | 836  | 251308 | 252153 |
| UN08534 | Rsa1.0.05477.1 | 924  | 13613  | 1.00E-130 | 284  | 298  | 95 -  | 636  | 924  | 4150   | 4447   |
| UN08535 | Rsa1.0.00328.1 | 2049 | 224661 | 0         | 548  | 558  | 98 +  | 3    | 560  | 140650 | 141205 |
| UN08536 | Rsa1.0.01803.1 | 869  | 173846 | 0         | 399  | 412  | 96 +  | 461  | 869  | 143938 | 144349 |
| UN08537 | Rsa1.0.13994.1 | 1070 | 3941   | 0         | 331  | 333  | 99 -  | 7    | 339  | 2090   | 2422   |
| UN08538 | Rsa1.0.00205.1 | 1239 | 193401 | 0         | 469  | 482  | 97 +  | 85   | 566  | 97462  | 97943  |
| UN08539 | Rsa1.0.00418.1 | 1243 | 215377 | 1.00E-142 | 271  | 276  | 98 -  | 4    | 279  | 47449  | 47724  |

|         |                |      |        |           |      |      |       |      |      |        |        |
|---------|----------------|------|--------|-----------|------|------|-------|------|------|--------|--------|
| UN08540 | Rsa1.0.03469.1 | 1043 | 22681  | 0         | 786  | 805  | 97 +  | 199  | 1000 | 11058  | 11858  |
| UN08541 | Rsa1.0.01293.1 | 1861 | 49139  | 0         | 573  | 575  | 99 +  | 1285 | 1859 | 23051  | 23625  |
| UN08542 | Rsa1.0.01573.1 | 1134 | 42964  | 1.00E-135 | 318  | 341  | 93 +  | 780  | 1119 | 4044   | 4369   |
| UN08543 | Rsa1.0.00149.1 | 1040 | 305196 | 0         | 506  | 506  | 100 + | 535  | 1040 | 104054 | 104559 |
| UN08544 | Rsa1.0.00101.1 | 763  | 267193 | 0         | 344  | 349  | 98 -  | 416  | 762  | 216292 | 216640 |
| UN08545 | Rsa1.0.02415.1 | 1403 | 31609  | 0         | 784  | 799  | 98 +  | 604  | 1402 | 27010  | 27808  |
| UN08546 | Rsa1.0.03952.1 | 908  | 19891  | 0         | 562  | 567  | 99 +  | 171  | 736  | 3722   | 4288   |
| UN08547 | Rsa1.0.07515.1 | 629  | 9221   | 0         | 627  | 629  | 99 -  | 3    | 629  | 7004   | 7632   |
| UN08548 | Rsa1.0.01833.1 | 1117 | 38555  | 1.00E-116 | 213  | 213  | 100 + | 830  | 1042 | 16525  | 16737  |
| UN08549 | Rsa1.0.02058.1 | 1133 | 35532  | 0         | 535  | 537  | 99 -  | 1    | 537  | 13428  | 13964  |
| UN08550 | Rsa1.0.00917.1 | 964  | 182012 | 0         | 444  | 467  | 95 -  | 498  | 964  | 175675 | 176128 |
| UN08551 | Rsa1.0.00086.1 | 1243 | 439854 | 0         | 583  | 601  | 97 +  | 641  | 1237 | 234282 | 234875 |
| UN08552 | Rsa1.0.00725.1 | 819  | 66757  | 0         | 633  | 648  | 97 -  | 14   | 660  | 40226  | 40872  |
| UN08553 | Rsa1.0.02406.1 | 806  | 145276 | 1.00E-169 | 327  | 333  | 98 +  | 472  | 803  | 1739   | 2070   |
| UN08554 | Rsa1.0.02605.1 | 1107 | 29637  | 0         | 545  | 578  | 94 -  | 3    | 566  | 25931  | 26504  |
| UN08555 | Rsa1.0.00954.1 | 1125 | 189536 | 1.00E-174 | 316  | 318  | 99 +  | 808  | 1125 | 155715 | 156032 |
| UN08556 | Rsa1.0.03500.1 | 1264 | 22461  | 0         | 1251 | 1260 | 99 -  | 5    | 1264 | 7828   | 9086   |
| UN08557 | Rsa1.0.00269.1 | 1290 | 341668 | 0         | 892  | 899  | 99 +  | 368  | 1266 | 48310  | 49208  |
| UN08558 | Rsa1.0.00629.1 | 1454 | 71381  | 0         | 788  | 812  | 97 +  | 292  | 1102 | 45375  | 46186  |
| UN08559 | Rsa1.0.00037.1 | 1279 | 307838 | 0         | 951  | 954  | 99 -  | 325  | 1278 | 175872 | 176825 |
| UN08560 | Rsa1.0.04218.1 | 708  | 18423  | 6.00E-82  | 164  | 167  | 98 -  | 234  | 400  | 17583  | 17749  |
| UN08561 | Rsa1.0.02707.1 | 1282 | 28520  | 0         | 348  | 350  | 99 +  | 433  | 782  | 12735  | 13084  |
| UN08562 | Rsa1.0.10478.1 | 1086 | 5832   | 1.00E-154 | 277  | 277  | 100 - | 1    | 277  | 5140   | 5416   |
| UN08563 | Rsa1.0.01403.1 | 903  | 46453  | 0         | 449  | 457  | 98 +  | 448  | 903  | 3064   | 3518   |
| UN08564 | Rsa1.0.00113.1 | 914  | 131574 | 0         | 704  | 723  | 97 +  | 1    | 720  | 31560  | 32282  |
| UN08565 | Rsa1.0.00416.1 | 2214 | 86772  | 0         | 508  | 510  | 99 +  | 247  | 756  | 74497  | 75006  |
| UN08566 | Rsa1.0.00031.1 | 728  | 179862 | 1.00E-163 | 391  | 422  | 92 +  | 1    | 421  | 73397  | 73816  |
| UN08567 | Rsa1.0.02033.1 | 1133 | 35828  | 0         | 1087 | 1130 | 96 -  | 2    | 1124 | 20373  | 21501  |
| UN08568 | Rsa1.0.00038.1 | 1389 | 314568 | 1.00E-126 | 285  | 299  | 95 +  | 1065 | 1359 | 52376  | 52671  |
| UN08569 | Rsa1.0.00051.1 | 1068 | 258225 | 0         | 1014 | 1088 | 93 +  | 3    | 1068 | 113688 | 114762 |
| UN08570 | Rsa1.0.01434.1 | 890  | 45951  | 0         | 781  | 802  | 97 +  | 95   | 889  | 351    | 1151   |
| UN08571 | Rsa1.0.00039.1 | 1247 | 296927 | 4.00E-63  | 202  | 227  | 88 -  | 984  | 1198 | 223067 | 223293 |
| UN08572 | Rsa1.0.00161.1 | 1198 | 116891 | 0         | 449  | 452  | 99 +  | 3    | 454  | 30418  | 30869  |
| UN08573 | Rsa1.0.02418.1 | 747  | 31590  | 1.00E-169 | 305  | 306  | 99 -  | 1    | 306  | 5189   | 5494   |
| UN08574 | Rsa1.0.00344.1 | 1647 | 191774 | 0         | 817  | 847  | 96 -  | 780  | 1614 | 102407 | 103253 |
| UN08575 | Rsa1.0.00615.1 | 1018 | 72235  | 0         | 383  | 384  | 99 +  | 633  | 1016 | 26377  | 26760  |
| UN08576 | Rsa1.0.04121.1 | 770  | 18951  | 0         | 436  | 455  | 95 -  | 55   | 509  | 13882  | 14336  |
| UN08577 | Rsa1.0.01136.1 | 577  | 52724  | 2.00E-84  | 229  | 252  | 90 +  | 315  | 553  | 14179  | 14429  |
| UN08578 | Rsa1.0.00710.1 | 562  | 67325  | 1.00E-153 | 317  | 329  | 96 -  | 237  | 562  | 65792  | 66119  |

|         |                |      |        |           |      |      |       |      |      |        |        |
|---------|----------------|------|--------|-----------|------|------|-------|------|------|--------|--------|
| UN08579 | Rsa1.0.00589.1 | 1318 | 209965 | 1.00E-170 | 312  | 315  | 99 +  | 984  | 1298 | 194796 | 195110 |
| UN08580 | Rsa1.0.00017.1 | 1229 | 752458 | 0         | 680  | 716  | 94 +  | 491  | 1204 | 416018 | 416733 |
| UN08581 | Rsa1.0.00678.1 | 604  | 193163 | 1.00E-153 | 275  | 275  | 100 + | 330  | 604  | 23909  | 24183  |
| UN08582 | Rsa1.0.00851.1 | 734  | 62181  | 0         | 443  | 475  | 93 -  | 3    | 468  | 8707   | 9171   |
| UN08583 | Rsa1.0.01026.1 | 2152 | 171624 | 0         | 2144 | 2154 | 99 -  | 1    | 2152 | 138812 | 140965 |
| UN08584 | Rsa1.0.02280.1 | 613  | 33063  | 2.00E-53  | 225  | 264  | 85 +  | 93   | 356  | 29423  | 29677  |
| UN08585 | Rsa1.0.00323.1 | 534  | 159650 | 1.00E-134 | 286  | 299  | 95 -  | 234  | 530  | 61652  | 61947  |
| UN08586 | Rsa1.0.00089.1 | 1095 | 406142 | 0         | 515  | 515  | 100 + | 581  | 1095 | 196391 | 196905 |
| UN08587 | Rsa1.0.03605.1 | 696  | 21827  | 0         | 407  | 412  | 98 -  | 288  | 696  | 17738  | 18149  |
| UN08588 | Rsa1.0.00065.1 | 741  | 454616 | 1.00E-148 | 293  | 302  | 97 +  | 356  | 657  | 231797 | 232098 |
| UN08589 | Rsa1.0.00302.1 | 1378 | 97521  | 1.00E-158 | 344  | 363  | 94 +  | 3    | 362  | 33883  | 34242  |
| UN08590 | Rsa1.0.01322.1 | 746  | 48166  | 1.00E-168 | 326  | 335  | 97 -  | 35   | 369  | 28900  | 29234  |
| UN08591 | Rsa1.0.00071.1 | 991  | 345714 | 0         | 372  | 378  | 98 -  | 469  | 846  | 311954 | 312331 |
| UN08592 | Rsa1.0.00610.1 | 976  | 72740  | 0         | 491  | 513  | 95 +  | 8    | 513  | 35082  | 35589  |
| UN08593 | Rsa1.0.00337.1 | 813  | 143174 | 1.00E-137 | 260  | 264  | 98 +  | 134  | 397  | 1585   | 1848   |
| UN08594 | Rsa1.0.03406.1 | 846  | 23159  | 0         | 488  | 499  | 97 +  | 3    | 501  | 15506  | 16002  |
| UN08595 | Rsa1.0.05708.1 | 995  | 12871  | 0         | 623  | 651  | 95 -  | 10   | 660  | 11144  | 11794  |
| UN08596 | Rsa1.0.28133.1 | 1259 | 826    | 0         | 417  | 426  | 97 -  | 3    | 428  | 1      | 426    |
| UN08597 | Rsa1.0.01335.1 | 1104 | 47894  | 1.00E-157 | 368  | 397  | 92 -  | 708  | 1104 | 18291  | 18681  |
| UN08598 | Rsa1.0.00162.1 | 529  | 239935 | 0         | 406  | 407  | 99 -  | 1    | 407  | 12315  | 12721  |
| UN08599 | Rsa1.0.01088.1 | 736  | 54416  | 2.00E-97  | 195  | 199  | 97 -  | 3    | 198  | 30917  | 31115  |
| UN08600 | Rsa1.0.02606.1 | 1412 | 29635  | 1.00E-175 | 356  | 366  | 97 +  | 1050 | 1412 | 7554   | 7916   |
| UN08601 | Rsa1.0.00433.1 | 799  | 85381  | 5.00E-95  | 253  | 273  | 92 +  | 28   | 295  | 65209  | 65477  |
| UN08602 | Rsa1.0.00136.1 | 626  | 122464 | 1.00E-110 | 206  | 207  | 99 +  | 2    | 208  | 54754  | 54960  |
| UN08603 | Rsa1.0.00077.1 | 1039 | 145005 | 0         | 799  | 849  | 94 +  | 177  | 1022 | 33313  | 34143  |
| UN08604 | Rsa1.0.00306.1 | 1019 | 146760 | 1.00E-164 | 417  | 459  | 90 -  | 155  | 595  | 133202 | 133651 |
| UN08605 | Rsa1.0.00900.1 | 906  | 60367  | 0         | 507  | 511  | 99 +  | 3    | 513  | 19835  | 20345  |
| UN08606 | Rsa1.0.15466.1 | 775  | 2589   | 0         | 748  | 774  | 96 -  | 9    | 773  | 983    | 1752   |
| UN08607 | Rsa1.0.00262.1 | 688  | 101906 | 1.00E-121 | 248  | 256  | 96 -  | 417  | 670  | 46408  | 46663  |
| UN08608 | Rsa1.0.25755.1 | 671  | 922    | 0         | 507  | 531  | 95 +  | 115  | 637  | 1      | 531    |
| UN08609 | Rsa1.0.03462.1 | 1023 | 22725  | 1.00E-130 | 258  | 264  | 97 +  | 758  | 1021 | 15190  | 15452  |
| UN08610 | Rsa1.0.02956.1 | 1288 | 26483  | 0         | 540  | 541  | 99 -  | 748  | 1288 | 3074   | 3614   |
| UN08611 | Rsa1.0.07528.1 | 645  | 9195   | 0         | 632  | 644  | 98 +  | 3    | 645  | 3308   | 3950   |
| UN08612 | Rsa1.0.15363.1 | 617  | 2655   | 0         | 591  | 613  | 96 -  | 1    | 608  | 1692   | 2304   |
| UN08613 | Rsa1.0.00931.1 | 920  | 59210  | 0         | 916  | 927  | 98 -  | 3    | 920  | 44659  | 45585  |
| UN08614 | Rsa1.0.01655.1 | 874  | 41508  | 0         | 411  | 429  | 95 -  | 448  | 874  | 1660   | 2088   |
| UN08615 | Rsa1.0.06732.1 | 800  | 10449  | 0         | 748  | 763  | 98 -  | 41   | 800  | 8829   | 9591   |
| UN08616 | Rsa1.0.16475.1 | 933  | 2143   | 1.00E-103 | 209  | 215  | 97 +  | 625  | 839  | 1084   | 1298   |
| UN08617 | Rsa1.0.01340.1 | 1120 | 47805  | 0         | 558  | 605  | 92 +  | 520  | 1120 | 46060  | 46664  |

|         |                |      |        |           |      |      |       |     |      |        |        |
|---------|----------------|------|--------|-----------|------|------|-------|-----|------|--------|--------|
| UN08618 | Rsa1.0.00017.1 | 1565 | 752458 | 0         | 694  | 751  | 92 +  | 750 | 1497 | 352440 | 353175 |
| UN08619 | Rsa1.0.00194.1 | 1216 | 110851 | 0         | 518  | 519  | 99 -  | 1   | 519  | 50578  | 51096  |
| UN08620 | Rsa1.0.00066.1 | 868  | 152418 | 0         | 429  | 451  | 95 -  | 8   | 450  | 19638  | 20088  |
| UN08621 | Rsa1.0.09211.1 | 914  | 6556   | 8.00E-76  | 157  | 161  | 97 +  | 580 | 740  | 4357   | 4517   |
| UN08622 | Rsa1.0.00121.1 | 1240 | 278029 | 1.00E-167 | 411  | 444  | 92 -  | 240 | 683  | 44291  | 44727  |
| UN08623 | Rsa1.0.03794.1 | 662  | 20825  | 0         | 659  | 660  | 99 +  | 3   | 662  | 16628  | 17286  |
| UN08624 | Rsa1.0.01373.1 | 1702 | 47052  | 0         | 481  | 481  | 100 + | 1   | 481  | 3444   | 3924   |
| UN08625 | Rsa1.0.02482.1 | 1113 | 31000  | 0         | 612  | 634  | 96 +  | 329 | 947  | 26970  | 27603  |
| UN08626 | Rsa1.0.01529.1 | 891  | 43871  | 1.00E-145 | 359  | 393  | 91 -  | 499 | 891  | 38298  | 38675  |
| UN08627 | Rsa1.0.02365.1 | 1174 | 32118  | 0         | 555  | 596  | 93 -  | 568 | 1157 | 29274  | 29863  |
| UN08628 | Rsa1.0.01803.1 | 1104 | 173846 | 1.00E-167 | 335  | 347  | 96 +  | 6   | 352  | 169093 | 169439 |
| UN08629 | Rsa1.0.04787.1 | 520  | 15987  | 9.00E-99  | 246  | 264  | 93 -  | 261 | 519  | 3082   | 3344   |
| UN08630 | Rsa1.0.01352.1 | 784  | 47443  | 0         | 460  | 464  | 99 -  | 4   | 467  | 954    | 1417   |
| UN08631 | Rsa1.0.00971.1 | 1450 | 57973  | 0         | 1448 | 1451 | 99 -  | 1   | 1450 | 14055  | 15505  |
| UN08632 | Rsa1.0.02684.1 | 1474 | 28676  | 0         | 512  | 552  | 92 -  | 447 | 984  | 336    | 882    |
| UN08633 | Rsa1.0.05782.1 | 1028 | 12646  | 1.00E-108 | 211  | 215  | 98 +  | 147 | 361  | 8062   | 8276   |
| UN08634 | Rsa1.0.09130.1 | 708  | 6623   | 0         | 615  | 645  | 95 +  | 20  | 661  | 3395   | 4028   |
| UN08635 | Rsa1.0.01058.1 | 879  | 55430  | 0         | 575  | 594  | 96 -  | 288 | 879  | 31998  | 32588  |
| UN08636 | Rsa1.0.00039.1 | 1134 | 296927 | 0         | 368  | 374  | 98 -  | 119 | 492  | 290917 | 291290 |
| UN08637 | Rsa1.0.00460.1 | 1064 | 206387 | 0         | 540  | 560  | 96 +  | 3   | 555  | 17702  | 18261  |
| UN08638 | Rsa1.0.34683.1 | 1386 | 653    | 0         | 649  | 653  | 99 +  | 3   | 654  | 1      | 653    |
| UN08639 | Rsa1.0.00579.1 | 1240 | 148308 | 1.00E-155 | 279  | 279  | 100 - | 1   | 279  | 71242  | 71520  |
| UN08640 | Rsa1.0.01388.1 | 1263 | 46741  | 0         | 342  | 346  | 98 +  | 62  | 407  | 25410  | 25755  |
| UN08641 | Rsa1.0.00769.1 | 1000 | 64911  | 1.00E-157 | 297  | 302  | 98 +  | 3   | 304  | 12971  | 13272  |
| UN08642 | Rsa1.0.01581.1 | 675  | 42833  | 1.00E-160 | 298  | 302  | 98 +  | 86  | 387  | 7614   | 7915   |
| UN08643 | Rsa1.0.00820.1 | 945  | 62911  | 0         | 562  | 564  | 99 +  | 382 | 944  | 24795  | 25358  |
| UN08644 | Rsa1.0.00448.1 | 1089 | 84048  | 0         | 1086 | 1087 | 99 +  | 3   | 1089 | 19792  | 20878  |
| UN08645 | Rsa1.0.01881.1 | 683  | 37721  | 2.00E-51  | 113  | 116  | 97 -  | 129 | 244  | 23401  | 23516  |
| UN08646 | Rsa1.0.02505.1 | 649  | 30703  | 1.00E-89  | 180  | 184  | 97 -  | 159 | 342  | 29797  | 29980  |
| UN08647 | Rsa1.0.00938.1 | 931  | 193891 | 0         | 784  | 801  | 97 -  | 2   | 800  | 179936 | 180735 |
| UN08648 | Rsa1.0.04051.1 | 1147 | 19375  | 0         | 486  | 491  | 98 +  | 611 | 1101 | 10627  | 11117  |
| UN08649 | Rsa1.0.01519.1 | 1565 | 44144  | 0         | 612  | 622  | 98 -  | 951 | 1565 | 14902  | 15523  |
| UN08650 | Rsa1.0.00980.1 | 1054 | 57729  | 1.00E-142 | 256  | 256  | 100 - | 799 | 1054 | 26581  | 26836  |
| UN08651 | Rsa1.0.01857.1 | 1260 | 38103  | 1.00E-149 | 356  | 383  | 92 +  | 361 | 737  | 6745   | 7124   |
| UN08652 | Rsa1.0.01578.1 | 1231 | 42880  | 0         | 780  | 790  | 98 -  | 400 | 1188 | 4209   | 4998   |
| UN08653 | Rsa1.0.00213.1 | 561  | 108167 | 1.00E-168 | 302  | 303  | 99 +  | 259 | 561  | 39811  | 40113  |
| UN08654 | Rsa1.0.00064.1 | 1239 | 240927 | 1.00E-132 | 246  | 248  | 99 -  | 651 | 898  | 185539 | 185786 |
| UN08655 | Rsa1.0.00135.1 | 585  | 178077 | 0         | 350  | 351  | 99 -  | 236 | 585  | 2957   | 3307   |
| UN08656 | Rsa1.0.00370.1 | 1196 | 90472  | 1.00E-132 | 258  | 263  | 98 +  | 85  | 345  | 42     | 304    |



|         |                |      |        |           |      |      |       |     |      |        |        |
|---------|----------------|------|--------|-----------|------|------|-------|-----|------|--------|--------|
| UN08657 | Rsa1.0.00375.1 | 1113 | 90207  | 0         | 379  | 387  | 97 +  | 120 | 506  | 56410  | 56796  |
| UN08658 | Rsa1.0.00201.1 | 790  | 232851 | 0         | 741  | 775  | 95 +  | 8   | 779  | 140320 | 141089 |
| UN08659 | Rsa1.0.03355.1 | 868  | 23489  | 0         | 563  | 565  | 99 -  | 304 | 868  | 14147  | 14711  |
| UN08660 | Rsa1.0.01454.1 | 1348 | 45440  | 1.00E-175 | 359  | 373  | 96 +  | 985 | 1348 | 12955  | 13326  |
| UN08661 | Rsa1.0.03049.1 | 1267 | 25771  | 1.00E-166 | 296  | 296  | 100 - | 970 | 1265 | 9212   | 9507   |
| UN08662 | Rsa1.0.01493.1 | 1281 | 44670  | 0         | 781  | 782  | 99 +  | 156 | 937  | 32666  | 33447  |
| UN08663 | Rsa1.0.25895.1 | 567  | 914    | 0         | 370  | 371  | 99 -  | 195 | 565  | 161    | 531    |
| UN08664 | Rsa1.0.00018.1 | 765  | 410899 | 1.00E-165 | 323  | 329  | 98 +  | 437 | 765  | 259091 | 259415 |
| UN08665 | Rsa1.0.03476.1 | 1527 | 22646  | 0         | 1365 | 1397 | 97 -  | 88  | 1479 | 12628  | 14022  |
| UN08666 | Rsa1.0.02201.1 | 607  | 33981  | 0         | 598  | 606  | 98 -  | 3   | 606  | 26536  | 27137  |
| UN08667 | Rsa1.0.01359.1 | 1009 | 47271  | 1.00E-122 | 280  | 299  | 93 -  | 1   | 299  | 33556  | 33849  |
| UN08668 | Rsa1.0.03253.1 | 925  | 24321  | 1.00E-103 | 203  | 207  | 98 -  | 49  | 255  | 15147  | 15353  |
| UN08669 | Rsa1.0.01958.1 | 560  | 261128 | 1.00E-117 | 294  | 318  | 92 -  | 55  | 368  | 110198 | 110502 |
| UN08670 | Rsa1.0.00050.1 | 472  | 237174 | 1.00E-125 | 350  | 388  | 90 -  | 6   | 383  | 180825 | 181210 |
| UN08671 | Rsa1.0.00005.1 | 684  | 353093 | 1.00E-101 | 198  | 200  | 99 +  | 1   | 200  | 280457 | 280655 |
| UN08672 | Rsa1.0.00880.1 | 515  | 61271  | 0         | 453  | 463  | 97 +  | 52  | 510  | 40587  | 41049  |
| UN08673 | Rsa1.0.02976.1 | 621  | 26315  | 0         | 378  | 382  | 98 -  | 240 | 621  | 18436  | 18816  |
| UN08674 | Rsa1.0.02983.1 | 440  | 26268  | 1.00E-103 | 190  | 190  | 100 - | 87  | 276  | 809    | 998    |
| UN08675 | Rsa1.0.00838.1 | 686  | 153820 | 0         | 395  | 396  | 99 -  | 291 | 686  | 149595 | 149990 |
| UN08676 | Rsa1.0.00050.1 | 1676 | 237174 | 0         | 1034 | 1042 | 99 -  | 635 | 1676 | 10213  | 11254  |
| UN08677 | Rsa1.0.04070.1 | 937  | 19244  | 0         | 497  | 508  | 97 +  | 438 | 937  | 2567   | 3074   |
| UN08678 | Rsa1.0.00176.1 | 687  | 240984 | 0         | 524  | 560  | 93 -  | 3   | 547  | 9869   | 10426  |
| UN08679 | Rsa1.0.02037.1 | 815  | 35717  | 0         | 362  | 368  | 98 +  | 2   | 368  | 25463  | 25830  |
| UN08680 | Rsa1.0.04794.1 | 767  | 15960  | 1.00E-131 | 306  | 328  | 93 -  | 120 | 447  | 2694   | 3014   |
| UN08681 | Rsa1.0.00033.1 | 516  | 515811 | 7.00E-78  | 247  | 280  | 88 +  | 248 | 516  | 33139  | 33414  |
| UN08682 | Rsa1.0.02500.1 | 822  | 30768  | 1.00E-152 | 359  | 390  | 92 +  | 444 | 816  | 7770   | 8159   |
| UN08683 | Rsa1.0.02360.1 | 1047 | 32203  | 0         | 588  | 630  | 93 +  | 1   | 609  | 23949  | 24578  |
| UN08684 | Rsa1.0.01492.1 | 1056 | 44704  | 0         | 329  | 329  | 100 - | 3   | 331  | 35636  | 35964  |
| UN08685 | Rsa1.0.08224.1 | 503  | 7697   | 0         | 452  | 472  | 95 +  | 3   | 472  | 4459   | 4925   |
| UN08686 | Rsa1.0.01136.1 | 652  | 52724  | 0         | 377  | 378  | 99 +  | 276 | 652  | 14179  | 14556  |
| UN08687 | Rsa1.0.02869.1 | 1042 | 27109  | 0         | 447  | 470  | 95 +  | 28  | 496  | 3367   | 3823   |
| UN08688 | Rsa1.0.00301.1 | 746  | 365315 | 1.00E-132 | 346  | 382  | 90 +  | 368 | 737  | 346680 | 347051 |
| UN08689 | Rsa1.0.00237.1 | 1129 | 235974 | 0         | 396  | 401  | 98 -  | 4   | 399  | 99025  | 99425  |
| UN08690 | Rsa1.0.00679.1 | 977  | 68971  | 0         | 877  | 921  | 95 -  | 3   | 923  | 701    | 1605   |
| UN08691 | Rsa1.0.00410.1 | 771  | 86957  | 0         | 421  | 421  | 100 + | 19  | 439  | 33168  | 33588  |
| UN08692 | Rsa1.0.00867.1 | 819  | 61635  | 1.00E-147 | 267  | 268  | 99 -  | 3   | 270  | 45036  | 45303  |
| UN08693 | Rsa1.0.02848.1 | 573  | 27329  | 1.00E-116 | 222  | 225  | 98 +  | 204 | 428  | 8638   | 8862   |
| UN08694 | Rsa1.0.00066.1 | 1433 | 152418 | 0         | 568  | 568  | 100 - | 866 | 1433 | 65065  | 65632  |
| UN08695 | Rsa1.0.07606.1 | 937  | 9035   | 1.00E-133 | 332  | 362  | 91 -  | 584 | 937  | 2792   | 3142   |

|         |                |      |        |           |      |      |       |      |      |        |        |
|---------|----------------|------|--------|-----------|------|------|-------|------|------|--------|--------|
| UN08696 | Rsa1.0_00306.1 | 1075 | 146760 | 0         | 546  | 555  | 98 -  | 521  | 1072 | 135593 | 136147 |
| UN08697 | Rsa1.0_00743.1 | 661  | 177459 | 4.00E-61  | 132  | 136  | 97 +  | 259  | 394  | 613    | 748    |
| UN08698 | Rsa1.0_00250.1 | 1306 | 273771 | 0         | 370  | 371  | 99 +  | 935  | 1305 | 230593 | 230963 |
| UN08699 | Rsa1.0_00179.1 | 671  | 393324 | 1.00E-166 | 365  | 383  | 95 -  | 17   | 392  | 248844 | 249223 |
| UN08700 | Rsa1.0_18177.1 | 800  | 1651   | 1.00E-165 | 309  | 314  | 98 -  | 487  | 800  | 706    | 1019   |
| UN08701 | Rsa1.0_00598.1 | 673  | 73425  | 0         | 662  | 669  | 98 -  | 5    | 673  | 66879  | 67541  |
| UN08702 | Rsa1.0_00017.1 | 626  | 752458 | 9.00E-87  | 220  | 237  | 92 +  | 393  | 624  | 661547 | 661779 |
| UN08703 | Rsa1.0_11534.1 | 1190 | 5477   | 0         | 454  | 467  | 97 -  | 452  | 918  | 1259   | 1725   |
| UN08704 | Rsa1.0_00639.1 | 982  | 165873 | 0         | 956  | 976  | 97 -  | 6    | 981  | 126875 | 127849 |
| UN08705 | Rsa1.0_00056.1 | 744  | 332604 | 0         | 722  | 736  | 98 +  | 5    | 739  | 1485   | 2220   |
| UN08706 | Rsa1.0_00059.1 | 1317 | 159650 | 0         | 560  | 572  | 97 -  | 748  | 1315 | 121057 | 121628 |
| UN08707 | Rsa1.0_03467.1 | 1396 | 22687  | 0         | 581  | 592  | 98 +  | 756  | 1346 | 13100  | 13691  |
| UN08708 | Rsa1.0_00145.1 | 1143 | 261008 | 0         | 612  | 619  | 98 +  | 3    | 616  | 48222  | 48840  |
| UN08709 | Rsa1.0_00224.1 | 704  | 327530 | 1.00E-95  | 218  | 227  | 96 -  | 411  | 634  | 178415 | 178637 |
| UN08710 | Rsa1.0_00662.1 | 1012 | 192183 | 0         | 476  | 485  | 98 +  | 392  | 876  | 29861  | 30342  |
| UN08711 | Rsa1.0_00111.1 | 861  | 390088 | 0         | 487  | 487  | 100 - | 375  | 861  | 219082 | 219568 |
| UN08712 | Rsa1.0_02831.1 | 1427 | 27533  | 0         | 1381 | 1381 | 100 + | 47   | 1427 | 13241  | 14621  |
| UN08713 | Rsa1.0_00644.1 | 874  | 136881 | 1.00E-144 | 321  | 339  | 94 +  | 545  | 874  | 31373  | 31708  |
| UN08714 | Rsa1.0_17354.1 | 576  | 1851   | 2.33E-156 | 278  | 282  | 98 +  | 157  | 437  | 420    | 701    |
| UN08715 | Rsa1.0_00065.1 | 951  | 454616 | 0         | 681  | 690  | 98 -  | 260  | 949  | 58813  | 59501  |
| UN08716 | Rsa1.0_00405.1 | 1194 | 202864 | 0         | 1146 | 1172 | 97 +  | 22   | 1193 | 154165 | 155336 |
| UN08717 | Rsa1.0_00078.1 | 1289 | 175053 | 0         | 524  | 531  | 98 +  | 3    | 533  | 91043  | 91570  |
| UN08718 | Rsa1.0_00407.1 | 994  | 191544 | 0         | 447  | 457  | 97 +  | 535  | 990  | 25043  | 25499  |
| UN08719 | Rsa1.0_00655.1 | 1356 | 195840 | 1.00E-120 | 329  | 369  | 89 +  | 1009 | 1356 | 163505 | 163873 |
| UN08720 | Rsa1.0_02630.1 | 1274 | 29349  | 0         | 504  | 515  | 97 +  | 1    | 515  | 21173  | 21687  |
| UN08721 | Rsa1.0_00179.1 | 830  | 393324 | 1.00E-123 | 276  | 289  | 95 -  | 65   | 351  | 250660 | 250943 |
| UN08722 | Rsa1.0_12975.1 | 1097 | 5057   | 0         | 486  | 497  | 97 -  | 194  | 690  | 1      | 496    |
| UN08723 | Rsa1.0_00472.1 | 1469 | 398134 | 0         | 1065 | 1100 | 96 -  | 8    | 1084 | 174721 | 175820 |
| UN08724 | Rsa1.0_03865.1 | 837  | 20373  | 1.00E-126 | 230  | 230  | 100 - | 258  | 487  | 15975  | 16204  |
| UN08725 | Rsa1.0_04493.1 | 868  | 17137  | 0         | 848  | 868  | 97 -  | 6    | 868  | 5195   | 6056   |
| UN08726 | Rsa1.0_00323.1 | 1006 | 159650 | 0         | 527  | 527  | 100 - | 68   | 594  | 78555  | 79081  |
| UN08727 | Rsa1.0_00171.1 | 788  | 115622 | 0         | 603  | 609  | 99 -  | 180  | 788  | 113756 | 114364 |
| UN08728 | Rsa1.0_07638.1 | 1575 | 8967   | 1.00E-168 | 426  | 466  | 91 -  | 1115 | 1573 | 4103   | 4555   |
| UN08729 | Rsa1.0_00130.1 | 583  | 125737 | 1.00E-110 | 253  | 264  | 95 +  | 326  | 583  | 50495  | 50757  |
| UN08730 | Rsa1.0_05082.1 | 1385 | 14896  | 0         | 1338 | 1367 | 97 +  | 5    | 1368 | 9751   | 11116  |
| UN08731 | Rsa1.0_00316.1 | 731  | 96264  | 6.00E-45  | 108  | 112  | 96 +  | 177  | 286  | 57738  | 57849  |
| UN08732 | Rsa1.0_00037.1 | 1642 | 307838 | 0         | 550  | 601  | 91 +  | 1    | 578  | 236111 | 236705 |
| UN08733 | Rsa1.0_02840.1 | 929  | 27386  | 0         | 432  | 458  | 94 +  | 278  | 726  | 26285  | 26742  |
| UN08734 | Rsa1.0_33333.1 | 684  | 681    | 0         | 578  | 613  | 94 -  | 53   | 661  | 76     | 681    |

|         |                |      |        |           |      |      |       |     |      |        |        |
|---------|----------------|------|--------|-----------|------|------|-------|-----|------|--------|--------|
| UN08735 | Rsa1.0_14327.1 | 694  | 3518   | 1.00E-152 | 394  | 428  | 92 +  | 254 | 679  | 231    | 645    |
| UN08736 | Rsa1.0_08796.1 | 749  | 6916   | 0         | 446  | 463  | 96 +  | 288 | 749  | 4101   | 4562   |
| UN08737 | Rsa1.0_09528.1 | 919  | 6309   | 0         | 405  | 405  | 100 + | 515 | 919  | 1      | 405    |
| UN08738 | Rsa1.0_02601.1 | 552  | 29654  | 1.00E-60  | 119  | 119  | 100 + | 432 | 550  | 2926   | 3044   |
| UN08739 | Rsa1.0_05074.1 | 2119 | 14925  | 0         | 517  | 527  | 98 +  | 1   | 525  | 902    | 1427   |
| UN08740 | Rsa1.0_00456.1 | 1224 | 82826  | 0         | 980  | 1013 | 96 -  | 210 | 1222 | 78585  | 79582  |
| UN08741 | Rsa1.0_00124.1 | 624  | 262503 | 0         | 621  | 624  | 99 +  | 1   | 624  | 142943 | 143565 |
| UN08742 | Rsa1.0_04520.1 | 525  | 16995  | 1.00E-156 | 289  | 291  | 99 -  | 3   | 291  | 11580  | 11870  |
| UN08743 | Rsa1.0_00041.1 | 1067 | 186197 | 1.00E-139 | 279  | 288  | 96 +  | 371 | 658  | 33067  | 33354  |
| UN08744 | Rsa1.0_00078.1 | 1229 | 175053 | 0         | 502  | 508  | 98 +  | 605 | 1112 | 41372  | 41879  |
| UN08745 | Rsa1.0_00293.1 | 939  | 339294 | 0         | 465  | 471  | 98 -  | 83  | 553  | 65205  | 65675  |
| UN08746 | Rsa1.0_13353.1 | 475  | 4894   | 7.00E-84  | 161  | 162  | 99 -  | 230 | 391  | 4060   | 4221   |
| UN08747 | Rsa1.0_00001.1 | 1024 | 363028 | 1.00E-123 | 255  | 263  | 96 +  | 718 | 978  | 322377 | 322638 |
| UN08748 | Rsa1.0_00121.1 | 1235 | 278029 | 0         | 423  | 437  | 96 -  | 233 | 666  | 44291  | 44727  |
| UN08749 | Rsa1.0_03028.1 | 706  | 25872  | 0         | 585  | 602  | 97 -  | 68  | 668  | 16430  | 17031  |
| UN08750 | Rsa1.0_00920.1 | 966  | 601703 | 0         | 920  | 940  | 97 +  | 1   | 939  | 13704  | 14643  |
| UN08751 | Rsa1.0_06728.1 | 916  | 10455  | 1.00E-173 | 342  | 352  | 97 -  | 565 | 916  | 9098   | 9448   |
| UN08752 | Rsa1.0_05895.1 | 1261 | 12305  | 0         | 342  | 342  | 100 + | 920 | 1261 | 4214   | 4555   |
| UN08753 | Rsa1.0_00741.1 | 1443 | 66117  | 0         | 1055 | 1233 | 85 -  | 212 | 1438 | 30392  | 31621  |
| UN08754 | Rsa1.0_05440.1 | 512  | 13749  | 6.00E-66  | 128  | 128  | 100 - | 3   | 130  | 13262  | 13389  |
| UN08755 | Rsa1.0_00800.1 | 490  | 63868  | 1.00E-136 | 248  | 249  | 99 +  | 45  | 293  | 14037  | 14285  |
| UN08756 | Rsa1.0_00777.1 | 965  | 191865 | 0         | 424  | 436  | 97 -  | 178 | 613  | 128527 | 128962 |
| UN08757 | Rsa1.0_00197.1 | 699  | 109714 | 0         | 376  | 382  | 98 +  | 224 | 605  | 94811  | 95190  |
| UN08758 | Rsa1.0_05819.1 | 1281 | 12543  | 0         | 1243 | 1270 | 97 +  | 12  | 1280 | 2234   | 3494   |
| UN08759 | Rsa1.0_00157.1 | 566  | 245832 | 0         | 433  | 456  | 94 -  | 62  | 516  | 239149 | 239590 |
| UN08760 | Rsa1.0_00198.1 | 568  | 222963 | 0         | 554  | 562  | 98 -  | 6   | 567  | 134425 | 134980 |
| UN08761 | Rsa1.0_00181.1 | 1028 | 114269 | 1.00E-124 | 248  | 255  | 97 -  | 3   | 257  | 103461 | 103715 |
| UN08762 | Rsa1.0_00126.1 | 1159 | 127534 | 0         | 596  | 600  | 99 +  | 560 | 1159 | 17416  | 18015  |
| UN08763 | Rsa1.0_02931.1 | 951  | 26654  | 0         | 517  | 539  | 95 -  | 10  | 541  | 5953   | 6486   |
| UN08764 | Rsa1.0_01172.1 | 890  | 51734  | 1.00E-128 | 236  | 237  | 99 +  | 1   | 237  | 20089  | 20325  |
| UN08765 | Rsa1.0_02825.1 | 868  | 27568  | 0         | 418  | 436  | 95 -  | 432 | 866  | 26073  | 26506  |
| UN08766 | Rsa1.0_00161.1 | 956  | 116891 | 1.00E-151 | 287  | 291  | 98 -  | 1   | 291  | 8114   | 8403   |
| UN08767 | Rsa1.0_00401.1 | 850  | 244410 | 0         | 403  | 405  | 99 -  | 446 | 850  | 243396 | 243800 |
| UN08768 | Rsa1.0_00121.1 | 774  | 278029 | 1.00E-122 | 232  | 235  | 98 -  | 1   | 235  | 86793  | 87027  |
| UN08769 | Rsa1.0_75692.1 | 805  | 303    | 1.00E-122 | 233  | 235  | 99 -  | 457 | 690  | 52     | 286    |
| UN08770 | Rsa1.0_14821.1 | 765  | 3044   | 0         | 344  | 345  | 99 -  | 1   | 345  | 1310   | 1654   |
| UN08771 | Rsa1.0_00447.1 | 1594 | 84051  | 1.00E-140 | 300  | 315  | 95 +  | 1   | 312  | 34487  | 34801  |
| UN08772 | Rsa1.0_01774.1 | 1563 | 39528  | 0         | 770  | 772  | 99 +  | 1   | 771  | 5756   | 6526   |
| UN08773 | Rsa1.0_01650.1 | 613  | 41589  | 0         | 538  | 579  | 92 -  | 32  | 607  | 27296  | 27871  |

|         |                |      |        |           |      |      |       |      |      |        |        |
|---------|----------------|------|--------|-----------|------|------|-------|------|------|--------|--------|
| UN08774 | Rsa1.0.03126.1 | 1479 | 25192  | 1.00E-176 | 314  | 314  | 100 + | 1166 | 1479 | 6646   | 6959   |
| UN08775 | Rsa1.0.02976.1 | 614  | 26315  | 1.00E-98  | 280  | 314  | 89 +  | 298  | 596  | 18887  | 19200  |
| UN08776 | Rsa1.0.01143.1 | 1006 | 52456  | 0         | 1005 | 1007 | 99 +  | 1    | 1006 | 19034  | 20039  |
| UN08777 | Rsa1.0.04325.1 | 1397 | 17885  | 1.00E-136 | 294  | 312  | 94 +  | 3    | 302  | 13731  | 14042  |
| UN08778 | Rsa1.0.15967.1 | 658  | 2337   | 1.00E-141 | 279  | 283  | 98 +  | 377  | 658  | 538    | 818    |
| UN08779 | Rsa1.0.00592.1 | 559  | 73788  | 0         | 517  | 563  | 91 -  | 6    | 558  | 21189  | 21733  |
| UN08780 | Rsa1.0.00518.1 | 2014 | 78360  | 0         | 837  | 978  | 85 +  | 423  | 1361 | 57799  | 58776  |
| UN08781 | Rsa1.0.00335.1 | 490  | 94371  | 0         | 401  | 407  | 98 +  | 82   | 488  | 50290  | 50696  |
| UN08782 | Rsa1.0.00197.1 | 878  | 109714 | 1.00E-139 | 273  | 280  | 97 +  | 7    | 286  | 76243  | 76522  |
| UN08783 | Rsa1.0.00196.1 | 1727 | 109960 | 0         | 535  | 537  | 99 -  | 1047 | 1583 | 59198  | 59734  |
| UN08784 | Rsa1.0.00344.1 | 526  | 191774 | 1.00E-140 | 255  | 256  | 99 -  | 2    | 257  | 136306 | 136561 |
| UN08785 | Rsa1.0.01552.1 | 650  | 43396  | 1.00E-112 | 262  | 279  | 93 +  | 372  | 645  | 12725  | 13003  |
| UN08786 | Rsa1.0.00414.1 | 476  | 202190 | 0         | 451  | 477  | 94 -  | 4    | 466  | 180872 | 181348 |
| UN08787 | Rsa1.0.00792.1 | 1120 | 64163  | 0         | 555  | 556  | 99 -  | 4    | 559  | 27760  | 28315  |
| UN08788 | Rsa1.0.00697.1 | 982  | 67913  | 1.00E-124 | 307  | 322  | 95 -  | 670  | 982  | 39690  | 40011  |
| UN08789 | Rsa1.0.02406.1 | 822  | 145276 | 1.00E-163 | 420  | 459  | 91 +  | 365  | 822  | 14630  | 15080  |
| UN08790 | Rsa1.0.05838.1 | 1357 | 12479  | 0         | 954  | 998  | 95 -  | 366  | 1357 | 8369   | 9365   |
| UN08791 | Rsa1.0.05146.1 | 1362 | 14678  | 1.00E-177 | 321  | 323  | 99 -  | 1    | 323  | 3072   | 3394   |
| UN08792 | Rsa1.0.00184.1 | 645  | 218748 | 1.00E-178 | 333  | 338  | 98 +  | 3    | 340  | 213946 | 214279 |
| UN08793 | Rsa1.0.52876.1 | 1224 | 431    | 0         | 386  | 386  | 100 + | 428  | 813  | 40     | 425    |
| UN08794 | Rsa1.0.00396.1 | 1369 | 88242  | 0         | 385  | 403  | 95 -  | 112  | 514  | 19721  | 20114  |
| UN08795 | Rsa1.0.03781.1 | 731  | 20891  | 0         | 463  | 474  | 97 -  | 259  | 728  | 5091   | 5562   |
| UN08796 | Rsa1.0.01117.1 | 1291 | 53465  | 0         | 463  | 464  | 99 +  | 1    | 464  | 37870  | 38333  |
| UN08797 | Rsa1.0.17040.1 | 568  | 1944   | 1.00E-178 | 386  | 411  | 93 +  | 158  | 565  | 1207   | 1605   |
| UN08798 | Rsa1.0.00010.1 | 922  | 294827 | 0         | 454  | 475  | 95 -  | 274  | 747  | 247813 | 248287 |
| UN08799 | Rsa1.0.03246.1 | 777  | 24379  | 0         | 760  | 783  | 97 +  | 2    | 777  | 14687  | 15467  |
| UN08800 | Rsa1.0.08562.1 | 564  | 7193   | 3.00E-80  | 170  | 175  | 97 +  | 45   | 219  | 3782   | 3954   |
| UN08801 | Rsa1.0.00855.1 | 451  | 62047  | 0         | 432  | 449  | 96 -  | 1    | 449  | 42814  | 43250  |
| UN08802 | Rsa1.0.00180.1 | 1161 | 114581 | 0         | 393  | 406  | 96 +  | 756  | 1161 | 111408 | 111810 |
| UN08803 | Rsa1.0.00571.1 | 605  | 329018 | 1.00E-142 | 272  | 276  | 98 +  | 194  | 468  | 35755  | 36030  |
| UN08804 | Rsa1.0.05951.1 | 1048 | 12128  | 1.00E-160 | 310  | 318  | 97 -  | 13   | 324  | 5602   | 5919   |
| UN08805 | Rsa1.0.18790.1 | 1171 | 1533   | 0         | 986  | 995  | 99 -  | 1    | 994  | 528    | 1522   |
| UN08806 | Rsa1.0.00233.1 | 747  | 104918 | 0         | 714  | 744  | 95 +  | 1    | 739  | 31462  | 32201  |
| UN08807 | Rsa1.0.04741.1 | 702  | 16164  | 1.00E-106 | 219  | 226  | 96 +  | 475  | 698  | 8098   | 8323   |
| UN08808 | Rsa1.0.01297.1 | 772  | 49029  | 5.00E-92  | 289  | 328  | 88 +  | 138  | 465  | 30755  | 31082  |
| UN08809 | Rsa1.0.00190.1 | 667  | 318240 | 1.00E-149 | 282  | 287  | 98 +  | 44   | 330  | 28703  | 28989  |
| UN08810 | Rsa1.0.01539.1 | 585  | 43698  | 1.00E-123 | 230  | 232  | 99 -  | 354  | 585  | 5486   | 5717   |
| UN08811 | Rsa1.0.00307.1 | 1013 | 199003 | 9.00E-82  | 326  | 381  | 85 -  | 647  | 1001 | 87295  | 87662  |
| UN08812 | Rsa1.0.00890.1 | 731  | 323870 | 0         | 396  | 414  | 95 -  | 320  | 728  | 166555 | 166964 |

|         |                |      |        |           |      |      |       |     |      |        |        |
|---------|----------------|------|--------|-----------|------|------|-------|-----|------|--------|--------|
| UN08813 | Rsa1.0_04603.1 | 878  | 16682  | 1.00E-160 | 311  | 319  | 97 -  | 560 | 878  | 15427  | 15745  |
| UN08814 | Rsa1.0_03378.1 | 863  | 23322  | 0         | 369  | 377  | 97 -  | 27  | 402  | 21304  | 21680  |
| UN08815 | Rsa1.0_02413.1 | 1583 | 31628  | 0         | 393  | 417  | 94 +  | 250 | 666  | 6450   | 6853   |
| UN08816 | Rsa1.0_31664.1 | 618  | 722    | 1.00E-110 | 214  | 218  | 98 +  | 61  | 278  | 500    | 717    |
| UN08817 | Rsa1.0_02431.1 | 687  | 31504  | 1.00E-156 | 396  | 428  | 92 +  | 270 | 682  | 26607  | 27030  |
| UN08818 | Rsa1.0_73022.1 | 853  | 314    | 1.00E-123 | 236  | 240  | 98 -  | 227 | 466  | 75     | 314    |
| UN08819 | Rsa1.0_12161.1 | 665  | 5297   | 1.00E-98  | 201  | 206  | 97 +  | 442 | 645  | 4345   | 4550   |
| UN08820 | Rsa1.0_02194.1 | 688  | 34029  | 0         | 378  | 390  | 96 +  | 292 | 680  | 33393  | 33779  |
| UN08821 | Rsa1.0_00155.1 | 850  | 118465 | 0         | 382  | 390  | 97 -  | 1   | 388  | 96670  | 97053  |
| UN08822 | Rsa1.0_01319.1 | 993  | 48273  | 0         | 687  | 714  | 96 +  | 3   | 715  | 10899  | 11594  |
| UN08823 | Rsa1.0_00090.1 | 773  | 273859 | 0         | 499  | 510  | 97 -  | 3   | 512  | 148579 | 149088 |
| UN08824 | Rsa1.0_00167.1 | 600  | 116000 | 1.00E-109 | 229  | 237  | 96 -  | 365 | 600  | 90133  | 90369  |
| UN08825 | Rsa1.0_03401.1 | 1381 | 23191  | 3.00E-48  | 296  | 361  | 81 +  | 128 | 469  | 4703   | 5059   |
| UN08826 | Rsa1.0_03062.1 | 996  | 25678  | 0         | 448  | 450  | 99 +  | 326 | 775  | 6369   | 6818   |
| UN08827 | Rsa1.0_06521.1 | 1485 | 10856  | 0         | 1470 | 1485 | 98 -  | 1   | 1485 | 680    | 2164   |
| UN08828 | Rsa1.0_00522.1 | 532  | 78103  | 1.00E-153 | 435  | 485  | 89 -  | 2   | 477  | 60118  | 60582  |
| UN08829 | Rsa1.0_03964.1 | 717  | 19835  | 1.00E-114 | 210  | 210  | 100 + | 2   | 211  | 13128  | 13337  |
| UN08830 | Rsa1.0_15118.1 | 798  | 2814   | 1.00E-144 | 281  | 288  | 97 +  | 88  | 375  | 934    | 1221   |
| UN08831 | Rsa1.0_00240.1 | 632  | 104175 | 0         | 524  | 527  | 99 -  | 100 | 625  | 52522  | 53048  |
| UN08832 | Rsa1.0_01980.1 | 612  | 36544  | 1.00E-122 | 334  | 370  | 90 +  | 255 | 612  | 32527  | 32891  |
| UN08833 | Rsa1.0_04318.1 | 1197 | 17947  | 1.00E-128 | 239  | 241  | 99 +  | 2   | 242  | 4048   | 4288   |
| UN08834 | Rsa1.0_00670.1 | 697  | 69371  | 3.00E-90  | 181  | 185  | 97 +  | 275 | 459  | 39326  | 39510  |
| UN08835 | Rsa1.0_00345.1 | 868  | 93226  | 1.00E-149 | 310  | 323  | 95 +  | 4   | 324  | 84267  | 84589  |
| UN08836 | Rsa1.0_01881.1 | 686  | 37721  | 3.00E-93  | 265  | 288  | 92 -  | 325 | 607  | 22834  | 23113  |
| UN08837 | Rsa1.0_00060.1 | 771  | 502678 | 0         | 335  | 335  | 100 + | 433 | 767  | 500151 | 500485 |
| UN08838 | Rsa1.0_00273.1 | 1312 | 326186 | 1.00E-172 | 344  | 355  | 96 -  | 3   | 355  | 4768   | 5119   |
| UN08839 | Rsa1.0_01466.1 | 687  | 45161  | 0         | 634  | 681  | 93 -  | 7   | 687  | 38699  | 39353  |
| UN08840 | Rsa1.0_00632.1 | 598  | 183777 | 1.00E-108 | 267  | 291  | 91 -  | 318 | 595  | 149149 | 149438 |
| UN08841 | Rsa1.0_18647.1 | 846  | 1560   | 1.00E-140 | 326  | 345  | 94 -  | 499 | 842  | 591    | 932    |
| UN08842 | Rsa1.0_15148.1 | 579  | 2797   | 1.00E-150 | 296  | 304  | 97 -  | 276 | 579  | 1946   | 2247   |
| UN08843 | Rsa1.0_00332.1 | 683  | 94575  | 1.00E-92  | 182  | 185  | 98 +  | 144 | 328  | 61370  | 61554  |
| UN08844 | Rsa1.0_02945.1 | 1340 | 26548  | 0         | 1109 | 1116 | 99 +  | 225 | 1340 | 8447   | 9562   |
| UN08845 | Rsa1.0_00055.1 | 520  | 520193 | 1.00E-126 | 238  | 241  | 98 -  | 280 | 520  | 328674 | 328914 |
| UN08846 | #              | #    | #      | #         | #    | #    | #     | #   | #    | #      | #      |
| UN08847 | Rsa1.0_00044.1 | 1330 | 271658 | 1.00E-113 | 272  | 294  | 92 -  | 1   | 294  | 6694   | 6980   |
| UN08848 | Rsa1.0_07850.1 | 644  | 8423   | 1.00E-136 | 268  | 274  | 97 -  | 1   | 274  | 6410   | 6682   |
| UN08849 | Rsa1.0_01965.1 | 699  | 36698  | 0         | 682  | 697  | 97 +  | 3   | 699  | 3467   | 4155   |
| UN08850 | Rsa1.0_01923.1 | 451  | 37233  | 1.00E-121 | 221  | 221  | 100 + | 1   | 221  | 27800  | 28020  |
| UN08851 | Rsa1.0_00042.1 | 1284 | 171507 | 1.00E-176 | 390  | 410  | 95 +  | 878 | 1282 | 159615 | 160020 |

|         |                |      |        |           |      |      |       |     |      |        |        |
|---------|----------------|------|--------|-----------|------|------|-------|-----|------|--------|--------|
| UN08852 | Rsa1.0.00163.1 | 1091 | 116847 | 0         | 402  | 408  | 98 -  | 1   | 405  | 62264  | 62671  |
| UN08853 | Rsa1.0.00817.1 | 886  | 62961  | 0         | 873  | 876  | 99 -  | 1   | 876  | 26779  | 27654  |
| UN08854 | Rsa1.0.01832.1 | 462  | 38581  | 1.00E-142 | 255  | 255  | 100 - | 4   | 258  | 14445  | 14699  |
| UN08855 | Rsa1.0.00201.1 | 783  | 232851 | 0         | 460  | 487  | 94 -  | 3   | 486  | 140594 | 141080 |
| UN08856 | Rsa1.0.26382.1 | 530  | 894    | 1.00E-136 | 254  | 257  | 98 -  | 274 | 530  | 547    | 803    |
| UN08857 | Rsa1.0.02050.1 | 583  | 35570  | 0         | 570  | 576  | 98 -  | 1   | 576  | 30797  | 31367  |
| UN08858 | Rsa1.0.03964.1 | 701  | 19835  | 9.00E-72  | 196  | 215  | 91 +  | 1   | 205  | 13127  | 13337  |
| UN08859 | Rsa1.0.06402.1 | 827  | 11080  | 0         | 556  | 565  | 98 +  | 259 | 820  | 3431   | 3995   |
| UN08860 | Rsa1.0.01352.1 | 488  | 47443  | 4.00E-70  | 223  | 247  | 90 +  | 249 | 488  | 35006  | 35240  |
| UN08861 | Rsa1.0.01769.1 | 1000 | 39568  | 0         | 422  | 443  | 95 +  | 3   | 442  | 32131  | 32571  |
| UN08862 | Rsa1.0.00016.1 | 1103 | 831256 | 0         | 1093 | 1114 | 98 -  | 3   | 1101 | 537699 | 538810 |
| UN08863 | Rsa1.0.00807.1 | 536  | 63607  | 1.00E-139 | 258  | 259  | 99 -  | 278 | 536  | 40788  | 41045  |
| UN08864 | Rsa1.0.02975.1 | 866  | 26322  | 1.00E-129 | 255  | 261  | 97 +  | 235 | 493  | 4821   | 5081   |
| UN08865 | Rsa1.0.01016.1 | 609  | 181422 | 1.00E-149 | 288  | 295  | 97 -  | 66  | 360  | 44377  | 44671  |
| UN08866 | Rsa1.0.04111.1 | 1547 | 18991  | 0         | 559  | 579  | 96 +  | 135 | 705  | 11440  | 12017  |
| UN08867 | Rsa1.0.00196.1 | 961  | 109960 | 1.00E-123 | 303  | 323  | 93 +  | 633 | 951  | 72827  | 73141  |
| UN08868 | Rsa1.0.00077.1 | 740  | 145005 | 1.00E-89  | 184  | 188  | 97 +  | 452 | 639  | 71685  | 71871  |
| UN08869 | Rsa1.0.01026.1 | 675  | 171624 | 0         | 541  | 574  | 94 -  | 109 | 675  | 14047  | 14614  |
| UN08870 | Rsa1.0.02606.1 | 1005 | 29635  | 1.00E-131 | 264  | 273  | 96 +  | 40  | 312  | 5960   | 6226   |
| UN08871 | Rsa1.0.01568.1 | 679  | 43077  | 1.00E-174 | 336  | 345  | 97 -  | 335 | 679  | 21139  | 21483  |
| UN08872 | Rsa1.0.05745.1 | 781  | 12750  | 0         | 766  | 783  | 97 +  | 3   | 781  | 6801   | 7580   |
| UN08873 | Rsa1.0.01941.1 | 802  | 37069  | 5.00E-89  | 249  | 276  | 90 +  | 546 | 802  | 28851  | 29126  |
| UN08874 | Rsa1.0.00457.1 | 799  | 337301 | 3.00E-96  | 221  | 231  | 95 -  | 567 | 797  | 198587 | 198814 |
| UN08875 | Rsa1.0.00524.1 | 900  | 169613 | 1.00E-116 | 264  | 279  | 94 -  | 586 | 862  | 133346 | 133623 |
| UN08876 | Rsa1.0.00327.1 | 675  | 94892  | 6.00E-88  | 196  | 205  | 95 +  | 449 | 653  | 20149  | 20352  |
| UN08877 | Rsa1.0.04511.1 | 873  | 17032  | 0         | 391  | 392  | 99 +  | 482 | 873  | 4585   | 4975   |
| UN08878 | Rsa1.0.00065.1 | 724  | 454616 | 3.00E-99  | 184  | 184  | 100 + | 325 | 508  | 446607 | 446790 |
| UN08879 | Rsa1.0.00192.1 | 805  | 278200 | 0         | 455  | 455  | 100 - | 1   | 455  | 33911  | 34365  |
| UN08880 | Rsa1.0.02346.1 | 770  | 32337  | 1.00E-95  | 181  | 182  | 99 -  | 153 | 334  | 7207   | 7388   |
| UN08881 | Rsa1.0.05707.1 | 706  | 12872  | 0         | 685  | 713  | 96 +  | 1   | 706  | 407    | 1119   |
| UN08882 | Rsa1.0.04346.1 | 789  | 17813  | 0         | 542  | 552  | 98 +  | 1   | 552  | 12956  | 13502  |
| UN08883 | Rsa1.0.14881.1 | 1176 | 2995   | 0         | 454  | 469  | 96 +  | 707 | 1173 | 2323   | 2790   |
| UN08884 | Rsa1.0.04591.1 | 941  | 16717  | 1.00E-150 | 277  | 278  | 99 +  | 665 | 941  | 1      | 278    |
| UN08885 | Rsa1.0.00214.1 | 894  | 107508 | 0         | 397  | 404  | 98 +  | 44  | 447  | 75595  | 75993  |
| UN08886 | Rsa1.0.00056.1 | 935  | 332604 | 0         | 358  | 370  | 96 +  | 577 | 935  | 107099 | 107468 |
| UN08887 | Rsa1.0.10540.1 | 925  | 5811   | 0         | 542  | 552  | 98 +  | 2   | 553  | 2219   | 2769   |
| UN08888 | Rsa1.0.16229.1 | 536  | 2235   | 1.00E-109 | 201  | 201  | 100 - | 2   | 202  | 130    | 330    |
| UN08889 | Rsa1.0.03990.1 | 320  | 19676  | 1.00E-120 | 234  | 238  | 98 +  | 1   | 238  | 8880   | 9116   |
| UN08890 | Rsa1.0.15163.1 | 758  | 2786   | 0         | 690  | 701  | 98 -  | 58  | 756  | 2091   | 2786   |

|         |                |      |        |           |      |      |      |     |      |        |        |
|---------|----------------|------|--------|-----------|------|------|------|-----|------|--------|--------|
| UN08891 | Rsa1.0.00446.1 | 733  | 167829 | 0         | 409  | 426  | 96 - | 32  | 456  | 129961 | 130381 |
| UN08892 | Rsa1.0.00006.1 | 842  | 396176 | 0         | 762  | 764  | 99 + | 64  | 827  | 186848 | 187611 |
| UN08893 | Rsa1.0.06141.1 | 650  | 11644  | 0         | 612  | 654  | 93 + | 1   | 650  | 6587   | 7225   |
| UN08894 | Rsa1.0.02157.1 | 947  | 149652 | 1.00E-114 | 233  | 238  | 97 - | 473 | 710  | 133616 | 133851 |
| UN08895 | Rsa1.0.06071.1 | 474  | 11813  | 1.00E-168 | 344  | 355  | 96 + | 120 | 474  | 2582   | 2932   |
| UN08896 | Rsa1.0.01081.1 | 620  | 499226 | 0         | 589  | 613  | 96 + | 4   | 615  | 456338 | 456948 |
| UN08897 | Rsa1.0.00920.1 | 849  | 601703 | 0         | 456  | 465  | 98 + | 385 | 849  | 439756 | 440216 |
| UN08898 | Rsa1.0.00385.1 | 578  | 89160  | 0         | 324  | 325  | 99 - | 1   | 325  | 31104  | 31428  |
| UN08899 | Rsa1.0.00323.1 | 840  | 159650 | 0         | 393  | 413  | 95 + | 432 | 840  | 148155 | 148558 |
| UN08900 | Rsa1.0.00013.1 | 850  | 292129 | 0         | 651  | 669  | 97 - | 181 | 849  | 191168 | 191832 |
| UN08901 | Rsa1.0.02648.1 | 572  | 29073  | 4.00E-58  | 240  | 285  | 84 + | 306 | 572  | 28376  | 28643  |
| UN08902 | Rsa1.0.00740.1 | 743  | 215972 | 0         | 715  | 744  | 96 + | 1   | 743  | 35235  | 35977  |
| UN08903 | Rsa1.0.00875.1 | 1073 | 61371  | 0         | 729  | 750  | 97 - | 165 | 905  | 1411   | 2157   |
| UN08904 | Rsa1.0.01026.1 | 705  | 171624 | 0         | 555  | 588  | 94 - | 107 | 687  | 14033  | 14614  |
| UN08905 | Rsa1.0.00002.1 | 1744 | 601661 | 0         | 1040 | 1057 | 98 + | 502 | 1557 | 289625 | 290680 |
| UN08906 | Rsa1.0.07863.1 | 583  | 8404   | 0         | 558  | 588  | 94 - | 1   | 583  | 2635   | 3218   |
| UN08907 | Rsa1.0.00254.1 | 713  | 102600 | 1.00E-112 | 227  | 233  | 97 - | 98  | 328  | 85303  | 85535  |
| UN08908 | Rsa1.0.00016.1 | 669  | 831256 | 0         | 666  | 668  | 99 + | 2   | 669  | 505433 | 506098 |
| UN08909 | Rsa1.0.00793.1 | 383  | 64103  | 1.00E-113 | 217  | 219  | 99 - | 165 | 383  | 59208  | 59425  |
| UN08910 | Rsa1.0.06541.1 | 702  | 10806  | 1.00E-169 | 313  | 317  | 98 - | 386 | 702  | 10056  | 10372  |
| UN08911 | Rsa1.0.07617.1 | 880  | 9015   | 0         | 852  | 889  | 95 + | 3   | 876  | 2174   | 3059   |
| UN08912 | Rsa1.0.00253.1 | 768  | 231292 | 0         | 737  | 769  | 95 - | 2   | 768  | 196671 | 197431 |
| UN08913 | Rsa1.0.00985.1 | 741  | 161950 | 0         | 374  | 389  | 96 - | 3   | 388  | 32823  | 33211  |
| UN08914 | Rsa1.0.00351.1 | 693  | 413096 | 1.00E-177 | 404  | 430  | 93 - | 274 | 692  | 244400 | 244827 |
| UN08915 | Rsa1.0.09520.1 | 1336 | 6318   | 0         | 541  | 560  | 96 - | 20  | 578  | 3074   | 3633   |
| UN08916 | Rsa1.0.00678.1 | 786  | 193163 | 1.00E-150 | 277  | 278  | 99 + | 510 | 786  | 167678 | 167955 |
| UN08917 | Rsa1.0.00502.1 | 557  | 204180 | 0         | 460  | 493  | 93 - | 67  | 557  | 63890  | 64372  |
| UN08918 | Rsa1.0.03552.1 | 1312 | 22151  | 2.33E-156 | 341  | 366  | 93 - | 90  | 454  | 12808  | 13161  |
| UN08919 | Rsa1.0.00063.1 | 1104 | 156150 | 0         | 523  | 550  | 95 + | 551 | 1100 | 142261 | 142810 |
| UN08920 | Rsa1.0.02452.1 | 850  | 31280  | 0         | 417  | 432  | 96 + | 420 | 848  | 13666  | 14097  |
| UN08921 | Rsa1.0.00253.1 | 688  | 231292 | 0         | 639  | 677  | 94 - | 7   | 681  | 196759 | 197423 |
| UN08922 | Rsa1.0.03982.1 | 763  | 19723  | 0         | 551  | 577  | 95 - | 185 | 760  | 17040  | 17616  |
| UN08923 | Rsa1.0.00010.1 | 1030 | 294827 | 0         | 460  | 494  | 93 + | 1   | 488  | 116518 | 116996 |
| UN08924 | Rsa1.0.02130.1 | 887  | 34755  | 0         | 434  | 437  | 99 + | 451 | 887  | 14820  | 15253  |
| UN08925 | Rsa1.0.00417.1 | 830  | 395068 | 0         | 335  | 338  | 99 - | 493 | 830  | 286876 | 287213 |
| UN08926 | Rsa1.0.04504.1 | 804  | 17069  | 1.00E-126 | 273  | 292  | 93 - | 4   | 277  | 2573   | 2864   |
| UN08927 | Rsa1.0.00019.1 | 766  | 301669 | 1.00E-113 | 390  | 455  | 85 + | 4   | 449  | 293078 | 293498 |
| UN08928 | Rsa1.0.02662.1 | 1246 | 28956  | 0         | 1106 | 1184 | 93 + | 60  | 1231 | 8640   | 9822   |
| UN08929 | Rsa1.0.00082.1 | 731  | 237584 | 0         | 343  | 349  | 98 - | 32  | 377  | 231097 | 231445 |

|         |                |      |        |           |      |      |       |     |      |        |        |
|---------|----------------|------|--------|-----------|------|------|-------|-----|------|--------|--------|
| UN08930 | Rsa1.0.08397.1 | 819  | 7427   | 1.00E-89  | 179  | 182  | 98 +  | 264 | 442  | 5025   | 5206   |
| UN08931 | Rsa1.0.02757.1 | 636  | 28187  | 0         | 476  | 485  | 98 +  | 154 | 636  | 16196  | 16680  |
| UN08932 | Rsa1.0.02114.1 | 1076 | 34873  | 0         | 504  | 507  | 99 +  | 570 | 1076 | 16049  | 16555  |
| UN08933 | Rsa1.0.01591.1 | 711  | 42718  | 0         | 588  | 607  | 96 +  | 106 | 709  | 14788  | 15392  |
| UN08934 | Rsa1.0.01106.1 | 947  | 53916  | 0         | 552  | 565  | 97 +  | 383 | 947  | 12267  | 12828  |
| UN08935 | Rsa1.0.00522.1 | 1122 | 78103  | 5.00E-99  | 199  | 204  | 97 +  | 306 | 509  | 35226  | 35429  |
| UN08936 | Rsa1.0.00098.1 | 741  | 349239 | 0         | 416  | 420  | 99 -  | 322 | 741  | 220987 | 221405 |
| UN08937 | Rsa1.0.00515.1 | 725  | 78417  | 0         | 356  | 357  | 99 -  | 369 | 725  | 43479  | 43835  |
| UN08938 | Rsa1.0.01482.1 | 782  | 44855  | 0         | 706  | 722  | 97 -  | 3   | 721  | 12165  | 12886  |
| UN08939 | Rsa1.0.00835.1 | 882  | 278058 | 0         | 666  | 682  | 97 -  | 203 | 881  | 261815 | 262495 |
| UN08940 | Rsa1.0.00101.1 | 907  | 267193 | 0         | 451  | 452  | 99 +  | 456 | 907  | 44122  | 44573  |
| UN08941 | Rsa1.0.00017.1 | 1009 | 752458 | 0         | 459  | 462  | 99 +  | 1   | 460  | 466023 | 466483 |
| UN08942 | Rsa1.0.00119.1 | 1342 | 467509 | 1.00E-164 | 328  | 338  | 97 -  | 1   | 337  | 302973 | 303310 |
| UN08943 | Rsa1.0.00002.1 | 1781 | 601661 | 0         | 1283 | 1346 | 95 +  | 247 | 1590 | 289356 | 290680 |
| UN08944 | Rsa1.0.00120.1 | 832  | 277288 | 1.00E-174 | 348  | 361  | 96 -  | 458 | 818  | 120631 | 120991 |
| UN08945 | Rsa1.0.05811.1 | 661  | 12572  | 0         | 479  | 522  | 91 -  | 3   | 523  | 11594  | 12091  |
| UN08946 | Rsa1.0.00082.1 | 836  | 237584 | 0         | 488  | 490  | 99 -  | 1   | 490  | 217985 | 218474 |
| UN08947 | Rsa1.0.01595.1 | 787  | 175383 | 1.00E-101 | 212  | 218  | 97 +  | 1   | 218  | 4059   | 4273   |
| UN08948 | Rsa1.0.00163.1 | 1323 | 116847 | 0         | 575  | 587  | 97 +  | 738 | 1321 | 73974  | 74557  |
| UN08949 | Rsa1.0.05804.1 | 683  | 12586  | 0         | 634  | 666  | 95 +  | 2   | 667  | 9611   | 10276  |
| UN08950 | Rsa1.0.02158.1 | 700  | 154841 | 0         | 336  | 341  | 98 +  | 331 | 671  | 122311 | 122651 |
| UN08951 | Rsa1.0.06604.1 | 850  | 10681  | 0         | 550  | 553  | 99 +  | 1   | 552  | 5922   | 6474   |
| UN08952 | Rsa1.0.07591.1 | 871  | 9060   | 0         | 817  | 849  | 96 -  | 1   | 841  | 1287   | 2132   |
| UN08953 | Rsa1.0.00144.1 | 758  | 120708 | 0         | 361  | 366  | 98 +  | 393 | 758  | 115794 | 116159 |
| UN08954 | Rsa1.0.03722.1 | 637  | 21184  | 1.00E-149 | 314  | 329  | 95 -  | 34  | 359  | 20756  | 21084  |
| UN08955 | Rsa1.0.00662.1 | 700  | 192183 | 1.00E-104 | 251  | 268  | 93 +  | 7   | 267  | 7993   | 8260   |
| UN08956 | Rsa1.0.03669.1 | 828  | 147114 | 0         | 384  | 402  | 95 -  | 3   | 403  | 17855  | 18248  |
| UN08957 | Rsa1.0.01737.1 | 733  | 40101  | 1.00E-106 | 219  | 227  | 96 +  | 479 | 705  | 17336  | 17562  |
| UN08958 | Rsa1.0.00978.1 | 826  | 57739  | 0         | 659  | 678  | 97 -  | 1   | 678  | 26879  | 27556  |
| UN08959 | Rsa1.0.01943.1 | 1123 | 37042  | 0         | 327  | 327  | 100 - | 796 | 1122 | 4779   | 5105   |
| UN08960 | Rsa1.0.02198.1 | 759  | 33989  | 1.00E-144 | 291  | 299  | 97 +  | 4   | 296  | 13910  | 14207  |
| UN08961 | Rsa1.0.03569.1 | 607  | 22041  | 1.00E-128 | 232  | 232  | 100 + | 374 | 605  | 10002  | 10233  |
| UN08962 | Rsa1.0.01675.1 | 1542 | 41155  | 1.00E-164 | 303  | 306  | 99 -  | 279 | 584  | 40809  | 41114  |
| UN08963 | Rsa1.0.00059.1 | 934  | 159650 | 1.00E-167 | 386  | 415  | 93 +  | 518 | 932  | 2240   | 2644   |
| UN08964 | Rsa1.0.00239.1 | 1191 | 104332 | 0         | 496  | 530  | 93 -  | 652 | 1172 | 67906  | 68429  |
| UN08965 | Rsa1.0.00807.1 | 770  | 63607  | 0         | 349  | 351  | 99 -  | 1   | 351  | 48916  | 49266  |
| UN08966 | Rsa1.0.01029.1 | 1324 | 256254 | 0         | 442  | 444  | 99 -  | 1   | 444  | 2337   | 2779   |
| UN08967 | Rsa1.0.00331.1 | 582  | 176754 | 4.00E-98  | 206  | 214  | 96 -  | 192 | 405  | 159068 | 159281 |
| UN08968 | Rsa1.0.01230.1 | 801  | 50221  | 0         | 791  | 793  | 99 -  | 7   | 799  | 16959  | 17750  |



|         |                |      |        |           |     |     |       |      |      |        |        |
|---------|----------------|------|--------|-----------|-----|-----|-------|------|------|--------|--------|
| UN08969 | Rsa1.0.00142.1 | 706  | 121474 | 1.00E-132 | 258 | 264 | 97 +  | 308  | 571  | 64267  | 64530  |
| UN08970 | Rsa1.0.01016.1 | 739  | 181422 | 0         | 484 | 516 | 93 +  | 226  | 739  | 171865 | 172361 |
| UN08971 | Rsa1.0.02249.1 | 909  | 33412  | 0         | 908 | 909 | 99 +  | 1    | 909  | 16786  | 17694  |
| UN08972 | Rsa1.0.03152.1 | 634  | 24974  | 1.00E-156 | 293 | 296 | 98 +  | 1    | 296  | 3422   | 3716   |
| UN08973 | Rsa1.0.07921.1 | 1199 | 8259   | 0         | 452 | 459 | 98 -  | 7    | 465  | 2634   | 3092   |
| UN08974 | Rsa1.0.01666.1 | 840  | 173972 | 1.00E-163 | 340 | 354 | 96 +  | 90   | 442  | 6729   | 7080   |
| UN08975 | Rsa1.0.13538.1 | 1392 | 4746   | 1.00E-78  | 150 | 150 | 100 - | 222  | 371  | 1      | 150    |
| UN08976 | Rsa1.0.00067.1 | 1322 | 415055 | 0         | 739 | 749 | 98 -  | 1    | 745  | 7421   | 8168   |
| UN08977 | Rsa1.0.05097.1 | 660  | 14864  | 1.00E-119 | 270 | 288 | 93 +  | 1    | 285  | 1264   | 1542   |
| UN08978 | Rsa1.0.03435.1 | 682  | 22958  | 1.00E-153 | 296 | 303 | 97 +  | 220  | 522  | 21975  | 22277  |
| UN08979 | Rsa1.0.00048.1 | 890  | 167185 | 1.00E-142 | 274 | 280 | 97 +  | 480  | 759  | 8087   | 8366   |
| UN08980 | Rsa1.0.00148.1 | 1094 | 120234 | 0         | 657 | 663 | 99 +  | 433  | 1094 | 8606   | 9268   |
| UN08981 | Rsa1.0.03652.1 | 405  | 21565  | 0         | 398 | 404 | 98 -  | 1    | 403  | 28     | 429    |
| UN08982 | Rsa1.0.03356.1 | 1070 | 23487  | 1.00E-177 | 332 | 337 | 98 +  | 2    | 335  | 20116  | 20452  |
| UN08983 | Rsa1.0.00107.1 | 734  | 431659 | 0         | 731 | 732 | 99 +  | 1    | 732  | 425791 | 426522 |
| UN08984 | Rsa1.0.05078.1 | 696  | 14912  | 0         | 386 | 401 | 96 -  | 273  | 673  | 7480   | 7880   |
| UN08985 | Rsa1.0.00101.1 | 973  | 267193 | 1.00E-120 | 266 | 281 | 94 +  | 7    | 287  | 131428 | 131700 |
| UN08986 | Rsa1.0.04520.1 | 471  | 16995  | 1.00E-103 | 207 | 210 | 98 +  | 3    | 212  | 10798  | 11005  |
| UN08987 | Rsa1.0.04234.1 | 854  | 18378  | 0         | 594 | 603 | 98 +  | 1    | 603  | 7512   | 8114   |
| UN08988 | Rsa1.0.00711.1 | 739  | 67223  | 0         | 478 | 521 | 91 +  | 225  | 739  | 15004  | 15517  |
| UN08989 | Rsa1.0.00154.1 | 588  | 189461 | 1.00E-131 | 271 | 283 | 95 -  | 314  | 588  | 79500  | 79782  |
| UN08990 | Rsa1.0.00387.1 | 1118 | 495407 | 0         | 849 | 888 | 95 +  | 198  | 1085 | 409522 | 410403 |
| UN08991 | Rsa1.0.08498.1 | 634  | 7270   | 0         | 423 | 445 | 95 -  | 198  | 634  | 5572   | 6016   |
| UN08992 | Rsa1.0.00453.1 | 554  | 83031  | 1.00E-128 | 260 | 269 | 96 +  | 3    | 271  | 534    | 802    |
| UN08993 | Rsa1.0.01149.1 | 1330 | 160459 | 1.00E-111 | 228 | 235 | 97 +  | 786  | 1020 | 131080 | 131311 |
| UN08994 | Rsa1.0.02903.1 | 569  | 26901  | 1.00E-103 | 266 | 288 | 92 +  | 267  | 549  | 17844  | 18120  |
| UN08995 | Rsa1.0.00389.1 | 922  | 88795  | 1.00E-114 | 210 | 210 | 100 + | 713  | 922  | 68854  | 69063  |
| UN08996 | Rsa1.0.04871.1 | 862  | 15662  | 0         | 838 | 852 | 98 -  | 3    | 848  | 2842   | 3692   |
| UN08997 | Rsa1.0.00416.1 | 1038 | 86772  | 0         | 488 | 494 | 98 +  | 545  | 1038 | 41164  | 41653  |
| UN08998 | Rsa1.0.00642.1 | 1108 | 201230 | 1.00E-172 | 361 | 379 | 95 +  | 733  | 1108 | 161688 | 162055 |
| UN08999 | Rsa1.0.09895.1 | 716  | 6101   | 0         | 703 | 722 | 97 -  | 3    | 716  | 4875   | 5596   |
| UN09000 | Rsa1.0.00192.1 | 654  | 278200 | 0         | 339 | 339 | 100 + | 3    | 341  | 16376  | 16714  |
| UN09001 | Rsa1.0.05013.1 | 1370 | 15131  | 0         | 940 | 963 | 97 +  | 415  | 1370 | 1      | 963    |
| UN09002 | Rsa1.0.15782.1 | 991  | 2423   | 0         | 762 | 764 | 99 -  | 1    | 763  | 861    | 1623   |
| UN09003 | Rsa1.0.02274.1 | 2284 | 33109  | 0         | 522 | 556 | 93 +  | 1732 | 2284 | 277    | 814    |
| UN09004 | Rsa1.0.00740.1 | 577  | 215972 | 1.00E-148 | 266 | 266 | 100 + | 310  | 575  | 1704   | 1969   |
| UN09005 | Rsa1.0.00006.1 | 729  | 396176 | 1.00E-121 | 284 | 302 | 94 +  | 1    | 295  | 9150   | 9447   |
| UN09006 | Rsa1.0.01845.1 | 1058 | 38415  | 1.00E-110 | 214 | 218 | 98 +  | 527  | 744  | 36772  | 36989  |
| UN09007 | Rsa1.0.09470.1 | 986  | 6345   | 1.00E-156 | 304 | 311 | 97 -  | 123  | 432  | 2894   | 3204   |

|         |                |      |        |           |      |      |       |     |      |        |        |
|---------|----------------|------|--------|-----------|------|------|-------|-----|------|--------|--------|
| UN09008 | Rsa1.0.01228.1 | 458  | 50238  | 1.00E-132 | 281  | 293  | 95 -  | 2   | 294  | 733    | 1021   |
| UN09009 | Rsa1.0.00273.1 | 823  | 326186 | 0         | 819  | 821  | 99 -  | 2   | 821  | 296578 | 297398 |
| UN09010 | Rsa1.0.00033.1 | 545  | 515811 | 1.00E-104 | 285  | 313  | 91 -  | 2   | 312  | 33139  | 33446  |
| UN09011 | Rsa1.0.01626.1 | 1022 | 41989  | 0         | 470  | 488  | 96 -  | 534 | 1021 | 12327  | 12814  |
| UN09012 | Rsa1.0.01740.1 | 971  | 39986  | 1.00E-141 | 280  | 288  | 97 +  | 582 | 866  | 27598  | 27885  |
| UN09013 | Rsa1.0.00069.1 | 1002 | 403561 | 1.00E-164 | 318  | 326  | 97 -  | 1   | 326  | 135862 | 136187 |
| UN09014 | Rsa1.0.01926.1 | 1055 | 37206  | 0         | 597  | 613  | 97 -  | 361 | 973  | 13122  | 13734  |
| UN09015 | Rsa1.0.03738.1 | 856  | 21071  | 0         | 461  | 486  | 94 -  | 29  | 502  | 10785  | 11267  |
| UN09016 | Rsa1.0.00628.1 | 647  | 214360 | 1.00E-149 | 334  | 350  | 95 +  | 7   | 353  | 34412  | 34758  |
| UN09017 | Rsa1.0.03107.1 | 834  | 25349  | 1.00E-159 | 358  | 378  | 94 -  | 324 | 699  | 18569  | 18942  |
| UN09018 | Rsa1.0.03958.1 | 625  | 19868  | 1.00E-119 | 336  | 373  | 90 -  | 6   | 367  | 16483  | 16844  |
| UN09019 | Rsa1.0.03477.1 | 923  | 22635  | 1.00E-176 | 327  | 331  | 98 +  | 1   | 331  | 4856   | 5183   |
| UN09020 | Rsa1.0.02269.1 | 878  | 33168  | 0         | 325  | 326  | 99 -  | 2   | 327  | 3021   | 3346   |
| UN09021 | Rsa1.0.01319.1 | 969  | 48273  | 0         | 639  | 696  | 91 -  | 283 | 968  | 10927  | 11594  |
| UN09022 | Rsa1.0.01591.1 | 714  | 42718  | 0         | 595  | 615  | 96 -  | 32  | 645  | 14800  | 15413  |
| UN09023 | Rsa1.0.01002.1 | 1320 | 57063  | 0         | 1311 | 1319 | 99 +  | 1   | 1318 | 17461  | 18779  |
| UN09024 | Rsa1.0.03022.1 | 1143 | 25968  | 0         | 517  | 536  | 96 -  | 610 | 1142 | 1571   | 2106   |
| UN09025 | Rsa1.0.01084.1 | 967  | 54605  | 0         | 404  | 405  | 99 -  | 561 | 965  | 44683  | 45087  |
| UN09026 | Rsa1.0.12520.1 | 892  | 5205   | 1.00E-166 | 361  | 384  | 94 +  | 194 | 577  | 1      | 374    |
| UN09027 | Rsa1.0.01611.1 | 870  | 42269  | 0         | 866  | 867  | 99 +  | 3   | 869  | 3996   | 4862   |
| UN09028 | Rsa1.0.00165.1 | 1054 | 116466 | 1.00E-157 | 307  | 314  | 97 -  | 3   | 315  | 7613   | 7926   |
| UN09029 | Rsa1.0.02482.1 | 952  | 31000  | 0         | 597  | 627  | 95 -  | 1   | 624  | 26970  | 27572  |
| UN09030 | Rsa1.0.14791.1 | 608  | 3064   | 1.00E-152 | 282  | 285  | 98 +  | 296 | 580  | 2779   | 3063   |
| UN09031 | Rsa1.0.00228.1 | 463  | 105511 | 1.00E-141 | 347  | 375  | 92 +  | 28  | 397  | 13172  | 13545  |
| UN09032 | Rsa1.0.00549.1 | 1341 | 76473  | 1.00E-132 | 251  | 255  | 98 -  | 132 | 386  | 9511   | 9765   |
| UN09033 | Rsa1.0.01099.1 | 894  | 158481 | 0         | 457  | 462  | 98 -  | 1   | 460  | 153098 | 153559 |
| UN09034 | Rsa1.0.16218.1 | 898  | 2240   | 1.00E-126 | 258  | 265  | 97 +  | 630 | 892  | 1645   | 1908   |
| UN09035 | Rsa1.0.00369.1 | 843  | 266462 | 1.00E-111 | 217  | 221  | 98 +  | 335 | 555  | 20557  | 20777  |
| UN09036 | Rsa1.0.01390.1 | 617  | 46695  | 1.00E-139 | 290  | 301  | 96 +  | 104 | 404  | 5172   | 5469   |
| UN09037 | Rsa1.0.00197.1 | 689  | 109714 | 1.00E-160 | 309  | 315  | 98 -  | 91  | 405  | 78615  | 78928  |
| UN09038 | Rsa1.0.00571.1 | 932  | 329018 | 0         | 482  | 496  | 97 -  | 436 | 931  | 48784  | 49277  |
| UN09039 | Rsa1.0.00157.1 | 859  | 245832 | 2.00E-94  | 182  | 184  | 98 -  | 421 | 604  | 162373 | 162556 |
| UN09040 | Rsa1.0.00191.1 | 649  | 316976 | 1.00E-178 | 425  | 459  | 92 +  | 163 | 604  | 140127 | 140583 |
| UN09041 | Rsa1.0.03376.1 | 1290 | 23326  | 1.00E-166 | 436  | 476  | 91 -  | 828 | 1290 | 18752  | 19224  |
| UN09042 | Rsa1.0.00896.1 | 844  | 60509  | 0         | 697  | 697  | 100 + | 1   | 697  | 38747  | 39443  |
| UN09043 | Rsa1.0.06083.1 | 1384 | 11780  | 0         | 332  | 334  | 99 +  | 2   | 334  | 7849   | 8182   |
| UN09044 | Rsa1.0.43457.1 | 886  | 517    | 0         | 369  | 373  | 98 -  | 165 | 536  | 145    | 517    |
| UN09045 | Rsa1.0.00051.1 | 1047 | 258225 | 0         | 984  | 1077 | 91 -  | 1   | 1045 | 113688 | 114741 |
| UN09046 | Rsa1.0.06563.1 | 577  | 10765  | 1.00E-73  | 165  | 172  | 95 +  | 361 | 532  | 863    | 1032   |

|         |                |      |        |           |     |     |       |     |      |        |        |
|---------|----------------|------|--------|-----------|-----|-----|-------|-----|------|--------|--------|
| UN09047 | Rsa1.0.00603.1 | 685  | 73299  | 0         | 417 | 431 | 96 -  | 49  | 478  | 32629  | 33057  |
| UN09048 | Rsa1.0.00420.1 | 638  | 86496  | 0         | 349 | 353 | 98 -  | 286 | 638  | 36503  | 36853  |
| UN09049 | Rsa1.0.03722.1 | 816  | 21184  | 1.00E-148 | 314 | 329 | 95 +  | 474 | 799  | 20756  | 21084  |
| UN09050 | Rsa1.0.08933.1 | 648  | 6772   | 1.00E-108 | 218 | 223 | 97 -  | 6   | 228  | 6266   | 6487   |
| UN09051 | Rsa1.0.00009.1 | 435  | 232558 | 1.00E-128 | 293 | 310 | 94 -  | 126 | 435  | 185030 | 185329 |
| UN09052 | Rsa1.0.14302.1 | 820  | 3558   | 0         | 488 | 488 | 100 + | 333 | 820  | 1424   | 1911   |
| UN09053 | Rsa1.0.01301.1 | 1389 | 169072 | 0         | 496 | 498 | 99 +  | 890 | 1387 | 13992  | 14489  |
| UN09054 | Rsa1.0.00899.1 | 1050 | 60404  | 0         | 474 | 496 | 95 -  | 429 | 921  | 56656  | 57151  |
| UN09055 | Rsa1.0.00438.1 | 740  | 84861  | 1.00E-151 | 416 | 458 | 90 -  | 5   | 451  | 76921  | 77368  |
| UN09056 | Rsa1.0.04937.1 | 1420 | 15401  | 0         | 625 | 632 | 98 +  | 791 | 1420 | 12077  | 12708  |
| UN09057 | Rsa1.0.00690.1 | 616  | 140527 | 1.00E-179 | 321 | 322 | 99 -  | 293 | 614  | 34106  | 34427  |
| UN09058 | Rsa1.0.00585.1 | 870  | 74164  | 0         | 360 | 367 | 98 +  | 504 | 870  | 59736  | 60102  |
| UN09059 | Rsa1.0.00265.1 | 653  | 220635 | 0         | 384 | 387 | 99 +  | 3   | 389  | 24197  | 24583  |
| UN09060 | Rsa1.0.00329.1 | 783  | 222544 | 1.00E-120 | 293 | 316 | 92 -  | 461 | 769  | 178090 | 178397 |
| UN09061 | Rsa1.0.02975.1 | 592  | 26322  | 1.00E-140 | 274 | 280 | 97 +  | 313 | 592  | 23332  | 23609  |
| UN09062 | Rsa1.0.00644.1 | 860  | 136881 | 1.00E-148 | 309 | 321 | 96 +  | 539 | 858  | 31373  | 31686  |
| UN09063 | Rsa1.0.03163.1 | 986  | 24894  | 0         | 473 | 474 | 99 -  | 513 | 986  | 4477   | 4950   |
| UN09064 | Rsa1.0.01701.1 | 717  | 162121 | 0         | 393 | 393 | 100 - | 1   | 393  | 13837  | 14229  |
| UN09065 | Rsa1.0.01415.1 | 722  | 46263  | 1.00E-130 | 273 | 286 | 95 -  | 443 | 721  | 17573  | 17858  |
| UN09066 | Rsa1.0.01481.1 | 773  | 184562 | 1.00E-162 | 301 | 305 | 98 -  | 467 | 771  | 39106  | 39410  |
| UN09067 | Rsa1.0.03503.1 | 796  | 22445  | 1.00E-163 | 315 | 320 | 98 +  | 3   | 320  | 9930   | 10249  |
| UN09068 | Rsa1.0.00568.1 | 1396 | 75219  | 0         | 445 | 445 | 100 - | 948 | 1392 | 3698   | 4142   |
| UN09069 | Rsa1.0.01373.1 | 770  | 47052  | 0         | 410 | 422 | 97 +  | 318 | 736  | 21559  | 21980  |
| UN09070 | Rsa1.0.00015.1 | 1167 | 561803 | 0         | 417 | 434 | 96 -  | 739 | 1167 | 362103 | 362533 |
| UN09071 | Rsa1.0.00152.1 | 1414 | 257730 | 0         | 604 | 609 | 99 +  | 808 | 1414 | 118021 | 118629 |
| UN09072 | Rsa1.0.13798.1 | 807  | 4320   | 1.00E-126 | 242 | 246 | 98 +  | 337 | 582  | 3764   | 4009   |
| UN09073 | Rsa1.0.03074.1 | 970  | 25568  | 1.00E-166 | 335 | 345 | 97 +  | 624 | 968  | 21332  | 21674  |
| UN09074 | Rsa1.0.00069.1 | 955  | 403561 | 0         | 941 | 953 | 98 +  | 1   | 953  | 231058 | 232007 |
| UN09075 | Rsa1.0.03821.1 | 1140 | 20643  | 1.00E-110 | 275 | 294 | 93 -  | 849 | 1138 | 12652  | 12940  |
| UN09076 | Rsa1.0.00173.1 | 812  | 288743 | 1.00E-153 | 274 | 274 | 100 + | 128 | 401  | 41089  | 41362  |
| UN09077 | Rsa1.0.18035.1 | 1284 | 1685   | 0         | 626 | 647 | 96 +  | 3   | 646  | 450    | 1094   |
| UN09078 | Rsa1.0.05271.1 | 960  | 14306  | 0         | 333 | 334 | 99 +  | 558 | 890  | 10323  | 10656  |
| UN09079 | Rsa1.0.13498.1 | 849  | 4764   | 1.00E-175 | 320 | 322 | 99 +  | 3   | 322  | 555    | 876    |
| UN09080 | Rsa1.0.06509.1 | 937  | 10873  | 2.33E-156 | 263 | 263 | 100 + | 1   | 263  | 7125   | 7387   |
| UN09081 | Rsa1.0.00381.1 | 867  | 89718  | 0         | 530 | 547 | 96 +  | 323 | 867  | 79836  | 80382  |
| UN09082 | Rsa1.0.00369.1 | 866  | 266462 | 0         | 591 | 593 | 99 -  | 274 | 866  | 258502 | 259094 |
| UN09083 | Rsa1.0.01315.1 | 673  | 48361  | 0         | 324 | 324 | 100 - | 350 | 673  | 11564  | 11887  |
| UN09084 | Rsa1.0.00748.1 | 773  | 65983  | 0         | 442 | 464 | 95 -  | 25  | 485  | 63996  | 64453  |
| UN09085 | Rsa1.0.00221.1 | 837  | 106972 | 1.00E-148 | 282 | 287 | 98 +  | 550 | 836  | 52627  | 52913  |

|         |                |      |        |           |     |      |       |      |      |        |        |
|---------|----------------|------|--------|-----------|-----|------|-------|------|------|--------|--------|
| UN09086 | Rsa1.0_00736.1 | 1025 | 66455  | 0         | 857 | 911  | 94 +  | 119  | 1023 | 50684  | 51591  |
| UN09087 | Rsa1.0_04123.1 | 782  | 18947  | 0         | 759 | 768  | 98 -  | 1    | 768  | 11871  | 12637  |
| UN09088 | Rsa1.0_00205.1 | 1134 | 193401 | 0         | 609 | 617  | 98 -  | 520  | 1133 | 181776 | 182392 |
| UN09089 | Rsa1.0_02431.1 | 687  | 31504  | 0         | 655 | 687  | 95 -  | 3    | 683  | 12950  | 13631  |
| UN09090 | Rsa1.0_07305.1 | 1614 | 9578   | 0         | 376 | 381  | 98 -  | 4    | 381  | 8667   | 9045   |
| UN09091 | Rsa1.0_00434.1 | 1495 | 85171  | 0         | 701 | 701  | 100 - | 129  | 829  | 30393  | 31093  |
| UN09092 | Rsa1.0_01632.1 | 1123 | 181224 | 1.00E-123 | 311 | 339  | 91 -  | 3    | 335  | 7459   | 7791   |
| UN09093 | Rsa1.0_02017.1 | 1344 | 35999  | 1.00E-132 | 269 | 280  | 96 +  | 761  | 1040 | 26577  | 26847  |
| UN09094 | Rsa1.0_00850.1 | 548  | 62193  | 0         | 415 | 430  | 96 +  | 2    | 430  | 5918   | 6346   |
| UN09095 | Rsa1.0_04504.1 | 767  | 17069  | 1.00E-154 | 276 | 276  | 100 + | 492  | 767  | 2573   | 2848   |
| UN09096 | Rsa1.0_00663.1 | 359  | 164969 | 1.00E-143 | 324 | 338  | 95 +  | 4    | 337  | 120751 | 121082 |
| UN09097 | Rsa1.0_00087.1 | 662  | 761073 | 1.00E-128 | 302 | 323  | 93 -  | 14   | 323  | 217289 | 217610 |
| UN09098 | Rsa1.0_02282.1 | 979  | 163951 | 1.00E-129 | 316 | 339  | 93 +  | 641  | 979  | 154467 | 154802 |
| UN09099 | Rsa1.0_03422.1 | 678  | 23076  | 0         | 443 | 457  | 96 +  | 233  | 678  | 9861   | 10317  |
| UN09100 | Rsa1.0_01827.1 | 696  | 143321 | 0         | 677 | 704  | 96 +  | 10   | 695  | 139171 | 139873 |
| UN09101 | Rsa1.0_15780.1 | 1389 | 2424   | 0         | 475 | 477  | 99 +  | 914  | 1389 | 1216   | 1691   |
| UN09102 | Rsa1.0_00803.1 | 1196 | 144228 | 0         | 489 | 494  | 98 +  | 667  | 1158 | 37985  | 38478  |
| UN09103 | Rsa1.0_04218.1 | 600  | 18423  | 1.00E-164 | 410 | 449  | 91 -  | 155  | 597  | 15845  | 16280  |
| UN09104 | Rsa1.0_00038.1 | 618  | 314568 | 1.00E-163 | 292 | 292  | 100 + | 327  | 618  | 141728 | 142019 |
| UN09105 | Rsa1.0_00677.1 | 492  | 69159  | 1.00E-140 | 311 | 333  | 93 -  | 173  | 492  | 20365  | 20693  |
| UN09106 | Rsa1.0_04689.1 | 1628 | 16376  | 0         | 969 | 1006 | 96 +  | 623  | 1628 | 475    | 1469   |
| UN09107 | Rsa1.0_07724.1 | 808  | 8708   | 0         | 381 | 390  | 97 +  | 32   | 421  | 6618   | 7007   |
| UN09108 | Rsa1.0_02449.1 | 1047 | 31292  | 9.00E-79  | 189 | 198  | 95 +  | 1    | 196  | 13263  | 13459  |
| UN09109 | Rsa1.0_01190.1 | 646  | 194501 | 1.00E-167 | 356 | 372  | 95 -  | 274  | 642  | 157947 | 158316 |
| UN09110 | Rsa1.0_01824.1 | 838  | 38733  | 1.00E-122 | 228 | 230  | 99 +  | 375  | 604  | 8413   | 8642   |
| UN09111 | Rsa1.0_02865.1 | 762  | 27133  | 0         | 451 | 484  | 93 +  | 290  | 761  | 22643  | 23116  |
| UN09112 | Rsa1.0_01778.1 | 1120 | 39509  | 1.00E-74  | 149 | 151  | 98 +  | 456  | 606  | 16810  | 16960  |
| UN09113 | Rsa1.0_00055.1 | 1124 | 520193 | 1.00E-127 | 259 | 268  | 96 -  | 467  | 734  | 207861 | 208128 |
| UN09114 | Rsa1.0_00907.1 | 1023 | 60062  | 0         | 515 | 539  | 95 -  | 4    | 534  | 2211   | 2749   |
| UN09115 | Rsa1.0_08007.1 | 1399 | 8087   | 1.00E-139 | 259 | 260  | 99 +  | 1138 | 1397 | 2203   | 2461   |
| UN09116 | Rsa1.0_00294.1 | 685  | 144860 | 1.00E-130 | 299 | 317  | 94 -  | 298  | 605  | 54782  | 55096  |
| UN09117 | Rsa1.0_00049.1 | 998  | 167018 | 0         | 642 | 656  | 97 -  | 343  | 994  | 137812 | 138467 |
| UN09118 | Rsa1.0_03563.1 | 1277 | 22070  | 0         | 632 | 635  | 99 +  | 3    | 637  | 15461  | 16095  |
| UN09119 | Rsa1.0_00123.1 | 907  | 325650 | 0         | 463 | 480  | 96 -  | 430  | 906  | 109845 | 110321 |
| UN09120 | Rsa1.0_29830.1 | 1041 | 770    | 1.00E-126 | 289 | 309  | 93 +  | 625  | 928  | 114    | 422    |
| UN09121 | Rsa1.0_00132.1 | 648  | 124299 | 1.00E-143 | 298 | 310  | 96 +  | 338  | 646  | 99696  | 100001 |
| UN09122 | Rsa1.0_00207.1 | 820  | 248736 | 0         | 335 | 335  | 100 + | 478  | 812  | 55294  | 55628  |
| UN09123 | Rsa1.0_00533.1 | 695  | 77375  | 0         | 602 | 642  | 93 +  | 3    | 644  | 49299  | 49937  |
| UN09124 | Rsa1.0_08151.1 | 949  | 7830   | 0         | 920 | 951  | 96 -  | 3    | 949  | 1053   | 2000   |

|         |                |      |        |           |      |      |       |     |      |        |        |
|---------|----------------|------|--------|-----------|------|------|-------|-----|------|--------|--------|
| UN09125 | Rsa1.0_00903.1 | 1066 | 60228  | 0         | 565  | 575  | 98 +  | 495 | 1066 | 38141  | 38714  |
| UN09126 | Rsa1.0_08221.1 | 1532 | 7700   | 0         | 1234 | 1234 | 100 + | 291 | 1524 | 5416   | 6649   |
| UN09127 | Rsa1.0_00104.1 | 520  | 368722 | 1.00E-138 | 313  | 333  | 93 -  | 183 | 513  | 225000 | 225328 |
| UN09128 | Rsa1.0_22492.1 | 956  | 1117   | 1.00E-114 | 213  | 214  | 99 +  | 23  | 236  | 685    | 898    |
| UN09129 | Rsa1.0_02099.1 | 707  | 35030  | 1.00E-166 | 297  | 297  | 100 + | 10  | 306  | 17742  | 18038  |
| UN09130 | Rsa1.0_02064.1 | 1021 | 35476  | 1.00E-138 | 339  | 363  | 93 -  | 1   | 351  | 9518   | 9879   |
| UN09131 | Rsa1.0_01856.1 | 555  | 38181  | 0         | 399  | 415  | 96 +  | 141 | 555  | 12953  | 13366  |
| UN09132 | Rsa1.0_00333.1 | 1043 | 94500  | 0         | 896  | 901  | 99 -  | 143 | 1043 | 44005  | 44905  |
| UN09133 | Rsa1.0_03552.1 | 878  | 22151  | 4.00E-93  | 202  | 210  | 96 +  | 3   | 211  | 13461  | 13670  |
| UN09134 | Rsa1.0_00381.1 | 1471 | 89718  | 1.00E-121 | 249  | 258  | 96 +  | 3   | 260  | 39724  | 39981  |
| UN09135 | Rsa1.0_48558.1 | 864  | 466    | 0         | 353  | 355  | 99 +  | 52  | 406  | 1      | 355    |
| UN09136 | Rsa1.0_00283.1 | 1134 | 183797 | 1.00E-161 | 351  | 369  | 95 +  | 3   | 366  | 10947  | 11313  |
| UN09137 | Rsa1.0_00482.1 | 2132 | 81162  | 0         | 1366 | 1371 | 99 +  | 1   | 1371 | 3813   | 5180   |
| UN09138 | Rsa1.0_00552.1 | 1100 | 206757 | 0         | 588  | 593  | 99 -  | 506 | 1098 | 68022  | 68611  |
| UN09139 | Rsa1.0_01941.1 | 1114 | 37069  | 1.00E-129 | 240  | 242  | 99 -  | 164 | 405  | 32330  | 32571  |
| UN09140 | Rsa1.0_00706.1 | 1197 | 291570 | 1.00E-167 | 304  | 306  | 99 -  | 3   | 308  | 231041 | 231346 |
| UN09141 | Rsa1.0_15024.1 | 1020 | 2885   | 1.00E-141 | 328  | 346  | 94 -  | 667 | 1007 | 2252   | 2592   |
| UN09142 | Rsa1.0_00007.1 | 1299 | 239325 | 1.00E-154 | 321  | 333  | 96 -  | 965 | 1297 | 14225  | 14555  |
| UN09143 | Rsa1.0_00146.1 | 996  | 149343 | 0         | 918  | 951  | 96 -  | 14  | 961  | 67449  | 68388  |
| UN09144 | Rsa1.0_02287.1 | 1237 | 32986  | 1.00E-168 | 336  | 348  | 96 +  | 278 | 625  | 7095   | 7442   |
| UN09145 | Rsa1.0_01696.1 | 1029 | 301850 | 2.00E-98  | 219  | 229  | 95 +  | 780 | 1005 | 32637  | 32864  |
| UN09146 | Rsa1.0_00369.1 | 1036 | 266462 | 1.00E-136 | 382  | 424  | 90 +  | 1   | 410  | 146164 | 146575 |
| UN09147 | Rsa1.0_02139.1 | 1134 | 34686  | 0         | 534  | 534  | 100 - | 601 | 1134 | 24881  | 25414  |
| UN09148 | Rsa1.0_14744.1 | 1620 | 3111   | 0         | 489  | 506  | 96 -  | 303 | 808  | 724    | 1229   |
| UN09149 | Rsa1.0_03447.1 | 825  | 22857  | 1.00E-141 | 255  | 255  | 100 - | 571 | 825  | 19460  | 19714  |
| UN09150 | Rsa1.0_07472.1 | 1222 | 9306   | 0         | 446  | 447  | 99 -  | 1   | 447  | 6661   | 7107   |
| UN09151 | Rsa1.0_02213.1 | 1052 | 33824  | 4.00E-53  | 107  | 107  | 100 - | 946 | 1052 | 33603  | 33709  |
| UN09152 | Rsa1.0_03218.1 | 1679 | 24539  | 6.00E-78  | 159  | 161  | 98 -  | 3   | 163  | 9502   | 9661   |
| UN09153 | Rsa1.0_24098.1 | 924  | 1007   | 1.00E-114 | 280  | 305  | 91 -  | 597 | 887  | 643    | 947    |
| UN09154 | Rsa1.0_01786.1 | 956  | 133324 | 1.00E-126 | 242  | 246  | 98 +  | 522 | 767  | 101482 | 101727 |
| UN09155 | Rsa1.0_00131.1 | 1123 | 432233 | 1.00E-169 | 393  | 423  | 92 +  | 539 | 961  | 34875  | 35288  |
| UN09156 | Rsa1.0_15591.1 | 985  | 2530   | 0         | 587  | 619  | 94 +  | 383 | 985  | 1224   | 1838   |
| UN09157 | Rsa1.0_00089.1 | 562  | 406142 | 0         | 548  | 564  | 97 -  | 1   | 560  | 80693  | 81252  |
| UN09158 | Rsa1.0_02858.1 | 985  | 27246  | 1.00E-113 | 357  | 395  | 90 -  | 3   | 380  | 1699   | 2086   |
| UN09159 | Rsa1.0_00028.1 | 1063 | 293984 | 1.00E-147 | 268  | 269  | 99 +  | 1   | 269  | 263729 | 263997 |
| UN09160 | Rsa1.0_21236.1 | 1228 | 1222   | 0         | 471  | 476  | 98 -  | 752 | 1227 | 605    | 1080   |
| UN09161 | Rsa1.0_00548.1 | 1069 | 76518  | 6.00E-80  | 214  | 234  | 91 -  | 16  | 249  | 62227  | 62457  |
| UN09162 | Rsa1.0_00894.1 | 1104 | 269700 | 1.00E-110 | 300  | 326  | 92 -  | 718 | 1039 | 128038 | 128357 |
| UN09163 | Rsa1.0_00163.1 | 1061 | 116847 | 1.00E-160 | 368  | 393  | 93 +  | 4   | 390  | 25822  | 26212  |

|         |                |      |        |           |     |     |       |      |      |        |        |
|---------|----------------|------|--------|-----------|-----|-----|-------|------|------|--------|--------|
| UN09164 | Rsa1.0_00712.1 | 1722 | 67217  | 0         | 575 | 597 | 96 +  | 2    | 597  | 16542  | 17138  |
| UN09165 | Rsa1.0_14737.1 | 874  | 3115   | 1.00E-154 | 310 | 321 | 96 +  | 256  | 576  | 2055   | 2375   |
| UN09166 | Rsa1.0_04384.1 | 1301 | 17629  | 1.00E-172 | 333 | 342 | 97 +  | 415  | 756  | 3729   | 4070   |
| UN09167 | Rsa1.0_02146.1 | 880  | 34625  | 0         | 747 | 771 | 96 +  | 112  | 879  | 17169  | 17931  |
| UN09168 | Rsa1.0_00561.1 | 1238 | 75653  | 0         | 844 | 849 | 99 -  | 390  | 1236 | 4205   | 5053   |
| UN09169 | Rsa1.0_00757.1 | 1621 | 65559  | 1.00E-108 | 199 | 199 | 100 + | 1    | 199  | 12480  | 12678  |
| UN09170 | Rsa1.0_00167.1 | 934  | 116000 | 5.00E-80  | 374 | 449 | 83 +  | 125  | 573  | 28365  | 28795  |
| UN09171 | Rsa1.0_01214.1 | 1037 | 50599  | 0         | 595 | 623 | 95 -  | 3    | 625  | 49762  | 50384  |
| UN09172 | Rsa1.0_03940.1 | 1291 | 19962  | 0         | 931 | 938 | 99 +  | 359  | 1291 | 11912  | 12849  |
| UN09173 | Rsa1.0_00353.1 | 1035 | 92242  | 1.00E-104 | 237 | 248 | 95 -  | 789  | 1035 | 55684  | 55928  |
| UN09174 | Rsa1.0_01687.1 | 1014 | 40979  | 0         | 787 | 841 | 93 -  | 2    | 829  | 1551   | 2390   |
| UN09175 | Rsa1.0_00116.1 | 1052 | 365886 | 1.00E-130 | 252 | 256 | 98 +  | 4    | 258  | 239004 | 239259 |
| UN09176 | Rsa1.0_00066.1 | 1024 | 152418 | 1.00E-145 | 268 | 269 | 99 +  | 755  | 1022 | 60921  | 61189  |
| UN09177 | Rsa1.0_03860.1 | 833  | 20407  | 0         | 479 | 507 | 94 +  | 8    | 509  | 15820  | 16316  |
| UN09178 | Rsa1.0_02068.1 | 1144 | 35432  | 1.00E-59  | 121 | 122 | 99 -  | 559  | 680  | 3872   | 3993   |
| UN09179 | Rsa1.0_02048.1 | 741  | 35605  | 0         | 473 | 474 | 99 -  | 191  | 664  | 24818  | 25291  |
| UN09180 | Rsa1.0_03380.1 | 1208 | 23320  | 1.00E-166 | 319 | 326 | 97 -  | 883  | 1208 | 4293   | 4615   |
| UN09181 | Rsa1.0_01666.1 | 1237 | 173972 | 1.00E-115 | 249 | 259 | 96 +  | 219  | 477  | 23919  | 24175  |
| UN09182 | Rsa1.0_00020.1 | 1361 | 283099 | 1.00E-132 | 291 | 309 | 94 +  | 3    | 303  | 90045  | 90353  |
| UN09183 | Rsa1.0_00797.1 | 1054 | 63959  | 0         | 372 | 376 | 98 +  | 186  | 561  | 10750  | 11125  |
| UN09184 | Rsa1.0_21842.1 | 1268 | 1169   | 1.00E-135 | 244 | 244 | 100 - | 1    | 244  | 480    | 723    |
| UN09185 | Rsa1.0_00131.1 | 1179 | 432233 | 0         | 392 | 396 | 98 -  | 510  | 905  | 194264 | 194659 |
| UN09186 | Rsa1.0_00609.1 | 1320 | 72785  | 0         | 445 | 450 | 98 -  | 129  | 578  | 70202  | 70651  |
| UN09187 | Rsa1.0_39035.1 | 893  | 576    | 1.00E-121 | 257 | 268 | 95 +  | 595  | 862  | 316    | 576    |
| UN09188 | Rsa1.0_07256.1 | 927  | 9655   | 0         | 471 | 477 | 98 +  | 2    | 478  | 4824   | 5300   |
| UN09189 | Rsa1.0_07775.1 | 860  | 8594   | 0         | 347 | 349 | 99 -  | 1    | 348  | 614    | 962    |
| UN09190 | Rsa1.0_03352.1 | 1487 | 23506  | 1.00E-128 | 276 | 286 | 96 +  | 1201 | 1485 | 4054   | 4337   |
| UN09191 | Rsa1.0_02009.1 | 905  | 36100  | 0         | 421 | 438 | 96 -  | 140  | 577  | 35107  | 35544  |
| UN09192 | Rsa1.0_00133.1 | 1085 | 123768 | 1.00E-179 | 318 | 318 | 100 - | 1    | 318  | 29742  | 30059  |
| UN09193 | Rsa1.0_14298.1 | 947  | 3561   | 1.00E-96  | 186 | 188 | 98 +  | 618  | 805  | 3278   | 3465   |
| UN09194 | Rsa1.0_00226.1 | 1287 | 105884 | 0         | 602 | 622 | 96 -  | 618  | 1238 | 63959  | 64580  |
| UN09195 | Rsa1.0_00645.1 | 1507 | 189716 | 1.00E-176 | 322 | 325 | 99 -  | 528  | 852  | 150795 | 151119 |
| UN09196 | Rsa1.0_02058.1 | 1295 | 35532  | 0         | 452 | 463 | 97 -  | 4    | 466  | 13428  | 13890  |
| UN09197 | Rsa1.0_00497.1 | 460  | 79830  | 1.00E-111 | 238 | 248 | 95 +  | 1    | 247  | 43611  | 43858  |
| UN09198 | Rsa1.0_01130.1 | 1220 | 52929  | 0         | 371 | 385 | 96 -  | 1    | 379  | 44531  | 44915  |
| UN09199 | Rsa1.0_00620.1 | 1379 | 71985  | 0         | 491 | 506 | 97 +  | 728  | 1233 | 55327  | 55832  |
| UN09200 | Rsa1.0_03937.1 | 1247 | 19969  | 1.00E-119 | 280 | 298 | 93 +  | 5    | 291  | 3005   | 3301   |
| UN09201 | Rsa1.0_01282.1 | 970  | 49304  | 1.00E-148 | 311 | 321 | 96 -  | 654  | 970  | 28012  | 28331  |
| UN09202 | Rsa1.0_00020.1 | 750  | 283099 | 0         | 401 | 403 | 99 -  | 348  | 750  | 60863  | 61265  |

|         |                |      |        |           |      |      |       |      |      |        |        |
|---------|----------------|------|--------|-----------|------|------|-------|------|------|--------|--------|
| UN09203 | Rsa1.0.01170.1 | 834  | 161131 | 1.00E-171 | 332  | 341  | 97 +  | 494  | 834  | 129391 | 129727 |
| UN09204 | Rsa1.0.01058.1 | 832  | 55430  | 0         | 804  | 845  | 95 -  | 1    | 828  | 34187  | 35029  |
| UN09205 | Rsa1.0.00034.1 | 1100 | 260119 | 1.00E-149 | 340  | 358  | 94 -  | 59   | 413  | 841    | 1189   |
| UN09206 | Rsa1.0.00002.1 | 951  | 601661 | 0         | 566  | 597  | 94 +  | 254  | 829  | 289356 | 289949 |
| UN09207 | Rsa1.0.01713.1 | 1112 | 40564  | 0         | 1108 | 1108 | 100 + | 3    | 1110 | 26203  | 27310  |
| UN09208 | Rsa1.0.01420.1 | 2291 | 46210  | 0         | 1083 | 1086 | 99 -  | 1    | 1086 | 8650   | 9735   |
| UN09209 | Rsa1.0.36749.1 | 922  | 613    | 0         | 340  | 340  | 100 - | 352  | 691  | 186    | 525    |
| UN09210 | Rsa1.0.00269.1 | 1028 | 341668 | 0         | 456  | 470  | 97 +  | 21   | 486  | 323926 | 324393 |
| UN09211 | Rsa1.0.00002.1 | 1940 | 601661 | 0         | 794  | 824  | 96 +  | 821  | 1626 | 289098 | 289921 |
| UN09212 | Rsa1.0.01564.1 | 877  | 43169  | 2.33E-156 | 275  | 279  | 98 -  | 597  | 875  | 36245  | 36523  |
| UN09213 | Rsa1.0.11573.1 | 1576 | 5468   | 1.00E-167 | 326  | 335  | 97 -  | 376  | 710  | 5108   | 5442   |
| UN09214 | Rsa1.0.15481.1 | 1058 | 2582   | 0         | 631  | 642  | 98 +  | 1    | 631  | 1050   | 1691   |
| UN09215 | Rsa1.0.05496.1 | 929  | 13533  | 0         | 626  | 634  | 98 +  | 302  | 929  | 453    | 1086   |
| UN09216 | Rsa1.0.00093.1 | 1407 | 214962 | 1.00E-143 | 354  | 383  | 92 -  | 3    | 380  | 81375  | 81740  |
| UN09217 | Rsa1.0.00644.1 | 1138 | 136881 | 0         | 387  | 390  | 99 +  | 749  | 1138 | 52173  | 52561  |
| UN09218 | Rsa1.0.01947.1 | 687  | 36977  | 0         | 387  | 392  | 98 -  | 296  | 687  | 23177  | 23567  |
| UN09219 | Rsa1.0.05624.1 | 705  | 13140  | 1.00E-163 | 397  | 433  | 91 -  | 268  | 699  | 3783   | 4199   |
| UN09220 | Rsa1.0.00894.1 | 1163 | 269700 | 1.00E-101 | 215  | 222  | 96 -  | 856  | 1075 | 128137 | 128357 |
| UN09221 | Rsa1.0.00425.1 | 942  | 147080 | 0         | 926  | 943  | 98 +  | 1    | 942  | 897    | 1829   |
| UN09222 | Rsa1.0.01537.1 | 691  | 187285 | 1.00E-160 | 364  | 387  | 94 +  | 249  | 634  | 839    | 1220   |
| UN09223 | Rsa1.0.00341.1 | 931  | 249309 | 3.00E-75  | 156  | 160  | 97 -  | 356  | 515  | 115284 | 115443 |
| UN09224 | Rsa1.0.00049.1 | 973  | 167018 | 0         | 651  | 656  | 99 +  | 1    | 655  | 137814 | 138468 |
| UN09225 | Rsa1.0.26642.1 | 949  | 883    | 0         | 477  | 486  | 98 -  | 284  | 769  | 294    | 779    |
| UN09226 | Rsa1.0.00728.1 | 1085 | 66704  | 1.00E-171 | 327  | 333  | 98 -  | 753  | 1085 | 2998   | 3329   |
| UN09227 | Rsa1.0.01082.1 | 504  | 54640  | 0         | 477  | 497  | 95 -  | 8    | 502  | 17718  | 18212  |
| UN09228 | Rsa1.0.00204.1 | 721  | 109056 | 1.00E-171 | 439  | 478  | 91 -  | 1    | 473  | 17525  | 17990  |
| UN09229 | Rsa1.0.03560.1 | 522  | 22092  | 1.00E-109 | 212  | 216  | 98 +  | 27   | 242  | 3019   | 3234   |
| UN09230 | Rsa1.0.00502.1 | 705  | 204180 | 0         | 616  | 650  | 94 -  | 58   | 705  | 63729  | 64372  |
| UN09231 | Rsa1.0.00092.1 | 1059 | 659932 | 0         | 546  | 578  | 94 -  | 416  | 988  | 141118 | 141690 |
| UN09232 | Rsa1.0.00009.1 | 1000 | 232558 | 0         | 413  | 416  | 99 -  | 1    | 416  | 53021  | 53436  |
| UN09233 | Rsa1.0.05376.1 | 885  | 13977  | 0         | 620  | 631  | 98 -  | 1    | 631  | 5384   | 6014   |
| UN09234 | Rsa1.0.00104.1 | 1072 | 368722 | 3.00E-94  | 239  | 260  | 91 +  | 634  | 893  | 201374 | 201633 |
| UN09235 | Rsa1.0.04568.1 | 1418 | 16805  | 0         | 1045 | 1083 | 96 +  | 337  | 1418 | 4609   | 5681   |
| UN09236 | Rsa1.0.03686.1 | 1364 | 21387  | 0         | 357  | 361  | 98 -  | 1005 | 1364 | 8981   | 9340   |
| UN09237 | Rsa1.0.52605.1 | 939  | 433    | 0         | 432  | 433  | 99 -  | 157  | 589  | 1      | 433    |
| UN09238 | Rsa1.0.00140.1 | 474  | 121541 | 1.00E-164 | 295  | 296  | 99 +  | 179  | 474  | 579    | 874    |
| UN09239 | Rsa1.0.02813.1 | 538  | 27656  | 0         | 415  | 426  | 97 +  | 122  | 538  | 25679  | 26104  |
| UN09240 | Rsa1.0.01774.1 | 718  | 39528  | 1.00E-135 | 256  | 260  | 98 +  | 450  | 709  | 23650  | 23909  |
| UN09241 | Rsa1.0.01651.1 | 1036 | 41586  | 0         | 1029 | 1036 | 99 +  | 1    | 1036 | 31227  | 32262  |

|         |                |      |        |           |      |      |       |      |      |        |        |
|---------|----------------|------|--------|-----------|------|------|-------|------|------|--------|--------|
| UN09242 | Rsa1.0_01176.1 | 687  | 51638  | 1.00E-123 | 236  | 240  | 98 -  | 448  | 687  | 47334  | 47573  |
| UN09243 | Rsa1.0_00083.1 | 883  | 442773 | 0         | 391  | 394  | 99 -  | 490  | 883  | 261482 | 261875 |
| UN09244 | Rsa1.0_07309.1 | 821  | 9572   | 6.00E-98  | 185  | 186  | 99 -  | 635  | 820  | 7736   | 7921   |
| UN09245 | Rsa1.0_02955.1 | 780  | 26484  | 7.00E-82  | 217  | 235  | 92 -  | 547  | 778  | 20351  | 20581  |
| UN09246 | Rsa1.0_01097.1 | 1651 | 173349 | 1.00E-180 | 404  | 432  | 93 -  | 1233 | 1648 | 32232  | 32663  |
| UN09247 | Rsa1.0_02043.1 | 900  | 163754 | 1.00E-114 | 237  | 246  | 96 -  | 377  | 622  | 145291 | 145536 |
| UN09248 | Rsa1.0_00060.1 | 1416 | 502678 | 1.00E-155 | 350  | 371  | 94 -  | 1046 | 1415 | 368884 | 369249 |
| UN09249 | Rsa1.0_00855.1 | 1236 | 62047  | 0         | 378  | 392  | 96 -  | 3    | 394  | 55971  | 56359  |
| UN09250 | Rsa1.0_03168.1 | 1141 | 24827  | 1.00E-123 | 243  | 249  | 97 +  | 10   | 258  | 4696   | 4944   |
| UN09251 | Rsa1.0_01212.1 | 1222 | 50622  | 0         | 1193 | 1218 | 97 +  | 5    | 1220 | 44889  | 46106  |
| UN09252 | Rsa1.0_02622.1 | 1155 | 142402 | 0         | 683  | 699  | 97 +  | 455  | 1153 | 9528   | 10226  |
| UN09253 | Rsa1.0_01545.1 | 1047 | 43599  | 0         | 558  | 559  | 99 -  | 6    | 564  | 32611  | 33169  |
| UN09254 | Rsa1.0_02474.1 | 1267 | 31076  | 0         | 436  | 438  | 99 +  | 828  | 1265 | 21211  | 21648  |
| UN09255 | Rsa1.0_00054.1 | 1226 | 162053 | 1.00E-122 | 388  | 436  | 88 -  | 792  | 1218 | 5405   | 5820   |
| UN09256 | Rsa1.0_18628.1 | 945  | 1562   | 0         | 910  | 946  | 96 -  | 2    | 944  | 367    | 1307   |
| UN09257 | Rsa1.0_04286.1 | 1022 | 18084  | 0         | 375  | 376  | 99 -  | 647  | 1022 | 4017   | 4392   |
| UN09258 | Rsa1.0_00108.1 | 1223 | 478491 | 1.00E-144 | 371  | 403  | 92 -  | 2    | 394  | 463726 | 464123 |
| UN09259 | Rsa1.0_09250.1 | 1397 | 6528   | 0         | 449  | 458  | 98 +  | 215  | 672  | 3462   | 3916   |
| UN09260 | Rsa1.0_00119.1 | 1337 | 467509 | 1.00E-173 | 333  | 340  | 97 +  | 998  | 1337 | 302973 | 303310 |
| UN09261 | Rsa1.0_00198.1 | 1066 | 222963 | 0         | 897  | 944  | 95 +  | 120  | 1054 | 138000 | 138942 |
| UN09262 | Rsa1.0_01683.1 | 1388 | 41059  | 1.00E-166 | 339  | 353  | 96 -  | 529  | 881  | 23260  | 23612  |
| UN09263 | Rsa1.0_13895.1 | 1363 | 4135   | 0         | 401  | 401  | 100 + | 1    | 401  | 155    | 555    |
| UN09264 | Rsa1.0_00332.1 | 969  | 94575  | 0         | 507  | 507  | 100 + | 1    | 507  | 62018  | 62524  |
| UN09265 | Rsa1.0_01431.1 | 910  | 167877 | 0         | 904  | 907  | 99 -  | 3    | 909  | 36772  | 37678  |
| UN09266 | Rsa1.0_01696.1 | 1409 | 301850 | 1.00E-171 | 328  | 333  | 98 -  | 6    | 338  | 297579 | 297908 |
| UN09267 | Rsa1.0_03318.1 | 1096 | 23780  | 1.00E-168 | 334  | 344  | 97 -  | 718  | 1060 | 2397   | 2740   |
| UN09268 | Rsa1.0_00356.1 | 937  | 91521  | 0         | 490  | 511  | 95 -  | 19   | 523  | 34979  | 35485  |
| UN09269 | Rsa1.0_00525.1 | 1322 | 78030  | 0         | 441  | 452  | 97 +  | 2    | 453  | 30668  | 31119  |
| UN09270 | Rsa1.0_18957.1 | 1235 | 1505   | 1.00E-158 | 295  | 299  | 98 +  | 248  | 546  | 1203   | 1501   |
| UN09271 | Rsa1.0_00048.1 | 858  | 167185 | 1.00E-137 | 272  | 280  | 97 +  | 470  | 749  | 8087   | 8366   |
| UN09272 | Rsa1.0_00615.1 | 986  | 72235  | 0         | 620  | 639  | 97 +  | 1    | 639  | 54770  | 55402  |
| UN09273 | Rsa1.0_08807.1 | 872  | 6906   | 1.00E-120 | 229  | 232  | 98 -  | 273  | 504  | 4140   | 4371   |
| UN09274 | Rsa1.0_02922.1 | 907  | 26753  | 0         | 364  | 364  | 100 - | 544  | 907  | 12326  | 12689  |
| UN09275 | Rsa1.0_05804.1 | 739  | 12586  | 0         | 737  | 737  | 100 - | 3    | 739  | 9607   | 10343  |
| UN09276 | Rsa1.0_04794.1 | 773  | 15960  | 0         | 461  | 462  | 99 +  | 312  | 773  | 2694   | 3155   |
| UN09277 | Rsa1.0_00067.1 | 1036 | 415055 | 1.00E-150 | 333  | 352  | 94 +  | 641  | 991  | 301029 | 301368 |
| UN09278 | Rsa1.0_00140.1 | 713  | 121541 | 1.00E-152 | 316  | 329  | 96 -  | 383  | 711  | 21968  | 22295  |
| UN09279 | Rsa1.0_37242.1 | 943  | 605    | 1.00E-150 | 317  | 330  | 96 +  | 42   | 367  | 10     | 337    |
| UN09280 | Rsa1.0_00642.1 | 1316 | 201230 | 0         | 969  | 1017 | 95 -  | 1    | 1013 | 157947 | 158961 |



|         |                |      |        |           |     |     |       |      |      |        |        |
|---------|----------------|------|--------|-----------|-----|-----|-------|------|------|--------|--------|
| UN09281 | Rsa1.0_14319.1 | 1104 | 3529   | 1.00E-179 | 491 | 548 | 89 +  | 293  | 840  | 2316   | 2860   |
| UN09282 | Rsa1.0_01091.1 | 1268 | 54383  | 0         | 562 | 572 | 98 +  | 4    | 575  | 11319  | 11890  |
| UN09283 | Rsa1.0_01530.1 | 814  | 43820  | 0         | 514 | 527 | 97 -  | 288  | 814  | 5929   | 6455   |
| UN09284 | Rsa1.0_00026.1 | 411  | 327835 | 2.00E-12  | 61  | 68  | 89 +  | 16   | 80   | 305879 | 305946 |
| UN09285 | Rsa1.0_00049.1 | 1463 | 167018 | 0         | 700 | 716 | 97 +  | 3    | 718  | 144469 | 145184 |
| UN09286 | Rsa1.0_01537.1 | 1001 | 187285 | 1.00E-129 | 333 | 361 | 92 -  | 648  | 1001 | 38620  | 38977  |
| UN09287 | Rsa1.0_03728.1 | 1423 | 21147  | 0         | 454 | 462 | 98 +  | 1    | 462  | 631    | 1092   |
| UN09288 | Rsa1.0_08045.1 | 1451 | 8014   | 0         | 341 | 343 | 99 -  | 1109 | 1450 | 4994   | 5336   |
| UN09289 | Rsa1.0_00147.1 | 1143 | 249503 | 0         | 462 | 497 | 92 -  | 658  | 1136 | 155766 | 156259 |
| UN09290 | Rsa1.0_02165.1 | 1036 | 34423  | 0         | 556 | 600 | 92 -  | 374  | 960  | 3037   | 3636   |
| UN09291 | Rsa1.0_00865.1 | 1293 | 61686  | 0         | 471 | 471 | 100 - | 2    | 472  | 2371   | 2841   |
| UN09292 | Rsa1.0_02043.1 | 1503 | 163754 | 0         | 450 | 486 | 92 +  | 653  | 1123 | 145937 | 146415 |
| UN09293 | Rsa1.0_00096.1 | 973  | 198773 | 1.00E-176 | 320 | 322 | 99 +  | 4    | 325  | 14856  | 15177  |
| UN09294 | Rsa1.0_00715.1 | 515  | 67116  | 1.00E-100 | 238 | 250 | 95 +  | 14   | 259  | 40324  | 40573  |
| UN09295 | Rsa1.0_02433.1 | 1464 | 158318 | 0         | 413 | 440 | 93 +  | 1    | 426  | 19973  | 20411  |
| UN09296 | Rsa1.0_00772.1 | 1136 | 64856  | 0         | 433 | 464 | 93 -  | 618  | 1080 | 47121  | 47580  |
| UN09297 | Rsa1.0_06898.1 | 1007 | 10191  | 4.00E-93  | 189 | 194 | 97 -  | 1    | 194  | 5050   | 5243   |
| UN09298 | Rsa1.0_01519.1 | 960  | 44144  | 0         | 503 | 521 | 96 -  | 441  | 960  | 11634  | 12151  |
| UN09299 | Rsa1.0_00166.1 | 1193 | 240912 | 0         | 410 | 422 | 97 +  | 521  | 942  | 221531 | 221952 |
| UN09300 | Rsa1.0_03971.1 | 1284 | 19788  | 1.00E-151 | 293 | 299 | 97 +  | 981  | 1279 | 3924   | 4221   |
| UN09301 | Rsa1.0_16493.1 | 1305 | 2136   | 1.00E-118 | 228 | 232 | 98 +  | 1    | 232  | 1336   | 1567   |
| UN09302 | Rsa1.0_00017.1 | 921  | 752458 | 6.00E-92  | 209 | 220 | 95 -  | 7    | 226  | 298464 | 298682 |
| UN09303 | Rsa1.0_01144.1 | 1280 | 52431  | 1.00E-155 | 325 | 340 | 95 +  | 3    | 339  | 22926  | 23265  |
| UN09304 | Rsa1.0_00684.1 | 935  | 141701 | 0         | 463 | 469 | 98 +  | 466  | 934  | 9100   | 9568   |
| UN09305 | Rsa1.0_05449.1 | 1074 | 13711  | 0         | 440 | 471 | 93 +  | 5    | 473  | 13194  | 13646  |
| UN09306 | Rsa1.0_00132.1 | 978  | 124299 | 1.00E-172 | 353 | 367 | 96 -  | 2    | 367  | 99700  | 100066 |
| UN09307 | Rsa1.0_00147.1 | 1218 | 249503 | 0         | 567 | 609 | 93 +  | 1    | 607  | 155663 | 156259 |
| UN09308 | Rsa1.0_09273.1 | 1087 | 6511   | 1.00E-107 | 216 | 222 | 97 -  | 1    | 222  | 1960   | 2181   |
| UN09309 | Rsa1.0_01377.1 | 1070 | 46967  | 0         | 356 | 363 | 98 +  | 708  | 1070 | 21582  | 21943  |
| UN09310 | Rsa1.0_00040.1 | 1881 | 324196 | 1.00E-172 | 334 | 343 | 97 +  | 1539 | 1881 | 315220 | 315562 |
| UN09311 | Rsa1.0_00473.1 | 1293 | 212204 | 1.00E-148 | 278 | 282 | 98 +  | 485  | 766  | 48003  | 48284  |
| UN09312 | Rsa1.0_00895.1 | 1032 | 60615  | 1.00E-159 | 308 | 313 | 98 +  | 722  | 1032 | 16603  | 16915  |
| UN09313 | Rsa1.0_00338.1 | 1098 | 94109  | 1.00E-110 | 261 | 280 | 93 -  | 819  | 1098 | 34847  | 35117  |
| UN09314 | Rsa1.0_11428.1 | 1305 | 5511   | 1.00E-167 | 391 | 424 | 92 -  | 1    | 402  | 4231   | 4654   |
| UN09315 | Rsa1.0_00218.1 | 1092 | 201480 | 0         | 847 | 857 | 98 +  | 235  | 1090 | 174782 | 175637 |
| UN09316 | Rsa1.0_02165.1 | 1067 | 34423  | 0         | 550 | 600 | 91 +  | 114  | 693  | 3037   | 3636   |
| UN09317 | Rsa1.0_00760.1 | 1125 | 65267  | 1.00E-139 | 263 | 267 | 98 +  | 401  | 667  | 19685  | 19951  |
| UN09318 | Rsa1.0_02209.1 | 1078 | 33873  | 1.00E-155 | 340 | 362 | 93 -  | 720  | 1078 | 26608  | 26957  |
| UN09319 | Rsa1.0_36506.1 | 1096 | 618    | 1.00E-141 | 293 | 306 | 95 -  | 786  | 1091 | 313    | 618    |

|         |                |      |        |           |     |     |       |      |      |        |        |
|---------|----------------|------|--------|-----------|-----|-----|-------|------|------|--------|--------|
| UN09320 | Rsa1.0.02550.1 | 1072 | 291051 | 0         | 364 | 367 | 99 +  | 706  | 1072 | 6190   | 6556   |
| UN09321 | Rsa1.0.06303.1 | 1025 | 11268  | 0         | 792 | 814 | 97 +  | 2    | 815  | 4844   | 5657   |
| UN09322 | Rsa1.0.00497.1 | 1223 | 79830  | 0         | 720 | 741 | 97 +  | 487  | 1223 | 73170  | 73910  |
| UN09323 | Rsa1.0.11811.1 | 1369 | 5401   | 1.00E-113 | 224 | 229 | 97 +  | 1140 | 1364 | 2702   | 2930   |
| UN09324 | Rsa1.0.08617.1 | 867  | 7124   | 0         | 837 | 880 | 95 -  | 2    | 867  | 284    | 1161   |
| UN09325 | Rsa1.0.00145.1 | 765  | 261008 | 0         | 428 | 428 | 100 - | 336  | 763  | 8526   | 8953   |
| UN09326 | Rsa1.0.00816.1 | 1042 | 403350 | 0         | 562 | 583 | 96 -  | 3    | 582  | 127627 | 128209 |
| UN09327 | Rsa1.0.02379.1 | 845  | 150705 | 1.00E-141 | 380 | 424 | 89 -  | 352  | 753  | 141733 | 142156 |
| UN09328 | Rsa1.0.01104.1 | 1192 | 285480 | 0         | 452 | 456 | 99 +  | 736  | 1191 | 35015  | 35470  |
| UN09329 | Rsa1.0.09048.1 | 769  | 6683   | 0         | 667 | 679 | 98 +  | 95   | 769  | 5245   | 5923   |
| UN09330 | Rsa1.0.01618.1 | 625  | 42118  | 1.00E-108 | 266 | 290 | 91 +  | 1    | 280  | 17298  | 17587  |
| UN09331 | Rsa1.0.09325.1 | 956  | 6454   | 0         | 340 | 344 | 98 +  | 613  | 956  | 716    | 1059   |
| UN09332 | Rsa1.0.08255.1 | 801  | 7652   | 0         | 522 | 524 | 99 +  | 1    | 524  | 3734   | 4257   |
| UN09333 | Rsa1.0.00387.1 | 709  | 495407 | 1.00E-163 | 314 | 320 | 98 +  | 1    | 320  | 349283 | 349601 |
| UN09334 | Rsa1.0.02658.1 | 1294 | 28978  | 1.00E-161 | 319 | 329 | 96 +  | 60   | 388  | 17755  | 18083  |
| UN09335 | Rsa1.0.01958.1 | 1345 | 261128 | 0         | 410 | 414 | 99 +  | 1    | 414  | 129275 | 129688 |
| UN09336 | Rsa1.0.01397.1 | 595  | 183276 | 8.00E-81  | 162 | 165 | 98 +  | 73   | 237  | 171641 | 171805 |
| UN09337 | Rsa1.0.00558.1 | 1335 | 75819  | 0         | 739 | 751 | 98 +  | 311  | 1061 | 28073  | 28823  |
| UN09338 | Rsa1.0.00364.1 | 839  | 90951  | 0         | 440 | 443 | 99 +  | 397  | 839  | 63260  | 63702  |
| UN09339 | Rsa1.0.00097.1 | 837  | 138858 | 0         | 375 | 386 | 97 +  | 458  | 837  | 42576  | 42958  |
| UN09340 | Rsa1.0.02345.1 | 743  | 32337  | 1.00E-106 | 262 | 282 | 92 +  | 460  | 738  | 15392  | 15673  |
| UN09341 | Rsa1.0.02848.1 | 786  | 27329  | 0         | 517 | 530 | 97 -  | 254  | 782  | 12523  | 13050  |
| UN09342 | Rsa1.0.02548.1 | 1077 | 30228  | 1.00E-153 | 330 | 348 | 94 +  | 743  | 1077 | 10107  | 10454  |
| UN09343 | Rsa1.0.00086.1 | 1034 | 439854 | 0         | 865 | 865 | 100 + | 3    | 867  | 341743 | 342607 |
| UN09344 | Rsa1.0.02888.1 | 1639 | 27020  | 0         | 426 | 430 | 99 +  | 2    | 431  | 8692   | 9121   |
| UN09345 | Rsa1.0.00636.1 | 736  | 71113  | 1.00E-158 | 286 | 287 | 99 +  | 2    | 288  | 14334  | 14620  |
| UN09346 | Rsa1.0.00192.1 | 865  | 278200 | 0         | 452 | 453 | 99 -  | 1    | 453  | 223102 | 223554 |
| UN09347 | Rsa1.0.00045.1 | 1305 | 328694 | 2.33E-156 | 275 | 279 | 98 -  | 799  | 1077 | 161663 | 161941 |
| UN09348 | Rsa1.0.08619.1 | 784  | 7123   | 1.00E-108 | 243 | 255 | 95 -  | 538  | 784  | 5465   | 5719   |
| UN09349 | Rsa1.0.00025.1 | 667  | 277312 | 0         | 661 | 661 | 100 + | 5    | 665  | 79953  | 80613  |
| UN09350 | Rsa1.0.00398.1 | 861  | 88007  | 1.00E-141 | 270 | 274 | 98 +  | 588  | 860  | 28102  | 28375  |
| UN09351 | Rsa1.0.01144.1 | 1626 | 52431  | 0         | 414 | 420 | 98 -  | 2    | 420  | 42305  | 42724  |
| UN09352 | Rsa1.0.01806.1 | 1124 | 39021  | 0         | 567 | 569 | 99 -  | 1    | 569  | 24551  | 25118  |
| UN09353 | Rsa1.0.02152.1 | 884  | 34558  | 0         | 597 | 603 | 99 +  | 3    | 603  | 26442  | 27044  |
| UN09354 | Rsa1.0.06911.1 | 2022 | 10178  | 0         | 599 | 609 | 98 -  | 861  | 1469 | 9273   | 9881   |
| UN09355 | Rsa1.0.02392.1 | 1369 | 152517 | 1.00E-163 | 298 | 300 | 99 +  | 6    | 305  | 7771   | 8070   |
| UN09356 | Rsa1.0.29217.1 | 622  | 789    | 1.00E-104 | 250 | 268 | 93 +  | 353  | 618  | 335    | 602    |
| UN09357 | Rsa1.0.08909.1 | 477  | 6799   | 8.00E-96  | 246 | 264 | 93 -  | 14   | 270  | 5387   | 5646   |
| UN09358 | Rsa1.0.01388.1 | 1016 | 46741  | 1.00E-128 | 321 | 349 | 91 +  | 1    | 341  | 16555  | 16900  |

|         |                |      |        |           |      |      |       |      |      |        |        |
|---------|----------------|------|--------|-----------|------|------|-------|------|------|--------|--------|
| UN09359 | Rsa1.0.00055.1 | 871  | 520193 | 0         | 695  | 719  | 96 +  | 152  | 867  | 339997 | 340715 |
| UN09360 | Rsa1.0.01574.1 | 1136 | 42930  | 0         | 672  | 673  | 99 +  | 29   | 701  | 17701  | 18373  |
| UN09361 | Rsa1.0.02377.1 | 902  | 31994  | 1.00E-160 | 361  | 382  | 94 +  | 2    | 377  | 17523  | 17902  |
| UN09362 | Rsa1.0.00050.1 | 1920 | 237174 | 0         | 418  | 440  | 95 -  | 1488 | 1919 | 33927  | 34366  |
| UN09363 | Rsa1.0.05973.1 | 1132 | 12065  | 0         | 1061 | 1136 | 93 -  | 1    | 1129 | 3811   | 4935   |
| UN09364 | Rsa1.0.06373.1 | 942  | 11138  | 1.00E-148 | 298  | 307  | 97 -  | 641  | 942  | 727    | 1033   |
| UN09365 | Rsa1.0.02108.1 | 1336 | 163029 | 0         | 637  | 643  | 99 +  | 693  | 1335 | 154209 | 154848 |
| UN09366 | Rsa1.0.00708.1 | 1496 | 67366  | 0         | 410  | 426  | 96 -  | 285  | 710  | 13811  | 14236  |
| UN09367 | Rsa1.0.03818.1 | 1259 | 20668  | 1.00E-121 | 303  | 327  | 92 -  | 934  | 1256 | 6603   | 6923   |
| UN09368 | Rsa1.0.36506.1 | 704  | 618    | 1.00E-152 | 297  | 305  | 97 +  | 3    | 307  | 314    | 618    |
| UN09369 | Rsa1.0.00134.1 | 1308 | 390219 | 0         | 407  | 407  | 100 + | 902  | 1308 | 381305 | 381711 |
| UN09370 | Rsa1.0.00178.1 | 1530 | 114861 | 0         | 796  | 804  | 99 +  | 727  | 1530 | 67460  | 68258  |
| UN09371 | Rsa1.0.01388.1 | 973  | 46741  | 1.00E-120 | 274  | 291  | 94 +  | 15   | 302  | 16613  | 16900  |
| UN09372 | Rsa1.0.00321.1 | 1360 | 95671  | 0         | 408  | 419  | 97 -  | 1    | 419  | 21420  | 21835  |
| UN09373 | Rsa1.0.00798.1 | 968  | 63945  | 0         | 504  | 510  | 98 +  | 459  | 968  | 43764  | 44273  |
| UN09374 | Rsa1.0.12060.1 | 958  | 5328   | 1.00E-138 | 253  | 254  | 99 -  | 3    | 256  | 97     | 350    |
| UN09375 | Rsa1.0.00868.1 | 1163 | 61630  | 0         | 445  | 450  | 98 +  | 717  | 1163 | 32742  | 33191  |
| UN09376 | Rsa1.0.02138.1 | 608  | 34695  | 1.00E-171 | 315  | 317  | 99 -  | 3    | 318  | 7722   | 8038   |
| UN09377 | Rsa1.0.09709.1 | 2137 | 6198   | 0         | 661  | 662  | 99 +  | 1    | 662  | 4025   | 4686   |
| UN09378 | Rsa1.0.00594.1 | 1703 | 73729  | 0         | 889  | 905  | 98 -  | 800  | 1703 | 4073   | 4973   |
| UN09379 | Rsa1.0.00193.1 | 1387 | 194198 | 0         | 433  | 441  | 98 -  | 414  | 854  | 98615  | 99055  |
| UN09380 | Rsa1.0.00260.1 | 1226 | 102021 | 0         | 902  | 940  | 95 -  | 4    | 938  | 26336  | 27275  |
| UN09381 | Rsa1.0.04281.1 | 1620 | 18107  | 0         | 1122 | 1124 | 99 -  | 497  | 1620 | 15446  | 16568  |
| UN09382 | Rsa1.0.15993.1 | 646  | 2329   | 0         | 407  | 419  | 97 +  | 220  | 638  | 1900   | 2315   |
| UN09383 | Rsa1.0.06408.1 | 1198 | 11070  | 0         | 345  | 348  | 99 -  | 10   | 357  | 1608   | 1955   |
| UN09384 | Rsa1.0.01438.1 | 601  | 45882  | 0         | 388  | 401  | 96 +  | 3    | 403  | 32818  | 33216  |
| UN09385 | Rsa1.0.00541.1 | 885  | 76863  | 1.00E-119 | 254  | 265  | 95 +  | 1    | 265  | 9084   | 9341   |
| UN09386 | Rsa1.0.01156.1 | 796  | 52147  | 1.00E-132 | 283  | 299  | 94 +  | 180  | 469  | 33026  | 33324  |
| UN09387 | Rsa1.0.01458.1 | 954  | 175719 | 0         | 362  | 371  | 97 -  | 585  | 952  | 33186  | 33554  |
| UN09388 | Rsa1.0.04126.1 | 1171 | 18939  | 0         | 548  | 561  | 97 -  | 2    | 560  | 17402  | 17959  |
| UN09389 | Rsa1.0.01097.1 | 548  | 173349 | 8.00E-81  | 156  | 157  | 99 +  | 189  | 345  | 8872   | 9028   |
| UN09390 | Rsa1.0.01876.1 | 1119 | 37800  | 0         | 351  | 356  | 98 -  | 1    | 356  | 9471   | 9825   |
| UN09391 | Rsa1.0.00950.1 | 694  | 58547  | 1.00E-76  | 179  | 187  | 95 +  | 3    | 186  | 54197  | 54380  |
| UN09392 | Rsa1.0.00451.1 | 917  | 322533 | 0         | 341  | 343  | 99 -  | 573  | 915  | 48180  | 48522  |
| UN09393 | Rsa1.0.00033.1 | 977  | 515811 | 7.00E-98  | 262  | 289  | 90 -  | 94   | 380  | 462808 | 463082 |
| UN09394 | Rsa1.0.03607.1 | 1230 | 21817  | 1.00E-129 | 287  | 301  | 95 +  | 928  | 1226 | 3939   | 4237   |
| UN09395 | Rsa1.0.03001.1 | 769  | 26108  | 1.00E-125 | 276  | 292  | 94 -  | 483  | 769  | 9416   | 9707   |
| UN09396 | Rsa1.0.03738.1 | 749  | 21071  | 0         | 738  | 744  | 99 +  | 3    | 746  | 19580  | 20323  |
| UN09397 | Rsa1.0.00519.1 | 1092 | 197864 | 0         | 416  | 423  | 98 -  | 673  | 1090 | 191658 | 192080 |

|         |                |      |        |           |      |      |       |      |      |        |        |
|---------|----------------|------|--------|-----------|------|------|-------|------|------|--------|--------|
| UN09398 | Rsa1.0_00655.1 | 912  | 195840 | 1.00E-163 | 368  | 390  | 94 +  | 525  | 912  | 163505 | 163892 |
| UN09399 | Rsa1.0_07935.1 | 1561 | 8229   | 0         | 1282 | 1334 | 96 -  | 3    | 1321 | 6844   | 8177   |
| UN09400 | Rsa1.0_00059.1 | 637  | 159650 | 1.00E-129 | 301  | 319  | 94 -  | 319  | 634  | 123644 | 123957 |
| UN09401 | Rsa1.0_00339.1 | 1121 | 222974 | 7.00E-92  | 181  | 184  | 98 -  | 907  | 1090 | 39246  | 39429  |
| UN09402 | Rsa1.0_02064.1 | 961  | 35476  | 1.00E-102 | 285  | 311  | 91 -  | 3    | 306  | 9520   | 9825   |
| UN09403 | Rsa1.0_20672.1 | 1102 | 1281   | 1.00E-133 | 242  | 242  | 100 - | 457  | 698  | 1020   | 1261   |
| UN09404 | Rsa1.0_00271.1 | 807  | 101125 | 0         | 804  | 809  | 99 +  | 1    | 806  | 90528  | 91336  |
| UN09405 | Rsa1.0_01546.1 | 956  | 43586  | 0         | 954  | 956  | 99 +  | 3    | 956  | 30240  | 31195  |
| UN09406 | Rsa1.0_00203.1 | 1108 | 109129 | 3.00E-82  | 183  | 192  | 95 +  | 138  | 329  | 21777  | 21968  |
| UN09407 | Rsa1.0_07030.1 | 940  | 10008  | 3.00E-47  | 158  | 178  | 88 -  | 324  | 497  | 5301   | 5478   |
| UN09408 | Rsa1.0_00058.1 | 1445 | 159921 | 1.00E-120 | 231  | 235  | 98 +  | 759  | 993  | 92939  | 93173  |
| UN09409 | Rsa1.0_00094.1 | 2069 | 139042 | 0         | 772  | 803  | 96 +  | 70   | 866  | 90319  | 91115  |
| UN09410 | Rsa1.0_00593.1 | 526  | 143463 | 1.00E-133 | 240  | 240  | 100 - | 287  | 526  | 60989  | 61228  |
| UN09411 | Rsa1.0_11621.1 | 625  | 5457   | 1.00E-166 | 308  | 312  | 98 -  | 2    | 313  | 601    | 912    |
| UN09412 | Rsa1.0_01023.1 | 1707 | 56571  | 1.00E-117 | 221  | 223  | 99 -  | 1094 | 1316 | 51375  | 51597  |
| UN09413 | Rsa1.0_02176.1 | 598  | 34291  | 0         | 590  | 596  | 98 -  | 1    | 596  | 21001  | 21596  |
| UN09414 | Rsa1.0_01054.1 | 921  | 55470  | 0         | 916  | 918  | 99 -  | 3    | 920  | 23592  | 24509  |
| UN09415 | Rsa1.0_01263.1 | 494  | 49703  | 1.00E-85  | 164  | 165  | 99 +  | 70   | 234  | 39806  | 39970  |
| UN09416 | Rsa1.0_04655.1 | 1701 | 16495  | 0         | 625  | 625  | 100 + | 1077 | 1701 | 11787  | 12411  |
| UN09417 | Rsa1.0_04027.1 | 591  | 19501  | 1.00E-161 | 366  | 387  | 94 -  | 1    | 380  | 6649   | 7033   |
| UN09418 | Rsa1.0_00301.1 | 679  | 365315 | 0         | 427  | 430  | 99 -  | 249  | 676  | 207737 | 208166 |
| UN09419 | Rsa1.0_00457.1 | 1485 | 337301 | 0         | 584  | 588  | 99 -  | 896  | 1483 | 334144 | 334731 |
| UN09420 | Rsa1.0_01625.1 | 715  | 42019  | 1.00E-116 | 267  | 280  | 95 -  | 438  | 715  | 20455  | 20732  |
| UN09421 | Rsa1.0_00157.1 | 924  | 245832 | 0         | 407  | 422  | 96 +  | 503  | 924  | 160498 | 160908 |
| UN09422 | Rsa1.0_01553.1 | 630  | 43379  | 1.00E-140 | 253  | 253  | 100 + | 68   | 320  | 14846  | 15098  |
| UN09423 | Rsa1.0_07389.1 | 850  | 9479   | 0         | 480  | 510  | 94 -  | 339  | 848  | 555    | 1045   |
| UN09424 | Rsa1.0_01926.1 | 1304 | 37206  | 0         | 463  | 464  | 99 +  | 840  | 1303 | 17508  | 17971  |
| UN09425 | Rsa1.0_00201.1 | 1627 | 232851 | 0         | 389  | 403  | 96 +  | 748  | 1148 | 4150   | 4548   |
| UN09426 | Rsa1.0_00275.1 | 1314 | 210104 | 1.00E-166 | 304  | 305  | 99 +  | 8    | 311  | 176437 | 176741 |
| UN09427 | Rsa1.0_00341.1 | 670  | 249309 | 1.00E-107 | 206  | 209  | 98 -  | 189  | 397  | 128945 | 129153 |
| UN09428 | Rsa1.0_00035.1 | 1465 | 176449 | 0         | 1268 | 1332 | 95 -  | 134  | 1464 | 51613  | 52916  |
| UN09429 | Rsa1.0_00999.1 | 1411 | 57162  | 1.00E-150 | 285  | 290  | 98 +  | 2    | 291  | 14247  | 14536  |
| UN09430 | Rsa1.0_02074.1 | 1190 | 35370  | 0         | 527  | 532  | 99 +  | 9    | 540  | 11996  | 12527  |
| UN09431 | Rsa1.0_00128.1 | 855  | 228675 | 0         | 846  | 853  | 99 -  | 3    | 855  | 185139 | 185991 |
| UN09432 | Rsa1.0_01635.1 | 742  | 41865  | 0         | 707  | 720  | 98 -  | 3    | 722  | 15877  | 16592  |
| UN09433 | Rsa1.0_01955.1 | 1255 | 36850  | 1.00E-169 | 454  | 497  | 91 +  | 211  | 701  | 13073  | 13563  |
| UN09434 | Rsa1.0_00813.1 | 1370 | 63202  | 1.00E-167 | 326  | 335  | 97 -  | 1040 | 1370 | 10828  | 11162  |
| UN09435 | Rsa1.0_27069.1 | 430  | 867    | 0         | 367  | 380  | 96 +  | 56   | 430  | 31     | 404    |
| UN09436 | Rsa1.0_16574.1 | 798  | 2106   | 0         | 372  | 378  | 98 +  | 323  | 700  | 1729   | 2106   |

|         |                |      |        |           |      |      |       |      |      |        |        |
|---------|----------------|------|--------|-----------|------|------|-------|------|------|--------|--------|
| UN09437 | Rsa1.0_04004.1 | 491  | 19594  | 0         | 466  | 466  | 100 - | 3    | 468  | 15169  | 15634  |
| UN09438 | Rsa1.0_02648.1 | 745  | 29073  | 1.00E-175 | 368  | 390  | 94 +  | 360  | 745  | 12514  | 12887  |
| UN09439 | Rsa1.0_00014.1 | 719  | 348985 | 0         | 564  | 571  | 98 -  | 149  | 719  | 241634 | 242204 |
| UN09440 | Rsa1.0_02113.1 | 744  | 34890  | 0         | 734  | 757  | 96 -  | 2    | 744  | 22769  | 23525  |
| UN09441 | Rsa1.0_04411.1 | 1300 | 142979 | 0         | 392  | 414  | 94 +  | 260  | 661  | 127303 | 127716 |
| UN09442 | Rsa1.0_02768.1 | 1723 | 28110  | 0         | 387  | 388  | 99 +  | 1332 | 1719 | 26304  | 26691  |
| UN09443 | Rsa1.0_00228.1 | 546  | 105511 | 0         | 477  | 482  | 98 -  | 65   | 546  | 13065  | 13545  |
| UN09444 | Rsa1.0_01235.1 | 605  | 50180  | 0         | 573  | 603  | 95 -  | 3    | 605  | 21049  | 21646  |
| UN09445 | Rsa1.0_00761.1 | 2377 | 65133  | 0         | 894  | 922  | 96 -  | 1454 | 2365 | 23616  | 24535  |
| UN09446 | Rsa1.0_01453.1 | 894  | 45449  | 0         | 803  | 840  | 95 +  | 43   | 880  | 28437  | 29273  |
| UN09447 | Rsa1.0_01630.1 | 916  | 41913  | 1.00E-155 | 281  | 282  | 99 -  | 633  | 914  | 923    | 1204   |
| UN09448 | Rsa1.0_00047.1 | 1075 | 168582 | 0         | 551  | 552  | 99 +  | 1    | 551  | 33970  | 34521  |
| UN09449 | Rsa1.0_00145.1 | 1491 | 261008 | 0         | 507  | 539  | 94 +  | 390  | 913  | 83077  | 83607  |
| UN09450 | Rsa1.0_18611.1 | 1297 | 1565   | 0         | 403  | 412  | 97 -  | 1    | 412  | 957    | 1368   |
| UN09451 | Rsa1.0_01896.1 | 800  | 37512  | 0         | 581  | 610  | 95 +  | 191  | 800  | 19518  | 20127  |
| UN09452 | Rsa1.0_00083.1 | 1069 | 442773 | 0         | 951  | 954  | 99 +  | 5    | 958  | 359476 | 360429 |
| UN09453 | Rsa1.0_00275.1 | 998  | 210104 | 1.00E-114 | 210  | 210  | 100 + | 79   | 288  | 164586 | 164795 |
| UN09454 | Rsa1.0_00971.1 | 1216 | 57973  | 0         | 895  | 899  | 99 -  | 316  | 1214 | 47270  | 48167  |
| UN09455 | Rsa1.0_00760.1 | 959  | 65267  | 6.00E-86  | 247  | 277  | 89 -  | 677  | 953  | 51860  | 52116  |
| UN09456 | Rsa1.0_19592.1 | 1332 | 1410   | 0         | 482  | 488  | 98 -  | 753  | 1240 | 1      | 488    |
| UN09457 | Rsa1.0_00018.1 | 620  | 410899 | 0         | 500  | 521  | 95 +  | 97   | 608  | 140603 | 141116 |
| UN09458 | Rsa1.0_05443.1 | 720  | 13737  | 1.00E-113 | 221  | 225  | 98 +  | 496  | 720  | 4067   | 4288   |
| UN09459 | Rsa1.0_01985.1 | 1396 | 36491  | 0         | 1269 | 1282 | 98 +  | 115  | 1396 | 25011  | 26292  |
| UN09460 | Rsa1.0_00323.1 | 1068 | 159650 | 0         | 570  | 577  | 98 +  | 3    | 579  | 138237 | 138813 |
| UN09461 | Rsa1.0_02123.1 | 496  | 149053 | 0         | 493  | 493  | 100 - | 4    | 496  | 1171   | 1663   |
| UN09462 | Rsa1.0_02898.1 | 1465 | 26958  | 0         | 384  | 387  | 99 +  | 100  | 486  | 4910   | 5296   |
| UN09463 | Rsa1.0_00245.1 | 847  | 103569 | 0         | 454  | 475  | 95 +  | 1    | 474  | 55038  | 55503  |
| UN09464 | Rsa1.0_01245.1 | 973  | 149868 | 0         | 641  | 647  | 99 +  | 328  | 973  | 45960  | 46606  |
| UN09465 | Rsa1.0_02275.1 | 1040 | 33107  | 0         | 496  | 505  | 98 +  | 539  | 1040 | 30103  | 30606  |
| UN09466 | Rsa1.0_00796.1 | 1805 | 63997  | 0         | 335  | 335  | 100 + | 1    | 335  | 53537  | 53871  |
| UN09467 | Rsa1.0_01389.1 | 909  | 46716  | 0         | 382  | 395  | 96 +  | 3    | 397  | 9775   | 10165  |
| UN09468 | Rsa1.0_01340.1 | 1242 | 47805  | 0         | 347  | 351  | 98 -  | 892  | 1242 | 12797  | 13147  |
| UN09469 | Rsa1.0_02855.1 | 890  | 27271  | 0         | 559  | 572  | 97 -  | 2    | 573  | 10684  | 11254  |
| UN09470 | Rsa1.0_00002.1 | 1418 | 601661 | 0         | 330  | 330  | 100 + | 3    | 332  | 114970 | 115299 |
| UN09471 | #              | #    | #      | #         | #    | #    | #     | #    | #    | #      | #      |
| UN09472 | Rsa1.0_00100.1 | 2112 | 249232 | 1.00E-106 | 216  | 220  | 98 +  | 378  | 596  | 115618 | 115836 |
| UN09473 | Rsa1.0_03191.1 | 979  | 145762 | 0         | 357  | 359  | 99 +  | 621  | 979  | 16325  | 16683  |
| UN09474 | Rsa1.0_04110.1 | 764  | 18998  | 1.00E-128 | 232  | 232  | 100 - | 1    | 232  | 6562   | 6793   |
| UN09475 | Rsa1.0_00335.1 | 1499 | 94371  | 3.00E-73  | 175  | 185  | 94 -  | 1268 | 1452 | 35199  | 35382  |

|         |                |      |        |           |      |      |       |      |      |        |        |
|---------|----------------|------|--------|-----------|------|------|-------|------|------|--------|--------|
| UN09476 | Rsa1.0.01196.1 | 872  | 51097  | 1.00E-171 | 352  | 370  | 95 -  | 501  | 870  | 32479  | 32837  |
| UN09477 | Rsa1.0.00272.1 | 1070 | 447836 | 0         | 593  | 625  | 94 +  | 444  | 1068 | 78070  | 78673  |
| UN09478 | Rsa1.0.01295.1 | 999  | 49040  | 0         | 398  | 405  | 98 -  | 595  | 999  | 40213  | 40616  |
| UN09479 | Rsa1.0.00088.1 | 767  | 141341 | 1.00E-114 | 221  | 225  | 98 +  | 354  | 578  | 19396  | 19620  |
| UN09480 | Rsa1.0.02139.1 | 812  | 34686  | 1.00E-132 | 337  | 364  | 92 -  | 448  | 805  | 5551   | 5912   |
| UN09481 | Rsa1.0.00017.1 | 422  | 752458 | 1.00E-127 | 267  | 277  | 96 -  | 11   | 287  | 539206 | 539479 |
| UN09482 | Rsa1.0.00438.1 | 605  | 84861  | 1.00E-156 | 285  | 287  | 99 -  | 36   | 322  | 2602   | 2888   |
| UN09483 | Rsa1.0.01387.1 | 950  | 46745  | 1.00E-145 | 262  | 262  | 100 + | 1    | 262  | 31059  | 31320  |
| UN09484 | Rsa1.0.04886.1 | 1113 | 15597  | 0         | 669  | 674  | 99 +  | 439  | 1112 | 2209   | 2882   |
| UN09485 | Rsa1.0.00386.1 | 1847 | 89134  | 1.00E-171 | 350  | 365  | 95 +  | 633  | 997  | 42823  | 43187  |
| UN09486 | Rsa1.0.00713.1 | 1085 | 158017 | 0         | 1078 | 1083 | 99 +  | 1    | 1083 | 38893  | 39974  |
| UN09487 | Rsa1.0.02872.1 | 1105 | 27080  | 0         | 499  | 519  | 96 -  | 568  | 1080 | 11232  | 11749  |
| UN09488 | Rsa1.0.00114.1 | 936  | 131330 | 1.00E-140 | 289  | 301  | 96 +  | 452  | 752  | 117617 | 117917 |
| UN09489 | Rsa1.0.08988.1 | 1488 | 6732   | 0         | 597  | 649  | 91 -  | 856  | 1486 | 612    | 1243   |
| UN09490 | Rsa1.0.02018.1 | 657  | 35994  | 0         | 645  | 646  | 99 +  | 4    | 649  | 4756   | 5401   |
| UN09491 | Rsa1.0.00354.1 | 834  | 232005 | 1.00E-114 | 258  | 272  | 94 +  | 565  | 833  | 170578 | 170849 |
| UN09492 | Rsa1.0.01373.1 | 660  | 47052  | 0         | 580  | 589  | 98 +  | 1    | 589  | 31451  | 32039  |
| UN09493 | Rsa1.0.00789.1 | 1090 | 64233  | 1.00E-132 | 246  | 248  | 99 -  | 3    | 250  | 44999  | 45246  |
| UN09494 | Rsa1.0.17016.1 | 1007 | 1952   | 1.00E-171 | 374  | 395  | 94 -  | 596  | 987  | 220    | 613    |
| UN09495 | Rsa1.0.00027.1 | 970  | 283362 | 0         | 448  | 479  | 93 +  | 3    | 480  | 56539  | 57005  |
| UN09496 | Rsa1.0.00485.1 | 1274 | 80937  | 0         | 518  | 533  | 97 -  | 605  | 1137 | 30531  | 31063  |
| UN09497 | Rsa1.0.08165.1 | 840  | 7806   | 1.00E-101 | 288  | 317  | 90 -  | 2    | 309  | 2878   | 3192   |
| UN09498 | Rsa1.0.02152.1 | 729  | 34558  | 0         | 594  | 625  | 95 -  | 117  | 729  | 26446  | 27067  |
| UN09499 | Rsa1.0.21881.1 | 945  | 1167   | 1.00E-143 | 276  | 281  | 98 -  | 2    | 280  | 13     | 293    |
| UN09500 | Rsa1.0.00025.1 | 695  | 277312 | 0         | 679  | 683  | 99 +  | 14   | 695  | 39139  | 39821  |
| UN09501 | Rsa1.0.00035.1 | 496  | 176449 | 1.00E-150 | 335  | 353  | 94 -  | 1    | 352  | 156806 | 157155 |
| UN09502 | Rsa1.0.00276.1 | 754  | 100160 | 0         | 745  | 753  | 98 -  | 3    | 754  | 89077  | 89829  |
| UN09503 | Rsa1.0.00089.1 | 1039 | 406142 | 0         | 333  | 335  | 99 +  | 3    | 337  | 162002 | 162336 |
| UN09504 | Rsa1.0.01199.1 | 819  | 163576 | 1.00E-170 | 303  | 303  | 100 - | 517  | 819  | 124415 | 124717 |
| UN09505 | Rsa1.0.02253.1 | 1343 | 33356  | 1.00E-131 | 251  | 254  | 98 -  | 1091 | 1343 | 23321  | 23574  |
| UN09506 | Rsa1.0.45348.1 | 311  | 497    | 1.00E-110 | 240  | 253  | 94 -  | 59   | 311  | 237    | 489    |
| UN09507 | Rsa1.0.00354.1 | 822  | 232005 | 1.00E-114 | 262  | 279  | 93 +  | 546  | 822  | 170578 | 170849 |
| UN09508 | Rsa1.0.02923.1 | 832  | 26736  | 1.00E-127 | 329  | 356  | 92 +  | 56   | 407  | 15750  | 16101  |
| UN09509 | Rsa1.0.03408.1 | 1832 | 23154  | 1.00E-167 | 444  | 494  | 89 -  | 70   | 543  | 3835   | 4328   |
| UN09510 | Rsa1.0.02449.1 | 1076 | 31292  | 1.00E-84  | 194  | 200  | 97 -  | 879  | 1075 | 13261  | 13459  |
| UN09511 | Rsa1.0.01774.1 | 749  | 39528  | 1.00E-168 | 316  | 321  | 98 +  | 3    | 323  | 23015  | 23331  |
| UN09512 | Rsa1.0.00009.1 | 570  | 232558 | 0         | 431  | 437  | 98 -  | 135  | 570  | 184896 | 185329 |
| UN09513 | Rsa1.0.00329.1 | 1347 | 222544 | 0         | 652  | 690  | 94 -  | 677  | 1347 | 193045 | 193732 |
| UN09514 | Rsa1.0.01296.1 | 788  | 49035  | 1.00E-161 | 371  | 398  | 93 -  | 403  | 788  | 35557  | 35953  |

|         |                |      |        |           |      |      |       |      |      |        |        |
|---------|----------------|------|--------|-----------|------|------|-------|------|------|--------|--------|
| UN09515 | Rsa1.0_00098.1 | 849  | 349239 | 0         | 399  | 419  | 95 +  | 23   | 434  | 228880 | 229298 |
| UN09516 | Rsa1.0_00082.1 | 915  | 237584 | 0         | 325  | 325  | 100 + | 591  | 915  | 38549  | 38873  |
| UN09517 | Rsa1.0_02349.1 | 1103 | 32312  | 0         | 644  | 668  | 96 +  | 1    | 668  | 14862  | 15510  |
| UN09518 | Rsa1.0_15363.1 | 454  | 2655   | 0         | 393  | 405  | 97 +  | 53   | 454  | 1072   | 1476   |
| UN09519 | Rsa1.0_06898.1 | 1134 | 10191  | 0         | 332  | 332  | 100 + | 1    | 332  | 3152   | 3483   |
| UN09520 | Rsa1.0_01007.1 | 778  | 56933  | 0         | 732  | 765  | 95 -  | 20   | 777  | 6796   | 7545   |
| UN09521 | Rsa1.0_00028.1 | 1878 | 293984 | 0         | 358  | 358  | 100 + | 296  | 653  | 20828  | 21185  |
| UN09522 | Rsa1.0_07345.1 | 925  | 9526   | 0         | 914  | 922  | 99 -  | 3    | 924  | 6239   | 7160   |
| UN09523 | Rsa1.0_00015.1 | 827  | 561803 | 0         | 611  | 645  | 94 -  | 3    | 641  | 185641 | 186284 |
| UN09524 | Rsa1.0_05812.1 | 1047 | 12571  | 0         | 962  | 995  | 96 +  | 3    | 997  | 2554   | 3548   |
| UN09525 | Rsa1.0_01022.1 | 2061 | 56606  | 0         | 484  | 494  | 97 +  | 893  | 1386 | 28582  | 29075  |
| UN09526 | Rsa1.0_00200.1 | 709  | 162016 | 0         | 497  | 498  | 99 -  | 6    | 502  | 119257 | 119754 |
| UN09527 | Rsa1.0_00065.1 | 1490 | 454616 | 0         | 441  | 454  | 97 +  | 1038 | 1488 | 213563 | 214016 |
| UN09528 | Rsa1.0_02252.1 | 1131 | 33375  | 0         | 495  | 508  | 97 -  | 523  | 1030 | 27492  | 27999  |
| UN09529 | Rsa1.0_06513.1 | 1134 | 10869  | 1.00E-103 | 191  | 191  | 100 - | 868  | 1058 | 1      | 191    |
| UN09530 | Rsa1.0_06803.1 | 1190 | 10330  | 1.00E-121 | 269  | 278  | 96 +  | 22   | 295  | 7266   | 7542   |
| UN09531 | Rsa1.0_00419.1 | 771  | 86562  | 1.00E-165 | 302  | 303  | 99 +  | 470  | 771  | 6011   | 6313   |
| UN09532 | Rsa1.0_00410.1 | 927  | 86957  | 1.00E-167 | 323  | 330  | 97 -  | 599  | 927  | 39714  | 40043  |
| UN09533 | Rsa1.0_00007.1 | 841  | 239325 | 1.00E-125 | 250  | 256  | 97 -  | 580  | 834  | 30263  | 30518  |
| UN09534 | Rsa1.0_00221.1 | 1101 | 106972 | 0         | 531  | 546  | 97 +  | 63   | 608  | 37064  | 37609  |
| UN09535 | Rsa1.0_01660.1 | 1293 | 41400  | 1.00E-144 | 438  | 492  | 89 +  | 804  | 1293 | 32286  | 32760  |
| UN09536 | Rsa1.0_01815.1 | 2439 | 38897  | 3.00E-37  | 81   | 81   | 100 - | 381  | 461  | 23439  | 23519  |
| UN09537 | Rsa1.0_02494.1 | 1617 | 132923 | 0         | 874  | 918  | 95 +  | 446  | 1363 | 4498   | 5410   |
| UN09538 | Rsa1.0_00851.1 | 1318 | 62181  | 1.00E-69  | 173  | 182  | 95 -  | 1    | 181  | 29745  | 29923  |
| UN09539 | Rsa1.0_00153.1 | 1330 | 192931 | 0         | 1064 | 1072 | 99 +  | 1    | 1072 | 13929  | 15000  |
| UN09540 | Rsa1.0_00201.1 | 1270 | 232851 | 0         | 1181 | 1237 | 95 -  | 1    | 1229 | 208685 | 209911 |
| UN09541 | Rsa1.0_01336.1 | 922  | 47853  | 0         | 738  | 747  | 98 -  | 1    | 747  | 39106  | 39852  |
| UN09542 | Rsa1.0_03853.1 | 812  | 20447  | 0         | 348  | 348  | 100 - | 11   | 358  | 14042  | 14389  |
| UN09543 | Rsa1.0_23843.1 | 1313 | 1022   | 0         | 693  | 719  | 96 +  | 561  | 1269 | 1      | 717    |
| UN09544 | Rsa1.0_07439.1 | 3141 | 9392   | 1.00E-148 | 268  | 268  | 100 + | 329  | 596  | 4581   | 4848   |
| UN09545 | Rsa1.0_01403.1 | 782  | 46453  | 1.00E-132 | 273  | 284  | 96 -  | 398  | 681  | 32717  | 33000  |
| UN09546 | Rsa1.0_00434.1 | 826  | 85171  | 0         | 425  | 434  | 97 +  | 394  | 826  | 69751  | 70184  |
| UN09547 | Rsa1.0_00900.1 | 1223 | 60367  | 0         | 551  | 569  | 96 -  | 653  | 1220 | 17378  | 17936  |
| UN09548 | Rsa1.0_00727.1 | 663  | 66724  | 1.00E-107 | 201  | 202  | 99 -  | 180  | 381  | 15710  | 15911  |
| UN09549 | Rsa1.0_00351.1 | 747  | 413096 | 0         | 414  | 434  | 95 +  | 1    | 428  | 244397 | 244827 |
| UN09550 | Rsa1.0_00107.1 | 1007 | 431659 | 0         | 573  | 577  | 99 -  | 1    | 575  | 196976 | 197552 |
| UN09551 | Rsa1.0_00123.1 | 872  | 325650 | 1.00E-107 | 294  | 326  | 90 +  | 415  | 740  | 305227 | 305552 |
| UN09552 | Rsa1.0_33464.1 | 975  | 678    | 1.00E-148 | 278  | 282  | 98 -  | 208  | 489  | 154    | 435    |
| UN09553 | Rsa1.0_01448.1 | 943  | 45645  | 5.00E-71  | 154  | 159  | 96 -  | 22   | 180  | 41275  | 41430  |

|         |                |      |        |           |      |      |       |      |      |        |        |
|---------|----------------|------|--------|-----------|------|------|-------|------|------|--------|--------|
| UN09554 | Rsa1.0.01007.1 | 955  | 56933  | 0         | 692  | 721  | 95 -  | 224  | 943  | 48054  | 48774  |
| UN09555 | Rsa1.0.06541.1 | 752  | 10806  | 1.00E-110 | 315  | 345  | 91 -  | 385  | 714  | 10030  | 10372  |
| UN09556 | Rsa1.0.36204.1 | 914  | 623    | 1.00E-110 | 209  | 211  | 99 -  | 418  | 628  | 154    | 364    |
| UN09557 | Rsa1.0.00247.1 | 1068 | 103408 | 0         | 388  | 402  | 96 -  | 3    | 396  | 66969  | 67369  |
| UN09558 | Rsa1.0.00017.1 | 1399 | 752458 | 0         | 1391 | 1395 | 99 +  | 2    | 1396 | 285204 | 286594 |
| UN09559 | Rsa1.0.05141.1 | 489  | 14710  | 0         | 347  | 348  | 99 -  | 143  | 489  | 5485   | 5832   |
| UN09560 | Rsa1.0.02105.1 | 1012 | 156953 | 1.00E-177 | 354  | 367  | 96 -  | 242  | 608  | 149700 | 150066 |
| UN09561 | Rsa1.0.02248.1 | 847  | 33414  | 0         | 361  | 361  | 100 + | 1    | 361  | 26046  | 26406  |
| UN09562 | Rsa1.0.00467.1 | 1081 | 156542 | 0         | 549  | 562  | 97 -  | 6    | 564  | 77638  | 78199  |
| UN09563 | Rsa1.0.02966.1 | 996  | 135126 | 0         | 515  | 532  | 96 -  | 2    | 528  | 17972  | 18502  |
| UN09564 | Rsa1.0.00226.1 | 1293 | 105884 | 1.00E-101 | 188  | 188  | 100 - | 1106 | 1293 | 79137  | 79324  |
| UN09565 | Rsa1.0.02248.1 | 832  | 33414  | 1.00E-163 | 342  | 360  | 95 +  | 1    | 351  | 26047  | 26406  |
| UN09566 | Rsa1.0.03911.1 | 1510 | 20133  | 0         | 584  | 584  | 100 + | 927  | 1510 | 16851  | 17434  |
| UN09567 | Rsa1.0.02625.1 | 1098 | 139104 | 0         | 1050 | 1051 | 99 -  | 43   | 1093 | 24665  | 25715  |
| UN09568 | Rsa1.0.00243.1 | 757  | 103651 | 1.00E-175 | 343  | 352  | 97 -  | 1    | 352  | 23261  | 23606  |
| UN09569 | Rsa1.0.00977.1 | 1301 | 198001 | 0         | 1211 | 1309 | 92 +  | 3    | 1285 | 47149  | 48442  |
| UN09570 | Rsa1.0.04649.1 | 1195 | 16538  | 0         | 418  | 420  | 99 -  | 776  | 1195 | 10582  | 11001  |
| UN09571 | #              | #    | #      | #         | #    | #    | #     | #    | #    | #      | #      |
| UN09572 | Rsa1.0.02922.1 | 925  | 26753  | 1.00E-154 | 357  | 383  | 93 +  | 1    | 381  | 12322  | 12689  |
| UN09573 | Rsa1.0.00422.1 | 1348 | 86144  | 0         | 569  | 610  | 93 -  | 331  | 926  | 83575  | 84184  |
| UN09574 | Rsa1.0.02722.1 | 1094 | 28417  | 0         | 403  | 422  | 95 +  | 1    | 416  | 266    | 687    |
| UN09575 | Rsa1.0.01881.1 | 1383 | 37721  | 0         | 1353 | 1381 | 97 -  | 3    | 1383 | 7714   | 9090   |
| UN09576 | Rsa1.0.00152.1 | 1004 | 257730 | 0         | 568  | 572  | 99 -  | 1    | 572  | 256945 | 257513 |
| UN09577 | Rsa1.0.00020.1 | 1475 | 283099 | 0         | 427  | 430  | 99 +  | 3    | 432  | 89927  | 90353  |
| UN09578 | Rsa1.0.00359.1 | 1016 | 91256  | 0         | 435  | 470  | 92 -  | 309  | 778  | 47430  | 47899  |
| UN09579 | Rsa1.0.00313.1 | 738  | 96745  | 0         | 321  | 321  | 100 + | 414  | 734  | 79688  | 80008  |
| UN09580 | Rsa1.0.00092.1 | 1307 | 659932 | 0         | 350  | 358  | 97 -  | 956  | 1306 | 634946 | 635303 |
| UN09581 | Rsa1.0.02671.1 | 1177 | 28887  | 1.00E-151 | 322  | 339  | 94 +  | 5    | 343  | 9126   | 9449   |
| UN09582 | Rsa1.0.03231.1 | 1428 | 24456  | 0         | 428  | 428  | 100 - | 3    | 430  | 23696  | 24123  |
| UN09583 | Rsa1.0.07894.1 | 1437 | 8347   | 0         | 861  | 879  | 97 +  | 1    | 878  | 5528   | 6406   |
| UN09584 | Rsa1.0.09284.1 | 764  | 6496   | 1.00E-132 | 246  | 248  | 99 +  | 517  | 764  | 589    | 836    |
| UN09585 | Rsa1.0.02065.1 | 1101 | 35467  | 0         | 410  | 413  | 99 +  | 691  | 1101 | 15761  | 16173  |
| UN09586 | Rsa1.0.00179.1 | 1078 | 393324 | 1.00E-145 | 357  | 389  | 91 -  | 696  | 1064 | 51785  | 52173  |
| UN09587 | Rsa1.0.03241.1 | 1067 | 24423  | 0         | 484  | 489  | 98 +  | 579  | 1067 | 14637  | 15125  |
| UN09588 | Rsa1.0.00307.1 | 1798 | 199003 | 0         | 831  | 868  | 95 +  | 1    | 867  | 170975 | 171841 |
| UN09589 | Rsa1.0.02658.1 | 1282 | 28978  | 0         | 358  | 364  | 98 -  | 907  | 1268 | 17720  | 18083  |
| UN09590 | Rsa1.0.00194.1 | 1061 | 110851 | 1.00E-62  | 168  | 182  | 92 -  | 880  | 1061 | 100172 | 100351 |
| UN09591 | Rsa1.0.24098.1 | 940  | 1007   | 1.00E-172 | 340  | 351  | 96 -  | 589  | 939  | 597    | 947    |
| UN09592 | Rsa1.0.03555.1 | 1620 | 22129  | 0         | 658  | 674  | 97 +  | 164  | 837  | 16383  | 17056  |



|         |                |      |        |           |      |      |       |     |      |        |        |
|---------|----------------|------|--------|-----------|------|------|-------|-----|------|--------|--------|
| UN09593 | Rsa1.0.00078.1 | 1762 | 175053 | 0         | 1454 | 1512 | 96 -  | 207 | 1715 | 78925  | 80430  |
| UN09594 | Rsa1.0.00473.1 | 1339 | 212204 | 0         | 774  | 789  | 98 -  | 1   | 789  | 76768  | 77555  |
| UN09595 | Rsa1.0.01166.1 | 1215 | 51877  | 0         | 599  | 618  | 96 +  | 3   | 620  | 36965  | 37579  |
| UN09596 | Rsa1.0.00529.1 | 951  | 77487  | 1.00E-151 | 296  | 304  | 97 +  | 652 | 951  | 23092  | 23395  |
| UN09597 | Rsa1.0.00379.1 | 808  | 89865  | 1.00E-150 | 382  | 423  | 90 -  | 3   | 416  | 52174  | 52575  |
| UN09598 | Rsa1.0.00844.1 | 1289 | 62403  | 0         | 571  | 580  | 98 +  | 711 | 1289 | 19070  | 19646  |
| UN09599 | Rsa1.0.03887.1 | 1130 | 20247  | 0         | 1004 | 1037 | 96 -  | 102 | 1130 | 17980  | 19014  |
| UN09600 | Rsa1.0.00097.1 | 889  | 138858 | 0         | 430  | 446  | 96 -  | 1   | 441  | 42576  | 43021  |
| UN09601 | Rsa1.0.08668.1 | 1529 | 7059   | 1.00E-114 | 212  | 213  | 99 +  | 472 | 684  | 5662   | 5874   |
| UN09602 | Rsa1.0.03552.1 | 1527 | 22151  | 0         | 511  | 519  | 98 -  | 1   | 519  | 15663  | 16181  |
| UN09603 | Rsa1.0.00866.1 | 1520 | 61676  | 0         | 626  | 662  | 94 -  | 1   | 649  | 30853  | 31511  |
| UN09604 | Rsa1.0.00349.1 | 1149 | 92621  | 0         | 1047 | 1086 | 96 +  | 66  | 1149 | 691    | 1773   |
| UN09605 | Rsa1.0.01668.1 | 903  | 41299  | 1.00E-108 | 266  | 288  | 92 -  | 125 | 412  | 40402  | 40689  |
| UN09606 | Rsa1.0.01502.1 | 1112 | 44519  | 1.00E-149 | 330  | 349  | 94 +  | 765 | 1111 | 39463  | 39808  |
| UN09607 | Rsa1.0.01077.1 | 1136 | 54772  | 0         | 583  | 606  | 96 -  | 534 | 1136 | 10739  | 11340  |
| UN09608 | Rsa1.0.00642.1 | 1090 | 201230 | 0         | 615  | 635  | 96 -  | 1   | 635  | 180069 | 180702 |
| UN09609 | Rsa1.0.01034.1 | 660  | 56046  | 0         | 356  | 367  | 97 -  | 60  | 426  | 35993  | 36359  |
| UN09610 | Rsa1.0.00501.1 | 1045 | 79545  | 1.00E-173 | 315  | 317  | 99 +  | 1   | 317  | 73172  | 73488  |
| UN09611 | Rsa1.0.01541.1 | 841  | 43682  | 0         | 413  | 436  | 94 -  | 8   | 442  | 1663   | 2095   |
| UN09612 | Rsa1.0.18172.1 | 1375 | 1653   | 0         | 382  | 385  | 99 -  | 993 | 1375 | 719    | 1103   |
| UN09613 | Rsa1.0.03150.1 | 1460 | 24980  | 0         | 421  | 421  | 100 - | 1   | 421  | 23709  | 24129  |
| UN09614 | Rsa1.0.02362.1 | 1223 | 32190  | 0         | 468  | 493  | 94 -  | 1   | 475  | 23950  | 24440  |
| UN09615 | Rsa1.0.00198.1 | 1245 | 222963 | 0         | 398  | 417  | 95 -  | 837 | 1245 | 37691  | 38100  |
| UN09616 | Rsa1.0.11462.1 | 1286 | 5500   | 0         | 1094 | 1153 | 94 -  | 160 | 1284 | 2183   | 3334   |
| UN09617 | Rsa1.0.00056.1 | 1409 | 332604 | 0         | 760  | 762  | 99 +  | 646 | 1407 | 24496  | 25257  |
| UN09618 | Rsa1.0.01492.1 | 952  | 44704  | 2.00E-91  | 236  | 258  | 91 -  | 14  | 265  | 6008   | 6265   |
| UN09619 | Rsa1.0.00896.1 | 901  | 60509  | 0         | 688  | 709  | 97 -  | 2   | 710  | 29277  | 29984  |
| UN09620 | Rsa1.0.00761.1 | 951  | 65133  | 1.00E-167 | 335  | 346  | 96 +  | 602 | 947  | 62157  | 62495  |
| UN09621 | Rsa1.0.02870.1 | 1250 | 27102  | 1.00E-132 | 255  | 259  | 98 +  | 1   | 258  | 12901  | 13159  |
| UN09622 | Rsa1.0.05106.1 | 1839 | 14828  | 0         | 649  | 653  | 99 -  | 685 | 1337 | 9829   | 10481  |
| UN09623 | Rsa1.0.00642.1 | 1027 | 201230 | 0         | 411  | 424  | 96 +  | 3   | 424  | 181249 | 181667 |
| UN09624 | Rsa1.0.02428.1 | 1840 | 31542  | 0         | 697  | 697  | 100 - | 406 | 1102 | 28430  | 29126  |
| UN09625 | Rsa1.0.08023.1 | 976  | 8071   | 0         | 531  | 562  | 94 -  | 422 | 976  | 4838   | 5399   |
| UN09626 | Rsa1.0.00710.1 | 743  | 67325  | 1.00E-153 | 393  | 430  | 91 +  | 320 | 743  | 28163  | 28591  |
| UN09627 | Rsa1.0.03401.1 | 1261 | 23191  | 0         | 410  | 412  | 99 -  | 851 | 1261 | 4660   | 5070   |
| UN09628 | Rsa1.0.00092.1 | 1357 | 659932 | 0         | 468  | 504  | 92 +  | 650 | 1141 | 494917 | 495420 |
| UN09629 | Rsa1.0.00008.1 | 978  | 358124 | 0         | 624  | 630  | 99 -  | 350 | 978  | 50872  | 51499  |
| UN09630 | Rsa1.0.00007.1 | 1265 | 239325 | 0         | 542  | 572  | 94 +  | 696 | 1265 | 58424  | 58990  |
| UN09631 | Rsa1.0.00253.1 | 1871 | 231292 | 0         | 536  | 587  | 91 +  | 811 | 1381 | 86630  | 87195  |

|         |                |      |        |           |      |      |       |      |      |        |        |
|---------|----------------|------|--------|-----------|------|------|-------|------|------|--------|--------|
| UN09632 | Rsa1.0.02125.1 | 825  | 34775  | 9.00E-94  | 182  | 183  | 99 +  | 574  | 755  | 24927  | 25109  |
| UN09633 | Rsa1.0.00253.1 | 1286 | 231292 | 1.00E-103 | 192  | 192  | 100 + | 405  | 596  | 90275  | 90466  |
| UN09634 | Rsa1.0.04458.1 | 1007 | 17255  | 0         | 556  | 566  | 98 -  | 1    | 566  | 3967   | 4532   |
| UN09635 | Rsa1.0.02605.1 | 753  | 29637  | 1.00E-128 | 239  | 241  | 99 -  | 2    | 242  | 13844  | 14084  |
| UN09636 | Rsa1.0.00017.1 | 1140 | 752458 | 0         | 544  | 548  | 99 -  | 593  | 1139 | 293263 | 293810 |
| UN09637 | Rsa1.0.03326.1 | 785  | 23710  | 0         | 537  | 555  | 96 +  | 232  | 785  | 17095  | 17641  |
| UN09638 | Rsa1.0.02943.1 | 1349 | 153598 | 0         | 639  | 647  | 98 +  | 1    | 646  | 128867 | 129513 |
| UN09639 | Rsa1.0.00495.1 | 1083 | 79934  | 0         | 560  | 589  | 95 -  | 2    | 576  | 11988  | 12570  |
| UN09640 | Rsa1.0.02295.1 | 1033 | 149884 | 1.00E-127 | 290  | 310  | 93 -  | 1    | 303  | 12460  | 12765  |
| UN09641 | Rsa1.0.00425.1 | 1356 | 147080 | 0         | 1208 | 1241 | 97 +  | 114  | 1354 | 95740  | 96980  |
| UN09642 | Rsa1.0.00646.1 | 1274 | 70473  | 1.00E-163 | 377  | 407  | 92 +  | 3    | 406  | 22444  | 22838  |
| UN09643 | Rsa1.0.00025.1 | 1518 | 277312 | 0         | 797  | 810  | 98 -  | 1    | 810  | 226330 | 227135 |
| UN09644 | Rsa1.0.02505.1 | 1084 | 30703  | 1.00E-145 | 270  | 273  | 98 +  | 113  | 385  | 10093  | 10365  |
| UN09645 | Rsa1.0.05282.1 | 1615 | 14270  | 1.00E-172 | 334  | 343  | 97 +  | 1    | 343  | 4132   | 4474   |
| UN09646 | Rsa1.0.08575.1 | 1549 | 7180   | 0         | 458  | 458  | 100 + | 249  | 706  | 5922   | 6379   |
| UN09647 | Rsa1.0.00032.1 | 972  | 306326 | 0         | 940  | 974  | 96 -  | 1    | 970  | 144545 | 145509 |
| UN09648 | Rsa1.0.00336.1 | 1173 | 445051 | 1.00E-152 | 302  | 309  | 97 -  | 1    | 307  | 218905 | 219212 |
| UN09649 | Rsa1.0.00925.1 | 995  | 59481  | 0         | 566  | 566  | 100 + | 430  | 995  | 13819  | 14384  |
| UN09650 | Rsa1.0.03608.1 | 1357 | 21804  | 0         | 525  | 556  | 94 -  | 813  | 1356 | 924    | 1478   |
| UN09651 | Rsa1.0.00522.1 | 1158 | 78103  | 1.00E-105 | 209  | 214  | 97 -  | 592  | 805  | 48991  | 49204  |
| UN09652 | Rsa1.0.03344.1 | 1031 | 23593  | 1.00E-120 | 292  | 315  | 92 +  | 717  | 1031 | 12303  | 12615  |
| UN09653 | Rsa1.0.01588.1 | 1168 | 42724  | 0         | 462  | 466  | 99 -  | 701  | 1166 | 10024  | 10489  |
| UN09654 | Rsa1.0.04474.1 | 885  | 17191  | 0         | 393  | 395  | 99 -  | 490  | 884  | 15117  | 15511  |
| UN09655 | Rsa1.0.01839.1 | 1170 | 38482  | 0         | 1086 | 1117 | 97 -  | 2    | 1118 | 9010   | 10126  |
| UN09656 | Rsa1.0.00214.1 | 1693 | 107508 | 0         | 782  | 797  | 98 +  | 891  | 1687 | 103190 | 103982 |
| UN09657 | Rsa1.0.01151.1 | 769  | 52268  | 1.00E-106 | 199  | 200  | 99 +  | 63   | 262  | 38493  | 38692  |
| UN09658 | Rsa1.0.03955.1 | 842  | 19884  | 0         | 384  | 392  | 97 -  | 449  | 840  | 12308  | 12697  |
| UN09659 | Rsa1.0.14912.1 | 944  | 2970   | 0         | 342  | 344  | 99 +  | 600  | 943  | 1944   | 2287   |
| UN09660 | Rsa1.0.00362.1 | 719  | 299497 | 1.00E-174 | 343  | 352  | 97 +  | 371  | 719  | 228930 | 229281 |
| UN09661 | Rsa1.0.33878.1 | 795  | 669    | 1.00E-128 | 265  | 272  | 97 +  | 423  | 693  | 161    | 430    |
| UN09662 | Rsa1.0.00348.1 | 1411 | 92818  | 0         | 376  | 377  | 99 -  | 10   | 386  | 65410  | 65786  |
| UN09663 | Rsa1.0.01119.1 | 1279 | 53459  | 1.00E-120 | 233  | 236  | 98 +  | 1035 | 1269 | 23849  | 24084  |
| UN09664 | Rsa1.0.00049.1 | 1727 | 167018 | 0         | 1225 | 1246 | 98 +  | 482  | 1726 | 74435  | 75680  |
| UN09665 | Rsa1.0.03506.1 | 1382 | 22416  | 0         | 527  | 548  | 96 -  | 1    | 542  | 8413   | 8952   |
| UN09666 | Rsa1.0.00088.1 | 783  | 141341 | 0         | 767  | 780  | 98 -  | 4    | 783  | 44467  | 45238  |
| UN09667 | Rsa1.0.05792.1 | 757  | 12612  | 1.00E-173 | 336  | 344  | 97 +  | 414  | 757  | 1150   | 1492   |
| UN09668 | Rsa1.0.05415.1 | 523  | 13830  | 0         | 515  | 519  | 99 +  | 4    | 522  | 6191   | 6709   |
| UN09669 | Rsa1.0.04258.1 | 831  | 18254  | 0         | 425  | 439  | 96 -  | 394  | 829  | 2338   | 2776   |
| UN09670 | Rsa1.0.00179.1 | 1094 | 393324 | 1.00E-71  | 255  | 294  | 86 -  | 259  | 552  | 19880  | 20173  |

|         |                |      |        |           |      |      |       |      |      |        |        |
|---------|----------------|------|--------|-----------|------|------|-------|------|------|--------|--------|
| UN09671 | Rsa1.0.02658.1 | 951  | 28978  | 0         | 405  | 407  | 99 +  | 1    | 406  | 5440   | 5846   |
| UN09672 | Rsa1.0.04220.1 | 863  | 18421  | 0         | 510  | 530  | 96 +  | 1    | 528  | 9467   | 9982   |
| UN09673 | Rsa1.0.00107.1 | 2470 | 431659 | 0         | 1498 | 1523 | 98 +  | 640  | 2160 | 13765  | 15287  |
| UN09674 | Rsa1.0.02248.1 | 884  | 33414  | 0         | 355  | 361  | 98 +  | 1    | 361  | 26046  | 26406  |
| UN09675 | Rsa1.0.00315.1 | 1509 | 96426  | 0         | 1286 | 1287 | 99 +  | 155  | 1441 | 89766  | 91052  |
| UN09676 | Rsa1.0.02020.1 | 1105 | 173211 | 0         | 572  | 575  | 99 +  | 1    | 575  | 153343 | 153915 |
| UN09677 | Rsa1.0.00108.1 | 980  | 478491 | 1.00E-120 | 288  | 301  | 95 -  | 3    | 298  | 51602  | 51897  |
| UN09678 | Rsa1.0.01170.1 | 815  | 161131 | 0         | 385  | 394  | 97 +  | 3    | 395  | 128366 | 128759 |
| UN09679 | Rsa1.0.00832.1 | 1819 | 62622  | 0         | 959  | 1047 | 91 -  | 600  | 1646 | 34580  | 35626  |
| UN09680 | Rsa1.0.00042.1 | 1172 | 171507 | 0         | 527  | 550  | 95 -  | 635  | 1171 | 55333  | 55880  |
| UN09681 | Rsa1.0.01868.1 | 984  | 150904 | 1.00E-147 | 288  | 296  | 97 +  | 107  | 402  | 138768 | 139063 |
| UN09682 | Rsa1.0.01341.1 | 2402 | 47764  | 0         | 899  | 901  | 99 +  | 1502 | 2402 | 44618  | 45518  |
| UN09683 | Rsa1.0.00002.1 | 515  | 601661 | 4.00E-64  | 134  | 137  | 97 +  | 15   | 151  | 242456 | 242592 |
| UN09684 | Rsa1.0.00223.1 | 856  | 106231 | 0         | 735  | 746  | 98 -  | 113  | 856  | 11528  | 12273  |
| UN09685 | Rsa1.0.02039.1 | 1190 | 35699  | 0         | 1161 | 1193 | 97 +  | 1    | 1174 | 19033  | 20224  |
| UN09686 | Rsa1.0.38361.1 | 877  | 587    | 0         | 437  | 437  | 100 - | 370  | 806  | 1      | 437    |
| UN09687 | Rsa1.0.00480.1 | 738  | 81325  | 1.00E-159 | 288  | 289  | 99 +  | 3    | 291  | 619    | 907    |
| UN09688 | Rsa1.0.02105.1 | 1059 | 156953 | 0         | 367  | 367  | 100 - | 270  | 636  | 149700 | 150066 |
| UN09689 | Rsa1.0.00816.1 | 811  | 403350 | 0         | 364  | 368  | 98 -  | 428  | 795  | 267878 | 268245 |
| UN09690 | Rsa1.0.00382.1 | 1118 | 251946 | 0         | 499  | 504  | 99 +  | 1    | 503  | 172844 | 173347 |
| UN09691 | Rsa1.0.00741.1 | 1195 | 66117  | 1.00E-164 | 351  | 371  | 94 -  | 832  | 1187 | 52571  | 52938  |
| UN09692 | Rsa1.0.01006.1 | 661  | 163670 | 1.00E-156 | 288  | 291  | 98 -  | 174  | 464  | 138108 | 138398 |
| UN09693 | Rsa1.0.03433.1 | 1116 | 22966  | 0         | 631  | 647  | 97 -  | 3    | 649  | 11809  | 12446  |
| UN09694 | Rsa1.0.07429.1 | 1087 | 9411   | 0         | 505  | 505  | 100 + | 157  | 661  | 7      | 511    |
| UN09695 | Rsa1.0.00003.1 | 2113 | 340054 | 0         | 686  | 706  | 97 +  | 5    | 710  | 8264   | 8966   |
| UN09696 | Rsa1.0.01080.1 | 1177 | 54752  | 0         | 553  | 557  | 99 -  | 610  | 1166 | 7919   | 8475   |
| UN09697 | Rsa1.0.00322.1 | 1740 | 212233 | 0         | 487  | 491  | 99 -  | 1248 | 1738 | 4310   | 4800   |
| UN09698 | Rsa1.0.00577.1 | 1508 | 174827 | 0         | 353  | 353  | 100 - | 1    | 353  | 148897 | 149249 |
| UN09699 | Rsa1.0.00186.1 | 1550 | 112669 | 0         | 1251 | 1259 | 99 +  | 292  | 1550 | 106712 | 107970 |
| UN09700 | Rsa1.0.01036.1 | 540  | 55978  | 1.00E-125 | 255  | 262  | 97 -  | 281  | 540  | 26497  | 26757  |
| UN09701 | Rsa1.0.08848.1 | 455  | 6865   | 1.00E-106 | 195  | 195  | 100 - | 1    | 195  | 1      | 195    |
| UN09702 | Rsa1.0.01845.1 | 967  | 38415  | 1.00E-114 | 216  | 218  | 99 -  | 320  | 537  | 36772  | 36989  |
| UN09703 | Rsa1.0.00425.1 | 816  | 147080 | 0         | 395  | 396  | 99 +  | 421  | 816  | 17416  | 17811  |
| UN09704 | Rsa1.0.00159.1 | 971  | 431686 | 1.00E-173 | 317  | 320  | 99 -  | 222  | 541  | 268820 | 269139 |
| UN09705 | Rsa1.0.02180.1 | 933  | 34176  | 0         | 442  | 460  | 96 -  | 1    | 460  | 27171  | 27626  |
| UN09706 | Rsa1.0.00031.1 | 803  | 179862 | 1.00E-160 | 306  | 313  | 97 +  | 1    | 313  | 129331 | 129637 |
| UN09707 | Rsa1.0.01023.1 | 870  | 56571  | 0         | 853  | 866  | 98 -  | 3    | 868  | 49493  | 50352  |
| UN09708 | Rsa1.0.01875.1 | 659  | 37849  | 1.00E-179 | 342  | 350  | 97 +  | 310  | 659  | 25024  | 25373  |
| UN09709 | Rsa1.0.00056.1 | 1134 | 332604 | 0         | 1130 | 1132 | 99 -  | 2    | 1132 | 73652  | 74783  |

|         |                |      |        |           |      |      |       |      |      |        |        |
|---------|----------------|------|--------|-----------|------|------|-------|------|------|--------|--------|
| UN09710 | Rsa1.0.00121.1 | 670  | 278029 | 1.00E-106 | 297  | 325  | 91 +  | 342  | 662  | 54300  | 54615  |
| UN09711 | Rsa1.0.00451.1 | 1344 | 322533 | 1.00E-171 | 336  | 345  | 97 -  | 998  | 1342 | 283341 | 283684 |
| UN09712 | Rsa1.0.00990.1 | 1148 | 57445  | 0         | 1143 | 1149 | 99 +  | 1    | 1148 | 38652  | 39798  |
| UN09713 | Rsa1.0.00108.1 | 1663 | 478491 | 0         | 879  | 879  | 100 + | 783  | 1661 | 460044 | 460922 |
| UN09714 | Rsa1.0.04254.1 | 698  | 18258  | 1.00E-113 | 258  | 270  | 95 -  | 433  | 698  | 5139   | 5406   |
| UN09715 | Rsa1.0.16553.1 | 418  | 2115   | 2.00E-80  | 161  | 164  | 98 -  | 176  | 339  | 106    | 269    |
| UN09716 | Rsa1.0.11859.1 | 1205 | 5389   | 0         | 573  | 573  | 100 - | 630  | 1202 | 4393   | 4965   |
| UN09717 | Rsa1.0.00044.1 | 810  | 271658 | 1.00E-178 | 316  | 316  | 100 - | 361  | 676  | 13553  | 13868  |
| UN09718 | Rsa1.0.00608.1 | 1052 | 172672 | 0         | 733  | 792  | 92 +  | 244  | 1010 | 3169   | 3956   |
| UN09719 | Rsa1.0.00490.1 | 849  | 186713 | 1.00E-139 | 313  | 331  | 94 -  | 6    | 335  | 153661 | 153985 |
| UN09720 | Rsa1.0.51905.1 | 707  | 438    | 1.00E-112 | 212  | 214  | 99 -  | 492  | 705  | 225    | 438    |
| UN09721 | Rsa1.0.00571.1 | 756  | 329018 | 1.00E-151 | 301  | 310  | 97 +  | 3    | 310  | 158790 | 159099 |
| UN09722 | Rsa1.0.00097.1 | 858  | 138858 | 1.00E-179 | 382  | 400  | 95 +  | 468  | 858  | 54312  | 54710  |
| UN09723 | Rsa1.0.00127.1 | 1568 | 127446 | 1.00E-160 | 391  | 424  | 92 +  | 1147 | 1567 | 21412  | 21828  |
| UN09724 | Rsa1.0.00492.1 | 1191 | 80178  | 1.00E-118 | 261  | 278  | 93 +  | 7    | 273  | 69385  | 69662  |
| UN09725 | Rsa1.0.02215.1 | 1350 | 33822  | 0         | 391  | 401  | 97 +  | 1    | 399  | 8395   | 8795   |
| UN09726 | Rsa1.0.00961.1 | 997  | 58185  | 0         | 594  | 609  | 97 +  | 135  | 743  | 1047   | 1655   |
| UN09727 | Rsa1.0.00066.1 | 472  | 152418 | 9.00E-68  | 134  | 135  | 99 -  | 123  | 257  | 140160 | 140294 |
| UN09728 | Rsa1.0.03795.1 | 1116 | 20818  | 1.00E-103 | 203  | 207  | 98 +  | 470  | 676  | 14751  | 14957  |
| UN09729 | Rsa1.0.00198.1 | 894  | 222963 | 0         | 595  | 599  | 99 -  | 296  | 894  | 176266 | 176864 |
| UN09730 | Rsa1.0.01005.1 | 822  | 56967  | 0         | 470  | 483  | 97 -  | 1    | 483  | 39743  | 40224  |
| UN09731 | Rsa1.0.00394.1 | 1275 | 148426 | 0         | 478  | 491  | 97 +  | 751  | 1238 | 67486  | 67976  |
| UN09732 | Rsa1.0.37428.1 | 1164 | 602    | 0         | 525  | 550  | 95 +  | 1    | 545  | 6      | 554    |
| UN09733 | Rsa1.0.00014.1 | 1014 | 348985 | 1.00E-142 | 341  | 362  | 94 +  | 659  | 1014 | 323900 | 324259 |
| UN09734 | Rsa1.0.02586.1 | 771  | 29856  | 0         | 686  | 716  | 95 +  | 56   | 771  | 15528  | 16236  |
| UN09735 | Rsa1.0.00699.1 | 855  | 184398 | 0         | 474  | 477  | 99 -  | 358  | 834  | 121669 | 122145 |
| UN09736 | Rsa1.0.00425.1 | 1031 | 147080 | 0         | 622  | 669  | 92 +  | 18   | 664  | 125711 | 126375 |
| UN09737 | Rsa1.0.03681.1 | 1795 | 21405  | 0         | 1280 | 1307 | 97 -  | 424  | 1728 | 664    | 1965   |
| UN09738 | Rsa1.0.08947.1 | 444  | 6761   | 0         | 380  | 386  | 98 +  | 4    | 389  | 5535   | 5920   |
| UN09739 | Rsa1.0.00863.1 | 1025 | 254535 | 1.00E-162 | 290  | 290  | 100 - | 728  | 1017 | 239512 | 239801 |
| UN09740 | Rsa1.0.00525.1 | 2274 | 78030  | 0         | 1023 | 1024 | 99 -  | 1250 | 2273 | 47680  | 48703  |
| UN09741 | Rsa1.0.01046.1 | 980  | 152989 | 1.00E-170 | 306  | 307  | 99 +  | 489  | 795  | 128362 | 128668 |
| UN09742 | Rsa1.0.00168.1 | 1124 | 115870 | 1.00E-179 | 376  | 395  | 95 +  | 730  | 1124 | 31046  | 31440  |
| UN09743 | Rsa1.0.02609.1 | 1218 | 29600  | 0         | 439  | 473  | 92 -  | 1    | 458  | 21111  | 21581  |
| UN09744 | Rsa1.0.00113.1 | 892  | 131574 | 0         | 383  | 391  | 97 -  | 2    | 392  | 72531  | 72920  |
| UN09745 | Rsa1.0.01581.1 | 674  | 42833  | 1.00E-165 | 300  | 302  | 99 +  | 84   | 385  | 7614   | 7915   |
| UN09746 | Rsa1.0.01549.1 | 1182 | 43543  | 0         | 692  | 705  | 98 -  | 478  | 1182 | 341    | 1042   |
| UN09747 | Rsa1.0.00120.1 | 1206 | 277288 | 1.00E-131 | 269  | 276  | 97 +  | 1    | 273  | 92236  | 92509  |
| UN09748 | Rsa1.0.01705.1 | 1079 | 40710  | 0         | 344  | 347  | 99 -  | 1    | 347  | 38579  | 38924  |

|         |                |      |        |           |      |      |       |      |      |        |        |
|---------|----------------|------|--------|-----------|------|------|-------|------|------|--------|--------|
| UN09749 | Rsa1.0.02085.1 | 1282 | 35198  | 0         | 1247 | 1293 | 96 +  | 3    | 1282 | 27913  | 29201  |
| UN09750 | Rsa1.0.00389.1 | 713  | 88795  | 1.00E-145 | 261  | 261  | 100 + | 2    | 262  | 40534  | 40794  |
| UN09751 | Rsa1.0.07066.1 | 1503 | 9954   | 1.00E-161 | 327  | 340  | 96 +  | 2    | 341  | 5833   | 6161   |
| UN09752 | Rsa1.0.00048.1 | 1479 | 167185 | 2.33E-156 | 267  | 268  | 99 -  | 3    | 270  | 154401 | 154668 |
| UN09753 | Rsa1.0.01895.1 | 1138 | 37512  | 1.00E-105 | 266  | 288  | 92 -  | 3    | 290  | 34522  | 34794  |
| UN09754 | Rsa1.0.00065.1 | 1029 | 454616 | 1.00E-112 | 306  | 336  | 91 +  | 704  | 1027 | 438582 | 438914 |
| UN09755 | Rsa1.0.01926.1 | 1070 | 37206  | 0         | 601  | 613  | 98 +  | 71   | 683  | 13122  | 13734  |
| UN09756 | Rsa1.0.00198.1 | 1182 | 222963 | 0         | 573  | 576  | 99 +  | 607  | 1182 | 35760  | 36335  |
| UN09757 | Rsa1.0.01292.1 | 850  | 175783 | 0         | 626  | 653  | 95 -  | 146  | 795  | 144715 | 145360 |
| UN09758 | Rsa1.0.20013.1 | 961  | 1352   | 1.00E-116 | 213  | 213  | 100 - | 746  | 958  | 294    | 506    |
| UN09759 | Rsa1.0.00031.1 | 1127 | 179862 | 0         | 637  | 639  | 99 +  | 1    | 639  | 43037  | 43675  |
| UN09760 | Rsa1.0.00133.1 | 1153 | 123768 | 1.00E-136 | 271  | 279  | 97 +  | 468  | 746  | 9256   | 9534   |
| UN09761 | Rsa1.0.01930.1 | 706  | 37189  | 0         | 638  | 645  | 98 -  | 3    | 643  | 1141   | 1785   |
| UN09762 | Rsa1.0.52720.1 | 963  | 432    | 0         | 430  | 432  | 99 +  | 112  | 543  | 1      | 432    |
| UN09763 | Rsa1.0.03205.1 | 1531 | 24614  | 0         | 438  | 439  | 99 +  | 1    | 439  | 1618   | 2056   |
| UN09764 | Rsa1.0.00005.1 | 861  | 353093 | 0         | 833  | 859  | 96 +  | 3    | 860  | 288477 | 289330 |
| UN09765 | Rsa1.0.01196.1 | 1179 | 51097  | 1.00E-150 | 306  | 317  | 96 -  | 1    | 317  | 40985  | 41294  |
| UN09766 | Rsa1.0.03599.1 | 1045 | 21857  | 0         | 585  | 593  | 98 -  | 2    | 594  | 2346   | 2938   |
| UN09767 | Rsa1.0.00686.1 | 841  | 68511  | 0         | 458  | 468  | 97 +  | 35   | 502  | 26807  | 27271  |
| UN09768 | Rsa1.0.00008.1 | 1075 | 358124 | 1.00E-111 | 230  | 237  | 97 +  | 569  | 804  | 321744 | 321980 |
| UN09769 | Rsa1.0.02825.1 | 1430 | 27568  | 0         | 1393 | 1405 | 99 -  | 1    | 1405 | 16906  | 18309  |
| UN09770 | Rsa1.0.00239.1 | 1126 | 104332 | 0         | 455  | 457  | 99 -  | 261  | 717  | 97669  | 98125  |
| UN09771 | Rsa1.0.00026.1 | 986  | 327835 | 0         | 451  | 472  | 95 -  | 484  | 952  | 240917 | 241382 |
| UN09772 | Rsa1.0.02753.1 | 674  | 28215  | 0         | 637  | 681  | 93 +  | 1    | 672  | 8063   | 8731   |
| UN09773 | Rsa1.0.03311.1 | 1231 | 23850  | 1.00E-129 | 253  | 259  | 97 +  | 4    | 262  | 17488  | 17746  |
| UN09774 | Rsa1.0.08518.1 | 1858 | 7244   | 0         | 574  | 599  | 95 +  | 1125 | 1723 | 5069   | 5659   |
| UN09775 | Rsa1.0.06936.1 | 1547 | 10143  | 0         | 866  | 908  | 95 +  | 643  | 1546 | 1      | 906    |
| UN09776 | Rsa1.0.04353.1 | 696  | 138437 | 1.00E-107 | 209  | 213  | 98 +  | 480  | 692  | 132600 | 132812 |
| UN09777 | Rsa1.0.00943.1 | 925  | 58862  | 0         | 569  | 575  | 98 -  | 351  | 925  | 6507   | 7081   |
| UN09778 | Rsa1.0.02969.1 | 1794 | 26390  | 1.00E-179 | 318  | 318  | 100 - | 1477 | 1794 | 10032  | 10349  |
| UN09779 | Rsa1.0.03427.1 | 1520 | 22992  | 0         | 1190 | 1206 | 98 +  | 2    | 1204 | 21787  | 22992  |
| UN09780 | Rsa1.0.04404.1 | 830  | 17510  | 0         | 680  | 687  | 98 +  | 143  | 828  | 9475   | 10161  |
| UN09781 | Rsa1.0.03009.1 | 764  | 26065  | 0         | 357  | 357  | 100 - | 402  | 758  | 2650   | 3006   |
| UN09782 | Rsa1.0.02314.1 | 1055 | 32642  | 0         | 528  | 540  | 97 -  | 515  | 1054 | 4774   | 5305   |
| UN09783 | Rsa1.0.10577.1 | 1696 | 5796   | 0         | 492  | 502  | 98 +  | 1195 | 1696 | 535    | 1035   |
| UN09784 | Rsa1.0.01819.1 | 672  | 38834  | 2.00E-38  | 82   | 82   | 100 + | 1    | 82   | 19030  | 19111  |
| UN09785 | Rsa1.0.03869.1 | 725  | 20365  | 0         | 515  | 529  | 97 +  | 198  | 725  | 4022   | 4550   |
| UN09786 | Rsa1.0.00595.1 | 1253 | 341648 | 1.00E-137 | 257  | 260  | 98 -  | 407  | 666  | 142866 | 143125 |
| UN09787 | Rsa1.0.14183.1 | 2430 | 132309 | 0         | 1165 | 1166 | 99 -  | 305  | 1470 | 1395   | 2560   |

|         |                |      |        |           |     |     |       |     |      |        |        |
|---------|----------------|------|--------|-----------|-----|-----|-------|-----|------|--------|--------|
| UN09788 | Rsa1.0.06185.1 | 956  | 11540  | 0         | 410 | 436 | 94 +  | 182 | 617  | 3892   | 4327   |
| UN09789 | Rsa1.0.01529.1 | 1010 | 43871  | 0         | 400 | 408 | 98 +  | 30  | 437  | 11420  | 11821  |
| UN09790 | Rsa1.0.01175.1 | 734  | 51674  | 1.00E-154 | 338 | 352 | 96 -  | 387 | 734  | 35951  | 36301  |
| UN09791 | Rsa1.0.00026.1 | 566  | 327835 | 7.00E-78  | 151 | 152 | 99 +  | 127 | 278  | 207342 | 207493 |
| UN09792 | Rsa1.0.01655.1 | 768  | 41508  | 0         | 330 | 330 | 100 - | 438 | 767  | 6891   | 7220   |
| UN09793 | Rsa1.0.01016.1 | 833  | 181422 | 0         | 517 | 524 | 98 -  | 1   | 523  | 27020  | 27541  |
| UN09794 | Rsa1.0.02774.1 | 766  | 28038  | 0         | 749 | 766 | 97 +  | 1   | 764  | 13384  | 14147  |
| UN09795 | Rsa1.0.00663.1 | 1084 | 164969 | 0         | 590 | 591 | 99 -  | 492 | 1082 | 120771 | 121360 |
| UN09796 | Rsa1.0.00340.1 | 1515 | 305782 | 1.00E-120 | 248 | 257 | 96 +  | 3   | 256  | 188899 | 189155 |
| UN09797 | Rsa1.0.05593.1 | 1618 | 13235  | 0         | 749 | 751 | 99 +  | 87  | 836  | 1140   | 1890   |
| UN09798 | Rsa1.0.00425.1 | 1136 | 147080 | 0         | 388 | 389 | 99 -  | 3   | 390  | 121247 | 121635 |
| UN09799 | Rsa1.0.00017.1 | 1192 | 752458 | 1.00E-108 | 225 | 232 | 96 -  | 924 | 1155 | 1810   | 2040   |
| UN09800 | Rsa1.0.06054.1 | 774  | 11847  | 0         | 400 | 400 | 100 + | 351 | 750  | 1351   | 1750   |
| UN09801 | Rsa1.0.14535.1 | 627  | 3289   | 0         | 600 | 613 | 97 +  | 15  | 627  | 477    | 1089   |
| UN09802 | Rsa1.0.00336.1 | 581  | 445051 | 1.00E-125 | 288 | 309 | 93 +  | 1   | 309  | 150272 | 150562 |
| UN09803 | Rsa1.0.02404.1 | 852  | 31702  | 0         | 413 | 418 | 98 -  | 299 | 716  | 907    | 1324   |
| UN09804 | Rsa1.0.01402.1 | 771  | 46509  | 0         | 367 | 378 | 97 -  | 101 | 478  | 6199   | 6576   |
| UN09805 | Rsa1.0.01158.1 | 1436 | 52121  | 0         | 609 | 615 | 99 -  | 268 | 882  | 31439  | 32053  |
| UN09806 | Rsa1.0.00870.1 | 762  | 61606  | 1.00E-151 | 272 | 272 | 100 + | 3   | 274  | 24795  | 25066  |
| UN09807 | Rsa1.0.26775.1 | 514  | 878    | 1.00E-153 | 278 | 279 | 99 +  | 1   | 279  | 600    | 878    |
| UN09808 | Rsa1.0.00632.1 | 826  | 183777 | 0         | 442 | 458 | 96 +  | 375 | 824  | 37301  | 37758  |
| UN09809 | Rsa1.0.00646.1 | 1153 | 70473  | 0         | 899 | 928 | 96 -  | 63  | 990  | 4449   | 5375   |
| UN09810 | Rsa1.0.06382.1 | 1321 | 11121  | 3.00E-45  | 100 | 102 | 98 +  | 993 | 1094 | 10909  | 11010  |
| UN09811 | Rsa1.0.00128.1 | 1337 | 228675 | 0         | 709 | 725 | 97 -  | 544 | 1266 | 154949 | 155671 |
| UN09812 | Rsa1.0.01292.1 | 673  | 175783 | 0         | 481 | 482 | 99 +  | 4   | 485  | 152615 | 153096 |
| UN09813 | Rsa1.0.00153.1 | 1140 | 192931 | 1.00E-122 | 233 | 235 | 99 -  | 905 | 1138 | 168976 | 169210 |
| UN09814 | Rsa1.0.06275.1 | 711  | 11342  | 0         | 707 | 709 | 99 +  | 3   | 711  | 3859   | 4565   |
| UN09815 | Rsa1.0.00952.1 | 691  | 58450  | 0         | 329 | 330 | 99 +  | 2   | 331  | 41887  | 42216  |
| UN09816 | Rsa1.0.00331.1 | 561  | 176754 | 1.00E-162 | 359 | 381 | 94 +  | 182 | 561  | 159068 | 159442 |
| UN09817 | Rsa1.0.01539.1 | 623  | 43698  | 1.00E-135 | 244 | 244 | 100 - | 3   | 246  | 6459   | 6702   |
| UN09818 | Rsa1.0.00171.1 | 728  | 115622 | 0         | 362 | 371 | 97 +  | 355 | 725  | 52232  | 52602  |
| UN09819 | Rsa1.0.01101.1 | 1486 | 54031  | 0         | 696 | 719 | 96 -  | 415 | 1132 | 14928  | 15645  |
| UN09820 | Rsa1.0.03081.1 | 750  | 25523  | 1.00E-159 | 356 | 376 | 94 +  | 384 | 750  | 22991  | 23361  |
| UN09821 | Rsa1.0.05379.1 | 1333 | 13968  | 0         | 824 | 837 | 98 +  | 495 | 1331 | 8413   | 9247   |
| UN09822 | Rsa1.0.03381.1 | 812  | 23306  | 0         | 672 | 675 | 99 -  | 136 | 810  | 15740  | 16412  |
| UN09823 | Rsa1.0.01179.1 | 714  | 51549  | 0         | 709 | 713 | 99 -  | 3   | 713  | 42457  | 43169  |
| UN09824 | Rsa1.0.02979.1 | 1449 | 26298  | 0         | 934 | 946 | 98 -  | 504 | 1449 | 13517  | 14462  |
| UN09825 | Rsa1.0.00107.1 | 711  | 431659 | 1.00E-144 | 265 | 267 | 99 +  | 8   | 274  | 82089  | 82355  |
| UN09826 | Rsa1.0.02057.1 | 790  | 35540  | 1.00E-120 | 256 | 270 | 94 -  | 531 | 789  | 22288  | 22557  |

|         |                |      |        |           |      |      |       |      |      |        |        |
|---------|----------------|------|--------|-----------|------|------|-------|------|------|--------|--------|
| UN09827 | Rsa1.0.00037.1 | 1289 | 307838 | 1.00E-145 | 286  | 294  | 97 +  | 516  | 809  | 305123 | 305416 |
| UN09828 | Rsa1.0.28844.1 | 902  | 801    | 0         | 647  | 659  | 98 +  | 243  | 901  | 1      | 659    |
| UN09829 | Rsa1.0.04223.1 | 1300 | 18407  | 1.00E-115 | 273  | 290  | 94 -  | 1004 | 1293 | 9537   | 9816   |
| UN09830 | Rsa1.0.02001.1 | 932  | 36198  | 0         | 578  | 609  | 94 +  | 333  | 932  | 31940  | 32544  |
| UN09831 | Rsa1.0.00251.1 | 1360 | 303968 | 0         | 534  | 588  | 90 -  | 799  | 1360 | 83651  | 84232  |
| UN09832 | Rsa1.0.03869.1 | 778  | 20365  | 0         | 558  | 589  | 94 -  | 1    | 573  | 4022   | 4610   |
| UN09833 | Rsa1.0.00192.1 | 1012 | 278200 | 0         | 652  | 685  | 95 +  | 328  | 1012 | 25299  | 25966  |
| UN09834 | Rsa1.0.05273.1 | 1442 | 14304  | 1.00E-144 | 267  | 268  | 99 +  | 1    | 267  | 13724  | 13991  |
| UN09835 | Rsa1.0.00589.1 | 892  | 209965 | 1.00E-153 | 361  | 384  | 94 +  | 2    | 381  | 179877 | 180257 |
| UN09836 | Rsa1.0.01168.1 | 507  | 153765 | 3.00E-52  | 114  | 117  | 97 -  | 34   | 150  | 24410  | 24526  |
| UN09837 | Rsa1.0.02607.1 | 1772 | 29629  | 0         | 366  | 366  | 100 - | 19   | 384  | 9268   | 9633   |
| UN09838 | Rsa1.0.03448.1 | 660  | 22844  | 1.00E-117 | 298  | 323  | 92 +  | 321  | 634  | 1239   | 1559   |
| UN09839 | Rsa1.0.02020.1 | 757  | 173211 | 1.00E-128 | 252  | 256  | 98 +  | 501  | 755  | 21498  | 21751  |
| UN09840 | Rsa1.0.08622.1 | 842  | 7122   | 0         | 433  | 435  | 99 +  | 408  | 842  | 5862   | 6295   |
| UN09841 | Rsa1.0.03694.1 | 1133 | 21336  | 0         | 828  | 864  | 95 +  | 288  | 1132 | 358    | 1221   |
| UN09842 | Rsa1.0.06694.1 | 1092 | 10526  | 0         | 815  | 820  | 99 +  | 1    | 819  | 3918   | 4737   |
| UN09843 | Rsa1.0.00949.1 | 754  | 58549  | 0         | 743  | 751  | 98 +  | 3    | 753  | 54271  | 55021  |
| UN09844 | Rsa1.0.00130.1 | 1540 | 125737 | 0         | 561  | 567  | 98 +  | 963  | 1527 | 117675 | 118240 |
| UN09845 | Rsa1.0.01172.1 | 1281 | 51734  | 1.00E-167 | 307  | 310  | 99 -  | 3    | 312  | 51035  | 51344  |
| UN09846 | Rsa1.0.00668.1 | 1398 | 69421  | 7.00E-77  | 210  | 229  | 91 +  | 932  | 1157 | 54729  | 54951  |
| UN09847 | Rsa1.0.01861.1 | 956  | 38031  | 1.00E-170 | 345  | 359  | 96 +  | 293  | 651  | 32331  | 32689  |
| UN09848 | Rsa1.0.00635.1 | 743  | 175826 | 1.00E-167 | 311  | 314  | 99 +  | 430  | 743  | 15994  | 16306  |
| UN09849 | Rsa1.0.00005.1 | 1348 | 353093 | 0         | 348  | 348  | 100 + | 1000 | 1347 | 130794 | 131141 |
| UN09850 | Rsa1.0.02180.1 | 917  | 34176  | 0         | 532  | 539  | 98 +  | 381  | 917  | 17424  | 17962  |
| UN09851 | Rsa1.0.00208.1 | 1012 | 108565 | 1.00E-111 | 240  | 248  | 96 -  | 766  | 1012 | 7723   | 7968   |
| UN09852 | Rsa1.0.00913.1 | 1282 | 59914  | 0         | 426  | 438  | 97 +  | 1    | 436  | 19782  | 20210  |
| UN09853 | Rsa1.0.02648.1 | 721  | 29073  | 0         | 344  | 347  | 99 -  | 1    | 345  | 12514  | 12859  |
| UN09854 | Rsa1.0.03401.1 | 529  | 23191  | 0         | 525  | 528  | 99 -  | 3    | 529  | 15968  | 16493  |
| UN09855 | Rsa1.0.00238.1 | 945  | 193193 | 0         | 534  | 543  | 98 +  | 3    | 544  | 192085 | 192627 |
| UN09856 | Rsa1.0.04319.1 | 1475 | 17944  | 0         | 515  | 534  | 96 +  | 942  | 1475 | 16581  | 17113  |
| UN09857 | Rsa1.0.03581.1 | 2580 | 21965  | 0         | 1456 | 1457 | 99 +  | 452  | 1908 | 1      | 1457   |
| UN09858 | Rsa1.0.00910.1 | 677  | 59975  | 0         | 540  | 578  | 93 +  | 81   | 647  | 30391  | 30964  |
| UN09859 | Rsa1.0.00266.1 | 1297 | 163932 | 0         | 1279 | 1294 | 98 +  | 3    | 1295 | 109372 | 110665 |
| UN09860 | Rsa1.0.00144.1 | 1347 | 120708 | 0         | 1018 | 1041 | 97 -  | 307  | 1347 | 47301  | 48338  |
| UN09861 | Rsa1.0.02939.1 | 1249 | 26595  | 0         | 523  | 551  | 94 -  | 1    | 551  | 18298  | 18839  |
| UN09862 | Rsa1.0.00017.1 | 1192 | 752458 | 0         | 981  | 1044 | 93 -  | 149  | 1192 | 71068  | 72111  |
| UN09863 | Rsa1.0.01651.1 | 1019 | 41586  | 1.00E-163 | 294  | 295  | 99 -  | 9    | 303  | 30453  | 30747  |
| UN09864 | Rsa1.0.00326.1 | 1372 | 171955 | 0         | 401  | 411  | 97 +  | 23   | 432  | 66179  | 66589  |
| UN09865 | Rsa1.0.01749.1 | 948  | 39822  | 0         | 376  | 391  | 96 +  | 25   | 412  | 32662  | 33052  |

|         |                |      |        |           |      |      |       |      |      |        |        |
|---------|----------------|------|--------|-----------|------|------|-------|------|------|--------|--------|
| UN09866 | Rsa1.0.03089.1 | 959  | 25465  | 0         | 490  | 497  | 98 -  | 1    | 497  | 8730   | 9225   |
| UN09867 | Rsa1.0.01171.1 | 1075 | 51752  | 1.00E-147 | 354  | 378  | 93 -  | 1    | 371  | 50943  | 51315  |
| UN09868 | Rsa1.0.00523.1 | 1526 | 178770 | 0         | 360  | 370  | 97 -  | 1    | 369  | 144517 | 144886 |
| UN09869 | Rsa1.0.00421.1 | 589  | 86365  | 1.00E-61  | 156  | 165  | 94 -  | 245  | 408  | 33753  | 33916  |
| UN09870 | Rsa1.0.04086.1 | 1702 | 19166  | 0         | 1206 | 1226 | 98 -  | 2    | 1227 | 11442  | 12667  |
| UN09871 | Rsa1.0.00055.1 | 1109 | 520193 | 0         | 760  | 764  | 99 +  | 3    | 766  | 64614  | 65377  |
| UN09872 | Rsa1.0.01129.1 | 1401 | 52949  | 0         | 470  | 472  | 99 +  | 575  | 1046 | 15750  | 16220  |
| UN09873 | Rsa1.0.03722.1 | 906  | 21184  | 1.00E-148 | 314  | 329  | 95 -  | 34   | 359  | 20756  | 21084  |
| UN09874 | Rsa1.0.00467.1 | 845  | 156542 | 1.00E-176 | 386  | 407  | 94 -  | 445  | 845  | 80113  | 80514  |
| UN09875 | Rsa1.0.07440.1 | 1247 | 9389   | 0         | 1165 | 1207 | 96 +  | 3    | 1208 | 4133   | 5339   |
| UN09876 | Rsa1.0.00330.1 | 837  | 94666  | 1.00E-171 | 305  | 305  | 100 - | 533  | 837  | 42444  | 42748  |
| UN09877 | Rsa1.0.05510.1 | 835  | 13470  | 1.00E-124 | 247  | 253  | 97 +  | 581  | 833  | 12012  | 12262  |
| UN09878 | Rsa1.0.05365.1 | 1144 | 14040  | 0         | 582  | 582  | 100 - | 1    | 582  | 11967  | 12548  |
| UN09879 | Rsa1.0.09775.1 | 914  | 6156   | 0         | 420  | 424  | 99 +  | 3    | 423  | 4670   | 5093   |
| UN09880 | Rsa1.0.01595.1 | 804  | 175383 | 3.00E-87  | 176  | 180  | 97 -  | 81   | 260  | 5166   | 5345   |
| UN09881 | Rsa1.0.02750.1 | 1027 | 28239  | 1.00E-93  | 188  | 191  | 98 -  | 714  | 904  | 22935  | 23124  |
| UN09882 | Rsa1.0.05668.1 | 1007 | 12994  | 0         | 381  | 382  | 99 +  | 624  | 1005 | 12064  | 12445  |
| UN09883 | Rsa1.0.05570.1 | 997  | 13301  | 0         | 997  | 997  | 100 - | 1    | 997  | 10562  | 11558  |
| UN09884 | Rsa1.0.00031.1 | 617  | 179862 | 1.00E-176 | 316  | 317  | 99 +  | 1    | 317  | 73500  | 73816  |
| UN09885 | Rsa1.0.00017.1 | 1797 | 752458 | 0         | 384  | 385  | 99 -  | 1413 | 1797 | 661834 | 662218 |
| UN09886 | Rsa1.0.01724.1 | 1365 | 40292  | 0         | 418  | 419  | 99 +  | 947  | 1365 | 37306  | 37724  |
| UN09887 | Rsa1.0.01327.1 | 1199 | 48033  | 1.00E-130 | 267  | 276  | 96 +  | 6    | 281  | 14703  | 14977  |
| UN09888 | Rsa1.0.03347.1 | 761  | 23588  | 1.00E-125 | 255  | 261  | 97 +  | 36   | 295  | 20326  | 20582  |
| UN09889 | Rsa1.0.01465.1 | 1244 | 45175  | 0         | 966  | 1037 | 93 +  | 219  | 1243 | 28909  | 29925  |
| UN09890 | Rsa1.0.00112.1 | 1533 | 132199 | 1.00E-160 | 358  | 376  | 95 +  | 1160 | 1529 | 12848  | 13221  |
| UN09891 | Rsa1.0.00546.1 | 1005 | 76523  | 1.00E-117 | 227  | 231  | 98 -  | 724  | 954  | 73168  | 73398  |
| UN09892 | Rsa1.0.04098.1 | 977  | 19078  | 1.00E-132 | 311  | 329  | 94 -  | 3    | 328  | 10291  | 10614  |
| UN09893 | Rsa1.0.00122.1 | 1473 | 265937 | 0         | 442  | 471  | 93 +  | 32   | 489  | 247401 | 247866 |
| UN09894 | Rsa1.0.00078.1 | 922  | 175053 | 0         | 387  | 392  | 98 -  | 2    | 390  | 137160 | 137551 |
| UN09895 | Rsa1.0.10587.1 | 762  | 5794   | 0         | 443  | 446  | 99 +  | 317  | 762  | 234    | 678    |
| UN09896 | Rsa1.0.03395.1 | 1245 | 23243  | 0         | 402  | 414  | 97 +  | 827  | 1240 | 21042  | 21453  |
| UN09897 | Rsa1.0.00656.1 | 859  | 69968  | 0         | 492  | 493  | 99 -  | 1    | 493  | 39109  | 39601  |
| UN09898 | Rsa1.0.00224.1 | 1026 | 327530 | 1.00E-139 | 340  | 365  | 93 +  | 4    | 363  | 228452 | 228815 |
| UN09899 | Rsa1.0.00710.1 | 559  | 67325  | 1.00E-168 | 324  | 330  | 98 +  | 1    | 329  | 65793  | 66119  |
| UN09900 | Rsa1.0.21831.1 | 899  | 1169   | 1.00E-119 | 230  | 233  | 98 +  | 208  | 438  | 793    | 1025   |
| UN09901 | Rsa1.0.04005.1 | 1573 | 19586  | 0         | 840  | 843  | 99 -  | 731  | 1573 | 2113   | 2955   |
| UN09902 | Rsa1.0.00240.1 | 1108 | 104175 | 0         | 365  | 370  | 98 -  | 4    | 373  | 45959  | 46327  |
| UN09903 | Rsa1.0.01976.1 | 926  | 36570  | 1.00E-175 | 320  | 322  | 99 -  | 605  | 926  | 25270  | 25589  |
| UN09904 | Rsa1.0.01997.1 | 702  | 158416 | 3.00E-62  | 163  | 177  | 92 +  | 4    | 169  | 7959   | 8135   |



|         |                |      |        |           |      |      |       |     |      |        |        |
|---------|----------------|------|--------|-----------|------|------|-------|-----|------|--------|--------|
| UN09905 | Rsa1.0.01536.1 | 811  | 43747  | 1.00E-157 | 319  | 330  | 96 +  | 410 | 739  | 28390  | 28718  |
| UN09906 | Rsa1.0.00678.1 | 1138 | 193163 | 0         | 1094 | 1133 | 96 +  | 4   | 1136 | 155003 | 156130 |
| UN09907 | Rsa1.0.00056.1 | 843  | 332604 | 0         | 389  | 391  | 99 +  | 451 | 841  | 206057 | 206446 |
| UN09908 | Rsa1.0.00328.1 | 1045 | 224661 | 0         | 575  | 575  | 100 + | 471 | 1045 | 207122 | 207696 |
| UN09909 | Rsa1.0.06382.1 | 605  | 11121  | 1.00E-160 | 286  | 286  | 100 - | 1   | 286  | 10119  | 10404  |
| UN09910 | Rsa1.0.02794.1 | 2088 | 27820  | 0         | 1409 | 1433 | 98 -  | 671 | 2088 | 25524  | 26956  |
| UN09911 | Rsa1.0.02872.1 | 742  | 27080  | 1.00E-128 | 236  | 237  | 99 -  | 504 | 740  | 25658  | 25894  |
| UN09912 | Rsa1.0.09875.1 | 802  | 6109   | 1.00E-141 | 272  | 278  | 97 -  | 523 | 800  | 5095   | 5372   |
| UN09913 | Rsa1.0.00108.1 | 1286 | 478491 | 0         | 454  | 480  | 94 -  | 7   | 472  | 91768  | 92247  |
| UN09914 | Rsa1.0.02950.1 | 938  | 26506  | 1.00E-136 | 271  | 279  | 97 -  | 284 | 562  | 6575   | 6853   |
| UN09915 | Rsa1.0.01963.1 | 1001 | 36719  | 0         | 440  | 467  | 94 -  | 296 | 761  | 19722  | 20188  |
| UN09916 | Rsa1.0.00707.1 | 707  | 190112 | 1.00E-95  | 212  | 223  | 95 -  | 34  | 252  | 16479  | 16701  |
| UN09917 | Rsa1.0.02750.1 | 955  | 28239  | 1.00E-140 | 253  | 253  | 100 + | 2   | 254  | 22872  | 23124  |
| UN09918 | Rsa1.0.00055.1 | 1481 | 520193 | 1.00E-129 | 241  | 243  | 99 -  | 621 | 863  | 334867 | 335109 |
| UN09919 | Rsa1.0.20105.1 | 1084 | 1340   | 0         | 461  | 487  | 94 -  | 1   | 484  | 457    | 931    |
| UN09920 | Rsa1.0.21673.1 | 752  | 1183   | 1.00E-43  | 415  | 514  | 80 -  | 239 | 737  | 280    | 780    |
| UN09921 | Rsa1.0.00121.1 | 669  | 278029 | 1.00E-118 | 299  | 326  | 91 +  | 336 | 659  | 54300  | 54615  |
| UN09922 | Rsa1.0.00925.1 | 1042 | 59481  | 0         | 450  | 459  | 98 -  | 7   | 464  | 13819  | 14277  |
| UN09923 | Rsa1.0.00480.1 | 813  | 81325  | 0         | 376  | 383  | 98 -  | 430 | 811  | 3549   | 3931   |
| UN09924 | Rsa1.0.01389.1 | 1054 | 46716  | 0         | 391  | 393  | 99 +  | 4   | 396  | 9773   | 10165  |
| UN09925 | Rsa1.0.00012.1 | 1034 | 222148 | 0         | 525  | 535  | 98 -  | 500 | 1034 | 54569  | 55103  |
| UN09926 | Rsa1.0.00604.1 | 696  | 146282 | 0         | 455  | 471  | 96 +  | 226 | 696  | 16045  | 16511  |
| UN09927 | Rsa1.0.03842.1 | 848  | 20503  | 0         | 428  | 447  | 95 -  | 1   | 445  | 17620  | 18056  |
| UN09928 | Rsa1.0.07536.1 | 919  | 9178   | 0         | 404  | 406  | 99 +  | 1   | 406  | 6488   | 6893   |
| UN09929 | Rsa1.0.01119.1 | 725  | 53459  | 0         | 479  | 489  | 97 -  | 3   | 491  | 1103   | 1591   |
| UN09930 | Rsa1.0.00139.1 | 585  | 357786 | 0         | 451  | 453  | 99 +  | 1   | 453  | 16916  | 17368  |
| UN09931 | Rsa1.0.02362.1 | 1362 | 32190  | 0         | 392  | 402  | 97 -  | 4   | 403  | 5146   | 5544   |
| UN09932 | Rsa1.0.26477.1 | 581  | 890    | 3.00E-80  | 245  | 280  | 87 +  | 283 | 558  | 1      | 262    |
| UN09933 | Rsa1.0.00863.1 | 1150 | 254535 | 0         | 680  | 691  | 98 +  | 3   | 693  | 209202 | 209892 |
| UN09934 | Rsa1.0.01263.1 | 534  | 49703  | 1.00E-159 | 285  | 285  | 100 + | 249 | 533  | 40157  | 40441  |
| UN09935 | Rsa1.0.02748.1 | 2067 | 28242  | 0         | 1308 | 1334 | 98 -  | 4   | 1335 | 15482  | 16815  |
| UN09936 | Rsa1.0.00397.1 | 814  | 88189  | 6.00E-73  | 161  | 168  | 95 -  | 645 | 812  | 64276  | 64443  |
| UN09937 | Rsa1.0.04510.1 | 901  | 17033  | 1.00E-157 | 347  | 367  | 94 -  | 5   | 361  | 12403  | 12769  |
| UN09938 | Rsa1.0.00294.1 | 762  | 144860 | 1.00E-153 | 307  | 318  | 96 -  | 66  | 383  | 116969 | 117286 |
| UN09939 | Rsa1.0.00227.1 | 836  | 105849 | 0         | 833  | 833  | 100 - | 2   | 834  | 77950  | 78782  |
| UN09940 | Rsa1.0.00036.1 | 1039 | 176186 | 0         | 1017 | 1040 | 97 +  | 1   | 1039 | 112138 | 113174 |
| UN09941 | Rsa1.0.04961.1 | 903  | 15316  | 0         | 507  | 517  | 98 -  | 2   | 517  | 10674  | 11190  |
| UN09942 | Rsa1.0.00069.1 | 999  | 403561 | 1.00E-147 | 273  | 276  | 98 -  | 117 | 392  | 179274 | 179549 |
| UN09943 | Rsa1.0.02349.1 | 1021 | 32312  | 0         | 454  | 466  | 97 -  | 1   | 463  | 26844  | 27303  |

|         |                |      |        |           |      |      |       |      |      |        |        |
|---------|----------------|------|--------|-----------|------|------|-------|------|------|--------|--------|
| UN09944 | Rsa1.0.00019.1 | 992  | 301669 | 0         | 661  | 670  | 98 +  | 323  | 992  | 273565 | 274234 |
| UN09945 | Rsa1.0.00500.1 | 479  | 272308 | 1.00E-124 | 245  | 251  | 97 -  | 98   | 348  | 102407 | 102654 |
| UN09946 | Rsa1.0.00033.1 | 716  | 515811 | 1.00E-143 | 257  | 257  | 100 - | 458  | 714  | 33602  | 33858  |
| UN09947 | Rsa1.0.00454.1 | 822  | 216970 | 0         | 805  | 822  | 97 +  | 3    | 822  | 158096 | 158915 |
| UN09948 | Rsa1.0.01410.1 | 650  | 46345  | 1.00E-172 | 310  | 311  | 99 +  | 66   | 376  | 14359  | 14669  |
| UN09949 | Rsa1.0.00585.1 | 1070 | 74164  | 0         | 386  | 386  | 100 + | 685  | 1070 | 59736  | 60121  |
| UN09950 | Rsa1.0.26314.1 | 886  | 897    | 0         | 412  | 430  | 95 +  | 11   | 438  | 109    | 537    |
| UN09951 | Rsa1.0.04641.1 | 1202 | 268012 | 1.00E-178 | 332  | 337  | 98 -  | 665  | 1001 | 260501 | 260837 |
| UN09952 | Rsa1.0.40008.1 | 990  | 562    | 0         | 344  | 350  | 98 +  | 340  | 689  | 1      | 350    |
| UN09953 | Rsa1.0.06500.1 | 736  | 10887  | 0         | 588  | 596  | 98 +  | 6    | 601  | 6670   | 7265   |
| UN09954 | Rsa1.0.02982.1 | 2431 | 26270  | 0         | 1602 | 1607 | 99 +  | 3    | 1609 | 8888   | 10494  |
| UN09955 | Rsa1.0.07440.1 | 590  | 9389   | 1.00E-178 | 332  | 336  | 98 -  | 3    | 337  | 6268   | 6603   |
| UN09956 | Rsa1.0.00589.1 | 1170 | 209965 | 1.00E-155 | 278  | 278  | 100 + | 472  | 749  | 197377 | 197654 |
| UN09957 | Rsa1.0.18906.1 | 1178 | 1514   | 0         | 375  | 381  | 98 -  | 771  | 1151 | 58     | 438    |
| UN09958 | Rsa1.0.03656.1 | 784  | 21552  | 0         | 422  | 430  | 98 +  | 3    | 432  | 1446   | 1871   |
| UN09959 | Rsa1.0.00294.1 | 2238 | 144860 | 0         | 560  | 588  | 95 +  | 551  | 1136 | 60107  | 60694  |
| UN09960 | Rsa1.0.00437.1 | 1381 | 84879  | 0         | 840  | 849  | 98 +  | 534  | 1381 | 62710  | 63556  |
| UN09961 | Rsa1.0.00642.1 | 2293 | 201230 | 0         | 683  | 686  | 99 -  | 1609 | 2293 | 195794 | 196479 |
| UN09962 | Rsa1.0.00250.1 | 1320 | 273771 | 1.00E-154 | 362  | 385  | 94 +  | 925  | 1307 | 230593 | 230971 |
| UN09963 | Rsa1.0.00322.1 | 811  | 212233 | 1.00E-162 | 290  | 290  | 100 - | 233  | 522  | 206966 | 207255 |
| UN09964 | Rsa1.0.00143.1 | 1446 | 121313 | 0         | 1394 | 1452 | 96 -  | 5    | 1446 | 32757  | 34188  |
| UN09965 | Rsa1.0.00926.1 | 926  | 195072 | 0         | 850  | 865  | 98 +  | 63   | 925  | 890    | 1754   |
| UN09966 | Rsa1.0.02252.1 | 797  | 33375  | 0         | 489  | 522  | 93 +  | 106  | 627  | 27494  | 27999  |
| UN09967 | Rsa1.0.02584.1 | 778  | 29877  | 0         | 376  | 388  | 96 +  | 391  | 778  | 806    | 1189   |
| UN09968 | Rsa1.0.00380.1 | 545  | 89748  | 1.00E-106 | 233  | 242  | 96 +  | 304  | 543  | 8474   | 8712   |
| UN09969 | Rsa1.0.06155.1 | 1267 | 11609  | 1.00E-126 | 232  | 233  | 99 -  | 1    | 233  | 10248  | 10480  |
| UN09970 | Rsa1.0.01743.1 | 837  | 39926  | 0         | 420  | 451  | 93 +  | 3    | 440  | 6763   | 7212   |
| UN09971 | Rsa1.0.62053.1 | 539  | 369    | 6.00E-63  | 123  | 123  | 100 + | 379  | 501  | 215    | 337    |
| UN09972 | Rsa1.0.00646.1 | 925  | 70473  | 7.00E-73  | 257  | 294  | 87 -  | 648  | 923  | 5972   | 6254   |
| UN09973 | Rsa1.0.01135.1 | 843  | 52799  | 0         | 565  | 588  | 96 -  | 258  | 840  | 41650  | 42235  |
| UN09974 | Rsa1.0.00727.1 | 784  | 66724  | 0         | 736  | 780  | 94 +  | 3    | 769  | 44953  | 45714  |
| UN09975 | Rsa1.0.01883.1 | 1352 | 37661  | 0         | 738  | 755  | 97 -  | 511  | 1265 | 35516  | 36270  |
| UN09976 | Rsa1.0.02813.1 | 617  | 27656  | 0         | 490  | 492  | 99 +  | 123  | 614  | 25679  | 26170  |
| UN09977 | Rsa1.0.04073.1 | 771  | 19238  | 1.00E-108 | 214  | 219  | 97 -  | 1    | 219  | 13359  | 13577  |
| UN09978 | Rsa1.0.08562.1 | 538  | 7193   | 3.00E-92  | 181  | 184  | 98 +  | 40   | 223  | 3771   | 3954   |
| UN09979 | Rsa1.0.00017.1 | 1841 | 752458 | 0         | 1076 | 1145 | 93 -  | 543  | 1687 | 70609  | 71753  |
| UN09980 | Rsa1.0.18568.1 | 960  | 1573   | 1.00E-138 | 277  | 286  | 96 +  | 3    | 288  | 623    | 908    |
| UN09981 | Rsa1.0.01716.1 | 776  | 40483  | 1.00E-163 | 332  | 345  | 96 +  | 4    | 345  | 17530  | 17868  |
| UN09982 | Rsa1.0.00285.1 | 566  | 149638 | 1.00E-162 | 293  | 294  | 99 +  | 273  | 566  | 71820  | 72113  |

|         |                |      |        |           |      |      |       |      |      |        |        |
|---------|----------------|------|--------|-----------|------|------|-------|------|------|--------|--------|
| UN09983 | Rsa1.0.00580.1 | 1324 | 74515  | 0         | 722  | 836  | 86 -  | 182  | 1011 | 54379  | 55208  |
| UN09984 | Rsa1.0.01913.1 | 769  | 37363  | 1.00E-160 | 315  | 323  | 97 +  | 448  | 769  | 27662  | 27984  |
| UN09985 | Rsa1.0.11068.1 | 1464 | 5627   | 0         | 445  | 447  | 99 +  | 362  | 808  | 5174   | 5620   |
| UN09986 | Rsa1.0.00045.1 | 1252 | 328694 | 0         | 1196 | 1199 | 99 +  | 54   | 1252 | 45322  | 46520  |
| UN09987 | Rsa1.0.00470.1 | 724  | 81968  | 1.00E-178 | 411  | 439  | 93 -  | 288  | 724  | 27934  | 28369  |
| UN09988 | Rsa1.0.01384.1 | 764  | 46803  | 1.00E-175 | 366  | 378  | 96 -  | 1    | 374  | 41768  | 42142  |
| UN09989 | Rsa1.0.00502.1 | 1106 | 204180 | 1.00E-153 | 284  | 287  | 98 +  | 1    | 287  | 20714  | 21000  |
| UN09990 | Rsa1.0.02717.1 | 961  | 28458  | 1.00E-131 | 289  | 303  | 95 +  | 1    | 303  | 19174  | 19465  |
| UN09991 | Rsa1.0.00135.1 | 640  | 178077 | 1.00E-133 | 262  | 268  | 97 -  | 243  | 508  | 3040   | 3307   |
| UN09992 | Rsa1.0.05559.1 | 1425 | 13329  | 0         | 561  | 563  | 99 -  | 2    | 564  | 1716   | 2278   |
| UN09993 | Rsa1.0.00287.1 | 757  | 98687  | 1.00E-159 | 287  | 288  | 99 +  | 1    | 288  | 12801  | 13088  |
| UN09994 | Rsa1.0.00686.1 | 837  | 68511  | 0         | 497  | 497  | 100 + | 3    | 499  | 26775  | 27271  |
| UN09995 | Rsa1.0.00237.1 | 1169 | 235974 | 0         | 809  | 809  | 100 + | 1    | 809  | 188234 | 189042 |
| UN09996 | Rsa1.0.01086.1 | 797  | 54509  | 0         | 762  | 817  | 93 -  | 3    | 795  | 36460  | 37269  |
| UN09997 | Rsa1.0.19197.1 | 803  | 1466   | 1.00E-124 | 241  | 246  | 97 +  | 3    | 248  | 1104   | 1349   |
| UN09998 | Rsa1.0.00394.1 | 901  | 148426 | 1.00E-119 | 347  | 386  | 89 -  | 533  | 900  | 105856 | 106241 |
| UN09999 | Rsa1.0.16597.1 | 666  | 2098   | 1.00E-162 | 328  | 340  | 96 -  | 186  | 518  | 1416   | 1755   |
| UN10000 | Rsa1.0.00118.1 | 1421 | 130637 | 0         | 576  | 598  | 96 +  | 3    | 600  | 28806  | 29403  |
| UN10001 | Rsa1.0.03944.1 | 1239 | 19926  | 0         | 463  | 463  | 100 - | 776  | 1238 | 10167  | 10629  |
| UN10002 | Rsa1.0.02411.1 | 1563 | 31655  | 0         | 819  | 838  | 97 +  | 307  | 1144 | 27638  | 28475  |
| UN10003 | Rsa1.0.01544.1 | 924  | 185602 | 0         | 376  | 383  | 98 -  | 3    | 385  | 9690   | 10069  |
| UN10004 | Rsa1.0.00226.1 | 925  | 105884 | 0         | 574  | 575  | 99 -  | 351  | 925  | 97447  | 98021  |
| UN10005 | Rsa1.0.03410.1 | 804  | 23147  | 0         | 613  | 667  | 91 +  | 155  | 804  | 10247  | 10905  |
| UN10006 | Rsa1.0.00550.1 | 846  | 210790 | 0         | 350  | 354  | 98 -  | 44   | 397  | 60958  | 61311  |
| UN10007 | Rsa1.0.04235.1 | 874  | 18373  | 0         | 854  | 875  | 97 -  | 1    | 874  | 16330  | 17193  |
| UN10008 | Rsa1.0.17272.1 | 966  | 1874   | 0         | 469  | 475  | 98 -  | 1    | 475  | 1      | 475    |
| UN10009 | Rsa1.0.02282.1 | 1043 | 163951 | 1.00E-113 | 436  | 507  | 85 -  | 28   | 524  | 150175 | 150666 |
| UN10010 | Rsa1.0.04027.1 | 514  | 19501  | 1.00E-158 | 289  | 291  | 99 +  | 223  | 513  | 6649   | 6939   |
| UN10011 | Rsa1.0.00803.1 | 1292 | 144228 | 0         | 389  | 389  | 100 - | 612  | 1000 | 52682  | 53070  |
| UN10012 | Rsa1.0.00180.1 | 1703 | 114581 | 1.00E-154 | 350  | 372  | 94 +  | 493  | 864  | 14427  | 14795  |
| UN10013 | Rsa1.0.03487.1 | 1033 | 22564  | 0         | 495  | 495  | 100 + | 539  | 1033 | 10540  | 11034  |
| UN10014 | Rsa1.0.00092.1 | 750  | 659932 | 0         | 480  | 490  | 97 -  | 261  | 750  | 242810 | 243295 |
| UN10015 | Rsa1.0.00666.1 | 1863 | 69505  | 0         | 1169 | 1170 | 99 +  | 3    | 1172 | 25947  | 27116  |
| UN10016 | Rsa1.0.06100.1 | 1503 | 11746  | 2.00E-92  | 173  | 173  | 100 - | 280  | 452  | 1076   | 1248   |
| UN10017 | Rsa1.0.03738.1 | 629  | 21071  | 1.00E-165 | 314  | 319  | 98 +  | 312  | 629  | 6129   | 6447   |
| UN10018 | Rsa1.0.01798.1 | 1215 | 173909 | 0         | 1031 | 1053 | 97 -  | 1    | 1049 | 5150   | 6202   |
| UN10019 | Rsa1.0.01077.1 | 739  | 54772  | 0         | 571  | 598  | 95 +  | 99   | 690  | 21078  | 21673  |
| UN10020 | Rsa1.0.01958.1 | 969  | 261128 | 1.00E-153 | 352  | 376  | 93 -  | 608  | 968  | 119362 | 119737 |
| UN10021 | Rsa1.0.01920.1 | 1577 | 158533 | 0         | 469  | 492  | 95 +  | 1093 | 1577 | 128073 | 128554 |

|         |                |      |        |           |      |      |       |      |      |        |        |
|---------|----------------|------|--------|-----------|------|------|-------|------|------|--------|--------|
| UN10022 | Rsa1.0.00145.1 | 1541 | 261008 | 3.00E-95  | 200  | 206  | 97 -  | 39   | 244  | 73241  | 73445  |
| UN10023 | Rsa1.0.17015.1 | 1172 | 1953   | 1.00E-112 | 265  | 281  | 94 -  | 2    | 278  | 874    | 1148   |
| UN10024 | Rsa1.0.28434.1 | 1236 | 815    | 0         | 420  | 439  | 95 +  | 800  | 1233 | 48     | 486    |
| UN10025 | Rsa1.0.00005.1 | 1282 | 353093 | 0         | 580  | 583  | 99 -  | 138  | 720  | 138648 | 139230 |
| UN10026 | Rsa1.0.09210.1 | 1115 | 6556   | 1.00E-180 | 335  | 340  | 98 -  | 99   | 438  | 650    | 989    |
| UN10027 | Rsa1.0.05948.1 | 1369 | 12142  | 0         | 342  | 347  | 98 -  | 415  | 761  | 4859   | 5205   |
| UN10028 | Rsa1.0.08598.1 | 1535 | 7143   | 1.00E-161 | 300  | 304  | 98 -  | 521  | 824  | 6199   | 6502   |
| UN10029 | Rsa1.0.01144.1 | 1216 | 52431  | 0         | 358  | 363  | 98 +  | 852  | 1214 | 42305  | 42667  |
| UN10030 | Rsa1.0.05622.1 | 1519 | 13145  | 0         | 570  | 583  | 97 -  | 1    | 576  | 3626   | 4206   |
| UN10031 | Rsa1.0.04323.1 | 1079 | 17915  | 1.00E-108 | 227  | 236  | 96 -  | 4    | 239  | 15646  | 15881  |
| UN10032 | Rsa1.0.00719.1 | 1178 | 66952  | 0         | 375  | 381  | 98 -  | 1    | 381  | 47331  | 47711  |
| UN10033 | Rsa1.0.00303.1 | 1660 | 97468  | 0         | 828  | 909  | 91 +  | 758  | 1660 | 44008  | 44900  |
| UN10034 | Rsa1.0.05228.1 | 1258 | 14437  | 0         | 398  | 415  | 95 -  | 846  | 1258 | 4899   | 5313   |
| UN10035 | Rsa1.0.00016.1 | 964  | 831256 | 1.00E-154 | 291  | 295  | 98 +  | 1    | 295  | 225483 | 225775 |
| UN10036 | Rsa1.0.06421.1 | 943  | 11053  | 1.00E-147 | 336  | 357  | 94 -  | 587  | 943  | 3887   | 4231   |
| UN10037 | Rsa1.0.01507.1 | 1627 | 44361  | 1.00E-137 | 252  | 253  | 99 -  | 569  | 821  | 26446  | 26698  |
| UN10038 | Rsa1.0.01539.1 | 1384 | 43698  | 0         | 676  | 693  | 97 +  | 704  | 1384 | 4616   | 5308   |
| UN10039 | Rsa1.0.00018.1 | 1929 | 410899 | 0         | 840  | 939  | 89 -  | 778  | 1707 | 144212 | 145134 |
| UN10040 | Rsa1.0.00010.1 | 1016 | 294827 | 0         | 667  | 718  | 92 -  | 301  | 1015 | 90136  | 90830  |
| UN10041 | Rsa1.0.00755.1 | 1454 | 192559 | 0         | 847  | 847  | 100 + | 3    | 849  | 138020 | 138866 |
| UN10042 | Rsa1.0.00732.1 | 1263 | 66631  | 1.00E-111 | 208  | 209  | 99 -  | 339  | 547  | 4101   | 4309   |
| UN10043 | Rsa1.0.00529.1 | 983  | 77487  | 0         | 330  | 331  | 99 -  | 653  | 983  | 21764  | 22094  |
| UN10044 | Rsa1.0.02744.1 | 1180 | 28268  | 8.00E-92  | 365  | 430  | 84 +  | 751  | 1180 | 15581  | 15983  |
| UN10045 | Rsa1.0.01270.1 | 1509 | 49574  | 6.00E-87  | 179  | 184  | 97 -  | 1    | 184  | 18017  | 18200  |
| UN10046 | Rsa1.0.05947.1 | 1990 | 12142  | 0         | 1259 | 1328 | 94 +  | 675  | 1990 | 3191   | 4512   |
| UN10047 | Rsa1.0.01877.1 | 1046 | 37789  | 1.00E-153 | 278  | 279  | 99 +  | 768  | 1046 | 34868  | 35146  |
| UN10048 | Rsa1.0.00173.1 | 986  | 288743 | 1.00E-144 | 260  | 260  | 100 + | 3    | 262  | 109113 | 109372 |
| UN10049 | Rsa1.0.05329.1 | 1193 | 14130  | 1.00E-133 | 302  | 321  | 94 +  | 273  | 592  | 2124   | 2429   |
| UN10050 | Rsa1.0.03294.1 | 1043 | 23971  | 0         | 503  | 508  | 99 +  | 460  | 967  | 16378  | 16885  |
| UN10051 | Rsa1.0.08516.1 | 1552 | 7245   | 1.00E-161 | 328  | 341  | 96 +  | 899  | 1239 | 891    | 1231   |
| UN10052 | Rsa1.0.03809.1 | 1173 | 20731  | 0         | 780  | 831  | 93 +  | 347  | 1172 | 19080  | 19907  |
| UN10053 | Rsa1.0.00335.1 | 454  | 94371  | 0         | 375  | 386  | 97 -  | 2    | 383  | 50290  | 50674  |
| UN10054 | Rsa1.0.26155.1 | 928  | 904    | 0         | 632  | 634  | 99 +  | 293  | 926  | 1      | 634    |
| UN10055 | Rsa1.0.03292.1 | 1313 | 23977  | 1.00E-161 | 306  | 312  | 98 +  | 1    | 312  | 4625   | 4936   |
| UN10056 | Rsa1.0.04772.1 | 1603 | 16040  | 0         | 468  | 501  | 93 -  | 1115 | 1602 | 13583  | 14079  |
| UN10057 | Rsa1.0.00223.1 | 1277 | 106231 | 0         | 663  | 669  | 99 -  | 1    | 669  | 69796  | 70464  |
| UN10058 | Rsa1.0.01004.1 | 2183 | 56975  | 0         | 984  | 992  | 99 +  | 2    | 993  | 49782  | 50773  |
| UN10059 | Rsa1.0.00270.1 | 2093 | 101236 | 0         | 1144 | 1157 | 98 +  | 3    | 1158 | 39775  | 40931  |
| UN10060 | Rsa1.0.00011.1 | 1459 | 225044 | 0         | 448  | 448  | 100 - | 1011 | 1458 | 177239 | 177686 |

|         |                |      |        |           |      |      |       |     |      |        |        |
|---------|----------------|------|--------|-----------|------|------|-------|-----|------|--------|--------|
| UN10061 | Rsa1.0.00111.1 | 1333 | 390088 | 1.00E-161 | 405  | 431  | 93 -  | 915 | 1333 | 32713  | 33134  |
| UN10062 | Rsa1.0.02821.1 | 1519 | 27602  | 0         | 371  | 380  | 97 +  | 3   | 380  | 14874  | 15251  |
| UN10063 | Rsa1.0.00078.1 | 1040 | 175053 | 0         | 1037 | 1038 | 99 +  | 3   | 1040 | 3932   | 4969   |
| UN10064 | Rsa1.0.02914.1 | 516  | 26815  | 1.00E-155 | 340  | 358  | 94 +  | 3   | 358  | 26110  | 26467  |
| UN10065 | Rsa1.0.02928.1 | 1421 | 26680  | 0         | 788  | 795  | 99 +  | 1   | 794  | 15338  | 16132  |
| UN10066 | Rsa1.0.00143.1 | 960  | 121313 | 1.00E-164 | 309  | 313  | 98 +  | 648 | 960  | 87223  | 87534  |
| UN10067 | Rsa1.0.08285.1 | 1393 | 7606   | 0         | 553  | 563  | 98 +  | 491 | 1053 | 2625   | 3187   |
| UN10068 | Rsa1.0.00019.1 | 973  | 301669 | 0         | 490  | 498  | 98 -  | 478 | 972  | 26632  | 27129  |
| UN10069 | Rsa1.0.00059.1 | 1628 | 159650 | 0         | 1281 | 1337 | 95 -  | 301 | 1627 | 38598  | 39932  |
| UN10070 | Rsa1.0.02267.1 | 550  | 33194  | 0         | 473  | 494  | 95 +  | 65  | 547  | 11925  | 12416  |
| UN10071 | Rsa1.0.00466.1 | 1001 | 82132  | 0         | 739  | 740  | 99 -  | 262 | 1001 | 23507  | 24246  |
| UN10072 | Rsa1.0.08259.1 | 1126 | 7641   | 1.00E-140 | 336  | 364  | 92 -  | 3   | 351  | 3089   | 3451   |
| UN10073 | Rsa1.0.00911.1 | 1081 | 59943  | 0         | 1045 | 1084 | 96 -  | 3   | 1081 | 56159  | 57234  |
| UN10074 | Rsa1.0.00171.1 | 834  | 115622 | 1.00E-123 | 269  | 279  | 96 +  | 48  | 324  | 41358  | 41632  |
| UN10075 | Rsa1.0.11285.1 | 1156 | 5556   | 0         | 385  | 395  | 97 +  | 761 | 1155 | 3883   | 4277   |
| UN10076 | Rsa1.0.01033.1 | 990  | 56173  | 0         | 606  | 620  | 97 -  | 369 | 988  | 48472  | 49090  |
| UN10077 | Rsa1.0.03606.1 | 933  | 21818  | 1.00E-165 | 306  | 309  | 99 -  | 3   | 309  | 1339   | 1647   |
| UN10078 | Rsa1.0.16774.1 | 755  | 2038   | 1.00E-137 | 259  | 263  | 98 +  | 132 | 394  | 1396   | 1658   |
| UN10079 | Rsa1.0.00492.1 | 1278 | 80178  | 0         | 669  | 679  | 98 -  | 3   | 681  | 23202  | 23880  |
| UN10080 | Rsa1.0.09091.1 | 1212 | 6656   | 0         | 363  | 366  | 99 -  | 810 | 1174 | 3746   | 4111   |
| UN10081 | Rsa1.0.00269.1 | 1333 | 341668 | 0         | 542  | 542  | 100 + | 317 | 858  | 189849 | 190390 |
| UN10082 | Rsa1.0.00735.1 | 1457 | 66503  | 0         | 596  | 597  | 99 +  | 860 | 1456 | 4823   | 5419   |
| UN10083 | Rsa1.0.00058.1 | 1353 | 159921 | 1.00E-139 | 349  | 376  | 92 +  | 965 | 1339 | 139467 | 139830 |
| UN10084 | Rsa1.0.00674.1 | 1549 | 193753 | 0         | 514  | 517  | 99 -  | 11  | 527  | 181840 | 182356 |
| UN10085 | Rsa1.0.00040.1 | 1376 | 324196 | 0         | 522  | 546  | 95 +  | 824 | 1360 | 114552 | 115096 |
| UN10086 | Rsa1.0.01731.1 | 1089 | 40208  | 1.00E-127 | 250  | 256  | 97 +  | 3   | 253  | 18260  | 18515  |
| UN10087 | Rsa1.0.34603.1 | 1247 | 654    | 1.00E-126 | 233  | 234  | 99 -  | 99  | 332  | 223    | 456    |
| UN10088 | Rsa1.0.01005.1 | 982  | 56967  | 1.00E-132 | 258  | 264  | 97 -  | 424 | 687  | 19291  | 19554  |
| UN10089 | Rsa1.0.02312.1 | 1795 | 32675  | 0         | 882  | 882  | 100 - | 267 | 1148 | 20773  | 21654  |
| UN10090 | Rsa1.0.06976.1 | 1356 | 10073  | 0         | 331  | 331  | 100 - | 2   | 332  | 1316   | 1646   |
| UN10091 | Rsa1.0.00080.1 | 1070 | 190437 | 0         | 393  | 397  | 98 -  | 1   | 394  | 65785  | 66181  |
| UN10092 | Rsa1.0.00011.1 | 1023 | 225044 | 1.00E-93  | 184  | 187  | 98 -  | 616 | 802  | 50686  | 50872  |
| UN10093 | Rsa1.0.00596.1 | 1024 | 73578  | 1.00E-90  | 173  | 174  | 99 -  | 849 | 1022 | 9140   | 9313   |
| UN10094 | Rsa1.0.05890.1 | 711  | 12317  | 1.00E-114 | 212  | 213  | 99 +  | 1   | 213  | 6836   | 7048   |
| UN10095 | Rsa1.0.03479.1 | 1010 | 22631  | 0         | 785  | 833  | 94 +  | 8   | 836  | 21398  | 22217  |
| UN10096 | Rsa1.0.00076.1 | 601  | 146021 | 0         | 573  | 595  | 96 +  | 14  | 601  | 100578 | 101171 |
| UN10097 | Rsa1.0.01469.1 | 860  | 45139  | 1.00E-120 | 219  | 219  | 100 + | 1   | 219  | 42143  | 42361  |
| UN10098 | Rsa1.0.00838.1 | 1872 | 153820 | 0         | 412  | 418  | 98 +  | 9   | 426  | 54187  | 54603  |
| UN10099 | Rsa1.0.00264.1 | 850  | 101674 | 1.00E-148 | 285  | 290  | 98 +  | 3   | 291  | 68831  | 69120  |

|         |                |      |        |           |      |      |       |      |      |        |        |
|---------|----------------|------|--------|-----------|------|------|-------|------|------|--------|--------|
| UN10100 | Rsa1.0_00189.1 | 1261 | 111830 | 1.00E-167 | 302  | 303  | 99 -  | 958  | 1260 | 55224  | 55526  |
| UN10101 | Rsa1.0_00141.1 | 888  | 121494 | 0         | 461  | 474  | 97 +  | 1    | 473  | 82243  | 82714  |
| UN10102 | Rsa1.0_05013.1 | 905  | 15131  | 1.00E-154 | 298  | 303  | 98 -  | 602  | 904  | 1039   | 1338   |
| UN10103 | Rsa1.0_03627.1 | 964  | 21658  | 1.00E-179 | 400  | 423  | 94 +  | 549  | 964  | 8013   | 8434   |
| UN10104 | Rsa1.0_00474.1 | 825  | 81731  | 0         | 399  | 417  | 95 +  | 15   | 428  | 30343  | 30753  |
| UN10105 | Rsa1.0_01081.1 | 892  | 499226 | 1.00E-155 | 290  | 294  | 98 -  | 599  | 892  | 323183 | 323476 |
| UN10106 | Rsa1.0_01656.1 | 1373 | 41494  | 0         | 438  | 455  | 96 +  | 1    | 455  | 35728  | 36181  |
| UN10107 | Rsa1.0_00384.1 | 1083 | 89278  | 0         | 325  | 326  | 99 -  | 32   | 357  | 48409  | 48734  |
| UN10108 | Rsa1.0_01855.1 | 1885 | 38204  | 0         | 635  | 642  | 98 -  | 2    | 643  | 12693  | 13332  |
| UN10109 | Rsa1.0_03790.1 | 1744 | 20844  | 0         | 426  | 436  | 97 -  | 582  | 1013 | 7623   | 8058   |
| UN10110 | Rsa1.0_01459.1 | 2732 | 45277  | 0         | 2165 | 2186 | 99 +  | 1    | 2186 | 35839  | 38024  |
| UN10111 | Rsa1.0_01126.1 | 960  | 53127  | 0         | 696  | 716  | 97 +  | 3    | 710  | 41996  | 42709  |
| UN10112 | Rsa1.0_01272.1 | 1944 | 49553  | 0         | 1044 | 1087 | 96 +  | 2    | 1087 | 17182  | 18268  |
| UN10113 | Rsa1.0_00017.1 | 954  | 752458 | 0         | 414  | 434  | 95 -  | 525  | 953  | 412620 | 413048 |
| UN10114 | Rsa1.0_18957.1 | 1285 | 1505   | 1.00E-160 | 296  | 299  | 98 +  | 354  | 652  | 1203   | 1501   |
| UN10115 | Rsa1.0_00100.1 | 1604 | 249232 | 2.00E-99  | 185  | 185  | 100 + | 632  | 816  | 220066 | 220250 |
| UN10116 | Rsa1.0_00169.1 | 1281 | 274298 | 0         | 718  | 741  | 96 +  | 3    | 743  | 26954  | 27690  |
| UN10117 | Rsa1.0_03971.1 | 1294 | 19788  | 1.00E-159 | 291  | 293  | 99 +  | 3    | 295  | 1772   | 2064   |
| UN10118 | Rsa1.0_14151.1 | 1104 | 3731   | 0         | 490  | 493  | 99 +  | 612  | 1104 | 981    | 1472   |
| UN10119 | Rsa1.0_01358.1 | 1478 | 47278  | 0         | 506  | 506  | 100 + | 548  | 1053 | 15623  | 16128  |
| UN10120 | Rsa1.0_08957.1 | 1280 | 6754   | 0         | 411  | 429  | 95 -  | 854  | 1280 | 6326   | 6754   |
| UN10121 | Rsa1.0_07766.1 | 1247 | 8612   | 0         | 382  | 383  | 99 +  | 49   | 431  | 5866   | 6248   |
| UN10122 | Rsa1.0_00068.1 | 1514 | 151813 | 1.00E-111 | 246  | 260  | 94 -  | 1    | 251  | 35329  | 35586  |
| UN10123 | Rsa1.0_00336.1 | 1217 | 445051 | 0         | 484  | 488  | 99 +  | 1    | 488  | 4046   | 4532   |
| UN10124 | Rsa1.0_00045.1 | 895  | 328694 | 1.00E-150 | 276  | 278  | 99 +  | 1    | 278  | 165161 | 165438 |
| UN10125 | Rsa1.0_05410.1 | 1127 | 13840  | 0         | 507  | 509  | 99 -  | 124  | 632  | 5729   | 6237   |
| UN10126 | Rsa1.0_01354.1 | 692  | 47342  | 1.00E-138 | 265  | 270  | 98 -  | 423  | 692  | 9360   | 9629   |
| UN10127 | Rsa1.0_13204.1 | 1555 | 4970   | 0         | 504  | 504  | 100 + | 102  | 605  | 4329   | 4832   |
| UN10128 | Rsa1.0_01907.1 | 855  | 37431  | 0         | 513  | 519  | 98 +  | 337  | 855  | 17877  | 18395  |
| UN10129 | Rsa1.0_02438.1 | 1399 | 31392  | 0         | 474  | 496  | 95 -  | 3    | 497  | 13585  | 14074  |
| UN10130 | Rsa1.0_00816.1 | 1315 | 403350 | 0         | 694  | 719  | 96 +  | 3    | 716  | 139083 | 139801 |
| UN10131 | Rsa1.0_00272.1 | 1332 | 447836 | 0         | 371  | 377  | 98 -  | 957  | 1332 | 65635  | 66010  |
| UN10132 | Rsa1.0_01943.1 | 1056 | 37042  | 1.00E-164 | 309  | 313  | 98 -  | 744  | 1056 | 4794   | 5105   |
| UN10133 | Rsa1.0_02703.1 | 1150 | 28544  | 0         | 526  | 532  | 98 -  | 40   | 569  | 25964  | 26495  |
| UN10134 | Rsa1.0_28315.1 | 1144 | 820    | 1.00E-119 | 310  | 334  | 92 -  | 818  | 1144 | 446    | 771    |
| UN10135 | Rsa1.0_08102.1 | 1301 | 7901   | 1.00E-130 | 260  | 267  | 97 -  | 1035 | 1301 | 718    | 981    |
| UN10136 | Rsa1.0_02615.1 | 758  | 29547  | 0         | 753  | 756  | 99 -  | 3    | 758  | 24432  | 25187  |
| UN10137 | Rsa1.0_00098.1 | 969  | 349239 | 0         | 447  | 467  | 95 -  | 419  | 881  | 220945 | 221405 |
| UN10138 | Rsa1.0_01156.1 | 603  | 52147  | 1.00E-128 | 280  | 296  | 94 -  | 316  | 602  | 33030  | 33324  |

|         |                |      |        |           |      |      |       |     |      |        |        |
|---------|----------------|------|--------|-----------|------|------|-------|-----|------|--------|--------|
| UN10139 | Rsa1.0.00063.1 | 536  | 156150 | 1.00E-121 | 229  | 232  | 98 +  | 116 | 347  | 3494   | 3725   |
| UN10140 | Rsa1.0.13982.1 | 949  | 3960   | 0         | 944  | 948  | 99 +  | 2   | 949  | 649    | 1596   |
| UN10141 | Rsa1.0.05367.1 | 1157 | 14010  | 0         | 475  | 490  | 96 +  | 3   | 492  | 2676   | 3156   |
| UN10142 | Rsa1.0.01124.1 | 2100 | 53295  | 0         | 369  | 370  | 99 -  | 378 | 747  | 27263  | 27632  |
| UN10143 | Rsa1.0.02756.1 | 1743 | 28202  | 1.00E-176 | 334  | 338  | 98 +  | 1   | 336  | 20785  | 21122  |
| UN10144 | Rsa1.0.04772.1 | 1004 | 16040  | 1.00E-157 | 291  | 293  | 99 +  | 6   | 298  | 11870  | 12160  |
| UN10145 | Rsa1.0.06319.1 | 1654 | 11243  | 0         | 471  | 481  | 97 -  | 3   | 482  | 9996   | 10476  |
| UN10146 | Rsa1.0.01389.1 | 1270 | 46716  | 1.00E-69  | 135  | 135  | 100 - | 494 | 628  | 16433  | 16567  |
| UN10147 | Rsa1.0.00189.1 | 692  | 111830 | 1.00E-158 | 380  | 405  | 93 +  | 1   | 397  | 491    | 890    |
| UN10148 | Rsa1.0.00654.1 | 905  | 70012  | 1.00E-166 | 296  | 296  | 100 - | 610 | 905  | 40143  | 40438  |
| UN10149 | Rsa1.0.00008.1 | 1198 | 358124 | 0         | 609  | 625  | 97 -  | 574 | 1198 | 6476   | 7100   |
| UN10150 | Rsa1.0.00112.1 | 1002 | 132199 | 0         | 703  | 750  | 93 +  | 253 | 993  | 55783  | 56507  |
| UN10151 | Rsa1.0.07657.1 | 1148 | 8896   | 0         | 536  | 551  | 97 +  | 607 | 1148 | 3516   | 4066   |
| UN10152 | Rsa1.0.00838.1 | 527  | 153820 | 0         | 366  | 376  | 97 +  | 1   | 376  | 146488 | 146863 |
| UN10153 | Rsa1.0.13767.1 | 944  | 4361   | 0         | 552  | 553  | 99 -  | 391 | 943  | 566    | 1118   |
| UN10154 | Rsa1.0.03204.1 | 1138 | 24622  | 0         | 492  | 492  | 100 - | 238 | 729  | 6070   | 6561   |
| UN10155 | Rsa1.0.38829.1 | 431  | 579    | 1.00E-91  | 212  | 222  | 95 -  | 8   | 226  | 32     | 252    |
| UN10156 | Rsa1.0.05696.1 | 1154 | 12896  | 0         | 520  | 540  | 96 -  | 369 | 906  | 351    | 890    |
| UN10157 | Rsa1.0.19770.1 | 963  | 1385   | 0         | 343  | 344  | 99 -  | 619 | 962  | 465    | 808    |
| UN10158 | Rsa1.0.02222.1 | 532  | 152798 | 0         | 503  | 556  | 90 +  | 1   | 514  | 4560   | 5115   |
| UN10159 | Rsa1.0.02273.1 | 1076 | 140964 | 1.00E-178 | 319  | 320  | 99 +  | 756 | 1075 | 4741   | 5060   |
| UN10160 | Rsa1.0.00746.1 | 924  | 66044  | 1.00E-139 | 309  | 328  | 94 +  | 599 | 919  | 22302  | 22626  |
| UN10161 | Rsa1.0.01735.1 | 1056 | 40128  | 0         | 678  | 708  | 95 -  | 3   | 710  | 33988  | 34675  |
| UN10162 | Rsa1.0.02247.1 | 964  | 33427  | 1.00E-150 | 341  | 370  | 92 -  | 2   | 371  | 28646  | 28995  |
| UN10163 | Rsa1.0.01211.1 | 1274 | 50646  | 0         | 620  | 665  | 93 +  | 612 | 1274 | 41797  | 42450  |
| UN10164 | Rsa1.0.00387.1 | 635  | 495407 | 0         | 411  | 415  | 99 -  | 1   | 415  | 475782 | 476195 |
| UN10165 | Rsa1.0.00014.1 | 633  | 348985 | 0         | 348  | 352  | 98 -  | 188 | 539  | 315790 | 316137 |
| UN10166 | Rsa1.0.02777.1 | 1387 | 27986  | 0         | 596  | 625  | 95 +  | 766 | 1387 | 15700  | 16316  |
| UN10167 | Rsa1.0.01700.1 | 1011 | 40745  | 0         | 420  | 429  | 97 -  | 3   | 431  | 31534  | 31959  |
| UN10168 | Rsa1.0.01561.1 | 721  | 43227  | 0         | 532  | 552  | 96 +  | 156 | 705  | 84     | 633    |
| UN10169 | Rsa1.0.04124.1 | 1294 | 18945  | 1.00E-106 | 359  | 407  | 88 +  | 1   | 393  | 6518   | 6906   |
| UN10170 | Rsa1.0.00086.1 | 952  | 439854 | 0         | 322  | 322  | 100 + | 2   | 323  | 325322 | 325643 |
| UN10171 | Rsa1.0.07339.1 | 1020 | 9534   | 1.00E-179 | 351  | 359  | 97 +  | 2   | 354  | 6432   | 6790   |
| UN10172 | Rsa1.0.00374.1 | 533  | 165738 | 0         | 526  | 530  | 99 +  | 4   | 533  | 160631 | 161160 |
| UN10173 | Rsa1.0.00128.1 | 807  | 228675 | 0         | 742  | 763  | 97 -  | 45  | 806  | 203865 | 204627 |
| UN10174 | Rsa1.0.21673.1 | 720  | 1183   | 0         | 703  | 725  | 96 +  | 11  | 720  | 226    | 950    |
| UN10175 | Rsa1.0.00240.1 | 1073 | 104175 | 0         | 615  | 623  | 98 +  | 425 | 1047 | 14974  | 15595  |
| UN10176 | Rsa1.0.00425.1 | 524  | 147080 | 0         | 378  | 388  | 97 -  | 2   | 388  | 24733  | 25120  |
| UN10177 | Rsa1.0.00537.1 | 1893 | 186980 | 0         | 1831 | 1893 | 96 -  | 1   | 1893 | 164273 | 166150 |

|         |                |      |        |           |      |      |       |      |      |        |        |
|---------|----------------|------|--------|-----------|------|------|-------|------|------|--------|--------|
| UN10178 | Rsa1.0.05218.1 | 874  | 14457  | 1.00E-169 | 321  | 326  | 98 +  | 7    | 332  | 9535   | 9859   |
| UN10179 | Rsa1.0.11463.1 | 1145 | 5500   | 1.00E-172 | 309  | 310  | 99 -  | 836  | 1145 | 677    | 986    |
| UN10180 | Rsa1.0.02379.1 | 867  | 150705 | 0         | 371  | 383  | 96 +  | 392  | 774  | 140540 | 140922 |
| UN10181 | Rsa1.0.00675.1 | 1383 | 145590 | 0         | 1229 | 1253 | 98 -  | 131  | 1383 | 67398  | 68649  |
| UN10182 | Rsa1.0.01169.1 | 1055 | 51829  | 0         | 556  | 570  | 97 -  | 486  | 1055 | 36443  | 37012  |
| UN10183 | Rsa1.0.00464.1 | 731  | 82253  | 0         | 573  | 579  | 98 -  | 3    | 581  | 64562  | 65140  |
| UN10184 | Rsa1.0.00071.1 | 1041 | 345714 | 0         | 361  | 362  | 99 -  | 3    | 364  | 317193 | 317554 |
| UN10185 | Rsa1.0.03307.1 | 797  | 23872  | 0         | 467  | 480  | 97 +  | 320  | 791  | 16405  | 16881  |
| UN10186 | Rsa1.0.02506.1 | 1081 | 30700  | 0         | 495  | 524  | 94 -  | 558  | 1081 | 5605   | 6119   |
| UN10187 | Rsa1.0.01937.1 | 1464 | 37147  | 1.00E-132 | 296  | 314  | 94 -  | 3    | 316  | 32247  | 32557  |
| UN10188 | Rsa1.0.06032.1 | 632  | 11886  | 2.00E-78  | 219  | 240  | 91 -  | 399  | 632  | 7622   | 7859   |
| UN10189 | Rsa1.0.00749.1 | 1295 | 65933  | 0         | 1261 | 1301 | 96 +  | 2    | 1293 | 20487  | 21776  |
| UN10190 | Rsa1.0.00550.1 | 1867 | 210790 | 0         | 460  | 475  | 96 -  | 707  | 1179 | 177713 | 178187 |
| UN10191 | Rsa1.0.00108.1 | 722  | 478491 | 0         | 684  | 715  | 95 -  | 15   | 722  | 460205 | 460913 |
| UN10192 | Rsa1.0.00985.1 | 1382 | 161950 | 0         | 562  | 581  | 96 +  | 6    | 586  | 141740 | 142317 |
| UN10193 | Rsa1.0.00930.1 | 1564 | 59224  | 0         | 389  | 397  | 97 +  | 1    | 392  | 38934  | 39330  |
| UN10194 | Rsa1.0.10565.1 | 1453 | 5800   | 0         | 464  | 475  | 97 +  | 3    | 476  | 4451   | 4919   |
| UN10195 | Rsa1.0.07246.1 | 1884 | 9665   | 1.00E-163 | 315  | 320  | 98 +  | 851  | 1168 | 122    | 441    |
| UN10196 | Rsa1.0.01778.1 | 1123 | 39509  | 1.00E-168 | 306  | 308  | 99 -  | 6    | 313  | 23431  | 23738  |
| UN10197 | Rsa1.0.03467.1 | 1142 | 22687  | 0         | 509  | 521  | 97 -  | 1    | 521  | 13100  | 13620  |
| UN10198 | Rsa1.0.00351.1 | 851  | 413096 | 0         | 375  | 375  | 100 + | 476  | 850  | 242921 | 243295 |
| UN10199 | Rsa1.0.03633.1 | 927  | 21644  | 1.00E-125 | 230  | 231  | 99 -  | 1    | 231  | 18297  | 18527  |
| UN10200 | Rsa1.0.00638.1 | 670  | 71037  | 0         | 629  | 640  | 98 +  | 2    | 641  | 36377  | 37012  |
| UN10201 | Rsa1.0.01788.1 | 842  | 39296  | 0         | 362  | 363  | 99 -  | 271  | 633  | 15792  | 16154  |
| UN10202 | Rsa1.0.02413.1 | 1288 | 31628  | 0         | 360  | 371  | 97 -  | 459  | 829  | 8130   | 8498   |
| UN10203 | Rsa1.0.00078.1 | 794  | 175053 | 0         | 741  | 765  | 96 +  | 3    | 762  | 3934   | 4695   |
| UN10204 | Rsa1.0.00419.1 | 1399 | 86562  | 0         | 638  | 647  | 98 -  | 752  | 1396 | 15419  | 16064  |
| UN10205 | Rsa1.0.01303.1 | 1196 | 48853  | 0         | 623  | 626  | 99 +  | 571  | 1196 | 15251  | 15876  |
| UN10206 | Rsa1.0.00453.1 | 1016 | 83031  | 0         | 633  | 643  | 98 +  | 375  | 1016 | 75551  | 76193  |
| UN10207 | Rsa1.0.06313.1 | 1545 | 11252  | 0         | 340  | 341  | 99 -  | 441  | 781  | 6081   | 6421   |
| UN10208 | Rsa1.0.02901.1 | 1171 | 26909  | 1.00E-109 | 266  | 287  | 92 -  | 893  | 1171 | 13866  | 14152  |
| UN10209 | Rsa1.0.00108.1 | 1233 | 478491 | 0         | 424  | 428  | 99 +  | 808  | 1233 | 463726 | 464153 |
| UN10210 | Rsa1.0.07757.1 | 944  | 8633   | 0         | 572  | 589  | 97 +  | 1    | 588  | 925    | 1512   |
| UN10211 | Rsa1.0.22271.1 | 1728 | 1135   | 0         | 415  | 422  | 98 +  | 1306 | 1727 | 548    | 966    |
| UN10212 | Rsa1.0.00033.1 | 963  | 515811 | 0         | 576  | 594  | 96 -  | 371  | 963  | 485021 | 485610 |
| UN10213 | Rsa1.0.01785.1 | 913  | 39368  | 0         | 585  | 585  | 100 + | 2    | 586  | 28416  | 29000  |
| UN10214 | Rsa1.0.00119.1 | 1123 | 467509 | 0         | 477  | 514  | 92 +  | 378  | 885  | 386218 | 386716 |
| UN10215 | Rsa1.0.00232.1 | 1273 | 104936 | 1.00E-152 | 295  | 301  | 98 +  | 907  | 1206 | 48471  | 48771  |
| UN10216 | Rsa1.0.06310.1 | 1589 | 11262  | 0         | 811  | 963  | 84 +  | 386  | 1345 | 5160   | 6122   |



|         |                |      |        |           |      |      |       |      |      |        |        |
|---------|----------------|------|--------|-----------|------|------|-------|------|------|--------|--------|
| UN10217 | Rsa1.0.00412.1 | 1015 | 86935  | 1.00E-135 | 252  | 253  | 99 +  | 762  | 1013 | 71685  | 71937  |
| UN10218 | Rsa1.0.00037.1 | 1165 | 307838 | 0         | 779  | 786  | 99 +  | 9    | 792  | 293238 | 294022 |
| UN10219 | Rsa1.0.07577.1 | 1098 | 9092   | 0         | 423  | 423  | 100 + | 3    | 425  | 5723   | 6145   |
| UN10220 | Rsa1.0.00329.1 | 965  | 222544 | 1.00E-166 | 411  | 449  | 91 +  | 1    | 439  | 29883  | 30321  |
| UN10221 | Rsa1.0.00660.1 | 705  | 69688  | 1.00E-80  | 162  | 165  | 98 -  | 362  | 526  | 52782  | 52946  |
| UN10222 | Rsa1.0.00504.1 | 977  | 79334  | 1.00E-119 | 223  | 225  | 99 +  | 750  | 974  | 64280  | 64504  |
| UN10223 | Rsa1.0.00478.1 | 1487 | 81419  | 0         | 403  | 403  | 100 - | 1079 | 1481 | 60585  | 60987  |
| UN10224 | Rsa1.0.00195.1 | 1388 | 251884 | 0         | 596  | 629  | 94 -  | 3    | 628  | 248803 | 249431 |
| UN10225 | Rsa1.0.04436.1 | 1216 | 17364  | 0         | 617  | 637  | 96 -  | 1    | 623  | 15688  | 16324  |
| UN10226 | Rsa1.0.00340.1 | 1418 | 305782 | 1.00E-132 | 249  | 252  | 98 -  | 1165 | 1416 | 188904 | 189155 |
| UN10227 | Rsa1.0.00041.1 | 1319 | 186197 | 0         | 447  | 448  | 99 -  | 867  | 1313 | 56659  | 57106  |
| UN10228 | Rsa1.0.01789.1 | 1201 | 39250  | 0         | 459  | 473  | 97 -  | 4    | 474  | 19826  | 20296  |
| UN10229 | Rsa1.0.00012.1 | 769  | 222148 | 1.00E-147 | 318  | 340  | 93 +  | 1    | 322  | 49635  | 49974  |
| UN10230 | Rsa1.0.10523.1 | 1649 | 5816   | 0         | 366  | 373  | 98 -  | 1269 | 1640 | 5304   | 5676   |
| UN10231 | Rsa1.0.01543.1 | 1154 | 43645  | 0         | 1036 | 1098 | 94 +  | 64   | 1146 | 24619  | 25697  |
| UN10232 | Rsa1.0.00382.1 | 910  | 251946 | 1.00E-154 | 277  | 277  | 100 - | 634  | 910  | 112485 | 112761 |
| UN10233 | Rsa1.0.36296.1 | 1303 | 621    | 0         | 354  | 358  | 98 +  | 550  | 907  | 1      | 358    |
| UN10234 | Rsa1.0.01690.1 | 1448 | 40939  | 0         | 763  | 798  | 95 +  | 112  | 900  | 5950   | 6747   |
| UN10235 | Rsa1.0.01081.1 | 856  | 499226 | 0         | 845  | 854  | 98 -  | 3    | 854  | 318528 | 319381 |
| UN10236 | Rsa1.0.05541.1 | 1084 | 139959 | 1.00E-151 | 301  | 310  | 97 -  | 775  | 1084 | 2800   | 3107   |
| UN10237 | Rsa1.0.00483.1 | 1273 | 81102  | 1.00E-155 | 320  | 331  | 96 -  | 943  | 1271 | 56262  | 56592  |
| UN10238 | Rsa1.0.00328.1 | 1483 | 224661 | 0         | 832  | 855  | 97 -  | 3    | 855  | 176338 | 177191 |
| UN10239 | Rsa1.0.02101.1 | 1038 | 35017  | 0         | 992  | 1009 | 98 -  | 3    | 1010 | 15755  | 16763  |
| UN10240 | Rsa1.0.00577.1 | 1400 | 174827 | 0         | 734  | 746  | 98 -  | 566  | 1311 | 29514  | 30259  |
| UN10241 | Rsa1.0.01058.1 | 1125 | 55430  | 1.00E-110 | 238  | 247  | 96 -  | 1    | 246  | 29543  | 29788  |
| UN10242 | Rsa1.0.01776.1 | 767  | 39511  | 0         | 600  | 613  | 97 +  | 162  | 767  | 9082   | 9693   |
| UN10243 | Rsa1.0.00193.1 | 1081 | 194198 | 1.00E-128 | 283  | 296  | 95 +  | 784  | 1076 | 102524 | 102818 |
| UN10244 | Rsa1.0.48139.1 | 1162 | 470    | 0         | 382  | 392  | 97 +  | 489  | 880  | 76     | 467    |
| UN10245 | Rsa1.0.00928.1 | 1089 | 59293  | 1.00E-81  | 211  | 230  | 91 +  | 805  | 1034 | 32258  | 32481  |
| UN10246 | Rsa1.0.00314.1 | 801  | 96472  | 1.00E-105 | 228  | 238  | 95 +  | 565  | 801  | 56253  | 56490  |
| UN10247 | Rsa1.0.01200.1 | 1214 | 50895  | 0         | 869  | 914  | 95 +  | 305  | 1212 | 42501  | 43412  |
| UN10248 | Rsa1.0.00662.1 | 1589 | 192183 | 0         | 1335 | 1399 | 95 -  | 1    | 1392 | 59159  | 60550  |
| UN10249 | Rsa1.0.03001.1 | 787  | 26108  | 1.00E-125 | 305  | 327  | 93 -  | 468  | 787  | 5505   | 5824   |
| UN10250 | Rsa1.0.01591.1 | 776  | 42718  | 1.00E-77  | 204  | 224  | 91 -  | 560  | 774  | 15670  | 15893  |
| UN10251 | Rsa1.0.00737.1 | 804  | 66432  | 1.00E-126 | 296  | 316  | 93 +  | 491  | 804  | 25538  | 25847  |
| UN10252 | Rsa1.0.00075.1 | 870  | 146680 | 1.00E-110 | 219  | 222  | 98 -  | 649  | 868  | 26141  | 26362  |
| UN10253 | Rsa1.0.00529.1 | 1591 | 77487  | 1.00E-162 | 294  | 295  | 99 +  | 1    | 295  | 15484  | 15778  |
| UN10254 | Rsa1.0.00457.1 | 901  | 337301 | 1.00E-128 | 232  | 232  | 100 + | 1    | 232  | 159587 | 159818 |
| UN10255 | Rsa1.0.06535.1 | 1336 | 10827  | 0         | 1321 | 1336 | 98 -  | 1    | 1336 | 2711   | 4044   |

|         |                |      |        |           |      |      |       |      |      |        |        |
|---------|----------------|------|--------|-----------|------|------|-------|------|------|--------|--------|
| UN10256 | Rsa1.0.00727.1 | 1661 | 66724  | 0         | 359  | 361  | 99 -  | 1301 | 1661 | 61914  | 62274  |
| UN10257 | Rsa1.0.02226.1 | 814  | 33726  | 1.00E-61  | 159  | 169  | 94 -  | 609  | 775  | 10227  | 10395  |
| UN10258 | Rsa1.0.01278.1 | 1039 | 49370  | 4.00E-93  | 180  | 182  | 98 +  | 766  | 947  | 20617  | 20798  |
| UN10259 | Rsa1.0.00111.1 | 862  | 390088 | 0         | 384  | 394  | 97 +  | 265  | 658  | 381107 | 381500 |
| UN10260 | Rsa1.0.01846.1 | 1324 | 38367  | 0         | 550  | 567  | 97 +  | 758  | 1324 | 33297  | 33863  |
| UN10261 | Rsa1.0.05384.1 | 1437 | 13960  | 0         | 778  | 785  | 99 +  | 4    | 788  | 1086   | 1870   |
| UN10262 | Rsa1.0.00224.1 | 1699 | 327530 | 0         | 940  | 947  | 99 +  | 753  | 1699 | 192182 | 193126 |
| UN10263 | Rsa1.0.04626.1 | 1271 | 16611  | 0         | 604  | 631  | 95 -  | 3    | 631  | 14781  | 15406  |
| UN10264 | Rsa1.0.00056.1 | 871  | 332604 | 9.00E-60  | 133  | 138  | 96 -  | 336  | 473  | 309803 | 309940 |
| UN10265 | Rsa1.0.00218.1 | 998  | 201480 | 0         | 441  | 451  | 97 -  | 1    | 451  | 153355 | 153804 |
| UN10266 | Rsa1.0.00719.1 | 2450 | 66952  | 0         | 474  | 474  | 100 + | 82   | 555  | 23347  | 23820  |
| UN10267 | Rsa1.0.00505.1 | 1071 | 79323  | 1.00E-106 | 217  | 224  | 96 +  | 1    | 224  | 4309   | 4532   |
| UN10268 | Rsa1.0.00421.1 | 1275 | 86365  | 0         | 564  | 564  | 100 + | 421  | 984  | 17163  | 17726  |
| UN10269 | Rsa1.0.01561.1 | 1925 | 43227  | 1.00E-126 | 233  | 234  | 99 +  | 1692 | 1925 | 27114  | 27347  |
| UN10270 | Rsa1.0.00925.1 | 1770 | 59481  | 0         | 445  | 451  | 98 +  | 247  | 693  | 56289  | 56739  |
| UN10271 | Rsa1.0.16574.1 | 890  | 2106   | 0         | 526  | 538  | 97 -  | 352  | 888  | 1573   | 2106   |
| UN10272 | Rsa1.0.00023.1 | 1559 | 194764 | 0         | 331  | 332  | 99 -  | 1226 | 1557 | 182540 | 182871 |
| UN10273 | Rsa1.0.01931.1 | 810  | 37187  | 1.00E-169 | 385  | 412  | 93 +  | 391  | 802  | 32029  | 32428  |
| UN10274 | Rsa1.0.00794.1 | 833  | 64063  | 1.00E-179 | 361  | 373  | 96 -  | 458  | 827  | 39651  | 40023  |
| UN10275 | Rsa1.0.00652.1 | 946  | 70089  | 0         | 373  | 385  | 96 -  | 2    | 385  | 47920  | 48304  |
| UN10276 | Rsa1.0.01440.1 | 883  | 45807  | 0         | 750  | 775  | 96 +  | 1    | 774  | 13700  | 14471  |
| UN10277 | Rsa1.0.01200.1 | 1123 | 50895  | 0         | 1113 | 1121 | 99 -  | 1    | 1121 | 42229  | 43347  |
| UN10278 | Rsa1.0.05884.1 | 700  | 12337  | 0         | 669  | 702  | 95 +  | 3    | 697  | 10020  | 10716  |
| UN10279 | Rsa1.0.00108.1 | 1322 | 478491 | 0         | 429  | 454  | 94 +  | 868  | 1320 | 279966 | 280404 |
| UN10280 | Rsa1.0.01985.1 | 524  | 36491  | 1.00E-143 | 258  | 258  | 100 - | 267  | 524  | 1761   | 2018   |
| UN10281 | Rsa1.0.00066.1 | 888  | 152418 | 0         | 518  | 536  | 96 +  | 22   | 557  | 20936  | 21465  |
| UN10282 | Rsa1.0.13888.1 | 1142 | 4146   | 0         | 879  | 879  | 100 + | 1    | 879  | 1792   | 2670   |
| UN10283 | Rsa1.0.00502.1 | 1345 | 204180 | 0         | 541  | 546  | 99 +  | 1    | 546  | 60925  | 61469  |
| UN10284 | Rsa1.0.00991.1 | 1319 | 143101 | 0         | 634  | 668  | 94 -  | 1    | 664  | 137872 | 138532 |
| UN10285 | Rsa1.0.00773.1 | 957  | 64839  | 0         | 433  | 460  | 94 -  | 515  | 957  | 52202  | 52660  |
| UN10286 | Rsa1.0.24540.1 | 808  | 982    | 0         | 710  | 732  | 96 -  | 47   | 778  | 251    | 982    |
| UN10287 | Rsa1.0.00022.1 | 1375 | 200461 | 1.00E-170 | 316  | 320  | 98 -  | 1036 | 1355 | 96365  | 96684  |
| UN10288 | Rsa1.0.04156.1 | 1411 | 18799  | 0         | 505  | 505  | 100 - | 905  | 1409 | 242    | 746    |
| UN10289 | Rsa1.0.01058.1 | 1379 | 55430  | 1.00E-156 | 304  | 310  | 98 +  | 1070 | 1379 | 44751  | 45056  |
| UN10290 | Rsa1.0.12394.1 | 1320 | 5237   | 1.00E-160 | 325  | 337  | 96 -  | 1    | 337  | 4534   | 4862   |
| UN10291 | Rsa1.0.02358.1 | 913  | 32213  | 0         | 477  | 478  | 99 +  | 1    | 478  | 236    | 712    |
| UN10292 | Rsa1.0.05161.1 | 1132 | 14631  | 1.00E-138 | 320  | 345  | 92 +  | 16   | 351  | 8351   | 8695   |
| UN10293 | Rsa1.0.01668.1 | 898  | 41299  | 1.00E-108 | 266  | 288  | 92 -  | 122  | 409  | 40402  | 40689  |
| UN10294 | Rsa1.0.00967.1 | 823  | 58049  | 0         | 783  | 784  | 99 +  | 3    | 786  | 3374   | 4156   |

|         |                |      |        |           |     |      |       |      |      |        |        |
|---------|----------------|------|--------|-----------|-----|------|-------|------|------|--------|--------|
| UN10295 | Rsa1.0_11577.1 | 937  | 5467   | 1.00E-114 | 275 | 294  | 93 -  | 646  | 937  | 723    | 1012   |
| UN10296 | Rsa1.0_07808.1 | 849  | 8504   | 0         | 593 | 614  | 96 -  | 239  | 849  | 117    | 727    |
| UN10297 | Rsa1.0_02098.1 | 1031 | 35032  | 1.00E-112 | 256 | 270  | 94 +  | 142  | 410  | 17299  | 17567  |
| UN10298 | Rsa1.0_02020.1 | 922  | 173211 | 0         | 707 | 720  | 98 -  | 1    | 720  | 164608 | 165327 |
| UN10299 | Rsa1.0_03123.1 | 891  | 25207  | 0         | 561 | 582  | 96 -  | 3    | 584  | 22210  | 22786  |
| UN10300 | Rsa1.0_00129.1 | 891  | 126831 | 1.00E-125 | 289 | 304  | 95 +  | 23   | 324  | 113583 | 113884 |
| UN10301 | Rsa1.0_00876.1 | 1390 | 61328  | 1.00E-127 | 279 | 295  | 94 -  | 1032 | 1320 | 49382  | 49676  |
| UN10302 | Rsa1.0_00407.1 | 1046 | 191544 | 0         | 395 | 403  | 98 -  | 3    | 402  | 154691 | 155093 |
| UN10303 | Rsa1.0_00024.1 | 1304 | 188018 | 1.00E-155 | 400 | 443  | 90 -  | 424  | 845  | 84667  | 85097  |
| UN10304 | Rsa1.0_00873.1 | 1429 | 61459  | 1.00E-126 | 293 | 313  | 93 +  | 2    | 308  | 11603  | 11915  |
| UN10305 | Rsa1.0_00515.1 | 979  | 78417  | 0         | 940 | 982  | 95 -  | 3    | 979  | 59809  | 60784  |
| UN10306 | Rsa1.0_00086.1 | 1185 | 439854 | 1.00E-84  | 195 | 204  | 95 +  | 3    | 205  | 429    | 631    |
| UN10307 | Rsa1.0_00329.1 | 995  | 222544 | 1.00E-153 | 389 | 426  | 91 -  | 523  | 937  | 29906  | 30321  |
| UN10308 | Rsa1.0_00041.1 | 814  | 186197 | 1.00E-143 | 341 | 369  | 92 +  | 3    | 361  | 156429 | 156786 |
| UN10309 | Rsa1.0_00369.1 | 1124 | 266462 | 0         | 437 | 450  | 97 -  | 360  | 809  | 169354 | 169802 |
| UN10310 | Rsa1.0_02022.1 | 1286 | 35923  | 1.00E-158 | 329 | 343  | 95 -  | 1    | 343  | 14054  | 14395  |
| UN10311 | Rsa1.0_07835.1 | 1438 | 8453   | 0         | 364 | 364  | 100 - | 1    | 364  | 6351   | 6714   |
| UN10312 | Rsa1.0_01502.1 | 1125 | 44519  | 1.00E-131 | 325 | 354  | 91 +  | 775  | 1125 | 39463  | 39804  |
| UN10313 | Rsa1.0_00470.1 | 1566 | 81968  | 1.00E-158 | 283 | 283  | 100 + | 248  | 530  | 48972  | 49254  |
| UN10314 | Rsa1.0_00336.1 | 1209 | 445051 | 1.00E-164 | 350 | 368  | 95 -  | 723  | 1080 | 441    | 805    |
| UN10315 | Rsa1.0_00339.1 | 1614 | 222974 | 0         | 781 | 920  | 84 +  | 337  | 1255 | 28077  | 28996  |
| UN10316 | Rsa1.0_00371.1 | 1074 | 90463  | 0         | 409 | 421  | 97 -  | 648  | 1067 | 73347  | 73767  |
| UN10317 | Rsa1.0_02954.1 | 1146 | 26485  | 0         | 369 | 385  | 95 -  | 404  | 788  | 13577  | 13961  |
| UN10318 | Rsa1.0_03589.1 | 1383 | 21893  | 0         | 434 | 452  | 96 +  | 3    | 450  | 604    | 1055   |
| UN10319 | Rsa1.0_23451.1 | 1196 | 1048   | 1.00E-156 | 371 | 402  | 92 -  | 1    | 393  | 184    | 572    |
| UN10320 | Rsa1.0_00008.1 | 1015 | 358124 | 0         | 598 | 635  | 94 -  | 382  | 1015 | 50872  | 51499  |
| UN10321 | Rsa1.0_01248.1 | 1077 | 154103 | 7.00E-95  | 211 | 221  | 95 -  | 855  | 1075 | 41446  | 41660  |
| UN10322 | Rsa1.0_01338.1 | 1545 | 155644 | 0         | 465 | 487  | 95 +  | 548  | 1034 | 142949 | 143435 |
| UN10323 | Rsa1.0_24295.1 | 1252 | 994    | 0         | 598 | 611  | 97 +  | 97   | 707  | 1      | 611    |
| UN10324 | Rsa1.0_00180.1 | 956  | 114581 | 1.00E-156 | 310 | 319  | 97 +  | 2    | 320  | 34754  | 35066  |
| UN10325 | Rsa1.0_01000.1 | 1507 | 57140  | 0         | 476 | 479  | 99 -  | 1031 | 1507 | 35248  | 35726  |
| UN10326 | Rsa1.0_03347.1 | 1860 | 23588  | 0         | 968 | 1006 | 96 +  | 2    | 1003 | 7901   | 8903   |
| UN10327 | Rsa1.0_54025.1 | 894  | 422    | 0         | 413 | 422  | 97 +  | 210  | 630  | 1      | 422    |
| UN10328 | Rsa1.0_00306.1 | 786  | 146760 | 0         | 555 | 629  | 88 +  | 189  | 784  | 76532  | 77144  |
| UN10329 | Rsa1.0_01920.1 | 1612 | 158533 | 0         | 482 | 485  | 99 +  | 3    | 487  | 125759 | 126241 |
| UN10330 | Rsa1.0_00816.1 | 1059 | 403350 | 1.00E-148 | 286 | 290  | 98 +  | 124  | 411  | 390143 | 390432 |
| UN10331 | Rsa1.0_02884.1 | 1185 | 27034  | 0         | 645 | 682  | 94 -  | 2    | 681  | 12569  | 13240  |
| UN10332 | Rsa1.0_01896.1 | 940  | 37512  | 0         | 901 | 938  | 96 +  | 2    | 939  | 20688  | 21623  |
| UN10333 | Rsa1.0_05909.1 | 1132 | 12265  | 1.00E-157 | 319 | 327  | 97 -  | 1    | 324  | 6137   | 6460   |

|         |                |      |        |           |      |      |       |      |      |        |        |
|---------|----------------|------|--------|-----------|------|------|-------|------|------|--------|--------|
| UN10334 | Rsa1.0.00094.1 | 1383 | 139042 | 0         | 543  | 563  | 96 -  | 3    | 564  | 62288  | 62850  |
| UN10335 | Rsa1.0.00383.1 | 861  | 398431 | 1.00E-134 | 297  | 316  | 93 -  | 558  | 861  | 182089 | 182404 |
| UN10336 | Rsa1.0.04882.1 | 1204 | 15606  | 0         | 341  | 341  | 100 - | 857  | 1197 | 7132   | 7472   |
| UN10337 | Rsa1.0.00152.1 | 1653 | 257730 | 0         | 1236 | 1241 | 99 +  | 411  | 1651 | 201609 | 202849 |
| UN10338 | Rsa1.0.00002.1 | 922  | 601661 | 0         | 586  | 593  | 98 -  | 31   | 623  | 527335 | 527927 |
| UN10339 | Rsa1.0.14918.1 | 985  | 2967   | 1.00E-178 | 316  | 316  | 100 - | 2    | 317  | 1      | 316    |
| UN10340 | Rsa1.0.00689.1 | 991  | 68305  | 0         | 621  | 632  | 98 -  | 338  | 969  | 12770  | 13401  |
| UN10341 | Rsa1.0.00070.1 | 1713 | 150321 | 0         | 577  | 583  | 98 -  | 1131 | 1713 | 59034  | 59616  |
| UN10342 | Rsa1.0.02322.1 | 1515 | 32555  | 0         | 619  | 629  | 98 +  | 5    | 633  | 4740   | 5365   |
| UN10343 | Rsa1.0.00073.1 | 867  | 240924 | 1.00E-133 | 250  | 252  | 99 +  | 2    | 251  | 97580  | 97831  |
| UN10344 | Rsa1.0.01889.1 | 600  | 37562  | 1.00E-167 | 313  | 318  | 98 +  | 277  | 594  | 23938  | 24255  |
| UN10345 | Rsa1.0.02377.1 | 973  | 31994  | 1.00E-127 | 303  | 325  | 93 -  | 1    | 322  | 10248  | 10571  |
| UN10346 | Rsa1.0.00250.1 | 714  | 273771 | 1.00E-171 | 313  | 316  | 99 +  | 1    | 316  | 16202  | 16517  |
| UN10347 | Rsa1.0.00637.1 | 1579 | 71038  | 0         | 848  | 851  | 99 +  | 1    | 851  | 2355   | 3204   |
| UN10348 | Rsa1.0.04998.1 | 1110 | 15180  | 0         | 1085 | 1096 | 98 -  | 3    | 1098 | 6674   | 7765   |
| UN10349 | Rsa1.0.02583.1 | 1151 | 29887  | 0         | 435  | 437  | 99 -  | 432  | 868  | 24108  | 24544  |
| UN10350 | Rsa1.0.00571.1 | 967  | 329018 | 0         | 928  | 980  | 94 +  | 4    | 967  | 173767 | 174742 |
| UN10351 | Rsa1.0.01534.1 | 897  | 43764  | 0         | 727  | 757  | 96 +  | 7    | 755  | 10709  | 11464  |
| UN10352 | Rsa1.0.02505.1 | 667  | 30703  | 1.00E-149 | 367  | 393  | 93 +  | 266  | 658  | 21664  | 22048  |
| UN10353 | Rsa1.0.00157.1 | 1152 | 245832 | 1.00E-179 | 408  | 431  | 94 +  | 2    | 431  | 64001  | 64422  |
| UN10354 | Rsa1.0.03646.1 | 902  | 21598  | 0         | 868  | 905  | 95 -  | 3    | 902  | 18024  | 18918  |
| UN10355 | Rsa1.0.01632.1 | 652  | 181224 | 0         | 364  | 371  | 98 +  | 275  | 645  | 27928  | 28294  |
| UN10356 | Rsa1.0.05282.1 | 1696 | 14270  | 1.00E-154 | 276  | 276  | 100 + | 1419 | 1694 | 6690   | 6965   |
| UN10357 | Rsa1.0.01047.1 | 1223 | 55705  | 0         | 1178 | 1232 | 95 +  | 2    | 1218 | 39313  | 40541  |
| UN10358 | Rsa1.0.01097.1 | 1674 | 173349 | 0         | 420  | 423  | 99 +  | 1    | 422  | 32242  | 32663  |
| UN10359 | Rsa1.0.00219.1 | 1487 | 106983 | 1.00E-121 | 238  | 242  | 98 +  | 80   | 321  | 42325  | 42565  |
| UN10360 | Rsa1.0.00065.1 | 1436 | 454616 | 0         | 610  | 610  | 100 + | 1    | 610  | 26103  | 26712  |
| UN10361 | Rsa1.0.12642.1 | 1540 | 5165   | 0         | 505  | 506  | 99 +  | 825  | 1330 | 18     | 523    |
| UN10362 | Rsa1.0.00635.1 | 1205 | 175826 | 0         | 592  | 618  | 95 +  | 2    | 619  | 19297  | 19903  |
| UN10363 | Rsa1.0.32803.1 | 1506 | 693    | 0         | 677  | 705  | 96 +  | 554  | 1258 | 1      | 693    |
| UN10364 | Rsa1.0.00302.1 | 908  | 97521  | 1.00E-165 | 362  | 382  | 94 -  | 329  | 705  | 79283  | 79656  |
| UN10365 | Rsa1.0.00886.1 | 919  | 167350 | 0         | 455  | 491  | 92 +  | 7    | 488  | 11230  | 11719  |
| UN10366 | Rsa1.0.04446.1 | 1288 | 17317  | 0         | 712  | 723  | 98 -  | 264  | 986  | 2267   | 2989   |
| UN10367 | Rsa1.0.00033.1 | 1040 | 515811 | 1.00E-132 | 270  | 279  | 96 -  | 762  | 1036 | 41403  | 41679  |
| UN10368 | Rsa1.0.09091.1 | 708  | 6656   | 0         | 500  | 501  | 99 -  | 1    | 501  | 2634   | 3134   |
| UN10369 | Rsa1.0.02000.1 | 1386 | 36210  | 1.00E-112 | 273  | 295  | 92 +  | 1059 | 1343 | 4950   | 5244   |
| UN10370 | Rsa1.0.00810.1 | 990  | 63289  | 0         | 534  | 553  | 96 +  | 441  | 990  | 57632  | 58175  |
| UN10371 | Rsa1.0.02901.1 | 1172 | 26909  | 1.00E-158 | 293  | 295  | 99 -  | 879  | 1172 | 13858  | 14152  |
| UN10372 | Rsa1.0.05956.1 | 928  | 12111  | 1.00E-156 | 282  | 283  | 99 -  | 642  | 924  | 3203   | 3485   |

|         |                |      |        |           |      |      |       |      |      |        |        |
|---------|----------------|------|--------|-----------|------|------|-------|------|------|--------|--------|
| UN10373 | Rsa1.0.02859.1 | 1116 | 162118 | 1.00E-150 | 366  | 396  | 92 -  | 5    | 390  | 144252 | 144639 |
| UN10374 | Rsa1.0.00244.1 | 1617 | 103590 | 0         | 1600 | 1619 | 98 -  | 1    | 1617 | 21064  | 22671  |
| UN10375 | Rsa1.0.00169.1 | 1004 | 274298 | 0         | 614  | 642  | 95 -  | 1    | 641  | 87856  | 88495  |
| UN10376 | Rsa1.0.00659.1 | 740  | 69733  | 1.00E-127 | 322  | 347  | 92 -  | 42   | 383  | 20560  | 20902  |
| UN10377 | Rsa1.0.00863.1 | 1240 | 254535 | 0         | 557  | 564  | 98 +  | 3    | 566  | 126471 | 127032 |
| UN10378 | Rsa1.0.01527.1 | 1221 | 43905  | 1.00E-164 | 328  | 341  | 96 -  | 3    | 343  | 37951  | 38282  |
| UN10379 | Rsa1.0.01448.1 | 876  | 45645  | 0         | 460  | 489  | 94 +  | 2    | 488  | 37833  | 38314  |
| UN10380 | Rsa1.0.00602.1 | 1131 | 73302  | 0         | 561  | 570  | 98 +  | 3    | 565  | 28641  | 29210  |
| UN10381 | Rsa1.0.00273.1 | 1226 | 326186 | 0         | 659  | 663  | 99 +  | 1    | 659  | 287923 | 288585 |
| UN10382 | Rsa1.0.05100.1 | 1051 | 14853  | 1.00E-117 | 253  | 264  | 95 +  | 10   | 268  | 1926   | 2189   |
| UN10383 | Rsa1.0.01094.1 | 1702 | 167285 | 0         | 586  | 586  | 100 - | 1117 | 1702 | 162962 | 163547 |
| UN10384 | Rsa1.0.01836.1 | 1468 | 38503  | 0         | 404  | 405  | 99 -  | 1064 | 1467 | 1674   | 2078   |
| UN10385 | Rsa1.0.01559.1 | 958  | 43262  | 2.00E-61  | 121  | 121  | 100 - | 34   | 154  | 23194  | 23314  |
| UN10386 | Rsa1.0.00051.1 | 665  | 258225 | 0         | 656  | 663  | 98 +  | 1    | 663  | 100708 | 101370 |
| UN10387 | Rsa1.0.15691.1 | 1315 | 2479   | 1.00E-134 | 252  | 255  | 98 -  | 1061 | 1315 | 1418   | 1672   |
| UN10388 | Rsa1.0.01549.1 | 821  | 43543  | 0         | 778  | 805  | 96 -  | 18   | 819  | 31477  | 32275  |
| UN10389 | Rsa1.0.02068.1 | 1200 | 35432  | 0         | 399  | 401  | 99 +  | 802  | 1200 | 8081   | 8481   |
| UN10390 | Rsa1.0.02561.1 | 1357 | 30080  | 0         | 403  | 415  | 97 +  | 462  | 876  | 14681  | 15090  |
| UN10391 | Rsa1.0.00087.1 | 1074 | 761073 | 1.00E-170 | 416  | 449  | 92 +  | 4    | 443  | 620991 | 621436 |
| UN10392 | Rsa1.0.00623.1 | 959  | 207630 | 0         | 453  | 458  | 98 -  | 503  | 959  | 11311  | 11768  |
| UN10393 | Rsa1.0.00329.1 | 794  | 222544 | 1.00E-137 | 248  | 248  | 100 - | 3    | 250  | 179292 | 179539 |
| UN10394 | Rsa1.0.00361.1 | 1324 | 91181  | 1.00E-147 | 274  | 277  | 98 -  | 834  | 1110 | 12174  | 12450  |
| UN10395 | Rsa1.0.01667.1 | 1572 | 41315  | 0         | 728  | 740  | 98 -  | 1    | 740  | 33670  | 34407  |
| UN10396 | Rsa1.0.00258.1 | 1235 | 102381 | 1.00E-178 | 331  | 336  | 98 +  | 27   | 362  | 45308  | 45643  |
| UN10397 | Rsa1.0.00660.1 | 757  | 69688  | 0         | 395  | 399  | 98 -  | 362  | 757  | 52548  | 52946  |
| UN10398 | Rsa1.0.00277.1 | 430  | 100132 | 1.00E-158 | 291  | 294  | 98 +  | 112  | 405  | 8930   | 9223   |
| UN10399 | Rsa1.0.02753.1 | 710  | 28215  | 0         | 675  | 713  | 94 -  | 3    | 708  | 8050   | 8744   |
| UN10400 | Rsa1.0.04034.1 | 1162 | 19481  | 1.00E-147 | 264  | 264  | 100 + | 213  | 476  | 12812  | 13075  |
| UN10401 | Rsa1.0.00541.1 | 912  | 76863  | 1.00E-163 | 316  | 324  | 97 -  | 200  | 523  | 34580  | 34903  |
| UN10402 | Rsa1.0.12343.1 | 895  | 5249   | 1.00E-65  | 190  | 208  | 91 +  | 688  | 895  | 2222   | 2427   |
| UN10403 | Rsa1.0.14175.1 | 1170 | 3704   | 0         | 443  | 444  | 99 +  | 273  | 715  | 2887   | 3330   |
| UN10404 | Rsa1.0.05287.1 | 1883 | 14264  | 0         | 1516 | 1606 | 94 +  | 11   | 1614 | 3998   | 5587   |
| UN10405 | Rsa1.0.04806.1 | 683  | 15898  | 0         | 465  | 481  | 96 +  | 203  | 683  | 7176   | 7647   |
| UN10406 | Rsa1.0.00354.1 | 1464 | 232005 | 0         | 1436 | 1457 | 98 +  | 4    | 1460 | 171044 | 172500 |
| UN10407 | Rsa1.0.00415.1 | 743  | 86795  | 1.00E-179 | 375  | 394  | 95 -  | 1    | 394  | 4549   | 4942   |
| UN10408 | Rsa1.0.00722.1 | 734  | 66840  | 0         | 333  | 336  | 99 -  | 3    | 338  | 61473  | 61808  |
| UN10409 | Rsa1.0.00047.1 | 1246 | 168582 | 1.00E-137 | 298  | 313  | 95 -  | 933  | 1244 | 113998 | 114306 |
| UN10410 | Rsa1.0.15127.1 | 632  | 2809   | 0         | 403  | 403  | 100 - | 4    | 406  | 2023   | 2425   |
| UN10411 | Rsa1.0.00855.1 | 1229 | 62047  | 0         | 797  | 812  | 98 +  | 414  | 1225 | 22692  | 23503  |

|         |                |      |        |           |      |      |       |      |      |        |        |
|---------|----------------|------|--------|-----------|------|------|-------|------|------|--------|--------|
| UN10412 | Rsa1.0.00215.1 | 734  | 201775 | 0         | 384  | 390  | 98 +  | 343  | 732  | 24023  | 24412  |
| UN10413 | Rsa1.0.01835.1 | 707  | 38542  | 0         | 419  | 419  | 100 - | 288  | 706  | 24220  | 24638  |
| UN10414 | Rsa1.0.00833.1 | 1219 | 62621  | 1.00E-119 | 244  | 252  | 96 +  | 969  | 1217 | 7472   | 7723   |
| UN10415 | Rsa1.0.00198.1 | 1104 | 222963 | 0         | 387  | 390  | 99 -  | 715  | 1103 | 178618 | 179007 |
| UN10416 | Rsa1.0.01037.1 | 1100 | 55969  | 0         | 445  | 451  | 98 +  | 19   | 469  | 51914  | 52364  |
| UN10417 | Rsa1.0.03009.1 | 751  | 26065  | 1.00E-180 | 366  | 379  | 96 +  | 7    | 382  | 2628   | 3006   |
| UN10418 | Rsa1.0.00260.1 | 1968 | 102021 | 0         | 880  | 921  | 95 +  | 732  | 1652 | 27623  | 28531  |
| UN10419 | Rsa1.0.00195.1 | 676  | 251884 | 1.00E-156 | 286  | 288  | 99 +  | 389  | 676  | 83583  | 83870  |
| UN10420 | Rsa1.0.02212.1 | 1008 | 33840  | 1.00E-179 | 319  | 319  | 100 + | 1    | 319  | 27406  | 27724  |
| UN10421 | Rsa1.0.00059.1 | 1324 | 159650 | 1.00E-157 | 319  | 331  | 96 -  | 995  | 1322 | 131088 | 131418 |
| UN10422 | Rsa1.0.00120.1 | 854  | 277288 | 0         | 405  | 406  | 99 -  | 1    | 406  | 121696 | 122100 |
| UN10423 | Rsa1.0.05991.1 | 500  | 12013  | 1.00E-115 | 238  | 246  | 96 -  | 254  | 499  | 1321   | 1564   |
| UN10424 | Rsa1.0.00328.1 | 1337 | 224661 | 0         | 921  | 927  | 99 -  | 37   | 963  | 184283 | 185209 |
| UN10425 | Rsa1.0.00088.1 | 1293 | 141341 | 1.00E-151 | 389  | 424  | 91 -  | 868  | 1283 | 66452  | 66870  |
| UN10426 | Rsa1.0.00163.1 | 1511 | 116847 | 0         | 439  | 464  | 94 +  | 1033 | 1493 | 83512  | 83968  |
| UN10427 | Rsa1.0.00545.1 | 1278 | 189649 | 0         | 589  | 596  | 98 +  | 3    | 598  | 29512  | 30105  |
| UN10428 | Rsa1.0.01872.1 | 904  | 37908  | 0         | 481  | 483  | 99 -  | 1    | 483  | 9035   | 9517   |
| UN10429 | Rsa1.0.07639.1 | 1432 | 8966   | 0         | 1427 | 1433 | 99 -  | 1    | 1432 | 6028   | 7460   |
| UN10430 | Rsa1.0.00902.1 | 1157 | 60241  | 0         | 665  | 667  | 99 -  | 3    | 669  | 16185  | 16851  |
| UN10431 | Rsa1.0.00360.1 | 1411 | 91190  | 1.00E-129 | 389  | 434  | 89 +  | 299  | 711  | 43686  | 44119  |
| UN10432 | Rsa1.0.00040.1 | 1499 | 324196 | 0         | 961  | 965  | 99 -  | 535  | 1499 | 217469 | 218433 |
| UN10433 | Rsa1.0.00413.1 | 749  | 86921  | 0         | 373  | 373  | 100 - | 375  | 747  | 20449  | 20821  |
| UN10434 | Rsa1.0.01467.1 | 1828 | 45161  | 1.00E-105 | 267  | 294  | 90 +  | 1554 | 1828 | 23046  | 23339  |
| UN10435 | Rsa1.0.00884.1 | 772  | 61150  | 0         | 765  | 769  | 99 -  | 4    | 772  | 56311  | 57078  |
| UN10436 | Rsa1.0.00933.1 | 1320 | 59164  | 1.00E-178 | 343  | 350  | 98 -  | 1    | 345  | 2856   | 3205   |
| UN10437 | Rsa1.0.00328.1 | 614  | 224661 | 0         | 407  | 407  | 100 - | 6    | 412  | 861    | 1267   |
| UN10438 | Rsa1.0.00949.1 | 797  | 58549  | 0         | 330  | 331  | 99 +  | 467  | 797  | 39561  | 39891  |
| UN10439 | Rsa1.0.03455.1 | 1712 | 22804  | 0         | 1668 | 1732 | 96 +  | 4    | 1711 | 1286   | 3007   |
| UN10440 | Rsa1.0.03413.1 | 1524 | 23137  | 0         | 1286 | 1313 | 97 +  | 3    | 1312 | 17992  | 19304  |
| UN10441 | Rsa1.0.13478.1 | 922  | 4790   | 0         | 383  | 385  | 99 -  | 1    | 385  | 615    | 999    |
| UN10442 | Rsa1.0.00088.1 | 866  | 141341 | 1.00E-133 | 259  | 265  | 97 -  | 38   | 302  | 6655   | 6919   |
| UN10443 | Rsa1.0.00211.1 | 1375 | 228189 | 0         | 494  | 516  | 95 -  | 315  | 830  | 130199 | 130714 |
| UN10444 | Rsa1.0.03401.1 | 1300 | 23191  | 8.00E-52  | 248  | 293  | 84 +  | 626  | 917  | 5986   | 6277   |
| UN10445 | Rsa1.0.00190.1 | 896  | 318240 | 0         | 383  | 400  | 95 -  | 408  | 805  | 314391 | 314786 |
| UN10446 | Rsa1.0.01271.1 | 1552 | 49569  | 0         | 482  | 497  | 96 -  | 825  | 1320 | 22174  | 22670  |
| UN10447 | Rsa1.0.00293.1 | 1103 | 339294 | 0         | 385  | 392  | 98 -  | 712  | 1103 | 4126   | 4515   |
| UN10448 | Rsa1.0.00419.1 | 1495 | 86562  | 1.00E-117 | 234  | 238  | 98 -  | 1241 | 1477 | 15435  | 15671  |
| UN10449 | Rsa1.0.01295.1 | 881  | 49040  | 0         | 411  | 425  | 96 +  | 458  | 881  | 21320  | 21740  |
| UN10450 | Rsa1.0.18906.1 | 1215 | 1514   | 0         | 374  | 381  | 98 -  | 831  | 1211 | 58     | 438    |

|         |                |      |        |           |      |      |       |      |      |        |        |
|---------|----------------|------|--------|-----------|------|------|-------|------|------|--------|--------|
| UN10451 | Rsa1.0_03618.1 | 1016 | 21744  | 1.00E-136 | 247  | 247  | 100 - | 770  | 1016 | 11073  | 11319  |
| UN10452 | Rsa1.0_04022.1 | 922  | 19534  | 2.00E-85  | 214  | 235  | 91 +  | 703  | 922  | 6268   | 6502   |
| UN10453 | Rsa1.0_00797.1 | 1032 | 63959  | 0         | 565  | 565  | 100 - | 468  | 1032 | 51725  | 52289  |
| UN10454 | Rsa1.0_01537.1 | 699  | 187285 | 1.00E-166 | 407  | 444  | 91 +  | 257  | 698  | 841    | 1261   |
| UN10455 | Rsa1.0_00030.1 | 1663 | 250988 | 0         | 567  | 571  | 99 -  | 1093 | 1663 | 44636  | 45206  |
| UN10456 | Rsa1.0_04395.1 | 592  | 17570  | 1.00E-135 | 253  | 256  | 98 -  | 306  | 561  | 10029  | 10284  |
| UN10457 | Rsa1.0_00066.1 | 1024 | 152418 | 0         | 568  | 589  | 96 -  | 45   | 633  | 112082 | 112670 |
| UN10458 | Rsa1.0_02266.1 | 1114 | 33195  | 1.00E-174 | 339  | 346  | 97 -  | 759  | 1104 | 21919  | 22262  |
| UN10459 | Rsa1.0_00434.1 | 1260 | 85171  | 0         | 639  | 658  | 97 +  | 617  | 1259 | 71294  | 71949  |
| UN10460 | Rsa1.0_00190.1 | 1636 | 318240 | 0         | 417  | 417  | 100 - | 1219 | 1635 | 211837 | 212253 |
| UN10461 | Rsa1.0_01997.1 | 1182 | 158416 | 1.00E-116 | 295  | 315  | 93 -  | 8    | 318  | 7533   | 7843   |
| UN10462 | Rsa1.0_00294.1 | 1814 | 144860 | 0         | 841  | 871  | 96 -  | 300  | 1167 | 57575  | 58442  |
| UN10463 | Rsa1.0_00090.1 | 764  | 273859 | 0         | 492  | 511  | 96 +  | 256  | 760  | 148579 | 149086 |
| UN10464 | Rsa1.0_02907.1 | 1222 | 26861  | 0         | 572  | 575  | 99 -  | 616  | 1190 | 15223  | 15794  |
| UN10465 | Rsa1.0_03560.1 | 1586 | 22092  | 0         | 456  | 464  | 98 +  | 1122 | 1585 | 379    | 841    |
| UN10466 | Rsa1.0_00215.1 | 1622 | 201775 | 0         | 922  | 941  | 97 +  | 684  | 1622 | 26877  | 27817  |
| UN10467 | Rsa1.0_00589.1 | 850  | 209965 | 0         | 793  | 836  | 94 +  | 12   | 847  | 154838 | 155658 |
| UN10468 | Rsa1.0_00483.1 | 898  | 81102  | 0         | 381  | 385  | 98 -  | 514  | 898  | 46548  | 46932  |
| UN10469 | Rsa1.0_00706.1 | 797  | 291570 | 0         | 498  | 510  | 97 +  | 2    | 511  | 159001 | 159504 |
| UN10470 | Rsa1.0_00145.1 | 739  | 261008 | 0         | 406  | 428  | 94 +  | 6    | 424  | 8528   | 8953   |
| UN10471 | Rsa1.0_01926.1 | 1358 | 37206  | 1.00E-178 | 380  | 402  | 94 +  | 3    | 402  | 15739  | 16124  |
| UN10472 | Rsa1.0_00560.1 | 1334 | 75685  | 7.00E-71  | 184  | 197  | 93 -  | 1    | 191  | 3912   | 4107   |
| UN10473 | Rsa1.0_00451.1 | 1514 | 322533 | 0         | 1445 | 1550 | 93 +  | 1    | 1512 | 249756 | 251305 |
| UN10474 | Rsa1.0_11429.1 | 506  | 5511   | 0         | 376  | 389  | 96 +  | 127  | 506  | 4743   | 5131   |
| UN10475 | Rsa1.0_01951.1 | 1274 | 36941  | 0         | 766  | 767  | 99 -  | 492  | 1258 | 10719  | 11485  |
| UN10476 | Rsa1.0_00826.1 | 1253 | 166736 | 0         | 525  | 525  | 100 + | 1    | 525  | 130428 | 130952 |
| UN10477 | Rsa1.0_01154.1 | 907  | 52249  | 0         | 560  | 570  | 98 -  | 1    | 570  | 38105  | 38670  |
| UN10478 | Rsa1.0_00808.1 | 1331 | 63351  | 0         | 799  | 799  | 100 + | 1    | 799  | 39339  | 40137  |
| UN10479 | Rsa1.0_11046.1 | 1330 | 5635   | 0         | 339  | 341  | 99 -  | 11   | 351  | 3092   | 3432   |
| UN10480 | Rsa1.0_02143.1 | 1026 | 34632  | 0         | 1011 | 1021 | 99 +  | 4    | 1024 | 8838   | 9856   |
| UN10481 | Rsa1.0_00734.1 | 1009 | 66508  | 1.00E-56  | 116  | 117  | 99 +  | 388  | 504  | 15185  | 15301  |
| UN10482 | Rsa1.0_00054.1 | 1177 | 162053 | 0         | 336  | 336  | 100 - | 841  | 1176 | 5485   | 5820   |
| UN10483 | Rsa1.0_01559.1 | 625  | 43262  | 1.00E-105 | 219  | 225  | 97 +  | 389  | 611  | 2268   | 2491   |
| UN10484 | Rsa1.0_01339.1 | 1726 | 47813  | 1.00E-110 | 307  | 342  | 89 +  | 1336 | 1661 | 14806  | 15137  |
| UN10485 | Rsa1.0_01448.1 | 1130 | 45645  | 0         | 1119 | 1138 | 98 -  | 1    | 1128 | 15660  | 16796  |
| UN10486 | Rsa1.0_01569.1 | 1340 | 43029  | 1.00E-167 | 301  | 302  | 99 -  | 5    | 306  | 38883  | 39184  |
| UN10487 | Rsa1.0_02265.1 | 1665 | 33233  | 1.00E-124 | 239  | 243  | 98 +  | 1196 | 1438 | 9083   | 9325   |
| UN10488 | Rsa1.0_00176.1 | 1525 | 240984 | 1.00E-154 | 297  | 304  | 97 +  | 3    | 306  | 184021 | 184324 |
| UN10489 | Rsa1.0_00707.1 | 943  | 190112 | 0         | 367  | 369  | 99 +  | 1    | 369  | 65242  | 65610  |

|         |                |      |        |           |      |      |       |      |      |        |        |
|---------|----------------|------|--------|-----------|------|------|-------|------|------|--------|--------|
| UN10490 | Rsa1.0.03581.1 | 1709 | 21965  | 0         | 401  | 406  | 98 +  | 1269 | 1674 | 20231  | 20636  |
| UN10491 | Rsa1.0.01055.1 | 1445 | 55466  | 0         | 1444 | 1446 | 99 -  | 1    | 1445 | 25304  | 26748  |
| UN10492 | Rsa1.0.00941.1 | 1136 | 58891  | 1.00E-162 | 297  | 298  | 99 -  | 1    | 298  | 44924  | 45220  |
| UN10493 | Rsa1.0.00849.1 | 1043 | 62212  | 0         | 406  | 425  | 95 -  | 617  | 1037 | 9683   | 10099  |
| UN10494 | Rsa1.0.00113.1 | 1603 | 131574 | 1.00E-172 | 319  | 323  | 98 -  | 1281 | 1603 | 74503  | 74825  |
| UN10495 | Rsa1.0.00782.1 | 1618 | 64468  | 0         | 474  | 494  | 95 -  | 553  | 1046 | 30043  | 30536  |
| UN10496 | Rsa1.0.04199.1 | 890  | 18501  | 0         | 860  | 889  | 96 +  | 12   | 889  | 8176   | 9064   |
| UN10497 | Rsa1.0.05846.1 | 700  | 12434  | 2.00E-94  | 179  | 180  | 99 +  | 317  | 496  | 7562   | 7741   |
| UN10498 | Rsa1.0.00381.1 | 1173 | 89718  | 8.00E-98  | 255  | 276  | 92 -  | 904  | 1173 | 71999  | 72270  |
| UN10499 | Rsa1.0.04696.1 | 6086 | 16339  | 0         | 617  | 694  | 88 +  | 3857 | 4550 | 11817  | 12499  |
| UN10500 | Rsa1.0.00682.1 | 1377 | 68680  | 0         | 822  | 834  | 98 +  | 16   | 849  | 46123  | 46956  |
| UN10501 | Rsa1.0.09388.1 | 1093 | 6405   | 1.00E-164 | 367  | 390  | 94 +  | 3    | 389  | 2824   | 3210   |
| UN10502 | Rsa1.0.25509.1 | 1217 | 933    | 0         | 394  | 405  | 97 -  | 1    | 405  | 498    | 902    |
| UN10503 | Rsa1.0.09951.1 | 917  | 6072   | 0         | 539  | 540  | 99 -  | 378  | 917  | 2117   | 2656   |
| UN10504 | Rsa1.0.00500.1 | 836  | 272308 | 0         | 613  | 618  | 99 -  | 4    | 621  | 157120 | 157735 |
| UN10505 | Rsa1.0.02928.1 | 1597 | 26680  | 0         | 363  | 369  | 98 -  | 1220 | 1582 | 7240   | 7608   |
| UN10506 | Rsa1.0.16693.1 | 1042 | 2064   | 0         | 493  | 494  | 99 -  | 549  | 1042 | 747    | 1240   |
| UN10507 | Rsa1.0.01737.1 | 1320 | 40101  | 0         | 463  | 490  | 94 +  | 826  | 1315 | 19997  | 20463  |
| UN10508 | Rsa1.0.02358.1 | 1636 | 32213  | 0         | 922  | 946  | 97 -  | 198  | 1138 | 7909   | 8854   |
| UN10509 | Rsa1.0.00697.1 | 768  | 67913  | 0         | 750  | 769  | 97 +  | 1    | 767  | 46052  | 46817  |
| UN10510 | Rsa1.0.05199.1 | 1524 | 14529  | 0         | 761  | 807  | 94 +  | 1    | 805  | 6531   | 7324   |
| UN10511 | Rsa1.0.00162.1 | 1144 | 239935 | 0         | 618  | 620  | 99 +  | 4    | 623  | 112749 | 113368 |
| UN10512 | Rsa1.0.00317.1 | 1022 | 218290 | 0         | 327  | 328  | 99 +  | 1    | 328  | 72594  | 72921  |
| UN10513 | Rsa1.0.00484.1 | 635  | 203294 | 6.00E-91  | 242  | 262  | 92 +  | 1    | 262  | 143450 | 143708 |
| UN10514 | Rsa1.0.06278.1 | 807  | 11333  | 0         | 387  | 389  | 99 +  | 418  | 806  | 1864   | 2251   |
| UN10515 | Rsa1.0.02949.1 | 1309 | 26506  | 0         | 799  | 816  | 97 -  | 500  | 1309 | 12852  | 13664  |
| UN10516 | Rsa1.0.00571.1 | 1412 | 329018 | 0         | 824  | 853  | 96 -  | 94   | 942  | 204578 | 205423 |
| UN10517 | Rsa1.0.00101.1 | 1019 | 267193 | 0         | 382  | 396  | 96 +  | 623  | 1017 | 208637 | 209032 |
| UN10518 | Rsa1.0.01768.1 | 1205 | 138463 | 1.00E-138 | 282  | 290  | 97 -  | 916  | 1205 | 120013 | 120300 |
| UN10519 | Rsa1.0.00451.1 | 2310 | 322533 | 3.00E-99  | 297  | 336  | 88 -  | 1132 | 1467 | 293086 | 293411 |
| UN10520 | Rsa1.0.00002.1 | 810  | 601661 | 0         | 433  | 461  | 93 +  | 1    | 461  | 240858 | 241305 |
| UN10521 | Rsa1.0.03067.1 | 901  | 25651  | 2.00E-94  | 236  | 256  | 92 +  | 149  | 404  | 5352   | 5607   |
| UN10522 | Rsa1.0.00507.1 | 1229 | 79074  | 0         | 468  | 476  | 98 -  | 754  | 1229 | 42740  | 43214  |
| UN10523 | Rsa1.0.00077.1 | 1252 | 145005 | 0         | 1231 | 1250 | 98 -  | 3    | 1252 | 129688 | 130936 |
| UN10524 | Rsa1.0.01426.1 | 658  | 46112  | 0         | 333  | 333  | 100 - | 326  | 658  | 44168  | 44500  |
| UN10525 | Rsa1.0.02789.1 | 1578 | 27850  | 0         | 383  | 385  | 99 +  | 239  | 623  | 22916  | 23300  |
| UN10526 | Rsa1.0.00706.1 | 784  | 291570 | 0         | 468  | 484  | 96 +  | 2    | 485  | 159033 | 159504 |
| UN10527 | Rsa1.0.05755.1 | 918  | 12730  | 0         | 529  | 544  | 97 -  | 377  | 916  | 9387   | 9928   |
| UN10528 | Rsa1.0.00351.1 | 789  | 413096 | 0         | 413  | 413  | 100 - | 377  | 789  | 244415 | 244827 |



|         |                |      |        |           |      |      |       |      |      |        |        |
|---------|----------------|------|--------|-----------|------|------|-------|------|------|--------|--------|
| UN10529 | Rsa1.0_00344.1 | 1079 | 191774 | 0         | 528  | 529  | 99 +  | 550  | 1078 | 108987 | 109515 |
| UN10530 | Rsa1.0_01005.1 | 1177 | 56967  | 0         | 627  | 631  | 99 +  | 546  | 1176 | 37403  | 38033  |
| UN10531 | Rsa1.0_00021.1 | 1090 | 263655 | 0         | 358  | 367  | 97 -  | 244  | 610  | 238503 | 238869 |
| UN10532 | Rsa1.0_00073.1 | 1484 | 240924 | 0         | 657  | 660  | 99 -  | 825  | 1484 | 118465 | 119124 |
| UN10533 | Rsa1.0_08790.1 | 882  | 6918   | 0         | 479  | 517  | 92 +  | 367  | 872  | 4980   | 5496   |
| UN10534 | Rsa1.0_00273.1 | 1382 | 326186 | 1.00E-143 | 363  | 401  | 90 +  | 988  | 1379 | 4768   | 5148   |
| UN10535 | Rsa1.0_00675.1 | 1035 | 145590 | 0         | 551  | 553  | 99 -  | 3    | 555  | 23696  | 24248  |
| UN10536 | Rsa1.0_02934.1 | 760  | 26627  | 0         | 472  | 480  | 98 -  | 1    | 480  | 25244  | 25722  |
| UN10537 | Rsa1.0_00116.1 | 940  | 365886 | 8.00E-79  | 150  | 150  | 100 - | 720  | 869  | 353829 | 353978 |
| UN10538 | Rsa1.0_01135.1 | 1053 | 52799  | 0         | 500  | 501  | 99 -  | 209  | 709  | 24574  | 25074  |
| UN10539 | Rsa1.0_00828.1 | 828  | 62744  | 1.00E-165 | 395  | 428  | 92 -  | 406  | 828  | 47929  | 48337  |
| UN10540 | Rsa1.0_00110.1 | 787  | 132719 | 0         | 672  | 750  | 89 +  | 44   | 760  | 116490 | 117227 |
| UN10541 | Rsa1.0_00198.1 | 860  | 222963 | 0         | 426  | 427  | 99 -  | 4    | 429  | 174650 | 175076 |
| UN10542 | Rsa1.0_00041.1 | 1138 | 186197 | 0         | 786  | 803  | 97 +  | 335  | 1137 | 157067 | 157869 |
| UN10543 | Rsa1.0_01406.1 | 429  | 46439  | 0         | 340  | 341  | 99 -  | 89   | 429  | 40283  | 40623  |
| UN10544 | Rsa1.0_02290.1 | 1426 | 32971  | 0         | 469  | 470  | 99 -  | 955  | 1424 | 21744  | 22213  |
| UN10545 | Rsa1.0_47400.1 | 910  | 477    | 0         | 393  | 393  | 100 + | 168  | 560  | 1      | 393    |
| UN10546 | Rsa1.0_01701.1 | 541  | 162121 | 2.00E-32  | 96   | 104  | 92 +  | 3    | 106  | 9023   | 9126   |
| UN10547 | Rsa1.0_02365.1 | 1164 | 32118  | 0         | 543  | 556  | 97 -  | 3    | 557  | 12194  | 12741  |
| UN10548 | Rsa1.0_00471.1 | 785  | 81897  | 1.00E-178 | 344  | 352  | 97 +  | 429  | 779  | 65986  | 66337  |
| UN10549 | Rsa1.0_00394.1 | 1267 | 148426 | 0         | 466  | 491  | 94 +  | 775  | 1265 | 67486  | 67964  |
| UN10550 | Rsa1.0_73802.1 | 938  | 310    | 1.00E-172 | 309  | 310  | 99 -  | 99   | 408  | 1      | 310    |
| UN10551 | Rsa1.0_00347.1 | 1415 | 93048  | 1.00E-176 | 340  | 348  | 97 -  | 1071 | 1415 | 72503  | 72850  |
| UN10552 | Rsa1.0_03878.1 | 1027 | 20305  | 1.00E-178 | 316  | 316  | 100 - | 681  | 996  | 11883  | 12198  |
| UN10553 | Rsa1.0_26708.1 | 1627 | 881    | 0         | 571  | 602  | 94 -  | 1011 | 1591 | 4      | 605    |
| UN10554 | Rsa1.0_00485.1 | 775  | 80937  | 2.00E-66  | 243  | 279  | 87 +  | 435  | 709  | 37393  | 37671  |
| UN10555 | Rsa1.0_00394.1 | 1236 | 148426 | 0         | 399  | 413  | 96 +  | 827  | 1236 | 99869  | 100278 |
| UN10556 | Rsa1.0_00805.1 | 1346 | 63724  | 0         | 855  | 925  | 92 -  | 6    | 907  | 57517  | 58441  |
| UN10557 | Rsa1.0_00387.1 | 1216 | 495407 | 0         | 874  | 901  | 97 -  | 8    | 907  | 409522 | 410422 |
| UN10558 | Rsa1.0_00706.1 | 1146 | 291570 | 0         | 623  | 657  | 94 -  | 493  | 1145 | 23308  | 23961  |
| UN10559 | Rsa1.0_00330.1 | 1263 | 94666  | 0         | 830  | 843  | 98 -  | 1    | 843  | 16817  | 17659  |
| UN10560 | Rsa1.0_00529.1 | 1613 | 77487  | 0         | 538  | 539  | 99 +  | 2    | 540  | 69325  | 69863  |
| UN10561 | Rsa1.0_02117.1 | 1422 | 34843  | 1.00E-150 | 273  | 274  | 99 -  | 238  | 511  | 15985  | 16258  |
| UN10562 | Rsa1.0_00028.1 | 1423 | 293984 | 5.00E-87  | 173  | 176  | 98 +  | 1187 | 1362 | 175533 | 175708 |
| UN10563 | Rsa1.0_00697.1 | 1487 | 67913  | 1.00E-115 | 229  | 235  | 97 -  | 765  | 999  | 57671  | 57905  |
| UN10564 | Rsa1.0_13353.1 | 1356 | 4894   | 0         | 567  | 569  | 99 +  | 245  | 813  | 4326   | 4894   |
| UN10565 | Rsa1.0_00407.1 | 1728 | 191544 | 0         | 1241 | 1242 | 99 -  | 3    | 1244 | 166770 | 168011 |
| UN10566 | Rsa1.0_00710.1 | 2319 | 67325  | 0         | 943  | 964  | 97 +  | 865  | 1822 | 11528  | 12490  |
| UN10567 | Rsa1.0_32838.1 | 1240 | 693    | 0         | 380  | 380  | 100 - | 506  | 885  | 314    | 693    |

|         |                |      |        |           |     |     |       |      |      |        |        |
|---------|----------------|------|--------|-----------|-----|-----|-------|------|------|--------|--------|
| UN10568 | Rsa1.0_01958.1 | 750  | 261128 | 7.00E-88  | 195 | 205 | 95 +  | 527  | 731  | 134810 | 135009 |
| UN10569 | Rsa1.0_02173.1 | 1235 | 34318  | 1.00E-118 | 225 | 228 | 98 +  | 1    | 228  | 15510  | 15737  |
| UN10570 | Rsa1.0_33997.1 | 1559 | 666    | 0         | 486 | 488 | 99 +  | 3    | 490  | 179    | 666    |
| UN10571 | Rsa1.0_04845.1 | 1462 | 15747  | 1.00E-111 | 220 | 225 | 97 -  | 1055 | 1279 | 4169   | 4393   |
| UN10572 | Rsa1.0_00896.1 | 896  | 60509  | 0         | 650 | 652 | 99 -  | 184  | 835  | 38792  | 39443  |
| UN10573 | Rsa1.0_00850.1 | 526  | 62193  | 0         | 401 | 406 | 98 +  | 1    | 406  | 5941   | 6346   |
| UN10574 | Rsa1.0_03062.1 | 1638 | 25678  | 0         | 465 | 467 | 99 -  | 3    | 469  | 8175   | 8641   |
| UN10575 | Rsa1.0_00122.1 | 590  | 265937 | 0         | 559 | 575 | 97 +  | 10   | 583  | 224759 | 225333 |
| UN10576 | Rsa1.0_01837.1 | 793  | 38502  | 0         | 789 | 791 | 99 -  | 3    | 793  | 3739   | 4529   |
| UN10577 | Rsa1.0_00893.1 | 1047 | 60626  | 0         | 495 | 506 | 97 +  | 38   | 543  | 46402  | 46907  |
| UN10578 | Rsa1.0_00064.1 | 852  | 240927 | 0         | 845 | 850 | 99 +  | 1    | 850  | 123684 | 124533 |
| UN10579 | Rsa1.0_00240.1 | 1200 | 104175 | 1.00E-123 | 274 | 289 | 94 -  | 913  | 1200 | 53548  | 53836  |
| UN10580 | Rsa1.0_00050.1 | 1404 | 237174 | 0         | 875 | 876 | 99 -  | 1    | 876  | 124201 | 125076 |
| UN10581 | Rsa1.0_00108.1 | 1288 | 478491 | 1.00E-155 | 335 | 350 | 95 -  | 114  | 459  | 463726 | 464071 |
| UN10582 | Rsa1.0_03140.1 | 1166 | 25081  | 0         | 387 | 390 | 99 +  | 506  | 895  | 12030  | 12419  |
| UN10583 | Rsa1.0_02730.1 | 1186 | 28385  | 0         | 373 | 373 | 100 - | 814  | 1186 | 2508   | 2880   |
| UN10584 | Rsa1.0_02794.1 | 1186 | 27820  | 1.00E-176 | 317 | 318 | 99 +  | 869  | 1186 | 18902  | 19219  |
| UN10585 | Rsa1.0_00351.1 | 1104 | 413096 | 0         | 567 | 568 | 99 -  | 2    | 569  | 376778 | 377345 |
| UN10586 | Rsa1.0_00001.1 | 1294 | 363028 | 1.00E-177 | 325 | 327 | 99 -  | 1    | 327  | 319592 | 319916 |
| UN10587 | Rsa1.0_00281.1 | 1120 | 99908  | 1.00E-150 | 276 | 278 | 99 -  | 74   | 351  | 6793   | 7070   |
| UN10588 | Rsa1.0_01591.1 | 1268 | 42718  | 1.00E-168 | 370 | 393 | 94 +  | 863  | 1249 | 24117  | 24506  |
| UN10589 | Rsa1.0_00019.1 | 1291 | 301669 | 0         | 612 | 621 | 98 +  | 67   | 687  | 100107 | 100727 |
| UN10590 | Rsa1.0_12292.1 | 1023 | 5263   | 0         | 743 | 744 | 99 +  | 280  | 1023 | 1      | 744    |
| UN10591 | Rsa1.0_01412.1 | 949  | 46311  | 0         | 511 | 520 | 98 -  | 7    | 526  | 2268   | 2787   |
| UN10592 | Rsa1.0_01418.1 | 1006 | 46237  | 1.00E-173 | 312 | 313 | 99 +  | 694  | 1006 | 7186   | 7498   |
| UN10593 | Rsa1.0_02430.1 | 1013 | 31506  | 0         | 735 | 740 | 99 -  | 274  | 1013 | 12837  | 13576  |
| UN10594 | Rsa1.0_00018.1 | 1043 | 410899 | 1.00E-106 | 268 | 288 | 93 +  | 741  | 1025 | 262610 | 262892 |
| UN10595 | Rsa1.0_00063.1 | 950  | 156150 | 1.00E-178 | 359 | 373 | 96 -  | 1    | 373  | 138349 | 138721 |
| UN10596 | Rsa1.0_00756.1 | 785  | 65628  | 0         | 397 | 402 | 98 +  | 376  | 776  | 57538  | 57939  |
| UN10597 | Rsa1.0_03539.1 | 963  | 22199  | 1.00E-138 | 276 | 282 | 97 +  | 680  | 961  | 7072   | 7351   |
| UN10598 | Rsa1.0_00380.1 | 833  | 89748  | 0         | 663 | 679 | 97 -  | 1    | 676  | 83924  | 84598  |
| UN10599 | Rsa1.0_00144.1 | 1282 | 120708 | 1.00E-113 | 217 | 220 | 98 -  | 464  | 683  | 13724  | 13943  |
| UN10600 | Rsa1.0_01853.1 | 1298 | 147800 | 0         | 489 | 497 | 98 +  | 804  | 1298 | 128509 | 129003 |
| UN10601 | Rsa1.0_05321.1 | 2279 | 14154  | 5.00E-73  | 153 | 157 | 97 +  | 1749 | 1905 | 6323   | 6479   |
| UN10602 | Rsa1.0_00706.1 | 1130 | 291570 | 0         | 642 | 664 | 96 +  | 15   | 674  | 23300  | 23961  |
| UN10603 | Rsa1.0_07444.1 | 1633 | 9386   | 0         | 470 | 473 | 99 -  | 604  | 1076 | 918    | 1390   |
| UN10604 | Rsa1.0_15033.1 | 687  | 2880   | 0         | 542 | 573 | 94 -  | 115  | 683  | 128    | 700    |
| UN10605 | Rsa1.0_05945.1 | 1227 | 12149  | 0         | 366 | 366 | 100 + | 27   | 392  | 11752  | 12117  |
| UN10606 | Rsa1.0_01106.1 | 941  | 53916  | 0         | 552 | 560 | 98 +  | 383  | 939  | 30702  | 31260  |

|         |                |      |        |           |      |      |       |      |      |        |        |
|---------|----------------|------|--------|-----------|------|------|-------|------|------|--------|--------|
| UN10607 | Rsa1.0.01089.1 | 1734 | 142191 | 0         | 696  | 696  | 100 + | 1030 | 1725 | 103236 | 103931 |
| UN10608 | Rsa1.0.02945.1 | 1529 | 26548  | 0         | 1001 | 1005 | 99 -  | 289  | 1293 | 8396   | 9400   |
| UN10609 | Rsa1.0.08916.1 | 1555 | 6792   | 0         | 1263 | 1279 | 98 +  | 276  | 1548 | 5181   | 6458   |
| UN10610 | Rsa1.0.03978.1 | 1088 | 19753  | 0         | 359  | 368  | 97 -  | 16   | 380  | 11983  | 12350  |
| UN10611 | Rsa1.0.07381.1 | 967  | 9488   | 0         | 590  | 590  | 100 + | 1    | 590  | 3898   | 4487   |
| UN10612 | Rsa1.0.00302.1 | 1221 | 97521  | 1.00E-159 | 300  | 305  | 98 +  | 915  | 1219 | 67021  | 67325  |
| UN10613 | Rsa1.0.18510.1 | 1041 | 1586   | 0         | 560  | 602  | 93 -  | 444  | 1040 | 1001   | 1586   |
| UN10614 | Rsa1.0.04243.1 | 1329 | 18321  | 1.00E-165 | 295  | 295  | 100 + | 1    | 295  | 2892   | 3186   |
| UN10615 | Rsa1.0.02994.1 | 674  | 26168  | 0         | 654  | 658  | 99 +  | 12   | 669  | 2139   | 2795   |
| UN10616 | Rsa1.0.03114.1 | 805  | 25318  | 0         | 515  | 551  | 93 -  | 4    | 552  | 6565   | 7106   |
| UN10617 | Rsa1.0.00116.1 | 1502 | 365886 | 0         | 606  | 621  | 97 -  | 887  | 1501 | 242226 | 242843 |
| UN10618 | Rsa1.0.02563.1 | 1339 | 30050  | 0         | 531  | 535  | 99 -  | 4    | 538  | 29101  | 29635  |
| UN10619 | Rsa1.0.60174.1 | 858  | 381    | 1.00E-149 | 268  | 268  | 100 - | 556  | 823  | 1      | 268    |
| UN10620 | Rsa1.0.03860.1 | 756  | 20407  | 0         | 496  | 517  | 95 -  | 245  | 755  | 15804  | 16316  |
| UN10621 | Rsa1.0.02435.1 | 928  | 31454  | 0         | 353  | 358  | 98 -  | 3    | 360  | 20980  | 21334  |
| UN10622 | Rsa1.0.01439.1 | 1002 | 45841  | 0         | 1000 | 1002 | 99 +  | 1    | 1002 | 27658  | 28659  |
| UN10623 | Rsa1.0.00701.1 | 1100 | 67691  | 0         | 632  | 635  | 99 -  | 466  | 1100 | 5281   | 5915   |
| UN10624 | Rsa1.0.01051.1 | 1175 | 55577  | 0         | 711  | 733  | 96 -  | 184  | 912  | 3695   | 4422   |
| UN10625 | Rsa1.0.00793.1 | 661  | 64103  | 1.00E-119 | 241  | 249  | 96 +  | 413  | 661  | 24186  | 24434  |
| UN10626 | Rsa1.0.04518.1 | 1825 | 17005  | 0         | 517  | 543  | 95 -  | 600  | 1141 | 11675  | 12209  |
| UN10627 | Rsa1.0.01931.1 | 726  | 37187  | 1.00E-154 | 338  | 358  | 94 -  | 7    | 364  | 32029  | 32373  |
| UN10628 | Rsa1.0.03843.1 | 1049 | 20496  | 1.00E-157 | 370  | 398  | 92 +  | 17   | 408  | 6124   | 6521   |
| UN10629 | Rsa1.0.01078.1 | 1900 | 316910 | 0         | 812  | 843  | 96 -  | 1059 | 1900 | 280066 | 280905 |
| UN10630 | Rsa1.0.01786.1 | 1173 | 133324 | 0         | 821  | 868  | 94 -  | 226  | 1087 | 98698  | 99561  |
| UN10631 | Rsa1.0.00097.1 | 1058 | 138858 | 0         | 342  | 344  | 99 -  | 14   | 357  | 65577  | 65920  |
| UN10632 | Rsa1.0.00101.1 | 689  | 267193 | 1.00E-122 | 243  | 247  | 98 -  | 444  | 689  | 119126 | 119371 |
| UN10633 | Rsa1.0.01896.1 | 1819 | 37512  | 0         | 1234 | 1251 | 98 +  | 351  | 1600 | 20513  | 21763  |
| UN10634 | Rsa1.0.08846.1 | 436  | 6867   | 4.00E-48  | 107  | 110  | 97 +  | 99   | 208  | 1959   | 2068   |
| UN10635 | Rsa1.0.01522.1 | 742  | 157436 | 0         | 407  | 413  | 98 -  | 330  | 741  | 3059   | 3471   |
| UN10636 | Rsa1.0.00434.1 | 1017 | 85171  | 1.00E-135 | 278  | 288  | 96 -  | 2    | 287  | 9575   | 9857   |
| UN10637 | Rsa1.0.01536.1 | 448  | 43747  | 0         | 404  | 405  | 99 +  | 4    | 408  | 25749  | 26153  |
| UN10638 | Rsa1.0.00900.1 | 820  | 60367  | 3.00E-96  | 185  | 187  | 98 +  | 537  | 723  | 29648  | 29834  |
| UN10639 | Rsa1.0.25306.1 | 862  | 942    | 1.00E-175 | 388  | 411  | 94 -  | 340  | 746  | 329    | 735    |
| UN10640 | Rsa1.0.00595.1 | 789  | 341648 | 0         | 623  | 631  | 98 +  | 159  | 789  | 12663  | 13287  |
| UN10641 | Rsa1.0.00263.1 | 826  | 224968 | 0         | 432  | 450  | 96 +  | 368  | 815  | 151524 | 151964 |
| UN10642 | Rsa1.0.07775.1 | 430  | 8594   | 0         | 425  | 430  | 98 +  | 1    | 430  | 281    | 709    |
| UN10643 | Rsa1.0.02405.1 | 785  | 31692  | 1.00E-156 | 348  | 370  | 94 +  | 3    | 369  | 17028  | 17383  |
| UN10644 | Rsa1.0.03843.1 | 1126 | 20496  | 0         | 444  | 488  | 90 +  | 5    | 471  | 6051   | 6521   |
| UN10645 | Rsa1.0.02212.1 | 793  | 33840  | 0         | 752  | 790  | 95 -  | 4    | 793  | 25149  | 25932  |

|         |                |      |        |           |      |      |       |      |      |        |        |
|---------|----------------|------|--------|-----------|------|------|-------|------|------|--------|--------|
| UN10646 | Rsa1.0.00715.1 | 593  | 67116  | 1.00E-172 | 475  | 530  | 89 +  | 10   | 538  | 63627  | 64136  |
| UN10647 | Rsa1.0.00354.1 | 900  | 232005 | 1.00E-147 | 307  | 320  | 95 +  | 569  | 887  | 170578 | 170897 |
| UN10648 | Rsa1.0.32300.1 | 954  | 705    | 5.00E-68  | 135  | 136  | 99 -  | 601  | 736  | 44     | 179    |
| UN10649 | Rsa1.0.01740.1 | 893  | 39986  | 0         | 360  | 360  | 100 - | 428  | 787  | 26707  | 27066  |
| UN10650 | Rsa1.0.03851.1 | 1476 | 20451  | 0         | 452  | 452  | 100 + | 1022 | 1473 | 11491  | 11942  |
| UN10651 | Rsa1.0.00223.1 | 679  | 106231 | 3.00E-93  | 177  | 178  | 99 -  | 502  | 679  | 72335  | 72512  |
| UN10652 | Rsa1.0.08259.1 | 1112 | 7641   | 1.00E-154 | 346  | 369  | 93 -  | 2    | 358  | 3089   | 3455   |
| UN10653 | Rsa1.0.00041.1 | 711  | 186197 | 1.00E-141 | 276  | 282  | 97 -  | 430  | 711  | 127152 | 127432 |
| UN10654 | Rsa1.0.01588.1 | 289  | 42724  | 1.00E-145 | 282  | 288  | 97 -  | 2    | 289  | 12918  | 13204  |
| UN10655 | Rsa1.0.03460.1 | 837  | 22747  | 0         | 425  | 440  | 96 -  | 208  | 646  | 12965  | 13404  |
| UN10656 | Rsa1.0.00337.1 | 629  | 143174 | 7.00E-69  | 148  | 153  | 96 -  | 477  | 629  | 128208 | 128360 |
| UN10657 | Rsa1.0.02103.1 | 725  | 35006  | 1.00E-139 | 263  | 267  | 98 +  | 459  | 725  | 24076  | 24342  |
| UN10658 | Rsa1.0.00944.1 | 925  | 58733  | 0         | 595  | 627  | 94 +  | 302  | 923  | 10746  | 11368  |
| UN10659 | Rsa1.0.06488.1 | 382  | 141774 | 1.00E-109 | 215  | 219  | 98 +  | 166  | 382  | 136121 | 136339 |
| UN10660 | Rsa1.0.00247.1 | 975  | 103408 | 0         | 487  | 502  | 97 -  | 474  | 975  | 6006   | 6507   |
| UN10661 | Rsa1.0.00281.1 | 678  | 99908  | 1.00E-168 | 313  | 316  | 99 +  | 3    | 318  | 11309  | 11623  |
| UN10662 | Rsa1.0.01433.1 | 912  | 45976  | 0         | 362  | 363  | 99 +  | 3    | 365  | 13494  | 13856  |
| UN10663 | Rsa1.0.00882.1 | 1330 | 61249  | 1.00E-129 | 257  | 262  | 98 +  | 1    | 260  | 49147  | 49407  |
| UN10664 | Rsa1.0.01326.1 | 432  | 48072  | 1.00E-127 | 253  | 260  | 97 +  | 173  | 432  | 10896  | 11151  |
| UN10665 | Rsa1.0.01046.1 | 803  | 152989 | 0         | 535  | 569  | 94 +  | 1    | 568  | 118630 | 119184 |
| UN10666 | Rsa1.0.05893.1 | 1379 | 12306  | 1.00E-170 | 392  | 419  | 93 -  | 8    | 419  | 8742   | 9154   |
| UN10667 | Rsa1.0.03344.1 | 1032 | 23593  | 0         | 432  | 456  | 94 +  | 578  | 1032 | 12154  | 12607  |
| UN10668 | Rsa1.0.04235.1 | 1345 | 18373  | 0         | 1247 | 1396 | 89 -  | 1    | 1345 | 11381  | 12739  |
| UN10669 | Rsa1.0.00537.1 | 471  | 186980 | 0         | 451  | 475  | 94 -  | 2    | 471  | 176098 | 176562 |
| UN10670 | Rsa1.0.01101.1 | 1064 | 54031  | 3.00E-94  | 238  | 256  | 92 +  | 60   | 311  | 40325  | 40577  |
| UN10671 | Rsa1.0.01211.1 | 845  | 50646  | 1.00E-147 | 419  | 466  | 89 +  | 387  | 835  | 41797  | 42258  |
| UN10672 | Rsa1.0.01549.1 | 964  | 43543  | 0         | 442  | 451  | 98 +  | 109  | 559  | 592    | 1042   |
| UN10673 | Rsa1.0.01453.1 | 969  | 45449  | 0         | 375  | 375  | 100 + | 3    | 377  | 25076  | 25450  |
| UN10674 | Rsa1.0.00235.1 | 501  | 154696 | 3.00E-77  | 223  | 248  | 89 -  | 250  | 486  | 143801 | 144045 |
| UN10675 | Rsa1.0.00668.1 | 905  | 69421  | 1.00E-110 | 352  | 403  | 87 +  | 521  | 901  | 55635  | 56035  |
| UN10676 | Rsa1.0.07955.1 | 830  | 8180   | 1.00E-174 | 309  | 309  | 100 + | 522  | 830  | 6422   | 6730   |
| UN10677 | Rsa1.0.00016.1 | 1137 | 831256 | 1.00E-138 | 289  | 300  | 96 -  | 841  | 1137 | 348675 | 348974 |
| UN10678 | Rsa1.0.03956.1 | 665  | 19872  | 1.00E-115 | 292  | 317  | 92 -  | 47   | 357  | 16858  | 17171  |
| UN10679 | Rsa1.0.00213.1 | 948  | 108167 | 0         | 766  | 807  | 94 -  | 144  | 948  | 34732  | 35527  |
| UN10680 | Rsa1.0.01221.1 | 1360 | 50421  | 1.00E-147 | 318  | 335  | 94 +  | 1030 | 1360 | 49364  | 49694  |
| UN10681 | Rsa1.0.02392.1 | 910  | 152517 | 1.00E-127 | 274  | 287  | 95 -  | 619  | 905  | 7785   | 8070   |
| UN10682 | Rsa1.0.01058.1 | 867  | 55430  | 0         | 864  | 867  | 99 -  | 1    | 865  | 34187  | 35053  |
| UN10683 | Rsa1.0.00061.1 | 1408 | 218685 | 0         | 1252 | 1285 | 97 +  | 125  | 1408 | 185100 | 186383 |
| UN10684 | Rsa1.0.02105.1 | 679  | 156953 | 1.00E-162 | 347  | 363  | 95 +  | 320  | 679  | 9327   | 9686   |

|         |                |      |        |           |      |      |       |      |      |        |        |
|---------|----------------|------|--------|-----------|------|------|-------|------|------|--------|--------|
| UN10685 | Rsa1.0.02903.1 | 831  | 26901  | 0         | 432  | 451  | 95 -  | 3    | 451  | 14022  | 14466  |
| UN10686 | Rsa1.0.28307.1 | 1802 | 820    | 0         | 773  | 841  | 91 +  | 706  | 1540 | 1      | 820    |
| UN10687 | Rsa1.0.06386.1 | 609  | 140583 | 0         | 415  | 422  | 98 -  | 186  | 607  | 134600 | 135021 |
| UN10688 | Rsa1.0.00152.1 | 1136 | 257730 | 0         | 836  | 845  | 98 -  | 4    | 848  | 81107  | 81951  |
| UN10689 | Rsa1.0.02265.1 | 717  | 33233  | 1.00E-122 | 238  | 243  | 97 +  | 199  | 441  | 9083   | 9325   |
| UN10690 | Rsa1.0.00059.1 | 762  | 159650 | 1.00E-166 | 302  | 304  | 99 -  | 204  | 507  | 45276  | 45579  |
| UN10691 | Rsa1.0.01545.1 | 910  | 43599  | 1.00E-174 | 322  | 326  | 98 -  | 98   | 423  | 32611  | 32936  |
| UN10692 | Rsa1.0.00087.1 | 1018 | 761073 | 1.00E-153 | 287  | 291  | 98 -  | 407  | 697  | 729346 | 729636 |
| UN10693 | Rsa1.0.04874.1 | 735  | 15652  | 1.00E-134 | 259  | 262  | 98 +  | 3    | 264  | 15379  | 15637  |
| UN10694 | Rsa1.0.00394.1 | 916  | 148426 | 1.00E-118 | 347  | 385  | 90 -  | 543  | 914  | 105823 | 106207 |
| UN10695 | Rsa1.0.01058.1 | 1223 | 55430  | 5.00E-96  | 185  | 187  | 98 -  | 126  | 312  | 22337  | 22523  |
| UN10696 | Rsa1.0.00310.1 | 1288 | 96852  | 0         | 452  | 474  | 95 -  | 815  | 1288 | 82816  | 83289  |
| UN10697 | Rsa1.0.04535.1 | 1348 | 136600 | 0         | 710  | 729  | 97 +  | 618  | 1346 | 126575 | 127303 |
| UN10698 | Rsa1.0.42534.1 | 1289 | 528    | 0         | 525  | 528  | 99 +  | 132  | 659  | 1      | 528    |
| UN10699 | Rsa1.0.02372.1 | 932  | 32053  | 1.00E-142 | 269  | 272  | 98 +  | 662  | 932  | 23597  | 23868  |
| UN10700 | Rsa1.0.00022.1 | 750  | 200461 | 0         | 516  | 542  | 95 +  | 3    | 540  | 22593  | 23133  |
| UN10701 | Rsa1.0.04395.1 | 1604 | 17570  | 0         | 1531 | 1605 | 95 -  | 3    | 1604 | 6924   | 8512   |
| UN10702 | Rsa1.0.06323.1 | 807  | 11236  | 0         | 653  | 662  | 98 -  | 147  | 807  | 7477   | 8138   |
| UN10703 | Rsa1.0.17779.1 | 1136 | 1742   | 0         | 809  | 829  | 97 +  | 67   | 892  | 914    | 1742   |
| UN10704 | Rsa1.0.00092.1 | 940  | 659932 | 0         | 795  | 836  | 95 -  | 115  | 940  | 21377  | 22206  |
| UN10705 | Rsa1.0.04279.1 | 760  | 18113  | 1.00E-145 | 286  | 293  | 97 +  | 7    | 298  | 14291  | 14583  |
| UN10706 | Rsa1.0.02320.1 | 1620 | 32575  | 1.00E-143 | 314  | 331  | 94 -  | 1290 | 1620 | 6264   | 6588   |
| UN10707 | Rsa1.0.01287.1 | 1185 | 49195  | 0         | 488  | 501  | 97 -  | 683  | 1183 | 5836   | 6336   |
| UN10708 | Rsa1.0.08609.1 | 825  | 7132   | 0         | 495  | 509  | 97 -  | 304  | 809  | 5515   | 6023   |
| UN10709 | Rsa1.0.02204.1 | 1114 | 33930  | 0         | 486  | 505  | 96 +  | 2    | 498  | 20620  | 21120  |
| UN10710 | Rsa1.0.03843.1 | 1243 | 20496  | 0         | 769  | 779  | 98 +  | 1    | 779  | 3640   | 4418   |
| UN10711 | Rsa1.0.00041.1 | 1300 | 186197 | 1.00E-167 | 420  | 458  | 91 -  | 604  | 1060 | 159530 | 159986 |
| UN10712 | Rsa1.0.03166.1 | 1226 | 24863  | 0         | 391  | 405  | 96 -  | 800  | 1200 | 5364   | 5765   |
| UN10713 | Rsa1.0.01726.1 | 390  | 40263  | 1.00E-125 | 352  | 387  | 90 -  | 4    | 385  | 6807   | 7178   |
| UN10714 | Rsa1.0.01740.1 | 747  | 39986  | 0         | 709  | 768  | 92 +  | 1    | 746  | 11555  | 12315  |
| UN10715 | Rsa1.0.00979.1 | 756  | 57733  | 0         | 573  | 599  | 95 -  | 156  | 754  | 27178  | 27762  |
| UN10716 | Rsa1.0.00196.1 | 1231 | 109960 | 0         | 780  | 800  | 97 +  | 435  | 1231 | 90095  | 90894  |
| UN10717 | Rsa1.0.00110.1 | 591  | 132719 | 0         | 451  | 482  | 93 -  | 1    | 482  | 32257  | 32727  |
| UN10718 | Rsa1.0.00467.1 | 686  | 156542 | 0         | 630  | 676  | 93 -  | 2    | 676  | 94473  | 95139  |
| UN10719 | Rsa1.0.03627.1 | 776  | 21658  | 1.00E-163 | 381  | 408  | 93 +  | 376  | 776  | 8024   | 8431   |
| UN10720 | Rsa1.0.00012.1 | 1063 | 222148 | 0         | 786  | 848  | 92 +  | 133  | 965  | 110286 | 111109 |
| UN10721 | Rsa1.0.03439.1 | 830  | 22930  | 0         | 756  | 756  | 100 + | 68   | 823  | 14985  | 15740  |
| UN10722 | Rsa1.0.03477.1 | 1174 | 22635  | 0         | 545  | 590  | 92 +  | 303  | 875  | 15370  | 15958  |
| UN10723 | Rsa1.0.01293.1 | 705  | 49139  | 1.00E-166 | 376  | 395  | 95 -  | 321  | 705  | 34533  | 34924  |

|         |                |      |        |           |     |     |      |      |      |        |        |
|---------|----------------|------|--------|-----------|-----|-----|------|------|------|--------|--------|
| UN10724 | Rsa1.0_04973.1 | 951  | 15267  | 0         | 774 | 784 | 98 + | 1    | 784  | 12214  | 12996  |
| UN10725 | Rsa1.0_07559.1 | 906  | 9131   | 1.00E-102 | 248 | 265 | 93 - | 174  | 437  | 1879   | 2142   |
| UN10726 | Rsa1.0_02803.1 | 942  | 27715  | 1.00E-153 | 343 | 366 | 93 - | 577  | 942  | 2352   | 2717   |
| UN10727 | Rsa1.0_02604.1 | 786  | 29638  | 1.00E-171 | 327 | 333 | 98 - | 2    | 333  | 28224  | 28556  |
| UN10728 | Rsa1.0_00385.1 | 704  | 89160  | 0         | 683 | 701 | 97 - | 5    | 704  | 16178  | 16878  |
| UN10729 | Rsa1.0_05653.1 | 550  | 13043  | 0         | 474 | 478 | 99 + | 73   | 550  | 9994   | 10471  |
| UN10730 | Rsa1.0_00807.1 | 678  | 63607  | 0         | 374 | 376 | 99 - | 303  | 678  | 54492  | 54866  |
| UN10731 | Rsa1.0_04504.1 | 994  | 17069  | 0         | 684 | 714 | 95 - | 290  | 994  | 8748   | 9457   |
| UN10732 | Rsa1.0_15167.1 | 1474 | 2783   | 0         | 598 | 606 | 98 + | 214  | 818  | 896    | 1501   |
| UN10733 | Rsa1.0_00012.1 | 925  | 222148 | 1.00E-156 | 347 | 374 | 92 - | 259  | 632  | 76837  | 77192  |
| UN10734 | Rsa1.0_02413.1 | 1728 | 31628  | 0         | 692 | 716 | 96 - | 463  | 1177 | 7791   | 8498   |
| UN10735 | Rsa1.0_01130.1 | 1191 | 52929  | 1.00E-167 | 350 | 366 | 95 + | 832  | 1191 | 44531  | 44896  |
| UN10736 | Rsa1.0_03969.1 | 472  | 19797  | 1.00E-136 | 322 | 347 | 92 - | 126  | 472  | 16653  | 16996  |
| UN10737 | Rsa1.0_00661.1 | 951  | 213041 | 1.00E-151 | 311 | 323 | 96 - | 9    | 331  | 195844 | 196165 |
| UN10738 | Rsa1.0_00176.1 | 651  | 240984 | 0         | 570 | 636 | 89 - | 4    | 620  | 9780   | 10392  |
| UN10739 | Rsa1.0_01543.1 | 799  | 43645  | 1.00E-143 | 306 | 322 | 95 - | 478  | 799  | 7865   | 8186   |
| UN10740 | Rsa1.0_00586.1 | 1135 | 163802 | 0         | 422 | 453 | 93 - | 6    | 458  | 119295 | 119746 |
| UN10741 | Rsa1.0_02190.1 | 1228 | 34084  | 0         | 843 | 844 | 99 - | 385  | 1228 | 28789  | 29632  |
| UN10742 | Rsa1.0_00539.1 | 785  | 76926  | 1.00E-177 | 358 | 372 | 96 - | 414  | 785  | 57283  | 57650  |
| UN10743 | Rsa1.0_02414.1 | 864  | 31625  | 0         | 736 | 750 | 98 - | 114  | 863  | 19100  | 19848  |
| UN10744 | Rsa1.0_00312.1 | 889  | 96765  | 1.00E-175 | 320 | 323 | 99 - | 566  | 888  | 77984  | 78306  |
| UN10745 | Rsa1.0_02672.1 | 828  | 28884  | 1.00E-115 | 229 | 235 | 97 + | 3    | 237  | 15539  | 15773  |
| UN10746 | Rsa1.0_00414.1 | 748  | 202190 | 0         | 395 | 407 | 97 + | 343  | 748  | 22226  | 22628  |
| UN10747 | Rsa1.0_02835.1 | 862  | 27491  | 1.00E-114 | 271 | 293 | 92 - | 3    | 288  | 21042  | 21327  |
| UN10748 | Rsa1.0_05572.1 | 489  | 13291  | 3.00E-98  | 201 | 206 | 97 - | 59   | 263  | 11854  | 12059  |
| UN10749 | Rsa1.0_01239.1 | 1502 | 50107  | 1.00E-147 | 283 | 289 | 97 - | 1214 | 1502 | 20875  | 21163  |
| UN10750 | Rsa1.0_00449.1 | 1772 | 83863  | 0         | 439 | 454 | 96 + | 1319 | 1770 | 2417   | 2867   |
| UN10751 | Rsa1.0_00048.1 | 798  | 167185 | 0         | 430 | 461 | 93 - | 13   | 470  | 146592 | 147043 |
| UN10752 | Rsa1.0_00480.1 | 806  | 81325  | 0         | 599 | 622 | 96 + | 2    | 623  | 7037   | 7640   |
| UN10753 | Rsa1.0_00348.1 | 788  | 92818  | 0         | 584 | 617 | 94 - | 93   | 699  | 3332   | 3946   |
| UN10754 | Rsa1.0_00216.1 | 1093 | 197563 | 1.00E-120 | 229 | 232 | 98 + | 582  | 813  | 88910  | 89141  |
| UN10755 | Rsa1.0_01536.1 | 784  | 43747  | 0         | 565 | 593 | 95 - | 193  | 784  | 18759  | 19349  |
| UN10756 | Rsa1.0_01063.1 | 974  | 55301  | 0         | 543 | 548 | 99 + | 1    | 547  | 2774   | 3321   |
| UN10757 | Rsa1.0_00802.1 | 906  | 63846  | 0         | 450 | 460 | 97 + | 447  | 906  | 26567  | 27020  |
| UN10758 | Rsa1.0_01607.1 | 765  | 42328  | 9.00E-32  | 100 | 107 | 93 - | 14   | 120  | 30704  | 30808  |
| UN10759 | Rsa1.0_17040.1 | 746  | 1944   | 1.00E-162 | 333 | 347 | 95 - | 20   | 363  | 195    | 541    |
| UN10760 | Rsa1.0_00340.1 | 786  | 305782 | 2.00E-91  | 180 | 183 | 98 - | 247  | 429  | 195108 | 195290 |
| UN10761 | Rsa1.0_01898.1 | 614  | 37491  | 0         | 394 | 404 | 97 + | 160  | 563  | 33926  | 34329  |
| UN10762 | Rsa1.0_00987.1 | 814  | 57543  | 0         | 802 | 815 | 98 + | 1    | 813  | 402    | 1215   |

|         |                |      |        |           |      |      |       |      |      |        |        |
|---------|----------------|------|--------|-----------|------|------|-------|------|------|--------|--------|
| UN10763 | Rsa1.0.00344.1 | 898  | 191774 | 0         | 586  | 586  | 100 + | 313  | 898  | 155554 | 156139 |
| UN10764 | Rsa1.0.00019.1 | 1546 | 301669 | 0         | 1084 | 1163 | 93 +  | 3    | 1164 | 276419 | 277557 |
| UN10765 | Rsa1.0.11912.1 | 1468 | 5372   | 0         | 841  | 844  | 99 +  | 513  | 1356 | 1377   | 2220   |
| UN10766 | Rsa1.0.00105.1 | 823  | 134138 | 0         | 593  | 621  | 95 +  | 209  | 823  | 81104  | 81721  |
| UN10767 | Rsa1.0.00107.1 | 1169 | 431659 | 0         | 391  | 402  | 97 +  | 3    | 402  | 298704 | 299101 |
| UN10768 | Rsa1.0.01544.1 | 1575 | 185602 | 0         | 724  | 739  | 97 -  | 3    | 738  | 33890  | 34627  |
| UN10769 | Rsa1.0.00457.1 | 1172 | 337301 | 0         | 1102 | 1173 | 93 +  | 2    | 1164 | 308152 | 309307 |
| UN10770 | Rsa1.0.00695.1 | 790  | 68019  | 2.00E-26  | 74   | 78   | 94 +  | 334  | 411  | 49728  | 49805  |
| UN10771 | Rsa1.0.26056.1 | 406  | 908    | 1.00E-109 | 219  | 225  | 97 +  | 2    | 226  | 528    | 752    |
| UN10772 | Rsa1.0.00016.1 | 1000 | 831256 | 1.00E-157 | 307  | 314  | 97 -  | 687  | 999  | 447826 | 448139 |
| UN10773 | Rsa1.0.05352.1 | 1148 | 14079  | 0         | 634  | 673  | 94 -  | 22   | 689  | 3381   | 4040   |
| UN10774 | Rsa1.0.00286.1 | 465  | 98709  | 1.00E-116 | 219  | 220  | 99 +  | 247  | 465  | 11606  | 11825  |
| UN10775 | Rsa1.0.01388.1 | 1017 | 46741  | 1.00E-160 | 330  | 342  | 96 +  | 3    | 344  | 16561  | 16900  |
| UN10776 | Rsa1.0.00138.1 | 823  | 247040 | 0         | 437  | 451  | 96 +  | 372  | 822  | 234197 | 234645 |
| UN10777 | Rsa1.0.00703.1 | 1141 | 67597  | 1.00E-169 | 320  | 326  | 98 +  | 593  | 918  | 18006  | 18331  |
| UN10778 | Rsa1.0.13696.1 | 756  | 4467   | 0         | 579  | 613  | 94 +  | 3    | 609  | 3855   | 4467   |
| UN10779 | Rsa1.0.01232.1 | 1073 | 155185 | 1.00E-150 | 323  | 340  | 95 -  | 4    | 343  | 134026 | 134363 |
| UN10780 | Rsa1.0.00477.1 | 961  | 81556  | 1.00E-107 | 222  | 230  | 96 -  | 732  | 961  | 61904  | 62133  |
| UN10781 | Rsa1.0.00437.1 | 1605 | 84879  | 1.00E-117 | 310  | 342  | 90 +  | 807  | 1148 | 23217  | 23558  |
| UN10782 | Rsa1.0.10038.1 | 707  | 6029   | 0         | 419  | 424  | 98 -  | 284  | 707  | 5124   | 5543   |
| UN10783 | Rsa1.0.00082.1 | 1026 | 237584 | 1.00E-107 | 226  | 233  | 96 +  | 795  | 1026 | 38683  | 38913  |
| UN10784 | Rsa1.0.01061.1 | 1389 | 55349  | 0         | 368  | 377  | 97 +  | 1015 | 1389 | 17393  | 17769  |
| UN10785 | Rsa1.0.00336.1 | 853  | 445051 | 0         | 475  | 477  | 99 -  | 3    | 479  | 16575  | 17051  |
| UN10786 | Rsa1.0.00107.1 | 1037 | 431659 | 0         | 555  | 557  | 99 -  | 480  | 1036 | 165603 | 166159 |
| UN10787 | Rsa1.0.01408.1 | 454  | 46383  | 1.00E-177 | 368  | 383  | 96 +  | 59   | 439  | 34615  | 34997  |
| UN10788 | Rsa1.0.00380.1 | 832  | 89748  | 1.00E-135 | 247  | 248  | 99 -  | 204  | 451  | 78451  | 78698  |
| UN10789 | Rsa1.0.00302.1 | 1477 | 97521  | 0         | 918  | 936  | 98 +  | 544  | 1477 | 61024  | 61959  |
| UN10790 | Rsa1.0.04179.1 | 837  | 18633  | 0         | 666  | 682  | 97 +  | 119  | 800  | 15932  | 16613  |
| UN10791 | Rsa1.0.01230.1 | 795  | 50221  | 0         | 678  | 695  | 97 -  | 36   | 726  | 15664  | 16358  |
| UN10792 | Rsa1.0.00582.1 | 1594 | 74333  | 0         | 386  | 398  | 96 +  | 90   | 486  | 15883  | 16274  |
| UN10793 | Rsa1.0.26314.1 | 885  | 897    | 0         | 414  | 429  | 96 -  | 439  | 861  | 109    | 537    |
| UN10794 | Rsa1.0.00063.1 | 1180 | 156150 | 0         | 619  | 626  | 98 +  | 554  | 1178 | 142261 | 142886 |
| UN10795 | Rsa1.0.00342.1 | 1626 | 93695  | 1.00E-174 | 418  | 453  | 92 -  | 62   | 492  | 15020  | 15471  |
| UN10796 | Rsa1.0.09538.1 | 879  | 6301   | 1.00E-121 | 224  | 225  | 99 -  | 645  | 869  | 2206   | 2430   |
| UN10797 | Rsa1.0.50623.1 | 286  | 449    | 5.00E-31  | 93   | 101  | 92 -  | 162  | 262  | 349    | 449    |
| UN10798 | Rsa1.0.01705.1 | 1007 | 40710  | 1.00E-176 | 709  | 844  | 84 -  | 6    | 834  | 19076  | 19919  |
| UN10799 | Rsa1.0.01456.1 | 747  | 45372  | 1.00E-165 | 313  | 318  | 98 +  | 432  | 747  | 9266   | 9583   |
| UN10800 | Rsa1.0.05376.1 | 779  | 13977  | 0         | 463  | 483  | 95 +  | 273  | 754  | 5384   | 5865   |
| UN10801 | Rsa1.0.01328.1 | 1163 | 48021  | 1.00E-132 | 247  | 248  | 99 +  | 3    | 249  | 19715  | 19962  |

|         |                |      |        |           |      |      |       |      |      |        |        |
|---------|----------------|------|--------|-----------|------|------|-------|------|------|--------|--------|
| UN10802 | Rsa1.0.00154.1 | 628  | 189461 | 6.00E-82  | 200  | 215  | 93 -  | 144  | 358  | 52420  | 52634  |
| UN10803 | Rsa1.0.00377.1 | 619  | 90038  | 1.00E-155 | 287  | 290  | 98 +  | 5    | 294  | 67689  | 67978  |
| UN10804 | Rsa1.0.27986.1 | 826  | 831    | 0         | 345  | 348  | 99 +  | 478  | 825  | 346    | 692    |
| UN10805 | Rsa1.0.00487.1 | 1130 | 80674  | 0         | 906  | 918  | 98 -  | 214  | 1129 | 70391  | 71306  |
| UN10806 | Rsa1.0.05569.1 | 1055 | 13311  | 0         | 1030 | 1053 | 97 +  | 2    | 1050 | 1990   | 3041   |
| UN10807 | Rsa1.0.03634.1 | 478  | 145192 | 1.00E-113 | 207  | 207  | 100 - | 1    | 207  | 129362 | 129568 |
| UN10808 | Rsa1.0.01355.1 | 552  | 47303  | 6.00E-97  | 282  | 313  | 90 -  | 241  | 552  | 25895  | 26192  |
| UN10809 | Rsa1.0.00224.1 | 1417 | 327530 | 0         | 414  | 421  | 98 -  | 1    | 420  | 195632 | 196052 |
| UN10810 | Rsa1.0.00106.1 | 1699 | 133916 | 0         | 1062 | 1100 | 96 -  | 601  | 1699 | 19193  | 20287  |
| UN10811 | Rsa1.0.44104.1 | 1323 | 510    | 2.00E-52  | 170  | 190  | 89 +  | 1067 | 1256 | 29     | 217    |
| UN10812 | Rsa1.0.00065.1 | 924  | 454616 | 0         | 827  | 861  | 96 -  | 2    | 862  | 414616 | 415468 |
| UN10813 | Rsa1.0.03175.1 | 1558 | 24802  | 0         | 979  | 1004 | 97 +  | 3    | 1003 | 20687  | 21683  |
| UN10814 | Rsa1.0.01173.1 | 1017 | 51727  | 1.00E-118 | 225  | 227  | 99 +  | 793  | 1017 | 10160  | 10386  |
| UN10815 | Rsa1.0.05467.1 | 636  | 13649  | 0         | 491  | 509  | 96 +  | 130  | 636  | 11334  | 11842  |
| UN10816 | Rsa1.0.03190.1 | 576  | 24708  | 0         | 380  | 386  | 98 +  | 191  | 576  | 19575  | 19960  |
| UN10817 | Rsa1.0.06254.1 | 699  | 11384  | 2.00E-57  | 138  | 146  | 94 -  | 265  | 410  | 1306   | 1451   |
| UN10818 | Rsa1.0.02876.1 | 517  | 27062  | 0         | 504  | 516  | 97 +  | 2    | 517  | 5057   | 5572   |
| UN10819 | Rsa1.0.00001.1 | 931  | 363028 | 4.00E-90  | 229  | 249  | 91 -  | 665  | 910  | 190906 | 191142 |
| UN10820 | Rsa1.0.00364.1 | 523  | 90951  | 0         | 432  | 432  | 100 - | 1    | 432  | 16823  | 17254  |
| UN10821 | Rsa1.0.00110.1 | 812  | 132719 | 0         | 511  | 558  | 91 -  | 271  | 803  | 35301  | 35850  |
| UN10822 | Rsa1.0.00131.1 | 711  | 432233 | 0         | 668  | 710  | 94 -  | 4    | 711  | 45508  | 46202  |
| UN10823 | Rsa1.0.01340.1 | 885  | 47805  | 1.00E-104 | 254  | 272  | 93 +  | 8    | 272  | 20648  | 20919  |
| UN10824 | Rsa1.0.03122.1 | 782  | 25207  | 4.00E-83  | 163  | 165  | 98 -  | 283  | 447  | 7333   | 7497   |
| UN10825 | Rsa1.0.02170.1 | 434  | 34352  | 0         | 432  | 435  | 99 +  | 1    | 434  | 32948  | 33382  |
| UN10826 | Rsa1.0.00978.1 | 1435 | 57739  | 0         | 973  | 1059 | 91 -  | 417  | 1435 | 17066  | 18112  |
| UN10827 | Rsa1.0.00044.1 | 1030 | 271658 | 2.00E-86  | 172  | 175  | 98 +  | 855  | 1029 | 264749 | 264923 |
| UN10828 | Rsa1.0.05890.1 | 642  | 12317  | 2.00E-72  | 223  | 251  | 88 +  | 1    | 235  | 735    | 976    |
| UN10829 | Rsa1.0.00252.1 | 942  | 102760 | 0         | 334  | 335  | 99 -  | 3    | 337  | 64920  | 65254  |
| UN10830 | Rsa1.0.12954.1 | 403  | 5066   | 3.00E-39  | 86   | 87   | 98 +  | 197  | 283  | 4552   | 4638   |
| UN10831 | Rsa1.0.01085.1 | 1356 | 54539  | 1.00E-115 | 237  | 243  | 97 -  | 3    | 243  | 12212  | 12454  |
| UN10832 | Rsa1.0.01239.1 | 2744 | 50107  | 0         | 1565 | 1624 | 96 -  | 3    | 1619 | 18949  | 20553  |
| UN10833 | Rsa1.0.02068.1 | 596  | 35432  | 0         | 406  | 406  | 100 + | 1    | 406  | 15206  | 15611  |
| UN10834 | Rsa1.0.01004.1 | 879  | 56975  | 0         | 802  | 876  | 91 +  | 18   | 877  | 17034  | 17899  |
| UN10835 | Rsa1.0.00930.1 | 812  | 59224  | 1.00E-153 | 284  | 286  | 99 -  | 2    | 287  | 49934  | 50218  |
| UN10836 | Rsa1.0.00060.1 | 1411 | 502678 | 1.00E-176 | 356  | 368  | 96 +  | 1    | 366  | 368883 | 369249 |
| UN10837 | Rsa1.0.00481.1 | 469  | 81316  | 0         | 375  | 377  | 99 +  | 3    | 379  | 10479  | 10855  |
| UN10838 | Rsa1.0.00234.1 | 1137 | 197060 | 0         | 404  | 415  | 97 -  | 374  | 788  | 144150 | 144564 |
| UN10839 | Rsa1.0.02372.1 | 1057 | 32053  | 0         | 512  | 524  | 97 -  | 1    | 523  | 24847  | 25369  |
| UN10840 | Rsa1.0.00757.1 | 881  | 65559  | 0         | 569  | 585  | 97 -  | 1    | 580  | 35781  | 36364  |



|         |                |      |        |           |      |      |       |     |      |        |        |
|---------|----------------|------|--------|-----------|------|------|-------|-----|------|--------|--------|
| UN10841 | Rsa1.0.01422.1 | 762  | 46172  | 8.00E-91  | 223  | 234  | 95 -  | 3   | 234  | 1      | 231    |
| UN10842 | Rsa1.0.00329.1 | 1433 | 222544 | 0         | 1069 | 1157 | 92 -  | 286 | 1429 | 48995  | 50142  |
| UN10843 | Rsa1.0.02011.1 | 969  | 36088  | 0         | 665  | 667  | 99 +  | 301 | 967  | 24827  | 25493  |
| UN10844 | Rsa1.0.01857.1 | 859  | 38103  | 1.00E-138 | 298  | 313  | 95 -  | 542 | 852  | 6812   | 7124   |
| UN10845 | Rsa1.0.26014.1 | 1110 | 910    | 1.00E-160 | 289  | 290  | 99 -  | 821 | 1110 | 236    | 525    |
| UN10846 | Rsa1.0.01514.1 | 1235 | 44222  | 0         | 890  | 902  | 98 -  | 1   | 901  | 22059  | 22960  |
| UN10847 | Rsa1.0.02411.1 | 645  | 31655  | 0         | 373  | 375  | 99 +  | 1   | 375  | 27171  | 27544  |
| UN10848 | Rsa1.0.01578.1 | 1096 | 42880  | 1.00E-151 | 283  | 287  | 98 +  | 202 | 488  | 11676  | 11962  |
| UN10849 | Rsa1.0.01565.1 | 912  | 155447 | 0         | 887  | 918  | 96 +  | 1   | 912  | 146485 | 147395 |
| UN10850 | Rsa1.0.03473.1 | 814  | 22665  | 0         | 690  | 692  | 99 +  | 12  | 703  | 7841   | 8532   |
| UN10851 | Rsa1.0.01534.1 | 1880 | 43764  | 0         | 892  | 916  | 97 -  | 121 | 1033 | 10551  | 11464  |
| UN10852 | Rsa1.0.00254.1 | 902  | 102600 | 0         | 492  | 512  | 96 +  | 4   | 515  | 52348  | 52845  |
| UN10853 | Rsa1.0.03079.1 | 1595 | 25545  | 0         | 926  | 932  | 99 +  | 2   | 931  | 9087   | 10016  |
| UN10854 | Rsa1.0.01149.1 | 867  | 160459 | 1.00E-108 | 220  | 227  | 96 +  | 258 | 484  | 154480 | 154706 |
| UN10855 | Rsa1.0.00947.1 | 729  | 58664  | 0         | 427  | 440  | 97 -  | 1   | 438  | 48225  | 48664  |
| UN10856 | Rsa1.0.00460.1 | 820  | 206387 | 0         | 495  | 514  | 96 +  | 16  | 529  | 27284  | 27783  |
| UN10857 | Rsa1.0.08558.1 | 994  | 7198   | 1.00E-134 | 359  | 392  | 91 +  | 8   | 393  | 2337   | 2721   |
| UN10858 | Rsa1.0.01130.1 | 1328 | 52929  | 1.00E-116 | 254  | 265  | 95 -  | 1   | 262  | 44655  | 44915  |
| UN10859 | Rsa1.0.01061.1 | 964  | 55349  | 1.00E-105 | 230  | 237  | 97 -  | 1   | 233  | 42974  | 43209  |
| UN10860 | Rsa1.0.00082.1 | 1138 | 237584 | 0         | 1091 | 1146 | 95 -  | 2   | 1138 | 105717 | 106850 |
| UN10861 | Rsa1.0.00495.1 | 668  | 79934  | 1.00E-179 | 328  | 330  | 99 -  | 238 | 566  | 14814  | 15143  |
| UN10862 | Rsa1.0.01110.1 | 805  | 195852 | 0         | 572  | 603  | 94 +  | 204 | 805  | 16834  | 17432  |
| UN10863 | Rsa1.0.48630.1 | 824  | 466    | 1.00E-166 | 339  | 353  | 96 -  | 18  | 370  | 1      | 353    |
| UN10864 | Rsa1.0.03646.1 | 1175 | 21598  | 1.00E-127 | 240  | 243  | 98 -  | 1   | 243  | 15617  | 15859  |
| UN10865 | Rsa1.0.01541.1 | 808  | 43682  | 0         | 500  | 509  | 98 -  | 300 | 808  | 4271   | 4779   |
| UN10866 | Rsa1.0.01697.1 | 1001 | 40837  | 1.00E-164 | 347  | 362  | 95 -  | 35  | 396  | 19131  | 19485  |
| UN10867 | Rsa1.0.00466.1 | 920  | 82132  | 0         | 786  | 831  | 94 -  | 1   | 818  | 27152  | 27979  |
| UN10868 | Rsa1.0.00161.1 | 1097 | 116891 | 0         | 622  | 643  | 96 +  | 456 | 1097 | 99195  | 99825  |
| UN10869 | Rsa1.0.04737.1 | 1425 | 16173  | 0         | 630  | 656  | 96 -  | 128 | 783  | 2705   | 3359   |
| UN10870 | Rsa1.0.07446.1 | 957  | 9384   | 0         | 415  | 423  | 98 +  | 533 | 955  | 1803   | 2225   |
| UN10871 | Rsa1.0.02964.1 | 1207 | 26407  | 1.00E-149 | 289  | 296  | 97 -  | 1   | 296  | 14541  | 14836  |
| UN10872 | Rsa1.0.03164.1 | 540  | 24887  | 0         | 517  | 540  | 95 -  | 1   | 540  | 11429  | 11968  |
| UN10873 | Rsa1.0.00157.1 | 799  | 245832 | 1.00E-151 | 297  | 304  | 97 -  | 11  | 314  | 187327 | 187629 |
| UN10874 | Rsa1.0.00869.1 | 671  | 61627  | 1.00E-107 | 221  | 229  | 96 +  | 142 | 370  | 53993  | 54221  |
| UN10875 | Rsa1.0.17551.1 | 876  | 1799   | 0         | 856  | 868  | 98 +  | 7   | 870  | 368    | 1234   |
| UN10876 | Rsa1.0.00898.1 | 653  | 202772 | 1.00E-161 | 288  | 288  | 100 - | 15  | 302  | 8777   | 9064   |
| UN10877 | Rsa1.0.02505.1 | 1050 | 30703  | 1.00E-153 | 330  | 347  | 95 -  | 704 | 1050 | 10020  | 10365  |
| UN10878 | Rsa1.0.08630.1 | 1525 | 7104   | 0         | 1480 | 1519 | 97 -  | 11  | 1524 | 4794   | 6312   |
| UN10879 | Rsa1.0.06492.1 | 608  | 10913  | 0         | 498  | 508  | 98 +  | 1   | 508  | 6242   | 6745   |

|         |                |      |        |           |      |      |      |      |      |        |        |
|---------|----------------|------|--------|-----------|------|------|------|------|------|--------|--------|
| UN10880 | Rsa1.0.00191.1 | 915  | 316976 | 0         | 417  | 421  | 99 - | 1    | 421  | 160979 | 161398 |
| UN10881 | Rsa1.0.01061.1 | 865  | 55349  | 0         | 391  | 405  | 96 - | 1    | 403  | 17654  | 18057  |
| UN10882 | Rsa1.0.53975.1 | 846  | 422    | 2.00E-94  | 228  | 243  | 93 - | 2    | 242  | 37     | 278    |
| UN10883 | Rsa1.0.11545.1 | 478  | 5474   | 1.00E-122 | 352  | 393  | 89 - | 1    | 384  | 4900   | 5282   |
| UN10884 | Rsa1.0.00615.1 | 762  | 72235  | 0         | 728  | 761  | 95 + | 2    | 762  | 60743  | 61480  |
| UN10885 | Rsa1.0.00589.1 | 1239 | 209965 | 1.00E-110 | 278  | 304  | 91 + | 1    | 286  | 188569 | 188872 |
| UN10886 | Rsa1.0.07334.1 | 940  | 9547   | 1.00E-164 | 327  | 336  | 97 - | 1    | 333  | 683    | 1018   |
| UN10887 | Rsa1.0.00377.1 | 597  | 90038  | 0         | 560  | 589  | 95 - | 9    | 597  | 69290  | 69874  |
| UN10888 | Rsa1.0.00040.1 | 1883 | 324196 | 0         | 662  | 676  | 97 + | 824  | 1494 | 261473 | 262142 |
| UN10889 | Rsa1.0.00203.1 | 1112 | 109129 | 7.00E-86  | 251  | 282  | 89 + | 760  | 1041 | 89591  | 89863  |
| UN10890 | Rsa1.0.08575.1 | 1542 | 7180   | 0         | 457  | 458  | 99 - | 897  | 1354 | 5922   | 6379   |
| UN10891 | Rsa1.0.00015.1 | 1330 | 561803 | 0         | 1134 | 1171 | 96 - | 162  | 1330 | 478490 | 479655 |
| UN10892 | Rsa1.0.00060.1 | 1102 | 502678 | 0         | 493  | 520  | 94 - | 13   | 517  | 144937 | 145456 |
| UN10893 | Rsa1.0.00083.1 | 1045 | 442773 | 0         | 857  | 893  | 95 - | 129  | 1015 | 359544 | 360429 |
| UN10894 | Rsa1.0.73033.1 | 715  | 314    | 1.00E-152 | 309  | 317  | 97 - | 251  | 567  | 1      | 314    |
| UN10895 | Rsa1.0.00701.1 | 1170 | 67691  | 3.00E-94  | 282  | 319  | 88 + | 791  | 1100 | 23226  | 23528  |
| UN10896 | Rsa1.0.02064.1 | 1044 | 35476  | 0         | 482  | 505  | 95 - | 545  | 1043 | 16521  | 17023  |
| UN10897 | Rsa1.0.01536.1 | 1063 | 43747  | 0         | 801  | 865  | 92 - | 16   | 860  | 18915  | 19773  |
| UN10898 | Rsa1.0.01339.1 | 864  | 47813  | 2.00E-57  | 139  | 145  | 95 + | 3    | 144  | 12190  | 12334  |
| UN10899 | Rsa1.0.00736.1 | 1185 | 66455  | 0         | 1012 | 1041 | 97 + | 146  | 1185 | 50684  | 51717  |
| UN10900 | Rsa1.0.04041.1 | 751  | 19430  | 8.00E-97  | 213  | 224  | 95 - | 1    | 224  | 463    | 686    |
| UN10901 | Rsa1.0.01248.1 | 710  | 154103 | 1.00E-106 | 256  | 276  | 92 + | 367  | 639  | 42217  | 42486  |
| UN10902 | Rsa1.0.01476.1 | 1185 | 172928 | 1.00E-125 | 285  | 303  | 94 - | 884  | 1185 | 137458 | 137754 |
| UN10903 | Rsa1.0.03761.1 | 843  | 20982  | 1.00E-176 | 328  | 333  | 98 + | 509  | 841  | 722    | 1054   |
| UN10904 | Rsa1.0.01239.1 | 763  | 50107  | 1.00E-105 | 212  | 217  | 97 + | 1    | 215  | 17160  | 17376  |
| UN10905 | Rsa1.0.00016.1 | 926  | 831256 | 1.00E-150 | 319  | 334  | 95 + | 593  | 926  | 426234 | 426566 |
| UN10906 | Rsa1.0.03594.1 | 780  | 21868  | 0         | 489  | 503  | 97 - | 278  | 780  | 15578  | 16080  |
| UN10907 | Rsa1.0.04520.1 | 462  | 16995  | 1.00E-85  | 234  | 256  | 91 + | 191  | 443  | 11580  | 11835  |
| UN10908 | Rsa1.0.00792.1 | 550  | 64163  | 2.00E-65  | 186  | 202  | 92 + | 348  | 541  | 7358   | 7558   |
| UN10909 | Rsa1.0.00019.1 | 424  | 301669 | 1.00E-145 | 357  | 390  | 91 - | 56   | 422  | 286292 | 286681 |
| UN10910 | Rsa1.0.00165.1 | 1082 | 116466 | 1.00E-142 | 355  | 389  | 91 - | 3    | 376  | 51074  | 51454  |
| UN10911 | Rsa1.0.00533.1 | 1224 | 77375  | 1.00E-122 | 266  | 279  | 95 - | 124  | 402  | 66092  | 66369  |
| UN10912 | Rsa1.0.00307.1 | 1044 | 199003 | 1.00E-108 | 268  | 287  | 93 - | 10   | 293  | 88766  | 89052  |
| UN10913 | Rsa1.0.00345.1 | 815  | 93226  | 0         | 645  | 687  | 93 - | 136  | 806  | 23826  | 24499  |
| UN10914 | Rsa1.0.00757.1 | 1304 | 65559  | 1.00E-142 | 265  | 267  | 99 - | 1038 | 1304 | 58108  | 58372  |
| UN10915 | Rsa1.0.01328.1 | 664  | 48021  | 0         | 535  | 555  | 96 + | 111  | 662  | 17568  | 18114  |
| UN10916 | Rsa1.0.03042.1 | 942  | 25803  | 0         | 429  | 430  | 99 + | 513  | 942  | 9536   | 9965   |
| UN10917 | Rsa1.0.00285.1 | 1190 | 149638 | 1.00E-124 | 305  | 331  | 92 + | 75   | 396  | 95084  | 95414  |
| UN10918 | Rsa1.0.04027.1 | 935  | 19501  | 0         | 689  | 776  | 88 + | 163  | 926  | 6199   | 6952   |

|         |                |      |        |           |      |      |       |      |      |        |        |
|---------|----------------|------|--------|-----------|------|------|-------|------|------|--------|--------|
| UN10919 | Rsa1.0.03385.1 | 979  | 23280  | 0         | 562  | 571  | 98 +  | 3    | 573  | 14015  | 14585  |
| UN10920 | Rsa1.0.00329.1 | 718  | 222544 | 4.00E-89  | 254  | 280  | 90 -  | 450  | 717  | 178122 | 178397 |
| UN10921 | Rsa1.0.11872.1 | 1059 | 5384   | 1.00E-126 | 321  | 345  | 93 -  | 710  | 1047 | 606    | 947    |
| UN10922 | Rsa1.0.02987.1 | 1420 | 26196  | 0         | 584  | 602  | 97 +  | 819  | 1420 | 21354  | 21955  |
| UN10923 | Rsa1.0.01294.1 | 1463 | 49090  | 0         | 1176 | 1232 | 95 -  | 229  | 1460 | 284    | 1512   |
| UN10924 | Rsa1.0.02165.1 | 833  | 34423  | 1.00E-166 | 309  | 313  | 98 +  | 1    | 313  | 12551  | 12863  |
| UN10925 | Rsa1.0.03294.1 | 789  | 23971  | 0         | 492  | 503  | 97 +  | 3    | 505  | 21764  | 22266  |
| UN10926 | Rsa1.0.00418.1 | 1983 | 215377 | 0         | 482  | 498  | 96 +  | 1171 | 1668 | 4220   | 4717   |
| UN10927 | Rsa1.0.00324.1 | 749  | 218805 | 0         | 637  | 651  | 97 -  | 99   | 749  | 216761 | 217409 |
| UN10928 | Rsa1.0.00425.1 | 1094 | 147080 | 0         | 663  | 668  | 99 +  | 1    | 668  | 85979  | 86646  |
| UN10929 | Rsa1.0.02608.1 | 891  | 29613  | 0         | 470  | 497  | 94 +  | 21   | 512  | 22131  | 22620  |
| UN10930 | Rsa1.0.05753.1 | 2229 | 12732  | 0         | 961  | 966  | 99 +  | 489  | 1451 | 11407  | 12372  |
| UN10931 | Rsa1.0.01896.1 | 1398 | 37512  | 0         | 1382 | 1405 | 98 +  | 2    | 1398 | 5758   | 7162   |
| UN10932 | Rsa1.0.00040.1 | 1889 | 324196 | 1.00E-108 | 202  | 203  | 99 -  | 1053 | 1255 | 267043 | 267245 |
| UN10933 | Rsa1.0.03143.1 | 1079 | 25024  | 0         | 608  | 648  | 93 +  | 444  | 1079 | 12212  | 12850  |
| UN10934 | Rsa1.0.00410.1 | 1037 | 86957  | 1.00E-123 | 279  | 291  | 95 +  | 376  | 663  | 20313  | 20600  |
| UN10935 | Rsa1.0.07606.1 | 657  | 9035   | 0         | 629  | 656  | 95 -  | 9    | 657  | 1976   | 2623   |
| UN10936 | Rsa1.0.00492.1 | 1405 | 80178  | 0         | 648  | 676  | 95 -  | 733  | 1401 | 26004  | 26677  |
| UN10937 | Rsa1.0.00107.1 | 819  | 431659 | 8.00E-85  | 235  | 260  | 90 -  | 561  | 819  | 254238 | 254478 |
| UN10938 | Rsa1.0.01397.1 | 862  | 183276 | 0         | 799  | 831  | 96 +  | 7    | 832  | 16441  | 17269  |
| UN10939 | Rsa1.0.00404.1 | 918  | 87635  | 0         | 913  | 915  | 99 -  | 1    | 915  | 17495  | 18409  |
| UN10940 | Rsa1.0.00642.1 | 1405 | 201230 | 0         | 939  | 1005 | 93 +  | 406  | 1400 | 157947 | 158941 |
| UN10941 | Rsa1.0.02803.1 | 724  | 27715  | 1.00E-162 | 333  | 347  | 95 +  | 25   | 368  | 18769  | 19115  |
| UN10942 | Rsa1.0.01655.1 | 896  | 41508  | 0         | 503  | 503  | 100 - | 394  | 896  | 1620   | 2122   |
| UN10943 | Rsa1.0.00394.1 | 565  | 148426 | 0         | 439  | 470  | 93 +  | 86   | 549  | 138987 | 139445 |
| UN10944 | Rsa1.0.00784.1 | 1022 | 64359  | 1.00E-151 | 370  | 394  | 93 -  | 630  | 1019 | 7625   | 8009   |
| UN10945 | Rsa1.0.00060.1 | 654  | 502678 | 1.00E-145 | 288  | 297  | 96 +  | 3    | 299  | 499386 | 499682 |
| UN10946 | Rsa1.0.00218.1 | 910  | 201480 | 1.00E-166 | 299  | 300  | 99 +  | 611  | 910  | 147248 | 147547 |
| UN10947 | Rsa1.0.02104.1 | 495  | 34985  | 1.00E-119 | 278  | 292  | 95 +  | 192  | 480  | 23511  | 23799  |
| UN10948 | Rsa1.0.00767.1 | 1202 | 64980  | 2.00E-92  | 260  | 288  | 90 -  | 4    | 289  | 18547  | 18819  |
| UN10949 | Rsa1.0.66323.1 | 458  | 345    | 1.00E-156 | 291  | 295  | 98 -  | 3    | 297  | 1      | 295    |
| UN10950 | Rsa1.0.00824.1 | 865  | 188447 | 0         | 583  | 597  | 97 +  | 58   | 654  | 154502 | 155098 |
| UN10951 | Rsa1.0.00079.1 | 1416 | 606987 | 0         | 385  | 401  | 96 -  | 2    | 402  | 450064 | 450464 |
| UN10952 | Rsa1.0.00347.1 | 1600 | 93048  | 0         | 399  | 419  | 95 +  | 1187 | 1600 | 12000  | 12414  |
| UN10953 | Rsa1.0.01948.1 | 711  | 36966  | 0         | 697  | 707  | 98 +  | 2    | 708  | 21363  | 22069  |
| UN10954 | Rsa1.0.03781.1 | 1138 | 20891  | 1.00E-176 | 360  | 378  | 95 +  | 140  | 517  | 1213   | 1578   |
| UN10955 | Rsa1.0.02642.1 | 1002 | 29181  | 0         | 796  | 818  | 97 +  | 179  | 991  | 13097  | 13914  |
| UN10956 | Rsa1.0.00025.1 | 965  | 277312 | 0         | 710  | 762  | 93 +  | 222  | 964  | 64911  | 65667  |
| UN10957 | Rsa1.0.00253.1 | 1170 | 231292 | 0         | 616  | 645  | 95 -  | 222  | 866  | 25399  | 26042  |

|         |                |      |        |           |      |      |       |      |      |        |        |
|---------|----------------|------|--------|-----------|------|------|-------|------|------|--------|--------|
| UN10958 | Rsa1.0.22094.1 | 1300 | 1150   | 1.00E-180 | 340  | 345  | 98 -  | 957  | 1300 | 725    | 1069   |
| UN10959 | Rsa1.0.00349.1 | 1451 | 92621  | 1.00E-103 | 191  | 191  | 100 - | 409  | 599  | 41412  | 41602  |
| UN10960 | Rsa1.0.00149.1 | 1671 | 305196 | 0         | 542  | 562  | 96 -  | 521  | 1080 | 200113 | 200674 |
| UN10961 | Rsa1.0.37121.1 | 1253 | 607    | 1.00E-132 | 338  | 371  | 91 +  | 138  | 508  | 237    | 607    |
| UN10962 | Rsa1.0.02785.1 | 599  | 27881  | 1.00E-123 | 241  | 246  | 97 -  | 353  | 598  | 22114  | 22356  |
| UN10963 | Rsa1.0.00639.1 | 743  | 165873 | 0         | 480  | 515  | 93 +  | 233  | 742  | 124129 | 124625 |
| UN10964 | Rsa1.0.05218.1 | 783  | 14457  | 1.00E-113 | 235  | 243  | 96 -  | 542  | 783  | 9617   | 9859   |
| UN10965 | Rsa1.0.00101.1 | 868  | 267193 | 0         | 821  | 871  | 94 +  | 2    | 861  | 192729 | 193589 |
| UN10966 | Rsa1.0.00269.1 | 848  | 341668 | 2.00E-97  | 202  | 209  | 96 +  | 344  | 552  | 322820 | 323028 |
| UN10967 | Rsa1.0.01382.1 | 963  | 46877  | 1.00E-176 | 369  | 387  | 95 -  | 577  | 963  | 16703  | 17085  |
| UN10968 | Rsa1.0.00447.1 | 924  | 84051  | 5.00E-77  | 162  | 167  | 97 -  | 5    | 171  | 26801  | 26967  |
| UN10969 | Rsa1.0.00437.1 | 937  | 84879  | 0         | 382  | 396  | 96 -  | 26   | 421  | 71069  | 71463  |
| UN10970 | Rsa1.0.40049.1 | 1312 | 561    | 2.00E-83  | 164  | 166  | 98 -  | 951  | 1116 | 244    | 409    |
| UN10971 | Rsa1.0.02841.1 | 1049 | 27383  | 1.00E-106 | 217  | 220  | 98 +  | 833  | 1049 | 5500   | 5719   |
| UN10972 | Rsa1.0.00062.1 | 812  | 299291 | 1.00E-108 | 217  | 223  | 97 +  | 204  | 426  | 281388 | 281610 |
| UN10973 | Rsa1.0.00707.1 | 829  | 190112 | 1.00E-138 | 267  | 273  | 97 -  | 172  | 444  | 188378 | 188650 |
| UN10974 | Rsa1.0.01537.1 | 779  | 187285 | 1.00E-125 | 278  | 295  | 94 +  | 223  | 517  | 19498  | 19792  |
| UN10975 | Rsa1.0.00422.1 | 761  | 86144  | 0         | 451  | 473  | 95 +  | 1    | 473  | 32011  | 32483  |
| UN10976 | Rsa1.0.00666.1 | 1047 | 69505  | 0         | 541  | 569  | 95 -  | 478  | 1045 | 41845  | 42408  |
| UN10977 | Rsa1.0.00114.1 | 736  | 131330 | 9.00E-69  | 142  | 145  | 97 +  | 234  | 378  | 117141 | 117285 |
| UN10978 | Rsa1.0.01190.1 | 665  | 194501 | 0         | 396  | 414  | 95 -  | 246  | 658  | 157903 | 158316 |
| UN10979 | Rsa1.0.01013.1 | 734  | 56822  | 1.00E-165 | 355  | 370  | 95 -  | 369  | 734  | 45836  | 46205  |
| UN10980 | Rsa1.0.00014.1 | 682  | 348985 | 7.00E-97  | 192  | 196  | 97 -  | 11   | 206  | 220714 | 220909 |
| UN10981 | Rsa1.0.00914.1 | 1159 | 59880  | 0         | 1098 | 1166 | 94 +  | 10   | 1159 | 12963  | 14122  |
| UN10982 | Rsa1.0.00058.1 | 804  | 159921 | 0         | 396  | 410  | 96 +  | 307  | 712  | 50728  | 51137  |
| UN10983 | Rsa1.0.07314.1 | 918  | 9563   | 0         | 422  | 430  | 98 +  | 2    | 431  | 6290   | 6719   |
| UN10984 | Rsa1.0.00092.1 | 1001 | 659932 | 1.00E-170 | 428  | 461  | 92 +  | 7    | 455  | 504555 | 505012 |
| UN10985 | Rsa1.0.00544.1 | 1014 | 76787  | 1.00E-154 | 280  | 281  | 99 -  | 418  | 698  | 9770   | 10050  |
| UN10986 | Rsa1.0.02767.1 | 1016 | 28111  | 0         | 979  | 1033 | 94 -  | 2    | 1016 | 9776   | 10806  |
| UN10987 | Rsa1.0.01168.1 | 493  | 153765 | 6.00E-75  | 198  | 212  | 93 -  | 288  | 493  | 23484  | 23689  |
| UN10988 | Rsa1.0.00217.1 | 2017 | 107079 | 0         | 557  | 578  | 96 +  | 14   | 591  | 55728  | 56299  |
| UN10989 | Rsa1.0.01382.1 | 964  | 46877  | 1.00E-154 | 279  | 280  | 99 -  | 685  | 964  | 37439  | 37718  |
| UN10990 | Rsa1.0.00224.1 | 1393 | 327530 | 1.00E-180 | 376  | 391  | 96 -  | 1006 | 1393 | 38875  | 39264  |
| UN10991 | Rsa1.0.05827.1 | 578  | 12503  | 1.00E-147 | 298  | 309  | 96 -  | 2    | 310  | 10771  | 11079  |
| UN10992 | Rsa1.0.39537.1 | 913  | 569    | 0         | 555  | 569  | 97 -  | 346  | 912  | 1      | 569    |
| UN10993 | Rsa1.0.00009.1 | 261  | 232558 | 1.00E-62  | 161  | 173  | 93 +  | 11   | 183  | 52203  | 52373  |
| UN10994 | Rsa1.0.06488.1 | 941  | 141774 | 1.00E-167 | 302  | 303  | 99 -  | 272  | 574  | 138123 | 138425 |
| UN10995 | Rsa1.0.01938.1 | 881  | 264018 | 0         | 584  | 617  | 94 -  | 262  | 874  | 159660 | 160265 |
| UN10996 | Rsa1.0.00480.1 | 576  | 81325  | 0         | 521  | 523  | 99 +  | 54   | 576  | 7827   | 8349   |

|         |                |      |        |           |      |      |       |     |      |        |        |
|---------|----------------|------|--------|-----------|------|------|-------|-----|------|--------|--------|
| UN10997 | Rsa1.0.03081.1 | 1587 | 25523  | 0         | 805  | 820  | 98 -  | 529 | 1346 | 22646  | 23459  |
| UN10998 | Rsa1.0.52681.1 | 815  | 432    | 0         | 330  | 332  | 99 -  | 80  | 411  | 101    | 432    |
| UN10999 | Rsa1.0.07806.1 | 1165 | 8506   | 1.00E-139 | 278  | 286  | 97 -  | 883 | 1165 | 7007   | 7292   |
| UN11000 | Rsa1.0.11948.1 | 813  | 5363   | 1.00E-134 | 330  | 359  | 91 -  | 475 | 810  | 5007   | 5363   |
| UN11001 | Rsa1.0.03842.1 | 1239 | 20503  | 0         | 599  | 609  | 98 +  | 585 | 1190 | 8299   | 8907   |
| UN11002 | Rsa1.0.02128.1 | 1218 | 34758  | 1.00E-127 | 262  | 271  | 96 +  | 949 | 1218 | 16398  | 16668  |
| UN11003 | Rsa1.0.02637.1 | 1116 | 29244  | 1.00E-159 | 311  | 319  | 97 +  | 799 | 1114 | 6155   | 6473   |
| UN11004 | Rsa1.0.01300.1 | 1373 | 48942  | 0         | 484  | 498  | 97 +  | 882 | 1373 | 46684  | 47181  |
| UN11005 | Rsa1.0.02266.1 | 1578 | 33195  | 0         | 611  | 631  | 96 -  | 620 | 1250 | 30338  | 30965  |
| UN11006 | Rsa1.0.09130.1 | 724  | 6623   | 0         | 626  | 654  | 95 -  | 65  | 715  | 3374   | 4021   |
| UN11007 | Rsa1.0.00900.1 | 819  | 60367  | 0         | 463  | 479  | 96 -  | 341 | 819  | 17468  | 17935  |
| UN11008 | Rsa1.0.00330.1 | 1323 | 94666  | 0         | 651  | 651  | 100 + | 3   | 653  | 26733  | 27383  |
| UN11009 | Rsa1.0.04141.1 | 983  | 18864  | 1.00E-133 | 250  | 253  | 98 -  | 277 | 529  | 16507  | 16759  |
| UN11010 | Rsa1.0.24633.1 | 1309 | 976    | 1.00E-69  | 161  | 169  | 95 +  | 3   | 168  | 742    | 910    |
| UN11011 | Rsa1.0.04873.1 | 753  | 15657  | 1.00E-135 | 280  | 289  | 96 -  | 13  | 299  | 8145   | 8433   |
| UN11012 | Rsa1.0.02803.1 | 489  | 27715  | 1.00E-73  | 188  | 203  | 92 -  | 290 | 489  | 17281  | 17483  |
| UN11013 | Rsa1.0.02939.1 | 1463 | 26595  | 0         | 769  | 770  | 99 -  | 694 | 1462 | 19725  | 20494  |
| UN11014 | Rsa1.0.00855.1 | 942  | 62047  | 0         | 839  | 866  | 96 +  | 1   | 862  | 11433  | 12295  |
| UN11015 | Rsa1.0.01860.1 | 1064 | 38057  | 6.00E-86  | 165  | 166  | 99 -  | 654 | 819  | 23462  | 23627  |
| UN11016 | Rsa1.0.01282.1 | 1097 | 49304  | 0         | 838  | 880  | 95 -  | 220 | 1082 | 30174  | 31052  |
| UN11017 | Rsa1.0.00424.1 | 428  | 86005  | 0         | 425  | 440  | 96 -  | 1   | 428  | 20411  | 20850  |
| UN11018 | Rsa1.0.00486.1 | 606  | 80875  | 0         | 527  | 554  | 95 -  | 56  | 605  | 44160  | 44700  |
| UN11019 | Rsa1.0.15414.1 | 1104 | 2620   | 1.00E-129 | 332  | 362  | 91 -  | 748 | 1104 | 321    | 674    |
| UN11020 | Rsa1.0.05874.1 | 821  | 12351  | 0         | 728  | 755  | 96 -  | 66  | 813  | 9404   | 10158  |
| UN11021 | Rsa1.0.04355.1 | 1188 | 146733 | 0         | 538  | 560  | 96 -  | 625 | 1178 | 3278   | 3831   |
| UN11022 | Rsa1.0.05820.1 | 1109 | 12540  | 1.00E-81  | 164  | 167  | 98 -  | 681 | 847  | 12002  | 12168  |
| UN11023 | Rsa1.0.00609.1 | 670  | 72785  | 1.00E-122 | 240  | 246  | 97 -  | 15  | 260  | 62899  | 63144  |
| UN11024 | Rsa1.0.02756.1 | 1006 | 28202  | 1.00E-101 | 196  | 199  | 98 -  | 269 | 467  | 19920  | 20118  |
| UN11025 | Rsa1.0.00302.1 | 707  | 97521  | 0         | 686  | 721  | 95 -  | 1   | 707  | 61937  | 62651  |
| UN11026 | Rsa1.0.00107.1 | 1517 | 431659 | 0         | 1190 | 1224 | 97 -  | 294 | 1512 | 14065  | 15287  |
| UN11027 | Rsa1.0.23188.1 | 438  | 1065   | 0         | 347  | 349  | 99 -  | 90  | 438  | 228    | 576    |
| UN11028 | Rsa1.0.03723.1 | 852  | 21173  | 0         | 358  | 360  | 99 +  | 3   | 362  | 4087   | 4446   |
| UN11029 | Rsa1.0.01182.1 | 912  | 167304 | 1.00E-179 | 328  | 330  | 99 +  | 3   | 332  | 11267  | 11595  |
| UN11030 | Rsa1.0.00354.1 | 1117 | 232005 | 1.00E-93  | 210  | 219  | 95 +  | 3   | 220  | 166322 | 166539 |
| UN11031 | Rsa1.0.06209.1 | 1097 | 11484  | 1.00E-177 | 430  | 471  | 91 +  | 33  | 503  | 2267   | 2719   |
| UN11032 | Rsa1.0.03898.1 | 874  | 20183  | 1.00E-129 | 308  | 327  | 94 +  | 549 | 866  | 2513   | 2834   |
| UN11033 | Rsa1.0.01960.1 | 768  | 36766  | 1.00E-111 | 205  | 205  | 100 + | 116 | 320  | 25981  | 26185  |
| UN11034 | Rsa1.0.02113.1 | 697  | 34890  | 0         | 629  | 633  | 99 +  | 68  | 697  | 22890  | 23522  |
| UN11035 | Rsa1.0.01783.1 | 668  | 39383  | 0         | 646  | 668  | 96 -  | 3   | 668  | 19838  | 20499  |

|         |                |      |        |           |      |      |       |      |      |        |        |
|---------|----------------|------|--------|-----------|------|------|-------|------|------|--------|--------|
| UN11036 | Rsa1.0.00031.1 | 924  | 179862 | 0         | 393  | 403  | 97 -  | 5    | 407  | 161267 | 161669 |
| UN11037 | Rsa1.0.03865.1 | 740  | 20373  | 1.00E-119 | 227  | 230  | 98 -  | 188  | 417  | 15975  | 16204  |
| UN11038 | Rsa1.0.00108.1 | 1485 | 478491 | 1.00E-160 | 385  | 412  | 93 +  | 189  | 597  | 419082 | 419489 |
| UN11039 | Rsa1.0.00048.1 | 1316 | 167185 | 0         | 725  | 745  | 97 +  | 2    | 740  | 125478 | 126221 |
| UN11040 | Rsa1.0.01285.1 | 1783 | 172709 | 0         | 478  | 487  | 98 +  | 1280 | 1766 | 134715 | 135200 |
| UN11041 | Rsa1.0.00595.1 | 833  | 341648 | 1.00E-168 | 407  | 440  | 92 -  | 2    | 424  | 24913  | 25348  |
| UN11042 | Rsa1.0.01434.1 | 1092 | 45951  | 1.00E-172 | 352  | 367  | 95 +  | 723  | 1089 | 5302   | 5668   |
| UN11043 | Rsa1.0.02734.1 | 1058 | 28344  | 0         | 1014 | 1070 | 94 +  | 2    | 1057 | 1722   | 2790   |
| UN11044 | Rsa1.0.11621.1 | 602  | 5457   | 1.00E-107 | 278  | 297  | 93 +  | 309  | 602  | 601    | 893    |
| UN11045 | Rsa1.0.07645.1 | 861  | 8949   | 2.00E-88  | 190  | 198  | 95 +  | 638  | 835  | 451    | 648    |
| UN11046 | Rsa1.0.00746.1 | 558  | 66044  | 1.00E-168 | 300  | 300  | 100 + | 259  | 558  | 56840  | 57139  |
| UN11047 | Rsa1.0.00529.1 | 887  | 77487  | 0         | 623  | 637  | 97 -  | 244  | 879  | 53899  | 54534  |
| UN11048 | Rsa1.0.03568.1 | 901  | 22048  | 0         | 677  | 688  | 98 +  | 214  | 901  | 18563  | 19250  |
| UN11049 | Rsa1.0.00887.1 | 738  | 61048  | 1.00E-92  | 191  | 197  | 96 +  | 190  | 386  | 49405  | 49601  |
| UN11050 | Rsa1.0.00608.1 | 1034 | 172672 | 0         | 605  | 617  | 98 +  | 6    | 622  | 112746 | 113362 |
| UN11051 | Rsa1.0.01022.1 | 589  | 56606  | 1.00E-122 | 252  | 262  | 96 -  | 79   | 340  | 37881  | 38142  |
| UN11052 | Rsa1.0.00045.1 | 1169 | 328694 | 1.00E-131 | 259  | 266  | 97 -  | 294  | 559  | 140949 | 141214 |
| UN11053 | Rsa1.0.00539.1 | 1518 | 76926  | 0         | 555  | 566  | 98 +  | 936  | 1501 | 74541  | 75105  |
| UN11054 | Rsa1.0.00092.1 | 493  | 659932 | 0         | 468  | 494  | 94 -  | 2    | 492  | 430883 | 431376 |
| UN11055 | Rsa1.0.00796.1 | 450  | 63997  | 1.00E-124 | 269  | 281  | 95 -  | 171  | 450  | 57203  | 57482  |
| UN11056 | Rsa1.0.02244.1 | 1444 | 33494  | 1.00E-180 | 373  | 387  | 96 +  | 1026 | 1408 | 3842   | 4228   |
| UN11057 | Rsa1.0.00133.1 | 1040 | 123768 | 1.00E-136 | 297  | 310  | 95 -  | 110  | 417  | 11639  | 11947  |
| UN11058 | Rsa1.0.00023.1 | 815  | 194764 | 0         | 624  | 640  | 97 +  | 177  | 815  | 104143 | 104779 |
| UN11059 | Rsa1.0.00097.1 | 1237 | 138858 | 0         | 355  | 360  | 98 -  | 876  | 1235 | 2757   | 3116   |
| UN11060 | Rsa1.0.02051.1 | 1756 | 35564  | 1.00E-100 | 195  | 198  | 98 +  | 737  | 934  | 24062  | 24259  |
| UN11061 | Rsa1.0.00664.1 | 884  | 69573  | 1.00E-165 | 318  | 325  | 97 +  | 559  | 880  | 52733  | 53057  |
| UN11062 | Rsa1.0.01519.1 | 865  | 44144  | 0         | 501  | 520  | 96 -  | 347  | 865  | 11634  | 12151  |
| UN11063 | Rsa1.0.00382.1 | 1176 | 251946 | 1.00E-127 | 284  | 297  | 95 -  | 878  | 1174 | 34559  | 34848  |
| UN11064 | Rsa1.0.00954.1 | 868  | 189536 | 0         | 733  | 747  | 98 -  | 4    | 744  | 8442   | 9188   |
| UN11065 | Rsa1.0.00031.1 | 1408 | 179862 | 4.00E-97  | 184  | 185  | 99 -  | 1223 | 1407 | 86699  | 86883  |
| UN11066 | Rsa1.0.02737.1 | 856  | 28325  | 1.00E-120 | 277  | 294  | 94 +  | 560  | 849  | 8107   | 8391   |
| UN11067 | Rsa1.0.01239.1 | 798  | 50107  | 0         | 770  | 796  | 96 -  | 3    | 798  | 19758  | 20549  |
| UN11068 | Rsa1.0.00964.1 | 590  | 316648 | 0         | 560  | 589  | 95 -  | 2    | 580  | 167634 | 168213 |
| UN11069 | Rsa1.0.00273.1 | 753  | 326186 | 0         | 731  | 757  | 96 -  | 2    | 753  | 274609 | 275361 |
| UN11070 | Rsa1.0.00188.1 | 1059 | 112020 | 0         | 964  | 1029 | 93 +  | 2    | 1009 | 22283  | 23296  |
| UN11071 | Rsa1.0.00097.1 | 839  | 138858 | 0         | 430  | 434  | 99 +  | 1    | 434  | 91322  | 91755  |
| UN11072 | Rsa1.0.01466.1 | 796  | 45161  | 1.00E-157 | 300  | 305  | 98 +  | 490  | 794  | 28487  | 28790  |
| UN11073 | Rsa1.0.04273.1 | 987  | 18144  | 1.00E-103 | 232  | 248  | 93 +  | 752  | 987  | 12147  | 12394  |
| UN11074 | Rsa1.0.00079.1 | 798  | 606987 | 1.00E-108 | 307  | 344  | 89 -  | 24   | 364  | 66614  | 66942  |

|         |                |      |        |           |     |     |       |      |      |        |        |
|---------|----------------|------|--------|-----------|-----|-----|-------|------|------|--------|--------|
| UN11075 | Rsa1.0_00720.1 | 601  | 66931  | 3.00E-71  | 224 | 251 | 89 +  | 356  | 599  | 26183  | 26426  |
| UN11076 | Rsa1.0_00602.1 | 884  | 73302  | 0         | 858 | 883 | 97 -  | 1    | 873  | 30255  | 31137  |
| UN11077 | Rsa1.0_02647.1 | 1490 | 29120  | 0         | 378 | 379 | 99 -  | 556  | 934  | 26972  | 27350  |
| UN11078 | Rsa1.0_02096.1 | 791  | 35041  | 0         | 564 | 570 | 98 +  | 222  | 790  | 14809  | 15378  |
| UN11079 | Rsa1.0_03092.1 | 1453 | 25448  | 0         | 466 | 471 | 98 +  | 983  | 1453 | 4317   | 4786   |
| UN11080 | Rsa1.0_00005.1 | 914  | 353093 | 0         | 486 | 490 | 99 +  | 5    | 494  | 341129 | 341617 |
| UN11081 | Rsa1.0_00497.1 | 839  | 79830  | 1.00E-98  | 269 | 290 | 92 +  | 550  | 836  | 54334  | 54614  |
| UN11082 | Rsa1.0_02756.1 | 1535 | 28202  | 0         | 673 | 674 | 99 +  | 6    | 679  | 16293  | 16966  |
| UN11083 | Rsa1.0_02426.1 | 796  | 31564  | 1.00E-151 | 289 | 292 | 98 +  | 507  | 796  | 12921  | 13212  |
| UN11084 | Rsa1.0_03237.1 | 1050 | 24434  | 0         | 403 | 421 | 95 +  | 212  | 629  | 748    | 1165   |
| UN11085 | Rsa1.0_00430.1 | 809  | 85453  | 0         | 722 | 754 | 95 -  | 58   | 809  | 44272  | 45025  |
| UN11086 | Rsa1.0_06310.1 | 1151 | 11262  | 0         | 768 | 913 | 84 +  | 1    | 913  | 5210   | 6122   |
| UN11087 | Rsa1.0_02280.1 | 240  | 33063  | 1.00E-105 | 206 | 210 | 98 +  | 31   | 240  | 911    | 1120   |
| UN11088 | Rsa1.0_00485.1 | 752  | 80937  | 2.00E-75  | 203 | 219 | 92 +  | 539  | 752  | 37570  | 37784  |
| UN11089 | Rsa1.0_00277.1 | 524  | 100132 | 0         | 328 | 329 | 99 +  | 197  | 524  | 10173  | 10501  |
| UN11090 | Rsa1.0_00191.1 | 1085 | 316976 | 0         | 533 | 590 | 90 +  | 38   | 627  | 9210   | 9799   |
| UN11091 | Rsa1.0_00076.1 | 1280 | 146021 | 1.00E-144 | 269 | 272 | 98 +  | 767  | 1038 | 44210  | 44481  |
| UN11092 | Rsa1.0_01716.1 | 853  | 40483  | 1.00E-141 | 288 | 299 | 96 +  | 523  | 821  | 18921  | 19219  |
| UN11093 | Rsa1.0_04873.1 | 942  | 15657  | 1.00E-116 | 240 | 247 | 97 -  | 1    | 243  | 8145   | 8391   |
| UN11094 | Rsa1.0_00636.1 | 1045 | 71113  | 1.00E-113 | 207 | 207 | 100 + | 25   | 231  | 694    | 900    |
| UN11095 | Rsa1.0_03820.1 | 2664 | 20664  | 1.00E-137 | 322 | 346 | 93 +  | 1726 | 2071 | 8726   | 9062   |
| UN11096 | Rsa1.0_00027.1 | 680  | 283362 | 5.00E-61  | 155 | 165 | 93 -  | 520  | 680  | 105215 | 105373 |
| UN11097 | Rsa1.0_00311.1 | 853  | 96847  | 0         | 521 | 533 | 97 -  | 3    | 535  | 35682  | 36210  |
| UN11098 | Rsa1.0_33464.1 | 946  | 678    | 1.00E-148 | 278 | 282 | 98 -  | 196  | 477  | 154    | 435    |
| UN11099 | Rsa1.0_00098.1 | 580  | 349239 | 0         | 489 | 521 | 93 -  | 61   | 576  | 234714 | 235221 |
| UN11100 | Rsa1.0_03860.1 | 628  | 20407  | 2.33E-156 | 272 | 275 | 98 +  | 2    | 276  | 14073  | 14347  |
| UN11101 | Rsa1.0_04760.1 | 862  | 16105  | 4.00E-99  | 229 | 242 | 94 +  | 622  | 859  | 7185   | 7426   |
| UN11102 | Rsa1.0_04870.1 | 758  | 135142 | 1.00E-159 | 312 | 321 | 97 +  | 309  | 629  | 638    | 958    |
| UN11103 | Rsa1.0_00502.1 | 585  | 204180 | 0         | 452 | 483 | 93 +  | 35   | 516  | 63883  | 64361  |
| UN11104 | Rsa1.0_05523.1 | 1039 | 13438  | 0         | 759 | 807 | 94 +  | 3    | 787  | 8986   | 9790   |
| UN11105 | Rsa1.0_10176.1 | 757  | 5959   | 1.00E-125 | 265 | 275 | 96 +  | 1    | 274  | 3184   | 3457   |
| UN11106 | Rsa1.0_00184.1 | 1517 | 218748 | 0         | 882 | 913 | 96 +  | 1    | 913  | 58806  | 59718  |
| UN11107 | Rsa1.0_00017.1 | 564  | 752458 | 4.00E-58  | 222 | 254 | 87 -  | 10   | 259  | 40150  | 40393  |
| UN11108 | Rsa1.0_01135.1 | 801  | 52799  | 0         | 537 | 546 | 98 +  | 2    | 547  | 44890  | 45435  |
| UN11109 | Rsa1.0_54418.1 | 1155 | 419    | 3.00E-97  | 217 | 229 | 94 +  | 68   | 296  | 1      | 229    |
| UN11110 | Rsa1.0_00715.1 | 523  | 67116  | 1.00E-176 | 441 | 488 | 90 -  | 36   | 523  | 63649  | 64119  |
| UN11111 | Rsa1.0_00064.1 | 744  | 240927 | 0         | 491 | 494 | 99 -  | 251  | 744  | 112101 | 112594 |
| UN11112 | Rsa1.0_00877.1 | 1392 | 61305  | 0         | 546 | 563 | 96 -  | 824  | 1385 | 6841   | 7400   |
| UN11113 | Rsa1.0_01907.1 | 585  | 37431  | 0         | 470 | 488 | 96 -  | 3    | 490  | 17907  | 18393  |

|         |                |      |        |           |      |      |       |      |      |        |        |
|---------|----------------|------|--------|-----------|------|------|-------|------|------|--------|--------|
| UN11114 | Rsa1.0.06392.1 | 1763 | 11104  | 0         | 1171 | 1279 | 91 +  | 507  | 1761 | 2775   | 4020   |
| UN11115 | Rsa1.0.02945.1 | 939  | 26548  | 0         | 537  | 540  | 99 -  | 165  | 704  | 8396   | 8935   |
| UN11116 | Rsa1.0.03233.1 | 870  | 24446  | 0         | 686  | 699  | 98 +  | 174  | 870  | 20170  | 20868  |
| UN11117 | Rsa1.0.00037.1 | 687  | 307838 | 1.00E-117 | 297  | 315  | 94 +  | 7    | 317  | 148299 | 148601 |
| UN11118 | Rsa1.0.00571.1 | 812  | 329018 | 0         | 733  | 744  | 98 +  | 70   | 812  | 165714 | 166456 |
| UN11119 | Rsa1.0.00179.1 | 822  | 393324 | 1.00E-153 | 344  | 364  | 94 +  | 1    | 359  | 334493 | 334856 |
| UN11120 | Rsa1.0.00363.1 | 572  | 90968  | 2.00E-90  | 195  | 204  | 95 -  | 228  | 425  | 53874  | 54077  |
| UN11121 | Rsa1.0.00220.1 | 949  | 192936 | 1.00E-158 | 330  | 342  | 96 +  | 1    | 340  | 143121 | 143460 |
| UN11122 | Rsa1.0.00145.1 | 872  | 261008 | 1.00E-136 | 266  | 271  | 98 +  | 2    | 271  | 50057  | 50327  |
| UN11123 | Rsa1.0.00079.1 | 858  | 606987 | 0         | 562  | 564  | 99 +  | 1    | 564  | 447436 | 447999 |
| UN11124 | Rsa1.0.03833.1 | 756  | 20575  | 1.00E-104 | 243  | 259  | 93 -  | 22   | 269  | 11313  | 11570  |
| UN11125 | Rsa1.0.02584.1 | 719  | 29877  | 1.00E-128 | 333  | 365  | 91 -  | 1    | 359  | 806    | 1155   |
| UN11126 | Rsa1.0.00296.1 | 1259 | 97854  | 0         | 1187 | 1259 | 94 +  | 3    | 1258 | 44704  | 45960  |
| UN11127 | Rsa1.0.01876.1 | 832  | 37800  | 1.00E-128 | 241  | 244  | 98 -  | 529  | 772  | 8719   | 8962   |
| UN11128 | Rsa1.0.00130.1 | 834  | 125737 | 1.00E-156 | 350  | 367  | 95 +  | 1    | 366  | 38241  | 38602  |
| UN11129 | Rsa1.0.00378.1 | 523  | 89892  | 1.00E-126 | 314  | 338  | 92 +  | 25   | 358  | 62119  | 62453  |
| UN11130 | Rsa1.0.00111.1 | 357  | 390088 | 1.00E-161 | 321  | 332  | 96 +  | 26   | 357  | 383857 | 384188 |
| UN11131 | Rsa1.0.00985.1 | 550  | 161950 | 1.00E-164 | 323  | 333  | 96 -  | 1    | 333  | 50364  | 50696  |
| UN11132 | Rsa1.0.00722.1 | 850  | 66840  | 0         | 384  | 400  | 96 +  | 4    | 399  | 58779  | 59175  |
| UN11133 | Rsa1.0.00277.1 | 998  | 100132 | 1.00E-111 | 314  | 351  | 89 +  | 11   | 360  | 83608  | 83938  |
| UN11134 | Rsa1.0.01878.1 | 783  | 37768  | 0         | 647  | 652  | 99 -  | 1    | 652  | 22554  | 23204  |
| UN11135 | Rsa1.0.01679.1 | 396  | 146876 | 1.00E-168 | 375  | 401  | 93 +  | 3    | 396  | 119034 | 119434 |
| UN11136 | Rsa1.0.00522.1 | 478  | 78103  | 1.00E-125 | 333  | 368  | 90 -  | 108  | 475  | 52124  | 52491  |
| UN11137 | Rsa1.0.05282.1 | 790  | 14270  | 8.00E-51  | 103  | 103  | 100 + | 535  | 637  | 4965   | 5067   |
| UN11138 | Rsa1.0.03193.1 | 998  | 24690  | 1.00E-102 | 234  | 244  | 95 +  | 1    | 242  | 19553  | 19793  |
| UN11139 | Rsa1.0.00833.1 | 811  | 62621  | 1.00E-108 | 212  | 216  | 98 -  | 428  | 643  | 28739  | 28954  |
| UN11140 | Rsa1.0.00615.1 | 996  | 72235  | 0         | 382  | 387  | 98 -  | 1    | 387  | 26377  | 26761  |
| UN11141 | Rsa1.0.02550.1 | 1236 | 291051 | 1.00E-165 | 334  | 346  | 96 +  | 884  | 1227 | 6190   | 6535   |
| UN11142 | Rsa1.0.00360.1 | 1074 | 91190  | 1.00E-128 | 307  | 327  | 93 -  | 23   | 345  | 67270  | 67594  |
| UN11143 | Rsa1.0.00087.1 | 646  | 761073 | 2.00E-91  | 236  | 255  | 92 +  | 12   | 265  | 11767  | 12015  |
| UN11144 | Rsa1.0.19812.1 | 975  | 1380   | 1.00E-142 | 313  | 331  | 94 +  | 634  | 964  | 836    | 1163   |
| UN11145 | Rsa1.0.10606.1 | 969  | 5787   | 1.00E-163 | 327  | 336  | 97 +  | 1    | 336  | 2172   | 2505   |
| UN11146 | Rsa1.0.00960.1 | 1280 | 58199  | 0         | 383  | 389  | 98 -  | 2    | 389  | 30003  | 30391  |
| UN11147 | Rsa1.0.00435.1 | 580  | 317579 | 1.00E-138 | 344  | 369  | 93 +  | 1    | 361  | 70714  | 71080  |
| UN11148 | Rsa1.0.05501.1 | 309  | 13513  | 1.00E-87  | 206  | 220  | 93 -  | 3    | 222  | 6241   | 6460   |
| UN11149 | Rsa1.0.01175.1 | 875  | 51674  | 1.00E-166 | 360  | 377  | 95 -  | 29   | 401  | 979    | 1351   |
| UN11150 | Rsa1.0.00002.1 | 1185 | 601661 | 0         | 1161 | 1189 | 97 -  | 1    | 1183 | 412143 | 413331 |
| UN11151 | Rsa1.0.00387.1 | 917  | 495407 | 0         | 390  | 399  | 97 +  | 107  | 501  | 363148 | 363546 |
| UN11152 | Rsa1.0.01588.1 | 1510 | 42724  | 4.00E-97  | 184  | 185  | 99 -  | 1326 | 1510 | 38439  | 38623  |



|         |                |      |        |           |      |      |      |     |      |        |        |
|---------|----------------|------|--------|-----------|------|------|------|-----|------|--------|--------|
| UN11153 | Rsa1.0.02266.1 | 853  | 33195  | 0         | 485  | 502  | 96 + | 349 | 847  | 30338  | 30839  |
| UN11154 | Rsa1.0.00010.1 | 1014 | 294827 | 2.00E-86  | 287  | 324  | 88 + | 7   | 322  | 135518 | 135837 |
| UN11155 | Rsa1.0.00913.1 | 665  | 59914  | 1.00E-142 | 326  | 353  | 92 - | 332 | 663  | 57997  | 58349  |
| UN11156 | Rsa1.0.00157.1 | 490  | 245832 | 1.00E-169 | 417  | 455  | 91 - | 44  | 490  | 163152 | 163606 |
| UN11157 | Rsa1.0.00040.1 | 1191 | 324196 | 0         | 648  | 662  | 97 - | 530 | 1191 | 51659  | 52320  |
| UN11158 | Rsa1.0.00108.1 | 1089 | 478491 | 1.00E-161 | 384  | 411  | 93 + | 1   | 398  | 450924 | 451332 |
| UN11159 | Rsa1.0.00050.1 | 509  | 237174 | 1.00E-148 | 296  | 305  | 97 - | 1   | 303  | 33432  | 33736  |
| UN11160 | Rsa1.0.04085.1 | 856  | 19168  | 0         | 465  | 517  | 89 + | 339 | 831  | 755    | 1268   |
| UN11161 | Rsa1.0.00635.1 | 742  | 175826 | 1.00E-86  | 222  | 246  | 90 - | 87  | 314  | 15994  | 16239  |
| UN11162 | Rsa1.0.24942.1 | 645  | 959    | 1.00E-147 | 340  | 362  | 93 - | 1   | 360  | 1      | 358    |
| UN11163 | Rsa1.0.29798.1 | 172  | 771    | 4.00E-46  | 109  | 114  | 95 + | 1   | 114  | 559    | 672    |
| UN11164 | Rsa1.0.07757.1 | 864  | 8633   | 0         | 512  | 537  | 95 + | 26  | 557  | 867    | 1403   |
| UN11165 | Rsa1.0.01896.1 | 1383 | 37512  | 0         | 452  | 466  | 96 + | 832 | 1297 | 9812   | 10277  |
| UN11166 | Rsa1.0.00711.1 | 846  | 67223  | 0         | 427  | 441  | 96 + | 401 | 841  | 30127  | 30566  |
| UN11167 | Rsa1.0.00025.1 | 716  | 277312 | 2.33E-156 | 299  | 310  | 96 - | 2   | 310  | 113952 | 114261 |
| UN11168 | Rsa1.0.00495.1 | 749  | 79934  | 3.00E-50  | 120  | 126  | 95 + | 295 | 420  | 16598  | 16723  |
| UN11169 | Rsa1.0.00536.1 | 849  | 77199  | 0         | 421  | 437  | 96 - | 4   | 439  | 23555  | 23990  |
| UN11170 | Rsa1.0.01384.1 | 522  | 46803  | 1.00E-159 | 401  | 432  | 92 - | 8   | 433  | 41768  | 42193  |
| UN11171 | Rsa1.0.00385.1 | 496  | 89160  | 1.00E-108 | 233  | 242  | 96 + | 255 | 496  | 31104  | 31342  |
| UN11172 | Rsa1.0.00040.1 | 751  | 324196 | 0         | 655  | 690  | 94 - | 63  | 751  | 224194 | 224883 |
| UN11173 | Rsa1.0.00595.1 | 810  | 341648 | 0         | 517  | 524  | 98 + | 1   | 524  | 23278  | 23799  |
| UN11174 | Rsa1.0.00437.1 | 814  | 84879  | 1.00E-119 | 259  | 273  | 94 - | 162 | 434  | 23635  | 23907  |
| UN11175 | Rsa1.0.00506.1 | 913  | 79106  | 0         | 517  | 531  | 97 + | 383 | 913  | 21608  | 22138  |
| UN11176 | Rsa1.0.01156.1 | 843  | 52147  | 0         | 348  | 350  | 99 + | 463 | 812  | 24757  | 25106  |
| UN11177 | Rsa1.0.03101.1 | 886  | 25410  | 0         | 878  | 887  | 98 - | 1   | 886  | 19681  | 20567  |
| UN11178 | Rsa1.0.04500.1 | 1183 | 17083  | 1.00E-175 | 422  | 455  | 92 - | 50  | 482  | 6445   | 6893   |
| UN11179 | Rsa1.0.03299.1 | 814  | 23949  | 0         | 566  | 593  | 95 - | 7   | 590  | 14331  | 14919  |
| UN11180 | Rsa1.0.00332.1 | 1323 | 94575  | 0         | 551  | 600  | 91 - | 7   | 594  | 59905  | 60490  |
| UN11181 | Rsa1.0.02157.1 | 647  | 149652 | 2.00E-69  | 158  | 166  | 95 + | 1   | 166  | 132597 | 132762 |
| UN11182 | Rsa1.0.00208.1 | 1450 | 108565 | 0         | 1123 | 1151 | 97 + | 1   | 1150 | 100682 | 101826 |
| UN11183 | Rsa1.0.01122.1 | 463  | 53369  | 0         | 451  | 462  | 97 + | 1   | 462  | 27966  | 28426  |
| UN11184 | Rsa1.0.00023.1 | 759  | 194764 | 0         | 748  | 754  | 99 - | 6   | 759  | 104960 | 105713 |
| UN11185 | Rsa1.0.00960.1 | 1442 | 58199  | 0         | 734  | 788  | 93 - | 585 | 1365 | 19404  | 20167  |
| UN11186 | Rsa1.0.02402.1 | 932  | 31710  | 0         | 721  | 773  | 93 + | 2   | 774  | 23951  | 24706  |
| UN11187 | Rsa1.0.00488.1 | 1358 | 80490  | 0         | 698  | 707  | 98 + | 652 | 1358 | 6874   | 7580   |
| UN11188 | Rsa1.0.07617.1 | 1485 | 9015   | 0         | 1303 | 1352 | 96 - | 5   | 1344 | 2699   | 4049   |
| UN11189 | Rsa1.0.01601.1 | 1285 | 42519  | 0         | 511  | 512  | 99 + | 31  | 541  | 11077  | 11588  |
| UN11190 | Rsa1.0.01796.1 | 841  | 39154  | 1.00E-129 | 247  | 251  | 98 - | 482 | 732  | 37475  | 37725  |
| UN11191 | Rsa1.0.11948.1 | 1312 | 5363   | 1.00E-117 | 250  | 261  | 95 + | 1   | 261  | 3922   | 4180   |

|         |                |      |        |           |      |      |      |      |      |        |        |
|---------|----------------|------|--------|-----------|------|------|------|------|------|--------|--------|
| UN11192 | Rsa1.0_01220.1 | 658  | 161775 | 1.00E-131 | 288  | 305  | 94 + | 6    | 296  | 126160 | 126462 |
| UN11193 | Rsa1.0_02020.1 | 814  | 173211 | 0         | 773  | 812  | 95 - | 2    | 812  | 148364 | 149172 |
| UN11194 | Rsa1.0_00802.1 | 813  | 63846  | 1.00E-123 | 289  | 305  | 94 - | 3    | 305  | 17081  | 17383  |
| UN11195 | Rsa1.0_00322.1 | 1265 | 212233 | 1.00E-117 | 221  | 223  | 99 + | 187  | 409  | 80171  | 80393  |
| UN11196 | Rsa1.0_04230.1 | 1196 | 18384  | 0         | 457  | 469  | 97 - | 728  | 1194 | 10536  | 11003  |
| UN11197 | Rsa1.0_00056.1 | 747  | 332604 | 1.00E-157 | 323  | 337  | 95 - | 1    | 337  | 113294 | 113630 |
| UN11198 | Rsa1.0_00018.1 | 763  | 410899 | 1.00E-166 | 396  | 424  | 93 - | 3    | 422  | 68738  | 69156  |
| UN11199 | Rsa1.0_01146.1 | 309  | 163455 | 2.00E-55  | 122  | 126  | 96 - | 90   | 215  | 162566 | 162691 |
| UN11200 | Rsa1.0_02803.1 | 754  | 27715  | 1.00E-112 | 276  | 297  | 92 - | 1    | 296  | 26242  | 26531  |
| UN11201 | Rsa1.0_00580.1 | 807  | 74515  | 1.00E-160 | 335  | 353  | 94 + | 4    | 341  | 33897  | 34249  |
| UN11202 | Rsa1.0_00335.1 | 1212 | 94371  | 1.00E-179 | 367  | 383  | 95 - | 828  | 1210 | 42153  | 42535  |
| UN11203 | Rsa1.0_00648.1 | 877  | 70351  | 4.00E-71  | 177  | 189  | 93 - | 127  | 315  | 19476  | 19663  |
| UN11204 | Rsa1.0_00264.1 | 1135 | 101674 | 0         | 1105 | 1137 | 97 + | 2    | 1131 | 11991  | 13127  |
| UN11205 | Rsa1.0_00417.1 | 1168 | 395068 | 1.00E-160 | 336  | 352  | 95 + | 1    | 343  | 225420 | 225771 |
| UN11206 | Rsa1.0_00457.1 | 1136 | 337301 | 1.00E-166 | 367  | 389  | 94 + | 283  | 668  | 5450   | 5831   |
| UN11207 | Rsa1.0_00339.1 | 413  | 222974 | 2.00E-40  | 88   | 89   | 98 - | 305  | 393  | 40128  | 40216  |
| UN11208 | Rsa1.0_15801.1 | 768  | 2415   | 0         | 703  | 725  | 96 - | 1    | 724  | 910    | 1634   |
| UN11209 | Rsa1.0_00453.1 | 1834 | 83031  | 0         | 466  | 502  | 92 + | 1050 | 1532 | 81190  | 81689  |
| UN11210 | Rsa1.0_00566.1 | 992  | 75325  | 0         | 366  | 377  | 97 + | 443  | 819  | 20189  | 20565  |
| UN11211 | Rsa1.0_01996.1 | 796  | 36327  | 1.00E-175 | 321  | 323  | 99 + | 1    | 323  | 22860  | 23181  |
| UN11212 | Rsa1.0_01236.1 | 678  | 50156  | 1.00E-104 | 199  | 201  | 99 + | 229  | 429  | 44319  | 44519  |
| UN11213 | Rsa1.0_00707.1 | 842  | 190112 | 0         | 507  | 515  | 98 - | 1    | 511  | 61070  | 61584  |
| UN11214 | Rsa1.0_00573.1 | 1037 | 74821  | 0         | 990  | 1037 | 95 + | 9    | 1036 | 44746  | 45782  |
| UN11215 | Rsa1.0_00074.1 | 544  | 147591 | 1.00E-137 | 300  | 318  | 94 + | 1    | 318  | 135599 | 135905 |
| UN11216 | Rsa1.0_07603.1 | 1103 | 9043   | 1.00E-111 | 348  | 394  | 88 + | 213  | 606  | 2808   | 3197   |
| UN11217 | Rsa1.0_00421.1 | 780  | 86365  | 1.00E-125 | 290  | 307  | 94 + | 16   | 314  | 82627  | 82933  |
| UN11218 | Rsa1.0_00856.1 | 975  | 62037  | 0         | 465  | 491  | 94 + | 1    | 491  | 6415   | 6889   |
| UN11219 | Rsa1.0_06373.1 | 989  | 11138  | 1.00E-148 | 292  | 299  | 97 + | 26   | 319  | 735    | 1033   |
| UN11220 | Rsa1.0_01326.1 | 1165 | 48072  | 0         | 524  | 552  | 94 - | 1    | 545  | 40139  | 40681  |
| UN11221 | Rsa1.0_00928.1 | 598  | 59293  | 4.00E-95  | 199  | 205  | 97 + | 1    | 205  | 29534  | 29737  |
| UN11222 | Rsa1.0_00173.1 | 1204 | 288743 | 3.00E-91  | 266  | 290  | 91 + | 925  | 1204 | 25595  | 25882  |
| UN11223 | Rsa1.0_01493.1 | 1330 | 44670  | 0         | 505  | 526  | 96 + | 1    | 523  | 13292  | 13805  |
| UN11224 | Rsa1.0_00055.1 | 1588 | 520193 | 0         | 457  | 483  | 94 + | 1    | 479  | 385970 | 386446 |
| UN11225 | Rsa1.0_01696.1 | 1088 | 301850 | 3.00E-63  | 139  | 144  | 96 - | 711  | 854  | 291899 | 292042 |
| UN11226 | Rsa1.0_02765.1 | 1456 | 28141  | 0         | 388  | 398  | 97 + | 1    | 392  | 16308  | 16705  |
| UN11227 | Rsa1.0_00626.1 | 1252 | 71582  | 0         | 378  | 380  | 99 - | 872  | 1251 | 17748  | 18127  |
| UN11228 | Rsa1.0_01768.1 | 827  | 138463 | 1.00E-117 | 220  | 222  | 99 - | 448  | 669  | 118797 | 119018 |
| UN11229 | Rsa1.0_00073.1 | 1526 | 240924 | 0         | 408  | 424  | 96 + | 1102 | 1525 | 226964 | 227384 |
| UN11230 | Rsa1.0_26587.1 | 1271 | 885    | 0         | 601  | 647  | 92 + | 1    | 642  | 262    | 885    |

|         |                |      |        |           |      |      |       |      |      |        |        |
|---------|----------------|------|--------|-----------|------|------|-------|------|------|--------|--------|
| UN11231 | Rsa1.0.00023.1 | 1167 | 194764 | 0         | 1146 | 1174 | 97 +  | 4    | 1166 | 70822  | 71992  |
| UN11232 | Rsa1.0.03568.1 | 972  | 22048  | 0         | 712  | 731  | 97 -  | 1    | 731  | 18651  | 19379  |
| UN11233 | Rsa1.0.55259.1 | 1584 | 413    | 0         | 405  | 413  | 98 +  | 93   | 505  | 1      | 413    |
| UN11234 | Rsa1.0.01593.1 | 1263 | 150996 | 1.00E-155 | 361  | 386  | 93 +  | 1    | 385  | 149467 | 149850 |
| UN11235 | Rsa1.0.13607.1 | 1238 | 4645   | 0         | 1217 | 1235 | 98 -  | 2    | 1236 | 1747   | 2981   |
| UN11236 | Rsa1.0.18598.1 | 787  | 1567   | 0         | 660  | 662  | 99 -  | 1    | 662  | 258    | 919    |
| UN11237 | Rsa1.0.00250.1 | 1164 | 273771 | 0         | 487  | 516  | 94 -  | 650  | 1163 | 253679 | 254181 |
| UN11238 | Rsa1.0.08412.1 | 792  | 7404   | 0         | 505  | 537  | 94 +  | 10   | 542  | 4359   | 4887   |
| UN11239 | Rsa1.0.03623.1 | 765  | 21714  | 0         | 667  | 675  | 98 +  | 4    | 678  | 11647  | 12321  |
| UN11240 | Rsa1.0.01626.1 | 1146 | 41989  | 1.00E-106 | 196  | 196  | 100 - | 542  | 737  | 22145  | 22340  |
| UN11241 | Rsa1.0.00643.1 | 814  | 70658  | 0         | 466  | 466  | 100 - | 1    | 466  | 27681  | 28146  |
| UN11242 | Rsa1.0.01682.1 | 851  | 41090  | 0         | 846  | 853  | 99 -  | 1    | 851  | 26026  | 26877  |
| UN11243 | Rsa1.0.00512.1 | 824  | 200277 | 0         | 555  | 555  | 100 - | 2    | 556  | 55821  | 56375  |
| UN11244 | Rsa1.0.00376.1 | 825  | 90101  | 0         | 437  | 458  | 95 -  | 31   | 485  | 49557  | 50013  |
| UN11245 | Rsa1.0.00048.1 | 827  | 167185 | 1.00E-128 | 268  | 280  | 95 +  | 429  | 708  | 8087   | 8366   |
| UN11246 | Rsa1.0.00699.1 | 1061 | 184398 | 0         | 368  | 383  | 96 -  | 1    | 383  | 145515 | 145897 |
| UN11247 | Rsa1.0.03780.1 | 1311 | 20899  | 2.00E-71  | 194  | 206  | 94 +  | 69   | 272  | 372    | 574    |
| UN11248 | Rsa1.0.00628.1 | 1029 | 214360 | 1.00E-111 | 207  | 208  | 99 -  | 3    | 210  | 48600  | 48807  |
| UN11249 | Rsa1.0.02026.1 | 907  | 35896  | 0         | 445  | 450  | 98 +  | 1    | 450  | 14910  | 15358  |
| UN11250 | Rsa1.0.01271.1 | 382  | 49569  | 0         | 382  | 382  | 100 - | 1    | 382  | 28301  | 28682  |
| UN11251 | Rsa1.0.04490.1 | 1172 | 17144  | 0         | 1153 | 1154 | 99 -  | 1    | 1154 | 12296  | 13449  |
| UN11252 | Rsa1.0.02623.1 | 773  | 29409  | 0         | 368  | 376  | 97 +  | 1    | 376  | 9606   | 9981   |
| UN11253 | Rsa1.0.00316.1 | 651  | 96264  | 3.00E-40  | 106  | 112  | 94 +  | 134  | 243  | 57738  | 57849  |
| UN11254 | Rsa1.0.00247.1 | 781  | 103408 | 0         | 468  | 471  | 99 +  | 1    | 471  | 6037   | 6507   |
| UN11255 | Rsa1.0.02505.1 | 830  | 30703  | 1.00E-145 | 348  | 376  | 92 -  | 1    | 374  | 17073  | 17438  |
| UN11256 | Rsa1.0.02560.1 | 1464 | 30091  | 0         | 456  | 456  | 100 + | 3    | 458  | 718    | 1173   |
| UN11257 | Rsa1.0.00248.1 | 1422 | 163568 | 0         | 605  | 658  | 91 +  | 781  | 1422 | 50066  | 50723  |
| UN11258 | Rsa1.0.00490.1 | 1651 | 186713 | 1.00E-117 | 302  | 327  | 92 +  | 1327 | 1651 | 153661 | 153982 |
| UN11259 | Rsa1.0.09108.1 | 1413 | 6644   | 0         | 907  | 942  | 96 -  | 473  | 1412 | 1601   | 2541   |
| UN11260 | Rsa1.0.01062.1 | 673  | 55325  | 1.00E-145 | 389  | 429  | 90 +  | 1    | 412  | 51156  | 51574  |
| UN11261 | Rsa1.0.00336.1 | 381  | 445051 | 0         | 378  | 381  | 99 +  | 1    | 380  | 263448 | 263828 |
| UN11262 | Rsa1.0.00556.1 | 1173 | 207212 | 1.00E-122 | 356  | 392  | 90 +  | 9    | 389  | 33472  | 33859  |
| UN11263 | Rsa1.0.00135.1 | 647  | 178077 | 0         | 438  | 447  | 97 +  | 201  | 647  | 23609  | 24053  |
| UN11264 | Rsa1.0.00081.1 | 1206 | 143261 | 1.00E-107 | 210  | 214  | 98 +  | 252  | 465  | 1376   | 1589   |
| UN11265 | Rsa1.0.01118.1 | 788  | 53460  | 1.00E-117 | 222  | 223  | 99 +  | 1    | 223  | 12659  | 12880  |
| UN11266 | Rsa1.0.00357.1 | 1387 | 173671 | 0         | 1331 | 1387 | 95 +  | 1    | 1385 | 144609 | 145991 |
| UN11267 | Rsa1.0.04051.1 | 786  | 19375  | 0         | 460  | 466  | 98 -  | 1    | 465  | 8731   | 9194   |
| UN11268 | Rsa1.0.00198.1 | 2219 | 222963 | 0         | 377  | 383  | 98 -  | 1837 | 2219 | 17904  | 18285  |
| UN11269 | Rsa1.0.00427.1 | 1157 | 189678 | 1.00E-155 | 336  | 351  | 95 +  | 2    | 350  | 182599 | 182948 |

|         |                |      |        |           |      |      |       |      |      |        |        |
|---------|----------------|------|--------|-----------|------|------|-------|------|------|--------|--------|
| UN11270 | Rsa1.0.01177.1 | 775  | 51572  | 0         | 436  | 443  | 98 +  | 233  | 675  | 6753   | 7195   |
| UN11271 | Rsa1.0.02316.1 | 1173 | 32608  | 1.00E-105 | 221  | 230  | 96 -  | 469  | 698  | 17754  | 17983  |
| UN11272 | Rsa1.0.00033.1 | 972  | 515811 | 0         | 514  | 549  | 93 +  | 7    | 551  | 333831 | 334369 |
| UN11273 | Rsa1.0.00145.1 | 931  | 261008 | 0         | 719  | 729  | 98 +  | 1    | 729  | 101336 | 102061 |
| UN11274 | Rsa1.0.00014.1 | 706  | 348985 | 0         | 693  | 705  | 98 -  | 3    | 706  | 174300 | 175003 |
| UN11275 | Rsa1.0.00127.1 | 741  | 127446 | 1.00E-180 | 345  | 352  | 98 -  | 92   | 442  | 106654 | 107005 |
| UN11276 | Rsa1.0.04071.1 | 789  | 19243  | 0         | 544  | 554  | 98 -  | 1    | 551  | 3747   | 4299   |
| UN11277 | Rsa1.0.15608.1 | 1104 | 2522   | 0         | 945  | 992  | 95 +  | 1    | 978  | 154    | 1144   |
| UN11278 | Rsa1.0.00671.1 | 783  | 397884 | 0         | 548  | 560  | 97 -  | 3    | 561  | 176948 | 177507 |
| UN11279 | Rsa1.0.03926.1 | 1054 | 20024  | 1.00E-147 | 264  | 264  | 100 - | 789  | 1052 | 5352   | 5615   |
| UN11280 | Rsa1.0.00423.1 | 933  | 86138  | 0         | 658  | 695  | 94 -  | 3    | 686  | 48394  | 49074  |
| UN11281 | Rsa1.0.02064.1 | 1594 | 35476  | 0         | 429  | 438  | 97 +  | 1010 | 1447 | 21446  | 21883  |
| UN11282 | Rsa1.0.00627.1 | 819  | 71566  | 3.00E-93  | 233  | 251  | 92 -  | 1    | 249  | 23881  | 24118  |
| UN11283 | Rsa1.0.53997.1 | 553  | 422    | 1.00E-144 | 313  | 330  | 94 -  | 224  | 553  | 95     | 422    |
| UN11284 | Rsa1.0.00210.1 | 974  | 108424 | 0         | 468  | 479  | 97 -  | 450  | 924  | 26237  | 26714  |
| UN11285 | Rsa1.0.00339.1 | 1379 | 222974 | 0         | 1365 | 1378 | 99 +  | 1    | 1377 | 81031  | 82408  |
| UN11286 | Rsa1.0.02248.1 | 1146 | 33414  | 0         | 536  | 558  | 96 -  | 1    | 550  | 3316   | 3870   |
| UN11287 | Rsa1.0.05490.1 | 1009 | 13556  | 1.00E-123 | 237  | 240  | 98 +  | 515  | 754  | 10484  | 10722  |
| UN11288 | Rsa1.0.00707.1 | 1150 | 190112 | 1.00E-168 | 331  | 339  | 97 -  | 11   | 349  | 161352 | 161687 |
| UN11289 | Rsa1.0.22550.1 | 1400 | 1111   | 0         | 562  | 583  | 96 -  | 1    | 583  | 485    | 1065   |
| UN11290 | Rsa1.0.01220.1 | 475  | 161775 | 1.00E-104 | 214  | 220  | 97 -  | 47   | 266  | 117110 | 117328 |
| UN11291 | Rsa1.0.21301.1 | 918  | 1217   | 1.00E-105 | 275  | 300  | 91 -  | 603  | 899  | 79     | 377    |
| UN11292 | Rsa1.0.19077.1 | 1161 | 1483   | 0         | 430  | 430  | 100 + | 672  | 1101 | 1054   | 1483   |
| UN11293 | Rsa1.0.00103.1 | 626  | 135304 | 0         | 624  | 624  | 100 + | 1    | 624  | 107507 | 108130 |
| UN11294 | Rsa1.0.01249.1 | 1610 | 188432 | 0         | 462  | 488  | 94 -  | 555  | 1030 | 43045  | 43532  |
| UN11295 | Rsa1.0.27704.1 | 1348 | 842    | 1.00E-148 | 304  | 315  | 96 -  | 357  | 670  | 51     | 365    |
| UN11296 | Rsa1.0.02280.1 | 1017 | 33063  | 0         | 1011 | 1012 | 99 +  | 1    | 1012 | 3266   | 4277   |
| UN11297 | Rsa1.0.02399.1 | 598  | 31763  | 0         | 556  | 593  | 93 -  | 7    | 598  | 13079  | 13667  |
| UN11298 | Rsa1.0.01405.1 | 1219 | 46445  | 0         | 575  | 586  | 98 +  | 1    | 586  | 20659  | 21238  |
| UN11299 | Rsa1.0.01142.1 | 713  | 52464  | 1.00E-111 | 221  | 226  | 97 -  | 121  | 346  | 50939  | 51161  |
| UN11300 | Rsa1.0.02585.1 | 1211 | 29865  | 0         | 344  | 346  | 99 +  | 759  | 1103 | 19802  | 20147  |
| UN11301 | Rsa1.0.00399.1 | 1238 | 242951 | 0         | 409  | 423  | 96 -  | 1    | 420  | 43978  | 44400  |
| UN11302 | Rsa1.0.04934.1 | 936  | 143962 | 0         | 902  | 943  | 95 +  | 2    | 936  | 11089  | 12028  |
| UN11303 | Rsa1.0.04456.1 | 1168 | 17260  | 1.00E-62  | 361  | 443  | 81 -  | 546  | 962  | 8880   | 9305   |
| UN11304 | Rsa1.0.01896.1 | 991  | 37512  | 0         | 954  | 991  | 96 +  | 3    | 991  | 31704  | 32692  |
| UN11305 | Rsa1.0.00130.1 | 975  | 125737 | 0         | 613  | 624  | 98 +  | 352  | 975  | 42198  | 42821  |
| UN11306 | Rsa1.0.00679.1 | 912  | 68971  | 1.00E-162 | 289  | 289  | 100 - | 3    | 291  | 49245  | 49533  |
| UN11307 | Rsa1.0.00047.1 | 1360 | 168582 | 0         | 1208 | 1221 | 98 +  | 1    | 1221 | 67959  | 69179  |
| UN11308 | Rsa1.0.00046.1 | 801  | 320315 | 0         | 597  | 617  | 96 -  | 1    | 605  | 47138  | 47754  |

|         |                |      |        |           |      |      |       |      |      |        |        |
|---------|----------------|------|--------|-----------|------|------|-------|------|------|--------|--------|
| UN11309 | Rsa1.0.02505.1 | 1315 | 30703  | 0         | 523  | 549  | 95 +  | 4    | 544  | 17564  | 18107  |
| UN11310 | Rsa1.0.00059.1 | 870  | 159650 | 0         | 732  | 762  | 96 +  | 1    | 760  | 77216  | 77963  |
| UN11311 | Rsa1.0.00695.1 | 1076 | 68019  | 0         | 626  | 627  | 99 +  | 2    | 627  | 58638  | 59264  |
| UN11312 | Rsa1.0.00042.1 | 1368 | 171507 | 1.00E-174 | 394  | 418  | 94 +  | 963  | 1366 | 159615 | 160028 |
| UN11313 | Rsa1.0.00254.1 | 1015 | 102600 | 0         | 494  | 524  | 94 +  | 3    | 514  | 90254  | 90773  |
| UN11314 | Rsa1.0.02210.1 | 562  | 33857  | 0         | 559  | 560  | 99 +  | 1    | 560  | 1029   | 1588   |
| UN11315 | Rsa1.0.02503.1 | 542  | 30709  | 4.00E-67  | 136  | 138  | 98 -  | 249  | 386  | 26114  | 26251  |
| UN11316 | Rsa1.0.01116.1 | 697  | 142088 | 2.33E-156 | 376  | 409  | 91 -  | 11   | 419  | 128912 | 129305 |
| UN11317 | Rsa1.0.00876.1 | 840  | 61328  | 0         | 722  | 760  | 95 +  | 1    | 742  | 35412  | 36171  |
| UN11318 | Rsa1.0.00009.1 | 986  | 232558 | 1.00E-160 | 347  | 366  | 94 -  | 120  | 477  | 53021  | 53382  |
| UN11319 | Rsa1.0.03709.1 | 1663 | 21247  | 0         | 974  | 980  | 99 -  | 685  | 1663 | 7789   | 8768   |
| UN11320 | Rsa1.0.00165.1 | 906  | 116466 | 1.00E-123 | 231  | 233  | 99 +  | 1    | 233  | 48170  | 48402  |
| UN11321 | Rsa1.0.02795.1 | 1372 | 27809  | 0         | 760  | 781  | 97 +  | 209  | 988  | 8002   | 8778   |
| UN11322 | Rsa1.0.00273.1 | 701  | 326186 | 1.00E-154 | 345  | 366  | 94 +  | 57   | 418  | 113973 | 114338 |
| UN11323 | Rsa1.0.24818.1 | 424  | 966    | 1.00E-163 | 318  | 327  | 97 -  | 98   | 424  | 521    | 847    |
| UN11324 | Rsa1.0.00048.1 | 1124 | 167185 | 0         | 370  | 377  | 98 -  | 2    | 376  | 100204 | 100579 |
| UN11325 | Rsa1.0.00239.1 | 1092 | 104332 | 0         | 450  | 450  | 100 + | 1    | 450  | 103584 | 104033 |
| UN11326 | Rsa1.0.00186.1 | 846  | 112669 | 0         | 831  | 847  | 98 +  | 1    | 846  | 34682  | 35525  |
| UN11327 | Rsa1.0.03774.1 | 1097 | 20932  | 0         | 529  | 577  | 91 -  | 513  | 1079 | 16175  | 16736  |
| UN11328 | Rsa1.0.00105.1 | 1628 | 134138 | 0         | 587  | 623  | 94 -  | 3    | 606  | 61301  | 61914  |
| UN11329 | Rsa1.0.01536.1 | 499  | 43747  | 0         | 386  | 400  | 96 -  | 20   | 419  | 39543  | 39942  |
| UN11330 | Rsa1.0.00286.1 | 460  | 98709  | 1.00E-108 | 243  | 256  | 94 -  | 1    | 247  | 11606  | 11861  |
| UN11331 | Rsa1.0.00050.1 | 1461 | 237174 | 0         | 1049 | 1092 | 96 +  | 2    | 1092 | 196179 | 197268 |
| UN11332 | Rsa1.0.02555.1 | 1421 | 30146  | 0         | 1361 | 1424 | 95 +  | 1    | 1420 | 2651   | 4068   |
| UN11333 | Rsa1.0.00218.1 | 1097 | 201480 | 0         | 483  | 520  | 92 +  | 584  | 1095 | 180348 | 180863 |
| UN11334 | Rsa1.0.03552.1 | 1327 | 22151  | 1.00E-163 | 403  | 438  | 92 +  | 899  | 1327 | 12808  | 13231  |
| UN11335 | Rsa1.0.01768.1 | 1410 | 138463 | 0         | 492  | 523  | 94 -  | 1    | 523  | 124510 | 125017 |
| UN11336 | Rsa1.0.02224.1 | 921  | 33758  | 0         | 803  | 836  | 96 +  | 69   | 903  | 25744  | 26576  |
| UN11337 | Rsa1.0.01000.1 | 1323 | 57140  | 0         | 990  | 1050 | 94 -  | 2    | 1042 | 52715  | 53738  |
| UN11338 | Rsa1.0.00837.1 | 1122 | 62568  | 0         | 761  | 770  | 98 +  | 355  | 1122 | 4682   | 5451   |
| UN11339 | Rsa1.0.00570.1 | 1253 | 75002  | 0         | 738  | 770  | 95 +  | 480  | 1247 | 72668  | 73433  |
| UN11340 | Rsa1.0.00112.1 | 1470 | 132199 | 0         | 515  | 531  | 96 -  | 1    | 531  | 89572  | 90100  |
| UN11341 | Rsa1.0.00107.1 | 981  | 431659 | 1.00E-117 | 234  | 240  | 97 -  | 75   | 314  | 183555 | 183791 |
| UN11342 | Rsa1.0.00699.1 | 1235 | 184398 | 1.00E-162 | 328  | 340  | 96 -  | 15   | 354  | 11508  | 11844  |
| UN11343 | Rsa1.0.02020.1 | 732  | 173211 | 0         | 697  | 728  | 95 +  | 1    | 728  | 148361 | 149085 |
| UN11344 | Rsa1.0.00041.1 | 934  | 186197 | 1.00E-176 | 355  | 368  | 96 -  | 227  | 591  | 157071 | 157438 |
| UN11345 | Rsa1.0.03357.1 | 1534 | 23478  | 0         | 483  | 496  | 97 +  | 1043 | 1532 | 19472  | 19966  |
| UN11346 | Rsa1.0.00997.1 | 1270 | 57190  | 0         | 1268 | 1271 | 99 +  | 1    | 1270 | 34831  | 36101  |
| UN11347 | Rsa1.0.00394.1 | 674  | 148426 | 1.00E-174 | 312  | 313  | 99 -  | 362  | 674  | 120718 | 121030 |

|         |                |      |        |           |      |      |       |      |      |        |        |
|---------|----------------|------|--------|-----------|------|------|-------|------|------|--------|--------|
| UN11348 | Rsa1.0.02671.1 | 1100 | 28887  | 1.00E-126 | 271  | 285  | 95 -  | 818  | 1100 | 9174   | 9449   |
| UN11349 | Rsa1.0.00399.1 | 1752 | 242951 | 0         | 666  | 667  | 99 +  | 1084 | 1750 | 189886 | 190552 |
| UN11350 | Rsa1.0.00247.1 | 427  | 103408 | 1.00E-100 | 198  | 202  | 98 -  | 226  | 427  | 64842  | 65043  |
| UN11351 | Rsa1.0.02858.1 | 744  | 27246  | 1.00E-169 | 404  | 435  | 92 -  | 321  | 744  | 2245   | 2679   |
| UN11352 | Rsa1.0.01996.1 | 925  | 36327  | 6.00E-98  | 185  | 186  | 99 -  | 256  | 441  | 25436  | 25621  |
| UN11353 | Rsa1.0.00955.1 | 1234 | 58358  | 1.00E-135 | 259  | 264  | 98 -  | 955  | 1218 | 8908   | 9171   |
| UN11354 | Rsa1.0.02456.1 | 767  | 31222  | 1.00E-118 | 247  | 256  | 96 -  | 512  | 767  | 23750  | 24004  |
| UN11355 | Rsa1.0.00299.1 | 1157 | 97770  | 0         | 1090 | 1120 | 97 -  | 40   | 1157 | 13734  | 14844  |
| UN11356 | Rsa1.0.05319.1 | 770  | 14158  | 1.00E-98  | 195  | 199  | 97 -  | 421  | 619  | 4536   | 4734   |
| UN11357 | Rsa1.0.00018.1 | 1305 | 410899 | 0         | 401  | 406  | 98 -  | 358  | 763  | 367394 | 367799 |
| UN11358 | Rsa1.0.00035.1 | 859  | 176449 | 5.00E-83  | 160  | 161  | 99 +  | 242  | 402  | 155788 | 155948 |
| UN11359 | Rsa1.0.23763.1 | 1543 | 1027   | 1.00E-162 | 291  | 291  | 100 - | 1251 | 1541 | 410    | 700    |
| UN11360 | Rsa1.0.00130.1 | 1036 | 125737 | 1.00E-109 | 210  | 213  | 98 +  | 187  | 399  | 34393  | 34605  |
| UN11361 | Rsa1.0.00595.1 | 1424 | 341648 | 0         | 574  | 587  | 97 -  | 2    | 588  | 38530  | 39116  |
| UN11362 | Rsa1.0.05352.1 | 1328 | 14079  | 0         | 993  | 1004 | 98 +  | 323  | 1326 | 1715   | 2717   |
| UN11363 | Rsa1.0.01295.1 | 1170 | 49040  | 0         | 547  | 559  | 97 -  | 122  | 677  | 8398   | 8956   |
| UN11364 | Rsa1.0.01117.1 | 900  | 53465  | 1.00E-151 | 414  | 456  | 90 -  | 464  | 900  | 40147  | 40598  |
| UN11365 | Rsa1.0.00866.1 | 1180 | 61676  | 0         | 546  | 570  | 95 -  | 614  | 1180 | 29469  | 30037  |
| UN11366 | Rsa1.0.00152.1 | 1326 | 257730 | 0         | 416  | 432  | 96 -  | 3    | 434  | 101069 | 101487 |
| UN11367 | Rsa1.0.02020.1 | 714  | 173211 | 1.00E-116 | 286  | 303  | 94 -  | 413  | 712  | 20289  | 20586  |
| UN11368 | Rsa1.0.00923.1 | 1604 | 153678 | 1.00E-115 | 254  | 268  | 94 -  | 1336 | 1603 | 33375  | 33642  |
| UN11369 | Rsa1.0.00472.1 | 852  | 398134 | 2.00E-66  | 161  | 169  | 95 -  | 5    | 166  | 301550 | 301718 |
| UN11370 | Rsa1.0.02072.1 | 847  | 35401  | 1.00E-129 | 281  | 295  | 95 -  | 527  | 820  | 18059  | 18353  |
| UN11371 | Rsa1.0.02474.1 | 1426 | 31076  | 0         | 801  | 810  | 98 +  | 566  | 1375 | 5737   | 6546   |
| UN11372 | Rsa1.0.29181.1 | 769  | 790    | 1.00E-167 | 310  | 314  | 98 +  | 450  | 763  | 44     | 357    |
| UN11373 | Rsa1.0.00464.1 | 669  | 82253  | 0         | 539  | 550  | 98 +  | 122  | 669  | 75573  | 76121  |
| UN11374 | Rsa1.0.00721.1 | 809  | 66918  | 0         | 359  | 362  | 99 -  | 448  | 809  | 13199  | 13559  |
| UN11375 | Rsa1.0.01306.1 | 1122 | 48720  | 1.00E-144 | 281  | 287  | 97 -  | 834  | 1119 | 26057  | 26343  |
| UN11376 | Rsa1.0.01220.1 | 1062 | 161775 | 0         | 419  | 445  | 94 +  | 640  | 1062 | 147689 | 148133 |
| UN11377 | Rsa1.0.01675.1 | 690  | 41155  | 1.00E-155 | 290  | 294  | 98 -  | 394  | 687  | 10316  | 10609  |
| UN11378 | Rsa1.0.04882.1 | 611  | 15606  | 1.00E-144 | 280  | 287  | 97 -  | 1    | 287  | 7553   | 7839   |
| UN11379 | Rsa1.0.00090.1 | 682  | 273859 | 1.00E-109 | 222  | 228  | 97 -  | 5    | 232  | 55632  | 55858  |
| UN11380 | Rsa1.0.02438.1 | 1427 | 31392  | 0         | 621  | 654  | 94 +  | 496  | 1145 | 2419   | 3072   |
| UN11381 | Rsa1.0.00041.1 | 888  | 186197 | 0         | 875  | 889  | 98 +  | 1    | 885  | 30009  | 30893  |
| UN11382 | Rsa1.0.00269.1 | 1736 | 341668 | 0         | 509  | 524  | 97 +  | 236  | 759  | 330610 | 331133 |
| UN11383 | Rsa1.0.02840.1 | 1103 | 27386  | 0         | 732  | 774  | 94 -  | 3    | 765  | 26285  | 27058  |
| UN11384 | Rsa1.0.05911.1 | 906  | 12261  | 1.00E-141 | 312  | 332  | 93 +  | 588  | 906  | 5182   | 5513   |
| UN11385 | Rsa1.0.01688.1 | 1007 | 40965  | 1.00E-158 | 335  | 350  | 95 +  | 658  | 1007 | 36521  | 36867  |
| UN11386 | Rsa1.0.00484.1 | 823  | 203294 | 1.00E-139 | 261  | 263  | 99 -  | 3    | 265  | 43038  | 43298  |

|         |                |      |        |           |      |      |       |      |      |        |        |
|---------|----------------|------|--------|-----------|------|------|-------|------|------|--------|--------|
| UN11387 | Rsa1.0.03623.1 | 708  | 21714  | 0         | 467  | 478  | 97 -  | 3    | 480  | 13561  | 14037  |
| UN11388 | Rsa1.0.07811.1 | 1208 | 8496   | 0         | 418  | 425  | 98 +  | 551  | 975  | 6679   | 7103   |
| UN11389 | Rsa1.0.02231.1 | 529  | 33661  | 1.00E-138 | 249  | 249  | 100 - | 281  | 529  | 33337  | 33585  |
| UN11390 | Rsa1.0.02707.1 | 561  | 28520  | 0         | 525  | 554  | 94 -  | 11   | 560  | 9437   | 9988   |
| UN11391 | Rsa1.0.00746.1 | 990  | 66044  | 1.00E-164 | 297  | 298  | 99 -  | 693  | 990  | 63317  | 63614  |
| UN11392 | Rsa1.0.00017.1 | 1238 | 752458 | 1.00E-152 | 283  | 286  | 98 -  | 291  | 576  | 720938 | 721223 |
| UN11393 | Rsa1.0.03880.1 | 1462 | 20293  | 1.00E-118 | 226  | 229  | 98 +  | 331  | 559  | 18518  | 18746  |
| UN11394 | Rsa1.0.03302.1 | 1060 | 23898  | 0         | 461  | 469  | 98 -  | 591  | 1059 | 5959   | 6427   |
| UN11395 | Rsa1.0.00176.1 | 1110 | 240984 | 0         | 463  | 488  | 94 -  | 640  | 1110 | 151042 | 151527 |
| UN11396 | Rsa1.0.00407.1 | 921  | 191544 | 0         | 634  | 663  | 95 -  | 259  | 921  | 43103  | 43746  |
| UN11397 | Rsa1.0.00483.1 | 1084 | 81102  | 2.00E-52  | 239  | 285  | 83 -  | 819  | 1084 | 32615  | 32898  |
| UN11398 | Rsa1.0.01508.1 | 664  | 44334  | 0         | 472  | 474  | 99 +  | 191  | 664  | 37681  | 38154  |
| UN11399 | Rsa1.0.02267.1 | 763  | 33194  | 1.00E-124 | 229  | 230  | 99 -  | 331  | 560  | 30984  | 31213  |
| UN11400 | Rsa1.0.00618.1 | 611  | 72195  | 1.00E-111 | 238  | 249  | 95 +  | 26   | 270  | 2625   | 2873   |
| UN11401 | Rsa1.0.00224.1 | 1329 | 327530 | 1.00E-102 | 266  | 292  | 91 -  | 1040 | 1329 | 222136 | 222408 |
| UN11402 | Rsa1.0.00501.1 | 894  | 79545  | 1.00E-162 | 313  | 321  | 97 -  | 477  | 797  | 22510  | 22830  |
| UN11403 | Rsa1.0.01696.1 | 1114 | 301850 | 0         | 717  | 737  | 97 -  | 1    | 736  | 273492 | 274228 |
| UN11404 | Rsa1.0.01803.1 | 713  | 173846 | 1.00E-128 | 274  | 286  | 95 +  | 241  | 526  | 34625  | 34906  |
| UN11405 | Rsa1.0.14509.1 | 1066 | 3318   | 1.00E-133 | 292  | 308  | 94 +  | 98   | 403  | 1766   | 2067   |
| UN11406 | Rsa1.0.00123.1 | 1091 | 325650 | 1.00E-179 | 403  | 425  | 94 +  | 7    | 427  | 141835 | 142252 |
| UN11407 | Rsa1.0.00045.1 | 771  | 328694 | 3.00E-62  | 134  | 138  | 97 -  | 521  | 658  | 263471 | 263608 |
| UN11408 | Rsa1.0.00032.1 | 1391 | 306326 | 0         | 435  | 436  | 99 -  | 954  | 1389 | 265453 | 265888 |
| UN11409 | Rsa1.0.02150.1 | 1372 | 34580  | 0         | 842  | 862  | 97 +  | 89   | 950  | 26700  | 27561  |
| UN11410 | Rsa1.0.00467.1 | 785  | 156542 | 1.00E-126 | 279  | 296  | 94 -  | 484  | 773  | 80219  | 80514  |
| UN11411 | Rsa1.0.01328.1 | 1400 | 48021  | 0         | 431  | 441  | 97 +  | 270  | 709  | 16027  | 16467  |
| UN11412 | Rsa1.0.01476.1 | 1004 | 172928 | 0         | 481  | 512  | 93 +  | 488  | 995  | 8955   | 9464   |
| UN11413 | Rsa1.0.02728.1 | 696  | 28400  | 0         | 399  | 402  | 99 -  | 295  | 696  | 17632  | 18033  |
| UN11414 | Rsa1.0.00248.1 | 1297 | 163568 | 0         | 698  | 719  | 97 -  | 578  | 1296 | 50141  | 50859  |
| UN11415 | Rsa1.0.00136.1 | 1131 | 122464 | 1.00E-175 | 348  | 358  | 97 -  | 3    | 358  | 17206  | 17561  |
| UN11416 | Rsa1.0.00006.1 | 466  | 396176 | 0         | 451  | 467  | 96 +  | 2    | 466  | 32240  | 32706  |
| UN11417 | Rsa1.0.00407.1 | 1937 | 191544 | 0         | 507  | 507  | 100 - | 1    | 507  | 163596 | 164102 |
| UN11418 | Rsa1.0.00589.1 | 504  | 209965 | 1.00E-151 | 405  | 451  | 89 -  | 80   | 504  | 181444 | 181891 |
| UN11419 | Rsa1.0.00068.1 | 1360 | 151813 | 0         | 979  | 1037 | 94 +  | 1    | 1022 | 42912  | 43944  |
| UN11420 | Rsa1.0.00997.1 | 1206 | 57190  | 0         | 1040 | 1076 | 96 +  | 3    | 1069 | 34836  | 35911  |
| UN11421 | Rsa1.0.03536.1 | 1120 | 22232  | 0         | 697  | 743  | 93 +  | 390  | 1120 | 7055   | 7797   |
| UN11422 | Rsa1.0.00473.1 | 1522 | 212204 | 1.00E-165 | 301  | 303  | 99 +  | 323  | 625  | 190581 | 190883 |
| UN11423 | Rsa1.0.00086.1 | 815  | 439854 | 0         | 780  | 802  | 97 +  | 3    | 802  | 434240 | 435039 |
| UN11424 | Rsa1.0.06691.1 | 759  | 10532  | 1.00E-171 | 329  | 337  | 97 +  | 423  | 759  | 6354   | 6690   |
| UN11425 | Rsa1.0.00476.1 | 1376 | 280966 | 0         | 849  | 853  | 99 -  | 525  | 1376 | 7408   | 8257   |

|         |                |      |        |           |      |      |       |      |      |        |        |
|---------|----------------|------|--------|-----------|------|------|-------|------|------|--------|--------|
| UN11426 | Rsa1.0.02454.1 | 2210 | 31263  | 0         | 1427 | 1485 | 96 +  | 50   | 1524 | 24099  | 25580  |
| UN11427 | Rsa1.0.07055.1 | 858  | 9970   | 1.00E-153 | 275  | 275  | 100 + | 226  | 500  | 219    | 493    |
| UN11428 | Rsa1.0.01249.1 | 726  | 188432 | 8.00E-97  | 186  | 188  | 98 -  | 315  | 502  | 151131 | 151318 |
| UN11429 | Rsa1.0.00182.1 | 1022 | 142305 | 1.00E-129 | 303  | 326  | 92 -  | 430  | 755  | 98126  | 98451  |
| UN11430 | Rsa1.0.00195.1 | 605  | 251884 | 1.00E-171 | 328  | 335  | 97 +  | 3    | 337  | 229134 | 229465 |
| UN11431 | Rsa1.0.03790.1 | 1650 | 20844  | 0         | 410  | 423  | 96 -  | 87   | 508  | 8657   | 9071   |
| UN11432 | Rsa1.0.01233.1 | 898  | 50184  | 0         | 887  | 913  | 97 -  | 3    | 898  | 23497  | 24407  |
| UN11433 | Rsa1.0.13999.1 | 716  | 3934   | 1.00E-120 | 267  | 284  | 94 -  | 99   | 382  | 3660   | 3934   |
| UN11434 | Rsa1.0.00662.1 | 1124 | 192183 | 2.00E-89  | 215  | 227  | 94 +  | 898  | 1124 | 53109  | 53331  |
| UN11435 | Rsa1.0.00146.1 | 929  | 149343 | 0         | 578  | 582  | 99 +  | 2    | 583  | 139775 | 140356 |
| UN11436 | Rsa1.0.00286.1 | 619  | 98709  | 1.00E-161 | 296  | 298  | 99 +  | 322  | 619  | 13001  | 13296  |
| UN11437 | Rsa1.0.03686.1 | 756  | 21387  | 1.00E-118 | 260  | 277  | 93 -  | 497  | 756  | 7475   | 7751   |
| UN11438 | Rsa1.0.00013.1 | 1011 | 292129 | 1.00E-136 | 273  | 282  | 96 -  | 8    | 289  | 253557 | 253838 |
| UN11439 | Rsa1.0.23843.1 | 1116 | 1022   | 0         | 634  | 655  | 96 +  | 459  | 1112 | 1      | 655    |
| UN11440 | Rsa1.0.01758.1 | 762  | 39747  | 0         | 403  | 415  | 97 -  | 342  | 756  | 37154  | 37568  |
| UN11441 | Rsa1.0.00109.1 | 896  | 132735 | 1.00E-110 | 208  | 210  | 99 -  | 424  | 633  | 53985  | 54194  |
| UN11442 | Rsa1.0.00010.1 | 994  | 294827 | 1.00E-167 | 358  | 379  | 94 +  | 316  | 694  | 119770 | 120139 |
| UN11443 | Rsa1.0.03424.1 | 1353 | 23064  | 1.00E-166 | 312  | 317  | 98 +  | 3    | 319  | 15398  | 15710  |
| UN11444 | Rsa1.0.09210.1 | 768  | 6556   | 1.00E-166 | 324  | 333  | 97 -  | 41   | 373  | 650    | 982    |
| UN11445 | Rsa1.0.02045.1 | 1428 | 35650  | 1.00E-75  | 231  | 254  | 90 +  | 1141 | 1391 | 22741  | 22989  |
| UN11446 | Rsa1.0.10942.1 | 1138 | 5669   | 0         | 435  | 436  | 99 -  | 703  | 1138 | 968    | 1403   |
| UN11447 | Rsa1.0.01292.1 | 790  | 175783 | 1.00E-131 | 251  | 254  | 98 +  | 537  | 790  | 2296   | 2548   |
| UN11448 | Rsa1.0.05611.1 | 786  | 13193  | 0         | 555  | 573  | 96 -  | 218  | 784  | 2562   | 3128   |
| UN11449 | Rsa1.0.00749.1 | 1525 | 65933  | 0         | 1480 | 1545 | 95 -  | 3    | 1525 | 28027  | 29566  |
| UN11450 | Rsa1.0.00662.1 | 782  | 192183 | 0         | 769  | 782  | 98 +  | 1    | 782  | 54357  | 55138  |
| UN11451 | Rsa1.0.03968.1 | 707  | 19804  | 0         | 420  | 425  | 98 +  | 3    | 427  | 18603  | 19027  |
| UN11452 | Rsa1.0.02384.1 | 906  | 31917  | 0         | 865  | 919  | 94 +  | 3    | 906  | 11014  | 11920  |
| UN11453 | Rsa1.0.02944.1 | 1057 | 26553  | 0         | 409  | 425  | 96 +  | 609  | 1025 | 4612   | 5036   |
| UN11454 | Rsa1.0.00017.1 | 744  | 752458 | 0         | 455  | 480  | 94 +  | 263  | 741  | 222799 | 223276 |
| UN11455 | Rsa1.0.00225.1 | 1867 | 105892 | 1.00E-134 | 305  | 322  | 94 +  | 1501 | 1822 | 20850  | 21161  |
| UN11456 | Rsa1.0.00402.1 | 1283 | 385315 | 0         | 557  | 582  | 95 +  | 1    | 567  | 119064 | 119645 |
| UN11457 | Rsa1.0.07974.1 | 1298 | 8147   | 0         | 1285 | 1298 | 98 -  | 6    | 1298 | 6216   | 7513   |
| UN11458 | Rsa1.0.00923.1 | 1377 | 153678 | 1.00E-109 | 228  | 237  | 96 +  | 203  | 439  | 31496  | 31732  |
| UN11459 | Rsa1.0.00630.1 | 637  | 71281  | 0         | 560  | 580  | 96 +  | 64   | 637  | 18575  | 19151  |
| UN11460 | Rsa1.0.04422.1 | 842  | 17423  | 1.00E-116 | 270  | 284  | 95 -  | 561  | 841  | 10730  | 11012  |
| UN11461 | Rsa1.0.01881.1 | 803  | 37721  | 0         | 781  | 809  | 96 -  | 3    | 803  | 16711  | 17518  |
| UN11462 | Rsa1.0.00385.1 | 1582 | 89160  | 1.00E-168 | 351  | 363  | 96 +  | 1220 | 1578 | 66235  | 66596  |
| UN11463 | Rsa1.0.06047.1 | 776  | 11854  | 0         | 570  | 590  | 96 -  | 187  | 773  | 6802   | 7390   |
| UN11464 | Rsa1.0.34075.1 | 1390 | 665    | 0         | 334  | 338  | 98 -  | 544  | 881  | 9      | 346    |



|         |                |      |        |           |      |      |      |     |      |        |        |
|---------|----------------|------|--------|-----------|------|------|------|-----|------|--------|--------|
| UN11465 | Rsa1.0_04286.1 | 892  | 18084  | 2.00E-91  | 221  | 237  | 93 - | 1   | 236  | 6107   | 6331   |
| UN11466 | Rsa1.0_02846.1 | 993  | 27338  | 0         | 956  | 997  | 95 - | 1   | 993  | 11314  | 12305  |
| UN11467 | Rsa1.0_00622.1 | 936  | 71822  | 0         | 859  | 935  | 91 - | 18  | 931  | 25990  | 26890  |
| UN11468 | Rsa1.0_00796.1 | 759  | 63997  | 1.00E-101 | 236  | 249  | 94 - | 446 | 692  | 58142  | 58387  |
| UN11469 | Rsa1.0_00687.1 | 775  | 68494  | 0         | 762  | 771  | 98 + | 3   | 773  | 42407  | 43177  |
| UN11470 | Rsa1.0_03466.1 | 1539 | 22698  | 0         | 1002 | 1052 | 95 + | 29  | 1080 | 17397  | 18416  |
| UN11471 | Rsa1.0_17297.1 | 1030 | 1867   | 4.00E-81  | 178  | 186  | 95 - | 607 | 792  | 350    | 535    |
| UN11472 | Rsa1.0_01870.1 | 1400 | 37919  | 1.00E-140 | 297  | 311  | 95 + | 3   | 313  | 14118  | 14425  |
| UN11473 | Rsa1.0_06149.1 | 778  | 11615  | 0         | 391  | 403  | 97 + | 376 | 778  | 5349   | 5751   |
| UN11474 | Rsa1.0_00570.1 | 1489 | 75002  | 0         | 1129 | 1208 | 93 + | 85  | 1275 | 20443  | 21612  |
| UN11475 | Rsa1.0_05139.1 | 1521 | 14718  | 1.00E-142 | 272  | 277  | 98 + | 661 | 937  | 5752   | 6028   |
| UN11476 | Rsa1.0_00380.1 | 985  | 89748  | 0         | 480  | 499  | 96 + | 2   | 497  | 53812  | 54310  |
| UN11477 | Rsa1.0_01157.1 | 886  | 52121  | 0         | 392  | 399  | 98 - | 488 | 886  | 28867  | 29265  |
| UN11478 | Rsa1.0_00016.1 | 1111 | 831256 | 0         | 457  | 483  | 94 - | 333 | 814  | 253037 | 253513 |
| UN11479 | Rsa1.0_04845.1 | 837  | 15747  | 1.00E-108 | 217  | 223  | 97 + | 69  | 291  | 4171   | 4393   |
| UN11480 | Rsa1.0_01448.1 | 960  | 45645  | 1.00E-173 | 315  | 317  | 99 - | 644 | 960  | 39297  | 39613  |
| UN11481 | Rsa1.0_00038.1 | 507  | 314568 | 0         | 372  | 382  | 97 + | 1   | 382  | 283109 | 283486 |
| UN11482 | Rsa1.0_00139.1 | 950  | 357786 | 4.00E-90  | 202  | 209  | 96 - | 744 | 950  | 290739 | 290946 |
| UN11483 | Rsa1.0_20261.1 | 806  | 1323   | 0         | 472  | 495  | 95 - | 292 | 783  | 81     | 575    |
| UN11484 | Rsa1.0_00514.1 | 873  | 78421  | 0         | 852  | 871  | 97 - | 1   | 867  | 65101  | 65969  |
| UN11485 | Rsa1.0_09514.1 | 1280 | 6322   | 0         | 560  | 594  | 94 + | 2   | 595  | 1150   | 1742   |
| UN11486 | Rsa1.0_05708.1 | 1419 | 12871  | 0         | 1413 | 1418 | 99 + | 2   | 1419 | 3514   | 4931   |
| UN11487 | Rsa1.0_00505.1 | 824  | 79323  | 0         | 791  | 805  | 98 + | 19  | 823  | 34066  | 34870  |
| UN11488 | Rsa1.0_00090.1 | 1270 | 273859 | 0         | 665  | 668  | 99 - | 1   | 667  | 260786 | 261453 |
| UN11489 | Rsa1.0_00603.1 | 840  | 73299  | 1.00E-160 | 537  | 620  | 86 + | 4   | 620  | 14304  | 14923  |
| UN11490 | Rsa1.0_00145.1 | 1362 | 261008 | 0         | 385  | 391  | 98 - | 972 | 1361 | 246121 | 246511 |
| UN11491 | Rsa1.0_00470.1 | 668  | 81968  | 1.00E-162 | 359  | 383  | 93 - | 291 | 665  | 27987  | 28369  |
| UN11492 | Rsa1.0_15660.1 | 801  | 2496   | 0         | 790  | 798  | 98 - | 2   | 797  | 1451   | 2246   |
| UN11493 | Rsa1.0_00098.1 | 1057 | 349239 | 0         | 420  | 426  | 98 + | 630 | 1054 | 293541 | 293966 |
| UN11494 | Rsa1.0_03081.1 | 288  | 25523  | 9.00E-76  | 249  | 275  | 90 + | 20  | 285  | 23144  | 23409  |
| UN11495 | Rsa1.0_05081.1 | 1467 | 136103 | 1.00E-120 | 263  | 277  | 94 - | 774 | 1050 | 2078   | 2351   |
| UN11496 | Rsa1.0_03460.1 | 1355 | 22747  | 0         | 662  | 692  | 95 - | 669 | 1355 | 12206  | 12897  |
| UN11497 | Rsa1.0_00192.1 | 1204 | 278200 | 0         | 1003 | 1040 | 96 - | 2   | 1039 | 225853 | 226884 |
| UN11498 | Rsa1.0_00370.1 | 884  | 90472  | 0         | 400  | 420  | 95 - | 356 | 770  | 4877   | 5296   |
| UN11499 | Rsa1.0_04002.1 | 516  | 19608  | 5.00E-88  | 172  | 173  | 99 + | 124 | 296  | 17107  | 17278  |
| UN11500 | Rsa1.0_00730.1 | 1032 | 66673  | 0         | 884  | 899  | 98 + | 30  | 926  | 52983  | 53881  |
| UN11501 | Rsa1.0_00059.1 | 1157 | 159650 | 0         | 577  | 614  | 93 - | 552 | 1157 | 136132 | 136741 |
| UN11502 | Rsa1.0_00339.1 | 1395 | 222974 | 0         | 1085 | 1110 | 97 + | 10  | 1119 | 4026   | 5135   |
| UN11503 | Rsa1.0_05153.1 | 739  | 14663  | 1.00E-105 | 240  | 253  | 94 + | 468 | 714  | 2744   | 2994   |

|         |                |      |        |           |      |      |       |      |      |        |        |
|---------|----------------|------|--------|-----------|------|------|-------|------|------|--------|--------|
| UN11504 | Rsa1.0.00214.1 | 782  | 107508 | 0         | 509  | 545  | 93 -  | 6    | 549  | 20107  | 20647  |
| UN11505 | Rsa1.0.00280.1 | 1143 | 99966  | 0         | 1135 | 1144 | 99 -  | 2    | 1143 | 19098  | 20241  |
| UN11506 | Rsa1.0.00411.1 | 859  | 86944  | 0         | 804  | 877  | 91 +  | 19   | 859  | 61976  | 62834  |
| UN11507 | Rsa1.0.00971.1 | 938  | 57973  | 4.00E-16  | 45   | 45   | 100 - | 790  | 834  | 43513  | 43557  |
| UN11508 | Rsa1.0.01146.1 | 733  | 163455 | 2.00E-72  | 192  | 208  | 92 -  | 529  | 732  | 20587  | 20793  |
| UN11509 | Rsa1.0.00341.1 | 2225 | 249309 | 0         | 714  | 715  | 99 -  | 774  | 1488 | 22700  | 23414  |
| UN11510 | Rsa1.0.00294.1 | 728  | 144860 | 1.00E-162 | 316  | 325  | 97 -  | 68   | 392  | 116969 | 117293 |
| UN11511 | Rsa1.0.02922.1 | 954  | 26753  | 1.00E-109 | 226  | 233  | 96 -  | 564  | 795  | 12457  | 12689  |
| UN11512 | Rsa1.0.00055.1 | 853  | 520193 | 1.00E-138 | 267  | 273  | 97 +  | 473  | 745  | 310467 | 310739 |
| UN11513 | Rsa1.0.00081.1 | 1008 | 143261 | 1.00E-157 | 314  | 321  | 97 +  | 691  | 1008 | 134326 | 134645 |
| UN11514 | Rsa1.0.01651.1 | 1064 | 41586  | 4.00E-93  | 177  | 178  | 99 -  | 2    | 179  | 39853  | 40030  |
| UN11515 | Rsa1.0.18474.1 | 1317 | 1593   | 1.00E-126 | 242  | 246  | 98 -  | 2    | 247  | 744    | 989    |
| UN11516 | Rsa1.0.00054.1 | 1117 | 162053 | 1.00E-169 | 307  | 309  | 99 -  | 809  | 1117 | 5512   | 5820   |
| UN11517 | Rsa1.0.08183.1 | 964  | 7775   | 0         | 488  | 500  | 97 -  | 195  | 694  | 5000   | 5498   |
| UN11518 | Rsa1.0.03350.1 | 1185 | 23522  | 0         | 406  | 420  | 96 -  | 769  | 1185 | 19888  | 20307  |
| UN11519 | Rsa1.0.03646.1 | 724  | 21598  | 1.00E-178 | 317  | 317  | 100 + | 408  | 724  | 13555  | 13871  |
| UN11520 | Rsa1.0.04043.1 | 1413 | 19416  | 0         | 735  | 790  | 93 -  | 3    | 783  | 4796   | 5566   |
| UN11521 | Rsa1.0.02105.1 | 311  | 156953 | 1.00E-112 | 284  | 303  | 93 -  | 15   | 311  | 149104 | 149404 |
| UN11522 | Rsa1.0.00934.1 | 1254 | 193516 | 0         | 1244 | 1253 | 99 +  | 1    | 1252 | 145909 | 147161 |
| UN11523 | Rsa1.0.00392.1 | 1243 | 88523  | 0         | 593  | 596  | 99 +  | 648  | 1243 | 65484  | 66079  |
| UN11524 | Rsa1.0.05978.1 | 531  | 12053  | 4.00E-33  | 94   | 101  | 93 -  | 210  | 310  | 2504   | 2604   |
| UN11525 | Rsa1.0.00045.1 | 898  | 328694 | 1.00E-107 | 214  | 218  | 98 +  | 681  | 898  | 313124 | 313340 |
| UN11526 | Rsa1.0.00202.1 | 1537 | 185895 | 1.00E-176 | 383  | 403  | 95 +  | 2    | 401  | 110697 | 111096 |
| UN11527 | Rsa1.0.08486.1 | 1086 | 7286   | 0         | 654  | 658  | 99 -  | 429  | 1086 | 3718   | 4375   |
| UN11528 | Rsa1.0.02203.1 | 633  | 164532 | 1.00E-121 | 265  | 280  | 94 -  | 31   | 310  | 27488  | 27767  |
| UN11529 | Rsa1.0.29345.1 | 1377 | 785    | 0         | 394  | 397  | 99 -  | 981  | 1377 | 36     | 429    |
| UN11530 | Rsa1.0.01832.1 | 683  | 38581  | 1.00E-180 | 361  | 374  | 96 -  | 7    | 380  | 31883  | 32253  |
| UN11531 | Rsa1.0.00054.1 | 763  | 162053 | 0         | 399  | 411  | 97 -  | 3    | 413  | 153867 | 154275 |
| UN11532 | Rsa1.0.00287.1 | 1164 | 98687  | 0         | 354  | 362  | 97 +  | 808  | 1164 | 77890  | 78251  |
| UN11533 | Rsa1.0.02096.1 | 799  | 35041  | 0         | 771  | 796  | 96 +  | 4    | 799  | 3488   | 4277   |
| UN11534 | Rsa1.0.00246.1 | 994  | 103541 | 0         | 937  | 1040 | 90 -  | 1    | 994  | 64497  | 65527  |
| UN11535 | Rsa1.0.04165.1 | 780  | 18757  | 0         | 377  | 384  | 98 -  | 2    | 385  | 613    | 996    |
| UN11536 | Rsa1.0.00407.1 | 533  | 191544 | 0         | 497  | 499  | 99 -  | 1    | 499  | 43246  | 43744  |
| UN11537 | Rsa1.0.00116.1 | 626  | 365886 | 0         | 424  | 430  | 98 -  | 1    | 430  | 139262 | 139691 |
| UN11538 | Rsa1.0.00190.1 | 1422 | 318240 | 0         | 535  | 551  | 97 -  | 16   | 566  | 968    | 1518   |
| UN11539 | Rsa1.0.03726.1 | 1611 | 21160  | 1.00E-115 | 233  | 240  | 97 -  | 1169 | 1408 | 14457  | 14696  |
| UN11540 | Rsa1.0.00921.1 | 791  | 59599  | 0         | 774  | 794  | 97 +  | 1    | 791  | 31024  | 31816  |
| UN11541 | Rsa1.0.01643.1 | 732  | 41765  | 1.00E-167 | 319  | 326  | 97 +  | 1    | 326  | 36731  | 37056  |
| UN11542 | Rsa1.0.00940.1 | 1367 | 179946 | 1.00E-142 | 295  | 307  | 96 +  | 1064 | 1367 | 41158  | 41464  |

|         |                |      |        |           |      |      |       |      |      |        |        |
|---------|----------------|------|--------|-----------|------|------|-------|------|------|--------|--------|
| UN11543 | Rsa1.0.05168.1 | 776  | 14621  | 0         | 652  | 689  | 94 -  | 89   | 765  | 8801   | 9486   |
| UN11544 | Rsa1.0.00436.1 | 2058 | 85008  | 0         | 479  | 479  | 100 - | 1579 | 2057 | 15632  | 16110  |
| UN11545 | Rsa1.0.05081.1 | 867  | 136103 | 1.00E-131 | 345  | 384  | 89 +  | 486  | 850  | 5006   | 5389   |
| UN11546 | Rsa1.0.00960.1 | 1361 | 58199  | 0         | 437  | 441  | 99 +  | 919  | 1359 | 29999  | 30439  |
| UN11547 | Rsa1.0.09781.1 | 1375 | 6153   | 0         | 762  | 767  | 99 +  | 1    | 767  | 4622   | 5388   |
| UN11548 | Rsa1.0.02774.1 | 1243 | 28038  | 1.00E-105 | 243  | 255  | 95 -  | 992  | 1243 | 15516  | 15770  |
| UN11549 | Rsa1.0.00168.1 | 789  | 115870 | 1.00E-156 | 316  | 327  | 96 +  | 114  | 440  | 87952  | 88277  |
| UN11550 | Rsa1.0.00127.1 | 949  | 127446 | 1.00E-157 | 358  | 385  | 92 +  | 33   | 407  | 113030 | 113405 |
| UN11551 | Rsa1.0.09854.1 | 1502 | 6118   | 0         | 1062 | 1116 | 95 +  | 3    | 1091 | 306    | 1415   |
| UN11552 | Rsa1.0.02430.1 | 962  | 31506  | 0         | 489  | 495  | 98 -  | 392  | 886  | 18912  | 19404  |
| UN11553 | Rsa1.0.09314.1 | 1334 | 6461   | 0         | 772  | 803  | 96 +  | 159  | 947  | 3997   | 4799   |
| UN11554 | Rsa1.0.02289.1 | 1144 | 32981  | 0         | 413  | 417  | 99 +  | 3    | 419  | 8949   | 9365   |
| UN11555 | Rsa1.0.00206.1 | 1310 | 109040 | 1.00E-164 | 294  | 294  | 100 + | 1    | 294  | 33998  | 34291  |
| UN11556 | Rsa1.0.00850.1 | 1187 | 62193  | 0         | 444  | 448  | 99 +  | 740  | 1187 | 49866  | 50311  |
| UN11557 | Rsa1.0.00007.1 | 1406 | 239325 | 0         | 1393 | 1411 | 98 -  | 1    | 1406 | 214053 | 215462 |
| UN11558 | Rsa1.0.02343.1 | 1371 | 32374  | 0         | 425  | 441  | 96 -  | 932  | 1371 | 27735  | 28172  |
| UN11559 | Rsa1.0.01118.1 | 796  | 53460  | 1.00E-145 | 315  | 333  | 94 +  | 2    | 334  | 42466  | 42788  |
| UN11560 | Rsa1.0.00145.1 | 1295 | 261008 | 1.00E-136 | 250  | 251  | 99 -  | 2    | 252  | 42012  | 42262  |
| UN11561 | Rsa1.0.00290.1 | 866  | 225096 | 0         | 371  | 377  | 98 -  | 3    | 379  | 15513  | 15888  |
| UN11562 | Rsa1.0.00087.1 | 799  | 761073 | 1.00E-143 | 287  | 294  | 97 -  | 498  | 790  | 102249 | 102541 |
| UN11563 | Rsa1.0.00046.1 | 1402 | 320315 | 0         | 644  | 670  | 96 +  | 735  | 1401 | 52061  | 52724  |
| UN11564 | Rsa1.0.00128.1 | 1367 | 228675 | 1.00E-150 | 270  | 270  | 100 + | 479  | 748  | 181348 | 181617 |
| UN11565 | Rsa1.0.00240.1 | 757  | 104175 | 4.00E-80  | 171  | 176  | 97 +  | 454  | 629  | 86117  | 86291  |
| UN11566 | Rsa1.0.00105.1 | 910  | 134138 | 0         | 598  | 617  | 96 +  | 27   | 642  | 106705 | 107306 |
| UN11567 | Rsa1.0.01020.1 | 1094 | 56619  | 1.00E-120 | 231  | 235  | 98 +  | 209  | 443  | 33443  | 33677  |
| UN11568 | Rsa1.0.04831.1 | 1098 | 15799  | 9.00E-76  | 325  | 383  | 84 -  | 546  | 927  | 12431  | 12805  |
| UN11569 | Rsa1.0.03194.1 | 770  | 24674  | 1.00E-147 | 265  | 265  | 100 - | 2    | 266  | 3262   | 3526   |
| UN11570 | Rsa1.0.00353.1 | 1232 | 92242  | 0         | 1190 | 1225 | 97 -  | 3    | 1224 | 27804  | 29025  |
| UN11571 | Rsa1.0.00368.1 | 788  | 90669  | 1.00E-119 | 247  | 256  | 96 -  | 1    | 256  | 5179   | 5432   |
| UN11572 | Rsa1.0.02326.1 | 944  | 32503  | 1.00E-161 | 332  | 348  | 95 -  | 34   | 372  | 25887  | 26234  |
| UN11573 | Rsa1.0.00494.1 | 807  | 79967  | 0         | 780  | 794  | 98 +  | 3    | 796  | 48939  | 49724  |
| UN11574 | Rsa1.0.00470.1 | 831  | 81968  | 1.00E-138 | 279  | 289  | 96 -  | 543  | 831  | 53615  | 53903  |
| UN11575 | Rsa1.0.00471.1 | 663  | 81897  | 1.00E-180 | 369  | 384  | 96 -  | 279  | 658  | 24754  | 25135  |
| UN11576 | Rsa1.0.09568.1 | 733  | 6284   | 1.00E-123 | 250  | 258  | 96 +  | 15   | 272  | 2860   | 3114   |
| UN11577 | Rsa1.0.00080.1 | 969  | 190437 | 0         | 680  | 702  | 96 -  | 147  | 845  | 104976 | 105677 |
| UN11578 | Rsa1.0.00207.1 | 1216 | 248736 | 3.00E-63  | 142  | 148  | 95 +  | 461  | 608  | 202907 | 203054 |
| UN11579 | Rsa1.0.07826.1 | 1153 | 8466   | 0         | 985  | 990  | 99 +  | 1    | 990  | 7477   | 8466   |
| UN11580 | Rsa1.0.00620.1 | 766  | 71985  | 0         | 568  | 617  | 92 +  | 154  | 766  | 8178   | 8789   |
| UN11581 | Rsa1.0.01151.1 | 756  | 52268  | 1.00E-123 | 245  | 252  | 97 +  | 25   | 276  | 27935  | 28186  |

|         |                |      |        |           |     |     |       |      |      |        |        |
|---------|----------------|------|--------|-----------|-----|-----|-------|------|------|--------|--------|
| UN11582 | Rsa1.0.00014.1 | 829  | 348985 | 1.00E-144 | 288 | 297 | 96 +  | 2    | 294  | 322437 | 322733 |
| UN11583 | Rsa1.0.01976.1 | 504  | 36570  | 5.00E-94  | 209 | 218 | 95 +  | 273  | 488  | 1119   | 1335   |
| UN11584 | Rsa1.0.02672.1 | 854  | 28884  | 0         | 677 | 745 | 90 +  | 133  | 846  | 10847  | 11584  |
| UN11585 | Rsa1.0.00189.1 | 759  | 111830 | 0         | 457 | 462 | 98 +  | 249  | 710  | 110540 | 111000 |
| UN11586 | Rsa1.0.00421.1 | 684  | 86365  | 8.00E-69  | 249 | 273 | 91 -  | 412  | 677  | 82657  | 82920  |
| UN11587 | Rsa1.0.00341.1 | 818  | 249309 | 1.00E-142 | 324 | 344 | 94 +  | 463  | 806  | 190245 | 190586 |
| UN11588 | Rsa1.0.00871.1 | 1236 | 61539  | 0         | 443 | 452 | 98 +  | 786  | 1234 | 4051   | 4502   |
| UN11589 | Rsa1.0.00001.1 | 953  | 363028 | 0         | 339 | 342 | 99 +  | 610  | 951  | 93769  | 94109  |
| UN11590 | Rsa1.0.01883.1 | 1317 | 37661  | 0         | 804 | 814 | 98 -  | 503  | 1316 | 35457  | 36270  |
| UN11591 | #              | #    | #      | #         | #   | #   | #     | #    | #    | #      | #      |
| UN11592 | Rsa1.0.00156.1 | 853  | 118383 | 1.00E-151 | 334 | 355 | 94 +  | 162  | 516  | 41727  | 42081  |
| UN11593 | Rsa1.0.00002.1 | 1355 | 601661 | 0         | 602 | 631 | 95 -  | 225  | 848  | 407155 | 407779 |
| UN11594 | Rsa1.0.07591.1 | 682  | 9060   | 1.00E-137 | 279 | 288 | 96 +  | 391  | 677  | 6177   | 6464   |
| UN11595 | Rsa1.0.05146.1 | 887  | 14678  | 0         | 843 | 875 | 96 -  | 13   | 887  | 3725   | 4598   |
| UN11596 | Rsa1.0.08015.1 | 676  | 8078   | 1.00E-119 | 218 | 218 | 100 - | 2    | 219  | 2331   | 2548   |
| UN11597 | Rsa1.0.01235.1 | 844  | 50180  | 0         | 815 | 840 | 97 +  | 5    | 844  | 20788  | 21614  |
| UN11598 | Rsa1.0.04888.1 | 1255 | 15595  | 2.00E-31  | 129 | 147 | 87 +  | 1084 | 1229 | 3004   | 3150   |
| UN11599 | Rsa1.0.02725.1 | 945  | 28404  | 0         | 631 | 634 | 99 +  | 312  | 945  | 1939   | 2572   |
| UN11600 | Rsa1.0.01986.1 | 490  | 36489  | 1.00E-173 | 351 | 363 | 96 +  | 117  | 478  | 23647  | 24007  |
| UN11601 | Rsa1.0.06647.1 | 1093 | 10604  | 0         | 612 | 638 | 95 +  | 463  | 1093 | 6307   | 6942   |
| UN11602 | Rsa1.0.00079.1 | 822  | 606987 | 1.00E-178 | 373 | 388 | 96 -  | 3    | 390  | 190876 | 191255 |
| UN11603 | Rsa1.0.03149.1 | 661  | 24983  | 1.00E-111 | 213 | 216 | 98 -  | 259  | 474  | 15485  | 15700  |
| UN11604 | Rsa1.0.03173.1 | 989  | 24815  | 0         | 951 | 983 | 96 +  | 9    | 989  | 18022  | 19004  |
| UN11605 | Rsa1.0.00578.1 | 476  | 74581  | 0         | 453 | 469 | 96 -  | 6    | 474  | 57295  | 57755  |
| UN11606 | Rsa1.0.03706.1 | 697  | 21255  | 0         | 678 | 701 | 96 +  | 1    | 697  | 481    | 1180   |
| UN11607 | Rsa1.0.04483.1 | 744  | 17174  | 1.00E-130 | 285 | 298 | 95 -  | 449  | 744  | 7590   | 7879   |
| UN11608 | Rsa1.0.05984.1 | 1191 | 12031  | 1.00E-138 | 287 | 298 | 96 -  | 11   | 302  | 10469  | 10766  |
| UN11609 | Rsa1.0.00119.1 | 1221 | 467509 | 0         | 594 | 610 | 97 -  | 611  | 1220 | 383281 | 383890 |
| UN11610 | Rsa1.0.01454.1 | 1238 | 45440  | 1.00E-160 | 364 | 390 | 93 +  | 849  | 1238 | 32801  | 33170  |
| UN11611 | Rsa1.0.01679.1 | 1277 | 146876 | 2.00E-95  | 233 | 249 | 93 -  | 1014 | 1260 | 135000 | 135247 |
| UN11612 | Rsa1.0.00005.1 | 828  | 353093 | 1.00E-130 | 242 | 244 | 99 +  | 239  | 482  | 329300 | 329543 |
| UN11613 | Rsa1.0.01294.1 | 820  | 49090  | 0         | 443 | 443 | 100 - | 3    | 445  | 36747  | 37189  |
| UN11614 | Rsa1.0.00230.1 | 1171 | 105389 | 1.00E-126 | 238 | 241 | 98 +  | 689  | 929  | 87728  | 87968  |
| UN11615 | Rsa1.0.00765.1 | 892  | 65029  | 0         | 871 | 891 | 97 -  | 2    | 892  | 22820  | 23710  |
| UN11616 | Rsa1.0.00457.1 | 1321 | 337301 | 0         | 861 | 911 | 94 -  | 3    | 909  | 317916 | 318814 |
| UN11617 | Rsa1.0.00092.1 | 1298 | 659932 | 1.00E-162 | 310 | 314 | 98 +  | 985  | 1298 | 626655 | 626966 |
| UN11618 | Rsa1.0.00044.1 | 760  | 271658 | 1.00E-148 | 293 | 302 | 97 +  | 458  | 759  | 133405 | 133706 |
| UN11619 | Rsa1.0.00764.1 | 977  | 65056  | 0         | 521 | 527 | 98 +  | 3    | 529  | 39975  | 40501  |
| UN11620 | Rsa1.0.07475.1 | 953  | 9292   | 0         | 503 | 520 | 96 +  | 312  | 826  | 585    | 1104   |

|         |                |      |        |           |      |      |       |      |      |        |        |
|---------|----------------|------|--------|-----------|------|------|-------|------|------|--------|--------|
| UN11621 | Rsa1.0.05496.1 | 1925 | 13533  | 0         | 806  | 816  | 98 -  | 869  | 1684 | 453    | 1265   |
| UN11622 | Rsa1.0.07321.1 | 854  | 9559   | 1.00E-176 | 373  | 390  | 95 -  | 442  | 824  | 4937   | 5326   |
| UN11623 | Rsa1.0.07381.1 | 856  | 9488   | 0         | 526  | 531  | 99 -  | 269  | 798  | 7918   | 8448   |
| UN11624 | Rsa1.0.00356.1 | 982  | 91521  | 0         | 385  | 404  | 95 -  | 201  | 604  | 80712  | 81097  |
| UN11625 | Rsa1.0.00216.1 | 1207 | 197563 | 0         | 545  | 562  | 96 +  | 646  | 1207 | 92955  | 93510  |
| UN11626 | Rsa1.0.02694.1 | 903  | 28610  | 0         | 699  | 715  | 97 -  | 2    | 716  | 9378   | 10092  |
| UN11627 | Rsa1.0.00047.1 | 1249 | 168582 | 0         | 1146 | 1193 | 96 -  | 1    | 1176 | 154406 | 155597 |
| UN11628 | Rsa1.0.00419.1 | 906  | 86562  | 3.00E-75  | 144  | 144  | 100 - | 361  | 504  | 42048  | 42191  |
| UN11629 | Rsa1.0.01960.1 | 1136 | 36766  | 0         | 396  | 411  | 96 -  | 726  | 1136 | 27519  | 27929  |
| UN11630 | Rsa1.0.05056.1 | 1395 | 14981  | 0         | 373  | 373  | 100 - | 3    | 375  | 9065   | 9437   |
| UN11631 | Rsa1.0.03150.1 | 1351 | 24980  | 0         | 363  | 364  | 99 +  | 3    | 366  | 22091  | 22454  |
| UN11632 | Rsa1.0.01789.1 | 1098 | 39250  | 1.00E-150 | 281  | 285  | 98 -  | 812  | 1096 | 7449   | 7733   |
| UN11633 | Rsa1.0.01957.1 | 599  | 36844  | 1.00E-126 | 232  | 233  | 99 -  | 87   | 319  | 13472  | 13704  |
| UN11634 | Rsa1.0.02173.1 | 834  | 34318  | 0         | 471  | 486  | 96 +  | 293  | 777  | 30693  | 31178  |
| UN11635 | Rsa1.0.08846.1 | 816  | 6867   | 1.00E-58  | 145  | 153  | 94 -  | 38   | 185  | 6654   | 6806   |
| UN11636 | Rsa1.0.33317.1 | 963  | 681    | 1.00E-165 | 374  | 399  | 93 +  | 3    | 401  | 1      | 398    |
| UN11637 | Rsa1.0.02179.1 | 1086 | 34188  | 0         | 1057 | 1085 | 97 +  | 2    | 1086 | 19843  | 20926  |
| UN11638 | Rsa1.0.18402.1 | 1153 | 1605   | 0         | 737  | 759  | 97 -  | 401  | 1153 | 232    | 990    |
| UN11639 | Rsa1.0.04497.1 | 1194 | 17103  | 1.00E-176 | 313  | 313  | 100 + | 882  | 1194 | 3905   | 4217   |
| UN11640 | Rsa1.0.03125.1 | 990  | 147978 | 0         | 677  | 705  | 96 -  | 2    | 704  | 131175 | 131879 |
| UN11641 | Rsa1.0.00725.1 | 1787 | 66757  | 0         | 743  | 825  | 90 +  | 20   | 843  | 45581  | 46401  |
| UN11642 | Rsa1.0.18069.1 | 868  | 1678   | 1.00E-130 | 303  | 319  | 94 +  | 549  | 862  | 197    | 504    |
| UN11643 | Rsa1.0.00341.1 | 1653 | 249309 | 0         | 596  | 600  | 99 -  | 1054 | 1653 | 207027 | 207626 |
| UN11644 | Rsa1.0.00041.1 | 1489 | 186197 | 1.00E-137 | 263  | 268  | 98 -  | 253  | 520  | 129816 | 130083 |
| UN11645 | Rsa1.0.00185.1 | 665  | 248445 | 0         | 540  | 552  | 97 -  | 117  | 665  | 30579  | 31130  |
| UN11646 | Rsa1.0.01896.1 | 867  | 37512  | 0         | 627  | 647  | 96 +  | 211  | 856  | 19518  | 20164  |
| UN11647 | Rsa1.0.00141.1 | 772  | 121494 | 0         | 519  | 537  | 96 -  | 6    | 542  | 60107  | 60643  |
| UN11648 | Rsa1.0.00487.1 | 799  | 80674  | 9.00E-63  | 123  | 123  | 100 - | 1    | 123  | 15702  | 15824  |
| UN11649 | Rsa1.0.02174.1 | 685  | 34316  | 0         | 667  | 685  | 97 -  | 3    | 683  | 10485  | 11169  |
| UN11650 | Rsa1.0.00503.1 | 626  | 79468  | 6.00E-88  | 192  | 200  | 96 +  | 428  | 625  | 66553  | 66752  |
| UN11651 | Rsa1.0.01724.1 | 773  | 40292  | 8.00E-97  | 189  | 192  | 98 -  | 1    | 192  | 13121  | 13312  |
| UN11652 | Rsa1.0.00398.1 | 896  | 88007  | 0         | 411  | 431  | 95 +  | 471  | 896  | 63443  | 63872  |
| UN11653 | Rsa1.0.00093.1 | 1222 | 214962 | 0         | 372  | 377  | 98 +  | 263  | 639  | 133459 | 133835 |
| UN11654 | Rsa1.0.02223.1 | 1191 | 152421 | 0         | 1164 | 1195 | 97 +  | 3    | 1190 | 14300  | 15494  |
| UN11655 | Rsa1.0.00800.1 | 642  | 63868  | 0         | 415  | 433  | 95 -  | 204  | 636  | 13864  | 14285  |
| UN11656 | Rsa1.0.01093.1 | 1628 | 54312  | 0         | 505  | 508  | 99 +  | 1121 | 1628 | 47030  | 47536  |
| UN11657 | Rsa1.0.01054.1 | 815  | 55470  | 0         | 640  | 642  | 99 -  | 171  | 811  | 8770   | 9411   |
| UN11658 | Rsa1.0.05305.1 | 588  | 14207  | 0         | 402  | 427  | 94 +  | 122  | 535  | 1015   | 1438   |
| UN11659 | Rsa1.0.00119.1 | 1304 | 467509 | 0         | 428  | 439  | 97 +  | 31   | 469  | 447655 | 448093 |

|         |                |      |        |           |      |      |       |     |      |        |        |
|---------|----------------|------|--------|-----------|------|------|-------|-----|------|--------|--------|
| UN11660 | Rsa1.0.00485.1 | 930  | 80937  | 0         | 424  | 428  | 99 -  | 503 | 930  | 40721  | 41148  |
| UN11661 | Rsa1.0.00044.1 | 885  | 271658 | 0         | 858  | 909  | 94 +  | 4   | 885  | 260545 | 261450 |
| UN11662 | Rsa1.0.00438.1 | 881  | 84861  | 0         | 370  | 380  | 97 +  | 501 | 877  | 75306  | 75684  |
| UN11663 | Rsa1.0.00068.1 | 802  | 151813 | 0         | 769  | 809  | 95 -  | 2   | 801  | 43681  | 44485  |
| UN11664 | Rsa1.0.01053.1 | 1150 | 55483  | 0         | 1147 | 1149 | 99 -  | 2   | 1148 | 46230  | 47378  |
| UN11665 | Rsa1.0.38108.1 | 244  | 591    | 2.00E-73  | 185  | 198  | 93 +  | 1   | 192  | 31     | 225    |
| UN11666 | Rsa1.0.00395.1 | 1228 | 214466 | 0         | 358  | 362  | 98 -  | 3   | 363  | 5892   | 6253   |
| UN11667 | Rsa1.0.03615.1 | 1206 | 21766  | 0         | 1004 | 1061 | 94 -  | 1   | 1057 | 17207  | 18246  |
| UN11668 | Rsa1.0.02312.1 | 234  | 32675  | 8.00E-85  | 207  | 223  | 92 +  | 9   | 231  | 16058  | 16280  |
| UN11669 | Rsa1.0.02361.1 | 1445 | 32190  | 0         | 344  | 346  | 99 -  | 2   | 347  | 11102  | 11446  |
| UN11670 | Rsa1.0.00066.1 | 643  | 152418 | 0         | 606  | 629  | 96 -  | 1   | 620  | 63377  | 64003  |
| UN11671 | Rsa1.0.02431.1 | 1367 | 31504  | 1.00E-111 | 262  | 276  | 94 -  | 109 | 380  | 2929   | 3203   |
| UN11672 | Rsa1.0.01552.1 | 778  | 43396  | 0         | 357  | 365  | 97 -  | 414 | 778  | 15684  | 16048  |
| UN11673 | Rsa1.0.03005.1 | 1129 | 26082  | 0         | 539  | 573  | 94 +  | 1   | 572  | 3526   | 4084   |
| UN11674 | Rsa1.0.03385.1 | 756  | 23280  | 0         | 552  | 582  | 94 -  | 2   | 570  | 3669   | 4250   |
| UN11675 | Rsa1.0.04236.1 | 367  | 18370  | 1.00E-117 | 268  | 284  | 94 -  | 17  | 298  | 6470   | 6751   |
| UN11676 | Rsa1.0.02633.1 | 985  | 29315  | 0         | 452  | 473  | 95 -  | 515 | 983  | 308    | 771    |
| UN11677 | Rsa1.0.04397.1 | 1308 | 17555  | 0         | 535  | 554  | 96 -  | 10  | 561  | 3221   | 3767   |
| UN11678 | Rsa1.0.02593.1 | 680  | 29744  | 1.00E-83  | 224  | 244  | 91 +  | 1   | 236  | 2922   | 3164   |
| UN11679 | Rsa1.0.00167.1 | 1615 | 116000 | 0         | 1352 | 1448 | 93 +  | 1   | 1424 | 87105  | 88534  |
| UN11680 | Rsa1.0.08919.1 | 755  | 6788   | 0         | 589  | 603  | 97 -  | 6   | 608  | 517    | 1119   |
| UN11681 | Rsa1.0.00087.1 | 1662 | 761073 | 1.00E-134 | 247  | 248  | 99 +  | 1   | 248  | 291710 | 291957 |
| UN11682 | Rsa1.0.00586.1 | 972  | 163802 | 2.00E-76  | 254  | 290  | 87 -  | 248 | 537  | 108878 | 109167 |
| UN11683 | Rsa1.0.18588.1 | 968  | 1570   | 1.00E-106 | 302  | 334  | 90 -  | 2   | 331  | 1176   | 1508   |
| UN11684 | Rsa1.0.00285.1 | 773  | 149638 | 1.00E-174 | 372  | 389  | 95 +  | 3   | 388  | 146424 | 146811 |
| UN11685 | Rsa1.0.05180.1 | 1019 | 14575  | 0         | 421  | 436  | 96 +  | 144 | 575  | 4725   | 5159   |
| UN11686 | Rsa1.0.00522.1 | 1106 | 78103  | 1.00E-101 | 200  | 204  | 98 -  | 637 | 840  | 35226  | 35429  |
| UN11687 | Rsa1.0.01631.1 | 1650 | 41882  | 0         | 386  | 386  | 100 - | 1   | 386  | 4841   | 5226   |
| UN11688 | Rsa1.0.01219.1 | 1085 | 50527  | 0         | 835  | 861  | 96 -  | 229 | 1085 | 9487   | 10346  |
| UN11689 | Rsa1.0.00114.1 | 1610 | 131330 | 0         | 577  | 581  | 99 +  | 1   | 580  | 7618   | 8197   |
| UN11690 | Rsa1.0.00092.1 | 680  | 659932 | 0         | 437  | 457  | 95 +  | 1   | 453  | 8515   | 8964   |
| UN11691 | Rsa1.0.01537.1 | 955  | 187285 | 0         | 353  | 361  | 97 +  | 2   | 360  | 38620  | 38980  |
| UN11692 | Rsa1.0.01286.1 | 1170 | 49209  | 1.00E-130 | 297  | 320  | 92 -  | 1   | 306  | 3049   | 3368   |
| UN11693 | Rsa1.0.09568.1 | 845  | 6284   | 1.00E-74  | 220  | 242  | 90 -  | 1   | 240  | 5564   | 5803   |
| UN11694 | Rsa1.0.01454.1 | 841  | 45440  | 1.00E-160 | 295  | 297  | 99 +  | 1   | 295  | 14232  | 14528  |
| UN11695 | Rsa1.0.06073.1 | 1361 | 11807  | 0         | 654  | 680  | 96 -  | 1   | 678  | 4362   | 5029   |
| UN11696 | Rsa1.0.03126.1 | 149  | 25192  | 4.00E-67  | 144  | 149  | 96 -  | 1   | 149  | 6718   | 6866   |
| UN11697 | Rsa1.0.00382.1 | 1180 | 251946 | 0         | 482  | 489  | 98 +  | 693 | 1180 | 173937 | 174423 |
| UN11698 | Rsa1.0.02625.1 | 988  | 139104 | 0         | 907  | 939  | 96 +  | 15  | 946  | 24773  | 25711  |

|         |                |      |        |           |      |      |      |     |      |        |        |
|---------|----------------|------|--------|-----------|------|------|------|-----|------|--------|--------|
| UN11699 | Rsa1.0_00634.1 | 512  | 71222  | 1.00E-180 | 380  | 399  | 95 - | 1   | 399  | 57160  | 57557  |
| UN11700 | Rsa1.0_14151.1 | 603  | 3731   | 0         | 397  | 409  | 97 - | 1   | 409  | 981    | 1389   |
| UN11701 | Rsa1.0_00198.1 | 965  | 222963 | 1.00E-167 | 358  | 373  | 95 + | 7   | 378  | 135060 | 135427 |
| UN11702 | Rsa1.0_02593.1 | 1468 | 29744  | 1.00E-164 | 330  | 342  | 96 + | 331 | 672  | 4754   | 5095   |
| UN11703 | Rsa1.0_03631.1 | 1522 | 21647  | 0         | 811  | 836  | 97 - | 690 | 1522 | 14187  | 15017  |
| UN11704 | Rsa1.0_00351.1 | 917  | 413096 | 0         | 895  | 912  | 98 - | 6   | 917  | 124066 | 124977 |
| UN11705 | Rsa1.0_18611.1 | 1329 | 1565   | 0         | 432  | 447  | 96 - | 1   | 447  | 957    | 1402   |
| UN11706 | Rsa1.0_00119.1 | 988  | 467509 | 0         | 640  | 669  | 95 + | 1   | 668  | 383222 | 383890 |
| UN11707 | Rsa1.0_00029.1 | 1435 | 272992 | 0         | 1161 | 1229 | 94 + | 1   | 1206 | 257531 | 258746 |
| UN11708 | Rsa1.0_00222.1 | 1276 | 172263 | 0         | 538  | 577  | 93 - | 714 | 1276 | 39715  | 40291  |
| UN11709 | Rsa1.0_02866.1 | 1811 | 27122  | 0         | 537  | 539  | 99 + | 903 | 1441 | 9631   | 10169  |
| UN11710 | Rsa1.0_00662.1 | 900  | 192183 | 0         | 806  | 838  | 96 - | 68  | 900  | 68347  | 69184  |
| UN11711 | Rsa1.0_00329.1 | 1334 | 222544 | 0         | 682  | 690  | 98 + | 6   | 694  | 193045 | 193732 |
| UN11712 | Rsa1.0_05559.1 | 693  | 13329  | 0         | 430  | 444  | 96 - | 61  | 504  | 8434   | 8872   |
| UN11713 | Rsa1.0_01482.1 | 289  | 44855  | 1.00E-147 | 279  | 284  | 98 + | 6   | 289  | 11985  | 12268  |
| UN11714 | Rsa1.0_01419.1 | 1350 | 167402 | 0         | 627  | 689  | 91 + | 677 | 1345 | 142662 | 143339 |
| UN11715 | Rsa1.0_00045.1 | 639  | 328694 | 0         | 581  | 585  | 99 - | 55  | 639  | 302570 | 303154 |
| UN11716 | Rsa1.0_26735.1 | 757  | 880    | 1.00E-127 | 495  | 583  | 84 - | 175 | 757  | 267    | 849    |
| UN11717 | Rsa1.0_00041.1 | 894  | 186197 | 1.00E-100 | 208  | 214  | 97 + | 288 | 501  | 127713 | 127925 |
| UN11718 | Rsa1.0_00178.1 | 1103 | 114861 | 0         | 859  | 902  | 95 - | 1   | 882  | 5884   | 6780   |
| UN11719 | Rsa1.0_09471.1 | 730  | 6345   | 1.00E-132 | 248  | 251  | 98 - | 383 | 633  | 496    | 746    |
| UN11720 | Rsa1.0_00967.1 | 1072 | 58049  | 0         | 889  | 911  | 97 + | 160 | 1070 | 10028  | 10937  |
| UN11721 | Rsa1.0_06312.1 | 580  | 11253  | 0         | 433  | 458  | 94 - | 7   | 464  | 6117   | 6556   |
| UN11722 | Rsa1.0_01441.1 | 952  | 45790  | 0         | 760  | 768  | 98 - | 1   | 767  | 19120  | 19885  |
| UN11723 | Rsa1.0_03388.1 | 1241 | 23277  | 0         | 417  | 426  | 97 + | 2   | 427  | 17420  | 17845  |
| UN11724 | Rsa1.0_00417.1 | 722  | 395068 | 1.00E-165 | 336  | 352  | 95 + | 381 | 720  | 14475  | 14826  |
| UN11725 | Rsa1.0_21914.1 | 151  | 1163   | 1.00E-45  | 135  | 149  | 90 - | 1   | 149  | 326    | 474    |
| UN11726 | Rsa1.0_08811.1 | 875  | 6904   | 0         | 516  | 545  | 94 + | 8   | 548  | 2993   | 3531   |
| UN11727 | Rsa1.0_07806.1 | 758  | 8506   | 1.00E-175 | 331  | 336  | 98 - | 423 | 758  | 6161   | 6495   |
| UN11728 | Rsa1.0_01326.1 | 437  | 48072  | 1.00E-104 | 255  | 280  | 91 + | 178 | 435  | 10896  | 11175  |
| UN11729 | Rsa1.0_00524.1 | 836  | 169613 | 1.00E-111 | 207  | 208  | 99 - | 372 | 579  | 133897 | 134104 |
| UN11730 | Rsa1.0_16139.1 | 1009 | 2268   | 1.00E-93  | 209  | 219  | 95 - | 286 | 503  | 684    | 902    |
| UN11731 | Rsa1.0_11716.1 | 827  | 5431   | 1.00E-126 | 257  | 262  | 98 + | 568 | 826  | 318    | 579    |
| UN11732 | Rsa1.0_02774.1 | 763  | 28038  | 1.00E-154 | 329  | 349  | 94 - | 28  | 376  | 18910  | 19246  |
| UN11733 | Rsa1.0_00214.1 | 808  | 107508 | 0         | 388  | 389  | 99 - | 420 | 808  | 69319  | 69707  |
| UN11734 | Rsa1.0_01621.1 | 1133 | 42090  | 0         | 386  | 393  | 98 - | 47  | 439  | 170    | 562    |
| UN11735 | Rsa1.0_00191.1 | 612  | 316976 | 0         | 526  | 574  | 91 - | 39  | 587  | 122015 | 122582 |
| UN11736 | Rsa1.0_00151.1 | 949  | 119541 | 0         | 454  | 467  | 97 + | 2   | 467  | 29920  | 30385  |
| UN11737 | Rsa1.0_00751.1 | 1405 | 65759  | 0         | 1314 | 1421 | 92 + | 3   | 1404 | 56920  | 58302  |

|         |                |      |        |           |      |      |       |     |      |        |        |
|---------|----------------|------|--------|-----------|------|------|-------|-----|------|--------|--------|
| UN11738 | Rsa1.0_04426.1 | 893  | 17399  | 0         | 494  | 508  | 97 +  | 389 | 893  | 16809  | 17316  |
| UN11739 | Rsa1.0_09343.1 | 1159 | 6439   | 0         | 363  | 365  | 99 -  | 793 | 1157 | 4332   | 4696   |
| UN11740 | Rsa1.0_00097.1 | 1166 | 138858 | 1.00E-128 | 249  | 253  | 98 +  | 80  | 332  | 116669 | 116920 |
| UN11741 | Rsa1.0_00803.1 | 988  | 144228 | 1.00E-101 | 213  | 222  | 95 -  | 727 | 942  | 2413   | 2634   |
| UN11742 | Rsa1.0_00222.1 | 1313 | 172263 | 0         | 1171 | 1221 | 95 -  | 103 | 1313 | 22625  | 23839  |
| UN11743 | Rsa1.0_01185.1 | 735  | 149842 | 0         | 724  | 729  | 99 -  | 3   | 731  | 142803 | 143529 |
| UN11744 | Rsa1.0_00176.1 | 810  | 240984 | 1.00E-172 | 339  | 351  | 96 +  | 3   | 345  | 183974 | 184324 |
| UN11745 | Rsa1.0_28876.1 | 924  | 800    | 0         | 682  | 705  | 96 +  | 220 | 924  | 79     | 782    |
| UN11746 | Rsa1.0_00025.1 | 710  | 277312 | 0         | 569  | 580  | 98 +  | 6   | 584  | 52186  | 52765  |
| UN11747 | Rsa1.0_03244.1 | 814  | 24413  | 0         | 437  | 439  | 99 +  | 3   | 440  | 10838  | 11276  |
| UN11748 | Rsa1.0_04436.1 | 1224 | 17364  | 0         | 607  | 652  | 93 -  | 3   | 640  | 15688  | 16328  |
| UN11749 | Rsa1.0_00558.1 | 1881 | 75819  | 0         | 738  | 751  | 98 +  | 774 | 1524 | 28073  | 28823  |
| UN11750 | Rsa1.0_00655.1 | 834  | 195840 | 0         | 421  | 427  | 98 -  | 407 | 833  | 35880  | 36305  |
| UN11751 | Rsa1.0_00207.1 | 1357 | 248736 | 0         | 386  | 396  | 97 +  | 536 | 929  | 63444  | 63839  |
| UN11752 | Rsa1.0_00016.1 | 1145 | 831256 | 0         | 363  | 370  | 98 +  | 773 | 1141 | 326365 | 326734 |
| UN11753 | Rsa1.0_01959.1 | 1357 | 36798  | 0         | 647  | 684  | 94 -  | 621 | 1304 | 15377  | 16060  |
| UN11754 | Rsa1.0_11912.1 | 1164 | 5372   | 0         | 1138 | 1176 | 96 -  | 3   | 1164 | 2904   | 4079   |
| UN11755 | Rsa1.0_00006.1 | 1004 | 396176 | 0         | 462  | 466  | 99 +  | 101 | 566  | 210336 | 210801 |
| UN11756 | Rsa1.0_02099.1 | 733  | 35030  | 1.00E-153 | 327  | 342  | 95 -  | 392 | 726  | 17697  | 18038  |
| UN11757 | Rsa1.0_00789.1 | 1288 | 64233  | 4.00E-78  | 174  | 181  | 96 +  | 887 | 1061 | 24697  | 24877  |
| UN11758 | Rsa1.0_02939.1 | 860  | 26595  | 0         | 622  | 658  | 94 -  | 1   | 649  | 15749  | 16400  |
| UN11759 | Rsa1.0_00242.1 | 762  | 103956 | 0         | 579  | 596  | 97 +  | 2   | 596  | 89912  | 90498  |
| UN11760 | Rsa1.0_04369.1 | 1109 | 17703  | 1.00E-99  | 232  | 249  | 93 +  | 2   | 250  | 7015   | 7254   |
| UN11761 | Rsa1.0_42525.1 | 1252 | 528    | 6.00E-74  | 163  | 169  | 96 +  | 275 | 441  | 1      | 169    |
| UN11762 | Rsa1.0_00017.1 | 1507 | 752458 | 0         | 963  | 1028 | 93 -  | 1   | 1019 | 416018 | 417042 |
| UN11763 | Rsa1.0_04873.1 | 935  | 15657  | 1.00E-106 | 217  | 224  | 96 -  | 9   | 232  | 8145   | 8368   |
| UN11764 | Rsa1.0_03410.1 | 1530 | 23147  | 0         | 1488 | 1541 | 96 +  | 6   | 1530 | 20091  | 21629  |
| UN11765 | Rsa1.0_00977.1 | 961  | 198001 | 1.00E-128 | 246  | 249  | 98 +  | 713 | 961  | 29296  | 29543  |
| UN11766 | Rsa1.0_02606.1 | 991  | 29635  | 1.00E-173 | 314  | 316  | 99 +  | 676 | 991  | 13308  | 13623  |
| UN11767 | Rsa1.0_00340.1 | 654  | 305782 | 0         | 369  | 369  | 100 - | 286 | 654  | 159725 | 160093 |
| UN11768 | Rsa1.0_00720.1 | 805  | 66931  | 1.00E-147 | 312  | 324  | 96 +  | 3   | 326  | 31878  | 32198  |
| UN11769 | Rsa1.0_06619.1 | 779  | 10650  | 0         | 350  | 356  | 98 +  | 6   | 361  | 517    | 871    |
| UN11770 | Rsa1.0_05095.1 | 947  | 14869  | 8.00E-76  | 170  | 178  | 95 +  | 15  | 188  | 14642  | 14819  |
| UN11771 | Rsa1.0_00176.1 | 971  | 240984 | 0         | 828  | 860  | 96 +  | 4   | 856  | 1877   | 2736   |
| UN11772 | Rsa1.0_04542.1 | 669  | 16930  | 1.00E-180 | 319  | 319  | 100 - | 1   | 319  | 15134  | 15452  |
| UN11773 | Rsa1.0_02410.1 | 508  | 31659  | 0         | 506  | 507  | 99 -  | 3   | 508  | 21387  | 21893  |
| UN11774 | Rsa1.0_00097.1 | 771  | 138858 | 0         | 400  | 412  | 97 +  | 340 | 747  | 116669 | 117080 |
| UN11775 | Rsa1.0_02958.1 | 779  | 26443  | 0         | 768  | 788  | 97 +  | 2   | 779  | 8913   | 9700   |
| UN11776 | Rsa1.0_00123.1 | 1115 | 325650 | 1.00E-160 | 341  | 357  | 95 +  | 1   | 355  | 46100  | 46450  |



|         |                |      |        |           |      |      |       |      |      |        |        |
|---------|----------------|------|--------|-----------|------|------|-------|------|------|--------|--------|
| UN11777 | Rsa1.0.00512.1 | 693  | 200277 | 1.00E-112 | 214  | 217  | 98 -  | 188  | 404  | 190936 | 191152 |
| UN11778 | Rsa1.0.00635.1 | 647  | 175826 | 1.00E-134 | 255  | 259  | 98 -  | 277  | 535  | 124757 | 125015 |
| UN11779 | Rsa1.0.06561.1 | 1159 | 10772  | 0         | 434  | 448  | 96 -  | 2    | 449  | 5342   | 5777   |
| UN11780 | Rsa1.0.08849.1 | 781  | 6864   | 1.00E-119 | 217  | 217  | 100 - | 4    | 220  | 1      | 217    |
| UN11781 | Rsa1.0.00300.1 | 940  | 97747  | 1.00E-166 | 297  | 297  | 100 - | 528  | 824  | 11210  | 11506  |
| UN11782 | Rsa1.0.06056.1 | 707  | 137271 | 1.00E-107 | 211  | 214  | 98 -  | 3    | 215  | 125553 | 125766 |
| UN11783 | Rsa1.0.00026.1 | 943  | 327835 | 0         | 425  | 434  | 97 -  | 510  | 943  | 178615 | 179048 |
| UN11784 | Rsa1.0.00545.1 | 1271 | 189649 | 0         | 1000 | 1045 | 95 +  | 193  | 1233 | 31865  | 32902  |
| UN11785 | Rsa1.0.00017.1 | 1611 | 752458 | 1.00E-177 | 367  | 383  | 95 +  | 1229 | 1611 | 711970 | 712351 |
| UN11786 | Rsa1.0.01453.1 | 829  | 45449  | 1.00E-130 | 255  | 260  | 98 -  | 535  | 793  | 14857  | 15116  |
| UN11787 | Rsa1.0.00071.1 | 985  | 345714 | 1.00E-119 | 224  | 226  | 99 +  | 3    | 228  | 216763 | 216988 |
| UN11788 | Rsa1.0.03407.1 | 836  | 23154  | 1.00E-141 | 263  | 266  | 98 +  | 27   | 292  | 3652   | 3917   |
| UN11789 | Rsa1.0.01788.1 | 996  | 39296  | 0         | 982  | 998  | 98 +  | 1    | 996  | 19142  | 20138  |
| UN11790 | Rsa1.0.00688.1 | 793  | 68396  | 0         | 720  | 739  | 97 +  | 19   | 756  | 41265  | 42003  |
| UN11791 | Rsa1.0.00269.1 | 1453 | 341668 | 0         | 514  | 521  | 98 -  | 76   | 596  | 316281 | 316801 |
| UN11792 | #              | #    | #      | #         | #    | #    | #     | #    | #    | #      | #      |
| UN11793 | Rsa1.0.00039.1 | 914  | 296927 | 0         | 548  | 578  | 94 -  | 341  | 914  | 11873  | 12448  |
| UN11794 | Rsa1.0.01321.1 | 976  | 48248  | 1.00E-157 | 376  | 403  | 93 +  | 570  | 963  | 8431   | 8825   |
| UN11795 | Rsa1.0.29623.1 | 783  | 777    | 0         | 537  | 538  | 99 +  | 155  | 692  | 240    | 777    |
| UN11796 | Rsa1.0.01883.1 | 958  | 37661  | 2.00E-67  | 177  | 192  | 92 +  | 543  | 725  | 29480  | 29671  |
| UN11797 | Rsa1.0.00947.1 | 1291 | 58664  | 0         | 457  | 460  | 99 -  | 832  | 1291 | 51430  | 51889  |
| UN11798 | Rsa1.0.17015.1 | 881  | 1953   | 1.00E-100 | 221  | 235  | 94 -  | 4    | 226  | 874    | 1108   |
| UN11799 | #              | #    | #      | #         | #    | #    | #     | #    | #    | #      | #      |
| UN11800 | Rsa1.0.00776.1 | 881  | 64637  | 0         | 768  | 853  | 90 +  | 1    | 850  | 6953   | 7804   |
| UN11801 | Rsa1.0.00741.1 | 980  | 66117  | 1.00E-175 | 344  | 351  | 98 +  | 615  | 962  | 50868  | 51218  |
| UN11802 | Rsa1.0.00772.1 | 806  | 64856  | 1.00E-68  | 142  | 145  | 97 +  | 122  | 266  | 6216   | 6360   |
| UN11803 | Rsa1.0.00146.1 | 605  | 149343 | 1.00E-143 | 258  | 258  | 100 - | 186  | 443  | 57099  | 57356  |
| UN11804 | Rsa1.0.00611.1 | 1752 | 72410  | 0         | 1364 | 1419 | 96 +  | 3    | 1414 | 42889  | 44294  |
| UN11805 | Rsa1.0.00081.1 | 1769 | 143261 | 0         | 419  | 443  | 94 +  | 1294 | 1733 | 129500 | 129940 |
| UN11806 | Rsa1.0.01516.1 | 1447 | 44196  | 4.00E-88  | 169  | 170  | 99 -  | 1    | 170  | 37369  | 37538  |
| UN11807 | Rsa1.0.04835.1 | 886  | 15766  | 1.00E-133 | 272  | 281  | 96 -  | 160  | 440  | 9964   | 10243  |
| UN11808 | Rsa1.0.55259.1 | 1460 | 413    | 1.00E-140 | 302  | 317  | 95 -  | 1094 | 1410 | 1      | 316    |
| UN11809 | Rsa1.0.00037.1 | 812  | 307838 | 1.00E-71  | 141  | 142  | 99 +  | 281  | 422  | 306697 | 306838 |
| UN11810 | Rsa1.0.00890.1 | 1692 | 323870 | 1.00E-156 | 338  | 354  | 95 +  | 1335 | 1687 | 213285 | 213634 |
| UN11811 | Rsa1.0.00913.1 | 690  | 59914  | 1.00E-169 | 369  | 390  | 94 +  | 228  | 614  | 10123  | 10509  |
| UN11812 | Rsa1.0.01028.1 | 1563 | 56401  | 0         | 900  | 916  | 98 +  | 657  | 1563 | 4694   | 5609   |
| UN11813 | Rsa1.0.05561.1 | 1066 | 13326  | 0         | 471  | 478  | 98 +  | 274  | 751  | 3563   | 4040   |
| UN11814 | Rsa1.0.00305.1 | 683  | 97308  | 1.00E-162 | 310  | 316  | 98 -  | 368  | 683  | 87066  | 87378  |
| UN11815 | Rsa1.0.00044.1 | 1413 | 271658 | 6.00E-62  | 122  | 122  | 100 - | 624  | 745  | 178856 | 178977 |

|         |                |      |        |           |      |      |       |      |      |        |        |
|---------|----------------|------|--------|-----------|------|------|-------|------|------|--------|--------|
| UN11816 | Rsa1.0_00413.1 | 966  | 86921  | 0         | 861  | 862  | 99 +  | 105  | 966  | 4445   | 5306   |
| UN11817 | Rsa1.0_01838.1 | 941  | 38500  | 0         | 828  | 842  | 98 +  | 3    | 844  | 7180   | 8021   |
| UN11818 | Rsa1.0_00697.1 | 845  | 67913  | 1.00E-125 | 236  | 239  | 98 +  | 3    | 241  | 54368  | 54606  |
| UN11819 | Rsa1.0_00135.1 | 1287 | 178077 | 0         | 1250 | 1290 | 96 -  | 3    | 1285 | 94525  | 95810  |
| UN11820 | Rsa1.0_01220.1 | 495  | 161775 | 1.00E-131 | 314  | 336  | 93 +  | 1    | 336  | 27368  | 27698  |
| UN11821 | Rsa1.0_00645.1 | 1315 | 189716 | 0         | 476  | 480  | 99 +  | 836  | 1315 | 34408  | 34887  |
| UN11822 | Rsa1.0_00026.1 | 925  | 327835 | 0         | 439  | 456  | 96 -  | 470  | 925  | 240935 | 241378 |
| UN11823 | Rsa1.0_00135.1 | 820  | 178077 | 0         | 412  | 414  | 99 +  | 3    | 416  | 79673  | 80086  |
| UN11824 | Rsa1.0_04773.1 | 1403 | 16037  | 0         | 1093 | 1095 | 99 +  | 309  | 1403 | 9495   | 10589  |
| UN11825 | Rsa1.0_01435.1 | 1538 | 45942  | 0         | 459  | 488  | 94 +  | 482  | 965  | 40444  | 40931  |
| UN11826 | Rsa1.0_00975.1 | 1263 | 57865  | 0         | 496  | 509  | 97 +  | 753  | 1261 | 6741   | 7247   |
| UN11827 | Rsa1.0_07005.1 | 1416 | 10044  | 0         | 1364 | 1442 | 94 +  | 2    | 1416 | 7961   | 9379   |
| UN11828 | Rsa1.0_00135.1 | 1368 | 178077 | 0         | 521  | 521  | 100 + | 2    | 522  | 102875 | 103395 |
| UN11829 | Rsa1.0_00014.1 | 628  | 348985 | 1.00E-76  | 155  | 158  | 98 -  | 296  | 453  | 220174 | 220331 |
| UN11830 | Rsa1.0_00757.1 | 676  | 65559  | 7.00E-57  | 116  | 117  | 99 -  | 280  | 396  | 60113  | 60229  |
| UN11831 | Rsa1.0_00629.1 | 685  | 71381  | 0         | 382  | 385  | 99 -  | 3    | 387  | 8236   | 8620   |
| UN11832 | Rsa1.0_00610.1 | 670  | 72740  | 0         | 644  | 665  | 96 +  | 3    | 667  | 3651   | 4315   |
| UN11833 | Rsa1.0_00563.1 | 620  | 75491  | 0         | 615  | 620  | 99 -  | 1    | 620  | 22740  | 23359  |
| UN11834 | Rsa1.0_40553.1 | 369  | 553    | 1.00E-142 | 348  | 373  | 93 -  | 2    | 369  | 94     | 463    |
| UN11835 | Rsa1.0_14004.1 | 896  | 3929   | 2.00E-27  | 94   | 102  | 92 -  | 22   | 119  | 869    | 970    |
| UN11836 | Rsa1.0_04419.1 | 766  | 17430  | 0         | 415  | 434  | 95 +  | 2    | 435  | 9162   | 9586   |
| UN11837 | Rsa1.0_01022.1 | 1152 | 56606  | 0         | 766  | 810  | 94 +  | 11   | 818  | 22338  | 23145  |
| UN11838 | Rsa1.0_01957.1 | 1846 | 36844  | 0         | 1128 | 1141 | 98 -  | 697  | 1832 | 23491  | 24629  |
| UN11839 | Rsa1.0_00197.1 | 838  | 109714 | 1.00E-120 | 219  | 219  | 100 + | 620  | 838  | 93294  | 93512  |
| UN11840 | Rsa1.0_01876.1 | 1148 | 37800  | 0         | 1137 | 1147 | 99 -  | 2    | 1148 | 7315   | 8458   |
| UN11841 | Rsa1.0_00002.1 | 928  | 601661 | 1.00E-150 | 284  | 289  | 98 +  | 596  | 884  | 136152 | 136440 |
| UN11842 | Rsa1.0_07942.1 | 795  | 8213   | 0         | 380  | 381  | 99 -  | 415  | 795  | 3890   | 4270   |
| UN11843 | Rsa1.0_00019.1 | 1397 | 301669 | 1.00E-155 | 300  | 306  | 98 -  | 1063 | 1368 | 176993 | 177297 |
| UN11844 | Rsa1.0_00010.1 | 1526 | 294827 | 0         | 441  | 477  | 92 -  | 1055 | 1512 | 132178 | 132653 |
| UN11845 | Rsa1.0_00518.1 | 985  | 78360  | 0         | 410  | 430  | 95 -  | 556  | 985  | 65054  | 65481  |
| UN11846 | Rsa1.0_04397.1 | 823  | 17555  | 1.00E-144 | 275  | 280  | 98 +  | 280  | 559  | 1800   | 2079   |
| UN11847 | Rsa1.0_02750.1 | 844  | 28239  | 2.00E-91  | 209  | 221  | 94 -  | 505  | 722  | 23211  | 23431  |
| UN11848 | Rsa1.0_01591.1 | 973  | 42718  | 1.00E-133 | 285  | 299  | 95 +  | 433  | 728  | 8053   | 8351   |
| UN11849 | Rsa1.0_00632.1 | 1459 | 183777 | 0         | 560  | 571  | 98 +  | 889  | 1459 | 160327 | 160897 |
| UN11850 | Rsa1.0_00655.1 | 1280 | 195840 | 0         | 344  | 344  | 100 - | 1    | 344  | 154909 | 155252 |
| UN11851 | Rsa1.0_00351.1 | 841  | 413096 | 1.00E-176 | 320  | 322  | 99 +  | 520  | 841  | 267204 | 267525 |
| UN11852 | Rsa1.0_01100.1 | 890  | 54113  | 0         | 410  | 417  | 98 +  | 3    | 419  | 22249  | 22663  |
| UN11853 | Rsa1.0_00129.1 | 998  | 126831 | 0         | 339  | 343  | 98 +  | 656  | 998  | 88631  | 88973  |
| UN11854 | Rsa1.0_01969.1 | 1251 | 153351 | 0         | 578  | 581  | 99 -  | 205  | 785  | 18539  | 19119  |

|         |                |      |        |           |      |      |       |      |      |        |        |
|---------|----------------|------|--------|-----------|------|------|-------|------|------|--------|--------|
| UN11855 | Rsa1.0_01732.1 | 883  | 40194  | 0         | 528  | 535  | 98 +  | 349  | 883  | 35777  | 36311  |
| UN11856 | Rsa1.0_00145.1 | 1205 | 261008 | 0         | 664  | 694  | 95 +  | 334  | 1021 | 252085 | 252778 |
| UN11857 | Rsa1.0_00202.1 | 918  | 185895 | 0         | 327  | 328  | 99 +  | 2    | 329  | 132991 | 133318 |
| UN11858 | Rsa1.0_01077.1 | 1449 | 54772  | 0         | 1038 | 1101 | 94 +  | 361  | 1448 | 48375  | 49471  |
| UN11859 | Rsa1.0_03575.1 | 1383 | 22002  | 0         | 1376 | 1382 | 99 -  | 2    | 1383 | 13685  | 15065  |
| UN11860 | Rsa1.0_04820.1 | 1564 | 15857  | 0         | 745  | 784  | 95 -  | 798  | 1563 | 14846  | 15622  |
| UN11861 | Rsa1.0_00065.1 | 911  | 454616 | 0         | 582  | 598  | 97 +  | 314  | 911  | 254496 | 255092 |
| UN11862 | Rsa1.0_04396.1 | 1364 | 17561  | 1.00E-114 | 238  | 246  | 96 +  | 1117 | 1362 | 2712   | 2956   |
| UN11863 | Rsa1.0_00155.1 | 1119 | 118465 | 0         | 796  | 802  | 99 -  | 1    | 801  | 61433  | 62234  |
| UN11864 | Rsa1.0_04419.1 | 1502 | 17430  | 0         | 719  | 766  | 93 -  | 41   | 798  | 7377   | 8124   |
| UN11865 | Rsa1.0_00826.1 | 1052 | 166736 | 1.00E-121 | 221  | 221  | 100 + | 146  | 366  | 155658 | 155878 |
| UN11866 | Rsa1.0_04181.1 | 1299 | 18615  | 0         | 691  | 720  | 95 +  | 255  | 974  | 936    | 1655   |
| UN11867 | Rsa1.0_00019.1 | 694  | 301669 | 0         | 614  | 659  | 93 -  | 41   | 694  | 295429 | 296083 |
| UN11868 | Rsa1.0_00131.1 | 919  | 432233 | 0         | 884  | 895  | 98 +  | 28   | 919  | 93710  | 94604  |
| UN11869 | Rsa1.0_00451.1 | 1035 | 322533 | 0         | 581  | 599  | 96 -  | 442  | 1033 | 64916  | 65513  |
| UN11870 | Rsa1.0_02583.1 | 975  | 29887  | 1.00E-130 | 254  | 257  | 98 +  | 490  | 746  | 4643   | 4897   |
| UN11871 | Rsa1.0_00654.1 | 772  | 70012  | 0         | 763  | 771  | 98 +  | 3    | 769  | 9140   | 9909   |
| UN11872 | Rsa1.0_03731.1 | 1041 | 21136  | 0         | 465  | 467  | 99 +  | 185  | 651  | 631    | 1097   |
| UN11873 | Rsa1.0_07499.1 | 908  | 9244   | 0         | 413  | 417  | 99 -  | 5    | 421  | 6510   | 6926   |
| UN11874 | Rsa1.0_06088.1 | 770  | 11767  | 1.00E-132 | 289  | 304  | 95 -  | 414  | 716  | 7185   | 7488   |
| UN11875 | Rsa1.0_01327.1 | 928  | 48033  | 0         | 510  | 512  | 99 +  | 2    | 513  | 22308  | 22819  |
| UN11876 | Rsa1.0_37083.1 | 374  | 608    | 1.00E-141 | 269  | 274  | 98 -  | 101  | 374  | 208    | 481    |
| UN11877 | Rsa1.0_00347.1 | 718  | 93048  | 1.00E-142 | 300  | 314  | 95 +  | 5    | 318  | 8821   | 9131   |
| UN11878 | Rsa1.0_11571.1 | 1068 | 5468   | 1.00E-148 | 275  | 278  | 98 +  | 5    | 282  | 261    | 538    |
| UN11879 | Rsa1.0_02315.1 | 1041 | 32618  | 1.00E-110 | 217  | 222  | 97 +  | 818  | 1039 | 25958  | 26179  |
| UN11880 | Rsa1.0_11924.1 | 638  | 5369   | 1.00E-132 | 246  | 248  | 99 -  | 391  | 638  | 4938   | 5185   |
| UN11881 | Rsa1.0_03692.1 | 855  | 21338  | 1.00E-132 | 289  | 304  | 95 +  | 555  | 854  | 3649   | 3951   |
| UN11882 | Rsa1.0_00193.1 | 1378 | 194198 | 1.00E-148 | 718  | 856  | 83 +  | 508  | 1344 | 13920  | 14766  |
| UN11883 | Rsa1.0_00278.1 | 1083 | 231896 | 0         | 628  | 655  | 95 +  | 379  | 1029 | 56571  | 57211  |
| UN11884 | Rsa1.0_00571.1 | 1052 | 329018 | 0         | 701  | 704  | 99 +  | 342  | 1044 | 143533 | 144236 |
| UN11885 | Rsa1.0_01516.1 | 746  | 44196  | 1.00E-123 | 264  | 276  | 95 -  | 216  | 491  | 36762  | 37035  |
| UN11886 | Rsa1.0_01317.1 | 761  | 48287  | 0         | 573  | 589  | 97 +  | 9    | 596  | 34091  | 34677  |
| UN11887 | Rsa1.0_01005.1 | 1308 | 56967  | 0         | 705  | 718  | 98 -  | 594  | 1308 | 4965   | 5682   |
| UN11888 | Rsa1.0_01925.1 | 1226 | 37220  | 0         | 482  | 507  | 95 +  | 723  | 1223 | 26163  | 26668  |
| UN11889 | Rsa1.0_00022.1 | 1068 | 200461 | 0         | 651  | 654  | 99 +  | 205  | 858  | 23401  | 24052  |
| UN11890 | Rsa1.0_00040.1 | 1078 | 324196 | 1.00E-147 | 289  | 297  | 97 +  | 392  | 688  | 70238  | 70534  |
| UN11891 | Rsa1.0_04296.1 | 1036 | 18030  | 1.00E-107 | 230  | 241  | 95 +  | 604  | 844  | 14729  | 14969  |
| UN11892 | Rsa1.0_04195.1 | 847  | 18528  | 1.00E-126 | 238  | 241  | 98 -  | 113  | 353  | 11857  | 12097  |
| UN11893 | Rsa1.0_00201.1 | 714  | 232851 | 0         | 671  | 713  | 94 -  | 4    | 714  | 140386 | 141089 |

|         |                |      |        |           |      |      |       |      |      |        |        |
|---------|----------------|------|--------|-----------|------|------|-------|------|------|--------|--------|
| UN11894 | Rsa1.0.03344.1 | 819  | 23593  | 0         | 523  | 566  | 92 +  | 1    | 558  | 20630  | 21195  |
| UN11895 | Rsa1.0.02061.1 | 1002 | 35487  | 1.00E-120 | 304  | 332  | 91 -  | 672  | 1001 | 23335  | 23648  |
| UN11896 | Rsa1.0.00741.1 | 1026 | 66117  | 0         | 653  | 705  | 92 -  | 318  | 1018 | 32560  | 33263  |
| UN11897 | Rsa1.0.00344.1 | 804  | 191774 | 1.00E-120 | 240  | 246  | 97 +  | 268  | 511  | 179315 | 179560 |
| UN11898 | Rsa1.0.06039.1 | 1030 | 11867  | 1.00E-136 | 276  | 284  | 97 -  | 749  | 1030 | 11470  | 11750  |
| UN11899 | Rsa1.0.15499.1 | 696  | 2570   | 1.00E-134 | 260  | 266  | 97 -  | 120  | 385  | 1132   | 1397   |
| UN11900 | Rsa1.0.00813.1 | 899  | 63202  | 1.00E-125 | 261  | 273  | 95 +  | 627  | 899  | 15290  | 15554  |
| UN11901 | Rsa1.0.00626.1 | 1332 | 71582  | 1.00E-139 | 522  | 613  | 85 +  | 723  | 1331 | 45083  | 45656  |
| UN11902 | Rsa1.0.01477.1 | 785  | 45008  | 0         | 743  | 787  | 94 -  | 2    | 782  | 41030  | 41809  |
| UN11903 | Rsa1.0.01731.1 | 521  | 40208  | 1.00E-66  | 204  | 228  | 89 +  | 3    | 230  | 34880  | 35105  |
| UN11904 | Rsa1.0.00065.1 | 1402 | 454616 | 1.00E-120 | 220  | 220  | 100 + | 936  | 1155 | 447874 | 448093 |
| UN11905 | Rsa1.0.04043.1 | 1076 | 19416  | 1.00E-147 | 321  | 336  | 95 -  | 3    | 336  | 10618  | 10946  |
| UN11906 | Rsa1.0.00001.1 | 1105 | 363028 | 0         | 494  | 531  | 93 -  | 2    | 529  | 266567 | 267085 |
| UN11907 | Rsa1.0.05599.1 | 811  | 143653 | 0         | 399  | 410  | 97 -  | 29   | 438  | 142328 | 142737 |
| UN11908 | Rsa1.0.02930.1 | 1192 | 26668  | 0         | 1161 | 1192 | 97 +  | 1    | 1192 | 8733   | 9921   |
| UN11909 | Rsa1.0.04458.1 | 1013 | 17255  | 0         | 984  | 1015 | 96 -  | 4    | 1013 | 9436   | 10442  |
| UN11910 | Rsa1.0.01092.1 | 782  | 54348  | 1.00E-117 | 352  | 394  | 89 -  | 346  | 712  | 7601   | 7993   |
| UN11911 | Rsa1.0.04141.1 | 1041 | 18864  | 0         | 453  | 456  | 99 +  | 3    | 456  | 14170  | 14625  |
| UN11912 | Rsa1.0.00468.1 | 1529 | 82095  | 0         | 542  | 547  | 99 -  | 182  | 728  | 12803  | 13349  |
| UN11913 | Rsa1.0.35376.1 | 891  | 640    | 1.00E-170 | 319  | 324  | 98 -  | 179  | 502  | 164    | 487    |
| UN11914 | Rsa1.0.00697.1 | 900  | 67913  | 0         | 783  | 839  | 93 +  | 3    | 832  | 42283  | 43121  |
| UN11915 | Rsa1.0.05367.1 | 835  | 14010  | 0         | 468  | 470  | 99 +  | 3    | 472  | 2687   | 3156   |
| UN11916 | Rsa1.0.03304.1 | 267  | 23883  | 2.00E-92  | 245  | 272  | 90 -  | 2    | 267  | 19525  | 19784  |
| UN11917 | Rsa1.0.00332.1 | 983  | 94575  | 0         | 475  | 504  | 94 +  | 101  | 604  | 54514  | 55017  |
| UN11918 | Rsa1.0.00089.1 | 1262 | 406142 | 0         | 425  | 435  | 97 +  | 161  | 595  | 150722 | 151156 |
| UN11919 | Rsa1.0.01552.1 | 1044 | 43396  | 0         | 490  | 498  | 98 +  | 213  | 710  | 15551  | 16048  |
| UN11920 | Rsa1.0.00269.1 | 1247 | 341668 | 0         | 913  | 917  | 99 +  | 2    | 917  | 37056  | 37972  |
| UN11921 | Rsa1.0.03839.1 | 1086 | 20525  | 4.00E-81  | 154  | 154  | 100 - | 2    | 155  | 15652  | 15805  |
| UN11922 | Rsa1.0.01343.1 | 924  | 47735  | 0         | 910  | 913  | 99 +  | 3    | 915  | 4082   | 4994   |
| UN11923 | Rsa1.0.04894.1 | 962  | 15569  | 0         | 945  | 964  | 98 +  | 1    | 959  | 3487   | 4450   |
| UN11924 | Rsa1.0.00476.1 | 1474 | 280966 | 0         | 424  | 437  | 97 -  | 1038 | 1474 | 245444 | 245880 |
| UN11925 | Rsa1.0.01164.1 | 828  | 51934  | 0         | 792  | 830  | 95 +  | 3    | 828  | 47385  | 48204  |
| UN11926 | Rsa1.0.03303.1 | 721  | 23890  | 1.00E-148 | 296  | 302  | 98 +  | 423  | 721  | 4111   | 4412   |
| UN11927 | Rsa1.0.06967.1 | 1411 | 10093  | 0         | 1146 | 1167 | 98 -  | 6    | 1172 | 7110   | 8275   |
| UN11928 | Rsa1.0.00040.1 | 1021 | 324196 | 0         | 549  | 553  | 99 +  | 469  | 1021 | 89428  | 89979  |
| UN11929 | Rsa1.0.01836.1 | 748  | 38503  | 1.00E-107 | 212  | 217  | 97 +  | 280  | 496  | 2782   | 2998   |
| UN11930 | Rsa1.0.07840.1 | 1099 | 8442   | 4.00E-53  | 147  | 159  | 92 +  | 830  | 987  | 1451   | 1609   |
| UN11931 | Rsa1.0.00184.1 | 1249 | 218748 | 0         | 590  | 617  | 95 -  | 642  | 1249 | 210843 | 211456 |
| UN11932 | Rsa1.0.01876.1 | 880  | 37800  | 0         | 688  | 688  | 100 + | 192  | 879  | 36310  | 36997  |

|         |                |      |        |           |      |      |       |      |      |        |        |
|---------|----------------|------|--------|-----------|------|------|-------|------|------|--------|--------|
| UN11933 | Rsa1.0_00163.1 | 942  | 116847 | 1.00E-143 | 277  | 281  | 98 -  | 664  | 941  | 10439  | 10719  |
| UN11934 | Rsa1.0_02320.1 | 724  | 32575  | 0         | 713  | 725  | 98 -  | 4    | 724  | 16021  | 16744  |
| UN11935 | Rsa1.0_01600.1 | 1147 | 42537  | 0         | 375  | 384  | 97 -  | 188  | 571  | 38437  | 38820  |
| UN11936 | Rsa1.0_03901.1 | 604  | 20170  | 0         | 334  | 337  | 99 -  | 268  | 604  | 1021   | 1357   |
| UN11937 | Rsa1.0_00275.1 | 673  | 210104 | 1.00E-163 | 321  | 331  | 96 -  | 3    | 333  | 7172   | 7502   |
| UN11938 | Rsa1.0_00051.1 | 1538 | 258225 | 0         | 1470 | 1555 | 94 -  | 1    | 1535 | 119454 | 120991 |
| UN11939 | Rsa1.0_00341.1 | 1253 | 249309 | 0         | 1240 | 1250 | 99 -  | 4    | 1253 | 3216   | 4465   |
| UN11940 | Rsa1.0_10964.1 | 1155 | 5663   | 0         | 397  | 406  | 97 +  | 645  | 1050 | 466    | 870    |
| UN11941 | Rsa1.0_00005.1 | 1177 | 353093 | 0         | 420  | 437  | 96 +  | 3    | 430  | 341181 | 341617 |
| UN11942 | Rsa1.0_05562.1 | 1119 | 13323  | 0         | 1105 | 1124 | 98 -  | 2    | 1119 | 2420   | 3540   |
| UN11943 | Rsa1.0_01236.1 | 1216 | 50156  | 1.00E-107 | 200  | 201  | 99 -  | 790  | 990  | 44319  | 44519  |
| UN11944 | Rsa1.0_00354.1 | 1494 | 232005 | 1.00E-177 | 408  | 435  | 93 +  | 525  | 955  | 191172 | 191606 |
| UN11945 | Rsa1.0_00083.1 | 1306 | 442773 | 0         | 695  | 706  | 98 -  | 563  | 1263 | 359724 | 360429 |
| UN11946 | Rsa1.0_03615.1 | 1249 | 21766  | 0         | 345  | 345  | 100 + | 905  | 1249 | 6065   | 6409   |
| UN11947 | Rsa1.0_00400.1 | 1324 | 87858  | 1.00E-103 | 197  | 199  | 98 +  | 1125 | 1323 | 61289  | 61487  |
| UN11948 | Rsa1.0_03878.1 | 1098 | 20305  | 1.00E-116 | 213  | 213  | 100 + | 555  | 767  | 4375   | 4587   |
| UN11949 | Rsa1.0_00326.1 | 1008 | 171955 | 1.00E-179 | 330  | 334  | 98 +  | 674  | 1007 | 65824  | 66157  |
| UN11950 | Rsa1.0_00016.1 | 1299 | 831256 | 1.00E-173 | 332  | 340  | 97 +  | 555  | 894  | 251373 | 251712 |
| UN11951 | Rsa1.0_00038.1 | 926  | 314568 | 1.00E-152 | 435  | 494  | 88 +  | 275  | 753  | 9529   | 9997   |
| UN11952 | Rsa1.0_00121.1 | 1186 | 278029 | 0         | 693  | 695  | 99 -  | 3    | 697  | 241558 | 242252 |
| UN11953 | Rsa1.0_01559.1 | 1327 | 43262  | 0         | 453  | 454  | 99 +  | 873  | 1326 | 4894   | 5347   |
| UN11954 | Rsa1.0_00108.1 | 1236 | 478491 | 0         | 737  | 766  | 96 +  | 470  | 1235 | 108338 | 109102 |
| UN11955 | Rsa1.0_02750.1 | 1359 | 28239  | 8.00E-86  | 221  | 237  | 93 -  | 1101 | 1333 | 25656  | 25892  |
| UN11956 | Rsa1.0_00417.1 | 765  | 395068 | 1.00E-153 | 389  | 423  | 91 +  | 355  | 765  | 228539 | 228960 |
| UN11957 | Rsa1.0_00309.1 | 1046 | 96883  | 5.00E-99  | 204  | 208  | 98 -  | 840  | 1046 | 64164  | 64370  |
| UN11958 | Rsa1.0_00190.1 | 900  | 318240 | 1.00E-154 | 342  | 362  | 94 +  | 230  | 582  | 211050 | 211411 |
| UN11959 | Rsa1.0_24633.1 | 1241 | 976    | 1.00E-99  | 223  | 236  | 94 +  | 3    | 238  | 681    | 910    |
| UN11960 | Rsa1.0_14007.1 | 770  | 3925   | 0         | 550  | 551  | 99 -  | 2    | 552  | 519    | 1069   |
| UN11961 | Rsa1.0_05947.1 | 1349 | 12142  | 0         | 605  | 614  | 98 +  | 735  | 1348 | 3191   | 3804   |
| UN11962 | Rsa1.0_01615.1 | 1251 | 42145  | 3.00E-45  | 149  | 166  | 89 +  | 443  | 607  | 2933   | 3098   |
| UN11963 | Rsa1.0_07021.1 | 1064 | 10016  | 1.00E-151 | 319  | 334  | 95 +  | 347  | 677  | 7093   | 7426   |
| UN11964 | Rsa1.0_00642.1 | 1096 | 201230 | 0         | 630  | 630  | 100 + | 467  | 1096 | 180069 | 180698 |
| UN11965 | Rsa1.0_01090.1 | 1231 | 54385  | 0         | 603  | 631  | 95 +  | 595  | 1220 | 28191  | 28818  |
| UN11966 | Rsa1.0_00271.1 | 1043 | 101125 | 1.00E-138 | 289  | 302  | 95 -  | 605  | 906  | 36771  | 37072  |
| UN11967 | Rsa1.0_00168.1 | 831  | 115870 | 0         | 427  | 437  | 97 -  | 396  | 831  | 57751  | 58187  |
| UN11968 | Rsa1.0_71997.1 | 807  | 318    | 2.00E-23  | 81   | 88   | 92 -  | 502  | 587  | 26     | 113    |
| UN11969 | Rsa1.0_00187.1 | 1147 | 393093 | 0         | 1106 | 1144 | 96 +  | 2    | 1143 | 245752 | 246894 |
| UN11970 | Rsa1.0_00594.1 | 172  | 73729  | 2.00E-17  | 55   | 58   | 94 -  | 115  | 172  | 30149  | 30206  |
| UN11971 | Rsa1.0_01117.1 | 899  | 53465  | 0         | 825  | 841  | 98 -  | 66   | 899  | 52547  | 53387  |

|         |                |      |        |           |      |      |       |     |      |        |        |
|---------|----------------|------|--------|-----------|------|------|-------|-----|------|--------|--------|
| UN11972 | Rsa1.0.03365.1 | 721  | 23410  | 0         | 541  | 542  | 99 +  | 1   | 542  | 14847  | 15388  |
| UN11973 | Rsa1.0.06225.1 | 879  | 11443  | 4.00E-31  | 104  | 114  | 91 +  | 437 | 550  | 9455   | 9567   |
| UN11974 | Rsa1.0.00001.1 | 831  | 363028 | 1.00E-163 | 298  | 300  | 99 +  | 459 | 758  | 208174 | 208473 |
| UN11975 | Rsa1.0.00290.1 | 1135 | 225096 | 0         | 684  | 706  | 96 +  | 1   | 706  | 1515   | 2214   |
| UN11976 | Rsa1.0.00803.1 | 1592 | 144228 | 0         | 1013 | 1057 | 95 +  | 5   | 1054 | 135672 | 136722 |
| UN11977 | Rsa1.0.00522.1 | 1909 | 78103  | 0         | 1078 | 1100 | 98 -  | 1   | 1082 | 36235  | 37334  |
| UN11978 | Rsa1.0.00212.1 | 724  | 108350 | 0         | 708  | 722  | 98 +  | 6   | 724  | 66442  | 67163  |
| UN11979 | Rsa1.0.00008.1 | 825  | 358124 | 0         | 357  | 357  | 100 - | 128 | 484  | 181921 | 182277 |
| UN11980 | Rsa1.0.00079.1 | 637  | 606987 | 0         | 548  | 570  | 96 -  | 68  | 637  | 57329  | 57898  |
| UN11981 | Rsa1.0.00221.1 | 1236 | 106972 | 0         | 415  | 426  | 97 -  | 1   | 418  | 6959   | 7384   |
| UN11982 | Rsa1.0.00005.1 | 821  | 353093 | 0         | 499  | 525  | 95 +  | 2   | 524  | 138046 | 138562 |
| UN11983 | Rsa1.0.00017.1 | 1045 | 752458 | 0         | 464  | 464  | 100 + | 1   | 464  | 318311 | 318774 |
| UN11984 | Rsa1.0.14319.1 | 1120 | 3529   | 1.00E-169 | 487  | 548  | 88 +  | 351 | 898  | 2316   | 2860   |
| UN11985 | Rsa1.0.00040.1 | 657  | 324196 | 0         | 510  | 541  | 94 -  | 19  | 551  | 114552 | 115092 |
| UN11986 | Rsa1.0.05612.1 | 1341 | 13193  | 0         | 569  | 586  | 97 -  | 734 | 1319 | 2444   | 3029   |
| UN11987 | Rsa1.0.04340.1 | 305  | 17831  | 1.00E-137 | 291  | 303  | 96 -  | 1   | 302  | 505    | 806    |
| UN11988 | Rsa1.0.05360.1 | 1126 | 14053  | 1.00E-149 | 290  | 296  | 97 -  | 347 | 641  | 11840  | 12135  |
| UN11989 | Rsa1.0.01726.1 | 774  | 40263  | 0         | 442  | 452  | 97 +  | 1   | 452  | 172    | 620    |
| UN11990 | Rsa1.0.03995.1 | 1189 | 19654  | 0         | 348  | 348  | 100 + | 1   | 348  | 8087   | 8434   |
| UN11991 | Rsa1.0.03612.1 | 1487 | 21784  | 0         | 633  | 678  | 93 -  | 21  | 693  | 1189   | 1862   |
| UN11992 | Rsa1.0.01244.1 | 1704 | 50061  | 0         | 443  | 451  | 98 -  | 1   | 447  | 27345  | 27795  |
| UN11993 | Rsa1.0.00284.1 | 869  | 323267 | 1.00E-152 | 273  | 273  | 100 - | 3   | 275  | 240625 | 240897 |
| UN11994 | Rsa1.0.04110.1 | 727  | 18998  | 1.00E-125 | 255  | 264  | 96 -  | 462 | 725  | 4839   | 5102   |
| UN11995 | Rsa1.0.03309.1 | 1025 | 23852  | 0         | 1023 | 1023 | 100 + | 3   | 1025 | 18483  | 19505  |
| UN11996 | Rsa1.0.52728.1 | 766  | 432    | 1.00E-172 | 319  | 323  | 98 +  | 191 | 513  | 1      | 323    |
| UN11997 | Rsa1.0.00128.1 | 1533 | 228675 | 0         | 421  | 435  | 96 +  | 42  | 473  | 200446 | 200880 |
| UN11998 | Rsa1.0.00186.1 | 706  | 112669 | 0         | 403  | 418  | 96 -  | 1   | 418  | 47100  | 47517  |
| UN11999 | Rsa1.0.01874.1 | 668  | 37853  | 1.00E-169 | 333  | 342  | 97 +  | 2   | 343  | 23893  | 24233  |
| UN12000 | Rsa1.0.18507.1 | 955  | 1586   | 1.00E-164 | 323  | 333  | 96 +  | 371 | 703  | 552    | 884    |
| UN12001 | Rsa1.0.01103.1 | 1695 | 53974  | 0         | 468  | 483  | 96 -  | 192 | 674  | 17346  | 17825  |
| UN12002 | Rsa1.0.06571.1 | 895  | 10750  | 1.00E-162 | 322  | 332  | 96 -  | 6   | 337  | 1      | 329    |
| UN12003 | Rsa1.0.01236.1 | 261  | 50156  | 1.00E-115 | 250  | 262  | 95 -  | 1   | 261  | 2006   | 2267   |
| UN12004 | Rsa1.0.00371.1 | 1840 | 90463  | 0         | 1002 | 1029 | 97 -  | 2   | 1029 | 51430  | 52452  |
| UN12005 | Rsa1.0.00363.1 | 580  | 90968  | 4.00E-95  | 197  | 204  | 96 -  | 237 | 434  | 53874  | 54077  |
| UN12006 | Rsa1.0.00567.1 | 1355 | 75260  | 0         | 376  | 376  | 100 + | 1   | 376  | 66917  | 67292  |
| UN12007 | Rsa1.0.01838.1 | 1556 | 38500  | 0         | 698  | 701  | 99 -  | 43  | 743  | 8300   | 9000   |
| UN12008 | Rsa1.0.09081.1 | 566  | 6664   | 1.00E-174 | 415  | 446  | 93 -  | 1   | 442  | 6013   | 6450   |
| UN12009 | Rsa1.0.01989.1 | 1144 | 36439  | 1.00E-175 | 377  | 396  | 95 -  | 1   | 396  | 11214  | 11593  |
| UN12010 | Rsa1.0.00609.1 | 1203 | 72785  | 0         | 434  | 448  | 96 -  | 112 | 554  | 70202  | 70649  |

|         |                |      |        |           |      |      |       |     |      |        |        |
|---------|----------------|------|--------|-----------|------|------|-------|-----|------|--------|--------|
| UN12011 | Rsa1.0_08265.1 | 180  | 7630   | 1.00E-73  | 164  | 172  | 95 +  | 5   | 176  | 6613   | 6784   |
| UN12012 | Rsa1.0_19598.1 | 856  | 1409   | 0         | 659  | 678  | 97 -  | 1   | 678  | 253    | 923    |
| UN12013 | Rsa1.0_02298.1 | 1052 | 32872  | 0         | 440  | 464  | 94 -  | 19  | 481  | 6363   | 6819   |
| UN12014 | Rsa1.0_00090.1 | 939  | 273859 | 1.00E-100 | 195  | 198  | 98 +  | 405 | 602  | 2039   | 2236   |
| UN12015 | Rsa1.0_00576.1 | 925  | 178949 | 0         | 749  | 751  | 99 -  | 1   | 751  | 25871  | 26621  |
| UN12016 | Rsa1.0_04195.1 | 1071 | 18528  | 1.00E-124 | 239  | 243  | 98 +  | 736 | 978  | 11857  | 12099  |
| UN12017 | Rsa1.0_00038.1 | 846  | 314568 | 1.00E-158 | 300  | 303  | 99 +  | 542 | 843  | 47307  | 47608  |
| UN12018 | Rsa1.0_03777.1 | 802  | 20922  | 0         | 463  | 491  | 94 -  | 3   | 479  | 2336   | 2823   |
| UN12019 | Rsa1.0_01785.1 | 196  | 39368  | 2.00E-66  | 183  | 199  | 91 +  | 1   | 196  | 28462  | 28660  |
| UN12020 | Rsa1.0_00350.1 | 1114 | 92346  | 1.00E-129 | 244  | 247  | 98 +  | 848 | 1094 | 2003   | 2249   |
| UN12021 | Rsa1.0_00155.1 | 2683 | 118465 | 0         | 2208 | 2254 | 97 +  | 6   | 2253 | 60603  | 62849  |
| UN12022 | Rsa1.0_00720.1 | 749  | 66931  | 0         | 427  | 436  | 97 -  | 1   | 435  | 26080  | 26511  |
| UN12023 | Rsa1.0_01900.1 | 918  | 37473  | 0         | 915  | 918  | 99 -  | 1   | 918  | 9796   | 10712  |
| UN12024 | Rsa1.0_01359.1 | 1327 | 47271  | 0         | 956  | 1062 | 90 +  | 9   | 1027 | 32320  | 33366  |
| UN12025 | Rsa1.0_00065.1 | 435  | 454616 | 0         | 433  | 433  | 100 - | 1   | 433  | 42271  | 42703  |
| UN12026 | Rsa1.0_03846.1 | 1198 | 20481  | 1.00E-173 | 308  | 308  | 100 - | 231 | 538  | 14102  | 14409  |
| UN12027 | Rsa1.0_08411.1 | 1464 | 7404   | 0         | 785  | 791  | 99 +  | 675 | 1464 | 1676   | 2466   |
| UN12028 | Rsa1.0_00637.1 | 1436 | 71038  | 0         | 854  | 888  | 96 +  | 2   | 889  | 2333   | 3205   |
| UN12029 | Rsa1.0_00190.1 | 1336 | 318240 | 0         | 536  | 552  | 97 +  | 791 | 1336 | 45482  | 46033  |
| UN12030 | Rsa1.0_14273.1 | 825  | 3588   | 1.00E-144 | 296  | 306  | 96 +  | 1   | 304  | 2202   | 2506   |
| UN12031 | Rsa1.0_43896.1 | 796  | 512    | 0         | 427  | 435  | 98 -  | 362 | 796  | 77     | 511    |
| UN12032 | Rsa1.0_02471.1 | 828  | 31104  | 1.00E-178 | 316  | 316  | 100 + | 3   | 318  | 27908  | 28223  |
| UN12033 | Rsa1.0_00041.1 | 783  | 186197 | 0         | 468  | 494  | 94 +  | 6   | 495  | 151491 | 151983 |
| UN12034 | Rsa1.0_00149.1 | 879  | 305196 | 1.00E-151 | 287  | 292  | 98 +  | 531 | 822  | 179522 | 179813 |
| UN12035 | Rsa1.0_02252.1 | 1254 | 33375  | 0         | 515  | 550  | 93 -  | 24  | 563  | 8074   | 8622   |
| UN12036 | Rsa1.0_00126.1 | 1352 | 127534 | 0         | 610  | 622  | 98 +  | 728 | 1348 | 41116  | 41737  |
| UN12037 | Rsa1.0_03972.1 | 1120 | 19787  | 1.00E-175 | 355  | 368  | 96 -  | 19  | 383  | 13644  | 14008  |
| UN12038 | Rsa1.0_16891.1 | 1235 | 1999   | 2.00E-71  | 182  | 193  | 94 -  | 1   | 188  | 856    | 1044   |
| UN12039 | Rsa1.0_01476.1 | 884  | 172928 | 9.00E-97  | 272  | 300  | 90 +  | 3   | 287  | 137462 | 137754 |
| UN12040 | Rsa1.0_00628.1 | 1185 | 214360 | 0         | 469  | 479  | 97 +  | 5   | 479  | 203522 | 204000 |
| UN12041 | Rsa1.0_00816.1 | 1184 | 403350 | 0         | 565  | 585  | 96 +  | 129 | 711  | 263913 | 264497 |
| UN12042 | Rsa1.0_00837.1 | 865  | 62568  | 0         | 652  | 659  | 98 -  | 1   | 659  | 3086   | 3737   |
| UN12043 | Rsa1.0_02605.1 | 1733 | 29637  | 0         | 333  | 335  | 99 -  | 3   | 337  | 8473   | 8807   |
| UN12044 | Rsa1.0_00616.1 | 1181 | 195713 | 0         | 474  | 501  | 94 +  | 1   | 494  | 183042 | 183530 |
| UN12045 | Rsa1.0_01696.1 | 775  | 301850 | 6.00E-70  | 141  | 143  | 98 +  | 125 | 267  | 291367 | 291509 |
| UN12046 | Rsa1.0_00116.1 | 1059 | 365886 | 1.00E-150 | 339  | 362  | 93 -  | 278 | 636  | 20143  | 20498  |
| UN12047 | Rsa1.0_00773.1 | 602  | 64839  | 1.00E-134 | 251  | 254  | 98 +  | 1   | 254  | 57170  | 57423  |
| UN12048 | Rsa1.0_00094.1 | 877  | 139042 | 3.00E-78  | 230  | 254  | 90 +  | 42  | 292  | 97632  | 97877  |
| UN12049 | Rsa1.0_02273.1 | 1604 | 140964 | 0         | 1603 | 1613 | 99 -  | 1   | 1604 | 136918 | 138530 |

|         |                |      |        |           |      |      |       |     |      |        |        |
|---------|----------------|------|--------|-----------|------|------|-------|-----|------|--------|--------|
| UN12050 | Rsa1.0_00596.1 | 1082 | 73578  | 1.00E-154 | 321  | 335  | 95 -  | 746 | 1080 | 9140   | 9467   |
| UN12051 | Rsa1.0_00001.1 | 812  | 363028 | 1.00E-132 | 264  | 272  | 97 -  | 2   | 273  | 156998 | 157269 |
| UN12052 | Rsa1.0_00086.1 | 1111 | 439854 | 6.00E-83  | 192  | 202  | 95 +  | 5   | 202  | 431    | 631    |
| UN12053 | Rsa1.0_04434.1 | 1502 | 17377  | 0         | 1089 | 1192 | 91 -  | 330 | 1487 | 7291   | 8475   |
| UN12054 | Rsa1.0_03019.1 | 1021 | 25987  | 0         | 330  | 331  | 99 -  | 683 | 1012 | 2643   | 2973   |
| UN12055 | Rsa1.0_00921.1 | 1313 | 59599  | 3.00E-42  | 164  | 187  | 87 -  | 133 | 318  | 55224  | 55407  |
| UN12056 | Rsa1.0_02282.1 | 1146 | 163951 | 7.00E-86  | 204  | 218  | 93 +  | 296 | 513  | 149855 | 150072 |
| UN12057 | Rsa1.0_02871.1 | 765  | 27085  | 1.00E-113 | 248  | 259  | 95 +  | 509 | 765  | 4928   | 5186   |
| UN12058 | Rsa1.0_01417.1 | 797  | 46252  | 4.00E-40  | 138  | 152  | 90 +  | 19  | 168  | 2265   | 2414   |
| UN12059 | Rsa1.0_00414.1 | 965  | 202190 | 1.00E-117 | 280  | 297  | 94 -  | 670 | 964  | 177489 | 177782 |
| UN12060 | Rsa1.0_00899.1 | 1003 | 60404  | 0         | 494  | 496  | 99 +  | 130 | 624  | 56656  | 57151  |
| UN12061 | Rsa1.0_04123.1 | 967  | 18947  | 1.00E-141 | 326  | 350  | 93 +  | 632 | 967  | 15564  | 15911  |
| UN12062 | Rsa1.0_05353.1 | 1432 | 14078  | 0         | 512  | 517  | 99 -  | 496 | 1012 | 965    | 1478   |
| UN12063 | Rsa1.0_05440.1 | 592  | 13749  | 1.00E-124 | 235  | 238  | 98 -  | 131 | 368  | 12893  | 13130  |
| UN12064 | Rsa1.0_02735.1 | 1373 | 28344  | 1.00E-173 | 309  | 309  | 100 + | 3   | 311  | 25349  | 25657  |
| UN12065 | Rsa1.0_04991.1 | 1335 | 15215  | 0         | 798  | 826  | 96 +  | 510 | 1335 | 9687   | 10502  |
| UN12066 | Rsa1.0_02883.1 | 1207 | 27035  | 0         | 719  | 772  | 93 -  | 5   | 755  | 3528   | 4299   |
| UN12067 | Rsa1.0_00002.1 | 719  | 601661 | 0         | 583  | 591  | 98 +  | 129 | 719  | 33588  | 34178  |
| UN12068 | Rsa1.0_00449.1 | 1334 | 83863  | 0         | 696  | 728  | 95 -  | 612 | 1332 | 66747  | 67466  |
| UN12069 | Rsa1.0_19998.1 | 608  | 1354   | 0         | 449  | 456  | 98 +  | 153 | 608  | 691    | 1142   |
| UN12070 | Rsa1.0_00577.1 | 1787 | 174827 | 0         | 658  | 662  | 99 -  | 709 | 1370 | 167911 | 168571 |
| UN12071 | Rsa1.0_01067.1 | 494  | 55230  | 1.00E-91  | 209  | 215  | 97 -  | 278 | 492  | 4569   | 4778   |
| UN12072 | Rsa1.0_14220.1 | 841  | 3652   | 3.00E-69  | 143  | 146  | 97 -  | 197 | 342  | 3225   | 3370   |
| UN12073 | Rsa1.0_31728.1 | 589  | 720    | 1.00E-141 | 306  | 314  | 97 -  | 277 | 589  | 413    | 720    |
| UN12074 | Rsa1.0_04937.1 | 311  | 15401  | 1.00E-134 | 294  | 308  | 95 +  | 1   | 303  | 12386  | 12693  |
| UN12075 | Rsa1.0_01090.1 | 801  | 54385  | 0         | 403  | 415  | 97 +  | 2   | 416  | 3212   | 3626   |
| UN12076 | Rsa1.0_00048.1 | 794  | 167185 | 1.00E-163 | 320  | 329  | 97 -  | 464 | 784  | 77345  | 77673  |
| UN12077 | Rsa1.0_00089.1 | 1044 | 406142 | 0         | 1033 | 1040 | 99 +  | 1   | 1040 | 118913 | 119948 |
| UN12078 | Rsa1.0_12087.1 | 721  | 5317   | 0         | 700  | 719  | 97 -  | 3   | 721  | 4366   | 5084   |
| UN12079 | Rsa1.0_00275.1 | 638  | 210104 | 1.00E-105 | 292  | 322  | 90 +  | 319 | 628  | 157269 | 157585 |
| UN12080 | Rsa1.0_03391.1 | 1306 | 23251  | 0         | 815  | 820  | 99 -  | 487 | 1306 | 2329   | 3148   |
| UN12081 | Rsa1.0_00940.1 | 1549 | 179946 | 0         | 560  | 564  | 99 -  | 986 | 1549 | 170747 | 171310 |
| UN12082 | Rsa1.0_02932.1 | 934  | 26647  | 0         | 535  | 540  | 99 -  | 1   | 540  | 14289  | 14826  |
| UN12083 | Rsa1.0_01778.1 | 876  | 39509  | 6.00E-92  | 193  | 200  | 96 +  | 261 | 460  | 8657   | 8856   |
| UN12084 | Rsa1.0_01210.1 | 1507 | 50663  | 2.00E-19  | 196  | 243  | 80 -  | 754 | 995  | 46593  | 46835  |
| UN12085 | Rsa1.0_00509.1 | 1023 | 78829  | 1.00E-131 | 256  | 262  | 97 -  | 84  | 345  | 77983  | 78244  |
| UN12086 | Rsa1.0_12119.1 | 963  | 5311   | 0         | 330  | 330  | 100 - | 633 | 962  | 4527   | 4856   |
| UN12087 | Rsa1.0_00715.1 | 950  | 67116  | 1.00E-176 | 317  | 318  | 99 -  | 600 | 917  | 23113  | 23430  |
| UN12088 | Rsa1.0_00196.1 | 933  | 109960 | 0         | 478  | 483  | 98 +  | 451 | 931  | 77908  | 78390  |



|         |                |      |        |           |      |      |       |     |      |        |        |
|---------|----------------|------|--------|-----------|------|------|-------|-----|------|--------|--------|
| UN12089 | Rsa1.0.02180.1 | 980  | 34176  | 1.00E-111 | 214  | 217  | 98 -  | 513 | 729  | 18478  | 18694  |
| UN12090 | Rsa1.0.00211.1 | 865  | 228189 | 0         | 433  | 433  | 100 - | 431 | 863  | 213042 | 213474 |
| UN12091 | Rsa1.0.00748.1 | 1588 | 65983  | 0         | 390  | 396  | 98 +  | 674 | 1069 | 52034  | 52429  |
| UN12092 | Rsa1.0.01220.1 | 1070 | 161775 | 1.00E-130 | 260  | 268  | 97 +  | 724 | 991  | 7326   | 7593   |
| UN12093 | Rsa1.0.41382.1 | 1035 | 543    | 1.00E-165 | 356  | 375  | 94 +  | 159 | 533  | 1      | 369    |
| UN12094 | Rsa1.0.00204.1 | 761  | 109056 | 1.00E-143 | 309  | 323  | 95 +  | 436 | 750  | 93161  | 93481  |
| UN12095 | Rsa1.0.00012.1 | 817  | 222148 | 1.00E-139 | 334  | 362  | 92 -  | 453 | 813  | 171062 | 171408 |
| UN12096 | Rsa1.0.03369.1 | 831  | 23381  | 1.00E-166 | 314  | 317  | 99 -  | 517 | 831  | 10375  | 10691  |
| UN12097 | Rsa1.0.00421.1 | 515  | 86365  | 1.00E-130 | 270  | 275  | 98 -  | 242 | 515  | 35834  | 36104  |
| UN12098 | Rsa1.0.01649.1 | 932  | 41624  | 1.00E-145 | 287  | 293  | 97 +  | 640 | 932  | 37920  | 38209  |
| UN12099 | Rsa1.0.03631.1 | 1417 | 21647  | 0         | 577  | 587  | 98 +  | 266 | 852  | 14431  | 15017  |
| UN12100 | Rsa1.0.00039.1 | 508  | 296927 | 6.00E-75  | 194  | 209  | 92 +  | 300 | 508  | 20208  | 20412  |
| UN12101 | Rsa1.0.00115.1 | 1126 | 131321 | 0         | 427  | 427  | 100 + | 436 | 862  | 104800 | 105226 |
| UN12102 | Rsa1.0.06417.1 | 1007 | 11056  | 1.00E-145 | 264  | 265  | 99 -  | 743 | 1007 | 10629  | 10893  |
| UN12103 | Rsa1.0.00361.1 | 837  | 91181  | 1.00E-116 | 245  | 253  | 96 +  | 363 | 615  | 9838   | 10088  |
| UN12104 | Rsa1.0.09709.1 | 1136 | 6198   | 0         | 419  | 420  | 99 -  | 56  | 475  | 1      | 420    |
| UN12105 | Rsa1.0.00070.1 | 808  | 150321 | 0         | 534  | 542  | 98 -  | 271 | 808  | 47733  | 48274  |
| UN12106 | Rsa1.0.00281.1 | 600  | 99908  | 0         | 591  | 598  | 98 +  | 3   | 600  | 47446  | 48042  |
| UN12107 | Rsa1.0.00417.1 | 1191 | 395068 | 0         | 378  | 387  | 97 -  | 805 | 1191 | 296239 | 296622 |
| UN12108 | Rsa1.0.02064.1 | 712  | 35476  | 8.00E-60  | 118  | 118  | 100 - | 531 | 648  | 8503   | 8620   |
| UN12109 | Rsa1.0.00156.1 | 767  | 118383 | 0         | 563  | 580  | 97 +  | 3   | 581  | 9522   | 10095  |
| UN12110 | Rsa1.0.03632.1 | 1069 | 21645  | 3.00E-94  | 179  | 180  | 99 +  | 106 | 285  | 7183   | 7362   |
| UN12111 | Rsa1.0.00027.1 | 1078 | 283362 | 0         | 385  | 385  | 100 + | 692 | 1076 | 275355 | 275739 |
| UN12112 | Rsa1.0.00017.1 | 924  | 752458 | 0         | 434  | 458  | 94 -  | 9   | 457  | 354538 | 354992 |
| UN12113 | Rsa1.0.01456.1 | 1111 | 45372  | 0         | 589  | 603  | 97 -  | 47  | 649  | 27459  | 28061  |
| UN12114 | Rsa1.0.03659.1 | 913  | 21525  | 0         | 881  | 912  | 96 +  | 2   | 913  | 11734  | 12643  |
| UN12115 | Rsa1.0.00190.1 | 850  | 318240 | 0         | 416  | 441  | 94 -  | 418 | 850  | 314346 | 314786 |
| UN12116 | Rsa1.0.00107.1 | 821  | 431659 | 3.00E-87  | 239  | 266  | 89 -  | 555 | 820  | 254234 | 254478 |
| UN12117 | Rsa1.0.01691.1 | 684  | 40921  | 1.00E-102 | 218  | 226  | 96 -  | 3   | 223  | 18956  | 19181  |
| UN12118 | Rsa1.0.00047.1 | 995  | 168582 | 0         | 652  | 682  | 95 -  | 317 | 994  | 108374 | 109049 |
| UN12119 | Rsa1.0.00208.1 | 784  | 108565 | 0         | 769  | 770  | 99 -  | 15  | 784  | 20188  | 20957  |
| UN12120 | Rsa1.0.06694.1 | 864  | 10526  | 0         | 469  | 475  | 98 -  | 375 | 848  | 3948   | 4422   |
| UN12121 | Rsa1.0.01719.1 | 1304 | 40388  | 0         | 1282 | 1309 | 97 -  | 1   | 1304 | 9373   | 10666  |
| UN12122 | Rsa1.0.01316.1 | 1375 | 48325  | 0         | 1370 | 1374 | 99 +  | 2   | 1375 | 21370  | 22743  |
| UN12123 | Rsa1.0.00418.1 | 1262 | 215377 | 1.00E-160 | 287  | 287  | 100 - | 7   | 293  | 47449  | 47735  |
| UN12124 | Rsa1.0.00351.1 | 837  | 413096 | 3.00E-90  | 280  | 297  | 94 -  | 58  | 354  | 133363 | 133644 |
| UN12125 | Rsa1.0.00055.1 | 526  | 520193 | 3.00E-15  | 83   | 95   | 87 +  | 402 | 495  | 180223 | 180317 |
| UN12126 | Rsa1.0.00363.1 | 1109 | 90968  | 0         | 327  | 328  | 99 +  | 782 | 1109 | 20089  | 20416  |
| UN12127 | Rsa1.0.02957.1 | 1467 | 26479  | 0         | 428  | 433  | 98 +  | 750 | 1182 | 26048  | 26479  |

|         |                |      |        |           |     |     |       |      |      |        |        |
|---------|----------------|------|--------|-----------|-----|-----|-------|------|------|--------|--------|
| UN12128 | Rsa1.0.05895.1 | 830  | 12305  | 1.00E-151 | 278 | 280 | 99 +  | 3    | 282  | 2192   | 2471   |
| UN12129 | Rsa1.0.00629.1 | 1222 | 71381  | 0         | 537 | 537 | 100 + | 686  | 1222 | 58787  | 59323  |
| UN12130 | Rsa1.0.00097.1 | 723  | 138858 | 0         | 352 | 352 | 100 + | 372  | 723  | 54312  | 54663  |
| UN12131 | Rsa1.0.01803.1 | 1637 | 173846 | 1.00E-128 | 270 | 282 | 95 +  | 1213 | 1494 | 34625  | 34906  |
| UN12132 | Rsa1.0.00074.1 | 1059 | 147591 | 7.00E-95  | 270 | 296 | 91 +  | 45   | 335  | 127846 | 128141 |
| UN12133 | Rsa1.0.01182.1 | 713  | 167304 | 1.00E-117 | 289 | 312 | 92 -  | 21   | 332  | 117900 | 118207 |
| UN12134 | Rsa1.0.69070.1 | 844  | 332    | 7.00E-82  | 155 | 155 | 100 - | 194  | 348  | 130    | 284    |
| UN12135 | Rsa1.0.02485.1 | 669  | 30968  | 1.00E-132 | 269 | 279 | 96 -  | 339  | 617  | 28448  | 28726  |
| UN12136 | Rsa1.0.03302.1 | 864  | 23898  | 5.00E-52  | 118 | 121 | 97 -  | 310  | 430  | 13234  | 13353  |
| UN12137 | Rsa1.0.04870.1 | 1374 | 135142 | 0         | 474 | 487 | 97 -  | 735  | 1220 | 1045   | 1531   |
| UN12138 | Rsa1.0.00370.1 | 829  | 90472  | 0         | 458 | 475 | 96 -  | 352  | 825  | 17870  | 18343  |
| UN12139 | Rsa1.0.00006.1 | 1131 | 396176 | 0         | 959 | 991 | 96 -  | 146  | 1131 | 385740 | 386727 |
| UN12140 | Rsa1.0.06955.1 | 848  | 10111  | 0         | 373 | 380 | 98 -  | 468  | 846  | 7311   | 7690   |
| UN12141 | Rsa1.0.00061.1 | 943  | 218685 | 0         | 454 | 457 | 99 +  | 4    | 460  | 176225 | 176681 |
| UN12142 | Rsa1.0.00035.1 | 1044 | 176449 | 0         | 889 | 924 | 96 -  | 3    | 926  | 167856 | 168766 |
| UN12143 | Rsa1.0.00727.1 | 1179 | 66724  | 0         | 591 | 605 | 97 +  | 1    | 602  | 5381   | 5979   |
| UN12144 | Rsa1.0.08879.1 | 546  | 6831   | 0         | 443 | 449 | 98 -  | 97   | 545  | 2182   | 2625   |
| UN12145 | Rsa1.0.00273.1 | 1093 | 326186 | 1.00E-107 | 207 | 210 | 98 -  | 328  | 537  | 132133 | 132342 |
| UN12146 | Rsa1.0.01061.1 | 458  | 55349  | 1.00E-137 | 267 | 272 | 98 -  | 188  | 458  | 27285  | 27556  |
| UN12147 | Rsa1.0.00175.1 | 913  | 166121 | 0         | 375 | 376 | 99 +  | 536  | 911  | 67110  | 67485  |
| UN12148 | Rsa1.0.05677.1 | 600  | 12968  | 0         | 591 | 599 | 98 -  | 2    | 600  | 6725   | 7323   |
| UN12149 | Rsa1.0.03740.1 | 1372 | 21065  | 0         | 364 | 369 | 98 +  | 3    | 371  | 15272  | 15640  |
| UN12150 | Rsa1.0.00048.1 | 787  | 167185 | 1.00E-141 | 254 | 254 | 100 + | 137  | 390  | 117771 | 118024 |
| UN12151 | Rsa1.0.01960.1 | 901  | 36766  | 2.00E-94  | 224 | 240 | 93 +  | 59   | 298  | 7984   | 8223   |
| UN12152 | Rsa1.0.01081.1 | 845  | 499226 | 1.00E-177 | 337 | 342 | 98 +  | 503  | 843  | 473293 | 473632 |
| UN12153 | Rsa1.0.00733.1 | 1371 | 66583  | 0         | 714 | 731 | 97 +  | 637  | 1366 | 47304  | 48033  |
| UN12154 | Rsa1.0.03263.1 | 836  | 24268  | 1.00E-108 | 223 | 231 | 96 -  | 606  | 836  | 3647   | 3877   |
| UN12155 | Rsa1.0.04428.1 | 596  | 17399  | 0         | 571 | 605 | 94 +  | 1    | 596  | 12969  | 13567  |
| UN12156 | Rsa1.0.00189.1 | 737  | 111830 | 1.00E-169 | 352 | 367 | 95 +  | 3    | 367  | 69237  | 69601  |
| UN12157 | Rsa1.0.01557.1 | 1002 | 43291  | 0         | 531 | 531 | 100 + | 470  | 1000 | 1053   | 1583   |
| UN12158 | Rsa1.0.00721.1 | 500  | 66918  | 0         | 468 | 483 | 96 +  | 2    | 480  | 59368  | 59844  |
| UN12159 | Rsa1.0.00223.1 | 770  | 106231 | 1.00E-174 | 378 | 394 | 95 +  | 147  | 540  | 2967   | 3355   |
| UN12160 | Rsa1.0.68929.1 | 1265 | 333    | 1.00E-121 | 285 | 304 | 93 -  | 475  | 776  | 1      | 303    |
| UN12161 | Rsa1.0.02067.1 | 824  | 35451  | 0         | 817 | 821 | 99 +  | 4    | 824  | 592    | 1411   |
| UN12162 | Rsa1.0.00507.1 | 722  | 79074  | 0         | 703 | 712 | 98 +  | 11   | 722  | 53468  | 54178  |
| UN12163 | Rsa1.0.00017.1 | 2160 | 752458 | 0         | 783 | 821 | 95 +  | 1353 | 2160 | 555179 | 555989 |
| UN12164 | Rsa1.0.01278.1 | 785  | 49370  | 8.00E-91  | 179 | 182 | 98 -  | 55   | 236  | 20617  | 20798  |
| UN12165 | Rsa1.0.00528.1 | 799  | 164755 | 1.00E-174 | 385 | 410 | 93 -  | 402  | 799  | 154833 | 155234 |
| UN12166 | Rsa1.0.00211.1 | 726  | 228189 | 0         | 672 | 685 | 98 -  | 4    | 684  | 6661   | 7345   |

|         |                |      |        |           |      |      |       |      |      |        |        |
|---------|----------------|------|--------|-----------|------|------|-------|------|------|--------|--------|
| UN12167 | Rsa1.0.00065.1 | 1031 | 454616 | 1.00E-151 | 280  | 283  | 98 +  | 3    | 285  | 114473 | 114755 |
| UN12168 | Rsa1.0.03263.1 | 857  | 24268  | 0         | 476  | 481  | 98 -  | 377  | 857  | 23594  | 24074  |
| UN12169 | Rsa1.0.00660.1 | 869  | 69688  | 0         | 862  | 867  | 99 -  | 3    | 869  | 39198  | 40064  |
| UN12170 | Rsa1.0.00030.1 | 825  | 250988 | 3.00E-72  | 142  | 143  | 99 +  | 297  | 439  | 174718 | 174860 |
| UN12171 | Rsa1.0.01219.1 | 957  | 50527  | 1.00E-158 | 319  | 331  | 96 +  | 81   | 411  | 39038  | 39368  |
| UN12172 | Rsa1.0.36118.1 | 1247 | 625    | 1.00E-155 | 290  | 294  | 98 +  | 614  | 907  | 3      | 296    |
| UN12173 | Rsa1.0.00629.1 | 910  | 71381  | 0         | 355  | 356  | 99 +  | 3    | 358  | 57277  | 57631  |
| UN12174 | Rsa1.0.05622.1 | 1437 | 13145  | 0         | 1369 | 1379 | 99 +  | 61   | 1437 | 8559   | 9935   |
| UN12175 | Rsa1.0.01168.1 | 845  | 153765 | 1.00E-12  | 63   | 71   | 88 -  | 316  | 386  | 7886   | 7956   |
| UN12176 | Rsa1.0.01954.1 | 907  | 145554 | 1.00E-178 | 330  | 333  | 99 -  | 575  | 907  | 17776  | 18107  |
| UN12177 | Rsa1.0.00485.1 | 1839 | 80937  | 1.00E-145 | 407  | 453  | 89 +  | 1200 | 1646 | 76412  | 76857  |
| UN12178 | Rsa1.0.16218.1 | 1002 | 2240   | 1.00E-169 | 326  | 332  | 98 -  | 309  | 636  | 750    | 1081   |
| UN12179 | Rsa1.0.00483.1 | 1155 | 81102  | 0         | 547  | 555  | 98 +  | 283  | 837  | 2359   | 2913   |
| UN12180 | Rsa1.0.01934.1 | 816  | 37162  | 2.00E-79  | 160  | 163  | 98 -  | 568  | 730  | 4026   | 4188   |
| UN12181 | Rsa1.0.00123.1 | 823  | 325650 | 2.00E-97  | 202  | 209  | 96 +  | 185  | 393  | 127544 | 127752 |
| UN12182 | Rsa1.0.06687.1 | 1345 | 10537  | 3.00E-45  | 221  | 267  | 82 -  | 752  | 1002 | 9902   | 10168  |
| UN12183 | Rsa1.0.05825.1 | 1617 | 12509  | 0         | 819  | 840  | 97 -  | 333  | 1171 | 7872   | 8701   |
| UN12184 | Rsa1.0.00999.1 | 1357 | 57162  | 2.33E-156 | 307  | 320  | 95 +  | 3    | 317  | 14218  | 14536  |
| UN12185 | Rsa1.0.14100.1 | 1106 | 3809   | 0         | 963  | 1010 | 95 -  | 26   | 1020 | 1147   | 2156   |
| UN12186 | Rsa1.0.03994.1 | 1331 | 19659  | 1.00E-173 | 315  | 317  | 99 +  | 1015 | 1331 | 1766   | 2082   |
| UN12187 | Rsa1.0.01766.1 | 1389 | 39617  | 1.00E-126 | 230  | 230  | 100 - | 2    | 231  | 32199  | 32428  |
| UN12188 | Rsa1.0.02937.1 | 814  | 26605  | 1.00E-140 | 262  | 265  | 98 +  | 239  | 503  | 7574   | 7838   |
| UN12189 | Rsa1.0.01377.1 | 1039 | 46967  | 1.00E-119 | 250  | 261  | 95 -  | 95   | 355  | 1262   | 1522   |
| UN12190 | Rsa1.0.01760.1 | 606  | 39730  | 0         | 597  | 612  | 97 -  | 3    | 603  | 27887  | 28498  |
| UN12191 | Rsa1.0.00640.1 | 1359 | 70979  | 0         | 1323 | 1389 | 95 -  | 1    | 1358 | 57774  | 59160  |
| UN12192 | Rsa1.0.13238.1 | 704  | 4960   | 0         | 401  | 416  | 96 +  | 297  | 704  | 2273   | 2685   |
| UN12193 | Rsa1.0.01094.1 | 1012 | 167285 | 0         | 580  | 598  | 96 +  | 403  | 994  | 49222  | 49819  |
| UN12194 | Rsa1.0.05428.1 | 841  | 13789  | 0         | 479  | 495  | 96 -  | 2    | 496  | 3394   | 3888   |
| UN12195 | Rsa1.0.06571.1 | 814  | 10750  | 1.00E-105 | 248  | 265  | 93 +  | 550  | 813  | 6156   | 6414   |
| UN12196 | Rsa1.0.00679.1 | 1008 | 68971  | 0         | 997  | 1005 | 99 -  | 4    | 1008 | 601    | 1605   |
| UN12197 | Rsa1.0.01302.1 | 815  | 48907  | 0         | 521  | 534  | 97 +  | 15   | 547  | 47056  | 47586  |
| UN12198 | Rsa1.0.01989.1 | 259  | 36439  | 1.00E-102 | 231  | 245  | 94 -  | 14   | 258  | 14985  | 15229  |
| UN12199 | Rsa1.0.01803.1 | 835  | 173846 | 0         | 409  | 410  | 99 +  | 423  | 832  | 31871  | 32280  |
| UN12200 | Rsa1.0.00080.1 | 985  | 190437 | 1.00E-80  | 192  | 204  | 94 +  | 622  | 818  | 65815  | 66018  |
| UN12201 | Rsa1.0.00186.1 | 758  | 112669 | 0         | 556  | 567  | 98 +  | 183  | 744  | 110485 | 111051 |
| UN12202 | Rsa1.0.00121.1 | 844  | 278029 | 0         | 335  | 338  | 99 +  | 3    | 338  | 30090  | 30427  |
| UN12203 | Rsa1.0.00826.1 | 1134 | 166736 | 0         | 388  | 392  | 98 -  | 318  | 709  | 131985 | 132375 |
| UN12204 | Rsa1.0.49724.1 | 958  | 456    | 1.00E-145 | 268  | 270  | 99 -  | 656  | 925  | 1      | 270    |
| UN12205 | Rsa1.0.00211.1 | 696  | 228189 | 1.00E-73  | 150  | 153  | 98 -  | 476  | 628  | 17865  | 18017  |

|         |                |      |        |           |      |      |       |     |      |        |        |
|---------|----------------|------|--------|-----------|------|------|-------|-----|------|--------|--------|
| UN12206 | Rsa1.0.00630.1 | 1153 | 71281  | 0         | 692  | 729  | 94 +  | 18  | 732  | 20912  | 21638  |
| UN12207 | Rsa1.0.15089.1 | 799  | 2840   | 0         | 644  | 677  | 95 -  | 19  | 692  | 308    | 981    |
| UN12208 | Rsa1.0.01773.1 | 1136 | 39546  | 0         | 443  | 454  | 97 +  | 683 | 1136 | 18314  | 18763  |
| UN12209 | Rsa1.0.00843.1 | 798  | 62411  | 3.00E-87  | 176  | 180  | 97 -  | 373 | 552  | 56484  | 56663  |
| UN12210 | Rsa1.0.02064.1 | 763  | 35476  | 1.00E-120 | 247  | 256  | 96 -  | 456 | 711  | 5542   | 5797   |
| UN12211 | Rsa1.0.18368.1 | 1149 | 1614   | 0         | 830  | 859  | 96 -  | 291 | 1149 | 762    | 1614   |
| UN12212 | Rsa1.0.00990.1 | 1403 | 57445  | 0         | 421  | 440  | 95 +  | 3   | 442  | 19531  | 19967  |
| UN12213 | Rsa1.0.00285.1 | 845  | 149638 | 1.00E-113 | 229  | 236  | 97 -  | 260 | 495  | 148538 | 148773 |
| UN12214 | Rsa1.0.00380.1 | 808  | 89748  | 1.00E-138 | 252  | 253  | 99 -  | 210 | 462  | 78451  | 78703  |
| UN12215 | Rsa1.0.11565.1 | 1234 | 5470   | 1.00E-129 | 262  | 270  | 97 +  | 807 | 1075 | 467    | 736    |
| UN12216 | Rsa1.0.01884.1 | 787  | 37659  | 1.00E-157 | 323  | 337  | 95 -  | 3   | 339  | 16441  | 16777  |
| UN12217 | Rsa1.0.00218.1 | 1191 | 201480 | 1.00E-144 | 289  | 299  | 96 +  | 453 | 751  | 179386 | 179684 |
| UN12218 | Rsa1.0.04322.1 | 1288 | 17917  | 0         | 487  | 493  | 98 +  | 3   | 495  | 7519   | 8011   |
| UN12219 | Rsa1.0.03524.1 | 1379 | 22297  | 0         | 855  | 887  | 96 -  | 319 | 1191 | 14069  | 14952  |
| UN12220 | Rsa1.0.04995.1 | 806  | 15199  | 0         | 669  | 672  | 99 -  | 135 | 805  | 8404   | 9075   |
| UN12221 | Rsa1.0.00110.1 | 794  | 132719 | 6.00E-73  | 149  | 152  | 98 +  | 505 | 656  | 4053   | 4204   |
| UN12222 | Rsa1.0.00670.1 | 802  | 69371  | 0         | 578  | 589  | 98 +  | 218 | 802  | 44010  | 44596  |
| UN12223 | Rsa1.0.00360.1 | 809  | 91190  | 1.00E-170 | 303  | 303  | 100 - | 6   | 308  | 78998  | 79300  |
| UN12224 | Rsa1.0.00529.1 | 793  | 77487  | 1.00E-177 | 418  | 452  | 92 +  | 3   | 448  | 72563  | 73001  |
| UN12225 | Rsa1.0.00360.1 | 894  | 91190  | 1.00E-138 | 290  | 301  | 96 +  | 595 | 894  | 71408  | 71707  |
| UN12226 | Rsa1.0.05108.1 | 1080 | 14820  | 1.00E-124 | 226  | 226  | 100 + | 40  | 265  | 13721  | 13946  |
| UN12227 | Rsa1.0.02269.1 | 1456 | 33168  | 1.00E-134 | 285  | 300  | 95 +  | 3   | 302  | 174    | 460    |
| UN12228 | Rsa1.0.00321.1 | 1000 | 95671  | 0         | 887  | 902  | 98 +  | 2   | 903  | 92674  | 93575  |
| UN12229 | Rsa1.0.05652.1 | 833  | 13043  | 0         | 352  | 355  | 99 +  | 478 | 832  | 2619   | 2972   |
| UN12230 | Rsa1.0.00016.1 | 1198 | 831256 | 0         | 376  | 377  | 99 +  | 233 | 609  | 428642 | 429018 |
| UN12231 | Rsa1.0.09002.1 | 1221 | 137863 | 0         | 751  | 773  | 97 -  | 3   | 766  | 4266   | 5035   |
| UN12232 | Rsa1.0.02762.1 | 1176 | 28146  | 1.00E-156 | 300  | 306  | 98 +  | 836 | 1138 | 8443   | 8748   |
| UN12233 | Rsa1.0.00373.1 | 1105 | 90296  | 1.00E-119 | 317  | 350  | 90 +  | 639 | 988  | 71492  | 71841  |
| UN12234 | Rsa1.0.02599.1 | 1024 | 29660  | 0         | 630  | 631  | 99 +  | 392 | 1022 | 4089   | 4719   |
| UN12235 | Rsa1.0.03624.1 | 770  | 21706  | 1.00E-77  | 160  | 164  | 97 +  | 106 | 269  | 2146   | 2309   |
| UN12236 | Rsa1.0.05105.1 | 1285 | 14833  | 0         | 710  | 745  | 95 +  | 3   | 741  | 3014   | 3758   |
| UN12237 | Rsa1.0.00131.1 | 771  | 432233 | 1.00E-129 | 269  | 282  | 95 +  | 3   | 284  | 286431 | 286703 |
| UN12238 | Rsa1.0.15191.1 | 1113 | 2770   | 0         | 1100 | 1115 | 98 -  | 1   | 1112 | 754    | 1866   |
| UN12239 | Rsa1.0.00378.1 | 815  | 89892  | 0         | 525  | 529  | 99 +  | 3   | 531  | 49538  | 50066  |
| UN12240 | Rsa1.0.01468.1 | 956  | 45146  | 0         | 825  | 925  | 89 -  | 2   | 925  | 23938  | 24862  |
| UN12241 | Rsa1.0.02593.1 | 849  | 29744  | 0         | 352  | 353  | 99 +  | 3   | 355  | 12031  | 12383  |
| UN12242 | Rsa1.0.18627.1 | 1317 | 1562   | 0         | 403  | 414  | 97 +  | 2   | 415  | 762    | 1175   |
| UN12243 | Rsa1.0.07091.1 | 911  | 9907   | 1.00E-147 | 264  | 264  | 100 - | 636 | 899  | 1      | 264    |
| UN12244 | Rsa1.0.00016.1 | 979  | 831256 | 0         | 349  | 351  | 99 +  | 629 | 979  | 521825 | 522175 |

|         |                |      |        |           |      |      |       |      |      |        |        |
|---------|----------------|------|--------|-----------|------|------|-------|------|------|--------|--------|
| UN12245 | Rsa1.0.00826.1 | 877  | 166736 | 0         | 870  | 874  | 99 -  | 3    | 875  | 118793 | 119666 |
| UN12246 | Rsa1.0.04027.1 | 676  | 19501  | 0         | 650  | 661  | 98 -  | 16   | 672  | 4294   | 4954   |
| UN12247 | Rsa1.0.00204.1 | 839  | 109056 | 0         | 781  | 817  | 95 +  | 2    | 817  | 104806 | 105622 |
| UN12248 | Rsa1.0.04419.1 | 999  | 17430  | 1.00E-122 | 309  | 333  | 92 +  | 672  | 999  | 9661   | 9987   |
| UN12249 | Rsa1.0.08045.1 | 1342 | 8014   | 1.00E-180 | 336  | 340  | 98 -  | 1004 | 1342 | 4997   | 5336   |
| UN12250 | Rsa1.0.01625.1 | 939  | 42019  | 0         | 928  | 937  | 99 -  | 3    | 939  | 29702  | 30637  |
| UN12251 | Rsa1.0.02383.1 | 975  | 31931  | 1.00E-162 | 356  | 378  | 94 -  | 601  | 969  | 15501  | 15878  |
| UN12252 | Rsa1.0.00021.1 | 1036 | 263655 | 0         | 360  | 363  | 99 -  | 248  | 610  | 238507 | 238869 |
| UN12253 | Rsa1.0.01462.1 | 570  | 45231  | 1.00E-162 | 311  | 318  | 97 +  | 253  | 570  | 18126  | 18443  |
| UN12254 | Rsa1.0.07845.1 | 436  | 8434   | 7.00E-99  | 219  | 231  | 94 -  | 165  | 395  | 6337   | 6567   |
| UN12255 | Rsa1.0.21254.1 | 557  | 1221   | 1.00E-107 | 247  | 265  | 93 -  | 3    | 267  | 1      | 250    |
| UN12256 | Rsa1.0.00328.1 | 856  | 224661 | 1.00E-180 | 344  | 350  | 98 +  | 507  | 855  | 201619 | 201965 |
| UN12257 | Rsa1.0.00744.1 | 1080 | 66084  | 0         | 453  | 471  | 96 -  | 610  | 1080 | 38777  | 39247  |
| UN12258 | Rsa1.0.00341.1 | 790  | 249309 | 0         | 346  | 352  | 98 +  | 17   | 367  | 177596 | 177947 |
| UN12259 | Rsa1.0.03981.1 | 765  | 19724  | 1.00E-110 | 221  | 227  | 97 -  | 265  | 491  | 19277  | 19503  |
| UN12260 | Rsa1.0.00539.1 | 1673 | 76926  | 1.00E-141 | 291  | 301  | 96 +  | 1374 | 1673 | 28381  | 28678  |
| UN12261 | Rsa1.0.05401.1 | 1369 | 13876  | 0         | 1041 | 1110 | 93 +  | 280  | 1369 | 1410   | 2514   |
| UN12262 | Rsa1.0.00025.1 | 1554 | 277312 | 0         | 617  | 637  | 96 -  | 813  | 1444 | 17828  | 18461  |
| UN12263 | Rsa1.0.00248.1 | 1390 | 163568 | 0         | 575  | 591  | 97 -  | 315  | 905  | 42447  | 43037  |
| UN12264 | Rsa1.0.14188.1 | 1325 | 3685   | 1.00E-129 | 244  | 246  | 99 -  | 1075 | 1319 | 3148   | 3393   |
| UN12265 | Rsa1.0.02597.1 | 857  | 29694  | 0         | 365  | 370  | 98 -  | 169  | 538  | 10697  | 11066  |
| UN12266 | Rsa1.0.00322.1 | 585  | 212233 | 4.00E-89  | 167  | 167  | 100 - | 22   | 188  | 83613  | 83779  |
| UN12267 | Rsa1.0.01958.1 | 1139 | 261128 | 1.00E-169 | 346  | 362  | 95 -  | 398  | 759  | 119970 | 120323 |
| UN12268 | Rsa1.0.01389.1 | 1050 | 46716  | 0         | 378  | 393  | 96 +  | 6    | 398  | 9773   | 10165  |
| UN12269 | Rsa1.0.08334.1 | 1048 | 7525   | 0         | 825  | 873  | 94 +  | 182  | 1048 | 1833   | 2693   |
| UN12270 | Rsa1.0.00017.1 | 855  | 752458 | 0         | 353  | 358  | 98 +  | 499  | 855  | 206408 | 206765 |
| UN12271 | Rsa1.0.04418.1 | 1169 | 17434  | 2.00E-76  | 255  | 293  | 87 +  | 795  | 1082 | 13307  | 13574  |
| UN12272 | Rsa1.0.07600.1 | 720  | 9052   | 2.00E-42  | 104  | 109  | 95 -  | 327  | 435  | 2941   | 3049   |
| UN12273 | Rsa1.0.00091.1 | 1094 | 139699 | 0         | 768  | 772  | 99 -  | 1    | 772  | 85481  | 86251  |
| UN12274 | Rsa1.0.01041.1 | 1283 | 55910  | 0         | 653  | 658  | 99 -  | 113  | 770  | 35356  | 36012  |
| UN12275 | Rsa1.0.03427.1 | 1294 | 22992  | 0         | 956  | 977  | 97 +  | 2    | 971  | 22016  | 22992  |
| UN12276 | Rsa1.0.00293.1 | 642  | 339294 | 1.00E-163 | 304  | 307  | 99 -  | 336  | 642  | 329554 | 329859 |
| UN12277 | Rsa1.0.01338.1 | 1151 | 155644 | 0         | 586  | 588  | 99 -  | 1    | 588  | 134305 | 134892 |
| UN12278 | Rsa1.0.00744.1 | 1049 | 66084  | 1.00E-115 | 293  | 317  | 92 -  | 737  | 1047 | 57794  | 58101  |
| UN12279 | Rsa1.0.13708.1 | 1009 | 4447   | 1.00E-167 | 299  | 299  | 100 - | 710  | 1008 | 3599   | 3897   |
| UN12280 | Rsa1.0.01298.1 | 712  | 48999  | 0         | 400  | 411  | 97 +  | 3    | 412  | 24192  | 24598  |
| UN12281 | Rsa1.0.01059.1 | 738  | 55410  | 0         | 707  | 738  | 95 -  | 2    | 738  | 28315  | 29043  |
| UN12282 | Rsa1.0.02219.1 | 763  | 33798  | 0         | 729  | 758  | 96 +  | 7    | 762  | 21464  | 22220  |
| UN12283 | Rsa1.0.00110.1 | 975  | 132719 | 0         | 732  | 748  | 97 +  | 3    | 748  | 96935  | 97674  |

|         |                |      |        |           |     |     |       |     |      |        |        |
|---------|----------------|------|--------|-----------|-----|-----|-------|-----|------|--------|--------|
| UN12284 | Rsa1.0.01048.1 | 1035 | 55684  | 0         | 379 | 379 | 100 + | 655 | 1033 | 46755  | 47133  |
| UN12285 | Rsa1.0.00642.1 | 860  | 201230 | 0         | 600 | 603 | 99 -  | 258 | 860  | 21306  | 21908  |
| UN12286 | Rsa1.0.01119.1 | 961  | 53459  | 1.00E-164 | 305 | 309 | 98 -  | 653 | 961  | 12720  | 13028  |
| UN12287 | Rsa1.0.03238.1 | 748  | 24432  | 1.00E-137 | 259 | 263 | 98 -  | 482 | 744  | 12785  | 13047  |
| UN12288 | Rsa1.0.00953.1 | 1325 | 145012 | 0         | 478 | 499 | 95 +  | 825 | 1323 | 12362  | 12851  |
| UN12289 | Rsa1.0.02139.1 | 1614 | 34686  | 0         | 645 | 672 | 95 -  | 3   | 671  | 26074  | 26736  |
| UN12290 | Rsa1.0.03786.1 | 1071 | 20879  | 0         | 893 | 933 | 95 -  | 2   | 932  | 7289   | 8218   |
| UN12291 | Rsa1.0.06061.1 | 920  | 11837  | 0         | 689 | 703 | 98 -  | 219 | 918  | 3206   | 3902   |
| UN12292 | Rsa1.0.04714.1 | 944  | 146738 | 0         | 407 | 420 | 96 +  | 513 | 928  | 139509 | 139928 |
| UN12293 | Rsa1.0.00367.1 | 544  | 90750  | 0         | 525 | 559 | 93 +  | 1   | 544  | 3323   | 3881   |
| UN12294 | Rsa1.0.00990.1 | 725  | 57445  | 0         | 549 | 554 | 99 -  | 80  | 633  | 46214  | 46765  |
| UN12295 | Rsa1.0.01949.1 | 777  | 36960  | 1.00E-67  | 152 | 159 | 95 -  | 30  | 188  | 26254  | 26412  |
| UN12296 | Rsa1.0.05661.1 | 1089 | 13011  | 0         | 680 | 681 | 99 -  | 3   | 683  | 6577   | 7257   |
| UN12297 | Rsa1.0.00672.1 | 803  | 69358  | 1.00E-135 | 300 | 316 | 94 -  | 378 | 691  | 40409  | 40724  |
| UN12298 | Rsa1.0.34075.1 | 783  | 665    | 0         | 464 | 470 | 98 -  | 3   | 472  | 9      | 478    |
| UN12299 | Rsa1.0.00147.1 | 1232 | 249503 | 0         | 575 | 585 | 98 +  | 1   | 583  | 148899 | 149483 |
| UN12300 | Rsa1.0.00028.1 | 893  | 293984 | 0         | 851 | 901 | 94 -  | 8   | 893  | 131879 | 132778 |
| UN12301 | Rsa1.0.00915.1 | 537  | 194446 | 0         | 535 | 538 | 99 +  | 2   | 537  | 44030  | 44566  |
| UN12302 | Rsa1.0.13478.1 | 884  | 4790   | 0         | 336 | 336 | 100 + | 3   | 338  | 4455   | 4790   |
| UN12303 | Rsa1.0.00118.1 | 850  | 130637 | 0         | 564 | 598 | 94 +  | 1   | 598  | 98363  | 98945  |
| UN12304 | Rsa1.0.02365.1 | 796  | 32118  | 1.00E-132 | 245 | 247 | 99 -  | 327 | 573  | 29954  | 30200  |
| UN12305 | Rsa1.0.00013.1 | 1055 | 292129 | 1.00E-157 | 313 | 321 | 97 +  | 733 | 1052 | 236612 | 236931 |
| UN12306 | Rsa1.0.02179.1 | 737  | 34188  | 0         | 717 | 736 | 97 +  | 2   | 737  | 18828  | 19561  |
| UN12307 | Rsa1.0.00387.1 | 912  | 495407 | 0         | 334 | 335 | 99 -  | 3   | 337  | 342905 | 343239 |
| UN12308 | Rsa1.0.00661.1 | 1402 | 213041 | 1.00E-130 | 259 | 266 | 97 -  | 842 | 1104 | 200599 | 200864 |
| UN12309 | Rsa1.0.00476.1 | 1043 | 280966 | 0         | 529 | 587 | 90 +  | 457 | 1037 | 163758 | 164336 |
| UN12310 | Rsa1.0.00428.1 | 1184 | 85599  | 0         | 562 | 590 | 95 -  | 22  | 611  | 31030  | 31616  |
| UN12311 | Rsa1.0.00791.1 | 1022 | 64201  | 1.00E-157 | 281 | 281 | 100 + | 740 | 1020 | 55181  | 55461  |
| UN12312 | Rsa1.0.06009.1 | 995  | 11950  | 1.00E-77  | 157 | 160 | 98 +  | 836 | 995  | 3391   | 3550   |
| UN12313 | Rsa1.0.00350.1 | 1085 | 92346  | 2.00E-82  | 162 | 164 | 98 -  | 619 | 782  | 79954  | 80117  |
| UN12314 | Rsa1.0.01219.1 | 963  | 50527  | 0         | 366 | 375 | 97 -  | 3   | 377  | 5476   | 5850   |
| UN12315 | Rsa1.0.00985.1 | 1352 | 161950 | 0         | 551 | 552 | 99 +  | 1   | 551  | 141766 | 142317 |
| UN12316 | Rsa1.0.01632.1 | 963  | 181224 | 1.00E-156 | 349 | 375 | 93 -  | 36  | 407  | 7459   | 7812   |
| UN12317 | Rsa1.0.01121.1 | 826  | 53407  | 1.00E-173 | 329 | 336 | 97 -  | 2   | 337  | 30379  | 30714  |
| UN12318 | Rsa1.0.00203.1 | 981  | 109129 | 0         | 383 | 395 | 96 -  | 3   | 397  | 26020  | 26413  |
| UN12319 | Rsa1.0.01668.1 | 882  | 41299  | 0         | 533 | 545 | 97 +  | 339 | 882  | 30426  | 30969  |
| UN12320 | Rsa1.0.00416.1 | 1339 | 86772  | 0         | 494 | 520 | 95 +  | 299 | 812  | 64686  | 65205  |
| UN12321 | Rsa1.0.23217.1 | 529  | 1064   | 1.00E-149 | 301 | 309 | 97 -  | 226 | 529  | 660    | 968    |
| UN12322 | Rsa1.0.00931.1 | 828  | 59210  | 0         | 464 | 484 | 95 -  | 127 | 610  | 19424  | 19895  |

|         |                |      |        |           |      |      |       |     |      |        |        |
|---------|----------------|------|--------|-----------|------|------|-------|-----|------|--------|--------|
| UN12323 | Rsa1.0.02202.1 | 1140 | 33961  | 0         | 484  | 487  | 99 +  | 654 | 1140 | 30950  | 31436  |
| UN12324 | Rsa1.0.00069.1 | 1275 | 403561 | 0         | 809  | 810  | 99 +  | 3   | 811  | 234604 | 235413 |
| UN12325 | Rsa1.0.04340.1 | 851  | 17831  | 1.00E-141 | 360  | 397  | 90 +  | 449 | 843  | 16410  | 16788  |
| UN12326 | Rsa1.0.00234.1 | 1101 | 197060 | 0         | 1085 | 1101 | 98 +  | 1   | 1101 | 55622  | 56722  |
| UN12327 | Rsa1.0.00019.1 | 1555 | 301669 | 1.00E-171 | 509  | 580  | 87 -  | 508 | 1069 | 56894  | 57432  |
| UN12328 | Rsa1.0.02197.1 | 743  | 33996  | 1.00E-102 | 201  | 205  | 98 +  | 287 | 491  | 4504   | 4708   |
| UN12329 | Rsa1.0.00784.1 | 1002 | 64359  | 0         | 489  | 492  | 99 +  | 3   | 494  | 36301  | 36792  |
| UN12330 | Rsa1.0.22545.1 | 934  | 1111   | 0         | 667  | 690  | 96 +  | 254 | 934  | 186    | 875    |
| UN12331 | Rsa1.0.00959.1 | 810  | 58202  | 5.00E-86  | 210  | 227  | 92 -  | 584 | 810  | 41528  | 41746  |
| UN12332 | Rsa1.0.01828.1 | 915  | 38681  | 0         | 901  | 914  | 98 +  | 2   | 915  | 6815   | 7727   |
| UN12333 | Rsa1.0.07541.1 | 776  | 9167   | 0         | 642  | 660  | 97 -  | 105 | 757  | 2424   | 3083   |
| UN12334 | Rsa1.0.00098.1 | 498  | 349239 | 0         | 489  | 498  | 98 -  | 1   | 498  | 115012 | 115509 |
| UN12335 | Rsa1.0.00184.1 | 325  | 218748 | 1.00E-145 | 306  | 321  | 95 +  | 1   | 321  | 2851   | 3171   |
| UN12336 | Rsa1.0.01205.1 | 1279 | 50795  | 0         | 690  | 698  | 98 +  | 580 | 1277 | 7529   | 8226   |
| UN12337 | Rsa1.0.01109.1 | 824  | 53793  | 0         | 576  | 580  | 99 +  | 3   | 582  | 50195  | 50774  |
| UN12338 | Rsa1.0.01460.1 | 1412 | 45255  | 0         | 661  | 679  | 97 +  | 1   | 676  | 34248  | 34925  |
| UN12339 | Rsa1.0.04194.1 | 820  | 132734 | 1.00E-149 | 286  | 292  | 97 +  | 528 | 819  | 132027 | 132318 |
| UN12340 | Rsa1.0.01174.1 | 792  | 51696  | 0         | 519  | 529  | 98 -  | 96  | 624  | 12826  | 13354  |
| UN12341 | Rsa1.0.01769.1 | 1296 | 39568  | 1.00E-100 | 228  | 242  | 94 +  | 903 | 1144 | 33607  | 33848  |
| UN12342 | Rsa1.0.00461.1 | 523  | 82509  | 3.00E-86  | 201  | 210  | 95 -  | 315 | 523  | 76296  | 76503  |
| UN12343 | Rsa1.0.01578.1 | 580  | 42880  | 1.00E-132 | 261  | 267  | 97 -  | 2   | 267  | 35273  | 35539  |
| UN12344 | Rsa1.0.01199.1 | 675  | 163576 | 1.00E-148 | 266  | 266  | 100 + | 62  | 327  | 589    | 854    |
| UN12345 | Rsa1.0.01536.1 | 900  | 43747  | 0         | 421  | 429  | 98 +  | 2   | 430  | 5549   | 5976   |
| UN12346 | Rsa1.0.00417.1 | 1408 | 395068 | 0         | 441  | 458  | 96 +  | 89  | 546  | 296178 | 296624 |
| UN12347 | Rsa1.0.00484.1 | 730  | 203294 | 3.00E-90  | 187  | 193  | 96 -  | 1   | 193  | 63056  | 63248  |
| UN12348 | Rsa1.0.06149.1 | 620  | 11615  | 1.00E-110 | 237  | 246  | 96 -  | 5   | 248  | 6788   | 7032   |
| UN12349 | Rsa1.0.04209.1 | 664  | 18442  | 0         | 566  | 584  | 96 +  | 1   | 583  | 12890  | 13465  |
| UN12350 | Rsa1.0.00122.1 | 951  | 265937 | 0         | 464  | 465  | 99 -  | 1   | 465  | 239713 | 240177 |
| UN12351 | Rsa1.0.01067.1 | 741  | 55230  | 7.00E-85  | 163  | 164  | 99 +  | 578 | 741  | 6328   | 6491   |
| UN12352 | Rsa1.0.00326.1 | 967  | 171955 | 0         | 381  | 394  | 96 +  | 1   | 384  | 21074  | 21467  |
| UN12353 | Rsa1.0.00727.1 | 653  | 66724  | 1.00E-112 | 278  | 296  | 93 +  | 2   | 287  | 14947  | 15240  |
| UN12354 | Rsa1.0.00321.1 | 768  | 95671  | 0         | 429  | 452  | 94 -  | 3   | 451  | 21420  | 21870  |
| UN12355 | Rsa1.0.08790.1 | 1466 | 6918   | 0         | 507  | 531  | 95 -  | 628 | 1151 | 4948   | 5478   |
| UN12356 | Rsa1.0.06133.1 | 902  | 11663  | 0         | 761  | 762  | 99 -  | 2   | 763  | 9464   | 10225  |
| UN12357 | Rsa1.0.00727.1 | 761  | 66724  | 0         | 484  | 504  | 96 -  | 2   | 503  | 6587   | 7090   |
| UN12358 | Rsa1.0.01561.1 | 604  | 43227  | 1.00E-164 | 305  | 309  | 98 -  | 296 | 604  | 36891  | 37199  |
| UN12359 | Rsa1.0.00020.1 | 886  | 283099 | 0         | 873  | 884  | 98 +  | 3   | 886  | 100023 | 100903 |
| UN12360 | Rsa1.0.00384.1 | 1324 | 89278  | 2.33E-156 | 293  | 302  | 97 -  | 4   | 303  | 35218  | 35519  |
| UN12361 | Rsa1.0.00722.1 | 773  | 66840  | 0         | 754  | 763  | 98 -  | 5   | 767  | 23819  | 24580  |

|         |                |      |        |           |     |     |       |      |      |        |        |
|---------|----------------|------|--------|-----------|-----|-----|-------|------|------|--------|--------|
| UN12362 | Rsa1.0_00763.1 | 808  | 65121  | 0         | 664 | 696 | 95 +  | 1    | 689  | 59130  | 59818  |
| UN12363 | Rsa1.0_00248.1 | 1492 | 163568 | 0         | 675 | 676 | 99 -  | 3    | 678  | 2319   | 2994   |
| UN12364 | Rsa1.0_06045.1 | 912  | 11858  | 0         | 907 | 917 | 98 -  | 1    | 911  | 3496   | 4410   |
| UN12365 | Rsa1.0_00733.1 | 1230 | 66583  | 0         | 715 | 735 | 97 -  | 43   | 777  | 47304  | 48034  |
| UN12366 | Rsa1.0_00621.1 | 809  | 71840  | 0         | 407 | 412 | 98 -  | 1    | 412  | 26851  | 27258  |
| UN12367 | Rsa1.0_02341.1 | 1453 | 32387  | 1.00E-114 | 281 | 302 | 93 -  | 1163 | 1453 | 31192  | 31492  |
| UN12368 | Rsa1.0_01036.1 | 782  | 55978  | 1.00E-168 | 299 | 299 | 100 + | 482  | 780  | 13317  | 13615  |
| UN12369 | Rsa1.0_01847.1 | 1273 | 38346  | 1.00E-121 | 227 | 229 | 99 -  | 649  | 877  | 8990   | 9218   |
| UN12370 | Rsa1.0_00275.1 | 1365 | 210104 | 1.00E-154 | 325 | 339 | 95 -  | 1    | 338  | 178612 | 178947 |
| UN12371 | Rsa1.0_02266.1 | 1582 | 33195  | 1.00E-117 | 236 | 243 | 97 +  | 1145 | 1387 | 13176  | 13418  |
| UN12372 | Rsa1.0_02229.1 | 1402 | 33672  | 0         | 408 | 420 | 97 -  | 980  | 1399 | 12887  | 13303  |
| UN12373 | Rsa1.0_00060.1 | 1164 | 502678 | 1.00E-177 | 370 | 385 | 96 -  | 6    | 385  | 495990 | 496374 |
| UN12374 | Rsa1.0_07541.1 | 936  | 9167   | 0         | 921 | 940 | 97 +  | 2    | 936  | 1610   | 2549   |
| UN12375 | Rsa1.0_00301.1 | 679  | 365315 | 0         | 661 | 672 | 98 +  | 12   | 678  | 320804 | 321475 |
| UN12376 | Rsa1.0_03122.1 | 1360 | 25207  | 0         | 464 | 465 | 99 +  | 3    | 467  | 9395   | 9859   |
| UN12377 | Rsa1.0_01154.1 | 289  | 52249  | 1.00E-138 | 279 | 289 | 96 +  | 1    | 289  | 9044   | 9332   |
| UN12378 | Rsa1.0_00040.1 | 752  | 324196 | 1.00E-137 | 248 | 248 | 100 - | 1    | 248  | 245385 | 245632 |
| UN12379 | Rsa1.0_19744.1 | 924  | 1389   | 1.00E-108 | 209 | 211 | 99 +  | 714  | 924  | 1179   | 1388   |
| UN12380 | Rsa1.0_15089.1 | 650  | 2840   | 1.00E-159 | 315 | 325 | 96 +  | 326  | 650  | 303    | 627    |
| UN12381 | Rsa1.0_00642.1 | 965  | 201230 | 1.00E-133 | 271 | 279 | 97 +  | 107  | 382  | 162621 | 162898 |
| UN12382 | Rsa1.0_21156.1 | 1265 | 1230   | 0         | 431 | 437 | 98 +  | 825  | 1259 | 1      | 437    |
| UN12383 | Rsa1.0_02064.1 | 1127 | 35476  | 1.00E-151 | 316 | 332 | 95 +  | 312  | 634  | 5466   | 5797   |
| UN12384 | Rsa1.0_00131.1 | 1096 | 432233 | 1.00E-142 | 262 | 264 | 99 -  | 831  | 1094 | 286440 | 286703 |
| UN12385 | Rsa1.0_03191.1 | 1047 | 145762 | 1.00E-151 | 308 | 320 | 96 +  | 727  | 1046 | 135086 | 135405 |
| UN12386 | Rsa1.0_02921.1 | 878  | 26779  | 1.00E-158 | 331 | 343 | 96 -  | 3    | 339  | 22561  | 22901  |
| UN12387 | Rsa1.0_01474.1 | 1057 | 45070  | 1.00E-178 | 414 | 441 | 93 +  | 214  | 649  | 165    | 601    |
| UN12388 | Rsa1.0_00124.1 | 580  | 262503 | 4.00E-89  | 185 | 191 | 96 +  | 363  | 553  | 17080  | 17270  |
| UN12389 | Rsa1.0_00093.1 | 1225 | 214962 | 0         | 408 | 408 | 100 + | 815  | 1222 | 97155  | 97562  |
| UN12390 | Rsa1.0_06179.1 | 966  | 11548  | 0         | 496 | 497 | 99 +  | 60   | 556  | 8510   | 9006   |
| UN12391 | Rsa1.0_07555.1 | 745  | 9139   | 1.00E-61  | 269 | 318 | 84 +  | 441  | 743  | 4836   | 5144   |
| UN12392 | Rsa1.0_05398.1 | 483  | 13885  | 0         | 412 | 412 | 100 - | 2    | 413  | 12820  | 13231  |
| UN12393 | Rsa1.0_08192.1 | 972  | 7762   | 0         | 352 | 355 | 99 +  | 617  | 970  | 6351   | 6705   |
| UN12394 | Rsa1.0_01884.1 | 896  | 37659  | 0         | 478 | 490 | 97 +  | 1    | 490  | 14498  | 14986  |
| UN12395 | Rsa1.0_00571.1 | 1194 | 329018 | 0         | 758 | 767 | 98 -  | 293  | 1059 | 145078 | 145844 |
| UN12396 | Rsa1.0_00219.1 | 982  | 106983 | 1.00E-164 | 303 | 306 | 99 +  | 269  | 574  | 29975  | 30280  |
| UN12397 | Rsa1.0_00170.1 | 1005 | 179538 | 0         | 388 | 402 | 96 +  | 1    | 398  | 57760  | 58161  |
| UN12398 | Rsa1.0_00782.1 | 1336 | 64468  | 1.00E-142 | 317 | 334 | 94 +  | 465  | 798  | 19988  | 20316  |
| UN12399 | Rsa1.0_00102.1 | 1209 | 135497 | 0         | 500 | 507 | 98 -  | 3    | 509  | 11483  | 11987  |
| UN12400 | Rsa1.0_02424.1 | 871  | 31570  | 0         | 484 | 486 | 99 -  | 1    | 485  | 6970   | 7455   |



|         |                |      |        |           |      |      |       |      |      |        |        |
|---------|----------------|------|--------|-----------|------|------|-------|------|------|--------|--------|
| UN12401 | Rsa1.0.00094.1 | 291  | 139042 | 2.00E-92  | 277  | 313  | 88 +  | 1    | 291  | 41119  | 41430  |
| UN12402 | Rsa1.0.00011.1 | 1618 | 225044 | 0         | 433  | 447  | 96 -  | 1171 | 1616 | 177241 | 177686 |
| UN12403 | Rsa1.0.07540.1 | 1662 | 9170   | 0         | 841  | 849  | 99 -  | 336  | 1184 | 4024   | 4872   |
| UN12404 | Rsa1.0.00228.1 | 1512 | 105511 | 2.00E-86  | 203  | 211  | 96 -  | 1303 | 1510 | 86275  | 86484  |
| UN12405 | Rsa1.0.00502.1 | 1207 | 204180 | 0         | 544  | 544  | 100 + | 3    | 546  | 159862 | 160405 |
| UN12406 | Rsa1.0.01836.1 | 1425 | 38503  | 0         | 1151 | 1154 | 99 -  | 272  | 1425 | 17887  | 19040  |
| UN12407 | Rsa1.0.00772.1 | 797  | 64856  | 0         | 365  | 366  | 99 +  | 432  | 797  | 51283  | 51648  |
| UN12408 | Rsa1.0.08807.1 | 981  | 6906   | 0         | 733  | 746  | 98 +  | 1    | 746  | 3399   | 4142   |
| UN12409 | Rsa1.0.11769.1 | 879  | 5414   | 0         | 528  | 535  | 98 -  | 346  | 879  | 777    | 1310   |
| UN12410 | Rsa1.0.01111.1 | 1053 | 53669  | 0         | 354  | 354  | 100 - | 700  | 1053 | 39891  | 40244  |
| UN12411 | Rsa1.0.00279.1 | 1314 | 100039 | 0         | 355  | 356  | 99 -  | 959  | 1314 | 87699  | 88054  |
| UN12412 | Rsa1.0.00449.1 | 765  | 83863  | 1.00E-154 | 295  | 301  | 98 +  | 465  | 765  | 2417   | 2717   |
| UN12413 | Rsa1.0.00011.1 | 907  | 225044 | 0         | 407  | 426  | 95 +  | 4    | 426  | 4124   | 4549   |
| UN12414 | Rsa1.0.03471.1 | 620  | 22678  | 0         | 397  | 408  | 97 +  | 209  | 616  | 14018  | 14417  |
| UN12415 | Rsa1.0.12341.1 | 886  | 5250   | 0         | 474  | 496  | 95 -  | 79   | 565  | 2120   | 2615   |
| UN12416 | Rsa1.0.00018.1 | 768  | 410899 | 0         | 576  | 601  | 95 +  | 168  | 768  | 49999  | 50599  |
| UN12417 | Rsa1.0.01235.1 | 796  | 50180  | 1.00E-155 | 287  | 290  | 98 +  | 2    | 291  | 20002  | 20291  |
| UN12418 | Rsa1.0.01487.1 | 1284 | 44784  | 0         | 528  | 571  | 92 +  | 300  | 865  | 27756  | 28326  |
| UN12419 | Rsa1.0.02941.1 | 862  | 26583  | 0         | 860  | 860  | 100 + | 3    | 862  | 22061  | 22920  |
| UN12420 | Rsa1.0.00141.1 | 915  | 121494 | 0         | 515  | 533  | 96 -  | 383  | 915  | 94785  | 95302  |
| UN12421 | Rsa1.0.03877.1 | 919  | 20318  | 1.00E-113 | 213  | 215  | 99 -  | 39   | 253  | 9001   | 9215   |
| UN12422 | Rsa1.0.00470.1 | 1057 | 81968  | 0         | 518  | 532  | 97 -  | 522  | 1053 | 78813  | 79344  |
| UN12423 | Rsa1.0.00128.1 | 731  | 228675 | 0         | 428  | 431  | 99 +  | 3    | 433  | 11663  | 12092  |
| UN12424 | Rsa1.0.02372.1 | 1368 | 32053  | 0         | 1142 | 1145 | 99 +  | 1    | 1145 | 8227   | 9371   |
| UN12425 | Rsa1.0.08429.1 | 968  | 7370   | 4.00E-99  | 196  | 200  | 98 +  | 257  | 456  | 568    | 767    |
| UN12426 | Rsa1.0.05881.1 | 1340 | 12341  | 0         | 441  | 452  | 97 -  | 751  | 1192 | 8912   | 9363   |
| UN12427 | Rsa1.0.00138.1 | 933  | 247040 | 0         | 411  | 423  | 97 -  | 1    | 415  | 230305 | 230727 |
| UN12428 | Rsa1.0.00803.1 | 976  | 144228 | 0         | 609  | 612  | 99 +  | 365  | 975  | 38543  | 39154  |
| UN12429 | Rsa1.0.03271.1 | 1175 | 24187  | 0         | 409  | 411  | 99 -  | 765  | 1175 | 1306   | 1716   |
| UN12430 | Rsa1.0.00280.1 | 799  | 99966  | 1.00E-122 | 252  | 258  | 97 -  | 3    | 260  | 65827  | 66081  |
| UN12431 | Rsa1.0.01585.1 | 780  | 42806  | 1.00E-145 | 276  | 281  | 98 +  | 19   | 299  | 14587  | 14867  |
| UN12432 | Rsa1.0.02185.1 | 263  | 34150  | 1.00E-116 | 255  | 267  | 95 -  | 2    | 263  | 27262  | 27526  |
| UN12433 | Rsa1.0.03014.1 | 859  | 26018  | 1.00E-128 | 301  | 317  | 94 -  | 547  | 859  | 7275   | 7590   |
| UN12434 | Rsa1.0.04651.1 | 1579 | 16516  | 1.00E-103 | 198  | 200  | 99 -  | 3    | 202  | 12242  | 12441  |
| UN12435 | Rsa1.0.01097.1 | 932  | 173349 | 1.00E-105 | 216  | 222  | 97 -  | 1    | 222  | 34536  | 34755  |
| UN12436 | Rsa1.0.03159.1 | 1350 | 24946  | 1.00E-180 | 363  | 377  | 96 +  | 491  | 867  | 14985  | 15361  |
| UN12437 | Rsa1.0.01249.1 | 941  | 188432 | 0         | 341  | 342  | 99 +  | 598  | 939  | 40576  | 40917  |
| UN12438 | Rsa1.0.03856.1 | 608  | 20429  | 0         | 338  | 342  | 98 -  | 268  | 608  | 18869  | 19210  |
| UN12439 | Rsa1.0.02858.1 | 974  | 27246  | 1.00E-160 | 343  | 353  | 97 -  | 3    | 349  | 1688   | 2037   |

|         |                |      |        |           |      |      |       |      |      |        |        |
|---------|----------------|------|--------|-----------|------|------|-------|------|------|--------|--------|
| UN12440 | Rsa1.0.00522.1 | 717  | 78103  | 4.00E-77  | 159  | 163  | 97 +  | 342  | 504  | 48991  | 49153  |
| UN12441 | Rsa1.0.01716.1 | 882  | 40483  | 0         | 882  | 882  | 100 + | 1    | 882  | 30051  | 30932  |
| UN12442 | Rsa1.0.02239.1 | 700  | 33534  | 1.00E-153 | 298  | 306  | 97 +  | 99   | 404  | 26202  | 26507  |
| UN12443 | Rsa1.0.58089.1 | 821  | 394    | 0         | 392  | 394  | 99 -  | 328  | 721  | 1      | 394    |
| UN12444 | Rsa1.0.02206.1 | 1711 | 33922  | 0         | 893  | 897  | 99 +  | 3    | 898  | 4082   | 4978   |
| UN12445 | Rsa1.0.00087.1 | 1213 | 761073 | 0         | 1172 | 1204 | 97 +  | 7    | 1208 | 321128 | 322326 |
| UN12446 | Rsa1.0.00204.1 | 1287 | 109056 | 2.33E-156 | 267  | 268  | 99 -  | 1020 | 1287 | 93547  | 93814  |
| UN12447 | Rsa1.0.05911.1 | 714  | 12261  | 1.00E-98  | 201  | 207  | 97 +  | 159  | 365  | 2115   | 2321   |
| UN12448 | Rsa1.0.04573.1 | 1093 | 16789  | 0         | 375  | 378  | 99 +  | 716  | 1093 | 6126   | 6503   |
| UN12449 | Rsa1.0.02359.1 | 878  | 32211  | 0         | 871  | 878  | 99 -  | 1    | 878  | 21824  | 22698  |
| UN12450 | Rsa1.0.03467.1 | 1029 | 22687  | 0         | 653  | 683  | 95 +  | 356  | 1029 | 10718  | 11394  |
| UN12451 | Rsa1.0.00748.1 | 694  | 65983  | 1.00E-101 | 214  | 222  | 96 +  | 385  | 606  | 65464  | 65682  |
| UN12452 | Rsa1.0.00860.1 | 1604 | 61789  | 0         | 338  | 338  | 100 - | 437  | 774  | 13435  | 13772  |
| UN12453 | Rsa1.0.00664.1 | 1064 | 69573  | 0         | 451  | 451  | 100 - | 614  | 1064 | 16651  | 17101  |
| UN12454 | Rsa1.0.01165.1 | 648  | 51898  | 0         | 443  | 445  | 99 -  | 2    | 446  | 51358  | 51802  |
| UN12455 | Rsa1.0.03776.1 | 787  | 20926  | 4.00E-80  | 197  | 212  | 92 -  | 186  | 397  | 1375   | 1586   |
| UN12456 | Rsa1.0.09687.1 | 1306 | 6212   | 0         | 860  | 867  | 99 -  | 3    | 869  | 2235   | 3100   |
| UN12457 | Rsa1.0.00778.1 | 759  | 196751 | 0         | 641  | 645  | 99 -  | 115  | 759  | 179980 | 180624 |
| UN12458 | Rsa1.0.03180.1 | 729  | 24764  | 1.00E-102 | 248  | 265  | 93 +  | 465  | 726  | 21745  | 22005  |
| UN12459 | Rsa1.0.00934.1 | 1088 | 193516 | 0         | 1051 | 1087 | 96 +  | 3    | 1088 | 151153 | 152239 |
| UN12460 | Rsa1.0.00484.1 | 1496 | 203294 | 1.00E-108 | 248  | 263  | 94 -  | 1232 | 1493 | 51197  | 51459  |
| UN12461 | Rsa1.0.00480.1 | 604  | 81325  | 0         | 581  | 602  | 96 +  | 3    | 604  | 3549   | 4146   |
| UN12462 | Rsa1.0.02121.1 | 424  | 34813  | 0         | 350  | 356  | 98 -  | 3    | 358  | 22260  | 22614  |
| UN12463 | Rsa1.0.00047.1 | 928  | 168582 | 0         | 541  | 549  | 98 +  | 2    | 550  | 33979  | 34521  |
| UN12464 | Rsa1.0.00804.1 | 819  | 63726  | 0         | 355  | 360  | 98 -  | 3    | 359  | 59947  | 60306  |
| UN12465 | Rsa1.0.00495.1 | 982  | 79934  | 1.00E-173 | 364  | 383  | 95 -  | 1    | 377  | 66097  | 66474  |
| UN12466 | Rsa1.0.00779.1 | 1532 | 64568  | 0         | 418  | 419  | 99 +  | 1115 | 1532 | 31172  | 31590  |
| UN12467 | Rsa1.0.02809.1 | 579  | 27674  | 1.00E-166 | 311  | 315  | 98 -  | 3    | 317  | 4665   | 4977   |
| UN12468 | Rsa1.0.01735.1 | 705  | 40128  | 1.00E-163 | 327  | 339  | 96 -  | 367  | 705  | 338    | 671    |
| UN12469 | Rsa1.0.00569.1 | 1026 | 75060  | 0         | 558  | 559  | 99 -  | 451  | 1009 | 72157  | 72715  |
| UN12470 | Rsa1.0.00178.1 | 1263 | 114861 | 1.00E-117 | 251  | 261  | 96 +  | 1    | 260  | 30323  | 30580  |
| UN12471 | Rsa1.0.00065.1 | 1354 | 454616 | 1.00E-114 | 264  | 279  | 94 +  | 1074 | 1352 | 116989 | 117262 |
| UN12472 | Rsa1.0.00632.1 | 820  | 183777 | 0         | 464  | 488  | 95 +  | 341  | 818  | 14434  | 14918  |
| UN12473 | Rsa1.0.00271.1 | 729  | 101125 | 1.00E-179 | 365  | 374  | 97 -  | 357  | 727  | 36294  | 36665  |
| UN12474 | Rsa1.0.05683.1 | 827  | 12944  | 0         | 688  | 690  | 99 -  | 3    | 692  | 4930   | 5619   |
| UN12475 | Rsa1.0.00476.1 | 965  | 280966 | 0         | 618  | 628  | 98 -  | 1    | 628  | 249081 | 249708 |
| UN12476 | Rsa1.0.00126.1 | 1089 | 127534 | 0         | 956  | 978  | 97 +  | 113  | 1089 | 107493 | 108470 |
| UN12477 | Rsa1.0.04569.1 | 1017 | 16798  | 1.00E-159 | 284  | 284  | 100 + | 368  | 651  | 7293   | 7576   |
| UN12478 | Rsa1.0.01895.1 | 1615 | 37512  | 0         | 730  | 731  | 99 -  | 885  | 1615 | 10709  | 11439  |

|         |                |      |        |           |      |      |       |     |      |        |        |
|---------|----------------|------|--------|-----------|------|------|-------|-----|------|--------|--------|
| UN12479 | Rsa1.0.01656.1 | 913  | 41494  | 1.00E-102 | 193  | 194  | 99 -  | 356 | 549  | 12318  | 12511  |
| UN12480 | Rsa1.0.00380.1 | 807  | 89748  | 0         | 404  | 419  | 96 -  | 389 | 807  | 27101  | 27519  |
| UN12481 | Rsa1.0.01850.1 | 721  | 162224 | 1.00E-107 | 209  | 213  | 98 -  | 226 | 438  | 34793  | 35005  |
| UN12482 | Rsa1.0.05123.1 | 1767 | 14790  | 0         | 1453 | 1463 | 99 +  | 305 | 1767 | 13180  | 14642  |
| UN12483 | Rsa1.0.00740.1 | 776  | 215972 | 1.00E-132 | 240  | 240  | 100 + | 497 | 736  | 212021 | 212260 |
| UN12484 | Rsa1.0.01687.1 | 879  | 40979  | 1.00E-104 | 195  | 196  | 99 -  | 659 | 854  | 13263  | 13458  |
| UN12485 | Rsa1.0.00191.1 | 663  | 316976 | 0         | 506  | 553  | 91 +  | 141 | 663  | 204217 | 204763 |
| UN12486 | Rsa1.0.01360.1 | 1292 | 47246  | 1.00E-160 | 338  | 352  | 96 -  | 903 | 1249 | 24163  | 24514  |
| UN12487 | Rsa1.0.04160.1 | 1090 | 18795  | 0         | 686  | 789  | 86 +  | 2   | 786  | 196    | 981    |
| UN12488 | Rsa1.0.01173.1 | 1171 | 51727  | 0         | 438  | 440  | 99 +  | 255 | 694  | 29674  | 30113  |
| UN12489 | Rsa1.0.00979.1 | 979  | 57733  | 3.00E-60  | 236  | 274  | 86 -  | 627 | 898  | 1113   | 1386   |
| UN12490 | Rsa1.0.32919.1 | 1140 | 690    | 1.00E-176 | 349  | 358  | 97 -  | 784 | 1140 | 334    | 690    |
| UN12491 | Rsa1.0.00347.1 | 817  | 93048  | 1.00E-107 | 264  | 283  | 93 +  | 422 | 702  | 86405  | 86679  |
| UN12492 | Rsa1.0.01996.1 | 737  | 36327  | 1.00E-132 | 275  | 287  | 95 -  | 117 | 403  | 28812  | 29098  |
| UN12493 | Rsa1.0.06403.1 | 914  | 11078  | 0         | 442  | 459  | 96 +  | 1   | 446  | 5766   | 6224   |
| UN12494 | Rsa1.0.06287.1 | 835  | 11303  | 1.00E-171 | 337  | 348  | 96 -  | 444 | 791  | 6397   | 6744   |
| UN12495 | Rsa1.0.01445.1 | 951  | 45671  | 2.00E-88  | 166  | 166  | 100 - | 544 | 709  | 21373  | 21538  |
| UN12496 | Rsa1.0.22389.1 | 738  | 1125   | 1.00E-109 | 258  | 273  | 94 +  | 3   | 272  | 486    | 758    |
| UN12497 | Rsa1.0.00752.1 | 1974 | 65756  | 0         | 528  | 531  | 99 +  | 535 | 1065 | 49382  | 49912  |
| UN12498 | Rsa1.0.00512.1 | 1245 | 200277 | 3.00E-97  | 193  | 197  | 97 -  | 1   | 197  | 66192  | 66388  |
| UN12499 | Rsa1.0.00285.1 | 1093 | 149638 | 0         | 445  | 482  | 92 -  | 3   | 484  | 87711  | 88171  |
| UN12500 | Rsa1.0.02028.1 | 1362 | 35857  | 1.00E-154 | 322  | 335  | 96 +  | 3   | 335  | 3872   | 4205   |
| UN12501 | Rsa1.0.00698.1 | 1634 | 67816  | 0         | 937  | 956  | 98 +  | 86  | 1041 | 10881  | 11836  |
| UN12502 | Rsa1.0.02228.1 | 1290 | 33688  | 1.00E-151 | 337  | 353  | 95 -  | 946 | 1289 | 10198  | 10547  |
| UN12503 | Rsa1.0.01603.1 | 659  | 42468  | 1.00E-172 | 339  | 350  | 96 +  | 3   | 352  | 36964  | 37313  |
| UN12504 | Rsa1.0.01377.1 | 828  | 46967  | 1.00E-125 | 236  | 239  | 98 +  | 7   | 245  | 22846  | 23084  |
| UN12505 | Rsa1.0.02807.1 | 669  | 27680  | 1.00E-160 | 298  | 302  | 98 +  | 54  | 355  | 7324   | 7625   |
| UN12506 | Rsa1.0.00073.1 | 734  | 240924 | 1.00E-117 | 240  | 250  | 96 +  | 1   | 250  | 91066  | 91306  |
| UN12507 | Rsa1.0.11720.1 | 1157 | 5430   | 1.00E-142 | 358  | 390  | 91 -  | 763 | 1150 | 2325   | 2696   |
| UN12508 | Rsa1.0.02222.1 | 475  | 152798 | 0         | 455  | 474  | 95 +  | 1   | 474  | 4666   | 5136   |
| UN12509 | Rsa1.0.09451.1 | 767  | 6359   | 1.00E-143 | 263  | 265  | 99 -  | 208 | 472  | 6063   | 6327   |
| UN12510 | Rsa1.0.00007.1 | 712  | 239325 | 1.00E-117 | 255  | 266  | 95 +  | 449 | 712  | 41121  | 41386  |
| UN12511 | Rsa1.0.01389.1 | 1100 | 46716  | 0         | 482  | 499  | 96 +  | 422 | 913  | 10246  | 10744  |
| UN12512 | Rsa1.0.00303.1 | 966  | 97468  | 6.00E-52  | 108  | 109  | 99 -  | 773 | 881  | 38623  | 38731  |
| UN12513 | Rsa1.0.00015.1 | 1128 | 561803 | 1.00E-129 | 257  | 262  | 98 -  | 856 | 1115 | 186279 | 186540 |
| UN12514 | Rsa1.0.00366.1 | 1035 | 90880  | 0         | 885  | 909  | 97 +  | 2   | 909  | 80229  | 81136  |
| UN12515 | Rsa1.0.01110.1 | 1279 | 195852 | 0         | 513  | 517  | 99 +  | 1   | 517  | 36509  | 37025  |
| UN12516 | Rsa1.0.01026.1 | 1246 | 171624 | 0         | 439  | 444  | 98 +  | 3   | 445  | 1088   | 1531   |
| UN12517 | Rsa1.0.01505.1 | 611  | 44382  | 1.00E-178 | 342  | 350  | 97 +  | 262 | 611  | 30211  | 30557  |

|         |                |      |        |           |      |      |       |     |      |        |        |
|---------|----------------|------|--------|-----------|------|------|-------|-----|------|--------|--------|
| UN12518 | Rsa1.0_72328.1 | 898  | 317    | 1.00E-176 | 314  | 314  | 100 - | 517 | 830  | 4      | 317    |
| UN12519 | Rsa1.0_00083.1 | 1034 | 442773 | 0         | 413  | 430  | 96 -  | 3   | 429  | 252723 | 253151 |
| UN12520 | Rsa1.0_03962.1 | 1085 | 19860  | 0         | 722  | 741  | 97 +  | 347 | 1084 | 7208   | 7947   |
| UN12521 | Rsa1.0_00030.1 | 854  | 250988 | 0         | 850  | 863  | 98 +  | 1   | 854  | 180342 | 181204 |
| UN12522 | Rsa1.0_00967.1 | 957  | 58049  | 0         | 787  | 796  | 98 -  | 162 | 957  | 22951  | 23746  |
| UN12523 | Rsa1.0_13708.1 | 996  | 4447   | 1.00E-110 | 270  | 290  | 93 -  | 694 | 980  | 3612   | 3897   |
| UN12524 | Rsa1.0_03125.1 | 1139 | 147978 | 1.00E-132 | 251  | 255  | 98 -  | 624 | 878  | 138288 | 138542 |
| UN12525 | Rsa1.0_00308.1 | 700  | 96915  | 1.00E-136 | 324  | 347  | 93 +  | 341 | 686  | 81326  | 81662  |
| UN12526 | Rsa1.0_01456.1 | 964  | 45372  | 4.00E-93  | 198  | 206  | 96 +  | 393 | 598  | 42151  | 42356  |
| UN12527 | Rsa1.0_00537.1 | 998  | 186980 | 0         | 699  | 713  | 98 -  | 287 | 998  | 169043 | 169755 |
| UN12528 | Rsa1.0_00134.1 | 795  | 390219 | 1.00E-117 | 292  | 319  | 91 +  | 483 | 789  | 13216  | 13528  |
| UN12529 | Rsa1.0_00558.1 | 797  | 75819  | 0         | 528  | 539  | 97 +  | 2   | 540  | 28285  | 28823  |
| UN12530 | Rsa1.0_04048.1 | 931  | 19394  | 0         | 839  | 878  | 95 +  | 5   | 876  | 13002  | 13879  |
| UN12531 | Rsa1.0_04208.1 | 758  | 18444  | 1.00E-109 | 234  | 245  | 95 +  | 65  | 309  | 12529  | 12773  |
| UN12532 | Rsa1.0_00602.1 | 868  | 73302  | 0         | 757  | 784  | 96 +  | 82  | 860  | 64379  | 65159  |
| UN12533 | Rsa1.0_00759.1 | 806  | 65465  | 1.00E-136 | 270  | 278  | 97 +  | 3   | 280  | 21778  | 22055  |
| UN12534 | Rsa1.0_00002.1 | 966  | 601661 | 0         | 519  | 520  | 99 -  | 3   | 522  | 184017 | 184536 |
| UN12535 | Rsa1.0_00098.1 | 1380 | 349239 | 1.00E-162 | 355  | 373  | 95 -  | 2   | 361  | 237652 | 238023 |
| UN12536 | Rsa1.0_02425.1 | 841  | 31567  | 0         | 449  | 451  | 99 -  | 390 | 839  | 10864  | 11314  |
| UN12537 | Rsa1.0_38008.1 | 491  | 593    | 1.00E-174 | 321  | 325  | 98 -  | 76  | 400  | 1      | 325    |
| UN12538 | Rsa1.0_07058.1 | 412  | 9964   | 1.00E-126 | 229  | 229  | 100 + | 3   | 231  | 1471   | 1699   |
| UN12539 | Rsa1.0_04511.1 | 1087 | 17032  | 0         | 405  | 410  | 98 -  | 405 | 814  | 8147   | 8556   |
| UN12540 | Rsa1.0_02555.1 | 745  | 30146  | 1.00E-120 | 242  | 247  | 97 +  | 117 | 361  | 18139  | 18385  |
| UN12541 | Rsa1.0_00020.1 | 786  | 283099 | 1.00E-154 | 313  | 324  | 96 +  | 69  | 392  | 90031  | 90353  |
| UN12542 | Rsa1.0_03878.1 | 629  | 20305  | 1.00E-166 | 315  | 321  | 98 +  | 1   | 321  | 2020   | 2340   |
| UN12543 | Rsa1.0_00107.1 | 891  | 431659 | 0         | 568  | 598  | 94 +  | 311 | 891  | 337025 | 337616 |
| UN12544 | Rsa1.0_02810.1 | 1783 | 27671  | 0         | 990  | 999  | 99 -  | 170 | 1167 | 14789  | 15786  |
| UN12545 | Rsa1.0_01414.1 | 938  | 149508 | 0         | 819  | 835  | 98 -  | 2   | 836  | 18058  | 18892  |
| UN12546 | Rsa1.0_00697.1 | 789  | 67913  | 1.00E-103 | 233  | 246  | 94 +  | 3   | 243  | 54368  | 54606  |
| UN12547 | Rsa1.0_01635.1 | 936  | 41865  | 0         | 680  | 708  | 96 -  | 230 | 936  | 17001  | 17703  |
| UN12548 | Rsa1.0_15024.1 | 955  | 2885   | 1.00E-135 | 273  | 281  | 97 -  | 676 | 954  | 2315   | 2592   |
| UN12549 | Rsa1.0_00676.1 | 1509 | 69166  | 0         | 1199 | 1206 | 99 +  | 3   | 1208 | 50311  | 51516  |
| UN12550 | Rsa1.0_00289.1 | 833  | 98620  | 1.00E-65  | 184  | 202  | 91 -  | 152 | 353  | 72035  | 72233  |
| UN12551 | Rsa1.0_00225.1 | 1041 | 105892 | 0         | 502  | 521  | 96 -  | 315 | 831  | 80714  | 81229  |
| UN12552 | Rsa1.0_01439.1 | 789  | 45841  | 0         | 491  | 493  | 99 +  | 296 | 788  | 28055  | 28547  |
| UN12553 | Rsa1.0_04169.1 | 765  | 18712  | 1.00E-131 | 271  | 280  | 96 -  | 351 | 629  | 2082   | 2358   |
| UN12554 | Rsa1.0_00082.1 | 1000 | 237584 | 8.00E-33  | 76   | 77   | 98 -  | 921 | 997  | 1882   | 1958   |
| UN12555 | Rsa1.0_55302.1 | 823  | 413    | 1.00E-109 | 201  | 201  | 100 - | 163 | 363  | 1      | 201    |
| UN12556 | Rsa1.0_00377.1 | 928  | 90038  | 1.00E-68  | 139  | 141  | 98 +  | 403 | 543  | 9346   | 9486   |

|         |                |      |        |           |      |      |       |     |      |        |        |
|---------|----------------|------|--------|-----------|------|------|-------|-----|------|--------|--------|
| UN12557 | Rsa1.0.01417.1 | 1127 | 46252  | 0         | 403  | 416  | 96 +  | 675 | 1088 | 20533  | 20947  |
| UN12558 | Rsa1.0.00004.1 | 1446 | 253996 | 0         | 608  | 619  | 98 +  | 828 | 1446 | 29150  | 29768  |
| UN12559 | Rsa1.0.00049.1 | 1290 | 167018 | 0         | 1218 | 1294 | 94 +  | 1   | 1288 | 63754  | 65043  |
| UN12560 | Rsa1.0.00329.1 | 917  | 222544 | 0         | 405  | 422  | 95 -  | 67  | 488  | 194066 | 194487 |
| UN12561 | Rsa1.0.01384.1 | 1116 | 46803  | 0         | 448  | 448  | 100 + | 345 | 792  | 20167  | 20614  |
| UN12562 | Rsa1.0.00002.1 | 1084 | 601661 | 0         | 445  | 464  | 95 +  | 623 | 1084 | 594694 | 595157 |
| UN12563 | Rsa1.0.00350.1 | 1209 | 92346  | 0         | 403  | 425  | 94 +  | 787 | 1209 | 51776  | 52197  |
| UN12564 | Rsa1.0.10530.1 | 1063 | 5813   | 1.00E-121 | 247  | 254  | 97 -  | 3   | 255  | 4587   | 4840   |
| UN12565 | Rsa1.0.02139.1 | 1097 | 34686  | 0         | 1044 | 1101 | 94 -  | 1   | 1092 | 27658  | 28740  |
| UN12566 | Rsa1.0.04194.1 | 1066 | 132734 | 0         | 626  | 654  | 95 +  | 413 | 1066 | 116698 | 117350 |
| UN12567 | Rsa1.0.00471.1 | 832  | 81897  | 1.00E-123 | 249  | 256  | 97 -  | 106 | 361  | 73515  | 73769  |
| UN12568 | Rsa1.0.00040.1 | 657  | 324196 | 1.00E-171 | 334  | 344  | 97 +  | 49  | 392  | 110483 | 110826 |
| UN12569 | Rsa1.0.00120.1 | 968  | 277288 | 5.00E-34  | 167  | 194  | 86 -  | 776 | 968  | 228729 | 228919 |
| UN12570 | Rsa1.0.02722.1 | 935  | 28417  | 1.00E-89  | 171  | 172  | 99 +  | 235 | 406  | 15844  | 16015  |
| UN12571 | Rsa1.0.07059.1 | 1081 | 9962   | 2.33E-156 | 302  | 315  | 95 -  | 386 | 700  | 3922   | 4236   |
| UN12572 | Rsa1.0.00759.1 | 1127 | 65465  | 0         | 889  | 937  | 94 +  | 98  | 1031 | 8202   | 9126   |
| UN12573 | Rsa1.0.01230.1 | 1079 | 50221  | 0         | 1052 | 1083 | 97 +  | 1   | 1079 | 40487  | 41569  |
| UN12574 | Rsa1.0.01501.1 | 874  | 44532  | 0         | 426  | 431  | 98 -  | 411 | 841  | 32684  | 33114  |
| UN12575 | Rsa1.0.01803.1 | 870  | 173846 | 1.00E-162 | 358  | 378  | 94 +  | 500 | 870  | 137460 | 137837 |
| UN12576 | Rsa1.0.01552.1 | 934  | 43396  | 1.00E-125 | 317  | 341  | 92 +  | 593 | 931  | 24239  | 24573  |
| UN12577 | Rsa1.0.02003.1 | 983  | 36171  | 1.00E-116 | 518  | 616  | 84 -  | 69  | 680  | 19901  | 20506  |
| UN12578 | #              | #    | #      | #         | #    | #    | #     | #   | #    | #      | #      |
| UN12579 | Rsa1.0.03145.1 | 1118 | 25020  | 0         | 768  | 786  | 97 -  | 118 | 903  | 9241   | 10026  |
| UN12580 | Rsa1.0.00130.1 | 828  | 125737 | 0         | 465  | 511  | 90 +  | 321 | 814  | 28245  | 28750  |
| UN12581 | Rsa1.0.01310.1 | 666  | 164719 | 0         | 516  | 554  | 93 -  | 122 | 661  | 6697   | 7247   |
| UN12582 | Rsa1.0.00760.1 | 945  | 65267  | 0         | 513  | 531  | 96 -  | 53  | 583  | 1718   | 2248   |
| UN12583 | Rsa1.0.03235.1 | 1067 | 24442  | 0         | 585  | 605  | 96 +  | 444 | 1047 | 14818  | 15420  |
| UN12584 | Rsa1.0.00425.1 | 1428 | 147080 | 0         | 1226 | 1227 | 99 +  | 202 | 1428 | 95758  | 96984  |
| UN12585 | Rsa1.0.31264.1 | 798  | 731    | 0         | 386  | 404  | 95 -  | 8   | 408  | 105    | 508    |
| UN12586 | Rsa1.0.00502.1 | 1152 | 204180 | 1.00E-157 | 299  | 305  | 98 -  | 836 | 1140 | 9361   | 9665   |
| UN12587 | Rsa1.0.01647.1 | 737  | 41645  | 1.00E-77  | 160  | 164  | 97 -  | 356 | 519  | 31207  | 31370  |
| UN12588 | Rsa1.0.00017.1 | 810  | 752458 | 3.00E-93  | 211  | 222  | 95 +  | 1   | 221  | 26745  | 26966  |
| UN12589 | Rsa1.0.00272.1 | 670  | 447836 | 1.00E-110 | 205  | 206  | 99 -  | 212 | 417  | 58523  | 58728  |
| UN12590 | Rsa1.0.00197.1 | 868  | 109714 | 0         | 659  | 684  | 96 +  | 3   | 676  | 7688   | 8370   |
| UN12591 | Rsa1.0.00191.1 | 1031 | 316976 | 0         | 1021 | 1031 | 99 +  | 1   | 1031 | 208145 | 209175 |
| UN12592 | Rsa1.0.03245.1 | 1019 | 24385  | 0         | 362  | 365  | 99 +  | 500 | 864  | 23943  | 24307  |
| UN12593 | Rsa1.0.07205.1 | 892  | 9726   | 0         | 408  | 417  | 97 -  | 468 | 883  | 259    | 675    |
| UN12594 | Rsa1.0.01092.1 | 1146 | 54348  | 1.00E-166 | 368  | 388  | 94 +  | 761 | 1145 | 53690  | 54076  |
| UN12595 | Rsa1.0.00188.1 | 965  | 112020 | 1.00E-129 | 271  | 283  | 95 +  | 14  | 296  | 9254   | 9536   |

|         |                |      |        |           |      |      |       |     |      |        |        |
|---------|----------------|------|--------|-----------|------|------|-------|-----|------|--------|--------|
| UN12596 | Rsa1.0.01294.1 | 605  | 49090  | 0         | 423  | 437  | 96 +  | 169 | 605  | 11942  | 12376  |
| UN12597 | Rsa1.0.00013.1 | 1041 | 292129 | 3.00E-69  | 134  | 134  | 100 + | 2   | 135  | 150538 | 150671 |
| UN12598 | Rsa1.0.01976.1 | 486  | 36570  | 1.00E-128 | 233  | 233  | 100 + | 253 | 485  | 1117   | 1349   |
| UN12599 | Rsa1.0.14668.1 | 1053 | 3173   | 0         | 498  | 507  | 98 -  | 547 | 1053 | 1837   | 2343   |
| UN12600 | Rsa1.0.04123.1 | 449  | 18947  | 1.00E-149 | 412  | 462  | 89 +  | 2   | 448  | 12312  | 12762  |
| UN12601 | Rsa1.0.02043.1 | 796  | 163754 | 0         | 720  | 735  | 97 +  | 3   | 736  | 156056 | 156790 |
| UN12602 | Rsa1.0.00821.1 | 782  | 62891  | 1.00E-132 | 310  | 331  | 93 -  | 51  | 381  | 43729  | 44051  |
| UN12603 | Rsa1.0.02548.1 | 902  | 30228  | 0         | 593  | 594  | 99 +  | 307 | 900  | 1221   | 1814   |
| UN12604 | Rsa1.0.00773.1 | 1099 | 64839  | 0         | 377  | 378  | 99 -  | 721 | 1098 | 42891  | 43268  |
| UN12605 | Rsa1.0.07030.1 | 1020 | 10008  | 3.00E-35  | 107  | 117  | 91 +  | 441 | 557  | 5301   | 5417   |
| UN12606 | Rsa1.0.03898.1 | 917  | 20183  | 0         | 412  | 416  | 99 +  | 3   | 415  | 6960   | 7375   |
| UN12607 | Rsa1.0.01983.1 | 1084 | 36509  | 0         | 489  | 523  | 93 -  | 494 | 1008 | 21825  | 22333  |
| UN12608 | Rsa1.0.05410.1 | 780  | 13840  | 0         | 370  | 376  | 98 -  | 308 | 683  | 7861   | 8236   |
| UN12609 | Rsa1.0.00190.1 | 820  | 318240 | 1.00E-126 | 289  | 302  | 95 -  | 504 | 800  | 8325   | 8626   |
| UN12610 | Rsa1.0.06648.1 | 1174 | 10603  | 0         | 447  | 456  | 98 +  | 719 | 1174 | 8894   | 9349   |
| UN12611 | Rsa1.0.04434.1 | 932  | 17377  | 0         | 498  | 499  | 99 -  | 3   | 500  | 11412  | 11910  |
| UN12612 | Rsa1.0.02700.1 | 1021 | 28584  | 0         | 356  | 366  | 97 -  | 658 | 1021 | 2911   | 3276   |
| UN12613 | Rsa1.0.00411.1 | 844  | 86944  | 0         | 448  | 478  | 93 +  | 3   | 480  | 41577  | 42054  |
| UN12614 | Rsa1.0.00454.1 | 1307 | 216970 | 1.00E-176 | 359  | 374  | 95 +  | 461 | 834  | 4657   | 5030   |
| UN12615 | Rsa1.0.07636.1 | 1137 | 8971   | 0         | 902  | 947  | 95 -  | 99  | 1040 | 4906   | 5841   |
| UN12616 | Rsa1.0.04462.1 | 2818 | 17250  | 0         | 899  | 999  | 89 -  | 10  | 996  | 4012   | 4967   |
| UN12617 | Rsa1.0.00130.1 | 1511 | 125737 | 0         | 827  | 832  | 99 +  | 678 | 1509 | 93480  | 94311  |
| UN12618 | Rsa1.0.03436.1 | 1346 | 22958  | 0         | 818  | 818  | 100 + | 1   | 818  | 18408  | 19225  |
| UN12619 | Rsa1.0.00353.1 | 775  | 92242  | 1.00E-58  | 131  | 136  | 96 -  | 1   | 136  | 19022  | 19157  |
| UN12620 | Rsa1.0.01833.1 | 905  | 38555  | 2.00E-82  | 181  | 187  | 96 +  | 718 | 904  | 16525  | 16708  |
| UN12621 | Rsa1.0.17475.1 | 1112 | 1820   | 0         | 504  | 508  | 99 +  | 293 | 799  | 1314   | 1820   |
| UN12622 | Rsa1.0.04005.1 | 1074 | 19586  | 0         | 573  | 589  | 97 +  | 486 | 1074 | 15406  | 15994  |
| UN12623 | Rsa1.0.00016.1 | 821  | 831256 | 4.00E-43  | 119  | 128  | 92 -  | 134 | 261  | 373073 | 373197 |
| UN12624 | Rsa1.0.00087.1 | 705  | 761073 | 0         | 363  | 370  | 98 -  | 2   | 371  | 731598 | 731967 |
| UN12625 | Rsa1.0.00087.1 | 713  | 761073 | 8.00E-66  | 185  | 206  | 89 +  | 524 | 713  | 314989 | 315194 |
| UN12626 | Rsa1.0.02682.1 | 1310 | 28711  | 0         | 1245 | 1299 | 95 -  | 2   | 1300 | 16960  | 18249  |
| UN12627 | Rsa1.0.03860.1 | 1442 | 20407  | 0         | 1349 | 1439 | 93 +  | 6   | 1433 | 12461  | 13879  |
| UN12628 | Rsa1.0.00157.1 | 949  | 245832 | 0         | 510  | 536  | 95 +  | 1   | 535  | 61535  | 62065  |
| UN12629 | Rsa1.0.00782.1 | 868  | 64468  | 9.00E-97  | 204  | 212  | 96 -  | 352 | 563  | 20391  | 20602  |
| UN12630 | Rsa1.0.00115.1 | 1063 | 131321 | 0         | 945  | 1001 | 94 +  | 66  | 1063 | 24263  | 25246  |
| UN12631 | Rsa1.0.06892.1 | 910  | 10197  | 0         | 423  | 423  | 100 + | 488 | 910  | 5734   | 6156   |
| UN12632 | Rsa1.0.01203.1 | 1182 | 50848  | 1.00E-109 | 235  | 245  | 95 -  | 939 | 1182 | 48526  | 48770  |
| UN12633 | Rsa1.0.01487.1 | 1277 | 44784  | 0         | 438  | 465  | 94 +  | 817 | 1276 | 2584   | 3042   |
| UN12634 | Rsa1.0.02841.1 | 1326 | 27383  | 2.00E-46  | 102  | 104  | 98 +  | 310 | 413  | 3289   | 3392   |

|         |                |      |        |           |      |      |       |      |      |        |        |
|---------|----------------|------|--------|-----------|------|------|-------|------|------|--------|--------|
| UN12635 | Rsa1.0.03964.1 | 986  | 19835  | 0         | 480  | 481  | 99 -  | 312  | 792  | 8248   | 8728   |
| UN12636 | Rsa1.0.01121.1 | 868  | 53407  | 0         | 731  | 762  | 95 +  | 108  | 868  | 19076  | 19836  |
| UN12637 | Rsa1.0.03163.1 | 554  | 24894  | 1.00E-157 | 290  | 293  | 98 -  | 262  | 554  | 19033  | 19325  |
| UN12638 | Rsa1.0.02490.1 | 1207 | 30885  | 0         | 1185 | 1192 | 99 -  | 17   | 1207 | 13667  | 14858  |
| UN12639 | Rsa1.0.03776.1 | 1029 | 20926  | 0         | 940  | 944  | 99 +  | 75   | 1018 | 14487  | 15430  |
| UN12640 | Rsa1.0.00612.1 | 920  | 72376  | 0         | 881  | 919  | 95 +  | 2    | 920  | 42047  | 42962  |
| UN12641 | Rsa1.0.00525.1 | 1382 | 78030  | 0         | 765  | 781  | 97 -  | 2    | 782  | 41941  | 42718  |
| UN12642 | Rsa1.0.00555.1 | 1135 | 75920  | 0         | 498  | 503  | 99 +  | 3    | 505  | 33413  | 33914  |
| UN12643 | Rsa1.0.00713.1 | 589  | 158017 | 1.00E-115 | 232  | 239  | 97 -  | 56   | 294  | 31529  | 31767  |
| UN12644 | Rsa1.0.02319.1 | 774  | 32580  | 1.00E-89  | 171  | 172  | 99 -  | 603  | 774  | 28474  | 28645  |
| UN12645 | Rsa1.0.07899.1 | 953  | 8335   | 0         | 536  | 536  | 100 - | 1    | 536  | 6134   | 6669   |
| UN12646 | Rsa1.0.03783.1 | 1115 | 20890  | 1.00E-156 | 322  | 336  | 95 -  | 780  | 1115 | 17823  | 18158  |
| UN12647 | Rsa1.0.18172.1 | 839  | 1653   | 0         | 404  | 408  | 99 +  | 1    | 408  | 696    | 1103   |
| UN12648 | Rsa1.0.01453.1 | 995  | 45449  | 1.00E-169 | 359  | 379  | 94 -  | 629  | 993  | 25076  | 25450  |
| UN12649 | Rsa1.0.01113.1 | 1317 | 53616  | 1.00E-163 | 292  | 292  | 100 - | 1024 | 1315 | 2880   | 3171   |
| UN12650 | Rsa1.0.02215.1 | 168  | 33822  | 4.00E-52  | 110  | 112  | 98 +  | 1    | 112  | 8684   | 8795   |
| UN12651 | Rsa1.0.00236.1 | 696  | 104771 | 0         | 496  | 514  | 96 +  | 5    | 516  | 87938  | 88448  |
| UN12652 | Rsa1.0.00010.1 | 942  | 294827 | 0         | 344  | 344  | 100 - | 1    | 344  | 291011 | 291354 |
| UN12653 | Rsa1.0.01537.1 | 635  | 187285 | 1.00E-149 | 267  | 267  | 100 - | 2    | 268  | 21663  | 21929  |
| UN12654 | Rsa1.0.01016.1 | 821  | 181422 | 0         | 344  | 347  | 99 -  | 361  | 707  | 54441  | 54787  |
| UN12655 | Rsa1.0.00123.1 | 829  | 325650 | 0         | 334  | 338  | 98 +  | 411  | 748  | 305219 | 305556 |
| UN12656 | Rsa1.0.02239.1 | 829  | 33534  | 1.00E-148 | 336  | 359  | 93 -  | 2    | 357  | 28204  | 28551  |
| UN12657 | Rsa1.0.05569.1 | 1393 | 13311  | 0         | 511  | 517  | 98 +  | 403  | 919  | 2935   | 3451   |
| UN12658 | Rsa1.0.03674.1 | 834  | 21442  | 0         | 406  | 407  | 99 -  | 1    | 407  | 4886   | 5292   |
| UN12659 | Rsa1.0.02447.1 | 834  | 31325  | 0         | 613  | 627  | 97 +  | 208  | 834  | 19325  | 19951  |
| UN12660 | Rsa1.0.00927.1 | 1140 | 59312  | 3.00E-48  | 155  | 171  | 90 +  | 395  | 563  | 37605  | 37775  |
| UN12661 | Rsa1.0.10001.1 | 1097 | 6042   | 0         | 481  | 489  | 98 +  | 552  | 1040 | 376    | 864    |
| UN12662 | Rsa1.0.00472.1 | 826  | 398134 | 0         | 811  | 819  | 99 -  | 2    | 819  | 175008 | 175826 |
| UN12663 | Rsa1.0.00707.1 | 717  | 190112 | 0         | 710  | 717  | 99 +  | 1    | 717  | 13083  | 13799  |
| UN12664 | Rsa1.0.07260.1 | 808  | 9650   | 0         | 621  | 638  | 97 +  | 175  | 808  | 3769   | 4406   |
| UN12665 | Rsa1.0.03467.1 | 894  | 22687  | 0         | 655  | 685  | 95 -  | 1    | 682  | 10718  | 11395  |
| UN12666 | Rsa1.0.00860.1 | 1319 | 61789  | 1.00E-174 | 329  | 335  | 98 +  | 836  | 1170 | 13438  | 13772  |
| UN12667 | Rsa1.0.00886.1 | 1617 | 167350 | 0         | 1292 | 1373 | 94 +  | 5    | 1358 | 41693  | 43031  |
| UN12668 | Rsa1.0.00358.1 | 647  | 91293  | 1.00E-112 | 295  | 321  | 91 -  | 10   | 326  | 34290  | 34605  |
| UN12669 | Rsa1.0.02874.1 | 924  | 27070  | 1.00E-130 | 242  | 244  | 99 -  | 4    | 247  | 3255   | 3498   |
| UN12670 | Rsa1.0.05024.1 | 1138 | 15105  | 0         | 695  | 706  | 98 -  | 3    | 708  | 12297  | 13002  |
| UN12671 | Rsa1.0.00131.1 | 806  | 432233 | 1.00E-142 | 256  | 256  | 100 - | 1    | 256  | 409494 | 409749 |
| UN12672 | Rsa1.0.01527.1 | 1898 | 43905  | 1.00E-170 | 335  | 344  | 97 -  | 1452 | 1795 | 3571   | 3908   |
| UN12673 | Rsa1.0.00253.1 | 1337 | 231292 | 0         | 825  | 831  | 99 +  | 503  | 1333 | 6842   | 7672   |

|         |                |      |        |           |      |      |       |      |      |        |        |
|---------|----------------|------|--------|-----------|------|------|-------|------|------|--------|--------|
| UN12674 | Rsa1.0.08338.1 | 704  | 7511   | 1.00E-134 | 260  | 266  | 97 +  | 178  | 443  | 1645   | 1910   |
| UN12675 | Rsa1.0.01360.1 | 1155 | 47246  | 0         | 954  | 962  | 99 +  | 1    | 962  | 23553  | 24514  |
| UN12676 | Rsa1.0.00039.1 | 1270 | 296927 | 0         | 1132 | 1138 | 99 -  | 2    | 1135 | 43601  | 44738  |
| UN12677 | Rsa1.0.08922.1 | 824  | 6788   | 0         | 646  | 649  | 99 -  | 11   | 659  | 2351   | 2999   |
| UN12678 | Rsa1.0.05854.1 | 592  | 12415  | 2.00E-94  | 417  | 498  | 83 -  | 121  | 590  | 1610   | 2103   |
| UN12679 | Rsa1.0.00277.1 | 913  | 100132 | 0         | 776  | 790  | 98 +  | 41   | 830  | 62070  | 62858  |
| UN12680 | Rsa1.0.17454.1 | 1287 | 1825   | 1.00E-178 | 338  | 345  | 97 +  | 185  | 529  | 397    | 741    |
| UN12681 | Rsa1.0.03753.1 | 966  | 21010  | 0         | 474  | 491  | 96 +  | 1    | 487  | 549    | 1036   |
| UN12682 | Rsa1.0.00168.1 | 703  | 115870 | 0         | 403  | 427  | 94 +  | 60   | 477  | 28692  | 29117  |
| UN12683 | Rsa1.0.02343.1 | 525  | 32374  | 1.00E-118 | 236  | 243  | 97 -  | 281  | 523  | 1010   | 1252   |
| UN12684 | Rsa1.0.01506.1 | 1015 | 44370  | 1.00E-96  | 300  | 338  | 88 +  | 1    | 332  | 34074  | 34398  |
| UN12685 | Rsa1.0.02162.1 | 961  | 34431  | 0         | 913  | 913  | 100 - | 1    | 913  | 9700   | 10612  |
| UN12686 | Rsa1.0.00308.1 | 951  | 96915  | 0         | 412  | 412  | 100 + | 496  | 907  | 85014  | 85425  |
| UN12687 | Rsa1.0.00470.1 | 768  | 81968  | 5.00E-95  | 189  | 193  | 97 -  | 380  | 572  | 50362  | 50554  |
| UN12688 | Rsa1.0.00340.1 | 1617 | 305782 | 0         | 1034 | 1038 | 99 +  | 3    | 1039 | 105673 | 106710 |
| UN12689 | Rsa1.0.01414.1 | 1052 | 149508 | 1.00E-159 | 297  | 301  | 98 +  | 749  | 1049 | 18060  | 18360  |
| UN12690 | Rsa1.0.00013.1 | 515  | 292129 | 0         | 431  | 450  | 95 -  | 1    | 446  | 116018 | 116467 |
| UN12691 | Rsa1.0.00773.1 | 1133 | 64839  | 0         | 375  | 378  | 99 +  | 2    | 378  | 42891  | 43268  |
| UN12692 | Rsa1.0.12696.1 | 637  | 5151   | 0         | 392  | 398  | 98 -  | 4    | 397  | 4      | 401    |
| UN12693 | Rsa1.0.00059.1 | 729  | 159650 | 1.00E-167 | 322  | 330  | 97 -  | 2    | 331  | 24598  | 24927  |
| UN12694 | Rsa1.0.07250.1 | 1370 | 9663   | 1.00E-148 | 274  | 275  | 99 +  | 1097 | 1370 | 9079   | 9353   |
| UN12695 | Rsa1.0.02672.1 | 876  | 28884  | 1.00E-133 | 266  | 273  | 97 -  | 602  | 874  | 15502  | 15773  |
| UN12696 | Rsa1.0.00087.1 | 801  | 761073 | 3.00E-75  | 150  | 152  | 98 -  | 111  | 262  | 294730 | 294881 |
| UN12697 | Rsa1.0.02233.1 | 1178 | 33658  | 0         | 453  | 457  | 99 +  | 720  | 1176 | 4344   | 4800   |
| UN12698 | Rsa1.0.00797.1 | 611  | 63959  | 1.00E-139 | 348  | 378  | 92 -  | 41   | 406  | 11646  | 12022  |
| UN12699 | Rsa1.0.02370.1 | 1113 | 32071  | 0         | 582  | 587  | 99 -  | 264  | 850  | 1342   | 1928   |
| UN12700 | Rsa1.0.00759.1 | 539  | 65465  | 1.00E-159 | 383  | 414  | 92 -  | 1    | 404  | 9402   | 9811   |
| UN12701 | Rsa1.0.11046.1 | 1252 | 5635   | 1.00E-99  | 185  | 185  | 100 - | 264  | 448  | 2762   | 2946   |
| UN12702 | Rsa1.0.00053.1 | 1484 | 263459 | 1.00E-161 | 395  | 430  | 91 -  | 5    | 429  | 84698  | 85118  |
| UN12703 | Rsa1.0.00671.1 | 859  | 397884 | 0         | 451  | 452  | 99 -  | 1    | 452  | 185631 | 186082 |
| UN12704 | Rsa1.0.07638.1 | 750  | 8967   | 7.00E-88  | 212  | 227  | 93 -  | 83   | 301  | 6345   | 6571   |
| UN12705 | Rsa1.0.00467.1 | 1116 | 156542 | 0         | 532  | 536  | 99 -  | 55   | 590  | 77638  | 78173  |
| UN12706 | Rsa1.0.00018.1 | 1157 | 410899 | 0         | 399  | 422  | 94 -  | 40   | 457  | 68738  | 69159  |
| UN12707 | Rsa1.0.00352.1 | 988  | 92266  | 0         | 533  | 570  | 93 +  | 1    | 567  | 24753  | 25312  |
| UN12708 | Rsa1.0.00457.1 | 888  | 337301 | 0         | 822  | 825  | 99 +  | 2    | 826  | 317281 | 318105 |
| UN12709 | Rsa1.0.00169.1 | 1198 | 274298 | 0         | 703  | 721  | 97 +  | 1    | 718  | 26972  | 27690  |
| UN12710 | Rsa1.0.01092.1 | 815  | 54348  | 0         | 407  | 416  | 97 +  | 365  | 780  | 43380  | 43795  |
| UN12711 | Rsa1.0.47960.1 | 1257 | 472    | 1.00E-157 | 282  | 282  | 100 + | 575  | 856  | 135    | 416    |
| UN12712 | Rsa1.0.01166.1 | 786  | 51877  | 0         | 485  | 491  | 98 -  | 2    | 492  | 8577   | 9067   |



|         |                |      |        |           |     |      |       |     |      |        |        |
|---------|----------------|------|--------|-----------|-----|------|-------|-----|------|--------|--------|
| UN12713 | Rsa1.0.01526.1 | 1087 | 43919  | 0         | 394 | 403  | 97 -  | 685 | 1087 | 1326   | 1728   |
| UN12714 | Rsa1.0.00788.1 | 912  | 64237  | 0         | 489 | 498  | 98 -  | 1   | 498  | 34653  | 35149  |
| UN12715 | Rsa1.0.04655.1 | 1084 | 16495  | 0         | 619 | 622  | 99 -  | 4   | 623  | 11787  | 12408  |
| UN12716 | Rsa1.0.02561.1 | 1083 | 30080  | 1.00E-110 | 218 | 222  | 98 +  | 1   | 222  | 13923  | 14143  |
| UN12717 | Rsa1.0.00087.1 | 1323 | 761073 | 0         | 505 | 506  | 99 -  | 816 | 1321 | 439499 | 440004 |
| UN12718 | Rsa1.0.03895.1 | 775  | 20206  | 1.00E-168 | 475 | 527  | 90 +  | 1   | 516  | 13684  | 14200  |
| UN12719 | Rsa1.0.00214.1 | 767  | 107508 | 0         | 627 | 635  | 98 -  | 3   | 636  | 74183  | 74817  |
| UN12720 | Rsa1.0.01829.1 | 729  | 166063 | 0         | 698 | 730  | 95 -  | 1   | 729  | 161056 | 161780 |
| UN12721 | Rsa1.0.00559.1 | 1255 | 190486 | 0         | 709 | 726  | 97 +  | 531 | 1255 | 182338 | 183063 |
| UN12722 | Rsa1.0.00303.1 | 376  | 97468  | 5.00E-41  | 101 | 106  | 95 +  | 257 | 362  | 39703  | 39808  |
| UN12723 | Rsa1.0.00002.1 | 586  | 601661 | 0         | 490 | 501  | 97 +  | 1   | 501  | 273867 | 274367 |
| UN12724 | Rsa1.0.00280.1 | 591  | 99966  | 1.00E-180 | 440 | 475  | 92 +  | 1   | 468  | 15030  | 15501  |
| UN12725 | Rsa1.0.00060.1 | 1494 | 502678 | 0         | 636 | 653  | 97 +  | 485 | 1137 | 335571 | 336223 |
| UN12726 | Rsa1.0.00152.1 | 1294 | 257730 | 0         | 493 | 513  | 96 -  | 167 | 676  | 84804  | 85316  |
| UN12727 | Rsa1.0.01983.1 | 820  | 36509  | 1.00E-129 | 277 | 292  | 94 -  | 143 | 434  | 31893  | 32171  |
| UN12728 | Rsa1.0.02772.1 | 1441 | 28047  | 0         | 441 | 441  | 100 + | 999 | 1439 | 4728   | 5168   |
| UN12729 | Rsa1.0.00307.1 | 727  | 199003 | 1.00E-158 | 331 | 346  | 95 -  | 80  | 425  | 70435  | 70778  |
| UN12730 | Rsa1.0.00625.1 | 631  | 71672  | 0         | 512 | 544  | 94 +  | 4   | 547  | 44621  | 45142  |
| UN12731 | Rsa1.0.02269.1 | 842  | 33168  | 0         | 362 | 374  | 96 -  | 473 | 842  | 18650  | 19023  |
| UN12732 | Rsa1.0.01540.1 | 1214 | 151890 | 0         | 464 | 471  | 98 +  | 3   | 473  | 109822 | 110288 |
| UN12733 | Rsa1.0.00002.1 | 869  | 601661 | 0         | 667 | 672  | 99 +  | 198 | 869  | 73556  | 74224  |
| UN12734 | Rsa1.0.01487.1 | 1330 | 44784  | 0         | 435 | 463  | 93 +  | 846 | 1303 | 2584   | 3046   |
| UN12735 | Rsa1.0.00132.1 | 876  | 124299 | 1.00E-168 | 383 | 414  | 92 -  | 3   | 411  | 92484  | 92882  |
| UN12736 | Rsa1.0.00123.1 | 860  | 325650 | 0         | 744 | 773  | 96 +  | 3   | 773  | 93792  | 94560  |
| UN12737 | Rsa1.0.02233.1 | 148  | 33658  | 4.00E-64  | 144 | 148  | 97 +  | 2   | 148  | 22592  | 22738  |
| UN12738 | Rsa1.0.06671.1 | 1451 | 10563  | 0         | 892 | 897  | 99 +  | 553 | 1449 | 3146   | 4042   |
| UN12739 | Rsa1.0.00121.1 | 880  | 278029 | 0         | 361 | 365  | 98 -  | 476 | 840  | 101741 | 102105 |
| UN12740 | Rsa1.0.00224.1 | 844  | 327530 | 0         | 400 | 406  | 98 +  | 32  | 437  | 191268 | 191673 |
| UN12741 | Rsa1.0.00053.1 | 720  | 263459 | 0         | 351 | 352  | 99 +  | 3   | 354  | 142354 | 142705 |
| UN12742 | Rsa1.0.04542.1 | 1147 | 16930  | 0         | 569 | 573  | 99 -  | 575 | 1145 | 14326  | 14898  |
| UN12743 | Rsa1.0.01806.1 | 794  | 39021  | 1.00E-166 | 309 | 313  | 98 +  | 218 | 530  | 11263  | 11575  |
| UN12744 | Rsa1.0.00997.1 | 1388 | 57190  | 0         | 930 | 1044 | 89 +  | 107 | 1111 | 55922  | 56933  |
| UN12745 | Rsa1.0.02001.1 | 1194 | 36198  | 0         | 562 | 574  | 97 -  | 288 | 861  | 18246  | 18819  |
| UN12746 | Rsa1.0.00698.1 | 931  | 67816  | 1.00E-139 | 281 | 287  | 97 +  | 604 | 887  | 65687  | 65973  |
| UN12747 | #              | #    | #      | #         | #   | #    | #     | #   | #    | #      | #      |
| UN12748 | Rsa1.0.00192.1 | 896  | 278200 | 0         | 708 | 761  | 93 +  | 137 | 896  | 251267 | 252016 |
| UN12749 | Rsa1.0.34603.1 | 1122 | 654    | 1.00E-136 | 252 | 254  | 99 -  | 68  | 321  | 203    | 456    |
| UN12750 | Rsa1.0.00051.1 | 1040 | 258225 | 0         | 985 | 1054 | 93 +  | 3   | 1030 | 113688 | 114731 |
| UN12751 | Rsa1.0.00534.1 | 675  | 77361  | 0         | 591 | 596  | 99 -  | 81  | 675  | 41291  | 41885  |

|         |                |      |        |           |      |      |      |     |      |        |        |
|---------|----------------|------|--------|-----------|------|------|------|-----|------|--------|--------|
| UN12752 | Rsa1.0.09314.1 | 1063 | 6461   | 0         | 522  | 530  | 98 + | 4   | 532  | 5588   | 6112   |
| UN12753 | Rsa1.0.00329.1 | 717  | 222544 | 1.00E-151 | 322  | 335  | 96 + | 19  | 353  | 69996  | 70327  |
| UN12754 | Rsa1.0.00476.1 | 1012 | 280966 | 0         | 561  | 574  | 97 + | 10  | 581  | 158349 | 158922 |
| UN12755 | Rsa1.0.05748.1 | 632  | 12749  | 1.00E-129 | 273  | 286  | 95 + | 1   | 286  | 8246   | 8531   |
| UN12756 | Rsa1.0.04725.1 | 1066 | 16221  | 0         | 549  | 554  | 99 + | 513 | 1066 | 629    | 1182   |
| UN12757 | Rsa1.0.00744.1 | 748  | 66084  | 1.00E-127 | 364  | 408  | 89 - | 3   | 394  | 58901  | 59305  |
| UN12758 | Rsa1.0.00366.1 | 963  | 90880  | 0         | 904  | 922  | 98 - | 43  | 963  | 18961  | 19882  |
| UN12759 | Rsa1.0.02671.1 | 839  | 28887  | 7.00E-76  | 151  | 153  | 98 + | 341 | 493  | 4160   | 4312   |
| UN12760 | Rsa1.0.00064.1 | 1077 | 240927 | 0         | 722  | 737  | 97 + | 343 | 1077 | 2395   | 3122   |
| UN12761 | Rsa1.0.03517.1 | 1267 | 22337  | 1.00E-126 | 258  | 265  | 97 - | 1   | 263  | 17681  | 17945  |
| UN12762 | Rsa1.0.00067.1 | 978  | 415055 | 0         | 602  | 672  | 89 + | 331 | 978  | 165425 | 166069 |
| UN12763 | Rsa1.0.01751.1 | 609  | 39806  | 1.00E-115 | 274  | 290  | 94 - | 318 | 606  | 30349  | 30634  |
| UN12764 | Rsa1.0.00173.1 | 773  | 288743 | 7.00E-85  | 188  | 196  | 95 - | 1   | 196  | 284813 | 285007 |
| UN12765 | Rsa1.0.04981.1 | 858  | 15250  | 0         | 337  | 338  | 99 + | 521 | 858  | 3452   | 3789   |
| UN12766 | Rsa1.0.00285.1 | 953  | 149638 | 1.00E-74  | 192  | 208  | 92 - | 746 | 953  | 51931  | 52134  |
| UN12767 | Rsa1.0.08080.1 | 1084 | 137363 | 0         | 1026 | 1075 | 95 + | 15  | 1084 | 3242   | 4298   |
| UN12768 | Rsa1.0.00687.1 | 1481 | 68494  | 0         | 842  | 928  | 90 - | 7   | 916  | 23396  | 24308  |
| UN12769 | Rsa1.0.00025.1 | 804  | 277312 | 0         | 746  | 747  | 99 - | 5   | 751  | 141060 | 141806 |
| UN12770 | Rsa1.0.07056.1 | 1676 | 9969   | 0         | 377  | 382  | 98 - | 444 | 825  | 3171   | 3552   |
| UN12771 | Rsa1.0.01236.1 | 810  | 50156  | 4.00E-68  | 196  | 211  | 92 - | 606 | 810  | 40391  | 40601  |
| UN12772 | Rsa1.0.01943.1 | 786  | 37042  | 0         | 382  | 398  | 95 + | 386 | 780  | 31522  | 31919  |
| UN12773 | Rsa1.0.00828.1 | 1094 | 62744  | 0         | 695  | 719  | 96 + | 376 | 1094 | 15666  | 16383  |
| UN12774 | Rsa1.0.00002.1 | 1276 | 601661 | 1.00E-157 | 290  | 293  | 98 - | 748 | 1040 | 56141  | 56433  |
| UN12775 | Rsa1.0.00387.1 | 886  | 495407 | 0         | 648  | 657  | 98 + | 226 | 876  | 279848 | 280504 |
| UN12776 | Rsa1.0.00183.1 | 1183 | 113277 | 1.00E-164 | 300  | 302  | 99 - | 66  | 367  | 71078  | 71379  |
| UN12777 | Rsa1.0.03122.1 | 559  | 25207  | 0         | 545  | 555  | 98 - | 3   | 557  | 14297  | 14851  |
| UN12778 | Rsa1.0.04022.1 | 1374 | 19534  | 0         | 813  | 840  | 96 - | 3   | 839  | 16373  | 17212  |
| UN12779 | Rsa1.0.00273.1 | 749  | 326186 | 0         | 619  | 633  | 97 - | 55  | 687  | 239109 | 239741 |
| UN12780 | Rsa1.0.08841.1 | 1243 | 6870   | 1.00E-173 | 317  | 320  | 99 - | 924 | 1243 | 2715   | 3034   |
| UN12781 | Rsa1.0.00504.1 | 1087 | 79334  | 0         | 439  | 454  | 96 - | 632 | 1085 | 49866  | 50319  |
| UN12782 | Rsa1.0.00085.1 | 776  | 142226 | 8.00E-91  | 198  | 206  | 96 - | 3   | 208  | 31612  | 31816  |
| UN12783 | Rsa1.0.08838.1 | 803  | 6873   | 0         | 416  | 438  | 94 + | 336 | 770  | 2202   | 2639   |
| UN12784 | Rsa1.0.00419.1 | 1014 | 86562  | 1.00E-117 | 327  | 364  | 89 + | 2   | 354  | 13957  | 14303  |
| UN12785 | Rsa1.0.75419.1 | 680  | 304    | 1.00E-52  | 126  | 133  | 94 - | 50  | 176  | 172    | 304    |
| UN12786 | Rsa1.0.00789.1 | 791  | 64233  | 1.00E-174 | 327  | 333  | 98 - | 2   | 334  | 18293  | 18625  |
| UN12787 | Rsa1.0.00255.1 | 1063 | 204967 | 0         | 394  | 407  | 96 + | 312 | 717  | 202520 | 202925 |
| UN12788 | Rsa1.0.02079.1 | 1398 | 35306  | 0         | 502  | 511  | 98 + | 38  | 548  | 23541  | 24051  |
| UN12789 | Rsa1.0.00263.1 | 1712 | 224968 | 1.00E-142 | 326  | 351  | 92 - | 13  | 348  | 143774 | 144123 |
| UN12790 | Rsa1.0.00104.1 | 815  | 368722 | 1.00E-122 | 343  | 381  | 90 + | 217 | 590  | 68056  | 68435  |

|         |                |      |        |           |      |      |      |     |      |        |        |
|---------|----------------|------|--------|-----------|------|------|------|-----|------|--------|--------|
| UN12791 | Rsa1.0.00019.1 | 759  | 301669 | 0         | 566  | 592  | 95 - | 174 | 758  | 240989 | 241580 |
| UN12792 | Rsa1.0.00055.1 | 1362 | 520193 | 0         | 414  | 417  | 99 + | 948 | 1362 | 402999 | 403415 |
| UN12793 | Rsa1.0.01151.1 | 702  | 52268  | 1.00E-125 | 255  | 262  | 97 - | 443 | 701  | 40359  | 40620  |
| UN12794 | Rsa1.0.00245.1 | 1091 | 103569 | 0         | 462  | 474  | 97 + | 620 | 1091 | 80498  | 80970  |
| UN12795 | Rsa1.0.00673.1 | 1097 | 69325  | 0         | 474  | 475  | 99 - | 623 | 1097 | 21082  | 21556  |
| UN12796 | Rsa1.0.07321.1 | 790  | 9559   | 1.00E-115 | 279  | 304  | 91 + | 395 | 676  | 4293   | 4596   |
| UN12797 | Rsa1.0.00252.1 | 890  | 102760 | 1.00E-156 | 406  | 443  | 91 + | 463 | 890  | 97946  | 98384  |
| UN12798 | Rsa1.0.01825.1 | 772  | 38725  | 1.00E-177 | 318  | 319  | 99 - | 2   | 320  | 8042   | 8360   |
| UN12799 | Rsa1.0.27953.1 | 903  | 833    | 1.00E-152 | 300  | 309  | 97 - | 507 | 815  | 4      | 312    |
| UN12800 | Rsa1.0.01318.1 | 1295 | 48275  | 0         | 931  | 975  | 95 + | 307 | 1279 | 46134  | 47105  |
| UN12801 | Rsa1.0.00048.1 | 1150 | 167185 | 1.00E-101 | 218  | 228  | 95 - | 922 | 1149 | 4779   | 5006   |
| UN12802 | Rsa1.0.11741.1 | 807  | 5423   | 1.00E-151 | 351  | 375  | 93 - | 419 | 791  | 4722   | 5096   |
| UN12803 | Rsa1.0.04399.1 | 1226 | 17543  | 0         | 525  | 552  | 95 + | 672 | 1222 | 9931   | 10478  |
| UN12804 | Rsa1.0.00449.1 | 1321 | 83863  | 0         | 900  | 953  | 94 - | 356 | 1306 | 69850  | 70799  |
| UN12805 | Rsa1.0.00061.1 | 751  | 218685 | 0         | 408  | 425  | 96 - | 334 | 746  | 2190   | 2614   |
| UN12806 | #              | #    | #      | #         | #    | #    | #    | #   | #    | #      | #      |
| UN12807 | Rsa1.0.01286.1 | 1128 | 49209  | 1.00E-178 | 379  | 402  | 94 - | 743 | 1127 | 24662  | 25063  |
| UN12808 | Rsa1.0.01088.1 | 1322 | 54416  | 0         | 414  | 422  | 98 - | 2   | 419  | 17524  | 17945  |
| UN12809 | Rsa1.0.01477.1 | 1238 | 45008  | 0         | 876  | 908  | 96 + | 314 | 1213 | 16872  | 17774  |
| UN12810 | Rsa1.0.01482.1 | 983  | 44855  | 7.00E-30  | 207  | 247  | 83 + | 733 | 976  | 1537   | 1780   |
| UN12811 | Rsa1.0.00017.1 | 1263 | 752458 | 0         | 426  | 428  | 99 - | 835 | 1260 | 154844 | 155271 |
| UN12812 | Rsa1.0.00935.1 | 315  | 59079  | 1.00E-112 | 238  | 246  | 96 + | 70  | 315  | 23754  | 23997  |
| UN12813 | Rsa1.0.00178.1 | 718  | 114861 | 0         | 385  | 391  | 98 + | 3   | 392  | 7147   | 7537   |
| UN12814 | Rsa1.0.03226.1 | 1105 | 24494  | 0         | 1028 | 1091 | 94 + | 14  | 1104 | 11458  | 12540  |
| UN12815 | Rsa1.0.00026.1 | 2149 | 327835 | 0         | 405  | 419  | 96 + | 1   | 419  | 168377 | 168795 |
| UN12816 | Rsa1.0.00033.1 | 861  | 515811 | 0         | 517  | 544  | 95 - | 318 | 861  | 392387 | 392921 |
| UN12817 | Rsa1.0.00068.1 | 915  | 151813 | 0         | 657  | 697  | 94 - | 2   | 695  | 105616 | 106300 |
| UN12818 | Rsa1.0.00127.1 | 1117 | 127446 | 0         | 471  | 497  | 94 - | 626 | 1117 | 98617  | 99109  |
| UN12819 | Rsa1.0.00218.1 | 1308 | 201480 | 0         | 748  | 766  | 97 + | 545 | 1308 | 197280 | 198045 |
| UN12820 | Rsa1.0.00159.1 | 585  | 431686 | 0         | 551  | 568  | 97 + | 4   | 571  | 402820 | 403375 |
| UN12821 | Rsa1.0.01451.1 | 868  | 45459  | 0         | 672  | 706  | 95 - | 6   | 702  | 29003  | 29707  |
| UN12822 | Rsa1.0.01279.1 | 1407 | 180330 | 0         | 580  | 581  | 99 - | 827 | 1407 | 132092 | 132672 |
| UN12823 | Rsa1.0.01097.1 | 528  | 173349 | 9.00E-96  | 181  | 182  | 99 - | 347 | 528  | 8596   | 8777   |
| UN12824 | Rsa1.0.00002.1 | 1262 | 601661 | 0         | 641  | 672  | 95 - | 2   | 670  | 454256 | 454927 |
| UN12825 | Rsa1.0.00900.1 | 688  | 60367  | 3.00E-74  | 145  | 146  | 99 - | 38  | 183  | 28111  | 28256  |
| UN12826 | Rsa1.0.00166.1 | 693  | 240912 | 0         | 386  | 388  | 99 + | 307 | 693  | 148292 | 148679 |
| UN12827 | Rsa1.0.02013.1 | 661  | 36041  | 0         | 653  | 661  | 98 + | 1   | 661  | 24618  | 25278  |
| UN12828 | Rsa1.0.00321.1 | 929  | 95671  | 1.00E-104 | 199  | 201  | 99 - | 509 | 709  | 49435  | 49635  |
| UN12829 | Rsa1.0.00099.1 | 1528 | 159619 | 0         | 425  | 427  | 99 - | 1   | 426  | 141527 | 141953 |

|         |                |      |        |           |     |     |       |      |      |        |        |
|---------|----------------|------|--------|-----------|-----|-----|-------|------|------|--------|--------|
| UN12830 | Rsa1.0.01563.1 | 705  | 170823 | 0         | 674 | 721 | 93 -  | 5    | 705  | 25362  | 26066  |
| UN12831 | Rsa1.0.00532.1 | 1099 | 77384  | 4.00E-81  | 178 | 186 | 95 -  | 545  | 730  | 35746  | 35931  |
| UN12832 | Rsa1.0.00675.1 | 713  | 145590 | 0         | 470 | 484 | 97 +  | 4    | 487  | 5564   | 6047   |
| UN12833 | Rsa1.0.03752.1 | 1204 | 21022  | 1.00E-105 | 245 | 262 | 93 +  | 952  | 1202 | 1341   | 1602   |
| UN12834 | Rsa1.0.46200.1 | 793  | 488    | 1.00E-110 | 211 | 214 | 98 +  | 387  | 600  | 167    | 380    |
| UN12835 | Rsa1.0.00373.1 | 848  | 90296  | 0         | 381 | 384 | 99 -  | 466  | 848  | 72444  | 72827  |
| UN12836 | Rsa1.0.01942.1 | 722  | 37048  | 0         | 508 | 519 | 97 +  | 205  | 722  | 3600   | 4118   |
| UN12837 | Rsa1.0.00105.1 | 954  | 134138 | 0         | 460 | 469 | 98 -  | 484  | 951  | 122067 | 122535 |
| UN12838 | Rsa1.0.13606.1 | 1039 | 4648   | 0         | 806 | 826 | 97 -  | 232  | 1039 | 3795   | 4620   |
| UN12839 | Rsa1.0.00483.1 | 961  | 81102  | 1.00E-172 | 388 | 408 | 95 -  | 1    | 403  | 51013  | 51417  |
| UN12840 | Rsa1.0.05108.1 | 1332 | 14820  | 1.00E-137 | 287 | 299 | 95 +  | 6    | 301  | 7623   | 7921   |
| UN12841 | Rsa1.0.02387.1 | 801  | 31890  | 0         | 489 | 503 | 97 +  | 300  | 801  | 13695  | 14197  |
| UN12842 | Rsa1.0.00821.1 | 809  | 62891  | 0         | 466 | 467 | 99 +  | 34   | 500  | 46889  | 47355  |
| UN12843 | Rsa1.0.05890.1 | 622  | 12317  | 3.00E-46  | 137 | 149 | 91 -  | 1    | 145  | 1820   | 1968   |
| UN12844 | Rsa1.0.09479.1 | 1146 | 6340   | 0         | 461 | 462 | 99 +  | 686  | 1146 | 1      | 462    |
| UN12845 | Rsa1.0.26922.1 | 781  | 873    | 9.00E-63  | 126 | 127 | 99 +  | 253  | 379  | 178    | 304    |
| UN12846 | Rsa1.0.00744.1 | 940  | 66084  | 1.00E-175 | 324 | 327 | 99 +  | 1    | 327  | 51350  | 51675  |
| UN12847 | Rsa1.0.00949.1 | 1106 | 58549  | 0         | 886 | 920 | 96 +  | 195  | 1106 | 51667  | 52584  |
| UN12848 | Rsa1.0.03327.1 | 777  | 23707  | 0         | 769 | 780 | 98 -  | 1    | 777  | 17824  | 18603  |
| UN12849 | Rsa1.0.00008.1 | 757  | 358124 | 1.00E-86  | 190 | 199 | 95 -  | 44   | 242  | 179685 | 179883 |
| UN12850 | Rsa1.0.02858.1 | 858  | 27246  | 4.00E-99  | 184 | 184 | 100 - | 617  | 800  | 1      | 184    |
| UN12851 | Rsa1.0.19044.1 | 789  | 1490   | 0         | 330 | 331 | 99 +  | 449  | 779  | 1016   | 1346   |
| UN12852 | Rsa1.0.23774.1 | 1152 | 1026   | 1.00E-145 | 307 | 322 | 95 +  | 3    | 312  | 519    | 837    |
| UN12853 | Rsa1.0.00821.1 | 1042 | 62891  | 1.00E-126 | 300 | 321 | 93 +  | 20   | 328  | 48999  | 49319  |
| UN12854 | Rsa1.0.00323.1 | 1466 | 159650 | 0         | 446 | 453 | 98 +  | 1013 | 1465 | 125184 | 125636 |
| UN12855 | Rsa1.0.00307.1 | 1488 | 199003 | 0         | 529 | 548 | 96 -  | 942  | 1487 | 9419   | 9963   |
| UN12856 | Rsa1.0.00589.1 | 1345 | 209965 | 0         | 916 | 930 | 98 -  | 417  | 1345 | 63245  | 64174  |
| UN12857 | Rsa1.0.00190.1 | 1405 | 318240 | 0         | 838 | 840 | 99 -  | 566  | 1405 | 199849 | 200688 |
| UN12858 | Rsa1.0.01121.1 | 734  | 53407  | 1.00E-171 | 387 | 411 | 94 -  | 327  | 732  | 30379  | 30789  |
| UN12859 | Rsa1.0.01537.1 | 743  | 187285 | 0         | 496 | 504 | 98 +  | 3    | 506  | 14810  | 15313  |
| UN12860 | Rsa1.0.00170.1 | 757  | 179538 | 7.00E-82  | 155 | 155 | 100 - | 299  | 453  | 28953  | 29107  |
| UN12861 | Rsa1.0.02268.1 | 1145 | 33172  | 0         | 674 | 700 | 96 +  | 413  | 1103 | 29896  | 30595  |
| UN12862 | Rsa1.0.02422.1 | 784  | 161122 | 0         | 775 | 784 | 98 +  | 3    | 784  | 154550 | 155333 |
| UN12863 | Rsa1.0.00008.1 | 1307 | 358124 | 0         | 830 | 835 | 99 -  | 472  | 1306 | 3045   | 3876   |
| UN12864 | Rsa1.0.02494.1 | 832  | 132923 | 3.00E-56  | 131 | 136 | 96 -  | 698  | 832  | 110900 | 111035 |
| UN12865 | Rsa1.0.02081.1 | 1262 | 35235  | 1.00E-164 | 309 | 313 | 98 +  | 951  | 1262 | 16615  | 16927  |
| UN12866 | Rsa1.0.00438.1 | 1310 | 84861  | 1.00E-141 | 308 | 319 | 96 -  | 965  | 1278 | 47498  | 47816  |
| UN12867 | Rsa1.0.05474.1 | 1182 | 13620  | 0         | 463 | 474 | 97 +  | 711  | 1181 | 6888   | 7361   |
| UN12868 | Rsa1.0.00175.1 | 756  | 166121 | 2.00E-75  | 200 | 219 | 91 -  | 123  | 341  | 141878 | 142090 |

|         |                |      |        |           |      |      |      |     |      |        |        |
|---------|----------------|------|--------|-----------|------|------|------|-----|------|--------|--------|
| UN12869 | Rsa1.0_00207.1 | 1544 | 248736 | 1.00E-139 | 299  | 312  | 95 + | 384 | 693  | 24164  | 24475  |
| UN12870 | Rsa1.0_01514.1 | 1183 | 44222  | 1.00E-156 | 295  | 300  | 98 + | 12  | 311  | 2906   | 3205   |
| UN12871 | Rsa1.0_01474.1 | 1081 | 45070  | 0         | 984  | 1001 | 98 + | 81  | 1081 | 18278  | 19277  |
| UN12872 | Rsa1.0_33384.1 | 488  | 679    | 0         | 378  | 388  | 97 - | 92  | 479  | 173    | 560    |
| UN12873 | Rsa1.0_00140.1 | 772  | 121541 | 0         | 730  | 756  | 96 + | 5   | 756  | 82013  | 82767  |
| UN12874 | Rsa1.0_00020.1 | 782  | 283099 | 0         | 544  | 597  | 91 + | 1   | 594  | 63641  | 64224  |
| UN12875 | Rsa1.0_01784.1 | 1049 | 39371  | 0         | 1033 | 1048 | 98 + | 3   | 1049 | 3946   | 4993   |
| UN12876 | Rsa1.0_01564.1 | 1274 | 43169  | 0         | 1108 | 1140 | 97 - | 118 | 1257 | 19661  | 20800  |
| UN12877 | Rsa1.0_00962.1 | 1302 | 184909 | 0         | 755  | 801  | 94 + | 513 | 1302 | 19815  | 20606  |
| UN12878 | Rsa1.0_08140.1 | 823  | 7845   | 0         | 413  | 430  | 96 + | 394 | 823  | 6704   | 7129   |
| UN12879 | Rsa1.0_02119.1 | 983  | 34833  | 0         | 843  | 894  | 94 - | 1   | 872  | 7164   | 8055   |
| UN12880 | Rsa1.0_04881.1 | 1198 | 15608  | 1.00E-175 | 353  | 367  | 96 + | 825 | 1191 | 7577   | 7943   |
| UN12881 | Rsa1.0_02655.1 | 1383 | 29027  | 1.00E-104 | 321  | 365  | 87 - | 15  | 376  | 13789  | 14132  |
| UN12882 | Rsa1.0_29200.1 | 1262 | 789    | 0         | 695  | 741  | 93 + | 492 | 1231 | 68     | 788    |
| UN12883 | #              | #    | #      | #         | #    | #    | #    | #   | #    | #      | #      |
| UN12884 | Rsa1.0_00372.1 | 906  | 90418  | 0         | 427  | 447  | 95 - | 470 | 905  | 46191  | 46637  |
| UN12885 | Rsa1.0_01026.1 | 1175 | 171624 | 1.00E-127 | 265  | 275  | 96 - | 902 | 1175 | 30319  | 30587  |
| UN12886 | Rsa1.0_00108.1 | 1266 | 478491 | 0         | 512  | 558  | 91 - | 668 | 1215 | 307490 | 308027 |
| UN12887 | Rsa1.0_00519.1 | 1329 | 197864 | 0         | 447  | 462  | 96 + | 422 | 883  | 192264 | 192724 |
| UN12888 | Rsa1.0_00652.1 | 906  | 70089  | 1.00E-109 | 229  | 237  | 96 - | 661 | 897  | 22798  | 23033  |
| UN12889 | Rsa1.0_07925.1 | 750  | 8245   | 0         | 723  | 756  | 95 + | 2   | 750  | 3710   | 4459   |
| UN12890 | Rsa1.0_00016.1 | 982  | 831256 | 1.00E-151 | 287  | 292  | 98 - | 691 | 982  | 204599 | 204890 |
| UN12891 | Rsa1.0_05505.1 | 677  | 13500  | 0         | 633  | 652  | 97 + | 3   | 652  | 6227   | 6878   |
| UN12892 | Rsa1.0_00226.1 | 719  | 105884 | 0         | 445  | 459  | 96 - | 257 | 713  | 42370  | 42828  |
| UN12893 | Rsa1.0_06590.1 | 1255 | 10706  | 0         | 409  | 429  | 95 - | 499 | 927  | 2006   | 2428   |
| UN12894 | Rsa1.0_00642.1 | 1490 | 201230 | 0         | 1032 | 1064 | 96 + | 2   | 1063 | 172898 | 173961 |
| UN12895 | Rsa1.0_00196.1 | 849  | 109960 | 0         | 619  | 638  | 97 + | 220 | 849  | 102104 | 102740 |
| UN12896 | Rsa1.0_01155.1 | 1097 | 52182  | 0         | 743  | 766  | 96 + | 4   | 769  | 12179  | 12944  |
| UN12897 | Rsa1.0_01585.1 | 614  | 42806  | 0         | 598  | 613  | 97 - | 2   | 614  | 8561   | 9173   |
| UN12898 | Rsa1.0_14855.1 | 1348 | 3011   | 0         | 650  | 674  | 96 + | 259 | 932  | 1310   | 1983   |
| UN12899 | Rsa1.0_00890.1 | 843  | 323870 | 1.00E-113 | 267  | 284  | 94 + | 560 | 842  | 213739 | 214021 |
| UN12900 | Rsa1.0_00218.1 | 1372 | 201480 | 0         | 997  | 1085 | 91 + | 285 | 1364 | 174782 | 175837 |
| UN12901 | Rsa1.0_00044.1 | 1150 | 271658 | 0         | 413  | 425  | 97 + | 718 | 1140 | 120064 | 120488 |
| UN12902 | Rsa1.0_04786.1 | 564  | 15988  | 9.00E-90  | 171  | 172  | 99 + | 279 | 450  | 964    | 1135   |
| UN12903 | Rsa1.0_01667.1 | 1033 | 41315  | 1.00E-155 | 341  | 362  | 94 + | 668 | 1029 | 2299   | 2655   |
| UN12904 | Rsa1.0_19029.1 | 775  | 1493   | 5.00E-58  | 169  | 186  | 90 - | 385 | 570  | 55     | 233    |
| UN12905 | Rsa1.0_12866.1 | 858  | 5093   | 0         | 805  | 847  | 95 - | 1   | 824  | 1621   | 2461   |
| UN12906 | Rsa1.0_00158.1 | 670  | 117999 | 1.00E-168 | 325  | 332  | 97 + | 337 | 668  | 68825  | 69155  |
| UN12907 | Rsa1.0_05687.1 | 1304 | 12932  | 0         | 575  | 589  | 97 + | 718 | 1304 | 3372   | 3956   |

|         |                |      |        |           |      |      |       |     |      |        |        |
|---------|----------------|------|--------|-----------|------|------|-------|-----|------|--------|--------|
| UN12908 | Rsa1.0.02750.1 | 999  | 28239  | 2.00E-89  | 206  | 218  | 94 -  | 487 | 701  | 23214  | 23431  |
| UN12909 | Rsa1.0.00441.1 | 796  | 84607  | 1.00E-156 | 289  | 292  | 98 +  | 3   | 294  | 67630  | 67921  |
| UN12910 | Rsa1.0.06452.1 | 1207 | 10994  | 1.00E-126 | 276  | 294  | 93 -  | 615 | 908  | 2469   | 2750   |
| UN12911 | Rsa1.0.01884.1 | 469  | 37659  | 1.00E-168 | 317  | 323  | 98 +  | 146 | 468  | 23642  | 23964  |
| UN12912 | Rsa1.0.00222.1 | 1019 | 172263 | 0         | 996  | 1015 | 98 +  | 3   | 1015 | 68984  | 69995  |
| UN12913 | Rsa1.0.00284.1 | 1294 | 323267 | 1.00E-103 | 194  | 195  | 99 -  | 197 | 391  | 137125 | 137319 |
| UN12914 | Rsa1.0.00037.1 | 1874 | 307838 | 0         | 450  | 451  | 99 -  | 938 | 1388 | 136526 | 136976 |
| UN12915 | Rsa1.0.00225.1 | 782  | 105892 | 0         | 434  | 435  | 99 -  | 348 | 782  | 47589  | 48023  |
| UN12916 | Rsa1.0.00451.1 | 603  | 322533 | 1.00E-174 | 309  | 309  | 100 - | 295 | 603  | 26266  | 26574  |
| UN12917 | Rsa1.0.03588.1 | 671  | 21908  | 0         | 349  | 352  | 99 +  | 3   | 353  | 3149   | 3500   |
| UN12918 | Rsa1.0.00215.1 | 1276 | 201775 | 1.00E-161 | 337  | 350  | 96 +  | 83  | 428  | 48897  | 49244  |
| UN12919 | Rsa1.0.00196.1 | 1177 | 109960 | 0         | 441  | 449  | 98 +  | 731 | 1177 | 37671  | 38114  |
| UN12920 | Rsa1.0.03878.1 | 961  | 20305  | 0         | 517  | 529  | 97 +  | 259 | 784  | 1652   | 2180   |
| UN12921 | Rsa1.0.03695.1 | 1276 | 21329  | 0         | 444  | 465  | 95 +  | 469 | 927  | 1      | 462    |
| UN12922 | Rsa1.0.03518.1 | 1249 | 22337  | 0         | 969  | 1114 | 86 -  | 71  | 1180 | 782    | 1892   |
| UN12923 | Rsa1.0.00837.1 | 1056 | 62568  | 0         | 1006 | 1060 | 94 -  | 2   | 1056 | 23094  | 24150  |
| UN12924 | Rsa1.0.27704.1 | 1233 | 842    | 1.00E-177 | 318  | 319  | 99 +  | 608 | 926  | 47     | 365    |
| UN12925 | Rsa1.0.03448.1 | 1217 | 22844  | 0         | 691  | 703  | 98 +  | 512 | 1212 | 3268   | 3970   |
| UN12926 | Rsa1.0.04036.1 | 298  | 19473  | 7.00E-89  | 277  | 310  | 89 +  | 1   | 298  | 2673   | 2976   |
| UN12927 | Rsa1.0.01335.1 | 1081 | 47894  | 0         | 407  | 415  | 98 +  | 61  | 475  | 8128   | 8542   |
| UN12928 | Rsa1.0.00017.1 | 763  | 752458 | 5.00E-18  | 63   | 68   | 92 -  | 677 | 744  | 603147 | 603214 |
| UN12929 | Rsa1.0.00017.1 | 1349 | 752458 | 0         | 483  | 489  | 98 -  | 3   | 490  | 206415 | 206903 |
| UN12930 | Rsa1.0.00088.1 | 1683 | 141341 | 0         | 332  | 332  | 100 + | 1   | 332  | 126100 | 126431 |
| UN12931 | Rsa1.0.01657.1 | 1035 | 41436  | 0         | 1012 | 1043 | 97 -  | 2   | 1034 | 18371  | 19411  |
| UN12932 | Rsa1.0.06482.1 | 851  | 10937  | 0         | 579  | 611  | 94 +  | 209 | 816  | 8153   | 8752   |
| UN12933 | Rsa1.0.17775.1 | 876  | 1743   | 1.00E-178 | 492  | 535  | 91 -  | 1   | 517  | 1      | 529    |
| UN12934 | Rsa1.0.01078.1 | 1024 | 316910 | 0         | 443  | 450  | 98 +  | 1   | 449  | 263780 | 264229 |
| UN12935 | Rsa1.0.00035.1 | 1494 | 176449 | 0         | 502  | 512  | 98 -  | 987 | 1493 | 41113  | 41624  |
| UN12936 | Rsa1.0.00715.1 | 254  | 67116  | 6.00E-49  | 120  | 127  | 94 +  | 76  | 202  | 41043  | 41169  |
| UN12937 | Rsa1.0.00015.1 | 533  | 561803 | 1.00E-107 | 267  | 288  | 92 -  | 37  | 321  | 323683 | 323970 |
| UN12938 | Rsa1.0.01039.1 | 1219 | 55946  | 1.00E-167 | 304  | 306  | 99 +  | 912 | 1217 | 1887   | 2192   |
| UN12939 | Rsa1.0.34219.1 | 1388 | 662    | 0         | 551  | 570  | 96 +  | 88  | 651  | 93     | 662    |
| UN12940 | Rsa1.0.13940.1 | 1152 | 4047   | 0         | 952  | 1001 | 95 -  | 1   | 996  | 533    | 1524   |
| UN12941 | Rsa1.0.01414.1 | 572  | 149508 | 0         | 556  | 568  | 97 -  | 3   | 570  | 143134 | 143695 |
| UN12942 | Rsa1.0.03594.1 | 573  | 21868  | 0         | 522  | 548  | 95 +  | 1   | 543  | 14605  | 15150  |
| UN12943 | Rsa1.0.01091.1 | 821  | 54383  | 0         | 421  | 428  | 98 +  | 8   | 435  | 3299   | 3726   |
| UN12944 | Rsa1.0.02933.1 | 747  | 26641  | 1.00E-134 | 330  | 357  | 92 -  | 363 | 718  | 14863  | 15217  |
| UN12945 | Rsa1.0.00714.1 | 348  | 67187  | 1.00E-87  | 192  | 200  | 96 +  | 1   | 200  | 22346  | 22544  |
| UN12946 | Rsa1.0.00476.1 | 687  | 280966 | 1.00E-149 | 381  | 415  | 91 +  | 33  | 434  | 31627  | 32036  |

|         |                |      |        |           |      |      |       |     |      |        |        |
|---------|----------------|------|--------|-----------|------|------|-------|-----|------|--------|--------|
| UN12947 | Rsa1.0.00139.1 | 1111 | 357786 | 0         | 342  | 344  | 99 -  | 397 | 740  | 307381 | 307724 |
| UN12948 | Rsa1.0.00236.1 | 552  | 104771 | 0         | 388  | 405  | 95 -  | 1   | 405  | 3599   | 4003   |
| UN12949 | Rsa1.0.02157.1 | 924  | 149652 | 1.00E-113 | 252  | 268  | 94 +  | 3   | 270  | 12864  | 13118  |
| UN12950 | Rsa1.0.01660.1 | 1365 | 41400  | 0         | 540  | 558  | 96 +  | 2   | 558  | 34367  | 34923  |
| UN12951 | Rsa1.0.09942.1 | 1454 | 6077   | 0         | 515  | 521  | 98 +  | 404 | 924  | 2178   | 2698   |
| UN12952 | Rsa1.0.02688.1 | 1460 | 28644  | 0         | 581  | 582  | 99 -  | 879 | 1459 | 16137  | 16718  |
| UN12953 | Rsa1.0.04658.1 | 782  | 16487  | 0         | 516  | 519  | 99 +  | 2   | 520  | 2415   | 2933   |
| UN12954 | Rsa1.0.01191.1 | 1300 | 51235  | 1.00E-111 | 216  | 220  | 98 +  | 887 | 1106 | 40960  | 41179  |
| UN12955 | Rsa1.0.01117.1 | 1395 | 53465  | 0         | 852  | 876  | 97 -  | 164 | 1032 | 45221  | 46096  |
| UN12956 | Rsa1.0.00114.1 | 848  | 131330 | 1.00E-128 | 248  | 252  | 98 +  | 595 | 846  | 31129  | 31379  |
| UN12957 | Rsa1.0.02952.1 | 594  | 26492  | 0         | 569  | 596  | 95 +  | 7   | 592  | 20510  | 21105  |
| UN12958 | Rsa1.0.00080.1 | 914  | 190437 | 1.00E-126 | 230  | 230  | 100 + | 682 | 911  | 37681  | 37910  |
| UN12959 | Rsa1.0.00644.1 | 814  | 136881 | 1.00E-74  | 146  | 147  | 99 -  | 401 | 547  | 43911  | 44057  |
| UN12960 | Rsa1.0.01721.1 | 644  | 40345  | 0         | 644  | 644  | 100 - | 1   | 644  | 24026  | 24669  |
| UN12961 | Rsa1.0.00251.1 | 1231 | 303968 | 1.00E-163 | 351  | 368  | 95 +  | 1   | 368  | 55620  | 55975  |
| UN12962 | Rsa1.0.00347.1 | 926  | 93048  | 1.00E-153 | 301  | 310  | 97 -  | 366 | 675  | 91691  | 92000  |
| UN12963 | Rsa1.0.01481.1 | 1207 | 184562 | 0         | 596  | 601  | 99 +  | 1   | 601  | 180888 | 181486 |
| UN12964 | Rsa1.0.00321.1 | 710  | 95671  | 1.00E-144 | 285  | 292  | 97 +  | 2   | 292  | 47875  | 48166  |
| UN12965 | Rsa1.0.03387.1 | 989  | 23278  | 1.00E-110 | 378  | 435  | 86 -  | 146 | 564  | 1752   | 2161   |
| UN12966 | Rsa1.0.02611.1 | 1388 | 29586  | 0         | 335  | 335  | 100 + | 3   | 337  | 19139  | 19473  |
| UN12967 | Rsa1.0.00040.1 | 836  | 324196 | 0         | 586  | 594  | 98 +  | 1   | 592  | 36346  | 36939  |
| UN12968 | Rsa1.0.01185.1 | 1352 | 149842 | 1.00E-121 | 222  | 222  | 100 - | 388 | 609  | 135255 | 135476 |
| UN12969 | Rsa1.0.00552.1 | 1050 | 206757 | 1.00E-162 | 333  | 342  | 97 +  | 3   | 340  | 193044 | 193385 |
| UN12970 | Rsa1.0.00381.1 | 471  | 89718  | 2.00E-65  | 179  | 193  | 92 +  | 3   | 194  | 72068  | 72256  |
| UN12971 | Rsa1.0.07105.1 | 502  | 9886   | 0         | 417  | 436  | 95 +  | 7   | 440  | 1413   | 1845   |
| UN12972 | Rsa1.0.00108.1 | 1115 | 478491 | 1.00E-152 | 291  | 297  | 97 +  | 776 | 1072 | 451984 | 452280 |
| UN12973 | Rsa1.0.18957.1 | 1293 | 1505   | 1.00E-149 | 293  | 300  | 97 +  | 353 | 652  | 1203   | 1501   |
| UN12974 | Rsa1.0.13999.1 | 1265 | 3934   | 0         | 357  | 358  | 99 +  | 1   | 358  | 1800   | 2157   |
| UN12975 | Rsa1.0.02365.1 | 927  | 32118  | 0         | 918  | 941  | 97 -  | 1   | 925  | 13255  | 14194  |
| UN12976 | Rsa1.0.69282.1 | 1183 | 331    | 1.00E-130 | 252  | 257  | 98 +  | 407 | 663  | 71     | 327    |
| UN12977 | Rsa1.0.00139.1 | 1014 | 357786 | 0         | 957  | 987  | 96 -  | 28  | 1012 | 263041 | 264021 |
| UN12978 | Rsa1.0.14538.1 | 1457 | 3287   | 0         | 385  | 392  | 98 +  | 1   | 392  | 2434   | 2825   |
| UN12979 | Rsa1.0.00117.1 | 1150 | 213118 | 0         | 582  | 584  | 99 +  | 1   | 584  | 122790 | 123373 |
| UN12980 | Rsa1.0.02119.1 | 1422 | 34833  | 0         | 1340 | 1372 | 97 +  | 3   | 1372 | 6569   | 7940   |
| UN12981 | Rsa1.0.03321.1 | 810  | 23755  | 0         | 484  | 497  | 97 -  | 9   | 503  | 21986  | 22480  |
| UN12982 | Rsa1.0.00428.1 | 748  | 85599  | 1.00E-164 | 296  | 297  | 99 -  | 7   | 303  | 64925  | 65221  |
| UN12983 | Rsa1.0.03770.1 | 1472 | 20952  | 0         | 693  | 715  | 96 -  | 1   | 714  | 5875   | 6582   |
| UN12984 | Rsa1.0.01571.1 | 1392 | 43000  | 0         | 416  | 433  | 96 +  | 968 | 1392 | 13732  | 14164  |
| UN12985 | Rsa1.0.05184.1 | 796  | 14563  | 1.00E-147 | 367  | 394  | 93 +  | 3   | 390  | 127    | 518    |

|         |                |      |        |           |      |      |       |      |      |        |        |
|---------|----------------|------|--------|-----------|------|------|-------|------|------|--------|--------|
| UN12986 | Rsa1.0.01881.1 | 996  | 37721  | 0         | 794  | 823  | 96 +  | 1    | 822  | 7716   | 8531   |
| UN12987 | Rsa1.0.00785.1 | 1563 | 64356  | 0         | 819  | 820  | 99 +  | 2    | 821  | 25927  | 26746  |
| UN12988 | Rsa1.0.01286.1 | 706  | 49209  | 1.00E-157 | 310  | 318  | 97 +  | 389  | 706  | 9368   | 9684   |
| UN12989 | Rsa1.0.02377.1 | 918  | 31994  | 1.00E-167 | 304  | 306  | 99 -  | 1    | 306  | 10248  | 10553  |
| UN12990 | Rsa1.0.00131.1 | 894  | 432233 | 0         | 406  | 424  | 95 +  | 472  | 893  | 96212  | 96630  |
| UN12991 | Rsa1.0.07738.1 | 680  | 8686   | 0         | 505  | 535  | 94 -  | 1    | 533  | 3745   | 4268   |
| UN12992 | Rsa1.0.00925.1 | 1313 | 59481  | 0         | 705  | 742  | 95 -  | 1    | 737  | 21015  | 21749  |
| UN12993 | Rsa1.0.00353.1 | 767  | 92242  | 0         | 523  | 542  | 96 +  | 1    | 541  | 7238   | 7779   |
| UN12994 | Rsa1.0.00435.1 | 186  | 317579 | 7.00E-54  | 151  | 165  | 91 +  | 1    | 162  | 70720  | 70884  |
| UN12995 | Rsa1.0.01310.1 | 874  | 164719 | 0         | 786  | 829  | 94 +  | 2    | 825  | 6052   | 6865   |
| UN12996 | Rsa1.0.00058.1 | 1307 | 159921 | 1.00E-126 | 306  | 328  | 93 -  | 3    | 328  | 139467 | 139782 |
| UN12997 | Rsa1.0.03927.1 | 525  | 19997  | 0         | 474  | 491  | 96 -  | 1    | 491  | 18432  | 18916  |
| UN12998 | Rsa1.0.03318.1 | 1552 | 23780  | 0         | 410  | 427  | 96 +  | 1119 | 1545 | 4296   | 4722   |
| UN12999 | Rsa1.0.00059.1 | 1330 | 159650 | 0         | 349  | 357  | 97 +  | 1    | 355  | 131062 | 131418 |
| UN13000 | Rsa1.0.00389.1 | 621  | 88795  | 5.00E-79  | 168  | 174  | 96 +  | 151  | 324  | 63738  | 63911  |
| UN13001 | Rsa1.0.00816.1 | 975  | 403350 | 4.00E-93  | 340  | 396  | 85 -  | 606  | 972  | 368893 | 369285 |
| UN13002 | Rsa1.0.03134.1 | 1255 | 145023 | 0         | 412  | 413  | 99 -  | 843  | 1255 | 130404 | 130816 |
| UN13003 | Rsa1.0.09270.1 | 786  | 6513   | 0         | 432  | 440  | 98 -  | 3    | 442  | 888    | 1327   |
| UN13004 | Rsa1.0.00437.1 | 1136 | 84879  | 0         | 428  | 444  | 96 +  | 693  | 1136 | 23633  | 24072  |
| UN13005 | Rsa1.0.00018.1 | 548  | 410899 | 1.00E-113 | 232  | 238  | 97 -  | 14   | 249  | 175470 | 175706 |
| UN13006 | Rsa1.0.07021.1 | 1068 | 10016  | 1.00E-133 | 315  | 343  | 91 +  | 336  | 666  | 7093   | 7426   |
| UN13007 | Rsa1.0.00125.1 | 896  | 253043 | 1.00E-157 | 350  | 372  | 94 -  | 62   | 433  | 994    | 1363   |
| UN13008 | Rsa1.0.01136.1 | 655  | 52724  | 2.00E-97  | 219  | 229  | 95 +  | 3    | 225  | 32169  | 32396  |
| UN13009 | Rsa1.0.00175.1 | 1356 | 166121 | 0         | 674  | 701  | 96 +  | 642  | 1342 | 85418  | 86113  |
| UN13010 | Rsa1.0.00105.1 | 1146 | 134138 | 0         | 385  | 395  | 97 +  | 3    | 391  | 126959 | 127353 |
| UN13011 | Rsa1.0.00425.1 | 1063 | 147080 | 0         | 542  | 562  | 96 -  | 348  | 909  | 75128  | 75689  |
| UN13012 | Rsa1.0.00588.1 | 1252 | 73939  | 1.00E-165 | 381  | 402  | 94 +  | 846  | 1242 | 19134  | 19528  |
| UN13013 | Rsa1.0.03543.1 | 1323 | 22185  | 0         | 494  | 511  | 96 -  | 96   | 603  | 3871   | 4378   |
| UN13014 | Rsa1.0.42837.1 | 730  | 524    | 3.00E-93  | 201  | 206  | 97 -  | 528  | 730  | 78     | 283    |
| UN13015 | Rsa1.0.00273.1 | 780  | 326186 | 5.00E-98  | 289  | 321  | 90 -  | 467  | 780  | 307766 | 308084 |
| UN13016 | Rsa1.0.00387.1 | 627  | 495407 | 0         | 441  | 457  | 96 -  | 172  | 627  | 382640 | 383092 |
| UN13017 | Rsa1.0.17794.1 | 896  | 1740   | 1.00E-119 | 254  | 265  | 95 +  | 632  | 896  | 1      | 264    |
| UN13018 | Rsa1.0.00037.1 | 1267 | 307838 | 0         | 448  | 467  | 95 -  | 803  | 1267 | 241190 | 241654 |
| UN13019 | Rsa1.0.00206.1 | 1387 | 109040 | 0         | 1077 | 1129 | 95 -  | 30   | 1144 | 28660  | 29786  |
| UN13020 | Rsa1.0.02921.1 | 1938 | 26779  | 0         | 1469 | 1501 | 97 +  | 460  | 1938 | 23735  | 25235  |
| UN13021 | Rsa1.0.01163.1 | 1536 | 51946  | 1.00E-158 | 305  | 310  | 98 -  | 1    | 308  | 16052  | 16359  |
| UN13022 | Rsa1.0.00069.1 | 852  | 403561 | 0         | 341  | 341  | 100 - | 2    | 342  | 200655 | 200995 |
| UN13023 | Rsa1.0.08553.1 | 1748 | 7210   | 1.00E-134 | 253  | 256  | 98 -  | 582  | 837  | 1103   | 1358   |
| UN13024 | Rsa1.0.00440.1 | 851  | 84723  | 1.00E-136 | 278  | 288  | 96 +  | 1    | 288  | 25114  | 25398  |



|         |                |      |        |           |      |      |       |      |      |        |        |
|---------|----------------|------|--------|-----------|------|------|-------|------|------|--------|--------|
| UN13025 | Rsa1.0.00480.1 | 1429 | 81325  | 0         | 471  | 480  | 98 +  | 361  | 837  | 4323   | 4802   |
| UN13026 | Rsa1.0.01453.1 | 2020 | 45449  | 0         | 1114 | 1114 | 100 + | 907  | 2020 | 5322   | 6435   |
| UN13027 | Rsa1.0.02493.1 | 570  | 30854  | 0         | 429  | 432  | 99 +  | 139  | 570  | 6059   | 6490   |
| UN13028 | Rsa1.0.02215.1 | 1364 | 33822  | 0         | 368  | 371  | 99 -  | 3    | 372  | 27836  | 28206  |
| UN13029 | Rsa1.0.13994.1 | 1136 | 3941   | 1.00E-176 | 346  | 357  | 96 -  | 285  | 641  | 1610   | 1966   |
| UN13030 | Rsa1.0.03195.1 | 1648 | 24673  | 0         | 485  | 506  | 95 -  | 29   | 534  | 9107   | 9605   |
| UN13031 | Rsa1.0.08557.1 | 1338 | 7199   | 1.00E-126 | 279  | 297  | 93 +  | 3    | 299  | 4756   | 5042   |
| UN13032 | Rsa1.0.03356.1 | 1024 | 23487  | 0         | 402  | 413  | 97 -  | 4    | 414  | 1225   | 1637   |
| UN13033 | Rsa1.0.00427.1 | 1177 | 189678 | 1.00E-142 | 262  | 264  | 99 +  | 707  | 970  | 37925  | 38188  |
| UN13034 | Rsa1.0.04301.1 | 1431 | 18022  | 0         | 464  | 474  | 97 -  | 864  | 1337 | 16876  | 17344  |
| UN13035 | Rsa1.0.00070.1 | 1028 | 150321 | 0         | 578  | 588  | 98 +  | 1    | 587  | 59029  | 59616  |
| UN13036 | Rsa1.0.00008.1 | 1366 | 358124 | 0         | 810  | 889  | 91 +  | 496  | 1366 | 277916 | 278786 |
| UN13037 | Rsa1.0.00518.1 | 799  | 78360  | 1.00E-126 | 233  | 234  | 99 -  | 3    | 236  | 20635  | 20868  |
| UN13038 | Rsa1.0.00863.1 | 1031 | 254535 | 0         | 387  | 391  | 98 -  | 1    | 391  | 213547 | 213933 |
| UN13039 | Rsa1.0.00324.1 | 1438 | 218805 | 0         | 1389 | 1446 | 96 -  | 2    | 1432 | 214977 | 216417 |
| UN13040 | Rsa1.0.14069.1 | 1184 | 3842   | 0         | 811  | 835  | 97 -  | 351  | 1180 | 1982   | 2810   |
| UN13041 | Rsa1.0.00522.1 | 1148 | 78103  | 2.00E-98  | 207  | 215  | 96 +  | 355  | 569  | 48991  | 49205  |
| UN13042 | Rsa1.0.04142.1 | 740  | 18861  | 0         | 416  | 434  | 95 -  | 8    | 441  | 13126  | 13554  |
| UN13043 | Rsa1.0.39426.1 | 1887 | 570    | 0         | 459  | 461  | 99 +  | 1427 | 1887 | 46     | 506    |
| UN13044 | Rsa1.0.00662.1 | 983  | 192183 | 0         | 671  | 701  | 95 -  | 241  | 941  | 182411 | 183105 |
| UN13045 | Rsa1.0.00759.1 | 964  | 65465  | 1.00E-108 | 268  | 289  | 92 -  | 2    | 290  | 63157  | 63435  |
| UN13046 | Rsa1.0.00244.1 | 949  | 103590 | 1.00E-144 | 292  | 302  | 96 +  | 7    | 306  | 29923  | 30224  |
| UN13047 | Rsa1.0.00006.1 | 1042 | 396176 | 0         | 1039 | 1041 | 99 -  | 3    | 1042 | 2835   | 3875   |
| UN13048 | Rsa1.0.10165.1 | 937  | 5966   | 0         | 413  | 427  | 96 -  | 18   | 444  | 365    | 790    |
| UN13049 | Rsa1.0.00484.1 | 3026 | 203294 | 0         | 1628 | 1649 | 98 +  | 566  | 2214 | 140171 | 141818 |
| UN13050 | Rsa1.0.00017.1 | 1401 | 752458 | 0         | 543  | 574  | 94 -  | 825  | 1384 | 743125 | 743692 |
| UN13051 | Rsa1.0.32561.1 | 1574 | 699    | 1.00E-165 | 311  | 315  | 98 +  | 1    | 314  | 385    | 699    |
| UN13052 | Rsa1.0.00229.1 | 1293 | 105471 | 1.00E-176 | 316  | 317  | 99 +  | 937  | 1253 | 43350  | 43666  |
| UN13053 | Rsa1.0.05573.1 | 1382 | 13290  | 0         | 472  | 493  | 95 -  | 26   | 509  | 4157   | 4646   |
| UN13054 | Rsa1.0.00642.1 | 1454 | 201230 | 0         | 473  | 477  | 99 -  | 977  | 1452 | 62495  | 62971  |
| UN13055 | Rsa1.0.05208.1 | 625  | 14504  | 1.00E-153 | 317  | 331  | 95 +  | 295  | 625  | 3908   | 4234   |
| UN13056 | Rsa1.0.03189.1 | 559  | 24710  | 0         | 421  | 435  | 96 -  | 1    | 423  | 9173   | 9607   |
| UN13057 | Rsa1.0.01932.1 | 1232 | 37177  | 1.00E-137 | 265  | 270  | 98 -  | 966  | 1232 | 10970  | 11239  |
| UN13058 | Rsa1.0.00108.1 | 968  | 478491 | 1.00E-126 | 283  | 296  | 95 +  | 102  | 390  | 67372  | 67663  |
| UN13059 | Rsa1.0.00009.1 | 959  | 232558 | 1.00E-135 | 344  | 369  | 93 +  | 582  | 937  | 53021  | 53382  |
| UN13060 | Rsa1.0.06509.1 | 1049 | 10873  | 1.00E-133 | 254  | 258  | 98 -  | 228  | 485  | 6323   | 6580   |
| UN13061 | Rsa1.0.00814.1 | 1214 | 63073  | 0         | 746  | 758  | 98 -  | 22   | 778  | 2802   | 3557   |
| UN13062 | Rsa1.0.02723.1 | 593  | 28408  | 0         | 342  | 342  | 100 - | 250  | 591  | 2561   | 2902   |
| UN13063 | Rsa1.0.01397.1 | 1513 | 183276 | 0         | 1131 | 1146 | 98 -  | 3    | 1148 | 162124 | 163267 |

|         |                |      |        |           |      |      |       |      |      |        |        |
|---------|----------------|------|--------|-----------|------|------|-------|------|------|--------|--------|
| UN13064 | Rsa1.0.00045.1 | 988  | 328694 | 0         | 429  | 446  | 96 -  | 543  | 988  | 131773 | 132215 |
| UN13065 | Rsa1.0.02534.1 | 997  | 30396  | 1.00E-143 | 261  | 262  | 99 -  | 2    | 263  | 5455   | 5716   |
| UN13066 | Rsa1.0.00473.1 | 1429 | 212204 | 1.00E-160 | 348  | 367  | 94 -  | 1063 | 1427 | 47338  | 47700  |
| UN13067 | Rsa1.0.05748.1 | 916  | 12749  | 1.00E-154 | 313  | 324  | 96 +  | 100  | 422  | 6628   | 6951   |
| UN13068 | Rsa1.0.00079.1 | 2926 | 606987 | 0         | 856  | 898  | 95 -  | 1281 | 2157 | 467327 | 468224 |
| UN13069 | Rsa1.0.00264.1 | 1811 | 101674 | 0         | 408  | 416  | 98 -  | 1097 | 1512 | 78413  | 78828  |
| UN13070 | Rsa1.0.02913.1 | 1070 | 26816  | 0         | 501  | 501  | 100 - | 570  | 1070 | 22091  | 22591  |
| UN13071 | Rsa1.0.00995.1 | 1754 | 57243  | 0         | 635  | 643  | 98 +  | 1112 | 1754 | 21109  | 21751  |
| UN13072 | Rsa1.0.02001.1 | 848  | 36198  | 0         | 507  | 515  | 98 -  | 2    | 516  | 31940  | 32449  |
| UN13073 | Rsa1.0.06273.1 | 907  | 11346  | 0         | 905  | 905  | 100 - | 3    | 907  | 2931   | 3835   |
| UN13074 | Rsa1.0.08957.1 | 805  | 6754   | 0         | 515  | 528  | 97 +  | 279  | 804  | 5841   | 6366   |
| UN13075 | Rsa1.0.02991.1 | 705  | 26178  | 0         | 381  | 391  | 97 +  | 306  | 696  | 21112  | 21502  |
| UN13076 | Rsa1.0.02229.1 | 852  | 33672  | 0         | 392  | 405  | 96 -  | 3    | 407  | 17849  | 18253  |
| UN13077 | Rsa1.0.02128.1 | 1352 | 34758  | 0         | 348  | 348  | 100 - | 3    | 350  | 16324  | 16671  |
| UN13078 | Rsa1.0.00287.1 | 952  | 98687  | 0         | 427  | 432  | 98 +  | 406  | 837  | 57224  | 57655  |
| UN13079 | Rsa1.0.04456.1 | 742  | 17260  | 1.00E-157 | 284  | 285  | 99 +  | 458  | 742  | 7706   | 7990   |
| UN13080 | Rsa1.0.00343.1 | 817  | 93570  | 0         | 530  | 532  | 99 +  | 287  | 817  | 84281  | 84812  |
| UN13081 | Rsa1.0.00198.1 | 1659 | 222963 | 0         | 464  | 491  | 94 +  | 1    | 485  | 141259 | 141746 |
| UN13082 | Rsa1.0.01220.1 | 1484 | 161775 | 1.00E-100 | 196  | 199  | 98 -  | 1030 | 1228 | 122655 | 122853 |
| UN13083 | Rsa1.0.00354.1 | 1134 | 232005 | 1.00E-139 | 270  | 276  | 97 -  | 831  | 1106 | 6914   | 7184   |
| UN13084 | Rsa1.0.01295.1 | 1739 | 49040  | 1.00E-156 | 299  | 305  | 98 -  | 865  | 1169 | 23660  | 23964  |
| UN13085 | Rsa1.0.00380.1 | 849  | 89748  | 0         | 664  | 692  | 95 +  | 160  | 847  | 83924  | 84610  |
| UN13086 | Rsa1.0.03740.1 | 769  | 21065  | 0         | 597  | 618  | 96 +  | 152  | 767  | 14480  | 15091  |
| UN13087 | Rsa1.0.00386.1 | 1515 | 89134  | 1.00E-124 | 248  | 254  | 97 -  | 3    | 256  | 67826  | 68078  |
| UN13088 | Rsa1.0.03692.1 | 570  | 21338  | 1.00E-112 | 244  | 255  | 95 -  | 316  | 570  | 6377   | 6627   |
| UN13089 | Rsa1.0.00328.1 | 1170 | 224661 | 1.00E-124 | 249  | 256  | 97 -  | 915  | 1167 | 217156 | 217411 |
| UN13090 | Rsa1.0.00020.1 | 1495 | 283099 | 1.00E-167 | 374  | 395  | 94 +  | 17   | 402  | 60874  | 61265  |
| UN13091 | Rsa1.0.03356.1 | 2300 | 23487  | 0         | 1345 | 1383 | 97 -  | 538  | 1912 | 5698   | 7080   |
| UN13092 | Rsa1.0.00419.1 | 1272 | 86562  | 0         | 1090 | 1108 | 98 -  | 1    | 1108 | 69863  | 70970  |
| UN13093 | Rsa1.0.01166.1 | 1806 | 51877  | 0         | 632  | 634  | 99 -  | 554  | 1187 | 10072  | 10705  |
| UN13094 | Rsa1.0.00316.1 | 1165 | 96264  | 0         | 590  | 590  | 100 - | 576  | 1165 | 57225  | 57814  |
| UN13095 | Rsa1.0.02872.1 | 1123 | 27080  | 0         | 538  | 542  | 99 -  | 582  | 1123 | 11208  | 11749  |
| UN13096 | Rsa1.0.00734.1 | 1623 | 66508  | 1.00E-164 | 297  | 298  | 99 +  | 836  | 1133 | 59680  | 59977  |
| UN13097 | Rsa1.0.00800.1 | 649  | 63868  | 1.00E-176 | 365  | 379  | 96 +  | 14   | 390  | 19313  | 19688  |
| UN13098 | Rsa1.0.00082.1 | 1308 | 237584 | 1.00E-117 | 230  | 235  | 97 -  | 497  | 731  | 133924 | 134158 |
| UN13099 | Rsa1.0.00507.1 | 1219 | 79074  | 1.00E-157 | 303  | 310  | 97 -  | 759  | 1068 | 42905  | 43214  |
| UN13100 | Rsa1.0.01166.1 | 1467 | 51877  | 0         | 638  | 648  | 98 +  | 1    | 647  | 9132   | 9779   |
| UN13101 | Rsa1.0.01296.1 | 1621 | 49035  | 0         | 337  | 339  | 99 +  | 5    | 343  | 5249   | 5587   |
| UN13102 | Rsa1.0.00451.1 | 1630 | 322533 | 0         | 476  | 482  | 98 -  | 632  | 1113 | 161726 | 162207 |

|         |                |      |        |           |      |      |       |      |      |        |        |
|---------|----------------|------|--------|-----------|------|------|-------|------|------|--------|--------|
| UN13103 | Rsa1.0.00026.1 | 671  | 327835 | 1.00E-113 | 224  | 228  | 98 -  | 442  | 669  | 206641 | 206867 |
| UN13104 | Rsa1.0.00556.1 | 1219 | 207212 | 0         | 422  | 422  | 100 - | 790  | 1211 | 137353 | 137774 |
| UN13105 | Rsa1.0.00296.1 | 1198 | 97854  | 1.00E-161 | 367  | 392  | 93 -  | 814  | 1196 | 51437  | 51825  |
| UN13106 | Rsa1.0.01188.1 | 1973 | 51362  | 0         | 776  | 790  | 98 -  | 1084 | 1870 | 46093  | 46882  |
| UN13107 | Rsa1.0.00413.1 | 786  | 86921  | 1.00E-168 | 320  | 326  | 98 -  | 5    | 330  | 10794  | 11117  |
| UN13108 | Rsa1.0.04014.1 | 876  | 19572  | 0         | 862  | 876  | 98 -  | 1    | 876  | 11437  | 12306  |
| UN13109 | Rsa1.0.00422.1 | 1089 | 86144  | 0         | 531  | 541  | 98 +  | 1    | 540  | 12755  | 13294  |
| UN13110 | Rsa1.0.02477.1 | 777  | 31058  | 0         | 417  | 421  | 99 -  | 1    | 418  | 13987  | 14407  |
| UN13111 | Rsa1.0.00168.1 | 1347 | 115870 | 2.33E-156 | 303  | 316  | 95 -  | 344  | 659  | 56550  | 56865  |
| UN13112 | Rsa1.0.05622.1 | 1339 | 13145  | 0         | 518  | 550  | 94 +  | 804  | 1339 | 3628   | 4175   |
| UN13113 | Rsa1.0.00557.1 | 758  | 75865  | 1.00E-143 | 276  | 281  | 98 +  | 20   | 300  | 16136  | 16415  |
| UN13114 | Rsa1.0.01239.1 | 1227 | 50107  | 0         | 1199 | 1217 | 98 +  | 7    | 1223 | 19332  | 20546  |
| UN13115 | Rsa1.0.00222.1 | 1314 | 172263 | 0         | 391  | 394  | 99 -  | 921  | 1314 | 17043  | 17436  |
| UN13116 | Rsa1.0.02105.1 | 871  | 156953 | 0         | 476  | 508  | 93 -  | 365  | 869  | 150672 | 151165 |
| UN13117 | Rsa1.0.00728.1 | 842  | 66704  | 0         | 383  | 396  | 96 -  | 1    | 395  | 36897  | 37288  |
| UN13118 | Rsa1.0.03279.1 | 1241 | 24115  | 0         | 620  | 622  | 99 -  | 3    | 624  | 7808   | 8428   |
| UN13119 | Rsa1.0.00075.1 | 2801 | 146680 | 0         | 1704 | 1801 | 94 -  | 1003 | 2787 | 140465 | 142244 |
| UN13120 | Rsa1.0.04378.1 | 819  | 17651  | 0         | 352  | 354  | 99 +  | 331  | 684  | 4630   | 4983   |
| UN13121 | Rsa1.0.00019.1 | 1953 | 301669 | 0         | 543  | 544  | 99 -  | 1408 | 1950 | 218690 | 219233 |
| UN13122 | Rsa1.0.02369.1 | 635  | 32075  | 0         | 483  | 507  | 95 +  | 133  | 635  | 5009   | 5511   |
| UN13123 | Rsa1.0.00454.1 | 895  | 216970 | 0         | 868  | 893  | 97 +  | 5    | 895  | 158096 | 158987 |
| UN13124 | Rsa1.0.01185.1 | 1686 | 149842 | 0         | 425  | 426  | 99 -  | 1260 | 1685 | 126522 | 126947 |
| UN13125 | Rsa1.0.01559.1 | 1263 | 43262  | 1.00E-123 | 333  | 365  | 91 +  | 6    | 361  | 20498  | 20858  |
| UN13126 | Rsa1.0.00015.1 | 1116 | 561803 | 1.00E-129 | 246  | 249  | 98 +  | 3    | 251  | 461863 | 462109 |
| UN13127 | Rsa1.0.02756.1 | 1710 | 28202  | 1.00E-175 | 315  | 316  | 99 +  | 1082 | 1397 | 22631  | 22946  |
| UN13128 | Rsa1.0.03299.1 | 1369 | 23949  | 0         | 476  | 500  | 95 -  | 11   | 510  | 14331  | 14817  |
| UN13129 | Rsa1.0.00108.1 | 1246 | 478491 | 0         | 487  | 491  | 99 +  | 756  | 1245 | 383773 | 384263 |
| UN13130 | Rsa1.0.01537.1 | 973  | 187285 | 0         | 356  | 358  | 99 -  | 617  | 973  | 38620  | 38977  |
| UN13131 | Rsa1.0.03054.1 | 1097 | 25738  | 1.00E-160 | 338  | 354  | 95 +  | 3    | 344  | 13554  | 13907  |
| UN13132 | Rsa1.0.01850.1 | 1547 | 162224 | 0         | 479  | 484  | 98 +  | 867  | 1350 | 1286   | 1768   |
| UN13133 | Rsa1.0.00139.1 | 815  | 357786 | 0         | 810  | 815  | 99 -  | 1    | 815  | 141376 | 142190 |
| UN13134 | Rsa1.0.02991.1 | 773  | 26178  | 0         | 427  | 438  | 97 -  | 3    | 436  | 21112  | 21549  |
| UN13135 | Rsa1.0.00045.1 | 642  | 328694 | 3.00E-93  | 190  | 194  | 97 -  | 449  | 642  | 148699 | 148891 |
| UN13136 | Rsa1.0.02946.1 | 1498 | 26537  | 0         | 928  | 951  | 97 +  | 549  | 1497 | 857    | 1804   |
| UN13137 | Rsa1.0.01153.1 | 1171 | 52264  | 0         | 386  | 390  | 98 +  | 1    | 390  | 42506  | 42893  |
| UN13138 | Rsa1.0.04095.1 | 1172 | 19095  | 1.00E-177 | 344  | 353  | 97 +  | 823  | 1172 | 12377  | 12729  |
| UN13139 | Rsa1.0.52681.1 | 1383 | 432    | 0         | 334  | 334  | 100 - | 95   | 428  | 99     | 432    |
| UN13140 | Rsa1.0.08994.1 | 929  | 6724   | 0         | 432  | 447  | 96 +  | 477  | 920  | 3405   | 3848   |
| UN13141 | Rsa1.0.07617.1 | 1853 | 9015   | 0         | 1837 | 1870 | 98 -  | 1    | 1853 | 2166   | 4032   |

|         |                |      |        |           |     |     |       |      |      |        |        |
|---------|----------------|------|--------|-----------|-----|-----|-------|------|------|--------|--------|
| UN13142 | Rsa1.0.21865.1 | 853  | 1168   | 0         | 543 | 548 | 99 -  | 154  | 701  | 1      | 548    |
| UN13143 | Rsa1.0.00645.1 | 1621 | 189716 | 1.00E-149 | 272 | 273 | 99 +  | 1349 | 1621 | 148716 | 148988 |
| UN13144 | Rsa1.0.00675.1 | 1020 | 145590 | 0         | 764 | 764 | 100 + | 1    | 764  | 30711  | 31474  |
| UN13145 | Rsa1.0.05510.1 | 894  | 13470  | 1.00E-107 | 215 | 221 | 97 -  | 121  | 341  | 2743   | 2963   |
| UN13146 | Rsa1.0.00198.1 | 776  | 222963 | 1.00E-151 | 286 | 291 | 98 +  | 136  | 426  | 123127 | 123417 |
| UN13147 | Rsa1.0.00482.1 | 1554 | 81162  | 1.00E-164 | 294 | 294 | 100 + | 1260 | 1553 | 2254   | 2547   |
| UN13148 | Rsa1.0.23933.1 | 962  | 1016   | 1.00E-110 | 209 | 211 | 99 +  | 752  | 962  | 195    | 405    |
| UN13149 | Rsa1.0.00001.1 | 1069 | 363028 | 0         | 479 | 483 | 99 -  | 3    | 485  | 335254 | 335733 |
| UN13150 | Rsa1.0.01249.1 | 788  | 188432 | 1.00E-131 | 279 | 293 | 95 -  | 506  | 788  | 150744 | 151035 |
| UN13151 | Rsa1.0.02901.1 | 910  | 26909  | 1.00E-119 | 310 | 337 | 91 +  | 575  | 905  | 21294  | 21623  |
| UN13152 | Rsa1.0.00398.1 | 986  | 88007  | 0         | 553 | 578 | 95 +  | 422  | 986  | 86395  | 86970  |
| UN13153 | Rsa1.0.02802.1 | 1433 | 27736  | 0         | 620 | 656 | 94 -  | 719  | 1355 | 10025  | 10678  |
| UN13154 | Rsa1.0.00410.1 | 767  | 86957  | 1.00E-119 | 258 | 269 | 95 +  | 471  | 737  | 26432  | 26699  |
| UN13155 | Rsa1.0.02043.1 | 882  | 163754 | 1.00E-147 | 278 | 282 | 98 +  | 2    | 280  | 144930 | 145211 |
| UN13156 | Rsa1.0.03491.1 | 748  | 22541  | 0         | 585 | 606 | 96 +  | 114  | 711  | 8983   | 9586   |
| UN13157 | Rsa1.0.01075.1 | 1213 | 156953 | 0         | 338 | 342 | 98 +  | 872  | 1213 | 23855  | 24196  |
| UN13158 | Rsa1.0.41964.1 | 835  | 535    | 1.00E-124 | 235 | 237 | 99 +  | 599  | 835  | 1      | 235    |
| UN13159 | Rsa1.0.00847.1 | 996  | 62270  | 0         | 409 | 434 | 94 +  | 568  | 993  | 55145  | 55578  |
| UN13160 | Rsa1.0.09273.1 | 1091 | 6511   | 1.00E-147 | 317 | 333 | 95 +  | 1    | 323  | 12     | 344    |
| UN13161 | Rsa1.0.00083.1 | 1189 | 442773 | 0         | 481 | 494 | 97 -  | 19   | 509  | 252723 | 253215 |
| UN13162 | Rsa1.0.04489.1 | 833  | 17145  | 1.00E-150 | 269 | 269 | 100 - | 2    | 270  | 14197  | 14465  |
| UN13163 | Rsa1.0.03194.1 | 744  | 24674  | 1.00E-142 | 256 | 256 | 100 - | 3    | 258  | 3262   | 3517   |
| UN13164 | Rsa1.0.00416.1 | 1020 | 86772  | 1.00E-158 | 295 | 299 | 98 -  | 720  | 1018 | 76128  | 76426  |
| UN13165 | Rsa1.0.00030.1 | 410  | 250988 | 1.00E-136 | 253 | 254 | 99 -  | 157  | 410  | 149392 | 149644 |
| UN13166 | Rsa1.0.01220.1 | 880  | 161775 | 1.00E-159 | 298 | 301 | 99 +  | 4    | 304  | 115836 | 116135 |
| UN13167 | Rsa1.0.18356.1 | 1055 | 1615   | 1.00E-165 | 324 | 333 | 97 +  | 663  | 995  | 177    | 506    |
| UN13168 | Rsa1.0.00652.1 | 857  | 70089  | 1.00E-133 | 277 | 287 | 96 +  | 1    | 285  | 59423  | 59707  |
| UN13169 | Rsa1.0.00478.1 | 785  | 81419  | 1.00E-141 | 258 | 259 | 99 +  | 1    | 259  | 28165  | 28423  |
| UN13170 | Rsa1.0.02605.1 | 1151 | 29637  | 0         | 585 | 611 | 95 +  | 556  | 1151 | 25931  | 26538  |
| UN13171 | Rsa1.0.02367.1 | 421  | 32106  | 1.00E-127 | 242 | 246 | 98 -  | 1    | 246  | 27423  | 27668  |
| UN13172 | Rsa1.0.00200.1 | 961  | 162016 | 1.00E-133 | 297 | 315 | 94 -  | 16   | 327  | 96962  | 97276  |
| UN13173 | Rsa1.0.00012.1 | 1007 | 222148 | 1.00E-137 | 277 | 286 | 96 +  | 1    | 286  | 69093  | 69375  |
| UN13174 | Rsa1.0.01554.1 | 951  | 43379  | 0         | 925 | 950 | 97 +  | 1    | 950  | 21188  | 22136  |
| UN13175 | Rsa1.0.02874.1 | 1236 | 27070  | 0         | 924 | 948 | 97 -  | 202  | 1146 | 4410   | 5357   |
| UN13176 | Rsa1.0.01425.1 | 1283 | 46136  | 0         | 423 | 427 | 99 -  | 857  | 1283 | 15494  | 15919  |
| UN13177 | Rsa1.0.02032.1 | 1129 | 35830  | 1.00E-160 | 292 | 294 | 99 -  | 128  | 421  | 5322   | 5615   |
| UN13178 | Rsa1.0.04192.1 | 1040 | 18572  | 0         | 711 | 714 | 99 +  | 1    | 714  | 12150  | 12863  |
| UN13179 | Rsa1.0.04894.1 | 1002 | 15569  | 1.00E-178 | 372 | 390 | 95 -  | 3    | 392  | 11339  | 11725  |
| UN13180 | Rsa1.0.05541.1 | 1130 | 139959 | 1.00E-144 | 295 | 307 | 96 -  | 824  | 1130 | 2801   | 3107   |

|         |                |      |        |           |      |      |       |      |      |        |        |
|---------|----------------|------|--------|-----------|------|------|-------|------|------|--------|--------|
| UN13181 | Rsa1.0.07657.1 | 754  | 8896   | 1.00E-165 | 347  | 359  | 96 -  | 7    | 357  | 3516   | 3874   |
| UN13182 | Rsa1.0.09211.1 | 1634 | 6556   | 1.00E-164 | 296  | 297  | 99 -  | 1134 | 1430 | 2282   | 2578   |
| UN13183 | Rsa1.0.00017.1 | 1536 | 752458 | 0         | 348  | 352  | 98 -  | 3    | 352  | 292600 | 292951 |
| UN13184 | Rsa1.0.00132.1 | 1371 | 124299 | 0         | 1323 | 1370 | 96 +  | 3    | 1371 | 52478  | 53838  |
| UN13185 | Rsa1.0.18611.1 | 1343 | 1565   | 0         | 431  | 457  | 94 +  | 875  | 1330 | 957    | 1409   |
| UN13186 | Rsa1.0.01850.1 | 1115 | 162224 | 0         | 356  | 361  | 98 -  | 5    | 365  | 31714  | 32072  |
| UN13187 | Rsa1.0.02053.1 | 1835 | 35554  | 0         | 431  | 435  | 99 +  | 1400 | 1834 | 3919   | 4353   |
| UN13188 | Rsa1.0.00231.1 | 1425 | 105381 | 0         | 396  | 396  | 100 - | 1    | 396  | 20793  | 21188  |
| UN13189 | Rsa1.0.00344.1 | 1148 | 191774 | 0         | 550  | 618  | 88 -  | 1    | 608  | 108987 | 109569 |
| UN13190 | Rsa1.0.00439.1 | 1205 | 142776 | 0         | 340  | 340  | 100 + | 416  | 755  | 63119  | 63458  |
| UN13191 | Rsa1.0.01958.1 | 1047 | 261128 | 0         | 385  | 398  | 96 +  | 1    | 394  | 119341 | 119737 |
| UN13192 | Rsa1.0.13229.1 | 1146 | 4963   | 1.00E-175 | 317  | 319  | 99 -  | 1    | 319  | 4414   | 4732   |
| UN13193 | Rsa1.0.05293.1 | 1439 | 14237  | 0         | 455  | 486  | 93 +  | 59   | 543  | 6250   | 6730   |
| UN13194 | Rsa1.0.02435.1 | 887  | 31454  | 1.00E-178 | 326  | 329  | 99 +  | 3    | 331  | 19857  | 20185  |
| UN13195 | Rsa1.0.08265.1 | 940  | 7630   | 0         | 489  | 494  | 98 +  | 2    | 494  | 6565   | 7058   |
| UN13196 | Rsa1.0.03920.1 | 943  | 20081  | 0         | 619  | 626  | 98 -  | 316  | 941  | 13862  | 14483  |
| UN13197 | Rsa1.0.03258.1 | 808  | 24302  | 1.00E-101 | 221  | 230  | 96 -  | 580  | 805  | 11081  | 11310  |
| UN13198 | Rsa1.0.01242.1 | 981  | 50066  | 1.00E-166 | 320  | 328  | 97 +  | 1    | 328  | 16424  | 16745  |
| UN13199 | Rsa1.0.01247.1 | 1086 | 49934  | 0         | 745  | 747  | 99 +  | 340  | 1086 | 45105  | 45851  |
| UN13200 | Rsa1.0.02213.1 | 1773 | 33824  | 0         | 468  | 481  | 97 -  | 1293 | 1773 | 28386  | 28861  |
| UN13201 | Rsa1.0.02825.1 | 1043 | 27568  | 0         | 510  | 556  | 91 -  | 434  | 973  | 25954  | 26506  |
| UN13202 | Rsa1.0.00115.1 | 2501 | 131321 | 0         | 805  | 815  | 98 -  | 972  | 1785 | 48839  | 49653  |
| UN13203 | Rsa1.0.00011.1 | 1246 | 225044 | 0         | 581  | 584  | 99 +  | 326  | 909  | 203328 | 203911 |
| UN13204 | Rsa1.0.00221.1 | 911  | 106972 | 0         | 345  | 347  | 99 +  | 1    | 347  | 51591  | 51937  |
| UN13205 | Rsa1.0.00802.1 | 1186 | 63846  | 1.00E-176 | 390  | 414  | 94 +  | 7    | 409  | 56790  | 57203  |
| UN13206 | Rsa1.0.03524.1 | 1458 | 22297  | 0         | 682  | 706  | 96 -  | 4    | 709  | 14064  | 14763  |
| UN13207 | Rsa1.0.04352.1 | 662  | 17779  | 0         | 546  | 549  | 99 +  | 114  | 662  | 12118  | 12666  |
| UN13208 | Rsa1.0.01964.1 | 889  | 36702  | 0         | 442  | 454  | 97 +  | 1    | 454  | 9330   | 9776   |
| UN13209 | Rsa1.0.00557.1 | 864  | 75865  | 1.00E-147 | 308  | 321  | 95 +  | 1    | 318  | 74489  | 74807  |
| UN13210 | Rsa1.0.00219.1 | 947  | 106983 | 0         | 425  | 443  | 95 +  | 501  | 943  | 67201  | 67641  |
| UN13211 | Rsa1.0.01068.1 | 912  | 55208  | 1.00E-148 | 282  | 287  | 98 -  | 365  | 651  | 46100  | 46386  |
| UN13212 | Rsa1.0.00194.1 | 1352 | 110851 | 0         | 664  | 668  | 99 +  | 685  | 1352 | 54321  | 54988  |
| UN13213 | Rsa1.0.00107.1 | 855  | 431659 | 1.00E-155 | 284  | 286  | 99 +  | 1    | 286  | 180720 | 181005 |
| UN13214 | Rsa1.0.00302.1 | 1487 | 97521  | 0         | 371  | 372  | 99 +  | 1    | 372  | 33875  | 34246  |
| UN13215 | Rsa1.0.02451.1 | 801  | 31283  | 1.00E-170 | 383  | 411  | 93 -  | 1    | 407  | 8148   | 8548   |
| UN13216 | Rsa1.0.00556.1 | 832  | 207212 | 0         | 815  | 832  | 97 -  | 1    | 831  | 14861  | 15689  |
| UN13217 | Rsa1.0.02387.1 | 913  | 31890  | 0         | 524  | 553  | 94 -  | 1    | 539  | 17300  | 17847  |
| UN13218 | Rsa1.0.01206.1 | 1950 | 50772  | 0         | 1100 | 1108 | 99 -  | 478  | 1585 | 33971  | 35078  |
| UN13219 | Rsa1.0.01633.1 | 1085 | 41868  | 0         | 427  | 430  | 99 +  | 656  | 1083 | 3035   | 3464   |

|         |                |      |        |           |      |      |       |      |      |        |        |
|---------|----------------|------|--------|-----------|------|------|-------|------|------|--------|--------|
| UN13220 | Rsa1.0.03088.1 | 539  | 25476  | 0         | 399  | 410  | 97 -  | 8    | 416  | 500    | 909    |
| UN13221 | Rsa1.0.00197.1 | 1107 | 109714 | 0         | 648  | 672  | 96 -  | 439  | 1107 | 73165  | 73828  |
| UN13222 | Rsa1.0.00035.1 | 1632 | 176449 | 1.00E-168 | 323  | 329  | 98 -  | 1304 | 1632 | 3179   | 3506   |
| UN13223 | Rsa1.0.26044.1 | 786  | 908    | 0         | 452  | 454  | 99 -  | 2    | 455  | 1      | 454    |
| UN13224 | Rsa1.0.02170.1 | 1078 | 34352  | 0         | 541  | 541  | 100 + | 536  | 1076 | 28526  | 29066  |
| UN13225 | Rsa1.0.09242.1 | 851  | 6534   | 0         | 461  | 464  | 99 +  | 1    | 464  | 957    | 1420   |
| UN13226 | Rsa1.0.07825.1 | 1566 | 8466   | 0         | 573  | 581  | 98 +  | 3    | 583  | 1349   | 1929   |
| UN13227 | Rsa1.0.00698.1 | 808  | 67816  | 0         | 596  | 645  | 92 -  | 179  | 808  | 21764  | 22408  |
| UN13228 | Rsa1.0.02098.1 | 1301 | 35032  | 0         | 560  | 600  | 93 -  | 719  | 1299 | 751    | 1349   |
| UN13229 | Rsa1.0.11534.1 | 922  | 5477   | 0         | 488  | 490  | 99 -  | 433  | 922  | 1236   | 1725   |
| UN13230 | Rsa1.0.08001.1 | 2403 | 8095   | 0         | 533  | 535  | 99 -  | 1192 | 1725 | 1559   | 2092   |
| UN13231 | Rsa1.0.02074.1 | 1933 | 35370  | 0         | 513  | 513  | 100 - | 2    | 514  | 17905  | 18417  |
| UN13232 | Rsa1.0.00250.1 | 2055 | 273771 | 0         | 487  | 491  | 99 +  | 37   | 525  | 4510   | 5000   |
| UN13233 | Rsa1.0.11046.1 | 1307 | 5635   | 1.00E-149 | 314  | 326  | 96 +  | 986  | 1307 | 3092   | 3415   |
| UN13234 | Rsa1.0.05624.1 | 739  | 13140  | 1.00E-126 | 392  | 447  | 87 -  | 284  | 722  | 3783   | 4199   |
| UN13235 | Rsa1.0.00250.1 | 1228 | 273771 | 1.00E-100 | 241  | 258  | 93 +  | 1    | 257  | 60326  | 60583  |
| UN13236 | Rsa1.0.01274.1 | 1005 | 49419  | 1.00E-170 | 332  | 341  | 97 +  | 7    | 344  | 30800  | 31140  |
| UN13237 | Rsa1.0.07482.1 | 1325 | 9278   | 0         | 669  | 677  | 98 -  | 1    | 677  | 1002   | 1677   |
| UN13238 | Rsa1.0.00314.1 | 2114 | 96472  | 0         | 479  | 494  | 96 +  | 750  | 1243 | 36322  | 36815  |
| UN13239 | Rsa1.0.01317.1 | 1916 | 48287  | 0         | 672  | 697  | 96 -  | 21   | 709  | 38419  | 39109  |
| UN13240 | Rsa1.0.00728.1 | 1169 | 66704  | 0         | 360  | 361  | 99 +  | 1    | 361  | 15830  | 16190  |
| UN13241 | Rsa1.0.10640.1 | 1868 | 5772   | 0         | 727  | 760  | 95 -  | 619  | 1367 | 1603   | 2359   |
| UN13242 | Rsa1.0.00805.1 | 1815 | 63724  | 0         | 431  | 439  | 98 -  | 10   | 447  | 43181  | 43619  |
| UN13243 | Rsa1.0.00102.1 | 738  | 135497 | 0         | 549  | 569  | 96 -  | 170  | 738  | 40804  | 41372  |
| UN13244 | Rsa1.0.02412.1 | 1200 | 31643  | 0         | 721  | 738  | 97 -  | 3    | 740  | 14291  | 15025  |
| UN13245 | Rsa1.0.00048.1 | 771  | 167185 | 0         | 400  | 400  | 100 + | 372  | 771  | 13591  | 13990  |
| UN13246 | Rsa1.0.14855.1 | 1372 | 3011   | 0         | 673  | 674  | 99 +  | 282  | 955  | 1310   | 1983   |
| UN13247 | Rsa1.0.01094.1 | 1620 | 167285 | 0         | 478  | 518  | 92 -  | 1094 | 1596 | 163031 | 163547 |
| UN13248 | Rsa1.0.01294.1 | 1276 | 49090  | 1.00E-163 | 334  | 346  | 96 +  | 933  | 1274 | 40470  | 40815  |
| UN13249 | Rsa1.0.00327.1 | 1053 | 94892  | 0         | 568  | 568  | 100 + | 435  | 1002 | 62360  | 62927  |
| UN13250 | Rsa1.0.21783.1 | 1000 | 1173   | 0         | 497  | 519  | 95 -  | 3    | 521  | 165    | 679    |
| UN13251 | Rsa1.0.00636.1 | 1851 | 71113  | 0         | 678  | 702  | 96 +  | 14   | 711  | 15978  | 16679  |
| UN13252 | Rsa1.0.01739.1 | 1120 | 40068  | 0         | 1095 | 1120 | 97 +  | 1    | 1120 | 13347  | 14460  |
| UN13253 | Rsa1.0.01251.1 | 1097 | 49873  | 0         | 490  | 494  | 99 -  | 1    | 494  | 7549   | 8042   |
| UN13254 | Rsa1.0.07916.1 | 1194 | 8288   | 1.00E-174 | 392  | 413  | 94 -  | 789  | 1194 | 4336   | 4744   |
| UN13255 | Rsa1.0.06571.1 | 932  | 10750  | 1.00E-150 | 296  | 305  | 97 +  | 626  | 930  | 6156   | 6460   |
| UN13256 | Rsa1.0.00055.1 | 1284 | 520193 | 0         | 921  | 921  | 100 - | 1    | 921  | 163773 | 164693 |
| UN13257 | Rsa1.0.00025.1 | 903  | 277312 | 1.00E-114 | 213  | 214  | 99 -  | 305  | 518  | 157157 | 157370 |
| UN13258 | Rsa1.0.00333.1 | 1217 | 94500  | 0         | 546  | 561  | 97 +  | 314  | 874  | 22948  | 23506  |

|         |                |      |        |           |      |      |       |      |      |        |        |
|---------|----------------|------|--------|-----------|------|------|-------|------|------|--------|--------|
| UN13259 | Rsa1.0.01641.1 | 1736 | 188213 | 0         | 1720 | 1742 | 98 -  | 2    | 1736 | 161019 | 162760 |
| UN13260 | Rsa1.0.02420.1 | 853  | 31580  | 0         | 848  | 851  | 99 -  | 3    | 853  | 15881  | 16729  |
| UN13261 | Rsa1.0.00114.1 | 1037 | 131330 | 1.00E-145 | 261  | 261  | 100 + | 2    | 262  | 127550 | 127810 |
| UN13262 | Rsa1.0.01536.1 | 878  | 43747  | 0         | 873  | 876  | 99 -  | 1    | 876  | 39096  | 39969  |
| UN13263 | Rsa1.0.00740.1 | 1198 | 215972 | 0         | 565  | 575  | 98 -  | 621  | 1195 | 11277  | 11848  |
| UN13264 | Rsa1.0.14637.1 | 1388 | 3201   | 0         | 1149 | 1184 | 97 +  | 32   | 1213 | 2018   | 3201   |
| UN13265 | Rsa1.0.01215.1 | 1049 | 166813 | 0         | 371  | 373  | 99 -  | 677  | 1049 | 9634   | 10006  |
| UN13266 | Rsa1.0.00093.1 | 648  | 214962 | 1.00E-152 | 276  | 277  | 99 +  | 372  | 648  | 48814  | 49090  |
| UN13267 | Rsa1.0.03123.1 | 1373 | 25207  | 0         | 1367 | 1370 | 99 -  | 3    | 1372 | 13492  | 14861  |
| UN13268 | Rsa1.0.01730.1 | 632  | 40223  | 1.00E-105 | 248  | 261  | 95 -  | 373  | 632  | 36577  | 36828  |
| UN13269 | Rsa1.0.17409.1 | 1132 | 1837   | 0         | 1011 | 1029 | 98 +  | 2    | 1030 | 101    | 1121   |
| UN13270 | Rsa1.0.34877.1 | 1178 | 649    | 1.00E-118 | 217  | 217  | 100 + | 1    | 217  | 361    | 577    |
| UN13271 | Rsa1.0.00358.1 | 1834 | 91293  | 0         | 454  | 454  | 100 + | 3    | 456  | 32086  | 32539  |
| UN13272 | Rsa1.0.00123.1 | 850  | 325650 | 0         | 538  | 540  | 99 +  | 311  | 850  | 237191 | 237730 |
| UN13273 | Rsa1.0.02543.1 | 1879 | 30302  | 0         | 375  | 380  | 98 -  | 5    | 382  | 3749   | 4126   |
| UN13274 | Rsa1.0.00832.1 | 854  | 62622  | 1.00E-163 | 334  | 343  | 97 +  | 513  | 854  | 41378  | 41717  |
| UN13275 | Rsa1.0.00777.1 | 963  | 191865 | 0         | 424  | 436  | 97 -  | 168  | 603  | 128527 | 128962 |
| UN13276 | Rsa1.0.03898.1 | 1635 | 20183  | 0         | 1256 | 1261 | 99 -  | 3    | 1262 | 5249   | 6508   |
| UN13277 | Rsa1.0.10495.1 | 1374 | 5827   | 0         | 414  | 417  | 99 -  | 1    | 417  | 55     | 471    |
| UN13278 | Rsa1.0.14555.1 | 1609 | 3273   | 1.00E-156 | 295  | 300  | 98 -  | 1310 | 1609 | 576    | 875    |
| UN13279 | Rsa1.0.03009.1 | 1105 | 26065  | 1.00E-130 | 239  | 240  | 99 -  | 757  | 996  | 15478  | 15717  |
| UN13280 | Rsa1.0.05166.1 | 926  | 14624  | 1.00E-128 | 281  | 295  | 95 +  | 37   | 328  | 13068  | 13361  |
| UN13281 | Rsa1.0.00301.1 | 495  | 365315 | 0         | 493  | 495  | 99 -  | 1    | 495  | 283377 | 283871 |
| UN13282 | Rsa1.0.05355.1 | 757  | 14069  | 0         | 597  | 613  | 97 +  | 145  | 753  | 4534   | 5146   |
| UN13283 | Rsa1.0.00019.1 | 733  | 301669 | 1.00E-169 | 400  | 430  | 93 -  | 293  | 722  | 293080 | 293498 |
| UN13284 | Rsa1.0.02085.1 | 1490 | 35198  | 2.00E-83  | 237  | 266  | 89 -  | 1060 | 1325 | 30157  | 30404  |
| UN13285 | Rsa1.0.02253.1 | 1277 | 33356  | 1.00E-101 | 245  | 260  | 94 +  | 1021 | 1273 | 25657  | 25915  |
| UN13286 | Rsa1.0.00870.1 | 1628 | 61606  | 1.00E-131 | 292  | 307  | 95 +  | 3    | 308  | 24761  | 25066  |
| UN13287 | Rsa1.0.00027.1 | 1894 | 283362 | 0         | 1512 | 1557 | 97 -  | 1    | 1556 | 182584 | 184135 |
| UN13288 | Rsa1.0.00959.1 | 1365 | 58202  | 0         | 762  | 791  | 96 +  | 577  | 1364 | 16920  | 17710  |
| UN13289 | Rsa1.0.05908.1 | 1331 | 12266  | 0         | 1315 | 1329 | 98 +  | 1    | 1329 | 10166  | 11493  |
| UN13290 | Rsa1.0.00122.1 | 1169 | 265937 | 0         | 723  | 739  | 97 +  | 429  | 1167 | 82124  | 82856  |
| UN13291 | Rsa1.0.00398.1 | 1267 | 88007  | 0         | 523  | 541  | 96 +  | 2    | 538  | 40985  | 41523  |
| UN13292 | Rsa1.0.00070.1 | 1013 | 150321 | 0         | 460  | 465  | 98 +  | 549  | 1013 | 55838  | 56300  |
| UN13293 | Rsa1.0.04708.1 | 1191 | 16286  | 1.00E-134 | 246  | 247  | 99 +  | 3    | 249  | 15877  | 16123  |
| UN13294 | Rsa1.0.03191.1 | 1189 | 145762 | 0         | 674  | 686  | 98 +  | 502  | 1187 | 134735 | 135420 |
| UN13295 | Rsa1.0.00054.1 | 1243 | 162053 | 0         | 363  | 369  | 98 -  | 875  | 1243 | 92464  | 92831  |
| UN13296 | Rsa1.0.01679.1 | 1061 | 146876 | 0         | 415  | 434  | 95 -  | 635  | 1061 | 122875 | 123308 |
| UN13297 | Rsa1.0.02626.1 | 918  | 29387  | 0         | 446  | 448  | 99 -  | 471  | 918  | 22846  | 23293  |

|         |                |      |        |           |      |      |       |      |      |        |        |
|---------|----------------|------|--------|-----------|------|------|-------|------|------|--------|--------|
| UN13298 | Rsa1.0.02207.1 | 1107 | 33914  | 0         | 470  | 483  | 97 -  | 627  | 1107 | 13535  | 14011  |
| UN13299 | Rsa1.0.00037.1 | 1118 | 307838 | 0         | 701  | 731  | 95 -  | 374  | 1095 | 293298 | 294022 |
| UN13300 | Rsa1.0.00198.1 | 1036 | 222963 | 0         | 369  | 374  | 98 -  | 663  | 1036 | 154810 | 155180 |
| UN13301 | Rsa1.0.03044.1 | 1334 | 25791  | 1.00E-144 | 299  | 308  | 97 -  | 1012 | 1319 | 14324  | 14628  |
| UN13302 | Rsa1.0.00732.1 | 1177 | 66631  | 1.00E-172 | 334  | 343  | 97 +  | 1    | 343  | 1781   | 2123   |
| UN13303 | Rsa1.0.02343.1 | 493  | 32374  | 1.00E-125 | 243  | 247  | 98 +  | 3    | 249  | 1007   | 1252   |
| UN13304 | Rsa1.0.00350.1 | 2245 | 92346  | 0         | 324  | 324  | 100 + | 47   | 370  | 61927  | 62250  |
| UN13305 | Rsa1.0.00468.1 | 1749 | 82095  | 0         | 591  | 605  | 97 -  | 3    | 604  | 36533  | 37137  |
| UN13306 | Rsa1.0.01193.1 | 1553 | 51147  | 0         | 349  | 354  | 98 +  | 1200 | 1553 | 15709  | 16060  |
| UN13307 | Rsa1.0.00065.1 | 1470 | 454616 | 1.00E-153 | 282  | 283  | 99 -  | 1    | 283  | 448185 | 448466 |
| UN13308 | Rsa1.0.00394.1 | 966  | 148426 | 1.00E-166 | 327  | 333  | 98 -  | 633  | 964  | 122810 | 123140 |
| UN13309 | Rsa1.0.08120.1 | 1520 | 7876   | 0         | 428  | 447  | 95 -  | 1081 | 1518 | 6672   | 7117   |
| UN13310 | Rsa1.0.01100.1 | 1538 | 54113  | 0         | 645  | 654  | 98 -  | 2    | 655  | 34687  | 35337  |
| UN13311 | Rsa1.0.00419.1 | 896  | 86562  | 0         | 886  | 898  | 98 +  | 3    | 895  | 55548  | 56445  |
| UN13312 | Rsa1.0.03822.1 | 1038 | 20640  | 1.00E-179 | 334  | 339  | 98 -  | 698  | 1036 | 13557  | 13895  |
| UN13313 | Rsa1.0.00077.1 | 923  | 145005 | 0         | 558  | 566  | 98 -  | 361  | 923  | 38535  | 39099  |
| UN13314 | Rsa1.0.03820.1 | 1768 | 20664  | 1.00E-115 | 211  | 211  | 100 + | 42   | 252  | 5379   | 5589   |
| UN13315 | Rsa1.0.00191.1 | 920  | 316976 | 0         | 411  | 424  | 96 -  | 318  | 735  | 259268 | 259691 |
| UN13316 | Rsa1.0.02750.1 | 1548 | 28239  | 1.00E-136 | 267  | 273  | 97 +  | 1    | 270  | 25620  | 25892  |
| UN13317 | Rsa1.0.02843.1 | 1240 | 27383  | 0         | 574  | 577  | 99 +  | 664  | 1240 | 23792  | 24368  |
| UN13318 | Rsa1.0.00001.1 | 1218 | 363028 | 1.00E-175 | 320  | 323  | 99 +  | 894  | 1216 | 91340  | 91662  |
| UN13319 | Rsa1.0.00382.1 | 1465 | 251946 | 0         | 696  | 716  | 97 +  | 264  | 979  | 45007  | 45712  |
| UN13320 | Rsa1.0.01679.1 | 1320 | 146876 | 1.00E-81  | 286  | 331  | 86 -  | 1004 | 1319 | 134936 | 135247 |
| UN13321 | Rsa1.0.00585.1 | 952  | 74164  | 0         | 446  | 446  | 100 + | 505  | 950  | 53696  | 54141  |
| UN13322 | Rsa1.0.00804.1 | 1256 | 63726  | 0         | 789  | 797  | 98 +  | 1    | 797  | 36763  | 37558  |
| UN13323 | Rsa1.0.01140.1 | 1168 | 52586  | 0         | 698  | 730  | 95 -  | 450  | 1162 | 6369   | 7094   |
| UN13324 | Rsa1.0.06004.1 | 932  | 11961  | 1.00E-173 | 327  | 333  | 98 -  | 596  | 928  | 7369   | 7701   |
| UN13325 | Rsa1.0.01019.1 | 989  | 56636  | 1.00E-164 | 300  | 302  | 99 +  | 669  | 970  | 45455  | 45756  |
| UN13326 | Rsa1.0.00017.1 | 992  | 752458 | 0         | 645  | 647  | 99 -  | 346  | 992  | 235957 | 236603 |
| UN13327 | Rsa1.0.01425.1 | 1527 | 46136  | 0         | 429  | 438  | 97 -  | 1093 | 1527 | 10898  | 11335  |
| UN13328 | Rsa1.0.00490.1 | 1515 | 186713 | 0         | 410  | 430  | 95 -  | 1    | 428  | 39915  | 40340  |
| UN13329 | Rsa1.0.01316.1 | 884  | 48325  | 1.00E-119 | 278  | 293  | 94 +  | 1    | 290  | 5498   | 5788   |
| UN13330 | Rsa1.0.00045.1 | 769  | 328694 | 1.00E-156 | 311  | 319  | 97 +  | 1    | 316  | 148573 | 148891 |
| UN13331 | Rsa1.0.04033.1 | 1455 | 19481  | 0         | 503  | 507  | 99 +  | 259  | 765  | 9206   | 9712   |
| UN13332 | Rsa1.0.00104.1 | 1347 | 368722 | 2.00E-92  | 205  | 212  | 96 -  | 1120 | 1329 | 18552  | 18761  |
| UN13333 | Rsa1.0.02536.1 | 1317 | 30368  | 0         | 1279 | 1319 | 96 -  | 2    | 1317 | 19445  | 20754  |
| UN13334 | Rsa1.0.23167.1 | 1453 | 1067   | 0         | 550  | 554  | 99 -  | 898  | 1451 | 345    | 898    |
| UN13335 | Rsa1.0.00045.1 | 1687 | 328694 | 0         | 555  | 580  | 95 -  | 1070 | 1642 | 261133 | 261705 |
| UN13336 | Rsa1.0.03334.1 | 1009 | 23659  | 1.00E-106 | 247  | 265  | 93 +  | 3    | 254  | 18787  | 19051  |



|         |                |      |        |           |     |     |       |      |      |        |        |
|---------|----------------|------|--------|-----------|-----|-----|-------|------|------|--------|--------|
| UN13337 | Rsa1.0_00938.1 | 1454 | 193891 | 0         | 635 | 638 | 99 -  | 1    | 637  | 172122 | 172759 |
| UN13338 | Rsa1.0_00006.1 | 1389 | 396176 | 1.00E-167 | 308 | 311 | 99 +  | 1079 | 1389 | 94003  | 94313  |
| UN13339 | Rsa1.0_00111.1 | 1943 | 390088 | 0         | 382 | 394 | 96 -  | 1245 | 1638 | 381107 | 381500 |
| UN13340 | Rsa1.0_01701.1 | 959  | 162121 | 0         | 532 | 538 | 98 -  | 3    | 540  | 30943  | 31479  |
| UN13341 | Rsa1.0_01981.1 | 688  | 36537  | 0         | 402 | 424 | 94 -  | 3    | 425  | 34741  | 35156  |
| UN13342 | Rsa1.0_00034.1 | 1278 | 260119 | 1.00E-177 | 316 | 316 | 100 - | 1    | 316  | 6537   | 6852   |
| UN13343 | Rsa1.0_01456.1 | 884  | 45372  | 0         | 878 | 882 | 99 +  | 3    | 884  | 25881  | 26762  |
| UN13344 | Rsa1.0_03387.1 | 2390 | 23278  | 0         | 671 | 681 | 98 +  | 385  | 1065 | 19355  | 20035  |
| UN13345 | Rsa1.0_00035.1 | 2901 | 176449 | 0         | 870 | 876 | 99 +  | 1368 | 2243 | 148096 | 148971 |
| UN13346 | Rsa1.0_00220.1 | 1042 | 192936 | 0         | 424 | 432 | 98 +  | 374  | 802  | 16394  | 16825  |
| UN13347 | Rsa1.0_00890.1 | 809  | 323870 | 1.00E-158 | 391 | 427 | 91 -  | 80   | 506  | 176492 | 176918 |
| UN13348 | Rsa1.0_00418.1 | 1172 | 215377 | 5.00E-99  | 196 | 200 | 98 -  | 968  | 1167 | 40452  | 40651  |
| UN13349 | Rsa1.0_00090.1 | 1891 | 273859 | 1.00E-135 | 257 | 261 | 98 -  | 1565 | 1825 | 184220 | 184480 |
| UN13350 | Rsa1.0_00705.1 | 1063 | 67505  | 0         | 705 | 712 | 99 -  | 342  | 1053 | 9366   | 10076  |
| UN13351 | Rsa1.0_00097.1 | 1825 | 138858 | 0         | 591 | 595 | 99 +  | 821  | 1415 | 21443  | 22037  |
| UN13352 | Rsa1.0_10656.1 | 921  | 5768   | 1.00E-176 | 569 | 652 | 87 +  | 96   | 745  | 3949   | 4598   |
| UN13353 | Rsa1.0_00540.1 | 1361 | 76895  | 1.00E-179 | 318 | 318 | 100 + | 1043 | 1360 | 33148  | 33465  |
| UN13354 | Rsa1.0_00190.1 | 995  | 318240 | 0         | 374 | 384 | 97 +  | 1    | 384  | 134843 | 135221 |
| UN13355 | Rsa1.0_08255.1 | 1659 | 7652   | 0         | 407 | 407 | 100 - | 52   | 458  | 2723   | 3129   |
| UN13356 | Rsa1.0_00261.1 | 1330 | 151157 | 0         | 696 | 702 | 99 -  | 5    | 706  | 2607   | 3308   |
| UN13357 | Rsa1.0_16170.1 | 807  | 2258   | 1.00E-105 | 289 | 315 | 91 -  | 495  | 799  | 1231   | 1542   |
| UN13358 | Rsa1.0_02236.1 | 1322 | 33558  | 0         | 476 | 476 | 100 + | 845  | 1320 | 14207  | 14682  |
| UN13359 | Rsa1.0_00697.1 | 1561 | 67913  | 0         | 594 | 602 | 98 +  | 376  | 977  | 51202  | 51802  |
| UN13360 | Rsa1.0_00453.1 | 915  | 83031  | 0         | 427 | 434 | 98 +  | 483  | 914  | 19304  | 19734  |
| UN13361 | Rsa1.0_00222.1 | 1695 | 172263 | 0         | 897 | 897 | 100 + | 797  | 1693 | 146662 | 147558 |
| UN13362 | Rsa1.0_00345.1 | 954  | 93226  | 0         | 354 | 357 | 99 +  | 595  | 951  | 85769  | 86122  |
| UN13363 | Rsa1.0_02879.1 | 1684 | 27047  | 0         | 485 | 485 | 100 + | 1194 | 1678 | 18068  | 18552  |
| UN13364 | Rsa1.0_00232.1 | 941  | 104936 | 1.00E-179 | 319 | 319 | 100 - | 2    | 320  | 38388  | 38706  |
| UN13365 | Rsa1.0_00249.1 | 779  | 153740 | 1.00E-126 | 272 | 286 | 95 +  | 1    | 286  | 52903  | 53188  |
| UN13366 | Rsa1.0_01387.1 | 812  | 46745  | 1.00E-169 | 310 | 313 | 99 +  | 499  | 811  | 46152  | 46464  |
| UN13367 | Rsa1.0_01376.1 | 1046 | 47004  | 1.00E-153 | 339 | 360 | 94 -  | 1    | 357  | 29440  | 29789  |
| UN13368 | Rsa1.0_00630.1 | 1148 | 71281  | 0         | 920 | 956 | 96 +  | 209  | 1146 | 23790  | 24743  |
| UN13369 | Rsa1.0_01402.1 | 1109 | 46509  | 0         | 772 | 788 | 97 +  | 1    | 787  | 17539  | 18325  |
| UN13370 | Rsa1.0_00198.1 | 1453 | 222963 | 0         | 362 | 374 | 96 -  | 1081 | 1453 | 40461  | 40834  |
| UN13371 | Rsa1.0_04477.1 | 1002 | 17183  | 3.00E-78  | 200 | 213 | 93 -  | 743  | 950  | 5320   | 5529   |
| UN13372 | Rsa1.0_01079.1 | 1315 | 54753  | 0         | 579 | 585 | 98 +  | 3    | 587  | 477    | 1061   |
| UN13373 | Rsa1.0_01116.1 | 788  | 142088 | 0         | 727 | 727 | 100 + | 5    | 731  | 129729 | 130455 |
| UN13374 | Rsa1.0_00663.1 | 1127 | 164969 | 1.00E-128 | 236 | 237 | 99 -  | 891  | 1127 | 14189  | 14425  |
| UN13375 | Rsa1.0_00009.1 | 2171 | 232558 | 0         | 956 | 971 | 98 -  | 851  | 1812 | 71154  | 72124  |

|         |                |      |        |           |      |      |       |      |      |        |        |
|---------|----------------|------|--------|-----------|------|------|-------|------|------|--------|--------|
| UN13376 | Rsa1.0_00991.1 | 1078 | 143101 | 0         | 455  | 474  | 95 +  | 1    | 471  | 133487 | 133957 |
| UN13377 | Rsa1.0_01919.1 | 939  | 37272  | 0         | 501  | 514  | 97 +  | 1    | 512  | 3478   | 3991   |
| UN13378 | Rsa1.0_01838.1 | 1768 | 38500  | 0         | 482  | 490  | 98 +  | 592  | 1081 | 21713  | 22202  |
| UN13379 | Rsa1.0_03567.1 | 725  | 22049  | 0         | 465  | 465  | 100 - | 259  | 723  | 3399   | 3863   |
| UN13380 | Rsa1.0_03185.1 | 1404 | 24739  | 1.00E-121 | 260  | 273  | 95 +  | 2    | 268  | 7473   | 7745   |
| UN13381 | Rsa1.0_06619.1 | 1415 | 10650  | 1.00E-164 | 382  | 406  | 94 +  | 426  | 824  | 1125   | 1518   |
| UN13382 | Rsa1.0_02288.1 | 1447 | 32984  | 1.00E-173 | 339  | 351  | 96 +  | 1107 | 1447 | 18618  | 18968  |
| UN13383 | Rsa1.0_00340.1 | 765  | 305782 | 0         | 726  | 760  | 95 +  | 3    | 762  | 173360 | 174118 |
| UN13384 | Rsa1.0_00079.1 | 1238 | 606987 | 0         | 374  | 382  | 97 +  | 801  | 1181 | 22253  | 22631  |
| UN13385 | Rsa1.0_10853.1 | 935  | 5700   | 0         | 350  | 352  | 99 +  | 8    | 358  | 1602   | 1953   |
| UN13386 | Rsa1.0_00064.1 | 946  | 240927 | 1.00E-136 | 268  | 274  | 97 +  | 673  | 946  | 170881 | 171153 |
| UN13387 | Rsa1.0_00008.1 | 1396 | 358124 | 0         | 783  | 801  | 97 -  | 216  | 1015 | 67789  | 68584  |
| UN13388 | Rsa1.0_03089.1 | 940  | 25465  | 0         | 377  | 382  | 98 -  | 1    | 382  | 8730   | 9111   |
| UN13389 | Rsa1.0_01777.1 | 1199 | 39511  | 0         | 381  | 400  | 95 +  | 801  | 1199 | 13918  | 14303  |
| UN13390 | Rsa1.0_00058.1 | 1284 | 159921 | 0         | 380  | 381  | 99 -  | 1    | 381  | 116921 | 117301 |
| UN13391 | Rsa1.0_00195.1 | 1290 | 251884 | 0         | 852  | 855  | 99 +  | 436  | 1290 | 85458  | 86312  |
| UN13392 | Rsa1.0_00520.1 | 1628 | 78226  | 0         | 1532 | 1540 | 99 -  | 88   | 1627 | 19279  | 20818  |
| UN13393 | Rsa1.0_02508.1 | 1042 | 30675  | 0         | 628  | 655  | 95 +  | 406  | 1041 | 24669  | 25323  |
| UN13394 | Rsa1.0_00019.1 | 1488 | 301669 | 0         | 458  | 463  | 98 +  | 1    | 462  | 64804  | 65266  |
| UN13395 | Rsa1.0_04911.1 | 1315 | 15483  | 0         | 422  | 427  | 98 +  | 6    | 432  | 7719   | 8143   |
| UN13396 | Rsa1.0_00546.1 | 818  | 76523  | 0         | 543  | 549  | 98 -  | 270  | 818  | 12515  | 13063  |
| UN13397 | Rsa1.0_02929.1 | 822  | 26673  | 1.00E-109 | 248  | 262  | 94 -  | 1    | 262  | 20275  | 20531  |
| UN13398 | Rsa1.0_00773.1 | 1514 | 64839  | 0         | 439  | 455  | 96 +  | 1061 | 1514 | 32802  | 33252  |
| UN13399 | Rsa1.0_01707.1 | 1281 | 40686  | 0         | 452  | 460  | 98 -  | 821  | 1280 | 7606   | 8065   |
| UN13400 | Rsa1.0_00437.1 | 1321 | 84879  | 0         | 637  | 648  | 98 +  | 603  | 1250 | 55056  | 55702  |
| UN13401 | Rsa1.0_00088.1 | 926  | 141341 | 1.00E-142 | 269  | 272  | 98 -  | 3    | 274  | 108001 | 108271 |
| UN13402 | Rsa1.0_00027.1 | 947  | 283362 | 1.00E-151 | 310  | 322  | 96 +  | 624  | 945  | 275355 | 275674 |
| UN13403 | Rsa1.0_01923.1 | 1035 | 37233  | 0         | 328  | 329  | 99 +  | 695  | 1023 | 36457  | 36785  |
| UN13404 | Rsa1.0_01494.1 | 2546 | 44641  | 0         | 1812 | 1852 | 97 +  | 705  | 2545 | 5834   | 7683   |
| UN13405 | Rsa1.0_02518.1 | 1084 | 30586  | 0         | 335  | 337  | 99 +  | 2    | 338  | 27755  | 28091  |
| UN13406 | Rsa1.0_00087.1 | 784  | 761073 | 1.00E-100 | 188  | 189  | 99 -  | 596  | 784  | 278160 | 278348 |
| UN13407 | Rsa1.0_00030.1 | 976  | 250988 | 1.00E-128 | 242  | 245  | 98 -  | 270  | 514  | 156217 | 156461 |
| UN13408 | Rsa1.0_00111.1 | 874  | 390088 | 0         | 642  | 644  | 99 +  | 2    | 645  | 383564 | 384207 |
| UN13409 | Rsa1.0_00651.1 | 1070 | 247766 | 0         | 738  | 760  | 97 -  | 318  | 1070 | 105172 | 105930 |
| UN13410 | Rsa1.0_00092.1 | 933  | 659932 | 7.00E-36  | 235  | 281  | 83 +  | 594  | 868  | 163749 | 164024 |
| UN13411 | Rsa1.0_00417.1 | 1284 | 395068 | 0         | 389  | 399  | 97 +  | 889  | 1283 | 376170 | 376568 |
| UN13412 | Rsa1.0_00451.1 | 775  | 322533 | 0         | 740  | 743  | 99 +  | 33   | 773  | 318149 | 318891 |
| UN13413 | Rsa1.0_01014.1 | 845  | 56762  | 6.00E-95  | 183  | 185  | 98 -  | 12   | 196  | 43013  | 43197  |
| UN13414 | Rsa1.0_01469.1 | 1599 | 45139  | 0         | 397  | 398  | 99 -  | 1203 | 1599 | 17649  | 18046  |

|         |                |      |        |           |      |      |       |      |      |        |        |
|---------|----------------|------|--------|-----------|------|------|-------|------|------|--------|--------|
| UN13415 | Rsa1.0.22190.1 | 565  | 1143   | 1.00E-115 | 232  | 238  | 97 -  | 328  | 565  | 908    | 1143   |
| UN13416 | Rsa1.0.00123.1 | 1303 | 325650 | 0         | 751  | 766  | 98 -  | 538  | 1301 | 284045 | 284809 |
| UN13417 | Rsa1.0.06333.1 | 1162 | 11217  | 2.33E-156 | 319  | 334  | 95 -  | 807  | 1139 | 2122   | 2452   |
| UN13418 | Rsa1.0.01140.1 | 1101 | 52586  | 0         | 676  | 687  | 98 +  | 3    | 686  | 6409   | 7094   |
| UN13419 | Rsa1.0.00049.1 | 1160 | 167018 | 0         | 1128 | 1162 | 97 +  | 2    | 1160 | 74527  | 75688  |
| UN13420 | Rsa1.0.01648.1 | 1155 | 41635  | 0         | 1136 | 1141 | 99 +  | 11   | 1147 | 5972   | 7112   |
| UN13421 | Rsa1.0.01217.1 | 1531 | 50554  | 0         | 1466 | 1512 | 96 -  | 4    | 1509 | 46734  | 48238  |
| UN13422 | Rsa1.0.00058.1 | 1316 | 159921 | 0         | 341  | 342  | 99 -  | 976  | 1316 | 46523  | 46864  |
| UN13423 | Rsa1.0.01540.1 | 1780 | 151890 | 1.00E-176 | 463  | 507  | 91 -  | 1034 | 1539 | 127704 | 128198 |
| UN13424 | Rsa1.0.01331.1 | 1232 | 47944  | 0         | 416  | 422  | 98 -  | 813  | 1232 | 29232  | 29653  |
| UN13425 | Rsa1.0.00038.1 | 1428 | 314568 | 0         | 721  | 728  | 99 +  | 703  | 1427 | 158194 | 158921 |
| UN13426 | Rsa1.0.02660.1 | 1279 | 28969  | 1.00E-160 | 313  | 320  | 97 -  | 3    | 319  | 12641  | 12959  |
| UN13427 | Rsa1.0.00323.1 | 1463 | 159650 | 0         | 1429 | 1461 | 97 -  | 3    | 1463 | 134581 | 136036 |
| UN13428 | Rsa1.0.00121.1 | 874  | 278029 | 1.00E-117 | 230  | 235  | 97 -  | 634  | 868  | 59505  | 59739  |
| UN13429 | Rsa1.0.02492.1 | 746  | 30859  | 1.00E-166 | 353  | 368  | 95 +  | 379  | 745  | 12178  | 12542  |
| UN13430 | Rsa1.0.00028.1 | 2072 | 293984 | 1.00E-159 | 348  | 361  | 96 +  | 336  | 692  | 20828  | 21185  |
| UN13431 | Rsa1.0.02272.1 | 973  | 33131  | 0         | 528  | 550  | 96 +  | 427  | 972  | 26860  | 27409  |
| UN13432 | Rsa1.0.00008.1 | 1334 | 358124 | 0         | 758  | 773  | 98 +  | 378  | 1147 | 287628 | 288397 |
| UN13433 | Rsa1.0.00741.1 | 1368 | 66117  | 0         | 516  | 538  | 95 -  | 341  | 878  | 60657  | 61194  |
| UN13434 | Rsa1.0.04064.1 | 703  | 19297  | 0         | 473  | 483  | 97 +  | 222  | 703  | 18501  | 18981  |
| UN13435 | Rsa1.0.09725.1 | 673  | 6186   | 0         | 369  | 372  | 99 -  | 302  | 673  | 944    | 1315   |
| UN13436 | Rsa1.0.01875.1 | 536  | 37849  | 1.00E-158 | 292  | 295  | 98 +  | 240  | 534  | 25879  | 26173  |
| UN13437 | Rsa1.0.00039.1 | 1510 | 296927 | 0         | 596  | 608  | 98 -  | 901  | 1508 | 11841  | 12448  |
| UN13438 | Rsa1.0.06133.1 | 1167 | 11663  | 1.00E-172 | 306  | 306  | 100 + | 614  | 919  | 8879   | 9184   |
| UN13439 | Rsa1.0.01016.1 | 1398 | 181422 | 0         | 369  | 378  | 97 +  | 1022 | 1398 | 164149 | 164526 |
| UN13440 | Rsa1.0.02392.1 | 779  | 152517 | 0         | 752  | 778  | 96 +  | 3    | 779  | 29654  | 30422  |
| UN13441 | Rsa1.0.01274.1 | 400  | 49419  | 2.00E-83  | 235  | 259  | 90 +  | 149  | 400  | 21348  | 21599  |
| UN13442 | Rsa1.0.04205.1 | 778  | 138772 | 0         | 435  | 436  | 99 -  | 343  | 778  | 133814 | 134249 |
| UN13443 | Rsa1.0.00205.1 | 857  | 193401 | 1.00E-124 | 241  | 246  | 97 +  | 291  | 536  | 98206  | 98451  |
| UN13444 | Rsa1.0.01516.1 | 1441 | 44196  | 1.00E-136 | 331  | 354  | 93 +  | 940  | 1291 | 23523  | 23873  |
| UN13445 | Rsa1.0.01707.1 | 1158 | 40686  | 0         | 391  | 401  | 97 -  | 338  | 738  | 25818  | 26218  |
| UN13446 | Rsa1.0.08927.1 | 1970 | 6782   | 0         | 799  | 868  | 92 +  | 1121 | 1967 | 87     | 949    |
| UN13447 | Rsa1.0.00467.1 | 1313 | 156542 | 0         | 566  | 566  | 100 + | 748  | 1313 | 77638  | 78203  |
| UN13448 | Rsa1.0.00648.1 | 912  | 70351  | 1.00E-163 | 301  | 303  | 99 +  | 608  | 910  | 24866  | 25166  |
| UN13449 | Rsa1.0.01609.1 | 1116 | 42280  | 0         | 1107 | 1111 | 99 +  | 3    | 1113 | 25585  | 26693  |
| UN13450 | Rsa1.0.13888.1 | 974  | 4146   | 1.00E-154 | 276  | 276  | 100 - | 699  | 974  | 3871   | 4146   |
| UN13451 | Rsa1.0.00817.1 | 920  | 62961  | 0         | 493  | 507  | 97 -  | 374  | 879  | 53828  | 54331  |
| UN13452 | Rsa1.0.05494.1 | 1023 | 13547  | 0         | 499  | 505  | 98 -  | 519  | 1023 | 7600   | 8102   |
| UN13453 | Rsa1.0.05489.1 | 1345 | 13562  | 0         | 551  | 564  | 97 +  | 393  | 956  | 6625   | 7188   |

|         |                |      |        |           |      |      |       |      |      |        |        |
|---------|----------------|------|--------|-----------|------|------|-------|------|------|--------|--------|
| UN13454 | Rsa1.0_00808.1 | 1160 | 63351  | 0         | 427  | 431  | 99 -  | 675  | 1105 | 35075  | 35505  |
| UN13455 | Rsa1.0_00484.1 | 1252 | 203294 | 0         | 407  | 420  | 96 -  | 770  | 1189 | 127050 | 127468 |
| UN13456 | Rsa1.0_02043.1 | 1991 | 163754 | 0         | 607  | 631  | 96 +  | 348  | 973  | 140557 | 141184 |
| UN13457 | Rsa1.0_04116.1 | 767  | 18971  | 0         | 423  | 430  | 98 +  | 3    | 432  | 612    | 1041   |
| UN13458 | Rsa1.0_01595.1 | 574  | 175383 | 1.00E-178 | 317  | 317  | 100 + | 2    | 318  | 41015  | 41331  |
| UN13459 | Rsa1.0_00240.1 | 1060 | 104175 | 1.00E-173 | 309  | 309  | 100 + | 752  | 1060 | 69794  | 70102  |
| UN13460 | Rsa1.0_00970.1 | 1350 | 57994  | 0         | 946  | 950  | 99 +  | 90   | 1039 | 18920  | 19869  |
| UN13461 | Rsa1.0_00476.1 | 1340 | 280966 | 1.00E-148 | 292  | 298  | 97 +  | 3    | 300  | 236929 | 237223 |
| UN13462 | Rsa1.0_00354.1 | 1525 | 232005 | 0         | 476  | 494  | 96 +  | 2    | 488  | 197353 | 197846 |
| UN13463 | Rsa1.0_01743.1 | 1099 | 39926  | 1.00E-176 | 334  | 340  | 98 -  | 1    | 340  | 15993  | 16330  |
| UN13464 | Rsa1.0_01950.1 | 533  | 36950  | 0         | 394  | 405  | 97 +  | 128  | 532  | 7846   | 8247   |
| UN13465 | Rsa1.0_16368.1 | 1539 | 2175   | 0         | 940  | 951  | 98 -  | 586  | 1535 | 315    | 1265   |
| UN13466 | Rsa1.0_06615.1 | 1802 | 10659  | 0         | 724  | 744  | 97 -  | 156  | 889  | 9364   | 10107  |
| UN13467 | Rsa1.0_02487.1 | 1533 | 30928  | 0         | 849  | 858  | 98 -  | 1    | 857  | 22194  | 23048  |
| UN13468 | Rsa1.0_01335.1 | 2043 | 47894  | 1.00E-121 | 235  | 238  | 98 +  | 656  | 892  | 430    | 667    |
| UN13469 | Rsa1.0_01078.1 | 1211 | 316910 | 1.00E-164 | 322  | 330  | 97 -  | 3    | 331  | 290400 | 290729 |
| UN13470 | Rsa1.0_14292.1 | 1429 | 3569   | 0         | 492  | 494  | 99 +  | 16   | 509  | 7      | 500    |
| UN13471 | Rsa1.0_08003.1 | 887  | 8094   | 1.00E-139 | 251  | 251  | 100 + | 197  | 447  | 5286   | 5536   |
| UN13472 | Rsa1.0_03873.1 | 732  | 20360  | 5.00E-98  | 273  | 306  | 89 +  | 443  | 731  | 9247   | 9541   |
| UN13473 | Rsa1.0_01945.1 | 1446 | 36989  | 0         | 1360 | 1445 | 94 +  | 6    | 1446 | 25694  | 27124  |
| UN13474 | Rsa1.0_02378.1 | 1041 | 31991  | 1.00E-178 | 368  | 383  | 96 -  | 659  | 1038 | 12955  | 13336  |
| UN13475 | Rsa1.0_12942.1 | 980  | 5068   | 1.00E-176 | 326  | 330  | 98 -  | 651  | 980  | 1312   | 1641   |
| UN13476 | Rsa1.0_03694.1 | 908  | 21336  | 0         | 656  | 661  | 99 +  | 220  | 876  | 549    | 1209   |
| UN13477 | Rsa1.0_00459.1 | 955  | 82580  | 0         | 508  | 509  | 99 +  | 1    | 509  | 40992  | 41500  |
| UN13478 | Rsa1.0_00827.1 | 1452 | 62790  | 0         | 398  | 421  | 94 -  | 1044 | 1452 | 49150  | 49567  |
| UN13479 | Rsa1.0_10868.1 | 1533 | 5695   | 1.00E-172 | 348  | 358  | 97 -  | 1166 | 1522 | 1661   | 2015   |
| UN13480 | Rsa1.0_01842.1 | 903  | 38430  | 0         | 387  | 392  | 98 -  | 472  | 863  | 2281   | 2670   |
| UN13481 | Rsa1.0_00977.1 | 860  | 198001 | 1.00E-106 | 205  | 207  | 99 +  | 3    | 207  | 197674 | 197880 |
| UN13482 | Rsa1.0_00630.1 | 913  | 71281  | 0         | 496  | 514  | 96 +  | 1    | 510  | 63634  | 64143  |
| UN13483 | Rsa1.0_00093.1 | 847  | 214962 | 0         | 838  | 840  | 99 -  | 6    | 845  | 83901  | 84740  |
| UN13484 | Rsa1.0_00974.1 | 684  | 57893  | 0         | 534  | 538  | 99 -  | 147  | 683  | 38809  | 39346  |
| UN13485 | Rsa1.0_03375.1 | 612  | 23332  | 2.00E-69  | 134  | 134  | 100 - | 1    | 134  | 7874   | 8007   |
| UN13486 | Rsa1.0_00868.1 | 746  | 61630  | 0         | 366  | 367  | 99 -  | 249  | 615  | 46733  | 47099  |
| UN13487 | Rsa1.0_02074.1 | 1889 | 35370  | 0         | 666  | 697  | 95 +  | 7    | 692  | 33161  | 33857  |
| UN13488 | Rsa1.0_01889.1 | 634  | 37562  | 1.00E-153 | 293  | 298  | 98 -  | 1    | 298  | 23938  | 24234  |
| UN13489 | Rsa1.0_04234.1 | 642  | 18378  | 1.00E-107 | 237  | 250  | 94 +  | 393  | 642  | 8210   | 8459   |
| UN13490 | Rsa1.0_01537.1 | 965  | 187285 | 0         | 736  | 748  | 98 -  | 217  | 964  | 33372  | 34119  |
| UN13491 | Rsa1.0_03216.1 | 925  | 24540  | 8.00E-82  | 267  | 302  | 88 -  | 623  | 916  | 12029  | 12330  |
| UN13492 | Rsa1.0_01855.1 | 946  | 38204  | 0         | 929  | 942  | 98 -  | 5    | 945  | 6567   | 7508   |

|         |                |      |        |           |      |      |       |      |      |        |        |
|---------|----------------|------|--------|-----------|------|------|-------|------|------|--------|--------|
| UN13493 | Rsa1.0.08003.1 | 890  | 8094   | 1.00E-132 | 261  | 267  | 97 -  | 625  | 890  | 6154   | 6420   |
| UN13494 | Rsa1.0.01909.1 | 1085 | 37417  | 1.00E-151 | 274  | 275  | 99 -  | 1    | 275  | 13     | 287    |
| UN13495 | Rsa1.0.02052.1 | 939  | 35555  | 0         | 347  | 353  | 98 -  | 5    | 357  | 20165  | 20517  |
| UN13496 | Rsa1.0.01220.1 | 1770 | 161775 | 0         | 496  | 518  | 95 +  | 1    | 506  | 11304  | 11819  |
| UN13497 | Rsa1.0.00105.1 | 1320 | 134138 | 0         | 462  | 466  | 99 +  | 1    | 465  | 126890 | 127353 |
| UN13498 | Rsa1.0.02855.1 | 1406 | 27271  | 0         | 420  | 420  | 100 - | 920  | 1339 | 10359  | 10778  |
| UN13499 | Rsa1.0.36951.1 | 1028 | 610    | 0         | 385  | 386  | 99 -  | 3    | 388  | 1      | 386    |
| UN13500 | Rsa1.0.04293.1 | 1400 | 18046  | 1.00E-172 | 338  | 346  | 97 -  | 5    | 350  | 11123  | 11465  |
| UN13501 | Rsa1.0.00351.1 | 855  | 413096 | 1.00E-135 | 289  | 303  | 95 -  | 2    | 304  | 269242 | 269542 |
| UN13502 | Rsa1.0.02690.1 | 1034 | 28629  | 1.00E-127 | 254  | 259  | 98 +  | 775  | 1033 | 17941  | 18197  |
| UN13503 | Rsa1.0.04462.1 | 6364 | 17250  | 0         | 1030 | 1088 | 94 +  | 5036 | 6121 | 6961   | 8026   |
| UN13504 | Rsa1.0.02185.1 | 749  | 34150  | 0         | 725  | 749  | 96 -  | 3    | 749  | 27251  | 27988  |
| UN13505 | Rsa1.0.00132.1 | 1369 | 124299 | 0         | 1298 | 1346 | 96 -  | 3    | 1342 | 52496  | 53834  |
| UN13506 | Rsa1.0.01958.1 | 1135 | 261128 | 1.00E-118 | 261  | 275  | 94 +  | 3    | 277  | 111078 | 111349 |
| UN13507 | Rsa1.0.04379.1 | 1195 | 17646  | 1.00E-173 | 347  | 356  | 97 +  | 1    | 354  | 16744  | 17097  |
| UN13508 | Rsa1.0.05049.1 | 1115 | 15025  | 1.00E-163 | 387  | 418  | 92 +  | 1    | 416  | 8807   | 9209   |
| UN13509 | Rsa1.0.02304.1 | 727  | 32793  | 1.00E-108 | 206  | 207  | 99 -  | 519  | 724  | 17374  | 17580  |
| UN13510 | Rsa1.0.03053.1 | 1412 | 25745  | 0         | 451  | 452  | 99 -  | 1    | 452  | 24134  | 24585  |
| UN13511 | Rsa1.0.00341.1 | 1000 | 249309 | 1.00E-153 | 274  | 274  | 100 + | 727  | 1000 | 6828   | 7101   |
| UN13512 | Rsa1.0.01031.1 | 1080 | 56236  | 0         | 385  | 398  | 96 -  | 683  | 1080 | 17186  | 17573  |
| UN13513 | Rsa1.0.01286.1 | 1357 | 49209  | 1.00E-136 | 287  | 298  | 96 +  | 1060 | 1357 | 39922  | 40212  |
| UN13514 | Rsa1.0.64913.1 | 993  | 353    | 1.00E-163 | 304  | 308  | 98 -  | 596  | 903  | 37     | 344    |
| UN13515 | Rsa1.0.00419.1 | 1379 | 86562  | 0         | 489  | 526  | 92 +  | 105  | 629  | 15539  | 16064  |
| UN13516 | Rsa1.0.00752.1 | 1530 | 65756  | 0         | 405  | 420  | 96 -  | 813  | 1230 | 35504  | 35920  |
| UN13517 | Rsa1.0.00317.1 | 994  | 218290 | 1.00E-104 | 249  | 266  | 93 +  | 37   | 294  | 72658  | 72921  |
| UN13518 | Rsa1.0.01251.1 | 1229 | 49873  | 1.00E-107 | 197  | 197  | 100 + | 1    | 197  | 7949   | 8145   |
| UN13519 | Rsa1.0.00339.1 | 1068 | 222974 | 0         | 650  | 659  | 98 +  | 137  | 795  | 4477   | 5135   |
| UN13520 | Rsa1.0.01730.1 | 787  | 40223  | 5.00E-92  | 207  | 217  | 95 -  | 7    | 221  | 26029  | 26242  |
| UN13521 | Rsa1.0.00191.1 | 2532 | 316976 | 0         | 583  | 584  | 99 +  | 942  | 1525 | 133763 | 134346 |
| UN13522 | Rsa1.0.07334.1 | 1452 | 9547   | 0         | 393  | 397  | 98 +  | 1057 | 1452 | 683    | 1079   |
| UN13523 | Rsa1.0.00216.1 | 851  | 197563 | 0         | 376  | 380  | 98 -  | 472  | 851  | 187821 | 188199 |
| UN13524 | Rsa1.0.00252.1 | 1371 | 102760 | 0         | 446  | 453  | 98 -  | 921  | 1370 | 93584  | 94036  |
| UN13525 | Rsa1.0.00119.1 | 1148 | 467509 | 1.00E-165 | 307  | 310  | 99 +  | 1    | 310  | 32133  | 32440  |
| UN13526 | Rsa1.0.00891.1 | 1250 | 60724  | 0         | 587  | 590  | 99 +  | 4    | 593  | 54503  | 55091  |
| UN13527 | Rsa1.0.00173.1 | 1070 | 288743 | 0         | 551  | 553  | 99 -  | 518  | 1070 | 29272  | 29824  |
| UN13528 | Rsa1.0.26211.1 | 664  | 901    | 1.00E-111 | 231  | 239  | 96 +  | 6    | 242  | 133    | 371    |
| UN13529 | Rsa1.0.12442.1 | 1121 | 5225   | 1.00E-105 | 204  | 207  | 98 -  | 317  | 523  | 163    | 369    |
| UN13530 | Rsa1.0.06892.1 | 919  | 10197  | 0         | 354  | 362  | 97 +  | 505  | 866  | 9775   | 10136  |
| UN13531 | Rsa1.0.00307.1 | 1568 | 199003 | 0         | 888  | 916  | 96 +  | 6    | 921  | 5352   | 6260   |

|         |                |      |        |           |     |     |       |      |      |        |        |
|---------|----------------|------|--------|-----------|-----|-----|-------|------|------|--------|--------|
| UN13532 | Rsa1.0.03291.1 | 810  | 24000  | 0         | 377 | 378 | 99 +  | 9    | 386  | 18131  | 18508  |
| UN13533 | Rsa1.0.00586.1 | 1848 | 163802 | 0         | 425 | 427 | 99 +  | 623  | 1049 | 153732 | 154158 |
| UN13534 | Rsa1.0.01190.1 | 1547 | 194501 | 0         | 885 | 895 | 98 +  | 653  | 1546 | 10236  | 11130  |
| UN13535 | Rsa1.0.00482.1 | 1161 | 81162  | 0         | 390 | 398 | 97 -  | 765  | 1161 | 60320  | 60717  |
| UN13536 | Rsa1.0.00092.1 | 1276 | 659932 | 0         | 471 | 488 | 96 +  | 81   | 568  | 20395  | 20882  |
| UN13537 | Rsa1.0.17040.1 | 607  | 1944   | 0         | 384 | 399 | 96 +  | 157  | 549  | 1207   | 1605   |
| UN13538 | Rsa1.0.00604.1 | 773  | 146282 | 1.00E-106 | 240 | 255 | 94 -  | 6    | 260  | 113696 | 113950 |
| UN13539 | Rsa1.0.00779.1 | 925  | 64568  | 0         | 919 | 923 | 99 -  | 3    | 925  | 49345  | 50267  |
| UN13540 | Rsa1.0.00131.1 | 1252 | 432233 | 0         | 582 | 606 | 96 +  | 636  | 1241 | 34864  | 35463  |
| UN13541 | Rsa1.0.13999.1 | 1436 | 3934   | 1.00E-167 | 344 | 357 | 96 -  | 1077 | 1433 | 1805   | 2157   |
| UN13542 | Rsa1.0.04338.1 | 1216 | 17840  | 0         | 334 | 334 | 100 + | 883  | 1216 | 12133  | 12466  |
| UN13543 | Rsa1.0.01177.1 | 1476 | 51572  | 0         | 354 | 355 | 99 +  | 1    | 355  | 47173  | 47527  |
| UN13544 | Rsa1.0.00108.1 | 1300 | 478491 | 1.00E-168 | 333 | 342 | 97 +  | 964  | 1300 | 467659 | 467996 |
| UN13545 | Rsa1.0.03365.1 | 827  | 23410  | 0         | 819 | 832 | 98 -  | 1    | 827  | 12912  | 13740  |
| UN13546 | Rsa1.0.08677.1 | 1499 | 7048   | 1.00E-167 | 325 | 334 | 97 -  | 1164 | 1497 | 2193   | 2526   |
| UN13547 | Rsa1.0.14674.1 | 1746 | 3167   | 1.00E-136 | 360 | 393 | 91 -  | 1    | 386  | 372    | 760    |
| UN13548 | Rsa1.0.01499.1 | 1239 | 44555  | 1.00E-175 | 332 | 339 | 97 +  | 1    | 339  | 14518  | 14856  |
| UN13549 | Rsa1.0.01115.1 | 1064 | 183545 | 0         | 418 | 440 | 95 -  | 1    | 434  | 6514   | 6952   |
| UN13550 | Rsa1.0.18154.1 | 799  | 1655   | 4.00E-80  | 158 | 160 | 98 -  | 527  | 686  | 1333   | 1492   |
| UN13551 | Rsa1.0.01431.1 | 712  | 167877 | 0         | 404 | 405 | 99 +  | 308  | 711  | 12009  | 12413  |
| UN13552 | Rsa1.0.00889.1 | 1413 | 60978  | 0         | 686 | 696 | 98 +  | 716  | 1411 | 55897  | 56592  |
| UN13553 | Rsa1.0.00608.1 | 1455 | 172672 | 0         | 815 | 817 | 99 -  | 638  | 1454 | 163142 | 163958 |
| UN13554 | Rsa1.0.00678.1 | 486  | 193163 | 4.00E-67  | 133 | 134 | 99 -  | 353  | 486  | 24426  | 24559  |
| UN13555 | Rsa1.0.14087.1 | 819  | 3821   | 0         | 680 | 702 | 96 -  | 107  | 804  | 1455   | 2153   |
| UN13556 | Rsa1.0.02345.1 | 825  | 32337  | 0         | 361 | 364 | 99 -  | 464  | 825  | 385    | 747    |
| UN13557 | Rsa1.0.00292.1 | 714  | 98141  | 9.00E-75  | 158 | 162 | 97 -  | 42   | 201  | 21932  | 22093  |
| UN13558 | Rsa1.0.03818.1 | 1236 | 20668  | 1.00E-106 | 203 | 205 | 99 -  | 726  | 930  | 10042  | 10246  |
| UN13559 | Rsa1.0.00979.1 | 1406 | 57733  | 0         | 333 | 336 | 99 -  | 1069 | 1404 | 40278  | 40613  |
| UN13560 | Rsa1.0.00180.1 | 855  | 114581 | 1.00E-135 | 253 | 256 | 98 -  | 534  | 789  | 62118  | 62373  |
| UN13561 | Rsa1.0.04063.1 | 1207 | 19300  | 1.00E-149 | 283 | 285 | 99 +  | 3    | 286  | 12085  | 12368  |
| UN13562 | Rsa1.0.01521.1 | 1093 | 142147 | 1.00E-141 | 260 | 262 | 99 -  | 360  | 621  | 7693   | 7954   |
| UN13563 | Rsa1.0.03334.1 | 946  | 23659  | 1.00E-150 | 273 | 274 | 99 -  | 1    | 274  | 20257  | 20530  |
| UN13564 | Rsa1.0.00933.1 | 1382 | 59164  | 0         | 341 | 342 | 99 +  | 1039 | 1379 | 2856   | 3197   |
| UN13565 | Rsa1.0.00910.1 | 1491 | 59975  | 0         | 550 | 563 | 97 -  | 931  | 1491 | 49138  | 49700  |
| UN13566 | Rsa1.0.00804.1 | 1363 | 63726  | 0         | 459 | 465 | 98 +  | 1    | 464  | 21629  | 22092  |
| UN13567 | Rsa1.0.01440.1 | 972  | 45807  | 0         | 479 | 493 | 97 +  | 470  | 954  | 19323  | 19815  |
| UN13568 | Rsa1.0.02233.1 | 1615 | 33658  | 0         | 675 | 707 | 95 +  | 225  | 931  | 2790   | 3496   |
| UN13569 | Rsa1.0.02605.1 | 762  | 29637  | 1.00E-138 | 276 | 285 | 96 +  | 3    | 287  | 12918  | 13202  |
| UN13570 | Rsa1.0.35458.1 | 1301 | 638    | 1.00E-132 | 270 | 276 | 97 -  | 1025 | 1299 | 365    | 638    |

|         |                |      |        |           |      |      |       |      |      |        |        |
|---------|----------------|------|--------|-----------|------|------|-------|------|------|--------|--------|
| UN13571 | Rsa1.0.00055.1 | 715  | 520193 | 0         | 346  | 351  | 98 -  | 365  | 715  | 153888 | 154237 |
| UN13572 | Rsa1.0.01119.1 | 1272 | 53459  | 1.00E-114 | 216  | 218  | 99 +  | 708  | 925  | 23345  | 23562  |
| UN13573 | Rsa1.0.03890.1 | 993  | 20223  | 0         | 973  | 995  | 97 -  | 1    | 993  | 1392   | 2384   |
| UN13574 | Rsa1.0.01172.1 | 904  | 51734  | 1.00E-171 | 321  | 326  | 98 -  | 282  | 607  | 6286   | 6607   |
| UN13575 | Rsa1.0.00222.1 | 1220 | 172263 | 0         | 789  | 816  | 96 +  | 410  | 1220 | 65105  | 65915  |
| UN13576 | Rsa1.0.01684.1 | 1186 | 41044  | 3.00E-29  | 160  | 187  | 85 +  | 184  | 363  | 5126   | 5311   |
| UN13577 | Rsa1.0.02020.1 | 1600 | 173211 | 0         | 1046 | 1088 | 96 -  | 512  | 1596 | 139262 | 140348 |
| UN13578 | Rsa1.0.10836.1 | 1180 | 5707   | 0         | 892  | 929  | 96 -  | 4    | 923  | 4133   | 5061   |
| UN13579 | Rsa1.0.00805.1 | 3718 | 63724  | 0         | 391  | 396  | 98 +  | 2985 | 3379 | 11592  | 11987  |
| UN13580 | Rsa1.0.02581.1 | 1481 | 29896  | 0         | 736  | 747  | 98 -  | 1    | 747  | 11138  | 11882  |
| UN13581 | Rsa1.0.00630.1 | 1653 | 71281  | 0         | 500  | 505  | 99 +  | 1027 | 1530 | 18575  | 19078  |
| UN13582 | Rsa1.0.00568.1 | 1012 | 75219  | 0         | 771  | 795  | 96 -  | 215  | 1007 | 1873   | 2658   |
| UN13583 | Rsa1.0.02295.1 | 1665 | 149884 | 0         | 761  | 797  | 95 +  | 177  | 968  | 118181 | 118968 |
| UN13584 | Rsa1.0.00387.1 | 1216 | 495407 | 0         | 909  | 909  | 100 + | 308  | 1216 | 409522 | 410430 |
| UN13585 | Rsa1.0.01067.1 | 1193 | 55230  | 1.00E-117 | 232  | 235  | 98 -  | 959  | 1193 | 4545   | 4777   |
| UN13586 | Rsa1.0.00066.1 | 1235 | 152418 | 0         | 1218 | 1233 | 98 +  | 1    | 1233 | 35808  | 37040  |
| UN13587 | Rsa1.0.02146.1 | 873  | 34625  | 0         | 740  | 764  | 96 +  | 110  | 872  | 17172  | 17931  |
| UN13588 | Rsa1.0.18413.1 | 1020 | 1603   | 0         | 362  | 367  | 98 +  | 251  | 617  | 1151   | 1517   |
| UN13589 | Rsa1.0.00052.1 | 1007 | 162771 | 1.00E-120 | 249  | 259  | 96 +  | 101  | 359  | 57659  | 57917  |
| UN13590 | Rsa1.0.02200.1 | 1773 | 33981  | 0         | 364  | 364  | 100 + | 1408 | 1771 | 10438  | 10801  |
| UN13591 | Rsa1.0.00688.1 | 1412 | 68396  | 0         | 592  | 602  | 98 +  | 811  | 1412 | 37596  | 38197  |
| UN13592 | Rsa1.0.00562.1 | 1994 | 75565  | 0         | 1417 | 1440 | 98 -  | 1    | 1436 | 5411   | 6850   |
| UN13593 | Rsa1.0.04892.1 | 1492 | 15573  | 0         | 370  | 381  | 97 -  | 1052 | 1430 | 6086   | 6463   |
| UN13594 | Rsa1.0.05200.1 | 556  | 14522  | 1.00E-142 | 256  | 256  | 100 - | 301  | 556  | 7534   | 7789   |
| UN13595 | Rsa1.0.00175.1 | 1575 | 166121 | 1.00E-156 | 286  | 288  | 99 +  | 1288 | 1575 | 28735  | 29022  |
| UN13596 | Rsa1.0.00122.1 | 1009 | 265937 | 0         | 870  | 874  | 99 +  | 136  | 1009 | 239355 | 240227 |
| UN13597 | Rsa1.0.01030.1 | 1196 | 56290  | 1.00E-144 | 294  | 304  | 96 +  | 893  | 1196 | 40732  | 41029  |
| UN13598 | Rsa1.0.10890.1 | 924  | 5688   | 0         | 844  | 857  | 98 -  | 1    | 857  | 1      | 856    |
| UN13599 | Rsa1.0.00728.1 | 919  | 66704  | 1.00E-172 | 354  | 366  | 96 -  | 553  | 918  | 15828  | 16190  |
| UN13600 | Rsa1.0.28780.1 | 1558 | 803    | 0         | 423  | 423  | 100 + | 1135 | 1557 | 1      | 423    |
| UN13601 | Rsa1.0.00065.1 | 1001 | 454616 | 1.00E-156 | 324  | 332  | 97 +  | 1    | 330  | 243703 | 244031 |
| UN13602 | Rsa1.0.02139.1 | 876  | 34686  | 2.33E-156 | 346  | 370  | 93 -  | 509  | 876  | 5545   | 5912   |
| UN13603 | Rsa1.0.03235.1 | 1099 | 24442  | 0         | 610  | 624  | 97 +  | 477  | 1099 | 14818  | 15441  |
| UN13604 | Rsa1.0.00128.1 | 1265 | 228675 | 0         | 383  | 390  | 98 +  | 876  | 1265 | 135383 | 135767 |
| UN13605 | Rsa1.0.02070.1 | 1344 | 158516 | 1.00E-130 | 261  | 268  | 97 +  | 2    | 268  | 16293  | 16560  |
| UN13606 | Rsa1.0.05569.1 | 1117 | 13311  | 0         | 731  | 742  | 98 -  | 375  | 1116 | 2710   | 3451   |
| UN13607 | Rsa1.0.00002.1 | 923  | 601661 | 0         | 692  | 724  | 95 -  | 7    | 726  | 231774 | 232495 |
| UN13608 | Rsa1.0.01313.1 | 1259 | 48387  | 0         | 463  | 472  | 98 -  | 789  | 1259 | 506    | 977    |
| UN13609 | Rsa1.0.00273.1 | 1903 | 326186 | 0         | 619  | 629  | 98 -  | 503  | 1131 | 137570 | 138198 |

|         |                |      |        |           |      |      |       |      |      |        |        |
|---------|----------------|------|--------|-----------|------|------|-------|------|------|--------|--------|
| UN13610 | Rsa1.0_00342.1 | 1337 | 93695  | 0         | 735  | 735  | 100 + | 3    | 737  | 12430  | 13164  |
| UN13611 | Rsa1.0_01220.1 | 869  | 161775 | 1.00E-131 | 289  | 304  | 95 -  | 564  | 867  | 115836 | 116135 |
| UN13612 | Rsa1.0_00002.1 | 2100 | 601661 | 0         | 505  | 509  | 99 -  | 1    | 509  | 138033 | 138540 |
| UN13613 | Rsa1.0_07877.1 | 1107 | 8373   | 6.00E-77  | 147  | 147  | 100 + | 238  | 384  | 4515   | 4661   |
| UN13614 | Rsa1.0_18628.1 | 1618 | 1562   | 0         | 1006 | 1011 | 99 -  | 608  | 1618 | 346    | 1355   |
| UN13615 | Rsa1.0_00064.1 | 1515 | 240927 | 0         | 888  | 906  | 98 -  | 1    | 906  | 65164  | 66069  |
| UN13616 | Rsa1.0_05745.1 | 1597 | 12750  | 0         | 1041 | 1055 | 98 +  | 541  | 1595 | 7883   | 8937   |
| UN13617 | Rsa1.0_00252.1 | 1282 | 102760 | 0         | 360  | 372  | 96 +  | 911  | 1282 | 44777  | 45148  |
| UN13618 | Rsa1.0_00090.1 | 807  | 273859 | 1.00E-119 | 236  | 242  | 97 -  | 3    | 244  | 41355  | 41596  |
| UN13619 | Rsa1.0_01209.1 | 936  | 50668  | 0         | 585  | 593  | 98 -  | 344  | 936  | 48588  | 49180  |
| UN13620 | Rsa1.0_09067.1 | 1057 | 6672   | 1.00E-120 | 234  | 239  | 97 -  | 3    | 241  | 4293   | 4531   |
| UN13621 | Rsa1.0_00048.1 | 1581 | 167185 | 0         | 411  | 416  | 98 +  | 2    | 417  | 154805 | 155219 |
| UN13622 | Rsa1.0_00015.1 | 1141 | 561803 | 1.00E-140 | 322  | 346  | 93 +  | 1    | 346  | 190551 | 190878 |
| UN13623 | Rsa1.0_04223.1 | 935  | 18407  | 1.00E-148 | 348  | 374  | 93 +  | 1    | 374  | 9455   | 9816   |
| UN13624 | Rsa1.0_02456.1 | 803  | 31222  | 1.00E-127 | 277  | 290  | 95 +  | 1    | 290  | 23723  | 24004  |
| UN13625 | Rsa1.0_00339.1 | 891  | 222974 | 5.00E-80  | 158  | 160  | 98 +  | 648  | 807  | 63385  | 63544  |
| UN13626 | Rsa1.0_01048.1 | 1773 | 55684  | 0         | 913  | 914  | 99 -  | 1    | 914  | 44113  | 45026  |
| UN13627 | Rsa1.0_01789.1 | 1030 | 39250  | 0         | 501  | 522  | 95 +  | 283  | 804  | 9785   | 10306  |
| UN13628 | Rsa1.0_00363.1 | 1163 | 90968  | 0         | 432  | 461  | 93 -  | 700  | 1160 | 9266   | 9713   |
| UN13629 | Rsa1.0_14319.1 | 1149 | 3529   | 1.00E-172 | 488  | 548  | 89 -  | 267  | 814  | 2316   | 2860   |
| UN13630 | Rsa1.0_00154.1 | 1702 | 189461 | 0         | 331  | 333  | 99 -  | 1370 | 1702 | 41236  | 41568  |
| UN13631 | Rsa1.0_00407.1 | 1098 | 191544 | 0         | 840  | 873  | 96 +  | 2    | 869  | 155496 | 156357 |
| UN13632 | Rsa1.0_01091.1 | 1240 | 54383  | 0         | 1214 | 1237 | 98 +  | 4    | 1239 | 49136  | 50372  |
| UN13633 | Rsa1.0_08072.1 | 1083 | 7955   | 1.00E-151 | 319  | 330  | 96 +  | 3    | 331  | 6001   | 6326   |
| UN13634 | Rsa1.0_00017.1 | 1136 | 752458 | 2.00E-77  | 148  | 148  | 100 - | 764  | 911  | 603348 | 603495 |
| UN13635 | Rsa1.0_01540.1 | 1229 | 151890 | 1.00E-104 | 213  | 220  | 96 +  | 781  | 1000 | 129408 | 129627 |
| UN13636 | Rsa1.0_00127.1 | 1371 | 127446 | 0         | 771  | 808  | 95 +  | 492  | 1298 | 102847 | 103654 |
| UN13637 | Rsa1.0_01493.1 | 1377 | 44670  | 0         | 379  | 381  | 99 -  | 1    | 380  | 7846   | 8226   |
| UN13638 | Rsa1.0_01485.1 | 872  | 44797  | 0         | 861  | 875  | 98 -  | 1    | 872  | 50     | 924    |
| UN13639 | Rsa1.0_01872.1 | 676  | 37908  | 3.00E-96  | 217  | 227  | 95 -  | 1    | 226  | 16038  | 16258  |
| UN13640 | Rsa1.0_18254.1 | 1454 | 1636   | 1.00E-151 | 329  | 347  | 94 +  | 1    | 334  | 682    | 1024   |
| UN13641 | Rsa1.0_00933.1 | 1323 | 59164  | 0         | 498  | 502  | 99 -  | 819  | 1320 | 52183  | 52684  |
| UN13642 | Rsa1.0_00033.1 | 1228 | 515811 | 0         | 349  | 352  | 99 -  | 1    | 350  | 131617 | 131968 |
| UN13643 | Rsa1.0_00152.1 | 1461 | 257730 | 0         | 821  | 848  | 96 +  | 618  | 1459 | 59089  | 59936  |
| UN13644 | Rsa1.0_05235.1 | 830  | 14421  | 0         | 405  | 411  | 98 -  | 425  | 830  | 10660  | 11070  |
| UN13645 | Rsa1.0_00841.1 | 1537 | 183065 | 0         | 777  | 786  | 98 +  | 2    | 787  | 48464  | 49248  |
| UN13646 | Rsa1.0_01198.1 | 834  | 51029  | 0         | 827  | 831  | 99 +  | 1    | 831  | 25776  | 26606  |
| UN13647 | Rsa1.0_02192.1 | 1828 | 171291 | 0         | 441  | 463  | 95 +  | 1283 | 1736 | 12268  | 12724  |
| UN13648 | Rsa1.0_00064.1 | 1716 | 240927 | 0         | 413  | 422  | 97 +  | 767  | 1183 | 60195  | 60615  |



|         |                |      |        |           |      |      |       |      |      |        |        |
|---------|----------------|------|--------|-----------|------|------|-------|------|------|--------|--------|
| UN13649 | Rsa1.0_10168.1 | 1118 | 5964   | 1.00E-144 | 262  | 263  | 99 -  | 4    | 266  | 934    | 1196   |
| UN13650 | Rsa1.0_03826.1 | 1248 | 20614  | 0         | 805  | 805  | 100 - | 3    | 807  | 16090  | 16894  |
| UN13651 | Rsa1.0_00101.1 | 1033 | 267193 | 1.00E-124 | 283  | 299  | 94 -  | 735  | 1032 | 131413 | 131700 |
| UN13652 | Rsa1.0_07622.1 | 903  | 9012   | 0         | 560  | 560  | 100 - | 344  | 903  | 4238   | 4797   |
| UN13653 | Rsa1.0_00675.1 | 1235 | 145590 | 0         | 351  | 359  | 97 -  | 1    | 359  | 144665 | 145019 |
| UN13654 | Rsa1.0_06887.1 | 873  | 10208  | 1.00E-159 | 297  | 301  | 98 +  | 24   | 324  | 4091   | 4391   |
| UN13655 | Rsa1.0_00819.1 | 1502 | 62918  | 0         | 1312 | 1389 | 94 +  | 13   | 1388 | 3643   | 5030   |
| UN13656 | Rsa1.0_03570.1 | 1116 | 22040  | 0         | 444  | 461  | 96 +  | 657  | 1116 | 9422   | 9875   |
| UN13657 | Rsa1.0_04097.1 | 1481 | 19090  | 0         | 660  | 683  | 96 -  | 1    | 682  | 6602   | 7283   |
| UN13658 | Rsa1.0_00705.1 | 1018 | 67505  | 1.00E-144 | 277  | 283  | 97 +  | 105  | 387  | 53881  | 54163  |
| UN13659 | Rsa1.0_00625.1 | 1078 | 71672  | 0         | 602  | 616  | 97 -  | 465  | 1077 | 14860  | 15475  |
| UN13660 | Rsa1.0_00627.1 | 1039 | 71566  | 0         | 360  | 362  | 99 -  | 8    | 369  | 63662  | 64023  |
| UN13661 | Rsa1.0_01670.1 | 1333 | 41260  | 1.00E-101 | 200  | 204  | 98 -  | 1031 | 1234 | 25218  | 25421  |
| UN13662 | Rsa1.0_00948.1 | 589  | 58620  | 1.00E-104 | 199  | 201  | 99 +  | 134  | 334  | 50390  | 50590  |
| UN13663 | Rsa1.0_00991.1 | 1425 | 143101 | 0         | 404  | 404  | 100 - | 105  | 508  | 142698 | 143101 |
| UN13664 | Rsa1.0_00697.1 | 766  | 67913  | 1.00E-174 | 372  | 392  | 94 +  | 3    | 394  | 59555  | 59944  |
| UN13665 | Rsa1.0_00385.1 | 1178 | 89160  | 0         | 567  | 569  | 99 +  | 3    | 569  | 47346  | 47914  |
| UN13666 | Rsa1.0_02916.1 | 1488 | 26809  | 1.00E-177 | 324  | 327  | 99 +  | 329  | 655  | 4488   | 4814   |
| UN13667 | Rsa1.0_02568.1 | 1234 | 30015  | 0         | 615  | 615  | 100 - | 618  | 1232 | 9866   | 10480  |
| UN13668 | Rsa1.0_07464.1 | 1053 | 9328   | 1.00E-151 | 352  | 375  | 93 +  | 682  | 1053 | 4      | 377    |
| UN13669 | Rsa1.0_00624.1 | 957  | 71773  | 1.00E-126 | 232  | 233  | 99 +  | 477  | 709  | 20764  | 20996  |
| UN13670 | Rsa1.0_42545.1 | 1182 | 527    | 0         | 341  | 344  | 99 -  | 8    | 351  | 1      | 344    |
| UN13671 | Rsa1.0_05950.1 | 832  | 12130  | 1.00E-111 | 222  | 228  | 97 -  | 297  | 524  | 2709   | 2936   |
| UN13672 | Rsa1.0_00197.1 | 1274 | 109714 | 1.00E-168 | 342  | 356  | 96 +  | 535  | 890  | 36533  | 36888  |
| UN13673 | Rsa1.0_04933.1 | 910  | 15410  | 0         | 631  | 650  | 97 -  | 1    | 649  | 6309   | 6958   |
| UN13674 | Rsa1.0_04325.1 | 1508 | 17885  | 0         | 382  | 382  | 100 + | 4    | 385  | 13661  | 14042  |
| UN13675 | Rsa1.0_04220.1 | 843  | 18421  | 0         | 516  | 517  | 99 -  | 328  | 843  | 9466   | 9982   |
| UN13676 | Rsa1.0_00048.1 | 772  | 167185 | 0         | 469  | 489  | 95 +  | 2    | 474  | 154732 | 155219 |
| UN13677 | Rsa1.0_05570.1 | 744  | 13301  | 0         | 458  | 467  | 98 -  | 279  | 744  | 6801   | 7266   |
| UN13678 | Rsa1.0_00017.1 | 908  | 752458 | 0         | 456  | 461  | 98 -  | 450  | 908  | 412583 | 413043 |
| UN13679 | Rsa1.0_00095.1 | 717  | 283384 | 0         | 633  | 645  | 98 -  | 2    | 645  | 96617  | 97258  |
| UN13680 | Rsa1.0_13767.1 | 951  | 4361   | 0         | 451  | 466  | 96 -  | 431  | 896  | 653    | 1118   |
| UN13681 | Rsa1.0_08280.1 | 1015 | 7610   | 0         | 974  | 1007 | 96 +  | 1    | 1006 | 753    | 1755   |
| UN13682 | Rsa1.0_00324.1 | 1131 | 218805 | 1.00E-133 | 270  | 278  | 97 +  | 855  | 1131 | 189680 | 189957 |
| UN13683 | Rsa1.0_03669.1 | 886  | 147114 | 0         | 763  | 791  | 96 +  | 102  | 886  | 20525  | 21309  |
| UN13684 | Rsa1.0_14348.1 | 953  | 3490   | 1.00E-142 | 307  | 320  | 95 +  | 637  | 953  | 1994   | 2313   |
| UN13685 | Rsa1.0_01773.1 | 1529 | 39546  | 0         | 666  | 674  | 98 -  | 3    | 675  | 4503   | 5174   |
| UN13686 | Rsa1.0_00087.1 | 673  | 761073 | 1.00E-174 | 318  | 320  | 99 -  | 1    | 318  | 217289 | 217608 |
| UN13687 | Rsa1.0_00387.1 | 2181 | 495407 | 0         | 551  | 564  | 97 -  | 1011 | 1574 | 396750 | 397310 |

|         |                |      |        |           |      |      |       |      |      |        |        |
|---------|----------------|------|--------|-----------|------|------|-------|------|------|--------|--------|
| UN13688 | Rsa1.0.00273.1 | 1569 | 326186 | 0         | 855  | 864  | 98 +  | 1    | 859  | 237423 | 238286 |
| UN13689 | Rsa1.0.11510.1 | 1275 | 5482   | 0         | 626  | 635  | 98 +  | 643  | 1274 | 4642   | 5276   |
| UN13690 | Rsa1.0.07974.1 | 656  | 8147   | 1.00E-177 | 326  | 330  | 98 -  | 327  | 656  | 6368   | 6697   |
| UN13691 | Rsa1.0.02027.1 | 1259 | 35869  | 1.00E-167 | 328  | 334  | 98 +  | 1    | 331  | 10181  | 10513  |
| UN13692 | Rsa1.0.01540.1 | 1321 | 151890 | 1.00E-152 | 274  | 274  | 100 - | 1048 | 1321 | 127925 | 128198 |
| UN13693 | Rsa1.0.00381.1 | 1253 | 89718  | 1.00E-160 | 287  | 287  | 100 - | 3    | 289  | 73706  | 73992  |
| UN13694 | Rsa1.0.14436.1 | 1640 | 3393   | 0         | 522  | 540  | 96 -  | 1106 | 1637 | 2252   | 2791   |
| UN13695 | Rsa1.0.01881.1 | 892  | 37721  | 0         | 841  | 871  | 96 -  | 24   | 890  | 16713  | 17578  |
| UN13696 | Rsa1.0.00440.1 | 1039 | 84723  | 1.00E-150 | 305  | 316  | 96 -  | 722  | 1037 | 25086  | 25398  |
| UN13697 | Rsa1.0.00067.1 | 1696 | 415055 | 1.00E-120 | 226  | 228  | 99 +  | 1    | 228  | 40082  | 40309  |
| UN13698 | Rsa1.0.05217.1 | 1090 | 142938 | 0         | 417  | 440  | 94 -  | 655  | 1084 | 136328 | 136763 |
| UN13699 | Rsa1.0.01836.1 | 1037 | 38503  | 1.00E-162 | 346  | 364  | 95 -  | 675  | 1035 | 2184   | 2547   |
| UN13700 | Rsa1.0.01171.1 | 1165 | 51752  | 0         | 402  | 413  | 97 +  | 755  | 1165 | 50943  | 51352  |
| UN13701 | Rsa1.0.42713.1 | 972  | 526    | 0         | 413  | 414  | 99 +  | 560  | 972  | 1      | 414    |
| UN13702 | Rsa1.0.04310.1 | 1451 | 17994  | 1.00E-157 | 290  | 293  | 98 -  | 438  | 730  | 1739   | 2031   |
| UN13703 | Rsa1.0.00602.1 | 1759 | 73302  | 1.00E-112 | 219  | 223  | 98 +  | 621  | 843  | 39855  | 40077  |
| UN13704 | Rsa1.0.01164.1 | 2667 | 51934  | 0         | 551  | 552  | 99 +  | 1697 | 2248 | 14403  | 14954  |
| UN13705 | Rsa1.0.13438.1 | 1260 | 4828   | 2.33E-156 | 275  | 279  | 98 -  | 982  | 1260 | 943    | 1221   |
| UN13706 | Rsa1.0.00191.1 | 1455 | 316976 | 0         | 1241 | 1277 | 97 +  | 2    | 1278 | 265865 | 267134 |
| UN13707 | Rsa1.0.00456.1 | 580  | 82826  | 0         | 540  | 557  | 96 +  | 30   | 578  | 24528  | 25082  |
| UN13708 | Rsa1.0.00263.1 | 1534 | 224968 | 0         | 456  | 460  | 99 -  | 1067 | 1526 | 6735   | 7191   |
| UN13709 | Rsa1.0.05311.1 | 1250 | 14181  | 0         | 656  | 666  | 98 +  | 583  | 1248 | 6590   | 7248   |
| UN13710 | Rsa1.0.00022.1 | 846  | 200461 | 0         | 396  | 402  | 98 -  | 5    | 403  | 46372  | 46773  |
| UN13711 | Rsa1.0.02802.1 | 1949 | 27736  | 0         | 1004 | 1045 | 96 +  | 892  | 1935 | 8951   | 9978   |
| UN13712 | Rsa1.0.05812.1 | 1030 | 12571  | 0         | 1028 | 1030 | 99 +  | 1    | 1028 | 2560   | 3589   |
| UN13713 | Rsa1.0.00417.1 | 1052 | 395068 | 0         | 738  | 739  | 99 +  | 313  | 1051 | 376215 | 376953 |
| UN13714 | Rsa1.0.00111.1 | 1328 | 390088 | 0         | 407  | 421  | 96 -  | 1    | 420  | 139323 | 139742 |
| UN13715 | Rsa1.0.00001.1 | 1796 | 363028 | 0         | 1772 | 1795 | 98 +  | 2    | 1795 | 280765 | 282559 |
| UN13716 | Rsa1.0.02319.1 | 1485 | 32580  | 0         | 784  | 806  | 97 +  | 680  | 1483 | 2476   | 3278   |
| UN13717 | Rsa1.0.00462.1 | 1367 | 82288  | 0         | 404  | 417  | 96 +  | 5    | 419  | 36788  | 37202  |
| UN13718 | Rsa1.0.00013.1 | 1830 | 292129 | 0         | 823  | 826  | 99 +  | 1005 | 1830 | 155315 | 156140 |
| UN13719 | Rsa1.0.01212.1 | 1222 | 50622  | 0         | 1180 | 1221 | 96 -  | 1    | 1221 | 46722  | 47939  |
| UN13720 | Rsa1.0.02085.1 | 1286 | 35198  | 1.00E-142 | 280  | 286  | 97 +  | 1000 | 1285 | 17654  | 17935  |
| UN13721 | Rsa1.0.06354.1 | 903  | 11186  | 1.00E-178 | 486  | 536  | 90 +  | 336  | 870  | 9549   | 10064  |
| UN13722 | Rsa1.0.11152.1 | 539  | 5602   | 2.00E-87  | 223  | 242  | 92 +  | 295  | 536  | 5016   | 5249   |
| UN13723 | Rsa1.0.01234.1 | 988  | 50183  | 0         | 513  | 514  | 99 +  | 449  | 962  | 8898   | 9411   |
| UN13724 | Rsa1.0.02081.1 | 1816 | 35235  | 0         | 1120 | 1127 | 99 +  | 688  | 1814 | 29049  | 30175  |
| UN13725 | Rsa1.0.02647.1 | 695  | 29120  | 0         | 672  | 674  | 99 +  | 6    | 679  | 25168  | 25840  |
| UN13726 | Rsa1.0.58354.1 | 769  | 392    | 1.00E-180 | 343  | 349  | 98 +  | 425  | 768  | 1      | 349    |

|         |                |      |        |           |      |      |       |      |      |        |        |
|---------|----------------|------|--------|-----------|------|------|-------|------|------|--------|--------|
| UN13727 | Rsa1.0.00550.1 | 597  | 210790 | 0         | 586  | 598  | 97 -  | 3    | 595  | 65628  | 66225  |
| UN13728 | Rsa1.0.00265.1 | 1748 | 220635 | 0         | 614  | 658  | 93 -  | 698  | 1355 | 175101 | 175758 |
| UN13729 | Rsa1.0.00416.1 | 1054 | 86772  | 0         | 432  | 436  | 99 -  | 2    | 437  | 81176  | 81608  |
| UN13730 | Rsa1.0.05070.1 | 1006 | 14933  | 0         | 814  | 823  | 98 -  | 1    | 823  | 1434   | 2256   |
| UN13731 | Rsa1.0.02201.1 | 1306 | 33981  | 1.00E-149 | 272  | 273  | 99 +  | 1034 | 1306 | 31757  | 32029  |
| UN13732 | Rsa1.0.01540.1 | 1294 | 151890 | 0         | 1236 | 1302 | 94 +  | 4    | 1294 | 142472 | 143763 |
| UN13733 | Rsa1.0.01468.1 | 1307 | 45146  | 0         | 440  | 441  | 99 -  | 481  | 921  | 34289  | 34729  |
| UN13734 | Rsa1.0.08170.1 | 935  | 7799   | 0         | 921  | 937  | 98 +  | 1    | 935  | 1623   | 2557   |
| UN13735 | Rsa1.0.03776.1 | 967  | 20926  | 0         | 520  | 555  | 93 -  | 2    | 549  | 80     | 625    |
| UN13736 | Rsa1.0.01382.1 | 1459 | 46877  | 1.00E-160 | 342  | 358  | 95 -  | 1103 | 1459 | 37445  | 37801  |
| UN13737 | Rsa1.0.00301.1 | 956  | 365315 | 0         | 468  | 500  | 93 +  | 460  | 956  | 215181 | 215669 |
| UN13738 | Rsa1.0.00220.1 | 1139 | 192936 | 0         | 414  | 429  | 96 +  | 400  | 822  | 16394  | 16819  |
| UN13739 | Rsa1.0.07756.1 | 619  | 8634   | 1.00E-116 | 221  | 224  | 98 -  | 396  | 619  | 6499   | 6722   |
| UN13740 | Rsa1.0.00484.1 | 931  | 203294 | 0         | 463  | 480  | 96 -  | 1    | 480  | 19530  | 20005  |
| UN13741 | Rsa1.0.04667.1 | 845  | 16460  | 0         | 658  | 667  | 98 +  | 4    | 669  | 13322  | 13983  |
| UN13742 | Rsa1.0.11893.1 | 1659 | 5379   | 0         | 504  | 507  | 99 +  | 1081 | 1587 | 3929   | 4435   |
| UN13743 | Rsa1.0.00739.1 | 1595 | 66155  | 0         | 481  | 505  | 95 -  | 617  | 1119 | 51817  | 52312  |
| UN13744 | Rsa1.0.00383.1 | 681  | 398431 | 0         | 619  | 630  | 98 -  | 41   | 670  | 186021 | 186649 |
| UN13745 | Rsa1.0.00017.1 | 1220 | 752458 | 0         | 531  | 531  | 100 + | 362  | 892  | 313714 | 314244 |
| UN13746 | Rsa1.0.00652.1 | 1173 | 70089  | 0         | 1155 | 1173 | 98 -  | 1    | 1172 | 26210  | 27382  |
| UN13747 | Rsa1.0.00413.1 | 966  | 86921  | 0         | 771  | 833  | 92 -  | 3    | 827  | 48011  | 48818  |
| UN13748 | Rsa1.0.26066.1 | 1243 | 908    | 0         | 901  | 921  | 97 -  | 13   | 933  | 1      | 908    |
| UN13749 | Rsa1.0.03447.1 | 582  | 22857  | 1.00E-147 | 265  | 265  | 100 - | 317  | 581  | 21380  | 21644  |
| UN13750 | Rsa1.0.00005.1 | 914  | 353093 | 0         | 898  | 912  | 98 +  | 1    | 912  | 199701 | 200612 |
| UN13751 | Rsa1.0.01389.1 | 1000 | 46716  | 0         | 382  | 390  | 97 -  | 606  | 995  | 9776   | 10165  |
| UN13752 | Rsa1.0.00055.1 | 770  | 520193 | 1.00E-143 | 265  | 266  | 99 +  | 505  | 769  | 202154 | 202419 |
| UN13753 | Rsa1.0.05134.1 | 1137 | 143181 | 0         | 712  | 739  | 96 +  | 9    | 737  | 5686   | 6420   |
| UN13754 | Rsa1.0.00040.1 | 1665 | 324196 | 4.00E-91  | 171  | 171  | 100 + | 511  | 681  | 243684 | 243854 |
| UN13755 | Rsa1.0.03960.1 | 1463 | 19864  | 1.00E-108 | 277  | 302  | 91 -  | 1    | 289  | 10400  | 10701  |
| UN13756 | Rsa1.0.01515.1 | 3197 | 170864 | 0         | 1285 | 1349 | 95 -  | 299  | 1631 | 142791 | 144127 |
| UN13757 | Rsa1.0.02865.1 | 546  | 27133  | 0         | 430  | 434  | 99 +  | 113  | 546  | 1804   | 2237   |
| UN13758 | Rsa1.0.00127.1 | 1790 | 127446 | 0         | 496  | 500  | 99 -  | 1    | 500  | 64912  | 65411  |
| UN13759 | Rsa1.0.00190.1 | 997  | 318240 | 1.00E-150 | 284  | 289  | 98 -  | 645  | 933  | 180338 | 180626 |
| UN13760 | Rsa1.0.01963.1 | 858  | 36719  | 0         | 424  | 436  | 97 -  | 425  | 856  | 31868  | 32302  |
| UN13761 | Rsa1.0.05427.1 | 1045 | 13790  | 0         | 393  | 423  | 92 -  | 650  | 1044 | 12596  | 13018  |
| UN13762 | Rsa1.0.00069.1 | 1076 | 403561 | 0         | 428  | 433  | 98 +  | 2    | 433  | 169601 | 170031 |
| UN13763 | Rsa1.0.00630.1 | 1346 | 71281  | 0         | 426  | 426  | 100 - | 202  | 627  | 62354  | 62779  |
| UN13764 | Rsa1.0.00082.1 | 895  | 237584 | 1.00E-148 | 270  | 271  | 99 -  | 107  | 377  | 54496  | 54766  |
| UN13765 | Rsa1.0.06604.1 | 1817 | 10681  | 0         | 394  | 406  | 97 -  | 1057 | 1462 | 8849   | 9252   |

|         |                |      |        |           |      |      |       |     |      |        |        |
|---------|----------------|------|--------|-----------|------|------|-------|-----|------|--------|--------|
| UN13766 | Rsa1.0.01836.1 | 870  | 38503  | 1.00E-148 | 314  | 327  | 96 -  | 545 | 870  | 5091   | 5416   |
| UN13767 | Rsa1.0.00215.1 | 796  | 201775 | 0         | 379  | 391  | 96 -  | 3   | 392  | 24023  | 24412  |
| UN13768 | Rsa1.0.00053.1 | 1365 | 263459 | 0         | 455  | 461  | 98 +  | 3   | 461  | 31999  | 32458  |
| UN13769 | Rsa1.0.00473.1 | 1368 | 212204 | 1.00E-107 | 251  | 267  | 94 -  | 20  | 282  | 73604  | 73864  |
| UN13770 | Rsa1.0.04405.1 | 1167 | 17508  | 0         | 1120 | 1170 | 95 +  | 3   | 1166 | 3076   | 4226   |
| UN13771 | Rsa1.0.39987.1 | 908  | 562    | 0         | 362  | 362  | 100 + | 394 | 755  | 201    | 562    |
| UN13772 | Rsa1.0.05161.1 | 1158 | 14631  | 0         | 340  | 345  | 98 +  | 20  | 364  | 8351   | 8695   |
| UN13773 | Rsa1.0.02955.1 | 813  | 26484  | 2.00E-73  | 274  | 318  | 86 -  | 1   | 297  | 21585  | 21894  |
| UN13774 | Rsa1.0.03191.1 | 1812 | 145762 | 0         | 1681 | 1720 | 97 +  | 94  | 1812 | 136988 | 138707 |
| UN13775 | Rsa1.0.06438.1 | 651  | 11017  | 0         | 445  | 476  | 93 -  | 41  | 511  | 1531   | 2002   |
| UN13776 | Rsa1.0.01252.1 | 822  | 49847  | 1.00E-112 | 215  | 218  | 98 -  | 370 | 587  | 19015  | 19232  |
| UN13777 | Rsa1.0.02157.1 | 883  | 149652 | 5.00E-80  | 155  | 156  | 99 -  | 6   | 161  | 134731 | 134886 |
| UN13778 | Rsa1.0.01947.1 | 664  | 36977  | 0         | 384  | 394  | 97 +  | 12  | 403  | 23170  | 23560  |
| UN13779 | Rsa1.0.01397.1 | 1446 | 183276 | 0         | 563  | 584  | 96 +  | 863 | 1444 | 11118  | 11700  |
| UN13780 | Rsa1.0.03428.1 | 1424 | 22987  | 0         | 519  | 522  | 99 +  | 29  | 548  | 14396  | 14917  |
| UN13781 | Rsa1.0.01000.1 | 1236 | 57140  | 0         | 489  | 495  | 98 -  | 747 | 1236 | 40270  | 40763  |
| UN13782 | Rsa1.0.00001.1 | 858  | 363028 | 0         | 591  | 597  | 98 +  | 262 | 858  | 210947 | 211540 |
| UN13783 | Rsa1.0.01201.1 | 1090 | 50856  | 1.00E-153 | 305  | 314  | 97 -  | 5   | 318  | 4      | 316    |
| UN13784 | Rsa1.0.00144.1 | 2231 | 120708 | 0         | 683  | 695  | 98 +  | 401 | 1095 | 8173   | 8867   |
| UN13785 | Rsa1.0.05694.1 | 903  | 12903  | 1.00E-118 | 219  | 220  | 99 +  | 1   | 220  | 7117   | 7336   |
| UN13786 | Rsa1.0.00047.1 | 1276 | 168582 | 0         | 431  | 451  | 95 +  | 834 | 1276 | 120050 | 120500 |
| UN13787 | Rsa1.0.03554.1 | 1284 | 22137  | 0         | 561  | 583  | 96 +  | 703 | 1284 | 20026  | 20596  |
| UN13788 | Rsa1.0.00137.1 | 1137 | 122457 | 1.00E-173 | 309  | 309  | 100 + | 2   | 310  | 81318  | 81626  |
| UN13789 | Rsa1.0.06482.1 | 904  | 10937  | 0         | 585  | 611  | 95 +  | 256 | 866  | 8153   | 8752   |
| UN13790 | Rsa1.0.03900.1 | 1040 | 133221 | 1.00E-151 | 321  | 335  | 95 +  | 680 | 1014 | 3917   | 4249   |
| UN13791 | Rsa1.0.07344.1 | 1971 | 9528   | 0         | 621  | 679  | 91 +  | 666 | 1335 | 525    | 1195   |
| UN13792 | Rsa1.0.02557.1 | 1334 | 30127  | 0         | 704  | 775  | 90 -  | 2   | 772  | 14219  | 14983  |
| UN13793 | Rsa1.0.02500.1 | 1136 | 30768  | 1.00E-155 | 314  | 324  | 96 +  | 814 | 1133 | 24051  | 24374  |
| UN13794 | Rsa1.0.00148.1 | 947  | 120234 | 0         | 504  | 552  | 91 -  | 393 | 944  | 87155  | 87705  |
| UN13795 | Rsa1.0.03253.1 | 1397 | 24321  | 0         | 579  | 581  | 99 -  | 440 | 1020 | 23060  | 23640  |
| UN13796 | Rsa1.0.00707.1 | 978  | 190112 | 1.00E-131 | 273  | 281  | 97 -  | 695 | 975  | 181039 | 181315 |
| UN13797 | Rsa1.0.00231.1 | 1993 | 105381 | 1.00E-161 | 291  | 292  | 99 -  | 263 | 554  | 32328  | 32619  |
| UN13798 | Rsa1.0.00440.1 | 898  | 84723  | 1.00E-169 | 352  | 369  | 95 -  | 528 | 896  | 25036  | 25398  |
| UN13799 | Rsa1.0.01022.1 | 822  | 56606  | 0         | 396  | 407  | 97 -  | 415 | 821  | 36882  | 37278  |
| UN13800 | Rsa1.0.03391.1 | 1663 | 23251  | 0         | 791  | 824  | 95 +  | 2   | 812  | 2328   | 3148   |
| UN13801 | Rsa1.0.00931.1 | 1072 | 59210  | 0         | 365  | 377  | 96 +  | 701 | 1072 | 55356  | 55732  |
| UN13802 | Rsa1.0.01335.1 | 1402 | 47894  | 0         | 477  | 478  | 99 -  | 542 | 1019 | 8065   | 8542   |
| UN13803 | Rsa1.0.00130.1 | 1442 | 125737 | 0         | 477  | 489  | 97 +  | 956 | 1438 | 117675 | 118163 |
| UN13804 | Rsa1.0.00070.1 | 1700 | 150321 | 0         | 400  | 400  | 100 - | 885 | 1284 | 59705  | 60104  |

|         |                |      |        |           |      |      |       |      |      |        |        |
|---------|----------------|------|--------|-----------|------|------|-------|------|------|--------|--------|
| UN13805 | Rsa1.0.03698.1 | 930  | 21302  | 0         | 376  | 394  | 95 +  | 2    | 389  | 6367   | 6760   |
| UN13806 | Rsa1.0.02457.1 | 1439 | 31208  | 1.00E-163 | 312  | 318  | 98 +  | 1121 | 1436 | 12120  | 12437  |
| UN13807 | Rsa1.0.00484.1 | 1497 | 203294 | 0         | 616  | 617  | 99 +  | 550  | 1166 | 63056  | 63672  |
| UN13808 | Rsa1.0.00353.1 | 1015 | 92242  | 1.00E-96  | 214  | 223  | 95 +  | 1    | 222  | 55708  | 55928  |
| UN13809 | Rsa1.0.31415.1 | 1392 | 728    | 2.33E-156 | 279  | 284  | 98 -  | 1094 | 1377 | 1      | 284    |
| UN13810 | Rsa1.0.03264.1 | 1190 | 145959 | 0         | 521  | 521  | 100 - | 2    | 522  | 134518 | 135038 |
| UN13811 | Rsa1.0.05217.1 | 1022 | 142938 | 0         | 441  | 447  | 98 +  | 1    | 447  | 129767 | 130211 |
| UN13812 | Rsa1.0.07894.1 | 1424 | 8347   | 0         | 844  | 878  | 96 -  | 550  | 1423 | 5534   | 6406   |
| UN13813 | Rsa1.0.00481.1 | 1189 | 81316  | 0         | 420  | 445  | 94 +  | 71   | 514  | 71997  | 72427  |
| UN13814 | Rsa1.0.01995.1 | 1062 | 36347  | 0         | 502  | 503  | 99 +  | 560  | 1062 | 22162  | 22663  |
| UN13815 | Rsa1.0.00364.1 | 1278 | 90951  | 0         | 561  | 572  | 98 -  | 500  | 1071 | 77149  | 77717  |
| UN13816 | Rsa1.0.00529.1 | 1216 | 77487  | 0         | 394  | 411  | 95 -  | 1    | 408  | 75987  | 76395  |
| UN13817 | Rsa1.0.00042.1 | 960  | 171507 | 4.00E-87  | 219  | 234  | 93 +  | 1    | 231  | 88317  | 88548  |
| UN13818 | Rsa1.0.01975.1 | 1040 | 36578  | 0         | 415  | 422  | 98 +  | 2    | 423  | 13994  | 14415  |
| UN13819 | Rsa1.0.04225.1 | 1631 | 18400  | 0         | 444  | 445  | 99 +  | 741  | 1185 | 10237  | 10681  |
| UN13820 | Rsa1.0.00013.1 | 1250 | 292129 | 0         | 506  | 511  | 99 +  | 6    | 516  | 114283 | 114793 |
| UN13821 | Rsa1.0.00090.1 | 1631 | 273859 | 0         | 1132 | 1156 | 97 +  | 194  | 1349 | 231858 | 232998 |
| UN13822 | Rsa1.0.06444.1 | 1150 | 11008  | 0         | 409  | 413  | 99 -  | 1    | 412  | 6961   | 7373   |
| UN13823 | Rsa1.0.00354.1 | 1369 | 232005 | 0         | 471  | 497  | 94 +  | 9    | 493  | 13044  | 13540  |
| UN13824 | Rsa1.0.01605.1 | 735  | 42442  | 0         | 509  | 517  | 98 -  | 224  | 733  | 13424  | 13940  |
| UN13825 | Rsa1.0.00015.1 | 1358 | 561803 | 1.00E-180 | 420  | 449  | 93 -  | 11   | 456  | 550661 | 551100 |
| UN13826 | Rsa1.0.03738.1 | 1157 | 21071  | 1.00E-138 | 297  | 311  | 95 -  | 3    | 310  | 12767  | 13075  |
| UN13827 | Rsa1.0.01899.1 | 1245 | 37474  | 0         | 336  | 337  | 99 -  | 1    | 337  | 35128  | 35464  |
| UN13828 | Rsa1.0.00382.1 | 979  | 251946 | 0         | 620  | 627  | 98 +  | 351  | 977  | 111146 | 111771 |
| UN13829 | Rsa1.0.04625.1 | 1430 | 16613  | 0         | 603  | 615  | 98 -  | 277  | 891  | 14784  | 15398  |
| UN13830 | Rsa1.0.00122.1 | 1093 | 265937 | 0         | 1079 | 1090 | 98 +  | 3    | 1091 | 239090 | 240178 |
| UN13831 | Rsa1.0.01799.1 | 1112 | 39127  | 0         | 1093 | 1114 | 98 +  | 2    | 1112 | 31541  | 32654  |
| UN13832 | Rsa1.0.00169.1 | 990  | 274298 | 1.00E-167 | 344  | 357  | 96 -  | 2    | 357  | 31558  | 31911  |
| UN13833 | Rsa1.0.00618.1 | 1478 | 72195  | 0         | 392  | 405  | 96 -  | 1076 | 1478 | 3276   | 3677   |
| UN13834 | Rsa1.0.00399.1 | 1714 | 242951 | 1.00E-167 | 314  | 319  | 98 +  | 1    | 319  | 51523  | 51841  |
| UN13835 | Rsa1.0.01062.1 | 1244 | 55325  | 1.00E-139 | 257  | 259  | 99 +  | 986  | 1244 | 38724  | 38982  |
| UN13836 | Rsa1.0.10507.1 | 1836 | 5822   | 0         | 879  | 903  | 97 -  | 424  | 1313 | 2792   | 3694   |
| UN13837 | Rsa1.0.03290.1 | 1270 | 24011  | 1.00E-165 | 336  | 349  | 96 -  | 925  | 1270 | 7207   | 7555   |
| UN13838 | Rsa1.0.06784.1 | 1102 | 10359  | 0         | 506  | 509  | 99 +  | 1    | 509  | 39     | 547    |
| UN13839 | Rsa1.0.00010.1 | 1015 | 294827 | 4.00E-81  | 277  | 314  | 88 -  | 698  | 1001 | 135527 | 135837 |
| UN13840 | Rsa1.0.03631.1 | 1351 | 21647  | 0         | 437  | 449  | 97 +  | 848  | 1293 | 2780   | 3228   |
| UN13841 | Rsa1.0.11822.1 | 668  | 5397   | 0         | 407  | 407  | 100 + | 261  | 667  | 4170   | 4576   |
| UN13842 | Rsa1.0.03556.1 | 1677 | 22121  | 0         | 700  | 700  | 100 - | 346  | 1045 | 14573  | 15272  |
| UN13843 | Rsa1.0.07645.1 | 790  | 8949   | 1.00E-178 | 325  | 328  | 99 -  | 3    | 330  | 4425   | 4752   |

|         |                |      |        |           |      |      |       |      |      |        |        |
|---------|----------------|------|--------|-----------|------|------|-------|------|------|--------|--------|
| UN13844 | Rsa1.0.00124.1 | 667  | 262503 | 1.00E-148 | 290  | 296  | 97 +  | 1    | 295  | 14152  | 14444  |
| UN13845 | Rsa1.0.01530.1 | 1159 | 43820  | 1.00E-118 | 230  | 233  | 98 -  | 20   | 251  | 5090   | 5322   |
| UN13846 | Rsa1.0.00166.1 | 590  | 240912 | 0         | 507  | 527  | 96 -  | 67   | 590  | 131072 | 131598 |
| UN13847 | Rsa1.0.02125.1 | 863  | 34775  | 1.00E-145 | 262  | 262  | 100 + | 602  | 863  | 24927  | 25188  |
| UN13848 | Rsa1.0.03195.1 | 849  | 24673  | 0         | 460  | 473  | 97 -  | 1    | 473  | 8990   | 9459   |
| UN13849 | Rsa1.0.00237.1 | 583  | 235974 | 0         | 381  | 395  | 96 +  | 189  | 583  | 58852  | 59246  |
| UN13850 | Rsa1.0.00681.1 | 1786 | 68779  | 1.00E-180 | 408  | 434  | 94 +  | 15   | 432  | 42433  | 42866  |
| UN13851 | Rsa1.0.00959.1 | 1465 | 58202  | 0         | 365  | 365  | 100 - | 753  | 1117 | 1503   | 1867   |
| UN13852 | Rsa1.0.00863.1 | 883  | 254535 | 1.00E-172 | 371  | 393  | 94 -  | 4    | 396  | 213547 | 213933 |
| UN13853 | Rsa1.0.03860.1 | 1501 | 20407  | 0         | 479  | 514  | 93 +  | 4    | 495  | 15804  | 16316  |
| UN13854 | Rsa1.0.43878.1 | 730  | 512    | 2.00E-23  | 63   | 65   | 96 -  | 177  | 241  | 43     | 107    |
| UN13855 | Rsa1.0.00285.1 | 1233 | 149638 | 1.00E-152 | 301  | 310  | 97 -  | 20   | 329  | 56337  | 56646  |
| UN13856 | Rsa1.0.00132.1 | 1115 | 124299 | 0         | 355  | 357  | 99 -  | 759  | 1115 | 108386 | 108742 |
| UN13857 | Rsa1.0.00891.1 | 880  | 60724  | 0         | 457  | 465  | 98 +  | 26   | 490  | 32887  | 33348  |
| UN13858 | Rsa1.0.00085.1 | 1016 | 142226 | 1.00E-152 | 294  | 299  | 98 -  | 643  | 940  | 62524  | 62819  |
| UN13859 | Rsa1.0.21688.1 | 1159 | 1181   | 0         | 583  | 599  | 97 -  | 560  | 1158 | 583    | 1181   |
| UN13860 | Rsa1.0.04088.1 | 1212 | 19150  | 0         | 498  | 504  | 98 -  | 1    | 504  | 18429  | 18929  |
| UN13861 | Rsa1.0.00503.1 | 909  | 79468  | 0         | 456  | 456  | 100 + | 454  | 909  | 57977  | 58432  |
| UN13862 | Rsa1.0.00180.1 | 1531 | 114581 | 1.00E-160 | 333  | 349  | 95 +  | 114  | 456  | 10716  | 11058  |
| UN13863 | Rsa1.0.04097.1 | 1480 | 19090  | 0         | 671  | 697  | 96 +  | 789  | 1478 | 6602   | 7298   |
| UN13864 | Rsa1.0.00089.1 | 1610 | 406142 | 1.00E-168 | 337  | 348  | 96 +  | 1251 | 1597 | 231223 | 231570 |
| UN13865 | Rsa1.0.42296.1 | 777  | 531    | 1.00E-125 | 253  | 259  | 97 +  | 461  | 719  | 2      | 258    |
| UN13866 | Rsa1.0.00178.1 | 1061 | 114861 | 0         | 404  | 409  | 98 +  | 1    | 408  | 84562  | 84969  |
| UN13867 | Rsa1.0.00694.1 | 809  | 68074  | 8.00E-91  | 190  | 196  | 96 +  | 3    | 198  | 1462   | 1654   |
| UN13868 | Rsa1.0.03416.1 | 1809 | 23112  | 0         | 345  | 347  | 99 +  | 1453 | 1797 | 16130  | 16476  |
| UN13869 | Rsa1.0.48565.1 | 1333 | 466    | 0         | 349  | 349  | 100 - | 983  | 1331 | 91     | 439    |
| UN13870 | Rsa1.0.01566.1 | 1326 | 43134  | 0         | 595  | 606  | 98 +  | 658  | 1263 | 34060  | 34665  |
| UN13871 | Rsa1.0.00097.1 | 1162 | 138858 | 2.00E-89  | 177  | 180  | 98 +  | 129  | 308  | 119408 | 119587 |
| UN13872 | Rsa1.0.12152.1 | 561  | 5300   | 0         | 476  | 477  | 99 +  | 3    | 479  | 4824   | 5300   |
| UN13873 | Rsa1.0.00340.1 | 1563 | 305782 | 0         | 401  | 424  | 94 -  | 878  | 1301 | 191839 | 192262 |
| UN13874 | Rsa1.0.00786.1 | 944  | 64285  | 1.00E-102 | 198  | 201  | 98 +  | 362  | 562  | 41596  | 41796  |
| UN13875 | Rsa1.0.00134.1 | 973  | 390219 | 0         | 340  | 343  | 99 -  | 3    | 344  | 157266 | 157607 |
| UN13876 | Rsa1.0.00914.1 | 1010 | 59880  | 0         | 359  | 366  | 98 +  | 1    | 360  | 21661  | 22026  |
| UN13877 | Rsa1.0.00104.1 | 1301 | 368722 | 0         | 767  | 774  | 99 +  | 484  | 1256 | 257026 | 257799 |
| UN13878 | Rsa1.0.00145.1 | 1383 | 261008 | 0         | 1348 | 1381 | 97 -  | 1    | 1381 | 44389  | 45766  |
| UN13879 | Rsa1.0.01273.1 | 1693 | 49464  | 0         | 1152 | 1184 | 97 +  | 466  | 1644 | 8684   | 9866   |
| UN13880 | Rsa1.0.00389.1 | 1052 | 88795  | 0         | 546  | 554  | 98 +  | 497  | 1050 | 18741  | 19294  |
| UN13881 | Rsa1.0.00601.1 | 909  | 177045 | 0         | 392  | 402  | 97 -  | 513  | 909  | 26095  | 26496  |
| UN13882 | Rsa1.0.00420.1 | 1526 | 86496  | 2.33E-156 | 277  | 279  | 99 -  | 2    | 278  | 45120  | 45398  |

|         |                |      |        |           |      |      |       |      |      |        |        |
|---------|----------------|------|--------|-----------|------|------|-------|------|------|--------|--------|
| UN13883 | Rsa1.0.00693.1 | 1223 | 161311 | 0         | 1096 | 1121 | 97 -  | 103  | 1223 | 41355  | 42475  |
| UN13884 | Rsa1.0.00378.1 | 1111 | 89892  | 1.00E-172 | 307  | 307  | 100 + | 3    | 309  | 62147  | 62453  |
| UN13885 | Rsa1.0.00451.1 | 1232 | 322533 | 0         | 430  | 463  | 92 +  | 3    | 450  | 300468 | 300930 |
| UN13886 | Rsa1.0.00152.1 | 1481 | 257730 | 0         | 851  | 853  | 99 +  | 629  | 1481 | 59089  | 59941  |
| UN13887 | Rsa1.0.01984.1 | 1750 | 36491  | 0         | 392  | 399  | 98 -  | 78   | 476  | 30118  | 30516  |
| UN13888 | Rsa1.0.00417.1 | 722  | 395068 | 0         | 350  | 356  | 98 +  | 355  | 710  | 14474  | 14829  |
| UN13889 | Rsa1.0.01947.1 | 721  | 36977  | 0         | 392  | 405  | 96 -  | 293  | 694  | 23163  | 23567  |
| UN13890 | Rsa1.0.06740.1 | 1446 | 10439  | 0         | 527  | 538  | 97 -  | 2    | 538  | 8581   | 9118   |
| UN13891 | Rsa1.0.06273.1 | 921  | 11346  | 0         | 799  | 850  | 94 -  | 68   | 917  | 2974   | 3810   |
| UN13892 | Rsa1.0.07471.1 | 1522 | 9307   | 0         | 910  | 935  | 97 +  | 590  | 1520 | 1      | 935    |
| UN13893 | Rsa1.0.11160.1 | 1077 | 5600   | 0         | 349  | 353  | 98 -  | 3    | 352  | 134    | 486    |
| UN13894 | Rsa1.0.00406.1 | 1117 | 87398  | 0         | 371  | 372  | 99 -  | 3    | 374  | 53293  | 53664  |
| UN13895 | Rsa1.0.05570.1 | 1158 | 13301  | 0         | 558  | 576  | 96 -  | 61   | 634  | 12647  | 13218  |
| UN13896 | Rsa1.0.01170.1 | 1232 | 161131 | 1.00E-130 | 254  | 260  | 97 +  | 24   | 283  | 130486 | 130745 |
| UN13897 | Rsa1.0.00015.1 | 782  | 561803 | 1.00E-142 | 268  | 272  | 98 -  | 509  | 780  | 480988 | 481259 |
| UN13898 | Rsa1.0.06603.1 | 1045 | 10682  | 1.00E-84  | 160  | 160  | 100 + | 108  | 267  | 3481   | 3640   |
| UN13899 | Rsa1.0.00139.1 | 959  | 357786 | 1.00E-130 | 246  | 249  | 98 +  | 1    | 249  | 290698 | 290946 |
| UN13900 | Rsa1.0.13828.1 | 785  | 4254   | 0         | 498  | 519  | 95 +  | 3    | 512  | 1999   | 2516   |
| UN13901 | Rsa1.0.00337.1 | 730  | 143174 | 1.00E-164 | 300  | 301  | 99 +  | 429  | 728  | 2366   | 2666   |
| UN13902 | Rsa1.0.01648.1 | 804  | 41635  | 0         | 541  | 551  | 98 +  | 99   | 649  | 15739  | 16289  |
| UN13903 | Rsa1.0.04273.1 | 1039 | 18144  | 2.33E-156 | 273  | 275  | 99 +  | 766  | 1039 | 12147  | 12421  |
| UN13904 | Rsa1.0.05243.1 | 728  | 14399  | 0         | 390  | 394  | 98 -  | 333  | 726  | 5705   | 6098   |
| UN13905 | Rsa1.0.00026.1 | 2206 | 327835 | 0         | 1111 | 1119 | 99 -  | 75   | 1189 | 176398 | 177516 |
| UN13906 | Rsa1.0.35192.1 | 742  | 643    | 1.00E-122 | 241  | 246  | 97 -  | 3    | 247  | 40     | 285    |
| UN13907 | Rsa1.0.00052.1 | 892  | 162771 | 1.00E-165 | 309  | 311  | 99 +  | 584  | 892  | 58551  | 58861  |
| UN13908 | Rsa1.0.00114.1 | 1832 | 131330 | 1.00E-174 | 342  | 351  | 97 -  | 588  | 938  | 44560  | 44909  |
| UN13909 | Rsa1.0.00222.1 | 1379 | 172263 | 1.00E-123 | 239  | 244  | 97 -  | 581  | 824  | 137688 | 137931 |
| UN13910 | Rsa1.0.01050.1 | 1232 | 55651  | 0         | 581  | 595  | 97 +  | 1    | 595  | 10695  | 11285  |
| UN13911 | Rsa1.0.03633.1 | 995  | 21644  | 1.00E-168 | 306  | 308  | 99 +  | 686  | 993  | 18297  | 18604  |
| UN13912 | Rsa1.0.00096.1 | 1548 | 198773 | 0         | 372  | 372  | 100 + | 1175 | 1546 | 138020 | 138391 |
| UN13913 | Rsa1.0.03647.1 | 1602 | 21597  | 0         | 815  | 840  | 97 -  | 2    | 837  | 2776   | 3613   |
| UN13914 | Rsa1.0.01154.1 | 1209 | 52249  | 0         | 556  | 576  | 96 +  | 3    | 577  | 9022   | 9597   |
| UN13915 | Rsa1.0.00546.1 | 551  | 76523  | 1.00E-177 | 354  | 366  | 96 -  | 1    | 365  | 11385  | 11750  |
| UN13916 | Rsa1.0.01743.1 | 881  | 39926  | 0         | 456  | 466  | 97 -  | 417  | 879  | 6748   | 7212   |
| UN13917 | Rsa1.0.00912.1 | 1388 | 59923  | 1.00E-173 | 308  | 308  | 100 + | 1    | 308  | 36975  | 37282  |
| UN13918 | Rsa1.0.00448.1 | 1919 | 84048  | 0         | 1396 | 1479 | 94 -  | 2    | 1480 | 7460   | 8925   |
| UN13919 | Rsa1.0.05319.1 | 975  | 14158  | 1.00E-130 | 288  | 305  | 94 +  | 18   | 318  | 398    | 702    |
| UN13920 | Rsa1.0.00991.1 | 849  | 143101 | 0         | 463  | 479  | 96 +  | 49   | 524  | 133482 | 133957 |
| UN13921 | Rsa1.0.01168.1 | 535  | 153765 | 0         | 364  | 373  | 97 +  | 160  | 532  | 44255  | 44627  |

|         |                |      |        |           |      |      |       |      |      |        |        |
|---------|----------------|------|--------|-----------|------|------|-------|------|------|--------|--------|
| UN13922 | Rsa1.0.01799.1 | 1423 | 39127  | 0         | 590  | 591  | 99 -  | 833  | 1423 | 2450   | 3040   |
| UN13923 | Rsa1.0.03382.1 | 1721 | 23299  | 1.00E-180 | 326  | 328  | 99 +  | 31   | 358  | 5210   | 5537   |
| UN13924 | Rsa1.0.01948.1 | 1257 | 36966  | 0         | 533  | 538  | 99 +  | 72   | 609  | 15111  | 15648  |
| UN13925 | Rsa1.0.00397.1 | 786  | 88189  | 1.00E-121 | 261  | 273  | 95 +  | 514  | 786  | 54834  | 55105  |
| UN13926 | Rsa1.0.00657.1 | 1308 | 69858  | 1.00E-148 | 311  | 325  | 95 +  | 3    | 327  | 37501  | 37818  |
| UN13927 | Rsa1.0.00230.1 | 1011 | 105389 | 1.00E-145 | 300  | 310  | 96 +  | 683  | 991  | 5859   | 6167   |
| UN13928 | Rsa1.0.00734.1 | 1015 | 66508  | 1.00E-116 | 215  | 216  | 99 +  | 65   | 280  | 25377  | 25592  |
| UN13929 | Rsa1.0.05818.1 | 974  | 12544  | 0         | 398  | 398  | 100 - | 575  | 972  | 6711   | 7108   |
| UN13930 | Rsa1.0.02991.1 | 753  | 26178  | 0         | 438  | 438  | 100 - | 3    | 440  | 21112  | 21549  |
| UN13931 | Rsa1.0.02400.1 | 1297 | 31750  | 0         | 628  | 633  | 99 -  | 3    | 631  | 9576   | 10208  |
| UN13932 | Rsa1.0.14356.1 | 872  | 3485   | 0         | 467  | 480  | 97 -  | 395  | 872  | 3009   | 3485   |
| UN13933 | Rsa1.0.00366.1 | 593  | 90880  | 0         | 590  | 593  | 99 -  | 1    | 591  | 25888  | 26480  |
| UN13934 | Rsa1.0.01923.1 | 1019 | 37233  | 1.00E-158 | 343  | 361  | 95 -  | 1    | 358  | 36457  | 36816  |
| UN13935 | Rsa1.0.01281.1 | 1079 | 49313  | 1.00E-145 | 264  | 265  | 99 -  | 815  | 1079 | 33489  | 33753  |
| UN13936 | Rsa1.0.00120.1 | 1376 | 277288 | 0         | 463  | 475  | 97 +  | 898  | 1370 | 96041  | 96513  |
| UN13937 | Rsa1.0.00599.1 | 1296 | 73418  | 0         | 438  | 471  | 92 +  | 8    | 477  | 52966  | 53420  |
| UN13938 | Rsa1.0.00078.1 | 1397 | 175053 | 0         | 445  | 445  | 100 - | 226  | 670  | 38368  | 38812  |
| UN13939 | Rsa1.0.01353.1 | 1431 | 47351  | 0         | 799  | 805  | 99 -  | 3    | 804  | 37255  | 38059  |
| UN13940 | Rsa1.0.00296.1 | 1220 | 97854  | 0         | 971  | 1038 | 93 +  | 180  | 1217 | 44816  | 45851  |
| UN13941 | Rsa1.0.00662.1 | 1074 | 192183 | 0         | 411  | 433  | 94 +  | 647  | 1071 | 2200   | 2630   |
| UN13942 | Rsa1.0.02976.1 | 622  | 26315  | 1.00E-100 | 197  | 201  | 98 +  | 373  | 573  | 18887  | 19087  |
| UN13943 | Rsa1.0.02177.1 | 952  | 34262  | 3.00E-75  | 168  | 176  | 95 +  | 306  | 481  | 14545  | 14720  |
| UN13944 | Rsa1.0.00268.1 | 1505 | 101470 | 0         | 444  | 450  | 98 -  | 1056 | 1505 | 43077  | 43526  |
| UN13945 | Rsa1.0.08402.1 | 1353 | 7417   | 1.00E-166 | 302  | 304  | 99 +  | 447  | 750  | 5352   | 5655   |
| UN13946 | Rsa1.0.02206.1 | 1169 | 33922  | 1.00E-170 | 303  | 303  | 100 + | 864  | 1166 | 19902  | 20204  |
| UN13947 | Rsa1.0.00139.1 | 2003 | 357786 | 0         | 1125 | 1173 | 95 -  | 827  | 1993 | 66423  | 67583  |
| UN13948 | Rsa1.0.10264.1 | 1101 | 5913   | 0         | 375  | 382  | 98 +  | 722  | 1101 | 605    | 986    |
| UN13949 | Rsa1.0.00673.1 | 2998 | 69325  | 1.00E-153 | 291  | 296  | 98 -  | 2341 | 2636 | 47441  | 47736  |
| UN13950 | Rsa1.0.00381.1 | 953  | 89718  | 1.00E-142 | 257  | 257  | 100 + | 695  | 951  | 62649  | 62905  |
| UN13951 | Rsa1.0.01601.1 | 1158 | 42519  | 1.00E-124 | 242  | 246  | 98 +  | 2    | 246  | 17151  | 17396  |
| UN13952 | Rsa1.0.00797.1 | 961  | 63959  | 0         | 565  | 603  | 93 +  | 3    | 598  | 51699  | 52289  |
| UN13953 | Rsa1.0.04028.1 | 1075 | 19493  | 1.00E-110 | 209  | 211  | 99 -  | 246  | 456  | 3399   | 3609   |
| UN13954 | Rsa1.0.01636.1 | 830  | 41863  | 0         | 327  | 328  | 99 -  | 503  | 830  | 34093  | 34420  |
| UN13955 | Rsa1.0.08293.1 | 1389 | 7593   | 0         | 553  | 565  | 97 -  | 436  | 1000 | 2270   | 2834   |
| UN13956 | Rsa1.0.00091.1 | 1892 | 139699 | 0         | 482  | 495  | 97 -  | 1399 | 1892 | 136921 | 137413 |
| UN13957 | Rsa1.0.00017.1 | 1311 | 752458 | 1.00E-151 | 336  | 354  | 94 +  | 959  | 1311 | 578918 | 579267 |
| UN13958 | Rsa1.0.00880.1 | 515  | 61271  | 0         | 506  | 512  | 98 -  | 2    | 513  | 40535  | 41046  |
| UN13959 | Rsa1.0.00524.1 | 994  | 169613 | 0         | 449  | 457  | 98 +  | 537  | 993  | 129773 | 130229 |
| UN13960 | Rsa1.0.01559.1 | 702  | 43262  | 1.00E-103 | 262  | 282  | 92 -  | 34   | 314  | 2268   | 2547   |



|         |                |      |        |           |      |      |       |      |      |        |        |
|---------|----------------|------|--------|-----------|------|------|-------|------|------|--------|--------|
| UN13961 | Rsa1.0.00812.1 | 613  | 63233  | 1.00E-172 | 309  | 310  | 99 +  | 4    | 313  | 17146  | 17455  |
| UN13962 | Rsa1.0.04218.1 | 840  | 18423  | 0         | 477  | 484  | 98 +  | 359  | 840  | 8963   | 9445   |
| UN13963 | Rsa1.0.01512.1 | 792  | 44234  | 0         | 486  | 511  | 95 +  | 282  | 792  | 18084  | 18592  |
| UN13964 | Rsa1.0.00823.1 | 1188 | 62889  | 0         | 834  | 835  | 99 -  | 1    | 835  | 45658  | 46492  |
| UN13965 | Rsa1.0.07208.1 | 1347 | 9719   | 0         | 548  | 558  | 98 -  | 790  | 1347 | 7437   | 7993   |
| UN13966 | Rsa1.0.00505.1 | 538  | 79323  | 0         | 388  | 389  | 99 +  | 146  | 534  | 13080  | 13468  |
| UN13967 | Rsa1.0.00954.1 | 1078 | 189536 | 1.00E-81  | 161  | 163  | 98 +  | 273  | 435  | 37320  | 37482  |
| UN13968 | Rsa1.0.08048.1 | 1031 | 137630 | 0         | 372  | 384  | 96 -  | 651  | 1031 | 135285 | 135667 |
| UN13969 | Rsa1.0.00551.1 | 1448 | 76227  | 0         | 524  | 530  | 98 -  | 920  | 1448 | 54764  | 55293  |
| UN13970 | Rsa1.0.01768.1 | 1379 | 138463 | 0         | 377  | 381  | 98 +  | 406  | 786  | 103736 | 104116 |
| UN13971 | Rsa1.0.00111.1 | 1333 | 390088 | 0         | 473  | 481  | 98 -  | 230  | 710  | 383729 | 384207 |
| UN13972 | Rsa1.0.01516.1 | 7762 | 44196  | 0         | 2199 | 2330 | 94 +  | 3888 | 6204 | 25718  | 28029  |
| UN13973 | Rsa1.0.02670.1 | 798  | 28887  | 1.00E-153 | 347  | 372  | 93 +  | 444  | 798  | 1836   | 2206   |
| UN13974 | Rsa1.0.00029.1 | 958  | 272992 | 0         | 559  | 559  | 100 + | 4    | 562  | 246766 | 247324 |
| UN13975 | Rsa1.0.08196.1 | 2403 | 7753   | 2.00E-84  | 205  | 217  | 94 +  | 1615 | 1827 | 605    | 819    |
| UN13976 | Rsa1.0.00441.1 | 1140 | 84607  | 2.33E-156 | 303  | 316  | 95 -  | 1    | 307  | 69639  | 69954  |
| UN13977 | Rsa1.0.04311.1 | 878  | 17984  | 0         | 723  | 736  | 98 -  | 135  | 870  | 1418   | 2152   |
| UN13978 | Rsa1.0.00605.1 | 1190 | 73199  | 0         | 609  | 620  | 98 -  | 3    | 620  | 28192  | 28811  |
| UN13979 | Rsa1.0.01806.1 | 936  | 39021  | 1.00E-101 | 187  | 187  | 100 - | 74   | 260  | 32010  | 32196  |
| UN13980 | Rsa1.0.09347.1 | 857  | 6437   | 0         | 508  | 510  | 99 +  | 1    | 510  | 4886   | 5395   |
| UN13981 | Rsa1.0.30957.1 | 1582 | 740    | 0         | 479  | 500  | 95 +  | 19   | 516  | 1      | 500    |
| UN13982 | Rsa1.0.06553.1 | 1220 | 10795  | 0         | 525  | 545  | 96 +  | 597  | 1134 | 5503   | 6046   |
| UN13983 | Rsa1.0.03800.1 | 1838 | 20768  | 0         | 528  | 533  | 99 +  | 455  | 987  | 18375  | 18907  |
| UN13984 | Rsa1.0.01171.1 | 965  | 51752  | 1.00E-102 | 237  | 246  | 96 +  | 11   | 253  | 14998  | 15241  |
| UN13985 | Rsa1.0.02633.1 | 936  | 29315  | 1.00E-160 | 391  | 424  | 92 -  | 516  | 927  | 361    | 771    |
| UN13986 | Rsa1.0.01846.1 | 1411 | 38367  | 0         | 744  | 749  | 99 -  | 182  | 930  | 35711  | 36459  |
| UN13987 | Rsa1.0.01515.1 | 2601 | 170864 | 0         | 558  | 596  | 93 -  | 1811 | 2405 | 140858 | 141453 |
| UN13988 | Rsa1.0.00466.1 | 1140 | 82132  | 0         | 404  | 422  | 95 +  | 187  | 608  | 63363  | 63783  |
| UN13989 | Rsa1.0.02545.1 | 1185 | 30286  | 0         | 520  | 542  | 95 -  | 649  | 1185 | 13581  | 14116  |
| UN13990 | Rsa1.0.01065.1 | 719  | 55264  | 0         | 529  | 542  | 97 -  | 180  | 719  | 30865  | 31396  |
| UN13991 | Rsa1.0.01302.1 | 708  | 48907  | 0         | 363  | 370  | 98 -  | 103  | 472  | 4012   | 4381   |
| UN13992 | Rsa1.0.05161.1 | 910  | 14631  | 1.00E-136 | 252  | 254  | 99 +  | 103  | 356  | 4      | 257    |
| UN13993 | Rsa1.0.00060.1 | 1388 | 502678 | 1.00E-173 | 409  | 431  | 94 +  | 969  | 1388 | 398264 | 398694 |
| UN13994 | Rsa1.0.00812.1 | 1033 | 63233  | 0         | 377  | 382  | 98 +  | 2    | 383  | 1591   | 1972   |
| UN13995 | Rsa1.0.01482.1 | 913  | 44855  | 0         | 898  | 903  | 99 -  | 4    | 906  | 11984  | 12886  |
| UN13996 | Rsa1.0.00425.1 | 523  | 147080 | 1.00E-178 | 371  | 389  | 95 -  | 1    | 389  | 24733  | 25121  |
| UN13997 | Rsa1.0.00105.1 | 1409 | 134138 | 9.00E-89  | 173  | 175  | 98 -  | 464  | 638  | 73020  | 73194  |
| UN13998 | Rsa1.0.03380.1 | 1290 | 23320  | 0         | 418  | 430  | 97 +  | 3    | 432  | 4190   | 4615   |
| UN13999 | Rsa1.0.02179.1 | 1223 | 34188  | 0         | 509  | 518  | 98 -  | 185  | 702  | 24265  | 24782  |

|         |                |      |        |           |      |      |       |      |      |        |        |
|---------|----------------|------|--------|-----------|------|------|-------|------|------|--------|--------|
| UN14000 | Rsa1.0_01668.1 | 846  | 41299  | 2.33E-156 | 284  | 291  | 97 +  | 511  | 801  | 40399  | 40689  |
| UN14001 | Rsa1.0_00387.1 | 1079 | 495407 | 0         | 508  | 521  | 97 -  | 561  | 1079 | 341781 | 342297 |
| UN14002 | Rsa1.0_00180.1 | 992  | 114581 | 1.00E-179 | 324  | 326  | 99 -  | 2    | 327  | 42152  | 42477  |
| UN14003 | Rsa1.0_00240.1 | 944  | 104175 | 0         | 655  | 666  | 98 -  | 280  | 937  | 46807  | 47471  |
| UN14004 | Rsa1.0_00190.1 | 1489 | 318240 | 1.00E-163 | 335  | 347  | 96 -  | 1143 | 1489 | 162006 | 162344 |
| UN14005 | Rsa1.0_00119.1 | 1116 | 467509 | 1.00E-121 | 239  | 245  | 97 +  | 773  | 1017 | 97222  | 97466  |
| UN14006 | Rsa1.0_00467.1 | 1238 | 156542 | 0         | 1177 | 1217 | 96 +  | 1    | 1216 | 98486  | 99695  |
| UN14007 | Rsa1.0_00137.1 | 1062 | 122457 | 1.00E-172 | 325  | 332  | 97 -  | 2    | 326  | 5329   | 5660   |
| UN14008 | Rsa1.0_00095.1 | 1017 | 283384 | 0         | 642  | 654  | 98 +  | 363  | 1016 | 4713   | 5366   |
| UN14009 | Rsa1.0_03241.1 | 1251 | 24423  | 1.00E-171 | 320  | 324  | 98 +  | 3    | 324  | 3136   | 3459   |
| UN14010 | Rsa1.0_00213.1 | 849  | 108167 | 0         | 362  | 366  | 98 +  | 3    | 368  | 14589  | 14954  |
| UN14011 | Rsa1.0_10036.1 | 890  | 6030   | 1.00E-153 | 426  | 477  | 89 -  | 1    | 456  | 496    | 967    |
| UN14012 | Rsa1.0_00206.1 | 946  | 109040 | 1.00E-163 | 306  | 310  | 98 -  | 639  | 946  | 45059  | 45368  |
| UN14013 | Rsa1.0_29537.1 | 1049 | 780    | 0         | 467  | 490  | 95 -  | 560  | 1049 | 199    | 688    |
| UN14014 | Rsa1.0_02628.1 | 1082 | 29369  | 1.00E-132 | 242  | 243  | 99 +  | 1    | 243  | 27702  | 27944  |
| UN14015 | Rsa1.0_00385.1 | 951  | 89160  | 1.00E-162 | 302  | 306  | 98 -  | 373  | 678  | 9032   | 9337   |
| UN14016 | Rsa1.0_00178.1 | 1736 | 114861 | 0         | 806  | 830  | 97 +  | 911  | 1734 | 5884   | 6709   |
| UN14017 | Rsa1.0_01517.1 | 891  | 44170  | 1.00E-136 | 351  | 381  | 92 -  | 485  | 851  | 29482  | 29855  |
| UN14018 | Rsa1.0_02848.1 | 1039 | 27329  | 0         | 1024 | 1029 | 99 +  | 11   | 1039 | 16975  | 18003  |
| UN14019 | Rsa1.0_02204.1 | 1049 | 33930  | 1.00E-153 | 343  | 361  | 95 +  | 4    | 362  | 20564  | 20915  |
| UN14020 | Rsa1.0_00065.1 | 1579 | 454616 | 1.00E-105 | 204  | 206  | 99 -  | 1283 | 1487 | 155644 | 155849 |
| UN14021 | Rsa1.0_00417.1 | 911  | 395068 | 1.00E-122 | 246  | 253  | 97 -  | 544  | 793  | 228530 | 228782 |
| UN14022 | Rsa1.0_00168.1 | 999  | 115870 | 1.00E-175 | 376  | 396  | 94 -  | 571  | 963  | 113976 | 114364 |
| UN14023 | Rsa1.0_05784.1 | 1027 | 12643  | 1.00E-167 | 405  | 424  | 95 +  | 618  | 1026 | 1645   | 2068   |
| UN14024 | Rsa1.0_03100.1 | 1592 | 25411  | 0         | 721  | 723  | 99 +  | 606  | 1326 | 1871   | 2593   |
| UN14025 | Rsa1.0_03361.1 | 798  | 23456  | 0         | 689  | 699  | 98 -  | 98   | 796  | 3196   | 3893   |
| UN14026 | Rsa1.0_02518.1 | 533  | 30586  | 1.00E-51  | 119  | 124  | 95 +  | 268  | 391  | 25939  | 26062  |
| UN14027 | Rsa1.0_01096.1 | 1385 | 54266  | 0         | 431  | 454  | 94 -  | 227  | 680  | 2669   | 3122   |
| UN14028 | Rsa1.0_02565.1 | 1563 | 30046  | 1.00E-149 | 299  | 310  | 96 +  | 1    | 302  | 25176  | 25485  |
| UN14029 | Rsa1.0_00989.1 | 1095 | 57494  | 1.00E-179 | 328  | 330  | 99 +  | 4    | 331  | 10671  | 11000  |
| UN14030 | Rsa1.0_06492.1 | 1028 | 10913  | 0         | 401  | 410  | 97 +  | 41   | 447  | 6336   | 6745   |
| UN14031 | Rsa1.0_00663.1 | 1061 | 164969 | 0         | 517  | 520  | 99 +  | 542  | 1061 | 100742 | 101261 |
| UN14032 | Rsa1.0_02241.1 | 1022 | 33520  | 1.00E-170 | 334  | 343  | 97 +  | 2    | 344  | 10272  | 10613  |
| UN14033 | Rsa1.0_04888.1 | 1265 | 15595  | 0         | 765  | 816  | 93 +  | 469  | 1265 | 1757   | 2571   |
| UN14034 | Rsa1.0_00152.1 | 752  | 257730 | 2.00E-48  | 152  | 168  | 90 +  | 4    | 167  | 116224 | 116390 |
| UN14035 | Rsa1.0_00336.1 | 1420 | 445051 | 0         | 554  | 561  | 98 +  | 2    | 562  | 219222 | 219780 |
| UN14036 | Rsa1.0_01679.1 | 1314 | 146876 | 0         | 1302 | 1311 | 99 -  | 4    | 1314 | 118982 | 120292 |
| UN14037 | Rsa1.0_05004.1 | 1394 | 15172  | 1.00E-117 | 214  | 214  | 100 - | 704  | 917  | 12015  | 12228  |
| UN14038 | Rsa1.0_00630.1 | 1385 | 71281  | 0         | 830  | 833  | 99 -  | 1    | 833  | 60102  | 60934  |

|         |                |      |        |           |     |     |       |      |      |        |        |
|---------|----------------|------|--------|-----------|-----|-----|-------|------|------|--------|--------|
| UN14039 | Rsa1.0.01576.1 | 711  | 42923  | 0         | 327 | 327 | 100 + | 385  | 711  | 22319  | 22645  |
| UN14040 | Rsa1.0.04470.1 | 1179 | 17204  | 1.00E-142 | 311 | 329 | 94 +  | 851  | 1179 | 4468   | 4787   |
| UN14041 | Rsa1.0.04519.1 | 1261 | 17004  | 0         | 570 | 572 | 99 +  | 2    | 573  | 3922   | 4493   |
| UN14042 | Rsa1.0.00092.1 | 725  | 659932 | 1.00E-137 | 270 | 276 | 97 +  | 2    | 276  | 43189  | 43464  |
| UN14043 | Rsa1.0.00558.1 | 607  | 75819  | 0         | 597 | 608 | 98 -  | 1    | 606  | 43386  | 43986  |
| UN14044 | Rsa1.0.02676.1 | 931  | 28834  | 0         | 551 | 556 | 99 -  | 1    | 556  | 13630  | 14185  |
| UN14045 | Rsa1.0.21865.1 | 860  | 1168   | 0         | 537 | 546 | 98 -  | 158  | 703  | 3      | 548    |
| UN14046 | Rsa1.0.00341.1 | 1658 | 249309 | 1.00E-142 | 256 | 256 | 100 + | 1403 | 1658 | 123448 | 123703 |
| UN14047 | Rsa1.0.02667.1 | 1945 | 28910  | 0         | 428 | 444 | 96 -  | 1    | 443  | 15395  | 15826  |
| UN14048 | Rsa1.0.02199.1 | 1389 | 33982  | 1.00E-131 | 241 | 242 | 99 +  | 1148 | 1389 | 13929  | 14170  |
| UN14049 | Rsa1.0.01634.1 | 1604 | 41865  | 1.00E-114 | 272 | 289 | 94 +  | 1317 | 1604 | 38465  | 38745  |
| UN14050 | Rsa1.0.00065.1 | 1427 | 454616 | 0         | 402 | 404 | 99 -  | 1015 | 1417 | 417264 | 417667 |
| UN14051 | Rsa1.0.00449.1 | 1510 | 83863  | 0         | 768 | 779 | 98 +  | 491  | 1269 | 67568  | 68346  |
| UN14052 | Rsa1.0.02072.1 | 817  | 35401  | 1.00E-114 | 260 | 274 | 94 -  | 541  | 812  | 18080  | 18353  |
| UN14053 | Rsa1.0.00225.1 | 1181 | 105892 | 0         | 503 | 504 | 99 +  | 167  | 670  | 43573  | 44076  |
| UN14054 | Rsa1.0.02186.1 | 818  | 34150  | 0         | 418 | 424 | 98 -  | 395  | 818  | 12067  | 12490  |
| UN14055 | Rsa1.0.01090.1 | 868  | 54385  | 0         | 420 | 444 | 94 +  | 3    | 446  | 3190   | 3626   |
| UN14056 | Rsa1.0.00790.1 | 1418 | 148693 | 1.00E-107 | 288 | 313 | 92 -  | 11   | 313  | 21937  | 22249  |
| UN14057 | Rsa1.0.20207.1 | 1030 | 1327   | 1.00E-119 | 233 | 237 | 98 -  | 1    | 237  | 161    | 396    |
| UN14058 | Rsa1.0.04272.1 | 1390 | 18144  | 0         | 420 | 421 | 99 +  | 966  | 1386 | 14816  | 15236  |
| UN14059 | Rsa1.0.01193.1 | 1537 | 51147  | 1.00E-149 | 281 | 285 | 98 -  | 64   | 348  | 15709  | 15993  |
| UN14060 | Rsa1.0.63077.1 | 1121 | 364    | 0         | 364 | 364 | 100 - | 738  | 1101 | 1      | 364    |
| UN14061 | Rsa1.0.02939.1 | 1650 | 26595  | 0         | 752 | 810 | 92 -  | 12   | 797  | 18298  | 19101  |
| UN14062 | Rsa1.0.00666.1 | 876  | 69505  | 0         | 457 | 470 | 97 -  | 406  | 875  | 34781  | 35250  |
| UN14063 | Rsa1.0.01029.1 | 1909 | 256254 | 0         | 334 | 334 | 100 - | 1    | 334  | 245893 | 246226 |
| UN14064 | Rsa1.0.00028.1 | 711  | 293984 | 0         | 691 | 704 | 98 -  | 8    | 709  | 64960  | 65662  |
| UN14065 | Rsa1.0.01696.1 | 957  | 301850 | 0         | 703 | 727 | 96 -  | 232  | 957  | 158936 | 159651 |
| UN14066 | Rsa1.0.46563.1 | 595  | 485    | 3.00E-65  | 134 | 135 | 99 +  | 56   | 189  | 1      | 135    |
| UN14067 | Rsa1.0.00368.1 | 1474 | 90669  | 1.00E-180 | 330 | 333 | 99 +  | 3    | 335  | 81664  | 81996  |
| UN14068 | Rsa1.0.00093.1 | 705  | 214962 | 0         | 694 | 696 | 99 +  | 3    | 697  | 135054 | 135749 |
| UN14069 | Rsa1.0.00016.1 | 1035 | 831256 | 1.00E-136 | 308 | 324 | 95 -  | 580  | 901  | 353891 | 354210 |
| UN14070 | Rsa1.0.02853.1 | 755  | 27281  | 1.00E-140 | 256 | 257 | 99 +  | 14   | 270  | 27025  | 27281  |
| UN14071 | Rsa1.0.00407.1 | 1067 | 191544 | 0         | 674 | 686 | 98 +  | 48   | 730  | 43063  | 43746  |
| UN14072 | Rsa1.0.14856.1 | 1207 | 3010   | 1.00E-166 | 371 | 396 | 93 -  | 344  | 739  | 1797   | 2192   |
| UN14073 | Rsa1.0.00060.1 | 839  | 502678 | 0         | 329 | 330 | 99 +  | 1    | 330  | 385886 | 386215 |
| UN14074 | Rsa1.0.00451.1 | 1304 | 322533 | 1.00E-56  | 122 | 125 | 97 -  | 740  | 864  | 294101 | 294225 |
| UN14075 | Rsa1.0.00762.1 | 1348 | 165246 | 0         | 418 | 433 | 96 +  | 655  | 1084 | 47997  | 48423  |
| UN14076 | Rsa1.0.01062.1 | 1274 | 55325  | 1.00E-136 | 255 | 257 | 99 -  | 3    | 259  | 38724  | 38978  |
| UN14077 | Rsa1.0.00558.1 | 804  | 75819  | 0         | 515 | 526 | 97 +  | 1    | 525  | 28298  | 28823  |

|         |                |      |        |           |      |      |       |      |      |        |        |
|---------|----------------|------|--------|-----------|------|------|-------|------|------|--------|--------|
| UN14078 | Rsa1.0.00339.1 | 1362 | 222974 | 0         | 629  | 648  | 97 -  | 469  | 1116 | 89885  | 90532  |
| UN14079 | Rsa1.0.15452.1 | 1082 | 2597   | 0         | 970  | 1017 | 95 +  | 55   | 1070 | 1581   | 2597   |
| UN14080 | Rsa1.0.00252.1 | 1414 | 102760 | 0         | 472  | 478  | 98 -  | 936  | 1412 | 93559  | 94036  |
| UN14081 | Rsa1.0.00094.1 | 1330 | 139042 | 1.00E-100 | 216  | 226  | 95 +  | 302  | 521  | 134442 | 134667 |
| UN14082 | Rsa1.0.00822.1 | 1069 | 62891  | 1.00E-172 | 309  | 310  | 99 -  | 31   | 340  | 47514  | 47823  |
| UN14083 | Rsa1.0.03783.1 | 1234 | 20890  | 0         | 335  | 336  | 99 +  | 4    | 339  | 17823  | 18158  |
| UN14084 | Rsa1.0.01374.1 | 872  | 47047  | 1.00E-145 | 321  | 338  | 94 +  | 25   | 356  | 27445  | 27782  |
| UN14085 | Rsa1.0.01536.1 | 868  | 43747  | 0         | 462  | 462  | 100 + | 407  | 868  | 28390  | 28851  |
| UN14086 | Rsa1.0.01688.1 | 964  | 40965  | 0         | 336  | 338  | 99 +  | 626  | 963  | 36521  | 36858  |
| UN14087 | Rsa1.0.02464.1 | 1106 | 31153  | 0         | 1067 | 1105 | 96 +  | 3    | 1106 | 11857  | 12961  |
| UN14088 | Rsa1.0.02934.1 | 770  | 26627  | 0         | 767  | 770  | 99 -  | 1    | 770  | 24954  | 25722  |
| UN14089 | Rsa1.0.00257.1 | 1692 | 102407 | 0         | 552  | 561  | 98 -  | 3    | 562  | 97010  | 97570  |
| UN14090 | Rsa1.0.01549.1 | 869  | 43543  | 0         | 797  | 829  | 96 -  | 17   | 840  | 31488  | 32312  |
| UN14091 | Rsa1.0.08645.1 | 1495 | 7087   | 0         | 754  | 788  | 95 -  | 448  | 1229 | 6133   | 6916   |
| UN14092 | Rsa1.0.00294.1 | 1310 | 144860 | 0         | 650  | 653  | 99 -  | 527  | 1179 | 138501 | 139153 |
| UN14093 | Rsa1.0.00197.1 | 1417 | 109714 | 1.00E-178 | 329  | 333  | 98 -  | 3    | 335  | 5607   | 5939   |
| UN14094 | Rsa1.0.05893.1 | 1437 | 12306  | 0         | 401  | 412  | 97 +  | 771  | 1182 | 8140   | 8551   |
| UN14095 | Rsa1.0.14124.1 | 810  | 3781   | 1.00E-178 | 319  | 320  | 99 -  | 1    | 320  | 239    | 558    |
| UN14096 | Rsa1.0.01188.1 | 1000 | 51362  | 0         | 335  | 338  | 99 +  | 663  | 1000 | 31071  | 31408  |
| UN14097 | Rsa1.0.00131.1 | 891  | 432233 | 1.00E-148 | 384  | 420  | 91 -  | 1    | 412  | 96212  | 96609  |
| UN14098 | Rsa1.0.01196.1 | 1420 | 51097  | 1.00E-130 | 246  | 248  | 99 +  | 1164 | 1410 | 26796  | 27043  |
| UN14099 | Rsa1.0.04890.1 | 1220 | 15591  | 1.00E-125 | 275  | 291  | 94 -  | 3    | 287  | 11260  | 11550  |
| UN14100 | Rsa1.0.00380.1 | 735  | 89748  | 1.00E-144 | 346  | 373  | 92 +  | 364  | 733  | 88066  | 88422  |
| UN14101 | Rsa1.0.00105.1 | 1610 | 134138 | 0         | 519  | 519  | 100 + | 480  | 998  | 110004 | 110522 |
| UN14102 | Rsa1.0.00123.1 | 1864 | 325650 | 0         | 372  | 380  | 97 -  | 1    | 378  | 10390  | 10766  |
| UN14103 | Rsa1.0.00720.1 | 1267 | 66931  | 0         | 740  | 743  | 99 -  | 525  | 1267 | 14940  | 15682  |
| UN14104 | Rsa1.0.04027.1 | 515  | 19501  | 1.00E-115 | 288  | 308  | 93 +  | 209  | 513  | 6649   | 6952   |
| UN14105 | Rsa1.0.00949.1 | 850  | 58549  | 1.00E-169 | 323  | 329  | 98 +  | 522  | 850  | 39561  | 39887  |
| UN14106 | Rsa1.0.02082.1 | 2187 | 35228  | 0         | 341  | 342  | 99 -  | 1846 | 2187 | 29648  | 29989  |
| UN14107 | Rsa1.0.07894.1 | 1531 | 8347   | 0         | 858  | 877  | 97 +  | 5    | 878  | 5533   | 6406   |
| UN14108 | Rsa1.0.06807.1 | 857  | 10324  | 0         | 358  | 366  | 97 +  | 492  | 857  | 6307   | 6672   |
| UN14109 | Rsa1.0.01529.1 | 1163 | 43871  | 0         | 356  | 364  | 97 +  | 3    | 362  | 24125  | 24488  |
| UN14110 | Rsa1.0.00477.1 | 1133 | 81556  | 0         | 359  | 361  | 99 +  | 770  | 1130 | 38643  | 39002  |
| UN14111 | Rsa1.0.00221.1 | 1003 | 106972 | 0         | 478  | 511  | 93 +  | 502  | 1002 | 23856  | 24353  |
| UN14112 | Rsa1.0.01000.1 | 2016 | 57140  | 0         | 466  | 466  | 100 + | 603  | 1068 | 6059   | 6524   |
| UN14113 | Rsa1.0.00216.1 | 803  | 197563 | 0         | 777  | 794  | 97 -  | 11   | 803  | 100207 | 100999 |
| UN14114 | Rsa1.0.02185.1 | 749  | 34150  | 0         | 736  | 737  | 99 -  | 4    | 740  | 27261  | 27997  |
| UN14115 | Rsa1.0.00313.1 | 638  | 96745  | 1.00E-142 | 259  | 260  | 99 -  | 379  | 638  | 24757  | 25016  |
| UN14116 | Rsa1.0.00176.1 | 1186 | 240984 | 0         | 619  | 623  | 99 -  | 567  | 1186 | 210440 | 211062 |

|         |                |      |        |           |      |      |       |      |      |        |        |
|---------|----------------|------|--------|-----------|------|------|-------|------|------|--------|--------|
| UN14117 | Rsa1.0_00065.1 | 1327 | 454616 | 0         | 457  | 474  | 96 +  | 781  | 1254 | 235414 | 235887 |
| UN14118 | Rsa1.0_00018.1 | 1657 | 410899 | 0         | 1621 | 1656 | 97 +  | 1    | 1656 | 79100  | 80752  |
| UN14119 | Rsa1.0_01146.1 | 1020 | 163455 | 1.00E-101 | 202  | 207  | 97 -  | 279  | 485  | 24783  | 24989  |
| UN14120 | Rsa1.0_01538.1 | 1433 | 43733  | 1.00E-174 | 310  | 310  | 100 + | 1    | 310  | 38509  | 38818  |
| UN14121 | Rsa1.0_00133.1 | 925  | 123768 | 0         | 921  | 924  | 99 -  | 1    | 924  | 84817  | 85740  |
| UN14122 | Rsa1.0_00087.1 | 1442 | 761073 | 1.00E-163 | 340  | 356  | 95 -  | 414  | 769  | 433300 | 433655 |
| UN14123 | Rsa1.0_01409.1 | 1868 | 151595 | 0         | 457  | 479  | 95 -  | 1388 | 1866 | 118264 | 118731 |
| UN14124 | Rsa1.0_02503.1 | 598  | 30709  | 1.00E-64  | 135  | 138  | 97 +  | 196  | 333  | 26114  | 26251  |
| UN14125 | Rsa1.0_00115.1 | 625  | 131321 | 0         | 618  | 627  | 98 -  | 3    | 625  | 63408  | 64031  |
| UN14126 | Rsa1.0_00079.1 | 1816 | 606987 | 0         | 996  | 1032 | 96 +  | 789  | 1816 | 38936  | 39952  |
| UN14127 | Rsa1.0_00347.1 | 933  | 93048  | 1.00E-157 | 298  | 302  | 98 +  | 326  | 627  | 68684  | 68984  |
| UN14128 | Rsa1.0_00483.1 | 940  | 81102  | 1.00E-141 | 327  | 344  | 95 +  | 572  | 910  | 51013  | 51353  |
| UN14129 | Rsa1.0_06939.1 | 791  | 10137  | 1.00E-175 | 318  | 319  | 99 +  | 472  | 790  | 4572   | 4889   |
| UN14130 | Rsa1.0_00111.1 | 709  | 390088 | 1.00E-152 | 404  | 445  | 90 +  | 270  | 709  | 75630  | 76052  |
| UN14131 | Rsa1.0_18035.1 | 1446 | 1685   | 0         | 689  | 709  | 97 -  | 731  | 1439 | 386    | 1094   |
| UN14132 | Rsa1.0_02020.1 | 1115 | 173211 | 0         | 546  | 552  | 98 +  | 564  | 1115 | 154385 | 154936 |
| UN14133 | Rsa1.0_00920.1 | 774  | 601703 | 2.00E-94  | 185  | 188  | 98 +  | 131  | 318  | 441092 | 441279 |
| UN14134 | Rsa1.0_03257.1 | 1115 | 24305  | 1.00E-130 | 250  | 253  | 98 +  | 1    | 252  | 13779  | 14031  |
| UN14135 | Rsa1.0_00684.1 | 1453 | 141701 | 0         | 649  | 671  | 96 -  | 433  | 1102 | 9545   | 10215  |
| UN14136 | Rsa1.0_05453.1 | 878  | 13696  | 0         | 381  | 386  | 98 -  | 494  | 878  | 11835  | 12220  |
| UN14137 | Rsa1.0_00012.1 | 1838 | 222148 | 0         | 388  | 390  | 99 -  | 809  | 1198 | 52405  | 52794  |
| UN14138 | Rsa1.0_20028.1 | 825  | 1350   | 0         | 610  | 629  | 96 -  | 196  | 823  | 722    | 1350   |
| UN14139 | Rsa1.0_04670.1 | 1914 | 16453  | 1.00E-179 | 355  | 366  | 96 -  | 371  | 735  | 5440   | 5805   |
| UN14140 | Rsa1.0_00867.1 | 1524 | 61635  | 0         | 532  | 547  | 97 +  | 20   | 566  | 32339  | 32884  |
| UN14141 | Rsa1.0_00200.1 | 718  | 162016 | 1.00E-168 | 332  | 340  | 97 +  | 380  | 718  | 104953 | 105291 |
| UN14142 | Rsa1.0_00037.1 | 1607 | 307838 | 1.00E-127 | 240  | 243  | 98 -  | 2    | 244  | 23059  | 23301  |
| UN14143 | Rsa1.0_06021.1 | 1433 | 11911  | 0         | 552  | 579  | 95 +  | 853  | 1431 | 5321   | 5899   |
| UN14144 | Rsa1.0_03951.1 | 622  | 19894  | 1.00E-134 | 287  | 302  | 95 -  | 241  | 537  | 10099  | 10400  |
| UN14145 | Rsa1.0_01879.1 | 1039 | 37748  | 0         | 383  | 393  | 97 +  | 645  | 1037 | 23051  | 23438  |
| UN14146 | Rsa1.0_00575.1 | 640  | 74791  | 0         | 404  | 413  | 97 +  | 3    | 415  | 62003  | 62415  |
| UN14147 | Rsa1.0_00089.1 | 1332 | 406142 | 1.00E-163 | 297  | 299  | 99 -  | 1    | 299  | 161534 | 161832 |
| UN14148 | Rsa1.0_15449.1 | 962  | 2599   | 0         | 937  | 957  | 97 -  | 10   | 962  | 1246   | 2194   |
| UN14149 | Rsa1.0_00477.1 | 956  | 81556  | 1.00E-129 | 242  | 243  | 99 -  | 474  | 715  | 43576  | 43818  |
| UN14150 | Rsa1.0_06311.1 | 782  | 11254  | 1.00E-134 | 263  | 269  | 97 -  | 514  | 780  | 1289   | 1557   |
| UN14151 | Rsa1.0_00273.1 | 1013 | 326186 | 1.00E-159 | 290  | 292  | 99 +  | 507  | 798  | 137142 | 137433 |
| UN14152 | Rsa1.0_01060.1 | 907  | 55368  | 0         | 570  | 596  | 95 +  | 323  | 907  | 42018  | 42613  |
| UN14153 | Rsa1.0_00096.1 | 1420 | 198773 | 1.00E-109 | 217  | 222  | 97 -  | 1177 | 1398 | 171703 | 171924 |
| UN14154 | Rsa1.0_00777.1 | 893  | 191865 | 1.00E-171 | 336  | 345  | 97 -  | 2    | 346  | 190877 | 191220 |
| UN14155 | Rsa1.0_07217.1 | 1647 | 9703   | 1.00E-147 | 373  | 411  | 90 +  | 727  | 1136 | 4498   | 4893   |

|         |                |      |        |           |      |      |       |      |      |        |        |
|---------|----------------|------|--------|-----------|------|------|-------|------|------|--------|--------|
| UN14156 | Rsa1.0.02343.1 | 483  | 32374  | 1.00E-100 | 201  | 206  | 97 -  | 247  | 452  | 1047   | 1252   |
| UN14157 | Rsa1.0.04692.1 | 1137 | 16357  | 0         | 1046 | 1076 | 97 -  | 1    | 1057 | 12091  | 13163  |
| UN14158 | Rsa1.0.03415.1 | 782  | 23117  | 0         | 761  | 786  | 96 +  | 3    | 782  | 17879  | 18659  |
| UN14159 | Rsa1.0.10708.1 | 1616 | 5750   | 0         | 841  | 871  | 96 +  | 750  | 1616 | 1323   | 2188   |
| UN14160 | Rsa1.0.00007.1 | 941  | 239325 | 0         | 388  | 394  | 98 +  | 547  | 939  | 13415  | 13807  |
| UN14161 | Rsa1.0.00016.1 | 995  | 831256 | 1.00E-161 | 304  | 308  | 98 -  | 683  | 990  | 204584 | 204890 |
| UN14162 | Rsa1.0.00048.1 | 1097 | 167185 | 1.00E-144 | 306  | 319  | 95 +  | 779  | 1095 | 159151 | 159469 |
| UN14163 | Rsa1.0.04141.1 | 1739 | 18864  | 1.00E-141 | 294  | 306  | 96 +  | 1    | 299  | 15811  | 16116  |
| UN14164 | Rsa1.0.01942.1 | 823  | 37048  | 0         | 557  | 561  | 99 +  | 263  | 823  | 3757   | 4317   |
| UN14165 | Rsa1.0.00409.1 | 1128 | 146788 | 0         | 1012 | 1087 | 93 -  | 39   | 1121 | 145664 | 146716 |
| UN14166 | Rsa1.0.00630.1 | 1485 | 71281  | 0         | 592  | 593  | 99 +  | 4    | 595  | 59091  | 59683  |
| UN14167 | Rsa1.0.14339.1 | 783  | 3501   | 0         | 534  | 534  | 100 + | 1    | 534  | 167    | 700    |
| UN14168 | Rsa1.0.00802.1 | 1592 | 63846  | 1.00E-145 | 281  | 286  | 98 +  | 650  | 934  | 16017  | 16302  |
| UN14169 | Rsa1.0.00684.1 | 1200 | 141701 | 0         | 697  | 724  | 96 -  | 2    | 725  | 9100   | 9822   |
| UN14170 | Rsa1.0.00009.1 | 637  | 232558 | 5.00E-79  | 156  | 158  | 98 -  | 405  | 562  | 207505 | 207662 |
| UN14171 | Rsa1.0.00644.1 | 1132 | 136881 | 1.00E-142 | 392  | 433  | 90 -  | 691  | 1105 | 62650  | 63077  |
| UN14172 | Rsa1.0.02079.1 | 1337 | 35306  | 0         | 524  | 544  | 96 +  | 794  | 1337 | 24546  | 25080  |
| UN14173 | Rsa1.0.00684.1 | 1831 | 141701 | 1.00E-136 | 253  | 255  | 99 +  | 1576 | 1830 | 24722  | 24976  |
| UN14174 | Rsa1.0.00009.1 | 1195 | 232558 | 0         | 460  | 479  | 96 +  | 1    | 473  | 29397  | 29875  |
| UN14175 | Rsa1.0.00303.1 | 1001 | 97468  | 1.00E-93  | 199  | 207  | 96 -  | 285  | 491  | 31704  | 31910  |
| UN14176 | Rsa1.0.00978.1 | 924  | 57739  | 0         | 353  | 354  | 99 +  | 571  | 924  | 20422  | 20775  |
| UN14177 | Rsa1.0.00016.1 | 1052 | 831256 | 0         | 443  | 443  | 100 + | 2    | 444  | 353768 | 354210 |
| UN14178 | Rsa1.0.00032.1 | 1092 | 306326 | 0         | 602  | 635  | 94 -  | 440  | 1064 | 284767 | 285401 |
| UN14179 | Rsa1.0.00221.1 | 745  | 106972 | 0         | 497  | 497  | 100 - | 32   | 528  | 8699   | 9195   |
| UN14180 | Rsa1.0.00097.1 | 735  | 138858 | 7.00E-14  | 98   | 117  | 83 -  | 229  | 345  | 106303 | 106419 |
| UN14181 | Rsa1.0.00272.1 | 1225 | 447836 | 1.00E-120 | 260  | 270  | 96 -  | 35   | 304  | 219273 | 219537 |
| UN14182 | Rsa1.0.00079.1 | 883  | 606987 | 0         | 459  | 478  | 96 +  | 405  | 880  | 66614  | 67086  |
| UN14183 | Rsa1.0.03463.1 | 1375 | 22724  | 0         | 528  | 535  | 98 -  | 841  | 1375 | 14080  | 14614  |
| UN14184 | Rsa1.0.03956.1 | 1274 | 19872  | 0         | 530  | 532  | 99 -  | 743  | 1274 | 17792  | 18323  |
| UN14185 | Rsa1.0.02214.1 | 841  | 161150 | 1.00E-124 | 233  | 234  | 99 +  | 1    | 233  | 212    | 445    |
| UN14186 | Rsa1.0.01434.1 | 1344 | 45951  | 0         | 778  | 796  | 97 +  | 550  | 1338 | 23019  | 23814  |
| UN14187 | Rsa1.0.00978.1 | 608  | 57739  | 0         | 565  | 614  | 92 +  | 12   | 608  | 12073  | 12666  |
| UN14188 | Rsa1.0.02962.1 | 992  | 26419  | 1.00E-109 | 263  | 285  | 92 -  | 717  | 992  | 11966  | 12250  |
| UN14189 | Rsa1.0.00396.1 | 816  | 88242  | 0         | 505  | 509  | 99 +  | 306  | 814  | 7161   | 7668   |
| UN14190 | Rsa1.0.00250.1 | 853  | 273771 | 0         | 366  | 371  | 98 -  | 131  | 500  | 186945 | 187315 |
| UN14191 | Rsa1.0.02012.1 | 1588 | 36084  | 1.00E-169 | 339  | 348  | 97 -  | 1    | 345  | 18461  | 18806  |
| UN14192 | Rsa1.0.00222.1 | 1327 | 172263 | 1.00E-150 | 280  | 282  | 99 -  | 1047 | 1327 | 138855 | 139136 |
| UN14193 | Rsa1.0.00886.1 | 1312 | 167350 | 0         | 334  | 337  | 99 -  | 552  | 888  | 33611  | 33947  |
| UN14194 | Rsa1.0.00816.1 | 1020 | 403350 | 0         | 381  | 382  | 99 +  | 1    | 382  | 390051 | 390432 |

|         |                |      |        |           |      |      |       |      |      |        |        |
|---------|----------------|------|--------|-----------|------|------|-------|------|------|--------|--------|
| UN14195 | Rsa1.0.00183.1 | 692  | 113277 | 0         | 688  | 698  | 98 -  | 1    | 692  | 56094  | 56791  |
| UN14196 | Rsa1.0.00069.1 | 1666 | 403561 | 0         | 719  | 719  | 100 + | 510  | 1228 | 102812 | 103530 |
| UN14197 | Rsa1.0.00137.1 | 1677 | 122457 | 0         | 1351 | 1360 | 99 +  | 123  | 1482 | 25462  | 26821  |
| UN14198 | Rsa1.0.01938.1 | 948  | 264018 | 0         | 650  | 658  | 98 +  | 6    | 662  | 156709 | 157365 |
| UN14199 | Rsa1.0.00477.1 | 1570 | 81556  | 0         | 461  | 464  | 99 -  | 1107 | 1570 | 23821  | 24283  |
| UN14200 | Rsa1.0.02923.1 | 850  | 26736  | 1.00E-128 | 327  | 354  | 92 +  | 104  | 453  | 15750  | 16101  |
| UN14201 | Rsa1.0.00095.1 | 748  | 283384 | 0         | 654  | 669  | 97 +  | 77   | 744  | 96594  | 97259  |
| UN14202 | Rsa1.0.02325.1 | 794  | 160025 | 0         | 357  | 358  | 99 +  | 436  | 793  | 20740  | 21097  |
| UN14203 | Rsa1.0.01937.1 | 769  | 37147  | 0         | 504  | 559  | 90 -  | 253  | 769  | 33650  | 34208  |
| UN14204 | Rsa1.0.00451.1 | 1079 | 322533 | 1.00E-154 | 360  | 381  | 94 +  | 705  | 1079 | 301659 | 302035 |
| UN14205 | Rsa1.0.00644.1 | 1457 | 136881 | 1.00E-151 | 277  | 279  | 99 +  | 1178 | 1456 | 44565  | 44843  |
| UN14206 | Rsa1.0.00604.1 | 979  | 146282 | 0         | 473  | 483  | 97 -  | 3    | 484  | 111511 | 111993 |
| UN14207 | Rsa1.0.01969.1 | 1362 | 153351 | 1.00E-151 | 274  | 275  | 99 -  | 242  | 516  | 13008  | 13282  |
| UN14208 | Rsa1.0.06653.1 | 1596 | 10596  | 0         | 681  | 688  | 98 +  | 908  | 1595 | 2350   | 3036   |
| UN14209 | Rsa1.0.03185.1 | 1537 | 24739  | 1.00E-136 | 247  | 247  | 100 + | 3    | 249  | 2968   | 3214   |
| UN14210 | Rsa1.0.00107.1 | 2182 | 431659 | 1.00E-166 | 300  | 301  | 99 +  | 1882 | 2182 | 347678 | 347978 |
| UN14211 | Rsa1.0.04021.1 | 711  | 19536  | 1.00E-160 | 298  | 301  | 99 +  | 19   | 317  | 4146   | 4446   |
| UN14212 | Rsa1.0.02343.1 | 1252 | 32374  | 0         | 414  | 416  | 99 -  | 369  | 784  | 9746   | 10161  |
| UN14213 | Rsa1.0.00055.1 | 935  | 520193 | 0         | 767  | 789  | 97 +  | 149  | 935  | 339997 | 340776 |
| UN14214 | Rsa1.0.03249.1 | 1260 | 146254 | 0         | 433  | 438  | 98 +  | 2    | 436  | 22377  | 22812  |
| UN14215 | Rsa1.0.00012.1 | 2072 | 222148 | 1.00E-173 | 403  | 431  | 93 -  | 101  | 520  | 108799 | 109225 |
| UN14216 | Rsa1.0.00013.1 | 1631 | 292129 | 0         | 469  | 477  | 98 -  | 3    | 477  | 122837 | 123313 |
| UN14217 | Rsa1.0.01610.1 | 1077 | 42274  | 0         | 810  | 818  | 99 -  | 262  | 1073 | 11387  | 12204  |
| UN14218 | Rsa1.0.00926.1 | 1180 | 195072 | 0         | 555  | 564  | 98 -  | 250  | 813  | 176937 | 177500 |
| UN14219 | Rsa1.0.00692.1 | 910  | 68151  | 0         | 486  | 530  | 91 -  | 4    | 533  | 52276  | 52805  |
| UN14220 | Rsa1.0.00380.1 | 2741 | 89748  | 0         | 1410 | 1463 | 96 -  | 2    | 1457 | 56277  | 57727  |
| UN14221 | Rsa1.0.07591.1 | 715  | 9060   | 1.00E-139 | 308  | 323  | 95 +  | 392  | 711  | 6177   | 6499   |
| UN14222 | Rsa1.0.00015.1 | 682  | 561803 | 1.00E-159 | 422  | 469  | 89 +  | 102  | 563  | 483122 | 483579 |
| UN14223 | Rsa1.0.00569.1 | 747  | 75060  | 0         | 395  | 400  | 98 -  | 346  | 745  | 52754  | 53149  |
| UN14224 | Rsa1.0.15250.1 | 955  | 2727   | 0         | 735  | 751  | 97 +  | 1    | 750  | 1977   | 2727   |
| UN14225 | Rsa1.0.00628.1 | 1627 | 214360 | 0         | 462  | 464  | 99 +  | 919  | 1382 | 204637 | 205100 |
| UN14226 | Rsa1.0.01000.1 | 1393 | 57140  | 1.00E-139 | 276  | 283  | 97 +  | 2    | 284  | 16819  | 17100  |
| UN14227 | Rsa1.0.08811.1 | 1461 | 6904   | 1.00E-149 | 269  | 269  | 100 + | 112  | 380  | 3263   | 3531   |
| UN14228 | Rsa1.0.01458.1 | 1121 | 175719 | 0         | 413  | 414  | 99 -  | 1    | 414  | 34495  | 34908  |
| UN14229 | Rsa1.0.04538.1 | 1454 | 16940  | 1.00E-131 | 261  | 267  | 97 -  | 1    | 266  | 12644  | 12910  |
| UN14230 | Rsa1.0.02165.1 | 1301 | 34423  | 0         | 515  | 516  | 99 +  | 1    | 516  | 4827   | 5342   |
| UN14231 | Rsa1.0.00339.1 | 1137 | 222974 | 1.00E-133 | 255  | 258  | 98 +  | 880  | 1137 | 40928  | 41184  |
| UN14232 | Rsa1.0.00751.1 | 875  | 65759  | 1.00E-129 | 266  | 274  | 97 -  | 603  | 874  | 42533  | 42806  |
| UN14233 | Rsa1.0.13800.1 | 1945 | 4315   | 1.00E-142 | 256  | 256  | 100 - | 1688 | 1943 | 327    | 582    |

|         |                |      |        |           |      |      |       |      |      |        |        |
|---------|----------------|------|--------|-----------|------|------|-------|------|------|--------|--------|
| UN14234 | Rsa1.0_00293.1 | 1210 | 339294 | 0         | 411  | 438  | 93 -  | 1    | 437  | 254540 | 254976 |
| UN14235 | Rsa1.0_01790.1 | 1344 | 39248  | 1.00E-160 | 313  | 320  | 97 -  | 1029 | 1344 | 17207  | 17526  |
| UN14236 | Rsa1.0_00676.1 | 985  | 69166  | 0         | 357  | 363  | 98 -  | 624  | 984  | 6802   | 7162   |
| UN14237 | Rsa1.0_00109.1 | 870  | 132735 | 0         | 437  | 442  | 98 -  | 2    | 443  | 52839  | 53280  |
| UN14238 | Rsa1.0_00642.1 | 1010 | 201230 | 4.00E-99  | 219  | 230  | 95 +  | 482  | 711  | 161379 | 161605 |
| UN14239 | Rsa1.0_00170.1 | 685  | 179538 | 0         | 363  | 364  | 99 -  | 321  | 684  | 90988  | 91351  |
| UN14240 | Rsa1.0_04652.1 | 837  | 16515  | 0         | 514  | 534  | 96 -  | 10   | 539  | 10530  | 11063  |
| UN14241 | Rsa1.0_00813.1 | 1555 | 63202  | 1.00E-140 | 260  | 262  | 99 -  | 862  | 1123 | 47779  | 48040  |
| UN14242 | Rsa1.0_24305.1 | 1095 | 994    | 1.00E-159 | 292  | 293  | 99 +  | 3    | 295  | 55     | 346    |
| UN14243 | Rsa1.0_09317.1 | 764  | 6459   | 0         | 571  | 574  | 99 +  | 188  | 761  | 5300   | 5873   |
| UN14244 | Rsa1.0_00205.1 | 695  | 193401 | 1.00E-86  | 211  | 222  | 95 -  | 456  | 676  | 99221  | 99438  |
| UN14245 | Rsa1.0_00294.1 | 1177 | 144860 | 0         | 1116 | 1174 | 95 +  | 4    | 1176 | 115494 | 116649 |
| UN14246 | Rsa1.0_07385.1 | 1064 | 9485   | 0         | 360  | 361  | 99 -  | 704  | 1064 | 2802   | 3162   |
| UN14247 | Rsa1.0_01838.1 | 1398 | 38500  | 0         | 429  | 452  | 94 -  | 1    | 442  | 17537  | 17988  |
| UN14248 | Rsa1.0_10486.1 | 1709 | 5830   | 0         | 396  | 405  | 97 -  | 1    | 403  | 1667   | 2071   |
| UN14249 | Rsa1.0_01053.1 | 1081 | 55483  | 0         | 749  | 763  | 98 +  | 324  | 1081 | 46655  | 47416  |
| UN14250 | Rsa1.0_03529.1 | 1423 | 22277  | 0         | 899  | 1010 | 89 -  | 101  | 1110 | 15606  | 16615  |
| UN14251 | Rsa1.0_00385.1 | 900  | 89160  | 1.00E-160 | 315  | 322  | 97 +  | 580  | 900  | 45744  | 46064  |
| UN14252 | Rsa1.0_00439.1 | 815  | 142776 | 0         | 394  | 395  | 99 +  | 419  | 813  | 59312  | 59706  |
| UN14253 | Rsa1.0_00730.1 | 1054 | 66673  | 0         | 1024 | 1052 | 97 +  | 1    | 1052 | 7013   | 8056   |
| UN14254 | Rsa1.0_03297.1 | 587  | 23969  | 1.00E-141 | 317  | 334  | 94 -  | 226  | 558  | 14221  | 14552  |
| UN14255 | Rsa1.0_00519.1 | 1115 | 197864 | 0         | 688  | 690  | 99 +  | 426  | 1115 | 192264 | 192953 |
| UN14256 | Rsa1.0_00190.1 | 1233 | 318240 | 0         | 407  | 408  | 99 +  | 3    | 410  | 116660 | 117067 |
| UN14257 | Rsa1.0_00409.1 | 858  | 146788 | 0         | 540  | 564  | 95 -  | 3    | 565  | 80743  | 81289  |
| UN14258 | Rsa1.0_01546.1 | 1360 | 43586  | 0         | 813  | 831  | 97 -  | 530  | 1360 | 33968  | 34797  |
| UN14259 | Rsa1.0_00487.1 | 1299 | 80674  | 0         | 370  | 383  | 96 -  | 915  | 1297 | 37979  | 38360  |
| UN14260 | Rsa1.0_01896.1 | 940  | 37512  | 1.00E-150 | 278  | 281  | 98 -  | 1    | 281  | 23896  | 24176  |
| UN14261 | Rsa1.0_01463.1 | 2923 | 45213  | 0         | 1113 | 1113 | 100 - | 34   | 1146 | 9762   | 10874  |
| UN14262 | Rsa1.0_00438.1 | 1264 | 84861  | 0         | 1216 | 1264 | 96 -  | 25   | 1263 | 69391  | 70651  |
| UN14263 | Rsa1.0_00067.1 | 1062 | 415055 | 0         | 442  | 443  | 99 +  | 2    | 444  | 46411  | 46853  |
| UN14264 | Rsa1.0_01337.1 | 1388 | 47829  | 0         | 412  | 416  | 99 -  | 973  | 1388 | 40094  | 40509  |
| UN14265 | Rsa1.0_00326.1 | 1966 | 171955 | 0         | 637  | 655  | 97 +  | 141  | 795  | 45447  | 46101  |
| UN14266 | Rsa1.0_00780.1 | 991  | 147795 | 0         | 546  | 561  | 97 -  | 433  | 991  | 42502  | 43061  |
| UN14267 | Rsa1.0_00287.1 | 1424 | 98687  | 0         | 690  | 707  | 97 +  | 5    | 708  | 29686  | 30391  |
| UN14268 | Rsa1.0_01384.1 | 852  | 46803  | 0         | 449  | 455  | 98 +  | 400  | 852  | 41768  | 42222  |
| UN14269 | Rsa1.0_00644.1 | 1601 | 136881 | 0         | 349  | 351  | 99 -  | 3    | 353  | 41427  | 41777  |
| UN14270 | Rsa1.0_01259.1 | 1334 | 49754  | 0         | 421  | 427  | 98 +  | 907  | 1332 | 35262  | 35688  |
| UN14271 | Rsa1.0_05586.1 | 736  | 13263  | 0         | 446  | 456  | 97 -  | 281  | 736  | 9659   | 10111  |
| UN14272 | Rsa1.0_11549.1 | 1065 | 5473   | 0         | 513  | 516  | 99 -  | 548  | 1063 | 4479   | 4993   |



|         |                |      |        |           |      |      |       |      |      |        |        |
|---------|----------------|------|--------|-----------|------|------|-------|------|------|--------|--------|
| UN14273 | Rsa1.0_09769.1 | 1307 | 6159   | 0         | 544  | 545  | 99 -  | 547  | 1091 | 3931   | 4475   |
| UN14274 | Rsa1.0_02221.1 | 637  | 33796  | 0         | 629  | 636  | 98 +  | 3    | 637  | 26997  | 27632  |
| UN14275 | Rsa1.0_06865.1 | 1118 | 10240  | 0         | 629  | 638  | 98 -  | 482  | 1118 | 8544   | 9181   |
| UN14276 | Rsa1.0_00098.1 | 1716 | 349239 | 0         | 1679 | 1728 | 97 -  | 1    | 1716 | 306601 | 308305 |
| UN14277 | Rsa1.0_00153.1 | 1440 | 192931 | 0         | 588  | 608  | 96 -  | 9    | 615  | 24233  | 24837  |
| UN14278 | Rsa1.0_23608.1 | 544  | 1037   | 1.00E-137 | 248  | 248  | 100 + | 2    | 249  | 790    | 1037   |
| UN14279 | Rsa1.0_00868.1 | 1101 | 61630  | 0         | 649  | 689  | 94 -  | 412  | 1100 | 58194  | 58874  |
| UN14280 | Rsa1.0_04286.1 | 1183 | 18084  | 0         | 448  | 459  | 97 -  | 554  | 1011 | 13076  | 13534  |
| UN14281 | Rsa1.0_04588.1 | 1026 | 16739  | 9.00E-85  | 160  | 160  | 100 + | 148  | 307  | 14592  | 14751  |
| UN14282 | Rsa1.0_03401.1 | 566  | 23191  | 1.00E-155 | 317  | 330  | 96 -  | 8    | 337  | 16158  | 16487  |
| UN14283 | Rsa1.0_00549.1 | 1183 | 76473  | 1.00E-122 | 289  | 312  | 92 -  | 866  | 1177 | 13029  | 13327  |
| UN14284 | Rsa1.0_01207.1 | 1687 | 141053 | 0         | 406  | 407  | 99 +  | 1    | 407  | 131180 | 131586 |
| UN14285 | Rsa1.0_01273.1 | 2477 | 49464  | 1.00E-124 | 247  | 251  | 98 -  | 2228 | 2477 | 18243  | 18492  |
| UN14286 | Rsa1.0_01792.1 | 1344 | 39227  | 0         | 784  | 810  | 96 +  | 537  | 1344 | 15907  | 16696  |
| UN14287 | Rsa1.0_00503.1 | 1462 | 79468  | 0         | 490  | 511  | 95 -  | 959  | 1462 | 39995  | 40505  |
| UN14288 | Rsa1.0_00473.1 | 1270 | 212204 | 1.00E-147 | 281  | 284  | 98 +  | 989  | 1270 | 73604  | 73886  |
| UN14289 | Rsa1.0_02569.1 | 1292 | 30002  | 0         | 793  | 811  | 97 +  | 483  | 1290 | 20247  | 21050  |
| UN14290 | Rsa1.0_02461.1 | 1113 | 31166  | 1.00E-173 | 327  | 333  | 98 -  | 784  | 1111 | 19449  | 19781  |
| UN14291 | Rsa1.0_00244.1 | 1438 | 103590 | 0         | 1289 | 1335 | 96 -  | 110  | 1438 | 76957  | 78290  |
| UN14292 | Rsa1.0_13767.1 | 981  | 4361   | 0         | 537  | 578  | 92 -  | 421  | 979  | 549    | 1118   |
| UN14293 | Rsa1.0_04141.1 | 999  | 18864  | 1.00E-165 | 311  | 315  | 98 +  | 2    | 315  | 15810  | 16124  |
| UN14294 | Rsa1.0_01585.1 | 1129 | 42806  | 0         | 513  | 531  | 96 +  | 589  | 1109 | 15623  | 16153  |
| UN14295 | Rsa1.0_00813.1 | 846  | 63202  | 0         | 814  | 861  | 94 -  | 3    | 845  | 18462  | 19321  |
| UN14296 | Rsa1.0_03643.1 | 1215 | 21607  | 0         | 634  | 653  | 97 +  | 13   | 656  | 20955  | 21607  |
| UN14297 | Rsa1.0_02060.1 | 1088 | 35528  | 0         | 675  | 676  | 99 +  | 413  | 1088 | 19474  | 20149  |
| UN14298 | Rsa1.0_01943.1 | 1460 | 37042  | 0         | 455  | 471  | 96 -  | 3    | 472  | 31522  | 31987  |
| UN14299 | Rsa1.0_00620.1 | 1668 | 71985  | 0         | 500  | 506  | 98 -  | 329  | 834  | 55327  | 55832  |
| UN14300 | Rsa1.0_00516.1 | 1172 | 78417  | 1.00E-143 | 357  | 386  | 92 +  | 792  | 1161 | 20048  | 20431  |
| UN14301 | Rsa1.0_00102.1 | 1337 | 135497 | 1.00E-115 | 248  | 262  | 94 -  | 1    | 262  | 51183  | 51434  |
| UN14302 | Rsa1.0_05326.1 | 764  | 14139  | 0         | 389  | 395  | 98 -  | 2    | 396  | 5288   | 5682   |
| UN14303 | Rsa1.0_30502.1 | 1296 | 752    | 1.00E-144 | 266  | 268  | 99 +  | 870  | 1137 | 483    | 750    |
| UN14304 | Rsa1.0_01740.1 | 940  | 39986  | 1.00E-127 | 274  | 287  | 95 -  | 72   | 352  | 27598  | 27884  |
| UN14305 | Rsa1.0_01121.1 | 1919 | 53407  | 0         | 1850 | 1894 | 97 +  | 32   | 1918 | 6767   | 8655   |
| UN14306 | Rsa1.0_02226.1 | 884  | 33726  | 1.00E-115 | 275  | 292  | 94 -  | 598  | 884  | 10106  | 10395  |
| UN14307 | Rsa1.0_05302.1 | 810  | 14212  | 0         | 449  | 452  | 99 -  | 359  | 810  | 6178   | 6629   |
| UN14308 | Rsa1.0_00224.1 | 1117 | 327530 | 0         | 462  | 463  | 99 +  | 655  | 1117 | 13608  | 14070  |
| UN14309 | Rsa1.0_00011.1 | 1090 | 225044 | 0         | 580  | 588  | 98 +  | 436  | 1023 | 94900  | 95485  |
| UN14310 | Rsa1.0_01412.1 | 918  | 46311  | 0         | 508  | 521  | 97 +  | 397  | 917  | 2268   | 2786   |
| UN14311 | Rsa1.0_16338.1 | 662  | 2190   | 0         | 345  | 347  | 99 +  | 4    | 350  | 392    | 737    |

|         |                |      |        |           |      |      |       |     |      |        |        |
|---------|----------------|------|--------|-----------|------|------|-------|-----|------|--------|--------|
| UN14312 | Rsa1.0_00097.1 | 695  | 138858 | 2.33E-156 | 281  | 287  | 97 -  | 51  | 337  | 14814  | 15100  |
| UN14313 | Rsa1.0_00108.1 | 962  | 478491 | 0         | 939  | 962  | 97 +  | 1   | 962  | 46801  | 47761  |
| UN14314 | Rsa1.0_00064.1 | 979  | 240927 | 0         | 655  | 665  | 98 +  | 315 | 979  | 132731 | 133392 |
| UN14315 | Rsa1.0_05217.1 | 1111 | 142938 | 0         | 428  | 428  | 100 - | 682 | 1109 | 136336 | 136763 |
| UN14316 | Rsa1.0_05421.1 | 1036 | 13806  | 1.00E-123 | 242  | 248  | 97 -  | 311 | 558  | 8527   | 8774   |
| UN14317 | Rsa1.0_00078.1 | 1823 | 175053 | 0         | 1385 | 1431 | 96 -  | 391 | 1821 | 66490  | 67910  |
| UN14318 | Rsa1.0_02606.1 | 1384 | 29635  | 0         | 381  | 389  | 97 +  | 997 | 1384 | 7554   | 7938   |
| UN14319 | Rsa1.0_00091.1 | 1056 | 139699 | 0         | 502  | 526  | 95 -  | 538 | 1056 | 80669  | 81190  |
| UN14320 | Rsa1.0_03074.1 | 1190 | 25568  | 1.00E-144 | 262  | 263  | 99 +  | 659 | 921  | 11008  | 11270  |
| UN14321 | Rsa1.0_00008.1 | 1352 | 358124 | 0         | 422  | 424  | 99 +  | 7   | 430  | 14721  | 15144  |
| UN14322 | Rsa1.0_14939.1 | 1594 | 2948   | 0         | 481  | 482  | 99 +  | 799 | 1280 | 559    | 1040   |
| UN14323 | Rsa1.0_05778.1 | 1216 | 12656  | 0         | 836  | 848  | 98 -  | 2   | 847  | 7      | 854    |
| UN14324 | Rsa1.0_04741.1 | 812  | 16164  | 1.00E-156 | 396  | 431  | 91 -  | 5   | 419  | 4356   | 4783   |
| UN14325 | Rsa1.0_00079.1 | 908  | 606987 | 0         | 434  | 455  | 95 +  | 447 | 895  | 66614  | 67064  |
| UN14326 | Rsa1.0_36749.1 | 866  | 613    | 1.00E-173 | 327  | 332  | 98 -  | 352 | 683  | 195    | 525    |
| UN14327 | Rsa1.0_00224.1 | 737  | 327530 | 1.00E-107 | 246  | 260  | 94 +  | 56  | 312  | 178383 | 178637 |
| UN14328 | Rsa1.0_10253.1 | 1057 | 5919   | 0         | 535  | 539  | 99 +  | 23  | 561  | 5381   | 5919   |
| UN14329 | Rsa1.0_00092.1 | 1609 | 659932 | 1.00E-148 | 442  | 506  | 87 -  | 375 | 880  | 443401 | 443865 |
| UN14330 | Rsa1.0_02278.1 | 1156 | 33085  | 0         | 331  | 334  | 99 -  | 1   | 334  | 20639  | 20972  |
| UN14331 | Rsa1.0_20045.1 | 1122 | 1348   | 0         | 598  | 641  | 93 +  | 225 | 865  | 720    | 1346   |
| UN14332 | Rsa1.0_02888.1 | 2011 | 27020  | 0         | 1011 | 1019 | 99 +  | 993 | 2011 | 6751   | 7767   |
| UN14333 | Rsa1.0_00153.1 | 1115 | 192931 | 0         | 371  | 372  | 99 -  | 744 | 1115 | 108610 | 108981 |
| UN14334 | Rsa1.0_03334.1 | 1036 | 23659  | 1.00E-129 | 285  | 299  | 95 +  | 4   | 296  | 18754  | 19051  |
| UN14335 | Rsa1.0_02215.1 | 739  | 33822  | 0         | 334  | 335  | 99 -  | 4   | 338  | 27836  | 28170  |
| UN14336 | Rsa1.0_01825.1 | 1942 | 38725  | 0         | 1268 | 1274 | 99 +  | 622 | 1892 | 27077  | 28350  |
| UN14337 | Rsa1.0_03054.1 | 1636 | 25738  | 0         | 490  | 492  | 99 -  | 2   | 493  | 15390  | 15881  |
| UN14338 | Rsa1.0_03278.1 | 974  | 24125  | 1.00E-107 | 225  | 229  | 98 -  | 699 | 923  | 2043   | 2271   |
| UN14339 | Rsa1.0_13747.1 | 1035 | 4388   | 0         | 373  | 373  | 100 - | 615 | 987  | 1574   | 1946   |
| UN14340 | Rsa1.0_03185.1 | 1516 | 24739  | 9.00E-86  | 165  | 166  | 99 -  | 350 | 515  | 4793   | 4958   |
| UN14341 | Rsa1.0_03090.1 | 759  | 25464  | 0         | 752  | 759  | 99 +  | 1   | 756  | 14136  | 14894  |
| UN14342 | Rsa1.0_00435.1 | 1310 | 317579 | 0         | 376  | 387  | 97 -  | 3   | 389  | 68865  | 69251  |
| UN14343 | Rsa1.0_00015.1 | 1905 | 561803 | 0         | 891  | 900  | 99 -  | 835 | 1728 | 185641 | 186540 |
| UN14344 | Rsa1.0_00387.1 | 1810 | 495407 | 0         | 940  | 981  | 95 -  | 828 | 1805 | 90908  | 91884  |
| UN14345 | Rsa1.0_01006.1 | 814  | 163670 | 1.00E-100 | 185  | 185  | 100 + | 630 | 814  | 25073  | 25257  |
| UN14346 | Rsa1.0_02372.1 | 1515 | 32053  | 0         | 351  | 353  | 99 -  | 367 | 719  | 29549  | 29901  |
| UN14347 | Rsa1.0_00879.1 | 797  | 61297  | 1.00E-138 | 265  | 269  | 98 +  | 1   | 267  | 27909  | 28177  |
| UN14348 | Rsa1.0_00510.1 | 744  | 78718  | 0         | 364  | 367  | 99 -  | 112 | 478  | 53847  | 54213  |
| UN14349 | Rsa1.0_00707.1 | 859  | 190112 | 1.00E-124 | 236  | 238  | 99 -  | 623 | 859  | 181078 | 181315 |
| UN14350 | Rsa1.0_01705.1 | 1629 | 40710  | 1.00E-120 | 231  | 235  | 98 -  | 473 | 707  | 12391  | 12625  |

|         |                |      |        |           |      |      |       |      |      |        |        |
|---------|----------------|------|--------|-----------|------|------|-------|------|------|--------|--------|
| UN14351 | Rsa1.0.06443.1 | 1043 | 11008  | 1.00E-148 | 298  | 308  | 96 -  | 737  | 1041 | 3689   | 3996   |
| UN14352 | Rsa1.0.00469.1 | 1045 | 82084  | 1.00E-118 | 219  | 220  | 99 -  | 551  | 770  | 57894  | 58113  |
| UN14353 | Rsa1.0.04696.1 | 2032 | 16339  | 0         | 686  | 765  | 89 +  | 1290 | 2032 | 10706  | 11462  |
| UN14354 | Rsa1.0.19120.1 | 1412 | 1477   | 1.00E-143 | 271  | 275  | 98 -  | 882  | 1156 | 326    | 600    |
| UN14355 | Rsa1.0.03668.1 | 1139 | 21483  | 0         | 634  | 659  | 96 -  | 18   | 669  | 2579   | 3235   |
| UN14356 | Rsa1.0.03513.1 | 1878 | 22349  | 0         | 395  | 407  | 97 -  | 1475 | 1878 | 14004  | 14409  |
| UN14357 | Rsa1.0.03352.1 | 1582 | 23506  | 1.00E-117 | 277  | 294  | 94 +  | 1285 | 1577 | 9339   | 9625   |
| UN14358 | Rsa1.0.05168.1 | 1443 | 14621  | 0         | 677  | 686  | 98 -  | 45   | 727  | 8801   | 9486   |
| UN14359 | Rsa1.0.00752.1 | 902  | 65756  | 1.00E-163 | 335  | 348  | 96 +  | 544  | 891  | 14186  | 14532  |
| UN14360 | Rsa1.0.01716.1 | 1115 | 40483  | 0         | 359  | 362  | 99 -  | 3    | 363  | 33499  | 33860  |
| UN14361 | Rsa1.0.00827.1 | 2393 | 62790  | 0         | 1234 | 1236 | 99 -  | 471  | 1706 | 22381  | 23616  |
| UN14362 | Rsa1.0.00533.1 | 1076 | 77375  | 0         | 562  | 571  | 98 +  | 1    | 570  | 1837   | 2406   |
| UN14363 | Rsa1.0.02918.1 | 977  | 26797  | 0         | 338  | 339  | 99 -  | 632  | 970  | 12962  | 13300  |
| UN14364 | Rsa1.0.02500.1 | 1494 | 30768  | 0         | 1428 | 1489 | 95 +  | 1    | 1483 | 26868  | 28353  |
| UN14365 | Rsa1.0.00475.1 | 615  | 81678  | 1.00E-172 | 325  | 330  | 98 +  | 1    | 330  | 26870  | 27198  |
| UN14366 | Rsa1.0.00017.1 | 838  | 752458 | 0         | 364  | 371  | 98 +  | 471  | 834  | 516052 | 516422 |
| UN14367 | Rsa1.0.03001.1 | 1021 | 26108  | 0         | 516  | 569  | 90 -  | 470  | 1021 | 5273   | 5824   |
| UN14368 | Rsa1.0.00018.1 | 637  | 410899 | 0         | 528  | 540  | 97 -  | 2    | 541  | 140603 | 141134 |
| UN14369 | Rsa1.0.00071.1 | 1751 | 345714 | 0         | 598  | 602  | 99 +  | 1150 | 1751 | 129522 | 130123 |
| UN14370 | Rsa1.0.01867.1 | 1023 | 37960  | 1.00E-169 | 337  | 349  | 96 +  | 235  | 583  | 17218  | 17566  |
| UN14371 | Rsa1.0.00133.1 | 1015 | 123768 | 1.00E-154 | 301  | 309  | 97 -  | 115  | 423  | 11639  | 11947  |
| UN14372 | Rsa1.0.00079.1 | 900  | 606987 | 1.00E-122 | 244  | 251  | 97 +  | 121  | 371  | 464295 | 464545 |
| UN14373 | Rsa1.0.00008.1 | 703  | 358124 | 0         | 332  | 334  | 99 +  | 96   | 429  | 194944 | 195277 |
| UN14374 | Rsa1.0.19809.1 | 815  | 1380   | 0         | 436  | 436  | 100 - | 379  | 814  | 175    | 610    |
| UN14375 | Rsa1.0.06166.1 | 886  | 11583  | 1.00E-160 | 349  | 367  | 95 +  | 1    | 356  | 6734   | 7094   |
| UN14376 | Rsa1.0.00213.1 | 282  | 108167 | 3.00E-63  | 177  | 193  | 91 +  | 5    | 196  | 58561  | 58745  |
| UN14377 | Rsa1.0.00380.1 | 464  | 89748  | 1.00E-126 | 251  | 257  | 97 +  | 5    | 261  | 48776  | 49031  |
| UN14378 | Rsa1.0.00247.1 | 1590 | 103408 | 9.00E-86  | 189  | 198  | 95 -  | 71   | 268  | 12486  | 12683  |
| UN14379 | Rsa1.0.00356.1 | 1109 | 91521  | 0         | 386  | 386  | 100 - | 347  | 732  | 80712  | 81097  |
| UN14380 | Rsa1.0.62301.1 | 1072 | 368    | 0         | 359  | 368  | 97 +  | 305  | 672  | 1      | 368    |
| UN14381 | Rsa1.0.00705.1 | 875  | 67505  | 0         | 435  | 451  | 96 +  | 87   | 536  | 9626   | 10076  |
| UN14382 | Rsa1.0.00421.1 | 2263 | 86365  | 1.00E-144 | 292  | 299  | 97 +  | 4    | 299  | 70153  | 70449  |
| UN14383 | Rsa1.0.01880.1 | 1148 | 37745  | 0         | 959  | 999  | 95 -  | 1    | 995  | 18288  | 19285  |
| UN14384 | Rsa1.0.00722.1 | 1252 | 66840  | 0         | 505  | 514  | 98 -  | 3    | 516  | 51173  | 51686  |
| UN14385 | Rsa1.0.00336.1 | 1151 | 445051 | 0         | 1094 | 1157 | 94 +  | 3    | 1149 | 308915 | 310062 |
| UN14386 | Rsa1.0.00092.1 | 1280 | 659932 | 1.00E-167 | 655  | 764  | 85 +  | 336  | 1079 | 124559 | 125307 |
| UN14387 | Rsa1.0.01296.1 | 1072 | 49035  | 1.00E-118 | 243  | 249  | 97 +  | 761  | 1009 | 13384  | 13630  |
| UN14388 | Rsa1.0.02430.1 | 998  | 31506  | 0         | 338  | 339  | 99 +  | 659  | 997  | 12388  | 12726  |
| UN14389 | Rsa1.0.18748.1 | 816  | 1541   | 1.00E-176 | 343  | 353  | 97 -  | 95   | 447  | 186    | 538    |

|         |                |      |        |           |      |      |       |      |      |        |        |
|---------|----------------|------|--------|-----------|------|------|-------|------|------|--------|--------|
| UN14390 | Rsa1.0.02931.1 | 1163 | 26654  | 0         | 589  | 612  | 96 +  | 537  | 1142 | 5953   | 6560   |
| UN14391 | Rsa1.0.09236.1 | 1145 | 6540   | 1.00E-155 | 313  | 324  | 96 -  | 406  | 729  | 5496   | 5816   |
| UN14392 | Rsa1.0.00506.1 | 1389 | 79106  | 1.00E-148 | 269  | 270  | 99 -  | 1    | 270  | 6009   | 6278   |
| UN14393 | Rsa1.0.00492.1 | 1319 | 80178  | 1.00E-136 | 385  | 430  | 89 +  | 3    | 424  | 69251  | 69662  |
| UN14394 | Rsa1.0.00045.1 | 821  | 328694 | 1.00E-162 | 316  | 324  | 97 -  | 1    | 322  | 139224 | 139547 |
| UN14395 | Rsa1.0.00931.1 | 1302 | 59210  | 0         | 490  | 509  | 96 +  | 3    | 506  | 47749  | 48246  |
| UN14396 | Rsa1.0.01198.1 | 738  | 51029  | 0         | 651  | 654  | 99 -  | 82   | 735  | 25781  | 26434  |
| UN14397 | Rsa1.0.03487.1 | 985  | 22564  | 0         | 982  | 984  | 99 -  | 2    | 985  | 2197   | 3179   |
| UN14398 | Rsa1.0.00738.1 | 2717 | 66322  | 0         | 460  | 469  | 98 +  | 2245 | 2712 | 26036  | 26504  |
| UN14399 | Rsa1.0.00092.1 | 814  | 659932 | 1.00E-179 | 355  | 366  | 96 +  | 352  | 716  | 198161 | 198526 |
| UN14400 | Rsa1.0.00213.1 | 1220 | 108167 | 1.00E-158 | 293  | 296  | 98 -  | 925  | 1220 | 93859  | 94154  |
| UN14401 | Rsa1.0.09490.1 | 740  | 6335   | 0         | 699  | 739  | 94 -  | 3    | 737  | 4796   | 5510   |
| UN14402 | Rsa1.0.01471.1 | 773  | 45101  | 0         | 593  | 625  | 94 +  | 154  | 773  | 13923  | 14546  |
| UN14403 | Rsa1.0.04367.1 | 546  | 17728  | 1.00E-113 | 220  | 224  | 98 +  | 4    | 227  | 13666  | 13889  |
| UN14404 | Rsa1.0.30664.1 | 1251 | 748    | 0         | 564  | 566  | 99 +  | 119  | 684  | 1      | 566    |
| UN14405 | Rsa1.0.08529.1 | 2042 | 7233   | 0         | 520  | 552  | 94 +  | 824  | 1371 | 6697   | 7233   |
| UN14406 | Rsa1.0.00963.1 | 679  | 58176  | 0         | 667  | 677  | 98 +  | 1    | 677  | 10188  | 10863  |
| UN14407 | Rsa1.0.01595.1 | 1064 | 175383 | 1.00E-129 | 257  | 262  | 98 +  | 3    | 263  | 5818   | 6078   |
| UN14408 | Rsa1.0.01287.1 | 4544 | 49195  | 0         | 743  | 838  | 88 +  | 63   | 893  | 18785  | 19604  |
| UN14409 | Rsa1.0.00863.1 | 1124 | 254535 | 1.00E-171 | 321  | 324  | 99 -  | 3    | 324  | 210902 | 211224 |
| UN14410 | Rsa1.0.02601.1 | 1547 | 29654  | 0         | 523  | 559  | 93 +  | 1    | 549  | 3232   | 3790   |
| UN14411 | Rsa1.0.34178.1 | 635  | 663    | 0         | 406  | 407  | 99 -  | 226  | 632  | 7      | 412    |
| UN14412 | Rsa1.0.02916.1 | 1465 | 26809  | 0         | 419  | 432  | 96 -  | 1    | 428  | 5584   | 6013   |
| UN14413 | Rsa1.0.47960.1 | 1093 | 472    | 1.00E-115 | 226  | 231  | 97 +  | 447  | 677  | 135    | 365    |
| UN14414 | Rsa1.0.07055.1 | 1595 | 9970   | 0         | 458  | 459  | 99 +  | 1137 | 1594 | 2701   | 3159   |
| UN14415 | Rsa1.0.03282.1 | 894  | 24107  | 0         | 558  | 571  | 97 -  | 3    | 573  | 10595  | 11159  |
| UN14416 | Rsa1.0.04258.1 | 784  | 18254  | 0         | 408  | 416  | 98 +  | 3    | 415  | 2361   | 2776   |
| UN14417 | Rsa1.0.09003.1 | 1474 | 6717   | 0         | 344  | 344  | 100 - | 3    | 346  | 2979   | 3322   |
| UN14418 | Rsa1.0.01573.1 | 1470 | 42964  | 1.00E-171 | 335  | 345  | 97 -  | 1126 | 1470 | 2655   | 2999   |
| UN14419 | Rsa1.0.00066.1 | 976  | 152418 | 1.00E-124 | 254  | 261  | 97 -  | 709  | 967  | 53160  | 53419  |
| UN14420 | Rsa1.0.05489.1 | 1135 | 13562  | 0         | 733  | 751  | 97 -  | 388  | 1135 | 12145  | 12894  |
| UN14421 | Rsa1.0.01403.1 | 759  | 46453  | 5.00E-95  | 216  | 227  | 95 -  | 3    | 228  | 26363  | 26586  |
| UN14422 | Rsa1.0.05611.1 | 817  | 13193  | 0         | 538  | 554  | 97 +  | 1    | 554  | 2576   | 3128   |
| UN14423 | Rsa1.0.00896.1 | 1387 | 60509  | 0         | 608  | 625  | 97 +  | 173  | 797  | 16901  | 17525  |
| UN14424 | Rsa1.0.02080.1 | 1448 | 35297  | 0         | 1324 | 1360 | 97 -  | 38   | 1396 | 22495  | 23851  |
| UN14425 | Rsa1.0.02389.1 | 1335 | 146428 | 0         | 1021 | 1039 | 98 +  | 3    | 1036 | 137834 | 138869 |
| UN14426 | Rsa1.0.02362.1 | 713  | 32190  | 0         | 414  | 414  | 100 - | 299  | 712  | 24732  | 25145  |
| UN14427 | Rsa1.0.00869.1 | 1647 | 61627  | 0         | 333  | 333  | 100 - | 848  | 1180 | 42825  | 43157  |
| UN14428 | Rsa1.0.00087.1 | 927  | 761073 | 1.00E-170 | 348  | 358  | 97 -  | 1    | 353  | 225356 | 225712 |

|         |                |      |        |           |     |     |       |      |      |        |        |
|---------|----------------|------|--------|-----------|-----|-----|-------|------|------|--------|--------|
| UN14429 | Rsa1.0_00340.1 | 636  | 305782 | 1.00E-153 | 352 | 375 | 93 -  | 277  | 636  | 159725 | 160093 |
| UN14430 | Rsa1.0_00178.1 | 678  | 114861 | 1.00E-130 | 288 | 302 | 95 +  | 374  | 674  | 12165  | 12462  |
| UN14431 | Rsa1.0_10893.1 | 907  | 5687   | 1.00E-170 | 312 | 315 | 99 +  | 431  | 745  | 236    | 550    |
| UN14432 | Rsa1.0_01144.1 | 1490 | 52431  | 0         | 419 | 432 | 96 +  | 1060 | 1490 | 42305  | 42732  |
| UN14433 | Rsa1.0_00163.1 | 1524 | 116847 | 0         | 446 | 471 | 94 +  | 1059 | 1523 | 83512  | 83980  |
| UN14434 | Rsa1.0_00216.1 | 901  | 197563 | 1.00E-89  | 213 | 227 | 93 -  | 3    | 229  | 51876  | 52090  |
| UN14435 | Rsa1.0_00718.1 | 1051 | 279335 | 0         | 515 | 515 | 100 - | 2    | 516  | 34460  | 34974  |
| UN14436 | Rsa1.0_00576.1 | 760  | 178949 | 1.00E-148 | 296 | 302 | 98 +  | 41   | 339  | 2749   | 3049   |
| UN14437 | Rsa1.0_01033.1 | 965  | 56173  | 0         | 555 | 570 | 97 +  | 1    | 568  | 48521  | 49090  |
| UN14438 | Rsa1.0_03261.1 | 1005 | 24281  | 0         | 439 | 441 | 99 -  | 2    | 442  | 5213   | 5653   |
| UN14439 | Rsa1.0_00595.1 | 822  | 341648 | 1.00E-138 | 272 | 278 | 97 -  | 1    | 278  | 4003   | 4279   |
| UN14440 | Rsa1.0_02365.1 | 886  | 32118  | 0         | 540 | 593 | 91 +  | 20   | 587  | 29274  | 29863  |
| UN14441 | Rsa1.0_00324.1 | 1261 | 218805 | 1.00E-168 | 326 | 333 | 97 +  | 929  | 1261 | 182824 | 183151 |
| UN14442 | Rsa1.0_00527.1 | 955  | 77733  | 0         | 474 | 477 | 99 -  | 479  | 955  | 24551  | 25027  |
| UN14443 | Rsa1.0_00128.1 | 563  | 228675 | 1.00E-103 | 237 | 248 | 95 -  | 9    | 252  | 61319  | 61564  |
| UN14444 | Rsa1.0_00526.1 | 1266 | 169279 | 0         | 322 | 322 | 100 - | 945  | 1266 | 139659 | 139980 |
| UN14445 | Rsa1.0_00022.1 | 1465 | 200461 | 0         | 546 | 556 | 98 +  | 497  | 1052 | 120556 | 121111 |
| UN14446 | Rsa1.0_00447.1 | 939  | 84051  | 0         | 381 | 382 | 99 +  | 1    | 382  | 56157  | 56538  |
| UN14447 | Rsa1.0_01173.1 | 1386 | 51727  | 0         | 399 | 412 | 96 +  | 968  | 1379 | 1555   | 1966   |
| UN14448 | Rsa1.0_00014.1 | 1608 | 348985 | 0         | 898 | 915 | 98 -  | 707  | 1608 | 267787 | 268701 |
| UN14449 | Rsa1.0_02963.1 | 1387 | 26407  | 1.00E-132 | 263 | 271 | 97 -  | 889  | 1159 | 13077  | 13347  |
| UN14450 | Rsa1.0_03491.1 | 756  | 22541  | 0         | 560 | 585 | 95 -  | 38   | 615  | 8996   | 9580   |
| UN14451 | Rsa1.0_00197.1 | 695  | 109714 | 1.00E-174 | 313 | 314 | 99 -  | 101  | 414  | 78615  | 78928  |
| UN14452 | Rsa1.0_00033.1 | 1250 | 515811 | 1.00E-145 | 265 | 266 | 99 +  | 274  | 539  | 354853 | 355118 |
| UN14453 | Rsa1.0_02692.1 | 634  | 28626  | 0         | 517 | 535 | 96 +  | 5    | 539  | 1031   | 1561   |
| UN14454 | Rsa1.0_01374.1 | 826  | 47047  | 0         | 524 | 532 | 98 +  | 294  | 824  | 32469  | 32996  |
| UN14455 | Rsa1.0_00082.1 | 1849 | 237584 | 1.00E-114 | 225 | 230 | 97 +  | 727  | 956  | 137067 | 137296 |
| UN14456 | Rsa1.0_04652.1 | 825  | 16515  | 0         | 359 | 361 | 99 -  | 1    | 361  | 4833   | 5193   |
| UN14457 | Rsa1.0_00387.1 | 1221 | 495407 | 0         | 885 | 924 | 95 -  | 1    | 924  | 409522 | 410423 |
| UN14458 | Rsa1.0_00851.1 | 738  | 62181  | 0         | 443 | 454 | 97 -  | 5    | 451  | 8707   | 9160   |
| UN14459 | Rsa1.0_00009.1 | 1267 | 232558 | 1.00E-167 | 298 | 298 | 100 - | 970  | 1267 | 53644  | 53941  |
| UN14460 | Rsa1.0_00663.1 | 1808 | 164969 | 0         | 523 | 528 | 99 -  | 944  | 1471 | 96870  | 97397  |
| UN14461 | Rsa1.0_02678.1 | 1281 | 135053 | 1.00E-179 | 318 | 318 | 100 + | 964  | 1281 | 112508 | 112825 |
| UN14462 | Rsa1.0_00312.1 | 912  | 96765  | 0         | 578 | 579 | 99 -  | 1    | 579  | 67883  | 68461  |
| UN14463 | Rsa1.0_01469.1 | 1106 | 45139  | 1.00E-117 | 223 | 226 | 98 +  | 61   | 286  | 18180  | 18405  |
| UN14464 | Rsa1.0_01707.1 | 866  | 40686  | 5.00E-86  | 162 | 162 | 100 - | 682  | 843  | 30412  | 30573  |
| UN14465 | Rsa1.0_00022.1 | 1421 | 200461 | 0         | 822 | 838 | 98 -  | 584  | 1419 | 67747  | 68575  |
| UN14466 | Rsa1.0_05654.1 | 1512 | 13042  | 0         | 497 | 503 | 98 +  | 694  | 1196 | 8195   | 8697   |
| UN14467 | Rsa1.0_00001.1 | 1531 | 363028 | 0         | 400 | 400 | 100 - | 1132 | 1531 | 284448 | 284847 |

|         |                |      |        |           |      |      |       |      |      |        |        |
|---------|----------------|------|--------|-----------|------|------|-------|------|------|--------|--------|
| UN14468 | Rsa1.0.00147.1 | 1302 | 249503 | 0         | 1268 | 1304 | 97 -  | 2    | 1301 | 240704 | 242005 |
| UN14469 | Rsa1.0.00891.1 | 1208 | 60724  | 1.00E-152 | 274  | 274  | 100 - | 3    | 276  | 57400  | 57673  |
| UN14470 | Rsa1.0.24632.1 | 826  | 976    | 1.00E-149 | 283  | 288  | 98 +  | 451  | 738  | 570    | 857    |
| UN14471 | Rsa1.0.04806.1 | 709  | 15898  | 0         | 559  | 586  | 95 +  | 130  | 709  | 7069   | 7646   |
| UN14472 | Rsa1.0.05784.1 | 1001 | 12643  | 0         | 411  | 425  | 96 +  | 576  | 1000 | 1645   | 2068   |
| UN14473 | Rsa1.0.08115.1 | 928  | 7882   | 0         | 634  | 641  | 98 +  | 281  | 921  | 3894   | 4534   |
| UN14474 | Rsa1.0.00067.1 | 941  | 415055 | 0         | 591  | 592  | 99 +  | 349  | 940  | 82824  | 83415  |
| UN14475 | Rsa1.0.00019.1 | 1921 | 301669 | 1.00E-145 | 275  | 278  | 98 +  | 42   | 319  | 33034  | 33310  |
| UN14476 | Rsa1.0.00028.1 | 1309 | 293984 | 0         | 902  | 912  | 98 -  | 404  | 1309 | 234590 | 235501 |
| UN14477 | Rsa1.0.00592.1 | 1045 | 73788  | 0         | 369  | 370  | 99 -  | 676  | 1045 | 24088  | 24457  |
| UN14478 | Rsa1.0.02560.1 | 925  | 30091  | 0         | 341  | 343  | 99 +  | 374  | 716  | 7721   | 8063   |
| UN14479 | Rsa1.0.00187.1 | 912  | 393093 | 0         | 403  | 413  | 97 +  | 49   | 460  | 212118 | 212530 |
| UN14480 | Rsa1.0.00100.1 | 781  | 249232 | 1.00E-179 | 406  | 432  | 93 +  | 300  | 728  | 13427  | 13856  |
| UN14481 | Rsa1.0.05864.1 | 849  | 12387  | 1.00E-108 | 257  | 272  | 94 +  | 1    | 272  | 9901   | 10165  |
| UN14482 | Rsa1.0.00688.1 | 1052 | 68396  | 1.00E-110 | 260  | 278  | 93 -  | 1    | 273  | 14821  | 15097  |
| UN14483 | Rsa1.0.00253.1 | 1168 | 231292 | 1.00E-110 | 246  | 259  | 94 -  | 907  | 1164 | 124380 | 124638 |
| UN14484 | Rsa1.0.00782.1 | 1619 | 64468  | 0         | 530  | 567  | 93 +  | 1062 | 1619 | 28205  | 28758  |
| UN14485 | Rsa1.0.00582.1 | 979  | 74333  | 0         | 588  | 604  | 97 +  | 1    | 604  | 18904  | 19507  |
| UN14486 | Rsa1.0.00407.1 | 835  | 191544 | 1.00E-160 | 325  | 335  | 97 -  | 497  | 829  | 24358  | 24688  |
| UN14487 | Rsa1.0.03916.1 | 1346 | 20117  | 0         | 567  | 572  | 99 -  | 777  | 1345 | 17771  | 18342  |
| UN14488 | Rsa1.0.00266.1 | 2855 | 163932 | 0         | 1167 | 1212 | 96 -  | 951  | 2158 | 9927   | 11135  |
| UN14489 | Rsa1.0.00049.1 | 1580 | 167018 | 0         | 625  | 639  | 97 -  | 942  | 1580 | 127386 | 128019 |
| UN14490 | Rsa1.0.00252.1 | 1321 | 102760 | 1.00E-142 | 275  | 281  | 97 +  | 377  | 657  | 43752  | 44032  |
| UN14491 | Rsa1.0.00144.1 | 1008 | 120708 | 0         | 448  | 451  | 99 +  | 3    | 453  | 45117  | 45567  |
| UN14492 | Rsa1.0.03981.1 | 474  | 19724  | 1.00E-127 | 296  | 315  | 93 +  | 98   | 411  | 17481  | 17789  |
| UN14493 | Rsa1.0.01717.1 | 755  | 143162 | 1.00E-140 | 270  | 276  | 97 -  | 140  | 415  | 15704  | 15979  |
| UN14494 | Rsa1.0.01303.1 | 998  | 48853  | 0         | 385  | 400  | 96 +  | 599  | 998  | 15291  | 15689  |
| UN14495 | Rsa1.0.01273.1 | 1402 | 49464  | 0         | 358  | 362  | 98 -  | 21   | 382  | 32716  | 33077  |
| UN14496 | Rsa1.0.00110.1 | 1237 | 132719 | 0         | 549  | 579  | 94 +  | 649  | 1227 | 6854   | 7417   |
| UN14497 | Rsa1.0.00764.1 | 1434 | 65056  | 0         | 1213 | 1232 | 98 -  | 204  | 1434 | 51993  | 53224  |
| UN14498 | Rsa1.0.00471.1 | 1165 | 81897  | 0         | 397  | 397  | 100 + | 765  | 1161 | 4146   | 4542   |
| UN14499 | Rsa1.0.00008.1 | 494  | 358124 | 1.00E-134 | 283  | 295  | 95 +  | 200  | 493  | 30632  | 30926  |
| UN14500 | Rsa1.0.01376.1 | 976  | 47004  | 1.00E-96  | 226  | 238  | 94 +  | 59   | 295  | 22550  | 22778  |
| UN14501 | Rsa1.0.00009.1 | 1496 | 232558 | 1.00E-131 | 270  | 278  | 97 -  | 1220 | 1496 | 40696  | 40972  |
| UN14502 | Rsa1.0.00026.1 | 829  | 327835 | 0         | 820  | 827  | 99 -  | 5    | 829  | 44003  | 44829  |
| UN14503 | Rsa1.0.08154.1 | 707  | 7823   | 1.00E-131 | 247  | 250  | 98 +  | 3    | 252  | 4183   | 4432   |
| UN14504 | Rsa1.0.00120.1 | 754  | 277288 | 0         | 370  | 382  | 96 -  | 22   | 403  | 266327 | 266707 |
| UN14505 | Rsa1.0.00190.1 | 693  | 318240 | 1.00E-141 | 356  | 388  | 91 +  | 3    | 379  | 91417  | 91801  |
| UN14506 | Rsa1.0.01546.1 | 942  | 43586  | 0         | 889  | 918  | 96 +  | 7    | 921  | 30264  | 31174  |

|         |                |      |        |           |      |      |       |      |      |        |        |
|---------|----------------|------|--------|-----------|------|------|-------|------|------|--------|--------|
| UN14507 | Rsa1.0_00707.1 | 866  | 190112 | 0         | 625  | 634  | 98 +  | 17   | 648  | 17632  | 18264  |
| UN14508 | Rsa1.0_00019.1 | 1760 | 301669 | 0         | 1104 | 1160 | 95 -  | 475  | 1629 | 280293 | 281443 |
| UN14509 | Rsa1.0_01420.1 | 2143 | 46210  | 0         | 847  | 884  | 95 -  | 1    | 868  | 8853   | 9736   |
| UN14510 | Rsa1.0_15692.1 | 822  | 2478   | 1.00E-147 | 350  | 375  | 93 +  | 2    | 369  | 686    | 1057   |
| UN14511 | Rsa1.0_02357.1 | 797  | 32220  | 0         | 332  | 335  | 99 -  | 452  | 786  | 11445  | 11779  |
| UN14512 | Rsa1.0_00408.1 | 1713 | 176752 | 0         | 441  | 463  | 95 -  | 272  | 734  | 134345 | 134803 |
| UN14513 | Rsa1.0_00509.1 | 1056 | 78829  | 0         | 363  | 372  | 97 -  | 685  | 1056 | 17051  | 17419  |
| UN14514 | Rsa1.0_00110.1 | 970  | 132719 | 1.00E-168 | 325  | 331  | 98 -  | 637  | 966  | 91299  | 91627  |
| UN14515 | Rsa1.0_00284.1 | 1553 | 323267 | 0         | 624  | 642  | 97 +  | 911  | 1552 | 243413 | 244042 |
| UN14516 | Rsa1.0_00426.1 | 1074 | 85668  | 1.00E-101 | 253  | 270  | 93 +  | 8    | 274  | 32315  | 32577  |
| UN14517 | Rsa1.0_03263.1 | 1404 | 24268  | 0         | 1045 | 1128 | 92 +  | 295  | 1403 | 20569  | 21667  |
| UN14518 | Rsa1.0_00879.1 | 846  | 61297  | 1.00E-153 | 300  | 307  | 97 +  | 541  | 846  | 38364  | 38670  |
| UN14519 | Rsa1.0_00804.1 | 792  | 63726  | 1.00E-141 | 275  | 282  | 97 -  | 364  | 645  | 16086  | 16367  |
| UN14520 | Rsa1.0_14032.1 | 980  | 3893   | 1.00E-157 | 322  | 334  | 96 +  | 647  | 980  | 3098   | 3426   |
| UN14521 | Rsa1.0_01244.1 | 1535 | 50061  | 0         | 417  | 419  | 99 -  | 1    | 419  | 30687  | 31105  |
| UN14522 | Rsa1.0_00184.1 | 1415 | 218748 | 0         | 587  | 600  | 97 -  | 675  | 1274 | 80617  | 81213  |
| UN14523 | Rsa1.0_01104.1 | 1637 | 285480 | 1.00E-130 | 345  | 383  | 90 +  | 1    | 363  | 266601 | 266983 |
| UN14524 | Rsa1.0_00337.1 | 933  | 143174 | 0         | 525  | 535  | 98 +  | 403  | 931  | 4654   | 5188   |
| UN14525 | Rsa1.0_03837.1 | 1900 | 20559  | 0         | 387  | 388  | 99 -  | 1253 | 1640 | 20172  | 20559  |
| UN14526 | Rsa1.0_00366.1 | 599  | 90880  | 0         | 570  | 597  | 95 +  | 3    | 597  | 25892  | 26478  |
| UN14527 | Rsa1.0_00140.1 | 2242 | 121541 | 1.00E-158 | 343  | 363  | 94 -  | 106  | 468  | 49081  | 49443  |
| UN14528 | Rsa1.0_06546.1 | 1248 | 10801  | 1.00E-145 | 274  | 278  | 98 -  | 538  | 815  | 4522   | 4799   |
| UN14529 | Rsa1.0_07681.1 | 1076 | 8808   | 1.00E-176 | 314  | 314  | 100 - | 58   | 371  | 2441   | 2754   |
| UN14530 | Rsa1.0_00298.1 | 1685 | 349131 | 1.00E-111 | 211  | 213  | 99 +  | 960  | 1172 | 177311 | 177523 |
| UN14531 | Rsa1.0_01754.1 | 714  | 39792  | 0         | 658  | 673  | 97 -  | 43   | 712  | 13161  | 13830  |
| UN14532 | Rsa1.0_00805.1 | 804  | 63724  | 0         | 428  | 454  | 94 +  | 351  | 804  | 43181  | 43621  |
| UN14533 | Rsa1.0_01034.1 | 737  | 56046  | 0         | 362  | 367  | 98 +  | 312  | 678  | 35993  | 36359  |
| UN14534 | Rsa1.0_00163.1 | 814  | 116847 | 1.00E-169 | 302  | 302  | 100 + | 135  | 436  | 66573  | 66874  |
| UN14535 | Rsa1.0_00191.1 | 826  | 316976 | 0         | 418  | 426  | 98 -  | 2    | 427  | 42419  | 42844  |
| UN14536 | Rsa1.0_00316.1 | 1297 | 96264  | 0         | 499  | 509  | 98 -  | 3    | 511  | 85542  | 86050  |
| UN14537 | Rsa1.0_00032.1 | 684  | 306326 | 1.00E-130 | 266  | 276  | 96 +  | 36   | 311  | 154752 | 155027 |
| UN14538 | Rsa1.0_00354.1 | 835  | 232005 | 9.00E-97  | 256  | 279  | 91 -  | 1    | 273  | 170578 | 170849 |
| UN14539 | Rsa1.0_00191.1 | 1567 | 316976 | 0         | 419  | 424  | 98 -  | 233  | 655  | 259269 | 259692 |
| UN14540 | Rsa1.0_00928.1 | 1156 | 59293  | 0         | 359  | 359  | 100 - | 796  | 1154 | 19222  | 19580  |
| UN14541 | Rsa1.0_01005.1 | 1409 | 56967  | 1.00E-162 | 302  | 306  | 98 -  | 1089 | 1394 | 2548   | 2853   |
| UN14542 | Rsa1.0_00235.1 | 1517 | 154696 | 0         | 415  | 415  | 100 + | 1092 | 1506 | 101650 | 102064 |
| UN14543 | Rsa1.0_00001.1 | 405  | 363028 | 1.00E-91  | 171  | 171  | 100 + | 229  | 399  | 314318 | 314488 |
| UN14544 | Rsa1.0_00034.1 | 870  | 260119 | 1.00E-157 | 320  | 330  | 96 -  | 1    | 327  | 67803  | 68129  |
| UN14545 | Rsa1.0_07657.1 | 1182 | 8896   | 0         | 549  | 564  | 97 +  | 622  | 1180 | 3516   | 4079   |

|         |                |      |        |           |      |      |       |      |      |        |        |
|---------|----------------|------|--------|-----------|------|------|-------|------|------|--------|--------|
| UN14546 | Rsa1.0.01422.1 | 1157 | 46172  | 0         | 481  | 501  | 96 -  | 657  | 1157 | 10164  | 10663  |
| UN14547 | Rsa1.0.01519.1 | 989  | 44144  | 0         | 579  | 594  | 97 -  | 400  | 989  | 11559  | 12151  |
| UN14548 | Rsa1.0.00425.1 | 1565 | 147080 | 0         | 1236 | 1246 | 99 +  | 320  | 1565 | 2361   | 3603   |
| UN14549 | Rsa1.0.00545.1 | 1078 | 189649 | 1.00E-148 | 282  | 287  | 98 -  | 792  | 1078 | 35014  | 35300  |
| UN14550 | Rsa1.0.02944.1 | 1322 | 26553  | 0         | 573  | 576  | 99 -  | 418  | 993  | 4612   | 5186   |
| UN14551 | Rsa1.0.00145.1 | 958  | 261008 | 0         | 348  | 349  | 99 +  | 2    | 349  | 38513  | 38861  |
| UN14552 | Rsa1.0.07601.1 | 969  | 9051   | 0         | 857  | 875  | 97 -  | 95   | 969  | 1300   | 2173   |
| UN14553 | Rsa1.0.01071.1 | 1198 | 166914 | 0         | 402  | 402  | 100 - | 797  | 1198 | 14006  | 14407  |
| UN14554 | Rsa1.0.03093.1 | 1545 | 25445  | 0         | 816  | 839  | 97 +  | 709  | 1541 | 14489  | 15324  |
| UN14555 | Rsa1.0.01521.1 | 1724 | 142147 | 0         | 1102 | 1117 | 98 +  | 3    | 1119 | 105710 | 106826 |
| UN14556 | Rsa1.0.01364.1 | 1490 | 47172  | 0         | 641  | 661  | 96 -  | 3    | 660  | 35965  | 36617  |
| UN14557 | Rsa1.0.00050.1 | 1863 | 237174 | 0         | 350  | 353  | 99 +  | 4    | 355  | 34014  | 34366  |
| UN14558 | Rsa1.0.00169.1 | 935  | 274298 | 0         | 503  | 513  | 98 -  | 423  | 935  | 270670 | 271182 |
| UN14559 | Rsa1.0.00326.1 | 1005 | 171955 | 4.00E-96  | 282  | 314  | 89 -  | 1    | 313  | 65824  | 66115  |
| UN14560 | Rsa1.0.00947.1 | 1000 | 58664  | 0         | 473  | 499  | 94 +  | 484  | 979  | 10169  | 10666  |
| UN14561 | Rsa1.0.00300.1 | 1307 | 97747  | 0         | 545  | 565  | 96 +  | 73   | 625  | 81510  | 82074  |
| UN14562 | Rsa1.0.09069.1 | 1601 | 6671   | 0         | 470  | 483  | 97 +  | 413  | 895  | 2813   | 3295   |
| UN14563 | Rsa1.0.00169.1 | 1239 | 274298 | 0         | 437  | 460  | 95 -  | 2    | 460  | 239066 | 239524 |
| UN14564 | Rsa1.0.01462.1 | 542  | 45231  | 2.00E-69  | 207  | 228  | 90 -  | 3    | 227  | 25946  | 26166  |
| UN14565 | Rsa1.0.08961.1 | 1019 | 6750   | 0         | 407  | 429  | 94 -  | 591  | 1017 | 4329   | 4752   |
| UN14566 | Rsa1.0.02306.1 | 958  | 32776  | 0         | 834  | 958  | 87 -  | 1    | 947  | 31298  | 32254  |
| UN14567 | Rsa1.0.01214.1 | 1270 | 50599  | 0         | 442  | 473  | 93 -  | 1    | 456  | 46274  | 46746  |
| UN14568 | Rsa1.0.54426.1 | 1024 | 419    | 1.00E-147 | 312  | 324  | 96 -  | 3    | 325  | 1      | 322    |
| UN14569 | Rsa1.0.00224.1 | 1604 | 327530 | 0         | 882  | 897  | 98 -  | 711  | 1604 | 38370  | 39264  |
| UN14570 | Rsa1.0.01981.1 | 645  | 36537  | 0         | 396  | 410  | 96 -  | 3    | 412  | 34743  | 35147  |
| UN14571 | Rsa1.0.00038.1 | 969  | 314568 | 0         | 431  | 435  | 99 -  | 535  | 969  | 252468 | 252902 |
| UN14572 | Rsa1.0.00420.1 | 1234 | 86496  | 1.00E-151 | 296  | 302  | 98 -  | 934  | 1232 | 67335  | 67635  |
| UN14573 | Rsa1.0.00015.1 | 737  | 561803 | 1.00E-155 | 419  | 468  | 89 +  | 158  | 614  | 483122 | 483579 |
| UN14574 | Rsa1.0.08265.1 | 878  | 7630   | 1.00E-179 | 419  | 436  | 96 -  | 458  | 878  | 6623   | 7058   |
| UN14575 | Rsa1.0.03325.1 | 2018 | 23720  | 0         | 393  | 396  | 99 -  | 1623 | 2018 | 6758   | 7150   |
| UN14576 | Rsa1.0.01666.1 | 1621 | 173972 | 0         | 435  | 447  | 97 +  | 1174 | 1620 | 4179   | 4625   |
| UN14577 | Rsa1.0.08225.1 | 1246 | 7695   | 0         | 746  | 770  | 96 -  | 481  | 1246 | 4138   | 4907   |
| UN14578 | Rsa1.0.02812.1 | 1120 | 27660  | 0         | 511  | 534  | 95 -  | 6    | 530  | 2883   | 3415   |
| UN14579 | Rsa1.0.00012.1 | 1399 | 222148 | 0         | 1352 | 1396 | 96 -  | 2    | 1394 | 102565 | 103958 |
| UN14580 | Rsa1.0.00121.1 | 816  | 278029 | 0         | 584  | 585  | 99 +  | 2    | 586  | 55530  | 56114  |
| UN14581 | Rsa1.0.01717.1 | 803  | 143162 | 1.00E-138 | 265  | 270  | 98 +  | 1    | 270  | 14895  | 15164  |
| UN14582 | Rsa1.0.00179.1 | 809  | 393324 | 1.00E-160 | 308  | 315  | 97 -  | 495  | 809  | 200102 | 200416 |
| UN14583 | Rsa1.0.08102.1 | 1541 | 7901   | 1.00E-114 | 408  | 475  | 85 +  | 12   | 465  | 521    | 969    |
| UN14584 | Rsa1.0.03668.1 | 1840 | 21483  | 0         | 834  | 854  | 97 +  | 510  | 1363 | 13253  | 14106  |



|         |                |      |        |           |      |      |       |      |      |        |        |
|---------|----------------|------|--------|-----------|------|------|-------|------|------|--------|--------|
| UN14585 | Rsa1.0_00079.1 | 866  | 606987 | 1.00E-160 | 334  | 347  | 96 -  | 517  | 863  | 464201 | 464545 |
| UN14586 | Rsa1.0_11741.1 | 1501 | 5423   | 0         | 482  | 500  | 96 -  | 412  | 908  | 4597   | 5096   |
| UN14587 | Rsa1.0_02142.1 | 1268 | 34633  | 1.00E-121 | 224  | 225  | 99 +  | 884  | 1108 | 16828  | 17052  |
| UN14588 | Rsa1.0_00646.1 | 882  | 70473  | 1.00E-58  | 140  | 148  | 94 +  | 731  | 878  | 7599   | 7746   |
| UN14589 | Rsa1.0_00321.1 | 864  | 95671  | 0         | 418  | 431  | 96 +  | 2    | 424  | 26911  | 27341  |
| UN14590 | Rsa1.0_00890.1 | 591  | 323870 | 1.00E-131 | 278  | 290  | 95 +  | 14   | 303  | 178708 | 178996 |
| UN14591 | Rsa1.0_00204.1 | 1262 | 109056 | 0         | 479  | 494  | 96 +  | 769  | 1262 | 9815   | 10308  |
| UN14592 | Rsa1.0_00065.1 | 1063 | 454616 | 0         | 980  | 991  | 98 -  | 73   | 1063 | 430845 | 431834 |
| UN14593 | Rsa1.0_03770.1 | 1138 | 20952  | 0         | 472  | 475  | 99 -  | 9    | 483  | 5875   | 6349   |
| UN14594 | Rsa1.0_00390.1 | 1030 | 88681  | 1.00E-176 | 328  | 332  | 98 -  | 696  | 1027 | 14406  | 14735  |
| UN14595 | Rsa1.0_02253.1 | 1240 | 33356  | 1.00E-119 | 224  | 226  | 99 +  | 1015 | 1240 | 25657  | 25882  |
| UN14596 | Rsa1.0_01193.1 | 920  | 51147  | 0         | 893  | 912  | 97 +  | 5    | 916  | 39664  | 40573  |
| UN14597 | Rsa1.0_00526.1 | 1121 | 169279 | 0         | 498  | 511  | 97 +  | 433  | 943  | 148049 | 148559 |
| UN14598 | Rsa1.0_23965.1 | 1059 | 1014   | 0         | 393  | 401  | 98 +  | 665  | 1059 | 374    | 773    |
| UN14599 | Rsa1.0_00102.1 | 1352 | 135497 | 0         | 1320 | 1357 | 97 +  | 1    | 1351 | 39742  | 41095  |
| UN14600 | Rsa1.0_00964.1 | 1237 | 316648 | 0         | 966  | 1000 | 96 +  | 253  | 1237 | 301610 | 302604 |
| UN14601 | Rsa1.0_00015.1 | 1917 | 561803 | 0         | 863  | 902  | 95 +  | 189  | 1083 | 185641 | 186540 |
| UN14602 | Rsa1.0_00263.1 | 1796 | 224968 | 0         | 380  | 392  | 96 +  | 1407 | 1796 | 151524 | 151911 |
| UN14603 | Rsa1.0_00866.1 | 1335 | 61676  | 0         | 524  | 544  | 96 -  | 798  | 1335 | 29494  | 30037  |
| UN14604 | Rsa1.0_00315.1 | 990  | 96426  | 1.00E-138 | 265  | 270  | 98 -  | 502  | 771  | 2999   | 3268   |
| UN14605 | Rsa1.0_02101.1 | 1476 | 35017  | 0         | 412  | 412  | 100 - | 403  | 814  | 28859  | 29270  |
| UN14606 | Rsa1.0_02210.1 | 765  | 33857  | 0         | 484  | 500  | 96 +  | 15   | 512  | 30230  | 30727  |
| UN14607 | Rsa1.0_00978.1 | 806  | 57739  | 0         | 454  | 476  | 95 +  | 337  | 806  | 14018  | 14493  |
| UN14608 | Rsa1.0_00373.1 | 1008 | 90296  | 1.00E-118 | 222  | 224  | 99 -  | 303  | 526  | 73915  | 74138  |
| UN14609 | Rsa1.0_10516.1 | 484  | 5818   | 1.00E-114 | 218  | 221  | 98 -  | 119  | 339  | 4536   | 4756   |
| UN14610 | Rsa1.0_28434.1 | 1241 | 815    | 0         | 438  | 438  | 100 + | 802  | 1239 | 48     | 485    |
| UN14611 | Rsa1.0_00002.1 | 1341 | 601661 | 1.00E-161 | 292  | 293  | 99 -  | 1047 | 1339 | 293447 | 293739 |
| UN14612 | Rsa1.0_00558.1 | 1916 | 75819  | 0         | 771  | 771  | 100 - | 8    | 778  | 56040  | 56810  |
| UN14613 | Rsa1.0_05611.1 | 993  | 13193  | 0         | 524  | 538  | 97 -  | 456  | 993  | 9250   | 9781   |
| UN14614 | Rsa1.0_00398.1 | 1039 | 88007  | 0         | 507  | 539  | 94 -  | 1    | 524  | 86450  | 86984  |
| UN14615 | Rsa1.0_05544.1 | 849  | 13381  | 1.00E-169 | 307  | 309  | 99 -  | 3    | 311  | 8507   | 8815   |
| UN14616 | Rsa1.0_02959.1 | 1403 | 26441  | 0         | 393  | 417  | 94 +  | 14   | 421  | 20181  | 20597  |
| UN14617 | Rsa1.0_00271.1 | 1460 | 101125 | 1.00E-131 | 239  | 239  | 100 + | 96   | 334  | 95742  | 95980  |
| UN14618 | Rsa1.0_00179.1 | 1591 | 393324 | 0         | 546  | 555  | 98 -  | 3    | 556  | 336310 | 336860 |
| UN14619 | Rsa1.0_02366.1 | 754  | 32110  | 1.00E-149 | 271  | 272  | 99 -  | 481  | 752  | 9096   | 9367   |
| UN14620 | Rsa1.0_00048.1 | 1145 | 167185 | 0         | 372  | 378  | 98 +  | 378  | 755  | 75719  | 76096  |
| UN14621 | Rsa1.0_00727.1 | 1537 | 66724  | 0         | 686  | 727  | 94 +  | 3    | 708  | 44991  | 45714  |
| UN14622 | Rsa1.0_01195.1 | 1095 | 147988 | 0         | 569  | 590  | 96 +  | 1    | 586  | 8316   | 8901   |
| UN14623 | Rsa1.0_00480.1 | 1387 | 81325  | 0         | 348  | 349  | 99 -  | 1039 | 1387 | 41821  | 42169  |

|         |                |      |        |           |      |      |       |      |      |        |        |
|---------|----------------|------|--------|-----------|------|------|-------|------|------|--------|--------|
| UN14624 | Rsa1.0_01054.1 | 2075 | 55470  | 0         | 1212 | 1215 | 99 -  | 3    | 1216 | 9825   | 11039  |
| UN14625 | Rsa1.0_14764.1 | 1724 | 3084   | 0         | 748  | 753  | 99 -  | 972  | 1724 | 1882   | 2634   |
| UN14626 | Rsa1.0_00328.1 | 1318 | 224661 | 0         | 543  | 559  | 97 +  | 489  | 1047 | 136232 | 136790 |
| UN14627 | Rsa1.0_03325.1 | 1814 | 23720  | 1.00E-165 | 318  | 324  | 98 -  | 1489 | 1811 | 14655  | 14978  |
| UN14628 | Rsa1.0_00017.1 | 927  | 752458 | 1.00E-179 | 324  | 326  | 99 -  | 238  | 563  | 467038 | 467363 |
| UN14629 | Rsa1.0_02237.1 | 1136 | 33544  | 0         | 387  | 395  | 97 -  | 344  | 738  | 17873  | 18264  |
| UN14630 | Rsa1.0_00302.1 | 1619 | 97521  | 0         | 631  | 653  | 96 -  | 844  | 1490 | 62037  | 62689  |
| UN14631 | Rsa1.0_04989.1 | 697  | 15217  | 0         | 523  | 535  | 97 -  | 1    | 534  | 2322   | 2853   |
| UN14632 | Rsa1.0_04662.1 | 1069 | 16477  | 0         | 652  | 660  | 98 -  | 2    | 661  | 4459   | 5118   |
| UN14633 | Rsa1.0_03713.1 | 737  | 21221  | 1.00E-153 | 280  | 282  | 99 +  | 6    | 287  | 16173  | 16454  |
| UN14634 | Rsa1.0_04332.1 | 842  | 17869  | 0         | 834  | 840  | 99 -  | 3    | 842  | 10897  | 11736  |
| UN14635 | Rsa1.0_00079.1 | 991  | 606987 | 0         | 338  | 340  | 99 +  | 648  | 987  | 41615  | 41954  |
| UN14636 | Rsa1.0_01783.1 | 1597 | 39383  | 0         | 382  | 399  | 95 +  | 1094 | 1492 | 15244  | 15632  |
| UN14637 | Rsa1.0_15775.1 | 1073 | 2429   | 1.00E-116 | 218  | 220  | 99 +  | 547  | 766  | 1      | 220    |
| UN14638 | Rsa1.0_00251.1 | 791  | 303968 | 0         | 462  | 498  | 92 +  | 1    | 484  | 114386 | 114876 |
| UN14639 | Rsa1.0_00111.1 | 788  | 390088 | 1.00E-129 | 235  | 235  | 100 + | 554  | 788  | 321110 | 321344 |
| UN14640 | Rsa1.0_01214.1 | 1100 | 50599  | 0         | 680  | 695  | 97 +  | 404  | 1098 | 49762  | 50456  |
| UN14641 | Rsa1.0_03609.1 | 1560 | 21798  | 0         | 484  | 495  | 97 -  | 4    | 496  | 8147   | 8641   |
| UN14642 | Rsa1.0_09813.1 | 1760 | 6138   | 0         | 524  | 529  | 99 +  | 1141 | 1669 | 5191   | 5719   |
| UN14643 | Rsa1.0_02373.1 | 1580 | 32048  | 0         | 689  | 689  | 100 - | 6    | 694  | 30160  | 30848  |
| UN14644 | Rsa1.0_00221.1 | 2034 | 106972 | 0         | 1349 | 1394 | 96 -  | 87   | 1474 | 101680 | 103060 |
| UN14645 | Rsa1.0_07573.1 | 1181 | 9101   | 0         | 785  | 796  | 98 +  | 28   | 823  | 5990   | 6785   |
| UN14646 | Rsa1.0_00063.1 | 932  | 156150 | 1.00E-175 | 321  | 323  | 99 +  | 610  | 932  | 138349 | 138670 |
| UN14647 | Rsa1.0_01410.1 | 740  | 46345  | 0         | 334  | 336  | 99 +  | 110  | 445  | 33684  | 34019  |
| UN14648 | Rsa1.0_00816.1 | 1265 | 403350 | 1.00E-128 | 336  | 366  | 91 +  | 5    | 363  | 109825 | 110180 |
| UN14649 | Rsa1.0_00021.1 | 1106 | 263655 | 1.00E-121 | 271  | 290  | 93 +  | 829  | 1106 | 186306 | 186595 |
| UN14650 | Rsa1.0_02442.1 | 520  | 31355  | 1.00E-132 | 261  | 267  | 97 +  | 1    | 267  | 12539  | 12804  |
| UN14651 | Rsa1.0_00008.1 | 1696 | 358124 | 0         | 1616 | 1711 | 94 +  | 1    | 1696 | 62808  | 64514  |
| UN14652 | Rsa1.0_00048.1 | 735  | 167185 | 1.00E-178 | 349  | 357  | 97 -  | 116  | 471  | 2507   | 2862   |
| UN14653 | Rsa1.0_01070.1 | 1789 | 55099  | 2.00E-71  | 189  | 203  | 93 -  | 1590 | 1789 | 31371  | 31570  |
| UN14654 | Rsa1.0_00571.1 | 1334 | 329018 | 0         | 739  | 767  | 96 -  | 349  | 1112 | 145078 | 145844 |
| UN14655 | Rsa1.0_00502.1 | 1054 | 204180 | 0         | 456  | 464  | 98 +  | 595  | 1054 | 46632  | 47095  |
| UN14656 | Rsa1.0_00888.1 | 1601 | 60978  | 0         | 606  | 615  | 98 -  | 576  | 1190 | 22815  | 23429  |
| UN14657 | Rsa1.0_00071.1 | 1826 | 345714 | 0         | 875  | 906  | 96 -  | 1    | 903  | 105124 | 106018 |
| UN14658 | Rsa1.0_00601.1 | 869  | 177045 | 0         | 361  | 361  | 100 - | 509  | 869  | 26136  | 26496  |
| UN14659 | Rsa1.0_00657.1 | 1263 | 69858  | 1.00E-168 | 318  | 323  | 98 -  | 1    | 323  | 9457   | 9777   |
| UN14660 | Rsa1.0_00942.1 | 786  | 58873  | 1.00E-152 | 341  | 357  | 95 +  | 429  | 784  | 3175   | 3527   |
| UN14661 | Rsa1.0_00414.1 | 983  | 202190 | 0         | 485  | 517  | 93 -  | 96   | 607  | 66934  | 67447  |
| UN14662 | Rsa1.0_00079.1 | 1255 | 606987 | 0         | 703  | 739  | 95 +  | 519  | 1253 | 4648   | 5383   |

|         |                |      |        |           |      |      |       |      |      |        |        |
|---------|----------------|------|--------|-----------|------|------|-------|------|------|--------|--------|
| UN14663 | Rsa1.0.02681.1 | 729  | 28711  | 1.00E-137 | 263  | 268  | 98 +  | 160  | 427  | 6017   | 6284   |
| UN14664 | Rsa1.0.00110.1 | 934  | 132719 | 1.00E-151 | 308  | 320  | 96 +  | 590  | 909  | 92532  | 92851  |
| UN14665 | Rsa1.0.02931.1 | 933  | 26654  | 0         | 886  | 927  | 95 -  | 6    | 932  | 12851  | 13774  |
| UN14666 | Rsa1.0.02700.1 | 1633 | 28584  | 1.00E-133 | 256  | 261  | 98 +  | 1    | 261  | 12453  | 12713  |
| UN14667 | Rsa1.0.00359.1 | 1274 | 91256  | 1.00E-118 | 267  | 279  | 95 +  | 997  | 1271 | 90578  | 90854  |
| UN14668 | Rsa1.0.07344.1 | 1484 | 9528   | 0         | 868  | 904  | 96 -  | 1    | 904  | 5897   | 6793   |
| UN14669 | Rsa1.0.03045.1 | 871  | 25787  | 0         | 545  | 569  | 95 +  | 1    | 566  | 5846   | 6403   |
| UN14670 | Rsa1.0.01020.1 | 1544 | 56619  | 1.00E-162 | 291  | 291  | 100 + | 3    | 293  | 32289  | 32579  |
| UN14671 | Rsa1.0.00169.1 | 1449 | 274298 | 1.00E-156 | 341  | 358  | 95 -  | 3    | 359  | 31558  | 31911  |
| UN14672 | Rsa1.0.00855.1 | 1483 | 62047  | 0         | 381  | 394  | 96 +  | 1098 | 1483 | 18514  | 18903  |
| UN14673 | Rsa1.0.00027.1 | 1698 | 283362 | 1.00E-163 | 295  | 296  | 99 +  | 1402 | 1697 | 137431 | 137726 |
| UN14674 | Rsa1.0.00221.1 | 1456 | 106972 | 0         | 525  | 539  | 97 -  | 925  | 1454 | 49096  | 49634  |
| UN14675 | Rsa1.0.05643.1 | 880  | 13065  | 0         | 443  | 454  | 97 -  | 430  | 879  | 2340   | 2793   |
| UN14676 | Rsa1.0.01596.1 | 1435 | 42595  | 1.00E-131 | 239  | 239  | 100 + | 3    | 241  | 37756  | 37994  |
| UN14677 | Rsa1.0.01626.1 | 1029 | 41989  | 1.00E-106 | 214  | 220  | 97 +  | 1    | 220  | 716    | 935    |
| UN14678 | Rsa1.0.00213.1 | 904  | 108167 | 1.00E-170 | 306  | 307  | 99 -  | 3    | 309  | 13319  | 13625  |
| UN14679 | Rsa1.0.00533.1 | 807  | 77375  | 0         | 401  | 403  | 99 -  | 399  | 801  | 52421  | 52822  |
| UN14680 | Rsa1.0.00486.1 | 1502 | 80875  | 0         | 564  | 590  | 95 +  | 3    | 587  | 14780  | 15369  |
| UN14681 | Rsa1.0.00491.1 | 930  | 80219  | 0         | 436  | 457  | 95 -  | 466  | 920  | 15740  | 16192  |
| UN14682 | Rsa1.0.00816.1 | 1075 | 403350 | 0         | 366  | 368  | 99 -  | 2    | 369  | 4316   | 4683   |
| UN14683 | Rsa1.0.01060.1 | 868  | 55368  | 0         | 554  | 561  | 98 +  | 304  | 861  | 42018  | 42578  |
| UN14684 | Rsa1.0.00237.1 | 961  | 235974 | 0         | 444  | 454  | 97 +  | 76   | 527  | 83061  | 83514  |
| UN14685 | Rsa1.0.00382.1 | 1541 | 251946 | 0         | 440  | 458  | 96 -  | 7    | 461  | 107859 | 108310 |
| UN14686 | Rsa1.0.00018.1 | 1289 | 410899 | 0         | 521  | 522  | 99 +  | 768  | 1289 | 115333 | 115854 |
| UN14687 | Rsa1.0.01436.1 | 1781 | 45894  | 0         | 798  | 897  | 88 -  | 380  | 1272 | 35342  | 36229  |
| UN14688 | Rsa1.0.01480.1 | 1391 | 44926  | 0         | 912  | 919  | 99 -  | 3    | 921  | 26422  | 27340  |
| UN14689 | Rsa1.0.00001.1 | 866  | 363028 | 1.00E-166 | 344  | 361  | 95 -  | 485  | 836  | 314899 | 315259 |
| UN14690 | Rsa1.0.01716.1 | 2399 | 40483  | 0         | 1012 | 1041 | 97 -  | 821  | 1854 | 31373  | 32410  |
| UN14691 | Rsa1.0.00018.1 | 1450 | 410899 | 0         | 620  | 621  | 99 +  | 3    | 623  | 61841  | 62461  |
| UN14692 | Rsa1.0.04470.1 | 1205 | 17204  | 0         | 922  | 936  | 98 +  | 22   | 953  | 13580  | 14515  |
| UN14693 | Rsa1.0.01735.1 | 1344 | 40128  | 0         | 463  | 470  | 98 +  | 98   | 567  | 25629  | 26098  |
| UN14694 | Rsa1.0.01008.1 | 1471 | 56924  | 0         | 398  | 398  | 100 + | 1    | 398  | 3644   | 4041   |
| UN14695 | Rsa1.0.11168.1 | 1002 | 5597   | 1.00E-131 | 293  | 310  | 94 +  | 693  | 998  | 541    | 848    |
| UN14696 | Rsa1.0.00734.1 | 801  | 66508  | 1.00E-142 | 260  | 261  | 99 +  | 3    | 263  | 56019  | 56279  |
| UN14697 | Rsa1.0.03377.1 | 1911 | 23322  | 0         | 889  | 892  | 99 +  | 714  | 1605 | 16518  | 17409  |
| UN14698 | Rsa1.0.00121.1 | 596  | 278029 | 6.00E-88  | 213  | 229  | 93 -  | 380  | 594  | 110609 | 110836 |
| UN14699 | Rsa1.0.00111.1 | 1621 | 390088 | 0         | 377  | 394  | 95 -  | 917  | 1310 | 381107 | 381500 |
| UN14700 | Rsa1.0.01094.1 | 796  | 167285 | 0         | 367  | 370  | 99 -  | 1    | 369  | 12558  | 12927  |
| UN14701 | Rsa1.0.05336.1 | 927  | 14117  | 0         | 863  | 892  | 96 +  | 37   | 927  | 3678   | 4556   |

|         |                |      |        |           |      |      |       |      |      |        |        |
|---------|----------------|------|--------|-----------|------|------|-------|------|------|--------|--------|
| UN14702 | Rsa1.0.00344.1 | 866  | 191774 | 1.00E-166 | 311  | 316  | 98 +  | 466  | 781  | 135888 | 136203 |
| UN14703 | Rsa1.0.34955.1 | 1304 | 647    | 0         | 358  | 359  | 99 -  | 947  | 1304 | 33     | 391    |
| UN14704 | Rsa1.0.00716.1 | 1022 | 67078  | 0         | 437  | 439  | 99 -  | 385  | 823  | 80     | 518    |
| UN14705 | Rsa1.0.08779.1 | 1360 | 6929   | 0         | 1287 | 1301 | 98 -  | 1    | 1301 | 2033   | 3332   |
| UN14706 | Rsa1.0.25122.1 | 1726 | 950    | 0         | 516  | 516  | 100 - | 394  | 909  | 313    | 828    |
| UN14707 | Rsa1.0.03405.1 | 3678 | 23166  | 0         | 357  | 357  | 100 - | 2331 | 2687 | 18369  | 18725  |
| UN14708 | Rsa1.0.00469.1 | 1187 | 82084  | 1.00E-101 | 199  | 202  | 98 +  | 986  | 1187 | 70000  | 70199  |
| UN14709 | Rsa1.0.16159.1 | 1294 | 2262   | 0         | 363  | 367  | 98 +  | 497  | 863  | 1340   | 1706   |
| UN14710 | Rsa1.0.02910.1 | 1285 | 26843  | 1.00E-167 | 298  | 298  | 100 - | 986  | 1283 | 20202  | 20499  |
| UN14711 | Rsa1.0.00080.1 | 1568 | 190437 | 0         | 1405 | 1406 | 99 +  | 1    | 1406 | 104272 | 105677 |
| UN14712 | Rsa1.0.00640.1 | 1721 | 70979  | 1.00E-161 | 313  | 322  | 97 +  | 1    | 322  | 42873  | 43186  |
| UN14713 | Rsa1.0.00765.1 | 898  | 65029  | 1.00E-133 | 241  | 241  | 100 + | 1    | 241  | 25088  | 25328  |
| UN14714 | Rsa1.0.00143.1 | 716  | 121313 | 0         | 658  | 676  | 97 +  | 41   | 716  | 31025  | 31699  |
| UN14715 | Rsa1.0.01632.1 | 639  | 181224 | 1.00E-161 | 350  | 371  | 94 -  | 4    | 362  | 27928  | 28294  |
| UN14716 | Rsa1.0.00964.1 | 555  | 316648 | 0         | 540  | 557  | 96 -  | 2    | 555  | 167658 | 168214 |
| UN14717 | Rsa1.0.04542.1 | 1463 | 16930  | 0         | 388  | 389  | 99 +  | 1075 | 1463 | 13253  | 13641  |
| UN14718 | Rsa1.0.01484.1 | 947  | 44806  | 0         | 538  | 539  | 99 +  | 407  | 945  | 21799  | 22337  |
| UN14719 | Rsa1.0.01608.1 | 1075 | 170540 | 0         | 360  | 366  | 98 -  | 348  | 713  | 35343  | 35708  |
| UN14720 | Rsa1.0.00550.1 | 1244 | 210790 | 1.00E-143 | 285  | 294  | 96 -  | 394  | 687  | 55698  | 55991  |
| UN14721 | Rsa1.0.00001.1 | 2030 | 363028 | 0         | 1167 | 1193 | 97 +  | 509  | 1700 | 93769  | 94955  |
| UN14722 | Rsa1.0.02355.1 | 1329 | 32260  | 0         | 632  | 667  | 94 -  | 668  | 1329 | 6881   | 7545   |
| UN14723 | Rsa1.0.02942.1 | 1416 | 26577  | 1.00E-109 | 213  | 217  | 98 -  | 936  | 1152 | 6404   | 6620   |
| UN14724 | Rsa1.0.00092.1 | 2072 | 659932 | 0         | 1007 | 1013 | 99 +  | 1060 | 2072 | 238480 | 239492 |
| UN14725 | Rsa1.0.00065.1 | 1212 | 454616 | 1.00E-153 | 275  | 275  | 100 + | 382  | 656  | 39827  | 40101  |
| UN14726 | Rsa1.0.01976.1 | 692  | 36570  | 1.00E-125 | 233  | 235  | 99 +  | 127  | 361  | 29697  | 29931  |
| UN14727 | Rsa1.0.62560.1 | 820  | 367    | 0         | 340  | 342  | 99 -  | 1    | 342  | 1      | 342    |
| UN14728 | Rsa1.0.00203.1 | 975  | 109129 | 0         | 346  | 349  | 99 +  | 24   | 372  | 80679  | 81027  |
| UN14729 | Rsa1.0.00384.1 | 1395 | 89278  | 1.00E-144 | 294  | 303  | 97 +  | 1095 | 1394 | 35218  | 35520  |
| UN14730 | Rsa1.0.03847.1 | 1150 | 20479  | 0         | 544  | 553  | 98 +  | 479  | 1030 | 3845   | 4397   |
| UN14731 | Rsa1.0.01666.1 | 1207 | 173972 | 1.00E-113 | 220  | 224  | 98 -  | 761  | 984  | 23952  | 24175  |
| UN14732 | Rsa1.0.02478.1 | 2232 | 150183 | 0         | 437  | 449  | 97 +  | 1    | 445  | 6671   | 7117   |
| UN14733 | Rsa1.0.00126.1 | 1369 | 127534 | 1.00E-161 | 309  | 316  | 97 +  | 492  | 807  | 37046  | 37361  |
| UN14734 | Rsa1.0.02036.1 | 1093 | 35731  | 0         | 573  | 575  | 99 -  | 1    | 575  | 8134   | 8707   |
| UN14735 | Rsa1.0.00061.1 | 1127 | 218685 | 1.00E-138 | 285  | 296  | 96 -  | 826  | 1121 | 75762  | 76055  |
| UN14736 | Rsa1.0.03156.1 | 800  | 24956  | 0         | 495  | 506  | 97 +  | 138  | 639  | 2777   | 3278   |
| UN14737 | Rsa1.0.53975.1 | 980  | 422    | 1.00E-120 | 283  | 303  | 93 -  | 1    | 303  | 1      | 302    |
| UN14738 | Rsa1.0.00703.1 | 1000 | 67597  | 0         | 540  | 595  | 90 -  | 12   | 592  | 19623  | 20198  |
| UN14739 | Rsa1.0.00647.1 | 1463 | 70440  | 0         | 1059 | 1068 | 99 -  | 1    | 1068 | 42016  | 43083  |
| UN14740 | Rsa1.0.00139.1 | 987  | 357786 | 0         | 437  | 437  | 100 - | 550  | 986  | 313072 | 313508 |

|         |                |      |        |           |      |      |       |      |      |        |        |
|---------|----------------|------|--------|-----------|------|------|-------|------|------|--------|--------|
| UN14741 | Rsa1.0_00229.1 | 576  | 105471 | 1.00E-163 | 349  | 367  | 95 -  | 1    | 367  | 43352  | 43717  |
| UN14742 | Rsa1.0_14263.1 | 1154 | 3600   | 1.00E-164 | 294  | 294  | 100 + | 1    | 294  | 1223   | 1516   |
| UN14743 | Rsa1.0_02231.1 | 528  | 33661  | 1.00E-116 | 245  | 253  | 96 +  | 1    | 251  | 33333  | 33585  |
| UN14744 | Rsa1.0_03278.1 | 923  | 24125  | 3.00E-72  | 166  | 173  | 95 +  | 68   | 238  | 2101   | 2271   |
| UN14745 | Rsa1.0_00959.1 | 1378 | 58202  | 0         | 898  | 911  | 98 +  | 1    | 909  | 56856  | 57763  |
| UN14746 | Rsa1.0_00537.1 | 1004 | 186980 | 1.00E-135 | 268  | 276  | 97 +  | 390  | 665  | 17079  | 17354  |
| UN14747 | Rsa1.0_02446.1 | 727  | 31330  | 0         | 426  | 436  | 97 +  | 3    | 436  | 16621  | 17055  |
| UN14748 | Rsa1.0_00145.1 | 719  | 261008 | 1.00E-134 | 287  | 298  | 96 -  | 9    | 302  | 83077  | 83369  |
| UN14749 | Rsa1.0_00035.1 | 1998 | 176449 | 0         | 1814 | 1859 | 97 +  | 142  | 1997 | 82921  | 84770  |
| UN14750 | Rsa1.0_02586.1 | 1227 | 29856  | 0         | 1213 | 1225 | 99 -  | 2    | 1222 | 15013  | 16236  |
| UN14751 | Rsa1.0_02859.1 | 1297 | 162118 | 0         | 470  | 470  | 100 - | 828  | 1297 | 24378  | 24847  |
| UN14752 | Rsa1.0_00104.1 | 1226 | 368722 | 0         | 1206 | 1224 | 98 -  | 4    | 1226 | 71719  | 72942  |
| UN14753 | Rsa1.0_07935.1 | 1603 | 8229   | 0         | 1310 | 1349 | 97 -  | 3    | 1330 | 6844   | 8189   |
| UN14754 | Rsa1.0_01394.1 | 690  | 46641  | 0         | 371  | 383  | 96 -  | 308  | 690  | 21732  | 22112  |
| UN14755 | Rsa1.0_16093.1 | 639  | 2288   | 0         | 346  | 351  | 98 +  | 3    | 351  | 1232   | 1581   |
| UN14756 | Rsa1.0_00970.1 | 1436 | 57994  | 1.00E-78  | 230  | 256  | 89 -  | 1099 | 1351 | 40381  | 40636  |
| UN14757 | Rsa1.0_00699.1 | 906  | 184398 | 1.00E-128 | 303  | 326  | 92 -  | 585  | 893  | 55759  | 56083  |
| UN14758 | Rsa1.0_04203.1 | 720  | 18479  | 1.00E-135 | 262  | 268  | 97 +  | 226  | 493  | 15931  | 16198  |
| UN14759 | Rsa1.0_00376.1 | 804  | 90101  | 1.00E-148 | 272  | 274  | 99 -  | 2    | 275  | 15971  | 16244  |
| UN14760 | Rsa1.0_01724.1 | 1087 | 40292  | 0         | 509  | 545  | 93 -  | 2    | 546  | 19668  | 20189  |
| UN14761 | Rsa1.0_00706.1 | 1057 | 291570 | 0         | 359  | 359  | 100 - | 1    | 359  | 59656  | 60014  |
| UN14762 | Rsa1.0_00343.1 | 2626 | 93570  | 0         | 731  | 752  | 97 +  | 301  | 1052 | 68624  | 69375  |
| UN14763 | Rsa1.0_01118.1 | 1121 | 53460  | 2.00E-27  | 76   | 80   | 95 +  | 23   | 102  | 26036  | 26115  |
| UN14764 | Rsa1.0_25222.1 | 1541 | 946    | 0         | 424  | 437  | 97 +  | 273  | 709  | 1      | 437    |
| UN14765 | Rsa1.0_00098.1 | 613  | 349239 | 0         | 398  | 414  | 96 -  | 111  | 524  | 234808 | 235221 |
| UN14766 | Rsa1.0_18964.1 | 1158 | 1503   | 1.00E-156 | 338  | 355  | 95 -  | 583  | 934  | 1      | 355    |
| UN14767 | Rsa1.0_03235.1 | 1993 | 24442  | 0         | 584  | 592  | 98 +  | 1404 | 1993 | 21156  | 21747  |
| UN14768 | Rsa1.0_01511.1 | 828  | 44235  | 1.00E-135 | 245  | 245  | 100 + | 3    | 247  | 27325  | 27569  |
| UN14769 | Rsa1.0_02648.1 | 730  | 29073  | 1.00E-137 | 342  | 372  | 91 +  | 357  | 722  | 12514  | 12865  |
| UN14770 | Rsa1.0_00143.1 | 1762 | 121313 | 0         | 396  | 412  | 96 +  | 427  | 838  | 91078  | 91486  |
| UN14771 | Rsa1.0_01252.1 | 1407 | 49847  | 1.00E-155 | 279  | 279  | 100 - | 1129 | 1407 | 17823  | 18101  |
| UN14772 | Rsa1.0_01144.1 | 901  | 52431  | 1.00E-169 | 330  | 339  | 97 +  | 46   | 381  | 22927  | 23265  |
| UN14773 | Rsa1.0_00583.1 | 1948 | 74309  | 1.00E-180 | 398  | 417  | 95 -  | 11   | 421  | 2938   | 3351   |
| UN14774 | Rsa1.0_06149.1 | 692  | 11615  | 0         | 672  | 690  | 97 -  | 2    | 691  | 3841   | 4530   |
| UN14775 | Rsa1.0_01220.1 | 1102 | 161775 | 1.00E-155 | 278  | 278  | 100 - | 675  | 952  | 30176  | 30453  |
| UN14776 | Rsa1.0_04198.1 | 874  | 18504  | 0         | 398  | 407  | 97 +  | 3    | 409  | 11194  | 11599  |
| UN14777 | Rsa1.0_00316.1 | 1834 | 96264  | 0         | 519  | 529  | 98 -  | 1307 | 1834 | 30580  | 31108  |
| UN14778 | Rsa1.0_06179.1 | 1138 | 11548  | 0         | 492  | 515  | 95 +  | 61   | 575  | 8510   | 9006   |
| UN14779 | Rsa1.0_29623.1 | 1450 | 777    | 0         | 518  | 535  | 96 +  | 53   | 587  | 243    | 777    |

|         |                |      |        |           |      |      |       |      |      |        |        |
|---------|----------------|------|--------|-----------|------|------|-------|------|------|--------|--------|
| UN14780 | Rsa1.0.00182.1 | 472  | 142305 | 1.00E-102 | 192  | 193  | 99 +  | 1    | 193  | 131693 | 131885 |
| UN14781 | Rsa1.0.00386.1 | 1415 | 89134  | 1.00E-142 | 259  | 260  | 99 +  | 1154 | 1413 | 72114  | 72373  |
| UN14782 | Rsa1.0.00560.1 | 1518 | 75685  | 0         | 497  | 500  | 99 -  | 4    | 503  | 44093  | 44590  |
| UN14783 | Rsa1.0.01536.1 | 1003 | 43747  | 0         | 453  | 460  | 98 +  | 21   | 480  | 21808  | 22267  |
| UN14784 | Rsa1.0.02739.1 | 1224 | 28304  | 5.00E-16  | 215  | 269  | 79 +  | 275  | 542  | 15657  | 15924  |
| UN14785 | Rsa1.0.00335.1 | 1048 | 94371  | 0         | 1024 | 1047 | 97 -  | 1    | 1047 | 19032  | 20077  |
| UN14786 | Rsa1.0.00001.1 | 1524 | 363028 | 1.00E-162 | 314  | 319  | 98 -  | 1    | 319  | 14633  | 14949  |
| UN14787 | Rsa1.0.00138.1 | 1041 | 247040 | 0         | 604  | 613  | 98 -  | 432  | 1040 | 59252  | 59863  |
| UN14788 | Rsa1.0.00637.1 | 812  | 71038  | 0         | 487  | 502  | 97 -  | 268  | 767  | 3282   | 3783   |
| UN14789 | Rsa1.0.02396.1 | 832  | 31783  | 0         | 327  | 328  | 99 +  | 196  | 523  | 8502   | 8829   |
| UN14790 | Rsa1.0.02195.1 | 707  | 34024  | 0         | 687  | 690  | 99 +  | 18   | 707  | 30589  | 31278  |
| UN14791 | Rsa1.0.00071.1 | 943  | 345714 | 1.00E-119 | 233  | 237  | 98 -  | 707  | 942  | 143202 | 143438 |
| UN14792 | Rsa1.0.00838.1 | 1072 | 153820 | 0         | 668  | 678  | 98 -  | 9    | 686  | 49065  | 49742  |
| UN14793 | Rsa1.0.00027.1 | 1178 | 283362 | 1.00E-121 | 365  | 412  | 88 -  | 31   | 420  | 150170 | 150581 |
| UN14794 | Rsa1.0.06160.1 | 2131 | 11596  | 0         | 696  | 723  | 96 +  | 685  | 1394 | 8631   | 9353   |
| UN14795 | Rsa1.0.01167.1 | 1192 | 51859  | 0         | 699  | 705  | 99 +  | 489  | 1192 | 27703  | 28407  |
| UN14796 | Rsa1.0.00035.1 | 1074 | 176449 | 0         | 491  | 495  | 99 -  | 579  | 1073 | 10603  | 11097  |
| UN14797 | Rsa1.0.00031.1 | 1138 | 179862 | 0         | 876  | 997  | 87 +  | 39   | 1025 | 92394  | 93340  |
| UN14798 | Rsa1.0.01138.1 | 1291 | 190615 | 1.00E-169 | 308  | 309  | 99 -  | 981  | 1288 | 10419  | 10727  |
| UN14799 | Rsa1.0.18159.1 | 1567 | 1654   | 0         | 631  | 668  | 94 -  | 7    | 652  | 1      | 665    |
| UN14800 | Rsa1.0.00699.1 | 925  | 184398 | 0         | 533  | 547  | 97 +  | 380  | 925  | 168017 | 168562 |
| UN14801 | Rsa1.0.07569.1 | 1385 | 9106   | 0         | 380  | 380  | 100 + | 844  | 1223 | 4562   | 4941   |
| UN14802 | Rsa1.0.05774.1 | 1066 | 12667  | 0         | 764  | 770  | 99 -  | 1    | 770  | 3452   | 4221   |
| UN14803 | Rsa1.0.00926.1 | 1039 | 195072 | 0         | 513  | 514  | 99 +  | 2    | 515  | 41560  | 42072  |
| UN14804 | Rsa1.0.07541.1 | 1468 | 9167   | 1.00E-157 | 783  | 953  | 82 -  | 206  | 1155 | 5430   | 6361   |
| UN14805 | Rsa1.0.00336.1 | 893  | 445051 | 1.00E-160 | 295  | 298  | 98 -  | 9    | 306  | 281490 | 281787 |
| UN14806 | Rsa1.0.01214.1 | 1452 | 50599  | 0         | 960  | 1032 | 93 -  | 434  | 1451 | 2222   | 3228   |
| UN14807 | Rsa1.0.05062.1 | 1360 | 14960  | 0         | 1339 | 1348 | 99 +  | 10   | 1357 | 8672   | 10019  |
| UN14808 | Rsa1.0.02575.1 | 1297 | 29944  | 1.00E-124 | 269  | 282  | 95 +  | 1018 | 1296 | 24000  | 24277  |
| UN14809 | Rsa1.0.01442.1 | 1477 | 45776  | 1.00E-156 | 296  | 300  | 98 -  | 3    | 301  | 23065  | 23364  |
| UN14810 | Rsa1.0.05070.1 | 1586 | 14933  | 0         | 334  | 334  | 100 - | 1253 | 1586 | 2639   | 2972   |
| UN14811 | Rsa1.0.01305.1 | 1360 | 48730  | 0         | 503  | 503  | 100 - | 376  | 878  | 18860  | 19362  |
| UN14812 | Rsa1.0.04194.1 | 2199 | 132734 | 0         | 807  | 857  | 94 +  | 353  | 1206 | 116698 | 117546 |
| UN14813 | Rsa1.0.00058.1 | 1314 | 159921 | 0         | 396  | 407  | 97 -  | 642  | 1048 | 50728  | 51134  |
| UN14814 | Rsa1.0.05653.1 | 546  | 13043  | 0         | 463  | 482  | 96 +  | 69   | 539  | 9994   | 10474  |
| UN14815 | Rsa1.0.05398.1 | 1102 | 13885  | 0         | 581  | 598  | 97 +  | 485  | 1081 | 3154   | 3747   |
| UN14816 | Rsa1.0.08385.1 | 852  | 7439   | 1.00E-170 | 312  | 315  | 99 +  | 3    | 317  | 3129   | 3443   |
| UN14817 | Rsa1.0.73312.1 | 391  | 313    | 1.00E-122 | 229  | 230  | 99 -  | 7    | 236  | 1      | 229    |
| UN14818 | Rsa1.0.07981.1 | 805  | 8132   | 0         | 561  | 575  | 97 +  | 1    | 575  | 3287   | 3852   |

|         |                |      |        |           |      |      |       |      |      |        |        |
|---------|----------------|------|--------|-----------|------|------|-------|------|------|--------|--------|
| UN14819 | Rsa1.0.01957.1 | 807  | 36844  | 1.00E-148 | 273  | 275  | 99 +  | 522  | 796  | 23850  | 24124  |
| UN14820 | Rsa1.0.00660.1 | 696  | 69688  | 1.00E-129 | 308  | 331  | 93 +  | 376  | 696  | 17669  | 17999  |
| UN14821 | Rsa1.0.00422.1 | 838  | 86144  | 0         | 565  | 600  | 94 -  | 1    | 597  | 54119  | 54705  |
| UN14822 | Rsa1.0.02913.1 | 1263 | 26816  | 0         | 1023 | 1037 | 98 -  | 224  | 1260 | 9449   | 10484  |
| UN14823 | Rsa1.0.00343.1 | 751  | 93570  | 0         | 474  | 492  | 96 +  | 248  | 739  | 2493   | 2980   |
| UN14824 | Rsa1.0.04378.1 | 819  | 17651  | 0         | 362  | 362  | 100 - | 124  | 485  | 4630   | 4991   |
| UN14825 | Rsa1.0.00337.1 | 1397 | 143174 | 0         | 422  | 422  | 100 + | 3    | 424  | 139838 | 140259 |
| UN14826 | Rsa1.0.00652.1 | 923  | 70089  | 1.00E-163 | 359  | 386  | 93 -  | 1    | 363  | 47920  | 48305  |
| UN14827 | Rsa1.0.12178.1 | 796  | 5294   | 0         | 414  | 427  | 96 -  | 371  | 794  | 3547   | 3970   |
| UN14828 | Rsa1.0.00052.1 | 906  | 162771 | 1.00E-119 | 238  | 245  | 97 +  | 36   | 280  | 57673  | 57917  |
| UN14829 | Rsa1.0.00422.1 | 877  | 86144  | 0         | 639  | 639  | 100 + | 239  | 877  | 54119  | 54757  |
| UN14830 | Rsa1.0.00890.1 | 515  | 323870 | 1.00E-88  | 221  | 234  | 94 -  | 284  | 514  | 178764 | 178996 |
| UN14831 | Rsa1.0.19203.1 | 951  | 1465   | 1.00E-179 | 330  | 334  | 98 -  | 1    | 334  | 795    | 1128   |
| UN14832 | Rsa1.0.00355.1 | 817  | 92038  | 0         | 680  | 689  | 98 +  | 1    | 689  | 77741  | 78429  |
| UN14833 | Rsa1.0.00881.1 | 1706 | 61260  | 0         | 604  | 635  | 95 -  | 826  | 1460 | 18614  | 19248  |
| UN14834 | Rsa1.0.07142.1 | 1471 | 9832   | 0         | 1452 | 1454 | 99 -  | 3    | 1455 | 4619   | 6072   |
| UN14835 | Rsa1.0.00979.1 | 1411 | 57733  | 1.00E-139 | 283  | 291  | 97 +  | 1    | 288  | 40182  | 40472  |
| UN14836 | Rsa1.0.04518.1 | 1639 | 17005  | 0         | 360  | 365  | 98 +  | 885  | 1249 | 11846  | 12209  |
| UN14837 | Rsa1.0.00111.1 | 687  | 390088 | 0         | 414  | 429  | 96 +  | 260  | 687  | 75630  | 76057  |
| UN14838 | Rsa1.0.00522.1 | 1170 | 78103  | 1.00E-131 | 306  | 325  | 94 -  | 1    | 321  | 36235  | 36549  |
| UN14839 | Rsa1.0.04123.1 | 1030 | 18947  | 1.00E-157 | 288  | 290  | 99 +  | 384  | 673  | 15187  | 15476  |
| UN14840 | Rsa1.0.04085.1 | 915  | 19168  | 1.00E-153 | 332  | 351  | 94 +  | 1    | 351  | 1560   | 1901   |
| UN14841 | Rsa1.0.02411.1 | 1602 | 31655  | 0         | 816  | 854  | 95 -  | 443  | 1296 | 27638  | 28475  |
| UN14842 | Rsa1.0.02375.1 | 1019 | 32026  | 0         | 738  | 754  | 97 -  | 5    | 755  | 28994  | 29747  |
| UN14843 | Rsa1.0.00706.1 | 1003 | 291570 | 0         | 459  | 463  | 99 +  | 540  | 1001 | 41885  | 42347  |
| UN14844 | Rsa1.0.14210.1 | 1732 | 3660   | 0         | 580  | 580  | 100 + | 601  | 1180 | 654    | 1233   |
| UN14845 | Rsa1.0.00222.1 | 1284 | 172263 | 0         | 407  | 415  | 98 -  | 34   | 445  | 31532  | 31945  |
| UN14846 | Rsa1.0.00111.1 | 489  | 390088 | 0         | 415  | 443  | 93 +  | 4    | 446  | 174815 | 175245 |
| UN14847 | Rsa1.0.00093.1 | 826  | 214962 | 0         | 530  | 530  | 100 - | 297  | 826  | 11283  | 11812  |
| UN14848 | Rsa1.0.00787.1 | 1319 | 64239  | 0         | 562  | 577  | 97 -  | 743  | 1319 | 32499  | 33075  |
| UN14849 | Rsa1.0.00211.1 | 1088 | 228189 | 0         | 578  | 617  | 93 +  | 1    | 616  | 179317 | 179912 |
| UN14850 | Rsa1.0.00645.1 | 488  | 189716 | 2.00E-99  | 184  | 184  | 100 + | 257  | 440  | 35226  | 35409  |
| UN14851 | Rsa1.0.00647.1 | 1088 | 70440  | 0         | 461  | 461  | 100 - | 628  | 1088 | 5071   | 5531   |
| UN14852 | Rsa1.0.00447.1 | 1062 | 84051  | 1.00E-102 | 218  | 226  | 96 -  | 3    | 227  | 26801  | 27026  |
| UN14853 | Rsa1.0.02981.1 | 707  | 26285  | 1.00E-116 | 219  | 221  | 99 +  | 487  | 707  | 5587   | 5807   |
| UN14854 | Rsa1.0.01553.1 | 1067 | 43379  | 0         | 651  | 666  | 97 +  | 401  | 1066 | 2337   | 3002   |
| UN14855 | Rsa1.0.00336.1 | 1812 | 445051 | 0         | 461  | 466  | 98 +  | 3    | 468  | 11085  | 11550  |
| UN14856 | Rsa1.0.01070.1 | 1730 | 55099  | 1.00E-111 | 204  | 204  | 100 - | 1526 | 1729 | 31367  | 31570  |
| UN14857 | Rsa1.0.06978.1 | 976  | 10073  | 0         | 628  | 656  | 95 -  | 1    | 646  | 1165   | 1819   |

|         |                |      |        |           |      |      |       |      |      |        |        |
|---------|----------------|------|--------|-----------|------|------|-------|------|------|--------|--------|
| UN14858 | Rsa1.0.08078.1 | 1546 | 7944   | 0         | 423  | 429  | 98 -  | 1118 | 1546 | 3015   | 3442   |
| UN14859 | Rsa1.0.00200.1 | 1032 | 162016 | 0         | 323  | 323  | 100 + | 708  | 1030 | 96962  | 97284  |
| UN14860 | Rsa1.0.01016.1 | 788  | 181422 | 0         | 563  | 563  | 100 - | 2    | 564  | 171865 | 172427 |
| UN14861 | Rsa1.0.00055.1 | 921  | 520193 | 0         | 740  | 764  | 96 +  | 30   | 792  | 289747 | 290503 |
| UN14862 | Rsa1.0.00810.1 | 805  | 63289  | 0         | 527  | 560  | 94 -  | 2    | 560  | 6634   | 7178   |
| UN14863 | Rsa1.0.00546.1 | 599  | 76523  | 1.00E-168 | 352  | 366  | 96 -  | 1    | 363  | 11385  | 11749  |
| UN14864 | Rsa1.0.00033.1 | 711  | 515811 | 0         | 373  | 373  | 100 + | 337  | 709  | 365844 | 366216 |
| UN14865 | Rsa1.0.02286.1 | 1203 | 32993  | 0         | 854  | 872  | 97 -  | 334  | 1202 | 24132  | 25003  |
| UN14866 | Rsa1.0.35276.1 | 1672 | 641    | 1.00E-121 | 227  | 229  | 99 +  | 48   | 276  | 367    | 595    |
| UN14867 | Rsa1.0.09899.1 | 1409 | 6099   | 0         | 1181 | 1201 | 98 +  | 216  | 1409 | 2789   | 3989   |
| UN14868 | Rsa1.0.00101.1 | 723  | 267193 | 1.00E-137 | 348  | 378  | 92 +  | 353  | 720  | 47241  | 47613  |
| UN14869 | Rsa1.0.00881.1 | 924  | 61260  | 1.00E-159 | 342  | 358  | 95 +  | 544  | 891  | 20053  | 20410  |
| UN14870 | Rsa1.0.07606.1 | 663  | 9035   | 0         | 638  | 667  | 95 -  | 6    | 663  | 1971   | 2628   |
| UN14871 | Rsa1.0.00331.1 | 1311 | 176754 | 0         | 806  | 810  | 99 +  | 1    | 810  | 22158  | 22967  |
| UN14872 | Rsa1.0.09472.1 | 1342 | 6344   | 1.00E-136 | 322  | 342  | 94 -  | 1004 | 1342 | 6005   | 6344   |
| UN14873 | Rsa1.0.01173.1 | 1189 | 51727  | 0         | 402  | 409  | 98 -  | 2    | 410  | 1555   | 1962   |
| UN14874 | Rsa1.0.00168.1 | 1294 | 115870 | 1.00E-170 | 313  | 316  | 99 +  | 662  | 977  | 56550  | 56865  |
| UN14875 | Rsa1.0.00087.1 | 941  | 761073 | 0         | 695  | 699  | 99 +  | 243  | 941  | 182792 | 183489 |
| UN14876 | Rsa1.0.00184.1 | 1185 | 218748 | 0         | 870  | 877  | 99 +  | 309  | 1185 | 43850  | 44724  |
| UN14877 | Rsa1.0.00295.1 | 807  | 152597 | 1.00E-89  | 202  | 212  | 95 +  | 540  | 750  | 140727 | 140938 |
| UN14878 | Rsa1.0.00646.1 | 937  | 70473  | 1.00E-116 | 267  | 279  | 95 -  | 660  | 933  | 5977   | 6254   |
| UN14879 | Rsa1.0.17320.1 | 829  | 1861   | 0         | 341  | 347  | 98 +  | 16   | 362  | 254    | 600    |
| UN14880 | Rsa1.0.01126.1 | 2877 | 53127  | 0         | 2720 | 2724 | 99 -  | 1    | 2724 | 35534  | 38257  |
| UN14881 | Rsa1.0.01272.1 | 967  | 49553  | 0         | 564  | 604  | 93 +  | 332  | 932  | 18652  | 19240  |
| UN14882 | Rsa1.0.05217.1 | 1016 | 142938 | 0         | 439  | 443  | 99 -  | 141  | 583  | 130269 | 130711 |
| UN14883 | Rsa1.0.01100.1 | 1377 | 54113  | 0         | 836  | 843  | 99 +  | 534  | 1375 | 52303  | 53145  |
| UN14884 | Rsa1.0.00059.1 | 655  | 159650 | 1.00E-135 | 304  | 322  | 94 +  | 4    | 319  | 123644 | 123957 |
| UN14885 | Rsa1.0.02723.1 | 1230 | 28408  | 0         | 644  | 654  | 98 -  | 549  | 1201 | 7650   | 8303   |
| UN14886 | Rsa1.0.00112.1 | 767  | 132199 | 0         | 498  | 505  | 98 -  | 262  | 766  | 72844  | 73348  |
| UN14887 | Rsa1.0.00154.1 | 1141 | 189461 | 0         | 623  | 632  | 98 +  | 508  | 1139 | 24514  | 25144  |
| UN14888 | Rsa1.0.00662.1 | 1496 | 192183 | 0         | 1346 | 1398 | 96 -  | 2    | 1398 | 59159  | 60549  |
| UN14889 | Rsa1.0.02043.1 | 1122 | 163754 | 0         | 858  | 859  | 99 +  | 264  | 1122 | 131101 | 131959 |
| UN14890 | Rsa1.0.00385.1 | 1299 | 89160  | 0         | 559  | 569  | 98 +  | 3    | 567  | 47349  | 47914  |
| UN14891 | Rsa1.0.03527.1 | 1765 | 22278  | 0         | 472  | 478  | 98 -  | 6    | 483  | 10601  | 11075  |
| UN14892 | Rsa1.0.01182.1 | 1328 | 167304 | 1.00E-152 | 332  | 348  | 95 -  | 980  | 1327 | 71     | 409    |
| UN14893 | Rsa1.0.00773.1 | 1523 | 64839  | 0         | 716  | 752  | 95 -  | 59   | 810  | 1579   | 2330   |
| UN14894 | Rsa1.0.00001.1 | 893  | 363028 | 0         | 377  | 381  | 98 +  | 32   | 412  | 200236 | 200616 |
| UN14895 | Rsa1.0.00871.1 | 1091 | 61539  | 0         | 448  | 464  | 96 -  | 621  | 1083 | 43277  | 43732  |
| UN14896 | Rsa1.0.02650.1 | 1063 | 29047  | 0         | 495  | 511  | 96 +  | 1    | 504  | 11523  | 12032  |



|         |                |      |        |           |      |      |       |      |      |        |        |
|---------|----------------|------|--------|-----------|------|------|-------|------|------|--------|--------|
| UN14897 | Rsa1.0.00077.1 | 678  | 145005 | 0         | 676  | 676  | 100 + | 3    | 678  | 1851   | 2526   |
| UN14898 | Rsa1.0.00664.1 | 712  | 69573  | 3.00E-96  | 259  | 281  | 92 +  | 435  | 712  | 1722   | 1994   |
| UN14899 | Rsa1.0.14871.1 | 654  | 2999   | 1.00E-95  | 205  | 214  | 95 -  | 44   | 257  | 2735   | 2948   |
| UN14900 | Rsa1.0.06596.1 | 761  | 10699  | 0         | 357  | 360  | 99 -  | 2    | 361  | 5401   | 5760   |
| UN14901 | Rsa1.0.00078.1 | 1431 | 175053 | 0         | 429  | 445  | 96 -  | 257  | 701  | 38368  | 38812  |
| UN14902 | Rsa1.0.01270.1 | 660  | 49574  | 1.00E-130 | 373  | 410  | 90 -  | 269  | 657  | 29161  | 29567  |
| UN14903 | Rsa1.0.03424.1 | 839  | 23064  | 0         | 604  | 604  | 100 + | 229  | 832  | 79     | 682    |
| UN14904 | Rsa1.0.00589.1 | 992  | 209965 | 0         | 571  | 595  | 95 -  | 398  | 992  | 9704   | 10294  |
| UN14905 | Rsa1.0.17884.1 | 1831 | 1718   | 1.00E-110 | 267  | 287  | 93 +  | 680  | 966  | 1433   | 1718   |
| UN14906 | Rsa1.0.01778.1 | 1017 | 39509  | 7.00E-98  | 218  | 230  | 94 -  | 788  | 1017 | 16288  | 16512  |
| UN14907 | Rsa1.0.00179.1 | 1058 | 393324 | 1.00E-142 | 279  | 285  | 97 +  | 3    | 286  | 188688 | 188972 |
| UN14908 | Rsa1.0.01958.1 | 1011 | 261128 | 4.00E-90  | 193  | 201  | 96 +  | 127  | 327  | 113925 | 114125 |
| UN14909 | Rsa1.0.02901.1 | 741  | 26909  | 0         | 389  | 400  | 97 -  | 6    | 404  | 25992  | 26389  |
| UN14910 | Rsa1.0.11724.1 | 709  | 5428   | 0         | 421  | 424  | 99 -  | 287  | 709  | 5005   | 5428   |
| UN14911 | Rsa1.0.01506.1 | 1040 | 44370  | 0         | 654  | 654  | 100 + | 1    | 654  | 13549  | 14202  |
| UN14912 | Rsa1.0.01800.1 | 1377 | 39109  | 0         | 555  | 564  | 98 +  | 293  | 856  | 6664   | 7227   |
| UN14913 | Rsa1.0.00026.1 | 667  | 327835 | 0         | 571  | 571  | 100 - | 9    | 579  | 306356 | 306926 |
| UN14914 | Rsa1.0.00097.1 | 604  | 138858 | 0         | 520  | 529  | 98 +  | 76   | 604  | 110448 | 110975 |
| UN14915 | Rsa1.0.00094.1 | 1157 | 139042 | 0         | 362  | 365  | 99 +  | 790  | 1154 | 5876   | 6238   |
| UN14916 | Rsa1.0.00143.1 | 715  | 121313 | 0         | 686  | 709  | 96 -  | 6    | 713  | 30990  | 31697  |
| UN14917 | Rsa1.0.02083.1 | 1201 | 35216  | 0         | 866  | 905  | 95 -  | 308  | 1199 | 34309  | 35212  |
| UN14918 | Rsa1.0.00302.1 | 744  | 97521  | 0         | 743  | 744  | 99 -  | 1    | 744  | 38111  | 38854  |
| UN14919 | Rsa1.0.02041.1 | 903  | 163634 | 0         | 890  | 897  | 99 +  | 3    | 899  | 157069 | 157965 |
| UN14920 | Rsa1.0.00124.1 | 1191 | 262503 | 0         | 445  | 448  | 99 +  | 742  | 1189 | 29622  | 30069  |
| UN14921 | Rsa1.0.00009.1 | 429  | 232558 | 1.00E-136 | 291  | 305  | 95 -  | 130  | 429  | 185026 | 185329 |
| UN14922 | Rsa1.0.01866.1 | 693  | 37961  | 0         | 412  | 419  | 98 +  | 273  | 691  | 36635  | 37049  |
| UN14923 | Rsa1.0.01276.1 | 1536 | 49384  | 0         | 557  | 558  | 99 -  | 1    | 558  | 18570  | 19127  |
| UN14924 | Rsa1.0.03795.1 | 1211 | 20818  | 1.00E-164 | 304  | 306  | 99 -  | 2    | 306  | 15481  | 15786  |
| UN14925 | Rsa1.0.03149.1 | 662  | 24983  | 1.00E-154 | 288  | 292  | 98 -  | 364  | 655  | 15409  | 15700  |
| UN14926 | Rsa1.0.13824.1 | 1136 | 4259   | 0         | 483  | 503  | 96 -  | 637  | 1134 | 2033   | 2534   |
| UN14927 | Rsa1.0.03662.1 | 519  | 21492  | 3.00E-92  | 184  | 188  | 97 -  | 69   | 256  | 11532  | 11719  |
| UN14928 | Rsa1.0.75718.1 | 2000 | 303    | 1.00E-122 | 239  | 244  | 97 +  | 913  | 1156 | 42     | 285    |
| UN14929 | Rsa1.0.00002.1 | 1214 | 601661 | 0         | 793  | 793  | 100 - | 422  | 1214 | 182851 | 183643 |
| UN14930 | Rsa1.0.00253.1 | 1090 | 231292 | 1.00E-153 | 310  | 318  | 97 +  | 1    | 316  | 23517  | 23833  |
| UN14931 | Rsa1.0.00178.1 | 1223 | 114861 | 0         | 559  | 584  | 95 -  | 654  | 1220 | 84388  | 84969  |
| UN14932 | Rsa1.0.14432.1 | 1055 | 3395   | 0         | 1023 | 1045 | 97 -  | 2    | 1046 | 1262   | 2305   |
| UN14933 | Rsa1.0.00751.1 | 1344 | 65759  | 0         | 470  | 475  | 98 +  | 279  | 753  | 3228   | 3702   |
| UN14934 | Rsa1.0.12933.1 | 1585 | 5071   | 0         | 549  | 550  | 99 -  | 1036 | 1585 | 3392   | 3941   |
| UN14935 | Rsa1.0.01567.1 | 1504 | 43090  | 0         | 1486 | 1510 | 98 +  | 3    | 1502 | 3586   | 5095   |

|         |                |      |        |           |      |      |      |      |      |        |        |
|---------|----------------|------|--------|-----------|------|------|------|------|------|--------|--------|
| UN14936 | Rsa1.0_00231.1 | 1277 | 105381 | 1.00E-180 | 323  | 324  | 99 - | 3    | 326  | 32718  | 33041  |
| UN14937 | Rsa1.0_00961.1 | 1054 | 58185  | 0         | 335  | 336  | 99 + | 1    | 336  | 18029  | 18364  |
| UN14938 | Rsa1.0_30995.1 | 1108 | 739    | 1.00E-117 | 226  | 230  | 98 + | 3    | 232  | 510    | 739    |
| UN14939 | Rsa1.0_00745.1 | 1426 | 66067  | 0         | 698  | 727  | 96 + | 119  | 844  | 42176  | 42902  |
| UN14940 | Rsa1.0_06968.1 | 1429 | 10090  | 0         | 651  | 676  | 96 - | 755  | 1429 | 7748   | 8421   |
| UN14941 | Rsa1.0_00251.1 | 1057 | 303968 | 1.00E-175 | 329  | 335  | 98 + | 494  | 828  | 141398 | 141732 |
| UN14942 | Rsa1.0_01696.1 | 1723 | 301850 | 1.00E-153 | 294  | 300  | 98 - | 1428 | 1723 | 153034 | 153333 |
| UN14943 | Rsa1.0_01087.1 | 1674 | 54508  | 0         | 747  | 749  | 99 - | 661  | 1409 | 18244  | 18992  |
| UN14944 | Rsa1.0_00039.1 | 1530 | 296927 | 0         | 558  | 590  | 94 - | 3    | 574  | 32084  | 32673  |
| UN14945 | Rsa1.0_00170.1 | 1527 | 179538 | 1.00E-158 | 358  | 381  | 93 - | 1154 | 1527 | 24375  | 24753  |
| UN14946 | Rsa1.0_07829.1 | 1259 | 8462   | 0         | 347  | 349  | 99 + | 911  | 1259 | 4627   | 4974   |
| UN14947 | Rsa1.0_00293.1 | 1627 | 339294 | 0         | 548  | 604  | 90 + | 75   | 678  | 88473  | 89076  |
| UN14948 | Rsa1.0_00027.1 | 771  | 283362 | 1.00E-178 | 349  | 356  | 98 + | 1    | 355  | 167567 | 167919 |
| UN14949 | Rsa1.0_00860.1 | 906  | 61789  | 0         | 897  | 906  | 99 - | 1    | 906  | 45040  | 45945  |
| UN14950 | Rsa1.0_00397.1 | 1246 | 88189  | 0         | 541  | 564  | 95 + | 1    | 555  | 28141  | 28698  |
| UN14951 | Rsa1.0_01351.1 | 1247 | 47498  | 0         | 468  | 484  | 96 - | 735  | 1214 | 1320   | 1801   |
| UN14952 | Rsa1.0_04070.1 | 1437 | 19244  | 0         | 426  | 434  | 98 - | 1004 | 1435 | 10639  | 11071  |
| UN14953 | Rsa1.0_02745.1 | 1174 | 28263  | 5.00E-62  | 249  | 289  | 86 - | 17   | 292  | 10794  | 11082  |
| UN14954 | Rsa1.0_00288.1 | 1504 | 98659  | 0         | 667  | 675  | 98 + | 831  | 1504 | 80376  | 81050  |
| UN14955 | Rsa1.0_00722.1 | 1237 | 66840  | 1.00E-149 | 274  | 276  | 99 + | 962  | 1237 | 21060  | 21335  |
| UN14956 | Rsa1.0_00840.1 | 1316 | 62514  | 0         | 688  | 694  | 99 - | 4    | 697  | 6307   | 7000   |
| UN14957 | Rsa1.0_14703.1 | 1190 | 3143   | 0         | 555  | 574  | 96 + | 187  | 760  | 1      | 573    |
| UN14958 | Rsa1.0_03876.1 | 505  | 20334  | 0         | 499  | 506  | 98 - | 1    | 504  | 16808  | 17313  |
| UN14959 | Rsa1.0_05461.1 | 1447 | 13674  | 0         | 399  | 406  | 98 + | 1044 | 1447 | 9168   | 9573   |
| UN14960 | Rsa1.0_00123.1 | 935  | 325650 | 1.00E-134 | 327  | 356  | 91 + | 581  | 935  | 128148 | 128481 |
| UN14961 | Rsa1.0_00047.1 | 1286 | 168582 | 0         | 554  | 597  | 92 - | 627  | 1213 | 122835 | 123416 |
| UN14962 | Rsa1.0_11581.1 | 1435 | 5466   | 0         | 439  | 464  | 94 - | 812  | 1274 | 557    | 1010   |
| UN14963 | Rsa1.0_15781.1 | 1390 | 2424   | 0         | 389  | 391  | 99 + | 949  | 1339 | 2034   | 2424   |
| UN14964 | Rsa1.0_00123.1 | 1019 | 325650 | 1.00E-163 | 339  | 352  | 96 + | 666  | 1017 | 2558   | 2907   |
| UN14965 | Rsa1.0_01921.1 | 1898 | 168088 | 1.00E-111 | 243  | 253  | 96 - | 1647 | 1898 | 141166 | 141417 |
| UN14966 | Rsa1.0_08355.1 | 1237 | 7487   | 0         | 424  | 427  | 99 - | 809  | 1235 | 6505   | 6931   |
| UN14967 | Rsa1.0_04478.1 | 1084 | 17183  | 0         | 1070 | 1084 | 98 + | 1    | 1084 | 9836   | 10919  |
| UN14968 | Rsa1.0_00123.1 | 1125 | 325650 | 1.00E-148 | 288  | 295  | 97 + | 1    | 295  | 224045 | 224339 |
| UN14969 | Rsa1.0_40698.1 | 1846 | 551    | 0         | 541  | 552  | 98 - | 1165 | 1714 | 1      | 551    |
| UN14970 | Rsa1.0_03125.1 | 1315 | 147978 | 0         | 339  | 341  | 99 - | 288  | 628  | 139075 | 139415 |
| UN14971 | Rsa1.0_00471.1 | 1619 | 81897  | 0         | 987  | 990  | 99 + | 1    | 990  | 27017  | 28005  |
| UN14972 | Rsa1.0_00374.1 | 1302 | 165738 | 0         | 467  | 472  | 98 + | 526  | 997  | 93436  | 93907  |
| UN14973 | Rsa1.0_06430.1 | 1398 | 11034  | 1.00E-176 | 327  | 330  | 99 + | 1070 | 1398 | 9389   | 9718   |
| UN14974 | Rsa1.0_00752.1 | 1023 | 65756  | 0         | 1006 | 1019 | 98 - | 3    | 1021 | 23450  | 24467  |

|         |                |      |        |           |      |      |       |      |      |        |        |
|---------|----------------|------|--------|-----------|------|------|-------|------|------|--------|--------|
| UN14975 | Rsa1.0.00286.1 | 581  | 98709  | 2.00E-96  | 295  | 329  | 89 +  | 259  | 581  | 29363  | 29681  |
| UN14976 | Rsa1.0.15608.1 | 1095 | 2522   | 0         | 957  | 967  | 98 -  | 129  | 1095 | 178    | 1144   |
| UN14977 | Rsa1.0.01511.1 | 1399 | 44235  | 0         | 620  | 620  | 100 - | 227  | 846  | 7364   | 7983   |
| UN14978 | Rsa1.0.00876.1 | 1131 | 61328  | 0         | 1096 | 1132 | 96 +  | 2    | 1129 | 25989  | 27115  |
| UN14979 | Rsa1.0.00047.1 | 1269 | 168582 | 0         | 1202 | 1281 | 93 -  | 1    | 1269 | 149243 | 150497 |
| UN14980 | Rsa1.0.15167.1 | 897  | 2783   | 0         | 881  | 896  | 98 -  | 1    | 893  | 835    | 1729   |
| UN14981 | Rsa1.0.01344.1 | 655  | 142535 | 0         | 647  | 649  | 99 +  | 3    | 651  | 117286 | 117934 |
| UN14982 | Rsa1.0.03524.1 | 1983 | 22297  | 0         | 680  | 682  | 99 -  | 909  | 1590 | 19400  | 20081  |
| UN14983 | Rsa1.0.06175.1 | 1415 | 11569  | 0         | 423  | 436  | 97 +  | 45   | 476  | 4547   | 4981   |
| UN14984 | Rsa1.0.00102.1 | 755  | 135497 | 2.00E-97  | 184  | 185  | 99 +  | 225  | 409  | 88065  | 88249  |
| UN14985 | Rsa1.0.03659.1 | 978  | 21525  | 1.00E-123 | 234  | 237  | 98 -  | 584  | 820  | 13404  | 13640  |
| UN14986 | Rsa1.0.04086.1 | 565  | 19166  | 0         | 490  | 533  | 91 +  | 10   | 535  | 10482  | 11003  |
| UN14987 | Rsa1.0.01545.1 | 906  | 43599  | 0         | 523  | 537  | 97 -  | 1    | 530  | 27015  | 27548  |
| UN14988 | Rsa1.0.00347.1 | 1315 | 93048  | 1.00E-173 | 366  | 385  | 95 +  | 827  | 1211 | 54584  | 54968  |
| UN14989 | Rsa1.0.01610.1 | 1585 | 42274  | 0         | 869  | 872  | 99 -  | 59   | 930  | 18789  | 19660  |
| UN14990 | Rsa1.0.02609.1 | 1306 | 29600  | 0         | 580  | 599  | 96 +  | 714  | 1306 | 24446  | 25044  |
| UN14991 | Rsa1.0.00071.1 | 1182 | 345714 | 0         | 703  | 779  | 90 -  | 40   | 805  | 11652  | 12412  |
| UN14992 | Rsa1.0.01024.1 | 1303 | 56569  | 0         | 402  | 430  | 93 -  | 874  | 1303 | 10984  | 11395  |
| UN14993 | Rsa1.0.00017.1 | 561  | 752458 | 0         | 542  | 565  | 95 +  | 1    | 561  | 363690 | 364245 |
| UN14994 | Rsa1.0.03785.1 | 1509 | 20883  | 0         | 370  | 370  | 100 - | 1    | 370  | 15659  | 16028  |
| UN14995 | Rsa1.0.00006.1 | 1028 | 396176 | 0         | 596  | 606  | 98 -  | 1    | 606  | 66782  | 67387  |
| UN14996 | Rsa1.0.00071.1 | 1411 | 345714 | 0         | 990  | 1006 | 98 +  | 387  | 1388 | 297779 | 298784 |
| UN14997 | Rsa1.0.00159.1 | 1193 | 431686 | 1.00E-140 | 356  | 390  | 91 -  | 351  | 736  | 333967 | 334356 |
| UN14998 | Rsa1.0.01115.1 | 825  | 183545 | 0         | 392  | 398  | 98 +  | 1    | 398  | 7262   | 7659   |
| UN14999 | Rsa1.0.00473.1 | 1749 | 212204 | 0         | 398  | 413  | 96 +  | 274  | 683  | 190475 | 190883 |
| UN15000 | Rsa1.0.01451.1 | 716  | 45459  | 0         | 698  | 715  | 97 +  | 3    | 713  | 42339  | 43053  |
| UN15001 | Rsa1.0.01699.1 | 838  | 40816  | 0         | 368  | 369  | 99 +  | 1    | 368  | 16162  | 16530  |
| UN15002 | Rsa1.0.01575.1 | 877  | 42924  | 1.00E-155 | 290  | 294  | 98 +  | 2    | 295  | 30820  | 31113  |
| UN15003 | Rsa1.0.07106.1 | 1090 | 9882   | 1.00E-158 | 286  | 287  | 99 +  | 804  | 1090 | 416    | 702    |
| UN15004 | Rsa1.0.00047.1 | 1310 | 168582 | 1.00E-133 | 247  | 249  | 99 -  | 1062 | 1310 | 79354  | 79602  |
| UN15005 | #              | #    | #      | #         | #    | #    | #     | #    | #    | #      | #      |
| UN15006 | Rsa1.0.00953.1 | 895  | 145012 | 0         | 487  | 493  | 98 +  | 352  | 844  | 26538  | 27030  |
| UN15007 | Rsa1.0.00363.1 | 1677 | 90968  | 1.00E-112 | 239  | 251  | 95 -  | 642  | 884  | 30983  | 31233  |
| UN15008 | Rsa1.0.02811.1 | 801  | 27669  | 0         | 499  | 513  | 97 +  | 289  | 801  | 26244  | 26744  |
| UN15009 | Rsa1.0.00013.1 | 489  | 292129 | 1.00E-154 | 307  | 316  | 97 -  | 5    | 320  | 228465 | 228779 |
| UN15010 | Rsa1.0.00739.1 | 936  | 66155  | 1.00E-157 | 323  | 339  | 95 +  | 3    | 329  | 49406  | 49744  |
| UN15011 | Rsa1.0.02725.1 | 1621 | 28404  | 0         | 1118 | 1119 | 99 +  | 1    | 1119 | 23754  | 24872  |
| UN15012 | Rsa1.0.02784.1 | 1167 | 27881  | 1.00E-124 | 226  | 226  | 100 + | 25   | 250  | 6347   | 6572   |
| UN15013 | Rsa1.0.25122.1 | 1404 | 950    | 0         | 424  | 425  | 99 -  | 311  | 735  | 313    | 737    |

|         |                |      |        |           |      |      |      |      |      |        |        |
|---------|----------------|------|--------|-----------|------|------|------|------|------|--------|--------|
| UN15014 | Rsa1.0.03354.1 | 931  | 23491  | 0         | 659  | 670  | 98 - | 10   | 679  | 13474  | 14138  |
| UN15015 | Rsa1.0.02975.1 | 1068 | 26322  | 0         | 577  | 593  | 97 + | 176  | 767  | 23819  | 24410  |
| UN15016 | Rsa1.0.01635.1 | 824  | 41865  | 0         | 408  | 415  | 98 + | 1    | 413  | 20348  | 20762  |
| UN15017 | Rsa1.0.00702.1 | 968  | 67600  | 0         | 602  | 607  | 99 + | 14   | 620  | 62881  | 63487  |
| UN15018 | Rsa1.0.00139.1 | 774  | 357786 | 2.00E-76  | 191  | 206  | 92 + | 406  | 611  | 44950  | 45155  |
| UN15019 | Rsa1.0.01814.1 | 1267 | 38917  | 0         | 505  | 509  | 99 - | 4    | 512  | 16947  | 17455  |
| UN15020 | Rsa1.0.00353.1 | 1226 | 92242  | 0         | 1197 | 1219 | 98 - | 3    | 1219 | 27804  | 29019  |
| UN15021 | Rsa1.0.00191.1 | 542  | 316976 | 0         | 535  | 542  | 98 + | 2    | 542  | 18342  | 18883  |
| UN15022 | Rsa1.0.04561.1 | 1596 | 16849  | 0         | 1060 | 1109 | 95 + | 492  | 1592 | 4119   | 5224   |
| UN15023 | Rsa1.0.18356.1 | 978  | 1615   | 1.00E-171 | 339  | 349  | 97 - | 29   | 376  | 177    | 525    |
| UN15024 | Rsa1.0.00554.1 | 1156 | 150953 | 0         | 864  | 882  | 97 - | 274  | 1155 | 51447  | 52328  |
| UN15025 | Rsa1.0.00793.1 | 1321 | 64103  | 1.00E-96  | 243  | 264  | 92 - | 99   | 362  | 5308   | 5571   |
| UN15026 | Rsa1.0.20758.1 | 1147 | 1272   | 0         | 519  | 523  | 99 + | 625  | 1147 | 557    | 1079   |
| UN15027 | Rsa1.0.01949.1 | 1447 | 36960  | 0         | 417  | 426  | 97 + | 1022 | 1447 | 27763  | 28188  |
| UN15028 | Rsa1.0.04516.1 | 790  | 17018  | 0         | 613  | 618  | 99 + | 1    | 618  | 16316  | 16933  |
| UN15029 | Rsa1.0.00926.1 | 849  | 195072 | 0         | 361  | 364  | 99 - | 170  | 532  | 35123  | 35485  |
| UN15030 | Rsa1.0.00703.1 | 703  | 67597  | 1.00E-174 | 317  | 318  | 99 - | 1    | 318  | 10307  | 10623  |
| UN15031 | Rsa1.0.01002.1 | 997  | 57063  | 0         | 431  | 446  | 96 - | 343  | 788  | 50140  | 50582  |
| UN15032 | Rsa1.0.00012.1 | 809  | 222148 | 1.00E-165 | 342  | 353  | 96 - | 459  | 808  | 83199  | 83548  |
| UN15033 | Rsa1.0.04132.1 | 572  | 18917  | 1.00E-117 | 248  | 257  | 96 - | 4    | 260  | 3215   | 3468   |
| UN15034 | Rsa1.0.00119.1 | 901  | 467509 | 0         | 468  | 474  | 98 - | 3    | 474  | 8515   | 8988   |
| UN15035 | Rsa1.0.00115.1 | 1643 | 131321 | 0         | 507  | 529  | 95 - | 105  | 625  | 54113  | 54641  |
| UN15036 | Rsa1.0.00004.1 | 855  | 253996 | 0         | 475  | 478  | 99 - | 38   | 515  | 198366 | 198840 |
| UN15037 | Rsa1.0.04355.1 | 881  | 146733 | 1.00E-157 | 323  | 336  | 96 + | 3    | 336  | 129240 | 129570 |
| UN15038 | Rsa1.0.00483.1 | 1480 | 81102  | 0         | 350  | 354  | 98 - | 283  | 636  | 30497  | 30850  |
| UN15039 | Rsa1.0.05019.1 | 1417 | 15114  | 0         | 679  | 680  | 99 - | 1    | 680  | 4471   | 5150   |
| UN15040 | Rsa1.0.04199.1 | 2255 | 18501  | 0         | 2138 | 2164 | 98 - | 92   | 2255 | 8231   | 10394  |
| UN15041 | Rsa1.0.02952.1 | 672  | 26492  | 0         | 658  | 672  | 97 - | 1    | 672  | 19790  | 20461  |
| UN15042 | Rsa1.0.00019.1 | 2070 | 301669 | 0         | 545  | 554  | 98 - | 1    | 554  | 298888 | 299440 |
| UN15043 | Rsa1.0.02036.1 | 542  | 35731  | 0         | 533  | 537  | 99 + | 3    | 539  | 11888  | 12424  |
| UN15044 | Rsa1.0.01296.1 | 623  | 49035  | 0         | 352  | 356  | 98 + | 270  | 623  | 3720   | 4075   |
| UN15045 | Rsa1.0.06138.1 | 1148 | 11651  | 1.00E-178 | 320  | 321  | 99 - | 1    | 321  | 8144   | 8464   |
| UN15046 | Rsa1.0.00065.1 | 1082 | 454616 | 0         | 548  | 551  | 99 + | 1    | 551  | 152180 | 152730 |
| UN15047 | Rsa1.0.00858.1 | 836  | 61892  | 1.00E-108 | 205  | 207  | 99 + | 49   | 255  | 14979  | 15185  |
| UN15048 | Rsa1.0.13600.1 | 967  | 4672   | 1.00E-170 | 328  | 336  | 97 - | 421  | 756  | 3970   | 4305   |
| UN15049 | Rsa1.0.00974.1 | 930  | 57893  | 0         | 483  | 489  | 98 + | 441  | 929  | 5213   | 5701   |
| UN15050 | Rsa1.0.00017.1 | 1139 | 752458 | 0         | 1084 | 1170 | 92 + | 2    | 1139 | 312127 | 313293 |
| UN15051 | Rsa1.0.01229.1 | 941  | 50235  | 0         | 937  | 946  | 99 + | 1    | 941  | 2586   | 3531   |
| UN15052 | Rsa1.0.03268.1 | 552  | 24197  | 0         | 536  | 550  | 97 - | 3    | 552  | 12409  | 12956  |

|         |                |      |        |           |     |      |       |     |      |        |        |
|---------|----------------|------|--------|-----------|-----|------|-------|-----|------|--------|--------|
| UN15053 | Rsa1.0_00964.1 | 950  | 316648 | 0         | 543 | 579  | 93 +  | 3   | 568  | 261724 | 262289 |
| UN15054 | Rsa1.0_00529.1 | 1402 | 77487  | 0         | 667 | 730  | 91 +  | 2   | 730  | 52460  | 53186  |
| UN15055 | Rsa1.0_19438.1 | 606  | 1432   | 3.00E-83  | 186 | 195  | 95 +  | 3   | 194  | 382    | 576    |
| UN15056 | Rsa1.0_00108.1 | 1528 | 478491 | 0         | 993 | 1028 | 96 +  | 511 | 1526 | 305432 | 306459 |
| UN15057 | Rsa1.0_10655.1 | 1208 | 5768   | 1.00E-161 | 295 | 296  | 99 -  | 911 | 1206 | 435    | 729    |
| UN15058 | Rsa1.0_09183.1 | 1040 | 6573   | 4.00E-81  | 257 | 284  | 90 -  | 762 | 1040 | 3968   | 4243   |
| UN15059 | Rsa1.0_18896.1 | 1396 | 1515   | 0         | 417 | 427  | 97 -  | 1   | 426  | 406    | 831    |
| UN15060 | Rsa1.0_07863.1 | 888  | 8404   | 1.00E-126 | 233 | 234  | 99 -  | 653 | 886  | 862    | 1095   |
| UN15061 | Rsa1.0_01442.1 | 670  | 45776  | 0         | 392 | 405  | 96 -  | 1   | 405  | 25486  | 25890  |
| UN15062 | Rsa1.0_00329.1 | 468  | 222544 | 1.00E-135 | 369 | 410  | 90 +  | 1   | 388  | 2552   | 2960   |
| UN15063 | Rsa1.0_03342.1 | 728  | 23600  | 0         | 389 | 405  | 96 +  | 1   | 401  | 17824  | 18227  |
| UN15064 | Rsa1.0_00025.1 | 1012 | 277312 | 0         | 394 | 408  | 96 -  | 1   | 397  | 14017  | 14423  |
| UN15065 | Rsa1.0_04397.1 | 775  | 17555  | 0         | 600 | 613  | 97 -  | 157 | 760  | 4519   | 5131   |
| UN15066 | Rsa1.0_01241.1 | 1665 | 50067  | 0         | 569 | 575  | 98 -  | 334 | 908  | 5667   | 6241   |
| UN15067 | Rsa1.0_00644.1 | 1067 | 136881 | 1.00E-169 | 404 | 434  | 93 -  | 642 | 1064 | 62650  | 63077  |
| UN15068 | Rsa1.0_01301.1 | 594  | 169072 | 0         | 409 | 421  | 97 +  | 177 | 594  | 42572  | 42989  |
| UN15069 | Rsa1.0_00061.1 | 914  | 218685 | 4.00E-93  | 238 | 263  | 90 -  | 653 | 914  | 166243 | 166485 |
| UN15070 | Rsa1.0_00686.1 | 760  | 68511  | 0         | 723 | 803  | 90 +  | 1   | 760  | 32781  | 33583  |
| UN15071 | Rsa1.0_00173.1 | 978  | 288743 | 9.00E-14  | 86  | 101  | 85 +  | 803 | 903  | 112554 | 112654 |
| UN15072 | Rsa1.0_01382.1 | 831  | 46877  | 0         | 423 | 440  | 96 +  | 359 | 795  | 21635  | 22071  |
| UN15073 | Rsa1.0_03944.1 | 806  | 19926  | 0         | 790 | 806  | 98 -  | 1   | 806  | 16353  | 17154  |
| UN15074 | Rsa1.0_00032.1 | 594  | 306326 | 2.00E-47  | 203 | 234  | 86 +  | 98  | 330  | 215913 | 216125 |
| UN15075 | Rsa1.0_00253.1 | 957  | 231292 | 2.00E-67  | 137 | 139  | 98 +  | 463 | 601  | 116001 | 116139 |
| UN15076 | Rsa1.0_02291.1 | 1074 | 32959  | 0         | 843 | 849  | 99 +  | 7   | 855  | 14784  | 15630  |
| UN15077 | Rsa1.0_00127.1 | 911  | 127446 | 0         | 467 | 479  | 97 +  | 3   | 479  | 13924  | 14395  |
| UN15078 | Rsa1.0_01882.1 | 819  | 37697  | 0         | 429 | 449  | 95 -  | 3   | 445  | 36182  | 36630  |
| UN15079 | Rsa1.0_00131.1 | 851  | 432233 | 1.00E-121 | 340 | 376  | 90 -  | 48  | 422  | 8545   | 8907   |
| UN15080 | Rsa1.0_00107.1 | 788  | 431659 | 0         | 784 | 791  | 99 +  | 1   | 788  | 153045 | 153833 |
| UN15081 | Rsa1.0_01625.1 | 863  | 42019  | 0         | 370 | 375  | 98 -  | 1   | 374  | 34139  | 34513  |
| UN15082 | Rsa1.0_09302.1 | 1108 | 6470   | 0         | 584 | 606  | 96 +  | 3   | 607  | 2966   | 3566   |
| UN15083 | Rsa1.0_00768.1 | 513  | 64969  | 1.00E-111 | 285 | 310  | 91 +  | 1   | 296  | 60638  | 60947  |
| UN15084 | Rsa1.0_00733.1 | 1000 | 66583  | 0         | 645 | 664  | 97 -  | 338 | 1000 | 59761  | 60423  |
| UN15085 | Rsa1.0_00577.1 | 698  | 174827 | 1.00E-134 | 265 | 272  | 97 -  | 101 | 368  | 173422 | 173693 |
| UN15086 | Rsa1.0_05050.1 | 908  | 15022  | 1.00E-128 | 256 | 264  | 96 +  | 639 | 902  | 6127   | 6390   |
| UN15087 | Rsa1.0_00369.1 | 1364 | 266462 | 0         | 370 | 382  | 96 +  | 1   | 374  | 143048 | 143428 |
| UN15088 | Rsa1.0_00516.1 | 778  | 78417  | 1.00E-119 | 241 | 249  | 96 -  | 4   | 252  | 37437  | 37685  |
| UN15089 | Rsa1.0_04646.1 | 753  | 16541  | 2.00E-88  | 166 | 166  | 100 + | 156 | 321  | 9517   | 9682   |
| UN15090 | Rsa1.0_02296.1 | 2022 | 32920  | 0         | 476 | 482  | 98 -  | 1   | 479  | 16072  | 16553  |
| UN15091 | Rsa1.0_00829.1 | 701  | 158305 | 0         | 461 | 503  | 91 +  | 10  | 509  | 47474  | 47954  |

|         |                |      |        |           |     |     |       |      |      |        |        |
|---------|----------------|------|--------|-----------|-----|-----|-------|------|------|--------|--------|
| UN15092 | Rsa1.0.08019.1 | 725  | 8075   | 3.00E-84  | 159 | 159 | 100 - | 564  | 722  | 2709   | 2867   |
| UN15093 | Rsa1.0.00652.1 | 1019 | 70089  | 0         | 528 | 567 | 93 -  | 424  | 989  | 18097  | 18649  |
| UN15094 | Rsa1.0.00088.1 | 1040 | 141341 | 6.00E-89  | 245 | 271 | 90 -  | 776  | 1039 | 62671  | 62928  |
| UN15095 | Rsa1.0.02185.1 | 749  | 34150  | 0         | 503 | 517 | 97 -  | 231  | 745  | 32514  | 33030  |
| UN15096 | Rsa1.0.01222.1 | 815  | 50398  | 9.00E-63  | 138 | 143 | 96 -  | 383  | 525  | 3523   | 3665   |
| UN15097 | Rsa1.0.00294.1 | 802  | 144860 | 0         | 529 | 546 | 96 +  | 67   | 612  | 57030  | 57575  |
| UN15098 | Rsa1.0.01436.1 | 857  | 45894  | 0         | 339 | 342 | 99 -  | 1    | 342  | 33611  | 33952  |
| UN15099 | Rsa1.0.13590.1 | 783  | 4689   | 0         | 747 | 768 | 97 -  | 3    | 767  | 3665   | 4431   |
| UN15100 | Rsa1.0.00718.1 | 837  | 279335 | 1.00E-168 | 303 | 304 | 99 -  | 1    | 304  | 235035 | 235338 |
| UN15101 | Rsa1.0.02362.1 | 1493 | 32190  | 0         | 613 | 630 | 97 +  | 1    | 629  | 21896  | 22525  |
| UN15102 | Rsa1.0.00482.1 | 1775 | 81162  | 0         | 766 | 780 | 98 -  | 256  | 1035 | 8800   | 9579   |
| UN15103 | Rsa1.0.08234.1 | 1576 | 7681   | 0         | 383 | 395 | 96 +  | 1    | 395  | 7210   | 7596   |
| UN15104 | Rsa1.0.00377.1 | 950  | 90038  | 0         | 374 | 387 | 96 +  | 7    | 390  | 17057  | 17443  |
| UN15105 | Rsa1.0.00104.1 | 1555 | 368722 | 1.00E-167 | 345 | 358 | 96 +  | 137  | 492  | 32684  | 33041  |
| UN15106 | Rsa1.0.00053.1 | 1070 | 263459 | 1.00E-173 | 362 | 381 | 95 +  | 666  | 1046 | 84698  | 85069  |
| UN15107 | Rsa1.0.00632.1 | 1281 | 183777 | 1.00E-176 | 356 | 370 | 96 +  | 911  | 1280 | 157543 | 157912 |
| UN15108 | Rsa1.0.00413.1 | 1052 | 86921  | 0         | 377 | 379 | 99 -  | 675  | 1052 | 37404  | 37782  |
| UN15109 | Rsa1.0.03302.1 | 976  | 23898  | 1.00E-174 | 350 | 361 | 96 -  | 610  | 967  | 6069   | 6429   |
| UN15110 | Rsa1.0.01425.1 | 1278 | 46136  | 0         | 355 | 362 | 98 +  | 59   | 420  | 15558  | 15919  |
| UN15111 | Rsa1.0.01053.1 | 902  | 55483  | 1.00E-165 | 309 | 311 | 99 +  | 1    | 311  | 40466  | 40774  |
| UN15112 | Rsa1.0.00407.1 | 1305 | 191544 | 0         | 337 | 338 | 99 +  | 968  | 1305 | 30155  | 30492  |
| UN15113 | Rsa1.0.01920.1 | 758  | 158533 | 0         | 738 | 749 | 98 -  | 13   | 758  | 4769   | 5515   |
| UN15114 | Rsa1.0.00426.1 | 1110 | 85668  | 0         | 390 | 405 | 96 -  | 3    | 407  | 59557  | 59955  |
| UN15115 | Rsa1.0.18100.1 | 1211 | 1667   | 1.00E-130 | 344 | 381 | 90 -  | 833  | 1211 | 278    | 641    |
| UN15116 | Rsa1.0.03937.1 | 1523 | 19969  | 1.00E-154 | 295 | 301 | 98 -  | 1223 | 1523 | 3001   | 3301   |
| UN15117 | Rsa1.0.00088.1 | 1180 | 141341 | 0         | 456 | 462 | 98 +  | 106  | 567  | 94765  | 95226  |
| UN15118 | Rsa1.0.01969.1 | 1592 | 153351 | 0         | 440 | 446 | 98 -  | 1    | 446  | 16782  | 17227  |
| UN15119 | Rsa1.0.00246.1 | 1023 | 103541 | 0         | 555 | 581 | 95 +  | 444  | 1023 | 78385  | 78965  |
| UN15120 | Rsa1.0.02191.1 | 800  | 34078  | 0         | 412 | 418 | 98 -  | 53   | 466  | 23641  | 24058  |
| UN15121 | Rsa1.0.00186.1 | 1286 | 112669 | 7.00E-83  | 227 | 247 | 91 -  | 95   | 336  | 10420  | 10666  |
| UN15122 | Rsa1.0.00739.1 | 438  | 66155  | 1.00E-145 | 260 | 260 | 100 - | 120  | 379  | 31439  | 31698  |
| UN15123 | Rsa1.0.01752.1 | 1359 | 39805  | 1.00E-154 | 298 | 305 | 97 +  | 2    | 306  | 19218  | 19522  |
| UN15124 | Rsa1.0.03959.1 | 810  | 19866  | 1.00E-172 | 324 | 330 | 98 -  | 3    | 332  | 165    | 494    |
| UN15125 | Rsa1.0.00427.1 | 496  | 189678 | 1.00E-122 | 281 | 297 | 94 -  | 2    | 294  | 14547  | 14842  |
| UN15126 | Rsa1.0.00684.1 | 1399 | 141701 | 0         | 540 | 557 | 96 +  | 1    | 556  | 54156  | 54698  |
| UN15127 | Rsa1.0.07376.1 | 970  | 9496   | 1.00E-110 | 202 | 202 | 100 + | 385  | 586  | 7283   | 7484   |
| UN15128 | Rsa1.0.03498.1 | 779  | 22480  | 0         | 549 | 550 | 99 -  | 230  | 779  | 18285  | 18833  |
| UN15129 | Rsa1.0.00708.1 | 1011 | 67366  | 0         | 451 | 464 | 97 -  | 1    | 462  | 25154  | 25615  |
| UN15130 | Rsa1.0.00418.1 | 1283 | 215377 | 0         | 381 | 396 | 96 +  | 363  | 758  | 2935   | 3330   |

|         |                |      |        |           |      |      |       |      |      |        |        |
|---------|----------------|------|--------|-----------|------|------|-------|------|------|--------|--------|
| UN15131 | Rsa1.0_03019.1 | 1365 | 25987  | 1.00E-135 | 257  | 261  | 98 -  | 7    | 267  | 21947  | 22207  |
| UN15132 | Rsa1.0_04156.1 | 1401 | 18799  | 1.00E-142 | 286  | 296  | 96 -  | 1105 | 1400 | 15209  | 15498  |
| UN15133 | Rsa1.0_02295.1 | 1325 | 149884 | 1.00E-154 | 298  | 305  | 97 +  | 528  | 832  | 9436   | 9740   |
| UN15134 | Rsa1.0_03068.1 | 863  | 25620  | 0         | 837  | 866  | 96 +  | 1    | 862  | 10839  | 11697  |
| UN15135 | Rsa1.0_00389.1 | 1361 | 88795  | 0         | 1066 | 1084 | 98 -  | 1    | 1084 | 61128  | 62211  |
| UN15136 | Rsa1.0_05293.1 | 1508 | 14237  | 0         | 490  | 515  | 95 +  | 103  | 617  | 6224   | 6730   |
| UN15137 | Rsa1.0_01188.1 | 1791 | 51362  | 0         | 833  | 851  | 97 +  | 941  | 1777 | 33730  | 34580  |
| UN15138 | Rsa1.0_00001.1 | 940  | 363028 | 0         | 392  | 397  | 98 +  | 1    | 397  | 249958 | 250354 |
| UN15139 | Rsa1.0_00100.1 | 1564 | 249232 | 1.00E-162 | 398  | 429  | 92 +  | 1088 | 1509 | 13427  | 13852  |
| UN15140 | Rsa1.0_01509.1 | 1537 | 44258  | 1.00E-178 | 317  | 317  | 100 + | 1221 | 1537 | 2566   | 2882   |
| UN15141 | Rsa1.0_01554.1 | 906  | 43379  | 0         | 879  | 907  | 96 -  | 1    | 905  | 39958  | 40863  |
| UN15142 | Rsa1.0_01553.1 | 1200 | 43379  | 0         | 1008 | 1057 | 95 -  | 148  | 1200 | 26896  | 27945  |
| UN15143 | Rsa1.0_00045.1 | 555  | 328694 | 1.00E-98  | 198  | 203  | 97 +  | 6    | 208  | 148689 | 148891 |
| UN15144 | Rsa1.0_00163.1 | 783  | 116847 | 1.00E-174 | 315  | 317  | 99 +  | 467  | 783  | 67121  | 67437  |
| UN15145 | Rsa1.0_02911.1 | 1450 | 142461 | 0         | 603  | 624  | 96 -  | 1    | 619  | 23423  | 24042  |
| UN15146 | Rsa1.0_04073.1 | 1222 | 19238  | 1.00E-129 | 259  | 267  | 97 +  | 959  | 1220 | 16886  | 17152  |
| UN15147 | Rsa1.0_00487.1 | 882  | 80674  | 1.00E-178 | 363  | 378  | 96 +  | 506  | 880  | 75851  | 76228  |
| UN15148 | Rsa1.0_10201.1 | 1743 | 5946   | 0         | 1403 | 1436 | 97 +  | 1    | 1436 | 418    | 1851   |
| UN15149 | Rsa1.0_00596.1 | 698  | 73578  | 0         | 420  | 425  | 98 +  | 5    | 429  | 42103  | 42527  |
| UN15150 | Rsa1.0_00277.1 | 1627 | 100132 | 1.00E-132 | 326  | 351  | 92 +  | 1    | 349  | 88382  | 88725  |
| UN15151 | Rsa1.0_00900.1 | 1028 | 60367  | 1.00E-145 | 306  | 321  | 95 -  | 1    | 321  | 29910  | 30230  |
| UN15152 | Rsa1.0_00029.1 | 758  | 272992 | 1.00E-168 | 367  | 385  | 95 -  | 374  | 750  | 10187  | 10568  |
| UN15153 | Rsa1.0_39426.1 | 713  | 570    | 0         | 384  | 398  | 96 -  | 1    | 398  | 48     | 445    |
| UN15154 | Rsa1.0_00469.1 | 1035 | 82084  | 1.00E-164 | 322  | 331  | 97 +  | 405  | 732  | 66858  | 67188  |
| UN15155 | Rsa1.0_01335.1 | 376  | 47894  | 0         | 344  | 351  | 98 +  | 26   | 376  | 29219  | 29569  |
| UN15156 | Rsa1.0_00275.1 | 773  | 210104 | 1.00E-162 | 326  | 337  | 96 +  | 10   | 346  | 176412 | 176741 |
| UN15157 | Rsa1.0_00446.1 | 736  | 167829 | 0         | 369  | 382  | 96 +  | 355  | 736  | 129961 | 130339 |
| UN15158 | Rsa1.0_03966.1 | 1745 | 19823  | 0         | 392  | 403  | 97 -  | 831  | 1233 | 2619   | 3021   |
| UN15159 | Rsa1.0_02991.1 | 628  | 26178  | 2.00E-88  | 209  | 219  | 95 -  | 1    | 216  | 4393   | 4607   |
| UN15160 | Rsa1.0_04835.1 | 1077 | 15766  | 1.00E-132 | 270  | 280  | 96 -  | 179  | 458  | 9964   | 10243  |
| UN15161 | Rsa1.0_00153.1 | 706  | 192931 | 1.00E-127 | 284  | 301  | 94 +  | 1    | 295  | 143120 | 143418 |
| UN15162 | Rsa1.0_04542.1 | 891  | 16930  | 1.00E-147 | 290  | 297  | 97 -  | 3    | 299  | 16072  | 16362  |
| UN15163 | Rsa1.0_03195.1 | 1354 | 24673  | 0         | 619  | 620  | 99 -  | 1    | 619  | 8990   | 9609   |
| UN15164 | Rsa1.0_00549.1 | 1395 | 76473  | 0         | 328  | 329  | 99 -  | 1067 | 1395 | 7914   | 8242   |
| UN15165 | Rsa1.0_01960.1 | 1862 | 36766  | 1.00E-153 | 287  | 291  | 98 -  | 592  | 882  | 9530   | 9820   |
| UN15166 | Rsa1.0_00407.1 | 1040 | 191544 | 0         | 771  | 822  | 93 -  | 218  | 1026 | 155550 | 156357 |
| UN15167 | Rsa1.0_02629.1 | 1383 | 29350  | 0         | 504  | 504  | 100 - | 555  | 1058 | 5350   | 5853   |
| UN15168 | Rsa1.0_01786.1 | 1469 | 133324 | 0         | 540  | 562  | 96 +  | 913  | 1469 | 113313 | 113870 |
| UN15169 | Rsa1.0_02070.1 | 864  | 158516 | 5.00E-83  | 160  | 161  | 99 -  | 130  | 290  | 141340 | 141500 |

|         |                |      |        |           |     |     |       |     |      |        |        |
|---------|----------------|------|--------|-----------|-----|-----|-------|-----|------|--------|--------|
| UN15170 | Rsa1.0.00539.1 | 1683 | 76926  | 1.00E-180 | 320 | 320 | 100 - | 1   | 320  | 28381  | 28700  |
| UN15171 | Rsa1.0.01651.1 | 867  | 41586  | 0         | 866 | 869 | 99 +  | 1   | 867  | 20839  | 21706  |
| UN15172 | Rsa1.0.01376.1 | 901  | 47004  | 0         | 369 | 374 | 98 -  | 1   | 374  | 41024  | 41397  |
| UN15173 | Rsa1.0.04272.1 | 766  | 18144  | 1.00E-156 | 315 | 326 | 96 +  | 2   | 325  | 9481   | 9806   |
| UN15174 | Rsa1.0.01740.1 | 892  | 39986  | 1.00E-140 | 279 | 287 | 97 -  | 71  | 354  | 27598  | 27884  |
| UN15175 | Rsa1.0.03569.1 | 600  | 22041  | 1.00E-100 | 201 | 205 | 98 -  | 395 | 598  | 9056   | 9260   |
| UN15176 | Rsa1.0.00071.1 | 1092 | 345714 | 0         | 381 | 382 | 99 -  | 331 | 712  | 311950 | 312331 |
| UN15177 | Rsa1.0.15363.1 | 1716 | 2655   | 0         | 931 | 975 | 95 -  | 744 | 1713 | 1688   | 2655   |
| UN15178 | Rsa1.0.03795.1 | 1178 | 20818  | 1.00E-129 | 267 | 275 | 97 -  | 1   | 271  | 15481  | 15753  |
| UN15179 | Rsa1.0.07955.1 | 932  | 8180   | 1.00E-160 | 290 | 291 | 99 +  | 642 | 932  | 6422   | 6712   |
| UN15180 | Rsa1.0.02829.1 | 872  | 27541  | 0         | 452 | 469 | 96 -  | 408 | 870  | 3313   | 3781   |
| UN15181 | Rsa1.0.01611.1 | 838  | 42269  | 1.00E-153 | 326 | 345 | 94 -  | 67  | 411  | 17493  | 17821  |
| UN15182 | Rsa1.0.02367.1 | 362  | 32106  | 1.00E-112 | 211 | 213 | 99 -  | 1   | 213  | 27423  | 27635  |
| UN15183 | Rsa1.0.00049.1 | 1047 | 167018 | 0         | 640 | 672 | 95 -  | 395 | 1045 | 7057   | 7728   |
| UN15184 | Rsa1.0.01065.1 | 750  | 55264  | 0         | 457 | 466 | 98 +  | 15  | 478  | 30932  | 31396  |
| UN15185 | Rsa1.0.01977.1 | 1213 | 36559  | 1.00E-155 | 278 | 278 | 100 - | 936 | 1213 | 9556   | 9833   |
| UN15186 | Rsa1.0.01512.1 | 934  | 44234  | 1.00E-167 | 379 | 405 | 93 +  | 528 | 932  | 32378  | 32769  |
| UN15187 | Rsa1.0.02163.1 | 1206 | 34427  | 0         | 356 | 356 | 100 + | 851 | 1206 | 5688   | 6043   |
| UN15188 | Rsa1.0.00813.1 | 571  | 63202  | 1.00E-164 | 440 | 487 | 90 -  | 1   | 472  | 51191  | 51668  |
| UN15189 | Rsa1.0.00773.1 | 1002 | 64839  | 1.00E-141 | 325 | 350 | 92 -  | 649 | 997  | 10104  | 10440  |
| UN15190 | Rsa1.0.12809.1 | 938  | 5119   | 1.00E-155 | 383 | 417 | 91 +  | 529 | 936  | 4445   | 4848   |
| UN15191 | Rsa1.0.01586.1 | 1157 | 42804  | 0         | 437 | 452 | 96 -  | 708 | 1157 | 28046  | 28496  |
| UN15192 | Rsa1.0.02626.1 | 918  | 29387  | 0         | 396 | 401 | 98 -  | 488 | 888  | 22893  | 23293  |
| UN15193 | Rsa1.0.30348.1 | 1038 | 756    | 1.00E-121 | 227 | 229 | 99 +  | 534 | 762  | 364    | 592    |
| UN15194 | Rsa1.0.01435.1 | 670  | 45942  | 0         | 387 | 389 | 99 -  | 1   | 389  | 28028  | 28416  |
| UN15195 | Rsa1.0.00579.1 | 789  | 148308 | 1.00E-102 | 207 | 213 | 97 -  | 5   | 217  | 65939  | 66151  |
| UN15196 | Rsa1.0.00476.1 | 970  | 280966 | 1.00E-171 | 353 | 366 | 96 -  | 613 | 967  | 241651 | 242016 |
| UN15197 | Rsa1.0.08230.1 | 673  | 7688   | 1.00E-144 | 272 | 276 | 98 -  | 1   | 276  | 5351   | 5626   |
| UN15198 | Rsa1.0.00758.1 | 1053 | 65477  | 1.00E-155 | 281 | 282 | 99 +  | 3   | 284  | 48370  | 48651  |
| UN15199 | Rsa1.0.63049.1 | 938  | 364    | 1.00E-149 | 278 | 280 | 99 -  | 659 | 938  | 64     | 342    |
| UN15200 | Rsa1.0.00652.1 | 941  | 70089  | 0         | 373 | 387 | 96 +  | 557 | 940  | 47920  | 48306  |
| UN15201 | Rsa1.0.02113.1 | 844  | 34890  | 0         | 824 | 830 | 99 -  | 12  | 841  | 22694  | 23522  |
| UN15202 | Rsa1.0.16435.1 | 542  | 2156   | 1.00E-102 | 201 | 205 | 98 +  | 5   | 209  | 315    | 519    |
| UN15203 | Rsa1.0.01469.1 | 1301 | 45139  | 1.00E-161 | 310 | 316 | 98 -  | 632 | 945  | 18477  | 18792  |
| UN15204 | Rsa1.0.03261.1 | 765  | 24281  | 1.00E-104 | 235 | 246 | 95 -  | 24  | 264  | 5213   | 5458   |
| UN15205 | Rsa1.0.50581.1 | 780  | 449    | 0         | 355 | 363 | 97 -  | 218 | 580  | 87     | 449    |
| UN15206 | Rsa1.0.00029.1 | 749  | 272992 | 1.00E-163 | 329 | 339 | 97 -  | 374 | 710  | 10231  | 10568  |
| UN15207 | Rsa1.0.00142.1 | 862  | 121474 | 0         | 438 | 445 | 98 -  | 42  | 486  | 62984  | 63427  |
| UN15208 | Rsa1.0.02101.1 | 970  | 35017  | 0         | 888 | 922 | 96 -  | 58  | 970  | 15791  | 16711  |



|         |                |      |        |           |      |      |       |      |      |        |        |
|---------|----------------|------|--------|-----------|------|------|-------|------|------|--------|--------|
| UN15209 | Rsa1.0.00396.1 | 707  | 88242  | 1.00E-126 | 253  | 261  | 96 -  | 391  | 651  | 20281  | 20541  |
| UN15210 | Rsa1.0.19203.1 | 867  | 1465   | 1.00E-151 | 287  | 292  | 98 +  | 576  | 867  | 795    | 1086   |
| UN15211 | Rsa1.0.06056.1 | 806  | 137271 | 0         | 344  | 344  | 100 + | 463  | 806  | 127496 | 127839 |
| UN15212 | Rsa1.0.01327.1 | 1291 | 48033  | 1.00E-145 | 334  | 354  | 94 -  | 940  | 1291 | 14629  | 14977  |
| UN15213 | Rsa1.0.00351.1 | 667  | 413096 | 1.00E-160 | 364  | 386  | 94 +  | 1    | 375  | 244444 | 244827 |
| UN15214 | Rsa1.0.00698.1 | 825  | 67816  | 0         | 613  | 646  | 94 -  | 186  | 825  | 21763  | 22408  |
| UN15215 | Rsa1.0.01827.1 | 806  | 143321 | 1.00E-101 | 187  | 187  | 100 - | 355  | 541  | 128843 | 129029 |
| UN15216 | Rsa1.0.00179.1 | 804  | 393324 | 1.00E-116 | 234  | 240  | 97 -  | 29   | 267  | 200962 | 201201 |
| UN15217 | Rsa1.0.00385.1 | 1055 | 89160  | 0         | 403  | 405  | 99 -  | 1    | 404  | 45744  | 46148  |
| UN15218 | Rsa1.0.00020.1 | 1296 | 283099 | 1.00E-142 | 278  | 285  | 97 -  | 1012 | 1296 | 90069  | 90353  |
| UN15219 | Rsa1.0.05162.1 | 1733 | 14631  | 1.00E-100 | 206  | 211  | 97 +  | 1524 | 1733 | 4180   | 4390   |
| UN15220 | Rsa1.0.33317.1 | 882  | 681    | 1.00E-153 | 380  | 413  | 92 +  | 330  | 733  | 1      | 409    |
| UN15221 | Rsa1.0.00275.1 | 1098 | 210104 | 0         | 995  | 1043 | 95 -  | 1    | 1042 | 205236 | 206257 |
| UN15222 | Rsa1.0.01370.1 | 1686 | 47093  | 0         | 578  | 590  | 97 +  | 1096 | 1683 | 6095   | 6683   |
| UN15223 | Rsa1.0.00825.1 | 942  | 62855  | 1.00E-166 | 302  | 304  | 99 -  | 107  | 410  | 37215  | 37518  |
| UN15224 | Rsa1.0.00128.1 | 997  | 228675 | 1.00E-145 | 318  | 334  | 95 +  | 664  | 997  | 135383 | 135710 |
| UN15225 | Rsa1.0.03813.1 | 1458 | 20708  | 0         | 398  | 403  | 98 -  | 1059 | 1457 | 4888   | 5290   |
| UN15226 | Rsa1.0.02358.1 | 932  | 32213  | 0         | 452  | 462  | 97 -  | 479  | 932  | 251    | 712    |
| UN15227 | Rsa1.0.00754.1 | 908  | 65689  | 1.00E-166 | 296  | 296  | 100 - | 1    | 296  | 53130  | 53425  |
| UN15228 | Rsa1.0.17687.1 | 1026 | 1765   | 0         | 922  | 961  | 95 -  | 37   | 994  | 1      | 956    |
| UN15229 | Rsa1.0.26461.1 | 1271 | 891    | 1.00E-90  | 231  | 247  | 93 -  | 1031 | 1271 | 490    | 730    |
| UN15230 | Rsa1.0.06715.1 | 1185 | 10485  | 0         | 519  | 547  | 94 -  | 1    | 539  | 2804   | 3349   |
| UN15231 | Rsa1.0.00190.1 | 1249 | 318240 | 0         | 606  | 647  | 93 -  | 606  | 1249 | 140909 | 141530 |
| UN15232 | Rsa1.0.27652.1 | 850  | 844    | 0         | 460  | 500  | 92 -  | 351  | 842  | 268    | 767    |
| UN15233 | Rsa1.0.00833.1 | 1204 | 62621  | 1.00E-114 | 223  | 226  | 98 -  | 978  | 1202 | 5189   | 5414   |
| UN15234 | Rsa1.0.00059.1 | 1064 | 159650 | 1.00E-104 | 232  | 243  | 95 +  | 1    | 240  | 147724 | 147965 |
| UN15235 | Rsa1.0.00047.1 | 1193 | 168582 | 1.00E-169 | 355  | 371  | 95 +  | 815  | 1184 | 4911   | 5278   |
| UN15236 | Rsa1.0.00168.1 | 900  | 115870 | 0         | 483  | 495  | 97 -  | 1    | 495  | 40022  | 40514  |
| UN15237 | Rsa1.0.00503.1 | 1077 | 79468  | 1.00E-145 | 338  | 359  | 94 +  | 643  | 998  | 69177  | 69532  |
| UN15238 | Rsa1.0.03455.1 | 1327 | 22804  | 1.00E-126 | 240  | 242  | 99 +  | 1    | 241  | 11896  | 12137  |
| UN15239 | Rsa1.0.05918.1 | 1124 | 12244  | 0         | 1097 | 1137 | 96 -  | 3    | 1119 | 8537   | 9667   |
| UN15240 | Rsa1.0.04123.1 | 851  | 18947  | 0         | 778  | 830  | 93 +  | 21   | 850  | 11889  | 12681  |
| UN15241 | Rsa1.0.02660.1 | 1253 | 28969  | 1.00E-115 | 235  | 243  | 96 +  | 951  | 1193 | 12641  | 12883  |
| UN15242 | Rsa1.0.01407.1 | 1537 | 46425  | 0         | 1465 | 1537 | 95 -  | 1    | 1537 | 9376   | 10911  |
| UN15243 | Rsa1.0.49117.1 | 1180 | 461    | 1.00E-141 | 261  | 263  | 99 -  | 11   | 273  | 121    | 383    |
| UN15244 | Rsa1.0.01806.1 | 1032 | 39021  | 1.00E-150 | 270  | 270  | 100 + | 762  | 1031 | 24779  | 25048  |
| UN15245 | Rsa1.0.00055.1 | 1587 | 520193 | 0         | 1271 | 1299 | 97 +  | 4    | 1301 | 331692 | 332984 |
| UN15246 | Rsa1.0.06563.1 | 1059 | 10765  | 1.00E-154 | 329  | 347  | 94 -  | 1    | 347  | 2187   | 2527   |
| UN15247 | Rsa1.0.02222.1 | 494  | 152798 | 0         | 472  | 488  | 96 -  | 3    | 481  | 4650   | 5136   |

|         |                |      |        |           |      |      |       |     |      |        |        |
|---------|----------------|------|--------|-----------|------|------|-------|-----|------|--------|--------|
| UN15248 | Rsa1.0.08346.1 | 891  | 7497   | 1.00E-133 | 244  | 245  | 99 -  | 1   | 245  | 3302   | 3546   |
| UN15249 | Rsa1.0.00707.1 | 686  | 190112 | 6.00E-76  | 179  | 189  | 94 -  | 3   | 185  | 182523 | 182711 |
| UN15250 | Rsa1.0.06213.1 | 876  | 11478  | 0         | 482  | 519  | 92 -  | 371 | 867  | 1021   | 1535   |
| UN15251 | Rsa1.0.01454.1 | 921  | 45440  | 1.00E-133 | 280  | 291  | 96 +  | 1   | 282  | 14235  | 14524  |
| UN15252 | Rsa1.0.00577.1 | 894  | 174827 | 0         | 537  | 550  | 97 -  | 1   | 550  | 132266 | 132812 |
| UN15253 | Rsa1.0.00931.1 | 1049 | 59210  | 1.00E-169 | 349  | 365  | 95 +  | 335 | 693  | 54903  | 55267  |
| UN15254 | Rsa1.0.01185.1 | 656  | 149842 | 1.00E-119 | 260  | 273  | 95 -  | 23  | 293  | 11446  | 11718  |
| UN15255 | Rsa1.0.01143.1 | 1359 | 52456  | 0         | 1286 | 1367 | 94 -  | 2   | 1356 | 18964  | 20302  |
| UN15256 | Rsa1.0.02129.1 | 967  | 34757  | 0         | 388  | 399  | 97 -  | 502 | 891  | 5631   | 6029   |
| UN15257 | Rsa1.0.00220.1 | 1116 | 192936 | 0         | 471  | 487  | 96 -  | 275 | 752  | 16394  | 16880  |
| UN15258 | Rsa1.0.00376.1 | 336  | 90101  | 3.00E-60  | 127  | 130  | 97 -  | 5   | 134  | 978    | 1107   |
| UN15259 | Rsa1.0.00550.1 | 1181 | 210790 | 0         | 447  | 475  | 94 -  | 712 | 1180 | 177713 | 178187 |
| UN15260 | Rsa1.0.00002.1 | 825  | 601661 | 1.00E-135 | 279  | 288  | 96 +  | 117 | 403  | 140391 | 140677 |
| UN15261 | Rsa1.0.03005.1 | 1177 | 26082  | 0         | 523  | 539  | 97 +  | 3   | 538  | 23151  | 23688  |
| UN15262 | Rsa1.0.00033.1 | 821  | 515811 | 0         | 455  | 455  | 100 - | 3   | 457  | 365760 | 366214 |
| UN15263 | Rsa1.0.01459.1 | 640  | 45277  | 2.00E-88  | 275  | 313  | 87 -  | 345 | 640  | 42955  | 43259  |
| UN15264 | Rsa1.0.00894.1 | 700  | 269700 | 7.00E-97  | 244  | 265  | 92 -  | 13  | 276  | 127216 | 127472 |
| UN15265 | Rsa1.0.00317.1 | 549  | 218290 | 3.00E-83  | 195  | 205  | 95 -  | 345 | 549  | 52669  | 52871  |
| UN15266 | Rsa1.0.02198.1 | 706  | 33989  | 1.00E-103 | 234  | 247  | 94 -  | 460 | 706  | 13971  | 14207  |
| UN15267 | Rsa1.0.17040.1 | 571  | 1944   | 0         | 389  | 397  | 97 +  | 154 | 550  | 1207   | 1602   |
| UN15268 | Rsa1.0.07506.1 | 1137 | 9233   | 0         | 539  | 555  | 97 -  | 583 | 1137 | 2689   | 3242   |
| UN15269 | Rsa1.0.03155.1 | 874  | 24958  | 0         | 443  | 460  | 96 -  | 417 | 873  | 9973   | 10426  |
| UN15270 | Rsa1.0.00503.1 | 763  | 79468  | 0         | 759  | 763  | 99 +  | 1   | 761  | 61033  | 61793  |
| UN15271 | Rsa1.0.00044.1 | 996  | 271658 | 1.00E-108 | 224  | 230  | 97 -  | 1   | 228  | 156762 | 156990 |
| UN15272 | Rsa1.0.00730.1 | 690  | 66673  | 1.00E-168 | 327  | 335  | 97 -  | 357 | 690  | 28375  | 28709  |
| UN15273 | Rsa1.0.05510.1 | 985  | 13470  | 1.00E-148 | 299  | 310  | 96 +  | 197 | 506  | 1981   | 2290   |
| UN15274 | Rsa1.0.00087.1 | 1235 | 761073 | 1.00E-145 | 265  | 266  | 99 +  | 675 | 940  | 274293 | 274558 |
| UN15275 | Rsa1.0.00047.1 | 700  | 168582 | 0         | 410  | 413  | 99 -  | 1   | 413  | 43362  | 43774  |
| UN15276 | Rsa1.0.02138.1 | 495  | 34695  | 5.00E-54  | 134  | 142  | 94 -  | 63  | 204  | 7722   | 7860   |
| UN15277 | Rsa1.0.04415.1 | 965  | 147889 | 0         | 922  | 933  | 98 +  | 3   | 934  | 143690 | 144621 |
| UN15278 | Rsa1.0.03656.1 | 1220 | 21552  | 0         | 749  | 757  | 98 +  | 463 | 1219 | 12500  | 13256  |
| UN15279 | Rsa1.0.14744.1 | 1117 | 3111   | 0         | 352  | 356  | 98 -  | 762 | 1117 | 2187   | 2542   |
| UN15280 | Rsa1.0.04281.1 | 826  | 18107  | 0         | 609  | 650  | 93 +  | 177 | 826  | 15672  | 16321  |
| UN15281 | Rsa1.0.06227.1 | 1103 | 11442  | 0         | 571  | 572  | 99 +  | 502 | 1073 | 4251   | 4822   |
| UN15282 | Rsa1.0.00645.1 | 834  | 189716 | 0         | 808  | 836  | 96 -  | 4   | 834  | 24190  | 25016  |
| UN15283 | Rsa1.0.02633.1 | 932  | 29315  | 0         | 404  | 422  | 95 +  | 3   | 415  | 350    | 771    |
| UN15284 | Rsa1.0.03099.1 | 1326 | 139424 | 0         | 440  | 443  | 99 +  | 1   | 443  | 4169   | 4611   |
| UN15285 | Rsa1.0.14032.1 | 875  | 3893   | 1.00E-160 | 304  | 310  | 98 +  | 564 | 873  | 3098   | 3407   |
| UN15286 | Rsa1.0.07565.1 | 792  | 9122   | 0         | 550  | 554  | 99 -  | 2   | 553  | 4744   | 5297   |

|         |                |      |        |           |      |      |       |     |      |        |        |
|---------|----------------|------|--------|-----------|------|------|-------|-----|------|--------|--------|
| UN15287 | Rsa1.0.02201.1 | 1405 | 33981  | 1.00E-172 | 445  | 494  | 90 +  | 310 | 784  | 30288  | 30776  |
| UN15288 | Rsa1.0.00707.1 | 1252 | 190112 | 0         | 899  | 911  | 98 -  | 345 | 1252 | 155128 | 156038 |
| UN15289 | Rsa1.0.03709.1 | 958  | 21247  | 1.00E-173 | 330  | 336  | 98 -  | 623 | 958  | 18566  | 18900  |
| UN15290 | Rsa1.0.20672.1 | 866  | 1281   | 1.00E-155 | 281  | 282  | 99 +  | 1   | 282  | 246    | 527    |
| UN15291 | Rsa1.0.00655.1 | 1410 | 195840 | 0         | 422  | 425  | 99 -  | 1   | 425  | 17675  | 18098  |
| UN15292 | Rsa1.0.02901.1 | 1609 | 26909  | 0         | 415  | 420  | 98 +  | 1   | 420  | 11160  | 11577  |
| UN15293 | Rsa1.0.04400.1 | 1319 | 17529  | 0         | 838  | 879  | 95 +  | 63  | 938  | 16666  | 17529  |
| UN15294 | Rsa1.0.00826.1 | 713  | 166736 | 0         | 572  | 592  | 96 -  | 116 | 705  | 118806 | 119397 |
| UN15295 | Rsa1.0.00697.1 | 1032 | 67913  | 1.00E-178 | 356  | 367  | 97 +  | 1   | 363  | 39649  | 40015  |
| UN15296 | Rsa1.0.00409.1 | 857  | 146788 | 0         | 467  | 478  | 97 +  | 387 | 856  | 87558  | 88034  |
| UN15297 | Rsa1.0.00418.1 | 718  | 215377 | 0         | 552  | 556  | 99 -  | 163 | 718  | 201867 | 202422 |
| UN15298 | Rsa1.0.00253.1 | 1240 | 231292 | 0         | 978  | 983  | 99 +  | 1   | 982  | 95972  | 96954  |
| UN15299 | Rsa1.0.00569.1 | 1007 | 75060  | 0         | 568  | 579  | 98 +  | 429 | 1006 | 65107  | 65682  |
| UN15300 | Rsa1.0.20024.1 | 977  | 1351   | 8.00E-36  | 141  | 162  | 87 -  | 2   | 163  | 56     | 217    |
| UN15301 | Rsa1.0.05217.1 | 1116 | 142938 | 0         | 533  | 553  | 96 +  | 564 | 1116 | 132903 | 133451 |
| UN15302 | Rsa1.0.07692.1 | 909  | 132338 | 0         | 721  | 736  | 97 -  | 167 | 902  | 6716   | 7450   |
| UN15303 | Rsa1.0.03610.1 | 979  | 21797  | 0         | 334  | 335  | 99 +  | 335 | 669  | 17230  | 17564  |
| UN15304 | Rsa1.0.02223.1 | 775  | 152421 | 1.00E-153 | 290  | 295  | 98 +  | 352 | 646  | 19316  | 19610  |
| UN15305 | Rsa1.0.07444.1 | 875  | 9386   | 1.00E-116 | 242  | 249  | 97 -  | 628 | 875  | 199    | 446    |
| UN15306 | Rsa1.0.00495.1 | 860  | 79934  | 7.00E-70  | 147  | 151  | 97 -  | 127 | 277  | 19840  | 19990  |
| UN15307 | Rsa1.0.01346.1 | 1022 | 47618  | 0         | 442  | 453  | 97 -  | 2   | 454  | 7627   | 8079   |
| UN15308 | Rsa1.0.00092.1 | 898  | 659932 | 0         | 458  | 489  | 93 +  | 413 | 896  | 42020  | 42499  |
| UN15309 | Rsa1.0.00858.1 | 802  | 61892  | 0         | 401  | 422  | 95 -  | 14  | 434  | 33273  | 33686  |
| UN15310 | Rsa1.0.00215.1 | 954  | 201775 | 2.00E-85  | 216  | 227  | 95 +  | 727 | 945  | 2172   | 2398   |
| UN15311 | Rsa1.0.04374.1 | 701  | 17670  | 6.00E-85  | 160  | 160  | 100 + | 542 | 701  | 8075   | 8234   |
| UN15312 | Rsa1.0.00168.1 | 1150 | 115870 | 0         | 478  | 496  | 96 -  | 334 | 826  | 98954  | 99439  |
| UN15313 | Rsa1.0.01454.1 | 1068 | 45440  | 1.00E-176 | 378  | 400  | 94 +  | 667 | 1066 | 32801  | 33183  |
| UN15314 | Rsa1.0.00253.1 | 905  | 231292 | 1.00E-105 | 219  | 226  | 96 -  | 3   | 228  | 206344 | 206568 |
| UN15315 | Rsa1.0.01001.1 | 560  | 57077  | 1.00E-179 | 357  | 370  | 96 -  | 191 | 560  | 23252  | 23621  |
| UN15316 | Rsa1.0.04172.1 | 1251 | 18679  | 1.00E-150 | 276  | 278  | 99 -  | 311 | 588  | 11435  | 11712  |
| UN15317 | Rsa1.0.00556.1 | 673  | 207212 | 1.00E-121 | 221  | 221  | 100 - | 78  | 298  | 146894 | 147114 |
| UN15318 | Rsa1.0.07250.1 | 863  | 9663   | 0         | 692  | 717  | 96 +  | 3   | 719  | 5384   | 6096   |
| UN15319 | Rsa1.0.00954.1 | 2294 | 189536 | 1.00E-163 | 331  | 342  | 96 -  | 7   | 348  | 40588  | 40925  |
| UN15320 | Rsa1.0.01540.1 | 1322 | 151890 | 0         | 1236 | 1328 | 93 +  | 1   | 1320 | 142474 | 143775 |
| UN15321 | Rsa1.0.00017.1 | 1732 | 752458 | 1.00E-152 | 323  | 336  | 96 +  | 80  | 415  | 272077 | 272408 |
| UN15322 | Rsa1.0.00003.1 | 764  | 340054 | 1.00E-119 | 304  | 332  | 91 +  | 403 | 733  | 4541   | 4856   |
| UN15323 | Rsa1.0.00087.1 | 810  | 761073 | 1.00E-119 | 308  | 335  | 91 -  | 485 | 810  | 615087 | 615419 |
| UN15324 | Rsa1.0.01105.1 | 559  | 53958  | 1.00E-152 | 275  | 276  | 99 -  | 138 | 413  | 1682   | 1957   |
| UN15325 | Rsa1.0.00883.1 | 836  | 61230  | 0         | 429  | 441  | 97 +  | 1   | 438  | 29866  | 30306  |

|         |                |      |        |           |      |      |       |     |      |        |        |
|---------|----------------|------|--------|-----------|------|------|-------|-----|------|--------|--------|
| UN15326 | Rsa1.0.09314.1 | 1403 | 6461   | 0         | 799  | 810  | 98 -  | 408 | 1216 | 3997   | 4803   |
| UN15327 | Rsa1.0.00330.1 | 701  | 94666  | 1.00E-129 | 240  | 242  | 99 +  | 1   | 242  | 42507  | 42748  |
| UN15328 | Rsa1.0.00135.1 | 687  | 178077 | 0         | 491  | 518  | 94 -  | 4   | 511  | 8955   | 9472   |
| UN15329 | Rsa1.0.02301.1 | 880  | 32835  | 0         | 794  | 837  | 94 -  | 44  | 878  | 20259  | 21093  |
| UN15330 | Rsa1.0.01995.1 | 855  | 36347  | 0         | 479  | 502  | 95 -  | 2   | 494  | 22162  | 22663  |
| UN15331 | Rsa1.0.00194.1 | 738  | 110851 | 0         | 604  | 641  | 94 -  | 3   | 625  | 54321  | 54961  |
| UN15332 | Rsa1.0.63101.1 | 638  | 364    | 4.00E-89  | 173  | 175  | 98 +  | 61  | 235  | 1      | 175    |
| UN15333 | Rsa1.0.00409.1 | 603  | 146788 | 0         | 365  | 365  | 100 - | 11  | 375  | 1659   | 2023   |
| UN15334 | Rsa1.0.16093.1 | 718  | 2288   | 0         | 357  | 358  | 99 +  | 1   | 357  | 1223   | 1580   |
| UN15335 | Rsa1.0.03887.1 | 1293 | 20247  | 0         | 975  | 982  | 99 +  | 311 | 1292 | 2579   | 3560   |
| UN15336 | Rsa1.0.00087.1 | 658  | 761073 | 1.00E-109 | 290  | 319  | 90 -  | 3   | 304  | 217289 | 217606 |
| UN15337 | Rsa1.0.00659.1 | 707  | 69733  | 1.00E-137 | 321  | 346  | 92 -  | 1   | 346  | 55176  | 55500  |
| UN15338 | Rsa1.0.11435.1 | 933  | 5508   | 1.00E-147 | 277  | 281  | 98 -  | 490 | 770  | 248    | 528    |
| UN15339 | Rsa1.0.00082.1 | 953  | 237584 | 1.00E-155 | 339  | 356  | 95 -  | 608 | 953  | 53592  | 53947  |
| UN15340 | Rsa1.0.03484.1 | 714  | 22618  | 1.00E-122 | 229  | 231  | 99 +  | 31  | 261  | 4972   | 5202   |
| UN15341 | Rsa1.0.04194.1 | 1175 | 132734 | 7.00E-89  | 214  | 227  | 94 -  | 950 | 1175 | 117319 | 117544 |
| UN15342 | Rsa1.0.01674.1 | 721  | 168300 | 1.00E-132 | 296  | 313  | 94 +  | 410 | 721  | 4084   | 4393   |
| UN15343 | Rsa1.0.11462.1 | 1135 | 5500   | 0         | 959  | 1022 | 93 -  | 137 | 1135 | 2312   | 3331   |
| UN15344 | Rsa1.0.00500.1 | 811  | 272308 | 0         | 586  | 599  | 97 -  | 1   | 599  | 157120 | 157717 |
| UN15345 | Rsa1.0.00198.1 | 863  | 222963 | 0         | 440  | 443  | 99 -  | 3   | 445  | 123517 | 123959 |
| UN15346 | Rsa1.0.08846.1 | 1491 | 6867   | 1.00E-145 | 324  | 342  | 94 +  | 11  | 350  | 3969   | 4300   |
| UN15347 | Rsa1.0.01412.1 | 1089 | 46311  | 0         | 569  | 586  | 97 +  | 506 | 1086 | 11181  | 11766  |
| UN15348 | Rsa1.0.18647.1 | 893  | 1560   | 0         | 389  | 389  | 100 - | 504 | 892  | 544    | 932    |
| UN15349 | Rsa1.0.02239.1 | 921  | 33534  | 0         | 379  | 381  | 99 +  | 1   | 380  | 9569   | 9949   |
| UN15350 | Rsa1.0.04138.1 | 794  | 18898  | 0         | 561  | 562  | 99 +  | 1   | 562  | 3225   | 3786   |
| UN15351 | Rsa1.0.06978.1 | 933  | 10073  | 0         | 645  | 645  | 100 + | 289 | 933  | 1165   | 1809   |
| UN15352 | Rsa1.0.00699.1 | 516  | 184398 | 0         | 507  | 517  | 98 -  | 1   | 516  | 127808 | 128324 |
| UN15353 | Rsa1.0.00358.1 | 1208 | 91293  | 0         | 574  | 578  | 99 -  | 2   | 579  | 74541  | 75118  |
| UN15354 | Rsa1.0.01400.1 | 666  | 46560  | 4.00E-95  | 180  | 181  | 99 -  | 484 | 664  | 5934   | 6114   |
| UN15355 | Rsa1.0.14826.1 | 1144 | 3040   | 0         | 443  | 456  | 97 +  | 689 | 1142 | 894    | 1347   |
| UN15356 | Rsa1.0.03870.1 | 795  | 20362  | 0         | 750  | 819  | 91 -  | 3   | 794  | 10660  | 11461  |
| UN15357 | Rsa1.0.02663.1 | 793  | 169243 | 0         | 629  | 643  | 97 -  | 5   | 647  | 7861   | 8502   |
| UN15358 | Rsa1.0.06288.1 | 2101 | 11302  | 0         | 1736 | 1773 | 97 +  | 1   | 1763 | 313    | 2084   |
| UN15359 | Rsa1.0.02629.1 | 1040 | 29350  | 1.00E-156 | 286  | 287  | 99 -  | 755 | 1040 | 4981   | 5267   |
| UN15360 | Rsa1.0.00034.1 | 790  | 260119 | 0         | 755  | 813  | 92 +  | 2   | 790  | 67162  | 67960  |
| UN15361 | Rsa1.0.02647.1 | 685  | 29120  | 0         | 617  | 638  | 96 -  | 48  | 684  | 25184  | 25819  |
| UN15362 | Rsa1.0.01469.1 | 1594 | 45139  | 0         | 811  | 837  | 96 -  | 759 | 1594 | 30986  | 31819  |
| UN15363 | Rsa1.0.01995.1 | 931  | 36347  | 0         | 478  | 504  | 94 +  | 439 | 930  | 22162  | 22664  |
| UN15364 | Rsa1.0.00006.1 | 799  | 396176 | 0         | 768  | 799  | 96 +  | 1   | 799  | 298200 | 298996 |

|         |                |      |        |           |      |      |       |     |      |        |        |
|---------|----------------|------|--------|-----------|------|------|-------|-----|------|--------|--------|
| UN15365 | Rsa1.0.03326.1 | 653  | 23710  | 0         | 645  | 653  | 98 +  | 1   | 653  | 16896  | 17548  |
| UN15366 | Rsa1.0.00805.1 | 994  | 63724  | 0         | 964  | 1008 | 95 -  | 2   | 994  | 42546  | 43543  |
| UN15367 | Rsa1.0.06802.1 | 640  | 10330  | 0         | 491  | 507  | 96 +  | 136 | 639  | 8965   | 9468   |
| UN15368 | Rsa1.0.01355.1 | 709  | 47303  | 0         | 621  | 671  | 92 -  | 41  | 703  | 39409  | 40068  |
| UN15369 | Rsa1.0.03713.1 | 671  | 21221  | 1.00E-117 | 220  | 222  | 99 +  | 220 | 441  | 16746  | 16967  |
| UN15370 | Rsa1.0.00205.1 | 547  | 193401 | 2.00E-99  | 218  | 228  | 95 -  | 307 | 533  | 130115 | 130342 |
| UN15371 | Rsa1.0.07617.1 | 866  | 9015   | 0         | 815  | 835  | 97 +  | 2   | 833  | 3003   | 3836   |
| UN15372 | Rsa1.0.00253.1 | 686  | 231292 | 0         | 658  | 689  | 95 -  | 2   | 686  | 196757 | 197431 |
| UN15373 | Rsa1.0.00012.1 | 890  | 222148 | 1.00E-131 | 244  | 246  | 99 -  | 643 | 888  | 69119  | 69364  |
| UN15374 | Rsa1.0.01887.1 | 818  | 37564  | 1.00E-137 | 277  | 287  | 96 +  | 159 | 445  | 26172  | 26458  |
| UN15375 | Rsa1.0.19809.1 | 810  | 1380   | 1.00E-138 | 264  | 269  | 98 -  | 106 | 374  | 715    | 983    |
| UN15376 | Rsa1.0.04470.1 | 1122 | 17204  | 1.00E-140 | 310  | 328  | 94 -  | 3   | 330  | 4465   | 4785   |
| UN15377 | Rsa1.0.00299.1 | 1117 | 97770  | 0         | 407  | 412  | 98 -  | 706 | 1117 | 19341  | 19751  |
| UN15378 | Rsa1.0.10940.1 | 511  | 5670   | 3.00E-77  | 172  | 177  | 97 +  | 238 | 414  | 5499   | 5670   |
| UN15379 | Rsa1.0.04542.1 | 961  | 16930  | 1.00E-105 | 235  | 246  | 95 +  | 719 | 961  | 16072  | 16312  |
| UN15380 | Rsa1.0.00358.1 | 988  | 91293  | 7.00E-98  | 188  | 190  | 98 -  | 177 | 366  | 22173  | 22362  |
| UN15381 | Rsa1.0.00001.1 | 1449 | 363028 | 0         | 1414 | 1447 | 97 +  | 5   | 1449 | 34790  | 36236  |
| UN15382 | Rsa1.0.13580.1 | 1778 | 4711   | 0         | 1059 | 1077 | 98 +  | 3   | 1077 | 1390   | 2464   |
| UN15383 | Rsa1.0.00642.1 | 682  | 201230 | 0         | 675  | 684  | 98 -  | 1   | 682  | 62519  | 63201  |
| UN15384 | Rsa1.0.00163.1 | 799  | 116847 | 0         | 552  | 581  | 95 -  | 230 | 793  | 8550   | 9130   |
| UN15385 | Rsa1.0.00127.1 | 1506 | 127446 | 0         | 472  | 502  | 94 +  | 2   | 492  | 62979  | 63478  |
| UN15386 | Rsa1.0.00502.1 | 1062 | 204180 | 0         | 368  | 372  | 98 -  | 690 | 1061 | 11653  | 12024  |
| UN15387 | Rsa1.0.20478.1 | 1616 | 1301   | 0         | 608  | 623  | 97 +  | 994 | 1616 | 5      | 623    |
| UN15388 | Rsa1.0.01349.1 | 1317 | 47513  | 0         | 357  | 358  | 99 -  | 960 | 1317 | 45089  | 45446  |
| UN15389 | Rsa1.0.07974.1 | 689  | 8147   | 1.00E-119 | 264  | 279  | 94 -  | 412 | 687  | 6419   | 6697   |
| UN15390 | Rsa1.0.04140.1 | 483  | 18879  | 1.00E-164 | 298  | 300  | 99 +  | 183 | 482  | 3855   | 4154   |
| UN15391 | Rsa1.0.02966.1 | 980  | 135126 | 0         | 489  | 512  | 95 +  | 461 | 971  | 17972  | 18475  |
| UN15392 | Rsa1.0.00049.1 | 761  | 167018 | 0         | 376  | 386  | 97 -  | 378 | 761  | 7072   | 7451   |
| UN15393 | Rsa1.0.00732.1 | 838  | 66631  | 1.00E-110 | 304  | 331  | 91 +  | 484 | 812  | 1460   | 1787   |
| UN15394 | Rsa1.0.03355.1 | 861  | 23489  | 0         | 560  | 572  | 97 -  | 290 | 861  | 14140  | 14711  |
| UN15395 | Rsa1.0.01773.1 | 919  | 39546  | 1.00E-132 | 239  | 239  | 100 - | 213 | 451  | 28417  | 28655  |
| UN15396 | Rsa1.0.00301.1 | 1520 | 365315 | 0         | 370  | 376  | 98 +  | 23  | 398  | 249    | 624    |
| UN15397 | Rsa1.0.00037.1 | 1133 | 307838 | 0         | 518  | 519  | 99 -  | 124 | 642  | 182054 | 182572 |
| UN15398 | Rsa1.0.36865.1 | 1389 | 612    | 1.00E-144 | 295  | 306  | 96 +  | 58  | 360  | 140    | 445    |
| UN15399 | Rsa1.0.00050.1 | 1119 | 237174 | 0         | 366  | 367  | 99 +  | 1   | 367  | 103878 | 104244 |
| UN15400 | Rsa1.0.00524.1 | 911  | 169613 | 0         | 420  | 430  | 97 +  | 450 | 874  | 129773 | 130202 |
| UN15401 | Rsa1.0.00777.1 | 909  | 191865 | 0         | 395  | 396  | 99 +  | 126 | 521  | 180530 | 180925 |
| UN15402 | Rsa1.0.00492.1 | 813  | 80178  | 4.00E-99  | 215  | 222  | 96 +  | 42  | 260  | 916    | 1135   |
| UN15403 | Rsa1.0.02550.1 | 1170 | 291051 | 1.00E-169 | 330  | 339  | 97 -  | 22  | 360  | 6190   | 6525   |

|         |                |      |        |           |      |      |      |     |      |        |        |
|---------|----------------|------|--------|-----------|------|------|------|-----|------|--------|--------|
| UN15404 | Rsa1.0_12060.1 | 1085 | 5328   | 1.00E-102 | 235  | 250  | 94 + | 832 | 1081 | 97     | 346    |
| UN15405 | Rsa1.0_02807.1 | 1289 | 27680  | 0         | 440  | 455  | 96 - | 783 | 1236 | 5010   | 5464   |
| UN15406 | Rsa1.0_00502.1 | 1209 | 204180 | 0         | 451  | 468  | 96 + | 15  | 479  | 61012  | 61469  |
| UN15407 | Rsa1.0_00648.1 | 1187 | 70351  | 1.00E-134 | 249  | 251  | 99 - | 1   | 251  | 13289  | 13539  |
| UN15408 | Rsa1.0_00457.1 | 962  | 337301 | 1.00E-108 | 273  | 297  | 91 - | 55  | 341  | 130569 | 130856 |
| UN15409 | Rsa1.0_00001.1 | 1051 | 363028 | 1.00E-163 | 378  | 406  | 93 - | 649 | 1051 | 190757 | 191142 |
| UN15410 | Rsa1.0_00009.1 | 1097 | 232558 | 1.00E-110 | 224  | 231  | 96 - | 867 | 1097 | 32980  | 33210  |
| UN15411 | Rsa1.0_02928.1 | 755  | 26680  | 1.00E-177 | 358  | 370  | 96 - | 382 | 749  | 7245   | 7608   |
| UN15412 | Rsa1.0_00386.1 | 858  | 89134  | 1.00E-150 | 301  | 309  | 97 + | 550 | 856  | 44310  | 44617  |
| UN15413 | Rsa1.0_07499.1 | 943  | 9244   | 0         | 414  | 421  | 98 + | 513 | 933  | 6510   | 6930   |
| UN15414 | Rsa1.0_03218.1 | 1021 | 24539  | 1.00E-167 | 358  | 374  | 95 - | 651 | 1021 | 3739   | 4112   |
| UN15415 | Rsa1.0_00675.1 | 1070 | 145590 | 0         | 418  | 422  | 99 - | 648 | 1069 | 143628 | 144049 |
| UN15416 | Rsa1.0_00504.1 | 1160 | 79334  | 1.00E-100 | 213  | 222  | 95 - | 265 | 486  | 31151  | 31372  |
| UN15417 | Rsa1.0_00059.1 | 1309 | 159650 | 1.00E-170 | 345  | 357  | 96 + | 1   | 353  | 131062 | 131418 |
| UN15418 | Rsa1.0_02219.1 | 899  | 33798  | 0         | 887  | 889  | 99 - | 9   | 897  | 21460  | 22347  |
| UN15419 | Rsa1.0_05559.1 | 1206 | 13329  | 0         | 430  | 440  | 97 - | 87  | 526  | 8434   | 8872   |
| UN15420 | Rsa1.0_00110.1 | 1040 | 132719 | 1.00E-173 | 377  | 395  | 95 - | 3   | 397  | 4280   | 4669   |
| UN15421 | Rsa1.0_01632.1 | 537  | 181224 | 0         | 533  | 535  | 99 - | 1   | 535  | 145738 | 146271 |
| UN15422 | Rsa1.0_00526.1 | 1062 | 169279 | 0         | 495  | 499  | 99 - | 199 | 697  | 148049 | 148547 |
| UN15423 | Rsa1.0_00324.1 | 1213 | 218805 | 0         | 1181 | 1227 | 96 + | 3   | 1212 | 214955 | 216176 |
| UN15424 | Rsa1.0_03781.1 | 899  | 20891  | 0         | 703  | 728  | 96 + | 171 | 897  | 11400  | 12127  |
| UN15425 | Rsa1.0_03158.1 | 1201 | 24950  | 0         | 447  | 472  | 94 - | 732 | 1197 | 8092   | 8563   |
| UN15426 | Rsa1.0_00101.1 | 1082 | 267193 | 0         | 638  | 640  | 99 - | 4   | 643  | 74600  | 75239  |
| UN15427 | Rsa1.0_00339.1 | 1031 | 222974 | 1.00E-93  | 220  | 231  | 95 - | 800 | 1028 | 176096 | 176325 |
| UN15428 | Rsa1.0_00909.1 | 774  | 59976  | 0         | 501  | 514  | 97 - | 8   | 521  | 26084  | 26597  |
| UN15429 | Rsa1.0_00285.1 | 971  | 149638 | 0         | 368  | 371  | 99 + | 231 | 601  | 86908  | 87278  |
| UN15430 | Rsa1.0_02700.1 | 1088 | 28584  | 0         | 414  | 420  | 98 - | 634 | 1053 | 2935   | 3354   |
| UN15431 | Rsa1.0_02097.1 | 757  | 35036  | 0         | 457  | 461  | 99 - | 1   | 461  | 16158  | 16618  |
| UN15432 | Rsa1.0_00308.1 | 678  | 96915  | 1.00E-145 | 292  | 302  | 96 - | 1   | 298  | 80355  | 80656  |
| UN15433 | Rsa1.0_00087.1 | 636  | 761073 | 0         | 630  | 636  | 99 - | 1   | 634  | 580712 | 581347 |
| UN15434 | Rsa1.0_08358.1 | 1092 | 7484   | 0         | 408  | 424  | 96 + | 2   | 418  | 6535   | 6958   |
| UN15435 | Rsa1.0_01104.1 | 1425 | 285480 | 0         | 844  | 879  | 96 - | 547 | 1425 | 263864 | 264742 |
| UN15436 | Rsa1.0_01883.1 | 1021 | 37661  | 1.00E-156 | 367  | 394  | 93 - | 3   | 390  | 22302  | 22692  |
| UN15437 | Rsa1.0_30502.1 | 1160 | 752    | 1.00E-158 | 361  | 383  | 94 - | 35  | 416  | 372    | 752    |
| UN15438 | Rsa1.0_00556.1 | 726  | 207212 | 0         | 695  | 725  | 95 - | 1   | 720  | 43742  | 44462  |
| UN15439 | Rsa1.0_03325.1 | 510  | 23720  | 1.00E-170 | 305  | 306  | 99 - | 205 | 510  | 19985  | 20290  |
| UN15440 | Rsa1.0_00917.1 | 747  | 182012 | 0         | 434  | 448  | 96 + | 6   | 449  | 175681 | 176128 |
| UN15441 | Rsa1.0_01096.1 | 868  | 54266  | 0         | 436  | 454  | 96 - | 172 | 625  | 2669   | 3122   |
| UN15442 | Rsa1.0_00168.1 | 824  | 115870 | 0         | 497  | 512  | 97 + | 316 | 823  | 40005  | 40513  |

|         |                |      |        |           |      |      |       |     |      |        |        |
|---------|----------------|------|--------|-----------|------|------|-------|-----|------|--------|--------|
| UN15443 | Rsa1.0.00195.1 | 729  | 251884 | 2.33E-156 | 282  | 288  | 97 +  | 445 | 729  | 83583  | 83870  |
| UN15444 | Rsa1.0.00482.1 | 868  | 81162  | 1.00E-130 | 239  | 240  | 99 +  | 268 | 507  | 63861  | 64100  |
| UN15445 | Rsa1.0.00121.1 | 1119 | 278029 | 1.00E-150 | 269  | 269  | 100 + | 619 | 887  | 265346 | 265614 |
| UN15446 | Rsa1.0.00204.1 | 883  | 109056 | 0         | 510  | 539  | 94 -  | 1   | 528  | 9815   | 10350  |
| UN15447 | Rsa1.0.00802.1 | 778  | 63846  | 0         | 382  | 383  | 99 +  | 69  | 451  | 26121  | 26503  |
| UN15448 | Rsa1.0.00087.1 | 1307 | 761073 | 1.00E-123 | 240  | 245  | 97 -  | 806 | 1050 | 293120 | 293364 |
| UN15449 | Rsa1.0.07756.1 | 588  | 8634   | 6.00E-91  | 210  | 221  | 95 +  | 3   | 221  | 6503   | 6722   |
| UN15450 | Rsa1.0.08922.1 | 1073 | 6788   | 0         | 1041 | 1066 | 97 -  | 8   | 1073 | 1939   | 3002   |
| UN15451 | Rsa1.0.00078.1 | 836  | 175053 | 1.00E-171 | 308  | 309  | 99 +  | 248 | 556  | 47230  | 47538  |
| UN15452 | Rsa1.0.08410.1 | 1559 | 7406   | 0         | 354  | 358  | 98 -  | 2   | 358  | 6034   | 6390   |
| UN15453 | Rsa1.0.00762.1 | 910  | 165246 | 0         | 399  | 402  | 99 +  | 3   | 404  | 25816  | 26217  |
| UN15454 | Rsa1.0.05491.1 | 1074 | 13554  | 4.00E-93  | 180  | 182  | 98 +  | 681 | 862  | 9307   | 9488   |
| UN15455 | Rsa1.0.04478.1 | 735  | 17183  | 0         | 693  | 727  | 95 -  | 1   | 727  | 3347   | 4068   |
| UN15456 | Rsa1.0.03574.1 | 472  | 22004  | 4.00E-79  | 267  | 302  | 88 +  | 1   | 290  | 17888  | 18178  |
| UN15457 | Rsa1.0.00579.1 | 1029 | 148308 | 1.00E-133 | 257  | 262  | 98 -  | 300 | 561  | 70548  | 70809  |
| UN15458 | Rsa1.0.00092.1 | 1122 | 659932 | 0         | 1118 | 1119 | 99 -  | 3   | 1121 | 175649 | 176766 |
| UN15459 | Rsa1.0.02178.1 | 421  | 156197 | 2.00E-99  | 205  | 212  | 96 +  | 3   | 214  | 870    | 1081   |
| UN15460 | Rsa1.0.02987.1 | 1478 | 26196  | 0         | 481  | 510  | 94 -  | 979 | 1478 | 24975  | 25473  |
| UN15461 | Rsa1.0.00235.1 | 913  | 154696 | 0         | 443  | 463  | 95 +  | 27  | 488  | 139911 | 140365 |
| UN15462 | Rsa1.0.00040.1 | 699  | 324196 | 0         | 443  | 454  | 97 -  | 60  | 510  | 224430 | 224883 |
| UN15463 | Rsa1.0.02500.1 | 793  | 30768  | 1.00E-159 | 333  | 347  | 95 +  | 444 | 787  | 7770   | 8115   |
| UN15464 | Rsa1.0.00662.1 | 588  | 192183 | 1.00E-167 | 310  | 314  | 98 +  | 1   | 314  | 11320  | 11633  |
| UN15465 | Rsa1.0.00097.1 | 646  | 138858 | 1.00E-168 | 303  | 304  | 99 +  | 5   | 308  | 14049  | 14352  |
| UN15466 | Rsa1.0.37078.1 | 805  | 608    | 0         | 374  | 385  | 97 -  | 422 | 805  | 225    | 608    |
| UN15467 | Rsa1.0.00807.1 | 711  | 63607  | 1.00E-180 | 361  | 371  | 97 -  | 340 | 709  | 11803  | 12170  |
| UN15468 | Rsa1.0.00135.1 | 763  | 178077 | 1.00E-172 | 330  | 338  | 97 +  | 223 | 560  | 8955   | 9292   |
| UN15469 | Rsa1.0.01214.1 | 918  | 50599  | 0         | 878  | 922  | 95 -  | 2   | 917  | 49192  | 50111  |
| UN15470 | Rsa1.0.03517.1 | 1041 | 22337  | 1.00E-130 | 295  | 312  | 94 -  | 1   | 312  | 8366   | 8674   |
| UN15471 | Rsa1.0.11599.1 | 897  | 5462   | 1.00E-133 | 253  | 257  | 98 -  | 637 | 893  | 4673   | 4929   |
| UN15472 | Rsa1.0.08358.1 | 1096 | 7484   | 0         | 392  | 409  | 95 -  | 694 | 1095 | 6550   | 6958   |
| UN15473 | Rsa1.0.01931.1 | 1086 | 37187  | 0         | 541  | 573  | 94 +  | 390 | 960  | 32029  | 32590  |
| UN15474 | Rsa1.0.15178.1 | 790  | 2778   | 0         | 505  | 515  | 98 +  | 3   | 516  | 1791   | 2305   |
| UN15475 | Rsa1.0.00055.1 | 806  | 520193 | 1.00E-128 | 263  | 273  | 96 +  | 457 | 729  | 310467 | 310739 |
| UN15476 | Rsa1.0.00168.1 | 748  | 115870 | 1.00E-123 | 224  | 224  | 100 + | 3   | 226  | 108565 | 108788 |
| UN15477 | Rsa1.0.00205.1 | 627  | 193401 | 1.00E-143 | 336  | 358  | 93 +  | 271 | 627  | 38432  | 38777  |
| UN15478 | Rsa1.0.00223.1 | 1393 | 106231 | 0         | 1068 | 1107 | 96 -  | 4   | 1109 | 2967   | 4073   |
| UN15479 | Rsa1.0.13708.1 | 1000 | 4447   | 1.00E-113 | 263  | 279  | 94 -  | 725 | 999  | 3623   | 3897   |
| UN15480 | Rsa1.0.01762.1 | 1150 | 39682  | 1.00E-142 | 378  | 416  | 90 -  | 720 | 1116 | 6860   | 7267   |
| UN15481 | Rsa1.0.06898.1 | 954  | 10191  | 3.00E-84  | 224  | 244  | 91 -  | 676 | 918  | 3249   | 3483   |

|         |                |      |        |           |      |      |       |      |      |        |        |
|---------|----------------|------|--------|-----------|------|------|-------|------|------|--------|--------|
| UN15482 | Rsa1.0.01090.1 | 1629 | 54385  | 0         | 625  | 636  | 98 +  | 147  | 782  | 44296  | 44931  |
| UN15483 | Rsa1.0.00577.1 | 1325 | 174827 | 0         | 423  | 444  | 95 -  | 789  | 1229 | 149759 | 150199 |
| UN15484 | Rsa1.0.00246.1 | 1159 | 103541 | 1.00E-169 | 318  | 323  | 98 +  | 838  | 1157 | 34114  | 34436  |
| UN15485 | Rsa1.0.00615.1 | 1030 | 72235  | 0         | 668  | 690  | 96 +  | 1    | 684  | 54716  | 55402  |
| UN15486 | Rsa1.0.00184.1 | 1210 | 218748 | 0         | 864  | 873  | 98 +  | 339  | 1210 | 43850  | 44722  |
| UN15487 | Rsa1.0.02910.1 | 1115 | 26843  | 1.00E-164 | 307  | 309  | 99 -  | 209  | 516  | 1620   | 1927   |
| UN15488 | Rsa1.0.44116.1 | 929  | 510    | 0         | 347  | 350  | 99 -  | 324  | 673  | 81     | 430    |
| UN15489 | Rsa1.0.00038.1 | 1054 | 314568 | 0         | 426  | 435  | 97 +  | 1    | 435  | 252468 | 252902 |
| UN15490 | Rsa1.0.01050.1 | 807  | 55651  | 0         | 783  | 815  | 96 -  | 3    | 807  | 12073  | 12887  |
| UN15491 | Rsa1.0.03191.1 | 1000 | 145762 | 1.00E-133 | 348  | 382  | 91 +  | 633  | 1000 | 16325  | 16695  |
| UN15492 | Rsa1.0.00161.1 | 684  | 116891 | 0         | 660  | 685  | 96 +  | 1    | 682  | 32514  | 33198  |
| UN15493 | Rsa1.0.00135.1 | 1219 | 178077 | 0         | 478  | 478  | 100 + | 741  | 1218 | 19426  | 19903  |
| UN15494 | Rsa1.0.11907.1 | 919  | 5374   | 0         | 487  | 492  | 98 -  | 1    | 492  | 1101   | 1591   |
| UN15495 | Rsa1.0.14913.1 | 1151 | 2969   | 0         | 461  | 482  | 95 +  | 666  | 1141 | 666    | 1145   |
| UN15496 | Rsa1.0.03295.1 | 1209 | 23970  | 1.00E-126 | 311  | 338  | 92 -  | 206  | 538  | 21467  | 21804  |
| UN15497 | Rsa1.0.02022.1 | 1261 | 35923  | 1.00E-151 | 324  | 340  | 95 +  | 864  | 1203 | 14042  | 14380  |
| UN15498 | Rsa1.0.02550.1 | 912  | 291051 | 0         | 323  | 323  | 100 - | 1    | 323  | 6190   | 6512   |
| UN15499 | Rsa1.0.00060.1 | 1139 | 502678 | 1.00E-168 | 395  | 424  | 93 -  | 16   | 437  | 495990 | 496403 |
| UN15500 | Rsa1.0.00807.1 | 1631 | 63607  | 0         | 626  | 632  | 99 -  | 1001 | 1627 | 16993  | 17624  |
| UN15501 | Rsa1.0.08717.1 | 856  | 7008   | 0         | 497  | 534  | 93 -  | 33   | 558  | 2884   | 3412   |
| UN15502 | Rsa1.0.00777.1 | 947  | 191865 | 0         | 414  | 436  | 94 -  | 168  | 603  | 128527 | 128962 |
| UN15503 | Rsa1.0.00534.1 | 950  | 77361  | 0         | 529  | 563  | 93 +  | 1    | 551  | 8745   | 9305   |
| UN15504 | Rsa1.0.00027.1 | 838  | 283362 | 0         | 354  | 354  | 100 + | 1    | 354  | 279811 | 280164 |
| UN15505 | Rsa1.0.05204.1 | 871  | 14516  | 0         | 427  | 459  | 93 -  | 108  | 551  | 6647   | 7105   |
| UN15506 | Rsa1.0.03499.1 | 1268 | 22462  | 0         | 731  | 775  | 94 -  | 497  | 1268 | 8399   | 9161   |
| UN15507 | Rsa1.0.00215.1 | 916  | 201775 | 7.00E-73  | 146  | 148  | 98 +  | 458  | 605  | 1921   | 2068   |
| UN15508 | Rsa1.0.02883.1 | 1116 | 27035  | 0         | 375  | 386  | 97 -  | 320  | 705  | 3528   | 3913   |
| UN15509 | Rsa1.0.03263.1 | 1366 | 24268  | 0         | 1061 | 1100 | 96 -  | 1    | 1087 | 20569  | 21661  |
| UN15510 | Rsa1.0.01537.1 | 462  | 187285 | 0         | 431  | 460  | 93 +  | 1    | 455  | 175370 | 175826 |
| UN15511 | Rsa1.0.00254.1 | 965  | 102600 | 1.00E-107 | 254  | 271  | 93 -  | 698  | 965  | 77343  | 77601  |
| UN15512 | Rsa1.0.01209.1 | 1002 | 50668  | 1.00E-176 | 351  | 361  | 97 +  | 648  | 1002 | 40043  | 40402  |
| UN15513 | Rsa1.0.00971.1 | 1410 | 57973  | 1.00E-148 | 322  | 338  | 95 -  | 4    | 336  | 51430  | 51764  |
| UN15514 | Rsa1.0.02019.1 | 1111 | 35983  | 1.00E-133 | 316  | 336  | 94 +  | 1    | 335  | 13309  | 13635  |
| UN15515 | Rsa1.0.01062.1 | 811  | 55325  | 1.00E-100 | 195  | 198  | 98 +  | 294  | 491  | 37369  | 37566  |
| UN15516 | Rsa1.0.01758.1 | 1116 | 39747  | 0         | 407  | 416  | 97 +  | 339  | 754  | 37154  | 37568  |
| UN15517 | Rsa1.0.00140.1 | 1518 | 121541 | 1.00E-165 | 346  | 363  | 95 +  | 1057 | 1419 | 49081  | 49443  |
| UN15518 | Rsa1.0.04034.1 | 1149 | 19481  | 1.00E-132 | 255  | 260  | 98 +  | 212  | 471  | 12812  | 13071  |
| UN15519 | Rsa1.0.02671.1 | 1185 | 28887  | 1.00E-154 | 322  | 336  | 95 -  | 850  | 1185 | 9126   | 9449   |
| UN15520 | Rsa1.0.00710.1 | 903  | 67325  | 1.00E-122 | 268  | 279  | 96 -  | 35   | 311  | 26519  | 26796  |



|         |                |      |        |           |      |      |       |      |      |        |        |
|---------|----------------|------|--------|-----------|------|------|-------|------|------|--------|--------|
| UN15521 | Rsa1.0.00026.1 | 1168 | 327835 | 0         | 1029 | 1059 | 97 -  | 110  | 1167 | 2423   | 3481   |
| UN15522 | Rsa1.0.01783.1 | 521  | 39383  | 1.00E-173 | 314  | 316  | 99 +  | 61   | 376  | 19912  | 20227  |
| UN15523 | Rsa1.0.00842.1 | 1258 | 62493  | 1.00E-124 | 307  | 326  | 94 -  | 9    | 330  | 29546  | 29868  |
| UN15524 | Rsa1.0.01581.1 | 1225 | 42833  | 0         | 575  | 581  | 98 +  | 647  | 1225 | 1828   | 2408   |
| UN15525 | Rsa1.0.00119.1 | 1297 | 467509 | 1.00E-104 | 208  | 213  | 97 -  | 34   | 246  | 390249 | 390461 |
| UN15526 | Rsa1.0.00838.1 | 726  | 153820 | 0         | 414  | 426  | 97 +  | 5    | 428  | 52156  | 52579  |
| UN15527 | Rsa1.0.03127.1 | 1042 | 25191  | 0         | 830  | 865  | 95 -  | 1    | 847  | 18507  | 19371  |
| UN15528 | Rsa1.0.03282.1 | 492  | 24107  | 1.00E-109 | 220  | 224  | 98 -  | 269  | 491  | 9551   | 9773   |
| UN15529 | Rsa1.0.01696.1 | 755  | 301850 | 2.00E-75  | 144  | 144  | 100 - | 596  | 739  | 291899 | 292042 |
| UN15530 | Rsa1.0.01850.1 | 1071 | 162224 | 1.00E-157 | 344  | 361  | 95 +  | 707  | 1065 | 31714  | 32072  |
| UN15531 | Rsa1.0.08558.1 | 1092 | 7198   | 0         | 436  | 446  | 97 +  | 3    | 446  | 2280   | 2721   |
| UN15532 | Rsa1.0.01512.1 | 1023 | 44234  | 0         | 526  | 530  | 99 +  | 1    | 529  | 20885  | 21414  |
| UN15533 | Rsa1.0.00113.1 | 705  | 131574 | 0         | 364  | 370  | 98 -  | 1    | 369  | 73859  | 74228  |
| UN15534 | Rsa1.0.00383.1 | 1240 | 398431 | 0         | 794  | 798  | 99 -  | 121  | 918  | 147000 | 147797 |
| UN15535 | Rsa1.0.00054.1 | 655  | 162053 | 1.00E-70  | 145  | 148  | 97 +  | 507  | 654  | 87400  | 87547  |
| UN15536 | Rsa1.0.00092.1 | 743  | 659932 | 0         | 652  | 676  | 96 +  | 1    | 675  | 126031 | 126699 |
| UN15537 | Rsa1.0.01435.1 | 1096 | 45942  | 0         | 384  | 397  | 96 +  | 702  | 1096 | 41112  | 41507  |
| UN15538 | Rsa1.0.03579.1 | 1086 | 21969  | 1.00E-109 | 366  | 403  | 90 +  | 704  | 1086 | 18958  | 19359  |
| UN15539 | Rsa1.0.00007.1 | 640  | 239325 | 0         | 530  | 553  | 95 +  | 95   | 640  | 58424  | 58966  |
| UN15540 | Rsa1.0.00301.1 | 731  | 365315 | 1.00E-129 | 337  | 370  | 91 +  | 373  | 729  | 346680 | 347040 |
| UN15541 | Rsa1.0.00165.1 | 666  | 116466 | 1.00E-116 | 225  | 228  | 98 -  | 440  | 666  | 26440  | 26667  |
| UN15542 | Rsa1.0.02443.1 | 930  | 31353  | 4.00E-65  | 146  | 151  | 96 -  | 1    | 151  | 20043  | 20192  |
| UN15543 | Rsa1.0.08807.1 | 947  | 6906   | 1.00E-150 | 295  | 302  | 97 -  | 647  | 947  | 3529   | 3830   |
| UN15544 | Rsa1.0.02022.1 | 1220 | 35923  | 1.00E-135 | 290  | 305  | 95 +  | 916  | 1220 | 14054  | 14358  |
| UN15545 | Rsa1.0.00251.1 | 1388 | 303968 | 0         | 607  | 620  | 97 +  | 2    | 621  | 83614  | 84232  |
| UN15546 | Rsa1.0.53223.1 | 1208 | 428    | 1.00E-151 | 312  | 322  | 96 -  | 3    | 321  | 1      | 321    |
| UN15547 | Rsa1.0.00473.1 | 1310 | 212204 | 0         | 414  | 423  | 97 +  | 881  | 1300 | 73422  | 73844  |
| UN15548 | Rsa1.0.02398.1 | 822  | 31766  | 0         | 814  | 822  | 99 +  | 1    | 821  | 4865   | 5684   |
| UN15549 | Rsa1.0.00447.1 | 1483 | 84051  | 0         | 1459 | 1480 | 98 -  | 3    | 1482 | 44335  | 45814  |
| UN15550 | Rsa1.0.01546.1 | 963  | 43586  | 0         | 527  | 528  | 99 -  | 2    | 528  | 34986  | 35513  |
| UN15551 | Rsa1.0.00222.1 | 1582 | 172263 | 0         | 485  | 489  | 99 -  | 3    | 491  | 15395  | 15882  |
| UN15552 | Rsa1.0.26066.1 | 786  | 908    | 0         | 560  | 570  | 98 -  | 13   | 582  | 339    | 908    |
| UN15553 | Rsa1.0.03500.1 | 827  | 22461  | 1.00E-178 | 316  | 316  | 100 - | 511  | 826  | 10033  | 10348  |
| UN15554 | Rsa1.0.00008.1 | 626  | 358124 | 1.00E-118 | 234  | 239  | 97 -  | 1    | 237  | 67627  | 67865  |
| UN15555 | Rsa1.0.10460.1 | 1430 | 5842   | 0         | 814  | 825  | 98 +  | 604  | 1428 | 4237   | 5061   |
| UN15556 | Rsa1.0.06701.1 | 1920 | 10514  | 0         | 512  | 526  | 97 +  | 939  | 1464 | 707    | 1232   |
| UN15557 | Rsa1.0.05449.1 | 2007 | 13711  | 0         | 382  | 382  | 100 - | 1626 | 2007 | 13265  | 13646  |
| UN15558 | Rsa1.0.00793.1 | 586  | 64103  | 1.00E-121 | 248  | 257  | 96 +  | 330  | 586  | 24186  | 24442  |
| UN15559 | Rsa1.0.06488.1 | 1822 | 141774 | 0         | 598  | 602  | 99 -  | 1222 | 1822 | 137824 | 138425 |

|         |                |      |        |           |     |     |       |     |      |        |        |
|---------|----------------|------|--------|-----------|-----|-----|-------|-----|------|--------|--------|
| UN15560 | Rsa1.0.05819.1 | 1319 | 12543  | 0         | 382 | 383 | 99 -  | 937 | 1319 | 10924  | 11305  |
| UN15561 | Rsa1.0.01618.1 | 649  | 42118  | 2.00E-87  | 241 | 259 | 93 -  | 380 | 636  | 17334  | 17587  |
| UN15562 | Rsa1.0.00111.1 | 706  | 390088 | 1.00E-169 | 412 | 449 | 91 +  | 262 | 706  | 75630  | 76057  |
| UN15563 | Rsa1.0.00034.1 | 1314 | 260119 | 1.00E-138 | 256 | 258 | 99 +  | 740 | 997  | 8763   | 9020   |
| UN15564 | Rsa1.0.00344.1 | 676  | 191774 | 1.00E-98  | 218 | 228 | 95 -  | 444 | 668  | 156236 | 156461 |
| UN15565 | Rsa1.0.20960.1 | 467  | 1250   | 0         | 437 | 455 | 96 -  | 10  | 462  | 521    | 974    |
| UN15566 | Rsa1.0.00848.1 | 335  | 152362 | 1.00E-151 | 285 | 290 | 98 +  | 1   | 290  | 48054  | 48343  |
| UN15567 | Rsa1.0.02020.1 | 1161 | 173211 | 0         | 584 | 596 | 97 -  | 1   | 595  | 154385 | 154980 |
| UN15568 | Rsa1.0.00171.1 | 636  | 115622 | 1.00E-144 | 322 | 345 | 93 -  | 293 | 626  | 50076  | 50420  |
| UN15569 | Rsa1.0.00841.1 | 803  | 183065 | 1.00E-140 | 253 | 253 | 100 + | 1   | 253  | 1054   | 1306   |
| UN15570 | Rsa1.0.01946.1 | 977  | 36982  | 0         | 468 | 471 | 99 +  | 506 | 976  | 33540  | 34010  |
| UN15571 | Rsa1.0.00056.1 | 1225 | 332604 | 1.00E-152 | 303 | 312 | 97 -  | 914 | 1222 | 81919  | 82230  |
| UN15572 | Rsa1.0.00197.1 | 879  | 109714 | 0         | 684 | 702 | 97 +  | 178 | 879  | 64829  | 65530  |
| UN15573 | Rsa1.0.00636.1 | 1349 | 71113  | 1.00E-180 | 334 | 337 | 99 -  | 1   | 337  | 3145   | 3480   |
| UN15574 | Rsa1.0.02588.1 | 1307 | 29840  | 0         | 404 | 404 | 100 - | 904 | 1307 | 14286  | 14689  |
| UN15575 | Rsa1.0.00033.1 | 1139 | 515811 | 2.33E-156 | 263 | 263 | 100 + | 877 | 1139 | 131617 | 131879 |
| UN15576 | Rsa1.0.00630.1 | 1046 | 71281  | 1.00E-176 | 335 | 341 | 98 -  | 704 | 1044 | 59344  | 59683  |
| UN15577 | Rsa1.0.00971.1 | 1184 | 57973  | 1.00E-157 | 309 | 317 | 97 -  | 1   | 316  | 48427  | 48743  |
| UN15578 | Rsa1.0.03258.1 | 902  | 24302  | 1.00E-138 | 271 | 277 | 97 -  | 625 | 900  | 11034  | 11310  |
| UN15579 | Rsa1.0.00066.1 | 594  | 152418 | 1.00E-152 | 297 | 304 | 97 -  | 290 | 593  | 139751 | 140053 |
| UN15580 | Rsa1.0.00546.1 | 1132 | 76523  | 1.00E-127 | 235 | 236 | 99 -  | 28  | 263  | 67867  | 68102  |
| UN15581 | Rsa1.0.03001.1 | 1202 | 26108  | 2.33E-156 | 389 | 425 | 91 -  | 756 | 1172 | 5410   | 5824   |
| UN15582 | Rsa1.0.02955.1 | 988  | 26484  | 1.00E-167 | 351 | 363 | 96 +  | 625 | 986  | 13654  | 14013  |
| UN15583 | Rsa1.0.00759.1 | 894  | 65465  | 1.00E-111 | 205 | 205 | 100 - | 42  | 246  | 63153  | 63357  |
| UN15584 | Rsa1.0.03940.1 | 1243 | 19962  | 0         | 842 | 843 | 99 -  | 1   | 842  | 12036  | 12878  |
| UN15585 | Rsa1.0.01355.1 | 837  | 47303  | 1.00E-166 | 311 | 316 | 98 +  | 414 | 729  | 23751  | 24066  |
| UN15586 | Rsa1.0.03344.1 | 1160 | 23593  | 0         | 423 | 448 | 94 -  | 8   | 455  | 12154  | 12601  |
| UN15587 | Rsa1.0.01581.1 | 669  | 42833  | 0         | 425 | 441 | 96 +  | 229 | 669  | 28862  | 29301  |
| UN15588 | Rsa1.0.07597.1 | 850  | 9055   | 7.00E-73  | 146 | 148 | 98 -  | 136 | 283  | 487    | 634    |
| UN15589 | Rsa1.0.00473.1 | 1115 | 212204 | 1.00E-111 | 254 | 268 | 94 -  | 15  | 281  | 73604  | 73864  |
| UN15590 | Rsa1.0.00451.1 | 951  | 322533 | 1.00E-176 | 354 | 371 | 95 +  | 2   | 372  | 48167  | 48522  |
| UN15591 | Rsa1.0.01955.1 | 1183 | 36850  | 0         | 964 | 993 | 97 +  | 190 | 1180 | 13035  | 14015  |
| UN15592 | Rsa1.0.05812.1 | 982  | 12571  | 0         | 907 | 940 | 96 -  | 46  | 982  | 2609   | 3548   |
| UN15593 | Rsa1.0.00020.1 | 1151 | 283099 | 1.00E-176 | 385 | 406 | 94 +  | 731 | 1130 | 140893 | 141292 |
| UN15594 | Rsa1.0.03134.1 | 1174 | 145023 | 0         | 513 | 516 | 99 +  | 260 | 775  | 136616 | 137131 |
| UN15595 | Rsa1.0.63936.1 | 1113 | 359    | 1.00E-152 | 297 | 305 | 97 +  | 669 | 973  | 55     | 359    |
| UN15596 | Rsa1.0.02616.1 | 802  | 29542  | 1.00E-138 | 266 | 270 | 98 -  | 2   | 270  | 22169  | 22438  |
| UN15597 | Rsa1.0.01112.1 | 939  | 310601 | 0         | 520 | 547 | 95 +  | 402 | 937  | 31685  | 32228  |
| UN15598 | Rsa1.0.00798.1 | 751  | 63945  | 1.00E-130 | 266 | 272 | 97 +  | 455 | 723  | 43764  | 44035  |

|         |                |      |        |           |     |     |       |     |      |        |        |
|---------|----------------|------|--------|-----------|-----|-----|-------|-----|------|--------|--------|
| UN15599 | Rsa1.0.07127.1 | 758  | 9863   | 0         | 725 | 756 | 95 +  | 1   | 755  | 8993   | 9738   |
| UN15600 | Rsa1.0.00333.1 | 1353 | 94500  | 0         | 532 | 565 | 94 +  | 803 | 1353 | 69143  | 69706  |
| UN15601 | Rsa1.0.01997.1 | 564  | 158416 | 3.00E-86  | 168 | 170 | 98 +  | 395 | 564  | 16696  | 16865  |
| UN15602 | Rsa1.0.06124.1 | 785  | 11681  | 1.00E-122 | 246 | 254 | 96 +  | 2   | 255  | 6814   | 7067   |
| UN15603 | Rsa1.0.00630.1 | 1071 | 71281  | 1.00E-168 | 306 | 308 | 99 -  | 764 | 1071 | 59376  | 59683  |
| UN15604 | Rsa1.0.12060.1 | 802  | 5328   | 1.00E-111 | 249 | 264 | 94 -  | 3   | 266  | 97     | 360    |
| UN15605 | Rsa1.0.00132.1 | 1470 | 124299 | 0         | 599 | 621 | 96 +  | 3   | 622  | 90920  | 91530  |
| UN15606 | Rsa1.0.00921.1 | 1114 | 59599  | 0         | 569 | 583 | 97 +  | 533 | 1114 | 2810   | 3388   |
| UN15607 | Rsa1.0.04342.1 | 760  | 17828  | 1.00E-166 | 320 | 328 | 97 -  | 2   | 329  | 422    | 749    |
| UN15608 | Rsa1.0.00133.1 | 582  | 123768 | 1.00E-119 | 218 | 218 | 100 + | 365 | 582  | 66900  | 67117  |
| UN15609 | Rsa1.0.00032.1 | 622  | 306326 | 1.00E-158 | 285 | 286 | 99 +  | 3   | 288  | 154750 | 155035 |
| UN15610 | Rsa1.0.01249.1 | 757  | 188432 | 0         | 480 | 501 | 95 +  | 247 | 743  | 149428 | 149921 |
| UN15611 | Rsa1.0.08862.1 | 933  | 6847   | 0         | 351 | 356 | 98 +  | 3   | 358  | 4153   | 4508   |
| UN15612 | Rsa1.0.08565.1 | 865  | 7189   | 2.00E-91  | 224 | 238 | 94 +  | 1   | 230  | 313    | 549    |
| UN15613 | Rsa1.0.00913.1 | 586  | 59914  | 1.00E-167 | 358 | 376 | 95 -  | 9   | 384  | 16421  | 16793  |
| UN15614 | Rsa1.0.16367.1 | 752  | 2176   | 0         | 728 | 740 | 98 -  | 2   | 738  | 1412   | 2145   |
| UN15615 | Rsa1.0.00048.1 | 405  | 167185 | 1.00E-168 | 368 | 387 | 95 -  | 1   | 384  | 73806  | 74191  |
| UN15616 | Rsa1.0.03818.1 | 1121 | 20668  | 1.00E-129 | 237 | 238 | 99 -  | 884 | 1121 | 6686   | 6923   |
| UN15617 | Rsa1.0.03940.1 | 638  | 19962  | 0         | 452 | 467 | 96 -  | 172 | 638  | 12248  | 12712  |
| UN15618 | Rsa1.0.00017.1 | 741  | 752458 | 1.00E-147 | 264 | 264 | 100 + | 1   | 264  | 141391 | 141654 |
| UN15619 | Rsa1.0.01340.1 | 844  | 47805  | 4.00E-65  | 256 | 301 | 85 +  | 8   | 298  | 20630  | 20919  |
| UN15620 | Rsa1.0.00018.1 | 760  | 410899 | 0         | 395 | 401 | 98 -  | 1   | 401  | 68738  | 69135  |
| UN15621 | Rsa1.0.00182.1 | 1393 | 142305 | 0         | 755 | 755 | 100 + | 639 | 1393 | 94201  | 94955  |
| UN15622 | Rsa1.0.00603.1 | 481  | 73299  | 0         | 398 | 416 | 95 +  | 66  | 481  | 32629  | 33039  |
| UN15623 | Rsa1.0.00119.1 | 626  | 467509 | 0         | 462 | 487 | 94 +  | 141 | 626  | 374988 | 375470 |
| UN15624 | Rsa1.0.12119.1 | 903  | 5311   | 1.00E-130 | 272 | 284 | 95 -  | 568 | 851  | 4573   | 4856   |
| UN15625 | Rsa1.0.02707.1 | 1045 | 28520  | 1.00E-100 | 226 | 237 | 95 +  | 812 | 1045 | 26163  | 26399  |
| UN15626 | Rsa1.0.00111.1 | 815  | 390088 | 0         | 540 | 567 | 95 -  | 232 | 795  | 383652 | 384207 |
| UN15627 | Rsa1.0.00962.1 | 727  | 184909 | 0         | 341 | 344 | 99 +  | 385 | 727  | 13117  | 13460  |
| UN15628 | Rsa1.0.00728.1 | 684  | 66704  | 0         | 527 | 548 | 96 -  | 141 | 684  | 10712  | 11258  |
| UN15629 | Rsa1.0.02647.1 | 679  | 29120  | 0         | 631 | 637 | 99 -  | 42  | 678  | 25183  | 25819  |
| UN15630 | Rsa1.0.01195.1 | 731  | 147988 | 0         | 703 | 733 | 95 -  | 3   | 731  | 15402  | 16127  |
| UN15631 | Rsa1.0.02693.1 | 197  | 28617  | 4.00E-37  | 103 | 112 | 91 -  | 60  | 163  | 26854  | 26965  |
| UN15632 | Rsa1.0.00324.1 | 692  | 218805 | 0         | 482 | 485 | 99 +  | 2   | 486  | 213316 | 213800 |
| UN15633 | Rsa1.0.01015.1 | 883  | 56752  | 1.00E-131 | 246 | 249 | 98 +  | 9   | 257  | 1739   | 1987   |
| UN15634 | Rsa1.0.01209.1 | 1091 | 50668  | 0         | 652 | 685 | 95 +  | 5   | 677  | 48496  | 49180  |
| UN15635 | Rsa1.0.00091.1 | 1548 | 139699 | 0         | 913 | 966 | 94 -  | 605 | 1548 | 137530 | 138479 |
| UN15636 | Rsa1.0.00364.1 | 771  | 90951  | 1.00E-154 | 353 | 377 | 93 +  | 397 | 770  | 63260  | 63629  |
| UN15637 | Rsa1.0.01561.1 | 723  | 43227  | 0         | 536 | 560 | 95 +  | 156 | 713  | 82     | 638    |

|         |                |      |        |           |      |      |      |     |      |        |        |
|---------|----------------|------|--------|-----------|------|------|------|-----|------|--------|--------|
| UN15638 | Rsa1.0_13593.1 | 754  | 4685   | 0         | 724  | 754  | 96 + | 1   | 745  | 45     | 795    |
| UN15639 | Rsa1.0_03271.1 | 1061 | 24187  | 1.00E-158 | 293  | 296  | 98 + | 1   | 296  | 14691  | 14986  |
| UN15640 | Rsa1.0_06092.1 | 298  | 11756  | 1.00E-144 | 291  | 300  | 97 - | 1   | 298  | 2803   | 3100   |
| UN15641 | Rsa1.0_00013.1 | 1114 | 292129 | 3.00E-88  | 172  | 174  | 98 - | 524 | 697  | 72142  | 72315  |
| UN15642 | Rsa1.0_00019.1 | 771  | 301669 | 7.00E-82  | 164  | 167  | 98 + | 322 | 488  | 113991 | 114157 |
| UN15643 | Rsa1.0_02079.1 | 1169 | 35306  | 0         | 481  | 493  | 97 - | 2   | 494  | 24546  | 25038  |
| UN15644 | Rsa1.0_00163.1 | 1390 | 116847 | 1.00E-155 | 321  | 334  | 96 - | 1   | 334  | 83512  | 83844  |
| UN15645 | Rsa1.0_00355.1 | 706  | 92038  | 0         | 538  | 581  | 92 - | 123 | 703  | 77872  | 78429  |
| UN15646 | Rsa1.0_02872.1 | 1057 | 27080  | 0         | 461  | 504  | 91 + | 1   | 497  | 11254  | 11749  |
| UN15647 | Rsa1.0_63936.1 | 1151 | 359    | 1.00E-161 | 301  | 305  | 98 + | 695 | 999  | 55     | 359    |
| UN15648 | Rsa1.0_01651.1 | 1095 | 41586  | 1.00E-153 | 281  | 283  | 99 - | 571 | 853  | 15937  | 16219  |
| UN15649 | Rsa1.0_04892.1 | 1300 | 15573  | 1.00E-126 | 278  | 289  | 96 + | 2   | 288  | 6177   | 6463   |
| UN15650 | Rsa1.0_01713.1 | 994  | 40564  | 6.00E-86  | 171  | 174  | 98 + | 3   | 176  | 30522  | 30695  |
| UN15651 | Rsa1.0_00048.1 | 1176 | 167185 | 0         | 407  | 411  | 99 + | 512 | 922  | 115660 | 116070 |
| UN15652 | Rsa1.0_02917.1 | 784  | 159058 | 0         | 662  | 681  | 97 + | 2   | 682  | 144119 | 144797 |
| UN15653 | Rsa1.0_16726.1 | 906  | 2053   | 1.00E-124 | 290  | 313  | 92 - | 1   | 313  | 1664   | 1961   |
| UN15654 | Rsa1.0_00066.1 | 987  | 152418 | 3.00E-94  | 182  | 184  | 98 + | 582 | 765  | 41862  | 42045  |
| UN15655 | Rsa1.0_02966.1 | 750  | 135126 | 0         | 469  | 482  | 97 + | 269 | 750  | 17972  | 18448  |
| UN15656 | Rsa1.0_32803.1 | 1488 | 693    | 0         | 538  | 578  | 93 - | 326 | 888  | 1      | 572    |
| UN15657 | Rsa1.0_06709.1 | 1070 | 10501  | 0         | 501  | 505  | 99 + | 564 | 1068 | 267    | 771    |
| UN15658 | Rsa1.0_01478.1 | 182  | 44991  | 4.00E-80  | 176  | 183  | 96 + | 1   | 182  | 31650  | 31832  |
| UN15659 | Rsa1.0_07193.1 | 1107 | 9752   | 1.00E-122 | 226  | 227  | 99 + | 825 | 1051 | 4357   | 4583   |
| UN15660 | Rsa1.0_00399.1 | 1174 | 242951 | 0         | 1130 | 1179 | 95 + | 3   | 1168 | 16373  | 17538  |
| UN15661 | Rsa1.0_05713.1 | 828  | 12855  | 1.00E-132 | 250  | 252  | 99 - | 12  | 262  | 2417   | 2668   |
| UN15662 | Rsa1.0_00480.1 | 743  | 81325  | 1.00E-166 | 309  | 313  | 98 - | 1   | 313  | 43625  | 43937  |
| UN15663 | Rsa1.0_00692.1 | 666  | 68151  | 1.00E-148 | 377  | 414  | 91 - | 2   | 415  | 52276  | 52689  |
| UN15664 | Rsa1.0_00451.1 | 510  | 322533 | 1.00E-140 | 277  | 285  | 97 + | 92  | 376  | 993    | 1277   |
| UN15665 | Rsa1.0_02040.1 | 167  | 35684  | 1.00E-61  | 156  | 166  | 93 + | 1   | 163  | 13306  | 13470  |
| UN15666 | Rsa1.0_00482.1 | 423  | 81162  | 0         | 421  | 425  | 99 + | 2   | 423  | 41471  | 41895  |
| UN15667 | Rsa1.0_01101.1 | 1354 | 54031  | 1.00E-139 | 263  | 267  | 98 - | 861 | 1127 | 22500  | 22766  |
| UN15668 | Rsa1.0_00265.1 | 763  | 220635 | 1.00E-116 | 306  | 336  | 91 + | 386 | 715  | 195833 | 196168 |
| UN15669 | Rsa1.0_01659.1 | 1785 | 164577 | 0         | 605  | 633  | 95 - | 157 | 781  | 143506 | 144135 |
| UN15670 | Rsa1.0_01568.1 | 715  | 43077  | 0         | 556  | 566  | 98 - | 87  | 652  | 40968  | 41533  |
| UN15671 | Rsa1.0_01588.1 | 1084 | 42724  | 1.00E-162 | 321  | 331  | 96 - | 756 | 1082 | 28807  | 29137  |
| UN15672 | Rsa1.0_00369.1 | 402  | 266462 | 4.00E-85  | 189  | 198  | 95 + | 208 | 402  | 199451 | 199648 |
| UN15673 | Rsa1.0_00473.1 | 1245 | 212204 | 1.00E-159 | 288  | 289  | 99 + | 955 | 1243 | 73607  | 73895  |
| UN15674 | Rsa1.0_01954.1 | 845  | 145554 | 0         | 538  | 580  | 92 - | 1   | 562  | 13390  | 13963  |
| UN15675 | Rsa1.0_00040.1 | 538  | 324196 | 0         | 452  | 491  | 92 + | 2   | 489  | 227886 | 228355 |
| UN15676 | Rsa1.0_00122.1 | 367  | 265937 | 1.00E-156 | 349  | 359  | 97 - | 1   | 359  | 82125  | 82473  |

|         |                |      |        |           |      |      |       |     |      |        |        |
|---------|----------------|------|--------|-----------|------|------|-------|-----|------|--------|--------|
| UN15677 | Rsa1.0_02963.1 | 974  | 26407  | 1.00E-107 | 242  | 254  | 95 -  | 721 | 974  | 3757   | 4008   |
| UN15678 | Rsa1.0_13843.1 | 647  | 4225   | 0         | 369  | 373  | 98 +  | 3   | 373  | 960    | 1332   |
| UN15679 | Rsa1.0_00347.1 | 834  | 93048  | 0         | 371  | 382  | 97 +  | 451 | 832  | 86405  | 86776  |
| UN15680 | Rsa1.0_00198.1 | 823  | 222963 | 1.00E-104 | 201  | 204  | 98 -  | 3   | 206  | 42326  | 42529  |
| UN15681 | Rsa1.0_02505.1 | 1057 | 30703  | 1.00E-157 | 375  | 407  | 92 -  | 668 | 1057 | 9964   | 10365  |
| UN15682 | Rsa1.0_00644.1 | 1078 | 136881 | 0         | 449  | 449  | 100 + | 1   | 449  | 62629  | 63077  |
| UN15683 | Rsa1.0_04192.1 | 1015 | 18572  | 0         | 692  | 712  | 97 -  | 304 | 1015 | 12152  | 12863  |
| UN15684 | Rsa1.0_00198.1 | 435  | 222963 | 0         | 370  | 372  | 99 +  | 1   | 372  | 40464  | 40834  |
| UN15685 | Rsa1.0_00143.1 | 797  | 121313 | 0         | 506  | 517  | 97 +  | 281 | 797  | 31129  | 31645  |
| UN15686 | Rsa1.0_02550.1 | 905  | 291051 | 1.00E-178 | 320  | 321  | 99 +  | 115 | 435  | 4853   | 5173   |
| UN15687 | Rsa1.0_00104.1 | 744  | 368722 | 6.00E-73  | 140  | 140  | 100 - | 3   | 142  | 21169  | 21308  |
| UN15688 | Rsa1.0_00596.1 | 797  | 73578  | 5.00E-98  | 223  | 233  | 95 +  | 561 | 791  | 28854  | 29084  |
| UN15689 | Rsa1.0_00376.1 | 716  | 90101  | 1.00E-171 | 314  | 317  | 99 +  | 243 | 559  | 49173  | 49489  |
| UN15690 | Rsa1.0_01494.1 | 897  | 44641  | 1.00E-152 | 273  | 273  | 100 - | 625 | 897  | 1605   | 1877   |
| UN15691 | Rsa1.0_07150.1 | 1115 | 9817   | 0         | 457  | 464  | 98 -  | 653 | 1115 | 1301   | 1764   |
| UN15692 | Rsa1.0_00900.1 | 519  | 60367  | 1.00E-128 | 273  | 286  | 95 +  | 2   | 284  | 12161  | 12446  |
| UN15693 | Rsa1.0_00985.1 | 549  | 161950 | 0         | 524  | 531  | 98 +  | 3   | 533  | 133141 | 133671 |
| UN15694 | Rsa1.0_00058.1 | 1366 | 159921 | 1.00E-148 | 272  | 274  | 99 -  | 1   | 274  | 93528  | 93801  |
| UN15695 | Rsa1.0_00029.1 | 727  | 272992 | 1.00E-166 | 305  | 308  | 99 -  | 85  | 392  | 10647  | 10954  |
| UN15696 | Rsa1.0_00497.1 | 694  | 79830  | 1.00E-156 | 285  | 287  | 99 +  | 1   | 287  | 50795  | 51081  |
| UN15697 | Rsa1.0_03422.1 | 268  | 23076  | 1.00E-149 | 267  | 267  | 100 + | 2   | 268  | 10050  | 10316  |
| UN15698 | Rsa1.0_01245.1 | 1349 | 149868 | 0         | 546  | 547  | 99 -  | 1   | 546  | 37644  | 38190  |
| UN15699 | Rsa1.0_00240.1 | 1033 | 104175 | 1.00E-112 | 255  | 271  | 94 -  | 753 | 1022 | 53574  | 53836  |
| UN15700 | Rsa1.0_00342.1 | 702  | 93695  | 0         | 451  | 454  | 99 -  | 42  | 495  | 15020  | 15470  |
| UN15701 | Rsa1.0_00482.1 | 1346 | 81162  | 0         | 656  | 692  | 94 +  | 1   | 687  | 67345  | 68021  |
| UN15702 | Rsa1.0_00439.1 | 771  | 142776 | 1.00E-167 | 319  | 326  | 97 +  | 382 | 707  | 63131  | 63456  |
| UN15703 | Rsa1.0_01576.1 | 634  | 42923  | 1.00E-105 | 243  | 258  | 94 +  | 384 | 634  | 22319  | 22572  |
| UN15704 | Rsa1.0_00007.1 | 2091 | 239325 | 0         | 669  | 672  | 99 -  | 322 | 993  | 16013  | 16684  |
| UN15705 | Rsa1.0_02586.1 | 766  | 29856  | 0         | 698  | 709  | 98 -  | 1   | 709  | 15528  | 16236  |
| UN15706 | Rsa1.0_00437.1 | 542  | 84879  | 2.00E-87  | 213  | 230  | 92 +  | 3   | 225  | 64125  | 64354  |
| UN15707 | Rsa1.0_00018.1 | 535  | 410899 | 0         | 515  | 536  | 96 +  | 1   | 535  | 79154  | 79687  |
| UN15708 | Rsa1.0_39888.1 | 855  | 563    | 0         | 490  | 501  | 97 -  | 2   | 502  | 1      | 499    |
| UN15709 | Rsa1.0_02080.1 | 1429 | 35297  | 0         | 1413 | 1429 | 98 -  | 1   | 1428 | 19034  | 20458  |
| UN15710 | Rsa1.0_00001.1 | 777  | 363028 | 1.00E-132 | 240  | 240  | 100 - | 1   | 240  | 91340  | 91579  |
| UN15711 | Rsa1.0_00107.1 | 361  | 431659 | 1.00E-109 | 244  | 256  | 95 -  | 101 | 352  | 180753 | 181005 |
| UN15712 | Rsa1.0_00773.1 | 1042 | 64839  | 0         | 457  | 467  | 97 +  | 3   | 469  | 25178  | 25644  |
| UN15713 | Rsa1.0_00017.1 | 1039 | 752458 | 0         | 423  | 442  | 95 -  | 587 | 1027 | 138929 | 139369 |
| UN15714 | Rsa1.0_03513.1 | 850  | 22349  | 0         | 490  | 503  | 97 -  | 349 | 850  | 20289  | 20791  |
| UN15715 | Rsa1.0_00388.1 | 797  | 88890  | 1.00E-142 | 299  | 311  | 96 +  | 490 | 797  | 56221  | 56525  |

|         |                |      |        |           |      |      |       |      |      |        |        |
|---------|----------------|------|--------|-----------|------|------|-------|------|------|--------|--------|
| UN15716 | Rsa1.0.08459.1 | 998  | 7315   | 0         | 493  | 524  | 94 -  | 476  | 998  | 6317   | 6834   |
| UN15717 | Rsa1.0.00381.1 | 1157 | 89718  | 3.00E-97  | 214  | 224  | 95 -  | 3    | 224  | 73705  | 73928  |
| UN15718 | Rsa1.0.00042.1 | 1073 | 171507 | 0         | 1022 | 1036 | 98 -  | 39   | 1073 | 53369  | 54404  |
| UN15719 | Rsa1.0.00112.1 | 754  | 132199 | 1.00E-126 | 251  | 258  | 97 -  | 42   | 299  | 73976  | 74233  |
| UN15720 | Rsa1.0.00777.1 | 787  | 191865 | 0         | 417  | 429  | 97 -  | 24   | 452  | 128527 | 128955 |
| UN15721 | Rsa1.0.03962.1 | 1325 | 19860  | 0         | 1001 | 1034 | 96 -  | 1    | 1030 | 13047  | 14079  |
| UN15722 | Rsa1.0.04744.1 | 1260 | 16154  | 1.00E-169 | 338  | 348  | 97 -  | 1    | 345  | 7259   | 7606   |
| UN15723 | Rsa1.0.02913.1 | 977  | 26816  | 0         | 420  | 437  | 96 +  | 3    | 438  | 22158  | 22591  |
| UN15724 | Rsa1.0.00019.1 | 703  | 301669 | 0         | 452  | 468  | 96 -  | 1    | 466  | 233346 | 233812 |
| UN15725 | Rsa1.0.00105.1 | 767  | 134138 | 1.00E-101 | 188  | 188  | 100 - | 374  | 561  | 68475  | 68662  |
| UN15726 | Rsa1.0.02641.1 | 1158 | 29191  | 0         | 331  | 332  | 99 +  | 3    | 334  | 5567   | 5898   |
| UN15727 | Rsa1.0.00552.1 | 897  | 206757 | 0         | 398  | 421  | 94 +  | 3    | 420  | 195137 | 195549 |
| UN15728 | Rsa1.0.01484.1 | 763  | 44806  | 0         | 736  | 763  | 96 +  | 1    | 763  | 28469  | 29218  |
| UN15729 | Rsa1.0.00073.1 | 794  | 240924 | 2.00E-88  | 187  | 194  | 96 -  | 297  | 490  | 98132  | 98325  |
| UN15730 | Rsa1.0.00294.1 | 602  | 144860 | 0         | 387  | 388  | 99 +  | 215  | 602  | 28240  | 28627  |
| UN15731 | Rsa1.0.01236.1 | 1184 | 50156  | 0         | 510  | 516  | 98 +  | 662  | 1177 | 12195  | 12709  |
| UN15732 | Rsa1.0.00707.1 | 860  | 190112 | 1.00E-148 | 267  | 267  | 100 - | 164  | 430  | 155739 | 156005 |
| UN15733 | Rsa1.0.03036.1 | 1086 | 25826  | 0         | 914  | 923  | 99 -  | 167  | 1086 | 20398  | 21320  |
| UN15734 | Rsa1.0.00005.1 | 1657 | 353093 | 0         | 581  | 584  | 99 +  | 523  | 1105 | 138648 | 139230 |
| UN15735 | Rsa1.0.00707.1 | 801  | 190112 | 1.00E-172 | 346  | 359  | 96 -  | 3    | 361  | 156145 | 156503 |
| UN15736 | Rsa1.0.02398.1 | 610  | 31766  | 1.00E-102 | 257  | 276  | 93 +  | 335  | 610  | 5418   | 5689   |
| UN15737 | Rsa1.0.00087.1 | 745  | 761073 | 1.00E-143 | 283  | 288  | 98 -  | 458  | 743  | 191386 | 191671 |
| UN15738 | Rsa1.0.02410.1 | 1064 | 31659  | 0         | 971  | 1001 | 97 -  | 11   | 1009 | 20161  | 21156  |
| UN15739 | Rsa1.0.00501.1 | 532  | 79545  | 0         | 510  | 532  | 95 -  | 1    | 532  | 68684  | 69215  |
| UN15740 | Rsa1.0.00340.1 | 614  | 305782 | 1.00E-143 | 347  | 374  | 92 +  | 1    | 359  | 159726 | 160093 |
| UN15741 | Rsa1.0.00107.1 | 1529 | 431659 | 0         | 503  | 531  | 94 -  | 572  | 1097 | 148415 | 148945 |
| UN15742 | Rsa1.0.01949.1 | 692  | 36960  | 1.00E-103 | 233  | 246  | 94 +  | 6    | 250  | 23210  | 23455  |
| UN15743 | Rsa1.0.04850.1 | 713  | 15722  | 0         | 613  | 636  | 96 -  | 1    | 636  | 7334   | 7969   |
| UN15744 | Rsa1.0.00058.1 | 724  | 159921 | 0         | 538  | 545  | 98 +  | 3    | 547  | 49006  | 49550  |
| UN15745 | Rsa1.0.01403.1 | 657  | 46453  | 2.00E-87  | 179  | 184  | 97 -  | 297  | 480  | 25846  | 26029  |
| UN15746 | Rsa1.0.00152.1 | 681  | 257730 | 1.00E-160 | 293  | 294  | 99 +  | 389  | 681  | 214460 | 214753 |
| UN15747 | Rsa1.0.05611.1 | 933  | 13193  | 0         | 523  | 541  | 96 -  | 390  | 930  | 9253   | 9785   |
| UN15748 | Rsa1.0.00035.1 | 1630 | 176449 | 0         | 433  | 445  | 97 -  | 60   | 504  | 96531  | 96974  |
| UN15749 | Rsa1.0.00163.1 | 858  | 116847 | 0         | 506  | 533  | 94 -  | 330  | 858  | 72621  | 73151  |
| UN15750 | Rsa1.0.00453.1 | 831  | 83031  | 0         | 490  | 503  | 97 -  | 51   | 553  | 68504  | 69006  |
| UN15751 | Rsa1.0.01611.1 | 775  | 42269  | 1.00E-166 | 320  | 328  | 97 -  | 256  | 583  | 25466  | 25793  |
| UN15752 | Rsa1.0.01497.1 | 1354 | 44559  | 1.00E-143 | 331  | 352  | 94 +  | 1003 | 1352 | 42441  | 42784  |
| UN15753 | Rsa1.0.16574.1 | 627  | 2106   | 0         | 384  | 390  | 98 +  | 58   | 446  | 1717   | 2106   |
| UN15754 | Rsa1.0.25951.1 | 1118 | 912    | 0         | 496  | 507  | 97 +  | 238  | 742  | 77     | 583    |

|         |                |      |        |           |      |      |       |      |      |        |        |
|---------|----------------|------|--------|-----------|------|------|-------|------|------|--------|--------|
| UN15755 | Rsa1.0.00175.1 | 815  | 166121 | 0         | 638  | 667  | 95 +  | 149  | 813  | 38440  | 39106  |
| UN15756 | Rsa1.0.05120.1 | 271  | 14793  | 1.00E-124 | 259  | 270  | 95 -  | 2    | 271  | 14397  | 14666  |
| UN15757 | Rsa1.0.02859.1 | 638  | 162118 | 1.00E-175 | 339  | 348  | 97 -  | 291  | 638  | 137969 | 138316 |
| UN15758 | Rsa1.0.03581.1 | 683  | 21965  | 0         | 395  | 407  | 97 -  | 53   | 454  | 20231  | 20636  |
| UN15759 | Rsa1.0.00793.1 | 1016 | 64103  | 1.00E-156 | 279  | 279  | 100 + | 738  | 1016 | 38449  | 38727  |
| UN15760 | Rsa1.0.04124.1 | 1523 | 18945  | 1.00E-133 | 360  | 394  | 91 -  | 3    | 383  | 8363   | 8751   |
| UN15761 | Rsa1.0.00034.1 | 1782 | 260119 | 0         | 779  | 779  | 100 + | 446  | 1224 | 66394  | 67172  |
| UN15762 | Rsa1.0.00216.1 | 857  | 197563 | 1.00E-119 | 296  | 316  | 93 +  | 1    | 314  | 50380  | 50690  |
| UN15763 | Rsa1.0.03581.1 | 588  | 21965  | 0         | 389  | 406  | 95 -  | 52   | 452  | 20231  | 20636  |
| UN15764 | Rsa1.0.00603.1 | 691  | 73299  | 0         | 662  | 693  | 95 -  | 3    | 691  | 58641  | 59327  |
| UN15765 | Rsa1.0.06852.1 | 1351 | 10265  | 0         | 538  | 565  | 95 +  | 792  | 1351 | 4327   | 4888   |
| UN15766 | Rsa1.0.02878.1 | 328  | 27048  | 1.00E-126 | 260  | 269  | 96 -  | 1    | 269  | 8374   | 8641   |
| UN15767 | Rsa1.0.01716.1 | 989  | 40483  | 1.00E-150 | 294  | 300  | 98 -  | 112  | 407  | 32951  | 33250  |
| UN15768 | Rsa1.0.00845.1 | 1464 | 62346  | 1.00E-166 | 335  | 348  | 96 -  | 350  | 697  | 12349  | 12696  |
| UN15769 | Rsa1.0.00136.1 | 1219 | 122464 | 0         | 463  | 480  | 96 -  | 689  | 1164 | 112511 | 112990 |
| UN15770 | Rsa1.0.01559.1 | 615  | 43262  | 2.00E-81  | 225  | 246  | 91 +  | 374  | 615  | 2268   | 2510   |
| UN15771 | Rsa1.0.00651.1 | 529  | 247766 | 1.00E-107 | 223  | 231  | 96 +  | 148  | 378  | 81983  | 82210  |
| UN15772 | Rsa1.0.00516.1 | 492  | 78417  | 1.00E-137 | 307  | 326  | 94 +  | 177  | 491  | 20048  | 20372  |
| UN15773 | Rsa1.0.02642.1 | 1565 | 29181  | 0         | 1232 | 1241 | 99 -  | 1    | 1240 | 13097  | 14337  |
| UN15774 | Rsa1.0.02173.1 | 771  | 34318  | 1.00E-110 | 230  | 239  | 96 -  | 394  | 632  | 16707  | 16945  |
| UN15775 | Rsa1.0.01015.1 | 1234 | 56752  | 1.00E-175 | 325  | 328  | 99 +  | 1    | 327  | 9980   | 10307  |
| UN15776 | Rsa1.0.03615.1 | 196  | 21766  | 3.00E-81  | 192  | 200  | 96 -  | 1    | 196  | 6198   | 6396   |
| UN15777 | Rsa1.0.00437.1 | 1095 | 84879  | 0         | 388  | 404  | 96 +  | 603  | 1006 | 39662  | 40065  |
| UN15778 | Rsa1.0.01882.1 | 682  | 37697  | 0         | 517  | 520  | 99 -  | 104  | 623  | 5482   | 6001   |
| UN15779 | Rsa1.0.54025.1 | 862  | 422    | 0         | 419  | 422  | 99 +  | 215  | 636  | 1      | 422    |
| UN15780 | Rsa1.0.04223.1 | 949  | 18407  | 0         | 417  | 421  | 99 -  | 3    | 421  | 6198   | 6618   |
| UN15781 | Rsa1.0.00239.1 | 834  | 104332 | 0         | 438  | 445  | 98 +  | 390  | 834  | 95757  | 96201  |
| UN15782 | Rsa1.0.05262.1 | 936  | 14334  | 1.00E-170 | 363  | 377  | 96 +  | 562  | 935  | 11001  | 11372  |
| UN15783 | Rsa1.0.00039.1 | 678  | 296927 | 0         | 661  | 676  | 97 -  | 3    | 678  | 288748 | 289421 |
| UN15784 | Rsa1.0.04524.1 | 1030 | 16981  | 0         | 413  | 435  | 94 +  | 604  | 1030 | 5653   | 6087   |
| UN15785 | Rsa1.0.02584.1 | 864  | 29877  | 0         | 436  | 450  | 96 +  | 412  | 861  | 806    | 1252   |
| UN15786 | Rsa1.0.04768.1 | 770  | 16066  | 0         | 750  | 771  | 97 +  | 2    | 770  | 4694   | 5463   |
| UN15787 | Rsa1.0.00075.1 | 1473 | 146680 | 0         | 387  | 394  | 98 -  | 1076 | 1469 | 29354  | 29743  |
| UN15788 | Rsa1.0.02152.1 | 654  | 34558  | 0         | 551  | 588  | 93 +  | 4    | 573  | 26481  | 27067  |
| UN15789 | Rsa1.0.00078.1 | 1308 | 175053 | 1.00E-138 | 365  | 402  | 90 -  | 1    | 393  | 74758  | 75152  |
| UN15790 | Rsa1.0.04538.1 | 714  | 16940  | 1.00E-116 | 258  | 270  | 95 -  | 1    | 267  | 12644  | 12910  |
| UN15791 | Rsa1.0.00434.1 | 841  | 85171  | 0         | 367  | 368  | 99 -  | 431  | 798  | 35769  | 36136  |
| UN15792 | Rsa1.0.00227.1 | 890  | 105849 | 0         | 660  | 660  | 100 - | 231  | 890  | 9773   | 10432  |
| UN15793 | Rsa1.0.04192.1 | 569  | 18572  | 0         | 440  | 477  | 92 +  | 94   | 569  | 17147  | 17622  |

|         |                |      |        |           |      |      |      |     |      |        |        |
|---------|----------------|------|--------|-----------|------|------|------|-----|------|--------|--------|
| UN15794 | Rsa1.0.00339.1 | 806  | 222974 | 2.00E-82  | 159  | 160  | 99 - | 146 | 305  | 63385  | 63544  |
| UN15795 | Rsa1.0.00130.1 | 775  | 125737 | 1.00E-161 | 304  | 308  | 98 - | 469 | 775  | 32083  | 32390  |
| UN15796 | Rsa1.0.00750.1 | 857  | 190548 | 0         | 637  | 651  | 97 - | 189 | 836  | 184595 | 185244 |
| UN15797 | Rsa1.0.06465.1 | 1376 | 10962  | 0         | 516  | 528  | 97 - | 35  | 562  | 4224   | 4749   |
| UN15798 | Rsa1.0.00065.1 | 749  | 454616 | 1.00E-121 | 268  | 278  | 96 - | 473 | 749  | 232830 | 233100 |
| UN15799 | Rsa1.0.16574.1 | 731  | 2106   | 0         | 383  | 390  | 98 - | 277 | 666  | 1717   | 2106   |
| UN15800 | Rsa1.0.04169.1 | 625  | 18712  | 1.00E-172 | 315  | 318  | 99 + | 1   | 318  | 3208   | 3525   |
| UN15801 | Rsa1.0.02934.1 | 654  | 26627  | 0         | 635  | 657  | 96 + | 1   | 654  | 24955  | 25610  |
| UN15802 | Rsa1.0.00153.1 | 808  | 192931 | 0         | 606  | 607  | 99 - | 1   | 606  | 24233  | 24839  |
| UN15803 | Rsa1.0.00121.1 | 333  | 278029 | 1.00E-120 | 295  | 317  | 93 + | 18  | 332  | 54300  | 54614  |
| UN15804 | Rsa1.0.00750.1 | 1189 | 190548 | 0         | 968  | 988  | 97 - | 188 | 1172 | 184257 | 185239 |
| UN15805 | Rsa1.0.00013.1 | 938  | 292129 | 1.00E-107 | 205  | 206  | 99 + | 665 | 870  | 73022  | 73226  |
| UN15806 | Rsa1.0.01453.1 | 804  | 45449  | 1.00E-113 | 266  | 282  | 94 + | 523 | 800  | 6149   | 6430   |
| UN15807 | Rsa1.0.00269.1 | 910  | 341668 | 1.00E-117 | 225  | 227  | 99 + | 685 | 910  | 323318 | 323544 |
| UN15808 | Rsa1.0.00224.1 | 859  | 327530 | 1.00E-92  | 182  | 185  | 98 + | 3   | 187  | 36681  | 36865  |
| UN15809 | Rsa1.0.58152.1 | 604  | 393    | 9.00E-90  | 183  | 188  | 97 + | 14  | 201  | 1      | 188    |
| UN15810 | Rsa1.0.07425.1 | 558  | 9414   | 1.00E-135 | 254  | 257  | 98 - | 218 | 474  | 4720   | 4976   |
| UN15811 | Rsa1.0.00088.1 | 1172 | 141341 | 1.00E-114 | 237  | 246  | 96 - | 926 | 1171 | 104118 | 104363 |
| UN15812 | Rsa1.0.00348.1 | 733  | 92818  | 0         | 356  | 359  | 99 + | 2   | 360  | 49675  | 50033  |
| UN15813 | Rsa1.0.02001.1 | 492  | 36198  | 0         | 482  | 492  | 97 - | 1   | 492  | 31958  | 32449  |
| UN15814 | Rsa1.0.00140.1 | 479  | 121541 | 1.00E-100 | 188  | 189  | 99 + | 3   | 191  | 114    | 302    |
| UN15815 | Rsa1.0.00480.1 | 724  | 81325  | 0         | 394  | 407  | 96 - | 1   | 404  | 29204  | 29607  |
| UN15816 | Rsa1.0.00326.1 | 791  | 171955 | 1.00E-148 | 284  | 290  | 97 - | 1   | 290  | 82742  | 83031  |
| UN15817 | Rsa1.0.02633.1 | 828  | 29315  | 1.00E-161 | 349  | 369  | 94 + | 100 | 456  | 405    | 771    |
| UN15818 | Rsa1.0.00147.1 | 1240 | 249503 | 0         | 338  | 341  | 99 - | 900 | 1239 | 217846 | 218186 |
| UN15819 | Rsa1.0.00630.1 | 1450 | 71281  | 0         | 804  | 829  | 96 - | 1   | 829  | 12763  | 13582  |
| UN15820 | Rsa1.0.01219.1 | 1049 | 50527  | 0         | 690  | 716  | 96 + | 332 | 1045 | 39455  | 40167  |
| UN15821 | Rsa1.0.03380.1 | 1163 | 23320  | 0         | 350  | 356  | 98 + | 3   | 358  | 4260   | 4615   |
| UN15822 | Rsa1.0.03718.1 | 710  | 21195  | 3.00E-90  | 181  | 185  | 97 - | 479 | 663  | 1723   | 1907   |
| UN15823 | Rsa1.0.02676.1 | 289  | 28834  | 1.00E-137 | 277  | 287  | 96 + | 3   | 289  | 12369  | 12655  |
| UN15824 | Rsa1.0.00130.1 | 323  | 125737 | 3.00E-97  | 209  | 216  | 96 + | 110 | 323  | 618    | 833    |
| UN15825 | Rsa1.0.03303.1 | 544  | 23890  | 1.00E-130 | 245  | 248  | 98 + | 297 | 544  | 7060   | 7307   |
| UN15826 | Rsa1.0.05199.1 | 752  | 14529  | 1.00E-158 | 429  | 479  | 89 + | 277 | 752  | 7773   | 8230   |
| UN15827 | Rsa1.0.00653.1 | 750  | 70029  | 1.00E-122 | 265  | 277  | 95 - | 202 | 472  | 37747  | 38020  |
| UN15828 | Rsa1.0.00192.1 | 428  | 278200 | 0         | 410  | 428  | 95 - | 1   | 428  | 13722  | 14148  |
| UN15829 | Rsa1.0.00015.1 | 1557 | 561803 | 0         | 1061 | 1067 | 99 + | 492 | 1557 | 362642 | 363708 |
| UN15830 | Rsa1.0.00336.1 | 1046 | 445051 | 1.00E-169 | 317  | 321  | 98 - | 718 | 1038 | 164262 | 164581 |
| UN15831 | Rsa1.0.02963.1 | 978  | 26407  | 1.00E-111 | 243  | 254  | 95 + | 727 | 976  | 5185   | 5437   |
| UN15832 | Rsa1.0.01656.1 | 526  | 41494  | 1.00E-82  | 176  | 182  | 96 - | 19  | 197  | 14762  | 14943  |



|         |                |      |        |           |     |     |       |     |      |        |        |
|---------|----------------|------|--------|-----------|-----|-----|-------|-----|------|--------|--------|
| UN15833 | Rsa1.0.04518.1 | 859  | 17005  | 1.00E-148 | 290 | 298 | 97 -  | 1   | 298  | 11675  | 11972  |
| UN15834 | Rsa1.0.00246.1 | 995  | 103541 | 1.00E-148 | 341 | 359 | 94 -  | 627 | 981  | 26557  | 26905  |
| UN15835 | Rsa1.0.03142.1 | 896  | 25043  | 0         | 486 | 503 | 96 -  | 348 | 846  | 1430   | 1932   |
| UN15836 | Rsa1.0.00023.1 | 901  | 194764 | 0         | 600 | 636 | 94 -  | 1   | 627  | 118142 | 118765 |
| UN15837 | Rsa1.0.05510.1 | 1032 | 13470  | 1.00E-150 | 285 | 290 | 98 -  | 475 | 764  | 1981   | 2270   |
| UN15838 | Rsa1.0.03799.1 | 535  | 20775  | 9.00E-93  | 191 | 197 | 96 -  | 164 | 360  | 17302  | 17498  |
| UN15839 | Rsa1.0.00790.1 | 487  | 148693 | 1.00E-119 | 227 | 230 | 98 +  | 218 | 447  | 135658 | 135887 |
| UN15840 | Rsa1.0.00226.1 | 1018 | 105884 | 0         | 383 | 396 | 96 +  | 596 | 990  | 32605  | 32999  |
| UN15841 | Rsa1.0.01047.1 | 1005 | 55705  | 1.00E-170 | 316 | 320 | 98 +  | 686 | 1005 | 2010   | 2329   |
| UN15842 | Rsa1.0.16567.1 | 767  | 2109   | 8.00E-94  | 188 | 191 | 98 +  | 545 | 734  | 1316   | 1506   |
| UN15843 | Rsa1.0.00253.1 | 824  | 231292 | 1.00E-127 | 272 | 286 | 95 -  | 2   | 285  | 28152  | 28428  |
| UN15844 | Rsa1.0.00020.1 | 513  | 283099 | 1.00E-164 | 354 | 371 | 95 -  | 144 | 513  | 60898  | 61265  |
| UN15845 | Rsa1.0.01171.1 | 1068 | 51752  | 0         | 362 | 362 | 100 + | 706 | 1067 | 50943  | 51304  |
| UN15846 | Rsa1.0.02834.1 | 695  | 27493  | 1.00E-174 | 368 | 382 | 96 -  | 1   | 380  | 24286  | 24665  |
| UN15847 | Rsa1.0.01908.1 | 1475 | 37427  | 0         | 911 | 957 | 95 +  | 276 | 1232 | 7707   | 8663   |
| UN15848 | Rsa1.0.01951.1 | 638  | 36941  | 1.00E-174 | 332 | 339 | 97 -  | 1   | 339  | 13558  | 13893  |
| UN15849 | Rsa1.0.00153.1 | 652  | 192931 | 0         | 556 | 578 | 96 -  | 1   | 574  | 157109 | 157686 |
| UN15850 | Rsa1.0.23535.1 | 631  | 1042   | 2.00E-63  | 130 | 132 | 98 +  | 212 | 343  | 98     | 229    |
| UN15851 | Rsa1.0.01068.1 | 638  | 55208  | 1.00E-98  | 200 | 205 | 97 +  | 40  | 244  | 5127   | 5328   |
| UN15852 | Rsa1.0.00163.1 | 692  | 116847 | 0         | 463 | 476 | 97 +  | 213 | 688  | 46561  | 47036  |
| UN15853 | Rsa1.0.02910.1 | 375  | 26843  | 5.00E-35  | 82  | 84  | 97 +  | 160 | 243  | 21401  | 21484  |
| UN15854 | Rsa1.0.00707.1 | 910  | 190112 | 1.00E-125 | 236 | 238 | 99 -  | 675 | 910  | 181078 | 181315 |
| UN15855 | Rsa1.0.00236.1 | 1293 | 104771 | 1.00E-163 | 372 | 395 | 94 -  | 16  | 403  | 82285  | 82673  |
| UN15856 | Rsa1.0.01655.1 | 686  | 41508  | 0         | 462 | 480 | 96 -  | 2   | 481  | 6342   | 6818   |
| UN15857 | Rsa1.0.02663.1 | 732  | 169243 | 1.00E-171 | 308 | 309 | 99 +  | 359 | 667  | 9930   | 10238  |
| UN15858 | Rsa1.0.00477.1 | 822  | 81556  | 0         | 416 | 429 | 96 +  | 1   | 425  | 23857  | 24283  |
| UN15859 | Rsa1.0.00087.1 | 1254 | 761073 | 1.00E-167 | 377 | 393 | 95 -  | 868 | 1254 | 615116 | 615505 |
| UN15860 | Rsa1.0.01245.1 | 540  | 149868 | 0         | 389 | 392 | 99 +  | 5   | 394  | 41022  | 41413  |
| UN15861 | Rsa1.0.00087.1 | 647  | 761073 | 1.00E-134 | 328 | 352 | 93 -  | 1   | 343  | 225356 | 225700 |
| UN15862 | Rsa1.0.00248.1 | 371  | 163568 | 1.00E-143 | 344 | 371 | 92 +  | 1   | 371  | 40147  | 40513  |
| UN15863 | Rsa1.0.02442.1 | 489  | 31355  | 1.00E-122 | 248 | 255 | 97 +  | 1   | 254  | 12550  | 12804  |
| UN15864 | Rsa1.0.11912.1 | 517  | 5372   | 0         | 491 | 514 | 95 +  | 1   | 514  | 1605   | 2115   |
| UN15865 | Rsa1.0.00451.1 | 661  | 322533 | 2.00E-57  | 196 | 225 | 87 +  | 1   | 225  | 293299 | 293508 |
| UN15866 | Rsa1.0.01104.1 | 1013 | 285480 | 1.00E-121 | 236 | 241 | 97 -  | 1   | 241  | 268644 | 268884 |
| UN15867 | Rsa1.0.00388.1 | 877  | 88890  | 0         | 396 | 398 | 99 -  | 3   | 400  | 56221  | 56618  |
| UN15868 | Rsa1.0.02389.1 | 716  | 146428 | 0         | 697 | 729 | 95 +  | 1   | 716  | 138078 | 138806 |
| UN15869 | Rsa1.0.00220.1 | 782  | 192936 | 0         | 418 | 426 | 98 -  | 193 | 615  | 16394  | 16819  |
| UN15870 | Rsa1.0.00018.1 | 732  | 410899 | 1.00E-174 | 330 | 337 | 97 +  | 87  | 423  | 114918 | 115254 |
| UN15871 | Rsa1.0.01937.1 | 1116 | 37147  | 0         | 423 | 439 | 96 -  | 5   | 437  | 21081  | 21517  |

|         |                |      |        |           |     |     |       |     |      |        |        |
|---------|----------------|------|--------|-----------|-----|-----|-------|-----|------|--------|--------|
| UN15872 | Rsa1.0.03579.1 | 1162 | 21969  | 0         | 403 | 422 | 95 -  | 1   | 421  | 18958  | 19378  |
| UN15873 | Rsa1.0.02434.1 | 437  | 31464  | 0         | 423 | 441 | 95 -  | 3   | 437  | 1757   | 2197   |
| UN15874 | Rsa1.0.01786.1 | 1020 | 133324 | 0         | 536 | 547 | 97 +  | 221 | 767  | 96281  | 96827  |
| UN15875 | Rsa1.0.00296.1 | 770  | 97854  | 1.00E-148 | 310 | 323 | 95 -  | 1   | 322  | 89589  | 89911  |
| UN15876 | Rsa1.0.00012.1 | 1121 | 222148 | 0         | 677 | 677 | 100 + | 443 | 1119 | 130812 | 131488 |
| UN15877 | Rsa1.0.01232.1 | 332  | 155185 | 1.00E-117 | 295 | 322 | 91 +  | 11  | 332  | 108755 | 109076 |
| UN15878 | Rsa1.0.00977.1 | 490  | 198001 | 0         | 413 | 432 | 95 +  | 18  | 449  | 50788  | 51219  |
| UN15879 | Rsa1.0.00496.1 | 870  | 79834  | 0         | 458 | 461 | 99 +  | 197 | 654  | 30141  | 30601  |
| UN15880 | Rsa1.0.00651.1 | 669  | 247766 | 0         | 438 | 475 | 92 -  | 1   | 472  | 207681 | 208143 |
| UN15881 | Rsa1.0.00762.1 | 823  | 165246 | 1.00E-163 | 327 | 339 | 96 +  | 9   | 347  | 25879  | 26217  |
| UN15882 | Rsa1.0.31708.1 | 806  | 721    | 1.00E-115 | 214 | 215 | 99 +  | 259 | 473  | 43     | 257    |
| UN15883 | Rsa1.0.01434.1 | 594  | 45951  | 0         | 575 | 596 | 96 +  | 3   | 594  | 7332   | 7923   |
| UN15884 | Rsa1.0.00659.1 | 260  | 69733  | 3.00E-60  | 128 | 130 | 98 +  | 55  | 183  | 20021  | 20150  |
| UN15885 | Rsa1.0.00417.1 | 1522 | 395068 | 0         | 801 | 811 | 98 -  | 1   | 811  | 294903 | 295713 |
| UN15886 | Rsa1.0.00133.1 | 784  | 123768 | 1.00E-174 | 309 | 309 | 100 - | 124 | 432  | 11639  | 11947  |
| UN15887 | Rsa1.0.00407.1 | 337  | 191544 | 1.00E-157 | 324 | 336 | 96 +  | 3   | 337  | 43105  | 43438  |
| UN15888 | Rsa1.0.08909.1 | 464  | 6799   | 1.00E-85  | 242 | 264 | 91 -  | 5   | 257  | 5387   | 5646   |
| UN15889 | Rsa1.0.03352.1 | 1520 | 23506  | 1.00E-128 | 279 | 289 | 96 -  | 1   | 288  | 4054   | 4339   |
| UN15890 | Rsa1.0.00038.1 | 851  | 314568 | 0         | 453 | 460 | 98 -  | 1   | 460  | 253300 | 253756 |
| UN15891 | Rsa1.0.43698.1 | 752  | 514    | 1.00E-163 | 298 | 300 | 99 +  | 254 | 553  | 215    | 514    |
| UN15892 | Rsa1.0.00897.1 | 747  | 60498  | 1.00E-112 | 238 | 249 | 95 -  | 349 | 597  | 22614  | 22856  |
| UN15893 | Rsa1.0.07536.1 | 1112 | 9178   | 0         | 419 | 419 | 100 - | 687 | 1105 | 6475   | 6893   |
| UN15894 | Rsa1.0.00005.1 | 839  | 353093 | 0         | 829 | 837 | 99 +  | 1   | 837  | 288482 | 289318 |
| UN15895 | Rsa1.0.03738.1 | 1174 | 21071  | 1.00E-172 | 306 | 306 | 100 - | 6   | 311  | 12767  | 13072  |
| UN15896 | Rsa1.0.01234.1 | 701  | 50183  | 0         | 509 | 509 | 100 - | 3   | 511  | 8897   | 9405   |
| UN15897 | Rsa1.0.06571.1 | 767  | 10750  | 3.00E-81  | 157 | 158 | 99 +  | 38  | 195  | 4754   | 4911   |
| UN15898 | Rsa1.0.02839.1 | 1273 | 27391  | 0         | 365 | 365 | 100 - | 235 | 599  | 18841  | 19205  |
| UN15899 | Rsa1.0.39888.1 | 936  | 563    | 0         | 491 | 501 | 98 +  | 435 | 935  | 1      | 499    |
| UN15900 | Rsa1.0.06201.1 | 1275 | 11506  | 1.00E-167 | 302 | 303 | 99 +  | 46  | 348  | 1      | 303    |
| UN15901 | Rsa1.0.03191.1 | 1061 | 145762 | 0         | 947 | 965 | 98 -  | 97  | 1061 | 137620 | 138583 |
| UN15902 | Rsa1.0.02373.1 | 270  | 32048  | 1.00E-116 | 260 | 274 | 94 -  | 1   | 270  | 30407  | 30680  |
| UN15903 | Rsa1.0.02908.1 | 253  | 26859  | 9.00E-91  | 214 | 228 | 93 -  | 27  | 252  | 9514   | 9741   |
| UN15904 | Rsa1.0.23451.1 | 1128 | 1048   | 0         | 396 | 396 | 100 - | 2   | 397  | 184    | 579    |
| UN15905 | Rsa1.0.00385.1 | 634  | 89160  | 1.00E-76  | 167 | 174 | 95 +  | 262 | 435  | 50842  | 51015  |
| UN15906 | Rsa1.0.05228.1 | 864  | 14437  | 1.00E-163 | 356 | 377 | 94 +  | 2   | 364  | 4937   | 5313   |
| UN15907 | Rsa1.0.00002.1 | 513  | 601661 | 0         | 466 | 483 | 96 -  | 1   | 477  | 289127 | 289606 |
| UN15908 | Rsa1.0.00130.1 | 438  | 125737 | 1.00E-145 | 375 | 409 | 91 +  | 1   | 391  | 115167 | 115570 |
| UN15909 | Rsa1.0.02910.1 | 985  | 26843  | 1.00E-108 | 244 | 258 | 94 +  | 3   | 260  | 20245  | 20499  |
| UN15910 | Rsa1.0.00602.1 | 804  | 73302  | 1.00E-154 | 295 | 301 | 98 -  | 3   | 303  | 720    | 1020   |

|         |                |      |        |           |     |     |       |     |      |        |        |
|---------|----------------|------|--------|-----------|-----|-----|-------|-----|------|--------|--------|
| UN15911 | Rsa1.0.03738.1 | 1143 | 21071  | 1.00E-142 | 266 | 269 | 98 -  | 306 | 574  | 12425  | 12693  |
| UN15912 | Rsa1.0.00288.1 | 583  | 98659  | 1.00E-102 | 192 | 193 | 99 +  | 391 | 583  | 52056  | 52248  |
| UN15913 | Rsa1.0.00632.1 | 556  | 183777 | 2.00E-56  | 115 | 116 | 99 +  | 374 | 489  | 60381  | 60496  |
| UN15914 | Rsa1.0.01865.1 | 596  | 37992  | 0         | 580 | 595 | 97 +  | 1   | 594  | 25937  | 26528  |
| UN15915 | Rsa1.0.00098.1 | 352  | 349239 | 1.00E-149 | 330 | 350 | 94 +  | 3   | 352  | 292708 | 293055 |
| UN15916 | Rsa1.0.00200.1 | 591  | 162016 | 0         | 495 | 512 | 96 +  | 75  | 586  | 119257 | 119754 |
| UN15917 | Rsa1.0.00463.1 | 1540 | 189177 | 1.00E-141 | 255 | 255 | 100 - | 928 | 1182 | 170242 | 170496 |
| UN15918 | Rsa1.0.03887.1 | 646  | 20247  | 1.00E-131 | 251 | 254 | 98 +  | 1   | 254  | 2246   | 2498   |
| UN15919 | Rsa1.0.00247.1 | 834  | 103408 | 0         | 378 | 380 | 99 -  | 447 | 825  | 65465  | 65844  |
| UN15920 | Rsa1.0.00382.1 | 882  | 251946 | 1.00E-159 | 285 | 285 | 100 + | 1   | 285  | 245728 | 246012 |
| UN15921 | Rsa1.0.01171.1 | 776  | 51752  | 0         | 395 | 395 | 100 + | 382 | 776  | 50943  | 51337  |
| UN15922 | Rsa1.0.00121.1 | 1335 | 278029 | 0         | 396 | 396 | 100 + | 940 | 1335 | 31815  | 32210  |
| UN15923 | Rsa1.0.01578.1 | 524  | 42880  | 1.00E-161 | 333 | 348 | 95 -  | 2   | 349  | 31335  | 31682  |
| UN15924 | Rsa1.0.00013.1 | 804  | 292129 | 1.00E-163 | 305 | 308 | 99 +  | 497 | 804  | 159602 | 159908 |
| UN15925 | Rsa1.0.00222.1 | 650  | 172263 | 0         | 503 | 519 | 96 -  | 1   | 519  | 69472  | 69990  |
| UN15926 | Rsa1.0.03740.1 | 501  | 21065  | 0         | 462 | 492 | 93 +  | 1   | 489  | 14534  | 15023  |
| UN15927 | Rsa1.0.01166.1 | 458  | 51877  | 0         | 446 | 459 | 97 +  | 1   | 458  | 9156   | 9614   |
| UN15928 | Rsa1.0.00015.1 | 904  | 561803 | 0         | 427 | 428 | 99 -  | 1   | 428  | 401953 | 402379 |
| UN15929 | Rsa1.0.00139.1 | 387  | 357786 | 0         | 380 | 386 | 98 -  | 2   | 387  | 128742 | 129127 |
| UN15930 | Rsa1.0.07808.1 | 766  | 8504   | 0         | 565 | 574 | 98 +  | 82  | 655  | 154    | 727    |
| UN15931 | Rsa1.0.00126.1 | 1257 | 127534 | 1.00E-156 | 308 | 316 | 97 +  | 255 | 569  | 37046  | 37361  |
| UN15932 | Rsa1.0.00122.1 | 1123 | 265937 | 1.00E-117 | 247 | 254 | 97 +  | 3   | 255  | 5366   | 5617   |
| UN15933 | Rsa1.0.07396.1 | 812  | 9465   | 0         | 490 | 506 | 96 -  | 310 | 812  | 94     | 598    |
| UN15934 | Rsa1.0.02384.1 | 1285 | 31917  | 0         | 797 | 811 | 98 -  | 478 | 1285 | 5571   | 6378   |
| UN15935 | Rsa1.0.00893.1 | 640  | 60626  | 0         | 395 | 396 | 99 -  | 245 | 640  | 8442   | 8837   |
| UN15936 | Rsa1.0.01649.1 | 1145 | 41624  | 0         | 562 | 575 | 97 -  | 2   | 576  | 18793  | 19367  |
| UN15937 | Rsa1.0.00782.1 | 697  | 64468  | 1.00E-137 | 301 | 318 | 94 -  | 301 | 618  | 60301  | 60615  |
| UN15938 | Rsa1.0.30388.1 | 416  | 755    | 1.00E-118 | 216 | 216 | 100 - | 2   | 217  | 533    | 748    |
| UN15939 | Rsa1.0.07344.1 | 744  | 9528   | 0         | 718 | 743 | 96 -  | 2   | 743  | 6004   | 6744   |
| UN15940 | Rsa1.0.02398.1 | 617  | 31766  | 1.00E-142 | 278 | 284 | 97 -  | 1   | 284  | 5418   | 5700   |
| UN15941 | Rsa1.0.00660.1 | 617  | 69688  | 1.00E-129 | 243 | 246 | 98 -  | 6   | 251  | 60390  | 60635  |
| UN15942 | Rsa1.0.00821.1 | 931  | 62891  | 1.00E-126 | 242 | 246 | 98 +  | 2   | 247  | 49074  | 49319  |
| UN15943 | Rsa1.0.00071.1 | 710  | 345714 | 1.00E-126 | 301 | 324 | 92 -  | 29  | 352  | 317193 | 317513 |
| UN15944 | Rsa1.0.03552.1 | 911  | 22151  | 0         | 419 | 426 | 98 -  | 1   | 425  | 12808  | 13231  |
| UN15945 | Rsa1.0.01896.1 | 793  | 37512  | 0         | 573 | 597 | 95 -  | 1   | 597  | 19518  | 20114  |
| UN15946 | Rsa1.0.00962.1 | 576  | 184909 | 0         | 334 | 334 | 100 + | 243 | 576  | 13117  | 13450  |
| UN15947 | Rsa1.0.03347.1 | 868  | 23588  | 0         | 865 | 868 | 99 +  | 1   | 868  | 8101   | 8968   |
| UN15948 | Rsa1.0.01389.1 | 1024 | 46716  | 0         | 414 | 424 | 97 +  | 3   | 422  | 9743   | 10165  |
| UN15949 | Rsa1.0.39335.1 | 663  | 572    | 0         | 339 | 340 | 99 -  | 1   | 339  | 11     | 350    |

|         |                |      |        |           |      |      |       |     |      |        |        |
|---------|----------------|------|--------|-----------|------|------|-------|-----|------|--------|--------|
| UN15950 | Rsa1.0_00382.1 | 909  | 251946 | 1.00E-138 | 279  | 287  | 97 +  | 3   | 288  | 34566  | 34848  |
| UN15951 | Rsa1.0_00022.1 | 608  | 200461 | 1.00E-151 | 295  | 303  | 97 +  | 304 | 606  | 45805  | 46107  |
| UN15952 | Rsa1.0_10036.1 | 813  | 6030   | 1.00E-117 | 243  | 252  | 96 +  | 419 | 667  | 496    | 747    |
| UN15953 | Rsa1.0_00356.1 | 743  | 91521  | 0         | 721  | 743  | 97 +  | 1   | 743  | 4650   | 5391   |
| UN15954 | Rsa1.0_00071.1 | 777  | 345714 | 0         | 362  | 373  | 97 -  | 1   | 372  | 142456 | 142821 |
| UN15955 | Rsa1.0_00070.1 | 695  | 150321 | 1.00E-128 | 262  | 272  | 96 +  | 420 | 691  | 59705  | 59976  |
| UN15956 | Rsa1.0_01002.1 | 730  | 57063  | 0         | 724  | 731  | 99 -  | 1   | 730  | 20631  | 21361  |
| UN15957 | Rsa1.0_02020.1 | 686  | 173211 | 0         | 396  | 405  | 97 -  | 1   | 404  | 154513 | 154917 |
| UN15958 | Rsa1.0_02040.1 | 880  | 35684  | 1.00E-178 | 323  | 325  | 99 +  | 554 | 878  | 13231  | 13555  |
| UN15959 | Rsa1.0_12866.1 | 1229 | 5093   | 0         | 1021 | 1059 | 96 +  | 6   | 1062 | 1044   | 2094   |
| UN15960 | Rsa1.0_00128.1 | 530  | 228675 | 8.00E-87  | 219  | 233  | 93 -  | 4   | 232  | 61319  | 61549  |
| UN15961 | Rsa1.0_01078.1 | 524  | 316910 | 1.00E-153 | 309  | 318  | 97 +  | 207 | 522  | 290400 | 290717 |
| UN15962 | Rsa1.0_05611.1 | 813  | 13193  | 0         | 537  | 555  | 96 -  | 261 | 813  | 2578   | 3128   |
| UN15963 | Rsa1.0_00168.1 | 616  | 115870 | 1.00E-168 | 320  | 327  | 97 -  | 4   | 330  | 54746  | 55072  |
| UN15964 | Rsa1.0_01182.1 | 668  | 167304 | 5.00E-76  | 192  | 209  | 91 -  | 5   | 213  | 3474   | 3673   |
| UN15965 | Rsa1.0_01281.1 | 537  | 49313  | 1.00E-109 | 210  | 213  | 98 +  | 285 | 497  | 34295  | 34507  |
| UN15966 | Rsa1.0_01412.1 | 872  | 46311  | 0         | 479  | 498  | 96 -  | 5   | 501  | 9158   | 9650   |
| UN15967 | Rsa1.0_02496.1 | 735  | 30814  | 0         | 392  | 400  | 98 -  | 1   | 394  | 28985  | 29384  |
| UN15968 | Rsa1.0_03191.1 | 382  | 145762 | 1.00E-148 | 301  | 312  | 96 -  | 1   | 312  | 16325  | 16633  |
| UN15969 | Rsa1.0_12954.1 | 1009 | 5066   | 1.00E-107 | 256  | 272  | 94 +  | 17  | 287  | 3809   | 4076   |
| UN15970 | Rsa1.0_00630.1 | 562  | 71281  | 1.00E-158 | 314  | 319  | 98 -  | 203 | 517  | 62461  | 62779  |
| UN15971 | Rsa1.0_00171.1 | 600  | 115622 | 0         | 330  | 330  | 100 - | 271 | 600  | 50091  | 50420  |
| UN15972 | Rsa1.0_29830.1 | 1085 | 770    | 0         | 409  | 437  | 93 +  | 649 | 1085 | 114    | 534    |
| UN15973 | Rsa1.0_00348.1 | 890  | 92818  | 0         | 444  | 454  | 97 -  | 440 | 889  | 49580  | 50033  |
| UN15974 | Rsa1.0_04396.1 | 1424 | 17561  | 0         | 1251 | 1287 | 97 +  | 50  | 1336 | 16277  | 17561  |
| UN15975 | Rsa1.0_00040.1 | 1314 | 324196 | 0         | 505  | 506  | 99 -  | 3   | 507  | 175165 | 175670 |
| UN15976 | Rsa1.0_00601.1 | 792  | 177045 | 0         | 394  | 404  | 97 +  | 1   | 400  | 26093  | 26496  |
| UN15977 | Rsa1.0_00341.1 | 631  | 249309 | 1.00E-73  | 225  | 249  | 90 -  | 375 | 620  | 123991 | 124239 |
| UN15978 | Rsa1.0_03900.1 | 1024 | 133221 | 1.00E-164 | 319  | 327  | 97 +  | 698 | 1024 | 3917   | 4239   |
| UN15979 | Rsa1.0_03465.1 | 1175 | 22700  | 0         | 508  | 522  | 97 -  | 569 | 1090 | 9803   | 10324  |
| UN15980 | Rsa1.0_00601.1 | 787  | 177045 | 0         | 404  | 404  | 100 - | 384 | 787  | 26093  | 26496  |
| UN15981 | Rsa1.0_00163.1 | 1252 | 116847 | 0         | 1207 | 1249 | 96 -  | 5   | 1252 | 48260  | 49508  |
| UN15982 | Rsa1.0_31664.1 | 582  | 722    | 1.00E-111 | 204  | 204  | 100 + | 60  | 263  | 514    | 717    |
| UN15983 | Rsa1.0_37263.1 | 1040 | 605    | 0         | 592  | 605  | 97 -  | 376 | 980  | 1      | 605    |
| UN15984 | Rsa1.0_00526.1 | 1440 | 169279 | 0         | 496  | 497  | 99 -  | 944 | 1440 | 128412 | 128908 |
| UN15985 | Rsa1.0_00456.1 | 638  | 82826  | 1.00E-134 | 263  | 270  | 97 +  | 19  | 288  | 65935  | 66204  |
| UN15986 | Rsa1.0_00001.1 | 1143 | 363028 | 0         | 549  | 549  | 100 + | 595 | 1143 | 266567 | 267115 |
| UN15987 | Rsa1.0_00632.1 | 699  | 183777 | 1.00E-128 | 265  | 278  | 95 -  | 434 | 699  | 55976  | 56253  |
| UN15988 | Rsa1.0_00647.1 | 1008 | 70440  | 1.00E-170 | 303  | 303  | 100 + | 706 | 1008 | 57755  | 58057  |

|         |                |      |        |           |      |      |       |      |      |        |        |
|---------|----------------|------|--------|-----------|------|------|-------|------|------|--------|--------|
| UN15989 | Rsa1.0.00071.1 | 746  | 345714 | 1.00E-132 | 263  | 268  | 98 +  | 5    | 271  | 324470 | 324736 |
| UN15990 | Rsa1.0.13595.1 | 1543 | 4681   | 0         | 1127 | 1141 | 98 +  | 3    | 1143 | 3541   | 4681   |
| UN15991 | Rsa1.0.00182.1 | 978  | 142305 | 1.00E-139 | 252  | 252  | 100 - | 320  | 571  | 74844  | 75095  |
| UN15992 | Rsa1.0.00075.1 | 1548 | 146680 | 0         | 457  | 482  | 94 +  | 1068 | 1548 | 17393  | 17857  |
| UN15993 | Rsa1.0.30668.1 | 1243 | 748    | 0         | 423  | 423  | 100 - | 326  | 748  | 1      | 423    |
| UN15994 | Rsa1.0.06136.1 | 1668 | 11659  | 0         | 388  | 388  | 100 - | 1001 | 1388 | 150    | 537    |
| UN15995 | Rsa1.0.05257.1 | 1857 | 14343  | 0         | 806  | 812  | 99 -  | 1031 | 1842 | 1937   | 2748   |
| UN15996 | Rsa1.0.00825.1 | 1624 | 62855  | 0         | 421  | 426  | 98 +  | 2    | 427  | 53120  | 53545  |
| UN15997 | Rsa1.0.03726.1 | 898  | 21160  | 4.00E-96  | 213  | 223  | 95 -  | 3    | 220  | 17199  | 17420  |
| UN15998 | Rsa1.0.59294.1 | 1232 | 386    | 5.00E-56  | 135  | 142  | 95 -  | 813  | 951  | 141    | 282    |
| UN15999 | Rsa1.0.01536.1 | 955  | 43747  | 0         | 347  | 349  | 99 +  | 482  | 830  | 28390  | 28738  |
| UN16000 | Rsa1.0.00246.1 | 1217 | 103541 | 1.00E-151 | 318  | 331  | 96 -  | 889  | 1216 | 89269  | 89594  |
| UN16001 | Rsa1.0.11549.1 | 1100 | 5473   | 0         | 529  | 530  | 99 -  | 571  | 1100 | 4464   | 4993   |
| UN16002 | Rsa1.0.01439.1 | 1521 | 45841  | 0         | 638  | 640  | 99 -  | 5    | 644  | 1211   | 1850   |
| UN16003 | Rsa1.0.00565.1 | 1182 | 75420  | 0         | 464  | 465  | 99 -  | 378  | 842  | 35259  | 35723  |
| UN16004 | Rsa1.0.03173.1 | 870  | 24815  | 1.00E-124 | 350  | 390  | 89 -  | 1    | 389  | 18617  | 19006  |
| UN16005 | Rsa1.0.01007.1 | 1029 | 56933  | 0         | 808  | 808  | 100 + | 1    | 808  | 47967  | 48774  |
| UN16006 | Rsa1.0.00407.1 | 1610 | 191544 | 1.00E-174 | 310  | 310  | 100 - | 3    | 312  | 9694   | 10003  |
| UN16007 | Rsa1.0.02314.1 | 1285 | 32642  | 1.00E-152 | 285  | 289  | 98 -  | 1    | 289  | 1471   | 1759   |
| UN16008 | Rsa1.0.05189.1 | 1124 | 14545  | 0         | 374  | 376  | 99 +  | 1    | 376  | 412    | 785    |
| UN16009 | Rsa1.0.00480.1 | 1114 | 81325  | 0         | 700  | 712  | 98 -  | 401  | 1111 | 3543   | 4254   |
| UN16010 | Rsa1.0.02878.1 | 1727 | 27048  | 0         | 607  | 630  | 96 -  | 1118 | 1727 | 8252   | 8880   |
| UN16011 | Rsa1.0.00156.1 | 704  | 118383 | 0         | 678  | 692  | 97 -  | 11   | 702  | 9517   | 10202  |
| UN16012 | Rsa1.0.03613.1 | 794  | 21773  | 1.00E-147 | 280  | 284  | 98 -  | 513  | 794  | 16649  | 16932  |
| UN16013 | Rsa1.0.00111.1 | 1551 | 390088 | 0         | 1506 | 1554 | 96 +  | 2    | 1551 | 189316 | 190869 |
| UN16014 | Rsa1.0.00247.1 | 1285 | 103408 | 2.00E-83  | 164  | 166  | 98 +  | 769  | 934  | 74405  | 74570  |
| UN16015 | Rsa1.0.03504.1 | 1117 | 22443  | 0         | 383  | 384  | 99 -  | 3    | 386  | 10641  | 11024  |
| UN16016 | Rsa1.0.02222.1 | 1279 | 152798 | 0         | 390  | 391  | 99 -  | 889  | 1279 | 14593  | 14983  |
| UN16017 | Rsa1.0.01015.1 | 1063 | 56752  | 0         | 612  | 618  | 99 +  | 65   | 682  | 8793   | 9410   |
| UN16018 | Rsa1.0.01829.1 | 1711 | 166063 | 0         | 1674 | 1728 | 96 +  | 3    | 1709 | 160068 | 161794 |
| UN16019 | Rsa1.0.00875.1 | 896  | 61371  | 0         | 856  | 890  | 96 +  | 1    | 890  | 6887   | 7775   |
| UN16020 | Rsa1.0.01382.1 | 1707 | 46877  | 0         | 508  | 509  | 99 +  | 586  | 1094 | 27502  | 28010  |
| UN16021 | Rsa1.0.02976.1 | 625  | 26315  | 1.00E-113 | 220  | 223  | 98 +  | 402  | 623  | 18887  | 19109  |
| UN16022 | Rsa1.0.08265.1 | 909  | 7630   | 0         | 483  | 488  | 98 -  | 422  | 908  | 6571   | 7058   |
| UN16023 | Rsa1.0.02663.1 | 1095 | 169243 | 0         | 366  | 372  | 98 -  | 725  | 1095 | 26577  | 26947  |
| UN16024 | Rsa1.0.00001.1 | 2871 | 363028 | 0         | 607  | 609  | 99 +  | 1    | 609  | 26313  | 26921  |
| UN16025 | Rsa1.0.00056.1 | 712  | 332604 | 1.00E-151 | 289  | 292  | 98 +  | 2    | 291  | 90001  | 90292  |
| UN16026 | Rsa1.0.01550.1 | 709  | 43443  | 1.00E-169 | 321  | 325  | 98 +  | 387  | 709  | 14090  | 14414  |
| UN16027 | Rsa1.0.00226.1 | 1989 | 105884 | 0         | 392  | 393  | 99 -  | 1175 | 1567 | 30643  | 31035  |

|         |                |      |        |           |      |      |       |      |      |        |        |
|---------|----------------|------|--------|-----------|------|------|-------|------|------|--------|--------|
| UN16028 | Rsa1.0_00638.1 | 966  | 71037  | 1.00E-139 | 269  | 275  | 97 +  | 307  | 581  | 9032   | 9306   |
| UN16029 | Rsa1.0_03009.1 | 1173 | 26065  | 1.00E-114 | 230  | 237  | 97 -  | 823  | 1059 | 15481  | 15717  |
| UN16030 | Rsa1.0_01553.1 | 638  | 43379  | 1.00E-161 | 328  | 338  | 97 +  | 301  | 633  | 15175  | 15512  |
| UN16031 | Rsa1.0_00224.1 | 1064 | 327530 | 1.00E-118 | 223  | 225  | 99 +  | 1    | 225  | 36641  | 36865  |
| UN16032 | Rsa1.0_00959.1 | 1355 | 58202  | 0         | 958  | 997  | 96 +  | 3    | 984  | 56777  | 57763  |
| UN16033 | Rsa1.0_00832.1 | 1745 | 62622  | 0         | 1243 | 1252 | 99 +  | 1    | 1252 | 34375  | 35626  |
| UN16034 | Rsa1.0_02930.1 | 911  | 26668  | 0         | 886  | 908  | 97 +  | 3    | 910  | 12340  | 13247  |
| UN16035 | Rsa1.0_04542.1 | 952  | 16930  | 1.00E-155 | 319  | 331  | 96 +  | 623  | 950  | 16072  | 16395  |
| UN16036 | Rsa1.0_00398.1 | 1685 | 88007  | 0         | 732  | 776  | 94 +  | 410  | 1174 | 70194  | 70965  |
| UN16037 | Rsa1.0_04194.1 | 1364 | 132734 | 1.00E-151 | 287  | 292  | 98 -  | 801  | 1092 | 131500 | 131791 |
| UN16038 | Rsa1.0_01482.1 | 2060 | 44855  | 0         | 448  | 452  | 99 -  | 1607 | 2058 | 22594  | 23044  |
| UN16039 | Rsa1.0_00689.1 | 935  | 68305  | 0         | 567  | 581  | 97 +  | 130  | 710  | 12824  | 13401  |
| UN16040 | Rsa1.0_01047.1 | 1058 | 55705  | 1.00E-133 | 248  | 250  | 99 -  | 807  | 1056 | 27263  | 27512  |
| UN16041 | Rsa1.0_02378.1 | 1122 | 31991  | 0         | 414  | 428  | 96 +  | 677  | 1104 | 13753  | 14179  |
| UN16042 | Rsa1.0_03114.1 | 2214 | 25318  | 0         | 790  | 791  | 99 +  | 1191 | 1981 | 9889   | 10679  |
| UN16043 | Rsa1.0_04383.1 | 1652 | 17631  | 0         | 502  | 503  | 99 +  | 1    | 503  | 9306   | 9808   |
| UN16044 | Rsa1.0_00153.1 | 897  | 192931 | 0         | 569  | 575  | 98 +  | 324  | 895  | 157109 | 157683 |
| UN16045 | Rsa1.0_01249.1 | 1579 | 188432 | 0         | 1163 | 1163 | 100 + | 417  | 1579 | 149233 | 150395 |
| UN16046 | Rsa1.0_01286.1 | 773  | 49209  | 0         | 580  | 580  | 100 + | 2    | 581  | 3945   | 4524   |
| UN16047 | Rsa1.0_00134.1 | 1132 | 390219 | 0         | 554  | 602  | 92 -  | 535  | 1131 | 45107  | 45694  |
| UN16048 | Rsa1.0_02329.1 | 1439 | 32474  | 0         | 784  | 795  | 98 +  | 645  | 1437 | 10253  | 11044  |
| UN16049 | Rsa1.0_02400.1 | 933  | 31750  | 1.00E-175 | 322  | 324  | 99 -  | 610  | 933  | 19678  | 20000  |
| UN16050 | Rsa1.0_00734.1 | 718  | 66508  | 1.00E-107 | 278  | 305  | 91 +  | 216  | 514  | 38631  | 38935  |
| UN16051 | Rsa1.0_04544.1 | 2471 | 16917  | 0         | 751  | 751  | 100 + | 1033 | 1783 | 6890   | 7640   |
| UN16052 | Rsa1.0_05448.1 | 1631 | 13712  | 1.00E-111 | 210  | 212  | 99 +  | 399  | 610  | 11459  | 11670  |
| UN16053 | Rsa1.0_01134.1 | 1933 | 52829  | 0         | 761  | 785  | 96 -  | 585  | 1365 | 23135  | 23912  |
| UN16054 | Rsa1.0_00180.1 | 1445 | 114581 | 0         | 1092 | 1119 | 97 -  | 331  | 1445 | 89957  | 91072  |
| UN16055 | Rsa1.0_08427.1 | 1121 | 7371   | 1.00E-180 | 320  | 320  | 100 - | 1    | 320  | 1      | 320    |
| UN16056 | Rsa1.0_00900.1 | 918  | 60367  | 0         | 390  | 404  | 96 -  | 3    | 399  | 13294  | 13696  |
| UN16057 | Rsa1.0_13747.1 | 961  | 4388   | 0         | 405  | 407  | 99 +  | 1    | 407  | 1540   | 1946   |
| UN16058 | Rsa1.0_00003.1 | 1192 | 340054 | 0         | 435  | 436  | 99 +  | 1    | 436  | 276970 | 277405 |
| UN16059 | Rsa1.0_08532.1 | 1186 | 7228   | 1.00E-163 | 322  | 332  | 96 -  | 854  | 1185 | 2741   | 3072   |
| UN16060 | Rsa1.0_17922.1 | 667  | 1708   | 0         | 428  | 438  | 97 +  | 229  | 666  | 315    | 752    |
| UN16061 | Rsa1.0_02707.1 | 1073 | 28520  | 1.00E-114 | 232  | 237  | 97 -  | 7    | 243  | 26163  | 26396  |
| UN16062 | Rsa1.0_03278.1 | 1001 | 24125  | 1.00E-159 | 285  | 285  | 100 + | 1    | 285  | 1987   | 2271   |
| UN16063 | Rsa1.0_01947.1 | 655  | 36977  | 0         | 614  | 633  | 96 +  | 4    | 636  | 24868  | 25499  |
| UN16064 | Rsa1.0_00720.1 | 896  | 66931  | 1.00E-135 | 244  | 244  | 100 + | 151  | 394  | 35053  | 35296  |
| UN16065 | Rsa1.0_20365.1 | 1398 | 1313   | 0         | 462  | 474  | 97 +  | 87   | 555  | 1      | 474    |
| UN16066 | Rsa1.0_01376.1 | 1087 | 47004  | 3.00E-97  | 187  | 189  | 98 -  | 428  | 616  | 38534  | 38722  |

|         |                |      |        |           |      |      |       |      |      |        |        |
|---------|----------------|------|--------|-----------|------|------|-------|------|------|--------|--------|
| UN16067 | Rsa1.0_04169.1 | 921  | 18712  | 1.00E-160 | 359  | 381  | 94 -  | 543  | 921  | 3161   | 3525   |
| UN16068 | Rsa1.0_02913.1 | 1057 | 26816  | 0         | 508  | 523  | 97 -  | 538  | 1057 | 22069  | 22591  |
| UN16069 | Rsa1.0_00979.1 | 1409 | 57733  | 0         | 372  | 372  | 100 + | 1    | 372  | 30341  | 30712  |
| UN16070 | Rsa1.0_13917.1 | 834  | 4095   | 0         | 360  | 366  | 98 +  | 460  | 825  | 1      | 366    |
| UN16071 | Rsa1.0_01713.1 | 1272 | 40564  | 1.00E-130 | 332  | 365  | 90 -  | 919  | 1271 | 30338  | 30695  |
| UN16072 | Rsa1.0_00500.1 | 1211 | 272308 | 0         | 756  | 760  | 99 +  | 219  | 978  | 143032 | 143791 |
| UN16073 | Rsa1.0_01679.1 | 1308 | 146876 | 1.00E-160 | 307  | 313  | 98 -  | 998  | 1308 | 134935 | 135247 |
| UN16074 | Rsa1.0_00858.1 | 1735 | 61892  | 0         | 425  | 432  | 98 +  | 1304 | 1735 | 33273  | 33704  |
| UN16075 | Rsa1.0_02580.1 | 805  | 29909  | 0         | 790  | 799  | 98 -  | 6    | 803  | 20985  | 21783  |
| UN16076 | Rsa1.0_00029.1 | 760  | 272992 | 0         | 361  | 364  | 99 +  | 397  | 760  | 23298  | 23661  |
| UN16077 | Rsa1.0_02001.1 | 857  | 36198  | 0         | 495  | 514  | 96 +  | 345  | 855  | 31940  | 32448  |
| UN16078 | Rsa1.0_00333.1 | 1399 | 94500  | 1.00E-125 | 273  | 284  | 96 +  | 1044 | 1326 | 50447  | 50728  |
| UN16079 | Rsa1.0_01376.1 | 962  | 47004  | 1.00E-139 | 301  | 315  | 95 +  | 17   | 325  | 22466  | 22778  |
| UN16080 | Rsa1.0_00239.1 | 1636 | 104332 | 0         | 484  | 488  | 99 +  | 1151 | 1636 | 95757  | 96244  |
| UN16081 | Rsa1.0_00602.1 | 1283 | 73302  | 0         | 714  | 715  | 99 -  | 1    | 715  | 29563  | 30276  |
| UN16082 | Rsa1.0_00948.1 | 510  | 58620  | 6.00E-63  | 208  | 235  | 88 -  | 13   | 240  | 50679  | 50904  |
| UN16083 | Rsa1.0_02157.1 | 705  | 149652 | 4.00E-83  | 200  | 215  | 93 -  | 1    | 215  | 134118 | 134320 |
| UN16084 | Rsa1.0_02401.1 | 419  | 138425 | 1.00E-106 | 251  | 266  | 94 +  | 158  | 416  | 14881  | 15144  |
| UN16085 | Rsa1.0_01376.1 | 1066 | 47004  | 1.00E-127 | 273  | 285  | 95 -  | 778  | 1062 | 37678  | 37957  |
| UN16086 | Rsa1.0_06803.1 | 700  | 10330  | 0         | 616  | 624  | 98 +  | 77   | 700  | 4636   | 5259   |
| UN16087 | Rsa1.0_00102.1 | 1749 | 135497 | 0         | 988  | 993  | 99 -  | 758  | 1749 | 39624  | 40616  |
| UN16088 | Rsa1.0_03292.1 | 1385 | 23977  | 0         | 1283 | 1330 | 96 -  | 57   | 1385 | 10858  | 12173  |
| UN16089 | Rsa1.0_00058.1 | 1464 | 159921 | 1.00E-117 | 230  | 235  | 97 +  | 712  | 946  | 92939  | 93173  |
| UN16090 | Rsa1.0_06433.1 | 1258 | 11031  | 1.00E-105 | 209  | 213  | 98 +  | 1046 | 1258 | 8829   | 9039   |
| UN16091 | Rsa1.0_00175.1 | 1299 | 166121 | 1.00E-123 | 253  | 261  | 96 -  | 28   | 287  | 28735  | 28995  |
| UN16092 | Rsa1.0_00913.1 | 2060 | 59914  | 0         | 425  | 435  | 97 -  | 11   | 440  | 16421  | 16855  |
| UN16093 | Rsa1.0_00327.1 | 1414 | 94892  | 0         | 1192 | 1205 | 98 +  | 3    | 1206 | 69881  | 71076  |
| UN16094 | Rsa1.0_02556.1 | 1765 | 30133  | 0         | 560  | 562  | 99 +  | 92   | 653  | 2960   | 3521   |
| UN16095 | Rsa1.0_00471.1 | 1116 | 81897  | 0         | 395  | 395  | 100 - | 1    | 395  | 4146   | 4540   |
| UN16096 | Rsa1.0_01484.1 | 1103 | 44806  | 0         | 662  | 663  | 99 -  | 3    | 665  | 40748  | 41410  |
| UN16097 | Rsa1.0_00186.1 | 1330 | 112669 | 0         | 620  | 628  | 98 +  | 2    | 629  | 111162 | 111789 |
| UN16098 | Rsa1.0_03303.1 | 1623 | 23890  | 0         | 405  | 407  | 99 +  | 847  | 1253 | 6082   | 6488   |
| UN16099 | Rsa1.0_00123.1 | 1022 | 325650 | 0         | 400  | 400  | 100 + | 622  | 1021 | 267980 | 268379 |
| UN16100 | Rsa1.0_00592.1 | 1124 | 73788  | 1.00E-142 | 257  | 257  | 100 - | 868  | 1124 | 10503  | 10759  |
| UN16101 | Rsa1.0_06803.1 | 1158 | 10330  | 1.00E-107 | 264  | 279  | 94 +  | 15   | 287  | 7267   | 7542   |
| UN16102 | Rsa1.0_00104.1 | 1867 | 368722 | 0         | 348  | 354  | 98 -  | 88   | 441  | 35597  | 35950  |
| UN16103 | Rsa1.0_60372.1 | 930  | 379    | 0         | 376  | 379  | 99 -  | 361  | 739  | 1      | 379    |
| UN16104 | Rsa1.0_01786.1 | 1948 | 133324 | 0         | 1119 | 1120 | 99 +  | 829  | 1948 | 97427  | 98546  |
| UN16105 | Rsa1.0_00019.1 | 1171 | 301669 | 0         | 471  | 474  | 99 -  | 11   | 484  | 233346 | 233819 |

|         |                |      |        |           |      |      |       |      |      |        |        |
|---------|----------------|------|--------|-----------|------|------|-------|------|------|--------|--------|
| UN16106 | Rsa1.0_34603.1 | 1128 | 654    | 1.00E-113 | 230  | 237  | 97 -  | 86   | 322  | 223    | 456    |
| UN16107 | Rsa1.0_02070.1 | 1266 | 158516 | 1.00E-148 | 270  | 271  | 99 +  | 1    | 271  | 16290  | 16560  |
| UN16108 | Rsa1.0_01413.1 | 1417 | 46275  | 0         | 853  | 865  | 98 -  | 554  | 1410 | 40290  | 41154  |
| UN16109 | Rsa1.0_02825.1 | 843  | 27568  | 0         | 423  | 434  | 97 -  | 408  | 841  | 26073  | 26506  |
| UN16110 | Rsa1.0_03257.1 | 1191 | 24305  | 1.00E-160 | 293  | 294  | 99 -  | 897  | 1189 | 13738  | 14031  |
| UN16111 | Rsa1.0_05501.1 | 842  | 13513  | 6.00E-70  | 150  | 155  | 96 +  | 516  | 670  | 8665   | 8819   |
| UN16112 | Rsa1.0_01947.1 | 1940 | 36977  | 0         | 986  | 998  | 98 -  | 1    | 998  | 11580  | 12576  |
| UN16113 | Rsa1.0_73985.1 | 885  | 310    | 1.00E-144 | 259  | 259  | 100 - | 1    | 259  | 1      | 259    |
| UN16114 | Rsa1.0_02950.1 | 1366 | 26506  | 6.00E-96  | 191  | 194  | 98 -  | 1171 | 1364 | 17900  | 18091  |
| UN16115 | Rsa1.0_00030.1 | 1659 | 250988 | 0         | 917  | 921  | 99 -  | 740  | 1659 | 141374 | 142293 |
| UN16116 | Rsa1.0_14230.1 | 1516 | 3638   | 1.00E-126 | 244  | 248  | 98 -  | 3    | 247  | 1860   | 2107   |
| UN16117 | Rsa1.0_17016.1 | 1008 | 1952   | 0         | 408  | 408  | 100 - | 591  | 998  | 206    | 613    |
| UN16118 | Rsa1.0_08293.1 | 1056 | 7593   | 0         | 638  | 663  | 96 -  | 395  | 1056 | 5325   | 5983   |
| UN16119 | Rsa1.0_05221.1 | 975  | 14452  | 1.00E-148 | 266  | 266  | 100 + | 3    | 268  | 9197   | 9462   |
| UN16120 | Rsa1.0_05510.1 | 1192 | 13470  | 0         | 341  | 346  | 98 -  | 847  | 1192 | 1552   | 1895   |
| UN16121 | Rsa1.0_00513.1 | 980  | 78579  | 1.00E-117 | 236  | 242  | 97 -  | 5    | 246  | 58775  | 59015  |
| UN16122 | Rsa1.0_03752.1 | 1188 | 21022  | 1.00E-109 | 226  | 234  | 96 -  | 16   | 249  | 1341   | 1574   |
| UN16123 | Rsa1.0_00676.1 | 1503 | 69166  | 0         | 1315 | 1361 | 96 +  | 46   | 1403 | 1037   | 2395   |
| UN16124 | Rsa1.0_01635.1 | 797  | 41865  | 1.00E-98  | 189  | 191  | 98 -  | 146  | 336  | 19217  | 19407  |
| UN16125 | Rsa1.0_02975.1 | 543  | 26322  | 1.00E-113 | 244  | 253  | 96 -  | 2    | 254  | 23332  | 23578  |
| UN16126 | Rsa1.0_00203.1 | 817  | 109129 | 9.00E-60  | 139  | 146  | 95 +  | 478  | 623  | 3653   | 3798   |
| UN16127 | Rsa1.0_01669.1 | 1008 | 41286  | 1.00E-166 | 306  | 309  | 99 -  | 700  | 1008 | 5328   | 5636   |
| UN16128 | Rsa1.0_02935.1 | 1092 | 26621  | 1.00E-176 | 320  | 322  | 99 -  | 155  | 476  | 20469  | 20790  |
| UN16129 | Rsa1.0_02149.1 | 1351 | 148330 | 1.00E-125 | 248  | 255  | 97 +  | 507  | 755  | 17448  | 17702  |
| UN16130 | Rsa1.0_01117.1 | 1779 | 53465  | 0         | 453  | 481  | 94 +  | 1    | 464  | 40118  | 40598  |
| UN16131 | Rsa1.0_04355.1 | 687  | 146733 | 0         | 398  | 411  | 96 -  | 277  | 687  | 14261  | 14671  |
| UN16132 | Rsa1.0_02404.1 | 1150 | 31702  | 0         | 1133 | 1137 | 99 +  | 12   | 1148 | 5089   | 6225   |
| UN16133 | Rsa1.0_00707.1 | 1038 | 190112 | 1.00E-145 | 300  | 312  | 96 -  | 728  | 1037 | 155116 | 155427 |
| UN16134 | Rsa1.0_01170.1 | 893  | 161131 | 1.00E-127 | 251  | 257  | 97 +  | 30   | 286  | 130492 | 130745 |
| UN16135 | Rsa1.0_01456.1 | 785  | 45372  | 0         | 726  | 750  | 96 +  | 3    | 752  | 25876  | 26624  |
| UN16136 | Rsa1.0_01946.1 | 2324 | 36982  | 0         | 716  | 724  | 98 -  | 1601 | 2323 | 35168  | 35891  |
| UN16137 | Rsa1.0_02730.1 | 714  | 28385  | 0         | 584  | 587  | 99 +  | 112  | 698  | 13862  | 14448  |
| UN16138 | Rsa1.0_00204.1 | 1352 | 109056 | 1.00E-115 | 217  | 219  | 99 +  | 960  | 1178 | 52555  | 52773  |
| UN16139 | Rsa1.0_00094.1 | 1681 | 139042 | 0         | 491  | 515  | 95 +  | 1    | 513  | 42328  | 42835  |
| UN16140 | Rsa1.0_03738.1 | 821  | 21071  | 1.00E-147 | 268  | 269  | 99 -  | 314  | 582  | 12425  | 12693  |
| UN16141 | Rsa1.0_02205.1 | 812  | 33923  | 0         | 770  | 816  | 94 -  | 4    | 811  | 5195   | 6007   |
| UN16142 | Rsa1.0_04852.1 | 1823 | 15712  | 0         | 1127 | 1169 | 96 +  | 387  | 1555 | 8979   | 10147  |
| UN16143 | Rsa1.0_02254.1 | 1584 | 33344  | 0         | 469  | 479  | 97 +  | 1106 | 1583 | 2379   | 2854   |
| UN16144 | Rsa1.0_00250.1 | 801  | 273771 | 0         | 536  | 548  | 97 +  | 3    | 542  | 39182  | 39729  |



|         |                |      |        |           |      |      |       |      |      |        |        |
|---------|----------------|------|--------|-----------|------|------|-------|------|------|--------|--------|
| UN16145 | Rsa1.0_00066.1 | 1332 | 152418 | 0         | 560  | 589  | 95 +  | 695  | 1282 | 112082 | 112670 |
| UN16146 | Rsa1.0_01453.1 | 872  | 45449  | 0         | 821  | 849  | 96 -  | 5    | 847  | 5585   | 6430   |
| UN16147 | Rsa1.0_03482.1 | 1107 | 22625  | 0         | 364  | 364  | 100 + | 3    | 366  | 4787   | 5150   |
| UN16148 | Rsa1.0_00205.1 | 1631 | 193401 | 1.00E-122 | 224  | 224  | 100 + | 983  | 1206 | 128919 | 129142 |
| UN16149 | Rsa1.0_05632.1 | 804  | 13120  | 0         | 482  | 489  | 98 +  | 310  | 798  | 9527   | 10015  |
| UN16150 | Rsa1.0_00016.1 | 892  | 831256 | 0         | 400  | 407  | 98 -  | 456  | 860  | 403615 | 404021 |
| UN16151 | Rsa1.0_00804.1 | 882  | 63726  | 0         | 493  | 495  | 99 -  | 388  | 882  | 15873  | 16367  |
| UN16152 | Rsa1.0_03543.1 | 1113 | 22185  | 0         | 395  | 398  | 99 -  | 714  | 1111 | 10470  | 10867  |
| UN16153 | Rsa1.0_01740.1 | 945  | 39986  | 1.00E-133 | 277  | 288  | 96 -  | 101  | 385  | 27598  | 27885  |
| UN16154 | Rsa1.0_03366.1 | 1339 | 23401  | 0         | 497  | 506  | 98 -  | 1    | 505  | 10204  | 10709  |
| UN16155 | Rsa1.0_00714.1 | 1444 | 67187  | 1.00E-161 | 291  | 292  | 99 +  | 1151 | 1442 | 393    | 684    |
| UN16156 | Rsa1.0_00201.1 | 789  | 232851 | 0         | 412  | 418  | 98 +  | 372  | 789  | 30998  | 31414  |
| UN16157 | Rsa1.0_00276.1 | 1622 | 100160 | 0         | 444  | 447  | 99 +  | 2    | 447  | 77970  | 78416  |
| UN16158 | Rsa1.0_01537.1 | 1121 | 187285 | 0         | 1086 | 1120 | 96 +  | 2    | 1121 | 33171  | 34289  |
| UN16159 | Rsa1.0_00135.1 | 783  | 178077 | 0         | 357  | 368  | 97 -  | 150  | 517  | 169208 | 169575 |
| UN16160 | Rsa1.0_00471.1 | 720  | 81897  | 0         | 430  | 434  | 99 -  | 277  | 710  | 24702  | 25135  |
| UN16161 | Rsa1.0_00962.1 | 1897 | 184909 | 0         | 362  | 365  | 99 -  | 1    | 364  | 37364  | 37726  |
| UN16162 | Rsa1.0_00793.1 | 1696 | 64103  | 1.00E-155 | 278  | 278  | 100 - | 1415 | 1692 | 12995  | 13272  |
| UN16163 | Rsa1.0_01011.1 | 1992 | 56883  | 0         | 622  | 629  | 98 +  | 546  | 1174 | 25569  | 26195  |
| UN16164 | Rsa1.0_00381.1 | 744  | 89718  | 0         | 375  | 376  | 99 +  | 6    | 381  | 65776  | 66151  |
| UN16165 | Rsa1.0_07824.1 | 996  | 8467   | 0         | 356  | 358  | 99 -  | 638  | 995  | 2585   | 2940   |
| UN16166 | Rsa1.0_05660.1 | 1343 | 13012  | 0         | 599  | 603  | 99 -  | 3    | 605  | 4750   | 5352   |
| UN16167 | Rsa1.0_03305.1 | 1188 | 147552 | 0         | 455  | 463  | 98 +  | 707  | 1168 | 141859 | 142321 |
| UN16168 | Rsa1.0_00369.1 | 988  | 266462 | 0         | 417  | 427  | 97 -  | 563  | 988  | 4549   | 4974   |
| UN16169 | Rsa1.0_00265.1 | 1990 | 220635 | 0         | 621  | 658  | 94 -  | 698  | 1355 | 175101 | 175758 |
| UN16170 | Rsa1.0_03759.1 | 1338 | 20987  | 0         | 1311 | 1335 | 98 +  | 1    | 1331 | 15445  | 16779  |
| UN16171 | Rsa1.0_04156.1 | 1388 | 18799  | 0         | 455  | 476  | 95 +  | 8    | 479  | 273    | 746    |
| UN16172 | Rsa1.0_00176.1 | 1166 | 240984 | 0         | 551  | 561  | 98 -  | 567  | 1127 | 210502 | 211062 |
| UN16173 | Rsa1.0_02727.1 | 2123 | 28404  | 0         | 1672 | 1715 | 97 +  | 1    | 1708 | 3361   | 5070   |
| UN16174 | Rsa1.0_00589.1 | 1028 | 209965 | 0         | 1004 | 1026 | 97 -  | 3    | 1028 | 154641 | 155658 |
| UN16175 | Rsa1.0_03326.1 | 751  | 23710  | 0         | 518  | 520  | 99 +  | 232  | 751  | 17095  | 17614  |
| UN16176 | Rsa1.0_02254.1 | 1231 | 33344  | 0         | 422  | 422  | 100 + | 27   | 448  | 32196  | 32617  |
| UN16177 | Rsa1.0_00107.1 | 2055 | 431659 | 0         | 675  | 682  | 98 -  | 731  | 1412 | 292597 | 293278 |
| UN16178 | Rsa1.0_07250.1 | 1008 | 9663   | 0         | 967  | 1006 | 96 +  | 3    | 1008 | 5296   | 6293   |
| UN16179 | Rsa1.0_01435.1 | 688  | 45942  | 1.00E-166 | 374  | 395  | 94 +  | 289  | 678  | 28028  | 28421  |
| UN16180 | Rsa1.0_00822.1 | 1374 | 62891  | 2.00E-98  | 198  | 203  | 97 +  | 10   | 212  | 29926  | 30128  |
| UN16181 | Rsa1.0_00807.1 | 1428 | 63607  | 0         | 817  | 834  | 97 +  | 589  | 1422 | 61983  | 62811  |
| UN16182 | Rsa1.0_00690.1 | 821  | 140527 | 1.00E-126 | 265  | 273  | 97 +  | 549  | 820  | 31841  | 32111  |
| UN16183 | Rsa1.0_17740.1 | 604  | 1752   | 1.00E-160 | 308  | 314  | 98 -  | 290  | 602  | 1182   | 1495   |

|         |                |      |        |           |      |      |       |      |      |        |        |
|---------|----------------|------|--------|-----------|------|------|-------|------|------|--------|--------|
| UN16184 | Rsa1.0.01512.1 | 1026 | 44234  | 0         | 379  | 380  | 99 -  | 647  | 1026 | 31276  | 31655  |
| UN16185 | Rsa1.0.00261.1 | 824  | 151157 | 0         | 809  | 825  | 98 -  | 1    | 822  | 116726 | 117547 |
| UN16186 | Rsa1.0.03477.1 | 964  | 22635  | 0         | 414  | 433  | 95 -  | 534  | 964  | 8439   | 8869   |
| UN16187 | Rsa1.0.01407.1 | 2405 | 46425  | 0         | 1351 | 1361 | 99 +  | 1    | 1361 | 14933  | 16293  |
| UN16188 | Rsa1.0.01786.1 | 1052 | 133324 | 1.00E-145 | 375  | 405  | 92 +  | 2    | 403  | 100602 | 100988 |
| UN16189 | Rsa1.0.02949.1 | 1423 | 26506  | 0         | 609  | 632  | 96 -  | 575  | 1206 | 13033  | 13664  |
| UN16190 | Rsa1.0.04390.1 | 1025 | 17598  | 0         | 398  | 405  | 98 -  | 619  | 1023 | 15931  | 16335  |
| UN16191 | Rsa1.0.03548.1 | 1019 | 22164  | 2.00E-51  | 157  | 172  | 91 -  | 820  | 990  | 1995   | 2165   |
| UN16192 | Rsa1.0.00007.1 | 1004 | 239325 | 1.00E-111 | 207  | 208  | 99 +  | 442  | 649  | 108295 | 108502 |
| UN16193 | Rsa1.0.00748.1 | 1416 | 65983  | 0         | 479  | 483  | 99 +  | 934  | 1416 | 59992  | 60474  |
| UN16194 | Rsa1.0.00923.1 | 1382 | 153678 | 1.00E-129 | 247  | 251  | 98 +  | 211  | 461  | 31482  | 31732  |
| UN16195 | Rsa1.0.01421.1 | 850  | 46197  | 0         | 677  | 680  | 99 -  | 166  | 845  | 18146  | 18825  |
| UN16196 | Rsa1.0.02267.1 | 2040 | 33194  | 0         | 556  | 586  | 94 +  | 1    | 573  | 22181  | 22764  |
| UN16197 | Rsa1.0.00059.1 | 806  | 159650 | 1.00E-119 | 232  | 234  | 99 -  | 1    | 233  | 70204  | 70436  |
| UN16198 | Rsa1.0.00429.1 | 1815 | 85559  | 0         | 629  | 635  | 99 +  | 535  | 1169 | 60450  | 61084  |
| UN16199 | Rsa1.0.03491.1 | 684  | 22541  | 0         | 588  | 612  | 96 +  | 52   | 653  | 8979   | 9590   |
| UN16200 | Rsa1.0.00476.1 | 1725 | 280966 | 1.00E-152 | 279  | 281  | 99 -  | 4    | 284  | 239317 | 239597 |
| UN16201 | Rsa1.0.00175.1 | 806  | 166121 | 0         | 643  | 669  | 96 -  | 1    | 667  | 38440  | 39108  |
| UN16202 | Rsa1.0.00361.1 | 807  | 91181  | 1.00E-152 | 276  | 277  | 99 +  | 161  | 437  | 12174  | 12450  |
| UN16203 | Rsa1.0.00190.1 | 1219 | 318240 | 0         | 608  | 623  | 97 -  | 603  | 1219 | 140909 | 141530 |
| UN16204 | Rsa1.0.01434.1 | 1194 | 45951  | 0         | 1166 | 1181 | 98 +  | 3    | 1180 | 7329   | 8506   |
| UN16205 | Rsa1.0.00094.1 | 1406 | 139042 | 1.00E-108 | 210  | 212  | 99 +  | 1191 | 1401 | 60270  | 60481  |
| UN16206 | Rsa1.0.01344.1 | 1553 | 142535 | 0         | 441  | 441  | 100 + | 29   | 469  | 109904 | 110344 |
| UN16207 | Rsa1.0.00387.1 | 1152 | 495407 | 1.00E-179 | 325  | 326  | 99 +  | 827  | 1152 | 134727 | 135051 |
| UN16208 | Rsa1.0.09117.1 | 1258 | 6637   | 0         | 405  | 420  | 96 -  | 846  | 1258 | 819    | 1236   |
| UN16209 | Rsa1.0.01581.1 | 1855 | 42833  | 0         | 524  | 549  | 95 -  | 1276 | 1817 | 8519   | 9067   |
| UN16210 | Rsa1.0.00002.1 | 744  | 601661 | 0         | 709  | 722  | 98 -  | 3    | 721  | 273785 | 274505 |
| UN16211 | Rsa1.0.03562.1 | 755  | 22084  | 0         | 638  | 642  | 99 +  | 31   | 672  | 5820   | 6461   |
| UN16212 | Rsa1.0.00770.1 | 935  | 64900  | 1.00E-156 | 313  | 324  | 96 -  | 610  | 933  | 9397   | 9720   |
| UN16213 | Rsa1.0.04128.1 | 1141 | 18927  | 0         | 517  | 539  | 95 -  | 4    | 541  | 12414  | 12952  |
| UN16214 | Rsa1.0.00069.1 | 845  | 403561 | 1.00E-166 | 332  | 343  | 96 -  | 4    | 343  | 151346 | 151688 |
| UN16215 | Rsa1.0.00171.1 | 743  | 115622 | 0         | 367  | 371  | 98 -  | 3    | 373  | 50726  | 51096  |
| UN16216 | Rsa1.0.00060.1 | 850  | 502678 | 0         | 821  | 838  | 97 -  | 1    | 838  | 64710  | 65547  |
| UN16217 | Rsa1.0.03726.1 | 847  | 21160  | 0         | 421  | 429  | 98 +  | 1    | 429  | 14268  | 14696  |
| UN16218 | Rsa1.0.00301.1 | 1751 | 365315 | 1.00E-165 | 328  | 336  | 97 +  | 1417 | 1751 | 189263 | 189597 |
| UN16219 | Rsa1.0.06213.1 | 872  | 11478  | 0         | 474  | 509  | 93 +  | 1    | 502  | 1038   | 1532   |
| UN16220 | Rsa1.0.00152.1 | 1421 | 257730 | 0         | 448  | 461  | 97 +  | 966  | 1421 | 66795  | 67255  |
| UN16221 | Rsa1.0.01866.1 | 990  | 37961  | 1.00E-103 | 206  | 211  | 97 +  | 208  | 418  | 12996  | 13206  |
| UN16222 | Rsa1.0.00789.1 | 1036 | 64233  | 0         | 404  | 425  | 95 +  | 615  | 1034 | 24999  | 25420  |

|         |                |      |        |           |     |      |       |      |      |        |        |
|---------|----------------|------|--------|-----------|-----|------|-------|------|------|--------|--------|
| UN16223 | Rsa1.0.00526.1 | 1332 | 169279 | 0         | 586 | 599  | 97 -  | 2    | 600  | 110767 | 111365 |
| UN16224 | Rsa1.0.35238.1 | 624  | 642    | 1.00E-101 | 208 | 214  | 97 -  | 353  | 564  | 129    | 342    |
| UN16225 | Rsa1.0.03028.1 | 1104 | 25872  | 1.00E-113 | 267 | 282  | 94 +  | 88   | 363  | 20177  | 20458  |
| UN16226 | Rsa1.0.00571.1 | 891  | 329018 | 1.00E-148 | 293 | 302  | 97 +  | 1    | 302  | 188139 | 188440 |
| UN16227 | Rsa1.0.00127.1 | 1354 | 127446 | 0         | 784 | 810  | 96 -  | 70   | 879  | 102847 | 103656 |
| UN16228 | Rsa1.0.23719.1 | 1623 | 1029   | 0         | 378 | 388  | 97 -  | 1    | 388  | 175    | 559    |
| UN16229 | Rsa1.0.00524.1 | 1309 | 169613 | 0         | 715 | 725  | 98 -  | 582  | 1306 | 151027 | 151750 |
| UN16230 | Rsa1.0.00866.1 | 731  | 61676  | 6.00E-76  | 152 | 153  | 99 -  | 578  | 729  | 55378  | 55530  |
| UN16231 | Rsa1.0.02178.1 | 896  | 156197 | 0         | 499 | 503  | 99 -  | 61   | 563  | 1510   | 2012   |
| UN16232 | Rsa1.0.00281.1 | 1796 | 99908  | 0         | 781 | 781  | 100 - | 477  | 1257 | 83409  | 84189  |
| UN16233 | Rsa1.0.00577.1 | 1281 | 174827 | 0         | 344 | 344  | 100 + | 937  | 1280 | 118729 | 119072 |
| UN16234 | Rsa1.0.01553.1 | 1233 | 43379  | 1.00E-150 | 295 | 302  | 97 +  | 926  | 1226 | 5534   | 5835   |
| UN16235 | Rsa1.0.02029.1 | 1106 | 35857  | 0         | 576 | 590  | 97 +  | 517  | 1105 | 13320  | 13907  |
| UN16236 | Rsa1.0.00251.1 | 1272 | 303968 | 1.00E-145 | 270 | 273  | 98 -  | 1000 | 1272 | 287414 | 287686 |
| UN16237 | Rsa1.0.01896.1 | 1289 | 37512  | 0         | 485 | 498  | 97 +  | 748  | 1245 | 9812   | 10308  |
| UN16238 | Rsa1.0.02874.1 | 931  | 27070  | 0         | 528 | 532  | 99 -  | 397  | 927  | 26412  | 26943  |
| UN16239 | Rsa1.0.00751.1 | 1364 | 65759  | 0         | 492 | 493  | 99 -  | 286  | 778  | 46552  | 47044  |
| UN16240 | Rsa1.0.00679.1 | 934  | 68971  | 9.00E-85  | 166 | 168  | 98 +  | 169  | 336  | 65933  | 66100  |
| UN16241 | Rsa1.0.00928.1 | 2266 | 59293  | 0         | 722 | 743  | 97 +  | 1523 | 2265 | 23621  | 24363  |
| UN16242 | Rsa1.0.01416.1 | 1024 | 46262  | 0         | 998 | 1009 | 98 -  | 14   | 1022 | 38989  | 39997  |
| UN16243 | Rsa1.0.00627.1 | 791  | 71566  | 1.00E-103 | 283 | 311  | 90 -  | 463  | 764  | 4453   | 4756   |
| UN16244 | Rsa1.0.20651.1 | 2014 | 1283   | 0         | 389 | 392  | 99 +  | 1    | 392  | 732    | 1120   |
| UN16245 | Rsa1.0.63163.1 | 891  | 363    | 0         | 362 | 363  | 99 +  | 487  | 849  | 1      | 363    |
| UN16246 | Rsa1.0.00001.1 | 798  | 363028 | 1.00E-142 | 296 | 306  | 96 -  | 3    | 308  | 101796 | 102096 |
| UN16247 | Rsa1.0.00087.1 | 744  | 761073 | 1.00E-109 | 211 | 213  | 99 +  | 533  | 744  | 314989 | 315201 |
| UN16248 | Rsa1.0.03925.1 | 784  | 20025  | 0         | 340 | 340  | 100 - | 10   | 349  | 3816   | 4155   |
| UN16249 | Rsa1.0.00221.1 | 1009 | 106972 | 0         | 484 | 509  | 95 -  | 8    | 515  | 23885  | 24385  |
| UN16250 | Rsa1.0.02706.1 | 523  | 28522  | 0         | 520 | 524  | 99 -  | 1    | 523  | 26835  | 27358  |
| UN16251 | Rsa1.0.00714.1 | 801  | 67187  | 0         | 404 | 407  | 99 +  | 395  | 801  | 46605  | 47010  |
| UN16252 | Rsa1.0.00642.1 | 1062 | 201230 | 1.00E-155 | 358 | 379  | 94 +  | 688  | 1061 | 161688 | 162063 |
| UN16253 | Rsa1.0.00947.1 | 1159 | 58664  | 0         | 409 | 418  | 97 +  | 586  | 1003 | 58154  | 58571  |
| UN16254 | Rsa1.0.10789.1 | 954  | 5720   | 9.00E-14  | 96  | 113  | 84 -  | 175  | 287  | 1056   | 1167   |
| UN16255 | Rsa1.0.03735.1 | 1254 | 21087  | 0         | 671 | 673  | 99 -  | 581  | 1253 | 7918   | 8590   |
| UN16256 | Rsa1.0.02178.1 | 638  | 156197 | 1.00E-137 | 297 | 310  | 95 +  | 2    | 310  | 151574 | 151879 |
| UN16257 | Rsa1.0.02085.1 | 1340 | 35198  | 1.00E-130 | 275 | 284  | 96 +  | 1057 | 1339 | 17654  | 17935  |
| UN16258 | Rsa1.0.04584.1 | 879  | 16756  | 1.00E-118 | 235 | 240  | 97 +  | 641  | 879  | 11165  | 11404  |
| UN16259 | Rsa1.0.00652.1 | 887  | 70089  | 1.00E-165 | 322 | 330  | 97 -  | 558  | 887  | 59380  | 59707  |
| UN16260 | Rsa1.0.00934.1 | 1096 | 193516 | 0         | 568 | 582  | 97 +  | 509  | 1090 | 176062 | 176637 |
| UN16261 | Rsa1.0.32205.1 | 1049 | 707    | 0         | 435 | 441  | 98 +  | 2    | 442  | 269    | 707    |

|         |                |      |        |           |      |      |      |      |      |        |        |
|---------|----------------|------|--------|-----------|------|------|------|------|------|--------|--------|
| UN16262 | Rsa1.0.00119.1 | 1366 | 467509 | 1.00E-111 | 275  | 296  | 92 + | 1072 | 1364 | 390249 | 390544 |
| UN16263 | Rsa1.0.00244.1 | 852  | 103590 | 2.00E-45  | 150  | 168  | 89 - | 102  | 269  | 73674  | 73838  |
| UN16264 | Rsa1.0.00013.1 | 947  | 292129 | 3.00E-81  | 169  | 174  | 97 - | 432  | 605  | 72142  | 72315  |
| UN16265 | Rsa1.0.00485.1 | 1194 | 80937  | 0         | 392  | 404  | 97 - | 2    | 405  | 16634  | 17037  |
| UN16266 | Rsa1.0.04223.1 | 1268 | 18407  | 0         | 1224 | 1268 | 96 - | 1    | 1267 | 2341   | 3607   |
| UN16267 | Rsa1.0.01420.1 | 1403 | 46210  | 1.00E-122 | 229  | 231  | 99 + | 776  | 1006 | 8010   | 8240   |
| UN16268 | Rsa1.0.00287.1 | 950  | 98687  | 0         | 420  | 429  | 97 - | 121  | 549  | 57224  | 57652  |
| UN16269 | Rsa1.0.07607.1 | 1110 | 9034   | 0         | 674  | 680  | 99 - | 1    | 680  | 4506   | 5185   |
| UN16270 | Rsa1.0.01031.1 | 1286 | 56236  | 1.00E-72  | 158  | 164  | 96 + | 888  | 1051 | 6523   | 6686   |
| UN16271 | Rsa1.0.02231.1 | 902  | 33661  | 0         | 515  | 525  | 98 - | 378  | 902  | 18154  | 18678  |
| UN16272 | Rsa1.0.00017.1 | 1013 | 752458 | 1.00E-130 | 316  | 337  | 93 + | 679  | 1008 | 11197  | 11531  |
| UN16273 | Rsa1.0.00167.1 | 1458 | 116000 | 0         | 550  | 560  | 98 + | 563  | 1122 | 84148  | 84707  |
| UN16274 | Rsa1.0.16915.1 | 1401 | 1991   | 1.00E-102 | 203  | 206  | 98 + | 79   | 284  | 5      | 209    |
| UN16275 | Rsa1.0.00175.1 | 1264 | 166121 | 0         | 445  | 449  | 99 + | 1    | 449  | 139806 | 140253 |
| UN16276 | Rsa1.0.00913.1 | 1384 | 59914  | 0         | 440  | 470  | 93 - | 933  | 1383 | 54248  | 54717  |
| UN16277 | Rsa1.0.03485.1 | 1147 | 22606  | 1.00E-120 | 223  | 224  | 99 - | 332  | 555  | 586    | 809    |
| UN16278 | Rsa1.0.03163.1 | 1428 | 24894  | 0         | 582  | 594  | 97 - | 1    | 593  | 22793  | 23386  |
| UN16279 | Rsa1.0.01156.1 | 1521 | 52147  | 0         | 685  | 701  | 97 + | 19   | 719  | 28060  | 28754  |
| UN16280 | Rsa1.0.01352.1 | 1308 | 47443  | 1.00E-102 | 219  | 229  | 95 + | 357  | 585  | 12214  | 12442  |
| UN16281 | Rsa1.0.00180.1 | 848  | 114581 | 1.00E-172 | 334  | 342  | 97 + | 507  | 848  | 63449  | 63789  |
| UN16282 | Rsa1.0.01954.1 | 790  | 145554 | 1.00E-163 | 297  | 299  | 99 - | 491  | 789  | 12997  | 13295  |
| UN16283 | Rsa1.0.05523.1 | 896  | 13438  | 0         | 707  | 751  | 94 + | 3    | 729  | 9041   | 9791   |
| UN16284 | Rsa1.0.02730.1 | 1228 | 28385  | 0         | 371  | 374  | 99 + | 854  | 1226 | 3777   | 4150   |
| UN16285 | Rsa1.0.02316.1 | 911  | 32608  | 0         | 890  | 910  | 97 - | 3    | 911  | 5912   | 6817   |
| UN16286 | Rsa1.0.02122.1 | 1378 | 34797  | 0         | 405  | 409  | 99 - | 973  | 1378 | 26094  | 26501  |
| UN16287 | Rsa1.0.04883.1 | 2002 | 15603  | 0         | 792  | 797  | 99 - | 1204 | 1999 | 10313  | 11109  |
| UN16288 | Rsa1.0.04395.1 | 644  | 17570  | 1.00E-173 | 320  | 324  | 98 - | 321  | 644  | 9961   | 10284  |
| UN16289 | Rsa1.0.04622.1 | 1222 | 16618  | 0         | 492  | 496  | 99 + | 1    | 496  | 14007  | 14502  |
| UN16290 | Rsa1.0.00163.1 | 1219 | 116847 | 0         | 756  | 771  | 98 + | 1    | 771  | 7919   | 8685   |
| UN16291 | Rsa1.0.00577.1 | 1948 | 174827 | 1.00E-176 | 380  | 397  | 95 + | 1165 | 1554 | 148897 | 149290 |
| UN16292 | Rsa1.0.03109.1 | 1723 | 25336  | 0         | 688  | 703  | 97 + | 1022 | 1723 | 3130   | 3826   |
| UN16293 | Rsa1.0.01719.1 | 1802 | 40388  | 0         | 868  | 886  | 97 - | 915  | 1800 | 31856  | 32737  |
| UN16294 | Rsa1.0.03209.1 | 707  | 24592  | 0         | 417  | 439  | 94 + | 270  | 707  | 18885  | 19318  |
| UN16295 | Rsa1.0.00223.1 | 1305 | 106231 | 0         | 354  | 358  | 98 - | 1    | 358  | 41017  | 41374  |
| UN16296 | Rsa1.0.03569.1 | 663  | 22041  | 1.00E-135 | 251  | 253  | 99 - | 411  | 663  | 19456  | 19708  |
| UN16297 | Rsa1.0.48139.1 | 1227 | 470    | 0         | 387  | 395  | 97 - | 424  | 818  | 76     | 470    |
| UN16298 | Rsa1.0.00369.1 | 839  | 266462 | 0         | 647  | 667  | 97 - | 176  | 839  | 186458 | 187123 |
| UN16299 | Rsa1.0.01115.1 | 1107 | 183545 | 0         | 450  | 462  | 97 + | 647  | 1107 | 6514   | 6974   |
| UN16300 | Rsa1.0.00354.1 | 1364 | 232005 | 8.00E-89  | 241  | 265  | 90 + | 975  | 1232 | 168195 | 168453 |

|         |                |      |        |           |      |      |       |      |      |        |        |
|---------|----------------|------|--------|-----------|------|------|-------|------|------|--------|--------|
| UN16301 | Rsa1.0_04794.1 | 827  | 15960  | 0         | 450  | 459  | 98 -  | 13   | 464  | 2694   | 3151   |
| UN16302 | Rsa1.0_00132.1 | 1396 | 124299 | 0         | 342  | 345  | 99 +  | 194  | 538  | 91186  | 91530  |
| UN16303 | Rsa1.0_00132.1 | 853  | 124299 | 0         | 821  | 851  | 96 +  | 3    | 853  | 25441  | 26275  |
| UN16304 | Rsa1.0_03184.1 | 1161 | 24750  | 1.00E-139 | 251  | 251  | 100 - | 1    | 251  | 21274  | 21524  |
| UN16305 | Rsa1.0_16978.1 | 1567 | 1964   | 1.00E-116 | 263  | 276  | 95 -  | 476  | 749  | 1215   | 1488   |
| UN16306 | Rsa1.0_00296.1 | 883  | 97854  | 1.00E-142 | 269  | 273  | 98 +  | 173  | 445  | 21946  | 22218  |
| UN16307 | Rsa1.0_00876.1 | 1207 | 61328  | 0         | 802  | 812  | 98 -  | 4    | 815  | 46191  | 47002  |
| UN16308 | Rsa1.0_00798.1 | 1352 | 63945  | 0         | 1227 | 1244 | 98 -  | 112  | 1352 | 19654  | 20896  |
| UN16309 | Rsa1.0_00017.1 | 1434 | 752458 | 0         | 678  | 682  | 99 -  | 753  | 1434 | 296906 | 297586 |
| UN16310 | Rsa1.0_01015.1 | 1281 | 56752  | 0         | 466  | 468  | 99 -  | 1    | 468  | 11172  | 11639  |
| UN16311 | Rsa1.0_00462.1 | 598  | 82288  | 1.00E-152 | 286  | 289  | 98 -  | 308  | 596  | 35985  | 36272  |
| UN16312 | Rsa1.0_00270.1 | 822  | 101236 | 2.00E-82  | 162  | 164  | 98 +  | 581  | 744  | 1852   | 2015   |
| UN16313 | Rsa1.0_01537.1 | 1843 | 187285 | 2.33E-156 | 307  | 319  | 96 +  | 18   | 336  | 9519   | 9829   |
| UN16314 | Rsa1.0_03278.1 | 986  | 24125  | 1.00E-122 | 270  | 283  | 95 -  | 706  | 986  | 1987   | 2269   |
| UN16315 | Rsa1.0_00416.1 | 907  | 86772  | 0         | 382  | 386  | 98 +  | 522  | 907  | 50850  | 51235  |
| UN16316 | Rsa1.0_00046.1 | 779  | 320315 | 0         | 748  | 776  | 96 -  | 3    | 777  | 22151  | 22926  |
| UN16317 | Rsa1.0_00296.1 | 1575 | 97854  | 0         | 1252 | 1262 | 99 +  | 1    | 1261 | 44613  | 45874  |
| UN16318 | Rsa1.0_26314.1 | 827  | 897    | 0         | 419  | 429  | 97 -  | 389  | 817  | 109    | 537    |
| UN16319 | Rsa1.0_00698.1 | 1189 | 67816  | 4.00E-84  | 295  | 336  | 87 +  | 837  | 1168 | 47244  | 47571  |
| UN16320 | Rsa1.0_04515.1 | 1282 | 17021  | 0         | 1275 | 1281 | 99 +  | 2    | 1282 | 1606   | 2886   |
| UN16321 | Rsa1.0_08484.1 | 720  | 7288   | 0         | 556  | 563  | 98 +  | 2    | 564  | 6567   | 7129   |
| UN16322 | Rsa1.0_01286.1 | 634  | 49209  | 0         | 559  | 580  | 96 -  | 48   | 626  | 3951   | 4524   |
| UN16323 | Rsa1.0_00058.1 | 699  | 159921 | 0         | 520  | 537  | 96 -  | 166  | 698  | 49021  | 49550  |
| UN16324 | Rsa1.0_01313.1 | 951  | 48387  | 1.00E-154 | 319  | 333  | 95 -  | 44   | 376  | 16151  | 16483  |
| UN16325 | Rsa1.0_14746.1 | 1448 | 3110   | 0         | 442  | 469  | 94 -  | 326  | 786  | 1379   | 1841   |
| UN16326 | Rsa1.0_02096.1 | 1002 | 35041  | 0         | 608  | 620  | 98 +  | 382  | 1000 | 14809  | 15426  |
| UN16327 | Rsa1.0_04905.1 | 962  | 15507  | 1.00E-148 | 364  | 400  | 91 +  | 480  | 859  | 5642   | 6040   |
| UN16328 | Rsa1.0_00050.1 | 968  | 237174 | 1.00E-127 | 279  | 292  | 95 -  | 684  | 968  | 133695 | 133986 |
| UN16329 | Rsa1.0_00188.1 | 728  | 112020 | 1.00E-142 | 290  | 299  | 96 +  | 394  | 691  | 47540  | 47836  |
| UN16330 | Rsa1.0_04600.1 | 964  | 16694  | 1.00E-137 | 285  | 296  | 96 +  | 621  | 915  | 12273  | 12568  |
| UN16331 | Rsa1.0_00524.1 | 811  | 169613 | 1.00E-140 | 336  | 364  | 92 +  | 56   | 419  | 161744 | 162096 |
| UN16332 | Rsa1.0_02967.1 | 777  | 26395  | 0         | 765  | 774  | 98 -  | 4    | 777  | 6619   | 7388   |
| UN16333 | Rsa1.0_14009.1 | 955  | 3924   | 0         | 450  | 450  | 100 - | 506  | 955  | 2437   | 2886   |
| UN16334 | Rsa1.0_76149.1 | 1076 | 301    | 1.00E-166 | 300  | 301  | 99 -  | 710  | 1010 | 1      | 301    |
| UN16335 | Rsa1.0_00686.1 | 1375 | 68511  | 0         | 485  | 485  | 100 - | 891  | 1375 | 27918  | 28402  |
| UN16336 | Rsa1.0_00007.1 | 1195 | 239325 | 0         | 368  | 371  | 99 -  | 3    | 373  | 108872 | 109242 |
| UN16337 | Rsa1.0_01104.1 | 1465 | 285480 | 0         | 446  | 447  | 99 +  | 1019 | 1465 | 10223  | 10669  |
| UN16338 | Rsa1.0_00273.1 | 1453 | 326186 | 0         | 606  | 629  | 96 +  | 776  | 1403 | 137570 | 138198 |
| UN16339 | Rsa1.0_01564.1 | 1295 | 43169  | 1.00E-168 | 315  | 320  | 98 -  | 976  | 1295 | 36204  | 36523  |

|         |                |      |        |           |      |      |       |      |      |        |        |
|---------|----------------|------|--------|-----------|------|------|-------|------|------|--------|--------|
| UN16340 | Rsa1.0.00017.1 | 687  | 752458 | 1.00E-168 | 316  | 320  | 98 -  | 368  | 687  | 398420 | 398738 |
| UN16341 | Rsa1.0.00198.1 | 1096 | 222963 | 0         | 567  | 570  | 99 +  | 1    | 570  | 87389  | 87958  |
| UN16342 | Rsa1.0.00483.1 | 1283 | 81102  | 1.00E-171 | 379  | 399  | 94 -  | 891  | 1283 | 56194  | 56592  |
| UN16343 | Rsa1.0.00833.1 | 1139 | 62621  | 0         | 352  | 352  | 100 + | 788  | 1139 | 46926  | 47277  |
| UN16344 | Rsa1.0.00078.1 | 1537 | 175053 | 1.00E-155 | 307  | 318  | 96 -  | 1220 | 1537 | 140374 | 140681 |
| UN16345 | Rsa1.0.00090.1 | 875  | 273859 | 0         | 694  | 718  | 96 -  | 158  | 874  | 171766 | 172481 |
| UN16346 | Rsa1.0.01408.1 | 1102 | 46383  | 0         | 732  | 749  | 97 -  | 3    | 750  | 17109  | 17853  |
| UN16347 | Rsa1.0.00338.1 | 1149 | 94109  | 1.00E-166 | 311  | 315  | 98 -  | 2    | 313  | 36386  | 36700  |
| UN16348 | Rsa1.0.00001.1 | 1766 | 363028 | 0         | 455  | 461  | 98 -  | 1308 | 1766 | 303151 | 303611 |
| UN16349 | Rsa1.0.00017.1 | 661  | 752458 | 0         | 494  | 511  | 96 +  | 153  | 661  | 534070 | 534576 |
| UN16350 | Rsa1.0.00605.1 | 1235 | 73199  | 0         | 396  | 399  | 99 +  | 837  | 1235 | 2322   | 2719   |
| UN16351 | Rsa1.0.00855.1 | 1384 | 62047  | 0         | 799  | 840  | 95 -  | 1    | 838  | 22692  | 23523  |
| UN16352 | Rsa1.0.03290.1 | 1004 | 24011  | 1.00E-138 | 268  | 274  | 97 -  | 1    | 274  | 4892   | 5165   |
| UN16353 | Rsa1.0.03668.1 | 1456 | 21483  | 0         | 507  | 519  | 97 -  | 941  | 1454 | 3785   | 4303   |
| UN16354 | Rsa1.0.01306.1 | 1226 | 48720  | 1.00E-154 | 298  | 303  | 98 +  | 1    | 303  | 26045  | 26343  |
| UN16355 | Rsa1.0.00571.1 | 743  | 329018 | 0         | 432  | 444  | 97 +  | 303  | 742  | 159412 | 159851 |
| UN16356 | Rsa1.0.01710.1 | 479  | 40586  | 0         | 379  | 390  | 97 +  | 1    | 388  | 19357  | 19746  |
| UN16357 | Rsa1.0.00042.1 | 1299 | 171507 | 1.00E-180 | 391  | 415  | 94 -  | 2    | 403  | 71838  | 72249  |
| UN16358 | Rsa1.0.01876.1 | 1173 | 37800  | 2.00E-64  | 153  | 162  | 94 -  | 521  | 682  | 10773  | 10934  |
| UN16359 | Rsa1.0.00608.1 | 1656 | 172672 | 0         | 1309 | 1323 | 98 -  | 1    | 1323 | 135636 | 136956 |
| UN16360 | Rsa1.0.00481.1 | 1185 | 81316  | 0         | 341  | 342  | 99 -  | 842  | 1183 | 33786  | 34127  |
| UN16361 | Rsa1.0.05044.1 | 1609 | 15041  | 0         | 760  | 762  | 99 +  | 1    | 762  | 8705   | 9466   |
| UN16362 | Rsa1.0.10681.1 | 865  | 5757   | 0         | 650  | 656  | 99 -  | 3    | 655  | 4487   | 5142   |
| UN16363 | Rsa1.0.04462.1 | 2768 | 17250  | 0         | 872  | 908  | 96 +  | 1617 | 2524 | 3091   | 3996   |
| UN16364 | Rsa1.0.01156.1 | 2230 | 52147  | 0         | 520  | 546  | 95 -  | 963  | 1502 | 25221  | 25757  |
| UN16365 | Rsa1.0.00096.1 | 2174 | 198773 | 0         | 655  | 657  | 99 -  | 466  | 1122 | 31167  | 31823  |
| UN16366 | Rsa1.0.00255.1 | 2031 | 204967 | 0         | 851  | 861  | 98 -  | 1154 | 2008 | 22419  | 23279  |
| UN16367 | Rsa1.0.02356.1 | 595  | 141500 | 0         | 579  | 589  | 98 -  | 3    | 590  | 136345 | 136932 |
| UN16368 | Rsa1.0.01578.1 | 897  | 42880  | 0         | 680  | 687  | 98 -  | 209  | 895  | 11499  | 12185  |
| UN16369 | Rsa1.0.04126.1 | 1112 | 18939  | 0         | 469  | 493  | 95 +  | 620  | 1112 | 17402  | 17890  |
| UN16370 | Rsa1.0.01865.1 | 1039 | 37992  | 1.00E-117 | 224  | 226  | 99 +  | 456  | 680  | 32692  | 32917  |
| UN16371 | Rsa1.0.00007.1 | 1340 | 239325 | 0         | 627  | 631  | 99 +  | 710  | 1340 | 58424  | 59054  |
| UN16372 | Rsa1.0.01540.1 | 880  | 151890 | 0         | 482  | 489  | 98 -  | 179  | 667  | 144792 | 145280 |
| UN16373 | Rsa1.0.01536.1 | 980  | 43747  | 0         | 612  | 633  | 96 -  | 346  | 978  | 18778  | 19406  |
| UN16374 | Rsa1.0.04890.1 | 924  | 15591  | 1.00E-123 | 237  | 241  | 98 +  | 473  | 713  | 10910  | 11150  |
| UN16375 | Rsa1.0.20365.1 | 1448 | 1313   | 0         | 468  | 474  | 98 +  | 69   | 541  | 1      | 474    |
| UN16376 | Rsa1.0.10201.1 | 880  | 5946   | 0         | 781  | 798  | 97 +  | 43   | 840  | 389    | 1184   |
| UN16377 | Rsa1.0.00484.1 | 1117 | 203294 | 0         | 794  | 832  | 95 +  | 284  | 1115 | 56116  | 56941  |
| UN16378 | Rsa1.0.00819.1 | 2104 | 62918  | 0         | 651  | 657  | 99 -  | 3    | 659  | 22482  | 23138  |

|         |                |      |        |           |     |     |       |      |      |        |        |
|---------|----------------|------|--------|-----------|-----|-----|-------|------|------|--------|--------|
| UN16379 | Rsa1.0.08250.1 | 1183 | 7658   | 0         | 574 | 602 | 95 +  | 3    | 604  | 2538   | 3121   |
| UN16380 | Rsa1.0.00667.1 | 1059 | 69460  | 0         | 483 | 496 | 97 +  | 83   | 578  | 24055  | 24549  |
| UN16381 | Rsa1.0.02135.1 | 618  | 34713  | 1.00E-147 | 267 | 268 | 99 -  | 1    | 268  | 17461  | 17728  |
| UN16382 | Rsa1.0.02989.1 | 819  | 26187  | 0         | 441 | 449 | 98 -  | 124  | 568  | 3228   | 3675   |
| UN16383 | Rsa1.0.02173.1 | 1129 | 34318  | 6.00E-74  | 167 | 174 | 95 +  | 50   | 222  | 15564  | 15737  |
| UN16384 | Rsa1.0.04512.1 | 640  | 17031  | 1.00E-135 | 275 | 285 | 96 -  | 263  | 547  | 12659  | 12943  |
| UN16385 | Rsa1.0.00140.1 | 1200 | 121541 | 0         | 453 | 460 | 98 +  | 712  | 1171 | 11145  | 11603  |
| UN16386 | Rsa1.0.08928.1 | 615  | 6781   | 0         | 590 | 615 | 95 +  | 2    | 615  | 493    | 1099   |
| UN16387 | Rsa1.0.01846.1 | 1344 | 38367  | 0         | 415 | 421 | 98 +  | 5    | 423  | 34627  | 35047  |
| UN16388 | Rsa1.0.02700.1 | 727  | 28584  | 0         | 416 | 419 | 99 +  | 309  | 727  | 6214   | 6632   |
| UN16389 | Rsa1.0.09126.1 | 827  | 6625   | 0         | 440 | 447 | 98 -  | 380  | 826  | 5262   | 5707   |
| UN16390 | Rsa1.0.00001.1 | 1232 | 363028 | 0         | 666 | 700 | 95 -  | 547  | 1232 | 26222  | 26921  |
| UN16391 | Rsa1.0.08285.1 | 1059 | 7606   | 0         | 401 | 416 | 96 -  | 7    | 420  | 6676   | 7088   |
| UN16392 | Rsa1.0.00168.1 | 1427 | 115870 | 0         | 835 | 835 | 100 - | 593  | 1427 | 38894  | 39728  |
| UN16393 | Rsa1.0.02506.1 | 1215 | 30700  | 1.00E-172 | 350 | 364 | 96 -  | 402  | 765  | 6452   | 6812   |
| UN16394 | Rsa1.0.00769.1 | 874  | 64911  | 1.00E-119 | 227 | 230 | 98 +  | 12   | 241  | 40086  | 40315  |
| UN16395 | Rsa1.0.04377.1 | 782  | 17658  | 0         | 760 | 781 | 97 -  | 3    | 782  | 5366   | 6145   |
| UN16396 | Rsa1.0.01513.1 | 411  | 44234  | 0         | 393 | 411 | 95 -  | 1    | 411  | 29195  | 29605  |
| UN16397 | Rsa1.0.02700.1 | 1178 | 28584  | 0         | 449 | 470 | 95 +  | 30   | 498  | 2886   | 3354   |
| UN16398 | Rsa1.0.00821.1 | 1400 | 62891  | 0         | 458 | 489 | 93 -  | 913  | 1398 | 48838  | 49319  |
| UN16399 | Rsa1.0.02017.1 | 1525 | 35999  | 1.00E-124 | 242 | 246 | 98 +  | 1276 | 1519 | 29901  | 30146  |
| UN16400 | Rsa1.0.04238.1 | 1093 | 18352  | 4.00E-93  | 247 | 262 | 94 -  | 24   | 273  | 2712   | 2973   |
| UN16401 | Rsa1.0.02593.1 | 729  | 29744  | 1.00E-116 | 266 | 280 | 95 +  | 1    | 278  | 2886   | 3164   |
| UN16402 | Rsa1.0.00343.1 | 842  | 93570  | 0         | 513 | 538 | 95 +  | 305  | 842  | 2493   | 3024   |
| UN16403 | Rsa1.0.00269.1 | 910  | 341668 | 1.00E-112 | 324 | 359 | 90 +  | 571  | 910  | 45768  | 46123  |
| UN16404 | Rsa1.0.00769.1 | 965  | 64911  | 0         | 950 | 961 | 98 +  | 1    | 958  | 11598  | 12558  |
| UN16405 | Rsa1.0.00380.1 | 737  | 89748  | 1.00E-159 | 367 | 393 | 93 +  | 347  | 736  | 88066  | 88441  |
| UN16406 | Rsa1.0.00719.1 | 1872 | 66952  | 1.00E-159 | 294 | 297 | 98 -  | 1207 | 1503 | 42432  | 42728  |
| UN16407 | Rsa1.0.01836.1 | 919  | 38503  | 1.00E-158 | 320 | 331 | 96 +  | 1    | 330  | 5086   | 5416   |
| UN16408 | Rsa1.0.03294.1 | 944  | 23971  | 0         | 446 | 471 | 94 -  | 478  | 944  | 5093   | 5558   |
| UN16409 | Rsa1.0.02811.1 | 697  | 27669  | 0         | 651 | 686 | 94 +  | 1    | 684  | 21138  | 21813  |
| UN16410 | Rsa1.0.06056.1 | 796  | 137271 | 8.00E-91  | 176 | 178 | 98 +  | 67   | 244  | 126368 | 126545 |
| UN16411 | Rsa1.0.02373.1 | 1381 | 32048  | 0         | 481 | 495 | 97 +  | 884  | 1376 | 30160  | 30654  |
| UN16412 | Rsa1.0.02395.1 | 772  | 31785  | 1.00E-162 | 358 | 381 | 93 +  | 407  | 771  | 8334   | 8714   |
| UN16413 | Rsa1.0.76149.1 | 1006 | 301    | 1.00E-169 | 301 | 301 | 100 + | 67   | 367  | 1      | 301    |
| UN16414 | Rsa1.0.00375.1 | 997  | 90207  | 0         | 451 | 458 | 98 +  | 540  | 997  | 2405   | 2861   |
| UN16415 | Rsa1.0.00568.1 | 1464 | 75219  | 0         | 806 | 836 | 96 -  | 630  | 1464 | 1834   | 2658   |
| UN16416 | Rsa1.0.18413.1 | 1065 | 1603   | 1.00E-172 | 352 | 367 | 95 +  | 242  | 608  | 1151   | 1517   |
| UN16417 | Rsa1.0.01895.1 | 814  | 37512  | 1.00E-122 | 223 | 223 | 100 + | 3    | 225  | 9117   | 9339   |

|         |                |      |        |           |     |     |       |      |      |        |        |
|---------|----------------|------|--------|-----------|-----|-----|-------|------|------|--------|--------|
| UN16418 | Rsa1.0.00833.1 | 1216 | 62621  | 1.00E-138 | 260 | 262 | 99 +  | 1    | 261  | 5160   | 5421   |
| UN16419 | Rsa1.0.00301.1 | 942  | 365315 | 0         | 482 | 482 | 100 + | 460  | 941  | 215181 | 215662 |
| UN16420 | Rsa1.0.07914.1 | 1203 | 8294   | 0         | 747 | 755 | 98 +  | 449  | 1203 | 1896   | 2650   |
| UN16421 | Rsa1.0.05494.1 | 912  | 13547  | 0         | 378 | 389 | 97 +  | 9    | 395  | 7715   | 8102   |
| UN16422 | Rsa1.0.00035.1 | 1053 | 176449 | 1.00E-133 | 276 | 285 | 96 -  | 53   | 336  | 156806 | 157089 |
| UN16423 | Rsa1.0.00657.1 | 1527 | 69858  | 0         | 433 | 436 | 99 -  | 1092 | 1527 | 3121   | 3556   |
| UN16424 | Rsa1.0.00630.1 | 755  | 71281  | 0         | 423 | 439 | 96 +  | 2    | 433  | 63707  | 64143  |
| UN16425 | Rsa1.0.00928.1 | 1059 | 59293  | 2.00E-92  | 214 | 228 | 93 -  | 1    | 228  | 32261  | 32482  |
| UN16426 | Rsa1.0.00006.1 | 726  | 396176 | 1.00E-101 | 261 | 282 | 92 +  | 1    | 275  | 9173   | 9447   |
| UN16427 | Rsa1.0.00170.1 | 857  | 179538 | 0         | 397 | 408 | 97 -  | 451  | 857  | 24343  | 24750  |
| UN16428 | Rsa1.0.04264.1 | 974  | 18207  | 0         | 430 | 449 | 95 -  | 168  | 615  | 5591   | 6039   |
| UN16429 | Rsa1.0.05494.1 | 888  | 13547  | 0         | 425 | 450 | 94 -  | 439  | 881  | 7654   | 8102   |
| UN16430 | Rsa1.0.05499.1 | 1154 | 13520  | 1.00E-104 | 234 | 246 | 95 +  | 890  | 1132 | 12343  | 12587  |
| UN16431 | Rsa1.0.00931.1 | 1010 | 59210  | 1.00E-130 | 266 | 276 | 96 -  | 141  | 416  | 7084   | 7359   |
| UN16432 | Rsa1.0.00041.1 | 1333 | 186197 | 0         | 411 | 427 | 96 +  | 45   | 470  | 56687  | 57106  |
| UN16433 | Rsa1.0.03887.1 | 1199 | 20247  | 0         | 391 | 404 | 96 +  | 795  | 1195 | 4347   | 4750   |
| UN16434 | Rsa1.0.00549.1 | 1113 | 76473  | 0         | 340 | 340 | 100 - | 772  | 1111 | 12988  | 13327  |
| UN16435 | Rsa1.0.00265.1 | 749  | 220635 | 1.00E-141 | 288 | 298 | 96 +  | 422  | 718  | 197596 | 197893 |
| UN16436 | Rsa1.0.08170.1 | 564  | 7799   | 0         | 541 | 566 | 95 +  | 1    | 564  | 1626   | 2189   |
| UN16437 | Rsa1.0.02041.1 | 1024 | 163634 | 1.00E-152 | 273 | 273 | 100 + | 1    | 273  | 18760  | 19032  |
| UN16438 | Rsa1.0.08529.1 | 1018 | 7233   | 7.00E-98  | 198 | 202 | 98 -  | 5    | 206  | 6697   | 6897   |
| UN16439 | Rsa1.0.04085.1 | 959  | 19168  | 1.00E-160 | 364 | 388 | 93 -  | 569  | 956  | 1528   | 1901   |
| UN16440 | Rsa1.0.01484.1 | 898  | 44806  | 0         | 534 | 544 | 98 -  | 33   | 576  | 40748  | 41289  |
| UN16441 | Rsa1.0.08558.1 | 760  | 7198   | 0         | 403 | 422 | 95 -  | 329  | 736  | 473    | 894    |
| UN16442 | Rsa1.0.00168.1 | 1459 | 115870 | 0         | 611 | 616 | 99 +  | 549  | 1164 | 88359  | 88974  |
| UN16443 | Rsa1.0.00280.1 | 813  | 99966  | 1.00E-178 | 333 | 336 | 99 -  | 481  | 813  | 12148  | 12483  |
| UN16444 | Rsa1.0.04198.1 | 1099 | 18504  | 0         | 407 | 418 | 97 +  | 682  | 1099 | 15733  | 16149  |
| UN16445 | Rsa1.0.00817.1 | 598  | 62961  | 0         | 570 | 594 | 95 +  | 5    | 598  | 23201  | 23792  |
| UN16446 | Rsa1.0.05095.1 | 906  | 14869  | 1.00E-102 | 253 | 277 | 91 +  | 644  | 906  | 773    | 1049   |
| UN16447 | Rsa1.0.00370.1 | 662  | 90472  | 0         | 464 | 484 | 95 -  | 35   | 517  | 21311  | 21794  |
| UN16448 | Rsa1.0.06488.1 | 1117 | 141774 | 0         | 619 | 628 | 98 -  | 365  | 992  | 4048   | 4675   |
| UN16449 | Rsa1.0.01049.1 | 1008 | 55655  | 1.00E-128 | 257 | 264 | 97 -  | 744  | 1007 | 41045  | 41306  |
| UN16450 | Rsa1.0.00139.1 | 364  | 357786 | 1.00E-171 | 353 | 367 | 96 +  | 2    | 364  | 149438 | 149804 |
| UN16451 | Rsa1.0.00251.1 | 770  | 303968 | 1.00E-156 | 331 | 347 | 95 -  | 5    | 349  | 147121 | 147463 |
| UN16452 | Rsa1.0.00045.1 | 1435 | 328694 | 0         | 362 | 363 | 99 +  | 8    | 370  | 160661 | 161022 |
| UN16453 | Rsa1.0.00100.1 | 1176 | 249232 | 1.00E-157 | 282 | 282 | 100 - | 202  | 483  | 117508 | 117789 |
| UN16454 | Rsa1.0.04128.1 | 1195 | 18927  | 0         | 523 | 563 | 92 -  | 13   | 570  | 12414  | 12973  |
| UN16455 | Rsa1.0.03185.1 | 848  | 24739  | 3.00E-90  | 178 | 181 | 98 -  | 216  | 396  | 5034   | 5214   |
| UN16456 | Rsa1.0.00887.1 | 1262 | 61048  | 8.00E-95  | 192 | 197 | 97 -  | 801  | 997  | 49405  | 49601  |



|         |                |      |        |           |      |      |       |      |      |        |        |
|---------|----------------|------|--------|-----------|------|------|-------|------|------|--------|--------|
| UN16457 | Rsa1.0.00008.1 | 760  | 358124 | 0         | 371  | 372  | 99 +  | 387  | 758  | 73510  | 73881  |
| UN16458 | Rsa1.0.01704.1 | 1745 | 40711  | 0         | 357  | 363  | 98 +  | 904  | 1266 | 5532   | 5894   |
| UN16459 | Rsa1.0.08529.1 | 1002 | 7233   | 2.00E-95  | 197  | 203  | 97 -  | 798  | 1000 | 4941   | 5139   |
| UN16460 | Rsa1.0.00094.1 | 1380 | 139042 | 1.00E-112 | 221  | 226  | 97 -  | 869  | 1094 | 134442 | 134667 |
| UN16461 | Rsa1.0.02217.1 | 1379 | 33812  | 0         | 1256 | 1261 | 99 +  | 1    | 1260 | 30263  | 31523  |
| UN16462 | Rsa1.0.02268.1 | 1167 | 33172  | 0         | 435  | 436  | 99 -  | 1    | 436  | 8776   | 9211   |
| UN16463 | Rsa1.0.01801.1 | 1427 | 39094  | 0         | 545  | 566  | 96 -  | 579  | 1138 | 20432  | 20997  |
| UN16464 | Rsa1.0.01887.1 | 1001 | 37564  | 0         | 439  | 457  | 96 +  | 510  | 966  | 26538  | 26992  |
| UN16465 | Rsa1.0.00566.1 | 445  | 75325  | 1.00E-175 | 320  | 323  | 99 -  | 2    | 324  | 61768  | 62090  |
| UN16466 | Rsa1.0.00234.1 | 1221 | 197060 | 1.00E-175 | 343  | 352  | 97 +  | 2    | 350  | 151100 | 151449 |
| UN16467 | Rsa1.0.08388.1 | 975  | 7436   | 0         | 548  | 575  | 95 +  | 1    | 566  | 2994   | 3563   |
| UN16468 | Rsa1.0.09608.1 | 992  | 6256   | 1.00E-142 | 304  | 317  | 95 +  | 677  | 992  | 172    | 487    |
| UN16469 | Rsa1.0.02486.1 | 1642 | 30965  | 0         | 757  | 806  | 93 -  | 1    | 795  | 11659  | 12462  |
| UN16470 | Rsa1.0.00557.1 | 2202 | 75865  | 1.00E-173 | 309  | 309  | 100 - | 3    | 311  | 19484  | 19792  |
| UN16471 | Rsa1.0.01762.1 | 1196 | 39682  | 0         | 403  | 417  | 96 -  | 685  | 1101 | 6859   | 7267   |
| UN16472 | Rsa1.0.00280.1 | 1368 | 99966  | 1.00E-144 | 352  | 385  | 91 +  | 1    | 366  | 12102  | 12483  |
| UN16473 | Rsa1.0.01187.1 | 1181 | 51377  | 1.00E-169 | 307  | 309  | 99 +  | 2    | 310  | 30063  | 30371  |
| UN16474 | Rsa1.0.00925.1 | 1696 | 59481  | 0         | 492  | 514  | 95 +  | 3    | 516  | 5571   | 6084   |
| UN16475 | Rsa1.0.01958.1 | 950  | 261128 | 1.00E-153 | 275  | 275  | 100 + | 320  | 594  | 132443 | 132717 |
| UN16476 | Rsa1.0.05049.1 | 740  | 15025  | 0         | 490  | 493  | 99 -  | 1    | 493  | 4126   | 4618   |
| UN16477 | Rsa1.0.00329.1 | 1479 | 222544 | 1.00E-130 | 236  | 236  | 100 - | 3    | 238  | 2056   | 2291   |
| UN16478 | Rsa1.0.02347.1 | 1852 | 32332  | 0         | 1349 | 1366 | 98 -  | 1    | 1363 | 29131  | 30496  |
| UN16479 | Rsa1.0.00031.1 | 920  | 179862 | 0         | 495  | 505  | 98 -  | 72   | 576  | 82447  | 82951  |
| UN16480 | Rsa1.0.00343.1 | 763  | 93570  | 0         | 473  | 493  | 95 -  | 17   | 507  | 2493   | 2979   |
| UN16481 | Rsa1.0.00121.1 | 1104 | 278029 | 0         | 565  | 596  | 94 +  | 3    | 597  | 55537  | 56114  |
| UN16482 | Rsa1.0.00642.1 | 1119 | 201230 | 0         | 385  | 388  | 99 +  | 2    | 386  | 160121 | 160508 |
| UN16483 | Rsa1.0.00313.1 | 725  | 96745  | 3.00E-93  | 287  | 318  | 90 +  | 409  | 718  | 79688  | 80003  |
| UN16484 | Rsa1.0.00437.1 | 1179 | 84879  | 0         | 484  | 494  | 97 -  | 11   | 502  | 50510  | 51002  |
| UN16485 | Rsa1.0.01115.1 | 892  | 183545 | 0         | 504  | 519  | 97 +  | 375  | 892  | 174692 | 175209 |
| UN16486 | Rsa1.0.00277.1 | 1444 | 100132 | 0         | 861  | 881  | 97 +  | 3    | 881  | 61968  | 62846  |
| UN16487 | Rsa1.0.02223.1 | 1066 | 152421 | 0         | 432  | 452  | 95 +  | 618  | 1066 | 17952  | 18403  |
| UN16488 | Rsa1.0.02756.1 | 818  | 28202  | 1.00E-179 | 322  | 323  | 99 -  | 3    | 325  | 23023  | 23345  |
| UN16489 | Rsa1.0.00758.1 | 748  | 65477  | 0         | 374  | 379  | 98 -  | 189  | 567  | 3991   | 4368   |
| UN16490 | Rsa1.0.00577.1 | 840  | 174827 | 5.00E-86  | 181  | 186  | 97 +  | 15   | 200  | 116900 | 117084 |
| UN16491 | Rsa1.0.01195.1 | 414  | 147988 | 0         | 404  | 415  | 97 -  | 2    | 413  | 8344   | 8758   |
| UN16492 | Rsa1.0.00112.1 | 607  | 132199 | 0         | 582  | 610  | 95 -  | 1    | 607  | 105199 | 105804 |
| UN16493 | Rsa1.0.00813.1 | 1378 | 63202  | 1.00E-147 | 290  | 298  | 97 -  | 1043 | 1340 | 10869  | 11162  |
| UN16494 | Rsa1.0.00232.1 | 1134 | 104936 | 1.00E-118 | 241  | 249  | 96 -  | 546  | 794  | 47669  | 47917  |
| UN16495 | Rsa1.0.04107.1 | 1280 | 19007  | 0         | 761  | 764  | 99 +  | 1    | 764  | 6776   | 7539   |

|         |                |      |        |           |      |      |       |      |      |        |        |
|---------|----------------|------|--------|-----------|------|------|-------|------|------|--------|--------|
| UN16496 | Rsa1.0.00773.1 | 943  | 64839  | 1.00E-179 | 382  | 400  | 95 -  | 31   | 429  | 32802  | 33197  |
| UN16497 | Rsa1.0.00645.1 | 462  | 189716 | 2.00E-99  | 187  | 188  | 99 -  | 42   | 229  | 35226  | 35413  |
| UN16498 | Rsa1.0.01879.1 | 489  | 37748  | 1.00E-170 | 362  | 380  | 95 -  | 3    | 382  | 23051  | 23425  |
| UN16499 | Rsa1.0.02212.1 | 960  | 33840  | 1.00E-90  | 186  | 190  | 97 +  | 770  | 958  | 29047  | 29236  |
| UN16500 | Rsa1.0.00998.1 | 1898 | 57168  | 1.00E-159 | 294  | 297  | 98 +  | 418  | 714  | 9918   | 10214  |
| UN16501 | Rsa1.0.00484.1 | 971  | 203294 | 0         | 445  | 451  | 98 +  | 3    | 452  | 19013  | 19462  |
| UN16502 | Rsa1.0.08947.1 | 458  | 6761   | 0         | 390  | 394  | 98 -  | 62   | 455  | 5535   | 5928   |
| UN16503 | Rsa1.0.14214.1 | 1194 | 3656   | 0         | 1146 | 1165 | 98 -  | 3    | 1167 | 2003   | 3159   |
| UN16504 | Rsa1.0.02304.1 | 693  | 32793  | 6.00E-82  | 183  | 191  | 95 -  | 504  | 693  | 17395  | 17580  |
| UN16505 | Rsa1.0.01410.1 | 741  | 46345  | 1.00E-164 | 326  | 336  | 97 +  | 110  | 443  | 33684  | 34019  |
| UN16506 | Rsa1.0.00483.1 | 756  | 81102  | 0         | 372  | 378  | 98 -  | 1    | 378  | 13909  | 14286  |
| UN16507 | Rsa1.0.00630.1 | 701  | 71281  | 1.00E-108 | 235  | 247  | 95 +  | 203  | 449  | 16575  | 16821  |
| UN16508 | Rsa1.0.00087.1 | 677  | 761073 | 1.00E-86  | 187  | 195  | 95 -  | 407  | 601  | 13132  | 13326  |
| UN16509 | Rsa1.0.01413.1 | 1292 | 46275  | 1.00E-136 | 256  | 259  | 98 -  | 1034 | 1292 | 42171  | 42429  |
| UN16510 | Rsa1.0.01696.1 | 767  | 301850 | 0         | 551  | 574  | 95 -  | 193  | 766  | 159083 | 159651 |
| UN16511 | Rsa1.0.00420.1 | 715  | 86496  | 1.00E-128 | 250  | 256  | 97 -  | 195  | 450  | 43112  | 43367  |
| UN16512 | Rsa1.0.00583.1 | 767  | 74309  | 1.00E-132 | 255  | 259  | 98 -  | 510  | 767  | 68504  | 68762  |
| UN16513 | Rsa1.0.00170.1 | 767  | 179538 | 1.00E-117 | 236  | 243  | 97 -  | 511  | 753  | 142304 | 142546 |
| UN16514 | Rsa1.0.01460.1 | 747  | 45255  | 1.00E-154 | 321  | 331  | 96 +  | 417  | 743  | 3258   | 3587   |
| UN16515 | Rsa1.0.03299.1 | 1334 | 23949  | 0         | 466  | 488  | 95 +  | 854  | 1332 | 14331  | 14814  |
| UN16516 | Rsa1.0.00384.1 | 1412 | 89278  | 1.00E-133 | 292  | 304  | 96 +  | 1111 | 1411 | 35218  | 35518  |
| UN16517 | Rsa1.0.00807.1 | 975  | 63607  | 1.00E-110 | 203  | 203  | 100 + | 119  | 321  | 46342  | 46544  |
| UN16518 | Rsa1.0.07998.1 | 921  | 8105   | 1.00E-154 | 303  | 312  | 97 +  | 213  | 524  | 4011   | 4322   |
| UN16519 | Rsa1.0.01701.1 | 525  | 162121 | 4.00E-27  | 90   | 99   | 90 +  | 3    | 101  | 9028   | 9126   |
| UN16520 | Rsa1.0.00417.1 | 1056 | 395068 | 0         | 484  | 521  | 92 -  | 22   | 542  | 259263 | 259778 |
| UN16521 | Rsa1.0.01180.1 | 983  | 51517  | 0         | 357  | 366  | 97 -  | 9    | 371  | 17037  | 17401  |
| UN16522 | Rsa1.0.00235.1 | 839  | 154696 | 0         | 401  | 418  | 95 -  | 12   | 425  | 101650 | 102064 |
| UN16523 | Rsa1.0.18141.1 | 1912 | 1658   | 0         | 458  | 462  | 99 -  | 1451 | 1912 | 923    | 1384   |
| UN16524 | Rsa1.0.01280.1 | 856  | 49321  | 0         | 824  | 855  | 96 -  | 5    | 856  | 36779  | 37629  |
| UN16525 | Rsa1.0.47144.1 | 860  | 479    | 1.00E-147 | 292  | 301  | 97 +  | 313  | 613  | 179    | 479    |
| UN16526 | Rsa1.0.00192.1 | 659  | 278200 | 0         | 404  | 405  | 99 +  | 254  | 658  | 22625  | 23029  |
| UN16527 | Rsa1.0.00605.1 | 1160 | 73199  | 0         | 574  | 580  | 98 +  | 581  | 1160 | 28192  | 28765  |
| UN16528 | Rsa1.0.01947.1 | 634  | 36977  | 0         | 607  | 623  | 97 -  | 6    | 628  | 24868  | 25488  |
| UN16529 | Rsa1.0.00533.1 | 716  | 77375  | 3.00E-81  | 175  | 182  | 96 +  | 139  | 320  | 52641  | 52822  |
| UN16530 | Rsa1.0.05239.1 | 768  | 14410  | 0         | 408  | 434  | 94 +  | 4    | 422  | 11690  | 12121  |
| UN16531 | Rsa1.0.02503.1 | 742  | 30709  | 1.00E-98  | 242  | 258  | 93 +  | 3    | 259  | 27268  | 27522  |
| UN16532 | Rsa1.0.04379.1 | 1055 | 17646  | 1.00E-132 | 324  | 347  | 93 +  | 4    | 348  | 16759  | 17097  |
| UN16533 | Rsa1.0.13800.1 | 1379 | 4315   | 1.00E-93  | 190  | 195  | 97 +  | 174  | 368  | 1605   | 1799   |
| UN16534 | Rsa1.0.00601.1 | 756  | 177045 | 0         | 721  | 754  | 95 -  | 3    | 756  | 134705 | 135454 |

|         |                |      |        |           |      |      |       |      |      |        |        |
|---------|----------------|------|--------|-----------|------|------|-------|------|------|--------|--------|
| UN16535 | Rsa1.0.00114.1 | 839  | 131330 | 1.00E-144 | 298  | 307  | 97 -  | 533  | 837  | 29607  | 29912  |
| UN16536 | Rsa1.0.00549.1 | 744  | 76473  | 1.00E-137 | 306  | 325  | 94 +  | 3    | 327  | 13012  | 13327  |
| UN16537 | Rsa1.0.00069.1 | 1326 | 403561 | 0         | 558  | 570  | 97 -  | 757  | 1326 | 353470 | 354037 |
| UN16538 | Rsa1.0.04378.1 | 777  | 17651  | 0         | 348  | 354  | 98 +  | 290  | 643  | 4630   | 4983   |
| UN16539 | Rsa1.0.01060.1 | 1488 | 55368  | 1.00E-116 | 225  | 229  | 98 +  | 388  | 616  | 38736  | 38964  |
| UN16540 | Rsa1.0.00483.1 | 1700 | 81102  | 0         | 558  | 564  | 98 +  | 432  | 995  | 13909  | 14472  |
| UN16541 | Rsa1.0.01959.1 | 1473 | 36798  | 0         | 517  | 530  | 97 +  | 942  | 1471 | 23374  | 23902  |
| UN16542 | Rsa1.0.00262.1 | 634  | 101906 | 0         | 410  | 424  | 96 +  | 214  | 633  | 53264  | 53684  |
| UN16543 | Rsa1.0.01185.1 | 731  | 149842 | 1.00E-122 | 244  | 249  | 97 +  | 3    | 248  | 131815 | 132062 |
| UN16544 | Rsa1.0.01376.1 | 1086 | 47004  | 1.00E-104 | 285  | 315  | 90 -  | 778  | 1080 | 37648  | 37957  |
| UN16545 | Rsa1.0.00137.1 | 1089 | 122457 | 1.00E-130 | 269  | 277  | 97 -  | 813  | 1089 | 81352  | 81626  |
| UN16546 | Rsa1.0.13492.1 | 1044 | 4775   | 0         | 400  | 405  | 98 -  | 638  | 1042 | 2425   | 2829   |
| UN16547 | Rsa1.0.00190.1 | 773  | 318240 | 1.00E-111 | 214  | 217  | 98 -  | 1    | 217  | 165006 | 165222 |
| UN16548 | Rsa1.0.00417.1 | 879  | 395068 | 1.00E-141 | 292  | 304  | 96 -  | 165  | 468  | 14475  | 14775  |
| UN16549 | Rsa1.0.00353.1 | 901  | 92242  | 0         | 545  | 556  | 98 -  | 346  | 901  | 59354  | 59906  |
| UN16550 | Rsa1.0.08557.1 | 460  | 7199   | 1.00E-127 | 252  | 258  | 97 +  | 200  | 457  | 6714   | 6970   |
| UN16551 | Rsa1.0.30260.1 | 1477 | 759    | 1.00E-126 | 251  | 257  | 97 -  | 1221 | 1477 | 500    | 755    |
| UN16552 | Rsa1.0.00328.1 | 1820 | 224661 | 0         | 698  | 791  | 88 +  | 662  | 1426 | 218269 | 219024 |
| UN16553 | Rsa1.0.16623.1 | 496  | 2086   | 0         | 453  | 458  | 98 -  | 40   | 496  | 217    | 671    |
| UN16554 | Rsa1.0.01168.1 | 642  | 153765 | 0         | 636  | 638  | 99 -  | 5    | 642  | 43989  | 44626  |
| UN16555 | Rsa1.0.03303.1 | 791  | 23890  | 2.33E-156 | 318  | 333  | 95 +  | 457  | 787  | 4111   | 4440   |
| UN16556 | Rsa1.0.04396.1 | 1225 | 17561  | 0         | 1133 | 1154 | 98 +  | 3    | 1153 | 16408  | 17561  |
| UN16557 | Rsa1.0.02588.1 | 643  | 29840  | 1.00E-104 | 220  | 228  | 96 -  | 10   | 236  | 16005  | 16232  |
| UN16558 | Rsa1.0.00265.1 | 716  | 220635 | 5.00E-92  | 288  | 324  | 88 +  | 399  | 716  | 195833 | 196155 |
| UN16559 | Rsa1.0.00422.1 | 827  | 86144  | 0         | 432  | 454  | 95 +  | 3    | 456  | 12844  | 13294  |
| UN16560 | Rsa1.0.08677.1 | 642  | 7048   | 0         | 371  | 380  | 97 -  | 27   | 399  | 4149   | 4528   |
| UN16561 | Rsa1.0.02438.1 | 994  | 31392  | 0         | 501  | 515  | 97 -  | 488  | 994  | 20171  | 20681  |
| UN16562 | Rsa1.0.00015.1 | 835  | 561803 | 1.00E-132 | 245  | 247  | 99 -  | 525  | 771  | 190632 | 190878 |
| UN16563 | Rsa1.0.00122.1 | 1423 | 265937 | 0         | 1203 | 1225 | 98 +  | 197  | 1421 | 30383  | 31607  |
| UN16564 | Rsa1.0.01143.1 | 516  | 52456  | 1.00E-149 | 330  | 347  | 95 -  | 1    | 347  | 15912  | 16255  |
| UN16565 | Rsa1.0.01376.1 | 618  | 47004  | 1.00E-137 | 247  | 247  | 100 - | 372  | 618  | 37711  | 37957  |
| UN16566 | Rsa1.0.02865.1 | 1106 | 27133  | 0         | 411  | 430  | 95 -  | 682  | 1105 | 18829  | 19258  |
| UN16567 | Rsa1.0.08811.1 | 568  | 6904   | 1.00E-125 | 233  | 235  | 99 +  | 326  | 560  | 5210   | 5444   |
| UN16568 | Rsa1.0.00171.1 | 487  | 115622 | 3.00E-95  | 211  | 221  | 95 +  | 250  | 469  | 50726  | 50941  |
| UN16569 | Rsa1.0.02269.1 | 719  | 33168  | 0         | 413  | 423  | 97 -  | 1    | 423  | 12865  | 13287  |
| UN16570 | Rsa1.0.00021.1 | 1461 | 263655 | 0         | 1251 | 1309 | 95 -  | 28   | 1326 | 123592 | 124899 |
| UN16571 | Rsa1.0.01536.1 | 770  | 43747  | 1.00E-144 | 312  | 327  | 95 +  | 421  | 745  | 28390  | 28715  |
| UN16572 | Rsa1.0.35376.1 | 907  | 640    | 1.00E-166 | 318  | 324  | 98 -  | 372  | 694  | 164    | 487    |
| UN16573 | Rsa1.0.01335.1 | 665  | 47894  | 0         | 480  | 503  | 95 -  | 4    | 496  | 3912   | 4412   |

|         |                |      |        |           |      |      |       |     |      |        |        |
|---------|----------------|------|--------|-----------|------|------|-------|-----|------|--------|--------|
| UN16574 | Rsa1.0.00816.1 | 1111 | 403350 | 1.00E-161 | 316  | 325  | 97 -  | 787 | 1111 | 382478 | 382802 |
| UN16575 | Rsa1.0.00014.1 | 654  | 348985 | 2.00E-87  | 176  | 180  | 97 +  | 472 | 651  | 220714 | 220893 |
| UN16576 | Rsa1.0.02430.1 | 294  | 31506  | 5.00E-99  | 204  | 211  | 96 -  | 64  | 274  | 12090  | 12300  |
| UN16577 | Rsa1.0.13916.1 | 1318 | 4098   | 0         | 544  | 565  | 96 -  | 6   | 570  | 531    | 1093   |
| UN16578 | Rsa1.0.08079.1 | 1191 | 7942   | 0         | 1156 | 1187 | 97 -  | 1   | 1187 | 4974   | 6155   |
| UN16579 | Rsa1.0.09269.1 | 787  | 6514   | 1.00E-130 | 239  | 240  | 99 -  | 450 | 689  | 35     | 274    |
| UN16580 | Rsa1.0.01005.1 | 694  | 56967  | 0         | 612  | 633  | 96 -  | 3   | 635  | 37403  | 38025  |
| UN16581 | Rsa1.0.08841.1 | 729  | 6870   | 1.00E-161 | 347  | 362  | 95 +  | 1   | 358  | 2675   | 3034   |
| UN16582 | Rsa1.0.00016.1 | 772  | 831256 | 1.00E-71  | 144  | 146  | 98 -  | 540 | 685  | 204992 | 205137 |
| UN16583 | Rsa1.0.00690.1 | 215  | 140527 | 9.00E-63  | 187  | 204  | 91 +  | 16  | 215  | 31841  | 32042  |
| UN16584 | Rsa1.0.00890.1 | 651  | 323870 | 1.00E-167 | 325  | 334  | 97 +  | 317 | 650  | 162561 | 162894 |
| UN16585 | Rsa1.0.17794.1 | 1062 | 1740   | 0         | 386  | 386  | 100 + | 677 | 1062 | 1      | 386    |
| UN16586 | Rsa1.0.00120.1 | 780  | 277288 | 2.00E-66  | 138  | 141  | 97 -  | 282 | 422  | 119078 | 119218 |
| UN16587 | Rsa1.0.00482.1 | 759  | 81162  | 1.00E-132 | 274  | 285  | 96 -  | 5   | 286  | 61822  | 62106  |
| UN16588 | Rsa1.0.36744.1 | 786  | 614    | 0         | 411  | 416  | 98 +  | 179 | 594  | 94     | 509    |
| UN16589 | Rsa1.0.00939.1 | 974  | 185227 | 0         | 923  | 972  | 94 -  | 1   | 972  | 152983 | 153950 |
| UN16590 | Rsa1.0.00437.1 | 894  | 84879  | 1.00E-116 | 258  | 273  | 94 -  | 198 | 470  | 23635  | 23907  |
| UN16591 | Rsa1.0.00017.1 | 886  | 752458 | 1.00E-142 | 282  | 289  | 97 -  | 1   | 288  | 154565 | 154853 |
| UN16592 | Rsa1.0.00054.1 | 750  | 162053 | 3.00E-84  | 162  | 163  | 99 -  | 3   | 165  | 7231   | 7393   |
| UN16593 | Rsa1.0.01654.1 | 891  | 41532  | 0         | 406  | 407  | 99 -  | 485 | 890  | 24818  | 25224  |
| UN16594 | Rsa1.0.03698.1 | 127  | 21302  | 1.00E-26  | 64   | 65   | 98 +  | 63  | 127  | 7933   | 7997   |
| UN16595 | Rsa1.0.00682.1 | 845  | 68680  | 0         | 503  | 519  | 96 -  | 2   | 519  | 37871  | 38387  |
| UN16596 | Rsa1.0.00568.1 | 1116 | 75219  | 0         | 1078 | 1122 | 96 -  | 2   | 1116 | 1853   | 2971   |
| UN16597 | Rsa1.0.00913.1 | 787  | 59914  | 7.00E-85  | 160  | 160  | 100 - | 231 | 390  | 29028  | 29187  |
| UN16598 | Rsa1.0.00913.1 | 1093 | 59914  | 1.00E-143 | 293  | 304  | 96 -  | 661 | 964  | 33903  | 34203  |
| UN16599 | Rsa1.0.00804.1 | 533  | 63726  | 0         | 408  | 423  | 96 -  | 111 | 533  | 21676  | 22092  |
| UN16600 | Rsa1.0.00476.1 | 1237 | 280966 | 0         | 519  | 523  | 99 +  | 290 | 812  | 160084 | 160606 |
| UN16601 | Rsa1.0.00699.1 | 666  | 184398 | 1.00E-128 | 266  | 277  | 96 -  | 6   | 278  | 56459  | 56735  |
| UN16602 | Rsa1.0.23405.1 | 1103 | 1052   | 1.00E-178 | 340  | 348  | 97 +  | 288 | 635  | 682    | 1029   |
| UN16603 | Rsa1.0.00657.1 | 1384 | 69858  | 0         | 406  | 417  | 97 -  | 16  | 431  | 36865  | 37281  |
| UN16604 | Rsa1.0.03569.1 | 666  | 22041  | 1.00E-76  | 192  | 207  | 92 +  | 3   | 200  | 9050   | 9256   |
| UN16605 | Rsa1.0.00816.1 | 1245 | 403350 | 1.00E-109 | 300  | 335  | 89 -  | 925 | 1244 | 109855 | 110183 |
| UN16606 | Rsa1.0.00979.1 | 852  | 57733  | 1.00E-170 | 335  | 344  | 97 +  | 1   | 341  | 30371  | 30712  |
| UN16607 | Rsa1.0.08170.1 | 783  | 7799   | 0         | 735  | 755  | 97 +  | 28  | 782  | 1728   | 2482   |
| UN16608 | Rsa1.0.00153.1 | 877  | 192931 | 0         | 374  | 387  | 96 +  | 488 | 874  | 125252 | 125636 |
| UN16609 | Rsa1.0.00382.1 | 703  | 251946 | 1.00E-175 | 314  | 315  | 99 -  | 389 | 703  | 45398  | 45712  |
| UN16610 | Rsa1.0.00467.1 | 1012 | 156542 | 0         | 477  | 512  | 93 -  | 6   | 514  | 77638  | 78146  |
| UN16611 | Rsa1.0.01344.1 | 783  | 142535 | 1.00E-151 | 327  | 343  | 95 +  | 1   | 342  | 129977 | 130312 |
| UN16612 | Rsa1.0.09695.1 | 732  | 6206   | 3.00E-65  | 162  | 171  | 94 +  | 564 | 732  | 577    | 747    |

|         |                |      |        |           |      |      |       |      |      |        |        |
|---------|----------------|------|--------|-----------|------|------|-------|------|------|--------|--------|
| UN16613 | Rsa1.0.00211.1 | 375  | 228189 | 1.00E-140 | 349  | 376  | 92 -  | 1    | 375  | 129494 | 129865 |
| UN16614 | Rsa1.0.08565.1 | 1443 | 7189   | 7.00E-74  | 178  | 186  | 95 -  | 1259 | 1442 | 365    | 549    |
| UN16615 | Rsa1.0.01732.1 | 1207 | 40194  | 0         | 723  | 742  | 97 -  | 105  | 846  | 24772  | 25513  |
| UN16616 | Rsa1.0.04125.1 | 727  | 18944  | 1.00E-178 | 319  | 320  | 99 +  | 3    | 322  | 9445   | 9764   |
| UN16617 | Rsa1.0.07425.1 | 735  | 9414   | 2.00E-82  | 204  | 214  | 95 +  | 494  | 702  | 4352   | 4563   |
| UN16618 | Rsa1.0.00409.1 | 676  | 146788 | 0         | 468  | 495  | 94 +  | 183  | 676  | 80743  | 81219  |
| UN16619 | Rsa1.0.00639.1 | 719  | 165873 | 0         | 468  | 494  | 94 +  | 229  | 716  | 124129 | 124622 |
| UN16620 | Rsa1.0.00244.1 | 623  | 103590 | 8.00E-41  | 148  | 168  | 88 -  | 87   | 254  | 73674  | 73838  |
| UN16621 | Rsa1.0.12391.1 | 1237 | 5238   | 1.00E-126 | 257  | 266  | 96 -  | 401  | 666  | 4081   | 4346   |
| UN16622 | Rsa1.0.03019.1 | 1208 | 25987  | 1.00E-111 | 271  | 291  | 93 -  | 917  | 1205 | 19495  | 19784  |
| UN16623 | Rsa1.0.25475.1 | 690  | 934    | 3.00E-68  | 135  | 136  | 99 -  | 265  | 400  | 28     | 163    |
| UN16624 | Rsa1.0.10890.1 | 697  | 5688   | 0         | 672  | 699  | 96 +  | 2    | 697  | 19     | 714    |
| UN16625 | Rsa1.0.00019.1 | 906  | 301669 | 0         | 500  | 523  | 95 +  | 7    | 524  | 218712 | 219233 |
| UN16626 | Rsa1.0.00269.1 | 824  | 341668 | 1.00E-106 | 256  | 271  | 94 -  | 1    | 268  | 45768  | 46036  |
| UN16627 | Rsa1.0.03369.1 | 851  | 23381  | 0         | 424  | 443  | 95 -  | 412  | 851  | 10354  | 10790  |
| UN16628 | Rsa1.0.00928.1 | 1424 | 59293  | 0         | 482  | 500  | 96 +  | 849  | 1348 | 24314  | 24813  |
| UN16629 | Rsa1.0.01364.1 | 1458 | 47172  | 0         | 1143 | 1161 | 98 -  | 301  | 1458 | 33909  | 35065  |
| UN16630 | Rsa1.0.42543.1 | 1256 | 527    | 1.00E-170 | 313  | 316  | 99 +  | 941  | 1256 | 3      | 318    |
| UN16631 | Rsa1.0.02593.1 | 971  | 29744  | 1.00E-106 | 226  | 235  | 96 +  | 5    | 237  | 28815  | 29049  |
| UN16632 | Rsa1.0.45675.1 | 812  | 494    | 1.00E-98  | 192  | 195  | 98 -  | 454  | 648  | 300    | 494    |
| UN16633 | Rsa1.0.00223.1 | 880  | 106231 | 0         | 852  | 880  | 96 +  | 2    | 880  | 3164   | 4040   |
| UN16634 | Rsa1.0.07829.1 | 686  | 8462   | 1.00E-122 | 231  | 234  | 98 +  | 232  | 465  | 3137   | 3370   |
| UN16635 | Rsa1.0.15591.1 | 978  | 2530   | 0         | 580  | 614  | 94 +  | 380  | 977  | 1224   | 1833   |
| UN16636 | Rsa1.0.00240.1 | 740  | 104175 | 1.00E-106 | 213  | 219  | 97 -  | 221  | 439  | 54590  | 54808  |
| UN16637 | Rsa1.0.05606.1 | 956  | 13202  | 0         | 480  | 485  | 98 -  | 3    | 487  | 11672  | 12156  |
| UN16638 | Rsa1.0.00659.1 | 661  | 69733  | 1.00E-113 | 271  | 295  | 91 +  | 359  | 653  | 55176  | 55451  |
| UN16639 | Rsa1.0.00354.1 | 1034 | 232005 | 1.00E-117 | 215  | 215  | 100 + | 818  | 1032 | 9448   | 9662   |
| UN16640 | Rsa1.0.04095.1 | 1177 | 19095  | 1.00E-168 | 321  | 328  | 97 -  | 3    | 330  | 12377  | 12704  |
| UN16641 | Rsa1.0.03900.1 | 900  | 133221 | 1.00E-62  | 208  | 224  | 92 -  | 1    | 211  | 3894   | 4117   |
| UN16642 | Rsa1.0.00979.1 | 1444 | 57733  | 1.00E-155 | 298  | 302  | 98 -  | 1140 | 1439 | 40171  | 40472  |
| UN16643 | Rsa1.0.00891.1 | 696  | 60724  | 1.00E-165 | 345  | 359  | 96 +  | 1    | 356  | 32993  | 33348  |
| UN16644 | Rsa1.0.00065.1 | 1260 | 454616 | 1.00E-141 | 270  | 275  | 98 -  | 576  | 850  | 39827  | 40101  |
| UN16645 | Rsa1.0.02500.1 | 686  | 30768  | 1.00E-152 | 303  | 313  | 96 -  | 1    | 313  | 24051  | 24363  |
| UN16646 | Rsa1.0.02670.1 | 689  | 28887  | 7.00E-91  | 193  | 200  | 96 +  | 423  | 622  | 1836   | 2032   |
| UN16647 | Rsa1.0.01316.1 | 799  | 48325  | 1.00E-117 | 221  | 222  | 99 -  | 3    | 224  | 6845   | 7065   |
| UN16648 | Rsa1.0.00002.1 | 638  | 601661 | 1.00E-149 | 320  | 337  | 94 -  | 3    | 339  | 558227 | 558560 |
| UN16649 | Rsa1.0.01245.1 | 457  | 149868 | 0         | 430  | 450  | 95 +  | 2    | 451  | 21666  | 22114  |
| UN16650 | Rsa1.0.01183.1 | 772  | 51465  | 0         | 752  | 774  | 97 -  | 3    | 772  | 41526  | 42291  |
| UN16651 | Rsa1.0.00992.1 | 541  | 57419  | 1.00E-79  | 151  | 151  | 100 - | 364  | 514  | 4746   | 4896   |

|         |                |      |        |           |     |     |       |      |      |        |        |
|---------|----------------|------|--------|-----------|-----|-----|-------|------|------|--------|--------|
| UN16652 | Rsa1.0.00014.1 | 875  | 348985 | 0         | 804 | 833 | 96 -  | 45   | 875  | 267872 | 268701 |
| UN16653 | Rsa1.0.03005.1 | 871  | 26082  | 0         | 535 | 536 | 99 -  | 336  | 871  | 23153  | 23688  |
| UN16654 | Rsa1.0.02254.1 | 553  | 33344  | 1.00E-159 | 331 | 347 | 95 -  | 2    | 347  | 2377   | 2713   |
| UN16655 | Rsa1.0.04542.1 | 1014 | 16930  | 1.00E-161 | 295 | 297 | 99 +  | 187  | 483  | 14602  | 14898  |
| UN16656 | Rsa1.0.18326.1 | 760  | 1620   | 0         | 677 | 700 | 96 -  | 61   | 760  | 927    | 1620   |
| UN16657 | Rsa1.0.03912.1 | 1419 | 135266 | 0         | 373 | 379 | 98 +  | 22   | 400  | 847    | 1225   |
| UN16658 | Rsa1.0.02429.1 | 456  | 31527  | 3.00E-49  | 185 | 211 | 87 +  | 11   | 203  | 29110  | 29320  |
| UN16659 | Rsa1.0.05076.1 | 829  | 14916  | 0         | 592 | 617 | 95 +  | 228  | 829  | 2709   | 3325   |
| UN16660 | Rsa1.0.03990.1 | 1116 | 19676  | 0         | 446 | 456 | 97 -  | 1    | 456  | 4678   | 5131   |
| UN16661 | Rsa1.0.00876.1 | 1236 | 61328  | 1.00E-176 | 314 | 314 | 100 + | 923  | 1236 | 51226  | 51539  |
| UN16662 | Rsa1.0.00027.1 | 742  | 283362 | 1.00E-129 | 278 | 290 | 95 -  | 441  | 727  | 279874 | 280163 |
| UN16663 | Rsa1.0.06213.1 | 760  | 11478  | 1.00E-177 | 380 | 398 | 95 -  | 368  | 759  | 1140   | 1535   |
| UN16664 | Rsa1.0.00816.1 | 783  | 403350 | 2.00E-63  | 139 | 144 | 96 +  | 357  | 500  | 110538 | 110681 |
| UN16665 | Rsa1.0.00124.1 | 530  | 262503 | 1.00E-153 | 305 | 315 | 96 +  | 3    | 317  | 162596 | 162910 |
| UN16666 | Rsa1.0.09928.1 | 946  | 6087   | 0         | 740 | 745 | 99 +  | 199  | 943  | 527    | 1271   |
| UN16667 | Rsa1.0.03633.1 | 548  | 21644  | 4.00E-95  | 198 | 205 | 96 +  | 293  | 497  | 17773  | 17977  |
| UN16668 | Rsa1.0.02981.1 | 676  | 26285  | 2.00E-85  | 170 | 173 | 98 -  | 502  | 674  | 4358   | 4530   |
| UN16669 | Rsa1.0.02807.1 | 1249 | 27680  | 0         | 515 | 516 | 99 +  | 2    | 517  | 4945   | 5460   |
| UN16670 | Rsa1.0.01581.1 | 1408 | 42833  | 0         | 499 | 519 | 96 +  | 1    | 519  | 8549   | 9067   |
| UN16671 | Rsa1.0.00635.1 | 867  | 175826 | 2.33E-156 | 359 | 387 | 92 +  | 4    | 386  | 14025  | 14407  |
| UN16672 | Rsa1.0.03982.1 | 379  | 19723  | 1.00E-35  | 86  | 89  | 96 -  | 217  | 305  | 3165   | 3253   |
| UN16673 | Rsa1.0.00152.1 | 658  | 257730 | 1.00E-138 | 287 | 297 | 96 -  | 1    | 295  | 214460 | 214756 |
| UN16674 | Rsa1.0.00190.1 | 1099 | 318240 | 0         | 536 | 568 | 94 +  | 3    | 568  | 140985 | 141530 |
| UN16675 | Rsa1.0.04779.1 | 841  | 16008  | 1.00E-103 | 200 | 203 | 98 -  | 639  | 841  | 9561   | 9763   |
| UN16676 | Rsa1.0.00947.1 | 1021 | 58664  | 0         | 410 | 418 | 98 -  | 175  | 592  | 58154  | 58571  |
| UN16677 | Rsa1.0.01937.1 | 726  | 37147  | 1.00E-141 | 308 | 325 | 94 +  | 3    | 320  | 19950  | 20274  |
| UN16678 | Rsa1.0.00262.1 | 863  | 101906 | 0         | 455 | 473 | 96 +  | 395  | 863  | 53296  | 53766  |
| UN16679 | Rsa1.0.04128.1 | 757  | 18927  | 0         | 541 | 585 | 92 -  | 1    | 580  | 12414  | 12995  |
| UN16680 | Rsa1.0.00382.1 | 748  | 251946 | 1.00E-120 | 273 | 293 | 93 +  | 4    | 296  | 245731 | 246012 |
| UN16681 | Rsa1.0.00035.1 | 654  | 176449 | 0         | 632 | 648 | 97 -  | 4    | 651  | 49852  | 50498  |
| UN16682 | Rsa1.0.00139.1 | 183  | 357786 | 7.00E-54  | 158 | 172 | 91 -  | 16   | 182  | 149611 | 149781 |
| UN16683 | Rsa1.0.00483.1 | 708  | 81102  | 1.00E-140 | 268 | 273 | 98 +  | 436  | 708  | 13909  | 14181  |
| UN16684 | Rsa1.0.00402.1 | 509  | 385315 | 1.00E-158 | 322 | 335 | 96 -  | 1    | 335  | 236413 | 236747 |
| UN16685 | Rsa1.0.00294.1 | 313  | 144860 | 1.00E-129 | 264 | 274 | 96 -  | 1    | 274  | 28240  | 28513  |
| UN16686 | Rsa1.0.00119.1 | 1914 | 467509 | 1.00E-152 | 337 | 354 | 95 +  | 1560 | 1910 | 59938  | 60291  |
| UN16687 | Rsa1.0.08970.1 | 513  | 6743   | 2.33E-156 | 307 | 321 | 95 -  | 1    | 318  | 415    | 731    |
| UN16688 | Rsa1.0.00351.1 | 672  | 413096 | 0         | 386 | 395 | 97 -  | 6    | 400  | 3047   | 3441   |
| UN16689 | Rsa1.0.03148.1 | 809  | 24989  | 0         | 354 | 361 | 98 +  | 1    | 361  | 12153  | 12513  |
| UN16690 | Rsa1.0.04852.1 | 791  | 15712  | 0         | 758 | 791 | 95 -  | 1    | 791  | 9102   | 9883   |

|         |                |      |        |           |     |     |       |      |      |        |        |
|---------|----------------|------|--------|-----------|-----|-----|-------|------|------|--------|--------|
| UN16691 | Rsa1.0.00719.1 | 876  | 66952  | 1.00E-165 | 303 | 306 | 99 +  | 399  | 704  | 46708  | 47013  |
| UN16692 | Rsa1.0.00708.1 | 749  | 67366  | 0         | 736 | 748 | 98 +  | 1    | 747  | 53292  | 54036  |
| UN16693 | Rsa1.0.00827.1 | 691  | 62790  | 1.00E-119 | 286 | 305 | 93 -  | 3    | 303  | 51187  | 51481  |
| UN16694 | Rsa1.0.02178.1 | 809  | 156197 | 0         | 479 | 503 | 95 -  | 38   | 540  | 1510   | 2012   |
| UN16695 | Rsa1.0.00777.1 | 1113 | 191865 | 0         | 715 | 752 | 95 -  | 5    | 753  | 128527 | 129275 |
| UN16696 | Rsa1.0.03100.1 | 969  | 25411  | 0         | 367 | 381 | 96 +  | 584  | 964  | 1871   | 2250   |
| UN16697 | Rsa1.0.00056.1 | 383  | 332604 | 2.00E-80  | 170 | 176 | 96 +  | 163  | 338  | 312898 | 313073 |
| UN16698 | Rsa1.0.00044.1 | 983  | 271658 | 7.00E-98  | 221 | 231 | 95 +  | 757  | 983  | 156762 | 156990 |
| UN16699 | Rsa1.0.02286.1 | 639  | 32993  | 1.00E-157 | 304 | 309 | 98 -  | 333  | 639  | 24695  | 25003  |
| UN16700 | Rsa1.0.00131.1 | 1271 | 432233 | 0         | 394 | 396 | 99 -  | 519  | 914  | 194264 | 194659 |
| UN16701 | Rsa1.0.00197.1 | 774  | 109714 | 1.00E-180 | 327 | 328 | 99 +  | 3    | 329  | 2464   | 2791   |
| UN16702 | Rsa1.0.02103.1 | 446  | 35006  | 0         | 438 | 444 | 98 +  | 3    | 446  | 13486  | 13929  |
| UN16703 | Rsa1.0.00381.1 | 1228 | 89718  | 1.00E-106 | 274 | 298 | 91 -  | 934  | 1227 | 71983  | 72270  |
| UN16704 | Rsa1.0.00116.1 | 1501 | 365886 | 0         | 599 | 609 | 98 -  | 1    | 609  | 83226  | 83833  |
| UN16705 | Rsa1.0.07577.1 | 944  | 9092   | 1.00E-153 | 278 | 279 | 99 -  | 626  | 904  | 3907   | 4185   |
| UN16706 | Rsa1.0.00569.1 | 728  | 75060  | 1.00E-175 | 373 | 394 | 94 +  | 3    | 396  | 64241  | 64628  |
| UN16707 | Rsa1.0.00526.1 | 795  | 169279 | 1.00E-106 | 208 | 212 | 98 -  | 78   | 289  | 141137 | 141348 |
| UN16708 | Rsa1.0.01558.1 | 896  | 43287  | 0         | 536 | 537 | 99 -  | 360  | 896  | 39101  | 39637  |
| UN16709 | Rsa1.0.00101.1 | 940  | 267193 | 1.00E-132 | 239 | 239 | 100 - | 700  | 938  | 131462 | 131700 |
| UN16710 | Rsa1.0.32735.1 | 815  | 695    | 1.00E-170 | 303 | 303 | 100 + | 107  | 409  | 1      | 303    |
| UN16711 | Rsa1.0.01846.1 | 821  | 38367  | 0         | 361 | 362 | 99 +  | 459  | 820  | 35711  | 36072  |
| UN16712 | Rsa1.0.00280.1 | 1333 | 99966  | 0         | 702 | 707 | 99 +  | 626  | 1332 | 18404  | 19110  |
| UN16713 | Rsa1.0.05049.1 | 739  | 15025  | 0         | 497 | 509 | 97 +  | 232  | 739  | 4126   | 4634   |
| UN16714 | Rsa1.0.09117.1 | 625  | 6637   | 0         | 396 | 399 | 99 -  | 226  | 624  | 839    | 1236   |
| UN16715 | Rsa1.0.00190.1 | 732  | 318240 | 0         | 711 | 728 | 97 -  | 3    | 727  | 314971 | 315695 |
| UN16716 | Rsa1.0.00168.1 | 733  | 115870 | 0         | 389 | 402 | 96 +  | 298  | 696  | 39841  | 40242  |
| UN16717 | Rsa1.0.00108.1 | 1128 | 478491 | 1.00E-115 | 311 | 346 | 89 +  | 1    | 321  | 134112 | 134456 |
| UN16718 | Rsa1.0.07516.1 | 693  | 9218   | 0         | 645 | 664 | 97 +  | 7    | 668  | 6378   | 7040   |
| UN16719 | Rsa1.0.00926.1 | 919  | 195072 | 0         | 503 | 504 | 99 +  | 1    | 504  | 41569  | 42072  |
| UN16720 | Rsa1.0.00126.1 | 1528 | 127534 | 1.00E-180 | 326 | 328 | 99 +  | 1201 | 1528 | 38254  | 38581  |
| UN16721 | Rsa1.0.02431.1 | 748  | 31504  | 1.00E-166 | 393 | 423 | 92 -  | 343  | 745  | 17503  | 17922  |
| UN16722 | Rsa1.0.00345.1 | 847  | 93226  | 0         | 322 | 322 | 100 + | 3    | 324  | 84266  | 84587  |
| UN16723 | Rsa1.0.03387.1 | 717  | 23278  | 1.00E-168 | 333 | 339 | 98 +  | 376  | 710  | 19355  | 19693  |
| UN16724 | Rsa1.0.00071.1 | 714  | 345714 | 1.00E-153 | 301 | 307 | 98 +  | 406  | 711  | 142456 | 142761 |
| UN16725 | Rsa1.0.00067.1 | 1174 | 415055 | 0         | 375 | 389 | 96 -  | 3    | 390  | 379553 | 379940 |
| UN16726 | Rsa1.0.13800.1 | 1054 | 4315   | 4.00E-96  | 179 | 179 | 100 + | 209  | 387  | 2063   | 2241   |
| UN16727 | Rsa1.0.02105.1 | 885  | 156953 | 0         | 412 | 422 | 97 -  | 460  | 881  | 150746 | 151165 |
| UN16728 | Rsa1.0.06939.1 | 813  | 10137  | 1.00E-162 | 344 | 359 | 95 +  | 3    | 361  | 3491   | 3838   |
| UN16729 | Rsa1.0.00185.1 | 1186 | 248445 | 1.00E-121 | 271 | 283 | 95 -  | 4    | 278  | 10314  | 10593  |

|         |                |      |        |           |      |      |       |     |      |        |        |
|---------|----------------|------|--------|-----------|------|------|-------|-----|------|--------|--------|
| UN16730 | Rsa1.0_00249.1 | 687  | 153740 | 1.00E-134 | 255  | 259  | 98 +  | 1   | 259  | 52930  | 53188  |
| UN16731 | Rsa1.0_00358.1 | 292  | 91293  | 1.00E-134 | 242  | 242  | 100 + | 1   | 242  | 20908  | 21149  |
| UN16732 | Rsa1.0_02692.1 | 885  | 28626  | 0         | 402  | 429  | 93 +  | 456 | 884  | 21962  | 22390  |
| UN16733 | Rsa1.0_00158.1 | 562  | 117999 | 2.00E-93  | 262  | 289  | 90 -  | 1   | 284  | 100334 | 100619 |
| UN16734 | Rsa1.0_00069.1 | 1359 | 403561 | 1.00E-160 | 354  | 374  | 94 -  | 1   | 363  | 205680 | 206052 |
| UN16735 | Rsa1.0_00015.1 | 621  | 561803 | 1.00E-141 | 401  | 454  | 88 -  | 123 | 569  | 483083 | 483516 |
| UN16736 | Rsa1.0_00333.1 | 807  | 94500  | 0         | 529  | 533  | 99 -  | 1   | 533  | 22949  | 23481  |
| UN16737 | Rsa1.0_00931.1 | 736  | 59210  | 0         | 362  | 365  | 99 +  | 345 | 708  | 54903  | 55267  |
| UN16738 | Rsa1.0_00187.1 | 686  | 393093 | 1.00E-179 | 363  | 378  | 96 -  | 141 | 518  | 47170  | 47547  |
| UN16739 | Rsa1.0_00110.1 | 749  | 132719 | 1.00E-151 | 304  | 315  | 96 -  | 7   | 321  | 92532  | 92846  |
| UN16740 | Rsa1.0_01595.1 | 464  | 175383 | 1.00E-119 | 220  | 221  | 99 +  | 3   | 223  | 41111  | 41331  |
| UN16741 | Rsa1.0_01934.1 | 639  | 37162  | 1.00E-159 | 323  | 332  | 97 +  | 1   | 329  | 1961   | 2291   |
| UN16742 | Rsa1.0_03873.1 | 420  | 20360  | 0         | 373  | 386  | 96 +  | 5   | 386  | 9573   | 9957   |
| UN16743 | Rsa1.0_00147.1 | 607  | 249503 | 0         | 603  | 605  | 99 -  | 3   | 607  | 241358 | 241962 |
| UN16744 | Rsa1.0_00244.1 | 558  | 103590 | 1.00E-117 | 286  | 304  | 94 +  | 8   | 309  | 29926  | 30224  |
| UN16745 | Rsa1.0_01352.1 | 1722 | 47443  | 0         | 1485 | 1518 | 97 -  | 4   | 1520 | 6219   | 7735   |
| UN16746 | Rsa1.0_00949.1 | 714  | 58549  | 1.00E-132 | 286  | 299  | 95 +  | 417 | 714  | 39561  | 39853  |
| UN16747 | Rsa1.0_04779.1 | 830  | 16008  | 7.00E-73  | 150  | 152  | 98 -  | 333 | 484  | 10245  | 10395  |
| UN16748 | Rsa1.0_00044.1 | 960  | 271658 | 1.00E-137 | 267  | 272  | 98 -  | 1   | 272  | 156101 | 156371 |
| UN16749 | Rsa1.0_09126.1 | 758  | 6625   | 0         | 412  | 431  | 95 -  | 327 | 756  | 5284   | 5707   |
| UN16750 | Rsa1.0_03377.1 | 677  | 23322  | 1.00E-110 | 206  | 207  | 99 +  | 467 | 673  | 16048  | 16254  |
| UN16751 | Rsa1.0_01896.1 | 749  | 37512  | 1.00E-175 | 353  | 361  | 97 -  | 389 | 742  | 35284  | 35644  |
| UN16752 | Rsa1.0_00154.1 | 587  | 189461 | 1.00E-133 | 269  | 278  | 96 +  | 1   | 274  | 79505  | 79782  |
| UN16753 | Rsa1.0_02217.1 | 888  | 33812  | 0         | 862  | 896  | 96 +  | 1   | 888  | 30263  | 31158  |
| UN16754 | Rsa1.0_13604.1 | 823  | 4657   | 3.00E-81  | 207  | 222  | 93 +  | 9   | 230  | 2040   | 2259   |
| UN16755 | Rsa1.0_01217.1 | 912  | 50554  | 0         | 884  | 913  | 96 -  | 1   | 912  | 47142  | 48040  |
| UN16756 | Rsa1.0_01803.1 | 680  | 173846 | 0         | 399  | 414  | 96 -  | 1   | 411  | 31867  | 32278  |
| UN16757 | Rsa1.0_01835.1 | 669  | 38542  | 0         | 391  | 405  | 96 -  | 256 | 659  | 24235  | 24638  |
| UN16758 | Rsa1.0_01958.1 | 1019 | 261128 | 3.00E-72  | 151  | 155  | 97 -  | 109 | 263  | 112507 | 112661 |
| UN16759 | Rsa1.0_03570.1 | 836  | 22040  | 1.00E-145 | 292  | 300  | 97 +  | 58  | 356  | 8517   | 8813   |
| UN16760 | Rsa1.0_00759.1 | 1040 | 65465  | 0         | 791  | 801  | 98 -  | 1   | 801  | 55681  | 56480  |
| UN16761 | Rsa1.0_00047.1 | 1101 | 168582 | 1.00E-127 | 247  | 252  | 98 -  | 1   | 252  | 115947 | 116198 |
| UN16762 | Rsa1.0_00044.1 | 951  | 271658 | 1.00E-108 | 220  | 227  | 96 +  | 723 | 949  | 156762 | 156988 |
| UN16763 | Rsa1.0_06468.1 | 923  | 10958  | 0         | 833  | 845  | 98 -  | 3   | 845  | 6517   | 7359   |
| UN16764 | Rsa1.0_00191.1 | 659  | 316976 | 0         | 494  | 499  | 98 -  | 5   | 501  | 140127 | 140625 |
| UN16765 | Rsa1.0_03440.1 | 732  | 22928  | 3.00E-68  | 141  | 144  | 97 +  | 470 | 613  | 12891  | 13034  |
| UN16766 | Rsa1.0_00101.1 | 660  | 267193 | 1.00E-129 | 300  | 321  | 93 -  | 7   | 315  | 47241  | 47560  |
| UN16767 | Rsa1.0_00167.1 | 618  | 116000 | 0         | 610  | 618  | 98 -  | 1   | 618  | 43630  | 44247  |
| UN16768 | Rsa1.0_01296.1 | 682  | 49035  | 1.00E-132 | 257  | 263  | 97 -  | 9   | 271  | 23171  | 23433  |



|         |                |      |        |           |     |     |       |     |      |        |        |
|---------|----------------|------|--------|-----------|-----|-----|-------|-----|------|--------|--------|
| UN16769 | Rsa1.0_14354.1 | 746  | 3487   | 0         | 738 | 746 | 98 +  | 2   | 746  | 1273   | 2017   |
| UN16770 | Rsa1.0_00718.1 | 792  | 279335 | 0         | 410 | 430 | 95 +  | 362 | 791  | 34463  | 34889  |
| UN16771 | Rsa1.0_01387.1 | 730  | 46745  | 1.00E-132 | 266 | 275 | 96 +  | 434 | 708  | 46152  | 46426  |
| UN16772 | Rsa1.0_03191.1 | 1004 | 145762 | 1.00E-150 | 330 | 348 | 94 +  | 626 | 973  | 16325  | 16663  |
| UN16773 | Rsa1.0_02458.1 | 806  | 31197  | 1.00E-160 | 322 | 332 | 96 +  | 474 | 804  | 9247   | 9575   |
| UN16774 | Rsa1.0_00039.1 | 1524 | 296927 | 1.00E-87  | 174 | 177 | 98 -  | 337 | 513  | 49432  | 49608  |
| UN16775 | Rsa1.0_04890.1 | 825  | 15591  | 1.00E-109 | 231 | 241 | 95 -  | 238 | 478  | 10910  | 11150  |
| UN16776 | Rsa1.0_00714.1 | 1333 | 67187  | 0         | 388 | 398 | 97 +  | 2   | 399  | 22328  | 22719  |
| UN16777 | Rsa1.0_00805.1 | 730  | 63724  | 1.00E-103 | 206 | 211 | 97 +  | 492 | 702  | 41298  | 41508  |
| UN16778 | Rsa1.0_00954.1 | 725  | 189536 | 2.00E-63  | 124 | 124 | 100 - | 590 | 713  | 152040 | 152163 |
| UN16779 | Rsa1.0_37263.1 | 647  | 605    | 0         | 572 | 589 | 97 -  | 1   | 589  | 1      | 589    |
| UN16780 | Rsa1.0_17775.1 | 693  | 1743   | 0         | 571 | 623 | 91 +  | 6   | 611  | 1132   | 1743   |
| UN16781 | Rsa1.0_00019.1 | 1124 | 301669 | 0         | 497 | 521 | 95 +  | 1   | 514  | 218714 | 219233 |
| UN16782 | Rsa1.0_00182.1 | 980  | 142305 | 0         | 916 | 984 | 93 -  | 12  | 976  | 35043  | 36008  |
| UN16783 | Rsa1.0_00132.1 | 1044 | 124299 | 1.00E-147 | 325 | 342 | 95 +  | 3   | 339  | 108401 | 108742 |
| UN16784 | Rsa1.0_00611.1 | 940  | 72410  | 0         | 486 | 501 | 97 +  | 438 | 938  | 60559  | 61059  |
| UN16785 | Rsa1.0_00218.1 | 1007 | 201480 | 1.00E-141 | 332 | 353 | 94 +  | 665 | 1007 | 173202 | 173553 |
| UN16786 | Rsa1.0_00213.1 | 689  | 108167 | 1.00E-117 | 217 | 218 | 99 -  | 468 | 685  | 14737  | 14954  |
| UN16787 | Rsa1.0_00848.1 | 795  | 152362 | 5.00E-95  | 234 | 249 | 93 -  | 1   | 248  | 38270  | 38516  |
| UN16788 | Rsa1.0_00394.1 | 1185 | 148426 | 1.00E-172 | 395 | 423 | 93 -  | 3   | 415  | 99869  | 100286 |
| UN16789 | Rsa1.0_17040.1 | 550  | 1944   | 0         | 379 | 396 | 95 -  | 9   | 396  | 1207   | 1602   |
| UN16790 | Rsa1.0_00008.1 | 475  | 358124 | 1.00E-147 | 276 | 280 | 98 -  | 3   | 282  | 30632  | 30911  |
| UN16791 | Rsa1.0_01286.1 | 568  | 49209  | 0         | 504 | 520 | 96 +  | 2   | 520  | 4008   | 4521   |
| UN16792 | Rsa1.0_02917.1 | 789  | 159058 | 0         | 728 | 740 | 98 +  | 1   | 740  | 144062 | 144799 |
| UN16793 | Rsa1.0_01274.1 | 357  | 49419  | 1.00E-72  | 202 | 221 | 91 -  | 1   | 214  | 21348  | 21566  |
| UN16794 | Rsa1.0_00418.1 | 652  | 215377 | 6.00E-88  | 174 | 177 | 98 +  | 291 | 467  | 46155  | 46331  |
| UN16795 | Rsa1.0_00113.1 | 646  | 131574 | 1.00E-165 | 322 | 330 | 97 -  | 1   | 330  | 73859  | 74187  |
| UN16796 | Rsa1.0_03894.1 | 796  | 20207  | 0         | 728 | 749 | 97 +  | 2   | 749  | 2591   | 3337   |
| UN16797 | Rsa1.0_02214.1 | 866  | 161150 | 5.00E-83  | 178 | 185 | 96 +  | 296 | 480  | 695    | 879    |
| UN16798 | Rsa1.0_00883.1 | 689  | 61230  | 0         | 432 | 440 | 98 +  | 1   | 440  | 29870  | 30306  |
| UN16799 | Rsa1.0_00490.1 | 1546 | 186713 | 0         | 402 | 428 | 93 -  | 1   | 411  | 39915  | 40340  |
| UN16800 | Rsa1.0_00549.1 | 1299 | 76473  | 1.00E-129 | 250 | 255 | 98 -  | 149 | 403  | 9511   | 9765   |
| UN16801 | Rsa1.0_02144.1 | 748  | 34630  | 5.00E-89  | 185 | 191 | 96 +  | 148 | 338  | 1304   | 1494   |
| UN16802 | Rsa1.0_10199.1 | 506  | 5948   | 0         | 460 | 489 | 94 +  | 1   | 484  | 5385   | 5869   |
| UN16803 | Rsa1.0_00860.1 | 965  | 61789  | 0         | 547 | 556 | 98 +  | 408 | 963  | 6973   | 7528   |
| UN16804 | Rsa1.0_00041.1 | 729  | 186197 | 9.00E-75  | 149 | 151 | 98 -  | 420 | 570  | 57669  | 57819  |
| UN16805 | Rsa1.0_00327.1 | 739  | 94892  | 1.00E-140 | 275 | 280 | 98 -  | 460 | 739  | 70364  | 70641  |
| UN16806 | Rsa1.0_00401.1 | 640  | 244410 | 0         | 391 | 394 | 99 +  | 5   | 398  | 178052 | 178445 |
| UN16807 | Rsa1.0_06663.1 | 728  | 10576  | 0         | 642 | 671 | 95 +  | 1   | 671  | 6933   | 7602   |

|         |                |      |        |           |      |      |       |     |      |        |        |
|---------|----------------|------|--------|-----------|------|------|-------|-----|------|--------|--------|
| UN16808 | Rsa1.0.01874.1 | 777  | 37853  | 0         | 766  | 776  | 98 -  | 3   | 777  | 21339  | 22109  |
| UN16809 | Rsa1.0.02105.1 | 895  | 156953 | 1.00E-179 | 355  | 367  | 96 -  | 126 | 492  | 149700 | 150066 |
| UN16810 | Rsa1.0.00185.1 | 522  | 248445 | 1.00E-128 | 251  | 257  | 97 -  | 3   | 259  | 10314  | 10566  |
| UN16811 | Rsa1.0.00686.1 | 737  | 68511  | 3.00E-99  | 219  | 230  | 95 -  | 10  | 236  | 29900  | 30129  |
| UN16812 | Rsa1.0.00605.1 | 617  | 73199  | 0         | 611  | 617  | 99 -  | 1   | 617  | 30938  | 31554  |
| UN16813 | Rsa1.0.15262.1 | 1318 | 2722   | 0         | 473  | 481  | 98 -  | 9   | 489  | 1765   | 2245   |
| UN16814 | Rsa1.0.00071.1 | 668  | 345714 | 1.00E-111 | 235  | 243  | 96 -  | 423 | 662  | 324494 | 324736 |
| UN16815 | Rsa1.0.04584.1 | 764  | 16756  | 0         | 469  | 476  | 98 -  | 283 | 757  | 12391  | 12866  |
| UN16816 | Rsa1.0.00816.1 | 696  | 403350 | 4.00E-83  | 210  | 227  | 92 +  | 3   | 223  | 109964 | 110183 |
| UN16817 | Rsa1.0.02158.1 | 832  | 154841 | 0         | 526  | 538  | 97 +  | 142 | 679  | 131881 | 132414 |
| UN16818 | Rsa1.0.00416.1 | 956  | 86772  | 4.00E-93  | 242  | 266  | 90 -  | 705 | 956  | 76161  | 76426  |
| UN16819 | Rsa1.0.00175.1 | 738  | 166121 | 5.00E-98  | 207  | 214  | 96 -  | 126 | 339  | 141878 | 142090 |
| UN16820 | Rsa1.0.02911.1 | 754  | 142461 | 0         | 601  | 622  | 96 -  | 1   | 618  | 23423  | 24039  |
| UN16821 | Rsa1.0.07692.1 | 2069 | 132338 | 0         | 543  | 553  | 98 +  | 544 | 1095 | 131072 | 131624 |
| UN16822 | Rsa1.0.03326.1 | 737  | 23710  | 0         | 446  | 461  | 96 -  | 47  | 506  | 17095  | 17547  |
| UN16823 | Rsa1.0.00737.1 | 1214 | 66432  | 1.00E-161 | 332  | 345  | 96 +  | 874 | 1214 | 30743  | 31086  |
| UN16824 | Rsa1.0.01874.1 | 1201 | 37853  | 0         | 500  | 513  | 97 +  | 1   | 510  | 23722  | 24233  |
| UN16825 | Rsa1.0.00111.1 | 1233 | 390088 | 1.00E-142 | 323  | 342  | 94 -  | 2   | 342  | 139323 | 139660 |
| UN16826 | Rsa1.0.00087.1 | 710  | 761073 | 1.00E-110 | 251  | 263  | 95 -  | 448 | 710  | 191412 | 191671 |
| UN16827 | Rsa1.0.01611.1 | 1027 | 42269  | 1.00E-164 | 362  | 387  | 93 -  | 3   | 383  | 17493  | 17863  |
| UN16828 | Rsa1.0.00369.1 | 867  | 266462 | 0         | 414  | 437  | 94 -  | 431 | 867  | 4549   | 4974   |
| UN16829 | Rsa1.0.08230.1 | 1439 | 7688   | 0         | 878  | 878  | 100 + | 562 | 1439 | 5127   | 6004   |
| UN16830 | Rsa1.0.00635.1 | 854  | 175826 | 1.00E-152 | 313  | 320  | 97 +  | 46  | 359  | 14088  | 14407  |
| UN16831 | Rsa1.0.02019.1 | 1062 | 35983  | 1.00E-99  | 254  | 273  | 93 -  | 798 | 1062 | 13360  | 13627  |
| UN16832 | Rsa1.0.00001.1 | 735  | 363028 | 1.00E-112 | 312  | 346  | 90 +  | 4   | 348  | 190816 | 191142 |
| UN16833 | Rsa1.0.00055.1 | 788  | 520193 | 1.00E-155 | 290  | 294  | 98 +  | 1   | 294  | 207483 | 207776 |
| UN16834 | Rsa1.0.05448.1 | 738  | 13712  | 1.00E-116 | 212  | 212  | 100 - | 195 | 406  | 11459  | 11670  |
| UN16835 | Rsa1.0.02650.1 | 352  | 29047  | 0         | 338  | 340  | 99 -  | 13  | 352  | 11566  | 11904  |
| UN16836 | Rsa1.0.00847.1 | 912  | 62270  | 1.00E-164 | 393  | 426  | 92 -  | 2   | 419  | 55145  | 55569  |
| UN16837 | Rsa1.0.02707.1 | 1051 | 28520  | 7.00E-95  | 215  | 225  | 95 -  | 8   | 230  | 26167  | 26391  |
| UN16838 | Rsa1.0.03120.1 | 1000 | 25269  | 7.00E-95  | 198  | 205  | 96 +  | 81  | 285  | 20575  | 20779  |
| UN16839 | Rsa1.0.03966.1 | 828  | 19823  | 1.00E-171 | 369  | 387  | 95 +  | 35  | 418  | 1948   | 2332   |
| UN16840 | Rsa1.0.00121.1 | 562  | 278029 | 0         | 540  | 561  | 96 +  | 3   | 562  | 55537  | 56091  |
| UN16841 | Rsa1.0.00780.1 | 774  | 147795 | 1.00E-154 | 295  | 300  | 98 -  | 447 | 745  | 42762  | 43061  |
| UN16842 | Rsa1.0.00038.1 | 1555 | 314568 | 0         | 1423 | 1450 | 98 +  | 2   | 1451 | 283204 | 284648 |
| UN16843 | Rsa1.0.02453.1 | 848  | 31271  | 0         | 359  | 361  | 99 -  | 5   | 364  | 14906  | 15266  |
| UN16844 | Rsa1.0.02660.1 | 742  | 28969  | 1.00E-115 | 235  | 243  | 96 -  | 65  | 307  | 12641  | 12883  |
| UN16845 | Rsa1.0.08846.1 | 648  | 6867   | 6.00E-88  | 248  | 275  | 90 +  | 382 | 645  | 3201   | 3473   |
| UN16846 | Rsa1.0.00190.1 | 986  | 318240 | 0         | 792  | 811  | 97 -  | 1   | 807  | 94238  | 95048  |

|         |                |      |        |           |      |      |       |      |      |        |        |
|---------|----------------|------|--------|-----------|------|------|-------|------|------|--------|--------|
| UN16847 | Rsa1.0.03668.1 | 290  | 21483  | 1.00E-138 | 279  | 289  | 96 -  | 1    | 289  | 11564  | 11852  |
| UN16848 | Rsa1.0.09017.1 | 1045 | 6706   | 0         | 353  | 359  | 98 -  | 685  | 1043 | 822    | 1180   |
| UN16849 | Rsa1.0.03770.1 | 706  | 20952  | 0         | 505  | 522  | 96 -  | 1    | 522  | 5875   | 6392   |
| UN16850 | Rsa1.0.00116.1 | 771  | 365886 | 0         | 439  | 443  | 99 +  | 329  | 771  | 344422 | 344864 |
| UN16851 | Rsa1.0.00017.1 | 917  | 752458 | 0         | 618  | 639  | 96 -  | 279  | 917  | 616126 | 616764 |
| UN16852 | Rsa1.0.01540.1 | 943  | 151890 | 0         | 495  | 507  | 97 +  | 208  | 714  | 144792 | 145298 |
| UN16853 | Rsa1.0.02723.1 | 295  | 28408  | 1.00E-143 | 288  | 297  | 96 +  | 3    | 293  | 2563   | 2859   |
| UN16854 | Rsa1.0.00827.1 | 1340 | 62790  | 0         | 691  | 718  | 96 -  | 2    | 719  | 22600  | 23299  |
| UN16855 | Rsa1.0.00855.1 | 1108 | 62047  | 0         | 451  | 458  | 98 +  | 649  | 1104 | 55676  | 56132  |
| UN16856 | Rsa1.0.01731.1 | 1078 | 40208  | 0         | 536  | 538  | 99 -  | 1    | 537  | 19840  | 20377  |
| UN16857 | Rsa1.0.00307.1 | 255  | 199003 | 1.00E-132 | 252  | 255  | 98 +  | 1    | 255  | 5805   | 6058   |
| UN16858 | Rsa1.0.01727.1 | 1423 | 40243  | 0         | 371  | 371  | 100 + | 3    | 373  | 5093   | 5463   |
| UN16859 | Rsa1.0.00552.1 | 848  | 206757 | 0         | 822  | 847  | 97 -  | 2    | 848  | 65984  | 66826  |
| UN16860 | Rsa1.0.06021.1 | 1278 | 11911  | 0         | 588  | 590  | 99 -  | 689  | 1278 | 4387   | 4976   |
| UN16861 | Rsa1.0.00040.1 | 822  | 324196 | 1.00E-150 | 386  | 426  | 90 -  | 421  | 820  | 227177 | 227600 |
| UN16862 | Rsa1.0.00521.1 | 831  | 78191  | 0         | 372  | 376  | 98 +  | 1    | 376  | 71471  | 71846  |
| UN16863 | Rsa1.0.00168.1 | 1441 | 115870 | 0         | 606  | 615  | 98 +  | 521  | 1135 | 88360  | 88974  |
| UN16864 | Rsa1.0.00321.1 | 1611 | 95671  | 0         | 352  | 354  | 99 +  | 1260 | 1611 | 40671  | 41024  |
| UN16865 | Rsa1.0.04518.1 | 1796 | 17005  | 1.00E-170 | 482  | 545  | 88 +  | 687  | 1206 | 11675  | 12209  |
| UN16866 | Rsa1.0.16623.1 | 1024 | 2086   | 0         | 411  | 424  | 96 +  | 378  | 801  | 1196   | 1619   |
| UN16867 | Rsa1.0.00132.1 | 766  | 124299 | 0         | 431  | 434  | 99 -  | 1    | 434  | 46291  | 46723  |
| UN16868 | Rsa1.0.01184.1 | 1848 | 51452  | 0         | 416  | 425  | 97 +  | 1424 | 1848 | 7609   | 8030   |
| UN16869 | Rsa1.0.00767.1 | 1377 | 64980  | 0         | 385  | 385  | 100 - | 1    | 385  | 18547  | 18931  |
| UN16870 | Rsa1.0.00120.1 | 1124 | 277288 | 1.00E-159 | 291  | 293  | 99 -  | 2    | 294  | 119581 | 119873 |
| UN16871 | Rsa1.0.02144.1 | 756  | 34630  | 1.00E-180 | 351  | 361  | 97 -  | 3    | 363  | 9429   | 9786   |
| UN16872 | Rsa1.0.03873.1 | 861  | 20360  | 1.00E-121 | 266  | 282  | 94 -  | 121  | 400  | 9247   | 9517   |
| UN16873 | Rsa1.0.00329.1 | 1428 | 222544 | 0         | 458  | 463  | 98 -  | 298  | 760  | 41377  | 41839  |
| UN16874 | Rsa1.0.00059.1 | 2146 | 159650 | 0         | 599  | 603  | 99 +  | 1047 | 1648 | 23292  | 23894  |
| UN16875 | Rsa1.0.00052.1 | 967  | 162771 | 1.00E-134 | 255  | 259  | 98 +  | 61   | 319  | 57659  | 57917  |
| UN16876 | Rsa1.0.06373.1 | 898  | 11138  | 1.00E-164 | 312  | 317  | 98 +  | 1    | 316  | 717    | 1033   |
| UN16877 | Rsa1.0.00123.1 | 719  | 325650 | 0         | 658  | 665  | 98 +  | 9    | 673  | 168294 | 168957 |
| UN16878 | Rsa1.0.01881.1 | 1305 | 37721  | 0         | 774  | 782  | 98 -  | 525  | 1305 | 32960  | 33741  |
| UN16879 | Rsa1.0.16623.1 | 1151 | 2086   | 0         | 454  | 466  | 97 -  | 687  | 1151 | 210    | 671    |
| UN16880 | Rsa1.0.00556.1 | 890  | 207212 | 0         | 351  | 356  | 98 +  | 519  | 873  | 5867   | 6222   |
| UN16881 | Rsa1.0.00020.1 | 1590 | 283099 | 0         | 1579 | 1584 | 99 +  | 1    | 1582 | 53213  | 54796  |
| UN16882 | Rsa1.0.05049.1 | 865  | 15025  | 0         | 485  | 498  | 97 +  | 351  | 848  | 4126   | 4619   |
| UN16883 | Rsa1.0.00046.1 | 1374 | 320315 | 1.00E-154 | 301  | 309  | 97 -  | 1071 | 1374 | 72846  | 73154  |
| UN16884 | Rsa1.0.06303.1 | 967  | 11268  | 1.00E-124 | 241  | 246  | 97 -  | 200  | 445  | 9882   | 10127  |
| UN16885 | Rsa1.0.01572.1 | 811  | 42995  | 0         | 796  | 810  | 98 +  | 2    | 811  | 6078   | 6879   |

|         |                |      |        |           |      |      |       |      |      |        |        |
|---------|----------------|------|--------|-----------|------|------|-------|------|------|--------|--------|
| UN16886 | Rsa1.0.00373.1 | 1180 | 90296  | 1.00E-132 | 261  | 268  | 97 -  | 536  | 803  | 60869  | 61136  |
| UN16887 | Rsa1.0.00045.1 | 876  | 328694 | 0         | 868  | 878  | 98 -  | 7    | 874  | 302345 | 303222 |
| UN16888 | Rsa1.0.01958.1 | 1122 | 261128 | 1.00E-142 | 318  | 337  | 94 +  | 785  | 1115 | 115205 | 115537 |
| UN16889 | Rsa1.0.00015.1 | 703  | 561803 | 1.00E-147 | 461  | 530  | 86 -  | 57   | 568  | 483124 | 483640 |
| UN16890 | Rsa1.0.01145.1 | 1517 | 149247 | 1.00E-178 | 380  | 396  | 95 +  | 1    | 395  | 123359 | 123750 |
| UN16891 | Rsa1.0.14674.1 | 945  | 3167   | 0         | 399  | 408  | 97 -  | 1    | 401  | 372    | 779    |
| UN16892 | Rsa1.0.00206.1 | 1310 | 109040 | 0         | 560  | 612  | 91 +  | 32   | 636  | 95688  | 96299  |
| UN16893 | Rsa1.0.00272.1 | 1003 | 447836 | 1.00E-135 | 258  | 261  | 98 -  | 5    | 265  | 219273 | 219532 |
| UN16894 | Rsa1.0.04407.1 | 1326 | 17504  | 0         | 436  | 444  | 98 -  | 868  | 1311 | 4181   | 4623   |
| UN16895 | Rsa1.0.00094.1 | 1458 | 139042 | 1.00E-175 | 319  | 320  | 99 -  | 1    | 320  | 99912  | 100230 |
| UN16896 | Rsa1.0.00034.1 | 2080 | 260119 | 4.00E-98  | 264  | 291  | 90 -  | 151  | 441  | 161164 | 161454 |
| UN16897 | Rsa1.0.04291.1 | 1111 | 18055  | 0         | 473  | 475  | 99 -  | 1    | 475  | 8239   | 8711   |
| UN16898 | Rsa1.0.09859.1 | 482  | 6115   | 1.00E-130 | 324  | 353  | 91 -  | 1    | 353  | 5753   | 6102   |
| UN16899 | Rsa1.0.00910.1 | 1206 | 59975  | 1.00E-155 | 389  | 426  | 91 -  | 590  | 1015 | 55926  | 56351  |
| UN16900 | Rsa1.0.00887.1 | 1419 | 61048  | 0         | 406  | 411  | 98 -  | 9    | 419  | 50891  | 51299  |
| UN16901 | Rsa1.0.01814.1 | 1327 | 38917  | 0         | 473  | 486  | 97 -  | 831  | 1316 | 5704   | 6180   |
| UN16902 | Rsa1.0.01512.1 | 2048 | 44234  | 0         | 591  | 609  | 97 -  | 1443 | 2045 | 20810  | 21414  |
| UN16903 | Rsa1.0.07914.1 | 1257 | 8294   | 0         | 779  | 801  | 97 +  | 454  | 1250 | 1883   | 2683   |
| UN16904 | Rsa1.0.18254.1 | 1443 | 1636   | 1.00E-168 | 337  | 345  | 97 -  | 1100 | 1442 | 681    | 1024   |
| UN16905 | Rsa1.0.00384.1 | 1052 | 89278  | 3.00E-94  | 179  | 180  | 99 +  | 563  | 742  | 81079  | 81258  |
| UN16906 | Rsa1.0.03282.1 | 857  | 24107  | 0         | 539  | 561  | 96 +  | 300  | 852  | 10595  | 11155  |
| UN16907 | Rsa1.0.04198.1 | 816  | 18504  | 0         | 811  | 817  | 99 +  | 1    | 816  | 15298  | 16113  |
| UN16908 | Rsa1.0.03195.1 | 1766 | 24673  | 0         | 625  | 654  | 95 -  | 41   | 694  | 8990   | 9634   |
| UN16909 | Rsa1.0.05095.1 | 956  | 14869  | 1.00E-149 | 299  | 309  | 96 +  | 648  | 956  | 773    | 1077   |
| UN16910 | Rsa1.0.02688.1 | 904  | 28644  | 0         | 494  | 512  | 96 -  | 1    | 509  | 26861  | 27371  |
| UN16911 | Rsa1.0.00135.1 | 1222 | 178077 | 0         | 460  | 474  | 97 -  | 2    | 473  | 19429  | 19899  |
| UN16912 | Rsa1.0.02201.1 | 1279 | 33981  | 1.00E-119 | 267  | 280  | 95 -  | 1    | 276  | 31757  | 32035  |
| UN16913 | Rsa1.0.00382.1 | 912  | 251946 | 0         | 587  | 613  | 95 -  | 4    | 607  | 111146 | 111756 |
| UN16914 | Rsa1.0.00734.1 | 843  | 66508  | 0         | 544  | 575  | 94 +  | 1    | 574  | 62091  | 62665  |
| UN16915 | Rsa1.0.01220.1 | 861  | 161775 | 1.00E-140 | 283  | 293  | 96 -  | 1    | 293  | 117108 | 117400 |
| UN16916 | Rsa1.0.03638.1 | 1792 | 21634  | 0         | 370  | 376  | 98 +  | 1420 | 1792 | 11607  | 11982  |
| UN16917 | Rsa1.0.00624.1 | 1018 | 71773  | 1.00E-172 | 322  | 327  | 98 +  | 692  | 1018 | 21070  | 21396  |
| UN16918 | Rsa1.0.00370.1 | 1020 | 90472  | 0         | 534  | 542  | 98 +  | 1    | 542  | 71034  | 71575  |
| UN16919 | Rsa1.0.00211.1 | 1452 | 228189 | 0         | 1442 | 1452 | 99 -  | 2    | 1452 | 211359 | 212810 |
| UN16920 | Rsa1.0.00087.1 | 1473 | 761073 | 0         | 493  | 493  | 100 + | 981  | 1473 | 568132 | 568624 |
| UN16921 | Rsa1.0.00102.1 | 1633 | 135497 | 0         | 385  | 388  | 99 +  | 1    | 388  | 42149  | 42536  |
| UN16922 | Rsa1.0.03191.1 | 999  | 145762 | 1.00E-118 | 259  | 272  | 95 +  | 5    | 275  | 15383  | 15654  |
| UN16923 | Rsa1.0.01273.1 | 1387 | 49464  | 1.00E-163 | 305  | 308  | 99 -  | 1074 | 1380 | 18185  | 18492  |
| UN16924 | Rsa1.0.01901.1 | 1094 | 37472  | 0         | 989  | 1003 | 98 +  | 2    | 1004 | 25164  | 26166  |

|         |                |      |        |           |      |      |       |      |      |        |        |
|---------|----------------|------|--------|-----------|------|------|-------|------|------|--------|--------|
| UN16925 | Rsa1.0_39538.1 | 1677 | 569    | 1.00E-174 | 332  | 338  | 98 +  | 11   | 346  | 90     | 427    |
| UN16926 | Rsa1.0_00457.1 | 856  | 337301 | 0         | 436  | 436  | 100 + | 420  | 855  | 142257 | 142692 |
| UN16927 | Rsa1.0_08430.1 | 1132 | 7367   | 0         | 391  | 408  | 95 -  | 1    | 407  | 2169   | 2573   |
| UN16928 | Rsa1.0_03120.1 | 1027 | 25269  | 1.00E-155 | 338  | 353  | 95 +  | 677  | 1027 | 22032  | 22381  |
| UN16929 | Rsa1.0_02910.1 | 975  | 26843  | 1.00E-118 | 216  | 216  | 100 - | 3    | 218  | 2761   | 2976   |
| UN16930 | Rsa1.0_00050.1 | 1626 | 237174 | 0         | 380  | 381  | 99 +  | 1    | 380  | 31140  | 31520  |
| UN16931 | Rsa1.0_02362.1 | 1148 | 32190  | 0         | 390  | 402  | 97 +  | 749  | 1148 | 21332  | 21730  |
| UN16932 | Rsa1.0_04873.1 | 1516 | 15657  | 1.00E-139 | 269  | 274  | 98 +  | 3    | 276  | 12262  | 12532  |
| UN16933 | Rsa1.0_00951.1 | 658  | 164588 | 1.00E-149 | 279  | 282  | 98 +  | 379  | 658  | 114506 | 114787 |
| UN16934 | Rsa1.0_00568.1 | 1831 | 75219  | 0         | 1020 | 1050 | 97 +  | 543  | 1584 | 1622   | 2658   |
| UN16935 | Rsa1.0_05336.1 | 1680 | 14117  | 0         | 335  | 335  | 100 - | 1    | 335  | 11121  | 11455  |
| UN16936 | Rsa1.0_02247.1 | 952  | 33427  | 2.33E-156 | 336  | 361  | 93 -  | 1    | 361  | 28646  | 28994  |
| UN16937 | Rsa1.0_00913.1 | 793  | 59914  | 0         | 390  | 393  | 99 +  | 228  | 620  | 10123  | 10512  |
| UN16938 | Rsa1.0_01434.1 | 1260 | 45951  | 0         | 1152 | 1196 | 96 -  | 66   | 1258 | 7329   | 8511   |
| UN16939 | Rsa1.0_03504.1 | 1102 | 22443  | 1.00E-166 | 334  | 342  | 97 -  | 36   | 376  | 10641  | 10977  |
| UN16940 | Rsa1.0_00300.1 | 1349 | 97747  | 0         | 536  | 566  | 94 -  | 703  | 1256 | 81512  | 82074  |
| UN16941 | Rsa1.0_01203.1 | 1147 | 50848  | 0         | 337  | 340  | 99 -  | 2    | 341  | 39876  | 40215  |
| UN16942 | Rsa1.0_00999.1 | 2300 | 57162  | 0         | 486  | 527  | 92 +  | 1759 | 2263 | 56248  | 56765  |
| UN16943 | Rsa1.0_00546.1 | 1497 | 76523  | 0         | 709  | 716  | 99 -  | 111  | 826  | 61328  | 62042  |
| UN16944 | Rsa1.0_04873.1 | 1655 | 15657  | 1.00E-152 | 315  | 327  | 96 +  | 1319 | 1642 | 15059  | 15384  |
| UN16945 | Rsa1.0_01462.1 | 989  | 45231  | 0         | 523  | 544  | 96 -  | 1    | 532  | 27589  | 28132  |
| UN16946 | Rsa1.0_00484.1 | 949  | 203294 | 0         | 537  | 546  | 98 -  | 404  | 949  | 49802  | 50347  |
| UN16947 | Rsa1.0_00017.1 | 1172 | 752458 | 0         | 1154 | 1171 | 98 +  | 2    | 1172 | 330369 | 331538 |
| UN16948 | Rsa1.0_00548.1 | 1091 | 76518  | 1.00E-138 | 259  | 262  | 98 +  | 3    | 264  | 60500  | 60761  |
| UN16949 | Rsa1.0_00302.1 | 1127 | 97521  | 1.00E-166 | 378  | 406  | 93 -  | 1    | 389  | 85022  | 85427  |
| UN16950 | Rsa1.0_05628.1 | 1184 | 13130  | 0         | 426  | 432  | 98 -  | 2    | 432  | 1627   | 2058   |
| UN16951 | Rsa1.0_00994.1 | 2532 | 165189 | 0         | 553  | 563  | 98 +  | 1843 | 2405 | 1248   | 1810   |
| UN16952 | Rsa1.0_00580.1 | 803  | 74515  | 1.00E-163 | 343  | 356  | 96 -  | 451  | 803  | 33899  | 34249  |
| UN16953 | Rsa1.0_00861.1 | 764  | 61759  | 1.00E-140 | 302  | 317  | 95 -  | 2    | 314  | 44481  | 44796  |
| UN16954 | Rsa1.0_65165.1 | 487  | 352    | 1.00E-91  | 204  | 213  | 95 +  | 278  | 487  | 1      | 212    |
| UN16955 | Rsa1.0_00084.1 | 1100 | 142338 | 0         | 694  | 711  | 97 -  | 395  | 1098 | 132713 | 133423 |
| UN16956 | Rsa1.0_01280.1 | 1537 | 49321  | 0         | 1091 | 1092 | 99 +  | 444  | 1535 | 36579  | 37670  |
| UN16957 | Rsa1.0_02859.1 | 554  | 162118 | 0         | 456  | 457  | 99 -  | 1    | 457  | 154217 | 154673 |
| UN16958 | Rsa1.0_00333.1 | 1446 | 94500  | 0         | 536  | 561  | 95 +  | 889  | 1446 | 69143  | 69703  |
| UN16959 | Rsa1.0_02431.1 | 816  | 31504  | 0         | 437  | 458  | 95 -  | 360  | 812  | 17474  | 17922  |
| UN16960 | Rsa1.0_02103.1 | 1001 | 35006  | 0         | 574  | 598  | 95 +  | 14   | 605  | 13499  | 14094  |
| UN16961 | Rsa1.0_09270.1 | 936  | 6513   | 0         | 884  | 941  | 93 -  | 3    | 936  | 5294   | 6201   |
| UN16962 | Rsa1.0_00437.1 | 1048 | 84879  | 0         | 427  | 452  | 94 +  | 593  | 1043 | 23633  | 24067  |
| UN16963 | Rsa1.0_09434.1 | 1294 | 6371   | 0         | 335  | 336  | 99 -  | 498  | 833  | 1196   | 1531   |

|         |                |      |        |           |      |      |      |      |      |        |        |
|---------|----------------|------|--------|-----------|------|------|------|------|------|--------|--------|
| UN16964 | Rsa1.0.02455.1 | 957  | 31262  | 0         | 556  | 564  | 98 - | 1    | 563  | 25408  | 25971  |
| UN16965 | Rsa1.0.06663.1 | 1506 | 10576  | 0         | 666  | 673  | 98 - | 834  | 1506 | 6927   | 7599   |
| UN16966 | Rsa1.0.00476.1 | 1328 | 280966 | 0         | 775  | 803  | 96 + | 279  | 1077 | 160084 | 160884 |
| UN16967 | Rsa1.0.11046.1 | 844  | 5635   | 1.00E-155 | 329  | 343  | 95 - | 9    | 347  | 3092   | 3432   |
| UN16968 | Rsa1.0.01092.1 | 1190 | 54348  | 1.00E-166 | 364  | 385  | 94 + | 805  | 1189 | 53693  | 54076  |
| UN16969 | Rsa1.0.04400.1 | 1318 | 17529  | 0         | 846  | 865  | 97 + | 75   | 933  | 16666  | 17529  |
| UN16970 | Rsa1.0.00995.1 | 1594 | 57243  | 0         | 1588 | 1593 | 99 - | 2    | 1594 | 46530  | 48122  |
| UN16971 | Rsa1.0.00184.1 | 1331 | 218748 | 0         | 623  | 635  | 98 - | 697  | 1331 | 210822 | 211456 |
| UN16972 | Rsa1.0.00069.1 | 1544 | 403561 | 0         | 463  | 464  | 99 - | 1081 | 1544 | 394775 | 395238 |
| UN16973 | Rsa1.0.00268.1 | 1554 | 101470 | 0         | 507  | 533  | 95 + | 4    | 518  | 42996  | 43526  |
| UN16974 | Rsa1.0.01108.1 | 1588 | 53865  | 0         | 1213 | 1224 | 99 - | 93   | 1316 | 1      | 1224   |
| UN16975 | Rsa1.0.00524.1 | 1517 | 169613 | 0         | 676  | 683  | 98 - | 426  | 1106 | 129773 | 130455 |
| UN16976 | Rsa1.0.03264.1 | 1179 | 145959 | 1.00E-139 | 275  | 283  | 97 - | 496  | 778  | 134142 | 134424 |
| UN16977 | Rsa1.0.00108.1 | 1315 | 478491 | 0         | 381  | 385  | 98 - | 931  | 1315 | 450948 | 451332 |
| UN16978 | Rsa1.0.01029.1 | 1064 | 256254 | 1.00E-155 | 320  | 332  | 96 - | 1    | 329  | 245893 | 246223 |
| UN16979 | Rsa1.0.00592.1 | 1187 | 73788  | 0         | 1157 | 1188 | 97 + | 1    | 1186 | 61537  | 62724  |
| UN16980 | Rsa1.0.00232.1 | 1236 | 104936 | 1.00E-167 | 304  | 306  | 99 + | 931  | 1236 | 48471  | 48776  |
| UN16981 | Rsa1.0.00111.1 | 1167 | 390088 | 0         | 376  | 385  | 97 + | 782  | 1166 | 373585 | 373965 |
| UN16982 | Rsa1.0.00167.1 | 1274 | 116000 | 0         | 653  | 670  | 97 - | 3    | 672  | 43588  | 44257  |
| UN16983 | Rsa1.0.00777.1 | 1049 | 191865 | 0         | 420  | 424  | 99 + | 4    | 427  | 129722 | 130145 |
| UN16984 | Rsa1.0.09656.1 | 1018 | 6229   | 0         | 940  | 986  | 95 + | 2    | 987  | 5101   | 6086   |
| UN16985 | Rsa1.0.00619.1 | 1708 | 71985  | 0         | 1526 | 1556 | 98 - | 153  | 1708 | 13958  | 15500  |
| UN16986 | Rsa1.0.00071.1 | 1150 | 345714 | 0         | 540  | 551  | 98 - | 600  | 1146 | 336436 | 336985 |
| UN16987 | Rsa1.0.00153.1 | 769  | 192931 | 1.00E-116 | 244  | 251  | 97 + | 517  | 765  | 168694 | 168941 |
| UN16988 | Rsa1.0.15323.1 | 1242 | 2685   | 5.00E-96  | 188  | 190  | 98 + | 3    | 190  | 1634   | 1823   |
| UN16989 | Rsa1.0.00381.1 | 1988 | 89718  | 1.00E-115 | 219  | 220  | 99 + | 1770 | 1988 | 37380  | 37599  |
| UN16990 | Rsa1.0.00107.1 | 2084 | 431659 | 0         | 527  | 534  | 98 - | 788  | 1321 | 299930 | 300463 |
| UN16991 | Rsa1.0.01377.1 | 1023 | 46967  | 1.00E-117 | 283  | 307  | 92 - | 3    | 308  | 24880  | 25174  |
| UN16992 | Rsa1.0.18948.1 | 1109 | 1506   | 6.00E-80  | 182  | 189  | 96 - | 17   | 203  | 686    | 870    |
| UN16993 | Rsa1.0.01005.1 | 1434 | 56967  | 0         | 642  | 648  | 99 - | 756  | 1403 | 5035   | 5682   |
| UN16994 | Rsa1.0.20420.1 | 872  | 1306   | 0         | 774  | 800  | 96 + | 1    | 800  | 84     | 861    |
| UN16995 | Rsa1.0.01676.1 | 966  | 41140  | 0         | 942  | 964  | 97 - | 2    | 962  | 32458  | 33420  |
| UN16996 | Rsa1.0.14001.1 | 908  | 3933   | 0         | 436  | 446  | 97 + | 3    | 448  | 1367   | 1810   |
| UN16997 | Rsa1.0.04121.1 | 670  | 18951  | 0         | 422  | 452  | 93 - | 51   | 502  | 13877  | 14328  |
| UN16998 | Rsa1.0.01831.1 | 1777 | 38628  | 1.00E-155 | 293  | 298  | 98 + | 1173 | 1470 | 32851  | 33148  |
| UN16999 | Rsa1.0.01000.1 | 1085 | 57140  | 1.00E-118 | 238  | 244  | 97 + | 54   | 297  | 37929  | 38171  |
| UN17000 | Rsa1.0.00566.1 | 524  | 75325  | 0         | 387  | 399  | 96 - | 1    | 395  | 61768  | 62165  |
| UN17001 | Rsa1.0.00006.1 | 1001 | 396176 | 1.00E-179 | 365  | 377  | 96 - | 625  | 1000 | 371008 | 371376 |
| UN17002 | Rsa1.0.00827.1 | 1758 | 62790  | 0         | 488  | 496  | 98 - | 1262 | 1757 | 57646  | 58141  |

|         |                |      |        |           |      |      |       |      |      |        |        |
|---------|----------------|------|--------|-----------|------|------|-------|------|------|--------|--------|
| UN17003 | Rsa1.0.00646.1 | 1201 | 70473  | 0         | 903  | 927  | 97 -  | 77   | 1003 | 4449   | 5375   |
| UN17004 | Rsa1.0.02319.1 | 1501 | 32580  | 0         | 773  | 794  | 97 +  | 708  | 1499 | 2476   | 3267   |
| UN17005 | Rsa1.0.01675.1 | 1197 | 41155  | 1.00E-134 | 243  | 243  | 100 + | 7    | 249  | 12330  | 12572  |
| UN17006 | Rsa1.0.15262.1 | 1212 | 2722   | 0         | 468  | 486  | 96 -  | 9    | 494  | 1765   | 2247   |
| UN17007 | Rsa1.0.04872.1 | 1295 | 15659  | 1.00E-104 | 214  | 221  | 96 +  | 818  | 1038 | 14076  | 14296  |
| UN17008 | Rsa1.0.00050.1 | 1421 | 237174 | 1.00E-133 | 251  | 254  | 98 -  | 3    | 256  | 179575 | 179828 |
| UN17009 | Rsa1.0.01668.1 | 934  | 41299  | 1.00E-105 | 267  | 291  | 91 -  | 96   | 386  | 40399  | 40689  |
| UN17010 | Rsa1.0.01867.1 | 1557 | 37960  | 0         | 485  | 496  | 97 +  | 788  | 1283 | 19568  | 20063  |
| UN17011 | Rsa1.0.00151.1 | 1000 | 119541 | 1.00E-123 | 287  | 303  | 94 +  | 7    | 303  | 109633 | 109935 |
| UN17012 | Rsa1.0.01000.1 | 1631 | 57140  | 0         | 412  | 413  | 99 +  | 17   | 429  | 2338   | 2750   |
| UN17013 | Rsa1.0.00033.1 | 683  | 515811 | 1.00E-155 | 328  | 343  | 95 +  | 1    | 337  | 365283 | 365622 |
| UN17014 | Rsa1.0.01286.1 | 1092 | 49209  | 0         | 438  | 441  | 99 -  | 651  | 1091 | 40337  | 40777  |
| UN17015 | Rsa1.0.01425.1 | 919  | 46136  | 1.00E-175 | 328  | 332  | 98 -  | 21   | 352  | 8221   | 8551   |
| UN17016 | Rsa1.0.00524.1 | 1533 | 169613 | 0         | 671  | 683  | 98 -  | 393  | 1074 | 129773 | 130455 |
| UN17017 | Rsa1.0.00476.1 | 2144 | 280966 | 0         | 551  | 565  | 97 -  | 676  | 1239 | 242668 | 243228 |
| UN17018 | Rsa1.0.02807.1 | 1669 | 27680  | 0         | 425  | 443  | 95 -  | 1    | 441  | 12120  | 12548  |
| UN17019 | Rsa1.0.01997.1 | 1738 | 158416 | 0         | 674  | 683  | 98 -  | 3    | 684  | 145620 | 146299 |
| UN17020 | Rsa1.0.03698.1 | 2715 | 21302  | 0         | 575  | 580  | 99 -  | 2136 | 2712 | 9537   | 10116  |
| UN17021 | Rsa1.0.01183.1 | 1363 | 51465  | 0         | 1158 | 1191 | 97 -  | 3    | 1191 | 41109  | 42291  |
| UN17022 | Rsa1.0.00197.1 | 906  | 109714 | 0         | 606  | 620  | 97 -  | 292  | 906  | 87937  | 88556  |
| UN17023 | Rsa1.0.01012.1 | 571  | 56836  | 1.00E-131 | 274  | 285  | 96 +  | 237  | 521  | 40013  | 40296  |
| UN17024 | Rsa1.0.01151.1 | 665  | 52268  | 0         | 451  | 451  | 100 - | 214  | 664  | 26191  | 26641  |
| UN17025 | Rsa1.0.00108.1 | 1337 | 478491 | 1.00E-179 | 397  | 422  | 94 -  | 912  | 1332 | 450922 | 451332 |
| UN17026 | Rsa1.0.01762.1 | 719  | 39682  | 0         | 465  | 492  | 94 +  | 144  | 632  | 1493   | 1973   |
| UN17027 | Rsa1.0.02089.1 | 1276 | 35163  | 0         | 331  | 333  | 99 +  | 941  | 1273 | 10642  | 10973  |
| UN17028 | Rsa1.0.00119.1 | 1382 | 467509 | 0         | 1259 | 1328 | 94 -  | 64   | 1382 | 346461 | 347782 |
| UN17029 | Rsa1.0.00822.1 | 1346 | 62891  | 1.00E-114 | 260  | 275  | 94 +  | 1050 | 1324 | 32221  | 32491  |
| UN17030 | Rsa1.0.00482.1 | 1291 | 81162  | 1.00E-133 | 252  | 254  | 99 +  | 1    | 254  | 25693  | 25945  |
| UN17031 | Rsa1.0.00611.1 | 985  | 72410  | 0         | 491  | 497  | 98 -  | 3    | 499  | 60559  | 61055  |
| UN17032 | Rsa1.0.00175.1 | 1108 | 166121 | 0         | 592  | 607  | 97 +  | 502  | 1108 | 151998 | 152597 |
| UN17033 | Rsa1.0.01085.1 | 864  | 54539  | 0         | 433  | 450  | 96 +  | 400  | 846  | 15815  | 16253  |
| UN17034 | Rsa1.0.02135.1 | 1285 | 34713  | 0         | 597  | 606  | 98 -  | 680  | 1285 | 15164  | 15766  |
| UN17035 | Rsa1.0.00237.1 | 897  | 235974 | 0         | 387  | 396  | 97 -  | 1    | 396  | 58852  | 59246  |
| UN17036 | Rsa1.0.00017.1 | 1176 | 752458 | 1.00E-144 | 337  | 359  | 93 +  | 30   | 382  | 661863 | 662218 |
| UN17037 | Rsa1.0.00374.1 | 945  | 165738 | 0         | 425  | 437  | 97 -  | 509  | 945  | 95783  | 96217  |
| UN17038 | Rsa1.0.06604.1 | 1682 | 10681  | 0         | 487  | 495  | 98 -  | 4    | 497  | 10140  | 10634  |
| UN17039 | Rsa1.0.01610.1 | 1018 | 42274  | 0         | 791  | 814  | 97 +  | 2    | 810  | 11392  | 12204  |
| UN17040 | Rsa1.0.00128.1 | 1699 | 228675 | 0         | 1424 | 1428 | 99 -  | 271  | 1698 | 207255 | 208682 |
| UN17041 | Rsa1.0.06151.1 | 1397 | 11612  | 0         | 377  | 380  | 99 -  | 1    | 379  | 10276  | 10655  |

|         |                |      |        |           |      |      |       |      |      |        |        |
|---------|----------------|------|--------|-----------|------|------|-------|------|------|--------|--------|
| UN17042 | Rsa1.0.00017.1 | 875  | 752458 | 0         | 322  | 322  | 100 - | 554  | 875  | 141333 | 141654 |
| UN17043 | Rsa1.0.01180.1 | 1021 | 51517  | 1.00E-166 | 312  | 317  | 98 +  | 2    | 318  | 30232  | 30548  |
| UN17044 | Rsa1.0.01701.1 | 709  | 162121 | 0         | 552  | 562  | 98 +  | 147  | 705  | 20038  | 20599  |
| UN17045 | Rsa1.0.00988.1 | 984  | 57525  | 0         | 336  | 340  | 98 +  | 1    | 338  | 27333  | 27672  |
| UN17046 | Rsa1.0.12119.1 | 2095 | 5311   | 2.33E-156 | 279  | 284  | 98 +  | 1170 | 1453 | 4573   | 4856   |
| UN17047 | Rsa1.0.00991.1 | 1621 | 143101 | 0         | 593  | 611  | 97 -  | 836  | 1445 | 28345  | 28955  |
| UN17048 | Rsa1.0.04238.1 | 1125 | 18352  | 1.00E-101 | 266  | 292  | 91 +  | 848  | 1125 | 2706   | 2996   |
| UN17049 | Rsa1.0.01335.1 | 388  | 47894  | 1.00E-172 | 366  | 386  | 94 -  | 1    | 386  | 29200  | 29585  |
| UN17050 | Rsa1.0.00168.1 | 1684 | 115870 | 0         | 378  | 386  | 97 +  | 16   | 398  | 113980 | 114364 |
| UN17051 | Rsa1.0.01707.1 | 1151 | 40686  | 0         | 394  | 401  | 98 -  | 333  | 733  | 25818  | 26218  |
| UN17052 | Rsa1.0.02041.1 | 991  | 163634 | 1.00E-121 | 240  | 246  | 97 -  | 746  | 991  | 18791  | 19032  |
| UN17053 | Rsa1.0.01786.1 | 981  | 133324 | 0         | 351  | 356  | 98 -  | 623  | 978  | 100633 | 100988 |
| UN17054 | Rsa1.0.00348.1 | 1377 | 92818  | 1.00E-111 | 217  | 220  | 98 -  | 104  | 322  | 39668  | 39887  |
| UN17055 | Rsa1.0.01600.1 | 871  | 42537  | 1.00E-159 | 294  | 297  | 98 -  | 1    | 297  | 25097  | 25393  |
| UN17056 | Rsa1.0.01743.1 | 1098 | 39926  | 1.00E-173 | 321  | 324  | 99 +  | 775  | 1098 | 15993  | 16315  |
| UN17057 | Rsa1.0.05051.1 | 1491 | 15018  | 0         | 456  | 464  | 98 +  | 1    | 460  | 13852  | 14315  |
| UN17058 | Rsa1.0.02196.1 | 1522 | 34005  | 0         | 470  | 484  | 97 -  | 1042 | 1522 | 9453   | 9934   |
| UN17059 | Rsa1.0.00457.1 | 902  | 337301 | 1.00E-122 | 230  | 231  | 99 +  | 3    | 232  | 140560 | 140790 |
| UN17060 | Rsa1.0.00132.1 | 753  | 124299 | 0         | 415  | 431  | 96 -  | 1    | 422  | 46291  | 46718  |
| UN17061 | Rsa1.0.00021.1 | 911  | 263655 | 0         | 473  | 477  | 99 -  | 2    | 478  | 78215  | 78691  |
| UN17062 | Rsa1.0.01958.1 | 1171 | 261128 | 1.00E-104 | 261  | 282  | 92 -  | 3    | 278  | 115205 | 115482 |
| UN17063 | Rsa1.0.01262.1 | 936  | 178815 | 0         | 775  | 783  | 98 +  | 1    | 783  | 162983 | 163765 |
| UN17064 | Rsa1.0.00008.1 | 1261 | 358124 | 1.00E-177 | 333  | 337  | 98 -  | 1    | 333  | 39412  | 39748  |
| UN17065 | Rsa1.0.31415.1 | 1402 | 728    | 1.00E-145 | 271  | 274  | 98 -  | 1123 | 1396 | 11     | 284    |
| UN17066 | Rsa1.0.00462.1 | 1333 | 82288  | 0         | 481  | 486  | 98 -  | 35   | 518  | 68395  | 68880  |
| UN17067 | Rsa1.0.01009.1 | 877  | 56922  | 1.00E-156 | 301  | 308  | 97 -  | 3    | 310  | 3612   | 3919   |
| UN17068 | Rsa1.0.00436.1 | 750  | 85008  | 0         | 532  | 532  | 100 + | 1    | 532  | 368    | 899    |
| UN17069 | Rsa1.0.05030.1 | 863  | 15088  | 0         | 820  | 866  | 94 -  | 3    | 863  | 10854  | 11698  |
| UN17070 | Rsa1.0.00479.1 | 713  | 81377  | 1.00E-144 | 263  | 264  | 99 +  | 155  | 418  | 28662  | 28925  |
| UN17071 | Rsa1.0.00104.1 | 513  | 368722 | 1.00E-169 | 325  | 333  | 97 -  | 181  | 513  | 224996 | 225328 |
| UN17072 | Rsa1.0.00006.1 | 984  | 396176 | 0         | 957  | 971  | 98 -  | 3    | 971  | 279153 | 280120 |
| UN17073 | Rsa1.0.01515.1 | 837  | 170864 | 0         | 801  | 834  | 96 +  | 4    | 837  | 140612 | 141438 |
| UN17074 | Rsa1.0.02494.1 | 1113 | 132923 | 0         | 1024 | 1024 | 100 - | 89   | 1112 | 6031   | 7054   |
| UN17075 | Rsa1.0.02911.1 | 952  | 142461 | 1.00E-121 | 224  | 225  | 99 +  | 639  | 863  | 129556 | 129780 |
| UN17076 | Rsa1.0.00369.1 | 1519 | 266462 | 1.00E-102 | 211  | 217  | 97 +  | 3    | 219  | 165218 | 165433 |
| UN17077 | Rsa1.0.00071.1 | 1036 | 345714 | 1.00E-158 | 328  | 343  | 95 -  | 3    | 345  | 317193 | 317535 |
| UN17078 | Rsa1.0.03951.1 | 791  | 19894  | 1.00E-155 | 296  | 302  | 98 -  | 365  | 666  | 10099  | 10400  |
| UN17079 | Rsa1.0.00765.1 | 923  | 65029  | 1.00E-144 | 260  | 260  | 100 - | 664  | 923  | 25069  | 25328  |
| UN17080 | Rsa1.0.03612.1 | 694  | 21784  | 1.00E-138 | 290  | 302  | 96 +  | 392  | 692  | 11617  | 11918  |



|         |                |      |        |           |     |     |       |      |      |        |        |
|---------|----------------|------|--------|-----------|-----|-----|-------|------|------|--------|--------|
| UN17081 | Rsa1.0_11019.1 | 769  | 5646   | 0         | 370 | 379 | 97 +  | 314  | 692  | 463    | 841    |
| UN17082 | Rsa1.0_07597.1 | 798  | 9055   | 0         | 554 | 562 | 98 -  | 239  | 798  | 7494   | 8053   |
| UN17083 | Rsa1.0_00465.1 | 1278 | 82138  | 1.00E-167 | 308 | 311 | 99 -  | 940  | 1250 | 15255  | 15565  |
| UN17084 | Rsa1.0_02433.1 | 889  | 158318 | 1.00E-92  | 173 | 173 | 100 - | 277  | 449  | 131433 | 131605 |
| UN17085 | Rsa1.0_01335.1 | 1293 | 47894  | 0         | 459 | 460 | 99 -  | 1    | 460  | 3909   | 4368   |
| UN17086 | Rsa1.0_08230.1 | 834  | 7688   | 2.33E-156 | 263 | 263 | 100 - | 1    | 263  | 5363   | 5625   |
| UN17087 | Rsa1.0_00131.1 | 943  | 432233 | 0         | 412 | 418 | 98 +  | 526  | 943  | 96212  | 96626  |
| UN17088 | Rsa1.0_00651.1 | 689  | 247766 | 0         | 544 | 557 | 97 -  | 1    | 555  | 178480 | 179032 |
| UN17089 | Rsa1.0_01004.1 | 1348 | 56975  | 0         | 562 | 583 | 96 -  | 748  | 1328 | 18969  | 19547  |
| UN17090 | Rsa1.0_00782.1 | 1690 | 64468  | 1.00E-102 | 240 | 259 | 92 -  | 1448 | 1690 | 32971  | 33228  |
| UN17091 | Rsa1.0_04198.1 | 1456 | 18504  | 0         | 628 | 628 | 100 - | 829  | 1456 | 12882  | 13509  |
| UN17092 | Rsa1.0_00031.1 | 1403 | 179862 | 0         | 468 | 468 | 100 - | 1    | 468  | 161267 | 161734 |
| UN17093 | Rsa1.0_08609.1 | 1295 | 7132   | 0         | 525 | 533 | 98 +  | 524  | 1056 | 5492   | 6024   |
| UN17094 | Rsa1.0_00136.1 | 1176 | 122464 | 1.00E-121 | 222 | 222 | 100 - | 955  | 1176 | 68773  | 68994  |
| UN17095 | Rsa1.0_28441.1 | 1565 | 815    | 0         | 808 | 815 | 99 -  | 559  | 1373 | 1      | 815    |
| UN17096 | Rsa1.0_01724.1 | 985  | 40292  | 0         | 512 | 536 | 95 -  | 1    | 536  | 19668  | 20191  |
| UN17097 | Rsa1.0_01866.1 | 1384 | 37961  | 0         | 573 | 600 | 95 -  | 785  | 1378 | 12330  | 12926  |
| UN17098 | Rsa1.0_02883.1 | 1001 | 27035  | 0         | 376 | 386 | 97 -  | 266  | 651  | 3528   | 3913   |
| UN17099 | Rsa1.0_01559.1 | 721  | 43262  | 1.00E-166 | 343 | 355 | 96 -  | 369  | 721  | 28796  | 29148  |
| UN17100 | Rsa1.0_00230.1 | 1286 | 105389 | 0         | 596 | 603 | 98 +  | 640  | 1242 | 32582  | 33183  |
| UN17101 | Rsa1.0_00056.1 | 695  | 332604 | 1.00E-150 | 287 | 292 | 98 -  | 407  | 695  | 90001  | 90292  |
| UN17102 | Rsa1.0_00879.1 | 734  | 61297  | 0         | 708 | 720 | 98 +  | 14   | 732  | 59152  | 59869  |
| UN17103 | Rsa1.0_00082.1 | 1391 | 237584 | 0         | 762 | 772 | 98 -  | 1    | 770  | 228596 | 229366 |
| UN17104 | Rsa1.0_02608.1 | 1217 | 29613  | 0         | 462 | 470 | 98 -  | 604  | 1073 | 24637  | 25105  |
| UN17105 | Rsa1.0_00159.1 | 1604 | 431686 | 0         | 489 | 515 | 94 -  | 1092 | 1598 | 407448 | 407952 |
| UN17106 | Rsa1.0_01185.1 | 1119 | 149842 | 1.00E-148 | 267 | 267 | 100 - | 397  | 663  | 132558 | 132824 |
| UN17107 | Rsa1.0_01943.1 | 1106 | 37042  | 1.00E-127 | 232 | 232 | 100 + | 404  | 635  | 30663  | 30894  |
| UN17108 | Rsa1.0_03375.1 | 1204 | 23332  | 0         | 393 | 398 | 98 -  | 1    | 398  | 15136  | 15532  |
| UN17109 | Rsa1.0_05469.1 | 991  | 13644  | 1.00E-149 | 313 | 328 | 95 -  | 17   | 344  | 10994  | 11321  |
| UN17110 | Rsa1.0_01964.1 | 710  | 36702  | 0         | 554 | 559 | 99 -  | 153  | 710  | 20109  | 20666  |
| UN17111 | Rsa1.0_14714.1 | 1110 | 3134   | 8.00E-98  | 218 | 229 | 95 +  | 1    | 229  | 2908   | 3134   |
| UN17112 | Rsa1.0_06468.1 | 706  | 10958  | 0         | 416 | 425 | 97 -  | 283  | 704  | 6358   | 6782   |
| UN17113 | Rsa1.0_00036.1 | 1066 | 176186 | 1.00E-133 | 245 | 246 | 99 +  | 820  | 1065 | 30358  | 30603  |
| UN17114 | Rsa1.0_00065.1 | 1492 | 454616 | 1.00E-160 | 290 | 291 | 99 -  | 552  | 842  | 234141 | 234431 |
| UN17115 | Rsa1.0_00033.1 | 1225 | 515811 | 1.00E-178 | 328 | 332 | 98 +  | 879  | 1210 | 131617 | 131948 |
| UN17116 | Rsa1.0_04564.1 | 883  | 16837  | 0         | 454 | 456 | 99 +  | 428  | 883  | 3115   | 3570   |
| UN17117 | Rsa1.0_18565.1 | 1748 | 1573   | 1.00E-143 | 315 | 331 | 95 -  | 166  | 492  | 1014   | 1342   |
| UN17118 | Rsa1.0_00744.1 | 370  | 66084  | 3.00E-70  | 138 | 139 | 99 -  | 81   | 219  | 16390  | 16528  |
| UN17119 | Rsa1.0_00401.1 | 982  | 244410 | 0         | 387 | 395 | 97 -  | 585  | 978  | 178052 | 178445 |

|         |                |      |        |           |     |     |       |      |      |        |        |
|---------|----------------|------|--------|-----------|-----|-----|-------|------|------|--------|--------|
| UN17120 | Rsa1.0.02252.1 | 1473 | 33375  | 0         | 539 | 540 | 99 -  | 1    | 540  | 8074   | 8613   |
| UN17121 | Rsa1.0.01638.1 | 1352 | 41857  | 1.00E-179 | 334 | 339 | 98 +  | 609  | 947  | 36262  | 36600  |
| UN17122 | Rsa1.0.05766.1 | 821  | 12708  | 0         | 662 | 668 | 99 +  | 148  | 815  | 3550   | 4217   |
| UN17123 | Rsa1.0.23487.1 | 1258 | 1045   | 0         | 730 | 762 | 95 -  | 411  | 1172 | 280    | 1041   |
| UN17124 | Rsa1.0.02404.1 | 972  | 31702  | 0         | 550 | 553 | 99 +  | 116  | 668  | 774    | 1324   |
| UN17125 | Rsa1.0.00418.1 | 1992 | 215377 | 0         | 490 | 498 | 98 -  | 345  | 842  | 4220   | 4717   |
| UN17126 | Rsa1.0.04027.1 | 782  | 19501  | 1.00E-120 | 225 | 227 | 99 +  | 54   | 280  | 3004   | 3230   |
| UN17127 | Rsa1.0.01540.1 | 1427 | 151890 | 0         | 489 | 490 | 99 +  | 938  | 1427 | 146855 | 147344 |
| UN17128 | Rsa1.0.03887.1 | 1390 | 20247  | 0         | 402 | 404 | 99 +  | 985  | 1388 | 4347   | 4750   |
| UN17129 | Rsa1.0.00484.1 | 1504 | 203294 | 0         | 782 | 802 | 97 -  | 1    | 802  | 56116  | 56910  |
| UN17130 | Rsa1.0.01887.1 | 1035 | 37564  | 0         | 504 | 531 | 94 -  | 1    | 527  | 26538  | 27062  |
| UN17131 | Rsa1.0.00323.1 | 1049 | 159650 | 0         | 401 | 417 | 96 -  | 1    | 412  | 32229  | 32645  |
| UN17132 | Rsa1.0.01783.1 | 995  | 39383  | 0         | 445 | 465 | 95 -  | 541  | 995  | 9401   | 9865   |
| UN17133 | Rsa1.0.00101.1 | 1000 | 267193 | 0         | 499 | 512 | 97 +  | 8    | 517  | 211676 | 212182 |
| UN17134 | Rsa1.0.02381.1 | 1860 | 31972  | 1.00E-151 | 362 | 389 | 93 +  | 4    | 391  | 13537  | 13910  |
| UN17135 | Rsa1.0.00254.1 | 1204 | 102600 | 1.00E-178 | 317 | 317 | 100 - | 888  | 1204 | 74047  | 74363  |
| UN17136 | Rsa1.0.00861.1 | 1007 | 61759  | 1.00E-147 | 268 | 269 | 99 -  | 326  | 594  | 44124  | 44392  |
| UN17137 | Rsa1.0.01047.1 | 1068 | 55705  | 0         | 325 | 326 | 99 -  | 1    | 326  | 2010   | 2335   |
| UN17138 | Rsa1.0.00396.1 | 780  | 88242  | 1.00E-170 | 318 | 323 | 98 -  | 452  | 774  | 20219  | 20541  |
| UN17139 | Rsa1.0.03782.1 | 1161 | 20891  | 1.00E-171 | 315 | 317 | 99 +  | 846  | 1161 | 13909  | 14225  |
| UN17140 | Rsa1.0.00549.1 | 827  | 76473  | 0         | 360 | 363 | 99 +  | 3    | 365  | 26130  | 26492  |
| UN17141 | Rsa1.0.00128.1 | 1047 | 228675 | 0         | 393 | 393 | 100 - | 653  | 1045 | 217824 | 218216 |
| UN17142 | Rsa1.0.00837.1 | 1384 | 62568  | 0         | 388 | 399 | 97 +  | 2    | 397  | 54460  | 54856  |
| UN17143 | Rsa1.0.00058.1 | 1407 | 159921 | 0         | 395 | 404 | 97 +  | 331  | 734  | 50728  | 51131  |
| UN17144 | Rsa1.0.00962.1 | 744  | 184909 | 0         | 380 | 380 | 100 + | 2    | 381  | 12660  | 13039  |
| UN17145 | Rsa1.0.01242.1 | 1718 | 50066  | 0         | 357 | 359 | 99 +  | 94   | 452  | 4509   | 4867   |
| UN17146 | Rsa1.0.00351.1 | 1351 | 413096 | 1.00E-157 | 282 | 282 | 100 - | 450  | 731  | 133363 | 133644 |
| UN17147 | Rsa1.0.26967.1 | 645  | 871    | 1.00E-180 | 355 | 367 | 96 +  | 279  | 645  | 308    | 668    |
| UN17148 | Rsa1.0.01328.1 | 816  | 48021  | 0         | 754 | 794 | 94 -  | 27   | 816  | 46022  | 46794  |
| UN17149 | Rsa1.0.00140.1 | 2017 | 121541 | 0         | 377 | 379 | 99 -  | 1093 | 1471 | 117693 | 118071 |
| UN17150 | Rsa1.0.00204.1 | 1139 | 109056 | 1.00E-165 | 422 | 464 | 90 -  | 2    | 456  | 59835  | 60283  |
| UN17151 | Rsa1.0.01326.1 | 842  | 48072  | 0         | 588 | 594 | 98 -  | 249  | 842  | 41525  | 42118  |
| UN17152 | Rsa1.0.04040.1 | 1366 | 19439  | 0         | 447 | 451 | 99 +  | 689  | 1139 | 9830   | 10280  |
| UN17153 | Rsa1.0.00769.1 | 865  | 64911  | 1.00E-160 | 338 | 352 | 96 +  | 516  | 865  | 41514  | 41861  |
| UN17154 | Rsa1.0.00240.1 | 1286 | 104175 | 0         | 569 | 594 | 95 -  | 1    | 591  | 92182  | 92773  |
| UN17155 | Rsa1.0.00577.1 | 1344 | 174827 | 0         | 386 | 388 | 99 +  | 954  | 1341 | 118729 | 119116 |
| UN17156 | Rsa1.0.07591.1 | 707  | 9060   | 1.00E-173 | 317 | 320 | 99 +  | 388  | 707  | 6177   | 6496   |
| UN17157 | Rsa1.0.09269.1 | 1237 | 6514   | 0         | 439 | 441 | 99 -  | 1    | 440  | 1082   | 1521   |
| UN17158 | Rsa1.0.08583.1 | 1321 | 7161   | 0         | 383 | 390 | 98 +  | 1    | 390  | 940    | 1329   |

|         |                |      |        |           |      |      |       |      |      |        |        |
|---------|----------------|------|--------|-----------|------|------|-------|------|------|--------|--------|
| UN17159 | Rsa1.0_00204.1 | 1384 | 109056 | 1.00E-108 | 214  | 219  | 97 -  | 216  | 434  | 52555  | 52773  |
| UN17160 | Rsa1.0_05482.1 | 601  | 13595  | 1.00E-125 | 257  | 263  | 97 -  | 339  | 601  | 13336  | 13595  |
| UN17161 | Rsa1.0_03005.1 | 1155 | 26082  | 0         | 543  | 581  | 93 -  | 579  | 1155 | 23125  | 23688  |
| UN17162 | Rsa1.0_00170.1 | 894  | 179538 | 0         | 493  | 503  | 98 -  | 44   | 546  | 22985  | 23487  |
| UN17163 | Rsa1.0_00121.1 | 716  | 278029 | 1.00E-122 | 268  | 280  | 95 +  | 1    | 279  | 122848 | 123123 |
| UN17164 | Rsa1.0_00475.1 | 1620 | 81678  | 0         | 827  | 890  | 92 -  | 738  | 1620 | 39188  | 40051  |
| UN17165 | Rsa1.0_01249.1 | 1656 | 188432 | 1.00E-168 | 321  | 326  | 98 -  | 690  | 1015 | 176676 | 176997 |
| UN17166 | Rsa1.0_00002.1 | 1604 | 601661 | 0         | 445  | 454  | 98 +  | 884  | 1337 | 247632 | 248085 |
| UN17167 | Rsa1.0_00090.1 | 1322 | 273859 | 0         | 371  | 377  | 98 +  | 3    | 379  | 241913 | 242289 |
| UN17168 | Rsa1.0_06883.1 | 1808 | 10210  | 0         | 335  | 339  | 98 +  | 117  | 455  | 5507   | 5845   |
| UN17169 | Rsa1.0_01086.1 | 1068 | 54509  | 3.00E-66  | 148  | 153  | 96 +  | 916  | 1067 | 29892  | 30044  |
| UN17170 | Rsa1.0_00913.1 | 1799 | 59914  | 0         | 843  | 862  | 97 -  | 938  | 1799 | 24410  | 25271  |
| UN17171 | Rsa1.0_00045.1 | 1421 | 328694 | 1.00E-177 | 341  | 349  | 97 +  | 3    | 348  | 160674 | 161022 |
| UN17172 | Rsa1.0_01374.1 | 1566 | 47047  | 1.00E-171 | 321  | 325  | 98 -  | 1164 | 1488 | 27459  | 27782  |
| UN17173 | Rsa1.0_00189.1 | 1555 | 111830 | 0         | 1259 | 1278 | 98 +  | 2    | 1279 | 70151  | 71425  |
| UN17174 | Rsa1.0_02433.1 | 1088 | 158318 | 0         | 387  | 395  | 97 +  | 2    | 393  | 128385 | 128779 |
| UN17175 | Rsa1.0_42062.1 | 1390 | 533    | 0         | 441  | 445  | 99 -  | 4    | 447  | 11     | 455    |
| UN17176 | Rsa1.0_00002.1 | 2549 | 601661 | 0         | 952  | 953  | 99 +  | 1596 | 2547 | 558227 | 559179 |
| UN17177 | Rsa1.0_00522.1 | 1232 | 78103  | 1.00E-105 | 209  | 214  | 97 -  | 665  | 878  | 48991  | 49204  |
| UN17178 | Rsa1.0_16140.1 | 1343 | 2268   | 0         | 980  | 1003 | 97 +  | 3    | 997  | 1271   | 2268   |
| UN17179 | Rsa1.0_00033.1 | 844  | 515811 | 1.00E-135 | 264  | 269  | 98 +  | 3    | 270  | 130066 | 130334 |
| UN17180 | Rsa1.0_00656.1 | 837  | 69968  | 1.00E-174 | 391  | 414  | 94 +  | 1    | 411  | 45247  | 45651  |
| UN17181 | Rsa1.0_29097.1 | 1203 | 793    | 0         | 335  | 336  | 99 -  | 868  | 1203 | 458    | 793    |
| UN17182 | Rsa1.0_03120.1 | 1006 | 25269  | 1.00E-110 | 284  | 309  | 91 -  | 30   | 334  | 22032  | 22336  |
| UN17183 | Rsa1.0_15977.1 | 1367 | 2333   | 0         | 401  | 413  | 97 +  | 1    | 408  | 1157   | 1568   |
| UN17184 | Rsa1.0_02955.1 | 963  | 26484  | 1.00E-119 | 332  | 366  | 90 -  | 1    | 351  | 13654  | 14011  |
| UN17185 | Rsa1.0_00596.1 | 1730 | 73578  | 1.00E-147 | 265  | 265  | 100 + | 1466 | 1730 | 24395  | 24659  |
| UN17186 | Rsa1.0_02869.1 | 977  | 27109  | 0         | 340  | 343  | 99 +  | 43   | 384  | 3356   | 3698   |
| UN17187 | Rsa1.0_00247.1 | 782  | 103408 | 0         | 629  | 630  | 99 -  | 1    | 630  | 14550  | 15179  |
| UN17188 | Rsa1.0_00344.1 | 1030 | 191774 | 0         | 472  | 480  | 98 -  | 1    | 478  | 108987 | 109465 |
| UN17189 | Rsa1.0_00678.1 | 1648 | 193163 | 0         | 659  | 666  | 98 +  | 29   | 694  | 161085 | 161750 |
| UN17190 | Rsa1.0_01157.1 | 830  | 52121  | 0         | 334  | 335  | 99 +  | 1    | 335  | 42503  | 42837  |
| UN17191 | Rsa1.0_07998.1 | 962  | 8105   | 1.00E-156 | 304  | 312  | 97 +  | 221  | 532  | 4011   | 4322   |
| UN17192 | Rsa1.0_04194.1 | 2327 | 132734 | 0         | 845  | 848  | 99 +  | 499  | 1346 | 116698 | 117545 |
| UN17193 | Rsa1.0_06468.1 | 1015 | 10958  | 0         | 993  | 1022 | 97 -  | 3    | 1015 | 6342   | 7359   |
| UN17194 | Rsa1.0_00477.1 | 1518 | 81556  | 0         | 448  | 451  | 99 +  | 1069 | 1518 | 17513  | 17962  |
| UN17195 | Rsa1.0_05303.1 | 2154 | 14211  | 0         | 1257 | 1263 | 99 +  | 3    | 1265 | 893    | 2155   |
| UN17196 | Rsa1.0_00605.1 | 696  | 73199  | 0         | 353  | 358  | 98 -  | 333  | 690  | 30515  | 30872  |
| UN17197 | Rsa1.0_01586.1 | 1288 | 42804  | 0         | 421  | 428  | 98 +  | 2    | 427  | 30177  | 30604  |

|         |                |      |        |           |      |      |       |      |      |        |        |
|---------|----------------|------|--------|-----------|------|------|-------|------|------|--------|--------|
| UN17198 | Rsa1.0.00674.1 | 1260 | 193753 | 0         | 507  | 508  | 99 -  | 232  | 739  | 4532   | 5039   |
| UN17199 | Rsa1.0.02097.1 | 954  | 35036  | 0         | 943  | 953  | 98 +  | 2    | 954  | 15577  | 16528  |
| UN17200 | Rsa1.0.00601.1 | 1304 | 177045 | 0         | 1258 | 1275 | 98 -  | 3    | 1277 | 134182 | 135456 |
| UN17201 | Rsa1.0.00705.1 | 950  | 67505  | 1.00E-161 | 320  | 327  | 97 +  | 25   | 349  | 17701  | 18025  |
| UN17202 | Rsa1.0.00321.1 | 1628 | 95671  | 0         | 503  | 512  | 98 +  | 1116 | 1627 | 21420  | 21931  |
| UN17203 | Rsa1.0.02267.1 | 1317 | 33194  | 1.00E-109 | 249  | 262  | 95 +  | 1    | 258  | 28519  | 28778  |
| UN17204 | Rsa1.0.01085.1 | 853  | 54539  | 1.00E-178 | 322  | 324  | 99 -  | 248  | 571  | 13646  | 13969  |
| UN17205 | Rsa1.0.00187.1 | 2047 | 393093 | 0         | 454  | 454  | 100 - | 1    | 454  | 48682  | 49135  |
| UN17206 | Rsa1.0.00033.1 | 1293 | 515811 | 1.00E-176 | 329  | 333  | 98 +  | 962  | 1293 | 356168 | 356500 |
| UN17207 | Rsa1.0.00789.1 | 1379 | 64233  | 0         | 384  | 386  | 99 +  | 995  | 1379 | 53473  | 53858  |
| UN17208 | Rsa1.0.02900.1 | 1490 | 26928  | 0         | 466  | 469  | 99 +  | 1    | 469  | 17172  | 17640  |
| UN17209 | Rsa1.0.04073.1 | 1339 | 19238  | 0         | 390  | 396  | 98 -  | 3    | 393  | 16757  | 17152  |
| UN17210 | Rsa1.0.00056.1 | 1259 | 332604 | 1.00E-101 | 203  | 208  | 97 +  | 836  | 1043 | 313940 | 314147 |
| UN17211 | Rsa1.0.00666.1 | 1209 | 69505  | 0         | 734  | 750  | 97 -  | 462  | 1209 | 41678  | 42418  |
| UN17212 | Rsa1.0.04846.1 | 1013 | 15739  | 0         | 569  | 570  | 99 +  | 442  | 1011 | 13280  | 13849  |
| UN17213 | Rsa1.0.00813.1 | 926  | 63202  | 0         | 536  | 548  | 97 -  | 1    | 547  | 51191  | 51732  |
| UN17214 | Rsa1.0.00097.1 | 1266 | 138858 | 0         | 600  | 632  | 94 -  | 653  | 1266 | 111486 | 112113 |
| UN17215 | Rsa1.0.00010.1 | 1499 | 294827 | 0         | 428  | 442  | 96 +  | 254  | 695  | 121872 | 122313 |
| UN17216 | Rsa1.0.02455.1 | 740  | 31262  | 1.00E-173 | 370  | 388  | 95 +  | 352  | 738  | 25408  | 25794  |
| UN17217 | Rsa1.0.00159.1 | 1616 | 431686 | 0         | 355  | 361  | 98 -  | 1    | 361  | 210507 | 210861 |
| UN17218 | Rsa1.0.00667.1 | 1051 | 69460  | 0         | 549  | 594  | 92 -  | 477  | 1051 | 23959  | 24549  |
| UN17219 | Rsa1.0.03302.1 | 1216 | 23898  | 0         | 361  | 362  | 99 -  | 849  | 1210 | 17711  | 18072  |
| UN17220 | Rsa1.0.03334.1 | 988  | 23659  | 1.00E-130 | 285  | 306  | 93 -  | 1    | 306  | 20257  | 20543  |
| UN17221 | Rsa1.0.01083.1 | 678  | 54617  | 1.00E-132 | 307  | 324  | 94 +  | 358  | 677  | 4951   | 5274   |
| UN17222 | Rsa1.0.07739.1 | 1855 | 8684   | 0         | 460  | 466  | 98 -  | 400  | 865  | 7273   | 7738   |
| UN17223 | Rsa1.0.02404.1 | 784  | 31702  | 0         | 467  | 482  | 96 -  | 300  | 776  | 843    | 1324   |
| UN17224 | Rsa1.0.02501.1 | 793  | 30764  | 0         | 459  | 482  | 95 -  | 274  | 749  | 10592  | 11072  |
| UN17225 | Rsa1.0.09200.1 | 800  | 6562   | 1.00E-143 | 280  | 286  | 97 -  | 476  | 761  | 6029   | 6313   |
| UN17226 | Rsa1.0.00476.1 | 1006 | 280966 | 1.00E-163 | 343  | 358  | 95 +  | 3    | 354  | 241508 | 241858 |
| UN17227 | Rsa1.0.01126.1 | 1344 | 53127  | 0         | 1203 | 1241 | 96 +  | 105  | 1344 | 51583  | 52822  |
| UN17228 | Rsa1.0.00093.1 | 983  | 214962 | 0         | 622  | 660  | 94 -  | 342  | 981  | 11159  | 11812  |
| UN17229 | Rsa1.0.16093.1 | 774  | 2288   | 0         | 349  | 355  | 98 -  | 65   | 419  | 1665   | 2019   |
| UN17230 | Rsa1.0.00476.1 | 536  | 280966 | 1.00E-113 | 319  | 357  | 89 -  | 2    | 354  | 7043   | 7380   |
| UN17231 | Rsa1.0.09695.1 | 851  | 6206   | 1.00E-159 | 324  | 336  | 96 +  | 512  | 845  | 603    | 934    |
| UN17232 | Rsa1.0.02455.1 | 523  | 31262  | 0         | 501  | 524  | 95 -  | 1    | 523  | 25426  | 25949  |
| UN17233 | Rsa1.0.01135.1 | 344  | 52799  | 1.00E-102 | 205  | 209  | 98 -  | 3    | 210  | 25251  | 25459  |
| UN17234 | Rsa1.0.02429.1 | 894  | 31527  | 2.00E-70  | 199  | 215  | 92 +  | 1    | 205  | 29106  | 29320  |
| UN17235 | Rsa1.0.00417.1 | 855  | 395068 | 0         | 347  | 355  | 97 -  | 5    | 359  | 14475  | 14826  |
| UN17236 | Rsa1.0.01000.1 | 990  | 57140  | 1.00E-114 | 225  | 230  | 97 -  | 761  | 990  | 37942  | 38171  |

|         |                |      |        |           |      |      |       |      |      |        |        |
|---------|----------------|------|--------|-----------|------|------|-------|------|------|--------|--------|
| UN17237 | Rsa1.0.00381.1 | 652  | 89718  | 0         | 368  | 376  | 97 +  | 3    | 378  | 65776  | 66151  |
| UN17238 | Rsa1.0.00241.1 | 1431 | 104000 | 0         | 579  | 592  | 97 -  | 1    | 586  | 13582  | 14172  |
| UN17239 | Rsa1.0.00900.1 | 807  | 60367  | 1.00E-135 | 273  | 281  | 97 -  | 9    | 288  | 13294  | 13574  |
| UN17240 | Rsa1.0.02904.1 | 500  | 26883  | 8.00E-93  | 221  | 237  | 93 -  | 1    | 237  | 6100   | 6336   |
| UN17241 | Rsa1.0.05049.1 | 863  | 15025  | 0         | 507  | 509  | 99 -  | 1    | 509  | 4126   | 4634   |
| UN17242 | Rsa1.0.00524.1 | 705  | 169613 | 0         | 462  | 477  | 96 -  | 108  | 584  | 151835 | 152310 |
| UN17243 | Rsa1.0.00686.1 | 715  | 68511  | 0         | 404  | 426  | 94 +  | 10   | 435  | 27977  | 28402  |
| UN17244 | Rsa1.0.26967.1 | 453  | 871    | 2.00E-87  | 205  | 216  | 94 -  | 1    | 214  | 308    | 523    |
| UN17245 | Rsa1.0.00002.1 | 734  | 601661 | 0         | 403  | 424  | 95 -  | 38   | 461  | 36398  | 36814  |
| UN17246 | Rsa1.0.01371.1 | 731  | 47079  | 0         | 471  | 478  | 98 -  | 70   | 547  | 25451  | 25927  |
| UN17247 | Rsa1.0.07482.1 | 751  | 9278   | 1.00E-151 | 278  | 280  | 99 -  | 3    | 282  | 2864   | 3143   |
| UN17248 | Rsa1.0.00006.1 | 865  | 396176 | 0         | 493  | 499  | 98 -  | 367  | 865  | 301524 | 302022 |
| UN17249 | Rsa1.0.01146.1 | 518  | 163455 | 3.00E-74  | 184  | 198  | 92 +  | 1    | 198  | 41288  | 41485  |
| UN17250 | Rsa1.0.00749.1 | 792  | 65933  | 0         | 610  | 631  | 96 -  | 164  | 792  | 44807  | 45433  |
| UN17251 | Rsa1.0.00144.1 | 1316 | 120708 | 0         | 521  | 528  | 98 +  | 1    | 528  | 12334  | 12860  |
| UN17252 | Rsa1.0.02144.1 | 581  | 34630  | 1.00E-132 | 258  | 264  | 97 +  | 318  | 581  | 9429   | 9692   |
| UN17253 | Rsa1.0.02246.1 | 679  | 33435  | 1.00E-141 | 312  | 330  | 94 -  | 1    | 324  | 8242   | 8571   |
| UN17254 | Rsa1.0.00050.1 | 816  | 237174 | 1.00E-168 | 302  | 303  | 99 +  | 1    | 303  | 133684 | 133986 |
| UN17255 | Rsa1.0.00017.1 | 1036 | 752458 | 0         | 762  | 783  | 97 -  | 1    | 783  | 21347  | 22127  |
| UN17256 | Rsa1.0.00050.1 | 889  | 237174 | 1.00E-119 | 274  | 294  | 93 -  | 603  | 883  | 133690 | 133982 |
| UN17257 | Rsa1.0.10681.1 | 517  | 5757   | 1.00E-178 | 327  | 329  | 99 +  | 190  | 517  | 4487   | 4815   |
| UN17258 | Rsa1.0.00459.1 | 652  | 82580  | 1.00E-137 | 257  | 260  | 98 -  | 150  | 409  | 57153  | 57412  |
| UN17259 | Rsa1.0.00019.1 | 562  | 301669 | 1.00E-137 | 388  | 432  | 89 +  | 1    | 430  | 293082 | 293498 |
| UN17260 | Rsa1.0.00019.1 | 404  | 301669 | 1.00E-102 | 259  | 286  | 90 +  | 5    | 287  | 112778 | 113045 |
| UN17261 | Rsa1.0.00484.1 | 1448 | 203294 | 0         | 1008 | 1027 | 98 -  | 424  | 1448 | 126950 | 127973 |
| UN17262 | Rsa1.0.04377.1 | 970  | 17658  | 0         | 862  | 897  | 96 +  | 72   | 968  | 5228   | 6124   |
| UN17263 | Rsa1.0.00353.1 | 716  | 92242  | 5.00E-55  | 116  | 118  | 98 -  | 507  | 624  | 56359  | 56476  |
| UN17264 | Rsa1.0.00869.1 | 722  | 61627  | 0         | 379  | 380  | 99 +  | 1    | 380  | 53842  | 54221  |
| UN17265 | Rsa1.0.00123.1 | 637  | 325650 | 0         | 571  | 600  | 95 -  | 39   | 637  | 168360 | 168957 |
| UN17266 | Rsa1.0.03016.1 | 1450 | 26000  | 0         | 406  | 411  | 98 -  | 1038 | 1448 | 1133   | 1542   |
| UN17267 | Rsa1.0.00446.1 | 900  | 167829 | 1.00E-153 | 274  | 274  | 100 + | 625  | 898  | 121449 | 121722 |
| UN17268 | Rsa1.0.00002.1 | 243  | 601661 | 1.00E-109 | 233  | 242  | 96 -  | 5    | 242  | 36553  | 36794  |
| UN17269 | Rsa1.0.00025.1 | 1634 | 277312 | 0         | 827  | 838  | 98 +  | 796  | 1633 | 271676 | 272513 |
| UN17270 | Rsa1.0.01016.1 | 780  | 181422 | 0         | 365  | 368  | 99 -  | 4    | 371  | 164149 | 164515 |
| UN17271 | Rsa1.0.00008.1 | 567  | 358124 | 1.00E-154 | 311  | 320  | 97 -  | 4    | 323  | 85294  | 85611  |
| UN17272 | Rsa1.0.02029.1 | 439  | 35857  | 1.00E-176 | 361  | 375  | 96 +  | 15   | 387  | 15219  | 15591  |
| UN17273 | Rsa1.0.05900.1 | 834  | 12295  | 1.00E-102 | 250  | 266  | 93 -  | 1    | 265  | 9713   | 9976   |
| UN17274 | Rsa1.0.04905.1 | 281  | 15507  | 1.00E-157 | 280  | 280  | 100 + | 2    | 281  | 4974   | 5253   |
| UN17275 | Rsa1.0.00863.1 | 1133 | 254535 | 0         | 609  | 641  | 95 +  | 1    | 636  | 251930 | 252566 |

|         |                |      |        |           |     |     |       |      |      |        |        |
|---------|----------------|------|--------|-----------|-----|-----|-------|------|------|--------|--------|
| UN17276 | Rsa1.0.03317.1 | 765  | 23782  | 0         | 695 | 742 | 93 -  | 3    | 736  | 7527   | 8247   |
| UN17277 | Rsa1.0.01335.1 | 786  | 47894  | 0         | 461 | 495 | 93 -  | 14   | 496  | 3909   | 4394   |
| UN17278 | Rsa1.0.05893.1 | 1590 | 12306  | 0         | 404 | 412 | 98 -  | 412  | 823  | 8140   | 8551   |
| UN17279 | Rsa1.0.08388.1 | 931  | 7436   | 0         | 457 | 483 | 94 -  | 452  | 931  | 2955   | 3434   |
| UN17280 | Rsa1.0.01558.1 | 914  | 43287  | 0         | 533 | 547 | 97 -  | 370  | 914  | 39092  | 39637  |
| UN17281 | Rsa1.0.00034.1 | 1349 | 260119 | 0         | 716 | 722 | 99 -  | 3    | 724  | 122108 | 122829 |
| UN17282 | Rsa1.0.02336.1 | 1047 | 32397  | 0         | 416 | 425 | 97 +  | 1    | 424  | 357    | 781    |
| UN17283 | Rsa1.0.01408.1 | 535  | 46383  | 0         | 511 | 527 | 96 -  | 7    | 532  | 34574  | 35100  |
| UN17284 | Rsa1.0.00014.1 | 660  | 348985 | 0         | 459 | 460 | 99 +  | 5    | 464  | 241604 | 242063 |
| UN17285 | Rsa1.0.00077.1 | 687  | 145005 | 1.00E-103 | 228 | 240 | 95 -  | 340  | 576  | 54043  | 54282  |
| UN17286 | Rsa1.0.00636.1 | 677  | 71113  | 2.00E-85  | 179 | 185 | 96 +  | 218  | 402  | 14731  | 14915  |
| UN17287 | Rsa1.0.00583.1 | 867  | 74309  | 1.00E-165 | 301 | 302 | 99 -  | 530  | 830  | 68461  | 68762  |
| UN17288 | Rsa1.0.01060.1 | 1578 | 55368  | 0         | 356 | 359 | 99 -  | 3    | 361  | 40139  | 40495  |
| UN17289 | Rsa1.0.03292.1 | 909  | 23977  | 1.00E-145 | 273 | 277 | 98 -  | 1    | 277  | 7108   | 7384   |
| UN17290 | Rsa1.0.00782.1 | 785  | 64468  | 2.00E-79  | 169 | 175 | 96 -  | 1    | 170  | 36483  | 36657  |
| UN17291 | Rsa1.0.00125.1 | 597  | 253043 | 1.00E-112 | 277 | 300 | 92 +  | 1    | 300  | 190696 | 190983 |
| UN17292 | Rsa1.0.00067.1 | 824  | 415055 | 0         | 735 | 743 | 98 +  | 83   | 823  | 177423 | 178165 |
| UN17293 | Rsa1.0.02989.1 | 731  | 26187  | 1.00E-149 | 268 | 268 | 100 + | 248  | 515  | 3252   | 3519   |
| UN17294 | Rsa1.0.00682.1 | 1720 | 68680  | 0         | 564 | 575 | 98 -  | 1145 | 1719 | 7486   | 8060   |
| UN17295 | Rsa1.0.00654.1 | 3285 | 70012  | 0         | 627 | 633 | 99 -  | 2141 | 2769 | 41560  | 42191  |
| UN17296 | Rsa1.0.04104.1 | 603  | 19043  | 0         | 595 | 606 | 98 -  | 1    | 601  | 4942   | 5546   |
| UN17297 | Rsa1.0.02089.1 | 1258 | 35163  | 1.00E-166 | 321 | 329 | 97 +  | 928  | 1256 | 10642  | 10970  |
| UN17298 | Rsa1.0.00469.1 | 892  | 82084  | 0         | 416 | 432 | 96 -  | 463  | 892  | 45058  | 45487  |
| UN17299 | Rsa1.0.00744.1 | 686  | 66084  | 1.00E-174 | 309 | 309 | 100 - | 378  | 686  | 18733  | 19041  |
| UN17300 | Rsa1.0.02593.1 | 715  | 29744  | 1.00E-116 | 251 | 261 | 96 -  | 452  | 711  | 2905   | 3164   |
| UN17301 | Rsa1.0.05491.1 | 1174 | 13554  | 1.00E-112 | 210 | 211 | 99 -  | 139  | 349  | 8427   | 8637   |
| UN17302 | Rsa1.0.02917.1 | 829  | 159058 | 0         | 816 | 830 | 98 +  | 1    | 829  | 144071 | 144900 |
| UN17303 | Rsa1.0.00042.1 | 1509 | 171507 | 0         | 382 | 397 | 96 -  | 3    | 393  | 90435  | 90831  |
| UN17304 | Rsa1.0.09695.1 | 984  | 6206   | 0         | 419 | 422 | 99 +  | 563  | 984  | 577    | 998    |
| UN17305 | Rsa1.0.00141.1 | 2158 | 121494 | 0         | 753 | 772 | 97 +  | 841  | 1608 | 104511 | 105282 |
| UN17306 | Rsa1.0.00705.1 | 474  | 67505  | 0         | 467 | 472 | 98 +  | 1    | 471  | 6457   | 6928   |
| UN17307 | Rsa1.0.00179.1 | 861  | 393324 | 0         | 515 | 526 | 97 -  | 342  | 861  | 45013  | 45538  |
| UN17308 | Rsa1.0.01096.1 | 1282 | 54266  | 1.00E-172 | 319 | 322 | 99 -  | 959  | 1280 | 8874   | 9194   |
| UN17309 | Rsa1.0.05319.1 | 1065 | 14158  | 1.00E-153 | 314 | 327 | 96 +  | 3    | 329  | 380    | 702    |
| UN17310 | Rsa1.0.03043.1 | 1324 | 130531 | 1.00E-118 | 229 | 233 | 98 -  | 212  | 444  | 129647 | 129879 |
| UN17311 | Rsa1.0.01376.1 | 1082 | 47004  | 0         | 478 | 481 | 99 +  | 602  | 1082 | 41027  | 41507  |
| UN17312 | Rsa1.0.03218.1 | 1724 | 24539  | 0         | 374 | 374 | 100 + | 1    | 374  | 6444   | 6817   |
| UN17313 | Rsa1.0.01803.1 | 1039 | 173846 | 1.00E-171 | 429 | 461 | 93 +  | 584  | 1039 | 137460 | 137913 |
| UN17314 | Rsa1.0.00772.1 | 1155 | 64856  | 0         | 530 | 536 | 98 +  | 3    | 538  | 47045  | 47580  |

|         |                |      |        |           |      |      |       |      |      |        |        |
|---------|----------------|------|--------|-----------|------|------|-------|------|------|--------|--------|
| UN17315 | Rsa1.0.05208.1 | 608  | 14504  | 1.00E-156 | 315  | 326  | 96 +  | 283  | 608  | 3908   | 4230   |
| UN17316 | Rsa1.0.00437.1 | 1369 | 84879  | 1.00E-102 | 210  | 217  | 96 -  | 29   | 245  | 15436  | 15652  |
| UN17317 | Rsa1.0.02103.1 | 865  | 35006  | 1.00E-151 | 303  | 311  | 97 -  | 21   | 329  | 24076  | 24386  |
| UN17318 | Rsa1.0.02671.1 | 1215 | 28887  | 1.00E-160 | 305  | 311  | 98 -  | 7    | 317  | 5055   | 5365   |
| UN17319 | Rsa1.0.00601.1 | 779  | 177045 | 1.00E-134 | 361  | 394  | 91 -  | 391  | 779  | 26119  | 26496  |
| UN17320 | Rsa1.0.08133.1 | 1297 | 7852   | 0         | 495  | 496  | 99 +  | 487  | 982  | 1307   | 1802   |
| UN17321 | Rsa1.0.01083.1 | 710  | 54617  | 1.00E-172 | 334  | 342  | 97 -  | 2    | 342  | 4951   | 5292   |
| UN17322 | Rsa1.0.08230.1 | 986  | 7688   | 1.00E-149 | 306  | 316  | 96 -  | 22   | 334  | 5325   | 5636   |
| UN17323 | Rsa1.0.06213.1 | 523  | 11478  | 8.00E-90  | 215  | 227  | 94 +  | 297  | 521  | 10901  | 11120  |
| UN17324 | Rsa1.0.02411.1 | 1413 | 31655  | 0         | 491  | 502  | 97 +  | 898  | 1399 | 5948   | 6441   |
| UN17325 | Rsa1.0.00281.1 | 1684 | 99908  | 0         | 1674 | 1685 | 99 -  | 1    | 1684 | 15586  | 17270  |
| UN17326 | Rsa1.0.00234.1 | 984  | 197060 | 1.00E-107 | 218  | 225  | 96 -  | 760  | 984  | 15854  | 16073  |
| UN17327 | Rsa1.0.00398.1 | 480  | 88007  | 1.00E-156 | 321  | 333  | 96 -  | 149  | 480  | 1596   | 1925   |
| UN17328 | Rsa1.0.00175.1 | 1692 | 166121 | 0         | 599  | 634  | 94 +  | 1071 | 1692 | 38440  | 39071  |
| UN17329 | Rsa1.0.03247.1 | 1267 | 24371  | 0         | 880  | 905  | 97 +  | 2    | 905  | 11640  | 12544  |
| UN17330 | Rsa1.0.00154.1 | 611  | 189461 | 1.00E-167 | 298  | 298  | 100 - | 314  | 611  | 79485  | 79782  |
| UN17331 | Rsa1.0.04876.1 | 1132 | 15631  | 1.00E-141 | 279  | 286  | 97 -  | 846  | 1131 | 4222   | 4506   |
| UN17332 | Rsa1.0.03223.1 | 1067 | 24512  | 0         | 406  | 406  | 100 - | 656  | 1061 | 9379   | 9784   |
| UN17333 | Rsa1.0.06258.1 | 610  | 11371  | 0         | 587  | 597  | 98 +  | 13   | 609  | 5683   | 6278   |
| UN17334 | Rsa1.0.00017.1 | 978  | 752458 | 0         | 389  | 409  | 95 -  | 573  | 978  | 138965 | 139373 |
| UN17335 | Rsa1.0.00157.1 | 1273 | 245832 | 0         | 622  | 631  | 98 +  | 642  | 1271 | 163052 | 163682 |
| UN17336 | Rsa1.0.00200.1 | 1191 | 162016 | 0         | 687  | 709  | 96 +  | 484  | 1190 | 108700 | 109406 |
| UN17337 | Rsa1.0.00767.1 | 814  | 64980  | 1.00E-160 | 326  | 339  | 96 -  | 5    | 337  | 18547  | 18882  |
| UN17338 | Rsa1.0.00218.1 | 1049 | 201480 | 0         | 379  | 383  | 98 -  | 1    | 382  | 173202 | 173584 |
| UN17339 | Rsa1.0.00211.1 | 1492 | 228189 | 0         | 450  | 468  | 96 -  | 6    | 472  | 201586 | 202046 |
| UN17340 | Rsa1.0.00033.1 | 801  | 515811 | 0         | 371  | 381  | 97 +  | 5    | 383  | 365245 | 365622 |
| UN17341 | Rsa1.0.00427.1 | 1045 | 189678 | 2.00E-98  | 201  | 207  | 97 -  | 303  | 509  | 10947  | 11153  |
| UN17342 | Rsa1.0.04793.1 | 684  | 15963  | 0         | 362  | 362  | 100 - | 96   | 457  | 2167   | 2528   |
| UN17343 | Rsa1.0.02574.1 | 1325 | 29954  | 0         | 658  | 680  | 96 +  | 646  | 1325 | 27348  | 28009  |
| UN17344 | Rsa1.0.00034.1 | 803  | 260119 | 1.00E-132 | 254  | 258  | 98 +  | 549  | 803  | 89248  | 89505  |
| UN17345 | Rsa1.0.07236.1 | 1621 | 9680   | 0         | 408  | 418  | 97 +  | 769  | 1186 | 2465   | 2882   |
| UN17346 | Rsa1.0.00224.1 | 1243 | 327530 | 1.00E-101 | 275  | 307  | 89 +  | 33   | 325  | 204842 | 205139 |
| UN17347 | Rsa1.0.00900.1 | 873  | 60367  | 1.00E-159 | 290  | 292  | 99 +  | 58   | 349  | 12155  | 12446  |
| UN17348 | Rsa1.0.05890.1 | 998  | 12317  | 1.00E-150 | 301  | 310  | 97 +  | 3    | 312  | 11601  | 11904  |
| UN17349 | Rsa1.0.11019.1 | 1130 | 5646   | 0         | 373  | 383  | 97 +  | 357  | 739  | 463    | 845    |
| UN17350 | Rsa1.0.11599.1 | 944  | 5462   | 1.00E-159 | 292  | 293  | 99 -  | 618  | 910  | 4638   | 4929   |
| UN17351 | Rsa1.0.00257.1 | 946  | 102407 | 0         | 489  | 508  | 96 +  | 1    | 508  | 70304  | 70802  |
| UN17352 | Rsa1.0.00771.1 | 2458 | 64870  | 0         | 747  | 768  | 97 -  | 395  | 1162 | 47309  | 48076  |
| UN17353 | Rsa1.0.00045.1 | 1374 | 328694 | 1.00E-162 | 313  | 318  | 98 +  | 2    | 318  | 178691 | 179007 |

|         |                |      |        |           |      |      |       |      |      |        |        |
|---------|----------------|------|--------|-----------|------|------|-------|------|------|--------|--------|
| UN17354 | Rsa1.0.02728.1 | 1015 | 28400  | 0         | 327  | 327  | 100 - | 1    | 327  | 26853  | 27179  |
| UN17355 | Rsa1.0.00015.1 | 699  | 561803 | 1.00E-153 | 418  | 470  | 88 +  | 83   | 545  | 483083 | 483532 |
| UN17356 | Rsa1.0.01884.1 | 1811 | 37659  | 0         | 795  | 814  | 97 +  | 151  | 962  | 17507  | 18320  |
| UN17357 | Rsa1.0.01651.1 | 1299 | 41586  | 0         | 591  | 612  | 96 +  | 1    | 611  | 20826  | 21433  |
| UN17358 | Rsa1.0.01581.1 | 730  | 42833  | 0         | 458  | 459  | 99 -  | 10   | 468  | 28862  | 29320  |
| UN17359 | Rsa1.0.00596.1 | 959  | 73578  | 3.00E-97  | 236  | 248  | 95 -  | 22   | 265  | 24395  | 24640  |
| UN17360 | Rsa1.0.01997.1 | 1407 | 158416 | 0         | 648  | 662  | 97 +  | 746  | 1406 | 145642 | 146298 |
| UN17361 | Rsa1.0.00071.1 | 921  | 345714 | 0         | 436  | 460  | 94 +  | 477  | 921  | 142456 | 142908 |
| UN17362 | Rsa1.0.63369.1 | 967  | 362    | 1.00E-175 | 317  | 319  | 99 +  | 477  | 795  | 44     | 362    |
| UN17363 | Rsa1.0.09583.1 | 1061 | 6270   | 0         | 385  | 385  | 100 - | 129  | 513  | 5886   | 6270   |
| UN17364 | Rsa1.0.06586.1 | 1243 | 10712  | 0         | 563  | 564  | 99 +  | 1    | 564  | 8594   | 9157   |
| UN17365 | Rsa1.0.00170.1 | 797  | 179538 | 1.00E-100 | 231  | 241  | 95 -  | 531  | 767  | 142306 | 142546 |
| UN17366 | Rsa1.0.01505.1 | 2008 | 44382  | 1.00E-180 | 458  | 499  | 91 +  | 1519 | 2008 | 38967  | 39454  |
| UN17367 | Rsa1.0.14772.1 | 1069 | 3077   | 0         | 1067 | 1070 | 99 +  | 1    | 1069 | 1242   | 2311   |
| UN17368 | Rsa1.0.00340.1 | 748  | 305782 | 0         | 419  | 428  | 97 -  | 90   | 511  | 186295 | 186722 |
| UN17369 | Rsa1.0.03521.1 | 1306 | 396204 | 1.00E-154 | 323  | 333  | 96 +  | 977  | 1306 | 139674 | 140005 |
| UN17370 | Rsa1.0.00429.1 | 1351 | 85559  | 0         | 722  | 723  | 99 -  | 1    | 723  | 61177  | 61899  |
| UN17371 | Rsa1.0.00135.1 | 939  | 178077 | 0         | 359  | 368  | 97 -  | 251  | 618  | 169208 | 169575 |
| UN17372 | Rsa1.0.01100.1 | 726  | 54113  | 0         | 425  | 445  | 95 -  | 289  | 726  | 33553  | 33997  |
| UN17373 | Rsa1.0.00247.1 | 1629 | 103408 | 0         | 951  | 1044 | 91 -  | 621  | 1629 | 13063  | 14090  |
| UN17374 | Rsa1.0.01335.1 | 826  | 47894  | 0         | 473  | 505  | 93 -  | 9    | 504  | 3909   | 4402   |
| UN17375 | Rsa1.0.00192.1 | 2259 | 278200 | 0         | 772  | 793  | 97 +  | 432  | 1222 | 41407  | 42196  |
| UN17376 | Rsa1.0.00148.1 | 1192 | 120234 | 0         | 932  | 935  | 99 -  | 1    | 935  | 63550  | 64484  |
| UN17377 | Rsa1.0.00284.1 | 1079 | 323267 | 0         | 726  | 750  | 96 +  | 330  | 1079 | 316783 | 317532 |
| UN17378 | Rsa1.0.03951.1 | 665  | 19894  | 1.00E-156 | 297  | 302  | 98 -  | 275  | 574  | 10099  | 10400  |
| UN17379 | Rsa1.0.04138.1 | 1011 | 18898  | 0         | 778  | 788  | 98 -  | 220  | 1007 | 3167   | 3953   |
| UN17380 | Rsa1.0.01761.1 | 1426 | 39717  | 0         | 890  | 924  | 96 +  | 410  | 1333 | 25093  | 26009  |
| UN17381 | Rsa1.0.04374.1 | 870  | 17670  | 0         | 446  | 453  | 98 +  | 422  | 870  | 7853   | 8305   |
| UN17382 | Rsa1.0.03077.1 | 1078 | 25558  | 1.00E-170 | 317  | 321  | 98 +  | 758  | 1078 | 8100   | 8417   |
| UN17383 | Rsa1.0.03818.1 | 835  | 20668  | 1.00E-145 | 292  | 301  | 97 +  | 5    | 299  | 9553   | 9853   |
| UN17384 | Rsa1.0.00092.1 | 1141 | 659932 | 1.00E-172 | 328  | 335  | 97 -  | 709  | 1043 | 13028  | 13362  |
| UN17385 | Rsa1.0.01344.1 | 981  | 142535 | 0         | 438  | 464  | 94 +  | 529  | 979  | 130981 | 131441 |
| UN17386 | Rsa1.0.04794.1 | 874  | 15960  | 0         | 384  | 393  | 97 -  | 9    | 397  | 7004   | 7395   |
| UN17387 | Rsa1.0.00397.1 | 874  | 88189  | 0         | 532  | 536  | 99 +  | 10   | 545  | 7409   | 7944   |
| UN17388 | Rsa1.0.06968.1 | 1513 | 10090  | 0         | 704  | 741  | 95 +  | 1    | 740  | 7686   | 8421   |
| UN17389 | Rsa1.0.00040.1 | 1922 | 324196 | 0         | 332  | 333  | 99 -  | 1    | 333  | 315220 | 315552 |
| UN17390 | Rsa1.0.00171.1 | 1471 | 115622 | 1.00E-140 | 276  | 282  | 97 +  | 12   | 293  | 90858  | 91138  |
| UN17391 | Rsa1.0.00336.1 | 1930 | 445051 | 0         | 482  | 484  | 99 +  | 876  | 1359 | 134298 | 134781 |
| UN17392 | Rsa1.0.03149.1 | 1753 | 24983  | 0         | 1392 | 1436 | 96 +  | 306  | 1734 | 13791  | 15224  |



|         |                |      |        |           |     |     |       |      |      |        |        |
|---------|----------------|------|--------|-----------|-----|-----|-------|------|------|--------|--------|
| UN17393 | Rsa1.0.03634.1 | 1973 | 145192 | 0         | 370 | 384 | 96 -  | 1593 | 1972 | 133526 | 133901 |
| UN17394 | Rsa1.0.03887.1 | 1253 | 20247  | 0         | 379 | 394 | 96 +  | 861  | 1251 | 4347   | 4740   |
| UN17395 | Rsa1.0.00301.1 | 1228 | 365315 | 0         | 608 | 617 | 98 +  | 612  | 1228 | 304665 | 305281 |
| UN17396 | Rsa1.0.00476.1 | 803  | 280966 | 1.00E-144 | 272 | 275 | 98 +  | 530  | 803  | 242668 | 242942 |
| UN17397 | Rsa1.0.00179.1 | 905  | 393324 | 0         | 423 | 437 | 96 -  | 456  | 892  | 196266 | 196702 |
| UN17398 | Rsa1.0.03491.1 | 678  | 22541  | 1.00E-115 | 406 | 471 | 86 +  | 105  | 575  | 9065   | 9535   |
| UN17399 | Rsa1.0.01773.1 | 933  | 39546  | 0         | 392 | 397 | 98 -  | 535  | 931  | 27322  | 27718  |
| UN17400 | Rsa1.0.01513.1 | 1020 | 44234  | 0         | 534 | 561 | 95 +  | 6    | 556  | 28412  | 28969  |
| UN17401 | Rsa1.0.00923.1 | 1768 | 153678 | 1.00E-155 | 294 | 299 | 98 +  | 301  | 599  | 53741  | 54039  |
| UN17402 | Rsa1.0.01963.1 | 884  | 36719  | 0         | 641 | 651 | 98 +  | 5    | 655  | 5467   | 6117   |
| UN17403 | Rsa1.0.00101.1 | 992  | 267193 | 1.00E-152 | 273 | 273 | 100 + | 7    | 279  | 131428 | 131700 |
| UN17404 | Rsa1.0.03163.1 | 1304 | 24894  | 0         | 487 | 502 | 97 +  | 801  | 1301 | 22793  | 23294  |
| UN17405 | Rsa1.0.03713.1 | 845  | 21221  | 0         | 433 | 447 | 96 -  | 401  | 845  | 10458  | 10904  |
| UN17406 | Rsa1.0.00123.1 | 642  | 325650 | 0         | 570 | 597 | 95 -  | 45   | 641  | 168363 | 168957 |
| UN17407 | Rsa1.0.17886.1 | 1717 | 1718   | 0         | 758 | 804 | 94 +  | 914  | 1715 | 1      | 794    |
| UN17408 | Rsa1.0.02215.1 | 1361 | 33822  | 1.00E-160 | 323 | 334 | 96 -  | 505  | 836  | 27167  | 27500  |
| UN17409 | Rsa1.0.00418.1 | 1069 | 215377 | 1.00E-107 | 257 | 270 | 95 +  | 807  | 1069 | 45045  | 45312  |
| UN17410 | Rsa1.0.00805.1 | 1447 | 63724  | 0         | 435 | 437 | 99 -  | 1011 | 1447 | 6952   | 7388   |
| UN17411 | Rsa1.0.00019.1 | 752  | 301669 | 1.00E-175 | 400 | 428 | 93 +  | 12   | 437  | 293080 | 293498 |
| UN17412 | Rsa1.0.00113.1 | 1252 | 131574 | 0         | 742 | 779 | 95 +  | 484  | 1252 | 52836  | 53613  |
| UN17413 | Rsa1.0.00270.1 | 528  | 101236 | 0         | 514 | 531 | 96 +  | 3    | 528  | 69420  | 69947  |
| UN17414 | Rsa1.0.01397.1 | 1319 | 183276 | 1.00E-167 | 332 | 341 | 97 -  | 3    | 343  | 175579 | 175916 |
| UN17415 | Rsa1.0.02228.1 | 1317 | 33688  | 0         | 384 | 384 | 100 + | 1    | 384  | 10171  | 10554  |
| UN17416 | Rsa1.0.02029.1 | 1400 | 35857  | 0         | 579 | 581 | 99 +  | 819  | 1398 | 16287  | 16867  |
| UN17417 | Rsa1.0.15018.1 | 825  | 2889   | 1.00E-145 | 283 | 290 | 97 +  | 331  | 620  | 2384   | 2673   |
| UN17418 | Rsa1.0.02092.1 | 1077 | 35135  | 0         | 801 | 823 | 97 -  | 1    | 819  | 27152  | 27974  |
| UN17419 | Rsa1.0.01384.1 | 604  | 46803  | 1.00E-109 | 222 | 228 | 97 -  | 4    | 230  | 33810  | 34037  |
| UN17420 | Rsa1.0.00875.1 | 855  | 61371  | 0         | 809 | 853 | 94 -  | 3    | 855  | 6927   | 7779   |
| UN17421 | Rsa1.0.00848.1 | 955  | 152362 | 0         | 801 | 807 | 99 +  | 1    | 807  | 48987  | 49792  |
| UN17422 | Rsa1.0.04612.1 | 1236 | 16647  | 1.00E-164 | 305 | 309 | 98 +  | 667  | 975  | 14693  | 15001  |
| UN17423 | Rsa1.0.02683.1 | 1479 | 28679  | 1.00E-180 | 383 | 399 | 95 +  | 1076 | 1471 | 16865  | 17261  |
| UN17424 | Rsa1.0.03741.1 | 994  | 143933 | 0         | 591 | 605 | 97 +  | 391  | 994  | 4881   | 5484   |
| UN17425 | Rsa1.0.01737.1 | 731  | 40101  | 1.00E-141 | 254 | 254 | 100 + | 476  | 729  | 17336  | 17589  |
| UN17426 | Rsa1.0.01310.1 | 1066 | 164719 | 1.00E-150 | 286 | 290 | 98 -  | 1    | 290  | 13319  | 13607  |
| UN17427 | Rsa1.0.00477.1 | 1342 | 81556  | 1.00E-139 | 300 | 312 | 96 +  | 1    | 310  | 10538  | 10848  |
| UN17428 | Rsa1.0.04630.1 | 743  | 16595  | 1.00E-141 | 385 | 423 | 91 +  | 1    | 402  | 14481  | 14895  |
| UN17429 | Rsa1.0.01326.1 | 755  | 48072  | 1.00E-158 | 391 | 421 | 92 -  | 335  | 754  | 43752  | 44166  |
| UN17430 | Rsa1.0.04511.1 | 1233 | 17032  | 1.00E-130 | 237 | 237 | 100 - | 664  | 900  | 8958   | 9194   |
| UN17431 | Rsa1.0.01884.1 | 996  | 37659  | 0         | 717 | 738 | 97 -  | 1    | 738  | 17512  | 18249  |

|         |                |      |        |           |      |      |       |      |      |        |        |
|---------|----------------|------|--------|-----------|------|------|-------|------|------|--------|--------|
| UN17432 | Rsa1.0.00856.1 | 1327 | 62037  | 2.00E-83  | 216  | 232  | 93 +  | 1015 | 1243 | 16952  | 17176  |
| UN17433 | Rsa1.0.12809.1 | 995  | 5119   | 0         | 457  | 458  | 99 -  | 1    | 457  | 4445   | 4902   |
| UN17434 | Rsa1.0.04238.1 | 1166 | 18352  | 1.00E-172 | 326  | 331  | 98 +  | 837  | 1166 | 2706   | 3036   |
| UN17435 | Rsa1.0.00583.1 | 843  | 74309  | 1.00E-141 | 327  | 346  | 94 -  | 502  | 841  | 68420  | 68762  |
| UN17436 | Rsa1.0.00231.1 | 1387 | 105381 | 1.00E-171 | 345  | 357  | 96 +  | 1    | 356  | 29946  | 30302  |
| UN17437 | Rsa1.0.02688.1 | 807  | 28644  | 0         | 513  | 519  | 98 +  | 292  | 807  | 26861  | 27379  |
| UN17438 | Rsa1.0.00017.1 | 1888 | 752458 | 1.00E-165 | 301  | 303  | 99 -  | 568  | 870  | 686521 | 686823 |
| UN17439 | Rsa1.0.00049.1 | 604  | 167018 | 7.00E-66  | 151  | 158  | 95 -  | 3    | 157  | 80313  | 80470  |
| UN17440 | Rsa1.0.00188.1 | 1339 | 112020 | 0         | 479  | 518  | 92 +  | 372  | 889  | 24708  | 25224  |
| UN17441 | Rsa1.0.00281.1 | 889  | 99908  | 0         | 414  | 439  | 94 -  | 461  | 889  | 24104  | 24539  |
| UN17442 | Rsa1.0.02400.1 | 635  | 31750  | 0         | 598  | 632  | 94 -  | 3    | 633  | 12369  | 12988  |
| UN17443 | Rsa1.0.07536.1 | 1113 | 9178   | 0         | 401  | 424  | 94 +  | 1    | 416  | 6471   | 6893   |
| UN17444 | Rsa1.0.08388.1 | 971  | 7436   | 0         | 558  | 576  | 96 -  | 404  | 971  | 2994   | 3563   |
| UN17445 | Rsa1.0.00197.1 | 863  | 109714 | 0         | 615  | 625  | 98 +  | 1    | 625  | 87932  | 88556  |
| UN17446 | Rsa1.0.02895.1 | 816  | 26979  | 1.00E-128 | 253  | 259  | 97 -  | 1    | 257  | 11384  | 11642  |
| UN17447 | Rsa1.0.03853.1 | 841  | 20447  | 1.00E-173 | 339  | 348  | 97 +  | 3    | 350  | 13326  | 13672  |
| UN17448 | Rsa1.0.00178.1 | 2004 | 114861 | 0         | 1118 | 1137 | 98 +  | 867  | 2002 | 26941  | 28077  |
| UN17449 | Rsa1.0.00679.1 | 800  | 68971  | 7.00E-76  | 151  | 153  | 98 -  | 564  | 716  | 65948  | 66100  |
| UN17450 | Rsa1.0.00476.1 | 1178 | 280966 | 1.00E-142 | 342  | 372  | 91 -  | 60   | 429  | 7043   | 7397   |
| UN17451 | Rsa1.0.01783.1 | 870  | 39383  | 1.00E-129 | 269  | 279  | 96 +  | 1    | 278  | 12978  | 13256  |
| UN17452 | Rsa1.0.06306.1 | 1087 | 11266  | 0         | 533  | 535  | 99 -  | 19   | 553  | 4950   | 5484   |
| UN17453 | Rsa1.0.00472.1 | 420  | 398134 | 1.00E-122 | 223  | 223  | 100 - | 1    | 223  | 163465 | 163687 |
| UN17454 | Rsa1.0.02365.1 | 1009 | 32118  | 0         | 431  | 442  | 97 -  | 1    | 440  | 12194  | 12628  |
| UN17455 | Rsa1.0.00126.1 | 786  | 127534 | 1.00E-163 | 310  | 316  | 98 +  | 345  | 660  | 37046  | 37361  |
| UN17456 | Rsa1.0.02398.1 | 618  | 31766  | 1.00E-115 | 260  | 273  | 95 -  | 9    | 281  | 5418   | 5686   |
| UN17457 | Rsa1.0.00326.1 | 1075 | 171955 | 1.00E-127 | 263  | 271  | 97 -  | 807  | 1075 | 28314  | 28583  |
| UN17458 | Rsa1.0.01431.1 | 854  | 167877 | 1.00E-169 | 311  | 313  | 99 +  | 539  | 850  | 157684 | 157996 |
| UN17459 | Rsa1.0.02281.1 | 962  | 292576 | 1.00E-129 | 237  | 238  | 99 -  | 476  | 713  | 263640 | 263877 |
| UN17460 | Rsa1.0.04107.1 | 1158 | 19007  | 0         | 378  | 388  | 97 -  | 775  | 1158 | 6895   | 7282   |
| UN17461 | Rsa1.0.00065.1 | 1452 | 454616 | 0         | 602  | 634  | 94 +  | 1    | 628  | 26082  | 26712  |
| UN17462 | Rsa1.0.00190.1 | 1581 | 318240 | 0         | 590  | 595  | 99 -  | 821  | 1415 | 14943  | 15537  |
| UN17463 | Rsa1.0.00546.1 | 702  | 76523  | 0         | 505  | 506  | 99 -  | 1    | 506  | 11381  | 11886  |
| UN17464 | Rsa1.0.00463.1 | 888  | 189177 | 1.00E-152 | 292  | 297  | 98 +  | 589  | 884  | 181422 | 181718 |
| UN17465 | Rsa1.0.00557.1 | 759  | 75865  | 0         | 510  | 523  | 97 +  | 205  | 725  | 69508  | 70030  |
| UN17466 | Rsa1.0.01180.1 | 1172 | 51517  | 0         | 423  | 447  | 94 -  | 731  | 1172 | 32258  | 32704  |
| UN17467 | Rsa1.0.00291.1 | 977  | 172129 | 0         | 451  | 456  | 98 +  | 1    | 453  | 64277  | 64732  |
| UN17468 | Rsa1.0.00017.1 | 1694 | 752458 | 0         | 328  | 328  | 100 - | 1329 | 1656 | 272081 | 272408 |
| UN17469 | Rsa1.0.01005.1 | 666  | 56967  | 0         | 608  | 640  | 95 -  | 1    | 637  | 37403  | 38029  |
| UN17470 | Rsa1.0.00002.1 | 835  | 601661 | 0         | 497  | 513  | 96 -  | 260  | 768  | 28847  | 29359  |

|         |                |      |        |           |      |      |       |      |      |        |        |
|---------|----------------|------|--------|-----------|------|------|-------|------|------|--------|--------|
| UN17471 | Rsa1.0.03521.1 | 776  | 396204 | 0         | 494  | 515  | 95 +  | 266  | 776  | 269243 | 269756 |
| UN17472 | Rsa1.0.03356.1 | 936  | 23487  | 1.00E-155 | 323  | 338  | 95 +  | 477  | 814  | 20820  | 21157  |
| UN17473 | Rsa1.0.02246.1 | 2405 | 33435  | 0         | 1417 | 1472 | 96 +  | 944  | 2405 | 8242   | 9705   |
| UN17474 | Rsa1.0.01047.1 | 1207 | 55705  | 0         | 375  | 383  | 97 +  | 753  | 1135 | 2010   | 2392   |
| UN17475 | Rsa1.0.01218.1 | 745  | 50536  | 0         | 719  | 743  | 96 +  | 3    | 743  | 20143  | 20874  |
| UN17476 | Rsa1.0.00277.1 | 1831 | 100132 | 0         | 573  | 579  | 98 -  | 1    | 579  | 50424  | 50999  |
| UN17477 | Rsa1.0.00960.1 | 787  | 58199  | 1.00E-141 | 343  | 368  | 93 -  | 3    | 364  | 14176  | 14542  |
| UN17478 | Rsa1.0.00593.1 | 1048 | 143463 | 1.00E-145 | 329  | 352  | 93 -  | 662  | 1012 | 56991  | 57332  |
| UN17479 | Rsa1.0.02750.1 | 2114 | 28239  | 1.00E-107 | 242  | 253  | 95 -  | 1707 | 1956 | 25641  | 25892  |
| UN17480 | Rsa1.0.00019.1 | 1119 | 301669 | 0         | 423  | 436  | 97 +  | 685  | 1119 | 233346 | 233777 |
| UN17481 | Rsa1.0.08867.1 | 1334 | 6843   | 0         | 1184 | 1196 | 98 +  | 137  | 1332 | 1      | 1196   |
| UN17482 | Rsa1.0.00426.1 | 840  | 85668  | 2.00E-82  | 254  | 285  | 89 +  | 25   | 308  | 32312  | 32577  |
| UN17483 | Rsa1.0.00039.1 | 1873 | 296927 | 1.00E-149 | 281  | 284  | 98 +  | 1    | 284  | 47162  | 47443  |
| UN17484 | Rsa1.0.01397.1 | 904  | 183276 | 2.00E-57  | 120  | 122  | 98 +  | 253  | 374  | 173954 | 174075 |
| UN17485 | Rsa1.0.16832.1 | 1577 | 2019   | 1.00E-148 | 290  | 298  | 97 +  | 1280 | 1577 | 122    | 419    |
| UN17486 | Rsa1.0.00097.1 | 750  | 138858 | 0         | 359  | 366  | 98 +  | 1    | 366  | 26228  | 26593  |
| UN17487 | Rsa1.0.00060.1 | 1078 | 502678 | 0         | 426  | 436  | 97 +  | 644  | 1078 | 398264 | 398697 |
| UN17488 | Rsa1.0.04371.1 | 1028 | 17700  | 1.00E-140 | 300  | 315  | 95 -  | 68   | 382  | 2476   | 2787   |
| UN17489 | Rsa1.0.00526.1 | 918  | 169279 | 0         | 585  | 600  | 97 +  | 1    | 596  | 126177 | 126774 |
| UN17490 | Rsa1.0.00948.1 | 760  | 58620  | 1.00E-173 | 318  | 320  | 99 -  | 442  | 760  | 49928  | 50247  |
| UN17491 | Rsa1.0.00002.1 | 1052 | 601661 | 0         | 518  | 527  | 98 -  | 127  | 653  | 28644  | 29170  |
| UN17492 | Rsa1.0.00121.1 | 949  | 278029 | 9.00E-91  | 199  | 206  | 96 -  | 745  | 948  | 104309 | 104514 |
| UN17493 | Rsa1.0.00280.1 | 2022 | 99966  | 0         | 821  | 926  | 88 +  | 719  | 1644 | 28824  | 29749  |
| UN17494 | Rsa1.0.05863.1 | 818  | 12388  | 0         | 358  | 361  | 99 -  | 458  | 818  | 7089   | 7449   |
| UN17495 | Rsa1.0.03581.1 | 873  | 21965  | 0         | 664  | 690  | 96 -  | 3    | 692  | 1557   | 2229   |
| UN17496 | Rsa1.0.00067.1 | 972  | 415055 | 1.00E-126 | 268  | 281  | 95 +  | 211  | 491  | 226623 | 226903 |
| UN17497 | Rsa1.0.00821.1 | 1499 | 62891  | 0         | 351  | 352  | 99 -  | 1146 | 1496 | 48968  | 49319  |
| UN17498 | Rsa1.0.01543.1 | 1181 | 43645  | 0         | 567  | 619  | 91 -  | 397  | 1009 | 24990  | 25584  |
| UN17499 | Rsa1.0.00269.1 | 924  | 341668 | 0         | 353  | 359  | 98 +  | 566  | 924  | 45769  | 46123  |
| UN17500 | Rsa1.0.00037.1 | 1109 | 307838 | 0         | 717  | 736  | 97 +  | 1    | 736  | 293287 | 294022 |
| UN17501 | Rsa1.0.04140.1 | 1335 | 18879  | 1.00E-106 | 211  | 216  | 97 +  | 329  | 544  | 7286   | 7501   |
| UN17502 | Rsa1.0.03956.1 | 685  | 19872  | 0         | 348  | 348  | 100 - | 332  | 679  | 16185  | 16532  |
| UN17503 | Rsa1.0.00013.1 | 970  | 292129 | 1.00E-177 | 315  | 315  | 100 - | 656  | 970  | 204483 | 204797 |
| UN17504 | Rsa1.0.12642.1 | 1552 | 5165   | 0         | 491  | 506  | 97 -  | 215  | 720  | 18     | 523    |
| UN17505 | Rsa1.0.00173.1 | 904  | 288743 | 0         | 459  | 463  | 99 -  | 443  | 904  | 83946  | 84408  |
| UN17506 | Rsa1.0.01228.1 | 644  | 50238  | 6.00E-91  | 217  | 233  | 93 -  | 412  | 644  | 21404  | 21625  |
| UN17507 | Rsa1.0.05321.1 | 879  | 14154  | 1.00E-129 | 237  | 238  | 99 +  | 237  | 474  | 399    | 636    |
| UN17508 | Rsa1.0.01895.1 | 964  | 37512  | 0         | 385  | 386  | 99 -  | 2    | 387  | 10218  | 10603  |
| UN17509 | Rsa1.0.01076.1 | 1396 | 54835  | 0         | 542  | 542  | 100 + | 534  | 1075 | 44925  | 45466  |

|         |                |      |        |           |      |      |       |     |      |        |        |
|---------|----------------|------|--------|-----------|------|------|-------|-----|------|--------|--------|
| UN17510 | Rsa1.0.02158.1 | 1518 | 154841 | 0         | 534  | 536  | 99 +  | 182 | 717  | 131881 | 132416 |
| UN17511 | Rsa1.0.02964.1 | 788  | 26407  | 3.00E-90  | 211  | 225  | 93 +  | 190 | 414  | 19004  | 19228  |
| UN17512 | Rsa1.0.00958.1 | 1891 | 58243  | 0         | 1247 | 1263 | 98 -  | 346 | 1608 | 2102   | 3364   |
| UN17513 | Rsa1.0.00092.1 | 1297 | 659932 | 1.00E-177 | 330  | 335  | 98 +  | 246 | 580  | 13028  | 13362  |
| UN17514 | Rsa1.0.00042.1 | 1414 | 171507 | 0         | 901  | 915  | 98 +  | 506 | 1414 | 161589 | 162503 |
| UN17515 | Rsa1.0.13498.1 | 1193 | 4764   | 0         | 417  | 435  | 95 -  | 1   | 434  | 1593   | 2024   |
| UN17516 | Rsa1.0.01026.1 | 1210 | 171624 | 1.00E-114 | 308  | 339  | 90 -  | 1   | 330  | 31953  | 32291  |
| UN17517 | Rsa1.0.05653.1 | 604  | 13043  | 0         | 572  | 604  | 94 -  | 1   | 601  | 10806  | 11405  |
| UN17518 | Rsa1.0.19257.1 | 712  | 1455   | 1.00E-159 | 366  | 392  | 93 +  | 319 | 710  | 108    | 487    |
| UN17519 | Rsa1.0.03605.1 | 759  | 21827  | 0         | 427  | 429  | 99 +  | 331 | 759  | 20342  | 20768  |
| UN17520 | Rsa1.0.00799.1 | 1501 | 63918  | 0         | 1364 | 1391 | 98 +  | 75  | 1455 | 38059  | 39447  |
| UN17521 | Rsa1.0.00055.1 | 709  | 520193 | 1.00E-124 | 253  | 260  | 97 +  | 450 | 709  | 202154 | 202409 |
| UN17522 | Rsa1.0.00251.1 | 799  | 303968 | 1.00E-173 | 359  | 373  | 96 -  | 1   | 372  | 147121 | 147488 |
| UN17523 | Rsa1.0.06336.1 | 910  | 11215  | 0         | 648  | 659  | 98 +  | 246 | 904  | 6954   | 7611   |
| UN17524 | Rsa1.0.00353.1 | 974  | 92242  | 3.00E-97  | 216  | 224  | 96 -  | 751 | 973  | 55708  | 55928  |
| UN17525 | Rsa1.0.01939.1 | 956  | 37124  | 0         | 364  | 375  | 97 -  | 1   | 375  | 33165  | 33533  |
| UN17526 | Rsa1.0.01419.1 | 1045 | 167402 | 0         | 813  | 833  | 97 -  | 215 | 1045 | 6718   | 7548   |
| UN17527 | Rsa1.0.02000.1 | 1300 | 36210  | 1.00E-155 | 282  | 283  | 99 -  | 1   | 283  | 4950   | 5232   |
| UN17528 | Rsa1.0.04358.1 | 1713 | 17759  | 0         | 1685 | 1720 | 97 -  | 3   | 1713 | 10290  | 12001  |
| UN17529 | Rsa1.0.00070.1 | 1987 | 150321 | 0         | 539  | 557  | 96 +  | 961 | 1513 | 115433 | 115989 |
| UN17530 | Rsa1.0.01069.1 | 814  | 55113  | 0         | 419  | 430  | 97 -  | 386 | 814  | 17637  | 18064  |
| UN17531 | Rsa1.0.07516.1 | 772  | 9218   | 0         | 758  | 763  | 99 +  | 1   | 762  | 6344   | 7105   |
| UN17532 | Rsa1.0.05124.1 | 1177 | 14790  | 1.00E-129 | 235  | 235  | 100 + | 420 | 654  | 2110   | 2344   |
| UN17533 | Rsa1.0.02859.1 | 356  | 162118 | 1.00E-156 | 339  | 358  | 94 -  | 1   | 356  | 154282 | 154639 |
| UN17534 | Rsa1.0.06303.1 | 982  | 11268  | 1.00E-117 | 238  | 246  | 96 +  | 529 | 774  | 9882   | 10127  |
| UN17535 | Rsa1.0.02253.1 | 1351 | 33356  | 0         | 438  | 459  | 95 -  | 5   | 457  | 11611  | 12065  |
| UN17536 | Rsa1.0.14855.1 | 1198 | 3011   | 0         | 772  | 787  | 98 +  | 1   | 785  | 1172   | 1958   |
| UN17537 | Rsa1.0.01414.1 | 901  | 149508 | 0         | 349  | 352  | 99 -  | 9   | 360  | 115743 | 116094 |
| UN17538 | Rsa1.0.00008.1 | 821  | 358124 | 0         | 359  | 365  | 98 +  | 180 | 544  | 85289  | 85653  |
| UN17539 | Rsa1.0.00646.1 | 1183 | 70473  | 0         | 906  | 933  | 97 -  | 80  | 1009 | 4443   | 5375   |
| UN17540 | Rsa1.0.00163.1 | 1513 | 116847 | 0         | 1512 | 1513 | 99 +  | 1   | 1513 | 48101  | 49613  |
| UN17541 | Rsa1.0.03482.1 | 1004 | 22625  | 1.00E-178 | 361  | 374  | 96 +  | 2   | 372  | 4778   | 5150   |
| UN17542 | Rsa1.0.00067.1 | 1126 | 415055 | 1.00E-133 | 271  | 281  | 96 -  | 367 | 647  | 226623 | 226903 |
| UN17543 | Rsa1.0.01482.1 | 1072 | 44855  | 0         | 504  | 540  | 93 +  | 3   | 525  | 15512  | 16044  |
| UN17544 | Rsa1.0.01884.1 | 670  | 37659  | 0         | 408  | 415  | 98 -  | 72  | 486  | 17511  | 17925  |
| UN17545 | Rsa1.0.02490.1 | 1222 | 30885  | 0         | 342  | 348  | 98 -  | 439 | 786  | 5982   | 6329   |
| UN17546 | Rsa1.0.00293.1 | 1259 | 339294 | 0         | 674  | 676  | 99 +  | 54  | 729  | 177088 | 177763 |
| UN17547 | Rsa1.0.06123.1 | 901  | 11681  | 1.00E-102 | 189  | 189  | 100 + | 3   | 191  | 11241  | 11429  |
| UN17548 | Rsa1.0.00153.1 | 772  | 192931 | 1.00E-108 | 229  | 236  | 97 +  | 538 | 772  | 168694 | 168928 |

|         |                |      |        |           |     |      |       |      |      |        |        |
|---------|----------------|------|--------|-----------|-----|------|-------|------|------|--------|--------|
| UN17549 | Rsa1.0.00472.1 | 545  | 398134 | 1.00E-150 | 269 | 269  | 100 - | 208  | 476  | 162878 | 163146 |
| UN17550 | Rsa1.0.04194.1 | 1627 | 132734 | 0         | 636 | 683  | 93 -  | 953  | 1625 | 116870 | 117544 |
| UN17551 | Rsa1.0.00077.1 | 791  | 145005 | 0         | 502 | 506  | 99 +  | 286  | 791  | 82456  | 82959  |
| UN17552 | Rsa1.0.07250.1 | 920  | 9663   | 0         | 907 | 919  | 98 +  | 1    | 918  | 5357   | 6273   |
| UN17553 | Rsa1.0.00713.1 | 1481 | 158017 | 0         | 513 | 515  | 99 +  | 56   | 570  | 19379  | 19893  |
| UN17554 | Rsa1.0.03831.1 | 1036 | 20579  | 2.00E-98  | 267 | 292  | 91 -  | 760  | 1035 | 18129  | 18420  |
| UN17555 | Rsa1.0.02085.1 | 710  | 35198  | 1.00E-116 | 252 | 263  | 95 +  | 4    | 266  | 15843  | 16097  |
| UN17556 | Rsa1.0.00289.1 | 1367 | 98620  | 1.00E-123 | 254 | 264  | 96 +  | 48   | 311  | 12905  | 13168  |
| UN17557 | Rsa1.0.09661.1 | 834  | 6226   | 1.00E-141 | 264 | 267  | 98 +  | 568  | 834  | 1      | 267    |
| UN17558 | Rsa1.0.00651.1 | 948  | 247766 | 0         | 357 | 365  | 97 +  | 552  | 915  | 231957 | 232321 |
| UN17559 | Rsa1.0.00108.1 | 1116 | 478491 | 0         | 348 | 349  | 99 -  | 738  | 1085 | 134108 | 134456 |
| UN17560 | Rsa1.0.00067.1 | 1009 | 415055 | 0         | 341 | 343  | 99 +  | 667  | 1009 | 227217 | 227559 |
| UN17561 | Rsa1.0.03439.1 | 846  | 22930  | 0         | 767 | 767  | 100 + | 80   | 846  | 14985  | 15751  |
| UN17562 | Rsa1.0.01362.1 | 992  | 47217  | 1.00E-124 | 252 | 259  | 97 -  | 695  | 953  | 28906  | 29163  |
| UN17563 | Rsa1.0.00251.1 | 775  | 303968 | 1.00E-149 | 297 | 306  | 97 +  | 423  | 725  | 147121 | 147426 |
| UN17564 | Rsa1.0.00089.1 | 1618 | 406142 | 0         | 984 | 1007 | 97 -  | 613  | 1618 | 322151 | 323152 |
| UN17565 | Rsa1.0.05311.1 | 814  | 14181  | 1.00E-163 | 330 | 340  | 97 -  | 4    | 342  | 3429   | 3767   |
| UN17566 | Rsa1.0.01039.1 | 1470 | 55946  | 0         | 395 | 399  | 98 +  | 3    | 401  | 37258  | 37653  |
| UN17567 | Rsa1.0.02688.1 | 780  | 28644  | 0         | 516 | 534  | 96 +  | 247  | 780  | 26861  | 27390  |
| UN17568 | Rsa1.0.07706.1 | 764  | 8752   | 0         | 592 | 600  | 98 -  | 165  | 764  | 8153   | 8752   |
| UN17569 | Rsa1.0.29951.1 | 1835 | 767    | 0         | 644 | 666  | 96 +  | 1175 | 1835 | 1      | 666    |
| UN17570 | Rsa1.0.01512.1 | 845  | 44234  | 1.00E-141 | 296 | 310  | 95 +  | 536  | 845  | 9997   | 10306  |
| UN17571 | Rsa1.0.00131.1 | 844  | 432233 | 1.00E-137 | 297 | 310  | 95 +  | 540  | 844  | 96212  | 96517  |
| UN17572 | Rsa1.0.00789.1 | 826  | 64233  | 1.00E-105 | 200 | 202  | 99 +  | 428  | 629  | 52566  | 52767  |
| UN17573 | Rsa1.0.00019.1 | 723  | 301669 | 2.00E-72  | 160 | 167  | 95 -  | 308  | 474  | 113991 | 114157 |
| UN17574 | Rsa1.0.03077.1 | 932  | 25558  | 1.00E-74  | 185 | 195  | 94 -  | 736  | 929  | 6795   | 6987   |
| UN17575 | Rsa1.0.01674.1 | 855  | 168300 | 0         | 507 | 523  | 96 +  | 335  | 855  | 19673  | 20190  |
| UN17576 | Rsa1.0.00786.1 | 1584 | 64285  | 0         | 389 | 391  | 99 +  | 1    | 390  | 52320  | 52710  |
| UN17577 | Rsa1.0.03965.1 | 1237 | 19828  | 0         | 518 | 534  | 97 -  | 699  | 1232 | 1289   | 1810   |
| UN17578 | Rsa1.0.00069.1 | 851  | 403561 | 0         | 489 | 511  | 95 +  | 5    | 515  | 353538 | 354037 |
| UN17579 | Rsa1.0.00331.1 | 1358 | 176754 | 0         | 868 | 887  | 97 -  | 474  | 1358 | 22206  | 23092  |
| UN17580 | Rsa1.0.03951.1 | 593  | 19894  | 1.00E-134 | 287 | 302  | 95 -  | 256  | 557  | 10099  | 10400  |
| UN17581 | Rsa1.0.02467.1 | 670  | 31141  | 1.00E-113 | 273 | 291  | 93 +  | 382  | 670  | 3808   | 4091   |
| UN17582 | Rsa1.0.00002.1 | 291  | 601661 | 4.00E-56  | 146 | 156  | 93 +  | 3    | 158  | 245979 | 246129 |
| UN17583 | Rsa1.0.00407.1 | 786  | 191544 | 0         | 718 | 756  | 94 -  | 35   | 784  | 155490 | 156225 |
| UN17584 | Rsa1.0.09422.1 | 775  | 6381   | 0         | 619 | 640  | 96 +  | 131  | 769  | 1654   | 2293   |
| UN17585 | Rsa1.0.00316.1 | 1272 | 96264  | 0         | 496 | 509  | 97 -  | 4    | 512  | 85542  | 86050  |
| UN17586 | Rsa1.0.01176.1 | 591  | 51638  | 0         | 395 | 405  | 97 -  | 1    | 402  | 28134  | 28538  |
| UN17587 | Rsa1.0.00094.1 | 782  | 139042 | 1.00E-138 | 312 | 334  | 93 -  | 3    | 323  | 99912  | 100245 |

|         |                |      |        |           |      |      |       |      |      |        |        |
|---------|----------------|------|--------|-----------|------|------|-------|------|------|--------|--------|
| UN17588 | Rsa1.0.00870.1 | 975  | 61606  | 0         | 377  | 380  | 99 +  | 2    | 381  | 27510  | 27889  |
| UN17589 | Rsa1.0.03625.1 | 1689 | 21692  | 0         | 731  | 742  | 98 +  | 948  | 1689 | 14698  | 15436  |
| UN17590 | Rsa1.0.02267.1 | 893  | 33194  | 0         | 479  | 483  | 99 -  | 411  | 893  | 22282  | 22764  |
| UN17591 | Rsa1.0.01505.1 | 556  | 44382  | 1.00E-171 | 305  | 305  | 100 + | 252  | 556  | 38967  | 39271  |
| UN17592 | Rsa1.0.01482.1 | 1047 | 44855  | 0         | 426  | 440  | 96 +  | 608  | 1047 | 16982  | 17414  |
| UN17593 | Rsa1.0.00524.1 | 960  | 169613 | 0         | 483  | 497  | 97 +  | 465  | 960  | 129773 | 130269 |
| UN17594 | Rsa1.0.00910.1 | 671  | 59975  | 0         | 585  | 586  | 99 -  | 1    | 586  | 30391  | 30976  |
| UN17595 | Rsa1.0.01977.1 | 1169 | 36559  | 1.00E-111 | 254  | 269  | 94 -  | 901  | 1169 | 9566   | 9833   |
| UN17596 | Rsa1.0.03254.1 | 999  | 24311  | 1.00E-159 | 292  | 293  | 99 +  | 1    | 293  | 2867   | 3158   |
| UN17597 | Rsa1.0.00008.1 | 839  | 358124 | 0         | 435  | 456  | 95 -  | 222  | 674  | 53991  | 54446  |
| UN17598 | Rsa1.0.00104.1 | 785  | 368722 | 0         | 390  | 393  | 99 +  | 394  | 785  | 265144 | 265536 |
| UN17599 | Rsa1.0.00068.1 | 682  | 151813 | 0         | 427  | 438  | 97 +  | 248  | 680  | 73640  | 74076  |
| UN17600 | Rsa1.0.05523.1 | 864  | 13438  | 0         | 709  | 713  | 99 -  | 152  | 864  | 9079   | 9791   |
| UN17601 | Rsa1.0.00752.1 | 603  | 65756  | 1.00E-129 | 322  | 345  | 93 +  | 3    | 342  | 12935  | 13277  |
| UN17602 | Rsa1.0.00108.1 | 1049 | 478491 | 1.00E-126 | 317  | 350  | 90 +  | 31   | 359  | 134108 | 134456 |
| UN17603 | Rsa1.0.02246.1 | 1305 | 33435  | 0         | 590  | 599  | 98 +  | 708  | 1305 | 7690   | 8288   |
| UN17604 | Rsa1.0.00427.1 | 1346 | 189678 | 1.00E-161 | 330  | 342  | 96 -  | 1009 | 1345 | 11818  | 12159  |
| UN17605 | Rsa1.0.09599.1 | 1231 | 6260   | 0         | 720  | 725  | 99 +  | 1    | 725  | 4431   | 5152   |
| UN17606 | Rsa1.0.00179.1 | 886  | 393324 | 1.00E-92  | 224  | 237  | 94 +  | 1    | 235  | 214015 | 214250 |
| UN17607 | Rsa1.0.00240.1 | 836  | 104175 | 0         | 515  | 538  | 95 -  | 5    | 541  | 92181  | 92715  |
| UN17608 | Rsa1.0.01068.1 | 1425 | 55208  | 0         | 480  | 493  | 97 +  | 934  | 1425 | 9670   | 10153  |
| UN17609 | Rsa1.0.01751.1 | 606  | 39806  | 1.00E-120 | 274  | 290  | 94 -  | 314  | 603  | 30348  | 30634  |
| UN17610 | Rsa1.0.00363.1 | 598  | 90968  | 1.00E-103 | 224  | 235  | 95 +  | 3    | 237  | 28268  | 28502  |
| UN17611 | Rsa1.0.00071.1 | 569  | 345714 | 0         | 459  | 479  | 95 +  | 1    | 478  | 336508 | 336985 |
| UN17612 | Rsa1.0.02750.1 | 841  | 28239  | 1.00E-101 | 253  | 270  | 93 +  | 1    | 266  | 25624  | 25892  |
| UN17613 | Rsa1.0.03028.1 | 779  | 25872  | 4.00E-71  | 143  | 145  | 98 -  | 142  | 286  | 21997  | 22141  |
| UN17614 | Rsa1.0.00923.1 | 863  | 153678 | 0         | 684  | 722  | 94 -  | 4    | 699  | 45727  | 46448  |
| UN17615 | Rsa1.0.01078.1 | 961  | 316910 | 0         | 941  | 971  | 96 +  | 1    | 961  | 136904 | 137871 |
| UN17616 | Rsa1.0.00646.1 | 601  | 70473  | 0         | 412  | 425  | 96 +  | 177  | 601  | 4452   | 4876   |
| UN17617 | Rsa1.0.02601.1 | 864  | 29654  | 0         | 386  | 403  | 95 +  | 462  | 863  | 26835  | 27237  |
| UN17618 | Rsa1.0.00300.1 | 1307 | 97747  | 0         | 633  | 636  | 99 +  | 292  | 927  | 31675  | 32310  |
| UN17619 | Rsa1.0.00451.1 | 2381 | 322533 | 0         | 1187 | 1193 | 99 -  | 1189 | 2381 | 9181   | 10373  |
| UN17620 | Rsa1.0.01377.1 | 834  | 46967  | 0         | 605  | 646  | 93 +  | 1    | 643  | 10023  | 10647  |
| UN17621 | Rsa1.0.03141.1 | 991  | 25061  | 0         | 399  | 415  | 96 +  | 3    | 413  | 15103  | 15517  |
| UN17622 | Rsa1.0.02158.1 | 765  | 154841 | 0         | 520  | 536  | 97 +  | 169  | 704  | 131881 | 132416 |
| UN17623 | Rsa1.0.15420.1 | 902  | 2614   | 1.00E-169 | 331  | 341  | 97 -  | 408  | 748  | 1557   | 1897   |
| UN17624 | Rsa1.0.00162.1 | 506  | 239935 | 1.00E-176 | 362  | 377  | 96 -  | 1    | 377  | 12315  | 12685  |
| UN17625 | Rsa1.0.00833.1 | 864  | 62621  | 1.00E-153 | 358  | 383  | 93 -  | 1    | 382  | 46926  | 47297  |
| UN17626 | Rsa1.0.00143.1 | 772  | 121313 | 0         | 704  | 718  | 98 +  | 3    | 715  | 30988  | 31705  |

|         |                |      |        |           |      |      |      |      |      |        |        |
|---------|----------------|------|--------|-----------|------|------|------|------|------|--------|--------|
| UN17627 | Rsa1.0.02396.1 | 1250 | 31783  | 1.00E-149 | 319  | 335  | 95 - | 1    | 335  | 27105  | 27431  |
| UN17628 | Rsa1.0.01403.1 | 762  | 46453  | 5.00E-92  | 181  | 184  | 98 + | 217  | 400  | 25846  | 26029  |
| UN17629 | Rsa1.0.02399.1 | 1652 | 31763  | 1.00E-141 | 287  | 295  | 97 - | 1355 | 1643 | 14145  | 14438  |
| UN17630 | Rsa1.0.00816.1 | 1196 | 403350 | 0         | 563  | 573  | 98 + | 5    | 577  | 132495 | 133066 |
| UN17631 | Rsa1.0_10348.1 | 1187 | 5880   | 1.00E-131 | 254  | 258  | 98 - | 930  | 1187 | 478    | 734    |
| UN17632 | Rsa1.0_01146.1 | 1250 | 163455 | 0         | 878  | 890  | 98 - | 360  | 1248 | 152929 | 153818 |
| UN17633 | Rsa1.0.04377.1 | 1046 | 17658  | 0         | 931  | 944  | 98 + | 104  | 1046 | 5220   | 6160   |
| UN17634 | Rsa1.0.55790.1 | 539  | 410    | 1.00E-143 | 282  | 290  | 97 + | 162  | 451  | 1      | 290    |
| UN17635 | Rsa1.0.02362.1 | 711  | 32190  | 2.33E-156 | 379  | 410  | 92 - | 296  | 696  | 24739  | 25145  |
| UN17636 | Rsa1.0.04729.1 | 1000 | 16201  | 1.00E-133 | 248  | 249  | 99 + | 3    | 251  | 11808  | 12055  |
| UN17637 | Rsa1.0.00323.1 | 1028 | 159650 | 0         | 441  | 442  | 99 - | 587  | 1028 | 11013  | 11454  |
| UN17638 | Rsa1.0.02719.1 | 990  | 28428  | 0         | 706  | 730  | 96 + | 262  | 990  | 9837   | 10554  |
| UN17639 | Rsa1.0.00228.1 | 1264 | 105511 | 0         | 1213 | 1228 | 98 + | 3    | 1229 | 97601  | 98827  |
| UN17640 | Rsa1.0.00331.1 | 1492 | 176754 | 0         | 976  | 1013 | 96 - | 482  | 1487 | 22081  | 23092  |
| UN17641 | Rsa1.0.00385.1 | 1331 | 89160  | 0         | 465  | 466  | 99 + | 867  | 1331 | 15758  | 16223  |
| UN17642 | Rsa1.0.03069.1 | 1352 | 25615  | 0         | 549  | 564  | 97 - | 398  | 960  | 18568  | 19131  |
| UN17643 | Rsa1.0.00744.1 | 644  | 66084  | 1.00E-124 | 258  | 268  | 96 + | 5    | 269  | 18774  | 19041  |
| UN17644 | Rsa1.0.00295.1 | 1394 | 152597 | 0         | 457  | 458  | 99 - | 1    | 458  | 87629  | 88086  |
| UN17645 | Rsa1.0.00119.1 | 650  | 467509 | 0         | 494  | 510  | 96 - | 1    | 510  | 374988 | 375497 |
| UN17646 | Rsa1.0.00407.1 | 697  | 191544 | 0         | 437  | 451  | 96 - | 44   | 493  | 182904 | 183344 |
| UN17647 | Rsa1.0_54025.1 | 957  | 422    | 0         | 411  | 422  | 97 + | 244  | 662  | 1      | 422    |
| UN17648 | Rsa1.0.00449.1 | 1210 | 83863  | 0         | 391  | 395  | 98 - | 806  | 1200 | 54568  | 54962  |
| UN17649 | Rsa1.0_15420.1 | 1763 | 2614   | 0         | 549  | 567  | 96 + | 823  | 1389 | 1334   | 1900   |
| UN17650 | Rsa1.0_01180.1 | 1203 | 51517  | 0         | 460  | 465  | 98 - | 741  | 1202 | 32240  | 32704  |
| UN17651 | Rsa1.0_01084.1 | 1523 | 54605  | 0         | 438  | 443  | 98 + | 1079 | 1521 | 18255  | 18694  |
| UN17652 | Rsa1.0.00733.1 | 1130 | 66583  | 0         | 652  | 662  | 98 - | 53   | 714  | 59548  | 60209  |
| UN17653 | Rsa1.0.00651.1 | 951  | 247766 | 0         | 364  | 365  | 99 - | 29   | 393  | 231957 | 232321 |
| UN17654 | Rsa1.0.09200.1 | 941  | 6562   | 0         | 399  | 402  | 99 - | 540  | 941  | 5913   | 6313   |
| UN17655 | Rsa1.0.00128.1 | 806  | 228675 | 3.00E-50  | 111  | 114  | 97 - | 693  | 806  | 218103 | 218216 |
| UN17656 | Rsa1.0.01513.1 | 1028 | 44234  | 0         | 548  | 561  | 97 - | 464  | 1024 | 28412  | 28969  |
| UN17657 | Rsa1.0.01696.1 | 1872 | 301850 | 0         | 844  | 861  | 98 + | 925  | 1785 | 279164 | 280024 |
| UN17658 | Rsa1.0.00739.1 | 950  | 66155  | 1.00E-150 | 328  | 342  | 95 - | 607  | 948  | 51979  | 52316  |
| UN17659 | Rsa1.0.01696.1 | 1145 | 301850 | 6.00E-77  | 200  | 213  | 93 + | 934  | 1144 | 293478 | 293686 |
| UN17660 | Rsa1.0.00603.1 | 861  | 73299  | 0         | 703  | 718  | 97 - | 7    | 724  | 42400  | 43117  |
| UN17661 | Rsa1.0.03077.1 | 1024 | 25558  | 1.00E-117 | 271  | 286  | 94 + | 1    | 285  | 6704   | 6987   |
| UN17662 | Rsa1.0.03120.1 | 972  | 25269  | 2.33E-156 | 298  | 309  | 96 - | 1    | 309  | 22032  | 22337  |
| UN17663 | Rsa1.0.01536.1 | 909  | 43747  | 0         | 620  | 622  | 99 + | 1    | 622  | 18728  | 19349  |
| UN17664 | Rsa1.0.01389.1 | 1534 | 46716  | 0         | 383  | 399  | 95 + | 182  | 575  | 27804  | 28202  |
| UN17665 | Rsa1.0_00391.1 | 975  | 183853 | 0         | 391  | 400  | 97 + | 3    | 396  | 72481  | 72880  |

|         |                |      |        |           |      |      |       |     |      |        |        |
|---------|----------------|------|--------|-----------|------|------|-------|-----|------|--------|--------|
| UN17666 | Rsa1.0_01076.1 | 1058 | 54835  | 1.00E-179 | 355  | 363  | 97 -  | 11  | 370  | 39978  | 40340  |
| UN17667 | Rsa1.0_02405.1 | 832  | 31692  | 0         | 362  | 362  | 100 - | 469 | 830  | 17022  | 17383  |
| UN17668 | Rsa1.0_03101.1 | 734  | 25410  | 0         | 561  | 568  | 98 +  | 3   | 570  | 17206  | 17773  |
| UN17669 | Rsa1.0_00237.1 | 884  | 235974 | 1.00E-159 | 284  | 284  | 100 - | 599 | 882  | 4688   | 4971   |
| UN17670 | Rsa1.0_07506.1 | 775  | 9233   | 0         | 533  | 535  | 99 +  | 6   | 539  | 2669   | 3203   |
| UN17671 | Rsa1.0_00316.1 | 1252 | 96264  | 0         | 537  | 540  | 99 -  | 706 | 1245 | 83816  | 84355  |
| UN17672 | Rsa1.0_00472.1 | 671  | 398134 | 0         | 397  | 402  | 98 +  | 3   | 404  | 162745 | 163146 |
| UN17673 | Rsa1.0_02097.1 | 1395 | 35036  | 1.00E-174 | 310  | 310  | 100 - | 1   | 310  | 19172  | 19481  |
| UN17674 | Rsa1.0_03831.1 | 1155 | 20579  | 1.00E-160 | 292  | 294  | 99 +  | 3   | 296  | 18127  | 18420  |
| UN17675 | Rsa1.0_00640.1 | 1225 | 70979  | 0         | 1200 | 1225 | 97 +  | 1   | 1225 | 16846  | 18067  |
| UN17676 | Rsa1.0_02144.1 | 1787 | 34630  | 0         | 678  | 690  | 98 -  | 78  | 766  | 2872   | 3558   |
| UN17677 | Rsa1.0_06648.1 | 911  | 10603  | 0         | 372  | 385  | 96 -  | 527 | 911  | 4432   | 4814   |
| UN17678 | Rsa1.0_00855.1 | 1355 | 62047  | 0         | 791  | 839  | 94 +  | 524 | 1355 | 22692  | 23522  |
| UN17679 | Rsa1.0_00622.1 | 822  | 71822  | 0         | 802  | 819  | 97 +  | 6   | 822  | 23241  | 24055  |
| UN17680 | Rsa1.0_01414.1 | 892  | 149508 | 1.00E-160 | 340  | 353  | 96 +  | 544 | 890  | 115743 | 116095 |
| UN17681 | Rsa1.0_00360.1 | 1289 | 91190  | 0         | 515  | 532  | 96 -  | 183 | 712  | 49756  | 50287  |
| UN17682 | Rsa1.0_00113.1 | 793  | 131574 | 1.00E-168 | 299  | 299  | 100 + | 3   | 301  | 59749  | 60047  |
| UN17683 | Rsa1.0_02000.1 | 909  | 36210  | 1.00E-116 | 281  | 302  | 93 -  | 3   | 295  | 4950   | 5251   |
| UN17684 | Rsa1.0_00239.1 | 808  | 104332 | 1.00E-142 | 281  | 289  | 97 -  | 329 | 617  | 28438  | 28726  |
| UN17685 | Rsa1.0_04779.1 | 947  | 16008  | 1.00E-110 | 279  | 298  | 93 +  | 10  | 305  | 9472   | 9765   |
| UN17686 | Rsa1.0_05847.1 | 1465 | 12433  | 0         | 524  | 535  | 97 +  | 931 | 1464 | 8210   | 8743   |
| UN17687 | Rsa1.0_00139.1 | 897  | 357786 | 0         | 885  | 894  | 98 -  | 2   | 894  | 148941 | 149834 |
| UN17688 | Rsa1.0_00480.1 | 934  | 81325  | 0         | 461  | 468  | 98 +  | 1   | 468  | 30781  | 31248  |
| UN17689 | Rsa1.0_00729.1 | 712  | 66690  | 0         | 697  | 713  | 97 -  | 1   | 712  | 56546  | 57252  |
| UN17690 | Rsa1.0_00078.1 | 1354 | 175053 | 0         | 544  | 550  | 98 -  | 804 | 1353 | 130154 | 130703 |
| UN17691 | Rsa1.0_00092.1 | 990  | 659932 | 0         | 362  | 363  | 99 +  | 628 | 990  | 234653 | 235015 |
| UN17692 | Rsa1.0_01553.1 | 1065 | 43379  | 0         | 652  | 665  | 98 -  | 3   | 665  | 2337   | 3001   |
| UN17693 | Rsa1.0_00730.1 | 806  | 66673  | 0         | 413  | 423  | 97 +  | 2   | 422  | 28287  | 28709  |
| UN17694 | Rsa1.0_00717.1 | 904  | 67051  | 0         | 449  | 463  | 96 -  | 3   | 463  | 8485   | 8945   |
| UN17695 | Rsa1.0_03303.1 | 1129 | 23890  | 0         | 645  | 663  | 97 +  | 1   | 661  | 9589   | 10250  |
| UN17696 | Rsa1.0_00525.1 | 1328 | 78030  | 1.00E-151 | 274  | 275  | 99 -  | 875 | 1149 | 25800  | 26074  |
| UN17697 | Rsa1.0_00348.1 | 892  | 92818  | 0         | 424  | 437  | 97 +  | 2   | 436  | 49598  | 50033  |
| UN17698 | Rsa1.0_03834.1 | 607  | 20572  | 1.00E-166 | 370  | 391  | 94 -  | 228 | 606  | 17625  | 18013  |
| UN17699 | Rsa1.0_00753.1 | 1232 | 65705  | 0         | 368  | 373  | 98 -  | 3   | 374  | 1957   | 2329   |
| UN17700 | Rsa1.0_01743.1 | 692  | 39926  | 1.00E-177 | 328  | 331  | 99 +  | 362 | 692  | 12660  | 12989  |
| UN17701 | Rsa1.0_00635.1 | 925  | 175826 | 0         | 403  | 424  | 95 -  | 503 | 921  | 13997  | 14407  |
| UN17702 | Rsa1.0_00382.1 | 2220 | 251946 | 0         | 622  | 674  | 92 -  | 900 | 1561 | 34180  | 34848  |
| UN17703 | Rsa1.0_00239.1 | 809  | 104332 | 1.00E-152 | 285  | 289  | 98 +  | 196 | 484  | 28438  | 28726  |
| UN17704 | Rsa1.0_49554.1 | 1231 | 458    | 0         | 424  | 425  | 99 -  | 807 | 1231 | 26     | 450    |



|         |                |      |        |           |     |     |       |      |      |        |        |
|---------|----------------|------|--------|-----------|-----|-----|-------|------|------|--------|--------|
| UN17705 | Rsa1.0_04200.1 | 934  | 18490  | 0         | 392 | 402 | 97 +  | 1    | 401  | 768    | 1169   |
| UN17706 | Rsa1.0_01126.1 | 914  | 53127  | 1.00E-162 | 308 | 313 | 98 -  | 604  | 914  | 14941  | 15253  |
| UN17707 | Rsa1.0_02685.1 | 784  | 28669  | 0         | 386 | 389 | 99 -  | 393  | 781  | 27822  | 28210  |
| UN17708 | Rsa1.0_02431.1 | 923  | 31504  | 0         | 485 | 502 | 96 -  | 396  | 895  | 17432  | 17922  |
| UN17709 | Rsa1.0_00121.1 | 1875 | 278029 | 0         | 547 | 547 | 100 - | 1329 | 1875 | 9593   | 10139  |
| UN17710 | Rsa1.0_00485.1 | 1673 | 80937  | 0         | 860 | 883 | 97 -  | 8    | 890  | 71868  | 72738  |
| UN17711 | Rsa1.0_01293.1 | 1304 | 49139  | 0         | 604 | 623 | 96 +  | 1    | 611  | 34534  | 35155  |
| UN17712 | Rsa1.0_02185.1 | 1266 | 34150  | 0         | 422 | 436 | 96 +  | 36   | 469  | 20599  | 21034  |
| UN17713 | Rsa1.0_02429.1 | 1004 | 31527  | 1.00E-154 | 319 | 332 | 96 +  | 676  | 1004 | 12869  | 13197  |
| UN17714 | Rsa1.0_03543.1 | 1720 | 22185  | 0         | 430 | 437 | 98 -  | 1269 | 1705 | 1769   | 2205   |
| UN17715 | Rsa1.0_01209.1 | 1053 | 50668  | 1.00E-173 | 351 | 364 | 96 -  | 10   | 366  | 40043  | 40406  |
| UN17716 | Rsa1.0_00342.1 | 1359 | 93695  | 4.00E-97  | 268 | 298 | 89 -  | 1    | 297  | 1568   | 1848   |
| UN17717 | Rsa1.0_00024.1 | 1453 | 188018 | 1.00E-123 | 253 | 259 | 97 -  | 4    | 258  | 108783 | 109040 |
| UN17718 | Rsa1.0_05043.1 | 800  | 15044  | 1.00E-180 | 355 | 364 | 97 +  | 438  | 798  | 332    | 691    |
| UN17719 | Rsa1.0_03069.1 | 1354 | 25615  | 0         | 559 | 564 | 99 +  | 414  | 977  | 18568  | 19131  |
| UN17720 | Rsa1.0_02964.1 | 1519 | 26407  | 1.00E-154 | 326 | 339 | 96 -  | 2    | 340  | 20559  | 20893  |
| UN17721 | Rsa1.0_03623.1 | 841  | 21714  | 0         | 528 | 535 | 98 -  | 308  | 841  | 3269   | 3803   |
| UN17722 | Rsa1.0_01004.1 | 720  | 56975  | 0         | 352 | 355 | 99 -  | 364  | 718  | 16989  | 17342  |
| UN17723 | Rsa1.0_00277.1 | 1411 | 100132 | 0         | 768 | 778 | 98 -  | 558  | 1335 | 62070  | 62846  |
| UN17724 | Rsa1.0_00141.1 | 792  | 121494 | 1.00E-169 | 367 | 388 | 94 +  | 409  | 792  | 20677  | 21051  |
| UN17725 | Rsa1.0_08259.1 | 819  | 7641   | 1.00E-171 | 350 | 360 | 97 -  | 8    | 367  | 3089   | 3443   |
| UN17726 | Rsa1.0_00792.1 | 2073 | 64163  | 0         | 655 | 665 | 98 -  | 1281 | 1945 | 3157   | 3821   |
| UN17727 | Rsa1.0_04518.1 | 1829 | 17005  | 0         | 525 | 536 | 97 -  | 610  | 1145 | 11675  | 12209  |
| UN17728 | Rsa1.0_00744.1 | 669  | 66084  | 1.00E-131 | 274 | 284 | 96 +  | 4    | 284  | 18759  | 19041  |
| UN17729 | Rsa1.0_04238.1 | 1100 | 18352  | 1.00E-108 | 254 | 268 | 94 -  | 1    | 266  | 2706   | 2972   |
| UN17730 | Rsa1.0_03247.1 | 719  | 24371  | 0         | 708 | 719 | 98 +  | 1    | 719  | 11700  | 12418  |
| UN17731 | Rsa1.0_24929.1 | 718  | 960    | 1.00E-141 | 281 | 290 | 96 +  | 54   | 343  | 159    | 448    |
| UN17732 | Rsa1.0_00224.1 | 1286 | 327530 | 1.00E-180 | 332 | 336 | 98 +  | 29   | 364  | 204804 | 205139 |
| UN17733 | Rsa1.0_00175.1 | 1325 | 166121 | 0         | 685 | 690 | 99 +  | 621  | 1309 | 140783 | 141471 |
| UN17734 | Rsa1.0_01707.1 | 416  | 40686  | 0         | 384 | 388 | 98 +  | 1    | 387  | 25316  | 25703  |
| UN17735 | Rsa1.0_02606.1 | 980  | 29635  | 0         | 382 | 387 | 98 +  | 252  | 637  | 14421  | 14807  |
| UN17736 | Rsa1.0_01776.1 | 1236 | 39511  | 0         | 361 | 371 | 97 +  | 42   | 410  | 35159  | 35529  |
| UN17737 | Rsa1.0_08717.1 | 929  | 7008   | 0         | 603 | 606 | 99 -  | 2    | 607  | 2884   | 3489   |
| UN17738 | Rsa1.0_04104.1 | 575  | 19043  | 0         | 548 | 574 | 95 -  | 8    | 574  | 4942   | 5515   |
| UN17739 | Rsa1.0_03634.1 | 755  | 145192 | 3.00E-90  | 175 | 177 | 98 -  | 321  | 497  | 136040 | 136216 |
| UN17740 | Rsa1.0_09406.1 | 1153 | 6391   | 1.00E-145 | 288 | 293 | 98 +  | 700  | 990  | 6100   | 6391   |
| UN17741 | Rsa1.0_00125.1 | 493  | 253043 | 5.00E-94  | 187 | 191 | 97 +  | 1    | 191  | 190793 | 190983 |
| UN17742 | Rsa1.0_16978.1 | 1138 | 1964   | 1.00E-141 | 305 | 319 | 95 -  | 1    | 319  | 1215   | 1527   |
| UN17743 | Rsa1.0_01049.1 | 770  | 55655  | 1.00E-116 | 235 | 241 | 97 +  | 7    | 246  | 33850  | 34090  |

|         |                |      |        |           |     |     |       |      |      |        |        |
|---------|----------------|------|--------|-----------|-----|-----|-------|------|------|--------|--------|
| UN17744 | Rsa1.0.00017.1 | 717  | 752458 | 2.33E-156 | 274 | 278 | 98 -  | 314  | 591  | 139458 | 139735 |
| UN17745 | Rsa1.0.05894.1 | 1346 | 12306  | 0         | 625 | 626 | 99 +  | 2    | 627  | 6858   | 7483   |
| UN17746 | Rsa1.0.01753.1 | 1478 | 39794  | 0         | 396 | 418 | 94 -  | 1    | 411  | 16947  | 17364  |
| UN17747 | Rsa1.0.00804.1 | 765  | 63726  | 1.00E-162 | 299 | 302 | 99 +  | 214  | 515  | 52476  | 52777  |
| UN17748 | Rsa1.0.01096.1 | 885  | 54266  | 1.00E-117 | 220 | 222 | 99 -  | 364  | 585  | 9756   | 9977   |
| UN17749 | Rsa1.0.01737.1 | 230  | 40101  | 8.00E-54  | 140 | 150 | 93 +  | 1    | 150  | 16476  | 16623  |
| UN17750 | Rsa1.0.03513.1 | 1305 | 22349  | 0         | 500 | 506 | 98 -  | 364  | 869  | 20286  | 20791  |
| UN17751 | Rsa1.0.16723.1 | 1388 | 2053   | 1.00E-147 | 309 | 321 | 96 -  | 1068 | 1388 | 1043   | 1356   |
| UN17752 | Rsa1.0.00025.1 | 780  | 277312 | 0         | 490 | 495 | 98 +  | 257  | 751  | 271079 | 271573 |
| UN17753 | Rsa1.0.00771.1 | 647  | 64870  | 0         | 460 | 464 | 99 -  | 184  | 647  | 47613  | 48076  |
| UN17754 | Rsa1.0.00077.1 | 541  | 145005 | 1.00E-108 | 199 | 199 | 100 - | 343  | 541  | 54084  | 54282  |
| UN17755 | Rsa1.0.04512.1 | 703  | 17031  | 0         | 390 | 403 | 96 -  | 301  | 703  | 12545  | 12943  |
| UN17756 | Rsa1.0.04140.1 | 747  | 18879  | 1.00E-104 | 210 | 216 | 97 +  | 292  | 507  | 7286   | 7501   |
| UN17757 | Rsa1.0.02788.1 | 1067 | 27852  | 1.00E-136 | 320 | 344 | 93 +  | 736  | 1066 | 5593   | 5935   |
| UN17758 | Rsa1.0.02395.1 | 725  | 31785  | 0         | 359 | 361 | 99 -  | 1    | 361  | 8334   | 8692   |
| UN17759 | Rsa1.0.00459.1 | 616  | 82580  | 1.00E-132 | 258 | 264 | 97 +  | 270  | 533  | 57149  | 57412  |
| UN17760 | Rsa1.0.01026.1 | 807  | 171624 | 1.00E-176 | 316 | 317 | 99 -  | 3    | 319  | 31953  | 32269  |
| UN17761 | Rsa1.0.00132.1 | 1094 | 124299 | 1.00E-150 | 334 | 352 | 94 -  | 743  | 1090 | 108391 | 108742 |
| UN17762 | Rsa1.0.00040.1 | 892  | 324196 | 1.00E-169 | 321 | 326 | 98 +  | 567  | 892  | 308714 | 309038 |
| UN17763 | Rsa1.0.00782.1 | 1469 | 64468  | 1.00E-101 | 188 | 188 | 100 + | 72   | 259  | 33382  | 33569  |
| UN17764 | Rsa1.0.00017.1 | 740  | 752458 | 2.00E-91  | 194 | 201 | 96 -  | 204  | 401  | 274013 | 274213 |
| UN17765 | Rsa1.0.00224.1 | 872  | 327530 | 1.00E-142 | 263 | 265 | 99 +  | 5    | 269  | 204875 | 205139 |
| UN17766 | Rsa1.0.00417.1 | 740  | 395068 | 1.00E-101 | 194 | 196 | 98 +  | 317  | 512  | 258984 | 259179 |
| UN17767 | Rsa1.0.00123.1 | 861  | 325650 | 0         | 356 | 359 | 99 -  | 1    | 359  | 227015 | 227373 |
| UN17768 | Rsa1.0.00725.1 | 1726 | 66757  | 0         | 474 | 489 | 96 -  | 54   | 542  | 10669  | 11155  |
| UN17769 | Rsa1.0.00116.1 | 724  | 365886 | 0         | 584 | 584 | 100 + | 141  | 724  | 154724 | 155307 |
| UN17770 | Rsa1.0.02601.1 | 879  | 29654  | 0         | 397 | 403 | 98 -  | 2    | 404  | 26835  | 27237  |
| UN17771 | Rsa1.0.01213.1 | 978  | 50616  | 0         | 465 | 474 | 98 +  | 226  | 699  | 10242  | 10712  |
| UN17772 | Rsa1.0.00501.1 | 1763 | 79545  | 0         | 466 | 485 | 96 -  | 1    | 482  | 20922  | 21401  |
| UN17773 | Rsa1.0.09695.1 | 803  | 6206   | 1.00E-131 | 352 | 388 | 90 +  | 411  | 795  | 577    | 948    |
| UN17774 | Rsa1.0.00034.1 | 983  | 260119 | 0         | 553 | 572 | 96 -  | 1    | 572  | 122108 | 122679 |
| UN17775 | Rsa1.0.00240.1 | 864  | 104175 | 1.00E-113 | 216 | 219 | 98 -  | 264  | 482  | 54590  | 54808  |
| UN17776 | Rsa1.0.03741.1 | 622  | 143933 | 0         | 550 | 566 | 97 -  | 1    | 564  | 4881   | 5440   |
| UN17777 | Rsa1.0.01146.1 | 729  | 163455 | 1.00E-109 | 247 | 257 | 96 -  | 1    | 255  | 25092  | 25346  |
| UN17778 | Rsa1.0.00006.1 | 751  | 396176 | 1.00E-127 | 285 | 302 | 94 -  | 452  | 751  | 9146   | 9447   |
| UN17779 | Rsa1.0.02431.1 | 443  | 31504  | 0         | 401 | 418 | 95 +  | 13   | 429  | 17508  | 17922  |
| UN17780 | Rsa1.0.03713.1 | 766  | 21221  | 1.00E-176 | 360 | 373 | 96 -  | 396  | 766  | 10532  | 10904  |
| UN17781 | Rsa1.0.00230.1 | 786  | 105389 | 1.00E-122 | 315 | 334 | 94 -  | 460  | 784  | 2593   | 2925   |
| UN17782 | Rsa1.0.11366.1 | 722  | 5532   | 1.00E-119 | 249 | 259 | 96 +  | 1    | 259  | 2668   | 2923   |

|         |                |      |        |           |      |      |       |     |      |        |        |
|---------|----------------|------|--------|-----------|------|------|-------|-----|------|--------|--------|
| UN17783 | Rsa1.0_19324.1 | 1674 | 1447   | 1.00E-130 | 267  | 276  | 96 +  | 963 | 1237 | 1029   | 1304   |
| UN17784 | Rsa1.0_01389.1 | 795  | 46716  | 1.00E-127 | 299  | 316  | 94 -  | 5   | 315  | 30335  | 30647  |
| UN17785 | Rsa1.0_14772.1 | 383  | 3077   | 0         | 373  | 383  | 97 +  | 1   | 383  | 1557   | 1939   |
| UN17786 | Rsa1.0_14856.1 | 1314 | 3010   | 0         | 426  | 429  | 99 -  | 3   | 431  | 2281   | 2709   |
| UN17787 | Rsa1.0_03292.1 | 701  | 23977  | 1.00E-139 | 279  | 287  | 97 -  | 2   | 288  | 7104   | 7389   |
| UN17788 | Rsa1.0_00895.1 | 1249 | 60615  | 0         | 474  | 483  | 98 +  | 452 | 934  | 39139  | 39621  |
| UN17789 | Rsa1.0_00224.1 | 1141 | 327530 | 1.00E-147 | 264  | 264  | 100 + | 2   | 265  | 204876 | 205139 |
| UN17790 | Rsa1.0_08293.1 | 791  | 7593   | 0         | 371  | 378  | 98 +  | 414 | 791  | 2270   | 2647   |
| UN17791 | Rsa1.0_02728.1 | 450  | 28400  | 1.00E-163 | 328  | 338  | 97 -  | 1   | 336  | 26853  | 27189  |
| UN17792 | Rsa1.0_00192.1 | 792  | 278200 | 0         | 397  | 415  | 95 +  | 12  | 426  | 41784  | 42196  |
| UN17793 | Rsa1.0_02501.1 | 505  | 30764  | 0         | 486  | 506  | 96 +  | 1   | 505  | 10542  | 11045  |
| UN17794 | Rsa1.0_00013.1 | 849  | 292129 | 1.00E-105 | 207  | 211  | 98 +  | 1   | 211  | 204587 | 204797 |
| UN17795 | Rsa1.0_00355.1 | 696  | 92038  | 0         | 531  | 576  | 92 -  | 129 | 695  | 77872  | 78429  |
| UN17796 | Rsa1.0_02964.1 | 728  | 26407  | 5.00E-95  | 213  | 225  | 94 +  | 198 | 422  | 19004  | 19228  |
| UN17797 | Rsa1.0_05893.1 | 765  | 12306  | 1.00E-174 | 343  | 350  | 98 -  | 419 | 765  | 8202   | 8551   |
| UN17798 | Rsa1.0_06968.1 | 633  | 10090  | 0         | 598  | 630  | 94 +  | 9   | 633  | 7775   | 8402   |
| UN17799 | Rsa1.0_00220.1 | 959  | 192936 | 1.00E-147 | 348  | 371  | 93 +  | 3   | 362  | 18977  | 19347  |
| UN17800 | Rsa1.0_03356.1 | 474  | 23487  | 1.00E-121 | 248  | 257  | 96 +  | 1   | 257  | 20196  | 20452  |
| UN17801 | Rsa1.0_00415.1 | 675  | 86795  | 1.00E-135 | 304  | 321  | 94 -  | 15  | 335  | 6755   | 7069   |
| UN17802 | Rsa1.0_00281.1 | 560  | 99908  | 0         | 439  | 462  | 95 +  | 11  | 465  | 24079  | 24539  |
| UN17803 | Rsa1.0_09583.1 | 937  | 6270   | 0         | 372  | 385  | 96 -  | 140 | 519  | 5886   | 6270   |
| UN17804 | Rsa1.0_00003.1 | 1382 | 340054 | 0         | 615  | 629  | 97 -  | 750 | 1378 | 257546 | 258174 |
| UN17805 | Rsa1.0_00190.1 | 461  | 318240 | 0         | 385  | 400  | 96 +  | 1   | 400  | 314387 | 314786 |
| UN17806 | Rsa1.0_01843.1 | 758  | 265131 | 0         | 479  | 481  | 99 -  | 13  | 493  | 25363  | 25843  |
| UN17807 | Rsa1.0_00127.1 | 866  | 127446 | 0         | 480  | 481  | 99 -  | 386 | 866  | 62999  | 63478  |
| UN17808 | Rsa1.0_00605.1 | 1022 | 73199  | 0         | 573  | 580  | 98 -  | 23  | 602  | 30975  | 31554  |
| UN17809 | Rsa1.0_02312.1 | 1064 | 32675  | 0         | 1060 | 1060 | 100 + | 2   | 1061 | 15843  | 16902  |
| UN17810 | Rsa1.0_32336.1 | 746  | 704    | 2.00E-76  | 197  | 213  | 92 +  | 1   | 201  | 451    | 663    |
| UN17811 | Rsa1.0_01768.1 | 1307 | 138463 | 1.00E-141 | 308  | 321  | 95 -  | 987 | 1307 | 119986 | 120300 |
| UN17812 | Rsa1.0_03028.1 | 979  | 25872  | 1.00E-118 | 271  | 286  | 94 +  | 26  | 307  | 20174  | 20458  |
| UN17813 | Rsa1.0_00067.1 | 430  | 415055 | 1.00E-157 | 303  | 308  | 98 +  | 121 | 428  | 351902 | 352206 |
| UN17814 | Rsa1.0_00397.1 | 396  | 88189  | 0         | 380  | 395  | 96 +  | 2   | 396  | 7409   | 7802   |
| UN17815 | Rsa1.0_02054.1 | 970  | 35548  | 1.00E-142 | 271  | 276  | 98 +  | 203 | 478  | 27079  | 27354  |
| UN17816 | Rsa1.0_01761.1 | 761  | 39717  | 0         | 421  | 425  | 99 +  | 334 | 758  | 25093  | 25516  |
| UN17817 | Rsa1.0_00960.1 | 683  | 58199  | 1.00E-107 | 245  | 257  | 95 -  | 6   | 260  | 14176  | 14431  |
| UN17818 | Rsa1.0_00123.1 | 678  | 325650 | 1.00E-179 | 364  | 376  | 96 +  | 1   | 374  | 59913  | 60285  |
| UN17819 | Rsa1.0_01618.1 | 693  | 42118  | 0         | 485  | 505  | 96 -  | 2   | 500  | 1      | 505    |
| UN17820 | Rsa1.0_00300.1 | 782  | 97747  | 0         | 544  | 574  | 94 +  | 73  | 640  | 81510  | 82074  |
| UN17821 | Rsa1.0_01068.1 | 696  | 55208  | 1.00E-106 | 246  | 267  | 92 +  | 2   | 268  | 5080   | 5328   |

|         |                |      |        |           |     |     |       |     |      |        |        |
|---------|----------------|------|--------|-----------|-----|-----|-------|-----|------|--------|--------|
| UN17822 | Rsa1.0.09406.1 | 781  | 6391   | 1.00E-113 | 222 | 227 | 97 +  | 165 | 391  | 5073   | 5299   |
| UN17823 | Rsa1.0.00475.1 | 510  | 81678  | 1.00E-115 | 266 | 282 | 94 +  | 1   | 280  | 26917  | 27198  |
| UN17824 | Rsa1.0.27096.1 | 862  | 866    | 0         | 411 | 421 | 97 -  | 1   | 420  | 335    | 755    |
| UN17825 | Rsa1.0.02258.1 | 378  | 33307  | 1.00E-121 | 242 | 249 | 97 +  | 1   | 249  | 23474  | 23722  |
| UN17826 | Rsa1.0.00284.1 | 749  | 323267 | 0         | 582 | 600 | 97 -  | 3   | 599  | 316787 | 317386 |
| UN17827 | Rsa1.0.02398.1 | 298  | 31766  | 1.00E-103 | 233 | 245 | 95 -  | 3   | 247  | 5418   | 5659   |
| UN17828 | Rsa1.0.03356.1 | 615  | 23487  | 1.00E-172 | 330 | 338 | 97 -  | 123 | 460  | 20820  | 21157  |
| UN17829 | Rsa1.0.00439.1 | 1074 | 142776 | 0         | 571 | 585 | 97 +  | 490 | 1073 | 52240  | 52824  |
| UN17830 | Rsa1.0.03160.1 | 452  | 24916  | 2.00E-80  | 169 | 172 | 98 +  | 280 | 450  | 18697  | 18867  |
| UN17831 | Rsa1.0.10348.1 | 733  | 5880   | 1.00E-128 | 257 | 264 | 97 +  | 1   | 264  | 478    | 740    |
| UN17832 | Rsa1.0.00014.1 | 336  | 348985 | 1.00E-164 | 325 | 336 | 96 +  | 1   | 336  | 241629 | 241964 |
| UN17833 | Rsa1.0.00805.1 | 860  | 63724  | 1.00E-138 | 256 | 258 | 99 +  | 327 | 584  | 8627   | 8884   |
| UN17834 | Rsa1.0.00753.1 | 673  | 65705  | 1.00E-144 | 282 | 290 | 97 -  | 384 | 673  | 588    | 870    |
| UN17835 | Rsa1.0.38832.1 | 1608 | 579    | 1.00E-121 | 224 | 225 | 99 +  | 74  | 298  | 1      | 225    |
| UN17836 | Rsa1.0.06306.1 | 609  | 11266  | 0         | 521 | 535 | 97 -  | 17  | 551  | 4950   | 5484   |
| UN17837 | Rsa1.0.02281.1 | 804  | 292576 | 1.00E-116 | 222 | 224 | 99 -  | 459 | 681  | 263654 | 263877 |
| UN17838 | Rsa1.0.02608.1 | 1063 | 29613  | 0         | 430 | 465 | 92 -  | 603 | 1063 | 24658  | 25105  |
| UN17839 | Rsa1.0.11366.1 | 877  | 5532   | 1.00E-116 | 224 | 228 | 98 -  | 106 | 333  | 3977   | 4204   |
| UN17840 | Rsa1.0.10348.1 | 476  | 5880   | 2.33E-156 | 263 | 263 | 100 + | 1   | 263  | 478    | 740    |
| UN17841 | Rsa1.0.00821.1 | 701  | 62891  | 1.00E-115 | 240 | 250 | 96 +  | 3   | 252  | 49070  | 49319  |
| UN17842 | Rsa1.0.01803.1 | 651  | 173846 | 1.00E-76  | 175 | 186 | 94 +  | 158 | 334  | 136428 | 136613 |
| UN17843 | Rsa1.0.02381.1 | 803  | 31972  | 1.00E-178 | 364 | 380 | 95 +  | 1   | 380  | 13541  | 13909  |
| UN17844 | Rsa1.0.00141.1 | 557  | 121494 | 1.00E-149 | 291 | 299 | 97 +  | 259 | 557  | 103874 | 104172 |
| UN17845 | Rsa1.0.30763.1 | 491  | 745    | 0         | 401 | 402 | 99 -  | 2   | 403  | 135    | 535    |
| UN17846 | Rsa1.0.00105.1 | 279  | 134138 | 1.00E-93  | 203 | 210 | 96 +  | 7   | 215  | 71490  | 71698  |
| UN17847 | Rsa1.0.00144.1 | 569  | 120708 | 0         | 505 | 528 | 95 +  | 20  | 546  | 12334  | 12860  |
| UN17848 | Rsa1.0.07536.1 | 1090 | 9178   | 0         | 399 | 423 | 94 +  | 5   | 417  | 6471   | 6893   |
| UN17849 | Rsa1.0.01047.1 | 862  | 55705  | 4.00E-96  | 200 | 207 | 96 +  | 208 | 414  | 1138   | 1344   |
| UN17850 | Rsa1.0.00848.1 | 855  | 152362 | 0         | 699 | 722 | 96 +  | 1   | 722  | 49072  | 49792  |
| UN17851 | Rsa1.0.01176.1 | 577  | 51638  | 0         | 389 | 404 | 96 +  | 174 | 575  | 28134  | 28534  |
| UN17852 | Rsa1.0.00630.1 | 1453 | 71281  | 0         | 520 | 520 | 100 - | 229 | 748  | 62260  | 62779  |
| UN17853 | Rsa1.0.00270.1 | 454  | 101236 | 0         | 454 | 454 | 100 + | 1   | 454  | 69450  | 69903  |
| UN17854 | Rsa1.0.01094.1 | 1145 | 167285 | 0         | 414 | 418 | 99 +  | 730 | 1145 | 12558  | 12975  |
| UN17855 | Rsa1.0.03873.1 | 1190 | 20360  | 0         | 701 | 715 | 98 -  | 35  | 746  | 9247   | 9957   |
| UN17856 | Rsa1.0.00289.1 | 832  | 98620  | 5.00E-86  | 180 | 186 | 96 +  | 417 | 602  | 14777  | 14962  |
| UN17857 | Rsa1.0.00111.1 | 741  | 390088 | 0         | 727 | 748 | 97 +  | 1   | 741  | 373996 | 374743 |
| UN17858 | Rsa1.0.02779.1 | 681  | 27968  | 0         | 664 | 683 | 97 +  | 1   | 681  | 3437   | 4119   |
| UN17859 | Rsa1.0.19861.1 | 822  | 1373   | 1.00E-154 | 277 | 277 | 100 - | 11  | 287  | 448    | 724    |
| UN17860 | Rsa1.0.00055.1 | 704  | 520193 | 3.00E-65  | 148 | 155 | 95 +  | 512 | 666  | 180177 | 180331 |

|         |                |      |        |           |     |     |       |     |      |        |        |
|---------|----------------|------|--------|-----------|-----|-----|-------|-----|------|--------|--------|
| UN17861 | Rsa1.0_04371.1 | 839  | 17700  | 1.00E-151 | 349 | 374 | 93 -  | 1   | 374  | 2476   | 2841   |
| UN17862 | Rsa1.0_01707.1 | 1158 | 40686  | 0         | 398 | 401 | 99 +  | 426 | 826  | 25818  | 26218  |
| UN17863 | Rsa1.0_03741.1 | 987  | 143933 | 0         | 552 | 566 | 97 -  | 3   | 568  | 4881   | 5443   |
| UN17864 | Rsa1.0_02054.1 | 953  | 35548  | 1.00E-142 | 272 | 277 | 98 -  | 482 | 758  | 27078  | 27354  |
| UN17865 | Rsa1.0_00055.1 | 1158 | 520193 | 0         | 368 | 368 | 100 + | 791 | 1158 | 106239 | 106606 |
| UN17866 | Rsa1.0_01325.1 | 1086 | 48131  | 0         | 631 | 652 | 96 +  | 429 | 1080 | 17437  | 18088  |
| UN17867 | Rsa1.0_01094.1 | 810  | 167285 | 1.00E-80  | 159 | 161 | 98 +  | 457 | 617  | 11257  | 11417  |
| UN17868 | Rsa1.0_00339.1 | 766  | 222974 | 0         | 391 | 394 | 99 +  | 3   | 395  | 210669 | 211062 |
| UN17869 | Rsa1.0_00689.1 | 982  | 68305  | 0         | 360 | 365 | 98 -  | 617 | 981  | 23514  | 23878  |
| UN17870 | Rsa1.0_02601.1 | 875  | 29654  | 0         | 400 | 416 | 96 -  | 1   | 416  | 26835  | 27249  |
| UN17871 | Rsa1.0_00041.1 | 691  | 186197 | 1.00E-156 | 324 | 338 | 95 +  | 357 | 691  | 157071 | 157408 |
| UN17872 | Rsa1.0_00729.1 | 1130 | 66690  | 0         | 616 | 627 | 98 -  | 1   | 627  | 56634  | 57260  |
| UN17873 | Rsa1.0_01811.1 | 554  | 38977  | 0         | 405 | 420 | 96 +  | 135 | 554  | 26394  | 26808  |
| UN17874 | Rsa1.0_07193.1 | 1044 | 9752   | 1.00E-166 | 302 | 304 | 99 +  | 741 | 1044 | 4357   | 4660   |
| UN17875 | Rsa1.0_01084.1 | 922  | 54605  | 1.00E-144 | 263 | 264 | 99 +  | 655 | 918  | 17676  | 17939  |
| UN17876 | Rsa1.0_00253.1 | 846  | 231292 | 0         | 448 | 455 | 98 +  | 2   | 456  | 204509 | 204960 |
| UN17877 | Rsa1.0_00903.1 | 1555 | 60228  | 0         | 413 | 415 | 99 -  | 1   | 415  | 9118   | 9532   |
| UN17878 | Rsa1.0_00033.1 | 705  | 515811 | 0         | 393 | 394 | 99 -  | 312 | 705  | 366451 | 366843 |
| UN17879 | Rsa1.0_02239.1 | 938  | 33534  | 1.00E-139 | 302 | 316 | 95 -  | 625 | 938  | 9639   | 9949   |
| UN17880 | Rsa1.0_00116.1 | 755  | 365886 | 5.00E-95  | 225 | 236 | 95 +  | 520 | 753  | 315711 | 315943 |
| UN17881 | Rsa1.0_00988.1 | 846  | 57525  | 1.00E-139 | 277 | 283 | 97 -  | 564 | 845  | 27392  | 27672  |
| UN17882 | Rsa1.0_04994.1 | 1007 | 15199  | 0         | 392 | 397 | 98 +  | 612 | 1007 | 5955   | 6351   |
| UN17883 | Rsa1.0_00652.1 | 922  | 70089  | 1.00E-107 | 229 | 239 | 95 -  | 671 | 909  | 22798  | 23033  |
| UN17884 | Rsa1.0_03831.1 | 942  | 20579  | 1.00E-109 | 271 | 291 | 93 +  | 3   | 279  | 18131  | 18420  |
| UN17885 | Rsa1.0_04462.1 | 422  | 17250  | 1.00E-144 | 323 | 343 | 94 -  | 1   | 343  | 13370  | 13711  |
| UN17886 | Rsa1.0_04194.1 | 777  | 132734 | 0         | 578 | 589 | 98 -  | 190 | 777  | 123400 | 123988 |
| UN17887 | Rsa1.0_03148.1 | 834  | 24989  | 0         | 380 | 399 | 95 +  | 368 | 766  | 21013  | 21408  |
| UN17888 | Rsa1.0_00141.1 | 765  | 121494 | 1.00E-140 | 318 | 339 | 93 +  | 432 | 765  | 20677  | 21003  |
| UN17889 | Rsa1.0_00253.1 | 604  | 231292 | 0         | 584 | 594 | 98 +  | 11  | 604  | 97765  | 98358  |
| UN17890 | Rsa1.0_00122.1 | 453  | 265937 | 1.00E-179 | 425 | 461 | 92 +  | 3   | 451  | 224882 | 225339 |
| UN17891 | Rsa1.0_03296.1 | 744  | 23969  | 0         | 389 | 394 | 98 +  | 3   | 396  | 14345  | 14738  |
| UN17892 | Rsa1.0_00501.1 | 300  | 79545  | 1.00E-131 | 283 | 297 | 95 +  | 4   | 299  | 58691  | 58987  |
| UN17893 | Rsa1.0_00437.1 | 629  | 84879  | 1.00E-103 | 227 | 240 | 94 -  | 397 | 629  | 64119  | 64358  |
| UN17894 | Rsa1.0_00884.1 | 901  | 61150  | 0         | 874 | 899 | 97 -  | 3   | 901  | 48091  | 48983  |
| UN17895 | Rsa1.0_00162.1 | 525  | 239935 | 0         | 384 | 398 | 96 +  | 128 | 525  | 12315  | 12703  |
| UN17896 | Rsa1.0_01311.1 | 756  | 48456  | 3.00E-96  | 222 | 233 | 95 +  | 65  | 295  | 20313  | 20542  |
| UN17897 | Rsa1.0_00501.1 | 1019 | 79545  | 0         | 557 | 573 | 97 -  | 448 | 1019 | 58698  | 59270  |
| UN17898 | Rsa1.0_02622.1 | 848  | 142402 | 1.00E-165 | 331 | 341 | 97 +  | 3   | 342  | 6671   | 7008   |
| UN17899 | Rsa1.0_13702.1 | 867  | 4456   | 1.00E-132 | 259 | 265 | 97 +  | 1   | 265  | 1756   | 2017   |

|         |                |      |        |           |     |     |       |      |      |        |        |
|---------|----------------|------|--------|-----------|-----|-----|-------|------|------|--------|--------|
| UN17900 | Rsa1.0.01146.1 | 778  | 163455 | 0         | 740 | 779 | 94 +  | 1    | 771  | 152988 | 153766 |
| UN17901 | Rsa1.0.16906.1 | 721  | 1993   | 1.00E-134 | 258 | 263 | 98 -  | 1    | 263  | 4      | 266    |
| UN17902 | Rsa1.0.00622.1 | 817  | 71822  | 0         | 802 | 823 | 97 -  | 1    | 817  | 23235  | 24055  |
| UN17903 | Rsa1.0.01651.1 | 360  | 41586  | 1.00E-176 | 350 | 361 | 96 +  | 1    | 360  | 20839  | 21199  |
| UN17904 | Rsa1.0.01509.1 | 848  | 44258  | 0         | 503 | 516 | 97 +  | 331  | 845  | 16019  | 16530  |
| UN17905 | Rsa1.0.00083.1 | 846  | 442773 | 0         | 496 | 516 | 96 -  | 332  | 846  | 323904 | 324417 |
| UN17906 | Rsa1.0.02072.1 | 801  | 35401  | 1.00E-132 | 264 | 272 | 97 -  | 528  | 799  | 18082  | 18353  |
| UN17907 | Rsa1.0.03783.1 | 1107 | 20890  | 1.00E-144 | 295 | 303 | 97 -  | 794  | 1096 | 17848  | 18147  |
| UN17908 | Rsa1.0.01299.1 | 529  | 162028 | 1.00E-106 | 202 | 204 | 99 +  | 326  | 529  | 159762 | 159965 |
| UN17909 | Rsa1.0.00123.1 | 958  | 325650 | 0         | 651 | 677 | 96 +  | 277  | 953  | 272132 | 272808 |
| UN17910 | Rsa1.0.01232.1 | 705  | 155185 | 0         | 487 | 497 | 97 -  | 210  | 705  | 108724 | 109218 |
| UN17911 | Rsa1.0.10547.1 | 863  | 5807   | 1.00E-151 | 346 | 373 | 92 -  | 502  | 863  | 104    | 476    |
| UN17912 | Rsa1.0.00190.1 | 611  | 318240 | 4.00E-58  | 115 | 115 | 100 - | 289  | 403  | 90400  | 90514  |
| UN17913 | Rsa1.0.00150.1 | 827  | 154416 | 1.00E-117 | 218 | 219 | 99 -  | 448  | 666  | 59697  | 59915  |
| UN17914 | Rsa1.0.03191.1 | 946  | 145762 | 1.00E-123 | 270 | 284 | 95 -  | 437  | 720  | 133541 | 133818 |
| UN17915 | Rsa1.0.01119.1 | 757  | 53459  | 0         | 475 | 489 | 97 +  | 269  | 757  | 1103   | 1589   |
| UN17916 | Rsa1.0.01874.1 | 784  | 37853  | 1.00E-116 | 255 | 268 | 95 -  | 422  | 688  | 24318  | 24585  |
| UN17917 | Rsa1.0.00240.1 | 1010 | 104175 | 1.00E-157 | 318 | 331 | 96 -  | 3    | 326  | 54892  | 55222  |
| UN17918 | Rsa1.0.00358.1 | 721  | 91293  | 7.00E-88  | 234 | 251 | 93 +  | 3    | 248  | 35095  | 35343  |
| UN17919 | Rsa1.0.04415.1 | 674  | 147889 | 1.00E-103 | 271 | 295 | 91 -  | 373  | 664  | 141075 | 141355 |
| UN17920 | Rsa1.0.14400.1 | 678  | 3430   | 0         | 617 | 669 | 92 -  | 1    | 660  | 1      | 662    |
| UN17921 | Rsa1.0.00220.1 | 874  | 192936 | 1.00E-141 | 274 | 278 | 98 +  | 2    | 278  | 143184 | 143460 |
| UN17922 | Rsa1.0.01926.1 | 831  | 37206  | 1.00E-154 | 276 | 276 | 100 + | 556  | 831  | 6451   | 6726   |
| UN17923 | Rsa1.0.04218.1 | 750  | 18423  | 1.00E-151 | 340 | 358 | 94 -  | 1    | 358  | 12805  | 13157  |
| UN17924 | Rsa1.0.00501.1 | 1051 | 79545  | 0         | 595 | 599 | 99 -  | 451  | 1049 | 58672  | 59270  |
| UN17925 | Rsa1.0.24632.1 | 747  | 976    | 1.00E-142 | 280 | 288 | 97 +  | 389  | 676  | 570    | 857    |
| UN17926 | Rsa1.0.00635.1 | 930  | 175826 | 1.00E-175 | 380 | 399 | 95 +  | 3    | 397  | 14013  | 14407  |
| UN17927 | Rsa1.0.02625.1 | 726  | 139104 | 0         | 558 | 628 | 88 +  | 1    | 602  | 138419 | 139030 |
| UN17928 | Rsa1.0.01843.1 | 263  | 265131 | 1.00E-125 | 254 | 263 | 96 -  | 1    | 263  | 25510  | 25772  |
| UN17929 | Rsa1.0.00497.1 | 1149 | 79830  | 0         | 502 | 525 | 95 -  | 3    | 525  | 41564  | 42079  |
| UN17930 | Rsa1.0.02362.1 | 766  | 32190  | 1.00E-128 | 338 | 365 | 92 +  | 1    | 356  | 24783  | 25145  |
| UN17931 | Rsa1.0.00992.1 | 1762 | 57419  | 1.00E-138 | 253 | 254 | 99 -  | 1509 | 1762 | 1930   | 2183   |
| UN17932 | Rsa1.0.01016.1 | 747  | 181422 | 0         | 400 | 408 | 98 +  | 341  | 747  | 18736  | 19143  |
| UN17933 | Rsa1.0.04371.1 | 847  | 17700  | 2.33E-156 | 348 | 374 | 93 -  | 5    | 378  | 2476   | 2841   |
| UN17934 | Rsa1.0.16723.1 | 804  | 2053   | 0         | 362 | 367 | 98 +  | 1    | 366  | 991    | 1356   |
| UN17935 | Rsa1.0.00139.1 | 858  | 357786 | 0         | 827 | 852 | 97 -  | 4    | 854  | 148943 | 149794 |
| UN17936 | Rsa1.0.00657.1 | 772  | 69858  | 0         | 396 | 410 | 96 -  | 336  | 744  | 4196   | 4605   |
| UN17937 | Rsa1.0.00733.1 | 548  | 66583  | 1.00E-106 | 226 | 238 | 94 -  | 2    | 239  | 59548  | 59774  |
| UN17938 | Rsa1.0.04200.1 | 927  | 18490  | 0         | 395 | 402 | 98 +  | 1    | 402  | 768    | 1169   |

|         |                |      |        |           |     |     |       |      |      |        |        |
|---------|----------------|------|--------|-----------|-----|-----|-------|------|------|--------|--------|
| UN17939 | Rsa1.0.48656.1 | 1042 | 465    | 1.00E-111 | 216 | 220 | 98 +  | 245  | 464  | 152    | 371    |
| UN17940 | Rsa1.0.00729.1 | 927  | 66690  | 0         | 607 | 622 | 97 -  | 4    | 625  | 56634  | 57253  |
| UN17941 | Rsa1.0.00719.1 | 650  | 66952  | 0         | 427 | 440 | 97 -  | 2    | 441  | 25642  | 26081  |
| UN17942 | Rsa1.0.01801.1 | 833  | 39094  | 0         | 554 | 566 | 97 -  | 21   | 579  | 20432  | 20997  |
| UN17943 | Rsa1.0.19861.1 | 805  | 1373   | 1.00E-120 | 258 | 271 | 95 +  | 535  | 805  | 448    | 712    |
| UN17944 | Rsa1.0.02399.1 | 798  | 31763  | 0         | 384 | 397 | 96 +  | 402  | 798  | 12071  | 12467  |
| UN17945 | Rsa1.0.07679.1 | 727  | 8811   | 0         | 348 | 348 | 100 + | 29   | 376  | 1      | 348    |
| UN17946 | Rsa1.0.00067.1 | 813  | 415055 | 0         | 777 | 798 | 97 -  | 3    | 796  | 614    | 1411   |
| UN17947 | Rsa1.0.03783.1 | 1192 | 20890  | 1.00E-147 | 314 | 325 | 96 -  | 869  | 1189 | 17823  | 18147  |
| UN17948 | Rsa1.0.04846.1 | 969  | 15739  | 0         | 503 | 525 | 95 +  | 442  | 965  | 13280  | 13801  |
| UN17949 | Rsa1.0.19050.1 | 749  | 1488   | 1.00E-114 | 213 | 214 | 99 +  | 350  | 563  | 257    | 470    |
| UN17950 | Rsa1.0.01482.1 | 1111 | 44855  | 0         | 442 | 446 | 99 +  | 666  | 1111 | 16982  | 17427  |
| UN17951 | Rsa1.0.00055.1 | 744  | 520193 | 1.00E-116 | 237 | 245 | 96 +  | 3    | 247  | 103853 | 104097 |
| UN17952 | Rsa1.0.00132.1 | 725  | 124299 | 0         | 687 | 710 | 96 +  | 14   | 723  | 25491  | 26200  |
| UN17953 | Rsa1.0.55790.1 | 397  | 410    | 1.00E-160 | 289 | 290 | 99 +  | 25   | 314  | 1      | 290    |
| UN17954 | Rsa1.0.04386.1 | 1397 | 17627  | 0         | 511 | 521 | 98 +  | 881  | 1397 | 15113  | 15633  |
| UN17955 | Rsa1.0.00114.1 | 677  | 131330 | 1.00E-165 | 424 | 464 | 91 -  | 7    | 468  | 117617 | 118072 |
| UN17956 | Rsa1.0.00250.1 | 775  | 273771 | 0         | 368 | 372 | 98 -  | 103  | 473  | 186945 | 187315 |
| UN17957 | Rsa1.0.00010.1 | 1109 | 294827 | 1.00E-170 | 411 | 447 | 91 +  | 2    | 448  | 81197  | 81627  |
| UN17958 | Rsa1.0.01707.1 | 978  | 40686  | 0         | 391 | 401 | 97 -  | 178  | 578  | 25818  | 26218  |
| UN17959 | Rsa1.0.01377.1 | 509  | 46967  | 0         | 470 | 509 | 92 +  | 1    | 508  | 10117  | 10601  |
| UN17960 | Rsa1.0.00324.1 | 772  | 218805 | 1.00E-100 | 205 | 210 | 97 +  | 18   | 226  | 188072 | 188281 |
| UN17961 | Rsa1.0.00270.1 | 1028 | 101236 | 1.00E-129 | 298 | 315 | 94 -  | 718  | 1028 | 57803  | 58114  |
| UN17962 | Rsa1.0.01115.1 | 820  | 183545 | 0         | 439 | 459 | 95 +  | 371  | 820  | 174692 | 175150 |
| UN17963 | Rsa1.0.00128.1 | 761  | 228675 | 1.00E-102 | 198 | 201 | 98 -  | 558  | 758  | 216628 | 216828 |
| UN17964 | Rsa1.0.01549.1 | 819  | 43543  | 0         | 755 | 781 | 96 -  | 37   | 817  | 41915  | 42691  |
| UN17965 | Rsa1.0.03723.1 | 744  | 21173  | 3.00E-13  | 55  | 60  | 91 +  | 137  | 196  | 16991  | 17050  |
| UN17966 | Rsa1.0.00644.1 | 1641 | 136881 | 1.00E-179 | 359 | 377 | 95 -  | 3    | 379  | 41427  | 41785  |
| UN17967 | Rsa1.0.03574.1 | 464  | 22004  | 2.00E-77  | 264 | 299 | 88 +  | 3    | 289  | 17891  | 18178  |
| UN17968 | Rsa1.0.01934.1 | 761  | 37162  | 0         | 424 | 438 | 96 -  | 318  | 752  | 1854   | 2291   |
| UN17969 | Rsa1.0.00128.1 | 1102 | 228675 | 1.00E-161 | 307 | 312 | 98 -  | 789  | 1099 | 216103 | 216414 |
| UN17970 | Rsa1.0.00825.1 | 834  | 62855  | 0         | 829 | 833 | 99 +  | 2    | 834  | 48140  | 48972  |
| UN17971 | Rsa1.0.00407.1 | 595  | 191544 | 0         | 380 | 382 | 99 +  | 214  | 595  | 182904 | 183285 |
| UN17972 | Rsa1.0.23101.1 | 816  | 1071   | 0         | 379 | 383 | 98 -  | 427  | 809  | 1      | 383    |
| UN17973 | Rsa1.0.03016.1 | 916  | 26000  | 1.00E-167 | 368 | 384 | 95 -  | 9    | 388  | 3315   | 3694   |
| UN17974 | Rsa1.0.15840.1 | 773  | 2394   | 0         | 403 | 403 | 100 + | 371  | 773  | 288    | 690    |
| UN17975 | Rsa1.0.00363.1 | 619  | 90968  | 1.00E-101 | 231 | 243 | 95 +  | 21   | 261  | 28260  | 28502  |
| UN17976 | Rsa1.0.00630.1 | 1109 | 71281  | 0         | 512 | 520 | 98 -  | 226  | 745  | 62260  | 62779  |
| UN17977 | Rsa1.0.00104.1 | 1475 | 368722 | 1.00E-174 | 368 | 383 | 96 +  | 1098 | 1475 | 197643 | 198022 |

|         |                |      |        |           |     |     |       |     |      |        |        |
|---------|----------------|------|--------|-----------|-----|-----|-------|-----|------|--------|--------|
| UN17978 | Rsa1.0_03303.1 | 542  | 23890  | 0         | 523 | 547 | 95 +  | 1   | 541  | 9575   | 10118  |
| UN17979 | Rsa1.0_00228.1 | 832  | 105511 | 0         | 797 | 825 | 96 +  | 3   | 826  | 97604  | 98424  |
| UN17980 | Rsa1.0_01126.1 | 819  | 53127  | 1.00E-137 | 264 | 268 | 98 +  | 2   | 268  | 14986  | 15253  |
| UN17981 | Rsa1.0_01874.1 | 834  | 37853  | 1.00E-113 | 254 | 268 | 94 -  | 421 | 687  | 24318  | 24585  |
| UN17982 | Rsa1.0_00953.1 | 805  | 145012 | 1.00E-169 | 360 | 379 | 94 +  | 3   | 376  | 11206  | 11581  |
| UN17983 | Rsa1.0_00194.1 | 597  | 110851 | 1.00E-108 | 319 | 360 | 88 +  | 253 | 590  | 56294  | 56652  |
| UN17984 | Rsa1.0_00083.1 | 818  | 442773 | 0         | 799 | 822 | 97 +  | 1   | 817  | 401735 | 402551 |
| UN17985 | Rsa1.0_03953.1 | 775  | 19889  | 0         | 693 | 728 | 95 +  | 1   | 709  | 6295   | 7021   |
| UN17986 | Rsa1.0_01730.1 | 577  | 40223  | 0         | 506 | 545 | 92 -  | 17  | 548  | 33434  | 33974  |
| UN17987 | Rsa1.0_02685.1 | 757  | 28669  | 0         | 361 | 364 | 99 -  | 392 | 755  | 27849  | 28210  |
| UN17988 | Rsa1.0_01783.1 | 788  | 39383  | 1.00E-159 | 294 | 297 | 98 +  | 1   | 297  | 12960  | 13256  |
| UN17989 | Rsa1.0_00730.1 | 448  | 66673  | 6.00E-81  | 162 | 165 | 98 +  | 1   | 165  | 28545  | 28709  |
| UN17990 | Rsa1.0_02470.1 | 772  | 31108  | 1.00E-55  | 123 | 127 | 96 +  | 319 | 445  | 24543  | 24669  |
| UN17991 | Rsa1.0_00739.1 | 1364 | 66155  | 0         | 506 | 516 | 98 -  | 598 | 1112 | 51804  | 52318  |
| UN17992 | Rsa1.0_07704.1 | 765  | 8754   | 0         | 517 | 544 | 95 -  | 227 | 765  | 3569   | 4101   |
| UN17993 | Rsa1.0_02092.1 | 747  | 35135  | 0         | 746 | 747 | 99 -  | 1   | 747  | 27231  | 27976  |
| UN17994 | Rsa1.0_00410.1 | 753  | 86957  | 5.00E-55  | 110 | 110 | 100 - | 375 | 484  | 18062  | 18171  |
| UN17995 | Rsa1.0_49554.1 | 1177 | 458    | 0         | 384 | 397 | 96 -  | 779 | 1174 | 59     | 450    |
| UN17996 | Rsa1.0_00863.1 | 1173 | 254535 | 0         | 636 | 636 | 100 - | 537 | 1172 | 251931 | 252566 |
| UN17997 | Rsa1.0_00123.1 | 899  | 325650 | 1.00E-159 | 327 | 339 | 96 +  | 450 | 786  | 305219 | 305556 |
| UN17998 | Rsa1.0_19861.1 | 514  | 1373   | 1.00E-119 | 265 | 281 | 94 -  | 1   | 281  | 448    | 722    |
| UN17999 | Rsa1.0_00037.1 | 1134 | 307838 | 0         | 599 | 618 | 96 +  | 1   | 618  | 16677  | 17290  |
| UN18000 | Rsa1.0_00490.1 | 1074 | 186713 | 0         | 621 | 623 | 99 -  | 450 | 1072 | 52225  | 52847  |
| UN18001 | Rsa1.0_00262.1 | 288  | 101906 | 9.00E-79  | 164 | 169 | 97 -  | 52  | 220  | 69618  | 69786  |
| UN18002 | Rsa1.0_00407.1 | 1039 | 191544 | 0         | 836 | 838 | 99 -  | 192 | 1028 | 155520 | 156357 |
| UN18003 | Rsa1.0_05199.1 | 1060 | 14529  | 0         | 537 | 584 | 91 +  | 9   | 592  | 7797   | 8369   |
| UN18004 | Rsa1.0_02693.1 | 782  | 28617  | 0         | 416 | 434 | 95 +  | 1   | 433  | 24856  | 25279  |
| UN18005 | Rsa1.0_01081.1 | 599  | 499226 | 0         | 592 | 594 | 99 +  | 6   | 599  | 456332 | 456925 |
| UN18006 | Rsa1.0_05199.1 | 891  | 14529  | 0         | 779 | 837 | 93 -  | 55  | 891  | 8003   | 8835   |
| UN18007 | Rsa1.0_00713.1 | 1165 | 158017 | 0         | 419 | 422 | 99 +  | 436 | 857  | 19367  | 19788  |
| UN18008 | Rsa1.0_04462.1 | 560  | 17250  | 0         | 417 | 435 | 95 +  | 94  | 528  | 13640  | 14074  |
| UN18009 | Rsa1.0_00449.1 | 809  | 83863  | 1.00E-173 | 344 | 356 | 96 -  | 3   | 358  | 56110  | 56465  |
| UN18010 | Rsa1.0_02312.1 | 761  | 32675  | 0         | 731 | 749 | 97 +  | 13  | 761  | 15856  | 16603  |
| UN18011 | Rsa1.0_08916.1 | 371  | 6792   | 1.00E-149 | 332 | 354 | 93 -  | 18  | 371  | 5995   | 6342   |
| UN18012 | Rsa1.0_00744.1 | 969  | 66084  | 0         | 423 | 443 | 95 -  | 2   | 442  | 54853  | 55295  |
| UN18013 | Rsa1.0_04793.1 | 659  | 15963  | 0         | 355 | 362 | 98 +  | 205 | 566  | 2167   | 2528   |
| UN18014 | Rsa1.0_00501.1 | 905  | 79545  | 0         | 449 | 466 | 96 -  | 11  | 476  | 20921  | 21386  |
| UN18015 | Rsa1.0_01206.1 | 880  | 50772  | 1.00E-154 | 326 | 341 | 95 +  | 1   | 341  | 38827  | 39166  |
| UN18016 | Rsa1.0_00360.1 | 797  | 91190  | 2.00E-94  | 210 | 220 | 95 -  | 1   | 220  | 49756  | 49974  |



|         |                |      |        |           |     |     |       |      |      |        |        |
|---------|----------------|------|--------|-----------|-----|-----|-------|------|------|--------|--------|
| UN18017 | Rsa1.0.00127.1 | 543  | 127446 | 1.00E-133 | 240 | 240 | 100 + | 234  | 473  | 35697  | 35936  |
| UN18018 | Rsa1.0.00917.1 | 687  | 182012 | 0         | 419 | 438 | 95 -  | 255  | 686  | 175692 | 176128 |
| UN18019 | Rsa1.0.00924.1 | 441  | 59524  | 3.00E-58  | 118 | 119 | 99 -  | 125  | 243  | 4369   | 4487   |
| UN18020 | Rsa1.0.01061.1 | 538  | 55349  | 0         | 532 | 540 | 98 -  | 1    | 538  | 29539  | 30075  |
| UN18021 | Rsa1.0.00038.1 | 835  | 314568 | 6.00E-67  | 186 | 200 | 93 +  | 3    | 198  | 254440 | 254637 |
| UN18022 | Rsa1.0.03158.1 | 726  | 24950  | 0         | 456 | 474 | 96 +  | 6    | 479  | 8090   | 8563   |
| UN18023 | Rsa1.0.00471.1 | 639  | 81897  | 1.00E-138 | 265 | 269 | 98 -  | 370  | 637  | 2892   | 3160   |
| UN18024 | Rsa1.0.05287.1 | 870  | 14264  | 0         | 445 | 467 | 95 +  | 279  | 745  | 5123   | 5587   |
| UN18025 | Rsa1.0.07877.1 | 733  | 8373   | 1.00E-154 | 309 | 320 | 96 +  | 420  | 733  | 5639   | 5958   |
| UN18026 | Rsa1.0.00876.1 | 711  | 61328  | 1.00E-134 | 283 | 297 | 95 +  | 67   | 357  | 49380  | 49676  |
| UN18027 | Rsa1.0.01126.1 | 837  | 53127  | 1.00E-125 | 262 | 271 | 96 -  | 570  | 837  | 14975  | 15245  |
| UN18028 | Rsa1.0.05332.1 | 866  | 14123  | 1.00E-129 | 271 | 283 | 95 +  | 186  | 468  | 8338   | 8620   |
| UN18029 | Rsa1.0.08133.1 | 733  | 7852   | 0         | 438 | 451 | 97 -  | 283  | 733  | 1352   | 1802   |
| UN18030 | Rsa1.0.16834.1 | 976  | 2019   | 0         | 514 | 526 | 97 -  | 442  | 966  | 606    | 1131   |
| UN18031 | Rsa1.0.00078.1 | 857  | 175053 | 0         | 380 | 390 | 97 -  | 23   | 412  | 131869 | 132258 |
| UN18032 | Rsa1.0.02362.1 | 695  | 32190  | 1.00E-119 | 361 | 400 | 90 -  | 298  | 684  | 24747  | 25145  |
| UN18033 | Rsa1.0.01233.1 | 1247 | 50184  | 0         | 433 | 445 | 97 -  | 1    | 445  | 42742  | 43186  |
| UN18034 | Rsa1.0.00651.1 | 1945 | 247766 | 0         | 711 | 711 | 100 + | 1235 | 1945 | 80258  | 80968  |
| UN18035 | Rsa1.0.02710.1 | 1552 | 28492  | 0         | 662 | 662 | 100 - | 1    | 662  | 20922  | 21583  |
| UN18036 | Rsa1.0.03751.1 | 833  | 21025  | 0         | 564 | 571 | 98 -  | 263  | 833  | 16682  | 17252  |
| UN18037 | Rsa1.0.04111.1 | 1556 | 18991  | 0         | 794 | 794 | 100 + | 1    | 794  | 11224  | 12017  |
| UN18038 | Rsa1.0.00363.1 | 1397 | 90968  | 0         | 534 | 548 | 97 -  | 750  | 1297 | 67294  | 67840  |
| UN18039 | Rsa1.0.06495.1 | 624  | 10899  | 1.00E-140 | 290 | 304 | 95 +  | 4    | 296  | 5240   | 5540   |
| UN18040 | Rsa1.0.01945.1 | 1388 | 36989  | 0         | 409 | 426 | 96 -  | 1    | 421  | 6140   | 6557   |
| UN18041 | Rsa1.0.00304.1 | 964  | 97429  | 0         | 540 | 540 | 100 + | 425  | 964  | 15850  | 16389  |
| UN18042 | Rsa1.0.02101.1 | 1169 | 35017  | 0         | 390 | 394 | 98 +  | 778  | 1168 | 14474  | 14867  |
| UN18043 | Rsa1.0.00198.1 | 1578 | 222963 | 0         | 617 | 627 | 98 -  | 627  | 1253 | 152016 | 152642 |
| UN18044 | Rsa1.0.00513.1 | 739  | 78579  | 1.00E-132 | 257 | 260 | 98 +  | 1    | 259  | 57408  | 57666  |
| UN18045 | Rsa1.0.00603.1 | 803  | 73299  | 0         | 798 | 800 | 99 +  | 2    | 801  | 58541  | 59340  |
| UN18046 | Rsa1.0.00547.1 | 1124 | 76521  | 0         | 471 | 476 | 98 -  | 647  | 1122 | 54262  | 54737  |
| UN18047 | Rsa1.0.01668.1 | 958  | 41299  | 1.00E-111 | 267 | 288 | 92 +  | 553  | 840  | 40402  | 40689  |
| UN18048 | Rsa1.0.00097.1 | 751  | 138858 | 0         | 445 | 448 | 99 +  | 306  | 751  | 59426  | 59873  |
| UN18049 | Rsa1.0.00144.1 | 811  | 120708 | 0         | 371 | 384 | 96 -  | 52   | 435  | 68637  | 69018  |
| UN18050 | Rsa1.0.00092.1 | 790  | 659932 | 1.00E-161 | 316 | 320 | 98 +  | 2    | 317  | 627090 | 627409 |
| UN18051 | Rsa1.0.01250.1 | 1210 | 49874  | 0         | 327 | 329 | 99 +  | 1    | 329  | 31238  | 31566  |
| UN18052 | Rsa1.0.01204.1 | 1403 | 50843  | 0         | 877 | 902 | 97 -  | 369  | 1270 | 28520  | 29421  |
| UN18053 | Rsa1.0.02040.1 | 886  | 35684  | 1.00E-157 | 316 | 326 | 96 +  | 560  | 885  | 13231  | 13555  |
| UN18054 | Rsa1.0.00153.1 | 994  | 192931 | 0         | 533 | 534 | 99 +  | 1    | 534  | 124372 | 124905 |
| UN18055 | Rsa1.0.00324.1 | 894  | 218805 | 0         | 893 | 893 | 100 + | 1    | 893  | 214998 | 215890 |

|         |                |      |        |           |      |      |       |      |      |        |        |
|---------|----------------|------|--------|-----------|------|------|-------|------|------|--------|--------|
| UN18056 | Rsa1.0.00434.1 | 1152 | 85171  | 0         | 370  | 373  | 99 +  | 782  | 1152 | 9575   | 9947   |
| UN18057 | Rsa1.0.02467.1 | 512  | 31141  | 0         | 487  | 527  | 92 +  | 3    | 509  | 15460  | 15978  |
| UN18058 | Rsa1.0.03898.1 | 880  | 20183  | 1.00E-111 | 225  | 231  | 97 +  | 1    | 231  | 12147  | 12375  |
| UN18059 | Rsa1.0.01766.1 | 2159 | 39617  | 0         | 399  | 424  | 94 -  | 1    | 403  | 26519  | 26942  |
| UN18060 | Rsa1.0.02926.1 | 1044 | 26716  | 0         | 803  | 805  | 99 +  | 1    | 804  | 2187   | 2991   |
| UN18061 | Rsa1.0.01016.1 | 1051 | 181422 | 0         | 500  | 508  | 98 +  | 402  | 907  | 18736  | 19243  |
| UN18062 | Rsa1.0.00009.1 | 1292 | 232558 | 0         | 411  | 420  | 97 +  | 191  | 606  | 8865   | 9284   |
| UN18063 | Rsa1.0.00107.1 | 1630 | 431659 | 0         | 720  | 720  | 100 + | 424  | 1143 | 148415 | 149134 |
| UN18064 | Rsa1.0.01860.1 | 1616 | 38057  | 1.00E-131 | 285  | 302  | 94 +  | 3    | 293  | 21475  | 21772  |
| UN18065 | Rsa1.0.01678.1 | 1278 | 162174 | 0         | 417  | 422  | 98 +  | 857  | 1278 | 161267 | 161687 |
| UN18066 | Rsa1.0.00131.1 | 1268 | 432233 | 1.00E-169 | 342  | 356  | 96 +  | 913  | 1268 | 11596  | 11940  |
| UN18067 | Rsa1.0.00792.1 | 585  | 64163  | 1.00E-109 | 237  | 246  | 96 +  | 342  | 582  | 7358   | 7603   |
| UN18068 | Rsa1.0.04200.1 | 1432 | 18490  | 0         | 358  | 360  | 99 -  | 1    | 360  | 10181  | 10540  |
| UN18069 | Rsa1.0.00065.1 | 1556 | 454616 | 0         | 500  | 530  | 94 -  | 1032 | 1555 | 26185  | 26712  |
| UN18070 | Rsa1.0.00001.1 | 789  | 363028 | 3.00E-96  | 202  | 209  | 96 -  | 9    | 214  | 252923 | 253131 |
| UN18071 | Rsa1.0.01937.1 | 1071 | 37147  | 0         | 387  | 400  | 96 +  | 676  | 1071 | 21081  | 21477  |
| UN18072 | Rsa1.0.01881.1 | 923  | 37721  | 0         | 523  | 542  | 96 +  | 12   | 553  | 13978  | 14513  |
| UN18073 | Rsa1.0.01185.1 | 830  | 149842 | 2.00E-82  | 246  | 274  | 89 -  | 435  | 708  | 126678 | 126947 |
| UN18074 | Rsa1.0.00190.1 | 1927 | 318240 | 0         | 405  | 405  | 100 + | 30   | 434  | 17920  | 18324  |
| UN18075 | Rsa1.0.12638.1 | 1599 | 5167   | 0         | 558  | 562  | 99 +  | 797  | 1358 | 4606   | 5167   |
| UN18076 | Rsa1.0.02067.1 | 885  | 35451  | 0         | 425  | 440  | 96 -  | 375  | 814  | 2132   | 2571   |
| UN18077 | Rsa1.0.00715.1 | 438  | 67116  | 5.00E-66  | 195  | 211  | 92 -  | 219  | 423  | 40371  | 40581  |
| UN18078 | Rsa1.0.00305.1 | 1659 | 97308  | 0         | 1612 | 1663 | 96 -  | 10   | 1655 | 15753  | 17399  |
| UN18079 | Rsa1.0.00106.1 | 1647 | 133916 | 0         | 651  | 674  | 96 +  | 36   | 709  | 91915  | 92585  |
| UN18080 | Rsa1.0.00030.1 | 611  | 250988 | 8.00E-81  | 232  | 262  | 88 +  | 9    | 249  | 123871 | 124132 |
| UN18081 | Rsa1.0.03241.1 | 1017 | 24423  | 0         | 775  | 787  | 98 -  | 233  | 1017 | 11435  | 12221  |
| UN18082 | Rsa1.0.14001.1 | 905  | 3933   | 0         | 397  | 403  | 98 +  | 39   | 441  | 1408   | 1810   |
| UN18083 | Rsa1.0.00724.1 | 867  | 66789  | 0         | 862  | 868  | 99 -  | 3    | 867  | 60470  | 61337  |
| UN18084 | Rsa1.0.00848.1 | 792  | 152362 | 1.00E-149 | 268  | 268  | 100 + | 3    | 270  | 139681 | 139948 |
| UN18085 | Rsa1.0.01504.1 | 1316 | 189978 | 0         | 732  | 747  | 97 -  | 277  | 1023 | 25772  | 26517  |
| UN18086 | Rsa1.0.02623.1 | 855  | 29409  | 0         | 482  | 489  | 98 -  | 2    | 490  | 21515  | 22003  |
| UN18087 | Rsa1.0.05546.1 | 1523 | 13379  | 0         | 528  | 538  | 98 +  | 988  | 1523 | 5177   | 5710   |
| UN18088 | Rsa1.0.00663.1 | 897  | 164969 | 1.00E-171 | 330  | 337  | 97 +  | 3    | 339  | 126367 | 126702 |
| UN18089 | Rsa1.0.01101.1 | 1532 | 54031  | 1.00E-148 | 267  | 267  | 100 + | 352  | 618  | 22500  | 22766  |
| UN18090 | Rsa1.0.01517.1 | 1461 | 44170  | 0         | 412  | 424  | 97 +  | 1036 | 1458 | 23723  | 24143  |
| UN18091 | Rsa1.0.00189.1 | 871  | 111830 | 1.00E-151 | 285  | 288  | 98 -  | 585  | 871  | 26274  | 26561  |
| UN18092 | Rsa1.0.00515.1 | 1293 | 78417  | 1.00E-107 | 211  | 214  | 98 -  | 3    | 216  | 50318  | 50530  |
| UN18093 | Rsa1.0.00740.1 | 1836 | 215972 | 0         | 1201 | 1209 | 99 +  | 625  | 1833 | 34795  | 36003  |
| UN18094 | Rsa1.0.01214.1 | 839  | 50599  | 0         | 432  | 442  | 97 +  | 396  | 835  | 35740  | 36180  |

|         |                |      |        |           |      |      |       |      |      |        |        |
|---------|----------------|------|--------|-----------|------|------|-------|------|------|--------|--------|
| UN18095 | Rsa1.0.03143.1 | 744  | 25024  | 1.00E-138 | 289  | 302  | 95 +  | 166  | 467  | 11910  | 12211  |
| UN18096 | Rsa1.0.00307.1 | 1451 | 199003 | 0         | 375  | 381  | 98 +  | 1071 | 1451 | 70435  | 70815  |
| UN18097 | Rsa1.0.02782.1 | 1001 | 27929  | 1.00E-176 | 325  | 329  | 98 +  | 3    | 331  | 13477  | 13805  |
| UN18098 | Rsa1.0.01423.1 | 1968 | 46170  | 0         | 434  | 437  | 99 +  | 1533 | 1968 | 28713  | 29149  |
| UN18099 | Rsa1.0.02586.1 | 1709 | 29856  | 1.00E-145 | 277  | 282  | 98 -  | 339  | 620  | 8030   | 8311   |
| UN18100 | Rsa1.0.00706.1 | 1464 | 291570 | 0         | 543  | 559  | 97 +  | 219  | 777  | 181310 | 181868 |
| UN18101 | Rsa1.0.06102.1 | 1374 | 11740  | 1.00E-167 | 318  | 324  | 98 -  | 3    | 323  | 6539   | 6862   |
| UN18102 | Rsa1.0.00001.1 | 819  | 363028 | 2.00E-85  | 194  | 203  | 95 +  | 14   | 212  | 99180  | 99382  |
| UN18103 | Rsa1.0.01214.1 | 1226 | 50599  | 0         | 385  | 390  | 98 +  | 837  | 1226 | 46274  | 46660  |
| UN18104 | Rsa1.0.00218.1 | 1115 | 201480 | 5.00E-68  | 135  | 136  | 99 +  | 1    | 136  | 35114  | 35249  |
| UN18105 | Rsa1.0.00913.1 | 2232 | 59914  | 0         | 880  | 880  | 100 - | 1352 | 2231 | 616    | 1495   |
| UN18106 | Rsa1.0.16335.1 | 1062 | 2193   | 1.00E-150 | 275  | 277  | 99 -  | 786  | 1062 | 933    | 1209   |
| UN18107 | Rsa1.0.00810.1 | 784  | 63289  | 0         | 537  | 544  | 98 +  | 239  | 782  | 6634   | 7176   |
| UN18108 | Rsa1.0.01182.1 | 1045 | 167304 | 0         | 355  | 360  | 98 -  | 688  | 1044 | 165185 | 165544 |
| UN18109 | Rsa1.0.02928.1 | 864  | 26680  | 0         | 474  | 479  | 98 -  | 381  | 858  | 25575  | 26053  |
| UN18110 | Rsa1.0.00194.1 | 729  | 110851 | 1.00E-132 | 249  | 252  | 98 +  | 3    | 254  | 83885  | 84136  |
| UN18111 | Rsa1.0.01999.1 | 1196 | 36237  | 0         | 1184 | 1194 | 99 +  | 3    | 1194 | 16309  | 17501  |
| UN18112 | Rsa1.0.00699.1 | 902  | 184398 | 0         | 878  | 899  | 97 -  | 4    | 902  | 146307 | 147204 |
| UN18113 | Rsa1.0.00061.1 | 1491 | 218685 | 0         | 1331 | 1372 | 97 +  | 126  | 1491 | 185101 | 186471 |
| UN18114 | Rsa1.0.02166.1 | 1204 | 34414  | 0         | 346  | 346  | 100 - | 416  | 761  | 20683  | 21028  |
| UN18115 | Rsa1.0.00296.1 | 844  | 97854  | 1.00E-131 | 264  | 273  | 96 +  | 149  | 421  | 21946  | 22218  |
| UN18116 | Rsa1.0.05338.1 | 1283 | 144511 | 0         | 385  | 391  | 98 -  | 894  | 1283 | 9087   | 9476   |
| UN18117 | Rsa1.0.38645.1 | 687  | 582    | 0         | 354  | 354  | 100 - | 20   | 373  | 1      | 354    |
| UN18118 | Rsa1.0.00037.1 | 2222 | 307838 | 0         | 1107 | 1133 | 97 +  | 1    | 1133 | 213823 | 214949 |
| UN18119 | Rsa1.0.00273.1 | 1665 | 326186 | 1.00E-137 | 267  | 273  | 97 -  | 513  | 785  | 152695 | 152967 |
| UN18120 | Rsa1.0.01997.1 | 1389 | 158416 | 1.00E-179 | 353  | 362  | 97 -  | 3    | 363  | 9828   | 10187  |
| UN18121 | Rsa1.0.04303.1 | 1439 | 18007  | 0         | 394  | 408  | 96 -  | 3    | 404  | 11136  | 11537  |
| UN18122 | Rsa1.0.01641.1 | 1140 | 188213 | 0         | 389  | 393  | 98 -  | 748  | 1140 | 174759 | 175151 |
| UN18123 | Rsa1.0.00105.1 | 945  | 134138 | 4.00E-99  | 196  | 200  | 98 +  | 170  | 369  | 67944  | 68143  |
| UN18124 | Rsa1.0.07482.1 | 945  | 9278   | 0         | 355  | 361  | 98 -  | 88   | 448  | 2864   | 3224   |
| UN18125 | Rsa1.0.00090.1 | 1207 | 273859 | 0         | 1194 | 1204 | 99 -  | 2    | 1205 | 161589 | 162792 |
| UN18126 | Rsa1.0.00331.1 | 591  | 176754 | 1.00E-104 | 219  | 228  | 96 -  | 186  | 413  | 159068 | 159295 |
| UN18127 | Rsa1.0.00173.1 | 733  | 288743 | 1.00E-148 | 288  | 294  | 97 +  | 166  | 458  | 23958  | 24251  |
| UN18128 | Rsa1.0.02848.1 | 611  | 27329  | 0         | 410  | 411  | 99 +  | 201  | 611  | 8638   | 9048   |
| UN18129 | Rsa1.0.02505.1 | 751  | 30703  | 1.00E-171 | 305  | 305  | 100 + | 3    | 307  | 29167  | 29471  |
| UN18130 | Rsa1.0.00018.1 | 1318 | 410899 | 0         | 420  | 441  | 95 +  | 871  | 1307 | 68738  | 69175  |
| UN18131 | Rsa1.0.00207.1 | 1196 | 248736 | 0         | 596  | 609  | 97 -  | 1    | 609  | 64174  | 64779  |
| UN18132 | Rsa1.0.00376.1 | 928  | 90101  | 1.00E-138 | 253  | 254  | 99 +  | 602  | 855  | 7299   | 7552   |
| UN18133 | Rsa1.0.00838.1 | 836  | 153820 | 0         | 609  | 632  | 96 -  | 197  | 820  | 15935  | 16558  |

|         |                |      |        |           |      |      |       |      |      |        |        |
|---------|----------------|------|--------|-----------|------|------|-------|------|------|--------|--------|
| UN18134 | Rsa1.0_00247.1 | 1097 | 103408 | 1.00E-159 | 388  | 421  | 92 -  | 3    | 415  | 66969  | 67376  |
| UN18135 | Rsa1.0_04108.1 | 707  | 19001  | 0         | 695  | 705  | 98 +  | 1    | 704  | 7385   | 8088   |
| UN18136 | Rsa1.0_02020.1 | 1072 | 173211 | 1.00E-135 | 260  | 264  | 98 +  | 1    | 264  | 162244 | 162506 |
| UN18137 | Rsa1.0_15257.1 | 1233 | 2724   | 0         | 1133 | 1233 | 91 -  | 2    | 1233 | 258    | 1490   |
| UN18138 | Rsa1.0_01164.1 | 619  | 51934  | 2.00E-90  | 271  | 297  | 91 -  | 2    | 294  | 43900  | 44189  |
| UN18139 | Rsa1.0_34719.1 | 1752 | 652    | 1.00E-145 | 273  | 277  | 98 +  | 868  | 1144 | 355    | 631    |
| UN18140 | Rsa1.0_02846.1 | 1528 | 27338  | 0         | 427  | 434  | 98 -  | 1    | 434  | 18619  | 19052  |
| UN18141 | Rsa1.0_02655.1 | 2698 | 29027  | 1.00E-170 | 317  | 320  | 99 +  | 942  | 1261 | 13789  | 14107  |
| UN18142 | Rsa1.0_00213.1 | 748  | 108167 | 1.00E-153 | 306  | 315  | 97 +  | 1    | 315  | 14641  | 14954  |
| UN18143 | Rsa1.0_03962.1 | 1187 | 19860  | 0         | 413  | 419  | 98 +  | 127  | 545  | 14221  | 14639  |
| UN18144 | Rsa1.0_00363.1 | 605  | 90968  | 1.00E-125 | 231  | 232  | 99 -  | 1    | 232  | 55162  | 55393  |
| UN18145 | Rsa1.0_00727.1 | 1023 | 66724  | 1.00E-156 | 295  | 300  | 98 -  | 601  | 900  | 30138  | 30437  |
| UN18146 | Rsa1.0_00066.1 | 1267 | 152418 | 7.00E-80  | 176  | 184  | 95 +  | 1082 | 1265 | 143576 | 143759 |
| UN18147 | Rsa1.0_05769.1 | 1828 | 12694  | 1.00E-143 | 273  | 278  | 98 -  | 2    | 279  | 6632   | 6909   |
| UN18148 | Rsa1.0_00228.1 | 697  | 105511 | 1.00E-168 | 307  | 308  | 99 -  | 390  | 697  | 50155  | 50461  |
| UN18149 | Rsa1.0_00628.1 | 815  | 214360 | 1.00E-125 | 237  | 240  | 98 -  | 204  | 443  | 66081  | 66320  |
| UN18150 | Rsa1.0_11080.1 | 1152 | 5623   | 0         | 379  | 380  | 99 +  | 395  | 774  | 1789   | 2168   |
| UN18151 | Rsa1.0_00287.1 | 969  | 98687  | 0         | 599  | 679  | 88 -  | 213  | 891  | 53406  | 54084  |
| UN18152 | Rsa1.0_06738.1 | 1712 | 10441  | 0         | 940  | 943  | 99 +  | 769  | 1710 | 4253   | 5195   |
| UN18153 | Rsa1.0_00329.1 | 1345 | 222544 | 0         | 669  | 689  | 97 -  | 657  | 1344 | 193046 | 193732 |
| UN18154 | Rsa1.0_03565.1 | 990  | 22062  | 1.00E-163 | 295  | 296  | 99 -  | 1    | 296  | 16874  | 17169  |
| UN18155 | Rsa1.0_08707.1 | 1031 | 7018   | 0         | 735  | 737  | 99 +  | 293  | 1029 | 1      | 737    |
| UN18156 | Rsa1.0_00275.1 | 1663 | 210104 | 0         | 352  | 360  | 97 +  | 81   | 439  | 149312 | 149671 |
| UN18157 | Rsa1.0_00772.1 | 1278 | 64856  | 0         | 493  | 501  | 98 -  | 417  | 917  | 28581  | 29081  |
| UN18158 | Rsa1.0_00857.1 | 1869 | 61904  | 0         | 724  | 743  | 97 -  | 824  | 1563 | 14129  | 14871  |
| UN18159 | Rsa1.0_01042.1 | 995  | 293264 | 0         | 575  | 592  | 97 +  | 403  | 993  | 141476 | 142066 |
| UN18160 | Rsa1.0_04489.1 | 748  | 17145  | 1.00E-106 | 225  | 233  | 96 +  | 521  | 748  | 14197  | 14429  |
| UN18161 | Rsa1.0_00886.1 | 714  | 167350 | 1.00E-149 | 274  | 276  | 99 -  | 2    | 277  | 8901   | 9176   |
| UN18162 | Rsa1.0_14220.1 | 1463 | 3652   | 1.00E-105 | 195  | 195  | 100 - | 74   | 268  | 3458   | 3652   |
| UN18163 | Rsa1.0_05467.1 | 1238 | 13649  | 0         | 557  | 559  | 99 -  | 673  | 1231 | 6289   | 6847   |
| UN18164 | Rsa1.0_00136.1 | 1332 | 122464 | 0         | 665  | 679  | 97 +  | 5    | 682  | 56038  | 56713  |
| UN18165 | Rsa1.0_00208.1 | 989  | 108565 | 1.00E-126 | 395  | 446  | 88 +  | 1    | 434  | 28175  | 28605  |
| UN18166 | Rsa1.0_02494.1 | 1176 | 132923 | 1.00E-165 | 316  | 323  | 97 -  | 801  | 1123 | 107655 | 107977 |
| UN18167 | Rsa1.0_00427.1 | 1406 | 189678 | 0         | 413  | 421  | 98 -  | 986  | 1406 | 53848  | 54266  |
| UN18168 | Rsa1.0_00016.1 | 1420 | 831256 | 0         | 416  | 418  | 99 -  | 769  | 1186 | 253037 | 253454 |
| UN18169 | Rsa1.0_00107.1 | 1229 | 431659 | 0         | 429  | 434  | 98 +  | 1    | 433  | 14103  | 14536  |
| UN18170 | Rsa1.0_14436.1 | 1672 | 3393   | 0         | 494  | 515  | 95 +  | 536  | 1050 | 2867   | 3381   |
| UN18171 | Rsa1.0_01511.1 | 840  | 44235  | 0         | 664  | 668  | 99 +  | 2    | 669  | 19782  | 20449  |
| UN18172 | Rsa1.0_00533.1 | 987  | 77375  | 0         | 362  | 364  | 99 -  | 623  | 986  | 43209  | 43572  |

|         |                |      |        |           |      |      |       |      |      |        |        |
|---------|----------------|------|--------|-----------|------|------|-------|------|------|--------|--------|
| UN18173 | Rsa1.0_04281.1 | 1603 | 18107  | 0         | 849  | 898  | 94 +  | 187  | 1084 | 15671  | 16568  |
| UN18174 | Rsa1.0_38435.1 | 1670 | 586    | 0         | 583  | 586  | 99 -  | 153  | 738  | 1      | 586    |
| UN18175 | Rsa1.0_00087.1 | 994  | 761073 | 1.00E-147 | 368  | 400  | 92 +  | 47   | 442  | 98854  | 99250  |
| UN18176 | Rsa1.0_00175.1 | 1921 | 166121 | 0         | 948  | 969  | 97 -  | 954  | 1921 | 84197  | 85165  |
| UN18177 | Rsa1.0_00253.1 | 1767 | 231292 | 0         | 587  | 617  | 95 +  | 755  | 1359 | 86583  | 87195  |
| UN18178 | Rsa1.0_02490.1 | 1241 | 30885  | 1.00E-180 | 341  | 348  | 97 +  | 440  | 787  | 5982   | 6329   |
| UN18179 | Rsa1.0_00326.1 | 1455 | 171955 | 1.00E-133 | 242  | 242  | 100 - | 691  | 932  | 41797  | 42038  |
| UN18180 | Rsa1.0_00562.1 | 1334 | 75565  | 0         | 1167 | 1210 | 96 +  | 4    | 1201 | 23842  | 25047  |
| UN18181 | Rsa1.0_00163.1 | 1730 | 116847 | 1.00E-112 | 296  | 325  | 91 -  | 754  | 1061 | 64188  | 64512  |
| UN18182 | Rsa1.0_46357.1 | 885  | 487    | 1.00E-136 | 262  | 267  | 98 +  | 613  | 879  | 221    | 487    |
| UN18183 | Rsa1.0_00230.1 | 849  | 105389 | 0         | 394  | 394  | 100 + | 1    | 394  | 2532   | 2925   |
| UN18184 | Rsa1.0_00092.1 | 1024 | 659932 | 2.00E-86  | 172  | 175  | 98 +  | 691  | 865  | 24958  | 25132  |
| UN18185 | Rsa1.0_06771.1 | 717  | 10388  | 0         | 699  | 709  | 98 -  | 5    | 712  | 2586   | 3293   |
| UN18186 | Rsa1.0_00235.1 | 813  | 154696 | 0         | 563  | 590  | 95 -  | 21   | 609  | 139087 | 139668 |
| UN18187 | Rsa1.0_00190.1 | 1133 | 318240 | 0         | 408  | 417  | 97 +  | 419  | 835  | 8210   | 8626   |
| UN18188 | Rsa1.0_04545.1 | 702  | 146799 | 0         | 335  | 337  | 99 -  | 366  | 702  | 7535   | 7869   |
| UN18189 | Rsa1.0_03673.1 | 996  | 21448  | 0         | 509  | 516  | 98 +  | 3    | 518  | 4077   | 4589   |
| UN18190 | Rsa1.0_00079.1 | 632  | 606987 | 1.00E-179 | 330  | 334  | 98 +  | 280  | 613  | 536507 | 536840 |
| UN18191 | Rsa1.0_00010.1 | 1387 | 294827 | 2.33E-156 | 283  | 288  | 98 +  | 1100 | 1386 | 291011 | 291298 |
| UN18192 | Rsa1.0_06840.1 | 1270 | 10286  | 1.00E-162 | 308  | 314  | 98 +  | 490  | 803  | 9049   | 9362   |
| UN18193 | Rsa1.0_00971.1 | 647  | 57973  | 0         | 621  | 622  | 99 -  | 3    | 623  | 19834  | 20455  |
| UN18194 | Rsa1.0_00105.1 | 799  | 134138 | 1.00E-168 | 384  | 411  | 93 +  | 398  | 798  | 91785  | 92188  |
| UN18195 | Rsa1.0_00278.1 | 935  | 231896 | 0         | 490  | 501  | 97 +  | 432  | 932  | 49869  | 50369  |
| UN18196 | Rsa1.0_04811.1 | 2200 | 15885  | 0         | 417  | 420  | 99 -  | 1469 | 1888 | 12070  | 12489  |
| UN18197 | Rsa1.0_02794.1 | 967  | 27820  | 1.00E-157 | 281  | 281  | 100 - | 685  | 965  | 26676  | 26956  |
| UN18198 | Rsa1.0_04369.1 | 1673 | 17703  | 1.00E-168 | 338  | 349  | 96 -  | 1326 | 1673 | 1786   | 2134   |
| UN18199 | Rsa1.0_05714.1 | 1415 | 12850  | 1.00E-124 | 230  | 231  | 99 +  | 98   | 328  | 8830   | 9060   |
| UN18200 | Rsa1.0_00104.1 | 619  | 368722 | 0         | 614  | 619  | 99 +  | 1    | 619  | 76335  | 76952  |
| UN18201 | Rsa1.0_00088.1 | 1248 | 141341 | 0         | 693  | 703  | 98 -  | 547  | 1248 | 96279  | 96981  |
| UN18202 | Rsa1.0_00253.1 | 744  | 231292 | 1.00E-179 | 399  | 423  | 94 -  | 309  | 722  | 79564  | 79984  |
| UN18203 | Rsa1.0_00472.1 | 1883 | 398134 | 1.00E-163 | 322  | 332  | 96 -  | 16   | 347  | 309961 | 310292 |
| UN18204 | Rsa1.0_00067.1 | 1878 | 415055 | 0         | 923  | 944  | 97 +  | 3    | 946  | 181422 | 182365 |
| UN18205 | Rsa1.0_00662.1 | 1325 | 192183 | 1.00E-172 | 319  | 323  | 98 +  | 3    | 325  | 51398  | 51720  |
| UN18206 | Rsa1.0_00182.1 | 1489 | 142305 | 0         | 699  | 702  | 99 -  | 247  | 948  | 132407 | 133108 |
| UN18207 | Rsa1.0_00037.1 | 1904 | 307838 | 0         | 868  | 906  | 95 -  | 1021 | 1904 | 33020  | 33925  |
| UN18208 | Rsa1.0_00010.1 | 1430 | 294827 | 0         | 453  | 458  | 98 +  | 202  | 659  | 87840  | 88297  |
| UN18209 | Rsa1.0_02214.1 | 1286 | 161150 | 0         | 377  | 391  | 96 -  | 894  | 1283 | 13132  | 13521  |
| UN18210 | Rsa1.0_00719.1 | 1699 | 66952  | 1.00E-145 | 288  | 297  | 96 +  | 368  | 664  | 42432  | 42728  |
| UN18211 | Rsa1.0_02570.1 | 753  | 30000  | 0         | 565  | 573  | 98 -  | 166  | 738  | 1046   | 1615   |

|         |                |      |        |           |      |      |       |      |      |        |        |
|---------|----------------|------|--------|-----------|------|------|-------|------|------|--------|--------|
| UN18212 | Rsa1.0.00087.1 | 1503 | 761073 | 1.00E-165 | 341  | 356  | 95 +  | 706  | 1061 | 433300 | 433655 |
| UN18213 | Rsa1.0.01996.1 | 885  | 36327  | 0         | 369  | 379  | 97 +  | 3    | 373  | 3452   | 3830   |
| UN18214 | Rsa1.0.01908.1 | 780  | 37427  | 0         | 518  | 521  | 99 +  | 260  | 780  | 16804  | 17324  |
| UN18215 | Rsa1.0.00069.1 | 813  | 403561 | 0         | 443  | 465  | 95 +  | 352  | 812  | 162099 | 162559 |
| UN18216 | Rsa1.0.01454.1 | 952  | 45440  | 1.00E-162 | 296  | 297  | 99 -  | 657  | 952  | 14232  | 14528  |
| UN18217 | Rsa1.0.01850.1 | 810  | 162224 | 2.00E-67  | 134  | 135  | 99 +  | 116  | 250  | 32969  | 33103  |
| UN18218 | Rsa1.0.07756.1 | 1481 | 8634   | 1.00E-177 | 327  | 331  | 98 +  | 1151 | 1481 | 5774   | 6104   |
| UN18219 | Rsa1.0.00805.1 | 1517 | 63724  | 0         | 783  | 829  | 94 -  | 29   | 851  | 57517  | 58345  |
| UN18220 | Rsa1.0.02786.1 | 800  | 27880  | 0         | 491  | 512  | 95 -  | 290  | 800  | 18684  | 19185  |
| UN18221 | Rsa1.0.01569.1 | 959  | 43029  | 0         | 675  | 676  | 99 +  | 1    | 676  | 22759  | 23434  |
| UN18222 | Rsa1.0.01376.1 | 984  | 47004  | 0         | 418  | 447  | 93 -  | 522  | 965  | 40139  | 40582  |
| UN18223 | Rsa1.0.00459.1 | 1350 | 82580  | 0         | 351  | 355  | 98 -  | 2    | 356  | 20821  | 21174  |
| UN18224 | Rsa1.0.01970.1 | 1259 | 36648  | 0         | 939  | 983  | 95 -  | 5    | 985  | 2521   | 3495   |
| UN18225 | Rsa1.0.00013.1 | 1552 | 292129 | 0         | 499  | 519  | 96 +  | 51   | 569  | 225224 | 225739 |
| UN18226 | Rsa1.0.00522.1 | 960  | 78103  | 2.00E-98  | 207  | 215  | 96 -  | 392  | 606  | 48991  | 49205  |
| UN18227 | Rsa1.0.09091.1 | 1153 | 6656   | 0         | 401  | 404  | 99 +  | 4    | 407  | 3708   | 4111   |
| UN18228 | Rsa1.0.00668.1 | 2559 | 69421  | 0         | 1132 | 1152 | 98 -  | 297  | 1448 | 23289  | 24437  |
| UN18229 | Rsa1.0.02454.1 | 2428 | 31263  | 0         | 1580 | 1584 | 99 +  | 96   | 1679 | 24099  | 25681  |
| UN18230 | Rsa1.0.00402.1 | 1951 | 385315 | 0         | 737  | 755  | 97 +  | 824  | 1578 | 88949  | 89697  |
| UN18231 | Rsa1.0.00179.1 | 1138 | 393324 | 0         | 412  | 414  | 99 -  | 724  | 1137 | 211659 | 212072 |
| UN18232 | Rsa1.0.01060.1 | 1383 | 55368  | 1.00E-111 | 223  | 229  | 97 -  | 894  | 1122 | 38736  | 38964  |
| UN18233 | Rsa1.0.00724.1 | 929  | 66789  | 0         | 605  | 619  | 97 -  | 317  | 927  | 4427   | 5045   |
| UN18234 | Rsa1.0.01139.1 | 1665 | 52601  | 0         | 431  | 441  | 97 -  | 1186 | 1626 | 48424  | 48864  |
| UN18235 | Rsa1.0.07344.1 | 1567 | 9528   | 0         | 848  | 858  | 98 -  | 1    | 858  | 5897   | 6754   |
| UN18236 | Rsa1.0.00414.1 | 862  | 202190 | 0         | 492  | 515  | 95 +  | 358  | 861  | 36763  | 37276  |
| UN18237 | Rsa1.0.01382.1 | 1258 | 46877  | 0         | 387  | 404  | 95 -  | 12   | 411  | 13890  | 14293  |
| UN18238 | Rsa1.0.04458.1 | 1211 | 17255  | 1.00E-179 | 319  | 319  | 100 + | 668  | 986  | 7725   | 8043   |
| UN18239 | Rsa1.0.00606.1 | 1184 | 73150  | 1.00E-123 | 237  | 240  | 98 +  | 945  | 1183 | 32638  | 32877  |
| UN18240 | Rsa1.0.00500.1 | 970  | 272308 | 0         | 798  | 803  | 99 -  | 1    | 802  | 143320 | 144121 |
| UN18241 | Rsa1.0.03655.1 | 1839 | 21557  | 0         | 349  | 356  | 98 -  | 798  | 1153 | 8466   | 8821   |
| UN18242 | Rsa1.0.00440.1 | 1430 | 84723  | 1.00E-151 | 275  | 276  | 99 -  | 1    | 276  | 68557  | 68832  |
| UN18243 | Rsa1.0.01352.1 | 1779 | 47443  | 0         | 1388 | 1415 | 98 +  | 1    | 1413 | 7065   | 8479   |
| UN18244 | Rsa1.0.04189.1 | 1052 | 18584  | 1.00E-178 | 320  | 321  | 99 -  | 3    | 323  | 4224   | 4544   |
| UN18245 | Rsa1.0.01659.1 | 1090 | 164577 | 0         | 404  | 409  | 98 +  | 1    | 408  | 148556 | 148963 |
| UN18246 | Rsa1.0.01546.1 | 890  | 43586  | 0         | 857  | 887  | 96 -  | 7    | 888  | 30231  | 31115  |
| UN18247 | Rsa1.0.00078.1 | 1450 | 175053 | 1.00E-103 | 203  | 207  | 98 +  | 648  | 854  | 43779  | 43985  |
| UN18248 | Rsa1.0.32222.1 | 1201 | 707    | 0         | 364  | 365  | 99 -  | 1    | 365  | 1      | 364    |
| UN18249 | Rsa1.0.03718.1 | 1612 | 21195  | 0         | 473  | 503  | 94 -  | 1109 | 1611 | 450    | 935    |
| UN18250 | Rsa1.0.04985.1 | 1061 | 15232  | 0         | 1041 | 1055 | 98 -  | 7    | 1061 | 4170   | 5219   |

|         |                |      |        |           |      |      |       |      |      |        |        |
|---------|----------------|------|--------|-----------|------|------|-------|------|------|--------|--------|
| UN18251 | Rsa1.0.00709.1 | 522  | 67329  | 0         | 497  | 520  | 95 -  | 1    | 520  | 13757  | 14268  |
| UN18252 | Rsa1.0.00493.1 | 1421 | 80007  | 1.00E-136 | 249  | 250  | 99 +  | 143  | 392  | 47779  | 48028  |
| UN18253 | Rsa1.0.00333.1 | 820  | 94500  | 1.00E-151 | 306  | 315  | 97 -  | 4    | 318  | 34823  | 35135  |
| UN18254 | Rsa1.0.01705.1 | 922  | 40710  | 1.00E-130 | 267  | 273  | 97 +  | 1    | 272  | 10482  | 10752  |
| UN18255 | Rsa1.0.00990.1 | 1428 | 57445  | 0         | 533  | 551  | 96 +  | 787  | 1333 | 42846  | 43396  |
| UN18256 | Rsa1.0.48565.1 | 1283 | 466    | 1.00E-119 | 306  | 338  | 90 +  | 5    | 320  | 108    | 439    |
| UN18257 | Rsa1.0.02802.1 | 1269 | 27736  | 0         | 631  | 657  | 96 +  | 1    | 648  | 10030  | 10678  |
| UN18258 | Rsa1.0.02916.1 | 1171 | 26809  | 0         | 341  | 343  | 99 -  | 10   | 352  | 1634   | 1976   |
| UN18259 | Rsa1.0.03874.1 | 979  | 20360  | 1.00E-165 | 310  | 314  | 98 +  | 49   | 360  | 381    | 694    |
| UN18260 | Rsa1.0.00734.1 | 2349 | 66508  | 0         | 718  | 732  | 98 +  | 1015 | 1745 | 27246  | 27974  |
| UN18261 | Rsa1.0.01788.1 | 1083 | 39296  | 1.00E-173 | 355  | 374  | 94 +  | 1    | 358  | 23988  | 24361  |
| UN18262 | Rsa1.0.01424.1 | 1246 | 46139  | 0         | 1222 | 1253 | 97 +  | 1    | 1246 | 30927  | 32176  |
| UN18263 | Rsa1.0.00038.1 | 1279 | 314568 | 1.00E-163 | 309  | 315  | 98 +  | 914  | 1228 | 194906 | 195220 |
| UN18264 | Rsa1.0.02791.1 | 1498 | 27832  | 0         | 892  | 924  | 96 -  | 26   | 935  | 20235  | 21158  |
| UN18265 | Rsa1.0.00176.1 | 777  | 240984 | 0         | 531  | 550  | 96 -  | 11   | 557  | 232410 | 232959 |
| UN18266 | Rsa1.0.00682.1 | 933  | 68680  | 0         | 542  | 546  | 99 +  | 388  | 933  | 2986   | 3531   |
| UN18267 | Rsa1.0.00848.1 | 1062 | 152362 | 5.00E-71  | 146  | 149  | 97 -  | 676  | 824  | 36953  | 37101  |
| UN18268 | Rsa1.0.13143.1 | 1539 | 4993   | 1.00E-144 | 334  | 354  | 94 +  | 1    | 353  | 702    | 1050   |
| UN18269 | Rsa1.0.01491.1 | 1415 | 44718  | 0         | 414  | 427  | 96 +  | 9    | 431  | 42154  | 42578  |
| UN18270 | Rsa1.0.02696.1 | 1233 | 28600  | 1.00E-164 | 310  | 314  | 98 -  | 920  | 1233 | 8254   | 8566   |
| UN18271 | Rsa1.0.00001.1 | 1239 | 363028 | 1.00E-172 | 318  | 321  | 99 +  | 922  | 1239 | 319592 | 319912 |
| UN18272 | Rsa1.0.00978.1 | 1936 | 57739  | 1.00E-165 | 310  | 312  | 99 +  | 1371 | 1680 | 35725  | 36036  |
| UN18273 | Rsa1.0.01104.1 | 1330 | 285480 | 0         | 388  | 390  | 99 -  | 915  | 1304 | 121482 | 121871 |
| UN18274 | Rsa1.0.00094.1 | 1576 | 139042 | 0         | 503  | 520  | 96 -  | 1033 | 1551 | 28273  | 28789  |
| UN18275 | Rsa1.0.05360.1 | 852  | 14053  | 1.00E-133 | 279  | 287  | 97 +  | 556  | 836  | 11840  | 12126  |
| UN18276 | Rsa1.0.00565.1 | 934  | 75420  | 0         | 534  | 537  | 99 -  | 3    | 538  | 21245  | 21781  |
| UN18277 | Rsa1.0.00032.1 | 1443 | 306326 | 0         | 1060 | 1072 | 98 -  | 330  | 1401 | 192599 | 193670 |
| UN18278 | Rsa1.0.00040.1 | 1895 | 324196 | 2.33E-156 | 269  | 271  | 99 +  | 88   | 358  | 312608 | 312878 |
| UN18279 | Rsa1.0.03702.1 | 825  | 21292  | 1.00E-128 | 233  | 233  | 100 + | 338  | 570  | 7814   | 8046   |
| UN18280 | Rsa1.0.00224.1 | 1284 | 327530 | 0         | 946  | 959  | 98 +  | 327  | 1284 | 85779  | 86736  |
| UN18281 | Rsa1.0.00173.1 | 682  | 288743 | 0         | 668  | 678  | 98 -  | 4    | 678  | 261503 | 262180 |
| UN18282 | Rsa1.0.00822.1 | 1099 | 62891  | 4.00E-84  | 259  | 292  | 88 +  | 818  | 1093 | 32221  | 32509  |
| UN18283 | Rsa1.0.00141.1 | 993  | 121494 | 0         | 387  | 395  | 97 -  | 157  | 551  | 105801 | 106195 |
| UN18284 | Rsa1.0.01270.1 | 1217 | 49574  | 1.00E-152 | 390  | 427  | 91 -  | 796  | 1217 | 29160  | 29567  |
| UN18285 | Rsa1.0.05827.1 | 969  | 12503  | 0         | 721  | 739  | 97 -  | 89   | 827  | 6485   | 7221   |
| UN18286 | Rsa1.0.00171.1 | 1254 | 115622 | 0         | 400  | 402  | 99 +  | 3    | 403  | 33584  | 33984  |
| UN18287 | Rsa1.0.01949.1 | 1036 | 36960  | 0         | 402  | 418  | 96 +  | 604  | 1021 | 27763  | 28176  |
| UN18288 | Rsa1.0.03738.1 | 816  | 21071  | 1.00E-135 | 263  | 269  | 97 -  | 312  | 580  | 12425  | 12693  |
| UN18289 | Rsa1.0.00111.1 | 1006 | 390088 | 0         | 382  | 394  | 96 +  | 331  | 724  | 381107 | 381500 |

|         |                |      |        |           |      |      |      |      |      |        |        |
|---------|----------------|------|--------|-----------|------|------|------|------|------|--------|--------|
| UN18290 | Rsa1.0_00785.1 | 1599 | 64356  | 0         | 432  | 438  | 98 - | 5    | 440  | 33751  | 34184  |
| UN18291 | Rsa1.0_03697.1 | 1532 | 21304  | 0         | 431  | 437  | 98 - | 1096 | 1532 | 16445  | 16881  |
| UN18292 | Rsa1.0_01806.1 | 1542 | 39021  | 0         | 771  | 833  | 92 + | 2    | 811  | 34071  | 34889  |
| UN18293 | Rsa1.0_01067.1 | 659  | 55230  | 1.00E-82  | 162  | 164  | 98 - | 1    | 164  | 6328   | 6491   |
| UN18294 | Rsa1.0_00457.1 | 913  | 337301 | 1.00E-123 | 278  | 292  | 95 + | 604  | 889  | 130569 | 130858 |
| UN18295 | Rsa1.0_01668.1 | 1069 | 41299  | 0         | 468  | 477  | 98 - | 597  | 1069 | 33622  | 34096  |
| UN18296 | Rsa1.0_00365.1 | 1670 | 90902  | 0         | 985  | 1011 | 97 - | 1    | 1010 | 59535  | 60545  |
| UN18297 | Rsa1.0_05505.1 | 1877 | 13500  | 0         | 464  | 487  | 95 - | 1392 | 1875 | 7318   | 7801   |
| UN18298 | Rsa1.0_01146.1 | 682  | 163455 | 1.00E-161 | 328  | 339  | 96 + | 341  | 679  | 162766 | 163101 |
| UN18299 | Rsa1.0_12642.1 | 1536 | 5165   | 0         | 497  | 504  | 98 + | 834  | 1337 | 23     | 523    |
| UN18300 | Rsa1.0_03160.1 | 873  | 24916  | 0         | 866  | 871  | 99 + | 3    | 873  | 2929   | 3799   |
| UN18301 | Rsa1.0_00645.1 | 2251 | 189716 | 0         | 1192 | 1204 | 99 - | 4    | 1206 | 23763  | 24966  |
| UN18302 | Rsa1.0_00200.1 | 1495 | 162016 | 0         | 816  | 871  | 93 + | 581  | 1445 | 85676  | 86546  |
| UN18303 | Rsa1.0_04811.1 | 1275 | 15885  | 0         | 402  | 404  | 99 - | 872  | 1275 | 1248   | 1651   |
| UN18304 | Rsa1.0_00010.1 | 1148 | 294827 | 0         | 422  | 435  | 97 + | 708  | 1142 | 244411 | 244838 |
| UN18305 | Rsa1.0_00476.1 | 1408 | 280966 | 0         | 491  | 493  | 99 - | 771  | 1263 | 44981  | 45473  |
| UN18306 | Rsa1.0_00351.1 | 1057 | 413096 | 0         | 403  | 419  | 96 + | 621  | 1038 | 3047   | 3457   |
| UN18307 | Rsa1.0_03448.1 | 921  | 22844  | 1.00E-169 | 313  | 317  | 98 - | 340  | 656  | 5438   | 5754   |
| UN18308 | Rsa1.0_00071.1 | 687  | 345714 | 1.00E-101 | 268  | 291  | 92 + | 397  | 687  | 22598  | 22875  |
| UN18309 | Rsa1.0_00271.1 | 773  | 101125 | 1.00E-160 | 311  | 319  | 97 + | 218  | 536  | 60726  | 61044  |
| UN18310 | Rsa1.0_00143.1 | 736  | 121313 | 0         | 723  | 736  | 98 - | 1    | 736  | 32757  | 33491  |
| UN18311 | Rsa1.0_00214.1 | 1394 | 107508 | 1.00E-179 | 339  | 345  | 98 + | 1051 | 1392 | 42267  | 42611  |
| UN18312 | Rsa1.0_01435.1 | 912  | 45942  | 1.00E-126 | 255  | 263  | 96 + | 3    | 265  | 24576  | 24835  |
| UN18313 | Rsa1.0_00037.1 | 2518 | 307838 | 0         | 964  | 994  | 96 - | 562  | 1550 | 180789 | 181781 |
| UN18314 | Rsa1.0_00611.1 | 827  | 72410  | 0         | 436  | 455  | 95 - | 370  | 823  | 15018  | 15467  |
| UN18315 | Rsa1.0_00323.1 | 1216 | 159650 | 1.00E-132 | 257  | 263  | 97 + | 322  | 584  | 43088  | 43350  |
| UN18316 | Rsa1.0_01375.1 | 863  | 47038  | 9.00E-60  | 124  | 126  | 98 - | 395  | 520  | 13143  | 13268  |
| UN18317 | Rsa1.0_00632.1 | 1330 | 183777 | 0         | 344  | 347  | 99 + | 986  | 1330 | 867    | 1212   |
| UN18318 | Rsa1.0_00185.1 | 1046 | 248445 | 1.00E-159 | 288  | 289  | 99 + | 756  | 1044 | 4378   | 4666   |
| UN18319 | Rsa1.0_00642.1 | 1412 | 201230 | 0         | 599  | 648  | 92 + | 781  | 1408 | 158305 | 158949 |
| UN18320 | Rsa1.0_00187.1 | 961  | 393093 | 0         | 959  | 961  | 99 - | 1    | 961  | 355923 | 356883 |
| UN18321 | Rsa1.0_00335.1 | 872  | 94371  | 1.00E-126 | 263  | 270  | 97 - | 603  | 871  | 33581  | 33848  |
| UN18322 | Rsa1.0_00082.1 | 1253 | 237584 | 0         | 1211 | 1268 | 95 - | 2    | 1247 | 46737  | 48000  |
| UN18323 | Rsa1.0_02860.1 | 856  | 27207  | 1.00E-163 | 308  | 313  | 98 + | 161  | 473  | 16123  | 16432  |
| UN18324 | Rsa1.0_00003.1 | 1371 | 340054 | 0         | 592  | 593  | 99 + | 779  | 1371 | 263741 | 264333 |
| UN18325 | Rsa1.0_05977.1 | 1081 | 12056  | 0         | 369  | 371  | 99 - | 589  | 959  | 8430   | 8799   |
| UN18326 | Rsa1.0_03384.1 | 898  | 23291  | 0         | 831  | 848  | 97 + | 7    | 851  | 10618  | 11465  |
| UN18327 | Rsa1.0_04936.1 | 846  | 15403  | 1.00E-104 | 199  | 200  | 99 + | 590  | 788  | 8752   | 8951   |
| UN18328 | Rsa1.0_00920.1 | 1511 | 601703 | 0         | 554  | 567  | 97 + | 945  | 1511 | 35940  | 36496  |



|         |                |      |        |           |      |      |       |      |      |        |        |
|---------|----------------|------|--------|-----------|------|------|-------|------|------|--------|--------|
| UN18329 | Rsa1.0_02105.1 | 1215 | 156953 | 3.00E-91  | 174  | 175  | 99 +  | 744  | 918  | 8913   | 9087   |
| UN18330 | Rsa1.0_00081.1 | 1736 | 143261 | 1.00E-158 | 286  | 287  | 99 -  | 1450 | 1736 | 140556 | 140842 |
| UN18331 | Rsa1.0_06341.1 | 1541 | 11209  | 0         | 373  | 383  | 97 +  | 1    | 380  | 2316   | 2698   |
| UN18332 | Rsa1.0_01635.1 | 683  | 41865  | 0         | 645  | 645  | 100 + | 35   | 679  | 15909  | 16553  |
| UN18333 | Rsa1.0_02281.1 | 1391 | 292576 | 0         | 349  | 354  | 98 +  | 3    | 356  | 1968   | 2321   |
| UN18334 | Rsa1.0_00043.1 | 835  | 264937 | 1.00E-105 | 218  | 225  | 96 +  | 49   | 273  | 243772 | 243993 |
| UN18335 | Rsa1.0_00990.1 | 1318 | 57445  | 0         | 1250 | 1322 | 94 -  | 3    | 1302 | 55447  | 56753  |
| UN18336 | Rsa1.0_00344.1 | 1683 | 191774 | 0         | 1103 | 1130 | 97 +  | 552  | 1681 | 129614 | 130743 |
| UN18337 | Rsa1.0_00071.1 | 1062 | 345714 | 0         | 370  | 382  | 96 +  | 369  | 750  | 311950 | 312331 |
| UN18338 | Rsa1.0_00481.1 | 1131 | 81316  | 1.00E-138 | 501  | 585  | 85 +  | 282  | 866  | 29295  | 29879  |
| UN18339 | Rsa1.0_00476.1 | 1474 | 280966 | 0         | 406  | 416  | 97 +  | 1    | 416  | 245467 | 245880 |
| UN18340 | Rsa1.0_04561.1 | 1660 | 16849  | 1.00E-117 | 250  | 262  | 95 +  | 30   | 286  | 5399   | 5660   |
| UN18341 | Rsa1.0_07919.1 | 1388 | 8261   | 1.00E-167 | 349  | 365  | 95 +  | 232  | 596  | 250    | 611    |
| UN18342 | Rsa1.0_74475.1 | 1433 | 308    | 1.00E-158 | 283  | 283  | 100 + | 1    | 283  | 26     | 308    |
| UN18343 | Rsa1.0_02766.1 | 1629 | 28128  | 0         | 586  | 592  | 98 -  | 571  | 1159 | 22540  | 23131  |
| UN18344 | Rsa1.0_00247.1 | 1458 | 103408 | 0         | 544  | 576  | 94 -  | 3    | 574  | 30209  | 30767  |
| UN18345 | Rsa1.0_00081.1 | 1033 | 143261 | 1.00E-151 | 307  | 317  | 96 -  | 1    | 313  | 134327 | 134643 |
| UN18346 | Rsa1.0_11907.1 | 913  | 5374   | 1.00E-179 | 430  | 455  | 94 -  | 1    | 445  | 1101   | 1551   |
| UN18347 | Rsa1.0_36803.1 | 1539 | 613    | 1.00E-179 | 322  | 323  | 99 +  | 1    | 323  | 291    | 613    |
| UN18348 | Rsa1.0_01092.1 | 1177 | 54348  | 0         | 1149 | 1175 | 97 +  | 3    | 1175 | 47736  | 48909  |
| UN18349 | Rsa1.0_01591.1 | 520  | 42718  | 1.00E-104 | 296  | 326  | 90 +  | 10   | 329  | 8914   | 9233   |
| UN18350 | Rsa1.0_03099.1 | 1459 | 139424 | 0         | 509  | 543  | 93 -  | 917  | 1457 | 4079   | 4611   |
| UN18351 | Rsa1.0_00763.1 | 1194 | 65121  | 0         | 356  | 359  | 99 +  | 1    | 359  | 38841  | 39199  |
| UN18352 | Rsa1.0_00961.1 | 1736 | 58185  | 0         | 472  | 482  | 97 -  | 393  | 874  | 14537  | 15018  |
| UN18353 | Rsa1.0_00266.1 | 987  | 163932 | 1.00E-123 | 236  | 240  | 98 -  | 272  | 511  | 7133   | 7372   |
| UN18354 | Rsa1.0_04369.1 | 1407 | 17703  | 2.33E-156 | 332  | 351  | 94 +  | 3    | 352  | 1792   | 2134   |
| UN18355 | Rsa1.0_00714.1 | 1110 | 67187  | 0         | 470  | 489  | 96 -  | 87   | 566  | 10569  | 11054  |
| UN18356 | Rsa1.0_00154.1 | 1880 | 189461 | 1.00E-147 | 283  | 288  | 98 +  | 1    | 285  | 157488 | 157775 |
| UN18357 | Rsa1.0_00046.1 | 1546 | 320315 | 0         | 1503 | 1542 | 97 +  | 7    | 1546 | 192831 | 194366 |
| UN18358 | Rsa1.0_03353.1 | 1799 | 23496  | 0         | 624  | 640  | 97 +  | 1163 | 1799 | 18009  | 18647  |
| UN18359 | Rsa1.0_00307.1 | 1067 | 199003 | 0         | 878  | 915  | 95 +  | 14   | 926  | 5353   | 6260   |
| UN18360 | Rsa1.0_00783.1 | 1830 | 64459  | 0         | 905  | 927  | 97 +  | 904  | 1827 | 20058  | 20984  |
| UN18361 | Rsa1.0_01536.1 | 761  | 43747  | 0         | 436  | 444  | 98 +  | 283  | 718  | 39543  | 39986  |
| UN18362 | Rsa1.0_20222.1 | 1987 | 1326   | 0         | 587  | 597  | 98 -  | 1145 | 1741 | 1      | 597    |
| UN18363 | Rsa1.0_00194.1 | 938  | 110851 | 0         | 413  | 432  | 95 +  | 183  | 614  | 7999   | 8430   |
| UN18364 | Rsa1.0_00621.1 | 1707 | 71840  | 1.00E-144 | 347  | 369  | 94 +  | 3    | 365  | 48836  | 49191  |
| UN18365 | Rsa1.0_00609.1 | 1320 | 72785  | 0         | 729  | 756  | 96 +  | 544  | 1296 | 17899  | 18637  |
| UN18366 | Rsa1.0_52653.1 | 1239 | 433    | 1.00E-166 | 305  | 308  | 99 -  | 1    | 308  | 1      | 308    |
| UN18367 | Rsa1.0_01305.1 | 1504 | 48730  | 0         | 476  | 477  | 99 -  | 1028 | 1504 | 15327  | 15803  |

|         |                |      |        |           |      |      |       |      |      |        |        |
|---------|----------------|------|--------|-----------|------|------|-------|------|------|--------|--------|
| UN18368 | Rsa1.0_00386.1 | 1211 | 89134  | 1.00E-143 | 295  | 305  | 96 -  | 3    | 307  | 29431  | 29732  |
| UN18369 | Rsa1.0_02803.1 | 960  | 27715  | 0         | 447  | 454  | 98 +  | 505  | 958  | 2231   | 2684   |
| UN18370 | Rsa1.0_00086.1 | 1168 | 439854 | 0         | 892  | 899  | 99 -  | 3    | 900  | 318961 | 319859 |
| UN18371 | Rsa1.0_00448.1 | 924  | 84048  | 0         | 903  | 922  | 97 +  | 3    | 924  | 32812  | 33732  |
| UN18372 | Rsa1.0_00162.1 | 1266 | 239935 | 0         | 731  | 744  | 98 -  | 523  | 1265 | 38543  | 39286  |
| UN18373 | Rsa1.0_00087.1 | 640  | 761073 | 1.00E-86  | 172  | 175  | 98 -  | 204  | 378  | 278974 | 279148 |
| UN18374 | Rsa1.0_00089.1 | 1059 | 406142 | 1.00E-130 | 261  | 267  | 97 +  | 795  | 1059 | 342938 | 343203 |
| UN18375 | Rsa1.0_00047.1 | 856  | 168582 | 1.00E-107 | 229  | 239  | 95 +  | 63   | 298  | 114068 | 114306 |
| UN18376 | Rsa1.0_00067.1 | 1203 | 415055 | 0         | 408  | 414  | 98 -  | 789  | 1202 | 147119 | 147531 |
| UN18377 | Rsa1.0_00153.1 | 761  | 192931 | 1.00E-95  | 222  | 232  | 95 +  | 531  | 759  | 168694 | 168922 |
| UN18378 | Rsa1.0_02634.1 | 1427 | 29299  | 0         | 1074 | 1082 | 99 -  | 2    | 1081 | 16743  | 17824  |
| UN18379 | Rsa1.0_00033.1 | 1141 | 515811 | 1.00E-130 | 268  | 275  | 97 +  | 20   | 294  | 467569 | 467839 |
| UN18380 | Rsa1.0_10503.1 | 1208 | 5824   | 1.00E-141 | 277  | 283  | 97 -  | 860  | 1141 | 1980   | 2262   |
| UN18381 | Rsa1.0_03451.1 | 998  | 22828  | 0         | 497  | 503  | 98 -  | 494  | 995  | 17165  | 17667  |
| UN18382 | Rsa1.0_27081.1 | 1404 | 866    | 1.00E-149 | 367  | 401  | 91 +  | 1018 | 1404 | 437    | 833    |
| UN18383 | Rsa1.0_00104.1 | 1062 | 368722 | 1.00E-142 | 259  | 260  | 99 +  | 7    | 266  | 65010  | 65269  |
| UN18384 | Rsa1.0_00280.1 | 1319 | 99966  | 0         | 630  | 665  | 94 -  | 661  | 1319 | 6002   | 6666   |
| UN18385 | Rsa1.0_00082.1 | 1057 | 237584 | 0         | 413  | 431  | 95 -  | 633  | 1051 | 53517  | 53947  |
| UN18386 | Rsa1.0_06839.1 | 1078 | 10286  | 0         | 531  | 542  | 97 -  | 537  | 1075 | 1902   | 2443   |
| UN18387 | Rsa1.0_02558.1 | 611  | 30112  | 0         | 601  | 625  | 96 +  | 3    | 611  | 7161   | 7785   |
| UN18388 | Rsa1.0_11362.1 | 991  | 5532   | 1.00E-147 | 295  | 305  | 96 +  | 3    | 307  | 4613   | 4917   |
| UN18389 | Rsa1.0_03319.1 | 1195 | 23767  | 0         | 554  | 574  | 96 -  | 574  | 1144 | 4081   | 4649   |
| UN18390 | Rsa1.0_00160.1 | 1260 | 346678 | 0         | 1196 | 1225 | 97 +  | 1    | 1225 | 144590 | 145814 |
| UN18391 | Rsa1.0_02410.1 | 1279 | 31659  | 0         | 1269 | 1277 | 99 -  | 2    | 1278 | 19948  | 21224  |
| UN18392 | Rsa1.0_00345.1 | 948  | 93226  | 0         | 447  | 467  | 95 -  | 388  | 854  | 74468  | 74934  |
| UN18393 | Rsa1.0_01015.1 | 1841 | 56752  | 0         | 457  | 466  | 98 +  | 1376 | 1841 | 7528   | 7990   |
| UN18394 | Rsa1.0_00676.1 | 1120 | 69166  | 0         | 486  | 519  | 93 -  | 99   | 603  | 54623  | 55138  |
| UN18395 | Rsa1.0_00739.1 | 1098 | 66155  | 1.00E-114 | 246  | 257  | 95 -  | 448  | 704  | 38886  | 39141  |
| UN18396 | Rsa1.0_00397.1 | 768  | 88189  | 1.00E-106 | 263  | 284  | 92 +  | 483  | 764  | 54834  | 55109  |
| UN18397 | Rsa1.0_00421.1 | 767  | 86365  | 1.00E-174 | 316  | 318  | 99 -  | 450  | 767  | 14715  | 15032  |
| UN18398 | Rsa1.0_44085.1 | 1286 | 510    | 1.00E-161 | 325  | 337  | 96 -  | 311  | 647  | 70     | 406    |
| UN18399 | Rsa1.0_00667.1 | 1861 | 69460  | 0         | 403  | 409  | 98 +  | 1    | 406  | 22479  | 22887  |
| UN18400 | Rsa1.0_36357.1 | 615  | 620    | 1.00E-101 | 187  | 187  | 100 + | 429  | 615  | 1      | 187    |
| UN18401 | Rsa1.0_00127.1 | 1326 | 127446 | 1.00E-142 | 263  | 265  | 99 +  | 830  | 1094 | 16292  | 16556  |
| UN18402 | Rsa1.0_07528.1 | 679  | 9195   | 0         | 641  | 668  | 95 +  | 5    | 671  | 3310   | 3975   |
| UN18403 | Rsa1.0_00128.1 | 1601 | 228675 | 0         | 460  | 467  | 98 +  | 1138 | 1599 | 202406 | 202871 |
| UN18404 | Rsa1.0_01767.1 | 1122 | 39615  | 1.00E-104 | 192  | 192  | 100 - | 1    | 192  | 15425  | 15616  |
| UN18405 | Rsa1.0_00467.1 | 961  | 156542 | 1.00E-120 | 249  | 259  | 96 -  | 593  | 851  | 91014  | 91272  |
| UN18406 | Rsa1.0_02505.1 | 1179 | 30703  | 0         | 417  | 418  | 99 -  | 755  | 1172 | 9948   | 10365  |

|         |                |      |        |           |      |      |       |     |      |        |        |
|---------|----------------|------|--------|-----------|------|------|-------|-----|------|--------|--------|
| UN18407 | Rsa1.0.00009.1 | 1238 | 232558 | 0         | 434  | 445  | 97 -  | 763 | 1207 | 22905  | 23349  |
| UN18408 | Rsa1.0.00200.1 | 1031 | 162016 | 0         | 345  | 346  | 99 -  | 1   | 346  | 115230 | 115575 |
| UN18409 | Rsa1.0.00038.1 | 1058 | 314568 | 0         | 429  | 439  | 97 -  | 36  | 474  | 253300 | 253735 |
| UN18410 | Rsa1.0.00286.1 | 844  | 98709  | 0         | 763  | 814  | 93 +  | 54  | 844  | 4958   | 5770   |
| UN18411 | Rsa1.0.02079.1 | 941  | 35306  | 0         | 404  | 410  | 98 -  | 242 | 651  | 18111  | 18517  |
| UN18412 | Rsa1.0.02871.1 | 791  | 27085  | 1.00E-145 | 262  | 262  | 100 + | 530 | 791  | 18241  | 18502  |
| UN18413 | Rsa1.0.08023.1 | 937  | 8071   | 0         | 492  | 521  | 94 -  | 422 | 937  | 4879   | 5399   |
| UN18414 | Rsa1.0.01116.1 | 775  | 142088 | 0         | 672  | 695  | 96 -  | 89  | 775  | 129744 | 130438 |
| UN18415 | Rsa1.0.01144.1 | 854  | 52431  | 0         | 407  | 425  | 95 -  | 2   | 424  | 42305  | 42724  |
| UN18416 | Rsa1.0.03191.1 | 1079 | 145762 | 0         | 740  | 747  | 99 -  | 332 | 1078 | 20691  | 21437  |
| UN18417 | Rsa1.0.00418.1 | 680  | 215377 | 1.00E-89  | 221  | 237  | 93 -  | 9   | 241  | 42754  | 42989  |
| UN18418 | Rsa1.0.02808.1 | 1714 | 27677  | 0         | 553  | 604  | 91 -  | 493 | 1092 | 17030  | 17614  |
| UN18419 | Rsa1.0.01146.1 | 1253 | 163455 | 0         | 419  | 423  | 99 +  | 1   | 422  | 16387  | 16809  |
| UN18420 | Rsa1.0.00031.1 | 1089 | 179862 | 0         | 420  | 420  | 100 - | 670 | 1089 | 165989 | 166408 |
| UN18421 | Rsa1.0.00348.1 | 1587 | 92818  | 0         | 1512 | 1544 | 97 -  | 3   | 1544 | 16030  | 17570  |
| UN18422 | Rsa1.0.00045.1 | 628  | 328694 | 1.00E-115 | 226  | 230  | 98 -  | 5   | 233  | 232551 | 232780 |
| UN18423 | Rsa1.0.00214.1 | 1179 | 107508 | 0         | 401  | 411  | 97 -  | 1   | 407  | 67033  | 67442  |
| UN18424 | Rsa1.0.00991.1 | 991  | 143101 | 0         | 533  | 539  | 98 -  | 1   | 537  | 34643  | 35181  |
| UN18425 | Rsa1.0.00937.1 | 1501 | 59061  | 1.00E-133 | 266  | 274  | 97 +  | 14  | 287  | 26612  | 26885  |
| UN18426 | Rsa1.0.01648.1 | 941  | 41635  | 0         | 718  | 723  | 99 +  | 222 | 941  | 10802  | 11524  |
| UN18427 | Rsa1.0.01997.1 | 1094 | 158416 | 1.00E-124 | 258  | 267  | 96 +  | 300 | 565  | 152201 | 152467 |
| UN18428 | Rsa1.0.01896.1 | 939  | 37512  | 0         | 910  | 938  | 97 +  | 1   | 937  | 31721  | 32658  |
| UN18429 | Rsa1.0.01511.1 | 1152 | 44235  | 1.00E-175 | 311  | 311  | 100 - | 1   | 311  | 30182  | 30492  |
| UN18430 | Rsa1.0.01559.1 | 2031 | 43262  | 0         | 1181 | 1189 | 99 +  | 840 | 2026 | 33099  | 34287  |
| UN18431 | Rsa1.0.05355.1 | 745  | 14069  | 0         | 580  | 609  | 95 -  | 1   | 600  | 4534   | 5139   |
| UN18432 | Rsa1.0.01323.1 | 1144 | 48152  | 1.00E-151 | 298  | 306  | 97 +  | 1   | 304  | 26865  | 27170  |
| UN18433 | Rsa1.0.02074.1 | 1115 | 35370  | 0         | 462  | 496  | 93 +  | 5   | 493  | 12043  | 12527  |
| UN18434 | Rsa1.0.02026.1 | 1200 | 35896  | 0         | 580  | 589  | 98 -  | 1   | 583  | 22657  | 23242  |
| UN18435 | Rsa1.0.01270.1 | 1796 | 49574  | 0         | 779  | 779  | 100 - | 435 | 1213 | 29988  | 30766  |
| UN18436 | Rsa1.0.01172.1 | 1020 | 51734  | 0         | 418  | 424  | 98 -  | 10  | 433  | 27421  | 27844  |
| UN18437 | Rsa1.0.00107.1 | 1167 | 431659 | 1.00E-166 | 338  | 352  | 96 -  | 806 | 1157 | 314611 | 314962 |
| UN18438 | Rsa1.0.03799.1 | 1437 | 20775  | 0         | 426  | 439  | 97 +  | 793 | 1231 | 18208  | 18646  |
| UN18439 | Rsa1.0.01634.1 | 1025 | 41865  | 1.00E-147 | 332  | 349  | 95 +  | 2   | 345  | 38759  | 39103  |
| UN18440 | Rsa1.0.00863.1 | 1513 | 254535 | 0         | 562  | 574  | 97 +  | 2   | 575  | 126460 | 127032 |
| UN18441 | Rsa1.0.01506.1 | 1140 | 44370  | 1.00E-141 | 312  | 327  | 95 -  | 815 | 1140 | 34074  | 34398  |
| UN18442 | Rsa1.0.01169.1 | 818  | 51829  | 0         | 813  | 817  | 99 +  | 1   | 816  | 5715   | 6531   |
| UN18443 | Rsa1.0.00065.1 | 1441 | 454616 | 1.00E-142 | 276  | 280  | 98 -  | 1   | 279  | 116989 | 117267 |
| UN18444 | Rsa1.0.01931.1 | 766  | 37187  | 1.00E-144 | 368  | 400  | 92 -  | 1   | 398  | 32029  | 32413  |
| UN18445 | Rsa1.0.00336.1 | 1214 | 445051 | 1.00E-126 | 245  | 250  | 98 +  | 462 | 711  | 164694 | 164943 |

|         |                |      |        |           |      |      |       |      |      |        |        |
|---------|----------------|------|--------|-----------|------|------|-------|------|------|--------|--------|
| UN18446 | Rsa1.0.03547.1 | 1358 | 22167  | 0         | 625  | 635  | 98 -  | 1    | 634  | 1874   | 2508   |
| UN18447 | Rsa1.0.03037.1 | 1735 | 25825  | 0         | 612  | 630  | 97 -  | 521  | 1145 | 11252  | 11881  |
| UN18448 | Rsa1.0.01696.1 | 1207 | 301850 | 1.00E-175 | 384  | 402  | 95 -  | 801  | 1197 | 298784 | 299179 |
| UN18449 | Rsa1.0.05864.1 | 930  | 12387  | 1.00E-123 | 299  | 322  | 92 -  | 608  | 928  | 9853   | 10165  |
| UN18450 | Rsa1.0.02023.1 | 1423 | 35922  | 0         | 1343 | 1423 | 94 -  | 6    | 1422 | 32669  | 34090  |
| UN18451 | Rsa1.0.02835.1 | 1122 | 27491  | 0         | 517  | 537  | 96 -  | 591  | 1120 | 9213   | 9749   |
| UN18452 | Rsa1.0.15018.1 | 801  | 2889   | 1.00E-148 | 284  | 290  | 97 -  | 222  | 511  | 2384   | 2673   |
| UN18453 | Rsa1.0.02476.1 | 1515 | 31063  | 8.00E-80  | 491  | 606  | 81 +  | 98   | 677  | 23812  | 24412  |
| UN18454 | Rsa1.0.05110.1 | 1208 | 14814  | 1.00E-163 | 308  | 312  | 98 +  | 245  | 555  | 5291   | 5602   |
| UN18455 | Rsa1.0.00038.1 | 994  | 314568 | 1.00E-172 | 309  | 310  | 99 +  | 535  | 844  | 249454 | 249763 |
| UN18456 | Rsa1.0.02246.1 | 972  | 33435  | 1.00E-167 | 356  | 375  | 94 -  | 597  | 971  | 4753   | 5127   |
| UN18457 | Rsa1.0.00312.1 | 1033 | 96765  | 1.00E-145 | 320  | 345  | 92 +  | 1    | 324  | 88011  | 88355  |
| UN18458 | Rsa1.0.01170.1 | 1679 | 161131 | 1.00E-163 | 316  | 324  | 97 +  | 868  | 1191 | 10604  | 10927  |
| UN18459 | Rsa1.0.03305.1 | 1016 | 147552 | 0         | 404  | 405  | 99 +  | 3    | 407  | 12490  | 12894  |
| UN18460 | Rsa1.0.00023.1 | 1583 | 194764 | 0         | 791  | 800  | 98 -  | 686  | 1484 | 104143 | 104941 |
| UN18461 | Rsa1.0.01331.1 | 1712 | 47944  | 0         | 1698 | 1715 | 99 -  | 1    | 1712 | 17681  | 19395  |
| UN18462 | Rsa1.0.01173.1 | 1251 | 51727  | 0         | 561  | 569  | 98 -  | 1    | 569  | 32928  | 33493  |
| UN18463 | Rsa1.0.00294.1 | 2316 | 144860 | 0         | 479  | 499  | 95 +  | 3    | 500  | 59118  | 59616  |
| UN18464 | Rsa1.0.14096.1 | 914  | 3814   | 1.00E-112 | 255  | 266  | 95 +  | 80   | 342  | 2615   | 2879   |
| UN18465 | Rsa1.0.00026.1 | 821  | 327835 | 0         | 808  | 818  | 98 +  | 3    | 820  | 41922  | 42737  |
| UN18466 | Rsa1.0.01024.1 | 1032 | 56569  | 0         | 1025 | 1030 | 99 -  | 2    | 1031 | 33919  | 34948  |
| UN18467 | Rsa1.0.01512.1 | 1650 | 44234  | 0         | 495  | 516  | 95 +  | 635  | 1150 | 17477  | 17992  |
| UN18468 | Rsa1.0.01660.1 | 1888 | 41400  | 0         | 485  | 521  | 93 +  | 1365 | 1876 | 30402  | 30919  |
| UN18469 | Rsa1.0.03554.1 | 1549 | 22137  | 0         | 1544 | 1547 | 99 +  | 1    | 1547 | 10349  | 11895  |
| UN18470 | Rsa1.0.00336.1 | 849  | 445051 | 0         | 739  | 777  | 95 -  | 34   | 810  | 146903 | 147660 |
| UN18471 | Rsa1.0.19807.1 | 933  | 1380   | 1.00E-145 | 325  | 343  | 94 -  | 595  | 933  | 365    | 700    |
| UN18472 | Rsa1.0.01884.1 | 1474 | 37659  | 0         | 565  | 583  | 96 -  | 122  | 704  | 20785  | 21367  |
| UN18473 | Rsa1.0.07122.1 | 941  | 9866   | 0         | 345  | 352  | 98 -  | 590  | 938  | 6612   | 6963   |
| UN18474 | Rsa1.0.05338.1 | 1363 | 144511 | 0         | 414  | 436  | 94 -  | 195  | 627  | 6891   | 7314   |
| UN18475 | Rsa1.0.00301.1 | 1293 | 365315 | 1.00E-115 | 217  | 219  | 99 +  | 22   | 240  | 87944  | 88162  |
| UN18476 | Rsa1.0.03668.1 | 1542 | 21483  | 0         | 508  | 528  | 96 -  | 942  | 1469 | 20227  | 20754  |
| UN18477 | Rsa1.0.00086.1 | 752  | 439854 | 0         | 375  | 379  | 98 +  | 3    | 381  | 240929 | 241307 |
| UN18478 | Rsa1.0.00359.1 | 1406 | 91256  | 0         | 446  | 446  | 100 + | 961  | 1406 | 84690  | 85135  |
| UN18479 | Rsa1.0.00087.1 | 1259 | 761073 | 0         | 403  | 405  | 99 +  | 854  | 1258 | 352672 | 353076 |
| UN18480 | Rsa1.0.04518.1 | 915  | 17005  | 1.00E-159 | 314  | 320  | 98 +  | 598  | 915  | 11675  | 11992  |
| UN18481 | Rsa1.0.00399.1 | 1095 | 242951 | 0         | 748  | 763  | 98 +  | 2    | 764  | 72869  | 73631  |
| UN18482 | Rsa1.0.03851.1 | 1192 | 20451  | 0         | 377  | 391  | 96 +  | 740  | 1129 | 11491  | 11880  |
| UN18483 | Rsa1.0.04428.1 | 1896 | 17399  | 0         | 1146 | 1167 | 98 +  | 416  | 1582 | 6851   | 8014   |
| UN18484 | Rsa1.0.01559.1 | 1143 | 43262  | 1.00E-127 | 304  | 327  | 92 +  | 3    | 329  | 3014   | 3329   |

|         |                |      |        |           |     |     |       |      |      |        |        |
|---------|----------------|------|--------|-----------|-----|-----|-------|------|------|--------|--------|
| UN18485 | Rsa1.0.03985.1 | 1185 | 19704  | 0         | 949 | 975 | 97 +  | 3    | 977  | 14374  | 15342  |
| UN18486 | Rsa1.0.00347.1 | 783  | 93048  | 0         | 443 | 454 | 97 -  | 330  | 782  | 70009  | 70462  |
| UN18487 | Rsa1.0.00045.1 | 1174 | 328694 | 1.00E-152 | 304 | 312 | 97 -  | 1    | 310  | 16514  | 16823  |
| UN18488 | Rsa1.0.00800.1 | 950  | 63868  | 0         | 370 | 381 | 97 +  | 570  | 950  | 21908  | 22279  |
| UN18489 | Rsa1.0.00550.1 | 1708 | 210790 | 0         | 421 | 423 | 99 +  | 1284 | 1706 | 60958  | 61380  |
| UN18490 | Rsa1.0.01434.1 | 1460 | 45951  | 0         | 446 | 470 | 94 -  | 1    | 462  | 39461  | 39930  |
| UN18491 | Rsa1.0.00687.1 | 1366 | 68494  | 1.00E-133 | 270 | 279 | 96 -  | 1088 | 1366 | 1925   | 2200   |
| UN18492 | Rsa1.0.03555.1 | 841  | 22129  | 0         | 673 | 677 | 99 +  | 160  | 835  | 16383  | 17059  |
| UN18493 | Rsa1.0.00050.1 | 1106 | 237174 | 1.00E-106 | 324 | 368 | 88 -  | 745  | 1104 | 103893 | 104244 |
| UN18494 | Rsa1.0.00018.1 | 923  | 410899 | 1.00E-156 | 308 | 316 | 97 -  | 18   | 328  | 128266 | 128580 |
| UN18495 | Rsa1.0.03201.1 | 993  | 157656 | 0         | 897 | 996 | 90 -  | 12   | 993  | 20750  | 21737  |
| UN18496 | Rsa1.0.00420.1 | 768  | 86496  | 0         | 566 | 568 | 99 -  | 160  | 727  | 41171  | 41738  |
| UN18497 | Rsa1.0.02836.1 | 1093 | 27481  | 1.00E-125 | 234 | 236 | 99 -  | 510  | 745  | 13279  | 13514  |
| UN18498 | Rsa1.0.01068.1 | 1045 | 55208  | 1.00E-125 | 244 | 249 | 97 -  | 7    | 251  | 10091  | 10339  |
| UN18499 | Rsa1.0.01976.1 | 987  | 36570  | 1.00E-133 | 349 | 379 | 92 -  | 606  | 979  | 25218  | 25588  |
| UN18500 | Rsa1.0.28177.1 | 928  | 825    | 1.00E-164 | 317 | 324 | 97 +  | 607  | 928  | 459    | 782    |
| UN18501 | Rsa1.0.00067.1 | 1343 | 415055 | 1.00E-108 | 214 | 219 | 97 -  | 368  | 586  | 41964  | 42182  |
| UN18502 | Rsa1.0.09929.1 | 569  | 6087   | 0         | 566 | 567 | 99 +  | 1    | 567  | 173    | 739    |
| UN18503 | Rsa1.0.00646.1 | 931  | 70473  | 0         | 678 | 691 | 98 -  | 238  | 927  | 1728   | 2417   |
| UN18504 | Rsa1.0.00121.1 | 2002 | 278029 | 1.00E-140 | 259 | 261 | 99 +  | 1742 | 2002 | 80339  | 80599  |
| UN18505 | Rsa1.0.01803.1 | 943  | 173846 | 0         | 404 | 426 | 94 -  | 3    | 421  | 137460 | 137885 |
| UN18506 | Rsa1.0.00028.1 | 975  | 293984 | 0         | 334 | 336 | 99 -  | 639  | 974  | 253781 | 254116 |
| UN18507 | Rsa1.0.00806.1 | 1343 | 63674  | 1.00E-154 | 313 | 322 | 97 -  | 3    | 323  | 29072  | 29389  |
| UN18508 | Rsa1.0.00544.1 | 683  | 76787  | 1.00E-144 | 277 | 283 | 97 +  | 377  | 659  | 445    | 721    |
| UN18509 | Rsa1.0.01411.1 | 925  | 46326  | 1.00E-170 | 309 | 311 | 99 +  | 11   | 321  | 36020  | 36330  |
| UN18510 | Rsa1.0.01593.1 | 1351 | 150996 | 0         | 421 | 421 | 100 - | 902  | 1322 | 149430 | 149850 |
| UN18511 | Rsa1.0.01412.1 | 1631 | 46311  | 0         | 548 | 549 | 99 -  | 502  | 1050 | 11181  | 11729  |
| UN18512 | Rsa1.0.00653.1 | 1199 | 70029  | 0         | 396 | 403 | 98 +  | 1    | 400  | 26626  | 27027  |
| UN18513 | Rsa1.0.00442.1 | 1198 | 84596  | 0         | 593 | 600 | 98 -  | 2    | 600  | 13141  | 13740  |
| UN18514 | Rsa1.0.02079.1 | 1170 | 35306  | 0         | 418 | 419 | 99 +  | 751  | 1169 | 7765   | 8183   |
| UN18515 | Rsa1.0.00786.1 | 1017 | 64285  | 0         | 364 | 366 | 99 -  | 3    | 368  | 50723  | 51087  |
| UN18516 | Rsa1.0.36951.1 | 1079 | 610    | 0         | 414 | 440 | 94 -  | 3    | 422  | 1      | 440    |
| UN18517 | Rsa1.0.15111.1 | 1481 | 2818   | 1.00E-151 | 272 | 272 | 100 - | 1208 | 1479 | 1444   | 1715   |
| UN18518 | Rsa1.0.02969.1 | 808  | 26390  | 0         | 667 | 697 | 95 +  | 3    | 692  | 23180  | 23875  |
| UN18519 | Rsa1.0.08085.1 | 1317 | 7934   | 0         | 721 | 739 | 97 -  | 562  | 1300 | 5075   | 5812   |
| UN18520 | Rsa1.0.01211.1 | 812  | 50646  | 0         | 803 | 816 | 98 -  | 1    | 812  | 15179  | 15989  |
| UN18521 | Rsa1.0.00153.1 | 1189 | 192931 | 1.00E-96  | 282 | 314 | 89 -  | 4    | 307  | 170695 | 171004 |
| UN18522 | Rsa1.0.00938.1 | 1314 | 193891 | 0         | 688 | 703 | 97 +  | 612  | 1314 | 50748  | 51450  |
| UN18523 | Rsa1.0.03376.1 | 1226 | 23326  | 0         | 461 | 482 | 95 +  | 13   | 488  | 18750  | 19225  |

|         |                |      |        |           |      |      |       |      |      |        |        |
|---------|----------------|------|--------|-----------|------|------|-------|------|------|--------|--------|
| UN18524 | Rsa1.0.00139.1 | 1352 | 357786 | 0         | 736  | 750  | 98 -  | 601  | 1350 | 120058 | 120807 |
| UN18525 | Rsa1.0.05324.1 | 1026 | 14145  | 0         | 405  | 411  | 98 +  | 195  | 605  | 11922  | 12332  |
| UN18526 | Rsa1.0.00193.1 | 1685 | 194198 | 0         | 439  | 441  | 99 -  | 418  | 858  | 98615  | 99055  |
| UN18527 | Rsa1.0.00182.1 | 1350 | 142305 | 0         | 698  | 717  | 97 -  | 2    | 718  | 94201  | 94913  |
| UN18528 | Rsa1.0.00087.1 | 651  | 761073 | 1.00E-145 | 279  | 285  | 97 +  | 327  | 611  | 532516 | 532800 |
| UN18529 | Rsa1.0.02984.1 | 1654 | 26263  | 1.00E-171 | 350  | 357  | 98 -  | 242  | 592  | 5683   | 6039   |
| UN18530 | Rsa1.0.00838.1 | 1108 | 153820 | 1.00E-108 | 230  | 239  | 96 -  | 1    | 238  | 35295  | 35533  |
| UN18531 | Rsa1.0.03158.1 | 2092 | 24950  | 0         | 533  | 542  | 98 +  | 7    | 546  | 15094  | 15633  |
| UN18532 | Rsa1.0.00098.1 | 926  | 349239 | 0         | 400  | 400  | 100 + | 1    | 400  | 228899 | 229298 |
| UN18533 | Rsa1.0.00119.1 | 1436 | 467509 | 0         | 1262 | 1302 | 96 +  | 1    | 1293 | 346494 | 347789 |
| UN18534 | Rsa1.0.00654.1 | 969  | 70012  | 0         | 435  | 439  | 99 +  | 1    | 438  | 32608  | 33046  |
| UN18535 | Rsa1.0.01301.1 | 1134 | 169072 | 0         | 493  | 508  | 97 -  | 620  | 1124 | 41711  | 42218  |
| UN18536 | Rsa1.0.01124.1 | 1667 | 53295  | 0         | 1202 | 1231 | 97 +  | 1    | 1228 | 50492  | 51721  |
| UN18537 | Rsa1.0.14084.1 | 1128 | 3822   | 0         | 463  | 468  | 98 +  | 454  | 921  | 281    | 748    |
| UN18538 | Rsa1.0.00141.1 | 1142 | 121494 | 1.00E-178 | 325  | 328  | 99 +  | 1    | 328  | 110498 | 110825 |
| UN18539 | Rsa1.0.00042.1 | 990  | 171507 | 0         | 485  | 510  | 95 +  | 2    | 509  | 143914 | 144412 |
| UN18540 | Rsa1.0.02786.1 | 904  | 27880  | 0         | 480  | 482  | 99 +  | 3    | 483  | 18704  | 19185  |
| UN18541 | Rsa1.0.00540.1 | 1261 | 76895  | 1.00E-136 | 249  | 250  | 99 -  | 590  | 839  | 35535  | 35784  |
| UN18542 | Rsa1.0.00466.1 | 986  | 82132  | 0         | 867  | 897  | 96 -  | 1    | 889  | 27152  | 28045  |
| UN18543 | Rsa1.0.01196.1 | 2048 | 51097  | 0         | 515  | 526  | 97 -  | 1030 | 1554 | 26796  | 27317  |
| UN18544 | Rsa1.0.03664.1 | 840  | 21487  | 0         | 539  | 550  | 98 -  | 1    | 549  | 10815  | 11364  |
| UN18545 | Rsa1.0.00545.1 | 1331 | 189649 | 0         | 526  | 538  | 97 -  | 789  | 1326 | 37246  | 37783  |
| UN18546 | Rsa1.0.03640.1 | 1476 | 21624  | 1.00E-176 | 368  | 385  | 95 +  | 2    | 385  | 17081  | 17454  |
| UN18547 | Rsa1.0.09407.1 | 1273 | 6390   | 0         | 537  | 551  | 97 -  | 45   | 593  | 1529   | 2077   |
| UN18548 | Rsa1.0.01747.1 | 1135 | 39881  | 0         | 1097 | 1112 | 98 +  | 1    | 1111 | 15949  | 17059  |
| UN18549 | Rsa1.0.00001.1 | 1492 | 363028 | 0         | 392  | 406  | 96 +  | 1    | 402  | 249949 | 250354 |
| UN18550 | Rsa1.0.00053.1 | 913  | 263459 | 1.00E-107 | 229  | 240  | 95 -  | 1    | 234  | 50661  | 50900  |
| UN18551 | Rsa1.0.00676.1 | 1464 | 69166  | 0         | 1001 | 1011 | 99 -  | 453  | 1462 | 61418  | 62428  |
| UN18552 | Rsa1.0.00240.1 | 1050 | 104175 | 1.00E-170 | 307  | 308  | 99 +  | 742  | 1049 | 20254  | 20561  |
| UN18553 | Rsa1.0.01296.1 | 1023 | 49035  | 1.00E-111 | 205  | 205  | 100 + | 561  | 765  | 13100  | 13304  |
| UN18554 | Rsa1.0.00013.1 | 779  | 292129 | 4.00E-83  | 172  | 176  | 97 -  | 1    | 176  | 206086 | 206259 |
| UN18555 | Rsa1.0.00065.1 | 1827 | 454616 | 0         | 356  | 357  | 99 -  | 1096 | 1452 | 224536 | 224892 |
| UN18556 | Rsa1.0.18047.1 | 1462 | 1682   | 5.00E-78  | 149  | 149  | 100 + | 165  | 313  | 1431   | 1579   |
| UN18557 | Rsa1.0.00235.1 | 967  | 154696 | 0         | 408  | 410  | 99 +  | 4    | 413  | 146397 | 146806 |
| UN18558 | Rsa1.0.10100.1 | 1569 | 5998   | 0         | 517  | 518  | 99 +  | 1052 | 1569 | 877    | 1394   |
| UN18559 | Rsa1.0.00044.1 | 1269 | 271658 | 0         | 355  | 358  | 99 +  | 911  | 1268 | 133405 | 133762 |
| UN18560 | Rsa1.0.00055.1 | 1648 | 520193 | 0         | 615  | 615  | 100 + | 1    | 615  | 401231 | 401845 |
| UN18561 | Rsa1.0.00608.1 | 1574 | 172672 | 0         | 1365 | 1372 | 99 +  | 202  | 1573 | 19560  | 20931  |
| UN18562 | Rsa1.0.05172.1 | 2093 | 14608  | 0         | 1806 | 1831 | 98 +  | 106  | 1931 | 9667   | 11495  |

|         |                |      |        |           |      |      |       |     |      |        |        |
|---------|----------------|------|--------|-----------|------|------|-------|-----|------|--------|--------|
| UN18563 | Rsa1.0.00846.1 | 1633 | 62342  | 0         | 1157 | 1170 | 98 -  | 460 | 1629 | 31233  | 32398  |
| UN18564 | Rsa1.0.03001.1 | 1099 | 26108  | 0         | 454  | 454  | 100 - | 646 | 1099 | 5371   | 5824   |
| UN18565 | Rsa1.0.00196.1 | 1444 | 109960 | 0         | 675  | 678  | 99 -  | 767 | 1444 | 53072  | 53749  |
| UN18566 | Rsa1.0.07881.1 | 1389 | 8369   | 1.00E-149 | 313  | 325  | 96 +  | 78  | 399  | 2930   | 3251   |
| UN18567 | Rsa1.0.00608.1 | 802  | 172672 | 0         | 527  | 546  | 96 +  | 239 | 780  | 3169   | 3708   |
| UN18568 | Rsa1.0.02129.1 | 525  | 34757  | 0         | 394  | 407  | 96 +  | 119 | 525  | 29381  | 29785  |
| UN18569 | Rsa1.0.01091.1 | 1475 | 54383  | 0         | 456  | 472  | 96 -  | 1   | 472  | 5374   | 5845   |
| UN18570 | Rsa1.0.02223.1 | 877  | 152421 | 0         | 875  | 878  | 99 +  | 1   | 877  | 25626  | 26503  |
| UN18571 | Rsa1.0.03165.1 | 994  | 24866  | 0         | 722  | 741  | 97 +  | 260 | 994  | 21465  | 22200  |
| UN18572 | Rsa1.0.02005.1 | 809  | 36137  | 1.00E-104 | 229  | 241  | 95 +  | 3   | 238  | 6393   | 6633   |
| UN18573 | Rsa1.0.00467.1 | 833  | 156542 | 0         | 798  | 843  | 94 +  | 1   | 832  | 92934  | 93769  |
| UN18574 | Rsa1.0.05389.1 | 1763 | 13943  | 0         | 991  | 1052 | 94 +  | 3   | 1037 | 7219   | 8249   |
| UN18575 | Rsa1.0.00667.1 | 1044 | 69460  | 0         | 537  | 560  | 95 -  | 477 | 1036 | 23995  | 24549  |
| UN18576 | Rsa1.0.00088.1 | 1276 | 141341 | 0         | 776  | 789  | 98 -  | 7   | 795  | 42241  | 43029  |
| UN18577 | Rsa1.0.00087.1 | 1742 | 761073 | 0         | 1723 | 1751 | 98 +  | 2   | 1742 | 275772 | 277513 |
| UN18578 | Rsa1.0.00599.1 | 1249 | 73418  | 0         | 1206 | 1219 | 98 +  | 2   | 1220 | 39408  | 40625  |
| UN18579 | Rsa1.0.00102.1 | 1093 | 135497 | 2.00E-95  | 204  | 212  | 96 +  | 843 | 1051 | 51183  | 51394  |
| UN18580 | Rsa1.0.00066.1 | 1621 | 152418 | 0         | 694  | 709  | 97 +  | 30  | 737  | 17596  | 18304  |
| UN18581 | Rsa1.0.03341.1 | 940  | 23604  | 0         | 543  | 581  | 93 +  | 360 | 939  | 2950   | 3527   |
| UN18582 | Rsa1.0.00487.1 | 730  | 80674  | 7.00E-85  | 166  | 168  | 98 +  | 276 | 443  | 8246   | 8413   |
| UN18583 | Rsa1.0.07193.1 | 1338 | 9752   | 0         | 633  | 638  | 99 -  | 5   | 642  | 3      | 639    |
| UN18584 | Rsa1.0.04768.1 | 1379 | 16066  | 0         | 1370 | 1384 | 98 +  | 1   | 1379 | 4080   | 5462   |
| UN18585 | Rsa1.0.00065.1 | 1168 | 454616 | 0         | 688  | 716  | 96 -  | 459 | 1168 | 150657 | 151371 |
| UN18586 | Rsa1.0.01940.1 | 1651 | 37073  | 0         | 482  | 482  | 100 + | 500 | 981  | 8086   | 8567   |
| UN18587 | Rsa1.0.03506.1 | 1330 | 22416  | 0         | 478  | 498  | 95 +  | 834 | 1330 | 8413   | 8907   |
| UN18588 | Rsa1.0.02092.1 | 573  | 35135  | 0         | 376  | 377  | 99 -  | 197 | 573  | 30332  | 30708  |
| UN18589 | Rsa1.0.07959.1 | 778  | 8173   | 1.00E-125 | 236  | 239  | 98 +  | 2   | 240  | 5603   | 5841   |
| UN18590 | Rsa1.0.00251.1 | 2196 | 303968 | 0         | 353  | 355  | 99 -  | 3   | 357  | 39415  | 39769  |
| UN18591 | Rsa1.0.04934.1 | 1611 | 143962 | 0         | 1487 | 1531 | 97 +  | 16  | 1543 | 11179  | 12707  |
| UN18592 | Rsa1.0.07314.1 | 1713 | 9563   | 0         | 630  | 632  | 99 +  | 580 | 1211 | 5776   | 6407   |
| UN18593 | Rsa1.0.07251.1 | 1359 | 9662   | 0         | 442  | 449  | 98 -  | 1   | 449  | 8993   | 9436   |
| UN18594 | Rsa1.0.02439.1 | 1033 | 31379  | 0         | 965  | 981  | 98 -  | 1   | 979  | 22953  | 23933  |
| UN18595 | Rsa1.0.02420.1 | 1287 | 31580  | 0         | 737  | 749  | 98 +  | 9   | 751  | 13687  | 14435  |
| UN18596 | Rsa1.0.04925.1 | 963  | 15424  | 1.00E-160 | 397  | 429  | 92 -  | 525 | 943  | 9282   | 9704   |
| UN18597 | Rsa1.0.07636.1 | 1182 | 8971   | 0         | 691  | 691  | 100 - | 3   | 693  | 3556   | 4246   |
| UN18598 | Rsa1.0.00059.1 | 981  | 159650 | 0         | 405  | 423  | 95 +  | 1   | 416  | 130999 | 131418 |
| UN18599 | Rsa1.0.00127.1 | 1196 | 127446 | 0         | 432  | 434  | 99 -  | 763 | 1196 | 46527  | 46960  |
| UN18600 | Rsa1.0.02434.1 | 1698 | 31464  | 0         | 755  | 765  | 98 -  | 2   | 765  | 27271  | 28032  |
| UN18601 | Rsa1.0.00838.1 | 1007 | 153820 | 1.00E-171 | 330  | 336  | 98 +  | 3   | 336  | 38110  | 38444  |

|         |                |      |        |           |     |     |       |      |      |        |        |
|---------|----------------|------|--------|-----------|-----|-----|-------|------|------|--------|--------|
| UN18602 | Rsa1.0_00971.1 | 1036 | 57973  | 0         | 385 | 385 | 100 + | 3    | 387  | 47270  | 47654  |
| UN18603 | Rsa1.0_18022.1 | 567  | 1687   | 0         | 357 | 361 | 98 -  | 207  | 567  | 419    | 779    |
| UN18604 | Rsa1.0_06728.1 | 968  | 10455  | 1.00E-161 | 366 | 387 | 94 -  | 579  | 961  | 9063   | 9448   |
| UN18605 | Rsa1.0_04488.1 | 1461 | 17155  | 0         | 657 | 672 | 97 +  | 3    | 674  | 13391  | 14062  |
| UN18606 | Rsa1.0_02248.1 | 1545 | 33414  | 0         | 463 | 470 | 98 -  | 566  | 1033 | 12478  | 12947  |
| UN18607 | Rsa1.0_01489.1 | 1271 | 44764  | 1.00E-174 | 335 | 343 | 97 +  | 92   | 430  | 127    | 469    |
| UN18608 | Rsa1.0_00113.1 | 498  | 131574 | 0         | 490 | 498 | 98 -  | 1    | 498  | 60382  | 60879  |
| UN18609 | Rsa1.0_01412.1 | 916  | 46311  | 0         | 519 | 519 | 100 - | 2    | 520  | 2268   | 2786   |
| UN18610 | Rsa1.0_01533.1 | 1040 | 43765  | 0         | 385 | 390 | 98 -  | 104  | 493  | 9229   | 9618   |
| UN18611 | Rsa1.0_04772.1 | 1600 | 16040  | 1.00E-127 | 245 | 247 | 99 +  | 1    | 245  | 5454   | 5700   |
| UN18612 | Rsa1.0_01779.1 | 1710 | 39448  | 0         | 709 | 802 | 88 +  | 899  | 1699 | 9724   | 10521  |
| UN18613 | Rsa1.0_00017.1 | 876  | 752458 | 1.00E-99  | 200 | 204 | 98 -  | 4    | 207  | 608166 | 608367 |
| UN18614 | Rsa1.0_00098.1 | 1048 | 349239 | 0         | 449 | 485 | 92 +  | 6    | 475  | 235871 | 236346 |
| UN18615 | Rsa1.0_00383.1 | 827  | 398431 | 3.00E-84  | 255 | 283 | 90 +  | 5    | 269  | 182122 | 182404 |
| UN18616 | Rsa1.0_00201.1 | 1410 | 232851 | 0         | 412 | 419 | 98 -  | 3    | 421  | 4812   | 5228   |
| UN18617 | Rsa1.0_00715.1 | 1320 | 67116  | 0         | 473 | 473 | 100 + | 1    | 473  | 26725  | 27197  |
| UN18618 | Rsa1.0_00048.1 | 919  | 167185 | 1.00E-123 | 233 | 236 | 98 -  | 2    | 237  | 33623  | 33858  |
| UN18619 | Rsa1.0_00367.1 | 1629 | 90750  | 0         | 646 | 648 | 99 -  | 983  | 1629 | 78116  | 78763  |
| UN18620 | Rsa1.0_08837.1 | 1484 | 6874   | 0         | 351 | 354 | 99 +  | 1    | 353  | 2905   | 3258   |
| UN18621 | Rsa1.0_00180.1 | 1113 | 114581 | 0         | 398 | 406 | 98 -  | 1    | 406  | 111408 | 111810 |
| UN18622 | Rsa1.0_00837.1 | 1470 | 62568  | 1.00E-143 | 336 | 358 | 93 +  | 32   | 383  | 50670  | 51024  |
| UN18623 | Rsa1.0_06102.1 | 1302 | 11740  | 0         | 550 | 563 | 97 -  | 431  | 993  | 3255   | 3817   |
| UN18624 | Rsa1.0_00412.1 | 1492 | 86935  | 0         | 712 | 714 | 99 -  | 762  | 1475 | 14941  | 15654  |
| UN18625 | Rsa1.0_01326.1 | 753  | 48072  | 0         | 412 | 417 | 98 +  | 1    | 416  | 43750  | 44166  |
| UN18626 | Rsa1.0_09203.1 | 724  | 6559   | 0         | 719 | 727 | 98 +  | 1    | 724  | 650    | 1376   |
| UN18627 | Rsa1.0_02269.1 | 1677 | 33168  | 0         | 621 | 640 | 97 +  | 416  | 1055 | 23759  | 24398  |
| UN18628 | Rsa1.0_11276.1 | 1193 | 5560   | 0         | 356 | 361 | 98 +  | 118  | 478  | 4      | 364    |
| UN18629 | Rsa1.0_01845.1 | 1151 | 38415  | 8.00E-98  | 224 | 234 | 95 -  | 1    | 232  | 8035   | 8267   |
| UN18630 | Rsa1.0_00546.1 | 581  | 76523  | 0         | 462 | 482 | 95 +  | 111  | 581  | 58516  | 58997  |
| UN18631 | Rsa1.0_03211.1 | 1670 | 24591  | 0         | 608 | 617 | 98 -  | 2    | 617  | 9059   | 9675   |
| UN18632 | Rsa1.0_20083.1 | 835  | 1343   | 0         | 390 | 397 | 98 +  | 1    | 397  | 152    | 547    |
| UN18633 | Rsa1.0_00234.1 | 1258 | 197060 | 0         | 462 | 465 | 99 +  | 792  | 1256 | 152696 | 153160 |
| UN18634 | Rsa1.0_00972.1 | 1500 | 57937  | 0         | 579 | 584 | 99 +  | 229  | 811  | 52610  | 53193  |
| UN18635 | Rsa1.0_03894.1 | 871  | 20207  | 0         | 335 | 335 | 100 + | 1    | 335  | 18461  | 18795  |
| UN18636 | Rsa1.0_00797.1 | 708  | 63959  | 1.00E-119 | 236 | 241 | 97 -  | 2    | 241  | 41753  | 41993  |
| UN18637 | Rsa1.0_00001.1 | 1991 | 363028 | 0         | 498 | 512 | 97 -  | 1    | 509  | 203498 | 204009 |
| UN18638 | Rsa1.0_00002.1 | 1245 | 601661 | 1.00E-168 | 328 | 336 | 97 -  | 910  | 1244 | 13141  | 13476  |
| UN18639 | Rsa1.0_49161.1 | 1337 | 461    | 1.00E-106 | 241 | 253 | 95 -  | 1063 | 1313 | 14     | 262    |
| UN18640 | Rsa1.0_05554.1 | 637  | 13343  | 0         | 597 | 627 | 95 -  | 10   | 635  | 12429  | 13049  |



|         |                |      |        |           |      |      |       |      |      |        |        |
|---------|----------------|------|--------|-----------|------|------|-------|------|------|--------|--------|
| UN18641 | Rsa1.0_00628.1 | 611  | 214360 | 1.00E-119 | 228  | 231  | 98 -  | 3    | 233  | 53812  | 54039  |
| UN18642 | Rsa1.0_00092.1 | 1266 | 659932 | 0         | 948  | 959  | 98 -  | 311  | 1266 | 530973 | 531931 |
| UN18643 | Rsa1.0_00546.1 | 837  | 76523  | 0         | 816  | 827  | 98 +  | 8    | 834  | 24901  | 25724  |
| UN18644 | Rsa1.0_00706.1 | 1133 | 291570 | 1.00E-145 | 262  | 262  | 100 - | 586  | 847  | 1      | 262    |
| UN18645 | Rsa1.0_01396.1 | 1894 | 151624 | 1.00E-177 | 337  | 342  | 98 +  | 3    | 341  | 136190 | 136530 |
| UN18646 | Rsa1.0_00017.1 | 2192 | 752458 | 0         | 1557 | 1576 | 98 +  | 617  | 2192 | 360274 | 361838 |
| UN18647 | Rsa1.0_02383.1 | 1967 | 31931  | 0         | 922  | 922  | 100 - | 229  | 1150 | 16329  | 17250  |
| UN18648 | Rsa1.0_00668.1 | 879  | 69421  | 1.00E-143 | 303  | 314  | 96 +  | 545  | 856  | 14760  | 15072  |
| UN18649 | Rsa1.0_01938.1 | 857  | 264018 | 0         | 600  | 621  | 96 -  | 240  | 856  | 159646 | 160265 |
| UN18650 | Rsa1.0_00741.1 | 1049 | 66117  | 0         | 365  | 365  | 100 + | 685  | 1049 | 50868  | 51232  |
| UN18651 | Rsa1.0_00589.1 | 1283 | 209965 | 1.00E-140 | 271  | 277  | 97 -  | 422  | 698  | 189295 | 189571 |
| UN18652 | Rsa1.0_00497.1 | 920  | 79830  | 0         | 429  | 433  | 99 +  | 488  | 920  | 73170  | 73602  |
| UN18653 | Rsa1.0_01090.1 | 779  | 54385  | 1.00E-175 | 396  | 424  | 93 -  | 354  | 777  | 3212   | 3626   |
| UN18654 | Rsa1.0_02625.1 | 920  | 139104 | 0         | 390  | 398  | 97 -  | 38   | 432  | 13985  | 14381  |
| UN18655 | Rsa1.0_00374.1 | 1319 | 165738 | 0         | 1314 | 1317 | 99 +  | 3    | 1319 | 163177 | 164493 |
| UN18656 | Rsa1.0_00220.1 | 891  | 192936 | 0         | 335  | 336  | 99 -  | 556  | 891  | 143125 | 143460 |
| UN18657 | Rsa1.0_00194.1 | 782  | 110851 | 0         | 383  | 384  | 99 +  | 398  | 781  | 42338  | 42721  |
| UN18658 | Rsa1.0_01468.1 | 710  | 45146  | 0         | 377  | 387  | 97 +  | 1    | 387  | 33809  | 34195  |
| UN18659 | #              | #    | #      | #         | #    | #    | #     | #    | #    | #      | #      |
| UN18660 | Rsa1.0_00128.1 | 1769 | 228675 | 0         | 419  | 423  | 99 -  | 1342 | 1764 | 100520 | 100941 |
| UN18661 | Rsa1.0_01363.1 | 2091 | 47195  | 0         | 775  | 786  | 98 -  | 97   | 882  | 1763   | 2548   |
| UN18662 | Rsa1.0_02107.1 | 556  | 34940  | 0         | 412  | 419  | 98 +  | 139  | 556  | 11867  | 12285  |
| UN18663 | Rsa1.0_00653.1 | 1223 | 70029  | 0         | 628  | 646  | 97 -  | 587  | 1223 | 54934  | 55579  |
| UN18664 | Rsa1.0_00265.1 | 1114 | 220635 | 0         | 990  | 1000 | 99 -  | 115  | 1114 | 207966 | 208965 |
| UN18665 | Rsa1.0_00222.1 | 891  | 172263 | 1.00E-170 | 307  | 308  | 99 +  | 113  | 420  | 28919  | 29226  |
| UN18666 | Rsa1.0_01785.1 | 1095 | 39368  | 0         | 496  | 499  | 99 +  | 589  | 1086 | 27142  | 27640  |
| UN18667 | Rsa1.0_00550.1 | 1068 | 210790 | 1.00E-118 | 249  | 259  | 96 +  | 3    | 259  | 58216  | 58474  |
| UN18668 | Rsa1.0_01363.1 | 1305 | 47195  | 0         | 492  | 495  | 99 -  | 17   | 511  | 674    | 1168   |
| UN18669 | Rsa1.0_00853.1 | 1468 | 62101  | 0         | 1463 | 1467 | 99 -  | 1    | 1466 | 35741  | 37205  |
| UN18670 | Rsa1.0_00714.1 | 1017 | 67187  | 0         | 368  | 368  | 100 + | 648  | 1015 | 14249  | 14616  |
| UN18671 | Rsa1.0_00954.1 | 804  | 189536 | 0         | 794  | 803  | 98 -  | 2    | 804  | 31811  | 32612  |
| UN18672 | Rsa1.0_00044.1 | 868  | 271658 | 0         | 336  | 336  | 100 - | 461  | 796  | 264749 | 265084 |
| UN18673 | Rsa1.0_00740.1 | 1735 | 215972 | 0         | 1042 | 1046 | 99 -  | 1    | 1046 | 198503 | 199548 |
| UN18674 | Rsa1.0_02910.1 | 1455 | 26843  | 0         | 445  | 452  | 98 -  | 1004 | 1455 | 10823  | 11273  |
| UN18675 | Rsa1.0_09707.1 | 824  | 6199   | 1.00E-135 | 355  | 389  | 91 +  | 436  | 824  | 5205   | 5577   |
| UN18676 | Rsa1.0_01661.1 | 1183 | 41400  | 0         | 773  | 783  | 98 -  | 319  | 1101 | 32175  | 32957  |
| UN18677 | Rsa1.0_01827.1 | 845  | 143321 | 9.00E-94  | 184  | 187  | 98 -  | 345  | 531  | 128843 | 129029 |
| UN18678 | Rsa1.0_00895.1 | 1281 | 60615  | 0         | 477  | 483  | 98 +  | 429  | 911  | 39139  | 39621  |
| UN18679 | Rsa1.0_02198.1 | 1066 | 33989  | 1.00E-166 | 306  | 309  | 99 -  | 635  | 943  | 23969  | 24277  |

|         |                |      |        |           |      |      |       |      |      |        |        |
|---------|----------------|------|--------|-----------|------|------|-------|------|------|--------|--------|
| UN18680 | Rsa1.0.02726.1 | 826  | 28404  | 0         | 664  | 670  | 99 -  | 144  | 813  | 8406   | 9075   |
| UN18681 | Rsa1.0.00746.1 | 1185 | 66044  | 1.00E-167 | 307  | 310  | 99 +  | 206  | 515  | 21064  | 21373  |
| UN18682 | Rsa1.0.00399.1 | 1990 | 242951 | 0         | 1946 | 1994 | 97 +  | 1    | 1990 | 238572 | 240562 |
| UN18683 | Rsa1.0.04194.1 | 786  | 132734 | 0         | 570  | 604  | 94 +  | 2    | 601  | 123389 | 123988 |
| UN18684 | Rsa1.0.00040.1 | 1401 | 324196 | 0         | 668  | 711  | 93 +  | 693  | 1400 | 15517  | 16201  |
| UN18685 | Rsa1.0.06825.1 | 1974 | 10297  | 0         | 788  | 791  | 99 -  | 398  | 1188 | 7176   | 7966   |
| UN18686 | Rsa1.0.00031.1 | 1059 | 179862 | 1.00E-142 | 271  | 276  | 98 +  | 146  | 421  | 172803 | 173078 |
| UN18687 | Rsa1.0.01105.1 | 694  | 53958  | 1.00E-155 | 278  | 278  | 100 - | 411  | 688  | 7703   | 7980   |
| UN18688 | Rsa1.0.00417.1 | 1432 | 395068 | 0         | 587  | 592  | 99 -  | 4    | 592  | 364722 | 365313 |
| UN18689 | Rsa1.0.00870.1 | 1219 | 61606  | 0         | 593  | 600  | 98 +  | 592  | 1187 | 27218  | 27817  |
| UN18690 | Rsa1.0.07122.1 | 849  | 9866   | 0         | 399  | 403  | 99 -  | 448  | 849  | 5080   | 5482   |
| UN18691 | Rsa1.0.00842.1 | 1204 | 62493  | 0         | 476  | 484  | 98 -  | 719  | 1202 | 14572  | 15054  |
| UN18692 | Rsa1.0.00119.1 | 1561 | 467509 | 1.00E-157 | 316  | 325  | 97 -  | 164  | 487  | 62711  | 63034  |
| UN18693 | Rsa1.0.00284.1 | 1468 | 323267 | 1.00E-136 | 258  | 262  | 98 +  | 1    | 262  | 237097 | 237358 |
| UN18694 | Rsa1.0.00104.1 | 1550 | 368722 | 0         | 975  | 1034 | 94 -  | 2    | 1015 | 68555  | 69588  |
| UN18695 | Rsa1.0.07645.1 | 1073 | 8949   | 0         | 609  | 622  | 97 +  | 1    | 622  | 2495   | 3116   |
| UN18696 | Rsa1.0.06597.1 | 894  | 10697  | 0         | 426  | 430  | 99 -  | 67   | 496  | 4936   | 5365   |
| UN18697 | Rsa1.0.00354.1 | 1012 | 232005 | 0         | 978  | 990  | 98 +  | 22   | 1011 | 76109  | 77095  |
| UN18698 | Rsa1.0.28295.1 | 2518 | 821    | 0         | 360  | 361  | 99 -  | 446  | 806  | 5      | 365    |
| UN18699 | Rsa1.0.36296.1 | 1156 | 621    | 0         | 351  | 358  | 98 +  | 618  | 974  | 1      | 358    |
| UN18700 | Rsa1.0.00070.1 | 853  | 150321 | 1.00E-174 | 310  | 310  | 100 - | 3    | 312  | 32070  | 32379  |
| UN18701 | Rsa1.0.00602.1 | 819  | 73302  | 0         | 804  | 817  | 98 -  | 1    | 817  | 35784  | 36596  |
| UN18702 | Rsa1.0.00201.1 | 1310 | 232851 | 0         | 662  | 684  | 96 +  | 481  | 1164 | 211    | 894    |
| UN18703 | Rsa1.0.13994.1 | 919  | 3941   | 1.00E-178 | 347  | 357  | 97 -  | 227  | 583  | 1610   | 1966   |
| UN18704 | Rsa1.0.00129.1 | 1436 | 126831 | 0         | 758  | 770  | 98 -  | 668  | 1433 | 34355  | 35124  |
| UN18705 | Rsa1.0.03172.1 | 1772 | 24816  | 0         | 1686 | 1705 | 98 -  | 1    | 1701 | 2171   | 3875   |
| UN18706 | Rsa1.0.01196.1 | 892  | 51097  | 1.00E-176 | 370  | 390  | 94 +  | 1    | 387  | 32459  | 32837  |
| UN18707 | Rsa1.0.00023.1 | 945  | 194764 | 0         | 385  | 387  | 99 -  | 370  | 756  | 96929  | 97315  |
| UN18708 | Rsa1.0.00426.1 | 1381 | 85668  | 1.00E-124 | 297  | 318  | 93 +  | 14   | 328  | 30271  | 30583  |
| UN18709 | Rsa1.0.03155.1 | 1495 | 24958  | 0         | 1385 | 1394 | 99 +  | 1    | 1394 | 20481  | 21874  |
| UN18710 | Rsa1.0.00642.1 | 1400 | 201230 | 0         | 510  | 516  | 98 +  | 883  | 1398 | 30064  | 30578  |
| UN18711 | Rsa1.0.00116.1 | 1451 | 365886 | 1.00E-115 | 289  | 315  | 91 -  | 45   | 359  | 67695  | 67993  |
| UN18712 | Rsa1.0.00648.1 | 1108 | 70351  | 0         | 398  | 407  | 97 -  | 1    | 407  | 31295  | 31701  |
| UN18713 | Rsa1.0.30970.1 | 1626 | 740    | 0         | 326  | 327  | 99 -  | 1011 | 1337 | 259    | 585    |
| UN18714 | Rsa1.0.01476.1 | 842  | 172928 | 1.00E-164 | 320  | 329  | 97 +  | 9    | 337  | 134299 | 134627 |
| UN18715 | Rsa1.0.04235.1 | 1649 | 18373  | 0         | 378  | 385  | 98 -  | 1016 | 1399 | 1875   | 2259   |
| UN18716 | Rsa1.0.04641.1 | 800  | 268012 | 1.00E-180 | 327  | 328  | 99 +  | 472  | 798  | 132021 | 132348 |
| UN18717 | Rsa1.0.05784.1 | 1027 | 12643  | 0         | 398  | 414  | 96 -  | 2    | 414  | 1645   | 2057   |
| UN18718 | Rsa1.0.02452.1 | 950  | 31280  | 0         | 545  | 545  | 100 + | 406  | 950  | 13663  | 14207  |

|         |                |      |        |           |      |      |       |      |      |        |        |
|---------|----------------|------|--------|-----------|------|------|-------|------|------|--------|--------|
| UN18719 | Rsa1.0.00483.1 | 1227 | 81102  | 0         | 553  | 555  | 99 +  | 440  | 994  | 2359   | 2913   |
| UN18720 | Rsa1.0.00105.1 | 896  | 134138 | 0         | 644  | 684  | 94 -  | 226  | 889  | 1925   | 2604   |
| UN18721 | Rsa1.0.13941.1 | 1639 | 4043   | 0         | 482  | 491  | 98 +  | 1093 | 1583 | 3554   | 4043   |
| UN18722 | Rsa1.0.00307.1 | 1223 | 199003 | 0         | 383  | 402  | 95 -  | 1    | 399  | 70435  | 70829  |
| UN18723 | Rsa1.0.00077.1 | 2318 | 145005 | 0         | 522  | 524  | 99 -  | 1795 | 2318 | 40534  | 41057  |
| UN18724 | Rsa1.0.00017.1 | 1984 | 752458 | 1.00E-140 | 396  | 435  | 91 +  | 1556 | 1984 | 718544 | 718965 |
| UN18725 | Rsa1.0.01812.1 | 1474 | 38956  | 0         | 1465 | 1472 | 99 -  | 1    | 1472 | 23997  | 25468  |
| UN18726 | Rsa1.0.00321.1 | 434  | 95671  | 1.00E-135 | 254  | 256  | 99 +  | 178  | 433  | 56950  | 57204  |
| UN18727 | Rsa1.0.00006.1 | 1200 | 396176 | 0         | 1190 | 1199 | 99 +  | 1    | 1199 | 266273 | 267471 |
| UN18728 | Rsa1.0.00414.1 | 1381 | 202190 | 0         | 1316 | 1401 | 93 +  | 1    | 1381 | 14739  | 16134  |
| UN18729 | Rsa1.0.00387.1 | 1045 | 495407 | 1.00E-167 | 319  | 326  | 97 -  | 689  | 1014 | 1271   | 1596   |
| UN18730 | Rsa1.0.02393.1 | 1448 | 31795  | 0         | 1442 | 1447 | 99 +  | 1    | 1447 | 14243  | 15689  |
| UN18731 | Rsa1.0.00053.1 | 1905 | 263459 | 0         | 1180 | 1193 | 98 -  | 713  | 1905 | 229615 | 230807 |
| UN18732 | Rsa1.0.03353.1 | 1400 | 23496  | 0         | 637  | 640  | 99 -  | 1    | 638  | 18009  | 18648  |
| UN18733 | Rsa1.0.07056.1 | 1071 | 9969   | 1.00E-173 | 393  | 424  | 92 -  | 651  | 1062 | 1789   | 2206   |
| UN18734 | Rsa1.0.14752.1 | 687  | 3100   | 1.00E-113 | 225  | 231  | 97 +  | 456  | 686  | 33     | 263    |
| UN18735 | Rsa1.0.01583.1 | 899  | 156297 | 8.00E-85  | 172  | 176  | 97 -  | 109  | 284  | 130377 | 130552 |
| UN18736 | Rsa1.0.02135.1 | 1829 | 34713  | 0         | 705  | 716  | 98 -  | 1036 | 1750 | 7000   | 7715   |
| UN18737 | Rsa1.0.06938.1 | 905  | 10140  | 2.00E-60  | 178  | 195  | 91 -  | 682  | 874  | 9785   | 9979   |
| UN18738 | Rsa1.0.10918.1 | 1504 | 5679   | 0         | 900  | 929  | 96 -  | 580  | 1504 | 2063   | 2989   |
| UN18739 | Rsa1.0.00433.1 | 1880 | 85381  | 0         | 573  | 587  | 97 -  | 3    | 586  | 79697  | 80279  |
| UN18740 | Rsa1.0.02103.1 | 1746 | 35006  | 0         | 488  | 500  | 97 -  | 137  | 636  | 34046  | 34545  |
| UN18741 | Rsa1.0.00318.1 | 1130 | 96094  | 0         | 356  | 359  | 99 +  | 771  | 1128 | 76649  | 77007  |
| UN18742 | Rsa1.0.00078.1 | 1169 | 175053 | 0         | 405  | 428  | 94 -  | 388  | 812  | 101013 | 101438 |
| UN18743 | Rsa1.0.06590.1 | 1246 | 10706  | 0         | 686  | 709  | 96 -  | 244  | 951  | 2006   | 2708   |
| UN18744 | Rsa1.0.00371.1 | 1236 | 90463  | 0         | 1221 | 1235 | 98 +  | 2    | 1236 | 19905  | 21138  |
| UN18745 | Rsa1.0.00480.1 | 1172 | 81325  | 0         | 441  | 456  | 96 +  | 385  | 840  | 4323   | 4778   |
| UN18746 | Rsa1.0.01236.1 | 825  | 50156  | 1.00E-132 | 239  | 239  | 100 - | 587  | 825  | 40363  | 40601  |
| UN18747 | Rsa1.0.00662.1 | 1249 | 192183 | 1.00E-101 | 246  | 264  | 93 -  | 883  | 1145 | 4988   | 5251   |
| UN18748 | Rsa1.0.01876.1 | 1282 | 37800  | 1.00E-103 | 199  | 200  | 99 -  | 1083 | 1282 | 9795   | 9993   |
| UN18749 | Rsa1.0.10764.1 | 1101 | 5726   | 1.00E-147 | 325  | 350  | 92 -  | 735  | 1064 | 2496   | 2845   |
| UN18750 | Rsa1.0.00545.1 | 1837 | 189649 | 0         | 489  | 497  | 98 -  | 1340 | 1835 | 44747  | 45243  |
| UN18751 | Rsa1.0.00900.1 | 1010 | 60367  | 1.00E-141 | 294  | 306  | 96 +  | 703  | 1007 | 29910  | 30215  |
| UN18752 | Rsa1.0.00818.1 | 1575 | 62939  | 0         | 783  | 809  | 96 +  | 768  | 1575 | 36240  | 37036  |
| UN18753 | Rsa1.0.00805.1 | 1067 | 63724  | 0         | 363  | 371  | 97 -  | 212  | 582  | 15725  | 16095  |
| UN18754 | Rsa1.0.02682.1 | 1333 | 28711  | 0         | 1003 | 1045 | 95 -  | 210  | 1251 | 16904  | 17947  |
| UN18755 | Rsa1.0.08551.1 | 2110 | 7210   | 0         | 1965 | 1977 | 99 -  | 3    | 1970 | 3      | 1979   |
| UN18756 | Rsa1.0.04600.1 | 1132 | 16694  | 0         | 482  | 498  | 96 +  | 633  | 1130 | 1433   | 1930   |
| UN18757 | Rsa1.0.01041.1 | 682  | 55910  | 1.00E-123 | 232  | 233  | 99 -  | 3    | 234  | 9812   | 10044  |

|         |                |      |        |           |      |      |       |     |      |        |        |
|---------|----------------|------|--------|-----------|------|------|-------|-----|------|--------|--------|
| UN18758 | Rsa1.0.03786.1 | 1218 | 20879  | 0         | 664  | 716  | 92 -  | 108 | 821  | 13224  | 13939  |
| UN18759 | Rsa1.0.00144.1 | 779  | 120708 | 0         | 386  | 388  | 99 -  | 392 | 779  | 79316  | 79702  |
| UN18760 | Rsa1.0.00067.1 | 1214 | 415055 | 0         | 494  | 506  | 97 -  | 9   | 514  | 237446 | 237951 |
| UN18761 | Rsa1.0.15455.1 | 1349 | 2595   | 0         | 604  | 618  | 97 +  | 1   | 615  | 1697   | 2313   |
| UN18762 | Rsa1.0.00329.1 | 1318 | 222544 | 1.00E-164 | 617  | 725  | 85 -  | 197 | 903  | 139552 | 140273 |
| UN18763 | Rsa1.0.00107.1 | 1382 | 431659 | 0         | 811  | 853  | 95 +  | 17  | 862  | 86606  | 87435  |
| UN18764 | Rsa1.0.00490.1 | 1174 | 186713 | 0         | 569  | 573  | 99 -  | 1   | 572  | 31223  | 31795  |
| UN18765 | Rsa1.0.03141.1 | 1187 | 25061  | 1.00E-177 | 338  | 345  | 97 -  | 841 | 1185 | 4256   | 4597   |
| UN18766 | Rsa1.0.00006.1 | 1267 | 396176 | 0         | 348  | 352  | 98 +  | 1   | 351  | 100733 | 101082 |
| UN18767 | Rsa1.0.00916.1 | 950  | 59789  | 1.00E-130 | 243  | 245  | 99 +  | 158 | 402  | 13276  | 13520  |
| UN18768 | Rsa1.0.00262.1 | 967  | 101906 | 0         | 415  | 424  | 97 -  | 1   | 423  | 66278  | 66700  |
| UN18769 | Rsa1.0.00732.1 | 1291 | 66631  | 1.00E-157 | 321  | 334  | 96 +  | 12  | 345  | 1795   | 2123   |
| UN18770 | Rsa1.0.01376.1 | 838  | 47004  | 0         | 392  | 400  | 98 -  | 1   | 400  | 41027  | 41426  |
| UN18771 | Rsa1.0.00021.1 | 1799 | 263655 | 1.00E-166 | 312  | 317  | 98 -  | 559 | 875  | 15808  | 16124  |
| UN18772 | Rsa1.0.00149.1 | 1162 | 305196 | 1.00E-65  | 216  | 244  | 88 +  | 741 | 984  | 12986  | 13228  |
| UN18773 | Rsa1.0.00194.1 | 826  | 110851 | 0         | 520  | 527  | 98 +  | 1   | 527  | 7904   | 8430   |
| UN18774 | Rsa1.0.12259.1 | 1442 | 5273   | 1.00E-162 | 334  | 348  | 95 +  | 164 | 511  | 487    | 831    |
| UN18775 | Rsa1.0.00247.1 | 909  | 103408 | 0         | 347  | 347  | 100 + | 561 | 907  | 9307   | 9653   |
| UN18776 | Rsa1.0.00017.1 | 1562 | 752458 | 0         | 877  | 879  | 99 -  | 651 | 1529 | 615886 | 616764 |
| UN18777 | Rsa1.0.08544.1 | 1105 | 7215   | 0         | 354  | 358  | 98 -  | 4   | 361  | 5274   | 5630   |
| UN18778 | Rsa1.0.02110.1 | 1022 | 34919  | 1.00E-132 | 239  | 239  | 100 - | 784 | 1022 | 23653  | 23891  |
| UN18779 | Rsa1.0.00058.1 | 1324 | 159921 | 1.00E-167 | 355  | 372  | 95 +  | 511 | 877  | 118433 | 118804 |
| UN18780 | Rsa1.0.00002.1 | 1461 | 601661 | 0         | 575  | 600  | 95 +  | 864 | 1457 | 33588  | 34173  |
| UN18781 | Rsa1.0.00079.1 | 1428 | 606987 | 0         | 520  | 525  | 99 +  | 2   | 526  | 81236  | 81760  |
| UN18782 | Rsa1.0.00361.1 | 1544 | 91181  | 0         | 1198 | 1242 | 96 +  | 317 | 1543 | 47136  | 48374  |
| UN18783 | Rsa1.0.00002.1 | 830  | 601661 | 0         | 510  | 515  | 99 -  | 316 | 830  | 240792 | 241305 |
| UN18784 | Rsa1.0.01004.1 | 813  | 56975  | 0         | 430  | 461  | 93 -  | 365 | 806  | 16883  | 17342  |
| UN18785 | Rsa1.0.03828.1 | 1141 | 20588  | 0         | 1112 | 1143 | 97 +  | 3   | 1141 | 10638  | 11780  |
| UN18786 | Rsa1.0.06101.1 | 1268 | 11745  | 1.00E-103 | 197  | 199  | 98 -  | 160 | 358  | 1332   | 1530   |
| UN18787 | Rsa1.0.00980.1 | 2450 | 57729  | 0         | 1910 | 1943 | 98 -  | 508 | 2446 | 7089   | 9026   |
| UN18788 | Rsa1.0.01876.1 | 782  | 37800  | 0         | 568  | 590  | 96 +  | 194 | 782  | 20518  | 21107  |
| UN18789 | Rsa1.0.02579.1 | 1069 | 29923  | 0         | 486  | 489  | 99 +  | 583 | 1069 | 28379  | 28867  |
| UN18790 | Rsa1.0.00155.1 | 1675 | 118465 | 0         | 975  | 1009 | 96 -  | 2   | 1010 | 61433  | 62438  |
| UN18791 | Rsa1.0.00017.1 | 798  | 752458 | 1.00E-103 | 203  | 207  | 98 -  | 100 | 306  | 644525 | 644731 |
| UN18792 | Rsa1.0.00460.1 | 1069 | 206387 | 1.00E-152 | 279  | 281  | 99 +  | 309 | 589  | 35604  | 35884  |
| UN18793 | Rsa1.0.02839.1 | 1387 | 27391  | 0         | 355  | 365  | 97 -  | 236 | 600  | 18841  | 19205  |
| UN18794 | Rsa1.0.00946.1 | 862  | 58666  | 1.00E-142 | 281  | 289  | 97 -  | 557 | 845  | 48137  | 48425  |
| UN18795 | Rsa1.0.01118.1 | 2599 | 53460  | 0         | 446  | 467  | 95 +  | 353 | 819  | 11739  | 12205  |
| UN18796 | Rsa1.0.00710.1 | 1003 | 67325  | 0         | 353  | 356  | 99 +  | 646 | 1001 | 26519  | 26874  |

|         |                |      |        |           |      |      |       |      |      |        |        |
|---------|----------------|------|--------|-----------|------|------|-------|------|------|--------|--------|
| UN18797 | Rsa1.0.00875.1 | 1851 | 61371  | 0         | 834  | 856  | 97 +  | 998  | 1850 | 37621  | 38474  |
| UN18798 | Rsa1.0.00434.1 | 802  | 85171  | 0         | 560  | 566  | 98 -  | 237  | 802  | 1504   | 2069   |
| UN18799 | Rsa1.0.03434.1 | 631  | 22960  | 1.00E-140 | 339  | 364  | 93 -  | 276  | 631  | 12113  | 12476  |
| UN18800 | Rsa1.0.19324.1 | 1560 | 1447   | 9.00E-86  | 165  | 166  | 99 -  | 502  | 667  | 1029   | 1194   |
| UN18801 | Rsa1.0.05423.1 | 1045 | 13800  | 1.00E-114 | 248  | 263  | 94 -  | 10   | 272  | 9118   | 9368   |
| UN18802 | Rsa1.0.00379.1 | 1226 | 89865  | 0         | 527  | 529  | 99 +  | 454  | 982  | 11782  | 12310  |
| UN18803 | Rsa1.0.00070.1 | 713  | 150321 | 0         | 376  | 376  | 100 + | 1    | 376  | 146028 | 146403 |
| UN18804 | Rsa1.0.00716.1 | 1196 | 67078  | 0         | 1027 | 1076 | 95 +  | 122  | 1194 | 1      | 1058   |
| UN18805 | Rsa1.0.00226.1 | 922  | 105884 | 0         | 499  | 512  | 97 +  | 56   | 567  | 97510  | 98021  |
| UN18806 | Rsa1.0.01134.1 | 1002 | 52829  | 0         | 992  | 1003 | 98 +  | 1    | 1001 | 1608   | 2610   |
| UN18807 | Rsa1.0.03541.1 | 1375 | 22194  | 0         | 1359 | 1378 | 98 +  | 3    | 1375 | 9567   | 10939  |
| UN18808 | Rsa1.0.00977.1 | 553  | 198001 | 0         | 463  | 492  | 94 -  | 3    | 486  | 50788  | 51279  |
| UN18809 | Rsa1.0.01236.1 | 859  | 50156  | 1.00E-104 | 199  | 201  | 99 +  | 220  | 420  | 44319  | 44519  |
| UN18810 | Rsa1.0.00690.1 | 815  | 140527 | 1.00E-74  | 207  | 224  | 92 -  | 52   | 271  | 31841  | 32061  |
| UN18811 | Rsa1.0.00001.1 | 1182 | 363028 | 0         | 478  | 480  | 99 -  | 703  | 1182 | 349184 | 349663 |
| UN18812 | Rsa1.0.05546.1 | 1119 | 13379  | 1.00E-135 | 282  | 292  | 96 +  | 381  | 670  | 7603   | 7894   |
| UN18813 | Rsa1.0.00686.1 | 1464 | 68511  | 1.00E-154 | 285  | 287  | 99 +  | 1176 | 1462 | 59729  | 60013  |
| UN18814 | Rsa1.0.00429.1 | 1605 | 85559  | 0         | 735  | 750  | 98 -  | 69   | 818  | 23587  | 24336  |
| UN18815 | Rsa1.0.06489.1 | 1005 | 10917  | 0         | 482  | 482  | 100 - | 29   | 510  | 4840   | 5321   |
| UN18816 | Rsa1.0.00628.1 | 657  | 214360 | 1.00E-163 | 326  | 335  | 97 +  | 1    | 333  | 34425  | 34758  |
| UN18817 | Rsa1.0.03016.1 | 1065 | 26000  | 1.00E-148 | 272  | 274  | 99 -  | 17   | 290  | 24452  | 24725  |
| UN18818 | Rsa1.0.01675.1 | 744  | 41155  | 1.00E-153 | 287  | 290  | 98 +  | 1    | 289  | 10320  | 10609  |
| UN18819 | Rsa1.0.00543.1 | 1186 | 76788  | 0         | 452  | 476  | 94 +  | 2    | 468  | 17171  | 17643  |
| UN18820 | Rsa1.0.05631.1 | 762  | 13127  | 1.00E-139 | 310  | 326  | 95 -  | 38   | 359  | 4477   | 4802   |
| UN18821 | Rsa1.0.03916.1 | 1103 | 20117  | 0         | 463  | 465  | 99 +  | 1    | 465  | 13460  | 13924  |
| UN18822 | Rsa1.0.00120.1 | 1358 | 277288 | 0         | 763  | 776  | 98 -  | 393  | 1164 | 272480 | 273251 |
| UN18823 | Rsa1.0.00741.1 | 1529 | 66117  | 1.00E-162 | 309  | 314  | 98 +  | 13   | 325  | 46297  | 46610  |
| UN18824 | Rsa1.0.01453.1 | 1055 | 45449  | 1.00E-132 | 333  | 369  | 90 -  | 702  | 1046 | 25082  | 25450  |
| UN18825 | Rsa1.0.00010.1 | 968  | 294827 | 0         | 381  | 383  | 99 +  | 33   | 415  | 269513 | 269894 |
| UN18826 | Rsa1.0.00108.1 | 1279 | 478491 | 1.00E-96  | 264  | 286  | 92 +  | 99   | 371  | 67382  | 67663  |
| UN18827 | Rsa1.0.03005.1 | 679  | 26082  | 0         | 654  | 685  | 95 +  | 3    | 679  | 19677  | 20352  |
| UN18828 | Rsa1.0.00586.1 | 897  | 163802 | 1.00E-116 | 244  | 253  | 96 +  | 161  | 412  | 154481 | 154733 |
| UN18829 | Rsa1.0.08526.1 | 1298 | 7236   | 0         | 376  | 382  | 98 +  | 916  | 1297 | 1300   | 1681   |
| UN18830 | Rsa1.0.00363.1 | 770  | 90968  | 0         | 753  | 770  | 97 -  | 1    | 770  | 14384  | 15153  |
| UN18831 | Rsa1.0.00190.1 | 873  | 318240 | 1.00E-175 | 353  | 367  | 96 -  | 177  | 543  | 4626   | 4992   |
| UN18832 | Rsa1.0.00494.1 | 866  | 79967  | 0         | 856  | 865  | 98 +  | 3    | 866  | 48939  | 49803  |
| UN18833 | Rsa1.0.00026.1 | 1032 | 327835 | 1.00E-127 | 294  | 312  | 94 -  | 731  | 1030 | 191591 | 191902 |
| UN18834 | Rsa1.0.04387.1 | 1187 | 17625  | 0         | 478  | 498  | 95 -  | 1    | 488  | 7587   | 8082   |
| UN18835 | Rsa1.0.01469.1 | 1340 | 45139  | 1.00E-166 | 311  | 316  | 98 +  | 355  | 670  | 18477  | 18792  |

|         |                |      |        |           |      |      |       |      |      |        |        |
|---------|----------------|------|--------|-----------|------|------|-------|------|------|--------|--------|
| UN18836 | Rsa1.0_15186.1 | 828  | 2772   | 4.00E-74  | 154  | 158  | 97 -  | 74   | 231  | 1966   | 2123   |
| UN18837 | Rsa1.0_00094.1 | 836  | 139042 | 1.00E-157 | 330  | 346  | 95 +  | 13   | 358  | 4652   | 4992   |
| UN18838 | Rsa1.0_00821.1 | 1069 | 62891  | 0         | 454  | 468  | 97 +  | 3    | 469  | 46889  | 47355  |
| UN18839 | Rsa1.0_00521.1 | 1390 | 78191  | 0         | 448  | 449  | 99 -  | 1    | 449  | 64098  | 64546  |
| UN18840 | Rsa1.0_00662.1 | 843  | 192183 | 1.00E-155 | 300  | 306  | 98 -  | 1    | 305  | 190197 | 190502 |
| UN18841 | Rsa1.0_01851.1 | 603  | 38275  | 1.00E-161 | 321  | 328  | 97 -  | 278  | 603  | 28477  | 28803  |
| UN18842 | Rsa1.0_03356.1 | 3393 | 23487  | 0         | 1318 | 1321 | 99 +  | 133  | 1453 | 3614   | 4934   |
| UN18843 | Rsa1.0_00228.1 | 1379 | 105511 | 0         | 484  | 503  | 96 +  | 873  | 1375 | 82494  | 82991  |
| UN18844 | Rsa1.0_01101.1 | 1267 | 54031  | 1.00E-112 | 206  | 206  | 100 + | 1060 | 1265 | 24383  | 24588  |
| UN18845 | Rsa1.0_03228.1 | 898  | 24471  | 0         | 406  | 419  | 96 +  | 475  | 892  | 22305  | 22722  |
| UN18846 | Rsa1.0_01494.1 | 2041 | 44641  | 0         | 753  | 783  | 96 -  | 1250 | 2027 | 11207  | 11988  |
| UN18847 | Rsa1.0_00422.1 | 626  | 86144  | 0         | 477  | 488  | 97 +  | 141  | 626  | 16094  | 16580  |
| UN18848 | Rsa1.0_00413.1 | 1465 | 86921  | 0         | 612  | 615  | 99 -  | 351  | 965  | 31378  | 31992  |
| UN18849 | Rsa1.0_74600.1 | 825  | 307    | 1.00E-164 | 299  | 301  | 99 -  | 73   | 373  | 7      | 307    |
| UN18850 | Rsa1.0_03133.1 | 1330 | 25135  | 0         | 669  | 679  | 98 +  | 408  | 1086 | 11553  | 12231  |
| UN18851 | Rsa1.0_04073.1 | 1637 | 19238  | 1.00E-132 | 243  | 244  | 99 -  | 1085 | 1328 | 11043  | 11286  |
| UN18852 | Rsa1.0_04095.1 | 1108 | 19095  | 0         | 353  | 353  | 100 - | 3    | 355  | 12377  | 12729  |
| UN18853 | Rsa1.0_00234.1 | 1952 | 197060 | 0         | 1551 | 1603 | 96 -  | 131  | 1725 | 13733  | 15331  |
| UN18854 | Rsa1.0_06247.1 | 1806 | 11395  | 0         | 778  | 841  | 92 +  | 784  | 1623 | 7116   | 7931   |
| UN18855 | Rsa1.0_14744.1 | 1284 | 3111   | 0         | 485  | 506  | 95 -  | 340  | 845  | 724    | 1229   |
| UN18856 | Rsa1.0_00173.1 | 957  | 288743 | 1.00E-116 | 260  | 268  | 97 -  | 675  | 936  | 26009  | 26275  |
| UN18857 | Rsa1.0_01762.1 | 1967 | 39682  | 7.00E-81  | 175  | 182  | 96 -  | 1576 | 1757 | 7088   | 7269   |
| UN18858 | Rsa1.0_00603.1 | 684  | 73299  | 0         | 465  | 475  | 97 +  | 209  | 683  | 32629  | 33097  |
| UN18859 | Rsa1.0_00517.1 | 830  | 142790 | 1.00E-144 | 285  | 291  | 97 +  | 540  | 829  | 69988  | 70276  |
| UN18860 | Rsa1.0_05943.1 | 1056 | 12158  | 0         | 588  | 603  | 97 -  | 8    | 610  | 6907   | 7509   |
| UN18861 | Rsa1.0_00457.1 | 899  | 337301 | 0         | 556  | 573  | 97 -  | 1    | 573  | 335355 | 335927 |
| UN18862 | Rsa1.0_02188.1 | 1725 | 34104  | 0         | 498  | 518  | 96 -  | 1212 | 1723 | 2416   | 2933   |
| UN18863 | Rsa1.0_00086.1 | 1310 | 439854 | 1.00E-112 | 215  | 218  | 98 -  | 5    | 222  | 373324 | 373541 |
| UN18864 | Rsa1.0_00009.1 | 984  | 232558 | 0         | 976  | 984  | 99 +  | 2    | 983  | 197731 | 198714 |
| UN18865 | Rsa1.0_00056.1 | 1215 | 332604 | 0         | 1012 | 1083 | 93 +  | 1    | 1078 | 84534  | 85600  |
| UN18866 | Rsa1.0_00095.1 | 1279 | 283384 | 1.00E-170 | 352  | 367  | 95 -  | 1    | 360  | 16815  | 17181  |
| UN18867 | Rsa1.0_14668.1 | 1679 | 3173   | 0         | 1188 | 1199 | 99 -  | 481  | 1679 | 1153   | 2343   |
| UN18868 | Rsa1.0_21467.1 | 1454 | 1200   | 0         | 639  | 672  | 95 +  | 588  | 1256 | 1      | 663    |
| UN18869 | Rsa1.0_00025.1 | 841  | 277312 | 0         | 327  | 327  | 100 + | 1    | 327  | 149589 | 149915 |
| UN18870 | Rsa1.0_00972.1 | 1171 | 57937  | 0         | 464  | 494  | 93 +  | 674  | 1167 | 53820  | 54309  |
| UN18871 | Rsa1.0_00308.1 | 703  | 96915  | 1.00E-76  | 266  | 302  | 88 -  | 1    | 289  | 80355  | 80656  |
| UN18872 | Rsa1.0_21660.1 | 1698 | 1184   | 0         | 477  | 503  | 94 +  | 309  | 805  | 506    | 1000   |
| UN18873 | Rsa1.0_00107.1 | 1546 | 431659 | 0         | 510  | 531  | 96 -  | 590  | 1114 | 148415 | 148945 |
| UN18874 | Rsa1.0_01969.1 | 512  | 153351 | 1.00E-125 | 298  | 318  | 93 -  | 1    | 314  | 22253  | 22565  |

|         |                |      |        |           |      |      |       |      |      |        |        |
|---------|----------------|------|--------|-----------|------|------|-------|------|------|--------|--------|
| UN18875 | Rsa1.0.01232.1 | 1317 | 155185 | 1.00E-115 | 220  | 223  | 98 -  | 272  | 494  | 131817 | 132039 |
| UN18876 | Rsa1.0.01455.1 | 1603 | 45440  | 0         | 647  | 679  | 95 +  | 931  | 1603 | 24534  | 25195  |
| UN18877 | Rsa1.0.00775.1 | 1960 | 64793  | 0         | 363  | 367  | 98 -  | 1595 | 1960 | 9000   | 9366   |
| UN18878 | Rsa1.0.02176.1 | 1520 | 34291  | 0         | 628  | 644  | 97 +  | 2    | 644  | 14455  | 15098  |
| UN18879 | Rsa1.0.00418.1 | 1266 | 215377 | 1.00E-156 | 298  | 304  | 98 -  | 1    | 304  | 47449  | 47752  |
| UN18880 | Rsa1.0.00620.1 | 1082 | 71985  | 0         | 906  | 913  | 99 +  | 168  | 1080 | 8178   | 9090   |
| UN18881 | Rsa1.0.01029.1 | 1091 | 256254 | 1.00E-153 | 336  | 354  | 94 +  | 741  | 1091 | 245893 | 246242 |
| UN18882 | Rsa1.0.00199.1 | 1453 | 249604 | 0         | 387  | 388  | 99 +  | 311  | 698  | 60822  | 61209  |
| UN18883 | Rsa1.0.00981.1 | 1836 | 57700  | 0         | 518  | 522  | 99 -  | 1315 | 1836 | 48205  | 48726  |
| UN18884 | Rsa1.0.02954.1 | 1296 | 26485  | 0         | 1282 | 1295 | 98 -  | 3    | 1294 | 16411  | 17704  |
| UN18885 | Rsa1.0.01198.1 | 828  | 51029  | 0         | 820  | 821  | 99 -  | 7    | 827  | 20993  | 21813  |
| UN18886 | Rsa1.0.01247.1 | 2017 | 49934  | 0         | 1160 | 1185 | 97 -  | 834  | 2017 | 7059   | 8223   |
| UN18887 | Rsa1.0.12119.1 | 959  | 5311   | 1.00E-138 | 264  | 269  | 98 +  | 64   | 332  | 4588   | 4856   |
| UN18888 | Rsa1.0.00183.1 | 1719 | 113277 | 0         | 764  | 788  | 96 +  | 3    | 790  | 62438  | 63223  |
| UN18889 | Rsa1.0.00237.1 | 565  | 235974 | 1.00E-172 | 358  | 375  | 95 +  | 191  | 565  | 58852  | 59226  |
| UN18890 | Rsa1.0.14939.1 | 1182 | 2948   | 0         | 478  | 482  | 99 -  | 303  | 783  | 559    | 1040   |
| UN18891 | Rsa1.0.02454.1 | 804  | 31263  | 0         | 556  | 571  | 97 +  | 227  | 797  | 27132  | 27702  |
| UN18892 | Rsa1.0.08062.1 | 1078 | 7978   | 0         | 489  | 520  | 94 -  | 26   | 531  | 6822   | 7336   |
| UN18893 | Rsa1.0.00357.1 | 1626 | 173671 | 1.00E-168 | 322  | 328  | 98 +  | 746  | 1073 | 8462   | 8788   |
| UN18894 | Rsa1.0.00425.1 | 624  | 147080 | 1.00E-134 | 314  | 337  | 93 +  | 2    | 337  | 132376 | 132701 |
| UN18895 | Rsa1.0.03199.1 | 1150 | 24640  | 0         | 541  | 551  | 98 +  | 599  | 1149 | 16239  | 16789  |
| UN18896 | Rsa1.0.00114.1 | 557  | 131330 | 0         | 532  | 553  | 96 -  | 10   | 557  | 65804  | 66351  |
| UN18897 | Rsa1.0.03671.1 | 1083 | 21459  | 1.00E-142 | 358  | 384  | 93 -  | 1    | 374  | 9842   | 10224  |
| UN18898 | Rsa1.0.02103.1 | 1416 | 35006  | 0         | 1193 | 1217 | 98 +  | 10   | 1222 | 29031  | 30243  |
| UN18899 | Rsa1.0.00002.1 | 1073 | 601661 | 1.00E-176 | 368  | 387  | 95 +  | 3    | 389  | 264137 | 264511 |
| UN18900 | Rsa1.0.05878.1 | 1305 | 12344  | 0         | 1258 | 1300 | 96 +  | 8    | 1305 | 7156   | 8451   |
| UN18901 | Rsa1.0.01760.1 | 1040 | 39730  | 0         | 351  | 354  | 99 -  | 488  | 841  | 1443   | 1796   |
| UN18902 | Rsa1.0.00048.1 | 1292 | 167185 | 0         | 630  | 642  | 98 +  | 643  | 1284 | 63567  | 64203  |
| UN18903 | Rsa1.0.00615.1 | 1811 | 72235  | 0         | 898  | 902  | 99 +  | 3    | 902  | 21727  | 22628  |
| UN18904 | Rsa1.0.00038.1 | 1107 | 314568 | 1.00E-145 | 262  | 262  | 100 - | 844  | 1105 | 8948   | 9209   |
| UN18905 | Rsa1.0.00773.1 | 1165 | 64839  | 1.00E-96  | 201  | 208  | 96 -  | 422  | 629  | 58210  | 58417  |
| UN18906 | Rsa1.0.02807.1 | 1247 | 27680  | 0         | 464  | 500  | 92 -  | 736  | 1217 | 4965   | 5464   |
| UN18907 | Rsa1.0.16685.1 | 1687 | 2065   | 0         | 1130 | 1159 | 97 -  | 2    | 1160 | 670    | 1826   |
| UN18908 | Rsa1.0.00512.1 | 1358 | 200277 | 1.00E-170 | 315  | 319  | 98 +  | 1035 | 1353 | 66192  | 66510  |
| UN18909 | Rsa1.0.58003.1 | 899  | 394    | 3.00E-84  | 191  | 199  | 95 -  | 678  | 875  | 117    | 314    |
| UN18910 | Rsa1.0.00495.1 | 787  | 79934  | 2.00E-76  | 149  | 150  | 99 -  | 107  | 256  | 19840  | 19989  |
| UN18911 | Rsa1.0.02717.1 | 1439 | 28458  | 0         | 624  | 648  | 96 +  | 804  | 1439 | 26715  | 27360  |
| UN18912 | Rsa1.0.11116.1 | 1734 | 5612   | 0         | 627  | 638  | 98 +  | 410  | 1047 | 4936   | 5573   |
| UN18913 | Rsa1.0.00637.1 | 1116 | 71038  | 0         | 451  | 459  | 98 -  | 615  | 1073 | 46365  | 46823  |





|         |                |      |        |           |      |      |       |      |      |        |        |
|---------|----------------|------|--------|-----------|------|------|-------|------|------|--------|--------|
| UN18953 | Rsa1.0_00284.1 | 1132 | 323267 | 1.00E-130 | 406  | 461  | 88 -  | 21   | 464  | 275018 | 275460 |
| UN18954 | Rsa1.0_00710.1 | 806  | 67325  | 1.00E-168 | 435  | 479  | 90 -  | 1    | 473  | 28170  | 28648  |
| UN18955 | Rsa1.0_01028.1 | 919  | 56401  | 0         | 644  | 657  | 98 +  | 1    | 656  | 7710   | 8365   |
| UN18956 | Rsa1.0_05336.1 | 1498 | 14117  | 0         | 1000 | 1075 | 93 -  | 3    | 1062 | 5128   | 6181   |
| UN18957 | Rsa1.0_01397.1 | 839  | 183276 | 0         | 744  | 775  | 96 +  | 38   | 800  | 16441  | 17215  |
| UN18958 | Rsa1.0_03562.1 | 1160 | 22084  | 0         | 1102 | 1143 | 96 -  | 21   | 1160 | 16086  | 17225  |
| UN18959 | Rsa1.0_00590.1 | 1267 | 73835  | 0         | 480  | 488  | 98 -  | 780  | 1265 | 23232  | 23718  |
| UN18960 | Rsa1.0_03237.1 | 1594 | 24434  | 1.00E-166 | 356  | 372  | 95 -  | 1227 | 1594 | 4566   | 4937   |
| UN18961 | Rsa1.0_04711.1 | 1188 | 16282  | 0         | 822  | 833  | 98 +  | 356  | 1188 | 11996  | 12828  |
| UN18962 | Rsa1.0_00218.1 | 1022 | 201480 | 1.00E-131 | 244  | 246  | 99 +  | 223  | 468  | 172495 | 172740 |
| UN18963 | Rsa1.0_03227.1 | 887  | 24478  | 0         | 863  | 886  | 97 +  | 3    | 887  | 4854   | 5737   |
| UN18964 | Rsa1.0_00040.1 | 1261 | 324196 | 0         | 646  | 656  | 98 +  | 606  | 1261 | 33258  | 33911  |
| UN18965 | Rsa1.0_00028.1 | 1604 | 293984 | 0         | 439  | 452  | 97 +  | 1160 | 1604 | 276975 | 277426 |
| UN18966 | Rsa1.0_00111.1 | 1810 | 390088 | 0         | 498  | 523  | 95 +  | 1286 | 1804 | 334412 | 334932 |
| UN18967 | Rsa1.0_00213.1 | 1694 | 108167 | 0         | 1053 | 1099 | 95 +  | 2    | 1100 | 9922   | 11001  |
| UN18968 | Rsa1.0_00206.1 | 916  | 109040 | 1.00E-137 | 257  | 260  | 98 -  | 655  | 914  | 45109  | 45368  |
| UN18969 | Rsa1.0_00103.1 | 1259 | 135304 | 4.00E-44  | 186  | 216  | 86 -  | 86   | 301  | 31552  | 31766  |
| UN18970 | Rsa1.0_00028.1 | 2943 | 293984 | 0         | 672  | 684  | 98 -  | 658  | 1337 | 54913  | 55596  |
| UN18971 | Rsa1.0_07603.1 | 1288 | 9043   | 1.00E-120 | 354  | 397  | 89 -  | 655  | 1051 | 2808   | 3200   |
| UN18972 | Rsa1.0_00453.1 | 1706 | 83031  | 0         | 682  | 684  | 99 +  | 1022 | 1705 | 16425  | 17107  |
| UN18973 | Rsa1.0_02428.1 | 1384 | 31542  | 0         | 478  | 497  | 96 -  | 180  | 667  | 28430  | 28923  |
| UN18974 | Rsa1.0_02411.1 | 1267 | 31655  | 0         | 604  | 612  | 98 -  | 651  | 1261 | 16712  | 17323  |
| UN18975 | Rsa1.0_00437.1 | 1870 | 84879  | 0         | 400  | 424  | 94 +  | 1447 | 1870 | 23633  | 24042  |
| UN18976 | Rsa1.0_00153.1 | 897  | 192931 | 0         | 555  | 580  | 95 +  | 317  | 892  | 157109 | 157682 |
| UN18977 | Rsa1.0_01370.1 | 1050 | 47093  | 1.00E-177 | 315  | 315  | 100 + | 736  | 1050 | 9921   | 10235  |
| UN18978 | Rsa1.0_00301.1 | 1193 | 365315 | 0         | 528  | 551  | 95 +  | 602  | 1152 | 304665 | 305208 |
| UN18979 | Rsa1.0_00827.1 | 1170 | 62790  | 0         | 780  | 805  | 96 -  | 366  | 1170 | 17354  | 18140  |
| UN18980 | Rsa1.0_02882.1 | 1031 | 27039  | 0         | 584  | 587  | 99 -  | 446  | 1031 | 1457   | 2042   |
| UN18981 | Rsa1.0_01156.1 | 2095 | 52147  | 0         | 639  | 667  | 95 +  | 1438 | 2094 | 32888  | 33553  |
| UN18982 | Rsa1.0_03205.1 | 1191 | 24614  | 0         | 359  | 362  | 99 -  | 3    | 364  | 4230   | 4591   |
| UN18983 | Rsa1.0_00063.1 | 1904 | 156150 | 0         | 945  | 1016 | 93 -  | 833  | 1840 | 62977  | 63986  |
| UN18984 | Rsa1.0_09689.1 | 1436 | 6210   | 0         | 411  | 424  | 96 -  | 963  | 1374 | 1784   | 2207   |
| UN18985 | Rsa1.0_04801.1 | 1252 | 15918  | 0         | 344  | 347  | 99 +  | 6    | 352  | 6890   | 7236   |
| UN18986 | Rsa1.0_00763.1 | 1293 | 65121  | 1.00E-145 | 268  | 269  | 99 -  | 1013 | 1280 | 59137  | 59405  |
| UN18987 | Rsa1.0_01405.1 | 1490 | 46445  | 0         | 415  | 431  | 96 -  | 1061 | 1489 | 37002  | 37432  |
| UN18988 | Rsa1.0_01141.1 | 2410 | 52530  | 0         | 376  | 390  | 96 +  | 36   | 422  | 3569   | 3955   |
| UN18989 | Rsa1.0_16203.1 | 932  | 2246   | 0         | 859  | 885  | 97 -  | 3    | 886  | 995    | 1875   |
| UN18990 | Rsa1.0_00278.1 | 1322 | 231896 | 0         | 935  | 963  | 97 +  | 344  | 1306 | 82162  | 83121  |
| UN18991 | Rsa1.0_05076.1 | 491  | 14916  | 1.00E-119 | 217  | 217  | 100 - | 1    | 217  | 7475   | 7691   |

|         |                |      |        |           |      |      |       |      |      |        |        |
|---------|----------------|------|--------|-----------|------|------|-------|------|------|--------|--------|
| UN18992 | Rsa1.0_00026.1 | 1217 | 327835 | 1.00E-158 | 298  | 302  | 98 +  | 683  | 981  | 24412  | 24713  |
| UN18993 | Rsa1.0_00206.1 | 1177 | 109040 | 0         | 507  | 518  | 97 -  | 2    | 519  | 68752  | 69269  |
| UN18994 | Rsa1.0_01555.1 | 759  | 166456 | 0         | 385  | 386  | 99 +  | 7    | 392  | 144938 | 145323 |
| UN18995 | Rsa1.0_00538.1 | 1514 | 77149  | 0         | 473  | 475  | 99 -  | 1040 | 1514 | 54717  | 55191  |
| UN18996 | Rsa1.0_09160.1 | 1057 | 6599   | 1.00E-172 | 312  | 314  | 99 -  | 249  | 562  | 1109   | 1422   |
| UN18997 | Rsa1.0_07124.1 | 1439 | 9865   | 0         | 516  | 527  | 97 -  | 913  | 1439 | 7506   | 8031   |
| UN18998 | Rsa1.0_02402.1 | 1260 | 31710  | 0         | 650  | 654  | 99 +  | 1    | 654  | 5332   | 5984   |
| UN18999 | Rsa1.0_02446.1 | 1816 | 31330  | 0         | 1372 | 1416 | 96 -  | 290  | 1701 | 3866   | 5281   |
| UN19000 | Rsa1.0_05319.1 | 999  | 14158  | 0         | 324  | 324  | 100 + | 3    | 326  | 379    | 702    |
| UN19001 | Rsa1.0_00020.1 | 1561 | 283099 | 0         | 1040 | 1069 | 97 +  | 6    | 1073 | 94582  | 95650  |
| UN19002 | Rsa1.0_03627.1 | 1757 | 21658  | 1.00E-147 | 312  | 325  | 96 -  | 1433 | 1757 | 661    | 983    |
| UN19003 | Rsa1.0_00015.1 | 1131 | 561803 | 1.00E-166 | 297  | 297  | 100 + | 835  | 1131 | 529332 | 529628 |
| UN19004 | Rsa1.0_00053.1 | 1557 | 263459 | 0         | 818  | 857  | 95 -  | 706  | 1556 | 242869 | 243720 |
| UN19005 | Rsa1.0_05792.1 | 1731 | 12612  | 0         | 550  | 570  | 96 -  | 1    | 568  | 8012   | 8581   |
| UN19006 | Rsa1.0_01354.1 | 658  | 47342  | 3.00E-74  | 169  | 174  | 97 -  | 352  | 523  | 9457   | 9629   |
| UN19007 | Rsa1.0_04576.1 | 1475 | 16783  | 1.00E-127 | 234  | 235  | 99 -  | 1241 | 1475 | 393    | 627    |
| UN19008 | Rsa1.0_00548.1 | 957  | 76518  | 2.00E-21  | 244  | 301  | 81 -  | 285  | 580  | 62952  | 63251  |
| UN19009 | Rsa1.0_00655.1 | 1365 | 195840 | 0         | 362  | 362  | 100 + | 1004 | 1365 | 163505 | 163866 |
| UN19010 | Rsa1.0_03555.1 | 1542 | 22129  | 0         | 653  | 674  | 96 +  | 160  | 833  | 16383  | 17056  |
| UN19011 | Rsa1.0_00857.1 | 1427 | 61904  | 0         | 620  | 695  | 89 -  | 617  | 1308 | 12884  | 13578  |
| UN19012 | Rsa1.0_00010.1 | 1218 | 294827 | 0         | 956  | 990  | 96 -  | 3    | 984  | 102962 | 103944 |
| UN19013 | Rsa1.0_00460.1 | 1100 | 206387 | 0         | 1089 | 1100 | 99 -  | 1    | 1099 | 196168 | 197267 |
| UN19014 | Rsa1.0_00389.1 | 1900 | 88795  | 0         | 1361 | 1443 | 94 +  | 1    | 1424 | 16759  | 18177  |
| UN19015 | Rsa1.0_15068.1 | 1550 | 2854   | 0         | 1056 | 1086 | 97 -  | 473  | 1548 | 999    | 2084   |
| UN19016 | Rsa1.0_00037.1 | 1460 | 307838 | 1.00E-168 | 304  | 305  | 99 +  | 750  | 1054 | 284445 | 284749 |
| UN19017 | Rsa1.0_00639.1 | 1963 | 165873 | 0         | 1076 | 1093 | 98 +  | 2    | 1090 | 134022 | 135114 |
| UN19018 | Rsa1.0_03589.1 | 1421 | 21893  | 0         | 428  | 436  | 98 -  | 986  | 1419 | 624    | 1055   |
| UN19019 | Rsa1.0_00302.1 | 1326 | 97521  | 0         | 362  | 371  | 97 +  | 3    | 373  | 64950  | 65312  |
| UN19020 | Rsa1.0_01113.1 | 1321 | 53616  | 1.00E-127 | 258  | 267  | 96 +  | 859  | 1125 | 4376   | 4642   |
| UN19021 | Rsa1.0_03261.1 | 1602 | 24281  | 0         | 1596 | 1598 | 99 -  | 2    | 1597 | 20779  | 22376  |
| UN19022 | Rsa1.0_01448.1 | 834  | 45645  | 0         | 446  | 446  | 100 - | 388  | 833  | 37869  | 38314  |
| UN19023 | Rsa1.0_72585.1 | 490  | 316    | 1.00E-107 | 200  | 201  | 99 +  | 289  | 489  | 1      | 201    |
| UN19024 | Rsa1.0_03311.1 | 1405 | 23850  | 0         | 442  | 447  | 98 +  | 500  | 946  | 1218   | 1664   |
| UN19025 | Rsa1.0_02663.1 | 1141 | 169243 | 1.00E-139 | 255  | 256  | 99 -  | 133  | 388  | 168988 | 169243 |
| UN19026 | Rsa1.0_00826.1 | 1630 | 166736 | 0         | 1517 | 1522 | 99 -  | 109  | 1630 | 14148  | 15665  |
| UN19027 | Rsa1.0_00107.1 | 1495 | 431659 | 0         | 1004 | 1032 | 97 -  | 2    | 1033 | 326713 | 327744 |
| UN19028 | Rsa1.0_11964.1 | 1004 | 5359   | 9.00E-85  | 311  | 361  | 86 -  | 655  | 1001 | 108    | 468    |
| UN19029 | Rsa1.0_03503.1 | 1769 | 22445  | 0         | 922  | 984  | 93 -  | 794  | 1769 | 19337  | 20315  |
| UN19030 | Rsa1.0_02769.1 | 1255 | 28107  | 0         | 369  | 377  | 97 +  | 370  | 746  | 10869  | 11239  |

|         |                |      |        |           |      |      |       |      |      |        |        |
|---------|----------------|------|--------|-----------|------|------|-------|------|------|--------|--------|
| UN19031 | Rsa1.0.00374.1 | 1057 | 165738 | 1.00E-127 | 254  | 259  | 98 -  | 85   | 343  | 5796   | 6051   |
| UN19032 | Rsa1.0.03646.1 | 1484 | 21598  | 1.00E-159 | 306  | 314  | 97 +  | 1    | 314  | 7610   | 7915   |
| UN19033 | Rsa1.0.00033.1 | 1079 | 515811 | 0         | 462  | 468  | 98 +  | 1    | 467  | 431431 | 431898 |
| UN19034 | Rsa1.0.00092.1 | 1703 | 659932 | 1.00E-124 | 257  | 267  | 96 +  | 1105 | 1371 | 189112 | 189378 |
| UN19035 | Rsa1.0.00615.1 | 1440 | 72235  | 0         | 1314 | 1352 | 97 +  | 89   | 1439 | 60843  | 62177  |
| UN19036 | Rsa1.0.00050.1 | 679  | 237174 | 0         | 610  | 672  | 90 -  | 11   | 677  | 84436  | 85092  |
| UN19037 | Rsa1.0.00377.1 | 1113 | 90038  | 0         | 422  | 435  | 97 -  | 1    | 435  | 9787   | 10211  |
| UN19038 | Rsa1.0.02670.1 | 1366 | 28887  | 1.00E-180 | 413  | 437  | 94 +  | 1    | 431  | 3772   | 4204   |
| UN19039 | Rsa1.0.00045.1 | 1186 | 328694 | 0         | 509  | 509  | 100 + | 1    | 509  | 184209 | 184717 |
| UN19040 | Rsa1.0.00844.1 | 1633 | 62403  | 0         | 560  | 570  | 98 -  | 1    | 570  | 41735  | 42304  |
| UN19041 | Rsa1.0.01016.1 | 945  | 181422 | 1.00E-123 | 227  | 228  | 99 -  | 211  | 438  | 3575   | 3802   |
| UN19042 | Rsa1.0.00893.1 | 1056 | 60626  | 0         | 680  | 706  | 96 +  | 1    | 703  | 43093  | 43797  |
| UN19043 | Rsa1.0.13471.1 | 1635 | 4802   | 0         | 497  | 526  | 94 -  | 2    | 526  | 3829   | 4346   |
| UN19044 | Rsa1.0.00332.1 | 746  | 94575  | 0         | 741  | 743  | 99 -  | 3    | 744  | 68951  | 69693  |
| UN19045 | Rsa1.0.00039.1 | 2141 | 296927 | 0         | 671  | 687  | 97 +  | 4    | 690  | 67268  | 67953  |
| UN19046 | Rsa1.0.49549.1 | 504  | 458    | 3.00E-86  | 165  | 166  | 99 +  | 339  | 504  | 75     | 240    |
| UN19047 | Rsa1.0.06272.1 | 3254 | 11351  | 5.00E-86  | 163  | 163  | 100 + | 2949 | 3111 | 1      | 163    |
| UN19048 | Rsa1.0.06645.1 | 1420 | 10607  | 0         | 963  | 977  | 98 -  | 1    | 977  | 8052   | 9028   |
| UN19049 | Rsa1.0.00079.1 | 912  | 606987 | 1.00E-117 | 260  | 274  | 94 -  | 18   | 285  | 41618  | 41891  |
| UN19050 | Rsa1.0.00732.1 | 1180 | 66631  | 0         | 359  | 359  | 100 + | 3    | 361  | 140    | 498    |
| UN19051 | Rsa1.0.00773.1 | 1386 | 64839  | 0         | 859  | 930  | 92 +  | 476  | 1385 | 25726  | 26634  |
| UN19052 | Rsa1.0.00406.1 | 1065 | 87398  | 0         | 370  | 373  | 99 -  | 5    | 377  | 53293  | 53665  |
| UN19053 | Rsa1.0.01295.1 | 810  | 49040  | 1.00E-142 | 257  | 257  | 100 - | 554  | 810  | 15483  | 15739  |
| UN19054 | Rsa1.0.03688.1 | 1661 | 143676 | 1.00E-137 | 314  | 333  | 94 -  | 1324 | 1650 | 3787   | 4119   |
| UN19055 | Rsa1.0.04692.1 | 1195 | 16357  | 0         | 1066 | 1073 | 99 +  | 127  | 1195 | 12091  | 13163  |
| UN19056 | Rsa1.0.00046.1 | 1066 | 320315 | 0         | 475  | 492  | 96 -  | 3    | 493  | 31869  | 32359  |
| UN19057 | Rsa1.0.00043.1 | 1454 | 264937 | 0         | 455  | 467  | 97 -  | 998  | 1454 | 259731 | 260197 |
| UN19058 | Rsa1.0.01494.1 | 1202 | 44641  | 0         | 887  | 888  | 99 -  | 315  | 1202 | 11101  | 11988  |
| UN19059 | Rsa1.0.02663.1 | 1616 | 169243 | 0         | 710  | 710  | 100 + | 907  | 1616 | 7793   | 8502   |
| UN19060 | Rsa1.0.00273.1 | 717  | 326186 | 1.00E-161 | 347  | 366  | 94 -  | 283  | 645  | 113973 | 114338 |
| UN19061 | Rsa1.0.01005.1 | 921  | 56967  | 0         | 482  | 482  | 100 + | 440  | 921  | 39743  | 40224  |
| UN19062 | Rsa1.0.00939.1 | 1424 | 185227 | 0         | 484  | 537  | 90 -  | 237  | 773  | 171556 | 172059 |
| UN19063 | Rsa1.0.02490.1 | 1542 | 30885  | 1.00E-143 | 262  | 263  | 99 +  | 226  | 488  | 26954  | 27216  |
| UN19064 | Rsa1.0.00117.1 | 1107 | 213118 | 0         | 380  | 380  | 100 - | 728  | 1107 | 202418 | 202797 |
| UN19065 | Rsa1.0.02536.1 | 1273 | 30368  | 1.00E-171 | 370  | 388  | 95 -  | 880  | 1265 | 21481  | 21861  |
| UN19066 | Rsa1.0.00753.1 | 1486 | 65705  | 0         | 834  | 852  | 97 +  | 2    | 853  | 57301  | 58152  |
| UN19067 | Rsa1.0.07521.1 | 1537 | 9206   | 0         | 521  | 526  | 99 -  | 3    | 528  | 7907   | 8429   |
| UN19068 | Rsa1.0.00833.1 | 1069 | 62621  | 0         | 1043 | 1069 | 97 +  | 1    | 1069 | 37633  | 38699  |
| UN19069 | Rsa1.0.00041.1 | 2190 | 186197 | 1.00E-111 | 324  | 359  | 90 +  | 1758 | 2106 | 148191 | 148548 |

|         |                |      |        |           |      |      |       |      |      |        |        |
|---------|----------------|------|--------|-----------|------|------|-------|------|------|--------|--------|
| UN19070 | Rsa1.0_00816.1 | 1266 | 403350 | 0         | 668  | 680  | 98 -  | 587  | 1265 | 137456 | 138135 |
| UN19071 | Rsa1.0_00089.1 | 1560 | 406142 | 0         | 810  | 829  | 97 +  | 716  | 1542 | 374035 | 374863 |
| UN19072 | Rsa1.0_02615.1 | 714  | 29547  | 1.00E-171 | 305  | 305  | 100 - | 407  | 711  | 15642  | 15946  |
| UN19073 | Rsa1.0_00191.1 | 834  | 316976 | 0         | 438  | 442  | 99 -  | 393  | 834  | 197443 | 197882 |
| UN19074 | Rsa1.0_03825.1 | 1373 | 20623  | 0         | 332  | 333  | 99 +  | 1041 | 1373 | 6154   | 6486   |
| UN19075 | Rsa1.0_00034.1 | 1154 | 260119 | 0         | 416  | 421  | 98 -  | 2    | 419  | 841    | 1261   |
| UN19076 | Rsa1.0_01773.1 | 1565 | 39546  | 0         | 1500 | 1540 | 97 +  | 28   | 1564 | 17250  | 18789  |
| UN19077 | Rsa1.0_01307.1 | 710  | 48685  | 0         | 704  | 707  | 99 -  | 4    | 710  | 11808  | 12514  |
| UN19078 | Rsa1.0_03280.1 | 1578 | 145083 | 0         | 608  | 620  | 98 +  | 2    | 621  | 125643 | 126262 |
| UN19079 | Rsa1.0_00124.1 | 672  | 262503 | 1.00E-108 | 273  | 292  | 93 -  | 382  | 671  | 14159  | 14444  |
| UN19080 | Rsa1.0_02797.1 | 1647 | 27800  | 0         | 537  | 563  | 95 -  | 1086 | 1642 | 13743  | 14301  |
| UN19081 | Rsa1.0_00198.1 | 616  | 222963 | 1.00E-162 | 334  | 346  | 96 +  | 1    | 346  | 37757  | 38100  |
| UN19082 | Rsa1.0_02541.1 | 1446 | 30342  | 0         | 481  | 489  | 98 -  | 3    | 491  | 11560  | 12046  |
| UN19083 | Rsa1.0_02841.1 | 1422 | 27383  | 1.00E-137 | 380  | 414  | 91 -  | 676  | 1079 | 78     | 485    |
| UN19084 | Rsa1.0_01513.1 | 1966 | 44234  | 0         | 1869 | 1909 | 97 -  | 1    | 1900 | 41226  | 43133  |
| UN19085 | Rsa1.0_02922.1 | 1462 | 26753  | 0         | 368  | 373  | 98 -  | 1    | 373  | 11365  | 11734  |
| UN19086 | Rsa1.0_02113.1 | 856  | 34890  | 0         | 852  | 854  | 99 -  | 3    | 855  | 14224  | 15077  |
| UN19087 | Rsa1.0_00005.1 | 1333 | 353093 | 1.00E-150 | 311  | 322  | 96 -  | 3    | 322  | 130794 | 131115 |
| UN19088 | Rsa1.0_01772.1 | 1306 | 39557  | 1.00E-118 | 217  | 217  | 100 - | 3    | 219  | 8198   | 8414   |
| UN19089 | Rsa1.0_00006.1 | 1485 | 396176 | 0         | 454  | 460  | 98 +  | 2    | 457  | 107049 | 107508 |
| UN19090 | Rsa1.0_02735.1 | 1551 | 28344  | 1.00E-107 | 248  | 261  | 95 -  | 87   | 345  | 28008  | 28266  |
| UN19091 | Rsa1.0_09270.1 | 1283 | 6513   | 0         | 509  | 520  | 97 +  | 469  | 988  | 1      | 520    |
| UN19092 | Rsa1.0_00178.1 | 720  | 114861 | 1.00E-151 | 328  | 343  | 95 -  | 7    | 347  | 12165  | 12501  |
| UN19093 | Rsa1.0_00467.1 | 1316 | 156542 | 0         | 388  | 388  | 100 + | 106  | 493  | 134097 | 134484 |
| UN19094 | Rsa1.0_09067.1 | 1315 | 6672   | 1.00E-114 | 248  | 257  | 96 +  | 3    | 258  | 2323   | 2577   |
| UN19095 | Rsa1.0_19308.1 | 1176 | 1449   | 0         | 933  | 939  | 99 +  | 1    | 936  | 511    | 1449   |
| UN19096 | Rsa1.0_00817.1 | 871  | 62961  | 0         | 520  | 537  | 96 -  | 335  | 871  | 53797  | 54331  |
| UN19097 | Rsa1.0_04256.1 | 857  | 18257  | 1.00E-147 | 267  | 268  | 99 -  | 590  | 857  | 13574  | 13841  |
| UN19098 | Rsa1.0_03117.1 | 1095 | 25295  | 3.00E-23  | 103  | 116  | 88 +  | 117  | 232  | 17004  | 17116  |
| UN19099 | Rsa1.0_05293.1 | 1343 | 14237  | 0         | 392  | 406  | 96 -  | 800  | 1205 | 6325   | 6730   |
| UN19100 | Rsa1.0_01168.1 | 738  | 153765 | 1.00E-175 | 337  | 344  | 97 +  | 398  | 738  | 41780  | 42121  |
| UN19101 | Rsa1.0_00035.1 | 1366 | 176449 | 0         | 1347 | 1368 | 98 -  | 2    | 1366 | 78863  | 80230  |
| UN19102 | Rsa1.0_01760.1 | 923  | 39730  | 0         | 468  | 468  | 100 + | 456  | 923  | 1864   | 2331   |
| UN19103 | Rsa1.0_01298.1 | 1307 | 48999  | 1.00E-160 | 290  | 291  | 99 +  | 13   | 303  | 6681   | 6971   |
| UN19104 | Rsa1.0_03131.1 | 887  | 25142  | 0         | 859  | 859  | 100 - | 27   | 885  | 3582   | 4440   |
| UN19105 | Rsa1.0_00910.1 | 801  | 59975  | 0         | 501  | 501  | 100 - | 3    | 503  | 58026  | 58526  |
| UN19106 | Rsa1.0_08342.1 | 1300 | 7502   | 0         | 344  | 346  | 99 +  | 955  | 1300 | 5075   | 5420   |
| UN19107 | Rsa1.0_01606.1 | 862  | 42432  | 0         | 794  | 828  | 95 -  | 46   | 862  | 38803  | 39630  |
| UN19108 | Rsa1.0_00009.1 | 2331 | 232558 | 0         | 1467 | 1509 | 97 +  | 2    | 1509 | 26775  | 28283  |

|         |                |      |        |           |      |      |       |      |      |        |        |
|---------|----------------|------|--------|-----------|------|------|-------|------|------|--------|--------|
| UN19109 | Rsa1.0.00039.1 | 1559 | 296927 | 0         | 1552 | 1560 | 99 +  | 2    | 1559 | 146905 | 148464 |
| UN19110 | Rsa1.0.04894.1 | 1257 | 15569  | 0         | 785  | 786  | 99 +  | 1    | 786  | 7358   | 8142   |
| UN19111 | Rsa1.0.02377.1 | 1449 | 31994  | 0         | 631  | 648  | 97 +  | 358  | 1005 | 4733   | 5380   |
| UN19112 | Rsa1.0.04651.1 | 1468 | 16516  | 0         | 561  | 581  | 96 -  | 335  | 914  | 13808  | 14388  |
| UN19113 | Rsa1.0.07811.1 | 1071 | 8496   | 0         | 588  | 588  | 100 + | 482  | 1069 | 1308   | 1895   |
| UN19114 | Rsa1.0.00728.1 | 917  | 66704  | 1.00E-136 | 268  | 274  | 97 +  | 2    | 275  | 33849  | 34120  |
| UN19115 | Rsa1.0.03469.1 | 718  | 22681  | 0         | 685  | 715  | 95 +  | 1    | 712  | 11103  | 11814  |
| UN19116 | Rsa1.0.00122.1 | 981  | 265937 | 2.00E-98  | 205  | 211  | 97 +  | 772  | 981  | 7192   | 7402   |
| UN19117 | Rsa1.0.03111.1 | 859  | 25327  | 0         | 375  | 377  | 99 -  | 284  | 660  | 4629   | 5005   |
| UN19118 | Rsa1.0.04073.1 | 1803 | 19238  | 1.00E-131 | 248  | 251  | 98 -  | 1    | 251  | 13359  | 13609  |
| UN19119 | Rsa1.0.00203.1 | 1112 | 109129 | 1.00E-114 | 212  | 213  | 99 +  | 467  | 679  | 22484  | 22696  |
| UN19120 | Rsa1.0.00790.1 | 844  | 148693 | 0         | 831  | 841  | 98 -  | 4    | 844  | 43541  | 44381  |
| UN19121 | Rsa1.0.04371.1 | 647  | 17700  | 0         | 626  | 649  | 96 +  | 2    | 646  | 14353  | 14997  |
| UN19122 | Rsa1.0.00073.1 | 901  | 240924 | 6.00E-98  | 191  | 194  | 98 +  | 357  | 550  | 98132  | 98325  |
| UN19123 | Rsa1.0.04181.1 | 1340 | 18615  | 0         | 714  | 723  | 98 +  | 281  | 1003 | 936    | 1658   |
| UN19124 | Rsa1.0.00003.1 | 1267 | 340054 | 0         | 405  | 418  | 96 -  | 850  | 1265 | 276988 | 277405 |
| UN19125 | Rsa1.0.00683.1 | 1539 | 68638  | 1.00E-155 | 296  | 302  | 98 -  | 1237 | 1538 | 8503   | 8804   |
| UN19126 | Rsa1.0.00010.1 | 976  | 294827 | 0         | 419  | 421  | 99 -  | 558  | 976  | 81207  | 81627  |
| UN19127 | Rsa1.0.00336.1 | 899  | 445051 | 0         | 629  | 631  | 99 -  | 267  | 897  | 194552 | 195182 |
| UN19128 | Rsa1.0.06819.1 | 1282 | 10302  | 0         | 1229 | 1271 | 96 +  | 10   | 1280 | 1017   | 2284   |
| UN19129 | Rsa1.0.00896.1 | 1973 | 60509  | 0         | 662  | 664  | 99 -  | 643  | 1306 | 20944  | 21607  |
| UN19130 | Rsa1.0.00727.1 | 957  | 66724  | 0         | 938  | 950  | 98 -  | 16   | 956  | 36814  | 37763  |
| UN19131 | Rsa1.0.06715.1 | 1030 | 10485  | 0         | 396  | 410  | 96 +  | 19   | 426  | 3413   | 3822   |
| UN19132 | Rsa1.0.06603.1 | 1406 | 10682  | 0         | 393  | 400  | 98 -  | 1    | 399  | 7727   | 8126   |
| UN19133 | Rsa1.0.00556.1 | 1403 | 207212 | 0         | 573  | 617  | 92 -  | 4    | 608  | 18791  | 19403  |
| UN19134 | Rsa1.0.00024.1 | 1064 | 188018 | 1.00E-138 | 280  | 289  | 96 +  | 1    | 288  | 75329  | 75612  |
| UN19135 | Rsa1.0.00179.1 | 1123 | 393324 | 1.00E-151 | 403  | 439  | 91 -  | 693  | 1123 | 280262 | 280692 |
| UN19136 | Rsa1.0.00211.1 | 911  | 228189 | 0         | 357  | 358  | 99 -  | 93   | 450  | 145393 | 145750 |
| UN19137 | Rsa1.0.00015.1 | 1568 | 561803 | 0         | 1305 | 1331 | 98 +  | 239  | 1568 | 252554 | 253883 |
| UN19138 | Rsa1.0.02645.1 | 1289 | 29158  | 1.00E-178 | 335  | 341  | 98 +  | 949  | 1289 | 3773   | 4113   |
| UN19139 | Rsa1.0.01043.1 | 1192 | 55893  | 0         | 549  | 572  | 95 +  | 622  | 1192 | 33225  | 33789  |
| UN19140 | Rsa1.0.00748.1 | 832  | 65983  | 0         | 457  | 483  | 94 -  | 28   | 504  | 63996  | 64475  |
| UN19141 | Rsa1.0.00093.1 | 1550 | 214962 | 0         | 549  | 574  | 95 -  | 975  | 1540 | 128325 | 128896 |
| UN19142 | Rsa1.0.00195.1 | 587  | 251884 | 1.00E-178 | 330  | 333  | 99 +  | 3    | 335  | 229134 | 229465 |
| UN19143 | Rsa1.0.00002.1 | 866  | 601661 | 0         | 864  | 865  | 99 -  | 3    | 866  | 113211 | 114075 |
| UN19144 | Rsa1.0.00562.1 | 1930 | 75565  | 0         | 1264 | 1285 | 98 +  | 546  | 1824 | 8259   | 9537   |
| UN19145 | Rsa1.0.02033.1 | 1452 | 35828  | 0         | 710  | 736  | 96 -  | 7    | 741  | 31310  | 32043  |
| UN19146 | Rsa1.0.00439.1 | 818  | 142776 | 0         | 414  | 423  | 97 +  | 3    | 422  | 57722  | 58144  |
| UN19147 | Rsa1.0.00759.1 | 1030 | 65465  | 1.00E-179 | 339  | 346  | 97 -  | 665  | 1010 | 61787  | 62132  |

|         |                |      |        |           |      |      |       |      |      |        |        |
|---------|----------------|------|--------|-----------|------|------|-------|------|------|--------|--------|
| UN19148 | Rsa1.0.00454.1 | 1289 | 216970 | 1.00E-121 | 221  | 221  | 100 + | 1069 | 1289 | 146032 | 146252 |
| UN19149 | Rsa1.0.00083.1 | 1373 | 442773 | 0         | 1213 | 1215 | 99 +  | 3    | 1217 | 432305 | 433519 |
| UN19150 | Rsa1.0.39138.1 | 1232 | 575    | 0         | 337  | 339  | 99 -  | 2    | 340  | 1      | 338    |
| UN19151 | Rsa1.0.00212.1 | 984  | 108350 | 0         | 704  | 705  | 99 +  | 280  | 984  | 14132  | 14836  |
| UN19152 | Rsa1.0.00372.1 | 1519 | 90418  | 0         | 486  | 486  | 100 + | 1    | 486  | 14572  | 15057  |
| UN19153 | Rsa1.0.00751.1 | 1272 | 65759  | 0         | 419  | 430  | 97 -  | 640  | 1069 | 3274   | 3702   |
| UN19154 | Rsa1.0.01606.1 | 1194 | 42432  | 1.00E-166 | 378  | 402  | 94 +  | 1    | 389  | 16041  | 16440  |
| UN19155 | Rsa1.0.02552.1 | 1939 | 30191  | 0         | 463  | 466  | 99 +  | 1474 | 1939 | 21612  | 22077  |
| UN19156 | Rsa1.0.00035.1 | 1003 | 176449 | 0         | 660  | 695  | 94 +  | 1    | 676  | 51397  | 52091  |
| UN19157 | Rsa1.0.00063.1 | 608  | 156150 | 1.00E-125 | 231  | 232  | 99 -  | 258  | 489  | 3494   | 3725   |
| UN19158 | Rsa1.0.00016.1 | 852  | 831256 | 0         | 839  | 855  | 98 +  | 3    | 850  | 684570 | 685421 |
| UN19159 | Rsa1.0.01387.1 | 981  | 46745  | 6.00E-95  | 262  | 289  | 90 +  | 1    | 275  | 31034  | 31320  |
| UN19160 | Rsa1.0.15067.1 | 1610 | 2854   | 0         | 613  | 615  | 99 +  | 2    | 616  | 646    | 1260   |
| UN19161 | Rsa1.0.03288.1 | 1001 | 24016  | 0         | 386  | 394  | 97 -  | 2    | 393  | 6221   | 6611   |
| UN19162 | Rsa1.0.01730.1 | 977  | 40223  | 0         | 373  | 381  | 97 +  | 154  | 534  | 22751  | 23131  |
| UN19163 | Rsa1.0.00366.1 | 715  | 90880  | 0         | 360  | 368  | 97 +  | 1    | 368  | 9189   | 9556   |
| UN19164 | Rsa1.0.00066.1 | 638  | 152418 | 0         | 563  | 582  | 96 -  | 3    | 579  | 63404  | 63985  |
| UN19165 | Rsa1.0.00055.1 | 1504 | 520193 | 1.00E-120 | 282  | 298  | 94 -  | 1    | 295  | 27909  | 28204  |
| UN19166 | Rsa1.0.22514.1 | 1234 | 1114   | 0         | 587  | 619  | 94 +  | 614  | 1232 | 212    | 830    |
| UN19167 | Rsa1.0.02040.1 | 1207 | 35684  | 1.00E-126 | 285  | 302  | 94 +  | 57   | 347  | 13775  | 14076  |
| UN19168 | Rsa1.0.00495.1 | 945  | 79934  | 1.00E-135 | 248  | 249  | 99 +  | 1    | 249  | 16085  | 16333  |
| UN19169 | Rsa1.0.00188.1 | 576  | 112020 | 0         | 504  | 555  | 90 -  | 11   | 561  | 4438   | 4977   |
| UN19170 | Rsa1.0.01191.1 | 1142 | 51235  | 0         | 778  | 779  | 99 +  | 1    | 779  | 48414  | 49192  |
| UN19171 | Rsa1.0.00047.1 | 1305 | 168582 | 0         | 1221 | 1249 | 97 -  | 57   | 1304 | 134145 | 135393 |
| UN19172 | Rsa1.0.00136.1 | 1449 | 122464 | 0         | 551  | 565  | 97 -  | 1    | 565  | 84856  | 85417  |
| UN19173 | Rsa1.0.33830.1 | 1009 | 670    | 0         | 408  | 411  | 99 +  | 133  | 543  | 1      | 411    |
| UN19174 | Rsa1.0.00179.1 | 1115 | 393324 | 0         | 750  | 759  | 98 +  | 357  | 1115 | 320006 | 320764 |
| UN19175 | Rsa1.0.09755.1 | 705  | 6166   | 0         | 480  | 504  | 95 -  | 1    | 500  | 1225   | 1723   |
| UN19176 | Rsa1.0.07895.1 | 1679 | 8344   | 0         | 1514 | 1666 | 90 -  | 1    | 1656 | 5934   | 7587   |
| UN19177 | Rsa1.0.07783.1 | 1043 | 8578   | 0         | 898  | 900  | 99 +  | 142  | 1041 | 7277   | 8176   |
| UN19178 | Rsa1.0.01220.1 | 764  | 161775 | 0         | 368  | 370  | 99 +  | 396  | 764  | 138711 | 139080 |
| UN19179 | Rsa1.0.02505.1 | 1173 | 30703  | 1.00E-166 | 391  | 418  | 93 -  | 741  | 1154 | 9950   | 10365  |
| UN19180 | Rsa1.0.00727.1 | 871  | 66724  | 0         | 800  | 831  | 96 -  | 4    | 823  | 13535  | 14361  |
| UN19181 | Rsa1.0.00011.1 | 824  | 225044 | 0         | 402  | 412  | 97 -  | 3    | 414  | 207085 | 207496 |
| UN19182 | Rsa1.0.16460.1 | 1867 | 2148   | 0         | 1044 | 1118 | 93 +  | 583  | 1674 | 669    | 1773   |
| UN19183 | Rsa1.0.00651.1 | 552  | 247766 | 1.00E-125 | 228  | 228  | 100 + | 178  | 405  | 81983  | 82210  |
| UN19184 | Rsa1.0.15387.1 | 1306 | 2642   | 0         | 390  | 402  | 97 -  | 906  | 1306 | 2008   | 2407   |
| UN19185 | Rsa1.0.00033.1 | 1283 | 515811 | 0         | 903  | 946  | 95 +  | 6    | 939  | 350359 | 351298 |
| UN19186 | Rsa1.0.28951.1 | 1674 | 798    | 1.00E-151 | 309  | 320  | 96 +  | 3    | 322  | 78     | 396    |

|         |                |      |        |           |      |      |       |      |      |        |        |
|---------|----------------|------|--------|-----------|------|------|-------|------|------|--------|--------|
| UN19187 | Rsa1.0.00195.1 | 1878 | 251884 | 0         | 726  | 729  | 99 +  | 1    | 729  | 75462  | 76189  |
| UN19188 | Rsa1.0.00001.1 | 1779 | 363028 | 0         | 722  | 756  | 95 -  | 1025 | 1777 | 287292 | 288046 |
| UN19189 | Rsa1.0.00111.1 | 889  | 390088 | 0         | 395  | 404  | 97 +  | 493  | 889  | 85380  | 85783  |
| UN19190 | Rsa1.0.02493.1 | 879  | 30854  | 1.00E-180 | 332  | 336  | 98 -  | 3    | 338  | 3991   | 4326   |
| UN19191 | Rsa1.0.02409.1 | 1777 | 31663  | 1.00E-161 | 445  | 492  | 90 +  | 63   | 553  | 22841  | 23323  |
| UN19192 | Rsa1.0.01387.1 | 750  | 46745  | 1.00E-162 | 305  | 309  | 98 -  | 442  | 750  | 2575   | 2881   |
| UN19193 | Rsa1.0.00289.1 | 1018 | 98620  | 1.00E-145 | 268  | 270  | 99 -  | 443  | 712  | 26980  | 27249  |
| UN19194 | Rsa1.0.02421.1 | 1319 | 31579  | 0         | 543  | 545  | 99 +  | 3    | 547  | 8459   | 9003   |
| UN19195 | Rsa1.0.04203.1 | 1314 | 18479  | 0         | 1285 | 1313 | 97 +  | 1    | 1311 | 10105  | 11417  |
| UN19196 | Rsa1.0.07621.1 | 1284 | 9014   | 0         | 495  | 503  | 98 -  | 782  | 1284 | 7421   | 7922   |
| UN19197 | Rsa1.0.16086.1 | 931  | 2289   | 1.00E-109 | 221  | 228  | 96 +  | 682  | 903  | 1078   | 1305   |
| UN19198 | Rsa1.0.03878.1 | 1137 | 20305  | 0         | 732  | 752  | 97 +  | 264  | 1014 | 1652   | 2399   |
| UN19199 | Rsa1.0.01245.1 | 1712 | 149868 | 0         | 865  | 866  | 99 +  | 846  | 1711 | 21270  | 22134  |
| UN19200 | Rsa1.0.02298.1 | 1068 | 32872  | 0         | 489  | 492  | 99 +  | 575  | 1066 | 6363   | 6854   |
| UN19201 | Rsa1.0.00841.1 | 1070 | 183065 | 1.00E-138 | 265  | 269  | 98 -  | 804  | 1070 | 1038   | 1306   |
| UN19202 | Rsa1.0.23598.1 | 1697 | 1038   | 1.00E-173 | 315  | 317  | 99 +  | 3    | 319  | 579    | 895    |
| UN19203 | Rsa1.0.00192.1 | 1962 | 278200 | 1.00E-169 | 312  | 314  | 99 -  | 1648 | 1960 | 90832  | 91145  |
| UN19204 | Rsa1.0.00041.1 | 1345 | 186197 | 0         | 696  | 711  | 97 +  | 635  | 1345 | 84481  | 85191  |
| UN19205 | Rsa1.0.05005.1 | 1448 | 15169  | 0         | 379  | 381  | 99 -  | 1    | 381  | 14659  | 15039  |
| UN19206 | Rsa1.0.02280.1 | 557  | 33063  | 0         | 549  | 554  | 99 -  | 1    | 554  | 29316  | 29869  |
| UN19207 | Rsa1.0.00087.1 | 1934 | 761073 | 0         | 489  | 496  | 98 -  | 1445 | 1933 | 624624 | 625119 |
| UN19208 | Rsa1.0.20417.1 | 1711 | 1307   | 1.00E-127 | 249  | 252  | 98 +  | 669  | 918  | 362    | 613    |
| UN19209 | Rsa1.0.01853.1 | 1289 | 147800 | 1.00E-126 | 232  | 233  | 99 +  | 401  | 633  | 8320   | 8552   |
| UN19210 | Rsa1.0.06915.1 | 729  | 10174  | 0         | 440  | 444  | 99 -  | 1    | 444  | 3810   | 4253   |
| UN19211 | Rsa1.0.17507.1 | 934  | 1814   | 0         | 427  | 430  | 99 +  | 1    | 430  | 283    | 712    |
| UN19212 | Rsa1.0.07619.1 | 1428 | 9015   | 0         | 348  | 354  | 98 -  | 982  | 1335 | 3415   | 3766   |
| UN19213 | Rsa1.0.06313.1 | 1627 | 11252  | 0         | 1038 | 1044 | 99 +  | 2    | 1044 | 1213   | 2256   |
| UN19214 | Rsa1.0.26642.1 | 902  | 883    | 0         | 490  | 490  | 100 + | 160  | 649  | 290    | 779    |
| UN19215 | Rsa1.0.00226.1 | 1449 | 105884 | 0         | 635  | 641  | 99 +  | 566  | 1203 | 42188  | 42828  |
| UN19216 | Rsa1.0.00031.1 | 1364 | 179862 | 0         | 484  | 486  | 99 +  | 165  | 650  | 76038  | 76523  |
| UN19217 | Rsa1.0.06839.1 | 1130 | 10286  | 3.00E-97  | 267  | 298  | 89 +  | 3    | 283  | 6343   | 6640   |
| UN19218 | Rsa1.0.10890.1 | 1549 | 5688   | 0         | 759  | 767  | 98 -  | 466  | 1232 | 3525   | 4291   |
| UN19219 | Rsa1.0.02126.1 | 2251 | 34765  | 0         | 375  | 376  | 99 -  | 1535 | 1910 | 4849   | 5224   |
| UN19220 | Rsa1.0.00518.1 | 1074 | 78360  | 1.00E-120 | 223  | 224  | 99 +  | 1    | 224  | 66713  | 66936  |
| UN19221 | Rsa1.0.00001.1 | 1250 | 363028 | 0         | 369  | 375  | 98 +  | 875  | 1249 | 88739  | 89112  |
| UN19222 | Rsa1.0.13630.1 | 2004 | 4607   | 0         | 864  | 875  | 98 +  | 1    | 874  | 1878   | 2752   |
| UN19223 | Rsa1.0.01202.1 | 1905 | 158825 | 0         | 674  | 691  | 97 +  | 1218 | 1903 | 45033  | 45719  |
| UN19224 | Rsa1.0.00817.1 | 1065 | 62961  | 0         | 618  | 627  | 98 +  | 437  | 1058 | 53165  | 53791  |
| UN19225 | Rsa1.0.04979.1 | 976  | 15257  | 1.00E-114 | 210  | 210  | 100 + | 374  | 583  | 8714   | 8923   |

|         |                |      |        |           |      |      |       |     |      |        |        |
|---------|----------------|------|--------|-----------|------|------|-------|-----|------|--------|--------|
| UN19226 | Rsa1.0.01355.1 | 782  | 47303  | 0         | 708  | 745  | 95 +  | 3   | 741  | 39399  | 40140  |
| UN19227 | Rsa1.0.00087.1 | 1067 | 761073 | 1.00E-101 | 199  | 203  | 98 +  | 628 | 830  | 292656 | 292858 |
| UN19228 | Rsa1.0.01185.1 | 1117 | 149842 | 1.00E-122 | 256  | 267  | 95 +  | 447 | 713  | 132558 | 132824 |
| UN19229 | Rsa1.0.00123.1 | 1104 | 325650 | 0         | 459  | 477  | 96 -  | 5   | 474  | 47946  | 48416  |
| UN19230 | Rsa1.0.01234.1 | 620  | 50183  | 0         | 468  | 478  | 97 -  | 1   | 473  | 43366  | 43843  |
| UN19231 | Rsa1.0.01825.1 | 893  | 38725  | 2.00E-85  | 185  | 193  | 95 +  | 168 | 360  | 24330  | 24522  |
| UN19232 | Rsa1.0.02461.1 | 1760 | 31166  | 0         | 1196 | 1209 | 98 -  | 552 | 1760 | 4244   | 5452   |
| UN19233 | Rsa1.0.08043.1 | 1457 | 8019   | 0         | 486  | 486  | 100 + | 972 | 1457 | 3725   | 4210   |
| UN19234 | Rsa1.0.01130.1 | 1253 | 52929  | 1.00E-175 | 374  | 393  | 95 +  | 867 | 1253 | 44531  | 44915  |
| UN19235 | Rsa1.0.00670.1 | 1715 | 69371  | 0         | 479  | 479  | 100 + | 523 | 1001 | 31040  | 31518  |
| UN19236 | Rsa1.0.00762.1 | 1432 | 165246 | 0         | 912  | 969  | 94 +  | 481 | 1432 | 32881  | 33840  |
| UN19237 | Rsa1.0.02443.1 | 1037 | 31353  | 1.00E-135 | 244  | 244  | 100 - | 793 | 1036 | 18128  | 18371  |
| UN19238 | Rsa1.0.00573.1 | 610  | 74821  | 1.00E-131 | 241  | 242  | 99 +  | 1   | 242  | 29923  | 30164  |
| UN19239 | Rsa1.0.00044.1 | 1241 | 271658 | 0         | 333  | 334  | 99 +  | 908 | 1241 | 139508 | 139841 |
| UN19240 | Rsa1.0.00915.1 | 917  | 194446 | 9.00E-94  | 211  | 223  | 94 +  | 148 | 370  | 178495 | 178717 |
| UN19241 | Rsa1.0.00009.1 | 1656 | 232558 | 0         | 994  | 1025 | 96 -  | 629 | 1653 | 130857 | 131878 |
| UN19242 | Rsa1.0.37455.1 | 1497 | 602    | 0         | 406  | 416  | 97 +  | 93  | 508  | 1      | 416    |
| UN19243 | Rsa1.0.00917.1 | 1453 | 182012 | 0         | 660  | 666  | 99 -  | 218 | 883  | 7047   | 7711   |
| UN19244 | Rsa1.0.02022.1 | 752  | 35923  | 1.00E-103 | 210  | 216  | 97 +  | 3   | 214  | 4698   | 4913   |
| UN19245 | Rsa1.0.00398.1 | 1373 | 88007  | 0         | 645  | 645  | 100 + | 280 | 924  | 62692  | 63336  |
| UN19246 | Rsa1.0.00007.1 | 1803 | 239325 | 0         | 816  | 863  | 94 +  | 946 | 1803 | 29997  | 30851  |
| UN19247 | Rsa1.0.00101.1 | 616  | 267193 | 1.00E-125 | 274  | 290  | 94 -  | 328 | 616  | 4429   | 4708   |
| UN19248 | Rsa1.0.00167.1 | 1436 | 116000 | 0         | 404  | 406  | 99 +  | 4   | 407  | 12093  | 12498  |
| UN19249 | Rsa1.0.08756.1 | 2495 | 6955   | 8.00E-69  | 234  | 268  | 87 +  | 281 | 537  | 6119   | 6385   |
| UN19250 | Rsa1.0.00723.1 | 808  | 66806  | 0         | 724  | 743  | 97 +  | 48  | 790  | 58018  | 58756  |
| UN19251 | Rsa1.0.00572.1 | 1593 | 74969  | 0         | 1281 | 1293 | 99 -  | 301 | 1593 | 60862  | 62154  |
| UN19252 | Rsa1.0.15644.1 | 1219 | 2505   | 0         | 598  | 619  | 96 +  | 599 | 1215 | 577    | 1195   |
| UN19253 | Rsa1.0.07058.1 | 1093 | 9964   | 0         | 832  | 855  | 97 -  | 70  | 920  | 3048   | 3901   |
| UN19254 | Rsa1.0.00869.1 | 666  | 61627  | 1.00E-129 | 344  | 372  | 92 +  | 18  | 376  | 53852  | 54221  |
| UN19255 | Rsa1.0.10900.1 | 740  | 5684   | 0         | 722  | 733  | 98 +  | 1   | 733  | 466    | 1198   |
| UN19256 | Rsa1.0.00009.1 | 1702 | 232558 | 0         | 731  | 743  | 98 +  | 1   | 742  | 202456 | 203198 |
| UN19257 | Rsa1.0.20028.1 | 1468 | 1350   | 0         | 768  | 781  | 98 -  | 51  | 830  | 406    | 1186   |
| UN19258 | Rsa1.0.00367.1 | 971  | 90750  | 0         | 967  | 969  | 99 -  | 1   | 969  | 20755  | 21722  |
| UN19259 | Rsa1.0.00131.1 | 1092 | 432233 | 0         | 350  | 350  | 100 + | 1   | 350  | 398586 | 398935 |
| UN19260 | Rsa1.0.01018.1 | 799  | 56685  | 1.00E-102 | 192  | 193  | 99 +  | 606 | 798  | 54766  | 54958  |
| UN19261 | Rsa1.0.00008.1 | 1751 | 358124 | 0         | 830  | 860  | 96 -  | 1   | 857  | 67627  | 68485  |
| UN19262 | Rsa1.0.00712.1 | 1747 | 67217  | 0         | 1083 | 1083 | 100 - | 215 | 1297 | 40531  | 41613  |
| UN19263 | Rsa1.0.01233.1 | 891  | 50184  | 0         | 444  | 472  | 94 -  | 283 | 751  | 23507  | 23969  |
| UN19264 | Rsa1.0.04455.1 | 1280 | 17266  | 0         | 433  | 439  | 98 -  | 3   | 440  | 12968  | 13406  |



|         |                |      |        |           |      |      |       |      |      |        |        |
|---------|----------------|------|--------|-----------|------|------|-------|------|------|--------|--------|
| UN19265 | Rsa1.0.01117.1 | 2884 | 53465  | 0         | 1325 | 1338 | 99 +  | 765  | 2099 | 52128  | 53465  |
| UN19266 | Rsa1.0.08532.1 | 738  | 7228   | 0         | 716  | 737  | 97 +  | 1    | 734  | 5235   | 5968   |
| UN19267 | Rsa1.0.01198.1 | 824  | 51029  | 0         | 805  | 831  | 96 -  | 3    | 824  | 25781  | 26606  |
| UN19268 | Rsa1.0.00145.1 | 1648 | 261008 | 0         | 604  | 628  | 96 -  | 604  | 1231 | 101443 | 102061 |
| UN19269 | Rsa1.0.00064.1 | 1163 | 240927 | 0         | 482  | 489  | 98 -  | 3    | 490  | 220651 | 221139 |
| UN19270 | Rsa1.0.00002.1 | 815  | 601661 | 2.33E-156 | 282  | 287  | 98 -  | 403  | 688  | 140391 | 140677 |
| UN19271 | Rsa1.0.47151.1 | 1233 | 479    | 0         | 479  | 479  | 100 + | 70   | 548  | 1      | 479    |
| UN19272 | Rsa1.0.00158.1 | 1223 | 117999 | 0         | 448  | 448  | 100 - | 1    | 448  | 14475  | 14922  |
| UN19273 | Rsa1.0.00556.1 | 1287 | 207212 | 0         | 510  | 527  | 96 +  | 3    | 528  | 193419 | 193935 |
| UN19274 | Rsa1.0.00836.1 | 1007 | 185968 | 0         | 641  | 676  | 94 +  | 21   | 687  | 161658 | 162333 |
| UN19275 | Rsa1.0.20661.1 | 1535 | 1282   | 0         | 988  | 1005 | 98 +  | 530  | 1534 | 1      | 999    |
| UN19276 | Rsa1.0.01283.1 | 1007 | 49257  | 0         | 461  | 464  | 99 +  | 526  | 989  | 7067   | 7530   |
| UN19277 | Rsa1.0.14140.1 | 1716 | 3748   | 0         | 549  | 594  | 92 -  | 513  | 1102 | 1121   | 1705   |
| UN19278 | Rsa1.0.02079.1 | 806  | 35306  | 0         | 567  | 574  | 98 +  | 206  | 779  | 24546  | 25119  |
| UN19279 | Rsa1.0.07786.1 | 771  | 8569   | 1.00E-103 | 190  | 190  | 100 + | 578  | 767  | 173    | 362    |
| UN19280 | Rsa1.0.00463.1 | 872  | 189177 | 1.00E-135 | 265  | 272  | 97 +  | 601  | 872  | 115301 | 115572 |
| UN19281 | Rsa1.0.00959.1 | 1519 | 58202  | 0         | 360  | 365  | 98 +  | 415  | 779  | 1503   | 1867   |
| UN19282 | Rsa1.0.01168.1 | 1327 | 153765 | 0         | 1097 | 1160 | 94 +  | 172  | 1322 | 20887  | 22031  |
| UN19283 | Rsa1.0.00883.1 | 1286 | 61230  | 1.00E-127 | 343  | 376  | 91 -  | 5    | 374  | 54391  | 54764  |
| UN19284 | Rsa1.0.02798.1 | 1392 | 27792  | 0         | 446  | 450  | 99 +  | 3    | 452  | 5375   | 5823   |
| UN19285 | Rsa1.0.03356.1 | 1275 | 23487  | 0         | 647  | 654  | 98 +  | 622  | 1274 | 11582  | 12235  |
| UN19286 | Rsa1.0.00257.1 | 1258 | 102407 | 0         | 515  | 525  | 98 -  | 16   | 540  | 17702  | 18225  |
| UN19287 | Rsa1.0.01768.1 | 752  | 138463 | 0         | 369  | 376  | 98 -  | 1    | 375  | 110146 | 110520 |
| UN19288 | Rsa1.0.03420.1 | 1191 | 23090  | 1.00E-134 | 253  | 255  | 99 -  | 2    | 256  | 668    | 921    |
| UN19289 | Rsa1.0.00026.1 | 1830 | 327835 | 1.00E-168 | 330  | 340  | 97 -  | 3    | 342  | 186323 | 186662 |
| UN19290 | Rsa1.0.33000.1 | 1347 | 689    | 1.00E-165 | 301  | 303  | 99 +  | 12   | 314  | 281    | 583    |
| UN19291 | Rsa1.0.01806.1 | 476  | 39021  | 0         | 474  | 474  | 100 - | 1    | 474  | 25710  | 26183  |
| UN19292 | Rsa1.0.03355.1 | 1767 | 23489  | 0         | 838  | 845  | 99 -  | 3    | 847  | 2596   | 3440   |
| UN19293 | Rsa1.0.25135.1 | 1596 | 950    | 0         | 883  | 969  | 91 +  | 66   | 1034 | 1      | 950    |
| UN19294 | Rsa1.0.00526.1 | 791  | 169279 | 0         | 482  | 499  | 96 -  | 198  | 696  | 148049 | 148547 |
| UN19295 | Rsa1.0.01632.1 | 1749 | 181224 | 1.00E-116 | 232  | 238  | 97 -  | 3    | 240  | 154142 | 154379 |
| UN19296 | Rsa1.0.09098.1 | 1588 | 6647   | 0         | 501  | 524  | 95 +  | 1    | 524  | 6125   | 6647   |
| UN19297 | Rsa1.0.02605.1 | 1138 | 29637  | 0         | 571  | 606  | 94 -  | 3    | 590  | 25931  | 26536  |
| UN19298 | Rsa1.0.01073.1 | 841  | 55030  | 0         | 827  | 840  | 98 +  | 2    | 841  | 34942  | 35781  |
| UN19299 | Rsa1.0.15681.1 | 1592 | 2484   | 1.00E-111 | 213  | 216  | 98 +  | 1097 | 1312 | 348    | 563    |
| UN19300 | Rsa1.0.02248.1 | 1095 | 33414  | 0         | 1057 | 1100 | 96 +  | 1    | 1093 | 31699  | 32788  |
| UN19301 | Rsa1.0.05870.1 | 1269 | 146055 | 0         | 477  | 507  | 94 -  | 3    | 502  | 142951 | 143450 |
| UN19302 | Rsa1.0.02589.1 | 990  | 300828 | 0         | 373  | 376  | 99 -  | 17   | 392  | 155784 | 156159 |
| UN19303 | Rsa1.0.00675.1 | 1113 | 145590 | 1.00E-179 | 434  | 468  | 92 -  | 651  | 1113 | 45266  | 45726  |

|         |                |      |        |           |      |      |       |      |      |        |        |
|---------|----------------|------|--------|-----------|------|------|-------|------|------|--------|--------|
| UN19304 | Rsa1.0_04027.1 | 981  | 19501  | 3.00E-75  | 147  | 148  | 99 +  | 136  | 283  | 14002  | 14149  |
| UN19305 | Rsa1.0_03085.1 | 1555 | 25500  | 0         | 738  | 768  | 96 +  | 808  | 1555 | 18211  | 18978  |
| UN19306 | Rsa1.0_00168.1 | 1532 | 115870 | 1.00E-110 | 209  | 211  | 99 +  | 1071 | 1281 | 35634  | 35844  |
| UN19307 | Rsa1.0_01070.1 | 614  | 55099  | 0         | 590  | 607  | 97 +  | 13   | 614  | 29901  | 30507  |
| UN19308 | Rsa1.0_00179.1 | 786  | 393324 | 0         | 777  | 788  | 98 -  | 2    | 784  | 73880  | 74665  |
| UN19309 | Rsa1.0_00016.1 | 1016 | 831256 | 1.00E-124 | 253  | 258  | 98 +  | 763  | 1016 | 246882 | 247139 |
| UN19310 | Rsa1.0_00663.1 | 836  | 164969 | 0         | 700  | 721  | 97 +  | 119  | 836  | 125061 | 125775 |
| UN19311 | Rsa1.0_02670.1 | 826  | 28887  | 1.00E-179 | 363  | 375  | 96 +  | 452  | 825  | 1836   | 2209   |
| UN19312 | Rsa1.0_00874.1 | 1905 | 179723 | 0         | 938  | 943  | 99 -  | 2    | 944  | 44911  | 45853  |
| UN19313 | Rsa1.0_01402.1 | 1715 | 46509  | 0         | 785  | 844  | 93 -  | 2    | 845  | 18403  | 19246  |
| UN19314 | Rsa1.0_01566.1 | 1236 | 43134  | 0         | 381  | 382  | 99 -  | 855  | 1236 | 30363  | 30744  |
| UN19315 | Rsa1.0_00351.1 | 872  | 413096 | 1.00E-152 | 364  | 389  | 93 +  | 490  | 872  | 267204 | 267584 |
| UN19316 | Rsa1.0_02486.1 | 1100 | 30965  | 1.00E-120 | 245  | 251  | 97 +  | 3    | 251  | 9729   | 9978   |
| UN19317 | Rsa1.0_01157.1 | 808  | 52121  | 1.00E-122 | 307  | 335  | 91 -  | 487  | 808  | 42504  | 42837  |
| UN19318 | Rsa1.0_00236.1 | 1249 | 104771 | 1.00E-129 | 346  | 379  | 91 -  | 8    | 375  | 82285  | 82651  |
| UN19319 | Rsa1.0_01720.1 | 1049 | 40358  | 1.00E-141 | 286  | 295  | 96 +  | 3    | 296  | 31601  | 31895  |
| UN19320 | Rsa1.0_00705.1 | 1032 | 67505  | 0         | 578  | 598  | 96 +  | 62   | 659  | 9479   | 10076  |
| UN19321 | Rsa1.0_00227.1 | 2070 | 105849 | 0         | 601  | 608  | 98 +  | 812  | 1419 | 30551  | 31158  |
| UN19322 | Rsa1.0_04405.1 | 1555 | 17508  | 0         | 405  | 409  | 99 +  | 1    | 409  | 9041   | 9449   |
| UN19323 | Rsa1.0_01352.1 | 1413 | 47443  | 1.00E-126 | 229  | 229  | 100 + | 348  | 576  | 12214  | 12442  |
| UN19324 | Rsa1.0_08285.1 | 1381 | 7606   | 0         | 551  | 563  | 97 -  | 337  | 897  | 2625   | 3187   |
| UN19325 | Rsa1.0_00871.1 | 1559 | 61539  | 0         | 1526 | 1557 | 98 -  | 3    | 1558 | 40032  | 41582  |
| UN19326 | Rsa1.0_06092.1 | 1955 | 11756  | 0         | 493  | 506  | 97 -  | 3    | 506  | 2635   | 3140   |
| UN19327 | Rsa1.0_03615.1 | 1023 | 21766  | 0         | 339  | 340  | 99 -  | 2    | 341  | 6065   | 6404   |
| UN19328 | Rsa1.0_00947.1 | 1711 | 58664  | 0         | 530  | 565  | 93 -  | 1157 | 1709 | 47261  | 47811  |
| UN19329 | Rsa1.0_00196.1 | 1156 | 109960 | 0         | 563  | 581  | 96 +  | 587  | 1156 | 102144 | 102722 |
| UN19330 | Rsa1.0_02914.1 | 1288 | 26815  | 0         | 360  | 366  | 98 -  | 15   | 378  | 25036  | 25401  |
| UN19331 | Rsa1.0_08429.1 | 895  | 7370   | 1.00E-128 | 235  | 236  | 99 +  | 70   | 305  | 5517   | 5752   |
| UN19332 | Rsa1.0_00130.1 | 1702 | 125737 | 1.00E-177 | 316  | 316  | 100 + | 1    | 316  | 99030  | 99345  |
| UN19333 | Rsa1.0_00801.1 | 845  | 63861  | 0         | 462  | 466  | 99 +  | 1    | 466  | 37111  | 37575  |
| UN19334 | #              | #    | #      | #         | #    | #    | #     | #    | #    | #      | #      |
| UN19335 | Rsa1.0_00758.1 | 1021 | 65477  | 1.00E-167 | 355  | 373  | 95 +  | 1    | 373  | 50034  | 50404  |
| UN19336 | Rsa1.0_01965.1 | 775  | 36698  | 0         | 348  | 352  | 98 -  | 1    | 352  | 24177  | 24526  |
| UN19337 | Rsa1.0_00363.1 | 579  | 90968  | 1.00E-82  | 191  | 203  | 94 -  | 238  | 434  | 53874  | 54076  |
| UN19338 | Rsa1.0_00152.1 | 871  | 257730 | 0         | 735  | 781  | 94 -  | 91   | 869  | 210117 | 210889 |
| UN19339 | Rsa1.0_06868.1 | 1353 | 10234  | 0         | 558  | 572  | 97 +  | 782  | 1351 | 3835   | 4406   |
| UN19340 | Rsa1.0_06311.1 | 457  | 11254  | 5.00E-94  | 219  | 233  | 93 -  | 91   | 323  | 2605   | 2834   |
| UN19341 | Rsa1.0_00730.1 | 789  | 66673  | 1.00E-163 | 374  | 398  | 93 +  | 2    | 384  | 28312  | 28709  |
| UN19342 | Rsa1.0_03292.1 | 1386 | 23977  | 0         | 439  | 457  | 96 -  | 1    | 448  | 20331  | 20782  |

|         |                |      |        |           |      |      |       |      |      |        |        |
|---------|----------------|------|--------|-----------|------|------|-------|------|------|--------|--------|
| UN19343 | Rsa1.0_00928.1 | 1117 | 59293  | 1.00E-118 | 229  | 233  | 98 -  | 770  | 1002 | 19347  | 19579  |
| UN19344 | Rsa1.0_00199.1 | 890  | 249604 | 0         | 530  | 539  | 98 +  | 360  | 890  | 164308 | 164846 |
| UN19345 | Rsa1.0_00086.1 | 1217 | 439854 | 0         | 717  | 723  | 99 -  | 494  | 1216 | 290243 | 290964 |
| UN19346 | Rsa1.0_02399.1 | 1600 | 31763  | 0         | 710  | 751  | 94 +  | 851  | 1600 | 12962  | 13708  |
| UN19347 | Rsa1.0_02009.1 | 905  | 36100  | 0         | 418  | 438  | 95 -  | 143  | 580  | 35107  | 35544  |
| UN19348 | Rsa1.0_01296.1 | 915  | 49035  | 0         | 422  | 422  | 100 - | 494  | 915  | 35532  | 35953  |
| UN19349 | Rsa1.0_00053.1 | 1540 | 263459 | 0         | 969  | 986  | 98 -  | 550  | 1535 | 210955 | 211935 |
| UN19350 | Rsa1.0_02716.1 | 1960 | 28465  | 1.00E-149 | 329  | 349  | 94 +  | 5    | 353  | 17871  | 18219  |
| UN19351 | Rsa1.0_04190.1 | 1747 | 18581  | 1.00E-120 | 227  | 228  | 99 -  | 1    | 227  | 1      | 228    |
| UN19352 | Rsa1.0_00502.1 | 779  | 204180 | 0         | 567  | 591  | 95 -  | 191  | 779  | 181060 | 181649 |
| UN19353 | Rsa1.0_01272.1 | 867  | 49553  | 1.00E-176 | 314  | 314  | 100 - | 553  | 866  | 36802  | 37115  |
| UN19354 | Rsa1.0_01465.1 | 1131 | 45175  | 0         | 629  | 631  | 99 +  | 470  | 1099 | 3759   | 4389   |
| UN19355 | Rsa1.0_02550.1 | 785  | 291051 | 1.00E-168 | 311  | 315  | 98 -  | 163  | 477  | 275718 | 276032 |
| UN19356 | Rsa1.0_00887.1 | 1346 | 61048  | 0         | 363  | 369  | 98 -  | 979  | 1346 | 29110  | 29478  |
| UN19357 | Rsa1.0_01519.1 | 1069 | 44144  | 0         | 586  | 608  | 96 +  | 466  | 1069 | 39374  | 39964  |
| UN19358 | Rsa1.0_00019.1 | 766  | 301669 | 1.00E-175 | 401  | 428  | 93 -  | 324  | 751  | 293082 | 293498 |
| UN19359 | Rsa1.0_05066.1 | 905  | 14943  | 0         | 428  | 439  | 97 +  | 475  | 905  | 419    | 855    |
| UN19360 | Rsa1.0_00285.1 | 1153 | 149638 | 0         | 849  | 866  | 98 -  | 288  | 1153 | 74970  | 75834  |
| UN19361 | Rsa1.0_00413.1 | 2099 | 86921  | 0         | 1158 | 1192 | 97 +  | 319  | 1510 | 2979   | 4170   |
| UN19362 | Rsa1.0_00985.1 | 1308 | 161950 | 0         | 492  | 506  | 97 +  | 5    | 510  | 141815 | 142317 |
| UN19363 | Rsa1.0_01236.1 | 1121 | 50156  | 0         | 665  | 694  | 95 +  | 440  | 1121 | 35121  | 35814  |
| UN19364 | Rsa1.0_01348.1 | 1876 | 47569  | 0         | 851  | 886  | 96 -  | 921  | 1799 | 16734  | 17618  |
| UN19365 | Rsa1.0_00278.1 | 1359 | 231896 | 0         | 516  | 528  | 97 +  | 1    | 526  | 162428 | 162951 |
| UN19366 | Rsa1.0_02981.1 | 1137 | 26285  | 0         | 476  | 481  | 98 +  | 2    | 482  | 23059  | 23539  |
| UN19367 | Rsa1.0_00722.1 | 1240 | 66840  | 0         | 474  | 493  | 96 +  | 749  | 1240 | 51177  | 51669  |
| UN19368 | Rsa1.0_02305.1 | 652  | 32783  | 0         | 648  | 650  | 99 -  | 3    | 652  | 22360  | 23009  |
| UN19369 | Rsa1.0_00968.1 | 1427 | 58020  | 0         | 425  | 436  | 97 -  | 242  | 677  | 49013  | 49448  |
| UN19370 | Rsa1.0_00380.1 | 898  | 89748  | 4.00E-99  | 231  | 248  | 93 +  | 444  | 682  | 78451  | 78698  |
| UN19371 | Rsa1.0_00222.1 | 1177 | 172263 | 0         | 783  | 815  | 96 -  | 2    | 807  | 65105  | 65914  |
| UN19372 | Rsa1.0_00037.1 | 1912 | 307838 | 0         | 365  | 369  | 98 -  | 919  | 1287 | 289028 | 289395 |
| UN19373 | Rsa1.0_09490.1 | 823  | 6335   | 0         | 815  | 822  | 99 +  | 2    | 822  | 4727   | 5548   |
| UN19374 | Rsa1.0_08988.1 | 1246 | 6732   | 1.00E-161 | 426  | 476  | 89 +  | 1    | 458  | 782    | 1243   |
| UN19375 | Rsa1.0_08661.1 | 940  | 7068   | 0         | 923  | 923  | 100 - | 2    | 924  | 4632   | 5554   |
| UN19376 | Rsa1.0_00517.1 | 1068 | 142790 | 0         | 397  | 410  | 96 +  | 1    | 401  | 135260 | 135669 |
| UN19377 | Rsa1.0_00823.1 | 1263 | 62889  | 0         | 358  | 358  | 100 - | 873  | 1230 | 36289  | 36646  |
| UN19378 | Rsa1.0_00159.1 | 910  | 431686 | 0         | 658  | 681  | 96 +  | 4    | 684  | 173431 | 174103 |
| UN19379 | Rsa1.0_01206.1 | 2992 | 50772  | 0         | 839  | 846  | 99 +  | 2147 | 2991 | 13869  | 14714  |
| UN19380 | Rsa1.0_00752.1 | 2567 | 65756  | 2.00E-91  | 281  | 317  | 88 +  | 2037 | 2349 | 49569  | 49885  |
| UN19381 | Rsa1.0_00193.1 | 987  | 194198 | 0         | 826  | 865  | 95 -  | 125  | 986  | 23793  | 24642  |

|         |                |      |        |           |      |      |       |      |      |        |        |
|---------|----------------|------|--------|-----------|------|------|-------|------|------|--------|--------|
| UN19382 | Rsa1.0.02716.1 | 881  | 28465  | 2.00E-67  | 149  | 155  | 96 +  | 575  | 729  | 1935   | 2089   |
| UN19383 | Rsa1.0.62786.1 | 1169 | 365    | 0         | 344  | 349  | 98 -  | 3    | 351  | 1      | 349    |
| UN19384 | Rsa1.0.09527.1 | 1099 | 6311   | 1.00E-134 | 295  | 311  | 94 -  | 527  | 837  | 5870   | 6179   |
| UN19385 | Rsa1.0.02504.1 | 780  | 30706  | 1.00E-134 | 243  | 243  | 100 - | 538  | 780  | 6846   | 7088   |
| UN19386 | Rsa1.0.00114.1 | 580  | 131330 | 0         | 576  | 578  | 99 +  | 3    | 580  | 53520  | 54097  |
| UN19387 | Rsa1.0.00440.1 | 905  | 84723  | 1.00E-166 | 324  | 332  | 97 -  | 572  | 903  | 25068  | 25398  |
| UN19388 | Rsa1.0.13229.1 | 1826 | 4963   | 1.00E-165 | 317  | 324  | 97 +  | 655  | 978  | 3129   | 3452   |
| UN19389 | Rsa1.0.01221.1 | 1018 | 50421  | 0         | 365  | 365  | 100 + | 654  | 1018 | 49364  | 49728  |
| UN19390 | Rsa1.0.01994.1 | 1184 | 36374  | 0         | 721  | 734  | 98 +  | 450  | 1182 | 10029  | 10762  |
| UN19391 | Rsa1.0.03065.1 | 686  | 25656  | 0         | 677  | 684  | 98 -  | 3    | 686  | 16139  | 16821  |
| UN19392 | Rsa1.0.00754.1 | 904  | 65689  | 1.00E-106 | 209  | 213  | 98 +  | 3    | 211  | 51674  | 51886  |
| UN19393 | Rsa1.0.03837.1 | 1799 | 20559  | 0         | 379  | 386  | 98 +  | 1369 | 1754 | 20172  | 20556  |
| UN19394 | Rsa1.0.00365.1 | 832  | 90902  | 0         | 376  | 384  | 97 -  | 450  | 832  | 58706  | 59089  |
| UN19395 | Rsa1.0.03355.1 | 956  | 23489  | 0         | 598  | 611  | 97 -  | 346  | 956  | 19179  | 19789  |
| UN19396 | Rsa1.0.02236.1 | 1396 | 33558  | 1.00E-136 | 300  | 319  | 94 -  | 4    | 313  | 19567  | 19885  |
| UN19397 | Rsa1.0.00050.1 | 859  | 237174 | 0         | 587  | 626  | 93 -  | 3    | 610  | 7595   | 8214   |
| UN19398 | Rsa1.0.03111.1 | 1054 | 25327  | 0         | 461  | 464  | 99 +  | 1    | 464  | 3018   | 3481   |
| UN19399 | Rsa1.0.00668.1 | 1025 | 69421  | 0         | 1001 | 1025 | 97 +  | 1    | 1025 | 64358  | 65378  |
| UN19400 | Rsa1.0.00154.1 | 1194 | 189461 | 0         | 965  | 1009 | 95 -  | 151  | 1159 | 125784 | 126792 |
| UN19401 | Rsa1.0.00224.1 | 539  | 327530 | 1.00E-97  | 257  | 280  | 91 -  | 125  | 402  | 221387 | 221660 |
| UN19402 | Rsa1.0.00690.1 | 1472 | 140527 | 0         | 1262 | 1280 | 98 +  | 2    | 1279 | 11466  | 12743  |
| UN19403 | Rsa1.0.31349.1 | 2130 | 729    | 0         | 561  | 578  | 97 -  | 118  | 688  | 152    | 729    |
| UN19404 | Rsa1.0.00801.1 | 1477 | 63861  | 0         | 1233 | 1337 | 92 -  | 8    | 1313 | 61300  | 62604  |
| UN19405 | Rsa1.0.51850.1 | 816  | 438    | 2.00E-97  | 234  | 248  | 94 +  | 5    | 248  | 22     | 269    |
| UN19406 | Rsa1.0.01035.1 | 1075 | 56019  | 0         | 1025 | 1074 | 95 +  | 1    | 1073 | 43847  | 44908  |
| UN19407 | Rsa1.0.00130.1 | 1419 | 125737 | 0         | 1415 | 1417 | 99 +  | 1    | 1417 | 29471  | 30885  |
| UN19408 | Rsa1.0.02424.1 | 572  | 31570  | 1.00E-162 | 303  | 306  | 99 -  | 267  | 572  | 6573   | 6877   |
| UN19409 | Rsa1.0.00656.1 | 876  | 69968  | 1.00E-147 | 285  | 292  | 97 -  | 39   | 330  | 46621  | 46912  |
| UN19410 | Rsa1.0.03834.1 | 1420 | 20572  | 0         | 1373 | 1418 | 96 +  | 3    | 1420 | 11804  | 13211  |
| UN19411 | Rsa1.0.00967.1 | 1764 | 58049  | 0         | 945  | 948  | 99 -  | 3    | 950  | 7511   | 8458   |
| UN19412 | Rsa1.0.03241.1 | 1181 | 24423  | 0         | 1000 | 1059 | 94 -  | 125  | 1180 | 5601   | 6646   |
| UN19413 | Rsa1.0.11710.1 | 1180 | 5433   | 0         | 647  | 651  | 99 -  | 299  | 949  | 1873   | 2523   |
| UN19414 | Rsa1.0.00339.1 | 845  | 222974 | 5.00E-80  | 158  | 160  | 98 -  | 85   | 244  | 63385  | 63544  |
| UN19415 | Rsa1.0.05995.1 | 1566 | 11997  | 0         | 361  | 367  | 98 +  | 1202 | 1566 | 8577   | 8943   |
| UN19416 | Rsa1.0.05620.1 | 557  | 13148  | 0         | 543  | 555  | 97 -  | 3    | 557  | 8128   | 8680   |
| UN19417 | Rsa1.0.02156.1 | 1235 | 34517  | 0         | 383  | 385  | 99 -  | 474  | 858  | 20207  | 20591  |
| UN19418 | Rsa1.0.01453.1 | 1757 | 45449  | 0         | 885  | 966  | 91 +  | 2    | 929  | 9979   | 10921  |
| UN19419 | Rsa1.0.01105.1 | 1481 | 53958  | 0         | 600  | 615  | 97 -  | 554  | 1168 | 27951  | 28565  |
| UN19420 | Rsa1.0.00559.1 | 1512 | 190486 | 0         | 1019 | 1136 | 89 -  | 38   | 1173 | 178452 | 179587 |

|         |                |      |        |           |      |      |       |      |      |        |        |
|---------|----------------|------|--------|-----------|------|------|-------|------|------|--------|--------|
| UN19421 | Rsa1.0.01012.1 | 1285 | 56836  | 0         | 624  | 624  | 100 + | 660  | 1283 | 7489   | 8112   |
| UN19422 | Rsa1.0.01371.1 | 1681 | 47079  | 0         | 1205 | 1316 | 91 -  | 125  | 1440 | 42895  | 44210  |
| UN19423 | Rsa1.0.00008.1 | 1510 | 358124 | 0         | 1086 | 1134 | 95 +  | 320  | 1450 | 28198  | 29322  |
| UN19424 | Rsa1.0.16880.1 | 732  | 2004   | 0         | 528  | 528  | 100 + | 1    | 528  | 468    | 995    |
| UN19425 | Rsa1.0.00284.1 | 1822 | 323267 | 0         | 459  | 487  | 94 -  | 1    | 464  | 134274 | 134760 |
| UN19426 | Rsa1.0.01770.1 | 1208 | 39563  | 0         | 1168 | 1210 | 96 +  | 1    | 1207 | 31815  | 33002  |
| UN19427 | Rsa1.0.03271.1 | 1441 | 24187  | 0         | 1396 | 1446 | 96 +  | 1    | 1441 | 12134  | 13579  |
| UN19428 | Rsa1.0.01170.1 | 573  | 161131 | 0         | 360  | 362  | 99 -  | 3    | 364  | 117909 | 118270 |
| UN19429 | Rsa1.0.00649.1 | 1494 | 70263  | 0         | 442  | 445  | 99 +  | 1050 | 1494 | 62855  | 63299  |
| UN19430 | Rsa1.0.18218.1 | 2080 | 1643   | 0         | 873  | 913  | 95 -  | 408  | 1320 | 1      | 912    |
| UN19431 | Rsa1.0.01602.1 | 2187 | 42503  | 0         | 560  | 565  | 99 -  | 446  | 1010 | 11562  | 12125  |
| UN19432 | Rsa1.0.01500.1 | 1546 | 141844 | 0         | 621  | 630  | 98 -  | 1    | 628  | 10187  | 10815  |
| UN19433 | Rsa1.0.00165.1 | 1580 | 116466 | 0         | 684  | 719  | 95 +  | 405  | 1113 | 27250  | 27960  |
| UN19434 | Rsa1.0.01450.1 | 471  | 144251 | 1.00E-91  | 180  | 183  | 98 +  | 1    | 183  | 133312 | 133494 |
| UN19435 | Rsa1.0.01368.1 | 2120 | 47129  | 0         | 566  | 579  | 97 +  | 1277 | 1848 | 29056  | 29634  |
| UN19436 | Rsa1.0.04617.1 | 967  | 16625  | 0         | 904  | 989  | 91 -  | 7    | 967  | 15283  | 16262  |
| UN19437 | Rsa1.0.01184.1 | 1268 | 51452  | 1.00E-175 | 375  | 394  | 95 +  | 882  | 1268 | 42359  | 42746  |
| UN19438 | Rsa1.0.05442.1 | 1303 | 13741  | 0         | 407  | 433  | 93 +  | 872  | 1303 | 1778   | 2196   |
| UN19439 | Rsa1.0.00841.1 | 1264 | 183065 | 0         | 595  | 598  | 99 -  | 2    | 598  | 49678  | 50275  |
| UN19440 | Rsa1.0.00475.1 | 1583 | 81678  | 0         | 867  | 869  | 99 -  | 714  | 1582 | 39183  | 40051  |
| UN19441 | Rsa1.0.01709.1 | 1239 | 40587  | 1.00E-179 | 337  | 343  | 98 +  | 758  | 1100 | 10369  | 10711  |
| UN19442 | Rsa1.0.01071.1 | 1169 | 166914 | 0         | 366  | 372  | 98 +  | 1    | 372  | 14036  | 14407  |
| UN19443 | Rsa1.0.00482.1 | 1445 | 81162  | 0         | 475  | 485  | 97 -  | 1    | 485  | 66121  | 66598  |
| UN19444 | Rsa1.0.00920.1 | 675  | 601703 | 1.00E-132 | 245  | 247  | 99 +  | 427  | 673  | 448348 | 448594 |
| UN19445 | Rsa1.0.00057.1 | 1319 | 160473 | 1.00E-170 | 312  | 315  | 99 -  | 208  | 522  | 71413  | 71727  |
| UN19446 | Rsa1.0.08861.1 | 1744 | 6847   | 0         | 1719 | 1744 | 98 -  | 1    | 1744 | 2308   | 4050   |
| UN19447 | Rsa1.0.00071.1 | 1132 | 345714 | 0         | 488  | 495  | 98 -  | 67   | 560  | 207419 | 207913 |
| UN19448 | Rsa1.0.03290.1 | 2124 | 24011  | 1.00E-157 | 329  | 341  | 96 +  | 1785 | 2124 | 18991  | 19328  |
| UN19449 | Rsa1.0.03663.1 | 1562 | 21488  | 0         | 749  | 760  | 98 +  | 792  | 1551 | 6262   | 7020   |
| UN19450 | Rsa1.0.00065.1 | 1484 | 454616 | 1.00E-163 | 291  | 291  | 100 + | 1    | 291  | 8919   | 9209   |
| UN19451 | Rsa1.0.00008.1 | 1285 | 358124 | 0         | 740  | 749  | 98 -  | 531  | 1274 | 283032 | 283780 |
| UN19452 | Rsa1.0.00543.1 | 867  | 76788  | 0         | 563  | 569  | 98 -  | 299  | 867  | 15007  | 15572  |
| UN19453 | Rsa1.0.00339.1 | 1099 | 222974 | 0         | 372  | 389  | 95 -  | 711  | 1098 | 180014 | 180389 |
| UN19454 | Rsa1.0.01728.1 | 1345 | 40239  | 0         | 1298 | 1335 | 97 -  | 15   | 1345 | 3956   | 5287   |
| UN19455 | Rsa1.0.01042.1 | 798  | 293264 | 0         | 527  | 527  | 100 + | 1    | 527  | 153984 | 154510 |
| UN19456 | Rsa1.0.49744.1 | 1617 | 456    | 1.00E-140 | 313  | 329  | 95 +  | 39   | 363  | 1      | 325    |
| UN19457 | Rsa1.0.08305.1 | 1151 | 7571   | 1.00E-126 | 286  | 301  | 95 -  | 1    | 295  | 5615   | 5912   |
| UN19458 | Rsa1.0.04574.1 | 1421 | 16786  | 0         | 515  | 526  | 97 -  | 402  | 921  | 5374   | 5899   |
| UN19459 | Rsa1.0.00453.1 | 1481 | 83031  | 0         | 1466 | 1479 | 99 -  | 1    | 1479 | 77210  | 78685  |

|         |                |      |        |           |      |      |       |      |      |        |        |
|---------|----------------|------|--------|-----------|------|------|-------|------|------|--------|--------|
| UN19460 | Rsa1.0.00236.1 | 1869 | 104771 | 0         | 576  | 583  | 98 -  | 1287 | 1867 | 61616  | 62198  |
| UN19461 | Rsa1.0.00497.1 | 1455 | 79830  | 0         | 990  | 990  | 100 + | 466  | 1455 | 70653  | 71642  |
| UN19462 | Rsa1.0.04934.1 | 991  | 143962 | 0         | 964  | 987  | 97 -  | 7    | 991  | 11783  | 12768  |
| UN19463 | Rsa1.0.04740.1 | 2135 | 16165  | 0         | 773  | 777  | 99 -  | 1343 | 2119 | 468    | 1243   |
| UN19464 | Rsa1.0.00616.1 | 2016 | 195713 | 0         | 471  | 471  | 100 - | 1544 | 2014 | 147120 | 147590 |
| UN19465 | Rsa1.0.00016.1 | 1354 | 831256 | 0         | 561  | 562  | 99 -  | 1    | 561  | 504338 | 504899 |
| UN19466 | Rsa1.0.00394.1 | 1523 | 148426 | 0         | 1497 | 1524 | 98 -  | 3    | 1523 | 102166 | 103686 |
| UN19467 | Rsa1.0.01295.1 | 1192 | 49040  | 0         | 1159 | 1194 | 97 +  | 1    | 1187 | 46793  | 47986  |
| UN19468 | Rsa1.0.07654.1 | 837  | 8917   | 0         | 408  | 416  | 98 -  | 1    | 408  | 3857   | 4272   |
| UN19469 | Rsa1.0.14764.1 | 1971 | 3084   | 0         | 1109 | 1156 | 95 +  | 814  | 1961 | 1483   | 2634   |
| UN19470 | Rsa1.0.00116.1 | 1264 | 365886 | 0         | 340  | 340  | 100 + | 924  | 1263 | 67695  | 68034  |
| UN19471 | Rsa1.0.00329.1 | 1543 | 222544 | 0         | 671  | 691  | 97 -  | 146  | 830  | 20262  | 20952  |
| UN19472 | Rsa1.0.15087.1 | 2002 | 2842   | 0         | 638  | 644  | 99 +  | 173  | 816  | 2062   | 2705   |
| UN19473 | Rsa1.0.03476.1 | 1416 | 22646  | 0         | 401  | 411  | 97 +  | 132  | 541  | 10297  | 10707  |
| UN19474 | Rsa1.0.00707.1 | 1372 | 190112 | 0         | 722  | 726  | 99 +  | 644  | 1369 | 149667 | 150392 |
| UN19475 | Rsa1.0.00684.1 | 1353 | 141701 | 0         | 497  | 531  | 93 -  | 828  | 1353 | 54180  | 54698  |
| UN19476 | Rsa1.0.01094.1 | 1450 | 167285 | 0         | 629  | 648  | 97 +  | 3    | 648  | 1140   | 1782   |
| UN19477 | Rsa1.0.00128.1 | 1692 | 228675 | 0         | 503  | 505  | 99 -  | 3    | 507  | 97144  | 97648  |
| UN19478 | Rsa1.0.03029.1 | 1409 | 25858  | 0         | 868  | 906  | 95 +  | 512  | 1408 | 20341  | 21241  |
| UN19479 | Rsa1.0.00657.1 | 2189 | 69858  | 1.00E-109 | 201  | 201  | 100 - | 1989 | 2189 | 58010  | 58210  |
| UN19480 | Rsa1.0.00027.1 | 1265 | 283362 | 0         | 514  | 519  | 99 +  | 402  | 920  | 51034  | 51552  |
| UN19481 | Rsa1.0.00047.1 | 1729 | 168582 | 0         | 570  | 605  | 94 +  | 99   | 703  | 29923  | 30513  |
| UN19482 | Rsa1.0.00904.1 | 995  | 180594 | 0         | 968  | 985  | 98 +  | 11   | 993  | 16478  | 17459  |
| UN19483 | Rsa1.0.06127.1 | 1564 | 11675  | 0         | 656  | 685  | 95 +  | 1    | 682  | 6082   | 6758   |
| UN19484 | Rsa1.0.05882.1 | 1915 | 12340  | 0         | 437  | 441  | 99 +  | 1    | 440  | 4283   | 4723   |
| UN19485 | Rsa1.0.02695.1 | 915  | 28605  | 0         | 650  | 660  | 98 -  | 255  | 914  | 7026   | 7685   |
| UN19486 | Rsa1.0.01331.1 | 3147 | 47944  | 0         | 1844 | 1931 | 95 -  | 2    | 1898 | 17217  | 19146  |
| UN19487 | Rsa1.0.02643.1 | 1153 | 29176  | 0         | 714  | 714  | 100 + | 56   | 769  | 27641  | 28354  |
| UN19488 | Rsa1.0.00056.1 | 1644 | 332604 | 0         | 375  | 378  | 99 +  | 1269 | 1644 | 94692  | 95069  |
| UN19489 | Rsa1.0.08430.1 | 2431 | 7367   | 0         | 444  | 479  | 92 +  | 1243 | 1710 | 5345   | 5821   |
| UN19490 | Rsa1.0.01263.1 | 1477 | 49703  | 0         | 973  | 1017 | 95 -  | 3    | 1005 | 1553   | 2569   |
| UN19491 | Rsa1.0.03978.1 | 1014 | 19753  | 1.00E-138 | 291  | 303  | 96 +  | 712  | 1011 | 11983  | 12284  |
| UN19492 | Rsa1.0.00434.1 | 1395 | 85171  | 0         | 358  | 363  | 98 +  | 727  | 1089 | 34846  | 35208  |
| UN19493 | Rsa1.0.01844.1 | 1412 | 38421  | 1.00E-163 | 340  | 356  | 95 -  | 612  | 967  | 15108  | 15463  |
| UN19494 | Rsa1.0.00262.1 | 1717 | 101906 | 0         | 483  | 496  | 97 -  | 1223 | 1716 | 94662  | 95156  |
| UN19495 | Rsa1.0.00216.1 | 594  | 197563 | 0         | 470  | 474  | 99 -  | 3    | 476  | 186705 | 187178 |
| UN19496 | Rsa1.0.01056.1 | 1207 | 55449  | 0         | 402  | 417  | 96 +  | 3    | 419  | 14440  | 14849  |
| UN19497 | Rsa1.0.15814.1 | 1299 | 2409   | 1.00E-155 | 279  | 279  | 100 + | 302  | 580  | 740    | 1018   |
| UN19498 | Rsa1.0.00435.1 | 572  | 317579 | 0         | 352  | 353  | 99 -  | 220  | 572  | 70728  | 71080  |

|         |                |      |        |           |      |      |       |      |      |        |        |
|---------|----------------|------|--------|-----------|------|------|-------|------|------|--------|--------|
| UN19499 | Rsa1.0.00686.1 | 1367 | 68511  | 1.00E-140 | 279  | 286  | 97 -  | 1    | 285  | 42629  | 42914  |
| UN19500 | Rsa1.0.00506.1 | 1401 | 79106  | 0         | 1015 | 1038 | 97 -  | 1    | 1038 | 64312  | 65342  |
| UN19501 | Rsa1.0.00363.1 | 1352 | 90968  | 0         | 397  | 407  | 97 +  | 944  | 1349 | 22565  | 22971  |
| UN19502 | Rsa1.0.00245.1 | 1508 | 103569 | 0         | 1069 | 1073 | 99 +  | 1    | 1073 | 61676  | 62748  |
| UN19503 | Rsa1.0.00144.1 | 765  | 120708 | 1.00E-152 | 349  | 374  | 93 -  | 391  | 763  | 79342  | 79702  |
| UN19504 | Rsa1.0.05723.1 | 1048 | 12817  | 0         | 646  | 678  | 95 -  | 7    | 678  | 5257   | 5932   |
| UN19505 | Rsa1.0.00017.1 | 1566 | 752458 | 1.00E-171 | 312  | 314  | 99 +  | 1253 | 1566 | 54639  | 54952  |
| UN19506 | Rsa1.0.00340.1 | 512  | 305782 | 1.00E-153 | 291  | 296  | 98 +  | 2    | 294  | 109342 | 109637 |
| UN19507 | Rsa1.0.00240.1 | 1276 | 104175 | 0         | 555  | 574  | 96 +  | 702  | 1274 | 92182  | 92747  |
| UN19508 | Rsa1.0.03956.1 | 1334 | 19872  | 0         | 819  | 841  | 97 -  | 493  | 1332 | 13126  | 13956  |
| UN19509 | Rsa1.0.15623.1 | 1209 | 2515   | 0         | 759  | 766  | 99 -  | 1    | 766  | 14     | 778    |
| UN19510 | Rsa1.0.14460.1 | 1139 | 3366   | 0         | 483  | 523  | 92 -  | 3    | 508  | 942    | 1460   |
| UN19511 | Rsa1.0.14737.1 | 1497 | 3115   | 0         | 611  | 631  | 96 -  | 646  | 1261 | 1328   | 1958   |
| UN19512 | Rsa1.0.01756.1 | 1441 | 39779  | 0         | 568  | 570  | 99 -  | 874  | 1441 | 26923  | 27492  |
| UN19513 | Rsa1.0.00532.1 | 949  | 77384  | 0         | 924  | 943  | 97 +  | 7    | 947  | 30126  | 31068  |
| UN19514 | Rsa1.0.00791.1 | 1061 | 64201  | 0         | 859  | 868  | 98 +  | 14   | 880  | 56706  | 57573  |
| UN19515 | Rsa1.0.00038.1 | 1153 | 314568 | 2.00E-27  | 67   | 68   | 98 +  | 54   | 121  | 27750  | 27817  |
| UN19516 | Rsa1.0.36275.1 | 1020 | 622    | 0         | 475  | 482  | 98 +  | 155  | 635  | 1      | 481    |
| UN19517 | Rsa1.0.00429.1 | 1091 | 85559  | 1.00E-178 | 322  | 324  | 99 +  | 2    | 325  | 25745  | 26068  |
| UN19518 | Rsa1.0.00292.1 | 924  | 98141  | 0         | 343  | 343  | 100 + | 1    | 343  | 63912  | 64254  |
| UN19519 | Rsa1.0.02894.1 | 2157 | 26997  | 0         | 535  | 552  | 96 -  | 1606 | 2157 | 12015  | 12557  |
| UN19520 | Rsa1.0.08079.1 | 1600 | 7942   | 0         | 1568 | 1603 | 97 +  | 1    | 1599 | 4554   | 6154   |
| UN19521 | Rsa1.0.01319.1 | 857  | 48273  | 1.00E-162 | 289  | 289  | 100 + | 79   | 367  | 40946  | 41234  |
| UN19522 | Rsa1.0.01245.1 | 1143 | 149868 | 0         | 604  | 604  | 100 + | 539  | 1142 | 42586  | 43189  |
| UN19523 | Rsa1.0.03063.1 | 1308 | 25673  | 0         | 564  | 584  | 96 -  | 1    | 580  | 9182   | 9765   |
| UN19524 | Rsa1.0.05273.1 | 1379 | 14304  | 1.00E-117 | 233  | 239  | 97 -  | 1139 | 1377 | 13753  | 13991  |
| UN19525 | Rsa1.0.11912.1 | 1454 | 5372   | 0         | 818  | 837  | 97 +  | 617  | 1453 | 2521   | 3351   |
| UN19526 | Rsa1.0.08645.1 | 987  | 7087   | 0         | 530  | 531  | 99 -  | 457  | 987  | 60     | 590    |
| UN19527 | Rsa1.0.03926.1 | 1012 | 20024  | 1.00E-123 | 228  | 229  | 99 +  | 34   | 262  | 5387   | 5615   |
| UN19528 | Rsa1.0.01310.1 | 900  | 164719 | 0         | 440  | 444  | 99 -  | 459  | 899  | 159252 | 159695 |
| UN19529 | Rsa1.0.03294.1 | 1652 | 23971  | 1.00E-136 | 258  | 261  | 98 +  | 1392 | 1652 | 4753   | 5011   |
| UN19530 | Rsa1.0.00716.1 | 684  | 67078  | 0         | 535  | 549  | 97 -  | 137  | 684  | 37365  | 37913  |
| UN19531 | Rsa1.0.01274.1 | 950  | 49419  | 1.00E-114 | 271  | 290  | 93 +  | 649  | 937  | 37166  | 37455  |
| UN19532 | Rsa1.0.05755.1 | 966  | 12730  | 0         | 531  | 545  | 97 +  | 10   | 550  | 9386   | 9928   |
| UN19533 | Rsa1.0.11741.1 | 1412 | 5423   | 0         | 464  | 500  | 92 -  | 414  | 913  | 4597   | 5096   |
| UN19534 | Rsa1.0.00532.1 | 1404 | 77384  | 1.00E-136 | 247  | 247  | 100 - | 3    | 249  | 15300  | 15546  |
| UN19535 | Rsa1.0.19147.1 | 874  | 1473   | 0         | 553  | 557  | 99 +  | 1    | 557  | 888    | 1441   |
| UN19536 | Rsa1.0.03978.1 | 1115 | 19753  | 0         | 370  | 370  | 100 + | 718  | 1087 | 11983  | 12352  |
| UN19537 | Rsa1.0.00402.1 | 899  | 385315 | 0         | 372  | 374  | 99 -  | 1    | 374  | 86468  | 86841  |

|         |                |      |        |           |     |     |       |      |      |        |        |
|---------|----------------|------|--------|-----------|-----|-----|-------|------|------|--------|--------|
| UN19538 | Rsa1.0.00038.1 | 889  | 314568 | 1.00E-120 | 305 | 330 | 92 +  | 571  | 889  | 16997  | 17323  |
| UN19539 | Rsa1.0.04835.1 | 993  | 15766  | 0         | 434 | 442 | 98 +  | 6    | 447  | 9140   | 9578   |
| UN19540 | Rsa1.0_11005.1 | 886  | 5650   | 1.00E-151 | 301 | 310 | 97 +  | 580  | 886  | 766    | 1075   |
| UN19541 | Rsa1.0_13978.1 | 1130 | 3965   | 0         | 674 | 678 | 99 -  | 146  | 823  | 1      | 678    |
| UN19542 | Rsa1.0_02226.1 | 908  | 33726  | 1.00E-126 | 287 | 305 | 94 -  | 610  | 903  | 10091  | 10395  |
| UN19543 | Rsa1.0_00922.1 | 871  | 59588  | 0         | 705 | 718 | 98 -  | 4    | 716  | 39245  | 39961  |
| UN19544 | Rsa1.0.35031.1 | 1354 | 646    | 0         | 594 | 596 | 99 -  | 706  | 1301 | 1      | 596    |
| UN19545 | Rsa1.0.09024.1 | 833  | 6703   | 0         | 628 | 633 | 99 +  | 28   | 660  | 6072   | 6703   |
| UN19546 | Rsa1.0.00021.1 | 1038 | 263655 | 0         | 361 | 367 | 98 -  | 246  | 612  | 238503 | 238869 |
| UN19547 | Rsa1.0.12442.1 | 1035 | 5225   | 1.00E-144 | 260 | 260 | 100 + | 776  | 1035 | 461    | 720    |
| UN19548 | Rsa1.0.00211.1 | 1373 | 228189 | 0         | 499 | 516 | 96 -  | 265  | 778  | 130199 | 130714 |
| UN19549 | Rsa1.0.21670.1 | 1082 | 1183   | 1.00E-124 | 236 | 239 | 98 -  | 844  | 1082 | 71     | 309    |
| UN19550 | Rsa1.0.03169.1 | 775  | 24826  | 0         | 471 | 477 | 98 -  | 304  | 775  | 2578   | 3054   |
| UN19551 | Rsa1.0.00315.1 | 1033 | 96426  | 0         | 597 | 601 | 99 -  | 433  | 1033 | 46896  | 47493  |
| UN19552 | Rsa1.0.02377.1 | 1202 | 31994  | 0         | 647 | 656 | 98 -  | 11   | 666  | 6670   | 7325   |
| UN19553 | Rsa1.0.01238.1 | 944  | 50120  | 0         | 904 | 915 | 98 -  | 30   | 944  | 26916  | 27828  |
| UN19554 | Rsa1.0.02090.1 | 1427 | 35161  | 1.00E-133 | 242 | 242 | 100 - | 157  | 398  | 20970  | 21211  |
| UN19555 | Rsa1.0.38361.1 | 899  | 587    | 0         | 430 | 437 | 98 -  | 384  | 820  | 1      | 437    |
| UN19556 | Rsa1.0.07331.1 | 710  | 9548   | 0         | 704 | 708 | 99 -  | 3    | 710  | 3176   | 3883   |
| UN19557 | Rsa1.0.02772.1 | 1143 | 28047  | 1.00E-163 | 348 | 368 | 94 -  | 776  | 1143 | 17257  | 17615  |
| UN19558 | Rsa1.0.00604.1 | 863  | 146282 | 1.00E-151 | 314 | 327 | 96 +  | 536  | 861  | 113696 | 114022 |
| UN19559 | Rsa1.0.00241.1 | 590  | 104000 | 1.00E-137 | 273 | 279 | 97 -  | 2    | 279  | 65104  | 65381  |
| UN19560 | Rsa1.0.01876.1 | 910  | 37800  | 0         | 690 | 699 | 98 +  | 212  | 910  | 36310  | 37006  |
| UN19561 | Rsa1.0.00093.1 | 1831 | 214962 | 0         | 741 | 743 | 99 -  | 1088 | 1830 | 22719  | 23461  |
| UN19562 | Rsa1.0.01660.1 | 913  | 41400  | 0         | 434 | 450 | 96 +  | 476  | 912  | 27246  | 27695  |
| UN19563 | Rsa1.0.34219.1 | 1389 | 662    | 0         | 644 | 653 | 98 -  | 739  | 1389 | 10     | 662    |
| UN19564 | Rsa1.0.33878.1 | 830  | 669    | 0         | 338 | 340 | 99 -  | 71   | 410  | 161    | 500    |
| UN19565 | Rsa1.0.00383.1 | 675  | 398431 | 0         | 621 | 658 | 94 -  | 16   | 664  | 186026 | 186678 |
| UN19566 | Rsa1.0.00387.1 | 814  | 495407 | 0         | 344 | 345 | 99 +  | 1    | 345  | 339943 | 340287 |
| UN19567 | Rsa1.0.21904.1 | 982  | 1164   | 1.00E-171 | 311 | 313 | 99 +  | 4    | 316  | 840    | 1152   |
| UN19568 | Rsa1.0.00281.1 | 638  | 99908  | 1.00E-125 | 234 | 235 | 99 +  | 376  | 609  | 12443  | 12677  |
| UN19569 | Rsa1.0.03995.1 | 1130 | 19654  | 1.00E-138 | 305 | 317 | 96 -  | 654  | 964  | 2310   | 2626   |
| UN19570 | Rsa1.0.00347.1 | 858  | 93048  | 0         | 410 | 417 | 98 +  | 444  | 858  | 86405  | 86821  |
| UN19571 | Rsa1.0.04064.1 | 893  | 19297  | 0         | 413 | 427 | 96 +  | 286  | 709  | 18501  | 18925  |
| UN19572 | Rsa1.0.01491.1 | 1265 | 44718  | 0         | 452 | 458 | 98 +  | 414  | 871  | 19029  | 19486  |
| UN19573 | Rsa1.0.01171.1 | 1138 | 51752  | 0         | 377 | 394 | 95 +  | 755  | 1134 | 50943  | 51336  |
| UN19574 | Rsa1.0.01525.1 | 1243 | 43925  | 0         | 440 | 441 | 99 -  | 1    | 441  | 32428  | 32867  |
| UN19575 | Rsa1.0.00080.1 | 909  | 190437 | 1.00E-133 | 265 | 273 | 97 -  | 185  | 457  | 34258  | 34530  |
| UN19576 | Rsa1.0.02944.1 | 868  | 26553  | 1.00E-165 | 306 | 310 | 98 +  | 28   | 337  | 24455  | 24764  |



|         |                |      |        |           |      |      |       |      |      |        |        |
|---------|----------------|------|--------|-----------|------|------|-------|------|------|--------|--------|
| UN19577 | Rsa1.0.00361.1 | 1261 | 91181  | 1.00E-154 | 277  | 277  | 100 - | 851  | 1127 | 12174  | 12450  |
| UN19578 | Rsa1.0.08558.1 | 1150 | 7198   | 0         | 483  | 526  | 91 -  | 633  | 1149 | 2202   | 2721   |
| UN19579 | Rsa1.0.01113.1 | 1983 | 53616  | 0         | 861  | 873  | 98 +  | 1110 | 1982 | 48955  | 49825  |
| UN19580 | Rsa1.0.05231.1 | 1816 | 14424  | 1.00E-113 | 227  | 233  | 97 +  | 1399 | 1631 | 7214   | 7446   |
| UN19581 | Rsa1.0.00612.1 | 1760 | 72376  | 1.00E-152 | 273  | 273  | 100 - | 848  | 1120 | 63354  | 63626  |
| UN19582 | Rsa1.0.00295.1 | 1408 | 152597 | 0         | 615  | 615  | 100 + | 274  | 888  | 33905  | 34519  |
| UN19583 | Rsa1.0.00061.1 | 964  | 218685 | 0         | 584  | 585  | 99 +  | 1    | 585  | 2031   | 2614   |
| UN19584 | Rsa1.0.02826.1 | 2330 | 27560  | 0         | 484  | 484  | 100 - | 256  | 739  | 25714  | 26197  |
| UN19585 | Rsa1.0.01604.1 | 918  | 42461  | 1.00E-175 | 343  | 352  | 97 +  | 3    | 353  | 1092   | 1443   |
| UN19586 | Rsa1.0.00382.1 | 914  | 251946 | 1.00E-129 | 244  | 247  | 98 -  | 284  | 530  | 113183 | 113429 |
| UN19587 | Rsa1.0.04852.1 | 2884 | 15712  | 0         | 923  | 977  | 94 +  | 414  | 1390 | 8979   | 9942   |
| UN19588 | Rsa1.0.00325.1 | 1016 | 95371  | 1.00E-153 | 284  | 287  | 98 +  | 174  | 460  | 73729  | 74015  |
| UN19589 | Rsa1.0.00205.1 | 1514 | 193401 | 0         | 593  | 599  | 98 -  | 114  | 712  | 175714 | 176311 |
| UN19590 | Rsa1.0.05324.1 | 1147 | 14145  | 0         | 444  | 449  | 98 -  | 1    | 449  | 13120  | 13568  |
| UN19591 | Rsa1.0.00006.1 | 683  | 396176 | 1.00E-106 | 294  | 321  | 91 -  | 368  | 677  | 275841 | 276159 |
| UN19592 | Rsa1.0.01434.1 | 1163 | 45951  | 0         | 889  | 905  | 98 -  | 1    | 905  | 23021  | 23925  |
| UN19593 | Rsa1.0.04969.1 | 935  | 15283  | 1.00E-105 | 209  | 214  | 97 +  | 288  | 501  | 14289  | 14502  |
| UN19594 | Rsa1.0.00525.1 | 714  | 78030  | 0         | 393  | 393  | 100 - | 321  | 713  | 23993  | 24385  |
| UN19595 | Rsa1.0.08459.1 | 1077 | 7315   | 0         | 594  | 595  | 99 +  | 2    | 596  | 6240   | 6834   |
| UN19596 | Rsa1.0.04437.1 | 787  | 17362  | 0         | 780  | 785  | 99 -  | 3    | 785  | 1600   | 2382   |
| UN19597 | Rsa1.0.02398.1 | 1366 | 31766  | 0         | 1099 | 1188 | 92 -  | 72   | 1250 | 16806  | 17987  |
| UN19598 | Rsa1.0.00589.1 | 1636 | 209965 | 0         | 1014 | 1051 | 96 -  | 402  | 1448 | 9243   | 10291  |
| UN19599 | Rsa1.0.04381.1 | 1015 | 17639  | 0         | 531  | 577  | 92 -  | 445  | 1011 | 12731  | 13281  |
| UN19600 | Rsa1.0.00065.1 | 1934 | 454616 | 0         | 1028 | 1040 | 98 +  | 887  | 1924 | 126502 | 127541 |
| UN19601 | Rsa1.0.03260.1 | 1212 | 24284  | 0         | 544  | 555  | 98 -  | 658  | 1212 | 16797  | 17349  |
| UN19602 | Rsa1.0.02276.1 | 898  | 33098  | 1.00E-129 | 271  | 283  | 95 +  | 3    | 280  | 28453  | 28735  |
| UN19603 | Rsa1.0.05539.1 | 1591 | 13389  | 0         | 563  | 566  | 99 +  | 1024 | 1589 | 8363   | 8928   |
| UN19604 | Rsa1.0.00494.1 | 936  | 79967  | 0         | 927  | 935  | 99 +  | 1    | 934  | 49884  | 50817  |
| UN19605 | Rsa1.0.12391.1 | 1247 | 5238   | 0         | 382  | 397  | 96 -  | 3    | 398  | 4768   | 5164   |
| UN19606 | Rsa1.0.03592.1 | 1686 | 21878  | 0         | 789  | 806  | 97 +  | 883  | 1686 | 4363   | 5168   |
| UN19607 | Rsa1.0.03110.1 | 1356 | 25335  | 0         | 463  | 466  | 99 +  | 890  | 1355 | 8179   | 8644   |
| UN19608 | Rsa1.0.00615.1 | 1549 | 72235  | 0         | 356  | 358  | 99 -  | 202  | 559  | 26723  | 27079  |
| UN19609 | Rsa1.0.00067.1 | 567  | 415055 | 0         | 368  | 379  | 97 -  | 55   | 428  | 209269 | 209647 |
| UN19610 | Rsa1.0.00302.1 | 713  | 97521  | 0         | 346  | 350  | 98 +  | 1    | 346  | 79307  | 79656  |
| UN19611 | Rsa1.0.01390.1 | 747  | 46695  | 0         | 435  | 435  | 100 - | 313  | 747  | 18984  | 19418  |
| UN19612 | Rsa1.0.03352.1 | 1039 | 23506  | 0         | 1029 | 1048 | 98 +  | 1    | 1039 | 14261  | 15308  |
| UN19613 | Rsa1.0.01590.1 | 857  | 42719  | 0         | 778  | 791  | 98 -  | 67   | 857  | 9983   | 10773  |
| UN19614 | Rsa1.0.03090.1 | 1610 | 25464  | 0         | 997  | 1035 | 96 -  | 389  | 1419 | 14474  | 15505  |
| UN19615 | Rsa1.0.02754.1 | 591  | 28213  | 0         | 426  | 429  | 99 -  | 164  | 591  | 8589   | 9017   |

|         |                |      |        |           |     |      |       |      |      |        |        |
|---------|----------------|------|--------|-----------|-----|------|-------|------|------|--------|--------|
| UN19616 | Rsa1.0.05501.1 | 1110 | 13513  | 1.00E-77  | 169 | 176  | 96 -  | 202  | 377  | 9065   | 9240   |
| UN19617 | Rsa1.0.04242.1 | 674  | 18340  | 1.00E-141 | 261 | 263  | 99 -  | 1    | 263  | 6626   | 6888   |
| UN19618 | Rsa1.0.05122.1 | 967  | 14791  | 1.00E-159 | 284 | 284  | 100 + | 1    | 284  | 9010   | 9293   |
| UN19619 | Rsa1.0.01466.1 | 1249 | 45161  | 1.00E-120 | 289 | 313  | 92 +  | 935  | 1247 | 14125  | 14430  |
| UN19620 | Rsa1.0.00546.1 | 681  | 76523  | 0         | 396 | 402  | 98 +  | 200  | 598  | 69605  | 70006  |
| UN19621 | Rsa1.0.00475.1 | 746  | 81678  | 0         | 736 | 755  | 97 +  | 1    | 746  | 38102  | 38856  |
| UN19622 | Rsa1.0.00273.1 | 969  | 326186 | 0         | 358 | 359  | 99 -  | 1    | 359  | 125342 | 125700 |
| UN19623 | Rsa1.0.01293.1 | 506  | 49139  | 1.00E-144 | 290 | 299  | 96 -  | 3    | 294  | 28083  | 28381  |
| UN19624 | Rsa1.0.00630.1 | 1718 | 71281  | 0         | 627 | 634  | 98 +  | 1086 | 1718 | 5334   | 5967   |
| UN19625 | Rsa1.0.00121.1 | 687  | 278029 | 1.00E-131 | 300 | 317  | 94 +  | 373  | 687  | 54300  | 54614  |
| UN19626 | Rsa1.0.16574.1 | 754  | 2106   | 0         | 386 | 390  | 98 +  | 76   | 465  | 1717   | 2106   |
| UN19627 | Rsa1.0.01123.1 | 713  | 53359  | 0         | 420 | 423  | 99 +  | 1    | 422  | 14635  | 15057  |
| UN19628 | Rsa1.0.00353.1 | 1003 | 92242  | 0         | 551 | 562  | 98 +  | 2    | 563  | 61983  | 62538  |
| UN19629 | Rsa1.0.00512.1 | 764  | 200277 | 0         | 560 | 578  | 96 +  | 187  | 764  | 72466  | 73043  |
| UN19630 | Rsa1.0.00021.1 | 644  | 263655 | 1.00E-179 | 363 | 376  | 96 -  | 267  | 640  | 80113  | 80486  |
| UN19631 | Rsa1.0.48937.1 | 1394 | 463    | 0         | 439 | 444  | 98 -  | 918  | 1361 | 1      | 441    |
| UN19632 | Rsa1.0.00224.1 | 1292 | 327530 | 0         | 561 | 566  | 99 +  | 716  | 1281 | 4810   | 5375   |
| UN19633 | Rsa1.0.00567.1 | 1443 | 75260  | 1.00E-115 | 280 | 303  | 92 +  | 47   | 339  | 66990  | 67292  |
| UN19634 | Rsa1.0.05436.1 | 1240 | 13758  | 0         | 844 | 854  | 98 +  | 332  | 1185 | 9953   | 10797  |
| UN19635 | Rsa1.0.00362.1 | 1155 | 299497 | 0         | 691 | 703  | 98 +  | 401  | 1103 | 238849 | 239549 |
| UN19636 | Rsa1.0.00782.1 | 1946 | 64468  | 1.00E-174 | 473 | 521  | 90 +  | 476  | 983  | 19171  | 19678  |
| UN19637 | Rsa1.0.00077.1 | 1006 | 145005 | 1.00E-149 | 271 | 272  | 99 -  | 732  | 1003 | 66829  | 67100  |
| UN19638 | Rsa1.0.00086.1 | 1221 | 439854 | 0         | 379 | 387  | 97 +  | 755  | 1140 | 299867 | 300253 |
| UN19639 | Rsa1.0.01633.1 | 1229 | 41868  | 0         | 739 | 755  | 97 +  | 14   | 765  | 18059  | 18813  |
| UN19640 | Rsa1.0.01459.1 | 662  | 45277  | 1.00E-100 | 287 | 321  | 89 -  | 346  | 657  | 42950  | 43259  |
| UN19641 | Rsa1.0.00123.1 | 965  | 325650 | 1.00E-136 | 257 | 259  | 99 +  | 706  | 964  | 143131 | 143388 |
| UN19642 | Rsa1.0.00022.1 | 576  | 200461 | 1.00E-104 | 192 | 192  | 100 + | 385  | 576  | 191050 | 191241 |
| UN19643 | Rsa1.0.39888.1 | 925  | 563    | 0         | 467 | 482  | 96 +  | 427  | 905  | 1      | 482    |
| UN19644 | Rsa1.0.03010.1 | 776  | 26054  | 1.00E-123 | 245 | 252  | 97 -  | 525  | 776  | 20626  | 20877  |
| UN19645 | Rsa1.0.01377.1 | 1025 | 46967  | 1.00E-130 | 299 | 321  | 93 +  | 704  | 1023 | 24880  | 25188  |
| UN19646 | Rsa1.0.01175.1 | 748  | 51674  | 0         | 365 | 365  | 100 - | 375  | 739  | 35937  | 36301  |
| UN19647 | Rsa1.0.05792.1 | 762  | 12612  | 1.00E-143 | 266 | 269  | 98 +  | 162  | 430  | 642    | 910    |
| UN19648 | Rsa1.0.00211.1 | 1212 | 228189 | 1.00E-130 | 242 | 244  | 99 -  | 414  | 657  | 16536  | 16779  |
| UN19649 | Rsa1.0.02295.1 | 684  | 149884 | 0         | 675 | 692  | 97 +  | 1    | 680  | 1496   | 2187   |
| UN19650 | Rsa1.0.00037.1 | 1363 | 307838 | 0         | 984 | 1026 | 95 +  | 1    | 1022 | 175802 | 176825 |
| UN19651 | Rsa1.0.00458.1 | 572  | 82717  | 0         | 568 | 568  | 100 - | 3    | 570  | 74870  | 75437  |
| UN19652 | Rsa1.0.00678.1 | 646  | 193163 | 6.00E-17  | 97  | 114  | 85 -  | 428  | 541  | 23509  | 23622  |
| UN19653 | Rsa1.0.01936.1 | 595  | 37151  | 9.00E-90  | 220 | 236  | 93 +  | 315  | 546  | 18530  | 18763  |
| UN19654 | Rsa1.0.05482.1 | 914  | 13595  | 1.00E-150 | 279 | 281  | 99 -  | 634  | 914  | 4273   | 4552   |

|         |                |      |        |           |      |      |       |      |      |        |        |
|---------|----------------|------|--------|-----------|------|------|-------|------|------|--------|--------|
| UN19655 | Rsa1.0_00848.1 | 1075 | 152362 | 1.00E-141 | 282  | 291  | 96 +  | 785  | 1075 | 35655  | 35945  |
| UN19656 | Rsa1.0_00596.1 | 752  | 73578  | 1.00E-164 | 353  | 373  | 94 +  | 123  | 495  | 42155  | 42527  |
| UN19657 | Rsa1.0_00179.1 | 736  | 393324 | 1.00E-150 | 287  | 292  | 98 -  | 22   | 310  | 199770 | 200061 |
| UN19658 | Rsa1.0_00414.1 | 946  | 202190 | 0         | 628  | 632  | 99 +  | 315  | 946  | 36763  | 37394  |
| UN19659 | Rsa1.0_00152.1 | 939  | 257730 | 1.00E-128 | 299  | 320  | 93 -  | 620  | 937  | 96159  | 96463  |
| UN19660 | Rsa1.0_01882.1 | 852  | 37697  | 0         | 817  | 858  | 95 -  | 3    | 851  | 10955  | 11799  |
| UN19661 | Rsa1.0_02829.1 | 961  | 27541  | 0         | 499  | 539  | 92 -  | 440  | 952  | 3243   | 3781   |
| UN19662 | Rsa1.0_00782.1 | 688  | 64468  | 1.00E-132 | 249  | 252  | 98 -  | 435  | 686  | 17720  | 17971  |
| UN19663 | Rsa1.0_00134.1 | 610  | 390219 | 0         | 374  | 377  | 99 +  | 1    | 377  | 21793  | 22169  |
| UN19664 | Rsa1.0_01786.1 | 692  | 133324 | 1.00E-119 | 232  | 237  | 97 -  | 23   | 259  | 106421 | 106657 |
| UN19665 | Rsa1.0_02450.1 | 934  | 31288  | 0         | 831  | 842  | 98 -  | 1    | 839  | 16916  | 17755  |
| UN19666 | Rsa1.0_00030.1 | 882  | 250988 | 0         | 464  | 468  | 99 +  | 417  | 882  | 87453  | 87920  |
| UN19667 | Rsa1.0_00695.1 | 1688 | 68019  | 0         | 667  | 673  | 99 -  | 1017 | 1686 | 58664  | 59336  |
| UN19668 | Rsa1.0_43909.1 | 645  | 512    | 0         | 396  | 398  | 99 +  | 3    | 400  | 77     | 473    |
| UN19669 | Rsa1.0_02813.1 | 1095 | 27656  | 2.00E-86  | 222  | 245  | 90 +  | 691  | 935  | 25680  | 25909  |
| UN19670 | Rsa1.0_04600.1 | 1634 | 16694  | 0         | 618  | 619  | 99 +  | 650  | 1268 | 12273  | 12891  |
| UN19671 | Rsa1.0_00194.1 | 1036 | 110851 | 0         | 393  | 397  | 98 -  | 641  | 1036 | 72527  | 72923  |
| UN19672 | Rsa1.0_00657.1 | 1303 | 69858  | 1.00E-154 | 319  | 329  | 96 +  | 977  | 1303 | 9457   | 9784   |
| UN19673 | Rsa1.0_02486.1 | 1051 | 30965  | 1.00E-150 | 284  | 289  | 98 +  | 762  | 1050 | 11659  | 11947  |
| UN19674 | Rsa1.0_00294.1 | 2294 | 144860 | 0         | 587  | 588  | 99 +  | 563  | 1150 | 60107  | 60694  |
| UN19675 | Rsa1.0_00318.1 | 628  | 96094  | 1.00E-108 | 202  | 203  | 99 +  | 208  | 410  | 43395  | 43597  |
| UN19676 | Rsa1.0_00204.1 | 1054 | 109056 | 1.00E-173 | 309  | 309  | 100 + | 598  | 906  | 48140  | 48448  |
| UN19677 | Rsa1.0_00453.1 | 868  | 83031  | 0         | 498  | 503  | 99 -  | 53   | 555  | 68504  | 69006  |
| UN19678 | Rsa1.0_00023.1 | 1407 | 194764 | 0         | 683  | 685  | 99 +  | 602  | 1286 | 180083 | 180767 |
| UN19679 | Rsa1.0_00911.1 | 1056 | 59943  | 0         | 499  | 504  | 99 -  | 552  | 1050 | 44346  | 44849  |
| UN19680 | Rsa1.0_00712.1 | 1138 | 67217  | 0         | 435  | 436  | 99 +  | 2    | 437  | 66455  | 66889  |
| UN19681 | Rsa1.0_00179.1 | 1647 | 393324 | 0         | 359  | 361  | 99 +  | 3    | 363  | 51814  | 52173  |
| UN19682 | Rsa1.0_01721.1 | 1599 | 40345  | 0         | 691  | 695  | 99 -  | 905  | 1599 | 23089  | 23783  |
| UN19683 | Rsa1.0_00185.1 | 1145 | 248445 | 0         | 1012 | 1077 | 93 -  | 1    | 1073 | 204336 | 205411 |
| UN19684 | Rsa1.0_03216.1 | 1360 | 24540  | 0         | 1281 | 1289 | 99 +  | 1    | 1288 | 23252  | 24540  |
| UN19685 | Rsa1.0_02079.1 | 1388 | 35306  | 0         | 504  | 511  | 98 +  | 103  | 613  | 23541  | 24051  |
| UN19686 | Rsa1.0_00101.1 | 954  | 267193 | 0         | 811  | 874  | 92 +  | 65   | 932  | 103685 | 104554 |
| UN19687 | Rsa1.0_00354.1 | 1376 | 232005 | 0         | 407  | 408  | 99 -  | 1    | 407  | 168195 | 168602 |
| UN19688 | Rsa1.0_00447.1 | 937  | 84051  | 1.00E-130 | 271  | 281  | 96 -  | 625  | 905  | 14956  | 15235  |
| UN19689 | Rsa1.0_00634.1 | 1816 | 71222  | 0         | 387  | 392  | 98 +  | 1421 | 1812 | 57160  | 57550  |
| UN19690 | Rsa1.0_00897.1 | 1088 | 60498  | 1.00E-118 | 318  | 348  | 91 -  | 747  | 1088 | 21846  | 22191  |
| UN19691 | Rsa1.0_05150.1 | 966  | 14673  | 0         | 367  | 369  | 99 +  | 1    | 369  | 3240   | 3608   |
| UN19692 | Rsa1.0_05130.1 | 1474 | 14758  | 0         | 1123 | 1126 | 99 +  | 1    | 1125 | 11444  | 12569  |
| UN19693 | Rsa1.0_01068.1 | 1732 | 55208  | 0         | 399  | 410  | 97 +  | 4    | 407  | 28140  | 28548  |

|         |                |      |        |           |      |      |       |     |      |        |        |
|---------|----------------|------|--------|-----------|------|------|-------|-----|------|--------|--------|
| UN19694 | Rsa1.0.00719.1 | 1227 | 66952  | 0         | 417  | 435  | 95 +  | 791 | 1225 | 47331  | 47760  |
| UN19695 | Rsa1.0.04030.1 | 823  | 19489  | 2.00E-66  | 158  | 167  | 94 +  | 659 | 822  | 304    | 470    |
| UN19696 | Rsa1.0.02389.1 | 1252 | 146428 | 0         | 474  | 476  | 99 -  | 4   | 479  | 694    | 1169   |
| UN19697 | Rsa1.0.06443.1 | 942  | 11008  | 1.00E-112 | 239  | 248  | 96 -  | 615 | 859  | 5835   | 6081   |
| UN19698 | Rsa1.0.04961.1 | 686  | 15316  | 1.00E-108 | 269  | 294  | 91 -  | 2   | 276  | 13226  | 13518  |
| UN19699 | Rsa1.0.00002.1 | 1179 | 601661 | 0         | 1110 | 1118 | 99 -  | 5   | 1121 | 289127 | 290241 |
| UN19700 | Rsa1.0.00468.1 | 1450 | 82095  | 0         | 1344 | 1385 | 97 -  | 65  | 1447 | 66625  | 68007  |
| UN19701 | Rsa1.0.01701.1 | 1309 | 162121 | 0         | 1069 | 1069 | 100 - | 1   | 1069 | 144523 | 145591 |
| UN19702 | Rsa1.0.02151.1 | 896  | 34575  | 0         | 350  | 350  | 100 - | 547 | 896  | 4597   | 4946   |
| UN19703 | Rsa1.0.00014.1 | 1781 | 348985 | 1.00E-133 | 400  | 452  | 88 +  | 672 | 1116 | 252326 | 252776 |
| UN19704 | Rsa1.0.01901.1 | 1324 | 37472  | 0         | 567  | 593  | 95 +  | 693 | 1284 | 20156  | 20727  |
| UN19705 | Rsa1.0.00238.1 | 773  | 193193 | 0         | 527  | 547  | 96 -  | 1   | 543  | 190030 | 190576 |
| UN19706 | Rsa1.0.00403.1 | 1187 | 87701  | 0         | 740  | 740  | 100 + | 1   | 740  | 43676  | 44415  |
| UN19707 | Rsa1.0.00819.1 | 949  | 62918  | 0         | 360  | 367  | 98 -  | 582 | 948  | 5151   | 5516   |
| UN19708 | Rsa1.0.01887.1 | 988  | 37564  | 1.00E-174 | 370  | 390  | 94 +  | 3   | 392  | 23860  | 24249  |
| UN19709 | Rsa1.0.01484.1 | 1028 | 44806  | 1.00E-170 | 318  | 320  | 99 +  | 1   | 319  | 14353  | 14671  |
| UN19710 | Rsa1.0.00179.1 | 1185 | 393324 | 0         | 739  | 747  | 98 +  | 2   | 747  | 277903 | 278648 |
| UN19711 | Rsa1.0.04252.1 | 1456 | 18262  | 1.00E-148 | 275  | 278  | 98 -  | 574 | 851  | 5104   | 5381   |
| UN19712 | Rsa1.0.03122.1 | 1372 | 25207  | 1.00E-180 | 326  | 328  | 99 -  | 758 | 1085 | 6320   | 6647   |
| UN19713 | Rsa1.0.00258.1 | 1113 | 102381 | 1.00E-161 | 304  | 309  | 98 -  | 157 | 465  | 46518  | 46826  |
| UN19714 | Rsa1.0.00059.1 | 1344 | 159650 | 0         | 412  | 423  | 97 -  | 921 | 1342 | 84772  | 85194  |
| UN19715 | Rsa1.0.00065.1 | 1231 | 454616 | 0         | 445  | 447  | 99 -  | 3   | 449  | 191624 | 192070 |
| UN19716 | Rsa1.0.01522.1 | 1252 | 157436 | 0         | 923  | 936  | 98 +  | 1   | 936  | 3042   | 3976   |
| UN19717 | Rsa1.0.01536.1 | 658  | 43747  | 0         | 639  | 658  | 97 -  | 1   | 656  | 25562  | 26207  |
| UN19718 | Rsa1.0.00087.1 | 1288 | 761073 | 0         | 489  | 491  | 99 -  | 798 | 1288 | 300483 | 300973 |
| UN19719 | Rsa1.0.10932.1 | 1023 | 5673   | 0         | 493  | 500  | 98 +  | 522 | 1021 | 2552   | 3051   |
| UN19720 | Rsa1.0.12394.1 | 1406 | 5237   | 0         | 378  | 393  | 96 +  | 977 | 1369 | 4534   | 4918   |
| UN19721 | Rsa1.0.02210.1 | 1646 | 33857  | 0         | 1037 | 1050 | 98 +  | 597 | 1646 | 5810   | 6859   |
| UN19722 | Rsa1.0.01240.1 | 1515 | 50075  | 0         | 674  | 683  | 98 -  | 836 | 1515 | 40540  | 41221  |
| UN19723 | Rsa1.0.01178.1 | 2267 | 51571  | 0         | 655  | 674  | 97 +  | 837 | 1509 | 19574  | 20234  |
| UN19724 | Rsa1.0.01795.1 | 1378 | 39171  | 0         | 628  | 640  | 98 +  | 508 | 1146 | 18095  | 18733  |
| UN19725 | Rsa1.0.00056.1 | 872  | 332604 | 0         | 790  | 836  | 94 +  | 44  | 872  | 7983   | 8808   |
| UN19726 | Rsa1.0.03175.1 | 1206 | 24802  | 0         | 524  | 540  | 97 +  | 667 | 1205 | 4236   | 4772   |
| UN19727 | Rsa1.0.03835.1 | 1400 | 20567  | 0         | 605  | 621  | 97 +  | 768 | 1382 | 8140   | 8760   |
| UN19728 | Rsa1.0.01198.1 | 680  | 51029  | 2.00E-97  | 312  | 353  | 88 -  | 292 | 629  | 7545   | 7885   |
| UN19729 | Rsa1.0.02333.1 | 624  | 32431  | 1.00E-105 | 358  | 405  | 88 +  | 234 | 624  | 29979  | 30370  |
| UN19730 | Rsa1.0.00977.1 | 589  | 198001 | 0         | 587  | 587  | 100 - | 1   | 587  | 50728  | 51314  |
| UN19731 | Rsa1.0.06166.1 | 1789 | 11583  | 0         | 789  | 825  | 95 +  | 968 | 1788 | 5941   | 6749   |
| UN19732 | Rsa1.0.00002.1 | 983  | 601661 | 1.00E-136 | 261  | 265  | 98 +  | 717 | 981  | 255585 | 255847 |

|         |                |      |        |           |      |      |       |      |      |        |        |
|---------|----------------|------|--------|-----------|------|------|-------|------|------|--------|--------|
| UN19733 | Rsa1.0.00015.1 | 881  | 561803 | 0         | 497  | 499  | 99 -  | 385  | 881  | 193292 | 193790 |
| UN19734 | Rsa1.0.01349.1 | 1213 | 47513  | 0         | 758  | 759  | 99 +  | 454  | 1212 | 34812  | 35570  |
| UN19735 | Rsa1.0.02725.1 | 762  | 28404  | 1.00E-86  | 182  | 186  | 97 +  | 2    | 185  | 6572   | 6756   |
| UN19736 | Rsa1.0.01363.1 | 1717 | 47195  | 1.00E-177 | 337  | 344  | 97 +  | 3    | 346  | 20177  | 20520  |
| UN19737 | Rsa1.0.01178.1 | 1040 | 51571  | 7.00E-98  | 260  | 286  | 90 +  | 443  | 728  | 25592  | 25877  |
| UN19738 | Rsa1.0.00062.1 | 1319 | 299291 | 0         | 396  | 407  | 97 -  | 806  | 1211 | 263778 | 264184 |
| UN19739 | Rsa1.0.00105.1 | 1981 | 134138 | 0         | 665  | 674  | 98 -  | 2    | 670  | 123747 | 124420 |
| UN19740 | Rsa1.0.16059.1 | 890  | 2302   | 1.00E-136 | 246  | 246  | 100 + | 645  | 890  | 345    | 590    |
| UN19741 | Rsa1.0.05679.1 | 1759 | 12958  | 1.00E-174 | 311  | 311  | 100 - | 1448 | 1758 | 499    | 809    |
| UN19742 | Rsa1.0.00055.1 | 863  | 520193 | 0         | 661  | 666  | 99 +  | 198  | 863  | 179688 | 180352 |
| UN19743 | Rsa1.0.00634.1 | 1392 | 71222  | 0         | 369  | 379  | 97 +  | 1015 | 1392 | 3677   | 4051   |
| UN19744 | Rsa1.0.00547.1 | 754  | 76521  | 0         | 374  | 376  | 99 +  | 3    | 378  | 74160  | 74535  |
| UN19745 | Rsa1.0.07634.1 | 913  | 8979   | 0         | 430  | 438  | 98 -  | 3    | 440  | 5114   | 5548   |
| UN19746 | Rsa1.0.00120.1 | 960  | 277288 | 1.00E-116 | 261  | 274  | 95 -  | 690  | 960  | 92238  | 92509  |
| UN19747 | Rsa1.0.02897.1 | 1334 | 26967  | 0         | 567  | 572  | 99 +  | 121  | 692  | 20103  | 20671  |
| UN19748 | Rsa1.0.03413.1 | 976  | 23137  | 0         | 974  | 976  | 99 +  | 3    | 976  | 15902  | 16877  |
| UN19749 | Rsa1.0.00451.1 | 769  | 322533 | 0         | 522  | 525  | 99 -  | 245  | 769  | 311698 | 312222 |
| UN19750 | Rsa1.0.03356.1 | 1244 | 23487  | 0         | 852  | 852  | 100 - | 1    | 852  | 5698   | 6549   |
| UN19751 | Rsa1.0.01331.1 | 1958 | 47944  | 0         | 1251 | 1334 | 93 +  | 152  | 1479 | 17354  | 18687  |
| UN19752 | Rsa1.0.01553.1 | 684  | 43379  | 1.00E-154 | 351  | 370  | 94 -  | 5    | 368  | 15175  | 15543  |
| UN19753 | Rsa1.0.02499.1 | 1003 | 30774  | 0         | 350  | 355  | 98 +  | 2    | 356  | 1068   | 1422   |
| UN19754 | Rsa1.0.03787.1 | 636  | 20876  | 0         | 601  | 607  | 99 -  | 31   | 636  | 13024  | 13629  |
| UN19755 | Rsa1.0.00480.1 | 1378 | 81325  | 0         | 1076 | 1119 | 96 -  | 1    | 1101 | 7351   | 8451   |
| UN19756 | Rsa1.0.00758.1 | 1431 | 65477  | 1.00E-135 | 277  | 287  | 96 -  | 636  | 919  | 34807  | 35093  |
| UN19757 | Rsa1.0.08027.1 | 1404 | 8058   | 0         | 727  | 741  | 98 -  | 1    | 740  | 6693   | 7433   |
| UN19758 | Rsa1.0.02908.1 | 964  | 26859  | 1.00E-136 | 253  | 255  | 99 +  | 324  | 578  | 8990   | 9244   |
| UN19759 | Rsa1.0.01405.1 | 1222 | 46445  | 0         | 596  | 610  | 97 +  | 3    | 612  | 12711  | 13312  |
| UN19760 | Rsa1.0.04250.1 | 1307 | 18264  | 1.00E-179 | 334  | 339  | 98 -  | 1    | 339  | 11034  | 11372  |
| UN19761 | Rsa1.0.01015.1 | 1261 | 56752  | 0         | 564  | 592  | 95 -  | 1    | 585  | 7528   | 8115   |
| UN19762 | Rsa1.0.00464.1 | 725  | 82253  | 0         | 554  | 577  | 96 -  | 6    | 573  | 64562  | 65138  |
| UN19763 | Rsa1.0.01388.1 | 1676 | 46741  | 0         | 453  | 474  | 95 +  | 844  | 1314 | 20000  | 20473  |
| UN19764 | Rsa1.0.00065.1 | 1446 | 454616 | 0         | 572  | 626  | 91 -  | 826  | 1446 | 26103  | 26712  |
| UN19765 | Rsa1.0.00978.1 | 922  | 57739  | 1.00E-159 | 513  | 588  | 87 +  | 45   | 623  | 42015  | 42599  |
| UN19766 | Rsa1.0.01033.1 | 781  | 56173  | 0         | 366  | 367  | 99 +  | 415  | 781  | 27108  | 27474  |
| UN19767 | Rsa1.0.05218.1 | 888  | 14457  | 0         | 329  | 329  | 100 - | 560  | 888  | 9531   | 9859   |
| UN19768 | Rsa1.0.02280.1 | 1017 | 33063  | 0         | 1008 | 1013 | 99 +  | 3    | 1015 | 106    | 1118   |
| UN19769 | Rsa1.0.02036.1 | 1903 | 35731  | 0         | 1047 | 1049 | 99 +  | 853  | 1901 | 24421  | 25469  |
| UN19770 | Rsa1.0.01149.1 | 1065 | 160459 | 0         | 522  | 528  | 98 +  | 539  | 1065 | 43118  | 43645  |
| UN19771 | Rsa1.0.00939.1 | 781  | 185227 | 0         | 771  | 775  | 99 +  | 2    | 776  | 34165  | 34939  |

|         |                |      |        |           |      |      |       |      |      |        |        |
|---------|----------------|------|--------|-----------|------|------|-------|------|------|--------|--------|
| UN19772 | Rsa1.0.00088.1 | 879  | 141341 | 0         | 394  | 400  | 98 -  | 479  | 877  | 108251 | 108650 |
| UN19773 | Rsa1.0.00207.1 | 1233 | 248736 | 0         | 624  | 631  | 98 -  | 1    | 631  | 3818   | 4448   |
| UN19774 | Rsa1.0.13737.1 | 1274 | 4403   | 1.00E-118 | 265  | 280  | 94 +  | 994  | 1272 | 3954   | 4233   |
| UN19775 | Rsa1.0.00772.1 | 1132 | 64856  | 0         | 325  | 325  | 100 - | 1    | 325  | 7619   | 7943   |
| UN19776 | Rsa1.0.00241.1 | 1049 | 104000 | 1.00E-135 | 310  | 330  | 93 -  | 1    | 330  | 66579  | 66898  |
| UN19777 | Rsa1.0.01783.1 | 1693 | 39383  | 0         | 732  | 737  | 99 +  | 958  | 1692 | 30710  | 31446  |
| UN19778 | Rsa1.0.00241.1 | 505  | 104000 | 1.00E-63  | 124  | 124  | 100 + | 142  | 265  | 34619  | 34742  |
| UN19779 | Rsa1.0.21240.1 | 1536 | 1222   | 1.00E-151 | 274  | 275  | 99 +  | 623  | 897  | 357    | 631    |
| UN19780 | Rsa1.0.10960.1 | 1027 | 5664   | 1.00E-180 | 333  | 336  | 99 +  | 690  | 1025 | 5138   | 5472   |
| UN19781 | Rsa1.0.00377.1 | 1438 | 90038  | 1.00E-176 | 361  | 380  | 95 -  | 1074 | 1438 | 51757  | 52136  |
| UN19782 | Rsa1.0.01938.1 | 1056 | 264018 | 0         | 597  | 611  | 97 +  | 131  | 736  | 156756 | 157365 |
| UN19783 | Rsa1.0.00980.1 | 1327 | 57729  | 0         | 339  | 340  | 99 +  | 649  | 988  | 39477  | 39816  |
| UN19784 | Rsa1.0.02911.1 | 996  | 142461 | 0         | 351  | 353  | 99 +  | 644  | 996  | 129556 | 129908 |
| UN19785 | Rsa1.0.00474.1 | 1471 | 81731  | 0         | 391  | 401  | 97 -  | 1061 | 1461 | 30358  | 30753  |
| UN19786 | Rsa1.0.00301.1 | 1186 | 365315 | 0         | 548  | 552  | 99 +  | 9    | 559  | 224439 | 224990 |
| UN19787 | Rsa1.0.15729.1 | 1988 | 2459   | 0         | 1171 | 1189 | 98 +  | 346  | 1534 | 405    | 1590   |
| UN19788 | Rsa1.0.00890.1 | 864  | 323870 | 1.00E-155 | 281  | 282  | 99 +  | 583  | 864  | 306236 | 306517 |
| UN19789 | Rsa1.0.02897.1 | 914  | 26967  | 0         | 382  | 393  | 97 -  | 62   | 448  | 21270  | 21661  |
| UN19790 | Rsa1.0.08831.1 | 772  | 6887   | 1.00E-142 | 265  | 267  | 99 -  | 508  | 772  | 4437   | 4703   |
| UN19791 | Rsa1.0.01641.1 | 1216 | 188213 | 0         | 371  | 384  | 96 -  | 3    | 381  | 179549 | 179932 |
| UN19792 | Rsa1.0.00476.1 | 1423 | 280966 | 0         | 554  | 555  | 99 -  | 869  | 1423 | 259622 | 260176 |
| UN19793 | Rsa1.0.01261.1 | 988  | 49744  | 1.00E-139 | 327  | 348  | 93 -  | 22   | 365  | 9567   | 9910   |
| UN19794 | Rsa1.0.02722.1 | 959  | 28417  | 1.00E-89  | 171  | 172  | 99 +  | 244  | 415  | 15844  | 16015  |
| UN19795 | Rsa1.0.00145.1 | 984  | 261008 | 1.00E-123 | 403  | 463  | 87 -  | 550  | 984  | 95894  | 96342  |
| UN19796 | Rsa1.0.15186.1 | 915  | 2772   | 1.00E-167 | 299  | 299  | 100 - | 614  | 912  | 777    | 1075   |
| UN19797 | Rsa1.0.01369.1 | 786  | 47127  | 0         | 430  | 430  | 100 + | 2    | 431  | 8379   | 8808   |
| UN19798 | Rsa1.0.00358.1 | 1102 | 91293  | 0         | 339  | 340  | 99 -  | 3    | 341  | 11551  | 11890  |
| UN19799 | Rsa1.0.00319.1 | 1152 | 167331 | 0         | 445  | 447  | 99 -  | 407  | 853  | 40588  | 41034  |
| UN19800 | Rsa1.0.01718.1 | 580  | 40389  | 1.00E-168 | 340  | 348  | 97 -  | 236  | 580  | 35298  | 35644  |
| UN19801 | Rsa1.0.03191.1 | 981  | 145762 | 1.00E-119 | 336  | 374  | 89 -  | 3    | 362  | 16325  | 16682  |
| UN19802 | Rsa1.0.01999.1 | 892  | 36237  | 1.00E-178 | 340  | 345  | 98 -  | 5    | 347  | 13718  | 14062  |
| UN19803 | Rsa1.0.02658.1 | 1362 | 28978  | 0         | 420  | 425  | 98 -  | 940  | 1362 | 11619  | 12043  |
| UN19804 | Rsa1.0.00740.1 | 1140 | 215972 | 0         | 556  | 575  | 96 +  | 1    | 572  | 11274  | 11848  |
| UN19805 | Rsa1.0.04319.1 | 1043 | 17944  | 0         | 619  | 636  | 97 -  | 407  | 1042 | 7165   | 7800   |
| UN19806 | Rsa1.0.06376.1 | 811  | 11135  | 1.00E-174 | 317  | 318  | 99 +  | 1    | 317  | 10818  | 11135  |
| UN19807 | Rsa1.0.00215.1 | 2186 | 201775 | 0         | 1030 | 1039 | 99 -  | 1149 | 2186 | 37829  | 38864  |
| UN19808 | Rsa1.0.00164.1 | 1844 | 116642 | 0         | 1725 | 1737 | 99 +  | 108  | 1844 | 47430  | 49164  |
| UN19809 | Rsa1.0.00219.1 | 1580 | 106983 | 1.00E-161 | 294  | 296  | 99 -  | 1283 | 1578 | 42270  | 42565  |
| UN19810 | Rsa1.0.01889.1 | 1098 | 37562  | 5.00E-96  | 179  | 179  | 100 + | 918  | 1096 | 22624  | 22802  |

|         |                |      |        |           |      |      |       |      |      |        |        |
|---------|----------------|------|--------|-----------|------|------|-------|------|------|--------|--------|
| UN19811 | Rsa1.0.00554.1 | 730  | 150953 | 2.00E-66  | 189  | 208  | 90 -  | 109  | 309  | 121603 | 121810 |
| UN19812 | Rsa1.0.01750.1 | 755  | 39816  | 1.00E-150 | 325  | 343  | 94 -  | 1    | 335  | 22530  | 22871  |
| UN19813 | Rsa1.0.00423.1 | 317  | 86138  | 1.00E-131 | 271  | 279  | 97 -  | 39   | 317  | 10842  | 11115  |
| UN19814 | Rsa1.0.10036.1 | 903  | 6030   | 0         | 478  | 483  | 98 +  | 423  | 902  | 490    | 972    |
| UN19815 | Rsa1.0.00281.1 | 933  | 99908  | 0         | 433  | 438  | 98 -  | 499  | 932  | 24103  | 24539  |
| UN19816 | Rsa1.0.01951.1 | 1443 | 36941  | 0         | 365  | 365  | 100 + | 3    | 367  | 2054   | 2418   |
| UN19817 | Rsa1.0.16193.1 | 877  | 2250   | 0         | 869  | 871  | 99 -  | 4    | 874  | 1105   | 1975   |
| UN19818 | Rsa1.0.13644.1 | 1329 | 4580   | 0         | 602  | 608  | 99 -  | 722  | 1329 | 2316   | 2923   |
| UN19819 | Rsa1.0.01394.1 | 981  | 46641  | 0         | 534  | 545  | 97 +  | 114  | 652  | 4597   | 5141   |
| UN19820 | Rsa1.0.00813.1 | 1374 | 63202  | 1.00E-151 | 315  | 328  | 96 -  | 1038 | 1365 | 10836  | 11162  |
| UN19821 | Rsa1.0.15735.1 | 1228 | 2455   | 1.00E-139 | 275  | 282  | 97 -  | 178  | 457  | 128    | 409    |
| UN19822 | Rsa1.0.00890.1 | 966  | 323870 | 0         | 816  | 893  | 91 +  | 1    | 893  | 176030 | 176918 |
| UN19823 | Rsa1.0.02690.1 | 1026 | 28629  | 1.00E-132 | 250  | 252  | 99 +  | 767  | 1018 | 17941  | 18191  |
| UN19824 | Rsa1.0.03309.1 | 1402 | 23852  | 0         | 519  | 524  | 99 -  | 876  | 1399 | 16961  | 17479  |
| UN19825 | Rsa1.0.00380.1 | 744  | 89748  | 0         | 376  | 376  | 100 - | 2    | 377  | 88066  | 88441  |
| UN19826 | Rsa1.0.03181.1 | 1567 | 24763  | 0         | 431  | 435  | 99 +  | 1133 | 1567 | 17156  | 17587  |
| UN19827 | Rsa1.0.00388.1 | 915  | 88890  | 0         | 408  | 409  | 99 -  | 2    | 410  | 56221  | 56629  |
| UN19828 | Rsa1.0.00384.1 | 976  | 89278  | 0         | 385  | 393  | 97 -  | 3    | 395  | 62852  | 63244  |
| UN19829 | Rsa1.0.01172.1 | 1128 | 51734  | 1.00E-174 | 345  | 356  | 96 -  | 772  | 1124 | 8356   | 8711   |
| UN19830 | Rsa1.0.00157.1 | 1466 | 245832 | 1.00E-126 | 254  | 262  | 96 +  | 446  | 707  | 134903 | 135164 |
| UN19831 | Rsa1.0.00053.1 | 1517 | 263459 | 0         | 398  | 419  | 94 +  | 1103 | 1517 | 84702  | 85119  |
| UN19832 | Rsa1.0.00646.1 | 1239 | 70473  | 0         | 924  | 935  | 98 +  | 219  | 1153 | 4441   | 5375   |
| UN19833 | Rsa1.0.00394.1 | 1419 | 148426 | 0         | 515  | 519  | 99 +  | 490  | 1008 | 113269 | 113787 |
| UN19834 | Rsa1.0.00136.1 | 857  | 122464 | 0         | 584  | 596  | 97 +  | 214  | 809  | 115441 | 116036 |
| UN19835 | Rsa1.0.02915.1 | 1019 | 26813  | 0         | 621  | 626  | 99 -  | 392  | 1017 | 24843  | 25468  |
| UN19836 | Rsa1.0.01964.1 | 735  | 36702  | 0         | 533  | 550  | 96 -  | 179  | 728  | 20124  | 20666  |
| UN19837 | Rsa1.0.01359.1 | 1156 | 47271  | 0         | 351  | 356  | 98 -  | 6    | 361  | 33553  | 33908  |
| UN19838 | Rsa1.0.08511.1 | 1132 | 7252   | 0         | 636  | 637  | 99 +  | 1    | 637  | 1630   | 2266   |
| UN19839 | Rsa1.0.08706.1 | 663  | 7018   | 1.00E-171 | 304  | 304  | 100 - | 355  | 658  | 5187   | 5490   |
| UN19840 | Rsa1.0.02305.1 | 625  | 32783  | 0         | 605  | 627  | 96 -  | 5    | 625  | 22383  | 23009  |
| UN19841 | Rsa1.0.01502.1 | 1147 | 44519  | 0         | 364  | 377  | 96 +  | 769  | 1145 | 39463  | 39839  |
| UN19842 | Rsa1.0.00202.1 | 623  | 185895 | 1.00E-118 | 219  | 220  | 99 +  | 404  | 623  | 12228  | 12447  |
| UN19843 | Rsa1.0.04714.1 | 1001 | 146738 | 0         | 497  | 503  | 98 +  | 499  | 1001 | 139509 | 140011 |
| UN19844 | Rsa1.0.03356.1 | 945  | 23487  | 1.00E-158 | 319  | 331  | 96 -  | 152  | 482  | 20827  | 21157  |
| UN19845 | Rsa1.0.00009.1 | 982  | 232558 | 1.00E-180 | 382  | 403  | 94 -  | 1    | 395  | 53021  | 53420  |
| UN19846 | Rsa1.0.00369.1 | 1204 | 266462 | 0         | 447  | 447  | 100 + | 391  | 837  | 169356 | 169802 |
| UN19847 | Rsa1.0.00256.1 | 1495 | 102426 | 1.00E-155 | 334  | 353  | 94 -  | 42   | 382  | 83858  | 84210  |
| UN19848 | Rsa1.0.03263.1 | 1456 | 24268  | 0         | 1167 | 1168 | 99 -  | 1    | 1167 | 20569  | 21736  |
| UN19849 | Rsa1.0.01306.1 | 1306 | 48720  | 1.00E-163 | 355  | 372  | 95 -  | 924  | 1293 | 25978  | 26343  |

|         |                |      |        |           |      |      |       |      |      |        |        |
|---------|----------------|------|--------|-----------|------|------|-------|------|------|--------|--------|
| UN19850 | Rsa1.0_01920.1 | 1345 | 158533 | 0         | 1103 | 1120 | 98 +  | 1    | 1120 | 3737   | 4856   |
| UN19851 | Rsa1.0_15831.1 | 1514 | 2398   | 0         | 579  | 580  | 99 +  | 286  | 865  | 1      | 580    |
| UN19852 | Rsa1.0_01997.1 | 1315 | 158416 | 1.00E-130 | 237  | 237  | 100 + | 178  | 414  | 15015  | 15251  |
| UN19853 | Rsa1.0_00339.1 | 1245 | 222974 | 0         | 642  | 648  | 99 +  | 133  | 780  | 89885  | 90532  |
| UN19854 | Rsa1.0_01425.1 | 996  | 46136  | 0         | 439  | 440  | 99 -  | 557  | 996  | 42203  | 42642  |
| UN19855 | Rsa1.0_00922.1 | 1720 | 59588  | 0         | 782  | 782  | 100 + | 737  | 1518 | 52985  | 53766  |
| UN19856 | Rsa1.0_01010.1 | 1229 | 56906  | 1.00E-123 | 249  | 256  | 97 +  | 975  | 1229 | 25672  | 25927  |
| UN19857 | Rsa1.0_14240.1 | 1381 | 3629   | 0         | 448  | 449  | 99 -  | 933  | 1381 | 632    | 1080   |
| UN19858 | Rsa1.0_04563.1 | 1301 | 16837  | 0         | 673  | 673  | 100 + | 381  | 1053 | 1988   | 2660   |
| UN19859 | Rsa1.0_00442.1 | 1908 | 84596  | 0         | 600  | 601  | 99 -  | 389  | 989  | 62079  | 62679  |
| UN19860 | Rsa1.0_00112.1 | 1578 | 132199 | 0         | 393  | 403  | 97 +  | 1139 | 1536 | 12848  | 13250  |
| UN19861 | Rsa1.0_08919.1 | 1477 | 6788   | 0         | 1117 | 1119 | 99 -  | 1    | 1119 | 1      | 1119   |
| UN19862 | Rsa1.0_13019.1 | 1690 | 5042   | 0         | 1612 | 1645 | 97 -  | 1    | 1641 | 2047   | 3691   |
| UN19863 | Rsa1.0_01068.1 | 1392 | 55208  | 0         | 440  | 465  | 94 -  | 936  | 1392 | 28087  | 28548  |
| UN19864 | Rsa1.0_00730.1 | 1542 | 66673  | 0         | 897  | 923  | 97 +  | 504  | 1426 | 48396  | 49318  |
| UN19865 | Rsa1.0_00826.1 | 1155 | 166736 | 0         | 1151 | 1159 | 99 +  | 3    | 1155 | 126919 | 128077 |
| UN19866 | Rsa1.0_00409.1 | 1090 | 146788 | 0         | 559  | 559  | 100 - | 530  | 1088 | 86809  | 87367  |
| UN19867 | Rsa1.0_02888.1 | 2239 | 27020  | 0         | 988  | 1022 | 96 +  | 811  | 1832 | 5422   | 6438   |
| UN19868 | Rsa1.0_12550.1 | 618  | 5195   | 0         | 508  | 527  | 96 +  | 92   | 617  | 4279   | 4802   |
| UN19869 | Rsa1.0_00736.1 | 1121 | 66455  | 0         | 1007 | 1008 | 99 +  | 112  | 1119 | 50684  | 51691  |
| UN19870 | Rsa1.0_04538.1 | 1761 | 16940  | 0         | 395  | 410  | 96 -  | 1    | 407  | 7026   | 7434   |
| UN19871 | Rsa1.0_03290.1 | 1221 | 24011  | 0         | 401  | 406  | 98 +  | 816  | 1221 | 8870   | 9271   |
| UN19872 | Rsa1.0_00725.1 | 1221 | 66757  | 0         | 688  | 708  | 97 -  | 1    | 708  | 21358  | 22056  |
| UN19873 | Rsa1.0_00985.1 | 1053 | 161950 | 0         | 415  | 424  | 97 +  | 352  | 772  | 43673  | 44096  |
| UN19874 | Rsa1.0_14767.1 | 496  | 3079   | 0         | 350  | 350  | 100 - | 147  | 496  | 2560   | 2909   |
| UN19875 | Rsa1.0_00376.1 | 2165 | 90101  | 0         | 679  | 695  | 97 -  | 2    | 696  | 47249  | 47935  |
| UN19876 | Rsa1.0_00739.1 | 1296 | 66155  | 0         | 432  | 438  | 98 +  | 1    | 437  | 38290  | 38725  |
| UN19877 | Rsa1.0_01814.1 | 1347 | 38917  | 0         | 509  | 540  | 94 +  | 1    | 534  | 37168  | 37698  |
| UN19878 | Rsa1.0_00273.1 | 1151 | 326186 | 5.00E-93  | 192  | 198  | 96 +  | 635  | 832  | 132144 | 132341 |
| UN19879 | Rsa1.0_05501.1 | 2010 | 13513  | 0         | 531  | 537  | 98 -  | 567  | 1103 | 9318   | 9854   |
| UN19880 | Rsa1.0_00017.1 | 1354 | 752458 | 0         | 536  | 541  | 99 +  | 814  | 1352 | 474193 | 474733 |
| UN19881 | Rsa1.0_17064.1 | 1146 | 1937   | 0         | 924  | 969  | 95 +  | 176  | 1144 | 1      | 955    |
| UN19882 | Rsa1.0_02155.1 | 1032 | 34522  | 0         | 364  | 364  | 100 - | 662  | 1025 | 28636  | 28999  |
| UN19883 | Rsa1.0_01149.1 | 1295 | 160459 | 0         | 787  | 791  | 99 -  | 117  | 907  | 155856 | 156646 |
| UN19884 | Rsa1.0_01964.1 | 780  | 36702  | 0         | 416  | 424  | 98 -  | 359  | 780  | 6957   | 7379   |
| UN19885 | Rsa1.0_01209.1 | 1403 | 50668  | 0         | 952  | 1004 | 94 +  | 19   | 1022 | 48198  | 49180  |
| UN19886 | Rsa1.0_04998.1 | 1007 | 15180  | 1.00E-136 | 311  | 331  | 93 +  | 103  | 433  | 14293  | 14613  |
| UN19887 | Rsa1.0_00025.1 | 901  | 277312 | 1.00E-142 | 269  | 273  | 98 +  | 158  | 430  | 115742 | 116014 |
| UN19888 | Rsa1.0_01211.1 | 1892 | 50646  | 0         | 622  | 637  | 97 +  | 631  | 1267 | 6850   | 7486   |



|         |                |      |        |           |      |      |       |      |      |        |        |
|---------|----------------|------|--------|-----------|------|------|-------|------|------|--------|--------|
| UN19889 | Rsa1.0_00092.1 | 792  | 659932 | 1.00E-110 | 280  | 305  | 91 +  | 32   | 332  | 627123 | 627409 |
| UN19890 | Rsa1.0_01634.1 | 1472 | 41865  | 0         | 477  | 482  | 98 +  | 609  | 1090 | 26085  | 26566  |
| UN19891 | Rsa1.0_01867.1 | 989  | 37960  | 1.00E-136 | 261  | 266  | 98 +  | 482  | 747  | 19214  | 19479  |
| UN19892 | Rsa1.0_00190.1 | 572  | 318240 | 1.00E-156 | 285  | 287  | 99 +  | 44   | 330  | 28703  | 28989  |
| UN19893 | Rsa1.0_00569.1 | 1182 | 75060  | 0         | 575  | 577  | 99 +  | 1    | 576  | 72139  | 72715  |
| UN19894 | Rsa1.0_00472.1 | 912  | 398134 | 1.00E-162 | 313  | 320  | 97 -  | 2    | 319  | 168065 | 168384 |
| UN19895 | Rsa1.0_04167.1 | 1074 | 18757  | 1.00E-147 | 265  | 265  | 100 - | 3    | 267  | 18127  | 18391  |
| UN19896 | Rsa1.0_00685.1 | 1374 | 68515  | 0         | 1358 | 1376 | 98 +  | 3    | 1374 | 63195  | 64569  |
| UN19897 | Rsa1.0_00689.1 | 1452 | 68305  | 0         | 909  | 958  | 94 +  | 11   | 959  | 43533  | 44485  |
| UN19898 | Rsa1.0_01794.1 | 1474 | 39215  | 0         | 716  | 718  | 99 -  | 1    | 717  | 20964  | 21681  |
| UN19899 | Rsa1.0_06978.1 | 1533 | 10073  | 0         | 849  | 883  | 96 -  | 357  | 1224 | 1165   | 2047   |
| UN19900 | Rsa1.0_03424.1 | 828  | 23064  | 0         | 773  | 804  | 96 +  | 4    | 795  | 8565   | 9368   |
| UN19901 | Rsa1.0_00859.1 | 1071 | 61795  | 0         | 603  | 613  | 98 +  | 1    | 612  | 59675  | 60284  |
| UN19902 | Rsa1.0_00196.1 | 779  | 109960 | 0         | 376  | 383  | 98 -  | 3    | 385  | 19288  | 19670  |
| UN19903 | Rsa1.0_03131.1 | 743  | 25142  | 0         | 391  | 403  | 97 +  | 50   | 451  | 11329  | 11729  |
| UN19904 | Rsa1.0_00361.1 | 1520 | 91181  | 0         | 1161 | 1173 | 98 -  | 1    | 1173 | 47136  | 48307  |
| UN19905 | Rsa1.0_00060.1 | 1618 | 502678 | 0         | 373  | 374  | 99 -  | 1243 | 1616 | 377916 | 378289 |
| UN19906 | Rsa1.0_00228.1 | 1899 | 105511 | 1.00E-128 | 260  | 268  | 97 +  | 1    | 266  | 38614  | 38881  |
| UN19907 | Rsa1.0_00125.1 | 937  | 253043 | 1.00E-147 | 280  | 284  | 98 -  | 655  | 937  | 181898 | 182181 |
| UN19908 | Rsa1.0_00286.1 | 528  | 98709  | 1.00E-164 | 295  | 296  | 99 +  | 231  | 526  | 11606  | 11901  |
| UN19909 | Rsa1.0_00900.1 | 1041 | 60367  | 1.00E-161 | 313  | 321  | 97 -  | 1    | 321  | 29910  | 30230  |
| UN19910 | Rsa1.0_01010.1 | 1351 | 56906  | 0         | 1317 | 1340 | 98 +  | 13   | 1349 | 30394  | 31727  |
| UN19911 | Rsa1.0_00609.1 | 774  | 72785  | 0         | 770  | 774  | 99 +  | 1    | 774  | 41141  | 41914  |
| UN19912 | Rsa1.0_00484.1 | 677  | 203294 | 1.00E-137 | 260  | 263  | 98 -  | 384  | 646  | 143448 | 143708 |
| UN19913 | Rsa1.0_00708.1 | 1313 | 67366  | 0         | 940  | 947  | 99 +  | 2    | 948  | 63705  | 64651  |
| UN19914 | Rsa1.0_03164.1 | 857  | 24887  | 0         | 852  | 853  | 99 -  | 3    | 855  | 11234  | 12086  |
| UN19915 | Rsa1.0_00341.1 | 1598 | 249309 | 0         | 470  | 476  | 98 +  | 779  | 1254 | 112038 | 112513 |
| UN19916 | Rsa1.0_00012.1 | 807  | 222148 | 9.00E-97  | 338  | 392  | 86 -  | 449  | 807  | 49584  | 49974  |
| UN19917 | Rsa1.0_02020.1 | 814  | 173211 | 0         | 786  | 816  | 96 +  | 1    | 813  | 148358 | 149172 |
| UN19918 | Rsa1.0_00790.1 | 836  | 148693 | 1.00E-117 | 226  | 230  | 98 +  | 296  | 525  | 135658 | 135887 |
| UN19919 | Rsa1.0_06228.1 | 1275 | 11439  | 0         | 961  | 986  | 97 +  | 2    | 976  | 3939   | 4921   |
| UN19920 | Rsa1.0_00017.1 | 1650 | 752458 | 1.00E-112 | 328  | 362  | 90 +  | 1292 | 1650 | 543209 | 543563 |
| UN19921 | Rsa1.0_04223.1 | 1517 | 18407  | 0         | 476  | 477  | 99 +  | 1    | 477  | 9340   | 9816   |
| UN19922 | Rsa1.0_01919.1 | 1683 | 37272  | 0         | 494  | 505  | 97 +  | 1    | 501  | 3487   | 3991   |
| UN19923 | Rsa1.0_00212.1 | 793  | 108350 | 0         | 355  | 359  | 98 -  | 434  | 791  | 59920  | 60278  |
| UN19924 | Rsa1.0_04513.1 | 907  | 17029  | 1.00E-121 | 398  | 457  | 87 -  | 179  | 635  | 8548   | 9004   |
| UN19925 | Rsa1.0_00341.1 | 1006 | 249309 | 1.00E-150 | 327  | 344  | 95 +  | 12   | 352  | 125807 | 126149 |
| UN19926 | Rsa1.0_31317.1 | 1461 | 730    | 0         | 574  | 584  | 98 +  | 792  | 1375 | 148    | 730    |
| UN19927 | Rsa1.0_01313.1 | 804  | 48387  | 1.00E-156 | 320  | 332  | 96 +  | 473  | 804  | 13937  | 14262  |

|         |                |      |        |           |      |      |       |      |      |        |        |
|---------|----------------|------|--------|-----------|------|------|-------|------|------|--------|--------|
| UN19928 | Rsa1.0.05367.1 | 1181 | 14010  | 0         | 394  | 406  | 97 +  | 778  | 1181 | 4072   | 4475   |
| UN19929 | Rsa1.0.00058.1 | 1412 | 159921 | 0         | 410  | 410  | 100 - | 673  | 1082 | 50728  | 51137  |
| UN19930 | Rsa1.0.00038.1 | 1259 | 314568 | 0         | 682  | 692  | 98 +  | 3    | 693  | 293876 | 294567 |
| UN19931 | Rsa1.0.00356.1 | 1903 | 91521  | 0         | 1882 | 1904 | 98 +  | 1    | 1903 | 3938   | 5837   |
| UN19932 | Rsa1.0.00706.1 | 1183 | 291570 | 0         | 396  | 397  | 99 +  | 785  | 1181 | 234049 | 234445 |
| UN19933 | Rsa1.0.01701.1 | 980  | 162121 | 1.00E-174 | 336  | 342  | 98 -  | 640  | 980  | 24978  | 25318  |
| UN19934 | Rsa1.0.06495.1 | 614  | 10899  | 1.00E-150 | 289  | 295  | 97 +  | 4    | 298  | 5250   | 5540   |
| UN19935 | Rsa1.0.00247.1 | 1347 | 103408 | 0         | 568  | 578  | 98 -  | 2    | 579  | 95132  | 95709  |
| UN19936 | Rsa1.0.00090.1 | 872  | 273859 | 0         | 729  | 730  | 99 -  | 142  | 871  | 171752 | 172481 |
| UN19937 | Rsa1.0.06542.1 | 769  | 10805  | 0         | 400  | 418  | 95 -  | 353  | 769  | 9602   | 10005  |
| UN19938 | Rsa1.0.01828.1 | 2040 | 38681  | 0         | 628  | 666  | 94 -  | 2    | 663  | 19642  | 20290  |
| UN19939 | Rsa1.0.01527.1 | 1251 | 43905  | 1.00E-178 | 325  | 328  | 99 -  | 3    | 330  | 37951  | 38278  |
| UN19940 | Rsa1.0.07143.1 | 802  | 9832   | 0         | 421  | 432  | 97 +  | 2    | 433  | 3686   | 4114   |
| UN19941 | Rsa1.0.00788.1 | 1137 | 64237  | 0         | 512  | 513  | 99 -  | 2    | 514  | 1960   | 2471   |
| UN19942 | Rsa1.0.00651.1 | 905  | 247766 | 1.00E-176 | 391  | 416  | 93 -  | 50   | 462  | 207681 | 208096 |
| UN19943 | Rsa1.0.02392.1 | 1253 | 152517 | 1.00E-171 | 314  | 317  | 99 +  | 1    | 317  | 19346  | 19662  |
| UN19944 | Rsa1.0.00759.1 | 2151 | 65465  | 0         | 934  | 946  | 98 +  | 546  | 1491 | 24308  | 25253  |
| UN19945 | Rsa1.0.00064.1 | 2132 | 240927 | 0         | 1222 | 1229 | 99 -  | 2    | 1229 | 120605 | 121832 |
| UN19946 | Rsa1.0.00124.1 | 733  | 262503 | 0         | 407  | 408  | 99 -  | 4    | 410  | 9932   | 10339  |
| UN19947 | Rsa1.0.00038.1 | 482  | 314568 | 1.00E-130 | 273  | 286  | 95 +  | 67   | 352  | 303996 | 304275 |
| UN19948 | Rsa1.0.48789.1 | 1314 | 464    | 0         | 356  | 357  | 99 -  | 437  | 793  | 73     | 429    |
| UN19949 | Rsa1.0.00383.1 | 1075 | 398431 | 0         | 531  | 531  | 100 + | 1    | 531  | 370738 | 371268 |
| UN19950 | Rsa1.0.00066.1 | 1476 | 152418 | 0         | 612  | 631  | 96 +  | 713  | 1342 | 112082 | 112712 |
| UN19951 | Rsa1.0.02648.1 | 955  | 29073  | 1.00E-139 | 300  | 313  | 95 +  | 2    | 308  | 7775   | 8087   |
| UN19952 | Rsa1.0.00660.1 | 691  | 69688  | 1.00E-172 | 319  | 322  | 99 +  | 371  | 691  | 60390  | 60711  |
| UN19953 | Rsa1.0.00797.1 | 1300 | 63959  | 0         | 1269 | 1302 | 97 -  | 2    | 1300 | 59565  | 60861  |
| UN19954 | Rsa1.0.00455.1 | 1402 | 224823 | 0         | 474  | 480  | 98 +  | 578  | 1057 | 153160 | 153637 |
| UN19955 | Rsa1.0.00388.1 | 860  | 88890  | 0         | 391  | 393  | 99 +  | 6    | 397  | 43307  | 43699  |
| UN19956 | Rsa1.0.00410.1 | 1347 | 86957  | 0         | 408  | 408  | 100 + | 940  | 1347 | 21084  | 21491  |
| UN19957 | Rsa1.0.00481.1 | 1191 | 81316  | 0         | 1185 | 1188 | 99 +  | 4    | 1191 | 26105  | 27292  |
| UN19958 | Rsa1.0.00071.1 | 1823 | 345714 | 0         | 1814 | 1822 | 99 +  | 2    | 1823 | 2916   | 4737   |
| UN19959 | Rsa1.0.02438.1 | 906  | 31392  | 0         | 392  | 400  | 98 +  | 1    | 400  | 12277  | 12670  |
| UN19960 | Rsa1.0.05431.1 | 1466 | 13780  | 1.00E-112 | 209  | 210  | 99 +  | 2    | 211  | 5257   | 5466   |
| UN19961 | Rsa1.0.00923.1 | 474  | 153678 | 1.00E-134 | 273  | 283  | 96 -  | 1    | 283  | 23354  | 23636  |
| UN19962 | Rsa1.0.00533.1 | 2030 | 77375  | 0         | 953  | 957  | 99 -  | 1    | 957  | 45912  | 46868  |
| UN19963 | Rsa1.0.09173.1 | 1426 | 6582   | 1.00E-122 | 223  | 223  | 100 + | 1204 | 1426 | 3328   | 3550   |
| UN19964 | Rsa1.0.01340.1 | 990  | 47805  | 7.00E-67  | 256  | 301  | 85 -  | 696  | 983  | 20630  | 20919  |
| UN19965 | Rsa1.0.00843.1 | 625  | 62411  | 0         | 618  | 623  | 99 +  | 3    | 625  | 44252  | 44871  |
| UN19966 | Rsa1.0.11080.1 | 1190 | 5623   | 1.00E-178 | 364  | 380  | 95 -  | 375  | 754  | 1789   | 2168   |

|         |                |      |        |           |     |     |       |      |      |        |        |
|---------|----------------|------|--------|-----------|-----|-----|-------|------|------|--------|--------|
| UN19967 | Rsa1.0.00579.1 | 1350 | 148308 | 1.00E-166 | 376 | 400 | 94 -  | 955  | 1350 | 66624  | 67019  |
| UN19968 | Rsa1.0.01048.1 | 573  | 55684  | 1.00E-104 | 236 | 250 | 94 +  | 126  | 375  | 31549  | 31790  |
| UN19969 | Rsa1.0.00182.1 | 968  | 142305 | 1.00E-143 | 258 | 258 | 100 - | 288  | 545  | 74844  | 75101  |
| UN19970 | Rsa1.0.02551.1 | 1192 | 30196  | 0         | 491 | 499 | 98 -  | 1    | 499  | 27667  | 28164  |
| UN19971 | Rsa1.0.02360.1 | 1090 | 32203  | 0         | 604 | 651 | 92 +  | 1    | 631  | 23928  | 24578  |
| UN19972 | Rsa1.0.02680.1 | 1769 | 28721  | 0         | 665 | 685 | 97 -  | 997  | 1679 | 5755   | 6439   |
| UN19973 | Rsa1.0.01046.1 | 653  | 152989 | 0         | 438 | 440 | 99 -  | 209  | 648  | 116358 | 116797 |
| UN19974 | Rsa1.0.03820.1 | 858  | 20664  | 2.00E-73  | 174 | 181 | 96 -  | 603  | 780  | 6779   | 6959   |
| UN19975 | Rsa1.0.02170.1 | 998  | 34352  | 0         | 963 | 978 | 98 +  | 20   | 997  | 15719  | 16696  |
| UN19976 | Rsa1.0.06376.1 | 917  | 11135  | 1.00E-136 | 255 | 258 | 98 +  | 591  | 848  | 10190  | 10447  |
| UN19977 | Rsa1.0.00566.1 | 1012 | 75325  | 1.00E-178 | 362 | 377 | 96 -  | 188  | 564  | 20189  | 20565  |
| UN19978 | Rsa1.0.00033.1 | 895  | 515811 | 0         | 534 | 537 | 99 +  | 1    | 536  | 485074 | 485610 |
| UN19979 | Rsa1.0.01752.1 | 1292 | 39805  | 1.00E-179 | 319 | 319 | 100 - | 1    | 319  | 4489   | 4807   |
| UN19980 | Rsa1.0.00666.1 | 1210 | 69505  | 0         | 743 | 744 | 99 +  | 1    | 744  | 41676  | 42418  |
| UN19981 | Rsa1.0.00892.1 | 838  | 60703  | 0         | 809 | 836 | 96 -  | 3    | 836  | 48069  | 48902  |
| UN19982 | Rsa1.0.05821.1 | 1486 | 12531  | 0         | 515 | 519 | 99 -  | 459  | 977  | 3519   | 4037   |
| UN19983 | Rsa1.0.00029.1 | 1440 | 272992 | 0         | 707 | 721 | 98 -  | 184  | 904  | 248566 | 249286 |
| UN19984 | Rsa1.0.02141.1 | 1413 | 34677  | 0         | 509 | 529 | 96 +  | 1    | 529  | 8942   | 9470   |
| UN19985 | Rsa1.0.00294.1 | 908  | 144860 | 0         | 536 | 554 | 96 -  | 358  | 905  | 17372  | 17925  |
| UN19986 | Rsa1.0.01357.1 | 718  | 47280  | 1.00E-127 | 234 | 235 | 99 -  | 385  | 619  | 36151  | 36385  |
| UN19987 | Rsa1.0.00246.1 | 1195 | 103541 | 0         | 373 | 383 | 97 -  | 811  | 1193 | 32611  | 32991  |
| UN19988 | Rsa1.0.00190.1 | 737  | 318240 | 1.00E-122 | 346 | 390 | 88 -  | 354  | 735  | 91437  | 91801  |
| UN19989 | Rsa1.0.00177.1 | 1582 | 143394 | 1.00E-118 | 286 | 311 | 91 +  | 1270 | 1580 | 43759  | 44048  |
| UN19990 | Rsa1.0.01044.1 | 879  | 55861  | 0         | 582 | 592 | 98 +  | 1    | 591  | 28384  | 28972  |
| UN19991 | Rsa1.0.07585.1 | 654  | 9077   | 0         | 615 | 630 | 97 +  | 21   | 650  | 6503   | 7128   |
| UN19992 | Rsa1.0.00026.1 | 634  | 327835 | 1.00E-177 | 359 | 370 | 97 +  | 261  | 624  | 174424 | 174791 |
| UN19993 | Rsa1.0.00769.1 | 887  | 64911  | 1.00E-106 | 196 | 196 | 100 - | 1    | 196  | 14972  | 15167  |
| UN19994 | Rsa1.0.05503.1 | 1254 | 13510  | 1.00E-171 | 338 | 347 | 97 +  | 62   | 404  | 2887   | 3233   |
| UN19995 | Rsa1.0.00829.1 | 735  | 158305 | 1.00E-154 | 361 | 386 | 93 -  | 1    | 375  | 102339 | 102724 |
| UN19996 | Rsa1.0.00017.1 | 1110 | 752458 | 0         | 432 | 458 | 94 -  | 8    | 459  | 354538 | 354992 |
| UN19997 | Rsa1.0.19459.1 | 1312 | 1429   | 0         | 425 | 431 | 98 +  | 1    | 430  | 644    | 1074   |
| UN19998 | Rsa1.0.00616.1 | 535  | 195713 | 0         | 532 | 532 | 100 - | 2    | 533  | 146206 | 146737 |
| UN19999 | Rsa1.0.00017.1 | 1169 | 752458 | 1.00E-169 | 340 | 352 | 96 +  | 816  | 1167 | 710503 | 710851 |
| UN20000 | Rsa1.0.03678.1 | 649  | 21425  | 1.00E-156 | 280 | 280 | 100 - | 5    | 284  | 6722   | 7001   |
| UN20001 | Rsa1.0.00002.1 | 1678 | 601661 | 0         | 471 | 496 | 94 -  | 1193 | 1678 | 81675  | 82166  |
| UN20002 | Rsa1.0.00245.1 | 892  | 103569 | 0         | 519 | 523 | 99 -  | 370  | 892  | 54981  | 55503  |
| UN20003 | Rsa1.0.01519.1 | 953  | 44144  | 0         | 546 | 546 | 100 - | 408  | 953  | 11606  | 12151  |
| UN20004 | Rsa1.0.15643.1 | 975  | 2505   | 0         | 963 | 975 | 98 +  | 2    | 975  | 834    | 1808   |
| UN20005 | Rsa1.0.15203.1 | 1875 | 2763   | 0         | 689 | 701 | 98 -  | 494  | 1194 | 1      | 696    |

|         |                |      |        |           |      |      |       |      |      |        |        |
|---------|----------------|------|--------|-----------|------|------|-------|------|------|--------|--------|
| UN20006 | Rsa1.0.00180.1 | 1188 | 114581 | 0         | 411  | 422  | 97 -  | 13   | 434  | 111408 | 111825 |
| UN20007 | Rsa1.0.04580.1 | 1299 | 16773  | 0         | 324  | 324  | 100 - | 911  | 1234 | 7383   | 7706   |
| UN20008 | Rsa1.0.04395.1 | 640  | 17570  | 1.00E-141 | 315  | 333  | 94 -  | 306  | 638  | 9961   | 10284  |
| UN20009 | Rsa1.0.05110.1 | 1199 | 14814  | 1.00E-168 | 309  | 312  | 99 -  | 574  | 885  | 5291   | 5602   |
| UN20010 | Rsa1.0.22880.1 | 1152 | 1086   | 1.00E-157 | 318  | 330  | 96 +  | 797  | 1116 | 32     | 361    |
| UN20011 | Rsa1.0.01119.1 | 1100 | 53459  | 0         | 697  | 705  | 98 -  | 396  | 1099 | 11221  | 11924  |
| UN20012 | Rsa1.0.00067.1 | 1014 | 415055 | 0         | 382  | 385  | 99 -  | 1    | 385  | 301029 | 301413 |
| UN20013 | Rsa1.0.02586.1 | 775  | 29856  | 0         | 642  | 658  | 97 +  | 117  | 770  | 9987   | 10643  |
| UN20014 | Rsa1.0.00420.1 | 1786 | 86496  | 0         | 562  | 602  | 93 +  | 461  | 1056 | 40353  | 40939  |
| UN20015 | Rsa1.0.04405.1 | 698  | 17508  | 1.00E-177 | 415  | 443  | 93 +  | 2    | 442  | 14189  | 14619  |
| UN20016 | Rsa1.0.00281.1 | 1324 | 99908  | 0         | 493  | 498  | 98 -  | 516  | 1013 | 71665  | 72162  |
| UN20017 | Rsa1.0.00196.1 | 695  | 109960 | 1.00E-138 | 313  | 330  | 94 +  | 370  | 693  | 82154  | 82481  |
| UN20018 | Rsa1.0.00829.1 | 1745 | 158305 | 0         | 462  | 502  | 92 -  | 1240 | 1738 | 47474  | 47954  |
| UN20019 | Rsa1.0.01028.1 | 884  | 56401  | 0         | 384  | 384  | 100 + | 1    | 384  | 35590  | 35973  |
| UN20020 | Rsa1.0.00056.1 | 1336 | 332604 | 0         | 989  | 1083 | 91 -  | 182  | 1254 | 84545  | 85600  |
| UN20021 | Rsa1.0.17346.1 | 1193 | 1853   | 1.00E-165 | 304  | 307  | 99 +  | 887  | 1193 | 154    | 460    |
| UN20022 | Rsa1.0.00748.1 | 810  | 65983  | 0         | 466  | 502  | 92 +  | 310  | 808  | 63996  | 64489  |
| UN20023 | Rsa1.0.01949.1 | 856  | 36960  | 1.00E-116 | 254  | 264  | 96 +  | 3    | 264  | 28245  | 28507  |
| UN20024 | Rsa1.0.03274.1 | 1894 | 24159  | 0         | 779  | 786  | 99 +  | 1    | 786  | 18637  | 19417  |
| UN20025 | Rsa1.0.00667.1 | 621  | 69460  | 0         | 415  | 421  | 98 +  | 201  | 621  | 58085  | 58502  |
| UN20026 | Rsa1.0.02529.1 | 1068 | 30437  | 0         | 609  | 619  | 98 -  | 450  | 1068 | 27965  | 28582  |
| UN20027 | Rsa1.0.02558.1 | 959  | 30112  | 0         | 628  | 640  | 98 +  | 320  | 959  | 7179   | 7806   |
| UN20028 | Rsa1.0.00664.1 | 759  | 69573  | 1.00E-174 | 317  | 318  | 99 +  | 442  | 759  | 1721   | 2037   |
| UN20029 | Rsa1.0.59447.1 | 1191 | 385    | 0         | 355  | 356  | 99 -  | 836  | 1191 | 30     | 385    |
| UN20030 | Rsa1.0.03465.1 | 1141 | 22700  | 0         | 522  | 522  | 100 + | 89   | 610  | 9803   | 10324  |
| UN20031 | Rsa1.0.00954.1 | 2120 | 189536 | 1.00E-138 | 251  | 251  | 100 - | 1    | 251  | 7992   | 8242   |
| UN20032 | Rsa1.0.09709.1 | 1222 | 6198   | 0         | 830  | 834  | 99 +  | 387  | 1220 | 2061   | 2894   |
| UN20033 | Rsa1.0.05130.1 | 587  | 14758  | 1.00E-121 | 220  | 220  | 100 + | 368  | 587  | 111    | 330    |
| UN20034 | Rsa1.0.02867.1 | 991  | 27121  | 0         | 914  | 932  | 98 +  | 18   | 948  | 632    | 1560   |
| UN20035 | Rsa1.0.00025.1 | 940  | 277312 | 0         | 922  | 936  | 98 -  | 2    | 937  | 181705 | 182640 |
| UN20036 | Rsa1.0.00570.1 | 1372 | 75002  | 0         | 384  | 384  | 100 + | 989  | 1372 | 29373  | 29756  |
| UN20037 | Rsa1.0.00198.1 | 951  | 222963 | 0         | 426  | 428  | 99 -  | 3    | 430  | 85081  | 85507  |
| UN20038 | Rsa1.0.02958.1 | 1679 | 26443  | 0         | 413  | 419  | 98 +  | 1159 | 1577 | 23146  | 23561  |
| UN20039 | Rsa1.0.01470.1 | 386  | 45108  | 0         | 380  | 385  | 98 +  | 3    | 384  | 15616  | 16000  |
| UN20040 | Rsa1.0.08846.1 | 1705 | 6867   | 1.00E-105 | 204  | 207  | 98 +  | 433  | 639  | 715    | 921    |
| UN20041 | Rsa1.0.02292.1 | 1987 | 32955  | 0         | 527  | 562  | 93 +  | 845  | 1396 | 31606  | 32164  |
| UN20042 | Rsa1.0.13238.1 | 1470 | 4960   | 0         | 580  | 600  | 96 +  | 872  | 1470 | 2195   | 2782   |
| UN20043 | Rsa1.0.00089.1 | 1176 | 406142 | 1.00E-161 | 298  | 301  | 99 -  | 874  | 1174 | 162036 | 162336 |
| UN20044 | Rsa1.0.01249.1 | 1612 | 188432 | 0         | 1136 | 1190 | 95 +  | 398  | 1584 | 149233 | 150405 |

|         |                |      |        |           |      |      |       |      |      |        |        |
|---------|----------------|------|--------|-----------|------|------|-------|------|------|--------|--------|
| UN20045 | Rsa1.0_11907.1 | 1558 | 5374   | 0         | 905  | 947  | 95 +  | 466  | 1396 | 1101   | 2038   |
| UN20046 | Rsa1.0_27081.1 | 1507 | 866    | 0         | 398  | 414  | 96 +  | 1095 | 1505 | 437    | 844    |
| UN20047 | Rsa1.0_00278.1 | 820  | 231896 | 0         | 372  | 376  | 98 +  | 285  | 660  | 58615  | 58990  |
| UN20048 | Rsa1.0_00329.1 | 1374 | 222544 | 0         | 683  | 690  | 98 +  | 2    | 688  | 193044 | 193732 |
| UN20049 | Rsa1.0_00622.1 | 1224 | 71822  | 0         | 731  | 749  | 97 -  | 4    | 752  | 2000   | 2748   |
| UN20050 | Rsa1.0_08869.1 | 2366 | 6840   | 0         | 1290 | 1349 | 95 +  | 1013 | 2361 | 2930   | 4266   |
| UN20051 | Rsa1.0_00792.1 | 615  | 64163  | 1.00E-126 | 257  | 262  | 98 +  | 355  | 615  | 7358   | 7617   |
| UN20052 | Rsa1.0_02389.1 | 1407 | 146428 | 0         | 413  | 426  | 96 -  | 574  | 999  | 133292 | 133717 |
| UN20053 | Rsa1.0_00464.1 | 1104 | 82253  | 1.00E-158 | 345  | 363  | 95 +  | 48   | 408  | 37238  | 37600  |
| UN20054 | Rsa1.0_01502.1 | 895  | 44519  | 0         | 861  | 893  | 96 -  | 3    | 894  | 40988  | 41861  |
| UN20055 | Rsa1.0_01554.1 | 1241 | 43379  | 0         | 553  | 560  | 98 -  | 418  | 977  | 41062  | 41621  |
| UN20056 | Rsa1.0_05749.1 | 902  | 12746  | 0         | 470  | 498  | 94 +  | 406  | 902  | 1417   | 1895   |
| UN20057 | Rsa1.0_00235.1 | 757  | 154696 | 1.00E-178 | 421  | 456  | 92 -  | 112  | 567  | 139087 | 139542 |
| UN20058 | Rsa1.0_00378.1 | 1446 | 89892  | 1.00E-168 | 333  | 343  | 97 -  | 1104 | 1446 | 36910  | 37250  |
| UN20059 | Rsa1.0_05823.1 | 651  | 12521  | 1.00E-171 | 364  | 383  | 95 -  | 3    | 382  | 7458   | 7840   |
| UN20060 | Rsa1.0_16051.1 | 872  | 2305   | 0         | 407  | 419  | 97 +  | 1    | 418  | 1887   | 2305   |
| UN20061 | Rsa1.0_01581.1 | 1112 | 42833  | 0         | 934  | 1039 | 89 -  | 6    | 1040 | 5055   | 6088   |
| UN20062 | Rsa1.0_00003.1 | 1236 | 340054 | 1.00E-87  | 186  | 193  | 96 +  | 1044 | 1236 | 74887  | 75079  |
| UN20063 | Rsa1.0_06563.1 | 1627 | 10765  | 0         | 397  | 420  | 94 +  | 515  | 934  | 1097   | 1502   |
| UN20064 | Rsa1.0_00001.1 | 942  | 363028 | 1.00E-174 | 316  | 318  | 99 -  | 624  | 941  | 92777  | 93094  |
| UN20065 | Rsa1.0_00053.1 | 997  | 263459 | 0         | 479  | 484  | 98 -  | 466  | 949  | 144815 | 145298 |
| UN20066 | Rsa1.0_06563.1 | 1064 | 10765  | 1.00E-175 | 350  | 360  | 97 -  | 703  | 1060 | 1143   | 1502   |
| UN20067 | Rsa1.0_01602.1 | 743  | 42503  | 1.00E-119 | 230  | 234  | 98 +  | 3    | 236  | 975    | 1208   |
| UN20068 | Rsa1.0_03634.1 | 1456 | 145192 | 0         | 688  | 689  | 99 +  | 1    | 689  | 18959  | 19647  |
| UN20069 | Rsa1.0_03344.1 | 1050 | 23593  | 0         | 608  | 626  | 97 +  | 3    | 626  | 8676   | 9301   |
| UN20070 | Rsa1.0_00051.1 | 1154 | 258225 | 0         | 529  | 557  | 94 +  | 3    | 556  | 47512  | 48062  |
| UN20071 | Rsa1.0_01390.1 | 1039 | 46695  | 1.00E-177 | 315  | 315  | 100 + | 725  | 1039 | 23365  | 23679  |
| UN20072 | Rsa1.0_00190.1 | 1082 | 318240 | 0         | 888  | 898  | 98 -  | 3    | 900  | 125544 | 126438 |
| UN20073 | Rsa1.0_00012.1 | 1878 | 222148 | 0         | 557  | 566  | 98 +  | 1    | 566  | 169617 | 170177 |
| UN20074 | Rsa1.0_06403.1 | 951  | 11078  | 1.00E-168 | 331  | 341  | 97 -  | 618  | 949  | 5640   | 5980   |
| UN20075 | Rsa1.0_00012.1 | 810  | 222148 | 0         | 363  | 365  | 99 +  | 1    | 363  | 49610  | 49974  |
| UN20076 | Rsa1.0_04128.1 | 797  | 18927  | 0         | 596  | 597  | 99 -  | 200  | 795  | 9138   | 9734   |
| UN20077 | Rsa1.0_00964.1 | 986  | 316648 | 0         | 710  | 711  | 99 +  | 1    | 711  | 147683 | 148393 |
| UN20078 | Rsa1.0_07381.1 | 1059 | 9488   | 0         | 528  | 533  | 99 +  | 59   | 591  | 7918   | 8448   |
| UN20079 | Rsa1.0_00273.1 | 1138 | 326186 | 0         | 694  | 722  | 96 -  | 418  | 1138 | 6325   | 7040   |
| UN20080 | Rsa1.0_36749.1 | 896  | 613    | 1.00E-161 | 322  | 332  | 96 -  | 351  | 682  | 195    | 525    |
| UN20081 | Rsa1.0_08427.1 | 1346 | 7371   | 5.00E-78  | 400  | 475  | 84 -  | 875  | 1343 | 4494   | 4965   |
| UN20082 | Rsa1.0_03922.1 | 833  | 20060  | 0         | 357  | 361  | 98 -  | 475  | 833  | 12535  | 12895  |
| UN20083 | Rsa1.0_00321.1 | 934  | 95671  | 0         | 611  | 619  | 98 -  | 3    | 621  | 77384  | 78002  |

|         |                |      |        |           |      |      |       |      |      |        |        |
|---------|----------------|------|--------|-----------|------|------|-------|------|------|--------|--------|
| UN20084 | Rsa1.0.00492.1 | 1299 | 80178  | 0         | 376  | 380  | 98 +  | 3    | 380  | 69283  | 69662  |
| UN20085 | Rsa1.0.00166.1 | 2014 | 240912 | 0         | 548  | 572  | 95 +  | 142  | 704  | 218132 | 218703 |
| UN20086 | Rsa1.0.00886.1 | 1681 | 167350 | 0         | 1039 | 1086 | 95 +  | 607  | 1681 | 12242  | 13322  |
| UN20087 | Rsa1.0.01422.1 | 1336 | 46172  | 0         | 850  | 887  | 95 +  | 415  | 1299 | 1695   | 2574   |
| UN20088 | Rsa1.0.05943.1 | 1083 | 12158  | 0         | 627  | 644  | 97 +  | 437  | 1080 | 6907   | 7546   |
| UN20089 | Rsa1.0.01965.1 | 825  | 36698  | 0         | 519  | 535  | 97 +  | 291  | 821  | 25803  | 26328  |
| UN20090 | Rsa1.0.01001.1 | 1123 | 57077  | 0         | 382  | 396  | 96 +  | 1    | 396  | 23226  | 23621  |
| UN20091 | Rsa1.0.02585.1 | 1258 | 29865  | 0         | 506  | 511  | 99 +  | 22   | 529  | 25267  | 25776  |
| UN20092 | Rsa1.0.00057.1 | 1554 | 160473 | 0         | 447  | 448  | 99 +  | 1103 | 1550 | 143476 | 143923 |
| UN20093 | Rsa1.0.00630.1 | 1704 | 71281  | 0         | 1701 | 1703 | 99 -  | 1    | 1703 | 11911  | 13613  |
| UN20094 | Rsa1.0.07732.1 | 1017 | 8695   | 0         | 392  | 399  | 98 -  | 1    | 399  | 1258   | 1653   |
| UN20095 | Rsa1.0.02149.1 | 691  | 148330 | 0         | 664  | 669  | 99 +  | 23   | 691  | 28737  | 29405  |
| UN20096 | Rsa1.0.00586.1 | 1162 | 163802 | 0         | 713  | 730  | 97 +  | 425  | 1154 | 108888 | 109608 |
| UN20097 | Rsa1.0.00092.1 | 646  | 659932 | 1.00E-169 | 305  | 306  | 99 +  | 336  | 641  | 325333 | 325638 |
| UN20098 | Rsa1.0.03736.1 | 1949 | 21081  | 0         | 579  | 580  | 99 +  | 1370 | 1949 | 12289  | 12868  |
| UN20099 | Rsa1.0.16090.1 | 1113 | 2289   | 0         | 873  | 877  | 99 -  | 239  | 1113 | 802    | 1678   |
| UN20100 | Rsa1.0.05663.1 | 1267 | 13005  | 0         | 955  | 961  | 99 -  | 307  | 1267 | 8433   | 9391   |
| UN20101 | Rsa1.0.06872.1 | 852  | 10231  | 1.00E-124 | 226  | 226  | 100 - | 168  | 393  | 1961   | 2186   |
| UN20102 | Rsa1.0.02022.1 | 587  | 35923  | 0         | 571  | 591  | 96 -  | 3    | 587  | 18367  | 18955  |
| UN20103 | Rsa1.0.00731.1 | 987  | 66638  | 1.00E-124 | 233  | 234  | 99 +  | 726  | 958  | 12178  | 12411  |
| UN20104 | Rsa1.0.00243.1 | 770  | 103651 | 1.00E-125 | 324  | 351  | 92 +  | 424  | 770  | 23261  | 23605  |
| UN20105 | Rsa1.0.03994.1 | 1277 | 19659  | 0         | 354  | 356  | 99 +  | 784  | 1139 | 1755   | 2110   |
| UN20106 | Rsa1.0.01196.1 | 1007 | 51097  | 0         | 454  | 459  | 98 +  | 551  | 1007 | 2049   | 2506   |
| UN20107 | Rsa1.0.13520.1 | 823  | 4755   | 0         | 425  | 427  | 99 -  | 396  | 822  | 2615   | 3041   |
| UN20108 | Rsa1.0.01640.1 | 1387 | 41822  | 0         | 567  | 577  | 98 -  | 809  | 1385 | 36269  | 36839  |
| UN20109 | Rsa1.0.14712.1 | 1497 | 3134   | 0         | 574  | 585  | 98 +  | 912  | 1495 | 479    | 1059   |
| UN20110 | Rsa1.0.01116.1 | 1144 | 142088 | 1.00E-104 | 205  | 209  | 98 +  | 107  | 315  | 119247 | 119455 |
| UN20111 | Rsa1.0.01876.1 | 1642 | 37800  | 4.00E-94  | 209  | 220  | 95 -  | 3    | 222  | 32500  | 32719  |
| UN20112 | Rsa1.0.01310.1 | 1350 | 164719 | 0         | 1178 | 1208 | 97 -  | 145  | 1348 | 6052   | 7246   |
| UN20113 | Rsa1.0.00273.1 | 737  | 326186 | 0         | 449  | 451  | 99 +  | 1    | 450  | 113888 | 114338 |
| UN20114 | Rsa1.0.02803.1 | 1383 | 27715  | 0         | 455  | 483  | 94 -  | 384  | 866  | 2235   | 2717   |
| UN20115 | Rsa1.0.00706.1 | 1975 | 291570 | 0         | 920  | 965  | 95 -  | 504  | 1467 | 47603  | 48538  |
| UN20116 | Rsa1.0.00033.1 | 966  | 515811 | 0         | 346  | 346  | 100 + | 620  | 965  | 469201 | 469546 |
| UN20117 | Rsa1.0.06784.1 | 811  | 10359  | 1.00E-131 | 250  | 254  | 98 -  | 270  | 523  | 781    | 1034   |
| UN20118 | Rsa1.0.00201.1 | 1054 | 232851 | 0         | 440  | 463  | 95 -  | 1    | 460  | 39482  | 39943  |
| UN20119 | Rsa1.0.42777.1 | 1181 | 525    | 1.00E-127 | 241  | 244  | 98 +  | 938  | 1181 | 7      | 250    |
| UN20120 | Rsa1.0.00976.1 | 894  | 57809  | 0         | 383  | 394  | 97 -  | 3    | 390  | 8262   | 8655   |
| UN20121 | Rsa1.0.00016.1 | 1447 | 831256 | 1.00E-118 | 283  | 298  | 94 -  | 1001 | 1293 | 522411 | 522704 |
| UN20122 | Rsa1.0.14220.1 | 1699 | 3652   | 5.00E-97  | 220  | 230  | 95 -  | 1474 | 1698 | 199    | 427    |

|         |                |      |        |           |      |      |       |      |      |        |        |
|---------|----------------|------|--------|-----------|------|------|-------|------|------|--------|--------|
| UN20123 | Rsa1.0_16338.1 | 675  | 2190   | 1.00E-133 | 335  | 360  | 93 -  | 319  | 674  | 385    | 737    |
| UN20124 | Rsa1.0_02027.1 | 1139 | 35869  | 0         | 513  | 517  | 99 -  | 621  | 1136 | 8070   | 8586   |
| UN20125 | Rsa1.0_00435.1 | 1342 | 317579 | 0         | 405  | 406  | 99 -  | 936  | 1341 | 67237  | 67641  |
| UN20126 | Rsa1.0_07898.1 | 1311 | 8339   | 0         | 658  | 675  | 97 +  | 637  | 1311 | 6826   | 7498   |
| UN20127 | Rsa1.0_14459.1 | 977  | 3367   | 3.00E-81  | 157  | 158  | 99 -  | 282  | 439  | 267    | 424    |
| UN20128 | Rsa1.0_00018.1 | 1305 | 410899 | 0         | 510  | 541  | 94 +  | 768  | 1305 | 115333 | 115864 |
| UN20129 | Rsa1.0_02043.1 | 943  | 163754 | 0         | 907  | 940  | 96 +  | 5    | 943  | 157063 | 158000 |
| UN20130 | Rsa1.0_01951.1 | 646  | 36941  | 1.00E-165 | 317  | 324  | 97 -  | 1    | 324  | 13558  | 13878  |
| UN20131 | Rsa1.0_01196.1 | 2181 | 51097  | 0         | 990  | 1029 | 96 -  | 527  | 1538 | 2049   | 3069   |
| UN20132 | Rsa1.0_00218.1 | 1482 | 201480 | 0         | 481  | 485  | 99 +  | 912  | 1396 | 163732 | 164216 |
| UN20133 | Rsa1.0_01613.1 | 1132 | 182542 | 1.00E-150 | 333  | 348  | 95 +  | 1    | 343  | 148702 | 149047 |
| UN20134 | Rsa1.0_38612.1 | 954  | 583    | 0         | 343  | 347  | 98 -  | 588  | 934  | 1      | 347    |
| UN20135 | Rsa1.0_33873.1 | 969  | 669    | 0         | 642  | 661  | 97 +  | 309  | 968  | 1      | 658    |
| UN20136 | Rsa1.0_01466.1 | 828  | 45161  | 2.00E-69  | 143  | 146  | 97 +  | 480  | 625  | 28487  | 28632  |
| UN20137 | Rsa1.0_01425.1 | 1001 | 46136  | 0         | 364  | 372  | 97 -  | 628  | 999  | 34226  | 34597  |
| UN20138 | Rsa1.0_02148.1 | 430  | 34610  | 6.00E-84  | 176  | 182  | 96 -  | 1    | 182  | 23020  | 23201  |
| UN20139 | Rsa1.0_00505.1 | 628  | 79323  | 0         | 596  | 623  | 95 +  | 3    | 622  | 68284  | 68892  |
| UN20140 | Rsa1.0_00363.1 | 2162 | 90968  | 0         | 468  | 486  | 96 -  | 1234 | 1719 | 75475  | 75957  |
| UN20141 | Rsa1.0_05503.1 | 2464 | 13510  | 0         | 540  | 540  | 100 + | 1072 | 1611 | 2694   | 3233   |
| UN20142 | Rsa1.0_00017.1 | 1617 | 752458 | 1.00E-148 | 281  | 286  | 98 +  | 1070 | 1355 | 720938 | 721223 |
| UN20143 | Rsa1.0_05260.1 | 2045 | 14337  | 0         | 912  | 938  | 97 -  | 474  | 1405 | 3507   | 4442   |
| UN20144 | Rsa1.0_03529.1 | 1526 | 22277  | 0         | 937  | 1010 | 92 +  | 303  | 1312 | 15606  | 16615  |
| UN20145 | Rsa1.0_02358.1 | 875  | 32213  | 0         | 552  | 581  | 95 +  | 1    | 566  | 7245   | 7824   |
| UN20146 | Rsa1.0_00153.1 | 1442 | 192931 | 1.00E-173 | 388  | 409  | 94 +  | 1020 | 1421 | 24427  | 24833  |
| UN20147 | Rsa1.0_02278.1 | 1065 | 33085  | 1.00E-170 | 344  | 354  | 97 +  | 3    | 352  | 18587  | 18939  |
| UN20148 | Rsa1.0_02807.1 | 1303 | 27680  | 0         | 496  | 522  | 95 -  | 782  | 1303 | 4944   | 5460   |
| UN20149 | Rsa1.0_00080.1 | 1280 | 190437 | 0         | 640  | 664  | 96 -  | 21   | 679  | 96870  | 97528  |
| UN20150 | Rsa1.0_04284.1 | 1254 | 18085  | 0         | 656  | 658  | 99 +  | 595  | 1252 | 10452  | 11108  |
| UN20151 | Rsa1.0_04126.1 | 1982 | 18939  | 0         | 1027 | 1088 | 94 -  | 900  | 1981 | 12033  | 13103  |
| UN20152 | Rsa1.0_08391.1 | 1252 | 7433   | 3.00E-17  | 102  | 119  | 85 -  | 846  | 964  | 6466   | 6583   |
| UN20153 | Rsa1.0_00522.1 | 1505 | 78103  | 0         | 659  | 683  | 96 +  | 794  | 1471 | 51939  | 52621  |
| UN20154 | Rsa1.0_00254.1 | 576  | 102600 | 1.00E-118 | 242  | 250  | 96 +  | 330  | 576  | 84257  | 84506  |
| UN20155 | Rsa1.0_00087.1 | 1955 | 761073 | 0         | 485  | 490  | 98 +  | 818  | 1307 | 558676 | 559165 |
| UN20156 | Rsa1.0_00087.1 | 1178 | 761073 | 0         | 414  | 427  | 96 +  | 1    | 423  | 615081 | 615505 |
| UN20157 | Rsa1.0_01282.1 | 1541 | 49304  | 0         | 865  | 901  | 96 +  | 158  | 1058 | 30305  | 31204  |
| UN20158 | Rsa1.0_00078.1 | 1177 | 175053 | 0         | 501  | 509  | 98 -  | 73   | 581  | 41372  | 41880  |
| UN20159 | Rsa1.0_00200.1 | 1222 | 162016 | 0         | 382  | 388  | 98 +  | 2    | 387  | 17328  | 17711  |
| UN20160 | Rsa1.0_00089.1 | 995  | 406142 | 1.00E-139 | 277  | 284  | 97 -  | 703  | 985  | 162053 | 162336 |
| UN20161 | Rsa1.0_00080.1 | 1512 | 190437 | 0         | 1289 | 1351 | 95 -  | 164  | 1511 | 104347 | 105677 |

|         |                |      |        |           |      |      |       |      |      |        |        |
|---------|----------------|------|--------|-----------|------|------|-------|------|------|--------|--------|
| UN20162 | Rsa1.0_00473.1 | 1320 | 212204 | 0         | 694  | 736  | 94 -  | 38   | 773  | 76768  | 77482  |
| UN20163 | Rsa1.0_00180.1 | 1082 | 114581 | 0         | 377  | 379  | 99 +  | 704  | 1082 | 36186  | 36563  |
| UN20164 | Rsa1.0_05067.1 | 1257 | 14941  | 0         | 568  | 568  | 100 - | 690  | 1257 | 5713   | 6280   |
| UN20165 | Rsa1.0_00493.1 | 1358 | 80007  | 0         | 531  | 545  | 97 -  | 248  | 789  | 6139   | 6682   |
| UN20166 | Rsa1.0_02248.1 | 1046 | 33414  | 0         | 807  | 825  | 97 -  | 1    | 815  | 25112  | 25936  |
| UN20167 | Rsa1.0_00296.1 | 1197 | 97854  | 0         | 590  | 593  | 99 -  | 1    | 592  | 17737  | 18329  |
| UN20168 | Rsa1.0_00003.1 | 1502 | 340054 | 0         | 477  | 482  | 98 -  | 1    | 482  | 2637   | 3118   |
| UN20169 | Rsa1.0_05964.1 | 983  | 12087  | 0         | 410  | 412  | 99 +  | 22   | 433  | 6226   | 6636   |
| UN20170 | Rsa1.0_01895.1 | 1370 | 37512  | 0         | 1047 | 1066 | 98 +  | 305  | 1370 | 23772  | 24824  |
| UN20171 | Rsa1.0_00631.1 | 1089 | 71277  | 0         | 668  | 675  | 98 -  | 1    | 675  | 48132  | 48806  |
| UN20172 | Rsa1.0_03887.1 | 821  | 20247  | 0         | 384  | 394  | 97 -  | 3    | 396  | 4347   | 4740   |
| UN20173 | Rsa1.0_01467.1 | 1409 | 45161  | 1.00E-149 | 268  | 268  | 100 - | 1142 | 1409 | 21127  | 21394  |
| UN20174 | Rsa1.0_00124.1 | 1548 | 262503 | 0         | 755  | 801  | 94 -  | 748  | 1548 | 64180  | 64979  |
| UN20175 | Rsa1.0_00131.1 | 1026 | 432233 | 2.00E-95  | 181  | 182  | 99 +  | 138  | 319  | 398754 | 398935 |
| UN20176 | Rsa1.0_00710.1 | 2480 | 67325  | 0         | 1190 | 1233 | 96 -  | 498  | 1722 | 11261  | 12490  |
| UN20177 | Rsa1.0_07849.1 | 1120 | 8425   | 0         | 365  | 375  | 97 -  | 3    | 377  | 7729   | 8097   |
| UN20178 | Rsa1.0_01585.1 | 948  | 42806  | 1.00E-164 | 300  | 302  | 99 -  | 645  | 946  | 4052   | 4353   |
| UN20179 | Rsa1.0_08538.1 | 1017 | 7220   | 0         | 387  | 387  | 100 + | 1    | 387  | 2069   | 2455   |
| UN20180 | Rsa1.0_02270.1 | 796  | 249821 | 0         | 399  | 403  | 99 +  | 3    | 405  | 6854   | 7256   |
| UN20181 | Rsa1.0_00315.1 | 928  | 96426  | 0         | 923  | 928  | 99 +  | 3    | 928  | 75131  | 76058  |
| UN20182 | Rsa1.0_00017.1 | 1064 | 752458 | 0         | 534  | 535  | 99 -  | 1    | 535  | 494221 | 494754 |
| UN20183 | Rsa1.0_00009.1 | 818  | 232558 | 0         | 798  | 806  | 99 -  | 12   | 817  | 17452  | 18256  |
| UN20184 | Rsa1.0_02777.1 | 833  | 27986  | 1.00E-149 | 292  | 300  | 97 +  | 527  | 826  | 25025  | 25324  |
| UN20185 | Rsa1.0_08154.1 | 1378 | 7823   | 0         | 490  | 493  | 99 +  | 16   | 508  | 769    | 1261   |
| UN20186 | Rsa1.0_00871.1 | 908  | 61539  | 1.00E-170 | 320  | 323  | 99 +  | 3    | 322  | 8060   | 8382   |
| UN20187 | Rsa1.0_06209.1 | 1141 | 11484  | 0         | 433  | 459  | 94 +  | 30   | 488  | 2267   | 2719   |
| UN20188 | Rsa1.0_06590.1 | 1324 | 10706  | 0         | 412  | 432  | 95 +  | 307  | 738  | 2006   | 2428   |
| UN20189 | Rsa1.0_00059.1 | 904  | 159650 | 0         | 842  | 888  | 94 -  | 1    | 888  | 101521 | 102394 |
| UN20190 | Rsa1.0_00645.1 | 1070 | 189716 | 0         | 715  | 727  | 98 +  | 3    | 729  | 124345 | 125069 |
| UN20191 | Rsa1.0_04760.1 | 1380 | 16105  | 0         | 1313 | 1374 | 95 +  | 19   | 1378 | 4184   | 5548   |
| UN20192 | Rsa1.0_02769.1 | 1389 | 28107  | 1.00E-173 | 355  | 367  | 96 +  | 4    | 366  | 24473  | 24839  |
| UN20193 | Rsa1.0_00821.1 | 810  | 62891  | 0         | 454  | 468  | 97 +  | 1    | 467  | 46885  | 47351  |
| UN20194 | Rsa1.0_01292.1 | 897  | 175783 | 0         | 632  | 645  | 97 -  | 254  | 897  | 144723 | 145360 |
| UN20195 | Rsa1.0_00628.1 | 722  | 214360 | 0         | 366  | 373  | 98 +  | 352  | 722  | 25502  | 25872  |
| UN20196 | Rsa1.0_05494.1 | 1290 | 13547  | 1.00E-132 | 248  | 251  | 98 -  | 883  | 1133 | 3338   | 3588   |
| UN20197 | Rsa1.0_01865.1 | 1033 | 37992  | 2.00E-92  | 182  | 185  | 98 +  | 464  | 648  | 32692  | 32876  |
| UN20198 | Rsa1.0_00654.1 | 1400 | 70012  | 0         | 1218 | 1305 | 93 -  | 3    | 1307 | 17774  | 19078  |
| UN20199 | Rsa1.0_00810.1 | 1265 | 63289  | 0         | 706  | 706  | 100 - | 7    | 712  | 27734  | 28439  |
| UN20200 | Rsa1.0_01405.1 | 1210 | 46445  | 0         | 1064 | 1075 | 98 -  | 1    | 1075 | 31229  | 32303  |



|         |                |      |        |           |      |      |       |      |      |        |        |
|---------|----------------|------|--------|-----------|------|------|-------|------|------|--------|--------|
| UN20201 | Rsa1.0.05633.1 | 732  | 13118  | 1.00E-137 | 284  | 292  | 97 +  | 444  | 732  | 4032   | 4323   |
| UN20202 | Rsa1.0.02884.1 | 1275 | 27034  | 0         | 1049 | 1080 | 97 -  | 203  | 1271 | 7606   | 8685   |
| UN20203 | Rsa1.0.04279.1 | 1150 | 18113  | 0         | 617  | 629  | 98 -  | 523  | 1148 | 4744   | 5372   |
| UN20204 | Rsa1.0.00949.1 | 1993 | 58549  | 0         | 455  | 457  | 99 +  | 167  | 623  | 9061   | 9516   |
| UN20205 | Rsa1.0.02026.1 | 1334 | 35896  | 1.00E-133 | 241  | 241  | 100 + | 1    | 241  | 12457  | 12697  |
| UN20206 | Rsa1.0.01380.1 | 1177 | 155003 | 0         | 1151 | 1151 | 100 - | 1    | 1151 | 8885   | 10035  |
| UN20207 | Rsa1.0.04627.1 | 1484 | 16604  | 0         | 345  | 347  | 99 +  | 3    | 349  | 1446   | 1792   |
| UN20208 | Rsa1.0.02221.1 | 1005 | 33796  | 0         | 524  | 540  | 97 +  | 464  | 1003 | 18658  | 19197  |
| UN20209 | Rsa1.0.00108.1 | 1251 | 478491 | 1.00E-133 | 330  | 351  | 94 -  | 909  | 1251 | 67319  | 67663  |
| UN20210 | Rsa1.0.38829.1 | 406  | 579    | 2.00E-86  | 190  | 198  | 95 +  | 209  | 406  | 32     | 228    |
| UN20211 | Rsa1.0.01467.1 | 1599 | 45161  | 1.00E-142 | 304  | 316  | 96 +  | 1234 | 1548 | 15493  | 15805  |
| UN20212 | Rsa1.0.01443.1 | 1264 | 45705  | 1.00E-179 | 325  | 326  | 99 -  | 6    | 331  | 34149  | 34473  |
| UN20213 | Rsa1.0.00994.1 | 833  | 165189 | 0         | 608  | 615  | 98 -  | 209  | 823  | 135949 | 136563 |
| UN20214 | Rsa1.0.00040.1 | 1172 | 324196 | 0         | 1146 | 1184 | 96 +  | 2    | 1171 | 128087 | 129261 |
| UN20215 | Rsa1.0.00008.1 | 664  | 358124 | 0         | 383  | 391  | 97 +  | 1    | 391  | 194895 | 195277 |
| UN20216 | Rsa1.0.00039.1 | 1139 | 296927 | 1.00E-137 | 261  | 264  | 98 -  | 874  | 1137 | 207518 | 207780 |
| UN20217 | #              | #    | #      | #         | #    | #    | #     | #    | #    | #      | #      |
| UN20218 | Rsa1.0.18563.1 | 1284 | 1574   | 1.00E-133 | 342  | 371  | 92 +  | 913  | 1280 | 528    | 889    |
| UN20219 | Rsa1.0.07757.1 | 994  | 8633   | 0         | 598  | 646  | 92 -  | 352  | 973  | 867    | 1512   |
| UN20220 | Rsa1.0.04573.1 | 1614 | 16789  | 0         | 377  | 378  | 99 +  | 1237 | 1614 | 6126   | 6503   |
| UN20221 | Rsa1.0.00034.1 | 786  | 260119 | 0         | 784  | 784  | 100 + | 1    | 784  | 32834  | 33617  |
| UN20222 | Rsa1.0.01417.1 | 1575 | 46252  | 0         | 549  | 552  | 99 -  | 2    | 552  | 40509  | 41060  |
| UN20223 | Rsa1.0.21221.1 | 2161 | 1224   | 0         | 1044 | 1066 | 97 -  | 684  | 1744 | 80     | 1144   |
| UN20224 | Rsa1.0.00678.1 | 1295 | 193163 | 0         | 1291 | 1293 | 99 -  | 3    | 1295 | 139124 | 140416 |
| UN20225 | Rsa1.0.11741.1 | 1518 | 5423   | 0         | 464  | 500  | 92 +  | 516  | 1015 | 4597   | 5096   |
| UN20226 | Rsa1.0.00130.1 | 1626 | 125737 | 0         | 806  | 823  | 97 -  | 3    | 823  | 88366  | 89184  |
| UN20227 | Rsa1.0.03499.1 | 1337 | 22462  | 0         | 448  | 448  | 100 - | 890  | 1337 | 21261  | 21708  |
| UN20228 | Rsa1.0.02710.1 | 1515 | 28492  | 1.00E-133 | 396  | 443  | 89 +  | 1084 | 1498 | 21164  | 21602  |
| UN20229 | Rsa1.0.00435.1 | 1304 | 317579 | 0         | 495  | 496  | 99 -  | 5    | 500  | 51989  | 52484  |
| UN20230 | Rsa1.0.00997.1 | 2127 | 57190  | 0         | 1034 | 1041 | 99 -  | 287  | 1326 | 25816  | 26856  |
| UN20231 | Rsa1.0.00960.1 | 1182 | 58199  | 0         | 671  | 676  | 99 -  | 507  | 1182 | 45922  | 46597  |
| UN20232 | Rsa1.0.00326.1 | 1161 | 171955 | 1.00E-160 | 327  | 340  | 96 +  | 3    | 333  | 19274  | 19613  |
| UN20233 | Rsa1.0.00481.1 | 949  | 81316  | 0         | 943  | 947  | 99 -  | 1    | 947  | 27793  | 28736  |
| UN20234 | Rsa1.0.10896.1 | 1349 | 5685   | 0         | 353  | 353  | 100 - | 997  | 1349 | 4758   | 5110   |
| UN20235 | Rsa1.0.00040.1 | 1389 | 324196 | 0         | 559  | 560  | 99 +  | 831  | 1389 | 114552 | 115111 |
| UN20236 | Rsa1.0.00497.1 | 851  | 79830  | 0         | 323  | 323  | 100 + | 508  | 830  | 54334  | 54656  |
| UN20237 | Rsa1.0.00991.1 | 1190 | 143101 | 0         | 522  | 545  | 95 +  | 649  | 1190 | 34646  | 35183  |
| UN20238 | Rsa1.0.00201.1 | 516  | 232851 | 3.00E-86  | 169  | 170  | 99 -  | 5    | 174  | 204714 | 204882 |
| UN20239 | Rsa1.0.00124.1 | 1256 | 262503 | 0         | 640  | 647  | 98 +  | 610  | 1256 | 255084 | 255726 |

|         |                |      |        |           |      |      |       |      |      |        |        |
|---------|----------------|------|--------|-----------|------|------|-------|------|------|--------|--------|
| UN20240 | Rsa1.0.06130.1 | 1913 | 11667  | 0         | 373  | 380  | 98 -  | 1537 | 1911 | 5676   | 6055   |
| UN20241 | Rsa1.0.00016.1 | 1792 | 831256 | 0         | 453  | 462  | 98 -  | 914  | 1375 | 569300 | 569761 |
| UN20242 | Rsa1.0.02266.1 | 1043 | 33195  | 0         | 398  | 406  | 98 +  | 641  | 1043 | 13845  | 14250  |
| UN20243 | Rsa1.0.17187.1 | 556  | 1897   | 0         | 552  | 554  | 99 +  | 4    | 556  | 1093   | 1646   |
| UN20244 | Rsa1.0.12005.1 | 1441 | 5344   | 0         | 750  | 814  | 92 -  | 630  | 1433 | 4334   | 5147   |
| UN20245 | Rsa1.0.01635.1 | 682  | 41865  | 0         | 516  | 547  | 94 -  | 144  | 682  | 7267   | 7801   |
| UN20246 | Rsa1.0.00632.1 | 477  | 183777 | 2.00E-74  | 142  | 142  | 100 - | 336  | 477  | 64161  | 64302  |
| UN20247 | Rsa1.0.15089.1 | 1101 | 2840   | 0         | 702  | 703  | 99 +  | 397  | 1099 | 303    | 1004   |
| UN20248 | Rsa1.0.16044.1 | 1052 | 2308   | 0         | 1046 | 1049 | 99 -  | 2    | 1050 | 861    | 1909   |
| UN20249 | Rsa1.0.00427.1 | 1210 | 189678 | 0         | 457  | 462  | 98 +  | 11   | 471  | 182487 | 182948 |
| UN20250 | Rsa1.0.03245.1 | 987  | 24385  | 0         | 364  | 365  | 99 +  | 500  | 864  | 23943  | 24307  |
| UN20251 | Rsa1.0.03416.1 | 1862 | 23112  | 0         | 505  | 564  | 89 +  | 616  | 1178 | 6161   | 6710   |
| UN20252 | Rsa1.0.18971.1 | 929  | 1502   | 0         | 353  | 353  | 100 - | 576  | 928  | 612    | 964    |
| UN20253 | Rsa1.0.03364.1 | 944  | 23446  | 0         | 516  | 516  | 100 - | 424  | 939  | 19984  | 20499  |
| UN20254 | Rsa1.0.00053.1 | 1215 | 263459 | 1.00E-166 | 303  | 305  | 99 +  | 644  | 948  | 100637 | 100941 |
| UN20255 | Rsa1.0.02713.1 | 1595 | 28470  | 0         | 564  | 583  | 96 +  | 1013 | 1594 | 27348  | 27930  |
| UN20256 | Rsa1.0.00108.1 | 1121 | 478491 | 1.00E-178 | 421  | 459  | 91 -  | 647  | 1081 | 285741 | 286199 |
| UN20257 | Rsa1.0.05776.1 | 663  | 12664  | 1.00E-134 | 267  | 273  | 97 -  | 1    | 269  | 11365  | 11637  |
| UN20258 | Rsa1.0.00062.1 | 485  | 299291 | 0         | 473  | 483  | 97 +  | 4    | 485  | 298508 | 298990 |
| UN20259 | Rsa1.0.05215.1 | 2712 | 14476  | 1.00E-159 | 286  | 286  | 100 - | 1611 | 1896 | 9243   | 9528   |
| UN20260 | Rsa1.0.00205.1 | 759  | 193401 | 1.00E-149 | 304  | 315  | 96 -  | 444  | 758  | 137532 | 137844 |
| UN20261 | Rsa1.0.03485.1 | 1016 | 22606  | 0         | 620  | 634  | 97 -  | 383  | 1016 | 18689  | 19319  |
| UN20262 | Rsa1.0.00552.1 | 628  | 206757 | 4.00E-95  | 261  | 288  | 90 +  | 51   | 329  | 72818  | 73102  |
| UN20263 | Rsa1.0.00243.1 | 1026 | 103651 | 1.00E-147 | 265  | 265  | 100 + | 756  | 1020 | 12271  | 12535  |
| UN20264 | Rsa1.0.01638.1 | 1426 | 41857  | 1.00E-170 | 330  | 339  | 97 -  | 402  | 740  | 36262  | 36600  |
| UN20265 | Rsa1.0.00855.1 | 1787 | 62047  | 0         | 752  | 753  | 99 +  | 3    | 754  | 42806  | 43558  |
| UN20266 | Rsa1.0.04266.1 | 1113 | 18195  | 2.00E-21  | 171  | 208  | 82 +  | 41   | 236  | 13335  | 13540  |
| UN20267 | Rsa1.0.02284.1 | 1230 | 33011  | 0         | 736  | 737  | 99 -  | 1    | 737  | 13022  | 13758  |
| UN20268 | Rsa1.0.02378.1 | 840  | 31991  | 0         | 793  | 853  | 92 -  | 4    | 837  | 1312   | 2159   |
| UN20269 | Rsa1.0.00020.1 | 765  | 283099 | 0         | 748  | 753  | 99 +  | 4    | 756  | 277907 | 278659 |
| UN20270 | Rsa1.0.04045.1 | 1646 | 19403  | 0         | 706  | 716  | 98 -  | 3    | 718  | 8280   | 8986   |
| UN20271 | Rsa1.0.00307.1 | 645  | 199003 | 1.00E-159 | 304  | 308  | 98 -  | 333  | 637  | 157783 | 158090 |
| UN20272 | Rsa1.0.00055.1 | 707  | 520193 | 1.00E-168 | 321  | 328  | 97 +  | 364  | 691  | 843    | 1170   |
| UN20273 | Rsa1.0.05741.1 | 635  | 12773  | 0         | 386  | 399  | 96 -  | 237  | 635  | 3037   | 3431   |
| UN20274 | Rsa1.0.07327.1 | 868  | 9549   | 0         | 420  | 429  | 97 +  | 3    | 431  | 3648   | 4076   |
| UN20275 | Rsa1.0.02212.1 | 687  | 33840  | 1.00E-131 | 240  | 241  | 99 +  | 2    | 242  | 29404  | 29644  |
| UN20276 | Rsa1.0.00589.1 | 612  | 209965 | 0         | 605  | 606  | 99 +  | 3    | 607  | 203886 | 204491 |
| UN20277 | Rsa1.0.02526.1 | 1521 | 30479  | 0         | 410  | 410  | 100 + | 159  | 568  | 13249  | 13658  |
| UN20278 | Rsa1.0.00358.1 | 1087 | 91293  | 0         | 403  | 403  | 100 - | 2    | 404  | 1111   | 1513   |

|         |                |      |        |           |      |      |       |      |      |        |        |
|---------|----------------|------|--------|-----------|------|------|-------|------|------|--------|--------|
| UN20279 | Rsa1.0.03594.1 | 1146 | 21868  | 0         | 396  | 401  | 98 -  | 4    | 404  | 12937  | 13337  |
| UN20280 | Rsa1.0.04066.1 | 841  | 19262  | 0         | 370  | 373  | 99 +  | 3    | 375  | 7121   | 7493   |
| UN20281 | Rsa1.0.00169.1 | 1727 | 274298 | 0         | 1004 | 1019 | 98 +  | 710  | 1727 | 94474  | 95487  |
| UN20282 | Rsa1.0.00178.1 | 1297 | 114861 | 1.00E-116 | 230  | 235  | 97 -  | 1063 | 1297 | 30349  | 30580  |
| UN20283 | Rsa1.0.01061.1 | 996  | 55349  | 0         | 437  | 445  | 98 -  | 554  | 996  | 21805  | 22249  |
| UN20284 | Rsa1.0.00248.1 | 1271 | 163568 | 1.00E-161 | 292  | 293  | 99 +  | 4    | 296  | 52414  | 52706  |
| UN20285 | Rsa1.0.00608.1 | 1079 | 172672 | 0         | 746  | 792  | 94 +  | 244  | 1025 | 3169   | 3956   |
| UN20286 | Rsa1.0.01870.1 | 1572 | 37919  | 1.00E-142 | 357  | 386  | 92 -  | 1199 | 1570 | 14043  | 14425  |
| UN20287 | Rsa1.0.01104.1 | 1142 | 285480 | 0         | 456  | 456  | 100 + | 686  | 1141 | 35015  | 35470  |
| UN20288 | Rsa1.0.00006.1 | 1166 | 396176 | 0         | 353  | 362  | 97 +  | 805  | 1166 | 223817 | 224175 |
| UN20289 | Rsa1.0.02722.1 | 1078 | 28417  | 0         | 422  | 425  | 99 -  | 654  | 1078 | 266    | 687    |
| UN20290 | Rsa1.0.00052.1 | 865  | 162771 | 0         | 522  | 528  | 98 +  | 3    | 530  | 52240  | 52767  |
| UN20291 | Rsa1.0.01969.1 | 1301 | 153351 | 1.00E-153 | 275  | 275  | 100 - | 202  | 476  | 13008  | 13282  |
| UN20292 | Rsa1.0.01071.1 | 1194 | 166914 | 0         | 384  | 398  | 96 -  | 795  | 1190 | 14011  | 14407  |
| UN20293 | Rsa1.0.01012.1 | 585  | 56836  | 1.00E-175 | 311  | 311  | 100 + | 274  | 584  | 40013  | 40323  |
| UN20294 | Rsa1.0.00201.1 | 1052 | 232851 | 0         | 458  | 458  | 100 + | 595  | 1052 | 39482  | 39939  |
| UN20295 | Rsa1.0.02931.1 | 724  | 26654  | 1.00E-112 | 205  | 205  | 100 - | 516  | 720  | 1064   | 1268   |
| UN20296 | Rsa1.0.00596.1 | 807  | 73578  | 6.00E-73  | 150  | 152  | 98 +  | 602  | 752  | 22940  | 23091  |
| UN20297 | Rsa1.0.00148.1 | 1173 | 120234 | 0         | 376  | 378  | 99 -  | 580  | 957  | 11968  | 12345  |
| UN20298 | Rsa1.0.00071.1 | 1173 | 345714 | 0         | 374  | 382  | 97 -  | 349  | 730  | 311950 | 312331 |
| UN20299 | Rsa1.0.09588.1 | 925  | 6267   | 1.00E-121 | 230  | 233  | 98 +  | 314  | 546  | 5405   | 5637   |
| UN20300 | Rsa1.0.37869.1 | 1655 | 595    | 0         | 585  | 596  | 98 +  | 751  | 1346 | 1      | 595    |
| UN20301 | Rsa1.0.00392.1 | 671  | 88523  | 0         | 350  | 352  | 99 +  | 3    | 354  | 30865  | 31216  |
| UN20302 | Rsa1.0.00329.1 | 1258 | 222544 | 0         | 593  | 616  | 96 -  | 644  | 1258 | 193125 | 193732 |
| UN20303 | Rsa1.0.00221.1 | 982  | 106972 | 0         | 489  | 498  | 98 +  | 491  | 980  | 23856  | 24352  |
| UN20304 | Rsa1.0.01789.1 | 1019 | 39250  | 0         | 500  | 522  | 95 +  | 302  | 823  | 9785   | 10306  |
| UN20305 | Rsa1.0.00679.1 | 1515 | 68971  | 1.00E-168 | 312  | 316  | 98 +  | 627  | 942  | 55747  | 56062  |
| UN20306 | Rsa1.0.00018.1 | 1092 | 410899 | 1.00E-159 | 298  | 301  | 99 +  | 792  | 1091 | 262610 | 262910 |
| UN20307 | Rsa1.0.00772.1 | 1195 | 64856  | 1.00E-164 | 319  | 327  | 97 +  | 872  | 1195 | 7619   | 7945   |
| UN20308 | Rsa1.0.01016.1 | 1168 | 181422 | 0         | 507  | 508  | 99 +  | 454  | 961  | 18736  | 19243  |
| UN20309 | Rsa1.0.00380.1 | 749  | 89748  | 0         | 468  | 475  | 98 -  | 276  | 749  | 58228  | 58701  |
| UN20310 | Rsa1.0.02374.1 | 1506 | 32043  | 0         | 449  | 449  | 100 + | 1    | 449  | 25543  | 25991  |
| UN20311 | Rsa1.0.00199.1 | 1769 | 249604 | 0         | 1734 | 1765 | 98 -  | 1    | 1765 | 180958 | 182718 |
| UN20312 | Rsa1.0.05326.1 | 1899 | 14139  | 0         | 628  | 633  | 99 -  | 736  | 1367 | 2834   | 3466   |
| UN20313 | Rsa1.0.00480.1 | 825  | 81325  | 0         | 479  | 480  | 99 +  | 346  | 825  | 11691  | 12170  |
| UN20314 | Rsa1.0.00179.1 | 1229 | 393324 | 0         | 509  | 517  | 98 +  | 658  | 1169 | 333811 | 334326 |
| UN20315 | Rsa1.0.00144.1 | 1940 | 120708 | 1.00E-164 | 368  | 390  | 94 +  | 1521 | 1907 | 68637  | 69018  |
| UN20316 | Rsa1.0.03826.1 | 1295 | 20614  | 0         | 740  | 761  | 97 +  | 1    | 743  | 3379   | 4139   |
| UN20317 | Rsa1.0.14974.1 | 939  | 2919   | 0         | 406  | 407  | 99 -  | 130  | 536  | 2513   | 2919   |

|         |                |      |        |           |      |      |       |      |      |        |        |
|---------|----------------|------|--------|-----------|------|------|-------|------|------|--------|--------|
| UN20318 | Rsa1.0.00167.1 | 1277 | 116000 | 0         | 594  | 599  | 99 -  | 87   | 685  | 46321  | 46919  |
| UN20319 | Rsa1.0.01396.1 | 945  | 151624 | 1.00E-139 | 298  | 313  | 95 -  | 1    | 307  | 105146 | 105455 |
| UN20320 | Rsa1.0.00136.1 | 1336 | 122464 | 0         | 607  | 657  | 92 -  | 373  | 1024 | 81116  | 81754  |
| UN20321 | Rsa1.0.01963.1 | 1145 | 36719  | 0         | 451  | 476  | 94 +  | 356  | 830  | 19722  | 20197  |
| UN20322 | Rsa1.0.00483.1 | 969  | 81102  | 1.00E-163 | 387  | 412  | 93 -  | 1    | 405  | 51013  | 51417  |
| UN20323 | Rsa1.0.04426.1 | 723  | 17399  | 1.00E-101 | 205  | 211  | 97 +  | 510  | 720  | 14213  | 14423  |
| UN20324 | Rsa1.0.02923.1 | 777  | 26736  | 0         | 359  | 362  | 99 -  | 416  | 777  | 15743  | 16101  |
| UN20325 | Rsa1.0.22508.1 | 561  | 1115   | 1.00E-143 | 285  | 292  | 97 +  | 151  | 439  | 815    | 1105   |
| UN20326 | Rsa1.0.02140.1 | 1205 | 34681  | 0         | 619  | 627  | 98 +  | 3    | 626  | 7088   | 7714   |
| UN20327 | Rsa1.0.00773.1 | 1004 | 64839  | 1.00E-130 | 303  | 322  | 94 -  | 667  | 981  | 10122  | 10440  |
| UN20328 | Rsa1.0.01583.1 | 981  | 156297 | 0         | 973  | 977  | 99 +  | 6    | 981  | 150926 | 151902 |
| UN20329 | Rsa1.0.04610.1 | 814  | 16653  | 0         | 354  | 354  | 100 - | 461  | 814  | 173    | 526    |
| UN20330 | Rsa1.0.02244.1 | 755  | 33494  | 0         | 416  | 417  | 99 +  | 3    | 418  | 10210  | 10626  |
| UN20331 | Rsa1.0.00133.1 | 1098 | 123768 | 1.00E-154 | 301  | 309  | 97 -  | 115  | 423  | 11639  | 11947  |
| UN20332 | Rsa1.0.00123.1 | 1345 | 325650 | 2.33E-156 | 266  | 267  | 99 +  | 620  | 886  | 64895  | 65161  |
| UN20333 | Rsa1.0.06563.1 | 595  | 10765  | 2.00E-93  | 224  | 237  | 94 +  | 361  | 595  | 863    | 1097   |
| UN20334 | Rsa1.0.00240.1 | 1301 | 104175 | 0         | 579  | 579  | 100 + | 713  | 1291 | 92182  | 92760  |
| UN20335 | Rsa1.0.00098.1 | 746  | 349239 | 0         | 712  | 737  | 96 +  | 16   | 746  | 317468 | 318196 |
| UN20336 | Rsa1.0.00206.1 | 1198 | 109040 | 0         | 679  | 687  | 98 -  | 512  | 1198 | 72454  | 73138  |
| UN20337 | Rsa1.0.06794.1 | 728  | 10347  | 0         | 660  | 684  | 96 +  | 45   | 728  | 369    | 1038   |
| UN20338 | Rsa1.0.01134.1 | 695  | 52829  | 0         | 675  | 694  | 97 -  | 3    | 694  | 51653  | 52341  |
| UN20339 | Rsa1.0.20045.1 | 1122 | 1348   | 0         | 593  | 641  | 92 +  | 196  | 836  | 720    | 1346   |
| UN20340 | Rsa1.0.00369.1 | 1019 | 266462 | 0         | 416  | 420  | 99 +  | 259  | 678  | 192827 | 193246 |
| UN20341 | Rsa1.0.00071.1 | 791  | 345714 | 0         | 692  | 732  | 94 -  | 60   | 786  | 214861 | 215579 |
| UN20342 | Rsa1.0.03498.1 | 1618 | 22480  | 0         | 1006 | 1013 | 99 -  | 5    | 1013 | 15917  | 16927  |
| UN20343 | Rsa1.0.03122.1 | 1114 | 25207  | 0         | 484  | 486  | 99 +  | 3    | 488  | 21600  | 22085  |
| UN20344 | Rsa1.0.10740.1 | 1222 | 5737   | 0         | 442  | 448  | 98 -  | 3    | 450  | 1766   | 2210   |
| UN20345 | Rsa1.0.05293.1 | 1277 | 14237  | 1.00E-143 | 271  | 275  | 98 -  | 3    | 277  | 11059  | 11333  |
| UN20346 | Rsa1.0.00869.1 | 713  | 61627  | 0         | 416  | 433  | 96 -  | 276  | 700  | 35875  | 36307  |
| UN20347 | Rsa1.0.03476.1 | 1456 | 22646  | 0         | 1391 | 1392 | 99 +  | 65   | 1456 | 12620  | 14011  |
| UN20348 | Rsa1.0.01442.1 | 826  | 45776  | 0         | 498  | 515  | 96 -  | 38   | 552  | 25486  | 26000  |
| UN20349 | Rsa1.0.01336.1 | 1013 | 47853  | 0         | 674  | 686  | 98 +  | 220  | 905  | 39106  | 39791  |
| UN20350 | Rsa1.0.00369.1 | 1027 | 266462 | 0         | 415  | 419  | 99 +  | 275  | 693  | 192827 | 193245 |
| UN20351 | Rsa1.0.01031.1 | 896  | 56236  | 0         | 444  | 466  | 95 -  | 434  | 896  | 42222  | 42685  |
| UN20352 | Rsa1.0.00123.1 | 1473 | 325650 | 1.00E-116 | 225  | 229  | 98 +  | 344  | 572  | 234211 | 234439 |
| UN20353 | Rsa1.0.03697.1 | 1461 | 21304  | 0         | 403  | 425  | 94 -  | 1045 | 1461 | 16457  | 16881  |
| UN20354 | Rsa1.0.00205.1 | 857  | 193401 | 1.00E-132 | 292  | 305  | 95 -  | 555  | 857  | 14414  | 14714  |
| UN20355 | Rsa1.0.00641.1 | 1680 | 208241 | 0         | 771  | 788  | 97 +  | 155  | 942  | 5190   | 5977   |
| UN20356 | Rsa1.0.01281.1 | 1347 | 49313  | 0         | 453  | 472  | 95 +  | 894  | 1347 | 12897  | 13368  |

|         |                |      |        |           |      |      |       |      |      |        |        |
|---------|----------------|------|--------|-----------|------|------|-------|------|------|--------|--------|
| UN20357 | Rsa1.0.01484.1 | 1419 | 44806  | 0         | 1114 | 1166 | 95 +  | 250  | 1415 | 28137  | 29271  |
| UN20358 | Rsa1.0.00340.1 | 2142 | 305782 | 0         | 854  | 873  | 97 +  | 1273 | 2140 | 5978   | 6849   |
| UN20359 | Rsa1.0.17779.1 | 978  | 1742   | 0         | 826  | 843  | 97 +  | 108  | 946  | 900    | 1742   |
| UN20360 | Rsa1.0.00217.1 | 1629 | 107079 | 0         | 520  | 534  | 97 -  | 1    | 529  | 61556  | 62089  |
| UN20361 | Rsa1.0.01282.1 | 669  | 49304  | 0         | 627  | 654  | 95 -  | 3    | 656  | 26620  | 27257  |
| UN20362 | Rsa1.0.01878.1 | 1249 | 37768  | 0         | 473  | 479  | 98 +  | 3    | 481  | 20791  | 21269  |
| UN20363 | Rsa1.0.00745.1 | 1608 | 66067  | 0         | 512  | 552  | 92 +  | 1068 | 1602 | 52944  | 53487  |
| UN20364 | Rsa1.0.03634.1 | 737  | 145192 | 1.00E-134 | 254  | 258  | 98 -  | 479  | 736  | 142830 | 143087 |
| UN20365 | Rsa1.0.00916.1 | 541  | 59789  | 1.00E-63  | 124  | 124  | 100 + | 174  | 297  | 22493  | 22616  |
| UN20366 | Rsa1.0.18416.1 | 932  | 1603   | 0         | 504  | 510  | 98 -  | 426  | 932  | 203    | 712    |
| UN20367 | Rsa1.0.00548.1 | 1087 | 76518  | 1.00E-119 | 252  | 262  | 96 -  | 825  | 1085 | 60500  | 60761  |
| UN20368 | Rsa1.0.00269.1 | 1436 | 341668 | 0         | 643  | 666  | 96 -  | 3    | 665  | 34527  | 35191  |
| UN20369 | Rsa1.0.00843.1 | 1819 | 62411  | 0         | 337  | 340  | 99 -  | 844  | 1183 | 55432  | 55771  |
| UN20370 | Rsa1.0.02058.1 | 707  | 35532  | 1.00E-131 | 247  | 249  | 99 -  | 3    | 249  | 15949  | 16197  |
| UN20371 | Rsa1.0.00238.1 | 514  | 193193 | 1.00E-156 | 339  | 355  | 95 -  | 132  | 485  | 3666   | 4017   |
| UN20372 | Rsa1.0.06738.1 | 1550 | 10441  | 0         | 766  | 793  | 96 -  | 711  | 1496 | 3218   | 4007   |
| UN20373 | Rsa1.0.00241.1 | 1028 | 104000 | 1.00E-132 | 316  | 344  | 91 -  | 690  | 1020 | 65473  | 65816  |
| UN20374 | Rsa1.0.00001.1 | 1266 | 363028 | 0         | 546  | 559  | 97 +  | 417  | 975  | 240541 | 241099 |
| UN20375 | Rsa1.0.06677.1 | 1122 | 10560  | 0         | 559  | 588  | 95 -  | 536  | 1122 | 9759   | 10344  |
| UN20376 | Rsa1.0.00628.1 | 440  | 214360 | 1.00E-114 | 209  | 209  | 100 + | 227  | 435  | 16117  | 16325  |
| UN20377 | Rsa1.0.14505.1 | 1095 | 3322   | 0         | 362  | 371  | 97 -  | 724  | 1089 | 1685   | 2055   |
| UN20378 | Rsa1.0.01475.1 | 1233 | 45044  | 0         | 464  | 468  | 99 +  | 3    | 470  | 38877  | 39344  |
| UN20379 | Rsa1.0.02122.1 | 1285 | 34797  | 1.00E-160 | 290  | 291  | 99 +  | 151  | 441  | 31779  | 32069  |
| UN20380 | Rsa1.0.05847.1 | 1725 | 12433  | 0         | 655  | 670  | 97 -  | 134  | 800  | 421    | 1090   |
| UN20381 | Rsa1.0.00453.1 | 834  | 83031  | 0         | 820  | 828  | 99 +  | 1    | 828  | 54767  | 55593  |
| UN20382 | Rsa1.0.00722.1 | 1749 | 66840  | 0         | 386  | 387  | 99 -  | 1311 | 1697 | 62816  | 63201  |
| UN20383 | Rsa1.0.00244.1 | 858  | 103590 | 1.00E-115 | 290  | 313  | 92 +  | 4    | 314  | 71210  | 71519  |
| UN20384 | Rsa1.0.01068.1 | 1351 | 55208  | 0         | 471  | 498  | 94 +  | 3    | 492  | 34526  | 35012  |
| UN20385 | Rsa1.0.02748.1 | 1160 | 28242  | 0         | 577  | 585  | 98 +  | 1    | 585  | 14241  | 14825  |
| UN20386 | Rsa1.0.02634.1 | 1645 | 29299  | 1.00E-154 | 300  | 307  | 97 +  | 1    | 307  | 10522  | 10826  |
| UN20387 | Rsa1.0.09458.1 | 947  | 6353   | 1.00E-114 | 212  | 213  | 99 +  | 735  | 947  | 4827   | 5039   |
| UN20388 | Rsa1.0.00109.1 | 1439 | 132735 | 0         | 471  | 473  | 99 +  | 1    | 472  | 61679  | 62151  |
| UN20389 | Rsa1.0.00301.1 | 858  | 365315 | 0         | 373  | 383  | 97 -  | 397  | 779  | 214376 | 214758 |
| UN20390 | Rsa1.0.03538.1 | 1440 | 22204  | 1.00E-106 | 196  | 196  | 100 + | 247  | 442  | 7575   | 7770   |
| UN20391 | Rsa1.0.00124.1 | 1169 | 262503 | 1.00E-147 | 334  | 355  | 94 +  | 813  | 1167 | 21650  | 21996  |
| UN20392 | Rsa1.0.16486.1 | 786  | 2139   | 1.00E-138 | 297  | 309  | 96 -  | 480  | 786  | 441    | 747    |
| UN20393 | Rsa1.0.00055.1 | 705  | 520193 | 0         | 641  | 666  | 96 -  | 43   | 705  | 340084 | 340743 |
| UN20394 | Rsa1.0.00413.1 | 1529 | 86921  | 1.00E-112 | 210  | 211  | 99 -  | 248  | 458  | 834    | 1044   |
| UN20395 | Rsa1.0.02379.1 | 690  | 150705 | 0         | 438  | 445  | 98 +  | 245  | 689  | 147073 | 147515 |

|         |                |      |        |           |     |     |       |      |      |        |        |
|---------|----------------|------|--------|-----------|-----|-----|-------|------|------|--------|--------|
| UN20396 | Rsa1.0_02681.1 | 718  | 28711  | 1.00E-128 | 299 | 317 | 94 -  | 102  | 417  | 20439  | 20753  |
| UN20397 | Rsa1.0_03553.1 | 1045 | 22150  | 0         | 418 | 419 | 99 +  | 626  | 1044 | 15786  | 16204  |
| UN20398 | Rsa1.0_00886.1 | 1463 | 167350 | 1.00E-179 | 319 | 319 | 100 - | 1    | 319  | 141325 | 141643 |
| UN20399 | Rsa1.0_00823.1 | 853  | 62889  | 4.00E-96  | 182 | 183 | 99 +  | 150  | 332  | 55413  | 55595  |
| UN20400 | Rsa1.0_02204.1 | 1045 | 33930  | 1.00E-161 | 340 | 353 | 96 -  | 695  | 1043 | 20567  | 20915  |
| UN20401 | Rsa1.0_02015.1 | 997  | 36008  | 1.00E-172 | 312 | 314 | 99 +  | 684  | 997  | 24383  | 24696  |
| UN20402 | Rsa1.0_00073.1 | 794  | 240924 | 0         | 541 | 581 | 93 +  | 17   | 597  | 81135  | 81695  |
| UN20403 | Rsa1.0_00663.1 | 557  | 164969 | 1.00E-125 | 304 | 322 | 94 -  | 4    | 315  | 120787 | 121105 |
| UN20404 | Rsa1.0_01803.1 | 1019 | 173846 | 0         | 434 | 453 | 95 +  | 568  | 1017 | 137460 | 137911 |
| UN20405 | Rsa1.0_01166.1 | 1012 | 51877  | 0         | 504 | 514 | 98 +  | 507  | 1012 | 37728  | 38241  |
| UN20406 | Rsa1.0_04870.1 | 1586 | 135142 | 0         | 473 | 487 | 97 -  | 321  | 807  | 1045   | 1531   |
| UN20407 | Rsa1.0_09854.1 | 1839 | 6118   | 0         | 430 | 444 | 96 -  | 1399 | 1839 | 972    | 1415   |
| UN20408 | Rsa1.0_04857.1 | 927  | 15703  | 0         | 793 | 809 | 98 -  | 124  | 927  | 11822  | 12626  |
| UN20409 | Rsa1.0_00589.1 | 1141 | 209965 | 0         | 359 | 359 | 100 - | 783  | 1141 | 179899 | 180257 |
| UN20410 | Rsa1.0_01278.1 | 1376 | 49370  | 1.00E-169 | 325 | 332 | 97 -  | 1047 | 1376 | 27599  | 27930  |
| UN20411 | Rsa1.0_00107.1 | 1323 | 431659 | 1.00E-133 | 316 | 338 | 93 +  | 986  | 1323 | 13765  | 14091  |
| UN20412 | Rsa1.0_00762.1 | 731  | 165246 | 0         | 343 | 344 | 99 -  | 389  | 731  | 51038  | 51381  |
| UN20413 | Rsa1.0_00058.1 | 1054 | 159921 | 1.00E-144 | 358 | 385 | 92 -  | 673  | 1052 | 46492  | 46864  |
| UN20414 | Rsa1.0_00387.1 | 1290 | 495407 | 1.00E-179 | 391 | 412 | 94 -  | 884  | 1290 | 398874 | 399285 |
| UN20415 | Rsa1.0_01135.1 | 1039 | 52799  | 1.00E-145 | 280 | 286 | 97 -  | 491  | 776  | 46588  | 46873  |
| UN20416 | Rsa1.0_00987.1 | 1054 | 57543  | 0         | 505 | 515 | 98 -  | 538  | 1052 | 4103   | 4608   |
| UN20417 | Rsa1.0_00414.1 | 1300 | 202190 | 0         | 527 | 542 | 97 -  | 2    | 543  | 201313 | 201852 |
| UN20418 | Rsa1.0_00796.1 | 508  | 63997  | 7.00E-84  | 161 | 162 | 99 +  | 126  | 287  | 57353  | 57514  |
| UN20419 | Rsa1.0_02022.1 | 1269 | 35923  | 1.00E-158 | 325 | 339 | 95 +  | 928  | 1266 | 14054  | 14392  |
| UN20420 | Rsa1.0_00005.1 | 1850 | 353093 | 0         | 629 | 633 | 99 +  | 441  | 1073 | 331563 | 332195 |
| UN20421 | Rsa1.0_00552.1 | 573  | 206757 | 1.00E-100 | 247 | 265 | 93 -  | 298  | 560  | 72839  | 73102  |
| UN20422 | Rsa1.0_01468.1 | 1855 | 45146  | 0         | 585 | 616 | 94 +  | 1260 | 1855 | 15030  | 15644  |
| UN20423 | Rsa1.0_00817.1 | 767  | 62961  | 0         | 457 | 479 | 95 -  | 292  | 767  | 53855  | 54331  |
| UN20424 | Rsa1.0_00728.1 | 691  | 66704  | 0         | 539 | 549 | 98 -  | 143  | 691  | 10711  | 11258  |
| UN20425 | Rsa1.0_08846.1 | 1088 | 6867   | 1.00E-144 | 326 | 344 | 94 -  | 741  | 1083 | 3968   | 4300   |
| UN20426 | Rsa1.0_01283.1 | 978  | 49257  | 2.00E-79  | 157 | 159 | 98 +  | 106  | 264  | 15344  | 15502  |
| UN20427 | Rsa1.0_04122.1 | 1345 | 18950  | 0         | 622 | 633 | 98 -  | 2    | 631  | 14017  | 14649  |
| UN20428 | Rsa1.0_00867.1 | 1434 | 61635  | 1.00E-164 | 302 | 305 | 99 -  | 1    | 305  | 27352  | 27656  |
| UN20429 | Rsa1.0_00316.1 | 920  | 96264  | 2.00E-20  | 58  | 60  | 96 +  | 780  | 839  | 38997  | 39056  |
| UN20430 | Rsa1.0_03366.1 | 879  | 23401  | 1.00E-151 | 298 | 303 | 98 -  | 580  | 879  | 13840  | 14142  |
| UN20431 | Rsa1.0_01058.1 | 1342 | 55430  | 1.00E-154 | 286 | 289 | 98 +  | 549  | 837  | 17057  | 17345  |
| UN20432 | Rsa1.0_00378.1 | 1917 | 89892  | 1.00E-178 | 349 | 359 | 97 -  | 215  | 573  | 64565  | 64920  |
| UN20433 | Rsa1.0_00435.1 | 590  | 317579 | 0         | 427 | 449 | 95 -  | 143  | 590  | 62605  | 63052  |
| UN20434 | Rsa1.0_00305.1 | 1054 | 97308  | 0         | 542 | 573 | 94 -  | 476  | 1045 | 78524  | 79094  |

|         |                |      |        |           |      |      |       |      |      |        |        |
|---------|----------------|------|--------|-----------|------|------|-------|------|------|--------|--------|
| UN20435 | Rsa1.0.01184.1 | 992  | 51452  | 0         | 383  | 383  | 100 + | 227  | 609  | 26949  | 27331  |
| UN20436 | Rsa1.0.00056.1 | 1067 | 332604 | 0         | 356  | 357  | 99 +  | 709  | 1065 | 155406 | 155762 |
| UN20437 | Rsa1.0.04194.1 | 1233 | 132734 | 1.00E-38  | 98   | 103  | 95 -  | 706  | 808  | 118157 | 118259 |
| UN20438 | Rsa1.0.00180.1 | 1157 | 114581 | 0         | 394  | 404  | 97 +  | 756  | 1157 | 111408 | 111810 |
| UN20439 | Rsa1.0.00060.1 | 1070 | 502678 | 3.00E-88  | 184  | 190  | 96 +  | 881  | 1070 | 494424 | 494613 |
| UN20440 | Rsa1.0.02800.1 | 1280 | 27760  | 0         | 387  | 387  | 100 + | 3    | 389  | 12373  | 12759  |
| UN20441 | Rsa1.0.00676.1 | 1588 | 69166  | 0         | 699  | 713  | 98 -  | 432  | 1144 | 53234  | 53943  |
| UN20442 | Rsa1.0.00960.1 | 1267 | 58199  | 1.00E-170 | 369  | 390  | 94 +  | 888  | 1265 | 29999  | 30388  |
| UN20443 | Rsa1.0.00014.1 | 500  | 348985 | 0         | 391  | 392  | 99 +  | 109  | 500  | 298418 | 298809 |
| UN20444 | Rsa1.0.03191.1 | 1602 | 145762 | 0         | 628  | 669  | 93 -  | 7    | 675  | 134735 | 135403 |
| UN20445 | Rsa1.0.00610.1 | 1962 | 72740  | 0         | 477  | 488  | 97 -  | 598  | 1083 | 70231  | 70718  |
| UN20446 | Rsa1.0.00315.1 | 932  | 96426  | 0         | 928  | 939  | 98 +  | 3    | 932  | 89409  | 90347  |
| UN20447 | Rsa1.0.13699.1 | 1335 | 4460   | 0         | 420  | 433  | 96 +  | 3    | 435  | 2257   | 2688   |
| UN20448 | Rsa1.0.02221.1 | 1200 | 33796  | 0         | 385  | 394  | 97 +  | 326  | 719  | 3350   | 3743   |
| UN20449 | Rsa1.0.00827.1 | 1453 | 62790  | 0         | 425  | 426  | 99 -  | 1028 | 1453 | 49142  | 49567  |
| UN20450 | Rsa1.0.01036.1 | 1393 | 55978  | 0         | 1050 | 1090 | 96 -  | 304  | 1386 | 47923  | 49006  |
| UN20451 | Rsa1.0.00047.1 | 912  | 168582 | 1.00E-137 | 333  | 356  | 93 +  | 558  | 912  | 99362  | 99714  |
| UN20452 | Rsa1.0.01564.1 | 1549 | 43169  | 1.00E-117 | 270  | 285  | 94 -  | 1268 | 1549 | 36240  | 36523  |
| UN20453 | Rsa1.0.00506.1 | 1441 | 79106  | 1.00E-112 | 291  | 318  | 91 +  | 1136 | 1441 | 6009   | 6326   |
| UN20454 | Rsa1.0.00464.1 | 1068 | 82253  | 0         | 491  | 498  | 98 +  | 229  | 726  | 21695  | 22192  |
| UN20455 | Rsa1.0.05155.1 | 1661 | 14653  | 0         | 567  | 584  | 97 +  | 850  | 1433 | 390    | 961    |
| UN20456 | Rsa1.0.00342.1 | 1401 | 93695  | 1.00E-154 | 280  | 281  | 99 +  | 1119 | 1399 | 1565   | 1845   |
| UN20457 | Rsa1.0.04563.1 | 1699 | 16837  | 1.00E-88  | 198  | 208  | 95 +  | 5    | 208  | 12887  | 13094  |
| UN20458 | Rsa1.0.00655.1 | 1328 | 195840 | 1.00E-123 | 300  | 321  | 93 +  | 1008 | 1328 | 165753 | 166070 |
| UN20459 | Rsa1.0.00339.1 | 1052 | 222974 | 0         | 772  | 795  | 97 +  | 1    | 795  | 4341   | 5135   |
| UN20460 | Rsa1.0.02623.1 | 1445 | 29409  | 1.00E-155 | 331  | 346  | 95 -  | 1090 | 1432 | 9641   | 9981   |
| UN20461 | Rsa1.0.01493.1 | 1397 | 44670  | 0         | 512  | 520  | 98 -  | 878  | 1397 | 13292  | 13805  |
| UN20462 | Rsa1.0.02622.1 | 1038 | 142402 | 1.00E-116 | 232  | 237  | 97 -  | 795  | 1031 | 10894  | 11129  |
| UN20463 | Rsa1.0.02064.1 | 1026 | 35476  | 1.00E-142 | 310  | 321  | 96 -  | 537  | 852  | 16703  | 17023  |
| UN20464 | Rsa1.0.01783.1 | 585  | 39383  | 0         | 433  | 438  | 98 -  | 149  | 585  | 19791  | 20227  |
| UN20465 | Rsa1.0.00056.1 | 1382 | 332604 | 0         | 720  | 760  | 94 +  | 617  | 1370 | 24496  | 25254  |
| UN20466 | Rsa1.0.00092.1 | 1510 | 659932 | 0         | 651  | 654  | 99 -  | 858  | 1510 | 200221 | 200874 |
| UN20467 | Rsa1.0.02300.1 | 1522 | 32847  | 0         | 454  | 461  | 98 +  | 1061 | 1521 | 25098  | 25556  |
| UN20468 | Rsa1.0.00381.1 | 1456 | 89718  | 2.00E-74  | 203  | 223  | 91 -  | 285  | 507  | 86318  | 86540  |
| UN20469 | Rsa1.0.00750.1 | 2336 | 190548 | 0         | 500  | 521  | 95 -  | 1821 | 2336 | 144351 | 144869 |
| UN20470 | Rsa1.0.01702.1 | 931  | 40722  | 1.00E-170 | 347  | 362  | 95 -  | 5    | 355  | 14976  | 15336  |
| UN20471 | Rsa1.0.01639.1 | 1444 | 41850  | 0         | 1330 | 1330 | 100 + | 1    | 1330 | 12477  | 13806  |
| UN20472 | Rsa1.0.00097.1 | 1532 | 138858 | 0         | 823  | 867  | 94 +  | 671  | 1525 | 29953  | 30810  |
| UN20473 | Rsa1.0.00190.1 | 1470 | 318240 | 1.00E-161 | 381  | 409  | 93 -  | 2    | 409  | 12061  | 12459  |

|         |                |      |        |           |      |      |       |      |      |        |        |
|---------|----------------|------|--------|-----------|------|------|-------|------|------|--------|--------|
| UN20474 | Rsa1.0.00844.1 | 1205 | 62403  | 0         | 555  | 567  | 97 -  | 8    | 574  | 19070  | 19633  |
| UN20475 | Rsa1.0.01390.1 | 1127 | 46695  | 1.00E-167 | 328  | 338  | 97 +  | 477  | 814  | 37463  | 37800  |
| UN20476 | Rsa1.0.06797.1 | 1396 | 10342  | 1.00E-123 | 255  | 263  | 96 +  | 149  | 408  | 5144   | 5406   |
| UN20477 | Rsa1.0.00029.1 | 1093 | 272992 | 0         | 702  | 716  | 98 -  | 126  | 840  | 248566 | 249281 |
| UN20478 | Rsa1.0.00101.1 | 1149 | 267193 | 0         | 654  | 661  | 98 -  | 487  | 1147 | 211522 | 212182 |
| UN20479 | Rsa1.0.00008.1 | 804  | 358124 | 1.00E-157 | 302  | 309  | 97 -  | 245  | 553  | 54138  | 54446  |
| UN20480 | Rsa1.0.22496.1 | 1120 | 1116   | 2.00E-79  | 164  | 167  | 98 +  | 952  | 1118 | 22     | 187    |
| UN20481 | Rsa1.0.01517.1 | 903  | 44170  | 1.00E-150 | 292  | 298  | 97 +  | 1    | 298  | 28310  | 28606  |
| UN20482 | Rsa1.0.17289.1 | 1246 | 1870   | 0         | 570  | 580  | 98 +  | 1    | 580  | 1291   | 1870   |
| UN20483 | Rsa1.0.01783.1 | 535  | 39383  | 4.00E-76  | 215  | 237  | 90 +  | 35   | 271  | 19850  | 20085  |
| UN20484 | Rsa1.0.00483.1 | 904  | 81102  | 1.00E-102 | 320  | 357  | 89 -  | 1    | 340  | 51013  | 51366  |
| UN20485 | Rsa1.0.01696.1 | 1378 | 301850 | 0         | 409  | 414  | 98 -  | 1    | 413  | 12506  | 12919  |
| UN20486 | Rsa1.0.00178.1 | 637  | 114861 | 1.00E-145 | 261  | 261  | 100 - | 374  | 634  | 98482  | 98742  |
| UN20487 | Rsa1.0.03508.1 | 822  | 22388  | 0         | 552  | 554  | 99 +  | 4    | 557  | 8273   | 8826   |
| UN20488 | Rsa1.0.13737.1 | 1191 | 4403   | 1.00E-157 | 320  | 332  | 96 +  | 858  | 1189 | 3954   | 4282   |
| UN20489 | Rsa1.0.04307.1 | 886  | 18001  | 0         | 506  | 511  | 99 -  | 1    | 511  | 16685  | 17195  |
| UN20490 | Rsa1.0.00558.1 | 363  | 75819  | 1.00E-163 | 348  | 364  | 95 -  | 3    | 360  | 43644  | 44003  |
| UN20491 | Rsa1.0.00487.1 | 1281 | 80674  | 0         | 1243 | 1292 | 96 +  | 1    | 1279 | 70327  | 71616  |
| UN20492 | Rsa1.0.00757.1 | 1334 | 65559  | 0         | 479  | 480  | 99 -  | 464  | 943  | 45702  | 46181  |
| UN20493 | Rsa1.0.05319.1 | 868  | 14158  | 0         | 595  | 598  | 99 +  | 3    | 600  | 3168   | 3765   |
| UN20494 | Rsa1.0.17040.1 | 1441 | 1944   | 1.00E-161 | 343  | 363  | 94 +  | 1068 | 1427 | 195    | 545    |
| UN20495 | Rsa1.0.00663.1 | 1061 | 164969 | 0         | 352  | 363  | 96 -  | 697  | 1059 | 126353 | 126704 |
| UN20496 | Rsa1.0.04399.1 | 934  | 17543  | 0         | 380  | 383  | 99 +  | 1    | 383  | 4659   | 5041   |
| UN20497 | Rsa1.0.07490.1 | 2090 | 9261   | 0         | 681  | 708  | 96 +  | 1    | 707  | 6566   | 7270   |
| UN20498 | Rsa1.0.00157.1 | 1785 | 245832 | 1.00E-152 | 340  | 363  | 93 +  | 3    | 357  | 38121  | 38483  |
| UN20499 | Rsa1.0.02322.1 | 1504 | 32555  | 1.00E-134 | 282  | 292  | 96 -  | 1    | 290  | 26961  | 27252  |
| UN20500 | Rsa1.0.01508.1 | 774  | 44334  | 1.00E-15  | 110  | 132  | 83 -  | 224  | 355  | 39209  | 39340  |
| UN20501 | Rsa1.0.00786.1 | 922  | 64285  | 1.00E-159 | 302  | 308  | 98 +  | 613  | 920  | 42075  | 42382  |
| UN20502 | Rsa1.0.02163.1 | 732  | 34427  | 0         | 345  | 352  | 98 -  | 381  | 732  | 28233  | 28584  |
| UN20503 | Rsa1.0.04488.1 | 1021 | 17155  | 0         | 487  | 504  | 96 -  | 1    | 500  | 14541  | 15044  |
| UN20504 | Rsa1.0.00051.1 | 761  | 258225 | 1.00E-158 | 451  | 494  | 91 +  | 3    | 493  | 16022  | 16502  |
| UN20505 | Rsa1.0.00130.1 | 943  | 125737 | 1.00E-151 | 298  | 306  | 97 -  | 1    | 304  | 37213  | 37518  |
| UN20506 | Rsa1.0.02079.1 | 1074 | 35306  | 0         | 473  | 476  | 99 -  | 599  | 1074 | 32780  | 33255  |
| UN20507 | Rsa1.0.04108.1 | 1399 | 19001  | 0         | 1390 | 1399 | 99 +  | 1    | 1399 | 9408   | 10806  |
| UN20508 | Rsa1.0.05854.1 | 652  | 12415  | 0         | 644  | 649  | 99 +  | 4    | 652  | 1593   | 2241   |
| UN20509 | Rsa1.0.01299.1 | 1370 | 162028 | 0         | 532  | 533  | 99 -  | 1    | 533  | 44526  | 45058  |
| UN20510 | Rsa1.0.00132.1 | 1171 | 124299 | 0         | 448  | 448  | 100 - | 724  | 1171 | 105859 | 106306 |
| UN20511 | Rsa1.0.01195.1 | 632  | 147988 | 0         | 628  | 630  | 99 -  | 1    | 630  | 23188  | 23816  |
| UN20512 | Rsa1.0.00114.1 | 548  | 131330 | 0         | 546  | 546  | 100 - | 3    | 548  | 65801  | 66346  |



|         |                |      |        |           |      |      |       |      |      |        |        |
|---------|----------------|------|--------|-----------|------|------|-------|------|------|--------|--------|
| UN20513 | Rsa1.0.01867.1 | 1494 | 37960  | 0         | 486  | 496  | 97 +  | 698  | 1193 | 19568  | 20063  |
| UN20514 | Rsa1.0.00071.1 | 1740 | 345714 | 0         | 575  | 589  | 97 -  | 1    | 589  | 332641 | 333222 |
| UN20515 | Rsa1.0.04429.1 | 1257 | 17393  | 1.00E-139 | 265  | 269  | 98 +  | 255  | 523  | 11732  | 11997  |
| UN20516 | Rsa1.0.03424.1 | 1282 | 23064  | 0         | 896  | 915  | 97 -  | 10   | 924  | 17318  | 18228  |
| UN20517 | Rsa1.0.04106.1 | 1749 | 19018  | 0         | 391  | 393  | 99 +  | 155  | 547  | 4248   | 4640   |
| UN20518 | Rsa1.0.00116.1 | 1580 | 365886 | 1.00E-116 | 260  | 277  | 93 -  | 1301 | 1568 | 127928 | 128204 |
| UN20519 | Rsa1.0.03290.1 | 1253 | 24011  | 0         | 1177 | 1248 | 94 -  | 1    | 1236 | 22647  | 23886  |
| UN20520 | Rsa1.0.00326.1 | 793  | 171955 | 1.00E-151 | 312  | 324  | 96 -  | 3    | 326  | 86619  | 86937  |
| UN20521 | Rsa1.0.00079.1 | 1200 | 606987 | 0         | 415  | 427  | 97 +  | 2    | 425  | 466217 | 466637 |
| UN20522 | Rsa1.0.00973.1 | 1113 | 57913  | 0         | 1098 | 1114 | 98 +  | 1    | 1113 | 22820  | 23933  |
| UN20523 | Rsa1.0.00192.1 | 1111 | 278200 | 0         | 454  | 456  | 99 -  | 426  | 881  | 260592 | 261047 |
| UN20524 | Rsa1.0.00053.1 | 1570 | 263459 | 0         | 375  | 391  | 95 +  | 984  | 1374 | 250289 | 250679 |
| UN20525 | Rsa1.0.00493.1 | 1312 | 80007  | 0         | 425  | 427  | 99 +  | 5    | 431  | 33579  | 34005  |
| UN20526 | Rsa1.0.51744.1 | 1931 | 439    | 0         | 434  | 439  | 98 -  | 944  | 1382 | 1      | 439    |
| UN20527 | Rsa1.0.00160.1 | 1109 | 346678 | 0         | 523  | 528  | 99 +  | 1    | 527  | 190698 | 191224 |
| UN20528 | Rsa1.0.03763.1 | 1082 | 20975  | 0         | 555  | 561  | 98 +  | 519  | 1079 | 14472  | 15032  |
| UN20529 | Rsa1.0.00045.1 | 1236 | 328694 | 1.00E-141 | 263  | 266  | 98 +  | 703  | 968  | 144010 | 144275 |
| UN20530 | Rsa1.0.05081.1 | 1566 | 136103 | 4.00E-88  | 203  | 214  | 94 -  | 1200 | 1411 | 7886   | 8095   |
| UN20531 | Rsa1.0.00310.1 | 1530 | 96852  | 1.00E-152 | 343  | 366  | 93 +  | 1150 | 1501 | 71221  | 71586  |
| UN20532 | Rsa1.0.04600.1 | 1055 | 16694  | 0         | 403  | 420  | 95 +  | 638  | 1055 | 12273  | 12692  |
| UN20533 | Rsa1.0.00387.1 | 1165 | 495407 | 0         | 459  | 470  | 97 -  | 696  | 1165 | 163054 | 163523 |
| UN20534 | Rsa1.0.02276.1 | 960  | 33098  | 0         | 816  | 834  | 97 -  | 118  | 948  | 23612  | 24440  |
| UN20535 | Rsa1.0.00936.1 | 1509 | 59078  | 0         | 527  | 567  | 92 -  | 962  | 1509 | 22948  | 23514  |
| UN20536 | Rsa1.0.00682.1 | 1617 | 68680  | 0         | 863  | 877  | 98 +  | 2    | 878  | 33738  | 34613  |
| UN20537 | Rsa1.0.69843.1 | 1104 | 328    | 1.00E-178 | 325  | 328  | 99 -  | 140  | 467  | 1      | 328    |
| UN20538 | Rsa1.0.01603.1 | 714  | 42468  | 0         | 623  | 679  | 91 +  | 3    | 653  | 8934   | 9607   |
| UN20539 | Rsa1.0.01363.1 | 885  | 47195  | 1.00E-116 | 278  | 299  | 92 +  | 3    | 298  | 23091  | 23380  |
| UN20540 | Rsa1.0.15173.1 | 1557 | 2779   | 0         | 505  | 510  | 99 +  | 603  | 1112 | 886    | 1395   |
| UN20541 | Rsa1.0.02684.1 | 615  | 28676  | 0         | 351  | 354  | 99 +  | 262  | 615  | 1255   | 1606   |
| UN20542 | Rsa1.0.05864.1 | 899  | 12387  | 1.00E-159 | 307  | 313  | 98 +  | 2    | 313  | 9853   | 10165  |
| UN20543 | Rsa1.0.05076.1 | 880  | 14916  | 0         | 547  | 547  | 100 + | 4    | 550  | 432    | 978    |
| UN20544 | Rsa1.0.00175.1 | 1051 | 166121 | 1.00E-133 | 276  | 285  | 96 -  | 765  | 1048 | 56275  | 56558  |
| UN20545 | Rsa1.0.01603.1 | 1111 | 42468  | 0         | 360  | 370  | 97 +  | 3    | 372  | 36944  | 37313  |
| UN20546 | Rsa1.0.00073.1 | 1025 | 240924 | 0         | 356  | 361  | 98 +  | 11   | 371  | 187799 | 188159 |
| UN20547 | Rsa1.0.01534.1 | 1020 | 43764  | 0         | 932  | 971  | 95 +  | 2    | 972  | 9502   | 10472  |
| UN20548 | Rsa1.0.05331.1 | 1507 | 14127  | 0         | 860  | 867  | 99 -  | 642  | 1507 | 6867   | 7733   |
| UN20549 | Rsa1.0.06125.1 | 816  | 11680  | 6.00E-33  | 170  | 199  | 85 -  | 618  | 813  | 3526   | 3722   |
| UN20550 | Rsa1.0.00399.1 | 837  | 242951 | 0         | 482  | 498  | 96 +  | 317  | 813  | 43915  | 44407  |
| UN20551 | Rsa1.0.01638.1 | 1492 | 41857  | 1.00E-177 | 333  | 339  | 98 +  | 705  | 1043 | 36262  | 36600  |

|         |                |      |        |           |      |      |       |      |      |        |        |
|---------|----------------|------|--------|-----------|------|------|-------|------|------|--------|--------|
| UN20552 | Rsa1.0.02694.1 | 1273 | 28610  | 0         | 395  | 402  | 98 +  | 383  | 781  | 6542   | 6943   |
| UN20553 | Rsa1.0.00628.1 | 935  | 214360 | 2.00E-91  | 174  | 175  | 99 +  | 225  | 399  | 45588  | 45762  |
| UN20554 | Rsa1.0.03242.1 | 823  | 24415  | 0         | 440  | 441  | 99 -  | 337  | 777  | 1634   | 2074   |
| UN20555 | Rsa1.0.01285.1 | 1528 | 172709 | 0         | 1005 | 1041 | 96 +  | 496  | 1528 | 139837 | 140871 |
| UN20556 | Rsa1.0.01580.1 | 1921 | 42852  | 0         | 954  | 955  | 99 +  | 1    | 954  | 22344  | 23298  |
| UN20557 | Rsa1.0.04051.1 | 915  | 19375  | 0         | 374  | 381  | 98 +  | 3    | 379  | 6419   | 6799   |
| UN20558 | #              | #    | #      | #         | #    | #    | #     | #    | #    | #      | #      |
| UN20559 | Rsa1.0.10507.1 | 1800 | 5822   | 0         | 883  | 906  | 97 -  | 419  | 1311 | 2792   | 3694   |
| UN20560 | Rsa1.0.01803.1 | 982  | 173846 | 0         | 424  | 424  | 100 + | 559  | 982  | 31867  | 32290  |
| UN20561 | Rsa1.0.00394.1 | 1693 | 148426 | 0         | 679  | 690  | 98 -  | 209  | 897  | 125670 | 126356 |
| UN20562 | Rsa1.0.01370.1 | 1631 | 47093  | 0         | 607  | 612  | 99 -  | 2    | 613  | 6095   | 6704   |
| UN20563 | Rsa1.0.01811.1 | 773  | 38977  | 1.00E-169 | 314  | 317  | 99 +  | 456  | 770  | 1187   | 1503   |
| UN20564 | Rsa1.0.00423.1 | 2271 | 86138  | 0         | 653  | 684  | 95 +  | 1594 | 2267 | 48394  | 49068  |
| UN20565 | Rsa1.0.00108.1 | 375  | 478491 | 1.00E-164 | 322  | 330  | 97 +  | 42   | 371  | 47419  | 47743  |
| UN20566 | Rsa1.0.02133.1 | 1126 | 34726  | 0         | 380  | 383  | 99 +  | 192  | 574  | 26082  | 26463  |
| UN20567 | Rsa1.0.01049.1 | 913  | 55655  | 0         | 901  | 915  | 98 -  | 1    | 913  | 9313   | 10225  |
| UN20568 | Rsa1.0.23054.1 | 1080 | 1074   | 1.00E-28  | 88   | 94   | 93 -  | 986  | 1078 | 784    | 877    |
| UN20569 | Rsa1.0.00092.1 | 1299 | 659932 | 1.00E-177 | 330  | 335  | 98 +  | 246  | 580  | 13028  | 13362  |
| UN20570 | Rsa1.0.01466.1 | 1412 | 45161  | 0         | 616  | 617  | 99 -  | 794  | 1410 | 38737  | 39353  |
| UN20571 | Rsa1.0.03123.1 | 924  | 25207  | 0         | 625  | 631  | 99 +  | 294  | 924  | 22210  | 22840  |
| UN20572 | Rsa1.0.02333.1 | 1291 | 32431  | 1.00E-120 | 228  | 230  | 99 +  | 16   | 245  | 17988  | 18215  |
| UN20573 | Rsa1.0.00060.1 | 1341 | 502678 | 0         | 523  | 528  | 99 -  | 483  | 1010 | 224224 | 224748 |
| UN20574 | Rsa1.0.16367.1 | 1427 | 2176   | 0         | 511  | 512  | 99 +  | 207  | 718  | 1      | 512    |
| UN20575 | Rsa1.0.01179.1 | 1721 | 51549  | 0         | 1608 | 1617 | 99 +  | 112  | 1721 | 21812  | 23428  |
| UN20576 | Rsa1.0.00002.1 | 769  | 601661 | 1.00E-135 | 321  | 343  | 93 -  | 380  | 716  | 55285  | 55623  |
| UN20577 | Rsa1.0.00300.1 | 1610 | 97747  | 0         | 1502 | 1559 | 96 -  | 55   | 1610 | 88786  | 90340  |
| UN20578 | Rsa1.0.00609.1 | 1433 | 72785  | 0         | 405  | 406  | 99 -  | 1027 | 1432 | 60297  | 60702  |
| UN20579 | Rsa1.0.01296.1 | 1405 | 49035  | 0         | 1090 | 1152 | 94 -  | 2    | 1131 | 27040  | 28191  |
| UN20580 | Rsa1.0.06166.1 | 2162 | 11583  | 0         | 1140 | 1155 | 98 +  | 516  | 1658 | 5941   | 7094   |
| UN20581 | Rsa1.0.00232.1 | 1117 | 104936 | 0         | 1101 | 1116 | 98 +  | 2    | 1117 | 25980  | 27093  |
| UN20582 | Rsa1.0.11294.1 | 951  | 5555   | 0         | 472  | 476  | 99 +  | 476  | 951  | 61     | 536    |
| UN20583 | Rsa1.0.00017.1 | 969  | 752458 | 0         | 441  | 451  | 97 +  | 7    | 456  | 40724  | 41168  |
| UN20584 | Rsa1.0.00015.1 | 717  | 561803 | 1.00E-142 | 366  | 405  | 90 +  | 125  | 522  | 483122 | 483516 |
| UN20585 | Rsa1.0.37121.1 | 1294 | 607    | 1.00E-131 | 334  | 366  | 91 +  | 131  | 496  | 242    | 607    |
| UN20586 | Rsa1.0.01126.1 | 1058 | 53127  | 2.00E-95  | 245  | 267  | 91 -  | 799  | 1056 | 25857  | 26123  |
| UN20587 | Rsa1.0.00056.1 | 804  | 332604 | 6.00E-67  | 136  | 138  | 98 +  | 393  | 530  | 309803 | 309940 |
| UN20588 | Rsa1.0.03878.1 | 891  | 20305  | 1.00E-163 | 323  | 328  | 98 -  | 567  | 890  | 11871  | 12198  |
| UN20589 | Rsa1.0.00386.1 | 1718 | 89134  | 0         | 413  | 415  | 99 +  | 1    | 414  | 42136  | 42549  |
| UN20590 | Rsa1.0.05359.1 | 630  | 14054  | 3.00E-56  | 118  | 120  | 98 -  | 186  | 305  | 12742  | 12861  |

|         |                |      |        |           |      |      |       |      |      |        |        |
|---------|----------------|------|--------|-----------|------|------|-------|------|------|--------|--------|
| UN20591 | Rsa1.0.00813.1 | 924  | 63202  | 0         | 521  | 560  | 93 +  | 381  | 924  | 51191  | 51742  |
| UN20592 | Rsa1.0.07534.1 | 770  | 9184   | 1.00E-115 | 241  | 251  | 96 -  | 494  | 744  | 5051   | 5301   |
| UN20593 | Rsa1.0.03325.1 | 1380 | 23720  | 1.00E-110 | 293  | 322  | 90 -  | 1064 | 1368 | 14657  | 14978  |
| UN20594 | Rsa1.0.00157.1 | 1519 | 245832 | 0         | 536  | 547  | 97 +  | 971  | 1516 | 236325 | 236871 |
| UN20595 | Rsa1.0.00001.1 | 1228 | 363028 | 0         | 950  | 968  | 98 +  | 261  | 1226 | 147746 | 148706 |
| UN20596 | Rsa1.0.02450.1 | 1617 | 31288  | 1.00E-139 | 320  | 343  | 93 -  | 1247 | 1589 | 18041  | 18367  |
| UN20597 | Rsa1.0.01815.1 | 1278 | 38897  | 0         | 780  | 802  | 97 -  | 480  | 1273 | 2944   | 3745   |
| UN20598 | Rsa1.0.01955.1 | 868  | 36850  | 0         | 438  | 460  | 95 +  | 226  | 682  | 13035  | 13489  |
| UN20599 | Rsa1.0.04199.1 | 1423 | 18501  | 0         | 1364 | 1418 | 96 -  | 3    | 1413 | 8259   | 9673   |
| UN20600 | Rsa1.0.60459.1 | 1300 | 379    | 0         | 357  | 363  | 98 +  | 847  | 1208 | 1      | 363    |
| UN20601 | Rsa1.0.00487.1 | 1260 | 80674  | 0         | 543  | 580  | 93 -  | 669  | 1238 | 64292  | 64863  |
| UN20602 | Rsa1.0.01540.1 | 962  | 151890 | 0         | 606  | 624  | 97 +  | 338  | 960  | 139025 | 139647 |
| UN20603 | Rsa1.0.02122.1 | 884  | 34797  | 1.00E-113 | 258  | 275  | 93 -  | 382  | 656  | 32894  | 33168  |
| UN20604 | Rsa1.0.11409.1 | 1588 | 5515   | 0         | 497  | 497  | 100 + | 301  | 797  | 2356   | 2852   |
| UN20605 | Rsa1.0.07639.1 | 1133 | 8966   | 0         | 964  | 988  | 97 -  | 145  | 1126 | 7221   | 8200   |
| UN20606 | Rsa1.0.00434.1 | 1035 | 85171  | 1.00E-142 | 295  | 307  | 96 -  | 13   | 316  | 9575   | 9876   |
| UN20607 | Rsa1.0.02429.1 | 713  | 31527  | 1.00E-122 | 229  | 230  | 99 +  | 482  | 711  | 17242  | 17470  |
| UN20608 | Rsa1.0.02935.1 | 587  | 26621  | 1.00E-156 | 288  | 291  | 98 -  | 297  | 587  | 24378  | 24668  |
| UN20609 | Rsa1.0.02117.1 | 833  | 34843  | 1.00E-105 | 261  | 281  | 92 +  | 564  | 833  | 30965  | 31243  |
| UN20610 | Rsa1.0.00012.1 | 2476 | 222148 | 0         | 533  | 546  | 97 +  | 1380 | 1925 | 73315  | 73860  |
| UN20611 | Rsa1.0.01635.1 | 851  | 41865  | 0         | 596  | 616  | 96 -  | 66   | 680  | 17094  | 17703  |
| UN20612 | Rsa1.0.00066.1 | 1653 | 152418 | 2.00E-83  | 224  | 246  | 91 -  | 594  | 839  | 44281  | 44526  |
| UN20613 | Rsa1.0.01352.1 | 769  | 47443  | 0         | 399  | 407  | 98 -  | 53   | 459  | 954    | 1360   |
| UN20614 | Rsa1.0.00890.1 | 1101 | 323870 | 0         | 407  | 412  | 98 -  | 246  | 657  | 17871  | 18282  |
| UN20615 | Rsa1.0.01311.1 | 1440 | 48456  | 0         | 375  | 389  | 96 +  | 1045 | 1432 | 38967  | 39353  |
| UN20616 | Rsa1.0.07296.1 | 1303 | 9599   | 0         | 534  | 567  | 94 -  | 595  | 1155 | 3015   | 3581   |
| UN20617 | Rsa1.0.02935.1 | 1628 | 26621  | 1.00E-173 | 341  | 351  | 97 +  | 75   | 425  | 7304   | 7651   |
| UN20618 | Rsa1.0.00757.1 | 559  | 65559  | 0         | 551  | 556  | 99 +  | 4    | 559  | 41585  | 42140  |
| UN20619 | Rsa1.0.00715.1 | 811  | 67116  | 0         | 553  | 553  | 100 - | 9    | 561  | 27710  | 28262  |
| UN20620 | Rsa1.0.01594.1 | 1201 | 42612  | 2.00E-86  | 172  | 175  | 98 +  | 672  | 846  | 9033   | 9207   |
| UN20621 | Rsa1.0.00064.1 | 1547 | 240927 | 1.00E-148 | 273  | 275  | 99 -  | 620  | 894  | 125727 | 126001 |
| UN20622 | Rsa1.0.07981.1 | 1150 | 8132   | 1.00E-170 | 303  | 303  | 100 + | 204  | 506  | 1846   | 2148   |
| UN20623 | Rsa1.0.00104.1 | 1550 | 368722 | 0         | 995  | 999  | 99 -  | 551  | 1549 | 205856 | 206854 |
| UN20624 | Rsa1.0.06701.1 | 1035 | 10514  | 0         | 510  | 532  | 95 -  | 507  | 1035 | 8016   | 8540   |
| UN20625 | Rsa1.0.00087.1 | 1467 | 761073 | 0         | 407  | 412  | 98 +  | 1044 | 1455 | 433742 | 434153 |
| UN20626 | Rsa1.0.28365.1 | 1943 | 818    | 0         | 599  | 637  | 94 -  | 1314 | 1941 | 189    | 810    |
| UN20627 | Rsa1.0.01999.1 | 752  | 36237  | 1.00E-153 | 328  | 343  | 95 +  | 411  | 751  | 13718  | 14060  |
| UN20628 | Rsa1.0.00595.1 | 1701 | 341648 | 1.00E-157 | 297  | 302  | 98 +  | 1398 | 1699 | 15432  | 15733  |
| UN20629 | Rsa1.0.00017.1 | 1275 | 752458 | 0         | 336  | 337  | 99 -  | 262  | 597  | 726017 | 726353 |

|         |                |      |        |           |      |      |       |      |      |        |        |
|---------|----------------|------|--------|-----------|------|------|-------|------|------|--------|--------|
| UN20630 | Rsa1.0.00200.1 | 1159 | 162016 | 0         | 662  | 715  | 92 +  | 451  | 1153 | 108700 | 109394 |
| UN20631 | Rsa1.0.08796.1 | 699  | 6916   | 0         | 395  | 404  | 97 +  | 278  | 680  | 4101   | 4504   |
| UN20632 | Rsa1.0.00490.1 | 1640 | 186713 | 1.00E-168 | 308  | 309  | 99 +  | 1321 | 1628 | 153661 | 153969 |
| UN20633 | Rsa1.0.04375.1 | 2065 | 141717 | 0         | 735  | 766  | 95 -  | 698  | 1463 | 16899  | 17664  |
| UN20634 | Rsa1.0.00111.1 | 882  | 390088 | 1.00E-105 | 312  | 354  | 88 +  | 1    | 325  | 369869 | 370222 |
| UN20635 | Rsa1.0.01295.1 | 1007 | 49040  | 0         | 386  | 405  | 95 -  | 602  | 1006 | 40213  | 40616  |
| UN20636 | Rsa1.0.00127.1 | 1544 | 127446 | 0         | 823  | 865  | 95 +  | 553  | 1417 | 125267 | 126130 |
| UN20637 | Rsa1.0.00509.1 | 1417 | 78829  | 0         | 583  | 615  | 94 -  | 1    | 611  | 75614  | 76222  |
| UN20638 | Rsa1.0.00136.1 | 617  | 122464 | 1.00E-144 | 260  | 260  | 100 + | 358  | 617  | 55507  | 55766  |
| UN20639 | Rsa1.0.03073.1 | 1797 | 25574  | 0         | 1715 | 1733 | 98 +  | 59   | 1788 | 13812  | 15542  |
| UN20640 | Rsa1.0.00273.1 | 697  | 326186 | 1.00E-172 | 381  | 404  | 94 -  | 1    | 404  | 45539  | 45938  |
| UN20641 | Rsa1.0.00017.1 | 1103 | 752458 | 1.00E-166 | 360  | 376  | 95 +  | 1    | 374  | 272036 | 272408 |
| UN20642 | Rsa1.0.00744.1 | 1473 | 66084  | 0         | 395  | 408  | 96 -  | 1    | 406  | 53238  | 53642  |
| UN20643 | Rsa1.0.00657.1 | 1424 | 69858  | 1.00E-100 | 230  | 242  | 95 +  | 4    | 244  | 25331  | 25570  |
| UN20644 | Rsa1.0.04415.1 | 1655 | 147889 | 0         | 494  | 513  | 96 +  | 1    | 511  | 134349 | 134844 |
| UN20645 | Rsa1.0.02857.1 | 2694 | 27254  | 0         | 1020 | 1034 | 98 +  | 833  | 1866 | 14543  | 15576  |
| UN20646 | #              | #    | #      | #         | #    | #    | #     | #    | #    | #      | #      |
| UN20647 | Rsa1.0.00060.1 | 1133 | 502678 | 1.00E-137 | 260  | 264  | 98 -  | 658  | 921  | 126419 | 126682 |
| UN20648 | Rsa1.0.00774.1 | 1245 | 64831  | 0         | 1238 | 1243 | 99 -  | 1    | 1243 | 49629  | 50871  |
| UN20649 | Rsa1.0.04367.1 | 521  | 17728  | 0         | 370  | 370  | 100 - | 1    | 370  | 13016  | 13385  |
| UN20650 | Rsa1.0.01310.1 | 976  | 164719 | 0         | 333  | 334  | 99 +  | 2    | 335  | 137112 | 137445 |
| UN20651 | Rsa1.0.00979.1 | 1178 | 57733  | 0         | 378  | 393  | 96 -  | 188  | 580  | 2037   | 2428   |
| UN20652 | Rsa1.0.00637.1 | 1564 | 71038  | 2.33E-156 | 278  | 283  | 98 -  | 814  | 1096 | 23549  | 23831  |
| UN20653 | Rsa1.0.00157.1 | 971  | 245832 | 0         | 355  | 361  | 98 -  | 612  | 970  | 128826 | 129186 |
| UN20654 | Rsa1.0.03167.1 | 1311 | 24858  | 0         | 355  | 355  | 100 - | 957  | 1311 | 13333  | 13687  |
| UN20655 | Rsa1.0.01767.1 | 1105 | 39615  | 0         | 417  | 422  | 98 +  | 2    | 423  | 12167  | 12587  |
| UN20656 | Rsa1.0.00043.1 | 1467 | 264937 | 0         | 356  | 356  | 100 - | 293  | 648  | 125184 | 125539 |
| UN20657 | Rsa1.0.00213.1 | 795  | 108167 | 1.00E-151 | 274  | 275  | 99 +  | 3    | 277  | 4392   | 4666   |
| UN20658 | Rsa1.0.00851.1 | 1285 | 62181  | 6.00E-71  | 174  | 183  | 95 +  | 1104 | 1285 | 29745  | 29923  |
| UN20659 | Rsa1.0.01154.1 | 1277 | 52249  | 0         | 617  | 617  | 100 - | 661  | 1277 | 8981   | 9597   |
| UN20660 | Rsa1.0.53817.1 | 843  | 424    | 1.00E-142 | 257  | 257  | 100 + | 469  | 725  | 164    | 420    |
| UN20661 | Rsa1.0.01196.1 | 1025 | 51097  | 0         | 385  | 389  | 98 -  | 637  | 1025 | 2522   | 2910   |
| UN20662 | Rsa1.0.01633.1 | 996  | 41868  | 1.00E-175 | 402  | 426  | 94 +  | 523  | 941  | 3035   | 3455   |
| UN20663 | Rsa1.0.13514.1 | 833  | 4757   | 0         | 547  | 570  | 95 +  | 230  | 794  | 836    | 1405   |
| UN20664 | Rsa1.0.00453.1 | 980  | 83031  | 1.00E-176 | 412  | 435  | 94 +  | 554  | 980  | 19304  | 19735  |
| UN20665 | Rsa1.0.01958.1 | 1497 | 261128 | 0         | 412  | 420  | 98 -  | 86   | 505  | 131033 | 131452 |
| UN20666 | Rsa1.0.00228.1 | 1031 | 105511 | 0         | 739  | 741  | 99 -  | 289  | 1029 | 48930  | 49670  |
| UN20667 | Rsa1.0.03100.1 | 1695 | 25411  | 0         | 454  | 477  | 95 -  | 232  | 705  | 19710  | 20183  |
| UN20668 | Rsa1.0.01958.1 | 579  | 261128 | 1.00E-105 | 290  | 319  | 90 +  | 202  | 517  | 110202 | 110502 |

|         |                |      |        |           |      |      |       |      |      |        |        |
|---------|----------------|------|--------|-----------|------|------|-------|------|------|--------|--------|
| UN20669 | Rsa1.0_01980.1 | 629  | 36544  | 1.00E-112 | 343  | 384  | 89 +  | 258  | 629  | 32527  | 32902  |
| UN20670 | Rsa1.0_01986.1 | 1624 | 36489  | 0         | 664  | 692  | 95 -  | 933  | 1616 | 16784  | 17472  |
| UN20671 | Rsa1.0_00161.1 | 1083 | 116891 | 1.00E-172 | 307  | 307  | 100 - | 340  | 646  | 77572  | 77878  |
| UN20672 | Rsa1.0_00017.1 | 2102 | 752458 | 1.00E-124 | 226  | 226  | 100 - | 1877 | 2102 | 304085 | 304310 |
| UN20673 | Rsa1.0_03168.1 | 1415 | 24827  | 1.00E-152 | 306  | 317  | 96 +  | 202  | 518  | 4731   | 5047   |
| UN20674 | Rsa1.0_03276.1 | 1710 | 24152  | 0         | 422  | 430  | 98 +  | 1284 | 1710 | 15610  | 16039  |
| UN20675 | Rsa1.0_03268.1 | 1221 | 24197  | 0         | 1211 | 1230 | 98 -  | 2    | 1221 | 15696  | 16920  |
| UN20676 | Rsa1.0_02074.1 | 1309 | 35370  | 0         | 1205 | 1235 | 97 -  | 79   | 1309 | 30138  | 31372  |
| UN20677 | Rsa1.0_05228.1 | 1787 | 14437  | 1.00E-159 | 360  | 385  | 93 -  | 1405 | 1787 | 4937   | 5313   |
| UN20678 | Rsa1.0_00819.1 | 1203 | 62918  | 1.00E-161 | 351  | 371  | 94 -  | 837  | 1201 | 46857  | 47221  |
| UN20679 | Rsa1.0_00088.1 | 1179 | 141341 | 1.00E-132 | 240  | 240  | 100 - | 3    | 242  | 105848 | 106087 |
| UN20680 | Rsa1.0_02663.1 | 1555 | 169243 | 0         | 559  | 574  | 97 +  | 902  | 1475 | 7793   | 8361   |
| UN20681 | Rsa1.0_01983.1 | 1573 | 36509  | 0         | 368  | 373  | 98 +  | 1    | 370  | 30035  | 30407  |
| UN20682 | Rsa1.0_02006.1 | 821  | 36135  | 0         | 810  | 816  | 99 -  | 3    | 818  | 32716  | 33531  |
| UN20683 | Rsa1.0_02987.1 | 815  | 26196  | 0         | 359  | 371  | 96 +  | 178  | 548  | 22775  | 23145  |
| UN20684 | Rsa1.0_00215.1 | 872  | 201775 | 0         | 440  | 442  | 99 +  | 4    | 445  | 162412 | 162853 |
| UN20685 | Rsa1.0_01767.1 | 737  | 39615  | 2.00E-51  | 186  | 211  | 88 +  | 497  | 706  | 36769  | 36977  |
| UN20686 | Rsa1.0_00644.1 | 1005 | 136881 | 1.00E-150 | 383  | 417  | 91 -  | 607  | 1005 | 62662  | 63077  |
| UN20687 | Rsa1.0_00007.1 | 1784 | 239325 | 0         | 1397 | 1478 | 94 +  | 318  | 1784 | 49571  | 51044  |
| UN20688 | Rsa1.0_01934.1 | 1107 | 37162  | 0         | 367  | 371  | 98 -  | 739  | 1107 | 3569   | 3939   |
| UN20689 | Rsa1.0_00341.1 | 1362 | 249309 | 0         | 608  | 638  | 95 +  | 218  | 852  | 189541 | 190172 |
| UN20690 | Rsa1.0_01287.1 | 1640 | 49195  | 0         | 901  | 929  | 96 -  | 716  | 1640 | 2253   | 3181   |
| UN20691 | Rsa1.0_01420.1 | 1240 | 46210  | 0         | 1232 | 1240 | 99 -  | 3    | 1240 | 10520  | 11759  |
| UN20692 | Rsa1.0_02016.1 | 836  | 36003  | 0         | 345  | 347  | 99 +  | 491  | 836  | 26194  | 26539  |
| UN20693 | Rsa1.0_00233.1 | 1590 | 104918 | 0         | 1074 | 1077 | 99 +  | 514  | 1590 | 66048  | 67124  |
| UN20694 | Rsa1.0_00820.1 | 1184 | 62911  | 1.00E-134 | 282  | 293  | 96 -  | 790  | 1081 | 61834  | 62123  |
| UN20695 | Rsa1.0_00384.1 | 801  | 89278  | 0         | 793  | 808  | 98 -  | 3    | 801  | 945    | 1751   |
| UN20696 | Rsa1.0_00010.1 | 896  | 294827 | 1.00E-117 | 223  | 226  | 98 -  | 146  | 371  | 248372 | 248597 |
| UN20697 | Rsa1.0_00204.1 | 788  | 109056 | 0         | 350  | 350  | 100 + | 437  | 786  | 93161  | 93510  |
| UN20698 | Rsa1.0_00278.1 | 795  | 231896 | 3.00E-93  | 192  | 198  | 96 -  | 215  | 412  | 67513  | 67710  |
| UN20699 | Rsa1.0_00056.1 | 1177 | 332604 | 0         | 352  | 353  | 99 +  | 824  | 1176 | 313940 | 314292 |
| UN20700 | Rsa1.0_00055.1 | 1296 | 520193 | 0         | 634  | 655  | 96 +  | 603  | 1252 | 348112 | 348766 |
| UN20701 | Rsa1.0_00034.1 | 1822 | 260119 | 0         | 569  | 599  | 94 -  | 3    | 588  | 79102  | 79690  |
| UN20702 | Rsa1.0_02367.1 | 1342 | 32106  | 0         | 661  | 662  | 99 +  | 680  | 1341 | 25289  | 25950  |
| UN20703 | Rsa1.0_00027.1 | 804  | 283362 | 1.00E-169 | 341  | 353  | 96 -  | 450  | 802  | 279812 | 280163 |
| UN20704 | Rsa1.0_04653.1 | 1250 | 16509  | 0         | 402  | 422  | 95 -  | 103  | 523  | 5218   | 5632   |
| UN20705 | Rsa1.0_00069.1 | 1087 | 403561 | 0         | 347  | 350  | 99 +  | 1    | 349  | 385301 | 385649 |
| UN20706 | Rsa1.0_00361.1 | 1391 | 91181  | 0         | 369  | 369  | 100 - | 1023 | 1391 | 37963  | 38331  |
| UN20707 | Rsa1.0_01236.1 | 762  | 50156  | 0         | 445  | 446  | 99 -  | 1    | 446  | 1967   | 2412   |

|         |                |      |        |           |      |      |       |     |      |        |        |
|---------|----------------|------|--------|-----------|------|------|-------|-----|------|--------|--------|
| UN20708 | Rsa1.0_00098.1 | 1642 | 349239 | 0         | 917  | 934  | 98 -  | 717 | 1641 | 264086 | 265018 |
| UN20709 | Rsa1.0_00807.1 | 1393 | 63607  | 1.00E-139 | 298  | 311  | 95 +  | 2   | 310  | 11860  | 12170  |
| UN20710 | Rsa1.0_00655.1 | 1221 | 195840 | 0         | 1194 | 1221 | 97 +  | 2   | 1219 | 35914  | 37134  |
| UN20711 | Rsa1.0_02646.1 | 1021 | 29123  | 0         | 447  | 451  | 99 -  | 568 | 1018 | 14057  | 14507  |
| UN20712 | Rsa1.0_00007.1 | 1907 | 239325 | 0         | 1516 | 1740 | 87 -  | 13  | 1692 | 52943  | 54637  |
| UN20713 | Rsa1.0_00069.1 | 803  | 403561 | 1.00E-101 | 244  | 260  | 93 -  | 51  | 309  | 200655 | 200909 |
| UN20714 | Rsa1.0_00800.1 | 1263 | 63868  | 0         | 580  | 622  | 93 -  | 646 | 1260 | 11244  | 11842  |
| UN20715 | Rsa1.0_01067.1 | 1569 | 55230  | 8.00E-40  | 88   | 89   | 98 +  | 371 | 459  | 26955  | 27043  |
| UN20716 | Rsa1.0_14764.1 | 931  | 3084   | 0         | 729  | 774  | 94 +  | 1   | 771  | 1870   | 2634   |
| UN20717 | Rsa1.0_00009.1 | 1608 | 232558 | 0         | 466  | 484  | 96 +  | 1   | 476  | 60720  | 61202  |
| UN20718 | Rsa1.0_01539.1 | 716  | 43698  | 1.00E-129 | 238  | 239  | 99 +  | 2   | 240  | 22171  | 22409  |
| UN20719 | Rsa1.0_04820.1 | 1156 | 15857  | 0         | 687  | 732  | 93 +  | 1   | 721  | 14907  | 15622  |
| UN20720 | Rsa1.0_00579.1 | 1373 | 148308 | 0         | 404  | 406  | 99 -  | 967 | 1372 | 63803  | 64208  |
| UN20721 | Rsa1.0_03408.1 | 827  | 23154  | 0         | 363  | 367  | 98 -  | 1   | 367  | 16945  | 17311  |
| UN20722 | Rsa1.0_00302.1 | 1597 | 97521  | 1.00E-140 | 309  | 326  | 94 -  | 310 | 635  | 82291  | 82615  |
| UN20723 | Rsa1.0_02110.1 | 815  | 34919  | 0         | 784  | 832  | 94 -  | 1   | 814  | 22731  | 23550  |
| UN20724 | Rsa1.0_02872.1 | 1107 | 27080  | 0         | 498  | 526  | 94 +  | 26  | 545  | 11232  | 11749  |
| UN20725 | Rsa1.0_00217.1 | 1017 | 107079 | 0         | 538  | 542  | 99 -  | 478 | 1017 | 99824  | 100365 |
| UN20726 | Rsa1.0_04214.1 | 974  | 18437  | 0         | 595  | 603  | 98 +  | 1   | 601  | 6070   | 6672   |
| UN20727 | Rsa1.0_03521.1 | 895  | 396204 | 1.00E-161 | 315  | 324  | 97 +  | 572 | 895  | 15137  | 15460  |
| UN20728 | Rsa1.0_07396.1 | 974  | 9465   | 0         | 955  | 957  | 99 +  | 17  | 973  | 77     | 1033   |
| UN20729 | Rsa1.0_00384.1 | 989  | 89278  | 1.00E-174 | 322  | 326  | 98 +  | 663 | 988  | 66429  | 66754  |
| UN20730 | Rsa1.0_02282.1 | 1008 | 163951 | 0         | 369  | 372  | 99 -  | 619 | 990  | 162912 | 163283 |
| UN20731 | Rsa1.0_03789.1 | 709  | 20847  | 1.00E-171 | 372  | 392  | 94 +  | 318 | 709  | 9758   | 10146  |
| UN20732 | Rsa1.0_12809.1 | 886  | 5119   | 1.00E-172 | 393  | 419  | 93 -  | 3   | 420  | 4445   | 4848   |
| UN20733 | Rsa1.0_00503.1 | 1017 | 79468  | 0         | 414  | 414  | 100 + | 603 | 1016 | 69177  | 69590  |
| UN20734 | Rsa1.0_00069.1 | 802  | 403561 | 1.00E-122 | 305  | 328  | 92 +  | 2   | 318  | 169710 | 170031 |
| UN20735 | Rsa1.0_04194.1 | 1452 | 132734 | 1.00E-149 | 292  | 300  | 97 -  | 492 | 791  | 132027 | 132326 |
| UN20736 | Rsa1.0_00944.1 | 842  | 58733  | 0         | 425  | 426  | 99 -  | 417 | 842  | 41318  | 41743  |
| UN20737 | Rsa1.0_02148.1 | 461  | 34610  | 4.00E-91  | 201  | 210  | 95 +  | 252 | 461  | 23020  | 23228  |
| UN20738 | Rsa1.0_00557.1 | 785  | 75865  | 0         | 501  | 524  | 95 +  | 225 | 745  | 69508  | 70031  |
| UN20739 | Rsa1.0_06054.1 | 707  | 11847  | 0         | 399  | 400  | 99 +  | 298 | 697  | 1351   | 1750   |
| UN20740 | Rsa1.0_00679.1 | 974  | 68971  | 1.00E-104 | 315  | 355  | 88 +  | 633 | 971  | 17739  | 18087  |
| UN20741 | Rsa1.0_00087.1 | 1592 | 761073 | 0         | 353  | 355  | 99 +  | 617 | 971  | 189734 | 190088 |
| UN20742 | Rsa1.0_00439.1 | 997  | 142776 | 0         | 606  | 609  | 99 -  | 79  | 687  | 130460 | 131068 |
| UN20743 | Rsa1.0_00553.1 | 1019 | 75983  | 5.00E-74  | 145  | 146  | 99 +  | 199 | 344  | 12359  | 12504  |
| UN20744 | Rsa1.0_00227.1 | 1179 | 105849 | 1.00E-139 | 302  | 317  | 95 -  | 832 | 1140 | 102281 | 102596 |
| UN20745 | Rsa1.0_00079.1 | 879  | 606987 | 0         | 862  | 882  | 97 +  | 1   | 879  | 134515 | 135396 |
| UN20746 | Rsa1.0_00041.1 | 805  | 186197 | 0         | 381  | 388  | 98 +  | 420 | 805  | 73947  | 74334  |

|         |                |      |        |           |      |      |       |      |      |        |        |
|---------|----------------|------|--------|-----------|------|------|-------|------|------|--------|--------|
| UN20747 | Rsa1.0.02086.1 | 1654 | 35198  | 0         | 1601 | 1661 | 96 -  | 2    | 1654 | 27599  | 29253  |
| UN20748 | Rsa1.0.00421.1 | 785  | 86365  | 1.00E-180 | 326  | 327  | 99 -  | 459  | 784  | 82607  | 82933  |
| UN20749 | Rsa1.0.02160.1 | 1392 | 34468  | 1.00E-151 | 351  | 377  | 93 +  | 2    | 370  | 13384  | 13744  |
| UN20750 | Rsa1.0.04113.1 | 1706 | 18986  | 1.00E-126 | 251  | 257  | 97 +  | 1165 | 1419 | 10364  | 10620  |
| UN20751 | Rsa1.0.04242.1 | 1170 | 18340  | 0         | 740  | 774  | 95 -  | 352  | 1118 | 14714  | 15487  |
| UN20752 | Rsa1.0.05474.1 | 1503 | 13620  | 8.00E-40  | 106  | 113  | 93 -  | 1338 | 1450 | 10742  | 10854  |
| UN20753 | Rsa1.0.00152.1 | 649  | 257730 | 1.00E-153 | 336  | 355  | 94 -  | 291  | 641  | 203802 | 204155 |
| UN20754 | Rsa1.0.00221.1 | 576  | 106972 | 0         | 371  | 371  | 100 + | 206  | 576  | 48663  | 49033  |
| UN20755 | Rsa1.0.02899.1 | 1176 | 26936  | 0         | 562  | 569  | 98 -  | 608  | 1176 | 767    | 1335   |
| UN20756 | Rsa1.0.02496.1 | 706  | 30814  | 1.00E-156 | 303  | 311  | 97 -  | 390  | 700  | 14674  | 14984  |
| UN20757 | Rsa1.0.00344.1 | 1563 | 191774 | 1.00E-114 | 254  | 266  | 95 +  | 586  | 850  | 132724 | 132988 |
| UN20758 | Rsa1.0.13506.1 | 1199 | 4760   | 1.00E-138 | 313  | 330  | 94 +  | 870  | 1199 | 3263   | 3585   |
| UN20759 | Rsa1.0.01541.1 | 1044 | 43682  | 1.00E-114 | 244  | 252  | 96 +  | 796  | 1044 | 17489  | 17739  |
| UN20760 | Rsa1.0.01280.1 | 1264 | 49321  | 0         | 897  | 916  | 97 +  | 348  | 1263 | 29082  | 29997  |
| UN20761 | Rsa1.0.03695.1 | 653  | 21329  | 1.00E-165 | 295  | 295  | 100 + | 358  | 652  | 5196   | 5490   |
| UN20762 | Rsa1.0.00210.1 | 1211 | 108424 | 1.00E-179 | 345  | 353  | 97 +  | 95   | 447  | 50760  | 51109  |
| UN20763 | Rsa1.0.02157.1 | 604  | 149652 | 0         | 464  | 464  | 100 + | 141  | 604  | 11588  | 12051  |
| UN20764 | Rsa1.0.03491.1 | 1428 | 22541  | 1.00E-162 | 323  | 335  | 96 +  | 1101 | 1427 | 21174  | 21508  |
| UN20765 | Rsa1.0.02282.1 | 1135 | 163951 | 7.00E-86  | 204  | 218  | 93 +  | 297  | 514  | 149855 | 150072 |
| UN20766 | Rsa1.0.04124.1 | 1397 | 18945  | 1.00E-179 | 363  | 378  | 96 -  | 3    | 371  | 8363   | 8739   |
| UN20767 | Rsa1.0.25249.1 | 1269 | 945    | 0         | 936  | 945  | 99 -  | 217  | 1159 | 1      | 945    |
| UN20768 | Rsa1.0.00154.1 | 1111 | 189461 | 0         | 607  | 616  | 98 -  | 262  | 877  | 183631 | 184246 |
| UN20769 | Rsa1.0.03602.1 | 1251 | 21847  | 0         | 598  | 615  | 97 +  | 69   | 677  | 5938   | 6552   |
| UN20770 | Rsa1.0.05423.1 | 1207 | 13800  | 1.00E-140 | 262  | 265  | 98 -  | 3    | 267  | 9118   | 9382   |
| UN20771 | Rsa1.0.01364.1 | 1072 | 47172  | 0         | 468  | 475  | 98 -  | 600  | 1072 | 43469  | 43943  |
| UN20772 | Rsa1.0.02105.1 | 920  | 156953 | 0         | 385  | 402  | 95 +  | 40   | 441  | 150764 | 151165 |
| UN20773 | Rsa1.0.00710.1 | 1106 | 67325  | 0         | 412  | 414  | 99 +  | 1    | 413  | 255    | 668    |
| UN20774 | Rsa1.0.00040.1 | 1127 | 324196 | 0         | 790  | 791  | 99 -  | 337  | 1127 | 296469 | 297259 |
| UN20775 | Rsa1.0.00139.1 | 932  | 357786 | 1.00E-119 | 516  | 613  | 84 +  | 151  | 757  | 141498 | 142104 |
| UN20776 | Rsa1.0.00737.1 | 1170 | 66432  | 1.00E-141 | 321  | 343  | 93 +  | 828  | 1170 | 30743  | 31076  |
| UN20777 | Rsa1.0.00067.1 | 1247 | 415055 | 1.00E-100 | 268  | 293  | 91 -  | 958  | 1247 | 78597  | 78874  |
| UN20778 | Rsa1.0.00206.1 | 1228 | 109040 | 0         | 618  | 620  | 99 +  | 5    | 624  | 84995  | 85614  |
| UN20779 | Rsa1.0.00146.1 | 1100 | 149343 | 0         | 1063 | 1099 | 96 +  | 8    | 1100 | 135513 | 136611 |
| UN20780 | Rsa1.0.01269.1 | 2929 | 49622  | 0         | 379  | 396  | 95 +  | 1194 | 1586 | 32684  | 33079  |
| UN20781 | Rsa1.0.00045.1 | 981  | 328694 | 0         | 378  | 393  | 96 +  | 590  | 980  | 132518 | 132910 |
| UN20782 | Rsa1.0.00985.1 | 1154 | 161950 | 0         | 634  | 636  | 99 -  | 2    | 637  | 133968 | 134603 |
| UN20783 | Rsa1.0.00541.1 | 806  | 76863  | 0         | 512  | 513  | 99 -  | 9    | 521  | 62313  | 62825  |
| UN20784 | Rsa1.0.00189.1 | 1412 | 111830 | 0         | 1104 | 1139 | 96 -  | 280  | 1412 | 70287  | 71425  |
| UN20785 | Rsa1.0.00394.1 | 1348 | 148426 | 0         | 539  | 567  | 95 -  | 793  | 1348 | 135128 | 135689 |

|         |                |      |        |           |      |      |       |      |      |        |        |
|---------|----------------|------|--------|-----------|------|------|-------|------|------|--------|--------|
| UN20786 | Rsa1.0.03220.1 | 1180 | 24536  | 0         | 1168 | 1178 | 99 -  | 3    | 1180 | 12496  | 13673  |
| UN20787 | Rsa1.0.00458.1 | 1128 | 82717  | 0         | 460  | 466  | 98 -  | 3    | 467  | 32223  | 32688  |
| UN20788 | Rsa1.0.02874.1 | 983  | 27070  | 1.00E-111 | 215  | 217  | 99 +  | 3    | 218  | 1674   | 1890   |
| UN20789 | Rsa1.0.01412.1 | 877  | 46311  | 0         | 508  | 541  | 93 +  | 349  | 876  | 6349   | 6884   |
| UN20790 | Rsa1.0.00662.1 | 985  | 192183 | 1.00E-167 | 397  | 431  | 92 +  | 571  | 982  | 2200   | 2630   |
| UN20791 | Rsa1.0.00586.1 | 1043 | 163802 | 0         | 543  | 558  | 97 +  | 3    | 560  | 145622 | 146177 |
| UN20792 | Rsa1.0.01110.1 | 1451 | 195852 | 2.00E-80  | 171  | 177  | 96 -  | 1264 | 1440 | 173678 | 173854 |
| UN20793 | Rsa1.0.03514.1 | 806  | 22346  | 0         | 344  | 350  | 98 -  | 457  | 806  | 18722  | 19071  |
| UN20794 | Rsa1.0.21003.1 | 1499 | 1246   | 0         | 429  | 431  | 99 +  | 106  | 536  | 1      | 431    |
| UN20795 | Rsa1.0.02107.1 | 1480 | 34940  | 0         | 464  | 464  | 100 + | 5    | 468  | 4870   | 5333   |
| UN20796 | Rsa1.0.09517.1 | 1217 | 6319   | 0         | 684  | 708  | 96 -  | 159  | 863  | 2293   | 3000   |
| UN20797 | Rsa1.0.08949.1 | 897  | 6759   | 1.00E-12  | 83   | 100  | 83 -  | 91   | 190  | 6313   | 6400   |
| UN20798 | Rsa1.0.02231.1 | 919  | 33661  | 0         | 476  | 484  | 98 -  | 436  | 919  | 15670  | 16153  |
| UN20799 | Rsa1.0.01469.1 | 1110 | 45139  | 1.00E-177 | 315  | 315  | 100 + | 3    | 317  | 20524  | 20838  |
| UN20800 | Rsa1.0.00262.1 | 995  | 101906 | 1.00E-162 | 299  | 302  | 99 -  | 690  | 991  | 55567  | 55868  |
| UN20801 | Rsa1.0.00107.1 | 993  | 431659 | 0         | 505  | 520  | 97 -  | 482  | 993  | 165640 | 166159 |
| UN20802 | Rsa1.0.19089.1 | 1128 | 1481   | 0         | 511  | 516  | 99 +  | 614  | 1128 | 886    | 1401   |
| UN20803 | Rsa1.0.09255.1 | 1026 | 6525   | 0         | 697  | 697  | 100 - | 1    | 697  | 1257   | 1953   |
| UN20804 | Rsa1.0.00937.1 | 1322 | 59061  | 0         | 354  | 362  | 97 +  | 694  | 1055 | 13645  | 14006  |
| UN20805 | Rsa1.0.05618.1 | 677  | 13165  | 2.33E-156 | 395  | 431  | 91 +  | 1    | 420  | 6671   | 7091   |
| UN20806 | Rsa1.0.00004.1 | 1080 | 253996 | 0         | 719  | 757  | 94 +  | 1    | 747  | 69018  | 69773  |
| UN20807 | Rsa1.0.02975.1 | 497  | 26322  | 1.00E-134 | 245  | 246  | 99 -  | 10   | 255  | 23332  | 23577  |
| UN20808 | Rsa1.0.05692.1 | 1847 | 12914  | 0         | 639  | 658  | 97 +  | 1    | 649  | 4871   | 5528   |
| UN20809 | Rsa1.0.00176.1 | 858  | 240984 | 1.00E-131 | 238  | 238  | 100 + | 620  | 857  | 219890 | 220127 |
| UN20810 | Rsa1.0.01234.1 | 679  | 50183  | 1.00E-165 | 301  | 303  | 99 -  | 121  | 423  | 20599  | 20901  |
| UN20811 | Rsa1.0.05156.1 | 1208 | 14648  | 0         | 540  | 541  | 99 -  | 283  | 823  | 10618  | 11158  |
| UN20812 | Rsa1.0.00015.1 | 1323 | 561803 | 0         | 417  | 422  | 98 +  | 5    | 426  | 178692 | 179113 |
| UN20813 | Rsa1.0.00041.1 | 995  | 186197 | 1.00E-172 | 359  | 374  | 95 -  | 3    | 375  | 70808  | 71180  |
| UN20814 | Rsa1.0.00504.1 | 1097 | 79334  | 0         | 1087 | 1097 | 99 +  | 2    | 1097 | 75249  | 76344  |
| UN20815 | Rsa1.0.01299.1 | 987  | 162028 | 0         | 969  | 986  | 98 -  | 1    | 986  | 4579   | 5564   |
| UN20816 | Rsa1.0.00033.1 | 1408 | 515811 | 0         | 1164 | 1196 | 97 +  | 217  | 1408 | 391469 | 392660 |
| UN20817 | Rsa1.0.01622.1 | 945  | 42071  | 0         | 938  | 943  | 99 -  | 3    | 944  | 1160   | 2102   |
| UN20818 | Rsa1.0.00754.1 | 1128 | 65689  | 0         | 743  | 764  | 97 -  | 4    | 761  | 53718  | 54481  |
| UN20819 | Rsa1.0.04249.1 | 956  | 18269  | 1.00E-175 | 359  | 373  | 96 +  | 2    | 371  | 4457   | 4827   |
| UN20820 | Rsa1.0.02937.1 | 912  | 26605  | 0         | 340  | 341  | 99 -  | 1    | 340  | 9814   | 10154  |
| UN20821 | Rsa1.0.06864.1 | 1222 | 10240  | 1.00E-176 | 394  | 424  | 92 -  | 2    | 418  | 5823   | 6233   |
| UN20822 | Rsa1.0.00067.1 | 1887 | 415055 | 0         | 711  | 760  | 93 +  | 994  | 1744 | 227438 | 228184 |
| UN20823 | Rsa1.0.29309.1 | 1228 | 786    | 1.00E-155 | 278  | 278  | 100 + | 489  | 766  | 344    | 621    |
| UN20824 | Rsa1.0.03664.1 | 1065 | 21487  | 0         | 361  | 367  | 98 +  | 2    | 368  | 3076   | 3441   |



|         |                |      |        |           |      |      |       |      |      |        |        |
|---------|----------------|------|--------|-----------|------|------|-------|------|------|--------|--------|
| UN20825 | Rsa1.0.00470.1 | 748  | 81968  | 0         | 721  | 749  | 96 +  | 3    | 748  | 78045  | 78790  |
| UN20826 | Rsa1.0.00401.1 | 1104 | 244410 | 1.00E-174 | 368  | 385  | 95 -  | 3    | 384  | 30107  | 30491  |
| UN20827 | Rsa1.0.01926.1 | 1056 | 37206  | 0         | 614  | 627  | 97 +  | 48   | 674  | 13108  | 13734  |
| UN20828 | Rsa1.0.01523.1 | 1406 | 43959  | 8.00E-46  | 260  | 305  | 85 -  | 1113 | 1406 | 1851   | 2146   |
| UN20829 | Rsa1.0.01112.1 | 1308 | 310601 | 0         | 611  | 653  | 93 +  | 3    | 639  | 44288  | 44925  |
| UN20830 | Rsa1.0.00816.1 | 1257 | 403350 | 0         | 587  | 591  | 99 +  | 667  | 1257 | 251526 | 252116 |
| UN20831 | Rsa1.0.00101.1 | 964  | 267193 | 0         | 929  | 947  | 98 -  | 18   | 964  | 103627 | 104560 |
| UN20832 | Rsa1.0.00257.1 | 1151 | 102407 | 0         | 572  | 581  | 98 +  | 4    | 582  | 65673  | 66248  |
| UN20833 | Rsa1.0.04413.1 | 1533 | 17481  | 0         | 818  | 824  | 99 +  | 1    | 821  | 9869   | 10692  |
| UN20834 | Rsa1.0.02983.1 | 525  | 26268  | 1.00E-102 | 256  | 273  | 93 -  | 256  | 525  | 442    | 709    |
| UN20835 | Rsa1.0.00236.1 | 897  | 104771 | 0         | 504  | 519  | 97 -  | 383  | 897  | 83309  | 83827  |
| UN20836 | Rsa1.0.00533.1 | 1409 | 77375  | 0         | 388  | 397  | 97 +  | 1    | 397  | 43143  | 43539  |
| UN20837 | Rsa1.0.00155.1 | 1396 | 118465 | 0         | 605  | 617  | 98 +  | 498  | 1114 | 12377  | 12993  |
| UN20838 | Rsa1.0.00216.1 | 1545 | 197563 | 0         | 377  | 377  | 100 - | 1166 | 1542 | 11068  | 11444  |
| UN20839 | Rsa1.0.00748.1 | 1371 | 65983  | 1.00E-139 | 298  | 315  | 94 -  | 1064 | 1369 | 14260  | 14574  |
| UN20840 | Rsa1.0.01237.1 | 1679 | 50124  | 0         | 655  | 659  | 99 -  | 3    | 661  | 32744  | 33401  |
| UN20841 | Rsa1.0.00442.1 | 1729 | 84596  | 0         | 518  | 520  | 99 +  | 1209 | 1728 | 19753  | 20272  |
| UN20842 | Rsa1.0.01573.1 | 1113 | 42964  | 0         | 473  | 508  | 93 +  | 12   | 504  | 14934  | 15436  |
| UN20843 | Rsa1.0.00048.1 | 1218 | 167185 | 0         | 1185 | 1222 | 96 +  | 1    | 1218 | 125129 | 126337 |
| UN20844 | Rsa1.0.01853.1 | 797  | 147800 | 0         | 789  | 795  | 99 -  | 3    | 797  | 27663  | 28457  |
| UN20845 | Rsa1.0.03239.1 | 1216 | 24430  | 0         | 418  | 418  | 100 + | 3    | 420  | 10882  | 11299  |
| UN20846 | Rsa1.0.07058.1 | 541  | 9964   | 0         | 526  | 542  | 97 +  | 3    | 541  | 5540   | 6079   |
| UN20847 | Rsa1.0.03332.1 | 944  | 23665  | 0         | 925  | 947  | 97 +  | 1    | 944  | 12926  | 13872  |
| UN20848 | Rsa1.0.01718.1 | 238  | 40389  | 1.00E-129 | 237  | 238  | 99 -  | 1    | 238  | 35329  | 35566  |
| UN20849 | Rsa1.0.07408.1 | 765  | 9445   | 0         | 414  | 418  | 99 -  | 348  | 765  | 6023   | 6440   |
| UN20850 | Rsa1.0.01452.1 | 988  | 45459  | 0         | 553  | 553  | 100 - | 436  | 988  | 20359  | 20911  |
| UN20851 | Rsa1.0.01913.1 | 1526 | 37363  | 0         | 845  | 849  | 99 +  | 130  | 978  | 22007  | 22854  |
| UN20852 | Rsa1.0.00522.1 | 1499 | 78103  | 0         | 698  | 699  | 99 +  | 801  | 1499 | 51939  | 52637  |
| UN20853 | Rsa1.0.00221.1 | 1708 | 106972 | 0         | 867  | 873  | 99 +  | 607  | 1479 | 30142  | 31014  |
| UN20854 | Rsa1.0.00330.1 | 1137 | 94666  | 0         | 353  | 353  | 100 + | 784  | 1136 | 26086  | 26438  |
| UN20855 | Rsa1.0.16660.1 | 1410 | 2073   | 1.00E-169 | 334  | 345  | 96 +  | 1075 | 1408 | 645    | 989    |
| UN20856 | Rsa1.0.00064.1 | 1389 | 240927 | 0         | 404  | 408  | 99 -  | 307  | 714  | 47280  | 47687  |
| UN20857 | Rsa1.0.00460.1 | 1149 | 206387 | 0         | 605  | 606  | 99 -  | 542  | 1147 | 17656  | 18261  |
| UN20858 | Rsa1.0.00144.1 | 1383 | 120708 | 0         | 827  | 866  | 95 -  | 1    | 852  | 25501  | 26362  |
| UN20859 | Rsa1.0.00251.1 | 1595 | 303968 | 0         | 1351 | 1390 | 97 +  | 213  | 1595 | 8338   | 9722   |
| UN20860 | Rsa1.0.00453.1 | 1373 | 83031  | 1.00E-147 | 329  | 344  | 95 +  | 1037 | 1373 | 73766  | 74105  |
| UN20861 | Rsa1.0.00069.1 | 1729 | 403561 | 1.00E-140 | 334  | 357  | 93 +  | 1375 | 1729 | 177753 | 178103 |
| UN20862 | Rsa1.0.03523.1 | 1154 | 22299  | 0         | 345  | 346  | 99 +  | 809  | 1154 | 10142  | 10487  |
| UN20863 | Rsa1.0.00070.1 | 962  | 150321 | 1.00E-119 | 265  | 279  | 94 -  | 6    | 280  | 1      | 279    |

|         |                |      |        |           |      |      |       |      |      |        |        |
|---------|----------------|------|--------|-----------|------|------|-------|------|------|--------|--------|
| UN20864 | Rsa1.0_00045.1 | 832  | 328694 | 5.00E-92  | 312  | 356  | 87 -  | 402  | 755  | 133104 | 133459 |
| UN20865 | Rsa1.0_00003.1 | 960  | 340054 | 0         | 605  | 641  | 94 -  | 326  | 960  | 16046  | 16685  |
| UN20866 | Rsa1.0_39807.1 | 2166 | 564    | 0         | 459  | 470  | 97 -  | 672  | 1141 | 1      | 463    |
| UN20867 | Rsa1.0_00797.1 | 1762 | 63959  | 0         | 682  | 682  | 100 + | 224  | 905  | 9991   | 10672  |
| UN20868 | Rsa1.0_03663.1 | 1893 | 21488  | 1.00E-136 | 250  | 251  | 99 +  | 530  | 780  | 12839  | 13089  |
| UN20869 | Rsa1.0_02125.1 | 1786 | 34775  | 0         | 863  | 864  | 99 +  | 216  | 1079 | 20554  | 21417  |
| UN20870 | Rsa1.0_04510.1 | 1826 | 17033  | 0         | 347  | 348  | 99 +  | 1479 | 1826 | 12403  | 12750  |
| UN20871 | Rsa1.0_00715.1 | 1315 | 67116  | 0         | 552  | 553  | 99 -  | 3    | 555  | 14847  | 15399  |
| UN20872 | Rsa1.0_00040.1 | 2241 | 324196 | 0         | 1202 | 1267 | 94 +  | 884  | 2141 | 239506 | 240758 |
| UN20873 | Rsa1.0_01016.1 | 994  | 181422 | 0         | 517  | 537  | 96 +  | 459  | 994  | 27020  | 27553  |
| UN20874 | Rsa1.0_23894.1 | 1307 | 1018   | 0         | 437  | 449  | 97 +  | 516  | 955  | 555    | 1003   |
| UN20875 | Rsa1.0_00556.1 | 1349 | 207212 | 0         | 590  | 633  | 93 -  | 3    | 625  | 18791  | 19419  |
| UN20876 | Rsa1.0_00132.1 | 1470 | 124299 | 0         | 1184 | 1221 | 96 +  | 1    | 1217 | 55761  | 56980  |
| UN20877 | Rsa1.0_00051.1 | 1216 | 258225 | 0         | 1148 | 1209 | 94 +  | 3    | 1192 | 88776  | 89968  |
| UN20878 | Rsa1.0_00382.1 | 1027 | 251946 | 0         | 475  | 497  | 95 -  | 3    | 499  | 173998 | 174480 |
| UN20879 | Rsa1.0_00480.1 | 743  | 81325  | 1.00E-154 | 286  | 289  | 98 +  | 3    | 291  | 619    | 907    |
| UN20880 | Rsa1.0_00788.1 | 1643 | 64237  | 0         | 495  | 497  | 99 +  | 1147 | 1643 | 34653  | 35149  |
| UN20881 | Rsa1.0_03560.1 | 1182 | 22092  | 1.00E-173 | 348  | 360  | 96 +  | 387  | 745  | 2543   | 2902   |
| UN20882 | Rsa1.0_00342.1 | 1306 | 93695  | 0         | 413  | 422  | 97 +  | 885  | 1306 | 35893  | 36314  |
| UN20883 | Rsa1.0_01661.1 | 971  | 41400  | 0         | 826  | 832  | 99 -  | 116  | 947  | 32126  | 32957  |
| UN20884 | Rsa1.0_02144.1 | 1483 | 34630  | 0         | 407  | 420  | 96 +  | 1018 | 1427 | 2872   | 3291   |
| UN20885 | Rsa1.0_01461.1 | 1486 | 45240  | 0         | 1460 | 1491 | 97 +  | 3    | 1479 | 26105  | 27595  |
| UN20886 | Rsa1.0_01857.1 | 1610 | 38103  | 1.00E-121 | 288  | 306  | 94 -  | 1294 | 1594 | 8868   | 9166   |
| UN20887 | Rsa1.0_14912.1 | 875  | 2970   | 1.00E-141 | 323  | 343  | 94 +  | 532  | 873  | 1944   | 2285   |
| UN20888 | Rsa1.0_01467.1 | 1035 | 45161  | 1.00E-171 | 343  | 352  | 97 +  | 684  | 1035 | 15493  | 15840  |
| UN20889 | Rsa1.0_00002.1 | 1280 | 601661 | 0         | 1081 | 1092 | 98 -  | 1    | 1092 | 574057 | 575148 |
| UN20890 | Rsa1.0_00391.1 | 1011 | 183853 | 0         | 522  | 538  | 97 +  | 342  | 879  | 64159  | 64696  |
| UN20891 | Rsa1.0_00273.1 | 2392 | 326186 | 0         | 628  | 631  | 99 +  | 1321 | 1951 | 307454 | 308084 |
| UN20892 | Rsa1.0_02086.1 | 1495 | 35198  | 0         | 378  | 379  | 99 +  | 974  | 1352 | 18885  | 19263  |
| UN20893 | Rsa1.0_20065.1 | 976  | 1346   | 0         | 973  | 976  | 99 +  | 1    | 974  | 308    | 1283   |
| UN20894 | Rsa1.0_00784.1 | 1134 | 64359  | 0         | 462  | 468  | 98 -  | 83   | 550  | 36891  | 37357  |
| UN20895 | Rsa1.0_02412.1 | 728  | 31643  | 0         | 416  | 419  | 99 +  | 293  | 711  | 4832   | 5250   |
| UN20896 | Rsa1.0_02143.1 | 1807 | 34632  | 0         | 1572 | 1601 | 98 +  | 215  | 1807 | 13061  | 14658  |
| UN20897 | Rsa1.0_00944.1 | 1082 | 58733  | 4.00E-87  | 170  | 172  | 98 -  | 876  | 1047 | 58562  | 58733  |
| UN20898 | Rsa1.0_01310.1 | 1707 | 164719 | 0         | 618  | 665  | 92 -  | 999  | 1657 | 8733   | 9391   |
| UN20899 | Rsa1.0_00290.1 | 929  | 225096 | 0         | 787  | 798  | 98 +  | 110  | 907  | 216554 | 217349 |
| UN20900 | Rsa1.0_01840.1 | 871  | 38449  | 0         | 434  | 437  | 99 -  | 435  | 871  | 15086  | 15522  |
| UN20901 | Rsa1.0_18686.1 | 873  | 1552   | 0         | 416  | 420  | 99 -  | 1    | 419  | 1      | 419    |
| UN20902 | Rsa1.0_00274.1 | 1304 | 210119 | 0         | 594  | 597  | 99 -  | 576  | 1172 | 188576 | 189172 |

|         |                |      |        |           |      |      |       |      |      |        |        |
|---------|----------------|------|--------|-----------|------|------|-------|------|------|--------|--------|
| UN20903 | Rsa1.0.01796.1 | 1221 | 39154  | 0         | 368  | 371  | 99 -  | 1    | 371  | 38212  | 38580  |
| UN20904 | Rsa1.0.00838.1 | 1993 | 153820 | 0         | 685  | 707  | 96 -  | 3    | 708  | 11067  | 11766  |
| UN20905 | Rsa1.0.00092.1 | 1395 | 659932 | 0         | 342  | 344  | 99 -  | 1    | 344  | 154977 | 155320 |
| UN20906 | Rsa1.0.01172.1 | 721  | 51734  | 0         | 355  | 362  | 98 +  | 359  | 720  | 9538   | 9897   |
| UN20907 | Rsa1.0.01112.1 | 1494 | 310601 | 0         | 372  | 375  | 99 +  | 1120 | 1494 | 292804 | 293178 |
| UN20908 | Rsa1.0.00152.1 | 920  | 257730 | 0         | 810  | 914  | 88 -  | 5    | 886  | 201925 | 202807 |
| UN20909 | Rsa1.0.13535.1 | 1352 | 4747   | 3.00E-76  | 159  | 163  | 97 +  | 1183 | 1341 | 4585   | 4747   |
| UN20910 | Rsa1.0.00176.1 | 2292 | 240984 | 1.00E-124 | 330  | 359  | 91 -  | 1827 | 2174 | 134591 | 134947 |
| UN20911 | Rsa1.0.00422.1 | 601  | 86144  | 0         | 444  | 470  | 94 +  | 139  | 601  | 16094  | 16562  |
| UN20912 | Rsa1.0.19162.1 | 774  | 1471   | 1.00E-137 | 257  | 260  | 98 -  | 1    | 260  | 686    | 945    |
| UN20913 | Rsa1.0.02064.1 | 981  | 35476  | 1.00E-153 | 308  | 317  | 97 -  | 3    | 318  | 9518   | 9831   |
| UN20914 | Rsa1.0.00287.1 | 1206 | 98687  | 1.00E-132 | 287  | 301  | 95 -  | 16   | 312  | 46610  | 46910  |
| UN20915 | Rsa1.0.02226.1 | 1658 | 33726  | 1.00E-149 | 322  | 334  | 96 -  | 1208 | 1536 | 12287  | 12618  |
| UN20916 | Rsa1.0.00780.1 | 1206 | 147795 | 1.00E-113 | 278  | 300  | 92 +  | 878  | 1175 | 16309  | 16604  |
| UN20917 | Rsa1.0.01803.1 | 1058 | 173846 | 0         | 409  | 420  | 97 +  | 641  | 1058 | 31867  | 32278  |
| UN20918 | Rsa1.0.00318.1 | 1590 | 96094  | 1.00E-125 | 264  | 273  | 96 +  | 1319 | 1590 | 79852  | 80123  |
| UN20919 | Rsa1.0.07565.1 | 784  | 9122   | 0         | 358  | 366  | 97 +  | 319  | 682  | 4285   | 4650   |
| UN20920 | Rsa1.0.02955.1 | 1001 | 26484  | 1.00E-129 | 244  | 247  | 98 +  | 3    | 249  | 12164  | 12410  |
| UN20921 | Rsa1.0.00541.1 | 930  | 76863  | 1.00E-112 | 271  | 292  | 92 -  | 626  | 916  | 9062   | 9341   |
| UN20922 | Rsa1.0.55015.1 | 930  | 415    | 0         | 405  | 417  | 97 +  | 3    | 419  | 2      | 415    |
| UN20923 | Rsa1.0.02398.1 | 1142 | 31766  | 0         | 503  | 526  | 95 +  | 615  | 1131 | 29879  | 30404  |
| UN20924 | Rsa1.0.00804.1 | 905  | 63726  | 0         | 608  | 620  | 98 -  | 286  | 905  | 2253   | 2870   |
| UN20925 | Rsa1.0.14003.1 | 1351 | 3930   | 0         | 386  | 396  | 97 +  | 960  | 1351 | 2895   | 3290   |
| UN20926 | Rsa1.0.00354.1 | 1318 | 232005 | 0         | 486  | 497  | 97 +  | 12   | 502  | 13044  | 13540  |
| UN20927 | Rsa1.0.02407.1 | 1021 | 31684  | 0         | 513  | 525  | 97 -  | 481  | 1003 | 9279   | 9801   |
| UN20928 | Rsa1.0.00810.1 | 910  | 63289  | 0         | 627  | 636  | 98 +  | 94   | 726  | 5220   | 5855   |
| UN20929 | Rsa1.0.00975.1 | 1093 | 57865  | 0         | 678  | 681  | 99 +  | 3    | 683  | 5590   | 6270   |
| UN20930 | Rsa1.0.16875.1 | 759  | 2005   | 1.00E-165 | 315  | 321  | 98 +  | 160  | 477  | 542    | 862    |
| UN20931 | Rsa1.0.03016.1 | 685  | 26000  | 0         | 680  | 688  | 98 -  | 1    | 685  | 4836   | 5523   |
| UN20932 | Rsa1.0.31506.1 | 1044 | 725    | 0         | 625  | 678  | 92 +  | 385  | 1044 | 1      | 665    |
| UN20933 | Rsa1.0.01322.1 | 1608 | 48166  | 1.00E-171 | 384  | 399  | 96 -  | 1222 | 1608 | 9660   | 10058  |
| UN20934 | Rsa1.0.09130.1 | 705  | 6623   | 0         | 627  | 647  | 96 -  | 41   | 686  | 3395   | 4035   |
| UN20935 | Rsa1.0.05277.1 | 1199 | 14284  | 1.00E-145 | 262  | 262  | 100 + | 272  | 533  | 7247   | 7508   |
| UN20936 | Rsa1.0.03627.1 | 739  | 21658  | 1.00E-113 | 240  | 249  | 96 +  | 3    | 250  | 5081   | 5326   |
| UN20937 | Rsa1.0.00527.1 | 1095 | 77733  | 1.00E-179 | 360  | 375  | 96 -  | 718  | 1092 | 57464  | 57830  |
| UN20938 | Rsa1.0.01081.1 | 1428 | 499226 | 0         | 1188 | 1190 | 99 +  | 1    | 1190 | 18432  | 19621  |
| UN20939 | Rsa1.0.01580.1 | 1423 | 42852  | 0         | 354  | 357  | 99 +  | 1067 | 1423 | 24650  | 25006  |
| UN20940 | Rsa1.0.00150.1 | 1491 | 154416 | 0         | 786  | 828  | 94 -  | 3    | 805  | 63284  | 64108  |
| UN20941 | Rsa1.0.02225.1 | 1605 | 33738  | 1.00E-163 | 292  | 292  | 100 - | 1312 | 1603 | 29527  | 29818  |

|         |                |      |        |           |      |      |       |      |      |        |        |
|---------|----------------|------|--------|-----------|------|------|-------|------|------|--------|--------|
| UN20942 | Rsa1.0_02645.1 | 1382 | 29158  | 0         | 836  | 857  | 97 -  | 471  | 1327 | 17552  | 18408  |
| UN20943 | Rsa1.0_13239.1 | 1325 | 4960   | 0         | 507  | 508  | 99 -  | 818  | 1325 | 3168   | 3675   |
| UN20944 | Rsa1.0_00139.1 | 752  | 357786 | 0         | 512  | 524  | 97 -  | 1    | 524  | 128608 | 129131 |
| UN20945 | Rsa1.0_00204.1 | 1347 | 109056 | 1.00E-155 | 282  | 283  | 99 -  | 1065 | 1347 | 50919  | 51201  |
| UN20946 | Rsa1.0_00600.1 | 1294 | 73395  | 0         | 740  | 764  | 96 +  | 214  | 977  | 28584  | 29341  |
| UN20947 | Rsa1.0_01895.1 | 987  | 37512  | 1.00E-176 | 391  | 416  | 93 +  | 577  | 985  | 10218  | 10633  |
| UN20948 | Rsa1.0_02596.1 | 853  | 29709  | 1.00E-100 | 189  | 190  | 99 +  | 79   | 268  | 310    | 499    |
| UN20949 | Rsa1.0_00194.1 | 974  | 110851 | 1.00E-156 | 308  | 318  | 96 -  | 3    | 320  | 74269  | 74580  |
| UN20950 | Rsa1.0_00074.1 | 1240 | 147591 | 0         | 603  | 637  | 94 +  | 1    | 631  | 127788 | 128423 |
| UN20951 | Rsa1.0_00501.1 | 880  | 79545  | 0         | 632  | 654  | 96 -  | 224  | 877  | 21557  | 22210  |
| UN20952 | Rsa1.0_00998.1 | 1055 | 57168  | 1.00E-161 | 298  | 301  | 99 -  | 1    | 301  | 18161  | 18461  |
| UN20953 | Rsa1.0_01753.1 | 1073 | 39794  | 0         | 843  | 861  | 97 -  | 1    | 854  | 10586  | 11443  |
| UN20954 | Rsa1.0_04768.1 | 571  | 16066  | 1.00E-172 | 307  | 307  | 100 - | 265  | 571  | 14728  | 15034  |
| UN20955 | Rsa1.0_08259.1 | 1022 | 7641   | 1.00E-104 | 285  | 316  | 90 +  | 717  | 1022 | 6833   | 7147   |
| UN20956 | Rsa1.0_00376.1 | 1050 | 90101  | 0         | 500  | 517  | 96 -  | 1    | 514  | 49557  | 50063  |
| UN20957 | Rsa1.0_00131.1 | 508  | 432233 | 0         | 431  | 440  | 97 +  | 70   | 508  | 269799 | 270238 |
| UN20958 | Rsa1.0_16138.1 | 1004 | 2268   | 0         | 657  | 671  | 97 +  | 336  | 1004 | 1266   | 1933   |
| UN20959 | Rsa1.0_01351.1 | 1058 | 47498  | 0         | 403  | 411  | 98 -  | 531  | 941  | 1391   | 1801   |
| UN20960 | Rsa1.0_00951.1 | 758  | 164588 | 1.00E-147 | 335  | 356  | 94 +  | 400  | 753  | 114506 | 114860 |
| UN20961 | Rsa1.0_02289.1 | 1533 | 32981  | 0         | 1095 | 1123 | 97 +  | 421  | 1533 | 22168  | 23282  |
| UN20962 | Rsa1.0_00031.1 | 823  | 179862 | 0         | 485  | 526  | 92 +  | 3    | 513  | 165901 | 166408 |
| UN20963 | Rsa1.0_00139.1 | 874  | 357786 | 0         | 664  | 688  | 96 +  | 199  | 874  | 263175 | 263859 |
| UN20964 | Rsa1.0_00197.1 | 1406 | 109714 | 0         | 453  | 460  | 98 -  | 537  | 996  | 24337  | 24796  |
| UN20965 | Rsa1.0_07321.1 | 881  | 9559   | 1.00E-180 | 387  | 404  | 95 -  | 446  | 842  | 4925   | 5326   |
| UN20966 | Rsa1.0_02367.1 | 1096 | 32106  | 0         | 894  | 898  | 99 -  | 199  | 1096 | 11098  | 11995  |
| UN20967 | Rsa1.0_02322.1 | 1502 | 32555  | 0         | 646  | 650  | 99 +  | 1    | 650  | 4720   | 5369   |
| UN20968 | Rsa1.0_00428.1 | 1540 | 85599  | 0         | 425  | 428  | 99 +  | 3    | 430  | 62630  | 63057  |
| UN20969 | Rsa1.0_01026.1 | 998  | 171624 | 0         | 779  | 800  | 97 +  | 4    | 792  | 3016   | 3813   |
| UN20970 | Rsa1.0_00169.1 | 1264 | 274298 | 1.00E-161 | 336  | 353  | 95 -  | 909  | 1261 | 267848 | 268191 |
| UN20971 | Rsa1.0_01707.1 | 1346 | 40686  | 1.00E-164 | 335  | 348  | 96 -  | 144  | 488  | 5127   | 5474   |
| UN20972 | Rsa1.0_05955.1 | 1721 | 12115  | 0         | 555  | 566  | 98 -  | 1156 | 1721 | 618    | 1181   |
| UN20973 | Rsa1.0_02237.1 | 716  | 33544  | 1.00E-64  | 132  | 134  | 98 -  | 583  | 716  | 7832   | 7965   |
| UN20974 | Rsa1.0_03826.1 | 1030 | 20614  | 0         | 569  | 592  | 96 -  | 456  | 1029 | 3380   | 3971   |
| UN20975 | Rsa1.0_00817.1 | 843  | 62961  | 0         | 409  | 417  | 98 -  | 432  | 842  | 31882  | 32298  |
| UN20976 | Rsa1.0_01933.1 | 492  | 37172  | 0         | 342  | 342  | 100 + | 149  | 490  | 2756   | 3097   |
| UN20977 | Rsa1.0_00576.1 | 769  | 178949 | 2.00E-85  | 179  | 185  | 96 +  | 335  | 519  | 3257   | 3441   |
| UN20978 | Rsa1.0_00054.1 | 1656 | 162053 | 0         | 723  | 772  | 93 +  | 662  | 1407 | 15265  | 16036  |
| UN20979 | Rsa1.0_02375.1 | 1154 | 32026  | 0         | 822  | 823  | 99 +  | 330  | 1152 | 28994  | 29816  |
| UN20980 | Rsa1.0_00690.1 | 928  | 140527 | 0         | 420  | 426  | 98 +  | 502  | 927  | 25984  | 26409  |

|         |                |      |        |           |      |      |       |      |      |        |        |
|---------|----------------|------|--------|-----------|------|------|-------|------|------|--------|--------|
| UN20981 | Rsa1.0_04470.1 | 1700 | 17204  | 0         | 929  | 949  | 97 -  | 752  | 1700 | 10806  | 11754  |
| UN20982 | Rsa1.0_01010.1 | 1414 | 56906  | 0         | 610  | 628  | 97 +  | 4    | 631  | 26027  | 26654  |
| UN20983 | Rsa1.0_02374.1 | 942  | 32043  | 0         | 839  | 888  | 94 -  | 40   | 920  | 24674  | 25557  |
| UN20984 | Rsa1.0_01568.1 | 1344 | 43077  | 0         | 586  | 604  | 97 +  | 646  | 1248 | 40930  | 41533  |
| UN20985 | Rsa1.0_01295.1 | 899  | 49040  | 1.00E-140 | 283  | 293  | 96 -  | 606  | 898  | 15447  | 15739  |
| UN20986 | Rsa1.0_08386.1 | 578  | 7438   | 0         | 382  | 382  | 100 - | 1    | 382  | 516    | 897    |
| UN20987 | Rsa1.0_00507.1 | 1506 | 79074  | 0         | 482  | 516  | 93 +  | 991  | 1499 | 59842  | 60352  |
| UN20988 | Rsa1.0_00161.1 | 1348 | 116891 | 0         | 516  | 541  | 95 +  | 702  | 1242 | 26063  | 26603  |
| UN20989 | Rsa1.0_00745.1 | 771  | 66067  | 9.00E-69  | 165  | 175  | 94 -  | 341  | 515  | 54350  | 54521  |
| UN20990 | Rsa1.0_00307.1 | 1019 | 199003 | 0         | 432  | 432  | 100 - | 353  | 784  | 6619   | 7050   |
| UN20991 | Rsa1.0_02662.1 | 1493 | 28956  | 0         | 1114 | 1173 | 94 -  | 11   | 1169 | 8640   | 9810   |
| UN20992 | Rsa1.0_00141.1 | 784  | 121494 | 1.00E-140 | 262  | 265  | 98 +  | 1    | 265  | 29559  | 29823  |
| UN20993 | Rsa1.0_02071.1 | 825  | 35409  | 1.00E-131 | 260  | 266  | 97 -  | 8    | 268  | 7713   | 7978   |
| UN20994 | Rsa1.0_00410.1 | 1018 | 86957  | 0         | 426  | 429  | 99 -  | 590  | 1018 | 39615  | 40043  |
| UN20995 | Rsa1.0_01591.1 | 1600 | 42718  | 0         | 1122 | 1125 | 99 +  | 476  | 1600 | 31723  | 32846  |
| UN20996 | Rsa1.0_01147.1 | 1225 | 52391  | 3.00E-76  | 146  | 146  | 100 - | 785  | 930  | 46884  | 47029  |
| UN20997 | Rsa1.0_00261.1 | 1383 | 151157 | 0         | 577  | 582  | 99 +  | 801  | 1382 | 67571  | 68152  |
| UN20998 | Rsa1.0_00712.1 | 1315 | 67217  | 0         | 836  | 868  | 96 +  | 448  | 1315 | 40531  | 41393  |
| UN20999 | Rsa1.0_01281.1 | 1315 | 49313  | 1.00E-135 | 262  | 268  | 97 -  | 249  | 516  | 36376  | 36643  |
| UN21000 | Rsa1.0_00746.1 | 1205 | 66044  | 1.00E-164 | 306  | 310  | 98 +  | 208  | 517  | 21064  | 21373  |
| UN21001 | Rsa1.0_01660.1 | 753  | 41400  | 1.00E-109 | 336  | 375  | 89 +  | 382  | 753  | 32286  | 32646  |
| UN21002 | Rsa1.0_05156.1 | 2026 | 14648  | 0         | 526  | 541  | 97 -  | 250  | 790  | 10618  | 11158  |
| UN21003 | Rsa1.0_04092.1 | 1738 | 19128  | 0         | 711  | 716  | 99 -  | 231  | 946  | 5972   | 6687   |
| UN21004 | Rsa1.0_01145.1 | 1136 | 149247 | 0         | 628  | 632  | 99 -  | 504  | 1135 | 116649 | 117279 |
| UN21005 | Rsa1.0_00158.1 | 1118 | 117999 | 1.00E-121 | 258  | 268  | 96 +  | 737  | 1003 | 14489  | 14754  |
| UN21006 | Rsa1.0_00892.1 | 765  | 60703  | 0         | 554  | 571  | 97 +  | 193  | 759  | 53100  | 53668  |
| UN21007 | Rsa1.0_00398.1 | 1317 | 88007  | 0         | 534  | 538  | 99 -  | 780  | 1317 | 40978  | 41515  |
| UN21008 | Rsa1.0_00288.1 | 919  | 98659  | 1.00E-126 | 268  | 278  | 96 +  | 587  | 863  | 52520  | 52796  |
| UN21009 | Rsa1.0_02524.1 | 1456 | 30496  | 0         | 483  | 484  | 99 -  | 2    | 485  | 145    | 628    |
| UN21010 | Rsa1.0_00065.1 | 1763 | 454616 | 0         | 1746 | 1758 | 99 -  | 3    | 1760 | 4384   | 6141   |
| UN21011 | Rsa1.0_04192.1 | 1077 | 18572  | 0         | 749  | 752  | 99 -  | 326  | 1076 | 17005  | 17756  |
| UN21012 | Rsa1.0_01046.1 | 590  | 152989 | 0         | 556  | 563  | 98 -  | 27   | 588  | 118622 | 119184 |
| UN21013 | Rsa1.0_01553.1 | 1502 | 43379  | 1.00E-111 | 210  | 212  | 99 +  | 1289 | 1500 | 10545  | 10756  |
| UN21014 | Rsa1.0_09859.1 | 566  | 6115   | 0         | 362  | 366  | 98 +  | 126  | 491  | 5753   | 6115   |
| UN21015 | Rsa1.0_00208.1 | 1122 | 108565 | 1.00E-170 | 395  | 424  | 93 +  | 47   | 449  | 59720  | 60138  |
| UN21016 | Rsa1.0_00179.1 | 1216 | 393324 | 0         | 385  | 386  | 99 +  | 3    | 388  | 200031 | 200416 |
| UN21017 | Rsa1.0_04070.1 | 1380 | 19244  | 1.00E-163 | 376  | 403  | 93 +  | 2    | 392  | 10674  | 11071  |
| UN21018 | Rsa1.0_01093.1 | 947  | 54312  | 1.00E-119 | 394  | 452  | 87 -  | 159  | 610  | 26474  | 26922  |
| UN21019 | Rsa1.0_04323.1 | 1114 | 17915  | 1.00E-161 | 295  | 297  | 99 +  | 1    | 297  | 13888  | 14184  |

|         |                |      |        |           |      |      |       |      |      |        |        |
|---------|----------------|------|--------|-----------|------|------|-------|------|------|--------|--------|
| UN21020 | Rsa1.0.09772.1 | 1263 | 6158   | 0         | 610  | 632  | 96 -  | 101  | 732  | 2718   | 3330   |
| UN21021 | Rsa1.0.00328.1 | 989  | 224661 | 0         | 858  | 863  | 99 -  | 125  | 987  | 130925 | 131787 |
| UN21022 | Rsa1.0.00253.1 | 661  | 231292 | 0         | 620  | 621  | 99 -  | 38   | 658  | 153606 | 154226 |
| UN21023 | Rsa1.0.00281.1 | 773  | 99908  | 1.00E-106 | 254  | 273  | 93 -  | 1    | 259  | 4927   | 5199   |
| UN21024 | Rsa1.0.03027.1 | 1200 | 25883  | 0         | 1138 | 1184 | 96 +  | 1    | 1184 | 11253  | 12422  |
| UN21025 | Rsa1.0.02492.1 | 719  | 30859  | 0         | 328  | 328  | 100 - | 1    | 328  | 12178  | 12505  |
| UN21026 | Rsa1.0.04028.1 | 1095 | 19493  | 1.00E-148 | 291  | 298  | 97 -  | 792  | 1089 | 2293   | 2588   |
| UN21027 | Rsa1.0.02672.1 | 717  | 28884  | 0         | 715  | 715  | 100 + | 1    | 715  | 27398  | 28112  |
| UN21028 | Rsa1.0.01612.1 | 861  | 42255  | 0         | 849  | 858  | 98 -  | 2    | 859  | 29901  | 30755  |
| UN21029 | Rsa1.0.01704.1 | 856  | 40711  | 0         | 809  | 840  | 96 -  | 13   | 845  | 31947  | 32785  |
| UN21030 | Rsa1.0.00608.1 | 1500 | 172672 | 1.00E-132 | 272  | 280  | 97 -  | 607  | 884  | 117005 | 117284 |
| UN21031 | Rsa1.0.05758.1 | 1318 | 12721  | 0         | 492  | 501  | 98 +  | 818  | 1318 | 6823   | 7323   |
| UN21032 | Rsa1.0.00902.1 | 1080 | 60241  | 0         | 657  | 667  | 98 +  | 415  | 1078 | 16185  | 16851  |
| UN21033 | Rsa1.0.21309.1 | 2006 | 1216   | 0         | 582  | 592  | 98 +  | 205  | 796  | 257    | 848    |
| UN21034 | Rsa1.0.02688.1 | 977  | 28644  | 0         | 594  | 596  | 99 +  | 383  | 977  | 22913  | 23508  |
| UN21035 | Rsa1.0.04493.1 | 1721 | 17137  | 4.00E-79  | 202  | 217  | 93 -  | 1    | 216  | 4233   | 4441   |
| UN21036 | Rsa1.0.06303.1 | 999  | 11268  | 1.00E-179 | 343  | 350  | 98 +  | 1    | 348  | 9097   | 9446   |
| UN21037 | Rsa1.0.00878.1 | 1052 | 330303 | 0         | 399  | 410  | 97 +  | 1    | 406  | 9080   | 9489   |
| UN21038 | Rsa1.0.00180.1 | 1166 | 114581 | 0         | 415  | 422  | 98 -  | 4    | 425  | 111408 | 111829 |
| UN21039 | Rsa1.0.09160.1 | 1025 | 6599   | 0         | 360  | 367  | 98 -  | 228  | 594  | 1056   | 1422   |
| UN21040 | Rsa1.0.00326.1 | 1121 | 171955 | 1.00E-130 | 240  | 241  | 99 -  | 596  | 836  | 81729  | 81969  |
| UN21041 | Rsa1.0.00154.1 | 1416 | 189461 | 1.00E-129 | 298  | 317  | 94 +  | 5    | 319  | 129855 | 130164 |
| UN21042 | Rsa1.0.03925.1 | 1006 | 20025  | 0         | 996  | 1001 | 99 +  | 1    | 1001 | 12620  | 13620  |
| UN21043 | Rsa1.0.00050.1 | 1605 | 237174 | 0         | 1107 | 1111 | 99 +  | 495  | 1605 | 235465 | 236575 |
| UN21044 | Rsa1.0.01369.1 | 429  | 47127  | 0         | 364  | 376  | 96 +  | 1    | 376  | 8429   | 8803   |
| UN21045 | Rsa1.0.00279.1 | 1558 | 100039 | 1.00E-163 | 327  | 337  | 97 +  | 23   | 359  | 4343   | 4674   |
| UN21046 | Rsa1.0.00294.1 | 1225 | 144860 | 0         | 690  | 695  | 99 +  | 3    | 697  | 137138 | 137832 |
| UN21047 | Rsa1.0.03968.1 | 759  | 19804  | 1.00E-174 | 351  | 365  | 96 -  | 323  | 687  | 18663  | 19027  |
| UN21048 | Rsa1.0.00258.1 | 1145 | 102381 | 0         | 529  | 538  | 98 +  | 595  | 1132 | 85534  | 86068  |
| UN21049 | Rsa1.0.00163.1 | 1680 | 116847 | 0         | 1637 | 1679 | 97 +  | 3    | 1680 | 105790 | 107465 |
| UN21050 | Rsa1.0.01151.1 | 1130 | 52268  | 0         | 433  | 439  | 98 +  | 695  | 1130 | 50521  | 50957  |
| UN21051 | Rsa1.0.00206.1 | 1018 | 109040 | 1.00E-143 | 270  | 273  | 98 -  | 637  | 907  | 45096  | 45368  |
| UN21052 | Rsa1.0.01965.1 | 775  | 36698  | 1.00E-156 | 352  | 370  | 95 +  | 410  | 774  | 24177  | 24540  |
| UN21053 | Rsa1.0.17009.1 | 1552 | 1954   | 0         | 873  | 878  | 99 -  | 459  | 1336 | 721    | 1598   |
| UN21054 | Rsa1.0.00022.1 | 2122 | 200461 | 1.00E-156 | 293  | 297  | 98 -  | 1826 | 2122 | 123599 | 123895 |
| UN21055 | Rsa1.0.01866.1 | 1384 | 37961  | 0         | 605  | 605  | 100 - | 778  | 1382 | 12324  | 12928  |
| UN21056 | Rsa1.0.00245.1 | 1194 | 103569 | 0         | 393  | 396  | 99 +  | 795  | 1190 | 47278  | 47673  |
| UN21057 | Rsa1.0.00251.1 | 810  | 303968 | 3.00E-96  | 189  | 191  | 98 +  | 3    | 192  | 124680 | 124870 |
| UN21058 | Rsa1.0.05878.1 | 1100 | 12344  | 1.00E-177 | 345  | 353  | 97 -  | 746  | 1098 | 8153   | 8501   |

|         |                |      |        |           |      |      |       |      |      |        |        |
|---------|----------------|------|--------|-----------|------|------|-------|------|------|--------|--------|
| UN21059 | Rsa1.0_00067.1 | 1338 | 415055 | 1.00E-152 | 323  | 341  | 94 -  | 998  | 1338 | 78551  | 78877  |
| UN21060 | Rsa1.0_00767.1 | 1210 | 64980  | 0         | 1058 | 1096 | 96 +  | 117  | 1209 | 35067  | 36143  |
| UN21061 | Rsa1.0_00182.1 | 1706 | 142305 | 0         | 802  | 847  | 94 +  | 878  | 1706 | 35901  | 36743  |
| UN21062 | Rsa1.0_00302.1 | 878  | 97521  | 0         | 531  | 536  | 99 +  | 3    | 538  | 36872  | 37406  |
| UN21063 | Rsa1.0_00094.1 | 1271 | 139042 | 0         | 503  | 517  | 97 +  | 16   | 532  | 96094  | 96610  |
| UN21064 | Rsa1.0_00323.1 | 1354 | 159650 | 0         | 525  | 525  | 100 - | 1    | 525  | 148152 | 148676 |
| UN21065 | Rsa1.0_34473.1 | 2182 | 656    | 0         | 361  | 363  | 99 -  | 1820 | 2182 | 294    | 656    |
| UN21066 | Rsa1.0_02358.1 | 1487 | 32213  | 1.00E-112 | 292  | 319  | 91 +  | 1177 | 1483 | 21989  | 22304  |
| UN21067 | Rsa1.0_17344.1 | 1928 | 1853   | 1.00E-94  | 183  | 185  | 98 +  | 343  | 527  | 1669   | 1853   |
| UN21068 | Rsa1.0_01288.1 | 1618 | 49188  | 0         | 1576 | 1616 | 97 -  | 3    | 1618 | 21822  | 23427  |
| UN21069 | Rsa1.0_02349.1 | 1203 | 32312  | 0         | 445  | 461  | 96 -  | 497  | 957  | 28306  | 28763  |
| UN21070 | Rsa1.0_00234.1 | 1282 | 197060 | 0         | 402  | 415  | 96 +  | 416  | 830  | 144150 | 144564 |
| UN21071 | Rsa1.0_00882.1 | 741  | 61249  | 0         | 700  | 705  | 99 +  | 1    | 705  | 52871  | 53575  |
| UN21072 | Rsa1.0_00123.1 | 919  | 325650 | 3.00E-87  | 197  | 207  | 95 +  | 418  | 622  | 251511 | 251717 |
| UN21073 | Rsa1.0_06113.1 | 1827 | 11721  | 0         | 885  | 902  | 98 +  | 926  | 1827 | 277    | 1175   |
| UN21074 | Rsa1.0_01945.1 | 1400 | 36989  | 0         | 1326 | 1400 | 94 +  | 3    | 1395 | 25729  | 27117  |
| UN21075 | Rsa1.0_02430.1 | 974  | 31506  | 0         | 597  | 597  | 100 - | 275  | 871  | 12980  | 13576  |
| UN21076 | Rsa1.0_01974.1 | 1215 | 36583  | 0         | 388  | 388  | 100 + | 554  | 941  | 12506  | 12893  |
| UN21077 | Rsa1.0_00967.1 | 1071 | 58049  | 0         | 816  | 838  | 97 -  | 231  | 1064 | 6424   | 7259   |
| UN21078 | Rsa1.0_02882.1 | 1405 | 27039  | 0         | 823  | 833  | 98 -  | 581  | 1405 | 10831  | 11663  |
| UN21079 | Rsa1.0_03127.1 | 1010 | 25191  | 0         | 963  | 966  | 99 +  | 2    | 967  | 22601  | 23564  |
| UN21080 | Rsa1.0_01190.1 | 649  | 194501 | 0         | 402  | 403  | 99 +  | 1    | 402  | 157914 | 158316 |
| UN21081 | Rsa1.0_02680.1 | 1530 | 28721  | 0         | 418  | 434  | 96 +  | 1    | 431  | 13540  | 13970  |
| UN21082 | Rsa1.0_28478.1 | 1292 | 814    | 0         | 776  | 779  | 99 -  | 396  | 1174 | 1      | 779    |
| UN21083 | Rsa1.0_01553.1 | 774  | 43379  | 5.00E-64  | 136  | 139  | 97 +  | 367  | 502  | 7679   | 7817   |
| UN21084 | Rsa1.0_00160.1 | 812  | 346678 | 1.00E-168 | 383  | 403  | 95 +  | 347  | 743  | 31620  | 32022  |
| UN21085 | Rsa1.0_00731.1 | 925  | 66638  | 1.00E-155 | 278  | 278  | 100 + | 648  | 925  | 12178  | 12455  |
| UN21086 | Rsa1.0_19592.1 | 1168 | 1410   | 2.00E-92  | 249  | 271  | 91 -  | 854  | 1121 | 1      | 264    |
| UN21087 | Rsa1.0_00240.1 | 1157 | 104175 | 0         | 927  | 936  | 99 +  | 223  | 1157 | 57352  | 58286  |
| UN21088 | Rsa1.0_00896.1 | 733  | 60509  | 1.00E-107 | 198  | 198  | 100 + | 536  | 733  | 50620  | 50817  |
| UN21089 | Rsa1.0_05938.1 | 1904 | 12173  | 0         | 1800 | 1849 | 97 +  | 59   | 1903 | 2089   | 3929   |
| UN21090 | Rsa1.0_00205.1 | 1174 | 193401 | 1.00E-171 | 327  | 333  | 98 +  | 843  | 1174 | 1291   | 1623   |
| UN21091 | Rsa1.0_00615.1 | 1140 | 72235  | 0         | 348  | 352  | 98 +  | 719  | 1070 | 26377  | 26727  |
| UN21092 | Rsa1.0_01971.1 | 720  | 36641  | 0         | 703  | 718  | 97 -  | 3    | 720  | 21019  | 21736  |
| UN21093 | Rsa1.0_02289.1 | 1978 | 32981  | 0         | 446  | 447  | 99 -  | 1533 | 1978 | 25079  | 25525  |
| UN21094 | Rsa1.0_00259.1 | 2270 | 163204 | 0         | 1823 | 1857 | 98 -  | 287  | 2138 | 154400 | 156255 |
| UN21095 | Rsa1.0_26967.1 | 2157 | 871    | 0         | 530  | 563  | 94 +  | 276  | 823  | 308    | 864    |
| UN21096 | Rsa1.0_00107.1 | 2183 | 431659 | 0         | 1102 | 1124 | 98 -  | 220  | 1342 | 299930 | 301052 |
| UN21097 | Rsa1.0_00737.1 | 1078 | 66432  | 0         | 436  | 437  | 99 -  | 642  | 1078 | 61612  | 62048  |

|         |                |      |        |           |      |      |       |      |      |        |        |
|---------|----------------|------|--------|-----------|------|------|-------|------|------|--------|--------|
| UN21098 | Rsa1.0.05586.1 | 795  | 13263  | 0         | 468  | 475  | 98 +  | 1    | 475  | 9637   | 10111  |
| UN21099 | Rsa1.0.00627.1 | 1818 | 71566  | 0         | 350  | 350  | 100 + | 2    | 351  | 50143  | 50492  |
| UN21100 | Rsa1.0.00361.1 | 1339 | 91181  | 0         | 1319 | 1339 | 98 -  | 5    | 1339 | 13812  | 15142  |
| UN21101 | Rsa1.0.02616.1 | 1884 | 29542  | 0         | 627  | 662  | 94 -  | 541  | 1202 | 1279   | 1931   |
| UN21102 | Rsa1.0.03268.1 | 1538 | 24197  | 0         | 1153 | 1161 | 99 -  | 379  | 1538 | 6823   | 7983   |
| UN21103 | Rsa1.0.00179.1 | 1191 | 393324 | 1.00E-170 | 304  | 304  | 100 - | 181  | 484  | 47984  | 48287  |
| UN21104 | Rsa1.0.00331.1 | 572  | 176754 | 0         | 395  | 395  | 100 + | 178  | 572  | 159068 | 159462 |
| UN21105 | Rsa1.0.01358.1 | 1421 | 47278  | 0         | 504  | 506  | 99 +  | 564  | 1069 | 6488   | 6993   |
| UN21106 | Rsa1.0.00212.1 | 1789 | 108350 | 0         | 1163 | 1288 | 90 +  | 375  | 1645 | 46098  | 47370  |
| UN21107 | Rsa1.0.00144.1 | 1042 | 120708 | 0         | 424  | 446  | 95 +  | 4    | 446  | 45131  | 45567  |
| UN21108 | Rsa1.0.00119.1 | 2280 | 467509 | 0         | 671  | 682  | 98 +  | 969  | 1650 | 55982  | 56663  |
| UN21109 | Rsa1.0.00634.1 | 1442 | 71222  | 0         | 406  | 414  | 98 +  | 1029 | 1442 | 45773  | 46184  |
| UN21110 | Rsa1.0.00065.1 | 1414 | 454616 | 0         | 463  | 466  | 99 -  | 4    | 469  | 213563 | 214028 |
| UN21111 | Rsa1.0.02259.1 | 1326 | 33299  | 0         | 494  | 499  | 98 -  | 3    | 501  | 515    | 1013   |
| UN21112 | Rsa1.0.00608.1 | 1185 | 172672 | 0         | 788  | 788  | 100 + | 239  | 1026 | 3169   | 3956   |
| UN21113 | Rsa1.0.02099.1 | 1442 | 35030  | 0         | 438  | 449  | 97 +  | 996  | 1442 | 2291   | 2734   |
| UN21114 | Rsa1.0.00480.1 | 1344 | 81325  | 0         | 838  | 887  | 94 +  | 3    | 869  | 7037   | 7905   |
| UN21115 | Rsa1.0.00461.1 | 1292 | 82509  | 0         | 642  | 650  | 98 +  | 641  | 1289 | 54888  | 55535  |
| UN21116 | Rsa1.0.00266.1 | 762  | 163932 | 1.00E-95  | 193  | 198  | 97 +  | 459  | 656  | 7175   | 7372   |
| UN21117 | Rsa1.0.11955.1 | 1630 | 5361   | 1.00E-133 | 242  | 242  | 100 + | 1389 | 1630 | 1531   | 1772   |
| UN21118 | Rsa1.0.06274.1 | 1962 | 11343  | 0         | 915  | 937  | 97 +  | 383  | 1319 | 9228   | 10164  |
| UN21119 | Rsa1.0.00025.1 | 870  | 277312 | 0         | 333  | 335  | 99 -  | 4    | 338  | 117609 | 117942 |
| UN21120 | Rsa1.0.01414.1 | 860  | 149508 | 1.00E-108 | 213  | 216  | 98 +  | 644  | 858  | 9517   | 9732   |
| UN21121 | Rsa1.0.01705.1 | 1419 | 40710  | 5.00E-84  | 171  | 175  | 97 -  | 304  | 478  | 12730  | 12904  |
| UN21122 | Rsa1.0.00213.1 | 914  | 108167 | 0         | 445  | 467  | 95 +  | 444  | 910  | 8309   | 8766   |
| UN21123 | Rsa1.0.00497.1 | 1156 | 79830  | 0         | 796  | 805  | 98 -  | 1    | 805  | 73170  | 73974  |
| UN21124 | Rsa1.0.01355.1 | 1085 | 47303  | 0         | 834  | 849  | 98 -  | 174  | 1021 | 41387  | 42235  |
| UN21125 | Rsa1.0.00554.1 | 772  | 150953 | 1.00E-110 | 249  | 261  | 95 -  | 1    | 261  | 121603 | 121859 |
| UN21126 | Rsa1.0.03959.1 | 903  | 19866  | 0         | 898  | 899  | 99 -  | 5    | 903  | 14869  | 15767  |
| UN21127 | Rsa1.0.00081.1 | 1495 | 143261 | 0         | 468  | 468  | 100 + | 286  | 753  | 85804  | 86271  |
| UN21128 | Rsa1.0.02508.1 | 1277 | 30675  | 1.00E-125 | 306  | 326  | 93 +  | 144  | 463  | 1081   | 1405   |
| UN21129 | Rsa1.0.00080.1 | 1463 | 190437 | 0         | 624  | 648  | 96 +  | 816  | 1463 | 81407  | 82053  |
| UN21130 | Rsa1.0.02295.1 | 983  | 149884 | 1.00E-175 | 312  | 312  | 100 + | 221  | 532  | 138280 | 138591 |
| UN21131 | Rsa1.0.02656.1 | 723  | 29018  | 1.00E-159 | 315  | 325  | 96 +  | 19   | 343  | 21953  | 22277  |
| UN21132 | Rsa1.0.01712.1 | 1205 | 154210 | 0         | 568  | 569  | 99 -  | 637  | 1205 | 28286  | 28853  |
| UN21133 | Rsa1.0.02648.1 | 1247 | 29073  | 0         | 363  | 372  | 97 +  | 876  | 1247 | 7184   | 7552   |
| UN21134 | Rsa1.0.00020.1 | 1126 | 283099 | 1.00E-170 | 319  | 323  | 98 +  | 1    | 321  | 29988  | 30310  |
| UN21135 | Rsa1.0.00571.1 | 844  | 329018 | 0         | 446  | 460  | 96 +  | 11   | 461  | 206037 | 206495 |
| UN21136 | Rsa1.0.00292.1 | 786  | 98141  | 1.00E-136 | 263  | 269  | 97 -  | 1    | 269  | 21932  | 22194  |



|         |                |      |        |           |      |      |       |      |      |        |        |
|---------|----------------|------|--------|-----------|------|------|-------|------|------|--------|--------|
| UN21137 | Rsa1.0.07250.1 | 696  | 9663   | 0         | 519  | 556  | 93 +  | 1    | 536  | 6909   | 7463   |
| UN21138 | Rsa1.0.04224.1 | 1092 | 18402  | 0         | 468  | 478  | 97 -  | 2    | 478  | 703    | 1177   |
| UN21139 | Rsa1.0.02812.1 | 732  | 27660  | 0         | 437  | 439  | 99 +  | 1    | 439  | 3717   | 4155   |
| UN21140 | Rsa1.0.00326.1 | 1007 | 171955 | 1.00E-112 | 260  | 279  | 93 -  | 76   | 346  | 69916  | 70194  |
| UN21141 | Rsa1.0.01420.1 | 1531 | 46210  | 2.00E-71  | 180  | 194  | 92 +  | 1332 | 1525 | 5375   | 5568   |
| UN21142 | Rsa1.0.00734.1 | 920  | 66508  | 1.00E-154 | 292  | 296  | 98 -  | 624  | 918  | 55984  | 56279  |
| UN21143 | Rsa1.0.00085.1 | 1564 | 142226 | 0         | 1558 | 1564 | 99 +  | 1    | 1563 | 87790  | 89352  |
| UN21144 | Rsa1.0.01902.1 | 1387 | 37455  | 2.00E-24  | 140  | 167  | 83 -  | 353  | 519  | 32477  | 32643  |
| UN21145 | Rsa1.0.00924.1 | 751  | 59524  | 0         | 352  | 357  | 98 +  | 5    | 361  | 3343   | 3699   |
| UN21146 | Rsa1.0.00321.1 | 1126 | 95671  | 0         | 428  | 435  | 98 +  | 3    | 433  | 61441  | 61875  |
| UN21147 | Rsa1.0.00029.1 | 647  | 272992 | 0         | 642  | 650  | 98 -  | 1    | 647  | 261648 | 262297 |
| UN21148 | Rsa1.0.02505.1 | 728  | 30703  | 1.00E-180 | 406  | 432  | 93 -  | 6    | 436  | 21664  | 22085  |
| UN21149 | Rsa1.0.04522.1 | 860  | 16988  | 0         | 496  | 500  | 99 +  | 14   | 512  | 12908  | 13407  |
| UN21150 | Rsa1.0.00045.1 | 888  | 328694 | 0         | 574  | 579  | 99 +  | 1    | 579  | 261127 | 261705 |
| UN21151 | Rsa1.0.02187.1 | 856  | 34113  | 0         | 626  | 645  | 97 -  | 2    | 646  | 26133  | 26776  |
| UN21152 | Rsa1.0.10067.1 | 1579 | 6015   | 0         | 512  | 517  | 99 -  | 7    | 523  | 5286   | 5802   |
| UN21153 | Rsa1.0.02414.1 | 965  | 31625  | 0         | 566  | 574  | 98 +  | 3    | 571  | 29251  | 29824  |
| UN21154 | Rsa1.0.01219.1 | 1319 | 50527  | 0         | 1195 | 1285 | 92 +  | 48   | 1315 | 21460  | 22727  |
| UN21155 | Rsa1.0.07241.1 | 995  | 9675   | 1.00E-105 | 207  | 211  | 98 +  | 5    | 215  | 8894   | 9104   |
| UN21156 | Rsa1.0.00094.1 | 1698 | 139042 | 0         | 667  | 691  | 96 -  | 596  | 1283 | 25774  | 26463  |
| UN21157 | Rsa1.0.00699.1 | 857  | 184398 | 5.00E-77  | 302  | 355  | 85 -  | 269  | 614  | 127771 | 128125 |
| UN21158 | Rsa1.0.02070.1 | 1282 | 158516 | 1.00E-121 | 222  | 222  | 100 - | 43   | 264  | 18729  | 18950  |
| UN21159 | Rsa1.0.01154.1 | 1299 | 52249  | 0         | 651  | 651  | 100 - | 649  | 1299 | 3372   | 4022   |
| UN21160 | Rsa1.0.01123.1 | 2046 | 53359  | 0         | 612  | 629  | 97 -  | 55   | 683  | 21063  | 21688  |
| UN21161 | Rsa1.0.00007.1 | 1027 | 239325 | 1.00E-141 | 257  | 258  | 99 -  | 1    | 258  | 108905 | 109162 |
| UN21162 | Rsa1.0.07149.1 | 858  | 9824   | 0         | 447  | 452  | 98 -  | 411  | 858  | 794    | 1245   |
| UN21163 | Rsa1.0.00245.1 | 1093 | 103569 | 0         | 910  | 950  | 95 +  | 143  | 1091 | 11461  | 12385  |
| UN21164 | Rsa1.0.00286.1 | 702  | 98709  | 1.00E-112 | 218  | 222  | 98 +  | 48   | 269  | 23243  | 23464  |
| UN21165 | Rsa1.0.00480.1 | 1074 | 81325  | 0         | 417  | 420  | 99 -  | 654  | 1073 | 36845  | 37264  |
| UN21166 | Rsa1.0.27950.1 | 1765 | 833    | 0         | 646  | 664  | 97 -  | 765  | 1428 | 170    | 833    |
| UN21167 | Rsa1.0.06295.1 | 1151 | 140785 | 0         | 1147 | 1149 | 99 +  | 3    | 1151 | 4548   | 5696   |
| UN21168 | Rsa1.0.10770.1 | 1265 | 5723   | 1.00E-109 | 231  | 242  | 95 -  | 1022 | 1263 | 580    | 813    |
| UN21169 | Rsa1.0.02074.1 | 1135 | 35370  | 0         | 459  | 488  | 94 -  | 638  | 1121 | 12052  | 12527  |
| UN21170 | Rsa1.0.13816.1 | 1541 | 4270   | 1.00E-118 | 249  | 257  | 96 +  | 3    | 257  | 296    | 552    |
| UN21171 | Rsa1.0.01603.1 | 883  | 42468  | 0         | 476  | 485  | 98 -  | 3    | 486  | 17728  | 18212  |
| UN21172 | Rsa1.0.00027.1 | 1110 | 283362 | 0         | 588  | 623  | 94 -  | 493  | 1110 | 56385  | 57005  |
| UN21173 | Rsa1.0.02655.1 | 1323 | 29027  | 1.00E-105 | 208  | 211  | 98 -  | 464  | 673  | 13319  | 13529  |
| UN21174 | Rsa1.0.01739.1 | 1607 | 40068  | 0         | 534  | 545  | 97 +  | 166  | 710  | 22888  | 23432  |
| UN21175 | Rsa1.0.02306.1 | 1721 | 32776  | 0         | 836  | 863  | 96 -  | 38   | 900  | 20830  | 21692  |

|         |                |      |        |           |      |      |       |      |      |        |        |
|---------|----------------|------|--------|-----------|------|------|-------|------|------|--------|--------|
| UN21176 | Rsa1.0_00788.1 | 1480 | 64237  | 0         | 1435 | 1481 | 96 +  | 4    | 1479 | 22275  | 23753  |
| UN21177 | Rsa1.0_01270.1 | 1816 | 49574  | 0         | 1057 | 1059 | 99 -  | 211  | 1269 | 26998  | 28056  |
| UN21178 | Rsa1.0_00301.1 | 884  | 365315 | 0         | 652  | 661  | 98 +  | 216  | 870  | 26031  | 26691  |
| UN21179 | Rsa1.0_08526.1 | 1250 | 7236   | 1.00E-161 | 358  | 383  | 93 +  | 883  | 1250 | 1300   | 1681   |
| UN21180 | Rsa1.0_00907.1 | 1357 | 60062  | 0         | 1305 | 1356 | 96 -  | 2    | 1357 | 48758  | 50112  |
| UN21181 | Rsa1.0_04658.1 | 1580 | 16487  | 1.00E-137 | 262  | 265  | 98 -  | 1317 | 1580 | 6920   | 7184   |
| UN21182 | Rsa1.0_00457.1 | 1083 | 337301 | 0         | 422  | 442  | 95 +  | 643  | 1083 | 142257 | 142697 |
| UN21183 | Rsa1.0_01591.1 | 851  | 42718  | 1.00E-137 | 256  | 258  | 99 +  | 594  | 851  | 16746  | 17001  |
| UN21184 | Rsa1.0_05984.1 | 1141 | 12031  | 1.00E-145 | 282  | 289  | 97 -  | 208  | 496  | 6099   | 6387   |
| UN21185 | Rsa1.0_00383.1 | 1136 | 398431 | 0         | 814  | 818  | 99 +  | 319  | 1135 | 4356   | 5173   |
| UN21186 | Rsa1.0_00053.1 | 1308 | 263459 | 0         | 589  | 593  | 99 -  | 617  | 1209 | 108391 | 108983 |
| UN21187 | Rsa1.0_00032.1 | 1017 | 306326 | 0         | 1000 | 1004 | 99 -  | 1    | 1004 | 270888 | 271891 |
| UN21188 | Rsa1.0_01785.1 | 926  | 39368  | 0         | 616  | 627  | 98 +  | 297  | 923  | 27136  | 27762  |
| UN21189 | Rsa1.0_03292.1 | 1312 | 23977  | 0         | 429  | 443  | 96 +  | 873  | 1312 | 20331  | 20771  |
| UN21190 | Rsa1.0_00127.1 | 1479 | 127446 | 0         | 505  | 532  | 94 -  | 911  | 1434 | 29921  | 30450  |
| UN21191 | Rsa1.0_00254.1 | 1436 | 102600 | 0         | 555  | 565  | 98 +  | 875  | 1436 | 47947  | 48510  |
| UN21192 | Rsa1.0_02589.1 | 1024 | 300828 | 0         | 488  | 494  | 98 +  | 3    | 496  | 15390  | 15883  |
| UN21193 | Rsa1.0_01315.1 | 1602 | 48361  | 1.00E-139 | 255  | 256  | 99 +  | 917  | 1172 | 24003  | 24258  |
| UN21194 | Rsa1.0_00073.1 | 1972 | 240924 | 0         | 1915 | 1983 | 96 -  | 4    | 1972 | 224990 | 226969 |
| UN21195 | Rsa1.0_04882.1 | 1420 | 15606  | 0         | 392  | 392  | 100 - | 1    | 392  | 9519   | 9910   |
| UN21196 | Rsa1.0_01489.1 | 2041 | 44764  | 0         | 443  | 447  | 99 +  | 1597 | 2041 | 35635  | 36081  |
| UN21197 | Rsa1.0_19977.1 | 1384 | 1357   | 0         | 409  | 409  | 100 + | 976  | 1384 | 54     | 462    |
| UN21198 | Rsa1.0_08220.1 | 900  | 7701   | 0         | 723  | 745  | 97 -  | 150  | 894  | 1954   | 2698   |
| UN21199 | Rsa1.0_01780.1 | 1225 | 39411  | 0         | 569  | 570  | 99 +  | 654  | 1223 | 36676  | 37245  |
| UN21200 | Rsa1.0_01434.1 | 1241 | 45951  | 0         | 357  | 358  | 99 -  | 884  | 1241 | 36274  | 36631  |
| UN21201 | Rsa1.0_00116.1 | 552  | 365886 | 0         | 547  | 553  | 98 +  | 3    | 552  | 137226 | 137778 |
| UN21202 | Rsa1.0_00094.1 | 1321 | 139042 | 1.00E-127 | 238  | 240  | 99 +  | 1082 | 1321 | 135915 | 136154 |
| UN21203 | Rsa1.0_02817.1 | 532  | 27644  | 0         | 519  | 532  | 97 -  | 3    | 532  | 13900  | 14431  |
| UN21204 | Rsa1.0_00100.1 | 1178 | 249232 | 0         | 670  | 673  | 99 -  | 506  | 1178 | 39845  | 40515  |
| UN21205 | Rsa1.0_06619.1 | 1977 | 10650  | 0         | 408  | 433  | 94 +  | 1185 | 1617 | 2133   | 2565   |
| UN21206 | Rsa1.0_02874.1 | 951  | 27070  | 0         | 557  | 583  | 95 -  | 367  | 947  | 26365  | 26943  |
| UN21207 | Rsa1.0_00497.1 | 1121 | 79830  | 0         | 343  | 345  | 99 +  | 777  | 1121 | 52219  | 52562  |
| UN21208 | Rsa1.0_02026.1 | 1440 | 35896  | 1.00E-131 | 238  | 238  | 100 - | 935  | 1172 | 12795  | 13032  |
| UN21209 | Rsa1.0_01157.1 | 1573 | 52121  | 0         | 1519 | 1578 | 96 -  | 2    | 1573 | 44774  | 46348  |
| UN21210 | Rsa1.0_02791.1 | 1647 | 27832  | 0         | 459  | 498  | 92 -  | 1171 | 1644 | 8462   | 8959   |
| UN21211 | Rsa1.0_02244.1 | 1767 | 33494  | 1.00E-118 | 251  | 261  | 96 -  | 695  | 952  | 13146  | 13403  |
| UN21212 | Rsa1.0_02499.1 | 1284 | 30774  | 0         | 1086 | 1143 | 95 -  | 155  | 1273 | 4725   | 5863   |
| UN21213 | Rsa1.0_18990.1 | 697  | 1499   | 1.00E-110 | 243  | 255  | 95 -  | 3    | 253  | 485    | 737    |
| UN21214 | Rsa1.0_00044.1 | 759  | 271658 | 1.00E-156 | 304  | 312  | 97 -  | 1    | 312  | 188112 | 188423 |

|         |                |      |        |           |      |      |       |      |      |        |        |
|---------|----------------|------|--------|-----------|------|------|-------|------|------|--------|--------|
| UN21215 | Rsa1.0.02333.1 | 662  | 32431  | 0         | 433  | 447  | 96 +  | 222  | 662  | 29979  | 30424  |
| UN21216 | Rsa1.0.00067.1 | 1689 | 415055 | 1.00E-175 | 333  | 339  | 98 -  | 3    | 341  | 244191 | 244527 |
| UN21217 | Rsa1.0.58913.1 | 1080 | 388    | 1.00E-108 | 223  | 230  | 96 -  | 650  | 876  | 1      | 230    |
| UN21218 | Rsa1.0.04933.1 | 927  | 15410  | 0         | 646  | 666  | 96 -  | 2    | 665  | 6309   | 6965   |
| UN21219 | Rsa1.0.00301.1 | 1250 | 365315 | 0         | 474  | 479  | 98 -  | 4    | 482  | 328732 | 329210 |
| UN21220 | Rsa1.0.00035.1 | 1208 | 176449 | 0         | 1191 | 1206 | 98 -  | 1    | 1206 | 83588  | 84791  |
| UN21221 | Rsa1.0.18326.1 | 1301 | 1620   | 0         | 951  | 959  | 99 -  | 335  | 1293 | 312    | 1270   |
| UN21222 | Rsa1.0.04161.1 | 691  | 18788  | 1.00E-157 | 281  | 281  | 100 + | 410  | 690  | 2612   | 2892   |
| UN21223 | Rsa1.0.00160.1 | 1535 | 346678 | 0         | 410  | 417  | 98 -  | 783  | 1199 | 31620  | 32036  |
| UN21224 | Rsa1.0.17040.1 | 576  | 1944   | 0         | 388  | 399  | 97 -  | 18   | 413  | 1207   | 1605   |
| UN21225 | Rsa1.0.20028.1 | 1394 | 1350   | 1.00E-155 | 328  | 342  | 95 +  | 1054 | 1394 | 406    | 746    |
| UN21226 | Rsa1.0.19149.1 | 850  | 1472   | 1.00E-145 | 297  | 309  | 96 -  | 236  | 544  | 257    | 565    |
| UN21227 | Rsa1.0.03303.1 | 622  | 23890  | 1.00E-159 | 294  | 297  | 98 +  | 324  | 620  | 7044   | 7340   |
| UN21228 | Rsa1.0.02923.1 | 755  | 26736  | 1.00E-138 | 332  | 354  | 93 -  | 395  | 744  | 15753  | 16101  |
| UN21229 | Rsa1.0.03277.1 | 1417 | 24138  | 0         | 327  | 328  | 99 +  | 319  | 646  | 13549  | 13876  |
| UN21230 | Rsa1.0.00410.1 | 745  | 86957  | 1.00E-123 | 340  | 371  | 91 -  | 1    | 366  | 28659  | 29021  |
| UN21231 | Rsa1.0.00034.1 | 1255 | 260119 | 0         | 514  | 515  | 99 -  | 739  | 1253 | 129224 | 129738 |
| UN21232 | Rsa1.0.00638.1 | 1315 | 71037  | 0         | 706  | 729  | 96 -  | 22   | 750  | 36315  | 37038  |
| UN21233 | Rsa1.0.00009.1 | 1211 | 232558 | 1.00E-134 | 308  | 334  | 92 -  | 1    | 333  | 123926 | 124237 |
| UN21234 | Rsa1.0.01100.1 | 1218 | 54113  | 1.00E-127 | 258  | 264  | 97 +  | 954  | 1217 | 32751  | 33012  |
| UN21235 | Rsa1.0.00484.1 | 2237 | 203294 | 0         | 447  | 449  | 99 -  | 3    | 450  | 149773 | 150221 |
| UN21236 | Rsa1.0.01719.1 | 1388 | 40388  | 0         | 589  | 590  | 99 +  | 622  | 1211 | 1051   | 1640   |
| UN21237 | Rsa1.0.03131.1 | 801  | 25142  | 0         | 488  | 495  | 98 -  | 306  | 800  | 11236  | 11729  |
| UN21238 | Rsa1.0.03075.1 | 1384 | 25560  | 0         | 519  | 520  | 99 -  | 862  | 1381 | 16371  | 16890  |
| UN21239 | Rsa1.0.01282.1 | 746  | 49304  | 0         | 734  | 743  | 98 -  | 2    | 744  | 23421  | 24162  |
| UN21240 | Rsa1.0.00001.1 | 804  | 363028 | 0         | 775  | 796  | 97 -  | 1    | 793  | 144992 | 145784 |
| UN21241 | Rsa1.0.03384.1 | 980  | 23291  | 0         | 451  | 474  | 95 -  | 498  | 969  | 11505  | 11978  |
| UN21242 | Rsa1.0.01245.1 | 1132 | 149868 | 0         | 1103 | 1139 | 96 -  | 5    | 1132 | 20977  | 22114  |
| UN21243 | Rsa1.0.03142.1 | 943  | 25043  | 0         | 494  | 503  | 98 +  | 62   | 564  | 1430   | 1932   |
| UN21244 | Rsa1.0.04961.1 | 900  | 15316  | 1.00E-154 | 308  | 316  | 97 +  | 585  | 900  | 3669   | 3981   |
| UN21245 | Rsa1.0.01121.1 | 729  | 53407  | 1.00E-120 | 228  | 231  | 98 +  | 73   | 303  | 23305  | 23535  |
| UN21246 | Rsa1.0.00042.1 | 802  | 171507 | 0         | 526  | 542  | 97 +  | 5    | 541  | 55339  | 55880  |
| UN21247 | Rsa1.0.01824.1 | 987  | 38733  | 0         | 394  | 394  | 100 - | 594  | 987  | 7630   | 8023   |
| UN21248 | Rsa1.0.00556.1 | 891  | 207212 | 9.00E-94  | 184  | 187  | 98 -  | 99   | 285  | 139064 | 139250 |
| UN21249 | Rsa1.0.01926.1 | 1324 | 37206  | 0         | 414  | 416  | 99 -  | 65   | 480  | 17508  | 17923  |
| UN21250 | Rsa1.0.03668.1 | 630  | 21483  | 0         | 476  | 480  | 99 -  | 1    | 480  | 11438  | 11917  |
| UN21251 | Rsa1.0.01248.1 | 949  | 154103 | 1.00E-155 | 318  | 329  | 96 +  | 1    | 326  | 10528  | 10856  |
| UN21252 | Rsa1.0.00029.1 | 1067 | 272992 | 0         | 373  | 384  | 97 +  | 6    | 385  | 10187  | 10568  |
| UN21253 | Rsa1.0.01305.1 | 1448 | 48730  | 1.00E-139 | 252  | 252  | 100 - | 332  | 583  | 13231  | 13482  |

|         |                |      |        |           |      |      |       |      |      |        |        |
|---------|----------------|------|--------|-----------|------|------|-------|------|------|--------|--------|
| UN21254 | Rsa1.0_00762.1 | 545  | 165246 | 7.00E-81  | 231  | 252  | 91 -  | 1    | 248  | 27108  | 27358  |
| UN21255 | Rsa1.0_01896.1 | 671  | 37512  | 1.00E-141 | 325  | 343  | 94 -  | 336  | 671  | 35303  | 35644  |
| UN21256 | Rsa1.0_00009.1 | 1645 | 232558 | 0         | 696  | 716  | 97 +  | 929  | 1643 | 28719  | 29432  |
| UN21257 | Rsa1.0_00632.1 | 643  | 183777 | 2.00E-88  | 191  | 198  | 96 +  | 1    | 198  | 55992  | 56188  |
| UN21258 | Rsa1.0_00682.1 | 1523 | 68680  | 0         | 643  | 653  | 98 -  | 3    | 654  | 37867  | 38516  |
| UN21259 | Rsa1.0_00027.1 | 673  | 283362 | 0         | 346  | 351  | 98 -  | 323  | 673  | 48195  | 48544  |
| UN21260 | Rsa1.0_00759.1 | 947  | 65465  | 1.00E-145 | 324  | 346  | 93 +  | 3    | 335  | 61787  | 62132  |
| UN21261 | Rsa1.0_00377.1 | 1410 | 90038  | 1.00E-139 | 351  | 384  | 91 +  | 1    | 372  | 51756  | 52136  |
| UN21262 | Rsa1.0_00821.1 | 1308 | 62891  | 0         | 602  | 612  | 98 -  | 19   | 627  | 50456  | 51067  |
| UN21263 | Rsa1.0_03238.1 | 647  | 24432  | 4.00E-92  | 206  | 218  | 94 +  | 437  | 647  | 18219  | 18436  |
| UN21264 | Rsa1.0_05542.1 | 804  | 13384  | 1.00E-136 | 266  | 272  | 97 -  | 1    | 272  | 9977   | 10245  |
| UN21265 | Rsa1.0_01750.1 | 811  | 39816  | 1.00E-168 | 347  | 361  | 96 -  | 21   | 381  | 22530  | 22886  |
| UN21266 | Rsa1.0_01394.1 | 846  | 46641  | 0         | 662  | 663  | 99 +  | 1    | 663  | 21768  | 22430  |
| UN21267 | Rsa1.0_06054.1 | 791  | 11847  | 0         | 431  | 446  | 96 -  | 1    | 439  | 11033  | 11477  |
| UN21268 | Rsa1.0_01403.1 | 1043 | 46453  | 0         | 640  | 661  | 96 -  | 3    | 660  | 25846  | 26502  |
| UN21269 | Rsa1.0_00034.1 | 660  | 260119 | 0         | 611  | 627  | 97 -  | 35   | 660  | 32837  | 33459  |
| UN21270 | Rsa1.0_00192.1 | 633  | 278200 | 0         | 401  | 412  | 97 +  | 222  | 633  | 22625  | 23030  |
| UN21271 | Rsa1.0_02963.1 | 751  | 26407  | 1.00E-131 | 241  | 242  | 99 -  | 503  | 744  | 3767   | 4008   |
| UN21272 | Rsa1.0_01068.1 | 946  | 55208  | 0         | 332  | 333  | 99 -  | 612  | 944  | 4996   | 5328   |
| UN21273 | Rsa1.0_00215.1 | 780  | 201775 | 0         | 410  | 429  | 95 -  | 15   | 441  | 24023  | 24441  |
| UN21274 | Rsa1.0_00140.1 | 1748 | 121541 | 1.00E-158 | 346  | 366  | 94 -  | 107  | 472  | 49081  | 49443  |
| UN21275 | Rsa1.0_00457.1 | 1087 | 337301 | 1.00E-169 | 301  | 301  | 100 - | 276  | 576  | 288997 | 289297 |
| UN21276 | Rsa1.0_00001.1 | 1305 | 363028 | 1.00E-121 | 293  | 310  | 94 -  | 14   | 316  | 319592 | 319899 |
| UN21277 | Rsa1.0_00953.1 | 1707 | 145012 | 0         | 665  | 670  | 99 -  | 1035 | 1704 | 97122  | 97791  |
| UN21278 | Rsa1.0_07614.1 | 935  | 9019   | 1.00E-112 | 256  | 270  | 94 -  | 2    | 270  | 8150   | 8418   |
| UN21279 | Rsa1.0_04192.1 | 813  | 18572  | 0         | 564  | 608  | 92 +  | 125  | 732  | 12259  | 12866  |
| UN21280 | Rsa1.0_00480.1 | 1033 | 81325  | 0         | 463  | 478  | 96 +  | 3    | 480  | 28254  | 28728  |
| UN21281 | Rsa1.0_00381.1 | 786  | 89718  | 1.00E-100 | 261  | 286  | 91 +  | 500  | 783  | 47421  | 47693  |
| UN21282 | Rsa1.0_00475.1 | 1450 | 81678  | 0         | 480  | 496  | 96 -  | 1    | 496  | 39554  | 40049  |
| UN21283 | Rsa1.0_59564.1 | 1045 | 384    | 0         | 379  | 384  | 98 -  | 5    | 388  | 1      | 384    |
| UN21284 | Rsa1.0_00388.1 | 959  | 88890  | 0         | 389  | 410  | 94 -  | 2    | 408  | 56221  | 56621  |
| UN21285 | Rsa1.0_01768.1 | 1243 | 138463 | 0         | 445  | 455  | 97 -  | 55   | 506  | 104192 | 104646 |
| UN21286 | Rsa1.0_01023.1 | 1037 | 56571  | 0         | 461  | 463  | 99 -  | 1    | 462  | 28175  | 28637  |
| UN21287 | Rsa1.0_02322.1 | 1167 | 32555  | 1.00E-150 | 288  | 293  | 98 -  | 19   | 309  | 3350   | 3642   |
| UN21288 | Rsa1.0_03089.1 | 974  | 25465  | 1.00E-180 | 356  | 368  | 96 +  | 510  | 877  | 8730   | 9097   |
| UN21289 | Rsa1.0_00913.1 | 1864 | 59914  | 0         | 1173 | 1205 | 97 -  | 661  | 1862 | 24373  | 25576  |
| UN21290 | Rsa1.0_03738.1 | 1164 | 21071  | 1.00E-147 | 268  | 269  | 99 -  | 311  | 579  | 12425  | 12693  |
| UN21291 | Rsa1.0_02901.1 | 708  | 26909  | 1.00E-167 | 301  | 302  | 99 -  | 1    | 302  | 21290  | 21591  |
| UN21292 | Rsa1.0_00365.1 | 653  | 90902  | 0         | 370  | 373  | 99 +  | 281  | 653  | 81720  | 82092  |

|         |                |      |        |           |     |     |       |      |      |        |        |
|---------|----------------|------|--------|-----------|-----|-----|-------|------|------|--------|--------|
| UN21293 | Rsa1.0.00152.1 | 1321 | 257730 | 1.00E-135 | 286 | 298 | 95 -  | 1026 | 1321 | 98717  | 99012  |
| UN21294 | Rsa1.0.00192.1 | 974  | 278200 | 1.00E-134 | 243 | 243 | 100 - | 730  | 972  | 16376  | 16618  |
| UN21295 | Rsa1.0.16093.1 | 1207 | 2288   | 0         | 619 | 624 | 99 +  | 356  | 978  | 1665   | 2288   |
| UN21296 | Rsa1.0.08288.1 | 671  | 7604   | 1.00E-166 | 300 | 301 | 99 +  | 371  | 671  | 4335   | 4635   |
| UN21297 | Rsa1.0.03209.1 | 1200 | 24592  | 0         | 464 | 478 | 97 +  | 2    | 477  | 17798  | 18274  |
| UN21298 | Rsa1.0.00838.1 | 1262 | 153820 | 0         | 965 | 979 | 98 +  | 1    | 979  | 14738  | 15715  |
| UN21299 | Rsa1.0.01389.1 | 692  | 46716  | 1.00E-162 | 308 | 314 | 98 +  | 189  | 502  | 10431  | 10744  |
| UN21300 | Rsa1.0.00913.1 | 748  | 59914  | 6.00E-73  | 155 | 160 | 96 -  | 235  | 394  | 29028  | 29187  |
| UN21301 | Rsa1.0.01611.1 | 926  | 42269  | 1.00E-156 | 316 | 328 | 96 -  | 254  | 581  | 25466  | 25793  |
| UN21302 | Rsa1.0.08609.1 | 771  | 7132   | 1.00E-150 | 318 | 333 | 95 -  | 437  | 769  | 4811   | 5142   |
| UN21303 | Rsa1.0.00102.1 | 538  | 135497 | 1.00E-130 | 244 | 247 | 98 +  | 292  | 538  | 51183  | 51429  |
| UN21304 | Rsa1.0.04026.1 | 822  | 19508  | 1.00E-137 | 307 | 322 | 95 -  | 5    | 322  | 11005  | 11325  |
| UN21305 | Rsa1.0.00130.1 | 958  | 125737 | 0         | 454 | 476 | 95 +  | 2    | 474  | 38131  | 38602  |
| UN21306 | Rsa1.0.00091.1 | 960  | 139699 | 1.00E-170 | 304 | 304 | 100 + | 656  | 959  | 80286  | 80589  |
| UN21307 | Rsa1.0.39335.1 | 780  | 572    | 1.00E-166 | 336 | 347 | 96 +  | 417  | 760  | 11     | 356    |
| UN21308 | Rsa1.0.45980.1 | 502  | 491    | 1.00E-173 | 339 | 349 | 97 -  | 3    | 348  | 1      | 349    |
| UN21309 | Rsa1.0.05382.1 | 1261 | 13963  | 0         | 396 | 413 | 95 +  | 483  | 895  | 423    | 833    |
| UN21310 | Rsa1.0.00594.1 | 763  | 73729  | 1.00E-114 | 264 | 279 | 94 +  | 481  | 758  | 30039  | 30313  |
| UN21311 | Rsa1.0.02707.1 | 926  | 28520  | 1.00E-101 | 222 | 231 | 96 -  | 8    | 238  | 26163  | 26391  |
| UN21312 | Rsa1.0.02777.1 | 831  | 27986  | 1.00E-152 | 294 | 301 | 97 -  | 6    | 306  | 25025  | 25325  |
| UN21313 | Rsa1.0.01995.1 | 823  | 36347  | 0         | 527 | 553 | 95 -  | 3    | 546  | 22162  | 22714  |
| UN21314 | Rsa1.0.00153.1 | 613  | 192931 | 8.00E-72  | 201 | 219 | 91 +  | 25   | 239  | 168999 | 169210 |
| UN21315 | Rsa1.0.01236.1 | 1434 | 50156  | 0         | 524 | 526 | 99 +  | 907  | 1432 | 30684  | 31209  |
| UN21316 | Rsa1.0.02079.1 | 1254 | 35306  | 0         | 660 | 713 | 92 -  | 13   | 725  | 16536  | 17229  |
| UN21317 | Rsa1.0.00416.1 | 1094 | 86772  | 6.00E-83  | 199 | 213 | 93 -  | 823  | 1035 | 66646  | 66858  |
| UN21318 | Rsa1.0.00087.1 | 635  | 761073 | 1.00E-136 | 287 | 300 | 95 +  | 338  | 629  | 217289 | 217588 |
| UN21319 | Rsa1.0.04641.1 | 680  | 268012 | 1.00E-176 | 347 | 356 | 97 +  | 321  | 673  | 261466 | 261821 |
| UN21320 | Rsa1.0.01264.1 | 1377 | 49697  | 0         | 840 | 861 | 97 -  | 516  | 1376 | 15561  | 16421  |
| UN21321 | Rsa1.0.06133.1 | 1847 | 11663  | 0         | 532 | 539 | 98 +  | 1043 | 1581 | 9464   | 10002  |
| UN21322 | Rsa1.0.02550.1 | 1275 | 291051 | 1.00E-171 | 331 | 339 | 97 +  | 893  | 1231 | 6190   | 6525   |
| UN21323 | Rsa1.0.07732.1 | 877  | 8695   | 1.00E-164 | 355 | 372 | 95 -  | 3    | 368  | 1258   | 1626   |
| UN21324 | Rsa1.0.00727.1 | 1081 | 66724  | 1.00E-157 | 296 | 301 | 98 +  | 140  | 440  | 30137  | 30437  |
| UN21325 | Rsa1.0.00157.1 | 1292 | 245832 | 0         | 586 | 614 | 95 -  | 2    | 609  | 163052 | 163665 |
| UN21326 | Rsa1.0.75934.1 | 676  | 302    | 1.00E-169 | 302 | 302 | 100 - | 320  | 621  | 1      | 302    |
| UN21327 | Rsa1.0.02950.1 | 667  | 26506  | 1.00E-128 | 269 | 281 | 95 -  | 213  | 493  | 6575   | 6855   |
| UN21328 | Rsa1.0.01934.1 | 831  | 37162  | 3.00E-78  | 149 | 149 | 100 - | 566  | 714  | 4040   | 4188   |
| UN21329 | Rsa1.0.00826.1 | 924  | 166736 | 0         | 629 | 631 | 99 -  | 225  | 855  | 118767 | 119397 |
| UN21330 | Rsa1.0.03191.1 | 1383 | 145762 | 1.00E-129 | 248 | 251 | 98 -  | 1133 | 1383 | 8197   | 8446   |
| UN21331 | Rsa1.0.00483.1 | 1207 | 81102  | 1.00E-101 | 248 | 266 | 93 -  | 936  | 1200 | 56329  | 56592  |

|         |                |      |        |           |      |      |       |     |      |        |        |
|---------|----------------|------|--------|-----------|------|------|-------|-----|------|--------|--------|
| UN21332 | Rsa1.0.00546.1 | 553  | 76523  | 2.33E-156 | 331  | 353  | 93 +  | 209 | 553  | 69605  | 69957  |
| UN21333 | Rsa1.0.01214.1 | 824  | 50599  | 1.00E-157 | 311  | 319  | 97 +  | 3   | 318  | 44850  | 45167  |
| UN21334 | Rsa1.0.04192.1 | 859  | 18572  | 0         | 564  | 605  | 93 +  | 119 | 723  | 12259  | 12863  |
| UN21335 | Rsa1.0.02398.1 | 1146 | 31766  | 0         | 516  | 539  | 95 -  | 1   | 535  | 29879  | 30414  |
| UN21336 | Rsa1.0.04697.1 | 1380 | 16336  | 0         | 456  | 460  | 99 -  | 5   | 464  | 7245   | 7704   |
| UN21337 | Rsa1.0.01170.1 | 843  | 161131 | 1.00E-131 | 300  | 324  | 92 -  | 416 | 739  | 131513 | 131821 |
| UN21338 | Rsa1.0.00577.1 | 896  | 174827 | 0         | 770  | 790  | 97 +  | 1   | 789  | 29470  | 30259  |
| UN21339 | Rsa1.0.00222.1 | 733  | 172263 | 1.00E-122 | 238  | 243  | 97 +  | 469 | 711  | 139604 | 139846 |
| UN21340 | Rsa1.0.21783.1 | 872  | 1173   | 0         | 513  | 515  | 99 -  | 3   | 517  | 165    | 679    |
| UN21341 | Rsa1.0.15993.1 | 634  | 2329   | 0         | 408  | 414  | 98 +  | 221 | 634  | 1900   | 2310   |
| UN21342 | Rsa1.0.01564.1 | 1528 | 43169  | 1.00E-124 | 230  | 231  | 99 +  | 873 | 1103 | 37725  | 37955  |
| UN21343 | Rsa1.0.00329.1 | 1149 | 222544 | 0         | 451  | 468  | 96 +  | 3   | 459  | 175854 | 176318 |
| UN21344 | Rsa1.0.08994.1 | 1106 | 6724   | 0         | 596  | 599  | 99 +  | 79  | 677  | 2717   | 3315   |
| UN21345 | Rsa1.0.00001.1 | 886  | 363028 | 1.00E-154 | 277  | 277  | 100 + | 3   | 279  | 89683  | 89959  |
| UN21346 | Rsa1.0.11760.1 | 1090 | 5417   | 0         | 412  | 412  | 100 - | 352 | 763  | 5006   | 5417   |
| UN21347 | Rsa1.0.00065.1 | 892  | 454616 | 0         | 533  | 558  | 95 +  | 3   | 557  | 26159  | 26712  |
| UN21348 | Rsa1.0.02118.1 | 1380 | 34839  | 0         | 387  | 392  | 98 +  | 990 | 1380 | 7761   | 8152   |
| UN21349 | Rsa1.0.02834.1 | 710  | 27493  | 0         | 388  | 399  | 97 -  | 3   | 400  | 24287  | 24685  |
| UN21350 | Rsa1.0.08609.1 | 1364 | 7132   | 0         | 529  | 532  | 99 +  | 525 | 1056 | 5492   | 6023   |
| UN21351 | Rsa1.0.00758.1 | 1083 | 65477  | 1.00E-144 | 266  | 268  | 99 +  | 815 | 1082 | 49765  | 50032  |
| UN21352 | Rsa1.0.00939.1 | 1233 | 185227 | 0         | 1098 | 1157 | 94 -  | 75  | 1231 | 152983 | 154136 |
| UN21353 | Rsa1.0.00719.1 | 1117 | 66952  | 1.00E-152 | 298  | 306  | 97 -  | 351 | 656  | 46708  | 47013  |
| UN21354 | Rsa1.0.07693.1 | 778  | 8776   | 1.00E-142 | 343  | 372  | 92 -  | 286 | 657  | 7066   | 7437   |
| UN21355 | Rsa1.0.00380.1 | 737  | 89748  | 1.00E-138 | 339  | 368  | 92 +  | 372 | 737  | 88066  | 88417  |
| UN21356 | Rsa1.0.02499.1 | 1472 | 30774  | 0         | 355  | 362  | 98 +  | 52  | 413  | 17426  | 17787  |
| UN21357 | Rsa1.0.19197.1 | 841  | 1466   | 1.00E-119 | 239  | 246  | 97 +  | 3   | 248  | 1104   | 1349   |
| UN21358 | Rsa1.0.05784.1 | 1044 | 12643  | 0         | 418  | 427  | 97 +  | 617 | 1043 | 1645   | 2070   |
| UN21359 | Rsa1.0.05704.1 | 908  | 12883  | 0         | 608  | 623  | 97 -  | 284 | 906  | 2517   | 3136   |
| UN21360 | Rsa1.0.02499.1 | 896  | 30774  | 1.00E-156 | 298  | 303  | 98 +  | 1   | 303  | 22309  | 22610  |
| UN21361 | Rsa1.0.04286.1 | 1346 | 18084  | 0         | 550  | 561  | 98 -  | 576 | 1136 | 13076  | 13636  |
| UN21362 | Rsa1.0.10199.1 | 1006 | 5948   | 0         | 645  | 654  | 98 -  | 11  | 663  | 5187   | 5840   |
| UN21363 | Rsa1.0.00481.1 | 879  | 81316  | 1.00E-139 | 270  | 276  | 97 +  | 197 | 472  | 72152  | 72427  |
| UN21364 | Rsa1.0.00734.1 | 802  | 66508  | 1.00E-153 | 345  | 364  | 94 +  | 1   | 363  | 53538  | 53891  |
| UN21365 | Rsa1.0.01272.1 | 649  | 49553  | 0         | 598  | 639  | 93 +  | 13  | 649  | 18652  | 19270  |
| UN21366 | Rsa1.0.00478.1 | 826  | 81419  | 1.00E-178 | 319  | 320  | 99 -  | 1   | 320  | 62811  | 63130  |
| UN21367 | Rsa1.0.06978.1 | 610  | 10073  | 1.00E-156 | 291  | 295  | 98 -  | 80  | 374  | 2434   | 2728   |
| UN21368 | Rsa1.0.00065.1 | 871  | 454616 | 0         | 722  | 722  | 100 + | 1   | 722  | 150650 | 151371 |
| UN21369 | Rsa1.0.00529.1 | 1160 | 77487  | 0         | 344  | 347  | 99 -  | 9   | 355  | 63127  | 63473  |
| UN21370 | Rsa1.0.00365.1 | 493  | 90902  | 1.00E-110 | 218  | 223  | 97 +  | 264 | 486  | 81720  | 81942  |

|         |                |      |        |           |      |      |       |      |      |        |        |
|---------|----------------|------|--------|-----------|------|------|-------|------|------|--------|--------|
| UN21371 | Rsa1.0_03148.1 | 1094 | 24989  | 0         | 381  | 400  | 95 +  | 640  | 1039 | 21012  | 21408  |
| UN21372 | Rsa1.0_14660.1 | 1073 | 3181   | 1.00E-170 | 335  | 344  | 97 +  | 728  | 1071 | 2019   | 2361   |
| UN21373 | Rsa1.0_00473.1 | 821  | 212204 | 0         | 505  | 509  | 99 +  | 26   | 534  | 76191  | 76699  |
| UN21374 | Rsa1.0_07207.1 | 899  | 9720   | 1.00E-158 | 307  | 315  | 97 -  | 308  | 622  | 8629   | 8943   |
| UN21375 | Rsa1.0_00348.1 | 789  | 92818  | 1.00E-159 | 341  | 355  | 96 +  | 1    | 353  | 49682  | 50033  |
| UN21376 | Rsa1.0_02026.1 | 1264 | 35896  | 0         | 644  | 654  | 98 -  | 2    | 652  | 22657  | 23308  |
| UN21377 | Rsa1.0_00475.1 | 808  | 81678  | 0         | 638  | 654  | 97 +  | 162  | 806  | 39332  | 39985  |
| UN21378 | Rsa1.0_03362.1 | 1310 | 23453  | 6.00E-96  | 198  | 203  | 97 -  | 970  | 1172 | 13730  | 13931  |
| UN21379 | Rsa1.0_06771.1 | 540  | 10388  | 0         | 525  | 540  | 97 -  | 1    | 540  | 2725   | 3264   |
| UN21380 | Rsa1.0_03241.1 | 1165 | 24423  | 0         | 572  | 580  | 98 -  | 2    | 581  | 11090  | 11669  |
| UN21381 | Rsa1.0_04192.1 | 1010 | 18572  | 0         | 540  | 589  | 91 +  | 98   | 686  | 17124  | 17708  |
| UN21382 | Rsa1.0_01286.1 | 802  | 49209  | 2.00E-88  | 215  | 231  | 93 +  | 2    | 232  | 40556  | 40777  |
| UN21383 | Rsa1.0_00084.1 | 801  | 142338 | 1.00E-177 | 376  | 389  | 96 +  | 420  | 801  | 92752  | 93140  |
| UN21384 | Rsa1.0_00990.1 | 1110 | 57445  | 0         | 1072 | 1130 | 94 -  | 1    | 1109 | 55719  | 56834  |
| UN21385 | Rsa1.0_06918.1 | 2037 | 10166  | 0         | 773  | 809  | 95 +  | 584  | 1369 | 1350   | 2153   |
| UN21386 | Rsa1.0_00087.1 | 609  | 761073 | 1.00E-128 | 281  | 296  | 94 -  | 1    | 289  | 217289 | 217584 |
| UN21387 | Rsa1.0_01376.1 | 1086 | 47004  | 1.00E-105 | 282  | 310  | 90 +  | 6    | 314  | 37648  | 37957  |
| UN21388 | Rsa1.0_02079.1 | 1497 | 35306  | 0         | 700  | 701  | 99 -  | 252  | 952  | 16530  | 17229  |
| UN21389 | Rsa1.0_08023.1 | 955  | 8071   | 0         | 521  | 548  | 95 -  | 415  | 954  | 4852   | 5399   |
| UN21390 | Rsa1.0_18393.1 | 587  | 1607   | 1.00E-102 | 215  | 223  | 96 -  | 3    | 225  | 111    | 330    |
| UN21391 | Rsa1.0_00571.1 | 647  | 329018 | 0         | 335  | 339  | 98 -  | 1    | 339  | 159412 | 159750 |
| UN21392 | Rsa1.0_00351.1 | 1099 | 413096 | 0         | 513  | 522  | 98 -  | 584  | 1099 | 13641  | 14162  |
| UN21393 | Rsa1.0_03169.1 | 1639 | 24826  | 1.00E-158 | 286  | 287  | 99 +  | 1353 | 1639 | 18033  | 18319  |
| UN21394 | Rsa1.0_00095.1 | 765  | 283384 | 0         | 677  | 682  | 99 +  | 85   | 765  | 96573  | 97254  |
| UN21395 | Rsa1.0_02503.1 | 1652 | 30709  | 1.00E-111 | 258  | 271  | 95 -  | 1349 | 1616 | 27255  | 27522  |
| UN21396 | Rsa1.0_02180.1 | 822  | 34176  | 1.00E-164 | 330  | 342  | 96 -  | 478  | 815  | 26510  | 26851  |
| UN21397 | Rsa1.0_21317.1 | 1088 | 1216   | 1.00E-154 | 298  | 304  | 98 +  | 657  | 959  | 502    | 805    |
| UN21398 | Rsa1.0_03738.1 | 465  | 21071  | 1.00E-128 | 232  | 232  | 100 + | 1    | 232  | 11528  | 11759  |
| UN21399 | Rsa1.0_05228.1 | 731  | 14437  | 0         | 363  | 372  | 97 +  | 6    | 375  | 4942   | 5313   |
| UN21400 | Rsa1.0_00108.1 | 776  | 478491 | 0         | 344  | 345  | 99 +  | 1    | 345  | 67319  | 67663  |
| UN21401 | Rsa1.0_00727.1 | 828  | 66724  | 0         | 535  | 535  | 100 + | 294  | 828  | 2274   | 2808   |
| UN21402 | Rsa1.0_00101.1 | 822  | 267193 | 1.00E-135 | 302  | 312  | 96 -  | 518  | 822  | 211871 | 212182 |
| UN21403 | Rsa1.0_01214.1 | 790  | 50599  | 0         | 387  | 397  | 97 -  | 396  | 788  | 35165  | 35561  |
| UN21404 | Rsa1.0_03233.1 | 1516 | 24446  | 0         | 374  | 378  | 98 -  | 1137 | 1514 | 7152   | 7529   |
| UN21405 | Rsa1.0_02459.1 | 1385 | 31185  | 0         | 414  | 414  | 100 - | 3    | 416  | 19843  | 20256  |
| UN21406 | Rsa1.0_01261.1 | 842  | 49744  | 2.00E-97  | 219  | 229  | 95 +  | 100  | 326  | 22740  | 22968  |
| UN21407 | Rsa1.0_13843.1 | 584  | 4225   | 1.00E-168 | 302  | 303  | 99 -  | 1    | 303  | 1422   | 1724   |
| UN21408 | Rsa1.0_00644.1 | 632  | 136881 | 1.00E-64  | 126  | 126  | 100 + | 369  | 494  | 39544  | 39669  |
| UN21409 | Rsa1.0_00087.1 | 718  | 761073 | 1.00E-131 | 249  | 253  | 98 +  | 9    | 261  | 191419 | 191671 |

|         |                |      |        |           |      |      |       |      |      |        |        |
|---------|----------------|------|--------|-----------|------|------|-------|------|------|--------|--------|
| UN21410 | Rsa1.0_63163.1 | 895  | 363    | 0         | 356  | 363  | 98 +  | 491  | 853  | 1      | 363    |
| UN21411 | Rsa1.0_00016.1 | 832  | 831256 | 1.00E-161 | 302  | 304  | 99 +  | 531  | 832  | 783490 | 783793 |
| UN21412 | Rsa1.0_00653.1 | 752  | 70029  | 0         | 442  | 454  | 97 +  | 3    | 456  | 37047  | 37500  |
| UN21413 | Rsa1.0_03352.1 | 725  | 23506  | 1.00E-126 | 237  | 238  | 99 +  | 8    | 244  | 17824  | 18061  |
| UN21414 | #              | #    | #      | #         | #    | #    | #     | #    | #    | #      | #      |
| UN21415 | Rsa1.0_00699.1 | 731  | 184398 | 0         | 409  | 415  | 98 -  | 318  | 731  | 183905 | 184319 |
| UN21416 | Rsa1.0_01241.1 | 1145 | 50067  | 0         | 449  | 453  | 99 +  | 73   | 525  | 3931   | 4383   |
| UN21417 | Rsa1.0_00344.1 | 729  | 191774 | 1.00E-160 | 290  | 291  | 99 -  | 438  | 728  | 156171 | 156461 |
| UN21418 | Rsa1.0_00805.1 | 912  | 63724  | 0         | 357  | 360  | 99 -  | 552  | 911  | 35515  | 35874  |
| UN21419 | Rsa1.0_00769.1 | 827  | 64911  | 0         | 694  | 723  | 95 +  | 14   | 732  | 11747  | 12460  |
| UN21420 | Rsa1.0_10503.1 | 1186 | 5824   | 1.00E-179 | 319  | 319  | 100 - | 868  | 1186 | 1944   | 2262   |
| UN21421 | Rsa1.0_00770.1 | 907  | 64900  | 1.00E-166 | 296  | 296  | 100 + | 327  | 622  | 9808   | 10103  |
| UN21422 | Rsa1.0_00842.1 | 536  | 62493  | 1.00E-127 | 236  | 238  | 99 +  | 2    | 239  | 38925  | 39162  |
| UN21423 | Rsa1.0_00215.1 | 1039 | 201775 | 0         | 338  | 340  | 99 -  | 1    | 340  | 2172   | 2510   |
| UN21424 | Rsa1.0_00394.1 | 1235 | 148426 | 0         | 409  | 414  | 98 +  | 823  | 1233 | 99869  | 100282 |
| UN21425 | Rsa1.0_00044.1 | 1813 | 271658 | 0         | 1455 | 1458 | 99 +  | 1    | 1457 | 260650 | 262107 |
| UN21426 | Rsa1.0_01422.1 | 1114 | 46172  | 1.00E-145 | 283  | 289  | 97 +  | 826  | 1114 | 28595  | 28881  |
| UN21427 | Rsa1.0_01249.1 | 814  | 188432 | 4.00E-99  | 187  | 188  | 99 -  | 317  | 504  | 151131 | 151318 |
| UN21428 | Rsa1.0_03581.1 | 1560 | 21965  | 0         | 858  | 885  | 96 +  | 1    | 884  | 573    | 1457   |
| UN21429 | Rsa1.0_02901.1 | 1318 | 26909  | 1.00E-152 | 347  | 370  | 93 -  | 1    | 367  | 21290  | 21657  |
| UN21430 | Rsa1.0_01156.1 | 1434 | 52147  | 0         | 592  | 608  | 97 +  | 1    | 599  | 48725  | 49327  |
| UN21431 | Rsa1.0_00608.1 | 1224 | 172672 | 0         | 486  | 499  | 97 +  | 726  | 1224 | 113755 | 114253 |
| UN21432 | Rsa1.0_02105.1 | 1148 | 156953 | 1.00E-175 | 353  | 367  | 96 +  | 531  | 897  | 149700 | 150066 |
| UN21433 | Rsa1.0_00641.1 | 1890 | 208241 | 0         | 556  | 569  | 97 -  | 989  | 1557 | 146242 | 146810 |
| UN21434 | Rsa1.0_10026.1 | 995  | 6034   | 1.00E-126 | 278  | 292  | 95 -  | 687  | 973  | 5747   | 6034   |
| UN21435 | Rsa1.0_00101.1 | 1131 | 267193 | 0         | 408  | 420  | 97 +  | 701  | 1120 | 251580 | 251996 |
| UN21436 | Rsa1.0_00040.1 | 1704 | 324196 | 0         | 1341 | 1360 | 98 +  | 283  | 1639 | 223524 | 224883 |
| UN21437 | Rsa1.0_00038.1 | 1286 | 314568 | 0         | 512  | 521  | 98 +  | 770  | 1284 | 238902 | 239422 |
| UN21438 | Rsa1.0_00971.1 | 1371 | 57973  | 1.00E-173 | 326  | 330  | 98 -  | 1046 | 1371 | 49789  | 50118  |
| UN21439 | Rsa1.0_02596.1 | 1118 | 29709  | 1.00E-173 | 325  | 328  | 99 -  | 2    | 328  | 1721   | 2047   |
| UN21440 | Rsa1.0_02453.1 | 1679 | 31271  | 1.00E-176 | 335  | 341  | 98 -  | 1    | 340  | 14906  | 15246  |
| UN21441 | Rsa1.0_00603.1 | 672  | 73299  | 0         | 464  | 471  | 98 +  | 200  | 667  | 32629  | 33099  |
| UN21442 | Rsa1.0_00119.1 | 1034 | 467509 | 0         | 394  | 394  | 100 + | 641  | 1034 | 337593 | 337986 |
| UN21443 | Rsa1.0_06443.1 | 1093 | 11008  | 0         | 442  | 447  | 98 -  | 645  | 1091 | 5636   | 6081   |
| UN21444 | Rsa1.0_00358.1 | 1846 | 91293  | 1.00E-174 | 425  | 457  | 92 +  | 5    | 453  | 32091  | 32539  |
| UN21445 | Rsa1.0_00384.1 | 1098 | 89278  | 0         | 358  | 364  | 98 +  | 733  | 1096 | 12264  | 12627  |
| UN21446 | Rsa1.0_00327.1 | 2043 | 94892  | 1.00E-162 | 345  | 363  | 95 -  | 1535 | 1894 | 15925  | 16281  |
| UN21447 | Rsa1.0_02005.1 | 1046 | 36137  | 0         | 409  | 410  | 99 +  | 637  | 1046 | 7475   | 7884   |
| UN21448 | Rsa1.0_01214.1 | 1258 | 50599  | 0         | 441  | 465  | 94 +  | 809  | 1258 | 46274  | 46736  |



|         |                |      |        |           |     |     |       |      |      |        |        |
|---------|----------------|------|--------|-----------|-----|-----|-------|------|------|--------|--------|
| UN21449 | Rsa1.0_00295.1 | 1017 | 152597 | 0         | 468 | 508 | 92 -  | 1    | 494  | 84036  | 84529  |
| UN21450 | Rsa1.0_01571.1 | 1106 | 43000  | 1.00E-159 | 310 | 318 | 97 +  | 3    | 320  | 4397   | 4710   |
| UN21451 | Rsa1.0_00153.1 | 901  | 192931 | 0         | 501 | 527 | 95 -  | 387  | 900  | 124379 | 124905 |
| UN21452 | Rsa1.0_03195.1 | 1534 | 24673  | 1.00E-177 | 372 | 389 | 95 +  | 1145 | 1530 | 8990   | 9372   |
| UN21453 | Rsa1.0_00104.1 | 566  | 368722 | 1.00E-128 | 232 | 232 | 100 - | 129  | 360  | 211493 | 211724 |
| UN21454 | Rsa1.0_01962.1 | 595  | 153412 | 0         | 588 | 594 | 98 -  | 1    | 594  | 144468 | 145061 |
| UN21455 | Rsa1.0_01857.1 | 590  | 38103  | 1.00E-107 | 212 | 217 | 97 -  | 239  | 455  | 18550  | 18766  |
| UN21456 | Rsa1.0_00096.1 | 1467 | 198773 | 1.00E-174 | 348 | 358 | 97 -  | 1094 | 1450 | 136017 | 136372 |
| UN21457 | Rsa1.0_03966.1 | 1522 | 19823  | 0         | 421 | 430 | 97 +  | 2    | 430  | 1906   | 2332   |
| UN21458 | Rsa1.0_00281.1 | 1400 | 99908  | 0         | 582 | 621 | 93 -  | 800  | 1399 | 68426  | 69044  |
| UN21459 | Rsa1.0_00034.1 | 1413 | 260119 | 0         | 469 | 469 | 100 + | 5    | 473  | 7131   | 7599   |
| UN21460 | Rsa1.0_00218.1 | 867  | 201480 | 0         | 827 | 860 | 96 -  | 3    | 858  | 157959 | 158815 |
| UN21461 | Rsa1.0_00032.1 | 1780 | 306326 | 0         | 529 | 541 | 97 -  | 1240 | 1778 | 146634 | 147171 |
| UN21462 | Rsa1.0_00944.1 | 1485 | 58733  | 0         | 456 | 460 | 99 +  | 1026 | 1485 | 35701  | 36160  |
| UN21463 | Rsa1.0_00304.1 | 1244 | 97429  | 0         | 935 | 940 | 99 -  | 12   | 950  | 59666  | 60605  |
| UN21464 | Rsa1.0_02158.1 | 707  | 154841 | 0         | 520 | 536 | 97 +  | 155  | 690  | 131881 | 132416 |
| UN21465 | Rsa1.0_00961.1 | 1901 | 58185  | 0         | 759 | 777 | 97 +  | 666  | 1442 | 1751   | 2527   |
| UN21466 | Rsa1.0_13384.1 | 1086 | 4873   | 0         | 352 | 358 | 98 +  | 729  | 1086 | 3829   | 4183   |
| UN21467 | Rsa1.0_01721.1 | 1611 | 40345  | 1.00E-149 | 268 | 268 | 100 - | 1    | 268  | 7945   | 8212   |
| UN21468 | Rsa1.0_00291.1 | 629  | 172129 | 1.00E-161 | 300 | 303 | 99 -  | 325  | 627  | 17349  | 17650  |
| UN21469 | Rsa1.0_04400.1 | 2037 | 17529  | 0         | 722 | 757 | 95 -  | 1273 | 2027 | 10938  | 11677  |
| UN21470 | Rsa1.0_00152.1 | 1446 | 257730 | 1.00E-123 | 228 | 229 | 99 -  | 1    | 229  | 229620 | 229848 |
| UN21471 | Rsa1.0_00690.1 | 743  | 140527 | 2.00E-66  | 188 | 205 | 91 -  | 5    | 209  | 31841  | 32043  |
| UN21472 | Rsa1.0_00937.1 | 2758 | 59061  | 0         | 745 | 769 | 96 -  | 554  | 1322 | 50377  | 51145  |
| UN21473 | Rsa1.0_00463.1 | 930  | 189177 | 1.00E-129 | 290 | 308 | 94 -  | 621  | 928  | 168758 | 169061 |
| UN21474 | Rsa1.0_00148.1 | 905  | 120234 | 0         | 892 | 905 | 98 -  | 1    | 903  | 36558  | 37462  |
| UN21475 | Rsa1.0_01223.1 | 842  | 50392  | 0         | 428 | 429 | 99 -  | 1    | 429  | 47953  | 48381  |
| UN21476 | Rsa1.0_00942.1 | 767  | 58873  | 1.00E-141 | 320 | 339 | 94 +  | 430  | 767  | 3175   | 3512   |
| UN21477 | Rsa1.0_00398.1 | 1189 | 88007  | 0         | 709 | 715 | 99 -  | 1    | 715  | 29015  | 29727  |
| UN21478 | Rsa1.0_01984.1 | 927  | 36491  | 1.00E-135 | 244 | 244 | 100 - | 3    | 246  | 24426  | 24669  |
| UN21479 | Rsa1.0_00276.1 | 864  | 100160 | 0         | 361 | 366 | 98 -  | 223  | 588  | 95446  | 95811  |
| UN21480 | Rsa1.0_00031.1 | 1382 | 179862 | 0         | 406 | 420 | 96 -  | 31   | 447  | 161267 | 161686 |
| UN21481 | Rsa1.0_09385.1 | 1369 | 6405   | 0         | 783 | 795 | 98 +  | 533  | 1327 | 3183   | 3977   |
| UN21482 | Rsa1.0_04928.1 | 1044 | 15420  | 0         | 367 | 372 | 98 -  | 675  | 1044 | 9510   | 9881   |
| UN21483 | Rsa1.0_00632.1 | 708  | 183777 | 1.00E-168 | 312 | 316 | 98 +  | 393  | 708  | 168864 | 169179 |
| UN21484 | Rsa1.0_01460.1 | 1470 | 45255  | 0         | 502 | 516 | 97 -  | 962  | 1470 | 32131  | 32642  |
| UN21485 | Rsa1.0_03698.1 | 849  | 21302  | 1.00E-127 | 273 | 283 | 96 +  | 2    | 282  | 7551   | 7832   |
| UN21486 | Rsa1.0_01695.1 | 1293 | 40848  | 1.00E-175 | 364 | 376 | 96 +  | 902  | 1275 | 8401   | 8774   |
| UN21487 | Rsa1.0_00111.1 | 698  | 390088 | 0         | 418 | 429 | 97 +  | 271  | 698  | 75630  | 76057  |

|         |                |      |        |           |      |      |       |      |      |        |        |
|---------|----------------|------|--------|-----------|------|------|-------|------|------|--------|--------|
| UN21488 | Rsa1.0_11760.1 | 1197 | 5417   | 0         | 389  | 396  | 98 +  | 3    | 398  | 4513   | 4908   |
| UN21489 | Rsa1.0_01156.1 | 1966 | 52147  | 1.00E-151 | 284  | 288  | 98 -  | 1    | 288  | 42873  | 43160  |
| UN21490 | Rsa1.0_00025.1 | 1209 | 277312 | 0         | 632  | 633  | 99 -  | 575  | 1207 | 52179  | 52811  |
| UN21491 | Rsa1.0_01377.1 | 1035 | 46967  | 0         | 988  | 1019 | 96 +  | 24   | 1033 | 31199  | 32211  |
| UN21492 | Rsa1.0_00295.1 | 832  | 152597 | 5.00E-92  | 224  | 239  | 93 +  | 567  | 805  | 140727 | 140962 |
| UN21493 | Rsa1.0_00190.1 | 860  | 318240 | 0         | 795  | 818  | 97 +  | 47   | 860  | 94238  | 95055  |
| UN21494 | Rsa1.0_00207.1 | 933  | 248736 | 0         | 474  | 489  | 96 +  | 442  | 930  | 22526  | 23010  |
| UN21495 | Rsa1.0_01493.1 | 1943 | 44670  | 0         | 990  | 1018 | 97 -  | 927  | 1943 | 19665  | 20675  |
| UN21496 | Rsa1.0_00016.1 | 1182 | 831256 | 0         | 1089 | 1105 | 98 -  | 77   | 1179 | 542847 | 543947 |
| UN21497 | Rsa1.0_02259.1 | 891  | 33299  | 0         | 601  | 604  | 99 +  | 288  | 891  | 16588  | 17190  |
| UN21498 | Rsa1.0_01320.1 | 1493 | 48271  | 1.00E-168 | 321  | 327  | 98 -  | 1169 | 1493 | 19588  | 19914  |
| UN21499 | Rsa1.0_27679.1 | 538  | 843    | 0         | 419  | 421  | 99 -  | 118  | 538  | 107    | 527    |
| UN21500 | Rsa1.0_00179.1 | 910  | 393324 | 0         | 460  | 463  | 99 +  | 1    | 463  | 196240 | 196702 |
| UN21501 | Rsa1.0_00135.1 | 775  | 178077 | 0         | 517  | 520  | 99 +  | 257  | 775  | 8955   | 9474   |
| UN21502 | Rsa1.0_00009.1 | 1745 | 232558 | 0         | 777  | 826  | 94 +  | 60   | 866  | 8460   | 9284   |
| UN21503 | Rsa1.0_00190.1 | 918  | 318240 | 0         | 502  | 502  | 100 - | 416  | 917  | 314285 | 314786 |
| UN21504 | Rsa1.0_01144.1 | 1299 | 52431  | 1.00E-166 | 329  | 339  | 97 +  | 52   | 387  | 22927  | 23265  |
| UN21505 | Rsa1.0_04032.1 | 978  | 19489  | 0         | 428  | 430  | 99 -  | 401  | 830  | 13909  | 14338  |
| UN21506 | Rsa1.0_00875.1 | 1105 | 61371  | 0         | 356  | 357  | 99 +  | 749  | 1105 | 19111  | 19467  |
| UN21507 | Rsa1.0_02309.1 | 1323 | 32744  | 0         | 443  | 443  | 100 + | 881  | 1323 | 31125  | 31567  |
| UN21508 | Rsa1.0_05702.1 | 764  | 12884  | 1.00E-157 | 288  | 290  | 99 +  | 475  | 764  | 712    | 1001   |
| UN21509 | Rsa1.0_16159.1 | 1525 | 2262   | 0         | 360  | 367  | 98 -  | 1033 | 1399 | 1340   | 1706   |
| UN21510 | Rsa1.0_42799.1 | 838  | 525    | 1.00E-107 | 197  | 197  | 100 + | 642  | 838  | 1      | 197    |
| UN21511 | Rsa1.0_02991.1 | 848  | 26178  | 1.00E-154 | 296  | 301  | 98 +  | 548  | 848  | 23578  | 23877  |
| UN21512 | Rsa1.0_00169.1 | 1424 | 274298 | 1.00E-125 | 276  | 290  | 95 +  | 1134 | 1422 | 31558  | 31844  |
| UN21513 | Rsa1.0_03216.1 | 1143 | 24540  | 0         | 636  | 637  | 99 +  | 3    | 639  | 19461  | 20097  |
| UN21514 | Rsa1.0_00848.1 | 611  | 152362 | 0         | 418  | 437  | 95 +  | 49   | 485  | 47909  | 48343  |
| UN21515 | Rsa1.0_02079.1 | 1176 | 35306  | 0         | 447  | 448  | 99 +  | 1    | 448  | 3664   | 4111   |
| UN21516 | Rsa1.0_00071.1 | 1143 | 345714 | 0         | 519  | 522  | 99 -  | 3    | 524  | 207419 | 207938 |
| UN21517 | Rsa1.0_08841.1 | 1410 | 6870   | 1.00E-157 | 326  | 336  | 97 +  | 4    | 337  | 2702   | 3034   |
| UN21518 | Rsa1.0_00920.1 | 2223 | 601703 | 0         | 2093 | 2112 | 99 +  | 112  | 2223 | 295343 | 297448 |
| UN21519 | Rsa1.0_00128.1 | 1734 | 228675 | 0         | 450  | 451  | 99 +  | 972  | 1422 | 80481  | 80931  |
| UN21520 | Rsa1.0_01567.1 | 609  | 43090  | 0         | 388  | 389  | 99 +  | 221  | 608  | 26025  | 26413  |
| UN21521 | Rsa1.0_01101.1 | 2349 | 54031  | 0         | 694  | 718  | 96 +  | 715  | 1428 | 14928  | 15645  |
| UN21522 | Rsa1.0_00336.1 | 1034 | 445051 | 0         | 550  | 555  | 99 +  | 1    | 554  | 15932  | 16486  |
| UN21523 | Rsa1.0_15453.1 | 809  | 2597   | 8.00E-91  | 176  | 178  | 98 -  | 1    | 178  | 67     | 244    |
| UN21524 | Rsa1.0_19149.1 | 875  | 1472   | 1.00E-157 | 302  | 309  | 97 +  | 325  | 633  | 257    | 565    |
| UN21525 | Rsa1.0_01410.1 | 770  | 46345  | 1.00E-175 | 330  | 336  | 98 -  | 326  | 661  | 33684  | 34019  |
| UN21526 | Rsa1.0_02269.1 | 1921 | 33168  | 0         | 1473 | 1478 | 99 -  | 138  | 1615 | 12865  | 14342  |

|         |                |      |        |           |      |      |       |      |      |        |        |
|---------|----------------|------|--------|-----------|------|------|-------|------|------|--------|--------|
| UN21527 | Rsa1.0.00817.1 | 842  | 62961  | 0         | 504  | 512  | 98 +  | 2    | 513  | 53822  | 54331  |
| UN21528 | Rsa1.0.04027.1 | 1510 | 19501  | 0         | 984  | 1006 | 97 -  | 1    | 1005 | 14735  | 15740  |
| UN21529 | Rsa1.0.00342.1 | 1102 | 93695  | 1.00E-151 | 281  | 284  | 98 -  | 537  | 820  | 63912  | 64195  |
| UN21530 | Rsa1.0.00029.1 | 1407 | 272992 | 0         | 1200 | 1229 | 97 -  | 181  | 1407 | 257527 | 258746 |
| UN21531 | Rsa1.0.04116.1 | 958  | 18971  | 1.00E-150 | 288  | 293  | 98 +  | 667  | 958  | 3060   | 3352   |
| UN21532 | Rsa1.0.00398.1 | 1030 | 88007  | 0         | 352  | 352  | 100 + | 677  | 1028 | 44624  | 44975  |
| UN21533 | Rsa1.0.01874.1 | 1107 | 37853  | 0         | 408  | 420  | 97 -  | 689  | 1107 | 23815  | 24233  |
| UN21534 | Rsa1.0.01261.1 | 1381 | 49744  | 1.00E-153 | 275  | 275  | 100 + | 1105 | 1379 | 25172  | 25446  |
| UN21535 | Rsa1.0.00009.1 | 1315 | 232558 | 0         | 827  | 836  | 98 +  | 466  | 1301 | 11234  | 12069  |
| UN21536 | Rsa1.0.00011.1 | 1918 | 225044 | 0         | 362  | 363  | 99 +  | 1555 | 1917 | 200725 | 201087 |
| UN21537 | Rsa1.0.00119.1 | 1458 | 467509 | 0         | 454  | 465  | 97 -  | 1    | 465  | 91903  | 92364  |
| UN21538 | Rsa1.0.02195.1 | 918  | 34024  | 0         | 703  | 711  | 98 -  | 1    | 711  | 23555  | 24265  |
| UN21539 | Rsa1.0.00249.1 | 1456 | 153740 | 0         | 791  | 793  | 99 +  | 93   | 885  | 26101  | 26893  |
| UN21540 | Rsa1.0.01559.1 | 1686 | 43262  | 0         | 1600 | 1647 | 97 +  | 7    | 1648 | 16015  | 17652  |
| UN21541 | Rsa1.0.01396.1 | 933  | 151624 | 1.00E-160 | 310  | 317  | 97 +  | 608  | 924  | 105146 | 105459 |
| UN21542 | Rsa1.0.00130.1 | 1470 | 125737 | 0         | 386  | 388  | 99 -  | 51   | 438  | 13295  | 13682  |
| UN21543 | Rsa1.0.38118.1 | 1219 | 591    | 0         | 341  | 343  | 99 -  | 877  | 1219 | 249    | 591    |
| UN21544 | Rsa1.0.01651.1 | 1233 | 41586  | 0         | 680  | 694  | 97 -  | 540  | 1233 | 20749  | 21433  |
| UN21545 | Rsa1.0.03870.1 | 1141 | 20362  | 1.00E-141 | 279  | 287  | 97 +  | 1    | 287  | 17474  | 17755  |
| UN21546 | Rsa1.0.00171.1 | 680  | 115622 | 1.00E-134 | 311  | 336  | 92 +  | 1    | 324  | 50085  | 50420  |
| UN21547 | Rsa1.0.00216.1 | 1162 | 197563 | 1.00E-137 | 317  | 335  | 94 +  | 2    | 335  | 50360  | 50690  |
| UN21548 | Rsa1.0.04342.1 | 1172 | 17828  | 0         | 503  | 509  | 98 -  | 62   | 570  | 355    | 863    |
| UN21549 | Rsa1.0.09706.1 | 1361 | 6199   | 1.00E-169 | 305  | 306  | 99 +  | 1056 | 1361 | 151    | 456    |
| UN21550 | Rsa1.0.00861.1 | 1655 | 61759  | 1.00E-120 | 220  | 220  | 100 + | 1435 | 1654 | 44584  | 44803  |
| UN21551 | Rsa1.0.00213.1 | 2139 | 108167 | 0         | 534  | 563  | 94 +  | 1578 | 2138 | 62067  | 62618  |
| UN21552 | Rsa1.0.00436.1 | 1189 | 85008  | 0         | 530  | 549  | 96 +  | 3    | 551  | 356    | 903    |
| UN21553 | Rsa1.0.07936.1 | 1320 | 8228   | 0         | 378  | 389  | 97 -  | 1    | 388  | 2616   | 3003   |
| UN21554 | Rsa1.0.00397.1 | 1343 | 88189  | 0         | 679  | 741  | 91 +  | 1    | 731  | 64524  | 65242  |
| UN21555 | Rsa1.0.03781.1 | 1086 | 20891  | 1.00E-151 | 319  | 331  | 96 -  | 2    | 329  | 4225   | 4550   |
| UN21556 | Rsa1.0.02041.1 | 1112 | 163634 | 1.00E-169 | 328  | 334  | 98 +  | 774  | 1107 | 29064  | 29395  |
| UN21557 | Rsa1.0.02163.1 | 1780 | 34427  | 0         | 1649 | 1672 | 98 -  | 109  | 1779 | 17296  | 18963  |
| UN21558 | Rsa1.0.00719.1 | 1165 | 66952  | 0         | 431  | 436  | 98 +  | 727  | 1162 | 25642  | 26077  |
| UN21559 | Rsa1.0.02955.1 | 984  | 26484  | 0         | 355  | 359  | 98 -  | 1    | 358  | 13654  | 14011  |
| UN21560 | Rsa1.0.00890.1 | 1046 | 323870 | 0         | 422  | 431  | 97 -  | 3    | 433  | 159640 | 160067 |
| UN21561 | Rsa1.0.00369.1 | 4009 | 266462 | 0         | 745  | 755  | 98 +  | 244  | 994  | 199451 | 200205 |
| UN21562 | Rsa1.0.00104.1 | 2047 | 368722 | 0         | 604  | 604  | 100 - | 1444 | 2047 | 11806  | 12409  |
| UN21563 | Rsa1.0.00002.1 | 1481 | 601661 | 1.00E-140 | 404  | 454  | 88 +  | 789  | 1242 | 247632 | 248085 |
| UN21564 | Rsa1.0.00163.1 | 2663 | 116847 | 0         | 737  | 745  | 98 +  | 1347 | 2091 | 46557  | 47301  |
| UN21565 | Rsa1.0.01530.1 | 2099 | 43820  | 0         | 483  | 489  | 98 -  | 1612 | 2099 | 23280  | 23763  |

|         |                |      |        |           |      |      |       |      |      |        |        |
|---------|----------------|------|--------|-----------|------|------|-------|------|------|--------|--------|
| UN21566 | Rsa1.0.00218.1 | 1482 | 201480 | 0         | 547  | 556  | 98 -  | 928  | 1481 | 162643 | 163197 |
| UN21567 | Rsa1.0.04489.1 | 895  | 17145  | 1.00E-122 | 261  | 270  | 96 +  | 625  | 891  | 10019  | 10287  |
| UN21568 | Rsa1.0.04658.1 | 1396 | 16487  | 0         | 554  | 579  | 95 -  | 820  | 1396 | 2367   | 2933   |
| UN21569 | Rsa1.0.07200.1 | 712  | 9734   | 0         | 698  | 710  | 98 +  | 3    | 712  | 6080   | 6788   |
| UN21570 | Rsa1.0.07159.1 | 690  | 9796   | 1.00E-149 | 293  | 299  | 97 -  | 394  | 690  | 58     | 356    |
| UN21571 | Rsa1.0.00055.1 | 975  | 520193 | 0         | 793  | 813  | 97 +  | 163  | 975  | 339997 | 340806 |
| UN21572 | Rsa1.0.05544.1 | 879  | 13381  | 1.00E-156 | 292  | 296  | 98 -  | 337  | 632  | 7514   | 7809   |
| UN21573 | Rsa1.0.00457.1 | 1780 | 337301 | 1.00E-179 | 365  | 374  | 97 -  | 2    | 373  | 301000 | 301370 |
| UN21574 | Rsa1.0.02826.1 | 982  | 27560  | 0         | 323  | 323  | 100 + | 1    | 323  | 14753  | 15075  |
| UN21575 | Rsa1.0.04584.1 | 969  | 16756  | 0         | 577  | 598  | 96 -  | 375  | 969  | 12271  | 12866  |
| UN21576 | Rsa1.0.00116.1 | 1317 | 365886 | 0         | 663  | 677  | 97 +  | 369  | 1045 | 344197 | 344873 |
| UN21577 | Rsa1.0.00067.1 | 1072 | 415055 | 1.00E-176 | 346  | 354  | 97 +  | 182  | 534  | 34645  | 34997  |
| UN21578 | Rsa1.0.01316.1 | 1006 | 48325  | 0         | 682  | 702  | 97 +  | 304  | 1004 | 40153  | 40851  |
| UN21579 | Rsa1.0.07000.1 | 1491 | 10049  | 1.00E-112 | 223  | 228  | 97 +  | 1267 | 1491 | 8619   | 8846   |
| UN21580 | Rsa1.0.01937.1 | 1280 | 37147  | 0         | 434  | 448  | 96 +  | 818  | 1261 | 21081  | 21525  |
| UN21581 | Rsa1.0.00034.1 | 1798 | 260119 | 0         | 735  | 779  | 94 +  | 444  | 1222 | 66394  | 67172  |
| UN21582 | Rsa1.0.03990.1 | 1385 | 19676  | 0         | 658  | 700  | 94 -  | 46   | 728  | 4678   | 5368   |
| UN21583 | Rsa1.0.06938.1 | 957  | 10140  | 1.00E-132 | 261  | 267  | 97 +  | 2    | 267  | 9713   | 9979   |
| UN21584 | Rsa1.0.00100.1 | 627  | 249232 | 1.00E-132 | 245  | 247  | 99 -  | 380  | 626  | 21311  | 21557  |
| UN21585 | Rsa1.0.01494.1 | 932  | 44641  | 1.00E-130 | 240  | 241  | 99 +  | 680  | 920  | 3175   | 3415   |
| UN21586 | Rsa1.0.00871.1 | 1936 | 61539  | 1.00E-140 | 288  | 297  | 96 -  | 1    | 297  | 13835  | 14129  |
| UN21587 | Rsa1.0.12954.1 | 1017 | 5066   | 1.00E-156 | 280  | 280  | 100 - | 738  | 1017 | 3797   | 4076   |
| UN21588 | Rsa1.0.00237.1 | 1724 | 235974 | 0         | 598  | 611  | 97 +  | 1108 | 1718 | 40883  | 41490  |
| UN21589 | Rsa1.0.05571.1 | 1201 | 13298  | 1.00E-152 | 307  | 316  | 97 -  | 863  | 1174 | 252    | 567    |
| UN21590 | Rsa1.0.00627.1 | 1058 | 71566  | 1.00E-102 | 347  | 396  | 87 +  | 1    | 392  | 3972   | 4341   |
| UN21591 | Rsa1.0.00454.1 | 1420 | 216970 | 0         | 382  | 382  | 100 - | 3    | 384  | 168272 | 168653 |
| UN21592 | Rsa1.0.03209.1 | 1804 | 24592  | 0         | 462  | 478  | 96 -  | 5    | 479  | 18885  | 19356  |
| UN21593 | Rsa1.0.02913.1 | 1257 | 26816  | 0         | 1053 | 1102 | 95 -  | 108  | 1207 | 24541  | 25635  |
| UN21594 | Rsa1.0.00168.1 | 1166 | 115870 | 1.00E-176 | 336  | 343  | 97 +  | 824  | 1166 | 54746  | 55085  |
| UN21595 | Rsa1.0.00382.1 | 889  | 251946 | 1.00E-137 | 292  | 306  | 95 -  | 62   | 367  | 246902 | 247204 |
| UN21596 | Rsa1.0.01662.1 | 833  | 41382  | 0         | 352  | 352  | 100 + | 481  | 832  | 12520  | 12871  |
| UN21597 | Rsa1.0.01190.1 | 945  | 194501 | 0         | 459  | 459  | 100 - | 2    | 460  | 13189  | 13647  |
| UN21598 | Rsa1.0.00681.1 | 1527 | 68779  | 1.00E-147 | 299  | 308  | 97 -  | 1223 | 1527 | 52423  | 52730  |
| UN21599 | Rsa1.0.02816.1 | 794  | 27649  | 0         | 378  | 386  | 97 +  | 17   | 401  | 5365   | 5750   |
| UN21600 | Rsa1.0.00056.1 | 961  | 332604 | 1.00E-129 | 348  | 381  | 91 -  | 17   | 395  | 108444 | 108800 |
| UN21601 | Rsa1.0.06397.1 | 940  | 11088  | 1.00E-151 | 290  | 296  | 97 -  | 11   | 306  | 3715   | 4010   |
| UN21602 | Rsa1.0.00640.1 | 1659 | 70979  | 0         | 641  | 645  | 99 +  | 1007 | 1651 | 49402  | 50044  |
| UN21603 | Rsa1.0.02941.1 | 901  | 26583  | 0         | 381  | 398  | 95 -  | 1    | 388  | 6324   | 6719   |
| UN21604 | Rsa1.0.00016.1 | 955  | 831256 | 0         | 372  | 379  | 98 +  | 579  | 954  | 576420 | 576797 |

|         |                |      |        |           |      |      |       |      |      |        |        |
|---------|----------------|------|--------|-----------|------|------|-------|------|------|--------|--------|
| UN21605 | Rsa1.0.03036.1 | 1086 | 25826  | 0         | 618  | 620  | 99 -  | 427  | 1045 | 20414  | 21033  |
| UN21606 | Rsa1.0.04729.1 | 967  | 16201  | 0         | 398  | 398  | 100 + | 291  | 688  | 15804  | 16201  |
| UN21607 | Rsa1.0.04154.1 | 553  | 18802  | 1.00E-175 | 318  | 320  | 99 +  | 234  | 553  | 15466  | 15785  |
| UN21608 | Rsa1.0.03579.1 | 2438 | 21969  | 0         | 800  | 820  | 97 -  | 869  | 1687 | 18958  | 19775  |
| UN21609 | Rsa1.0.00789.1 | 700  | 64233  | 0         | 689  | 698  | 98 -  | 3    | 700  | 13089  | 13786  |
| UN21610 | Rsa1.0.11995.1 | 1696 | 5347   | 0         | 561  | 566  | 99 -  | 1    | 566  | 4458   | 5023   |
| UN21611 | Rsa1.0.01457.1 | 1644 | 45337  | 1.00E-132 | 263  | 270  | 97 +  | 181  | 450  | 6330   | 6596   |
| UN21612 | Rsa1.0.01727.1 | 1373 | 40243  | 1.00E-154 | 313  | 323  | 96 +  | 3    | 324  | 5144   | 5463   |
| UN21613 | Rsa1.0.00784.1 | 1477 | 64359  | 0         | 979  | 979  | 100 + | 1    | 979  | 19645  | 20623  |
| UN21614 | Rsa1.0.00556.1 | 1856 | 207212 | 0         | 411  | 417  | 98 +  | 1104 | 1520 | 147816 | 148232 |
| UN21615 | Rsa1.0.01732.1 | 1497 | 40194  | 0         | 1251 | 1298 | 96 +  | 1    | 1287 | 24216  | 25510  |
| UN21616 | Rsa1.0.00035.1 | 731  | 176449 | 0         | 704  | 722  | 97 -  | 1    | 721  | 49858  | 50579  |
| UN21617 | Rsa1.0.00285.1 | 1280 | 149638 | 1.00E-162 | 302  | 306  | 98 +  | 946  | 1251 | 56337  | 56642  |
| UN21618 | Rsa1.0.01005.1 | 1186 | 56967  | 0         | 614  | 641  | 95 -  | 3    | 643  | 37403  | 38031  |
| UN21619 | Rsa1.0.00138.1 | 1848 | 247040 | 0         | 327  | 327  | 100 - | 40   | 366  | 64744  | 65070  |
| UN21620 | Rsa1.0.00623.1 | 1558 | 207630 | 0         | 511  | 523  | 97 +  | 1042 | 1558 | 22569  | 23091  |
| UN21621 | Rsa1.0.00245.1 | 907  | 103569 | 0         | 888  | 912  | 97 +  | 3    | 906  | 19247  | 20158  |
| UN21622 | Rsa1.0.02865.1 | 807  | 27133  | 1.00E-179 | 449  | 490  | 91 +  | 328  | 798  | 22643  | 23129  |
| UN21623 | Rsa1.0.00051.1 | 1047 | 258225 | 0         | 540  | 558  | 96 +  | 1    | 555  | 47509  | 48059  |
| UN21624 | Rsa1.0.02963.1 | 1044 | 26407  | 1.00E-141 | 303  | 317  | 95 -  | 728  | 1044 | 3695   | 4008   |
| UN21625 | Rsa1.0.05884.1 | 1231 | 12337  | 0         | 352  | 352  | 100 + | 880  | 1231 | 8522   | 8873   |
| UN21626 | Rsa1.0.00347.1 | 1691 | 93048  | 0         | 1002 | 1039 | 96 +  | 652  | 1689 | 69070  | 70106  |
| UN21627 | Rsa1.0.00614.1 | 1230 | 72276  | 0         | 379  | 385  | 98 -  | 136  | 519  | 27549  | 27933  |
| UN21628 | Rsa1.0.00332.1 | 1195 | 94575  | 0         | 394  | 412  | 95 -  | 784  | 1195 | 22583  | 22989  |
| UN21629 | Rsa1.0.00482.1 | 1167 | 81162  | 0         | 384  | 396  | 96 +  | 3    | 395  | 60322  | 60717  |
| UN21630 | Rsa1.0.02268.1 | 1309 | 33172  | 1.00E-180 | 320  | 320  | 100 - | 5    | 324  | 16898  | 17217  |
| UN21631 | Rsa1.0.05489.1 | 1188 | 13562  | 0         | 785  | 808  | 97 +  | 1    | 803  | 12093  | 12894  |
| UN21632 | Rsa1.0.01364.1 | 1745 | 47172  | 1.00E-128 | 261  | 269  | 97 -  | 3    | 269  | 21203  | 21471  |
| UN21633 | Rsa1.0.02286.1 | 1423 | 32993  | 0         | 441  | 442  | 99 -  | 982  | 1423 | 16616  | 17057  |
| UN21634 | Rsa1.0.00347.1 | 1204 | 93048  | 0         | 768  | 769  | 99 -  | 1    | 769  | 34139  | 34907  |
| UN21635 | Rsa1.0.03612.1 | 1153 | 21784  | 1.00E-145 | 293  | 302  | 97 +  | 848  | 1148 | 11617  | 11918  |
| UN21636 | Rsa1.0.09527.1 | 1124 | 6311   | 1.00E-141 | 296  | 310  | 95 -  | 523  | 832  | 5870   | 6179   |
| UN21637 | Rsa1.0.00429.1 | 1612 | 85559  | 0         | 820  | 820  | 100 + | 793  | 1612 | 23587  | 24406  |
| UN21638 | Rsa1.0.02094.1 | 1640 | 35116  | 0         | 712  | 718  | 99 +  | 3    | 719  | 23422  | 24139  |
| UN21639 | Rsa1.0.00456.1 | 586  | 82826  | 0         | 549  | 558  | 98 -  | 3    | 556  | 24528  | 25082  |
| UN21640 | Rsa1.0.06541.1 | 759  | 10806  | 1.00E-103 | 318  | 350  | 90 +  | 40   | 378  | 10030  | 10372  |
| UN21641 | Rsa1.0.05262.1 | 1186 | 14334  | 0         | 502  | 530  | 94 +  | 585  | 1112 | 11001  | 11513  |
| UN21642 | Rsa1.0.01335.1 | 1308 | 47894  | 1.00E-123 | 234  | 237  | 98 +  | 152  | 388  | 747    | 983    |
| UN21643 | Rsa1.0.00101.1 | 716  | 267193 | 1.00E-153 | 353  | 379  | 93 +  | 349  | 716  | 47241  | 47611  |

|         |                |      |        |           |      |      |       |      |      |        |        |
|---------|----------------|------|--------|-----------|------|------|-------|------|------|--------|--------|
| UN21644 | Rsa1.0_02020.1 | 1128 | 173211 | 0         | 554  | 578  | 95 +  | 549  | 1124 | 154385 | 154962 |
| UN21645 | Rsa1.0_04873.1 | 1268 | 15657  | 1.00E-151 | 306  | 318  | 96 +  | 3    | 320  | 3414   | 3724   |
| UN21646 | Rsa1.0_00018.1 | 1468 | 410899 | 0         | 656  | 661  | 99 +  | 60   | 720  | 76680  | 77340  |
| UN21647 | Rsa1.0_02517.1 | 614  | 30600  | 0         | 611  | 612  | 99 -  | 3    | 614  | 4901   | 5512   |
| UN21648 | Rsa1.0_00205.1 | 937  | 193401 | 1.00E-110 | 225  | 231  | 97 +  | 298  | 527  | 130115 | 130345 |
| UN21649 | Rsa1.0_00018.1 | 1344 | 410899 | 0         | 761  | 792  | 96 +  | 3    | 787  | 76720  | 77509  |
| UN21650 | Rsa1.0_05870.1 | 1067 | 146055 | 0         | 458  | 459  | 99 +  | 196  | 654  | 10604  | 11062  |
| UN21651 | Rsa1.0_00016.1 | 1864 | 831256 | 0         | 1000 | 1007 | 99 +  | 592  | 1598 | 785585 | 786591 |
| UN21652 | Rsa1.0_23642.1 | 1553 | 1035   | 0         | 1018 | 1023 | 99 +  | 114  | 1136 | 15     | 1035   |
| UN21653 | Rsa1.0_60619.1 | 1250 | 378    | 2.00E-68  | 133  | 133  | 100 + | 67   | 199  | 1      | 133    |
| UN21654 | Rsa1.0_02593.1 | 801  | 29744  | 1.00E-145 | 342  | 365  | 93 +  | 2    | 365  | 2802   | 3164   |
| UN21655 | Rsa1.0_03235.1 | 2057 | 24442  | 0         | 1010 | 1014 | 99 +  | 1044 | 2057 | 20856  | 21869  |
| UN21656 | Rsa1.0_00402.1 | 877  | 385315 | 0         | 342  | 343  | 99 +  | 535  | 877  | 236413 | 236755 |
| UN21657 | Rsa1.0_00725.1 | 1717 | 66757  | 0         | 573  | 577  | 99 -  | 1    | 577  | 8026   | 8602   |
| UN21658 | Rsa1.0_18326.1 | 1502 | 1620   | 0         | 1397 | 1400 | 99 -  | 103  | 1500 | 221    | 1620   |
| UN21659 | Rsa1.0_03062.1 | 1704 | 25678  | 0         | 508  | 517  | 98 +  | 1190 | 1704 | 8175   | 8691   |
| UN21660 | Rsa1.0_00046.1 | 804  | 320315 | 1.00E-175 | 357  | 370  | 96 -  | 1    | 370  | 29574  | 29939  |
| UN21661 | Rsa1.0_03821.1 | 1597 | 20643  | 1.00E-108 | 211  | 215  | 98 +  | 903  | 1117 | 5285   | 5499   |
| UN21662 | Rsa1.0_21718.1 | 838  | 1178   | 0         | 521  | 531  | 98 -  | 308  | 837  | 72     | 600    |
| UN21663 | Rsa1.0_00873.1 | 1460 | 61459  | 1.00E-131 | 294  | 310  | 94 -  | 1155 | 1456 | 11606  | 11915  |
| UN21664 | Rsa1.0_00653.1 | 782  | 70029  | 0         | 457  | 470  | 97 -  | 311  | 780  | 37031  | 37500  |
| UN21665 | Rsa1.0_00097.1 | 1211 | 138858 | 1.00E-156 | 280  | 280  | 100 + | 2    | 281  | 73734  | 74013  |
| UN21666 | Rsa1.0_06213.1 | 858  | 11478  | 0         | 495  | 496  | 99 -  | 364  | 858  | 1040   | 1535   |
| UN21667 | Rsa1.0_00087.1 | 904  | 761073 | 0         | 720  | 746  | 96 +  | 8    | 753  | 9234   | 9978   |
| UN21668 | Rsa1.0_02841.1 | 895  | 27383  | 1.00E-125 | 231  | 232  | 99 +  | 3    | 234  | 254    | 485    |
| UN21669 | Rsa1.0_00012.1 | 692  | 222148 | 1.00E-136 | 258  | 262  | 98 -  | 431  | 692  | 83287  | 83548  |
| UN21670 | Rsa1.0_00018.1 | 1531 | 410899 | 1.00E-149 | 268  | 268  | 100 + | 1264 | 1531 | 55120  | 55387  |
| UN21671 | Rsa1.0_00503.1 | 686  | 79468  | 0         | 457  | 459  | 99 +  | 1    | 458  | 61006  | 61463  |
| UN21672 | Rsa1.0_03709.1 | 1123 | 21247  | 0         | 360  | 360  | 100 + | 56   | 415  | 18541  | 18900  |
| UN21673 | Rsa1.0_07692.1 | 632  | 132338 | 0         | 377  | 381  | 98 -  | 251  | 631  | 6687   | 7067   |
| UN21674 | Rsa1.0_03627.1 | 1656 | 21658  | 0         | 410  | 423  | 96 +  | 1232 | 1654 | 8024   | 8443   |
| UN21675 | Rsa1.0_04138.1 | 872  | 18898  | 0         | 866  | 872  | 99 +  | 1    | 872  | 3200   | 4071   |
| UN21676 | Rsa1.0_01544.1 | 841  | 185602 | 0         | 376  | 380  | 98 +  | 460  | 839  | 9690   | 10069  |
| UN21677 | Rsa1.0_00962.1 | 969  | 184909 | 0         | 882  | 920  | 95 +  | 45   | 961  | 51825  | 52738  |
| UN21678 | Rsa1.0_01306.1 | 1218 | 48720  | 0         | 845  | 854  | 98 -  | 2    | 855  | 46543  | 47396  |
| UN21679 | Rsa1.0_05431.1 | 2447 | 13780  | 0         | 574  | 574  | 100 - | 694  | 1267 | 7915   | 8488   |
| UN21680 | Rsa1.0_01050.1 | 1699 | 55651  | 0         | 1093 | 1108 | 98 -  | 3    | 1103 | 11784  | 12891  |
| UN21681 | Rsa1.0_00517.1 | 941  | 142790 | 0         | 430  | 433  | 99 +  | 509  | 941  | 113059 | 113491 |
| UN21682 | Rsa1.0_00961.1 | 1007 | 58185  | 1.00E-166 | 315  | 321  | 98 -  | 5    | 321  | 44233  | 44553  |

|         |                |      |        |           |      |      |       |      |      |        |        |
|---------|----------------|------|--------|-----------|------|------|-------|------|------|--------|--------|
| UN21683 | Rsa1.0.00826.1 | 920  | 166736 | 0         | 411  | 417  | 98 +  | 504  | 920  | 130040 | 130456 |
| UN21684 | Rsa1.0.02467.1 | 536  | 31141  | 0         | 500  | 505  | 99 +  | 31   | 535  | 15480  | 15981  |
| UN21685 | Rsa1.0.00339.1 | 941  | 222974 | 1.00E-138 | 273  | 280  | 97 +  | 663  | 940  | 40928  | 41207  |
| UN21686 | Rsa1.0.00950.1 | 1741 | 58547  | 0         | 1141 | 1150 | 99 -  | 1    | 1150 | 39149  | 40298  |
| UN21687 | Rsa1.0.25558.1 | 1523 | 931    | 1.00E-109 | 278  | 298  | 93 +  | 1231 | 1523 | 1      | 290    |
| UN21688 | Rsa1.0.06388.1 | 1360 | 11110  | 0         | 380  | 384  | 98 -  | 19   | 402  | 5506   | 5889   |
| UN21689 | Rsa1.0.00067.1 | 1162 | 415055 | 0         | 385  | 397  | 96 -  | 497  | 893  | 378116 | 378512 |
| UN21690 | Rsa1.0.00136.1 | 2572 | 122464 | 0         | 893  | 920  | 97 +  | 717  | 1633 | 60043  | 60962  |
| UN21691 | Rsa1.0.02524.1 | 871  | 30496  | 0         | 361  | 372  | 97 +  | 190  | 561  | 11355  | 11726  |
| UN21692 | Rsa1.0.04744.1 | 1279 | 16154  | 1.00E-148 | 334  | 352  | 94 -  | 1    | 346  | 7259   | 7609   |
| UN21693 | Rsa1.0.02518.1 | 1528 | 30586  | 0         | 674  | 705  | 95 +  | 842  | 1528 | 21523  | 22224  |
| UN21694 | Rsa1.0.00281.1 | 1406 | 99908  | 0         | 770  | 778  | 98 -  | 627  | 1404 | 49017  | 49794  |
| UN21695 | Rsa1.0.07056.1 | 1400 | 9969   | 0         | 461  | 470  | 98 -  | 934  | 1400 | 1737   | 2206   |
| UN21696 | Rsa1.0.02466.1 | 1454 | 31142  | 0         | 1058 | 1079 | 98 -  | 2    | 1079 | 27098  | 28176  |
| UN21697 | Rsa1.0.00341.1 | 1074 | 249309 | 0         | 557  | 560  | 99 +  | 515  | 1074 | 190245 | 190804 |
| UN21698 | Rsa1.0.02862.1 | 1161 | 27163  | 0         | 527  | 539  | 97 +  | 267  | 805  | 21827  | 22365  |
| UN21699 | Rsa1.0.00482.1 | 2202 | 81162  | 0         | 767  | 780  | 98 -  | 255  | 1034 | 8800   | 9579   |
| UN21700 | Rsa1.0.08105.1 | 1865 | 7894   | 0         | 1826 | 1866 | 97 -  | 2    | 1864 | 4088   | 5950   |
| UN21701 | Rsa1.0.00571.1 | 1426 | 329018 | 0         | 795  | 815  | 97 +  | 478  | 1290 | 204578 | 205392 |
| UN21702 | Rsa1.0.00236.1 | 582  | 104771 | 0         | 429  | 432  | 99 +  | 152  | 582  | 3599   | 4030   |
| UN21703 | Rsa1.0.01182.1 | 552  | 167304 | 1.00E-163 | 303  | 307  | 98 -  | 2    | 308  | 133142 | 133448 |
| UN21704 | Rsa1.0.00048.1 | 1576 | 167185 | 0         | 420  | 425  | 98 -  | 447  | 871  | 75672  | 76096  |
| UN21705 | Rsa1.0.37078.1 | 1172 | 608    | 0         | 395  | 402  | 98 +  | 2    | 403  | 208    | 608    |
| UN21706 | Rsa1.0.01713.1 | 1358 | 40564  | 0         | 429  | 432  | 99 -  | 926  | 1357 | 30264  | 30695  |
| UN21707 | Rsa1.0.06213.1 | 542  | 11478  | 8.00E-87  | 212  | 228  | 92 +  | 315  | 542  | 10901  | 11119  |
| UN21708 | Rsa1.0.01400.1 | 1362 | 46560  | 0         | 395  | 397  | 99 -  | 966  | 1362 | 43975  | 44371  |
| UN21709 | Rsa1.0.02298.1 | 1058 | 32872  | 0         | 451  | 483  | 93 -  | 8    | 476  | 6363   | 6841   |
| UN21710 | Rsa1.0.00954.1 | 1174 | 189536 | 1.00E-167 | 310  | 313  | 99 -  | 861  | 1173 | 151486 | 151796 |
| UN21711 | Rsa1.0.00747.1 | 1294 | 66030  | 0         | 764  | 772  | 98 +  | 9    | 777  | 35942  | 36713  |
| UN21712 | Rsa1.0.00099.1 | 1125 | 159619 | 0         | 825  | 858  | 96 +  | 266  | 1115 | 51332  | 52189  |
| UN21713 | Rsa1.0.00016.1 | 1377 | 831256 | 0         | 792  | 811  | 97 +  | 1    | 807  | 270052 | 270862 |
| UN21714 | Rsa1.0.00598.1 | 730  | 73425  | 0         | 502  | 506  | 99 -  | 7    | 509  | 31636  | 32141  |
| UN21715 | Rsa1.0.00094.1 | 2624 | 139042 | 0         | 609  | 651  | 93 -  | 1081 | 1721 | 97239  | 97877  |
| UN21716 | Rsa1.0.02605.1 | 2025 | 29637  | 0         | 1172 | 1226 | 95 -  | 308  | 1516 | 13844  | 15060  |
| UN21717 | Rsa1.0.03009.1 | 1684 | 26065  | 1.00E-179 | 327  | 330  | 99 +  | 1353 | 1682 | 8603   | 8932   |
| UN21718 | Rsa1.0.00198.1 | 793  | 222963 | 2.33E-156 | 284  | 291  | 97 +  | 134  | 424  | 123127 | 123417 |
| UN21719 | Rsa1.0.03031.1 | 718  | 25839  | 0         | 336  | 336  | 100 - | 276  | 611  | 24118  | 24453  |
| UN21720 | Rsa1.0.01963.1 | 1065 | 36719  | 0         | 637  | 651  | 97 +  | 1    | 644  | 5467   | 6117   |
| UN21721 | Rsa1.0.00144.1 | 697  | 120708 | 1.00E-125 | 247  | 254  | 97 +  | 6    | 259  | 24832  | 25079  |

|         |                |      |        |           |      |      |      |      |      |        |        |
|---------|----------------|------|--------|-----------|------|------|------|------|------|--------|--------|
| UN21722 | Rsa1.0.01283.1 | 982  | 49257  | 1.00E-135 | 248  | 249  | 99 + | 734  | 982  | 16633  | 16881  |
| UN21723 | Rsa1.0.03323.1 | 1366 | 23751  | 0         | 405  | 417  | 97 + | 1    | 416  | 13128  | 13544  |
| UN21724 | Rsa1.0.00732.1 | 998  | 66631  | 1.00E-104 | 266  | 284  | 93 + | 705  | 986  | 1460   | 1740   |
| UN21725 | Rsa1.0.01295.1 | 990  | 49040  | 0         | 401  | 404  | 99 + | 587  | 990  | 29327  | 29730  |
| UN21726 | Rsa1.0.02435.1 | 640  | 31454  | 1.00E-123 | 237  | 241  | 98 - | 395  | 635  | 18340  | 18580  |
| UN21727 | Rsa1.0.01294.1 | 869  | 49090  | 6.00E-95  | 192  | 197  | 97 + | 531  | 727  | 26968  | 27164  |
| UN21728 | Rsa1.0.00196.1 | 1579 | 109960 | 0         | 836  | 877  | 95 - | 712  | 1578 | 61445  | 62309  |
| UN21729 | Rsa1.0.06791.1 | 1059 | 10350  | 0         | 836  | 875  | 95 + | 47   | 921  | 6552   | 7421   |
| UN21730 | Rsa1.0.00184.1 | 1184 | 218748 | 0         | 864  | 876  | 98 + | 308  | 1183 | 43850  | 44723  |
| UN21731 | Rsa1.0.01625.1 | 723  | 42019  | 1.00E-153 | 281  | 283  | 99 - | 440  | 722  | 20450  | 20732  |
| UN21732 | Rsa1.0.01905.1 | 1891 | 37450  | 0         | 437  | 438  | 99 - | 1453 | 1890 | 31762  | 32198  |
| UN21733 | Rsa1.0.01960.1 | 1457 | 36766  | 0         | 914  | 917  | 99 - | 1    | 917  | 4125   | 5041   |
| UN21734 | Rsa1.0.01206.1 | 2067 | 50772  | 0         | 1099 | 1118 | 98 - | 331  | 1441 | 29572  | 30689  |
| UN21735 | Rsa1.0.05168.1 | 861  | 14621  | 0         | 693  | 699  | 99 + | 1    | 698  | 11515  | 12213  |
| UN21736 | Rsa1.0.00270.1 | 1107 | 101236 | 1.00E-143 | 349  | 376  | 92 - | 725  | 1095 | 62746  | 63106  |
| UN21737 | Rsa1.0.04355.1 | 1949 | 146733 | 0         | 1614 | 1622 | 99 + | 3    | 1624 | 7819   | 9440   |
| UN21738 | Rsa1.0.03241.1 | 1118 | 24423  | 0         | 987  | 1016 | 97 - | 57   | 1072 | 5633   | 6646   |
| UN21739 | Rsa1.0.00372.1 | 1357 | 90418  | 0         | 467  | 477  | 97 + | 2    | 478  | 22694  | 23170  |
| UN21740 | Rsa1.0.00393.1 | 1110 | 158674 | 0         | 736  | 747  | 98 + | 2    | 748  | 110426 | 111172 |
| UN21741 | Rsa1.0.00121.1 | 657  | 278029 | 1.00E-116 | 240  | 247  | 97 + | 8    | 252  | 110591 | 110836 |
| UN21742 | Rsa1.0.04426.1 | 790  | 17399  | 1.00E-134 | 292  | 306  | 95 - | 3    | 301  | 14213  | 14518  |
| UN21743 | Rsa1.0.07936.1 | 712  | 8228   | 1.00E-108 | 217  | 223  | 97 - | 2    | 224  | 4275   | 4497   |
| UN21744 | Rsa1.0.00524.1 | 1408 | 169613 | 1.00E-155 | 292  | 296  | 98 + | 3    | 295  | 153399 | 153694 |
| UN21745 | Rsa1.0.00352.1 | 922  | 92266  | 0         | 908  | 927  | 97 - | 3    | 920  | 61950  | 62876  |
| UN21746 | Rsa1.0.00017.1 | 2287 | 752458 | 0         | 800  | 819  | 97 - | 1471 | 2285 | 369440 | 370256 |
| UN21747 | Rsa1.0.00719.1 | 1636 | 66952  | 0         | 504  | 506  | 99 + | 174  | 679  | 24491  | 24996  |
| UN21748 | #              | #    | #      | #         | #    | #    | #    | #    | #    | #      | #      |
| UN21749 | Rsa1.0.25516.1 | 1157 | 933    | 0         | 641  | 649  | 98 - | 476  | 1124 | 1      | 649    |
| UN21750 | Rsa1.0.01248.1 | 953  | 154103 | 1.00E-163 | 316  | 323  | 97 - | 631  | 953  | 10531  | 10847  |
| UN21751 | Rsa1.0.04254.1 | 972  | 18258  | 0         | 930  | 987  | 94 + | 3    | 970  | 8317   | 9298   |
| UN21752 | Rsa1.0.00030.1 | 1695 | 250988 | 0         | 694  | 695  | 99 + | 1    | 694  | 4000   | 4694   |
| UN21753 | Rsa1.0.32587.1 | 830  | 698    | 1.00E-135 | 254  | 256  | 99 - | 2    | 257  | 115    | 369    |
| UN21754 | Rsa1.0.07170.1 | 1125 | 9788   | 0         | 430  | 448  | 95 - | 5    | 446  | 6217   | 6658   |
| UN21755 | Rsa1.0.02870.1 | 2386 | 27102  | 0         | 2135 | 2180 | 97 - | 2    | 2179 | 6398   | 8577   |
| UN21756 | Rsa1.0.02220.1 | 1735 | 176031 | 0         | 945  | 947  | 99 - | 170  | 1116 | 157222 | 158168 |
| UN21757 | Rsa1.0.02433.1 | 1125 | 158318 | 0         | 529  | 544  | 97 + | 3    | 542  | 141349 | 141892 |
| UN21758 | Rsa1.0.01216.1 | 982  | 50580  | 1.00E-170 | 306  | 307  | 99 - | 641  | 947  | 17807  | 18113  |
| UN21759 | Rsa1.0.00773.1 | 1002 | 64839  | 1.00E-147 | 268  | 269  | 99 - | 734  | 1002 | 61610  | 61878  |
| UN21760 | Rsa1.0.04022.1 | 944  | 19534  | 1.00E-128 | 239  | 241  | 99 + | 690  | 930  | 6268   | 6508   |



|         |                |      |        |           |      |      |       |      |      |        |        |
|---------|----------------|------|--------|-----------|------|------|-------|------|------|--------|--------|
| UN21761 | Rsa1.0_00257.1 | 1282 | 102407 | 0         | 550  | 550  | 100 + | 1    | 550  | 70253  | 70802  |
| UN21762 | Rsa1.0_01296.1 | 1019 | 49035  | 0         | 430  | 445  | 96 -  | 552  | 994  | 21737  | 22173  |
| UN21763 | Rsa1.0_03471.1 | 640  | 22678  | 1.00E-124 | 232  | 234  | 99 -  | 167  | 400  | 14969  | 15202  |
| UN21764 | Rsa1.0_01567.1 | 1416 | 43090  | 0         | 1389 | 1415 | 98 +  | 3    | 1413 | 3721   | 5132   |
| UN21765 | Rsa1.0_00017.1 | 1916 | 752458 | 0         | 446  | 486  | 91 -  | 1441 | 1914 | 409118 | 409589 |
| UN21766 | Rsa1.0_01201.1 | 1011 | 50856  | 0         | 361  | 364  | 99 +  | 646  | 1009 | 46496  | 46859  |
| UN21767 | Rsa1.0_00759.1 | 2071 | 65465  | 0         | 861  | 873  | 98 -  | 501  | 1369 | 64598  | 65465  |
| UN21768 | Rsa1.0_00848.1 | 1193 | 152362 | 1.00E-169 | 314  | 318  | 98 -  | 1    | 318  | 38270  | 38587  |
| UN21769 | Rsa1.0_03700.1 | 1249 | 21299  | 0         | 371  | 378  | 98 +  | 874  | 1249 | 1331   | 1707   |
| UN21770 | Rsa1.0_05978.1 | 1538 | 12053  | 0         | 699  | 721  | 96 -  | 426  | 1136 | 6833   | 7552   |
| UN21771 | Rsa1.0_39335.1 | 1227 | 572    | 0         | 347  | 352  | 98 +  | 873  | 1223 | 11     | 361    |
| UN21772 | Rsa1.0_04288.1 | 1049 | 18077  | 0         | 442  | 449  | 98 +  | 36   | 479  | 4774   | 5222   |
| UN21773 | Rsa1.0_00154.1 | 787  | 189461 | 0         | 585  | 605  | 96 +  | 183  | 787  | 171029 | 171625 |
| UN21774 | Rsa1.0_05596.1 | 959  | 137912 | 2.00E-18  | 55   | 57   | 96 -  | 1    | 57   | 6636   | 6692   |
| UN21775 | Rsa1.0_02223.1 | 1130 | 152421 | 0         | 463  | 465  | 99 +  | 663  | 1126 | 17952  | 18416  |
| UN21776 | Rsa1.0_00437.1 | 1091 | 84879  | 0         | 404  | 404  | 100 + | 601  | 1004 | 39662  | 40065  |
| UN21777 | Rsa1.0_01068.1 | 1192 | 55208  | 1.00E-160 | 303  | 308  | 98 +  | 3    | 310  | 5024   | 5328   |
| UN21778 | Rsa1.0_00195.1 | 1134 | 251884 | 0         | 578  | 601  | 96 -  | 535  | 1134 | 76316  | 76902  |
| UN21779 | Rsa1.0_01281.1 | 1355 | 49313  | 0         | 670  | 705  | 95 -  | 666  | 1355 | 42580  | 43283  |
| UN21780 | Rsa1.0_01552.1 | 825  | 43396  | 0         | 445  | 446  | 99 -  | 2    | 447  | 25165  | 25610  |
| UN21781 | Rsa1.0_00120.1 | 1103 | 277288 | 1.00E-167 | 311  | 314  | 99 -  | 789  | 1102 | 118237 | 118549 |
| UN21782 | Rsa1.0_01806.1 | 1027 | 39021  | 0         | 816  | 860  | 94 -  | 3    | 839  | 29007  | 29863  |
| UN21783 | Rsa1.0_02862.1 | 1109 | 27163  | 0         | 526  | 539  | 97 -  | 365  | 903  | 21827  | 22365  |
| UN21784 | Rsa1.0_02034.1 | 1400 | 35823  | 0         | 388  | 392  | 98 -  | 983  | 1374 | 10061  | 10451  |
| UN21785 | Rsa1.0_00253.1 | 2298 | 231292 | 0         | 920  | 946  | 97 +  | 1246 | 2185 | 160740 | 161685 |
| UN21786 | Rsa1.0_02601.1 | 969  | 29654  | 0         | 443  | 459  | 96 +  | 509  | 967  | 26835  | 27293  |
| UN21787 | Rsa1.0_00632.1 | 1257 | 183777 | 0         | 603  | 606  | 99 +  | 3    | 607  | 40248  | 40853  |
| UN21788 | Rsa1.0_01419.1 | 1967 | 167402 | 0         | 1152 | 1179 | 97 -  | 3    | 1170 | 6787   | 7963   |
| UN21789 | Rsa1.0_03555.1 | 876  | 22129  | 0         | 429  | 468  | 91 -  | 2    | 453  | 17793  | 18252  |
| UN21790 | Rsa1.0_00078.1 | 1817 | 175053 | 0         | 1369 | 1431 | 95 +  | 6    | 1430 | 66490  | 67910  |
| UN21791 | Rsa1.0_00596.1 | 2074 | 73578  | 0         | 349  | 353  | 98 -  | 1722 | 2074 | 30895  | 31247  |
| UN21792 | Rsa1.0_02270.1 | 574  | 249821 | 1.00E-162 | 344  | 362  | 95 -  | 213  | 574  | 141030 | 141382 |
| UN21793 | Rsa1.0_04264.1 | 2110 | 18207  | 0         | 1188 | 1195 | 99 -  | 535  | 1728 | 5591   | 6783   |
| UN21794 | Rsa1.0_00260.1 | 926  | 102021 | 0         | 362  | 364  | 99 +  | 562  | 925  | 67044  | 67407  |
| UN21795 | Rsa1.0_00108.1 | 1682 | 478491 | 0         | 737  | 755  | 97 -  | 17   | 770  | 271632 | 272386 |
| UN21796 | Rsa1.0_01181.1 | 1647 | 51496  | 0         | 1021 | 1024 | 99 -  | 3    | 1025 | 26963  | 27986  |
| UN21797 | Rsa1.0_16253.1 | 1605 | 2225   | 1.00E-125 | 253  | 260  | 97 -  | 3    | 257  | 1      | 259    |
| UN21798 | Rsa1.0_01848.1 | 1115 | 38312  | 1.00E-169 | 308  | 309  | 99 +  | 806  | 1114 | 3194   | 3501   |
| UN21799 | Rsa1.0_01081.1 | 1417 | 499226 | 0         | 1136 | 1187 | 95 +  | 3    | 1185 | 18453  | 19621  |

|         |                |      |        |           |      |      |       |      |      |        |        |
|---------|----------------|------|--------|-----------|------|------|-------|------|------|--------|--------|
| UN21800 | Rsa1.0_02030.1 | 1460 | 179909 | 0         | 1344 | 1363 | 98 -  | 93   | 1453 | 18387  | 19748  |
| UN21801 | Rsa1.0_00017.1 | 1798 | 752458 | 1.00E-162 | 316  | 324  | 97 -  | 5    | 325  | 664149 | 664472 |
| UN21802 | Rsa1.0_02911.1 | 1555 | 142461 | 0         | 482  | 491  | 98 -  | 256  | 745  | 26352  | 26842  |
| UN21803 | Rsa1.0_05571.1 | 1742 | 13298  | 1.00E-167 | 304  | 306  | 99 -  | 11   | 316  | 4630   | 4935   |
| UN21804 | Rsa1.0_00501.1 | 1441 | 79545  | 0         | 678  | 688  | 98 +  | 754  | 1439 | 68586  | 69273  |
| UN21805 | Rsa1.0_00108.1 | 1365 | 478491 | 3.00E-88  | 206  | 217  | 94 -  | 1039 | 1255 | 119277 | 119490 |
| UN21806 | Rsa1.0_00008.1 | 930  | 358124 | 0         | 923  | 934  | 98 +  | 1    | 930  | 28725  | 29658  |
| UN21807 | Rsa1.0_02196.1 | 1282 | 34005  | 0         | 350  | 352  | 99 +  | 265  | 616  | 1716   | 2067   |
| UN21808 | Rsa1.0_01730.1 | 703  | 40223  | 1.00E-138 | 289  | 303  | 95 +  | 1    | 303  | 36539  | 36828  |
| UN21809 | Rsa1.0_01815.1 | 1234 | 38897  | 0         | 684  | 702  | 97 +  | 1    | 694  | 14341  | 15042  |
| UN21810 | Rsa1.0_01581.1 | 691  | 42833  | 1.00E-162 | 299  | 302  | 99 +  | 88   | 389  | 7614   | 7915   |
| UN21811 | Rsa1.0_02643.1 | 2217 | 29176  | 0         | 420  | 423  | 99 -  | 1796 | 2217 | 3927   | 4349   |
| UN21812 | Rsa1.0_02756.1 | 1525 | 28202  | 0         | 647  | 654  | 98 -  | 872  | 1523 | 16313  | 16966  |
| UN21813 | Rsa1.0_00550.1 | 1243 | 210790 | 0         | 1217 | 1248 | 97 -  | 1    | 1243 | 28024  | 29269  |
| UN21814 | Rsa1.0_04741.1 | 753  | 16164  | 1.00E-139 | 257  | 259  | 99 -  | 489  | 747  | 7116   | 7374   |
| UN21815 | Rsa1.0_00262.1 | 841  | 101906 | 1.00E-154 | 356  | 381  | 93 +  | 466  | 841  | 33151  | 33531  |
| UN21816 | Rsa1.0_01742.1 | 388  | 39962  | 1.00E-87  | 198  | 208  | 95 -  | 179  | 386  | 25943  | 26149  |
| UN21817 | Rsa1.0_17687.1 | 1062 | 1765   | 0         | 1001 | 1011 | 99 +  | 38   | 1047 | 2      | 1012   |
| UN21818 | Rsa1.0_14001.1 | 898  | 3933   | 0         | 425  | 428  | 99 -  | 469  | 896  | 1383   | 1810   |
| UN21819 | Rsa1.0_04286.1 | 910  | 18084  | 0         | 550  | 561  | 98 +  | 228  | 786  | 13076  | 13636  |
| UN21820 | Rsa1.0_03261.1 | 1255 | 24281  | 0         | 492  | 497  | 98 +  | 224  | 717  | 10621  | 11117  |
| UN21821 | Rsa1.0_11577.1 | 1744 | 5467   | 1.00E-173 | 309  | 309  | 100 + | 1    | 309  | 704    | 1012   |
| UN21822 | Rsa1.0_01400.1 | 1463 | 46560  | 0         | 389  | 404  | 96 +  | 689  | 1092 | 9774   | 10177  |
| UN21823 | Rsa1.0_00289.1 | 1375 | 98620  | 1.00E-163 | 298  | 300  | 99 +  | 4    | 303  | 12869  | 13168  |
| UN21824 | Rsa1.0_00253.1 | 1095 | 231292 | 0         | 321  | 321  | 100 + | 3    | 323  | 23513  | 23833  |
| UN21825 | Rsa1.0_11820.1 | 1586 | 5398   | 1.00E-149 | 278  | 281  | 98 -  | 1295 | 1575 | 27     | 307    |
| UN21826 | #              | #    | #      | #         | #    | #    | #     | #    | #    | #      | #      |
| UN21827 | Rsa1.0_04786.1 | 788  | 15988  | 1.00E-121 | 235  | 239  | 98 +  | 28   | 263  | 2656   | 2894   |
| UN21828 | Rsa1.0_04618.1 | 1775 | 16623  | 0         | 632  | 660  | 95 -  | 1    | 651  | 2856   | 3510   |
| UN21829 | Rsa1.0_01740.1 | 1014 | 39986  | 1.00E-125 | 274  | 288  | 95 -  | 137  | 418  | 27598  | 27885  |
| UN21830 | Rsa1.0_00007.1 | 1375 | 239325 | 0         | 568  | 592  | 95 +  | 789  | 1375 | 58424  | 59011  |
| UN21831 | Rsa1.0_00047.1 | 937  | 168582 | 0         | 519  | 544  | 95 -  | 112  | 655  | 96256  | 96799  |
| UN21832 | Rsa1.0_12809.1 | 1000 | 5119   | 0         | 425  | 449  | 94 +  | 556  | 1000 | 4445   | 4884   |
| UN21833 | Rsa1.0_01581.1 | 993  | 42833  | 0         | 904  | 925  | 97 +  | 75   | 993  | 2933   | 3857   |
| UN21834 | Rsa1.0_02688.1 | 2061 | 28644  | 1.00E-158 | 313  | 320  | 97 -  | 1743 | 2061 | 9632   | 9950   |
| UN21835 | Rsa1.0_01844.1 | 1849 | 38421  | 1.00E-158 | 283  | 283  | 100 - | 1003 | 1285 | 5187   | 5469   |
| UN21836 | Rsa1.0_05169.1 | 2363 | 14620  | 0         | 849  | 863  | 98 -  | 1503 | 2363 | 7406   | 8262   |
| UN21837 | Rsa1.0_03436.1 | 1423 | 22958  | 0         | 425  | 432  | 98 -  | 989  | 1420 | 6285   | 6716   |
| UN21838 | Rsa1.0_00427.1 | 1084 | 189678 | 1.00E-140 | 266  | 269  | 98 +  | 815  | 1083 | 11409  | 11676  |

|         |                |      |        |           |      |      |       |      |      |        |        |
|---------|----------------|------|--------|-----------|------|------|-------|------|------|--------|--------|
| UN21839 | Rsa1.0.00915.1 | 1049 | 194446 | 0         | 596  | 608  | 98 -  | 442  | 1047 | 41549  | 42150  |
| UN21840 | Rsa1.0.07256.1 | 1430 | 9655   | 0         | 509  | 519  | 98 -  | 448  | 966  | 4782   | 5300   |
| UN21841 | Rsa1.0.01156.1 | 1513 | 52147  | 0         | 339  | 341  | 99 -  | 3    | 343  | 20079  | 20419  |
| UN21842 | Rsa1.0.00375.1 | 903  | 90207  | 0         | 438  | 456  | 96 -  | 1    | 453  | 2406   | 2861   |
| UN21843 | Rsa1.0.00566.1 | 465  | 75325  | 1.00E-161 | 328  | 339  | 96 -  | 1    | 336  | 61768  | 62106  |
| UN21844 | Rsa1.0.00528.1 | 1149 | 164755 | 0         | 667  | 683  | 97 -  | 467  | 1149 | 109339 | 110021 |
| UN21845 | Rsa1.0.03853.1 | 895  | 20447  | 0         | 374  | 378  | 98 +  | 2    | 379  | 13295  | 13672  |
| UN21846 | Rsa1.0.01419.1 | 1617 | 167402 | 0         | 782  | 825  | 94 +  | 278  | 1097 | 130447 | 131262 |
| UN21847 | Rsa1.0.00435.1 | 1346 | 317579 | 0         | 433  | 439  | 98 -  | 196  | 634  | 3797   | 4235   |
| UN21848 | Rsa1.0.03352.1 | 746  | 23506  | 1.00E-89  | 183  | 188  | 97 -  | 294  | 481  | 18148  | 18335  |
| UN21849 | Rsa1.0.00953.1 | 1225 | 145012 | 0         | 455  | 456  | 99 +  | 770  | 1225 | 12362  | 12817  |
| UN21850 | Rsa1.0.00250.1 | 1287 | 273771 | 1.00E-144 | 307  | 320  | 95 -  | 970  | 1287 | 60264  | 60583  |
| UN21851 | Rsa1.0.00363.1 | 582  | 90968  | 1.00E-114 | 234  | 241  | 97 +  | 1    | 240  | 28262  | 28502  |
| UN21852 | Rsa1.0.03329.1 | 1413 | 23676  | 0         | 779  | 784  | 99 +  | 615  | 1398 | 22343  | 23126  |
| UN21853 | Rsa1.0.01096.1 | 1323 | 54266  | 0         | 441  | 454  | 97 +  | 678  | 1131 | 2669   | 3122   |
| UN21854 | Rsa1.0.00055.1 | 1484 | 520193 | 0         | 1330 | 1435 | 92 -  | 5    | 1391 | 168864 | 170294 |
| UN21855 | Rsa1.0.00623.1 | 1011 | 207630 | 0         | 384  | 398  | 96 -  | 1    | 394  | 22569  | 22962  |
| UN21856 | Rsa1.0.00429.1 | 1484 | 85559  | 0         | 355  | 361  | 98 +  | 1122 | 1482 | 18599  | 18959  |
| UN21857 | Rsa1.0.00340.1 | 1343 | 305782 | 0         | 338  | 343  | 98 +  | 3    | 345  | 191920 | 192262 |
| UN21858 | Rsa1.0.05076.1 | 914  | 14916  | 0         | 595  | 598  | 99 +  | 317  | 914  | 2709   | 3306   |
| UN21859 | Rsa1.0.22077.1 | 1100 | 1151   | 1.00E-153 | 281  | 283  | 99 -  | 816  | 1098 | 869    | 1151   |
| UN21860 | Rsa1.0.00552.1 | 894  | 206757 | 0         | 856  | 885  | 96 -  | 6    | 890  | 65956  | 66838  |
| UN21861 | Rsa1.0.01669.1 | 965  | 41286  | 1.00E-157 | 309  | 318  | 97 -  | 7    | 324  | 8172   | 8489   |
| UN21862 | Rsa1.0.01558.1 | 902  | 43287  | 0         | 531  | 545  | 97 -  | 356  | 898  | 39094  | 39637  |
| UN21863 | Rsa1.0.04415.1 | 791  | 147889 | 1.00E-161 | 312  | 320  | 97 -  | 6    | 325  | 144332 | 144651 |
| UN21864 | Rsa1.0.01783.1 | 716  | 39383  | 0         | 403  | 412  | 97 -  | 282  | 693  | 9454   | 9865   |
| UN21865 | Rsa1.0.01251.1 | 1131 | 49873  | 0         | 391  | 394  | 99 +  | 3    | 395  | 4816   | 5209   |
| UN21866 | Rsa1.0.00019.1 | 1408 | 301669 | 1.00E-144 | 316  | 333  | 94 -  | 768  | 1099 | 113150 | 113473 |
| UN21867 | Rsa1.0.00457.1 | 1077 | 337301 | 1.00E-154 | 295  | 301  | 98 -  | 271  | 571  | 288997 | 289297 |
| UN21868 | Rsa1.0.04198.1 | 1238 | 18504  | 0         | 567  | 595  | 95 -  | 2    | 589  | 13939  | 14532  |
| UN21869 | Rsa1.0.00071.1 | 817  | 345714 | 0         | 427  | 436  | 97 +  | 382  | 817  | 142456 | 142884 |
| UN21870 | Rsa1.0.01958.1 | 1127 | 261128 | 1.00E-137 | 275  | 284  | 96 -  | 844  | 1127 | 111066 | 111349 |
| UN21871 | Rsa1.0.00017.1 | 946  | 752458 | 1.00E-142 | 289  | 296  | 97 -  | 12   | 306  | 11197  | 11490  |
| UN21872 | Rsa1.0.01553.1 | 1043 | 43379  | 1.00E-157 | 310  | 316  | 98 +  | 732  | 1043 | 5530   | 5845   |
| UN21873 | Rsa1.0.00123.1 | 921  | 325650 | 0         | 534  | 548  | 97 +  | 374  | 921  | 237191 | 237736 |
| UN21874 | Rsa1.0.03185.1 | 1368 | 24739  | 1.00E-109 | 231  | 240  | 96 -  | 1132 | 1368 | 7506   | 7745   |
| UN21875 | Rsa1.0.04741.1 | 761  | 16164  | 1.00E-150 | 272  | 273  | 99 -  | 489  | 761  | 7098   | 7370   |
| UN21876 | Rsa1.0.07482.1 | 988  | 9278   | 0         | 360  | 360  | 100 + | 5    | 364  | 2138   | 2497   |
| UN21877 | Rsa1.0.00192.1 | 911  | 278200 | 0         | 498  | 498  | 100 + | 2    | 499  | 37881  | 38378  |

|         |                |      |        |           |      |      |       |      |      |        |        |
|---------|----------------|------|--------|-----------|------|------|-------|------|------|--------|--------|
| UN21878 | Rsa1.0.06288.1 | 1669 | 11302  | 0         | 1267 | 1333 | 95 -  | 336  | 1668 | 758    | 2084   |
| UN21879 | Rsa1.0.00642.1 | 1161 | 201230 | 0         | 398  | 398  | 100 - | 1    | 398  | 161688 | 162085 |
| UN21880 | Rsa1.0.00446.1 | 816  | 167829 | 1.00E-108 | 234  | 244  | 95 -  | 574  | 816  | 120006 | 120249 |
| UN21881 | Rsa1.0.00863.1 | 1146 | 254535 | 0         | 595  | 617  | 96 +  | 5    | 621  | 251958 | 252566 |
| UN21882 | Rsa1.0.19861.1 | 798  | 1373   | 1.00E-105 | 253  | 269  | 94 +  | 533  | 798  | 448    | 710    |
| UN21883 | Rsa1.0.00060.1 | 1018 | 502678 | 0         | 990  | 1030 | 96 -  | 3    | 1018 | 128110 | 129126 |
| UN21884 | Rsa1.0.02964.1 | 846  | 26407  | 2.00E-48  | 111  | 115  | 96 +  | 280  | 394  | 13665  | 13779  |
| UN21885 | Rsa1.0.03867.1 | 774  | 20369  | 0         | 769  | 771  | 99 +  | 3    | 772  | 14997  | 15767  |
| UN21886 | Rsa1.0.00576.1 | 1070 | 178949 | 0         | 493  | 494  | 99 -  | 3    | 496  | 6064   | 6557   |
| UN21887 | Rsa1.0.00045.1 | 820  | 328694 | 1.00E-171 | 328  | 335  | 97 -  | 1    | 335  | 139224 | 139556 |
| UN21888 | Rsa1.0.04415.1 | 964  | 147889 | 1.00E-160 | 294  | 295  | 99 +  | 3    | 296  | 141061 | 141355 |
| UN21889 | Rsa1.0.00089.1 | 1067 | 406142 | 0         | 988  | 1016 | 97 -  | 51   | 1065 | 322148 | 323152 |
| UN21890 | Rsa1.0.00369.1 | 752  | 266462 | 0         | 558  | 579  | 96 -  | 175  | 752  | 186545 | 187123 |
| UN21891 | Rsa1.0.01957.1 | 730  | 36844  | 2.00E-69  | 183  | 198  | 92 +  | 523  | 720  | 23850  | 24041  |
| UN21892 | Rsa1.0.01410.1 | 712  | 46345  | 1.00E-173 | 329  | 336  | 97 +  | 115  | 450  | 33684  | 34019  |
| UN21893 | Rsa1.0.00422.1 | 595  | 86144  | 0         | 452  | 463  | 97 -  | 3    | 462  | 16094  | 16556  |
| UN21894 | Rsa1.0.02901.1 | 733  | 26909  | 0         | 394  | 401  | 98 -  | 4    | 403  | 25992  | 26392  |
| UN21895 | Rsa1.0.00168.1 | 841  | 115870 | 1.00E-156 | 335  | 348  | 96 -  | 1    | 347  | 54746  | 55085  |
| UN21896 | Rsa1.0.02532.1 | 2128 | 30403  | 0         | 830  | 849  | 97 +  | 1045 | 1893 | 1      | 849    |
| UN21897 | Rsa1.0.00047.1 | 1087 | 168582 | 0         | 528  | 565  | 93 -  | 536  | 1087 | 33961  | 34521  |
| UN21898 | Rsa1.0.00991.1 | 1356 | 143101 | 0         | 696  | 696  | 100 - | 1    | 696  | 137872 | 138567 |
| UN21899 | Rsa1.0.09661.1 | 767  | 6226   | 1.00E-138 | 263  | 266  | 98 +  | 500  | 765  | 1      | 265    |
| UN21900 | Rsa1.0.01724.1 | 1129 | 40292  | 0         | 564  | 579  | 97 +  | 546  | 1120 | 19668  | 20241  |
| UN21901 | Rsa1.0.00896.1 | 440  | 60509  | 1.00E-78  | 165  | 169  | 97 +  | 3    | 171  | 49723  | 49890  |
| UN21902 | Rsa1.0.00402.1 | 431  | 385315 | 1.00E-106 | 241  | 256  | 94 -  | 1    | 256  | 236413 | 236668 |
| UN21903 | Rsa1.0.02508.1 | 794  | 30675  | 0         | 551  | 568  | 97 -  | 1    | 567  | 20736  | 21302  |
| UN21904 | Rsa1.0.00108.1 | 799  | 478491 | 1.00E-161 | 344  | 358  | 96 +  | 6    | 362  | 450980 | 451332 |
| UN21905 | Rsa1.0.00645.1 | 837  | 189716 | 1.00E-102 | 241  | 255  | 94 -  | 1    | 252  | 148716 | 148968 |
| UN21906 | Rsa1.0.00527.1 | 858  | 77733  | 0         | 455  | 484  | 94 +  | 5    | 481  | 24550  | 25027  |
| UN21907 | Rsa1.0.00117.1 | 1674 | 213118 | 0         | 695  | 706  | 98 -  | 2    | 706  | 177367 | 178072 |
| UN21908 | Rsa1.0.00170.1 | 868  | 179538 | 0         | 479  | 499  | 95 +  | 336  | 834  | 22989  | 23487  |
| UN21909 | Rsa1.0.00571.1 | 1386 | 329018 | 0         | 1314 | 1320 | 99 -  | 52   | 1371 | 165653 | 166972 |
| UN21910 | Rsa1.0.05068.1 | 586  | 14940  | 0         | 352  | 358  | 98 -  | 145  | 502  | 6132   | 6489   |
| UN21911 | Rsa1.0.00269.1 | 929  | 341668 | 1.00E-114 | 209  | 209  | 100 - | 372  | 580  | 322820 | 323028 |
| UN21912 | Rsa1.0.13994.1 | 942  | 3941   | 0         | 352  | 357  | 98 -  | 250  | 606  | 1610   | 1966   |
| UN21913 | Rsa1.0.00239.1 | 900  | 104332 | 0         | 391  | 391  | 100 - | 1    | 391  | 28808  | 29198  |
| UN21914 | Rsa1.0.35376.1 | 755  | 640    | 1.00E-168 | 318  | 324  | 98 +  | 385  | 708  | 164    | 487    |
| UN21915 | Rsa1.0.01717.1 | 1157 | 143162 | 1.00E-155 | 317  | 329  | 96 +  | 829  | 1157 | 106428 | 106754 |
| UN21916 | Rsa1.0.00427.1 | 1014 | 189678 | 1.00E-100 | 201  | 205  | 98 +  | 788  | 992  | 11409  | 11611  |

|         |                |      |        |           |      |      |       |      |      |        |        |
|---------|----------------|------|--------|-----------|------|------|-------|------|------|--------|--------|
| UN21917 | Rsa1.0.00427.1 | 1301 | 189678 | 0         | 342  | 344  | 99 -  | 959  | 1301 | 11816  | 12159  |
| UN21918 | Rsa1.0.02467.1 | 530  | 31141  | 0         | 504  | 527  | 95 +  | 4    | 530  | 15460  | 15971  |
| UN21919 | Rsa1.0.00341.1 | 885  | 249309 | 1.00E-121 | 300  | 323  | 92 +  | 3    | 317  | 4963   | 5283   |
| UN21920 | Rsa1.0.00427.1 | 1092 | 189678 | 1.00E-107 | 206  | 209  | 98 +  | 509  | 717  | 10945  | 11153  |
| UN21921 | Rsa1.0.00062.1 | 672  | 299291 | 1.00E-174 | 371  | 389  | 95 -  | 3    | 385  | 185443 | 185830 |
| UN21922 | Rsa1.0.00113.1 | 1028 | 131574 | 0         | 619  | 635  | 97 +  | 390  | 1021 | 52836  | 53469  |
| UN21923 | Rsa1.0.01958.1 | 952  | 261128 | 1.00E-125 | 263  | 275  | 95 +  | 319  | 593  | 132443 | 132717 |
| UN21924 | Rsa1.0.01651.1 | 950  | 41586  | 1.00E-153 | 284  | 287  | 98 +  | 166  | 452  | 15937  | 16223  |
| UN21925 | Rsa1.0.00354.1 | 1082 | 232005 | 1.00E-126 | 284  | 302  | 94 -  | 1    | 302  | 9448   | 9740   |
| UN21926 | Rsa1.0.01457.1 | 879  | 45337  | 1.00E-148 | 267  | 267  | 100 + | 222  | 488  | 6330   | 6596   |
| UN21927 | Rsa1.0.12292.1 | 561  | 5263   | 0         | 545  | 562  | 96 -  | 1    | 561  | 172    | 733    |
| UN21928 | Rsa1.0.00773.1 | 1375 | 64839  | 0         | 900  | 908  | 99 -  | 1    | 908  | 25726  | 26633  |
| UN21929 | Rsa1.0.00069.1 | 1482 | 403561 | 0         | 424  | 439  | 96 -  | 1044 | 1482 | 394797 | 395235 |
| UN21930 | Rsa1.0.00865.1 | 848  | 61686  | 0         | 421  | 437  | 96 -  | 26   | 459  | 2371   | 2807   |
| UN21931 | Rsa1.0.08293.1 | 1004 | 7593   | 0         | 713  | 718  | 99 -  | 287  | 1004 | 5267   | 5983   |
| UN21932 | Rsa1.0.03162.1 | 926  | 24895  | 1.00E-159 | 303  | 309  | 98 +  | 616  | 924  | 22626  | 22934  |
| UN21933 | Rsa1.0.02041.1 | 814  | 163634 | 8.00E-88  | 165  | 165  | 100 - | 4    | 168  | 20259  | 20423  |
| UN21934 | Rsa1.0.01836.1 | 842  | 38503  | 0         | 329  | 331  | 99 -  | 512  | 842  | 5086   | 5416   |
| UN21935 | Rsa1.0.04254.1 | 804  | 18258  | 0         | 515  | 538  | 95 +  | 1    | 538  | 14158  | 14695  |
| UN21936 | Rsa1.0.03241.1 | 1101 | 24423  | 0         | 1026 | 1062 | 96 +  | 2    | 1059 | 5601   | 6646   |
| UN21937 | Rsa1.0.00707.1 | 1162 | 190112 | 0         | 411  | 412  | 99 +  | 749  | 1160 | 156145 | 156556 |
| UN21938 | Rsa1.0.00190.1 | 1853 | 318240 | 0         | 940  | 950  | 98 -  | 610  | 1559 | 191430 | 192379 |
| UN21939 | Rsa1.0.00265.1 | 759  | 220635 | 1.00E-180 | 343  | 351  | 97 +  | 409  | 759  | 197596 | 197946 |
| UN21940 | Rsa1.0.01146.1 | 659  | 163455 | 1.00E-121 | 239  | 245  | 97 -  | 413  | 657  | 41241  | 41485  |
| UN21941 | Rsa1.0.08170.1 | 852  | 7799   | 0         | 818  | 846  | 96 -  | 3    | 842  | 1720   | 2565   |
| UN21942 | Rsa1.0.00610.1 | 925  | 72740  | 1.00E-140 | 326  | 347  | 93 +  | 485  | 817  | 36010  | 36355  |
| UN21943 | Rsa1.0.40553.1 | 621  | 553    | 0         | 445  | 450  | 98 -  | 173  | 621  | 104    | 553    |
| UN21944 | Rsa1.0.00132.1 | 746  | 124299 | 0         | 413  | 420  | 98 +  | 332  | 745  | 46291  | 46710  |
| UN21945 | Rsa1.0.00933.1 | 1601 | 59164  | 0         | 449  | 456  | 98 -  | 2    | 457  | 40175  | 40628  |
| UN21946 | Rsa1.0.05595.1 | 1650 | 13228  | 0         | 574  | 579  | 99 +  | 1069 | 1647 | 5046   | 5624   |
| UN21947 | Rsa1.0.00075.1 | 1096 | 146680 | 0         | 435  | 461  | 94 -  | 1    | 460  | 17393  | 17836  |
| UN21948 | Rsa1.0.04238.1 | 822  | 18352  | 1.00E-71  | 149  | 152  | 98 +  | 502  | 653  | 1658   | 1806   |
| UN21949 | Rsa1.0.01305.1 | 1333 | 48730  | 1.00E-125 | 246  | 252  | 97 -  | 320  | 571  | 13231  | 13482  |
| UN21950 | Rsa1.0.00019.1 | 977  | 301669 | 0         | 452  | 464  | 97 -  | 1    | 464  | 233346 | 233806 |
| UN21951 | Rsa1.0.00926.1 | 1010 | 195072 | 0         | 493  | 514  | 95 +  | 1    | 514  | 41560  | 42072  |
| UN21952 | Rsa1.0.00925.1 | 806  | 59481  | 1.00E-166 | 333  | 344  | 96 -  | 38   | 381  | 8960   | 9301   |
| UN21953 | Rsa1.0.00863.1 | 639  | 254535 | 0         | 423  | 430  | 98 -  | 3    | 432  | 213547 | 213975 |
| UN21954 | Rsa1.0.02400.1 | 925  | 31750  | 1.00E-178 | 342  | 350  | 97 -  | 3    | 352  | 21067  | 21413  |
| UN21955 | Rsa1.0.05239.1 | 798  | 14410  | 0         | 451  | 451  | 100 - | 348  | 798  | 11682  | 12132  |

|         |                |      |        |           |     |     |       |      |      |        |        |
|---------|----------------|------|--------|-----------|-----|-----|-------|------|------|--------|--------|
| UN21956 | Rsa1.0.01016.1 | 751  | 181422 | 0         | 480 | 492 | 97 +  | 232  | 723  | 171865 | 172354 |
| UN21957 | Rsa1.0.19408.1 | 703  | 1436   | 1.00E-117 | 278 | 294 | 94 +  | 410  | 700  | 391    | 677    |
| UN21958 | Rsa1.0.00179.1 | 838  | 393324 | 1.00E-118 | 216 | 216 | 100 - | 32   | 247  | 215537 | 215752 |
| UN21959 | Rsa1.0.01482.1 | 1080 | 44855  | 0         | 403 | 423 | 95 +  | 653  | 1074 | 16982  | 17404  |
| UN21960 | Rsa1.0.07471.1 | 1315 | 9307   | 0         | 696 | 742 | 93 -  | 3    | 738  | 1      | 734    |
| UN21961 | Rsa1.0.00055.1 | 706  | 520193 | 0         | 349 | 354 | 98 -  | 351  | 704  | 153885 | 154237 |
| UN21962 | Rsa1.0.01034.1 | 816  | 56046  | 1.00E-113 | 210 | 211 | 99 -  | 561  | 771  | 14273  | 14483  |
| UN21963 | Rsa1.0.00484.1 | 1385 | 203294 | 0         | 610 | 615 | 99 -  | 773  | 1385 | 126854 | 127468 |
| UN21964 | Rsa1.0.08288.1 | 603  | 7604   | 2.00E-93  | 224 | 240 | 93 +  | 364  | 603  | 4335   | 4571   |
| UN21965 | Rsa1.0.00279.1 | 1199 | 100039 | 1.00E-136 | 265 | 271 | 97 -  | 709  | 979  | 83435  | 83705  |
| UN21966 | Rsa1.0.02399.1 | 1685 | 31763  | 1.00E-134 | 246 | 247 | 99 +  | 331  | 577  | 14522  | 14768  |
| UN21967 | Rsa1.0.00773.1 | 1076 | 64839  | 0         | 428 | 433 | 98 -  | 379  | 810  | 1058   | 1490   |
| UN21968 | Rsa1.0.00707.1 | 929  | 190112 | 0         | 819 | 842 | 97 -  | 92   | 929  | 52295  | 53136  |
| UN21969 | Rsa1.0.08558.1 | 806  | 7198   | 0         | 401 | 422 | 95 -  | 363  | 770  | 473    | 894    |
| UN21970 | Rsa1.0.02811.1 | 700  | 27669  | 0         | 682 | 695 | 98 -  | 3    | 696  | 21132  | 21825  |
| UN21971 | Rsa1.0.01207.1 | 899  | 141053 | 0         | 375 | 384 | 97 -  | 364  | 747  | 132857 | 133240 |
| UN21972 | Rsa1.0.00019.1 | 1347 | 301669 | 2.00E-89  | 174 | 176 | 98 +  | 394  | 569  | 113298 | 113473 |
| UN21973 | Rsa1.0.00281.1 | 751  | 99908  | 0         | 521 | 538 | 96 -  | 46   | 581  | 49992  | 50529  |
| UN21974 | Rsa1.0.00717.1 | 926  | 67051  | 0         | 453 | 457 | 99 -  | 1    | 457  | 8485   | 8941   |
| UN21975 | Rsa1.0.00028.1 | 1044 | 293984 | 0         | 636 | 646 | 98 +  | 1    | 646  | 282596 | 283237 |
| UN21976 | Rsa1.0.04630.1 | 754  | 16595  | 1.00E-159 | 396 | 421 | 94 -  | 338  | 746  | 14481  | 14895  |
| UN21977 | Rsa1.0.16965.1 | 612  | 1971   | 1.00E-131 | 240 | 241 | 99 +  | 371  | 611  | 1247   | 1487   |
| UN21978 | Rsa1.0.01562.1 | 1437 | 43196  | 1.00E-143 | 268 | 270 | 99 +  | 1169 | 1437 | 10038  | 10307  |
| UN21979 | Rsa1.0.06791.1 | 1045 | 10350  | 0         | 839 | 890 | 94 +  | 20   | 907  | 6538   | 7421   |
| UN21980 | Rsa1.0.01649.1 | 933  | 41624  | 0         | 567 | 569 | 99 +  | 361  | 929  | 18793  | 19361  |
| UN21981 | Rsa1.0.00152.1 | 963  | 257730 | 0         | 382 | 388 | 98 +  | 575  | 962  | 11897  | 12281  |
| UN21982 | Rsa1.0.00504.1 | 1327 | 79334  | 1.00E-136 | 291 | 301 | 96 -  | 1030 | 1327 | 36019  | 36317  |
| UN21983 | Rsa1.0.01814.1 | 727  | 38917  | 0         | 494 | 521 | 94 +  | 11   | 525  | 37186  | 37704  |
| UN21984 | Rsa1.0.00616.1 | 662  | 195713 | 0         | 453 | 466 | 97 +  | 198  | 662  | 181781 | 182245 |
| UN21985 | Rsa1.0.01220.1 | 1083 | 161775 | 1.00E-148 | 270 | 271 | 99 -  | 283  | 553  | 30769  | 31039  |
| UN21986 | Rsa1.0.01056.1 | 1029 | 55449  | 1.00E-143 | 273 | 278 | 98 +  | 750  | 1027 | 40196  | 40473  |
| UN21987 | Rsa1.0.00071.1 | 762  | 345714 | 0         | 355 | 356 | 99 +  | 2    | 357  | 206158 | 206512 |
| UN21988 | Rsa1.0.02601.1 | 909  | 29654  | 0         | 356 | 358 | 99 -  | 43   | 400  | 26835  | 27192  |
| UN21989 | Rsa1.0.06002.1 | 1586 | 11976  | 0         | 547 | 555 | 98 +  | 625  | 1179 | 5767   | 6321   |
| UN21990 | Rsa1.0.01376.1 | 1049 | 47004  | 1.00E-99  | 188 | 189 | 99 -  | 417  | 605  | 38534  | 38722  |
| UN21991 | Rsa1.0.00081.1 | 752  | 143261 | 0         | 398 | 407 | 97 +  | 67   | 473  | 126206 | 126612 |
| UN21992 | Rsa1.0.04198.1 | 668  | 18504  | 0         | 531 | 532 | 99 +  | 137  | 667  | 15581  | 16112  |
| UN21993 | Rsa1.0.00157.1 | 1022 | 245832 | 1.00E-116 | 230 | 236 | 97 +  | 1    | 236  | 134929 | 135164 |
| UN21994 | Rsa1.0.00627.1 | 1741 | 71566  | 0         | 584 | 602 | 97 +  | 1138 | 1737 | 63352  | 63952  |

|         |                |      |        |           |      |      |       |      |      |        |        |
|---------|----------------|------|--------|-----------|------|------|-------|------|------|--------|--------|
| UN21995 | Rsa1.0.02901.1 | 821  | 26909  | 1.00E-170 | 306  | 307  | 99 -  | 9    | 315  | 21290  | 21596  |
| UN21996 | Rsa1.0.00300.1 | 1335 | 97747  | 0         | 547  | 574  | 95 +  | 76   | 643  | 81510  | 82074  |
| UN21997 | Rsa1.0.01272.1 | 503  | 49553  | 0         | 343  | 350  | 98 -  | 154  | 503  | 27964  | 28313  |
| UN21998 | Rsa1.0.02848.1 | 1560 | 27329  | 0         | 610  | 615  | 99 +  | 568  | 1182 | 23818  | 24432  |
| UN21999 | Rsa1.0.01632.1 | 447  | 181224 | 0         | 428  | 443  | 96 +  | 3    | 445  | 145796 | 146226 |
| UN22000 | Rsa1.0.00407.1 | 609  | 191544 | 0         | 594  | 619  | 95 +  | 1    | 609  | 43102  | 43716  |
| UN22001 | Rsa1.0.01866.1 | 698  | 37961  | 0         | 411  | 418  | 98 +  | 277  | 693  | 36635  | 37049  |
| UN22002 | Rsa1.0.02257.1 | 1067 | 33318  | 2.00E-73  | 150  | 153  | 98 +  | 508  | 660  | 21062  | 21214  |
| UN22003 | Rsa1.0.00639.1 | 760  | 165873 | 0         | 512  | 521  | 98 +  | 233  | 749  | 124129 | 124649 |
| UN22004 | Rsa1.0.01783.1 | 784  | 39383  | 0         | 419  | 437  | 95 +  | 1    | 435  | 9429   | 9865   |
| UN22005 | Rsa1.0.02281.1 | 852  | 292576 | 0         | 467  | 473  | 98 -  | 1    | 472  | 16469  | 16941  |
| UN22006 | Rsa1.0.00626.1 | 1069 | 71582  | 0         | 350  | 353  | 99 +  | 62   | 414  | 54678  | 55030  |
| UN22007 | Rsa1.0.03741.1 | 1029 | 143933 | 0         | 597  | 619  | 96 -  | 1    | 613  | 4881   | 5498   |
| UN22008 | Rsa1.0.00153.1 | 754  | 192931 | 1.00E-112 | 226  | 230  | 98 +  | 526  | 754  | 168694 | 168922 |
| UN22009 | Rsa1.0.00015.1 | 691  | 561803 | 1.00E-121 | 228  | 229  | 99 +  | 463  | 691  | 463749 | 463976 |
| UN22010 | Rsa1.0.05331.1 | 1030 | 14127  | 0         | 444  | 444  | 100 - | 3    | 446  | 7854   | 8297   |
| UN22011 | Rsa1.0.00197.1 | 870  | 109714 | 0         | 609  | 622  | 97 -  | 252  | 870  | 87936  | 88556  |
| UN22012 | Rsa1.0.00269.1 | 1016 | 341668 | 0         | 526  | 539  | 97 -  | 480  | 1012 | 247456 | 247994 |
| UN22013 | Rsa1.0.01898.1 | 604  | 37491  | 0         | 441  | 448  | 98 +  | 158  | 604  | 33926  | 34373  |
| UN22014 | Rsa1.0.00108.1 | 1023 | 478491 | 5.00E-99  | 196  | 200  | 98 -  | 271  | 470  | 134964 | 135163 |
| UN22015 | Rsa1.0.00110.1 | 788  | 132719 | 0         | 344  | 345  | 99 +  | 443  | 787  | 4280   | 4624   |
| UN22016 | Rsa1.0.00087.1 | 1586 | 761073 | 1.00E-171 | 317  | 321  | 98 -  | 1266 | 1586 | 11695  | 12015  |
| UN22017 | Rsa1.0.00926.1 | 1008 | 195072 | 0         | 482  | 505  | 95 +  | 1    | 503  | 41569  | 42072  |
| UN22018 | Rsa1.0.00564.1 | 1288 | 75428  | 1.00E-161 | 324  | 333  | 97 +  | 19   | 350  | 55499  | 55830  |
| UN22019 | Rsa1.0.00767.1 | 1458 | 64980  | 1.00E-139 | 295  | 309  | 95 +  | 937  | 1239 | 18547  | 18852  |
| UN22020 | Rsa1.0.02163.1 | 1230 | 34427  | 1.00E-142 | 281  | 289  | 97 -  | 478  | 766  | 4861   | 5149   |
| UN22021 | Rsa1.0.02488.1 | 928  | 30913  | 0         | 458  | 464  | 98 +  | 2    | 465  | 29806  | 30269  |
| UN22022 | Rsa1.0.14454.1 | 1591 | 3372   | 0         | 599  | 627  | 95 +  | 118  | 742  | 2746   | 3372   |
| UN22023 | Rsa1.0.03610.1 | 732  | 21797  | 1.00E-180 | 331  | 335  | 98 -  | 108  | 442  | 17230  | 17564  |
| UN22024 | Rsa1.0.02663.1 | 1648 | 169243 | 0         | 686  | 743  | 92 -  | 1    | 742  | 7793   | 8505   |
| UN22025 | Rsa1.0.00126.1 | 1295 | 127534 | 1.00E-149 | 301  | 312  | 96 +  | 345  | 656  | 37050  | 37361  |
| UN22026 | Rsa1.0.00440.1 | 1192 | 84723  | 1.00E-161 | 300  | 304  | 98 +  | 3    | 306  | 46570  | 46873  |
| UN22027 | Rsa1.0.00679.1 | 851  | 68971  | 1.00E-125 | 301  | 322  | 93 -  | 540  | 851  | 65779  | 66100  |
| UN22028 | Rsa1.0.07482.1 | 827  | 9278   | 0         | 607  | 631  | 96 -  | 1    | 629  | 1004   | 1633   |
| UN22029 | Rsa1.0.00614.1 | 1106 | 72276  | 1.00E-136 | 253  | 254  | 99 +  | 1    | 254  | 26554  | 26806  |
| UN22030 | Rsa1.0.04161.1 | 693  | 18788  | 1.00E-107 | 267  | 286  | 93 -  | 1    | 285  | 2612   | 2891   |
| UN22031 | Rsa1.0.00788.1 | 1292 | 64237  | 0         | 1172 | 1211 | 96 +  | 79   | 1287 | 22542  | 23752  |
| UN22032 | Rsa1.0.09608.1 | 795  | 6256   | 1.00E-89  | 171  | 172  | 99 -  | 1    | 172  | 172    | 343    |
| UN22033 | Rsa1.0.00034.1 | 834  | 260119 | 1.00E-131 | 277  | 292  | 94 -  | 2    | 282  | 89248  | 89539  |

|         |                |      |        |           |      |      |       |      |      |        |        |
|---------|----------------|------|--------|-----------|------|------|-------|------|------|--------|--------|
| UN22034 | Rsa1.0_00944.1 | 604  | 58733  | 0         | 441  | 462  | 95 -  | 2    | 454  | 35701  | 36160  |
| UN22035 | Rsa1.0_04779.1 | 978  | 16008  | 1.00E-120 | 326  | 358  | 91 -  | 631  | 975  | 9409   | 9765   |
| UN22036 | Rsa1.0_00504.1 | 967  | 79334  | 1.00E-159 | 314  | 321  | 97 +  | 16   | 335  | 35998  | 36317  |
| UN22037 | Rsa1.0_00248.1 | 956  | 163568 | 0         | 741  | 759  | 97 -  | 201  | 956  | 40076  | 40834  |
| UN22038 | Rsa1.0_11080.1 | 1152 | 5623   | 1.00E-175 | 344  | 352  | 97 +  | 1    | 352  | 1165   | 1514   |
| UN22039 | Rsa1.0_02373.1 | 1436 | 32048  | 0         | 575  | 576  | 99 +  | 5    | 580  | 8545   | 9119   |
| UN22040 | Rsa1.0_01836.1 | 878  | 38503  | 0         | 331  | 332  | 99 +  | 1    | 332  | 5086   | 5416   |
| UN22041 | Rsa1.0_02103.1 | 1049 | 35006  | 0         | 610  | 627  | 97 -  | 424  | 1048 | 13471  | 14094  |
| UN22042 | Rsa1.0_00697.1 | 1516 | 67913  | 0         | 475  | 484  | 98 +  | 745  | 1228 | 61996  | 62479  |
| UN22043 | Rsa1.0_00729.1 | 1086 | 66690  | 0         | 552  | 559  | 98 +  | 528  | 1086 | 49670  | 50228  |
| UN22044 | Rsa1.0_00009.1 | 994  | 232558 | 0         | 750  | 776  | 96 -  | 1    | 765  | 11234  | 12008  |
| UN22045 | Rsa1.0_04377.1 | 677  | 17658  | 0         | 651  | 677  | 96 -  | 2    | 677  | 5458   | 6130   |
| UN22046 | Rsa1.0_01512.1 | 1293 | 44234  | 0         | 357  | 363  | 98 -  | 394  | 756  | 9997   | 10359  |
| UN22047 | Rsa1.0_00741.1 | 877  | 66117  | 0         | 546  | 568  | 96 -  | 1    | 566  | 61288  | 61851  |
| UN22048 | Rsa1.0_02373.1 | 992  | 32048  | 0         | 416  | 422  | 98 +  | 1    | 422  | 8698   | 9119   |
| UN22049 | Rsa1.0_01882.1 | 1471 | 37697  | 0         | 1251 | 1269 | 98 +  | 5    | 1270 | 4733   | 6001   |
| UN22050 | Rsa1.0_45280.1 | 947  | 498    | 1.00E-83  | 158  | 158  | 100 + | 211  | 368  | 136    | 293    |
| UN22051 | Rsa1.0_02826.1 | 885  | 27560  | 2.00E-91  | 228  | 242  | 94 +  | 4    | 242  | 14841  | 15075  |
| UN22052 | Rsa1.0_00693.1 | 972  | 161311 | 0         | 383  | 394  | 97 -  | 3    | 393  | 61031  | 61424  |
| UN22053 | Rsa1.0_08430.1 | 1445 | 7367   | 0         | 381  | 384  | 99 -  | 1    | 384  | 2169   | 2551   |
| UN22054 | Rsa1.0_08717.1 | 692  | 7008   | 0         | 513  | 535  | 95 -  | 22   | 553  | 2884   | 3412   |
| UN22055 | Rsa1.0_02001.1 | 1025 | 36198  | 0         | 786  | 824  | 95 -  | 3    | 819  | 31728  | 32544  |
| UN22056 | Rsa1.0_01505.1 | 797  | 44382  | 4.00E-68  | 132  | 132  | 100 + | 403  | 534  | 36671  | 36802  |
| UN22057 | Rsa1.0_00504.1 | 1170 | 79334  | 1.00E-121 | 222  | 222  | 100 - | 282  | 503  | 31151  | 31372  |
| UN22058 | Rsa1.0_18326.1 | 916  | 1620   | 0         | 402  | 415  | 96 +  | 500  | 914  | 1205   | 1616   |
| UN22059 | Rsa1.0_00136.1 | 895  | 122464 | 0         | 596  | 596  | 100 + | 253  | 848  | 115441 | 116036 |
| UN22060 | Rsa1.0_01771.1 | 1259 | 172709 | 0         | 698  | 716  | 97 -  | 3    | 714  | 169301 | 170013 |
| UN22061 | Rsa1.0_02265.1 | 1328 | 33233  | 0         | 447  | 454  | 98 +  | 810  | 1263 | 5156   | 5608   |
| UN22062 | Rsa1.0_01674.1 | 1007 | 168300 | 0         | 636  | 642  | 99 -  | 2    | 640  | 19673  | 20314  |
| UN22063 | Rsa1.0_05569.1 | 1112 | 13311  | 0         | 488  | 503  | 97 +  | 8    | 508  | 4080   | 4579   |
| UN22064 | Rsa1.0_00467.1 | 1003 | 156542 | 1.00E-141 | 269  | 274  | 98 +  | 730  | 1003 | 91898  | 92171  |
| UN22065 | Rsa1.0_00279.1 | 1235 | 100039 | 1.00E-121 | 232  | 234  | 99 -  | 1002 | 1235 | 83118  | 83350  |
| UN22066 | Rsa1.0_04138.1 | 813  | 18898  | 0         | 530  | 534  | 99 -  | 222  | 752  | 3420   | 3953   |
| UN22067 | Rsa1.0_00417.1 | 1049 | 395068 | 0         | 495  | 523  | 94 -  | 16   | 538  | 259259 | 259778 |
| UN22068 | Rsa1.0_11602.1 | 881  | 5461   | 1.00E-153 | 281  | 282  | 99 +  | 11   | 291  | 4024   | 4305   |
| UN22069 | Rsa1.0_01800.1 | 924  | 39109  | 0         | 553  | 565  | 97 +  | 309  | 873  | 6664   | 7227   |
| UN22070 | Rsa1.0_00160.1 | 1899 | 346678 | 1.00E-137 | 262  | 265  | 98 -  | 1    | 264  | 330046 | 330310 |
| UN22071 | Rsa1.0_00427.1 | 1290 | 189678 | 0         | 437  | 453  | 96 -  | 843  | 1289 | 38444  | 38894  |
| UN22072 | Rsa1.0_00081.1 | 1485 | 143261 | 0         | 391  | 392  | 99 -  | 825  | 1216 | 125251 | 125642 |



|         |                |      |        |           |      |      |       |      |      |        |        |
|---------|----------------|------|--------|-----------|------|------|-------|------|------|--------|--------|
| UN22073 | Rsa1.0.03264.1 | 1115 | 145959 | 1.00E-90  | 189  | 194  | 97 +  | 920  | 1112 | 130936 | 131129 |
| UN22074 | Rsa1.0.02690.1 | 1021 | 28629  | 1.00E-121 | 246  | 253  | 97 +  | 763  | 1014 | 17941  | 18193  |
| UN22075 | Rsa1.0.00069.1 | 1132 | 403561 | 0         | 619  | 633  | 97 +  | 1    | 633  | 130925 | 131556 |
| UN22076 | Rsa1.0.00469.1 | 1195 | 82084  | 1.00E-118 | 229  | 233  | 98 +  | 963  | 1195 | 70008  | 70240  |
| UN22077 | Rsa1.0.31288.1 | 2150 | 731    | 0         | 553  | 561  | 98 -  | 1590 | 2150 | 171    | 731    |
| UN22078 | Rsa1.0.04400.1 | 878  | 17529  | 0         | 604  | 639  | 94 +  | 30   | 665  | 10902  | 11524  |
| UN22079 | Rsa1.0.00942.1 | 774  | 58873  | 1.00E-165 | 337  | 347  | 97 -  | 1    | 346  | 3175   | 3519   |
| UN22080 | Rsa1.0.00313.1 | 729  | 96745  | 1.00E-150 | 294  | 301  | 97 +  | 429  | 729  | 79688  | 79987  |
| UN22081 | Rsa1.0.01278.1 | 1542 | 49370  | 0         | 331  | 334  | 99 -  | 1209 | 1542 | 27597  | 27930  |
| UN22082 | Rsa1.0.00045.1 | 764  | 328694 | 0         | 346  | 349  | 99 +  | 417  | 764  | 189602 | 189950 |
| UN22083 | Rsa1.0.00111.1 | 905  | 390088 | 0         | 708  | 710  | 99 +  | 1    | 710  | 374000 | 374709 |
| UN22084 | Rsa1.0.02019.1 | 1437 | 35983  | 0         | 1409 | 1436 | 98 +  | 4    | 1436 | 17685  | 19120  |
| UN22085 | Rsa1.0.00229.1 | 1412 | 105471 | 0         | 474  | 494  | 95 +  | 919  | 1412 | 32875  | 33367  |
| UN22086 | Rsa1.0.00168.1 | 941  | 115870 | 0         | 663  | 681  | 97 -  | 1    | 677  | 39841  | 40520  |
| UN22087 | Rsa1.0.00359.1 | 1827 | 91256  | 0         | 618  | 630  | 98 +  | 632  | 1261 | 46725  | 47354  |
| UN22088 | Rsa1.0.00134.1 | 1727 | 390219 | 0         | 860  | 877  | 98 +  | 824  | 1700 | 155036 | 155907 |
| UN22089 | Rsa1.0.03413.1 | 967  | 23137  | 0         | 362  | 367  | 98 +  | 3    | 367  | 22081  | 22445  |
| UN22090 | Rsa1.0.04463.1 | 782  | 17247  | 0         | 763  | 786  | 97 -  | 1    | 780  | 8275   | 9057   |
| UN22091 | Rsa1.0.00019.1 | 1333 | 301669 | 0         | 590  | 617  | 95 -  | 635  | 1239 | 100111 | 100727 |
| UN22092 | Rsa1.0.00002.1 | 1293 | 601661 | 1.00E-168 | 318  | 323  | 98 -  | 973  | 1293 | 245807 | 246129 |
| UN22093 | Rsa1.0.00533.1 | 930  | 77375  | 1.00E-157 | 309  | 316  | 97 +  | 1    | 314  | 52304  | 52618  |
| UN22094 | Rsa1.0.00108.1 | 944  | 478491 | 0         | 498  | 506  | 98 -  | 439  | 944  | 431788 | 432289 |
| UN22095 | Rsa1.0.00838.1 | 1163 | 153820 | 1.00E-144 | 286  | 291  | 98 +  | 876  | 1163 | 35295  | 35585  |
| UN22096 | Rsa1.0.00384.1 | 1042 | 89278  | 1.00E-145 | 294  | 302  | 97 -  | 1    | 302  | 81388  | 81682  |
| UN22097 | Rsa1.0.00911.1 | 1519 | 59943  | 0         | 929  | 946  | 98 +  | 567  | 1512 | 20536  | 21481  |
| UN22098 | Rsa1.0.02568.1 | 1371 | 30015  | 0         | 589  | 609  | 96 -  | 765  | 1371 | 9871   | 10477  |
| UN22099 | Rsa1.0.02961.1 | 1648 | 26435  | 0         | 1609 | 1648 | 97 +  | 2    | 1648 | 14550  | 16194  |
| UN22100 | Rsa1.0.31858.1 | 671  | 716    | 0         | 506  | 510  | 99 +  | 3    | 511  | 207    | 716    |
| UN22101 | Rsa1.0.05332.1 | 863  | 14123  | 1.00E-129 | 243  | 246  | 98 +  | 209  | 454  | 8375   | 8620   |
| UN22102 | Rsa1.0.01860.1 | 983  | 38057  | 0         | 477  | 490  | 97 -  | 479  | 965  | 25842  | 26331  |
| UN22103 | Rsa1.0.00201.1 | 650  | 232851 | 0         | 393  | 410  | 95 +  | 1    | 404  | 72588  | 72994  |
| UN22104 | Rsa1.0.00006.1 | 783  | 396176 | 1.00E-165 | 307  | 310  | 99 -  | 476  | 783  | 9138   | 9447   |
| UN22105 | Rsa1.0.11519.1 | 920  | 5480   | 0         | 436  | 436  | 100 - | 3    | 438  | 4924   | 5359   |
| UN22106 | Rsa1.0.01611.1 | 1003 | 42269  | 1.00E-166 | 318  | 325  | 97 -  | 268  | 592  | 25469  | 25793  |
| UN22107 | Rsa1.0.00426.1 | 1542 | 85668  | 1.00E-108 | 209  | 212  | 98 +  | 340  | 551  | 34554  | 34765  |
| UN22108 | Rsa1.0.00003.1 | 1012 | 340054 | 0         | 369  | 379  | 97 -  | 1    | 378  | 4541   | 4917   |
| UN22109 | Rsa1.0.00323.1 | 1395 | 159650 | 0         | 372  | 375  | 99 -  | 1019 | 1393 | 144840 | 145214 |
| UN22110 | Rsa1.0.00556.1 | 810  | 207212 | 0         | 788  | 818  | 96 +  | 3    | 810  | 43740  | 44553  |
| UN22111 | Rsa1.0.00069.1 | 757  | 403561 | 0         | 357  | 366  | 97 -  | 138  | 503  | 354429 | 354794 |

|         |                |      |        |           |      |      |       |     |      |        |        |
|---------|----------------|------|--------|-----------|------|------|-------|-----|------|--------|--------|
| UN22112 | Rsa1.0.00292.1 | 764  | 98141  | 1.00E-134 | 274  | 283  | 96 -  | 7   | 288  | 6664   | 6946   |
| UN22113 | Rsa1.0.03423.1 | 720  | 23064  | 1.00E-130 | 242  | 244  | 99 -  | 4   | 247  | 11403  | 11646  |
| UN22114 | Rsa1.0.14714.1 | 615  | 3134   | 1.00E-115 | 221  | 224  | 98 +  | 2   | 225  | 2914   | 3134   |
| UN22115 | Rsa1.0.01007.1 | 975  | 56933  | 0         | 728  | 755  | 96 +  | 2   | 755  | 48021  | 48774  |
| UN22116 | Rsa1.0.00988.1 | 935  | 57525  | 1.00E-172 | 327  | 334  | 97 +  | 1   | 334  | 27339  | 27672  |
| UN22117 | Rsa1.0.04827.1 | 757  | 15815  | 0         | 632  | 640  | 98 +  | 118 | 757  | 14237  | 14876  |
| UN22118 | Rsa1.0.00855.1 | 777  | 62047  | 0         | 744  | 779  | 95 -  | 2   | 777  | 22745  | 23521  |
| UN22119 | Rsa1.0.03028.1 | 1106 | 25872  | 1.00E-120 | 272  | 286  | 95 +  | 70  | 351  | 20174  | 20458  |
| UN22120 | Rsa1.0.00504.1 | 1266 | 79334  | 1.00E-155 | 314  | 322  | 97 +  | 16  | 336  | 35998  | 36317  |
| UN22121 | Rsa1.0.11366.1 | 1233 | 5532   | 0         | 343  | 349  | 98 +  | 1   | 349  | 2578   | 2923   |
| UN22122 | Rsa1.0.03831.1 | 1140 | 20579  | 1.00E-117 | 278  | 295  | 94 +  | 9   | 290  | 18126  | 18420  |
| UN22123 | Rsa1.0.02490.1 | 1038 | 30885  | 1.00E-173 | 338  | 348  | 97 -  | 418 | 765  | 5982   | 6329   |
| UN22124 | Rsa1.0.06648.1 | 804  | 10603  | 1.00E-159 | 297  | 300  | 99 -  | 506 | 804  | 4515   | 4814   |
| UN22125 | Rsa1.0.03426.1 | 1083 | 23010  | 0         | 632  | 636  | 99 +  | 447 | 1081 | 10632  | 11267  |
| UN22126 | Rsa1.0.03759.1 | 768  | 20987  | 0         | 756  | 768  | 98 +  | 1   | 768  | 15431  | 16197  |
| UN22127 | Rsa1.0.00002.1 | 1387 | 601661 | 0         | 708  | 716  | 98 +  | 259 | 974  | 35605  | 36320  |
| UN22128 | Rsa1.0.03077.1 | 1084 | 25558  | 1.00E-156 | 315  | 324  | 97 +  | 1   | 323  | 6665   | 6987   |
| UN22129 | Rsa1.0.09218.1 | 1072 | 6550   | 0         | 534  | 554  | 96 +  | 1   | 547  | 263    | 816    |
| UN22130 | Rsa1.0.00571.1 | 548  | 329018 | 1.00E-155 | 355  | 375  | 94 -  | 4   | 374  | 159412 | 159783 |
| UN22131 | Rsa1.0.03191.1 | 1632 | 145762 | 0         | 655  | 681  | 96 +  | 948 | 1626 | 134735 | 135415 |
| UN22132 | Rsa1.0.18565.1 | 772  | 1573   | 0         | 330  | 330  | 100 - | 1   | 330  | 1014   | 1343   |
| UN22133 | Rsa1.0.03149.1 | 1356 | 24983  | 0         | 1352 | 1353 | 99 +  | 1   | 1353 | 13808  | 15159  |
| UN22134 | Rsa1.0.01518.1 | 1728 | 141402 | 0         | 1401 | 1408 | 99 +  | 3   | 1410 | 117711 | 119118 |
| UN22135 | Rsa1.0.00978.1 | 957  | 57739  | 0         | 607  | 640  | 94 +  | 3   | 636  | 41966  | 42599  |
| UN22136 | Rsa1.0.00243.1 | 817  | 103651 | 0         | 449  | 455  | 98 -  | 365 | 817  | 63690  | 64143  |
| UN22137 | Rsa1.0.04489.1 | 789  | 17145  | 3.00E-96  | 244  | 263  | 92 +  | 531 | 787  | 14197  | 14458  |
| UN22138 | Rsa1.0.16553.1 | 461  | 2115   | 1.00E-133 | 262  | 269  | 97 -  | 177 | 441  | 1      | 269    |
| UN22139 | Rsa1.0.02214.1 | 846  | 161150 | 1.00E-95  | 205  | 210  | 97 +  | 27  | 235  | 238    | 445    |
| UN22140 | Rsa1.0.01049.1 | 837  | 55655  | 2.00E-94  | 223  | 235  | 94 +  | 9   | 242  | 33859  | 34090  |
| UN22141 | Rsa1.0.00556.1 | 722  | 207212 | 0         | 716  | 721  | 99 +  | 1   | 719  | 43757  | 44477  |
| UN22142 | Rsa1.0.01039.1 | 1531 | 55946  | 0         | 415  | 417  | 99 +  | 1   | 417  | 37237  | 37653  |
| UN22143 | Rsa1.0.00614.1 | 1167 | 72276  | 1.00E-173 | 350  | 362  | 96 +  | 678 | 1036 | 27549  | 27908  |
| UN22144 | Rsa1.0.00114.1 | 1051 | 131330 | 0         | 770  | 778  | 98 +  | 1   | 778  | 95481  | 96258  |
| UN22145 | Rsa1.0.00008.1 | 1199 | 358124 | 0         | 504  | 510  | 98 +  | 1   | 510  | 85144  | 85653  |
| UN22146 | Rsa1.0.07974.1 | 965  | 8147   | 0         | 730  | 746  | 97 -  | 222 | 965  | 957    | 1701   |
| UN22147 | Rsa1.0.00375.1 | 789  | 90207  | 1.00E-132 | 319  | 339  | 94 +  | 453 | 786  | 2405   | 2743   |
| UN22148 | Rsa1.0.02016.1 | 1184 | 36003  | 1.00E-149 | 277  | 280  | 98 -  | 1   | 280  | 35178  | 35457  |
| UN22149 | Rsa1.0.00526.1 | 908  | 169279 | 0         | 620  | 631  | 98 -  | 282 | 908  | 126148 | 126774 |
| UN22150 | Rsa1.0.05095.1 | 697  | 14869  | 1.00E-165 | 294  | 294  | 100 - | 1   | 294  | 773    | 1066   |

|         |                |      |        |           |      |      |       |      |      |        |        |
|---------|----------------|------|--------|-----------|------|------|-------|------|------|--------|--------|
| UN22151 | Rsa1.0.00101.1 | 700  | 267193 | 0         | 357  | 358  | 99 +  | 343  | 700  | 47238  | 47595  |
| UN22152 | Rsa1.0.06940.1 | 1134 | 10137  | 1.00E-180 | 399  | 423  | 94 +  | 1    | 420  | 8335   | 8757   |
| UN22153 | Rsa1.0.00060.1 | 1013 | 502678 | 0         | 970  | 1019 | 95 +  | 7    | 1011 | 128121 | 129126 |
| UN22154 | Rsa1.0.00045.1 | 1803 | 328694 | 1.00E-163 | 292  | 292  | 100 + | 9    | 300  | 11895  | 12186  |
| UN22155 | Rsa1.0.01146.1 | 1004 | 163455 | 1.00E-107 | 255  | 271  | 94 -  | 1    | 263  | 25092  | 25360  |
| UN22156 | Rsa1.0.07706.1 | 833  | 8752   | 0         | 673  | 675  | 99 -  | 158  | 832  | 8078   | 8752   |
| UN22157 | Rsa1.0.00415.1 | 824  | 86795  | 0         | 412  | 427  | 96 +  | 398  | 823  | 6755   | 7177   |
| UN22158 | Rsa1.0.02215.1 | 910  | 33822  | 1.00E-179 | 331  | 334  | 99 +  | 519  | 851  | 27167  | 27500  |
| UN22159 | Rsa1.0.00113.1 | 1170 | 131574 | 0         | 621  | 634  | 97 +  | 521  | 1152 | 52836  | 53469  |
| UN22160 | Rsa1.0.03329.1 | 1250 | 23676  | 0         | 559  | 565  | 98 -  | 2    | 566  | 22571  | 23135  |
| UN22161 | Rsa1.0.00168.1 | 1067 | 115870 | 0         | 744  | 767  | 97 +  | 304  | 1066 | 39841  | 40606  |
| UN22162 | Rsa1.0.03253.1 | 2144 | 24321  | 0         | 757  | 786  | 96 -  | 762  | 1540 | 13387  | 14159  |
| UN22163 | Rsa1.0.04630.1 | 770  | 16595  | 1.00E-154 | 403  | 435  | 92 -  | 343  | 766  | 14470  | 14895  |
| UN22164 | Rsa1.0.02257.1 | 1243 | 33318  | 1.00E-117 | 230  | 235  | 97 -  | 245  | 479  | 21475  | 21709  |
| UN22165 | Rsa1.0.08230.1 | 1032 | 7688   | 0         | 348  | 350  | 99 +  | 683  | 1032 | 5325   | 5673   |
| UN22166 | Rsa1.0.00047.1 | 990  | 168582 | 0         | 522  | 550  | 94 +  | 1    | 540  | 33976  | 34521  |
| UN22167 | Rsa1.0.00240.1 | 1204 | 104175 | 0         | 341  | 342  | 99 -  | 3    | 344  | 54892  | 55233  |
| UN22168 | Rsa1.0.00059.1 | 1744 | 159650 | 0         | 848  | 870  | 97 +  | 9    | 871  | 88304  | 89170  |
| UN22169 | Rsa1.0.05411.1 | 1690 | 13838  | 0         | 1654 | 1692 | 97 -  | 3    | 1690 | 7559   | 9250   |
| UN22170 | Rsa1.0.11522.1 | 754  | 5479   | 1.00E-143 | 292  | 301  | 97 +  | 1    | 298  | 5025   | 5325   |
| UN22171 | Rsa1.0.00135.1 | 936  | 178077 | 0         | 368  | 368  | 100 - | 250  | 617  | 169208 | 169575 |
| UN22172 | Rsa1.0.04236.1 | 930  | 18370  | 1.00E-178 | 340  | 345  | 98 -  | 582  | 925  | 12239  | 12582  |
| UN22173 | Rsa1.0.00357.1 | 558  | 173671 | 1.00E-130 | 245  | 247  | 99 -  | 251  | 497  | 146382 | 146627 |
| UN22174 | Rsa1.0.00959.1 | 902  | 58202  | 0         | 356  | 364  | 97 +  | 1    | 360  | 3594   | 3957   |
| UN22175 | Rsa1.0.00870.1 | 1220 | 61606  | 0         | 613  | 631  | 97 -  | 589  | 1219 | 27262  | 27892  |
| UN22176 | Rsa1.0.00067.1 | 552  | 415055 | 1.00E-135 | 285  | 296  | 96 +  | 255  | 546  | 351902 | 352194 |
| UN22177 | Rsa1.0.02161.1 | 1117 | 34459  | 0         | 431  | 467  | 92 -  | 583  | 1046 | 32620  | 33077  |
| UN22178 | Rsa1.0.09422.1 | 1202 | 6381   | 0         | 1023 | 1045 | 97 +  | 158  | 1202 | 1652   | 2696   |
| UN22179 | Rsa1.0.02239.1 | 757  | 33534  | 1.00E-139 | 304  | 319  | 95 +  | 2    | 318  | 9636   | 9949   |
| UN22180 | Rsa1.0.00925.1 | 1669 | 59481  | 0         | 484  | 485  | 99 -  | 1185 | 1669 | 5600   | 6084   |
| UN22181 | Rsa1.0.00020.1 | 1261 | 283099 | 0         | 417  | 424  | 98 +  | 831  | 1254 | 140893 | 141315 |
| UN22182 | Rsa1.0.09218.1 | 1269 | 6550   | 0         | 560  | 584  | 95 +  | 1    | 574  | 234    | 816    |
| UN22183 | Rsa1.0.18860.1 | 1099 | 1522   | 0         | 403  | 406  | 99 -  | 693  | 1097 | 1117   | 1522   |
| UN22184 | Rsa1.0.05239.1 | 786  | 14410  | 0         | 425  | 448  | 94 -  | 351  | 786  | 11688  | 12132  |
| UN22185 | Rsa1.0.01041.1 | 833  | 55910  | 0         | 364  | 375  | 97 -  | 464  | 833  | 26416  | 26790  |
| UN22186 | Rsa1.0.01058.1 | 1564 | 55430  | 1.00E-147 | 283  | 289  | 97 +  | 584  | 872  | 17057  | 17345  |
| UN22187 | Rsa1.0.03867.1 | 756  | 20369  | 0         | 570  | 575  | 99 +  | 175  | 748  | 15194  | 15767  |
| UN22188 | Rsa1.0.32336.1 | 910  | 704    | 1.00E-160 | 287  | 287  | 100 - | 622  | 908  | 377    | 663    |
| UN22189 | Rsa1.0.00707.1 | 1664 | 190112 | 0         | 909  | 916  | 99 -  | 749  | 1663 | 52224  | 53136  |

|         |                |      |        |           |      |      |      |      |      |        |        |
|---------|----------------|------|--------|-----------|------|------|------|------|------|--------|--------|
| UN22190 | Rsa1.0.01484.1 | 1672 | 44806  | 0         | 336  | 338  | 99 - | 463  | 800  | 15912  | 16249  |
| UN22191 | Rsa1.0.01076.1 | 906  | 54835  | 0         | 356  | 360  | 98 - | 2    | 361  | 39978  | 40337  |
| UN22192 | Rsa1.0.00767.1 | 1292 | 64980  | 1.00E-139 | 337  | 366  | 92 - | 3    | 360  | 18547  | 18899  |
| UN22193 | Rsa1.0.07425.1 | 1237 | 9414   | 1.00E-145 | 268  | 270  | 99 - | 246  | 515  | 4707   | 4976   |
| UN22194 | Rsa1.0.00190.1 | 735  | 318240 | 1.00E-154 | 292  | 297  | 98 + | 439  | 735  | 8210   | 8506   |
| UN22195 | Rsa1.0.01146.1 | 700  | 163455 | 1.00E-161 | 340  | 356  | 95 - | 346  | 700  | 153463 | 153818 |
| UN22196 | Rsa1.0.00805.1 | 2027 | 63724  | 0         | 804  | 851  | 94 - | 778  | 1619 | 57519  | 58369  |
| UN22197 | Rsa1.0.01104.1 | 1438 | 285480 | 0         | 820  | 862  | 95 - | 576  | 1435 | 263887 | 264748 |
| UN22198 | Rsa1.0.01076.1 | 996  | 54835  | 1.00E-151 | 338  | 358  | 94 + | 646  | 995  | 39978  | 40334  |
| UN22199 | Rsa1.0.00083.1 | 889  | 442773 | 0         | 507  | 512  | 99 + | 1    | 512  | 323907 | 324417 |
| UN22200 | Rsa1.0.00115.1 | 2340 | 131321 | 1.00E-134 | 294  | 311  | 94 - | 2011 | 2321 | 34887  | 35197  |
| UN22201 | Rsa1.0.00019.1 | 1303 | 301669 | 0         | 543  | 562  | 96 - | 681  | 1239 | 100166 | 100727 |
| UN22202 | Rsa1.0.01882.1 | 684  | 37697  | 0         | 660  | 689  | 95 + | 2    | 683  | 4741   | 5428   |
| UN22203 | Rsa1.0.01421.1 | 746  | 46197  | 0         | 592  | 614  | 96 + | 1    | 613  | 18231  | 18831  |
| UN22204 | Rsa1.0.00223.1 | 827  | 106231 | 1.00E-150 | 287  | 293  | 97 + | 334  | 626  | 40246  | 40538  |
| UN22205 | Rsa1.0.08230.1 | 838  | 7688   | 1.00E-147 | 298  | 309  | 96 + | 529  | 837  | 5325   | 5629   |
| UN22206 | Rsa1.0.04194.1 | 1148 | 132734 | 5.00E-56  | 177  | 195  | 90 - | 957  | 1148 | 117325 | 117518 |
| UN22207 | Rsa1.0.00879.1 | 588  | 61297  | 0         | 577  | 586  | 98 - | 1    | 585  | 10965  | 11549  |
| UN22208 | Rsa1.0.00925.1 | 1160 | 59481  | 0         | 1086 | 1103 | 98 + | 30   | 1126 | 46296  | 47397  |
| UN22209 | Rsa1.0.08970.1 | 1870 | 6743   | 1.00E-131 | 305  | 325  | 93 - | 7    | 325  | 415    | 731    |
| UN22210 | Rsa1.0.01213.1 | 1018 | 50616  | 0         | 459  | 471  | 97 + | 243  | 710  | 10242  | 10712  |
| UN22211 | Rsa1.0.01056.1 | 792  | 55449  | 1.00E-129 | 277  | 291  | 95 + | 1    | 288  | 38756  | 39039  |
| UN22212 | Rsa1.0.00566.1 | 444  | 75325  | 1.00E-168 | 315  | 319  | 98 - | 1    | 317  | 61768  | 62086  |
| UN22213 | Rsa1.0.00415.1 | 704  | 86795  | 1.00E-133 | 262  | 269  | 97 + | 101  | 369  | 6401   | 6669   |
| UN22214 | Rsa1.0.00131.1 | 765  | 432233 | 1.00E-134 | 305  | 323  | 94 + | 444  | 758  | 96212  | 96530  |
| UN22215 | Rsa1.0.01884.1 | 1179 | 37659  | 0         | 477  | 485  | 98 - | 510  | 994  | 17511  | 17995  |
| UN22216 | Rsa1.0.00019.1 | 768  | 301669 | 1.00E-176 | 402  | 431  | 93 + | 8    | 432  | 293080 | 293498 |
| UN22217 | Rsa1.0.00351.1 | 870  | 413096 | 6.00E-92  | 178  | 180  | 98 - | 380  | 559  | 133715 | 133894 |
| UN22218 | Rsa1.0.26227.1 | 848  | 900    | 0         | 549  | 554  | 99 + | 70   | 623  | 347    | 900    |
| UN22219 | Rsa1.0.55072.1 | 1001 | 415    | 1.00E-174 | 369  | 386  | 95 + | 100  | 483  | 1      | 386    |
| UN22220 | Rsa1.0.00040.1 | 496  | 324196 | 1.00E-100 | 243  | 261  | 93 - | 63   | 318  | 228102 | 228355 |
| UN22221 | Rsa1.0.00489.1 | 782  | 80434  | 1.00E-131 | 264  | 273  | 96 - | 373  | 645  | 47295  | 47567  |
| UN22222 | Rsa1.0.00111.1 | 721  | 390088 | 0         | 694  | 724  | 95 + | 4    | 721  | 374002 | 374721 |
| UN22223 | Rsa1.0.02429.1 | 978  | 31527  | 3.00E-94  | 276  | 306  | 90 - | 691  | 978  | 29017  | 29320  |
| UN22224 | Rsa1.0.05745.1 | 1027 | 12750  | 1.00E-126 | 241  | 244  | 98 + | 1    | 242  | 2828   | 3071   |
| UN22225 | Rsa1.0.00220.1 | 1031 | 192936 | 1.00E-179 | 360  | 373  | 96 + | 3    | 375  | 18977  | 19347  |
| UN22226 | Rsa1.0.08916.1 | 1637 | 6792   | 0         | 1227 | 1283 | 95 - | 4    | 1277 | 5334   | 6606   |
| UN22227 | Rsa1.0.00744.1 | 985  | 66084  | 0         | 412  | 437  | 94 - | 10   | 444  | 54853  | 55289  |
| UN22228 | Rsa1.0.07425.1 | 767  | 9414   | 1.00E-131 | 266  | 276  | 96 - | 215  | 490  | 4707   | 4976   |

|         |                |      |        |           |     |     |       |      |      |        |        |
|---------|----------------|------|--------|-----------|-----|-----|-------|------|------|--------|--------|
| UN22229 | Rsa1.0.03043.1 | 820  | 130531 | 1.00E-126 | 331 | 363 | 91 +  | 1    | 360  | 128248 | 128603 |
| UN22230 | Rsa1.0.00026.1 | 755  | 327835 | 1.00E-175 | 319 | 320 | 99 -  | 430  | 748  | 29222  | 29541  |
| UN22231 | Rsa1.0.01206.1 | 1400 | 50772  | 0         | 421 | 421 | 100 + | 3    | 423  | 38746  | 39166  |
| UN22232 | Rsa1.0.54025.1 | 884  | 422    | 0         | 414 | 422 | 98 -  | 239  | 657  | 1      | 422    |
| UN22233 | Rsa1.0.02365.1 | 1001 | 32118  | 0         | 379 | 386 | 98 -  | 8    | 391  | 12194  | 12578  |
| UN22234 | Rsa1.0.00135.1 | 763  | 178077 | 1.00E-173 | 353 | 368 | 95 -  | 250  | 617  | 169208 | 169575 |
| UN22235 | Rsa1.0.00917.1 | 1666 | 182012 | 0         | 737 | 738 | 99 -  | 2    | 738  | 177109 | 177846 |
| UN22236 | Rsa1.0.00924.1 | 553  | 59524  | 2.00E-69  | 167 | 178 | 93 -  | 41   | 213  | 4568   | 4745   |
| UN22237 | Rsa1.0.00475.1 | 656  | 81678  | 1.00E-174 | 326 | 330 | 98 +  | 6    | 335  | 26870  | 27198  |
| UN22238 | Rsa1.0.01376.1 | 843  | 47004  | 0         | 447 | 463 | 96 +  | 3    | 465  | 40123  | 40582  |
| UN22239 | Rsa1.0.01061.1 | 1224 | 55349  | 0         | 694 | 704 | 98 -  | 523  | 1224 | 29539  | 30241  |
| UN22240 | Rsa1.0.05745.1 | 1124 | 12750  | 1.00E-148 | 319 | 334 | 95 -  | 795  | 1124 | 2741   | 3071   |
| UN22241 | Rsa1.0.07877.1 | 1082 | 8373   | 1.00E-147 | 325 | 343 | 94 +  | 747  | 1082 | 5639   | 5979   |
| UN22242 | Rsa1.0.00876.1 | 1419 | 61328  | 1.00E-179 | 324 | 326 | 99 +  | 1094 | 1419 | 51226  | 51551  |
| UN22243 | Rsa1.0.05332.1 | 1013 | 14123  | 1.00E-154 | 282 | 284 | 99 +  | 238  | 521  | 8337   | 8620   |
| UN22244 | Rsa1.0.00013.1 | 1266 | 292129 | 1.00E-158 | 283 | 283 | 100 - | 1    | 283  | 236975 | 237257 |
| UN22245 | Rsa1.0.20262.1 | 1170 | 1323   | 0         | 647 | 649 | 99 +  | 3    | 651  | 357    | 1004   |
| UN22246 | Rsa1.0.04876.1 | 1053 | 15631  | 1.00E-155 | 281 | 282 | 99 -  | 770  | 1051 | 4225   | 4506   |
| UN22247 | Rsa1.0.00469.1 | 823  | 82084  | 0         | 424 | 424 | 100 - | 399  | 822  | 45064  | 45487  |
| UN22248 | Rsa1.0.00067.1 | 993  | 415055 | 0         | 982 | 998 | 98 -  | 3    | 993  | 415    | 1411   |
| UN22249 | Rsa1.0.00339.1 | 1021 | 222974 | 0         | 399 | 400 | 99 +  | 1    | 400  | 210664 | 211062 |
| UN22250 | Rsa1.0.00689.1 | 987  | 68305  | 0         | 358 | 364 | 98 -  | 624  | 987  | 23515  | 23878  |
| UN22251 | Rsa1.0.01176.1 | 589  | 51638  | 0         | 368 | 383 | 96 +  | 185  | 567  | 28134  | 28516  |
| UN22252 | Rsa1.0.00041.1 | 1077 | 186197 | 0         | 721 | 738 | 97 +  | 340  | 1074 | 157071 | 157808 |
| UN22253 | Rsa1.0.02429.1 | 949  | 31527  | 1.00E-144 | 263 | 264 | 99 +  | 1    | 264  | 29057  | 29320  |
| UN22254 | Rsa1.0.00051.1 | 754  | 258225 | 0         | 483 | 488 | 98 +  | 2    | 489  | 62874  | 63361  |
| UN22255 | Rsa1.0.00269.1 | 933  | 341668 | 1.00E-151 | 349 | 367 | 95 -  | 1    | 363  | 45768  | 46131  |
| UN22256 | Rsa1.0.01811.1 | 577  | 38977  | 0         | 420 | 421 | 99 +  | 136  | 556  | 26394  | 26813  |
| UN22257 | Rsa1.0.07193.1 | 1183 | 9752   | 1.00E-175 | 319 | 320 | 99 +  | 864  | 1183 | 4357   | 4675   |
| UN22258 | Rsa1.0.00303.1 | 1021 | 97468  | 1.00E-134 | 249 | 251 | 99 -  | 769  | 1019 | 38481  | 38731  |
| UN22259 | Rsa1.0.00744.1 | 1757 | 66084  | 1.00E-102 | 233 | 244 | 95 +  | 1140 | 1380 | 18800  | 19041  |
| UN22260 | Rsa1.0.00253.1 | 1280 | 231292 | 0         | 490 | 498 | 98 +  | 2    | 499  | 204463 | 204960 |
| UN22261 | Rsa1.0.00148.1 | 697  | 120234 | 0         | 676 | 697 | 96 -  | 8    | 697  | 63788  | 64484  |
| UN22262 | Rsa1.0.03465.1 | 991  | 22700  | 1.00E-104 | 236 | 250 | 94 -  | 5    | 245  | 11014  | 11263  |
| UN22263 | Rsa1.0.62614.1 | 777  | 366    | 1.00E-137 | 266 | 272 | 97 -  | 328  | 599  | 1      | 272    |
| UN22264 | Rsa1.0.00693.1 | 1015 | 161311 | 0         | 349 | 354 | 98 -  | 662  | 1015 | 60122  | 60475  |
| UN22265 | Rsa1.0.00033.1 | 784  | 515811 | 0         | 421 | 430 | 97 -  | 355  | 783  | 366406 | 366835 |
| UN22266 | Rsa1.0.00116.1 | 984  | 365886 | 1.00E-134 | 288 | 298 | 96 +  | 617  | 910  | 315711 | 316007 |
| UN22267 | Rsa1.0.00978.1 | 957  | 57739  | 0         | 604 | 641 | 94 +  | 4    | 641  | 41966  | 42599  |

|         |                |      |        |           |     |      |       |      |      |        |        |
|---------|----------------|------|--------|-----------|-----|------|-------|------|------|--------|--------|
| UN22268 | Rsa1.0.00988.1 | 1034 | 57525  | 0         | 382 | 398  | 95 -  | 639  | 1034 | 27283  | 27672  |
| UN22269 | Rsa1.0.04994.1 | 1105 | 15199  | 0         | 402 | 418  | 96 +  | 635  | 1051 | 5955   | 6369   |
| UN22270 | Rsa1.0.01922.1 | 671  | 37236  | 0         | 382 | 383  | 99 +  | 9    | 390  | 12528  | 12910  |
| UN22271 | Rsa1.0.00652.1 | 925  | 70089  | 1.00E-104 | 228 | 239  | 95 -  | 678  | 916  | 22798  | 23033  |
| UN22272 | Rsa1.0.00111.1 | 951  | 390088 | 0         | 659 | 678  | 97 +  | 1    | 671  | 373996 | 374673 |
| UN22273 | Rsa1.0.09126.1 | 744  | 6625   | 0         | 589 | 614  | 95 +  | 18   | 629  | 5100   | 5707   |
| UN22274 | Rsa1.0.00040.1 | 799  | 324196 | 1.00E-145 | 308 | 321  | 95 -  | 2    | 320  | 315220 | 315539 |
| UN22275 | Rsa1.0.09917.1 | 626  | 6091   | 1.00E-171 | 352 | 366  | 96 -  | 1    | 365  | 934    | 1295   |
| UN22276 | Rsa1.0.08750.1 | 1065 | 6961   | 1.00E-175 | 335 | 342  | 97 -  | 703  | 1044 | 6080   | 6419   |
| UN22277 | Rsa1.0.13824.1 | 1117 | 4259   | 0         | 392 | 395  | 99 -  | 3    | 397  | 2919   | 3313   |
| UN22278 | Rsa1.0.00253.1 | 2377 | 231292 | 0         | 974 | 1007 | 96 +  | 3    | 1009 | 95951  | 96954  |
| UN22279 | Rsa1.0.00141.1 | 816  | 121494 | 1.00E-176 | 369 | 388  | 95 -  | 1    | 385  | 20677  | 21051  |
| UN22280 | Rsa1.0.00635.1 | 808  | 175826 | 1.00E-141 | 288 | 296  | 97 -  | 503  | 792  | 14112  | 14407  |
| UN22281 | Rsa1.0.11698.1 | 823  | 5438   | 0         | 396 | 396  | 100 - | 428  | 823  | 1091   | 1486   |
| UN22282 | Rsa1.0.00437.1 | 890  | 84879  | 1.00E-139 | 267 | 272  | 98 -  | 603  | 874  | 64087  | 64358  |
| UN22283 | Rsa1.0.00884.1 | 950  | 61150  | 0         | 933 | 945  | 98 -  | 6    | 950  | 48041  | 48981  |
| UN22284 | Rsa1.0.04794.1 | 798  | 15960  | 0         | 371 | 384  | 96 +  | 88   | 471  | 6544   | 6926   |
| UN22285 | Rsa1.0.00437.1 | 799  | 84879  | 8.00E-94  | 230 | 248  | 92 -  | 8    | 255  | 15436  | 15674  |
| UN22286 | Rsa1.0.04846.1 | 1019 | 15739  | 0         | 534 | 556  | 96 +  | 438  | 991  | 13280  | 13832  |
| UN22287 | Rsa1.0.16906.1 | 1192 | 1993   | 2.33E-156 | 276 | 280  | 98 -  | 1    | 280  | 4      | 283    |
| UN22288 | Rsa1.0.08970.1 | 748  | 6743   | 1.00E-141 | 305 | 321  | 95 -  | 2    | 319  | 415    | 731    |
| UN22289 | Rsa1.0.05491.1 | 838  | 13554  | 1.00E-122 | 228 | 230  | 99 -  | 609  | 838  | 7004   | 7233   |
| UN22290 | Rsa1.0.05795.1 | 1127 | 12609  | 0         | 600 | 603  | 99 -  | 525  | 1127 | 1091   | 1693   |
| UN22291 | Rsa1.0.01509.1 | 868  | 44258  | 0         | 502 | 522  | 96 +  | 350  | 868  | 16019  | 16538  |
| UN22292 | Rsa1.0.00083.1 | 900  | 442773 | 0         | 506 | 515  | 98 -  | 386  | 900  | 323904 | 324417 |
| UN22293 | Rsa1.0.02072.1 | 830  | 35401  | 1.00E-167 | 301 | 302  | 99 -  | 529  | 830  | 18052  | 18353  |
| UN22294 | Rsa1.0.00231.1 | 960  | 105381 | 0         | 356 | 358  | 99 +  | 1    | 358  | 29945  | 30302  |
| UN22295 | Rsa1.0.00123.1 | 1404 | 325650 | 0         | 755 | 760  | 99 +  | 645  | 1404 | 272132 | 272890 |
| UN22296 | Rsa1.0.10547.1 | 907  | 5807   | 0         | 415 | 438  | 94 -  | 483  | 907  | 40     | 476    |
| UN22297 | Rsa1.0.00190.1 | 1611 | 318240 | 1.00E-115 | 234 | 239  | 97 -  | 1361 | 1597 | 87808  | 88045  |
| UN22298 | Rsa1.0.03191.1 | 1653 | 145762 | 0         | 658 | 679  | 96 -  | 3    | 681  | 134735 | 135413 |
| UN22299 | Rsa1.0.00179.1 | 838  | 393324 | 0         | 494 | 523  | 94 +  | 1    | 512  | 45019  | 45538  |
| UN22300 | Rsa1.0.01939.1 | 939  | 37124  | 0         | 360 | 369  | 97 +  | 578  | 939  | 33165  | 33533  |
| UN22301 | Rsa1.0.05748.1 | 657  | 12749  | 0         | 567 | 577  | 98 -  | 80   | 655  | 10377  | 10953  |
| UN22302 | Rsa1.0.00175.1 | 869  | 166121 | 0         | 679 | 685  | 99 -  | 3    | 687  | 38440  | 39124  |
| UN22303 | Rsa1.0.01060.1 | 754  | 55368  | 1.00E-113 | 267 | 280  | 95 -  | 1    | 273  | 40139  | 40416  |
| UN22304 | Rsa1.0.00804.1 | 784  | 63726  | 0         | 367 | 380  | 96 +  | 3    | 382  | 51930  | 52307  |
| UN22305 | Rsa1.0.00179.1 | 806  | 393324 | 0         | 476 | 480  | 99 -  | 327  | 806  | 45059  | 45538  |
| UN22306 | Rsa1.0.00049.1 | 1116 | 167018 | 0         | 715 | 735  | 97 +  | 1    | 723  | 6994   | 7728   |

|         |                |      |        |           |      |      |       |      |      |        |        |
|---------|----------------|------|--------|-----------|------|------|-------|------|------|--------|--------|
| UN22307 | Rsa1.0.00358.1 | 741  | 91293  | 2.00E-94  | 245  | 261  | 93 +  | 6    | 264  | 35090  | 35343  |
| UN22308 | Rsa1.0.00220.1 | 928  | 192936 | 1.00E-154 | 277  | 277  | 100 + | 650  | 926  | 152562 | 152838 |
| UN22309 | Rsa1.0.00112.1 | 665  | 132199 | 0         | 496  | 500  | 99 -  | 159  | 658  | 43245  | 43740  |
| UN22310 | Rsa1.0.01553.1 | 897  | 43379  | 0         | 531  | 543  | 97 +  | 366  | 897  | 2337   | 2879   |
| UN22311 | Rsa1.0.02395.1 | 768  | 31785  | 0         | 379  | 379  | 100 + | 390  | 768  | 8334   | 8712   |
| UN22312 | Rsa1.0.00937.1 | 840  | 59061  | 0         | 783  | 802  | 97 +  | 3    | 804  | 22552  | 23349  |
| UN22313 | Rsa1.0.14400.1 | 999  | 3430   | 0         | 634  | 678  | 93 -  | 2    | 668  | 1      | 674    |
| UN22314 | Rsa1.0.00220.1 | 1111 | 192936 | 0         | 444  | 454  | 97 +  | 3    | 455  | 143007 | 143460 |
| UN22315 | Rsa1.0.00805.1 | 1317 | 63724  | 1.00E-180 | 365  | 379  | 96 +  | 1    | 379  | 7013   | 7388   |
| UN22316 | Rsa1.0.00026.1 | 798  | 327835 | 0         | 577  | 593  | 97 +  | 189  | 781  | 1485   | 2077   |
| UN22317 | Rsa1.0.54025.1 | 854  | 422    | 0         | 409  | 422  | 96 +  | 225  | 640  | 1      | 422    |
| UN22318 | Rsa1.0.02964.1 | 1026 | 26407  | 1.00E-163 | 295  | 296  | 99 +  | 731  | 1026 | 14541  | 14836  |
| UN22319 | Rsa1.0.01327.1 | 1280 | 48033  | 0         | 337  | 337  | 100 + | 8    | 344  | 14641  | 14977  |
| UN22320 | Rsa1.0.01926.1 | 1400 | 37206  | 1.00E-160 | 309  | 316  | 97 +  | 1082 | 1397 | 6451   | 6763   |
| UN22321 | Rsa1.0.00037.1 | 750  | 307838 | 0         | 656  | 671  | 97 +  | 42   | 712  | 293352 | 294022 |
| UN22322 | Rsa1.0.24632.1 | 800  | 976    | 1.00E-133 | 274  | 285  | 96 +  | 426  | 710  | 573    | 857    |
| UN22323 | Rsa1.0.01016.1 | 1049 | 181422 | 0         | 507  | 508  | 99 +  | 341  | 848  | 18736  | 19243  |
| UN22324 | Rsa1.0.36627.1 | 773  | 616    | 4.00E-83  | 172  | 177  | 97 -  | 122  | 298  | 343    | 519    |
| UN22325 | Rsa1.0.42727.1 | 1142 | 526    | 1.00E-148 | 267  | 267  | 100 + | 1    | 267  | 247    | 513    |
| UN22326 | Rsa1.0.04518.1 | 906  | 17005  | 9.00E-94  | 181  | 183  | 98 +  | 122  | 304  | 10549  | 10731  |
| UN22327 | Rsa1.0.00920.1 | 702  | 601703 | 1.00E-131 | 250  | 253  | 98 +  | 448  | 700  | 448348 | 448599 |
| UN22328 | Rsa1.0.00593.1 | 702  | 143463 | 2.33E-156 | 293  | 302  | 97 -  | 389  | 690  | 57036  | 57335  |
| UN22329 | Rsa1.0.00068.1 | 680  | 151813 | 0         | 423  | 433  | 97 -  | 1    | 433  | 73640  | 74071  |
| UN22330 | Rsa1.0.27304.1 | 753  | 858    | 1.00E-158 | 304  | 311  | 97 +  | 1    | 311  | 548    | 858    |
| UN22331 | Rsa1.0.01801.1 | 1662 | 39094  | 0         | 566  | 566  | 100 - | 822  | 1387 | 20432  | 20997  |
| UN22332 | Rsa1.0.02399.1 | 1575 | 31763  | 0         | 715  | 751  | 95 +  | 826  | 1575 | 12962  | 13708  |
| UN22333 | Rsa1.0.00398.1 | 472  | 88007  | 1.00E-180 | 323  | 324  | 99 -  | 149  | 472  | 1602   | 1925   |
| UN22334 | Rsa1.0.01371.1 | 1116 | 47079  | 0         | 470  | 476  | 98 -  | 165  | 638  | 25451  | 25925  |
| UN22335 | Rsa1.0.00171.1 | 936  | 115622 | 1.00E-132 | 246  | 248  | 99 +  | 1    | 248  | 90891  | 91138  |
| UN22336 | Rsa1.0.00427.1 | 1284 | 189678 | 0         | 442  | 452  | 97 -  | 836  | 1284 | 38443  | 38894  |
| UN22337 | Rsa1.0.00015.1 | 644  | 561803 | 1.00E-150 | 417  | 470  | 88 +  | 72   | 534  | 483083 | 483532 |
| UN22338 | Rsa1.0.01414.1 | 1025 | 149508 | 0         | 408  | 429  | 95 +  | 556  | 972  | 115743 | 116171 |
| UN22339 | Rsa1.0.00869.1 | 718  | 61627  | 0         | 391  | 401  | 97 +  | 1    | 398  | 53821  | 54221  |
| UN22340 | Rsa1.0.25054.1 | 2030 | 953    | 0         | 343  | 343  | 100 - | 4    | 346  | 311    | 653    |
| UN22341 | Rsa1.0.19050.1 | 1300 | 1488   | 0         | 329  | 330  | 99 +  | 624  | 952  | 976    | 1305   |
| UN22342 | Rsa1.0.00132.1 | 837  | 124299 | 0         | 835  | 835  | 100 + | 3    | 837  | 25441  | 26275  |
| UN22343 | Rsa1.0.13702.1 | 1891 | 4456   | 0         | 1069 | 1114 | 95 +  | 60   | 1165 | 914    | 2017   |
| UN22344 | Rsa1.0.01632.1 | 526  | 181224 | 1.00E-180 | 338  | 343  | 98 -  | 184  | 526  | 168283 | 168624 |
| UN22345 | Rsa1.0.02054.1 | 965  | 35548  | 1.00E-147 | 274  | 277  | 98 +  | 196  | 472  | 27078  | 27354  |

|         |                |      |        |           |      |      |       |     |      |        |        |
|---------|----------------|------|--------|-----------|------|------|-------|-----|------|--------|--------|
| UN22346 | Rsa1.0.00782.1 | 765  | 64468  | 9.00E-69  | 165  | 175  | 94 -  | 62  | 228  | 36483  | 36657  |
| UN22347 | Rsa1.0.67746.1 | 1203 | 338    | 1.00E-168 | 324  | 332  | 97 +  | 481 | 812  | 6      | 337    |
| UN22348 | Rsa1.0.00114.1 | 978  | 131330 | 0         | 428  | 459  | 93 -  | 5   | 461  | 117617 | 118071 |
| UN22349 | Rsa1.0.02622.1 | 896  | 142402 | 1.00E-157 | 326  | 338  | 96 -  | 559 | 894  | 6671   | 7008   |
| UN22350 | Rsa1.0.00340.1 | 733  | 305782 | 0         | 423  | 434  | 97 -  | 65  | 498  | 186295 | 186722 |
| UN22351 | Rsa1.0.01707.1 | 1160 | 40686  | 0         | 392  | 401  | 97 -  | 342 | 742  | 25818  | 26218  |
| UN22352 | Rsa1.0.09406.1 | 712  | 6391   | 1.00E-120 | 277  | 291  | 95 -  | 85  | 372  | 6100   | 6388   |
| UN22353 | Rsa1.0.00324.1 | 1179 | 218805 | 5.00E-99  | 259  | 280  | 92 +  | 13  | 287  | 188005 | 188281 |
| UN22354 | Rsa1.0.00270.1 | 1079 | 101236 | 1.00E-140 | 273  | 279  | 97 -  | 754 | 1029 | 57836  | 58114  |
| UN22355 | Rsa1.0.01549.1 | 1779 | 43543  | 0         | 1739 | 1784 | 97 -  | 3   | 1779 | 41006  | 42779  |
| UN22356 | Rsa1.0.00093.1 | 758  | 214962 | 0         | 499  | 539  | 92 +  | 1   | 520  | 11283  | 11812  |
| UN22357 | Rsa1.0.00281.1 | 1123 | 99908  | 1.00E-166 | 344  | 356  | 96 +  | 11  | 365  | 68691  | 69044  |
| UN22358 | Rsa1.0.00825.1 | 845  | 62855  | 0         | 824  | 847  | 97 +  | 1   | 844  | 48151  | 48994  |
| UN22359 | Rsa1.0.23101.1 | 906  | 1071   | 1.00E-180 | 372  | 386  | 96 -  | 455 | 838  | 1      | 383    |
| UN22360 | Rsa1.0.21137.1 | 1535 | 1231   | 0         | 408  | 420  | 97 -  | 432 | 851  | 192    | 611    |
| UN22361 | Rsa1.0.00363.1 | 695  | 90968  | 1.00E-111 | 222  | 228  | 97 +  | 109 | 336  | 28275  | 28502  |
| UN22362 | Rsa1.0.03408.1 | 1022 | 23154  | 0         | 675  | 695  | 97 +  | 329 | 1022 | 12750  | 13443  |
| UN22363 | Rsa1.0.00194.1 | 639  | 110851 | 1.00E-150 | 364  | 398  | 91 +  | 263 | 638  | 56294  | 56691  |
| UN22364 | Rsa1.0.00083.1 | 1372 | 442773 | 0         | 1360 | 1372 | 99 +  | 2   | 1372 | 401729 | 403095 |
| UN22365 | Rsa1.0.02125.1 | 1667 | 34775  | 0         | 349  | 356  | 98 -  | 1   | 356  | 18813  | 19163  |
| UN22366 | Rsa1.0.03953.1 | 1447 | 19889  | 0         | 834  | 880  | 94 +  | 3   | 859  | 6144   | 7021   |
| UN22367 | Rsa1.0.02470.1 | 1156 | 31108  | 1.00E-163 | 315  | 320  | 98 +  | 836 | 1154 | 25952  | 26270  |
| UN22368 | Rsa1.0.07704.1 | 862  | 8754   | 0         | 634  | 639  | 99 -  | 227 | 862  | 3463   | 4101   |
| UN22369 | Rsa1.0.00410.1 | 1280 | 86957  | 1.00E-99  | 266  | 294  | 90 -  | 995 | 1280 | 16801  | 17094  |
| UN22370 | Rsa1.0.00123.1 | 925  | 325650 | 0         | 335  | 338  | 99 +  | 475 | 812  | 305219 | 305556 |
| UN22371 | Rsa1.0.00037.1 | 1536 | 307838 | 0         | 838  | 873  | 95 +  | 663 | 1535 | 17364  | 18236  |
| UN22372 | Rsa1.0.01081.1 | 627  | 499226 | 0         | 593  | 612  | 96 +  | 14  | 625  | 456338 | 456948 |
| UN22373 | Rsa1.0.08388.1 | 983  | 7436   | 0         | 562  | 570  | 98 -  | 414 | 982  | 2994   | 3563   |
| UN22374 | Rsa1.0.00218.1 | 726  | 201480 | 1.00E-153 | 321  | 335  | 95 +  | 20  | 353  | 111974 | 112308 |
| UN22375 | Rsa1.0.00101.1 | 853  | 267193 | 0         | 780  | 840  | 92 +  | 15  | 853  | 103663 | 104498 |
| UN22376 | Rsa1.0.00123.1 | 2044 | 325650 | 0         | 513  | 527  | 97 +  | 569 | 1094 | 227015 | 227541 |
| UN22377 | Rsa1.0.00651.1 | 1034 | 247766 | 0         | 437  | 453  | 96 -  | 27  | 476  | 231957 | 232407 |
| UN22378 | Rsa1.0.15420.1 | 1110 | 2614   | 0         | 551  | 564  | 97 +  | 139 | 702  | 1334   | 1897   |
| UN22379 | Rsa1.0.06056.1 | 888  | 137271 | 0         | 357  | 363  | 98 +  | 528 | 888  | 127496 | 127857 |
| UN22380 | Rsa1.0.02606.1 | 974  | 29635  | 0         | 378  | 387  | 97 +  | 245 | 631  | 14421  | 14807  |
| UN22381 | Rsa1.0.00817.1 | 1195 | 62961  | 0         | 1127 | 1140 | 98 -  | 3   | 1142 | 23169  | 24306  |
| UN22382 | Rsa1.0.06940.1 | 1047 | 10137  | 0         | 338  | 338  | 100 - | 708 | 1045 | 8420   | 8757   |
| UN22383 | Rsa1.0.15420.1 | 1016 | 2614   | 0         | 555  | 564  | 98 +  | 45  | 608  | 1334   | 1897   |
| UN22384 | Rsa1.0.00019.1 | 770  | 301669 | 0         | 407  | 433  | 93 -  | 318 | 746  | 293079 | 293498 |



|         |                |      |        |           |      |      |       |      |      |        |        |
|---------|----------------|------|--------|-----------|------|------|-------|------|------|--------|--------|
| UN22385 | Rsa1.0.03356.1 | 875  | 23487  | 0         | 338  | 338  | 100 + | 412  | 749  | 20820  | 21157  |
| UN22386 | Rsa1.0.00038.1 | 992  | 314568 | 3.00E-91  | 302  | 341  | 88 -  | 1    | 326  | 255570 | 255909 |
| UN22387 | Rsa1.0.00230.1 | 892  | 105389 | 1.00E-178 | 354  | 364  | 97 -  | 457  | 819  | 2564   | 2925   |
| UN22388 | Rsa1.0.13841.1 | 1338 | 4232   | 0         | 1283 | 1335 | 96 +  | 1    | 1326 | 87     | 1420   |
| UN22389 | Rsa1.0.04823.1 | 1345 | 15840  | 0         | 794  | 813  | 97 +  | 537  | 1344 | 8959   | 9770   |
| UN22390 | Rsa1.0.75825.1 | 1763 | 302    | 1.00E-134 | 275  | 283  | 97 -  | 1451 | 1732 | 1      | 281    |
| UN22391 | Rsa1.0.12809.1 | 753  | 5119   | 1.00E-145 | 305  | 319  | 95 +  | 434  | 752  | 4445   | 4760   |
| UN22392 | Rsa1.0.02107.1 | 1271 | 34940  | 0         | 507  | 513  | 98 +  | 15   | 527  | 30777  | 31289  |
| UN22393 | Rsa1.0.01955.1 | 734  | 36850  | 0         | 595  | 596  | 99 +  | 137  | 732  | 18144  | 18739  |
| UN22394 | Rsa1.0.02429.1 | 917  | 31527  | 1.00E-150 | 285  | 290  | 98 +  | 371  | 660  | 12481  | 12770  |
| UN22395 | Rsa1.0.03895.1 | 3548 | 20206  | 0         | 1148 | 1204 | 95 -  | 1376 | 2563 | 13000  | 14200  |
| UN22396 | Rsa1.0.01536.1 | 862  | 43747  | 0         | 519  | 540  | 96 -  | 323  | 862  | 18811  | 19349  |
| UN22397 | Rsa1.0.10699.1 | 825  | 5752   | 0         | 451  | 466  | 96 +  | 4    | 466  | 3988   | 4453   |
| UN22398 | Rsa1.0.54025.1 | 929  | 422    | 0         | 419  | 422  | 99 +  | 212  | 633  | 1      | 422    |
| UN22399 | Rsa1.0.10699.1 | 877  | 5752   | 0         | 501  | 518  | 96 +  | 1    | 517  | 3941   | 4453   |
| UN22400 | Rsa1.0.00960.1 | 700  | 58199  | 1.00E-133 | 276  | 285  | 96 -  | 1    | 284  | 14176  | 14459  |
| UN22401 | Rsa1.0.05748.1 | 729  | 12749  | 0         | 595  | 613  | 97 -  | 115  | 727  | 10369  | 10969  |
| UN22402 | Rsa1.0.00423.1 | 953  | 86138  | 1.00E-175 | 323  | 327  | 98 -  | 338  | 664  | 72588  | 72914  |
| UN22403 | Rsa1.0.00122.1 | 543  | 265937 | 0         | 467  | 501  | 93 +  | 53   | 541  | 224842 | 225339 |
| UN22404 | Rsa1.0.01232.1 | 734  | 155185 | 0         | 483  | 496  | 97 -  | 239  | 732  | 108723 | 109218 |
| UN22405 | Rsa1.0.00657.1 | 1458 | 69858  | 0         | 399  | 410  | 97 -  | 334  | 743  | 4196   | 4605   |
| UN22406 | Rsa1.0.00331.1 | 801  | 176754 | 0         | 411  | 428  | 96 -  | 3    | 430  | 23174  | 23601  |
| UN22407 | Rsa1.0.03646.1 | 1414 | 21598  | 1.00E-105 | 230  | 243  | 94 -  | 1172 | 1414 | 7681   | 7915   |
| UN22408 | Rsa1.0.00387.1 | 1170 | 495407 | 2.00E-83  | 182  | 190  | 95 -  | 819  | 1008 | 159611 | 159800 |
| UN22409 | Rsa1.0.02253.1 | 740  | 33356  | 0         | 385  | 406  | 94 -  | 345  | 740  | 10435  | 10839  |
| UN22410 | Rsa1.0.00744.1 | 667  | 66084  | 1.00E-133 | 280  | 291  | 96 -  | 378  | 665  | 18752  | 19041  |
| UN22411 | Rsa1.0.00407.1 | 1092 | 191544 | 0         | 846  | 872  | 97 +  | 1    | 863  | 155495 | 156357 |
| UN22412 | Rsa1.0.03158.1 | 1276 | 24950  | 0         | 477  | 477  | 100 + | 3    | 479  | 8087   | 8563   |
| UN22413 | Rsa1.0.01934.1 | 790  | 37162  | 0         | 436  | 438  | 99 -  | 352  | 787  | 1854   | 2291   |
| UN22414 | Rsa1.0.03218.1 | 873  | 24539  | 1.00E-153 | 331  | 348  | 95 +  | 1    | 339  | 6471   | 6817   |
| UN22415 | Rsa1.0.02693.1 | 1195 | 28617  | 0         | 421  | 421  | 100 + | 1    | 421  | 24859  | 25279  |
| UN22416 | Rsa1.0.02517.1 | 1669 | 30600  | 0         | 572  | 572  | 100 - | 1092 | 1663 | 4904   | 5475   |
| UN22417 | Rsa1.0.03148.1 | 1041 | 24989  | 0         | 385  | 397  | 96 -  | 77   | 473  | 21012  | 21408  |
| UN22418 | Rsa1.0.00475.1 | 654  | 81678  | 1.00E-144 | 311  | 327  | 95 -  | 324  | 649  | 26872  | 27198  |
| UN22419 | Rsa1.0.00026.1 | 715  | 327835 | 1.00E-163 | 308  | 311  | 99 -  | 406  | 715  | 29232  | 29541  |
| UN22420 | Rsa1.0.00937.1 | 782  | 59061  | 0         | 776  | 779  | 99 +  | 4    | 782  | 22552  | 23330  |
| UN22421 | Rsa1.0.00026.1 | 790  | 327835 | 0         | 598  | 601  | 99 +  | 190  | 790  | 1485   | 2085   |
| UN22422 | Rsa1.0.01094.1 | 979  | 167285 | 1.00E-108 | 237  | 249  | 95 +  | 734  | 979  | 12558  | 12806  |
| UN22423 | Rsa1.0.04512.1 | 639  | 17031  | 0         | 375  | 383  | 97 -  | 257  | 639  | 12561  | 12943  |

|         |                |      |        |           |     |     |       |      |      |        |        |
|---------|----------------|------|--------|-----------|-----|-----|-------|------|------|--------|--------|
| UN22424 | Rsa1.0_00920.1 | 654  | 601703 | 1.00E-122 | 233 | 235 | 99 +  | 420  | 654  | 448348 | 448581 |
| UN22425 | Rsa1.0_04002.1 | 900  | 19608  | 0         | 520 | 520 | 100 - | 1    | 520  | 17610  | 18129  |
| UN22426 | Rsa1.0_02321.1 | 922  | 32572  | 0         | 648 | 671 | 96 -  | 3    | 672  | 5991   | 6654   |
| UN22427 | Rsa1.0_04194.1 | 875  | 132734 | 0         | 739 | 776 | 95 +  | 3    | 777  | 123402 | 124168 |
| UN22428 | Rsa1.0_00485.1 | 1138 | 80937  | 0         | 710 | 727 | 97 -  | 415  | 1138 | 71066  | 71792  |
| UN22429 | Rsa1.0_00635.1 | 896  | 175826 | 0         | 394 | 397 | 99 -  | 500  | 896  | 14012  | 14407  |
| UN22430 | Rsa1.0_01730.1 | 786  | 40223  | 0         | 620 | 676 | 91 +  | 125  | 786  | 33434  | 34102  |
| UN22431 | Rsa1.0_00303.1 | 708  | 97468  | 1.00E-116 | 240 | 250 | 96 +  | 1    | 242  | 38482  | 38731  |
| UN22432 | Rsa1.0_04462.1 | 1810 | 17250  | 0         | 678 | 712 | 95 +  | 1046 | 1757 | 13320  | 14029  |
| UN22433 | Rsa1.0_05745.1 | 802  | 12750  | 2.00E-70  | 189 | 206 | 91 +  | 1    | 193  | 2866   | 3071   |
| UN22434 | Rsa1.0_00092.1 | 742  | 659932 | 1.00E-83  | 167 | 170 | 98 +  | 177  | 346  | 233723 | 233892 |
| UN22435 | Rsa1.0_09340.1 | 808  | 6443   | 1.00E-178 | 389 | 408 | 95 -  | 1    | 405  | 5945   | 6346   |
| UN22436 | Rsa1.0_00556.1 | 1385 | 207212 | 0         | 539 | 541 | 99 -  | 631  | 1171 | 51917  | 52457  |
| UN22437 | Rsa1.0_02956.1 | 1786 | 26483  | 0         | 767 | 788 | 97 -  | 1008 | 1786 | 12874  | 13659  |
| UN22438 | Rsa1.0_08721.1 | 825  | 7000   | 0         | 730 | 761 | 95 -  | 74   | 825  | 6165   | 6921   |
| UN22439 | Rsa1.0_01357.1 | 828  | 47280  | 1.00E-137 | 274 | 283 | 96 +  | 544  | 826  | 2072   | 2354   |
| UN22440 | Rsa1.0_00192.1 | 745  | 278200 | 0         | 398 | 415 | 95 -  | 2    | 416  | 22625  | 23023  |
| UN22441 | Rsa1.0_00605.1 | 882  | 73199  | 0         | 501 | 514 | 97 +  | 367  | 880  | 30975  | 31488  |
| UN22442 | Rsa1.0_07998.1 | 719  | 8105   | 1.00E-153 | 284 | 287 | 98 -  | 427  | 713  | 4036   | 4322   |
| UN22443 | Rsa1.0_16978.1 | 819  | 1964   | 1.00E-114 | 246 | 256 | 96 -  | 30   | 285  | 1215   | 1467   |
| UN22444 | Rsa1.0_07998.1 | 748  | 8105   | 1.00E-156 | 304 | 312 | 97 -  | 422  | 733  | 4011   | 4322   |
| UN22445 | Rsa1.0_03646.1 | 810  | 21598  | 1.00E-119 | 250 | 259 | 96 -  | 546  | 804  | 7662   | 7915   |
| UN22446 | Rsa1.0_00640.1 | 864  | 70979  | 0         | 856 | 863 | 99 +  | 1    | 863  | 16831  | 17693  |
| UN22447 | Rsa1.0_03280.1 | 727  | 145083 | 0         | 335 | 339 | 98 +  | 1    | 339  | 139165 | 139503 |
| UN22448 | Rsa1.0_00280.1 | 1391 | 99966  | 0         | 359 | 368 | 97 -  | 1008 | 1370 | 12119  | 12483  |
| UN22449 | Rsa1.0_01632.1 | 502  | 181224 | 1.00E-176 | 330 | 336 | 98 -  | 166  | 501  | 168289 | 168624 |
| UN22450 | Rsa1.0_00387.1 | 1258 | 495407 | 1.00E-106 | 250 | 266 | 93 -  | 4    | 265  | 161141 | 161406 |
| UN22451 | Rsa1.0_03612.1 | 776  | 21784  | 0         | 725 | 730 | 99 -  | 1    | 730  | 9710   | 10439  |
| UN22452 | Rsa1.0_09917.1 | 581  | 6091   | 0         | 321 | 321 | 100 - | 2    | 322  | 934    | 1254   |
| UN22453 | Rsa1.0_10720.1 | 889  | 5746   | 0         | 405 | 430 | 94 +  | 1    | 419  | 5317   | 5746   |
| UN22454 | Rsa1.0_00379.1 | 1003 | 89865  | 1.00E-103 | 230 | 244 | 94 +  | 3    | 243  | 86272  | 86505  |
| UN22455 | Rsa1.0_67746.1 | 1083 | 338    | 1.00E-171 | 326 | 333 | 97 +  | 418  | 750  | 6      | 338    |
| UN22456 | Rsa1.0_00553.1 | 978  | 75983  | 1.00E-68  | 142 | 145 | 97 -  | 644  | 788  | 1707   | 1851   |
| UN22457 | Rsa1.0_09661.1 | 1037 | 6226   | 1.00E-171 | 308 | 309 | 99 +  | 729  | 1037 | 1      | 309    |
| UN22458 | Rsa1.0_07506.1 | 707  | 9233   | 0         | 510 | 524 | 97 +  | 2    | 525  | 2681   | 3203   |
| UN22459 | Rsa1.0_00123.1 | 824  | 325650 | 1.00E-135 | 259 | 264 | 98 +  | 561  | 824  | 227015 | 227278 |
| UN22460 | Rsa1.0_01357.1 | 811  | 47280  | 1.00E-116 | 267 | 286 | 93 +  | 531  | 809  | 2072   | 2357   |
| UN22461 | Rsa1.0_00355.1 | 669  | 92038  | 0         | 504 | 551 | 91 +  | 1    | 542  | 77899  | 78429  |
| UN22462 | Rsa1.0_00281.1 | 826  | 99908  | 1.00E-176 | 323 | 326 | 99 +  | 1    | 326  | 68719  | 69044  |

|         |                |      |        |           |      |      |       |     |      |        |        |
|---------|----------------|------|--------|-----------|------|------|-------|-----|------|--------|--------|
| UN22463 | Rsa1.0.03160.1 | 599  | 24916  | 1.00E-135 | 261  | 264  | 98 -  | 335 | 597  | 17957  | 18219  |
| UN22464 | Rsa1.0.18666.1 | 681  | 1556   | 0         | 560  | 561  | 99 +  | 1   | 561  | 3      | 562    |
| UN22465 | Rsa1.0.03408.1 | 1020 | 23154  | 0         | 678  | 694  | 97 +  | 328 | 1020 | 12750  | 13443  |
| UN22466 | Rsa1.0.01126.1 | 864  | 53127  | 1.00E-114 | 264  | 281  | 93 -  | 585 | 864  | 14983  | 15253  |
| UN22467 | Rsa1.0.00418.1 | 1165 | 215377 | 1.00E-132 | 248  | 251  | 98 -  | 915 | 1165 | 43204  | 43454  |
| UN22468 | Rsa1.0.01285.1 | 608  | 172709 | 0         | 439  | 451  | 97 +  | 2   | 447  | 156713 | 157163 |
| UN22469 | Rsa1.0.13010.1 | 929  | 5047   | 0         | 433  | 446  | 97 -  | 484 | 929  | 2345   | 2789   |
| UN22470 | Rsa1.0.04630.1 | 716  | 16595  | 1.00E-165 | 399  | 425  | 93 -  | 302 | 716  | 14480  | 14895  |
| UN22471 | Rsa1.0.00348.1 | 783  | 92818  | 1.00E-160 | 337  | 350  | 96 +  | 13  | 360  | 49685  | 50033  |
| UN22472 | Rsa1.0.00024.1 | 992  | 188018 | 1.00E-105 | 226  | 234  | 96 -  | 2   | 233  | 108783 | 109015 |
| UN22473 | Rsa1.0.49835.1 | 838  | 455    | 3.00E-72  | 172  | 179  | 96 -  | 1   | 176  | 1      | 179    |
| UN22474 | Rsa1.0.00700.1 | 1045 | 67699  | 0         | 671  | 679  | 98 +  | 366 | 1038 | 48286  | 48964  |
| UN22475 | Rsa1.0.00237.1 | 887  | 235974 | 0         | 342  | 349  | 97 -  | 130 | 478  | 45583  | 45931  |
| UN22476 | Rsa1.0.00958.1 | 919  | 58243  | 0         | 574  | 577  | 99 -  | 96  | 672  | 2101   | 2677   |
| UN22477 | Rsa1.0.00285.1 | 809  | 149638 | 0         | 364  | 371  | 98 -  | 210 | 580  | 86908  | 87278  |
| UN22478 | Rsa1.0.00423.1 | 920  | 86138  | 1.00E-167 | 320  | 327  | 97 -  | 333 | 659  | 72588  | 72914  |
| UN22479 | Rsa1.0.00013.1 | 726  | 292129 | 1.00E-131 | 267  | 278  | 96 -  | 1   | 270  | 236975 | 237252 |
| UN22480 | Rsa1.0.27096.1 | 792  | 866    | 1.00E-156 | 342  | 360  | 95 +  | 445 | 792  | 335    | 694    |
| UN22481 | Rsa1.0.04630.1 | 752  | 16595  | 1.00E-159 | 400  | 426  | 93 -  | 339 | 752  | 14480  | 14895  |
| UN22482 | Rsa1.0.00269.1 | 752  | 341668 | 1.00E-163 | 352  | 368  | 95 -  | 1   | 366  | 45768  | 46130  |
| UN22483 | Rsa1.0.30678.1 | 439  | 747    | 0         | 350  | 351  | 99 +  | 89  | 439  | 135    | 485    |
| UN22484 | Rsa1.0.00713.1 | 833  | 158017 | 0         | 523  | 527  | 99 +  | 24  | 550  | 19367  | 19893  |
| UN22485 | Rsa1.0.00415.1 | 677  | 86795  | 0         | 369  | 373  | 98 -  | 1   | 373  | 6755   | 7123   |
| UN22486 | Rsa1.0.03718.1 | 838  | 21195  | 1.00E-114 | 264  | 282  | 93 +  | 331 | 612  | 654    | 935    |
| UN22487 | Rsa1.0.02387.1 | 784  | 31890  | 0         | 493  | 532  | 92 -  | 2   | 517  | 17300  | 17827  |
| UN22488 | Rsa1.0.00415.1 | 887  | 86795  | 0         | 379  | 379  | 100 + | 509 | 887  | 6755   | 7133   |
| UN22489 | Rsa1.0.01536.1 | 881  | 43747  | 0         | 568  | 596  | 95 -  | 288 | 879  | 18754  | 19349  |
| UN22490 | Rsa1.0.00181.1 | 805  | 114269 | 0         | 382  | 388  | 98 +  | 416 | 803  | 54547  | 54934  |
| UN22491 | Rsa1.0.04415.1 | 1129 | 147889 | 0         | 339  | 340  | 99 -  | 790 | 1129 | 141016 | 141355 |
| UN22492 | Rsa1.0.00816.1 | 677  | 403350 | 0         | 553  | 572  | 96 +  | 3   | 574  | 132500 | 133066 |
| UN22493 | Rsa1.0.62614.1 | 778  | 366    | 1.00E-151 | 272  | 272  | 100 + | 179 | 450  | 1      | 272    |
| UN22494 | Rsa1.0.00369.1 | 805  | 266462 | 1.00E-152 | 372  | 405  | 91 +  | 276 | 680  | 192839 | 193243 |
| UN22495 | Rsa1.0.13824.1 | 781  | 4259   | 0         | 386  | 395  | 97 -  | 3   | 397  | 2919   | 3313   |
| UN22496 | Rsa1.0.00293.1 | 1351 | 339294 | 0         | 1272 | 1289 | 98 -  | 12  | 1300 | 177088 | 178372 |
| UN22497 | Rsa1.0.00128.1 | 1071 | 228675 | 1.00E-150 | 304  | 313  | 97 -  | 758 | 1069 | 216103 | 216414 |
| UN22498 | Rsa1.0.00237.1 | 805  | 235974 | 1.00E-153 | 275  | 275  | 100 - | 3   | 277  | 5808   | 6082   |
| UN22499 | Rsa1.0.01086.1 | 828  | 54509  | 0         | 775  | 821  | 94 -  | 3   | 816  | 36460  | 37267  |
| UN22500 | Rsa1.0.03895.1 | 1000 | 20206  | 0         | 510  | 528  | 96 -  | 480 | 1000 | 13677  | 14200  |
| UN22501 | Rsa1.0.00068.1 | 799  | 151813 | 0         | 534  | 548  | 97 +  | 257 | 799  | 134543 | 135086 |

|         |                |      |        |           |      |      |       |      |      |        |        |
|---------|----------------|------|--------|-----------|------|------|-------|------|------|--------|--------|
| UN22502 | Rsa1.0_00205.1 | 615  | 193401 | 7.00E-69  | 190  | 207  | 91 -  | 410  | 609  | 130141 | 130345 |
| UN22503 | Rsa1.0_00295.1 | 534  | 152597 | 0         | 416  | 430  | 96 -  | 1    | 425  | 87629  | 88055  |
| UN22504 | Rsa1.0_00817.1 | 782  | 62961  | 0         | 746  | 769  | 97 +  | 15   | 782  | 23219  | 23980  |
| UN22505 | Rsa1.0_03606.1 | 864  | 21818  | 1.00E-140 | 288  | 299  | 96 -  | 15   | 310  | 1339   | 1637   |
| UN22506 | Rsa1.0_04463.1 | 733  | 17247  | 0         | 728  | 732  | 99 +  | 3    | 733  | 8275   | 9005   |
| UN22507 | Rsa1.0_04098.1 | 738  | 19078  | 1.00E-134 | 306  | 322  | 95 +  | 4    | 318  | 11234  | 11553  |
| UN22508 | Rsa1.0_07824.1 | 931  | 8467   | 1.00E-165 | 335  | 349  | 95 +  | 4    | 352  | 2603   | 2940   |
| UN22509 | Rsa1.0_02811.1 | 1122 | 27669  | 0         | 501  | 509  | 98 -  | 619  | 1122 | 13286  | 13793  |
| UN22510 | Rsa1.0_01126.1 | 805  | 53127  | 1.00E-117 | 238  | 245  | 97 -  | 197  | 441  | 15539  | 15780  |
| UN22511 | Rsa1.0_00120.1 | 834  | 277288 | 0         | 804  | 837  | 96 -  | 1    | 834  | 223094 | 223930 |
| UN22512 | Rsa1.0_00220.1 | 912  | 192936 | 1.00E-104 | 261  | 280  | 93 +  | 630  | 906  | 152562 | 152835 |
| UN22513 | Rsa1.0_03465.1 | 1026 | 22700  | 0         | 505  | 522  | 96 +  | 88   | 606  | 9803   | 10324  |
| UN22514 | Rsa1.0_00104.1 | 2567 | 368722 | 0         | 750  | 765  | 98 +  | 1729 | 2493 | 198446 | 199204 |
| UN22515 | Rsa1.0_00112.1 | 605  | 132199 | 0         | 455  | 476  | 95 -  | 138  | 605  | 43276  | 43740  |
| UN22516 | Rsa1.0_00262.1 | 760  | 101906 | 0         | 452  | 461  | 98 +  | 296  | 755  | 53264  | 53722  |
| UN22517 | Rsa1.0_00055.1 | 1534 | 520193 | 0         | 393  | 408  | 96 +  | 1    | 400  | 44935  | 45341  |
| UN22518 | Rsa1.0_04218.1 | 764  | 18423  | 0         | 424  | 426  | 99 +  | 340  | 764  | 12805  | 13230  |
| UN22519 | Rsa1.0_10036.1 | 905  | 6030   | 1.00E-171 | 442  | 490  | 90 +  | 429  | 900  | 496    | 981    |
| UN22520 | Rsa1.0_27319.1 | 1754 | 857    | 0         | 521  | 534  | 97 +  | 855  | 1388 | 158    | 687    |
| UN22521 | Rsa1.0_00734.1 | 624  | 66508  | 0         | 362  | 368  | 98 +  | 261  | 624  | 28553  | 28920  |
| UN22522 | Rsa1.0_00480.1 | 1422 | 81325  | 1.00E-179 | 318  | 318  | 100 - | 1016 | 1333 | 52512  | 52829  |
| UN22523 | Rsa1.0_00677.1 | 1761 | 69159  | 0         | 1753 | 1758 | 99 +  | 3    | 1760 | 45113  | 46867  |
| UN22524 | Rsa1.0_02282.1 | 923  | 163951 | 9.00E-91  | 206  | 218  | 94 +  | 296  | 513  | 149855 | 150072 |
| UN22525 | Rsa1.0_06474.1 | 897  | 10949  | 0         | 453  | 456  | 99 -  | 3    | 458  | 5791   | 6246   |
| UN22526 | Rsa1.0_01002.1 | 1185 | 57063  | 0         | 1165 | 1185 | 98 +  | 1    | 1185 | 20319  | 21503  |
| UN22527 | Rsa1.0_01105.1 | 1534 | 53958  | 0         | 615  | 615  | 100 - | 550  | 1164 | 27951  | 28565  |
| UN22528 | Rsa1.0_01716.1 | 825  | 40483  | 0         | 341  | 347  | 98 +  | 31   | 374  | 17522  | 17868  |
| UN22529 | Rsa1.0_00100.1 | 1577 | 249232 | 0         | 694  | 702  | 98 +  | 863  | 1564 | 179062 | 179763 |
| UN22530 | Rsa1.0_00097.1 | 1980 | 138858 | 0         | 921  | 934  | 98 -  | 1046 | 1979 | 81930  | 82863  |
| UN22531 | Rsa1.0_00316.1 | 727  | 96264  | 0         | 428  | 429  | 99 +  | 295  | 723  | 12840  | 13268  |
| UN22532 | Rsa1.0_03015.1 | 817  | 26006  | 0         | 542  | 548  | 98 -  | 1    | 548  | 12215  | 12762  |
| UN22533 | Rsa1.0_00247.1 | 1355 | 103408 | 1.00E-129 | 256  | 263  | 97 +  | 1091 | 1353 | 74920  | 75182  |
| UN22534 | Rsa1.0_01344.1 | 1515 | 142535 | 1.00E-180 | 343  | 350  | 98 +  | 1168 | 1514 | 17745  | 18094  |
| UN22535 | Rsa1.0_02962.1 | 1292 | 26419  | 1.00E-100 | 186  | 186  | 100 + | 998  | 1183 | 21023  | 21208  |
| UN22536 | Rsa1.0_00156.1 | 2342 | 118383 | 0         | 342  | 346  | 98 -  | 1586 | 1931 | 57571  | 57916  |
| UN22537 | Rsa1.0_00840.1 | 1362 | 62514  | 0         | 472  | 474  | 99 -  | 233  | 706  | 31489  | 31962  |
| UN22538 | Rsa1.0_00931.1 | 1070 | 59210  | 1.00E-166 | 299  | 300  | 99 -  | 771  | 1070 | 8469   | 8768   |
| UN22539 | Rsa1.0_00080.1 | 961  | 190437 | 0         | 387  | 391  | 98 +  | 571  | 961  | 33248  | 33637  |
| UN22540 | Rsa1.0_00039.1 | 1249 | 296927 | 0         | 703  | 737  | 95 -  | 510  | 1245 | 288696 | 289430 |

|         |                |      |        |           |      |      |       |      |      |        |        |
|---------|----------------|------|--------|-----------|------|------|-------|------|------|--------|--------|
| UN22541 | Rsa1.0.00632.1 | 784  | 183777 | 0         | 388  | 410  | 94 -  | 4    | 402  | 15549  | 15958  |
| UN22542 | Rsa1.0.03385.1 | 614  | 23280  | 0         | 611  | 612  | 99 +  | 3    | 614  | 18091  | 18702  |
| UN22543 | Rsa1.0.00741.1 | 1608 | 66117  | 1.00E-172 | 307  | 307  | 100 - | 1302 | 1608 | 46304  | 46610  |
| UN22544 | Rsa1.0.02123.1 | 1538 | 149053 | 0         | 518  | 519  | 99 +  | 539  | 1057 | 32143  | 32661  |
| UN22545 | Rsa1.0.00329.1 | 1251 | 222544 | 0         | 580  | 591  | 98 +  | 1    | 591  | 72464  | 73053  |
| UN22546 | Rsa1.0.03169.1 | 932  | 24826  | 0         | 435  | 446  | 97 -  | 485  | 930  | 519    | 961    |
| UN22547 | Rsa1.0.02288.1 | 3953 | 32984  | 0         | 376  | 380  | 98 -  | 1472 | 1851 | 32605  | 32984  |
| UN22548 | Rsa1.0.00146.1 | 1224 | 149343 | 0         | 501  | 507  | 98 +  | 1    | 506  | 542    | 1048   |
| UN22549 | Rsa1.0.02178.1 | 636  | 156197 | 7.00E-97  | 261  | 280  | 93 -  | 332  | 607  | 151602 | 151879 |
| UN22550 | Rsa1.0.14371.1 | 1604 | 3465   | 0         | 1014 | 1021 | 99 -  | 6    | 1026 | 785    | 1805   |
| UN22551 | Rsa1.0.00016.1 | 1167 | 831256 | 0         | 916  | 938  | 97 +  | 2    | 939  | 182526 | 183463 |
| UN22552 | Rsa1.0.03345.1 | 1438 | 23590  | 1.00E-115 | 224  | 227  | 98 +  | 3    | 229  | 19661  | 19886  |
| UN22553 | Rsa1.0.00462.1 | 1285 | 82288  | 0         | 691  | 696  | 99 +  | 579  | 1274 | 1723   | 2418   |
| UN22554 | Rsa1.0.00793.1 | 1489 | 64103  | 0         | 679  | 721  | 94 -  | 781  | 1485 | 51724  | 52439  |
| UN22555 | Rsa1.0.00679.1 | 1243 | 68971  | 1.00E-112 | 251  | 266  | 94 +  | 868  | 1133 | 34534  | 34799  |
| UN22556 | Rsa1.0.74770.1 | 685  | 307    | 1.00E-122 | 231  | 234  | 98 +  | 444  | 677  | 33     | 266    |
| UN22557 | Rsa1.0.13593.1 | 1337 | 4685   | 0         | 787  | 806  | 97 -  | 1    | 803  | 1      | 806    |
| UN22558 | Rsa1.0.04159.1 | 967  | 18795  | 0         | 836  | 864  | 96 -  | 90   | 949  | 5752   | 6615   |
| UN22559 | Rsa1.0.60551.1 | 560  | 378    | 1.00E-111 | 207  | 208  | 99 -  | 216  | 423  | 171    | 378    |
| UN22560 | Rsa1.0.01968.1 | 1558 | 36654  | 0         | 591  | 593  | 99 -  | 3    | 595  | 18714  | 19306  |
| UN22561 | Rsa1.0.00145.1 | 898  | 261008 | 1.00E-158 | 314  | 323  | 97 -  | 3    | 324  | 51003  | 51325  |
| UN22562 | Rsa1.0.03576.1 | 1262 | 21986  | 1.00E-133 | 301  | 320  | 94 -  | 949  | 1257 | 13927  | 14245  |
| UN22563 | Rsa1.0.01629.1 | 2183 | 41917  | 0         | 619  | 624  | 99 +  | 861  | 1484 | 17966  | 18589  |
| UN22564 | Rsa1.0.00223.1 | 1352 | 106231 | 0         | 705  | 720  | 97 -  | 7    | 725  | 69796  | 70515  |
| UN22565 | Rsa1.0.01236.1 | 1922 | 50156  | 1.00E-120 | 223  | 224  | 99 -  | 1699 | 1922 | 44008  | 44231  |
| UN22566 | Rsa1.0.00064.1 | 1688 | 240927 | 0         | 377  | 388  | 97 +  | 1025 | 1406 | 55402  | 55788  |
| UN22567 | Rsa1.0.04229.1 | 920  | 18389  | 0         | 328  | 329  | 99 +  | 253  | 581  | 1      | 329    |
| UN22568 | Rsa1.0.31312.1 | 1199 | 730    | 5.00E-96  | 204  | 211  | 96 -  | 1    | 211  | 151    | 360    |
| UN22569 | Rsa1.0.04454.1 | 1121 | 17268  | 0         | 704  | 717  | 98 +  | 2    | 718  | 11505  | 12221  |
| UN22570 | Rsa1.0.00037.1 | 1308 | 307838 | 0         | 558  | 564  | 98 -  | 746  | 1308 | 65578  | 66140  |
| UN22571 | Rsa1.0.01487.1 | 1475 | 44784  | 0         | 559  | 566  | 98 +  | 2    | 566  | 14376  | 14939  |
| UN22572 | Rsa1.0.01750.1 | 1622 | 39816  | 0         | 1591 | 1619 | 98 -  | 3    | 1618 | 28174  | 29792  |
| UN22573 | Rsa1.0.00189.1 | 922  | 111830 | 1.00E-126 | 255  | 261  | 97 +  | 662  | 922  | 7153   | 7410   |
| UN22574 | Rsa1.0.20649.1 | 3901 | 1283   | 0         | 1023 | 1031 | 99 -  | 2300 | 3323 | 253    | 1283   |
| UN22575 | Rsa1.0.02634.1 | 1049 | 29299  | 6.00E-43  | 90   | 90   | 100 - | 3    | 92   | 3125   | 3214   |
| UN22576 | Rsa1.0.03294.1 | 1613 | 23971  | 1.00E-157 | 281  | 281  | 100 + | 1333 | 1613 | 21060  | 21340  |
| UN22577 | Rsa1.0.02573.1 | 1065 | 29955  | 0         | 370  | 370  | 100 + | 696  | 1065 | 1797   | 2166   |
| UN22578 | Rsa1.0.00857.1 | 1016 | 61904  | 0         | 682  | 683  | 99 -  | 334  | 1016 | 44432  | 45114  |
| UN22579 | Rsa1.0.00101.1 | 1797 | 267193 | 0         | 616  | 627  | 98 -  | 365  | 991  | 237949 | 238575 |

|         |                |      |        |           |      |      |       |      |      |        |        |
|---------|----------------|------|--------|-----------|------|------|-------|------|------|--------|--------|
| UN22580 | Rsa1.0.00018.1 | 1998 | 410899 | 1.00E-116 | 256  | 269  | 95 -  | 3    | 271  | 106214 | 106480 |
| UN22581 | Rsa1.0.03699.1 | 876  | 21301  | 1.00E-139 | 287  | 297  | 96 +  | 554  | 849  | 2357   | 2650   |
| UN22582 | Rsa1.0.01613.1 | 1619 | 182542 | 0         | 791  | 803  | 98 +  | 820  | 1619 | 165612 | 166409 |
| UN22583 | Rsa1.0.00205.1 | 1400 | 193401 | 0         | 464  | 464  | 100 - | 281  | 744  | 101044 | 101507 |
| UN22584 | Rsa1.0.00237.1 | 966  | 235974 | 0         | 408  | 415  | 98 -  | 553  | 966  | 184544 | 184958 |
| UN22585 | Rsa1.0.03771.1 | 1400 | 20942  | 0         | 748  | 776  | 96 -  | 641  | 1400 | 10437  | 11212  |
| UN22586 | Rsa1.0.00335.1 | 1689 | 94371  | 0         | 1161 | 1190 | 97 -  | 388  | 1575 | 10454  | 11633  |
| UN22587 | Rsa1.0.03181.1 | 1093 | 24763  | 1.00E-178 | 350  | 361  | 96 -  | 417  | 777  | 19289  | 19649  |
| UN22588 | Rsa1.0.00201.1 | 933  | 232851 | 0         | 854  | 914  | 93 -  | 6    | 908  | 140223 | 141124 |
| UN22589 | Rsa1.0.00247.1 | 1627 | 103408 | 1.00E-137 | 249  | 249  | 100 - | 1379 | 1627 | 9944   | 10192  |
| UN22590 | Rsa1.0.00127.1 | 1100 | 127446 | 0         | 403  | 408  | 98 +  | 692  | 1099 | 86821  | 87227  |
| UN22591 | Rsa1.0.01376.1 | 1246 | 47004  | 0         | 515  | 526  | 97 +  | 720  | 1245 | 968    | 1490   |
| UN22592 | Rsa1.0.06010.1 | 1401 | 11944  | 0         | 929  | 969  | 95 +  | 439  | 1401 | 1551   | 2518   |
| UN22593 | Rsa1.0.02233.1 | 987  | 33658  | 0         | 903  | 907  | 99 -  | 81   | 987  | 2590   | 3496   |
| UN22594 | Rsa1.0.00038.1 | 2068 | 314568 | 0         | 366  | 371  | 98 -  | 1699 | 2068 | 232859 | 233225 |
| UN22595 | Rsa1.0.02229.1 | 867  | 33672  | 0         | 407  | 408  | 99 -  | 4    | 411  | 17849  | 18256  |
| UN22596 | Rsa1.0.00096.1 | 1291 | 198773 | 1.00E-159 | 344  | 363  | 94 +  | 57   | 419  | 113949 | 114308 |
| UN22597 | Rsa1.0.00179.1 | 1535 | 393324 | 0         | 858  | 858  | 100 + | 315  | 1172 | 63299  | 64156  |
| UN22598 | Rsa1.0.01170.1 | 1076 | 161131 | 1.00E-121 | 299  | 328  | 91 -  | 311  | 638  | 131509 | 131821 |
| UN22599 | Rsa1.0.00520.1 | 1569 | 78226  | 0         | 1550 | 1572 | 98 -  | 3    | 1568 | 1829   | 3397   |
| UN22600 | #              | #    | #      | #         | #    | #    | #     | #    | #    | #      | #      |
| UN22601 | Rsa1.0.01388.1 | 985  | 46741  | 1.00E-177 | 315  | 315  | 100 + | 671  | 985  | 17656  | 17970  |
| UN22602 | Rsa1.0.01691.1 | 1876 | 40921  | 0         | 475  | 484  | 98 +  | 473  | 956  | 4333   | 4816   |
| UN22603 | Rsa1.0.03753.1 | 1906 | 21010  | 1.00E-165 | 374  | 398  | 93 -  | 1    | 398  | 3208   | 3586   |
| UN22604 | Rsa1.0.07000.1 | 1485 | 10049  | 0         | 405  | 419  | 96 +  | 1063 | 1481 | 3834   | 4246   |
| UN22605 | Rsa1.0.00556.1 | 987  | 207212 | 2.00E-98  | 240  | 254  | 94 -  | 716  | 964  | 166486 | 166739 |
| UN22606 | Rsa1.0.05827.1 | 1679 | 12503  | 0         | 730  | 738  | 98 -  | 788  | 1525 | 6485   | 7221   |
| UN22607 | Rsa1.0.02370.1 | 1305 | 32071  | 0         | 1290 | 1304 | 98 +  | 11   | 1305 | 1000   | 2303   |
| UN22608 | Rsa1.0.01022.1 | 1089 | 56606  | 0         | 591  | 597  | 98 -  | 493  | 1086 | 42010  | 42606  |
| UN22609 | Rsa1.0.00080.1 | 1052 | 190437 | 0         | 808  | 829  | 97 -  | 227  | 1048 | 108122 | 108947 |
| UN22610 | Rsa1.0.06728.1 | 996  | 10455  | 1.00E-145 | 359  | 393  | 91 +  | 2    | 382  | 9058   | 9448   |
| UN22611 | Rsa1.0.00246.1 | 1238 | 103541 | 1.00E-179 | 331  | 335  | 98 +  | 902  | 1236 | 7484   | 7818   |
| UN22612 | Rsa1.0.00744.1 | 663  | 66084  | 0         | 356  | 359  | 99 -  | 301  | 659  | 46081  | 46439  |
| UN22613 | Rsa1.0.01191.1 | 1586 | 51235  | 0         | 678  | 693  | 97 -  | 1    | 693  | 40957  | 41648  |
| UN22614 | Rsa1.0.00670.1 | 1735 | 69371  | 0         | 579  | 592  | 97 -  | 911  | 1502 | 41282  | 41873  |
| UN22615 | Rsa1.0.07059.1 | 1121 | 9962   | 0         | 583  | 613  | 95 +  | 521  | 1118 | 1685   | 2291   |
| UN22616 | Rsa1.0.05581.1 | 758  | 13272  | 0         | 467  | 479  | 97 +  | 232  | 707  | 4241   | 4719   |
| UN22617 | Rsa1.0.00034.1 | 1228 | 260119 | 1.00E-114 | 228  | 233  | 97 -  | 493  | 724  | 30072  | 30304  |
| UN22618 | Rsa1.0.00612.1 | 1576 | 72376  | 0         | 441  | 444  | 99 -  | 1    | 444  | 17099  | 17540  |

|         |                |      |        |           |     |     |       |      |      |        |        |
|---------|----------------|------|--------|-----------|-----|-----|-------|------|------|--------|--------|
| UN22619 | Rsa1.0_04029.1 | 1270 | 19491  | 0         | 571 | 585 | 97 +  | 689  | 1270 | 6666   | 7250   |
| UN22620 | Rsa1.0_00045.1 | 1695 | 328694 | 1.00E-114 | 262 | 279 | 93 +  | 1420 | 1695 | 14422  | 14700  |
| UN22621 | Rsa1.0_02019.1 | 1141 | 35983  | 1.00E-156 | 321 | 331 | 96 -  | 810  | 1139 | 13300  | 13627  |
| UN22622 | Rsa1.0_63049.1 | 1070 | 364    | 1.00E-119 | 234 | 238 | 98 +  | 19   | 255  | 105    | 342    |
| UN22623 | Rsa1.0_00229.1 | 1314 | 105471 | 0         | 368 | 371 | 99 -  | 2    | 372  | 43350  | 43720  |
| UN22624 | Rsa1.0_01497.1 | 1453 | 44559  | 0         | 416 | 437 | 95 +  | 1019 | 1453 | 42441  | 42876  |
| UN22625 | Rsa1.0_07490.1 | 1352 | 9261   | 0         | 970 | 973 | 99 +  | 184  | 1156 | 782    | 1754   |
| UN22626 | Rsa1.0_15530.1 | 1694 | 2556   | 0         | 841 | 864 | 97 -  | 412  | 1272 | 110    | 973    |
| UN22627 | Rsa1.0_00157.1 | 1521 | 245832 | 0         | 368 | 370 | 99 +  | 1152 | 1521 | 190584 | 190953 |
| UN22628 | Rsa1.0_00698.1 | 1333 | 67816  | 0         | 632 | 649 | 97 +  | 694  | 1333 | 65687  | 66331  |
| UN22629 | Rsa1.0_00119.1 | 1159 | 467509 | 0         | 573 | 590 | 97 +  | 559  | 1147 | 335390 | 335978 |
| UN22630 | Rsa1.0_00005.1 | 622  | 353093 | 0         | 533 | 533 | 100 - | 90   | 622  | 32472  | 33004  |
| UN22631 | Rsa1.0_01920.1 | 1318 | 158533 | 1.00E-133 | 241 | 241 | 100 + | 1077 | 1317 | 152299 | 152539 |
| UN22632 | Rsa1.0_02173.1 | 959  | 34318  | 0         | 456 | 466 | 97 +  | 47   | 512  | 30709  | 31174  |
| UN22633 | Rsa1.0_02428.1 | 1007 | 31542  | 1.00E-161 | 314 | 324 | 96 -  | 684  | 1007 | 11086  | 11400  |
| UN22634 | Rsa1.0_00518.1 | 934  | 78360  | 1.00E-130 | 262 | 268 | 97 -  | 583  | 850  | 12707  | 12972  |
| UN22635 | Rsa1.0_00366.1 | 719  | 90880  | 0         | 368 | 368 | 100 - | 352  | 719  | 9189   | 9556   |
| UN22636 | Rsa1.0_04489.1 | 1002 | 17145  | 1.00E-156 | 295 | 299 | 98 -  | 704  | 1002 | 8289   | 8586   |
| UN22637 | Rsa1.0_00546.1 | 2247 | 76523  | 1.00E-117 | 227 | 231 | 98 -  | 769  | 999  | 73168  | 73398  |
| UN22638 | Rsa1.0_07695.1 | 1607 | 8770   | 0         | 474 | 477 | 99 +  | 3    | 479  | 1421   | 1897   |
| UN22639 | Rsa1.0_08814.1 | 1571 | 6901   | 0         | 520 | 520 | 100 - | 3    | 522  | 1105   | 1624   |
| UN22640 | Rsa1.0_04819.1 | 1007 | 140505 | 1.00E-177 | 360 | 371 | 97 +  | 3    | 366  | 4060   | 4429   |
| UN22641 | Rsa1.0_00159.1 | 1678 | 431686 | 0         | 459 | 483 | 95 +  | 995  | 1477 | 261877 | 262359 |
| UN22642 | Rsa1.0_01519.1 | 1126 | 44144  | 1.00E-169 | 302 | 302 | 100 - | 2    | 303  | 41308  | 41609  |
| UN22643 | Rsa1.0_06258.1 | 592  | 11371  | 0         | 585 | 590 | 99 +  | 3    | 592  | 3899   | 4488   |
| UN22644 | Rsa1.0_00179.1 | 1481 | 393324 | 0         | 453 | 477 | 94 +  | 3    | 479  | 348466 | 348942 |
| UN22645 | Rsa1.0_00875.1 | 888  | 61371  | 0         | 878 | 879 | 99 -  | 10   | 888  | 6901   | 7779   |
| UN22646 | Rsa1.0_01151.1 | 700  | 52268  | 0         | 464 | 487 | 95 -  | 215  | 692  | 26156  | 26641  |
| UN22647 | Rsa1.0_00460.1 | 1885 | 206387 | 1.00E-142 | 275 | 281 | 97 -  | 391  | 671  | 35604  | 35884  |
| UN22648 | Rsa1.0_00147.1 | 1345 | 249503 | 1.00E-167 | 343 | 358 | 95 -  | 993  | 1345 | 217829 | 218186 |
| UN22649 | Rsa1.0_00978.1 | 1812 | 57739  | 0         | 574 | 589 | 97 +  | 1065 | 1653 | 23249  | 23837  |
| UN22650 | Rsa1.0_01958.1 | 2564 | 261128 | 0         | 464 | 474 | 97 -  | 2064 | 2537 | 115754 | 116227 |
| UN22651 | Rsa1.0_03954.1 | 909  | 19886  | 0         | 424 | 427 | 99 -  | 483  | 906  | 676    | 1102   |
| UN22652 | Rsa1.0_03362.1 | 1270 | 23453  | 1.00E-133 | 241 | 241 | 100 + | 1    | 241  | 13691  | 13931  |
| UN22653 | Rsa1.0_00697.1 | 974  | 67913  | 1.00E-141 | 270 | 275 | 98 -  | 3    | 277  | 34223  | 34497  |
| UN22654 | Rsa1.0_00057.1 | 1814 | 160473 | 0         | 908 | 910 | 99 +  | 6    | 915  | 96247  | 97156  |
| UN22655 | Rsa1.0_00202.1 | 1822 | 185895 | 0         | 853 | 862 | 98 +  | 4    | 865  | 147064 | 147925 |
| UN22656 | Rsa1.0_00274.1 | 1516 | 210119 | 1.00E-148 | 267 | 267 | 100 + | 1225 | 1491 | 98748  | 99014  |
| UN22657 | Rsa1.0_00250.1 | 1760 | 273771 | 0         | 612 | 644 | 95 +  | 25   | 667  | 262044 | 262667 |

|         |                |      |        |           |      |      |       |      |      |        |        |
|---------|----------------|------|--------|-----------|------|------|-------|------|------|--------|--------|
| UN22658 | Rsa1.0.00048.1 | 1398 | 167185 | 0         | 426  | 431  | 98 -  | 3    | 432  | 73806  | 74235  |
| UN22659 | Rsa1.0.01949.1 | 955  | 36960  | 1.00E-143 | 264  | 266  | 99 +  | 1    | 266  | 23190  | 23455  |
| UN22660 | Rsa1.0.03307.1 | 1867 | 23872  | 0         | 573  | 574  | 99 -  | 1    | 574  | 17877  | 18450  |
| UN22661 | Rsa1.0.03972.1 | 1749 | 19787  | 1.00E-147 | 337  | 361  | 93 -  | 1    | 361  | 13644  | 13999  |
| UN22662 | Rsa1.0.00027.1 | 1970 | 283362 | 1.00E-173 | 349  | 359  | 97 +  | 3    | 359  | 167564 | 167919 |
| UN22663 | Rsa1.0.00273.1 | 965  | 326186 | 1.00E-170 | 345  | 360  | 95 -  | 614  | 965  | 45976  | 46335  |
| UN22664 | Rsa1.0.00647.1 | 1446 | 70440  | 0         | 1033 | 1051 | 98 -  | 3    | 1053 | 42016  | 43062  |
| UN22665 | Rsa1.0.03624.1 | 1872 | 21706  | 1.00E-176 | 362  | 378  | 95 +  | 1493 | 1862 | 5298   | 5674   |
| UN22666 | Rsa1.0.73415.1 | 1226 | 312    | 1.00E-173 | 311  | 312  | 99 -  | 179  | 490  | 1      | 312    |
| UN22667 | Rsa1.0.02320.1 | 1646 | 32575  | 1.00E-116 | 279  | 298  | 93 +  | 1    | 297  | 6296   | 6588   |
| UN22668 | Rsa1.0.00273.1 | 1964 | 326186 | 0         | 670  | 689  | 97 +  | 1277 | 1963 | 37563  | 38249  |
| UN22669 | Rsa1.0.00179.1 | 2033 | 393324 | 0         | 488  | 491  | 99 +  | 472  | 962  | 348452 | 348942 |
| UN22670 | Rsa1.0.01616.1 | 2457 | 42137  | 0         | 1806 | 1837 | 98 -  | 625  | 2457 | 22149  | 23983  |
| UN22671 | Rsa1.0.00275.1 | 2729 | 210104 | 0         | 1618 | 1652 | 97 +  | 2    | 1648 | 3983   | 5633   |
| UN22672 | Rsa1.0.02744.1 | 4009 | 28268  | 1.00E-113 | 551  | 663  | 83 -  | 1350 | 2008 | 15581  | 16208  |
| UN22673 | Rsa1.0.05878.1 | 784  | 12344  | 1.00E-148 | 275  | 278  | 98 +  | 176  | 453  | 1473   | 1750   |
| UN22674 | Rsa1.0.01536.1 | 1673 | 43747  | 0         | 397  | 397  | 100 - | 1277 | 1673 | 5580   | 5976   |
| UN22675 | Rsa1.0.00064.1 | 977  | 240927 | 0         | 342  | 344  | 99 +  | 3    | 346  | 28729  | 29072  |
| UN22676 | Rsa1.0.60028.1 | 1361 | 381    | 8.00E-80  | 155  | 156  | 99 -  | 1204 | 1359 | 226    | 381    |
| UN22677 | Rsa1.0.03618.1 | 1171 | 21744  | 1.00E-136 | 338  | 371  | 91 -  | 796  | 1165 | 10975  | 11319  |
| UN22678 | Rsa1.0.01453.1 | 1020 | 45449  | 0         | 939  | 948  | 99 -  | 1    | 944  | 28437  | 29384  |
| UN22679 | Rsa1.0.02646.1 | 2164 | 29123  | 0         | 724  | 729  | 99 -  | 597  | 1325 | 13779  | 14507  |
| UN22680 | Rsa1.0.07246.1 | 3439 | 9665   | 0         | 434  | 440  | 98 +  | 309  | 748  | 4606   | 5045   |
| UN22681 | Rsa1.0.00369.1 | 1066 | 266462 | 0         | 450  | 450  | 100 + | 2    | 451  | 146127 | 146576 |
| UN22682 | Rsa1.0.00332.1 | 988  | 94575  | 0         | 492  | 504  | 97 +  | 100  | 603  | 54514  | 55017  |
| UN22683 | Rsa1.0.02648.1 | 824  | 29073  | 1.00E-150 | 299  | 309  | 96 -  | 412  | 720  | 25917  | 26225  |
| UN22684 | Rsa1.0.00441.1 | 1213 | 84607  | 0         | 651  | 654  | 99 +  | 556  | 1209 | 61230  | 61883  |
| UN22685 | Rsa1.0.02030.1 | 1392 | 179909 | 0         | 1162 | 1189 | 97 -  | 62   | 1250 | 18560  | 19748  |
| UN22686 | Rsa1.0.02370.1 | 1819 | 32071  | 1.00E-176 | 334  | 340  | 98 +  | 1    | 337  | 6994   | 7333   |
| UN22687 | Rsa1.0.00106.1 | 1828 | 133916 | 0         | 364  | 366  | 99 +  | 70   | 435  | 59737  | 60102  |
| UN22688 | Rsa1.0.05938.1 | 1080 | 12173  | 0         | 638  | 646  | 98 -  | 2    | 647  | 7620   | 8265   |
| UN22689 | Rsa1.0.01364.1 | 1641 | 47172  | 0         | 543  | 556  | 97 -  | 3    | 556  | 45490  | 46038  |
| UN22690 | Rsa1.0.05360.1 | 1560 | 14053  | 1.00E-180 | 363  | 372  | 97 -  | 1    | 369  | 9252   | 9621   |
| UN22691 | Rsa1.0.03781.1 | 957  | 20891  | 0         | 626  | 648  | 96 -  | 93   | 739  | 11400  | 12047  |
| UN22692 | Rsa1.0.01896.1 | 828  | 37512  | 0         | 434  | 436  | 99 +  | 1    | 434  | 35209  | 35644  |
| UN22693 | Rsa1.0.03114.1 | 1576 | 25318  | 0         | 531  | 555  | 95 -  | 1    | 554  | 9889   | 10434  |
| UN22694 | Rsa1.0.00058.1 | 1727 | 159921 | 0         | 452  | 453  | 99 -  | 1274 | 1726 | 54122  | 54573  |
| UN22695 | Rsa1.0.02839.1 | 1204 | 27391  | 0         | 354  | 365  | 96 -  | 129  | 493  | 18841  | 19205  |
| UN22696 | Rsa1.0.01425.1 | 1548 | 46136  | 0         | 405  | 417  | 97 -  | 1096 | 1509 | 10921  | 11335  |



|         |                |      |        |           |      |      |       |      |      |        |        |
|---------|----------------|------|--------|-----------|------|------|-------|------|------|--------|--------|
| UN22697 | Rsa1.0_13661.1 | 961  | 4542   | 0         | 468  | 468  | 100 - | 3    | 470  | 1405   | 1872   |
| UN22698 | Rsa1.0_01931.1 | 538  | 37187  | 1.00E-124 | 232  | 234  | 99 -  | 299  | 532  | 32357  | 32590  |
| UN22699 | Rsa1.0_01206.1 | 1900 | 50772  | 0         | 384  | 385  | 99 +  | 1516 | 1900 | 11398  | 11782  |
| UN22700 | Rsa1.0_01480.1 | 938  | 44926  | 0         | 359  | 367  | 97 -  | 110  | 476  | 23931  | 24297  |
| UN22701 | Rsa1.0_00962.1 | 949  | 184909 | 0         | 890  | 910  | 97 -  | 3    | 906  | 51830  | 52739  |
| UN22702 | Rsa1.0_00807.1 | 1005 | 63607  | 1.00E-161 | 300  | 303  | 99 +  | 704  | 1004 | 47287  | 47589  |
| UN22703 | Rsa1.0_00179.1 | 953  | 393324 | 1.00E-148 | 290  | 295  | 98 +  | 659  | 951  | 205617 | 205911 |
| UN22704 | Rsa1.0_05760.1 | 1703 | 12720  | 0         | 378  | 380  | 99 +  | 1    | 380  | 2601   | 2979   |
| UN22705 | Rsa1.0_04977.1 | 5790 | 15260  | 0         | 681  | 692  | 98 +  | 3042 | 3731 | 8856   | 9547   |
| UN22706 | Rsa1.0_09543.1 | 1381 | 6298   | 0         | 774  | 827  | 93 -  | 326  | 1150 | 4416   | 5219   |
| UN22707 | Rsa1.0_04837.1 | 941  | 15764  | 0         | 475  | 475  | 100 - | 467  | 941  | 6020   | 6494   |
| UN22708 | Rsa1.0_00716.1 | 757  | 67078  | 0         | 383  | 385  | 99 -  | 109  | 493  | 36370  | 36754  |
| UN22709 | Rsa1.0_00780.1 | 1715 | 147795 | 1.00E-125 | 237  | 240  | 98 +  | 1311 | 1550 | 25606  | 25845  |
| UN22710 | Rsa1.0_01294.1 | 687  | 49090  | 0         | 455  | 467  | 97 -  | 1    | 467  | 11942  | 12408  |
| UN22711 | Rsa1.0_08598.1 | 1973 | 7143   | 0         | 695  | 718  | 96 +  | 666  | 1380 | 4940   | 5646   |
| UN22712 | Rsa1.0_00893.1 | 992  | 60626  | 0         | 724  | 741  | 97 +  | 1    | 741  | 8101   | 8837   |
| UN22713 | Rsa1.0_00464.1 | 1188 | 82253  | 0         | 713  | 742  | 96 -  | 1    | 727  | 48375  | 49111  |
| UN22714 | Rsa1.0_00148.1 | 931  | 120234 | 0         | 921  | 929  | 99 -  | 1    | 929  | 87155  | 88082  |
| UN22715 | Rsa1.0_09707.1 | 804  | 6199   | 0         | 369  | 371  | 99 -  | 3    | 373  | 5205   | 5575   |
| UN22716 | Rsa1.0_17040.1 | 571  | 1944   | 0         | 412  | 419  | 98 -  | 3    | 418  | 1207   | 1625   |
| UN22717 | Rsa1.0_00194.1 | 1031 | 110851 | 0         | 423  | 424  | 99 +  | 1    | 423  | 17462  | 17885  |
| UN22718 | Rsa1.0_01611.1 | 1075 | 42269  | 1.00E-169 | 305  | 306  | 99 -  | 768  | 1073 | 15232  | 15537  |
| UN22719 | Rsa1.0_00064.1 | 1543 | 240927 | 0         | 429  | 433  | 99 -  | 1    | 433  | 73671  | 74103  |
| UN22720 | Rsa1.0_05501.1 | 1995 | 13513  | 0         | 440  | 448  | 98 +  | 633  | 1079 | 4974   | 5421   |
| UN22721 | Rsa1.0_01554.1 | 875  | 43379  | 0         | 370  | 373  | 99 +  | 504  | 875  | 30995  | 31367  |
| UN22722 | Rsa1.0_00073.1 | 907  | 240924 | 6.00E-98  | 191  | 194  | 98 -  | 340  | 533  | 98132  | 98325  |
| UN22723 | Rsa1.0_00928.1 | 1092 | 59293  | 1.00E-160 | 290  | 291  | 99 -  | 3    | 293  | 20524  | 20814  |
| UN22724 | Rsa1.0_00472.1 | 1341 | 398134 | 0         | 505  | 507  | 99 -  | 835  | 1341 | 178854 | 179360 |
| UN22725 | Rsa1.0_00192.1 | 920  | 278200 | 0         | 520  | 526  | 98 -  | 2    | 525  | 13714  | 14238  |
| UN22726 | Rsa1.0_00457.1 | 1696 | 337301 | 0         | 1439 | 1477 | 97 +  | 128  | 1600 | 176239 | 177714 |
| UN22727 | Rsa1.0_01553.1 | 1606 | 43379  | 1.00E-174 | 313  | 314  | 99 +  | 1289 | 1602 | 10545  | 10858  |
| UN22728 | Rsa1.0_00062.1 | 1198 | 299291 | 0         | 578  | 582  | 99 -  | 614  | 1193 | 142212 | 142793 |
| UN22729 | Rsa1.0_00852.1 | 1427 | 62179  | 0         | 784  | 796  | 98 +  | 639  | 1427 | 28028  | 28823  |
| UN22730 | Rsa1.0_00160.1 | 1574 | 346678 | 0         | 414  | 415  | 99 -  | 3    | 417  | 333322 | 333736 |
| UN22731 | Rsa1.0_00064.1 | 1067 | 240927 | 1.00E-133 | 266  | 272  | 97 +  | 799  | 1067 | 60195  | 60466  |
| UN22732 | Rsa1.0_02735.1 | 3031 | 28344  | 0         | 975  | 1038 | 93 -  | 1081 | 2101 | 3938   | 4959   |
| UN22733 | Rsa1.0_00011.1 | 1583 | 225044 | 0         | 476  | 494  | 96 -  | 1092 | 1583 | 103626 | 104111 |
| UN22734 | Rsa1.0_00886.1 | 1331 | 167350 | 0         | 359  | 362  | 99 -  | 970  | 1331 | 33027  | 33388  |
| UN22735 | Rsa1.0_03733.1 | 837  | 21108  | 0         | 830  | 839  | 98 +  | 1    | 837  | 14645  | 15482  |

|         |                |      |        |           |      |      |       |      |      |        |        |
|---------|----------------|------|--------|-----------|------|------|-------|------|------|--------|--------|
| UN22736 | Rsa1.0.00690.1 | 1590 | 140527 | 0         | 334  | 336  | 99 -  | 1253 | 1588 | 4939   | 5273   |
| UN22737 | Rsa1.0.00890.1 | 765  | 323870 | 1.00E-169 | 304  | 305  | 99 +  | 7    | 311  | 160728 | 161032 |
| UN22738 | Rsa1.0.01172.1 | 902  | 51734  | 1.00E-147 | 271  | 273  | 99 +  | 463  | 735  | 12391  | 12663  |
| UN22739 | Rsa1.0.00069.1 | 1015 | 403561 | 0         | 419  | 421  | 99 +  | 591  | 1011 | 170791 | 171211 |
| UN22740 | Rsa1.0.00930.1 | 850  | 59224  | 3.00E-78  | 214  | 233  | 91 +  | 559  | 790  | 49934  | 50155  |
| UN22741 | Rsa1.0.20416.1 | 769  | 1307   | 1.00E-166 | 325  | 333  | 97 -  | 432  | 762  | 777    | 1106   |
| UN22742 | Rsa1.0.01489.1 | 1868 | 44764  | 1.00E-145 | 282  | 289  | 97 -  | 925  | 1213 | 38870  | 39158  |
| UN22743 | Rsa1.0.13143.1 | 1608 | 4993   | 1.00E-179 | 349  | 355  | 98 -  | 1254 | 1608 | 699    | 1050   |
| UN22744 | Rsa1.0.01418.1 | 969  | 46237  | 0         | 958  | 969  | 98 -  | 1    | 969  | 4196   | 5163   |
| UN22745 | Rsa1.0.00044.1 | 2665 | 271658 | 0         | 417  | 419  | 99 -  | 537  | 955  | 160183 | 160601 |
| UN22746 | Rsa1.0.00118.1 | 1739 | 130637 | 0         | 591  | 609  | 97 -  | 4    | 605  | 36394  | 37000  |
| UN22747 | Rsa1.0.04103.1 | 1333 | 19048  | 0         | 618  | 632  | 97 +  | 701  | 1332 | 9795   | 10426  |
| UN22748 | Rsa1.0.01119.1 | 1008 | 53459  | 0         | 601  | 608  | 98 -  | 312  | 919  | 35552  | 36156  |
| UN22749 | Rsa1.0.16837.1 | 1495 | 2018   | 0         | 673  | 682  | 98 +  | 1    | 682  | 538    | 1219   |
| UN22750 | Rsa1.0.15691.1 | 1340 | 2479   | 1.00E-108 | 252  | 270  | 93 +  | 14   | 279  | 1416   | 1672   |
| UN22751 | Rsa1.0.00991.1 | 1596 | 143101 | 0         | 606  | 617  | 98 +  | 163  | 779  | 28342  | 28955  |
| UN22752 | Rsa1.0.00198.1 | 1713 | 222963 | 0         | 618  | 627  | 98 -  | 777  | 1403 | 152016 | 152642 |
| UN22753 | Rsa1.0.01987.1 | 1671 | 36446  | 0         | 507  | 513  | 98 +  | 1159 | 1671 | 33721  | 34231  |
| UN22754 | Rsa1.0.00037.1 | 1495 | 307838 | 0         | 636  | 664  | 95 +  | 487  | 1149 | 252726 | 253380 |
| UN22755 | Rsa1.0.01443.1 | 1099 | 45705  | 1.00E-172 | 316  | 319  | 99 -  | 781  | 1099 | 32134  | 32452  |
| UN22756 | Rsa1.0.04689.1 | 2613 | 16376  | 0         | 857  | 884  | 96 +  | 1443 | 2324 | 15500  | 16376  |
| UN22757 | Rsa1.0.05381.1 | 2208 | 13966  | 0         | 350  | 351  | 99 -  | 931  | 1281 | 1      | 351    |
| UN22758 | Rsa1.0.03865.1 | 1159 | 20373  | 1.00E-159 | 285  | 285  | 100 + | 873  | 1157 | 3477   | 3761   |
| UN22759 | Rsa1.0.07584.1 | 1343 | 9081   | 0         | 660  | 678  | 97 -  | 3    | 680  | 2681   | 3356   |
| UN22760 | Rsa1.0.01403.1 | 1470 | 46453  | 0         | 925  | 945  | 97 +  | 2    | 944  | 18791  | 19734  |
| UN22761 | Rsa1.0.01958.1 | 1679 | 261128 | 1.00E-175 | 331  | 336  | 98 +  | 1320 | 1654 | 1802   | 2137   |
| UN22762 | Rsa1.0.06465.1 | 2603 | 10962  | 0         | 686  | 697  | 98 -  | 986  | 1682 | 4224   | 4918   |
| UN22763 | Rsa1.0.04653.1 | 1150 | 16509  | 0         | 414  | 419  | 98 +  | 619  | 1033 | 5218   | 5636   |
| UN22764 | Rsa1.0.00045.1 | 1246 | 328694 | 1.00E-166 | 296  | 296  | 100 - | 951  | 1246 | 142602 | 142897 |
| UN22765 | Rsa1.0.02911.1 | 1483 | 142461 | 0         | 584  | 599  | 97 +  | 845  | 1442 | 23404  | 24001  |
| UN22766 | Rsa1.0.06117.1 | 970  | 11709  | 0         | 453  | 453  | 100 - | 518  | 970  | 1282   | 1734   |
| UN22767 | Rsa1.0.00318.1 | 1294 | 96094  | 0         | 575  | 577  | 99 -  | 719  | 1294 | 81589  | 82165  |
| UN22768 | Rsa1.0.03886.1 | 1428 | 154643 | 0         | 1280 | 1349 | 94 -  | 2    | 1349 | 9011   | 10358  |
| UN22769 | Rsa1.0.00404.1 | 1573 | 87635  | 0         | 410  | 412  | 99 +  | 5    | 415  | 9744   | 10155  |
| UN22770 | Rsa1.0.00811.1 | 2153 | 63242  | 0         | 399  | 399  | 100 + | 3    | 401  | 30478  | 30876  |
| UN22771 | Rsa1.0.03786.1 | 2233 | 20879  | 0         | 1319 | 1333 | 98 +  | 2    | 1333 | 13874  | 15206  |
| UN22772 | Rsa1.0.00171.1 | 1139 | 115622 | 0         | 372  | 379  | 98 +  | 3    | 381  | 40735  | 41109  |
| UN22773 | Rsa1.0.00948.1 | 1220 | 58620  | 1.00E-152 | 447  | 504  | 88 -  | 14   | 486  | 1582   | 2079   |
| UN22774 | Rsa1.0.00016.1 | 1320 | 831256 | 1.00E-143 | 386  | 426  | 90 +  | 894  | 1315 | 663583 | 663985 |

|         |                |      |        |           |      |      |       |      |      |        |        |
|---------|----------------|------|--------|-----------|------|------|-------|------|------|--------|--------|
| UN22775 | Rsa1.0.00273.1 | 917  | 326186 | 1.00E-141 | 376  | 412  | 91 -  | 515  | 916  | 307679 | 308084 |
| UN22776 | Rsa1.0.00958.1 | 1755 | 58243  | 0         | 1380 | 1444 | 95 -  | 315  | 1743 | 5848   | 7280   |
| UN22777 | Rsa1.0.00085.1 | 1964 | 142226 | 0         | 389  | 389  | 100 + | 1576 | 1964 | 98297  | 98685  |
| UN22778 | Rsa1.0.00556.1 | 911  | 207212 | 0         | 907  | 908  | 99 -  | 4    | 911  | 140437 | 141344 |
| UN22779 | Rsa1.0.05410.1 | 1658 | 13840  | 0         | 371  | 376  | 98 -  | 1140 | 1515 | 7861   | 8236   |
| UN22780 | Rsa1.0.00729.1 | 1062 | 66690  | 0         | 535  | 552  | 96 +  | 511  | 1060 | 46412  | 46959  |
| UN22781 | Rsa1.0.03833.1 | 1537 | 20575  | 3.00E-95  | 266  | 294  | 90 +  | 1243 | 1531 | 11313  | 11600  |
| UN22782 | Rsa1.0.00201.1 | 1235 | 232851 | 0         | 788  | 789  | 99 -  | 328  | 1116 | 150926 | 151714 |
| UN22783 | Rsa1.0.03191.1 | 1544 | 145762 | 0         | 340  | 342  | 99 +  | 1    | 342  | 11849  | 12190  |
| UN22784 | Rsa1.0.00451.1 | 769  | 322533 | 1.00E-127 | 289  | 307  | 94 -  | 257  | 563  | 311917 | 312222 |
| UN22785 | Rsa1.0.05559.1 | 1597 | 13329  | 0         | 437  | 437  | 100 + | 244  | 680  | 7400   | 7836   |
| UN22786 | Rsa1.0.01712.1 | 1585 | 154210 | 0         | 672  | 672  | 100 - | 195  | 866  | 2819   | 3490   |
| UN22787 | Rsa1.0.03439.1 | 881  | 22930  | 0         | 754  | 790  | 95 +  | 74   | 862  | 14985  | 15765  |
| UN22788 | Rsa1.0.03564.1 | 1854 | 22068  | 0         | 552  | 608  | 90 +  | 1    | 587  | 13944  | 14535  |
| UN22789 | Rsa1.0.01424.1 | 921  | 46139  | 0         | 580  | 581  | 99 -  | 341  | 921  | 10585  | 11165  |
| UN22790 | Rsa1.0.03300.1 | 1494 | 23937  | 0         | 632  | 639  | 98 -  | 795  | 1433 | 10167  | 10802  |
| UN22791 | Rsa1.0.00201.1 | 659  | 232851 | 0         | 397  | 411  | 96 -  | 254  | 659  | 72588  | 72994  |
| UN22792 | Rsa1.0.04199.1 | 1713 | 18501  | 0         | 1646 | 1656 | 99 -  | 58   | 1713 | 5304   | 6959   |
| UN22793 | Rsa1.0.01245.1 | 971  | 149868 | 4.00E-93  | 177  | 178  | 99 -  | 88   | 265  | 40251  | 40428  |
| UN22794 | Rsa1.0.01987.1 | 1511 | 36446  | 0         | 894  | 903  | 99 -  | 30   | 932  | 7571   | 8473   |
| UN22795 | Rsa1.0.00121.1 | 1378 | 278029 | 0         | 800  | 827  | 96 +  | 4    | 827  | 34359  | 35185  |
| UN22796 | Rsa1.0.00106.1 | 1339 | 133916 | 0         | 408  | 416  | 98 +  | 3    | 415  | 17417  | 17832  |
| UN22797 | Rsa1.0.01830.1 | 1129 | 38641  | 1.00E-101 | 194  | 196  | 98 -  | 267  | 462  | 30212  | 30407  |
| UN22798 | Rsa1.0.01571.1 | 1618 | 43000  | 0         | 642  | 644  | 99 +  | 976  | 1618 | 6133   | 6775   |
| UN22799 | Rsa1.0.00329.1 | 1602 | 222544 | 0         | 903  | 913  | 98 -  | 689  | 1601 | 159695 | 160602 |
| UN22800 | Rsa1.0.00620.1 | 1751 | 71985  | 1.00E-145 | 286  | 293  | 97 -  | 1459 | 1751 | 45395  | 45686  |
| UN22801 | Rsa1.0.02021.1 | 1718 | 35926  | 1.00E-178 | 326  | 329  | 99 +  | 1    | 329  | 22337  | 22665  |
| UN22802 | Rsa1.0.00417.1 | 1615 | 395068 | 0         | 1224 | 1244 | 98 +  | 2    | 1243 | 7061   | 8304   |
| UN22803 | Rsa1.0.00199.1 | 959  | 249604 | 0         | 545  | 547  | 99 +  | 411  | 957  | 164308 | 164854 |
| UN22804 | Rsa1.0.01539.1 | 1575 | 43698  | 0         | 581  | 584  | 99 -  | 992  | 1575 | 36439  | 37022  |
| UN22805 | Rsa1.0.00008.1 | 1845 | 358124 | 0         | 451  | 477  | 94 +  | 1369 | 1842 | 323035 | 323511 |
| UN22806 | Rsa1.0.00350.1 | 1622 | 92346  | 1.00E-131 | 239  | 239  | 100 - | 1    | 239  | 15064  | 15302  |
| UN22807 | Rsa1.0.07808.1 | 1679 | 8504   | 0         | 603  | 626  | 96 +  | 6    | 627  | 106    | 727    |
| UN22808 | Rsa1.0.00385.1 | 990  | 89160  | 1.00E-166 | 354  | 376  | 94 +  | 614  | 989  | 51732  | 52093  |
| UN22809 | Rsa1.0.08756.1 | 2055 | 6955   | 1.00E-131 | 260  | 267  | 97 +  | 469  | 735  | 6119   | 6385   |
| UN22810 | Rsa1.0.00161.1 | 1589 | 116891 | 1.00E-153 | 278  | 279  | 99 +  | 2    | 280  | 114225 | 114503 |
| UN22811 | Rsa1.0.05564.1 | 1630 | 13319  | 0         | 493  | 499  | 98 +  | 1132 | 1630 | 4682   | 5179   |
| UN22812 | Rsa1.0.01339.1 | 1283 | 47813  | 0         | 399  | 420  | 95 +  | 863  | 1280 | 29690  | 30102  |
| UN22813 | Rsa1.0.04486.1 | 1498 | 17161  | 0         | 980  | 1015 | 96 +  | 3    | 1017 | 12250  | 13249  |

|         |                |      |        |           |      |      |       |      |      |        |        |
|---------|----------------|------|--------|-----------|------|------|-------|------|------|--------|--------|
| UN22814 | Rsa1.0.00457.1 | 578  | 337301 | 1.00E-105 | 254  | 270  | 94 -  | 307  | 571  | 314304 | 314570 |
| UN22815 | Rsa1.0.00713.1 | 1082 | 158017 | 1.00E-139 | 269  | 275  | 97 -  | 523  | 797  | 21437  | 21711  |
| UN22816 | Rsa1.0.00078.1 | 825  | 175053 | 1.00E-159 | 303  | 309  | 98 -  | 274  | 582  | 47230  | 47538  |
| UN22817 | Rsa1.0.01285.1 | 1816 | 172709 | 1.00E-173 | 349  | 361  | 96 -  | 1455 | 1814 | 159760 | 160111 |
| UN22818 | Rsa1.0.01673.1 | 1300 | 41197  | 0         | 847  | 867  | 97 -  | 8    | 861  | 7236   | 8102   |
| UN22819 | Rsa1.0.05755.1 | 1749 | 12730  | 1.00E-119 | 262  | 273  | 95 +  | 1479 | 1749 | 8876   | 9146   |
| UN22820 | Rsa1.0.00558.1 | 1128 | 75819  | 0         | 460  | 460  | 100 - | 661  | 1120 | 10337  | 10796  |
| UN22821 | Rsa1.0.02772.1 | 1491 | 28047  | 0         | 588  | 600  | 98 +  | 883  | 1478 | 16175  | 16774  |
| UN22822 | Rsa1.0.00015.1 | 1354 | 561803 | 0         | 991  | 993  | 99 -  | 362  | 1354 | 253933 | 254925 |
| UN22823 | Rsa1.0.00628.1 | 1789 | 214360 | 0         | 1127 | 1129 | 99 +  | 1    | 1129 | 49890  | 51018  |
| UN22824 | Rsa1.0.01241.1 | 1652 | 50067  | 0         | 340  | 341  | 99 +  | 1    | 341  | 30334  | 30674  |
| UN22825 | Rsa1.0.00157.1 | 1164 | 245832 | 1.00E-163 | 294  | 295  | 99 -  | 868  | 1162 | 228386 | 228680 |
| UN22826 | Rsa1.0.06726.1 | 2015 | 10460  | 0         | 937  | 946  | 99 -  | 83   | 1024 | 9437   | 10382  |
| UN22827 | Rsa1.0.00695.1 | 1530 | 68019  | 0         | 468  | 470  | 99 +  | 1049 | 1518 | 50092  | 50560  |
| UN22828 | Rsa1.0.00387.1 | 1574 | 495407 | 0         | 1373 | 1385 | 99 -  | 175  | 1559 | 250407 | 251791 |
| UN22829 | Rsa1.0.00189.1 | 693  | 111830 | 1.00E-137 | 318  | 339  | 93 -  | 351  | 688  | 568    | 890    |
| UN22830 | Rsa1.0.00097.1 | 1014 | 138858 | 0         | 1000 | 1014 | 98 +  | 4    | 1013 | 52514  | 53527  |
| UN22831 | Rsa1.0.10853.1 | 1850 | 5700   | 1.00E-125 | 228  | 228  | 100 - | 127  | 354  | 3961   | 4188   |
| UN22832 | Rsa1.0.00903.1 | 1615 | 60228  | 0         | 719  | 744  | 96 +  | 122  | 865  | 37183  | 37926  |
| UN22833 | Rsa1.0.02840.1 | 2337 | 27386  | 0         | 956  | 968  | 98 +  | 262  | 1229 | 16399  | 17365  |
| UN22834 | Rsa1.0.00782.1 | 1304 | 64468  | 1.00E-178 | 326  | 329  | 99 -  | 546  | 874  | 19988  | 20316  |
| UN22835 | Rsa1.0.04010.1 | 796  | 19576  | 0         | 419  | 428  | 97 +  | 1    | 428  | 861    | 1288   |
| UN22836 | Rsa1.0.01711.1 | 738  | 40578  | 0         | 467  | 471  | 99 -  | 1    | 471  | 19491  | 19957  |
| UN22837 | Rsa1.0.04793.1 | 1106 | 15963  | 1.00E-147 | 265  | 265  | 100 - | 1    | 265  | 9876   | 10140  |
| UN22838 | Rsa1.0.06149.1 | 1327 | 11615  | 0         | 560  | 574  | 97 +  | 754  | 1327 | 4020   | 4593   |
| UN22839 | Rsa1.0.02834.1 | 720  | 27493  | 0         | 389  | 397  | 97 +  | 325  | 720  | 24286  | 24678  |
| UN22840 | Rsa1.0.01581.1 | 1389 | 42833  | 0         | 574  | 581  | 98 +  | 811  | 1389 | 1828   | 2408   |
| UN22841 | Rsa1.0.01082.1 | 1603 | 54640  | 0         | 466  | 467  | 99 +  | 248  | 714  | 9377   | 9843   |
| UN22842 | Rsa1.0.11442.1 | 1023 | 5506   | 0         | 889  | 959  | 92 +  | 49   | 998  | 1      | 953    |
| UN22843 | Rsa1.0.00050.1 | 1714 | 237174 | 0         | 1182 | 1222 | 96 +  | 43   | 1261 | 16696  | 17913  |
| UN22844 | Rsa1.0.00828.1 | 832  | 62744  | 0         | 409  | 412  | 99 -  | 421  | 832  | 47926  | 48337  |
| UN22845 | Rsa1.0.00777.1 | 1463 | 191865 | 0         | 829  | 829  | 100 + | 3    | 831  | 12184  | 13012  |
| UN22846 | Rsa1.0.05748.1 | 951  | 12749  | 0         | 444  | 444  | 100 + | 1    | 444  | 6508   | 6951   |
| UN22847 | Rsa1.0.17100.1 | 1885 | 1924   | 1.00E-173 | 331  | 338  | 97 -  | 1    | 338  | 141    | 475    |
| UN22848 | Rsa1.0.02663.1 | 1312 | 169243 | 1.00E-171 | 308  | 309  | 99 +  | 356  | 664  | 9930   | 10238  |
| UN22849 | Rsa1.0.00284.1 | 1503 | 323267 | 0         | 498  | 501  | 99 -  | 3    | 503  | 258208 | 258708 |
| UN22850 | Rsa1.0.00586.1 | 810  | 163802 | 3.00E-75  | 246  | 280  | 87 +  | 261  | 540  | 108888 | 109167 |
| UN22851 | Rsa1.0.04552.1 | 1625 | 16878  | 0         | 1098 | 1118 | 98 -  | 526  | 1625 | 11034  | 12150  |
| UN22852 | Rsa1.0.03688.1 | 1570 | 143676 | 1.00E-111 | 207  | 208  | 99 -  | 3    | 210  | 16485  | 16692  |

|         |                |      |        |           |      |      |       |      |      |        |        |
|---------|----------------|------|--------|-----------|------|------|-------|------|------|--------|--------|
| UN22853 | Rsa1.0.01105.1 | 1880 | 53958  | 0         | 623  | 668  | 93 +  | 3    | 653  | 15891  | 16540  |
| UN22854 | Rsa1.0.00001.1 | 1690 | 363028 | 1.00E-161 | 308  | 313  | 98 +  | 1378 | 1690 | 168093 | 168404 |
| UN22855 | Rsa1.0.00466.1 | 1576 | 82132  | 0         | 558  | 567  | 98 -  | 276  | 842  | 64224  | 64790  |
| UN22856 | Rsa1.0.09876.1 | 1812 | 6108   | 0         | 383  | 386  | 99 +  | 1427 | 1812 | 2225   | 2608   |
| UN22857 | Rsa1.0.02360.1 | 1124 | 32203  | 0         | 616  | 648  | 95 -  | 480  | 1122 | 23933  | 24578  |
| UN22858 | Rsa1.0.01159.1 | 955  | 52115  | 1.00E-126 | 241  | 245  | 98 -  | 398  | 642  | 32156  | 32400  |
| UN22859 | Rsa1.0.19812.1 | 1013 | 1380   | 0         | 360  | 361  | 99 -  | 3    | 363  | 836    | 1196   |
| UN22860 | Rsa1.0.05600.1 | 1595 | 13222  | 0         | 1135 | 1136 | 99 +  | 1    | 1136 | 4467   | 5602   |
| UN22861 | Rsa1.0.00116.1 | 1560 | 365886 | 0         | 918  | 958  | 95 -  | 519  | 1464 | 8242   | 9199   |
| UN22862 | Rsa1.0.00981.1 | 854  | 57700  | 1.00E-150 | 276  | 278  | 99 -  | 286  | 563  | 35145  | 35422  |
| UN22863 | Rsa1.0.04648.1 | 1474 | 16540  | 0         | 743  | 747  | 99 -  | 727  | 1473 | 4735   | 5481   |
| UN22864 | Rsa1.0.24094.1 | 766  | 1007   | 1.00E-161 | 291  | 292  | 99 -  | 475  | 766  | 311    | 602    |
| UN22865 | Rsa1.0.02264.1 | 1377 | 33233  | 0         | 479  | 480  | 99 -  | 1    | 480  | 9388   | 9866   |
| UN22866 | Rsa1.0.01591.1 | 1563 | 42718  | 0         | 437  | 440  | 99 -  | 1124 | 1563 | 26838  | 27277  |
| UN22867 | Rsa1.0.03843.1 | 939  | 20496  | 1.00E-165 | 376  | 400  | 94 +  | 5    | 401  | 6124   | 6521   |
| UN22868 | Rsa1.0.02749.1 | 1605 | 28241  | 0         | 1430 | 1441 | 99 +  | 2    | 1442 | 7124   | 8561   |
| UN22869 | Rsa1.0.00727.1 | 1722 | 66724  | 0         | 532  | 538  | 98 -  | 1161 | 1695 | 50820  | 51356  |
| UN22870 | Rsa1.0.00032.1 | 725  | 306326 | 1.00E-163 | 309  | 312  | 99 -  | 2    | 312  | 155775 | 156085 |
| UN22871 | Rsa1.0.00899.1 | 1582 | 60404  | 0         | 397  | 413  | 96 +  | 38   | 449  | 12582  | 12994  |
| UN22872 | Rsa1.0.01675.1 | 1610 | 41155  | 0         | 943  | 952  | 99 +  | 661  | 1608 | 267    | 1216   |
| UN22873 | Rsa1.0.69052.1 | 656  | 332    | 1.00E-176 | 313  | 313  | 100 - | 149  | 461  | 1      | 313    |
| UN22874 | Rsa1.0.00521.1 | 1261 | 78191  | 0         | 503  | 506  | 99 -  | 755  | 1260 | 3379   | 3884   |
| UN22875 | Rsa1.0.00105.1 | 1401 | 134138 | 1.00E-141 | 255  | 255  | 100 - | 1147 | 1401 | 53833  | 54087  |
| UN22876 | Rsa1.0.00078.1 | 1116 | 175053 | 0         | 443  | 464  | 95 +  | 659  | 1116 | 52479  | 52941  |
| UN22877 | Rsa1.0.00128.1 | 1141 | 228675 | 0         | 799  | 828  | 96 -  | 1    | 828  | 42451  | 43265  |
| UN22878 | Rsa1.0.00699.1 | 900  | 184398 | 0         | 543  | 551  | 98 -  | 19   | 564  | 56178  | 56728  |
| UN22879 | Rsa1.0.01182.1 | 1329 | 167304 | 0         | 352  | 352  | 100 - | 977  | 1328 | 58     | 409    |
| UN22880 | Rsa1.0.01685.1 | 2231 | 175033 | 1.00E-174 | 330  | 335  | 98 -  | 1893 | 2227 | 26660  | 26993  |
| UN22881 | #              | #    | #      | #         | #    | #    | #     | #    | #    | #      | #      |
| UN22882 | Rsa1.0.03201.1 | 1106 | 157656 | 0         | 517  | 521  | 99 +  | 69   | 587  | 10722  | 11242  |
| UN22883 | Rsa1.0.00446.1 | 1644 | 167829 | 0         | 390  | 391  | 99 -  | 1    | 391  | 160580 | 160970 |
| UN22884 | Rsa1.0.00247.1 | 1075 | 103408 | 1.00E-166 | 391  | 423  | 92 -  | 3    | 414  | 66969  | 67376  |
| UN22885 | Rsa1.0.00944.1 | 1991 | 58733  | 0         | 573  | 573  | 100 - | 1411 | 1983 | 184    | 756    |
| UN22886 | Rsa1.0.07849.1 | 983  | 8425   | 0         | 540  | 554  | 97 -  | 83   | 635  | 4233   | 4786   |
| UN22887 | Rsa1.0.00350.1 | 1674 | 92346  | 1.00E-123 | 262  | 272  | 96 +  | 1404 | 1672 | 48362  | 48633  |
| UN22888 | Rsa1.0.24055.1 | 1708 | 1009   | 0         | 467  | 473  | 98 -  | 640  | 1112 | 527    | 999    |
| UN22889 | Rsa1.0.00399.1 | 1115 | 242951 | 0         | 679  | 688  | 98 -  | 430  | 1115 | 16371  | 17055  |
| UN22890 | Rsa1.0.01978.1 | 1888 | 36546  | 0         | 1732 | 1766 | 98 +  | 4    | 1767 | 8479   | 10241  |
| UN22891 | Rsa1.0.00556.1 | 1596 | 207212 | 0         | 437  | 456  | 95 -  | 1140 | 1594 | 198606 | 199049 |

|         |                |      |        |           |      |      |       |      |      |        |        |
|---------|----------------|------|--------|-----------|------|------|-------|------|------|--------|--------|
| UN22892 | Rsa1.0.05963.1 | 1755 | 12090  | 0         | 388  | 388  | 100 + | 1368 | 1755 | 3256   | 3643   |
| UN22893 | Rsa1.0.00890.1 | 719  | 323870 | 0         | 397  | 400  | 99 +  | 319  | 718  | 162561 | 162960 |
| UN22894 | Rsa1.0.02966.1 | 1000 | 135126 | 0         | 540  | 541  | 99 -  | 1    | 541  | 17972  | 18512  |
| UN22895 | Rsa1.0.00017.1 | 1042 | 752458 | 0         | 472  | 472  | 100 - | 571  | 1042 | 138902 | 139373 |
| UN22896 | Rsa1.0.05767.1 | 2075 | 12701  | 0         | 1708 | 1740 | 98 -  | 1    | 1739 | 10225  | 11960  |
| UN22897 | Rsa1.0.04192.1 | 1053 | 18572  | 0         | 566  | 610  | 92 -  | 326  | 934  | 17147  | 17756  |
| UN22898 | Rsa1.0.01656.1 | 1953 | 41494  | 0         | 840  | 864  | 97 -  | 757  | 1619 | 14762  | 15624  |
| UN22899 | Rsa1.0.02496.1 | 723  | 30814  | 1.00E-137 | 310  | 328  | 94 -  | 397  | 723  | 14658  | 14984  |
| UN22900 | Rsa1.0.00350.1 | 1988 | 92346  | 1.00E-103 | 207  | 212  | 97 +  | 356  | 567  | 7323   | 7534   |
| UN22901 | Rsa1.0.07105.1 | 765  | 9886   | 0         | 446  | 455  | 98 -  | 313  | 765  | 1392   | 1845   |
| UN22902 | Rsa1.0.00081.1 | 1051 | 143261 | 1.00E-145 | 289  | 296  | 97 -  | 13   | 306  | 134326 | 134620 |
| UN22903 | Rsa1.0.00931.1 | 801  | 59210  | 1.00E-178 | 423  | 456  | 92 -  | 332  | 780  | 26259  | 26698  |
| UN22904 | Rsa1.0.00068.1 | 1636 | 151813 | 0         | 695  | 735  | 94 -  | 13   | 727  | 104236 | 104965 |
| UN22905 | Rsa1.0.05218.1 | 741  | 14457  | 2.00E-82  | 165  | 168  | 98 +  | 2    | 169  | 4209   | 4376   |
| UN22906 | Rsa1.0.00008.1 | 839  | 358124 | 0         | 438  | 441  | 99 +  | 1    | 441  | 201147 | 201587 |
| UN22907 | Rsa1.0.00431.1 | 905  | 85391  | 0         | 883  | 919  | 96 +  | 3    | 905  | 6070   | 6987   |
| UN22908 | Rsa1.0.00459.1 | 745  | 82580  | 1.00E-157 | 298  | 302  | 98 -  | 445  | 745  | 56625  | 56926  |
| UN22909 | Rsa1.0.01355.1 | 645  | 47303  | 0         | 375  | 381  | 98 +  | 1    | 381  | 25812  | 26192  |
| UN22910 | Rsa1.0.00092.1 | 1235 | 659932 | 0         | 334  | 336  | 99 -  | 6    | 341  | 519402 | 519737 |
| UN22911 | Rsa1.0.00101.1 | 819  | 267193 | 1.00E-150 | 281  | 285  | 98 +  | 409  | 693  | 258416 | 258700 |
| UN22912 | Rsa1.0.00636.1 | 1402 | 71113  | 0         | 552  | 558  | 98 -  | 3    | 559  | 58750  | 59304  |
| UN22913 | Rsa1.0.00272.1 | 1017 | 447836 | 0         | 378  | 379  | 99 -  | 21   | 399  | 83797  | 84175  |
| UN22914 | Rsa1.0.02471.1 | 629  | 31104  | 0         | 364  | 369  | 98 +  | 2    | 370  | 24371  | 24739  |
| UN22915 | Rsa1.0.01015.1 | 1495 | 56752  | 0         | 510  | 524  | 97 +  | 3    | 524  | 1086   | 1608   |
| UN22916 | Rsa1.0.00221.1 | 1880 | 106972 | 0         | 401  | 421  | 95 +  | 1466 | 1874 | 3248   | 3668   |
| UN22917 | Rsa1.0.04470.1 | 1114 | 17204  | 1.00E-176 | 319  | 321  | 99 +  | 792  | 1112 | 4465   | 4785   |
| UN22918 | Rsa1.0.00413.1 | 1153 | 86921  | 1.00E-161 | 311  | 318  | 97 -  | 28   | 345  | 10794  | 11108  |
| UN22919 | Rsa1.0.00018.1 | 1429 | 410899 | 0         | 407  | 410  | 99 -  | 1    | 410  | 406316 | 406724 |
| UN22920 | Rsa1.0.00463.1 | 1705 | 189177 | 0         | 561  | 569  | 98 -  | 1136 | 1704 | 15168  | 15736  |
| UN22921 | Rsa1.0.02522.1 | 1332 | 30548  | 0         | 503  | 503  | 100 - | 717  | 1219 | 27459  | 27961  |
| UN22922 | Rsa1.0.47960.1 | 1187 | 472    | 1.00E-157 | 282  | 282  | 100 - | 396  | 677  | 135    | 416    |
| UN22923 | Rsa1.0.20054.1 | 1268 | 1347   | 1.00E-109 | 204  | 205  | 99 +  | 600  | 804  | 1083   | 1287   |
| UN22924 | Rsa1.0.00131.1 | 817  | 432233 | 0         | 518  | 545  | 95 -  | 248  | 792  | 387627 | 388167 |
| UN22925 | Rsa1.0.02449.1 | 1107 | 31292  | 1.00E-111 | 204  | 204  | 100 - | 904  | 1107 | 13256  | 13459  |
| UN22926 | Rsa1.0.00406.1 | 1386 | 87398  | 0         | 657  | 658  | 99 -  | 1    | 658  | 75093  | 75750  |
| UN22927 | Rsa1.0.05689.1 | 1734 | 12927  | 1.00E-118 | 222  | 224  | 99 +  | 1019 | 1242 | 8752   | 8975   |
| UN22928 | Rsa1.0.00978.1 | 486  | 57739  | 3.00E-40  | 119  | 128  | 92 -  | 3    | 130  | 4434   | 4553   |
| UN22929 | Rsa1.0.01778.1 | 1169 | 39509  | 1.00E-120 | 310  | 335  | 92 -  | 825  | 1157 | 16190  | 16512  |
| UN22930 | Rsa1.0.00759.1 | 823  | 65465  | 1.00E-163 | 298  | 300  | 99 +  | 8    | 307  | 10810  | 11109  |

|         |                |      |        |           |      |      |       |      |      |        |        |
|---------|----------------|------|--------|-----------|------|------|-------|------|------|--------|--------|
| UN22931 | Rsa1.0.00409.1 | 2485 | 146788 | 0         | 949  | 966  | 98 +  | 396  | 1359 | 130747 | 131712 |
| UN22932 | Rsa1.0.04760.1 | 881  | 16105  | 1.00E-143 | 271  | 274  | 98 -  | 604  | 877  | 5848   | 6120   |
| UN22933 | Rsa1.0.02036.1 | 514  | 35731  | 0         | 507  | 514  | 98 -  | 1    | 512  | 26464  | 26977  |
| UN22934 | Rsa1.0.01957.1 | 1552 | 36844  | 0         | 976  | 996  | 97 +  | 2    | 996  | 16726  | 17721  |
| UN22935 | Rsa1.0.00483.1 | 948  | 81102  | 1.00E-160 | 366  | 386  | 94 -  | 1    | 382  | 51013  | 51392  |
| UN22936 | Rsa1.0.00662.1 | 2126 | 192183 | 0         | 618  | 658  | 93 +  | 592  | 1235 | 2200   | 2857   |
| UN22937 | Rsa1.0.00962.1 | 955  | 184909 | 0         | 945  | 951  | 99 +  | 3    | 953  | 51791  | 52738  |
| UN22938 | Rsa1.0.08928.1 | 2525 | 6781   | 0         | 1948 | 1978 | 98 -  | 3    | 1979 | 123    | 2097   |
| UN22939 | Rsa1.0.04696.1 | 4563 | 16339  | 1.00E-137 | 409  | 456  | 89 +  | 2204 | 2649 | 12501  | 12950  |
| UN22940 | Rsa1.0.00706.1 | 1260 | 291570 | 0         | 416  | 431  | 96 +  | 832  | 1258 | 240972 | 241398 |
| UN22941 | Rsa1.0.00120.1 | 756  | 277288 | 1.00E-175 | 366  | 382  | 95 +  | 362  | 740  | 266327 | 266707 |
| UN22942 | Rsa1.0.03995.1 | 1779 | 19654  | 0         | 644  | 646  | 99 +  | 1123 | 1768 | 3701   | 4346   |
| UN22943 | Rsa1.0.11258.1 | 512  | 5566   | 1.00E-165 | 294  | 294  | 100 - | 198  | 491  | 1      | 294    |
| UN22944 | Rsa1.0.01068.1 | 956  | 55208  | 1.00E-164 | 336  | 350  | 96 -  | 3    | 352  | 46500  | 46845  |
| UN22945 | Rsa1.0.02043.1 | 1459 | 163754 | 0         | 1159 | 1171 | 98 +  | 290  | 1459 | 156879 | 158049 |
| UN22946 | Rsa1.0.00112.1 | 1084 | 132199 | 0         | 480  | 485  | 98 -  | 589  | 1070 | 72864  | 73348  |
| UN22947 | Rsa1.0.01635.1 | 718  | 41865  | 0         | 534  | 565  | 94 -  | 145  | 702  | 7246   | 7801   |
| UN22948 | Rsa1.0.07565.1 | 1334 | 9122   | 0         | 712  | 727  | 97 +  | 611  | 1334 | 4744   | 5469   |
| UN22949 | Rsa1.0.03818.1 | 1072 | 20668  | 0         | 434  | 440  | 98 -  | 2    | 440  | 18130  | 18569  |
| UN22950 | Rsa1.0.14292.1 | 2374 | 3569   | 0         | 643  | 673  | 95 +  | 1019 | 1680 | 1368   | 2037   |
| UN22951 | Rsa1.0.00064.1 | 1005 | 240927 | 0         | 352  | 355  | 99 -  | 1    | 355  | 35983  | 36337  |
| UN22952 | Rsa1.0.00082.1 | 1021 | 237584 | 1.00E-122 | 345  | 382  | 90 +  | 1    | 380  | 53578  | 53947  |
| UN22953 | Rsa1.0.01203.1 | 1554 | 50848  | 0         | 408  | 432  | 94 +  | 10   | 441  | 40692  | 41114  |
| UN22954 | Rsa1.0.03406.1 | 842  | 23159  | 0         | 517  | 522  | 99 +  | 7    | 528  | 15481  | 16002  |
| UN22955 | Rsa1.0.06185.1 | 1485 | 11540  | 0         | 506  | 506  | 100 + | 574  | 1079 | 1688   | 2193   |
| UN22956 | Rsa1.0.02139.1 | 2181 | 34686  | 0         | 644  | 647  | 99 -  | 345  | 991  | 21220  | 21866  |
| UN22957 | Rsa1.0.02204.1 | 1053 | 33930  | 1.00E-132 | 298  | 314  | 94 -  | 743  | 1053 | 20608  | 20915  |
| UN22958 | Rsa1.0.37428.1 | 1213 | 602    | 0         | 552  | 554  | 99 +  | 29   | 582  | 1      | 554    |
| UN22959 | Rsa1.0.04113.1 | 1711 | 18986  | 1.00E-134 | 273  | 284  | 96 +  | 1187 | 1470 | 10364  | 10638  |
| UN22960 | Rsa1.0.00286.1 | 1636 | 98709  | 1.00E-108 | 238  | 248  | 95 +  | 1350 | 1597 | 23786  | 24027  |
| UN22961 | Rsa1.0.00522.1 | 1935 | 78103  | 0         | 357  | 357  | 100 - | 55   | 411  | 62843  | 63199  |
| UN22962 | Rsa1.0.00023.1 | 1614 | 194764 | 0         | 624  | 641  | 97 -  | 1    | 633  | 118142 | 118782 |
| UN22963 | Rsa1.0.00370.1 | 1437 | 90472  | 0         | 376  | 380  | 98 -  | 1058 | 1437 | 73384  | 73762  |
| UN22964 | Rsa1.0.46994.1 | 2077 | 481    | 0         | 472  | 484  | 97 -  | 91   | 568  | 1      | 481    |
| UN22965 | Rsa1.0.02742.1 | 1807 | 28284  | 0         | 1774 | 1808 | 98 +  | 1    | 1807 | 25694  | 27501  |
| UN22966 | Rsa1.0.00027.1 | 2189 | 283362 | 0         | 553  | 615  | 89 +  | 1574 | 2188 | 22417  | 23031  |
| UN22967 | Rsa1.0.00258.1 | 1594 | 102381 | 0         | 1034 | 1043 | 99 -  | 554  | 1594 | 83723  | 84764  |
| UN22968 | Rsa1.0.01809.1 | 1685 | 39004  | 0         | 898  | 905  | 99 +  | 778  | 1682 | 25375  | 26279  |
| UN22969 | Rsa1.0.01007.1 | 1256 | 56933  | 0         | 408  | 413  | 98 -  | 760  | 1172 | 30857  | 31269  |

|         |                |      |        |           |      |      |       |      |      |        |        |
|---------|----------------|------|--------|-----------|------|------|-------|------|------|--------|--------|
| UN22970 | Rsa1.0.00663.1 | 2344 | 164969 | 0         | 656  | 661  | 99 +  | 701  | 1361 | 121912 | 122572 |
| UN22971 | Rsa1.0.00380.1 | 556  | 89748  | 1.00E-121 | 245  | 251  | 97 +  | 308  | 556  | 8474   | 8722   |
| UN22972 | Rsa1.0.12609.1 | 1949 | 5175   | 0         | 576  | 617  | 93 +  | 1128 | 1720 | 1026   | 1638   |
| UN22973 | Rsa1.0.00522.1 | 2132 | 78103  | 0         | 405  | 409  | 99 -  | 868  | 1272 | 36235  | 36643  |
| UN22974 | Rsa1.0.00128.1 | 1951 | 228675 | 1.00E-106 | 229  | 240  | 95 +  | 1324 | 1563 | 89116  | 89355  |
| UN22975 | Rsa1.0.00058.1 | 980  | 159921 | 0         | 450  | 451  | 99 +  | 1    | 451  | 150847 | 151297 |
| UN22976 | Rsa1.0.01186.1 | 866  | 51418  | 0         | 852  | 863  | 98 +  | 4    | 866  | 45744  | 46606  |
| UN22977 | Rsa1.0.04696.1 | 4470 | 16339  | 0         | 577  | 648  | 89 +  | 94   | 741  | 11862  | 12499  |
| UN22978 | Rsa1.0.00202.1 | 1025 | 185895 | 0         | 369  | 373  | 98 -  | 1    | 373  | 4685   | 5054   |
| UN22979 | Rsa1.0.01629.1 | 1073 | 41917  | 0         | 395  | 396  | 99 -  | 678  | 1073 | 13287  | 13682  |
| UN22980 | Rsa1.0.00222.1 | 1166 | 172263 | 0         | 511  | 526  | 97 +  | 643  | 1166 | 69472  | 69994  |
| UN22981 | Rsa1.0.03319.1 | 1272 | 23767  | 0         | 619  | 622  | 99 +  | 651  | 1272 | 23035  | 23656  |
| UN22982 | Rsa1.0.13891.1 | 478  | 4144   | 0         | 418  | 437  | 95 +  | 4    | 435  | 754    | 1186   |
| UN22983 | Rsa1.0.00269.1 | 1563 | 341668 | 0         | 339  | 344  | 98 +  | 913  | 1256 | 192836 | 193179 |
| UN22984 | Rsa1.0.01869.1 | 817  | 37928  | 0         | 398  | 409  | 97 -  | 413  | 817  | 280    | 687    |
| UN22985 | Rsa1.0.00159.1 | 829  | 431686 | 1.00E-176 | 328  | 332  | 98 +  | 500  | 829  | 325900 | 326231 |
| UN22986 | Rsa1.0.00359.1 | 1340 | 91256  | 1.00E-145 | 338  | 357  | 94 +  | 989  | 1337 | 90578  | 90932  |
| UN22987 | Rsa1.0.00336.1 | 1100 | 445051 | 0         | 798  | 802  | 99 +  | 298  | 1099 | 145621 | 146422 |
| UN22988 | Rsa1.0.01799.1 | 1557 | 39127  | 0         | 846  | 856  | 98 -  | 705  | 1556 | 34840  | 35694  |
| UN22989 | Rsa1.0.00052.1 | 619  | 162771 | 1.00E-156 | 280  | 280  | 100 - | 1    | 280  | 98435  | 98714  |
| UN22990 | Rsa1.0.03560.1 | 1243 | 22092  | 0         | 355  | 360  | 98 +  | 378  | 737  | 2543   | 2902   |
| UN22991 | Rsa1.0.00111.1 | 1976 | 390088 | 0         | 383  | 394  | 97 +  | 317  | 709  | 381107 | 381500 |
| UN22992 | Rsa1.0.05239.1 | 797  | 14410  | 0         | 449  | 450  | 99 +  | 1    | 449  | 11672  | 12121  |
| UN22993 | Rsa1.0.20942.1 | 1168 | 1252   | 1.00E-172 | 309  | 310  | 99 -  | 859  | 1168 | 825    | 1134   |
| UN22994 | Rsa1.0.17320.1 | 1037 | 1861   | 1.00E-163 | 310  | 315  | 98 -  | 714  | 1027 | 286    | 600    |
| UN22995 | Rsa1.0.02288.1 | 3310 | 32984  | 0         | 367  | 380  | 96 +  | 2392 | 2762 | 32605  | 32984  |
| UN22996 | Rsa1.0.01201.1 | 961  | 50856  | 0         | 710  | 718  | 98 -  | 1    | 717  | 6024   | 6741   |
| UN22997 | Rsa1.0.14576.1 | 1050 | 3250   | 1.00E-174 | 313  | 314  | 99 -  | 240  | 553  | 2525   | 2838   |
| UN22998 | Rsa1.0.19197.1 | 840  | 1466   | 1.00E-133 | 253  | 257  | 98 +  | 3    | 259  | 1093   | 1349   |
| UN22999 | Rsa1.0.04057.1 | 1339 | 19333  | 0         | 618  | 628  | 98 -  | 1    | 627  | 3402   | 4029   |
| UN23000 | Rsa1.0.01287.1 | 2091 | 49195  | 0         | 1253 | 1409 | 88 +  | 374  | 1774 | 18219  | 19604  |
| UN23001 | Rsa1.0.02944.1 | 3344 | 26553  | 0         | 493  | 498  | 98 -  | 1218 | 1715 | 15940  | 16437  |
| UN23002 | Rsa1.0.02000.1 | 1338 | 36210  | 1.00E-136 | 285  | 296  | 96 +  | 1046 | 1336 | 4950   | 5245   |
| UN23003 | Rsa1.0.03263.1 | 2087 | 24268  | 0         | 500  | 500  | 100 + | 1    | 500  | 1861   | 2360   |
| UN23004 | Rsa1.0.02347.1 | 1469 | 32332  | 0         | 539  | 541  | 99 +  | 1    | 541  | 18589  | 19129  |
| UN23005 | Rsa1.0.07389.1 | 1741 | 9479   | 0         | 490  | 505  | 97 -  | 1237 | 1741 | 548    | 1045   |
| UN23006 | Rsa1.0.01245.1 | 1416 | 149868 | 0         | 572  | 625  | 91 +  | 812  | 1415 | 37644  | 38256  |
| UN23007 | Rsa1.0.00461.1 | 1886 | 82509  | 0         | 932  | 943  | 98 -  | 349  | 1290 | 19429  | 20371  |
| UN23008 | Rsa1.0.02150.1 | 843  | 34580  | 0         | 377  | 379  | 99 +  | 429  | 807  | 34063  | 34441  |



|         |                |      |        |           |      |      |       |      |      |        |        |
|---------|----------------|------|--------|-----------|------|------|-------|------|------|--------|--------|
| UN23009 | Rsa1.0_04755.1 | 1506 | 16121  | 0         | 361  | 367  | 98 +  | 1140 | 1506 | 12065  | 12431  |
| UN23010 | Rsa1.0_01405.1 | 1208 | 46445  | 0         | 611  | 621  | 98 +  | 588  | 1208 | 11767  | 12385  |
| UN23011 | Rsa1.0_01184.1 | 995  | 51452  | 0         | 381  | 383  | 99 +  | 245  | 627  | 26949  | 27331  |
| UN23012 | Rsa1.0_01648.1 | 805  | 41635  | 0         | 645  | 646  | 99 +  | 1    | 645  | 15644  | 16289  |
| UN23013 | Rsa1.0_00978.1 | 1199 | 57739  | 1.00E-159 | 312  | 317  | 98 -  | 884  | 1199 | 43626  | 43940  |
| UN23014 | Rsa1.0_02768.1 | 1723 | 28110  | 1.00E-157 | 291  | 294  | 98 -  | 2    | 295  | 6687   | 6980   |
| UN23015 | Rsa1.0_00101.1 | 797  | 267193 | 0         | 794  | 797  | 99 +  | 1    | 795  | 15468  | 16264  |
| UN23016 | Rsa1.0_00590.1 | 4076 | 73835  | 0         | 619  | 677  | 91 +  | 3252 | 3916 | 9530   | 10197  |
| UN23017 | Rsa1.0_00436.1 | 2696 | 85008  | 0         | 553  | 553  | 100 - | 1077 | 1629 | 1858   | 2410   |
| UN23018 | Rsa1.0_00016.1 | 896  | 831256 | 0         | 469  | 469  | 100 - | 428  | 896  | 426933 | 427401 |
| UN23019 | Rsa1.0_00990.1 | 1440 | 57445  | 0         | 551  | 551  | 100 - | 94   | 644  | 42846  | 43396  |
| UN23020 | Rsa1.0_04355.1 | 1606 | 146733 | 0         | 578  | 607  | 95 +  | 3    | 604  | 3231   | 3831   |
| UN23021 | Rsa1.0_00451.1 | 1443 | 322533 | 1.00E-151 | 355  | 374  | 94 +  | 12   | 380  | 283315 | 283684 |
| UN23022 | Rsa1.0_00991.1 | 1475 | 143101 | 0         | 604  | 605  | 99 -  | 872  | 1475 | 33489  | 34093  |
| UN23023 | Rsa1.0_01115.1 | 1020 | 183545 | 0         | 385  | 392  | 98 -  | 3    | 391  | 6514   | 6904   |
| UN23024 | Rsa1.0_00977.1 | 1893 | 198001 | 0         | 428  | 467  | 91 +  | 1417 | 1872 | 47164  | 47618  |
| UN23025 | #              | #    | #      | #         | #    | #    | #     | #    | #    | #      | #      |
| UN23026 | Rsa1.0_00351.1 | 1065 | 413096 | 0         | 430  | 432  | 99 -  | 1    | 432  | 3047   | 3478   |
| UN23027 | Rsa1.0_00043.1 | 767  | 264937 | 0         | 337  | 337  | 100 + | 1    | 337  | 259861 | 260197 |
| UN23028 | Rsa1.0_00121.1 | 852  | 278029 | 1.00E-117 | 236  | 242  | 97 +  | 612  | 852  | 6631   | 6872   |
| UN23029 | Rsa1.0_04483.1 | 802  | 17174  | 1.00E-168 | 311  | 315  | 98 +  | 3    | 317  | 7565   | 7879   |
| UN23030 | Rsa1.0_01603.1 | 760  | 42468  | 0         | 747  | 754  | 99 +  | 7    | 760  | 8936   | 9684   |
| UN23031 | Rsa1.0_38829.1 | 389  | 579    | 1.00E-106 | 201  | 203  | 99 +  | 187  | 389  | 32     | 234    |
| UN23032 | Rsa1.0_00150.1 | 640  | 154416 | 0         | 346  | 346  | 100 + | 4    | 349  | 151413 | 151758 |
| UN23033 | Rsa1.0_00097.1 | 1246 | 138858 | 0         | 417  | 417  | 100 + | 458  | 874  | 26177  | 26593  |
| UN23034 | Rsa1.0_04254.1 | 546  | 18258  | 1.00E-108 | 202  | 203  | 99 -  | 125  | 327  | 5539   | 5741   |
| UN23035 | Rsa1.0_01195.1 | 748  | 147988 | 0         | 737  | 737  | 100 - | 5    | 741  | 15379  | 16115  |
| UN23036 | Rsa1.0_00439.1 | 1305 | 142776 | 0         | 752  | 752  | 100 + | 193  | 944  | 20147  | 20898  |
| UN23037 | #              | #    | #      | #         | #    | #    | #     | #    | #    | #      | #      |
| UN23038 | Rsa1.0_02508.1 | 1108 | 30675  | 0         | 573  | 583  | 98 -  | 3    | 585  | 20736  | 21318  |
| UN23039 | Rsa1.0_00187.1 | 1000 | 393093 | 0         | 434  | 453  | 95 +  | 78   | 529  | 212078 | 212530 |
| UN23040 | Rsa1.0_17354.1 | 561  | 1851   | 0         | 415  | 419  | 99 -  | 143  | 561  | 283    | 701    |
| UN23041 | Rsa1.0_01997.1 | 1463 | 158416 | 1.00E-151 | 318  | 334  | 95 -  | 600  | 927  | 1002   | 1329   |
| UN23042 | Rsa1.0_02116.1 | 1380 | 34853  | 0         | 1323 | 1373 | 96 +  | 1    | 1370 | 30548  | 31892  |
| UN23043 | Rsa1.0_01327.1 | 1282 | 48033  | 1.00E-139 | 321  | 340  | 94 -  | 938  | 1276 | 14644  | 14977  |
| UN23044 | Rsa1.0_19149.1 | 946  | 1472   | 1.00E-164 | 305  | 309  | 98 +  | 397  | 705  | 257    | 565    |
| UN23045 | Rsa1.0_00628.1 | 1244 | 214360 | 1.00E-169 | 329  | 337  | 97 -  | 1    | 335  | 184065 | 184401 |
| UN23046 | Rsa1.0_00369.1 | 1133 | 266462 | 0         | 709  | 711  | 99 +  | 1    | 709  | 118781 | 119491 |
| UN23047 | Rsa1.0_03369.1 | 1503 | 23381  | 0         | 637  | 664  | 95 -  | 496  | 1156 | 10035  | 10691  |

|         |                |      |        |           |     |     |       |      |      |        |        |
|---------|----------------|------|--------|-----------|-----|-----|-------|------|------|--------|--------|
| UN23048 | Rsa1.0.00351.1 | 981  | 413096 | 0         | 434 | 444 | 97 -  | 7    | 450  | 3047   | 3489   |
| UN23049 | Rsa1.0.00037.1 | 1311 | 307838 | 0         | 923 | 958 | 96 -  | 354  | 1311 | 175871 | 176825 |
| UN23050 | Rsa1.0.00855.1 | 895  | 62047  | 0         | 446 | 452 | 98 +  | 3    | 453  | 9526   | 9977   |
| UN23051 | Rsa1.0.05850.1 | 1174 | 12425  | 1.00E-110 | 203 | 203 | 100 - | 3    | 205  | 1182   | 1384   |
| UN23052 | Rsa1.0.11007.1 | 663  | 5650   | 0         | 645 | 654 | 98 +  | 4    | 657  | 131    | 784    |
| UN23053 | Rsa1.0.01835.1 | 678  | 38542  | 0         | 401 | 417 | 96 -  | 256  | 671  | 24224  | 24638  |
| UN23054 | Rsa1.0.00318.1 | 1165 | 96094  | 0         | 323 | 323 | 100 - | 841  | 1163 | 28125  | 28447  |
| UN23055 | Rsa1.0.00135.1 | 1978 | 178077 | 0         | 744 | 751 | 99 -  | 886  | 1636 | 165548 | 166298 |
| UN23056 | Rsa1.0.58152.1 | 1870 | 393    | 1.00E-101 | 188 | 188 | 100 + | 84   | 271  | 1      | 188    |
| UN23057 | Rsa1.0.03303.1 | 894  | 23890  | 0         | 381 | 385 | 98 +  | 510  | 892  | 4111   | 4495   |
| UN23058 | Rsa1.0.00124.1 | 1551 | 262503 | 0         | 790 | 825 | 95 -  | 726  | 1550 | 64156  | 64979  |
| UN23059 | Rsa1.0.01362.1 | 892  | 47217  | 5.00E-74  | 148 | 150 | 98 -  | 264  | 413  | 30107  | 30256  |
| UN23060 | Rsa1.0.01998.1 | 827  | 36276  | 0         | 811 | 826 | 98 +  | 3    | 827  | 665    | 1488   |
| UN23061 | Rsa1.0.02226.1 | 626  | 33726  | 1.00E-131 | 306 | 327 | 93 +  | 310  | 626  | 27340  | 27666  |
| UN23062 | Rsa1.0.01394.1 | 991  | 46641  | 0         | 719 | 734 | 97 +  | 1    | 732  | 21699  | 22430  |
| UN23063 | Rsa1.0.00668.1 | 862  | 69421  | 1.00E-162 | 320 | 328 | 97 -  | 11   | 334  | 14760  | 15087  |
| UN23064 | Rsa1.0.03019.1 | 879  | 25987  | 1.00E-147 | 271 | 273 | 99 -  | 164  | 436  | 18013  | 18285  |
| UN23065 | Rsa1.0.05447.1 | 898  | 13713  | 0         | 889 | 896 | 99 -  | 1    | 896  | 3051   | 3946   |
| UN23066 | Rsa1.0.01413.1 | 2531 | 46275  | 0         | 590 | 599 | 98 +  | 898  | 1495 | 41833  | 42429  |
| UN23067 | Rsa1.0.01146.1 | 957  | 163455 | 1.00E-111 | 249 | 257 | 96 -  | 1    | 254  | 25092  | 25346  |
| UN23068 | Rsa1.0.00904.1 | 1040 | 180594 | 0         | 492 | 499 | 98 +  | 542  | 1040 | 19352  | 19850  |
| UN23069 | Rsa1.0.00044.1 | 1031 | 271658 | 1.00E-126 | 232 | 233 | 99 +  | 798  | 1030 | 156769 | 157001 |
| UN23070 | Rsa1.0.24305.1 | 881  | 994    | 1.00E-141 | 267 | 271 | 98 +  | 374  | 644  | 655    | 925    |
| UN23071 | Rsa1.0.00227.1 | 1054 | 105849 | 0         | 446 | 448 | 99 -  | 606  | 1053 | 9002   | 9449   |
| UN23072 | Rsa1.0.00273.1 | 845  | 326186 | 0         | 820 | 843 | 97 +  | 4    | 845  | 45172  | 46010  |
| UN23073 | Rsa1.0.00087.1 | 630  | 761073 | 1.00E-144 | 280 | 287 | 97 -  | 47   | 333  | 532514 | 532800 |
| UN23074 | Rsa1.0.02494.1 | 810  | 132923 | 0         | 781 | 808 | 96 -  | 3    | 805  | 6063   | 6869   |
| UN23075 | Rsa1.0.02879.1 | 873  | 27047  | 0         | 474 | 490 | 96 -  | 21   | 507  | 18068  | 18552  |
| UN23076 | Rsa1.0.00492.1 | 1204 | 80178  | 1.00E-107 | 231 | 239 | 96 +  | 25   | 260  | 899    | 1135   |
| UN23077 | Rsa1.0.00351.1 | 1031 | 413096 | 0         | 391 | 404 | 96 +  | 634  | 1031 | 3050   | 3453   |
| UN23078 | Rsa1.0.00202.1 | 511  | 185895 | 1.00E-119 | 217 | 217 | 100 + | 3    | 219  | 11697  | 11913  |
| UN23079 | Rsa1.0.05279.1 | 1767 | 14277  | 1.00E-177 | 316 | 316 | 100 + | 3    | 318  | 11523  | 11838  |
| UN23080 | Rsa1.0.00457.1 | 1043 | 337301 | 0         | 468 | 472 | 99 +  | 572  | 1043 | 197550 | 198021 |
| UN23081 | Rsa1.0.00653.1 | 688  | 70029  | 0         | 441 | 445 | 99 -  | 244  | 688  | 37056  | 37500  |
| UN23082 | Rsa1.0.01060.1 | 1114 | 55368  | 0         | 762 | 793 | 96 -  | 25   | 803  | 42018  | 42809  |
| UN23083 | Rsa1.0.02158.1 | 957  | 154841 | 0         | 520 | 536 | 97 +  | 175  | 710  | 131881 | 132416 |
| UN23084 | Rsa1.0.00229.1 | 1197 | 105471 | 1.00E-178 | 353 | 365 | 96 -  | 2    | 366  | 43352  | 43716  |
| UN23085 | Rsa1.0.00013.1 | 1020 | 292129 | 1.00E-125 | 238 | 240 | 99 -  | 1    | 239  | 73022  | 73261  |
| UN23086 | Rsa1.0.00320.1 | 1694 | 95784  | 0         | 574 | 581 | 98 +  | 1112 | 1692 | 9746   | 10325  |

|         |                |      |        |           |      |      |       |      |      |        |        |
|---------|----------------|------|--------|-----------|------|------|-------|------|------|--------|--------|
| UN23087 | Rsa1.0.07959.1 | 676  | 8173   | 0         | 362  | 366  | 98 +  | 6    | 371  | 5555   | 5919   |
| UN23088 | Rsa1.0.01731.1 | 1692 | 40208  | 0         | 587  | 607  | 96 -  | 15   | 621  | 19840  | 20438  |
| UN23089 | Rsa1.0.07693.1 | 936  | 8776   | 1.00E-163 | 355  | 376  | 94 -  | 312  | 687  | 7062   | 7437   |
| UN23090 | Rsa1.0.01497.1 | 1022 | 44559  | 0         | 378  | 378  | 100 + | 645  | 1022 | 42441  | 42818  |
| UN23091 | Rsa1.0.00055.1 | 1118 | 520193 | 0         | 397  | 398  | 99 +  | 1    | 398  | 207379 | 207776 |
| UN23092 | Rsa1.0.00016.1 | 1255 | 831256 | 0         | 430  | 441  | 97 +  | 200  | 640  | 59358  | 59792  |
| UN23093 | Rsa1.0.00112.1 | 1441 | 132199 | 0         | 1114 | 1145 | 97 +  | 306  | 1441 | 104957 | 106096 |
| UN23094 | Rsa1.0.00502.1 | 1206 | 204180 | 0         | 368  | 384  | 95 -  | 822  | 1205 | 11653  | 12024  |
| UN23095 | Rsa1.0.00351.1 | 749  | 413096 | 1.00E-119 | 239  | 246  | 97 +  | 257  | 502  | 2503   | 2748   |
| UN23096 | Rsa1.0.00457.1 | 1228 | 337301 | 0         | 418  | 434  | 96 -  | 1    | 433  | 142257 | 142686 |
| UN23097 | Rsa1.0.00067.1 | 1101 | 415055 | 1.00E-138 | 286  | 298  | 95 -  | 466  | 763  | 226606 | 226903 |
| UN23098 | Rsa1.0.01214.1 | 969  | 50599  | 1.00E-172 | 391  | 415  | 94 -  | 1    | 400  | 46274  | 46685  |
| UN23099 | Rsa1.0.00039.1 | 1075 | 296927 | 0         | 793  | 796  | 99 -  | 280  | 1075 | 133710 | 134505 |
| UN23100 | Rsa1.0.00017.1 | 759  | 752458 | 0         | 354  | 359  | 98 -  | 388  | 746  | 398381 | 398738 |
| UN23101 | Rsa1.0.00482.1 | 1037 | 81162  | 1.00E-109 | 201  | 201  | 100 + | 661  | 861  | 8135   | 8335   |
| UN23102 | Rsa1.0.03693.1 | 468  | 21337  | 0         | 322  | 322  | 100 + | 3    | 324  | 16639  | 16960  |
| UN23103 | Rsa1.0.19694.1 | 993  | 1396   | 0         | 435  | 435  | 100 - | 3    | 437  | 490    | 924    |
| UN23104 | Rsa1.0.01203.1 | 1079 | 50848  | 1.00E-151 | 274  | 275  | 99 -  | 805  | 1079 | 48500  | 48774  |
| UN23105 | Rsa1.0.15363.1 | 603  | 2655   | 0         | 576  | 617  | 93 -  | 1    | 600  | 1688   | 2304   |
| UN23106 | Rsa1.0.05501.1 | 1457 | 13513  | 0         | 418  | 435  | 96 +  | 1009 | 1443 | 1399   | 1829   |
| UN23107 | Rsa1.0.00890.1 | 2540 | 323870 | 0         | 492  | 508  | 96 +  | 1    | 508  | 169176 | 169680 |
| UN23108 | Rsa1.0.08445.1 | 1594 | 7344   | 1.00E-172 | 325  | 331  | 98 -  | 2    | 332  | 5908   | 6238   |
| UN23109 | Rsa1.0.01980.1 | 755  | 36544  | 0         | 482  | 494  | 97 +  | 262  | 755  | 32527  | 33016  |
| UN23110 | Rsa1.0.00019.1 | 1866 | 301669 | 0         | 580  | 583  | 99 +  | 11   | 593  | 270305 | 270885 |
| UN23111 | Rsa1.0.19408.1 | 739  | 1436   | 1.00E-160 | 286  | 286  | 100 + | 454  | 739  | 391    | 676    |
| UN23112 | Rsa1.0.00237.1 | 1045 | 235974 | 0         | 496  | 500  | 99 -  | 412  | 910  | 58242  | 58740  |
| UN23113 | Rsa1.0.02295.1 | 1723 | 149884 | 0         | 959  | 981  | 97 +  | 96   | 1075 | 118179 | 119156 |
| UN23114 | Rsa1.0.00065.1 | 704  | 454616 | 1.00E-152 | 293  | 300  | 97 -  | 102  | 401  | 231797 | 232096 |
| UN23115 | Rsa1.0.00779.1 | 1148 | 64568  | 0         | 352  | 352  | 100 - | 796  | 1147 | 46981  | 47332  |
| UN23116 | Rsa1.0.01506.1 | 480  | 44370  | 1.00E-147 | 291  | 299  | 97 -  | 185  | 480  | 17882  | 18180  |
| UN23117 | Rsa1.0.01078.1 | 906  | 316910 | 0         | 885  | 904  | 97 -  | 3    | 906  | 137033 | 137935 |
| UN23118 | Rsa1.0.00699.1 | 917  | 184398 | 1.00E-167 | 334  | 342  | 97 -  | 579  | 917  | 55743  | 56083  |
| UN23119 | Rsa1.0.00358.1 | 939  | 91293  | 1.00E-118 | 273  | 290  | 94 -  | 654  | 939  | 20860  | 21149  |
| UN23120 | Rsa1.0.00071.1 | 831  | 345714 | 0         | 402  | 428  | 93 -  | 1    | 414  | 142456 | 142876 |
| UN23121 | Rsa1.0.02124.1 | 1524 | 34780  | 0         | 1474 | 1503 | 98 +  | 1    | 1502 | 4369   | 5868   |
| UN23122 | Rsa1.0.07693.1 | 897  | 8776   | 0         | 369  | 376  | 98 -  | 309  | 684  | 7062   | 7437   |
| UN23123 | Rsa1.0.00158.1 | 938  | 117999 | 1.00E-141 | 277  | 284  | 97 +  | 659  | 938  | 100334 | 100617 |
| UN23124 | Rsa1.0.00237.1 | 1534 | 235974 | 0         | 823  | 879  | 93 -  | 178  | 1035 | 45583  | 46461  |
| UN23125 | Rsa1.0.01410.1 | 775  | 46345  | 0         | 333  | 336  | 99 -  | 296  | 631  | 33684  | 34019  |

|         |                |      |        |           |      |      |       |      |      |        |        |
|---------|----------------|------|--------|-----------|------|------|-------|------|------|--------|--------|
| UN23126 | Rsa1.0_01292.1 | 1085 | 175783 | 1.00E-159 | 300  | 305  | 98 -  | 475  | 779  | 140977 | 141281 |
| UN23127 | Rsa1.0_00130.1 | 1643 | 125737 | 0         | 1006 | 1025 | 98 +  | 619  | 1641 | 54118  | 55142  |
| UN23128 | Rsa1.0_00124.1 | 1120 | 262503 | 0         | 731  | 744  | 98 +  | 382  | 1119 | 163290 | 164032 |
| UN23129 | Rsa1.0_00190.1 | 1382 | 318240 | 0         | 417  | 417  | 100 - | 518  | 934  | 8210   | 8626   |
| UN23130 | Rsa1.0_00940.1 | 1064 | 179946 | 0         | 611  | 623  | 98 +  | 443  | 1064 | 175916 | 176537 |
| UN23131 | Rsa1.0_00931.1 | 1037 | 59210  | 1.00E-151 | 275  | 276  | 99 -  | 206  | 481  | 7084   | 7359   |
| UN23132 | Rsa1.0_00002.1 | 849  | 601661 | 0         | 582  | 589  | 98 +  | 1    | 588  | 405990 | 406577 |
| UN23133 | Rsa1.0_00764.1 | 1151 | 65056  | 1.00E-154 | 307  | 316  | 97 -  | 1    | 316  | 21209  | 21522  |
| UN23134 | Rsa1.0_00900.1 | 960  | 60367  | 0         | 615  | 617  | 99 -  | 344  | 960  | 17319  | 17935  |
| UN23135 | Rsa1.0_01140.1 | 1192 | 52586  | 0         | 563  | 595  | 94 +  | 598  | 1189 | 4637   | 5216   |
| UN23136 | Rsa1.0_04254.1 | 1402 | 18258  | 0         | 612  | 615  | 99 +  | 489  | 1103 | 14081  | 14695  |
| UN23137 | Rsa1.0_00037.1 | 1600 | 307838 | 0         | 977  | 997  | 97 -  | 555  | 1550 | 180789 | 181785 |
| UN23138 | Rsa1.0_00200.1 | 1261 | 162016 | 0         | 706  | 706  | 100 - | 1    | 706  | 108700 | 109405 |
| UN23139 | Rsa1.0_00627.1 | 769  | 71566  | 1.00E-106 | 225  | 231  | 97 +  | 541  | 769  | 5781   | 6010   |
| UN23140 | Rsa1.0_02374.1 | 1486 | 32043  | 1.00E-142 | 256  | 256  | 100 - | 3    | 258  | 27825  | 28080  |
| UN23141 | Rsa1.0_00543.1 | 1008 | 76788  | 1.00E-172 | 348  | 358  | 97 +  | 644  | 1000 | 8642   | 8996   |
| UN23142 | Rsa1.0_04544.1 | 1433 | 16917  | 0         | 754  | 764  | 98 -  | 133  | 896  | 6890   | 7653   |
| UN23143 | Rsa1.0_04022.1 | 739  | 19534  | 0         | 361  | 367  | 98 +  | 138  | 504  | 4139   | 4505   |
| UN23144 | Rsa1.0_06213.1 | 846  | 11478  | 0         | 466  | 484  | 96 +  | 1    | 478  | 1053   | 1535   |
| UN23145 | Rsa1.0_01633.1 | 999  | 41868  | 0         | 423  | 433  | 97 +  | 569  | 999  | 3035   | 3466   |
| UN23146 | Rsa1.0_03346.1 | 615  | 23589  | 0         | 584  | 599  | 97 -  | 1    | 597  | 10510  | 11108  |
| UN23147 | Rsa1.0_00029.1 | 763  | 272992 | 0         | 374  | 384  | 97 +  | 6    | 387  | 10187  | 10568  |
| UN23148 | Rsa1.0_04850.1 | 1328 | 15722  | 0         | 727  | 729  | 99 +  | 601  | 1328 | 7334   | 8062   |
| UN23149 | Rsa1.0_02713.1 | 1491 | 28470  | 0         | 505  | 509  | 99 +  | 219  | 727  | 24110  | 24618  |
| UN23150 | Rsa1.0_22403.1 | 797  | 1124   | 0         | 493  | 494  | 99 +  | 3    | 496  | 405    | 898    |
| UN23151 | Rsa1.0_00265.1 | 868  | 220635 | 0         | 459  | 465  | 98 +  | 407  | 868  | 197596 | 198060 |
| UN23152 | Rsa1.0_00434.1 | 1930 | 85171  | 0         | 836  | 858  | 97 +  | 330  | 1187 | 69753  | 70610  |
| UN23153 | Rsa1.0_19230.1 | 988  | 1460   | 1.00E-169 | 304  | 305  | 99 -  | 683  | 987  | 967    | 1271   |
| UN23154 | Rsa1.0_00048.1 | 1672 | 167185 | 0         | 429  | 430  | 99 -  | 27   | 456  | 2507   | 2936   |
| UN23155 | Rsa1.0_00170.1 | 1815 | 179538 | 0         | 345  | 348  | 99 +  | 424  | 771  | 141881 | 142228 |
| UN23156 | Rsa1.0_00136.1 | 2220 | 122464 | 1.00E-132 | 384  | 426  | 90 +  | 1207 | 1622 | 81116  | 81534  |
| UN23157 | Rsa1.0_00597.1 | 1686 | 73445  | 0         | 1562 | 1563 | 99 -  | 3    | 1565 | 9940   | 11502  |
| UN23158 | Rsa1.0_02811.1 | 899  | 27669  | 1.00E-122 | 250  | 258  | 96 -  | 644  | 899  | 1268   | 1521   |
| UN23159 | Rsa1.0_00002.1 | 895  | 601661 | 0         | 462  | 464  | 99 -  | 429  | 892  | 523556 | 524019 |
| UN23160 | Rsa1.0_00081.1 | 1901 | 143261 | 0         | 873  | 892  | 97 +  | 1013 | 1901 | 71173  | 72057  |
| UN23161 | Rsa1.0_00853.1 | 817  | 62101  | 1.00E-134 | 248  | 250  | 99 +  | 567  | 816  | 49970  | 50219  |
| UN23162 | Rsa1.0_01923.1 | 1238 | 37233  | 0         | 336  | 339  | 99 -  | 900  | 1238 | 17973  | 18311  |
| UN23163 | Rsa1.0_04250.1 | 1348 | 18264  | 1.00E-148 | 300  | 311  | 96 +  | 582  | 892  | 10458  | 10768  |
| UN23164 | Rsa1.0_00020.1 | 2295 | 283099 | 0         | 2282 | 2293 | 99 -  | 1    | 2293 | 13355  | 15647  |

|         |                |      |        |           |     |     |       |      |      |        |        |
|---------|----------------|------|--------|-----------|-----|-----|-------|------|------|--------|--------|
| UN23165 | Rsa1.0_01502.1 | 887  | 44519  | 0         | 841 | 857 | 98 -  | 5    | 860  | 41006  | 41859  |
| UN23166 | Rsa1.0_00605.1 | 1265 | 73199  | 0         | 454 | 454 | 100 + | 810  | 1263 | 4479   | 4932   |
| UN23167 | Rsa1.0_01846.1 | 1297 | 38367  | 0         | 598 | 602 | 99 -  | 1    | 602  | 33297  | 33898  |
| UN23168 | Rsa1.0_00720.1 | 428  | 66931  | 1.00E-121 | 220 | 220 | 100 + | 205  | 424  | 1305   | 1524   |
| UN23169 | Rsa1.0_07693.1 | 942  | 8776   | 1.00E-161 | 354 | 376 | 94 -  | 316  | 691  | 7062   | 7437   |
| UN23170 | Rsa1.0_00758.1 | 813  | 65477  | 0         | 807 | 813 | 99 -  | 3    | 813  | 36547  | 37359  |
| UN23171 | Rsa1.0_16486.1 | 846  | 2139   | 1.00E-132 | 319 | 349 | 91 -  | 498  | 846  | 414    | 747    |
| UN23172 | Rsa1.0_04319.1 | 1341 | 17944  | 0         | 564 | 567 | 99 +  | 776  | 1341 | 16581  | 17147  |
| UN23173 | Rsa1.0_00976.1 | 1231 | 57809  | 1.00E-136 | 256 | 259 | 98 +  | 973  | 1231 | 49516  | 49774  |
| UN23174 | Rsa1.0_03738.1 | 732  | 21071  | 0         | 714 | 733 | 97 +  | 7    | 732  | 19580  | 20312  |
| UN23175 | Rsa1.0_00611.1 | 1015 | 72410  | 0         | 516 | 534 | 96 +  | 475  | 1008 | 60559  | 61091  |
| UN23176 | Rsa1.0_00026.1 | 820  | 327835 | 0         | 799 | 818 | 97 +  | 3    | 820  | 45472  | 46283  |
| UN23177 | Rsa1.0_01469.1 | 843  | 45139  | 3.00E-93  | 258 | 282 | 91 -  | 1    | 274  | 19815  | 20086  |
| UN23178 | Rsa1.0_01031.1 | 1234 | 56236  | 1.00E-108 | 210 | 212 | 99 -  | 1023 | 1234 | 4889   | 5099   |
| UN23179 | Rsa1.0_00861.1 | 994  | 61759  | 1.00E-147 | 265 | 265 | 100 + | 3    | 267  | 43457  | 43721  |
| UN23180 | Rsa1.0_06336.1 | 825  | 11215  | 0         | 640 | 659 | 97 -  | 3    | 661  | 6954   | 7610   |
| UN23181 | Rsa1.0_03982.1 | 2566 | 19723  | 0         | 468 | 480 | 97 -  | 130  | 609  | 4841   | 5320   |
| UN23182 | Rsa1.0_02254.1 | 771  | 33344  | 4.00E-77  | 181 | 191 | 94 +  | 386  | 575  | 4778   | 4968   |
| UN23183 | Rsa1.0_00502.1 | 1254 | 204180 | 0         | 428 | 434 | 98 +  | 3    | 436  | 11595  | 12024  |
| UN23184 | Rsa1.0_00558.1 | 820  | 75819  | 0         | 555 | 555 | 100 + | 1    | 555  | 28269  | 28823  |
| UN23185 | Rsa1.0_16163.1 | 1493 | 2261   | 0         | 570 | 593 | 96 -  | 84   | 676  | 754    | 1346   |
| UN23186 | Rsa1.0_00236.1 | 1593 | 104771 | 0         | 800 | 821 | 97 -  | 2    | 822  | 37614  | 38434  |
| UN23187 | Rsa1.0_00251.1 | 1335 | 303968 | 0         | 519 | 528 | 98 -  | 1    | 528  | 61884  | 62406  |
| UN23188 | Rsa1.0_01811.1 | 1217 | 38977  | 0         | 583 | 589 | 98 +  | 629  | 1215 | 2328   | 2914   |
| UN23189 | Rsa1.0_22181.1 | 660  | 1144   | 1.00E-138 | 273 | 277 | 98 +  | 383  | 657  | 16     | 291    |
| UN23190 | Rsa1.0_01958.1 | 965  | 261128 | 1.00E-134 | 267 | 275 | 97 -  | 375  | 649  | 132443 | 132717 |
| UN23191 | Rsa1.0_01783.1 | 977  | 39383  | 0         | 385 | 398 | 96 -  | 552  | 947  | 9468   | 9865   |
| UN23192 | Rsa1.0_01180.1 | 1312 | 51517  | 0         | 536 | 585 | 91 +  | 1    | 578  | 32140  | 32704  |
| UN23193 | Rsa1.0_00758.1 | 2784 | 65477  | 0         | 397 | 399 | 99 +  | 1    | 399  | 2727   | 3125   |
| UN23194 | Rsa1.0_01034.1 | 1266 | 56046  | 0         | 736 | 757 | 97 +  | 260  | 1016 | 19416  | 20172  |
| UN23195 | Rsa1.0_00211.1 | 1013 | 228189 | 0         | 574 | 614 | 93 +  | 4    | 616  | 179317 | 179912 |
| UN23196 | Rsa1.0_01534.1 | 976  | 43764  | 0         | 786 | 814 | 96 +  | 161  | 974  | 6707   | 7504   |
| UN23197 | Rsa1.0_00250.1 | 752  | 273771 | 0         | 482 | 507 | 95 +  | 1    | 498  | 39230  | 39729  |
| UN23198 | Rsa1.0_01049.1 | 1764 | 55655  | 1.00E-140 | 286 | 294 | 97 +  | 1    | 293  | 41014  | 41306  |
| UN23199 | Rsa1.0_01610.1 | 1018 | 42274  | 0         | 707 | 730 | 96 -  | 299  | 1018 | 11475  | 12204  |
| UN23200 | Rsa1.0_00556.1 | 1380 | 207212 | 0         | 524 | 541 | 96 +  | 206  | 746  | 51917  | 52457  |
| UN23201 | Rsa1.0_02281.1 | 2186 | 292576 | 0         | 582 | 595 | 97 +  | 273  | 867  | 14503  | 15094  |
| UN23202 | Rsa1.0_00254.1 | 1029 | 102600 | 0         | 350 | 356 | 98 -  | 675  | 1028 | 77246  | 77601  |
| UN23203 | Rsa1.0_04785.1 | 998  | 15993  | 0         | 368 | 369 | 99 +  | 629  | 996  | 8415   | 8783   |

|         |                |      |        |           |      |      |       |      |      |        |        |
|---------|----------------|------|--------|-----------|------|------|-------|------|------|--------|--------|
| UN23204 | Rsa1.0.00196.1 | 624  | 109960 | 1.00E-114 | 224  | 229  | 97 +  | 393  | 621  | 51296  | 51524  |
| UN23205 | Rsa1.0.00018.1 | 1735 | 410899 | 0         | 616  | 622  | 99 +  | 111  | 732  | 193614 | 194235 |
| UN23206 | Rsa1.0.05204.1 | 945  | 14516  | 0         | 465  | 468  | 99 -  | 479  | 945  | 6086   | 6553   |
| UN23207 | Rsa1.0.01824.1 | 2198 | 38733  | 0         | 1315 | 1330 | 98 +  | 227  | 1556 | 5376   | 6705   |
| UN23208 | Rsa1.0.00773.1 | 1228 | 64839  | 0         | 733  | 760  | 96 +  | 469  | 1228 | 25726  | 26484  |
| UN23209 | Rsa1.0.03741.1 | 940  | 143933 | 0         | 556  | 564  | 98 +  | 377  | 940  | 4881   | 5444   |
| UN23210 | Rsa1.0.00305.1 | 1600 | 97308  | 0         | 1072 | 1120 | 95 +  | 1    | 1114 | 38469  | 39582  |
| UN23211 | Rsa1.0.00196.1 | 1327 | 109960 | 0         | 753  | 786  | 95 +  | 402  | 1186 | 51296  | 52079  |
| UN23212 | Rsa1.0.00190.1 | 910  | 318240 | 0         | 458  | 475  | 96 -  | 416  | 887  | 314315 | 314786 |
| UN23213 | Rsa1.0.00017.1 | 1568 | 752458 | 1.00E-163 | 292  | 292  | 100 - | 1145 | 1436 | 409937 | 410228 |
| UN23214 | Rsa1.0.08259.1 | 1136 | 7641   | 1.00E-149 | 316  | 330  | 95 -  | 42   | 368  | 3089   | 3417   |
| UN23215 | Rsa1.0.00635.1 | 984  | 175826 | 0         | 470  | 497  | 94 -  | 497  | 984  | 13925  | 14407  |
| UN23216 | Rsa1.0.00013.1 | 1656 | 292129 | 1.00E-164 | 369  | 391  | 94 -  | 1277 | 1654 | 74062  | 74450  |
| UN23217 | Rsa1.0.02501.1 | 849  | 30764  | 0         | 563  | 566  | 99 +  | 2    | 567  | 10507  | 11072  |
| UN23218 | Rsa1.0.01313.1 | 720  | 48387  | 1.00E-174 | 328  | 334  | 98 -  | 1    | 334  | 16151  | 16484  |
| UN23219 | Rsa1.0.02122.1 | 818  | 34797  | 1.00E-142 | 274  | 280  | 97 -  | 393  | 672  | 27182  | 27461  |
| UN23220 | Rsa1.0.03148.1 | 991  | 24989  | 1.00E-176 | 336  | 342  | 98 -  | 651  | 991  | 12172  | 12513  |
| UN23221 | Rsa1.0.26615.1 | 1773 | 884    | 2.33E-156 | 266  | 267  | 99 -  | 1    | 267  | 275    | 541    |
| UN23222 | Rsa1.0.01078.1 | 1338 | 316910 | 0         | 593  | 602  | 98 +  | 737  | 1338 | 293227 | 293827 |
| UN23223 | Rsa1.0.00670.1 | 737  | 69371  | 1.00E-155 | 291  | 294  | 98 +  | 443  | 735  | 39606  | 39899  |
| UN23224 | Rsa1.0.00954.1 | 1817 | 189536 | 1.00E-116 | 229  | 233  | 98 -  | 11   | 242  | 40588  | 40820  |
| UN23225 | Rsa1.0.00978.1 | 817  | 57739  | 0         | 613  | 642  | 95 +  | 3    | 641  | 41966  | 42599  |
| UN23226 | Rsa1.0.00130.1 | 1384 | 125737 | 0         | 906  | 919  | 98 -  | 1    | 919  | 74913  | 75831  |
| UN23227 | Rsa1.0.00580.1 | 794  | 74515  | 1.00E-177 | 343  | 351  | 97 +  | 1    | 350  | 33899  | 34249  |
| UN23228 | Rsa1.0.08250.1 | 1154 | 7658   | 0         | 492  | 505  | 97 +  | 72   | 576  | 2620   | 3121   |
| UN23229 | Rsa1.0.01865.1 | 634  | 37992  | 0         | 561  | 569  | 98 +  | 57   | 624  | 25976  | 26543  |
| UN23230 | Rsa1.0.03294.1 | 952  | 23971  | 0         | 473  | 476  | 99 +  | 1    | 476  | 5083   | 5558   |
| UN23231 | Rsa1.0.13800.1 | 730  | 4315   | 9.00E-75  | 149  | 151  | 98 -  | 409  | 559  | 2525   | 2675   |
| UN23232 | Rsa1.0.00033.1 | 703  | 515811 | 0         | 372  | 372  | 100 - | 3    | 374  | 365845 | 366216 |
| UN23233 | Rsa1.0.00734.1 | 1981 | 66508  | 0         | 513  | 528  | 97 -  | 557  | 1077 | 55754  | 56279  |
| UN23234 | Rsa1.0.02625.1 | 649  | 139104 | 0         | 646  | 648  | 99 +  | 1    | 648  | 17327  | 17974  |
| UN23235 | Rsa1.0.00104.1 | 902  | 368722 | 0         | 446  | 461  | 96 +  | 440  | 900  | 265144 | 265596 |
| UN23236 | Rsa1.0.05494.1 | 968  | 13547  | 0         | 514  | 532  | 96 -  | 438  | 968  | 7574   | 8102   |
| UN23237 | Rsa1.0.00250.1 | 739  | 273771 | 0         | 468  | 471  | 99 -  | 261  | 730  | 39260  | 39729  |
| UN23238 | Rsa1.0.00384.1 | 1047 | 89278  | 1.00E-117 | 283  | 302  | 93 +  | 747  | 1046 | 81388  | 81682  |
| UN23239 | Rsa1.0.00207.1 | 930  | 248736 | 0         | 451  | 482  | 93 -  | 8    | 489  | 22526  | 22996  |
| UN23240 | Rsa1.0.01887.1 | 961  | 37564  | 0         | 438  | 458  | 95 +  | 509  | 961  | 26538  | 26995  |
| UN23241 | Rsa1.0.08558.1 | 903  | 7198   | 0         | 469  | 480  | 97 +  | 424  | 903  | 988    | 1467   |
| UN23242 | Rsa1.0.06546.1 | 1010 | 10801  | 1.00E-145 | 274  | 278  | 98 -  | 501  | 778  | 4522   | 4799   |

|         |                |      |        |           |     |     |       |      |      |        |        |
|---------|----------------|------|--------|-----------|-----|-----|-------|------|------|--------|--------|
| UN23243 | Rsa1.0_00105.1 | 840  | 134138 | 4.00E-77  | 195 | 209 | 93 -  | 623  | 823  | 71491  | 71698  |
| UN23244 | Rsa1.0_00078.1 | 1285 | 175053 | 0         | 400 | 411 | 97 +  | 876  | 1285 | 74758  | 75168  |
| UN23245 | Rsa1.0_03423.1 | 1227 | 23064  | 1.00E-163 | 330 | 340 | 97 +  | 198  | 537  | 9873   | 10210  |
| UN23246 | Rsa1.0_01195.1 | 708  | 147988 | 0         | 691 | 716 | 96 +  | 1    | 706  | 15402  | 16117  |
| UN23247 | Rsa1.0_01521.1 | 1397 | 142147 | 0         | 538 | 539 | 99 +  | 3    | 541  | 98995  | 99533  |
| UN23248 | Rsa1.0_05411.1 | 845  | 13838  | 0         | 827 | 848 | 97 -  | 1    | 845  | 7561   | 8408   |
| UN23249 | Rsa1.0_00192.1 | 772  | 278200 | 0         | 440 | 457 | 96 -  | 39   | 495  | 22625  | 23065  |
| UN23250 | Rsa1.0_00707.1 | 1113 | 190112 | 0         | 355 | 363 | 97 +  | 750  | 1111 | 156145 | 156507 |
| UN23251 | Rsa1.0_26211.1 | 563  | 901    | 1.00E-115 | 224 | 227 | 98 +  | 3    | 228  | 145    | 371    |
| UN23252 | Rsa1.0_00693.1 | 1042 | 161311 | 0         | 394 | 394 | 100 - | 3    | 396  | 61031  | 61424  |
| UN23253 | Rsa1.0_00111.1 | 1024 | 390088 | 0         | 997 | 998 | 99 +  | 24   | 1021 | 373994 | 374991 |
| UN23254 | Rsa1.0_01562.1 | 775  | 43196  | 1.00E-106 | 217 | 224 | 96 +  | 3    | 226  | 7735   | 7958   |
| UN23255 | Rsa1.0_00089.1 | 695  | 406142 | 0         | 671 | 687 | 97 -  | 2    | 688  | 322213 | 322899 |
| UN23256 | Rsa1.0_01884.1 | 867  | 37659  | 0         | 663 | 672 | 98 -  | 11   | 682  | 17511  | 18182  |
| UN23257 | Rsa1.0_00381.1 | 661  | 89718  | 0         | 372 | 376 | 98 +  | 3    | 378  | 65776  | 66151  |
| UN23258 | Rsa1.0_00039.1 | 661  | 296927 | 0         | 565 | 586 | 96 -  | 66   | 651  | 131736 | 132315 |
| UN23259 | Rsa1.0_00008.1 | 1951 | 358124 | 0         | 507 | 516 | 98 -  | 1428 | 1943 | 85138  | 85653  |
| UN23260 | Rsa1.0_00991.1 | 1363 | 143101 | 0         | 659 | 686 | 96 -  | 15   | 698  | 137872 | 138552 |
| UN23261 | Rsa1.0_02625.1 | 593  | 139104 | 0         | 580 | 600 | 96 -  | 2    | 593  | 17376  | 17974  |
| UN23262 | Rsa1.0_00931.1 | 973  | 59210  | 1.00E-137 | 269 | 276 | 97 +  | 557  | 832  | 7084   | 7359   |
| UN23263 | Rsa1.0_03831.1 | 840  | 20579  | 1.00E-136 | 249 | 250 | 99 -  | 583  | 832  | 16163  | 16412  |
| UN23264 | Rsa1.0_00218.1 | 1197 | 201480 | 1.00E-151 | 338 | 356 | 94 +  | 27   | 379  | 111960 | 112310 |
| UN23265 | Rsa1.0_00194.1 | 635  | 110851 | 0         | 436 | 456 | 95 -  | 1    | 455  | 13143  | 13591  |
| UN23266 | Rsa1.0_00292.1 | 892  | 98141  | 1.00E-135 | 285 | 295 | 96 +  | 598  | 891  | 6664   | 6955   |
| UN23267 | Rsa1.0_00954.1 | 784  | 189536 | 1.00E-165 | 294 | 294 | 100 + | 3    | 296  | 57712  | 58005  |
| UN23268 | Rsa1.0_02103.1 | 882  | 35006  | 0         | 598 | 618 | 96 +  | 1    | 618  | 13484  | 14094  |
| UN23269 | Rsa1.0_01012.1 | 549  | 56836  | 1.00E-121 | 270 | 285 | 94 -  | 14   | 298  | 40013  | 40296  |
| UN23270 | Rsa1.0_06969.1 | 1041 | 10088  | 0         | 339 | 340 | 99 +  | 1    | 339  | 1140   | 1479   |
| UN23271 | Rsa1.0_01751.1 | 660  | 39806  | 1.00E-169 | 317 | 321 | 98 -  | 332  | 651  | 30314  | 30634  |
| UN23272 | Rsa1.0_00211.1 | 770  | 228189 | 0         | 436 | 439 | 99 -  | 6    | 444  | 201586 | 202024 |
| UN23273 | Rsa1.0_00001.1 | 1797 | 363028 | 0         | 778 | 795 | 97 +  | 1    | 794  | 287252 | 288046 |
| UN23274 | Rsa1.0_00175.1 | 890  | 166121 | 0         | 663 | 685 | 96 -  | 4    | 688  | 38440  | 39124  |
| UN23275 | Rsa1.0_01086.1 | 835  | 54509  | 0         | 780 | 825 | 94 -  | 3    | 822  | 36460  | 37269  |
| UN23276 | Rsa1.0_13702.1 | 837  | 4456   | 1.00E-129 | 271 | 282 | 96 +  | 2    | 281  | 1736   | 2017   |
| UN23277 | Rsa1.0_01326.1 | 744  | 48072  | 1.00E-171 | 393 | 416 | 94 -  | 330  | 742  | 43754  | 44166  |
| UN23278 | Rsa1.0_03253.1 | 779  | 24321  | 3.00E-93  | 174 | 174 | 100 + | 206  | 379  | 14236  | 14409  |
| UN23279 | Rsa1.0_00546.1 | 594  | 76523  | 1.00E-180 | 361 | 374 | 96 -  | 3    | 368  | 11381  | 11754  |
| UN23280 | Rsa1.0_00181.1 | 1573 | 114269 | 0         | 803 | 808 | 99 +  | 352  | 1157 | 53498  | 54305  |
| UN23281 | Rsa1.0_00497.1 | 1172 | 79830  | 0         | 537 | 556 | 96 -  | 1    | 551  | 41564  | 42113  |

|         |                |      |        |           |     |     |       |     |      |        |        |
|---------|----------------|------|--------|-----------|-----|-----|-------|-----|------|--------|--------|
| UN23282 | Rsa1.0.00277.1 | 860  | 100132 | 0         | 422 | 434 | 97 -  | 1   | 433  | 50424  | 50857  |
| UN23283 | Rsa1.0.00879.1 | 464  | 61297  | 0         | 433 | 448 | 96 -  | 5   | 451  | 10982  | 11426  |
| UN23284 | Rsa1.0.01357.1 | 840  | 47280  | 1.00E-116 | 251 | 260 | 96 -  | 583 | 839  | 673    | 931    |
| UN23285 | Rsa1.0.00218.1 | 809  | 201480 | 0         | 343 | 344 | 99 +  | 2   | 345  | 111965 | 112308 |
| UN23286 | Rsa1.0.00120.1 | 1140 | 277288 | 0         | 919 | 958 | 95 +  | 185 | 1140 | 223009 | 223966 |
| UN23287 | Rsa1.0.03465.1 | 1203 | 22700  | 0         | 516 | 522 | 98 -  | 594 | 1115 | 9803   | 10324  |
| UN23288 | Rsa1.0.09340.1 | 1401 | 6443   | 0         | 393 | 399 | 98 -  | 1   | 399  | 5945   | 6340   |
| UN23289 | Rsa1.0.04794.1 | 844  | 15960  | 0         | 372 | 381 | 97 -  | 6   | 385  | 7004   | 7383   |
| UN23290 | Rsa1.0.05781.1 | 1550 | 12654  | 0         | 386 | 404 | 95 +  | 2   | 400  | 11635  | 12036  |
| UN23291 | Rsa1.0.03831.1 | 787  | 20579  | 3.00E-90  | 172 | 173 | 99 +  | 421 | 593  | 17021  | 17193  |
| UN23292 | Rsa1.0.00192.1 | 748  | 278200 | 0         | 416 | 416 | 100 - | 1   | 416  | 22625  | 23040  |
| UN23293 | Rsa1.0.00700.1 | 1161 | 67699  | 0         | 793 | 807 | 98 +  | 367 | 1161 | 48286  | 49092  |
| UN23294 | Rsa1.0.00113.1 | 826  | 131574 | 1.00E-142 | 282 | 289 | 97 +  | 526 | 813  | 52836  | 53124  |
| UN23295 | Rsa1.0.00285.1 | 1075 | 149638 | 0         | 461 | 462 | 99 -  | 3   | 464  | 87711  | 88171  |
| UN23296 | Rsa1.0.00490.1 | 934  | 186713 | 0         | 472 | 488 | 96 -  | 446 | 932  | 52365  | 52850  |
| UN23297 | Rsa1.0.00218.1 | 843  | 201480 | 1.00E-139 | 340 | 362 | 93 -  | 3   | 356  | 173202 | 173559 |
| UN23298 | Rsa1.0.00991.1 | 1113 | 143101 | 0         | 655 | 681 | 96 -  | 18  | 694  | 137874 | 138549 |
| UN23299 | Rsa1.0.02387.1 | 897  | 31890  | 0         | 506 | 530 | 95 -  | 1   | 520  | 17300  | 17827  |
| UN23300 | Rsa1.0.00417.1 | 1060 | 395068 | 0         | 505 | 523 | 96 -  | 26  | 548  | 259259 | 259778 |
| UN23301 | Rsa1.0.00910.1 | 632  | 59975  | 0         | 536 | 554 | 96 -  | 1   | 552  | 30391  | 30944  |
| UN23302 | Rsa1.0.00557.1 | 731  | 75865  | 0         | 517 | 520 | 99 +  | 211 | 730  | 69508  | 70026  |
| UN23303 | Rsa1.0.05863.1 | 715  | 12388  | 1.00E-108 | 250 | 266 | 93 -  | 458 | 712  | 7185   | 7449   |
| UN23304 | Rsa1.0.00068.1 | 818  | 151813 | 0         | 559 | 559 | 100 + | 260 | 818  | 134543 | 135101 |
| UN23305 | Rsa1.0.00205.1 | 648  | 193401 | 7.00E-66  | 211 | 236 | 89 -  | 410 | 638  | 130115 | 130345 |
| UN23306 | Rsa1.0.00601.1 | 765  | 177045 | 1.00E-144 | 356 | 386 | 92 +  | 3   | 378  | 26119  | 26496  |
| UN23307 | Rsa1.0.03606.1 | 2268 | 21818  | 0         | 417 | 425 | 98 -  | 703 | 1123 | 344    | 766    |
| UN23308 | Rsa1.0.00391.1 | 842  | 183853 | 1.00E-154 | 277 | 277 | 100 - | 566 | 842  | 72608  | 72884  |
| UN23309 | Rsa1.0.00135.1 | 918  | 178077 | 0         | 358 | 368 | 97 -  | 251 | 618  | 169208 | 169575 |
| UN23310 | Rsa1.0.09599.1 | 776  | 6260   | 0         | 658 | 679 | 96 +  | 1   | 679  | 4474   | 5152   |
| UN23311 | Rsa1.0.00301.1 | 779  | 365315 | 1.00E-111 | 210 | 212 | 99 +  | 396 | 607  | 304349 | 304560 |
| UN23312 | Rsa1.0.02991.1 | 849  | 26178  | 1.00E-80  | 188 | 196 | 95 +  | 38  | 230  | 7030   | 7224   |
| UN23313 | Rsa1.0.00280.1 | 875  | 99966  | 0         | 369 | 382 | 96 +  | 1   | 376  | 12102  | 12483  |
| UN23314 | Rsa1.0.04002.1 | 1195 | 19608  | 0         | 533 | 555 | 96 -  | 1   | 542  | 17610  | 18164  |
| UN23315 | Rsa1.0.02321.1 | 965  | 32572  | 0         | 669 | 672 | 99 -  | 1   | 672  | 5991   | 6660   |
| UN23316 | Rsa1.0.55072.1 | 904  | 415    | 0         | 384 | 384 | 100 + | 2   | 385  | 3      | 386    |
| UN23317 | Rsa1.0.08721.1 | 915  | 7000   | 0         | 836 | 842 | 99 -  | 74  | 915  | 6080   | 6921   |
| UN23318 | Rsa1.0.10720.1 | 905  | 5746   | 0         | 432 | 434 | 99 +  | 2   | 435  | 5313   | 5746   |
| UN23319 | Rsa1.0.00379.1 | 1284 | 89865  | 1.00E-100 | 245 | 265 | 92 +  | 58  | 316  | 86251  | 86505  |
| UN23320 | Rsa1.0.03254.1 | 847  | 24311  | 1.00E-145 | 316 | 337 | 93 +  | 1   | 319  | 2823   | 3158   |



|         |                |      |        |           |     |     |       |      |      |        |        |
|---------|----------------|------|--------|-----------|-----|-----|-------|------|------|--------|--------|
| UN23321 | Rsa1.0.03306.1 | 753  | 23873  | 0         | 522 | 526 | 99 -  | 10   | 535  | 12625  | 13147  |
| UN23322 | Rsa1.0.02054.1 | 913  | 35548  | 1.00E-154 | 277 | 277 | 100 + | 151  | 427  | 27078  | 27354  |
| UN23323 | Rsa1.0.01403.1 | 695  | 46453  | 1.00E-83  | 158 | 158 | 100 + | 399  | 556  | 26104  | 26261  |
| UN23324 | Rsa1.0.00124.1 | 725  | 262503 | 1.00E-138 | 249 | 249 | 100 + | 1    | 249  | 47449  | 47697  |
| UN23325 | Rsa1.0.75825.1 | 841  | 302    | 1.00E-157 | 281 | 281 | 100 - | 535  | 815  | 1      | 281    |
| UN23326 | Rsa1.0.01776.1 | 736  | 39511  | 1.00E-102 | 192 | 193 | 99 -  | 233  | 425  | 36275  | 36467  |
| UN23327 | Rsa1.0.04198.1 | 714  | 18504  | 0         | 439 | 439 | 100 - | 1    | 439  | 15738  | 16176  |
| UN23328 | Rsa1.0.01879.1 | 790  | 37748  | 1.00E-139 | 266 | 271 | 98 +  | 3    | 273  | 21820  | 22090  |
| UN23329 | Rsa1.0.14856.1 | 804  | 3010   | 0         | 383 | 388 | 98 -  | 372  | 759  | 1805   | 2192   |
| UN23330 | Rsa1.0.02258.1 | 1253 | 33307  | 1.00E-158 | 283 | 283 | 100 - | 971  | 1253 | 23440  | 23722  |
| UN23331 | Rsa1.0.02779.1 | 597  | 27968  | 0         | 591 | 595 | 99 -  | 3    | 597  | 3435   | 4029   |
| UN23332 | Rsa1.0.05399.1 | 1016 | 13879  | 0         | 509 | 529 | 96 -  | 1    | 528  | 8834   | 9350   |
| UN23333 | Rsa1.0.21244.1 | 1379 | 1222   | 0         | 669 | 672 | 99 +  | 708  | 1379 | 1      | 672    |
| UN23334 | Rsa1.0.03834.1 | 542  | 20572  | 1.00E-169 | 314 | 317 | 99 -  | 227  | 542  | 17697  | 18013  |
| UN23335 | Rsa1.0.04098.1 | 752  | 19078  | 1.00E-177 | 318 | 319 | 99 -  | 430  | 748  | 11235  | 11553  |
| UN23336 | Rsa1.0.01004.1 | 709  | 56975  | 1.00E-175 | 342 | 350 | 97 -  | 361  | 709  | 16996  | 17342  |
| UN23337 | Rsa1.0.00113.1 | 715  | 131574 | 1.00E-143 | 279 | 286 | 97 +  | 3    | 288  | 59762  | 60047  |
| UN23338 | Rsa1.0.08388.1 | 787  | 7436   | 0         | 402 | 414 | 97 -  | 1    | 414  | 3639   | 4045   |
| UN23339 | Rsa1.0.01180.1 | 742  | 51517  | 1.00E-150 | 296 | 305 | 97 -  | 9    | 313  | 33362  | 33666  |
| UN23340 | Rsa1.0.00181.1 | 839  | 114269 | 1.00E-125 | 563 | 662 | 85 +  | 186  | 839  | 30699  | 31347  |
| UN23341 | Rsa1.0.00415.1 | 831  | 86795  | 0         | 384 | 392 | 97 -  | 22   | 413  | 6755   | 7145   |
| UN23342 | Rsa1.0.00895.1 | 825  | 60615  | 0         | 472 | 483 | 97 +  | 28   | 510  | 39139  | 39621  |
| UN23343 | Rsa1.0.00014.1 | 722  | 348985 | 1.00E-117 | 215 | 215 | 100 + | 506  | 720  | 220714 | 220928 |
| UN23344 | Rsa1.0.02429.1 | 999  | 31527  | 1.00E-159 | 318 | 329 | 96 -  | 1    | 329  | 12869  | 13197  |
| UN23345 | Rsa1.0.00116.1 | 720  | 365886 | 0         | 567 | 580 | 97 +  | 141  | 720  | 154724 | 155303 |
| UN23346 | Rsa1.0.00119.1 | 641  | 467509 | 0         | 494 | 494 | 100 - | 7    | 500  | 374988 | 375481 |
| UN23347 | Rsa1.0.10243.1 | 979  | 5925   | 1.00E-135 | 257 | 261 | 98 -  | 349  | 609  | 5665   | 5925   |
| UN23348 | Rsa1.0.05748.1 | 622  | 12749  | 0         | 618 | 620 | 99 +  | 3    | 622  | 10377  | 10995  |
| UN23349 | Rsa1.0.00092.1 | 965  | 659932 | 0         | 441 | 472 | 93 -  | 24   | 494  | 30460  | 30919  |
| UN23350 | Rsa1.0.00055.1 | 690  | 520193 | 2.00E-66  | 150 | 157 | 95 +  | 505  | 661  | 180175 | 180331 |
| UN23351 | Rsa1.0.04377.1 | 1051 | 17658  | 0         | 916 | 944 | 97 -  | 1    | 944  | 5220   | 6160   |
| UN23352 | Rsa1.0.05208.1 | 613  | 14504  | 1.00E-152 | 312 | 324 | 96 +  | 287  | 610  | 3908   | 4230   |
| UN23353 | Rsa1.0.00855.1 | 1327 | 62047  | 0         | 422 | 433 | 97 -  | 33   | 465  | 55971  | 56401  |
| UN23354 | Rsa1.0.00153.1 | 794  | 192931 | 1.00E-124 | 269 | 282 | 95 +  | 84   | 365  | 143143 | 143418 |
| UN23355 | Rsa1.0.02097.1 | 1419 | 35036  | 1.00E-142 | 297 | 308 | 96 +  | 1115 | 1419 | 19172  | 19479  |
| UN23356 | Rsa1.0.03781.1 | 881  | 20891  | 0         | 581 | 622 | 93 +  | 3    | 611  | 4946   | 5562   |
| UN23357 | Rsa1.0.00077.1 | 1352 | 145005 | 0         | 500 | 507 | 98 -  | 1    | 506  | 82456  | 82962  |
| UN23358 | Rsa1.0.05847.1 | 1054 | 12433  | 0         | 532 | 545 | 97 +  | 512  | 1054 | 8210   | 8752   |
| UN23359 | Rsa1.0.00248.1 | 826  | 163568 | 0         | 609 | 629 | 96 -  | 197  | 823  | 40210  | 40834  |

|         |                |      |        |           |      |      |       |      |      |        |        |
|---------|----------------|------|--------|-----------|------|------|-------|------|------|--------|--------|
| UN23360 | Rsa1.0_10699.1 | 825  | 5752   | 0         | 509  | 513  | 99 +  | 1    | 513  | 3941   | 4453   |
| UN23361 | Rsa1.0_02229.1 | 1611 | 33672  | 0         | 506  | 512  | 98 +  | 202  | 713  | 24817  | 25328  |
| UN23362 | Rsa1.0_00237.1 | 1184 | 235974 | 0         | 575  | 581  | 98 +  | 1    | 579  | 41571  | 42151  |
| UN23363 | Rsa1.0_00630.1 | 1449 | 71281  | 0         | 508  | 519  | 97 +  | 708  | 1226 | 62260  | 62778  |
| UN23364 | Rsa1.0_01327.1 | 898  | 48033  | 1.00E-150 | 326  | 340  | 95 +  | 4    | 340  | 14641  | 14977  |
| UN23365 | Rsa1.0_03513.1 | 828  | 22349  | 0         | 464  | 479  | 96 -  | 350  | 825  | 20313  | 20791  |
| UN23366 | Rsa1.0_03581.1 | 1101 | 21965  | 0         | 558  | 561  | 99 +  | 541  | 1101 | 12554  | 13114  |
| UN23367 | Rsa1.0_00203.1 | 1843 | 109129 | 0         | 1112 | 1165 | 95 +  | 9    | 1173 | 36927  | 38088  |
| UN23368 | Rsa1.0_04446.1 | 1290 | 17317  | 0         | 711  | 723  | 98 -  | 262  | 984  | 2267   | 2989   |
| UN23369 | Rsa1.0_04139.1 | 1450 | 18883  | 1.00E-176 | 348  | 358  | 97 +  | 1093 | 1450 | 16416  | 16772  |
| UN23370 | Rsa1.0_32848.1 | 1998 | 692    | 0         | 466  | 481  | 96 -  | 3    | 481  | 1      | 481    |
| UN23371 | Rsa1.0_00389.1 | 1325 | 88795  | 1.00E-174 | 357  | 369  | 96 -  | 958  | 1325 | 85320  | 85680  |
| UN23372 | Rsa1.0_00417.1 | 2258 | 395068 | 0         | 2225 | 2255 | 98 -  | 3    | 2257 | 6393   | 8645   |
| UN23373 | Rsa1.0_08568.1 | 980  | 7186   | 0         | 688  | 691  | 99 -  | 3    | 693  | 2268   | 2957   |
| UN23374 | Rsa1.0_02167.1 | 1675 | 34401  | 0         | 582  | 587  | 99 +  | 1088 | 1674 | 28475  | 29061  |
| UN23375 | Rsa1.0_00107.1 | 1716 | 431659 | 0         | 505  | 510  | 99 +  | 226  | 735  | 145075 | 145581 |
| UN23376 | Rsa1.0_00538.1 | 1499 | 77149  | 1.00E-176 | 353  | 363  | 97 +  | 1137 | 1499 | 18485  | 18842  |
| UN23377 | Rsa1.0_01996.1 | 692  | 36327  | 1.00E-153 | 296  | 302  | 98 -  | 393  | 692  | 28067  | 28368  |
| UN23378 | Rsa1.0_01079.1 | 1456 | 54753  | 1.00E-148 | 275  | 278  | 98 +  | 1177 | 1454 | 24471  | 24748  |
| UN23379 | Rsa1.0_00048.1 | 1317 | 167185 | 0         | 393  | 395  | 99 -  | 924  | 1317 | 81391  | 81784  |
| UN23380 | Rsa1.0_00707.1 | 1240 | 190112 | 0         | 676  | 681  | 99 -  | 559  | 1238 | 38568  | 39247  |
| UN23381 | Rsa1.0_01860.1 | 847  | 38057  | 0         | 535  | 537  | 99 +  | 5    | 541  | 521    | 1057   |
| UN23382 | Rsa1.0_00447.1 | 1087 | 84051  | 1.00E-131 | 238  | 238  | 100 - | 849  | 1086 | 25257  | 25494  |
| UN23383 | Rsa1.0_02064.1 | 1118 | 35476  | 0         | 355  | 359  | 98 -  | 1    | 357  | 15796  | 16154  |
| UN23384 | Rsa1.0_01068.1 | 1373 | 55208  | 0         | 508  | 527  | 96 +  | 859  | 1373 | 35984  | 36509  |
| UN23385 | Rsa1.0_00848.1 | 1282 | 152362 | 1.00E-135 | 260  | 264  | 98 -  | 1013 | 1276 | 39167  | 39429  |
| UN23386 | Rsa1.0_00087.1 | 1051 | 761073 | 1.00E-142 | 286  | 295  | 96 +  | 17   | 308  | 298357 | 298651 |
| UN23387 | Rsa1.0_00468.1 | 974  | 82095  | 0         | 400  | 413  | 96 -  | 571  | 974  | 75525  | 75937  |
| UN23388 | Rsa1.0_00065.1 | 1642 | 454616 | 1.00E-122 | 312  | 335  | 93 +  | 1291 | 1620 | 438582 | 438911 |
| UN23389 | Rsa1.0_00582.1 | 1849 | 74333  | 0         | 420  | 442  | 95 -  | 1    | 440  | 64112  | 64540  |
| UN23390 | Rsa1.0_02458.1 | 898  | 31197  | 1.00E-170 | 336  | 345  | 97 -  | 3    | 347  | 9247   | 9587   |
| UN23391 | Rsa1.0_00197.1 | 1616 | 109714 | 0         | 637  | 641  | 99 +  | 970  | 1609 | 92930  | 93570  |
| UN23392 | Rsa1.0_00805.1 | 1848 | 63724  | 0         | 844  | 854  | 98 +  | 1    | 854  | 3601   | 4448   |
| UN23393 | Rsa1.0_23419.1 | 764  | 1050   | 4.00E-83  | 185  | 192  | 96 -  | 571  | 759  | 859    | 1050   |
| UN23394 | Rsa1.0_00546.1 | 1624 | 76523  | 0         | 615  | 615  | 100 - | 371  | 985  | 39401  | 40015  |
| UN23395 | Rsa1.0_00385.1 | 1342 | 89160  | 0         | 778  | 785  | 99 +  | 561  | 1341 | 47991  | 48775  |
| UN23396 | Rsa1.0_03894.1 | 1017 | 20207  | 0         | 888  | 890  | 99 -  | 127  | 1016 | 2448   | 3337   |
| UN23397 | Rsa1.0_00025.1 | 1193 | 277312 | 0         | 638  | 675  | 94 +  | 3    | 677  | 52141  | 52811  |
| UN23398 | Rsa1.0_00108.1 | 2332 | 478491 | 1.00E-135 | 282  | 292  | 96 +  | 2042 | 2330 | 277523 | 277814 |

|         |                |      |        |           |      |      |       |      |      |        |        |
|---------|----------------|------|--------|-----------|------|------|-------|------|------|--------|--------|
| UN23399 | Rsa1.0.00194.1 | 1135 | 110851 | 1.00E-135 | 253  | 255  | 99 -  | 881  | 1135 | 100099 | 100351 |
| UN23400 | Rsa1.0.03940.1 | 1406 | 19962  | 0         | 798  | 803  | 99 +  | 411  | 1213 | 11912  | 12712  |
| UN23401 | Rsa1.0.00058.1 | 1389 | 159921 | 1.00E-173 | 320  | 324  | 98 -  | 5    | 328  | 30217  | 30540  |
| UN23402 | Rsa1.0.00002.1 | 804  | 601661 | 1.00E-137 | 278  | 289  | 96 -  | 517  | 798  | 18030  | 18318  |
| UN23403 | Rsa1.0.03681.1 | 1737 | 21405  | 0         | 1297 | 1305 | 99 -  | 410  | 1714 | 664    | 1965   |
| UN23404 | Rsa1.0.00670.1 | 1923 | 69371  | 0         | 689  | 695  | 99 -  | 26   | 720  | 37674  | 38368  |
| UN23405 | Rsa1.0.00057.1 | 1115 | 160473 | 0         | 377  | 378  | 99 -  | 3    | 380  | 49865  | 50242  |
| UN23406 | Rsa1.0.00041.1 | 1605 | 186197 | 0         | 456  | 474  | 96 -  | 1113 | 1586 | 151511 | 151983 |
| UN23407 | Rsa1.0.00858.1 | 1759 | 61892  | 1.00E-155 | 282  | 283  | 99 +  | 835  | 1117 | 53263  | 53545  |
| UN23408 | Rsa1.0.01042.1 | 1256 | 293264 | 0         | 647  | 649  | 99 -  | 1    | 649  | 137345 | 137993 |
| UN23409 | Rsa1.0.00801.1 | 1600 | 63861  | 0         | 1524 | 1541 | 98 -  | 17   | 1555 | 11409  | 12949  |
| UN23410 | Rsa1.0.03130.1 | 1125 | 25145  | 1.00E-156 | 290  | 292  | 99 +  | 835  | 1125 | 2282   | 2573   |
| UN23411 | Rsa1.0.07818.1 | 785  | 8477   | 1.00E-144 | 306  | 319  | 95 +  | 467  | 785  | 561    | 876    |
| UN23412 | Rsa1.0.00905.1 | 1943 | 60110  | 0         | 719  | 737  | 97 -  | 805  | 1538 | 26071  | 26807  |
| UN23413 | Rsa1.0.00090.1 | 1785 | 273859 | 1.00E-141 | 299  | 313  | 95 +  | 12   | 316  | 51349  | 51661  |
| UN23414 | Rsa1.0.08419.1 | 796  | 7381   | 0         | 445  | 457  | 97 -  | 283  | 738  | 6926   | 7381   |
| UN23415 | Rsa1.0.02919.1 | 1408 | 26780  | 0         | 404  | 408  | 99 +  | 1004 | 1408 | 7688   | 8095   |
| UN23416 | Rsa1.0.01459.1 | 1692 | 45277  | 0         | 373  | 379  | 98 +  | 1    | 379  | 22453  | 22828  |
| UN23417 | Rsa1.0.05354.1 | 2190 | 14073  | 0         | 464  | 488  | 95 +  | 1710 | 2190 | 4161   | 4646   |
| UN23418 | Rsa1.0.00053.1 | 900  | 263459 | 0         | 545  | 547  | 99 -  | 354  | 900  | 235093 | 235639 |
| UN23419 | Rsa1.0.00275.1 | 749  | 210104 | 3.00E-99  | 187  | 188  | 99 -  | 312  | 499  | 23445  | 23632  |
| UN23420 | Rsa1.0.00274.1 | 1716 | 210119 | 0         | 525  | 533  | 98 +  | 3    | 535  | 44412  | 44944  |
| UN23421 | Rsa1.0.00772.1 | 1867 | 64856  | 0         | 591  | 593  | 99 -  | 417  | 1009 | 52504  | 53096  |
| UN23422 | Rsa1.0.00277.1 | 1672 | 100132 | 1.00E-153 | 278  | 279  | 99 +  | 3    | 281  | 48117  | 48395  |
| UN23423 | Rsa1.0.02163.1 | 1043 | 34427  | 0         | 1041 | 1041 | 100 - | 3    | 1043 | 12718  | 13758  |
| UN23424 | Rsa1.0.01578.1 | 1052 | 42880  | 0         | 359  | 361  | 99 +  | 689  | 1049 | 31335  | 31695  |
| UN23425 | Rsa1.0.00111.1 | 961  | 390088 | 1.00E-116 | 254  | 263  | 96 -  | 702  | 961  | 77400  | 77659  |
| UN23426 | Rsa1.0.00113.1 | 1399 | 131574 | 2.33E-156 | 270  | 271  | 99 +  | 2    | 271  | 79736  | 80006  |
| UN23427 | Rsa1.0.01462.1 | 2054 | 45231  | 0         | 563  | 568  | 99 +  | 3    | 569  | 29979  | 30546  |
| UN23428 | Rsa1.0.03684.1 | 672  | 21392  | 0         | 410  | 414  | 99 -  | 3    | 415  | 14749  | 15162  |
| UN23429 | Rsa1.0.02561.1 | 1203 | 30080  | 1.00E-116 | 216  | 217  | 99 +  | 123  | 339  | 13929  | 14145  |
| UN23430 | Rsa1.0.00978.1 | 797  | 57739  | 0         | 466  | 472  | 98 +  | 329  | 797  | 14022  | 14493  |
| UN23431 | Rsa1.0.01540.1 | 1880 | 151890 | 0         | 494  | 494  | 100 + | 1386 | 1879 | 111905 | 112398 |
| UN23432 | Rsa1.0.00023.1 | 1191 | 194764 | 0         | 567  | 573  | 98 -  | 3    | 573  | 172209 | 172780 |
| UN23433 | Rsa1.0.05329.1 | 1871 | 14130  | 0         | 506  | 507  | 99 +  | 1    | 506  | 6657   | 7163   |
| UN23434 | Rsa1.0.01561.1 | 916  | 43227  | 0         | 430  | 443  | 97 +  | 474  | 916  | 28427  | 28869  |
| UN23435 | Rsa1.0.05782.1 | 1030 | 12646  | 1.00E-120 | 239  | 245  | 97 +  | 785  | 1029 | 9196   | 9436   |
| UN23436 | Rsa1.0.14746.1 | 2026 | 3110   | 1.00E-162 | 437  | 482  | 90 +  | 1229 | 1706 | 1379   | 1841   |
| UN23437 | Rsa1.0.01957.1 | 2317 | 36844  | 0         | 437  | 451  | 96 +  | 1872 | 2317 | 33257  | 33707  |

|         |                |      |        |           |      |      |       |      |      |        |        |
|---------|----------------|------|--------|-----------|------|------|-------|------|------|--------|--------|
| UN23438 | Rsa1.0.00136.1 | 1523 | 122464 | 0         | 457  | 461  | 99 +  | 161  | 621  | 34049  | 34509  |
| UN23439 | Rsa1.0.02908.1 | 1633 | 26859  | 0         | 378  | 378  | 100 - | 1    | 378  | 9465   | 9842   |
| UN23440 | Rsa1.0.00749.1 | 2051 | 65933  | 0         | 554  | 587  | 94 +  | 825  | 1408 | 20245  | 20811  |
| UN23441 | Rsa1.0.07614.1 | 1579 | 9019   | 1.00E-155 | 281  | 282  | 99 +  | 1298 | 1579 | 8150   | 8431   |
| UN23442 | Rsa1.0.00824.1 | 1775 | 188447 | 0         | 1671 | 1699 | 98 +  | 73   | 1769 | 154502 | 156199 |
| UN23443 | Rsa1.0.00336.1 | 834  | 445051 | 0         | 676  | 679  | 99 -  | 150  | 828  | 2227   | 2905   |
| UN23444 | Rsa1.0.02654.1 | 506  | 29028  | 1.00E-168 | 306  | 308  | 99 -  | 199  | 506  | 19592  | 19899  |
| UN23445 | Rsa1.0.01148.1 | 665  | 52375  | 0         | 478  | 484  | 98 -  | 182  | 664  | 31443  | 31926  |
| UN23446 | Rsa1.0.00749.1 | 895  | 65933  | 0         | 636  | 649  | 97 -  | 205  | 848  | 44789  | 45434  |
| UN23447 | Rsa1.0.00821.1 | 1234 | 62891  | 0         | 494  | 518  | 95 -  | 708  | 1225 | 42350  | 42866  |
| UN23448 | Rsa1.0.02431.1 | 726  | 31504  | 1.00E-156 | 329  | 340  | 96 +  | 395  | 726  | 29244  | 29583  |
| UN23449 | Rsa1.0.00071.1 | 1083 | 345714 | 0         | 478  | 487  | 98 +  | 595  | 1081 | 72109  | 72592  |
| UN23450 | Rsa1.0.01248.1 | 1212 | 154103 | 1.00E-111 | 217  | 221  | 98 -  | 990  | 1210 | 41440  | 41660  |
| UN23451 | Rsa1.0.00360.1 | 895  | 91190  | 1.00E-168 | 302  | 303  | 99 +  | 589  | 891  | 78998  | 79300  |
| UN23452 | Rsa1.0.02515.1 | 1422 | 30616  | 1.00E-120 | 322  | 355  | 90 +  | 1    | 355  | 1015   | 1352   |
| UN23453 | Rsa1.0.00734.1 | 1239 | 66508  | 0         | 364  | 369  | 98 -  | 870  | 1237 | 53524  | 53891  |
| UN23454 | Rsa1.0.00002.1 | 1449 | 601661 | 0         | 654  | 668  | 97 +  | 403  | 1070 | 278342 | 279009 |
| UN23455 | Rsa1.0.09709.1 | 756  | 6198   | 0         | 746  | 757  | 98 -  | 4    | 755  | 2933   | 3689   |
| UN23456 | Rsa1.0.01537.1 | 978  | 187285 | 0         | 499  | 502  | 99 -  | 477  | 978  | 175325 | 175826 |
| UN23457 | Rsa1.0.07959.1 | 597  | 8173   | 1.00E-179 | 361  | 373  | 96 +  | 3    | 375  | 5552   | 5921   |
| UN23458 | Rsa1.0.40824.1 | 1039 | 550    | 1.00E-135 | 269  | 278  | 96 +  | 73   | 350  | 263    | 533    |
| UN23459 | Rsa1.0.00377.1 | 989  | 90038  | 1.00E-150 | 353  | 382  | 92 +  | 1    | 369  | 51755  | 52136  |
| UN23460 | Rsa1.0.00179.1 | 1019 | 393324 | 1.00E-141 | 270  | 274  | 98 +  | 3    | 275  | 213977 | 214250 |
| UN23461 | Rsa1.0.04806.1 | 691  | 15898  | 0         | 537  | 580  | 92 -  | 1    | 559  | 7069   | 7640   |
| UN23462 | Rsa1.0.00353.1 | 1898 | 92242  | 0         | 824  | 850  | 96 +  | 945  | 1783 | 60960  | 61808  |
| UN23463 | Rsa1.0.01300.1 | 1564 | 48942  | 0         | 653  | 671  | 97 +  | 352  | 1022 | 33052  | 33708  |
| UN23464 | Rsa1.0.01186.1 | 1232 | 51418  | 0         | 714  | 721  | 99 -  | 509  | 1229 | 2229   | 2949   |
| UN23465 | Rsa1.0.04031.1 | 653  | 19489  | 0         | 365  | 376  | 97 +  | 2    | 377  | 960    | 1334   |
| UN23466 | Rsa1.0.00090.1 | 753  | 273859 | 1.00E-180 | 359  | 370  | 97 +  | 385  | 751  | 141630 | 141998 |
| UN23467 | Rsa1.0.00660.1 | 968  | 69688  | 1.00E-171 | 329  | 336  | 97 +  | 633  | 966  | 17669  | 18004  |
| UN23468 | Rsa1.0.01552.1 | 728  | 43396  | 0         | 385  | 387  | 99 -  | 41   | 427  | 25165  | 25551  |
| UN23469 | Rsa1.0.01313.1 | 968  | 48387  | 1.00E-150 | 318  | 333  | 95 +  | 596  | 927  | 16151  | 16483  |
| UN23470 | Rsa1.0.00062.1 | 743  | 299291 | 0         | 740  | 741  | 99 +  | 1    | 740  | 247931 | 248671 |
| UN23471 | Rsa1.0.03074.1 | 766  | 25568  | 0         | 401  | 403  | 99 +  | 3    | 405  | 3414   | 3816   |
| UN23472 | Rsa1.0.00389.1 | 1789 | 88795  | 1.00E-149 | 275  | 277  | 99 +  | 15   | 291  | 29355  | 29631  |
| UN23473 | Rsa1.0.01460.1 | 872  | 45255  | 0         | 415  | 418  | 99 -  | 1    | 417  | 3258   | 3675   |
| UN23474 | Rsa1.0.00135.1 | 1297 | 178077 | 0         | 799  | 801  | 99 -  | 126  | 925  | 165548 | 166348 |
| UN23475 | Rsa1.0.00427.1 | 592  | 189678 | 1.00E-150 | 309  | 320  | 96 -  | 2    | 321  | 162553 | 162869 |
| UN23476 | Rsa1.0.00047.1 | 1014 | 168582 | 1.00E-142 | 275  | 280  | 98 +  | 12   | 291  | 165001 | 165279 |

|         |                |      |        |           |     |     |       |      |      |        |        |
|---------|----------------|------|--------|-----------|-----|-----|-------|------|------|--------|--------|
| UN23477 | Rsa1.0.02150.1 | 1135 | 34580  | 0         | 535 | 536 | 99 +  | 597  | 1132 | 17386  | 17921  |
| UN23478 | Rsa1.0.06541.1 | 731  | 10806  | 1.00E-101 | 290 | 316 | 91 +  | 9    | 316  | 10064  | 10372  |
| UN23479 | Rsa1.0.00116.1 | 967  | 365886 | 0         | 357 | 362 | 98 -  | 510  | 871  | 35472  | 35833  |
| UN23480 | Rsa1.0.00838.1 | 1406 | 153820 | 0         | 628 | 636 | 98 -  | 769  | 1404 | 52111  | 52744  |
| UN23481 | Rsa1.0.04031.1 | 689  | 19489  | 0         | 369 | 376 | 98 +  | 9    | 384  | 960    | 1334   |
| UN23482 | Rsa1.0.00318.1 | 1200 | 96094  | 1.00E-156 | 286 | 288 | 99 +  | 913  | 1200 | 29692  | 29979  |
| UN23483 | Rsa1.0.02969.1 | 985  | 26390  | 1.00E-164 | 319 | 325 | 98 +  | 661  | 984  | 17574  | 17897  |
| UN23484 | Rsa1.0.00027.1 | 950  | 283362 | 1.00E-148 | 307 | 319 | 96 -  | 636  | 950  | 105057 | 105373 |
| UN23485 | Rsa1.0.01860.1 | 794  | 38057  | 0         | 505 | 528 | 95 +  | 3    | 518  | 531    | 1057   |
| UN23486 | Rsa1.0.60478.1 | 813  | 379    | 1.00E-140 | 265 | 269 | 98 -  | 110  | 378  | 96     | 364    |
| UN23487 | Rsa1.0.00391.1 | 1072 | 183853 | 0         | 324 | 325 | 99 -  | 1    | 325  | 86965  | 87289  |
| UN23488 | Rsa1.0.00123.1 | 2041 | 325650 | 0         | 422 | 435 | 97 -  | 1606 | 2039 | 59853  | 60285  |
| UN23489 | Rsa1.0.00490.1 | 918  | 186713 | 0         | 361 | 365 | 98 +  | 557  | 918  | 21840  | 22204  |
| UN23490 | Rsa1.0.01296.1 | 700  | 49035  | 1.00E-132 | 269 | 276 | 97 -  | 1    | 270  | 23171  | 23446  |
| UN23491 | Rsa1.0.00033.1 | 756  | 515811 | 2.33E-156 | 326 | 344 | 94 -  | 419  | 755  | 365282 | 365622 |
| UN23492 | Rsa1.0.00058.1 | 680  | 159921 | 0         | 508 | 513 | 99 -  | 167  | 679  | 49040  | 49550  |
| UN23493 | Rsa1.0.04371.1 | 1408 | 17700  | 1.00E-179 | 366 | 381 | 96 -  | 7    | 387  | 2476   | 2853   |
| UN23494 | Rsa1.0.03127.1 | 1666 | 25191  | 0         | 937 | 949 | 98 -  | 1    | 946  | 18507  | 19455  |
| UN23495 | Rsa1.0.02700.1 | 1201 | 28584  | 0         | 415 | 421 | 98 -  | 745  | 1164 | 2935   | 3354   |
| UN23496 | Rsa1.0.05112.1 | 1540 | 14814  | 0         | 341 | 342 | 99 +  | 1    | 341  | 11193  | 11534  |
| UN23497 | Rsa1.0.04794.1 | 776  | 15960  | 1.00E-168 | 421 | 457 | 92 +  | 331  | 776  | 2694   | 3144   |
| UN23498 | Rsa1.0.47682.1 | 654  | 474    | 1.00E-153 | 274 | 274 | 100 + | 1    | 274  | 109    | 382    |
| UN23499 | Rsa1.0.09126.1 | 1374 | 6625   | 0         | 619 | 645 | 95 +  | 1    | 642  | 5071   | 5707   |
| UN23500 | Rsa1.0.00923.1 | 575  | 153678 | 0         | 432 | 436 | 99 +  | 1    | 436  | 152552 | 152986 |
| UN23501 | Rsa1.0.02904.1 | 1660 | 26883  | 1.00E-170 | 357 | 372 | 95 +  | 581  | 946  | 4883   | 5253   |
| UN23502 | Rsa1.0.02228.1 | 1188 | 33688  | 1.00E-163 | 362 | 384 | 94 +  | 3    | 376  | 10171  | 10554  |
| UN23503 | Rsa1.0.01041.1 | 824  | 55910  | 1.00E-174 | 348 | 358 | 97 +  | 3    | 354  | 26433  | 26790  |
| UN23504 | Rsa1.0.05166.1 | 960  | 14624  | 1.00E-171 | 321 | 325 | 98 +  | 636  | 960  | 14105  | 14428  |
| UN23505 | Rsa1.0.00141.1 | 814  | 121494 | 0         | 375 | 385 | 97 +  | 432  | 813  | 20677  | 21061  |
| UN23506 | Rsa1.0.08846.1 | 1796 | 6867   | 1.00E-164 | 308 | 313 | 98 -  | 1    | 313  | 3201   | 3513   |
| UN23507 | Rsa1.0.00959.1 | 828  | 58202  | 1.00E-125 | 291 | 309 | 94 +  | 4    | 311  | 3659   | 3957   |
| UN23508 | Rsa1.0.00077.1 | 1354 | 145005 | 0         | 506 | 506 | 100 + | 847  | 1352 | 82456  | 82961  |
| UN23509 | Rsa1.0.04785.1 | 968  | 15993  | 1.00E-154 | 310 | 321 | 96 -  | 339  | 659  | 7584   | 7904   |
| UN23510 | Rsa1.0.00753.1 | 1188 | 65705  | 1.00E-163 | 345 | 363 | 95 +  | 1    | 363  | 518    | 870    |
| UN23511 | Rsa1.0.00248.1 | 933  | 163568 | 0         | 707 | 738 | 95 -  | 199  | 930  | 40101  | 40834  |
| UN23512 | Rsa1.0.10699.1 | 929  | 5752   | 0         | 559 | 571 | 97 +  | 1    | 571  | 3884   | 4453   |
| UN23513 | Rsa1.0.03426.1 | 599  | 23010  | 0         | 579 | 598 | 96 -  | 3    | 596  | 10671  | 11267  |
| UN23514 | Rsa1.0.00003.1 | 918  | 340054 | 0         | 580 | 596 | 97 -  | 1    | 590  | 258511 | 259102 |
| UN23515 | Rsa1.0.01879.1 | 1091 | 37748  | 0         | 417 | 421 | 99 -  | 1    | 421  | 23051  | 23471  |



|         |                |       |        |           |      |      |       |      |      |        |        |
|---------|----------------|-------|--------|-----------|------|------|-------|------|------|--------|--------|
| UN23555 | Rsa1.0.00489.1 | 790   | 80434  | 1.00E-152 | 273  | 273  | 100 + | 137  | 409  | 47295  | 47567  |
| UN23556 | Rsa1.0.00008.1 | 877   | 358124 | 1.00E-166 | 306  | 309  | 99 +  | 249  | 557  | 54138  | 54446  |
| UN23557 | Rsa1.0.01505.1 | 869   | 44382  | 1.00E-150 | 293  | 300  | 97 -  | 1    | 300  | 38967  | 39264  |
| UN23558 | Rsa1.0.00008.1 | 753   | 358124 | 0         | 356  | 365  | 97 +  | 391  | 752  | 73510  | 73874  |
| UN23559 | Rsa1.0.00006.1 | 787   | 396176 | 0         | 497  | 500  | 99 -  | 288  | 787  | 301523 | 302022 |
| UN23560 | Rsa1.0.17354.1 | 559   | 1851   | 1.00E-175 | 396  | 421  | 94 -  | 140  | 558  | 284    | 701    |
| UN23561 | Rsa1.0.00936.1 | 444   | 59078  | 1.00E-152 | 307  | 316  | 97 -  | 126  | 441  | 27801  | 28114  |
| UN23562 | Rsa1.0.02288.1 | 17828 | 32984  | 0         | 903  | 936  | 96 -  | 2283 | 3218 | 31569  | 32502  |
| UN23563 | Rsa1.0.04071.1 | 1865  | 19243  | 0         | 345  | 346  | 99 -  | 1520 | 1865 | 10753  | 11098  |
| UN23564 | Rsa1.0.00031.1 | 1013  | 179862 | 0         | 498  | 504  | 98 -  | 99   | 602  | 82448  | 82951  |
| UN23565 | Rsa1.0.00417.1 | 892   | 395068 | 0         | 353  | 355  | 99 -  | 52   | 406  | 14475  | 14829  |
| UN23566 | Rsa1.0.03698.1 | 1648  | 21302  | 0         | 691  | 733  | 94 -  | 715  | 1435 | 7114   | 7832   |
| UN23567 | Rsa1.0.75906.1 | 534   | 302    | 1.00E-163 | 297  | 299  | 99 +  | 124  | 422  | 3      | 301    |
| UN23568 | Rsa1.0.04580.1 | 632   | 16773  | 2.00E-84  | 168  | 171  | 98 +  | 192  | 362  | 8538   | 8708   |
| UN23569 | Rsa1.0.00357.1 | 814   | 173671 | 1.00E-122 | 222  | 222  | 100 - | 192  | 413  | 9232   | 9453   |
| UN23570 | Rsa1.0.02428.1 | 873   | 31542  | 1.00E-101 | 231  | 242  | 95 -  | 504  | 743  | 25352  | 25590  |
| UN23571 | Rsa1.0.01081.1 | 931   | 499226 | 6.00E-86  | 250  | 273  | 91 -  | 663  | 931  | 323211 | 323476 |
| UN23572 | Rsa1.0.01245.1 | 637   | 149868 | 1.00E-180 | 351  | 359  | 97 +  | 275  | 632  | 28733  | 29090  |
| UN23573 | Rsa1.0.00170.1 | 899   | 179538 | 1.00E-141 | 258  | 259  | 99 -  | 346  | 604  | 28952  | 29210  |
| UN23574 | Rsa1.0.00034.1 | 1285  | 260119 | 0         | 638  | 667  | 95 -  | 2    | 666  | 48060  | 48726  |
| UN23575 | Rsa1.0.00838.1 | 731   | 153820 | 1.00E-107 | 198  | 198  | 100 - | 118  | 315  | 150288 | 150485 |
| UN23576 | Rsa1.0.02845.1 | 706   | 27340  | 0         | 386  | 389  | 99 +  | 229  | 616  | 3483   | 3871   |
| UN23577 | Rsa1.0.01016.1 | 657   | 181422 | 0         | 462  | 492  | 93 -  | 2    | 493  | 171865 | 172340 |
| UN23578 | Rsa1.0.02540.1 | 1259  | 30344  | 0         | 932  | 950  | 98 -  | 3    | 952  | 4744   | 5690   |
| UN23579 | Rsa1.0.27096.1 | 849   | 866    | 0         | 389  | 406  | 95 -  | 3    | 400  | 335    | 740    |
| UN23580 | Rsa1.0.06071.1 | 874   | 11813  | 0         | 513  | 524  | 97 -  | 353  | 874  | 8845   | 9367   |
| UN23581 | Rsa1.0.02326.1 | 795   | 32503  | 0         | 519  | 548  | 94 -  | 2    | 537  | 9274   | 9821   |
| UN23582 | Rsa1.0.01242.1 | 1565  | 50066  | 0         | 1057 | 1080 | 97 +  | 3    | 1082 | 47957  | 49035  |
| UN23583 | Rsa1.0.00047.1 | 1261  | 168582 | 0         | 517  | 557  | 92 -  | 1    | 537  | 67922  | 68477  |
| UN23584 | Rsa1.0.41382.1 | 722   | 543    | 1.00E-160 | 357  | 378  | 94 +  | 173  | 547  | 1      | 369    |
| UN23585 | Rsa1.0.01515.1 | 848   | 170864 | 0         | 514  | 538  | 95 +  | 308  | 845  | 157969 | 158506 |
| UN23586 | Rsa1.0.04578.1 | 743   | 16774  | 1.00E-180 | 348  | 354  | 98 +  | 394  | 743  | 16195  | 16547  |
| UN23587 | Rsa1.0.02228.1 | 1051  | 33688  | 0         | 931  | 968  | 96 +  | 32   | 997  | 20944  | 21909  |
| UN23588 | Rsa1.0.01460.1 | 782   | 45255  | 0         | 600  | 652  | 92 -  | 3    | 635  | 33286  | 33929  |
| UN23589 | Rsa1.0.01285.1 | 716   | 172709 | 0         | 386  | 389  | 99 +  | 5    | 393  | 36504  | 36892  |
| UN23590 | Rsa1.0.00476.1 | 848   | 280966 | 1.00E-117 | 260  | 274  | 94 -  | 520  | 793  | 234226 | 234498 |
| UN23591 | Rsa1.0.00157.1 | 795   | 245832 | 0         | 723  | 724  | 99 +  | 1    | 724  | 12249  | 12972  |
| UN23592 | Rsa1.0.01803.1 | 986   | 173846 | 0         | 452  | 452  | 100 + | 535  | 986  | 137460 | 137911 |
| UN23593 | Rsa1.0.00042.1 | 761   | 171507 | 1.00E-130 | 272  | 284  | 95 +  | 112  | 395  | 155679 | 155962 |

|         |                |      |        |           |      |      |       |      |      |        |        |
|---------|----------------|------|--------|-----------|------|------|-------|------|------|--------|--------|
| UN23594 | Rsa1.0_03005.1 | 659  | 26082  | 0         | 656  | 657  | 99 +  | 3    | 659  | 19679  | 20335  |
| UN23595 | Rsa1.0_10110.1 | 561  | 5994   | 0         | 468  | 492  | 95 -  | 45   | 536  | 4576   | 5061   |
| UN23596 | Rsa1.0_01452.1 | 883  | 45459  | 0         | 878  | 881  | 99 +  | 1    | 881  | 10069  | 10949  |
| UN23597 | Rsa1.0_00733.1 | 875  | 66583  | 4.00E-99  | 196  | 200  | 98 -  | 258  | 457  | 48918  | 49117  |
| UN23598 | Rsa1.0_00351.1 | 784  | 413096 | 0         | 636  | 644  | 98 -  | 141  | 784  | 246027 | 246668 |
| UN23599 | Rsa1.0_00681.1 | 741  | 68779  | 0         | 458  | 474  | 96 +  | 268  | 741  | 37951  | 38415  |
| UN23600 | Rsa1.0_00566.1 | 542  | 75325  | 0         | 498  | 498  | 100 - | 1    | 498  | 26259  | 26756  |
| UN23601 | Rsa1.0_02387.1 | 910  | 31890  | 0         | 366  | 369  | 99 -  | 1    | 369  | 4637   | 5003   |
| UN23602 | Rsa1.0_09270.1 | 822  | 6513   | 0         | 798  | 824  | 96 +  | 9    | 822  | 5297   | 6119   |
| UN23603 | Rsa1.0_00618.1 | 787  | 72195  | 0         | 501  | 504  | 99 -  | 1    | 504  | 62676  | 63178  |
| UN23604 | Rsa1.0_00017.1 | 1525 | 752458 | 0         | 848  | 887  | 95 -  | 227  | 1113 | 56177  | 57054  |
| UN23605 | Rsa1.0_00080.1 | 1597 | 190437 | 0         | 524  | 563  | 93 -  | 944  | 1496 | 64464  | 65012  |
| UN23606 | Rsa1.0_02059.1 | 739  | 35532  | 1.00E-137 | 248  | 248  | 100 - | 3    | 250  | 32783  | 33030  |
| UN23607 | Rsa1.0_06364.1 | 1315 | 11151  | 0         | 1294 | 1313 | 98 -  | 1    | 1313 | 5330   | 6642   |
| UN23608 | Rsa1.0_02053.1 | 1343 | 35554  | 0         | 367  | 368  | 99 -  | 2    | 369  | 12183  | 12550  |
| UN23609 | Rsa1.0_01588.1 | 456  | 42724  | 1.00E-151 | 274  | 275  | 99 -  | 182  | 456  | 5081   | 5355   |
| UN23610 | Rsa1.0_12341.1 | 685  | 5250   | 1.00E-108 | 220  | 227  | 96 +  | 1    | 227  | 206    | 432    |
| UN23611 | Rsa1.0_01642.1 | 1103 | 41772  | 0         | 1057 | 1113 | 94 -  | 12   | 1103 | 14421  | 15532  |
| UN23612 | Rsa1.0_00642.1 | 1211 | 201230 | 1.00E-135 | 273  | 282  | 96 -  | 485  | 763  | 163117 | 163398 |
| UN23613 | Rsa1.0_00031.1 | 550  | 179862 | 1.00E-120 | 276  | 294  | 93 +  | 4    | 297  | 64518  | 64809  |
| UN23614 | Rsa1.0_01635.1 | 709  | 41865  | 0         | 548  | 571  | 95 -  | 141  | 705  | 7236   | 7801   |
| UN23615 | Rsa1.0_06751.1 | 571  | 10417  | 1.00E-124 | 292  | 310  | 94 -  | 40   | 349  | 9247   | 9548   |
| UN23616 | Rsa1.0_02265.1 | 1109 | 33233  | 0         | 468  | 475  | 98 -  | 1    | 475  | 25713  | 26184  |
| UN23617 | Rsa1.0_01666.1 | 1116 | 173972 | 0         | 1114 | 1114 | 100 - | 3    | 1116 | 145664 | 146777 |
| UN23618 | Rsa1.0_00681.1 | 1509 | 68779  | 0         | 430  | 430  | 100 - | 1080 | 1509 | 26837  | 27266  |
| UN23619 | Rsa1.0_00073.1 | 967  | 240924 | 1.00E-179 | 337  | 342  | 98 +  | 626  | 967  | 13026  | 13366  |
| UN23620 | Rsa1.0_33726.1 | 726  | 672    | 0         | 671  | 676  | 99 +  | 51   | 726  | 1      | 671    |
| UN23621 | Rsa1.0_11080.1 | 1159 | 5623   | 1.00E-170 | 361  | 380  | 95 -  | 396  | 775  | 1789   | 2168   |
| UN23622 | Rsa1.0_16459.1 | 751  | 2148   | 1.00E-159 | 423  | 468  | 90 +  | 285  | 751  | 1564   | 2031   |
| UN23623 | Rsa1.0_01039.1 | 459  | 55946  | 1.00E-63  | 127  | 128  | 99 -  | 2    | 129  | 32012  | 32139  |
| UN23624 | Rsa1.0_00457.1 | 806  | 337301 | 1.00E-107 | 445  | 533  | 83 +  | 304  | 806  | 302541 | 303031 |
| UN23625 | #              | #    | #      | #         | #    | #    | #     | #    | #    | #      | #      |
| UN23626 | Rsa1.0_02028.1 | 1311 | 35857  | 0         | 511  | 523  | 97 +  | 3    | 525  | 26577  | 27098  |
| UN23627 | Rsa1.0_00149.1 | 755  | 305196 | 1.00E-152 | 297  | 305  | 97 -  | 142  | 446  | 180454 | 180758 |
| UN23628 | Rsa1.0_00002.1 | 771  | 601661 | 0         | 740  | 768  | 96 +  | 8    | 771  | 411316 | 412069 |
| UN23629 | Rsa1.0_02803.1 | 1140 | 27715  | 0         | 627  | 638  | 98 +  | 503  | 1140 | 5049   | 5685   |
| UN23630 | Rsa1.0_01041.1 | 965  | 55910  | 0         | 851  | 883  | 96 +  | 84   | 965  | 37194  | 38061  |
| UN23631 | Rsa1.0_00040.1 | 423  | 324196 | 1.00E-103 | 226  | 236  | 95 +  | 178  | 413  | 228102 | 228333 |
| UN23632 | Rsa1.0_00796.1 | 656  | 63997  | 1.00E-105 | 197  | 198  | 99 +  | 268  | 465  | 57607  | 57804  |



|         |                |      |        |           |      |      |       |     |      |        |        |
|---------|----------------|------|--------|-----------|------|------|-------|-----|------|--------|--------|
| UN23633 | Rsa1.0.03490.1 | 949  | 22545  | 0         | 932  | 955  | 97 +  | 1   | 949  | 12776  | 13730  |
| UN23634 | Rsa1.0.00703.1 | 1243 | 67597  | 0         | 474  | 499  | 94 -  | 9   | 501  | 8411   | 8902   |
| UN23635 | Rsa1.0.00017.1 | 753  | 752458 | 6.00E-76  | 176  | 185  | 95 +  | 107 | 290  | 275131 | 275315 |
| UN23636 | Rsa1.0.00019.1 | 738  | 301669 | 0         | 596  | 620  | 96 -  | 36  | 641  | 22469  | 23088  |
| UN23637 | Rsa1.0.03880.1 | 746  | 20293  | 1.00E-175 | 392  | 422  | 92 -  | 4   | 424  | 19678  | 20081  |
| UN23638 | Rsa1.0.00684.1 | 647  | 141701 | 1.00E-173 | 327  | 332  | 98 -  | 1   | 331  | 43174  | 43505  |
| UN23639 | Rsa1.0.03629.1 | 1328 | 21649  | 0         | 731  | 743  | 98 -  | 1   | 742  | 13994  | 14736  |
| UN23640 | Rsa1.0.15215.1 | 850  | 2752   | 1.00E-170 | 325  | 332  | 97 -  | 4   | 331  | 1684   | 2015   |
| UN23641 | Rsa1.0.00178.1 | 890  | 114861 | 0         | 821  | 849  | 96 -  | 2   | 837  | 5884   | 6732   |
| UN23642 | Rsa1.0.00305.1 | 663  | 97308  | 0         | 609  | 647  | 94 +  | 17  | 663  | 37471  | 38094  |
| UN23643 | Rsa1.0.03992.1 | 621  | 19675  | 1.00E-100 | 195  | 198  | 98 +  | 11  | 208  | 12053  | 12250  |
| UN23644 | Rsa1.0.03713.1 | 824  | 21221  | 1.00E-153 | 357  | 381  | 93 -  | 446 | 824  | 10526  | 10904  |
| UN23645 | Rsa1.0.00358.1 | 829  | 91293  | 0         | 444  | 463  | 95 +  | 3   | 460  | 32086  | 32539  |
| UN23646 | Rsa1.0.00293.1 | 1432 | 339294 | 0         | 750  | 795  | 94 -  | 630 | 1415 | 318318 | 319106 |
| UN23647 | Rsa1.0.01104.1 | 1153 | 285480 | 0         | 1123 | 1150 | 97 -  | 3   | 1151 | 5773   | 6922   |
| UN23648 | Rsa1.0.00218.1 | 658  | 201480 | 1.00E-180 | 407  | 433  | 93 -  | 235 | 658  | 162645 | 163076 |
| UN23649 | Rsa1.0.00252.1 | 691  | 102760 | 6.00E-79  | 192  | 206  | 93 +  | 180 | 385  | 61583  | 61788  |
| UN23650 | Rsa1.0.03281.1 | 801  | 143349 | 1.00E-131 | 241  | 242  | 99 -  | 382 | 623  | 137634 | 137875 |
| UN23651 | Rsa1.0.06042.1 | 840  | 11860  | 0         | 395  | 397  | 99 +  | 2   | 398  | 8961   | 9356   |
| UN23652 | Rsa1.0.06751.1 | 558  | 10417  | 1.00E-111 | 291  | 314  | 92 +  | 221 | 534  | 9247   | 9548   |
| UN23653 | Rsa1.0.08326.1 | 588  | 7534   | 1.00E-121 | 252  | 261  | 96 -  | 3   | 262  | 3841   | 4101   |
| UN23654 | Rsa1.0.00938.1 | 1625 | 193891 | 1.00E-171 | 346  | 358  | 96 +  | 402 | 759  | 186475 | 186831 |
| UN23655 | Rsa1.0.01077.1 | 758  | 54772  | 0         | 377  | 385  | 97 -  | 2   | 386  | 28257  | 28640  |
| UN23656 | Rsa1.0.01511.1 | 817  | 44235  | 1.00E-150 | 279  | 282  | 98 -  | 299 | 580  | 29770  | 30051  |
| UN23657 | Rsa1.0.00273.1 | 695  | 326186 | 1.00E-151 | 344  | 366  | 93 -  | 283 | 640  | 113973 | 114338 |
| UN23658 | Rsa1.0.00066.1 | 580  | 152418 | 1.00E-112 | 267  | 285  | 93 -  | 254 | 536  | 139769 | 140053 |
| UN23659 | Rsa1.0.05273.1 | 839  | 14304  | 1.00E-147 | 294  | 303  | 97 +  | 4   | 303  | 13689  | 13991  |
| UN23660 | Rsa1.0.00868.1 | 1866 | 61630  | 0         | 464  | 474  | 97 +  | 539 | 1012 | 13926  | 14399  |
| UN23661 | Rsa1.0.01689.1 | 705  | 40944  | 1.00E-166 | 296  | 296  | 100 - | 6   | 301  | 28308  | 28603  |
| UN23662 | Rsa1.0.02817.1 | 1243 | 27644  | 0         | 824  | 826  | 99 -  | 1   | 826  | 21193  | 22018  |
| UN23663 | Rsa1.0.00131.1 | 1635 | 432233 | 0         | 474  | 495  | 95 +  | 83  | 569  | 65724  | 66217  |
| UN23664 | Rsa1.0.03264.1 | 794  | 145959 | 0         | 558  | 580  | 96 -  | 6   | 584  | 143112 | 143683 |
| UN23665 | Rsa1.0.00589.1 | 904  | 209965 | 0         | 545  | 557  | 97 +  | 3   | 556  | 9740   | 10294  |
| UN23666 | Rsa1.0.00945.1 | 790  | 58714  | 0         | 440  | 466  | 94 +  | 2   | 467  | 30453  | 30912  |
| UN23667 | Rsa1.0.00055.1 | 1160 | 520193 | 0         | 595  | 627  | 94 +  | 2   | 627  | 350353 | 350963 |
| UN23668 | Rsa1.0.00153.1 | 744  | 192931 | 1.00E-138 | 297  | 311  | 95 -  | 434 | 744  | 143113 | 143418 |
| UN23669 | Rsa1.0.08257.1 | 1105 | 7650   | 0         | 1024 | 1088 | 94 +  | 5   | 1087 | 1239   | 2322   |
| UN23670 | Rsa1.0.22067.1 | 451  | 1152   | 1.00E-173 | 317  | 319  | 99 +  | 132 | 450  | 113    | 430    |
| UN23671 | Rsa1.0.08220.1 | 1561 | 7701   | 0         | 834  | 868  | 96 +  | 695 | 1561 | 775    | 1642   |

|         |                |      |        |           |      |      |       |      |      |        |        |
|---------|----------------|------|--------|-----------|------|------|-------|------|------|--------|--------|
| UN23672 | Rsa1.0_00005.1 | 303  | 353093 | 1.00E-106 | 278  | 303  | 91 +  | 1    | 303  | 300500 | 300800 |
| UN23673 | Rsa1.0_03237.1 | 1103 | 24434  | 0         | 593  | 618  | 95 +  | 492  | 1103 | 10287  | 10903  |
| UN23674 | Rsa1.0_00341.1 | 723  | 249309 | 1.00E-168 | 356  | 373  | 95 -  | 3    | 372  | 112596 | 112967 |
| UN23675 | Rsa1.0_01369.1 | 1387 | 47127  | 0         | 601  | 608  | 98 -  | 782  | 1387 | 28226  | 28833  |
| UN23676 | Rsa1.0_08681.1 | 720  | 7046   | 0         | 608  | 662  | 91 +  | 51   | 706  | 5337   | 5985   |
| UN23677 | Rsa1.0_03640.1 | 1399 | 21624  | 0         | 926  | 974  | 95 -  | 435  | 1399 | 15031  | 15995  |
| UN23678 | Rsa1.0_00017.1 | 749  | 752458 | 0         | 466  | 485  | 96 +  | 3    | 481  | 313761 | 314244 |
| UN23679 | Rsa1.0_00171.1 | 1412 | 115622 | 0         | 488  | 495  | 98 -  | 2    | 495  | 102394 | 102885 |
| UN23680 | Rsa1.0_00780.1 | 748  | 147795 | 0         | 503  | 527  | 95 -  | 3    | 529  | 25606  | 26120  |
| UN23681 | Rsa1.0_00028.1 | 617  | 293984 | 1.00E-162 | 293  | 294  | 99 -  | 324  | 617  | 137283 | 137576 |
| UN23682 | Rsa1.0_01147.1 | 667  | 52391  | 1.00E-106 | 228  | 239  | 95 +  | 435  | 667  | 3522   | 3760   |
| UN23683 | Rsa1.0_21673.1 | 698  | 1183   | 0         | 679  | 695  | 97 -  | 1    | 695  | 266    | 949    |
| UN23684 | Rsa1.0_00055.1 | 1258 | 520193 | 0         | 411  | 427  | 96 +  | 557  | 983  | 198752 | 199178 |
| UN23685 | Rsa1.0_00642.1 | 1135 | 201230 | 0         | 653  | 672  | 97 -  | 1    | 672  | 180069 | 180739 |
| UN23686 | Rsa1.0_00483.1 | 1119 | 81102  | 0         | 531  | 555  | 95 +  | 342  | 878  | 2359   | 2913   |
| UN23687 | Rsa1.0_00362.1 | 1023 | 299497 | 1.00E-168 | 327  | 336  | 97 +  | 688  | 1023 | 14774  | 15109  |
| UN23688 | Rsa1.0_05015.1 | 813  | 15125  | 1.00E-114 | 271  | 290  | 93 -  | 521  | 809  | 7027   | 7307   |
| UN23689 | Rsa1.0_00417.1 | 957  | 395068 | 0         | 502  | 523  | 95 -  | 21   | 543  | 259259 | 259778 |
| UN23690 | Rsa1.0_01651.1 | 1076 | 41586  | 1.00E-127 | 241  | 243  | 99 +  | 3    | 243  | 40170  | 40412  |
| UN23691 | Rsa1.0_00178.1 | 1104 | 114861 | 0         | 1067 | 1120 | 95 -  | 1    | 1104 | 82100  | 83218  |
| UN23692 | Rsa1.0_05280.1 | 1173 | 14272  | 0         | 575  | 577  | 99 -  | 1    | 577  | 13568  | 14143  |
| UN23693 | Rsa1.0_00016.1 | 789  | 831256 | 1.00E-160 | 348  | 363  | 95 -  | 176  | 526  | 13149  | 13510  |
| UN23694 | Rsa1.0_02418.1 | 835  | 31590  | 0         | 829  | 833  | 99 +  | 1    | 833  | 9653   | 10485  |
| UN23695 | Rsa1.0_00055.1 | 800  | 520193 | 1.00E-176 | 433  | 476  | 90 -  | 296  | 770  | 59049  | 59506  |
| UN23696 | Rsa1.0_09388.1 | 1136 | 6405   | 1.00E-155 | 336  | 355  | 94 -  | 780  | 1134 | 2854   | 3208   |
| UN23697 | Rsa1.0_01682.1 | 814  | 41090  | 0         | 601  | 601  | 100 - | 214  | 814  | 40467  | 41067  |
| UN23698 | Rsa1.0_00855.1 | 752  | 62047  | 0         | 392  | 401  | 97 -  | 1    | 397  | 13651  | 14051  |
| UN23699 | Rsa1.0_00016.1 | 1224 | 831256 | 0         | 450  | 477  | 94 -  | 374  | 850  | 253037 | 253513 |
| UN23700 | Rsa1.0_00774.1 | 1459 | 64831  | 0         | 518  | 520  | 99 -  | 940  | 1459 | 3761   | 4280   |
| UN23701 | Rsa1.0_00855.1 | 1201 | 62047  | 1.00E-156 | 370  | 395  | 93 -  | 1    | 394  | 55971  | 56361  |
| UN23702 | Rsa1.0_00651.1 | 724  | 247766 | 1.00E-104 | 196  | 197  | 99 -  | 1    | 197  | 186768 | 186964 |
| UN23703 | Rsa1.0_03890.1 | 968  | 20223  | 0         | 427  | 448  | 95 -  | 3    | 446  | 3988   | 4426   |
| UN23704 | Rsa1.0_00823.1 | 1762 | 62889  | 0         | 580  | 616  | 94 +  | 1152 | 1761 | 5743   | 6358   |
| UN23705 | Rsa1.0_00401.1 | 998  | 244410 | 0         | 380  | 385  | 98 +  | 299  | 683  | 241585 | 241969 |
| UN23706 | Rsa1.0_00101.1 | 1053 | 267193 | 0         | 883  | 897  | 98 -  | 2    | 896  | 65403  | 66299  |
| UN23707 | Rsa1.0_00299.1 | 978  | 97770  | 0         | 928  | 973  | 95 -  | 2    | 974  | 9351   | 10320  |
| UN23708 | Rsa1.0_00440.1 | 2088 | 84723  | 1.00E-144 | 260  | 260  | 100 + | 1829 | 2088 | 21994  | 22253  |
| UN23709 | Rsa1.0_01009.1 | 612  | 56922  | 1.00E-107 | 239  | 253  | 94 +  | 359  | 611  | 29788  | 30034  |
| UN23710 | Rsa1.0_05741.1 | 557  | 12773  | 1.00E-178 | 357  | 368  | 97 -  | 187  | 554  | 3067   | 3431   |

|         |                |      |        |           |      |      |       |      |      |        |        |
|---------|----------------|------|--------|-----------|------|------|-------|------|------|--------|--------|
| UN23711 | Rsa1.0_01732.1 | 935  | 40194  | 0         | 448  | 461  | 97 +  | 475  | 935  | 35777  | 36237  |
| UN23712 | Rsa1.0_00533.1 | 763  | 77375  | 1.00E-131 | 273  | 282  | 96 -  | 464  | 744  | 47019  | 47299  |
| UN23713 | Rsa1.0_01000.1 | 594  | 57140  | 1.00E-122 | 229  | 231  | 99 -  | 109  | 339  | 44394  | 44624  |
| UN23714 | Rsa1.0_01126.1 | 952  | 53127  | 2.00E-79  | 185  | 194  | 95 +  | 2    | 194  | 25932  | 26123  |
| UN23715 | Rsa1.0_05382.1 | 1198 | 13963  | 0         | 404  | 411  | 98 +  | 440  | 850  | 423    | 833    |
| UN23716 | Rsa1.0_02551.1 | 1830 | 30196  | 0         | 467  | 477  | 97 +  | 1352 | 1825 | 27667  | 28141  |
| UN23717 | Rsa1.0_07767.1 | 788  | 8609   | 1.00E-168 | 308  | 311  | 99 +  | 53   | 363  | 5425   | 5735   |
| UN23718 | Rsa1.0_00019.1 | 1055 | 301669 | 1.00E-156 | 279  | 279  | 100 + | 369  | 647  | 238711 | 238989 |
| UN23719 | Rsa1.0_00098.1 | 1010 | 349239 | 0         | 772  | 798  | 96 +  | 12   | 809  | 311145 | 311942 |
| UN23720 | Rsa1.0_00337.1 | 457  | 143174 | 0         | 442  | 458  | 96 -  | 1    | 457  | 4687   | 5144   |
| UN23721 | Rsa1.0_02071.1 | 885  | 35409  | 0         | 857  | 858  | 99 -  | 1    | 858  | 15292  | 16149  |
| UN23722 | Rsa1.0_01461.1 | 727  | 45240  | 0         | 704  | 745  | 94 -  | 1    | 727  | 27346  | 28089  |
| UN23723 | Rsa1.0_01561.1 | 894  | 43227  | 1.00E-142 | 301  | 314  | 95 +  | 567  | 880  | 9197   | 9506   |
| UN23724 | Rsa1.0_00135.1 | 758  | 178077 | 0         | 747  | 755  | 98 -  | 1    | 755  | 33256  | 34010  |
| UN23725 | Rsa1.0_00487.1 | 683  | 80674  | 1.00E-161 | 325  | 336  | 96 +  | 2    | 337  | 12904  | 13238  |
| UN23726 | Rsa1.0_00060.1 | 714  | 502678 | 0         | 379  | 380  | 99 +  | 1    | 380  | 368870 | 369249 |
| UN23727 | Rsa1.0_10093.1 | 1730 | 6001   | 0         | 509  | 530  | 96 -  | 3    | 529  | 4459   | 4988   |
| UN23728 | Rsa1.0_01344.1 | 772  | 142535 | 1.00E-168 | 374  | 396  | 94 +  | 383  | 772  | 129448 | 129843 |
| UN23729 | Rsa1.0_00342.1 | 794  | 93695  | 1.00E-173 | 412  | 440  | 93 -  | 1    | 438  | 57424  | 57860  |
| UN23730 | Rsa1.0_01549.1 | 874  | 43543  | 0         | 441  | 445  | 99 -  | 430  | 874  | 35995  | 36439  |
| UN23731 | Rsa1.0_00100.1 | 725  | 249232 | 0         | 700  | 729  | 96 -  | 3    | 725  | 196539 | 197261 |
| UN23732 | Rsa1.0_00123.1 | 672  | 325650 | 1.00E-180 | 319  | 319  | 100 - | 354  | 672  | 241743 | 242061 |
| UN23733 | Rsa1.0_01845.1 | 1211 | 38415  | 1.00E-170 | 336  | 344  | 97 -  | 866  | 1207 | 36041  | 36384  |
| UN23734 | Rsa1.0_07398.1 | 431  | 9464   | 1.00E-162 | 310  | 316  | 98 +  | 113  | 428  | 3970   | 4282   |
| UN23735 | Rsa1.0_00421.1 | 882  | 86365  | 1.00E-147 | 324  | 341  | 95 -  | 525  | 865  | 75841  | 76174  |
| UN23736 | Rsa1.0_01827.1 | 1201 | 143321 | 1.00E-123 | 319  | 346  | 92 -  | 851  | 1191 | 130946 | 131280 |
| UN23737 | Rsa1.0_00089.1 | 1467 | 406142 | 1.00E-173 | 369  | 387  | 95 -  | 1083 | 1465 | 95904  | 96290  |
| UN23738 | Rsa1.0_00472.1 | 611  | 398134 | 1.00E-124 | 318  | 344  | 92 +  | 271  | 609  | 273297 | 273639 |
| UN23739 | Rsa1.0_12999.1 | 1381 | 5050   | 0         | 434  | 437  | 99 -  | 651  | 1087 | 128    | 563    |
| UN23740 | Rsa1.0_09008.1 | 1281 | 6712   | 1.00E-133 | 241  | 241  | 100 - | 1019 | 1259 | 1      | 241    |
| UN23741 | Rsa1.0_00190.1 | 1182 | 318240 | 1.00E-144 | 353  | 379  | 93 +  | 348  | 717  | 151660 | 152038 |
| UN23742 | Rsa1.0_13877.1 | 1235 | 4169   | 0         | 1229 | 1237 | 99 +  | 3    | 1235 | 1241   | 2475   |
| UN23743 | Rsa1.0_07556.1 | 679  | 9136   | 0         | 598  | 625  | 95 -  | 40   | 660  | 8086   | 8703   |
| UN23744 | Rsa1.0_00163.1 | 1531 | 116847 | 0         | 455  | 475  | 95 -  | 1    | 475  | 83512  | 83980  |
| UN23745 | Rsa1.0_01442.1 | 708  | 45776  | 0         | 700  | 707  | 99 -  | 3    | 708  | 4636   | 5342   |
| UN23746 | Rsa1.0_04332.1 | 776  | 17869  | 0         | 414  | 424  | 97 -  | 3    | 426  | 6775   | 7192   |
| UN23747 | Rsa1.0_04214.1 | 694  | 18437  | 0         | 368  | 372  | 98 -  | 2    | 373  | 7889   | 8260   |
| UN23748 | Rsa1.0_01115.1 | 758  | 183545 | 3.00E-59  | 120  | 121  | 99 +  | 334  | 454  | 5805   | 5925   |
| UN23749 | Rsa1.0_01688.1 | 1442 | 40965  | 0         | 423  | 424  | 99 +  | 692  | 1115 | 9664   | 10087  |

|         |                |      |        |           |      |      |       |      |      |        |        |
|---------|----------------|------|--------|-----------|------|------|-------|------|------|--------|--------|
| UN23750 | Rsa1.0_12356.1 | 799  | 5246   | 0         | 359  | 366  | 98 -  | 316  | 681  | 225    | 590    |
| UN23751 | Rsa1.0_05412.1 | 798  | 13836  | 1.00E-153 | 284  | 287  | 98 -  | 268  | 554  | 3143   | 3429   |
| UN23752 | Rsa1.0_00195.1 | 841  | 251884 | 0         | 833  | 842  | 98 -  | 2    | 841  | 203892 | 204733 |
| UN23753 | Rsa1.0_10946.1 | 757  | 5668   | 0         | 726  | 737  | 98 +  | 22   | 755  | 4820   | 5556   |
| UN23754 | Rsa1.0_00991.1 | 1351 | 143101 | 0         | 656  | 686  | 95 +  | 654  | 1336 | 137872 | 138552 |
| UN23755 | Rsa1.0_00088.1 | 787  | 141341 | 1.00E-74  | 149  | 151  | 98 +  | 291  | 441  | 85952  | 86102  |
| UN23756 | Rsa1.0_00155.1 | 722  | 118465 | 0         | 677  | 699  | 96 -  | 25   | 722  | 89863  | 90558  |
| UN23757 | Rsa1.0_01484.1 | 865  | 44806  | 0         | 472  | 472  | 100 - | 3    | 474  | 38825  | 39296  |
| UN23758 | Rsa1.0_00612.1 | 1383 | 72376  | 0         | 685  | 700  | 97 -  | 1    | 700  | 13897  | 14591  |
| UN23759 | Rsa1.0_02728.1 | 791  | 28400  | 0         | 437  | 456  | 95 +  | 339  | 791  | 17440  | 17887  |
| UN23760 | Rsa1.0_58370.1 | 695  | 392    | 1.00E-167 | 298  | 298  | 100 - | 81   | 378  | 95     | 392    |
| UN23761 | Rsa1.0_02228.1 | 771  | 33688  | 0         | 386  | 388  | 99 +  | 2    | 389  | 28329  | 28716  |
| UN23762 | Rsa1.0_03249.1 | 710  | 146254 | 0         | 443  | 454  | 97 +  | 6    | 458  | 141671 | 142124 |
| UN23763 | Rsa1.0_09897.1 | 819  | 6100   | 0         | 809  | 819  | 98 -  | 1    | 819  | 4354   | 5172   |
| UN23764 | Rsa1.0_00758.1 | 1009 | 65477  | 0         | 371  | 373  | 99 +  | 1    | 373  | 50032  | 50404  |
| UN23765 | Rsa1.0_15481.1 | 631  | 2582   | 0         | 440  | 463  | 95 +  | 1    | 446  | 1058   | 1520   |
| UN23766 | Rsa1.0_05015.1 | 1160 | 15125  | 1.00E-141 | 293  | 302  | 97 -  | 741  | 1038 | 309    | 610    |
| UN23767 | Rsa1.0_00299.1 | 1895 | 97770  | 0         | 664  | 665  | 99 -  | 1231 | 1895 | 2108   | 2772   |
| UN23768 | Rsa1.0_20183.1 | 927  | 1330   | 0         | 544  | 547  | 99 +  | 359  | 905  | 1      | 547    |
| UN23769 | Rsa1.0_00019.1 | 1349 | 301669 | 1.00E-151 | 272  | 272  | 100 - | 1078 | 1349 | 112774 | 113045 |
| UN23770 | Rsa1.0_00447.1 | 641  | 84051  | 0         | 449  | 451  | 99 +  | 3    | 451  | 12845  | 13295  |
| UN23771 | Rsa1.0_00223.1 | 1024 | 106231 | 1.00E-173 | 366  | 387  | 94 -  | 55   | 426  | 42188  | 42574  |
| UN23772 | Rsa1.0_01081.1 | 919  | 499226 | 1.00E-141 | 263  | 266  | 98 -  | 654  | 919  | 176099 | 176364 |
| UN23773 | Rsa1.0_09566.1 | 930  | 6285   | 0         | 906  | 932  | 97 +  | 3    | 930  | 818    | 1748   |
| UN23774 | Rsa1.0_39894.1 | 1604 | 563    | 1.00E-174 | 311  | 311  | 100 + | 326  | 636  | 1      | 311    |
| UN23775 | Rsa1.0_02274.1 | 1334 | 33109  | 0         | 350  | 350  | 100 + | 1    | 350  | 12426  | 12775  |
| UN23776 | Rsa1.0_02903.1 | 907  | 26901  | 0         | 625  | 643  | 97 +  | 252  | 890  | 1124   | 1766   |
| UN23777 | Rsa1.0_06364.1 | 789  | 11151  | 1.00E-103 | 196  | 198  | 98 +  | 1    | 198  | 10954  | 11151  |
| UN23778 | Rsa1.0_00724.1 | 338  | 66789  | 1.00E-177 | 329  | 334  | 98 +  | 1    | 334  | 17084  | 17417  |
| UN23779 | Rsa1.0_00324.1 | 701  | 218805 | 0         | 689  | 699  | 98 -  | 4    | 701  | 145202 | 145897 |
| UN23780 | Rsa1.0_02027.1 | 993  | 35869  | 0         | 387  | 405  | 95 -  | 528  | 932  | 1072   | 1476   |
| UN23781 | Rsa1.0_22144.1 | 1528 | 1147   | 0         | 788  | 793  | 99 -  | 4    | 796  | 157    | 949    |
| UN23782 | Rsa1.0_00572.1 | 1330 | 74969  | 0         | 1189 | 1205 | 98 +  | 125  | 1326 | 60010  | 61214  |
| UN23783 | Rsa1.0_02703.1 | 1250 | 28544  | 0         | 451  | 462  | 97 +  | 790  | 1250 | 9801   | 10261  |
| UN23784 | Rsa1.0_00925.1 | 689  | 59481  | 0         | 686  | 686  | 100 - | 2    | 687  | 23688  | 24373  |
| UN23785 | Rsa1.0_03374.1 | 1856 | 23345  | 0         | 1004 | 1007 | 99 -  | 841  | 1847 | 10135  | 11141  |
| UN23786 | Rsa1.0_17492.1 | 545  | 1816   | 1.00E-60  | 131  | 135  | 97 +  | 190  | 324  | 897    | 1031   |
| UN23787 | Rsa1.0_00251.1 | 1434 | 303968 | 0         | 586  | 634  | 92 -  | 820  | 1432 | 83607  | 84232  |
| UN23788 | Rsa1.0_00510.1 | 1500 | 78718  | 0         | 509  | 510  | 99 +  | 990  | 1499 | 28307  | 28816  |

|         |                |   |      |        |           |      |      |       |   |     |      |        |        |
|---------|----------------|---|------|--------|-----------|------|------|-------|---|-----|------|--------|--------|
| UN23789 | Rsa1.0_02070.1 |   | 814  | 158516 | 1.00E-145 | 429  | 489  | 87 -  |   | 1   | 449  | 10246  | 10732  |
| UN23790 | #              | # | #    | #      | #         | #    | #    | #     | # | #   | #    | #      | #      |
| UN23791 | Rsa1.0_00720.1 |   | 1050 | 66931  | 4.00E-78  | 221  | 245  | 90 +  |   | 730 | 964  | 62325  | 62564  |
| UN23792 | Rsa1.0_03263.1 |   | 858  | 24268  | 1.00E-136 | 344  | 377  | 91 +  |   | 291 | 640  | 20569  | 20945  |
| UN23793 | Rsa1.0_01181.1 |   | 734  | 51496  | 5.00E-64  | 159  | 169  | 94 +  |   | 288 | 456  | 35637  | 35804  |
| UN23794 | Rsa1.0_08006.1 |   | 962  | 8091   | 0         | 587  | 634  | 92 -  |   | 2   | 635  | 1315   | 1923   |
| UN23795 | Rsa1.0_01771.1 |   | 719  | 172709 | 0         | 397  | 397  | 100 + |   | 1   | 397  | 29136  | 29532  |
| UN23796 | Rsa1.0_02304.1 |   | 655  | 32793  | 3.00E-93  | 190  | 194  | 97 -  |   | 462 | 654  | 17387  | 17580  |
| UN23797 | Rsa1.0_00534.1 |   | 1029 | 77361  | 0         | 499  | 517  | 96 -  |   | 59  | 574  | 8708   | 9222   |
| UN23798 | Rsa1.0_04342.1 |   | 1111 | 17828  | 0         | 749  | 766  | 97 +  |   | 25  | 790  | 11193  | 11956  |
| UN23799 | Rsa1.0_02128.1 |   | 1217 | 34758  | 0         | 604  | 612  | 98 +  |   | 606 | 1217 | 25609  | 26220  |
| UN23800 | Rsa1.0_00007.1 |   | 1102 | 239325 | 4.00E-84  | 174  | 178  | 97 -  |   | 925 | 1102 | 65982  | 66157  |
| UN23801 | Rsa1.0_00306.1 |   | 964  | 146760 | 0         | 407  | 408  | 99 +  |   | 557 | 964  | 103082 | 103489 |
| UN23802 | Rsa1.0_01081.1 |   | 1251 | 499226 | 0         | 1179 | 1264 | 93 -  |   | 20  | 1251 | 163216 | 164468 |
| UN23803 | Rsa1.0_00645.1 |   | 1407 | 189716 | 0         | 400  | 402  | 99 +  |   | 2   | 403  | 33312  | 33713  |
| UN23804 | Rsa1.0_00030.1 |   | 1056 | 250988 | 0         | 491  | 491  | 100 - |   | 566 | 1056 | 210840 | 211330 |
| UN23805 | Rsa1.0_01717.1 |   | 738  | 143162 | 1.00E-144 | 262  | 263  | 99 -  |   | 120 | 382  | 15717  | 15979  |
| UN23806 | Rsa1.0_00128.1 |   | 1009 | 228675 | 1.00E-167 | 302  | 303  | 99 +  |   | 707 | 1009 | 55079  | 55381  |
| UN23807 | Rsa1.0_16218.1 |   | 869  | 2240   | 1.00E-131 | 277  | 290  | 95 -  |   | 565 | 854  | 85     | 374    |
| UN23808 | Rsa1.0_02098.1 |   | 1008 | 35032  | 0         | 642  | 659  | 97 -  |   | 354 | 1008 | 687    | 1344   |
| UN23809 | Rsa1.0_00023.1 |   | 788  | 194764 | 0         | 586  | 586  | 100 + |   | 47  | 632  | 94507  | 95092  |
| UN23810 | Rsa1.0_00683.1 |   | 1504 | 68638  | 1.00E-137 | 270  | 277  | 97 -  |   | 635 | 911  | 9458   | 9734   |
| UN23811 | Rsa1.0_02792.1 |   | 955  | 27829  | 0         | 952  | 952  | 100 - |   | 3   | 954  | 14852  | 15803  |
| UN23812 | Rsa1.0_01149.1 |   | 1036 | 160459 | 0         | 1021 | 1034 | 98 -  |   | 3   | 1036 | 12994  | 14027  |
| UN23813 | Rsa1.0_00343.1 |   | 695  | 93570  | 0         | 444  | 486  | 91 +  |   | 218 | 689  | 2493   | 2969   |
| UN23814 | Rsa1.0_00394.1 |   | 964  | 148426 | 1.00E-169 | 311  | 313  | 99 -  |   | 650 | 962  | 122829 | 123140 |
| UN23815 | Rsa1.0_03281.1 |   | 690  | 143349 | 4.00E-86  | 171  | 174  | 98 -  |   | 148 | 321  | 6419   | 6592   |
| UN23816 | Rsa1.0_02428.1 |   | 1515 | 31542  | 1.00E-159 | 300  | 305  | 98 -  |   | 175 | 479  | 17805  | 18109  |
| UN23817 | Rsa1.0_00332.1 |   | 588  | 94575  | 0         | 386  | 397  | 97 +  |   | 190 | 585  | 74767  | 75162  |
| UN23818 | Rsa1.0_00928.1 |   | 755  | 59293  | 1.00E-157 | 294  | 297  | 98 -  |   | 408 | 703  | 29444  | 29740  |
| UN23819 | Rsa1.0_00609.1 |   | 761  | 72785  | 0         | 700  | 734  | 95 -  |   | 33  | 761  | 17907  | 18629  |
| UN23820 | Rsa1.0_01027.1 |   | 814  | 56402  | 0         | 395  | 415  | 95 -  |   | 380 | 793  | 45017  | 45430  |
| UN23821 | Rsa1.0_06488.1 |   | 858  | 141774 | 0         | 480  | 500  | 96 -  |   | 361 | 858  | 134014 | 134505 |
| UN23822 | Rsa1.0_01920.1 |   | 545  | 158533 | 1.00E-110 | 214  | 218  | 98 +  |   | 1   | 218  | 20628  | 20845  |
| UN23823 | Rsa1.0_00207.1 |   | 672  | 248736 | 0         | 566  | 598  | 94 +  |   | 6   | 595  | 194245 | 194836 |
| UN23824 | Rsa1.0_01740.1 |   | 1246 | 39986  | 0         | 449  | 459  | 97 +  |   | 395 | 853  | 13886  | 14344  |
| UN23825 | Rsa1.0_00490.1 |   | 929  | 186713 | 0         | 528  | 557  | 94 +  |   | 379 | 926  | 165155 | 165709 |
| UN23826 | Rsa1.0_01679.1 |   | 1306 | 146876 | 0         | 327  | 327  | 100 + |   | 980 | 1306 | 134616 | 134942 |
| UN23827 | Rsa1.0_02319.1 |   | 795  | 32580  | 1.00E-98  | 225  | 238  | 94 +  |   | 72  | 309  | 15721  | 15951  |

|         |                |      |        |           |     |     |       |      |      |        |        |
|---------|----------------|------|--------|-----------|-----|-----|-------|------|------|--------|--------|
| UN23828 | Rsa1.0.00127.1 | 1023 | 127446 | 1.00E-178 | 360 | 373 | 96 +  | 34   | 403  | 113036 | 113405 |
| UN23829 | Rsa1.0.00626.1 | 662  | 71582  | 1.00E-134 | 265 | 273 | 97 -  | 1    | 267  | 28841  | 29113  |
| UN23830 | Rsa1.0.01022.1 | 823  | 56606  | 1.00E-174 | 413 | 447 | 92 -  | 224  | 659  | 29073  | 29516  |
| UN23831 | Rsa1.0.01745.1 | 526  | 39905  | 0         | 520 | 524 | 99 -  | 3    | 526  | 39217  | 39737  |
| UN23832 | Rsa1.0.01281.1 | 811  | 49313  | 1.00E-150 | 364 | 392 | 92 +  | 261  | 633  | 30590  | 30981  |
| UN23833 | Rsa1.0.00016.1 | 797  | 831256 | 0         | 542 | 546 | 99 +  | 3    | 548  | 571068 | 571613 |
| UN23834 | Rsa1.0.00336.1 | 519  | 445051 | 1.00E-140 | 303 | 319 | 94 +  | 19   | 333  | 490    | 805    |
| UN23835 | Rsa1.0.00157.1 | 730  | 245832 | 1.00E-140 | 306 | 320 | 95 +  | 5    | 324  | 64106  | 64422  |
| UN23836 | Rsa1.0.00817.1 | 854  | 62961  | 0         | 817 | 854 | 95 -  | 3    | 853  | 26858  | 27702  |
| UN23837 | Rsa1.0.01595.1 | 655  | 175383 | 0         | 522 | 526 | 99 +  | 131  | 655  | 24270  | 24794  |
| UN23838 | Rsa1.0.01937.1 | 996  | 37147  | 0         | 538 | 556 | 96 +  | 445  | 996  | 20915  | 21465  |
| UN23839 | Rsa1.0.00476.1 | 636  | 280966 | 1.00E-160 | 299 | 303 | 98 -  | 280  | 582  | 246593 | 246895 |
| UN23840 | Rsa1.0.03870.1 | 762  | 20362  | 0         | 742 | 764 | 97 +  | 3    | 762  | 10652  | 11410  |
| UN23841 | Rsa1.0.00060.1 | 1103 | 502678 | 0         | 464 | 478 | 97 +  | 207  | 684  | 396688 | 397165 |
| UN23842 | Rsa1.0.02477.1 | 1448 | 31058  | 1.00E-124 | 229 | 230 | 99 -  | 1035 | 1264 | 1613   | 1842   |
| UN23843 | Rsa1.0.01563.1 | 1118 | 170823 | 0         | 507 | 516 | 98 +  | 296  | 811  | 38791  | 39306  |
| UN23844 | Rsa1.0.01238.1 | 803  | 50120  | 0         | 383 | 383 | 100 - | 124  | 506  | 48359  | 48741  |
| UN23845 | Rsa1.0.01106.1 | 1039 | 53916  | 0         | 385 | 388 | 99 +  | 43   | 430  | 49258  | 49645  |
| UN23846 | Rsa1.0.00016.1 | 1337 | 831256 | 0         | 644 | 678 | 94 +  | 2    | 674  | 48223  | 48892  |
| UN23847 | Rsa1.0.03818.1 | 1201 | 20668  | 1.00E-105 | 275 | 301 | 91 +  | 3    | 299  | 9562   | 9853   |
| UN23848 | Rsa1.0.00217.1 | 697  | 107079 | 0         | 466 | 482 | 96 +  | 215  | 696  | 82516  | 82991  |
| UN23849 | Rsa1.0.00450.1 | 1153 | 139397 | 0         | 573 | 592 | 96 +  | 1    | 592  | 40463  | 41051  |
| UN23850 | #              | #    | #      | #         | #   | #   | #     | #    | #    | #      | #      |
| UN23851 | Rsa1.0.00076.1 | 751  | 146021 | 1.00E-128 | 242 | 245 | 98 +  | 138  | 382  | 75339  | 75583  |
| UN23852 | Rsa1.0.02051.1 | 1428 | 35564  | 0         | 454 | 470 | 96 +  | 961  | 1428 | 1329   | 1795   |
| UN23853 | Rsa1.0.04772.1 | 839  | 16040  | 0         | 834 | 839 | 99 -  | 1    | 839  | 3876   | 4713   |
| UN23854 | Rsa1.0.00812.1 | 521  | 63233  | 1.00E-112 | 220 | 225 | 97 +  | 58   | 282  | 17228  | 17452  |
| UN23855 | Rsa1.0.13944.1 | 896  | 4039   | 5.00E-46  | 389 | 477 | 81 +  | 165  | 638  | 427    | 896    |
| UN23856 | Rsa1.0.23989.1 | 599  | 1013   | 1.00E-109 | 460 | 532 | 86 +  | 3    | 504  | 80     | 609    |
| UN23857 | Rsa1.0.01732.1 | 1400 | 40194  | 0         | 765 | 778 | 98 +  | 626  | 1397 | 18160  | 18937  |
| UN23858 | Rsa1.0.00675.1 | 721  | 145590 | 7.00E-85  | 229 | 252 | 90 -  | 31   | 282  | 144741 | 144992 |
| UN23859 | Rsa1.0.09446.1 | 1311 | 6362   | 1.00E-115 | 224 | 228 | 98 +  | 620  | 847  | 2014   | 2241   |
| UN23860 | Rsa1.0.00384.1 | 793  | 89278  | 0         | 715 | 733 | 97 -  | 33   | 765  | 2840   | 3572   |
| UN23861 | Rsa1.0.00518.1 | 445  | 78360  | 2.00E-93  | 195 | 201 | 97 -  | 241  | 439  | 42830  | 43030  |
| UN23862 | Rsa1.0.08356.1 | 666  | 7485   | 1.00E-144 | 317 | 336 | 94 +  | 283  | 618  | 6679   | 7005   |
| UN23863 | Rsa1.0.00260.1 | 1108 | 102021 | 0         | 420 | 436 | 96 +  | 292  | 727  | 63807  | 64242  |
| UN23864 | Rsa1.0.01647.1 | 1080 | 41645  | 1.00E-110 | 218 | 223 | 97 +  | 101  | 323  | 39198  | 39420  |
| UN23865 | Rsa1.0.00706.1 | 1161 | 291570 | 0         | 647 | 674 | 95 -  | 1    | 674  | 47603  | 48273  |
| UN23866 | Rsa1.0.00207.1 | 654  | 248736 | 0         | 573 | 593 | 96 -  | 59   | 649  | 194245 | 194836 |

|         |                |      |        |           |      |      |       |      |      |        |        |
|---------|----------------|------|--------|-----------|------|------|-------|------|------|--------|--------|
| UN23867 | Rsa1.0.02429.1 | 883  | 31527  | 2.00E-64  | 214  | 238  | 89 -  | 657  | 883  | 29086  | 29320  |
| UN23868 | Rsa1.0.06795.1 | 1069 | 10346  | 0         | 372  | 383  | 97 +  | 243  | 625  | 5026   | 5408   |
| UN23869 | Rsa1.0.00773.1 | 1151 | 64839  | 1.00E-96  | 213  | 224  | 95 -  | 387  | 610  | 58210  | 58433  |
| UN23870 | Rsa1.0.00085.1 | 482  | 142226 | 1.00E-72  | 139  | 139  | 100 - | 139  | 277  | 27114  | 27252  |
| UN23871 | Rsa1.0.00539.1 | 696  | 76926  | 1.00E-129 | 284  | 297  | 95 -  | 1    | 295  | 28381  | 28674  |
| UN23872 | Rsa1.0.08196.1 | 1732 | 7753   | 0         | 422  | 427  | 98 -  | 1309 | 1732 | 3827   | 4253   |
| UN23873 | Rsa1.0.00634.1 | 1361 | 71222  | 1.00E-148 | 298  | 306  | 97 +  | 1056 | 1361 | 45773  | 46075  |
| UN23874 | Rsa1.0.01388.1 | 981  | 46741  | 1.00E-111 | 275  | 298  | 92 +  | 15   | 309  | 16613  | 16900  |
| UN23875 | Rsa1.0.05487.1 | 569  | 13576  | 0         | 401  | 408  | 98 +  | 163  | 569  | 7300   | 7706   |
| UN23876 | Rsa1.0.08688.1 | 899  | 7037   | 0         | 888  | 897  | 98 +  | 3    | 899  | 5781   | 6674   |
| UN23877 | Rsa1.0.04039.1 | 644  | 19467  | 0         | 601  | 636  | 94 +  | 3    | 635  | 8276   | 8907   |
| UN23878 | Rsa1.0.02017.1 | 581  | 35999  | 1.00E-134 | 258  | 262  | 98 +  | 294  | 555  | 34477  | 34737  |
| UN23879 | Rsa1.0.07385.1 | 879  | 9485   | 1.00E-130 | 251  | 256  | 98 -  | 13   | 268  | 5009   | 5264   |
| UN23880 | Rsa1.0.00423.1 | 970  | 86138  | 1.00E-132 | 264  | 272  | 97 -  | 689  | 960  | 53544  | 53815  |
| UN23881 | Rsa1.0.00171.1 | 602  | 115622 | 1.00E-141 | 294  | 307  | 95 +  | 3    | 309  | 50112  | 50418  |
| UN23882 | Rsa1.0.00480.1 | 890  | 81325  | 0         | 406  | 430  | 94 +  | 3    | 431  | 30819  | 31248  |
| UN23883 | Rsa1.0.00038.1 | 1112 | 314568 | 0         | 474  | 496  | 95 +  | 11   | 506  | 237808 | 238293 |
| UN23884 | Rsa1.0.00552.1 | 558  | 206757 | 1.00E-113 | 255  | 268  | 95 -  | 293  | 558  | 70105  | 70372  |
| UN23885 | Rsa1.0.00125.1 | 572  | 253043 | 2.00E-84  | 183  | 191  | 95 +  | 297  | 487  | 168487 | 168677 |
| UN23886 | Rsa1.0.00339.1 | 888  | 222974 | 1.00E-141 | 485  | 561  | 86 +  | 324  | 881  | 28077  | 28637  |
| UN23887 | Rsa1.0.04279.1 | 1152 | 18113  | 0         | 608  | 628  | 96 +  | 1    | 628  | 4746   | 5372   |
| UN23888 | Rsa1.0.00116.1 | 335  | 365886 | 1.00E-143 | 311  | 329  | 94 +  | 1    | 329  | 154980 | 155308 |
| UN23889 | Rsa1.0.00080.1 | 995  | 190437 | 0         | 481  | 495  | 97 -  | 307  | 800  | 68420  | 68914  |
| UN23890 | Rsa1.0.01682.1 | 1188 | 41090  | 0         | 549  | 551  | 99 +  | 356  | 906  | 20336  | 20886  |
| UN23891 | Rsa1.0.03953.1 | 1059 | 19889  | 1.00E-115 | 227  | 232  | 97 -  | 831  | 1058 | 238    | 469    |
| UN23892 | Rsa1.0.00055.1 | 1083 | 520193 | 0         | 388  | 401  | 96 -  | 681  | 1081 | 207381 | 207776 |
| UN23893 | Rsa1.0.05173.1 | 1021 | 14606  | 0         | 811  | 845  | 95 -  | 145  | 989  | 9368   | 10212  |
| UN23894 | Rsa1.0.00108.1 | 766  | 478491 | 0         | 746  | 767  | 97 +  | 1    | 765  | 162682 | 163444 |
| UN23895 | Rsa1.0.03469.1 | 209  | 22681  | 3.00E-75  | 195  | 210  | 92 +  | 2    | 205  | 11583  | 11790  |
| UN23896 | Rsa1.0.04371.1 | 824  | 17700  | 1.00E-150 | 358  | 384  | 93 +  | 447  | 823  | 12630  | 13005  |
| UN23897 | Rsa1.0.00546.1 | 1026 | 76523  | 1.00E-124 | 230  | 231  | 99 +  | 414  | 644  | 73168  | 73398  |
| UN23898 | Rsa1.0.00009.1 | 820  | 232558 | 1.00E-171 | 437  | 473  | 92 +  | 1    | 463  | 117423 | 117890 |
| UN23899 | Rsa1.0.00033.1 | 589  | 515811 | 1.00E-131 | 305  | 323  | 94 -  | 266  | 586  | 13472  | 13790  |
| UN23900 | Rsa1.0.01029.1 | 791  | 256254 | 1.00E-150 | 320  | 334  | 95 -  | 2    | 332  | 245893 | 246222 |
| UN23901 | Rsa1.0.03455.1 | 457  | 22804  | 1.00E-137 | 311  | 332  | 93 +  | 1    | 323  | 11806  | 12137  |
| UN23902 | Rsa1.0.08253.1 | 809  | 7653   | 0         | 626  | 636  | 98 -  | 174  | 809  | 394    | 1024   |
| UN23903 | Rsa1.0.00417.1 | 973  | 395068 | 1.00E-114 | 269  | 286  | 94 -  | 1    | 285  | 250554 | 250838 |
| UN23904 | Rsa1.0.01243.1 | 1170 | 50061  | 0         | 528  | 537  | 98 +  | 135  | 671  | 49259  | 49795  |
| UN23905 | Rsa1.0.00628.1 | 1663 | 214360 | 0         | 1624 | 1662 | 97 -  | 2    | 1663 | 7726   | 9387   |

|         |                |      |        |           |      |      |       |      |      |        |        |
|---------|----------------|------|--------|-----------|------|------|-------|------|------|--------|--------|
| UN23906 | Rsa1.0_01236.1 | 889  | 50156  | 1.00E-95  | 201  | 208  | 96 +  | 2    | 209  | 42342  | 42546  |
| UN23907 | Rsa1.0_00419.1 | 1158 | 86562  | 0         | 1116 | 1170 | 95 +  | 2    | 1158 | 38499  | 39665  |
| UN23908 | Rsa1.0_00873.1 | 828  | 61459  | 1.00E-113 | 239  | 244  | 97 -  | 200  | 443  | 60323  | 60562  |
| UN23909 | Rsa1.0_00910.1 | 1858 | 59975  | 1.00E-162 | 290  | 290  | 100 - | 1567 | 1856 | 30987  | 31276  |
| UN23910 | Rsa1.0_07540.1 | 682  | 9170   | 0         | 650  | 700  | 92 -  | 3    | 682  | 5871   | 6565   |
| UN23911 | Rsa1.0_21831.1 | 842  | 1169   | 1.00E-117 | 232  | 237  | 97 +  | 171  | 407  | 791    | 1025   |
| UN23912 | Rsa1.0_00269.1 | 1398 | 341668 | 0         | 603  | 641  | 94 -  | 760  | 1379 | 292814 | 293452 |
| UN23913 | Rsa1.0_00094.1 | 789  | 139042 | 3.00E-96  | 221  | 235  | 94 +  | 563  | 789  | 119349 | 119581 |
| UN23914 | Rsa1.0_00128.1 | 1361 | 228675 | 0         | 374  | 380  | 98 +  | 982  | 1361 | 170963 | 171342 |
| UN23915 | Rsa1.0_01031.1 | 941  | 56236  | 1.00E-157 | 343  | 360  | 95 -  | 588  | 940  | 25501  | 25857  |
| UN23916 | Rsa1.0_02169.1 | 715  | 34367  | 1.00E-159 | 404  | 438  | 92 +  | 6    | 435  | 28951  | 29379  |
| UN23917 | Rsa1.0_00838.1 | 1352 | 153820 | 0         | 1313 | 1357 | 96 -  | 1    | 1350 | 58562  | 59904  |
| UN23918 | Rsa1.0_00625.1 | 1020 | 71672  | 0         | 566  | 595  | 95 +  | 12   | 601  | 14884  | 15475  |
| UN23919 | Rsa1.0_00153.1 | 834  | 192931 | 0         | 833  | 834  | 99 -  | 1    | 834  | 132658 | 133490 |
| UN23920 | Rsa1.0_00201.1 | 1188 | 232851 | 0         | 483  | 490  | 98 +  | 699  | 1188 | 129193 | 129681 |
| UN23921 | Rsa1.0_00120.1 | 1327 | 277288 | 1.00E-166 | 495  | 559  | 88 -  | 651  | 1203 | 247100 | 247641 |
| UN23922 | Rsa1.0_00719.1 | 585  | 66952  | 0         | 553  | 580  | 95 -  | 2    | 581  | 29896  | 30462  |
| UN23923 | Rsa1.0_00218.1 | 518  | 201480 | 0         | 500  | 527  | 94 +  | 2    | 517  | 115966 | 116490 |
| UN23924 | Rsa1.0_00725.1 | 792  | 66757  | 0         | 553  | 584  | 94 +  | 90   | 673  | 43135  | 43718  |
| UN23925 | Rsa1.0_00022.1 | 691  | 200461 | 0         | 610  | 634  | 96 -  | 59   | 691  | 67773  | 68396  |
| UN23926 | Rsa1.0_00706.1 | 671  | 291570 | 1.00E-132 | 249  | 252  | 98 -  | 140  | 391  | 50148  | 50399  |
| UN23927 | Rsa1.0_03681.1 | 1294 | 21405  | 1.00E-157 | 282  | 282  | 100 - | 1002 | 1283 | 16766  | 17047  |
| UN23928 | Rsa1.0_08538.1 | 1124 | 7220   | 0         | 637  | 671  | 94 +  | 472  | 1124 | 1430   | 2097   |
| UN23929 | Rsa1.0_02248.1 | 1080 | 33414  | 0         | 1075 | 1078 | 99 -  | 3    | 1080 | 31711  | 32788  |
| UN23930 | Rsa1.0_03394.1 | 815  | 23247  | 1.00E-142 | 283  | 292  | 96 +  | 3    | 294  | 4886   | 5177   |
| UN23931 | Rsa1.0_02214.1 | 792  | 161150 | 0         | 579  | 588  | 98 -  | 212  | 792  | 160475 | 161062 |
| UN23932 | Rsa1.0_00223.1 | 1511 | 106231 | 0         | 737  | 750  | 98 -  | 148  | 897  | 100526 | 101275 |
| UN23933 | Rsa1.0_00162.1 | 743  | 239935 | 0         | 740  | 742  | 99 -  | 2    | 743  | 14939  | 15680  |
| UN23934 | Rsa1.0_00482.1 | 875  | 81162  | 3.00E-53  | 113  | 115  | 98 -  | 575  | 689  | 5280   | 5394   |
| UN23935 | Rsa1.0_00230.1 | 673  | 105389 | 0         | 392  | 397  | 98 -  | 277  | 673  | 104425 | 104821 |
| UN23936 | Rsa1.0_07377.1 | 786  | 9494   | 1.00E-149 | 280  | 284  | 98 -  | 2    | 285  | 6338   | 6621   |
| UN23937 | Rsa1.0_03068.1 | 1712 | 25620  | 0         | 1664 | 1703 | 97 -  | 2    | 1702 | 10854  | 12555  |
| UN23938 | Rsa1.0_03543.1 | 810  | 22185  | 0         | 492  | 510  | 96 -  | 115  | 623  | 3871   | 4379   |
| UN23939 | Rsa1.0_00263.1 | 1209 | 224968 | 3.00E-45  | 129  | 140  | 92 -  | 1025 | 1164 | 126811 | 126942 |
| UN23940 | Rsa1.0_00728.1 | 502  | 66704  | 0         | 448  | 463  | 96 -  | 44   | 502  | 10734  | 11196  |
| UN23941 | Rsa1.0_00112.1 | 1360 | 132199 | 1.00E-129 | 258  | 266  | 96 +  | 668  | 933  | 71862  | 72127  |
| UN23942 | Rsa1.0_00144.1 | 1016 | 120708 | 0         | 515  | 531  | 96 -  | 485  | 1015 | 12331  | 12860  |
| UN23943 | Rsa1.0_00363.1 | 1539 | 90968  | 1.00E-120 | 243  | 251  | 96 +  | 612  | 856  | 30983  | 31233  |
| UN23944 | Rsa1.0_02651.1 | 1105 | 29046  | 0         | 419  | 439  | 95 +  | 2    | 437  | 5903   | 6341   |



|         |                |      |        |           |      |      |       |      |      |        |        |
|---------|----------------|------|--------|-----------|------|------|-------|------|------|--------|--------|
| UN23945 | Rsa1.0.02994.1 | 512  | 26168  | 0         | 507  | 510  | 99 -  | 1    | 510  | 1402   | 1911   |
| UN23946 | Rsa1.0.00688.1 | 684  | 68396  | 0         | 395  | 413  | 95 -  | 272  | 684  | 15261  | 15664  |
| UN23947 | Rsa1.0.03604.1 | 1353 | 21832  | 0         | 364  | 368  | 98 +  | 722  | 1089 | 5525   | 5892   |
| UN23948 | Rsa1.0.04191.1 | 735  | 18578  | 0         | 434  | 451  | 96 -  | 3    | 453  | 7426   | 7864   |
| UN23949 | Rsa1.0.07246.1 | 1070 | 9665   | 1.00E-150 | 283  | 286  | 98 +  | 785  | 1069 | 122    | 407    |
| UN23950 | Rsa1.0.00307.1 | 562  | 199003 | 1.00E-122 | 289  | 310  | 93 +  | 1    | 308  | 157781 | 158090 |
| UN23951 | Rsa1.0.16164.1 | 716  | 2261   | 0         | 384  | 384  | 100 + | 3    | 386  | 1877   | 2260   |
| UN23952 | Rsa1.0.06160.1 | 904  | 11596  | 0         | 860  | 902  | 95 +  | 3    | 904  | 3986   | 4874   |
| UN23953 | Rsa1.0.01921.1 | 1686 | 168088 | 0         | 622  | 632  | 98 -  | 1056 | 1686 | 152208 | 152838 |
| UN23954 | Rsa1.0.01724.1 | 1014 | 40292  | 1.00E-148 | 322  | 336  | 95 -  | 684  | 1014 | 9994   | 10323  |
| UN23955 | Rsa1.0.01112.1 | 1023 | 310601 | 0         | 545  | 568  | 95 +  | 458  | 1023 | 31685  | 32249  |
| UN23956 | Rsa1.0.00382.1 | 783  | 251946 | 0         | 511  | 545  | 93 +  | 246  | 781  | 111146 | 111686 |
| UN23957 | Rsa1.0.05354.1 | 790  | 14073  | 0         | 624  | 643  | 97 -  | 150  | 790  | 4709   | 5350   |
| UN23958 | Rsa1.0.05902.1 | 786  | 12284  | 3.00E-19  | 91   | 104  | 87 +  | 173  | 273  | 11678  | 11781  |
| UN23959 | Rsa1.0.34887.1 | 809  | 648    | 0         | 612  | 615  | 99 +  | 70   | 684  | 34     | 648    |
| UN23960 | Rsa1.0.02499.1 | 859  | 30774  | 1.00E-121 | 248  | 257  | 96 +  | 345  | 601  | 22878  | 23134  |
| UN23961 | Rsa1.0.02241.1 | 808  | 33520  | 0         | 416  | 441  | 94 +  | 6    | 435  | 355    | 794    |
| UN23962 | Rsa1.0.00915.1 | 931  | 194446 | 0         | 372  | 377  | 98 +  | 554  | 930  | 5858   | 6234   |
| UN23963 | Rsa1.0.00082.1 | 706  | 237584 | 0         | 680  | 713  | 95 +  | 7    | 706  | 105660 | 106370 |
| UN23964 | Rsa1.0.00048.1 | 1128 | 167185 | 1.00E-115 | 282  | 306  | 92 -  | 833  | 1128 | 4854   | 5158   |
| UN23965 | Rsa1.0.01872.1 | 1663 | 37908  | 0         | 1306 | 1340 | 97 +  | 67   | 1406 | 20454  | 21793  |
| UN23966 | Rsa1.0.01553.1 | 753  | 43379  | 1.00E-117 | 298  | 322  | 92 +  | 438  | 753  | 26451  | 26769  |
| UN23967 | Rsa1.0.00019.1 | 1603 | 301669 | 0         | 581  | 622  | 93 -  | 39   | 643  | 22469  | 23088  |
| UN23968 | Rsa1.0.01632.1 | 732  | 181224 | 1.00E-113 | 229  | 236  | 97 -  | 214  | 449  | 38492  | 38727  |
| UN23969 | Rsa1.0.04288.1 | 783  | 18077  | 7.00E-85  | 163  | 164  | 99 +  | 367  | 530  | 3382   | 3545   |
| UN23970 | Rsa1.0.02423.1 | 880  | 31576  | 0         | 877  | 880  | 99 -  | 1    | 880  | 8168   | 9047   |
| UN23971 | Rsa1.0.03532.1 | 1311 | 22272  | 0         | 416  | 417  | 99 -  | 895  | 1311 | 15163  | 15579  |
| UN23972 | Rsa1.0.04591.1 | 1221 | 16717  | 6.00E-34  | 103  | 111  | 92 -  | 1106 | 1216 | 3028   | 3137   |
| UN23973 | Rsa1.0.00121.1 | 726  | 278029 | 0         | 435  | 455  | 95 +  | 1    | 452  | 4005   | 4459   |
| UN23974 | Rsa1.0.02093.1 | 675  | 35125  | 1.00E-171 | 308  | 309  | 99 -  | 1    | 309  | 21784  | 22092  |
| UN23975 | Rsa1.0.01707.1 | 869  | 40686  | 1.00E-125 | 286  | 302  | 94 +  | 56   | 356  | 29001  | 29298  |
| UN23976 | Rsa1.0.02514.1 | 759  | 30642  | 0         | 383  | 392  | 97 +  | 1    | 392  | 16186  | 16577  |
| UN23977 | Rsa1.0.01554.1 | 973  | 43379  | 0         | 963  | 972  | 99 -  | 2    | 973  | 11093  | 12064  |
| UN23978 | Rsa1.0.04248.1 | 757  | 18287  | 1.00E-139 | 280  | 288  | 97 +  | 11   | 298  | 11679  | 11961  |
| UN23979 | Rsa1.0.00343.1 | 1211 | 93570  | 0         | 851  | 854  | 99 +  | 358  | 1211 | 48698  | 49551  |
| UN23980 | Rsa1.0.00546.1 | 990  | 76523  | 1.00E-153 | 284  | 287  | 98 +  | 704  | 990  | 51920  | 52206  |
| UN23981 | Rsa1.0.00577.1 | 738  | 174827 | 4.00E-77  | 156  | 159  | 98 +  | 215  | 373  | 170863 | 171021 |
| UN23982 | Rsa1.0.04890.1 | 1334 | 15591  | 0         | 608  | 641  | 94 -  | 5    | 639  | 10910  | 11544  |
| UN23983 | Rsa1.0.04630.1 | 652  | 16595  | 1.00E-134 | 304  | 315  | 96 +  | 1    | 313  | 14586  | 14895  |

|         |                |      |        |           |      |      |       |     |      |        |        |
|---------|----------------|------|--------|-----------|------|------|-------|-----|------|--------|--------|
| UN23984 | Rsa1.0_00583.1 | 547  | 74309  | 1.00E-129 | 309  | 334  | 92 +  | 211 | 544  | 71952  | 72285  |
| UN23985 | Rsa1.0_07287.1 | 945  | 9615   | 0         | 623  | 629  | 99 -  | 3   | 631  | 8418   | 9046   |
| UN23986 | Rsa1.0_00676.1 | 740  | 69166  | 0         | 623  | 654  | 95 -  | 9   | 659  | 42070  | 42723  |
| UN23987 | Rsa1.0_00577.1 | 1362 | 174827 | 0         | 779  | 795  | 97 -  | 566 | 1360 | 29466  | 30259  |
| UN23988 | Rsa1.0_06056.1 | 1298 | 137271 | 0         | 740  | 786  | 94 -  | 494 | 1266 | 128419 | 129201 |
| UN23989 | Rsa1.0_01476.1 | 1344 | 172928 | 0         | 358  | 362  | 98 -  | 640 | 1001 | 140327 | 140688 |
| UN23990 | Rsa1.0_00456.1 | 1496 | 82826  | 0         | 1356 | 1357 | 99 -  | 140 | 1496 | 78580  | 79936  |
| UN23991 | Rsa1.0_06629.1 | 903  | 10633  | 0         | 861  | 862  | 99 +  | 42  | 903  | 1251   | 2112   |
| UN23992 | Rsa1.0_00361.1 | 673  | 91181  | 1.00E-92  | 179  | 181  | 98 -  | 165 | 345  | 47136  | 47316  |
| UN23993 | Rsa1.0_16460.1 | 1290 | 2148   | 0         | 1048 | 1064 | 98 +  | 177 | 1238 | 1      | 1063   |
| UN23994 | Rsa1.0_00320.1 | 1009 | 95784  | 1.00E-170 | 340  | 352  | 96 -  | 658 | 1009 | 3664   | 4015   |
| UN23995 | Rsa1.0_15298.1 | 781  | 2704   | 1.00E-122 | 365  | 408  | 89 +  | 37  | 441  | 1489   | 1878   |
| UN23996 | Rsa1.0_04470.1 | 1121 | 17204  | 1.00E-113 | 271  | 289  | 93 +  | 835 | 1121 | 4465   | 4749   |
| UN23997 | Rsa1.0_01077.1 | 1132 | 54772  | 0         | 570  | 606  | 94 -  | 535 | 1130 | 10736  | 11340  |
| UN23998 | Rsa1.0_19373.1 | 1047 | 1441   | 1.00E-136 | 254  | 255  | 99 -  | 794 | 1047 | 470    | 724    |
| UN23999 | Rsa1.0_00019.1 | 1200 | 301669 | 0         | 1159 | 1199 | 96 -  | 2   | 1199 | 229796 | 230992 |
| UN24000 | Rsa1.0_01815.1 | 1225 | 38897  | 0         | 1139 | 1157 | 98 -  | 71  | 1225 | 3023   | 4173   |
| UN24001 | Rsa1.0_00391.1 | 865  | 183853 | 0         | 865  | 866  | 99 +  | 1   | 865  | 59899  | 60764  |
| UN24002 | Rsa1.0_00016.1 | 1104 | 831256 | 0         | 669  | 671  | 99 +  | 433 | 1103 | 398861 | 399531 |
| UN24003 | Rsa1.0_00499.1 | 1160 | 79633  | 0         | 1133 | 1161 | 97 +  | 1   | 1159 | 6938   | 8096   |
| UN24004 | Rsa1.0_00800.1 | 718  | 63868  | 0         | 421  | 423  | 99 -  | 1   | 423  | 57262  | 57684  |
| UN24005 | Rsa1.0_00067.1 | 801  | 415055 | 1.00E-131 | 237  | 237  | 100 - | 434 | 670  | 146203 | 146439 |
| UN24006 | Rsa1.0_01559.1 | 604  | 43262  | 0         | 600  | 603  | 99 -  | 2   | 604  | 17081  | 17682  |
| UN24007 | Rsa1.0_00160.1 | 745  | 346678 | 0         | 422  | 425  | 99 +  | 1   | 425  | 145866 | 146290 |
| UN24008 | Rsa1.0_00236.1 | 694  | 104771 | 0         | 523  | 582  | 89 +  | 4   | 582  | 10507  | 11082  |
| UN24009 | Rsa1.0_50819.1 | 721  | 447    | 0         | 440  | 447  | 98 +  | 19  | 465  | 1      | 447    |
| UN24010 | Rsa1.0_00197.1 | 823  | 109714 | 0         | 521  | 540  | 96 -  | 150 | 688  | 64829  | 65368  |
| UN24011 | Rsa1.0_02266.1 | 931  | 33195  | 1.00E-179 | 324  | 326  | 99 +  | 4   | 329  | 21937  | 22262  |
| UN24012 | Rsa1.0_00201.1 | 1071 | 232851 | 0         | 889  | 945  | 94 -  | 118 | 1043 | 40433  | 41374  |
| UN24013 | Rsa1.0_03512.1 | 429  | 22362  | 1.00E-144 | 311  | 327  | 95 +  | 1   | 327  | 6315   | 6640   |
| UN24014 | Rsa1.0_16069.1 | 809  | 2298   | 0         | 787  | 799  | 98 +  | 3   | 793  | 707    | 1504   |
| UN24015 | Rsa1.0_01199.1 | 692  | 163576 | 3.00E-93  | 225  | 240  | 93 +  | 9   | 241  | 124480 | 124717 |
| UN24016 | Rsa1.0_00087.1 | 708  | 761073 | 1.00E-103 | 208  | 214  | 97 -  | 4   | 217  | 14036  | 14244  |
| UN24017 | Rsa1.0_00208.1 | 1030 | 108565 | 1.00E-123 | 236  | 240  | 98 -  | 705 | 944  | 7689   | 7928   |
| UN24018 | Rsa1.0_00154.1 | 872  | 189461 | 1.00E-107 | 254  | 271  | 93 -  | 596 | 857  | 157506 | 157775 |
| UN24019 | Rsa1.0_04379.1 | 1164 | 17646  | 0         | 336  | 336  | 100 - | 829 | 1164 | 16762  | 17097  |
| UN24020 | Rsa1.0_00480.1 | 527  | 81325  | 0         | 440  | 443  | 99 -  | 1   | 443  | 7962   | 8404   |
| UN24021 | Rsa1.0_02015.1 | 667  | 36008  | 0         | 652  | 665  | 98 -  | 2   | 666  | 31478  | 32142  |
| UN24022 | Rsa1.0_00135.1 | 1251 | 178077 | 0         | 706  | 706  | 100 - | 546 | 1251 | 138361 | 139066 |

|         |                |      |        |           |      |      |       |      |      |        |        |
|---------|----------------|------|--------|-----------|------|------|-------|------|------|--------|--------|
| UN24023 | Rsa1.0.01058.1 | 1170 | 55430  | 1.00E-144 | 287  | 294  | 97 +  | 878  | 1170 | 29543  | 29834  |
| UN24024 | Rsa1.0.01422.1 | 1062 | 46172  | 0         | 495  | 500  | 99 -  | 563  | 1062 | 10164  | 10663  |
| UN24025 | Rsa1.0.00070.1 | 867  | 150321 | 0         | 413  | 423  | 97 +  | 2    | 424  | 54394  | 54815  |
| UN24026 | Rsa1.0.00382.1 | 1272 | 251946 | 0         | 1190 | 1262 | 94 -  | 3    | 1263 | 108348 | 109598 |
| UN24027 | Rsa1.0.00301.1 | 753  | 365315 | 1.00E-152 | 276  | 277  | 99 +  | 2    | 278  | 161031 | 161307 |
| UN24028 | Rsa1.0.00206.1 | 1200 | 109040 | 0         | 952  | 956  | 99 -  | 3    | 957  | 28660  | 29615  |
| UN24029 | Rsa1.0.00205.1 | 835  | 193401 | 0         | 800  | 840  | 95 -  | 1    | 835  | 183981 | 184820 |
| UN24030 | Rsa1.0.00525.1 | 825  | 78030  | 0         | 378  | 384  | 98 +  | 5    | 388  | 29552  | 29935  |
| UN24031 | Rsa1.0.00394.1 | 866  | 148426 | 1.00E-106 | 245  | 259  | 94 +  | 1    | 258  | 122884 | 123140 |
| UN24032 | Rsa1.0.03965.1 | 804  | 19828  | 0         | 368  | 370  | 99 +  | 437  | 804  | 13259  | 13628  |
| UN24033 | Rsa1.0.00437.1 | 805  | 84879  | 1.00E-100 | 237  | 249  | 95 +  | 561  | 805  | 31311  | 31558  |
| UN24034 | Rsa1.0.03692.1 | 870  | 21338  | 1.00E-139 | 306  | 320  | 95 +  | 3    | 318  | 679    | 994    |
| UN24035 | Rsa1.0.02316.1 | 607  | 32608  | 0         | 556  | 563  | 98 -  | 45   | 607  | 25260  | 25819  |
| UN24036 | Rsa1.0.34308.1 | 775  | 660    | 1.00E-166 | 300  | 301  | 99 -  | 151  | 451  | 360    | 660    |
| UN24037 | Rsa1.0.00211.1 | 671  | 228189 | 1.00E-109 | 230  | 239  | 96 -  | 107  | 345  | 149262 | 149497 |
| UN24038 | Rsa1.0.00427.1 | 839  | 189678 | 0         | 614  | 614  | 100 - | 226  | 839  | 33180  | 33793  |
| UN24039 | Rsa1.0.00207.1 | 1029 | 248736 | 1.00E-125 | 296  | 312  | 94 +  | 705  | 1011 | 236736 | 237047 |
| UN24040 | Rsa1.0.00417.1 | 1008 | 395068 | 1.00E-131 | 247  | 250  | 98 -  | 1    | 250  | 8402   | 8651   |
| UN24041 | Rsa1.0.04997.1 | 640  | 15182  | 1.00E-89  | 177  | 180  | 98 -  | 256  | 435  | 7089   | 7268   |
| UN24042 | Rsa1.0.01870.1 | 789  | 37919  | 1.00E-177 | 393  | 418  | 94 -  | 380  | 787  | 13906  | 14321  |
| UN24043 | Rsa1.0.02248.1 | 1273 | 33414  | 0         | 405  | 405  | 100 + | 279  | 683  | 22961  | 23365  |
| UN24044 | Rsa1.0.00323.1 | 1150 | 159650 | 0         | 497  | 499  | 99 -  | 652  | 1150 | 99380  | 99878  |
| UN24045 | Rsa1.0.00025.1 | 750  | 277312 | 0         | 458  | 462  | 99 +  | 289  | 750  | 97736  | 98197  |
| UN24046 | #              | #    | #      | #         | #    | #    | #     | #    | #    | #      | #      |
| UN24047 | Rsa1.0.01586.1 | 1173 | 42804  | 0         | 434  | 455  | 95 +  | 2    | 454  | 28048  | 28496  |
| UN24048 | Rsa1.0.03387.1 | 540  | 23278  | 0         | 525  | 539  | 97 -  | 1    | 539  | 8042   | 8580   |
| UN24049 | Rsa1.0.00473.1 | 798  | 212204 | 0         | 747  | 776  | 96 -  | 26   | 798  | 199831 | 200598 |
| UN24050 | Rsa1.0.00553.1 | 730  | 75983  | 2.00E-17  | 164  | 203  | 80 -  | 312  | 514  | 15170  | 15372  |
| UN24051 | Rsa1.0.05305.1 | 1087 | 14207  | 1.00E-164 | 303  | 306  | 99 +  | 1    | 306  | 3277   | 3582   |
| UN24052 | Rsa1.0.00002.1 | 513  | 601661 | 0         | 438  | 438  | 100 + | 5    | 442  | 453712 | 454149 |
| UN24053 | Rsa1.0.02235.1 | 739  | 33615  | 0         | 470  | 498  | 94 -  | 245  | 735  | 17591  | 18082  |
| UN24054 | Rsa1.0.00114.1 | 974  | 131330 | 0         | 922  | 963  | 95 -  | 22   | 974  | 28480  | 29441  |
| UN24055 | Rsa1.0.08728.1 | 729  | 6995   | 0         | 355  | 358  | 99 +  | 1    | 358  | 1878   | 2235   |
| UN24056 | Rsa1.0.09314.1 | 1006 | 6461   | 0         | 516  | 520  | 99 -  | 485  | 1004 | 5595   | 6112   |
| UN24057 | Rsa1.0.00116.1 | 684  | 365886 | 0         | 568  | 586  | 96 -  | 2    | 587  | 154724 | 155307 |
| UN24058 | Rsa1.0.00120.1 | 543  | 277288 | 1.00E-174 | 348  | 361  | 96 -  | 3    | 363  | 266328 | 266688 |
| UN24059 | Rsa1.0.01238.1 | 819  | 50120  | 1.00E-136 | 246  | 246  | 100 - | 221  | 466  | 48496  | 48741  |
| UN24060 | Rsa1.0.01956.1 | 715  | 36847  | 0         | 388  | 400  | 97 -  | 259  | 658  | 22766  | 23165  |
| UN24061 | Rsa1.0.00039.1 | 1583 | 296927 | 1.00E-149 | 271  | 272  | 99 -  | 1312 | 1583 | 210817 | 211088 |

|         |                |      |        |           |      |      |       |      |      |        |        |
|---------|----------------|------|--------|-----------|------|------|-------|------|------|--------|--------|
| UN24062 | Rsa1.0.01489.1 | 764  | 44764  | 1.00E-134 | 245  | 246  | 99 -  | 143  | 388  | 38536  | 38781  |
| UN24063 | Rsa1.0.04692.1 | 753  | 16357  | 0         | 746  | 748  | 99 +  | 6    | 753  | 11760  | 12506  |
| UN24064 | Rsa1.0.00061.1 | 846  | 218685 | 0         | 513  | 532  | 96 -  | 323  | 845  | 2085   | 2614   |
| UN24065 | Rsa1.0.02399.1 | 830  | 31763  | 0         | 405  | 415  | 97 +  | 360  | 773  | 12071  | 12484  |
| UN24066 | Rsa1.0.00060.1 | 597  | 502678 | 1.00E-136 | 255  | 258  | 98 -  | 340  | 597  | 370114 | 370371 |
| UN24067 | Rsa1.0.05081.1 | 1137 | 136103 | 0         | 425  | 434  | 97 -  | 1    | 434  | 121527 | 121960 |
| UN24068 | Rsa1.0.00308.1 | 919  | 96915  | 1.00E-130 | 335  | 364  | 92 -  | 3    | 364  | 71892  | 72253  |
| UN24069 | Rsa1.0.01313.1 | 1346 | 48387  | 1.00E-111 | 217  | 221  | 98 -  | 113  | 333  | 19753  | 19973  |
| UN24070 | Rsa1.0.03475.1 | 777  | 22653  | 3.00E-59  | 126  | 129  | 97 -  | 1    | 129  | 22098  | 22226  |
| UN24071 | Rsa1.0.06836.1 | 1306 | 10289  | 0         | 844  | 877  | 96 -  | 429  | 1305 | 349    | 1221   |
| UN24072 | Rsa1.0.00006.1 | 1141 | 396176 | 0         | 463  | 480  | 96 -  | 117  | 595  | 17281  | 17760  |
| UN24073 | Rsa1.0.01091.1 | 939  | 54383  | 0         | 461  | 472  | 97 -  | 436  | 905  | 9418   | 9883   |
| UN24074 | Rsa1.0.34308.1 | 1263 | 660    | 1.00E-151 | 294  | 301  | 97 -  | 204  | 501  | 360    | 660    |
| UN24075 | Rsa1.0.00058.1 | 688  | 159921 | 0         | 682  | 686  | 99 +  | 3    | 688  | 86926  | 87609  |
| UN24076 | Rsa1.0.16833.1 | 779  | 2019   | 1.00E-107 | 197  | 197  | 100 + | 141  | 337  | 1453   | 1649   |
| UN24077 | Rsa1.0.02983.1 | 857  | 26268  | 1.00E-129 | 262  | 269  | 97 -  | 581  | 847  | 1817   | 2084   |
| UN24078 | Rsa1.0.00085.1 | 889  | 142226 | 0         | 408  | 411  | 99 +  | 479  | 889  | 49282  | 49692  |
| UN24079 | Rsa1.0.00040.1 | 1334 | 324196 | 0         | 399  | 422  | 94 +  | 907  | 1320 | 306929 | 307349 |
| UN24080 | Rsa1.0.01036.1 | 1297 | 55978  | 0         | 1293 | 1296 | 99 +  | 2    | 1297 | 19127  | 20421  |
| UN24081 | Rsa1.0.04975.1 | 824  | 15264  | 1.00E-150 | 288  | 294  | 97 +  | 3    | 296  | 13649  | 13942  |
| UN24082 | #              | #    | #      | #         | #    | #    | #     | #    | #    | #      | #      |
| UN24083 | Rsa1.0.04281.1 | 599  | 18107  | 0         | 447  | 459  | 97 +  | 142  | 599  | 14748  | 15202  |
| UN24084 | Rsa1.0.05076.1 | 1517 | 14916  | 0         | 1366 | 1367 | 99 -  | 151  | 1517 | 8882   | 10248  |
| UN24085 | Rsa1.0.00457.1 | 1537 | 337301 | 0         | 1459 | 1542 | 94 -  | 3    | 1537 | 317277 | 318801 |
| UN24086 | Rsa1.0.01424.1 | 753  | 46139  | 1.00E-120 | 273  | 291  | 93 -  | 159  | 449  | 42149  | 42439  |
| UN24087 | Rsa1.0.05804.1 | 526  | 12586  | 0         | 493  | 524  | 94 -  | 2    | 525  | 9638   | 10161  |
| UN24088 | Rsa1.0.00123.1 | 618  | 325650 | 0         | 607  | 621  | 97 -  | 1    | 618  | 184093 | 184713 |
| UN24089 | Rsa1.0.28680.1 | 1046 | 806    | 0         | 361  | 369  | 97 -  | 678  | 1046 | 128    | 493    |
| UN24090 | Rsa1.0.00065.1 | 1465 | 454616 | 0         | 642  | 657  | 97 -  | 803  | 1457 | 173790 | 174442 |
| UN24091 | Rsa1.0.00116.1 | 993  | 365886 | 1.00E-117 | 235  | 242  | 97 +  | 355  | 596  | 239724 | 239965 |
| UN24092 | Rsa1.0.02834.1 | 910  | 27493  | 0         | 357  | 357  | 100 - | 552  | 908  | 19583  | 19939  |
| UN24093 | Rsa1.0.00959.1 | 1513 | 58202  | 0         | 1002 | 1027 | 97 +  | 3    | 1022 | 56743  | 57763  |
| UN24094 | Rsa1.0.03475.1 | 1760 | 22653  | 0         | 723  | 733  | 98 -  | 126  | 855  | 18249  | 18981  |
| UN24095 | Rsa1.0.00621.1 | 829  | 71840  | 7.00E-82  | 180  | 187  | 96 -  | 609  | 794  | 42405  | 42591  |
| UN24096 | Rsa1.0.05002.1 | 787  | 15173  | 2.00E-91  | 183  | 187  | 97 -  | 387  | 573  | 8410   | 8596   |
| UN24097 | Rsa1.0.08959.1 | 1315 | 6751   | 0         | 654  | 657  | 99 +  | 8    | 664  | 6095   | 6751   |
| UN24098 | Rsa1.0.18008.1 | 1216 | 1691   | 1.00E-138 | 309  | 324  | 95 -  | 894  | 1216 | 244    | 563    |
| UN24099 | Rsa1.0.00476.1 | 2060 | 280966 | 0         | 779  | 789  | 98 +  | 1275 | 2060 | 232122 | 232910 |
| UN24100 | Rsa1.0.00073.1 | 1183 | 240924 | 0         | 584  | 625  | 93 -  | 558  | 1182 | 81093  | 81695  |

|         |                |      |        |           |      |      |       |      |      |        |        |
|---------|----------------|------|--------|-----------|------|------|-------|------|------|--------|--------|
| UN24101 | Rsa1.0.00457.1 | 524  | 337301 | 1.00E-126 | 264  | 272  | 97 +  | 1    | 268  | 314299 | 314570 |
| UN24102 | Rsa1.0.00851.1 | 669  | 62181  | 1.00E-161 | 305  | 308  | 99 -  | 362  | 669  | 30609  | 30914  |
| UN24103 | Rsa1.0.02814.1 | 232  | 27656  | 2.00E-64  | 149  | 157  | 94 +  | 76   | 232  | 25969  | 26125  |
| UN24104 | Rsa1.0.02500.1 | 608  | 30768  | 1.00E-116 | 222  | 225  | 98 +  | 126  | 350  | 2416   | 2640   |
| UN24105 | Rsa1.0.03147.1 | 787  | 25001  | 5.00E-95  | 183  | 185  | 98 -  | 403  | 587  | 15103  | 15287  |
| UN24106 | Rsa1.0.09314.1 | 1444 | 6461   | 0         | 775  | 809  | 95 +  | 274  | 1071 | 3997   | 4802   |
| UN24107 | Rsa1.0.01964.1 | 914  | 36702  | 0         | 427  | 430  | 99 -  | 486  | 914  | 25882  | 26311  |
| UN24108 | Rsa1.0.00378.1 | 825  | 89892  | 1.00E-132 | 239  | 239  | 100 - | 419  | 657  | 51054  | 51292  |
| UN24109 | Rsa1.0.00008.1 | 766  | 358124 | 1.00E-134 | 276  | 287  | 96 +  | 3    | 289  | 320172 | 320454 |
| UN24110 | Rsa1.0.36974.1 | 831  | 610    | 0         | 575  | 589  | 97 -  | 158  | 734  | 22     | 610    |
| UN24111 | Rsa1.0.01881.1 | 823  | 37721  | 0         | 518  | 537  | 96 +  | 11   | 547  | 13978  | 14513  |
| UN24112 | Rsa1.0.01193.1 | 691  | 51147  | 6.00E-85  | 166  | 168  | 98 +  | 213  | 380  | 13320  | 13487  |
| UN24113 | Rsa1.0.00114.1 | 964  | 131330 | 4.00E-84  | 165  | 167  | 98 -  | 143  | 309  | 129182 | 129348 |
| UN24114 | Rsa1.0.00112.1 | 380  | 132199 | 0         | 372  | 374  | 99 +  | 7    | 380  | 33536  | 33909  |
| UN24115 | Rsa1.0.02032.1 | 1232 | 35830  | 0         | 1066 | 1089 | 97 +  | 144  | 1232 | 10723  | 11810  |
| UN24116 | #              | #    | #      | #         | #    | #    | #     | #    | #    | #      | #      |
| UN24117 | Rsa1.0.03805.1 | 859  | 20746  | 0         | 834  | 861  | 96 +  | 5    | 859  | 13656  | 14503  |
| UN24118 | Rsa1.0.00175.1 | 818  | 166121 | 0         | 617  | 627  | 98 +  | 192  | 818  | 35218  | 35838  |
| UN24119 | Rsa1.0.03527.1 | 1390 | 22278  | 1.00E-169 | 395  | 421  | 93 +  | 981  | 1390 | 18596  | 19013  |
| UN24120 | Rsa1.0.00376.1 | 1550 | 90101  | 0         | 407  | 411  | 99 +  | 1135 | 1545 | 31654  | 32063  |
| UN24121 | Rsa1.0.08459.1 | 1131 | 7315   | 0         | 989  | 1012 | 97 -  | 121  | 1131 | 6307   | 7315   |
| UN24122 | Rsa1.0.02295.1 | 1289 | 149884 | 0         | 537  | 578  | 92 -  | 68   | 642  | 19090  | 19652  |
| UN24123 | Rsa1.0.02333.1 | 865  | 32431  | 1.00E-179 | 332  | 335  | 99 -  | 1    | 335  | 21102  | 21435  |
| UN24124 | Rsa1.0.00123.1 | 1432 | 325650 | 3.00E-85  | 212  | 229  | 92 -  | 833  | 1061 | 234211 | 234439 |
| UN24125 | Rsa1.0.21301.1 | 935  | 1217   | 1.00E-154 | 300  | 308  | 97 +  | 1    | 308  | 70     | 377    |
| UN24126 | Rsa1.0.00107.1 | 997  | 431659 | 0         | 704  | 704  | 100 - | 1    | 704  | 146548 | 147251 |
| UN24127 | Rsa1.0.03741.1 | 657  | 143933 | 0         | 649  | 658  | 98 +  | 1    | 657  | 8489   | 9145   |
| UN24128 | Rsa1.0.00141.1 | 1081 | 121494 | 0         | 542  | 544  | 99 +  | 1    | 544  | 67415  | 67958  |
| UN24129 | Rsa1.0.23849.1 | 815  | 1022   | 0         | 799  | 850  | 94 +  | 3    | 815  | 8      | 855    |
| UN24130 | Rsa1.0.00782.1 | 761  | 64468  | 1.00E-166 | 375  | 396  | 94 -  | 369  | 761  | 48577  | 48971  |
| UN24131 | Rsa1.0.00476.1 | 869  | 280966 | 0         | 489  | 502  | 97 -  | 368  | 867  | 220783 | 221278 |
| UN24132 | Rsa1.0.00595.1 | 918  | 341648 | 0         | 881  | 920  | 95 +  | 3    | 915  | 192506 | 193425 |
| UN24133 | Rsa1.0.10900.1 | 690  | 5684   | 0         | 648  | 672  | 96 -  | 17   | 687  | 1247   | 1918   |
| UN24134 | Rsa1.0.01565.1 | 1332 | 155447 | 0         | 479  | 481  | 99 +  | 196  | 676  | 1771   | 2251   |
| UN24135 | Rsa1.0.14639.1 | 971  | 3198   | 1.00E-102 | 223  | 234  | 95 -  | 485  | 718  | 1011   | 1244   |
| UN24136 | Rsa1.0.13972.1 | 638  | 3970   | 0         | 636  | 636  | 100 - | 1    | 636  | 1056   | 1691   |
| UN24137 | Rsa1.0.01730.1 | 763  | 40223  | 1.00E-126 | 321  | 348  | 92 -  | 417  | 762  | 36499  | 36828  |
| UN24138 | Rsa1.0.07767.1 | 762  | 8609   | 1.00E-134 | 256  | 259  | 98 -  | 463  | 720  | 6842   | 7100   |
| UN24139 | Rsa1.0.00308.1 | 1037 | 96915  | 0         | 562  | 571  | 98 -  | 3    | 569  | 46036  | 46606  |

|         |                |      |        |           |      |      |       |      |      |        |        |
|---------|----------------|------|--------|-----------|------|------|-------|------|------|--------|--------|
| UN24140 | Rsa1.0_16310.1 | 506  | 2205   | 1.00E-116 | 216  | 217  | 99 +  | 3    | 219  | 904    | 1120   |
| UN24141 | Rsa1.0_00153.1 | 675  | 192931 | 1.00E-108 | 235  | 247  | 95 +  | 39   | 285  | 601    | 847    |
| UN24142 | Rsa1.0_01136.1 | 1188 | 52724  | 0         | 664  | 712  | 93 +  | 479  | 1187 | 35425  | 36134  |
| UN24143 | Rsa1.0_01792.1 | 890  | 39227  | 0         | 466  | 501  | 93 -  | 397  | 890  | 17495  | 17978  |
| UN24144 | Rsa1.0_00169.1 | 2294 | 274298 | 0         | 932  | 939  | 99 -  | 1355 | 2293 | 224097 | 225035 |
| UN24145 | Rsa1.0_04267.1 | 1609 | 18193  | 0         | 650  | 650  | 100 - | 5    | 654  | 11855  | 12504  |
| UN24146 | Rsa1.0_00008.1 | 937  | 358124 | 0         | 478  | 479  | 99 -  | 3    | 481  | 289698 | 290176 |
| UN24147 | Rsa1.0_02070.1 | 926  | 158516 | 1.00E-71  | 169  | 178  | 94 +  | 674  | 851  | 141340 | 141516 |
| UN24148 | Rsa1.0_00007.1 | 772  | 239325 | 1.00E-149 | 274  | 276  | 99 -  | 3    | 278  | 121788 | 122063 |
| UN24149 | Rsa1.0_00128.1 | 229  | 228675 | 1.00E-101 | 221  | 230  | 96 -  | 3    | 229  | 70388  | 70612  |
| UN24150 | Rsa1.0_00564.1 | 1137 | 75428  | 0         | 1128 | 1137 | 99 -  | 2    | 1137 | 60617  | 61751  |
| UN24151 | Rsa1.0_05161.1 | 793  | 14631  | 1.00E-161 | 338  | 354  | 95 +  | 3    | 356  | 8345   | 8695   |
| UN24152 | Rsa1.0_07577.1 | 1272 | 9092   | 0         | 504  | 528  | 95 +  | 746  | 1272 | 7519   | 8043   |
| UN24153 | Rsa1.0_00031.1 | 932  | 179862 | 0         | 689  | 691  | 99 -  | 242  | 932  | 57219  | 57909  |
| UN24154 | Rsa1.0_00190.1 | 1238 | 318240 | 1.00E-121 | 236  | 241  | 97 -  | 982  | 1222 | 69460  | 69700  |
| UN24155 | Rsa1.0_02582.1 | 914  | 29889  | 0         | 444  | 457  | 97 -  | 1    | 457  | 23047  | 23497  |
| UN24156 | Rsa1.0_00805.1 | 1523 | 63724  | 0         | 785  | 826  | 95 -  | 24   | 843  | 57517  | 58342  |
| UN24157 | Rsa1.0_00382.1 | 990  | 251946 | 0         | 938  | 969  | 96 +  | 5    | 973  | 108610 | 109578 |
| UN24158 | Rsa1.0_00027.1 | 994  | 283362 | 1.00E-150 | 406  | 446  | 91 -  | 557  | 994  | 160657 | 161096 |
| UN24159 | Rsa1.0_14624.1 | 923  | 3217   | 1.00E-133 | 291  | 307  | 94 +  | 615  | 921  | 1334   | 1632   |
| UN24160 | Rsa1.0_02540.1 | 1064 | 30344  | 0         | 774  | 803  | 96 +  | 1    | 785  | 17822  | 18622  |
| UN24161 | Rsa1.0_00959.1 | 885  | 58202  | 0         | 629  | 674  | 93 -  | 221  | 885  | 17000  | 17669  |
| UN24162 | Rsa1.0_05140.1 | 885  | 14710  | 1.00E-126 | 297  | 317  | 93 -  | 1    | 306  | 5327   | 5641   |
| UN24163 | Rsa1.0_02006.1 | 878  | 36135  | 1.00E-106 | 234  | 247  | 94 -  | 1    | 236  | 4294   | 4540   |
| UN24164 | Rsa1.0_02199.1 | 1310 | 33982  | 1.00E-113 | 243  | 253  | 96 -  | 1    | 253  | 13929  | 14176  |
| UN24165 | Rsa1.0_00251.1 | 797  | 303968 | 1.00E-98  | 211  | 219  | 96 -  | 580  | 797  | 148069 | 148287 |
| UN24166 | Rsa1.0_00299.1 | 892  | 97770  | 2.00E-98  | 251  | 273  | 91 -  | 496  | 768  | 26265  | 26534  |
| UN24167 | Rsa1.0_07243.1 | 946  | 9673   | 1.00E-153 | 281  | 282  | 99 -  | 1    | 281  | 3530   | 3811   |
| UN24168 | Rsa1.0_02456.1 | 924  | 31222  | 0         | 781  | 785  | 99 -  | 110  | 894  | 29851  | 30634  |
| UN24169 | Rsa1.0_00009.1 | 997  | 232558 | 0         | 625  | 666  | 93 +  | 337  | 996  | 138504 | 139161 |
| UN24170 | Rsa1.0_14276.1 | 808  | 3585   | 0         | 648  | 657  | 98 +  | 12   | 666  | 2850   | 3506   |
| UN24171 | Rsa1.0_08222.1 | 732  | 7700   | 1.00E-149 | 285  | 291  | 97 +  | 218  | 508  | 2508   | 2798   |
| UN24172 | Rsa1.0_00369.1 | 900  | 266462 | 1.00E-138 | 279  | 288  | 96 -  | 618  | 900  | 146291 | 146576 |
| UN24173 | Rsa1.0_00070.1 | 856  | 150321 | 1.00E-173 | 419  | 457  | 91 +  | 98   | 545  | 37051  | 37507  |
| UN24174 | Rsa1.0_00427.1 | 526  | 189678 | 0         | 495  | 519  | 95 +  | 9    | 526  | 32834  | 33352  |
| UN24175 | Rsa1.0_02131.1 | 678  | 34754  | 0         | 445  | 460  | 96 +  | 4    | 461  | 2934   | 3393   |
| UN24176 | Rsa1.0_00566.1 | 562  | 75325  | 0         | 493  | 509  | 96 +  | 48   | 556  | 26261  | 26769  |
| UN24177 | Rsa1.0_04647.1 | 1062 | 16541  | 1.00E-121 | 273  | 290  | 94 +  | 487  | 776  | 8197   | 8486   |
| UN24178 | Rsa1.0_00622.1 | 832  | 71822  | 0         | 802  | 829  | 96 -  | 3    | 829  | 26186  | 27010  |

|         |                |      |        |           |      |      |      |     |      |        |        |
|---------|----------------|------|--------|-----------|------|------|------|-----|------|--------|--------|
| UN24179 | Rsa1.0.00865.1 | 1134 | 61686  | 0         | 936  | 954  | 98 + | 186 | 1133 | 3897   | 4850   |
| UN24180 | Rsa1.0.18066.1 | 1042 | 1678   | 0         | 440  | 452  | 97 - | 5   | 456  | 28     | 476    |
| UN24181 | Rsa1.0.00744.1 | 687  | 66084  | 0         | 393  | 406  | 96 - | 283 | 687  | 56513  | 56916  |
| UN24182 | Rsa1.0.02592.1 | 1358 | 29751  | 0         | 453  | 457  | 99 + | 3   | 459  | 756    | 1212   |
| UN24183 | Rsa1.0.02946.1 | 1478 | 26537  | 0         | 918  | 947  | 96 + | 522 | 1468 | 857    | 1800   |
| UN24184 | Rsa1.0.02057.1 | 664  | 35540  | 0         | 449  | 454  | 98 - | 4   | 457  | 20916  | 21369  |
| UN24185 | Rsa1.0.01506.1 | 497  | 44370  | 1.00E-131 | 294  | 315  | 93 - | 183 | 497  | 17882  | 18180  |
| UN24186 | Rsa1.0.03532.1 | 383  | 22272  | 1.00E-114 | 215  | 216  | 99 + | 8   | 223  | 15168  | 15382  |
| UN24187 | Rsa1.0.02213.1 | 1225 | 33824  | 0         | 458  | 486  | 94 + | 719 | 1195 | 12822  | 13307  |
| UN24188 | Rsa1.0.00304.1 | 1675 | 97429  | 0         | 593  | 637  | 93 - | 927 | 1561 | 24062  | 24671  |
| UN24189 | Rsa1.0.03954.1 | 882  | 19886  | 0         | 463  | 490  | 94 + | 2   | 480  | 730    | 1214   |
| UN24190 | Rsa1.0.01506.1 | 452  | 44370  | 1.00E-109 | 257  | 274  | 93 - | 184 | 452  | 17907  | 18180  |
| UN24191 | Rsa1.0.00881.1 | 672  | 61260  | 0         | 645  | 666  | 96 + | 5   | 667  | 1669   | 2330   |
| UN24192 | Rsa1.0.00187.1 | 1299 | 393093 | 1.00E-178 | 329  | 333  | 98 + | 337 | 669  | 210221 | 210553 |
| UN24193 | Rsa1.0.31053.1 | 468  | 737    | 5.00E-97  | 202  | 207  | 97 - | 10  | 215  | 1      | 205    |
| UN24194 | Rsa1.0.00734.1 | 163  | 66508  | 1.00E-21  | 62   | 65   | 95 - | 39  | 103  | 55572  | 55636  |
| UN24195 | Rsa1.0.03733.1 | 787  | 21108  | 5.00E-98  | 253  | 280  | 90 - | 6   | 266  | 7077   | 7355   |
| UN24196 | Rsa1.0.11160.1 | 756  | 5600   | 1.00E-131 | 264  | 272  | 97 + | 485 | 754  | 1870   | 2141   |
| UN24197 | Rsa1.0.00048.1 | 710  | 167185 | 1.00E-140 | 255  | 256  | 99 + | 455 | 710  | 115681 | 115936 |
| UN24198 | Rsa1.0.08919.1 | 953  | 6788   | 0         | 922  | 956  | 96 + | 1   | 953  | 161    | 1116   |
| UN24199 | Rsa1.0.03658.1 | 642  | 21549  | 1.00E-171 | 325  | 332  | 97 - | 140 | 471  | 9116   | 9447   |
| UN24200 | Rsa1.0.00045.1 | 835  | 328694 | 0         | 789  | 824  | 95 + | 21  | 835  | 302399 | 303222 |
| UN24201 | Rsa1.0.00568.1 | 670  | 75219  | 1.00E-64  | 132  | 134  | 98 - | 447 | 580  | 931    | 1064   |
| UN24202 | Rsa1.0.01979.1 | 1206 | 36545  | 0         | 1197 | 1205 | 99 + | 2   | 1206 | 31312  | 32516  |
| UN24203 | Rsa1.0.01104.1 | 709  | 285480 | 1.00E-122 | 232  | 234  | 99 + | 477 | 709  | 29366  | 29599  |
| UN24204 | Rsa1.0.00133.1 | 812  | 123768 | 1.00E-130 | 255  | 260  | 98 + | 552 | 810  | 29742  | 30001  |
| UN24205 | Rsa1.0.00707.1 | 822  | 190112 | 1.00E-131 | 264  | 273  | 96 - | 164 | 436  | 188378 | 188650 |
| UN24206 | Rsa1.0.00017.1 | 720  | 752458 | 1.00E-145 | 324  | 345  | 93 + | 263 | 607  | 222799 | 223143 |
| UN24207 | Rsa1.0.02178.1 | 840  | 156197 | 0         | 827  | 842  | 98 - | 3   | 840  | 19955  | 20796  |
| UN24208 | Rsa1.0.32748.1 | 818  | 695    | 0         | 661  | 699  | 94 + | 12  | 697  | 1      | 692    |
| UN24209 | Rsa1.0.00418.1 | 745  | 215377 | 1.00E-127 | 258  | 267  | 96 + | 459 | 725  | 2935   | 3201   |
| UN24210 | Rsa1.0.00041.1 | 1067 | 186197 | 0         | 563  | 568  | 99 - | 500 | 1067 | 183216 | 183780 |
| UN24211 | Rsa1.0.01155.1 | 1211 | 52182  | 0         | 852  | 883  | 96 + | 3   | 884  | 12068  | 12944  |
| UN24212 | Rsa1.0.00026.1 | 671  | 327835 | 1.00E-144 | 301  | 313  | 96 - | 361 | 671  | 29231  | 29541  |
| UN24213 | Rsa1.0.01108.1 | 1248 | 53865  | 0         | 404  | 406  | 99 + | 844 | 1248 | 28450  | 28855  |
| UN24214 | Rsa1.0.00972.1 | 980  | 57937  | 0         | 433  | 452  | 95 - | 533 | 979  | 52694  | 53140  |
| UN24215 | Rsa1.0.04415.1 | 793  | 147889 | 0         | 535  | 558  | 95 - | 229 | 785  | 132357 | 132905 |
| UN24216 | Rsa1.0.01005.1 | 982  | 56967  | 1.00E-138 | 262  | 266  | 98 - | 420 | 685  | 19291  | 19556  |
| UN24217 | Rsa1.0.04286.1 | 1351 | 18084  | 0         | 547  | 561  | 97 - | 560 | 1120 | 13076  | 13636  |

|         |                |      |        |           |      |      |       |      |      |        |        |
|---------|----------------|------|--------|-----------|------|------|-------|------|------|--------|--------|
| UN24218 | Rsa1.0.00002.1 | 763  | 601661 | 0         | 569  | 600  | 94 -  | 174  | 762  | 407180 | 407779 |
| UN24219 | Rsa1.0.00278.1 | 1315 | 231896 | 1.00E-141 | 339  | 369  | 91 -  | 3    | 352  | 60144  | 60510  |
| UN24220 | Rsa1.0.10544.1 | 821  | 5807   | 0         | 540  | 555  | 97 +  | 65   | 619  | 4750   | 5301   |
| UN24221 | Rsa1.0.01968.1 | 1257 | 36654  | 0         | 479  | 503  | 95 -  | 2    | 503  | 18714  | 19212  |
| UN24222 | Rsa1.0.01149.1 | 749  | 160459 | 0         | 501  | 507  | 98 +  | 4    | 510  | 23892  | 24398  |
| UN24223 | Rsa1.0.16367.1 | 939  | 2176   | 1.00E-140 | 253  | 253  | 100 - | 2    | 254  | 1748   | 2000   |
| UN24224 | Rsa1.0.00088.1 | 1019 | 141341 | 1.00E-164 | 483  | 547  | 88 +  | 37   | 575  | 62412  | 62928  |
| UN24225 | Rsa1.0.00335.1 | 532  | 94371  | 1.00E-106 | 288  | 315  | 91 +  | 1    | 305  | 35053  | 35363  |
| UN24226 | Rsa1.0.02750.1 | 1346 | 28239  | 1.00E-109 | 239  | 249  | 95 +  | 1    | 247  | 25645  | 25892  |
| UN24227 | Rsa1.0.00920.1 | 885  | 601703 | 1.00E-166 | 302  | 304  | 99 +  | 4    | 307  | 28944  | 29247  |
| UN24228 | Rsa1.0.01465.1 | 920  | 45175  | 0         | 878  | 934  | 94 +  | 5    | 920  | 28590  | 29516  |
| UN24229 | Rsa1.0.00251.1 | 461  | 303968 | 8.00E-68  | 199  | 221  | 90 -  | 242  | 454  | 121001 | 121221 |
| UN24230 | Rsa1.0.54139.1 | 1168 | 421    | 1.00E-178 | 401  | 421  | 95 -  | 433  | 842  | 1      | 421    |
| UN24231 | Rsa1.0.00193.1 | 571  | 194198 | 1.00E-115 | 278  | 296  | 93 -  | 4    | 294  | 102524 | 102818 |
| UN24232 | Rsa1.0.01461.1 | 1350 | 45240  | 0         | 1306 | 1351 | 96 +  | 2    | 1350 | 26688  | 28036  |
| UN24233 | Rsa1.0.01403.1 | 805  | 46453  | 0         | 404  | 412  | 98 +  | 394  | 805  | 3064   | 3472   |
| UN24234 | Rsa1.0.01223.1 | 853  | 50392  | 1.00E-179 | 365  | 378  | 96 -  | 4    | 379  | 30265  | 30641  |
| UN24235 | Rsa1.0.00330.1 | 2072 | 94666  | 0         | 1424 | 1508 | 94 +  | 394  | 1895 | 13892  | 15390  |
| UN24236 | Rsa1.0.02245.1 | 727  | 33478  | 1.00E-176 | 337  | 345  | 97 -  | 1    | 345  | 6822   | 7166   |
| UN24237 | Rsa1.0.00096.1 | 809  | 198773 | 0         | 805  | 810  | 99 -  | 3    | 809  | 130160 | 130969 |
| UN24238 | Rsa1.0.00577.1 | 1434 | 174827 | 0         | 679  | 762  | 89 +  | 146  | 880  | 134088 | 134828 |
| UN24239 | Rsa1.0.03646.1 | 769  | 21598  | 1.00E-132 | 317  | 342  | 92 +  | 42   | 383  | 12456  | 12794  |
| UN24240 | Rsa1.0.14063.1 | 1425 | 3852   | 0         | 995  | 997  | 99 +  | 429  | 1425 | 1911   | 2907   |
| UN24241 | Rsa1.0.00087.1 | 1128 | 761073 | 0         | 576  | 598  | 96 -  | 537  | 1125 | 104346 | 104939 |
| UN24242 | Rsa1.0.09769.1 | 829  | 6159   | 2.00E-88  | 276  | 294  | 93 -  | 545  | 824  | 4182   | 4475   |
| UN24243 | Rsa1.0.03645.1 | 854  | 21599  | 0         | 364  | 366  | 99 -  | 4    | 369  | 18186  | 18551  |
| UN24244 | Rsa1.0.00418.1 | 743  | 215377 | 0         | 450  | 457  | 98 -  | 1    | 457  | 49159  | 49615  |
| UN24245 | Rsa1.0.00040.1 | 859  | 324196 | 1.00E-98  | 201  | 207  | 97 -  | 56   | 262  | 267043 | 267249 |
| UN24246 | Rsa1.0.02435.1 | 1485 | 31454  | 0         | 431  | 450  | 95 +  | 1014 | 1462 | 17706  | 18152  |
| UN24247 | Rsa1.0.01317.1 | 858  | 48287  | 1.00E-105 | 219  | 227  | 96 +  | 624  | 850  | 38419  | 38645  |
| UN24248 | Rsa1.0.00686.1 | 1206 | 68511  | 0         | 442  | 444  | 99 +  | 1    | 444  | 8593   | 9034   |
| UN24249 | Rsa1.0.00594.1 | 624  | 73729  | 4.00E-98  | 185  | 186  | 99 +  | 439  | 624  | 30039  | 30224  |
| UN24250 | Rsa1.0.00011.1 | 670  | 225044 | 0         | 489  | 500  | 97 -  | 159  | 658  | 213353 | 213851 |
| UN24251 | Rsa1.0.00348.1 | 758  | 92818  | 0         | 704  | 760  | 92 +  | 13   | 756  | 5635   | 6394   |
| UN24252 | Rsa1.0.00136.1 | 777  | 122464 | 1.00E-104 | 202  | 204  | 99 +  | 1    | 204  | 13051  | 13253  |
| UN24253 | Rsa1.0.00253.1 | 298  | 231292 | 1.00E-133 | 279  | 292  | 95 -  | 4    | 295  | 153947 | 154238 |
| UN24254 | Rsa1.0.00086.1 | 567  | 439854 | 0         | 388  | 403  | 96 +  | 1    | 399  | 342206 | 342607 |
| UN24255 | Rsa1.0.02827.1 | 1154 | 27544  | 0         | 362  | 366  | 98 -  | 1    | 366  | 16492  | 16856  |
| UN24256 | Rsa1.0.00893.1 | 374  | 60626  | 4.00E-94  | 199  | 206  | 96 +  | 171  | 374  | 47601  | 47806  |



|         |                |      |        |           |      |      |       |     |      |        |        |
|---------|----------------|------|--------|-----------|------|------|-------|-----|------|--------|--------|
| UN24257 | Rsa1.0.00344.1 | 594  | 191774 | 1.00E-105 | 213  | 219  | 97 -  | 380 | 594  | 156243 | 156461 |
| UN24258 | Rsa1.0.07861.1 | 736  | 8406   | 0         | 714  | 739  | 96 -  | 1   | 736  | 6839   | 7574   |
| UN24259 | Rsa1.0.05832.1 | 842  | 12491  | 1.00E-171 | 330  | 336  | 98 +  | 12  | 346  | 6060   | 6394   |
| UN24260 | Rsa1.0.02903.1 | 683  | 26901  | 0         | 401  | 405  | 99 -  | 279 | 683  | 5838   | 6242   |
| UN24261 | Rsa1.0.00128.1 | 1471 | 228675 | 0         | 369  | 372  | 99 -  | 7   | 378  | 42871  | 43241  |
| UN24262 | Rsa1.0.14996.1 | 895  | 2904   | 0         | 834  | 870  | 95 +  | 26  | 895  | 2019   | 2882   |
| UN24263 | Rsa1.0.37242.1 | 833  | 605    | 1.00E-116 | 254  | 266  | 95 +  | 1   | 266  | 76     | 337    |
| UN24264 | Rsa1.0.02384.1 | 1453 | 31917  | 0         | 683  | 739  | 92 -  | 716 | 1451 | 13168  | 13897  |
| UN24265 | Rsa1.0.04760.1 | 873  | 16105  | 5.00E-89  | 170  | 171  | 99 -  | 59  | 229  | 7185   | 7355   |
| UN24266 | Rsa1.0.01513.1 | 1128 | 44234  | 1.00E-169 | 324  | 330  | 98 +  | 800 | 1128 | 29258  | 29587  |
| UN24267 | Rsa1.0.00752.1 | 747  | 65756  | 1.00E-119 | 259  | 274  | 94 +  | 474 | 747  | 14186  | 14451  |
| UN24268 | Rsa1.0.14739.1 | 876  | 3113   | 0         | 609  | 653  | 93 +  | 1   | 635  | 2461   | 3113   |
| UN24269 | Rsa1.0.07767.1 | 1024 | 8609   | 4.00E-90  | 198  | 205  | 96 +  | 822 | 1024 | 4682   | 4886   |
| UN24270 | Rsa1.0.01185.1 | 743  | 149842 | 1.00E-150 | 291  | 297  | 97 -  | 142 | 438  | 9157   | 9452   |
| UN24271 | Rsa1.0.04692.1 | 1122 | 16357  | 0         | 1026 | 1076 | 95 +  | 74  | 1122 | 12091  | 13163  |
| UN24272 | Rsa1.0.00828.1 | 654  | 62744  | 1.00E-101 | 285  | 319  | 89 +  | 345 | 654  | 9114   | 9432   |
| UN24273 | Rsa1.0.00796.1 | 747  | 63997  | 0         | 578  | 594  | 97 -  | 155 | 747  | 53512  | 54104  |
| UN24274 | Rsa1.0.01568.1 | 629  | 43077  | 1.00E-171 | 335  | 345  | 97 -  | 281 | 625  | 21139  | 21483  |
| UN24275 | Rsa1.0.05350.1 | 1289 | 14090  | 0         | 789  | 793  | 99 -  | 498 | 1289 | 716    | 1508   |
| UN24276 | Rsa1.0.00370.1 | 735  | 90472  | 0         | 715  | 749  | 95 -  | 7   | 735  | 43129  | 43876  |
| UN24277 | Rsa1.0.00157.1 | 1204 | 245832 | 1.00E-178 | 329  | 333  | 98 +  | 90  | 422  | 3875   | 4207   |
| UN24278 | Rsa1.0.00636.1 | 1590 | 71113  | 0         | 633  | 637  | 99 -  | 949 | 1585 | 36903  | 37538  |
| UN24279 | Rsa1.0.00090.1 | 903  | 273859 | 0         | 415  | 417  | 99 -  | 240 | 656  | 243674 | 244090 |
| UN24280 | Rsa1.0.02049.1 | 841  | 35600  | 0         | 769  | 848  | 90 +  | 2   | 835  | 12173  | 13013  |
| UN24281 | Rsa1.0.03155.1 | 828  | 24958  | 1.00E-178 | 394  | 416  | 94 -  | 420 | 826  | 10011  | 10426  |
| UN24282 | Rsa1.0.02845.1 | 1037 | 27340  | 0         | 651  | 653  | 99 -  | 385 | 1037 | 1071   | 1723   |
| UN24283 | Rsa1.0.00451.1 | 1333 | 322533 | 0         | 659  | 690  | 95 -  | 652 | 1332 | 153123 | 153808 |
| UN24284 | Rsa1.0.00673.1 | 716  | 69325  | 1.00E-114 | 252  | 265  | 95 -  | 223 | 487  | 20250  | 20513  |
| UN24285 | Rsa1.0.11107.1 | 952  | 5613   | 1.00E-99  | 211  | 219  | 96 +  | 580 | 795  | 3883   | 4101   |
| UN24286 | Rsa1.0.00008.1 | 674  | 358124 | 0         | 460  | 479  | 96 -  | 3   | 481  | 289698 | 290176 |
| UN24287 | #              | #    | #      | #         | #    | #    | #     | #   | #    | #      | #      |
| UN24288 | #              | #    | #      | #         | #    | #    | #     | #   | #    | #      | #      |
| UN24289 | #              | #    | #      | #         | #    | #    | #     | #   | #    | #      | #      |
| UN24290 | Rsa1.0.05391.1 | 1091 | 13936  | 1.00E-138 | 401  | 445  | 90 -  | 630 | 1055 | 2767   | 3209   |
| UN24291 | Rsa1.0.06883.1 | 974  | 10210  | 0         | 538  | 540  | 99 +  | 1   | 540  | 5306   | 5845   |
| UN24292 | Rsa1.0.01126.1 | 839  | 53127  | 1.00E-154 | 276  | 276  | 100 + | 564 | 839  | 14375  | 14650  |
| UN24293 | Rsa1.0.02529.1 | 823  | 30437  | 0         | 820  | 824  | 99 +  | 1   | 823  | 15685  | 16508  |
| UN24294 | Rsa1.0.01433.1 | 1317 | 45976  | 1.00E-118 | 223  | 225  | 99 +  | 197 | 421  | 10403  | 10627  |
| UN24295 | Rsa1.0.00226.1 | 1020 | 105884 | 0         | 628  | 631  | 99 -  | 1   | 630  | 36407  | 37037  |

|         |                |      |        |           |      |      |       |      |      |        |        |
|---------|----------------|------|--------|-----------|------|------|-------|------|------|--------|--------|
| UN24296 | Rsa1.0.02229.1 | 1148 | 33672  | 0         | 724  | 755  | 95 -  | 1    | 751  | 13379  | 14126  |
| UN24297 | Rsa1.0.00171.1 | 770  | 115622 | 0         | 458  | 466  | 98 -  | 308  | 770  | 42662  | 43127  |
| UN24298 | Rsa1.0.00430.1 | 1326 | 85453  | 0         | 698  | 720  | 96 -  | 427  | 1146 | 28114  | 28830  |
| UN24299 | Rsa1.0.01336.1 | 1694 | 47853  | 0         | 950  | 960  | 98 -  | 735  | 1694 | 39992  | 40951  |
| UN24300 | Rsa1.0.00067.1 | 1353 | 415055 | 0         | 519  | 521  | 99 +  | 1    | 519  | 158805 | 159325 |
| UN24301 | Rsa1.0.52224.1 | 1118 | 436    | 1.00E-118 | 226  | 229  | 98 -  | 436  | 664  | 1      | 229    |
| UN24302 | Rsa1.0.00293.1 | 1207 | 339294 | 0         | 629  | 640  | 98 +  | 1    | 640  | 313860 | 314499 |
| UN24303 | Rsa1.0.00689.1 | 826  | 68305  | 0         | 427  | 430  | 99 -  | 2    | 431  | 43611  | 44040  |
| UN24304 | Rsa1.0.02099.1 | 1333 | 35030  | 0         | 587  | 601  | 97 -  | 736  | 1333 | 11907  | 12507  |
| UN24305 | Rsa1.0.00212.1 | 1048 | 108350 | 0         | 701  | 702  | 99 +  | 1    | 702  | 41256  | 41957  |
| UN24306 | Rsa1.0.00383.1 | 872  | 398431 | 0         | 860  | 860  | 100 - | 13   | 872  | 364629 | 365488 |
| UN24307 | Rsa1.0.05239.1 | 812  | 14410  | 0         | 659  | 662  | 99 -  | 151  | 812  | 12103  | 12763  |
| UN24308 | Rsa1.0.13926.1 | 1063 | 4079   | 0         | 520  | 520  | 100 + | 1    | 520  | 1900   | 2419   |
| UN24309 | Rsa1.0.08811.1 | 871  | 6904   | 0         | 780  | 782  | 99 +  | 92   | 871  | 5080   | 5861   |
| UN24310 | Rsa1.0.11391.1 | 1025 | 5522   | 0         | 767  | 804  | 95 +  | 1    | 803  | 190    | 990    |
| UN24311 | Rsa1.0.00490.1 | 1636 | 186713 | 0         | 1451 | 1463 | 99 +  | 172  | 1631 | 23769  | 25229  |
| UN24312 | Rsa1.0.05789.1 | 804  | 12620  | 0         | 791  | 802  | 98 -  | 3    | 804  | 7835   | 8636   |
| UN24313 | Rsa1.0.00069.1 | 831  | 403561 | 1.00E-110 | 203  | 203  | 100 + | 94   | 296  | 165869 | 166071 |
| UN24314 | Rsa1.0.01958.1 | 823  | 261128 | 0         | 681  | 695  | 97 +  | 1    | 695  | 115698 | 116384 |
| UN24315 | Rsa1.0.00189.1 | 1321 | 111830 | 0         | 349  | 349  | 100 - | 162  | 510  | 77014  | 77362  |
| UN24316 | Rsa1.0.00059.1 | 957  | 159650 | 0         | 627  | 646  | 97 -  | 9    | 654  | 45904  | 46549  |
| UN24317 | Rsa1.0.02733.1 | 1199 | 28354  | 0         | 430  | 431  | 99 -  | 1    | 431  | 25829  | 26259  |
| UN24318 | Rsa1.0.00034.1 | 1350 | 260119 | 1.00E-72  | 161  | 168  | 95 -  | 907  | 1074 | 158357 | 158524 |
| UN24319 | Rsa1.0.02163.1 | 1142 | 34427  | 0         | 389  | 389  | 100 + | 1    | 389  | 25712  | 26100  |
| UN24320 | Rsa1.0.08253.1 | 727  | 7653   | 0         | 487  | 506  | 96 -  | 7    | 506  | 524    | 1024   |
| UN24321 | Rsa1.0.01516.1 | 1656 | 44196  | 0         | 583  | 627  | 92 +  | 1030 | 1656 | 25718  | 26332  |
| UN24322 | Rsa1.0.00788.1 | 957  | 64237  | 0         | 427  | 450  | 94 -  | 512  | 950  | 4325   | 4773   |
| UN24323 | Rsa1.0.02797.1 | 967  | 27800  | 1.00E-133 | 257  | 262  | 98 +  | 687  | 948  | 7742   | 8003   |
| UN24324 | Rsa1.0.02432.1 | 807  | 31499  | 0         | 625  | 632  | 98 -  | 8    | 639  | 18708  | 19336  |
| UN24325 | Rsa1.0.06170.1 | 1151 | 11575  | 1.00E-141 | 265  | 267  | 99 -  | 1    | 266  | 9244   | 9510   |
| UN24326 | Rsa1.0.02527.1 | 1028 | 177225 | 0         | 530  | 555  | 95 +  | 1    | 555  | 17232  | 17777  |
| UN24327 | Rsa1.0.03348.1 | 927  | 23559  | 0         | 628  | 657  | 95 -  | 1    | 644  | 9013   | 9665   |
| UN24328 | Rsa1.0.01504.1 | 1472 | 189978 | 0         | 834  | 881  | 94 +  | 584  | 1458 | 11092  | 11966  |
| UN24329 | Rsa1.0.01701.1 | 1501 | 162121 | 0         | 678  | 682  | 99 -  | 33   | 714  | 29277  | 29958  |
| UN24330 | Rsa1.0.01002.1 | 1088 | 57063  | 0         | 1040 | 1051 | 98 +  | 16   | 1066 | 3496   | 4546   |
| UN24331 | Rsa1.0.00007.1 | 679  | 239325 | 1.00E-134 | 243  | 243  | 100 + | 8    | 250  | 27789  | 28031  |
| UN24332 | Rsa1.0.00559.1 | 1094 | 190486 | 0         | 1070 | 1096 | 97 -  | 1    | 1094 | 181905 | 183000 |
| UN24333 | Rsa1.0.29997.1 | 804  | 766    | 0         | 422  | 424  | 99 +  | 1    | 424  | 181    | 603    |
| UN24334 | Rsa1.0.00765.1 | 1228 | 65029  | 0         | 362  | 368  | 98 +  | 862  | 1228 | 40123  | 40490  |

|         |                |      |        |           |      |      |       |      |      |        |        |
|---------|----------------|------|--------|-----------|------|------|-------|------|------|--------|--------|
| UN24335 | Rsa1.0.00018.1 | 1572 | 410899 | 0         | 600  | 600  | 100 + | 1    | 600  | 182022 | 182621 |
| UN24336 | Rsa1.0.03393.1 | 831  | 23247  | 0         | 554  | 571  | 97 +  | 25   | 592  | 13189  | 13758  |
| UN24337 | Rsa1.0.00087.1 | 613  | 761073 | 0         | 373  | 375  | 99 -  | 1    | 375  | 7704   | 8078   |
| UN24338 | Rsa1.0.06614.1 | 738  | 10659  | 0         | 442  | 443  | 99 +  | 1    | 442  | 5361   | 5803   |
| UN24339 | Rsa1.0.02567.1 | 771  | 30016  | 0         | 673  | 678  | 99 +  | 94   | 771  | 20365  | 21037  |
| UN24340 | Rsa1.0.01064.1 | 1348 | 55295  | 4.00E-32  | 100  | 108  | 92 +  | 842  | 949  | 19865  | 19971  |
| UN24341 | Rsa1.0.05849.1 | 1142 | 12425  | 1.00E-139 | 252  | 252  | 100 - | 1    | 252  | 11067  | 11318  |
| UN24342 | Rsa1.0.01798.1 | 794  | 173909 | 1.00E-111 | 207  | 208  | 99 +  | 1    | 208  | 2850   | 3057   |
| UN24343 | Rsa1.0.08864.1 | 922  | 6845   | 1.00E-96  | 197  | 200  | 98 -  | 1    | 198  | 409    | 608    |
| UN24344 | Rsa1.0.01126.1 | 963  | 53127  | 0         | 685  | 719  | 95 -  | 245  | 963  | 38762  | 39480  |
| UN24345 | Rsa1.0.02062.1 | 829  | 35485  | 1.00E-162 | 296  | 298  | 99 -  | 532  | 829  | 19441  | 19738  |
| UN24346 | Rsa1.0.02431.1 | 897  | 31504  | 1.00E-147 | 265  | 265  | 100 + | 1    | 265  | 548    | 812    |
| UN24347 | Rsa1.0.02478.1 | 1608 | 150183 | 0         | 1363 | 1391 | 97 +  | 221  | 1608 | 144225 | 145615 |
| UN24348 | Rsa1.0.00923.1 | 821  | 153678 | 1.00E-113 | 213  | 215  | 99 -  | 443  | 657  | 18504  | 18718  |
| UN24349 | Rsa1.0.00505.1 | 1035 | 79323  | 0         | 1017 | 1034 | 98 +  | 2    | 1035 | 26712  | 27745  |
| UN24350 | Rsa1.0.00195.1 | 997  | 251884 | 0         | 937  | 974  | 96 +  | 1    | 959  | 104587 | 105557 |
| UN24351 | Rsa1.0.13018.1 | 1368 | 5042   | 0         | 834  | 840  | 99 +  | 1    | 840  | 4203   | 5042   |
| UN24352 | Rsa1.0.00219.1 | 905  | 106983 | 0         | 571  | 578  | 98 +  | 328  | 905  | 55600  | 56176  |
| UN24353 | Rsa1.0.00131.1 | 885  | 432233 | 0         | 595  | 670  | 88 -  | 5    | 633  | 289720 | 290377 |
| UN24354 | Rsa1.0.00421.1 | 1731 | 86365  | 0         | 369  | 370  | 99 -  | 1    | 369  | 41064  | 41433  |
| UN24355 | Rsa1.0.00050.1 | 1349 | 237174 | 1.00E-154 | 282  | 284  | 99 -  | 1065 | 1348 | 174661 | 174944 |
| UN24356 | Rsa1.0.03072.1 | 1116 | 25577  | 1.00E-171 | 317  | 321  | 98 +  | 1    | 321  | 11213  | 11533  |
| UN24357 | Rsa1.0.16114.1 | 445  | 2279   | 0         | 387  | 388  | 99 -  | 59   | 445  | 1742   | 2129   |
| UN24358 | Rsa1.0.13190.1 | 637  | 4976   | 0         | 399  | 415  | 96 +  | 224  | 636  | 1723   | 2137   |
| UN24359 | Rsa1.0.09478.1 | 1401 | 6341   | 0         | 684  | 701  | 97 -  | 620  | 1320 | 4681   | 5381   |
| UN24360 | Rsa1.0.01715.1 | 626  | 40489  | 0         | 611  | 629  | 97 -  | 1    | 626  | 28703  | 29324  |
| UN24361 | Rsa1.0.12669.1 | 1228 | 5159   | 1.00E-122 | 226  | 227  | 99 +  | 74   | 300  | 1      | 227    |
| UN24362 | Rsa1.0.00154.1 | 1585 | 189461 | 0         | 712  | 728  | 97 -  | 4    | 729  | 31892  | 32618  |
| UN24363 | Rsa1.0.02343.1 | 1562 | 32374  | 0         | 828  | 846  | 97 +  | 104  | 942  | 30564  | 31409  |
| UN24364 | Rsa1.0.00285.1 | 1871 | 149638 | 0         | 368  | 368  | 100 + | 1    | 368  | 143044 | 143411 |
| UN24365 | Rsa1.0.01303.1 | 1120 | 48853  | 0         | 488  | 497  | 98 +  | 1    | 497  | 16102  | 16598  |
| UN24366 | Rsa1.0.01363.1 | 1720 | 47195  | 0         | 419  | 428  | 97 +  | 1298 | 1720 | 42307  | 42734  |
| UN24367 | Rsa1.0.00224.1 | 1299 | 327530 | 0         | 1296 | 1296 | 100 - | 4    | 1299 | 241708 | 243003 |
| UN24368 | Rsa1.0.11181.1 | 938  | 5592   | 0         | 372  | 375  | 99 -  | 25   | 398  | 182    | 554    |
| UN24369 | Rsa1.0.02629.1 | 1386 | 29350  | 0         | 784  | 806  | 97 +  | 168  | 973  | 17117  | 17919  |
| UN24370 | Rsa1.0.00190.1 | 929  | 318240 | 0         | 391  | 392  | 99 -  | 3    | 394  | 40833  | 41224  |
| UN24371 | Rsa1.0.03264.1 | 1553 | 145959 | 0         | 420  | 441  | 95 +  | 2    | 442  | 138225 | 138665 |
| UN24372 | Rsa1.0.00089.1 | 878  | 406142 | 1.00E-154 | 276  | 276  | 100 - | 267  | 542  | 8996   | 9271   |
| UN24373 | Rsa1.0.16344.1 | 995  | 2187   | 1.00E-167 | 308  | 310  | 99 -  | 544  | 852  | 335    | 644    |

|         |                |      |        |           |      |      |       |      |      |        |        |
|---------|----------------|------|--------|-----------|------|------|-------|------|------|--------|--------|
| UN24374 | Rsa1.0_16114.1 | 448  | 2279   | 1.00E-159 | 290  | 292  | 99 -  | 157  | 448  | 1952   | 2243   |
| UN24375 | Rsa1.0_00788.1 | 1484 | 64237  | 0         | 785  | 808  | 97 -  | 653  | 1448 | 58538  | 59345  |
| UN24376 | Rsa1.0_00346.1 | 1319 | 93130  | 0         | 1296 | 1319 | 98 -  | 1    | 1316 | 85788  | 87106  |
| UN24377 | Rsa1.0_00318.1 | 1016 | 96094  | 0         | 372  | 376  | 98 +  | 643  | 1016 | 19219  | 19594  |
| UN24378 | Rsa1.0_00360.1 | 1311 | 91190  | 1.00E-120 | 279  | 298  | 93 +  | 710  | 1004 | 2261   | 2558   |
| UN24379 | Rsa1.0_01347.1 | 558  | 47606  | 0         | 531  | 556  | 95 -  | 5    | 556  | 3557   | 4110   |
| UN24380 | Rsa1.0_02105.1 | 812  | 156953 | 0         | 468  | 469  | 99 +  | 344  | 812  | 28045  | 28513  |
| UN24381 | Rsa1.0_01102.1 | 935  | 53987  | 0         | 701  | 720  | 97 -  | 6    | 725  | 51418  | 52131  |
| UN24382 | Rsa1.0_02659.1 | 1634 | 28971  | 0         | 518  | 566  | 91 +  | 1071 | 1633 | 5807   | 6350   |
| UN24383 | Rsa1.0_02909.1 | 1505 | 26856  | 0         | 1180 | 1180 | 100 - | 1    | 1180 | 10746  | 11925  |
| UN24384 | Rsa1.0_03631.1 | 1128 | 21647  | 1.00E-101 | 398  | 462  | 86 -  | 599  | 1058 | 19100  | 19557  |
| UN24385 | Rsa1.0_00962.1 | 1624 | 184909 | 0         | 404  | 408  | 99 +  | 1217 | 1624 | 31268  | 31674  |
| UN24386 | Rsa1.0_00737.1 | 1664 | 66432  | 0         | 900  | 934  | 96 -  | 747  | 1664 | 23559  | 24485  |
| UN24387 | Rsa1.0_02410.1 | 1037 | 31659  | 0         | 488  | 489  | 99 +  | 549  | 1037 | 8725   | 9213   |
| UN24388 | Rsa1.0_22038.1 | 973  | 1153   | 0         | 862  | 871  | 98 -  | 3    | 872  | 31     | 901    |
| UN24389 | Rsa1.0_01356.1 | 1243 | 47287  | 0         | 404  | 405  | 99 +  | 838  | 1242 | 6134   | 6538   |
| UN24390 | Rsa1.0_00111.1 | 1489 | 390088 | 0         | 1451 | 1489 | 97 -  | 1    | 1489 | 189315 | 190803 |
| UN24391 | Rsa1.0_15693.1 | 1204 | 2478   | 0         | 359  | 366  | 98 +  | 839  | 1204 | 109    | 474    |
| UN24392 | Rsa1.0_01884.1 | 1799 | 37659  | 0         | 598  | 598  | 100 + | 1    | 598  | 14389  | 14986  |
| UN24393 | Rsa1.0_01403.1 | 1180 | 46453  | 0         | 383  | 395  | 96 -  | 165  | 559  | 37286  | 37680  |
| UN24394 | Rsa1.0_00265.1 | 1039 | 220635 | 1.00E-164 | 326  | 336  | 97 +  | 705  | 1039 | 139882 | 140211 |
| UN24395 | Rsa1.0_00213.1 | 1315 | 108167 | 0         | 729  | 733  | 99 -  | 578  | 1310 | 81522  | 82254  |
| UN24396 | Rsa1.0_01964.1 | 768  | 36702  | 0         | 630  | 670  | 94 -  | 102  | 768  | 11336  | 11983  |
| UN24397 | Rsa1.0_00015.1 | 998  | 561803 | 0         | 876  | 883  | 99 +  | 116  | 998  | 282849 | 283731 |
| UN24398 | Rsa1.0_01565.1 | 1806 | 155447 | 0         | 883  | 888  | 99 +  | 7    | 894  | 33708  | 34593  |
| UN24399 | Rsa1.0_01436.1 | 1211 | 45894  | 1.00E-136 | 308  | 325  | 94 -  | 3    | 325  | 16901  | 17218  |
| UN24400 | Rsa1.0_10147.1 | 1105 | 5976   | 0         | 364  | 369  | 98 +  | 3    | 370  | 735    | 1103   |
| UN24401 | Rsa1.0_00210.1 | 1248 | 108424 | 0         | 379  | 380  | 99 +  | 869  | 1248 | 14783  | 15162  |
| UN24402 | Rsa1.0_10770.1 | 1218 | 5723   | 1.00E-125 | 234  | 236  | 99 -  | 983  | 1218 | 574    | 809    |
| UN24403 | Rsa1.0_00307.1 | 1339 | 199003 | 0         | 715  | 729  | 98 +  | 42   | 770  | 188964 | 189692 |
| UN24404 | Rsa1.0_00053.1 | 594  | 263459 | 1.00E-152 | 272  | 272  | 100 + | 323  | 594  | 229722 | 229993 |
| UN24405 | Rsa1.0_00001.1 | 1215 | 363028 | 0         | 1150 | 1232 | 93 +  | 2    | 1215 | 235164 | 236381 |
| UN24406 | Rsa1.0_01828.1 | 1339 | 38681  | 0         | 1082 | 1246 | 86 -  | 92   | 1301 | 25937  | 27182  |
| UN24407 | Rsa1.0_04482.1 | 1166 | 17175  | 1.00E-149 | 320  | 337  | 94 +  | 9    | 345  | 8792   | 9128   |
| UN24408 | Rsa1.0_00466.1 | 1304 | 82132  | 0         | 1267 | 1301 | 97 +  | 1    | 1300 | 55424  | 56722  |
| UN24409 | Rsa1.0_01513.1 | 1031 | 44234  | 1.00E-104 | 365  | 418  | 87 -  | 3    | 408  | 20355  | 20757  |
| UN24410 | Rsa1.0_01679.1 | 1752 | 146876 | 0         | 1729 | 1743 | 99 +  | 8    | 1750 | 144973 | 146715 |
| UN24411 | Rsa1.0_07610.1 | 1030 | 9026   | 0         | 567  | 568  | 99 -  | 114  | 681  | 8459   | 9026   |
| UN24412 | Rsa1.0_00526.1 | 934  | 169279 | 0         | 934  | 934  | 100 - | 1    | 934  | 165061 | 165994 |

|         |                |      |        |           |      |      |       |      |      |        |        |
|---------|----------------|------|--------|-----------|------|------|-------|------|------|--------|--------|
| UN24413 | Rsa1.0_15860.1 | 1457 | 2385   | 0         | 1072 | 1113 | 96 -  | 138  | 1250 | 642    | 1751   |
| UN24414 | Rsa1.0_09091.1 | 1044 | 6656   | 0         | 350  | 352  | 99 -  | 692  | 1043 | 3760   | 4111   |
| UN24415 | Rsa1.0_00122.1 | 969  | 265937 | 0         | 497  | 546  | 91 +  | 252  | 784  | 107244 | 107782 |
| UN24416 | Rsa1.0_00040.1 | 1294 | 324196 | 1.00E-172 | 394  | 420  | 93 +  | 866  | 1276 | 306929 | 307347 |
| UN24417 | Rsa1.0_00002.1 | 1868 | 601661 | 0         | 500  | 500  | 100 + | 380  | 879  | 92134  | 92633  |
| UN24418 | Rsa1.0_00267.1 | 1778 | 101509 | 0         | 997  | 1009 | 98 +  | 1    | 1009 | 28392  | 29400  |
| UN24419 | Rsa1.0_00017.1 | 958  | 752458 | 1.00E-169 | 317  | 322  | 98 -  | 633  | 954  | 326078 | 326399 |
| UN24420 | Rsa1.0_02810.1 | 1384 | 27671  | 0         | 1373 | 1382 | 99 -  | 3    | 1384 | 7466   | 8847   |
| UN24421 | Rsa1.0_00494.1 | 998  | 79967  | 4.00E-16  | 48   | 49   | 97 -  | 1    | 49   | 14773  | 14821  |
| UN24422 | Rsa1.0_00087.1 | 1062 | 761073 | 0         | 345  | 350  | 98 +  | 2    | 351  | 189739 | 190088 |
| UN24423 | Rsa1.0_00434.1 | 1051 | 85171  | 0         | 359  | 368  | 97 +  | 259  | 626  | 35769  | 36136  |
| UN24424 | Rsa1.0_00438.1 | 1301 | 84861  | 0         | 1286 | 1303 | 98 -  | 1    | 1301 | 69285  | 70586  |
| UN24425 | Rsa1.0_03253.1 | 1185 | 24321  | 0         | 586  | 603  | 97 +  | 578  | 1179 | 13387  | 13983  |
| UN24426 | Rsa1.0_00306.1 | 1062 | 146760 | 0         | 385  | 390  | 98 +  | 674  | 1061 | 115946 | 116335 |
| UN24427 | Rsa1.0_00868.1 | 988  | 61630  | 1.00E-153 | 323  | 336  | 96 +  | 654  | 988  | 15834  | 16165  |
| UN24428 | Rsa1.0_00049.1 | 1282 | 167018 | 0         | 528  | 582  | 90 +  | 227  | 799  | 94348  | 94916  |
| UN24429 | Rsa1.0_06713.1 | 639  | 10488  | 0         | 546  | 554  | 98 +  | 1    | 551  | 5026   | 5579   |
| UN24430 | Rsa1.0_00454.1 | 1290 | 216970 | 0         | 569  | 569  | 100 - | 720  | 1288 | 212661 | 213229 |
| UN24431 | Rsa1.0_00065.1 | 849  | 454616 | 1.00E-128 | 239  | 241  | 99 -  | 607  | 847  | 143381 | 143621 |
| UN24432 | Rsa1.0_00636.1 | 483  | 71113  | 1.00E-102 | 191  | 192  | 99 +  | 1    | 192  | 41771  | 41962  |
| UN24433 | Rsa1.0_00343.1 | 1174 | 93570  | 0         | 491  | 517  | 94 -  | 1    | 503  | 74535  | 75048  |
| UN24434 | Rsa1.0_04428.1 | 1005 | 17399  | 1.00E-101 | 222  | 233  | 95 -  | 758  | 990  | 10071  | 10299  |
| UN24435 | Rsa1.0_00142.1 | 1436 | 121474 | 0         | 694  | 724  | 95 -  | 1    | 724  | 32885  | 33594  |
| UN24436 | Rsa1.0_02460.1 | 1314 | 31169  | 0         | 975  | 978  | 99 +  | 1    | 978  | 3661   | 4638   |
| UN24437 | Rsa1.0_00402.1 | 960  | 385315 | 0         | 506  | 516  | 98 +  | 451  | 960  | 267425 | 267940 |
| UN24438 | Rsa1.0_17063.1 | 938  | 1937   | 0         | 661  | 679  | 97 -  | 11   | 689  | 180    | 854    |
| UN24439 | Rsa1.0_00978.1 | 1764 | 57739  | 0         | 775  | 813  | 95 +  | 901  | 1713 | 2372   | 3178   |
| UN24440 | Rsa1.0_34341.1 | 1239 | 659    | 0         | 597  | 598  | 99 +  | 202  | 799  | 1      | 598    |
| UN24441 | Rsa1.0_01374.1 | 752  | 47047  | 0         | 746  | 751  | 99 +  | 3    | 752  | 19953  | 20703  |
| UN24442 | Rsa1.0_01624.1 | 960  | 42064  | 0         | 347  | 348  | 99 -  | 3    | 350  | 5012   | 5359   |
| UN24443 | Rsa1.0_29194.1 | 1211 | 789    | 0         | 604  | 611  | 98 +  | 602  | 1211 | 42     | 651    |
| UN24444 | Rsa1.0_00107.1 | 883  | 431659 | 0         | 336  | 336  | 100 + | 1    | 336  | 374600 | 374935 |
| UN24445 | Rsa1.0_00002.1 | 1984 | 601661 | 0         | 663  | 670  | 98 -  | 1003 | 1672 | 68497  | 69166  |
| UN24446 | Rsa1.0_04384.1 | 1110 | 17629  | 1.00E-145 | 273  | 277  | 98 -  | 821  | 1097 | 16284  | 16560  |
| UN24447 | Rsa1.0_01925.1 | 917  | 37220  | 1.00E-117 | 262  | 279  | 93 -  | 1    | 279  | 7141   | 7405   |
| UN24448 | Rsa1.0_03315.1 | 1100 | 23797  | 1.00E-160 | 305  | 311  | 98 -  | 790  | 1100 | 4348   | 4658   |
| UN24449 | Rsa1.0_03229.1 | 845  | 24470  | 0         | 332  | 334  | 99 -  | 3    | 335  | 12170  | 12503  |
| UN24450 | Rsa1.0_00369.1 | 356  | 266462 | 1.00E-149 | 270  | 271  | 99 +  | 1    | 271  | 120815 | 121085 |
| UN24451 | Rsa1.0_00484.1 | 1012 | 203294 | 1.00E-179 | 346  | 354  | 97 +  | 196  | 549  | 60382  | 60734  |

|         |                |      |        |           |      |      |       |     |      |        |        |
|---------|----------------|------|--------|-----------|------|------|-------|-----|------|--------|--------|
| UN24452 | Rsa1.0.00101.1 | 688  | 267193 | 0         | 466  | 468  | 99 -  | 1   | 467  | 219932 | 220399 |
| UN24453 | Rsa1.0.05189.1 | 983  | 14545  | 1.00E-170 | 407  | 440  | 92 -  | 555 | 983  | 3080   | 3515   |
| UN24454 | Rsa1.0.03107.1 | 865  | 25349  | 1.00E-165 | 303  | 306  | 99 +  | 250 | 555  | 20247  | 20552  |
| UN24455 | Rsa1.0.00487.1 | 933  | 80674  | 1.00E-150 | 312  | 320  | 97 +  | 621 | 933  | 24669  | 24988  |
| UN24456 | Rsa1.0.00380.1 | 797  | 89748  | 0         | 712  | 727  | 97 +  | 3   | 727  | 47876  | 48601  |
| UN24457 | Rsa1.0.02006.1 | 936  | 36135  | 1.00E-174 | 310  | 310  | 100 + | 627 | 936  | 4294   | 4603   |
| UN24458 | Rsa1.0.03593.1 | 1164 | 21869  | 0         | 440  | 446  | 98 +  | 344 | 789  | 2156   | 2601   |
| UN24459 | Rsa1.0.00675.1 | 1158 | 145590 | 2.00E-98  | 210  | 219  | 95 -  | 514 | 732  | 40513  | 40731  |
| UN24460 | Rsa1.0.00236.1 | 1182 | 104771 | 1.00E-132 | 242  | 243  | 99 -  | 920 | 1162 | 20621  | 20863  |
| UN24461 | Rsa1.0.00514.1 | 1621 | 78421  | 0         | 1032 | 1060 | 97 +  | 564 | 1621 | 70396  | 71455  |
| UN24462 | Rsa1.0.01525.1 | 1356 | 43925  | 1.00E-161 | 288  | 288  | 100 - | 1   | 288  | 3308   | 3595   |
| UN24463 | Rsa1.0.02079.1 | 1194 | 35306  | 1.00E-144 | 303  | 315  | 96 -  | 1   | 313  | 29707  | 30021  |
| UN24464 | Rsa1.0.03211.1 | 921  | 24591  | 0         | 748  | 771  | 97 +  | 156 | 921  | 9059   | 9826   |
| UN24465 | Rsa1.0.05673.1 | 942  | 12980  | 0         | 909  | 929  | 97 -  | 15  | 942  | 9755   | 10679  |
| UN24466 | Rsa1.0.00218.1 | 1386 | 201480 | 0         | 599  | 608  | 98 -  | 257 | 864  | 52148  | 52755  |
| UN24467 | Rsa1.0.00884.1 | 1422 | 61150  | 1.00E-166 | 299  | 300  | 99 -  | 582 | 881  | 8929   | 9228   |
| UN24468 | Rsa1.0.07021.1 | 959  | 10016  | 0         | 545  | 566  | 96 +  | 3   | 568  | 8611   | 9170   |
| UN24469 | Rsa1.0.00946.1 | 732  | 58666  | 0         | 391  | 394  | 99 -  | 339 | 732  | 46910  | 47302  |
| UN24470 | Rsa1.0.01987.1 | 1289 | 36446  | 0         | 566  | 580  | 97 -  | 24  | 603  | 19077  | 19656  |
| UN24471 | Rsa1.0.02241.1 | 1143 | 33520  | 0         | 930  | 948  | 98 -  | 198 | 1143 | 20365  | 21308  |
| UN24472 | Rsa1.0.01909.1 | 1238 | 37417  | 1.00E-81  | 368  | 431  | 85 +  | 680 | 1103 | 29581  | 30007  |
| UN24473 | Rsa1.0.00201.1 | 1303 | 232851 | 0         | 1239 | 1304 | 95 +  | 3   | 1302 | 141772 | 143069 |
| UN24474 | Rsa1.0.00861.1 | 601  | 61759  | 1.00E-159 | 324  | 335  | 96 -  | 269 | 600  | 1700   | 2033   |
| UN24475 | Rsa1.0.24911.1 | 659  | 961    | 0         | 425  | 435  | 97 +  | 222 | 656  | 55     | 489    |
| UN24476 | Rsa1.0.00154.1 | 584  | 189461 | 0         | 561  | 583  | 96 +  | 1   | 581  | 181968 | 182544 |
| UN24477 | Rsa1.0.00029.1 | 727  | 272992 | 0         | 439  | 443  | 99 -  | 283 | 725  | 147127 | 147569 |
| UN24478 | Rsa1.0.00196.1 | 796  | 109960 | 0         | 782  | 789  | 99 +  | 5   | 791  | 32533  | 33321  |
| UN24479 | Rsa1.0.16826.1 | 610  | 2021   | 1.00E-141 | 261  | 263  | 99 -  | 231 | 493  | 1679   | 1941   |
| UN24480 | Rsa1.0.01659.1 | 1268 | 164577 | 0         | 670  | 670  | 100 + | 597 | 1266 | 158555 | 159224 |
| UN24481 | Rsa1.0.61677.1 | 958  | 372    | 0         | 370  | 377  | 98 +  | 24  | 400  | 1      | 372    |
| UN24482 | Rsa1.0.00310.1 | 822  | 96852  | 0         | 748  | 774  | 96 -  | 62  | 822  | 47914  | 48686  |
| UN24483 | Rsa1.0.00473.1 | 1036 | 212204 | 0         | 332  | 333  | 99 -  | 2   | 334  | 44099  | 44431  |
| UN24484 | Rsa1.0.02471.1 | 588  | 31104  | 4.00E-98  | 244  | 260  | 93 -  | 46  | 300  | 3907   | 4165   |
| UN24485 | Rsa1.0.09460.1 | 816  | 6352   | 0         | 421  | 430  | 97 +  | 1   | 424  | 4430   | 4859   |
| UN24486 | Rsa1.0.00490.1 | 1046 | 186713 | 0         | 448  | 450  | 99 +  | 597 | 1046 | 73331  | 73780  |
| UN24487 | Rsa1.0.00129.1 | 1025 | 126831 | 0         | 605  | 620  | 97 +  | 406 | 1025 | 28225  | 28838  |
| UN24488 | Rsa1.0.02762.1 | 1453 | 28146  | 0         | 988  | 1023 | 96 -  | 108 | 1129 | 14577  | 15594  |
| UN24489 | Rsa1.0.06975.1 | 1036 | 10074  | 0         | 1023 | 1049 | 97 -  | 1   | 1036 | 8605   | 9653   |
| UN24490 | Rsa1.0.00105.1 | 1444 | 134138 | 0         | 584  | 624  | 93 +  | 833 | 1443 | 61301  | 61914  |

|         |                |      |        |           |      |      |       |      |      |        |        |
|---------|----------------|------|--------|-----------|------|------|-------|------|------|--------|--------|
| UN24491 | Rsa1.0_16078.1 | 941  | 2294   | 0         | 910  | 942  | 96 -  | 2    | 940  | 300    | 1231   |
| UN24492 | Rsa1.0_00904.1 | 1087 | 180594 | 1.00E-139 | 261  | 264  | 98 +  | 824  | 1087 | 145946 | 146209 |
| UN24493 | Rsa1.0_01244.1 | 1557 | 50061  | 0         | 1438 | 1438 | 100 - | 1    | 1438 | 41233  | 42670  |
| UN24494 | Rsa1.0_03945.1 | 1075 | 19924  | 1.00E-173 | 308  | 308  | 100 - | 3    | 310  | 17078  | 17385  |
| UN24495 | Rsa1.0_00011.1 | 786  | 225044 | 1.00E-148 | 266  | 266  | 100 + | 3    | 268  | 197590 | 197855 |
| UN24496 | Rsa1.0_00387.1 | 840  | 495407 | 0         | 386  | 391  | 98 +  | 450  | 840  | 472962 | 473352 |
| UN24497 | Rsa1.0_01375.1 | 1060 | 47038  | 1.00E-128 | 233  | 233  | 100 + | 406  | 638  | 37288  | 37520  |
| UN24498 | Rsa1.0_35742.1 | 938  | 633    | 1.00E-107 | 204  | 206  | 99 +  | 2    | 207  | 288    | 493    |
| UN24499 | Rsa1.0_00224.1 | 2086 | 327530 | 0         | 797  | 801  | 99 -  | 693  | 1493 | 54489  | 55289  |
| UN24500 | Rsa1.0_00999.1 | 545  | 57162  | 0         | 535  | 541  | 98 +  | 8    | 545  | 41925  | 42465  |
| UN24501 | Rsa1.0_00713.1 | 739  | 158017 | 0         | 541  | 547  | 98 -  | 1    | 547  | 8151   | 8697   |
| UN24502 | Rsa1.0_00342.1 | 686  | 93695  | 0         | 672  | 706  | 95 +  | 1    | 684  | 61517  | 62220  |
| UN24503 | Rsa1.0_00472.1 | 967  | 398134 | 1.00E-157 | 308  | 317  | 97 +  | 1    | 317  | 18777  | 19093  |
| UN24504 | Rsa1.0_05923.1 | 1072 | 12230  | 0         | 397  | 402  | 98 -  | 107  | 508  | 7344   | 7745   |
| UN24505 | Rsa1.0_02160.1 | 1452 | 34468  | 0         | 412  | 414  | 99 -  | 1039 | 1452 | 13331  | 13744  |
| UN24506 | Rsa1.0_00022.1 | 1460 | 200461 | 0         | 1459 | 1462 | 99 +  | 1    | 1460 | 129323 | 130784 |
| UN24507 | Rsa1.0_00308.1 | 1019 | 96915  | 0         | 1013 | 1020 | 99 -  | 1    | 1019 | 31975  | 32994  |
| UN24508 | Rsa1.0_01064.1 | 1431 | 55295  | 0         | 502  | 518  | 96 -  | 84   | 601  | 51704  | 52221  |
| UN24509 | Rsa1.0_00005.1 | 1435 | 353093 | 8.00E-43  | 163  | 183  | 89 -  | 4    | 184  | 257446 | 257623 |
| UN24510 | Rsa1.0_00127.1 | 1051 | 127446 | 1.00E-178 | 397  | 423  | 93 -  | 1    | 422  | 86821  | 87221  |
| UN24511 | Rsa1.0_01937.1 | 1376 | 37147  | 0         | 1220 | 1240 | 98 -  | 142  | 1376 | 23128  | 24367  |
| UN24512 | Rsa1.0_03140.1 | 1126 | 25081  | 0         | 385  | 390  | 98 -  | 265  | 654  | 12030  | 12419  |
| UN24513 | Rsa1.0_17484.1 | 1109 | 1817   | 0         | 930  | 930  | 100 + | 179  | 1108 | 1      | 930    |
| UN24514 | Rsa1.0_00861.1 | 1053 | 61759  | 0         | 582  | 588  | 98 -  | 448  | 1034 | 59543  | 60130  |
| UN24515 | Rsa1.0_00329.1 | 1130 | 222544 | 1.00E-176 | 325  | 329  | 98 +  | 5    | 333  | 64112  | 64440  |
| UN24516 | Rsa1.0_00032.1 | 482  | 306326 | 0         | 408  | 410  | 99 +  | 1    | 410  | 142020 | 142429 |
| UN24517 | Rsa1.0_05658.1 | 1122 | 13021  | 0         | 620  | 633  | 97 +  | 492  | 1122 | 6553   | 7185   |
| UN24518 | Rsa1.0_00339.1 | 1304 | 222974 | 1.00E-173 | 308  | 308  | 100 - | 386  | 693  | 198502 | 198809 |
| UN24519 | Rsa1.0_00071.1 | 1130 | 345714 | 0         | 508  | 550  | 92 -  | 1    | 534  | 210478 | 211019 |
| UN24520 | Rsa1.0_00238.1 | 973  | 193193 | 0         | 921  | 967  | 95 -  | 16   | 973  | 60861  | 61818  |
| UN24521 | Rsa1.0_01644.1 | 776  | 41754  | 1.00E-52  | 121  | 126  | 96 -  | 1    | 126  | 29028  | 29153  |
| UN24522 | Rsa1.0_03949.1 | 925  | 19899  | 0         | 361  | 362  | 99 -  | 562  | 923  | 11720  | 12081  |
| UN24523 | Rsa1.0_01568.1 | 1130 | 43077  | 0         | 594  | 597  | 99 -  | 3    | 597  | 24215  | 24811  |
| UN24524 | Rsa1.0_00762.1 | 946  | 165246 | 0         | 702  | 703  | 99 +  | 3    | 705  | 1352   | 2054   |
| UN24525 | Rsa1.0_00019.1 | 1527 | 301669 | 0         | 537  | 550  | 97 -  | 219  | 765  | 60520  | 61069  |
| UN24526 | Rsa1.0_01076.1 | 1024 | 54835  | 0         | 994  | 1027 | 96 -  | 3    | 1024 | 19032  | 20058  |
| UN24527 | Rsa1.0_04333.1 | 1342 | 17865  | 0         | 383  | 402  | 95 -  | 417  | 807  | 188    | 589    |
| UN24528 | Rsa1.0_00706.1 | 1617 | 291570 | 0         | 802  | 802  | 100 + | 816  | 1617 | 53256  | 54057  |
| UN24529 | Rsa1.0_02007.1 | 890  | 36130  | 1.00E-165 | 310  | 314  | 98 -  | 1    | 314  | 33302  | 33613  |

|         |                |      |        |           |      |      |       |      |      |        |        |
|---------|----------------|------|--------|-----------|------|------|-------|------|------|--------|--------|
| UN24530 | Rsa1.0_13546.1 | 1408 | 4740   | 2.00E-31  | 71   | 71   | 100 + | 1338 | 1408 | 4609   | 4679   |
| UN24531 | Rsa1.0_00229.1 | 671  | 105471 | 0         | 670  | 671  | 99 +  | 1    | 671  | 71248  | 71917  |
| UN24532 | Rsa1.0_03743.1 | 1038 | 21062  | 0         | 647  | 655  | 98 +  | 4    | 658  | 5721   | 6375   |
| UN24533 | Rsa1.0_00402.1 | 1797 | 385315 | 0         | 397  | 397  | 100 - | 3    | 399  | 273020 | 273416 |
| UN24534 | Rsa1.0_02157.1 | 872  | 149652 | 1.00E-68  | 133  | 133  | 100 - | 109  | 241  | 140841 | 140973 |
| UN24535 | Rsa1.0_01129.1 | 710  | 52949  | 1.00E-165 | 369  | 395  | 93 +  | 8    | 402  | 8751   | 9132   |
| UN24536 | Rsa1.0_00017.1 | 655  | 752458 | 0         | 639  | 651  | 98 -  | 1    | 647  | 624760 | 625410 |
| UN24537 | Rsa1.0_01196.1 | 1190 | 51097  | 1.00E-161 | 304  | 308  | 98 -  | 881  | 1187 | 19359  | 19666  |
| UN24538 | Rsa1.0_05291.1 | 1319 | 14255  | 0         | 999  | 1096 | 91 +  | 196  | 1289 | 13180  | 14255  |
| UN24539 | Rsa1.0_00082.1 | 1580 | 237584 | 0         | 691  | 724  | 95 +  | 863  | 1580 | 46718  | 47438  |
| UN24540 | Rsa1.0_00169.1 | 1433 | 274298 | 0         | 889  | 895  | 99 -  | 540  | 1433 | 26796  | 27690  |
| UN24541 | Rsa1.0_00121.1 | 990  | 278029 | 1.00E-145 | 261  | 261  | 100 + | 398  | 658  | 114461 | 114721 |
| UN24542 | Rsa1.0_01249.1 | 1267 | 188432 | 0         | 1071 | 1088 | 98 -  | 179  | 1266 | 186883 | 187970 |
| UN24543 | Rsa1.0_01063.1 | 820  | 55301  | 0         | 633  | 643  | 98 +  | 1    | 643  | 6886   | 7528   |
| UN24544 | Rsa1.0_00192.1 | 378  | 278200 | 0         | 372  | 372  | 100 + | 7    | 378  | 78262  | 78633  |
| UN24545 | Rsa1.0_01767.1 | 1200 | 39615  | 0         | 368  | 371  | 99 +  | 3    | 373  | 12209  | 12579  |
| UN24546 | Rsa1.0_00339.1 | 961  | 222974 | 0         | 796  | 819  | 97 +  | 1    | 809  | 45954  | 46767  |
| UN24547 | Rsa1.0_00329.1 | 673  | 222544 | 0         | 371  | 371  | 100 + | 1    | 371  | 40344  | 40714  |
| UN24548 | #              | #    | #      | #         | #    | #    | #     | #    | #    | #      | #      |
| UN24549 | Rsa1.0_02224.1 | 972  | 33758  | 0         | 509  | 514  | 99 +  | 459  | 972  | 3482   | 3995   |
| UN24550 | Rsa1.0_01691.1 | 947  | 40921  | 0         | 608  | 614  | 99 -  | 333  | 946  | 10609  | 11222  |
| UN24551 | Rsa1.0_02909.1 | 1165 | 26856  | 0         | 458  | 481  | 95 +  | 586  | 1066 | 8206   | 8686   |
| UN24552 | Rsa1.0_00454.1 | 600  | 216970 | 1.00E-103 | 293  | 324  | 90 +  | 270  | 585  | 142992 | 143308 |
| UN24553 | Rsa1.0_03800.1 | 1008 | 20768  | 0         | 605  | 611  | 99 -  | 398  | 1008 | 7225   | 7831   |
| UN24554 | Rsa1.0_00318.1 | 1231 | 96094  | 0         | 1120 | 1157 | 96 -  | 66   | 1222 | 43879  | 45034  |
| UN24555 | Rsa1.0_00969.1 | 847  | 58014  | 0         | 408  | 411  | 99 -  | 437  | 847  | 21855  | 22262  |
| UN24556 | Rsa1.0_00155.1 | 1585 | 118465 | 0         | 969  | 987  | 98 +  | 599  | 1585 | 89517  | 90503  |
| UN24557 | Rsa1.0_01555.1 | 1206 | 166456 | 0         | 563  | 569  | 98 +  | 1    | 569  | 6266   | 6834   |
| UN24558 | Rsa1.0_02858.1 | 1721 | 27246  | 0         | 1565 | 1683 | 92 -  | 58   | 1721 | 20572  | 22220  |
| UN24559 | Rsa1.0_06579.1 | 1761 | 10724  | 0         | 531  | 532  | 99 +  | 1230 | 1761 | 1400   | 1931   |
| UN24560 | Rsa1.0_00221.1 | 1093 | 106972 | 0         | 403  | 420  | 95 -  | 167  | 582  | 32623  | 33042  |
| UN24561 | Rsa1.0_00081.1 | 895  | 143261 | 0         | 519  | 524  | 99 +  | 372  | 895  | 136889 | 137410 |
| UN24562 | Rsa1.0_04674.1 | 1488 | 139859 | 0         | 905  | 967  | 93 +  | 1    | 943  | 6975   | 7923   |
| UN24563 | Rsa1.0_00001.1 | 923  | 363028 | 0         | 906  | 921  | 98 -  | 3    | 923  | 208741 | 209655 |
| UN24564 | Rsa1.0_02897.1 | 1020 | 26967  | 1.00E-173 | 315  | 317  | 99 -  | 702  | 1018 | 7608   | 7924   |
| UN24565 | Rsa1.0_04026.1 | 820  | 19508  | 1.00E-122 | 225  | 226  | 99 +  | 1    | 226  | 14370  | 14595  |
| UN24566 | Rsa1.0_00817.1 | 1426 | 62961  | 0         | 1014 | 1022 | 99 +  | 1    | 1022 | 948    | 1969   |
| UN24567 | Rsa1.0_00928.1 | 417  | 59293  | 0         | 410  | 416  | 98 -  | 2    | 417  | 46953  | 47365  |
| UN24568 | Rsa1.0_02531.1 | 656  | 266414 | 1.00E-125 | 249  | 255  | 97 +  | 213  | 466  | 156550 | 156804 |



|         |                |      |        |           |      |      |       |      |      |        |        |
|---------|----------------|------|--------|-----------|------|------|-------|------|------|--------|--------|
| UN24569 | Rsa1.0.02478.1 | 1269 | 150183 | 0         | 824  | 849  | 97 -  | 1    | 848  | 144776 | 145623 |
| UN24570 | Rsa1.0.01530.1 | 1588 | 43820  | 0         | 715  | 716  | 99 +  | 1    | 716  | 10218  | 10932  |
| UN24571 | Rsa1.0.04196.1 | 1075 | 18515  | 0         | 1071 | 1072 | 99 +  | 1    | 1072 | 2666   | 3737   |
| UN24572 | Rsa1.0.05549.1 | 805  | 13366  | 0         | 529  | 531  | 99 -  | 275  | 805  | 5552   | 6080   |
| UN24573 | Rsa1.0.02625.1 | 723  | 139104 | 7.00E-91  | 188  | 194  | 96 -  | 15   | 208  | 24068  | 24261  |
| UN24574 | Rsa1.0.01203.1 | 797  | 50848  | 0         | 794  | 795  | 99 +  | 3    | 797  | 18626  | 19419  |
| UN24575 | Rsa1.0.04455.1 | 1464 | 17266  | 0         | 506  | 509  | 99 +  | 955  | 1463 | 10562  | 11070  |
| UN24576 | Rsa1.0.17675.1 | 1360 | 1767   | 0         | 615  | 638  | 96 +  | 71   | 694  | 1130   | 1767   |
| UN24577 | Rsa1.0.04896.1 | 820  | 15552  | 1.00E-175 | 400  | 423  | 94 -  | 2    | 416  | 1770   | 2189   |
| UN24578 | Rsa1.0.03777.1 | 1064 | 20922  | 0         | 439  | 443  | 99 +  | 1    | 443  | 424    | 865    |
| UN24579 | Rsa1.0.03390.1 | 1226 | 23270  | 0         | 734  | 752  | 97 +  | 475  | 1225 | 22237  | 22985  |
| UN24580 | Rsa1.0.00037.1 | 1071 | 307838 | 0         | 358  | 368  | 97 -  | 483  | 850  | 250191 | 250558 |
| UN24581 | Rsa1.0.00073.1 | 1038 | 240924 | 0         | 1033 | 1036 | 99 +  | 1    | 1036 | 33510  | 34545  |
| UN24582 | Rsa1.0.03820.1 | 1458 | 20664  | 0         | 1387 | 1471 | 94 -  | 3    | 1457 | 10042  | 11508  |
| UN24583 | Rsa1.0.01588.1 | 603  | 42724  | 0         | 588  | 606  | 97 +  | 3    | 603  | 18645  | 19247  |
| UN24584 | Rsa1.0.01608.1 | 1390 | 170540 | 0         | 1111 | 1272 | 87 +  | 1    | 1258 | 153832 | 155096 |
| UN24585 | Rsa1.0.00632.1 | 1009 | 183777 | 0         | 987  | 1006 | 98 +  | 3    | 1008 | 173497 | 174501 |
| UN24586 | Rsa1.0.36056.1 | 721  | 626    | 1.00E-137 | 291  | 306  | 95 +  | 324  | 622  | 321    | 626    |
| UN24587 | Rsa1.0.00912.1 | 1512 | 59923  | 0         | 924  | 935  | 98 -  | 1    | 929  | 31050  | 31983  |
| UN24588 | Rsa1.0.00301.1 | 930  | 365315 | 0         | 905  | 935  | 96 -  | 3    | 930  | 7881   | 8814   |
| UN24589 | Rsa1.0.00977.1 | 1801 | 198001 | 1.00E-158 | 608  | 716  | 84 -  | 420  | 1126 | 168740 | 169454 |
| UN24590 | Rsa1.0.00231.1 | 1002 | 105381 | 0         | 458  | 460  | 99 -  | 1    | 460  | 38588  | 39047  |
| UN24591 | Rsa1.0.03238.1 | 776  | 24432  | 0         | 493  | 515  | 95 -  | 110  | 624  | 4549   | 5063   |
| UN24592 | Rsa1.0.03014.1 | 1002 | 26018  | 3.00E-26  | 74   | 78   | 94 +  | 728  | 805  | 15002  | 15079  |
| UN24593 | Rsa1.0.02128.1 | 1240 | 34758  | 0         | 576  | 581  | 99 -  | 1    | 581  | 33290  | 33870  |
| UN24594 | Rsa1.0.00101.1 | 1239 | 267193 | 0         | 1128 | 1185 | 95 -  | 56   | 1239 | 253272 | 254455 |
| UN24595 | Rsa1.0.01983.1 | 818  | 36509  | 0         | 328  | 329  | 99 +  | 490  | 818  | 34199  | 34527  |
| UN24596 | Rsa1.0.04504.1 | 1259 | 17069  | 0         | 981  | 999  | 98 -  | 254  | 1252 | 5181   | 6178   |
| UN24597 | Rsa1.0.00190.1 | 836  | 318240 | 0         | 394  | 394  | 100 + | 435  | 828  | 204950 | 205343 |
| UN24598 | Rsa1.0.09141.1 | 751  | 6612   | 1.00E-95  | 246  | 270  | 91 +  | 491  | 746  | 4437   | 4706   |
| UN24599 | Rsa1.0.00582.1 | 785  | 74333  | 0         | 456  | 460  | 99 -  | 6    | 464  | 60005  | 60464  |
| UN24600 | Rsa1.0.04848.1 | 811  | 15727  | 0         | 797  | 812  | 98 +  | 3    | 809  | 14316  | 15127  |
| UN24601 | Rsa1.0.00744.1 | 943  | 66084  | 0         | 426  | 426  | 100 + | 518  | 943  | 54853  | 55278  |
| UN24602 | Rsa1.0.65285.1 | 1206 | 351    | 2.00E-40  | 115  | 122  | 94 +  | 1085 | 1206 | 49     | 168    |
| UN24603 | Rsa1.0.00273.1 | 619  | 326186 | 1.00E-100 | 322  | 361  | 89 +  | 1    | 349  | 160360 | 160717 |
| UN24604 | Rsa1.0.02226.1 | 1150 | 33726  | 4.00E-87  | 191  | 200  | 95 +  | 934  | 1133 | 33349  | 33548  |
| UN24605 | Rsa1.0.04594.1 | 1048 | 16713  | 1.00E-134 | 249  | 251  | 99 -  | 3    | 253  | 11876  | 12126  |
| UN24606 | Rsa1.0.00050.1 | 587  | 237174 | 0         | 576  | 584  | 98 -  | 4    | 587  | 82404  | 82987  |
| UN24607 | Rsa1.0.00732.1 | 1143 | 66631  | 0         | 391  | 400  | 97 +  | 744  | 1142 | 13550  | 13949  |

|         |                |      |        |           |      |      |       |      |      |        |        |
|---------|----------------|------|--------|-----------|------|------|-------|------|------|--------|--------|
| UN24608 | Rsa1.0_40125.1 | 1307 | 560    | 1.00E-151 | 299  | 306  | 97 +  | 1    | 306  | 69     | 371    |
| UN24609 | Rsa1.0_01868.1 | 1298 | 150904 | 0         | 576  | 583  | 98 -  | 1    | 582  | 140139 | 140719 |
| UN24610 | Rsa1.0_22115.1 | 1194 | 1149   | 1.00E-150 | 314  | 328  | 95 -  | 2    | 329  | 651    | 975    |
| UN24611 | Rsa1.0_00844.1 | 1378 | 62403  | 0         | 1302 | 1352 | 96 -  | 38   | 1378 | 48452  | 49794  |
| UN24612 | Rsa1.0_16200.1 | 507  | 2246   | 1.00E-161 | 327  | 339  | 96 +  | 1    | 339  | 1909   | 2246   |
| UN24613 | Rsa1.0_19075.1 | 1837 | 1483   | 0         | 645  | 681  | 94 +  | 304  | 978  | 71     | 742    |
| UN24614 | Rsa1.0_00017.1 | 1131 | 752458 | 1.00E-155 | 325  | 338  | 96 +  | 795  | 1131 | 649181 | 649516 |
| UN24615 | Rsa1.0_00255.1 | 910  | 204967 | 4.00E-22  | 55   | 55   | 100 + | 842  | 896  | 193375 | 193429 |
| UN24616 | Rsa1.0_00346.1 | 807  | 93130  | 4.00E-37  | 90   | 92   | 97 -  | 717  | 807  | 23048  | 23139  |
| UN24617 | Rsa1.0_00540.1 | 1203 | 76895  | 0         | 885  | 917  | 96 +  | 1    | 907  | 67260  | 68173  |
| UN24618 | Rsa1.0_00360.1 | 1381 | 91190  | 0         | 883  | 906  | 97 -  | 20   | 922  | 4038   | 4943   |
| UN24619 | Rsa1.0_00111.1 | 826  | 390088 | 0         | 383  | 392  | 97 -  | 1    | 392  | 71526  | 71914  |
| UN24620 | Rsa1.0_02995.1 | 1019 | 26163  | 0         | 399  | 400  | 99 +  | 3    | 402  | 19533  | 19932  |
| UN24621 | Rsa1.0_00017.1 | 860  | 752458 | 0         | 667  | 683  | 97 +  | 1    | 678  | 68634  | 69315  |
| UN24622 | Rsa1.0_01821.1 | 1121 | 38798  | 0         | 763  | 766  | 99 -  | 2    | 767  | 6873   | 7637   |
| UN24623 | Rsa1.0_00435.1 | 1345 | 317579 | 0         | 402  | 403  | 99 +  | 475  | 877  | 28245  | 28647  |
| UN24624 | Rsa1.0_03155.1 | 777  | 24958  | 0         | 450  | 461  | 97 -  | 1    | 455  | 7374   | 7834   |
| UN24625 | Rsa1.0_01513.1 | 821  | 44234  | 0         | 776  | 783  | 99 +  | 42   | 821  | 11466  | 12247  |
| UN24626 | Rsa1.0_36855.1 | 907  | 612    | 0         | 340  | 340  | 100 + | 78   | 417  | 1      | 340    |
| UN24627 | Rsa1.0_01829.1 | 771  | 166063 | 1.00E-179 | 330  | 334  | 98 -  | 252  | 585  | 135457 | 135790 |
| UN24628 | #              | #    | #      | #         | #    | #    | #     | #    | #    | #      | #      |
| UN24629 | Rsa1.0_02494.1 | 1131 | 132923 | 1.00E-161 | 345  | 362  | 95 +  | 772  | 1129 | 121412 | 121773 |
| UN24630 | Rsa1.0_02033.1 | 1182 | 35828  | 0         | 561  | 593  | 94 -  | 595  | 1181 | 20836  | 21427  |
| UN24631 | Rsa1.0_00046.1 | 1010 | 320315 | 1.00E-116 | 252  | 264  | 95 +  | 730  | 991  | 75017  | 75280  |
| UN24632 | Rsa1.0_02605.1 | 840  | 29637  | 0         | 748  | 768  | 97 +  | 72   | 839  | 23193  | 23954  |
| UN24633 | Rsa1.0_02449.1 | 759  | 31292  | 0         | 333  | 334  | 99 +  | 1    | 334  | 11804  | 12137  |
| UN24634 | Rsa1.0_00204.1 | 1136 | 109056 | 0         | 495  | 501  | 98 +  | 639  | 1136 | 45212  | 45712  |
| UN24635 | Rsa1.0_02240.1 | 668  | 153768 | 1.00E-147 | 270  | 272  | 99 -  | 397  | 668  | 145233 | 145504 |
| UN24636 | Rsa1.0_01419.1 | 1358 | 167402 | 1.00E-169 | 336  | 345  | 97 -  | 1015 | 1358 | 133900 | 134242 |
| UN24637 | Rsa1.0_08518.1 | 915  | 7244   | 2.00E-98  | 198  | 203  | 97 +  | 379  | 581  | 6688   | 6890   |
| UN24638 | Rsa1.0_07431.1 | 1298 | 9406   | 1.00E-123 | 267  | 280  | 95 +  | 560  | 839  | 232    | 504    |
| UN24639 | Rsa1.0_04283.1 | 754  | 18089  | 0         | 676  | 750  | 90 -  | 4    | 747  | 10785  | 11529  |
| UN24640 | Rsa1.0_00879.1 | 919  | 61297  | 0         | 803  | 809  | 99 -  | 112  | 919  | 12002  | 12806  |
| UN24641 | Rsa1.0_01578.1 | 734  | 42880  | 0         | 708  | 732  | 96 +  | 3    | 734  | 35761  | 36484  |
| UN24642 | Rsa1.0_00056.1 | 945  | 332604 | 0         | 925  | 942  | 98 +  | 3    | 944  | 60907  | 61845  |
| UN24643 | Rsa1.0_01827.1 | 1598 | 143321 | 0         | 633  | 648  | 97 +  | 3    | 650  | 134057 | 134704 |
| UN24644 | Rsa1.0_00628.1 | 1235 | 214360 | 0         | 637  | 641  | 99 +  | 589  | 1229 | 42082  | 42722  |
| UN24645 | Rsa1.0_01820.1 | 938  | 38804  | 0         | 417  | 422  | 98 -  | 3    | 424  | 18794  | 19215  |
| UN24646 | Rsa1.0_00439.1 | 957  | 142776 | 1.00E-104 | 216  | 224  | 96 -  | 557  | 780  | 22249  | 22472  |

|         |                |      |        |           |      |      |       |     |      |        |        |
|---------|----------------|------|--------|-----------|------|------|-------|-----|------|--------|--------|
| UN24647 | Rsa1.0.00890.1 | 801  | 323870 | 0         | 778  | 804  | 96 +  | 1   | 801  | 191210 | 192012 |
| UN24648 | Rsa1.0.00748.1 | 1467 | 65983  | 0         | 1091 | 1150 | 94 -  | 35  | 1156 | 61251  | 62400  |
| UN24649 | Rsa1.0.06454.1 | 846  | 10987  | 1.00E-122 | 307  | 334  | 91 +  | 509 | 839  | 6861   | 7181   |
| UN24650 | Rsa1.0.01560.1 | 805  | 43256  | 0         | 414  | 414  | 100 + | 81  | 494  | 22552  | 22965  |
| UN24651 | Rsa1.0.13606.1 | 876  | 4648   | 0         | 411  | 411  | 100 - | 1   | 411  | 1705   | 2115   |
| UN24652 | Rsa1.0.03013.1 | 1967 | 26026  | 0         | 1510 | 1527 | 98 -  | 441 | 1967 | 17271  | 18797  |
| UN24653 | Rsa1.0.00949.1 | 1526 | 58549  | 0         | 1020 | 1021 | 99 -  | 2   | 1022 | 30841  | 31861  |
| UN24654 | Rsa1.0.17112.1 | 1319 | 1920   | 0         | 1288 | 1295 | 99 +  | 3   | 1297 | 626    | 1920   |
| UN24655 | Rsa1.0.00033.1 | 1414 | 515811 | 0         | 1052 | 1090 | 96 -  | 328 | 1414 | 497747 | 498835 |
| UN24656 | Rsa1.0.00842.1 | 1124 | 62493  | 0         | 452  | 453  | 99 +  | 1   | 453  | 50186  | 50638  |
| UN24657 | Rsa1.0.00772.1 | 1247 | 64856  | 0         | 485  | 504  | 96 -  | 387 | 890  | 28581  | 29081  |
| UN24658 | Rsa1.0.01489.1 | 1394 | 44764  | 0         | 1220 | 1236 | 98 -  | 161 | 1392 | 2862   | 4097   |
| UN24659 | Rsa1.0.10555.1 | 1306 | 5802   | 0         | 880  | 884  | 99 -  | 346 | 1229 | 3283   | 4166   |
| UN24660 | Rsa1.0.00193.1 | 1601 | 194198 | 0         | 480  | 504  | 95 -  | 3   | 505  | 94582  | 95074  |
| UN24661 | Rsa1.0.00097.1 | 1592 | 138858 | 1.00E-162 | 311  | 318  | 97 -  | 893 | 1204 | 85149  | 85466  |
| UN24662 | Rsa1.0.01059.1 | 1218 | 55410  | 1.00E-179 | 327  | 330  | 99 -  | 301 | 630  | 12529  | 12858  |
| UN24663 | Rsa1.0.00568.1 | 776  | 75219  | 0         | 773  | 776  | 99 +  | 1   | 774  | 51127  | 51902  |
| UN24664 | Rsa1.0.00005.1 | 677  | 353093 | 0         | 450  | 451  | 99 -  | 227 | 677  | 207848 | 208298 |
| UN24665 | Rsa1.0.09932.1 | 1261 | 6085   | 0         | 1249 | 1259 | 99 +  | 4   | 1261 | 248    | 1506   |
| UN24666 | Rsa1.0.01729.1 | 544  | 304246 | 0         | 537  | 537  | 100 + | 8   | 544  | 279583 | 280119 |
| UN24667 | Rsa1.0.13283.1 | 600  | 4941   | 0         | 596  | 599  | 99 +  | 2   | 600  | 4217   | 4815   |
| UN24668 | Rsa1.0.04551.1 | 922  | 16886  | 8.00E-11  | 57   | 64   | 89 -  | 85  | 148  | 12413  | 12476  |
| UN24669 | Rsa1.0.25620.1 | 1404 | 928    | 0         | 584  | 594  | 98 -  | 795 | 1386 | 1      | 592    |
| UN24670 | Rsa1.0.14686.1 | 924  | 3157   | 0         | 730  | 740  | 98 +  | 187 | 924  | 1      | 739    |
| UN24671 | Rsa1.0.01942.1 | 898  | 37048  | 0         | 884  | 896  | 98 -  | 3   | 898  | 724    | 1618   |
| UN24672 | Rsa1.0.00034.1 | 864  | 260119 | 1.00E-150 | 269  | 269  | 100 + | 1   | 269  | 94632  | 94900  |
| UN24673 | Rsa1.0.00681.1 | 1090 | 68779  | 0         | 477  | 494  | 96 -  | 2   | 494  | 62890  | 63379  |
| UN24674 | Rsa1.0.06619.1 | 478  | 10650  | 1.00E-127 | 274  | 284  | 96 +  | 6   | 285  | 4509   | 4790   |
| UN24675 | Rsa1.0.01659.1 | 1215 | 164577 | 0         | 1133 | 1167 | 97 +  | 2   | 1163 | 135079 | 136241 |
| UN24676 | Rsa1.0.04925.1 | 856  | 15424  | 0         | 627  | 644  | 97 +  | 213 | 856  | 456    | 1098   |
| UN24677 | Rsa1.0.00914.1 | 703  | 59880  | 1.00E-138 | 262  | 266  | 98 +  | 290 | 555  | 3727   | 3992   |
| UN24678 | Rsa1.0.01045.1 | 749  | 55853  | 1.00E-129 | 289  | 306  | 94 -  | 156 | 458  | 27100  | 27402  |
| UN24679 | Rsa1.0.20977.1 | 996  | 1248   | 1.00E-135 | 248  | 249  | 99 +  | 747 | 995  | 894    | 1142   |
| UN24680 | Rsa1.0.01163.1 | 1034 | 51946  | 1.00E-121 | 442  | 510  | 86 -  | 525 | 1024 | 6950   | 7456   |
| UN24681 | #              | #    | #      | #         | #    | #    | #     | #   | #    | #      | #      |
| UN24682 | Rsa1.0.06104.1 | 873  | 11737  | 0         | 861  | 871  | 98 +  | 1   | 871  | 9263   | 10129  |
| UN24683 | Rsa1.0.00058.1 | 1012 | 159921 | 0         | 594  | 601  | 98 +  | 412 | 1012 | 19768  | 20368  |
| UN24684 | Rsa1.0.16572.1 | 704  | 2108   | 0         | 602  | 628  | 95 +  | 3   | 629  | 1384   | 2007   |
| UN24685 | Rsa1.0.02962.1 | 693  | 26419  | 0         | 566  | 611  | 92 +  | 87  | 693  | 11344  | 11931  |

|         |                |      |        |           |      |      |       |      |      |        |        |
|---------|----------------|------|--------|-----------|------|------|-------|------|------|--------|--------|
| UN24686 | Rsa1.0.00357.1 | 941  | 173671 | 0         | 617  | 657  | 93 -  | 6    | 661  | 124107 | 124762 |
| UN24687 | Rsa1.0.00469.1 | 655  | 82084  | 0         | 500  | 500  | 100 - | 115  | 614  | 23579  | 24078  |
| UN24688 | Rsa1.0.00496.1 | 855  | 79834  | 0         | 653  | 663  | 98 -  | 1    | 663  | 34242  | 34904  |
| UN24689 | Rsa1.0.00008.1 | 803  | 358124 | 0         | 370  | 373  | 99 -  | 3    | 375  | 286672 | 287043 |
| UN24690 | Rsa1.0.00054.1 | 642  | 162053 | 5.00E-79  | 191  | 205  | 93 -  | 3    | 201  | 85898  | 86102  |
| UN24691 | Rsa1.0.00153.1 | 1032 | 192931 | 2.00E-92  | 185  | 189  | 97 +  | 594  | 782  | 31712  | 31900  |
| UN24692 | Rsa1.0.00017.1 | 1380 | 752458 | 0         | 536  | 565  | 94 -  | 185  | 749  | 58376  | 58922  |
| UN24693 | Rsa1.0.04538.1 | 1089 | 16940  | 0         | 1069 | 1092 | 97 +  | 4    | 1087 | 15137  | 16227  |
| UN24694 | Rsa1.0.00134.1 | 1120 | 390219 | 0         | 850  | 854  | 99 -  | 267  | 1120 | 148397 | 149250 |
| UN24695 | Rsa1.0.01004.1 | 704  | 56975  | 0         | 397  | 398  | 99 -  | 307  | 704  | 4218   | 4615   |
| UN24696 | Rsa1.0.01048.1 | 1290 | 55684  | 0         | 1061 | 1068 | 99 -  | 143  | 1210 | 4574   | 5641   |
| UN24697 | Rsa1.0.00457.1 | 653  | 337301 | 1.00E-107 | 273  | 304  | 89 +  | 372  | 653  | 179228 | 179531 |
| UN24698 | Rsa1.0.06508.1 | 947  | 10874  | 0         | 541  | 560  | 96 -  | 392  | 947  | 4532   | 5090   |
| UN24699 | Rsa1.0.00973.1 | 1527 | 57913  | 1.00E-126 | 262  | 273  | 95 -  | 984  | 1256 | 5428   | 5700   |
| UN24700 | Rsa1.0.03313.1 | 1234 | 23834  | 0         | 522  | 530  | 98 -  | 37   | 566  | 11402  | 11931  |
| UN24701 | #              | #    | #      | #         | #    | #    | #     | #    | #    | #      | #      |
| UN24702 | Rsa1.0.04819.1 | 1342 | 140505 | 1.00E-105 | 235  | 247  | 95 -  | 1    | 246  | 139907 | 140153 |
| UN24703 | Rsa1.0.00013.1 | 1064 | 292129 | 0         | 380  | 382  | 99 +  | 1    | 381  | 250791 | 251172 |
| UN24704 | Rsa1.0.14549.1 | 1003 | 3281   | 1.00E-134 | 246  | 247  | 99 -  | 1    | 247  | 2823   | 3069   |
| UN24705 | Rsa1.0.00168.1 | 602  | 115870 | 0         | 587  | 597  | 98 +  | 6    | 601  | 23009  | 23605  |
| UN24706 | Rsa1.0.17887.1 | 1352 | 1718   | 0         | 821  | 823  | 99 -  | 375  | 1197 | 771    | 1593   |
| UN24707 | Rsa1.0.00001.1 | 2038 | 363028 | 0         | 800  | 804  | 99 -  | 1235 | 2038 | 120329 | 121132 |
| UN24708 | Rsa1.0.05504.1 | 1793 | 13508  | 0         | 717  | 738  | 97 +  | 681  | 1418 | 5846   | 6580   |
| UN24709 | Rsa1.0.05894.1 | 1038 | 12306  | 0         | 354  | 362  | 97 -  | 229  | 590  | 11501  | 11862  |
| UN24710 | Rsa1.0.00591.1 | 1303 | 73789  | 0         | 369  | 377  | 97 -  | 821  | 1197 | 36407  | 36783  |
| UN24711 | Rsa1.0.00661.1 | 1035 | 213041 | 1.00E-165 | 349  | 367  | 95 -  | 94   | 460  | 5979   | 6345   |
| UN24712 | Rsa1.0.01218.1 | 1680 | 50536  | 1.00E-103 | 227  | 236  | 96 +  | 1    | 234  | 14227  | 14457  |
| UN24713 | Rsa1.0.05838.1 | 713  | 12479  | 0         | 537  | 553  | 97 -  | 2    | 546  | 591    | 1142   |
| UN24714 | Rsa1.0.01081.1 | 606  | 499226 | 0         | 391  | 396  | 98 -  | 1    | 396  | 13074  | 13469  |
| UN24715 | Rsa1.0.00067.1 | 618  | 415055 | 0         | 598  | 617  | 96 -  | 3    | 616  | 197481 | 198091 |
| UN24716 | Rsa1.0.00180.1 | 1226 | 114581 | 1.00E-141 | 274  | 279  | 98 +  | 4    | 282  | 37967  | 38244  |
| UN24717 | Rsa1.0.07579.1 | 643  | 9086   | 3.00E-59  | 178  | 199  | 89 -  | 416  | 607  | 8338   | 8536   |
| UN24718 | Rsa1.0.00001.1 | 818  | 363028 | 0         | 382  | 392  | 97 -  | 427  | 818  | 47817  | 48206  |
| UN24719 | Rsa1.0.01371.1 | 813  | 47079  | 0         | 775  | 786  | 98 +  | 23   | 808  | 37578  | 38359  |
| UN24720 | Rsa1.0.03502.1 | 870  | 22446  | 1.00E-102 | 195  | 197  | 98 -  | 339  | 535  | 9041   | 9237   |
| UN24721 | Rsa1.0.01962.1 | 818  | 153412 | 0         | 497  | 499  | 99 -  | 320  | 818  | 4390   | 4888   |
| UN24722 | Rsa1.0.00264.1 | 585  | 101674 | 0         | 569  | 574  | 99 -  | 2    | 571  | 11937  | 12510  |
| UN24723 | Rsa1.0.06298.1 | 745  | 11280  | 0         | 619  | 644  | 96 -  | 97   | 738  | 10646  | 11280  |
| UN24724 | Rsa1.0.00371.1 | 536  | 90463  | 0         | 526  | 539  | 97 -  | 1    | 536  | 76386  | 76921  |

|         |                |      |        |           |      |      |       |     |      |        |        |
|---------|----------------|------|--------|-----------|------|------|-------|-----|------|--------|--------|
| UN24725 | Rsa1.0.00190.1 | 1258 | 318240 | 0         | 457  | 482  | 94 -  | 777 | 1256 | 300454 | 300925 |
| UN24726 | Rsa1.0.05737.1 | 1973 | 12778  | 0         | 1060 | 1083 | 97 -  | 507 | 1587 | 419    | 1501   |
| UN24727 | Rsa1.0.00206.1 | 718  | 109040 | 3.00E-34  | 81   | 83   | 97 +  | 367 | 449  | 985    | 1067   |
| UN24728 | Rsa1.0.00219.1 | 928  | 106983 | 0         | 928  | 928  | 100 + | 1   | 928  | 66717  | 67644  |
| UN24729 | Rsa1.0.03746.1 | 1226 | 21050  | 1.00E-157 | 360  | 382  | 94 -  | 832 | 1206 | 8036   | 8417   |
| UN24730 | Rsa1.0.00017.1 | 1665 | 752458 | 0         | 343  | 343  | 100 - | 1   | 343  | 503128 | 503470 |
| UN24731 | Rsa1.0.07319.1 | 1028 | 9561   | 0         | 389  | 390  | 99 +  | 635 | 1024 | 8937   | 9326   |
| UN24732 | Rsa1.0.14199.1 | 1331 | 3671   | 0         | 435  | 440  | 98 -  | 16  | 455  | 2045   | 2484   |
| UN24733 | Rsa1.0.00838.1 | 947  | 153820 | 0         | 921  | 955  | 96 +  | 2   | 947  | 29485  | 30439  |
| UN24734 | Rsa1.0.00434.1 | 1064 | 85171  | 0         | 540  | 592  | 91 +  | 35  | 613  | 66220  | 66802  |
| UN24735 | Rsa1.0.04146.1 | 1557 | 18833  | 0         | 1548 | 1559 | 99 +  | 2   | 1557 | 3270   | 4828   |
| UN24736 | Rsa1.0.01516.1 | 2384 | 44196  | 0         | 1049 | 1115 | 94 +  | 783 | 1894 | 26925  | 28029  |
| UN24737 | Rsa1.0.02871.1 | 1284 | 27085  | 0         | 1067 | 1073 | 99 -  | 212 | 1284 | 21396  | 22468  |
| UN24738 | Rsa1.0.03722.1 | 952  | 21184  | 0         | 476  | 477  | 99 -  | 1   | 477  | 9320   | 9795   |
| UN24739 | Rsa1.0.00279.1 | 827  | 100039 | 1.00E-125 | 268  | 281  | 95 -  | 4   | 281  | 37942  | 38222  |
| UN24740 | Rsa1.0.00121.1 | 858  | 278029 | 0         | 388  | 392  | 98 -  | 91  | 482  | 106621 | 107012 |
| UN24741 | Rsa1.0.00064.1 | 1228 | 240927 | 0         | 756  | 787  | 96 -  | 442 | 1228 | 57362  | 58125  |
| UN24742 | Rsa1.0.08332.1 | 941  | 7528   | 0         | 762  | 790  | 96 -  | 162 | 941  | 3938   | 4727   |
| UN24743 | Rsa1.0.00152.1 | 1392 | 257730 | 0         | 395  | 396  | 99 +  | 997 | 1392 | 245480 | 245875 |
| UN24744 | #              | #    | #      | #         | #    | #    | #     | #   | #    | #      | #      |
| UN24745 | Rsa1.0.06163.1 | 1385 | 11588  | 0         | 1221 | 1246 | 97 -  | 1   | 1246 | 8      | 1253   |
| UN24746 | Rsa1.0.00281.1 | 1468 | 99908  | 0         | 1431 | 1441 | 99 +  | 29  | 1468 | 58980  | 60419  |
| UN24747 | Rsa1.0.02472.1 | 1029 | 31085  | 0         | 728  | 767  | 94 +  | 2   | 767  | 10582  | 11337  |
| UN24748 | Rsa1.0.16572.1 | 1527 | 2108   | 0         | 609  | 631  | 96 +  | 2   | 628  | 1377   | 2007   |
| UN24749 | Rsa1.0.02745.1 | 683  | 28263  | 0         | 358  | 364  | 98 +  | 317 | 680  | 3009   | 3371   |
| UN24750 | Rsa1.0.05345.1 | 763  | 14103  | 0         | 387  | 388  | 99 +  | 376 | 763  | 3356   | 3743   |
| UN24751 | Rsa1.0.00383.1 | 896  | 398431 | 0         | 511  | 522  | 97 -  | 371 | 892  | 284015 | 284530 |
| UN24752 | Rsa1.0.02923.1 | 1271 | 26736  | 0         | 810  | 853  | 94 -  | 11  | 863  | 12677  | 13517  |
| UN24753 | Rsa1.0.00465.1 | 734  | 82138  | 0         | 473  | 477  | 99 -  | 259 | 734  | 67740  | 68216  |
| UN24754 | Rsa1.0.00213.1 | 884  | 108167 | 0         | 808  | 814  | 99 +  | 71  | 884  | 9890   | 10703  |
| UN24755 | Rsa1.0.00898.1 | 934  | 202772 | 2.00E-76  | 266  | 300  | 88 -  | 23  | 318  | 174644 | 174935 |
| UN24756 | Rsa1.0.00246.1 | 1608 | 103541 | 0         | 1585 | 1604 | 98 +  | 3   | 1606 | 10100  | 11703  |
| UN24757 | Rsa1.0.01163.1 | 1207 | 51946  | 0         | 434  | 436  | 99 -  | 4   | 439  | 33379  | 33814  |
| UN24758 | Rsa1.0.00378.1 | 1424 | 89892  | 0         | 828  | 834  | 99 +  | 592 | 1424 | 60682  | 61515  |
| UN24759 | Rsa1.0.00376.1 | 1185 | 90101  | 0         | 643  | 667  | 96 +  | 517 | 1183 | 2298   | 2954   |
| UN24760 | Rsa1.0.00057.1 | 1058 | 160473 | 0         | 359  | 367  | 97 -  | 1   | 367  | 100728 | 101094 |
| UN24761 | Rsa1.0.00485.1 | 1295 | 80937  | 0         | 554  | 589  | 94 -  | 708 | 1293 | 22007  | 22588  |
| UN24762 | Rsa1.0.02171.1 | 827  | 167557 | 0         | 424  | 441  | 96 +  | 392 | 826  | 12344  | 12784  |
| UN24763 | Rsa1.0.00657.1 | 686  | 69858  | 0         | 381  | 383  | 99 -  | 1   | 382  | 53893  | 54275  |

|         |                |      |        |           |      |      |      |     |      |        |        |
|---------|----------------|------|--------|-----------|------|------|------|-----|------|--------|--------|
| UN24764 | Rsa1.0.01656.1 | 540  | 41494  | 0         | 521  | 540  | 96 + | 2   | 537  | 16480  | 17019  |
| UN24765 | Rsa1.0.01687.1 | 1200 | 40979  | 0         | 900  | 902  | 99 + | 298 | 1199 | 26429  | 27330  |
| UN24766 | Rsa1.0.19175.1 | 1050 | 1469   | 0         | 665  | 667  | 99 + | 383 | 1049 | 577    | 1243   |
| UN24767 | Rsa1.0.04384.1 | 1244 | 17629  | 0         | 469  | 472  | 99 + | 1   | 471  | 4696   | 5167   |
| UN24768 | Rsa1.0.02247.1 | 672  | 33427  | 0         | 668  | 674  | 99 + | 1   | 670  | 765    | 1438   |
| UN24769 | Rsa1.0.06049.1 | 494  | 11851  | 1.00E-117 | 252  | 264  | 95 + | 232 | 492  | 10624  | 10887  |
| UN24770 | Rsa1.0.00216.1 | 1126 | 197563 | 0         | 1094 | 1126 | 97 - | 1   | 1123 | 9862   | 10987  |
| UN24771 | Rsa1.0.10976.1 | 1182 | 5657   | 0         | 790  | 807  | 97 - | 1   | 807  | 3467   | 4270   |
| UN24772 | Rsa1.0.05622.1 | 1174 | 13145  | 1.00E-157 | 469  | 531  | 88 - | 637 | 1167 | 12527  | 13054  |
| UN24773 | Rsa1.0.02896.1 | 965  | 26970  | 0         | 891  | 926  | 96 + | 42  | 964  | 23364  | 24289  |
| UN24774 | Rsa1.0.01350.1 | 794  | 47503  | 2.00E-11  | 76   | 89   | 85 - | 227 | 315  | 12290  | 12378  |
| UN24775 | Rsa1.0.59221.1 | 754  | 386    | 0         | 381  | 386  | 98 - | 95  | 480  | 1      | 386    |
| UN24776 | Rsa1.0.00379.1 | 1824 | 89865  | 0         | 1055 | 1071 | 98 - | 755 | 1824 | 83241  | 84311  |
| UN24777 | Rsa1.0.01952.1 | 879  | 36940  | 0         | 666  | 720  | 92 - | 4   | 723  | 28471  | 29187  |
| UN24778 | Rsa1.0.00329.1 | 1102 | 222544 | 1.00E-167 | 309  | 311  | 99 - | 1   | 310  | 25085  | 25395  |
| UN24779 | Rsa1.0.01104.1 | 741  | 285480 | 0         | 423  | 450  | 94 - | 222 | 667  | 135402 | 135844 |
| UN24780 | Rsa1.0.00018.1 | 786  | 410899 | 0         | 766  | 788  | 97 - | 1   | 785  | 7515   | 8301   |
| UN24781 | Rsa1.0.02185.1 | 828  | 34150  | 0         | 525  | 545  | 96 + | 15  | 558  | 31458  | 32002  |
| UN24782 | Rsa1.0.01394.1 | 1070 | 46641  | 0         | 1058 | 1070 | 98 - | 1   | 1070 | 33543  | 34610  |
| UN24783 | Rsa1.0.00577.1 | 717  | 174827 | 0         | 432  | 437  | 98 - | 281 | 717  | 7966   | 8402   |
| UN24784 | Rsa1.0.01095.1 | 713  | 54276  | 0         | 506  | 507  | 99 - | 206 | 712  | 45587  | 46093  |
| UN24785 | Rsa1.0.05815.1 | 1144 | 12563  | 1.00E-160 | 300  | 303  | 99 + | 843 | 1144 | 9748   | 10050  |
| UN24786 | Rsa1.0.00138.1 | 690  | 247040 | 1.00E-163 | 321  | 330  | 97 - | 105 | 434  | 64744  | 65070  |
| UN24787 | Rsa1.0.00915.1 | 1459 | 194446 | 0         | 1206 | 1305 | 92 + | 2   | 1289 | 18618  | 19922  |
| UN24788 | Rsa1.0.45645.1 | 893  | 494    | 0         | 490  | 494  | 99 - | 298 | 791  | 1      | 494    |
| UN24789 | Rsa1.0.00380.1 | 701  | 89748  | 0         | 654  | 692  | 94 - | 14  | 701  | 41507  | 42194  |
| UN24790 | Rsa1.0.01989.1 | 719  | 36439  | 1.00E-98  | 216  | 227  | 95 - | 214 | 440  | 32960  | 33186  |
| UN24791 | Rsa1.0.07127.1 | 1473 | 9863   | 0         | 640  | 666  | 96 - | 506 | 1171 | 681    | 1346   |
| UN24792 | Rsa1.0.00173.1 | 1329 | 288743 | 0         | 732  | 746  | 98 + | 583 | 1328 | 219387 | 220132 |
| UN24793 | Rsa1.0.02122.1 | 779  | 34797  | 1.00E-106 | 273  | 299  | 91 + | 471 | 769  | 32145  | 32443  |
| UN24794 | Rsa1.0.02668.1 | 804  | 28895  | 0         | 780  | 819  | 95 - | 1   | 804  | 5069   | 5882   |
| UN24795 | Rsa1.0.02160.1 | 1694 | 34468  | 0         | 443  | 467  | 94 - | 1   | 446  | 10197  | 10663  |
| UN24796 | Rsa1.0.00050.1 | 518  | 237174 | 0         | 509  | 516  | 98 + | 3   | 518  | 216666 | 217180 |
| UN24797 | Rsa1.0.01078.1 | 843  | 316910 | 0         | 497  | 500  | 99 - | 1   | 499  | 135725 | 136224 |
| UN24798 | Rsa1.0.00077.1 | 685  | 145005 | 1.00E-147 | 279  | 284  | 98 - | 382 | 665  | 92101  | 92384  |
| UN24799 | Rsa1.0.26446.1 | 1025 | 891    | 0         | 483  | 488  | 98 + | 538 | 1024 | 146    | 633    |
| UN24800 | Rsa1.0.08657.1 | 1055 | 7074   | 0         | 470  | 490  | 95 + | 565 | 1054 | 4705   | 5194   |
| UN24801 | Rsa1.0.00193.1 | 752  | 194198 | 0         | 653  | 690  | 94 + | 3   | 681  | 140765 | 141451 |
| UN24802 | Rsa1.0.04100.1 | 1065 | 19060  | 0         | 515  | 523  | 98 - | 2   | 524  | 18429  | 18951  |

|         |                |      |        |           |      |      |       |      |      |        |        |
|---------|----------------|------|--------|-----------|------|------|-------|------|------|--------|--------|
| UN24803 | Rsa1.0.00178.1 | 1447 | 114861 | 0         | 1336 | 1408 | 94 -  | 48   | 1447 | 60467  | 61866  |
| UN24804 | Rsa1.0.02748.1 | 867  | 28242  | 0         | 685  | 751  | 91 -  | 127  | 866  | 18385  | 19135  |
| UN24805 | Rsa1.0.00020.1 | 1111 | 283099 | 0         | 743  | 756  | 98 -  | 3    | 757  | 187452 | 188204 |
| UN24806 | Rsa1.0.00025.1 | 777  | 277312 | 0         | 361  | 365  | 98 -  | 2    | 366  | 159843 | 160207 |
| UN24807 | Rsa1.0.00402.1 | 752  | 385315 | 1.00E-158 | 286  | 287  | 99 +  | 466  | 752  | 252520 | 252806 |
| UN24808 | Rsa1.0.00175.1 | 1516 | 166121 | 1.00E-169 | 308  | 310  | 99 -  | 1207 | 1516 | 16354  | 16663  |
| UN24809 | Rsa1.0.00055.1 | 1050 | 520193 | 5.00E-71  | 190  | 204  | 93 -  | 821  | 1023 | 354451 | 354651 |
| UN24810 | Rsa1.0.01526.1 | 1123 | 43919  | 0         | 914  | 935  | 97 -  | 190  | 1123 | 35072  | 36006  |
| UN24811 | Rsa1.0.00123.1 | 627  | 325650 | 1.00E-107 | 261  | 278  | 93 -  | 353  | 627  | 241793 | 242061 |
| UN24812 | Rsa1.0.00111.1 | 1260 | 390088 | 0         | 458  | 475  | 96 +  | 1    | 472  | 197735 | 198208 |
| UN24813 | Rsa1.0.13535.1 | 1508 | 4747   | 1.00E-57  | 124  | 127  | 97 +  | 12   | 138  | 1      | 127    |
| UN24814 | Rsa1.0.08412.1 | 849  | 7404   | 0         | 511  | 530  | 96 +  | 12   | 539  | 4359   | 4887   |
| UN24815 | Rsa1.0.00324.1 | 843  | 218805 | 1.00E-134 | 258  | 263  | 98 -  | 3    | 265  | 133661 | 133923 |
| UN24816 | Rsa1.0.00405.1 | 794  | 202864 | 0         | 477  | 480  | 99 +  | 315  | 794  | 66025  | 66504  |
| UN24817 | Rsa1.0.16781.1 | 1108 | 2037   | 0         | 963  | 991  | 97 -  | 1    | 991  | 365    | 1350   |
| UN24818 | Rsa1.0.00085.1 | 1172 | 142226 | 0         | 760  | 768  | 98 -  | 406  | 1172 | 49794  | 50558  |
| UN24819 | Rsa1.0.01768.1 | 819  | 138463 | 1.00E-169 | 354  | 369  | 95 +  | 385  | 751  | 769    | 1136   |
| UN24820 | Rsa1.0.04285.1 | 1130 | 18085  | 0         | 1122 | 1129 | 99 +  | 2    | 1130 | 4753   | 5881   |
| UN24821 | Rsa1.0.08477.1 | 1013 | 7295   | 0         | 403  | 403  | 100 + | 3    | 405  | 2963   | 3365   |
| UN24822 | Rsa1.0.02070.1 | 875  | 158516 | 0         | 446  | 452  | 98 +  | 424  | 875  | 764    | 1215   |
| UN24823 | Rsa1.0.00216.1 | 783  | 197563 | 1.00E-159 | 308  | 316  | 97 -  | 467  | 782  | 92960  | 93275  |
| UN24824 | Rsa1.0.00251.1 | 596  | 303968 | 0         | 564  | 591  | 95 -  | 1    | 586  | 299129 | 299712 |
| UN24825 | Rsa1.0.01351.1 | 981  | 47498  | 8.00E-76  | 372  | 443  | 83 +  | 2    | 423  | 23375  | 23807  |
| UN24826 | Rsa1.0.01184.1 | 956  | 51452  | 0         | 951  | 972  | 97 -  | 1    | 956  | 48086  | 49057  |
| UN24827 | Rsa1.0.00538.1 | 1051 | 77149  | 0         | 394  | 399  | 98 +  | 654  | 1051 | 66277  | 66675  |
| UN24828 | Rsa1.0.00204.1 | 747  | 109056 | 0         | 408  | 426  | 95 +  | 92   | 507  | 19482  | 19907  |
| UN24829 | Rsa1.0.08162.1 | 1401 | 7813   | 0         | 767  | 798  | 96 +  | 1    | 798  | 7019   | 7813   |
| UN24830 | Rsa1.0.06353.1 | 692  | 11194  | 0         | 669  | 675  | 99 -  | 18   | 692  | 4250   | 4921   |
| UN24831 | Rsa1.0.03302.1 | 1156 | 23898  | 0         | 1116 | 1158 | 96 +  | 2    | 1156 | 10552  | 11709  |
| UN24832 | Rsa1.0.02222.1 | 660  | 152798 | 0         | 530  | 537  | 98 +  | 2    | 537  | 121266 | 121802 |
| UN24833 | Rsa1.0.00484.1 | 728  | 203294 | 0         | 405  | 412  | 98 +  | 1    | 411  | 153099 | 153509 |
| UN24834 | Rsa1.0.05817.1 | 1032 | 12552  | 1.00E-99  | 185  | 185  | 100 - | 183  | 367  | 3543   | 3727   |
| UN24835 | Rsa1.0.00153.1 | 1083 | 192931 | 0         | 515  | 548  | 93 -  | 552  | 1083 | 171931 | 172473 |
| UN24836 | Rsa1.0.01520.1 | 1580 | 44087  | 0         | 550  | 552  | 99 -  | 581  | 1132 | 33477  | 34028  |
| UN24837 | Rsa1.0.01279.1 | 1170 | 180330 | 0         | 721  | 733  | 98 -  | 440  | 1170 | 21096  | 21825  |
| UN24838 | Rsa1.0.01156.1 | 1025 | 52147  | 0         | 370  | 373  | 99 -  | 646  | 1018 | 14807  | 15179  |
| UN24839 | #              | #    | #      | #         | #    | #    | #     | #    | #    | #      | #      |
| UN24840 | Rsa1.0.03034.1 | 1506 | 157864 | 0         | 459  | 481  | 95 +  | 1026 | 1506 | 134541 | 135020 |
| UN24841 | Rsa1.0.00026.1 | 545  | 327835 | 0         | 335  | 337  | 99 -  | 3    | 339  | 123766 | 124102 |

|         |                |      |        |           |      |      |       |      |      |        |        |
|---------|----------------|------|--------|-----------|------|------|-------|------|------|--------|--------|
| UN24842 | Rsa1.0.05004.1 | 1239 | 15172  | 0         | 847  | 903  | 93 +  | 3    | 894  | 799    | 1699   |
| UN24843 | Rsa1.0.03843.1 | 1130 | 20496  | 1.00E-111 | 298  | 334  | 89 +  | 139  | 460  | 8119   | 8435   |
| UN24844 | Rsa1.0.02951.1 | 824  | 26505  | 0         | 535  | 555  | 96 -  | 1    | 547  | 14215  | 14765  |
| UN24845 | Rsa1.0.00305.1 | 693  | 97308  | 0         | 489  | 496  | 98 -  | 197  | 692  | 43700  | 44195  |
| UN24846 | Rsa1.0.04872.1 | 2014 | 15659  | 0         | 428  | 435  | 98 +  | 591  | 1021 | 12472  | 12906  |
| UN24847 | Rsa1.0.00384.1 | 707  | 89278  | 1.00E-127 | 237  | 239  | 99 +  | 3    | 241  | 79101  | 79339  |
| UN24848 | Rsa1.0.01189.1 | 1134 | 51358  | 0         | 1128 | 1138 | 99 -  | 1    | 1134 | 4129   | 5264   |
| UN24849 | Rsa1.0.02682.1 | 1005 | 28711  | 1.00E-118 | 216  | 216  | 100 + | 202  | 417  | 13239  | 13454  |
| UN24850 | Rsa1.0.01998.1 | 1575 | 36276  | 0         | 546  | 551  | 99 +  | 2    | 552  | 12575  | 13125  |
| UN24851 | Rsa1.0.01716.1 | 1504 | 40483  | 1.00E-153 | 382  | 416  | 91 +  | 1    | 396  | 9622   | 10037  |
| UN24852 | Rsa1.0.04860.1 | 1088 | 15696  | 0         | 558  | 575  | 97 -  | 14   | 588  | 1305   | 1876   |
| UN24853 | Rsa1.0.11429.1 | 512  | 5511   | 0         | 390  | 393  | 99 +  | 122  | 512  | 4743   | 5135   |
| UN24854 | Rsa1.0.00685.1 | 764  | 68515  | 0         | 369  | 372  | 99 +  | 393  | 764  | 14743  | 15114  |
| UN24855 | Rsa1.0.03364.1 | 753  | 23446  | 0         | 751  | 751  | 100 + | 3    | 753  | 11319  | 12069  |
| UN24856 | Rsa1.0.00559.1 | 845  | 190486 | 0         | 384  | 389  | 98 +  | 96   | 484  | 2470   | 2858   |
| UN24857 | Rsa1.0.02189.1 | 505  | 34098  | 0         | 500  | 503  | 99 +  | 3    | 505  | 2131   | 2633   |
| UN24858 | Rsa1.0.03280.1 | 674  | 145083 | 1.00E-159 | 291  | 293  | 99 -  | 3    | 295  | 143707 | 143999 |
| UN24859 | Rsa1.0.01704.1 | 794  | 40711  | 1.00E-169 | 357  | 374  | 95 -  | 1    | 372  | 18105  | 18470  |
| UN24860 | Rsa1.0.08679.1 | 750  | 7047   | 0         | 567  | 624  | 90 -  | 139  | 750  | 870    | 1481   |
| UN24861 | Rsa1.0.04762.1 | 1517 | 16101  | 0         | 369  | 383  | 96 -  | 1004 | 1383 | 9068   | 9450   |
| UN24862 | Rsa1.0.01780.1 | 859  | 39411  | 0         | 494  | 500  | 98 -  | 360  | 859  | 2706   | 3205   |
| UN24863 | Rsa1.0.00087.1 | 747  | 761073 | 0         | 728  | 746  | 97 -  | 1    | 746  | 561211 | 561954 |
| UN24864 | Rsa1.0.01081.1 | 1068 | 499226 | 0         | 524  | 541  | 96 +  | 525  | 1065 | 322593 | 323133 |
| UN24865 | Rsa1.0.00124.1 | 724  | 262503 | 1.00E-175 | 350  | 359  | 97 -  | 366  | 724  | 16228  | 16583  |
| UN24866 | Rsa1.0.07870.1 | 601  | 8384   | 0         | 399  | 407  | 98 -  | 187  | 593  | 1665   | 2068   |
| UN24867 | Rsa1.0.03873.1 | 965  | 20360  | 0         | 480  | 499  | 96 -  | 467  | 965  | 9588   | 10077  |
| UN24868 | Rsa1.0.00182.1 | 856  | 142305 | 0         | 436  | 438  | 99 +  | 64   | 500  | 105345 | 105782 |
| UN24869 | Rsa1.0.00019.1 | 507  | 301669 | 1.00E-162 | 383  | 408  | 93 +  | 94   | 496  | 295024 | 295424 |
| UN24870 | Rsa1.0.07150.1 | 842  | 9817   | 0         | 655  | 668  | 98 +  | 178  | 841  | 6972   | 7639   |
| UN24871 | Rsa1.0.00460.1 | 1032 | 206387 | 1.00E-65  | 170  | 184  | 92 +  | 844  | 1027 | 18371  | 18554  |
| UN24872 | Rsa1.0.51060.1 | 1032 | 445    | 0         | 443  | 445  | 99 -  | 188  | 632  | 1      | 445    |
| UN24873 | Rsa1.0.03184.1 | 1476 | 24750  | 1.00E-121 | 240  | 246  | 97 -  | 1174 | 1419 | 15432  | 15677  |
| UN24874 | Rsa1.0.00826.1 | 641  | 166736 | 1.00E-156 | 342  | 358  | 95 -  | 286  | 641  | 11593  | 11947  |
| UN24875 | Rsa1.0.03224.1 | 1425 | 24501  | 0         | 367  | 377  | 97 -  | 383  | 758  | 2071   | 2447   |
| UN24876 | Rsa1.0.02030.1 | 864  | 179909 | 0         | 324  | 324  | 100 - | 384  | 707  | 165998 | 166321 |
| UN24877 | Rsa1.0.00046.1 | 690  | 320315 | 0         | 679  | 686  | 98 -  | 3    | 688  | 52068  | 52750  |
| UN24878 | Rsa1.0.00377.1 | 1742 | 90038  | 3.00E-98  | 204  | 211  | 96 -  | 1512 | 1722 | 573    | 783    |
| UN24879 | Rsa1.0.11002.1 | 1241 | 5651   | 0         | 748  | 757  | 98 +  | 485  | 1241 | 4206   | 4962   |
| UN24880 | Rsa1.0.02924.1 | 826  | 26736  | 0         | 551  | 552  | 99 +  | 273  | 824  | 17587  | 18138  |



|         |                |      |        |           |      |      |       |      |      |        |        |
|---------|----------------|------|--------|-----------|------|------|-------|------|------|--------|--------|
| UN24881 | Rsa1.0_11224.1 | 1072 | 5577   | 0         | 905  | 916  | 98 -  | 157  | 1072 | 4530   | 5445   |
| UN24882 | Rsa1.0_00122.1 | 922  | 265937 | 0         | 634  | 634  | 100 + | 1    | 634  | 33165  | 33798  |
| UN24883 | Rsa1.0_02784.1 | 867  | 27881  | 0         | 776  | 777  | 99 +  | 1    | 777  | 17544  | 18320  |
| UN24884 | Rsa1.0_02234.1 | 813  | 33618  | 1.00E-149 | 312  | 327  | 95 -  | 276  | 602  | 4214   | 4534   |
| UN24885 | Rsa1.0_00789.1 | 1342 | 64233  | 0         | 591  | 592  | 99 -  | 255  | 846  | 33179  | 33769  |
| UN24886 | Rsa1.0_04876.1 | 1415 | 15631  | 1.00E-142 | 262  | 264  | 99 -  | 3    | 266  | 3539   | 3802   |
| UN24887 | Rsa1.0_01207.1 | 2007 | 141053 | 0         | 544  | 546  | 99 +  | 1462 | 2007 | 130561 | 131106 |
| UN24888 | Rsa1.0_00059.1 | 1290 | 159650 | 0         | 580  | 609  | 95 -  | 7    | 600  | 63622  | 64229  |
| UN24889 | Rsa1.0_00850.1 | 997  | 62193  | 0         | 405  | 419  | 96 -  | 584  | 997  | 25123  | 25539  |
| UN24890 | Rsa1.0_05415.1 | 751  | 13830  | 0         | 601  | 634  | 94 -  | 120  | 751  | 4799   | 5432   |
| UN24891 | Rsa1.0_00664.1 | 1444 | 69573  | 0         | 452  | 454  | 99 +  | 991  | 1444 | 16178  | 16631  |
| UN24892 | Rsa1.0_00332.1 | 1401 | 94575  | 1.00E-100 | 199  | 202  | 98 +  | 1201 | 1401 | 43005  | 43206  |
| UN24893 | Rsa1.0_04456.1 | 1740 | 17260  | 0         | 570  | 590  | 96 +  | 845  | 1431 | 15708  | 16297  |
| UN24894 | Rsa1.0_01573.1 | 1295 | 42964  | 0         | 712  | 734  | 97 +  | 453  | 1186 | 13460  | 14190  |
| UN24895 | Rsa1.0_00507.1 | 1325 | 79074  | 1.00E-174 | 320  | 322  | 99 +  | 1    | 321  | 9947   | 10268  |
| UN24896 | Rsa1.0_01350.1 | 1146 | 47503  | 0         | 1133 | 1144 | 99 -  | 3    | 1145 | 10446  | 11587  |
| UN24897 | Rsa1.0_01444.1 | 565  | 169539 | 1.00E-130 | 248  | 251  | 98 -  | 315  | 565  | 14839  | 15088  |
| UN24898 | Rsa1.0_07548.1 | 596  | 9150   | 1.00E-179 | 327  | 330  | 99 -  | 106  | 435  | 1      | 330    |
| UN24899 | Rsa1.0_00275.1 | 1345 | 210104 | 0         | 1333 | 1343 | 99 +  | 1    | 1343 | 14785  | 16127  |
| UN24900 | Rsa1.0_02090.1 | 1298 | 35161  | 0         | 590  | 597  | 98 +  | 701  | 1296 | 33851  | 34447  |
| UN24901 | Rsa1.0_03035.1 | 1280 | 25827  | 1.00E-118 | 216  | 216  | 100 - | 1    | 216  | 5045   | 5260   |
| UN24902 | Rsa1.0_02456.1 | 750  | 31222  | 1.00E-139 | 251  | 251  | 100 - | 499  | 749  | 23754  | 24004  |
| UN24903 | Rsa1.0_03284.1 | 1465 | 24069  | 0         | 637  | 639  | 99 +  | 1    | 639  | 2507   | 3145   |
| UN24904 | Rsa1.0_00280.1 | 1093 | 99966  | 0         | 809  | 833  | 97 -  | 3    | 823  | 75915  | 76747  |
| UN24905 | Rsa1.0_00108.1 | 1074 | 478491 | 0         | 503  | 523  | 96 +  | 545  | 1063 | 66756  | 67274  |
| UN24906 | Rsa1.0_02070.1 | 1424 | 158516 | 0         | 548  | 578  | 94 -  | 1    | 578  | 156434 | 156991 |
| UN24907 | Rsa1.0_03382.1 | 849  | 23299  | 0         | 338  | 341  | 99 -  | 510  | 849  | 5197   | 5537   |
| UN24908 | Rsa1.0_00148.1 | 1119 | 120234 | 0         | 533  | 552  | 96 -  | 519  | 1069 | 72135  | 72685  |
| UN24909 | Rsa1.0_00218.1 | 723  | 201480 | 0         | 702  | 722  | 97 +  | 1    | 722  | 45431  | 46152  |
| UN24910 | Rsa1.0_02871.1 | 738  | 27085  | 5.00E-64  | 152  | 161  | 94 +  | 430  | 590  | 7452   | 7612   |
| UN24911 | Rsa1.0_00124.1 | 629  | 262503 | 0         | 591  | 622  | 95 -  | 10   | 625  | 159689 | 160310 |
| UN24912 | Rsa1.0_03720.1 | 1432 | 21187  | 0         | 1087 | 1182 | 91 +  | 256  | 1430 | 10921  | 12095  |
| UN24913 | Rsa1.0_01933.1 | 1314 | 37172  | 1.00E-121 | 237  | 241  | 98 -  | 238  | 478  | 15512  | 15751  |
| UN24914 | Rsa1.0_02104.1 | 1045 | 34985  | 0         | 373  | 383  | 97 +  | 663  | 1045 | 7644   | 8025   |
| UN24915 | Rsa1.0_01242.1 | 1668 | 50066  | 0         | 1635 | 1671 | 97 -  | 1    | 1668 | 48006  | 49675  |
| UN24916 | Rsa1.0_06412.1 | 1005 | 11060  | 0         | 550  | 580  | 94 +  | 3    | 576  | 951    | 1524   |
| UN24917 | Rsa1.0_00384.1 | 787  | 89278  | 0         | 705  | 756  | 93 -  | 1    | 753  | 26323  | 27078  |
| UN24918 | Rsa1.0_00964.1 | 810  | 316648 | 1.00E-135 | 247  | 248  | 99 +  | 563  | 810  | 165354 | 165601 |
| UN24919 | Rsa1.0_05090.1 | 1610 | 14879  | 0         | 390  | 407  | 95 -  | 1204 | 1610 | 7794   | 8193   |

|         |                |      |        |           |      |      |       |      |      |        |        |
|---------|----------------|------|--------|-----------|------|------|-------|------|------|--------|--------|
| UN24920 | Rsa1.0.01105.1 | 917  | 53958  | 0         | 622  | 644  | 96 +  | 1    | 644  | 19707  | 20345  |
| UN24921 | Rsa1.0.19308.1 | 1135 | 1449   | 0         | 908  | 950  | 95 +  | 1    | 946  | 511    | 1449   |
| UN24922 | Rsa1.0.00013.1 | 1291 | 292129 | 0         | 1047 | 1075 | 97 -  | 2    | 1075 | 119779 | 120852 |
| UN24923 | Rsa1.0.01014.1 | 833  | 56762  | 1.00E-177 | 324  | 327  | 99 +  | 483  | 809  | 27362  | 27688  |
| UN24924 | Rsa1.0.13926.1 | 861  | 4079   | 0         | 856  | 857  | 99 +  | 5    | 861  | 307    | 1163   |
| UN24925 | Rsa1.0.06462.1 | 835  | 10972  | 0         | 824  | 835  | 98 +  | 1    | 835  | 648    | 1481   |
| UN24926 | Rsa1.0.01452.1 | 1240 | 45459  | 0         | 1235 | 1238 | 99 -  | 1    | 1238 | 19026  | 20263  |
| UN24927 | Rsa1.0.02378.1 | 1475 | 31991  | 0         | 1026 | 1046 | 98 +  | 429  | 1474 | 14707  | 15752  |
| UN24928 | Rsa1.0.00951.1 | 603  | 164588 | 0         | 598  | 613  | 97 +  | 1    | 602  | 143856 | 144468 |
| UN24929 | Rsa1.0.00294.1 | 1003 | 144860 | 0         | 775  | 787  | 98 +  | 3    | 788  | 35156  | 35942  |
| UN24930 | Rsa1.0.00512.1 | 867  | 200277 | 1.00E-104 | 260  | 282  | 92 -  | 2    | 283  | 24322  | 24600  |
| UN24931 | Rsa1.0.00111.1 | 1342 | 390088 | 0         | 578  | 592  | 97 +  | 1    | 588  | 338259 | 338850 |
| UN24932 | Rsa1.0.03870.1 | 651  | 20362  | 0         | 456  | 459  | 99 +  | 193  | 651  | 654    | 1112   |
| UN24933 | Rsa1.0.08550.1 | 962  | 7211   | 0         | 591  | 603  | 98 -  | 1    | 603  | 6016   | 6618   |
| UN24934 | Rsa1.0.00051.1 | 869  | 258225 | 0         | 827  | 875  | 94 +  | 7    | 869  | 106503 | 107370 |
| UN24935 | Rsa1.0.02805.1 | 1307 | 27698  | 0         | 397  | 398  | 99 -  | 1    | 398  | 19031  | 19428  |
| UN24936 | Rsa1.0.13866.1 | 1003 | 4183   | 1.00E-138 | 284  | 297  | 95 -  | 690  | 977  | 467    | 763    |
| UN24937 | Rsa1.0.00653.1 | 1320 | 70029  | 0         | 420  | 425  | 98 -  | 1    | 422  | 18742  | 19166  |
| UN24938 | Rsa1.0.06876.1 | 979  | 10223  | 0         | 508  | 508  | 100 - | 4    | 511  | 4106   | 4613   |
| UN24939 | Rsa1.0.14058.1 | 429  | 3860   | 1.00E-140 | 256  | 257  | 99 +  | 173  | 429  | 1      | 257    |
| UN24940 | Rsa1.0.09157.1 | 564  | 6602   | 0         | 557  | 562  | 99 +  | 3    | 564  | 3141   | 3699   |
| UN24941 | Rsa1.0.06671.1 | 1200 | 10563  | 0         | 484  | 487  | 99 +  | 714  | 1200 | 553    | 1039   |
| UN24942 | Rsa1.0.00381.1 | 1370 | 89718  | 0         | 636  | 636  | 100 + | 735  | 1370 | 1      | 636    |
| UN24943 | Rsa1.0.00562.1 | 822  | 75565  | 0         | 529  | 530  | 99 +  | 1    | 530  | 658    | 1187   |
| UN24944 | Rsa1.0.02431.1 | 1581 | 31504  | 0         | 439  | 440  | 99 -  | 3    | 442  | 2929   | 3368   |
| UN24945 | Rsa1.0.00785.1 | 977  | 64356  | 0         | 903  | 926  | 97 -  | 3    | 928  | 12375  | 13300  |
| UN24946 | Rsa1.0.00460.1 | 577  | 206387 | 0         | 510  | 543  | 93 +  | 7    | 547  | 189489 | 190027 |
| UN24947 | Rsa1.0.00083.1 | 976  | 442773 | 1.00E-177 | 553  | 636  | 86 -  | 142  | 768  | 319657 | 320280 |
| UN24948 | Rsa1.0.02473.1 | 1012 | 31083  | 1.00E-149 | 295  | 304  | 97 +  | 709  | 1012 | 14966  | 15269  |
| UN24949 | Rsa1.0.00077.1 | 980  | 145005 | 0         | 427  | 439  | 97 -  | 546  | 980  | 44541  | 44978  |
| UN24950 | Rsa1.0.00251.1 | 803  | 303968 | 0         | 787  | 799  | 98 +  | 3    | 801  | 299102 | 299897 |
| UN24951 | Rsa1.0.00210.1 | 1214 | 108424 | 1.00E-127 | 244  | 248  | 98 +  | 1    | 248  | 46176  | 46423  |
| UN24952 | Rsa1.0.00898.1 | 809  | 202772 | 1.00E-131 | 237  | 237  | 100 + | 573  | 809  | 186227 | 186463 |
| UN24953 | Rsa1.0.01899.1 | 974  | 37474  | 0         | 534  | 535  | 99 +  | 440  | 974  | 14937  | 15471  |
| UN24954 | Rsa1.0.03427.1 | 1423 | 22992  | 1.00E-129 | 326  | 349  | 93 -  | 8    | 353  | 11180  | 11518  |
| UN24955 | Rsa1.0.04463.1 | 1551 | 17247  | 0         | 469  | 491  | 95 -  | 2    | 490  | 15847  | 16329  |
| UN24956 | Rsa1.0.01064.1 | 1340 | 55295  | 0         | 1211 | 1219 | 99 +  | 122  | 1340 | 49185  | 50403  |
| UN24957 | Rsa1.0.03261.1 | 1523 | 24281  | 3.00E-21  | 109  | 126  | 86 -  | 1331 | 1455 | 20831  | 20956  |
| UN24958 | Rsa1.0.03240.1 | 793  | 24429  | 0         | 480  | 492  | 97 +  | 305  | 793  | 7701   | 8192   |

|         |                |   |      |        |           |      |      |       |   |     |      |        |        |
|---------|----------------|---|------|--------|-----------|------|------|-------|---|-----|------|--------|--------|
| UN24959 | Rsa1.0_08325.1 |   | 690  | 7536   | 0         | 541  | 542  | 99 +  |   | 149 | 690  | 4688   | 5229   |
| UN24960 | #              | # | #    | #      | #         | #    | #    | #     | # | #   | #    | #      | #      |
| UN24961 | Rsa1.0_00464.1 |   | 738  | 82253  | 0         | 486  | 494  | 98 -  |   | 3   | 496  | 69041  | 69534  |
| UN24962 | Rsa1.0_00102.1 |   | 863  | 135497 | 0         | 592  | 605  | 97 -  |   | 259 | 863  | 27293  | 27894  |
| UN24963 | Rsa1.0_15766.1 |   | 591  | 2435   | 1.00E-140 | 284  | 292  | 97 +  |   | 3   | 286  | 927    | 1218   |
| UN24964 | Rsa1.0_07827.1 |   | 797  | 8466   | 0         | 367  | 369  | 99 -  |   | 1   | 369  | 3606   | 3974   |
| UN24965 | Rsa1.0_06902.1 |   | 1110 | 10186  | 2.00E-92  | 188  | 192  | 97 -  |   | 469 | 658  | 243    | 434    |
| UN24966 | Rsa1.0_00692.1 |   | 1601 | 68151  | 0         | 1227 | 1335 | 91 -  |   | 2   | 1336 | 52276  | 53610  |
| UN24967 | Rsa1.0_04901.1 |   | 1016 | 15526  | 0         | 437  | 443  | 98 -  |   | 365 | 807  | 11239  | 11681  |
| UN24968 | Rsa1.0_00030.1 |   | 764  | 250988 | 0         | 637  | 643  | 99 -  |   | 3   | 645  | 54400  | 55041  |
| UN24969 | Rsa1.0_01246.1 |   | 1331 | 49968  | 0         | 1291 | 1335 | 96 -  |   | 1   | 1328 | 21498  | 22824  |
| UN24970 | Rsa1.0_02772.1 |   | 1918 | 28047  | 0         | 1293 | 1297 | 99 +  |   | 622 | 1918 | 15900  | 17196  |
| UN24971 | Rsa1.0_03150.1 |   | 960  | 24980  | 1.00E-157 | 359  | 382  | 93 +  |   | 180 | 559  | 6649   | 7025   |
| UN24972 | Rsa1.0_00190.1 |   | 1170 | 318240 | 0         | 1134 | 1148 | 98 +  |   | 25  | 1170 | 294376 | 295521 |
| UN24973 | Rsa1.0_51875.1 |   | 948  | 438    | 0         | 418  | 420  | 99 +  |   | 529 | 948  | 1      | 420    |
| UN24974 | Rsa1.0_00264.1 |   | 787  | 101674 | 0         | 779  | 782  | 99 +  |   | 9   | 787  | 97219  | 98000  |
| UN24975 | Rsa1.0_21613.1 |   | 1288 | 1187   | 1.00E-167 | 317  | 322  | 98 +  |   | 968 | 1288 | 714    | 1035   |
| UN24976 | Rsa1.0_08922.1 |   | 1530 | 6788   | 0         | 738  | 749  | 98 +  |   | 525 | 1273 | 1849   | 2597   |
| UN24977 | Rsa1.0_01308.1 |   | 1102 | 48596  | 0         | 1094 | 1101 | 99 -  |   | 2   | 1102 | 26953  | 28051  |
| UN24978 | Rsa1.0_15795.1 |   | 1226 | 2418   | 1.00E-124 | 246  | 251  | 98 +  |   | 185 | 435  | 211    | 460    |
| UN24979 | Rsa1.0_00964.1 |   | 1717 | 316648 | 0         | 999  | 1034 | 96 -  |   | 684 | 1717 | 304617 | 305644 |
| UN24980 | Rsa1.0_01153.1 |   | 877  | 52264  | 0         | 681  | 701  | 97 -  |   | 3   | 696  | 36760  | 37460  |
| UN24981 | Rsa1.0_00014.1 |   | 912  | 348985 | 0         | 601  | 637  | 94 +  |   | 1   | 615  | 168271 | 168906 |
| UN24982 | Rsa1.0_02281.1 |   | 1228 | 292576 | 1.00E-120 | 220  | 220  | 100 + |   | 819 | 1038 | 13338  | 13557  |
| UN24983 | Rsa1.0_03244.1 |   | 782  | 24413  | 0         | 741  | 769  | 96 +  |   | 14  | 782  | 20251  | 21014  |
| UN24984 | Rsa1.0_11393.1 |   | 828  | 5521   | 1.00E-105 | 239  | 253  | 94 -  |   | 547 | 792  | 1122   | 1368   |
| UN24985 | Rsa1.0_00202.1 |   | 751  | 185895 | 0         | 730  | 761  | 95 +  |   | 1   | 751  | 147056 | 147813 |
| UN24986 | Rsa1.0_00131.1 |   | 689  | 432233 | 1.00E-131 | 237  | 237  | 100 - |   | 453 | 689  | 395516 | 395752 |
| UN24987 | Rsa1.0_01659.1 |   | 1315 | 164577 | 1.00E-151 | 348  | 373  | 93 -  |   | 949 | 1313 | 141669 | 142041 |
| UN24988 | Rsa1.0_00221.1 |   | 1026 | 106972 | 0         | 412  | 430  | 95 +  |   | 1   | 415  | 103785 | 104214 |
| UN24989 | Rsa1.0_00001.1 |   | 1017 | 363028 | 0         | 539  | 559  | 96 +  |   | 168 | 726  | 240541 | 241099 |
| UN24990 | Rsa1.0_00208.1 |   | 1088 | 108565 | 0         | 492  | 509  | 96 -  |   | 2   | 510  | 21769  | 22276  |
| UN24991 | Rsa1.0_02229.1 |   | 997  | 33672  | 0         | 382  | 385  | 99 +  |   | 611 | 995  | 14453  | 14837  |
| UN24992 | Rsa1.0_00059.1 |   | 811  | 159650 | 0         | 660  | 677  | 97 +  |   | 1   | 677  | 99687  | 100363 |
| UN24993 | Rsa1.0_00123.1 |   | 917  | 325650 | 0         | 618  | 619  | 99 +  |   | 299 | 917  | 262756 | 263374 |
| UN24994 | Rsa1.0_02351.1 |   | 1433 | 32305  | 0         | 1413 | 1431 | 98 +  |   | 3   | 1433 | 4951   | 6379   |
| UN24995 | Rsa1.0_00136.1 |   | 692  | 122464 | 1.00E-156 | 344  | 363  | 94 +  |   | 1   | 363  | 64050  | 64409  |
| UN24996 | Rsa1.0_00005.1 |   | 1569 | 353093 | 1.00E-135 | 336  | 364  | 92 -  |   | 5   | 368  | 121587 | 121947 |
| UN24997 | Rsa1.0_00168.1 |   | 1223 | 115870 | 0         | 1158 | 1194 | 96 -  |   | 28  | 1221 | 16028  | 17220  |

|         |                |      |        |           |      |      |       |     |      |        |        |
|---------|----------------|------|--------|-----------|------|------|-------|-----|------|--------|--------|
| UN24998 | Rsa1.0.00182.1 | 1383 | 142305 | 2.33E-156 | 312  | 327  | 95 -  | 536 | 862  | 98126  | 98451  |
| UN24999 | Rsa1.0.05549.1 | 1503 | 13366  | 0         | 704  | 713  | 98 -  | 791 | 1503 | 12654  | 13366  |
| UN25000 | Rsa1.0.00317.1 | 907  | 218290 | 2.00E-60  | 119  | 119  | 100 - | 1   | 119  | 204688 | 204806 |
| UN25001 | Rsa1.0.03682.1 | 1286 | 21396  | 1.00E-180 | 365  | 380  | 96 -  | 585 | 964  | 12324  | 12703  |
| UN25002 | Rsa1.0.00100.1 | 1089 | 249232 | 1.00E-118 | 266  | 280  | 95 +  | 685 | 963  | 117508 | 117786 |
| UN25003 | Rsa1.0.03921.1 | 1253 | 20080  | 0         | 1214 | 1255 | 96 -  | 1   | 1252 | 3240   | 4490   |
| UN25004 | Rsa1.0.00457.1 | 1156 | 337301 | 1.00E-173 | 371  | 388  | 95 -  | 772 | 1154 | 289907 | 290291 |
| UN25005 | Rsa1.0.03107.1 | 986  | 25349  | 0         | 346  | 348  | 99 -  | 640 | 986  | 14750  | 15097  |
| UN25006 | Rsa1.0.00635.1 | 1047 | 175826 | 0         | 683  | 707  | 96 +  | 340 | 1046 | 106336 | 107041 |
| UN25007 | Rsa1.0.00384.1 | 1012 | 89278  | 0         | 389  | 392  | 99 +  | 622 | 1012 | 73990  | 74381  |
| UN25008 | Rsa1.0.00072.1 | 1300 | 148743 | 0         | 679  | 681  | 99 -  | 8   | 688  | 145354 | 146034 |
| UN25009 | Rsa1.0.00478.1 | 1224 | 81419  | 0         | 1219 | 1225 | 99 -  | 1   | 1224 | 33903  | 35127  |
| UN25010 | Rsa1.0.01683.1 | 1373 | 41059  | 0         | 349  | 356  | 98 -  | 533 | 888  | 23260  | 23612  |
| UN25011 | Rsa1.0.01029.1 | 716  | 256254 | 1.00E-131 | 310  | 328  | 94 +  | 397 | 714  | 144670 | 144996 |
| UN25012 | Rsa1.0.01727.1 | 1556 | 40243  | 0         | 462  | 477  | 96 -  | 2   | 476  | 27904  | 28379  |
| UN25013 | Rsa1.0.00803.1 | 1310 | 144228 | 0         | 382  | 389  | 98 -  | 623 | 1011 | 52682  | 53070  |
| UN25014 | Rsa1.0.02387.1 | 900  | 31890  | 0         | 511  | 524  | 97 +  | 382 | 896  | 17300  | 17823  |
| UN25015 | Rsa1.0.00782.1 | 1335 | 64468  | 0         | 461  | 482  | 95 -  | 512 | 993  | 30051  | 30532  |
| UN25016 | Rsa1.0.05002.1 | 966  | 15173  | 2.33E-156 | 302  | 311  | 97 +  | 1   | 309  | 7823   | 8132   |
| UN25017 | Rsa1.0.07550.1 | 1479 | 9147   | 0         | 1476 | 1476 | 100 - | 1   | 1476 | 3119   | 4594   |
| UN25018 | Rsa1.0.01282.1 | 1973 | 49304  | 1.00E-162 | 297  | 299  | 99 -  | 103 | 401  | 8878   | 9176   |
| UN25019 | Rsa1.0.01695.1 | 764  | 40848  | 1.00E-177 | 367  | 382  | 96 +  | 370 | 751  | 11765  | 12144  |
| UN25020 | Rsa1.0.03546.1 | 1689 | 22172  | 1.00E-137 | 385  | 431  | 89 -  | 1   | 416  | 14336  | 14755  |
| UN25021 | Rsa1.0.01305.1 | 983  | 48730  | 0         | 460  | 480  | 95 +  | 41  | 517  | 15324  | 15803  |
| UN25022 | Rsa1.0.40140.1 | 724  | 559    | 1.00E-111 | 207  | 208  | 99 +  | 2   | 209  | 144    | 351    |
| UN25023 | Rsa1.0.01233.1 | 1448 | 50184  | 0         | 1013 | 1025 | 98 +  | 1   | 1025 | 30926  | 31950  |
| UN25024 | Rsa1.0.01035.1 | 903  | 56019  | 1.00E-175 | 318  | 320  | 99 -  | 245 | 564  | 48721  | 49040  |
| UN25025 | Rsa1.0.07488.1 | 1506 | 9265   | 0         | 431  | 436  | 98 +  | 3   | 436  | 4541   | 4976   |
| UN25026 | Rsa1.0.00553.1 | 1565 | 75983  | 0         | 759  | 768  | 98 +  | 1   | 766  | 70412  | 71176  |
| UN25027 | Rsa1.0.00346.1 | 865  | 93130  | 0         | 821  | 828  | 99 +  | 42  | 863  | 52081  | 52908  |
| UN25028 | Rsa1.0.00593.1 | 657  | 143463 | 0         | 651  | 670  | 97 +  | 1   | 657  | 140792 | 141461 |
| UN25029 | Rsa1.0.16402.1 | 1194 | 2166   | 1.00E-154 | 279  | 280  | 99 +  | 915 | 1194 | 202    | 481    |
| UN25030 | Rsa1.0.05501.1 | 1713 | 13513  | 0         | 592  | 598  | 98 -  | 84  | 681  | 11140  | 11737  |
| UN25031 | Rsa1.0.01008.1 | 832  | 56924  | 0         | 362  | 371  | 97 -  | 3   | 368  | 31029  | 31399  |
| UN25032 | Rsa1.0.05031.1 | 887  | 15083  | 0         | 802  | 812  | 98 -  | 76  | 887  | 8017   | 8827   |
| UN25033 | Rsa1.0.02871.1 | 583  | 27085  | 0         | 351  | 361  | 97 -  | 221 | 581  | 565    | 925    |
| UN25034 | Rsa1.0.00011.1 | 1290 | 225044 | 0         | 477  | 479  | 99 +  | 812 | 1290 | 163185 | 163663 |
| UN25035 | Rsa1.0.00283.1 | 1168 | 183797 | 0         | 777  | 800  | 97 +  | 1   | 798  | 37053  | 37841  |
| UN25036 | Rsa1.0.09671.1 | 1430 | 6221   | 1.00E-165 | 333  | 344  | 96 -  | 997 | 1337 | 1      | 342    |

|         |                |      |        |           |      |      |       |     |      |        |        |
|---------|----------------|------|--------|-----------|------|------|-------|-----|------|--------|--------|
| UN25037 | Rsa1.0.01105.1 | 863  | 53958  | 0         | 458  | 463  | 98 +  | 403 | 863  | 12551  | 13011  |
| UN25038 | Rsa1.0.01920.1 | 1260 | 158533 | 0         | 1151 | 1223 | 94 -  | 50  | 1259 | 22450  | 23663  |
| UN25039 | Rsa1.0.00920.1 | 754  | 601703 | 0         | 375  | 390  | 96 +  | 366 | 752  | 5595   | 5984   |
| UN25040 | Rsa1.0.00569.1 | 857  | 75060  | 0         | 469  | 471  | 99 +  | 388 | 857  | 65107  | 65577  |
| UN25041 | Rsa1.0.02452.1 | 745  | 31280  | 0         | 383  | 389  | 98 +  | 1   | 389  | 11094  | 11482  |
| UN25042 | Rsa1.0.06376.1 | 806  | 11135  | 1.00E-174 | 316  | 317  | 99 -  | 491 | 806  | 10819  | 11135  |
| UN25043 | Rsa1.0.00978.1 | 475  | 57739  | 2.00E-38  | 118  | 129  | 91 -  | 3   | 130  | 4434   | 4556   |
| UN25044 | Rsa1.0.01292.1 | 898  | 175783 | 0         | 362  | 362  | 100 - | 537 | 898  | 147712 | 148073 |
| UN25045 | Rsa1.0.00157.1 | 1195 | 245832 | 1.00E-173 | 308  | 308  | 100 + | 888 | 1195 | 184047 | 184354 |
| UN25046 | Rsa1.0.03605.1 | 681  | 21827  | 1.00E-168 | 319  | 324  | 98 -  | 358 | 680  | 14442  | 14765  |
| UN25047 | Rsa1.0.01009.1 | 1105 | 56922  | 0         | 415  | 439  | 94 -  | 556 | 992  | 2790   | 3228   |
| UN25048 | Rsa1.0.15782.1 | 1061 | 2423   | 0         | 1061 | 1061 | 100 - | 1   | 1061 | 555    | 1615   |
| UN25049 | Rsa1.0.02681.1 | 804  | 28711  | 8.00E-88  | 168  | 169  | 99 -  | 2   | 170  | 12659  | 12827  |
| UN25050 | Rsa1.0.35376.1 | 1161 | 640    | 1.00E-175 | 321  | 324  | 99 +  | 416 | 739  | 164    | 487    |
| UN25051 | Rsa1.0.00068.1 | 876  | 151813 | 0         | 363  | 371  | 97 -  | 509 | 875  | 121726 | 122096 |
| UN25052 | Rsa1.0.02392.1 | 1127 | 152517 | 0         | 334  | 335  | 99 +  | 11  | 344  | 25809  | 26143  |
| UN25053 | Rsa1.0.02057.1 | 1195 | 35540  | 1.00E-121 | 225  | 226  | 99 -  | 969 | 1194 | 18539  | 18764  |
| UN25054 | Rsa1.0.00029.1 | 886  | 272992 | 8.00E-88  | 174  | 177  | 98 -  | 2   | 178  | 25639  | 25815  |
| UN25055 | Rsa1.0.00920.1 | 820  | 601703 | 0         | 429  | 431  | 99 -  | 390 | 820  | 4844   | 5274   |
| UN25056 | Rsa1.0.05702.1 | 768  | 12884  | 1.00E-129 | 279  | 291  | 95 +  | 469 | 757  | 712    | 1002   |
| UN25057 | Rsa1.0.00190.1 | 612  | 318240 | 1.00E-115 | 241  | 249  | 96 -  | 18  | 265  | 103229 | 103474 |
| UN25058 | Rsa1.0.00310.1 | 799  | 96852  | 0         | 619  | 652  | 94 -  | 142 | 790  | 3224   | 3863   |
| UN25059 | Rsa1.0.12425.1 | 1026 | 5229   | 1.00E-113 | 207  | 207  | 100 - | 3   | 209  | 190    | 396    |
| UN25060 | Rsa1.0.02633.1 | 943  | 29315  | 0         | 413  | 431  | 95 -  | 513 | 939  | 347    | 768    |
| UN25061 | Rsa1.0.01754.1 | 707  | 39792  | 0         | 629  | 665  | 94 +  | 7   | 663  | 13165  | 13829  |
| UN25062 | Rsa1.0.02884.1 | 637  | 27034  | 0         | 421  | 435  | 96 +  | 154 | 587  | 6764   | 7198   |
| UN25063 | Rsa1.0.00874.1 | 1523 | 179723 | 0         | 1145 | 1151 | 99 +  | 374 | 1523 | 4488   | 5636   |
| UN25064 | Rsa1.0.04272.1 | 1282 | 18144  | 1.00E-149 | 292  | 300  | 97 -  | 2   | 301  | 14816  | 15115  |
| UN25065 | Rsa1.0.01530.1 | 1260 | 43820  | 0         | 677  | 688  | 98 +  | 573 | 1260 | 32926  | 33613  |
| UN25066 | Rsa1.0.00827.1 | 1080 | 62790  | 0         | 1035 | 1071 | 96 +  | 8   | 1078 | 30488  | 31542  |
| UN25067 | Rsa1.0.00480.1 | 916  | 81325  | 0         | 903  | 952  | 94 -  | 1   | 916  | 7605   | 8555   |
| UN25068 | Rsa1.0.02931.1 | 745  | 26654  | 1.00E-110 | 222  | 228  | 97 +  | 2   | 229  | 1044   | 1268   |
| UN25069 | Rsa1.0.00541.1 | 909  | 76863  | 1.00E-164 | 320  | 329  | 97 +  | 390 | 718  | 34575  | 34903  |
| UN25070 | Rsa1.0.01154.1 | 998  | 52249  | 0         | 997  | 998  | 99 -  | 1   | 998  | 34345  | 35342  |
| UN25071 | Rsa1.0.00896.1 | 909  | 60509  | 0         | 713  | 713  | 100 + | 197 | 909  | 29277  | 29989  |
| UN25072 | Rsa1.0.00414.1 | 1023 | 202190 | 0         | 896  | 908  | 98 -  | 95  | 1002 | 13262  | 14166  |
| UN25073 | Rsa1.0.05631.1 | 683  | 13127  | 4.00E-95  | 224  | 237  | 94 -  | 39  | 273  | 4477   | 4713   |
| UN25074 | Rsa1.0.02008.1 | 933  | 36109  | 1.00E-113 | 250  | 261  | 95 -  | 672 | 931  | 16941  | 17196  |
| UN25075 | Rsa1.0.00019.1 | 1077 | 301669 | 1.00E-124 | 264  | 276  | 95 -  | 423 | 698  | 238714 | 238986 |

|         |                |      |        |           |      |      |       |     |      |        |        |
|---------|----------------|------|--------|-----------|------|------|-------|-----|------|--------|--------|
| UN25076 | Rsa1.0.05708.1 | 920  | 12871  | 0         | 629  | 629  | 100 + | 290 | 918  | 11144  | 11772  |
| UN25077 | Rsa1.0.01236.1 | 1270 | 50156  | 0         | 747  | 828  | 90 +  | 388 | 1202 | 1967   | 2765   |
| UN25078 | Rsa1.0.02020.1 | 920  | 173211 | 1.00E-144 | 352  | 382  | 92 -  | 2   | 383  | 172619 | 172987 |
| UN25079 | Rsa1.0.00077.1 | 976  | 145005 | 0         | 897  | 963  | 93 +  | 3   | 955  | 33231  | 34176  |
| UN25080 | Rsa1.0.02584.1 | 826  | 29877  | 0         | 385  | 400  | 96 -  | 1   | 400  | 808    | 1201   |
| UN25081 | Rsa1.0.06728.1 | 948  | 10455  | 1.00E-111 | 297  | 329  | 90 -  | 632 | 948  | 9056   | 9382   |
| UN25082 | Rsa1.0.01005.1 | 1018 | 56967  | 0         | 376  | 376  | 100 - | 642 | 1017 | 16018  | 16393  |
| UN25083 | Rsa1.0.01116.1 | 1406 | 142088 | 0         | 421  | 451  | 93 +  | 957 | 1406 | 128912 | 129357 |
| UN25084 | Rsa1.0.00002.1 | 1373 | 601661 | 0         | 1305 | 1366 | 95 +  | 8   | 1373 | 453717 | 455072 |
| UN25085 | Rsa1.0.00006.1 | 743  | 396176 | 0         | 707  | 743  | 95 +  | 3   | 741  | 157555 | 158292 |
| UN25086 | Rsa1.0.09238.1 | 633  | 6539   | 0         | 625  | 633  | 98 -  | 3   | 633  | 4486   | 5116   |
| UN25087 | Rsa1.0.00025.1 | 781  | 277312 | 0         | 477  | 477  | 100 - | 1   | 477  | 97736  | 98212  |
| UN25088 | Rsa1.0.00196.1 | 1087 | 109960 | 0         | 1087 | 1087 | 100 + | 1   | 1087 | 3908   | 4994   |
| UN25089 | Rsa1.0.05189.1 | 1122 | 14545  | 1.00E-162 | 352  | 374  | 94 +  | 24  | 397  | 421    | 785    |
| UN25090 | Rsa1.0.00194.1 | 595  | 110851 | 0         | 582  | 591  | 98 +  | 3   | 590  | 75125  | 75715  |
| UN25091 | Rsa1.0.00245.1 | 803  | 103569 | 0         | 799  | 803  | 99 +  | 1   | 803  | 19299  | 20099  |
| UN25092 | Rsa1.0.02888.1 | 960  | 27020  | 0         | 566  | 579  | 97 -  | 315 | 893  | 10898  | 11476  |
| UN25093 | Rsa1.0.00462.1 | 525  | 82288  | 1.00E-119 | 224  | 226  | 99 +  | 3   | 228  | 36047  | 36272  |
| UN25094 | Rsa1.0.02855.1 | 985  | 27271  | 0         | 894  | 897  | 99 +  | 89  | 985  | 10359  | 11255  |
| UN25095 | Rsa1.0.04275.1 | 721  | 18136  | 1.00E-117 | 261  | 279  | 93 +  | 2   | 264  | 9496   | 9773   |
| UN25096 | Rsa1.0.00776.1 | 1004 | 64637  | 1.00E-132 | 243  | 244  | 99 -  | 445 | 688  | 2561   | 2804   |
| UN25097 | Rsa1.0.00397.1 | 899  | 88189  | 1.00E-108 | 211  | 215  | 98 -  | 685 | 899  | 19985  | 20199  |
| UN25098 | Rsa1.0.08498.1 | 697  | 7270   | 0         | 492  | 492  | 100 - | 198 | 689  | 5525   | 6016   |
| UN25099 | Rsa1.0.07616.1 | 1254 | 9016   | 0         | 1248 | 1252 | 99 +  | 1   | 1252 | 5248   | 6499   |
| UN25100 | Rsa1.0.02270.1 | 653  | 249821 | 0         | 375  | 384  | 97 +  | 1   | 384  | 140999 | 141382 |
| UN25101 | Rsa1.0.00422.1 | 1493 | 86144  | 0         | 610  | 610  | 100 - | 345 | 954  | 83575  | 84184  |
| UN25102 | Rsa1.0.00451.1 | 1041 | 322533 | 1.00E-142 | 320  | 337  | 94 -  | 1   | 334  | 301659 | 301986 |
| UN25103 | Rsa1.0.00011.1 | 727  | 225044 | 0         | 504  | 538  | 93 -  | 192 | 726  | 213315 | 213851 |
| UN25104 | Rsa1.0.00453.1 | 960  | 83031  | 0         | 414  | 437  | 94 -  | 1   | 430  | 19304  | 19735  |
| UN25105 | Rsa1.0.17881.1 | 538  | 1720   | 0         | 531  | 539  | 98 +  | 3   | 538  | 1006   | 1541   |
| UN25106 | Rsa1.0.01451.1 | 921  | 45459  | 0         | 522  | 523  | 99 +  | 397 | 919  | 18789  | 19311  |
| UN25107 | Rsa1.0.00062.1 | 912  | 299291 | 0         | 896  | 910  | 98 -  | 3   | 912  | 73362  | 74271  |
| UN25108 | Rsa1.0.00017.1 | 969  | 752458 | 0         | 898  | 898  | 100 - | 1   | 898  | 187371 | 188268 |
| UN25109 | Rsa1.0.00270.1 | 902  | 101236 | 1.00E-157 | 281  | 281  | 100 + | 1   | 281  | 684    | 964    |
| UN25110 | Rsa1.0.01803.1 | 989  | 173846 | 0         | 438  | 465  | 94 +  | 530 | 989  | 137460 | 137917 |
| UN25111 | Rsa1.0.02026.1 | 1157 | 35896  | 0         | 692  | 705  | 98 +  | 106 | 809  | 24305  | 25009  |
| UN25112 | Rsa1.0.02544.1 | 1267 | 30290  | 1.00E-180 | 374  | 387  | 96 +  | 6   | 391  | 28775  | 29157  |
| UN25113 | Rsa1.0.03843.1 | 1062 | 20496  | 1.00E-136 | 387  | 431  | 89 -  | 624 | 1045 | 6094   | 6521   |
| UN25114 | Rsa1.0.09527.1 | 1136 | 6311   | 1.00E-172 | 309  | 310  | 99 +  | 296 | 605  | 5870   | 6179   |

|         |                |      |        |           |      |      |       |      |      |        |        |
|---------|----------------|------|--------|-----------|------|------|-------|------|------|--------|--------|
| UN25115 | Rsa1.0.03344.1 | 991  | 23593  | 0         | 440  | 460  | 95 -  | 1    | 460  | 12154  | 12611  |
| UN25116 | Rsa1.0.01012.1 | 1034 | 56836  | 0         | 639  | 642  | 99 -  | 393  | 1034 | 50951  | 51592  |
| UN25117 | Rsa1.0.02658.1 | 1243 | 28978  | 0         | 415  | 431  | 96 +  | 3    | 430  | 17653  | 18083  |
| UN25118 | Rsa1.0.00001.1 | 652  | 363028 | 1.00E-89  | 221  | 240  | 92 -  | 3    | 242  | 245412 | 245642 |
| UN25119 | Rsa1.0.01261.1 | 844  | 49744  | 0         | 744  | 787  | 94 +  | 32   | 807  | 30847  | 31629  |
| UN25120 | Rsa1.0.01924.1 | 1141 | 37226  | 0         | 535  | 574  | 93 +  | 504  | 1060 | 23204  | 23771  |
| UN25121 | Rsa1.0.00660.1 | 623  | 69688  | 1.00E-79  | 163  | 167  | 97 +  | 210  | 376  | 17354  | 17520  |
| UN25122 | Rsa1.0.02606.1 | 1442 | 29635  | 1.00E-165 | 369  | 389  | 94 +  | 1055 | 1442 | 7554   | 7937   |
| UN25123 | Rsa1.0.00826.1 | 817  | 166736 | 0         | 368  | 379  | 97 +  | 439  | 817  | 130040 | 130418 |
| UN25124 | Rsa1.0.07331.1 | 884  | 9548   | 0         | 648  | 690  | 93 -  | 3    | 690  | 3210   | 3883   |
| UN25125 | Rsa1.0.03738.1 | 764  | 21071  | 0         | 720  | 759  | 94 +  | 1    | 759  | 19581  | 20321  |
| UN25126 | Rsa1.0.00262.1 | 838  | 101906 | 1.00E-149 | 345  | 369  | 93 +  | 473  | 836  | 33151  | 33519  |
| UN25127 | Rsa1.0.08583.1 | 1360 | 7161   | 1.00E-154 | 291  | 296  | 98 +  | 423  | 718  | 1426   | 1721   |
| UN25128 | Rsa1.0.01299.1 | 1158 | 162028 | 1.00E-148 | 275  | 277  | 99 +  | 882  | 1158 | 159762 | 160036 |
| UN25129 | Rsa1.0.02672.1 | 740  | 28884  | 0         | 537  | 549  | 97 -  | 3    | 547  | 27567  | 28115  |
| UN25130 | Rsa1.0.01452.1 | 834  | 45459  | 0         | 832  | 834  | 99 -  | 1    | 834  | 28728  | 29559  |
| UN25131 | Rsa1.0.03605.1 | 744  | 21827  | 1.00E-169 | 343  | 354  | 96 +  | 354  | 707  | 20342  | 20693  |
| UN25132 | Rsa1.0.02158.1 | 940  | 154841 | 0         | 938  | 938  | 100 + | 1    | 938  | 148340 | 149277 |
| UN25133 | Rsa1.0.00001.1 | 871  | 363028 | 1.00E-176 | 362  | 377  | 96 -  | 502  | 871  | 314883 | 315259 |
| UN25134 | Rsa1.0.01921.1 | 1533 | 168088 | 1.00E-142 | 296  | 307  | 96 -  | 1    | 304  | 135302 | 135608 |
| UN25135 | Rsa1.0.06677.1 | 667  | 10560  | 1.00E-107 | 318  | 361  | 88 -  | 324  | 665  | 31     | 382    |
| UN25136 | Rsa1.0.00071.1 | 759  | 345714 | 0         | 426  | 428  | 99 +  | 1    | 428  | 54406  | 54833  |
| UN25137 | Rsa1.0.00065.1 | 928  | 454616 | 1.00E-169 | 342  | 353  | 96 -  | 1    | 351  | 191624 | 191976 |
| UN25138 | Rsa1.0.01311.1 | 955  | 48456  | 0         | 909  | 944  | 96 +  | 22   | 955  | 27588  | 28528  |
| UN25139 | Rsa1.0.00211.1 | 1092 | 228189 | 0         | 553  | 617  | 89 -  | 498  | 1090 | 179317 | 179912 |
| UN25140 | Rsa1.0.03149.1 | 660  | 24983  | 1.00E-144 | 281  | 289  | 97 +  | 377  | 658  | 19482  | 19770  |
| UN25141 | Rsa1.0.05815.1 | 1149 | 12563  | 1.00E-138 | 293  | 305  | 96 +  | 846  | 1149 | 9748   | 10050  |
| UN25142 | Rsa1.0.00026.1 | 575  | 327835 | 1.00E-123 | 301  | 321  | 93 +  | 249  | 568  | 174424 | 174737 |
| UN25143 | Rsa1.0.00293.1 | 2580 | 339294 | 0         | 1564 | 1571 | 99 -  | 4    | 1568 | 306710 | 308279 |
| UN25144 | Rsa1.0.00522.1 | 900  | 78103  | 1.00E-114 | 234  | 242  | 96 -  | 630  | 871  | 57158  | 57399  |
| UN25145 | Rsa1.0.01866.1 | 635  | 37961  | 0         | 400  | 415  | 96 -  | 3    | 411  | 36635  | 37049  |
| UN25146 | Rsa1.0.00030.1 | 497  | 250988 | 1.00E-104 | 274  | 298  | 91 -  | 153  | 449  | 149351 | 149644 |
| UN25147 | Rsa1.0.00150.1 | 838  | 154416 | 0         | 410  | 421  | 97 -  | 1    | 421  | 60307  | 60727  |
| UN25148 | Rsa1.0.00077.1 | 1198 | 145005 | 0         | 525  | 534  | 98 +  | 109  | 642  | 89656  | 90189  |
| UN25149 | Rsa1.0.04971.1 | 1248 | 15273  | 1.00E-120 | 225  | 227  | 99 -  | 3    | 229  | 8547   | 8773   |
| UN25150 | Rsa1.0.00616.1 | 655  | 195713 | 0         | 434  | 461  | 94 +  | 193  | 644  | 181777 | 182234 |
| UN25151 | Rsa1.0.23959.1 | 1808 | 1014   | 0         | 507  | 521  | 97 +  | 843  | 1361 | 152    | 666    |
| UN25152 | Rsa1.0.00203.1 | 756  | 109129 | 2.00E-88  | 210  | 224  | 93 -  | 526  | 741  | 27505  | 27728  |
| UN25153 | Rsa1.0.01507.1 | 741  | 44361  | 4.00E-74  | 158  | 162  | 97 +  | 199  | 359  | 24853  | 25014  |

|         |                |      |        |           |      |      |       |      |      |        |        |
|---------|----------------|------|--------|-----------|------|------|-------|------|------|--------|--------|
| UN25154 | Rsa1.0_00645.1 | 424  | 189716 | 4.00E-85  | 181  | 188  | 96 -  | 39   | 226  | 35226  | 35413  |
| UN25155 | Rsa1.0_02396.1 | 873  | 31783  | 0         | 390  | 393  | 99 -  | 479  | 871  | 9555   | 9947   |
| UN25156 | Rsa1.0_02020.1 | 913  | 173211 | 1.00E-160 | 353  | 374  | 94 +  | 535  | 908  | 172619 | 172991 |
| UN25157 | Rsa1.0_01666.1 | 1218 | 173972 | 0         | 458  | 458  | 100 + | 1    | 458  | 23718  | 24175  |
| UN25158 | Rsa1.0_01651.1 | 929  | 41586  | 0         | 870  | 925  | 94 -  | 10   | 929  | 31343  | 32257  |
| UN25159 | Rsa1.0_00017.1 | 1024 | 752458 | 0         | 508  | 535  | 94 +  | 90   | 620  | 503623 | 504157 |
| UN25160 | Rsa1.0_00645.1 | 811  | 189716 | 0         | 793  | 811  | 97 -  | 1    | 811  | 29860  | 30670  |
| UN25161 | Rsa1.0_00017.1 | 945  | 752458 | 0         | 445  | 461  | 96 +  | 1    | 454  | 412583 | 413043 |
| UN25162 | Rsa1.0_00978.1 | 728  | 57739  | 1.00E-172 | 376  | 400  | 94 -  | 2    | 393  | 14018  | 14417  |
| UN25163 | Rsa1.0_00610.1 | 840  | 72740  | 0         | 350  | 351  | 99 +  | 490  | 840  | 36010  | 36360  |
| UN25164 | Rsa1.0_02316.1 | 777  | 32608  | 0         | 545  | 564  | 96 -  | 3    | 565  | 6257   | 6817   |
| UN25165 | Rsa1.0_00978.1 | 794  | 57739  | 0         | 448  | 476  | 94 -  | 1    | 469  | 14018  | 14493  |
| UN25166 | Rsa1.0_00773.1 | 998  | 64839  | 1.00E-119 | 302  | 327  | 92 -  | 654  | 973  | 10122  | 10440  |
| UN25167 | Rsa1.0_05208.1 | 654  | 14504  | 0         | 357  | 358  | 99 -  | 1    | 358  | 3908   | 4265   |
| UN25168 | Rsa1.0_04218.1 | 748  | 18423  | 1.00E-138 | 342  | 366  | 93 -  | 41   | 403  | 12805  | 13163  |
| UN25169 | Rsa1.0_00018.1 | 673  | 410899 | 0         | 574  | 575  | 99 -  | 1    | 575  | 140603 | 141176 |
| UN25170 | Rsa1.0_00557.1 | 857  | 75865  | 0         | 438  | 450  | 97 +  | 205  | 653  | 69508  | 69957  |
| UN25171 | Rsa1.0_02442.1 | 489  | 31355  | 1.00E-102 | 242  | 257  | 94 +  | 1    | 252  | 12550  | 12804  |
| UN25172 | Rsa1.0_00577.1 | 529  | 174827 | 0         | 503  | 539  | 93 -  | 1    | 522  | 111653 | 112189 |
| UN25173 | Rsa1.0_00002.1 | 837  | 601661 | 0         | 758  | 780  | 97 -  | 57   | 835  | 76769  | 77548  |
| UN25174 | Rsa1.0_00748.1 | 1340 | 65983  | 0         | 440  | 462  | 95 +  | 881  | 1340 | 59992  | 60447  |
| UN25175 | Rsa1.0_04630.1 | 768  | 16595  | 0         | 403  | 422  | 95 -  | 350  | 762  | 14479  | 14895  |
| UN25176 | Rsa1.0_00639.1 | 989  | 165873 | 0         | 872  | 897  | 97 +  | 23   | 918  | 128436 | 129331 |
| UN25177 | Rsa1.0_00248.1 | 1539 | 163568 | 0         | 360  | 361  | 99 -  | 1179 | 1539 | 99359  | 99719  |
| UN25178 | Rsa1.0_02467.1 | 755  | 31141  | 0         | 642  | 706  | 90 +  | 1    | 685  | 15463  | 16150  |
| UN25179 | Rsa1.0_00552.1 | 900  | 206757 | 1.00E-141 | 311  | 327  | 95 -  | 566  | 891  | 70049  | 70374  |
| UN25180 | Rsa1.0_02923.1 | 742  | 26736  | 1.00E-117 | 321  | 354  | 90 +  | 9    | 346  | 15750  | 16101  |
| UN25181 | Rsa1.0_00279.1 | 653  | 100039 | 1.00E-158 | 317  | 328  | 96 +  | 41   | 368  | 4350   | 4674   |
| UN25182 | Rsa1.0_00351.1 | 679  | 413096 | 0         | 385  | 400  | 96 -  | 276  | 673  | 244431 | 244827 |
| UN25183 | Rsa1.0_06535.1 | 1208 | 10827  | 0         | 1149 | 1218 | 94 +  | 3    | 1208 | 2590   | 3789   |
| UN25184 | Rsa1.0_02252.1 | 1096 | 33375  | 0         | 551  | 575  | 95 -  | 520  | 1094 | 27425  | 27999  |
| UN25185 | Rsa1.0_01630.1 | 869  | 41913  | 1.00E-99  | 233  | 246  | 94 +  | 3    | 242  | 959    | 1204   |
| UN25186 | Rsa1.0_00114.1 | 902  | 131330 | 0         | 428  | 455  | 94 -  | 6    | 456  | 117617 | 118070 |
| UN25187 | Rsa1.0_00217.1 | 1425 | 107079 | 0         | 545  | 545  | 100 - | 1    | 545  | 53336  | 53880  |
| UN25188 | Rsa1.0_01106.1 | 970  | 53916  | 0         | 576  | 585  | 98 -  | 12   | 595  | 37216  | 37800  |
| UN25189 | Rsa1.0_03718.1 | 763  | 21195  | 9.00E-69  | 172  | 185  | 92 -  | 497  | 681  | 1723   | 1907   |
| UN25190 | Rsa1.0_02254.1 | 683  | 33344  | 2.00E-69  | 179  | 193  | 92 +  | 383  | 575  | 4778   | 4968   |
| UN25191 | Rsa1.0_00029.1 | 1223 | 272992 | 0         | 1117 | 1162 | 96 -  | 2    | 1161 | 253417 | 254561 |
| UN25192 | Rsa1.0_00198.1 | 1777 | 222963 | 0         | 402  | 413  | 97 -  | 1    | 413  | 50595  | 51005  |



|         |                |      |        |           |      |      |       |     |      |        |        |
|---------|----------------|------|--------|-----------|------|------|-------|-----|------|--------|--------|
| UN25193 | Rsa1.0.01633.1 | 986  | 41868  | 0         | 401  | 416  | 96 -  | 2   | 415  | 3035   | 3449   |
| UN25194 | Rsa1.0.02449.1 | 1097 | 31292  | 7.00E-92  | 196  | 200  | 98 -  | 899 | 1096 | 13261  | 13459  |
| UN25195 | Rsa1.0.04224.1 | 952  | 18402  | 1.00E-154 | 337  | 353  | 95 -  | 1   | 351  | 710    | 1057   |
| UN25196 | Rsa1.0.00273.1 | 975  | 326186 | 0         | 456  | 482  | 94 +  | 123 | 603  | 26599  | 27078  |
| UN25197 | Rsa1.0.01039.1 | 1448 | 55946  | 0         | 394  | 404  | 97 -  | 3   | 405  | 1886   | 2289   |
| UN25198 | Rsa1.0.01180.1 | 559  | 51517  | 1.00E-127 | 299  | 324  | 92 +  | 1   | 309  | 38958  | 39279  |
| UN25199 | Rsa1.0.00153.1 | 753  | 192931 | 1.00E-157 | 334  | 350  | 95 -  | 404 | 751  | 149983 | 150323 |
| UN25200 | Rsa1.0.02333.1 | 547  | 32431  | 0         | 330  | 332  | 99 -  | 1   | 330  | 29979  | 30310  |
| UN25201 | Rsa1.0.00467.1 | 833  | 156542 | 0         | 830  | 831  | 99 +  | 3   | 833  | 92923  | 93753  |
| UN25202 | Rsa1.0.15363.1 | 588  | 2655   | 0         | 543  | 570  | 95 +  | 11  | 580  | 1704   | 2273   |
| UN25203 | Rsa1.0.04355.1 | 635  | 146733 | 1.00E-138 | 313  | 333  | 93 -  | 277 | 608  | 14339  | 14671  |
| UN25204 | Rsa1.0.00469.1 | 1636 | 82084  | 0         | 719  | 724  | 99 +  | 910 | 1633 | 48767  | 49486  |
| UN25205 | Rsa1.0.24219.1 | 790  | 999    | 1.00E-27  | 95   | 104  | 91 +  | 60  | 163  | 605    | 702    |
| UN25206 | Rsa1.0.00290.1 | 775  | 225096 | 1.00E-144 | 288  | 296  | 97 -  | 6   | 300  | 159826 | 160121 |
| UN25207 | Rsa1.0.00597.1 | 811  | 73445  | 0         | 620  | 628  | 98 +  | 186 | 811  | 1148   | 1775   |
| UN25208 | Rsa1.0.04630.1 | 764  | 16595  | 0         | 420  | 420  | 100 - | 344 | 763  | 14476  | 14895  |
| UN25209 | Rsa1.0.03550.1 | 1318 | 22154  | 0         | 460  | 495  | 92 -  | 814 | 1307 | 5205   | 5681   |
| UN25210 | Rsa1.0.00296.1 | 1205 | 97854  | 0         | 394  | 394  | 100 + | 3   | 396  | 51433  | 51826  |
| UN25211 | Rsa1.0.10877.1 | 1645 | 5693   | 0         | 1585 | 1613 | 98 -  | 2   | 1614 | 1      | 1610   |
| UN25212 | Rsa1.0.04415.1 | 795  | 147889 | 0         | 560  | 560  | 100 + | 1   | 560  | 132346 | 132905 |
| UN25213 | Rsa1.0.02223.1 | 1094 | 152421 | 0         | 422  | 440  | 95 +  | 655 | 1094 | 17952  | 18387  |
| UN25214 | Rsa1.0.00751.1 | 811  | 65759  | 1.00E-110 | 211  | 214  | 98 -  | 94  | 307  | 43442  | 43655  |
| UN25215 | Rsa1.0.01232.1 | 767  | 155185 | 0         | 353  | 362  | 97 -  | 242 | 603  | 108857 | 109218 |
| UN25216 | Rsa1.0.01606.1 | 803  | 42432  | 1.00E-118 | 219  | 220  | 99 -  | 313 | 532  | 18157  | 18376  |
| UN25217 | Rsa1.0.01153.1 | 1214 | 52264  | 0         | 1045 | 1158 | 90 +  | 3   | 1157 | 49073  | 50226  |
| UN25218 | Rsa1.0.00118.1 | 1424 | 130637 | 0         | 666  | 667  | 99 +  | 758 | 1424 | 29905  | 30570  |
| UN25219 | Rsa1.0.01012.1 | 1095 | 56836  | 0         | 489  | 524  | 93 +  | 296 | 816  | 30849  | 31372  |
| UN25220 | Rsa1.0.02043.1 | 1484 | 163754 | 0         | 477  | 483  | 98 -  | 376 | 854  | 145937 | 146419 |
| UN25221 | Rsa1.0.00035.1 | 1048 | 176449 | 1.00E-161 | 354  | 371  | 95 +  | 674 | 1043 | 156806 | 157172 |
| UN25222 | Rsa1.0.00076.1 | 930  | 146021 | 0         | 413  | 426  | 96 +  | 506 | 929  | 76300  | 76714  |
| UN25223 | Rsa1.0.02518.1 | 1103 | 30586  | 0         | 354  | 357  | 99 -  | 3   | 359  | 29328  | 29684  |
| UN25224 | Rsa1.0.00360.1 | 725  | 91190  | 1.00E-86  | 169  | 171  | 98 +  | 257 | 427  | 46323  | 46493  |
| UN25225 | Rsa1.0.00016.1 | 1214 | 831256 | 0         | 477  | 477  | 100 + | 394 | 870  | 253037 | 253513 |
| UN25226 | Rsa1.0.05418.1 | 500  | 13816  | 1.00E-139 | 250  | 250  | 100 - | 251 | 500  | 1476   | 1725   |
| UN25227 | Rsa1.0.00025.1 | 1083 | 277312 | 1.00E-177 | 315  | 315  | 100 + | 1   | 315  | 134682 | 134996 |
| UN25228 | Rsa1.0.00161.1 | 1364 | 116891 | 0         | 520  | 541  | 96 +  | 718 | 1258 | 26063  | 26603  |
| UN25229 | Rsa1.0.00252.1 | 855  | 102760 | 1.00E-145 | 386  | 422  | 91 -  | 2   | 417  | 44777  | 45186  |
| UN25230 | Rsa1.0.00577.1 | 1373 | 174827 | 0         | 471  | 488  | 96 -  | 5   | 492  | 151072 | 151556 |
| UN25231 | Rsa1.0.00662.1 | 916  | 192183 | 9.00E-94  | 188  | 191  | 98 -  | 713 | 903  | 32233  | 32422  |

|         |                |      |        |           |      |      |       |      |      |        |        |
|---------|----------------|------|--------|-----------|------|------|-------|------|------|--------|--------|
| UN25232 | Rsa1.0.00211.1 | 1008 | 228189 | 1.00E-119 | 235  | 240  | 97 -  | 13   | 250  | 180454 | 180693 |
| UN25233 | Rsa1.0.00909.1 | 1218 | 59976  | 0         | 704  | 704  | 100 + | 1    | 704  | 24870  | 25573  |
| UN25234 | Rsa1.0.01403.1 | 1195 | 46453  | 0         | 488  | 510  | 95 -  | 683  | 1188 | 32134  | 32639  |
| UN25235 | Rsa1.0.00002.1 | 1072 | 601661 | 0         | 372  | 380  | 97 -  | 686  | 1065 | 264135 | 264511 |
| UN25236 | Rsa1.0.03344.1 | 756  | 23593  | 0         | 679  | 681  | 99 -  | 3    | 683  | 15207  | 15887  |
| UN25237 | Rsa1.0.01696.1 | 1114 | 301850 | 3.00E-97  | 239  | 257  | 92 +  | 858  | 1108 | 32637  | 32893  |
| UN25238 | Rsa1.0.00301.1 | 1591 | 365315 | 0         | 447  | 468  | 95 -  | 207  | 669  | 195261 | 195717 |
| UN25239 | Rsa1.0.00628.1 | 962  | 214360 | 0         | 427  | 436  | 97 +  | 16   | 450  | 203568 | 204000 |
| UN25240 | Rsa1.0.00737.1 | 1057 | 66432  | 0         | 350  | 354  | 98 -  | 704  | 1057 | 14220  | 14573  |
| UN25241 | Rsa1.0.14912.1 | 878  | 2970   | 1.00E-120 | 314  | 343  | 91 +  | 535  | 876  | 1944   | 2285   |
| UN25242 | Rsa1.0.02053.1 | 1422 | 35554  | 0         | 400  | 400  | 100 + | 1023 | 1422 | 29006  | 29405  |
| UN25243 | Rsa1.0.07894.1 | 591  | 8347   | 0         | 571  | 591  | 96 +  | 5    | 591  | 5605   | 6193   |
| UN25244 | Rsa1.0.00734.1 | 1020 | 66508  | 8.00E-70  | 164  | 171  | 95 -  | 848  | 1017 | 14209  | 14378  |
| UN25245 | Rsa1.0.00178.1 | 596  | 114861 | 1.00E-134 | 251  | 254  | 98 -  | 343  | 596  | 98489  | 98742  |
| UN25246 | Rsa1.0.00173.1 | 903  | 288743 | 1.00E-100 | 203  | 206  | 98 -  | 1    | 206  | 110433 | 110636 |
| UN25247 | Rsa1.0.07591.1 | 1885 | 9060   | 0         | 891  | 892  | 99 +  | 995  | 1885 | 1287   | 2178   |
| UN25248 | Rsa1.0.00066.1 | 449  | 152418 | 2.00E-65  | 133  | 135  | 98 +  | 196  | 330  | 140160 | 140294 |
| UN25249 | Rsa1.0.00025.1 | 1089 | 277312 | 0         | 805  | 857  | 93 +  | 241  | 1088 | 64911  | 65753  |
| UN25250 | Rsa1.0.02934.1 | 1159 | 26627  | 0         | 959  | 1044 | 91 +  | 94   | 1129 | 23252  | 24283  |
| UN25251 | Rsa1.0.00227.1 | 1165 | 105849 | 1.00E-149 | 357  | 381  | 93 +  | 2    | 378  | 102221 | 102596 |
| UN25252 | Rsa1.0.01440.1 | 500  | 45807  | 1.00E-176 | 319  | 321  | 99 -  | 119  | 439  | 6071   | 6391   |
| UN25253 | Rsa1.0.00038.1 | 1087 | 314568 | 1.00E-145 | 417  | 464  | 89 +  | 1    | 460  | 252455 | 252902 |
| UN25254 | Rsa1.0.00112.1 | 986  | 132199 | 1.00E-179 | 390  | 413  | 94 -  | 390  | 799  | 116397 | 116809 |
| UN25255 | Rsa1.0.02976.1 | 583  | 26315  | 1.00E-104 | 196  | 197  | 99 +  | 385  | 581  | 18887  | 19083  |
| UN25256 | Rsa1.0.00159.1 | 894  | 431686 | 0         | 854  | 869  | 98 -  | 34   | 894  | 244966 | 245834 |
| UN25257 | Rsa1.0.01655.1 | 1280 | 41508  | 0         | 453  | 479  | 94 +  | 812  | 1280 | 6342   | 6820   |
| UN25258 | Rsa1.0.00642.1 | 1417 | 201230 | 0         | 1013 | 1013 | 100 + | 403  | 1415 | 157947 | 158959 |
| UN25259 | Rsa1.0.15602.1 | 1329 | 2523   | 0         | 784  | 784  | 100 + | 546  | 1329 | 1648   | 2431   |
| UN25260 | Rsa1.0.00111.1 | 958  | 390088 | 1.00E-179 | 380  | 403  | 94 -  | 568  | 958  | 5943   | 6345   |
| UN25261 | Rsa1.0.16965.1 | 595  | 1971   | 2.00E-93  | 226  | 238  | 94 -  | 1    | 235  | 1247   | 1483   |
| UN25262 | Rsa1.0.12720.1 | 1087 | 5145   | 0         | 751  | 756  | 99 +  | 305  | 1060 | 80     | 835    |
| UN25263 | Rsa1.0.05800.1 | 985  | 141392 | 0         | 463  | 478  | 96 +  | 1    | 477  | 133088 | 133561 |
| UN25264 | Rsa1.0.01440.1 | 783  | 45807  | 0         | 697  | 719  | 96 -  | 66   | 783  | 13755  | 14471  |
| UN25265 | Rsa1.0.00559.1 | 1307 | 190486 | 0         | 1031 | 1233 | 83 -  | 80   | 1304 | 181738 | 182958 |
| UN25266 | Rsa1.0.00243.1 | 725  | 103651 | 1.00E-156 | 299  | 305  | 98 -  | 3    | 307  | 23261  | 23562  |
| UN25267 | Rsa1.0.02756.1 | 1034 | 28202  | 1.00E-102 | 213  | 219  | 97 +  | 816  | 1033 | 20365  | 20580  |
| UN25268 | Rsa1.0.00020.1 | 679  | 283099 | 1.00E-119 | 256  | 269  | 95 -  | 91   | 359  | 76615  | 76883  |
| UN25269 | Rsa1.0.00034.1 | 1335 | 260119 | 0         | 610  | 672  | 90 +  | 506  | 1173 | 129833 | 130504 |
| UN25270 | Rsa1.0.00340.1 | 1161 | 305782 | 0         | 486  | 488  | 99 -  | 671  | 1158 | 132832 | 133318 |

|         |                |      |        |           |      |      |       |      |      |        |        |
|---------|----------------|------|--------|-----------|------|------|-------|------|------|--------|--------|
| UN25271 | Rsa1.0.00679.1 | 1097 | 68971  | 0         | 974  | 1062 | 91 +  | 23   | 1080 | 575    | 1584   |
| UN25272 | Rsa1.0.00656.1 | 943  | 69968  | 1.00E-115 | 250  | 265  | 94 -  | 679  | 943  | 49253  | 49506  |
| UN25273 | Rsa1.0.00301.1 | 793  | 365315 | 1.00E-138 | 337  | 361  | 93 +  | 25   | 379  | 27842  | 28188  |
| UN25274 | Rsa1.0.00791.1 | 741  | 64201  | 0         | 422  | 425  | 99 -  | 308  | 732  | 30443  | 30865  |
| UN25275 | Rsa1.0.30745.1 | 1226 | 746    | 1.00E-117 | 504  | 592  | 85 +  | 646  | 1224 | 144    | 713    |
| UN25276 | Rsa1.0.00033.1 | 1194 | 515811 | 0         | 1183 | 1192 | 99 +  | 3    | 1194 | 465    | 1655   |
| UN25277 | Rsa1.0.00231.1 | 1400 | 105381 | 0         | 383  | 398  | 96 -  | 1    | 397  | 20793  | 21188  |
| UN25278 | Rsa1.0.13828.1 | 772  | 4254   | 0         | 515  | 516  | 99 -  | 254  | 769  | 2001   | 2516   |
| UN25279 | Rsa1.0.05166.1 | 754  | 14624  | 0         | 748  | 754  | 99 -  | 1    | 754  | 6935   | 7688   |
| UN25280 | Rsa1.0.00711.1 | 885  | 67223  | 0         | 342  | 342  | 100 + | 1    | 342  | 6580   | 6921   |
| UN25281 | Rsa1.0.03028.1 | 1119 | 25872  | 1.00E-129 | 273  | 285  | 95 +  | 82   | 363  | 20174  | 20458  |
| UN25282 | Rsa1.0.01448.1 | 1128 | 45645  | 0         | 863  | 881  | 97 -  | 248  | 1127 | 20603  | 21478  |
| UN25283 | Rsa1.0.00019.1 | 1089 | 301669 | 1.00E-116 | 262  | 278  | 94 +  | 380  | 657  | 238712 | 238986 |
| UN25284 | Rsa1.0.06795.1 | 1127 | 10346  | 0         | 366  | 373  | 98 +  | 286  | 658  | 5037   | 5409   |
| UN25285 | Rsa1.0.00539.1 | 1835 | 76926  | 0         | 654  | 654  | 100 + | 1180 | 1833 | 56646  | 57299  |
| UN25286 | Rsa1.0.00592.1 | 1618 | 73788  | 0         | 1581 | 1618 | 97 -  | 1    | 1617 | 61632  | 63232  |
| UN25287 | Rsa1.0.02299.1 | 849  | 32857  | 6.00E-98  | 220  | 231  | 95 -  | 30   | 259  | 23200  | 23426  |
| UN25288 | Rsa1.0.00586.1 | 786  | 163802 | 1.00E-67  | 233  | 267  | 87 +  | 257  | 523  | 108888 | 109154 |
| UN25289 | Rsa1.0.00069.1 | 775  | 403561 | 1.00E-126 | 263  | 273  | 96 +  | 3    | 275  | 15265  | 15535  |
| UN25290 | Rsa1.0.00287.1 | 966  | 98687  | 0         | 652  | 730  | 89 +  | 12   | 736  | 53355  | 54084  |
| UN25291 | Rsa1.0.00052.1 | 943  | 162771 | 0         | 574  | 603  | 95 -  | 343  | 943  | 52170  | 52767  |
| UN25292 | Rsa1.0.00064.1 | 954  | 240927 | 0         | 710  | 738  | 96 -  | 220  | 954  | 119438 | 120162 |
| UN25293 | Rsa1.0.01551.1 | 751  | 43411  | 0         | 408  | 410  | 99 +  | 3    | 412  | 2567   | 2976   |
| UN25294 | Rsa1.0.01184.1 | 1068 | 51452  | 0         | 381  | 383  | 99 +  | 217  | 599  | 26949  | 27331  |
| UN25295 | Rsa1.0.02884.1 | 712  | 27034  | 1.00E-156 | 338  | 355  | 95 +  | 1    | 354  | 18810  | 19152  |
| UN25296 | Rsa1.0.00626.1 | 1360 | 71582  | 0         | 389  | 404  | 96 -  | 631  | 1034 | 52410  | 52813  |
| UN25297 | Rsa1.0.02288.1 | 649  | 32984  | 1.00E-163 | 292  | 292  | 100 + | 358  | 649  | 14023  | 14314  |
| UN25298 | Rsa1.0.00528.1 | 1009 | 164755 | 0         | 659  | 678  | 97 +  | 1    | 677  | 109344 | 110021 |
| UN25299 | Rsa1.0.01217.1 | 1339 | 50554  | 0         | 575  | 581  | 98 +  | 346  | 926  | 13414  | 13994  |
| UN25300 | Rsa1.0.02070.1 | 1025 | 158516 | 1.00E-172 | 321  | 325  | 98 -  | 1    | 323  | 145612 | 145936 |
| UN25301 | Rsa1.0.00078.1 | 1145 | 175053 | 0         | 425  | 428  | 99 -  | 378  | 805  | 101013 | 101438 |
| UN25302 | Rsa1.0.02666.1 | 1042 | 28915  | 1.00E-173 | 312  | 313  | 99 -  | 1    | 313  | 24580  | 24892  |
| UN25303 | #              | #    | #      | #         | #    | #    | #     | #    | #    | #      | #      |
| UN25304 | Rsa1.0.01513.1 | 1811 | 44234  | 0         | 821  | 823  | 99 -  | 990  | 1811 | 2347   | 3169   |
| UN25305 | Rsa1.0.00183.1 | 1321 | 113277 | 1.00E-111 | 270  | 287  | 94 -  | 153  | 437  | 67155  | 67437  |
| UN25306 | Rsa1.0.00034.1 | 1492 | 260119 | 0         | 417  | 418  | 99 +  | 1    | 418  | 77390  | 77807  |
| UN25307 | Rsa1.0.00340.1 | 662  | 305782 | 1.00E-177 | 368  | 383  | 96 -  | 288  | 662  | 159714 | 160093 |
| UN25308 | Rsa1.0.00752.1 | 1408 | 65756  | 0         | 392  | 412  | 95 +  | 21   | 432  | 49490  | 49901  |
| UN25309 | Rsa1.0.00015.1 | 790  | 561803 | 0         | 530  | 531  | 99 -  | 3    | 533  | 550649 | 551179 |

|         |                |      |        |           |      |      |       |     |      |        |        |
|---------|----------------|------|--------|-----------|------|------|-------|-----|------|--------|--------|
| UN25310 | Rsa1.0.06774.1 | 1141 | 10381  | 0         | 682  | 702  | 97 -  | 5   | 706  | 3738   | 4433   |
| UN25311 | Rsa1.0.00116.1 | 1187 | 365886 | 1.00E-142 | 302  | 316  | 95 -  | 829 | 1144 | 36668  | 36982  |
| UN25312 | Rsa1.0.05570.1 | 887  | 13301  | 1.00E-160 | 381  | 402  | 94 -  | 5   | 401  | 12649  | 13047  |
| UN25313 | Rsa1.0.01740.1 | 1159 | 39986  | 0         | 446  | 462  | 96 +  | 365 | 825  | 13886  | 14344  |
| UN25314 | Rsa1.0.00097.1 | 1016 | 138858 | 0         | 544  | 551  | 98 +  | 460 | 1007 | 42576  | 43124  |
| UN25315 | Rsa1.0.00016.1 | 658  | 831256 | 0         | 649  | 650  | 99 +  | 5   | 654  | 175603 | 176252 |
| UN25316 | Rsa1.0.00517.1 | 825  | 142790 | 4.00E-99  | 184  | 184  | 100 - | 560 | 743  | 69292  | 69475  |
| UN25317 | Rsa1.0.00788.1 | 1009 | 64237  | 0         | 472  | 472  | 100 - | 537 | 1008 | 4302   | 4773   |
| UN25318 | Rsa1.0.00571.1 | 1374 | 329018 | 0         | 808  | 837  | 96 -  | 72  | 906  | 204578 | 205413 |
| UN25319 | Rsa1.0.00392.1 | 1287 | 88523  | 0         | 1161 | 1257 | 92 -  | 46  | 1284 | 82889  | 84141  |
| UN25320 | Rsa1.0.07577.1 | 1301 | 9092   | 0         | 521  | 546  | 95 -  | 1   | 546  | 7519   | 8061   |
| UN25321 | Rsa1.0.01575.1 | 1139 | 42924  | 1.00E-129 | 241  | 243  | 99 +  | 511 | 753  | 25407  | 25649  |
| UN25322 | Rsa1.0.02769.1 | 1048 | 28107  | 0         | 439  | 443  | 99 -  | 8   | 450  | 9897   | 10339  |
| UN25323 | Rsa1.0.00421.1 | 658  | 86365  | 1.00E-177 | 368  | 386  | 95 +  | 1   | 386  | 44734  | 45113  |
| UN25324 | Rsa1.0.00013.1 | 841  | 292129 | 0         | 611  | 616  | 99 -  | 226 | 841  | 191213 | 191828 |
| UN25325 | Rsa1.0.04288.1 | 804  | 18077  | 0         | 419  | 420  | 99 -  | 1   | 419  | 13754  | 14173  |
| UN25326 | Rsa1.0.00660.1 | 570  | 69688  | 1.00E-104 | 217  | 224  | 96 +  | 13  | 236  | 15771  | 15993  |
| UN25327 | Rsa1.0.07044.1 | 1192 | 9986   | 0         | 635  | 637  | 99 +  | 1   | 636  | 134    | 770    |
| UN25328 | Rsa1.0.00616.1 | 488  | 195713 | 0         | 464  | 482  | 96 +  | 7   | 484  | 146209 | 146688 |
| UN25329 | Rsa1.0.06213.1 | 754  | 11478  | 0         | 483  | 522  | 92 +  | 233 | 753  | 7641   | 8135   |
| UN25330 | Rsa1.0.02494.1 | 708  | 132923 | 1.00E-175 | 384  | 404  | 95 +  | 3   | 403  | 110135 | 110533 |
| UN25331 | Rsa1.0.00296.1 | 1211 | 97854  | 1.00E-157 | 371  | 404  | 91 +  | 3   | 397  | 51437  | 51825  |
| UN25332 | Rsa1.0.00218.1 | 634  | 201480 | 1.00E-140 | 274  | 281  | 97 +  | 205 | 485  | 170910 | 171190 |
| UN25333 | Rsa1.0.00008.1 | 1472 | 358124 | 0         | 1033 | 1050 | 98 +  | 423 | 1472 | 281884 | 282928 |
| UN25334 | Rsa1.0.00323.1 | 1785 | 159650 | 0         | 508  | 512  | 99 -  | 3   | 514  | 13045  | 13556  |
| UN25335 | Rsa1.0.01012.1 | 1148 | 56836  | 0         | 618  | 621  | 99 +  | 1   | 621  | 19153  | 19773  |
| UN25336 | Rsa1.0.00122.1 | 912  | 265937 | 1.00E-113 | 213  | 215  | 99 -  | 38  | 252  | 100614 | 100828 |
| UN25337 | Rsa1.0.00026.1 | 1362 | 327835 | 0         | 574  | 575  | 99 +  | 531 | 1105 | 43975  | 44549  |
| UN25338 | Rsa1.0.00048.1 | 998  | 167185 | 1.00E-129 | 237  | 238  | 99 -  | 760 | 997  | 84810  | 85047  |
| UN25339 | Rsa1.0.00817.1 | 1157 | 62961  | 0         | 929  | 964  | 96 -  | 1   | 964  | 57676  | 58639  |
| UN25340 | Rsa1.0.02379.1 | 791  | 150705 | 0         | 383  | 383  | 100 + | 329 | 711  | 140540 | 140922 |
| UN25341 | Rsa1.0.01058.1 | 1334 | 55430  | 1.00E-140 | 281  | 289  | 97 -  | 532 | 819  | 17057  | 17345  |
| UN25342 | Rsa1.0.02256.1 | 1050 | 33329  | 0         | 428  | 435  | 98 +  | 616 | 1049 | 15140  | 15571  |
| UN25343 | Rsa1.0.01978.1 | 837  | 36546  | 0         | 712  | 719  | 99 +  | 3   | 720  | 27001  | 27719  |
| UN25344 | Rsa1.0.00015.1 | 1328 | 561803 | 0         | 420  | 429  | 97 +  | 1   | 429  | 178685 | 179113 |
| UN25345 | Rsa1.0.01304.1 | 456  | 48790  | 0         | 367  | 367  | 100 + | 2   | 368  | 38011  | 38377  |
| UN25346 | Rsa1.0.00026.1 | 694  | 327835 | 1.00E-144 | 364  | 395  | 92 -  | 313 | 693  | 209430 | 209819 |
| UN25347 | Rsa1.0.02791.1 | 1542 | 27832  | 0         | 497  | 527  | 94 -  | 1   | 513  | 7700   | 8224   |
| UN25348 | Rsa1.0.04382.1 | 776  | 17635  | 0         | 588  | 594  | 98 -  | 182 | 775  | 4803   | 5396   |

|         |                |      |        |           |      |      |       |     |      |        |        |
|---------|----------------|------|--------|-----------|------|------|-------|-----|------|--------|--------|
| UN25349 | Rsa1.0.01489.1 | 1147 | 44764  | 0         | 340  | 342  | 99 +  | 1   | 342  | 38120  | 38460  |
| UN25350 | Rsa1.0.02966.1 | 960  | 135126 | 0         | 474  | 488  | 97 +  | 466 | 952  | 17972  | 18455  |
| UN25351 | Rsa1.0.00131.1 | 1354 | 432233 | 0         | 729  | 731  | 99 +  | 622 | 1352 | 121577 | 122307 |
| UN25352 | Rsa1.0.00646.1 | 1286 | 70473  | 1.00E-115 | 232  | 239  | 97 +  | 293 | 531  | 8478   | 8716   |
| UN25353 | Rsa1.0.04111.1 | 539  | 18991  | 0         | 498  | 529  | 94 -  | 18  | 538  | 11207  | 11732  |
| UN25354 | Rsa1.0.00003.1 | 703  | 340054 | 0         | 509  | 536  | 94 +  | 3   | 534  | 326257 | 326791 |
| UN25355 | Rsa1.0.00040.1 | 956  | 324196 | 0         | 854  | 900  | 94 +  | 2   | 892  | 223985 | 224883 |
| UN25356 | #              | #    | #      | #         | #    | #    | #     | #   | #    | #      | #      |
| UN25357 | Rsa1.0.00014.1 | 1160 | 348985 | 1.00E-154 | 531  | 622  | 85 +  | 1   | 600  | 331475 | 332065 |
| UN25358 | Rsa1.0.07105.1 | 796  | 9886   | 0         | 353  | 362  | 97 +  | 121 | 482  | 1485   | 1845   |
| UN25359 | Rsa1.0.00015.1 | 852  | 561803 | 0         | 488  | 504  | 96 +  | 15  | 517  | 362038 | 362533 |
| UN25360 | Rsa1.0.00539.1 | 1488 | 76926  | 0         | 1242 | 1292 | 96 +  | 209 | 1487 | 67748  | 69029  |
| UN25361 | Rsa1.0.00180.1 | 895  | 114581 | 1.00E-125 | 236  | 238  | 99 +  | 660 | 895  | 61516  | 61753  |
| UN25362 | Rsa1.0.03225.1 | 1205 | 24500  | 0         | 446  | 452  | 98 +  | 754 | 1205 | 20705  | 21153  |
| UN25363 | Rsa1.0.00063.1 | 1158 | 156150 | 0         | 541  | 557  | 97 +  | 554 | 1110 | 142261 | 142817 |
| UN25364 | Rsa1.0.06619.1 | 771  | 10650  | 1.00E-165 | 344  | 358  | 96 +  | 3   | 358  | 515    | 871    |
| UN25365 | Rsa1.0.02397.1 | 734  | 31778  | 0         | 545  | 548  | 99 +  | 6   | 553  | 12342  | 12888  |
| UN25366 | Rsa1.0.00744.1 | 646  | 66084  | 1.00E-125 | 304  | 327  | 92 +  | 325 | 646  | 32778  | 33102  |
| UN25367 | Rsa1.0.06160.1 | 1376 | 11596  | 0         | 455  | 486  | 93 +  | 277 | 762  | 10936  | 11421  |
| UN25368 | Rsa1.0.04340.1 | 776  | 17831  | 1.00E-159 | 355  | 376  | 94 +  | 402 | 775  | 16410  | 16780  |
| UN25369 | Rsa1.0.00025.1 | 774  | 277312 | 0         | 450  | 450  | 100 + | 325 | 774  | 148902 | 149351 |
| UN25370 | Rsa1.0.04126.1 | 546  | 18939  | 0         | 364  | 373  | 97 -  | 3   | 375  | 15519  | 15888  |
| UN25371 | Rsa1.0.02648.1 | 686  | 29073  | 3.00E-90  | 226  | 246  | 91 +  | 362 | 605  | 12514  | 12743  |
| UN25372 | Rsa1.0.01777.1 | 737  | 39511  | 0         | 352  | 354  | 99 +  | 2   | 353  | 21598  | 21951  |
| UN25373 | Rsa1.0.00189.1 | 1284 | 111830 | 0         | 376  | 377  | 99 -  | 3   | 379  | 57598  | 57974  |
| UN25374 | Rsa1.0.00098.1 | 803  | 349239 | 0         | 500  | 508  | 98 +  | 222 | 729  | 230056 | 230563 |
| UN25375 | Rsa1.0.02353.1 | 1537 | 32300  | 0         | 866  | 869  | 99 +  | 2   | 869  | 29834  | 30701  |
| UN25376 | Rsa1.0.41277.1 | 907  | 544    | 0         | 544  | 544  | 100 + | 218 | 761  | 1      | 544    |
| UN25377 | Rsa1.0.02157.1 | 894  | 149652 | 1.00E-144 | 306  | 322  | 95 -  | 568 | 888  | 12807  | 13118  |
| UN25378 | Rsa1.0.00008.1 | 912  | 358124 | 0         | 468  | 480  | 97 +  | 1   | 479  | 90112  | 90591  |
| UN25379 | Rsa1.0.04220.1 | 840  | 18421  | 0         | 490  | 515  | 95 -  | 328 | 839  | 9471   | 9982   |
| UN25380 | Rsa1.0.00583.1 | 714  | 74309  | 1.00E-163 | 325  | 336  | 96 +  | 256 | 591  | 71950  | 72285  |
| UN25381 | Rsa1.0.00094.1 | 972  | 139042 | 0         | 411  | 432  | 95 -  | 537 | 968  | 39858  | 40286  |
| UN25382 | Rsa1.0.03473.1 | 969  | 22665  | 0         | 685  | 708  | 96 -  | 260 | 965  | 7835   | 8532   |
| UN25383 | Rsa1.0.00251.1 | 615  | 303968 | 1.00E-121 | 339  | 371  | 91 +  | 253 | 615  | 128883 | 129248 |
| UN25384 | Rsa1.0.66827.1 | 772  | 343    | 1.00E-154 | 300  | 308  | 97 +  | 275 | 582  | 36     | 343    |
| UN25385 | Rsa1.0.03012.1 | 1088 | 26042  | 1.00E-158 | 305  | 311  | 98 -  | 772 | 1081 | 8099   | 8409   |
| UN25386 | Rsa1.0.01977.1 | 449  | 36559  | 1.00E-167 | 347  | 361  | 96 +  | 82  | 442  | 23094  | 23452  |
| UN25387 | Rsa1.0.02515.1 | 1539 | 30616  | 0         | 412  | 447  | 92 -  | 10  | 456  | 29932  | 30346  |

|         |                |      |        |           |      |      |       |      |      |        |        |
|---------|----------------|------|--------|-----------|------|------|-------|------|------|--------|--------|
| UN25388 | Rsa1.0.01667.1 | 1126 | 41315  | 1.00E-170 | 304  | 304  | 100 - | 3    | 306  | 9678   | 9981   |
| UN25389 | Rsa1.0.00395.1 | 552  | 214466 | 1.00E-144 | 293  | 303  | 96 -  | 253  | 552  | 202697 | 202995 |
| UN25390 | Rsa1.0.06229.1 | 903  | 11439  | 0         | 480  | 481  | 99 -  | 1    | 481  | 8749   | 9229   |
| UN25391 | Rsa1.0.00198.1 | 832  | 222963 | 0         | 823  | 830  | 99 +  | 1    | 830  | 108590 | 109418 |
| UN25392 | Rsa1.0.41382.1 | 1027 | 543    | 1.00E-163 | 353  | 372  | 94 +  | 174  | 542  | 1      | 369    |
| UN25393 | Rsa1.0.00801.1 | 1178 | 63861  | 1.00E-136 | 311  | 334  | 93 -  | 28   | 358  | 24598  | 24919  |
| UN25394 | Rsa1.0.00284.1 | 628  | 323267 | 1.00E-155 | 311  | 321  | 96 +  | 168  | 488  | 241863 | 242177 |
| UN25395 | Rsa1.0.00001.1 | 1089 | 363028 | 0         | 1082 | 1085 | 99 -  | 1    | 1085 | 153214 | 154297 |
| UN25396 | Rsa1.0.00038.1 | 819  | 314568 | 1.00E-141 | 344  | 371  | 92 -  | 449  | 818  | 232869 | 233229 |
| UN25397 | Rsa1.0.02268.1 | 1001 | 33172  | 0         | 661  | 700  | 94 -  | 2    | 680  | 29896  | 30593  |
| UN25398 | Rsa1.0.00214.1 | 509  | 107508 | 1.00E-158 | 283  | 283  | 100 - | 227  | 509  | 6317   | 6599   |
| UN25399 | Rsa1.0.07581.1 | 549  | 9084   | 1.00E-112 | 234  | 242  | 96 +  | 177  | 412  | 5224   | 5465   |
| UN25400 | Rsa1.0.14560.1 | 1613 | 3267   | 0         | 364  | 365  | 99 -  | 1249 | 1613 | 1368   | 1731   |
| UN25401 | Rsa1.0.00039.1 | 667  | 296927 | 0         | 629  | 644  | 97 +  | 3    | 646  | 92     | 735    |
| UN25402 | Rsa1.0.01482.1 | 734  | 44855  | 0         | 465  | 473  | 98 -  | 262  | 734  | 17827  | 18299  |
| UN25403 | Rsa1.0.00524.1 | 902  | 169613 | 1.00E-133 | 292  | 307  | 95 -  | 588  | 890  | 133317 | 133623 |
| UN25404 | Rsa1.0.01393.1 | 1254 | 46661  | 0         | 608  | 608  | 100 - | 641  | 1248 | 25492  | 26099  |
| UN25405 | Rsa1.0.00407.1 | 979  | 191544 | 0         | 975  | 977  | 99 +  | 3    | 979  | 176613 | 177589 |
| UN25406 | Rsa1.0.00030.1 | 1045 | 250988 | 1.00E-163 | 444  | 494  | 89 +  | 3    | 471  | 210840 | 211330 |
| UN25407 | Rsa1.0.09048.1 | 706  | 6683   | 0         | 636  | 666  | 95 -  | 4    | 662  | 5245   | 5909   |
| UN25408 | Rsa1.0.01537.1 | 2092 | 187285 | 0         | 452  | 459  | 98 +  | 1    | 459  | 175370 | 175826 |
| UN25409 | Rsa1.0.00015.1 | 1633 | 561803 | 0         | 457  | 458  | 99 -  | 3    | 460  | 217939 | 218396 |
| UN25410 | Rsa1.0.00008.1 | 1114 | 358124 | 0         | 896  | 993  | 90 +  | 143  | 1112 | 72898  | 73866  |
| UN25411 | Rsa1.0.04396.1 | 1502 | 17561  | 1.00E-155 | 278  | 278  | 100 - | 598  | 875  | 12194  | 12471  |
| UN25412 | Rsa1.0.01104.1 | 797  | 285480 | 0         | 516  | 533  | 96 -  | 269  | 797  | 130245 | 130777 |
| UN25413 | Rsa1.0.01920.1 | 1193 | 158533 | 0         | 1039 | 1137 | 91 -  | 52   | 1171 | 22526  | 23659  |
| UN25414 | Rsa1.0.02343.1 | 503  | 32374  | 2.00E-96  | 200  | 207  | 96 +  | 30   | 236  | 1046   | 1252   |
| UN25415 | Rsa1.0.00031.1 | 977  | 179862 | 0         | 518  | 524  | 98 -  | 452  | 975  | 23182  | 23703  |
| UN25416 | Rsa1.0.00628.1 | 821  | 214360 | 0         | 455  | 478  | 95 -  | 1    | 476  | 20466  | 20936  |
| UN25417 | Rsa1.0.03718.1 | 821  | 21195  | 0         | 483  | 486  | 99 -  | 334  | 819  | 451    | 935    |
| UN25418 | Rsa1.0.08170.1 | 907  | 7799   | 0         | 851  | 874  | 97 +  | 1    | 872  | 1622   | 2489   |
| UN25419 | Rsa1.0.26360.1 | 760  | 895    | 0         | 610  | 610  | 100 - | 4    | 613  | 1      | 610    |
| UN25420 | Rsa1.0.00208.1 | 620  | 108565 | 0         | 599  | 619  | 96 +  | 6    | 619  | 20226  | 20843  |
| UN25421 | Rsa1.0.01077.1 | 1036 | 54772  | 0         | 482  | 515  | 93 +  | 2    | 507  | 10830  | 11340  |
| UN25422 | Rsa1.0.00048.1 | 1270 | 167185 | 0         | 515  | 522  | 98 +  | 439  | 960  | 109464 | 109985 |
| UN25423 | Rsa1.0.00659.1 | 915  | 69733  | 0         | 535  | 581  | 92 +  | 360  | 915  | 20560  | 21140  |
| UN25424 | Rsa1.0.08192.1 | 899  | 7762   | 0         | 463  | 464  | 99 -  | 436  | 899  | 2230   | 2693   |
| UN25425 | Rsa1.0.01991.1 | 1315 | 36425  | 1.00E-127 | 243  | 247  | 98 +  | 9    | 255  | 9836   | 10082  |
| UN25426 | Rsa1.0.04396.1 | 1398 | 17561  | 1.00E-133 | 269  | 278  | 96 -  | 637  | 914  | 12194  | 12471  |

|         |                |      |        |           |     |     |       |      |      |        |        |
|---------|----------------|------|--------|-----------|-----|-----|-------|------|------|--------|--------|
| UN25427 | Rsa1.0.35485.1 | 1048 | 638    | 0         | 384 | 398 | 96 +  | 551  | 943  | 242    | 638    |
| UN25428 | Rsa1.0.00951.1 | 634  | 164588 | 0         | 627 | 632 | 99 -  | 3    | 634  | 143857 | 144486 |
| UN25429 | Rsa1.0.02200.1 | 833  | 33981  | 0         | 630 | 632 | 99 +  | 202  | 833  | 24074  | 24705  |
| UN25430 | Rsa1.0.00018.1 | 893  | 410899 | 0         | 733 | 741 | 98 -  | 153  | 893  | 154321 | 155060 |
| UN25431 | Rsa1.0.00418.1 | 1189 | 215377 | 0         | 333 | 335 | 99 +  | 4    | 338  | 55187  | 55521  |
| UN25432 | Rsa1.0.00131.1 | 777  | 432233 | 0         | 529 | 533 | 99 -  | 245  | 776  | 384409 | 384941 |
| UN25433 | Rsa1.0.02305.1 | 569  | 32783  | 0         | 539 | 578 | 93 +  | 1    | 566  | 22432  | 23009  |
| UN25434 | Rsa1.0.00928.1 | 986  | 59293  | 1.00E-101 | 191 | 192 | 99 -  | 795  | 986  | 30828  | 31019  |
| UN25435 | Rsa1.0.02319.1 | 805  | 32580  | 1.00E-158 | 283 | 283 | 100 + | 25   | 307  | 15669  | 15951  |
| UN25436 | Rsa1.0.00303.1 | 824  | 97468  | 0         | 490 | 505 | 97 +  | 1    | 505  | 65968  | 66471  |
| UN25437 | Rsa1.0.00853.1 | 696  | 62101  | 0         | 438 | 438 | 100 - | 252  | 689  | 33193  | 33630  |
| UN25438 | Rsa1.0.02398.1 | 1165 | 31766  | 1.00E-153 | 484 | 557 | 86 +  | 619  | 1165 | 29870  | 30391  |
| UN25439 | Rsa1.0.02111.1 | 1859 | 34913  | 0         | 611 | 614 | 99 -  | 1    | 614  | 8921   | 9534   |
| UN25440 | Rsa1.0.02600.1 | 789  | 29657  | 0         | 476 | 499 | 95 -  | 3    | 491  | 27845  | 28339  |
| UN25441 | Rsa1.0.02732.1 | 700  | 28372  | 4.00E-15  | 67  | 75  | 89 +  | 254  | 328  | 769    | 843    |
| UN25442 | Rsa1.0.50228.1 | 859  | 452    | 1.00E-157 | 284 | 285 | 99 +  | 571  | 855  | 40     | 324    |
| UN25443 | Rsa1.0.02152.1 | 727  | 34558  | 0         | 592 | 627 | 94 +  | 3    | 619  | 26442  | 27067  |
| UN25444 | Rsa1.0.00379.1 | 923  | 89865  | 1.00E-104 | 199 | 201 | 99 -  | 1    | 201  | 52412  | 52612  |
| UN25445 | Rsa1.0.08338.1 | 809  | 7511   | 1.00E-129 | 252 | 258 | 97 +  | 254  | 511  | 1653   | 1910   |
| UN25446 | Rsa1.0.02456.1 | 828  | 31222  | 0         | 821 | 824 | 99 -  | 2    | 825  | 14598  | 15421  |
| UN25447 | Rsa1.0.00909.1 | 746  | 59976  | 1.00E-175 | 331 | 336 | 98 +  | 315  | 650  | 43852  | 44186  |
| UN25448 | Rsa1.0.04652.1 | 779  | 16515  | 0         | 458 | 471 | 97 -  | 13   | 483  | 10530  | 11000  |
| UN25449 | Rsa1.0.01606.1 | 683  | 42432  | 1.00E-134 | 279 | 289 | 96 +  | 395  | 683  | 29730  | 30010  |
| UN25450 | Rsa1.0.00522.1 | 694  | 78103  | 4.00E-77  | 156 | 159 | 98 -  | 155  | 313  | 60908  | 61066  |
| UN25451 | Rsa1.0.00741.1 | 1340 | 66117  | 1.00E-124 | 258 | 267 | 96 -  | 1075 | 1340 | 46349  | 46610  |
| UN25452 | Rsa1.0.05866.1 | 1027 | 12376  | 0         | 628 | 635 | 98 +  | 15   | 648  | 3894   | 4525   |
| UN25453 | Rsa1.0.00991.1 | 1210 | 143101 | 0         | 524 | 554 | 94 +  | 659  | 1210 | 34643  | 35188  |
| UN25454 | Rsa1.0.00096.1 | 1106 | 198773 | 1.00E-175 | 367 | 383 | 95 +  | 2    | 383  | 135997 | 136372 |
| UN25455 | Rsa1.0.00093.1 | 1240 | 214962 | 1.00E-81  | 179 | 186 | 96 +  | 1    | 184  | 97789  | 97974  |
| UN25456 | Rsa1.0.01903.1 | 1108 | 37451  | 0         | 339 | 340 | 99 +  | 1    | 340  | 13871  | 14210  |
| UN25457 | Rsa1.0.00963.1 | 950  | 58176  | 2.00E-64  | 201 | 223 | 90 +  | 1    | 223  | 26329  | 26545  |
| UN25458 | Rsa1.0.01655.1 | 777  | 41508  | 1.00E-125 | 299 | 321 | 93 -  | 452  | 771  | 6908   | 7220   |
| UN25459 | Rsa1.0.07379.1 | 681  | 9492   | 4.00E-77  | 214 | 235 | 91 +  | 445  | 678  | 3308   | 3532   |
| UN25460 | Rsa1.0.00190.1 | 897  | 318240 | 0         | 451 | 472 | 95 -  | 419  | 882  | 314315 | 314786 |
| UN25461 | Rsa1.0.04218.1 | 730  | 18423  | 1.00E-144 | 316 | 334 | 94 -  | 397  | 730  | 16987  | 17308  |
| UN25462 | Rsa1.0.01130.1 | 1387 | 52929  | 0         | 499 | 504 | 99 +  | 364  | 867  | 33983  | 34486  |
| UN25463 | Rsa1.0.10909.1 | 639  | 5681   | 0         | 439 | 471 | 93 -  | 11   | 477  | 79     | 549    |
| UN25464 | Rsa1.0.00152.1 | 884  | 257730 | 1.00E-104 | 227 | 238 | 95 -  | 629  | 862  | 96226  | 96463  |
| UN25465 | Rsa1.0.02874.1 | 723  | 27070  | 0         | 526 | 532 | 98 +  | 157  | 686  | 16196  | 16727  |

|         |                |      |        |           |     |     |       |     |      |        |        |
|---------|----------------|------|--------|-----------|-----|-----|-------|-----|------|--------|--------|
| UN25466 | Rsa1.0.00387.1 | 1000 | 495407 | 1.00E-172 | 406 | 433 | 93 +  | 40  | 468  | 349171 | 349601 |
| UN25467 | Rsa1.0.03204.1 | 1078 | 24622  | 1.00E-159 | 442 | 497 | 88 -  | 227 | 686  | 6071   | 6561   |
| UN25468 | Rsa1.0.07831.1 | 866  | 8461   | 0         | 849 | 864 | 98 -  | 1   | 864  | 4689   | 5551   |
| UN25469 | Rsa1.0.01390.1 | 627  | 46695  | 2.33E-156 | 331 | 356 | 92 -  | 48  | 403  | 5259   | 5602   |
| UN25470 | Rsa1.0.06136.1 | 724  | 11659  | 0         | 571 | 581 | 98 +  | 143 | 723  | 2141   | 2720   |
| UN25471 | Rsa1.0.00323.1 | 1244 | 159650 | 0         | 505 | 510 | 99 -  | 2   | 511  | 13045  | 13554  |
| UN25472 | Rsa1.0.13975.1 | 730  | 3968   | 1.00E-165 | 295 | 295 | 100 + | 228 | 522  | 1537   | 1831   |
| UN25473 | Rsa1.0.02513.1 | 1019 | 30643  | 0         | 553 | 553 | 100 + | 465 | 1017 | 29577  | 30129  |
| UN25474 | Rsa1.0.04318.1 | 1237 | 17947  | 1.00E-129 | 234 | 234 | 100 + | 2   | 235  | 4046   | 4279   |
| UN25475 | Rsa1.0.00179.1 | 654  | 393324 | 1.00E-148 | 312 | 325 | 96 -  | 1   | 325  | 63299  | 63620  |
| UN25476 | Rsa1.0.01015.1 | 824  | 56752  | 0         | 447 | 464 | 96 +  | 368 | 824  | 7528   | 7990   |
| UN25477 | Rsa1.0.00145.1 | 1306 | 261008 | 0         | 374 | 385 | 97 -  | 1   | 379  | 247625 | 248009 |
| UN25478 | Rsa1.0.00945.1 | 790  | 58714  | 0         | 588 | 594 | 98 -  | 3   | 594  | 51533  | 52125  |
| UN25479 | Rsa1.0.00071.1 | 629  | 345714 | 0         | 607 | 627 | 96 +  | 1   | 625  | 41937  | 42559  |
| UN25480 | Rsa1.0.03908.1 | 710  | 20151  | 0         | 334 | 336 | 99 -  | 375 | 710  | 19816  | 20151  |
| UN25481 | Rsa1.0.00570.1 | 938  | 75002  | 0         | 359 | 360 | 99 +  | 578 | 937  | 3251   | 3610   |
| UN25482 | Rsa1.0.07021.1 | 1090 | 10016  | 1.00E-147 | 315 | 334 | 94 -  | 409 | 730  | 7093   | 7426   |
| UN25483 | Rsa1.0.00351.1 | 845  | 413096 | 1.00E-122 | 246 | 254 | 96 +  | 306 | 559  | 266861 | 267114 |
| UN25484 | Rsa1.0.00341.1 | 649  | 249309 | 1.00E-150 | 270 | 270 | 100 - | 380 | 649  | 123970 | 124239 |
| UN25485 | Rsa1.0.01649.1 | 1313 | 41624  | 1.00E-109 | 233 | 241 | 96 -  | 2   | 241  | 37920  | 38158  |
| UN25486 | Rsa1.0.00697.1 | 1429 | 67913  | 0         | 822 | 877 | 93 +  | 2   | 868  | 42237  | 43113  |
| UN25487 | Rsa1.0.01090.1 | 643  | 54385  | 0         | 503 | 510 | 98 +  | 1   | 510  | 7042   | 7548   |
| UN25488 | Rsa1.0.09577.1 | 1305 | 6275   | 0         | 652 | 655 | 99 -  | 237 | 888  | 1281   | 1935   |
| UN25489 | Rsa1.0.00025.1 | 1801 | 277312 | 0         | 785 | 792 | 99 -  | 1   | 791  | 265538 | 266329 |
| UN25490 | Rsa1.0.03728.1 | 1406 | 21147  | 0         | 501 | 530 | 94 +  | 11  | 540  | 3486   | 4003   |
| UN25491 | Rsa1.0.00162.1 | 815  | 239935 | 0         | 780 | 815 | 95 +  | 3   | 815  | 14921  | 15716  |
| UN25492 | Rsa1.0.02726.1 | 1161 | 28404  | 0         | 404 | 422 | 95 +  | 746 | 1161 | 22727  | 23146  |
| UN25493 | Rsa1.0.04066.1 | 590  | 19262  | 0         | 369 | 373 | 98 +  | 4   | 376  | 7121   | 7493   |
| UN25494 | Rsa1.0.00378.1 | 1150 | 89892  | 0         | 635 | 669 | 94 -  | 2   | 661  | 48520  | 49172  |
| UN25495 | Rsa1.0.03178.1 | 599  | 24798  | 5.00E-48  | 113 | 118 | 95 -  | 38  | 155  | 9993   | 10110  |
| UN25496 | Rsa1.0.04169.1 | 1260 | 18712  | 0         | 453 | 455 | 99 -  | 806 | 1260 | 1006   | 1460   |
| UN25497 | Rsa1.0.15320.1 | 723  | 2688   | 0         | 513 | 518 | 99 -  | 199 | 716  | 741    | 1254   |
| UN25498 | Rsa1.0.03572.1 | 548  | 146346 | 1.00E-171 | 304 | 304 | 100 - | 3   | 306  | 137177 | 137480 |
| UN25499 | Rsa1.0.06516.1 | 812  | 10866  | 1.00E-98  | 192 | 195 | 98 +  | 245 | 439  | 6415   | 6609   |
| UN25500 | Rsa1.0.43953.1 | 1094 | 511    | 0         | 441 | 442 | 99 +  | 271 | 712  | 70     | 511    |
| UN25501 | Rsa1.0.01297.1 | 807  | 49029  | 0         | 458 | 460 | 99 -  | 347 | 806  | 30626  | 31085  |
| UN25502 | Rsa1.0.00453.1 | 683  | 83031  | 1.00E-115 | 398 | 461 | 86 +  | 1   | 449  | 27529  | 27974  |
| UN25503 | Rsa1.0.31902.1 | 473  | 715    | 1.00E-133 | 240 | 240 | 100 - | 159 | 398  | 1      | 240    |
| UN25504 | Rsa1.0.00813.1 | 832  | 63202  | 0         | 787 | 815 | 96 -  | 9   | 822  | 18501  | 19314  |



|         |                |      |        |           |      |      |       |      |      |        |        |
|---------|----------------|------|--------|-----------|------|------|-------|------|------|--------|--------|
| UN25505 | Rsa1.0.00431.1 | 1469 | 85391  | 0         | 421  | 446  | 94 +  | 1028 | 1469 | 16430  | 16868  |
| UN25506 | Rsa1.0.01561.1 | 1015 | 43227  | 1.00E-130 | 294  | 311  | 94 -  | 703  | 1010 | 27521  | 27826  |
| UN25507 | Rsa1.0.00005.1 | 1419 | 353093 | 1.00E-171 | 410  | 441  | 92 -  | 980  | 1419 | 143852 | 144275 |
| UN25508 | Rsa1.0.00007.1 | 717  | 239325 | 1.00E-169 | 331  | 341  | 97 -  | 129  | 469  | 209156 | 209496 |
| UN25509 | Rsa1.0.00508.1 | 722  | 194352 | 0         | 333  | 334  | 99 -  | 389  | 722  | 186858 | 187191 |
| UN25510 | Rsa1.0.00192.1 | 746  | 278200 | 0         | 342  | 343  | 99 +  | 84   | 426  | 26743  | 27085  |
| UN25511 | Rsa1.0.00945.1 | 1664 | 58714  | 0         | 658  | 660  | 99 -  | 885  | 1544 | 50045  | 50704  |
| UN25512 | Rsa1.0.00336.1 | 765  | 445051 | 9.00E-69  | 133  | 133  | 100 + | 216  | 348  | 305579 | 305711 |
| UN25513 | Rsa1.0.02131.1 | 887  | 34754  | 0         | 882  | 883  | 99 -  | 5    | 887  | 17969  | 18851  |
| UN25514 | Rsa1.0.02855.1 | 980  | 27271  | 0         | 829  | 901  | 92 -  | 3    | 886  | 10359  | 11241  |
| UN25515 | Rsa1.0.04884.1 | 859  | 15599  | 0         | 365  | 370  | 98 +  | 490  | 859  | 9289   | 9655   |
| UN25516 | Rsa1.0.00472.1 | 1423 | 398134 | 0         | 389  | 403  | 96 +  | 465  | 867  | 166818 | 167220 |
| UN25517 | Rsa1.0.00554.1 | 736  | 150953 | 1.00E-109 | 262  | 283  | 92 +  | 49   | 331  | 119424 | 119694 |
| UN25518 | Rsa1.0.00250.1 | 1882 | 273771 | 0         | 509  | 538  | 94 -  | 690  | 1209 | 230593 | 231129 |
| UN25519 | Rsa1.0.11160.1 | 757  | 5600   | 1.00E-152 | 273  | 273  | 100 + | 484  | 756  | 1870   | 2142   |
| UN25520 | Rsa1.0.00869.1 | 704  | 61627  | 0         | 363  | 367  | 98 -  | 339  | 704  | 13380  | 13746  |
| UN25521 | Rsa1.0.04614.1 | 1389 | 16641  | 0         | 369  | 371  | 99 +  | 3    | 373  | 6637   | 7007   |
| UN25522 | Rsa1.0.00055.1 | 674  | 520193 | 1.00E-115 | 300  | 326  | 92 -  | 353  | 674  | 153916 | 154237 |
| UN25523 | Rsa1.0.00008.1 | 767  | 358124 | 0         | 435  | 437  | 99 +  | 329  | 765  | 28198  | 28634  |
| UN25524 | Rsa1.0.01774.1 | 733  | 39528  | 1.00E-155 | 287  | 290  | 98 -  | 444  | 733  | 23042  | 23331  |
| UN25525 | Rsa1.0.04886.1 | 920  | 15597  | 0         | 903  | 920  | 98 -  | 2    | 920  | 8199   | 9118   |
| UN25526 | Rsa1.0.00265.1 | 724  | 220635 | 1.00E-110 | 295  | 323  | 91 -  | 4    | 325  | 195834 | 196155 |
| UN25527 | Rsa1.0.00978.1 | 1188 | 57739  | 0         | 581  | 604  | 96 -  | 17   | 611  | 26879  | 27481  |
| UN25528 | Rsa1.0.03399.1 | 1412 | 23204  | 0         | 1401 | 1411 | 99 +  | 3    | 1412 | 3509   | 4919   |
| UN25529 | Rsa1.0.00052.1 | 920  | 162771 | 0         | 651  | 654  | 99 +  | 2    | 655  | 150425 | 151078 |
| UN25530 | Rsa1.0.01494.1 | 1726 | 44641  | 0         | 1254 | 1256 | 99 +  | 3    | 1257 | 34269  | 35524  |
| UN25531 | Rsa1.0.02748.1 | 774  | 28242  | 0         | 440  | 442  | 99 +  | 1    | 442  | 11621  | 12062  |
| UN25532 | Rsa1.0.09946.1 | 1482 | 6076   | 0         | 560  | 564  | 99 -  | 253  | 815  | 516    | 1079   |
| UN25533 | Rsa1.0.04248.1 | 1549 | 18287  | 0         | 553  | 587  | 94 +  | 967  | 1549 | 5963   | 6538   |
| UN25534 | Rsa1.0.00081.1 | 634  | 143261 | 0         | 597  | 643  | 92 -  | 6    | 634  | 123489 | 124125 |
| UN25535 | Rsa1.0.00304.1 | 999  | 97429  | 0         | 959  | 972  | 98 +  | 3    | 974  | 8657   | 9621   |
| UN25536 | Rsa1.0.00374.1 | 675  | 165738 | 0         | 364  | 371  | 98 +  | 1    | 371  | 128292 | 128662 |
| UN25537 | Rsa1.0.00146.1 | 898  | 149343 | 1.00E-180 | 404  | 429  | 94 -  | 473  | 898  | 53955  | 54375  |
| UN25538 | Rsa1.0.02299.1 | 886  | 32857  | 1.00E-142 | 263  | 265  | 99 -  | 2    | 266  | 23200  | 23464  |
| UN25539 | Rsa1.0.00122.1 | 733  | 265937 | 0         | 472  | 486  | 97 +  | 247  | 732  | 30383  | 30868  |
| UN25540 | Rsa1.0.02952.1 | 604  | 26492  | 0         | 582  | 602  | 96 +  | 1    | 602  | 20505  | 21102  |
| UN25541 | Rsa1.0.00716.1 | 422  | 67078  | 7.00E-56  | 132  | 139  | 94 -  | 73   | 211  | 33613  | 33751  |
| UN25542 | Rsa1.0.00125.1 | 641  | 253043 | 1.00E-101 | 307  | 346  | 88 +  | 294  | 639  | 168487 | 168820 |
| UN25543 | Rsa1.0.01553.1 | 775  | 43379  | 1.00E-150 | 324  | 343  | 94 +  | 341  | 670  | 15175  | 15517  |

|         |                |      |        |           |      |      |       |     |      |        |        |
|---------|----------------|------|--------|-----------|------|------|-------|-----|------|--------|--------|
| UN25544 | Rsa1.0_04085.1 | 890  | 19168  | 0         | 542  | 551  | 98 -  | 3   | 553  | 755    | 1305   |
| UN25545 | Rsa1.0_00201.1 | 1012 | 232851 | 0         | 606  | 629  | 96 -  | 1   | 626  | 131887 | 132515 |
| UN25546 | Rsa1.0_01742.1 | 985  | 39962  | 1.00E-120 | 319  | 348  | 91 +  | 640 | 985  | 6645   | 6991   |
| UN25547 | Rsa1.0_00306.1 | 879  | 146760 | 0         | 723  | 725  | 99 -  | 1   | 725  | 91980  | 92704  |
| UN25548 | Rsa1.0_00959.1 | 1473 | 58202  | 1.00E-180 | 356  | 365  | 97 -  | 744 | 1106 | 1503   | 1867   |
| UN25549 | Rsa1.0_01951.1 | 671  | 36941  | 0         | 348  | 352  | 98 +  | 4   | 351  | 12706  | 13057  |
| UN25550 | Rsa1.0_00632.1 | 1348 | 183777 | 0         | 1179 | 1322 | 89 +  | 59  | 1328 | 36474  | 37768  |
| UN25551 | Rsa1.0_02966.1 | 1005 | 135126 | 0         | 445  | 463  | 96 -  | 540 | 1002 | 17388  | 17844  |
| UN25552 | Rsa1.0_00119.1 | 651  | 467509 | 0         | 487  | 512  | 95 +  | 137 | 648  | 374988 | 375498 |
| UN25553 | Rsa1.0_01437.1 | 581  | 45887  | 0         | 570  | 577  | 98 -  | 4   | 580  | 4478   | 5051   |
| UN25554 | Rsa1.0_05510.1 | 1161 | 13470  | 1.00E-145 | 298  | 310  | 96 +  | 333 | 642  | 1981   | 2290   |
| UN25555 | Rsa1.0_04223.1 | 923  | 18407  | 0         | 409  | 423  | 96 -  | 1   | 418  | 6198   | 6620   |
| UN25556 | Rsa1.0_00184.1 | 633  | 218748 | 1.00E-160 | 321  | 331  | 96 +  | 2   | 327  | 213949 | 214279 |
| UN25557 | Rsa1.0_05822.1 | 693  | 12521  | 0         | 515  | 530  | 97 +  | 167 | 693  | 11655  | 12182  |
| UN25558 | Rsa1.0_00058.1 | 668  | 159921 | 0         | 492  | 525  | 93 +  | 1   | 516  | 49032  | 49550  |
| UN25559 | Rsa1.0_00186.1 | 814  | 112669 | 0         | 668  | 705  | 94 -  | 3   | 695  | 111868 | 112571 |
| UN25560 | Rsa1.0_00012.1 | 1210 | 222148 | 0         | 443  | 443  | 100 - | 768 | 1210 | 28088  | 28530  |
| UN25561 | Rsa1.0_02835.1 | 1491 | 27491  | 0         | 360  | 369  | 97 +  | 1   | 366  | 9381   | 9749   |
| UN25562 | Rsa1.0_04218.1 | 705  | 18423  | 1.00E-128 | 331  | 359  | 92 +  | 353 | 703  | 12805  | 13160  |
| UN25563 | Rsa1.0_03895.1 | 770  | 20206  | 0         | 511  | 545  | 93 +  | 1   | 536  | 13661  | 14200  |
| UN25564 | Rsa1.0_00347.1 | 537  | 93048  | 0         | 504  | 529  | 95 -  | 3   | 527  | 66839  | 67359  |
| UN25565 | Rsa1.0_03410.1 | 800  | 23147  | 0         | 605  | 668  | 90 +  | 154 | 800  | 10247  | 10903  |
| UN25566 | Rsa1.0_03238.1 | 816  | 24432  | 1.00E-110 | 249  | 263  | 94 -  | 490 | 751  | 12785  | 13047  |
| UN25567 | Rsa1.0_00977.1 | 554  | 198001 | 0         | 522  | 564  | 92 +  | 3   | 553  | 47145  | 47694  |
| UN25568 | Rsa1.0_01046.1 | 1198 | 152989 | 0         | 1180 | 1194 | 98 +  | 6   | 1198 | 116464 | 117657 |
| UN25569 | Rsa1.0_02268.1 | 828  | 33172  | 0         | 505  | 506  | 99 +  | 323 | 828  | 24316  | 24821  |
| UN25570 | Rsa1.0_00538.1 | 657  | 77149  | 1.00E-61  | 121  | 121  | 100 - | 472 | 592  | 19371  | 19491  |
| UN25571 | Rsa1.0_08828.1 | 1011 | 6889   | 0         | 592  | 595  | 99 -  | 416 | 1010 | 427    | 1019   |
| UN25572 | Rsa1.0_04429.1 | 1141 | 17393  | 0         | 469  | 480  | 97 -  | 578 | 1057 | 16125  | 16601  |
| UN25573 | Rsa1.0_00055.1 | 1625 | 520193 | 0         | 1345 | 1431 | 93 -  | 5   | 1393 | 168864 | 170294 |
| UN25574 | Rsa1.0_00092.1 | 702  | 659932 | 0         | 689  | 693  | 99 -  | 10  | 700  | 16769  | 17461  |
| UN25575 | Rsa1.0_21831.1 | 852  | 1169   | 1.00E-111 | 230  | 239  | 96 -  | 451 | 689  | 793    | 1025   |
| UN25576 | Rsa1.0_00079.1 | 975  | 606987 | 0         | 677  | 725  | 93 +  | 253 | 975  | 488673 | 489396 |
| UN25577 | Rsa1.0_00554.1 | 650  | 150953 | 0         | 638  | 650  | 98 +  | 1   | 648  | 14011  | 14657  |
| UN25578 | Rsa1.0_01556.1 | 648  | 163858 | 0         | 645  | 646  | 99 +  | 4   | 648  | 145273 | 145918 |
| UN25579 | Rsa1.0_03594.1 | 1380 | 21868  | 0         | 400  | 405  | 98 +  | 974 | 1378 | 12933  | 13337  |
| UN25580 | Rsa1.0_20157.1 | 1285 | 1333   | 0         | 1082 | 1104 | 98 +  | 2   | 1104 | 230    | 1333   |
| UN25581 | Rsa1.0_02633.1 | 171  | 29315  | 3.00E-43  | 110  | 117  | 94 +  | 1   | 117  | 655    | 771    |
| UN25582 | Rsa1.0_00394.1 | 990  | 148426 | 0         | 380  | 391  | 97 +  | 316 | 706  | 129296 | 129686 |

|         |                |      |        |           |      |      |       |     |      |        |        |
|---------|----------------|------|--------|-----------|------|------|-------|-----|------|--------|--------|
| UN25583 | Rsa1.0.01122.1 | 568  | 53369  | 0         | 470  | 495  | 94 -  | 1   | 495  | 41230  | 41706  |
| UN25584 | Rsa1.0.07528.1 | 650  | 9195   | 7.00E-63  | 175  | 192  | 91 -  | 12  | 201  | 1135   | 1314   |
| UN25585 | Rsa1.0.01122.1 | 1117 | 53369  | 0         | 664  | 685  | 96 +  | 433 | 1117 | 28559  | 29243  |
| UN25586 | Rsa1.0.00685.1 | 720  | 68515  | 1.00E-138 | 288  | 299  | 96 +  | 426 | 720  | 2414   | 2712   |
| UN25587 | Rsa1.0.02050.1 | 793  | 35570  | 0         | 345  | 351  | 98 +  | 1   | 351  | 9327   | 9675   |
| UN25588 | Rsa1.0.05140.1 | 856  | 14710  | 1.00E-136 | 247  | 247  | 100 + | 1   | 247  | 8842   | 9088   |
| UN25589 | Rsa1.0.02050.1 | 752  | 35570  | 1.00E-132 | 332  | 362  | 91 -  | 391 | 752  | 9332   | 9675   |
| UN25590 | Rsa1.0.02246.1 | 958  | 33435  | 0         | 924  | 960  | 96 +  | 1   | 958  | 8754   | 9705   |
| UN25591 | Rsa1.0.01119.1 | 877  | 53459  | 0         | 871  | 875  | 99 -  | 2   | 876  | 4306   | 5180   |
| UN25592 | Rsa1.0.07745.1 | 1000 | 8662   | 0         | 988  | 997  | 99 +  | 2   | 998  | 7464   | 8458   |
| UN25593 | Rsa1.0.00892.1 | 813  | 60703  | 0         | 774  | 810  | 95 +  | 2   | 811  | 48095  | 48902  |
| UN25594 | Rsa1.0.00100.1 | 867  | 249232 | 0         | 606  | 665  | 91 -  | 105 | 752  | 221602 | 222245 |
| UN25595 | Rsa1.0.00629.1 | 1039 | 71381  | 1.00E-156 | 371  | 399  | 92 +  | 656 | 1039 | 38665  | 39061  |
| UN25596 | Rsa1.0.00615.1 | 1046 | 72235  | 0         | 1028 | 1043 | 98 +  | 1   | 1043 | 60743  | 61785  |
| UN25597 | Rsa1.0.00879.1 | 786  | 61297  | 0         | 751  | 782  | 96 -  | 3   | 784  | 53173  | 53947  |
| UN25598 | Rsa1.0.01180.1 | 764  | 51517  | 1.00E-126 | 337  | 367  | 91 -  | 414 | 763  | 33801  | 34166  |
| UN25599 | Rsa1.0.00329.1 | 789  | 222544 | 1.00E-120 | 300  | 324  | 92 +  | 1   | 320  | 178081 | 178397 |
| UN25600 | Rsa1.0.05721.1 | 941  | 12821  | 0         | 545  | 549  | 99 -  | 2   | 550  | 5611   | 6158   |
| UN25601 | Rsa1.0.02941.1 | 834  | 26583  | 0         | 806  | 831  | 96 +  | 4   | 832  | 22066  | 22894  |
| UN25602 | Rsa1.0.00773.1 | 1459 | 64839  | 0         | 498  | 506  | 98 -  | 816 | 1321 | 12562  | 13067  |
| UN25603 | Rsa1.0.01513.1 | 793  | 44234  | 1.00E-108 | 278  | 297  | 93 +  | 3   | 294  | 17205  | 17498  |
| UN25604 | Rsa1.0.02360.1 | 997  | 32203  | 0         | 534  | 547  | 97 -  | 451 | 997  | 24034  | 24578  |
| UN25605 | Rsa1.0.02203.1 | 676  | 164532 | 1.00E-165 | 306  | 310  | 98 +  | 366 | 675  | 27488  | 27797  |
| UN25606 | Rsa1.0.00347.1 | 876  | 93048  | 0         | 415  | 439  | 94 +  | 440 | 872  | 12000  | 12434  |
| UN25607 | Rsa1.0.04142.1 | 738  | 18861  | 0         | 423  | 433  | 97 +  | 304 | 736  | 13126  | 13558  |
| UN25608 | Rsa1.0.04626.1 | 1137 | 16611  | 0         | 820  | 822  | 99 +  | 1   | 822  | 9518   | 10337  |
| UN25609 | Rsa1.0.01951.1 | 624  | 36941  | 1.00E-159 | 313  | 321  | 97 +  | 300 | 619  | 13558  | 13878  |
| UN25610 | Rsa1.0.01695.1 | 843  | 40848  | 0         | 819  | 846  | 96 -  | 1   | 838  | 15373  | 16218  |
| UN25611 | Rsa1.0.00103.1 | 782  | 135304 | 0         | 778  | 780  | 99 +  | 1   | 780  | 116122 | 116899 |
| UN25612 | Rsa1.0.01203.1 | 821  | 50848  | 0         | 761  | 798  | 95 +  | 20  | 802  | 18639  | 19429  |
| UN25613 | Rsa1.0.00552.1 | 465  | 206757 | 6.00E-75  | 149  | 151  | 98 +  | 279 | 429  | 73559  | 73709  |
| UN25614 | Rsa1.0.03107.1 | 808  | 25349  | 0         | 430  | 431  | 99 -  | 378 | 808  | 18515  | 18945  |
| UN25615 | Rsa1.0.25951.1 | 830  | 912    | 0         | 582  | 612  | 95 +  | 230 | 830  | 77     | 686    |
| UN25616 | Rsa1.0.05496.1 | 688  | 13533  | 1.00E-178 | 365  | 380  | 96 +  | 315 | 688  | 456    | 835    |
| UN25617 | Rsa1.0.00025.1 | 684  | 277312 | 0         | 420  | 430  | 97 -  | 255 | 684  | 79958  | 80384  |
| UN25618 | Rsa1.0.02229.1 | 843  | 33672  | 0         | 467  | 467  | 100 + | 377 | 843  | 2770   | 3236   |
| UN25619 | Rsa1.0.02420.1 | 666  | 31580  | 1.00E-149 | 289  | 295  | 97 +  | 4   | 297  | 7435   | 7729   |
| UN25620 | Rsa1.0.01960.1 | 804  | 36766  | 1.00E-128 | 269  | 279  | 96 -  | 442 | 716  | 5864   | 6142   |
| UN25621 | Rsa1.0.00107.1 | 681  | 431659 | 0         | 645  | 683  | 94 +  | 1   | 681  | 281216 | 281889 |

|         |                |      |        |           |      |      |      |     |      |        |        |
|---------|----------------|------|--------|-----------|------|------|------|-----|------|--------|--------|
| UN25622 | Rsa1.0.00213.1 | 638  | 108167 | 1.00E-107 | 275  | 297  | 92 + | 346 | 638  | 39822  | 40109  |
| UN25623 | Rsa1.0.04002.1 | 1031 | 19608  | 0         | 493  | 515  | 95 - | 1   | 502  | 17610  | 18124  |
| UN25624 | Rsa1.0.07309.1 | 950  | 9572   | 0         | 487  | 514  | 94 + | 438 | 949  | 4292   | 4800   |
| UN25625 | Rsa1.0.00028.1 | 913  | 293984 | 0         | 906  | 914  | 99 - | 3   | 913  | 131795 | 132708 |
| UN25626 | Rsa1.0.04405.1 | 631  | 17508  | 1.00E-138 | 355  | 383  | 92 + | 1   | 376  | 14239  | 14619  |
| UN25627 | Rsa1.0.00848.1 | 1197 | 152362 | 1.00E-112 | 249  | 261  | 95 - | 26  | 284  | 19591  | 19850  |
| UN25628 | Rsa1.0.02494.1 | 1069 | 132923 | 0         | 960  | 989  | 97 + | 2   | 987  | 6063   | 7046   |
| UN25629 | Rsa1.0.01608.1 | 663  | 170540 | 1.00E-174 | 319  | 322  | 99 - | 3   | 324  | 38412  | 38733  |
| UN25630 | Rsa1.0.04134.1 | 349  | 149811 | 1.00E-151 | 277  | 278  | 99 + | 72  | 349  | 8952   | 9228   |
| UN25631 | Rsa1.0.02079.1 | 1106 | 35306  | 0         | 418  | 432  | 96 + | 3   | 426  | 3680   | 4111   |
| UN25632 | Rsa1.0.02991.1 | 642  | 26178  | 4.00E-89  | 237  | 257  | 92 - | 5   | 252  | 4392   | 4647   |
| UN25633 | Rsa1.0.01504.1 | 842  | 189978 | 0         | 499  | 505  | 98 - | 3   | 507  | 9044   | 9547   |
| UN25634 | Rsa1.0.01090.1 | 791  | 54385  | 0         | 401  | 427  | 93 + | 13  | 439  | 3206   | 3626   |
| UN25635 | Rsa1.0.05078.1 | 734  | 14912  | 1.00E-179 | 365  | 378  | 96 + | 139 | 516  | 7505   | 7880   |
| UN25636 | Rsa1.0.02099.1 | 627  | 35030  | 1.00E-160 | 337  | 350  | 96 - | 273 | 620  | 29860  | 30208  |
| UN25637 | Rsa1.0.03238.1 | 729  | 24432  | 1.00E-110 | 249  | 263  | 94 - | 443 | 704  | 12785  | 13047  |
| UN25638 | Rsa1.0.00293.1 | 1178 | 339294 | 0         | 433  | 446  | 97 + | 738 | 1176 | 254540 | 254985 |
| UN25639 | Rsa1.0.00078.1 | 990  | 175053 | 0         | 789  | 815  | 96 + | 175 | 989  | 78916  | 79730  |
| UN25640 | Rsa1.0.02185.1 | 724  | 34150  | 0         | 709  | 740  | 95 - | 3   | 724  | 27259  | 27997  |
| UN25641 | Rsa1.0.02694.1 | 1971 | 28610  | 0         | 1923 | 1980 | 97 + | 1   | 1970 | 9145   | 11123  |
| UN25642 | Rsa1.0.00010.1 | 968  | 294827 | 0         | 958  | 969  | 98 + | 2   | 968  | 94094  | 95060  |
| UN25643 | Rsa1.0.00017.1 | 573  | 752458 | 1.00E-127 | 284  | 301  | 94 + | 1   | 299  | 96901  | 97201  |
| UN25644 | Rsa1.0.00213.1 | 713  | 108167 | 1.00E-128 | 292  | 308  | 94 + | 14  | 317  | 14651  | 14954  |
| UN25645 | Rsa1.0.00433.1 | 798  | 85381  | 9.00E-97  | 262  | 284  | 92 + | 12  | 293  | 65201  | 65477  |
| UN25646 | Rsa1.0.00566.1 | 840  | 75325  | 0         | 362  | 367  | 98 + | 472 | 838  | 38342  | 38706  |
| UN25647 | Rsa1.0.00019.1 | 768  | 301669 | 0         | 734  | 762  | 96 + | 8   | 766  | 237109 | 237867 |
| UN25648 | Rsa1.0.11285.1 | 1152 | 5556   | 0         | 386  | 389  | 99 - | 1   | 389  | 3883   | 4271   |
| UN25649 | Rsa1.0.01674.1 | 797  | 168300 | 1.00E-165 | 305  | 308  | 99 - | 1   | 308  | 4084   | 4388   |
| UN25650 | Rsa1.0.00472.1 | 888  | 398134 | 0         | 696  | 781  | 89 + | 108 | 876  | 4539   | 5301   |
| UN25651 | Rsa1.0.00111.1 | 872  | 390088 | 0         | 451  | 486  | 92 - | 373 | 851  | 219088 | 219568 |
| UN25652 | Rsa1.0.00375.1 | 960  | 90207  | 0         | 502  | 508  | 98 - | 1   | 508  | 2405   | 2912   |
| UN25653 | Rsa1.0.59564.1 | 1095 | 384    | 1.00E-171 | 344  | 357  | 96 - | 29  | 385  | 1      | 357    |
| UN25654 | Rsa1.0.05782.1 | 1072 | 12646  | 1.00E-130 | 264  | 273  | 96 + | 770 | 1042 | 9196   | 9468   |
| UN25655 | Rsa1.0.00034.1 | 770  | 260119 | 1.00E-131 | 258  | 266  | 96 + | 505 | 770  | 89248  | 89505  |
| UN25656 | Rsa1.0.01693.1 | 701  | 40876  | 0         | 660  | 667  | 98 - | 5   | 671  | 19291  | 19957  |
| UN25657 | Rsa1.0.39035.1 | 821  | 576    | 1.00E-117 | 256  | 268  | 95 + | 552 | 819  | 316    | 574    |
| UN25658 | Rsa1.0.08258.1 | 676  | 7649   | 1.00E-110 | 262  | 278  | 94 + | 407 | 676  | 6849   | 7126   |
| UN25659 | Rsa1.0.02283.1 | 1088 | 33024  | 0         | 861  | 890  | 96 + | 176 | 1065 | 17110  | 17992  |
| UN25660 | Rsa1.0.00089.1 | 1082 | 406142 | 0         | 611  | 633  | 96 + | 33  | 659  | 58191  | 58821  |

|         |                |      |        |           |      |      |       |     |      |        |        |
|---------|----------------|------|--------|-----------|------|------|-------|-----|------|--------|--------|
| UN25661 | Rsa1.0.05264.1 | 1299 | 14327  | 0         | 422  | 425  | 99 +  | 873 | 1297 | 1627   | 2051   |
| UN25662 | Rsa1.0.05076.1 | 486  | 14916  | 1.00E-104 | 207  | 212  | 97 +  | 3   | 214  | 13053  | 13264  |
| UN25663 | Rsa1.0.03724.1 | 1039 | 21171  | 0         | 495  | 503  | 98 +  | 13  | 513  | 16464  | 16966  |
| UN25664 | Rsa1.0.04041.1 | 922  | 19430  | 1.00E-130 | 265  | 273  | 97 +  | 650 | 922  | 463    | 734    |
| UN25665 | Rsa1.0.01246.1 | 788  | 49968  | 0         | 591  | 615  | 96 +  | 1   | 614  | 34283  | 34886  |
| UN25666 | Rsa1.0.05778.1 | 1625 | 12656  | 0         | 1428 | 1456 | 98 -  | 2   | 1457 | 7      | 1462   |
| UN25667 | Rsa1.0.00263.1 | 1007 | 224968 | 0         | 474  | 481  | 98 -  | 261 | 738  | 17314  | 17794  |
| UN25668 | Rsa1.0.06392.1 | 702  | 11104  | 0         | 542  | 542  | 100 + | 160 | 701  | 10528  | 11069  |
| UN25669 | Rsa1.0.00205.1 | 690  | 193401 | 1.00E-95  | 297  | 335  | 88 +  | 205 | 533  | 130428 | 130748 |
| UN25670 | Rsa1.0.00152.1 | 814  | 257730 | 6.00E-61  | 129  | 131  | 98 +  | 60  | 188  | 96333  | 96463  |
| UN25671 | Rsa1.0.00058.1 | 1121 | 159921 | 0         | 475  | 479  | 99 -  | 3   | 481  | 95773  | 96251  |
| UN25672 | Rsa1.0.00567.1 | 892  | 75260  | 4.00E-59  | 415  | 504  | 82 -  | 159 | 657  | 10852  | 11346  |
| UN25673 | Rsa1.0.00539.1 | 762  | 76926  | 1.00E-104 | 213  | 220  | 96 +  | 176 | 395  | 57431  | 57650  |
| UN25674 | Rsa1.0.00879.1 | 755  | 61297  | 1.00E-125 | 283  | 299  | 94 -  | 450 | 747  | 23764  | 24055  |
| UN25675 | Rsa1.0.00807.1 | 534  | 63607  | 1.00E-100 | 236  | 251  | 94 +  | 1   | 247  | 40784  | 41034  |
| UN25676 | Rsa1.0.00515.1 | 555  | 78417  | 1.00E-112 | 231  | 238  | 97 +  | 5   | 242  | 43599  | 43835  |
| UN25677 | Rsa1.0.00075.1 | 435  | 146680 | 1.00E-100 | 308  | 342  | 90 +  | 44  | 383  | 132990 | 133318 |
| UN25678 | Rsa1.0.04448.1 | 1249 | 17309  | 0         | 1181 | 1266 | 93 +  | 1   | 1249 | 9895   | 11158  |
| UN25679 | Rsa1.0.00394.1 | 1302 | 148426 | 0         | 865  | 874  | 98 +  | 1   | 874  | 105908 | 106779 |
| UN25680 | Rsa1.0.00192.1 | 562  | 278200 | 1.00E-122 | 268  | 282  | 95 +  | 3   | 277  | 18342  | 18623  |
| UN25681 | Rsa1.0.00303.1 | 926  | 97468  | 1.00E-122 | 237  | 242  | 97 -  | 685 | 926  | 31022  | 31263  |
| UN25682 | Rsa1.0.00475.1 | 873  | 81678  | 0         | 831  | 888  | 93 -  | 1   | 871  | 38086  | 38961  |
| UN25683 | Rsa1.0.00645.1 | 775  | 189716 | 9.00E-66  | 137  | 140  | 97 +  | 411 | 550  | 4503   | 4642   |
| UN25684 | Rsa1.0.03887.1 | 1100 | 20247  | 0         | 1011 | 1052 | 96 -  | 51  | 1100 | 17971  | 19019  |
| UN25685 | Rsa1.0.18748.1 | 956  | 1541   | 1.00E-171 | 338  | 348  | 97 -  | 99  | 446  | 186    | 531    |
| UN25686 | Rsa1.0.00518.1 | 757  | 78360  | 8.00E-97  | 180  | 180  | 100 + | 284 | 463  | 59969  | 60148  |
| UN25687 | Rsa1.0.00773.1 | 1193 | 64839  | 2.00E-86  | 210  | 225  | 93 -  | 420 | 644  | 58210  | 58431  |
| UN25688 | Rsa1.0.01920.1 | 1359 | 158533 | 0         | 1189 | 1271 | 93 -  | 50  | 1308 | 22406  | 23673  |
| UN25689 | Rsa1.0.02501.1 | 831  | 30764  | 0         | 525  | 550  | 95 -  | 283 | 831  | 10529  | 11072  |
| UN25690 | Rsa1.0.01476.1 | 790  | 172928 | 0         | 765  | 774  | 98 +  | 17  | 790  | 144440 | 145213 |
| UN25691 | Rsa1.0.04201.1 | 830  | 18487  | 1.00E-129 | 237  | 238  | 99 -  | 591 | 828  | 2909   | 3146   |
| UN25692 | Rsa1.0.08317.1 | 734  | 7554   | 0         | 695  | 715  | 97 +  | 3   | 717  | 1857   | 2567   |
| UN25693 | Rsa1.0.00310.1 | 769  | 96852  | 1.00E-77  | 154  | 156  | 98 +  | 215 | 370  | 16896  | 17051  |
| UN25694 | Rsa1.0.00020.1 | 631  | 283099 | 1.00E-104 | 251  | 268  | 93 -  | 365 | 631  | 75594  | 75860  |
| UN25695 | Rsa1.0.00739.1 | 666  | 66155  | 1.00E-112 | 229  | 237  | 96 +  | 6   | 242  | 58213  | 58449  |
| UN25696 | Rsa1.0.14356.1 | 1259 | 3485   | 0         | 489  | 501  | 97 +  | 314 | 814  | 1709   | 2209   |
| UN25697 | Rsa1.0.02462.1 | 850  | 31158  | 0         | 638  | 640  | 99 +  | 209 | 848  | 3034   | 3673   |
| UN25698 | Rsa1.0.01633.1 | 1269 | 41868  | 1.00E-152 | 283  | 285  | 99 -  | 1   | 284  | 8461   | 8745   |
| UN25699 | Rsa1.0.03201.1 | 979  | 157656 | 0         | 404  | 416  | 97 +  | 2   | 407  | 18907  | 19322  |



|         |                |      |        |           |      |      |       |      |      |        |        |
|---------|----------------|------|--------|-----------|------|------|-------|------|------|--------|--------|
| UN25739 | Rsa1.0.02402.1 | 1099 | 31710  | 0         | 527  | 547  | 96 -  | 3    | 544  | 30607  | 31153  |
| UN25740 | Rsa1.0.00546.1 | 643  | 76523  | 0         | 441  | 442  | 99 +  | 203  | 643  | 69605  | 70046  |
| UN25741 | Rsa1.0.03634.1 | 726  | 145192 | 1.00E-153 | 293  | 298  | 98 -  | 428  | 725  | 131076 | 131372 |
| UN25742 | Rsa1.0.04934.1 | 547  | 143962 | 0         | 518  | 555  | 93 -  | 3    | 543  | 141884 | 142435 |
| UN25743 | Rsa1.0.02247.1 | 1213 | 33427  | 0         | 698  | 731  | 95 -  | 2    | 732  | 28261  | 28979  |
| UN25744 | Rsa1.0.02493.1 | 622  | 30854  | 1.00E-138 | 274  | 281  | 97 -  | 214  | 494  | 6059   | 6333   |
| UN25745 | Rsa1.0.00593.1 | 736  | 143463 | 1.00E-114 | 221  | 225  | 98 -  | 225  | 449  | 55065  | 55289  |
| UN25746 | Rsa1.0.07201.1 | 710  | 9732   | 0         | 389  | 391  | 99 -  | 1    | 391  | 159    | 549    |
| UN25747 | Rsa1.0.00772.1 | 765  | 64856  | 0         | 530  | 541  | 97 +  | 3    | 543  | 12934  | 13474  |
| UN25748 | Rsa1.0.00038.1 | 753  | 314568 | 1.00E-103 | 352  | 404  | 87 +  | 341  | 742  | 141728 | 142109 |
| UN25749 | Rsa1.0.00904.1 | 830  | 180594 | 0         | 418  | 432  | 96 -  | 3    | 434  | 19352  | 19778  |
| UN25750 | Rsa1.0.02064.1 | 1216 | 35476  | 0         | 516  | 533  | 96 +  | 690  | 1216 | 15632  | 16163  |
| UN25751 | Rsa1.0.01031.1 | 970  | 56236  | 6.00E-83  | 169  | 173  | 97 +  | 345  | 517  | 8951   | 9123   |
| UN25752 | Rsa1.0.00625.1 | 750  | 71672  | 0         | 743  | 748  | 99 +  | 4    | 750  | 26544  | 27287  |
| UN25753 | Rsa1.0.00639.1 | 991  | 165873 | 0         | 865  | 878  | 98 +  | 44   | 920  | 128454 | 129331 |
| UN25754 | Rsa1.0.01650.1 | 634  | 41589  | 0         | 578  | 629  | 91 -  | 2    | 629  | 34730  | 35340  |
| UN25755 | Rsa1.0.04250.1 | 1700 | 18264  | 0         | 371  | 378  | 98 +  | 1325 | 1700 | 8455   | 8832   |
| UN25756 | Rsa1.0.01875.1 | 739  | 37849  | 1.00E-134 | 282  | 295  | 95 +  | 17   | 306  | 28834  | 29128  |
| UN25757 | Rsa1.0.02154.1 | 942  | 34528  | 1.00E-126 | 233  | 234  | 99 +  | 2    | 235  | 21248  | 21481  |
| UN25758 | Rsa1.0.00967.1 | 1768 | 58049  | 0         | 919  | 930  | 98 +  | 1    | 919  | 11596  | 12525  |
| UN25759 | Rsa1.0.00018.1 | 604  | 410899 | 1.00E-164 | 353  | 371  | 95 -  | 7    | 375  | 189085 | 189449 |
| UN25760 | Rsa1.0.03037.1 | 984  | 25825  | 0         | 377  | 378  | 99 -  | 605  | 982  | 4292   | 4669   |
| UN25761 | Rsa1.0.01924.1 | 815  | 37226  | 0         | 809  | 813  | 99 +  | 1    | 813  | 26093  | 26905  |
| UN25762 | Rsa1.0.01969.1 | 492  | 153351 | 1.00E-113 | 278  | 298  | 93 -  | 1    | 295  | 22253  | 22544  |
| UN25763 | Rsa1.0.01295.1 | 1031 | 49040  | 0         | 1003 | 1030 | 97 +  | 1    | 1030 | 47021  | 48050  |
| UN25764 | Rsa1.0.00329.1 | 960  | 222544 | 0         | 433  | 433  | 100 + | 1    | 433  | 29889  | 30321  |
| UN25765 | Rsa1.0.01529.1 | 926  | 43871  | 0         | 402  | 403  | 99 +  | 3    | 405  | 11419  | 11821  |
| UN25766 | Rsa1.0.01600.1 | 720  | 42537  | 1.00E-121 | 276  | 295  | 93 +  | 4    | 286  | 10066  | 10360  |
| UN25767 | Rsa1.0.00376.1 | 1071 | 90101  | 0         | 479  | 508  | 94 +  | 555  | 1058 | 49559  | 50056  |
| UN25768 | Rsa1.0.03231.1 | 1420 | 24456  | 1.00E-132 | 323  | 353  | 91 +  | 1077 | 1413 | 23697  | 24048  |
| UN25769 | Rsa1.0.00114.1 | 1024 | 131330 | 2.00E-76  | 199  | 214  | 92 -  | 772  | 984  | 127598 | 127810 |
| UN25770 | Rsa1.0.00019.1 | 827  | 301669 | 0         | 820  | 825  | 99 +  | 4    | 827  | 48487  | 49311  |
| UN25771 | Rsa1.0.00307.1 | 1660 | 199003 | 0         | 860  | 869  | 98 -  | 792  | 1660 | 170974 | 171841 |
| UN25772 | Rsa1.0.02585.1 | 1140 | 29865  | 1.00E-87  | 168  | 169  | 99 -  | 131  | 299  | 19979  | 20147  |
| UN25773 | Rsa1.0.00515.1 | 983  | 78417  | 0         | 978  | 980  | 99 -  | 3    | 982  | 59805  | 60784  |
| UN25774 | Rsa1.0.00457.1 | 1062 | 337301 | 1.00E-150 | 293  | 301  | 97 +  | 494  | 794  | 288997 | 289297 |
| UN25775 | Rsa1.0.14816.1 | 1088 | 3046   | 0         | 517  | 519  | 99 -  | 570  | 1088 | 1792   | 2310   |
| UN25776 | Rsa1.0.02322.1 | 1191 | 32555  | 1.00E-166 | 300  | 301  | 99 -  | 4    | 304  | 3350   | 3650   |
| UN25777 | Rsa1.0.05262.1 | 1621 | 14334  | 0         | 800  | 815  | 98 +  | 623  | 1433 | 11001  | 11815  |

|         |                |      |        |           |      |      |       |      |      |        |        |
|---------|----------------|------|--------|-----------|------|------|-------|------|------|--------|--------|
| UN25778 | Rsa1.0.01789.1 | 1196 | 39250  | 0         | 445  | 470  | 94 +  | 732  | 1196 | 19826  | 20290  |
| UN25779 | Rsa1.0.05410.1 | 1592 | 13840  | 0         | 800  | 831  | 96 -  | 625  | 1445 | 4714   | 5539   |
| UN25780 | Rsa1.0.09527.1 | 1104 | 6311   | 1.00E-150 | 300  | 310  | 96 -  | 519  | 828  | 5870   | 6179   |
| UN25781 | Rsa1.0.00697.1 | 899  | 67913  | 0         | 719  | 761  | 94 +  | 1    | 761  | 42350  | 43104  |
| UN25782 | Rsa1.0.00329.1 | 1249 | 222544 | 0         | 562  | 589  | 95 -  | 661  | 1247 | 72466  | 73053  |
| UN25783 | Rsa1.0.02220.1 | 981  | 176031 | 0         | 558  | 586  | 95 -  | 410  | 981  | 156555 | 157138 |
| UN25784 | Rsa1.0.00237.1 | 780  | 235974 | 1.00E-162 | 363  | 384  | 94 +  | 400  | 780  | 225556 | 225938 |
| UN25785 | Rsa1.0.02625.1 | 1147 | 139104 | 0         | 336  | 336  | 100 - | 3    | 338  | 132490 | 132825 |
| UN25786 | Rsa1.0.03491.1 | 728  | 22541  | 1.00E-165 | 427  | 471  | 90 -  | 82   | 552  | 9065   | 9535   |
| UN25787 | Rsa1.0.01026.1 | 1401 | 171624 | 4.00E-69  | 152  | 157  | 96 +  | 256  | 412  | 166697 | 166851 |
| UN25788 | Rsa1.0.00111.1 | 907  | 390088 | 1.00E-165 | 325  | 334  | 97 +  | 574  | 907  | 7100   | 7432   |
| UN25789 | Rsa1.0.00647.1 | 1442 | 70440  | 0         | 1031 | 1064 | 96 -  | 7    | 1070 | 42016  | 43079  |
| UN25790 | Rsa1.0.03607.1 | 1264 | 21817  | 1.00E-155 | 309  | 318  | 97 +  | 949  | 1264 | 3939   | 4256   |
| UN25791 | Rsa1.0.00181.1 | 1594 | 114269 | 0         | 623  | 638  | 97 -  | 851  | 1488 | 101327 | 101959 |
| UN25792 | Rsa1.0.05489.1 | 1142 | 13562  | 0         | 553  | 564  | 98 -  | 212  | 775  | 6625   | 7188   |
| UN25793 | Rsa1.0.00198.1 | 1182 | 222963 | 0         | 508  | 537  | 94 -  | 653  | 1180 | 128582 | 129114 |
| UN25794 | Rsa1.0.18460.1 | 1109 | 1595   | 1.00E-178 | 341  | 348  | 97 -  | 760  | 1107 | 829    | 1175   |
| UN25795 | Rsa1.0.03955.1 | 936  | 19884  | 4.00E-90  | 285  | 322  | 88 -  | 635  | 936  | 5810   | 6126   |
| UN25796 | Rsa1.0.01146.1 | 1787 | 163455 | 0         | 545  | 558  | 97 +  | 478  | 1035 | 159451 | 160008 |
| UN25797 | Rsa1.0.01134.1 | 1060 | 52829  | 0         | 356  | 357  | 99 -  | 704  | 1060 | 41842  | 42198  |
| UN25798 | Rsa1.0.00486.1 | 739  | 80875  | 0         | 423  | 442  | 95 +  | 5    | 446  | 32585  | 33022  |
| UN25799 | Rsa1.0.00176.1 | 1361 | 240984 | 0         | 528  | 550  | 96 +  | 808  | 1354 | 232410 | 232959 |
| UN25800 | Rsa1.0.00009.1 | 1411 | 232558 | 1.00E-160 | 306  | 311  | 98 +  | 1002 | 1311 | 40154  | 40464  |
| UN25801 | Rsa1.0.05822.1 | 1575 | 12521  | 1.00E-165 | 322  | 328  | 98 -  | 103  | 428  | 7677   | 8004   |
| UN25802 | Rsa1.0.00116.1 | 559  | 365886 | 1.00E-111 | 257  | 270  | 95 +  | 290  | 557  | 33998  | 34263  |
| UN25803 | Rsa1.0.02260.1 | 657  | 33260  | 0         | 373  | 375  | 99 -  | 1    | 375  | 26323  | 26697  |
| UN25804 | Rsa1.0.00292.1 | 1235 | 98141  | 0         | 435  | 457  | 95 -  | 730  | 1186 | 46187  | 46640  |
| UN25805 | Rsa1.0.00137.1 | 747  | 122457 | 0         | 332  | 335  | 99 -  | 245  | 579  | 41739  | 42073  |
| UN25806 | Rsa1.0.04493.1 | 1394 | 17137  | 0         | 1383 | 1395 | 99 -  | 3    | 1394 | 15052  | 16446  |
| UN25807 | Rsa1.0.02870.1 | 760  | 27102  | 1.00E-145 | 393  | 434  | 90 +  | 1    | 431  | 9320   | 9735   |
| UN25808 | Rsa1.0.01843.1 | 711  | 265131 | 1.00E-152 | 297  | 305  | 97 -  | 321  | 625  | 9831   | 10135  |
| UN25809 | Rsa1.0.04384.1 | 1190 | 17629  | 0         | 432  | 432  | 100 + | 749  | 1180 | 4187   | 4618   |
| UN25810 | Rsa1.0.02314.1 | 713  | 32642  | 0         | 447  | 461  | 96 +  | 8    | 464  | 14192  | 14652  |
| UN25811 | Rsa1.0.00152.1 | 627  | 257730 | 1.00E-150 | 336  | 356  | 94 +  | 1    | 352  | 203804 | 204155 |
| UN25812 | Rsa1.0.00686.1 | 811  | 68511  | 0         | 476  | 502  | 94 +  | 3    | 499  | 26775  | 27271  |
| UN25813 | Rsa1.0.01174.1 | 750  | 51696  | 0         | 378  | 385  | 98 -  | 3    | 387  | 35988  | 36372  |
| UN25814 | Rsa1.0.01453.1 | 756  | 45449  | 1.00E-129 | 267  | 277  | 96 -  | 413  | 686  | 11450  | 11726  |
| UN25815 | Rsa1.0.05122.1 | 996  | 14791  | 2.00E-92  | 197  | 205  | 96 +  | 316  | 520  | 9372   | 9576   |
| UN25816 | Rsa1.0.00153.1 | 757  | 192931 | 1.00E-126 | 307  | 330  | 93 +  | 2    | 324  | 143094 | 143418 |



|         |                |      |        |           |      |      |       |      |      |        |        |
|---------|----------------|------|--------|-----------|------|------|-------|------|------|--------|--------|
| UN25817 | Rsa1.0_17258.1 | 1136 | 1878   | 1.00E-135 | 244  | 244  | 100 + | 893  | 1136 | 627    | 870    |
| UN25818 | Rsa1.0_01516.1 | 1289 | 44196  | 0         | 937  | 995  | 94 +  | 116  | 1109 | 26673  | 27663  |
| UN25819 | Rsa1.0_01819.1 | 765  | 38834  | 0         | 437  | 439  | 99 -  | 156  | 594  | 15079  | 15517  |
| UN25820 | Rsa1.0_09186.1 | 957  | 6572   | 0         | 367  | 378  | 97 +  | 568  | 945  | 5790   | 6167   |
| UN25821 | Rsa1.0_00118.1 | 914  | 130637 | 0         | 864  | 913  | 94 +  | 6    | 912  | 39948  | 40856  |
| UN25822 | Rsa1.0_05739.1 | 986  | 12778  | 0         | 391  | 392  | 99 -  | 527  | 918  | 2233   | 2624   |
| UN25823 | Rsa1.0_01803.1 | 1054 | 173846 | 0         | 395  | 408  | 96 -  | 8    | 415  | 143938 | 144344 |
| UN25824 | Rsa1.0_00816.1 | 795  | 403350 | 0         | 354  | 360  | 98 +  | 3    | 362  | 267886 | 268245 |
| UN25825 | Rsa1.0_00916.1 | 561  | 59789  | 1.00E-142 | 259  | 260  | 99 +  | 302  | 561  | 35590  | 35849  |
| UN25826 | Rsa1.0_00100.1 | 800  | 249232 | 0         | 497  | 505  | 98 -  | 1    | 501  | 13427  | 13930  |
| UN25827 | Rsa1.0_01975.1 | 1076 | 36578  | 1.00E-135 | 272  | 280  | 97 +  | 1    | 280  | 31179  | 31457  |
| UN25828 | Rsa1.0_28597.1 | 895  | 809    | 1.00E-161 | 288  | 288  | 100 + | 3    | 290  | 188    | 475    |
| UN25829 | Rsa1.0_00379.1 | 1150 | 89865  | 0         | 455  | 459  | 99 +  | 688  | 1146 | 52172  | 52629  |
| UN25830 | Rsa1.0_00833.1 | 1533 | 62621  | 0         | 505  | 544  | 92 -  | 653  | 1187 | 28121  | 28663  |
| UN25831 | Rsa1.0_00154.1 | 1384 | 189461 | 1.00E-160 | 290  | 291  | 99 +  | 920  | 1210 | 174178 | 174468 |
| UN25832 | Rsa1.0_00182.1 | 1177 | 142305 | 0         | 1124 | 1184 | 94 +  | 2    | 1177 | 66817  | 67998  |
| UN25833 | Rsa1.0_00272.1 | 1160 | 447836 | 1.00E-124 | 243  | 247  | 98 -  | 15   | 261  | 219273 | 219518 |
| UN25834 | Rsa1.0_00289.1 | 624  | 98620  | 0         | 472  | 476  | 99 -  | 152  | 624  | 1200   | 1675   |
| UN25835 | Rsa1.0_01943.1 | 1035 | 37042  | 1.00E-138 | 309  | 325  | 95 +  | 1    | 323  | 4782   | 5105   |
| UN25836 | Rsa1.0_00706.1 | 955  | 291570 | 0         | 369  | 385  | 95 -  | 114  | 498  | 182172 | 182556 |
| UN25837 | Rsa1.0_14791.1 | 588  | 3064   | 2.33E-156 | 280  | 286  | 97 -  | 30   | 315  | 2779   | 3064   |
| UN25838 | Rsa1.0_13708.1 | 966  | 4447   | 1.00E-118 | 263  | 276  | 95 +  | 2    | 276  | 3623   | 3897   |
| UN25839 | Rsa1.0_03940.1 | 1175 | 19962  | 0         | 522  | 522  | 100 + | 654  | 1175 | 7982   | 8503   |
| UN25840 | Rsa1.0_04267.1 | 887  | 18193  | 0         | 543  | 543  | 100 + | 1    | 543  | 10652  | 11194  |
| UN25841 | Rsa1.0_01025.1 | 1278 | 56471  | 5.00E-81  | 412  | 498  | 82 -  | 607  | 1104 | 21252  | 21749  |
| UN25842 | Rsa1.0_01540.1 | 1406 | 151890 | 0         | 496  | 507  | 97 -  | 103  | 609  | 144792 | 145298 |
| UN25843 | Rsa1.0_07745.1 | 981  | 8662   | 0         | 874  | 934  | 93 +  | 39   | 968  | 7521   | 8447   |
| UN25844 | Rsa1.0_01188.1 | 991  | 51362  | 1.00E-166 | 334  | 346  | 96 -  | 4    | 348  | 31071  | 31409  |
| UN25845 | Rsa1.0_21906.1 | 1608 | 1163   | 0         | 491  | 495  | 99 -  | 1112 | 1606 | 320    | 813    |
| UN25846 | Rsa1.0_01666.1 | 1157 | 173972 | 1.00E-115 | 248  | 259  | 95 -  | 760  | 1018 | 23919  | 24175  |
| UN25847 | Rsa1.0_00508.1 | 1048 | 194352 | 0         | 773  | 774  | 99 -  | 275  | 1048 | 186839 | 187612 |
| UN25848 | Rsa1.0_00369.1 | 696  | 266462 | 0         | 693  | 694  | 99 +  | 3    | 696  | 136076 | 136769 |
| UN25849 | Rsa1.0_02071.1 | 820  | 35409  | 1.00E-142 | 290  | 299  | 96 +  | 3    | 297  | 5457   | 5755   |
| UN25850 | Rsa1.0_01153.1 | 786  | 52264  | 0         | 678  | 697  | 97 -  | 1    | 696  | 36760  | 37456  |
| UN25851 | Rsa1.0_00745.1 | 1513 | 66067  | 0         | 376  | 377  | 99 +  | 678  | 1054 | 47567  | 47943  |
| UN25852 | Rsa1.0_01606.1 | 854  | 42432  | 0         | 848  | 854  | 99 +  | 3    | 853  | 1028   | 1881   |
| UN25853 | Rsa1.0_00425.1 | 1414 | 147080 | 0         | 1165 | 1204 | 96 +  | 186  | 1389 | 95758  | 96961  |
| UN25854 | Rsa1.0_01156.1 | 1013 | 52147  | 1.00E-117 | 341  | 382  | 89 -  | 2    | 362  | 29706  | 30072  |
| UN25855 | Rsa1.0_05653.1 | 548  | 13043  | 0         | 461  | 483  | 95 -  | 3    | 475  | 9994   | 10471  |

|         |                |      |        |           |      |      |      |     |      |        |        |
|---------|----------------|------|--------|-----------|------|------|------|-----|------|--------|--------|
| UN25856 | Rsa1.0.00412.1 | 797  | 86935  | 3.00E-90  | 225  | 241  | 93 + | 3   | 238  | 47423  | 47661  |
| UN25857 | Rsa1.0.00092.1 | 719  | 659932 | 0         | 377  | 393  | 95 + | 67  | 457  | 242903 | 243295 |
| UN25858 | Rsa1.0.03668.1 | 580  | 21483  | 0         | 418  | 436  | 95 + | 150 | 580  | 11438  | 11872  |
| UN25859 | Rsa1.0.02716.1 | 894  | 28465  | 1.00E-175 | 318  | 319  | 99 + | 576 | 894  | 1935   | 2252   |
| UN25860 | Rsa1.0.04623.1 | 807  | 16617  | 0         | 765  | 805  | 95 + | 2   | 806  | 15491  | 16288  |
| UN25861 | Rsa1.0.01732.1 | 564  | 40194  | 0         | 538  | 566  | 95 - | 3   | 564  | 37238  | 37790  |
| UN25862 | Rsa1.0.02633.1 | 811  | 29315  | 1.00E-164 | 337  | 351  | 96 + | 1   | 351  | 429    | 771    |
| UN25863 | Rsa1.0.00341.1 | 627  | 249309 | 1.00E-110 | 244  | 259  | 94 - | 375 | 625  | 123981 | 124239 |
| UN25864 | Rsa1.0.00924.1 | 544  | 59524  | 1.00E-103 | 206  | 210  | 98 - | 335 | 544  | 3653   | 3861   |
| UN25865 | Rsa1.0.01836.1 | 1408 | 38503  | 0         | 1079 | 1140 | 94 + | 1   | 1133 | 17891  | 19026  |
| UN25866 | Rsa1.0.00720.1 | 1109 | 66931  | 1.00E-133 | 244  | 245  | 99 - | 1   | 245  | 57375  | 57619  |
| UN25867 | Rsa1.0.01142.1 | 980  | 52464  | 0         | 374  | 378  | 98 + | 604 | 980  | 19737  | 20113  |
| UN25868 | Rsa1.0.01530.1 | 859  | 43820  | 0         | 517  | 535  | 96 + | 7   | 539  | 31510  | 32044  |
| UN25869 | Rsa1.0.02684.1 | 617  | 28676  | 1.00E-124 | 235  | 238  | 98 - | 126 | 363  | 1255   | 1492   |
| UN25870 | Rsa1.0.00294.1 | 1183 | 144860 | 0         | 772  | 780  | 98 - | 1   | 780  | 43286  | 44065  |
| UN25871 | Rsa1.0.00220.1 | 883  | 192936 | 1.00E-123 | 248  | 255  | 97 + | 1   | 255  | 143209 | 143460 |
| UN25872 | Rsa1.0.24098.1 | 889  | 1007   | 1.00E-128 | 317  | 345  | 91 + | 7   | 342  | 603    | 947    |
| UN25873 | Rsa1.0.01707.1 | 807  | 40686  | 0         | 389  | 396  | 98 - | 340 | 732  | 25823  | 26218  |
| UN25874 | Rsa1.0.05078.1 | 983  | 14912  | 0         | 665  | 691  | 96 + | 190 | 878  | 9687   | 10375  |
| UN25875 | Rsa1.0.03005.1 | 1764 | 26082  | 0         | 335  | 336  | 99 - | 7   | 342  | 10402  | 10737  |
| UN25876 | Rsa1.0.01593.1 | 1389 | 150996 | 0         | 399  | 415  | 96 + | 1   | 414  | 149438 | 149850 |
| UN25877 | Rsa1.0.00772.1 | 586  | 64856  | 1.00E-95  | 198  | 205  | 96 - | 3   | 207  | 53782  | 53980  |
| UN25878 | Rsa1.0.00273.1 | 2035 | 326186 | 0         | 594  | 639  | 92 - | 439 | 1070 | 307454 | 308084 |
| UN25879 | Rsa1.0.00580.1 | 724  | 74515  | 0         | 343  | 346  | 99 + | 379 | 724  | 18782  | 19127  |
| UN25880 | Rsa1.0.01468.1 | 931  | 45146  | 1.00E-160 | 340  | 358  | 94 - | 2   | 359  | 16769  | 17126  |
| UN25881 | Rsa1.0.00017.1 | 908  | 752458 | 0         | 411  | 436  | 94 + | 2   | 437  | 412620 | 413043 |
| UN25882 | Rsa1.0.18045.1 | 802  | 1683   | 3.00E-87  | 186  | 192  | 96 + | 608 | 798  | 531    | 722    |
| UN25883 | Rsa1.0.03550.1 | 775  | 22154  | 1.00E-142 | 271  | 276  | 98 - | 450 | 725  | 8342   | 8617   |
| UN25884 | Rsa1.0.02117.1 | 1367 | 34843  | 0         | 544  | 557  | 97 + | 807 | 1363 | 4965   | 5521   |
| UN25885 | Rsa1.0.00959.1 | 1180 | 58202  | 0         | 560  | 578  | 96 - | 608 | 1178 | 56858  | 57430  |
| UN25886 | Rsa1.0.00146.1 | 838  | 149343 | 0         | 354  | 363  | 97 + | 1   | 363  | 54013  | 54375  |
| UN25887 | Rsa1.0.00009.1 | 885  | 232558 | 0         | 417  | 425  | 98 + | 4   | 428  | 22925  | 23349  |
| UN25888 | Rsa1.0.02253.1 | 831  | 33356  | 1.00E-180 | 456  | 509  | 89 - | 23  | 509  | 13144  | 13636  |
| UN25889 | Rsa1.0.00934.1 | 778  | 193516 | 8.00E-94  | 197  | 204  | 96 + | 228 | 427  | 34494  | 34697  |
| UN25890 | Rsa1.0.03122.1 | 554  | 25207  | 0         | 504  | 516  | 97 + | 42  | 554  | 12895  | 13408  |
| UN25891 | Rsa1.0.01730.1 | 1179 | 40223  | 0         | 628  | 684  | 91 - | 9   | 672  | 33408  | 34086  |
| UN25892 | Rsa1.0.00327.1 | 786  | 94892  | 0         | 747  | 786  | 95 + | 1   | 786  | 75612  | 76397  |
| UN25893 | Rsa1.0.02245.1 | 710  | 33478  | 0         | 385  | 400  | 96 + | 3   | 400  | 6327   | 6725   |
| UN25894 | Rsa1.0.01205.1 | 858  | 50795  | 0         | 851  | 859  | 99 - | 2   | 858  | 8471   | 9329   |

|         |                |      |        |           |      |      |       |     |      |        |        |
|---------|----------------|------|--------|-----------|------|------|-------|-----|------|--------|--------|
| UN25895 | Rsa1.0.00127.1 | 1295 | 127446 | 0         | 450  | 454  | 99 +  | 12  | 465  | 79074  | 79527  |
| UN25896 | Rsa1.0.02207.1 | 1587 | 33914  | 0         | 582  | 600  | 97 -  | 996 | 1586 | 33318  | 33914  |
| UN25897 | Rsa1.0.03634.1 | 953  | 145192 | 0         | 459  | 494  | 92 -  | 1   | 491  | 127454 | 127927 |
| UN25898 | Rsa1.0.00546.1 | 568  | 76523  | 0         | 481  | 494  | 97 -  | 3   | 496  | 58508  | 59000  |
| UN25899 | Rsa1.0.01124.1 | 617  | 53295  | 0         | 594  | 617  | 96 -  | 3   | 616  | 25589  | 26204  |
| UN25900 | Rsa1.0.04191.1 | 983  | 18578  | 0         | 436  | 439  | 99 +  | 543 | 981  | 7426   | 7864   |
| UN25901 | Rsa1.0.01613.1 | 641  | 182542 | 1.00E-169 | 302  | 302  | 100 - | 186 | 487  | 28807  | 29108  |
| UN25902 | Rsa1.0.03434.1 | 648  | 22960  | 0         | 389  | 389  | 100 - | 259 | 647  | 12088  | 12476  |
| UN25903 | Rsa1.0.00812.1 | 564  | 63233  | 1.00E-144 | 292  | 303  | 96 +  | 7   | 309  | 17155  | 17451  |
| UN25904 | Rsa1.0.02377.1 | 1024 | 31994  | 0         | 374  | 385  | 97 +  | 3   | 387  | 17523  | 17902  |
| UN25905 | Rsa1.0.00609.1 | 616  | 72785  | 1.00E-176 | 365  | 381  | 95 -  | 244 | 615  | 4919   | 5297   |
| UN25906 | Rsa1.0.02210.1 | 1160 | 33857  | 0         | 475  | 489  | 97 -  | 678 | 1160 | 22538  | 23023  |
| UN25907 | Rsa1.0.00619.1 | 1170 | 71985  | 0         | 490  | 492  | 99 -  | 150 | 641  | 15001  | 15492  |
| UN25908 | Rsa1.0.00414.1 | 789  | 202190 | 0         | 333  | 334  | 99 +  | 2   | 335  | 185478 | 185811 |
| UN25909 | Rsa1.0.00697.1 | 855  | 67913  | 0         | 829  | 856  | 96 +  | 1   | 852  | 47731  | 48583  |
| UN25910 | Rsa1.0.03303.1 | 1134 | 23890  | 0         | 641  | 658  | 97 -  | 472 | 1129 | 9594   | 10250  |
| UN25911 | Rsa1.0.01649.1 | 622  | 41624  | 1.00E-103 | 231  | 242  | 95 -  | 1   | 242  | 27705  | 27944  |
| UN25912 | Rsa1.0.00697.1 | 1012 | 67913  | 0         | 577  | 602  | 95 +  | 324 | 925  | 51202  | 51800  |
| UN25913 | Rsa1.0.02503.1 | 547  | 30709  | 1.00E-100 | 245  | 263  | 93 -  | 17  | 270  | 26808  | 27069  |
| UN25914 | Rsa1.0.09388.1 | 1243 | 6405   | 5.00E-47  | 121  | 129  | 93 +  | 949 | 1077 | 3630   | 3758   |
| UN25915 | Rsa1.0.00562.1 | 1318 | 75565  | 0         | 1143 | 1197 | 95 +  | 13  | 1195 | 23851  | 25043  |
| UN25916 | Rsa1.0.00697.1 | 1421 | 67913  | 0         | 779  | 828  | 94 -  | 593 | 1420 | 42278  | 43104  |
| UN25917 | Rsa1.0.00030.1 | 740  | 250988 | 1.00E-104 | 245  | 260  | 94 +  | 3   | 258  | 150140 | 150396 |
| UN25918 | Rsa1.0.00198.1 | 1195 | 222963 | 1.00E-173 | 333  | 341  | 97 +  | 1   | 341  | 125227 | 125567 |
| UN25919 | Rsa1.0.01035.1 | 1717 | 56019  | 0         | 449  | 449  | 100 + | 1   | 449  | 45047  | 45495  |
| UN25920 | Rsa1.0.00697.1 | 848  | 67913  | 0         | 843  | 847  | 99 -  | 4   | 848  | 47733  | 48579  |
| UN25921 | Rsa1.0.01246.1 | 1199 | 49968  | 0         | 1182 | 1209 | 97 -  | 1   | 1197 | 21624  | 22823  |
| UN25922 | Rsa1.0.00258.1 | 740  | 102381 | 8.00E-94  | 181  | 183  | 98 +  | 545 | 727  | 7934   | 8116   |
| UN25923 | Rsa1.0.00135.1 | 1273 | 178077 | 0         | 517  | 521  | 99 -  | 753 | 1271 | 102875 | 103395 |
| UN25924 | Rsa1.0.00128.1 | 835  | 228675 | 0         | 461  | 461  | 100 - | 2   | 462  | 13227  | 13687  |
| UN25925 | Rsa1.0.28434.1 | 1205 | 815    | 1.00E-165 | 378  | 400  | 94 -  | 1   | 397  | 49     | 443    |
| UN25926 | Rsa1.0.00065.1 | 952  | 454616 | 1.00E-169 | 311  | 314  | 99 +  | 3   | 316  | 172353 | 172666 |
| UN25927 | Rsa1.0.00715.1 | 512  | 67116  | 9.00E-99  | 277  | 302  | 91 -  | 222 | 512  | 40280  | 40581  |
| UN25928 | Rsa1.0.03263.1 | 1305 | 24268  | 0         | 967  | 1029 | 93 +  | 293 | 1305 | 20569  | 21586  |
| UN25929 | Rsa1.0.00546.1 | 566  | 76523  | 1.00E-134 | 344  | 373  | 92 +  | 188 | 558  | 11381  | 11739  |
| UN25930 | Rsa1.0.00645.1 | 1231 | 189716 | 0         | 428  | 446  | 95 +  | 701 | 1146 | 34408  | 34853  |
| UN25931 | Rsa1.0.05884.1 | 819  | 12337  | 0         | 812  | 817  | 99 +  | 3   | 819  | 10020  | 10835  |
| UN25932 | Rsa1.0.48565.1 | 1413 | 466    | 1.00E-152 | 397  | 439  | 90 -  | 995 | 1410 | 1      | 439    |
| UN25933 | Rsa1.0.01220.1 | 1123 | 161775 | 1.00E-127 | 310  | 336  | 92 -  | 13  | 346  | 7326   | 7649   |

|         |                |      |        |           |      |      |       |      |      |        |        |
|---------|----------------|------|--------|-----------|------|------|-------|------|------|--------|--------|
| UN25934 | Rsa1.0_00322.1 | 849  | 212233 | 1.00E-151 | 271  | 271  | 100 - | 1    | 271  | 6591   | 6861   |
| UN25935 | Rsa1.0_19036.1 | 1375 | 1492   | 1.00E-147 | 351  | 375  | 93 -  | 1001 | 1371 | 542    | 909    |
| UN25936 | Rsa1.0_00006.1 | 1021 | 396176 | 1.00E-133 | 262  | 269  | 97 +  | 289  | 557  | 222130 | 222398 |
| UN25937 | Rsa1.0_04181.1 | 1318 | 18615  | 0         | 693  | 723  | 95 -  | 339  | 1061 | 936    | 1658   |
| UN25938 | Rsa1.0_00662.1 | 942  | 192183 | 9.00E-85  | 192  | 202  | 95 -  | 740  | 941  | 32229  | 32422  |
| UN25939 | Rsa1.0_01371.1 | 831  | 47079  | 0         | 812  | 831  | 97 +  | 1    | 831  | 32210  | 33033  |
| UN25940 | Rsa1.0_00016.1 | 1135 | 831256 | 1.00E-115 | 304  | 332  | 91 -  | 799  | 1128 | 370682 | 371003 |
| UN25941 | Rsa1.0_11462.1 | 1197 | 5500   | 0         | 1033 | 1034 | 99 -  | 162  | 1195 | 2298   | 3331   |
| UN25942 | Rsa1.0_02902.1 | 1182 | 26907  | 1.00E-104 | 252  | 269  | 93 +  | 917  | 1176 | 5590   | 5855   |
| UN25943 | Rsa1.0_00394.1 | 1312 | 148426 | 0         | 522  | 568  | 91 +  | 746  | 1310 | 67486  | 68037  |
| UN25944 | Rsa1.0_01974.1 | 1174 | 36583  | 0         | 421  | 421  | 100 + | 1    | 421  | 11619  | 12039  |
| UN25945 | Rsa1.0_23487.1 | 1328 | 1045   | 0         | 731  | 766  | 95 -  | 469  | 1234 | 279    | 1041   |
| UN25946 | Rsa1.0_00923.1 | 781  | 153678 | 0         | 609  | 618  | 98 -  | 1    | 615  | 45727  | 46344  |
| UN25947 | Rsa1.0_01951.1 | 1279 | 36941  | 0         | 1226 | 1283 | 95 -  | 1    | 1277 | 5978   | 7259   |
| UN25948 | Rsa1.0_22589.1 | 1393 | 1109   | 0         | 646  | 647  | 99 -  | 3    | 649  | 1      | 647    |
| UN25949 | Rsa1.0_01750.1 | 669  | 39816  | 1.00E-109 | 241  | 255  | 94 -  | 1    | 245  | 22530  | 22783  |
| UN25950 | Rsa1.0_00303.1 | 1146 | 97468  | 0         | 788  | 889  | 88 -  | 9    | 876  | 44008  | 44880  |
| UN25951 | Rsa1.0_00924.1 | 564  | 59524  | 1.00E-106 | 211  | 215  | 98 -  | 350  | 564  | 3648   | 3861   |
| UN25952 | Rsa1.0_01335.1 | 1216 | 47894  | 0         | 467  | 509  | 91 -  | 4    | 491  | 3909   | 4411   |
| UN25953 | Rsa1.0_00101.1 | 764  | 267193 | 1.00E-138 | 276  | 285  | 96 -  | 124  | 408  | 258416 | 258700 |
| UN25954 | Rsa1.0_00464.1 | 978  | 82253  | 1.00E-129 | 306  | 324  | 94 +  | 50   | 366  | 14632  | 14950  |
| UN25955 | Rsa1.0_00037.1 | 1265 | 307838 | 0         | 461  | 474  | 97 +  | 4    | 469  | 241181 | 241654 |
| UN25956 | Rsa1.0_02555.1 | 1193 | 30146  | 1.00E-129 | 279  | 291  | 95 -  | 3    | 291  | 2219   | 2509   |
| UN25957 | Rsa1.0_01976.1 | 532  | 36570  | 3.00E-92  | 254  | 276  | 92 -  | 257  | 531  | 32521  | 32793  |
| UN25958 | Rsa1.0_00104.1 | 1208 | 368722 | 0         | 445  | 447  | 99 +  | 2    | 448  | 41572  | 42018  |
| UN25959 | Rsa1.0_00356.1 | 843  | 91521  | 0         | 491  | 510  | 96 +  | 321  | 828  | 34979  | 35485  |
| UN25960 | Rsa1.0_00979.1 | 1248 | 57733  | 1.00E-117 | 215  | 215  | 100 + | 1    | 215  | 40258  | 40472  |
| UN25961 | Rsa1.0_00140.1 | 889  | 121541 | 0         | 363  | 363  | 100 - | 151  | 513  | 49081  | 49443  |
| UN25962 | Rsa1.0_00833.1 | 1319 | 62621  | 0         | 420  | 426  | 98 -  | 895  | 1319 | 5195   | 5619   |
| UN25963 | Rsa1.0_00207.1 | 1223 | 248736 | 0         | 586  | 626  | 93 +  | 618  | 1223 | 3818   | 4443   |
| UN25964 | Rsa1.0_00457.1 | 915  | 337301 | 1.00E-119 | 271  | 287  | 94 -  | 20   | 297  | 130569 | 130855 |
| UN25965 | Rsa1.0_00302.1 | 1047 | 97521  | 1.00E-122 | 325  | 357  | 91 -  | 21   | 363  | 85022  | 85373  |
| UN25966 | Rsa1.0_03290.1 | 1124 | 24011  | 0         | 1078 | 1125 | 95 +  | 3    | 1124 | 22636  | 23755  |
| UN25967 | Rsa1.0_00104.1 | 1256 | 368722 | 0         | 807  | 841  | 95 -  | 77   | 916  | 213055 | 213895 |
| UN25968 | Rsa1.0_01550.1 | 901  | 43443  | 0         | 449  | 479  | 93 -  | 422  | 900  | 14576  | 15030  |
| UN25969 | Rsa1.0_01561.1 | 592  | 43227  | 1.00E-79  | 163  | 167  | 97 -  | 327  | 493  | 26162  | 26328  |
| UN25970 | Rsa1.0_00058.1 | 817  | 159921 | 0         | 392  | 410  | 95 -  | 409  | 817  | 84747  | 85153  |
| UN25971 | Rsa1.0_00014.1 | 627  | 348985 | 0         | 430  | 434  | 99 -  | 194  | 627  | 241630 | 242063 |
| UN25972 | Rsa1.0_01719.1 | 875  | 40388  | 5.00E-77  | 153  | 155  | 98 +  | 551  | 705  | 28284  | 28438  |

|         |                |      |        |           |      |      |       |      |      |        |        |
|---------|----------------|------|--------|-----------|------|------|-------|------|------|--------|--------|
| UN25973 | Rsa1.0_01786.1 | 962  | 133324 | 1.00E-147 | 302  | 312  | 96 -  | 650  | 961  | 100680 | 100988 |
| UN25974 | Rsa1.0_15016.1 | 440  | 2892   | 0         | 407  | 420  | 96 +  | 3    | 421  | 660    | 1079   |
| UN25975 | Rsa1.0_02314.1 | 577  | 32642  | 1.00E-167 | 320  | 327  | 97 -  | 230  | 552  | 14326  | 14652  |
| UN25976 | Rsa1.0_00744.1 | 1427 | 66084  | 0         | 372  | 389  | 95 +  | 1053 | 1427 | 53238  | 53626  |
| UN25977 | Rsa1.0_00567.1 | 738  | 75260  | 1.00E-141 | 255  | 255  | 100 - | 4    | 258  | 68879  | 69133  |
| UN25978 | Rsa1.0_00296.1 | 1213 | 97854  | 1.00E-151 | 321  | 337  | 95 -  | 377  | 713  | 52385  | 52718  |
| UN25979 | Rsa1.0_05823.1 | 1230 | 12521  | 1.00E-111 | 204  | 204  | 100 + | 1023 | 1226 | 10828  | 11031  |
| UN25980 | Rsa1.0_00120.1 | 1144 | 277288 | 0         | 955  | 955  | 100 - | 3    | 957  | 223009 | 223963 |
| UN25981 | Rsa1.0_00251.1 | 1469 | 303968 | 0         | 558  | 579  | 96 -  | 885  | 1462 | 83660  | 84232  |
| UN25982 | Rsa1.0_01316.1 | 852  | 48325  | 1.00E-98  | 240  | 256  | 93 -  | 598  | 851  | 5537   | 5788   |
| UN25983 | Rsa1.0_00016.1 | 575  | 831256 | 0         | 431  | 441  | 97 +  | 59   | 498  | 197887 | 198326 |
| UN25984 | Rsa1.0_00416.1 | 1200 | 86772  | 0         | 532  | 571  | 93 -  | 2    | 547  | 41164  | 41733  |
| UN25985 | Rsa1.0_01295.1 | 725  | 49040  | 0         | 461  | 464  | 99 +  | 1    | 462  | 22348  | 22811  |
| UN25986 | Rsa1.0_02165.1 | 745  | 34423  | 1.00E-120 | 271  | 289  | 93 -  | 468  | 745  | 187    | 474    |
| UN25987 | Rsa1.0_00055.1 | 1124 | 520193 | 0         | 743  | 773  | 96 +  | 3    | 774  | 64610  | 65377  |
| UN25988 | Rsa1.0_07129.1 | 932  | 9861   | 1.00E-163 | 292  | 292  | 100 - | 479  | 770  | 2436   | 2727   |
| UN25989 | Rsa1.0_04218.1 | 729  | 18423  | 1.00E-152 | 346  | 364  | 95 +  | 320  | 682  | 12805  | 13163  |
| UN25990 | Rsa1.0_37108.1 | 961  | 607    | 0         | 454  | 458  | 99 -  | 1    | 457  | 21     | 477    |
| UN25991 | Rsa1.0_01803.1 | 696  | 173846 | 1.00E-143 | 375  | 408  | 91 +  | 3    | 407  | 35617  | 36005  |
| UN25992 | Rsa1.0_03606.1 | 933  | 21818  | 1.00E-149 | 294  | 302  | 97 -  | 3    | 301  | 1339   | 1640   |
| UN25993 | Rsa1.0_01827.1 | 784  | 143321 | 0         | 633  | 652  | 97 +  | 3    | 651  | 134053 | 134704 |
| UN25994 | Rsa1.0_01094.1 | 1203 | 167285 | 0         | 541  | 552  | 98 +  | 494  | 1045 | 53683  | 54234  |
| UN25995 | Rsa1.0_00340.1 | 636  | 305782 | 1.00E-162 | 356  | 374  | 95 -  | 271  | 636  | 159725 | 160093 |
| UN25996 | Rsa1.0_00112.1 | 1000 | 132199 | 0         | 685  | 753  | 90 -  | 3    | 743  | 55783  | 56501  |
| UN25997 | Rsa1.0_20424.1 | 649  | 1306   | 1.00E-168 | 317  | 320  | 99 +  | 330  | 649  | 1      | 318    |
| UN25998 | Rsa1.0_00144.1 | 1279 | 120708 | 0         | 719  | 729  | 98 +  | 55   | 783  | 85247  | 85975  |
| UN25999 | Rsa1.0_04215.1 | 1139 | 18437  | 0         | 1134 | 1137 | 99 +  | 3    | 1139 | 7585   | 8721   |
| UN26000 | Rsa1.0_00059.1 | 997  | 159650 | 0         | 960  | 998  | 96 -  | 3    | 997  | 35757  | 36751  |
| UN26001 | Rsa1.0_00067.1 | 1638 | 415055 | 1.00E-170 | 333  | 342  | 97 -  | 388  | 727  | 242547 | 242888 |
| UN26002 | Rsa1.0_01230.1 | 1291 | 50221  | 1.00E-117 | 250  | 262  | 95 -  | 553  | 814  | 23481  | 23742  |
| UN26003 | Rsa1.0_01119.1 | 575  | 53459  | 1.00E-121 | 244  | 251  | 97 -  | 328  | 575  | 11678  | 11924  |
| UN26004 | Rsa1.0_05326.1 | 753  | 14139  | 1.00E-115 | 317  | 354  | 89 +  | 372  | 719  | 5288   | 5632   |
| UN26005 | Rsa1.0_00842.1 | 1225 | 62493  | 1.00E-102 | 205  | 210  | 97 +  | 3    | 212  | 27688  | 27897  |
| UN26006 | Rsa1.0_00851.1 | 680  | 62181  | 1.00E-137 | 299  | 315  | 94 -  | 368  | 680  | 30600  | 30914  |
| UN26007 | Rsa1.0_00483.1 | 873  | 81102  | 1.00E-122 | 288  | 303  | 95 -  | 567  | 866  | 56292  | 56592  |
| UN26008 | Rsa1.0_00059.1 | 816  | 159650 | 1.00E-144 | 269  | 272  | 98 -  | 545  | 816  | 23625  | 23896  |
| UN26009 | Rsa1.0_01012.1 | 1030 | 56836  | 0         | 485  | 524  | 92 +  | 444  | 964  | 30849  | 31372  |
| UN26010 | Rsa1.0_08558.1 | 1049 | 7198   | 1.00E-122 | 404  | 455  | 88 -  | 601  | 1049 | 2278   | 2721   |
| UN26011 | Rsa1.0_03606.1 | 805  | 21818  | 1.00E-103 | 212  | 219  | 96 -  | 294  | 512  | 2155   | 2373   |

|         |                |      |        |           |     |     |      |      |      |        |        |
|---------|----------------|------|--------|-----------|-----|-----|------|------|------|--------|--------|
| UN26012 | Rsa1.0.01178.1 | 1075 | 51571  | 1.00E-135 | 279 | 288 | 96 - | 791  | 1075 | 19947  | 20234  |
| UN26013 | Rsa1.0.02750.1 | 994  | 28239  | 2.00E-89  | 206 | 218 | 94 + | 344  | 558  | 23214  | 23431  |
| UN26014 | Rsa1.0.01155.1 | 1110 | 52182  | 0         | 743 | 761 | 97 + | 6    | 766  | 12184  | 12944  |
| UN26015 | Rsa1.0.01340.1 | 899  | 47805  | 1.00E-102 | 275 | 300 | 91 + | 10   | 299  | 20624  | 20919  |
| UN26016 | Rsa1.0.00040.1 | 1164 | 324196 | 0         | 761 | 762 | 99 - | 274  | 1035 | 172326 | 173087 |
| UN26017 | Rsa1.0.00697.1 | 1423 | 67913  | 0         | 374 | 375 | 99 - | 1038 | 1412 | 31783  | 32157  |
| UN26018 | Rsa1.0.01359.1 | 1194 | 47271  | 0         | 486 | 537 | 90 + | 1    | 525  | 32304  | 32833  |
| UN26019 | Rsa1.0.00409.1 | 906  | 146788 | 0         | 485 | 493 | 98 + | 412  | 902  | 130747 | 131239 |
| UN26020 | Rsa1.0.07854.1 | 922  | 8417   | 1.00E-89  | 178 | 180 | 98 - | 735  | 913  | 1668   | 1847   |
| UN26021 | Rsa1.0.00829.1 | 702  | 158305 | 1.00E-138 | 264 | 269 | 98 - | 322  | 590  | 101844 | 102112 |
| UN26022 | Rsa1.0.00275.1 | 1072 | 210104 | 0         | 562 | 567 | 99 - | 506  | 1072 | 206429 | 206995 |
| UN26023 | Rsa1.0.00009.1 | 761  | 232558 | 0         | 485 | 525 | 92 - | 249  | 760  | 117370 | 117890 |
| UN26024 | Rsa1.0.02228.1 | 1671 | 33688  | 0         | 574 | 575 | 99 - | 409  | 983  | 16770  | 17344  |
| UN26025 | Rsa1.0.00221.1 | 644  | 106972 | 1.00E-131 | 246 | 249 | 98 - | 394  | 642  | 37361  | 37609  |
| UN26026 | Rsa1.0.19592.1 | 1262 | 1410   | 0         | 481 | 492 | 97 - | 754  | 1245 | 1      | 488    |
| UN26027 | Rsa1.0.00721.1 | 1388 | 66918  | 0         | 436 | 442 | 98 - | 639  | 1080 | 918    | 1359   |
| UN26028 | Rsa1.0.01848.1 | 1425 | 38312  | 0         | 555 | 558 | 99 - | 2    | 559  | 35052  | 35608  |
| UN26029 | Rsa1.0.02228.1 | 807  | 33688  | 1.00E-133 | 358 | 389 | 92 - | 421  | 804  | 15787  | 16174  |
| UN26030 | Rsa1.0.00089.1 | 927  | 406142 | 4.00E-99  | 187 | 188 | 99 - | 355  | 542  | 345178 | 345365 |
| UN26031 | Rsa1.0.18045.1 | 817  | 1683   | 3.00E-90  | 184 | 189 | 97 - | 3    | 191  | 531    | 719    |
| UN26032 | Rsa1.0.01453.1 | 728  | 45449  | 1.00E-140 | 280 | 287 | 97 + | 1    | 285  | 10636  | 10921  |
| UN26033 | Rsa1.0.03766.1 | 1050 | 20970  | 0         | 720 | 728 | 98 + | 3    | 729  | 18606  | 19332  |
| UN26034 | Rsa1.0.00121.1 | 984  | 278029 | 0         | 527 | 544 | 96 + | 1    | 544  | 9589   | 10132  |
| UN26035 | Rsa1.0.00116.1 | 1045 | 365886 | 1.00E-135 | 263 | 268 | 98 - | 779  | 1045 | 238992 | 239259 |
| UN26036 | Rsa1.0.00058.1 | 837  | 159921 | 0         | 432 | 454 | 95 + | 1    | 452  | 84706  | 85153  |
| UN26037 | Rsa1.0.00055.1 | 901  | 520193 | 1.00E-71  | 141 | 142 | 99 - | 655  | 796  | 311033 | 311174 |
| UN26038 | Rsa1.0.00374.1 | 1230 | 165738 | 0         | 652 | 662 | 98 - | 6    | 663  | 140693 | 141354 |
| UN26039 | Rsa1.0.00173.1 | 789  | 288743 | 1.00E-127 | 255 | 263 | 96 - | 111  | 373  | 84715  | 84977  |
| UN26040 | Rsa1.0.01602.1 | 720  | 42503  | 1.00E-117 | 265 | 280 | 94 - | 32   | 311  | 1873   | 2147   |
| UN26041 | Rsa1.0.00218.1 | 1111 | 201480 | 0         | 806 | 883 | 91 + | 228  | 1108 | 174782 | 175637 |
| UN26042 | Rsa1.0.01786.1 | 1069 | 133324 | 0         | 838 | 840 | 99 + | 5    | 844  | 98722  | 99561  |
| UN26043 | Rsa1.0.00108.1 | 1211 | 478491 | 0         | 391 | 392 | 99 + | 3    | 394  | 416500 | 416891 |
| UN26044 | Rsa1.0.05545.1 | 905  | 13379  | 0         | 798 | 850 | 93 + | 3    | 845  | 11086  | 11934  |
| UN26045 | Rsa1.0.01344.1 | 1292 | 142535 | 0         | 717 | 776 | 92 - | 1    | 753  | 130981 | 131737 |
| UN26046 | Rsa1.0.00096.1 | 999  | 198773 | 1.00E-143 | 267 | 270 | 98 + | 730  | 999  | 115751 | 116020 |
| UN26047 | Rsa1.0.01621.1 | 850  | 42090  | 1.00E-142 | 348 | 378 | 92 + | 1    | 375  | 38846  | 39217  |
| UN26048 | Rsa1.0.00890.1 | 726  | 323870 | 1.00E-120 | 269 | 284 | 94 + | 1    | 279  | 160755 | 161032 |
| UN26049 | Rsa1.0.02118.1 | 1425 | 34839  | 0         | 387 | 395 | 97 - | 1    | 394  | 7761   | 8155   |
| UN26050 | Rsa1.0.05431.1 | 940  | 13780  | 0         | 354 | 363 | 97 - | 280  | 642  | 8836   | 9198   |

|         |                |      |        |           |      |      |       |      |      |        |        |
|---------|----------------|------|--------|-----------|------|------|-------|------|------|--------|--------|
| UN26051 | Rsa1.0_00225.1 | 1331 | 105892 | 1.00E-180 | 345  | 353  | 97 +  | 980  | 1328 | 55265  | 55617  |
| UN26052 | Rsa1.0_02518.1 | 979  | 30586  | 1.00E-139 | 321  | 344  | 93 -  | 2    | 333  | 29328  | 29668  |
| UN26053 | Rsa1.0_00149.1 | 1004 | 305196 | 0         | 442  | 463  | 95 +  | 533  | 992  | 104054 | 104515 |
| UN26054 | Rsa1.0_00001.1 | 1179 | 363028 | 0         | 500  | 526  | 95 +  | 659  | 1178 | 62099  | 62619  |
| UN26055 | Rsa1.0_00147.1 | 1229 | 249503 | 0         | 483  | 521  | 92 -  | 692  | 1212 | 155749 | 156259 |
| UN26056 | Rsa1.0_59564.1 | 1192 | 384    | 0         | 375  | 384  | 97 +  | 803  | 1185 | 1      | 384    |
| UN26057 | Rsa1.0_00734.1 | 1018 | 66508  | 3.00E-57  | 182  | 203  | 89 -  | 3    | 202  | 15869  | 16064  |
| UN26058 | Rsa1.0_01540.1 | 1262 | 151890 | 0         | 1190 | 1273 | 93 -  | 3    | 1262 | 142525 | 143786 |
| UN26059 | Rsa1.0_00945.1 | 1367 | 58714  | 1.00E-111 | 207  | 208  | 99 -  | 1109 | 1316 | 32073  | 32280  |
| UN26060 | Rsa1.0_16460.1 | 1182 | 2148   | 0         | 1139 | 1181 | 96 -  | 2    | 1182 | 494    | 1674   |
| UN26061 | Rsa1.0_02321.1 | 921  | 32572  | 0         | 556  | 576  | 96 -  | 3    | 578  | 5991   | 6565   |
| UN26062 | Rsa1.0_00028.1 | 1562 | 293984 | 0         | 880  | 889  | 98 -  | 674  | 1562 | 149865 | 150752 |
| UN26063 | Rsa1.0_00131.1 | 868  | 432233 | 0         | 552  | 575  | 96 -  | 294  | 868  | 259021 | 259595 |
| UN26064 | Rsa1.0_00789.1 | 939  | 64233  | 0         | 545  | 546  | 99 +  | 394  | 939  | 34406  | 34951  |
| UN26065 | Rsa1.0_00152.1 | 1710 | 257730 | 0         | 1118 | 1203 | 92 -  | 1    | 1183 | 201609 | 202805 |
| UN26066 | Rsa1.0_04128.1 | 824  | 18927  | 0         | 505  | 513  | 98 -  | 2    | 514  | 12414  | 12926  |
| UN26067 | Rsa1.0_00437.1 | 1026 | 84879  | 0         | 436  | 455  | 95 +  | 1    | 454  | 70159  | 70609  |
| UN26068 | Rsa1.0_01256.1 | 1121 | 49770  | 3.00E-82  | 156  | 156  | 100 + | 1    | 156  | 2600   | 2755   |
| UN26069 | Rsa1.0_02173.1 | 1163 | 34318  | 0         | 493  | 495  | 99 +  | 281  | 775  | 30684  | 31178  |
| UN26070 | Rsa1.0_00506.1 | 1485 | 79106  | 1.00E-158 | 309  | 316  | 97 -  | 1    | 316  | 6009   | 6323   |
| UN26071 | Rsa1.0_02165.1 | 996  | 34423  | 0         | 567  | 600  | 94 -  | 378  | 963  | 3037   | 3636   |
| UN26072 | Rsa1.0_01522.1 | 863  | 157436 | 0         | 331  | 334  | 99 +  | 285  | 618  | 3643   | 3976   |
| UN26073 | Rsa1.0_00260.1 | 856  | 102021 | 0         | 436  | 436  | 100 + | 270  | 705  | 63807  | 64242  |
| UN26074 | Rsa1.0_11811.1 | 535  | 5401   | 9.00E-96  | 181  | 182  | 99 -  | 305  | 486  | 2094   | 2275   |
| UN26075 | Rsa1.0_00260.1 | 1271 | 102021 | 0         | 424  | 436  | 97 +  | 315  | 749  | 63807  | 64242  |
| UN26076 | Rsa1.0_00316.1 | 728  | 96264  | 0         | 557  | 593  | 93 -  | 137  | 724  | 57238  | 57814  |
| UN26077 | Rsa1.0_10284.1 | 1300 | 5904   | 1.00E-150 | 289  | 294  | 98 +  | 2    | 294  | 1810   | 2103   |
| UN26078 | Rsa1.0_02152.1 | 724  | 34558  | 0         | 589  | 630  | 93 -  | 102  | 722  | 26442  | 27067  |
| UN26079 | Rsa1.0_01209.1 | 965  | 50668  | 1.00E-138 | 296  | 308  | 96 +  | 658  | 962  | 47015  | 47321  |
| UN26080 | Rsa1.0_00208.1 | 1064 | 108565 | 1.00E-108 | 212  | 216  | 98 -  | 708  | 923  | 7713   | 7928   |
| UN26081 | Rsa1.0_00917.1 | 476  | 182012 | 1.00E-165 | 410  | 452  | 90 -  | 25   | 476  | 175703 | 176128 |
| UN26082 | Rsa1.0_00437.1 | 1134 | 84879  | 0         | 415  | 436  | 95 +  | 614  | 1046 | 45488  | 45923  |
| UN26083 | Rsa1.0_00851.1 | 1215 | 62181  | 0         | 356  | 358  | 99 +  | 858  | 1215 | 12047  | 12404  |
| UN26084 | Rsa1.0_04460.1 | 745  | 17250  | 7.00E-91  | 442  | 530  | 83 +  | 78   | 603  | 15788  | 16314  |
| UN26085 | Rsa1.0_00124.1 | 679  | 262503 | 2.00E-97  | 181  | 181  | 100 - | 497  | 677  | 9266   | 9446   |
| UN26086 | Rsa1.0_00081.1 | 1470 | 143261 | 0         | 396  | 407  | 97 +  | 769  | 1175 | 126206 | 126612 |
| UN26087 | Rsa1.0_00207.1 | 959  | 248736 | 0         | 485  | 511  | 94 +  | 443  | 951  | 22526  | 23029  |
| UN26088 | Rsa1.0_00528.1 | 1048 | 164755 | 0         | 527  | 539  | 97 +  | 95   | 633  | 109483 | 110021 |
| UN26089 | Rsa1.0_01606.1 | 772  | 42432  | 1.00E-134 | 287  | 301  | 95 -  | 4    | 302  | 29730  | 30020  |

|         |                |      |        |           |      |      |       |      |      |        |        |
|---------|----------------|------|--------|-----------|------|------|-------|------|------|--------|--------|
| UN26090 | Rsa1.0.00437.1 | 1162 | 84879  | 0         | 644  | 652  | 98 -  | 511  | 1162 | 3752   | 4397   |
| UN26091 | Rsa1.0.18274.1 | 863  | 1632   | 0         | 377  | 379  | 99 +  | 1    | 379  | 895    | 1273   |
| UN26092 | Rsa1.0.02884.1 | 1029 | 27034  | 1.00E-111 | 241  | 251  | 96 +  | 1    | 248  | 18902  | 19152  |
| UN26093 | Rsa1.0.00208.1 | 1086 | 108565 | 0         | 1022 | 1085 | 94 +  | 13   | 1081 | 63025  | 64094  |
| UN26094 | Rsa1.0.00678.1 | 801  | 193163 | 2.00E-73  | 147  | 149  | 98 -  | 651  | 799  | 166564 | 166712 |
| UN26095 | Rsa1.0.00336.1 | 1048 | 445051 | 0         | 598  | 617  | 96 +  | 22   | 635  | 25324  | 25940  |
| UN26096 | Rsa1.0.00008.1 | 889  | 358124 | 0         | 434  | 448  | 96 +  | 8    | 453  | 196856 | 197301 |
| UN26097 | Rsa1.0.03261.1 | 761  | 24281  | 2.00E-97  | 187  | 189  | 98 +  | 243  | 431  | 4757   | 4945   |
| UN26098 | Rsa1.0.00550.1 | 1169 | 210790 | 0         | 1123 | 1171 | 95 -  | 1    | 1168 | 28087  | 29252  |
| UN26099 | Rsa1.0.01833.1 | 1080 | 38555  | 2.00E-95  | 207  | 216  | 95 -  | 77   | 292  | 16525  | 16737  |
| UN26100 | Rsa1.0.04405.1 | 642  | 17508  | 0         | 405  | 416  | 97 -  | 227  | 642  | 14211  | 14619  |
| UN26101 | Rsa1.0.01660.1 | 910  | 41400  | 1.00E-168 | 400  | 431  | 92 -  | 12   | 431  | 27246  | 27675  |
| UN26102 | Rsa1.0.07809.1 | 1071 | 8503   | 0         | 883  | 938  | 94 +  | 11   | 930  | 1009   | 1940   |
| UN26103 | Rsa1.0.41105.1 | 1987 | 546    | 0         | 378  | 390  | 96 +  | 1    | 386  | 157    | 545    |
| UN26104 | Rsa1.0.00886.1 | 979  | 167350 | 0         | 459  | 490  | 93 -  | 493  | 976  | 11230  | 11719  |
| UN26105 | Rsa1.0.02165.1 | 1158 | 34423  | 1.00E-174 | 355  | 370  | 95 -  | 789  | 1158 | 4973   | 5342   |
| UN26106 | Rsa1.0.03818.1 | 855  | 20668  | 0         | 847  | 853  | 99 +  | 1    | 853  | 19676  | 20528  |
| UN26107 | Rsa1.0.02295.1 | 1117 | 149884 | 0         | 473  | 484  | 97 -  | 523  | 1006 | 127178 | 127660 |
| UN26108 | Rsa1.0.00757.1 | 401  | 65559  | 7.00E-62  | 121  | 121  | 100 - | 50   | 170  | 13259  | 13379  |
| UN26109 | Rsa1.0.01077.1 | 1127 | 54772  | 0         | 562  | 604  | 93 +  | 2    | 594  | 10739  | 11340  |
| UN26110 | Rsa1.0.00342.1 | 581  | 93695  | 0         | 437  | 441  | 99 -  | 141  | 581  | 79973  | 80412  |
| UN26111 | Rsa1.0.00124.1 | 596  | 262503 | 1.00E-155 | 372  | 400  | 93 +  | 3    | 389  | 162513 | 162910 |
| UN26112 | Rsa1.0.05218.1 | 2693 | 14457  | 0         | 1508 | 1562 | 96 +  | 290  | 1829 | 5131   | 6677   |
| UN26113 | Rsa1.0.00386.1 | 1231 | 89134  | 0         | 705  | 716  | 98 +  | 2    | 713  | 55864  | 56579  |
| UN26114 | Rsa1.0.01586.1 | 1143 | 42804  | 0         | 414  | 438  | 94 +  | 1    | 436  | 28066  | 28496  |
| UN26115 | Rsa1.0.02872.1 | 744  | 27080  | 1.00E-110 | 212  | 215  | 98 +  | 414  | 628  | 26214  | 26428  |
| UN26116 | Rsa1.0.00525.1 | 1254 | 78030  | 0         | 397  | 397  | 100 + | 2    | 398  | 30725  | 31121  |
| UN26117 | Rsa1.0.00008.1 | 897  | 358124 | 0         | 564  | 580  | 97 -  | 305  | 883  | 50921  | 51499  |
| UN26118 | Rsa1.0.05624.1 | 748  | 13140  | 1.00E-117 | 391  | 452  | 86 -  | 282  | 732  | 3783   | 4199   |
| UN26119 | Rsa1.0.00055.1 | 1131 | 520193 | 0         | 1089 | 1150 | 94 -  | 28   | 1127 | 169129 | 170276 |
| UN26120 | Rsa1.0.00335.1 | 806  | 94371  | 1.00E-125 | 262  | 270  | 97 +  | 1    | 268  | 33581  | 33848  |
| UN26121 | Rsa1.0.00407.1 | 599  | 191544 | 0         | 541  | 550  | 98 -  | 3    | 549  | 67755  | 68304  |
| UN26122 | Rsa1.0.00041.1 | 1096 | 186197 | 0         | 689  | 711  | 96 +  | 386  | 1093 | 157071 | 157781 |
| UN26123 | Rsa1.0.00469.1 | 916  | 82084  | 0         | 809  | 817  | 99 +  | 1    | 813  | 52003  | 52819  |
| UN26124 | Rsa1.0.01409.1 | 1458 | 151595 | 0         | 340  | 341  | 99 +  | 1118 | 1458 | 117986 | 118326 |
| UN26125 | Rsa1.0.05510.1 | 881  | 13470  | 1.00E-133 | 250  | 253  | 98 -  | 1    | 253  | 12012  | 12264  |
| UN26126 | Rsa1.0.00010.1 | 953  | 294827 | 0         | 635  | 661  | 96 -  | 290  | 949  | 90173  | 90830  |
| UN26127 | Rsa1.0.05123.1 | 730  | 14790  | 0         | 696  | 723  | 96 -  | 3    | 724  | 6406   | 7125   |
| UN26128 | Rsa1.0.64256.1 | 756  | 357    | 1.00E-148 | 278  | 282  | 98 -  | 258  | 539  | 1      | 282    |



|         |                |      |        |           |      |      |       |     |      |        |        |
|---------|----------------|------|--------|-----------|------|------|-------|-----|------|--------|--------|
| UN26129 | Rsa1.0.02027.1 | 1072 | 35869  | 0         | 755  | 762  | 99 +  | 1   | 759  | 27311  | 28072  |
| UN26130 | Rsa1.0.00198.1 | 1120 | 222963 | 0         | 474  | 474  | 100 - | 647 | 1120 | 171153 | 171626 |
| UN26131 | Rsa1.0.00468.1 | 779  | 82095  | 0         | 391  | 391  | 100 - | 389 | 779  | 34585  | 34975  |
| UN26132 | Rsa1.0.01405.1 | 1145 | 46445  | 0         | 393  | 405  | 97 +  | 605 | 1009 | 27825  | 28226  |
| UN26133 | Rsa1.0.00127.1 | 733  | 127446 | 0         | 676  | 685  | 98 -  | 1   | 685  | 11082  | 11764  |
| UN26134 | Rsa1.0.00013.1 | 848  | 292129 | 6.00E-98  | 298  | 330  | 90 +  | 524 | 848  | 159602 | 159921 |
| UN26135 | Rsa1.0.03309.1 | 348  | 23852  | 1.00E-148 | 289  | 297  | 97 +  | 1   | 297  | 12217  | 12513  |
| UN26136 | Rsa1.0.14737.1 | 928  | 3115   | 0         | 321  | 321  | 100 - | 337 | 657  | 2055   | 2375   |
| UN26137 | Rsa1.0.00007.1 | 1240 | 239325 | 0         | 1006 | 1051 | 95 +  | 203 | 1239 | 52943  | 53991  |
| UN26138 | Rsa1.0.00010.1 | 863  | 294827 | 1.00E-129 | 275  | 288  | 95 +  | 579 | 863  | 119168 | 119455 |
| UN26139 | Rsa1.0.00132.1 | 1554 | 124299 | 0         | 504  | 518  | 97 +  | 287 | 803  | 99696  | 100209 |
| UN26140 | Rsa1.0.00727.1 | 632  | 66724  | 1.00E-135 | 260  | 263  | 98 -  | 360 | 621  | 14980  | 15240  |
| UN26141 | Rsa1.0.07260.1 | 1140 | 9650   | 0         | 856  | 878  | 97 -  | 91  | 968  | 3733   | 4606   |
| UN26142 | Rsa1.0.08828.1 | 1215 | 6889   | 0         | 1208 | 1213 | 99 -  | 3   | 1215 | 492    | 1704   |
| UN26143 | Rsa1.0.00221.1 | 1336 | 106972 | 0         | 546  | 546  | 100 + | 57  | 602  | 37064  | 37609  |
| UN26144 | Rsa1.0.00662.1 | 835  | 192183 | 1.00E-121 | 236  | 241  | 97 -  | 296 | 536  | 189853 | 190093 |
| UN26145 | Rsa1.0.01031.1 | 1058 | 56236  | 1.00E-122 | 256  | 267  | 95 -  | 153 | 419  | 18106  | 18372  |
| UN26146 | Rsa1.0.00921.1 | 1043 | 59599  | 0         | 483  | 505  | 95 +  | 513 | 1014 | 2814   | 3311   |
| UN26147 | Rsa1.0.20913.1 | 1078 | 1256   | 0         | 877  | 908  | 96 -  | 159 | 1055 | 1      | 908    |
| UN26148 | Rsa1.0.00655.1 | 954  | 195840 | 1.00E-160 | 347  | 366  | 94 -  | 3   | 366  | 163505 | 163870 |
| UN26149 | Rsa1.0.03908.1 | 684  | 20151  | 1.00E-166 | 305  | 308  | 99 -  | 376 | 683  | 13953  | 14260  |
| UN26150 | Rsa1.0.01843.1 | 712  | 265131 | 1.00E-150 | 296  | 305  | 97 +  | 96  | 400  | 9831   | 10135  |
| UN26151 | Rsa1.0.00006.1 | 766  | 396176 | 0         | 453  | 476  | 95 +  | 6   | 479  | 307637 | 308106 |
| UN26152 | Rsa1.0.00033.1 | 884  | 515811 | 0         | 506  | 540  | 93 -  | 346 | 879  | 366304 | 366843 |
| UN26153 | Rsa1.0.00886.1 | 957  | 167350 | 0         | 426  | 442  | 96 -  | 489 | 927  | 11278  | 11719  |
| UN26154 | Rsa1.0.00116.1 | 556  | 365886 | 1.00E-155 | 278  | 278  | 100 - | 1   | 278  | 33998  | 34275  |
| UN26155 | Rsa1.0.05030.1 | 923  | 15088  | 0         | 871  | 912  | 95 -  | 3   | 907  | 10791  | 11698  |
| UN26156 | Rsa1.0.02930.1 | 649  | 26668  | 0         | 587  | 621  | 94 -  | 1   | 619  | 1721   | 2325   |
| UN26157 | Rsa1.0.02222.1 | 474  | 152798 | 0         | 471  | 472  | 99 -  | 3   | 474  | 4666   | 5136   |
| UN26158 | Rsa1.0.00184.1 | 1604 | 218748 | 2.33E-156 | 349  | 374  | 93 +  | 928 | 1296 | 213915 | 214279 |
| UN26159 | Rsa1.0.00133.1 | 1237 | 123768 | 0         | 524  | 532  | 98 +  | 704 | 1235 | 71028  | 71552  |
| UN26160 | Rsa1.0.02845.1 | 1237 | 27340  | 0         | 1130 | 1142 | 98 +  | 7   | 1147 | 2732   | 3871   |
| UN26161 | Rsa1.0.04435.1 | 1386 | 17369  | 0         | 1031 | 1032 | 99 -  | 118 | 1149 | 1      | 1032   |
| UN26162 | Rsa1.0.02769.1 | 859  | 28107  | 0         | 412  | 417  | 98 +  | 441 | 856  | 7186   | 7602   |
| UN26163 | Rsa1.0.01166.1 | 818  | 51877  | 0         | 431  | 432  | 99 +  | 385 | 816  | 26786  | 27217  |
| UN26164 | Rsa1.0.00203.1 | 927  | 109129 | 1.00E-116 | 316  | 343  | 92 -  | 587 | 925  | 27389  | 27728  |
| UN26165 | Rsa1.0.15250.1 | 748  | 2727   | 1.00E-163 | 417  | 455  | 91 +  | 295 | 748  | 1092   | 1538   |
| UN26166 | Rsa1.0.05871.1 | 1519 | 12356  | 0         | 471  | 496  | 94 +  | 1   | 493  | 4439   | 4913   |
| UN26167 | Rsa1.0.00277.1 | 395  | 100132 | 1.00E-120 | 267  | 283  | 94 +  | 112 | 394  | 8930   | 9207   |

|         |                |      |        |           |      |      |       |      |      |        |        |
|---------|----------------|------|--------|-----------|------|------|-------|------|------|--------|--------|
| UN26168 | Rsa1.0_12721.1 | 1146 | 5145   | 0         | 1121 | 1121 | 100 + | 1    | 1121 | 2491   | 3611   |
| UN26169 | Rsa1.0_00386.1 | 961  | 89134  | 1.00E-155 | 314  | 326  | 96 +  | 360  | 685  | 40382  | 40707  |
| UN26170 | Rsa1.0_00133.1 | 706  | 123768 | 1.00E-179 | 321  | 322  | 99 +  | 384  | 705  | 36170  | 36491  |
| UN26171 | Rsa1.0_00425.1 | 1436 | 147080 | 0         | 1156 | 1204 | 96 -  | 24   | 1218 | 95758  | 96961  |
| UN26172 | Rsa1.0_23451.1 | 514  | 1048   | 1.00E-115 | 211  | 211  | 100 + | 3    | 213  | 838    | 1048   |
| UN26173 | Rsa1.0_00283.1 | 944  | 183797 | 0         | 504  | 504  | 100 + | 441  | 944  | 66230  | 66733  |
| UN26174 | Rsa1.0_00194.1 | 623  | 110851 | 0         | 429  | 429  | 100 + | 195  | 623  | 13143  | 13571  |
| UN26175 | Rsa1.0_01041.1 | 871  | 55910  | 0         | 869  | 870  | 99 +  | 3    | 871  | 37192  | 38061  |
| UN26176 | Rsa1.0_02358.1 | 1175 | 32213  | 1.00E-155 | 423  | 461  | 91 +  | 702  | 1156 | 12217  | 12669  |
| UN26177 | Rsa1.0_00878.1 | 663  | 330303 | 1.00E-141 | 320  | 343  | 93 -  | 164  | 497  | 148561 | 148903 |
| UN26178 | Rsa1.0_00925.1 | 1342 | 59481  | 0         | 708  | 746  | 94 +  | 598  | 1342 | 21012  | 21749  |
| UN26179 | Rsa1.0_04250.1 | 512  | 18264  | 1.00E-106 | 199  | 200  | 99 -  | 311  | 510  | 9460   | 9659   |
| UN26180 | Rsa1.0_00966.1 | 379  | 58136  | 0         | 376  | 377  | 99 -  | 3    | 379  | 7148   | 7524   |
| UN26181 | Rsa1.0_03733.1 | 838  | 21108  | 0         | 366  | 370  | 98 +  | 471  | 838  | 723    | 1092   |
| UN26182 | Rsa1.0_00568.1 | 744  | 75219  | 1.00E-117 | 231  | 236  | 97 +  | 505  | 736  | 1622   | 1857   |
| UN26183 | Rsa1.0_01466.1 | 1605 | 45161  | 0         | 1011 | 1013 | 99 -  | 2    | 1014 | 25169  | 26181  |
| UN26184 | Rsa1.0_03605.1 | 718  | 21827  | 1.00E-168 | 341  | 353  | 96 -  | 31   | 380  | 20342  | 20693  |
| UN26185 | Rsa1.0_19592.1 | 1285 | 1410   | 0         | 379  | 388  | 97 -  | 746  | 1131 | 101    | 488    |
| UN26186 | Rsa1.0_00234.1 | 807  | 197060 | 0         | 792  | 808  | 98 -  | 4    | 806  | 43241  | 44048  |
| UN26187 | Rsa1.0_00497.1 | 1177 | 79830  | 0         | 623  | 624  | 99 -  | 552  | 1175 | 59735  | 60358  |
| UN26188 | Rsa1.0_02934.1 | 1229 | 26627  | 0         | 674  | 707  | 95 +  | 528  | 1229 | 23612  | 24314  |
| UN26189 | Rsa1.0_01701.1 | 1154 | 162121 | 0         | 591  | 600  | 98 +  | 2    | 601  | 19363  | 19962  |
| UN26190 | Rsa1.0_00101.1 | 847  | 267193 | 1.00E-163 | 291  | 291  | 100 - | 544  | 834  | 120539 | 120829 |
| UN26191 | Rsa1.0_00688.1 | 1073 | 68396  | 1.00E-169 | 302  | 302  | 100 - | 1    | 302  | 14822  | 15123  |
| UN26192 | Rsa1.0_03634.1 | 947  | 145192 | 0         | 442  | 459  | 96 +  | 489  | 947  | 127454 | 127899 |
| UN26193 | Rsa1.0_02181.1 | 444  | 34172  | 0         | 434  | 437  | 99 -  | 3    | 439  | 1007   | 1443   |
| UN26194 | Rsa1.0_14083.1 | 717  | 3824   | 0         | 561  | 569  | 98 -  | 150  | 717  | 1099   | 1667   |
| UN26195 | Rsa1.0_00015.1 | 1346 | 561803 | 0         | 849  | 882  | 96 -  | 465  | 1346 | 195970 | 196851 |
| UN26196 | Rsa1.0_00148.1 | 901  | 120234 | 0         | 502  | 556  | 90 -  | 345  | 900  | 87152  | 87705  |
| UN26197 | Rsa1.0_00926.1 | 933  | 195072 | 1.00E-175 | 352  | 364  | 96 -  | 139  | 502  | 35123  | 35485  |
| UN26198 | Rsa1.0_00609.1 | 1221 | 72785  | 0         | 496  | 505  | 98 +  | 625  | 1129 | 52619  | 53123  |
| UN26199 | Rsa1.0_00384.1 | 1485 | 89278  | 0         | 334  | 337  | 99 +  | 1149 | 1485 | 35218  | 35554  |
| UN26200 | Rsa1.0_07661.1 | 1105 | 8891   | 1.00E-56  | 177  | 196  | 90 -  | 111  | 303  | 4893   | 5088   |
| UN26201 | Rsa1.0_01226.1 | 480  | 50316  | 0         | 478  | 479  | 99 -  | 3    | 480  | 9186   | 9664   |
| UN26202 | Rsa1.0_03037.1 | 955  | 25825  | 0         | 346  | 353  | 98 -  | 3    | 354  | 5163   | 5515   |
| UN26203 | Rsa1.0_02179.1 | 966  | 34188  | 0         | 428  | 447  | 95 +  | 515  | 961  | 24265  | 24711  |
| UN26204 | Rsa1.0_00187.1 | 1626 | 393093 | 0         | 429  | 444  | 96 -  | 1183 | 1626 | 155751 | 156191 |
| UN26205 | Rsa1.0_02991.1 | 627  | 26178  | 9.00E-87  | 233  | 248  | 93 -  | 2    | 243  | 4393   | 4636   |
| UN26206 | Rsa1.0_00594.1 | 842  | 73729  | 0         | 833  | 837  | 99 -  | 3    | 839  | 26995  | 27831  |

|         |                |      |        |           |      |      |       |      |      |        |        |
|---------|----------------|------|--------|-----------|------|------|-------|------|------|--------|--------|
| UN26207 | Rsa1.0_12087.1 | 856  | 5317   | 0         | 833  | 864  | 96 +  | 1    | 854  | 4199   | 5059   |
| UN26208 | Rsa1.0_00354.1 | 832  | 232005 | 3.00E-87  | 255  | 282  | 90 -  | 1    | 277  | 170578 | 170849 |
| UN26209 | Rsa1.0_05382.1 | 1211 | 13963  | 0         | 397  | 411  | 96 +  | 448  | 858  | 423    | 833    |
| UN26210 | Rsa1.0_08680.1 | 1190 | 7047   | 1.00E-167 | 308  | 311  | 99 -  | 602  | 912  | 6110   | 6420   |
| UN26211 | Rsa1.0_00307.1 | 1049 | 199003 | 0         | 420  | 420  | 100 - | 630  | 1049 | 87243  | 87662  |
| UN26212 | Rsa1.0_03906.1 | 458  | 20161  | 1.00E-149 | 268  | 268  | 100 - | 190  | 457  | 15919  | 16186  |
| UN26213 | Rsa1.0_00211.1 | 1268 | 228189 | 0         | 1236 | 1275 | 96 -  | 1    | 1266 | 155222 | 156496 |
| UN26214 | Rsa1.0_05161.1 | 1121 | 14631  | 2.33E-156 | 290  | 299  | 96 -  | 796  | 1094 | 8397   | 8695   |
| UN26215 | Rsa1.0_02474.1 | 2125 | 31076  | 0         | 714  | 716  | 99 -  | 1390 | 2105 | 6622   | 7337   |
| UN26216 | Rsa1.0_00208.1 | 1308 | 108565 | 0         | 1225 | 1323 | 92 +  | 4    | 1307 | 62917  | 64210  |
| UN26217 | Rsa1.0_00212.1 | 1682 | 108350 | 0         | 1002 | 1031 | 97 +  | 34   | 1061 | 81931  | 82961  |
| UN26218 | Rsa1.0_00690.1 | 1247 | 140527 | 0         | 706  | 716  | 98 -  | 530  | 1245 | 61849  | 62564  |
| UN26219 | Rsa1.0_02094.1 | 1653 | 35116  | 0         | 752  | 753  | 99 +  | 3    | 755  | 19567  | 20319  |
| UN26220 | Rsa1.0_00761.1 | 1489 | 65133  | 0         | 1213 | 1279 | 94 +  | 202  | 1465 | 37781  | 39041  |
| UN26221 | Rsa1.0_00582.1 | 1234 | 74333  | 0         | 390  | 395  | 98 -  | 551  | 945  | 35654  | 36048  |
| UN26222 | Rsa1.0_02384.1 | 1768 | 31917  | 0         | 684  | 745  | 91 -  | 747  | 1476 | 13168  | 13897  |
| UN26223 | Rsa1.0_00043.1 | 630  | 264937 | 1.00E-162 | 365  | 390  | 93 -  | 244  | 624  | 225525 | 225914 |
| UN26224 | Rsa1.0_02421.1 | 1414 | 31579  | 0         | 427  | 427  | 100 + | 1    | 427  | 11294  | 11720  |
| UN26225 | Rsa1.0_01108.1 | 726  | 53865  | 6.00E-39  | 215  | 259  | 83 +  | 148  | 406  | 44156  | 44414  |
| UN26226 | Rsa1.0_04827.1 | 846  | 15815  | 1.00E-138 | 272  | 277  | 98 +  | 570  | 846  | 10043  | 10317  |
| UN26227 | Rsa1.0_02051.1 | 1171 | 35564  | 0         | 493  | 497  | 99 +  | 675  | 1171 | 1329   | 1825   |
| UN26228 | Rsa1.0_00386.1 | 617  | 89134  | 0         | 412  | 426  | 96 +  | 193  | 617  | 61405  | 61830  |
| UN26229 | Rsa1.0_02583.1 | 1720 | 29887  | 0         | 474  | 477  | 99 +  | 758  | 1234 | 24068  | 24544  |
| UN26230 | Rsa1.0_07984.1 | 1124 | 8130   | 0         | 428  | 430  | 99 -  | 10   | 439  | 5900   | 6329   |
| UN26231 | Rsa1.0_36212.1 | 775  | 623    | 0         | 424  | 435  | 97 +  | 183  | 615  | 173    | 607    |
| UN26232 | Rsa1.0_03180.1 | 1185 | 24764  | 0         | 337  | 337  | 100 + | 849  | 1185 | 21745  | 22081  |
| UN26233 | Rsa1.0_01690.1 | 1570 | 40939  | 0         | 967  | 987  | 97 -  | 299  | 1285 | 5761   | 6747   |
| UN26234 | Rsa1.0_02710.1 | 1284 | 28492  | 1.00E-172 | 314  | 315  | 99 +  | 1    | 314  | 19455  | 19769  |
| UN26235 | Rsa1.0_00287.1 | 829  | 98687  | 1.00E-125 | 233  | 235  | 99 -  | 4    | 238  | 13996  | 14230  |
| UN26236 | Rsa1.0_06376.1 | 937  | 11135  | 1.00E-125 | 252  | 260  | 96 +  | 609  | 868  | 10188  | 10447  |
| UN26237 | Rsa1.0_12867.1 | 853  | 5093   | 1.00E-101 | 214  | 223  | 95 -  | 1    | 223  | 4662   | 4884   |
| UN26238 | Rsa1.0_01046.1 | 452  | 152989 | 0         | 448  | 450  | 99 +  | 3    | 452  | 124132 | 124581 |
| UN26239 | Rsa1.0_01405.1 | 838  | 46445  | 0         | 821  | 836  | 98 +  | 1    | 836  | 15777  | 16603  |
| UN26240 | Rsa1.0_05815.1 | 1148 | 12563  | 1.00E-159 | 299  | 303  | 98 +  | 849  | 1148 | 9748   | 10050  |
| UN26241 | Rsa1.0_09006.1 | 1562 | 6715   | 0         | 1165 | 1182 | 98 -  | 168  | 1340 | 3725   | 4906   |
| UN26242 | Rsa1.0_01789.1 | 1018 | 39250  | 0         | 521  | 522  | 99 +  | 318  | 839  | 9785   | 10306  |
| UN26243 | Rsa1.0_00015.1 | 825  | 561803 | 0         | 595  | 633  | 93 +  | 184  | 810  | 185641 | 186273 |
| UN26244 | Rsa1.0_01835.1 | 660  | 38542  | 1.00E-166 | 388  | 412  | 94 -  | 255  | 660  | 24222  | 24629  |
| UN26245 | Rsa1.0_05554.1 | 1952 | 13343  | 0         | 512  | 512  | 100 - | 1    | 512  | 12494  | 13005  |

|         |                |      |        |           |     |     |       |      |      |        |        |
|---------|----------------|------|--------|-----------|-----|-----|-------|------|------|--------|--------|
| UN26246 | Rsa1.0.02587.1 | 770  | 156090 | 0         | 555 | 559 | 99 +  | 1    | 559  | 15079  | 15637  |
| UN26247 | Rsa1.0.01976.1 | 442  | 36570  | 1.00E-145 | 271 | 273 | 99 +  | 1    | 273  | 32522  | 32793  |
| UN26248 | Rsa1.0.01453.1 | 1090 | 45449  | 1.00E-142 | 299 | 309 | 96 -  | 780  | 1086 | 10614  | 10921  |
| UN26249 | Rsa1.0.00301.1 | 1286 | 365315 | 0         | 888 | 894 | 99 -  | 393  | 1284 | 27296  | 28188  |
| UN26250 | Rsa1.0.00890.1 | 737  | 323870 | 1.00E-114 | 269 | 287 | 93 -  | 452  | 734  | 160752 | 161032 |
| UN26251 | Rsa1.0.00971.1 | 631  | 57973  | 0         | 607 | 631 | 96 -  | 3    | 631  | 19834  | 20455  |
| UN26252 | Rsa1.0.01346.1 | 1078 | 47618  | 0         | 442 | 444 | 99 -  | 1    | 444  | 7627   | 8070   |
| UN26253 | Rsa1.0.07129.1 | 1452 | 9861   | 0         | 680 | 681 | 99 -  | 1    | 681  | 5653   | 6333   |
| UN26254 | Rsa1.0.00923.1 | 541  | 153678 | 0         | 537 | 539 | 99 -  | 1    | 539  | 27821  | 28359  |
| UN26255 | Rsa1.0.01527.1 | 779  | 43905  | 2.00E-69  | 274 | 324 | 84 -  | 46   | 367  | 22562  | 22857  |
| UN26256 | Rsa1.0.02858.1 | 770  | 27246  | 0         | 452 | 454 | 99 +  | 2    | 454  | 2226   | 2679   |
| UN26257 | Rsa1.0.01104.1 | 481  | 285480 | 6.00E-69  | 136 | 137 | 99 -  | 318  | 454  | 2638   | 2774   |
| UN26258 | Rsa1.0.02855.1 | 977  | 27271  | 0         | 750 | 766 | 97 -  | 1    | 766  | 10502  | 11255  |
| UN26259 | Rsa1.0.00782.1 | 786  | 64468  | 0         | 438 | 459 | 95 -  | 331  | 786  | 48513  | 48971  |
| UN26260 | Rsa1.0.06149.1 | 1045 | 11615  | 1.00E-173 | 309 | 309 | 100 + | 737  | 1045 | 8932   | 9240   |
| UN26261 | Rsa1.0.01997.1 | 1105 | 158416 | 1.00E-161 | 312 | 319 | 97 +  | 3    | 319  | 151780 | 152098 |
| UN26262 | #              | #    | #      | #         | #   | #   | #     | #    | #    | #      | #      |
| UN26263 | Rsa1.0.01721.1 | 1158 | 40345  | 0         | 568 | 579 | 98 +  | 580  | 1158 | 24212  | 24790  |
| UN26264 | Rsa1.0.00111.1 | 982  | 390088 | 1.00E-178 | 324 | 325 | 99 +  | 1    | 325  | 45741  | 46064  |
| UN26265 | Rsa1.0.00962.1 | 848  | 184909 | 1.00E-132 | 254 | 259 | 98 -  | 478  | 736  | 24843  | 25101  |
| UN26266 | Rsa1.0.01633.1 | 1367 | 41868  | 1.00E-180 | 346 | 355 | 97 +  | 1019 | 1367 | 8461   | 8815   |
| UN26267 | Rsa1.0.01480.1 | 709  | 44926  | 0         | 365 | 367 | 99 +  | 283  | 649  | 23931  | 24297  |
| UN26268 | Rsa1.0.06392.1 | 652  | 11104  | 0         | 474 | 504 | 94 -  | 9    | 494  | 10528  | 11030  |
| UN26269 | Rsa1.0.00087.1 | 1090 | 761073 | 0         | 817 | 848 | 96 +  | 240  | 1087 | 434872 | 435717 |
| UN26270 | Rsa1.0.00152.1 | 994  | 257730 | 0         | 549 | 573 | 95 -  | 1    | 571  | 256945 | 257513 |
| UN26271 | Rsa1.0.00628.1 | 1634 | 214360 | 0         | 459 | 459 | 100 - | 886  | 1344 | 201979 | 202437 |
| UN26272 | Rsa1.0.06802.1 | 449  | 10330  | 1.00E-173 | 317 | 320 | 99 -  | 1    | 320  | 8964   | 9283   |
| UN26273 | Rsa1.0.08706.1 | 599  | 7018   | 1.00E-138 | 288 | 300 | 96 -  | 300  | 599  | 5194   | 5490   |
| UN26274 | Rsa1.0.00278.1 | 1467 | 231896 | 0         | 399 | 408 | 97 -  | 571  | 974  | 23233  | 23640  |
| UN26275 | Rsa1.0.01214.1 | 1202 | 50599  | 0         | 385 | 387 | 99 +  | 816  | 1202 | 46274  | 46660  |
| UN26276 | Rsa1.0.05631.1 | 869  | 13127  | 0         | 325 | 325 | 100 + | 545  | 869  | 4477   | 4801   |
| UN26277 | Rsa1.0.01778.1 | 966  | 39509  | 1.00E-131 | 295 | 313 | 94 -  | 1    | 311  | 9400   | 9702   |
| UN26278 | Rsa1.0.05501.1 | 1070 | 13513  | 1.00E-84  | 194 | 203 | 95 -  | 1    | 203  | 9318   | 9517   |
| UN26279 | Rsa1.0.01516.1 | 1513 | 44196  | 0         | 717 | 752 | 95 -  | 47   | 797  | 24449  | 25199  |
| UN26280 | Rsa1.0.01937.1 | 1534 | 37147  | 0         | 342 | 342 | 100 + | 296  | 637  | 13169  | 13510  |
| UN26281 | Rsa1.0.02268.1 | 1169 | 33172  | 4.00E-78  | 179 | 189 | 94 +  | 682  | 870  | 8776   | 8964   |
| UN26282 | Rsa1.0.00403.1 | 1164 | 87701  | 0         | 721 | 729 | 98 -  | 432  | 1160 | 43687  | 44415  |
| UN26283 | Rsa1.0.01646.1 | 957  | 41735  | 1.00E-116 | 262 | 276 | 94 +  | 114  | 388  | 10736  | 11010  |
| UN26284 | Rsa1.0.03031.1 | 721  | 25839  | 1.00E-179 | 330 | 334 | 98 -  | 281  | 614  | 24118  | 24451  |

|         |                |      |        |           |      |      |       |      |      |        |        |
|---------|----------------|------|--------|-----------|------|------|-------|------|------|--------|--------|
| UN26285 | Rsa1.0.00167.1 | 1229 | 116000 | 1.00E-142 | 257  | 257  | 100 - | 1    | 257  | 14352  | 14608  |
| UN26286 | Rsa1.0.04422.1 | 655  | 17423  | 0         | 553  | 555  | 99 +  | 3    | 557  | 10087  | 10641  |
| UN26287 | Rsa1.0.04378.1 | 816  | 17651  | 1.00E-177 | 344  | 354  | 97 +  | 331  | 684  | 4630   | 4983   |
| UN26288 | Rsa1.0.00482.1 | 822  | 81162  | 1.00E-104 | 235  | 248  | 94 -  | 576  | 822  | 7087   | 7328   |
| UN26289 | Rsa1.0.00122.1 | 1336 | 265937 | 0         | 1332 | 1335 | 99 +  | 1    | 1335 | 12464  | 13796  |
| UN26290 | Rsa1.0.01827.1 | 744  | 143321 | 8.00E-57  | 139  | 145  | 95 +  | 2    | 145  | 13696  | 13839  |
| UN26291 | Rsa1.0.05541.1 | 1086 | 139959 | 2.33E-156 | 304  | 315  | 96 -  | 773  | 1086 | 2794   | 3107   |
| UN26292 | Rsa1.0.01388.1 | 1186 | 46741  | 1.00E-125 | 249  | 256  | 97 +  | 499  | 754  | 14739  | 14994  |
| UN26293 | Rsa1.0.00823.1 | 1102 | 62889  | 1.00E-144 | 304  | 319  | 95 -  | 782  | 1100 | 36328  | 36646  |
| UN26294 | Rsa1.0.00311.1 | 695  | 96847  | 1.00E-140 | 274  | 280  | 97 -  | 404  | 682  | 2614   | 2893   |
| UN26295 | Rsa1.0.02199.1 | 1378 | 33982  | 1.00E-151 | 274  | 275  | 99 -  | 1    | 275  | 13929  | 14203  |
| UN26296 | Rsa1.0.00652.1 | 898  | 70089  | 1.00E-165 | 338  | 351  | 96 -  | 6    | 351  | 47920  | 48270  |
| UN26297 | Rsa1.0.00214.1 | 908  | 107508 | 0         | 660  | 667  | 98 -  | 242  | 907  | 58538  | 59200  |
| UN26298 | Rsa1.0.00116.1 | 1427 | 365886 | 0         | 531  | 532  | 99 +  | 1    | 531  | 350747 | 351278 |
| UN26299 | Rsa1.0.02194.1 | 647  | 34029  | 0         | 645  | 645  | 100 + | 1    | 645  | 659    | 1303   |
| UN26300 | Rsa1.0.01701.1 | 508  | 162121 | 0         | 399  | 400  | 99 +  | 109  | 508  | 6994   | 7393   |
| UN26301 | Rsa1.0.00991.1 | 1249 | 143101 | 0         | 528  | 550  | 96 +  | 712  | 1249 | 34643  | 35187  |
| UN26302 | Rsa1.0.08916.1 | 355  | 6792   | 1.00E-167 | 349  | 362  | 96 -  | 1    | 355  | 6089   | 6450   |
| UN26303 | Rsa1.0.00101.1 | 1013 | 267193 | 0         | 974  | 1013 | 96 +  | 1    | 1009 | 103646 | 104653 |
| UN26304 | Rsa1.0.01586.1 | 1159 | 42804  | 0         | 405  | 423  | 95 +  | 3    | 423  | 28074  | 28496  |
| UN26305 | Rsa1.0.00273.1 | 781  | 326186 | 0         | 762  | 784  | 97 +  | 3    | 779  | 45173  | 45956  |
| UN26306 | Rsa1.0.04405.1 | 1192 | 17508  | 0         | 1120 | 1192 | 93 -  | 6    | 1191 | 3075   | 4245   |
| UN26307 | Rsa1.0.00203.1 | 854  | 109129 | 4.00E-74  | 239  | 270  | 88 -  | 586  | 854  | 2773   | 3022   |
| UN26308 | Rsa1.0.03670.1 | 1342 | 21461  | 0         | 1177 | 1188 | 99 +  | 2    | 1189 | 7211   | 8398   |
| UN26309 | Rsa1.0.00142.1 | 1762 | 121474 | 0         | 376  | 379  | 99 -  | 1385 | 1762 | 90377  | 90755  |
| UN26310 | Rsa1.0.00040.1 | 534  | 324196 | 8.00E-93  | 198  | 205  | 96 +  | 179  | 383  | 228102 | 228305 |
| UN26311 | Rsa1.0.01155.1 | 1091 | 52182  | 0         | 745  | 780  | 95 +  | 3    | 764  | 12165  | 12944  |
| UN26312 | Rsa1.0.06054.1 | 891  | 11847  | 0         | 440  | 440  | 100 - | 3    | 442  | 11033  | 11472  |
| UN26313 | Rsa1.0.00775.1 | 699  | 64793  | 0         | 660  | 704  | 93 -  | 3    | 688  | 5371   | 6074   |
| UN26314 | Rsa1.0.00157.1 | 1195 | 245832 | 2.00E-74  | 173  | 183  | 94 -  | 366  | 548  | 183436 | 183618 |
| UN26315 | Rsa1.0.00033.1 | 736  | 515811 | 0         | 430  | 457  | 94 +  | 3    | 453  | 470465 | 470916 |
| UN26316 | Rsa1.0.02554.1 | 869  | 30187  | 0         | 767  | 803  | 95 +  | 72   | 869  | 28843  | 29640  |
| UN26317 | Rsa1.0.00301.1 | 947  | 365315 | 0         | 481  | 528  | 91 -  | 80   | 580  | 182014 | 182541 |
| UN26318 | Rsa1.0.00180.1 | 1502 | 114581 | 1.00E-167 | 306  | 307  | 99 +  | 1    | 306  | 101711 | 102017 |
| UN26319 | Rsa1.0.00243.1 | 1016 | 103651 | 0         | 936  | 967  | 96 -  | 5    | 971  | 42199  | 43165  |
| UN26320 | Rsa1.0.01450.1 | 968  | 144251 | 0         | 646  | 690  | 93 -  | 241  | 916  | 41384  | 42073  |
| UN26321 | Rsa1.0.04975.1 | 670  | 15264  | 1.00E-110 | 217  | 221  | 98 +  | 386  | 606  | 14367  | 14585  |
| UN26322 | Rsa1.0.01261.1 | 1737 | 49744  | 0         | 399  | 399  | 100 + | 2    | 400  | 35519  | 35917  |
| UN26323 | Rsa1.0.02050.1 | 1103 | 35570  | 0         | 651  | 676  | 96 +  | 2    | 674  | 6555   | 7212   |

|         |                |      |        |           |      |      |       |      |      |        |        |
|---------|----------------|------|--------|-----------|------|------|-------|------|------|--------|--------|
| UN26324 | Rsa1.0.00037.1 | 1508 | 307838 | 0         | 644  | 694  | 92 -  | 50   | 737  | 261462 | 262135 |
| UN26325 | Rsa1.0.06821.1 | 1643 | 10301  | 1.00E-159 | 301  | 306  | 98 +  | 643  | 948  | 2076   | 2381   |
| UN26326 | Rsa1.0.00022.1 | 1300 | 200461 | 1.00E-175 | 318  | 320  | 99 +  | 17   | 336  | 96365  | 96684  |
| UN26327 | Rsa1.0.00069.1 | 969  | 403561 | 0         | 592  | 621  | 95 +  | 146  | 766  | 46995  | 47615  |
| UN26328 | Rsa1.0.01773.1 | 851  | 39546  | 0         | 741  | 771  | 96 +  | 87   | 851  | 17250  | 18017  |
| UN26329 | Rsa1.0.00020.1 | 764  | 283099 | 0         | 737  | 786  | 93 +  | 2    | 757  | 74673  | 75456  |
| UN26330 | Rsa1.0.01828.1 | 640  | 38681  | 0         | 405  | 406  | 99 +  | 235  | 640  | 27265  | 27670  |
| UN26331 | Rsa1.0.00176.1 | 1430 | 240984 | 1.00E-158 | 898  | 1098 | 81 +  | 101  | 1189 | 141016 | 142092 |
| UN26332 | Rsa1.0.03596.1 | 435  | 21862  | 0         | 432  | 434  | 99 -  | 3    | 435  | 17500  | 17933  |
| UN26333 | Rsa1.0.00861.1 | 964  | 61759  | 0         | 600  | 605  | 99 -  | 360  | 964  | 59528  | 60130  |
| UN26334 | Rsa1.0.47171.1 | 811  | 479    | 1.00E-136 | 264  | 270  | 97 -  | 11   | 280  | 4      | 273    |
| UN26335 | Rsa1.0.00277.1 | 542  | 100132 | 1.00E-131 | 364  | 402  | 90 -  | 157  | 542  | 10546  | 10946  |
| UN26336 | Rsa1.0.00134.1 | 1015 | 390219 | 0         | 402  | 424  | 94 +  | 301  | 724  | 148827 | 149250 |
| UN26337 | Rsa1.0.00302.1 | 1637 | 97521  | 0         | 903  | 944  | 95 +  | 712  | 1637 | 37916  | 38856  |
| UN26338 | Rsa1.0.00025.1 | 807  | 277312 | 0         | 345  | 349  | 98 -  | 15   | 363  | 60506  | 60854  |
| UN26339 | Rsa1.0.01070.1 | 990  | 55099  | 0         | 562  | 578  | 97 -  | 414  | 989  | 42433  | 43008  |
| UN26340 | Rsa1.0.00230.1 | 1208 | 105389 | 0         | 401  | 404  | 99 +  | 1    | 404  | 102737 | 103140 |
| UN26341 | Rsa1.0.14114.1 | 727  | 3792   | 0         | 675  | 720  | 93 +  | 11   | 726  | 751    | 1467   |
| UN26342 | Rsa1.0.01077.1 | 1394 | 54772  | 1.00E-113 | 226  | 232  | 97 -  | 1071 | 1302 | 17216  | 17447  |
| UN26343 | Rsa1.0.00246.1 | 566  | 103541 | 3.00E-15  | 55   | 59   | 93 -  | 3    | 61   | 39074  | 39132  |
| UN26344 | Rsa1.0.00097.1 | 964  | 138858 | 0         | 880  | 950  | 92 +  | 1    | 940  | 104280 | 105208 |
| UN26345 | Rsa1.0.01455.1 | 874  | 45440  | 0         | 446  | 447  | 99 -  | 1    | 447  | 24825  | 25271  |
| UN26346 | Rsa1.0.05473.1 | 821  | 13628  | 0         | 806  | 816  | 98 +  | 7    | 821  | 10497  | 11311  |
| UN26347 | Rsa1.0.02692.1 | 1378 | 28626  | 0         | 1071 | 1072 | 99 +  | 307  | 1378 | 19918  | 20988  |
| UN26348 | Rsa1.0.03134.1 | 1280 | 145023 | 0         | 419  | 438  | 95 +  | 3    | 440  | 130382 | 130819 |
| UN26349 | Rsa1.0.00002.1 | 1231 | 601661 | 1.00E-99  | 227  | 241  | 94 -  | 296  | 536  | 1909   | 2149   |
| UN26350 | Rsa1.0.04735.1 | 942  | 16180  | 0         | 657  | 671  | 97 -  | 75   | 744  | 8132   | 8802   |
| UN26351 | Rsa1.0.03391.1 | 812  | 23251  | 0         | 766  | 812  | 94 -  | 1    | 807  | 1655   | 2445   |
| UN26352 | Rsa1.0.00143.1 | 1399 | 121313 | 0         | 497  | 497  | 100 - | 6    | 502  | 99391  | 99887  |
| UN26353 | Rsa1.0.00397.1 | 757  | 88189  | 1.00E-95  | 191  | 194  | 98 -  | 3    | 196  | 61837  | 62029  |
| UN26354 | Rsa1.0.00092.1 | 1015 | 659932 | 1.00E-120 | 241  | 248  | 97 -  | 383  | 630  | 127591 | 127838 |
| UN26355 | Rsa1.0.14512.1 | 1033 | 3316   | 0         | 995  | 1005 | 99 -  | 29   | 1033 | 2312   | 3316   |
| UN26356 | Rsa1.0.01600.1 | 815  | 42537  | 1.00E-107 | 248  | 260  | 95 -  | 528  | 783  | 37513  | 37770  |
| UN26357 | Rsa1.0.06561.1 | 831  | 10772  | 0         | 815  | 832  | 97 +  | 1    | 829  | 1766   | 2597   |
| UN26358 | Rsa1.0.00190.1 | 769  | 318240 | 2.00E-82  | 171  | 175  | 97 +  | 94   | 268  | 51982  | 52154  |
| UN26359 | Rsa1.0.08220.1 | 1013 | 7701   | 1.00E-149 | 292  | 300  | 97 -  | 367  | 666  | 6608   | 6907   |
| UN26360 | Rsa1.0.00049.1 | 793  | 167018 | 0         | 468  | 472  | 99 -  | 322  | 793  | 30139  | 30607  |
| UN26361 | Rsa1.0.00421.1 | 1215 | 86365  | 2.00E-77  | 179  | 188  | 95 +  | 21   | 207  | 55705  | 55892  |
| UN26362 | Rsa1.0.01117.1 | 841  | 53465  | 0         | 711  | 711  | 100 + | 130  | 840  | 39287  | 39997  |

|         |                |      |        |           |      |      |       |      |      |        |        |
|---------|----------------|------|--------|-----------|------|------|-------|------|------|--------|--------|
| UN26363 | Rsa1.0.07775.1 | 1255 | 8594   | 0         | 762  | 808  | 94 +  | 1    | 803  | 946    | 1749   |
| UN26364 | Rsa1.0.00713.1 | 765  | 158017 | 1.00E-114 | 274  | 294  | 93 +  | 10   | 298  | 31149  | 31442  |
| UN26365 | Rsa1.0.00349.1 | 1239 | 92621  | 0         | 328  | 328  | 100 + | 912  | 1239 | 41690  | 42017  |
| UN26366 | Rsa1.0.00914.1 | 1164 | 59880  | 0         | 1162 | 1162 | 100 + | 3    | 1164 | 12959  | 14120  |
| UN26367 | Rsa1.0.00020.1 | 1046 | 283099 | 0         | 375  | 376  | 99 -  | 671  | 1046 | 54942  | 55317  |
| UN26368 | Rsa1.0.00100.1 | 1031 | 249232 | 0         | 851  | 861  | 98 -  | 166  | 1026 | 25763  | 26620  |
| UN26369 | Rsa1.0.01301.1 | 837  | 169072 | 2.00E-79  | 151  | 151  | 100 + | 517  | 667  | 168629 | 168779 |
| UN26370 | Rsa1.0.00981.1 | 875  | 57700  | 5.00E-80  | 152  | 152  | 100 - | 144  | 295  | 15319  | 15470  |
| UN26371 | Rsa1.0.05687.1 | 873  | 12932  | 0         | 500  | 541  | 92 -  | 350  | 873  | 6337   | 6877   |
| UN26372 | Rsa1.0.02052.1 | 843  | 35555  | 2.00E-11  | 46   | 49   | 93 +  | 71   | 119  | 16963  | 17011  |
| UN26373 | Rsa1.0.01981.1 | 1201 | 36537  | 0         | 473  | 483  | 97 -  | 371  | 853  | 23284  | 23766  |
| UN26374 | Rsa1.0.05293.1 | 654  | 14237  | 0         | 349  | 352  | 99 -  | 3    | 354  | 5524   | 5875   |
| UN26375 | Rsa1.0.02593.1 | 805  | 29744  | 1.00E-110 | 224  | 227  | 98 -  | 582  | 805  | 5184   | 5410   |
| UN26376 | Rsa1.0.01667.1 | 847  | 41315  | 0         | 839  | 846  | 99 +  | 3    | 847  | 7284   | 8129   |
| UN26377 | Rsa1.0.00039.1 | 1450 | 296927 | 1.00E-171 | 358  | 375  | 95 +  | 674  | 1048 | 16707  | 17078  |
| UN26378 | Rsa1.0.00270.1 | 1111 | 101236 | 1.00E-141 | 386  | 428  | 90 +  | 3    | 425  | 64715  | 65118  |
| UN26379 | Rsa1.0.07311.1 | 629  | 9567   | 0         | 392  | 409  | 95 +  | 2    | 410  | 7123   | 7527   |
| UN26380 | Rsa1.0.01657.1 | 922  | 41436  | 0         | 476  | 479  | 99 +  | 3    | 480  | 21557  | 22035  |
| UN26381 | Rsa1.0.01951.1 | 1506 | 36941  | 0         | 1494 | 1496 | 99 -  | 12   | 1506 | 30306  | 31801  |
| UN26382 | Rsa1.0.02748.1 | 1146 | 28242  | 0         | 510  | 551  | 92 -  | 591  | 1136 | 14277  | 14825  |
| UN26383 | Rsa1.0.00173.1 | 516  | 288743 | 0         | 403  | 417  | 96 +  | 1    | 417  | 260908 | 261320 |
| UN26384 | Rsa1.0.00774.1 | 1800 | 64831  | 0         | 1216 | 1218 | 99 -  | 1    | 1218 | 60675  | 61892  |
| UN26385 | Rsa1.0.04288.1 | 1256 | 18077  | 1.00E-102 | 281  | 308  | 91 +  | 1    | 298  | 616    | 918    |
| UN26386 | Rsa1.0.00925.1 | 775  | 59481  | 0         | 341  | 342  | 99 -  | 7    | 348  | 38881  | 39222  |
| UN26387 | Rsa1.0.00004.1 | 899  | 253996 | 0         | 868  | 897  | 96 +  | 6    | 899  | 176127 | 177019 |
| UN26388 | Rsa1.0.03964.1 | 717  | 19835  | 0         | 406  | 406  | 100 + | 310  | 715  | 5629   | 6034   |
| UN26389 | Rsa1.0.04262.1 | 1489 | 18220  | 0         | 999  | 1021 | 97 -  | 1    | 1017 | 8711   | 9716   |
| UN26390 | Rsa1.0.02429.1 | 1289 | 31527  | 0         | 1234 | 1260 | 97 +  | 2    | 1260 | 25812  | 27071  |
| UN26391 | Rsa1.0.00094.1 | 782  | 139042 | 0         | 748  | 790  | 94 +  | 1    | 782  | 93939  | 94716  |
| UN26392 | Rsa1.0.00915.1 | 941  | 194446 | 4.00E-96  | 264  | 291  | 90 +  | 507  | 796  | 33758  | 34048  |
| UN26393 | Rsa1.0.01675.1 | 1393 | 41155  | 1.00E-171 | 306  | 306  | 100 - | 274  | 579  | 40809  | 41114  |
| UN26394 | Rsa1.0.02532.1 | 984  | 30403  | 1.00E-135 | 269  | 275  | 97 -  | 3    | 273  | 17632  | 17906  |
| UN26395 | Rsa1.0.02299.1 | 857  | 32857  | 1.00E-148 | 266  | 266  | 100 - | 592  | 857  | 17878  | 18143  |
| UN26396 | Rsa1.0.00091.1 | 1319 | 139699 | 0         | 694  | 695  | 99 +  | 1    | 695  | 111408 | 112102 |
| UN26397 | Rsa1.0.00593.1 | 1414 | 143463 | 0         | 394  | 397  | 99 +  | 1015 | 1411 | 4707   | 5103   |
| UN26398 | #              | #    | #      | #         | #    | #    | #     | #    | #    | #      | #      |
| UN26399 | Rsa1.0.00085.1 | 789  | 142226 | 1.00E-178 | 352  | 364  | 96 -  | 195  | 558  | 50813  | 51176  |
| UN26400 | Rsa1.0.00251.1 | 485  | 303968 | 1.00E-173 | 454  | 496  | 91 +  | 1    | 485  | 139742 | 140233 |
| UN26401 | Rsa1.0.00343.1 | 1174 | 93570  | 0         | 531  | 552  | 96 +  | 632  | 1174 | 74535  | 75086  |

|         |                |      |        |           |      |      |       |      |      |        |        |
|---------|----------------|------|--------|-----------|------|------|-------|------|------|--------|--------|
| UN26402 | Rsa1.0.00596.1 | 850  | 73578  | 0         | 454  | 455  | 99 +  | 1    | 455  | 1887   | 2341   |
| UN26403 | Rsa1.0.01872.1 | 650  | 37908  | 1.00E-101 | 213  | 219  | 97 +  | 432  | 650  | 16038  | 16254  |
| UN26404 | Rsa1.0.17651.1 | 1335 | 1773   | 0         | 1313 | 1324 | 99 +  | 12   | 1335 | 1      | 1320   |
| UN26405 | Rsa1.0.00967.1 | 853  | 58049  | 0         | 780  | 793  | 98 +  | 61   | 852  | 10145  | 10937  |
| UN26406 | Rsa1.0.02524.1 | 879  | 30496  | 0         | 489  | 493  | 99 -  | 388  | 879  | 20345  | 20837  |
| UN26407 | Rsa1.0.00145.1 | 1160 | 261008 | 0         | 558  | 567  | 98 -  | 565  | 1129 | 27267  | 27833  |
| UN26408 | Rsa1.0.00928.1 | 1568 | 59293  | 0         | 666  | 682  | 97 +  | 1    | 682  | 13268  | 13948  |
| UN26409 | Rsa1.0.00718.1 | 1699 | 279335 | 0         | 383  | 383  | 100 + | 1317 | 1699 | 275526 | 275908 |
| UN26410 | Rsa1.0.00084.1 | 877  | 142338 | 0         | 447  | 448  | 99 +  | 38   | 485  | 113436 | 113883 |
| UN26411 | Rsa1.0.01087.1 | 3211 | 54508  | 1.00E-153 | 279  | 280  | 99 -  | 1140 | 1419 | 4323   | 4602   |
| UN26412 | Rsa1.0.04248.1 | 1381 | 18287  | 0         | 378  | 379  | 99 -  | 1    | 379  | 5494   | 5872   |
| UN26413 | Rsa1.0.05884.1 | 742  | 12337  | 0         | 703  | 705  | 99 -  | 38   | 742  | 479    | 1183   |
| UN26414 | Rsa1.0.01509.1 | 904  | 44258  | 0         | 874  | 906  | 96 +  | 2    | 904  | 35363  | 36268  |
| UN26415 | Rsa1.0.00067.1 | 1252 | 415055 | 0         | 1239 | 1243 | 99 -  | 1    | 1240 | 83568  | 84810  |
| UN26416 | Rsa1.0.59638.1 | 1096 | 384    | 0         | 384  | 384  | 100 - | 604  | 987  | 1      | 384    |
| UN26417 | Rsa1.0.68938.1 | 774  | 333    | 1.00E-118 | 240  | 246  | 97 -  | 4    | 245  | 1      | 246    |
| UN26418 | Rsa1.0.02757.1 | 887  | 28187  | 0         | 419  | 444  | 94 +  | 6    | 443  | 25610  | 26049  |
| UN26419 | Rsa1.0.03304.1 | 839  | 23883  | 0         | 569  | 569  | 100 - | 105  | 673  | 20916  | 21484  |
| UN26420 | Rsa1.0.00903.1 | 1340 | 60228  | 0         | 1325 | 1341 | 98 +  | 1    | 1340 | 29930  | 31270  |
| UN26421 | Rsa1.0.00072.1 | 1395 | 148743 | 0         | 653  | 655  | 99 +  | 710  | 1364 | 65398  | 66052  |
| UN26422 | Rsa1.0.27606.1 | 1238 | 846    | 0         | 541  | 555  | 97 -  | 690  | 1238 | 293    | 846    |
| UN26423 | Rsa1.0.00044.1 | 2075 | 271658 | 0         | 519  | 522  | 99 +  | 448  | 968  | 46569  | 47090  |
| UN26424 | Rsa1.0.04223.1 | 1523 | 18407  | 0         | 1051 | 1054 | 99 +  | 472  | 1523 | 16719  | 17772  |
| UN26425 | Rsa1.0.01545.1 | 1107 | 43599  | 1.00E-128 | 249  | 253  | 98 +  | 1    | 252  | 25130  | 25382  |
| UN26426 | Rsa1.0.22857.1 | 937  | 1088   | 0         | 667  | 679  | 98 +  | 258  | 936  | 1      | 679    |
| UN26427 | Rsa1.0.00275.1 | 746  | 210104 | 4.00E-71  | 137  | 137  | 100 - | 187  | 323  | 12785  | 12921  |
| UN26428 | Rsa1.0.02628.1 | 1632 | 29369  | 0         | 979  | 979  | 100 - | 654  | 1632 | 14204  | 15182  |
| UN26429 | Rsa1.0.05978.1 | 1312 | 12053  | 0         | 1296 | 1298 | 99 +  | 3    | 1300 | 432    | 1729   |
| UN26430 | Rsa1.0.00085.1 | 784  | 142226 | 0         | 587  | 590  | 99 -  | 194  | 783  | 5593   | 6182   |
| UN26431 | Rsa1.0.00504.1 | 1765 | 79334  | 0         | 346  | 346  | 100 + | 1418 | 1763 | 22252  | 22597  |
| UN26432 | Rsa1.0.63356.1 | 1225 | 362    | 1.00E-170 | 345  | 362  | 95 +  | 730  | 1076 | 1      | 362    |
| UN26433 | Rsa1.0.00621.1 | 738  | 71840  | 0         | 518  | 520  | 99 +  | 2    | 521  | 24883  | 25402  |
| UN26434 | Rsa1.0.00272.1 | 1500 | 447836 | 1.00E-136 | 255  | 258  | 98 +  | 1    | 258  | 56704  | 56961  |
| UN26435 | Rsa1.0.00649.1 | 738  | 70263  | 0         | 669  | 695  | 96 +  | 45   | 738  | 13894  | 14577  |
| UN26436 | Rsa1.0.03159.1 | 862  | 24946  | 1.00E-112 | 301  | 325  | 92 +  | 491  | 808  | 14982  | 15306  |
| UN26437 | Rsa1.0.00543.1 | 722  | 76788  | 0         | 404  | 405  | 99 -  | 316  | 720  | 51489  | 51893  |
| UN26438 | Rsa1.0.30038.1 | 849  | 764    | 0         | 672  | 759  | 88 -  | 72   | 814  | 1      | 757    |
| UN26439 | Rsa1.0.00218.1 | 849  | 201480 | 0         | 563  | 578  | 97 -  | 268  | 845  | 22354  | 22931  |
| UN26440 | Rsa1.0.00005.1 | 1039 | 353093 | 1.00E-162 | 296  | 298  | 99 -  | 742  | 1039 | 169032 | 169329 |



|         |                |      |        |           |      |      |       |      |      |        |        |
|---------|----------------|------|--------|-----------|------|------|-------|------|------|--------|--------|
| UN26441 | Rsa1.0.02920.1 | 727  | 26779  | 2.00E-75  | 184  | 196  | 93 -  | 346  | 538  | 18685  | 18877  |
| UN26442 | Rsa1.0.00713.1 | 1054 | 158017 | 1.00E-170 | 303  | 303  | 100 - | 223  | 525  | 31836  | 32138  |
| UN26443 | Rsa1.0.00017.1 | 1174 | 752458 | 0         | 594  | 600  | 99 +  | 1    | 599  | 106188 | 106787 |
| UN26444 | Rsa1.0.00200.1 | 832  | 162016 | 1.00E-111 | 211  | 213  | 99 +  | 3    | 215  | 134464 | 134676 |
| UN26445 | Rsa1.0.00342.1 | 764  | 93695  | 0         | 420  | 439  | 95 -  | 1    | 437  | 57424  | 57859  |
| UN26446 | Rsa1.0.01110.1 | 1771 | 195852 | 0         | 818  | 883  | 92 -  | 795  | 1649 | 36147  | 37025  |
| UN26447 | Rsa1.0.00324.1 | 1368 | 218805 | 0         | 504  | 507  | 99 +  | 2    | 505  | 192834 | 193340 |
| UN26448 | Rsa1.0.00818.1 | 751  | 62939  | 1.00E-116 | 293  | 318  | 92 +  | 294  | 601  | 53239  | 53556  |
| UN26449 | Rsa1.0.00551.1 | 887  | 76227  | 0         | 498  | 498  | 100 + | 390  | 887  | 20659  | 21156  |
| UN26450 | Rsa1.0.00033.1 | 1345 | 515811 | 0         | 1331 | 1357 | 98 -  | 1    | 1345 | 371700 | 373055 |
| UN26451 | Rsa1.0.00022.1 | 651  | 200461 | 0         | 443  | 457  | 96 +  | 12   | 468  | 186108 | 186564 |
| UN26452 | Rsa1.0.00541.1 | 1405 | 76863  | 0         | 1338 | 1414 | 94 -  | 1    | 1398 | 38136  | 39520  |
| UN26453 | Rsa1.0.01482.1 | 801  | 44855  | 0         | 543  | 545  | 99 +  | 4    | 548  | 17754  | 18298  |
| UN26454 | Rsa1.0.00507.1 | 1411 | 79074  | 1.00E-174 | 317  | 319  | 99 +  | 1091 | 1409 | 20321  | 20639  |
| UN26455 | Rsa1.0.07607.1 | 850  | 9034   | 1.00E-156 | 306  | 315  | 97 -  | 530  | 844  | 2375   | 2689   |
| UN26456 | Rsa1.0.01747.1 | 682  | 39881  | 0         | 673  | 680  | 98 +  | 1    | 680  | 38892  | 39571  |
| UN26457 | Rsa1.0.00207.1 | 1037 | 248736 | 2.00E-11  | 74   | 84   | 88 -  | 74   | 157  | 99845  | 99925  |
| UN26458 | Rsa1.0.04279.1 | 1447 | 18113  | 0         | 429  | 429  | 100 + | 1    | 429  | 8569   | 8997   |
| UN26459 | Rsa1.0.00377.1 | 1283 | 90038  | 0         | 538  | 549  | 97 -  | 500  | 1047 | 55850  | 56396  |
| UN26460 | Rsa1.0.01119.1 | 1211 | 53459  | 0         | 1168 | 1207 | 96 +  | 8    | 1211 | 3978   | 5181   |
| UN26461 | Rsa1.0.01171.1 | 762  | 51752  | 1.00E-144 | 279  | 284  | 98 -  | 472  | 755  | 14959  | 15241  |
| UN26462 | Rsa1.0.01220.1 | 1284 | 161775 | 1.00E-105 | 306  | 336  | 91 +  | 1    | 323  | 126128 | 126462 |
| UN26463 | Rsa1.0.03455.1 | 900  | 22804  | 1.00E-80  | 182  | 191  | 95 -  | 576  | 766  | 12998  | 13185  |
| UN26464 | Rsa1.0.00106.1 | 1352 | 133916 | 0         | 579  | 591  | 97 +  | 3    | 591  | 95692  | 96276  |
| UN26465 | Rsa1.0.22927.1 | 1435 | 1084   | 0         | 991  | 1002 | 98 -  | 268  | 1269 | 83     | 1084   |
| UN26466 | Rsa1.0.01256.1 | 1736 | 49770  | 1.00E-108 | 253  | 272  | 93 +  | 1393 | 1664 | 6290   | 6552   |
| UN26467 | Rsa1.0.13820.1 | 1091 | 4264   | 1.00E-141 | 275  | 282  | 97 +  | 581  | 862  | 1101   | 1382   |
| UN26468 | Rsa1.0.02473.1 | 1504 | 31083  | 0         | 1465 | 1506 | 97 -  | 1    | 1502 | 8037   | 9530   |
| UN26469 | Rsa1.0.02976.1 | 1643 | 26315  | 1.00E-94  | 207  | 216  | 95 -  | 1166 | 1381 | 18603  | 18816  |
| UN26470 | Rsa1.0.02505.1 | 775  | 30703  | 0         | 705  | 737  | 95 +  | 3    | 726  | 396    | 1129   |
| UN26471 | Rsa1.0.00025.1 | 1011 | 277312 | 0         | 975  | 1009 | 96 +  | 2    | 1010 | 14388  | 15396  |
| UN26472 | Rsa1.0.01991.1 | 846  | 36425  | 1.00E-40  | 233  | 282  | 82 -  | 254  | 535  | 18024  | 18305  |
| UN26473 | Rsa1.0.01014.1 | 1319 | 56762  | 0         | 1318 | 1322 | 99 +  | 1    | 1319 | 25121  | 26442  |
| UN26474 | Rsa1.0.08740.1 | 1378 | 6980   | 0         | 460  | 463  | 99 -  | 32   | 494  | 706    | 1168   |
| UN26475 | Rsa1.0.00604.1 | 1661 | 146282 | 0         | 1132 | 1139 | 99 -  | 1    | 1139 | 137567 | 138705 |
| UN26476 | Rsa1.0.03213.1 | 1527 | 24568  | 0         | 1471 | 1553 | 94 -  | 1    | 1523 | 21327  | 22876  |
| UN26477 | Rsa1.0.00269.1 | 672  | 341668 | 1.00E-170 | 406  | 437  | 92 -  | 248  | 665  | 292838 | 293273 |
| UN26478 | Rsa1.0.01352.1 | 1903 | 47443  | 0         | 1855 | 1905 | 97 +  | 1    | 1903 | 24768  | 26660  |
| UN26479 | Rsa1.0.00817.1 | 1295 | 62961  | 0         | 364  | 370  | 98 +  | 906  | 1275 | 16183  | 16552  |

|         |                |      |        |           |      |      |       |      |      |        |        |
|---------|----------------|------|--------|-----------|------|------|-------|------|------|--------|--------|
| UN26480 | Rsa1.0.00593.1 | 1337 | 143463 | 0         | 411  | 438  | 93 +  | 908  | 1337 | 141785 | 142222 |
| UN26481 | Rsa1.0.03601.1 | 778  | 21850  | 0         | 761  | 773  | 98 -  | 8    | 778  | 13277  | 14049  |
| UN26482 | Rsa1.0.00060.1 | 1893 | 502678 | 0         | 744  | 744  | 100 - | 1    | 744  | 336316 | 337059 |
| UN26483 | Rsa1.0.02500.1 | 1461 | 30768  | 0         | 1450 | 1456 | 99 +  | 7    | 1461 | 26868  | 28322  |
| UN26484 | Rsa1.0.07001.1 | 1527 | 10048  | 1.00E-144 | 263  | 264  | 99 +  | 1    | 264  | 5060   | 5323   |
| UN26485 | Rsa1.0.00642.1 | 890  | 201230 | 1.00E-18  | 80   | 89   | 89 +  | 36   | 123  | 35382  | 35470  |
| UN26486 | Rsa1.0.20372.1 | 635  | 1312   | 0         | 531  | 558  | 95 -  | 3    | 559  | 654    | 1208   |
| UN26487 | Rsa1.0.14004.1 | 969  | 3929   | 7.00E-30  | 95   | 103  | 92 -  | 39   | 139  | 869    | 971    |
| UN26488 | Rsa1.0.01411.1 | 561  | 46326  | 0         | 368  | 370  | 99 +  | 192  | 561  | 2189   | 2558   |
| UN26489 | Rsa1.0.08564.1 | 1520 | 7193   | 0         | 931  | 937  | 99 +  | 584  | 1520 | 3323   | 4259   |
| UN26490 | Rsa1.0.01191.1 | 1124 | 51235  | 0         | 337  | 339  | 99 +  | 784  | 1122 | 11275  | 11613  |
| UN26491 | Rsa1.0.24949.1 | 1424 | 959    | 0         | 923  | 940  | 98 -  | 489  | 1424 | 20     | 959    |
| UN26492 | Rsa1.0.01624.1 | 1258 | 42064  | 1.00E-141 | 668  | 798  | 83 -  | 466  | 1258 | 25305  | 26095  |
| UN26493 | Rsa1.0.03267.1 | 1688 | 24230  | 4.00E-91  | 264  | 295  | 89 -  | 567  | 861  | 21935  | 22229  |
| UN26494 | Rsa1.0.00211.1 | 669  | 228189 | 0         | 457  | 466  | 98 -  | 190  | 655  | 132067 | 132531 |
| UN26495 | Rsa1.0.02571.1 | 1315 | 29995  | 0         | 1251 | 1271 | 98 -  | 31   | 1301 | 20382  | 21649  |
| UN26496 | Rsa1.0.01030.1 | 1505 | 56290  | 1.00E-159 | 285  | 285  | 100 - | 1214 | 1498 | 45193  | 45477  |
| UN26497 | #              | #    | #      | #         | #    | #    | #     | #    | #    | #      | #      |
| UN26498 | Rsa1.0.02903.1 | 1713 | 26901  | 0         | 1149 | 1170 | 98 +  | 119  | 1287 | 7639   | 8808   |
| UN26499 | Rsa1.0.00015.1 | 1049 | 561803 | 0         | 1011 | 1042 | 97 -  | 6    | 1047 | 195529 | 196567 |
| UN26500 | Rsa1.0.03469.1 | 1348 | 22681  | 0         | 393  | 393  | 100 + | 956  | 1348 | 21947  | 22339  |
| UN26501 | Rsa1.0.00014.1 | 1307 | 348985 | 0         | 548  | 548  | 100 + | 505  | 1052 | 27744  | 28291  |
| UN26502 | Rsa1.0.04732.1 | 924  | 16193  | 0         | 909  | 917  | 99 -  | 3    | 919  | 8266   | 9182   |
| UN26503 | Rsa1.0.00203.1 | 761  | 109129 | 1.00E-169 | 315  | 318  | 99 +  | 3    | 319  | 42270  | 42587  |
| UN26504 | Rsa1.0.01010.1 | 856  | 56906  | 1.00E-114 | 221  | 225  | 98 -  | 632  | 856  | 43779  | 44003  |
| UN26505 | Rsa1.0.00651.1 | 1463 | 247766 | 0         | 1456 | 1457 | 99 +  | 8    | 1463 | 113537 | 114993 |
| UN26506 | Rsa1.0.00087.1 | 596  | 761073 | 8.00E-47  | 102  | 104  | 98 -  | 248  | 351  | 16818  | 16921  |
| UN26507 | Rsa1.0.03015.1 | 1456 | 26006  | 0         | 906  | 940  | 96 +  | 1    | 925  | 4947   | 5886   |
| UN26508 | Rsa1.0.04337.1 | 1337 | 17845  | 0         | 389  | 389  | 100 + | 948  | 1336 | 10847  | 11235  |
| UN26509 | Rsa1.0.01602.1 | 1878 | 42503  | 0         | 562  | 564  | 99 -  | 91   | 654  | 11562  | 12125  |
| UN26510 | Rsa1.0.01613.1 | 1199 | 182542 | 0         | 448  | 448  | 100 - | 750  | 1197 | 4278   | 4725   |
| UN26511 | Rsa1.0.06759.1 | 1314 | 10402  | 0         | 461  | 472  | 97 -  | 1    | 469  | 159    | 630    |
| UN26512 | Rsa1.0.00838.1 | 584  | 153820 | 0         | 515  | 518  | 99 -  | 1    | 518  | 7812   | 8329   |
| UN26513 | Rsa1.0.02588.1 | 680  | 29840  | 0         | 669  | 672  | 99 +  | 3    | 674  | 27351  | 28022  |
| UN26514 | Rsa1.0.06602.1 | 1324 | 10683  | 0         | 743  | 743  | 100 - | 2    | 744  | 9015   | 9757   |
| UN26515 | Rsa1.0.02478.1 | 1001 | 150183 | 7.00E-58  | 328  | 393  | 83 -  | 383  | 773  | 14306  | 14693  |
| UN26516 | Rsa1.0.00077.1 | 861  | 145005 | 0         | 679  | 696  | 97 +  | 166  | 861  | 134031 | 134723 |
| UN26517 | Rsa1.0.00192.1 | 1225 | 278200 | 0         | 402  | 403  | 99 -  | 821  | 1223 | 224883 | 225285 |
| UN26518 | Rsa1.0.03649.1 | 1018 | 21589  | 0         | 420  | 426  | 98 +  | 592  | 1016 | 16545  | 16969  |

|         |                |      |        |           |     |     |       |      |      |        |        |
|---------|----------------|------|--------|-----------|-----|-----|-------|------|------|--------|--------|
| UN26519 | Rsa1.0.02720.1 | 1074 | 28427  | 0         | 783 | 839 | 93 +  | 239  | 1073 | 11937  | 12765  |
| UN26520 | Rsa1.0.00255.1 | 788  | 204967 | 0         | 411 | 418 | 98 -  | 1    | 418  | 164296 | 164713 |
| UN26521 | Rsa1.0.00903.1 | 1195 | 60228  | 0         | 496 | 521 | 95 +  | 677  | 1195 | 52193  | 52710  |
| UN26522 | Rsa1.0.03037.1 | 855  | 25825  | 1.00E-128 | 359 | 405 | 88 +  | 470  | 847  | 9108   | 9512   |
| UN26523 | Rsa1.0_45011.1 | 749  | 501    | 1.00E-112 | 360 | 409 | 88 +  | 43   | 438  | 93     | 501    |
| UN26524 | Rsa1.0_00113.1 | 927  | 131574 | 0         | 567 | 568 | 99 +  | 360  | 927  | 4409   | 4975   |
| UN26525 | Rsa1.0.07316.1 | 1915 | 9562   | 0         | 590 | 594 | 99 -  | 433  | 1026 | 4255   | 4848   |
| UN26526 | Rsa1.0.00176.1 | 1412 | 240984 | 0         | 672 | 680 | 98 +  | 1    | 676  | 150848 | 151527 |
| UN26527 | Rsa1.0.00284.1 | 1104 | 323267 | 0         | 437 | 462 | 94 +  | 643  | 1104 | 275018 | 275464 |
| UN26528 | Rsa1.0.00035.1 | 503  | 176449 | 1.00E-162 | 346 | 362 | 95 -  | 133  | 493  | 111346 | 111706 |
| UN26529 | Rsa1.0.00001.1 | 999  | 363028 | 1.00E-126 | 532 | 627 | 84 -  | 383  | 998  | 37504  | 38104  |
| UN26530 | Rsa1.0.00567.1 | 1374 | 75260  | 2.00E-89  | 180 | 184 | 97 +  | 379  | 562  | 67577  | 67760  |
| UN26531 | Rsa1.0.00441.1 | 1381 | 84607  | 0         | 538 | 568 | 94 -  | 12   | 576  | 29577  | 30140  |
| UN26532 | Rsa1.0.01769.1 | 1118 | 39568  | 0         | 439 | 441 | 99 -  | 676  | 1116 | 32131  | 32571  |
| UN26533 | Rsa1.0.02456.1 | 760  | 31222  | 0         | 394 | 395 | 99 +  | 367  | 760  | 26022  | 26416  |
| UN26534 | Rsa1.0_17558.1 | 1450 | 1798   | 0         | 722 | 802 | 90 -  | 460  | 1255 | 996    | 1797   |
| UN26535 | Rsa1.0.01573.1 | 1203 | 42964  | 0         | 735 | 735 | 100 - | 45   | 779  | 13460  | 14194  |
| UN26536 | Rsa1.0.05599.1 | 968  | 143653 | 0         | 578 | 590 | 97 -  | 1    | 589  | 4266   | 4855   |
| UN26537 | Rsa1.0.00228.1 | 1466 | 105511 | 0         | 350 | 350 | 100 - | 1117 | 1466 | 86135  | 86484  |
| UN26538 | Rsa1.0.00068.1 | 1289 | 151813 | 0         | 384 | 393 | 97 +  | 898  | 1289 | 104236 | 104628 |
| UN26539 | Rsa1.0.00019.1 | 1118 | 301669 | 4.00E-84  | 188 | 198 | 94 -  | 866  | 1057 | 181302 | 181499 |
| UN26540 | Rsa1.0.01316.1 | 1074 | 48325  | 1.00E-123 | 255 | 263 | 96 +  | 811  | 1072 | 2833   | 3093   |
| UN26541 | Rsa1.0.00124.1 | 1129 | 262503 | 1.00E-122 | 303 | 327 | 92 +  | 807  | 1127 | 21650  | 21975  |
| UN26542 | Rsa1.0.01269.1 | 963  | 49622  | 1.00E-150 | 317 | 332 | 95 +  | 1    | 332  | 13975  | 14304  |
| UN26543 | Rsa1.0.01199.1 | 931  | 163576 | 1.00E-118 | 282 | 300 | 94 +  | 628  | 925  | 20827  | 21125  |
| UN26544 | Rsa1.0.00850.1 | 800  | 62193  | 0         | 592 | 598 | 98 -  | 8    | 605  | 25983  | 26580  |
| UN26545 | Rsa1.0.00080.1 | 1110 | 190437 | 1.00E-178 | 316 | 316 | 100 - | 795  | 1110 | 36248  | 36563  |
| UN26546 | Rsa1.0.09504.1 | 1204 | 6328   | 0         | 916 | 918 | 99 +  | 1    | 918  | 3643   | 4560   |
| UN26547 | Rsa1.0.01141.1 | 2093 | 52530  | 0         | 551 | 564 | 97 -  | 543  | 1101 | 7031   | 7590   |
| UN26548 | Rsa1.0.00040.1 | 1088 | 324196 | 3.00E-85  | 212 | 224 | 94 +  | 807  | 1026 | 245385 | 245607 |
| UN26549 | Rsa1.0.03997.1 | 974  | 19652  | 1.00E-153 | 293 | 299 | 97 +  | 3    | 301  | 2579   | 2877   |
| UN26550 | Rsa1.0.00088.1 | 1211 | 141341 | 0         | 445 | 462 | 96 +  | 66   | 527  | 94765  | 95226  |
| UN26551 | Rsa1.0.09320.1 | 1093 | 6457   | 0         | 428 | 440 | 97 -  | 129  | 565  | 1368   | 1806   |
| UN26552 | Rsa1.0.00407.1 | 1207 | 191544 | 1.00E-141 | 257 | 258 | 99 +  | 10   | 267  | 152732 | 152989 |
| UN26553 | Rsa1.0.05002.1 | 735  | 15173  | 1.00E-138 | 284 | 290 | 97 -  | 448  | 735  | 7823   | 8110   |
| UN26554 | Rsa1.0.00191.1 | 1095 | 316976 | 7.00E-92  | 203 | 213 | 95 +  | 850  | 1062 | 51282  | 51490  |
| UN26555 | Rsa1.0.01081.1 | 1293 | 499226 | 0         | 519 | 542 | 95 +  | 752  | 1293 | 322593 | 323133 |
| UN26556 | Rsa1.0.00399.1 | 982  | 242951 | 0         | 422 | 428 | 98 -  | 303  | 730  | 79753  | 80180  |
| UN26557 | Rsa1.0_00647.1 | 974  | 70440  | 0         | 962 | 976 | 98 -  | 1    | 973  | 44480  | 45455  |

|         |                |      |        |           |     |     |       |      |      |        |        |
|---------|----------------|------|--------|-----------|-----|-----|-------|------|------|--------|--------|
| UN26558 | Rsa1.0_01294.1 | 1266 | 49090  | 1.00E-105 | 222 | 231 | 96 -  | 720  | 950  | 42556  | 42786  |
| UN26559 | Rsa1.0_02372.1 | 1178 | 32053  | 0         | 468 | 474 | 98 +  | 16   | 489  | 28530  | 29001  |
| UN26560 | Rsa1.0_00029.1 | 1238 | 272992 | 0         | 635 | 635 | 100 + | 604  | 1238 | 3110   | 3744   |
| UN26561 | Rsa1.0_00005.1 | 839  | 353093 | 1.00E-117 | 236 | 243 | 97 -  | 456  | 698  | 334080 | 334322 |
| UN26562 | Rsa1.0_01026.1 | 1510 | 171624 | 2.00E-68  | 151 | 156 | 96 -  | 1150 | 1305 | 166697 | 166850 |
| UN26563 | Rsa1.0_07018.1 | 1186 | 10020  | 1.00E-172 | 341 | 351 | 97 -  | 1    | 350  | 4418   | 4764   |
| UN26564 | Rsa1.0_00748.1 | 885  | 65983  | 8.00E-88  | 165 | 165 | 100 - | 3    | 167  | 17336  | 17500  |
| UN26565 | Rsa1.0_00092.1 | 1471 | 659932 | 0         | 775 | 831 | 93 -  | 1    | 812  | 192222 | 193044 |
| UN26566 | Rsa1.0_00074.1 | 1210 | 147591 | 0         | 322 | 322 | 100 + | 2    | 323  | 135584 | 135905 |
| UN26567 | Rsa1.0_00007.1 | 608  | 239325 | 1.00E-158 | 283 | 283 | 100 + | 326  | 608  | 118618 | 118900 |
| UN26568 | Rsa1.0_04262.1 | 1128 | 18220  | 0         | 554 | 555 | 99 +  | 574  | 1128 | 3395   | 3949   |
| UN26569 | Rsa1.0_00507.1 | 833  | 79074  | 1.00E-151 | 311 | 324 | 95 -  | 378  | 701  | 62115  | 62438  |
| UN26570 | Rsa1.0_00730.1 | 738  | 66673  | 0         | 737 | 737 | 100 + | 1    | 737  | 48672  | 49408  |
| UN26571 | Rsa1.0_02358.1 | 996  | 32213  | 1.00E-179 | 319 | 319 | 100 + | 676  | 994  | 21989  | 22307  |
| UN26572 | Rsa1.0_00801.1 | 1160 | 63861  | 0         | 827 | 850 | 97 +  | 1    | 848  | 10935  | 11783  |
| UN26573 | Rsa1.0_00031.1 | 1356 | 179862 | 8.00E-83  | 164 | 165 | 99 -  | 1    | 164  | 89257  | 89421  |
| UN26574 | Rsa1.0_00507.1 | 855  | 79074  | 1.00E-134 | 265 | 272 | 97 -  | 6    | 274  | 10817  | 11088  |
| UN26575 | Rsa1.0_02274.1 | 833  | 33109  | 1.00E-156 | 320 | 334 | 95 +  | 498  | 831  | 22370  | 22696  |
| UN26576 | Rsa1.0_00716.1 | 1171 | 67078  | 1.00E-118 | 696 | 843 | 82 -  | 192  | 1029 | 51443  | 52279  |
| UN26577 | Rsa1.0_00707.1 | 1611 | 190112 | 0         | 592 | 626 | 94 -  | 987  | 1610 | 17656  | 18264  |
| UN26578 | Rsa1.0_01224.1 | 926  | 50388  | 0         | 920 | 920 | 100 - | 3    | 922  | 39060  | 39979  |
| UN26579 | Rsa1.0_03307.1 | 1262 | 23872  | 1.00E-104 | 240 | 256 | 93 +  | 564  | 813  | 16635  | 16890  |
| UN26580 | Rsa1.0_00278.1 | 1409 | 231896 | 0         | 421 | 422 | 99 +  | 4    | 425  | 22591  | 23012  |
| UN26581 | Rsa1.0_00407.1 | 1196 | 191544 | 1.00E-155 | 322 | 335 | 96 +  | 5    | 339  | 28403  | 28736  |
| UN26582 | Rsa1.0_00413.1 | 902  | 86921  | 0         | 816 | 820 | 99 -  | 1    | 820  | 15935  | 16754  |
| UN26583 | Rsa1.0_02435.1 | 1423 | 31454  | 0         | 457 | 457 | 100 - | 1    | 457  | 17703  | 18159  |
| UN26584 | Rsa1.0_00030.1 | 1173 | 250988 | 0         | 908 | 911 | 99 -  | 1    | 911  | 87453  | 88363  |
| UN26585 | Rsa1.0_32838.1 | 655  | 693    | 3.00E-99  | 221 | 228 | 96 +  | 432  | 655  | 314    | 541    |
| UN26586 | Rsa1.0_03800.1 | 1237 | 20768  | 1.00E-129 | 256 | 263 | 97 -  | 852  | 1114 | 18645  | 18907  |
| UN26587 | Rsa1.0_00092.1 | 1325 | 659932 | 0         | 450 | 463 | 97 +  | 870  | 1325 | 42020  | 42482  |
| UN26588 | Rsa1.0_01052.1 | 783  | 55548  | 1.00E-119 | 292 | 317 | 92 -  | 286  | 602  | 45267  | 45583  |
| UN26589 | Rsa1.0_01235.1 | 1389 | 50180  | 0         | 898 | 936 | 95 -  | 2    | 931  | 21234  | 22167  |
| UN26590 | Rsa1.0_00549.1 | 1691 | 76473  | 0         | 569 | 642 | 88 +  | 35   | 649  | 23821  | 24461  |
| UN26591 | Rsa1.0_00050.1 | 1219 | 237174 | 0         | 661 | 662 | 99 +  | 557  | 1218 | 4619   | 5280   |
| UN26592 | Rsa1.0_03483.1 | 1777 | 22621  | 0         | 473 | 481 | 98 +  | 617  | 1097 | 18178  | 18658  |
| UN26593 | Rsa1.0_00373.1 | 981  | 90296  | 0         | 361 | 372 | 97 +  | 3    | 374  | 25722  | 26087  |
| UN26594 | Rsa1.0_01648.1 | 1134 | 41635  | 0         | 455 | 458 | 99 -  | 213  | 670  | 17598  | 18055  |
| UN26595 | Rsa1.0_00921.1 | 1442 | 59599  | 0         | 464 | 464 | 100 + | 10   | 473  | 24612  | 25075  |
| UN26596 | Rsa1.0_01898.1 | 1197 | 37491  | 0         | 576 | 608 | 94 +  | 596  | 1197 | 6437   | 7040   |

|         |                |      |        |           |      |      |       |      |      |        |        |
|---------|----------------|------|--------|-----------|------|------|-------|------|------|--------|--------|
| UN26597 | Rsa1.0_14637.1 | 1386 | 3201   | 0         | 1157 | 1174 | 98 +  | 37   | 1210 | 2028   | 3201   |
| UN26598 | Rsa1.0_02288.1 | 700  | 32984  | 5.00E-95  | 208  | 218  | 95 +  | 294  | 511  | 836    | 1049   |
| UN26599 | Rsa1.0_04340.1 | 1227 | 17831  | 0         | 410  | 431  | 95 -  | 606  | 1031 | 12838  | 13260  |
| UN26600 | Rsa1.0_00010.1 | 1657 | 294827 | 1.00E-170 | 344  | 357  | 96 -  | 771  | 1127 | 119168 | 119521 |
| UN26601 | Rsa1.0_00377.1 | 977  | 90038  | 0         | 370  | 382  | 96 +  | 3    | 381  | 17062  | 17443  |
| UN26602 | Rsa1.0_01659.1 | 524  | 164577 | 1.00E-23  | 84   | 93   | 90 -  | 313  | 405  | 134709 | 134801 |
| UN26603 | Rsa1.0_03877.1 | 1463 | 20318  | 1.00E-171 | 311  | 313  | 99 -  | 1150 | 1462 | 13786  | 14098  |
| UN26604 | Rsa1.0_00145.1 | 2763 | 261008 | 0         | 2039 | 2077 | 98 -  | 398  | 2473 | 62129  | 64186  |
| UN26605 | Rsa1.0_37975.1 | 1155 | 593    | 0         | 574  | 584  | 98 -  | 201  | 783  | 1      | 582    |
| UN26606 | Rsa1.0_00838.1 | 778  | 153820 | 0         | 622  | 629  | 98 -  | 138  | 764  | 15930  | 16558  |
| UN26607 | Rsa1.0_02229.1 | 1418 | 33672  | 0         | 357  | 359  | 99 +  | 1    | 359  | 12945  | 13303  |
| UN26608 | Rsa1.0_03627.1 | 1217 | 21658  | 0         | 400  | 408  | 98 +  | 810  | 1217 | 8024   | 8431   |
| UN26609 | Rsa1.0_00167.1 | 1052 | 116000 | 1.00E-144 | 336  | 362  | 92 -  | 15   | 376  | 17177  | 17526  |
| UN26610 | Rsa1.0_00336.1 | 1118 | 445051 | 0         | 419  | 432  | 96 -  | 1    | 426  | 14187  | 14616  |
| UN26611 | Rsa1.0_02536.1 | 614  | 30368  | 0         | 614  | 615  | 99 -  | 1    | 614  | 28703  | 29317  |
| UN26612 | Rsa1.0_00340.1 | 946  | 305782 | 0         | 435  | 435  | 100 - | 151  | 585  | 101949 | 102383 |
| UN26613 | Rsa1.0_00055.1 | 824  | 520193 | 0         | 428  | 431  | 99 -  | 3    | 433  | 75573  | 76003  |
| UN26614 | Rsa1.0_00197.1 | 1158 | 109714 | 0         | 353  | 356  | 99 +  | 515  | 869  | 36533  | 36888  |
| UN26615 | Rsa1.0_00002.1 | 1084 | 601661 | 0         | 380  | 382  | 99 +  | 3    | 384  | 97452  | 97833  |
| UN26616 | Rsa1.0_00016.1 | 757  | 831256 | 0         | 350  | 352  | 99 +  | 406  | 757  | 569300 | 569651 |
| UN26617 | Rsa1.0_03605.1 | 1187 | 21827  | 1.00E-25  | 67   | 69   | 97 +  | 1    | 69   | 4627   | 4695   |
| UN26618 | Rsa1.0_00201.1 | 1566 | 232851 | 0         | 1375 | 1418 | 96 -  | 156  | 1566 | 208602 | 210015 |
| UN26619 | Rsa1.0_01613.1 | 1914 | 182542 | 0         | 571  | 571  | 100 + | 3    | 573  | 26770  | 27340  |
| UN26620 | Rsa1.0_01756.1 | 1228 | 39779  | 0         | 400  | 401  | 99 -  | 828  | 1228 | 8765   | 9165   |
| UN26621 | Rsa1.0_04399.1 | 885  | 17543  | 0         | 403  | 419  | 96 +  | 469  | 882  | 12162  | 12578  |
| UN26622 | Rsa1.0_08790.1 | 1041 | 6918   | 0         | 693  | 736  | 94 +  | 313  | 1041 | 4948   | 5661   |
| UN26623 | Rsa1.0_00105.1 | 1194 | 134138 | 0         | 609  | 622  | 97 -  | 1    | 616  | 107748 | 108368 |
| UN26624 | Rsa1.0_00725.1 | 836  | 66757  | 2.00E-76  | 149  | 150  | 99 -  | 544  | 693  | 44369  | 44518  |
| UN26625 | Rsa1.0_00342.1 | 1348 | 93695  | 1.00E-145 | 274  | 278  | 98 +  | 1    | 278  | 55851  | 56128  |
| UN26626 | Rsa1.0_03387.1 | 1227 | 23278  | 0         | 1125 | 1137 | 98 -  | 4    | 1139 | 7459   | 8592   |
| UN26627 | Rsa1.0_00197.1 | 1171 | 109714 | 0         | 402  | 407  | 98 -  | 1    | 407  | 66982  | 67388  |
| UN26628 | Rsa1.0_01958.1 | 1172 | 261128 | 0         | 672  | 686  | 97 -  | 487  | 1172 | 115699 | 116384 |
| UN26629 | Rsa1.0_01634.1 | 1079 | 41865  | 1.00E-163 | 407  | 439  | 92 -  | 642  | 1079 | 1123   | 1551   |
| UN26630 | Rsa1.0_05192.1 | 870  | 136195 | 0         | 525  | 527  | 99 -  | 2    | 528  | 124985 | 125511 |
| UN26631 | Rsa1.0_00188.1 | 1155 | 112020 | 0         | 1141 | 1159 | 98 -  | 1    | 1153 | 11522  | 12680  |
| UN26632 | Rsa1.0_01536.1 | 1150 | 43747  | 0         | 746  | 749  | 99 +  | 3    | 751  | 31935  | 32683  |
| UN26633 | Rsa1.0_00243.1 | 805  | 103651 | 0         | 755  | 794  | 95 -  | 2    | 790  | 87272  | 88064  |
| UN26634 | Rsa1.0_00020.1 | 1101 | 283099 | 0         | 517  | 517  | 100 + | 3    | 519  | 128180 | 128696 |
| UN26635 | Rsa1.0_00341.1 | 1032 | 249309 | 0         | 949  | 1016 | 93 -  | 23   | 1032 | 113259 | 114254 |

|         |                |      |        |           |      |      |       |      |      |        |        |
|---------|----------------|------|--------|-----------|------|------|-------|------|------|--------|--------|
| UN26636 | Rsa1.0_01010.1 | 1166 | 56906  | 0         | 324  | 324  | 100 + | 843  | 1166 | 30047  | 30370  |
| UN26637 | Rsa1.0_08586.1 | 1311 | 7157   | 0         | 467  | 506  | 92 -  | 391  | 896  | 1944   | 2422   |
| UN26638 | Rsa1.0_04140.1 | 1276 | 18879  | 1.00E-103 | 210  | 216  | 97 -  | 770  | 985  | 7286   | 7501   |
| UN26639 | Rsa1.0_00170.1 | 1485 | 179538 | 0         | 508  | 524  | 96 +  | 454  | 977  | 57648  | 58161  |
| UN26640 | Rsa1.0_02494.1 | 1084 | 132923 | 0         | 685  | 687  | 99 +  | 2    | 688  | 109848 | 110533 |
| UN26641 | Rsa1.0_01692.1 | 1106 | 40894  | 0         | 370  | 380  | 97 -  | 2    | 381  | 26640  | 27013  |
| UN26642 | Rsa1.0_02473.1 | 1437 | 31083  | 0         | 683  | 700  | 97 +  | 741  | 1437 | 14966  | 15665  |
| UN26643 | Rsa1.0_01438.1 | 1622 | 45882  | 0         | 494  | 501  | 98 +  | 1122 | 1620 | 15044  | 15544  |
| UN26644 | Rsa1.0_00097.1 | 474  | 138858 | 0         | 401  | 412  | 97 +  | 63   | 474  | 110403 | 110814 |
| UN26645 | Rsa1.0_01504.1 | 1148 | 189978 | 0         | 635  | 653  | 97 -  | 1    | 647  | 17042  | 17692  |
| UN26646 | Rsa1.0_01713.1 | 799  | 40564  | 0         | 352  | 361  | 97 +  | 437  | 797  | 5295   | 5655   |
| UN26647 | Rsa1.0_04186.1 | 1244 | 18589  | 8.00E-92  | 172  | 172  | 100 - | 2    | 173  | 18182  | 18353  |
| UN26648 | Rsa1.0_02555.1 | 1143 | 30146  | 1.00E-132 | 281  | 291  | 96 -  | 4    | 292  | 2219   | 2507   |
| UN26649 | Rsa1.0_00061.1 | 736  | 218685 | 1.00E-123 | 237  | 241  | 98 -  | 89   | 329  | 76432  | 76672  |
| UN26650 | Rsa1.0_00453.1 | 842  | 83031  | 1.00E-58  | 132  | 136  | 97 -  | 493  | 628  | 73312  | 73446  |
| UN26651 | Rsa1.0_00525.1 | 1413 | 78030  | 0         | 392  | 396  | 98 -  | 1018 | 1413 | 19775  | 20170  |
| UN26652 | Rsa1.0_00035.1 | 1424 | 176449 | 0         | 711  | 729  | 97 -  | 158  | 886  | 52190  | 52916  |
| UN26653 | Rsa1.0_00100.1 | 778  | 249232 | 1.00E-123 | 231  | 233  | 99 +  | 6    | 238  | 11284  | 11516  |
| UN26654 | Rsa1.0_02966.1 | 1024 | 135126 | 0         | 347  | 354  | 98 -  | 245  | 598  | 133355 | 133708 |
| UN26655 | Rsa1.0_01855.1 | 865  | 38204  | 0         | 407  | 408  | 99 -  | 1    | 408  | 7015   | 7422   |
| UN26656 | Rsa1.0_00060.1 | 1019 | 502678 | 0         | 360  | 365  | 98 +  | 1    | 365  | 385853 | 386215 |
| UN26657 | Rsa1.0_04022.1 | 1692 | 19534  | 0         | 1654 | 1658 | 99 -  | 35   | 1692 | 6514   | 8171   |
| UN26658 | Rsa1.0_00224.1 | 845  | 327530 | 1.00E-138 | 256  | 258  | 99 +  | 207  | 464  | 146846 | 147103 |
| UN26659 | Rsa1.0_00501.1 | 1595 | 79545  | 0         | 662  | 666  | 99 +  | 1    | 665  | 21545  | 22210  |
| UN26660 | Rsa1.0_00028.1 | 650  | 293984 | 1.00E-140 | 255  | 256  | 99 -  | 395  | 650  | 137144 | 137399 |
| UN26661 | Rsa1.0_08395.1 | 1317 | 7428   | 0         | 942  | 969  | 97 -  | 1    | 968  | 1407   | 2375   |
| UN26662 | Rsa1.0_01799.1 | 1469 | 39127  | 0         | 1457 | 1458 | 99 -  | 7    | 1464 | 8397   | 9854   |
| UN26663 | Rsa1.0_00417.1 | 1003 | 395068 | 0         | 690  | 703  | 98 -  | 2    | 704  | 376217 | 376918 |
| UN26664 | Rsa1.0_03353.1 | 1025 | 23496  | 0         | 536  | 578  | 92 -  | 450  | 1025 | 18997  | 19561  |
| UN26665 | Rsa1.0_00153.1 | 1390 | 192931 | 0         | 777  | 788  | 98 +  | 375  | 1162 | 191754 | 192540 |
| UN26666 | Rsa1.0_02320.1 | 1575 | 32575  | 1.00E-101 | 254  | 276  | 92 +  | 176  | 451  | 22169  | 22444  |
| UN26667 | Rsa1.0_00827.1 | 1251 | 62790  | 0         | 732  | 778  | 94 -  | 475  | 1245 | 22863  | 23616  |
| UN26668 | Rsa1.0_00657.1 | 1245 | 69858  | 1.00E-134 | 260  | 266  | 97 -  | 3    | 262  | 62716  | 62981  |
| UN26669 | Rsa1.0_00676.1 | 1528 | 69166  | 0         | 1385 | 1407 | 98 +  | 1    | 1405 | 985    | 2389   |
| UN26670 | Rsa1.0_00058.1 | 998  | 159921 | 0         | 324  | 325  | 99 -  | 466  | 790  | 120963 | 121287 |
| UN26671 | Rsa1.0_04388.1 | 1157 | 17614  | 1.00E-121 | 245  | 253  | 96 +  | 493  | 745  | 11399  | 11651  |
| UN26672 | Rsa1.0_00131.1 | 988  | 432233 | 1.00E-111 | 231  | 240  | 96 -  | 747  | 986  | 410397 | 410630 |
| UN26673 | Rsa1.0_09024.1 | 1013 | 6703   | 0         | 523  | 525  | 99 +  | 181  | 705  | 5348   | 5872   |
| UN26674 | Rsa1.0_03259.1 | 1606 | 24290  | 0         | 397  | 401  | 99 +  | 804  | 1204 | 2057   | 2457   |

|         |                |      |        |           |      |      |       |      |      |        |        |
|---------|----------------|------|--------|-----------|------|------|-------|------|------|--------|--------|
| UN26675 | Rsa1.0.00064.1 | 1053 | 240927 | 0         | 525  | 537  | 97 +  | 247  | 783  | 132115 | 132651 |
| UN26676 | Rsa1.0.00730.1 | 845  | 66673  | 0         | 463  | 465  | 99 -  | 3    | 467  | 40906  | 41370  |
| UN26677 | Rsa1.0.00727.1 | 1431 | 66724  | 0         | 751  | 751  | 100 + | 1    | 751  | 44964  | 45714  |
| UN26678 | Rsa1.0.15414.1 | 1162 | 2620   | 0         | 353  | 354  | 99 +  | 1    | 354  | 322    | 674    |
| UN26679 | Rsa1.0.00030.1 | 1183 | 250988 | 1.00E-112 | 239  | 250  | 95 -  | 934  | 1183 | 104268 | 104512 |
| UN26680 | Rsa1.0.01033.1 | 793  | 56173  | 0         | 770  | 774  | 99 -  | 6    | 778  | 6295   | 7068   |
| UN26681 | Rsa1.0.01052.1 | 867  | 55548  | 0         | 799  | 845  | 94 -  | 23   | 867  | 39428  | 40272  |
| UN26682 | Rsa1.0.00314.1 | 1478 | 96472  | 0         | 485  | 486  | 99 -  | 993  | 1478 | 14607  | 15092  |
| UN26683 | Rsa1.0.00575.1 | 1229 | 74791  | 0         | 644  | 671  | 95 -  | 148  | 815  | 54880  | 55550  |
| UN26684 | Rsa1.0.00054.1 | 1460 | 162053 | 0         | 751  | 772  | 97 -  | 161  | 926  | 15265  | 16036  |
| UN26685 | Rsa1.0.00067.1 | 703  | 415055 | 0         | 536  | 552  | 97 -  | 122  | 670  | 252590 | 253141 |
| UN26686 | Rsa1.0.00092.1 | 1094 | 659932 | 1.00E-109 | 276  | 301  | 91 +  | 2    | 287  | 132907 | 133207 |
| UN26687 | Rsa1.0.01682.1 | 1226 | 41090  | 0         | 489  | 489  | 100 - | 738  | 1226 | 40438  | 40926  |
| UN26688 | Rsa1.0.15477.1 | 502  | 2584   | 0         | 474  | 512  | 92 -  | 1    | 502  | 867    | 1367   |
| UN26689 | Rsa1.0.00812.1 | 996  | 63233  | 0         | 597  | 606  | 98 +  | 371  | 976  | 13929  | 14534  |
| UN26690 | Rsa1.0.03798.1 | 1154 | 20800  | 0         | 1050 | 1055 | 99 -  | 104  | 1154 | 564    | 1618   |
| UN26691 | Rsa1.0.03375.1 | 915  | 23332  | 0         | 493  | 505  | 97 -  | 351  | 855  | 17205  | 17709  |
| UN26692 | Rsa1.0.03759.1 | 1263 | 20987  | 0         | 745  | 751  | 99 +  | 508  | 1258 | 5009   | 5759   |
| UN26693 | Rsa1.0.01456.1 | 963  | 45372  | 1.00E-90  | 197  | 206  | 95 +  | 378  | 583  | 42151  | 42356  |
| UN26694 | Rsa1.0.18008.1 | 1499 | 1691   | 0         | 452  | 454  | 99 -  | 1046 | 1499 | 110    | 563    |
| UN26695 | Rsa1.0.00497.1 | 1573 | 79830  | 0         | 931  | 932  | 99 -  | 642  | 1573 | 26980  | 27911  |
| UN26696 | Rsa1.0.00065.1 | 898  | 454616 | 0         | 426  | 435  | 97 -  | 465  | 898  | 248974 | 249408 |
| UN26697 | Rsa1.0.00131.1 | 1100 | 432233 | 1.00E-176 | 350  | 362  | 96 -  | 722  | 1081 | 151899 | 152252 |
| UN26698 | Rsa1.0.02327.1 | 1103 | 32497  | 0         | 1081 | 1098 | 98 +  | 1    | 1098 | 22750  | 23847  |
| UN26699 | Rsa1.0.00552.1 | 1068 | 206757 | 0         | 443  | 458  | 96 -  | 612  | 1067 | 18056  | 18511  |
| UN26700 | Rsa1.0.00730.1 | 719  | 66673  | 0         | 706  | 719  | 98 +  | 1    | 719  | 53322  | 54039  |
| UN26701 | Rsa1.0.00784.1 | 1425 | 64359  | 0         | 588  | 590  | 99 -  | 834  | 1423 | 29143  | 29732  |
| UN26702 | Rsa1.0.02253.1 | 964  | 33356  | 0         | 953  | 959  | 99 -  | 1    | 959  | 14513  | 15471  |
| UN26703 | Rsa1.0.03107.1 | 1190 | 25349  | 1.00E-110 | 206  | 207  | 99 +  | 803  | 1009 | 15975  | 16181  |
| UN26704 | Rsa1.0.00491.1 | 1781 | 80219  | 0         | 775  | 806  | 96 -  | 89   | 883  | 15387  | 16192  |
| UN26705 | Rsa1.0.08558.1 | 1232 | 7198   | 8.00E-95  | 239  | 255  | 93 +  | 6    | 254  | 4446   | 4700   |
| UN26706 | Rsa1.0.05581.1 | 961  | 13272  | 0         | 645  | 651  | 99 +  | 312  | 961  | 5476   | 6124   |
| UN26707 | Rsa1.0.01293.1 | 1095 | 49139  | 0         | 938  | 943  | 99 -  | 1    | 943  | 2686   | 3628   |
| UN26708 | Rsa1.0.01967.1 | 1138 | 36672  | 0         | 937  | 965  | 97 -  | 145  | 1109 | 23201  | 24165  |
| UN26709 | Rsa1.0.00538.1 | 469  | 77149  | 1.00E-115 | 270  | 287  | 94 +  | 183  | 469  | 66277  | 66556  |
| UN26710 | Rsa1.0.00031.1 | 1867 | 179862 | 0         | 510  | 511  | 99 -  | 1357 | 1867 | 43101  | 43611  |
| UN26711 | Rsa1.0.00914.1 | 1289 | 59880  | 1.00E-143 | 264  | 266  | 99 +  | 288  | 553  | 3727   | 3992   |
| UN26712 | Rsa1.0.00742.1 | 519  | 66106  | 0         | 437  | 438  | 99 +  | 82   | 519  | 15643  | 16080  |
| UN26713 | Rsa1.0.04755.1 | 1232 | 16121  | 5.00E-90  | 175  | 177  | 98 +  | 3    | 179  | 8255   | 8431   |

|         |                |      |        |           |      |      |       |      |      |        |        |
|---------|----------------|------|--------|-----------|------|------|-------|------|------|--------|--------|
| UN26714 | Rsa1.0.00376.1 | 1036 | 90101  | 0         | 393  | 397  | 98 +  | 447  | 843  | 8837   | 9233   |
| UN26715 | Rsa1.0.02670.1 | 1169 | 28887  | 0         | 419  | 428  | 97 -  | 336  | 763  | 16285  | 16712  |
| UN26716 | Rsa1.0.02660.1 | 833  | 28969  | 1.00E-147 | 267  | 268  | 99 +  | 251  | 518  | 26200  | 26467  |
| UN26717 | Rsa1.0.00783.1 | 1429 | 64459  | 8.00E-77  | 168  | 174  | 96 +  | 1167 | 1340 | 58687  | 58858  |
| UN26718 | Rsa1.0.00037.1 | 1778 | 307838 | 0         | 1096 | 1135 | 96 -  | 669  | 1778 | 197521 | 198655 |
| UN26719 | Rsa1.0.00575.1 | 1166 | 74791  | 0         | 407  | 413  | 98 -  | 16   | 428  | 21031  | 21443  |
| UN26720 | Rsa1.0.02418.1 | 830  | 31590  | 0         | 808  | 843  | 95 -  | 3    | 827  | 9652   | 10485  |
| UN26721 | Rsa1.0.01480.1 | 1034 | 44926  | 0         | 427  | 438  | 97 +  | 600  | 1034 | 38123  | 38560  |
| UN26722 | Rsa1.0.00090.1 | 752  | 273859 | 1.00E-106 | 286  | 319  | 89 +  | 455  | 752  | 2718   | 3033   |
| UN26723 | Rsa1.0.00017.1 | 1076 | 752458 | 0         | 502  | 506  | 99 +  | 569  | 1074 | 268430 | 268935 |
| UN26724 | Rsa1.0.01803.1 | 957  | 173846 | 1.00E-144 | 262  | 263  | 99 +  | 695  | 957  | 18351  | 18613  |
| UN26725 | Rsa1.0.00738.1 | 1131 | 66322  | 0         | 640  | 644  | 99 +  | 488  | 1131 | 17706  | 18349  |
| UN26726 | Rsa1.0.02678.1 | 961  | 135053 | 0         | 393  | 414  | 94 -  | 8    | 415  | 130452 | 130865 |
| UN26727 | Rsa1.0.00642.1 | 824  | 201230 | 0         | 737  | 775  | 95 -  | 37   | 811  | 35344  | 36117  |
| UN26728 | Rsa1.0.01520.1 | 895  | 44087  | 1.00E-168 | 324  | 330  | 98 +  | 565  | 893  | 9003   | 9329   |
| UN26729 | Rsa1.0.00135.1 | 401  | 178077 | 1.00E-162 | 290  | 290  | 100 - | 112  | 401  | 81142  | 81431  |
| UN26730 | Rsa1.0.06887.1 | 1325 | 10208  | 0         | 1301 | 1324 | 98 -  | 1    | 1323 | 8127   | 9447   |
| UN26731 | Rsa1.0.00697.1 | 1340 | 67913  | 0         | 1336 | 1340 | 99 +  | 3    | 1340 | 7959   | 9298   |
| UN26732 | Rsa1.0.15358.1 | 963  | 2659   | 0         | 446  | 458  | 97 +  | 433  | 889  | 145    | 602    |
| UN26733 | Rsa1.0.00990.1 | 1032 | 57445  | 1.00E-131 | 255  | 260  | 98 +  | 2    | 258  | 20434  | 20693  |
| UN26734 | Rsa1.0.08755.1 | 1036 | 6955   | 0         | 738  | 768  | 96 -  | 18   | 783  | 3627   | 4386   |
| UN26735 | Rsa1.0.00174.1 | 1042 | 115363 | 0         | 560  | 566  | 98 +  | 477  | 1042 | 1217   | 1782   |
| UN26736 | Rsa1.0.02528.1 | 653  | 30452  | 0         | 452  | 482  | 93 +  | 176  | 649  | 17924  | 18403  |
| UN26737 | Rsa1.0.02220.1 | 882  | 176031 | 0         | 644  | 660  | 97 +  | 2    | 661  | 178    | 835    |
| UN26738 | Rsa1.0.00097.1 | 950  | 138858 | 5.00E-83  | 163  | 165  | 98 +  | 770  | 934  | 103035 | 103199 |
| UN26739 | Rsa1.0.03656.1 | 1089 | 21552  | 0         | 336  | 336  | 100 - | 1    | 336  | 3945   | 4280   |
| UN26740 | Rsa1.0.01525.1 | 1727 | 43925  | 0         | 499  | 520  | 95 +  | 1    | 518  | 16532  | 17050  |
| UN26741 | Rsa1.0.00392.1 | 1169 | 88523  | 1.00E-131 | 241  | 242  | 99 -  | 525  | 766  | 77597  | 77838  |
| UN26742 | Rsa1.0.01641.1 | 784  | 188213 | 1.00E-100 | 185  | 185  | 100 + | 125  | 309  | 14900  | 15084  |
| UN26743 | Rsa1.0.00529.1 | 823  | 77487  | 1.00E-111 | 205  | 205  | 100 + | 251  | 455  | 59539  | 59743  |
| UN26744 | Rsa1.0.65243.1 | 1229 | 351    | 1.00E-62  | 136  | 139  | 97 -  | 1092 | 1229 | 212    | 350    |
| UN26745 | Rsa1.0.01387.1 | 1163 | 46745  | 0         | 603  | 603  | 100 - | 557  | 1159 | 40875  | 41477  |
| UN26746 | Rsa1.0.00889.1 | 1079 | 60978  | 1.00E-143 | 277  | 281  | 98 -  | 801  | 1078 | 16300  | 16580  |
| UN26747 | Rsa1.0.00250.1 | 708  | 273771 | 1.00E-177 | 364  | 379  | 96 +  | 325  | 702  | 230593 | 230971 |
| UN26748 | Rsa1.0.04266.1 | 1267 | 18195  | 0         | 704  | 704  | 100 + | 12   | 715  | 4602   | 5305   |
| UN26749 | Rsa1.0.00055.1 | 545  | 520193 | 0         | 477  | 491  | 97 -  | 57   | 545  | 209709 | 210199 |
| UN26750 | Rsa1.0.59294.1 | 1269 | 386    | 6.00E-74  | 142  | 142  | 100 - | 832  | 973  | 141    | 282    |
| UN26751 | Rsa1.0.00123.1 | 1171 | 325650 | 0         | 1012 | 1012 | 100 - | 160  | 1171 | 41687  | 42698  |
| UN26752 | Rsa1.0.00383.1 | 959  | 398431 | 1.00E-105 | 203  | 206  | 98 -  | 253  | 458  | 185127 | 185332 |



|         |                |      |        |           |      |      |       |      |      |        |        |
|---------|----------------|------|--------|-----------|------|------|-------|------|------|--------|--------|
| UN26753 | Rsa1.0.00082.1 | 1426 | 237584 | 0         | 512  | 530  | 96 -  | 900  | 1426 | 19585  | 20112  |
| UN26754 | Rsa1.0.02090.1 | 1402 | 35161  | 0         | 821  | 829  | 99 +  | 576  | 1402 | 33692  | 34520  |
| UN26755 | Rsa1.0.00077.1 | 1240 | 145005 | 0         | 1118 | 1181 | 94 -  | 2    | 1167 | 19297  | 20477  |
| UN26756 | Rsa1.0.00552.1 | 693  | 206757 | 0         | 378  | 382  | 98 +  | 313  | 693  | 45268  | 45649  |
| UN26757 | Rsa1.0.02314.1 | 1939 | 32642  | 1.00E-130 | 268  | 277  | 96 +  | 78   | 354  | 24833  | 25108  |
| UN26758 | Rsa1.0.01504.1 | 1119 | 189978 | 0         | 445  | 445  | 100 - | 675  | 1119 | 168512 | 168956 |
| UN26759 | Rsa1.0.00030.1 | 954  | 250988 | 0         | 803  | 808  | 99 -  | 1    | 808  | 54399  | 55206  |
| UN26760 | Rsa1.0.00467.1 | 1348 | 156542 | 0         | 436  | 447  | 97 -  | 892  | 1338 | 125619 | 126061 |
| UN26761 | Rsa1.0.02776.1 | 714  | 27997  | 1.00E-132 | 250  | 252  | 99 -  | 461  | 712  | 17407  | 17657  |
| UN26762 | Rsa1.0.04977.1 | 1426 | 15260  | 1.00E-127 | 244  | 248  | 98 -  | 227  | 474  | 6953   | 7200   |
| UN26763 | Rsa1.0.00533.1 | 1089 | 77375  | 0         | 733  | 769  | 95 +  | 1    | 768  | 54290  | 55054  |
| UN26764 | Rsa1.0.00451.1 | 1053 | 322533 | 0         | 480  | 480  | 100 + | 1    | 480  | 297279 | 297758 |
| UN26765 | Rsa1.0.49425.1 | 1389 | 459    | 6.00E-93  | 197  | 205  | 96 +  | 1    | 205  | 261    | 459    |
| UN26766 | Rsa1.0.15081.1 | 1350 | 2848   | 0         | 493  | 516  | 95 -  | 801  | 1316 | 728    | 1238   |
| UN26767 | Rsa1.0.09895.1 | 1641 | 6101   | 0         | 1563 | 1599 | 97 -  | 5    | 1602 | 2723   | 4317   |
| UN26768 | Rsa1.0.00955.1 | 1279 | 58358  | 1.00E-109 | 211  | 214  | 98 -  | 138  | 351  | 35701  | 35914  |
| UN26769 | Rsa1.0.02516.1 | 933  | 30608  | 1.00E-52  | 241  | 281  | 85 -  | 328  | 607  | 13866  | 14142  |
| UN26770 | Rsa1.0.00053.1 | 820  | 263459 | 1.00E-159 | 359  | 383  | 93 -  | 2    | 380  | 84698  | 85071  |
| UN26771 | Rsa1.0.00354.1 | 1620 | 232005 | 0         | 584  | 601  | 97 +  | 1018 | 1618 | 3236   | 3836   |
| UN26772 | Rsa1.0.00213.1 | 901  | 108167 | 0         | 448  | 465  | 96 +  | 5    | 467  | 97087  | 97548  |
| UN26773 | Rsa1.0.02651.1 | 1978 | 29046  | 0         | 1939 | 1972 | 98 +  | 3    | 1973 | 9707   | 11678  |
| UN26774 | Rsa1.0.01311.1 | 1152 | 48456  | 0         | 425  | 425  | 100 + | 3    | 427  | 15395  | 15819  |
| UN26775 | Rsa1.0.00385.1 | 1162 | 89160  | 0         | 1158 | 1159 | 99 +  | 4    | 1162 | 66920  | 68078  |
| UN26776 | Rsa1.0.50682.1 | 859  | 448    | 0         | 388  | 397  | 97 +  | 53   | 449  | 1      | 397    |
| UN26777 | Rsa1.0.03242.1 | 950  | 24415  | 0         | 355  | 361  | 98 -  | 590  | 950  | 3770   | 4128   |
| UN26778 | Rsa1.0.00165.1 | 306  | 116466 | 1.00E-145 | 295  | 305  | 96 +  | 1    | 304  | 29413  | 29713  |
| UN26779 | Rsa1.0.00799.1 | 1011 | 63918  | 0         | 374  | 375  | 99 -  | 2    | 376  | 19652  | 20026  |
| UN26780 | Rsa1.0.00101.1 | 939  | 267193 | 0         | 344  | 344  | 100 + | 1    | 344  | 140363 | 140706 |
| UN26781 | Rsa1.0.00350.1 | 932  | 92346  | 1.00E-123 | 231  | 233  | 99 +  | 310  | 542  | 49125  | 49357  |
| UN26782 | Rsa1.0.00105.1 | 1542 | 134138 | 1.00E-121 | 277  | 293  | 94 +  | 1251 | 1542 | 56206  | 56496  |
| UN26783 | Rsa1.0.05090.1 | 1512 | 14879  | 0         | 433  | 444  | 97 -  | 564  | 1006 | 7753   | 8193   |
| UN26784 | Rsa1.0.00079.1 | 935  | 606987 | 0         | 906  | 929  | 97 +  | 8    | 935  | 539897 | 540819 |
| UN26785 | Rsa1.0.01743.1 | 1012 | 39926  | 0         | 613  | 629  | 97 +  | 385  | 1012 | 24530  | 25155  |
| UN26786 | Rsa1.0.01519.1 | 1247 | 44144  | 0         | 618  | 620  | 99 -  | 623  | 1242 | 24232  | 24851  |
| UN26787 | Rsa1.0.02513.1 | 895  | 30643  | 0         | 819  | 895  | 91 +  | 1    | 895  | 18773  | 19660  |
| UN26788 | Rsa1.0.02004.1 | 1102 | 169138 | 0         | 812  | 846  | 95 +  | 2    | 845  | 167780 | 168625 |
| UN26789 | Rsa1.0.00016.1 | 1651 | 831256 | 0         | 1004 | 1030 | 97 -  | 629  | 1651 | 509610 | 510638 |
| UN26790 | Rsa1.0.00418.1 | 1224 | 215377 | 1.00E-104 | 192  | 192  | 100 - | 1024 | 1215 | 40460  | 40651  |
| UN26791 | Rsa1.0.03327.1 | 1726 | 23707  | 0         | 1391 | 1401 | 99 +  | 326  | 1726 | 17092  | 18487  |

|         |                |      |        |           |      |      |       |     |      |        |        |
|---------|----------------|------|--------|-----------|------|------|-------|-----|------|--------|--------|
| UN26792 | Rsa1.0_01048.1 | 885  | 55684  | 0         | 390  | 390  | 100 + | 496 | 885  | 29274  | 29663  |
| UN26793 | Rsa1.0_00276.1 | 1003 | 100160 | 0         | 564  | 577  | 97 -  | 2   | 575  | 78818  | 79394  |
| UN26794 | Rsa1.0_04670.1 | 1252 | 16453  | 0         | 422  | 426  | 99 -  | 827 | 1252 | 6502   | 6927   |
| UN26795 | Rsa1.0_03843.1 | 1035 | 20496  | 1.00E-120 | 291  | 317  | 91 -  | 602 | 906  | 8119   | 8435   |
| UN26796 | Rsa1.0_00646.1 | 1491 | 70473  | 0         | 1444 | 1491 | 96 -  | 1   | 1491 | 18010  | 19494  |
| UN26797 | Rsa1.0_01247.1 | 1882 | 49934  | 0         | 1008 | 1008 | 100 + | 1   | 1008 | 24383  | 25390  |
| UN26798 | Rsa1.0_08773.1 | 1195 | 6935   | 0         | 564  | 566  | 99 -  | 1   | 566  | 242    | 807    |
| UN26799 | Rsa1.0_00064.1 | 1115 | 240927 | 0         | 383  | 383  | 100 - | 1   | 383  | 80699  | 81081  |
| UN26800 | Rsa1.0_07345.1 | 596  | 9526   | 0         | 365  | 371  | 98 +  | 1   | 371  | 7350   | 7719   |
| UN26801 | Rsa1.0_02387.1 | 1287 | 31890  | 1.00E-173 | 367  | 383  | 95 +  | 904 | 1286 | 4635   | 5008   |
| UN26802 | Rsa1.0_00288.1 | 1246 | 98659  | 0         | 497  | 522  | 95 +  | 726 | 1245 | 89852  | 90369  |
| UN26803 | Rsa1.0_02015.1 | 1069 | 36008  | 1.00E-105 | 222  | 230  | 96 -  | 377 | 606  | 3355   | 3583   |
| UN26804 | Rsa1.0_00710.1 | 1942 | 67325  | 0         | 731  | 803  | 91 +  | 982 | 1781 | 43448  | 44250  |
| UN26805 | Rsa1.0_04584.1 | 1398 | 16756  | 0         | 573  | 575  | 99 +  | 414 | 988  | 6467   | 7041   |
| UN26806 | Rsa1.0_04863.1 | 927  | 15687  | 1.00E-111 | 243  | 252  | 96 -  | 52  | 295  | 4091   | 4342   |
| UN26807 | Rsa1.0_02008.1 | 1302 | 36109  | 0         | 1279 | 1296 | 98 +  | 5   | 1300 | 19083  | 20378  |
| UN26808 | Rsa1.0_02103.1 | 1249 | 35006  | 0         | 469  | 481  | 97 +  | 677 | 1157 | 33493  | 33973  |
| UN26809 | Rsa1.0_14201.1 | 1170 | 3670   | 0         | 628  | 651  | 96 -  | 2   | 652  | 1154   | 1801   |
| UN26810 | Rsa1.0_02446.1 | 817  | 31330  | 0         | 788  | 818  | 96 +  | 2   | 816  | 3880   | 4697   |
| UN26811 | Rsa1.0_02478.1 | 1119 | 150183 | 0         | 748  | 749  | 99 +  | 2   | 750  | 28813  | 29561  |
| UN26812 | Rsa1.0_05719.1 | 1798 | 12836  | 0         | 377  | 378  | 99 -  | 3   | 380  | 9506   | 9883   |
| UN26813 | Rsa1.0_00131.1 | 1357 | 432233 | 0         | 1193 | 1196 | 99 +  | 162 | 1357 | 44958  | 46153  |
| UN26814 | Rsa1.0_01998.1 | 1041 | 36276  | 0         | 713  | 749  | 95 -  | 22  | 767  | 10886  | 11623  |
| UN26815 | Rsa1.0_00673.1 | 850  | 69325  | 1.00E-114 | 233  | 240  | 97 -  | 338 | 577  | 55408  | 55644  |
| UN26816 | Rsa1.0_00676.1 | 1030 | 69166  | 1.00E-179 | 341  | 348  | 97 +  | 604 | 948  | 8100   | 8447   |
| UN26817 | Rsa1.0_01466.1 | 1240 | 45161  | 0         | 1041 | 1086 | 95 +  | 3   | 1085 | 14646  | 15731  |
| UN26818 | Rsa1.0_00015.1 | 539  | 561803 | 1.00E-157 | 281  | 281  | 100 - | 255 | 535  | 446952 | 447232 |
| UN26819 | Rsa1.0_00077.1 | 1664 | 145005 | 1.00E-97  | 191  | 194  | 98 +  | 818 | 1011 | 72109  | 72302  |
| UN26820 | Rsa1.0_00157.1 | 773  | 245832 | 0         | 751  | 783  | 95 -  | 1   | 773  | 195792 | 196574 |
| UN26821 | Rsa1.0_00187.1 | 1092 | 393093 | 0         | 476  | 492  | 96 -  | 36  | 527  | 234611 | 235102 |
| UN26822 | Rsa1.0_00548.1 | 994  | 76518  | 2.00E-14  | 48   | 50   | 96 -  | 577 | 626  | 62952  | 63001  |
| UN26823 | Rsa1.0_05863.1 | 1358 | 12388  | 1.00E-19  | 57   | 59   | 96 -  | 5   | 63   | 9681   | 9739   |
| UN26824 | Rsa1.0_03178.1 | 876  | 24798  | 0         | 872  | 875  | 99 +  | 2   | 876  | 15805  | 16679  |
| UN26825 | Rsa1.0_07548.1 | 584  | 9150   | 1.00E-167 | 323  | 330  | 97 -  | 111 | 439  | 1      | 330    |
| UN26826 | Rsa1.0_01388.1 | 1088 | 46741  | 0         | 456  | 489  | 93 +  | 606 | 1088 | 29300  | 29780  |
| UN26827 | Rsa1.0_17682.1 | 1192 | 1765   | 0         | 988  | 1092 | 90 +  | 126 | 1192 | 37     | 1119   |
| UN26828 | Rsa1.0_59638.1 | 944  | 384    | 0         | 383  | 384  | 99 -  | 341 | 724  | 1      | 384    |
| UN26829 | Rsa1.0_01687.1 | 1157 | 40979  | 0         | 740  | 743  | 99 +  | 2   | 744  | 24082  | 24824  |
| UN26830 | Rsa1.0_05112.1 | 1554 | 14814  | 1.00E-163 | 307  | 312  | 98 +  | 961 | 1272 | 12469  | 12780  |

|         |                |      |        |           |      |      |       |     |      |        |        |
|---------|----------------|------|--------|-----------|------|------|-------|-----|------|--------|--------|
| UN26831 | Rsa1.0.02871.1 | 689  | 27085  | 1.00E-142 | 265  | 268  | 98 -  | 422 | 689  | 6765   | 7032   |
| UN26832 | Rsa1.0.01670.1 | 1197 | 41260  | 0         | 1152 | 1224 | 94 -  | 1   | 1195 | 14362  | 15585  |
| UN26833 | Rsa1.0.00068.1 | 1429 | 151813 | 0         | 1346 | 1415 | 95 -  | 3   | 1408 | 42916  | 44323  |
| UN26834 | Rsa1.0.00218.1 | 823  | 201480 | 0         | 803  | 822  | 97 -  | 1   | 820  | 45434  | 46255  |
| UN26835 | Rsa1.0.01641.1 | 1165 | 188213 | 1.00E-178 | 316  | 316  | 100 + | 850 | 1165 | 179549 | 179864 |
| UN26836 | Rsa1.0.01882.1 | 996  | 37697  | 0         | 480  | 514  | 93 -  | 2   | 503  | 13166  | 13679  |
| UN26837 | Rsa1.0.00116.1 | 1059 | 365886 | 0         | 767  | 807  | 95 +  | 232 | 1031 | 8244   | 9044   |
| UN26838 | Rsa1.0.00176.1 | 858  | 240984 | 1.00E-120 | 222  | 223  | 99 -  | 634 | 856  | 151614 | 151836 |
| UN26839 | Rsa1.0.01341.1 | 979  | 47764  | 0         | 381  | 381  | 100 - | 597 | 977  | 10449  | 10829  |
| UN26840 | Rsa1.0.00425.1 | 1375 | 147080 | 0         | 828  | 835  | 99 +  | 226 | 1060 | 13682  | 14516  |
| UN26841 | Rsa1.0.04019.1 | 1273 | 19550  | 0         | 617  | 629  | 98 +  | 1   | 629  | 13399  | 14027  |
| UN26842 | Rsa1.0.01338.1 | 858  | 155644 | 0         | 556  | 595  | 93 +  | 277 | 858  | 128152 | 128746 |
| UN26843 | Rsa1.0.00075.1 | 897  | 146680 | 2.00E-88  | 182  | 186  | 97 +  | 669 | 853  | 69234  | 69419  |
| UN26844 | Rsa1.0.00416.1 | 1014 | 86772  | 9.00E-79  | 153  | 154  | 99 -  | 130 | 283  | 49230  | 49383  |
| UN26845 | Rsa1.0.10110.1 | 1082 | 5994   | 0         | 1048 | 1082 | 96 -  | 2   | 1082 | 3493   | 4573   |
| UN26846 | Rsa1.0.00391.1 | 1488 | 183853 | 0         | 782  | 784  | 99 -  | 2   | 785  | 52433  | 53216  |
| UN26847 | Rsa1.0.15062.1 | 1108 | 2857   | 0         | 945  | 979  | 96 +  | 129 | 1107 | 814    | 1792   |
| UN26848 | Rsa1.0.00071.1 | 784  | 345714 | 1.00E-180 | 333  | 336  | 99 -  | 450 | 784  | 193278 | 193613 |
| UN26849 | Rsa1.0.01602.1 | 774  | 42503  | 0         | 637  | 659  | 96 -  | 117 | 774  | 39907  | 40563  |
| UN26850 | Rsa1.0.00128.1 | 936  | 228675 | 1.00E-156 | 323  | 335  | 96 -  | 608 | 936  | 107140 | 107472 |
| UN26851 | Rsa1.0.00402.1 | 1258 | 385315 | 0         | 680  | 694  | 97 -  | 1   | 691  | 228806 | 229499 |
| UN26852 | Rsa1.0.00019.1 | 868  | 301669 | 0         | 859  | 868  | 98 +  | 1   | 866  | 191694 | 192561 |
| UN26853 | Rsa1.0.07630.1 | 944  | 8988   | 1.00E-115 | 252  | 265  | 95 +  | 693 | 944  | 1941   | 2205   |
| UN26854 | Rsa1.0.00592.1 | 1103 | 73788  | 2.00E-80  | 213  | 232  | 91 +  | 878 | 1101 | 12018  | 12245  |
| UN26855 | Rsa1.0.00182.1 | 1206 | 142305 | 1.00E-179 | 321  | 322  | 99 +  | 519 | 840  | 98130  | 98451  |
| UN26856 | Rsa1.0.00237.1 | 1508 | 235974 | 0         | 547  | 551  | 99 -  | 958 | 1508 | 519    | 1069   |
| UN26857 | Rsa1.0.02917.1 | 1381 | 159058 | 0         | 1358 | 1366 | 99 -  | 16  | 1381 | 133006 | 134371 |
| UN26858 | Rsa1.0.02429.1 | 1324 | 31527  | 1.00E-147 | 364  | 397  | 91 -  | 1   | 377  | 3094   | 3490   |
| UN26859 | Rsa1.0.00131.1 | 1192 | 432233 | 0         | 512  | 537  | 95 -  | 1   | 535  | 429983 | 430515 |
| UN26860 | Rsa1.0.02883.1 | 1260 | 27035  | 1.00E-131 | 262  | 270  | 97 -  | 910 | 1179 | 7232   | 7501   |
| UN26861 | Rsa1.0.00618.1 | 642  | 72195  | 0         | 340  | 340  | 100 + | 175 | 514  | 26098  | 26437  |
| UN26862 | Rsa1.0.07795.1 | 1005 | 8543   | 0         | 521  | 523  | 99 -  | 483 | 1005 | 3301   | 3823   |
| UN26863 | Rsa1.0.00089.1 | 1781 | 406142 | 0         | 867  | 880  | 98 +  | 905 | 1781 | 392266 | 393143 |
| UN26864 | Rsa1.0.00116.1 | 726  | 365886 | 1.00E-113 | 287  | 309  | 92 +  | 419 | 724  | 55807  | 56112  |
| UN26865 | Rsa1.0.03023.1 | 1382 | 25967  | 0         | 911  | 913  | 99 +  | 468 | 1380 | 6671   | 7583   |
| UN26866 | Rsa1.0.00836.1 | 1113 | 185968 | 0         | 414  | 415  | 99 +  | 699 | 1113 | 142387 | 142801 |
| UN26867 | Rsa1.0.07471.1 | 798  | 9307   | 0         | 694  | 757  | 91 -  | 35  | 780  | 1      | 747    |
| UN26868 | Rsa1.0.07851.1 | 701  | 8423   | 0         | 519  | 522  | 99 -  | 25  | 545  | 5130   | 5651   |
| UN26869 | Rsa1.0.01461.1 | 736  | 45240  | 1.00E-133 | 312  | 333  | 93 -  | 159 | 491  | 4204   | 4534   |

|         |                |      |        |           |     |     |       |      |      |        |        |
|---------|----------------|------|--------|-----------|-----|-----|-------|------|------|--------|--------|
| UN26870 | Rsa1.0.02516.1 | 913  | 30608  | 4.00E-16  | 123 | 145 | 84 -  | 39   | 183  | 14268  | 14409  |
| UN26871 | Rsa1.0.00206.1 | 1642 | 109040 | 0         | 398 | 402 | 99 +  | 315  | 716  | 12094  | 12495  |
| UN26872 | Rsa1.0.00017.1 | 1073 | 752458 | 1.00E-150 | 314 | 327 | 96 -  | 11   | 334  | 160917 | 161242 |
| UN26873 | Rsa1.0.01556.1 | 1012 | 163858 | 0         | 495 | 517 | 95 +  | 304  | 819  | 24947  | 25455  |
| UN26874 | Rsa1.0.00992.1 | 428  | 57419  | 0         | 405 | 423 | 95 -  | 13   | 428  | 7326   | 7748   |
| UN26875 | Rsa1.0.00104.1 | 896  | 368722 | 2.00E-60  | 173 | 190 | 91 +  | 286  | 473  | 349075 | 349264 |
| UN26876 | Rsa1.0.01760.1 | 1160 | 39730  | 0         | 674 | 678 | 99 +  | 1    | 677  | 5685   | 6361   |
| UN26877 | Rsa1.0.04155.1 | 889  | 134772 | 1.00E-177 | 327 | 331 | 98 -  | 559  | 889  | 123802 | 124132 |
| UN26878 | Rsa1.0.02070.1 | 1175 | 158516 | 0         | 749 | 769 | 97 -  | 413  | 1175 | 8314   | 9081   |
| UN26879 | Rsa1.0.03835.1 | 956  | 20567  | 0         | 606 | 616 | 98 +  | 342  | 953  | 8140   | 8755   |
| UN26880 | Rsa1.0.02202.1 | 825  | 33961  | 0         | 660 | 663 | 99 -  | 1    | 663  | 17228  | 17890  |
| UN26881 | Rsa1.0.00569.1 | 959  | 75060  | 1.00E-105 | 376 | 433 | 86 +  | 485  | 914  | 70090  | 70521  |
| UN26882 | Rsa1.0.00663.1 | 815  | 164969 | 0         | 692 | 726 | 95 -  | 1    | 710  | 125074 | 125793 |
| UN26883 | Rsa1.0.00048.1 | 624  | 167185 | 1.00E-135 | 258 | 261 | 98 -  | 361  | 621  | 90328  | 90587  |
| UN26884 | Rsa1.0.48078.1 | 892  | 471    | 1.00E-144 | 266 | 268 | 99 -  | 625  | 892  | 204    | 471    |
| UN26885 | Rsa1.0.02931.1 | 1593 | 26654  | 0         | 778 | 807 | 96 +  | 11   | 805  | 6963   | 7768   |
| UN26886 | Rsa1.0.00211.1 | 1172 | 228189 | 1.00E-147 | 284 | 291 | 97 -  | 3    | 293  | 14333  | 14617  |
| UN26887 | Rsa1.0.03037.1 | 1741 | 25825  | 0         | 476 | 477 | 99 +  | 1132 | 1608 | 9108   | 9584   |
| UN26888 | Rsa1.0.00159.1 | 1268 | 431686 | 1.00E-106 | 217 | 224 | 96 +  | 595  | 818  | 349193 | 349416 |
| UN26889 | Rsa1.0.03225.1 | 1140 | 24500  | 1.00E-154 | 371 | 408 | 90 -  | 1    | 387  | 20705  | 21106  |
| UN26890 | Rsa1.0.02651.1 | 882  | 29046  | 1.00E-147 | 355 | 381 | 93 +  | 498  | 867  | 6906   | 7279   |
| UN26891 | Rsa1.0.01581.1 | 697  | 42833  | 0         | 688 | 696 | 98 +  | 3    | 697  | 12260  | 12955  |
| UN26892 | Rsa1.0.01321.1 | 613  | 48248  | 1.00E-134 | 281 | 294 | 95 -  | 319  | 612  | 18737  | 19030  |
| UN26893 | Rsa1.0.00318.1 | 795  | 96094  | 1.00E-130 | 242 | 244 | 99 -  | 3    | 246  | 81383  | 81626  |
| UN26894 | Rsa1.0.01255.1 | 896  | 162921 | 0         | 435 | 443 | 98 -  | 10   | 452  | 22558  | 23000  |
| UN26895 | Rsa1.0.02567.1 | 922  | 30016  | 2.00E-20  | 58  | 60  | 96 -  | 859  | 918  | 1198   | 1257   |
| UN26896 | Rsa1.0.00103.1 | 784  | 135304 | 0         | 708 | 768 | 92 -  | 3    | 764  | 97659  | 98415  |
| UN26897 | Rsa1.0.01951.1 | 931  | 36941  | 1.00E-117 | 230 | 234 | 98 -  | 697  | 929  | 34045  | 34278  |
| UN26898 | Rsa1.0.06579.1 | 1676 | 10724  | 0         | 483 | 498 | 96 +  | 1178 | 1675 | 1400   | 1897   |
| UN26899 | Rsa1.0.00826.1 | 1006 | 166736 | 1.00E-176 | 319 | 321 | 99 +  | 685  | 1005 | 156527 | 156847 |
| UN26900 | Rsa1.0.00362.1 | 1174 | 299497 | 0         | 861 | 906 | 95 +  | 290  | 1172 | 292422 | 293323 |
| UN26901 | Rsa1.0.00818.1 | 1199 | 62939  | 0         | 364 | 365 | 99 +  | 824  | 1188 | 48304  | 48668  |
| UN26902 | Rsa1.0.00087.1 | 1072 | 761073 | 1.00E-135 | 250 | 252 | 99 +  | 821  | 1072 | 77023  | 77274  |
| UN26903 | Rsa1.0.00528.1 | 848  | 164755 | 2.00E-39  | 114 | 120 | 95 +  | 530  | 649  | 145669 | 145785 |
| UN26904 | Rsa1.0.01487.1 | 935  | 44784  | 1.00E-170 | 367 | 388 | 94 -  | 444  | 831  | 27939  | 28326  |
| UN26905 | Rsa1.0.00110.1 | 1114 | 132719 | 0         | 760 | 796 | 95 +  | 75   | 868  | 96884  | 97674  |
| UN26906 | Rsa1.0.00665.1 | 829  | 69539  | 0         | 329 | 329 | 100 + | 293  | 621  | 63769  | 64097  |
| UN26907 | Rsa1.0.00230.1 | 1237 | 105389 | 0         | 631 | 673 | 93 -  | 577  | 1235 | 850    | 1521   |
| UN26908 | Rsa1.0.00002.1 | 1201 | 601661 | 1.00E-166 | 453 | 499 | 90 -  | 683  | 1171 | 181114 | 181610 |

|         |                |      |        |           |      |      |       |      |      |        |        |
|---------|----------------|------|--------|-----------|------|------|-------|------|------|--------|--------|
| UN26909 | Rsa1.0.00377.1 | 715  | 90038  | 1.00E-114 | 271  | 293  | 92 +  | 3    | 283  | 10284  | 10574  |
| UN26910 | Rsa1.0.01280.1 | 1118 | 49321  | 1.00E-100 | 235  | 251  | 93 -  | 868  | 1118 | 37688  | 37929  |
| UN26911 | Rsa1.0.09261.1 | 887  | 6521   | 1.00E-125 | 249  | 256  | 97 +  | 255  | 510  | 1543   | 1798   |
| UN26912 | Rsa1.0.05723.1 | 540  | 12817  | 0         | 513  | 538  | 95 -  | 2    | 539  | 5349   | 5880   |
| UN26913 | Rsa1.0.00758.1 | 1333 | 65477  | 0         | 584  | 590  | 98 +  | 1    | 589  | 53770  | 54359  |
| UN26914 | Rsa1.0.01993.1 | 1499 | 36384  | 0         | 1495 | 1497 | 99 +  | 1    | 1497 | 11361  | 12857  |
| UN26915 | Rsa1.0.03658.1 | 861  | 21549  | 0         | 747  | 761  | 98 +  | 100  | 860  | 8744   | 9504   |
| UN26916 | Rsa1.0.01989.1 | 635  | 36439  | 2.00E-91  | 197  | 205  | 96 -  | 19   | 223  | 33287  | 33488  |
| UN26917 | Rsa1.0.00055.1 | 783  | 520193 | 1.00E-130 | 276  | 288  | 95 -  | 128  | 414  | 291243 | 291530 |
| UN26918 | Rsa1.0.00349.1 | 946  | 92621  | 0         | 372  | 372  | 100 - | 3    | 374  | 45076  | 45447  |
| UN26919 | Rsa1.0.01284.1 | 834  | 49231  | 0         | 325  | 326  | 99 -  | 476  | 801  | 20101  | 20426  |
| UN26920 | Rsa1.0.00602.1 | 1215 | 73302  | 0         | 783  | 799  | 97 -  | 48   | 843  | 1954   | 2752   |
| UN26921 | Rsa1.0.02593.1 | 812  | 29744  | 1.00E-163 | 338  | 352  | 96 +  | 5    | 356  | 12033  | 12383  |
| UN26922 | Rsa1.0.00454.1 | 1415 | 216970 | 0         | 440  | 441  | 99 +  | 523  | 963  | 183001 | 183441 |
| UN26923 | Rsa1.0.02589.1 | 1356 | 300828 | 0         | 496  | 496  | 100 + | 861  | 1356 | 25402  | 25897  |
| UN26924 | Rsa1.0.03727.1 | 1001 | 21158  | 0         | 666  | 668  | 99 +  | 332  | 999  | 11110  | 11777  |
| UN26925 | Rsa1.0.01302.1 | 823  | 48907  | 1.00E-109 | 246  | 262  | 93 -  | 2    | 263  | 40116  | 40364  |
| UN26926 | Rsa1.0.02229.1 | 1150 | 33672  | 0         | 458  | 464  | 98 -  | 6    | 469  | 22889  | 23352  |
| UN26927 | Rsa1.0.01931.1 | 912  | 37187  | 0         | 713  | 732  | 97 -  | 186  | 912  | 26615  | 27346  |
| UN26928 | Rsa1.0.13590.1 | 770  | 4689   | 0         | 738  | 770  | 95 +  | 3    | 770  | 3764   | 4530   |
| UN26929 | Rsa1.0.05001.1 | 1415 | 15176  | 0         | 998  | 1001 | 99 -  | 7    | 1007 | 7479   | 8479   |
| UN26930 | Rsa1.0.02120.1 | 1444 | 34819  | 0         | 449  | 449  | 100 - | 2    | 450  | 12621  | 13069  |
| UN26931 | Rsa1.0.07481.1 | 1055 | 9280   | 0         | 348  | 351  | 99 +  | 211  | 561  | 4144   | 4494   |
| UN26932 | Rsa1.0.00129.1 | 2556 | 126831 | 0         | 1201 | 1234 | 97 -  | 1323 | 2556 | 36005  | 37214  |
| UN26933 | Rsa1.0.01094.1 | 1377 | 167285 | 0         | 643  | 645  | 99 -  | 733  | 1377 | 1138   | 1782   |
| UN26934 | Rsa1.0.00816.1 | 578  | 403350 | 1.00E-164 | 305  | 309  | 98 +  | 5    | 313  | 106876 | 107184 |
| UN26935 | Rsa1.0.13551.1 | 1595 | 4737   | 7.00E-59  | 117  | 117  | 100 + | 569  | 685  | 1      | 117    |
| UN26936 | Rsa1.0.02729.1 | 1238 | 28394  | 0         | 582  | 591  | 98 +  | 654  | 1238 | 17109  | 17699  |
| UN26937 | Rsa1.0.00652.1 | 570  | 70089  | 5.00E-82  | 248  | 282  | 87 +  | 289  | 570  | 64567  | 64829  |
| UN26938 | Rsa1.0.22329.1 | 1929 | 1130   | 1.00E-107 | 208  | 211  | 98 -  | 434  | 644  | 636    | 846    |
| UN26939 | Rsa1.0.00018.1 | 1067 | 410899 | 0         | 382  | 383  | 99 -  | 685  | 1067 | 9178   | 9560   |
| UN26940 | Rsa1.0.00991.1 | 1296 | 143101 | 0         | 1038 | 1082 | 95 -  | 1    | 1082 | 32188  | 33267  |
| UN26941 | Rsa1.0.03425.1 | 427  | 23043  | 0         | 381  | 386  | 98 +  | 1    | 386  | 21702  | 22087  |
| UN26942 | Rsa1.0.08295.1 | 1052 | 7591   | 0         | 432  | 445  | 97 -  | 8    | 452  | 2931   | 3373   |
| UN26943 | Rsa1.0.02996.1 | 1071 | 26152  | 0         | 1068 | 1070 | 99 +  | 3    | 1071 | 15076  | 16145  |
| UN26944 | Rsa1.0.00712.1 | 1614 | 67217  | 0         | 1612 | 1616 | 99 -  | 1    | 1614 | 8108   | 9723   |
| UN26945 | Rsa1.0.00663.1 | 1365 | 164969 | 0         | 482  | 505  | 95 -  | 96   | 600  | 107089 | 107593 |
| UN26946 | Rsa1.0.04726.1 | 1397 | 16218  | 0         | 838  | 841  | 99 -  | 1    | 841  | 8826   | 9666   |
| UN26947 | Rsa1.0.00058.1 | 755  | 159921 | 0         | 724  | 733  | 98 -  | 21   | 753  | 153258 | 153990 |

|         |                |      |        |           |      |      |       |      |      |        |        |
|---------|----------------|------|--------|-----------|------|------|-------|------|------|--------|--------|
| UN26948 | Rsa1.0_02906.1 | 986  | 26866  | 0         | 429  | 446  | 96 +  | 550  | 986  | 5317   | 5759   |
| UN26949 | Rsa1.0_00089.1 | 582  | 406142 | 1.00E-172 | 347  | 359  | 96 -  | 51   | 408  | 351767 | 352125 |
| UN26950 | Rsa1.0_00632.1 | 1258 | 183777 | 0         | 596  | 597  | 99 +  | 9    | 605  | 50983  | 51579  |
| UN26951 | Rsa1.0_01537.1 | 992  | 187285 | 1.00E-140 | 268  | 273  | 98 -  | 617  | 889  | 11913  | 12185  |
| UN26952 | Rsa1.0_00364.1 | 486  | 90951  | 0         | 473  | 483  | 97 -  | 4    | 486  | 4227   | 4705   |
| UN26953 | Rsa1.0_01119.1 | 1236 | 53459  | 0         | 588  | 592  | 99 +  | 643  | 1233 | 40703  | 41294  |
| UN26954 | Rsa1.0_00657.1 | 1385 | 69858  | 1.00E-151 | 277  | 279  | 99 -  | 1107 | 1385 | 21979  | 22257  |
| UN26955 | Rsa1.0_00837.1 | 724  | 62568  | 1.00E-171 | 344  | 357  | 96 -  | 165  | 521  | 47711  | 48067  |
| UN26956 | Rsa1.0_49633.1 | 776  | 457    | 0         | 339  | 340  | 99 -  | 1    | 340  | 113    | 452    |
| UN26957 | Rsa1.0_01527.1 | 2138 | 43905  | 0         | 1299 | 1323 | 98 +  | 818  | 2138 | 20369  | 21684  |
| UN26958 | Rsa1.0_03616.1 | 1037 | 21756  | 2.00E-24  | 104  | 119  | 87 -  | 153  | 271  | 8002   | 8120   |
| UN26959 | Rsa1.0_00001.1 | 871  | 363028 | 0         | 492  | 495  | 99 -  | 2    | 496  | 37504  | 37998  |
| UN26960 | Rsa1.0_13347.1 | 1417 | 4900   | 1.00E-151 | 272  | 272  | 100 - | 1071 | 1342 | 4629   | 4900   |
| UN26961 | Rsa1.0_00758.1 | 1189 | 65477  | 0         | 609  | 614  | 99 -  | 2    | 615  | 62407  | 63019  |
| UN26962 | Rsa1.0_00106.1 | 1642 | 133916 | 0         | 786  | 794  | 98 -  | 851  | 1641 | 63456  | 64247  |
| UN26963 | Rsa1.0_01414.1 | 926  | 149508 | 1.00E-108 | 367  | 420  | 87 -  | 29   | 448  | 130284 | 130701 |
| UN26964 | Rsa1.0_01567.1 | 968  | 43090  | 0         | 537  | 551  | 97 -  | 416  | 966  | 19861  | 20402  |
| UN26965 | Rsa1.0_00139.1 | 959  | 357786 | 0         | 399  | 399  | 100 - | 561  | 959  | 274197 | 274595 |
| UN26966 | Rsa1.0_06876.1 | 411  | 10223  | 0         | 371  | 372  | 99 +  | 38   | 409  | 4267   | 4638   |
| UN26967 | Rsa1.0_00127.1 | 851  | 127446 | 1.00E-122 | 271  | 286  | 94 +  | 566  | 851  | 73899  | 74178  |
| UN26968 | Rsa1.0_01505.1 | 717  | 44382  | 1.00E-170 | 306  | 307  | 99 -  | 4    | 310  | 8600   | 8906   |
| UN26969 | Rsa1.0_03943.1 | 884  | 19931  | 0         | 361  | 370  | 97 +  | 25   | 394  | 7471   | 7840   |
| UN26970 | Rsa1.0_00286.1 | 759  | 98709  | 1.00E-105 | 197  | 198  | 99 +  | 154  | 351  | 60181  | 60378  |
| UN26971 | Rsa1.0_01491.1 | 947  | 44718  | 0         | 706  | 719  | 98 +  | 3    | 721  | 4038   | 4750   |
| UN26972 | Rsa1.0_04422.1 | 887  | 17423  | 0         | 812  | 842  | 96 +  | 2    | 840  | 8730   | 9564   |
| UN26973 | Rsa1.0_00201.1 | 1397 | 232851 | 0         | 1345 | 1376 | 97 +  | 32   | 1397 | 87133  | 88508  |
| UN26974 | Rsa1.0_11380.1 | 1233 | 5526   | 0         | 1076 | 1091 | 98 +  | 142  | 1232 | 736    | 1821   |
| UN26975 | Rsa1.0_04676.1 | 1245 | 16447  | 0         | 1245 | 1247 | 99 -  | 1    | 1245 | 4062   | 5308   |
| UN26976 | Rsa1.0_00328.1 | 1856 | 224661 | 0         | 1144 | 1149 | 99 +  | 706  | 1854 | 167282 | 168429 |
| UN26977 | Rsa1.0_00744.1 | 1108 | 66084  | 1.00E-148 | 464  | 526  | 88 +  | 3    | 523  | 16889  | 17401  |
| UN26978 | Rsa1.0_12923.1 | 1239 | 5075   | 2.00E-67  | 168  | 179  | 93 -  | 951  | 1128 | 4365   | 4543   |
| UN26979 | Rsa1.0_00709.1 | 617  | 67329  | 0         | 590  | 611  | 96 -  | 7    | 617  | 30559  | 31168  |
| UN26980 | Rsa1.0_04282.1 | 1098 | 18100  | 0         | 989  | 1029 | 96 +  | 73   | 1098 | 13726  | 14754  |
| UN26981 | Rsa1.0_09409.1 | 785  | 6390   | 1.00E-152 | 279  | 281  | 99 -  | 503  | 783  | 1161   | 1441   |
| UN26982 | Rsa1.0_00973.1 | 779  | 57913  | 0         | 674  | 675  | 99 +  | 105  | 779  | 40855  | 41529  |
| UN26983 | Rsa1.0_00028.1 | 1692 | 293984 | 0         | 846  | 862  | 98 +  | 827  | 1688 | 116337 | 117193 |
| UN26984 | Rsa1.0_09487.1 | 1001 | 6336   | 1.00E-151 | 274  | 275  | 99 +  | 727  | 1001 | 1624   | 1898   |
| UN26985 | Rsa1.0_03191.1 | 1460 | 145762 | 0         | 648  | 649  | 99 +  | 8    | 655  | 143382 | 144030 |
| UN26986 | Rsa1.0_00067.1 | 1270 | 415055 | 0         | 391  | 410  | 95 -  | 861  | 1267 | 138268 | 138672 |

|         |                |      |        |           |      |      |       |      |      |        |        |
|---------|----------------|------|--------|-----------|------|------|-------|------|------|--------|--------|
| UN26987 | Rsa1.0_00972.1 | 908  | 57937  | 0         | 903  | 907  | 99 +  | 1    | 907  | 49805  | 50711  |
| UN26988 | Rsa1.0_00321.1 | 986  | 95671  | 1.00E-164 | 299  | 301  | 99 +  | 686  | 986  | 60424  | 60724  |
| UN26989 | Rsa1.0_25509.1 | 915  | 933    | 0         | 376  | 383  | 98 +  | 533  | 915  | 498    | 880    |
| UN26990 | Rsa1.0_03233.1 | 661  | 24446  | 0         | 659  | 661  | 99 +  | 1    | 661  | 20023  | 20683  |
| UN26991 | Rsa1.0_00124.1 | 695  | 262503 | 0         | 661  | 695  | 95 +  | 2    | 693  | 159689 | 160381 |
| UN26992 | Rsa1.0_00354.1 | 2285 | 232005 | 0         | 1418 | 1467 | 96 +  | 839  | 2284 | 175638 | 177099 |
| UN26993 | Rsa1.0_03969.1 | 606  | 19797  | 0         | 477  | 482  | 98 +  | 2    | 483  | 16515  | 16996  |
| UN26994 | Rsa1.0_00168.1 | 721  | 115870 | 0         | 683  | 721  | 94 +  | 2    | 721  | 16498  | 17216  |
| UN26995 | Rsa1.0_00122.1 | 1004 | 265937 | 7.00E-21  | 53   | 53   | 100 - | 3    | 55   | 229896 | 229948 |
| UN26996 | Rsa1.0_00636.1 | 1658 | 71113  | 0         | 1645 | 1658 | 99 +  | 2    | 1656 | 27828  | 29485  |
| UN26997 | Rsa1.0_00280.1 | 1090 | 99966  | 0         | 1039 | 1093 | 95 +  | 1    | 1089 | 30053  | 31141  |
| UN26998 | Rsa1.0_01030.1 | 1037 | 56290  | 0         | 1000 | 1037 | 96 +  | 1    | 1035 | 42861  | 43877  |
| UN26999 | Rsa1.0_01819.1 | 862  | 38834  | 1.00E-164 | 300  | 301  | 99 -  | 3    | 303  | 28868  | 29167  |
| UN27000 | Rsa1.0_00122.1 | 1192 | 265937 | 0         | 341  | 341  | 100 + | 852  | 1192 | 41203  | 41543  |
| UN27001 | Rsa1.0_05490.1 | 1366 | 13556  | 0         | 420  | 425  | 98 +  | 938  | 1362 | 13046  | 13470  |
| UN27002 | Rsa1.0_00232.1 | 1562 | 104936 | 0         | 1082 | 1092 | 99 +  | 12   | 1103 | 34957  | 36048  |
| UN27003 | Rsa1.0_01243.1 | 1237 | 50061  | 0         | 788  | 790  | 99 -  | 178  | 967  | 33078  | 33867  |
| UN27004 | Rsa1.0_01524.1 | 1934 | 43949  | 0         | 551  | 552  | 99 -  | 1    | 551  | 6560   | 7111   |
| UN27005 | Rsa1.0_04043.1 | 906  | 19416  | 4.00E-65  | 130  | 131  | 99 -  | 87   | 217  | 9751   | 9881   |
| UN27006 | Rsa1.0_01439.1 | 1126 | 45841  | 0         | 401  | 401  | 100 + | 3    | 403  | 42551  | 42951  |
| UN27007 | Rsa1.0_20682.1 | 1164 | 1280   | 0         | 345  | 345  | 100 - | 3    | 347  | 785    | 1129   |
| UN27008 | Rsa1.0_00251.1 | 980  | 303968 | 1.00E-179 | 321  | 322  | 99 +  | 658  | 979  | 59688  | 60009  |
| UN27009 | Rsa1.0_19447.1 | 629  | 1430   | 2.00E-94  | 222  | 236  | 94 -  | 1    | 233  | 146    | 378    |
| UN27010 | Rsa1.0_01495.1 | 1007 | 44613  | 0         | 416  | 427  | 97 +  | 2    | 423  | 17951  | 18376  |
| UN27011 | Rsa1.0_01416.1 | 464  | 46262  | 0         | 371  | 385  | 96 +  | 2    | 383  | 24735  | 25119  |
| UN27012 | Rsa1.0_00068.1 | 1408 | 151813 | 0         | 365  | 365  | 100 + | 1044 | 1408 | 71030  | 71394  |
| UN27013 | Rsa1.0_00111.1 | 1564 | 390088 | 0         | 1182 | 1239 | 95 +  | 340  | 1560 | 60205  | 61436  |
| UN27014 | Rsa1.0_00638.1 | 960  | 71037  | 0         | 614  | 617  | 99 +  | 1    | 617  | 22302  | 22918  |
| UN27015 | Rsa1.0_01104.1 | 826  | 285480 | 1.00E-119 | 252  | 263  | 95 -  | 409  | 671  | 107190 | 107449 |
| UN27016 | Rsa1.0_02616.1 | 1444 | 29542  | 0         | 1420 | 1440 | 98 +  | 5    | 1444 | 5091   | 6530   |
| UN27017 | Rsa1.0_05248.1 | 969  | 14384  | 1.00E-128 | 233  | 233  | 100 + | 1    | 233  | 1499   | 1731   |
| UN27018 | Rsa1.0_00224.1 | 1140 | 327530 | 1.00E-141 | 254  | 254  | 100 + | 887  | 1140 | 44924  | 45177  |
| UN27019 | Rsa1.0_00073.1 | 846  | 240924 | 0         | 503  | 505  | 99 -  | 339  | 843  | 184125 | 184629 |
| UN27020 | Rsa1.0_02737.1 | 2091 | 28325  | 0         | 540  | 543  | 99 +  | 1473 | 2015 | 4879   | 5421   |
| UN27021 | Rsa1.0_00108.1 | 1477 | 478491 | 1.00E-137 | 260  | 264  | 98 -  | 1213 | 1476 | 433264 | 433527 |
| UN27022 | Rsa1.0_01982.1 | 1260 | 36530  | 0         | 717  | 718  | 99 +  | 369  | 1086 | 9616   | 10333  |
| UN27023 | Rsa1.0_00339.1 | 1108 | 222974 | 0         | 665  | 665  | 100 - | 7    | 671  | 53200  | 53864  |
| UN27024 | Rsa1.0_00842.1 | 1584 | 62493  | 0         | 1531 | 1594 | 96 +  | 1    | 1584 | 35530  | 37113  |
| UN27025 | Rsa1.0_00085.1 | 517  | 142226 | 1.00E-132 | 239  | 239  | 100 - | 279  | 517  | 26764  | 27002  |

|         |                |      |        |           |      |      |       |      |      |        |        |
|---------|----------------|------|--------|-----------|------|------|-------|------|------|--------|--------|
| UN27026 | Rsa1.0.00387.1 | 993  | 495407 | 0         | 452  | 458  | 98 +  | 254  | 711  | 471842 | 472299 |
| UN27027 | Rsa1.0.05428.1 | 1611 | 13789  | 0         | 581  | 596  | 97 -  | 1016 | 1611 | 492    | 1078   |
| UN27028 | Rsa1.0.01078.1 | 795  | 316910 | 0         | 442  | 444  | 99 +  | 232  | 675  | 315807 | 316250 |
| UN27029 | Rsa1.0.01077.1 | 1313 | 54772  | 1.00E-113 | 226  | 232  | 97 -  | 997  | 1228 | 17216  | 17447  |
| UN27030 | Rsa1.0.27336.1 | 1358 | 857    | 1.00E-137 | 266  | 272  | 97 -  | 721  | 992  | 7      | 278    |
| UN27031 | Rsa1.0.02074.1 | 1289 | 35370  | 0         | 1137 | 1178 | 96 -  | 112  | 1289 | 30195  | 31372  |
| UN27032 | Rsa1.0.00020.1 | 1888 | 283099 | 0         | 771  | 831  | 92 -  | 292  | 1113 | 56021  | 56829  |
| UN27033 | Rsa1.0.02247.1 | 1258 | 33427  | 0         | 529  | 529  | 100 - | 228  | 756  | 2209   | 2737   |
| UN27034 | #              | #    | #      | #         | #    | #    | #     | #    | #    | #      | #      |
| UN27035 | Rsa1.0.03560.1 | 1206 | 22092  | 1.00E-132 | 287  | 303  | 94 -  | 761  | 1063 | 6156   | 6458   |
| UN27036 | Rsa1.0.01410.1 | 1270 | 46345  | 3.00E-97  | 250  | 272  | 91 -  | 1003 | 1270 | 15769  | 16037  |
| UN27037 | Rsa1.0.00887.1 | 1245 | 61048  | 0         | 1068 | 1130 | 94 +  | 1    | 1120 | 47442  | 48567  |
| UN27038 | Rsa1.0.00030.1 | 984  | 250988 | 4.00E-87  | 182  | 188  | 96 -  | 3    | 190  | 184544 | 184731 |
| UN27039 | Rsa1.0.00198.1 | 807  | 222963 | 0         | 506  | 514  | 98 +  | 1    | 514  | 65033  | 65546  |
| UN27040 | Rsa1.0.00576.1 | 775  | 178949 | 1.00E-134 | 243  | 243  | 100 - | 2    | 244  | 38889  | 39131  |
| UN27041 | Rsa1.0.02046.1 | 817  | 162733 | 0         | 416  | 419  | 99 -  | 1    | 419  | 33362  | 33780  |
| UN27042 | Rsa1.0.01749.1 | 1298 | 39822  | 0         | 441  | 475  | 92 -  | 121  | 595  | 28271  | 28736  |
| UN27043 | Rsa1.0.01390.1 | 1256 | 46695  | 1.00E-124 | 321  | 350  | 91 +  | 908  | 1256 | 36004  | 36332  |
| UN27044 | Rsa1.0.04090.1 | 770  | 19145  | 0         | 377  | 384  | 98 +  | 375  | 751  | 5750   | 6133   |
| UN27045 | Rsa1.0.04641.1 | 849  | 268012 | 0         | 380  | 392  | 96 -  | 3    | 392  | 132018 | 132409 |
| UN27046 | Rsa1.0.00158.1 | 1045 | 117999 | 0         | 860  | 863  | 99 -  | 1    | 863  | 102143 | 103005 |
| UN27047 | Rsa1.0.00018.1 | 1007 | 410899 | 0         | 520  | 543  | 95 -  | 2    | 543  | 63452  | 63982  |
| UN27048 | Rsa1.0.00426.1 | 1319 | 85668  | 0         | 393  | 401  | 98 +  | 2    | 402  | 67127  | 67527  |
| UN27049 | Rsa1.0.00064.1 | 1151 | 240927 | 0         | 544  | 546  | 99 -  | 1    | 545  | 87916  | 88461  |
| UN27050 | Rsa1.0.04578.1 | 1102 | 16774  | 0         | 372  | 372  | 100 + | 731  | 1102 | 6018   | 6389   |
| UN27051 | Rsa1.0.25802.1 | 1168 | 919    | 1.00E-133 | 251  | 254  | 98 -  | 827  | 1080 | 666    | 919    |
| UN27052 | Rsa1.0.01196.1 | 1375 | 51097  | 0         | 341  | 343  | 99 -  | 1    | 343  | 47608  | 47950  |
| UN27053 | Rsa1.0.02624.1 | 1181 | 29402  | 0         | 705  | 709  | 99 -  | 29   | 737  | 3264   | 3972   |
| UN27054 | Rsa1.0.02808.1 | 1333 | 27677  | 0         | 385  | 403  | 95 +  | 792  | 1191 | 8151   | 8553   |
| UN27055 | Rsa1.0.04523.1 | 1135 | 16985  | 0         | 609  | 609  | 100 - | 2    | 610  | 4844   | 5452   |
| UN27056 | Rsa1.0.31019.1 | 1149 | 738    | 0         | 381  | 383  | 99 -  | 3    | 385  | 42     | 424    |
| UN27057 | Rsa1.0.02320.1 | 1469 | 32575  | 0         | 1461 | 1469 | 99 +  | 1    | 1469 | 13124  | 14592  |
| UN27058 | Rsa1.0.11171.1 | 1105 | 5595   | 1.00E-37  | 84   | 85   | 98 +  | 523  | 607  | 5511   | 5595   |
| UN27059 | Rsa1.0.04877.1 | 1526 | 15631  | 0         | 936  | 936  | 100 + | 7    | 942  | 2089   | 3024   |
| UN27060 | Rsa1.0.00207.1 | 1104 | 248736 | 0         | 364  | 365  | 99 -  | 740  | 1104 | 24111  | 24475  |
| UN27061 | Rsa1.0.03547.1 | 1002 | 22167  | 1.00E-129 | 249  | 254  | 98 +  | 553  | 806  | 3395   | 3648   |
| UN27062 | Rsa1.0.13369.1 | 502  | 4880   | 1.00E-170 | 302  | 302  | 100 - | 200  | 501  | 3522   | 3823   |
| UN27063 | Rsa1.0.04001.1 | 1223 | 19623  | 0         | 961  | 966  | 99 -  | 258  | 1223 | 5713   | 6678   |
| UN27064 | Rsa1.0.01561.1 | 1309 | 43227  | 0         | 619  | 619  | 100 - | 1    | 619  | 39415  | 40033  |



|         |                |      |        |           |      |      |       |      |      |        |        |
|---------|----------------|------|--------|-----------|------|------|-------|------|------|--------|--------|
| UN27065 | Rsa1.0.01220.1 | 1287 | 161775 | 1.00E-128 | 322  | 350  | 92 -  | 14   | 354  | 128572 | 128920 |
| UN27066 | Rsa1.0.02288.1 | 656  | 32984  | 1.00E-164 | 345  | 359  | 96 -  | 301  | 655  | 1162   | 1519   |
| UN27067 | Rsa1.0.00632.1 | 802  | 183777 | 0         | 795  | 804  | 98 -  | 1    | 800  | 144915 | 145718 |
| UN27068 | Rsa1.0.02586.1 | 2022 | 29856  | 0         | 1341 | 1343 | 99 +  | 1    | 1343 | 17622  | 18964  |
| UN27069 | Rsa1.0.03315.1 | 856  | 23797  | 0         | 388  | 389  | 99 -  | 2    | 390  | 3758   | 4146   |
| UN27070 | Rsa1.0.00753.1 | 1298 | 65705  | 0         | 822  | 881  | 93 -  | 1    | 879  | 31719  | 32576  |
| UN27071 | Rsa1.0.00706.1 | 827  | 291570 | 0         | 773  | 825  | 93 -  | 3    | 827  | 25570  | 26384  |
| UN27072 | Rsa1.0.01936.1 | 694  | 37151  | 1.00E-169 | 534  | 611  | 87 -  | 89   | 691  | 31785  | 32395  |
| UN27073 | Rsa1.0.02870.1 | 933  | 27102  | 0         | 931  | 934  | 99 +  | 1    | 933  | 15111  | 16044  |
| UN27074 | Rsa1.0.11516.1 | 789  | 5481   | 1.00E-112 | 206  | 206  | 100 - | 3    | 208  | 1681   | 1886   |
| UN27075 | Rsa1.0.00305.1 | 967  | 97308  | 0         | 443  | 459  | 96 -  | 509  | 967  | 63874  | 64326  |
| UN27076 | Rsa1.0.06421.1 | 1135 | 11053  | 0         | 1113 | 1136 | 97 +  | 1    | 1135 | 9136   | 10270  |
| UN27077 | Rsa1.0.05654.1 | 1592 | 13042  | 6.00E-47  | 304  | 372  | 81 +  | 1160 | 1531 | 5905   | 6274   |
| UN27078 | Rsa1.0.01442.1 | 590  | 45776  | 1.00E-150 | 314  | 329  | 95 -  | 2    | 330  | 25486  | 25814  |
| UN27079 | Rsa1.0.01018.1 | 1377 | 56685  | 0         | 422  | 425  | 99 -  | 953  | 1377 | 18623  | 19047  |
| UN27080 | Rsa1.0.02579.1 | 1048 | 29923  | 0         | 839  | 844  | 99 +  | 1    | 841  | 12609  | 13452  |
| UN27081 | Rsa1.0.00204.1 | 1452 | 109056 | 1.00E-175 | 360  | 376  | 95 +  | 1000 | 1375 | 33783  | 34158  |
| UN27082 | Rsa1.0.01812.1 | 934  | 38956  | 0         | 819  | 928  | 88 +  | 10   | 934  | 12923  | 13837  |
| UN27083 | Rsa1.0.45311.1 | 807  | 497    | 0         | 338  | 338  | 100 + | 470  | 807  | 1      | 338    |
| UN27084 | Rsa1.0.00017.1 | 918  | 752458 | 0         | 439  | 458  | 95 +  | 459  | 916  | 368688 | 369145 |
| UN27085 | Rsa1.0.00845.1 | 987  | 62346  | 0         | 604  | 605  | 99 +  | 383  | 987  | 32702  | 33306  |
| UN27086 | Rsa1.0.03169.1 | 462  | 24826  | 1.00E-175 | 365  | 380  | 96 -  | 33   | 408  | 11675  | 12052  |
| UN27087 | Rsa1.0.03801.1 | 902  | 20762  | 0         | 885  | 900  | 98 +  | 3    | 902  | 7791   | 8690   |
| UN27088 | Rsa1.0.03311.1 | 1270 | 23850  | 0         | 1266 | 1269 | 99 -  | 1    | 1269 | 1914   | 3182   |
| UN27089 | Rsa1.0.04395.1 | 1508 | 17570  | 0         | 1498 | 1527 | 98 +  | 1    | 1508 | 6986   | 8511   |
| UN27090 | Rsa1.0.10922.1 | 938  | 5677   | 1.00E-43  | 157  | 179  | 87 +  | 206  | 384  | 1579   | 1757   |
| UN27091 | Rsa1.0.01470.1 | 994  | 45108  | 1.00E-135 | 260  | 265  | 98 +  | 565  | 829  | 36430  | 36694  |
| UN27092 | Rsa1.0.02409.1 | 1000 | 31663  | 0         | 784  | 837  | 93 +  | 1    | 830  | 24130  | 24948  |
| UN27093 | Rsa1.0.15554.1 | 1658 | 2545   | 0         | 351  | 355  | 98 -  | 423  | 777  | 804    | 1157   |
| UN27094 | Rsa1.0.00749.1 | 770  | 65933  | 1.00E-156 | 279  | 279  | 100 - | 492  | 770  | 45793  | 46071  |
| UN27095 | Rsa1.0.00085.1 | 1204 | 142226 | 0         | 469  | 469  | 100 + | 77   | 545  | 21930  | 22398  |
| UN27096 | Rsa1.0.00394.1 | 711  | 148426 | 0         | 523  | 552  | 94 -  | 3    | 545  | 138926 | 139466 |
| UN27097 | Rsa1.0.02281.1 | 1219 | 292576 | 1.00E-102 | 204  | 209  | 97 +  | 606  | 814  | 13026  | 13234  |
| UN27098 | Rsa1.0.00240.1 | 1388 | 104175 | 0         | 468  | 496  | 94 +  | 891  | 1386 | 51981  | 52464  |
| UN27099 | Rsa1.0.13819.1 | 647  | 4264   | 0         | 463  | 480  | 96 +  | 169  | 647  | 1651   | 2127   |
| UN27100 | Rsa1.0.04804.1 | 1013 | 15902  | 0         | 720  | 732  | 98 +  | 282  | 1013 | 4557   | 5288   |
| UN27101 | Rsa1.0.01971.1 | 1120 | 36641  | 1.00E-13  | 76   | 87   | 87 +  | 283  | 369  | 11560  | 11643  |
| UN27102 | Rsa1.0.01039.1 | 918  | 55946  | 0         | 359  | 370  | 97 -  | 358  | 727  | 51786  | 52154  |
| UN27103 | Rsa1.0.01147.1 | 673  | 52391  | 0         | 662  | 667  | 99 -  | 3    | 669  | 9579   | 10245  |

|         |                |      |        |           |      |      |       |      |      |        |        |
|---------|----------------|------|--------|-----------|------|------|-------|------|------|--------|--------|
| UN27104 | Rsa1.0_01755.1 | 1180 | 155581 | 0         | 931  | 948  | 98 +  | 3    | 949  | 11023  | 11970  |
| UN27105 | Rsa1.0_01772.1 | 719  | 39557  | 0         | 560  | 560  | 100 + | 159  | 718  | 5824   | 6383   |
| UN27106 | Rsa1.0_04764.1 | 1055 | 16088  | 0         | 507  | 567  | 89 +  | 232  | 776  | 1239   | 1795   |
| UN27107 | Rsa1.0_00013.1 | 814  | 292129 | 0         | 457  | 469  | 97 -  | 345  | 811  | 76950  | 77418  |
| UN27108 | Rsa1.0_02316.1 | 1282 | 32608  | 1.00E-141 | 255  | 255  | 100 - | 1    | 255  | 18359  | 18613  |
| UN27109 | Rsa1.0_01476.1 | 953  | 172928 | 1.00E-154 | 301  | 309  | 97 +  | 645  | 953  | 148223 | 148526 |
| UN27110 | Rsa1.0_00936.1 | 618  | 59078  | 1.00E-157 | 284  | 285  | 99 -  | 334  | 618  | 58590  | 58874  |
| UN27111 | Rsa1.0_42146.1 | 1066 | 532    | 0         | 500  | 508  | 98 +  | 557  | 1064 | 14     | 520    |
| UN27112 | Rsa1.0_00748.1 | 652  | 65983  | 1.00E-106 | 216  | 222  | 97 +  | 359  | 580  | 65464  | 65682  |
| UN27113 | Rsa1.0_00251.1 | 993  | 303968 | 0         | 988  | 992  | 99 +  | 2    | 993  | 116824 | 117814 |
| UN27114 | Rsa1.0_03125.1 | 739  | 147978 | 1.00E-163 | 320  | 328  | 97 +  | 375  | 702  | 130250 | 130576 |
| UN27115 | #              | #    | #      | #         | #    | #    | #     | #    | #    | #      | #      |
| UN27116 | Rsa1.0_00176.1 | 744  | 240984 | 0         | 554  | 570  | 97 +  | 3    | 572  | 188323 | 188892 |
| UN27117 | Rsa1.0_02122.1 | 1044 | 34797  | 0         | 644  | 652  | 98 +  | 1    | 652  | 22600  | 23250  |
| UN27118 | Rsa1.0_02331.1 | 1055 | 32449  | 7.00E-55  | 122  | 126  | 96 -  | 588  | 713  | 9821   | 9946   |
| UN27119 | Rsa1.0_02404.1 | 859  | 31702  | 0         | 775  | 797  | 97 +  | 66   | 859  | 21958  | 22746  |
| UN27120 | Rsa1.0_01460.1 | 681  | 45255  | 1.00E-165 | 303  | 306  | 99 -  | 376  | 681  | 22221  | 22526  |
| UN27121 | Rsa1.0_00464.1 | 1275 | 82253  | 0         | 698  | 727  | 96 +  | 291  | 1017 | 61933  | 62659  |
| UN27122 | Rsa1.0_03033.1 | 848  | 25835  | 0         | 543  | 550  | 98 +  | 3    | 552  | 261    | 810    |
| UN27123 | Rsa1.0_00866.1 | 832  | 61676  | 1.00E-107 | 198  | 198  | 100 + | 417  | 614  | 9131   | 9328   |
| UN27124 | Rsa1.0_02311.1 | 660  | 169900 | 0         | 478  | 487  | 98 -  | 1    | 486  | 158276 | 158762 |
| UN27125 | Rsa1.0_02750.1 | 1040 | 28239  | 0         | 547  | 553  | 98 -  | 3    | 554  | 17543  | 18095  |
| UN27126 | Rsa1.0_00068.1 | 1671 | 151813 | 0         | 477  | 489  | 97 +  | 698  | 1183 | 95261  | 95746  |
| UN27127 | Rsa1.0_11931.1 | 1371 | 5367   | 9.00E-98  | 203  | 210  | 96 +  | 393  | 602  | 5016   | 5225   |
| UN27128 | Rsa1.0_01243.1 | 759  | 50061  | 0         | 434  | 441  | 98 +  | 3    | 443  | 5476   | 5916   |
| UN27129 | Rsa1.0_07250.1 | 1442 | 9663   | 1.00E-100 | 262  | 290  | 90 -  | 1169 | 1439 | 6933   | 7222   |
| UN27130 | Rsa1.0_02414.1 | 985  | 31625  | 0         | 681  | 694  | 98 -  | 295  | 985  | 19091  | 19784  |
| UN27131 | Rsa1.0_03692.1 | 937  | 21338  | 4.00E-16  | 135  | 165  | 81 +  | 314  | 478  | 14853  | 15017  |
| UN27132 | Rsa1.0_02129.1 | 1748 | 34757  | 1.00E-131 | 254  | 259  | 98 +  | 961  | 1219 | 2277   | 2535   |
| UN27133 | Rsa1.0_00632.1 | 949  | 183777 | 2.00E-94  | 210  | 220  | 95 -  | 3    | 221  | 5048   | 5267   |
| UN27134 | Rsa1.0_01110.1 | 1288 | 195852 | 0         | 1274 | 1291 | 98 +  | 2    | 1288 | 27543  | 28833  |
| UN27135 | Rsa1.0_00089.1 | 1195 | 406142 | 1.00E-118 | 246  | 253  | 97 -  | 878  | 1130 | 96040  | 96290  |
| UN27136 | Rsa1.0_05541.1 | 937  | 139959 | 0         | 399  | 409  | 97 -  | 536  | 937  | 133796 | 134204 |
| UN27137 | Rsa1.0_02183.1 | 962  | 34170  | 0         | 421  | 443  | 95 -  | 1    | 435  | 19134  | 19576  |
| UN27138 | Rsa1.0_00105.1 | 885  | 134138 | 1.00E-159 | 406  | 445  | 91 -  | 453  | 884  | 100303 | 100745 |
| UN27139 | Rsa1.0_00930.1 | 891  | 59224  | 0         | 767  | 798  | 96 -  | 1    | 798  | 38123  | 38919  |
| UN27140 | Rsa1.0_00170.1 | 1178 | 179538 | 0         | 384  | 386  | 99 -  | 1    | 386  | 146002 | 146387 |
| UN27141 | Rsa1.0_02985.1 | 689  | 26256  | 0         | 536  | 566  | 94 -  | 9    | 569  | 18488  | 19051  |
| UN27142 | Rsa1.0_08434.1 | 1247 | 7362   | 0         | 439  | 463  | 94 +  | 782  | 1243 | 4378   | 4839   |



|         |                |      |        |           |      |      |       |      |      |        |        |
|---------|----------------|------|--------|-----------|------|------|-------|------|------|--------|--------|
| UN27182 | Rsa1.0_00321.1 | 695  | 95671  | 1.00E-64  | 159  | 169  | 94 -  | 11   | 174  | 64387  | 64553  |
| UN27183 | Rsa1.0_08039.1 | 1110 | 8030   | 1.00E-126 | 380  | 427  | 88 +  | 684  | 1110 | 3759   | 4180   |
| UN27184 | Rsa1.0_00090.1 | 1866 | 273859 | 0         | 700  | 731  | 95 -  | 1135 | 1864 | 81587  | 82313  |
| UN27185 | Rsa1.0_00874.1 | 554  | 179723 | 0         | 539  | 579  | 93 +  | 2    | 554  | 24131  | 24709  |
| UN27186 | Rsa1.0_01026.1 | 727  | 171624 | 1.00E-106 | 220  | 226  | 97 +  | 1    | 222  | 138812 | 139037 |
| UN27187 | Rsa1.0_00308.1 | 911  | 96915  | 0         | 444  | 453  | 98 -  | 3    | 455  | 46038  | 46490  |
| UN27188 | Rsa1.0_00012.1 | 497  | 222148 | 0         | 472  | 522  | 90 -  | 6    | 497  | 74762  | 75280  |
| UN27189 | Rsa1.0_02643.1 | 788  | 29176  | 1.00E-104 | 227  | 235  | 96 +  | 1    | 230  | 6241   | 6475   |
| UN27190 | Rsa1.0_00035.1 | 846  | 176449 | 1.00E-152 | 330  | 345  | 95 +  | 481  | 825  | 90394  | 90730  |
| UN27191 | Rsa1.0_08517.1 | 685  | 7244   | 1.00E-24  | 131  | 155  | 84 +  | 205  | 359  | 1099   | 1253   |
| UN27192 | Rsa1.0_01733.1 | 809  | 40186  | 0         | 675  | 749  | 90 -  | 14   | 759  | 38151  | 38881  |
| UN27193 | Rsa1.0_02244.1 | 887  | 33494  | 1.00E-108 | 208  | 211  | 98 -  | 102  | 312  | 12852  | 13062  |
| UN27194 | Rsa1.0_02825.1 | 1330 | 27568  | 1.00E-123 | 279  | 295  | 94 +  | 1034 | 1326 | 1509   | 1802   |
| UN27195 | #              | #    | #      | #         | #    | #    | #     | #    | #    | #      | #      |
| UN27196 | Rsa1.0_00341.1 | 714  | 249309 | 1.00E-155 | 326  | 342  | 95 -  | 122  | 463  | 208697 | 209038 |
| UN27197 | Rsa1.0_02252.1 | 1111 | 33375  | 0         | 908  | 946  | 95 +  | 3    | 942  | 9852   | 10797  |
| UN27198 | Rsa1.0_07786.1 | 592  | 8569   | 2.00E-59  | 147  | 155  | 94 +  | 441  | 591  | 8397   | 8551   |
| UN27199 | Rsa1.0_01389.1 | 1159 | 46716  | 8.00E-95  | 189  | 193  | 97 +  | 577  | 769  | 26528  | 26720  |
| UN27200 | Rsa1.0_14273.1 | 1350 | 3588   | 1.00E-129 | 262  | 270  | 97 -  | 1064 | 1331 | 2237   | 2506   |
| UN27201 | Rsa1.0_00160.1 | 1551 | 346678 | 4.00E-17  | 158  | 195  | 81 +  | 573  | 767  | 175576 | 175770 |
| UN27202 | Rsa1.0_04001.1 | 863  | 19623  | 0         | 595  | 599  | 99 +  | 265  | 863  | 6743   | 7341   |
| UN27203 | Rsa1.0_00067.1 | 840  | 415055 | 0         | 353  | 362  | 97 -  | 478  | 839  | 18377  | 18738  |
| UN27204 | Rsa1.0_02747.1 | 1188 | 28247  | 0         | 894  | 918  | 97 +  | 282  | 1187 | 8170   | 9087   |
| UN27205 | Rsa1.0_00140.1 | 1308 | 121541 | 0         | 545  | 550  | 99 -  | 759  | 1308 | 103124 | 103672 |
| UN27206 | Rsa1.0_03325.1 | 833  | 23720  | 1.00E-101 | 188  | 188  | 100 - | 351  | 538  | 8182   | 8369   |
| UN27207 | Rsa1.0_05719.1 | 1355 | 12836  | 0         | 1080 | 1087 | 99 -  | 269  | 1355 | 10178  | 11264  |
| UN27208 | Rsa1.0_00005.1 | 726  | 353093 | 0         | 686  | 719  | 95 -  | 3    | 719  | 300424 | 301140 |
| UN27209 | Rsa1.0_57699.1 | 893  | 397    | 1.00E-168 | 369  | 391  | 94 -  | 347  | 736  | 7      | 397    |
| UN27210 | Rsa1.0_01645.1 | 794  | 41748  | 1.00E-156 | 294  | 299  | 98 -  | 3    | 301  | 1680   | 1978   |
| UN27211 | Rsa1.0_00516.1 | 1098 | 78417  | 1.00E-160 | 295  | 298  | 98 +  | 1    | 298  | 30461  | 30758  |
| UN27212 | Rsa1.0_20689.1 | 1290 | 1279   | 1.00E-163 | 302  | 304  | 99 +  | 988  | 1290 | 15     | 318    |
| UN27213 | Rsa1.0_00237.1 | 925  | 235974 | 1.00E-128 | 273  | 284  | 96 +  | 644  | 925  | 83983  | 84265  |
| UN27214 | Rsa1.0_00347.1 | 1222 | 93048  | 1.00E-123 | 227  | 228  | 99 -  | 391  | 618  | 83484  | 83711  |
| UN27215 | Rsa1.0_00944.1 | 709  | 58733  | 0         | 697  | 708  | 98 +  | 3    | 707  | 46320  | 47027  |
| UN27216 | Rsa1.0_00967.1 | 1280 | 58049  | 0         | 727  | 746  | 97 +  | 1    | 746  | 16342  | 17087  |
| UN27217 | Rsa1.0_00341.1 | 911  | 249309 | 0         | 853  | 879  | 97 +  | 1    | 879  | 169042 | 169919 |
| UN27218 | Rsa1.0_07576.1 | 860  | 9098   | 0         | 483  | 496  | 97 +  | 363  | 857  | 2495   | 2989   |
| UN27219 | Rsa1.0_00025.1 | 1634 | 277312 | 0         | 887  | 893  | 99 -  | 536  | 1428 | 231989 | 232881 |
| UN27220 | Rsa1.0_00540.1 | 918  | 76895  | 1.00E-170 | 403  | 434  | 92 -  | 349  | 773  | 57305  | 57738  |

|         |                |      |        |           |      |      |      |      |      |        |        |
|---------|----------------|------|--------|-----------|------|------|------|------|------|--------|--------|
| UN27221 | Rsa1.0.00104.1 | 1371 | 368722 | 0         | 366  | 378  | 96 + | 67   | 443  | 218004 | 218380 |
| UN27222 | Rsa1.0.05019.1 | 512  | 15114  | 1.00E-128 | 280  | 297  | 94 + | 73   | 360  | 1      | 297    |
| UN27223 | Rsa1.0.02157.1 | 779  | 149652 | 0         | 775  | 778  | 99 + | 2    | 779  | 8262   | 9039   |
| UN27224 | Rsa1.0.01530.1 | 1019 | 43820  | 1.00E-34  | 147  | 169  | 86 - | 298  | 458  | 21802  | 21968  |
| UN27225 | Rsa1.0.00001.1 | 1147 | 363028 | 3.00E-91  | 198  | 206  | 96 + | 2    | 205  | 99177  | 99382  |
| UN27226 | Rsa1.0.00145.1 | 766  | 261008 | 0         | 712  | 732  | 97 + | 2    | 725  | 244146 | 244877 |
| UN27227 | Rsa1.0.00116.1 | 1181 | 365886 | 1.00E-127 | 261  | 268  | 97 - | 916  | 1181 | 161010 | 161277 |
| UN27228 | Rsa1.0.02080.1 | 1190 | 35297  | 0         | 623  | 637  | 97 - | 490  | 1123 | 1      | 636    |
| UN27229 | Rsa1.0.00312.1 | 734  | 96765  | 0         | 729  | 742  | 98 + | 1    | 733  | 13603  | 14344  |
| UN27230 | Rsa1.0.00205.1 | 1673 | 193401 | 0         | 1600 | 1673 | 95 - | 1    | 1666 | 183870 | 185536 |
| UN27231 | Rsa1.0.14689.1 | 1579 | 3155   | 1.00E-127 | 253  | 260  | 97 + | 758  | 1017 | 1472   | 1731   |
| UN27232 | Rsa1.0.06412.1 | 1302 | 11060  | 1.00E-114 | 221  | 225  | 98 + | 469  | 693  | 8074   | 8298   |
| UN27233 | Rsa1.0.00971.1 | 992  | 57973  | 0         | 379  | 390  | 97 + | 600  | 989  | 56809  | 57198  |
| UN27234 | Rsa1.0.02196.1 | 782  | 34005  | 1.00E-168 | 347  | 364  | 95 - | 3    | 366  | 13490  | 13839  |
| UN27235 | Rsa1.0.03135.1 | 565  | 25114  | 0         | 557  | 563  | 98 - | 3    | 565  | 3780   | 4342   |
| UN27236 | Rsa1.0.04197.1 | 1065 | 18515  | 0         | 750  | 775  | 96 - | 291  | 1063 | 7615   | 8382   |
| UN27237 | Rsa1.0.00131.1 | 763  | 432233 | 0         | 461  | 464  | 99 - | 302  | 763  | 273272 | 273735 |
| UN27238 | Rsa1.0.05725.1 | 1220 | 12809  | 0         | 464  | 465  | 99 + | 429  | 893  | 216    | 680    |
| UN27239 | Rsa1.0.01749.1 | 1019 | 39822  | 0         | 592  | 639  | 92 + | 1    | 627  | 25319  | 25948  |
| UN27240 | Rsa1.0.02826.1 | 1281 | 27560  | 0         | 1234 | 1283 | 96 - | 3    | 1281 | 20965  | 22244  |
| UN27241 | Rsa1.0.00281.1 | 985  | 99908  | 0         | 874  | 894  | 97 + | 99   | 985  | 55802  | 56695  |
| UN27242 | Rsa1.0.00836.1 | 1240 | 185968 | 0         | 678  | 680  | 99 + | 560  | 1239 | 163675 | 164354 |
| UN27243 | Rsa1.0.07490.1 | 901  | 9261   | 0         | 489  | 504  | 97 + | 1    | 503  | 7216   | 7719   |
| UN27244 | Rsa1.0.08970.1 | 1551 | 6743   | 0         | 371  | 373  | 99 - | 1179 | 1551 | 5591   | 5962   |
| UN27245 | Rsa1.0.06395.1 | 1111 | 11096  | 0         | 456  | 461  | 98 + | 39   | 499  | 10389  | 10849  |
| UN27246 | Rsa1.0.00025.1 | 861  | 277312 | 0         | 815  | 862  | 94 + | 1    | 861  | 86171  | 87012  |
| UN27247 | Rsa1.0.00060.1 | 1348 | 502678 | 1.00E-151 | 288  | 293  | 98 - | 1060 | 1348 | 252673 | 252965 |
| UN27248 | Rsa1.0.01573.1 | 700  | 42964  | 1.00E-104 | 301  | 336  | 89 + | 5    | 330  | 4783   | 5102   |
| UN27249 | Rsa1.0.00773.1 | 974  | 64839  | 0         | 912  | 972  | 93 + | 22   | 972  | 19162  | 20130  |
| UN27250 | Rsa1.0.01053.1 | 406  | 55483  | 1.00E-179 | 387  | 407  | 95 - | 1    | 406  | 3291   | 3693   |
| UN27251 | Rsa1.0.00026.1 | 549  | 327835 | 1.00E-156 | 322  | 335  | 96 - | 3    | 337  | 123766 | 124099 |
| UN27252 | Rsa1.0.00801.1 | 809  | 63861  | 0         | 472  | 483  | 97 - | 329  | 809  | 39344  | 39825  |
| UN27253 | Rsa1.0.00045.1 | 627  | 328694 | 0         | 508  | 530  | 95 - | 90   | 617  | 175469 | 175997 |
| UN27254 | Rsa1.0.01321.1 | 772  | 48248  | 0         | 381  | 393  | 96 - | 349  | 741  | 9566   | 9949   |
| UN27255 | Rsa1.0.01788.1 | 1338 | 39296  | 0         | 747  | 757  | 98 + | 584  | 1338 | 19383  | 20138  |
| UN27256 | Rsa1.0.06604.1 | 618  | 10681  | 0         | 531  | 575  | 92 + | 3    | 576  | 5922   | 6473   |
| UN27257 | Rsa1.0.00340.1 | 913  | 305782 | 0         | 874  | 934  | 93 + | 2    | 913  | 145182 | 146103 |
| UN27258 | Rsa1.0.00241.1 | 997  | 104000 | 0         | 506  | 517  | 97 + | 433  | 947  | 42214  | 42727  |
| UN27259 | Rsa1.0.03624.1 | 1078 | 21706  | 0         | 588  | 599  | 98 + | 1    | 599  | 11079  | 11677  |

|         |                |      |        |           |      |      |       |     |      |        |        |
|---------|----------------|------|--------|-----------|------|------|-------|-----|------|--------|--------|
| UN27260 | Rsa1.0.00056.1 | 1093 | 332604 | 0         | 329  | 329  | 100 - | 765 | 1093 | 214224 | 214552 |
| UN27261 | Rsa1.0.02070.1 | 915  | 158516 | 0         | 501  | 511  | 98 +  | 405 | 915  | 156434 | 156942 |
| UN27262 | Rsa1.0.06064.1 | 882  | 11832  | 0         | 865  | 903  | 95 -  | 1   | 882  | 7981   | 8882   |
| UN27263 | Rsa1.0.08597.1 | 1047 | 7144   | 0         | 758  | 813  | 93 +  | 1   | 810  | 2730   | 3528   |
| UN27264 | Rsa1.0.00769.1 | 1043 | 64911  | 0         | 504  | 514  | 98 -  | 2   | 511  | 32295  | 32808  |
| UN27265 | Rsa1.0.01424.1 | 1231 | 46139  | 1.00E-179 | 549  | 625  | 87 +  | 178 | 802  | 43607  | 44228  |
| UN27266 | Rsa1.0.00329.1 | 447  | 222544 | 1.00E-165 | 362  | 383  | 94 +  | 68  | 445  | 192494 | 192876 |
| UN27267 | Rsa1.0.01026.1 | 771  | 171624 | 0         | 631  | 680  | 92 -  | 2   | 672  | 33467  | 34128  |
| UN27268 | Rsa1.0.00857.1 | 1032 | 61904  | 0         | 386  | 387  | 99 -  | 646 | 1032 | 54640  | 55026  |
| UN27269 | Rsa1.0.00632.1 | 1575 | 183777 | 0         | 1228 | 1229 | 99 +  | 2   | 1230 | 58411  | 59639  |
| UN27270 | Rsa1.0.00105.1 | 1154 | 134138 | 0         | 536  | 547  | 97 +  | 146 | 692  | 60005  | 60550  |
| UN27271 | Rsa1.0.01896.1 | 631  | 37512  | 0         | 603  | 613  | 98 -  | 1   | 613  | 1472   | 2083   |
| UN27272 | Rsa1.0.00093.1 | 1152 | 214962 | 0         | 451  | 454  | 99 -  | 361 | 814  | 104980 | 105433 |
| UN27273 | Rsa1.0.00201.1 | 954  | 232851 | 0         | 386  | 393  | 98 +  | 162 | 554  | 128665 | 129057 |
| UN27274 | Rsa1.0.00420.1 | 1115 | 86496  | 0         | 415  | 432  | 96 -  | 2   | 433  | 80134  | 80565  |
| UN27275 | Rsa1.0.00387.1 | 1203 | 495407 | 0         | 418  | 434  | 96 -  | 770 | 1203 | 354557 | 354981 |
| UN27276 | Rsa1.0.00478.1 | 692  | 81419  | 1.00E-122 | 280  | 299  | 93 +  | 1   | 299  | 20479  | 20777  |
| UN27277 | Rsa1.0.08558.1 | 1285 | 7198   | 1.00E-118 | 228  | 232  | 98 -  | 9   | 240  | 6434   | 6665   |
| UN27278 | Rsa1.0.00449.1 | 1002 | 83863  | 2.00E-48  | 175  | 199  | 87 -  | 682 | 880  | 18317  | 18514  |
| UN27279 | Rsa1.0.12720.1 | 1052 | 5145   | 1.00E-90  | 612  | 750  | 81 +  | 262 | 998  | 81     | 811    |
| UN27280 | Rsa1.0.00088.1 | 720  | 141341 | 0         | 713  | 732  | 97 +  | 3   | 719  | 55393  | 56124  |
| UN27281 | Rsa1.0.00930.1 | 1142 | 59224  | 1.00E-139 | 344  | 375  | 91 -  | 767 | 1125 | 38960  | 39330  |
| UN27282 | Rsa1.0.00593.1 | 943  | 143463 | 1.00E-118 | 254  | 264  | 96 -  | 681 | 943  | 2882   | 3144   |
| UN27283 | Rsa1.0.00294.1 | 976  | 144860 | 1.00E-154 | 280  | 281  | 99 -  | 401 | 681  | 38794  | 39074  |
| UN27284 | Rsa1.0.01090.1 | 1278 | 54385  | 0         | 574  | 603  | 95 +  | 680 | 1278 | 28191  | 28790  |
| UN27285 | Rsa1.0.07607.1 | 918  | 9034   | 1.00E-163 | 309  | 315  | 98 +  | 4   | 313  | 2375   | 2689   |
| UN27286 | Rsa1.0.01703.1 | 1330 | 40713  | 1.00E-151 | 280  | 283  | 98 +  | 1   | 283  | 20293  | 20575  |
| UN27287 | Rsa1.0.01484.1 | 568  | 44806  | 1.00E-119 | 301  | 329  | 91 +  | 235 | 563  | 6960   | 7288   |
| UN27288 | Rsa1.0.47115.1 | 996  | 480    | 1.00E-152 | 279  | 281  | 99 -  | 716 | 996  | 122    | 402    |
| UN27289 | Rsa1.0.02074.1 | 541  | 35370  | 0         | 425  | 430  | 98 +  | 112 | 541  | 20788  | 21217  |
| UN27290 | Rsa1.0.04063.1 | 1101 | 19300  | 0         | 505  | 520  | 97 +  | 584 | 1101 | 11287  | 11801  |
| UN27291 | Rsa1.0.00233.1 | 689  | 104918 | 0         | 460  | 481  | 95 -  | 213 | 689  | 9857   | 10332  |
| UN27292 | Rsa1.0.21540.1 | 1690 | 1194   | 0         | 1148 | 1163 | 98 -  | 86  | 1247 | 1      | 1161   |
| UN27293 | Rsa1.0.00017.1 | 1378 | 752458 | 1.00E-104 | 208  | 213  | 97 -  | 204 | 416  | 751088 | 751300 |
| UN27294 | Rsa1.0.00607.1 | 716  | 73146  | 0         | 708  | 714  | 99 +  | 3   | 716  | 40449  | 41162  |
| UN27295 | Rsa1.0.01939.1 | 713  | 37124  | 0         | 618  | 627  | 98 -  | 80  | 706  | 2121   | 2747   |
| UN27296 | Rsa1.0.00037.1 | 1185 | 307838 | 0         | 641  | 665  | 96 -  | 522 | 1185 | 16628  | 17290  |
| UN27297 | Rsa1.0.01261.1 | 1130 | 49744  | 1.00E-179 | 338  | 342  | 98 +  | 1   | 339  | 35576  | 35917  |
| UN27298 | Rsa1.0.04797.1 | 955  | 15932  | 0         | 782  | 796  | 98 +  | 2   | 795  | 15062  | 15855  |

|         |                |      |        |           |      |      |       |      |      |        |        |
|---------|----------------|------|--------|-----------|------|------|-------|------|------|--------|--------|
| UN27299 | Rsa1.0.00154.1 | 683  | 189461 | 1.00E-64  | 153  | 162  | 94 -  | 342  | 503  | 135334 | 135495 |
| UN27300 | Rsa1.0.03057.1 | 608  | 25724  | 0         | 329  | 331  | 99 -  | 276  | 606  | 6723   | 7053   |
| UN27301 | Rsa1.0.01515.1 | 990  | 170864 | 0         | 760  | 789  | 96 -  | 2    | 790  | 126884 | 127668 |
| UN27302 | Rsa1.0.11076.1 | 913  | 5624   | 3.00E-75  | 156  | 160  | 97 -  | 272  | 431  | 5098   | 5257   |
| UN27303 | Rsa1.0.00108.1 | 980  | 478491 | 1.00E-144 | 321  | 340  | 94 -  | 596  | 925  | 7735   | 8074   |
| UN27304 | Rsa1.0.05981.1 | 727  | 12043  | 1.00E-150 | 315  | 327  | 96 -  | 404  | 725  | 7311   | 7636   |
| UN27305 | Rsa1.0.10165.1 | 1021 | 5966   | 0         | 470  | 470  | 100 + | 550  | 1019 | 5186   | 5655   |
| UN27306 | Rsa1.0.00040.1 | 966  | 324196 | 1.00E-164 | 308  | 313  | 98 +  | 292  | 604  | 259818 | 260130 |
| UN27307 | Rsa1.0.06950.1 | 1452 | 10122  | 0         | 1446 | 1453 | 99 +  | 1    | 1452 | 8153   | 9603   |
| UN27308 | Rsa1.0.00205.1 | 1260 | 193401 | 0         | 474  | 495  | 95 +  | 767  | 1260 | 13243  | 13735  |
| UN27309 | Rsa1.0.00088.1 | 604  | 141341 | 0         | 469  | 471  | 99 -  | 134  | 603  | 55224  | 55694  |
| UN27310 | Rsa1.0.00741.1 | 843  | 66117  | 0         | 381  | 384  | 99 +  | 460  | 843  | 45663  | 46046  |
| UN27311 | Rsa1.0.00078.1 | 1431 | 175053 | 1.00E-180 | 420  | 453  | 92 -  | 985  | 1428 | 47886  | 48337  |
| UN27312 | Rsa1.0.06955.1 | 896  | 10111  | 0         | 375  | 391  | 95 -  | 219  | 609  | 7836   | 8226   |
| UN27313 | Rsa1.0.02654.1 | 1218 | 29028  | 0         | 889  | 938  | 94 +  | 219  | 1149 | 21334  | 22257  |
| UN27314 | Rsa1.0.00343.1 | 1491 | 93570  | 0         | 449  | 449  | 100 + | 386  | 834  | 4591   | 5039   |
| UN27315 | Rsa1.0.00104.1 | 961  | 368722 | 0         | 927  | 954  | 97 -  | 6    | 959  | 274297 | 275227 |
| UN27316 | Rsa1.0.01291.1 | 887  | 49159  | 1.00E-144 | 341  | 365  | 93 +  | 531  | 886  | 13663  | 14025  |
| UN27317 | Rsa1.0.02859.1 | 965  | 162118 | 0         | 417  | 421  | 99 -  | 545  | 965  | 14869  | 15288  |
| UN27318 | Rsa1.0.03083.1 | 1183 | 25520  | 0         | 393  | 403  | 97 -  | 781  | 1183 | 12283  | 12684  |
| UN27319 | Rsa1.0.00512.1 | 742  | 200277 | 1.00E-106 | 250  | 268  | 93 -  | 1    | 268  | 24322  | 24589  |
| UN27320 | Rsa1.0.00037.1 | 1322 | 307838 | 1.00E-140 | 285  | 294  | 96 +  | 1027 | 1320 | 27237  | 27529  |
| UN27321 | Rsa1.0.03581.1 | 1163 | 21965  | 1.00E-155 | 293  | 298  | 98 -  | 866  | 1163 | 14212  | 14509  |
| UN27322 | Rsa1.0.00546.1 | 772  | 76523  | 1.00E-119 | 321  | 355  | 90 -  | 368  | 714  | 4008   | 4347   |
| UN27323 | Rsa1.0.00273.1 | 1141 | 326186 | 0         | 604  | 619  | 97 -  | 523  | 1141 | 235617 | 236235 |
| UN27324 | Rsa1.0.01096.1 | 305  | 54266  | 1.00E-111 | 271  | 292  | 92 -  | 25   | 305  | 10261  | 10552  |
| UN27325 | Rsa1.0.04298.1 | 986  | 147466 | 0         | 453  | 455  | 99 +  | 2    | 456  | 5373   | 5827   |
| UN27326 | Rsa1.0.00679.1 | 598  | 68971  | 1.00E-129 | 238  | 239  | 99 +  | 146  | 384  | 57537  | 57775  |
| UN27327 | Rsa1.0.02212.1 | 1277 | 33840  | 0         | 367  | 375  | 97 -  | 892  | 1266 | 31209  | 31583  |
| UN27328 | Rsa1.0.02386.1 | 899  | 31895  | 0         | 897  | 898  | 99 -  | 2    | 899  | 16066  | 16963  |
| UN27329 | Rsa1.0.00571.1 | 681  | 329018 | 1.00E-157 | 303  | 309  | 98 -  | 373  | 681  | 2316   | 2623   |
| UN27330 | Rsa1.0.02074.1 | 785  | 35370  | 0         | 356  | 359  | 99 +  | 426  | 784  | 10903  | 11261  |
| UN27331 | Rsa1.0.13672.1 | 1024 | 4525   | 0         | 565  | 580  | 97 +  | 444  | 1023 | 2836   | 3414   |
| UN27332 | Rsa1.0.02863.1 | 892  | 27160  | 1.00E-163 | 337  | 349  | 96 +  | 540  | 883  | 14504  | 14852  |
| UN27333 | Rsa1.0.00363.1 | 1317 | 90968  | 0         | 691  | 731  | 94 -  | 23   | 738  | 38734  | 39461  |
| UN27334 | Rsa1.0.00108.1 | 1197 | 478491 | 2.00E-64  | 158  | 166  | 95 -  | 182  | 347  | 43807  | 43965  |
| UN27335 | Rsa1.0.01712.1 | 673  | 154210 | 0         | 668  | 671  | 99 -  | 2    | 672  | 34675  | 35345  |
| UN27336 | Rsa1.0.14340.1 | 1031 | 3501   | 0         | 447  | 479  | 93 -  | 556  | 1031 | 294    | 770    |
| UN27337 | Rsa1.0.01919.1 | 823  | 37272  | 0         | 487  | 515  | 94 -  | 308  | 821  | 13095  | 13601  |

|         |                |      |        |           |      |      |       |     |      |        |        |
|---------|----------------|------|--------|-----------|------|------|-------|-----|------|--------|--------|
| UN27338 | Rsa1.0.00816.1 | 846  | 403350 | 4.00E-65  | 130  | 131  | 99 -  | 8   | 138  | 400867 | 400997 |
| UN27339 | Rsa1.0.00387.1 | 756  | 495407 | 0         | 415  | 418  | 99 +  | 337 | 754  | 157729 | 158146 |
| UN27340 | Rsa1.0.02007.1 | 1216 | 36130  | 0         | 550  | 589  | 93 +  | 2   | 575  | 21790  | 22378  |
| UN27341 | Rsa1.0.00688.1 | 940  | 68396  | 0         | 647  | 695  | 93 +  | 226 | 916  | 30972  | 31642  |
| UN27342 | Rsa1.0.00384.1 | 765  | 89278  | 1.00E-177 | 335  | 342  | 97 +  | 4   | 345  | 73006  | 73347  |
| UN27343 | Rsa1.0.01004.1 | 849  | 56975  | 0         | 425  | 440  | 96 +  | 3   | 442  | 48499  | 48924  |
| UN27344 | Rsa1.0.01185.1 | 1127 | 149842 | 0         | 1082 | 1087 | 99 +  | 1   | 1087 | 142193 | 143279 |
| UN27345 | Rsa1.0.00832.1 | 1382 | 62622  | 0         | 837  | 839  | 99 +  | 1   | 839  | 21953  | 22791  |
| UN27346 | Rsa1.0.01221.1 | 959  | 50421  | 0         | 783  | 844  | 92 -  | 1   | 841  | 18191  | 19029  |
| UN27347 | Rsa1.0.10941.1 | 893  | 5670   | 0         | 882  | 896  | 98 +  | 1   | 891  | 4370   | 5265   |
| UN27348 | Rsa1.0.01958.1 | 1387 | 261128 | 1.00E-97  | 182  | 182  | 100 + | 1   | 182  | 253792 | 253973 |
| UN27349 | Rsa1.0.01846.1 | 1250 | 38367  | 0         | 1199 | 1247 | 96 -  | 4   | 1246 | 15824  | 17066  |
| UN27350 | Rsa1.0.00056.1 | 1192 | 332604 | 0         | 333  | 334  | 99 +  | 859 | 1192 | 113294 | 113627 |
| UN27351 | Rsa1.0.01223.1 | 913  | 50392  | 1.00E-135 | 263  | 268  | 98 -  | 1   | 267  | 33728  | 33995  |
| UN27352 | Rsa1.0.01300.1 | 783  | 48942  | 0         | 382  | 401  | 95 +  | 382 | 781  | 27539  | 27939  |
| UN27353 | Rsa1.0.04520.1 | 1528 | 16995  | 0         | 566  | 569  | 99 +  | 960 | 1528 | 9371   | 9938   |
| UN27354 | Rsa1.0.02043.1 | 918  | 163754 | 4.00E-90  | 172  | 173  | 99 +  | 373 | 545  | 24681  | 24853  |
| UN27355 | Rsa1.0.00484.1 | 1004 | 203294 | 0         | 572  | 591  | 96 -  | 5   | 595  | 152428 | 153011 |
| UN27356 | Rsa1.0.02360.1 | 780  | 32203  | 0         | 514  | 570  | 90 +  | 237 | 780  | 28271  | 28830  |
| UN27357 | Rsa1.0.00555.1 | 1124 | 75920  | 0         | 518  | 537  | 96 -  | 261 | 797  | 2504   | 3040   |
| UN27358 | Rsa1.0.01121.1 | 843  | 53407  | 0         | 629  | 642  | 97 -  | 201 | 842  | 50837  | 51475  |
| UN27359 | Rsa1.0.08332.1 | 1009 | 7528   | 0         | 461  | 475  | 97 -  | 359 | 833  | 4254   | 4728   |
| UN27360 | Rsa1.0.01662.1 | 1212 | 41382  | 0         | 435  | 436  | 99 +  | 381 | 816  | 26599  | 27034  |
| UN27361 | Rsa1.0.72353.1 | 1163 | 317    | 1.00E-81  | 241  | 269  | 89 -  | 619 | 887  | 1      | 266    |
| UN27362 | Rsa1.0.08477.1 | 715  | 7295   | 1.00E-105 | 197  | 198  | 99 +  | 1   | 198  | 3127   | 3324   |
| UN27363 | Rsa1.0.00042.1 | 757  | 171507 | 0         | 736  | 757  | 97 +  | 1   | 757  | 100151 | 100903 |
| UN27364 | Rsa1.0.04179.1 | 725  | 18633  | 1.00E-111 | 277  | 300  | 92 -  | 426 | 721  | 17730  | 18027  |
| UN27365 | Rsa1.0.03092.1 | 1274 | 25448  | 0         | 1172 | 1176 | 99 -  | 99  | 1274 | 16987  | 18162  |
| UN27366 | Rsa1.0.00342.1 | 1061 | 93695  | 0         | 487  | 489  | 99 -  | 197 | 685  | 28069  | 28557  |
| UN27367 | Rsa1.0.00905.1 | 962  | 60110  | 0         | 568  | 591  | 96 -  | 4   | 593  | 31862  | 32451  |
| UN27368 | Rsa1.0.04820.1 | 1075 | 15857  | 0         | 402  | 413  | 97 +  | 663 | 1075 | 5526   | 5933   |
| UN27369 | Rsa1.0.00538.1 | 878  | 77149  | 0         | 362  | 363  | 99 +  | 516 | 878  | 70926  | 71288  |
| UN27370 | Rsa1.0.00925.1 | 798  | 59481  | 0         | 356  | 359  | 99 +  | 440 | 798  | 38881  | 39239  |
| UN27371 | Rsa1.0.04258.1 | 845  | 18254  | 0         | 489  | 514  | 95 -  | 2   | 506  | 4410   | 4923   |
| UN27372 | Rsa1.0.09986.1 | 1234 | 6049   | 1.00E-109 | 323  | 360  | 89 +  | 349 | 707  | 5215   | 5570   |
| UN27373 | Rsa1.0.00363.1 | 473  | 90968  | 0         | 457  | 477  | 95 -  | 2   | 473  | 13533  | 14007  |
| UN27374 | Rsa1.0.01056.1 | 1519 | 55449  | 0         | 694  | 710  | 97 -  | 810 | 1519 | 11801  | 12507  |
| UN27375 | Rsa1.0.02141.1 | 1002 | 34677  | 0         | 513  | 532  | 96 +  | 3   | 534  | 8942   | 9473   |
| UN27376 | Rsa1.0.20815.1 | 1052 | 1266   | 3.00E-17  | 65   | 71   | 91 -  | 7   | 77   | 860    | 930    |



|         |                |      |        |           |      |      |       |      |      |        |        |
|---------|----------------|------|--------|-----------|------|------|-------|------|------|--------|--------|
| UN27377 | Rsa1.0.00438.1 | 1020 | 84861  | 1.00E-156 | 325  | 340  | 95 -  | 597  | 936  | 15677  | 16012  |
| UN27378 | Rsa1.0.01898.1 | 824  | 37491  | 0         | 466  | 479  | 97 -  | 345  | 823  | 1558   | 2036   |
| UN27379 | Rsa1.0.33083.1 | 817  | 687    | 1.00E-110 | 257  | 273  | 94 +  | 1    | 273  | 351    | 620    |
| UN27380 | Rsa1.0.02295.1 | 1272 | 149884 | 0         | 532  | 582  | 91 +  | 646  | 1218 | 19086  | 19652  |
| UN27381 | Rsa1.0.00806.1 | 1048 | 63674  | 0         | 1008 | 1046 | 96 +  | 2    | 1043 | 40447  | 41488  |
| UN27382 | Rsa1.0.03016.1 | 938  | 26000  | 0         | 919  | 943  | 97 -  | 1    | 938  | 21611  | 22552  |
| UN27383 | Rsa1.0.04918.1 | 1135 | 15441  | 0         | 754  | 772  | 97 +  | 365  | 1133 | 14333  | 15103  |
| UN27384 | Rsa1.0.05366.1 | 1413 | 14036  | 0         | 442  | 464  | 95 +  | 3    | 466  | 1331   | 1785   |
| UN27385 | Rsa1.0.02389.1 | 786  | 146428 | 0         | 650  | 669  | 97 +  | 118  | 786  | 131402 | 132070 |
| UN27386 | Rsa1.0.00579.1 | 818  | 148308 | 0         | 404  | 404  | 100 + | 414  | 817  | 147546 | 147949 |
| UN27387 | Rsa1.0.04140.1 | 573  | 18879  | 1.00E-141 | 257  | 258  | 99 -  | 315  | 572  | 5603   | 5860   |
| UN27388 | Rsa1.0.04711.1 | 1049 | 16282  | 0         | 412  | 416  | 99 +  | 2    | 415  | 6889   | 7304   |
| UN27389 | Rsa1.0.07019.1 | 1156 | 10020  | 1.00E-81  | 181  | 187  | 96 -  | 18   | 203  | 9297   | 9482   |
| UN27390 | Rsa1.0.02256.1 | 1458 | 33329  | 0         | 353  | 357  | 98 -  | 1100 | 1456 | 15530  | 15886  |
| UN27391 | Rsa1.0.02992.1 | 975  | 26176  | 0         | 598  | 605  | 98 -  | 1    | 604  | 20329  | 20933  |
| UN27392 | Rsa1.0.03560.1 | 993  | 22092  | 1.00E-126 | 310  | 337  | 91 +  | 660  | 990  | 5170   | 5506   |
| UN27393 | Rsa1.0.08840.1 | 815  | 6871   | 0         | 434  | 449  | 96 -  | 370  | 814  | 4213   | 4658   |
| UN27394 | Rsa1.0.22597.1 | 1382 | 1108   | 0         | 939  | 957  | 98 +  | 1    | 957  | 156    | 1108   |
| UN27395 | Rsa1.0.00805.1 | 1307 | 63724  | 0         | 402  | 425  | 94 -  | 568  | 983  | 31490  | 31914  |
| UN27396 | Rsa1.0.03289.1 | 825  | 24011  | 0         | 552  | 564  | 97 -  | 2    | 564  | 20277  | 20840  |
| UN27397 | Rsa1.0.01016.1 | 1415 | 181422 | 1.00E-171 | 336  | 345  | 97 +  | 1072 | 1415 | 52330  | 52674  |
| UN27398 | Rsa1.0.00865.1 | 696  | 61686  | 0         | 476  | 499  | 95 +  | 184  | 682  | 39292  | 39790  |
| UN27399 | Rsa1.0.05816.1 | 1202 | 12562  | 1.00E-157 | 282  | 282  | 100 + | 3    | 284  | 4223   | 4504   |
| UN27400 | Rsa1.0.07447.1 | 1044 | 9380   | 0         | 566  | 572  | 98 -  | 3    | 573  | 8315   | 8886   |
| UN27401 | Rsa1.0.07287.1 | 1309 | 9615   | 0         | 415  | 415  | 100 - | 895  | 1309 | 7536   | 7950   |
| UN27402 | Rsa1.0.00031.1 | 1052 | 179862 | 1.00E-126 | 247  | 253  | 97 +  | 707  | 959  | 51072  | 51324  |
| UN27403 | Rsa1.0.02220.1 | 1120 | 176031 | 0         | 1086 | 1122 | 96 +  | 1    | 1120 | 135    | 1247   |
| UN27404 | Rsa1.0.00010.1 | 1116 | 294827 | 1.00E-116 | 244  | 253  | 96 -  | 28   | 280  | 221675 | 221926 |
| UN27405 | Rsa1.0.00619.1 | 1048 | 71985  | 0         | 1024 | 1048 | 97 +  | 1    | 1048 | 49680  | 50727  |
| UN27406 | Rsa1.0.03964.1 | 833  | 19835  | 5.00E-12  | 81   | 94   | 86 -  | 118  | 210  | 16898  | 16991  |
| UN27407 | Rsa1.0.00838.1 | 1012 | 153820 | 0         | 654  | 673  | 97 +  | 312  | 984  | 4745   | 5417   |
| UN27408 | Rsa1.0.02085.1 | 250  | 35198  | 1.00E-131 | 246  | 249  | 98 +  | 1    | 249  | 15212  | 15460  |
| UN27409 | Rsa1.0.25608.1 | 541  | 928    | 0         | 532  | 535  | 99 -  | 6    | 540  | 238    | 772    |
| UN27410 | Rsa1.0.00996.1 | 1025 | 57222  | 1.00E-175 | 336  | 344  | 97 -  | 14   | 357  | 53540  | 53883  |
| UN27411 | Rsa1.0.00031.1 | 557  | 179862 | 1.00E-145 | 282  | 288  | 97 +  | 2    | 289  | 64524  | 64809  |
| UN27412 | Rsa1.0.03313.1 | 990  | 23834  | 0         | 960  | 998  | 96 +  | 4    | 990  | 15642  | 16635  |
| UN27413 | Rsa1.0.00698.1 | 924  | 67816  | 0         | 698  | 713  | 97 -  | 1    | 713  | 43060  | 43769  |
| UN27414 | Rsa1.0.00236.1 | 1130 | 104771 | 0         | 634  | 661  | 95 +  | 8    | 656  | 41080  | 41738  |
| UN27415 | Rsa1.0.01803.1 | 875  | 173846 | 3.00E-87  | 232  | 252  | 92 +  | 599  | 846  | 18351  | 18599  |

|         |                |      |        |           |      |      |       |     |      |        |        |
|---------|----------------|------|--------|-----------|------|------|-------|-----|------|--------|--------|
| UN27416 | Rsa1.0.00602.1 | 675  | 73302  | 0         | 454  | 455  | 99 +  | 219 | 673  | 58483  | 58937  |
| UN27417 | Rsa1.0.01039.1 | 904  | 55946  | 0         | 692  | 711  | 97 +  | 192 | 902  | 16302  | 17012  |
| UN27418 | Rsa1.0.00129.1 | 1217 | 126831 | 0         | 820  | 858  | 95 -  | 382 | 1217 | 67023  | 67880  |
| UN27419 | Rsa1.0.00387.1 | 952  | 495407 | 0         | 830  | 864  | 96 -  | 35  | 891  | 17850  | 18713  |
| UN27420 | Rsa1.0.00577.1 | 807  | 174827 | 4.00E-77  | 156  | 159  | 98 +  | 229 | 387  | 170863 | 171021 |
| UN27421 | Rsa1.0.00153.1 | 1055 | 192931 | 0         | 1010 | 1049 | 96 -  | 1   | 1047 | 132445 | 133490 |
| UN27422 | Rsa1.0.03193.1 | 1026 | 24690  | 0         | 979  | 991  | 98 +  | 2   | 991  | 8282   | 9272   |
| UN27423 | Rsa1.0.01584.1 | 925  | 42811  | 0         | 767  | 808  | 94 +  | 2   | 808  | 20682  | 21489  |
| UN27424 | Rsa1.0.01023.1 | 1621 | 56571  | 0         | 533  | 533  | 100 + | 1   | 533  | 6260   | 6792   |
| UN27425 | Rsa1.0.03577.1 | 1155 | 143993 | 0         | 404  | 415  | 97 -  | 74  | 488  | 6645   | 7053   |
| UN27426 | Rsa1.0.01846.1 | 1559 | 38367  | 0         | 540  | 549  | 98 -  | 1   | 549  | 18990  | 19538  |
| UN27427 | Rsa1.0.08326.1 | 678  | 7534   | 0         | 672  | 678  | 99 -  | 1   | 678  | 1655   | 2332   |
| UN27428 | Rsa1.0.00425.1 | 1339 | 147080 | 0         | 744  | 765  | 97 -  | 579 | 1338 | 89105  | 89865  |
| UN27429 | Rsa1.0.00832.1 | 1268 | 62622  | 1.00E-136 | 285  | 294  | 96 -  | 3   | 293  | 15429  | 15722  |
| UN27430 | Rsa1.0.00079.1 | 718  | 606987 | 0         | 556  | 571  | 97 +  | 149 | 718  | 489770 | 490340 |
| UN27431 | Rsa1.0.47695.1 | 845  | 474    | 1.00E-141 | 273  | 279  | 97 -  | 3   | 281  | 1      | 279    |
| UN27432 | Rsa1.0.07074.1 | 796  | 9944   | 0         | 794  | 796  | 99 +  | 1   | 796  | 3096   | 3891   |
| UN27433 | Rsa1.0.07100.1 | 905  | 9896   | 0         | 848  | 878  | 96 -  | 26  | 898  | 4768   | 5642   |
| UN27434 | Rsa1.0.03935.1 | 949  | 19983  | 1.00E-77  | 148  | 148  | 100 - | 239 | 386  | 6893   | 7040   |
| UN27435 | Rsa1.0.00487.1 | 1229 | 80674  | 0         | 591  | 613  | 96 -  | 622 | 1229 | 10346  | 10956  |
| UN27436 | Rsa1.0.00694.1 | 1406 | 68074  | 0         | 863  | 864  | 99 -  | 543 | 1406 | 6377   | 7240   |
| UN27437 | Rsa1.0.00034.1 | 1199 | 260119 | 0         | 977  | 1144 | 85 -  | 27  | 1153 | 100664 | 101790 |
| UN27438 | Rsa1.0.00019.1 | 1165 | 301669 | 0         | 709  | 714  | 99 -  | 452 | 1165 | 149146 | 149857 |
| UN27439 | Rsa1.0.05314.1 | 1452 | 14169  | 1.00E-102 | 189  | 189  | 100 + | 465 | 653  | 1      | 189    |
| UN27440 | Rsa1.0.05707.1 | 884  | 12872  | 0         | 784  | 785  | 99 +  | 1   | 785  | 12088  | 12872  |
| UN27441 | Rsa1.0.03609.1 | 566  | 21798  | 0         | 549  | 561  | 97 +  | 6   | 566  | 11142  | 11702  |
| UN27442 | Rsa1.0.00056.1 | 1262 | 332604 | 0         | 451  | 455  | 99 -  | 1   | 454  | 181030 | 181483 |
| UN27443 | Rsa1.0.00330.1 | 1235 | 94666  | 0         | 1125 | 1126 | 99 -  | 2   | 1127 | 84024  | 85149  |
| UN27444 | Rsa1.0.01913.1 | 692  | 37363  | 0         | 608  | 663  | 91 -  | 9   | 668  | 24442  | 25099  |
| UN27445 | Rsa1.0.00390.1 | 1250 | 88681  | 0         | 703  | 769  | 91 -  | 402 | 1169 | 16795  | 17562  |
| UN27446 | #              | #    | #      | #         | #    | #    | #     | #   | #    | #      | #      |
| UN27447 | Rsa1.0.00112.1 | 1426 | 132199 | 1.00E-148 | 273  | 275  | 99 +  | 670 | 944  | 71853  | 72127  |
| UN27448 | Rsa1.0.00855.1 | 1903 | 62047  | 0         | 1168 | 1168 | 100 - | 164 | 1331 | 5071   | 6238   |
| UN27449 | Rsa1.0.01809.1 | 1024 | 39004  | 0         | 381  | 381  | 100 - | 1   | 381  | 18864  | 19244  |
| UN27450 | Rsa1.0.00128.1 | 246  | 228675 | 4.00E-65  | 174  | 189  | 92 +  | 68  | 245  | 83328  | 83515  |
| UN27451 | #              | #    | #      | #         | #    | #    | #     | #   | #    | #      | #      |
| UN27452 | Rsa1.0.00048.1 | 1131 | 167185 | 1.00E-144 | 309  | 324  | 95 +  | 810 | 1131 | 100204 | 100523 |
| UN27453 | Rsa1.0.04159.1 | 957  | 18795  | 4.00E-90  | 210  | 225  | 93 +  | 158 | 373  | 7345   | 7569   |
| UN27454 | Rsa1.0.01180.1 | 767  | 51517  | 0         | 740  | 745  | 99 +  | 26  | 765  | 45834  | 46578  |

|         |                |      |        |           |      |      |       |     |      |        |        |
|---------|----------------|------|--------|-----------|------|------|-------|-----|------|--------|--------|
| UN27455 | Rsa1.0.00042.1 | 605  | 171507 | 2.00E-29  | 128  | 149  | 85 -  | 1   | 142  | 105310 | 105458 |
| UN27456 | Rsa1.0.00550.1 | 1695 | 210790 | 0         | 417  | 424  | 98 -  | 153 | 576  | 190847 | 191267 |
| UN27457 | Rsa1.0.00532.1 | 1442 | 77384  | 0         | 1440 | 1443 | 99 -  | 1   | 1441 | 32133  | 33575  |
| UN27458 | Rsa1.0.12539.1 | 834  | 5198   | 0         | 795  | 801  | 99 -  | 23  | 819  | 196    | 996    |
| UN27459 | Rsa1.0.01273.1 | 1090 | 49464  | 1.00E-59  | 149  | 158  | 94 -  | 230 | 386  | 31788  | 31945  |
| UN27460 | Rsa1.0.00275.1 | 678  | 210104 | 1.00E-149 | 296  | 303  | 97 +  | 1   | 302  | 154367 | 154667 |
| UN27461 | Rsa1.0.05496.1 | 827  | 13533  | 0         | 659  | 663  | 99 +  | 60  | 721  | 3832   | 4493   |
| UN27462 | Rsa1.0.00131.1 | 1347 | 432233 | 0         | 578  | 578  | 100 - | 3   | 580  | 402020 | 402597 |
| UN27463 | Rsa1.0.00206.1 | 554  | 109040 | 1.00E-158 | 283  | 283  | 100 - | 270 | 552  | 39409  | 39691  |
| UN27464 | Rsa1.0.00511.1 | 1098 | 78616  | 0         | 861  | 873  | 98 -  | 2   | 872  | 59056  | 59928  |
| UN27465 | Rsa1.0.00774.1 | 319  | 64831  | 1.00E-172 | 316  | 318  | 99 +  | 1   | 318  | 7227   | 7543   |
| UN27466 | Rsa1.0.00123.1 | 892  | 325650 | 0         | 862  | 890  | 96 -  | 2   | 891  | 175916 | 176805 |
| UN27467 | Rsa1.0.01540.1 | 1162 | 151890 | 0         | 805  | 805  | 100 + | 358 | 1162 | 125351 | 126155 |
| UN27468 | Rsa1.0.05428.1 | 918  | 13789  | 0         | 916  | 919  | 99 -  | 1   | 918  | 5350   | 6267   |
| UN27469 | Rsa1.0.01501.1 | 858  | 44532  | 0         | 506  | 509  | 99 +  | 1   | 509  | 36652  | 37160  |
| UN27470 | Rsa1.0.00441.1 | 1128 | 84607  | 0         | 343  | 343  | 100 - | 531 | 873  | 10629  | 10971  |
| UN27471 | Rsa1.0.00300.1 | 1384 | 97747  | 0         | 468  | 515  | 90 +  | 4   | 489  | 85265  | 85779  |
| UN27472 | Rsa1.0.04544.1 | 1130 | 16917  | 0         | 1088 | 1117 | 97 +  | 8   | 1124 | 12501  | 13608  |
| UN27473 | Rsa1.0.00248.1 | 863  | 163568 | 0         | 858  | 861  | 99 -  | 3   | 863  | 24337  | 25197  |
| UN27474 | Rsa1.0.00205.1 | 1042 | 193401 | 1.00E-178 | 337  | 344  | 97 +  | 698 | 1041 | 53365  | 53708  |
| UN27475 | Rsa1.0.00398.1 | 1124 | 88007  | 0         | 467  | 487  | 95 -  | 1   | 484  | 35201  | 35683  |
| UN27476 | Rsa1.0.03598.1 | 1350 | 21858  | 0         | 770  | 784  | 98 +  | 75  | 853  | 11767  | 12550  |
| UN27477 | Rsa1.0.00881.1 | 1185 | 61260  | 0         | 1185 | 1185 | 100 - | 1   | 1185 | 21137  | 22321  |
| UN27478 | Rsa1.0.01972.1 | 1172 | 36634  | 0         | 402  | 407  | 98 -  | 765 | 1171 | 2725   | 3131   |
| UN27479 | Rsa1.0.01144.1 | 702  | 52431  | 0         | 542  | 563  | 96 -  | 1   | 560  | 20853  | 21408  |
| UN27480 | Rsa1.0.02769.1 | 953  | 28107  | 0         | 468  | 476  | 98 -  | 1   | 476  | 13370  | 13842  |
| UN27481 | Rsa1.0.00356.1 | 899  | 91521  | 0         | 440  | 470  | 93 +  | 392 | 849  | 46820  | 47286  |
| UN27482 | Rsa1.0.14336.1 | 1142 | 3503   | 0         | 793  | 824  | 96 +  | 12  | 818  | 909    | 1732   |
| UN27483 | Rsa1.0.01081.1 | 854  | 499226 | 1.00E-152 | 279  | 281  | 99 -  | 4   | 284  | 455366 | 455646 |
| UN27484 | Rsa1.0.03692.1 | 938  | 21338  | 1.00E-124 | 241  | 246  | 97 -  | 544 | 789  | 2781   | 3026   |
| UN27485 | Rsa1.0.08373.1 | 1200 | 7455   | 0         | 1087 | 1214 | 89 -  | 1   | 1199 | 5331   | 6506   |
| UN27486 | Rsa1.0.00012.1 | 1231 | 222148 | 0         | 574  | 607  | 94 +  | 594 | 1185 | 190310 | 190913 |
| UN27487 | Rsa1.0.33679.1 | 1075 | 673    | 0         | 461  | 475  | 97 +  | 437 | 902  | 1      | 474    |
| UN27488 | Rsa1.0.02586.1 | 942  | 29856  | 0         | 496  | 532  | 93 +  | 414 | 942  | 19482  | 19995  |
| UN27489 | Rsa1.0.03934.1 | 753  | 19984  | 0         | 742  | 752  | 98 +  | 1   | 752  | 3302   | 4052   |
| UN27490 | Rsa1.0.00028.1 | 684  | 293984 | 0         | 681  | 682  | 99 +  | 3   | 684  | 228902 | 229583 |
| UN27491 | Rsa1.0.00067.1 | 1796 | 415055 | 0         | 1157 | 1175 | 98 +  | 625 | 1796 | 211659 | 212833 |
| UN27492 | Rsa1.0.14951.1 | 773  | 2939   | 5.00E-49  | 188  | 215  | 87 +  | 30  | 241  | 531    | 745    |
| UN27493 | Rsa1.0.14538.1 | 896  | 3287   | 0         | 880  | 904  | 97 +  | 2   | 896  | 583    | 1485   |

|         |                |      |        |           |      |      |       |      |      |        |        |
|---------|----------------|------|--------|-----------|------|------|-------|------|------|--------|--------|
| UN27494 | Rsa1.0.08427.1 | 1325 | 7371   | 2.00E-77  | 358  | 422  | 84 +  | 1    | 418  | 4494   | 4912   |
| UN27495 | Rsa1.0.00157.1 | 849  | 245832 | 0         | 703  | 714  | 98 +  | 20   | 733  | 156426 | 157138 |
| UN27496 | Rsa1.0.00294.1 | 1339 | 144860 | 1.00E-133 | 275  | 285  | 96 +  | 1055 | 1339 | 23941  | 24224  |
| UN27497 | Rsa1.0.00190.1 | 763  | 318240 | 0         | 366  | 366  | 100 - | 1    | 366  | 12061  | 12426  |
| UN27498 | Rsa1.0.00990.1 | 902  | 57445  | 0         | 458  | 459  | 99 +  | 3    | 461  | 25495  | 25953  |
| UN27499 | Rsa1.0.04139.1 | 1108 | 18883  | 1.00E-139 | 264  | 268  | 98 +  | 841  | 1108 | 7120   | 7387   |
| UN27500 | Rsa1.0.00411.1 | 1099 | 86944  | 0         | 1099 | 1100 | 99 -  | 1    | 1099 | 13763  | 14862  |
| UN27501 | Rsa1.0.01118.1 | 1368 | 53460  | 0         | 460  | 467  | 98 +  | 800  | 1266 | 11739  | 12205  |
| UN27502 | Rsa1.0.08183.1 | 1218 | 7775   | 0         | 555  | 579  | 95 -  | 645  | 1217 | 4924   | 5498   |
| UN27503 | Rsa1.0.04434.1 | 1342 | 17377  | 0         | 1124 | 1137 | 98 -  | 1    | 1124 | 10607  | 11743  |
| UN27504 | Rsa1.0.03983.1 | 815  | 19715  | 0         | 810  | 813  | 99 +  | 1    | 813  | 4062   | 4874   |
| UN27505 | Rsa1.0.00080.1 | 1610 | 190437 | 4.00E-79  | 151  | 151  | 100 - | 665  | 815  | 24542  | 24692  |
| UN27506 | Rsa1.0.00455.1 | 1259 | 224823 | 0         | 1244 | 1256 | 99 +  | 1    | 1256 | 164582 | 165837 |
| UN27507 | Rsa1.0.00785.1 | 1334 | 64356  | 0         | 910  | 930  | 97 +  | 404  | 1332 | 12375  | 13297  |
| UN27508 | Rsa1.0.01193.1 | 633  | 51147  | 0         | 627  | 632  | 99 -  | 1    | 632  | 27472  | 28103  |
| UN27509 | Rsa1.0.00327.1 | 1275 | 94892  | 0         | 627  | 644  | 97 +  | 1    | 644  | 22327  | 22969  |
| UN27510 | Rsa1.0.00800.1 | 934  | 63868  | 0         | 695  | 696  | 99 -  | 6    | 700  | 8666   | 9361   |
| UN27511 | Rsa1.0.00919.1 | 519  | 59675  | 2.00E-50  | 312  | 385  | 81 -  | 73   | 446  | 33479  | 33840  |
| UN27512 | Rsa1.0.03880.1 | 992  | 20293  | 0         | 399  | 417  | 95 -  | 1    | 406  | 13302  | 13718  |
| UN27513 | Rsa1.0.00221.1 | 569  | 106972 | 0         | 565  | 572  | 98 -  | 1    | 568  | 55062  | 55632  |
| UN27514 | Rsa1.0.01445.1 | 727  | 45671  | 0         | 713  | 742  | 96 -  | 2    | 723  | 33207  | 33948  |
| UN27515 | Rsa1.0.38999.1 | 631  | 577    | 1.00E-128 | 282  | 296  | 95 -  | 1    | 295  | 1      | 295    |
| UN27516 | Rsa1.0.02761.1 | 1004 | 28151  | 1.00E-176 | 338  | 345  | 97 -  | 1    | 344  | 27136  | 27480  |
| UN27517 | Rsa1.0.04561.1 | 743  | 16849  | 1.00E-86  | 189  | 197  | 95 -  | 91   | 284  | 9818   | 10014  |
| UN27518 | Rsa1.0.01000.1 | 709  | 57140  | 1.00E-149 | 268  | 268  | 100 - | 276  | 543  | 44976  | 45243  |
| UN27519 | Rsa1.0.11161.1 | 532  | 5599   | 0         | 523  | 526  | 99 +  | 2    | 527  | 197    | 722    |
| UN27520 | Rsa1.0.00495.1 | 736  | 79934  | 0         | 586  | 625  | 93 +  | 109  | 733  | 14814  | 15422  |
| UN27521 | Rsa1.0.00842.1 | 821  | 62493  | 0         | 483  | 526  | 91 -  | 1    | 503  | 36579  | 37095  |
| UN27522 | Rsa1.0.02846.1 | 873  | 27338  | 0         | 707  | 744  | 95 -  | 130  | 873  | 20930  | 21673  |
| UN27523 | Rsa1.0.00707.1 | 1545 | 190112 | 0         | 1510 | 1539 | 98 -  | 7    | 1545 | 9893   | 11429  |
| UN27524 | Rsa1.0.04552.1 | 1488 | 16878  | 0         | 1437 | 1492 | 96 +  | 9    | 1485 | 7020   | 8502   |
| UN27525 | Rsa1.0.06536.1 | 1166 | 10821  | 0         | 1157 | 1160 | 99 -  | 2    | 1161 | 8637   | 9796   |
| UN27526 | Rsa1.0.01424.1 | 423  | 46139  | 0         | 420  | 421  | 99 -  | 1    | 421  | 23812  | 24232  |
| UN27527 | Rsa1.0.01421.1 | 1227 | 46197  | 0         | 435  | 436  | 99 -  | 7    | 441  | 30027  | 30462  |
| UN27528 | #              | #    | #      | #         | #    | #    | #     | #    | #    | #      | #      |
| UN27529 | Rsa1.0.01574.1 | 887  | 42930  | 0         | 834  | 860  | 96 -  | 28   | 887  | 13051  | 13909  |
| UN27530 | Rsa1.0.02529.1 | 1342 | 30437  | 0         | 1064 | 1067 | 99 -  | 1    | 1066 | 13569  | 14635  |
| UN27531 | Rsa1.0.00047.1 | 1070 | 168582 | 0         | 987  | 1066 | 92 -  | 6    | 1068 | 17385  | 18439  |
| UN27532 | Rsa1.0.06691.1 | 767  | 10532  | 0         | 756  | 769  | 98 -  | 3    | 767  | 6242   | 7010   |

|         |                |      |        |           |      |      |       |     |      |        |        |
|---------|----------------|------|--------|-----------|------|------|-------|-----|------|--------|--------|
| UN27533 | Rsa1.0.02245.1 | 825  | 33478  | 3.00E-47  | 164  | 185  | 88 +  | 639 | 822  | 30388  | 30572  |
| UN27534 | Rsa1.0.02521.1 | 860  | 30562  | 1.00E-109 | 201  | 201  | 100 - | 660 | 860  | 6592   | 6792   |
| UN27535 | Rsa1.0.03498.1 | 1020 | 22480  | 0         | 641  | 649  | 98 +  | 1   | 646  | 18248  | 18896  |
| UN27536 | Rsa1.0.00119.1 | 704  | 467509 | 0         | 598  | 602  | 99 -  | 1   | 598  | 299443 | 300044 |
| UN27537 | Rsa1.0.03679.1 | 1574 | 21409  | 0         | 1249 | 1327 | 94 -  | 1   | 1315 | 13347  | 14669  |
| UN27538 | Rsa1.0.00300.1 | 1087 | 97747  | 0         | 1058 | 1086 | 97 -  | 3   | 1087 | 88819  | 89902  |
| UN27539 | Rsa1.0.00009.1 | 682  | 232558 | 1.00E-149 | 274  | 276  | 99 +  | 406 | 681  | 8171   | 8446   |
| UN27540 | Rsa1.0.03735.1 | 1635 | 21087  | 0         | 535  | 535  | 100 + | 122 | 656  | 3643   | 4177   |
| UN27541 | Rsa1.0.00277.1 | 885  | 100132 | 0         | 683  | 691  | 98 +  | 4   | 690  | 35471  | 36161  |
| UN27542 | Rsa1.0.00347.1 | 550  | 93048  | 2.00E-66  | 138  | 141  | 97 -  | 182 | 322  | 74987  | 75127  |
| UN27543 | Rsa1.0.00263.1 | 674  | 224968 | 1.00E-178 | 317  | 317  | 100 + | 358 | 674  | 140880 | 141196 |
| UN27544 | Rsa1.0.09441.1 | 1238 | 6367   | 0         | 496  | 499  | 99 +  | 1   | 499  | 5041   | 5539   |
| UN27545 | Rsa1.0.00223.1 | 872  | 106231 | 4.00E-71  | 143  | 145  | 98 +  | 162 | 306  | 36883  | 37027  |
| UN27546 | Rsa1.0.00543.1 | 1093 | 76788  | 1.00E-148 | 288  | 295  | 97 -  | 339 | 633  | 39411  | 39705  |
| UN27547 | Rsa1.0.11861.1 | 505  | 5388   | 0         | 502  | 503  | 99 -  | 1   | 503  | 3294   | 3796   |
| UN27548 | Rsa1.0.03096.1 | 620  | 25437  | 0         | 592  | 614  | 96 +  | 1   | 614  | 6508   | 7121   |
| UN27549 | Rsa1.0.02410.1 | 1130 | 31659  | 0         | 403  | 404  | 99 +  | 1   | 404  | 10635  | 11038  |
| UN27550 | Rsa1.0.00923.1 | 1030 | 153678 | 1.00E-138 | 258  | 261  | 98 +  | 598 | 858  | 21021  | 21281  |
| UN27551 | Rsa1.0.03474.1 | 1225 | 147790 | 1.00E-99  | 329  | 371  | 88 +  | 701 | 1055 | 131715 | 132084 |
| UN27552 | Rsa1.0.10003.1 | 954  | 6042   | 0         | 951  | 955  | 99 +  | 1   | 954  | 1671   | 2625   |
| UN27553 | Rsa1.0.01102.1 | 599  | 53987  | 1.00E-137 | 251  | 252  | 99 +  | 1   | 252  | 5252   | 5503   |
| UN27554 | Rsa1.0.00090.1 | 1135 | 273859 | 0         | 524  | 577  | 90 -  | 2   | 561  | 138994 | 139564 |
| UN27555 | Rsa1.0.01303.1 | 1497 | 48853  | 1.00E-127 | 235  | 236  | 99 +  | 426 | 661  | 44189  | 44424  |
| UN27556 | Rsa1.0.03352.1 | 1109 | 23506  | 0         | 1039 | 1047 | 99 -  | 70  | 1109 | 5113   | 6159   |
| UN27557 | Rsa1.0.01246.1 | 1095 | 49968  | 1.00E-115 | 254  | 267  | 95 -  | 2   | 267  | 29527  | 29793  |
| UN27558 | Rsa1.0.00956.1 | 1437 | 58304  | 0         | 1412 | 1437 | 98 -  | 1   | 1437 | 20254  | 21688  |
| UN27559 | Rsa1.0.01969.1 | 766  | 153351 | 0         | 718  | 785  | 91 -  | 1   | 761  | 14136  | 14902  |
| UN27560 | Rsa1.0.26178.1 | 977  | 903    | 0         | 789  | 791  | 99 -  | 187 | 977  | 114    | 903    |
| UN27561 | Rsa1.0.00082.1 | 582  | 237584 | 1.00E-142 | 269  | 272  | 98 -  | 311 | 582  | 41408  | 41678  |
| UN27562 | Rsa1.0.02997.1 | 1129 | 26150  | 0         | 938  | 995  | 94 +  | 130 | 1115 | 3419   | 4410   |
| UN27563 | Rsa1.0.02986.1 | 1363 | 26212  | 0         | 647  | 650  | 99 -  | 3   | 652  | 18049  | 18698  |
| UN27564 | Rsa1.0.00446.1 | 1255 | 167829 | 1.00E-155 | 297  | 303  | 98 -  | 948 | 1250 | 130666 | 130968 |
| UN27565 | Rsa1.0.00341.1 | 968  | 249309 | 0         | 913  | 981  | 93 -  | 1   | 968  | 3235   | 4195   |
| UN27566 | Rsa1.0.00585.1 | 1418 | 74164  | 1.00E-164 | 318  | 326  | 97 +  | 775 | 1100 | 49228  | 49553  |
| UN27567 | Rsa1.0.01781.1 | 783  | 39410  | 0         | 700  | 701  | 99 +  | 4   | 704  | 4069   | 4769   |
| UN27568 | Rsa1.0.00006.1 | 735  | 396176 | 0         | 406  | 411  | 98 -  | 321 | 731  | 61463  | 61873  |
| UN27569 | Rsa1.0.00945.1 | 1241 | 58714  | 0         | 795  | 795  | 100 - | 447 | 1241 | 4176   | 4970   |
| UN27570 | Rsa1.0.03832.1 | 1283 | 20577  | 0         | 455  | 477  | 95 +  | 336 | 803  | 8373   | 8849   |
| UN27571 | Rsa1.0.04561.1 | 1099 | 16849  | 0         | 1069 | 1071 | 99 -  | 1   | 1071 | 4119   | 5188   |

|         |                |      |        |           |      |      |       |      |      |        |        |
|---------|----------------|------|--------|-----------|------|------|-------|------|------|--------|--------|
| UN27572 | Rsa1.0.05355.1 | 928  | 14069  | 0         | 670  | 677  | 98 -  | 252  | 928  | 1      | 677    |
| UN27573 | Rsa1.0.00841.1 | 1448 | 183065 | 0         | 1344 | 1393 | 96 +  | 4    | 1394 | 44628  | 46017  |
| UN27574 | Rsa1.0.00463.1 | 738  | 189177 | 0         | 371  | 376  | 98 -  | 363  | 738  | 115918 | 116293 |
| UN27575 | Rsa1.0.00498.1 | 953  | 79746  | 0         | 610  | 635  | 96 -  | 326  | 952  | 50206  | 50834  |
| UN27576 | Rsa1.0.01312.1 | 1284 | 48401  | 3.00E-23  | 60   | 61   | 98 +  | 910  | 970  | 2913   | 2973   |
| UN27577 | Rsa1.0.04043.1 | 1130 | 19416  | 1.00E-133 | 277  | 286  | 96 -  | 3    | 285  | 10615  | 10897  |
| UN27578 | Rsa1.0.04242.1 | 1001 | 18340  | 0         | 999  | 1011 | 98 -  | 1    | 1001 | 14771  | 15781  |
| UN27579 | Rsa1.0.00106.1 | 1350 | 133916 | 0         | 496  | 500  | 99 -  | 669  | 1167 | 59737  | 60236  |
| UN27580 | Rsa1.0.00168.1 | 745  | 115870 | 0         | 635  | 641  | 99 -  | 105  | 745  | 41696  | 42336  |
| UN27581 | Rsa1.0.03368.1 | 1366 | 23382  | 1.00E-127 | 293  | 311  | 94 +  | 4    | 312  | 985    | 1295   |
| UN27582 | Rsa1.0.00833.1 | 1832 | 62621  | 0         | 596  | 601  | 99 +  | 1230 | 1830 | 40507  | 41107  |
| UN27583 | Rsa1.0.01701.1 | 887  | 162121 | 1.00E-175 | 318  | 320  | 99 -  | 3    | 322  | 22280  | 22599  |
| UN27584 | Rsa1.0.00017.1 | 1102 | 752458 | 0         | 383  | 387  | 98 +  | 715  | 1101 | 718544 | 718929 |
| UN27585 | Rsa1.0.00493.1 | 603  | 80007  | 0         | 599  | 604  | 99 +  | 1    | 603  | 68218  | 68821  |
| UN27586 | Rsa1.0.15037.1 | 574  | 2878   | 0         | 549  | 570  | 96 -  | 3    | 572  | 1018   | 1575   |
| UN27587 | Rsa1.0.00434.1 | 789  | 85171  | 1.00E-128 | 246  | 249  | 98 -  | 1    | 248  | 76093  | 76341  |
| UN27588 | Rsa1.0.00267.1 | 1363 | 101509 | 0         | 627  | 635  | 98 -  | 1    | 634  | 72937  | 73568  |
| UN27589 | Rsa1.0.03055.1 | 651  | 25730  | 0         | 566  | 597  | 94 +  | 1    | 596  | 4530   | 5116   |
| UN27590 | Rsa1.0.01553.1 | 858  | 43379  | 0         | 837  | 857  | 97 -  | 2    | 858  | 26918  | 27774  |
| UN27591 | Rsa1.0.04823.1 | 925  | 15840  | 1.00E-138 | 276  | 285  | 96 +  | 3    | 287  | 11455  | 11739  |
| UN27592 | Rsa1.0.02942.1 | 1446 | 26577  | 0         | 1412 | 1446 | 97 -  | 1    | 1446 | 10996  | 12433  |
| UN27593 | Rsa1.0.01397.1 | 1319 | 183276 | 0         | 1020 | 1037 | 98 -  | 283  | 1319 | 25566  | 26595  |
| UN27594 | Rsa1.0.00375.1 | 1036 | 90207  | 7.00E-24  | 169  | 202  | 83 +  | 77   | 278  | 37635  | 37828  |
| UN27595 | Rsa1.0.00387.1 | 1035 | 495407 | 0         | 977  | 994  | 98 -  | 2    | 991  | 280003 | 280996 |
| UN27596 | Rsa1.0.01201.1 | 834  | 50856  | 1.00E-131 | 278  | 290  | 95 +  | 1    | 290  | 44531  | 44819  |
| UN27597 | Rsa1.0.00251.1 | 588  | 303968 | 8.00E-81  | 156  | 157  | 99 -  | 1    | 157  | 298626 | 298782 |
| UN27598 | Rsa1.0.00118.1 | 2108 | 130637 | 0         | 2104 | 2107 | 99 +  | 2    | 2108 | 80638  | 82744  |
| UN27599 | Rsa1.0.00293.1 | 1029 | 339294 | 1.00E-112 | 209  | 210  | 99 -  | 716  | 925  | 30489  | 30698  |
| UN27600 | Rsa1.0.00051.1 | 1479 | 258225 | 0         | 494  | 508  | 97 -  | 460  | 967  | 3232   | 3739   |
| UN27601 | Rsa1.0.03053.1 | 1163 | 25745  | 0         | 344  | 347  | 99 +  | 817  | 1163 | 13555  | 13901  |
| UN27602 | Rsa1.0.00830.1 | 1616 | 62685  | 0         | 854  | 858  | 99 -  | 216  | 1073 | 49712  | 50569  |
| UN27603 | Rsa1.0.00020.1 | 1448 | 283099 | 0         | 645  | 656  | 98 +  | 589  | 1244 | 58982  | 59637  |
| UN27604 | Rsa1.0.03036.1 | 978  | 25826  | 1.00E-118 | 225  | 228  | 98 +  | 156  | 383  | 13375  | 13602  |
| UN27605 | Rsa1.0.03304.1 | 1443 | 23883  | 0         | 1001 | 1043 | 95 +  | 360  | 1396 | 18843  | 19873  |
| UN27606 | Rsa1.0.07346.1 | 1352 | 9526   | 0         | 680  | 680  | 100 + | 271  | 950  | 8847   | 9526   |
| UN27607 | Rsa1.0.00275.1 | 696  | 210104 | 0         | 336  | 338  | 99 +  | 208  | 545  | 171479 | 171816 |
| UN27608 | Rsa1.0.54575.1 | 1265 | 418    | 0         | 416  | 418  | 99 +  | 816  | 1233 | 1      | 418    |
| UN27609 | Rsa1.0.15220.1 | 1035 | 2748   | 0         | 393  | 410  | 95 +  | 1    | 409  | 2339   | 2748   |
| UN27610 | Rsa1.0.04311.1 | 1046 | 17984  | 0         | 830  | 855  | 97 +  | 27   | 877  | 418    | 1272   |

|         |                |      |        |           |      |      |       |      |      |        |        |
|---------|----------------|------|--------|-----------|------|------|-------|------|------|--------|--------|
| UN27611 | Rsa1.0_04321.1 | 644  | 17930  | 1.00E-179 | 336  | 342  | 98 +  | 302  | 643  | 3668   | 4009   |
| UN27612 | Rsa1.0_00246.1 | 574  | 103541 | 1.00E-167 | 300  | 301  | 99 -  | 89   | 389  | 43624  | 43924  |
| UN27613 | Rsa1.0_00878.1 | 578  | 330303 | 2.00E-13  | 43   | 44   | 97 -  | 1    | 44   | 113643 | 113686 |
| UN27614 | Rsa1.0_00392.1 | 1307 | 88523  | 1.00E-140 | 660  | 796  | 82 -  | 38   | 803  | 83379  | 84163  |
| UN27615 | Rsa1.0_06335.1 | 185  | 11216  | 3.00E-87  | 169  | 171  | 98 +  | 12   | 182  | 6932   | 7102   |
| UN27616 | Rsa1.0_00124.1 | 614  | 262503 | 0         | 609  | 610  | 99 +  | 4    | 613  | 169448 | 170057 |
| UN27617 | Rsa1.0_08114.1 | 903  | 7883   | 0         | 651  | 652  | 99 +  | 252  | 903  | 6163   | 6814   |
| UN27618 | Rsa1.0_03166.1 | 956  | 24863  | 0         | 729  | 743  | 98 -  | 214  | 955  | 23283  | 24025  |
| UN27619 | Rsa1.0_01164.1 | 1320 | 51934  | 1.00E-152 | 289  | 294  | 98 +  | 1027 | 1320 | 43900  | 44193  |
| UN27620 | #              | #    | #      | #         | #    | #    | #     | #    | #    | #      | #      |
| UN27621 | Rsa1.0_00252.1 | 1106 | 102760 | 0         | 1106 | 1106 | 100 + | 1    | 1106 | 100536 | 101641 |
| UN27622 | Rsa1.0_04741.1 | 930  | 16164  | 0         | 924  | 930  | 99 -  | 1    | 930  | 12681  | 13610  |
| UN27623 | Rsa1.0_01382.1 | 877  | 46877  | 0         | 600  | 689  | 87 -  | 138  | 825  | 22142  | 22829  |
| UN27624 | Rsa1.0_03566.1 | 831  | 22050  | 0         | 637  | 638  | 99 -  | 1    | 637  | 14133  | 14770  |
| UN27625 | Rsa1.0_01603.1 | 549  | 42468  | 1.00E-131 | 307  | 328  | 93 -  | 220  | 546  | 38952  | 39267  |
| UN27626 | Rsa1.0_00399.1 | 666  | 242951 | 0         | 661  | 664  | 99 +  | 3    | 664  | 14466  | 15129  |
| UN27627 | #              | #    | #      | #         | #    | #    | #     | #    | #    | #      | #      |
| UN27628 | Rsa1.0_04097.1 | 632  | 19090  | 0         | 613  | 633  | 96 -  | 1    | 632  | 6635   | 7267   |
| UN27629 | Rsa1.0_00915.1 | 1265 | 194446 | 0         | 1019 | 1025 | 99 +  | 1    | 1025 | 155198 | 156222 |
| UN27630 | Rsa1.0_00031.1 | 823  | 179862 | 0         | 417  | 423  | 98 -  | 401  | 823  | 117302 | 117724 |
| UN27631 | Rsa1.0_07130.1 | 1497 | 9861   | 1.00E-163 | 552  | 637  | 86 +  | 320  | 930  | 7568   | 8175   |
| UN27632 | Rsa1.0_18138.1 | 1198 | 1658   | 2.00E-21  | 141  | 170  | 82 +  | 458  | 627  | 831    | 1000   |
| UN27633 | Rsa1.0_00407.1 | 710  | 191544 | 1.00E-140 | 279  | 285  | 97 -  | 271  | 554  | 169505 | 169788 |
| UN27634 | Rsa1.0_00017.1 | 1341 | 752458 | 0         | 1337 | 1343 | 99 +  | 1    | 1341 | 149858 | 151200 |
| UN27635 | Rsa1.0_01862.1 | 890  | 38030  | 1.00E-107 | 201  | 202  | 99 +  | 245  | 446  | 13290  | 13491  |
| UN27636 | Rsa1.0_00119.1 | 993  | 467509 | 0         | 968  | 992  | 97 -  | 1    | 992  | 49965  | 50953  |
| UN27637 | Rsa1.0_01543.1 | 1223 | 43645  | 0         | 472  | 485  | 97 +  | 2    | 486  | 11258  | 11742  |
| UN27638 | Rsa1.0_07636.1 | 819  | 8971   | 0         | 529  | 530  | 99 -  | 290  | 819  | 4919   | 5448   |
| UN27639 | Rsa1.0_03997.1 | 1056 | 19652  | 1.00E-130 | 358  | 391  | 91 -  | 12   | 400  | 5326   | 5701   |
| UN27640 | Rsa1.0_01433.1 | 1314 | 45976  | 0         | 569  | 569  | 100 + | 310  | 878  | 6422   | 6990   |
| UN27641 | Rsa1.0_00863.1 | 682  | 254535 | 0         | 568  | 594  | 95 +  | 87   | 680  | 247666 | 248253 |
| UN27642 | Rsa1.0_01670.1 | 643  | 41260  | 0         | 367  | 372  | 98 -  | 12   | 383  | 1382   | 1753   |
| UN27643 | Rsa1.0_29451.1 | 1018 | 782    | 1.00E-113 | 211  | 212  | 99 +  | 129  | 340  | 571    | 782    |
| UN27644 | Rsa1.0_06218.1 | 1071 | 11461  | 0         | 1060 | 1070 | 99 -  | 2    | 1071 | 5583   | 6652   |
| UN27645 | Rsa1.0_01112.1 | 487  | 310601 | 1.00E-121 | 223  | 224  | 99 -  | 1    | 224  | 287342 | 287565 |
| UN27646 | Rsa1.0_17021.1 | 752  | 1951   | 0         | 502  | 506  | 99 +  | 1    | 506  | 715    | 1220   |
| UN27647 | Rsa1.0_01017.1 | 920  | 56714  | 1.00E-123 | 224  | 224  | 100 - | 362  | 585  | 18251  | 18474  |
| UN27648 | Rsa1.0_00150.1 | 1286 | 154416 | 0         | 1259 | 1286 | 97 +  | 4    | 1286 | 15963  | 17246  |
| UN27649 | Rsa1.0_00376.1 | 1189 | 90101  | 0         | 370  | 377  | 98 +  | 815  | 1189 | 69648  | 70024  |

|         |                |      |        |           |      |      |       |     |      |        |        |
|---------|----------------|------|--------|-----------|------|------|-------|-----|------|--------|--------|
| UN27650 | Rsa1.0_00857.1 | 338  | 61904  | 1.00E-65  | 199  | 222  | 89 +  | 5   | 222  | 20381  | 20599  |
| UN27651 | Rsa1.0_10130.1 | 1512 | 5985   | 0         | 727  | 736  | 98 +  | 352 | 1080 | 296    | 1031   |
| UN27652 | Rsa1.0_02588.1 | 997  | 29840  | 0         | 895  | 929  | 96 -  | 85  | 995  | 19028  | 19956  |
| UN27653 | Rsa1.0_60580.1 | 1379 | 378    | 0         | 365  | 368  | 99 -  | 271 | 638  | 5      | 372    |
| UN27654 | Rsa1.0_02930.1 | 1124 | 26668  | 0         | 1108 | 1120 | 98 -  | 1   | 1120 | 8940   | 10058  |
| UN27655 | Rsa1.0_04093.1 | 880  | 19106  | 0         | 407  | 413  | 98 +  | 417 | 829  | 1581   | 1993   |
| UN27656 | Rsa1.0_00329.1 | 460  | 222544 | 0         | 383  | 383  | 100 + | 78  | 460  | 192494 | 192876 |
| UN27657 | Rsa1.0_03278.1 | 685  | 24125  | 1.00E-166 | 441  | 485  | 90 +  | 199 | 683  | 8114   | 8595   |
| UN27658 | Rsa1.0_05707.1 | 1743 | 12872  | 0         | 1461 | 1467 | 99 -  | 279 | 1743 | 442    | 1908   |
| UN27659 | Rsa1.0_00279.1 | 868  | 100039 | 0         | 766  | 785  | 97 -  | 3   | 786  | 36226  | 37007  |
| UN27660 | Rsa1.0_13322.1 | 1431 | 4918   | 0         | 967  | 971  | 99 +  | 3   | 971  | 30     | 1000   |
| UN27661 | Rsa1.0_00033.1 | 1575 | 515811 | 0         | 1570 | 1575 | 99 +  | 1   | 1575 | 66252  | 67825  |
| UN27662 | Rsa1.0_00013.1 | 1304 | 292129 | 0         | 885  | 892  | 99 -  | 251 | 1141 | 276701 | 277591 |
| UN27663 | Rsa1.0_05134.1 | 930  | 143181 | 0         | 886  | 936  | 94 -  | 3   | 930  | 137729 | 138649 |
| UN27664 | Rsa1.0_00087.1 | 1231 | 761073 | 0         | 1206 | 1230 | 98 +  | 1   | 1230 | 612676 | 613905 |
| UN27665 | Rsa1.0_00203.1 | 660  | 109129 | 0         | 486  | 499  | 97 +  | 162 | 660  | 36184  | 36682  |
| UN27666 | Rsa1.0_01647.1 | 1020 | 41645  | 0         | 414  | 419  | 98 -  | 602 | 1020 | 41223  | 41641  |
| UN27667 | Rsa1.0_02513.1 | 465  | 30643  | 0         | 463  | 464  | 99 +  | 2   | 465  | 26421  | 26884  |
| UN27668 | Rsa1.0_00017.1 | 837  | 752458 | 3.00E-84  | 290  | 324  | 89 +  | 519 | 837  | 54639  | 54951  |
| UN27669 | Rsa1.0_00122.1 | 1586 | 265937 | 0         | 561  | 571  | 98 +  | 779 | 1348 | 59602  | 60170  |
| UN27670 | Rsa1.0_04969.1 | 841  | 15283  | 0         | 820  | 834  | 98 +  | 6   | 838  | 4720   | 5548   |
| UN27671 | Rsa1.0_00197.1 | 1100 | 109714 | 0         | 635  | 640  | 99 +  | 1   | 640  | 73191  | 73828  |
| UN27672 | Rsa1.0_00111.1 | 1566 | 390088 | 0         | 409  | 420  | 97 +  | 595 | 1014 | 155414 | 155833 |
| UN27673 | Rsa1.0_05056.1 | 1318 | 14981  | 1.00E-124 | 254  | 263  | 96 +  | 789 | 1051 | 8495   | 8757   |
| UN27674 | Rsa1.0_00632.1 | 1529 | 183777 | 0         | 634  | 636  | 99 -  | 894 | 1529 | 26588  | 27223  |
| UN27675 | Rsa1.0_00775.1 | 997  | 64793  | 0         | 971  | 994  | 97 -  | 4   | 997  | 52947  | 53937  |
| UN27676 | Rsa1.0_02313.1 | 907  | 32653  | 0         | 509  | 509  | 100 - | 399 | 907  | 9499   | 10007  |
| UN27677 | Rsa1.0_00022.1 | 1323 | 200461 | 0         | 1151 | 1194 | 96 +  | 137 | 1323 | 178283 | 179475 |
| UN27678 | Rsa1.0_00161.1 | 1107 | 116891 | 0         | 381  | 384  | 99 +  | 1   | 384  | 85918  | 86301  |
| UN27679 | Rsa1.0_01709.1 | 882  | 40587  | 0         | 881  | 882  | 99 -  | 1   | 882  | 14902  | 15783  |
| UN27680 | Rsa1.0_01194.1 | 677  | 51113  | 0         | 657  | 672  | 97 -  | 6   | 677  | 23100  | 23771  |
| UN27681 | Rsa1.0_06516.1 | 1240 | 10866  | 0         | 396  | 399  | 99 +  | 37  | 435  | 4508   | 4906   |
| UN27682 | Rsa1.0_24897.1 | 940  | 962    | 0         | 509  | 514  | 99 +  | 1   | 512  | 449    | 962    |
| UN27683 | Rsa1.0_00094.1 | 1136 | 139042 | 0         | 1103 | 1141 | 96 +  | 1   | 1136 | 46962  | 48094  |
| UN27684 | Rsa1.0_00787.1 | 514  | 64239  | 0         | 380  | 382  | 99 +  | 133 | 514  | 18413  | 18794  |
| UN27685 | Rsa1.0_74014.1 | 1026 | 310    | 1.00E-167 | 304  | 306  | 99 +  | 557 | 862  | 1      | 306    |
| UN27686 | Rsa1.0_07827.1 | 790  | 8466   | 1.00E-180 | 332  | 336  | 98 +  | 3   | 338  | 2147   | 2482   |
| UN27687 | Rsa1.0_00912.1 | 780  | 59923  | 1.00E-156 | 306  | 315  | 97 +  | 225 | 539  | 46660  | 46974  |
| UN27688 | Rsa1.0_02415.1 | 614  | 31609  | 0         | 612  | 615  | 99 +  | 1   | 612  | 10312  | 10926  |



|         |                |      |        |           |      |      |       |     |      |        |        |
|---------|----------------|------|--------|-----------|------|------|-------|-----|------|--------|--------|
| UN27689 | Rsa1.0.00364.1 | 1525 | 90951  | 0         | 1018 | 1029 | 98 +  | 1   | 1029 | 5227   | 6255   |
| UN27690 | Rsa1.0.00341.1 | 1266 | 249309 | 0         | 519  | 520  | 99 -  | 747 | 1266 | 213027 | 213546 |
| UN27691 | Rsa1.0.00090.1 | 1044 | 273859 | 1.00E-134 | 252  | 255  | 98 +  | 505 | 759  | 143363 | 143617 |
| UN27692 | Rsa1.0.02301.1 | 1282 | 32835  | 0         | 613  | 615  | 99 +  | 1   | 615  | 28180  | 28794  |
| UN27693 | Rsa1.0.02300.1 | 1205 | 32847  | 0         | 728  | 741  | 98 -  | 465 | 1204 | 4491   | 5230   |
| UN27694 | Rsa1.0.01824.1 | 1120 | 38733  | 0         | 988  | 1035 | 95 +  | 93  | 1120 | 29079  | 30112  |
| UN27695 | Rsa1.0.01696.1 | 826  | 301850 | 0         | 395  | 404  | 97 -  | 184 | 587  | 26660  | 27063  |
| UN27696 | Rsa1.0.01327.1 | 1191 | 48033  | 0         | 859  | 859  | 100 - | 333 | 1191 | 42388  | 43246  |
| UN27697 | Rsa1.0.00003.1 | 1274 | 340054 | 1.00E-147 | 397  | 442  | 89 +  | 3   | 433  | 326362 | 326791 |
| UN27698 | Rsa1.0.02510.1 | 1371 | 30662  | 0         | 701  | 726  | 96 +  | 645 | 1370 | 17208  | 17925  |
| UN27699 | #              | #    | #      | #         | #    | #    | #     | #   | #    | #      | #      |
| UN27700 | Rsa1.0.00545.1 | 803  | 189649 | 0         | 451  | 467  | 96 -  | 340 | 800  | 44779  | 45243  |
| UN27701 | Rsa1.0.01806.1 | 1166 | 39021  | 0         | 483  | 510  | 94 +  | 654 | 1163 | 24551  | 25044  |
| UN27702 | Rsa1.0.17697.1 | 959  | 1763   | 0         | 482  | 485  | 99 -  | 405 | 889  | 3      | 487    |
| UN27703 | Rsa1.0.52144.1 | 679  | 436    | 0         | 403  | 404  | 99 -  | 1   | 403  | 1      | 404    |
| UN27704 | Rsa1.0.00138.1 | 1417 | 247040 | 1.00E-164 | 305  | 309  | 98 -  | 249 | 557  | 16076  | 16384  |
| UN27705 | Rsa1.0.00045.1 | 1216 | 328694 | 0         | 602  | 604  | 99 -  | 2   | 605  | 225052 | 225655 |
| UN27706 | Rsa1.0.01612.1 | 391  | 42255  | 1.00E-129 | 234  | 234  | 100 + | 156 | 389  | 12739  | 12972  |
| UN27707 | Rsa1.0.06444.1 | 1101 | 11008  | 1.00E-167 | 317  | 323  | 98 +  | 2   | 324  | 5542   | 5864   |
| UN27708 | Rsa1.0.00336.1 | 1162 | 445051 | 0         | 430  | 431  | 99 -  | 733 | 1162 | 39557  | 39987  |
| UN27709 | Rsa1.0.00333.1 | 1048 | 94500  | 0         | 1041 | 1046 | 99 +  | 3   | 1048 | 64579  | 65624  |
| UN27710 | Rsa1.0.00521.1 | 1379 | 78191  | 1.00E-125 | 399  | 456  | 87 +  | 916 | 1371 | 76300  | 76755  |
| UN27711 | Rsa1.0.00879.1 | 955  | 61297  | 2.00E-45  | 135  | 146  | 92 -  | 790 | 934  | 31652  | 31796  |
| UN27712 | Rsa1.0.00186.1 | 1926 | 112669 | 0         | 606  | 609  | 99 +  | 463 | 1071 | 53607  | 54215  |
| UN27713 | Rsa1.0.01695.1 | 796  | 40848  | 0         | 460  | 494  | 93 -  | 312 | 793  | 10495  | 10988  |
| UN27714 | Rsa1.0.00608.1 | 789  | 172672 | 0         | 379  | 382  | 99 -  | 403 | 784  | 165742 | 166123 |
| UN27715 | Rsa1.0.00478.1 | 1120 | 81419  | 0         | 1098 | 1110 | 98 -  | 9   | 1118 | 36534  | 37643  |
| UN27716 | Rsa1.0.03159.1 | 1097 | 24946  | 0         | 1063 | 1070 | 99 +  | 29  | 1097 | 20824  | 21893  |
| UN27717 | Rsa1.0.00831.1 | 1074 | 62673  | 0         | 928  | 1053 | 88 +  | 15  | 1065 | 13855  | 14897  |
| UN27718 | Rsa1.0.04464.1 | 1151 | 17241  | 3.00E-88  | 263  | 294  | 89 +  | 418 | 711  | 4      | 296    |
| UN27719 | Rsa1.0.01760.1 | 1509 | 39730  | 0         | 334  | 334  | 100 + | 1   | 334  | 11090  | 11423  |
| UN27720 | Rsa1.0.00096.1 | 1382 | 198773 | 0         | 783  | 788  | 99 -  | 7   | 794  | 37587  | 38374  |
| UN27721 | Rsa1.0.01361.1 | 743  | 47226  | 0         | 432  | 446  | 96 -  | 1   | 444  | 22995  | 23440  |
| UN27722 | Rsa1.0.08550.1 | 876  | 7211   | 0         | 586  | 605  | 96 +  | 270 | 874  | 6016   | 6620   |
| UN27723 | Rsa1.0.04132.1 | 1396 | 18917  | 1.00E-160 | 339  | 354  | 95 +  | 25  | 377  | 6      | 358    |
| UN27724 | Rsa1.0.03338.1 | 1674 | 136346 | 0         | 908  | 932  | 97 -  | 2   | 930  | 7781   | 8712   |
| UN27725 | Rsa1.0.01315.1 | 1291 | 48361  | 0         | 1273 | 1274 | 99 +  | 19  | 1291 | 28492  | 29765  |
| UN27726 | Rsa1.0.00087.1 | 933  | 761073 | 0         | 395  | 403  | 98 +  | 526 | 928  | 179191 | 179592 |
| UN27727 | Rsa1.0.00002.1 | 1229 | 601661 | 0         | 1173 | 1194 | 98 +  | 37  | 1229 | 256858 | 258051 |

|         |                |      |        |           |      |      |      |      |      |        |        |
|---------|----------------|------|--------|-----------|------|------|------|------|------|--------|--------|
| UN27728 | Rsa1.0.03113.1 | 703  | 25318  | 0         | 677  | 710  | 95 - | 2    | 695  | 15777  | 16479  |
| UN27729 | Rsa1.0.01126.1 | 936  | 53127  | 0         | 527  | 552  | 95 + | 1    | 540  | 29080  | 29624  |
| UN27730 | Rsa1.0.13382.1 | 1104 | 4874   | 2.00E-82  | 315  | 369  | 85 - | 539  | 889  | 396    | 764    |
| UN27731 | Rsa1.0.05904.1 | 1745 | 12279  | 5.00E-57  | 223  | 258  | 86 + | 744  | 1000 | 538    | 795    |
| UN27732 | Rsa1.0.01772.1 | 830  | 39557  | 1.00E-144 | 271  | 275  | 98 + | 552  | 826  | 9880   | 10154  |
| UN27733 | Rsa1.0.01155.1 | 645  | 52182  | 0         | 573  | 608  | 94 - | 42   | 643  | 18089  | 18687  |
| UN27734 | Rsa1.0.00083.1 | 1127 | 442773 | 0         | 599  | 628  | 95 + | 505  | 1126 | 425236 | 425863 |
| UN27735 | Rsa1.0.00248.1 | 1365 | 163568 | 0         | 480  | 488  | 98 + | 551  | 1038 | 42447  | 42934  |
| UN27736 | Rsa1.0.00519.1 | 761  | 197864 | 0         | 758  | 759  | 99 + | 3    | 761  | 163270 | 164028 |
| UN27737 | Rsa1.0.00418.1 | 578  | 215377 | 1.00E-168 | 333  | 343  | 97 + | 236  | 576  | 194451 | 194793 |
| UN27738 | Rsa1.0.03579.1 | 961  | 21969  | 0         | 853  | 866  | 98 - | 1    | 860  | 10637  | 11502  |
| UN27739 | Rsa1.0.02494.1 | 1158 | 132923 | 0         | 1156 | 1158 | 99 + | 1    | 1158 | 117127 | 118283 |
| UN27740 | Rsa1.0.02085.1 | 1039 | 35198  | 0         | 981  | 1031 | 95 - | 2    | 1028 | 18304  | 19311  |
| UN27741 | Rsa1.0.00053.1 | 1042 | 263459 | 0         | 948  | 974  | 97 + | 71   | 1041 | 156957 | 157924 |
| UN27742 | Rsa1.0.00803.1 | 1560 | 144228 | 0         | 548  | 549  | 99 + | 1013 | 1560 | 38543  | 39091  |
| UN27743 | Rsa1.0.01887.1 | 948  | 37564  | 0         | 377  | 381  | 98 + | 3    | 383  | 23869  | 24249  |
| UN27744 | Rsa1.0.00614.1 | 895  | 72276  | 0         | 868  | 892  | 97 - | 4    | 895  | 9075   | 9965   |
| UN27745 | Rsa1.0.01064.1 | 1029 | 55295  | 0         | 1010 | 1042 | 96 - | 1    | 1028 | 49400  | 50432  |
| UN27746 | Rsa1.0.08217.1 | 1266 | 7707   | 0         | 425  | 432  | 98 + | 836  | 1266 | 177    | 608    |
| UN27747 | Rsa1.0.05262.1 | 1178 | 14334  | 0         | 459  | 495  | 92 - | 1    | 485  | 12878  | 13357  |
| UN27748 | Rsa1.0.03143.1 | 1516 | 25024  | 0         | 1035 | 1038 | 99 + | 479  | 1516 | 12212  | 13249  |
| UN27749 | Rsa1.0.00133.1 | 1553 | 123768 | 0         | 1108 | 1247 | 88 + | 155  | 1395 | 79865  | 81105  |
| UN27750 | Rsa1.0.00706.1 | 1588 | 291570 | 0         | 455  | 456  | 99 + | 441  | 896  | 31804  | 32259  |
| UN27751 | Rsa1.0.00344.1 | 860  | 191774 | 1.00E-122 | 243  | 250  | 97 - | 79   | 328  | 182012 | 182261 |
| UN27752 | Rsa1.0.00595.1 | 1323 | 341648 | 0         | 1077 | 1107 | 97 + | 2    | 1108 | 25488  | 26591  |
| UN27753 | Rsa1.0.05923.1 | 1139 | 12230  | 0         | 628  | 646  | 97 + | 1    | 644  | 1946   | 2590   |
| UN27754 | Rsa1.0.02394.1 | 1234 | 31789  | 3.00E-39  | 96   | 100  | 96 + | 249  | 348  | 5746   | 5845   |
| UN27755 | Rsa1.0.00015.1 | 1547 | 561803 | 0         | 1247 | 1259 | 99 - | 289  | 1547 | 16882  | 18140  |
| UN27756 | Rsa1.0.03188.1 | 1150 | 24722  | 0         | 762  | 781  | 97 + | 370  | 1150 | 6193   | 6973   |
| UN27757 | Rsa1.0.01273.1 | 739  | 49464  | 0         | 329  | 330  | 99 + | 1    | 330  | 40095  | 40424  |
| UN27758 | Rsa1.0.02076.1 | 926  | 153121 | 0         | 378  | 387  | 97 + | 85   | 470  | 32925  | 33311  |
| UN27759 | Rsa1.0.00190.1 | 368  | 318240 | 1.00E-120 | 339  | 379  | 89 - | 1    | 368  | 13256  | 13626  |
| UN27760 | Rsa1.0.02812.1 | 813  | 27660  | 1.00E-115 | 455  | 532  | 85 + | 3    | 494  | 3631   | 4155   |
| UN27761 | Rsa1.0.10431.1 | 1386 | 5853   | 0         | 918  | 924  | 99 + | 196  | 1119 | 4930   | 5853   |
| UN27762 | Rsa1.0.07379.1 | 1254 | 9492   | 0         | 1239 | 1251 | 99 - | 3    | 1253 | 5757   | 7007   |
| UN27763 | Rsa1.0.13531.1 | 949  | 4748   | 0         | 555  | 563  | 98 - | 385  | 947  | 180    | 742    |
| UN27764 | Rsa1.0.00980.1 | 916  | 57729  | 0         | 883  | 915  | 96 + | 2    | 916  | 7895   | 8800   |
| UN27765 | Rsa1.0.00211.1 | 1112 | 228189 | 0         | 1007 | 1053 | 95 + | 61   | 1112 | 215327 | 216355 |
| UN27766 | Rsa1.0.00836.1 | 1304 | 185968 | 0         | 1120 | 1134 | 98 - | 174  | 1302 | 180242 | 181375 |

|         |                |      |        |           |      |      |       |     |      |        |        |
|---------|----------------|------|--------|-----------|------|------|-------|-----|------|--------|--------|
| UN27767 | Rsa1.0.01910.1 | 884  | 37405  | 0         | 529  | 530  | 99 -  | 1   | 530  | 14209  | 14738  |
| UN27768 | Rsa1.0.09195.1 | 978  | 6565   | 3.00E-44  | 95   | 96   | 98 +  | 3   | 98   | 6181   | 6276   |
| UN27769 | Rsa1.0.00816.1 | 663  | 403350 | 0         | 534  | 557  | 95 +  | 9   | 565  | 360164 | 360712 |
| UN27770 | Rsa1.0.00294.1 | 1523 | 144860 | 0         | 1344 | 1370 | 98 +  | 2   | 1362 | 117900 | 119269 |
| UN27771 | Rsa1.0.00465.1 | 1488 | 82138  | 0         | 609  | 612  | 99 -  | 1   | 612  | 75654  | 76264  |
| UN27772 | Rsa1.0.19760.1 | 1292 | 1387   | 0         | 550  | 561  | 98 -  | 1   | 561  | 1      | 560    |
| UN27773 | Rsa1.0.13974.1 | 1326 | 3969   | 0         | 658  | 661  | 99 +  | 542 | 1202 | 2458   | 3118   |
| UN27774 | Rsa1.0.27853.1 | 1276 | 837    | 0         | 349  | 351  | 99 +  | 1   | 351  | 174    | 524    |
| UN27775 | Rsa1.0.00341.1 | 1511 | 249309 | 0         | 941  | 983  | 95 -  | 510 | 1480 | 209481 | 210459 |
| UN27776 | Rsa1.0.00722.1 | 820  | 66840  | 0         | 418  | 444  | 94 +  | 34  | 468  | 20493  | 20936  |
| UN27777 | Rsa1.0.01038.1 | 1137 | 55956  | 0         | 738  | 749  | 98 -  | 2   | 749  | 34768  | 35515  |
| UN27778 | Rsa1.0.08526.1 | 1029 | 7236   | 0         | 965  | 1004 | 96 -  | 23  | 1024 | 4562   | 5557   |
| UN27779 | Rsa1.0.05599.1 | 1167 | 143653 | 0         | 394  | 402  | 98 +  | 734 | 1135 | 142334 | 142735 |
| UN27780 | Rsa1.0.00055.1 | 1591 | 520193 | 0         | 417  | 427  | 97 -  | 821 | 1247 | 61321  | 61747  |
| UN27781 | Rsa1.0.09265.1 | 1280 | 6519   | 0         | 458  | 464  | 98 -  | 816 | 1279 | 5339   | 5801   |
| UN27782 | Rsa1.0.02606.1 | 1280 | 29635  | 1.00E-176 | 313  | 313  | 100 + | 967 | 1279 | 13308  | 13620  |
| UN27783 | Rsa1.0.10563.1 | 690  | 5800   | 0         | 569  | 625  | 91 -  | 68  | 689  | 4609   | 5220   |
| UN27784 | Rsa1.0.01771.1 | 937  | 172709 | 1.00E-167 | 381  | 408  | 93 -  | 8   | 405  | 12559  | 12963  |
| UN27785 | Rsa1.0.17073.1 | 1115 | 1934   | 0         | 749  | 750  | 99 -  | 366 | 1115 | 1185   | 1934   |
| UN27786 | Rsa1.0.04383.1 | 835  | 17631  | 1.00E-124 | 229  | 230  | 99 -  | 527 | 756  | 11091  | 11320  |
| UN27787 | Rsa1.0.01237.1 | 1192 | 50124  | 0         | 875  | 877  | 99 +  | 317 | 1192 | 44401  | 45276  |
| UN27788 | Rsa1.0.00335.1 | 1054 | 94371  | 0         | 895  | 914  | 97 +  | 3   | 915  | 10721  | 11633  |
| UN27789 | Rsa1.0.09513.1 | 1092 | 6322   | 0         | 1086 | 1094 | 99 +  | 1   | 1092 | 4280   | 5373   |
| UN27790 | Rsa1.0.01153.1 | 752  | 52264  | 0         | 402  | 411  | 97 +  | 38  | 448  | 34936  | 35346  |
| UN27791 | Rsa1.0.03225.1 | 857  | 24500  | 0         | 804  | 859  | 93 +  | 1   | 857  | 18747  | 19582  |
| UN27792 | Rsa1.0.00878.1 | 694  | 330303 | 0         | 465  | 481  | 96 -  | 213 | 692  | 131845 | 132319 |
| UN27793 | Rsa1.0.01166.1 | 1220 | 51877  | 0         | 474  | 491  | 96 +  | 730 | 1219 | 8577   | 9067   |
| UN27794 | Rsa1.0.01515.1 | 836  | 170864 | 0         | 478  | 479  | 99 +  | 359 | 836  | 157969 | 158447 |
| UN27795 | Rsa1.0.00131.1 | 839  | 432233 | 0         | 835  | 837  | 99 -  | 1   | 837  | 406702 | 407538 |
| UN27796 | Rsa1.0.03596.1 | 965  | 21862  | 1.00E-144 | 308  | 322  | 95 +  | 151 | 471  | 18115  | 18433  |
| UN27797 | Rsa1.0.03955.1 | 682  | 19884  | 0         | 627  | 660  | 95 -  | 29  | 679  | 18864  | 19522  |
| UN27798 | Rsa1.0.02385.1 | 728  | 31907  | 0         | 342  | 348  | 98 +  | 148 | 495  | 11441  | 11788  |
| UN27799 | Rsa1.0.04202.1 | 853  | 18479  | 0         | 572  | 595  | 96 +  | 262 | 853  | 3006   | 3600   |
| UN27800 | Rsa1.0.00070.1 | 724  | 150321 | 0         | 474  | 476  | 99 -  | 249 | 724  | 84813  | 85288  |
| UN27801 | Rsa1.0.00428.1 | 864  | 85599  | 0         | 814  | 841  | 96 +  | 4   | 842  | 6738   | 7572   |
| UN27802 | Rsa1.0.00388.1 | 934  | 88890  | 0         | 426  | 428  | 99 +  | 1   | 428  | 33295  | 33722  |
| UN27803 | Rsa1.0.00059.1 | 917  | 159650 | 0         | 639  | 671  | 95 +  | 3   | 672  | 70728  | 71391  |
| UN27804 | Rsa1.0.02059.1 | 667  | 35532  | 1.00E-115 | 210  | 210  | 100 + | 223 | 432  | 31337  | 31546  |
| UN27805 | Rsa1.0.02062.1 | 644  | 35485  | 2.00E-84  | 245  | 269  | 91 -  | 13  | 274  | 16493  | 16752  |

|         |                |      |        |           |      |      |       |      |      |        |        |
|---------|----------------|------|--------|-----------|------|------|-------|------|------|--------|--------|
| UN27806 | Rsa1.0.00460.1 | 590  | 206387 | 2.00E-53  | 110  | 111  | 99 -  | 3    | 113  | 50444  | 50554  |
| UN27807 | Rsa1.0.00293.1 | 808  | 339294 | 0         | 499  | 500  | 99 +  | 309  | 808  | 89958  | 90457  |
| UN27808 | Rsa1.0.00762.1 | 1898 | 165246 | 0         | 1711 | 1718 | 99 -  | 1    | 1718 | 32878  | 34588  |
| UN27809 | Rsa1.0.47563.1 | 1099 | 475    | 1.00E-120 | 261  | 277  | 94 +  | 413  | 677  | 199    | 475    |
| UN27810 | Rsa1.0.07970.1 | 708  | 8156   | 1.00E-152 | 318  | 333  | 95 +  | 3    | 335  | 6094   | 6421   |
| UN27811 | Rsa1.0.00093.1 | 1039 | 214962 | 0         | 476  | 482  | 98 +  | 560  | 1039 | 13902  | 14383  |
| UN27812 | Rsa1.0.02007.1 | 778  | 36130  | 3.00E-25  | 90   | 99   | 90 +  | 240  | 336  | 14832  | 14930  |
| UN27813 | Rsa1.0.00343.1 | 1238 | 93570  | 0         | 1230 | 1243 | 98 -  | 1    | 1238 | 62808  | 64047  |
| UN27814 | Rsa1.0.25265.1 | 771  | 944    | 1.00E-178 | 319  | 320  | 99 +  | 32   | 351  | 315    | 634    |
| UN27815 | Rsa1.0.04200.1 | 788  | 18490  | 0         | 770  | 789  | 97 -  | 1    | 786  | 9692   | 10479  |
| UN27816 | Rsa1.0.00168.1 | 1522 | 115870 | 0         | 518  | 518  | 100 + | 1001 | 1518 | 76605  | 77122  |
| UN27817 | Rsa1.0.03885.1 | 852  | 20256  | 0         | 818  | 849  | 96 -  | 3    | 850  | 18106  | 18948  |
| UN27818 | Rsa1.0.05462.1 | 1096 | 13671  | 0         | 1073 | 1100 | 97 -  | 1    | 1096 | 4862   | 5961   |
| UN27819 | Rsa1.0.00542.1 | 1190 | 76831  | 0         | 434  | 440  | 98 +  | 751  | 1190 | 10245  | 10682  |
| UN27820 | Rsa1.0.00179.1 | 1033 | 393324 | 0         | 591  | 600  | 98 +  | 37   | 636  | 230392 | 230991 |
| UN27821 | Rsa1.0.01848.1 | 473  | 38312  | 1.00E-178 | 432  | 472  | 91 -  | 2    | 473  | 2      | 449    |
| UN27822 | Rsa1.0.00282.1 | 963  | 177799 | 0         | 913  | 917  | 99 +  | 1    | 916  | 91387  | 92303  |
| UN27823 | Rsa1.0.01292.1 | 745  | 175783 | 1.00E-80  | 191  | 202  | 94 +  | 543  | 743  | 2295   | 2492   |
| UN27824 | Rsa1.0.00433.1 | 1239 | 85381  | 0         | 590  | 604  | 97 +  | 383  | 986  | 58786  | 59389  |
| UN27825 | Rsa1.0.10566.1 | 915  | 5799   | 0         | 876  | 887  | 98 +  | 1    | 886  | 3552   | 4438   |
| UN27826 | Rsa1.0.12582.1 | 1183 | 5184   | 0         | 426  | 427  | 99 +  | 327  | 753  | 4758   | 5184   |
| UN27827 | Rsa1.0.00388.1 | 1246 | 88890  | 1.00E-176 | 326  | 330  | 98 +  | 357  | 686  | 31435  | 31764  |
| UN27828 | Rsa1.0.08114.1 | 1389 | 7883   | 0         | 795  | 818  | 97 +  | 306  | 1120 | 6168   | 6984   |
| UN27829 | Rsa1.0.00464.1 | 747  | 82253  | 0         | 398  | 399  | 99 +  | 1    | 399  | 32302  | 32700  |
| UN27830 | Rsa1.0.04666.1 | 723  | 16466  | 0         | 721  | 721  | 100 - | 2    | 722  | 5638   | 6358   |
| UN27831 | Rsa1.0.23234.1 | 1130 | 1063   | 0         | 391  | 396  | 98 -  | 5    | 400  | 169    | 562    |
| UN27832 | Rsa1.0.04925.1 | 991  | 15424  | 0         | 773  | 800  | 96 -  | 200  | 990  | 1048   | 1845   |
| UN27833 | Rsa1.0.10327.1 | 541  | 5887   | 0         | 532  | 539  | 98 +  | 3    | 541  | 5161   | 5699   |
| UN27834 | Rsa1.0.00060.1 | 763  | 502678 | 1.00E-153 | 280  | 282  | 99 +  | 335  | 616  | 57446  | 57727  |
| UN27835 | #              | #    | #      | #         | #    | #    | #     | #    | #    | #      | #      |
| UN27836 | Rsa1.0.00781.1 | 817  | 64480  | 1.00E-144 | 267  | 268  | 99 -  | 198  | 465  | 31184  | 31450  |
| UN27837 | Rsa1.0.00019.1 | 522  | 301669 | 0         | 515  | 522  | 98 -  | 2    | 522  | 288293 | 288813 |
| UN27838 | Rsa1.0.00522.1 | 998  | 78103  | 2.33E-156 | 275  | 279  | 98 -  | 5    | 283  | 25952  | 26230  |
| UN27839 | Rsa1.0.01042.1 | 830  | 293264 | 1.00E-155 | 307  | 316  | 97 +  | 1    | 313  | 163097 | 163412 |
| UN27840 | Rsa1.0.03025.1 | 1008 | 25910  | 0         | 825  | 831  | 99 +  | 143  | 968  | 17782  | 18612  |
| UN27841 | Rsa1.0.00123.1 | 356  | 325650 | 0         | 351  | 352  | 99 +  | 4    | 355  | 22870  | 23221  |
| UN27842 | Rsa1.0.00903.1 | 623  | 60228  | 0         | 606  | 639  | 94 -  | 1    | 622  | 6265   | 6903   |
| UN27843 | Rsa1.0.00269.1 | 809  | 341668 | 1.00E-160 | 359  | 381  | 94 +  | 437  | 809  | 306853 | 307232 |
| UN27844 | Rsa1.0.01744.1 | 899  | 39910  | 0         | 862  | 907  | 95 -  | 1    | 893  | 35427  | 36321  |

|         |                |      |        |           |      |      |       |     |      |        |        |
|---------|----------------|------|--------|-----------|------|------|-------|-----|------|--------|--------|
| UN27845 | Rsa1.0_06924.1 | 1172 | 10158  | 0         | 354  | 357  | 99 -  | 246 | 602  | 6353   | 6709   |
| UN27846 | Rsa1.0_29322.1 | 633  | 786    | 0         | 610  | 626  | 97 +  | 11  | 633  | 1      | 624    |
| UN27847 | Rsa1.0_04668.1 | 1352 | 16456  | 6.00E-68  | 135  | 136  | 99 -  | 921 | 1056 | 14242  | 14377  |
| UN27848 | Rsa1.0_00168.1 | 797  | 115870 | 0         | 409  | 426  | 96 -  | 295 | 720  | 28692  | 29117  |
| UN27849 | Rsa1.0_00017.1 | 877  | 752458 | 0         | 622  | 685  | 90 -  | 137 | 795  | 367673 | 368357 |
| UN27850 | Rsa1.0_02020.1 | 1138 | 173211 | 0         | 1114 | 1142 | 97 -  | 1   | 1138 | 156518 | 157648 |
| UN27851 | Rsa1.0_00411.1 | 796  | 86944  | 0         | 739  | 758  | 97 +  | 6   | 761  | 64506  | 65261  |
| UN27852 | Rsa1.0_02781.1 | 795  | 27964  | 0         | 780  | 790  | 98 -  | 6   | 794  | 1249   | 2036   |
| UN27853 | Rsa1.0_07849.1 | 701  | 8425   | 0         | 361  | 361  | 100 + | 341 | 701  | 2074   | 2434   |
| UN27854 | Rsa1.0_00028.1 | 982  | 293984 | 1.00E-169 | 320  | 324  | 98 -  | 653 | 973  | 41557  | 41880  |
| UN27855 | Rsa1.0_04282.1 | 1105 | 18100  | 0         | 994  | 1032 | 96 +  | 75  | 1105 | 13726  | 14754  |
| UN27856 | Rsa1.0_00274.1 | 336  | 210119 | 2.33E-156 | 318  | 333  | 95 +  | 2   | 334  | 189600 | 189927 |
| UN27857 | Rsa1.0_08666.1 | 1437 | 7063   | 1.00E-145 | 262  | 262  | 100 - | 496 | 757  | 5190   | 5451   |
| UN27858 | Rsa1.0_00304.1 | 1091 | 97429  | 0         | 860  | 957  | 89 -  | 161 | 1091 | 66916  | 67851  |
| UN27859 | Rsa1.0_00387.1 | 1104 | 495407 | 0         | 1066 | 1111 | 95 -  | 1   | 1104 | 376840 | 377948 |
| UN27860 | Rsa1.0_00769.1 | 1003 | 64911  | 0         | 396  | 397  | 99 +  | 1   | 397  | 31508  | 31903  |
| UN27861 | Rsa1.0_00341.1 | 719  | 249309 | 0         | 673  | 718  | 93 -  | 3   | 711  | 82409  | 83121  |
| UN27862 | Rsa1.0_05923.1 | 1020 | 12230  | 0         | 387  | 404  | 95 -  | 632 | 1020 | 4127   | 4530   |
| UN27863 | Rsa1.0_00426.1 | 1054 | 85668  | 0         | 422  | 435  | 97 -  | 211 | 645  | 31242  | 31676  |
| UN27864 | Rsa1.0_12540.1 | 1136 | 5198   | 0         | 1069 | 1107 | 96 -  | 31  | 1136 | 3408   | 4510   |
| UN27865 | Rsa1.0_01732.1 | 1002 | 40194  | 0         | 769  | 770  | 99 -  | 233 | 1002 | 39425  | 40194  |
| UN27866 | Rsa1.0_03785.1 | 765  | 20883  | 0         | 346  | 347  | 99 +  | 1   | 347  | 12650  | 12996  |
| UN27867 | Rsa1.0_00272.1 | 986  | 447836 | 0         | 404  | 417  | 96 -  | 572 | 986  | 339471 | 339886 |
| UN27868 | Rsa1.0_13492.1 | 1223 | 4775   | 1.00E-144 | 353  | 384  | 91 +  | 741 | 1119 | 1575   | 1958   |
| UN27869 | Rsa1.0_00510.1 | 1277 | 78718  | 0         | 739  | 742  | 99 -  | 2   | 743  | 25008  | 25749  |
| UN27870 | Rsa1.0_00541.1 | 1240 | 76863  | 0         | 1005 | 1044 | 96 -  | 194 | 1229 | 11080  | 12123  |
| UN27871 | Rsa1.0_13830.1 | 1135 | 4249   | 0         | 508  | 514  | 98 +  | 4   | 517  | 2529   | 3041   |
| UN27872 | Rsa1.0_00491.1 | 1158 | 80219  | 0         | 1117 | 1169 | 95 +  | 13  | 1158 | 64155  | 65317  |
| UN27873 | Rsa1.0_00025.1 | 911  | 277312 | 0         | 856  | 910  | 94 +  | 3   | 911  | 86171  | 87059  |
| UN27874 | Rsa1.0_03036.1 | 1404 | 25826  | 0         | 1114 | 1120 | 99 +  | 210 | 1329 | 11773  | 12892  |
| UN27875 | Rsa1.0_00002.1 | 1001 | 601661 | 0         | 812  | 834  | 97 +  | 170 | 1001 | 220618 | 221451 |
| UN27876 | Rsa1.0_05310.1 | 711  | 14192  | 1.00E-116 | 224  | 227  | 98 +  | 242 | 466  | 3135   | 3361   |
| UN27877 | Rsa1.0_01011.1 | 1420 | 56883  | 0         | 1413 | 1419 | 99 +  | 2   | 1418 | 44193  | 45611  |
| UN27878 | Rsa1.0_34475.1 | 1066 | 656    | 0         | 433  | 441  | 98 +  | 624 | 1064 | 173    | 613    |
| UN27879 | Rsa1.0_00050.1 | 908  | 237174 | 7.00E-36  | 103  | 110  | 93 +  | 545 | 654  | 186052 | 186160 |
| UN27880 | Rsa1.0_00301.1 | 606  | 365315 | 0         | 426  | 436  | 97 -  | 171 | 606  | 223249 | 223684 |
| UN27881 | Rsa1.0_13592.1 | 1190 | 4685   | 0         | 598  | 605  | 98 +  | 466 | 1069 | 1155   | 1758   |
| UN27882 | Rsa1.0_02684.1 | 721  | 28676  | 0         | 673  | 674  | 99 +  | 48  | 721  | 22387  | 23060  |
| UN27883 | Rsa1.0_29900.1 | 1232 | 768    | 0         | 763  | 770  | 99 +  | 13  | 781  | 1      | 768    |

|         |                |      |        |           |      |      |       |     |      |        |        |
|---------|----------------|------|--------|-----------|------|------|-------|-----|------|--------|--------|
| UN27884 | Rsa1.0_00128.1 | 714  | 228675 | 5.00E-24  | 188  | 228  | 82 -  | 422 | 649  | 222121 | 222343 |
| UN27885 | Rsa1.0_03634.1 | 577  | 145192 | 0         | 553  | 571  | 96 -  | 1   | 564  | 128113 | 128681 |
| UN27886 | Rsa1.0_03062.1 | 1257 | 25678  | 0         | 550  | 563  | 97 -  | 8   | 566  | 8124   | 8686   |
| UN27887 | Rsa1.0_00160.1 | 887  | 346678 | 0         | 846  | 857  | 98 +  | 5   | 861  | 28080  | 28936  |
| UN27888 | Rsa1.0_00004.1 | 1304 | 253996 | 0         | 469  | 492  | 95 +  | 802 | 1289 | 233983 | 234471 |
| UN27889 | Rsa1.0_01361.1 | 826  | 47226  | 0         | 775  | 809  | 95 +  | 18  | 825  | 15458  | 16266  |
| UN27890 | Rsa1.0_01616.1 | 819  | 42137  | 0         | 542  | 551  | 98 +  | 3   | 553  | 23433  | 23983  |
| UN27891 | Rsa1.0_36427.1 | 1128 | 619    | 0         | 444  | 445  | 99 +  | 1   | 445  | 175    | 619    |
| UN27892 | Rsa1.0_00040.1 | 1539 | 324196 | 0         | 1024 | 1027 | 99 +  | 1   | 1027 | 71004  | 72030  |
| UN27893 | Rsa1.0_00163.1 | 702  | 116847 | 0         | 664  | 713  | 93 +  | 1   | 700  | 85483  | 86192  |
| UN27894 | Rsa1.0_00577.1 | 671  | 174827 | 0         | 665  | 672  | 98 +  | 1   | 671  | 143082 | 143752 |
| UN27895 | Rsa1.0_00684.1 | 859  | 141701 | 0         | 502  | 502  | 100 - | 1   | 502  | 66961  | 67462  |
| UN27896 | Rsa1.0_00060.1 | 1153 | 502678 | 0         | 939  | 948  | 99 -  | 208 | 1153 | 395216 | 396162 |
| UN27897 | Rsa1.0_38998.1 | 1063 | 577    | 0         | 402  | 407  | 98 -  | 391 | 797  | 1      | 407    |
| UN27898 | Rsa1.0_01176.1 | 998  | 51638  | 0         | 994  | 997  | 99 -  | 2   | 998  | 3827   | 4823   |
| UN27899 | Rsa1.0_00447.1 | 1063 | 84051  | 0         | 654  | 671  | 97 -  | 1   | 671  | 28097  | 28767  |
| UN27900 | Rsa1.0_00025.1 | 819  | 277312 | 0         | 789  | 801  | 98 -  | 1   | 800  | 86206  | 87004  |
| UN27901 | Rsa1.0_00100.1 | 795  | 249232 | 0         | 334  | 334  | 100 - | 462 | 795  | 186167 | 186500 |
| UN27902 | Rsa1.0_10113.1 | 1172 | 5992   | 0         | 961  | 977  | 98 -  | 71  | 1047 | 1930   | 2903   |
| UN27903 | Rsa1.0_01579.1 | 1001 | 42860  | 0         | 470  | 499  | 94 +  | 505 | 1001 | 23243  | 23723  |
| UN27904 | Rsa1.0_00651.1 | 861  | 247766 | 0         | 856  | 863  | 99 +  | 1   | 861  | 233625 | 234486 |
| UN27905 | Rsa1.0_30196.1 | 1418 | 760    | 1.00E-147 | 414  | 456  | 90 +  | 1   | 453  | 102    | 548    |
| UN27906 | Rsa1.0_02444.1 | 1461 | 31350  | 0         | 1381 | 1433 | 96 +  | 33  | 1460 | 24542  | 25974  |
| UN27907 | Rsa1.0_01857.1 | 667  | 38103  | 0         | 645  | 672  | 95 +  | 1   | 665  | 29108  | 29776  |
| UN27908 | Rsa1.0_01004.1 | 858  | 56975  | 0         | 383  | 404  | 94 +  | 469 | 858  | 29824  | 30227  |
| UN27909 | Rsa1.0_03413.1 | 615  | 23137  | 0         | 598  | 620  | 96 +  | 2   | 615  | 18233  | 18852  |
| UN27910 | Rsa1.0_16699.1 | 641  | 2062   | 0         | 493  | 512  | 96 +  | 130 | 641  | 501    | 1012   |
| UN27911 | Rsa1.0_03032.1 | 678  | 25836  | 1.00E-126 | 243  | 247  | 98 -  | 435 | 678  | 11001  | 11247  |
| UN27912 | Rsa1.0_04250.1 | 977  | 18264  | 0         | 948  | 983  | 96 -  | 1   | 977  | 514    | 1490   |
| UN27913 | Rsa1.0_04919.1 | 1239 | 15440  | 0         | 1100 | 1132 | 97 -  | 1   | 1132 | 9644   | 10765  |
| UN27914 | Rsa1.0_02599.1 | 1399 | 29660  | 0         | 436  | 447  | 97 +  | 953 | 1399 | 2198   | 2641   |
| UN27915 | Rsa1.0_14545.1 | 661  | 3284   | 1.00E-117 | 263  | 278  | 94 -  | 384 | 661  | 1674   | 1950   |
| UN27916 | Rsa1.0_00541.1 | 1037 | 76863  | 0         | 498  | 502  | 99 -  | 537 | 1037 | 75501  | 76002  |
| UN27917 | Rsa1.0_00713.1 | 982  | 158017 | 0         | 504  | 507  | 99 +  | 476 | 982  | 12893  | 13398  |
| UN27918 | Rsa1.0_00816.1 | 1338 | 403350 | 0         | 659  | 698  | 94 -  | 1   | 682  | 120486 | 121173 |
| UN27919 | Rsa1.0_00009.1 | 852  | 232558 | 0         | 572  | 588  | 97 +  | 226 | 806  | 59834  | 60421  |
| UN27920 | Rsa1.0_01954.1 | 662  | 145554 | 1.00E-135 | 277  | 285  | 97 +  | 375 | 658  | 9206   | 9489   |
| UN27921 | Rsa1.0_00806.1 | 897  | 63674  | 1.00E-154 | 276  | 276  | 100 + | 1   | 276  | 25508  | 25783  |
| UN27922 | Rsa1.0_00362.1 | 1052 | 299497 | 0         | 393  | 407  | 96 -  | 651 | 1052 | 222670 | 223076 |

|         |                |      |        |           |      |      |       |     |      |        |        |
|---------|----------------|------|--------|-----------|------|------|-------|-----|------|--------|--------|
| UN27923 | Rsa1.0.02827.1 | 862  | 27544  | 0         | 834  | 862  | 96 -  | 2   | 862  | 17223  | 18075  |
| UN27924 | Rsa1.0.09146.1 | 1267 | 6610   | 0         | 669  | 671  | 99 +  | 597 | 1267 | 5609   | 6279   |
| UN27925 | Rsa1.0.03998.1 | 1063 | 19651  | 1.00E-142 | 256  | 256  | 100 - | 268 | 523  | 11534  | 11789  |
| UN27926 | Rsa1.0.01232.1 | 1135 | 155185 | 0         | 748  | 761  | 98 +  | 373 | 1133 | 114298 | 115057 |
| UN27927 | Rsa1.0.02322.1 | 1081 | 32555  | 1.00E-104 | 226  | 236  | 95 +  | 442 | 677  | 10955  | 11189  |
| UN27928 | Rsa1.0.00725.1 | 1288 | 66757  | 0         | 727  | 769  | 94 +  | 537 | 1288 | 26554  | 27307  |
| UN27929 | Rsa1.0.00124.1 | 642  | 262503 | 0         | 562  | 567  | 99 +  | 72  | 638  | 194245 | 194811 |
| UN27930 | Rsa1.0.02791.1 | 711  | 27832  | 0         | 685  | 706  | 97 -  | 8   | 710  | 20453  | 21158  |
| UN27931 | Rsa1.0.04212.1 | 496  | 18439  | 1.00E-159 | 308  | 315  | 97 +  | 182 | 494  | 5356   | 5670   |
| UN27932 | Rsa1.0.00018.1 | 719  | 410899 | 1.00E-143 | 286  | 294  | 97 +  | 2   | 294  | 122581 | 122874 |
| UN27933 | Rsa1.0.00761.1 | 448  | 65133  | 0         | 427  | 452  | 94 +  | 2   | 443  | 38413  | 38857  |
| UN27934 | Rsa1.0.05306.1 | 700  | 14205  | 0         | 444  | 448  | 99 -  | 2   | 449  | 5341   | 5788   |
| UN27935 | Rsa1.0.03684.1 | 1272 | 21392  | 0         | 1264 | 1270 | 99 -  | 1   | 1270 | 2020   | 3289   |
| UN27936 | Rsa1.0.04395.1 | 401  | 17570  | 0         | 399  | 400  | 99 -  | 1   | 399  | 4123   | 4522   |
| UN27937 | Rsa1.0.00556.1 | 1797 | 207212 | 0         | 811  | 817  | 99 -  | 166 | 982  | 28258  | 29074  |
| UN27938 | Rsa1.0.00127.1 | 1313 | 127446 | 0         | 526  | 537  | 97 +  | 236 | 772  | 119057 | 119593 |
| UN27939 | Rsa1.0.00205.1 | 833  | 193401 | 0         | 526  | 526  | 100 + | 1   | 526  | 143238 | 143763 |
| UN27940 | Rsa1.0.00547.1 | 1300 | 76521  | 1.00E-148 | 316  | 327  | 96 -  | 1   | 325  | 60981  | 61301  |
| UN27941 | Rsa1.0.00299.1 | 868  | 97770  | 0         | 501  | 502  | 99 -  | 367 | 868  | 18020  | 18521  |
| UN27942 | Rsa1.0.05366.1 | 1378 | 14036  | 0         | 355  | 362  | 98 -  | 702 | 1063 | 8072   | 8433   |
| UN27943 | Rsa1.0.00911.1 | 632  | 59943  | 1.00E-174 | 315  | 317  | 99 +  | 316 | 632  | 34004  | 34320  |
| UN27944 | Rsa1.0.03376.1 | 1083 | 23326  | 8.00E-64  | 128  | 129  | 99 -  | 177 | 305  | 22715  | 22843  |
| UN27945 | Rsa1.0.01285.1 | 604  | 172709 | 2.00E-69  | 167  | 178  | 93 +  | 271 | 443  | 34017  | 34194  |
| UN27946 | Rsa1.0.00476.1 | 1152 | 280966 | 1.00E-119 | 224  | 226  | 99 +  | 575 | 800  | 24617  | 24842  |
| UN27947 | Rsa1.0.05173.1 | 1168 | 14606  | 0         | 436  | 457  | 95 +  | 716 | 1166 | 3434   | 3889   |
| UN27948 | Rsa1.0.02727.1 | 593  | 28404  | 0         | 354  | 360  | 98 +  | 85  | 444  | 3533   | 3892   |
| UN27949 | Rsa1.0.00657.1 | 1156 | 69858  | 0         | 1150 | 1155 | 99 -  | 2   | 1156 | 1827   | 2980   |
| UN27950 | Rsa1.0.00915.1 | 1003 | 194446 | 0         | 679  | 690  | 98 +  | 283 | 972  | 53333  | 54022  |
| UN27951 | Rsa1.0.02365.1 | 517  | 32118  | 0         | 482  | 518  | 93 -  | 6   | 517  | 6213   | 6718   |
| UN27952 | Rsa1.0.04713.1 | 816  | 16270  | 0         | 649  | 715  | 90 +  | 101 | 815  | 10149  | 10858  |
| UN27953 | Rsa1.0.05554.1 | 877  | 13343  | 0         | 421  | 424  | 99 -  | 454 | 877  | 1456   | 1878   |
| UN27954 | Rsa1.0.01242.1 | 642  | 50066  | 1.00E-130 | 248  | 252  | 98 -  | 342 | 593  | 6254   | 6505   |
| UN27955 | Rsa1.0.02520.1 | 1066 | 30568  | 0         | 782  | 810  | 96 -  | 1   | 806  | 922    | 1724   |
| UN27956 | Rsa1.0.00205.1 | 1066 | 193401 | 1.00E-175 | 358  | 375  | 95 +  | 153 | 527  | 180497 | 180862 |
| UN27957 | Rsa1.0.08388.1 | 1185 | 7436   | 0         | 1114 | 1116 | 99 +  | 1   | 1116 | 4633   | 5748   |
| UN27958 | Rsa1.0.00003.1 | 771  | 340054 | 0         | 563  | 565  | 99 -  | 2   | 566  | 168580 | 169144 |
| UN27959 | Rsa1.0.20750.1 | 1236 | 1273   | 0         | 1103 | 1121 | 98 +  | 117 | 1236 | 1      | 1115   |
| UN27960 | Rsa1.0.00108.1 | 1031 | 478491 | 0         | 773  | 803  | 96 +  | 1   | 791  | 10966  | 11767  |
| UN27961 | Rsa1.0.00322.1 | 978  | 212233 | 1.00E-124 | 245  | 250  | 98 +  | 730 | 978  | 57054  | 57303  |

|         |                |      |        |           |      |      |       |     |      |        |        |
|---------|----------------|------|--------|-----------|------|------|-------|-----|------|--------|--------|
| UN27962 | Rsa1.0.00190.1 | 1245 | 318240 | 0         | 568  | 581  | 97 +  | 666 | 1243 | 190102 | 190682 |
| UN27963 | Rsa1.0.00049.1 | 1284 | 167018 | 0         | 379  | 391  | 96 +  | 2   | 392  | 80769  | 81159  |
| UN27964 | Rsa1.0.17671.1 | 1321 | 1768   | 0         | 1002 | 1043 | 96 +  | 11  | 1049 | 728    | 1768   |
| UN27965 | Rsa1.0.02663.1 | 2014 | 169243 | 0         | 1997 | 2015 | 99 +  | 1   | 2014 | 22763  | 24777  |
| UN27966 | Rsa1.0.00571.1 | 1167 | 329018 | 0         | 689  | 689  | 100 - | 1   | 689  | 197339 | 198027 |
| UN27967 | Rsa1.0.03365.1 | 1125 | 23410  | 0         | 526  | 537  | 97 +  | 594 | 1125 | 12365  | 12901  |
| UN27968 | Rsa1.0.01970.1 | 834  | 36648  | 0         | 834  | 835  | 99 +  | 1   | 834  | 10208  | 11042  |
| UN27969 | Rsa1.0.00237.1 | 627  | 235974 | 1.00E-170 | 342  | 354  | 96 -  | 2   | 348  | 23737  | 24090  |
| UN27970 | Rsa1.0.00323.1 | 670  | 159650 | 0         | 663  | 665  | 99 +  | 4   | 668  | 76796  | 77460  |
| UN27971 | Rsa1.0.09173.1 | 958  | 6582   | 0         | 850  | 859  | 98 +  | 1   | 854  | 4779   | 5634   |
| UN27972 | Rsa1.0.00388.1 | 852  | 88890  | 0         | 464  | 466  | 99 -  | 388 | 852  | 40742  | 41207  |
| UN27973 | Rsa1.0.00099.1 | 1111 | 159619 | 0         | 711  | 753  | 94 -  | 203 | 948  | 45688  | 46427  |
| UN27974 | Rsa1.0.00090.1 | 1318 | 273859 | 0         | 511  | 513  | 99 +  | 1   | 513  | 197164 | 197676 |
| UN27975 | Rsa1.0.00514.1 | 1221 | 78421  | 0         | 659  | 666  | 98 -  | 436 | 1098 | 7716   | 8381   |
| UN27976 | Rsa1.0.01241.1 | 563  | 50067  | 0         | 549  | 557  | 98 -  | 7   | 563  | 6074   | 6630   |
| UN27977 | Rsa1.0.01416.1 | 932  | 46262  | 0         | 885  | 913  | 96 -  | 3   | 912  | 26463  | 27373  |
| UN27978 | Rsa1.0.04486.1 | 832  | 17161  | 0         | 559  | 605  | 92 -  | 1   | 602  | 9197   | 9780   |
| UN27979 | Rsa1.0.00571.1 | 580  | 329018 | 0         | 475  | 491  | 96 -  | 51  | 537  | 194319 | 194808 |
| UN27980 | Rsa1.0.01482.1 | 1079 | 44855  | 0         | 765  | 766  | 99 +  | 314 | 1079 | 6949   | 7714   |
| UN27981 | Rsa1.0.00008.1 | 1250 | 358124 | 0         | 592  | 598  | 98 -  | 652 | 1249 | 70099  | 70696  |
| UN27982 | Rsa1.0.00319.1 | 793  | 167331 | 0         | 410  | 420  | 97 +  | 2   | 420  | 152743 | 153160 |
| UN27983 | Rsa1.0.00146.1 | 1679 | 149343 | 1.00E-144 | 304  | 321  | 94 +  | 1   | 309  | 43375  | 43695  |
| UN27984 | Rsa1.0.00014.1 | 1052 | 348985 | 0         | 698  | 700  | 99 -  | 351 | 1050 | 168358 | 169057 |
| UN27985 | Rsa1.0.01140.1 | 846  | 52586  | 0         | 390  | 402  | 97 -  | 18  | 419  | 38736  | 39131  |
| UN27986 | Rsa1.0.02304.1 | 814  | 32793  | 0         | 812  | 814  | 99 -  | 1   | 814  | 28819  | 29632  |
| UN27987 | Rsa1.0.00421.1 | 771  | 86365  | 0         | 407  | 409  | 99 +  | 363 | 771  | 80783  | 81191  |
| UN27988 | Rsa1.0.02812.1 | 917  | 27660  | 1.00E-99  | 185  | 185  | 100 - | 454 | 638  | 5948   | 6132   |
| UN27989 | Rsa1.0.00942.1 | 1170 | 58873  | 1.00E-168 | 354  | 372  | 95 -  | 627 | 998  | 150    | 521    |
| UN27990 | Rsa1.0.01258.1 | 789  | 49755  | 1.00E-147 | 354  | 387  | 91 +  | 414 | 786  | 20950  | 21326  |
| UN27991 | Rsa1.0.00028.1 | 869  | 293984 | 0         | 414  | 417  | 99 +  | 1   | 417  | 142749 | 143164 |
| UN27992 | Rsa1.0.01775.1 | 929  | 39519  | 0         | 921  | 927  | 99 -  | 3   | 929  | 3245   | 4171   |
| UN27993 | Rsa1.0.17497.1 | 1265 | 1816   | 0         | 345  | 351  | 98 -  | 40  | 390  | 704    | 1054   |
| UN27994 | Rsa1.0.04013.1 | 891  | 19573  | 0         | 890  | 893  | 99 -  | 1   | 891  | 16972  | 17863  |
| UN27995 | Rsa1.0.00032.1 | 1084 | 306326 | 1.00E-126 | 230  | 230  | 100 - | 674 | 903  | 290010 | 290239 |
| UN27996 | Rsa1.0.01492.1 | 786  | 44704  | 1.00E-134 | 351  | 385  | 91 -  | 44  | 426  | 2784   | 3152   |
| UN27997 | Rsa1.0.00190.1 | 1188 | 318240 | 0         | 697  | 699  | 99 +  | 3   | 701  | 145274 | 145972 |
| UN27998 | Rsa1.0.05380.1 | 450  | 13968  | 1.00E-142 | 291  | 301  | 96 -  | 152 | 450  | 4480   | 4778   |
| UN27999 | Rsa1.0.02876.1 | 577  | 27062  | 0         | 574  | 575  | 99 +  | 3   | 577  | 597    | 1171   |
| UN28000 | Rsa1.0.00401.1 | 846  | 244410 | 6.00E-98  | 615  | 746  | 82 +  | 107 | 844  | 168795 | 169538 |



|         |                |      |        |           |      |      |       |     |      |        |        |
|---------|----------------|------|--------|-----------|------|------|-------|-----|------|--------|--------|
| UN28001 | Rsa1.0.01659.1 | 1147 | 164577 | 0         | 350  | 352  | 99 -  | 1   | 352  | 147655 | 148006 |
| UN28002 | Rsa1.0.01036.1 | 873  | 55978  | 1.00E-140 | 280  | 289  | 96 -  | 1   | 289  | 13176  | 13464  |
| UN28003 | Rsa1.0.00090.1 | 1867 | 273859 | 0         | 1032 | 1057 | 97 -  | 810 | 1866 | 233934 | 234990 |
| UN28004 | Rsa1.0.07775.1 | 823  | 8594   | 0         | 777  | 802  | 96 -  | 2   | 801  | 1443   | 2244   |
| UN28005 | Rsa1.0.13382.1 | 1067 | 4874   | 2.00E-89  | 303  | 352  | 86 +  | 239 | 573  | 406    | 757    |
| UN28006 | Rsa1.0.00643.1 | 1103 | 70658  | 0         | 1096 | 1100 | 99 -  | 3   | 1102 | 57680  | 58779  |
| UN28007 | Rsa1.0.00327.1 | 1057 | 94892  | 0         | 507  | 523  | 96 +  | 10  | 526  | 24926  | 25448  |
| UN28008 | Rsa1.0.04955.1 | 750  | 15337  | 4.00E-49  | 247  | 293  | 84 -  | 53  | 334  | 420    | 692    |
| UN28009 | Rsa1.0.03075.1 | 1163 | 25560  | 0         | 573  | 576  | 99 -  | 588 | 1163 | 19939  | 20513  |
| UN28010 | Rsa1.0.01430.1 | 676  | 46034  | 0         | 660  | 671  | 98 -  | 8   | 676  | 20107  | 20777  |
| UN28011 | Rsa1.0.00110.1 | 868  | 132719 | 0         | 541  | 576  | 93 +  | 1   | 575  | 115115 | 115678 |
| UN28012 | Rsa1.0.00250.1 | 903  | 273771 | 0         | 427  | 437  | 97 -  | 217 | 653  | 255526 | 255962 |
| UN28013 | Rsa1.0.02126.1 | 756  | 34765  | 0         | 458  | 506  | 90 +  | 222 | 715  | 1828   | 2318   |
| UN28014 | Rsa1.0.00031.1 | 693  | 179862 | 0         | 679  | 701  | 96 +  | 3   | 692  | 100487 | 101186 |
| UN28015 | Rsa1.0.01574.1 | 1169 | 42930  | 0         | 1161 | 1165 | 99 +  | 1   | 1165 | 7820   | 8984   |
| UN28016 | Rsa1.0.11943.1 | 708  | 5365   | 1.00E-109 | 309  | 341  | 90 +  | 355 | 683  | 570    | 905    |
| UN28017 | Rsa1.0.03859.1 | 473  | 20413  | 1.00E-139 | 286  | 296  | 96 -  | 3   | 298  | 5428   | 5718   |
| UN28018 | Rsa1.0.00771.1 | 1096 | 64870  | 0         | 713  | 750  | 95 +  | 123 | 870  | 20399  | 21136  |
| UN28019 | Rsa1.0.01768.1 | 1064 | 138463 | 0         | 991  | 1054 | 94 +  | 2   | 1055 | 113475 | 114512 |
| UN28020 | Rsa1.0.02750.1 | 724  | 28239  | 0         | 398  | 408  | 97 -  | 151 | 558  | 20939  | 21346  |
| UN28021 | Rsa1.0.00469.1 | 667  | 82084  | 0         | 449  | 460  | 97 -  | 3   | 459  | 26058  | 26517  |
| UN28022 | Rsa1.0.11107.1 | 854  | 5613   | 1.00E-86  | 225  | 249  | 90 +  | 469 | 702  | 3863   | 4111   |
| UN28023 | Rsa1.0.00599.1 | 1327 | 73418  | 0         | 1312 | 1329 | 98 +  | 1   | 1327 | 54267  | 55594  |
| UN28024 | Rsa1.0.00589.1 | 978  | 209965 | 1.00E-135 | 255  | 257  | 99 +  | 722 | 977  | 62060  | 62316  |
| UN28025 | Rsa1.0.03609.1 | 1345 | 21798  | 1.00E-170 | 383  | 408  | 93 -  | 1   | 406  | 2491   | 2890   |
| UN28026 | Rsa1.0.00125.1 | 915  | 253043 | 0         | 681  | 707  | 96 +  | 212 | 913  | 141375 | 142080 |
| UN28027 | Rsa1.0.00131.1 | 850  | 432233 | 0         | 451  | 472  | 95 -  | 380 | 849  | 165195 | 165666 |
| UN28028 | Rsa1.0.01662.1 | 1157 | 41382  | 1.00E-175 | 448  | 499  | 89 -  | 251 | 740  | 26599  | 27070  |
| UN28029 | Rsa1.0.00479.1 | 1381 | 81377  | 0         | 1030 | 1077 | 95 -  | 1   | 1070 | 80251  | 81317  |
| UN28030 | Rsa1.0.02197.1 | 964  | 33996  | 4.00E-93  | 193  | 199  | 96 -  | 3   | 201  | 2582   | 2776   |
| UN28031 | Rsa1.0.00178.1 | 1639 | 114861 | 0         | 663  | 677  | 97 -  | 2   | 678  | 37753  | 38429  |
| UN28032 | Rsa1.0.00191.1 | 1157 | 316976 | 0         | 435  | 448  | 97 +  | 40  | 487  | 159446 | 159893 |
| UN28033 | Rsa1.0.00525.1 | 604  | 78030  | 1.00E-140 | 252  | 252  | 100 - | 3   | 254  | 23389  | 23640  |
| UN28034 | Rsa1.0.00066.1 | 608  | 152418 | 0         | 395  | 412  | 95 +  | 197 | 607  | 14309  | 14717  |
| UN28035 | Rsa1.0.53462.1 | 1033 | 426    | 0         | 336  | 339  | 99 +  | 695 | 1033 | 48     | 386    |
| UN28036 | Rsa1.0.00549.1 | 1254 | 76473  | 0         | 495  | 496  | 99 -  | 425 | 920  | 10847  | 11342  |
| UN28037 | Rsa1.0.01310.1 | 947  | 164719 | 1.00E-147 | 274  | 277  | 98 -  | 671 | 947  | 18505  | 18781  |
| UN28038 | Rsa1.0.00366.1 | 622  | 90880  | 0         | 352  | 359  | 98 +  | 2   | 359  | 37383  | 37741  |
| UN28039 | Rsa1.0.00093.1 | 1667 | 214962 | 0         | 350  | 351  | 99 -  | 3   | 353  | 191597 | 191947 |

|         |                |      |        |           |      |      |       |      |      |        |        |
|---------|----------------|------|--------|-----------|------|------|-------|------|------|--------|--------|
| UN28040 | Rsa1.0_00903.1 | 867  | 60228  | 1.00E-119 | 233  | 238  | 97 +  | 120  | 357  | 49224  | 49461  |
| UN28041 | Rsa1.0_00992.1 | 693  | 57419  | 0         | 669  | 686  | 97 +  | 3    | 685  | 7283   | 7963   |
| UN28042 | Rsa1.0_00099.1 | 1166 | 159619 | 1.00E-147 | 313  | 326  | 96 -  | 2    | 326  | 7284   | 7604   |
| UN28043 | Rsa1.0_00013.1 | 760  | 292129 | 0         | 737  | 762  | 96 -  | 1    | 760  | 95996  | 96753  |
| UN28044 | Rsa1.0_01778.1 | 1766 | 39509  | 0         | 1382 | 1399 | 98 +  | 368  | 1765 | 13875  | 15273  |
| UN28045 | Rsa1.0_60389.1 | 988  | 379    | 1.00E-123 | 227  | 228  | 99 -  | 761  | 988  | 152    | 379    |
| UN28046 | Rsa1.0_01933.1 | 1277 | 37172  | 1.00E-155 | 317  | 332  | 95 +  | 958  | 1277 | 13625  | 13956  |
| UN28047 | Rsa1.0_01090.1 | 510  | 54385  | 1.00E-157 | 296  | 301  | 98 +  | 1    | 301  | 5787   | 6087   |
| UN28048 | Rsa1.0_00332.1 | 1060 | 94575  | 0         | 861  | 876  | 98 -  | 137  | 1010 | 38925  | 39800  |
| UN28049 | Rsa1.0_01766.1 | 621  | 39617  | 1.00E-102 | 189  | 189  | 100 + | 3    | 191  | 30018  | 30206  |
| UN28050 | Rsa1.0_00210.1 | 772  | 108424 | 1.00E-157 | 305  | 313  | 97 -  | 156  | 468  | 26777  | 27089  |
| UN28051 | Rsa1.0_01077.1 | 1171 | 54772  | 0         | 737  | 757  | 97 -  | 418  | 1169 | 37843  | 38596  |
| UN28052 | Rsa1.0_00294.1 | 904  | 144860 | 0         | 901  | 903  | 99 +  | 1    | 903  | 115508 | 116410 |
| UN28053 | Rsa1.0_11453.1 | 1377 | 5503   | 0         | 540  | 580  | 93 -  | 779  | 1344 | 5      | 575    |
| UN28054 | Rsa1.0_02504.1 | 778  | 30706  | 4.00E-68  | 275  | 319  | 86 -  | 422  | 740  | 14596  | 14910  |
| UN28055 | Rsa1.0_00104.1 | 864  | 368722 | 0         | 337  | 338  | 99 +  | 527  | 864  | 244360 | 244696 |
| UN28056 | #              | #    | #      | #         | #    | #    | #     | #    | #    | #      | #      |
| UN28057 | Rsa1.0_04167.1 | 1041 | 18757  | 0         | 336  | 337  | 99 -  | 705  | 1041 | 7554   | 7890   |
| UN28058 | Rsa1.0_00864.1 | 1049 | 61702  | 0         | 356  | 359  | 99 +  | 691  | 1049 | 35651  | 36009  |
| UN28059 | Rsa1.0_04438.1 | 1182 | 17361  | 0         | 393  | 399  | 98 -  | 461  | 859  | 16659  | 17057  |
| UN28060 | Rsa1.0_00858.1 | 883  | 61892  | 0         | 402  | 405  | 99 +  | 479  | 883  | 19996  | 20400  |
| UN28061 | Rsa1.0_01402.1 | 1261 | 46509  | 1.00E-134 | 246  | 247  | 99 +  | 1015 | 1261 | 4582   | 4828   |
| UN28062 | Rsa1.0_00128.1 | 1296 | 228675 | 0         | 833  | 842  | 98 -  | 458  | 1296 | 44631  | 45472  |
| UN28063 | Rsa1.0_00425.1 | 1034 | 147080 | 0         | 379  | 379  | 100 - | 656  | 1034 | 127644 | 128022 |
| UN28064 | Rsa1.0_00740.1 | 1487 | 215972 | 0         | 1471 | 1513 | 97 +  | 1    | 1487 | 212836 | 214348 |
| UN28065 | Rsa1.0_00092.1 | 938  | 659932 | 0         | 509  | 529  | 96 +  | 413  | 938  | 346569 | 347096 |
| UN28066 | Rsa1.0_00962.1 | 1056 | 184909 | 0         | 400  | 401  | 99 +  | 656  | 1056 | 25179  | 25579  |
| UN28067 | Rsa1.0_03614.1 | 842  | 21773  | 0         | 415  | 430  | 96 +  | 414  | 842  | 20041  | 20470  |
| UN28068 | Rsa1.0_02827.1 | 1217 | 27544  | 0         | 515  | 515  | 100 + | 7    | 521  | 6298   | 6812   |
| UN28069 | Rsa1.0_00457.1 | 685  | 337301 | 1.00E-123 | 423  | 498  | 84 -  | 24   | 496  | 304216 | 304677 |
| UN28070 | Rsa1.0_00178.1 | 933  | 114861 | 1.00E-173 | 349  | 361  | 96 -  | 576  | 932  | 88073  | 88432  |
| UN28071 | Rsa1.0_00131.1 | 1141 | 432233 | 0         | 396  | 408  | 97 -  | 3    | 407  | 197395 | 197802 |
| UN28072 | Rsa1.0_00653.1 | 903  | 70029  | 0         | 769  | 798  | 96 -  | 107  | 902  | 35916  | 36703  |
| UN28073 | Rsa1.0_00277.1 | 1398 | 100132 | 9.00E-58  | 184  | 204  | 90 -  | 80   | 277  | 10097  | 10300  |
| UN28074 | Rsa1.0_00093.1 | 1071 | 214962 | 0         | 380  | 382  | 99 +  | 690  | 1071 | 117743 | 118124 |
| UN28075 | Rsa1.0_03499.1 | 534  | 22462  | 8.00E-87  | 166  | 167  | 99 -  | 233  | 399  | 18554  | 18720  |
| UN28076 | Rsa1.0_04778.1 | 631  | 16010  | 0         | 612  | 648  | 94 +  | 1    | 631  | 8863   | 9510   |
| UN28077 | Rsa1.0_04331.1 | 1212 | 140984 | 1.00E-174 | 354  | 368  | 96 -  | 164  | 531  | 9636   | 10000  |
| UN28078 | Rsa1.0_00205.1 | 1389 | 193401 | 0         | 494  | 495  | 99 -  | 213  | 707  | 59001  | 59495  |

|         |                |   |      |        |           |      |      |       |   |      |      |        |        |
|---------|----------------|---|------|--------|-----------|------|------|-------|---|------|------|--------|--------|
| UN28079 | Rsa1.0_01829.1 |   | 929  | 166063 | 0         | 567  | 573  | 98 +  |   | 1    | 573  | 134054 | 134623 |
| UN28080 | #              | # | #    | #      | #         | #    | #    | #     | # | #    | #    | #      | #      |
| UN28081 | Rsa1.0_08833.1 |   | 1041 | 6882   | 0         | 632  | 633  | 99 +  |   | 409  | 1041 | 5193   | 5825   |
| UN28082 | Rsa1.0_02340.1 |   | 757  | 32388  | 0         | 359  | 360  | 99 +  |   | 2    | 361  | 12237  | 12596  |
| UN28083 | Rsa1.0_00753.1 |   | 677  | 65705  | 0         | 671  | 673  | 99 +  |   | 3    | 675  | 8049   | 8721   |
| UN28084 | Rsa1.0_00006.1 |   | 743  | 396176 | 1.00E-163 | 298  | 300  | 99 -  |   | 444  | 743  | 176373 | 176672 |
| UN28085 | Rsa1.0_00569.1 |   | 848  | 75060  | 0         | 824  | 848  | 97 -  |   | 1    | 848  | 42954  | 43798  |
| UN28086 | Rsa1.0_27044.1 |   | 1045 | 868    | 0         | 425  | 442  | 96 +  |   | 605  | 1045 | 279    | 714    |
| UN28087 | Rsa1.0_02020.1 |   | 744  | 173211 | 0         | 396  | 397  | 99 -  |   | 346  | 742  | 143722 | 144118 |
| UN28088 | Rsa1.0_00035.1 |   | 1006 | 176449 | 0         | 914  | 923  | 99 +  |   | 1    | 923  | 110784 | 111706 |
| UN28089 | Rsa1.0_00213.1 |   | 972  | 108167 | 0         | 745  | 746  | 99 +  |   | 96   | 840  | 997    | 1742   |
| UN28090 | Rsa1.0_00816.1 |   | 962  | 403350 | 0         | 555  | 576  | 96 -  |   | 386  | 961  | 113312 | 113887 |
| UN28091 | Rsa1.0_04166.1 |   | 946  | 18757  | 0         | 488  | 503  | 97 +  |   | 444  | 946  | 4520   | 5022   |
| UN28092 | Rsa1.0_59638.1 |   | 1590 | 384    | 0         | 382  | 384  | 99 +  |   | 1014 | 1397 | 1      | 384    |
| UN28093 | Rsa1.0_00127.1 |   | 1389 | 127446 | 0         | 391  | 408  | 95 -  |   | 2    | 408  | 83975  | 84382  |
| UN28094 | Rsa1.0_01223.1 |   | 829  | 50392  | 0         | 431  | 439  | 98 -  |   | 3    | 441  | 46191  | 46629  |
| UN28095 | Rsa1.0_02028.1 |   | 910  | 35857  | 0         | 887  | 947  | 93 -  |   | 1    | 910  | 17587  | 18530  |
| UN28096 | Rsa1.0_00201.1 |   | 870  | 232851 | 0         | 842  | 871  | 96 +  |   | 3    | 870  | 35720  | 36590  |
| UN28097 | Rsa1.0_00813.1 |   | 1190 | 63202  | 0         | 1165 | 1189 | 97 -  |   | 3    | 1190 | 38613  | 39801  |
| UN28098 | Rsa1.0_00191.1 |   | 1012 | 316976 | 0         | 738  | 757  | 97 +  |   | 268  | 1012 | 34469  | 35225  |
| UN28099 | Rsa1.0_00044.1 |   | 1465 | 271658 | 1.00E-173 | 329  | 336  | 97 +  |   | 646  | 981  | 264749 | 265084 |
| UN28100 | Rsa1.0_02609.1 |   | 879  | 29600  | 0         | 475  | 517  | 91 +  |   | 241  | 756  | 3130   | 3642   |
| UN28101 | Rsa1.0_00211.1 |   | 1224 | 228189 | 0         | 1171 | 1186 | 98 -  |   | 11   | 1196 | 695    | 1878   |
| UN28102 | Rsa1.0_00039.1 |   | 1118 | 296927 | 0         | 868  | 870  | 99 +  |   | 1    | 870  | 60277  | 61146  |
| UN28103 | Rsa1.0_00077.1 |   | 1115 | 145005 | 0         | 463  | 464  | 99 -  |   | 3    | 466  | 108217 | 108680 |
| UN28104 | Rsa1.0_00336.1 |   | 1784 | 445051 | 0         | 1017 | 1024 | 99 +  |   | 760  | 1783 | 30256  | 31279  |
| UN28105 | Rsa1.0_06388.1 |   | 868  | 11110  | 2.00E-85  | 161  | 161  | 100 - |   | 46   | 206  | 2288   | 2448   |
| UN28106 | Rsa1.0_01943.1 |   | 872  | 37042  | 1.00E-137 | 299  | 316  | 94 +  |   | 567  | 872  | 4006   | 4321   |
| UN28107 | Rsa1.0_01702.1 |   | 688  | 40722  | 0         | 389  | 389  | 100 + |   | 300  | 688  | 22395  | 22783  |
| UN28108 | Rsa1.0_01135.1 |   | 1034 | 52799  | 0         | 350  | 354  | 98 +  |   | 3    | 356  | 37847  | 38200  |
| UN28109 | Rsa1.0_00171.1 |   | 868  | 115622 | 1.00E-83  | 161  | 162  | 99 -  |   | 4    | 165  | 93549  | 93710  |
| UN28110 | Rsa1.0_00421.1 |   | 1164 | 86365  | 1.00E-114 | 259  | 272  | 95 +  |   | 50   | 316  | 80413  | 80684  |
| UN28111 | Rsa1.0_02651.1 |   | 1006 | 29046  | 0         | 563  | 599  | 93 +  |   | 1    | 599  | 354    | 946    |
| UN28112 | Rsa1.0_04691.1 |   | 769  | 16362  | 0         | 545  | 550  | 99 +  |   | 220  | 769  | 9409   | 9958   |
| UN28113 | Rsa1.0_00240.1 |   | 837  | 104175 | 3.00E-87  | 176  | 180  | 97 -  |   | 141  | 320  | 86112  | 86291  |
| UN28114 | Rsa1.0_01136.1 |   | 963  | 52724  | 1.00E-123 | 227  | 228  | 99 +  |   | 3    | 230  | 32169  | 32396  |
| UN28115 | Rsa1.0_03019.1 |   | 940  | 25987  | 0         | 467  | 469  | 99 +  |   | 1    | 469  | 754    | 1222   |
| UN28116 | Rsa1.0_00490.1 |   | 1223 | 186713 | 0         | 605  | 621  | 97 +  |   | 3    | 622  | 180069 | 180685 |
| UN28117 | Rsa1.0_00269.1 |   | 1070 | 341668 | 0         | 818  | 835  | 97 +  |   | 1    | 835  | 286083 | 286917 |

|         |                |      |        |           |      |      |       |      |      |        |        |
|---------|----------------|------|--------|-----------|------|------|-------|------|------|--------|--------|
| UN28118 | Rsa1.0.00016.1 | 1004 | 831256 | 0         | 1004 | 1005 | 99 -  | 1    | 1004 | 773872 | 774876 |
| UN28119 | Rsa1.0.02478.1 | 968  | 150183 | 0         | 543  | 553  | 98 +  | 416  | 968  | 3931   | 4483   |
| UN28120 | Rsa1.0.01362.1 | 961  | 47217  | 2.00E-95  | 242  | 260  | 93 -  | 705  | 960  | 3043   | 3301   |
| UN28121 | Rsa1.0.46909.1 | 651  | 482    | 0         | 387  | 387  | 100 + | 1    | 387  | 86     | 472    |
| UN28122 | Rsa1.0.18971.1 | 1078 | 1502   | 0         | 862  | 863  | 99 +  | 1    | 862  | 640    | 1502   |
| UN28123 | Rsa1.0.00384.1 | 907  | 89278  | 1.00E-162 | 307  | 313  | 98 +  | 3    | 315  | 32428  | 32740  |
| UN28124 | Rsa1.0.00926.1 | 914  | 195072 | 0         | 556  | 556  | 100 - | 359  | 914  | 170743 | 171298 |
| UN28125 | Rsa1.0.01880.1 | 1149 | 37745  | 0         | 1116 | 1147 | 97 -  | 1    | 1145 | 36148  | 37293  |
| UN28126 | Rsa1.0.00100.1 | 690  | 249232 | 0         | 658  | 679  | 96 -  | 12   | 690  | 165827 | 166501 |
| UN28127 | Rsa1.0.00055.1 | 696  | 520193 | 0         | 659  | 698  | 94 -  | 3    | 696  | 407893 | 408588 |
| UN28128 | Rsa1.0.02069.1 | 829  | 35425  | 1.00E-116 | 212  | 212  | 100 - | 438  | 649  | 1784   | 1995   |
| UN28129 | Rsa1.0.00159.1 | 1183 | 431686 | 0         | 999  | 1005 | 99 +  | 7    | 1011 | 385112 | 386113 |
| UN28130 | Rsa1.0.00707.1 | 785  | 190112 | 0         | 753  | 781  | 96 -  | 3    | 782  | 13928  | 14699  |
| UN28131 | Rsa1.0.00128.1 | 1149 | 228675 | 0         | 526  | 527  | 99 +  | 374  | 900  | 65988  | 66514  |
| UN28132 | Rsa1.0.02358.1 | 1380 | 32213  | 0         | 698  | 717  | 97 -  | 666  | 1380 | 22292  | 23008  |
| UN28133 | Rsa1.0.01254.1 | 1388 | 49801  | 0         | 1388 | 1388 | 100 + | 1    | 1388 | 40882  | 42269  |
| UN28134 | Rsa1.0.10620.1 | 1132 | 5781   | 1.00E-108 | 209  | 212  | 98 +  | 870  | 1081 | 5333   | 5544   |
| UN28135 | Rsa1.0.73030.1 | 745  | 314    | 1.00E-157 | 306  | 314  | 97 +  | 222  | 535  | 1      | 314    |
| UN28136 | Rsa1.0.00386.1 | 568  | 89134  | 1.00E-119 | 218  | 218  | 100 + | 1    | 218  | 81920  | 82137  |
| UN28137 | Rsa1.0.00218.1 | 880  | 201480 | 1.00E-110 | 205  | 206  | 99 +  | 675  | 880  | 197280 | 197485 |
| UN28138 | Rsa1.0.03161.1 | 679  | 24905  | 1.00E-114 | 240  | 248  | 96 +  | 2    | 246  | 15645  | 15892  |
| UN28139 | Rsa1.0.00100.1 | 1356 | 249232 | 0         | 1233 | 1265 | 97 +  | 93   | 1356 | 128847 | 130097 |
| UN28140 | Rsa1.0.00123.1 | 1667 | 325650 | 0         | 913  | 930  | 98 -  | 141  | 1070 | 293671 | 294600 |
| UN28141 | Rsa1.0.00013.1 | 782  | 292129 | 0         | 546  | 546  | 100 + | 88   | 633  | 94362  | 94907  |
| UN28142 | Rsa1.0.00675.1 | 1522 | 145590 | 1.00E-171 | 315  | 318  | 99 +  | 1    | 318  | 39830  | 40147  |
| UN28143 | Rsa1.0.00152.1 | 1229 | 257730 | 1.00E-137 | 251  | 252  | 99 -  | 977  | 1228 | 246424 | 246675 |
| UN28144 | Rsa1.0.03122.1 | 872  | 25207  | 0         | 361  | 362  | 99 -  | 3    | 363  | 11811  | 12172  |
| UN28145 | Rsa1.0.00066.1 | 1028 | 152418 | 0         | 486  | 529  | 91 -  | 165  | 693  | 146606 | 147134 |
| UN28146 | Rsa1.0.03155.1 | 735  | 24958  | 0         | 710  | 737  | 96 +  | 3    | 729  | 16221  | 16957  |
| UN28147 | Rsa1.0.15165.1 | 895  | 2785   | 0         | 528  | 546  | 96 +  | 350  | 895  | 642    | 1187   |
| UN28148 | Rsa1.0.01140.1 | 903  | 52586  | 0         | 452  | 470  | 96 +  | 432  | 898  | 31973  | 32437  |
| UN28149 | Rsa1.0.00964.1 | 1564 | 316648 | 1.00E-140 | 260  | 261  | 99 -  | 1304 | 1564 | 160130 | 160389 |
| UN28150 | Rsa1.0.01060.1 | 1140 | 55368  | 0         | 325  | 326  | 99 -  | 617  | 942  | 21378  | 21703  |
| UN28151 | Rsa1.0.00135.1 | 704  | 178077 | 0         | 687  | 706  | 97 -  | 1    | 704  | 104958 | 105662 |
| UN28152 | Rsa1.0.00108.1 | 1167 | 478491 | 0         | 809  | 811  | 99 -  | 1    | 811  | 389023 | 389833 |
| UN28153 | Rsa1.0.03731.1 | 1100 | 21136  | 0         | 449  | 458  | 98 +  | 340  | 797  | 892    | 1349   |
| UN28154 | Rsa1.0.04023.1 | 666  | 19522  | 1.00E-123 | 356  | 397  | 89 -  | 3    | 398  | 5840   | 6235   |
| UN28155 | Rsa1.0.01507.1 | 765  | 44361  | 9.00E-66  | 143  | 148  | 96 -  | 512  | 659  | 24867  | 25014  |
| UN28156 | Rsa1.0.01537.1 | 872  | 187285 | 0         | 861  | 871  | 98 -  | 2    | 872  | 167919 | 168789 |

|         |                |      |        |           |      |      |       |      |      |        |        |
|---------|----------------|------|--------|-----------|------|------|-------|------|------|--------|--------|
| UN28157 | Rsa1.0.61046.1 | 905  | 375    | 0         | 375  | 375  | 100 + | 314  | 688  | 1      | 375    |
| UN28158 | Rsa1.0.11562.1 | 1021 | 5471   | 3.00E-54  | 122  | 125  | 97 -  | 892  | 1015 | 1      | 125    |
| UN28159 | Rsa1.0.00244.1 | 1251 | 103590 | 1.00E-142 | 256  | 256  | 100 + | 9    | 264  | 48938  | 49193  |
| UN28160 | Rsa1.0.07377.1 | 1125 | 9494   | 0         | 429  | 431  | 99 +  | 144  | 573  | 1      | 431    |
| UN28161 | Rsa1.0.02840.1 | 948  | 27386  | 0         | 733  | 764  | 95 +  | 23   | 785  | 23814  | 24575  |
| UN28162 | Rsa1.0.04969.1 | 513  | 15283  | 0         | 430  | 435  | 98 +  | 79   | 512  | 11384  | 11817  |
| UN28163 | Rsa1.0.00576.1 | 830  | 178949 | 0         | 823  | 830  | 99 +  | 1    | 830  | 140751 | 141580 |
| UN28164 | Rsa1.0.00743.1 | 1385 | 177459 | 0         | 1360 | 1381 | 98 +  | 2    | 1382 | 29657  | 31032  |
| UN28165 | Rsa1.0.00373.1 | 669  | 90296  | 1.00E-141 | 301  | 314  | 95 -  | 356  | 666  | 49115  | 49428  |
| UN28166 | Rsa1.0.01144.1 | 1026 | 52431  | 1.00E-157 | 289  | 290  | 99 +  | 738  | 1026 | 17706  | 17995  |
| UN28167 | Rsa1.0.01430.1 | 635  | 46034  | 0         | 611  | 628  | 97 -  | 1    | 628  | 39427  | 40054  |
| UN28168 | Rsa1.0.01179.1 | 720  | 51549  | 0         | 394  | 397  | 99 +  | 165  | 561  | 44812  | 45208  |
| UN28169 | Rsa1.0.00125.1 | 681  | 253043 | 0         | 478  | 503  | 95 -  | 152  | 637  | 185036 | 185537 |
| UN28170 | Rsa1.0.09124.1 | 1326 | 6625   | 0         | 619  | 622  | 99 -  | 2    | 623  | 2944   | 3565   |
| UN28171 | Rsa1.0.00138.1 | 667  | 247040 | 0         | 408  | 424  | 96 -  | 1    | 418  | 230305 | 230727 |
| UN28172 | Rsa1.0.07637.1 | 1340 | 8969   | 0         | 759  | 759  | 100 + | 2    | 760  | 694    | 1452   |
| UN28173 | Rsa1.0.04383.1 | 736  | 17631  | 1.00E-117 | 226  | 230  | 98 -  | 311  | 540  | 11091  | 11320  |
| UN28174 | Rsa1.0.16521.1 | 736  | 2125   | 0         | 563  | 563  | 100 - | 4    | 566  | 1174   | 1736   |
| UN28175 | Rsa1.0.01039.1 | 704  | 55946  | 1.00E-103 | 200  | 203  | 98 -  | 2    | 204  | 30594  | 30796  |
| UN28176 | Rsa1.0.00226.1 | 637  | 105884 | 0         | 591  | 599  | 98 -  | 3    | 601  | 8946   | 9544   |
| UN28177 | Rsa1.0.01421.1 | 740  | 46197  | 0         | 384  | 384  | 100 + | 357  | 740  | 28143  | 28526  |
| UN28178 | Rsa1.0.12017.1 | 1155 | 5340   | 1.00E-118 | 225  | 228  | 98 +  | 524  | 751  | 4139   | 4366   |
| UN28179 | Rsa1.0.00765.1 | 1394 | 65029  | 0         | 332  | 335  | 99 +  | 1060 | 1394 | 17494  | 17828  |
| UN28180 | Rsa1.0.06690.1 | 772  | 10533  | 5.00E-12  | 83   | 98   | 84 -  | 529  | 626  | 3380   | 3477   |
| UN28181 | Rsa1.0.02004.1 | 840  | 169138 | 0         | 838  | 840  | 99 -  | 1    | 840  | 148471 | 149310 |
| UN28182 | Rsa1.0.00179.1 | 935  | 393324 | 1.00E-157 | 632  | 749  | 84 -  | 185  | 933  | 5218   | 5966   |
| UN28183 | Rsa1.0.06373.1 | 797  | 11138  | 0         | 757  | 797  | 94 -  | 1    | 797  | 3553   | 4326   |
| UN28184 | Rsa1.0.20934.1 | 1029 | 1252   | 1.00E-153 | 308  | 318  | 96 +  | 1    | 317  | 941    | 1252   |
| UN28185 | Rsa1.0.01524.1 | 693  | 43949  | 1.00E-160 | 287  | 287  | 100 - | 407  | 693  | 9153   | 9439   |
| UN28186 | Rsa1.0.00224.1 | 935  | 327530 | 1.00E-128 | 356  | 395  | 90 +  | 553  | 926  | 220354 | 220746 |
| UN28187 | Rsa1.0.17543.1 | 982  | 1802   | 0         | 516  | 517  | 99 -  | 3    | 518  | 767    | 1283   |
| UN28188 | Rsa1.0.03005.1 | 2031 | 26082  | 0         | 554  | 589  | 94 -  | 1440 | 2028 | 3513   | 4084   |
| UN28189 | Rsa1.0.17118.1 | 1021 | 1918   | 1.00E-160 | 290  | 291  | 99 -  | 2    | 292  | 379    | 669    |
| UN28190 | Rsa1.0.04203.1 | 737  | 18479  | 0         | 733  | 735  | 99 +  | 3    | 737  | 2042   | 2776   |
| UN28191 | Rsa1.0.02903.1 | 1972 | 26901  | 0         | 1075 | 1099 | 97 -  | 162  | 1260 | 7641   | 8739   |
| UN28192 | Rsa1.0.05889.1 | 910  | 12319  | 0         | 540  | 544  | 99 +  | 3    | 543  | 11776  | 12319  |
| UN28193 | Rsa1.0.05770.1 | 856  | 12678  | 0         | 356  | 365  | 97 +  | 484  | 848  | 2553   | 2917   |
| UN28194 | Rsa1.0.00628.1 | 796  | 214360 | 0         | 792  | 797  | 99 -  | 1    | 796  | 22916  | 23712  |
| UN28195 | Rsa1.0.00126.1 | 1033 | 127534 | 0         | 576  | 629  | 91 -  | 420  | 1033 | 114885 | 115492 |

|         |                |      |        |           |      |      |       |     |      |        |        |
|---------|----------------|------|--------|-----------|------|------|-------|-----|------|--------|--------|
| UN28196 | Rsa1.0.02071.1 | 926  | 35409  | 0         | 919  | 925  | 99 +  | 1   | 925  | 27558  | 28479  |
| UN28197 | Rsa1.0.00273.1 | 1306 | 326186 | 0         | 385  | 386  | 99 -  | 919 | 1304 | 38765  | 39150  |
| UN28198 | Rsa1.0.00020.1 | 881  | 283099 | 0         | 880  | 881  | 99 -  | 1   | 881  | 20938  | 21818  |
| UN28199 | Rsa1.0.01118.1 | 870  | 53460  | 0         | 534  | 534  | 100 + | 52  | 585  | 983    | 1516   |
| UN28200 | Rsa1.0.00002.1 | 1233 | 601661 | 1.00E-105 | 225  | 235  | 95 -  | 249 | 483  | 14232  | 14466  |
| UN28201 | Rsa1.0.00602.1 | 756  | 73302  | 1.00E-174 | 372  | 392  | 94 -  | 2   | 393  | 1954   | 2342   |
| UN28202 | Rsa1.0.00362.1 | 1381 | 299497 | 0         | 1042 | 1048 | 99 -  | 334 | 1381 | 255546 | 256593 |
| UN28203 | Rsa1.0.00876.1 | 919  | 61328  | 0         | 806  | 806  | 100 - | 114 | 919  | 8527   | 9332   |
| UN28204 | Rsa1.0.01702.1 | 736  | 40722  | 0         | 423  | 429  | 98 +  | 312 | 736  | 13207  | 13635  |
| UN28205 | Rsa1.0.00065.1 | 854  | 454616 | 1.00E-165 | 322  | 330  | 97 +  | 240 | 568  | 242654 | 242983 |
| UN28206 | Rsa1.0.01085.1 | 436  | 54539  | 0         | 435  | 436  | 99 +  | 1   | 436  | 8233   | 8668   |
| UN28207 | Rsa1.0.00031.1 | 831  | 179862 | 1.00E-117 | 215  | 215  | 100 - | 176 | 390  | 163319 | 163533 |
| UN28208 | Rsa1.0.03348.1 | 1375 | 23559  | 0         | 732  | 733  | 99 -  | 2   | 734  | 18648  | 19380  |
| UN28209 | Rsa1.0.07886.1 | 623  | 8358   | 0         | 617  | 622  | 99 +  | 3   | 623  | 6644   | 7265   |
| UN28210 | Rsa1.0.00190.1 | 1518 | 318240 | 0         | 1474 | 1498 | 98 -  | 1   | 1496 | 199822 | 201314 |
| UN28211 | Rsa1.0.00310.1 | 845  | 96852  | 0         | 407  | 413  | 98 +  | 414 | 826  | 19570  | 19982  |
| UN28212 | Rsa1.0.06430.1 | 1028 | 11034  | 0         | 567  | 567  | 100 - | 189 | 755  | 1517   | 2083   |
| UN28213 | Rsa1.0.00438.1 | 729  | 84861  | 0         | 491  | 527  | 93 -  | 50  | 570  | 62583  | 63109  |
| UN28214 | Rsa1.0.00038.1 | 595  | 314568 | 0         | 338  | 342  | 98 -  | 2   | 343  | 158442 | 158783 |
| UN28215 | Rsa1.0.13686.1 | 1286 | 4480   | 1.00E-113 | 214  | 216  | 99 -  | 352 | 567  | 3563   | 3778   |
| UN28216 | Rsa1.0.00802.1 | 1254 | 63846  | 0         | 366  | 371  | 98 +  | 3   | 373  | 10188  | 10558  |
| UN28217 | Rsa1.0.00100.1 | 1253 | 249232 | 0         | 429  | 429  | 100 + | 313 | 741  | 191118 | 191546 |
| UN28218 | Rsa1.0.07391.1 | 256  | 9477   | 1.00E-138 | 256  | 257  | 99 +  | 1   | 256  | 8081   | 8337   |
| UN28219 | Rsa1.0.00023.1 | 1291 | 194764 | 0         | 909  | 929  | 97 -  | 362 | 1290 | 836    | 1764   |
| UN28220 | Rsa1.0.04112.1 | 949  | 18989  | 0         | 818  | 827  | 98 +  | 123 | 949  | 2554   | 3380   |
| UN28221 | Rsa1.0.00755.1 | 1030 | 192559 | 0         | 1026 | 1031 | 99 -  | 1   | 1030 | 180739 | 181769 |
| UN28222 | Rsa1.0.00823.1 | 865  | 62889  | 0         | 502  | 512  | 98 +  | 8   | 512  | 8039   | 8550   |
| UN28223 | Rsa1.0.00153.1 | 888  | 192931 | 1.00E-111 | 239  | 250  | 95 -  | 1   | 244  | 111691 | 111937 |
| UN28224 | Rsa1.0.00800.1 | 1335 | 63868  | 0         | 1275 | 1352 | 94 +  | 1   | 1327 | 6611   | 7939   |
| UN28225 | Rsa1.0.02791.1 | 1174 | 27832  | 0         | 1168 | 1171 | 99 +  | 4   | 1174 | 15150  | 16320  |
| UN28226 | Rsa1.0.00606.1 | 908  | 73150  | 0         | 494  | 494  | 100 + | 209 | 702  | 30353  | 30846  |
| UN28227 | Rsa1.0.04538.1 | 1001 | 16940  | 0         | 447  | 482  | 92 -  | 537 | 1001 | 13590  | 14069  |
| UN28228 | Rsa1.0.01679.1 | 820  | 146876 | 5.00E-86  | 165  | 166  | 99 +  | 3   | 168  | 140871 | 141036 |
| UN28229 | Rsa1.0.35002.1 | 758  | 646    | 3.00E-90  | 172  | 173  | 99 -  | 318 | 490  | 28     | 200    |
| UN28230 | Rsa1.0.00277.1 | 1661 | 100132 | 0         | 794  | 794  | 100 - | 343 | 1136 | 72171  | 72964  |
| UN28231 | Rsa1.0.03714.1 | 840  | 21217  | 0         | 447  | 472  | 94 -  | 1   | 452  | 15909  | 16380  |
| UN28232 | Rsa1.0.17851.1 | 852  | 1726   | 1.00E-104 | 298  | 333  | 89 +  | 537 | 852  | 10     | 339    |
| UN28233 | Rsa1.0.00454.1 | 1043 | 216970 | 1.00E-164 | 487  | 551  | 88 +  | 3   | 547  | 181678 | 182196 |
| UN28234 | Rsa1.0.01632.1 | 775  | 181224 | 0         | 491  | 523  | 93 -  | 257 | 775  | 789    | 1304   |

|         |                |      |        |           |      |      |       |     |      |        |        |
|---------|----------------|------|--------|-----------|------|------|-------|-----|------|--------|--------|
| UN28235 | Rsa1.0.01963.1 | 868  | 36719  | 0         | 588  | 588  | 100 + | 1   | 588  | 34661  | 35248  |
| UN28236 | Rsa1.0.03742.1 | 853  | 21062  | 0         | 506  | 506  | 100 - | 169 | 674  | 16771  | 17276  |
| UN28237 | Rsa1.0.01574.1 | 1289 | 42930  | 0         | 786  | 789  | 99 -  | 501 | 1289 | 17736  | 18524  |
| UN28238 | Rsa1.0.00024.1 | 717  | 188018 | 1.00E-100 | 231  | 243  | 95 -  | 471 | 708  | 59162  | 59403  |
| UN28239 | Rsa1.0.00662.1 | 1023 | 192183 | 0         | 513  | 513  | 100 + | 511 | 1023 | 59159  | 59671  |
| UN28240 | Rsa1.0.00203.1 | 957  | 109129 | 0         | 662  | 750  | 88 -  | 234 | 956  | 47049  | 47792  |
| UN28241 | Rsa1.0.00711.1 | 851  | 67223  | 0         | 755  | 756  | 99 +  | 1   | 755  | 43824  | 44579  |
| UN28242 | Rsa1.0.13994.1 | 1328 | 3941   | 1.00E-176 | 388  | 410  | 94 -  | 923 | 1325 | 2761   | 3166   |
| UN28243 | Rsa1.0.06814.1 | 1180 | 10309  | 0         | 621  | 655  | 94 -  | 538 | 1180 | 6152   | 6806   |
| UN28244 | Rsa1.0.05629.1 | 1313 | 13129  | 0         | 621  | 622  | 99 +  | 692 | 1313 | 8805   | 9426   |
| UN28245 | Rsa1.0.00831.1 | 777  | 62673  | 0         | 503  | 508  | 99 +  | 3   | 510  | 37890  | 38396  |
| UN28246 | Rsa1.0.39059.1 | 1106 | 576    | 1.00E-111 | 256  | 278  | 92 +  | 827 | 1104 | 61     | 319    |
| UN28247 | Rsa1.0.03019.1 | 781  | 25987  | 1.00E-151 | 293  | 296  | 98 -  | 6   | 298  | 825    | 1120   |
| UN28248 | Rsa1.0.00391.1 | 638  | 183853 | 0         | 358  | 359  | 99 -  | 280 | 638  | 61540  | 61898  |
| UN28249 | Rsa1.0.05441.1 | 1434 | 13742  | 1.00E-149 | 268  | 268  | 100 + | 91  | 358  | 8798   | 9065   |
| UN28250 | Rsa1.0.00819.1 | 797  | 62918  | 0         | 771  | 799  | 96 -  | 1   | 792  | 22341  | 23139  |
| UN28251 | Rsa1.0.00122.1 | 1004 | 265937 | 4.00E-87  | 209  | 220  | 95 +  | 786 | 1002 | 7192   | 7411   |
| UN28252 | Rsa1.0.00320.1 | 904  | 95784  | 0         | 894  | 894  | 100 + | 11  | 904  | 25076  | 25969  |
| UN28253 | Rsa1.0.00182.1 | 950  | 142305 | 0         | 910  | 952  | 95 +  | 1   | 949  | 123254 | 124204 |
| UN28254 | Rsa1.0.00823.1 | 878  | 62889  | 1.00E-125 | 233  | 235  | 99 +  | 571 | 805  | 4859   | 5093   |
| UN28255 | Rsa1.0.00023.1 | 988  | 194764 | 0         | 394  | 410  | 96 -  | 551 | 960  | 35015  | 35423  |
| UN28256 | Rsa1.0.00920.1 | 870  | 601703 | 7.00E-73  | 181  | 194  | 93 -  | 611 | 801  | 443641 | 443834 |
| UN28257 | Rsa1.0.03847.1 | 833  | 20479  | 0         | 355  | 363  | 97 +  | 464 | 826  | 3842   | 4204   |
| UN28258 | Rsa1.0.00939.1 | 1462 | 185227 | 0         | 579  | 586  | 98 +  | 877 | 1462 | 159151 | 159735 |
| UN28259 | Rsa1.0.02846.1 | 656  | 27338  | 0         | 642  | 652  | 98 +  | 8   | 655  | 11358  | 12008  |
| UN28260 | Rsa1.0.10442.1 | 830  | 5849   | 0         | 427  | 446  | 95 +  | 1   | 427  | 1214   | 1659   |
| UN28261 | Rsa1.0.01642.1 | 809  | 41772  | 0         | 431  | 436  | 98 +  | 25  | 459  | 12167  | 12602  |
| UN28262 | Rsa1.0.00051.1 | 402  | 258225 | 1.00E-170 | 380  | 402  | 94 -  | 1   | 402  | 15938  | 16330  |
| UN28263 | Rsa1.0.07356.1 | 1153 | 9517   | 2.00E-89  | 260  | 289  | 89 +  | 2   | 286  | 8292   | 8574   |
| UN28264 | Rsa1.0.04169.1 | 1267 | 18712  | 0         | 1267 | 1267 | 100 - | 1   | 1267 | 15800  | 17066  |
| UN28265 | Rsa1.0.01696.1 | 1033 | 301850 | 0         | 580  | 608  | 95 +  | 1   | 605  | 160682 | 161284 |
| UN28266 | Rsa1.0.00050.1 | 966  | 237174 | 1.00E-180 | 320  | 320  | 100 - | 1   | 320  | 191559 | 191878 |
| UN28267 | Rsa1.0.02114.1 | 1039 | 34873  | 0         | 875  | 921  | 95 +  | 110 | 1027 | 14418  | 15337  |
| UN28268 | Rsa1.0.03562.1 | 723  | 22084  | 0         | 713  | 723  | 98 -  | 1   | 723  | 8204   | 8925   |
| UN28269 | Rsa1.0.02804.1 | 1213 | 27712  | 1.00E-75  | 154  | 157  | 98 +  | 555 | 711  | 8963   | 9119   |
| UN28270 | Rsa1.0.03310.1 | 1099 | 23851  | 0         | 1060 | 1098 | 96 +  | 3   | 1098 | 20998  | 22095  |
| UN28271 | Rsa1.0.15268.1 | 749  | 2720   | 0         | 465  | 468  | 99 +  | 282 | 749  | 1328   | 1795   |
| UN28272 | Rsa1.0.03341.1 | 1230 | 23604  | 1.00E-122 | 229  | 231  | 99 -  | 994 | 1224 | 16644  | 16874  |
| UN28273 | Rsa1.0.03080.1 | 716  | 25540  | 0         | 547  | 563  | 97 +  | 1   | 563  | 10875  | 11435  |

|         |                |   |      |        |           |      |      |       |   |     |      |        |        |
|---------|----------------|---|------|--------|-----------|------|------|-------|---|-----|------|--------|--------|
| UN28274 | Rsa1.0_02582.1 |   | 1107 | 29889  | 1.00E-138 | 279  | 287  | 97 +  |   | 826 | 1107 | 3887   | 4173   |
| UN28275 | #              | # | #    | #      | #         | #    | #    | #     | # | #   | #    | #      | #      |
| UN28276 | Rsa1.0_00390.1 |   | 801  | 88681  | 0         | 797  | 809  | 98 +  |   | 3   | 800  | 50381  | 51189  |
| UN28277 | Rsa1.0_00213.1 |   | 866  | 108167 | 0         | 831  | 856  | 97 -  |   | 15  | 866  | 35049  | 35904  |
| UN28278 | Rsa1.0_02358.1 |   | 998  | 32213  | 0         | 973  | 998  | 97 -  |   | 1   | 997  | 5288   | 6285   |
| UN28279 | Rsa1.0_02185.1 |   | 892  | 34150  | 0         | 550  | 559  | 98 +  |   | 269 | 827  | 15560  | 16117  |
| UN28280 | Rsa1.0_05596.1 |   | 943  | 137912 | 0         | 912  | 952  | 95 -  |   | 1   | 943  | 7235   | 8184   |
| UN28281 | Rsa1.0_01565.1 |   | 845  | 155447 | 1.00E-156 | 311  | 319  | 97 -  |   | 529 | 845  | 10765  | 11083  |
| UN28282 | Rsa1.0_00846.1 |   | 1009 | 62342  | 0         | 960  | 1009 | 95 -  |   | 1   | 1009 | 31274  | 32269  |
| UN28283 | Rsa1.0_17780.1 |   | 752  | 1742   | 1.00E-148 | 294  | 302  | 97 -  |   | 453 | 752  | 1082   | 1383   |
| UN28284 | Rsa1.0_00686.1 |   | 659  | 68511  | 1.00E-131 | 337  | 363  | 92 -  |   | 299 | 656  | 53123  | 53481  |
| UN28285 | Rsa1.0_01458.1 |   | 799  | 175719 | 0         | 745  | 781  | 95 +  |   | 6   | 784  | 27865  | 28645  |
| UN28286 | Rsa1.0_00129.1 |   | 999  | 126831 | 0         | 702  | 710  | 98 +  |   | 252 | 961  | 125970 | 126679 |
| UN28287 | Rsa1.0_06482.1 |   | 1233 | 10937  | 0         | 494  | 498  | 99 -  |   | 738 | 1233 | 10406  | 10902  |
| UN28288 | Rsa1.0_00650.1 |   | 1354 | 70235  | 0         | 480  | 484  | 99 +  |   | 3   | 486  | 65694  | 66177  |
| UN28289 | Rsa1.0_00133.1 |   | 365  | 123768 | 1.00E-166 | 342  | 356  | 96 +  |   | 10  | 364  | 110606 | 110961 |
| UN28290 | Rsa1.0_00300.1 |   | 1095 | 97747  | 0         | 1073 | 1092 | 98 -  |   | 5   | 1095 | 69156  | 70247  |
| UN28291 | Rsa1.0_04126.1 |   | 1142 | 18939  | 0         | 1035 | 1072 | 96 -  |   | 1   | 1071 | 10379  | 11449  |
| UN28292 | Rsa1.0_00933.1 |   | 1033 | 59164  | 0         | 535  | 538  | 99 +  |   | 3   | 540  | 35600  | 36137  |
| UN28293 | Rsa1.0_00281.1 |   | 838  | 99908  | 0         | 593  | 594  | 99 -  |   | 245 | 838  | 65770  | 66363  |
| UN28294 | Rsa1.0_01967.1 |   | 795  | 36672  | 1.00E-170 | 394  | 422  | 93 -  |   | 382 | 795  | 18339  | 18760  |
| UN28295 | #              | # | #    | #      | #         | #    | #    | #     | # | #   | #    | #      | #      |
| UN28296 | Rsa1.0_02040.1 |   | 995  | 35684  | 0         | 982  | 987  | 99 -  |   | 1   | 987  | 20993  | 21978  |
| UN28297 | Rsa1.0_01899.1 |   | 1288 | 37474  | 0         | 709  | 717  | 98 +  |   | 573 | 1288 | 1200   | 1916   |
| UN28298 | Rsa1.0_09753.1 |   | 1223 | 6166   | 0         | 454  | 463  | 98 -  |   | 761 | 1223 | 4749   | 5208   |
| UN28299 | Rsa1.0_04348.1 |   | 1095 | 17795  | 7.00E-15  | 64   | 71   | 90 +  |   | 101 | 171  | 9928   | 9998   |
| UN28300 | Rsa1.0_02952.1 |   | 1075 | 26492  | 0         | 408  | 418  | 97 -  |   | 218 | 635  | 1633   | 2050   |
| UN28301 | Rsa1.0_00016.1 |   | 705  | 831256 | 1.00E-33  | 250  | 306  | 81 -  |   | 31  | 335  | 685053 | 685357 |
| UN28302 | Rsa1.0_11247.1 |   | 771  | 5569   | 0         | 674  | 683  | 98 +  |   | 88  | 770  | 4305   | 4987   |
| UN28303 | Rsa1.0_30641.1 |   | 295  | 749    | 1.00E-166 | 295  | 295  | 100 - |   | 1   | 295  | 316    | 610    |
| UN28304 | Rsa1.0_00113.1 |   | 1174 | 131574 | 0         | 643  | 685  | 93 -  |   | 3   | 675  | 4639   | 5323   |
| UN28305 | Rsa1.0_01923.1 |   | 1255 | 37233  | 0         | 1114 | 1174 | 94 -  |   | 3   | 1157 | 31391  | 32561  |
| UN28306 | Rsa1.0_07973.1 |   | 1191 | 8149   | 0         | 534  | 535  | 99 +  |   | 657 | 1191 | 7285   | 7818   |
| UN28307 | Rsa1.0_00042.1 |   | 496  | 171507 | 8.00E-16  | 65   | 72   | 90 +  |   | 276 | 347  | 23832  | 23903  |
| UN28308 | Rsa1.0_01271.1 |   | 508  | 49569  | 0         | 323  | 323  | 100 + |   | 186 | 508  | 26026  | 26348  |
| UN28309 | Rsa1.0_28508.1 |   | 670  | 813    | 0         | 483  | 519  | 93 +  |   | 174 | 668  | 1      | 519    |
| UN28310 | Rsa1.0_06355.1 |   | 840  | 11180  | 0         | 824  | 849  | 97 -  |   | 1   | 838  | 265    | 1113   |
| UN28311 | Rsa1.0_02422.1 |   | 897  | 161122 | 0         | 443  | 459  | 96 -  |   | 440 | 897  | 157948 | 158402 |
| UN28312 | Rsa1.0_00803.1 |   | 157  | 144228 | 3.00E-83  | 156  | 156  | 100 - |   | 2   | 157  | 58938  | 59093  |



|         |                |      |        |           |      |      |       |     |      |        |        |
|---------|----------------|------|--------|-----------|------|------|-------|-----|------|--------|--------|
| UN28313 | Rsa1.0.03572.1 | 1109 | 146346 | 0         | 853  | 892  | 95 -  | 3   | 888  | 141058 | 141943 |
| UN28314 | Rsa1.0.00547.1 | 489  | 76521  | 0         | 435  | 465  | 93 -  | 1   | 456  | 60835  | 61288  |
| UN28315 | Rsa1.0.00095.1 | 848  | 283384 | 0         | 395  | 399  | 98 -  | 15  | 413  | 39786  | 40184  |
| UN28316 | Rsa1.0.00093.1 | 1242 | 214962 | 0         | 547  | 550  | 99 -  | 694 | 1242 | 95779  | 96328  |
| UN28317 | Rsa1.0.01752.1 | 730  | 39805  | 0         | 401  | 402  | 99 -  | 329 | 730  | 14297  | 14698  |
| UN28318 | Rsa1.0.00428.1 | 737  | 85599  | 0         | 615  | 631  | 97 -  | 108 | 737  | 31768  | 32395  |
| UN28319 | Rsa1.0.00047.1 | 865  | 168582 | 0         | 543  | 547  | 99 -  | 320 | 865  | 56079  | 56622  |
| UN28320 | Rsa1.0.00008.1 | 1380 | 358124 | 0         | 731  | 737  | 99 +  | 33  | 765  | 284759 | 285494 |
| UN28321 | Rsa1.0.15860.1 | 875  | 2385   | 0         | 598  | 604  | 99 -  | 232 | 835  | 1148   | 1751   |
| UN28322 | Rsa1.0.00173.1 | 769  | 288743 | 0         | 767  | 768  | 99 +  | 1   | 768  | 229636 | 230403 |
| UN28323 | Rsa1.0.00617.1 | 840  | 72199  | 0         | 817  | 854  | 95 +  | 2   | 828  | 19324  | 20174  |
| UN28324 | Rsa1.0.03260.1 | 883  | 24284  | 3.00E-38  | 193  | 230  | 83 +  | 226 | 455  | 7758   | 7987   |
| UN28325 | Rsa1.0.32573.1 | 445  | 699    | 0         | 398  | 400  | 99 -  | 45  | 444  | 131    | 529    |
| UN28326 | Rsa1.0.02947.1 | 887  | 26531  | 0         | 856  | 888  | 96 +  | 4   | 885  | 5532   | 6417   |
| UN28327 | Rsa1.0.00342.1 | 1480 | 93695  | 0         | 1381 | 1390 | 99 +  | 1   | 1386 | 37590  | 38979  |
| UN28328 | Rsa1.0.00648.1 | 1064 | 70351  | 0         | 1037 | 1069 | 97 -  | 1   | 1062 | 37937  | 39000  |
| UN28329 | Rsa1.0.00678.1 | 744  | 193163 | 0         | 365  | 367  | 99 -  | 3   | 369  | 188844 | 189210 |
| UN28330 | Rsa1.0.01295.1 | 874  | 49040  | 3.00E-50  | 108  | 110  | 98 +  | 690 | 799  | 9896   | 10005  |
| UN28331 | Rsa1.0.02124.1 | 1035 | 34780  | 0         | 483  | 495  | 97 +  | 1   | 493  | 7432   | 7926   |
| UN28332 | Rsa1.0.03452.1 | 1641 | 22817  | 0         | 900  | 903  | 99 +  | 3   | 905  | 17926  | 18828  |
| UN28333 | Rsa1.0.00001.1 | 661  | 363028 | 0         | 636  | 654  | 97 -  | 7   | 657  | 91750  | 92400  |
| UN28334 | Rsa1.0.04588.1 | 1740 | 16739  | 0         | 615  | 640  | 96 -  | 837 | 1471 | 9688   | 10327  |
| UN28335 | Rsa1.0.00040.1 | 735  | 324196 | 4.00E-89  | 167  | 167  | 100 - | 2   | 168  | 91484  | 91650  |
| UN28336 | Rsa1.0.02593.1 | 1186 | 29744  | 0         | 875  | 877  | 99 -  | 1   | 877  | 14793  | 15669  |
| UN28337 | Rsa1.0.09595.1 | 1775 | 6263   | 0         | 469  | 471  | 99 +  | 79  | 549  | 1070   | 1540   |
| UN28338 | Rsa1.0.02043.1 | 766  | 163754 | 0         | 502  | 505  | 99 -  | 262 | 766  | 143818 | 144322 |
| UN28339 | Rsa1.0.02068.1 | 1123 | 35432  | 0         | 593  | 604  | 98 +  | 151 | 754  | 10996  | 11599  |
| UN28340 | Rsa1.0.10789.1 | 979  | 5720   | 3.00E-32  | 227  | 276  | 82 -  | 323 | 596  | 767    | 1037   |
| UN28341 | Rsa1.0.19252.1 | 1441 | 1456   | 0         | 1434 | 1437 | 99 -  | 4   | 1440 | 9      | 1445   |
| UN28342 | Rsa1.0.01401.1 | 852  | 142441 | 0         | 480  | 488  | 98 +  | 1   | 487  | 127012 | 127493 |
| UN28343 | Rsa1.0.01003.1 | 874  | 56976  | 1.00E-120 | 447  | 520  | 85 -  | 233 | 751  | 53646  | 54164  |
| UN28344 | Rsa1.0.06465.1 | 1151 | 10962  | 1.00E-151 | 325  | 340  | 95 -  | 812 | 1150 | 6741   | 7074   |
| UN28345 | Rsa1.0.00215.1 | 777  | 201775 | 7.00E-88  | 248  | 271  | 91 +  | 516 | 771  | 172377 | 172646 |
| UN28346 | Rsa1.0.18913.1 | 1669 | 1512   | 0         | 904  | 937  | 96 +  | 731 | 1667 | 78     | 1013   |
| UN28347 | Rsa1.0.00285.1 | 893  | 149638 | 0         | 430  | 432  | 99 +  | 84  | 515  | 95085  | 95516  |
| UN28348 | Rsa1.0.01218.1 | 824  | 50536  | 1.00E-108 | 253  | 267  | 94 -  | 565 | 824  | 14192  | 14457  |
| UN28349 | Rsa1.0.02582.1 | 912  | 29889  | 0         | 448  | 451  | 99 +  | 462 | 912  | 23047  | 23497  |
| UN28350 | Rsa1.0.00438.1 | 951  | 84861  | 1.00E-133 | 242  | 242  | 100 + | 144 | 385  | 71374  | 71615  |
| UN28351 | Rsa1.0.00022.1 | 592  | 200461 | 0         | 580  | 603  | 96 +  | 2   | 592  | 104807 | 105409 |

|         |                |      |        |           |      |      |       |     |      |        |        |
|---------|----------------|------|--------|-----------|------|------|-------|-----|------|--------|--------|
| UN28352 | Rsa1.0.01474.1 | 1482 | 45070  | 0         | 908  | 910  | 99 +  | 1   | 910  | 39210  | 40119  |
| UN28353 | Rsa1.0.00994.1 | 1382 | 165189 | 0         | 607  | 608  | 99 -  | 1   | 608  | 2133   | 2740   |
| UN28354 | Rsa1.0.08516.1 | 868  | 7245   | 0         | 340  | 341  | 99 +  | 202 | 542  | 891    | 1231   |
| UN28355 | Rsa1.0.00608.1 | 846  | 172672 | 0         | 482  | 485  | 99 -  | 361 | 845  | 165639 | 166123 |
| UN28356 | Rsa1.0.06197.1 | 776  | 11510  | 0         | 772  | 777  | 99 +  | 1   | 776  | 1401   | 2177   |
| UN28357 | Rsa1.0.01076.1 | 1356 | 54835  | 0         | 587  | 587  | 100 + | 1   | 587  | 40418  | 41004  |
| UN28358 | Rsa1.0.07473.1 | 770  | 9296   | 0         | 374  | 378  | 98 +  | 393 | 770  | 2370   | 2747   |
| UN28359 | Rsa1.0.02621.1 | 825  | 156120 | 0         | 825  | 825  | 100 - | 1   | 825  | 18888  | 19712  |
| UN28360 | Rsa1.0.01303.1 | 859  | 48853  | 0         | 427  | 434  | 98 +  | 9   | 441  | 18944  | 19374  |
| UN28361 | Rsa1.0.00788.1 | 992  | 64237  | 0         | 775  | 808  | 95 -  | 173 | 961  | 58538  | 59345  |
| UN28362 | Rsa1.0.00723.1 | 1110 | 66806  | 0         | 417  | 419  | 99 +  | 690 | 1108 | 56385  | 56803  |
| UN28363 | Rsa1.0.00426.1 | 717  | 85668  | 0         | 415  | 427  | 97 +  | 297 | 717  | 73386  | 73812  |
| UN28364 | Rsa1.0.00004.1 | 939  | 253996 | 0         | 505  | 518  | 97 +  | 6   | 523  | 24609  | 25125  |
| UN28365 | Rsa1.0.03388.1 | 1412 | 23277  | 1.00E-170 | 325  | 332  | 97 +  | 474 | 805  | 1301   | 1632   |
| UN28366 | Rsa1.0.00387.1 | 987  | 495407 | 0         | 604  | 607  | 99 +  | 381 | 987  | 358755 | 359361 |
| UN28367 | Rsa1.0.01112.1 | 775  | 310601 | 1.00E-121 | 246  | 253  | 97 -  | 117 | 368  | 176919 | 177171 |
| UN28368 | Rsa1.0.01721.1 | 744  | 40345  | 0         | 456  | 475  | 96 +  | 190 | 664  | 5208   | 5682   |
| UN28369 | Rsa1.0.05652.1 | 1519 | 13043  | 0         | 590  | 590  | 100 - | 1   | 590  | 527    | 1116   |
| UN28370 | Rsa1.0.01100.1 | 796  | 54113  | 1.00E-164 | 416  | 455  | 91 -  | 342 | 796  | 37999  | 38449  |
| UN28371 | Rsa1.0.00351.1 | 803  | 413096 | 0         | 744  | 755  | 98 -  | 3   | 753  | 404985 | 405739 |
| UN28372 | Rsa1.0.01455.1 | 1059 | 45440  | 0         | 1035 | 1041 | 99 +  | 1   | 1041 | 29875  | 30915  |
| UN28373 | Rsa1.0.00635.1 | 264  | 175826 | 1.00E-107 | 239  | 251  | 95 -  | 12  | 261  | 19402  | 19650  |
| UN28374 | Rsa1.0.01081.1 | 935  | 499226 | 0         | 588  | 588  | 100 + | 1   | 588  | 453753 | 454340 |
| UN28375 | Rsa1.0.00882.1 | 1457 | 61249  | 0         | 480  | 480  | 100 - | 604 | 1083 | 14747  | 15226  |
| UN28376 | Rsa1.0.00023.1 | 1006 | 194764 | 0         | 975  | 1005 | 97 +  | 1   | 1005 | 37303  | 38307  |
| UN28377 | Rsa1.0.01561.1 | 749  | 43227  | 1.00E-140 | 258  | 260  | 99 -  | 250 | 509  | 32406  | 32665  |
| UN28378 | Rsa1.0.15710.1 | 1152 | 2468   | 0         | 608  | 658  | 92 -  | 510 | 1151 | 84     | 725    |
| UN28379 | Rsa1.0.02969.1 | 677  | 26390  | 0         | 405  | 408  | 99 -  | 270 | 677  | 6741   | 7148   |
| UN28380 | Rsa1.0.00836.1 | 756  | 185968 | 1.00E-106 | 256  | 275  | 93 -  | 1   | 265  | 161658 | 161931 |
| UN28381 | Rsa1.0.01591.1 | 744  | 42718  | 0         | 721  | 745  | 96 +  | 3   | 744  | 4523   | 5263   |
| UN28382 | Rsa1.0.02748.1 | 754  | 28242  | 0         | 436  | 440  | 99 -  | 2   | 441  | 11199  | 11638  |
| UN28383 | Rsa1.0.00318.1 | 886  | 96094  | 0         | 884  | 886  | 99 -  | 1   | 886  | 61099  | 61984  |
| UN28384 | Rsa1.0.00038.1 | 647  | 314568 | 0         | 600  | 625  | 96 -  | 4   | 627  | 61652  | 62275  |
| UN28385 | Rsa1.0.05506.1 | 845  | 13495  | 7.00E-36  | 116  | 126  | 92 -  | 101 | 225  | 11527  | 11651  |
| UN28386 | Rsa1.0.04288.1 | 593  | 18077  | 6.00E-88  | 171  | 173  | 98 -  | 421 | 593  | 3091   | 3263   |
| UN28387 | Rsa1.0.01329.1 | 1129 | 47982  | 9.00E-70  | 135  | 135  | 100 + | 473 | 607  | 1138   | 1272   |
| UN28388 | Rsa1.0.04574.1 | 968  | 16786  | 1.00E-155 | 331  | 348  | 95 -  | 532 | 871  | 9534   | 9881   |
| UN28389 | Rsa1.0.04819.1 | 1101 | 140505 | 0         | 807  | 836  | 96 +  | 219 | 1050 | 1503   | 2338   |
| UN28390 | Rsa1.0.00039.1 | 1018 | 296927 | 9.00E-85  | 252  | 281  | 89 -  | 746 | 1015 | 9896   | 10172  |

|         |                |      |        |           |      |      |       |     |      |        |        |
|---------|----------------|------|--------|-----------|------|------|-------|-----|------|--------|--------|
| UN28391 | Rsa1.0.00006.1 | 1377 | 396176 | 0         | 1049 | 1051 | 99 +  | 1   | 1050 | 243591 | 244641 |
| UN28392 | Rsa1.0.06173.1 | 918  | 11574  | 0         | 617  | 629  | 98 -  | 3   | 630  | 5761   | 6389   |
| UN28393 | Rsa1.0.00553.1 | 1734 | 75983  | 1.00E-147 | 268  | 269  | 99 -  | 970 | 1238 | 18637  | 18905  |
| UN28394 | Rsa1.0.01717.1 | 1340 | 143162 | 0         | 1092 | 1097 | 99 +  | 1   | 1097 | 124306 | 125402 |
| UN28395 | Rsa1.0.01108.1 | 657  | 53865  | 0         | 601  | 604  | 99 +  | 53  | 656  | 44126  | 44729  |
| UN28396 | Rsa1.0.00702.1 | 1252 | 67600  | 0         | 1219 | 1253 | 97 -  | 2   | 1252 | 9020   | 10272  |
| UN28397 | Rsa1.0.08840.1 | 957  | 6871   | 0         | 419  | 448  | 93 +  | 2   | 435  | 4213   | 4658   |
| UN28398 | Rsa1.0.01242.1 | 754  | 50066  | 1.00E-165 | 294  | 294  | 100 + | 1   | 294  | 2139   | 2432   |
| UN28399 | Rsa1.0.59402.1 | 791  | 385    | 1.00E-180 | 323  | 324  | 99 +  | 428 | 751  | 1      | 324    |
| UN28400 | Rsa1.0.05026.1 | 1097 | 15095  | 1.00E-141 | 360  | 389  | 92 -  | 1   | 376  | 10051  | 10436  |
| UN28401 | Rsa1.0.00068.1 | 754  | 151813 | 0         | 473  | 474  | 99 -  | 282 | 754  | 126126 | 126599 |
| UN28402 | Rsa1.0.01749.1 | 888  | 39822  | 1.00E-141 | 370  | 409  | 90 +  | 487 | 888  | 1554   | 1942   |
| UN28403 | Rsa1.0.00056.1 | 738  | 332604 | 1.00E-153 | 277  | 278  | 99 +  | 3   | 280  | 103788 | 104065 |
| UN28404 | Rsa1.0.00890.1 | 1536 | 323870 | 0         | 782  | 822  | 95 +  | 1   | 821  | 309684 | 310505 |
| UN28405 | Rsa1.0.48656.1 | 1222 | 465    | 1.00E-115 | 212  | 212  | 100 - | 627 | 838  | 152    | 363    |
| UN28406 | Rsa1.0.02003.1 | 894  | 36171  | 0         | 851  | 871  | 97 +  | 1   | 871  | 30435  | 31305  |
| UN28407 | Rsa1.0.00019.1 | 564  | 301669 | 0         | 431  | 456  | 94 -  | 113 | 564  | 295498 | 295953 |
| UN28408 | Rsa1.0.00064.1 | 1348 | 240927 | 0         | 824  | 824  | 100 + | 1   | 824  | 32618  | 33441  |
| UN28409 | Rsa1.0.00451.1 | 438  | 322533 | 0         | 402  | 419  | 95 -  | 21  | 436  | 247484 | 247901 |
| UN28410 | Rsa1.0.01728.1 | 560  | 40239  | 0         | 538  | 560  | 96 +  | 1   | 558  | 21633  | 22192  |
| UN28411 | Rsa1.0.00002.1 | 887  | 601661 | 0         | 796  | 846  | 94 -  | 51  | 887  | 403102 | 403935 |
| UN28412 | Rsa1.0.44387.1 | 1327 | 507    | 0         | 506  | 507  | 99 -  | 485 | 991  | 1      | 507    |
| UN28413 | Rsa1.0.08838.1 | 1017 | 6873   | 0         | 439  | 460  | 95 -  | 95  | 554  | 2943   | 3401   |
| UN28414 | Rsa1.0.00204.1 | 856  | 109056 | 1.00E-122 | 240  | 246  | 97 +  | 1   | 246  | 56779  | 57024  |
| UN28415 | Rsa1.0.02500.1 | 795  | 30768  | 1.00E-131 | 247  | 250  | 98 -  | 466 | 715  | 2391   | 2640   |
| UN28416 | Rsa1.0.06821.1 | 838  | 10301  | 1.00E-134 | 307  | 331  | 92 -  | 3   | 319  | 5081   | 5403   |
| UN28417 | Rsa1.0.05303.1 | 687  | 14211  | 0         | 412  | 414  | 99 +  | 9   | 422  | 4794   | 5206   |
| UN28418 | Rsa1.0.00679.1 | 821  | 68971  | 1.00E-123 | 259  | 267  | 97 +  | 387 | 652  | 22859  | 23121  |
| UN28419 | Rsa1.0.00590.1 | 837  | 73835  | 5.00E-83  | 157  | 157  | 100 - | 1   | 157  | 27491  | 27647  |
| UN28420 | Rsa1.0.00100.1 | 940  | 249232 | 0         | 938  | 940  | 99 +  | 1   | 940  | 211951 | 212890 |
| UN28421 | Rsa1.0.04331.1 | 1142 | 140984 | 0         | 1005 | 1012 | 99 -  | 132 | 1142 | 16780  | 17789  |
| UN28422 | Rsa1.0.25556.1 | 977  | 931    | 0         | 846  | 850  | 99 -  | 71  | 920  | 1      | 850    |
| UN28423 | Rsa1.0.00119.1 | 1029 | 467509 | 1.00E-112 | 236  | 246  | 95 +  | 132 | 377  | 63813  | 64058  |
| UN28424 | Rsa1.0.04789.1 | 639  | 15981  | 1.00E-114 | 218  | 221  | 98 +  | 3   | 223  | 3270   | 3490   |
| UN28425 | Rsa1.0.00821.1 | 1602 | 62891  | 0         | 1067 | 1085 | 98 +  | 518 | 1602 | 60021  | 61104  |
| UN28426 | Rsa1.0.01215.1 | 527  | 166813 | 1.00E-149 | 274  | 275  | 99 +  | 252 | 525  | 48386  | 48660  |
| UN28427 | Rsa1.0.00087.1 | 1200 | 761073 | 0         | 357  | 362  | 98 +  | 161 | 522  | 315299 | 315660 |
| UN28428 | Rsa1.0.00687.1 | 869  | 68494  | 0         | 839  | 851  | 98 +  | 18  | 868  | 49632  | 50482  |
| UN28429 | Rsa1.0.00089.1 | 1277 | 406142 | 0         | 1172 | 1225 | 95 -  | 53  | 1277 | 208448 | 209668 |

|         |                |      |        |           |      |      |       |     |      |        |        |
|---------|----------------|------|--------|-----------|------|------|-------|-----|------|--------|--------|
| UN28430 | Rsa1.0_06912.1 | 940  | 10177  | 1.00E-171 | 327  | 333  | 98 -  | 1   | 332  | 3310   | 3642   |
| UN28431 | Rsa1.0_00067.1 | 1099 | 415055 | 0         | 888  | 968  | 91 +  | 40  | 981  | 151702 | 152644 |
| UN28432 | Rsa1.0_19466.1 | 1334 | 1427   | 0         | 1126 | 1153 | 97 -  | 185 | 1334 | 284    | 1427   |
| UN28433 | Rsa1.0_00033.1 | 817  | 515811 | 0         | 814  | 816  | 99 -  | 3   | 817  | 44113  | 44928  |
| UN28434 | Rsa1.0_05413.1 | 1292 | 13834  | 0         | 479  | 483  | 99 -  | 810 | 1292 | 2470   | 2952   |
| UN28435 | Rsa1.0_00067.1 | 1199 | 415055 | 0         | 797  | 810  | 98 +  | 392 | 1199 | 30786  | 31594  |
| UN28436 | Rsa1.0_01448.1 | 778  | 45645  | 0         | 765  | 780  | 98 +  | 1   | 778  | 30249  | 31027  |
| UN28437 | Rsa1.0_00028.1 | 892  | 293984 | 0         | 871  | 894  | 97 -  | 1   | 892  | 230741 | 231634 |
| UN28438 | Rsa1.0_00782.1 | 1115 | 64468  | 0         | 954  | 959  | 99 +  | 85  | 1043 | 51840  | 52798  |
| UN28439 | Rsa1.0_00076.1 | 1157 | 146021 | 0         | 439  | 458  | 95 -  | 1   | 457  | 78464  | 78914  |
| UN28440 | Rsa1.0_00867.1 | 1097 | 61635  | 0         | 714  | 730  | 97 +  | 368 | 1097 | 60103  | 60832  |
| UN28441 | Rsa1.0_00022.1 | 730  | 200461 | 0         | 458  | 459  | 99 +  | 271 | 729  | 44985  | 45443  |
| UN28442 | Rsa1.0_00961.1 | 853  | 58185  | 0         | 501  | 503  | 99 -  | 1   | 503  | 15097  | 15599  |
| UN28443 | Rsa1.0_02969.1 | 541  | 26390  | 5.00E-91  | 173  | 174  | 99 -  | 64  | 237  | 10693  | 10866  |
| UN28444 | Rsa1.0_00707.1 | 1078 | 190112 | 0         | 364  | 366  | 99 +  | 711 | 1076 | 55985  | 56350  |
| UN28445 | Rsa1.0_30857.1 | 1427 | 743    | 0         | 741  | 743  | 99 +  | 577 | 1319 | 1      | 743    |
| UN28446 | Rsa1.0_00375.1 | 1091 | 90207  | 0         | 529  | 531  | 99 -  | 3   | 533  | 66274  | 66803  |
| UN28447 | Rsa1.0_00278.1 | 1077 | 231896 | 0         | 789  | 804  | 98 +  | 1   | 801  | 25521  | 26321  |
| UN28448 | Rsa1.0_00325.1 | 304  | 95371  | 1.00E-145 | 286  | 295  | 96 -  | 2   | 296  | 60028  | 60316  |
| UN28449 | Rsa1.0_00964.1 | 976  | 316648 | 1.00E-115 | 223  | 227  | 98 -  | 750 | 976  | 9711   | 9937   |
| UN28450 | Rsa1.0_06424.1 | 1007 | 11045  | 0         | 732  | 755  | 96 +  | 256 | 1003 | 2413   | 3167   |
| UN28451 | Rsa1.0_00037.1 | 815  | 307838 | 3.00E-72  | 172  | 183  | 93 -  | 633 | 815  | 66554  | 66736  |
| UN28452 | Rsa1.0_01008.1 | 991  | 56924  | 0         | 706  | 714  | 98 +  | 2   | 715  | 45917  | 46630  |
| UN28453 | Rsa1.0_00190.1 | 580  | 318240 | 0         | 570  | 580  | 98 +  | 1   | 580  | 93239  | 93818  |
| UN28454 | Rsa1.0_02893.1 | 1063 | 26999  | 1.00E-180 | 335  | 340  | 98 +  | 724 | 1063 | 23925  | 24264  |
| UN28455 | Rsa1.0_00019.1 | 945  | 301669 | 0         | 943  | 943  | 100 + | 3   | 945  | 250774 | 251716 |
| UN28456 | Rsa1.0_00253.1 | 601  | 231292 | 0         | 424  | 443  | 95 -  | 114 | 551  | 161243 | 161685 |
| UN28457 | Rsa1.0_06209.1 | 1119 | 11484  | 0         | 614  | 616  | 99 +  | 504 | 1119 | 8940   | 9555   |
| UN28458 | Rsa1.0_00125.1 | 1098 | 253043 | 1.00E-164 | 305  | 309  | 98 -  | 580 | 888  | 20060  | 20368  |
| UN28459 | Rsa1.0_00123.1 | 688  | 325650 | 0         | 530  | 531  | 99 +  | 3   | 533  | 27526  | 28056  |
| UN28460 | Rsa1.0_02792.1 | 865  | 27829  | 0         | 340  | 340  | 100 + | 68  | 407  | 17605  | 17944  |
| UN28461 | Rsa1.0_14287.1 | 1626 | 3573   | 0         | 603  | 604  | 99 -  | 3   | 605  | 1585   | 2188   |
| UN28462 | Rsa1.0_00244.1 | 1207 | 103590 | 0         | 812  | 820  | 99 +  | 388 | 1207 | 9308   | 10126  |
| UN28463 | Rsa1.0_00457.1 | 863  | 337301 | 0         | 501  | 504  | 99 +  | 102 | 605  | 328872 | 329375 |
| UN28464 | Rsa1.0_00170.1 | 870  | 179538 | 0         | 717  | 718  | 99 -  | 1   | 718  | 83462  | 84179  |
| UN28465 | Rsa1.0_00789.1 | 813  | 64233  | 0         | 510  | 535  | 95 +  | 3   | 522  | 16293  | 16824  |
| UN28466 | Rsa1.0_00362.1 | 509  | 299497 | 0         | 497  | 510  | 97 -  | 3   | 509  | 9581   | 10090  |
| UN28467 | Rsa1.0_00159.1 | 1096 | 431686 | 0         | 1041 | 1093 | 95 +  | 3   | 1095 | 232096 | 233178 |
| UN28468 | Rsa1.0_01070.1 | 523  | 55099  | 0         | 514  | 514  | 100 + | 1   | 514  | 2882   | 3395   |

|         |                |      |        |           |      |      |       |     |      |        |        |
|---------|----------------|------|--------|-----------|------|------|-------|-----|------|--------|--------|
| UN28469 | Rsa1.0.00460.1 | 1061 | 206387 | 0         | 359  | 360  | 99 -  | 1   | 360  | 38036  | 38395  |
| UN28470 | Rsa1.0.02205.1 | 914  | 33923  | 0         | 404  | 404  | 100 + | 1   | 404  | 683    | 1086   |
| UN28471 | Rsa1.0.10971.1 | 741  | 5659   | 0         | 445  | 445  | 100 + | 297 | 741  | 1      | 445    |
| UN28472 | Rsa1.0.00865.1 | 1102 | 61686  | 0         | 938  | 996  | 94 +  | 129 | 1101 | 3897   | 4887   |
| UN28473 | Rsa1.0.00866.1 | 1876 | 61676  | 0         | 846  | 863  | 98 +  | 356 | 1207 | 4227   | 5089   |
| UN28474 | Rsa1.0.04027.1 | 533  | 19501  | 0         | 505  | 530  | 95 -  | 8   | 531  | 8212   | 8735   |
| UN28475 | Rsa1.0.01536.1 | 1150 | 43747  | 1.00E-118 | 220  | 221  | 99 +  | 3   | 223  | 10820  | 11040  |
| UN28476 | Rsa1.0.15164.1 | 678  | 2786   | 1.00E-130 | 256  | 262  | 97 +  | 4   | 265  | 1972   | 2230   |
| UN28477 | Rsa1.0.00031.1 | 1127 | 179862 | 0         | 957  | 989  | 96 -  | 136 | 1121 | 92353  | 93340  |
| UN28478 | Rsa1.0.10836.1 | 1101 | 5707   | 0         | 859  | 878  | 97 -  | 1   | 878  | 4133   | 5010   |
| UN28479 | Rsa1.0.01361.1 | 1054 | 47226  | 0         | 904  | 972  | 93 +  | 3   | 967  | 16724  | 17690  |
| UN28480 | Rsa1.0.02003.1 | 951  | 36171  | 0         | 587  | 594  | 98 -  | 3   | 594  | 20798  | 21391  |
| UN28481 | Rsa1.0.00407.1 | 1034 | 191544 | 0         | 637  | 638  | 99 -  | 1   | 638  | 42060  | 42697  |
| UN28482 | Rsa1.0.00200.1 | 955  | 162016 | 0         | 393  | 395  | 99 -  | 430 | 824  | 150563 | 150956 |
| UN28483 | Rsa1.0.09625.1 | 481  | 6245   | 1.00E-130 | 271  | 280  | 96 +  | 1   | 279  | 1083   | 1361   |
| UN28484 | Rsa1.0.00915.1 | 701  | 194446 | 0         | 690  | 697  | 98 -  | 6   | 701  | 39732  | 40428  |
| UN28485 | Rsa1.0.03313.1 | 830  | 23834  | 0         | 821  | 831  | 98 +  | 1   | 830  | 15907  | 16734  |
| UN28486 | Rsa1.0.08344.1 | 918  | 7500   | 0         | 696  | 726  | 95 +  | 22  | 746  | 4537   | 5248   |
| UN28487 | Rsa1.0.00284.1 | 785  | 323267 | 0         | 773  | 777  | 99 -  | 8   | 782  | 257972 | 258748 |
| UN28488 | Rsa1.0.00394.1 | 1338 | 148426 | 0         | 524  | 552  | 94 +  | 797 | 1338 | 138926 | 139476 |
| UN28489 | Rsa1.0.00101.1 | 895  | 267193 | 0         | 591  | 646  | 91 +  | 277 | 895  | 210864 | 211506 |
| UN28490 | Rsa1.0.04877.1 | 690  | 15631  | 0         | 688  | 689  | 99 -  | 3   | 690  | 2959   | 3647   |
| UN28491 | Rsa1.0.16269.1 | 980  | 2219   | 1.00E-145 | 285  | 293  | 97 +  | 688 | 980  | 176    | 468    |
| UN28492 | Rsa1.0.05045.1 | 967  | 15035  | 0         | 865  | 868  | 99 -  | 100 | 967  | 6320   | 7187   |
| UN28493 | Rsa1.0.00816.1 | 1674 | 403350 | 0         | 1079 | 1079 | 100 + | 596 | 1674 | 248225 | 249303 |
| UN28494 | Rsa1.0.16391.1 | 711  | 2168   | 0         | 372  | 378  | 98 +  | 5   | 382  | 1791   | 2168   |
| UN28495 | Rsa1.0.00075.1 | 885  | 146680 | 0         | 426  | 426  | 100 + | 1   | 426  | 125314 | 125739 |
| UN28496 | Rsa1.0.02587.1 | 846  | 156090 | 0         | 501  | 513  | 97 +  | 169 | 681  | 15125  | 15637  |
| UN28497 | Rsa1.0.05611.1 | 794  | 13193  | 0         | 608  | 611  | 99 -  | 184 | 794  | 156    | 766    |
| UN28498 | Rsa1.0.00163.1 | 1444 | 116847 | 0         | 680  | 683  | 99 +  | 54  | 736  | 1510   | 2192   |
| UN28499 | Rsa1.0.04639.1 | 860  | 16550  | 1.00E-156 | 287  | 288  | 99 -  | 1   | 288  | 15588  | 15874  |
| UN28500 | Rsa1.0.05943.1 | 919  | 12158  | 0         | 341  | 341  | 100 - | 2   | 342  | 5572   | 5912   |
| UN28501 | Rsa1.0.00446.1 | 712  | 167829 | 4.00E-46  | 167  | 191  | 87 -  | 434 | 624  | 156632 | 156822 |
| UN28502 | Rsa1.0.00555.1 | 1141 | 75920  | 1.00E-100 | 335  | 383  | 87 +  | 38  | 420  | 36612  | 36984  |
| UN28503 | #              | #    | #      | #         | #    | #    | #     | #   | #    | #      | #      |
| UN28504 | Rsa1.0.00253.1 | 1398 | 231292 | 0         | 629  | 629  | 100 - | 1   | 629  | 88689  | 89317  |
| UN28505 | Rsa1.0.00030.1 | 790  | 250988 | 0         | 393  | 394  | 99 +  | 1   | 394  | 195788 | 196181 |
| UN28506 | Rsa1.0.00727.1 | 914  | 66724  | 0         | 884  | 890  | 99 -  | 22  | 910  | 13475  | 14361  |
| UN28507 | Rsa1.0.04253.1 | 1236 | 18259  | 0         | 755  | 769  | 98 -  | 1   | 765  | 12306  | 13074  |

|         |                |      |        |           |      |      |       |     |      |        |        |
|---------|----------------|------|--------|-----------|------|------|-------|-----|------|--------|--------|
| UN28508 | Rsa1.0.00865.1 | 636  | 61686  | 1.00E-124 | 312  | 341  | 91 -  | 1   | 335  | 9542   | 9882   |
| UN28509 | Rsa1.0.00928.1 | 1300 | 59293  | 0         | 577  | 603  | 95 -  | 699 | 1300 | 13350  | 13948  |
| UN28510 | Rsa1.0.02284.1 | 782  | 33011  | 0         | 636  | 641  | 99 -  | 142 | 782  | 8273   | 8913   |
| UN28511 | Rsa1.0.00218.1 | 1162 | 201480 | 2.00E-92  | 205  | 215  | 95 +  | 276 | 487  | 143419 | 143633 |
| UN28512 | Rsa1.0.00451.1 | 1068 | 322533 | 1.00E-154 | 457  | 513  | 89 -  | 576 | 1067 | 156207 | 156713 |
| UN28513 | Rsa1.0.01662.1 | 650  | 41382  | 0         | 622  | 648  | 95 +  | 3   | 650  | 19809  | 20452  |
| UN28514 | #              | #    | #      | #         | #    | #    | #     | #   | #    | #      | #      |
| UN28515 | Rsa1.0.01380.1 | 707  | 155003 | 0         | 478  | 495  | 96 +  | 196 | 688  | 46038  | 46527  |
| UN28516 | Rsa1.0.01733.1 | 457  | 40186  | 9.00E-77  | 149  | 150  | 99 -  | 308 | 457  | 17721  | 17870  |
| UN28517 | Rsa1.0.00953.1 | 554  | 145012 | 0         | 341  | 343  | 99 +  | 3   | 345  | 42166  | 42508  |
| UN28518 | Rsa1.0.00061.1 | 508  | 218685 | 9.00E-31  | 93   | 101  | 92 +  | 11  | 111  | 82468  | 82568  |
| UN28519 | Rsa1.0.00329.1 | 958  | 222544 | 0         | 927  | 957  | 96 -  | 2   | 958  | 60713  | 61669  |
| UN28520 | Rsa1.0.00281.1 | 562  | 99908  | 0         | 511  | 526  | 97 -  | 1   | 525  | 47519  | 48042  |
| UN28521 | Rsa1.0.37127.1 | 786  | 607    | 1.00E-169 | 313  | 317  | 98 -  | 288 | 604  | 1      | 317    |
| UN28522 | Rsa1.0.00290.1 | 1216 | 225096 | 1.00E-124 | 247  | 253  | 97 +  | 1   | 253  | 9496   | 9746   |
| UN28523 | Rsa1.0.01809.1 | 543  | 39004  | 2.00E-44  | 117  | 125  | 93 +  | 5   | 129  | 22760  | 22880  |
| UN28524 | #              | #    | #      | #         | #    | #    | #     | #   | #    | #      | #      |
| UN28525 | Rsa1.0.17654.1 | 818  | 1772   | 1.00E-151 | 286  | 291  | 98 -  | 285 | 575  | 1305   | 1595   |
| UN28526 | Rsa1.0.01868.1 | 727  | 150904 | 1.00E-174 | 313  | 314  | 99 -  | 1   | 314  | 4359   | 4672   |
| UN28527 | Rsa1.0.05027.1 | 895  | 15094  | 0         | 406  | 413  | 98 -  | 1   | 413  | 7611   | 8023   |
| UN28528 | Rsa1.0.04696.1 | 894  | 16339  | 8.00E-79  | 184  | 194  | 94 -  | 674 | 867  | 11599  | 11791  |
| UN28529 | Rsa1.0.03280.1 | 1153 | 145083 | 0         | 1141 | 1164 | 98 +  | 1   | 1152 | 50     | 1213   |
| UN28530 | Rsa1.0.00185.1 | 785  | 248445 | 0         | 454  | 459  | 98 -  | 3   | 459  | 197822 | 198280 |
| UN28531 | Rsa1.0.00241.1 | 1254 | 104000 | 1.00E-175 | 320  | 323  | 99 -  | 932 | 1254 | 91364  | 91686  |
| UN28532 | Rsa1.0.00931.1 | 864  | 59210  | 0         | 453  | 484  | 93 -  | 87  | 561  | 19424  | 19895  |
| UN28533 | Rsa1.0.02498.1 | 1431 | 30784  | 0         | 601  | 626  | 96 +  | 383 | 997  | 10905  | 11530  |
| UN28534 | Rsa1.0.00100.1 | 1048 | 249232 | 0         | 616  | 623  | 98 +  | 143 | 765  | 228080 | 228702 |
| UN28535 | Rsa1.0.00163.1 | 877  | 116847 | 1.00E-168 | 425  | 466  | 91 +  | 32  | 493  | 49868  | 50309  |
| UN28536 | Rsa1.0.00009.1 | 1235 | 232558 | 1.00E-142 | 287  | 297  | 96 -  | 27  | 323  | 55858  | 56154  |
| UN28537 | Rsa1.0.00425.1 | 1057 | 147080 | 2.33E-156 | 263  | 263  | 100 + | 292 | 554  | 124445 | 124707 |
| UN28538 | Rsa1.0.02013.1 | 670  | 36041  | 0         | 413  | 418  | 98 +  | 248 | 663  | 24924  | 25341  |
| UN28539 | Rsa1.0.00059.1 | 1180 | 159650 | 0         | 1149 | 1184 | 97 +  | 3   | 1180 | 104430 | 105613 |
| UN28540 | Rsa1.0.01986.1 | 1426 | 36489  | 1.00E-111 | 257  | 276  | 93 +  | 976 | 1251 | 12346  | 12612  |
| UN28541 | Rsa1.0.00983.1 | 847  | 57586  | 1.00E-49  | 107  | 109  | 98 +  | 588 | 696  | 13125  | 13233  |
| UN28542 | Rsa1.0.02707.1 | 1126 | 28520  | 0         | 531  | 549  | 96 -  | 239 | 786  | 15178  | 15726  |
| UN28543 | Rsa1.0.07361.1 | 862  | 9514   | 1.00E-133 | 279  | 291  | 95 -  | 280 | 570  | 8046   | 8333   |
| UN28544 | Rsa1.0.00366.1 | 562  | 90880  | 0         | 548  | 557  | 98 -  | 2   | 558  | 51667  | 52223  |
| UN28545 | Rsa1.0.00507.1 | 745  | 79074  | 0         | 688  | 750  | 91 +  | 1   | 728  | 7914   | 8642   |
| UN28546 | Rsa1.0.13829.1 | 808  | 4252   | 0         | 415  | 425  | 97 +  | 258 | 681  | 1      | 425    |

|         |                |      |        |           |      |      |       |     |      |        |        |
|---------|----------------|------|--------|-----------|------|------|-------|-----|------|--------|--------|
| UN28547 | Rsa1.0.01637.1 | 943  | 41862  | 0         | 559  | 588  | 95 -  | 361 | 943  | 32296  | 32880  |
| UN28548 | Rsa1.0.00064.1 | 958  | 240927 | 1.00E-179 | 344  | 352  | 97 +  | 607 | 958  | 217978 | 218326 |
| UN28549 | Rsa1.0.01754.1 | 624  | 39792  | 0         | 570  | 614  | 92 +  | 16  | 622  | 14957  | 15551  |
| UN28550 | Rsa1.0.01883.1 | 704  | 37661  | 0         | 496  | 507  | 97 -  | 194 | 699  | 23519  | 24024  |
| UN28551 | Rsa1.0.01614.1 | 628  | 42238  | 0         | 504  | 543  | 92 +  | 86  | 628  | 9039   | 9563   |
| UN28552 | Rsa1.0.00694.1 | 1190 | 68074  | 0         | 1157 | 1199 | 96 -  | 1   | 1190 | 60935  | 62130  |
| UN28553 | Rsa1.0.04789.1 | 1052 | 15981  | 0         | 924  | 968  | 95 +  | 83  | 1049 | 14388  | 15353  |
| UN28554 | Rsa1.0.05085.1 | 958  | 14889  | 3.00E-29  | 108  | 119  | 90 -  | 753 | 871  | 13877  | 13993  |
| UN28555 | Rsa1.0.09236.1 | 1126 | 6540   | 0         | 866  | 947  | 91 -  | 66  | 1012 | 1      | 937    |
| UN28556 | Rsa1.0.00002.1 | 740  | 601661 | 0         | 346  | 347  | 99 +  | 394 | 740  | 270307 | 270653 |
| UN28557 | Rsa1.0.00197.1 | 951  | 109714 | 0         | 882  | 924  | 95 -  | 32  | 949  | 82663  | 83582  |
| UN28558 | Rsa1.0.00683.1 | 1425 | 68638  | 0         | 1391 | 1423 | 97 -  | 2   | 1424 | 63535  | 64957  |
| UN28559 | Rsa1.0.04249.1 | 903  | 18269  | 1.00E-174 | 361  | 376  | 96 -  | 531 | 903  | 4453   | 4827   |
| UN28560 | Rsa1.0.02152.1 | 568  | 34558  | 1.00E-121 | 227  | 229  | 99 -  | 161 | 389  | 16195  | 16423  |
| UN28561 | Rsa1.0.04997.1 | 1084 | 15182  | 0         | 865  | 932  | 92 -  | 155 | 1078 | 3482   | 4413   |
| UN28562 | Rsa1.0.06619.1 | 384  | 10650  | 1.00E-100 | 262  | 285  | 91 +  | 1   | 273  | 4511   | 4790   |
| UN28563 | Rsa1.0.00112.1 | 530  | 132199 | 0         | 373  | 373  | 100 + | 158 | 530  | 41177  | 41549  |
| UN28564 | Rsa1.0.00156.1 | 1251 | 118383 | 0         | 737  | 746  | 98 -  | 2   | 747  | 63387  | 64132  |
| UN28565 | Rsa1.0.04935.1 | 874  | 15403  | 1.00E-105 | 261  | 283  | 92 +  | 590 | 872  | 13660  | 13937  |
| UN28566 | Rsa1.0.00119.1 | 1143 | 467509 | 0         | 780  | 808  | 96 -  | 298 | 1103 | 118477 | 119283 |
| UN28567 | Rsa1.0.02295.1 | 717  | 149884 | 0         | 667  | 728  | 91 -  | 4   | 714  | 4048   | 4766   |
| UN28568 | Rsa1.0.01591.1 | 1016 | 42718  | 0         | 987  | 1014 | 97 +  | 1   | 1014 | 5276   | 6276   |
| UN28569 | Rsa1.0.10500.1 | 909  | 5824   | 0         | 490  | 497  | 98 -  | 411 | 907  | 1959   | 2455   |
| UN28570 | #              | #    | #      | #         | #    | #    | #     | #   | #    | #      | #      |
| UN28571 | Rsa1.0.10655.1 | 1232 | 5768   | 0         | 484  | 484  | 100 - | 2   | 485  | 1968   | 2451   |
| UN28572 | Rsa1.0.00520.1 | 893  | 78226  | 0         | 481  | 490  | 98 +  | 405 | 893  | 31872  | 32361  |
| UN28573 | Rsa1.0.02521.1 | 858  | 30562  | 1.00E-104 | 230  | 242  | 95 -  | 591 | 825  | 6552   | 6792   |
| UN28574 | Rsa1.0.00010.1 | 983  | 294827 | 1.00E-130 | 258  | 265  | 97 -  | 7   | 271  | 260456 | 260720 |
| UN28575 | Rsa1.0.00868.1 | 782  | 61630  | 0         | 775  | 776  | 99 +  | 3   | 778  | 5841   | 6616   |
| UN28576 | Rsa1.0.00001.1 | 1601 | 363028 | 1.00E-166 | 369  | 389  | 94 +  | 4   | 385  | 41174  | 41561  |
| UN28577 | Rsa1.0.00475.1 | 905  | 81678  | 0         | 369  | 382  | 96 +  | 523 | 904  | 9354   | 9731   |
| UN28578 | Rsa1.0.09359.1 | 1340 | 6427   | 0         | 369  | 377  | 97 -  | 967 | 1340 | 6047   | 6423   |
| UN28579 | Rsa1.0.18046.1 | 516  | 1682   | 1.00E-91  | 184  | 187  | 98 -  | 3   | 188  | 1142   | 1328   |
| UN28580 | Rsa1.0.03320.1 | 730  | 23765  | 0         | 507  | 519  | 97 -  | 212 | 730  | 17695  | 18213  |
| UN28581 | Rsa1.0.04915.1 | 796  | 15461  | 0         | 426  | 448  | 95 +  | 1   | 446  | 8183   | 8630   |
| UN28582 | Rsa1.0.00191.1 | 1114 | 316976 | 0         | 1105 | 1109 | 99 +  | 1   | 1108 | 213200 | 214308 |
| UN28583 | Rsa1.0.75469.1 | 557  | 304    | 1.00E-161 | 300  | 304  | 98 -  | 124 | 427  | 1      | 304    |
| UN28584 | Rsa1.0.01614.1 | 803  | 42238  | 0         | 413  | 417  | 99 +  | 386 | 802  | 11122  | 11537  |
| UN28585 | Rsa1.0.04820.1 | 956  | 15857  | 0         | 765  | 810  | 94 -  | 158 | 956  | 14838  | 15627  |

|         |                |      |        |           |      |      |       |     |      |        |        |
|---------|----------------|------|--------|-----------|------|------|-------|-----|------|--------|--------|
| UN28586 | Rsa1.0.00361.1 | 1155 | 91181  | 0         | 367  | 367  | 100 - | 789 | 1155 | 42424  | 42790  |
| UN28587 | Rsa1.0.04525.1 | 793  | 16965  | 0         | 793  | 793  | 100 - | 1   | 793  | 9915   | 10707  |
| UN28588 | Rsa1.0.01388.1 | 1167 | 46741  | 0         | 399  | 413  | 96 +  | 755 | 1167 | 9318   | 9729   |
| UN28589 | Rsa1.0.00522.1 | 1075 | 78103  | 1.00E-151 | 290  | 296  | 97 +  | 2   | 297  | 67063  | 67358  |
| UN28590 | Rsa1.0.01311.1 | 959  | 48456  | 0         | 564  | 606  | 93 -  | 343 | 934  | 27554  | 28152  |
| UN28591 | Rsa1.0.02219.1 | 1204 | 33798  | 1.00E-157 | 305  | 313  | 97 -  | 543 | 855  | 13598  | 13910  |
| UN28592 | Rsa1.0.38485.1 | 519  | 585    | 1.00E-149 | 304  | 314  | 96 +  | 1   | 311  | 272    | 585    |
| UN28593 | #              | #    | #      | #         | #    | #    | #     | #   | #    | #      | #      |
| UN28594 | Rsa1.0.03650.1 | 706  | 21583  | 0         | 531  | 551  | 96 -  | 12  | 556  | 1368   | 1918   |
| UN28595 | Rsa1.0.00583.1 | 673  | 74309  | 1.00E-163 | 362  | 381  | 95 -  | 9   | 385  | 60044  | 60421  |
| UN28596 | Rsa1.0.00053.1 | 1296 | 263459 | 1.00E-147 | 312  | 325  | 96 +  | 969 | 1293 | 48209  | 48526  |
| UN28597 | Rsa1.0.01190.1 | 939  | 194501 | 0         | 842  | 873  | 96 -  | 82  | 939  | 37239  | 38111  |
| UN28598 | Rsa1.0.02695.1 | 802  | 28605  | 1.00E-174 | 322  | 326  | 98 -  | 9   | 334  | 9038   | 9363   |
| UN28599 | Rsa1.0.09853.1 | 929  | 6118   | 0         | 528  | 533  | 99 -  | 397 | 928  | 5108   | 5639   |
| UN28600 | Rsa1.0.00157.1 | 1076 | 245832 | 0         | 838  | 841  | 99 -  | 3   | 843  | 197369 | 198209 |
| UN28601 | Rsa1.0.04231.1 | 833  | 18380  | 0         | 479  | 519  | 92 +  | 325 | 833  | 15585  | 16092  |
| UN28602 | Rsa1.0.10275.1 | 931  | 5907   | 0         | 591  | 621  | 95 +  | 305 | 919  | 4812   | 5429   |
| UN28603 | Rsa1.0.00425.1 | 757  | 147080 | 1.00E-141 | 296  | 308  | 96 +  | 454 | 757  | 93236  | 93542  |
| UN28604 | Rsa1.0.04107.1 | 1262 | 19007  | 0         | 821  | 834  | 98 +  | 1   | 834  | 4371   | 5204   |
| UN28605 | Rsa1.0.35228.1 | 694  | 642    | 3.00E-56  | 142  | 152  | 93 +  | 539 | 690  | 4      | 155    |
| UN28606 | Rsa1.0.00190.1 | 610  | 318240 | 1.00E-98  | 199  | 203  | 98 +  | 405 | 606  | 52960  | 53162  |
| UN28607 | Rsa1.0.00161.1 | 773  | 116891 | 1.00E-154 | 280  | 281  | 99 -  | 2   | 282  | 116333 | 116613 |
| UN28608 | Rsa1.0.02405.1 | 748  | 31692  | 1.00E-178 | 320  | 321  | 99 +  | 4   | 324  | 17061  | 17381  |
| UN28609 | Rsa1.0.00072.1 | 1108 | 148743 | 0         | 903  | 933  | 96 +  | 3   | 935  | 143984 | 144916 |
| UN28610 | Rsa1.0.16561.1 | 1102 | 2111   | 1.00E-135 | 268  | 275  | 97 -  | 268 | 539  | 1336   | 1610   |
| UN28611 | Rsa1.0.10110.1 | 1497 | 5994   | 0         | 1394 | 1462 | 95 +  | 1   | 1454 | 3621   | 5061   |
| UN28612 | Rsa1.0.00371.1 | 1369 | 90463  | 0         | 1338 | 1385 | 96 -  | 1   | 1368 | 7484   | 8865   |
| UN28613 | Rsa1.0.00593.1 | 1168 | 143463 | 0         | 1103 | 1169 | 94 -  | 3   | 1168 | 14282  | 15423  |
| UN28614 | Rsa1.0.00836.1 | 913  | 185968 | 2.33E-156 | 287  | 295  | 97 +  | 596 | 890  | 148856 | 149150 |
| UN28615 | Rsa1.0.00381.1 | 683  | 89718  | 0         | 578  | 595  | 97 -  | 94  | 683  | 75904  | 76497  |
| UN28616 | Rsa1.0.00361.1 | 742  | 91181  | 1.00E-165 | 313  | 319  | 98 -  | 2   | 320  | 19216  | 19534  |
| UN28617 | Rsa1.0.00801.1 | 1346 | 63861  | 0         | 810  | 813  | 99 +  | 1   | 813  | 10940  | 11752  |
| UN28618 | Rsa1.0.00748.1 | 733  | 65983  | 4.00E-52  | 136  | 145  | 93 +  | 212 | 353  | 14433  | 14574  |
| UN28619 | Rsa1.0.13128.1 | 658  | 4999   | 0         | 516  | 520  | 99 -  | 138 | 657  | 2738   | 3257   |
| UN28620 | Rsa1.0.01077.1 | 506  | 54772  | 3.00E-83  | 241  | 264  | 91 +  | 1   | 257  | 15188  | 15448  |
| UN28621 | Rsa1.0.29599.1 | 953  | 778    | 0         | 500  | 506  | 98 -  | 448 | 953  | 43     | 548    |
| UN28622 | Rsa1.0.00151.1 | 594  | 119541 | 5.00E-11  | 42   | 44   | 95 +  | 69  | 112  | 118896 | 118939 |
| UN28623 | Rsa1.0.01016.1 | 754  | 181422 | 0         | 601  | 636  | 94 -  | 119 | 754  | 38082  | 38714  |
| UN28624 | Rsa1.0.00055.1 | 1050 | 520193 | 1.00E-87  | 192  | 201  | 95 -  | 815 | 1015 | 354451 | 354651 |



|         |                |      |        |           |      |      |       |      |      |        |        |
|---------|----------------|------|--------|-----------|------|------|-------|------|------|--------|--------|
| UN28625 | Rsa1.0.00899.1 | 1187 | 60404  | 5.00E-22  | 93   | 104  | 89 +  | 1071 | 1170 | 7929   | 8031   |
| UN28626 | Rsa1.0.01439.1 | 797  | 45841  | 0         | 402  | 406  | 99 -  | 387  | 792  | 197    | 602    |
| UN28627 | Rsa1.0_11445.1 | 721  | 5505   | 0         | 495  | 514  | 96 +  | 51   | 564  | 4993   | 5505   |
| UN28628 | Rsa1.0.00833.1 | 952  | 62621  | 0         | 407  | 427  | 95 -  | 88   | 514  | 39627  | 40053  |
| UN28629 | Rsa1.0_03142.1 | 1160 | 25043  | 0         | 1149 | 1171 | 98 +  | 1    | 1160 | 3170   | 4340   |
| UN28630 | Rsa1.0_04854.1 | 914  | 131560 | 0         | 438  | 440  | 99 +  | 2    | 440  | 172    | 611    |
| UN28631 | Rsa1.0.00409.1 | 1286 | 146788 | 1.00E-160 | 335  | 349  | 95 -  | 14   | 362  | 96200  | 96544  |
| UN28632 | Rsa1.0.00269.1 | 1163 | 341668 | 0         | 1074 | 1135 | 94 -  | 4    | 1135 | 1108   | 2242   |
| UN28633 | Rsa1.0.06561.1 | 944  | 10772  | 0         | 569  | 588  | 96 +  | 361  | 943  | 1974   | 2560   |
| UN28634 | Rsa1.0.03271.1 | 665  | 24187  | 6.00E-48  | 123  | 130  | 94 -  | 255  | 384  | 3003   | 3131   |
| UN28635 | Rsa1.0.00582.1 | 635  | 74333  | 0         | 609  | 644  | 94 +  | 3    | 635  | 33321  | 33950  |
| UN28636 | Rsa1.0.06286.1 | 1539 | 11307  | 0         | 1023 | 1035 | 98 +  | 1    | 1035 | 8588   | 9622   |
| UN28637 | Rsa1.0.00027.1 | 857  | 283362 | 0         | 443  | 457  | 96 -  | 392  | 846  | 53560  | 54016  |
| UN28638 | Rsa1.0.03141.1 | 1451 | 25061  | 1.00E-180 | 365  | 375  | 97 -  | 862  | 1234 | 16526  | 16897  |
| UN28639 | Rsa1.0.01060.1 | 1328 | 55368  | 0         | 626  | 688  | 90 -  | 667  | 1328 | 42913  | 43588  |
| UN28640 | Rsa1.0.02414.1 | 1016 | 31625  | 0         | 555  | 556  | 99 -  | 460  | 1015 | 12647  | 13202  |
| UN28641 | Rsa1.0.01033.1 | 577  | 56173  | 0         | 574  | 577  | 99 -  | 1    | 577  | 12064  | 12640  |
| UN28642 | Rsa1.0.00448.1 | 475  | 84048  | 1.00E-168 | 424  | 467  | 90 +  | 21   | 474  | 3261   | 3720   |
| UN28643 | Rsa1.0.03235.1 | 685  | 24442  | 0         | 525  | 529  | 99 +  | 2    | 530  | 10497  | 11025  |
| UN28644 | Rsa1.0.01232.1 | 868  | 155185 | 0         | 369  | 385  | 95 +  | 497  | 868  | 150401 | 150785 |
| UN28645 | Rsa1.0.46956.1 | 870  | 481    | 2.00E-70  | 142  | 144  | 98 -  | 393  | 536  | 191    | 334    |
| UN28646 | Rsa1.0.01826.1 | 876  | 38700  | 0         | 465  | 477  | 97 +  | 398  | 874  | 14064  | 14539  |
| UN28647 | Rsa1.0.00888.1 | 736  | 60978  | 0         | 693  | 731  | 94 +  | 17   | 731  | 53612  | 54339  |
| UN28648 | Rsa1.0_16460.1 | 849  | 2148   | 0         | 767  | 798  | 96 -  | 56   | 848  | 983    | 1775   |
| UN28649 | Rsa1.0.00061.1 | 1058 | 218685 | 0         | 530  | 538  | 98 +  | 1    | 538  | 201151 | 201688 |
| UN28650 | Rsa1.0.00473.1 | 746  | 212204 | 5.00E-92  | 175  | 176  | 99 +  | 543  | 718  | 81505  | 81680  |
| UN28651 | Rsa1.0.05911.1 | 530  | 12261  | 1.00E-100 | 272  | 305  | 89 -  | 2    | 278  | 5182   | 5486   |
| UN28652 | Rsa1.0.02005.1 | 576  | 36137  | 1.00E-145 | 261  | 261  | 100 - | 1    | 261  | 5599   | 5859   |
| UN28653 | Rsa1.0.00453.1 | 839  | 83031  | 0         | 814  | 850  | 95 +  | 1    | 837  | 54768  | 55613  |
| UN28654 | Rsa1.0.00725.1 | 814  | 66757  | 5.00E-58  | 139  | 147  | 94 +  | 149  | 295  | 44372  | 44518  |
| UN28655 | Rsa1.0.02060.1 | 721  | 35528  | 0         | 356  | 357  | 99 -  | 1    | 357  | 20929  | 21285  |
| UN28656 | Rsa1.0.04783.1 | 1027 | 15995  | 0         | 485  | 496  | 97 +  | 3    | 496  | 3295   | 3790   |
| UN28657 | Rsa1.0.00203.1 | 568  | 109129 | 1.00E-123 | 260  | 271  | 95 -  | 289  | 557  | 79773  | 80043  |
| UN28658 | Rsa1.0.01693.1 | 1639 | 40876  | 0         | 786  | 804  | 97 -  | 834  | 1637 | 32001  | 32804  |
| UN28659 | Rsa1.0.03291.1 | 881  | 24000  | 1.00E-141 | 254  | 254  | 100 - | 1    | 254  | 12342  | 12595  |
| UN28660 | Rsa1.0.00867.1 | 736  | 61635  | 2.00E-97  | 289  | 318  | 90 +  | 3    | 319  | 24762  | 25071  |
| UN28661 | Rsa1.0.00725.1 | 1228 | 66757  | 0         | 909  | 918  | 99 +  | 311  | 1228 | 24143  | 25060  |
| UN28662 | Rsa1.0.06206.1 | 873  | 11494  | 2.00E-91  | 180  | 183  | 98 +  | 473  | 655  | 11223  | 11405  |
| UN28663 | Rsa1.0_01341.1 | 860  | 47764  | 0         | 854  | 859  | 99 +  | 1    | 855  | 26981  | 27839  |

|         |                |      |        |           |      |      |       |     |      |        |        |
|---------|----------------|------|--------|-----------|------|------|-------|-----|------|--------|--------|
| UN28664 | Rsa1.0.02762.1 | 764  | 28146  | 1.00E-177 | 333  | 338  | 98 -  | 1   | 338  | 11710  | 12046  |
| UN28665 | Rsa1.0.03447.1 | 980  | 22857  | 0         | 465  | 475  | 97 -  | 506 | 980  | 7037   | 7511   |
| UN28666 | Rsa1.0.02601.1 | 776  | 29654  | 0         | 346  | 347  | 99 +  | 430 | 776  | 4759   | 5105   |
| UN28667 | Rsa1.0.25846.1 | 790  | 917    | 0         | 401  | 401  | 100 - | 4   | 404  | 177    | 577    |
| UN28668 | Rsa1.0.00100.1 | 1226 | 249232 | 0         | 1219 | 1225 | 99 +  | 2   | 1226 | 139353 | 140577 |
| UN28669 | Rsa1.0.03203.1 | 424  | 24624  | 0         | 418  | 424  | 98 +  | 1   | 424  | 1842   | 2265   |
| UN28670 | Rsa1.0.00476.1 | 894  | 280966 | 0         | 451  | 456  | 98 +  | 142 | 597  | 199384 | 199839 |
| UN28671 | Rsa1.0.00122.1 | 826  | 265937 | 0         | 529  | 546  | 96 -  | 273 | 818  | 33254  | 33798  |
| UN28672 | Rsa1.0.00002.1 | 1309 | 601661 | 0         | 430  | 430  | 100 - | 624 | 1053 | 151661 | 152090 |
| UN28673 | Rsa1.0.00812.1 | 973  | 63233  | 0         | 427  | 445  | 95 +  | 3   | 445  | 11997  | 12441  |
| UN28674 | Rsa1.0.00149.1 | 1442 | 305196 | 1.00E-155 | 314  | 326  | 96 +  | 726 | 1051 | 4712   | 5037   |
| UN28675 | Rsa1.0.01099.1 | 1674 | 158481 | 1.00E-162 | 306  | 311  | 98 -  | 235 | 545  | 44494  | 44804  |
| UN28676 | Rsa1.0.07600.1 | 799  | 9052   | 0         | 716  | 762  | 93 -  | 3   | 744  | 4780   | 5539   |
| UN28677 | Rsa1.0.02202.1 | 759  | 33961  | 0         | 754  | 757  | 99 -  | 3   | 759  | 12610  | 13366  |
| UN28678 | Rsa1.0.04109.1 | 824  | 19000  | 0         | 822  | 825  | 99 -  | 1   | 824  | 8332   | 9156   |
| UN28679 | Rsa1.0.01390.1 | 1072 | 46695  | 0         | 868  | 871  | 99 +  | 1   | 871  | 14606  | 15476  |
| UN28680 | Rsa1.0.00040.1 | 515  | 324196 | 1.00E-112 | 234  | 241  | 97 +  | 276 | 515  | 265642 | 265881 |
| UN28681 | Rsa1.0.00351.1 | 1806 | 413096 | 0         | 1256 | 1305 | 96 +  | 491 | 1795 | 123677 | 124979 |
| UN28682 | Rsa1.0.00307.1 | 1004 | 199003 | 0         | 560  | 577  | 97 -  | 429 | 1004 | 9389   | 9963   |
| UN28683 | Rsa1.0.03640.1 | 1199 | 21624  | 0         | 1037 | 1040 | 99 +  | 160 | 1199 | 77     | 1116   |
| UN28684 | Rsa1.0.00038.1 | 742  | 314568 | 1.00E-153 | 320  | 335  | 95 -  | 1   | 326  | 248043 | 248377 |
| UN28685 | Rsa1.0.01543.1 | 1111 | 43645  | 1.00E-159 | 291  | 293  | 99 +  | 817 | 1109 | 15361  | 15653  |
| UN28686 | Rsa1.0.00237.1 | 638  | 235974 | 1.00E-128 | 248  | 252  | 98 +  | 11  | 262  | 25555  | 25804  |
| UN28687 | Rsa1.0.00708.1 | 1342 | 67366  | 0         | 672  | 701  | 95 +  | 645 | 1342 | 38708  | 39408  |
| UN28688 | Rsa1.0.02413.1 | 799  | 31628  | 0         | 584  | 589  | 99 +  | 214 | 799  | 6416   | 7004   |
| UN28689 | Rsa1.0.00306.1 | 899  | 146760 | 0         | 553  | 594  | 93 -  | 3   | 585  | 88781  | 89368  |
| UN28690 | Rsa1.0.00849.1 | 852  | 62212  | 2.00E-73  | 181  | 193  | 93 -  | 84  | 275  | 8999   | 9191   |
| UN28691 | Rsa1.0.01603.1 | 1408 | 42468  | 0         | 734  | 754  | 97 -  | 615 | 1368 | 13627  | 14380  |
| UN28692 | Rsa1.0.04961.1 | 1164 | 15316  | 0         | 734  | 757  | 96 +  | 3   | 759  | 1411   | 2163   |
| UN28693 | Rsa1.0.02948.1 | 893  | 26526  | 0         | 346  | 349  | 99 -  | 545 | 893  | 3854   | 4202   |
| UN28694 | Rsa1.0.00040.1 | 538  | 324196 | 2.00E-93  | 248  | 269  | 92 +  | 280 | 538  | 265642 | 265906 |
| UN28695 | Rsa1.0.02942.1 | 770  | 26577  | 1.00E-143 | 326  | 347  | 93 -  | 432 | 770  | 5979   | 6323   |
| UN28696 | Rsa1.0.00358.1 | 862  | 91293  | 0         | 773  | 776  | 99 +  | 87  | 862  | 52827  | 53602  |
| UN28697 | Rsa1.0.11075.1 | 835  | 5625   | 0         | 444  | 447  | 99 +  | 389 | 835  | 4243   | 4689   |
| UN28698 | Rsa1.0.00985.1 | 1233 | 161950 | 0         | 553  | 570  | 97 +  | 652 | 1221 | 36103  | 36671  |
| UN28699 | Rsa1.0.00080.1 | 1362 | 190437 | 0         | 389  | 405  | 96 +  | 145 | 549  | 81692  | 82096  |
| UN28700 | Rsa1.0.02259.1 | 832  | 33299  | 0         | 645  | 660  | 97 -  | 173 | 832  | 30841  | 31499  |
| UN28701 | Rsa1.0.20735.1 | 881  | 1275   | 0         | 339  | 340  | 99 +  | 542 | 881  | 481    | 820    |
| UN28702 | Rsa1.0.05687.1 | 791  | 12932  | 1.00E-101 | 242  | 258  | 93 +  | 144 | 398  | 4298   | 4554   |

|         |                |      |        |           |      |      |       |     |      |        |        |
|---------|----------------|------|--------|-----------|------|------|-------|-----|------|--------|--------|
| UN28703 | Rsa1.0_00708.1 | 761  | 67366  | 1.00E-159 | 320  | 332  | 96 +  | 56  | 387  | 60747  | 61078  |
| UN28704 | Rsa1.0_00376.1 | 1356 | 90101  | 0         | 539  | 577  | 93 +  | 801 | 1356 | 64580  | 65152  |
| UN28705 | Rsa1.0_00304.1 | 1407 | 97429  | 0         | 512  | 537  | 95 +  | 872 | 1407 | 13853  | 14383  |
| UN28706 | Rsa1.0_04243.1 | 912  | 18321  | 1.00E-151 | 277  | 279  | 99 -  | 3   | 281  | 17384  | 17662  |
| UN28707 | Rsa1.0_05061.1 | 1113 | 14960  | 0         | 440  | 447  | 98 +  | 666 | 1112 | 14130  | 14576  |
| UN28708 | Rsa1.0_01678.1 | 1368 | 162174 | 0         | 365  | 365  | 100 + | 54  | 418  | 128112 | 128476 |
| UN28709 | Rsa1.0_02183.1 | 737  | 34170  | 0         | 539  | 541  | 99 +  | 3   | 543  | 1761   | 2301   |
| UN28710 | Rsa1.0_00580.1 | 623  | 74515  | 0         | 466  | 469  | 99 +  | 153 | 621  | 5565   | 6032   |
| UN28711 | Rsa1.0_04591.1 | 928  | 16717  | 7.00E-30  | 113  | 128  | 88 +  | 451 | 578  | 7075   | 7202   |
| UN28712 | Rsa1.0_00380.1 | 675  | 89748  | 0         | 653  | 673  | 97 -  | 1   | 673  | 47879  | 48550  |
| UN28713 | Rsa1.0_01837.1 | 864  | 38502  | 1.00E-178 | 352  | 364  | 96 -  | 501 | 864  | 17703  | 18066  |
| UN28714 | Rsa1.0_00589.1 | 499  | 209965 | 1.00E-161 | 409  | 452  | 90 -  | 52  | 480  | 181443 | 181894 |
| UN28715 | Rsa1.0_00323.1 | 1299 | 159650 | 0         | 500  | 504  | 99 +  | 798 | 1297 | 115387 | 115890 |
| UN28716 | Rsa1.0_06471.1 | 1331 | 10954  | 0         | 959  | 960  | 99 -  | 372 | 1331 | 668    | 1627   |
| UN28717 | Rsa1.0_01459.1 | 1055 | 45277  | 0         | 1005 | 1058 | 94 -  | 2   | 1052 | 35841  | 36886  |
| UN28718 | Rsa1.0_00329.1 | 1229 | 222544 | 1.00E-130 | 274  | 284  | 96 -  | 791 | 1073 | 32396  | 32678  |
| UN28719 | Rsa1.0_00002.1 | 1210 | 601661 | 1.00E-105 | 232  | 242  | 95 -  | 969 | 1210 | 380973 | 381211 |
| UN28720 | Rsa1.0_00480.1 | 995  | 81325  | 0         | 902  | 950  | 94 -  | 3   | 949  | 62837  | 63778  |
| UN28721 | Rsa1.0_00837.1 | 1190 | 62568  | 0         | 410  | 412  | 99 -  | 2   | 413  | 58055  | 58466  |
| UN28722 | Rsa1.0_06825.1 | 1073 | 10297  | 0         | 443  | 469  | 94 +  | 617 | 1073 | 7176   | 7643   |
| UN28723 | Rsa1.0_03847.1 | 1086 | 20479  | 0         | 1020 | 1070 | 95 +  | 1   | 1057 | 4692   | 5761   |
| UN28724 | Rsa1.0_03010.1 | 870  | 26054  | 0         | 380  | 385  | 98 +  | 471 | 855  | 9487   | 9871   |
| UN28725 | Rsa1.0_00225.1 | 605  | 105892 | 1.00E-152 | 288  | 292  | 98 -  | 287 | 578  | 70135  | 70425  |
| UN28726 | Rsa1.0_00002.1 | 778  | 601661 | 0         | 591  | 593  | 99 -  | 186 | 778  | 407188 | 407779 |
| UN28727 | Rsa1.0_00796.1 | 1145 | 63997  | 5.00E-99  | 205  | 212  | 96 -  | 184 | 395  | 3604   | 3815   |
| UN28728 | Rsa1.0_01228.1 | 1056 | 50238  | 1.00E-142 | 286  | 296  | 96 +  | 761 | 1056 | 5354   | 5649   |
| UN28729 | Rsa1.0_00050.1 | 1230 | 237174 | 0         | 777  | 778  | 99 -  | 1   | 778  | 108214 | 108991 |
| UN28730 | Rsa1.0_05339.1 | 1175 | 14114  | 0         | 1127 | 1193 | 94 -  | 1   | 1175 | 7035   | 8225   |
| UN28731 | Rsa1.0_00362.1 | 1346 | 299497 | 1.00E-164 | 393  | 420  | 93 -  | 158 | 573  | 18129  | 18545  |
| UN28732 | Rsa1.0_02735.1 | 1532 | 28344  | 0         | 687  | 706  | 97 -  | 831 | 1532 | 12893  | 13598  |
| UN28733 | Rsa1.0_00676.1 | 778  | 69166  | 0         | 431  | 432  | 99 +  | 3   | 434  | 64528  | 64959  |
| UN28734 | Rsa1.0_01829.1 | 668  | 166063 | 1.00E-101 | 216  | 226  | 95 -  | 422 | 641  | 157799 | 158024 |
| UN28735 | Rsa1.0_00930.1 | 625  | 59224  | 7.00E-69  | 207  | 227  | 91 -  | 6   | 231  | 51680  | 51901  |
| UN28736 | Rsa1.0_00123.1 | 1514 | 325650 | 0         | 1508 | 1512 | 99 +  | 1   | 1512 | 175353 | 176864 |
| UN28737 | Rsa1.0_07595.1 | 616  | 9057   | 2.00E-84  | 180  | 187  | 96 -  | 276 | 462  | 8438   | 8624   |
| UN28738 | Rsa1.0_00404.1 | 603  | 87635  | 1.00E-160 | 361  | 382  | 94 +  | 221 | 599  | 48085  | 48466  |
| UN28739 | Rsa1.0_00055.1 | 1120 | 520193 | 1.00E-123 | 255  | 265  | 96 +  | 163 | 427  | 99465  | 99729  |
| UN28740 | Rsa1.0_02922.1 | 745  | 26753  | 7.00E-91  | 186  | 190  | 97 -  | 1   | 189  | 4408   | 4597   |
| UN28741 | Rsa1.0_02468.1 | 332  | 31122  | 1.00E-131 | 313  | 336  | 93 +  | 1   | 331  | 26204  | 26536  |

|         |                |      |        |           |     |     |       |     |      |        |        |
|---------|----------------|------|--------|-----------|-----|-----|-------|-----|------|--------|--------|
| UN28742 | Rsa1.0_12526.1 | 1018 | 5204   | 0         | 795 | 815 | 97 -  | 13  | 827  | 1      | 815    |
| UN28743 | Rsa1.0_00336.1 | 979  | 445051 | 0         | 827 | 851 | 97 -  | 127 | 977  | 143272 | 144120 |
| UN28744 | Rsa1.0_03953.1 | 672  | 19889  | 0         | 641 | 675 | 94 +  | 9   | 671  | 2396   | 3068   |
| UN28745 | Rsa1.0_44332.1 | 902  | 508    | 1.00E-158 | 286 | 287 | 99 +  | 176 | 462  | 1      | 287    |
| UN28746 | Rsa1.0_00053.1 | 658  | 263459 | 1.00E-166 | 297 | 297 | 100 + | 272 | 568  | 233258 | 233554 |
| UN28747 | Rsa1.0_00273.1 | 884  | 326186 | 0         | 539 | 598 | 90 -  | 289 | 883  | 273545 | 274141 |
| UN28748 | Rsa1.0_00214.1 | 521  | 107508 | 1.00E-175 | 323 | 327 | 98 +  | 1   | 327  | 67496  | 67822  |
| UN28749 | Rsa1.0_03517.1 | 846  | 22337  | 1.00E-180 | 320 | 320 | 100 + | 3   | 322  | 11057  | 11376  |
| UN28750 | Rsa1.0_06747.1 | 1182 | 10426  | 1.00E-161 | 307 | 313 | 98 +  | 354 | 666  | 9303   | 9615   |
| UN28751 | Rsa1.0_02157.1 | 573  | 149652 | 0         | 483 | 485 | 99 +  | 88  | 572  | 10026  | 10509  |
| UN28752 | Rsa1.0_15719.1 | 841  | 2463   | 1.00E-40  | 135 | 150 | 90 -  | 34  | 182  | 1348   | 1497   |
| UN28753 | Rsa1.0_00923.1 | 607  | 153678 | 1.00E-135 | 356 | 398 | 89 +  | 1   | 379  | 55813  | 56200  |
| UN28754 | Rsa1.0_00437.1 | 1193 | 84879  | 1.00E-135 | 365 | 403 | 90 -  | 743 | 1142 | 58998  | 59389  |
| UN28755 | Rsa1.0_10570.1 | 908  | 5798   | 0         | 624 | 633 | 98 +  | 275 | 907  | 187    | 819    |
| UN28756 | Rsa1.0_00270.1 | 815  | 101236 | 0         | 434 | 438 | 99 +  | 380 | 815  | 18668  | 19105  |
| UN28757 | Rsa1.0_00154.1 | 955  | 189461 | 0         | 396 | 400 | 99 -  | 1   | 399  | 88516  | 88915  |
| UN28758 | Rsa1.0_06561.1 | 1048 | 10772  | 1.00E-164 | 296 | 297 | 99 +  | 4   | 300  | 2627   | 2923   |
| UN28759 | Rsa1.0_01495.1 | 850  | 44613  | 1.00E-147 | 308 | 319 | 96 -  | 532 | 846  | 18059  | 18376  |
| UN28760 | Rsa1.0_00225.1 | 1276 | 105892 | 0         | 535 | 540 | 99 +  | 3   | 542  | 97617  | 98155  |
| UN28761 | Rsa1.0_01893.1 | 940  | 37520  | 0         | 600 | 615 | 97 +  | 3   | 615  | 5103   | 5713   |
| UN28762 | Rsa1.0_00005.1 | 1080 | 353093 | 3.00E-60  | 252 | 295 | 85 -  | 680 | 974  | 251438 | 251731 |
| UN28763 | Rsa1.0_01578.1 | 874  | 42880  | 0         | 721 | 734 | 98 -  | 140 | 873  | 6743   | 7474   |
| UN28764 | Rsa1.0_32606.1 | 1003 | 698    | 0         | 536 | 543 | 98 +  | 1   | 543  | 134    | 676    |
| UN28765 | Rsa1.0_01835.1 | 669  | 38542  | 1.00E-137 | 333 | 361 | 92 -  | 4   | 361  | 23455  | 23815  |
| UN28766 | Rsa1.0_01061.1 | 822  | 55349  | 1.00E-132 | 250 | 252 | 99 -  | 120 | 371  | 26774  | 27024  |
| UN28767 | Rsa1.0_03365.1 | 717  | 23410  | 4.00E-89  | 197 | 208 | 94 +  | 60  | 259  | 4234   | 4441   |
| UN28768 | Rsa1.0_02663.1 | 1066 | 169243 | 4.00E-16  | 60  | 65  | 92 +  | 395 | 459  | 160089 | 160153 |
| UN28769 | Rsa1.0_00324.1 | 1226 | 218805 | 1.00E-138 | 253 | 254 | 99 +  | 543 | 796  | 168459 | 168712 |
| UN28770 | Rsa1.0_01059.1 | 1087 | 55410  | 0         | 905 | 933 | 96 -  | 140 | 1070 | 39308  | 40240  |
| UN28771 | Rsa1.0_02992.1 | 977  | 26176  | 0         | 892 | 993 | 89 -  | 7   | 977  | 550    | 1507   |
| UN28772 | Rsa1.0_00288.1 | 927  | 98659  | 1.00E-179 | 369 | 383 | 96 +  | 1   | 378  | 52863  | 53243  |
| UN28773 | Rsa1.0_04584.1 | 907  | 16756  | 0         | 589 | 597 | 98 -  | 2   | 593  | 8166   | 8762   |
| UN28774 | Rsa1.0_02211.1 | 623  | 33857  | 8.00E-78  | 349 | 412 | 84 +  | 208 | 612  | 2959   | 3369   |
| UN28775 | Rsa1.0_03426.1 | 887  | 23010  | 0         | 860 | 902 | 95 +  | 2   | 886  | 4958   | 5855   |
| UN28776 | Rsa1.0_00041.1 | 865  | 186197 | 0         | 372 | 385 | 96 +  | 481 | 865  | 53418  | 53799  |
| UN28777 | Rsa1.0_00616.1 | 1160 | 195713 | 1.00E-173 | 342 | 353 | 96 +  | 374 | 726  | 158875 | 159227 |
| UN28778 | Rsa1.0_00045.1 | 809  | 328694 | 1.00E-160 | 337 | 351 | 96 +  | 1   | 349  | 184182 | 184532 |
| UN28779 | Rsa1.0_00361.1 | 1141 | 91181  | 0         | 429 | 448 | 95 +  | 6   | 445  | 42343  | 42790  |
| UN28780 | Rsa1.0_16820.1 | 635  | 2023   | 1.00E-134 | 290 | 309 | 93 -  | 4   | 294  | 1560   | 1867   |

|         |                |      |        |           |      |      |       |     |      |        |        |
|---------|----------------|------|--------|-----------|------|------|-------|-----|------|--------|--------|
| UN28781 | Rsa1.0.00352.1 | 1748 | 92266  | 0         | 937  | 1011 | 92 +  | 1   | 974  | 24307  | 25312  |
| UN28782 | Rsa1.0.20183.1 | 1168 | 1330   | 0         | 472  | 487  | 96 -  | 165 | 642  | 1      | 484    |
| UN28783 | Rsa1.0.00020.1 | 1089 | 283099 | 6.00E-74  | 148  | 150  | 98 +  | 807 | 956  | 11180  | 11329  |
| UN28784 | Rsa1.0.00190.1 | 866  | 318240 | 1.00E-119 | 217  | 217  | 100 - | 649 | 865  | 280481 | 280697 |
| UN28785 | Rsa1.0.08740.1 | 742  | 6980   | 1.00E-162 | 299  | 302  | 99 +  | 359 | 660  | 1988   | 2289   |
| UN28786 | Rsa1.0.00737.1 | 676  | 66432  | 0         | 674  | 676  | 99 -  | 1   | 676  | 2370   | 3045   |
| UN28787 | Rsa1.0.01905.1 | 632  | 37450  | 1.00E-158 | 475  | 530  | 89 -  | 111 | 632  | 7380   | 7894   |
| UN28788 | Rsa1.0.24061.1 | 1478 | 1009   | 0         | 499  | 508  | 98 +  | 971 | 1478 | 404    | 910    |
| UN28789 | Rsa1.0.03280.1 | 681  | 145083 | 0         | 637  | 654  | 97 -  | 6   | 659  | 127452 | 128105 |
| UN28790 | Rsa1.0.06392.1 | 1264 | 11104  | 0         | 397  | 405  | 98 +  | 563 | 967  | 6263   | 6667   |
| UN28791 | Rsa1.0.07573.1 | 793  | 9101   | 0         | 790  | 791  | 99 +  | 1   | 791  | 7897   | 8687   |
| UN28792 | Rsa1.0.01341.1 | 1139 | 47764  | 0         | 751  | 800  | 93 +  | 2   | 801  | 40432  | 41228  |
| UN28793 | Rsa1.0.00419.1 | 888  | 86562  | 0         | 375  | 376  | 99 -  | 513 | 888  | 73040  | 73414  |
| UN28794 | Rsa1.0.00005.1 | 1396 | 353093 | 0         | 1279 | 1396 | 91 +  | 2   | 1396 | 64756  | 66092  |
| UN28795 | Rsa1.0.06288.1 | 685  | 11302  | 0         | 462  | 464  | 99 -  | 3   | 466  | 10748  | 11209  |
| UN28796 | Rsa1.0.01396.1 | 409  | 151624 | 1.00E-102 | 241  | 256  | 94 -  | 1   | 248  | 5051   | 5306   |
| UN28797 | Rsa1.0.00260.1 | 1254 | 102021 | 0         | 389  | 394  | 98 -  | 861 | 1254 | 56309  | 56700  |
| UN28798 | Rsa1.0.00966.1 | 1191 | 58136  | 2.00E-49  | 228  | 265  | 86 -  | 1   | 265  | 1732   | 1992   |
| UN28799 | Rsa1.0.01005.1 | 936  | 56967  | 1.00E-172 | 325  | 330  | 98 +  | 298 | 627  | 8496   | 8824   |
| UN28800 | Rsa1.0.00302.1 | 996  | 97521  | 0         | 625  | 630  | 99 +  | 368 | 995  | 40480  | 41108  |
| UN28801 | Rsa1.0.07527.1 | 737  | 9197   | 0         | 412  | 419  | 98 -  | 321 | 737  | 3343   | 3761   |
| UN28802 | Rsa1.0.00163.1 | 747  | 116847 | 0         | 740  | 744  | 99 +  | 3   | 746  | 75923  | 76666  |
| UN28803 | Rsa1.0.16744.1 | 629  | 2049   | 1.00E-107 | 198  | 198  | 100 + | 3   | 200  | 1503   | 1700   |
| UN28804 | Rsa1.0.01884.1 | 644  | 37659  | 4.00E-89  | 217  | 233  | 93 +  | 4   | 233  | 32443  | 32675  |
| UN28805 | Rsa1.0.62225.1 | 870  | 369    | 1.00E-176 | 340  | 346  | 98 -  | 526 | 869  | 24     | 369    |
| UN28806 | Rsa1.0.01512.1 | 1193 | 44234  | 0         | 1099 | 1113 | 98 -  | 1   | 1109 | 36469  | 37581  |
| UN28807 | Rsa1.0.01077.1 | 650  | 54772  | 1.00E-98  | 208  | 216  | 96 +  | 378 | 593  | 20022  | 20233  |
| UN28808 | Rsa1.0.19366.1 | 941  | 1442   | 0         | 591  | 592  | 99 -  | 189 | 780  | 851    | 1442   |
| UN28809 | Rsa1.0.00713.1 | 1005 | 158017 | 0         | 506  | 514  | 98 -  | 132 | 645  | 147241 | 147754 |
| UN28810 | Rsa1.0.00291.1 | 1141 | 172129 | 1.00E-108 | 221  | 228  | 96 -  | 230 | 457  | 96215  | 96442  |
| UN28811 | Rsa1.0.00069.1 | 852  | 403561 | 0         | 393  | 398  | 98 +  | 405 | 802  | 224899 | 225295 |
| UN28812 | Rsa1.0.00224.1 | 1393 | 327530 | 4.00E-94  | 176  | 176  | 100 + | 204 | 379  | 152858 | 153033 |
| UN28813 | Rsa1.0.03789.1 | 712  | 20847  | 0         | 671  | 706  | 95 -  | 1   | 706  | 15924  | 16625  |
| UN28814 | Rsa1.0.00056.1 | 1001 | 332604 | 1.00E-96  | 232  | 250  | 92 -  | 749 | 989  | 292579 | 292825 |
| UN28815 | Rsa1.0.00915.1 | 239  | 194446 | 3.00E-75  | 219  | 238  | 92 +  | 1   | 234  | 39754  | 39984  |
| UN28816 | Rsa1.0.00111.1 | 851  | 390088 | 0         | 451  | 485  | 92 -  | 3   | 479  | 24413  | 24896  |
| UN28817 | Rsa1.0.04426.1 | 729  | 17399  | 0         | 487  | 492  | 98 -  | 2   | 493  | 5299   | 5790   |
| UN28818 | Rsa1.0.00016.1 | 612  | 831256 | 9.00E-90  | 264  | 289  | 91 -  | 334 | 612  | 293073 | 293357 |
| UN28819 | Rsa1.0.00018.1 | 1052 | 410899 | 0         | 402  | 402  | 100 + | 1   | 402  | 93226  | 93627  |

|         |                |      |        |           |      |      |       |      |      |        |        |
|---------|----------------|------|--------|-----------|------|------|-------|------|------|--------|--------|
| UN28820 | Rsa1.0.00147.1 | 1445 | 249503 | 0         | 1159 | 1180 | 98 -  | 1    | 1180 | 234285 | 235452 |
| UN28821 | Rsa1.0.00224.1 | 697  | 327530 | 8.00E-69  | 142  | 145  | 97 -  | 553  | 697  | 228675 | 228819 |
| UN28822 | Rsa1.0.00084.1 | 875  | 142338 | 1.00E-172 | 417  | 454  | 91 +  | 2    | 441  | 135368 | 135820 |
| UN28823 | Rsa1.0.32596.1 | 792  | 698    | 3.00E-93  | 174  | 174  | 100 + | 91   | 264  | 1      | 174    |
| UN28824 | Rsa1.0.04881.1 | 916  | 15608  | 0         | 363  | 367  | 98 -  | 2    | 368  | 7580   | 7946   |
| UN28825 | Rsa1.0.00111.1 | 959  | 390088 | 0         | 498  | 514  | 96 -  | 279  | 792  | 338919 | 339426 |
| UN28826 | Rsa1.0.04810.1 | 1368 | 15887  | 0         | 1327 | 1364 | 97 +  | 3    | 1366 | 1695   | 3057   |
| UN28827 | Rsa1.0.02219.1 | 1017 | 33798  | 0         | 471  | 500  | 94 -  | 379  | 868  | 14328  | 14818  |
| UN28828 | Rsa1.0.00016.1 | 680  | 831256 | 0         | 652  | 681  | 95 -  | 1    | 680  | 651430 | 652110 |
| UN28829 | Rsa1.0.01945.1 | 806  | 36989  | 0         | 781  | 807  | 96 +  | 3    | 806  | 31357  | 32149  |
| UN28830 | Rsa1.0.00753.1 | 1175 | 65705  | 0         | 813  | 826  | 98 -  | 1    | 826  | 31719  | 32544  |
| UN28831 | Rsa1.0.00598.1 | 735  | 73425  | 0         | 551  | 559  | 98 -  | 1    | 557  | 18251  | 18808  |
| UN28832 | Rsa1.0.01864.1 | 1338 | 37998  | 0         | 456  | 488  | 93 +  | 391  | 878  | 13619  | 14082  |
| UN28833 | Rsa1.0.01217.1 | 1065 | 50554  | 0         | 956  | 971  | 98 +  | 10   | 976  | 49503  | 50473  |
| UN28834 | Rsa1.0.01493.1 | 574  | 44670  | 1.00E-109 | 246  | 260  | 94 -  | 315  | 574  | 22099  | 22356  |
| UN28835 | Rsa1.0.01220.1 | 783  | 161775 | 0         | 783  | 784  | 99 -  | 1    | 783  | 7533   | 8316   |
| UN28836 | Rsa1.0.00866.1 | 815  | 61676  | 6.00E-30  | 101  | 112  | 90 -  | 520  | 631  | 57218  | 57329  |
| UN28837 | Rsa1.0.07939.1 | 737  | 8219   | 0         | 407  | 410  | 99 -  | 1    | 409  | 4863   | 5272   |
| UN28838 | Rsa1.0.00243.1 | 1050 | 103651 | 1.00E-156 | 296  | 299  | 98 -  | 308  | 604  | 36596  | 36893  |
| UN28839 | Rsa1.0.02207.1 | 1006 | 33914  | 0         | 493  | 501  | 98 +  | 507  | 1006 | 32827  | 33324  |
| UN28840 | Rsa1.0.00576.1 | 798  | 178949 | 0         | 381  | 387  | 98 +  | 406  | 786  | 25705  | 26091  |
| UN28841 | Rsa1.0.01584.1 | 850  | 42811  | 1.00E-103 | 235  | 249  | 94 +  | 519  | 764  | 22813  | 23061  |
| UN28842 | Rsa1.0.00743.1 | 909  | 177459 | 0         | 869  | 933  | 93 -  | 1    | 909  | 6051   | 6965   |
| UN28843 | Rsa1.0.00786.1 | 1273 | 64285  | 0         | 741  | 776  | 95 -  | 514  | 1273 | 43644  | 44410  |
| UN28844 | Rsa1.0.01910.1 | 1261 | 37405  | 3.00E-82  | 228  | 254  | 89 -  | 1019 | 1259 | 26983  | 27233  |
| UN28845 | Rsa1.0.02805.1 | 1312 | 27698  | 0         | 374  | 381  | 98 +  | 931  | 1310 | 15989  | 16369  |
| UN28846 | Rsa1.0.04395.1 | 1302 | 17570  | 0         | 525  | 539  | 97 -  | 609  | 1145 | 5807   | 6345   |
| UN28847 | Rsa1.0.14185.1 | 1028 | 3690   | 0         | 407  | 417  | 97 +  | 1    | 417  | 169    | 585    |
| UN28848 | Rsa1.0.00910.1 | 970  | 59975  | 0         | 910  | 947  | 96 +  | 15   | 957  | 28717  | 29661  |
| UN28849 | Rsa1.0.00347.1 | 1315 | 93048  | 0         | 421  | 437  | 96 +  | 33   | 469  | 58888  | 59320  |
| UN28850 | Rsa1.0.13865.1 | 1138 | 4184   | 0         | 418  | 424  | 98 -  | 120  | 543  | 1644   | 2067   |
| UN28851 | Rsa1.0.00890.1 | 1160 | 323870 | 1.00E-162 | 302  | 306  | 98 +  | 2    | 307  | 296640 | 296945 |
| UN28852 | Rsa1.0.02139.1 | 227  | 34686  | 1.00E-46  | 125  | 135  | 92 +  | 1    | 135  | 19488  | 19622  |
| UN28853 | Rsa1.0.00008.1 | 1403 | 358124 | 0         | 1388 | 1405 | 98 -  | 1    | 1403 | 63650  | 65054  |
| UN28854 | Rsa1.0.00081.1 | 1507 | 143261 | 0         | 616  | 630  | 97 -  | 701  | 1330 | 114494 | 115123 |
| UN28855 | Rsa1.0.00336.1 | 901  | 445051 | 0         | 778  | 798  | 97 +  | 1    | 798  | 23513  | 24310  |
| UN28856 | Rsa1.0.03118.1 | 662  | 25288  | 1.00E-171 | 423  | 461  | 91 -  | 174  | 624  | 2931   | 3381   |
| UN28857 | Rsa1.0.02686.1 | 1183 | 28666  | 0         | 358  | 361  | 99 -  | 515  | 875  | 5916   | 6276   |
| UN28858 | Rsa1.0.00128.1 | 888  | 228675 | 0         | 485  | 517  | 93 -  | 2    | 507  | 198952 | 199462 |

|         |                |      |        |           |      |      |       |      |      |        |        |
|---------|----------------|------|--------|-----------|------|------|-------|------|------|--------|--------|
| UN28859 | Rsa1.0.06781.1 | 700  | 10362  | 0         | 438  | 458  | 95 +  | 241  | 696  | 2647   | 3089   |
| UN28860 | Rsa1.0.00713.1 | 1201 | 158017 | 1.00E-163 | 311  | 316  | 98 -  | 817  | 1132 | 34445  | 34759  |
| UN28861 | Rsa1.0.01628.1 | 653  | 41932  | 1.00E-170 | 303  | 303  | 100 - | 77   | 379  | 6543   | 6845   |
| UN28862 | Rsa1.0.00331.1 | 754  | 176754 | 0         | 709  | 751  | 94 -  | 9    | 754  | 37621  | 38353  |
| UN28863 | Rsa1.0.27404.1 | 1204 | 854    | 0         | 459  | 473  | 97 +  | 356  | 826  | 3      | 475    |
| UN28864 | Rsa1.0.01391.1 | 770  | 46694  | 8.00E-26  | 153  | 181  | 84 -  | 275  | 453  | 17576  | 17756  |
| UN28865 | Rsa1.0.03277.1 | 1025 | 24138  | 0         | 430  | 443  | 97 -  | 579  | 1015 | 15485  | 15925  |
| UN28866 | Rsa1.0.01260.1 | 1005 | 49750  | 0         | 622  | 672  | 92 +  | 2    | 652  | 10257  | 10907  |
| UN28867 | Rsa1.0.00086.1 | 987  | 439854 | 1.00E-114 | 218  | 221  | 98 +  | 159  | 379  | 336764 | 336984 |
| UN28868 | Rsa1.0.01511.1 | 882  | 44235  | 0         | 455  | 457  | 99 +  | 426  | 882  | 37203  | 37659  |
| UN28869 | Rsa1.0.00123.1 | 995  | 325650 | 1.00E-124 | 247  | 254  | 97 -  | 540  | 793  | 222197 | 222450 |
| UN28870 | Rsa1.0.25174.1 | 453  | 948    | 1.00E-128 | 242  | 245  | 98 -  | 2    | 246  | 1      | 245    |
| UN28871 | Rsa1.0.02504.1 | 1510 | 30706  | 0         | 642  | 660  | 97 +  | 2    | 661  | 5064   | 5723   |
| UN28872 | Rsa1.0.01965.1 | 1144 | 36698  | 0         | 1094 | 1162 | 94 +  | 2    | 1143 | 4699   | 5854   |
| UN28873 | Rsa1.0.00283.1 | 965  | 183797 | 0         | 938  | 960  | 97 -  | 6    | 965  | 38136  | 39095  |
| UN28874 | Rsa1.0.09594.1 | 937  | 6263   | 1.00E-175 | 323  | 327  | 98 -  | 119  | 445  | 872    | 1198   |
| UN28875 | Rsa1.0.04394.1 | 1068 | 17571  | 0         | 1064 | 1067 | 99 +  | 1    | 1066 | 14686  | 15752  |
| UN28876 | Rsa1.0.00328.1 | 778  | 224661 | 0         | 758  | 765  | 99 +  | 1    | 765  | 207824 | 208588 |
| UN28877 | Rsa1.0.02881.1 | 1309 | 27041  | 0         | 667  | 677  | 98 +  | 632  | 1307 | 21097  | 21770  |
| UN28878 | Rsa1.0.02055.1 | 867  | 35546  | 1.00E-172 | 310  | 311  | 99 -  | 557  | 867  | 22727  | 23037  |
| UN28879 | Rsa1.0.00570.1 | 1308 | 75002  | 0         | 961  | 1012 | 94 +  | 300  | 1308 | 72668  | 73670  |
| UN28880 | Rsa1.0.19554.1 | 886  | 1416   | 0         | 384  | 402  | 95 +  | 486  | 886  | 666    | 1063   |
| UN28881 | Rsa1.0.05677.1 | 1500 | 12968  | 0         | 590  | 590  | 100 + | 1    | 590  | 7861   | 8450   |
| UN28882 | Rsa1.0.59214.1 | 1541 | 386    | 0         | 386  | 386  | 100 - | 437  | 822  | 1      | 386    |
| UN28883 | Rsa1.0.00480.1 | 790  | 81325  | 0         | 423  | 424  | 99 +  | 3    | 426  | 35699  | 36122  |
| UN28884 | Rsa1.0.00895.1 | 1040 | 60615  | 1.00E-173 | 361  | 378  | 95 +  | 186  | 556  | 59263  | 59639  |
| UN28885 | Rsa1.0.36484.1 | 1042 | 618    | 0         | 415  | 420  | 98 +  | 623  | 1042 | 1      | 420    |
| UN28886 | Rsa1.0.00222.1 | 735  | 172263 | 0         | 708  | 734  | 96 +  | 1    | 731  | 73321  | 74053  |
| UN28887 | Rsa1.0.03944.1 | 1321 | 19926  | 1.00E-154 | 304  | 312  | 97 -  | 1010 | 1320 | 10302  | 10613  |
| UN28888 | Rsa1.0.01083.1 | 749  | 54617  | 1.00E-164 | 323  | 333  | 96 +  | 69   | 401  | 14524  | 14856  |
| UN28889 | Rsa1.0.02719.1 | 1672 | 28428  | 6.00E-78  | 155  | 157  | 98 +  | 2    | 158  | 1400   | 1556   |
| UN28890 | Rsa1.0.08802.1 | 695  | 6911   | 0         | 684  | 694  | 98 +  | 2    | 695  | 844    | 1537   |
| UN28891 | Rsa1.0.05281.1 | 779  | 14271  | 0         | 557  | 558  | 99 +  | 220  | 777  | 1      | 558    |
| UN28892 | Rsa1.0.02496.1 | 702  | 30814  | 0         | 643  | 665  | 96 +  | 38   | 701  | 13850  | 14510  |
| UN28893 | Rsa1.0.00650.1 | 1171 | 70235  | 1.00E-152 | 313  | 326  | 96 +  | 752  | 1077 | 2442   | 2767   |
| UN28894 | Rsa1.0.00166.1 | 1136 | 240912 | 0         | 1128 | 1134 | 99 +  | 3    | 1136 | 150914 | 152047 |
| UN28895 | Rsa1.0.02402.1 | 1132 | 31710  | 1.00E-139 | 321  | 345  | 93 +  | 750  | 1094 | 23584  | 23915  |
| UN28896 | Rsa1.0.00651.1 | 773  | 247766 | 0         | 361  | 362  | 99 -  | 2    | 363  | 106008 | 106369 |
| UN28897 | Rsa1.0.01639.1 | 1730 | 41850  | 0         | 903  | 908  | 99 -  | 817  | 1721 | 13839  | 14746  |

|         |                |      |        |           |      |      |       |      |      |        |        |
|---------|----------------|------|--------|-----------|------|------|-------|------|------|--------|--------|
| UN28898 | Rsa1.0.00490.1 | 1589 | 186713 | 0         | 1501 | 1591 | 94 -  | 3    | 1588 | 180224 | 181792 |
| UN28899 | Rsa1.0.01343.1 | 1392 | 47735  | 0         | 1353 | 1390 | 97 +  | 1    | 1390 | 9645   | 11028  |
| UN28900 | Rsa1.0.29623.1 | 997  | 777    | 1.00E-101 | 214  | 223  | 95 +  | 1    | 223  | 555    | 777    |
| UN28901 | Rsa1.0.00751.1 | 1042 | 65759  | 0         | 990  | 1057 | 93 -  | 4    | 1038 | 57320  | 58362  |
| UN28902 | Rsa1.0.00411.1 | 1217 | 86944  | 0         | 857  | 861  | 99 +  | 357  | 1217 | 61976  | 62836  |
| UN28903 | Rsa1.0.01347.1 | 517  | 47606  | 0         | 512  | 513  | 99 +  | 2    | 514  | 3592   | 4104   |
| UN28904 | Rsa1.0.21935.1 | 1404 | 1162   | 0         | 463  | 475  | 97 -  | 5    | 472  | 656    | 1130   |
| UN28905 | Rsa1.0.15299.1 | 868  | 2704   | 0         | 826  | 866  | 95 -  | 2    | 867  | 1732   | 2587   |
| UN28906 | Rsa1.0.00173.1 | 615  | 288743 | 0         | 423  | 427  | 99 +  | 187  | 613  | 197613 | 198038 |
| UN28907 | Rsa1.0.02729.1 | 717  | 28394  | 0         | 480  | 481  | 99 +  | 236  | 716  | 21933  | 22413  |
| UN28908 | Rsa1.0.07815.1 | 867  | 8487   | 0         | 759  | 802  | 94 -  | 39   | 840  | 1245   | 2029   |
| UN28909 | Rsa1.0.02532.1 | 643  | 30403  | 0         | 633  | 641  | 98 -  | 4    | 643  | 13283  | 13923  |
| UN28910 | Rsa1.0.07661.1 | 1023 | 8891   | 0         | 479  | 498  | 96 -  | 379  | 867  | 7859   | 8353   |
| UN28911 | Rsa1.0.00191.1 | 800  | 316976 | 0         | 788  | 798  | 98 -  | 2    | 799  | 15346  | 16143  |
| UN28912 | Rsa1.0.09594.1 | 209  | 6263   | 5.00E-58  | 183  | 203  | 90 +  | 12   | 208  | 5543   | 5745   |
| UN28913 | Rsa1.0.16978.1 | 1242 | 1964   | 1.00E-130 | 239  | 240  | 99 -  | 1003 | 1242 | 1702   | 1941   |
| UN28914 | Rsa1.0.00104.1 | 749  | 368722 | 1.00E-123 | 225  | 225  | 100 + | 523  | 747  | 330532 | 330756 |
| UN28915 | Rsa1.0.00483.1 | 751  | 81102  | 1.00E-117 | 356  | 401  | 88 -  | 12   | 404  | 63959  | 64353  |
| UN28916 | Rsa1.0.02282.1 | 968  | 163951 | 0         | 713  | 734  | 97 +  | 241  | 968  | 143688 | 144419 |
| UN28917 | Rsa1.0.01935.1 | 1197 | 37152  | 0         | 512  | 522  | 98 +  | 412  | 933  | 5196   | 5716   |
| UN28918 | Rsa1.0.00330.1 | 843  | 94666  | 0         | 840  | 843  | 99 +  | 2    | 843  | 58289  | 59131  |
| UN28919 | Rsa1.0.03853.1 | 825  | 20447  | 4.00E-37  | 166  | 192  | 86 +  | 349  | 538  | 12392  | 12583  |
| UN28920 | Rsa1.0.03853.1 | 1273 | 20447  | 0         | 1236 | 1273 | 97 -  | 3    | 1273 | 11467  | 12739  |
| UN28921 | Rsa1.0.00778.1 | 970  | 196751 | 0         | 969  | 970  | 99 +  | 1    | 970  | 179001 | 179969 |
| UN28922 | Rsa1.0.01396.1 | 840  | 151624 | 3.00E-90  | 176  | 177  | 99 +  | 184  | 360  | 129209 | 129384 |
| UN28923 | Rsa1.0.23333.1 | 636  | 1056   | 1.00E-159 | 308  | 316  | 97 -  | 14   | 329  | 598    | 913    |
| UN28924 | Rsa1.0.01183.1 | 1128 | 51465  | 0         | 418  | 422  | 99 +  | 707  | 1128 | 20241  | 20661  |
| UN28925 | Rsa1.0.01171.1 | 1085 | 51752  | 0         | 1060 | 1100 | 96 +  | 1    | 1083 | 33654  | 34748  |
| UN28926 | Rsa1.0.00643.1 | 1632 | 70658  | 0         | 1344 | 1355 | 99 +  | 2    | 1354 | 24924  | 26276  |
| UN28927 | Rsa1.0.03263.1 | 530  | 24268  | 0         | 436  | 437  | 99 -  | 94   | 530  | 14975  | 15411  |
| UN28928 | Rsa1.0.12103.1 | 968  | 5314   | 0         | 404  | 406  | 99 +  | 1    | 405  | 9      | 414    |
| UN28929 | Rsa1.0.06653.1 | 806  | 10596  | 0         | 784  | 804  | 97 -  | 7    | 806  | 2225   | 3027   |
| UN28930 | Rsa1.0.08356.1 | 725  | 7485   | 0         | 435  | 437  | 99 +  | 290  | 725  | 6679   | 7115   |
| UN28931 | Rsa1.0.00008.1 | 738  | 358124 | 0         | 717  | 737  | 97 +  | 3    | 734  | 61748  | 62482  |
| UN28932 | Rsa1.0.02400.1 | 753  | 31750  | 0         | 750  | 753  | 99 -  | 1    | 753  | 14990  | 15742  |
| UN28933 | Rsa1.0.02573.1 | 1220 | 29955  | 0         | 1199 | 1220 | 98 +  | 1    | 1220 | 10754  | 11961  |
| UN28934 | Rsa1.0.03087.1 | 1178 | 25478  | 0         | 606  | 642  | 94 -  | 536  | 1175 | 14276  | 14903  |
| UN28935 | Rsa1.0.01553.1 | 1015 | 43379  | 1.00E-113 | 207  | 207  | 100 + | 713  | 919  | 39674  | 39880  |
| UN28936 | Rsa1.0.02030.1 | 712  | 179909 | 0         | 430  | 430  | 100 - | 1    | 430  | 11688  | 12117  |



|         |                |      |        |           |      |      |       |      |      |        |        |
|---------|----------------|------|--------|-----------|------|------|-------|------|------|--------|--------|
| UN28937 | Rsa1.0.03845.1 | 1108 | 20486  | 1.00E-100 | 204  | 210  | 97 -  | 740  | 949  | 10622  | 10831  |
| UN28938 | Rsa1.0.00196.1 | 1126 | 109960 | 0         | 394  | 408  | 96 -  | 78   | 484  | 39892  | 40299  |
| UN28939 | Rsa1.0.00543.1 | 1094 | 76788  | 0         | 404  | 404  | 100 - | 9    | 412  | 31685  | 32088  |
| UN28940 | Rsa1.0.00779.1 | 1211 | 64568  | 0         | 636  | 653  | 97 +  | 434  | 1080 | 53171  | 53823  |
| UN28941 | Rsa1.0.00711.1 | 1187 | 67223  | 0         | 427  | 427  | 100 + | 761  | 1187 | 22148  | 22574  |
| UN28942 | Rsa1.0.02237.1 | 797  | 33544  | 0         | 583  | 588  | 99 -  | 188  | 775  | 7887   | 8474   |
| UN28943 | Rsa1.0.01887.1 | 763  | 37564  | 1.00E-104 | 213  | 220  | 96 +  | 7    | 226  | 27503  | 27722  |
| UN28944 | Rsa1.0.00784.1 | 1653 | 64359  | 0         | 727  | 729  | 99 +  | 1    | 728  | 25498  | 26226  |
| UN28945 | Rsa1.0.02004.1 | 876  | 169138 | 0         | 777  | 820  | 94 +  | 57   | 874  | 148454 | 149259 |
| UN28946 | Rsa1.0.00241.1 | 378  | 104000 | 1.00E-127 | 300  | 318  | 94 +  | 67   | 378  | 27774  | 28088  |
| UN28947 | Rsa1.0.00048.1 | 1031 | 167185 | 0         | 622  | 643  | 96 -  | 388  | 1030 | 36504  | 37146  |
| UN28948 | Rsa1.0.00790.1 | 789  | 148693 | 0         | 784  | 787  | 99 +  | 3    | 789  | 14655  | 15441  |
| UN28949 | Rsa1.0.00081.1 | 1080 | 143261 | 1.00E-74  | 146  | 147  | 99 -  | 715  | 861  | 10213  | 10359  |
| UN28950 | Rsa1.0.00111.1 | 777  | 390088 | 0         | 697  | 704  | 99 +  | 2    | 705  | 89833  | 90535  |
| UN28951 | #              | #    | #      | #         | #    | #    | #     | #    | #    | #      | #      |
| UN28952 | Rsa1.0.00401.1 | 1062 | 244410 | 0         | 445  | 454  | 98 -  | 8    | 461  | 172543 | 172996 |
| UN28953 | Rsa1.0.18947.1 | 1126 | 1506   | 1.00E-78  | 150  | 150  | 100 - | 903  | 1052 | 188    | 337    |
| UN28954 | Rsa1.0.03263.1 | 936  | 24268  | 0         | 890  | 925  | 96 -  | 13   | 934  | 21909  | 22829  |
| UN28955 | Rsa1.0.01299.1 | 941  | 162028 | 1.00E-132 | 295  | 313  | 94 +  | 6    | 318  | 160816 | 161125 |
| UN28956 | Rsa1.0.02943.1 | 1166 | 153598 | 0         | 380  | 382  | 99 -  | 785  | 1166 | 132491 | 132872 |
| UN28957 | Rsa1.0.31798.1 | 667  | 718    | 0         | 372  | 374  | 99 +  | 3    | 376  | 55     | 428    |
| UN28958 | Rsa1.0.02108.1 | 1053 | 163029 | 0         | 1031 | 1052 | 98 +  | 2    | 1053 | 33618  | 34660  |
| UN28959 | Rsa1.0.16541.1 | 1193 | 2119   | 1.00E-164 | 402  | 440  | 91 +  | 780  | 1193 | 92     | 531    |
| UN28960 | Rsa1.0.00070.1 | 1245 | 150321 | 0         | 904  | 974  | 92 -  | 271  | 1226 | 88385  | 89346  |
| UN28961 | Rsa1.0.00131.1 | 1233 | 432233 | 0         | 636  | 670  | 94 +  | 1    | 650  | 153862 | 154531 |
| UN28962 | Rsa1.0.05575.1 | 1020 | 13288  | 0         | 404  | 416  | 97 -  | 367  | 779  | 8378   | 8793   |
| UN28963 | Rsa1.0.26735.1 | 938  | 880    | 0         | 356  | 357  | 99 +  | 581  | 937  | 1      | 357    |
| UN28964 | Rsa1.0.01339.1 | 1001 | 47813  | 0         | 674  | 696  | 96 -  | 202  | 894  | 44381  | 45076  |
| UN28965 | Rsa1.0.00195.1 | 769  | 251884 | 0         | 655  | 669  | 97 +  | 34   | 701  | 75521  | 76189  |
| UN28966 | Rsa1.0.00972.1 | 926  | 57937  | 5.00E-71  | 357  | 424  | 84 -  | 469  | 888  | 49948  | 50369  |
| UN28967 | Rsa1.0.04901.1 | 989  | 15526  | 0         | 327  | 328  | 99 +  | 110  | 437  | 10138  | 10465  |
| UN28968 | Rsa1.0.00205.1 | 1423 | 193401 | 1.00E-167 | 321  | 326  | 98 +  | 1099 | 1423 | 33441  | 33765  |
| UN28969 | Rsa1.0.14514.1 | 1074 | 3315   | 0         | 341  | 344  | 99 -  | 54   | 397  | 1993   | 2336   |
| UN28970 | Rsa1.0.06248.1 | 1295 | 11394  | 0         | 370  | 378  | 97 -  | 918  | 1294 | 4499   | 4876   |
| UN28971 | Rsa1.0.01167.1 | 1088 | 51859  | 0         | 900  | 901  | 99 -  | 1    | 901  | 3743   | 4643   |
| UN28972 | Rsa1.0.00017.1 | 441  | 752458 | 0         | 434  | 436  | 99 +  | 6    | 441  | 248042 | 248477 |
| UN28973 | Rsa1.0.01134.1 | 1140 | 52829  | 0         | 374  | 378  | 98 -  | 248  | 625  | 19094  | 19471  |
| UN28974 | Rsa1.0.17021.1 | 976  | 1951   | 0         | 910  | 977  | 93 -  | 2    | 973  | 696    | 1641   |
| UN28975 | Rsa1.0.07997.1 | 640  | 8106   | 0         | 358  | 358  | 100 - | 281  | 638  | 4071   | 4428   |

|         |                |      |        |           |     |     |       |     |      |        |        |
|---------|----------------|------|--------|-----------|-----|-----|-------|-----|------|--------|--------|
| UN28976 | Rsa1.0.03548.1 | 859  | 22164  | 3.00E-38  | 113 | 122 | 92 -  | 63  | 184  | 2045   | 2165   |
| UN28977 | Rsa1.0.02762.1 | 1323 | 28146  | 0         | 377 | 383 | 98 -  | 940 | 1322 | 23401  | 23783  |
| UN28978 | Rsa1.0.00905.1 | 570  | 60110  | 0         | 334 | 336 | 99 +  | 234 | 568  | 19489  | 19824  |
| UN28979 | Rsa1.0.63300.1 | 842  | 362    | 0         | 332 | 332 | 100 - | 1   | 332  | 1      | 332    |
| UN28980 | Rsa1.0.02301.1 | 1539 | 32835  | 0         | 541 | 551 | 98 +  | 3   | 550  | 6250   | 6800   |
| UN28981 | Rsa1.0.00072.1 | 737  | 148743 | 0         | 376 | 383 | 98 +  | 112 | 493  | 10439  | 10821  |
| UN28982 | Rsa1.0.00408.1 | 1216 | 176752 | 0         | 782 | 784 | 99 +  | 1   | 784  | 105810 | 106593 |
| UN28983 | Rsa1.0.00567.1 | 984  | 75260  | 0         | 866 | 902 | 96 -  | 6   | 904  | 69413  | 70311  |
| UN28984 | Rsa1.0.00092.1 | 1121 | 659932 | 0         | 489 | 499 | 97 -  | 1   | 499  | 315785 | 316283 |
| UN28985 | Rsa1.0.05683.1 | 1387 | 12944  | 0         | 437 | 440 | 99 +  | 3   | 442  | 3548   | 3987   |
| UN28986 | Rsa1.0.00275.1 | 922  | 210104 | 1.00E-145 | 274 | 278 | 98 -  | 643 | 920  | 10630  | 10907  |
| UN28987 | Rsa1.0.00110.1 | 971  | 132719 | 0         | 969 | 971 | 99 -  | 1   | 971  | 8592   | 9562   |
| UN28988 | Rsa1.0.01902.1 | 873  | 37455  | 0         | 569 | 572 | 99 -  | 301 | 872  | 2772   | 3342   |
| UN28989 | Rsa1.0.16067.1 | 1047 | 2300   | 1.00E-166 | 325 | 333 | 97 +  | 3   | 330  | 309    | 640    |
| UN28990 | Rsa1.0.08356.1 | 672  | 7485   | 1.00E-161 | 320 | 330 | 96 +  | 292 | 621  | 6679   | 7005   |
| UN28991 | Rsa1.0.00611.1 | 616  | 72410  | 0         | 428 | 438 | 97 +  | 1   | 438  | 40511  | 40948  |
| UN28992 | Rsa1.0.00130.1 | 1431 | 125737 | 0         | 766 | 793 | 96 +  | 646 | 1429 | 88366  | 89154  |
| UN28993 | Rsa1.0.01211.1 | 975  | 50646  | 0         | 684 | 724 | 94 -  | 7   | 723  | 19015  | 19733  |
| UN28994 | Rsa1.0.01150.1 | 723  | 52331  | 0         | 356 | 362 | 98 -  | 332 | 693  | 28938  | 29299  |
| UN28995 | Rsa1.0.10012.1 | 685  | 6039   | 1.00E-89  | 240 | 264 | 90 +  | 105 | 362  | 3632   | 3891   |
| UN28996 | Rsa1.0.00374.1 | 998  | 165738 | 0         | 753 | 755 | 99 +  | 1   | 755  | 146157 | 146911 |
| UN28997 | Rsa1.0.04660.1 | 214  | 16478  | 3.00E-90  | 203 | 212 | 95 +  | 1   | 212  | 4383   | 4592   |
| UN28998 | Rsa1.0.00067.1 | 470  | 415055 | 0         | 465 | 467 | 99 -  | 1   | 467  | 201846 | 202312 |
| UN28999 | Rsa1.0.01196.1 | 786  | 51097  | 4.00E-77  | 157 | 159 | 98 +  | 3   | 161  | 38384  | 38541  |
| UN29000 | Rsa1.0.15176.1 | 1338 | 2779   | 0         | 651 | 677 | 96 +  | 662 | 1338 | 357    | 1014   |
| UN29001 | Rsa1.0.00168.1 | 1099 | 115870 | 0         | 595 | 622 | 95 +  | 1   | 618  | 41775  | 42385  |
| UN29002 | Rsa1.0.02406.1 | 702  | 145276 | 0         | 552 | 564 | 97 +  | 1   | 561  | 29696  | 30259  |
| UN29003 | Rsa1.0.08401.1 | 1107 | 7418   | 0         | 371 | 376 | 98 -  | 733 | 1107 | 1686   | 2061   |
| UN29004 | Rsa1.0.00602.1 | 741  | 73302  | 1.00E-123 | 262 | 274 | 95 -  | 23  | 293  | 720    | 993    |
| UN29005 | Rsa1.0.00383.1 | 951  | 398431 | 0         | 933 | 951 | 98 +  | 1   | 951  | 145470 | 146420 |
| UN29006 | Rsa1.0.00051.1 | 840  | 258225 | 0         | 612 | 628 | 97 +  | 210 | 835  | 129741 | 130368 |
| UN29007 | Rsa1.0.00548.1 | 1440 | 76518  | 3.00E-27  | 151 | 177 | 85 +  | 324 | 497  | 3374   | 3547   |
| UN29008 | Rsa1.0.01424.1 | 427  | 46139  | 0         | 414 | 427 | 96 +  | 4   | 427  | 23807  | 24233  |
| UN29009 | Rsa1.0.08031.1 | 757  | 8048   | 0         | 356 | 363 | 98 +  | 1   | 361  | 6889   | 7251   |
| UN29010 | Rsa1.0.00329.1 | 272  | 222544 | 1.00E-144 | 265 | 267 | 99 +  | 2   | 268  | 56276  | 56542  |
| UN29011 | Rsa1.0.29602.1 | 1128 | 778    | 0         | 523 | 538 | 97 -  | 1   | 535  | 1      | 533    |
| UN29012 | Rsa1.0.01538.1 | 966  | 43733  | 0         | 533 | 565 | 94 +  | 35  | 599  | 4160   | 4715   |
| UN29013 | Rsa1.0.00238.1 | 945  | 193193 | 0         | 641 | 646 | 99 +  | 300 | 945  | 45025  | 45670  |
| UN29014 | Rsa1.0.00090.1 | 658  | 273859 | 0         | 589 | 625 | 94 +  | 1   | 625  | 88378  | 88993  |

|         |                |      |        |           |      |      |       |     |      |        |        |
|---------|----------------|------|--------|-----------|------|------|-------|-----|------|--------|--------|
| UN29015 | Rsa1.0.00198.1 | 657  | 222963 | 1.00E-161 | 302  | 306  | 98 -  | 353 | 655  | 23674  | 23979  |
| UN29016 | Rsa1.0.02191.1 | 990  | 34078  | 0         | 665  | 702  | 94 +  | 290 | 988  | 14506  | 15206  |
| UN29017 | Rsa1.0.00287.1 | 763  | 98687  | 0         | 747  | 768  | 97 -  | 3   | 763  | 85258  | 86025  |
| UN29018 | Rsa1.0.00867.1 | 747  | 61635  | 0         | 385  | 389  | 98 +  | 360 | 747  | 30726  | 31114  |
| UN29019 | Rsa1.0.02029.1 | 752  | 35857  | 0         | 377  | 384  | 98 +  | 1   | 384  | 25823  | 26206  |
| UN29020 | Rsa1.0.00258.1 | 993  | 102381 | 0         | 425  | 434  | 97 +  | 351 | 784  | 64017  | 64450  |
| UN29021 | Rsa1.0.00280.1 | 924  | 99966  | 0         | 345  | 348  | 99 +  | 10  | 357  | 63491  | 63838  |
| UN29022 | Rsa1.0.05573.1 | 1022 | 13290  | 1.00E-104 | 204  | 208  | 98 +  | 596 | 803  | 11128  | 11335  |
| UN29023 | Rsa1.0.01037.1 | 759  | 55969  | 0         | 443  | 445  | 99 -  | 315 | 759  | 35971  | 36415  |
| UN29024 | Rsa1.0.02136.1 | 915  | 34707  | 1.00E-101 | 190  | 191  | 99 +  | 725 | 915  | 3079   | 3269   |
| UN29025 | Rsa1.0.00948.1 | 291  | 58620  | 8.00E-67  | 132  | 133  | 99 -  | 134 | 266  | 43219  | 43351  |
| UN29026 | Rsa1.0.13478.1 | 1743 | 4790   | 0         | 1570 | 1667 | 94 -  | 99  | 1742 | 2031   | 3662   |
| UN29027 | Rsa1.0.00111.1 | 1127 | 390088 | 0         | 604  | 631  | 95 +  | 292 | 913  | 260656 | 261283 |
| UN29028 | Rsa1.0.00160.1 | 841  | 346678 | 1.00E-141 | 270  | 274  | 98 -  | 57  | 329  | 193005 | 193278 |
| UN29029 | Rsa1.0.00165.1 | 1195 | 116466 | 1.00E-121 | 239  | 245  | 97 +  | 951 | 1195 | 60604  | 60848  |
| UN29030 | Rsa1.0.17914.1 | 965  | 1711   | 0         | 338  | 340  | 99 -  | 624 | 963  | 532    | 871    |
| UN29031 | Rsa1.0.00006.1 | 780  | 396176 | 0         | 552  | 566  | 97 +  | 90  | 654  | 346200 | 346762 |
| UN29032 | Rsa1.0.03001.1 | 638  | 26108  | 1.00E-179 | 343  | 350  | 98 -  | 289 | 638  | 11695  | 12043  |
| UN29033 | Rsa1.0.02555.1 | 1016 | 30146  | 1.00E-172 | 381  | 403  | 94 -  | 1   | 401  | 22965  | 23367  |
| UN29034 | Rsa1.0.00628.1 | 1559 | 214360 | 0         | 719  | 719  | 100 - | 840 | 1558 | 66865  | 67583  |
| UN29035 | Rsa1.0.00107.1 | 1165 | 431659 | 0         | 1063 | 1067 | 99 -  | 1   | 1067 | 334017 | 335082 |
| UN29036 | Rsa1.0.14197.1 | 1013 | 3674   | 0         | 554  | 577  | 96 +  | 1   | 568  | 865    | 1441   |
| UN29037 | Rsa1.0.00487.1 | 971  | 80674  | 0         | 568  | 569  | 99 +  | 403 | 971  | 24669  | 25237  |
| UN29038 | Rsa1.0.00049.1 | 977  | 167018 | 1.00E-129 | 252  | 258  | 97 +  | 62  | 319  | 131986 | 132243 |
| UN29039 | Rsa1.0.00209.1 | 792  | 108531 | 0         | 433  | 444  | 97 +  | 348 | 791  | 4489   | 4932   |
| UN29040 | Rsa1.0.09014.1 | 718  | 6709   | 1.00E-159 | 285  | 285  | 100 - | 6   | 290  | 4408   | 4692   |
| UN29041 | Rsa1.0.05409.1 | 1185 | 13844  | 0         | 561  | 571  | 98 +  | 614 | 1184 | 11143  | 11711  |
| UN29042 | Rsa1.0.02987.1 | 1080 | 26196  | 1.00E-121 | 237  | 242  | 97 +  | 379 | 620  | 4636   | 4877   |
| UN29043 | Rsa1.0.00073.1 | 816  | 240924 | 3.00E-96  | 237  | 256  | 92 +  | 81  | 328  | 205535 | 205784 |
| UN29044 | Rsa1.0.00484.1 | 603  | 203294 | 1.00E-150 | 294  | 302  | 97 -  | 192 | 493  | 175407 | 175708 |
| UN29045 | Rsa1.0.07806.1 | 826  | 8506   | 1.00E-149 | 302  | 312  | 96 +  | 2   | 312  | 6184   | 6495   |
| UN29046 | Rsa1.0.02008.1 | 593  | 36109  | 0         | 590  | 592  | 99 -  | 2   | 593  | 15190  | 15781  |
| UN29047 | Rsa1.0.02856.1 | 652  | 27270  | 0         | 485  | 494  | 98 -  | 159 | 650  | 17675  | 18168  |
| UN29048 | Rsa1.0.00950.1 | 1204 | 58547  | 1.00E-166 | 300  | 301  | 99 +  | 904 | 1204 | 45825  | 46125  |
| UN29049 | Rsa1.0.03852.1 | 972  | 20451  | 0         | 622  | 625  | 99 +  | 1   | 625  | 10248  | 10872  |
| UN29050 | Rsa1.0.00964.1 | 499  | 316648 | 2.33E-156 | 328  | 348  | 94 -  | 155 | 495  | 143585 | 143930 |
| UN29051 | Rsa1.0.00028.1 | 1206 | 293984 | 1.00E-161 | 336  | 351  | 95 -  | 713 | 1060 | 33968  | 34318  |
| UN29052 | Rsa1.0.00385.1 | 851  | 89160  | 1.00E-176 | 325  | 329  | 98 -  | 523 | 851  | 52732  | 53060  |
| UN29053 | Rsa1.0.00060.1 | 1367 | 502678 | 0         | 841  | 874  | 96 -  | 502 | 1367 | 28769  | 29642  |

|         |                |      |        |           |      |      |       |     |      |        |        |
|---------|----------------|------|--------|-----------|------|------|-------|-----|------|--------|--------|
| UN29054 | Rsa1.0.02314.1 | 825  | 32642  | 0         | 553  | 582  | 95 -  | 254 | 820  | 29546  | 30126  |
| UN29055 | Rsa1.0.00155.1 | 1517 | 118465 | 0         | 575  | 575  | 100 - | 1   | 575  | 75583  | 76157  |
| UN29056 | Rsa1.0.04249.1 | 1372 | 18269  | 1.00E-179 | 433  | 468  | 92 -  | 430 | 881  | 4360   | 4827   |
| UN29057 | Rsa1.0.03292.1 | 300  | 23977  | 1.00E-106 | 230  | 239  | 96 +  | 62  | 298  | 8486   | 8724   |
| UN29058 | Rsa1.0.00284.1 | 709  | 323267 | 0         | 392  | 396  | 98 +  | 35  | 430  | 255723 | 256117 |
| UN29059 | Rsa1.0.02148.1 | 1083 | 34610  | 0         | 1072 | 1074 | 99 -  | 10  | 1083 | 23889  | 24962  |
| UN29060 | Rsa1.0.00041.1 | 786  | 186197 | 3.00E-87  | 179  | 184  | 97 -  | 100 | 283  | 175346 | 175529 |
| UN29061 | Rsa1.0.00585.1 | 1396 | 74164  | 0         | 326  | 326  | 100 - | 354 | 679  | 49228  | 49553  |
| UN29062 | Rsa1.0.06010.1 | 1405 | 11944  | 0         | 649  | 727  | 89 +  | 586 | 1312 | 4866   | 5592   |
| UN29063 | Rsa1.0.05269.1 | 1394 | 14311  | 0         | 1182 | 1212 | 97 +  | 1   | 1212 | 6347   | 7556   |
| UN29064 | #              | #    | #      | #         | #    | #    | #     | #   | #    | #      | #      |
| UN29065 | Rsa1.0.01071.1 | 811  | 166914 | 0         | 808  | 811  | 99 -  | 1   | 811  | 13081  | 13891  |
| UN29066 | Rsa1.0.02123.1 | 889  | 149053 | 0         | 700  | 702  | 99 +  | 188 | 889  | 30492  | 31193  |
| UN29067 | Rsa1.0.04816.1 | 1003 | 15872  | 1.00E-139 | 278  | 287  | 96 -  | 106 | 392  | 7702   | 7988   |
| UN29068 | Rsa1.0.00156.1 | 1307 | 118383 | 0         | 1205 | 1216 | 99 +  | 1   | 1215 | 89947  | 91162  |
| UN29069 | Rsa1.0.00036.1 | 506  | 176186 | 0         | 502  | 502  | 100 - | 3   | 504  | 159074 | 159575 |
| UN29070 | Rsa1.0.02300.1 | 958  | 32847  | 0         | 379  | 383  | 98 +  | 1   | 382  | 4524   | 4905   |
| UN29071 | Rsa1.0.00651.1 | 862  | 247766 | 0         | 474  | 485  | 97 -  | 39  | 523  | 80397  | 80880  |
| UN29072 | Rsa1.0.00898.1 | 594  | 202772 | 4.00E-30  | 263  | 328  | 80 -  | 40  | 367  | 16201  | 16528  |
| UN29073 | Rsa1.0.02957.1 | 426  | 26479  | 1.00E-140 | 256  | 257  | 99 +  | 169 | 425  | 4855   | 5111   |
| UN29074 | Rsa1.0.00984.1 | 987  | 57580  | 0         | 362  | 362  | 100 - | 626 | 987  | 3943   | 4304   |
| UN29075 | Rsa1.0.00110.1 | 1359 | 132719 | 0         | 458  | 468  | 97 +  | 892 | 1359 | 102697 | 103162 |
| UN29076 | Rsa1.0.02570.1 | 845  | 30000  | 1.00E-128 | 320  | 349  | 91 -  | 8   | 338  | 4772   | 5113   |
| UN29077 | Rsa1.0.00846.1 | 847  | 62342  | 0         | 808  | 848  | 95 -  | 1   | 847  | 40583  | 41430  |
| UN29078 | Rsa1.0.00300.1 | 841  | 97747  | 0         | 456  | 456  | 100 - | 1   | 456  | 2695   | 3150   |
| UN29079 | Rsa1.0.02220.1 | 1502 | 176031 | 0         | 854  | 861  | 99 +  | 646 | 1502 | 155570 | 156430 |
| UN29080 | Rsa1.0.00277.1 | 777  | 100132 | 0         | 486  | 490  | 99 +  | 137 | 626  | 14587  | 15076  |
| UN29081 | Rsa1.0.00579.1 | 674  | 148308 | 0         | 385  | 385  | 100 + | 3   | 387  | 35562  | 35946  |
| UN29082 | Rsa1.0.01450.1 | 604  | 144251 | 0         | 533  | 580  | 91 -  | 45  | 604  | 42214  | 42793  |
| UN29083 | Rsa1.0.00727.1 | 779  | 66724  | 5.00E-95  | 206  | 215  | 95 -  | 527 | 741  | 49448  | 49659  |
| UN29084 | Rsa1.0.01164.1 | 1298 | 51934  | 0         | 1242 | 1274 | 97 +  | 1   | 1272 | 36789  | 38061  |
| UN29085 | Rsa1.0.13828.1 | 1161 | 4254   | 0         | 795  | 819  | 97 +  | 1   | 809  | 2049   | 2866   |
| UN29086 | Rsa1.0.00490.1 | 903  | 186713 | 1.00E-165 | 324  | 334  | 97 -  | 569 | 902  | 164814 | 165147 |
| UN29087 | Rsa1.0.01199.1 | 714  | 163576 | 0         | 707  | 712  | 99 +  | 4   | 712  | 120059 | 120770 |
| UN29088 | Rsa1.0.02876.1 | 889  | 27062  | 0         | 861  | 873  | 98 +  | 3   | 874  | 8924   | 9796   |
| UN29089 | Rsa1.0.00363.1 | 678  | 90968  | 9.00E-81  | 159  | 161  | 98 +  | 218 | 378  | 30156  | 30316  |
| UN29090 | Rsa1.0.01021.1 | 586  | 56610  | 0         | 393  | 394  | 99 -  | 190 | 583  | 36470  | 36863  |
| UN29091 | Rsa1.0.01344.1 | 1044 | 142535 | 0         | 430  | 452  | 95 -  | 605 | 1044 | 109896 | 110344 |
| UN29092 | Rsa1.0.03305.1 | 1060 | 147552 | 0         | 1012 | 1019 | 99 +  | 39  | 1057 | 142405 | 143423 |

|         |                |      |        |           |      |      |       |     |      |        |        |
|---------|----------------|------|--------|-----------|------|------|-------|-----|------|--------|--------|
| UN29093 | Rsa1.0.00715.1 | 1054 | 67116  | 0         | 551  | 552  | 99 -  | 354 | 905  | 60349  | 60900  |
| UN29094 | Rsa1.0.07408.1 | 739  | 9445   | 0         | 333  | 337  | 98 -  | 3   | 339  | 4561   | 4897   |
| UN29095 | Rsa1.0.01087.1 | 482  | 54508  | 1.00E-144 | 300  | 316  | 94 +  | 167 | 482  | 16972  | 17275  |
| UN29096 | Rsa1.0.08069.1 | 1132 | 7960   | 0         | 969  | 1010 | 95 +  | 1   | 1006 | 6660   | 7669   |
| UN29097 | Rsa1.0.00201.1 | 515  | 232851 | 1.00E-100 | 215  | 225  | 95 -  | 207 | 431  | 109331 | 109555 |
| UN29098 | Rsa1.0.00070.1 | 790  | 150321 | 0         | 530  | 551  | 96 -  | 1   | 551  | 35895  | 36443  |
| UN29099 | Rsa1.0.01046.1 | 866  | 152989 | 0         | 830  | 873  | 95 -  | 3   | 863  | 140048 | 140911 |
| UN29100 | Rsa1.0.08020.1 | 909  | 8075   | 0         | 593  | 614  | 96 +  | 302 | 909  | 670    | 1283   |
| UN29101 | Rsa1.0.04321.1 | 980  | 17930  | 0         | 974  | 975  | 99 +  | 6   | 980  | 2998   | 3971   |
| UN29102 | Rsa1.0.00163.1 | 544  | 116847 | 0         | 512  | 553  | 92 +  | 2   | 544  | 85643  | 86195  |
| UN29103 | Rsa1.0.07999.1 | 1071 | 8102   | 0         | 1005 | 1015 | 99 -  | 2   | 1014 | 80     | 1093   |
| UN29104 | Rsa1.0.00589.1 | 1110 | 209965 | 3.00E-35  | 145  | 165  | 87 +  | 607 | 770  | 152513 | 152676 |
| UN29105 | Rsa1.0.05841.1 | 803  | 12465  | 0         | 798  | 801  | 99 +  | 3   | 803  | 5737   | 6535   |
| UN29106 | Rsa1.0.00031.1 | 929  | 179862 | 0         | 362  | 362  | 100 - | 568 | 929  | 116659 | 117020 |
| UN29107 | Rsa1.0.01353.1 | 1193 | 47351  | 0         | 1155 | 1197 | 96 -  | 1   | 1191 | 16428  | 17619  |
| UN29108 | Rsa1.0.03104.1 | 657  | 25374  | 0         | 421  | 435  | 96 +  | 222 | 656  | 5215   | 5649   |
| UN29109 | Rsa1.0.00013.1 | 1064 | 292129 | 1.00E-167 | 343  | 357  | 96 -  | 2   | 358  | 16535  | 16888  |
| UN29110 | Rsa1.0.01306.1 | 1003 | 48720  | 0         | 1000 | 1002 | 99 +  | 1   | 1002 | 38402  | 39403  |
| UN29111 | Rsa1.0.00009.1 | 820  | 232558 | 2.00E-85  | 164  | 165  | 99 +  | 249 | 413  | 148706 | 148870 |
| UN29112 | Rsa1.0.05081.1 | 724  | 136103 | 3.00E-93  | 180  | 182  | 98 -  | 106 | 287  | 10877  | 11058  |
| UN29113 | Rsa1.0.00077.1 | 1119 | 145005 | 0         | 680  | 713  | 95 +  | 16  | 727  | 17852  | 18552  |
| UN29114 | Rsa1.0.00069.1 | 457  | 403561 | 1.00E-151 | 274  | 275  | 99 +  | 183 | 457  | 236224 | 236498 |
| UN29115 | Rsa1.0.21919.1 | 937  | 1163   | 1.00E-114 | 233  | 241  | 96 +  | 2   | 242  | 923    | 1163   |
| UN29116 | Rsa1.0.00539.1 | 649  | 76926  | 0         | 407  | 411  | 99 -  | 237 | 647  | 52123  | 52533  |
| UN29117 | Rsa1.0.00121.1 | 871  | 278029 | 1.00E-118 | 231  | 236  | 97 -  | 19  | 254  | 60944  | 61179  |
| UN29118 | Rsa1.0.01687.1 | 983  | 40979  | 0         | 430  | 445  | 96 +  | 1   | 440  | 10521  | 10961  |
| UN29119 | Rsa1.0.30697.1 | 988  | 747    | 0         | 560  | 564  | 99 -  | 1   | 564  | 1      | 564    |
| UN29120 | Rsa1.0.11715.1 | 434  | 5432   | 0         | 433  | 434  | 99 -  | 1   | 434  | 226    | 659    |
| UN29121 | Rsa1.0.08297.1 | 872  | 7587   | 0         | 843  | 883  | 95 +  | 2   | 871  | 5331   | 6213   |
| UN29122 | Rsa1.0.00365.1 | 988  | 90902  | 0         | 681  | 690  | 98 +  | 1   | 689  | 63390  | 64077  |
| UN29123 | Rsa1.0.00037.1 | 592  | 307838 | 1.00E-134 | 255  | 259  | 98 +  | 331 | 589  | 249770 | 250028 |
| UN29124 | Rsa1.0.02605.1 | 664  | 29637  | 0         | 622  | 667  | 93 -  | 2   | 662  | 14048  | 14689  |
| UN29125 | Rsa1.0.15050.1 | 562  | 2868   | 0         | 380  | 383  | 99 +  | 2   | 382  | 429    | 811    |
| UN29126 | Rsa1.0.06941.1 | 1066 | 10137  | 3.00E-17  | 98   | 115  | 85 +  | 757 | 871  | 9727   | 9841   |
| UN29127 | Rsa1.0.01797.1 | 846  | 39140  | 7.00E-39  | 287  | 352  | 81 -  | 48  | 393  | 1037   | 1388   |
| UN29128 | Rsa1.0.00088.1 | 411  | 141341 | 0         | 405  | 406  | 99 -  | 6   | 411  | 21428  | 21833  |
| UN29129 | Rsa1.0.00981.1 | 730  | 57700  | 0         | 398  | 405  | 98 -  | 2   | 405  | 42146  | 42550  |
| UN29130 | Rsa1.0.12672.1 | 934  | 5157   | 1.00E-164 | 665  | 775  | 85 +  | 29  | 792  | 2731   | 3493   |
| UN29131 | Rsa1.0.00472.1 | 648  | 398134 | 1.00E-128 | 251  | 257  | 97 +  | 338 | 594  | 174721 | 174977 |

|         |                |      |        |           |      |      |       |     |      |        |        |
|---------|----------------|------|--------|-----------|------|------|-------|-----|------|--------|--------|
| UN29132 | Rsa1.0.03133.1 | 1041 | 25135  | 0         | 624  | 631  | 98 +  | 411 | 1041 | 18206  | 18836  |
| UN29133 | Rsa1.0.01098.1 | 870  | 54215  | 1.00E-165 | 303  | 306  | 99 -  | 1   | 306  | 52184  | 52489  |
| UN29134 | #              | #    | #      | #         | #    | #    | #     | #   | #    | #      | #      |
| UN29135 | Rsa1.0.01249.1 | 957  | 188432 | 0         | 399  | 407  | 98 +  | 551 | 957  | 160759 | 161165 |
| UN29136 | Rsa1.0.01134.1 | 1004 | 52829  | 0         | 378  | 378  | 100 + | 415 | 792  | 19094  | 19471  |
| UN29137 | Rsa1.0.00959.1 | 1148 | 58202  | 0         | 1125 | 1153 | 97 -  | 1   | 1145 | 33605  | 34757  |
| UN29138 | Rsa1.0.00595.1 | 378  | 341648 | 1.00E-176 | 368  | 386  | 95 +  | 1   | 378  | 49424  | 49809  |
| UN29139 | Rsa1.0.00191.1 | 828  | 316976 | 1.00E-168 | 380  | 401  | 94 +  | 436 | 828  | 144943 | 145343 |
| UN29140 | Rsa1.0.03977.1 | 777  | 19758  | 0         | 529  | 583  | 90 +  | 1   | 570  | 18346  | 18917  |
| UN29141 | Rsa1.0.00001.1 | 840  | 363028 | 0         | 787  | 836  | 94 -  | 7   | 836  | 44182  | 45012  |
| UN29142 | Rsa1.0.02379.1 | 626  | 150705 | 0         | 433  | 435  | 99 +  | 190 | 624  | 138122 | 138556 |
| UN29143 | Rsa1.0.00510.1 | 961  | 78718  | 0         | 465  | 468  | 99 +  | 494 | 961  | 57203  | 57670  |
| UN29144 | Rsa1.0.04028.1 | 812  | 19493  | 0         | 546  | 547  | 99 +  | 266 | 812  | 1399   | 1945   |
| UN29145 | Rsa1.0.14863.1 | 795  | 3006   | 0         | 443  | 449  | 98 -  | 250 | 697  | 602    | 1050   |
| UN29146 | Rsa1.0.00038.1 | 794  | 314568 | 3.00E-50  | 112  | 114  | 98 +  | 675 | 787  | 313091 | 313204 |
| UN29147 | Rsa1.0.01822.1 | 818  | 38784  | 0         | 408  | 408  | 100 + | 3   | 410  | 28866  | 29273  |
| UN29148 | Rsa1.0.07290.1 | 879  | 9608   | 0         | 744  | 782  | 95 -  | 3   | 781  | 4419   | 5197   |
| UN29149 | Rsa1.0.00451.1 | 581  | 322533 | 1.00E-158 | 288  | 290  | 99 -  | 4   | 293  | 28562  | 28851  |
| UN29150 | Rsa1.0.03984.1 | 873  | 19709  | 0         | 696  | 739  | 94 +  | 141 | 873  | 18714  | 19437  |
| UN29151 | Rsa1.0.00605.1 | 1043 | 73199  | 0         | 828  | 856  | 96 +  | 193 | 1042 | 26414  | 27269  |
| UN29152 | Rsa1.0.01963.1 | 893  | 36719  | 0         | 845  | 891  | 94 +  | 2   | 891  | 279    | 1149   |
| UN29153 | Rsa1.0.00269.1 | 823  | 341668 | 0         | 811  | 832  | 97 -  | 3   | 821  | 23661  | 24492  |
| UN29154 | Rsa1.0.00309.1 | 878  | 96883  | 0         | 381  | 384  | 99 -  | 475 | 858  | 89335  | 89718  |
| UN29155 | Rsa1.0.08675.1 | 429  | 7054   | 0         | 408  | 415  | 98 -  | 13  | 427  | 5749   | 6163   |
| UN29156 | Rsa1.0.02215.1 | 1371 | 33822  | 1.00E-115 | 239  | 247  | 96 -  | 1   | 247  | 24317  | 24562  |
| UN29157 | Rsa1.0.02723.1 | 423  | 28408  | 0         | 407  | 413  | 98 +  | 4   | 414  | 10659  | 11071  |
| UN29158 | Rsa1.0.00059.1 | 674  | 159650 | 1.00E-119 | 220  | 221  | 99 -  | 454 | 674  | 154839 | 155059 |
| UN29159 | Rsa1.0.00368.1 | 747  | 90669  | 9.00E-66  | 167  | 180  | 92 +  | 318 | 497  | 13900  | 14079  |
| UN29160 | Rsa1.0.01475.1 | 593  | 45044  | 0         | 567  | 595  | 95 -  | 5   | 587  | 7576   | 8168   |
| UN29161 | Rsa1.0.00040.1 | 897  | 324196 | 0         | 424  | 444  | 95 -  | 235 | 677  | 234158 | 234591 |
| UN29162 | Rsa1.0.00198.1 | 525  | 222963 | 1.00E-131 | 237  | 237  | 100 + | 289 | 525  | 31462  | 31698  |
| UN29163 | Rsa1.0.01308.1 | 1107 | 48596  | 0         | 681  | 684  | 99 +  | 3   | 686  | 21378  | 22061  |
| UN29164 | Rsa1.0.08048.1 | 676  | 137630 | 0         | 555  | 556  | 99 +  | 121 | 676  | 130328 | 130883 |
| UN29165 | Rsa1.0.00265.1 | 507  | 220635 | 1.00E-143 | 322  | 343  | 93 -  | 40  | 372  | 188305 | 188644 |
| UN29166 | Rsa1.0.07990.1 | 1126 | 8119   | 0         | 1120 | 1125 | 99 +  | 1   | 1125 | 6724   | 7848   |
| UN29167 | Rsa1.0.00205.1 | 1202 | 193401 | 0         | 1101 | 1126 | 97 -  | 83  | 1202 | 40233  | 41354  |
| UN29168 | Rsa1.0.00054.1 | 787  | 162053 | 0         | 425  | 444  | 95 +  | 347 | 787  | 105351 | 105792 |
| UN29169 | Rsa1.0.05876.1 | 317  | 12348  | 1.00E-179 | 317  | 317  | 100 + | 1   | 317  | 7792   | 8108   |
| UN29170 | Rsa1.0.09439.1 | 941  | 6370   | 0         | 529  | 530  | 99 -  | 230 | 759  | 4128   | 4657   |

|         |                |      |        |           |      |      |       |     |      |        |        |
|---------|----------------|------|--------|-----------|------|------|-------|-----|------|--------|--------|
| UN29171 | Rsa1.0.01118.1 | 1165 | 53460  | 0         | 534  | 552  | 96 +  | 109 | 660  | 2040   | 2591   |
| UN29172 | Rsa1.0.04130.1 | 1116 | 18924  | 4.00E-13  | 100  | 117  | 85 +  | 388 | 500  | 9439   | 9553   |
| UN29173 | Rsa1.0.01850.1 | 909  | 162224 | 0         | 469  | 472  | 99 +  | 438 | 909  | 18339  | 18810  |
| UN29174 | Rsa1.0.00218.1 | 722  | 201480 | 0         | 720  | 720  | 100 + | 2   | 721  | 138060 | 138779 |
| UN29175 | Rsa1.0.02063.1 | 1387 | 35484  | 0         | 1362 | 1386 | 98 +  | 2   | 1387 | 9698   | 11081  |
| UN29176 | Rsa1.0.00679.1 | 1013 | 68971  | 0         | 901  | 943  | 95 -  | 53  | 981  | 64493  | 65435  |
| UN29177 | Rsa1.0.03353.1 | 461  | 23496  | 0         | 444  | 481  | 92 +  | 1   | 461  | 15337  | 15811  |
| UN29178 | Rsa1.0.14793.1 | 573  | 3063   | 0         | 521  | 571  | 91 +  | 6   | 572  | 1270   | 1832   |
| UN29179 | Rsa1.0.01799.1 | 803  | 39127  | 0         | 462  | 466  | 99 +  | 1   | 466  | 18305  | 18769  |
| UN29180 | Rsa1.0.01321.1 | 808  | 48248  | 0         | 372  | 376  | 98 -  | 431 | 806  | 34827  | 35202  |
| UN29181 | Rsa1.0.00217.1 | 626  | 107079 | 1.00E-105 | 216  | 222  | 97 +  | 405 | 626  | 81630  | 81850  |
| UN29182 | Rsa1.0.15756.1 | 657  | 2442   | 1.00E-163 | 319  | 327  | 97 -  | 116 | 440  | 1884   | 2210   |
| UN29183 | Rsa1.0.01864.1 | 1155 | 37998  | 1.00E-132 | 240  | 240  | 100 - | 790 | 1029 | 36820  | 37059  |
| UN29184 | Rsa1.0.01740.1 | 830  | 39986  | 0         | 652  | 653  | 99 -  | 179 | 830  | 4782   | 5434   |
| UN29185 | Rsa1.0.01058.1 | 634  | 55430  | 0         | 543  | 544  | 99 -  | 91  | 634  | 35421  | 35964  |
| UN29186 | Rsa1.0.00806.1 | 1076 | 63674  | 0         | 589  | 607  | 97 -  | 1   | 602  | 4643   | 5246   |
| UN29187 | #              | #    | #      | #         | #    | #    | #     | #   | #    | #      | #      |
| UN29188 | Rsa1.0.00308.1 | 796  | 96915  | 0         | 428  | 430  | 99 -  | 367 | 796  | 90109  | 90538  |
| UN29189 | Rsa1.0.00116.1 | 1151 | 365886 | 0         | 710  | 741  | 95 +  | 1   | 740  | 13730  | 14460  |
| UN29190 | Rsa1.0.03357.1 | 690  | 23478  | 1.00E-130 | 242  | 244  | 99 +  | 251 | 494  | 14715  | 14958  |
| UN29191 | Rsa1.0.00015.1 | 695  | 561803 | 0         | 348  | 349  | 99 +  | 1   | 349  | 430757 | 431105 |
| UN29192 | Rsa1.0.02705.1 | 848  | 28535  | 0         | 610  | 631  | 96 +  | 75  | 705  | 940    | 1570   |
| UN29193 | Rsa1.0.00166.1 | 765  | 240912 | 0         | 482  | 485  | 99 +  | 3   | 487  | 207420 | 207903 |
| UN29194 | Rsa1.0.35503.1 | 547  | 637    | 1.00E-150 | 282  | 286  | 98 +  | 3   | 288  | 325    | 610    |
| UN29195 | Rsa1.0.00051.1 | 713  | 258225 | 0         | 541  | 574  | 94 +  | 7   | 572  | 118684 | 119250 |
| UN29196 | Rsa1.0.01514.1 | 646  | 44222  | 0         | 623  | 639  | 97 +  | 5   | 643  | 4069   | 4695   |
| UN29197 | Rsa1.0.00364.1 | 727  | 90951  | 0         | 712  | 727  | 97 +  | 1   | 727  | 49166  | 49892  |
| UN29198 | Rsa1.0.00639.1 | 736  | 165873 | 0         | 556  | 586  | 94 +  | 1   | 578  | 107987 | 108560 |
| UN29199 | Rsa1.0.00324.1 | 1100 | 218805 | 0         | 338  | 340  | 99 -  | 761 | 1100 | 28270  | 28609  |
| UN29200 | Rsa1.0.01789.1 | 870  | 39250  | 0         | 690  | 726  | 95 +  | 152 | 869  | 13468  | 14191  |
| UN29201 | Rsa1.0.00027.1 | 501  | 283362 | 0         | 363  | 369  | 98 +  | 1   | 369  | 110283 | 110651 |
| UN29202 | Rsa1.0.01327.1 | 729  | 48033  | 0         | 708  | 733  | 96 +  | 3   | 729  | 4703   | 5434   |
| UN29203 | Rsa1.0.01866.1 | 823  | 37961  | 0         | 769  | 826  | 93 -  | 8   | 822  | 13716  | 14510  |
| UN29204 | Rsa1.0.01556.1 | 719  | 163858 | 0         | 686  | 735  | 93 -  | 3   | 719  | 160588 | 161314 |
| UN29205 | Rsa1.0.02381.1 | 1030 | 31972  | 0         | 564  | 565  | 99 +  | 1   | 564  | 29619  | 30183  |
| UN29206 | Rsa1.0.01007.1 | 660  | 56933  | 0         | 477  | 483  | 98 +  | 5   | 486  | 4093   | 4575   |
| UN29207 | Rsa1.0.07095.1 | 909  | 9901   | 1.00E-155 | 290  | 294  | 98 +  | 612 | 905  | 5131   | 5424   |
| UN29208 | Rsa1.0.00362.1 | 671  | 299497 | 0         | 469  | 473  | 99 -  | 2   | 473  | 255628 | 256100 |
| UN29209 | Rsa1.0.01608.1 | 275  | 170540 | 1.00E-101 | 260  | 282  | 92 -  | 1   | 275  | 34324  | 34600  |

|         |                |      |        |           |      |      |       |     |      |        |        |
|---------|----------------|------|--------|-----------|------|------|-------|-----|------|--------|--------|
| UN29210 | Rsa1.0.00099.1 | 960  | 159619 | 0         | 911  | 954  | 95 -  | 7   | 960  | 156749 | 157693 |
| UN29211 | Rsa1.0.16480.1 | 1052 | 2141   | 0         | 721  | 722  | 99 +  | 331 | 1052 | 335    | 1056   |
| UN29212 | Rsa1.0.08477.1 | 832  | 7295   | 1.00E-132 | 239  | 239  | 100 - | 565 | 803  | 5421   | 5659   |
| UN29213 | Rsa1.0.02516.1 | 674  | 30608  | 1.00E-123 | 227  | 228  | 99 +  | 445 | 672  | 21007  | 21234  |
| UN29214 | Rsa1.0.00104.1 | 820  | 368722 | 0         | 776  | 818  | 94 -  | 5   | 810  | 68772  | 69589  |
| UN29215 | Rsa1.0.26434.1 | 641  | 892    | 0         | 331  | 334  | 99 -  | 1   | 334  | 546    | 879    |
| UN29216 | Rsa1.0.03668.1 | 390  | 21483  | 1.00E-136 | 352  | 387  | 90 +  | 27  | 389  | 3820   | 4206   |
| UN29217 | Rsa1.0.00181.1 | 757  | 114269 | 0         | 716  | 737  | 97 -  | 24  | 757  | 2985   | 3721   |
| UN29218 | Rsa1.0.14468.1 | 476  | 3362   | 0         | 433  | 439  | 98 +  | 38  | 476  | 581    | 1019   |
| UN29219 | Rsa1.0.03051.1 | 666  | 25758  | 0         | 661  | 663  | 99 -  | 3   | 665  | 5049   | 5711   |
| UN29220 | Rsa1.0.02115.1 | 778  | 34858  | 0         | 405  | 411  | 98 -  | 367 | 777  | 20510  | 20920  |
| UN29221 | Rsa1.0.00101.1 | 958  | 267193 | 0         | 432  | 436  | 99 +  | 524 | 958  | 94814  | 95249  |
| UN29222 | Rsa1.0.04596.1 | 582  | 16709  | 1.00E-152 | 327  | 350  | 93 -  | 1   | 330  | 6      | 355    |
| UN29223 | Rsa1.0.00747.1 | 535  | 66030  | 0         | 525  | 534  | 98 -  | 3   | 535  | 49916  | 50447  |
| UN29224 | Rsa1.0.01500.1 | 311  | 141844 | 8.00E-58  | 114  | 114  | 100 - | 116 | 229  | 112837 | 112950 |
| UN29225 | Rsa1.0.01712.1 | 195  | 154210 | 4.00E-74  | 181  | 194  | 93 +  | 1   | 190  | 28318  | 28511  |
| UN29226 | Rsa1.0.01035.1 | 692  | 56019  | 4.00E-80  | 199  | 211  | 94 -  | 301 | 507  | 51587  | 51797  |
| UN29227 | Rsa1.0.04665.1 | 753  | 16469  | 4.00E-34  | 99   | 107  | 92 +  | 394 | 500  | 15700  | 15806  |
| UN29228 | Rsa1.0.04489.1 | 970  | 17145  | 0         | 931  | 967  | 96 -  | 4   | 964  | 4020   | 4985   |
| UN29229 | Rsa1.0.08186.1 | 699  | 7770   | 0         | 377  | 378  | 99 +  | 322 | 699  | 6608   | 6985   |
| UN29230 | Rsa1.0.02870.1 | 1097 | 27102  | 1.00E-161 | 363  | 387  | 93 +  | 3   | 380  | 26058  | 26441  |
| UN29231 | Rsa1.0.01521.1 | 301  | 142147 | 1.00E-133 | 283  | 299  | 94 +  | 3   | 301  | 137580 | 137867 |
| UN29232 | Rsa1.0.71037.1 | 851  | 323    | 1.00E-166 | 303  | 305  | 99 +  | 1   | 305  | 15     | 319    |
| UN29233 | Rsa1.0.04779.1 | 1097 | 16008  | 0         | 441  | 458  | 96 -  | 255 | 712  | 1604   | 2061   |
| UN29234 | #              | #    | #      | #         | #    | #    | #     | #   | #    | #      | #      |
| UN29235 | Rsa1.0.07629.1 | 1331 | 8997   | 0         | 547  | 565  | 96 +  | 349 | 913  | 1      | 565    |
| UN29236 | Rsa1.0.03229.1 | 749  | 24470  | 1.00E-103 | 191  | 191  | 100 + | 76  | 266  | 10028  | 10218  |
| UN29237 | Rsa1.0.00210.1 | 765  | 108424 | 0         | 614  | 625  | 98 -  | 142 | 765  | 86580  | 87204  |
| UN29238 | Rsa1.0.11773.1 | 456  | 5413   | 6.00E-35  | 130  | 148  | 87 -  | 306 | 453  | 5217   | 5364   |
| UN29239 | Rsa1.0.06396.1 | 687  | 11094  | 1.00E-116 | 234  | 241  | 97 -  | 447 | 687  | 10462  | 10702  |
| UN29240 | Rsa1.0.04209.1 | 847  | 18442  | 1.00E-169 | 316  | 321  | 98 -  | 137 | 457  | 14161  | 14481  |
| UN29241 | Rsa1.0.04854.1 | 967  | 131560 | 1.00E-153 | 277  | 278  | 99 -  | 1   | 278  | 10471  | 10748  |
| UN29242 | Rsa1.0.00177.1 | 357  | 143394 | 2.00E-58  | 133  | 139  | 95 -  | 2   | 140  | 41885  | 42023  |
| UN29243 | Rsa1.0.03471.1 | 968  | 22678  | 9.00E-14  | 41   | 41   | 100 - | 927 | 967  | 5306   | 5346   |
| UN29244 | Rsa1.0.09458.1 | 1249 | 6353   | 0         | 1223 | 1286 | 95 -  | 3   | 1247 | 1465   | 2748   |
| UN29245 | Rsa1.0.02552.1 | 1004 | 30191  | 0         | 1002 | 1003 | 99 -  | 2   | 1004 | 17708  | 18710  |
| UN29246 | Rsa1.0.00107.1 | 1018 | 431659 | 0         | 733  | 741  | 98 +  | 4   | 744  | 280743 | 281483 |
| UN29247 | Rsa1.0.00015.1 | 1186 | 561803 | 0         | 685  | 742  | 92 +  | 2   | 729  | 553175 | 553905 |
| UN29248 | Rsa1.0.01727.1 | 747  | 40243  | 1.00E-138 | 287  | 300  | 95 +  | 3   | 293  | 25886  | 26182  |



|         |                |      |        |           |      |      |       |     |      |        |        |
|---------|----------------|------|--------|-----------|------|------|-------|-----|------|--------|--------|
| UN29249 | Rsa1.0.00420.1 | 627  | 86496  | 0         | 484  | 497  | 97 -  | 131 | 627  | 46886  | 47382  |
| UN29250 | Rsa1.0.74512.1 | 448  | 308    | 1.00E-165 | 307  | 310  | 99 +  | 109 | 418  | 1      | 308    |
| UN29251 | Rsa1.0.01628.1 | 1154 | 41932  | 0         | 1024 | 1062 | 96 -  | 96  | 1154 | 5791   | 6845   |
| UN29252 | Rsa1.0.08631.1 | 1147 | 7103   | 1.00E-157 | 359  | 387  | 92 +  | 23  | 397  | 2865   | 3251   |
| UN29253 | Rsa1.0.07344.1 | 588  | 9528   | 1.00E-180 | 332  | 336  | 98 +  | 3   | 338  | 7505   | 7840   |
| UN29254 | Rsa1.0.00055.1 | 1187 | 520193 | 0         | 1103 | 1167 | 94 -  | 1   | 1144 | 307818 | 308979 |
| UN29255 | Rsa1.0.03240.1 | 1255 | 24429  | 0         | 439  | 443  | 99 +  | 2   | 443  | 18456  | 18898  |
| UN29256 | Rsa1.0.00627.1 | 796  | 71566  | 1.00E-153 | 302  | 310  | 97 -  | 79  | 387  | 41766  | 42075  |
| UN29257 | Rsa1.0.04236.1 | 595  | 18370  | 0         | 437  | 447  | 97 -  | 151 | 595  | 15671  | 16117  |
| UN29258 | Rsa1.0.00412.1 | 1210 | 86935  | 1.00E-133 | 323  | 346  | 93 -  | 561 | 900  | 38190  | 38528  |
| UN29259 | Rsa1.0.00304.1 | 576  | 97429  | 0         | 372  | 376  | 98 -  | 200 | 575  | 74070  | 74445  |
| UN29260 | Rsa1.0.00166.1 | 778  | 240912 | 0         | 733  | 777  | 94 -  | 2   | 778  | 208968 | 209721 |
| UN29261 | Rsa1.0.00079.1 | 748  | 606987 | 0         | 722  | 767  | 94 +  | 1   | 747  | 584698 | 585457 |
| UN29262 | Rsa1.0.03624.1 | 954  | 21706  | 1.00E-179 | 412  | 443  | 93 -  | 8   | 439  | 5298   | 5732   |
| UN29263 | Rsa1.0.00001.1 | 772  | 363028 | 1.00E-172 | 347  | 360  | 96 +  | 1   | 360  | 223862 | 224217 |
| UN29264 | Rsa1.0.00891.1 | 723  | 60724  | 0         | 429  | 439  | 97 +  | 287 | 723  | 22254  | 22689  |
| UN29265 | Rsa1.0.03800.1 | 529  | 20768  | 0         | 348  | 348  | 100 + | 1   | 348  | 6063   | 6410   |
| UN29266 | Rsa1.0.00479.1 | 1391 | 81377  | 6.00E-90  | 181  | 185  | 97 +  | 235 | 419  | 23926  | 24110  |
| UN29267 | Rsa1.0.00157.1 | 729  | 245832 | 1.00E-128 | 316  | 346  | 91 -  | 118 | 452  | 76910  | 77244  |
| UN29268 | Rsa1.0.01489.1 | 654  | 44764  | 0         | 365  | 367  | 99 -  | 2   | 368  | 37595  | 37961  |
| UN29269 | Rsa1.0.02279.1 | 555  | 33069  | 0         | 548  | 552  | 99 -  | 5   | 554  | 20073  | 20624  |
| UN29270 | Rsa1.0.00375.1 | 228  | 90207  | 1.00E-125 | 227  | 227  | 100 + | 1   | 227  | 41453  | 41679  |
| UN29271 | Rsa1.0.02840.1 | 719  | 27386  | 0         | 714  | 717  | 99 +  | 3   | 719  | 7287   | 8003   |
| UN29272 | Rsa1.0.01973.1 | 601  | 36598  | 0         | 601  | 601  | 100 + | 1   | 601  | 29386  | 29986  |
| UN29273 | Rsa1.0.14063.1 | 747  | 3852   | 0         | 333  | 335  | 99 +  | 413 | 747  | 2582   | 2916   |
| UN29274 | Rsa1.0.14293.1 | 804  | 3569   | 0         | 802  | 805  | 99 -  | 2   | 804  | 1237   | 2041   |
| UN29275 | Rsa1.0.00685.1 | 1087 | 68515  | 0         | 807  | 810  | 99 -  | 3   | 812  | 27254  | 28063  |
| UN29276 | Rsa1.0.01081.1 | 864  | 499226 | 1.00E-86  | 190  | 199  | 95 +  | 374 | 572  | 6130   | 6328   |
| UN29277 | Rsa1.0.01011.1 | 664  | 56883  | 0         | 643  | 659  | 97 -  | 6   | 664  | 28147  | 28805  |
| UN29278 | Rsa1.0.00879.1 | 938  | 61297  | 0         | 826  | 854  | 96 -  | 87  | 934  | 47081  | 47922  |
| UN29279 | Rsa1.0.03767.1 | 936  | 20969  | 1.00E-114 | 281  | 300  | 93 -  | 2   | 293  | 6426   | 6722   |
| UN29280 | Rsa1.0.00080.1 | 583  | 190437 | 5.00E-76  | 293  | 340  | 86 +  | 1   | 319  | 99547  | 99884  |
| UN29281 | Rsa1.0.03446.1 | 591  | 22876  | 1.00E-24  | 74   | 79   | 93 -  | 278 | 356  | 21454  | 21532  |
| UN29282 | Rsa1.0.16793.1 | 805  | 2033   | 0         | 777  | 809  | 96 +  | 2   | 804  | 1021   | 1825   |
| UN29283 | Rsa1.0.00931.1 | 771  | 59210  | 0         | 466  | 481  | 96 -  | 111 | 591  | 19424  | 19895  |
| UN29284 | Rsa1.0.02608.1 | 649  | 29613  | 1.00E-158 | 396  | 433  | 91 +  | 178 | 608  | 21255  | 21677  |
| UN29285 | Rsa1.0.04063.1 | 1049 | 19300  | 0         | 937  | 970  | 96 +  | 93  | 1045 | 8188   | 9157   |
| UN29286 | Rsa1.0.00197.1 | 1043 | 109714 | 0         | 1038 | 1041 | 99 +  | 3   | 1043 | 82655  | 83695  |
| UN29287 | Rsa1.0.00991.1 | 756  | 143101 | 1.00E-131 | 311  | 331  | 93 +  | 421 | 746  | 45342  | 45665  |

|         |                |      |        |           |     |     |       |     |      |        |        |
|---------|----------------|------|--------|-----------|-----|-----|-------|-----|------|--------|--------|
| UN29288 | Rsa1.0.00132.1 | 667  | 124299 | 0         | 551 | 573 | 96 +  | 1   | 559  | 101782 | 102354 |
| UN29289 | Rsa1.0.00269.1 | 639  | 341668 | 1.00E-140 | 253 | 253 | 100 + | 387 | 639  | 16422  | 16674  |
| UN29290 | Rsa1.0.02333.1 | 1232 | 32431  | 0         | 611 | 646 | 94 -  | 601 | 1231 | 7847   | 8492   |
| UN29291 | Rsa1.0.02683.1 | 795  | 28679  | 1.00E-151 | 384 | 421 | 91 +  | 3   | 415  | 12315  | 12734  |
| UN29292 | Rsa1.0.00102.1 | 661  | 135497 | 0         | 560 | 584 | 95 -  | 3   | 582  | 55347  | 55929  |
| UN29293 | Rsa1.0.01584.1 | 752  | 42811  | 3.00E-93  | 373 | 438 | 85 -  | 295 | 710  | 16582  | 17005  |
| UN29294 | Rsa1.0.00471.1 | 962  | 81897  | 0         | 625 | 627 | 99 +  | 198 | 824  | 76439  | 77065  |
| UN29295 | Rsa1.0.00053.1 | 1169 | 263459 | 1.00E-157 | 311 | 317 | 98 +  | 855 | 1169 | 6932   | 7246   |
| UN29296 | Rsa1.0.02114.1 | 891  | 34873  | 0         | 424 | 446 | 95 +  | 450 | 891  | 2538   | 2977   |
| UN29297 | Rsa1.0.03646.1 | 771  | 21598  | 1.00E-131 | 318 | 345 | 92 -  | 1   | 335  | 9980   | 10324  |
| UN29298 | #              | #    | #      | #         | #   | #   | #     | #   | #    | #      | #      |
| UN29299 | Rsa1.0.01006.1 | 1250 | 163670 | 0         | 637 | 643 | 99 -  | 1   | 643  | 22996  | 23638  |
| UN29300 | Rsa1.0.01651.1 | 771  | 41586  | 0         | 539 | 560 | 96 +  | 213 | 768  | 19156  | 19713  |
| UN29301 | Rsa1.0.00611.1 | 1093 | 72410  | 0         | 575 | 608 | 94 +  | 497 | 1092 | 55879  | 56486  |
| UN29302 | Rsa1.0.00829.1 | 744  | 158305 | 1.00E-104 | 258 | 276 | 93 +  | 469 | 742  | 109209 | 109482 |
| UN29303 | Rsa1.0.00251.1 | 1317 | 303968 | 1.00E-136 | 255 | 258 | 98 +  | 19  | 276  | 111520 | 111777 |
| UN29304 | Rsa1.0.00116.1 | 437  | 365886 | 0         | 384 | 387 | 99 +  | 3   | 388  | 137227 | 137613 |
| UN29305 | Rsa1.0.00132.1 | 543  | 124299 | 0         | 404 | 407 | 99 +  | 137 | 543  | 107831 | 108237 |
| UN29306 | Rsa1.0.00288.1 | 668  | 98659  | 0         | 429 | 440 | 97 -  | 1   | 439  | 55610  | 56046  |
| UN29307 | Rsa1.0.00090.1 | 994  | 273859 | 0         | 992 | 993 | 99 +  | 2   | 994  | 252718 | 253710 |
| UN29308 | Rsa1.0.00222.1 | 1165 | 172263 | 0         | 848 | 871 | 97 +  | 1   | 867  | 2949   | 3817   |
| UN29309 | Rsa1.0.00529.1 | 933  | 77487  | 2.00E-92  | 179 | 181 | 98 -  | 295 | 475  | 19401  | 19581  |
| UN29310 | Rsa1.0.00178.1 | 681  | 114861 | 1.00E-178 | 342 | 350 | 97 -  | 332 | 681  | 42610  | 42956  |
| UN29311 | Rsa1.0.00785.1 | 946  | 64356  | 0         | 932 | 945 | 98 +  | 2   | 946  | 20456  | 21400  |
| UN29312 | Rsa1.0.00099.1 | 871  | 159619 | 0         | 391 | 391 | 100 + | 2   | 392  | 155517 | 155907 |
| UN29313 | Rsa1.0.00613.1 | 567  | 209993 | 0         | 549 | 553 | 99 -  | 3   | 555  | 197531 | 198082 |
| UN29314 | Rsa1.0.00153.1 | 695  | 192931 | 1.00E-112 | 220 | 225 | 97 +  | 471 | 695  | 77436  | 77660  |
| UN29315 | Rsa1.0.02632.1 | 795  | 29316  | 0         | 778 | 799 | 97 -  | 3   | 795  | 11304  | 12101  |
| UN29316 | Rsa1.0.01999.1 | 1344 | 36237  | 0         | 517 | 548 | 94 +  | 303 | 849  | 28001  | 28540  |
| UN29317 | Rsa1.0.00211.1 | 875  | 228189 | 0         | 380 | 386 | 98 +  | 441 | 826  | 183423 | 183808 |
| UN29318 | Rsa1.0.00322.1 | 1208 | 212233 | 0         | 688 | 703 | 97 -  | 32  | 733  | 53448  | 54150  |
| UN29319 | Rsa1.0.04223.1 | 617  | 18407  | 0         | 603 | 627 | 96 +  | 2   | 617  | 2981   | 3607   |
| UN29320 | Rsa1.0.00964.1 | 600  | 316648 | 1.00E-153 | 357 | 385 | 92 -  | 8   | 392  | 26183  | 26561  |
| UN29321 | Rsa1.0.01844.1 | 773  | 38421  | 3.00E-90  | 196 | 205 | 95 -  | 94  | 298  | 11674  | 11878  |
| UN29322 | Rsa1.0.00093.1 | 806  | 214962 | 0         | 743 | 791 | 93 +  | 8   | 795  | 4628   | 5415   |
| UN29323 | Rsa1.0.00161.1 | 1168 | 116891 | 1.00E-158 | 290 | 291 | 99 +  | 878 | 1168 | 5864   | 6153   |
| UN29324 | Rsa1.0.42609.1 | 782  | 527    | 0         | 508 | 513 | 99 -  | 144 | 656  | 15     | 527    |
| UN29325 | Rsa1.0.01964.1 | 905  | 36702  | 0         | 454 | 456 | 99 -  | 448 | 903  | 9322   | 9776   |
| UN29326 | Rsa1.0.00513.1 | 934  | 78579  | 1.00E-130 | 246 | 249 | 98 -  | 298 | 546  | 73789  | 74037  |

|         |                |      |        |           |      |      |       |     |      |        |        |
|---------|----------------|------|--------|-----------|------|------|-------|-----|------|--------|--------|
| UN29327 | Rsa1.0.02911.1 | 1098 | 142461 | 0         | 683  | 703  | 97 -  | 395 | 1097 | 141759 | 142461 |
| UN29328 | Rsa1.0.25656.1 | 705  | 927    | 7.00E-94  | 184  | 187  | 98 +  | 3   | 189  | 528    | 714    |
| UN29329 | Rsa1.0.00364.1 | 1070 | 90951  | 0         | 418  | 445  | 93 -  | 646 | 1068 | 20050  | 20494  |
| UN29330 | Rsa1.0.02505.1 | 822  | 30703  | 0         | 510  | 514  | 99 +  | 1   | 514  | 17594  | 18107  |
| UN29331 | Rsa1.0.02169.1 | 777  | 34367  | 0         | 767  | 768  | 99 -  | 8   | 775  | 6583   | 7350   |
| UN29332 | Rsa1.0.00087.1 | 705  | 761073 | 6.00E-73  | 152  | 156  | 97 -  | 406 | 561  | 76412  | 76567  |
| UN29333 | Rsa1.0.04518.1 | 684  | 17005  | 0         | 391  | 407  | 96 +  | 287 | 684  | 9229   | 9634   |
| UN29334 | Rsa1.0.00129.1 | 557  | 126831 | 0         | 553  | 558  | 99 +  | 1   | 556  | 29824  | 30381  |
| UN29335 | Rsa1.0.02371.1 | 524  | 32069  | 0         | 408  | 421  | 96 -  | 1   | 420  | 31512  | 31931  |
| UN29336 | Rsa1.0.01090.1 | 548  | 54385  | 2.00E-84  | 192  | 201  | 95 +  | 12  | 212  | 5797   | 5993   |
| UN29337 | Rsa1.0.00652.1 | 1168 | 70089  | 0         | 539  | 568  | 94 +  | 2   | 568  | 59758  | 60321  |
| UN29338 | Rsa1.0.00024.1 | 301  | 188018 | 1.00E-158 | 294  | 298  | 98 -  | 3   | 300  | 72714  | 73011  |
| UN29339 | Rsa1.0.04379.1 | 193  | 17646  | 6.00E-79  | 179  | 189  | 94 +  | 5   | 193  | 16819  | 17007  |
| UN29340 | Rsa1.0.00055.1 | 587  | 520193 | 0         | 552  | 580  | 95 +  | 6   | 585  | 340906 | 341483 |
| UN29341 | Rsa1.0.02257.1 | 629  | 33318  | 1.00E-82  | 220  | 240  | 91 -  | 13  | 251  | 26748  | 26987  |
| UN29342 | Rsa1.0.01327.1 | 1240 | 48033  | 0         | 1237 | 1239 | 99 +  | 2   | 1240 | 25521  | 26759  |
| UN29343 | Rsa1.0.01929.1 | 882  | 37191  | 0         | 509  | 539  | 94 +  | 349 | 882  | 21083  | 21607  |
| UN29344 | Rsa1.0.01466.1 | 899  | 45161  | 0         | 477  | 497  | 95 -  | 95  | 590  | 16726  | 17222  |
| UN29345 | Rsa1.0.07736.1 | 774  | 8687   | 0         | 591  | 598  | 98 -  | 176 | 773  | 5715   | 6311   |
| UN29346 | Rsa1.0.00363.1 | 996  | 90968  | 0         | 565  | 591  | 95 +  | 418 | 996  | 63275  | 63862  |
| UN29347 | Rsa1.0.00347.1 | 927  | 93048  | 0         | 925  | 928  | 99 +  | 2   | 927  | 64592  | 65519  |
| UN29348 | Rsa1.0.07494.1 | 795  | 9258   | 0         | 756  | 786  | 96 -  | 12  | 795  | 6336   | 7116   |
| UN29349 | Rsa1.0.03249.1 | 757  | 146254 | 1.00E-154 | 319  | 334  | 95 +  | 354 | 674  | 140603 | 140936 |
| UN29350 | Rsa1.0.07374.1 | 947  | 9503   | 0         | 534  | 540  | 98 +  | 409 | 946  | 4829   | 5368   |
| UN29351 | Rsa1.0.00344.1 | 655  | 191774 | 0         | 623  | 665  | 93 +  | 1   | 655  | 126323 | 126985 |
| UN29352 | Rsa1.0.03286.1 | 1133 | 24046  | 0         | 363  | 369  | 98 +  | 694 | 1061 | 1511   | 1879   |
| UN29353 | Rsa1.0.04522.1 | 1145 | 16988  | 0         | 1103 | 1144 | 96 -  | 1   | 1144 | 14107  | 15239  |
| UN29354 | Rsa1.0.01642.1 | 1309 | 41772  | 0         | 1306 | 1307 | 99 -  | 1   | 1307 | 8791   | 10097  |
| UN29355 | Rsa1.0.04525.1 | 830  | 16965  | 0         | 801  | 837  | 95 +  | 8   | 825  | 9139   | 9975   |
| UN29356 | Rsa1.0.00149.1 | 438  | 305196 | 1.00E-75  | 147  | 148  | 99 +  | 115 | 262  | 8266   | 8413   |
| UN29357 | Rsa1.0.00110.1 | 759  | 132719 | 0         | 756  | 758  | 99 -  | 1   | 757  | 34455  | 35212  |
| UN29358 | Rsa1.0.00842.1 | 546  | 62493  | 0         | 491  | 541  | 90 -  | 7   | 544  | 44600  | 45117  |
| UN29359 | Rsa1.0.37979.1 | 818  | 593    | 0         | 359  | 359  | 100 - | 423 | 781  | 1      | 359    |
| UN29360 | Rsa1.0.00143.1 | 1136 | 121313 | 0         | 1015 | 1041 | 97 -  | 1   | 1039 | 64361  | 65399  |
| UN29361 | Rsa1.0.00275.1 | 1014 | 210104 | 1.00E-179 | 356  | 368  | 96 -  | 651 | 1014 | 131472 | 131839 |
| UN29362 | Rsa1.0.02179.1 | 1107 | 34188  | 3.00E-54  | 130  | 137  | 94 +  | 69  | 205  | 21462  | 21598  |
| UN29363 | Rsa1.0.00123.1 | 930  | 325650 | 0         | 582  | 585  | 99 -  | 1   | 585  | 81624  | 82208  |
| UN29364 | Rsa1.0.71302.1 | 708  | 321    | 0         | 321  | 321  | 100 - | 330 | 650  | 1      | 321    |
| UN29365 | Rsa1.0.00213.1 | 890  | 108167 | 0         | 815  | 852  | 95 -  | 39  | 888  | 18057  | 18906  |

|         |                |      |        |           |      |      |       |     |      |        |        |
|---------|----------------|------|--------|-----------|------|------|-------|-----|------|--------|--------|
| UN29366 | Rsa1.0.03237.1 | 890  | 24434  | 0         | 575  | 613  | 93 -  | 1   | 612  | 10294  | 10904  |
| UN29367 | Rsa1.0.03743.1 | 1249 | 21062  | 0         | 486  | 503  | 96 +  | 746 | 1248 | 18008  | 18510  |
| UN29368 | Rsa1.0.04863.1 | 1151 | 15687  | 1.00E-169 | 311  | 314  | 99 +  | 1   | 314  | 6578   | 6891   |
| UN29369 | Rsa1.0.10394.1 | 1103 | 5861   | 1.00E-133 | 275  | 285  | 96 +  | 628 | 912  | 1486   | 1769   |
| UN29370 | Rsa1.0.01026.1 | 696  | 171624 | 0         | 370  | 371  | 99 -  | 1   | 371  | 12032  | 12401  |
| UN29371 | Rsa1.0.00141.1 | 797  | 121494 | 1.00E-100 | 195  | 198  | 98 +  | 303 | 500  | 98339  | 98536  |
| UN29372 | Rsa1.0.00501.1 | 1334 | 79545  | 0         | 676  | 677  | 99 +  | 1   | 676  | 35262  | 35938  |
| UN29373 | Rsa1.0.02532.1 | 437  | 30403  | 6.00E-87  | 182  | 187  | 97 +  | 2   | 188  | 27455  | 27640  |
| UN29374 | Rsa1.0.00458.1 | 667  | 82717  | 3.00E-99  | 187  | 188  | 99 -  | 1   | 188  | 75960  | 76147  |
| UN29375 | Rsa1.0.17140.1 | 464  | 1910   | 0         | 398  | 400  | 99 +  | 7   | 406  | 1327   | 1726   |
| UN29376 | Rsa1.0.01717.1 | 957  | 143162 | 0         | 527  | 528  | 99 -  | 1   | 528  | 27355  | 27882  |
| UN29377 | Rsa1.0.00222.1 | 812  | 172263 | 0         | 584  | 605  | 96 +  | 211 | 810  | 95612  | 96214  |
| UN29378 | Rsa1.0.12537.1 | 995  | 5199   | 0         | 958  | 1006 | 95 -  | 1   | 993  | 900    | 1897   |
| UN29379 | Rsa1.0.03035.1 | 746  | 25827  | 0         | 720  | 748  | 96 -  | 1   | 745  | 1700   | 2441   |
| UN29380 | Rsa1.0.05068.1 | 576  | 14940  | 0         | 360  | 362  | 99 +  | 1   | 362  | 10202  | 10563  |
| UN29381 | Rsa1.0.00269.1 | 1006 | 341668 | 1.00E-176 | 390  | 417  | 93 +  | 9   | 419  | 302639 | 303046 |
| UN29382 | Rsa1.0.15175.1 | 687  | 2779   | 1.00E-156 | 285  | 287  | 99 +  | 1   | 287  | 1086   | 1372   |
| UN29383 | Rsa1.0.00524.1 | 619  | 169613 | 1.00E-111 | 278  | 304  | 91 +  | 306 | 600  | 161157 | 161460 |
| UN29384 | Rsa1.0.00366.1 | 687  | 90880  | 1.00E-160 | 317  | 327  | 96 -  | 3   | 329  | 33806  | 34132  |
| UN29385 | Rsa1.0.02715.1 | 1066 | 28466  | 0         | 700  | 715  | 97 -  | 4   | 717  | 7285   | 7998   |
| UN29386 | Rsa1.0.01470.1 | 859  | 45108  | 0         | 829  | 855  | 96 +  | 2   | 856  | 43864  | 44717  |
| UN29387 | Rsa1.0.16231.1 | 678  | 131890 | 0         | 556  | 597  | 93 +  | 90  | 674  | 167    | 760    |
| UN29388 | Rsa1.0.00427.1 | 644  | 189678 | 0         | 454  | 456  | 99 -  | 188 | 643  | 44400  | 44855  |
| UN29389 | Rsa1.0.00017.1 | 787  | 752458 | 0         | 401  | 411  | 97 +  | 377 | 787  | 426994 | 427403 |
| UN29390 | Rsa1.0.01847.1 | 739  | 38346  | 0         | 542  | 545  | 99 -  | 1   | 545  | 3801   | 4345   |
| UN29391 | Rsa1.0.01122.1 | 730  | 53369  | 1.00E-147 | 280  | 284  | 98 +  | 449 | 730  | 4370   | 4653   |
| UN29392 | Rsa1.0.07319.1 | 1180 | 9561   | 0         | 383  | 389  | 98 -  | 1   | 389  | 8937   | 9325   |
| UN29393 | Rsa1.0.00278.1 | 1081 | 231896 | 0         | 616  | 644  | 95 +  | 456 | 1081 | 65539  | 66179  |
| UN29394 | Rsa1.0.02504.1 | 485  | 30706  | 0         | 381  | 385  | 98 -  | 102 | 485  | 16747  | 17131  |
| UN29395 | Rsa1.0.03594.1 | 1011 | 21868  | 0         | 418  | 420  | 99 -  | 2   | 421  | 8931   | 9350   |
| UN29396 | Rsa1.0.00038.1 | 1152 | 314568 | 0         | 1141 | 1156 | 98 -  | 1   | 1152 | 28871  | 30026  |
| UN29397 | Rsa1.0.00055.1 | 1252 | 520193 | 1.00E-99  | 241  | 259  | 93 +  | 798 | 1053 | 176460 | 176718 |
| UN29398 | Rsa1.0.10711.1 | 763  | 5749   | 1.00E-150 | 269  | 269  | 100 - | 8   | 276  | 5152   | 5420   |
| UN29399 | Rsa1.0.03800.1 | 630  | 20768  | 1.00E-177 | 315  | 315  | 100 - | 3   | 317  | 8309   | 8623   |
| UN29400 | Rsa1.0.00114.1 | 815  | 131330 | 0         | 397  | 408  | 97 +  | 409 | 815  | 16763  | 17168  |
| UN29401 | Rsa1.0.02406.1 | 502  | 145276 | 0         | 411  | 417  | 98 -  | 3   | 419  | 23686  | 24102  |
| UN29402 | Rsa1.0.00828.1 | 652  | 62744  | 0         | 637  | 646  | 98 -  | 7   | 652  | 898    | 1543   |
| UN29403 | Rsa1.0.00041.1 | 810  | 186197 | 1.00E-144 | 293  | 301  | 97 -  | 513 | 809  | 132774 | 133073 |
| UN29404 | Rsa1.0.00501.1 | 527  | 79545  | 1.00E-143 | 477  | 537  | 88 -  | 2   | 523  | 41893  | 42413  |



|         |                |      |        |           |     |     |       |     |     |        |        |
|---------|----------------|------|--------|-----------|-----|-----|-------|-----|-----|--------|--------|
| UN29444 | Rsa1.0_00715.1 | 610  | 67116  | 1.00E-122 | 267 | 279 | 95 -  | 3   | 279 | 46727  | 47000  |
| UN29445 | Rsa1.0_10663.1 | 346  | 5765   | 1.00E-124 | 232 | 234 | 99 +  | 1   | 234 | 4804   | 5037   |
| UN29446 | Rsa1.0_00366.1 | 580  | 90880  | 1.00E-168 | 356 | 370 | 96 -  | 177 | 541 | 37372  | 37741  |
| UN29447 | Rsa1.0_02693.1 | 558  | 28617  | 0         | 366 | 370 | 98 -  | 189 | 558 | 22359  | 22728  |
| UN29448 | Rsa1.0_00664.1 | 791  | 69573  | 1.00E-137 | 287 | 296 | 96 +  | 499 | 791 | 37111  | 37406  |
| UN29449 | Rsa1.0_05847.1 | 664  | 12433  | 0         | 653 | 663 | 98 +  | 2   | 664 | 618    | 1279   |
| UN29450 | Rsa1.0_00195.1 | 804  | 251884 | 1.00E-134 | 635 | 762 | 83 -  | 49  | 804 | 79659  | 80408  |
| UN29451 | Rsa1.0_00197.1 | 683  | 109714 | 1.00E-165 | 348 | 367 | 94 +  | 3   | 361 | 7668   | 8034   |
| UN29452 | Rsa1.0_00392.1 | 762  | 88523  | 0         | 561 | 561 | 100 + | 124 | 684 | 63998  | 64558  |
| UN29453 | Rsa1.0_14898.1 | 976  | 2982   | 0         | 388 | 400 | 97 -  | 1   | 400 | 1340   | 1739   |
| UN29454 | Rsa1.0_00010.1 | 835  | 294827 | 0         | 358 | 362 | 98 -  | 11  | 371 | 224149 | 224509 |
| UN29455 | Rsa1.0_00300.1 | 990  | 97747  | 0         | 947 | 991 | 95 -  | 3   | 983 | 24253  | 25239  |
| UN29456 | Rsa1.0_00621.1 | 943  | 71840  | 0         | 337 | 338 | 99 +  | 1   | 338 | 15955  | 16292  |
| UN29457 | Rsa1.0_00049.1 | 710  | 167018 | 0         | 436 | 446 | 97 +  | 1   | 446 | 82030  | 82475  |
| UN29458 | Rsa1.0_00047.1 | 829  | 168582 | 0         | 566 | 569 | 99 -  | 255 | 823 | 140718 | 141286 |
| UN29459 | Rsa1.0_02756.1 | 791  | 28202  | 0         | 576 | 579 | 99 -  | 213 | 791 | 23924  | 24502  |
| UN29460 | Rsa1.0_08387.1 | 617  | 7436   | 0         | 605 | 619 | 97 +  | 1   | 617 | 4848   | 5465   |
| UN29461 | Rsa1.0_01458.1 | 683  | 175719 | 0         | 426 | 436 | 97 +  | 3   | 438 | 26191  | 26626  |
| UN29462 | Rsa1.0_04535.1 | 703  | 136600 | 5.00E-33  | 115 | 129 | 89 +  | 428 | 556 | 15294  | 15422  |
| UN29463 | Rsa1.0_00743.1 | 759  | 177459 | 0         | 697 | 758 | 91 -  | 7   | 758 | 1834   | 2573   |
| UN29464 | Rsa1.0_03870.1 | 791  | 20362  | 0         | 415 | 432 | 96 -  | 13  | 443 | 11010  | 11435  |
| UN29465 | Rsa1.0_00408.1 | 657  | 176752 | 0         | 609 | 639 | 95 +  | 2   | 625 | 100541 | 101173 |
| UN29466 | Rsa1.0_05890.1 | 676  | 12317  | 1.00E-114 | 233 | 241 | 96 -  | 88  | 328 | 2574   | 2814   |
| UN29467 | Rsa1.0_01474.1 | 846  | 45070  | 0         | 533 | 567 | 94 -  | 1   | 563 | 16827  | 17375  |
| UN29468 | Rsa1.0_00420.1 | 308  | 86496  | 1.00E-110 | 266 | 285 | 93 +  | 22  | 300 | 78709  | 78991  |
| UN29469 | Rsa1.0_00291.1 | 902  | 172129 | 0         | 325 | 325 | 100 + | 484 | 808 | 42687  | 43011  |
| UN29470 | Rsa1.0_06150.1 | 676  | 11614  | 0         | 588 | 619 | 94 +  | 1   | 619 | 10846  | 11464  |
| UN29471 | Rsa1.0_07996.1 | 624  | 135291 | 1.00E-173 | 366 | 384 | 95 -  | 3   | 386 | 132672 | 133049 |
| UN29472 | Rsa1.0_00353.1 | 1327 | 92242  | 0         | 964 | 967 | 99 -  | 2   | 967 | 71817  | 72783  |
| UN29473 | Rsa1.0_02867.1 | 997  | 27121  | 0         | 593 | 667 | 88 -  | 361 | 997 | 22104  | 22768  |
| UN29474 | Rsa1.0_16361.1 | 861  | 2179   | 1.00E-159 | 288 | 289 | 99 -  | 573 | 861 | 943    | 1231   |
| UN29475 | Rsa1.0_00761.1 | 938  | 65133  | 0         | 883 | 947 | 93 -  | 3   | 938 | 53756  | 54681  |
| UN29476 | Rsa1.0_04486.1 | 649  | 17161  | 0         | 646 | 649 | 99 -  | 1   | 649 | 8413   | 9061   |
| UN29477 | Rsa1.0_02945.1 | 533  | 26548  | 0         | 361 | 361 | 100 + | 3   | 363 | 16914  | 17274  |
| UN29478 | Rsa1.0_00200.1 | 1030 | 162016 | 0         | 385 | 392 | 98 +  | 2   | 393 | 70155  | 70546  |
| UN29479 | Rsa1.0_01805.1 | 726  | 39024  | 1.00E-131 | 240 | 241 | 99 +  | 396 | 636 | 21077  | 21317  |
| UN29480 | Rsa1.0_00101.1 | 695  | 267193 | 0         | 691 | 692 | 99 +  | 2   | 693 | 98645  | 99336  |
| UN29481 | Rsa1.0_00595.1 | 680  | 341648 | 0         | 653 | 686 | 95 +  | 1   | 680 | 193457 | 194137 |
| UN29482 | Rsa1.0_00978.1 | 721  | 57739  | 0         | 498 | 506 | 98 +  | 216 | 721 | 39104  | 39608  |

|         |                |      |        |           |      |      |       |     |      |        |        |
|---------|----------------|------|--------|-----------|------|------|-------|-----|------|--------|--------|
| UN29483 | Rsa1.0.01644.1 | 1114 | 41754  | 1.00E-145 | 339  | 369  | 91 -  | 759 | 1107 | 39769  | 40135  |
| UN29484 | Rsa1.0.00990.1 | 934  | 57445  | 1.00E-105 | 209  | 214  | 97 -  | 66  | 279  | 11042  | 11255  |
| UN29485 | Rsa1.0.01841.1 | 393  | 38430  | 1.00E-130 | 274  | 287  | 95 +  | 5   | 291  | 833    | 1119   |
| UN29486 | Rsa1.0.01981.1 | 1188 | 36537  | 0         | 436  | 467  | 93 +  | 718 | 1184 | 25068  | 25518  |
| UN29487 | Rsa1.0.00122.1 | 729  | 265937 | 2.00E-75  | 153  | 156  | 98 +  | 160 | 315  | 228630 | 228785 |
| UN29488 | Rsa1.0.05399.1 | 751  | 13879  | 1.00E-111 | 211  | 213  | 99 +  | 539 | 751  | 7602   | 7814   |
| UN29489 | Rsa1.0.07823.1 | 1217 | 8468   | 0         | 995  | 1064 | 93 +  | 173 | 1217 | 4559   | 5617   |
| UN29490 | Rsa1.0.01622.1 | 538  | 42071  | 1.00E-167 | 298  | 298  | 100 - | 241 | 538  | 30162  | 30459  |
| UN29491 | Rsa1.0.02707.1 | 660  | 28520  | 1.00E-136 | 270  | 278  | 97 -  | 140 | 417  | 2862   | 3139   |
| UN29492 | Rsa1.0.02562.1 | 564  | 30061  | 1.00E-145 | 264  | 265  | 99 -  | 300 | 564  | 16582  | 16846  |
| UN29493 | Rsa1.0.00942.1 | 544  | 58873  | 1.00E-103 | 227  | 238  | 95 -  | 1   | 238  | 41205  | 41440  |
| UN29494 | Rsa1.0.00292.1 | 1290 | 98141  | 0         | 676  | 683  | 98 -  | 606 | 1288 | 390    | 1072   |
| UN29495 | Rsa1.0.00554.1 | 1116 | 150953 | 7.00E-15  | 67   | 75   | 89 -  | 879 | 953  | 46830  | 46904  |
| UN29496 | Rsa1.0.04254.1 | 1359 | 18258  | 0         | 1264 | 1281 | 98 +  | 1   | 1275 | 15140  | 16420  |
| UN29497 | Rsa1.0.00560.1 | 503  | 75685  | 1.00E-171 | 305  | 305  | 100 - | 199 | 503  | 8355   | 8659   |
| UN29498 | Rsa1.0.14684.1 | 835  | 3159   | 0         | 827  | 832  | 99 +  | 4   | 835  | 2006   | 2837   |
| UN29499 | Rsa1.0.00017.1 | 679  | 752458 | 0         | 662  | 666  | 99 +  | 15  | 679  | 481430 | 482095 |
| UN29500 | Rsa1.0.08935.1 | 1123 | 6771   | 1.00E-119 | 260  | 273  | 95 -  | 850 | 1121 | 2053   | 2319   |
| UN29501 | Rsa1.0.00564.1 | 1095 | 75428  | 0         | 948  | 991  | 95 -  | 70  | 1050 | 71103  | 72088  |
| UN29502 | Rsa1.0.02784.1 | 1327 | 27881  | 0         | 782  | 803  | 97 -  | 526 | 1327 | 27079  | 27881  |
| UN29503 | Rsa1.0.03316.1 | 1022 | 23785  | 0         | 613  | 625  | 98 +  | 2   | 626  | 17106  | 17730  |
| UN29504 | Rsa1.0.00386.1 | 448  | 89134  | 0         | 442  | 446  | 99 -  | 1   | 446  | 78925  | 79370  |
| UN29505 | Rsa1.0.01239.1 | 669  | 50107  | 0         | 641  | 642  | 99 +  | 3   | 644  | 32926  | 33567  |
| UN29506 | Rsa1.0.00195.1 | 584  | 251884 | 0         | 578  | 581  | 99 +  | 2   | 582  | 41309  | 41887  |
| UN29507 | Rsa1.0.02750.1 | 374  | 28239  | 1.00E-137 | 250  | 251  | 99 -  | 2   | 252  | 5084   | 5334   |
| UN29508 | Rsa1.0.02586.1 | 1122 | 29856  | 0         | 329  | 330  | 99 +  | 791 | 1120 | 28446  | 28775  |
| UN29509 | Rsa1.0.06561.1 | 1001 | 10772  | 0         | 973  | 1005 | 96 -  | 3   | 1000 | 1594   | 2597   |
| UN29510 | Rsa1.0.02871.1 | 532  | 27085  | 0         | 395  | 407  | 97 +  | 2   | 406  | 1608   | 2014   |
| UN29511 | Rsa1.0.00996.1 | 1034 | 57222  | 0         | 332  | 333  | 99 +  | 700 | 1032 | 53540  | 53872  |
| UN29512 | #              | #    | #      | #         | #    | #    | #     | #   | #    | #      | #      |
| UN29513 | Rsa1.0.04565.1 | 1325 | 16837  | 0         | 476  | 486  | 97 +  | 840 | 1325 | 4248   | 4731   |
| UN29514 | Rsa1.0.07786.1 | 799  | 8569   | 5.00E-86  | 203  | 212  | 95 +  | 1   | 209  | 6397   | 6605   |
| UN29515 | Rsa1.0.00240.1 | 1179 | 104175 | 0         | 638  | 660  | 96 -  | 521 | 1179 | 26512  | 27171  |
| UN29516 | Rsa1.0.00398.1 | 764  | 88007  | 1.00E-147 | 265  | 265  | 100 - | 2   | 266  | 60944  | 61208  |
| UN29517 | Rsa1.0.01048.1 | 1005 | 55684  | 0         | 366  | 367  | 99 -  | 637 | 1003 | 39092  | 39458  |
| UN29518 | Rsa1.0.05279.1 | 980  | 14277  | 1.00E-130 | 271  | 282  | 96 -  | 2   | 283  | 3897   | 4175   |
| UN29519 | Rsa1.0.01731.1 | 1159 | 40208  | 1.00E-130 | 247  | 249  | 99 +  | 513 | 760  | 29671  | 29919  |
| UN29520 | Rsa1.0.03023.1 | 793  | 25967  | 6.00E-27  | 162  | 195  | 83 +  | 121 | 315  | 18954  | 19148  |
| UN29521 | Rsa1.0.03326.1 | 778  | 23710  | 0         | 384  | 387  | 99 +  | 393 | 778  | 8578   | 8964   |

|         |                |      |        |           |     |     |       |     |      |        |        |
|---------|----------------|------|--------|-----------|-----|-----|-------|-----|------|--------|--------|
| UN29522 | Rsa1.0.01424.1 | 752  | 46139  | 1.00E-137 | 264 | 268 | 98 -  | 483 | 750  | 8974   | 9240   |
| UN29523 | Rsa1.0.00073.1 | 1063 | 240924 | 0         | 658 | 704 | 93 +  | 366 | 1060 | 53960  | 54663  |
| UN29524 | Rsa1.0.00394.1 | 769  | 148426 | 0         | 442 | 452 | 97 -  | 1   | 451  | 142837 | 143288 |
| UN29525 | Rsa1.0.00107.1 | 740  | 431659 | 0         | 451 | 454 | 99 -  | 288 | 740  | 326188 | 326641 |
| UN29526 | Rsa1.0.00255.1 | 491  | 204967 | 1.00E-159 | 353 | 374 | 94 -  | 119 | 491  | 166745 | 167104 |
| UN29527 | Rsa1.0.29685.1 | 630  | 775    | 1.00E-121 | 284 | 304 | 93 +  | 2   | 304  | 472    | 775    |
| UN29528 | Rsa1.0.00710.1 | 981  | 67325  | 0         | 387 | 399 | 96 +  | 451 | 849  | 34879  | 35277  |
| UN29529 | Rsa1.0.07885.1 | 874  | 8359   | 1.00E-178 | 522 | 591 | 88 -  | 141 | 731  | 6739   | 7323   |
| UN29530 | Rsa1.0.04353.1 | 721  | 138437 | 0         | 712 | 722 | 98 -  | 2   | 721  | 135303 | 136024 |
| UN29531 | Rsa1.0.00146.1 | 956  | 149343 | 0         | 949 | 957 | 99 +  | 1   | 956  | 99540  | 100496 |
| UN29532 | Rsa1.0.01078.1 | 809  | 316910 | 0         | 803 | 809 | 99 -  | 1   | 809  | 132830 | 133638 |
| UN29533 | Rsa1.0.00013.1 | 941  | 292129 | 0         | 831 | 855 | 97 +  | 91  | 937  | 105190 | 106043 |
| UN29534 | Rsa1.0.00394.1 | 550  | 148426 | 0         | 420 | 432 | 97 +  | 119 | 550  | 134470 | 134901 |
| UN29535 | Rsa1.0.04635.1 | 1007 | 16569  | 0         | 404 | 407 | 99 +  | 601 | 1007 | 7388   | 7794   |
| UN29536 | Rsa1.0.00001.1 | 645  | 363028 | 0         | 561 | 595 | 94 +  | 50  | 643  | 53869  | 54461  |
| UN29537 | Rsa1.0.00837.1 | 776  | 62568  | 1.00E-179 | 397 | 422 | 94 +  | 1   | 409  | 54438  | 54856  |
| UN29538 | Rsa1.0.13819.1 | 1090 | 4264   | 0         | 470 | 495 | 94 +  | 552 | 1045 | 1651   | 2143   |
| UN29539 | Rsa1.0.04203.1 | 815  | 18479  | 0         | 784 | 811 | 96 -  | 3   | 813  | 3524   | 4311   |
| UN29540 | Rsa1.0.00991.1 | 330  | 143101 | 1.00E-136 | 267 | 272 | 98 +  | 60  | 328  | 45335  | 45606  |
| UN29541 | Rsa1.0.01164.1 | 858  | 51934  | 0         | 456 | 482 | 94 +  | 12  | 493  | 14475  | 14954  |
| UN29542 | Rsa1.0.00028.1 | 724  | 293984 | 0         | 707 | 721 | 98 -  | 1   | 714  | 206605 | 207324 |
| UN29543 | Rsa1.0.01803.1 | 719  | 173846 | 0         | 715 | 717 | 99 +  | 2   | 718  | 170396 | 171112 |
| UN29544 | Rsa1.0.02948.1 | 575  | 26526  | 0         | 567 | 572 | 99 -  | 2   | 573  | 25254  | 25825  |
| UN29545 | Rsa1.0.01331.1 | 831  | 47944  | 0         | 456 | 463 | 98 +  | 1   | 463  | 13768  | 14230  |
| UN29546 | Rsa1.0.00381.1 | 680  | 89718  | 8.00E-66  | 140 | 144 | 97 -  | 17  | 160  | 17865  | 18008  |
| UN29547 | Rsa1.0.00999.1 | 929  | 57162  | 0         | 893 | 930 | 96 +  | 5   | 926  | 38603  | 39528  |
| UN29548 | Rsa1.0.00634.1 | 703  | 71222  | 0         | 528 | 559 | 94 +  | 140 | 697  | 37783  | 38334  |
| UN29549 | Rsa1.0.15552.1 | 553  | 2546   | 1.00E-125 | 230 | 231 | 99 +  | 323 | 553  | 1046   | 1276   |
| UN29550 | Rsa1.0.00491.1 | 769  | 80219  | 1.00E-110 | 215 | 219 | 98 -  | 3   | 221  | 18265  | 18483  |
| UN29551 | Rsa1.0.00094.1 | 707  | 139042 | 0         | 672 | 716 | 93 -  | 3   | 707  | 93955  | 94660  |
| UN29552 | Rsa1.0.00252.1 | 650  | 102760 | 1.00E-89  | 183 | 188 | 97 -  | 226 | 413  | 65962  | 66149  |
| UN29553 | Rsa1.0.00017.1 | 183  | 752458 | 1.00E-58  | 145 | 154 | 94 -  | 26  | 179  | 606859 | 607010 |
| UN29554 | Rsa1.0.00151.1 | 733  | 119541 | 0         | 655 | 693 | 94 +  | 42  | 733  | 8077   | 8766   |
| UN29555 | Rsa1.0.00218.1 | 789  | 201480 | 0         | 387 | 391 | 98 +  | 398 | 788  | 13863  | 14252  |
| UN29556 | Rsa1.0.04344.1 | 1304 | 17822  | 6.00E-34  | 132 | 151 | 87 +  | 981 | 1131 | 8614   | 8764   |
| UN29557 | Rsa1.0.09923.1 | 588  | 6089   | 1.00E-115 | 241 | 251 | 96 -  | 2   | 252  | 5419   | 5665   |
| UN29558 | Rsa1.0.01491.1 | 331  | 44718  | 0         | 330 | 330 | 100 + | 2   | 331  | 21024  | 21353  |
| UN29559 | Rsa1.0.30323.1 | 699  | 757    | 1.00E-107 | 258 | 269 | 95 -  | 1   | 266  | 1      | 264    |
| UN29560 | Rsa1.0.43057.1 | 839  | 522    | 8.00E-91  | 236 | 258 | 91 +  | 2   | 259  | 119    | 376    |



|         |                |      |        |           |      |      |       |     |      |        |        |
|---------|----------------|------|--------|-----------|------|------|-------|-----|------|--------|--------|
| UN29561 | Rsa1.0.00193.1 | 1149 | 194198 | 0         | 470  | 474  | 99 -  | 1   | 474  | 94582  | 95055  |
| UN29562 | Rsa1.0.00016.1 | 1173 | 831256 | 0         | 385  | 392  | 98 +  | 778 | 1169 | 517640 | 518027 |
| UN29563 | Rsa1.0.01861.1 | 1069 | 38031  | 0         | 394  | 404  | 97 -  | 665 | 1068 | 29537  | 29937  |
| UN29564 | Rsa1.0.02905.1 | 1195 | 26873  | 0         | 849  | 910  | 93 +  | 142 | 1026 | 23965  | 24874  |
| UN29565 | Rsa1.0.01182.1 | 1041 | 167304 | 0         | 982  | 1034 | 94 -  | 16  | 1038 | 164053 | 165075 |
| UN29566 | Rsa1.0.01860.1 | 1042 | 38057  | 0         | 611  | 618  | 98 -  | 426 | 1042 | 17580  | 18197  |
| UN29567 | Rsa1.0.08564.1 | 882  | 7193   | 0         | 338  | 339  | 99 +  | 544 | 882  | 3323   | 3661   |
| UN29568 | Rsa1.0.00621.1 | 1333 | 71840  | 8.00E-83  | 172  | 177  | 97 +  | 419 | 595  | 39515  | 39691  |
| UN29569 | Rsa1.0.00314.1 | 642  | 96472  | 1.00E-164 | 350  | 367  | 95 -  | 1   | 358  | 32755  | 33121  |
| UN29570 | Rsa1.0.04935.1 | 836  | 15403  | 1.00E-120 | 241  | 246  | 97 -  | 1   | 242  | 6666   | 6911   |
| UN29571 | Rsa1.0.15288.1 | 1081 | 2708   | 0         | 505  | 508  | 99 +  | 574 | 1081 | 1980   | 2487   |
| UN29572 | Rsa1.0.03876.1 | 741  | 20334  | 1.00E-134 | 270  | 279  | 96 -  | 84  | 362  | 19574  | 19852  |
| UN29573 | Rsa1.0.03178.1 | 940  | 24798  | 0         | 713  | 734  | 97 -  | 22  | 755  | 8432   | 9162   |
| UN29574 | Rsa1.0.28658.1 | 521  | 807    | 0         | 514  | 518  | 99 +  | 2   | 519  | 267    | 784    |
| UN29575 | Rsa1.0.05950.1 | 832  | 12130  | 1.00E-100 | 250  | 270  | 92 +  | 58  | 321  | 1035   | 1304   |
| UN29576 | Rsa1.0.00032.1 | 678  | 306326 | 0         | 637  | 679  | 93 -  | 1   | 678  | 159331 | 160009 |
| UN29577 | Rsa1.0.00294.1 | 957  | 144860 | 1.00E-167 | 312  | 315  | 99 -  | 1   | 315  | 16912  | 17225  |
| UN29578 | Rsa1.0.52034.1 | 727  | 437    | 0         | 433  | 433  | 100 - | 1   | 433  | 1      | 433    |
| UN29579 | Rsa1.0.00781.1 | 703  | 64480  | 0         | 699  | 702  | 99 +  | 3   | 703  | 14785  | 15486  |
| UN29580 | Rsa1.0.03912.1 | 726  | 135266 | 0         | 503  | 532  | 94 -  | 207 | 726  | 5406   | 5934   |
| UN29581 | Rsa1.0.01158.1 | 956  | 52121  | 0         | 365  | 366  | 99 -  | 1   | 366  | 50110  | 50475  |
| UN29582 | Rsa1.0.03642.1 | 1379 | 21609  | 6.00E-59  | 489  | 605  | 80 -  | 705 | 1292 | 8811   | 9401   |
| UN29583 | Rsa1.0.00005.1 | 613  | 353093 | 1.00E-118 | 299  | 327  | 91 +  | 287 | 613  | 121587 | 121913 |
| UN29584 | Rsa1.0.00547.1 | 612  | 76521  | 1.00E-127 | 323  | 354  | 91 -  | 272 | 608  | 17007  | 17357  |
| UN29585 | Rsa1.0.03941.1 | 1142 | 19960  | 0         | 446  | 481  | 92 +  | 147 | 627  | 12315  | 12791  |
| UN29586 | Rsa1.0.01031.1 | 918  | 56236  | 5.00E-83  | 224  | 245  | 91 +  | 671 | 914  | 13161  | 13390  |
| UN29587 | Rsa1.0.02200.1 | 1000 | 33981  | 0         | 437  | 441  | 99 +  | 558 | 998  | 2787   | 3225   |
| UN29588 | Rsa1.0.00707.1 | 1044 | 190112 | 0         | 1040 | 1043 | 99 +  | 1   | 1043 | 139866 | 140908 |
| UN29589 | Rsa1.0.00218.1 | 779  | 201480 | 0         | 757  | 780  | 97 +  | 1   | 779  | 181012 | 181791 |
| UN29590 | Rsa1.0.00197.1 | 727  | 109714 | 1.00E-178 | 317  | 317  | 100 - | 1   | 317  | 10486  | 10802  |
| UN29591 | Rsa1.0.00688.1 | 1153 | 68396  | 3.00E-66  | 265  | 307  | 86 -  | 224 | 528  | 2621   | 2919   |
| UN29592 | Rsa1.0.01021.1 | 702  | 56610  | 0         | 697  | 702  | 99 +  | 1   | 702  | 38711  | 39412  |
| UN29593 | Rsa1.0.03787.1 | 526  | 20876  | 0         | 524  | 525  | 99 +  | 2   | 526  | 6282   | 6806   |
| UN29594 | Rsa1.0.00074.1 | 928  | 147591 | 0         | 768  | 771  | 99 +  | 158 | 928  | 134257 | 135027 |
| UN29595 | Rsa1.0.01460.1 | 445  | 45255  | 1.00E-141 | 273  | 279  | 97 -  | 1   | 275  | 21440  | 21718  |
| UN29596 | Rsa1.0.00485.1 | 397  | 80937  | 1.00E-157 | 284  | 285  | 99 +  | 1   | 285  | 57188  | 57472  |
| UN29597 | Rsa1.0.05405.1 | 1136 | 13869  | 1.00E-126 | 239  | 241  | 99 -  | 896 | 1136 | 11614  | 11853  |
| UN29598 | Rsa1.0.06764.1 | 716  | 10398  | 0         | 655  | 664  | 98 -  | 1   | 664  | 5367   | 6030   |
| UN29599 | Rsa1.0.00050.1 | 1230 | 237174 | 0         | 1138 | 1178 | 96 -  | 56  | 1230 | 196091 | 197268 |

|         |                |      |        |           |     |     |       |      |      |        |        |
|---------|----------------|------|--------|-----------|-----|-----|-------|------|------|--------|--------|
| UN29600 | Rsa1.0_02906.1 | 1054 | 26866  | 1.00E-107 | 209 | 212 | 98 +  | 225  | 434  | 21763  | 21974  |
| UN29601 | Rsa1.0_00264.1 | 342  | 101674 | 0         | 339 | 340 | 99 +  | 1    | 340  | 100656 | 100995 |
| UN29602 | Rsa1.0_01182.1 | 996  | 167304 | 0         | 991 | 995 | 99 -  | 1    | 995  | 164010 | 165004 |
| UN29603 | Rsa1.0_00063.1 | 1278 | 156150 | 0         | 728 | 735 | 99 -  | 1    | 735  | 144679 | 145412 |
| UN29604 | Rsa1.0_00476.1 | 1119 | 280966 | 1.00E-130 | 288 | 300 | 96 -  | 824  | 1119 | 242930 | 243228 |
| UN29605 | Rsa1.0_02403.1 | 1043 | 31706  | 0         | 669 | 672 | 99 -  | 2    | 673  | 29764  | 30434  |
| UN29606 | Rsa1.0_00018.1 | 701  | 410899 | 1.00E-166 | 348 | 363 | 95 +  | 3    | 365  | 122515 | 122874 |
| UN29607 | Rsa1.0_00170.1 | 627  | 179538 | 0         | 605 | 626 | 96 +  | 2    | 627  | 89093  | 89715  |
| UN29608 | Rsa1.0_02011.1 | 773  | 36088  | 0         | 419 | 420 | 99 +  | 1    | 420  | 33232  | 33651  |
| UN29609 | Rsa1.0_00058.1 | 712  | 159921 | 3.00E-84  | 208 | 222 | 93 +  | 1    | 222  | 64419  | 64637  |
| UN29610 | Rsa1.0_00534.1 | 867  | 77361  | 0         | 469 | 470 | 99 +  | 397  | 866  | 40851  | 41320  |
| UN29611 | Rsa1.0_00627.1 | 876  | 71566  | 1.00E-142 | 363 | 397 | 91 -  | 485  | 876  | 25910  | 26301  |
| UN29612 | Rsa1.0_00551.1 | 927  | 76227  | 0         | 796 | 822 | 96 -  | 112  | 922  | 21638  | 22458  |
| UN29613 | Rsa1.0_01519.1 | 596  | 44144  | 0         | 594 | 595 | 99 +  | 2    | 596  | 14905  | 15499  |
| UN29614 | Rsa1.0_03282.1 | 438  | 24107  | 3.00E-92  | 248 | 268 | 92 +  | 179  | 437  | 7170   | 7437   |
| UN29615 | Rsa1.0_02273.1 | 578  | 140964 | 2.00E-26  | 130 | 151 | 86 -  | 11   | 160  | 23318  | 23464  |
| UN29616 | Rsa1.0_03390.1 | 1179 | 23270  | 0         | 826 | 839 | 98 -  | 3    | 833  | 20670  | 21508  |
| UN29617 | Rsa1.0_16561.1 | 1526 | 2111   | 1.00E-158 | 345 | 363 | 95 -  | 1151 | 1510 | 465    | 823    |
| UN29618 | Rsa1.0_02360.1 | 541  | 32203  | 1.00E-176 | 316 | 317 | 99 +  | 223  | 539  | 22909  | 23225  |
| UN29619 | Rsa1.0_09781.1 | 659  | 6153   | 0         | 529 | 533 | 99 +  | 2    | 534  | 310    | 842    |
| UN29620 | Rsa1.0_00113.1 | 685  | 131574 | 0         | 338 | 338 | 100 + | 3    | 340  | 91515  | 91852  |
| UN29621 | Rsa1.0_14293.1 | 1231 | 3569   | 0         | 926 | 975 | 94 +  | 270  | 1231 | 1      | 950    |
| UN29622 | Rsa1.0_04617.1 | 588  | 16625  | 0         | 511 | 512 | 99 +  | 2    | 513  | 16023  | 16534  |
| UN29623 | Rsa1.0_02130.1 | 1009 | 34755  | 0         | 600 | 607 | 98 +  | 404  | 1009 | 21296  | 21902  |
| UN29624 | Rsa1.0_00135.1 | 1053 | 178077 | 0         | 400 | 401 | 99 +  | 651  | 1051 | 65603  | 66003  |
| UN29625 | Rsa1.0_05975.1 | 531  | 12062  | 0         | 324 | 325 | 99 -  | 207  | 531  | 3805   | 4129   |
| UN29626 | Rsa1.0_02196.1 | 695  | 34005  | 3.00E-28  | 133 | 153 | 86 -  | 7    | 158  | 5458   | 5609   |
| UN29627 | Rsa1.0_00713.1 | 810  | 158017 | 0         | 345 | 346 | 99 +  | 3    | 348  | 5913   | 6258   |
| UN29628 | Rsa1.0_01496.1 | 583  | 44595  | 1.00E-119 | 241 | 249 | 96 +  | 1    | 249  | 41596  | 41844  |
| UN29629 | Rsa1.0_00073.1 | 932  | 240924 | 0         | 454 | 484 | 93 +  | 449  | 931  | 94015  | 94477  |
| UN29630 | Rsa1.0_11943.1 | 683  | 5365   | 1.00E-124 | 309 | 331 | 93 +  | 358  | 683  | 570    | 897    |
| UN29631 | Rsa1.0_00159.1 | 589  | 431686 | 0         | 585 | 588 | 99 -  | 2    | 589  | 253446 | 254033 |
| UN29632 | Rsa1.0_01474.1 | 822  | 45070  | 0         | 707 | 709 | 99 -  | 1    | 709  | 16827  | 17535  |
| UN29633 | Rsa1.0_01701.1 | 783  | 162121 | 0         | 739 | 785 | 94 +  | 1    | 783  | 38150  | 38906  |
| UN29634 | Rsa1.0_00208.1 | 836  | 108565 | 1.00E-114 | 232 | 237 | 97 -  | 390  | 625  | 51171  | 51406  |
| UN29635 | Rsa1.0_00672.1 | 561  | 69358  | 1.00E-171 | 311 | 313 | 99 -  | 249  | 561  | 96     | 408    |
| UN29636 | Rsa1.0_00977.1 | 644  | 198001 | 0         | 595 | 621 | 95 +  | 27   | 644  | 188615 | 189230 |
| UN29637 | Rsa1.0_01682.1 | 616  | 41090  | 1.00E-144 | 404 | 449 | 89 +  | 1    | 426  | 29219  | 29660  |
| UN29638 | Rsa1.0_01022.1 | 1061 | 56606  | 0         | 675 | 710 | 95 +  | 2    | 711  | 22436  | 23145  |

|         |                |      |        |           |     |      |       |     |      |        |        |
|---------|----------------|------|--------|-----------|-----|------|-------|-----|------|--------|--------|
| UN29639 | Rsa1.0.00175.1 | 763  | 166121 | 1.00E-180 | 359 | 370  | 97 +  | 7   | 376  | 109590 | 109956 |
| UN29640 | Rsa1.0.00407.1 | 964  | 191544 | 0         | 589 | 598  | 98 -  | 1   | 598  | 46770  | 47367  |
| UN29641 | Rsa1.0.00356.1 | 1039 | 91521  | 1.00E-84  | 199 | 212  | 93 +  | 173 | 384  | 65493  | 65704  |
| UN29642 | Rsa1.0.03355.1 | 693  | 23489  | 1.00E-160 | 305 | 311  | 98 +  | 138 | 448  | 1082   | 1392   |
| UN29643 | Rsa1.0.00325.1 | 1256 | 95371  | 0         | 809 | 849  | 95 -  | 421 | 1256 | 87642  | 88488  |
| UN29644 | Rsa1.0.00630.1 | 1063 | 71281  | 1.00E-150 | 366 | 397  | 92 -  | 674 | 1063 | 68938  | 69324  |
| UN29645 | Rsa1.0.01183.1 | 528  | 51465  | 0         | 388 | 393  | 98 +  | 135 | 525  | 20910  | 21302  |
| UN29646 | Rsa1.0.00030.1 | 740  | 250988 | 1.00E-144 | 374 | 410  | 91 -  | 331 | 740  | 203426 | 203826 |
| UN29647 | Rsa1.0.00259.1 | 919  | 163204 | 0         | 404 | 420  | 96 +  | 501 | 919  | 148202 | 148621 |
| UN29648 | Rsa1.0.02070.1 | 502  | 158516 | 1.00E-48  | 105 | 107  | 98 +  | 396 | 502  | 136984 | 137090 |
| UN29649 | Rsa1.0.02202.1 | 920  | 33961  | 0         | 324 | 324  | 100 + | 276 | 599  | 19550  | 19873  |
| UN29650 | Rsa1.0.03851.1 | 638  | 20451  | 0         | 613 | 643  | 95 -  | 3   | 631  | 7938   | 8572   |
| UN29651 | Rsa1.0.02586.1 | 1010 | 29856  | 0         | 745 | 769  | 96 -  | 108 | 867  | 2095   | 2863   |
| UN29652 | Rsa1.0.06272.1 | 1144 | 11351  | 1.00E-116 | 231 | 236  | 97 +  | 909 | 1142 | 3083   | 3318   |
| UN29653 | Rsa1.0.23526.1 | 730  | 1042   | 0         | 724 | 730  | 99 -  | 2   | 728  | 256    | 985    |
| UN29654 | Rsa1.0.00293.1 | 855  | 339294 | 0         | 840 | 853  | 98 +  | 3   | 855  | 200004 | 200856 |
| UN29655 | Rsa1.0.01317.1 | 659  | 48287  | 1.00E-165 | 309 | 313  | 98 +  | 340 | 652  | 41470  | 41780  |
| UN29656 | Rsa1.0.00778.1 | 901  | 196751 | 0         | 508 | 535  | 94 -  | 367 | 901  | 185490 | 186010 |
| UN29657 | Rsa1.0.01208.1 | 884  | 50718  | 0         | 430 | 440  | 97 -  | 317 | 754  | 5762   | 6201   |
| UN29658 | Rsa1.0.00180.1 | 628  | 114581 | 0         | 579 | 608  | 95 -  | 1   | 593  | 11082  | 11685  |
| UN29659 | Rsa1.0.29206.1 | 753  | 789    | 1.00E-147 | 286 | 292  | 97 +  | 461 | 752  | 205    | 494    |
| UN29660 | Rsa1.0.04398.1 | 875  | 17550  | 0         | 362 | 363  | 99 +  | 448 | 810  | 4320   | 4682   |
| UN29661 | Rsa1.0.00846.1 | 760  | 62342  | 1.00E-158 | 286 | 287  | 99 -  | 132 | 418  | 16009  | 16295  |
| UN29662 | Rsa1.0.04691.1 | 722  | 16362  | 0         | 492 | 530  | 92 +  | 211 | 722  | 9409   | 9928   |
| UN29663 | Rsa1.0.03057.1 | 222  | 25724  | 9.00E-60  | 159 | 168  | 94 +  | 1   | 167  | 11252  | 11415  |
| UN29664 | Rsa1.0.00720.1 | 1374 | 66931  | 0         | 408 | 423  | 96 +  | 2   | 424  | 20879  | 21301  |
| UN29665 | Rsa1.0.00096.1 | 709  | 198773 | 1.00E-170 | 309 | 311  | 99 +  | 399 | 709  | 176663 | 176973 |
| UN29666 | Rsa1.0.07540.1 | 796  | 9170   | 0         | 452 | 466  | 96 -  | 331 | 796  | 4407   | 4872   |
| UN29667 | Rsa1.0.00592.1 | 1081 | 73788  | 1.00E-105 | 234 | 246  | 95 +  | 837 | 1081 | 72     | 317    |
| UN29668 | Rsa1.0.00040.1 | 521  | 324196 | 0         | 487 | 514  | 94 -  | 3   | 511  | 63762  | 64267  |
| UN29669 | Rsa1.0.03506.1 | 788  | 22416  | 0         | 432 | 456  | 94 +  | 345 | 788  | 10789  | 11244  |
| UN29670 | Rsa1.0.17439.1 | 547  | 1829   | 0         | 543 | 545  | 99 -  | 1   | 545  | 84     | 628    |
| UN29671 | Rsa1.0.12004.1 | 1187 | 5344   | 0         | 831 | 933  | 89 -  | 2   | 930  | 146    | 1072   |
| UN29672 | Rsa1.0.07494.1 | 1006 | 9258   | 0         | 978 | 1001 | 97 +  | 7   | 1006 | 6101   | 7100   |
| UN29673 | Rsa1.0.01492.1 | 998  | 44704  | 1.00E-145 | 265 | 266  | 99 +  | 724 | 989  | 2784   | 3049   |
| UN29674 | Rsa1.0.15068.1 | 591  | 2854   | 0         | 573 | 597  | 95 -  | 2   | 590  | 974    | 1570   |
| UN29675 | Rsa1.0.02105.1 | 827  | 156953 | 0         | 807 | 824  | 97 -  | 3   | 824  | 18742  | 19564  |
| UN29676 | Rsa1.0.00177.1 | 613  | 143394 | 0         | 598 | 608  | 98 +  | 3   | 608  | 93809  | 94415  |
| UN29677 | Rsa1.0.06312.1 | 990  | 11253  | 0         | 529 | 543  | 97 -  | 448 | 990  | 6881   | 7415   |

|         |                |      |        |           |      |      |       |      |      |        |        |
|---------|----------------|------|--------|-----------|------|------|-------|------|------|--------|--------|
| UN29678 | Rsa1.0_10606.1 | 1233 | 5787   | 1.00E-141 | 278  | 285  | 97 -  | 2    | 284  | 3538   | 3822   |
| UN29679 | Rsa1.0_00674.1 | 574  | 193753 | 1.00E-144 | 330  | 351  | 94 -  | 214  | 563  | 129012 | 129356 |
| UN29680 | Rsa1.0_00045.1 | 436  | 328694 | 1.00E-168 | 300  | 300  | 100 + | 137  | 436  | 286644 | 286943 |
| UN29681 | Rsa1.0_46419.1 | 981  | 486    | 7.00E-24  | 88   | 98   | 89 -  | 220  | 317  | 160    | 257    |
| UN29682 | Rsa1.0_07309.1 | 816  | 9572   | 0         | 774  | 805  | 96 -  | 2    | 806  | 4781   | 5580   |
| UN29683 | #              | #    | #      | #         | #    | #    | #     | #    | #    | #      | #      |
| UN29684 | Rsa1.0_00078.1 | 1284 | 175053 | 0         | 1205 | 1315 | 91 +  | 2    | 1280 | 28053  | 29359  |
| UN29685 | Rsa1.0_10953.1 | 935  | 5666   | 0         | 465  | 485  | 95 +  | 2    | 483  | 3646   | 4122   |
| UN29686 | Rsa1.0_01470.1 | 592  | 45108  | 1.00E-115 | 213  | 214  | 99 +  | 142  | 355  | 32729  | 32942  |
| UN29687 | Rsa1.0_00177.1 | 798  | 143394 | 0         | 738  | 797  | 92 -  | 3    | 798  | 103366 | 104137 |
| UN29688 | Rsa1.0_00005.1 | 696  | 353093 | 4.00E-92  | 187  | 192  | 97 +  | 2    | 193  | 274700 | 274891 |
| UN29689 | Rsa1.0_04535.1 | 1259 | 136600 | 0         | 709  | 720  | 98 +  | 538  | 1257 | 126575 | 127294 |
| UN29690 | Rsa1.0_01661.1 | 737  | 41400  | 1.00E-136 | 249  | 250  | 99 +  | 488  | 737  | 40406  | 40655  |
| UN29691 | Rsa1.0_00015.1 | 641  | 561803 | 5.00E-36  | 121  | 134  | 90 +  | 71   | 203  | 390332 | 390465 |
| UN29692 | Rsa1.0_00134.1 | 849  | 390219 | 1.00E-160 | 329  | 342  | 96 +  | 511  | 849  | 13216  | 13554  |
| UN29693 | Rsa1.0_00081.1 | 637  | 143261 | 1.00E-156 | 307  | 314  | 97 +  | 281  | 592  | 48160  | 48472  |
| UN29694 | Rsa1.0_01387.1 | 1286 | 46745  | 1.00E-117 | 420  | 485  | 86 -  | 1    | 481  | 8907   | 9391   |
| UN29695 | Rsa1.0_00398.1 | 463  | 88007  | 0         | 457  | 462  | 98 +  | 2    | 463  | 82246  | 82707  |
| UN29696 | Rsa1.0_00006.1 | 581  | 396176 | 0         | 364  | 372  | 97 -  | 211  | 581  | 279312 | 279682 |
| UN29697 | Rsa1.0_00028.1 | 867  | 293984 | 0         | 558  | 578  | 96 +  | 6    | 583  | 220592 | 221162 |
| UN29698 | Rsa1.0_47413.1 | 497  | 477    | 1.00E-115 | 225  | 230  | 97 +  | 1    | 230  | 160    | 389    |
| UN29699 | Rsa1.0_00149.1 | 1387 | 305196 | 0         | 837  | 886  | 94 +  | 513  | 1385 | 103637 | 104515 |
| UN29700 | Rsa1.0_03066.1 | 1039 | 25653  | 1.00E-170 | 413  | 444  | 93 -  | 1    | 436  | 6790   | 7233   |
| UN29701 | Rsa1.0_04067.1 | 726  | 19256  | 1.00E-169 | 301  | 301  | 100 - | 426  | 726  | 7064   | 7364   |
| UN29702 | Rsa1.0_00818.1 | 737  | 62939  | 0         | 687  | 738  | 93 +  | 1    | 737  | 7563   | 8285   |
| UN29703 | Rsa1.0_00210.1 | 690  | 108424 | 0         | 677  | 688  | 98 -  | 5    | 690  | 55703  | 56390  |
| UN29704 | Rsa1.0_03502.1 | 754  | 22446  | 1.00E-152 | 283  | 285  | 99 +  | 470  | 754  | 9334   | 9617   |
| UN29705 | Rsa1.0_00435.1 | 876  | 317579 | 0         | 626  | 633  | 98 +  | 245  | 873  | 72296  | 72926  |
| UN29706 | Rsa1.0_00807.1 | 859  | 63607  | 1.00E-149 | 268  | 268  | 100 + | 592  | 859  | 53754  | 54021  |
| UN29707 | Rsa1.0_00341.1 | 757  | 249309 | 2.00E-54  | 119  | 121  | 98 +  | 12   | 132  | 248195 | 248314 |
| UN29708 | Rsa1.0_00653.1 | 658  | 70029  | 0         | 651  | 657  | 99 +  | 2    | 658  | 17230  | 17886  |
| UN29709 | Rsa1.0_02969.1 | 1435 | 26390  | 1.00E-157 | 306  | 313  | 97 +  | 1125 | 1435 | 13425  | 13737  |
| UN29710 | Rsa1.0_04847.1 | 1044 | 15731  | 4.00E-59  | 123  | 125  | 98 -  | 780  | 904  | 277    | 401    |
| UN29711 | Rsa1.0_03132.1 | 745  | 25142  | 0         | 702  | 726  | 96 -  | 20   | 745  | 16361  | 17085  |
| UN29712 | Rsa1.0_00069.1 | 964  | 403561 | 0         | 636  | 660  | 96 -  | 3    | 653  | 142701 | 143358 |
| UN29713 | Rsa1.0_05951.1 | 805  | 12128  | 0         | 517  | 529  | 97 +  | 3    | 531  | 9968   | 10493  |
| UN29714 | Rsa1.0_00006.1 | 1164 | 396176 | 0         | 735  | 785  | 93 -  | 260  | 1041 | 186848 | 187611 |
| UN29715 | Rsa1.0_02185.1 | 621  | 34150  | 0         | 582  | 609  | 95 +  | 1    | 609  | 2805   | 3409   |
| UN29716 | Rsa1.0_01314.1 | 738  | 48365  | 0         | 632  | 646  | 97 -  | 95   | 738  | 44307  | 44946  |

|         |                |      |        |           |     |      |       |     |      |        |        |
|---------|----------------|------|--------|-----------|-----|------|-------|-----|------|--------|--------|
| UN29717 | Rsa1.0_13946.1 | 1374 | 4033   | 1.00E-158 | 299 | 304  | 98 -  | 7   | 310  | 859    | 1162   |
| UN29718 | Rsa1.0_01484.1 | 876  | 44806  | 0         | 418 | 431  | 96 -  | 446 | 876  | 22447  | 22877  |
| UN29719 | Rsa1.0_01149.1 | 634  | 160459 | 1.00E-52  | 171 | 188  | 90 -  | 430 | 617  | 149775 | 149956 |
| UN29720 | Rsa1.0_14062.1 | 404  | 3854   | 1.00E-149 | 274 | 276  | 99 -  | 129 | 404  | 2313   | 2588   |
| UN29721 | Rsa1.0_00092.1 | 978  | 659932 | 1.00E-179 | 343 | 350  | 98 -  | 3   | 351  | 633967 | 634316 |
| UN29722 | Rsa1.0_00481.1 | 865  | 81316  | 0         | 597 | 611  | 97 -  | 257 | 865  | 44233  | 44839  |
| UN29723 | Rsa1.0_08907.1 | 822  | 6803   | 0         | 471 | 489  | 96 -  | 68  | 556  | 3712   | 4200   |
| UN29724 | Rsa1.0_00053.1 | 880  | 263459 | 1.00E-135 | 265 | 272  | 97 +  | 243 | 514  | 63729  | 64000  |
| UN29725 | Rsa1.0_00655.1 | 804  | 195840 | 0         | 504 | 513  | 98 +  | 31  | 542  | 192449 | 192961 |
| UN29726 | Rsa1.0_00267.1 | 698  | 101509 | 1.00E-177 | 393 | 419  | 93 +  | 293 | 696  | 11960  | 12378  |
| UN29727 | Rsa1.0_00708.1 | 365  | 67366  | 1.00E-160 | 338 | 352  | 96 -  | 12  | 362  | 25828  | 26176  |
| UN29728 | Rsa1.0_05569.1 | 1050 | 13311  | 0         | 357 | 358  | 99 -  | 3   | 360  | 11540  | 11897  |
| UN29729 | Rsa1.0_01144.1 | 1095 | 52431  | 3.00E-17  | 65  | 71   | 91 +  | 693 | 763  | 40196  | 40266  |
| UN29730 | Rsa1.0_01501.1 | 677  | 44532  | 0         | 648 | 675  | 96 +  | 3   | 677  | 23339  | 24013  |
| UN29731 | Rsa1.0_00093.1 | 696  | 214962 | 1.00E-116 | 315 | 347  | 90 +  | 365 | 696  | 13257  | 13600  |
| UN29732 | Rsa1.0_00080.1 | 833  | 190437 | 0         | 661 | 666  | 99 +  | 168 | 833  | 112565 | 113230 |
| UN29733 | #              | #    | #      | #         | #   | #    | #     | #   | #    | #      | #      |
| UN29734 | Rsa1.0_01070.1 | 281  | 55099  | 7.00E-24  | 66  | 69   | 95 +  | 13  | 81   | 37775  | 37843  |
| UN29735 | Rsa1.0_04256.1 | 1229 | 18257  | 0         | 567 | 621  | 91 -  | 351 | 957  | 13944  | 14542  |
| UN29736 | Rsa1.0_02553.1 | 788  | 30190  | 1.00E-40  | 209 | 247  | 84 -  | 22  | 268  | 23590  | 23830  |
| UN29737 | Rsa1.0_00048.1 | 196  | 167185 | 2.00E-91  | 182 | 186  | 97 +  | 11  | 196  | 74904  | 75089  |
| UN29738 | Rsa1.0_00096.1 | 759  | 198773 | 0         | 739 | 771  | 95 -  | 1   | 759  | 168466 | 169234 |
| UN29739 | Rsa1.0_02276.1 | 780  | 33098  | 0         | 682 | 695  | 98 -  | 82  | 775  | 23749  | 24440  |
| UN29740 | Rsa1.0_00589.1 | 692  | 209965 | 0         | 394 | 411  | 95 +  | 2   | 411  | 53528  | 53938  |
| UN29741 | Rsa1.0_00031.1 | 729  | 179862 | 0         | 699 | 747  | 93 -  | 2   | 729  | 105898 | 106631 |
| UN29742 | Rsa1.0_03411.1 | 1247 | 23143  | 0         | 673 | 708  | 95 -  | 433 | 1140 | 8889   | 9582   |
| UN29743 | #              | #    | #      | #         | #   | #    | #     | #   | #    | #      | #      |
| UN29744 | Rsa1.0_01214.1 | 803  | 50599  | 0         | 497 | 523  | 95 +  | 287 | 802  | 1680   | 2200   |
| UN29745 | Rsa1.0_04195.1 | 552  | 18528  | 1.00E-126 | 250 | 257  | 97 -  | 203 | 459  | 5698   | 5954   |
| UN29746 | Rsa1.0_00597.1 | 591  | 73445  | 0         | 585 | 608  | 96 -  | 1   | 591  | 44613  | 45220  |
| UN29747 | Rsa1.0_01609.1 | 974  | 42280  | 0         | 941 | 970  | 97 +  | 2   | 971  | 32103  | 33072  |
| UN29748 | Rsa1.0_01232.1 | 847  | 155185 | 0         | 842 | 845  | 99 +  | 3   | 847  | 114213 | 115057 |
| UN29749 | Rsa1.0_03491.1 | 599  | 22541  | 0         | 385 | 396  | 97 +  | 204 | 599  | 1751   | 2146   |
| UN29750 | Rsa1.0_02679.1 | 326  | 28730  | 2.00E-36  | 187 | 220  | 85 +  | 112 | 326  | 12440  | 12659  |
| UN29751 | Rsa1.0_00045.1 | 1030 | 328694 | 0         | 998 | 1049 | 95 -  | 5   | 1030 | 253505 | 254549 |
| UN29752 | Rsa1.0_01343.1 | 736  | 47735  | 0         | 550 | 592  | 92 +  | 12  | 599  | 4128   | 4698   |
| UN29753 | Rsa1.0_00477.1 | 998  | 81556  | 1.00E-113 | 207 | 207  | 100 - | 191 | 397  | 58568  | 58774  |
| UN29754 | Rsa1.0_00087.1 | 497  | 761073 | 0         | 454 | 493  | 92 +  | 3   | 484  | 41217  | 41697  |
| UN29755 | Rsa1.0_54617.1 | 768  | 418    | 0         | 413 | 418  | 98 +  | 52  | 469  | 1      | 418    |

|         |                |      |        |           |      |      |       |     |      |        |        |
|---------|----------------|------|--------|-----------|------|------|-------|-----|------|--------|--------|
| UN29756 | Rsa1.0.00644.1 | 404  | 136881 | 4.00E-17  | 88   | 100  | 88 -  | 115 | 211  | 64064  | 64162  |
| UN29757 | Rsa1.0.00191.1 | 833  | 316976 | 0         | 822  | 832  | 98 -  | 3   | 833  | 297898 | 298726 |
| UN29758 | Rsa1.0.00324.1 | 550  | 218805 | 1.00E-157 | 334  | 349  | 95 +  | 203 | 550  | 143427 | 143774 |
| UN29759 | Rsa1.0.14192.1 | 578  | 3681   | 2.00E-53  | 164  | 183  | 89 -  | 2   | 184  | 2598   | 2780   |
| UN29760 | Rsa1.0.02703.1 | 656  | 28544  | 1.00E-92  | 234  | 255  | 91 +  | 203 | 454  | 9476   | 9721   |
| UN29761 | Rsa1.0.00104.1 | 681  | 368722 | 0         | 529  | 545  | 97 +  | 136 | 680  | 29781  | 30323  |
| UN29762 | Rsa1.0.01318.1 | 929  | 48275  | 0         | 386  | 388  | 99 +  | 1   | 388  | 11684  | 12071  |
| UN29763 | Rsa1.0.00001.1 | 901  | 363028 | 0         | 875  | 911  | 96 +  | 1   | 901  | 39152  | 40055  |
| UN29764 | Rsa1.0.00268.1 | 607  | 101470 | 1.00E-123 | 252  | 260  | 96 -  | 279 | 538  | 51642  | 51900  |
| UN29765 | Rsa1.0.00065.1 | 799  | 454616 | 1.00E-80  | 153  | 153  | 100 - | 50  | 202  | 158659 | 158811 |
| UN29766 | Rsa1.0.07559.1 | 690  | 9131   | 0         | 389  | 397  | 97 -  | 3   | 399  | 3084   | 3474   |
| UN29767 | Rsa1.0.02228.1 | 1153 | 33688  | 0         | 449  | 475  | 94 -  | 676 | 1145 | 18504  | 18978  |
| UN29768 | Rsa1.0.07607.1 | 758  | 9034   | 1.00E-173 | 341  | 352  | 96 -  | 280 | 631  | 5344   | 5695   |
| UN29769 | Rsa1.0.00639.1 | 1014 | 165873 | 0         | 461  | 479  | 96 +  | 3   | 478  | 106126 | 106600 |
| UN29770 | Rsa1.0.02295.1 | 1012 | 149884 | 0         | 656  | 689  | 95 -  | 333 | 1011 | 125047 | 125734 |
| UN29771 | Rsa1.0.04325.1 | 739  | 17885  | 0         | 599  | 637  | 94 -  | 105 | 739  | 12630  | 13266  |
| UN29772 | Rsa1.0.00939.1 | 1020 | 185227 | 0         | 496  | 505  | 98 +  | 516 | 1020 | 177702 | 178206 |
| UN29773 | Rsa1.0.05611.1 | 953  | 13193  | 0         | 529  | 548  | 96 +  | 197 | 740  | 219    | 766    |
| UN29774 | Rsa1.0.15288.1 | 1029 | 2708   | 0         | 486  | 509  | 95 +  | 516 | 1024 | 1989   | 2497   |
| UN29775 | Rsa1.0.03322.1 | 655  | 23751  | 1.00E-150 | 282  | 286  | 98 -  | 151 | 436  | 23032  | 23317  |
| UN29776 | Rsa1.0.00219.1 | 727  | 106983 | 0         | 393  | 399  | 98 -  | 3   | 401  | 31635  | 32032  |
| UN29777 | Rsa1.0.00408.1 | 697  | 176752 | 0         | 688  | 696  | 98 -  | 3   | 696  | 167891 | 168585 |
| UN29778 | Rsa1.0.07819.1 | 1104 | 8476   | 0         | 608  | 633  | 96 -  | 416 | 1048 | 7467   | 8099   |
| UN29779 | Rsa1.0.08091.1 | 1208 | 7922   | 0         | 406  | 408  | 99 -  | 1   | 408  | 3588   | 3995   |
| UN29780 | Rsa1.0.00173.1 | 1067 | 288743 | 6.00E-43  | 123  | 134  | 91 -  | 254 | 387  | 267962 | 268095 |
| UN29781 | Rsa1.0.01705.1 | 902  | 40710  | 2.00E-94  | 294  | 333  | 88 +  | 15  | 347  | 22593  | 22916  |
| UN29782 | Rsa1.0.02186.1 | 955  | 34150  | 0         | 635  | 688  | 92 +  | 3   | 684  | 26354  | 27013  |
| UN29783 | Rsa1.0.20237.1 | 1142 | 1325   | 0         | 475  | 483  | 98 +  | 2   | 484  | 843    | 1325   |
| UN29784 | Rsa1.0.01193.1 | 741  | 51147  | 0         | 372  | 376  | 98 +  | 366 | 741  | 26420  | 26795  |
| UN29785 | Rsa1.0.00041.1 | 588  | 186197 | 1.00E-76  | 163  | 168  | 97 -  | 399 | 563  | 168292 | 168459 |
| UN29786 | Rsa1.0.03125.1 | 693  | 147978 | 0         | 345  | 348  | 99 +  | 346 | 693  | 130250 | 130597 |
| UN29787 | Rsa1.0.00273.1 | 477  | 326186 | 1.00E-164 | 313  | 320  | 97 +  | 2   | 321  | 130655 | 130974 |
| UN29788 | Rsa1.0.01976.1 | 790  | 36570  | 0         | 342  | 346  | 98 -  | 5   | 350  | 3898   | 4243   |
| UN29789 | Rsa1.0.01591.1 | 1404 | 42718  | 0         | 839  | 875  | 95 +  | 542 | 1403 | 18098  | 18972  |
| UN29790 | Rsa1.0.01097.1 | 1796 | 173349 | 0         | 1066 | 1100 | 96 -  | 699 | 1795 | 28880  | 29976  |
| UN29791 | Rsa1.0.04383.1 | 1005 | 17631  | 1.00E-117 | 226  | 230  | 98 -  | 466 | 695  | 11091  | 11320  |
| UN29792 | Rsa1.0.01684.1 | 611  | 41044  | 0         | 504  | 521  | 96 -  | 96  | 610  | 5049   | 5569   |
| UN29793 | Rsa1.0.03774.1 | 1238 | 20932  | 0         | 485  | 505  | 96 +  | 4   | 507  | 6317   | 6821   |
| UN29794 | Rsa1.0.00510.1 | 746  | 78718  | 1.00E-74  | 143  | 143  | 100 - | 517 | 659  | 60175  | 60317  |

|         |                |      |        |           |      |      |       |     |      |        |        |
|---------|----------------|------|--------|-----------|------|------|-------|-----|------|--------|--------|
| UN29795 | Rsa1.0.02466.1 | 1009 | 31142  | 1.00E-173 | 322  | 325  | 99 +  | 684 | 1007 | 27807  | 28131  |
| UN29796 | Rsa1.0.01823.1 | 744  | 38765  | 1.00E-61  | 169  | 185  | 91 +  | 553 | 737  | 35793  | 35977  |
| UN29797 | Rsa1.0.00017.1 | 1381 | 752458 | 2.00E-34  | 134  | 152  | 88 +  | 937 | 1087 | 647845 | 647996 |
| UN29798 | Rsa1.0.00467.1 | 826  | 156542 | 0         | 767  | 811  | 94 +  | 24  | 822  | 85260  | 86064  |
| UN29799 | Rsa1.0.00040.1 | 762  | 324196 | 0         | 459  | 472  | 97 -  | 5   | 476  | 323206 | 323674 |
| UN29800 | Rsa1.0.02117.1 | 1158 | 34843  | 0         | 1145 | 1159 | 98 +  | 3   | 1158 | 1419   | 2576   |
| UN29801 | Rsa1.0.04025.1 | 596  | 19511  | 0         | 498  | 515  | 96 -  | 41  | 555  | 8419   | 8932   |
| UN29802 | Rsa1.0.00582.1 | 1373 | 74333  | 0         | 625  | 628  | 99 +  | 4   | 631  | 20679  | 21306  |
| UN29803 | Rsa1.0.00123.1 | 885  | 325650 | 0         | 510  | 524  | 97 -  | 362 | 885  | 23098  | 23621  |
| UN29804 | Rsa1.0.00888.1 | 860  | 60978  | 0         | 668  | 680  | 98 +  | 1   | 680  | 49310  | 49989  |
| UN29805 | Rsa1.0.01196.1 | 830  | 51097  | 0         | 828  | 832  | 99 -  | 1   | 830  | 5981   | 6812   |
| UN29806 | Rsa1.0.01768.1 | 814  | 138463 | 0         | 468  | 468  | 100 + | 347 | 814  | 125672 | 126139 |
| UN29807 | Rsa1.0.00961.1 | 814  | 58185  | 0         | 417  | 420  | 99 -  | 2   | 421  | 20645  | 21064  |
| UN29808 | Rsa1.0.00003.1 | 1055 | 340054 | 0         | 1023 | 1061 | 96 +  | 8   | 1055 | 661    | 1708   |
| UN29809 | Rsa1.0.01091.1 | 1593 | 54383  | 0         | 342  | 342  | 100 - | 9   | 350  | 28855  | 29196  |
| UN29810 | Rsa1.0.00045.1 | 1159 | 328694 | 1.00E-169 | 330  | 339  | 97 -  | 821 | 1159 | 61371  | 61705  |
| UN29811 | Rsa1.0.02032.1 | 1004 | 35830  | 0         | 860  | 860  | 100 - | 1   | 860  | 6276   | 7135   |
| UN29812 | Rsa1.0.06048.1 | 838  | 11854  | 1.00E-100 | 185  | 185  | 100 - | 172 | 356  | 6457   | 6641   |
| UN29813 | Rsa1.0.00341.1 | 637  | 249309 | 0         | 633  | 641  | 98 +  | 1   | 637  | 134426 | 135066 |
| UN29814 | Rsa1.0.00305.1 | 567  | 97308  | 0         | 564  | 564  | 100 - | 4   | 567  | 53534  | 54097  |
| UN29815 | Rsa1.0.00251.1 | 869  | 303968 | 1.00E-169 | 302  | 302  | 100 - | 3   | 304  | 66488  | 66789  |
| UN29816 | Rsa1.0.00630.1 | 832  | 71281  | 0         | 487  | 487  | 100 - | 346 | 832  | 42130  | 42616  |
| UN29817 | Rsa1.0.00153.1 | 847  | 192931 | 0         | 418  | 422  | 99 -  | 426 | 847  | 120468 | 120889 |
| UN29818 | Rsa1.0.07910.1 | 846  | 8314   | 0         | 540  | 540  | 100 + | 250 | 789  | 975    | 1514   |
| UN29819 | Rsa1.0.00397.1 | 1146 | 88189  | 1.00E-164 | 297  | 298  | 99 +  | 577 | 874  | 52748  | 53045  |
| UN29820 | Rsa1.0.02975.1 | 568  | 26322  | 1.00E-165 | 295  | 295  | 100 - | 37  | 331  | 25714  | 26008  |
| UN29821 | Rsa1.0.05696.1 | 677  | 12896  | 1.00E-164 | 293  | 293  | 100 - | 383 | 675  | 11870  | 12162  |
| UN29822 | Rsa1.0.03768.1 | 1089 | 20961  | 0         | 801  | 898  | 89 -  | 1   | 896  | 7634   | 8531   |
| UN29823 | Rsa1.0.00902.1 | 1028 | 60241  | 0         | 581  | 584  | 99 +  | 3   | 586  | 35086  | 35667  |
| UN29824 | Rsa1.0.00512.1 | 1070 | 200277 | 0         | 390  | 394  | 98 +  | 1   | 392  | 20224  | 20616  |
| UN29825 | Rsa1.0.11113.1 | 892  | 5612   | 0         | 423  | 425  | 99 +  | 3   | 427  | 5022   | 5446   |
| UN29826 | Rsa1.0.01060.1 | 1387 | 55368  | 0         | 820  | 835  | 98 +  | 2   | 836  | 17226  | 18056  |
| UN29827 | Rsa1.0.01466.1 | 754  | 45161  | 1.00E-143 | 267  | 269  | 99 +  | 482 | 748  | 23254  | 23522  |
| UN29828 | Rsa1.0.02361.1 | 974  | 32190  | 0         | 605  | 629  | 96 +  | 346 | 974  | 30524  | 31152  |
| UN29829 | Rsa1.0.01666.1 | 774  | 173972 | 0         | 543  | 601  | 90 -  | 194 | 769  | 13200  | 13782  |
| UN29830 | Rsa1.0.00017.1 | 1132 | 752458 | 1.00E-141 | 350  | 380  | 92 +  | 470 | 848  | 51737  | 52112  |
| UN29831 | Rsa1.0.00009.1 | 799  | 232558 | 0         | 630  | 651  | 96 +  | 5   | 655  | 121453 | 122097 |
| UN29832 | Rsa1.0.00353.1 | 1369 | 92242  | 0         | 1016 | 1090 | 93 +  | 282 | 1368 | 71817  | 72888  |
| UN29833 | Rsa1.0.00485.1 | 546  | 80937  | 0         | 503  | 524  | 95 -  | 1   | 524  | 32474  | 32997  |





|         |                |      |        |           |      |      |      |     |      |        |        |
|---------|----------------|------|--------|-----------|------|------|------|-----|------|--------|--------|
| UN29873 | Rsa1.0_49831.1 | 733  | 455    | 0         | 451  | 455  | 99 - | 33  | 487  | 1      | 455    |
| UN29874 | Rsa1.0_01581.1 | 435  | 42833  | 0         | 431  | 433  | 99 - | 3   | 435  | 27842  | 28274  |
| UN29875 | Rsa1.0_06892.1 | 912  | 10197  | 0         | 399  | 408  | 97 - | 1   | 408  | 9775   | 10181  |
| UN29876 | #              | #    | #      | #         | #    | #    | #    | #   | #    | #      | #      |
| UN29877 | Rsa1.0_10192.1 | 526  | 5950   | 1.00E-30  | 146  | 171  | 85 - | 85  | 255  | 1258   | 1425   |
| UN29878 | Rsa1.0_00288.1 | 642  | 98659  | 1.00E-180 | 377  | 396  | 95 + | 3   | 398  | 13393  | 13788  |
| UN29879 | Rsa1.0_00526.1 | 743  | 169279 | 0         | 644  | 698  | 92 - | 16  | 692  | 165051 | 165745 |
| UN29880 | Rsa1.0_00205.1 | 380  | 193401 | 2.00E-74  | 206  | 224  | 91 - | 142 | 357  | 13793  | 14014  |
| UN29881 | Rsa1.0_03511.1 | 830  | 22373  | 0         | 470  | 495  | 94 + | 334 | 828  | 17057  | 17551  |
| UN29882 | Rsa1.0_07508.1 | 681  | 9231   | 1.00E-175 | 346  | 356  | 97 - | 13  | 367  | 4270   | 4625   |
| UN29883 | Rsa1.0_01687.1 | 508  | 40979  | 1.00E-118 | 221  | 223  | 99 + | 1   | 223  | 8807   | 9029   |
| UN29884 | Rsa1.0_02105.1 | 475  | 156953 | 1.00E-107 | 269  | 289  | 93 - | 169 | 452  | 3269   | 3554   |
| UN29885 | Rsa1.0_00016.1 | 823  | 831256 | 9.00E-23  | 194  | 232  | 83 + | 148 | 372  | 683753 | 683980 |
| UN29886 | Rsa1.0_04911.1 | 1288 | 15483  | 0         | 539  | 565  | 95 + | 733 | 1286 | 6226   | 6790   |
| UN29887 | Rsa1.0_00222.1 | 1426 | 172263 | 0         | 1263 | 1318 | 95 - | 61  | 1377 | 85303  | 86609  |
| UN29888 | Rsa1.0_66570.1 | 369  | 344    | 1.00E-41  | 123  | 135  | 91 + | 235 | 369  | 10     | 144    |
| UN29889 | Rsa1.0_03362.1 | 936  | 23453  | 0         | 906  | 935  | 96 + | 2   | 936  | 18234  | 19166  |
| UN29890 | Rsa1.0_05967.1 | 358  | 12079  | 1.00E-165 | 345  | 359  | 96 + | 3   | 358  | 11560  | 11915  |
| UN29891 | Rsa1.0_02026.1 | 920  | 35896  | 0         | 479  | 487  | 98 + | 438 | 920  | 29849  | 30335  |
| UN29892 | Rsa1.0_00155.1 | 528  | 118465 | 6.00E-72  | 286  | 332  | 86 - | 218 | 527  | 105963 | 106286 |
| UN29893 | Rsa1.0_01960.1 | 909  | 36766  | 1.00E-116 | 234  | 241  | 97 + | 90  | 330  | 7984   | 8224   |
| UN29894 | Rsa1.0_00019.1 | 746  | 301669 | 4.00E-12  | 148  | 182  | 81 + | 123 | 302  | 188882 | 189063 |
| UN29895 | Rsa1.0_00493.1 | 297  | 80007  | 1.00E-143 | 290  | 299  | 96 - | 3   | 297  | 38082  | 38380  |
| UN29896 | Rsa1.0_01717.1 | 1039 | 143162 | 0         | 443  | 444  | 99 + | 596 | 1039 | 138940 | 139383 |
| UN29897 | Rsa1.0_00017.1 | 844  | 752458 | 1.00E-142 | 288  | 298  | 96 - | 3   | 293  | 264368 | 264664 |
| UN29898 | Rsa1.0_02931.1 | 664  | 26654  | 0         | 341  | 344  | 99 - | 321 | 664  | 24827  | 25170  |
| UN29899 | Rsa1.0_03260.1 | 810  | 24284  | 0         | 796  | 810  | 98 - | 3   | 808  | 2531   | 3336   |
| UN29900 | Rsa1.0_01104.1 | 1180 | 285480 | 5.00E-28  | 104  | 117  | 88 - | 176 | 292  | 280774 | 280890 |
| UN29901 | Rsa1.0_00039.1 | 968  | 296927 | 0         | 822  | 917  | 89 - | 2   | 918  | 219251 | 220164 |
| UN29902 | Rsa1.0_01217.1 | 786  | 50554  | 0         | 477  | 491  | 97 - | 293 | 782  | 22516  | 23006  |
| UN29903 | Rsa1.0_03521.1 | 805  | 396204 | 1.00E-178 | 376  | 389  | 96 - | 374 | 757  | 15236  | 15624  |
| UN29904 | Rsa1.0_00161.1 | 729  | 116891 | 0         | 660  | 688  | 95 + | 46  | 729  | 24230  | 24916  |
| UN29905 | Rsa1.0_00006.1 | 902  | 396176 | 1.00E-179 | 406  | 438  | 92 - | 487 | 901  | 261412 | 261849 |
| UN29906 | Rsa1.0_02514.1 | 1007 | 30642  | 2.00E-51  | 254  | 307  | 82 - | 242 | 527  | 16669  | 16972  |
| UN29907 | Rsa1.0_05719.1 | 943  | 12836  | 1.00E-178 | 335  | 341  | 98 + | 603 | 943  | 9506   | 9846   |
| UN29908 | Rsa1.0_00037.1 | 832  | 307838 | 1.00E-129 | 326  | 356  | 91 - | 21  | 373  | 237974 | 238319 |
| UN29909 | Rsa1.0_04712.1 | 451  | 135669 | 1.00E-103 | 193  | 194  | 99 + | 258 | 451  | 16051  | 16244  |
| UN29910 | Rsa1.0_00009.1 | 752  | 232558 | 0         | 438  | 443  | 98 + | 5   | 444  | 6421   | 6863   |
| UN29911 | Rsa1.0_00203.1 | 748  | 109129 | 0         | 600  | 635  | 94 + | 113 | 746  | 78988  | 79621  |

|         |                |      |        |           |      |      |       |     |      |        |        |
|---------|----------------|------|--------|-----------|------|------|-------|-----|------|--------|--------|
| UN29912 | Rsa1.0.02167.1 | 817  | 34401  | 0         | 758  | 760  | 99 -  | 3   | 762  | 1086   | 1845   |
| UN29913 | Rsa1.0.03624.1 | 1156 | 21706  | 8.00E-58  | 190  | 215  | 88 -  | 75  | 289  | 20565  | 20779  |
| UN29914 | Rsa1.0.08109.1 | 906  | 7892   | 0         | 482  | 492  | 97 +  | 416 | 905  | 191    | 682    |
| UN29915 | Rsa1.0.00131.1 | 750  | 432233 | 2.00E-76  | 169  | 174  | 97 -  | 555 | 726  | 247570 | 247743 |
| UN29916 | Rsa1.0.00111.1 | 691  | 390088 | 0         | 600  | 678  | 88 -  | 20  | 691  | 352603 | 353255 |
| UN29917 | Rsa1.0.00030.1 | 1172 | 250988 | 0         | 602  | 662  | 90 +  | 376 | 1008 | 30250  | 30905  |
| UN29918 | Rsa1.0.00341.1 | 930  | 249309 | 0         | 362  | 368  | 98 -  | 270 | 635  | 204187 | 204554 |
| UN29919 | Rsa1.0.00237.1 | 1311 | 235974 | 0         | 1289 | 1311 | 98 -  | 3   | 1308 | 20637  | 21947  |
| UN29920 | Rsa1.0.04388.1 | 955  | 17614  | 1.00E-138 | 252  | 253  | 99 +  | 292 | 544  | 11399  | 11651  |
| UN29921 | Rsa1.0.00600.1 | 858  | 73395  | 1.00E-178 | 317  | 317  | 100 - | 3   | 319  | 30432  | 30748  |
| UN29922 | Rsa1.0.11424.1 | 480  | 5513   | 0         | 466  | 480  | 97 -  | 2   | 479  | 2919   | 3398   |
| UN29923 | Rsa1.0.42833.1 | 915  | 524    | 1.00E-118 | 232  | 236  | 98 +  | 680 | 914  | 180    | 415    |
| UN29924 | Rsa1.0.00013.1 | 1186 | 292129 | 0         | 573  | 575  | 99 -  | 2   | 576  | 227464 | 228038 |
| UN29925 | Rsa1.0.00157.1 | 985  | 245832 | 0         | 664  | 683  | 97 -  | 141 | 820  | 25708  | 26389  |
| UN29926 | Rsa1.0.00636.1 | 1265 | 71113  | 0         | 1261 | 1265 | 99 -  | 1   | 1265 | 66378  | 67642  |
| UN29927 | Rsa1.0.00944.1 | 728  | 58733  | 0         | 366  | 366  | 100 + | 361 | 726  | 54332  | 54697  |
| UN29928 | Rsa1.0.03623.1 | 1265 | 21714  | 0         | 598  | 616  | 97 -  | 660 | 1265 | 19171  | 19784  |
| UN29929 | Rsa1.0.31061.1 | 716  | 737    | 0         | 431  | 456  | 94 +  | 261 | 715  | 139    | 586    |
| UN29930 | Rsa1.0.00098.1 | 590  | 349239 | 0         | 513  | 545  | 94 -  | 56  | 590  | 234712 | 235244 |
| UN29931 | Rsa1.0.01876.1 | 518  | 37800  | 1.00E-130 | 262  | 271  | 96 -  | 3   | 273  | 32500  | 32770  |
| UN29932 | Rsa1.0.00160.1 | 758  | 346678 | 0         | 736  | 759  | 96 +  | 3   | 758  | 174975 | 175732 |
| UN29933 | Rsa1.0.00002.1 | 1388 | 601661 | 0         | 1163 | 1191 | 97 +  | 196 | 1386 | 256860 | 258050 |
| UN29934 | Rsa1.0.00022.1 | 689  | 200461 | 0         | 574  | 583  | 98 +  | 113 | 689  | 58087  | 58669  |
| UN29935 | Rsa1.0.00239.1 | 1043 | 104332 | 0         | 365  | 374  | 97 -  | 2   | 371  | 98285  | 98657  |
| UN29936 | Rsa1.0.15040.1 | 1058 | 2876   | 0         | 878  | 901  | 97 -  | 158 | 1058 | 1479   | 2379   |
| UN29937 | Rsa1.0.00321.1 | 810  | 95671  | 0         | 624  | 640  | 97 -  | 2   | 641  | 77384  | 78022  |
| UN29938 | Rsa1.0.01482.1 | 881  | 44855  | 0         | 657  | 690  | 95 -  | 8   | 697  | 10657  | 11334  |
| UN29939 | Rsa1.0.02849.1 | 681  | 27327  | 1.00E-137 | 505  | 586  | 86 -  | 97  | 681  | 22051  | 22627  |
| UN29940 | Rsa1.0.00071.1 | 1279 | 345714 | 1.00E-154 | 296  | 301  | 98 -  | 6   | 305  | 82181  | 82481  |
| UN29941 | Rsa1.0.00068.1 | 969  | 151813 | 0         | 658  | 684  | 96 -  | 3   | 686  | 105614 | 106294 |
| UN29942 | Rsa1.0.00382.1 | 514  | 251946 | 0         | 504  | 510  | 98 +  | 2   | 511  | 241886 | 242395 |
| UN29943 | Rsa1.0.03294.1 | 653  | 23971  | 6.00E-79  | 211  | 222  | 95 +  | 430 | 646  | 21081  | 21300  |
| UN29944 | Rsa1.0.47147.1 | 727  | 479    | 1.00E-170 | 318  | 323  | 98 -  | 3   | 325  | 36     | 358    |
| UN29945 | Rsa1.0.00714.1 | 436  | 67187  | 1.00E-162 | 363  | 385  | 94 +  | 27  | 405  | 7022   | 7399   |
| UN29946 | Rsa1.0.28735.1 | 1232 | 804    | 0         | 525  | 526  | 99 -  | 707 | 1232 | 240    | 765    |
| UN29947 | Rsa1.0.04265.1 | 1088 | 18199  | 1.00E-178 | 322  | 324  | 99 -  | 765 | 1088 | 4789   | 5112   |
| UN29948 | Rsa1.0.06026.1 | 558  | 11898  | 0         | 555  | 558  | 99 -  | 3   | 558  | 845    | 1402   |
| UN29949 | Rsa1.0.03736.1 | 768  | 21081  | 0         | 458  | 491  | 93 +  | 291 | 768  | 7755   | 8245   |
| UN29950 | Rsa1.0.08677.1 | 866  | 7048   | 0         | 735  | 756  | 97 -  | 113 | 866  | 4656   | 5410   |

|         |                |      |        |           |      |      |      |     |      |        |        |
|---------|----------------|------|--------|-----------|------|------|------|-----|------|--------|--------|
| UN29951 | Rsa1.0_01301.1 | 222  | 169072 | 6.00E-67  | 202  | 223  | 90 - | 1   | 222  | 12063  | 12281  |
| UN29952 | Rsa1.0_00625.1 | 828  | 71672  | 7.00E-73  | 170  | 180  | 94 + | 100 | 278  | 53567  | 53737  |
| UN29953 | Rsa1.0_00533.1 | 773  | 77375  | 0         | 749  | 775  | 96 + | 3   | 773  | 681    | 1454   |
| UN29954 | Rsa1.0_01338.1 | 888  | 155644 | 1.00E-166 | 311  | 316  | 98 + | 227 | 542  | 12333  | 12648  |
| UN29955 | Rsa1.0_00621.1 | 1058 | 71840  | 1.00E-145 | 296  | 306  | 96 - | 389 | 694  | 63900  | 64204  |
| UN29956 | Rsa1.0_02174.1 | 1078 | 34316  | 0         | 1033 | 1078 | 95 - | 1   | 1077 | 4435   | 5508   |
| UN29957 | Rsa1.0_00176.1 | 522  | 240984 | 1.00E-104 | 274  | 302  | 90 + | 226 | 522  | 223410 | 223698 |
| UN29958 | Rsa1.0_05740.1 | 1222 | 12775  | 0         | 1217 | 1221 | 99 - | 3   | 1222 | 10830  | 12050  |
| UN29959 | Rsa1.0_00016.1 | 881  | 831256 | 9.00E-20  | 190  | 231  | 82 + | 116 | 340  | 683753 | 683980 |
| UN29960 | Rsa1.0_00024.1 | 1022 | 188018 | 0         | 675  | 717  | 94 - | 131 | 844  | 123951 | 124665 |
| UN29961 | Rsa1.0_03171.1 | 1028 | 24817  | 0         | 933  | 984  | 94 + | 5   | 986  | 18660  | 19640  |
| UN29962 | Rsa1.0_01638.1 | 770  | 41857  | 0         | 387  | 400  | 96 - | 375 | 770  | 438    | 836    |
| UN29963 | Rsa1.0_00454.1 | 1122 | 216970 | 0         | 1086 | 1104 | 98 + | 21  | 1122 | 18813  | 19916  |
| UN29964 | Rsa1.0_00346.1 | 750  | 93130  | 1.00E-172 | 354  | 369  | 95 - | 2   | 367  | 86176  | 86544  |
| UN29965 | Rsa1.0_02967.1 | 635  | 26395  | 0         | 615  | 634  | 97 - | 2   | 635  | 11198  | 11829  |
| UN29966 | Rsa1.0_00447.1 | 877  | 84051  | 8.00E-79  | 245  | 274  | 89 + | 222 | 493  | 73422  | 73690  |
| UN29967 | Rsa1.0_00452.1 | 852  | 83201  | 0         | 340  | 342  | 99 + | 235 | 576  | 73659  | 74000  |
| UN29968 | Rsa1.0_01281.1 | 978  | 49313  | 0         | 617  | 685  | 90 + | 303 | 978  | 6610   | 7268   |
| UN29969 | Rsa1.0_00066.1 | 1067 | 152418 | 0         | 1013 | 1064 | 95 + | 5   | 1066 | 2415   | 3475   |
| UN29970 | #              | #    | #      | #         | #    | #    | #    | #   | #    | #      | #      |
| UN29971 | Rsa1.0_01586.1 | 1364 | 42804  | 0         | 635  | 658  | 96 + | 139 | 796  | 20465  | 21122  |
| UN29972 | Rsa1.0_00779.1 | 873  | 64568  | 2.00E-61  | 299  | 355  | 84 - | 44  | 397  | 4050   | 4400   |
| UN29973 | Rsa1.0_00094.1 | 1328 | 139042 | 0         | 800  | 863  | 92 + | 471 | 1328 | 75280  | 76119  |
| UN29974 | Rsa1.0_03366.1 | 618  | 23401  | 1.00E-143 | 310  | 329  | 94 - | 1   | 329  | 12024  | 12343  |
| UN29975 | Rsa1.0_02550.1 | 923  | 291051 | 0         | 859  | 887  | 96 + | 2   | 886  | 2712   | 3596   |
| UN29976 | Rsa1.0_01036.1 | 1171 | 55978  | 0         | 371  | 374  | 99 - | 371 | 744  | 15901  | 16274  |
| UN29977 | Rsa1.0_00040.1 | 402  | 324196 | 1.00E-153 | 368  | 401  | 91 + | 9   | 402  | 15635  | 16017  |
| UN29978 | Rsa1.0_01035.1 | 705  | 56019  | 1.00E-55  | 124  | 127  | 97 - | 359 | 485  | 51672  | 51797  |
| UN29979 | Rsa1.0_00102.1 | 1149 | 135497 | 0         | 629  | 644  | 97 - | 3   | 644  | 60465  | 61108  |
| UN29980 | Rsa1.0_02648.1 | 1095 | 29073  | 0         | 666  | 706  | 94 + | 415 | 1092 | 11052  | 11757  |
| UN29981 | Rsa1.0_00072.1 | 741  | 148743 | 3.00E-53  | 587  | 739  | 79 + | 2   | 731  | 66982  | 67713  |
| UN29982 | Rsa1.0_00019.1 | 988  | 301669 | 0         | 982  | 1009 | 97 - | 2   | 988  | 129768 | 130776 |
| UN29983 | Rsa1.0_00911.1 | 1035 | 59943  | 1.00E-124 | 282  | 300  | 94 + | 732 | 1031 | 11222  | 11518  |
| UN29984 | Rsa1.0_00198.1 | 1395 | 222963 | 2.00E-74  | 171  | 179  | 95 + | 185 | 362  | 142263 | 142441 |
| UN29985 | Rsa1.0_02356.1 | 808  | 141500 | 1.00E-106 | 202  | 204  | 99 - | 506 | 709  | 123611 | 123814 |
| UN29986 | Rsa1.0_00120.1 | 779  | 277288 | 0         | 600  | 625  | 96 + | 3   | 627  | 45238  | 45860  |
| UN29987 | Rsa1.0_02619.1 | 643  | 29444  | 0         | 514  | 531  | 96 - | 2   | 529  | 209    | 737    |
| UN29988 | Rsa1.0_02981.1 | 671  | 26285  | 0         | 548  | 554  | 98 - | 5   | 558  | 7208   | 7761   |
| UN29989 | Rsa1.0_00923.1 | 761  | 153678 | 0         | 532  | 585  | 90 - | 166 | 737  | 56675  | 57250  |

|         |                |      |        |           |      |      |       |     |      |        |        |
|---------|----------------|------|--------|-----------|------|------|-------|-----|------|--------|--------|
| UN29990 | Rsa1.0.03342.1 | 1043 | 23600  | 0         | 568  | 589  | 96 +  | 2   | 590  | 16264  | 16852  |
| UN29991 | Rsa1.0.46380.1 | 747  | 487    | 0         | 485  | 487  | 99 +  | 189 | 675  | 1      | 487    |
| UN29992 | Rsa1.0.00041.1 | 779  | 186197 | 1.00E-111 | 254  | 267  | 95 +  | 517 | 779  | 33784  | 34049  |
| UN29993 | Rsa1.0.00698.1 | 724  | 67816  | 1.00E-171 | 308  | 309  | 99 +  | 2   | 310  | 10893  | 11201  |
| UN29994 | Rsa1.0.01659.1 | 907  | 164577 | 0         | 861  | 904  | 95 +  | 2   | 905  | 15038  | 15941  |
| UN29995 | Rsa1.0.00563.1 | 1107 | 75491  | 1.00E-139 | 270  | 276  | 97 +  | 236 | 511  | 7217   | 7492   |
| UN29996 | Rsa1.0.01659.1 | 669  | 164577 | 7.00E-94  | 205  | 211  | 97 +  | 4   | 214  | 16853  | 17060  |
| UN29997 | Rsa1.0.03178.1 | 588  | 24798  | 0         | 439  | 456  | 96 +  | 133 | 588  | 8721   | 9173   |
| UN29998 | Rsa1.0.03949.1 | 1245 | 19899  | 6.00E-68  | 252  | 290  | 86 -  | 485 | 764  | 18509  | 18794  |
| UN29999 | Rsa1.0.00441.1 | 1075 | 84607  | 0         | 1040 | 1072 | 97 -  | 3   | 1073 | 7069   | 8140   |
| UN30000 | Rsa1.0.02758.1 | 547  | 28186  | 0         | 406  | 420  | 96 +  | 114 | 533  | 20143  | 20560  |
| UN30001 | Rsa1.0.03833.1 | 749  | 20575  | 0         | 552  | 559  | 98 -  | 3   | 560  | 19050  | 19608  |
| UN30002 | Rsa1.0.01052.1 | 759  | 55548  | 0         | 758  | 759  | 99 +  | 2   | 759  | 32275  | 33033  |
| UN30003 | Rsa1.0.21583.1 | 750  | 1190   | 1.00E-156 | 374  | 405  | 92 -  | 350 | 750  | 408    | 793    |
| UN30004 | Rsa1.0.23235.1 | 870  | 1063   | 0         | 357  | 358  | 99 -  | 4   | 361  | 535    | 892    |
| UN30005 | Rsa1.0.01580.1 | 799  | 42852  | 0         | 773  | 798  | 96 +  | 2   | 798  | 24193  | 24985  |
| UN30006 | Rsa1.0.00019.1 | 1510 | 301669 | 0         | 573  | 574  | 99 +  | 2   | 574  | 244029 | 244602 |
| UN30007 | Rsa1.0.00104.1 | 749  | 368722 | 7.00E-11  | 51   | 56   | 91 +  | 397 | 452  | 351969 | 352024 |
| UN30008 | Rsa1.0.00455.1 | 1098 | 224823 | 0         | 510  | 521  | 97 -  | 578 | 1097 | 166415 | 166934 |
| UN30009 | Rsa1.0.02323.1 | 949  | 32534  | 0         | 902  | 949  | 95 -  | 1   | 949  | 17139  | 18080  |
| UN30010 | Rsa1.0.03906.1 | 490  | 20161  | 1.00E-101 | 187  | 187  | 100 - | 304 | 490  | 15920  | 16106  |
| UN30011 | Rsa1.0.07598.1 | 1117 | 9054   | 1.00E-177 | 350  | 361  | 96 +  | 259 | 619  | 1188   | 1540   |
| UN30012 | Rsa1.0.01138.1 | 774  | 190615 | 0         | 391  | 392  | 99 -  | 1   | 392  | 17260  | 17651  |
| UN30013 | Rsa1.0.00031.1 | 722  | 179862 | 1.00E-176 | 316  | 317  | 99 -  | 1   | 317  | 51072  | 51388  |
| UN30014 | Rsa1.0.07895.1 | 746  | 8344   | 0         | 694  | 742  | 93 -  | 5   | 746  | 6780   | 7513   |
| UN30015 | Rsa1.0.02225.1 | 1213 | 33738  | 1.00E-147 | 277  | 281  | 98 +  | 1   | 281  | 9365   | 9645   |
| UN30016 | Rsa1.0.00131.1 | 1791 | 432233 | 0         | 931  | 1011 | 92 +  | 457 | 1439 | 164657 | 165666 |
| UN30017 | Rsa1.0.00673.1 | 838  | 69325  | 0         | 412  | 441  | 93 +  | 1   | 441  | 18859  | 19291  |
| UN30018 | Rsa1.0.00287.1 | 849  | 98687  | 0         | 821  | 850  | 96 +  | 3   | 849  | 29686  | 30533  |
| UN30019 | Rsa1.0.00162.1 | 667  | 239935 | 1.00E-117 | 273  | 290  | 94 -  | 165 | 454  | 62258  | 62545  |
| UN30020 | Rsa1.0.00100.1 | 1002 | 249232 | 0         | 407  | 412  | 98 +  | 367 | 778  | 188897 | 189308 |
| UN30021 | Rsa1.0.06168.1 | 1032 | 11580  | 1.00E-135 | 286  | 299  | 95 -  | 711 | 1006 | 9698   | 9996   |
| UN30022 | Rsa1.0.04243.1 | 836  | 18321  | 0         | 807  | 860  | 93 +  | 1   | 834  | 7244   | 8100   |
| UN30023 | Rsa1.0.00553.1 | 717  | 75983  | 0         | 438  | 441  | 99 -  | 1   | 441  | 25379  | 25819  |
| UN30024 | Rsa1.0.00809.1 | 726  | 177832 | 1.00E-131 | 244  | 246  | 99 -  | 1   | 246  | 7117   | 7362   |
| UN30025 | Rsa1.0.05464.1 | 537  | 13660  | 0         | 529  | 530  | 99 -  | 1   | 530  | 1027   | 1556   |
| UN30026 | Rsa1.0.02030.1 | 811  | 179909 | 1.00E-120 | 228  | 231  | 98 +  | 160 | 390  | 30369  | 30599  |
| UN30027 | Rsa1.0.14393.1 | 481  | 3440   | 1.00E-137 | 318  | 338  | 94 +  | 88  | 422  | 81     | 417    |
| UN30028 | Rsa1.0.00865.1 | 787  | 61686  | 0         | 774  | 786  | 98 +  | 2   | 787  | 35050  | 35835  |

|         |                |      |        |           |      |      |      |     |      |        |        |
|---------|----------------|------|--------|-----------|------|------|------|-----|------|--------|--------|
| UN30029 | Rsa1.0.02050.1 | 1202 | 35570  | 0         | 544  | 559  | 97 - | 1   | 557  | 5038   | 5596   |
| UN30030 | Rsa1.0.00187.1 | 782  | 393093 | 0         | 387  | 399  | 96 - | 369 | 767  | 221747 | 222145 |
| UN30031 | Rsa1.0.00782.1 | 585  | 64468  | 0         | 526  | 547  | 96 + | 42  | 585  | 47518  | 48064  |
| UN30032 | Rsa1.0.00682.1 | 755  | 68680  | 7.00E-91  | 257  | 285  | 90 + | 4   | 286  | 14082  | 14351  |
| UN30033 | Rsa1.0.06968.1 | 799  | 10090  | 1.00E-141 | 315  | 338  | 93 - | 1   | 320  | 7329   | 7665   |
| UN30034 | Rsa1.0.00775.1 | 473  | 64793  | 0         | 467  | 470  | 99 - | 4   | 473  | 59188  | 59656  |
| UN30035 | Rsa1.0.02467.1 | 937  | 31141  | 2.00E-88  | 213  | 226  | 94 - | 714 | 937  | 19729  | 19954  |
| UN30036 | Rsa1.0.00466.1 | 774  | 82132  | 1.00E-157 | 349  | 368  | 94 - | 374 | 737  | 59577  | 59943  |
| UN30037 | Rsa1.0.00108.1 | 943  | 478491 | 1.00E-126 | 289  | 307  | 94 + | 638 | 941  | 45777  | 46082  |
| UN30038 | Rsa1.0.07606.1 | 860  | 9035   | 2.00E-60  | 225  | 261  | 86 + | 5   | 257  | 3071   | 3327   |
| UN30039 | Rsa1.0.00736.1 | 1081 | 66455  | 0         | 1074 | 1079 | 99 - | 3   | 1081 | 42189  | 43267  |
| UN30040 | Rsa1.0.05702.1 | 843  | 12884  | 1.00E-160 | 307  | 311  | 98 + | 176 | 485  | 10373  | 10682  |
| UN30041 | Rsa1.0.10731.1 | 972  | 5743   | 0         | 955  | 965  | 98 - | 6   | 970  | 4782   | 5743   |
| UN30042 | Rsa1.0.03142.1 | 743  | 25043  | 2.33E-156 | 284  | 290  | 97 + | 2   | 290  | 23079  | 23368  |
| UN30043 | Rsa1.0.04317.1 | 675  | 17967  | 1.00E-125 | 240  | 244  | 98 + | 174 | 417  | 16547  | 16790  |
| UN30044 | Rsa1.0.02968.1 | 626  | 26392  | 4.00E-61  | 123  | 124  | 99 - | 503 | 626  | 14765  | 14888  |
| UN30045 | Rsa1.0.01887.1 | 963  | 37564  | 1.00E-83  | 251  | 280  | 89 - | 113 | 384  | 18883  | 19161  |
| UN30046 | Rsa1.0.00525.1 | 159  | 78030  | 5.00E-82  | 157  | 158  | 99 + | 2   | 159  | 40396  | 40553  |
| UN30047 | Rsa1.0.02299.1 | 896  | 32857  | 8.00E-82  | 184  | 193  | 95 - | 453 | 642  | 7149   | 7341   |
| UN30048 | Rsa1.0.00924.1 | 689  | 59524  | 0         | 680  | 690  | 98 + | 2   | 689  | 31133  | 31821  |
| UN30049 | Rsa1.0.00322.1 | 1360 | 212233 | 0         | 500  | 518  | 96 - | 1   | 513  | 56950  | 57467  |
| UN30050 | Rsa1.0.02169.1 | 899  | 34367  | 1.00E-168 | 372  | 392  | 94 + | 509 | 899  | 31821  | 32210  |
| UN30051 | Rsa1.0.02030.1 | 787  | 179909 | 1.00E-145 | 303  | 316  | 95 - | 207 | 522  | 31734  | 32046  |
| UN30052 | Rsa1.0.00082.1 | 805  | 237584 | 0         | 439  | 459  | 95 - | 348 | 803  | 19604  | 20059  |
| UN30053 | Rsa1.0.03001.1 | 685  | 26108  | 1.00E-177 | 569  | 642  | 88 - | 16  | 649  | 7362   | 7981   |
| UN30054 | Rsa1.0.00180.1 | 1034 | 114581 | 0         | 1024 | 1033 | 99 + | 2   | 1034 | 85811  | 86843  |
| UN30055 | Rsa1.0.00180.1 | 737  | 114581 | 1.00E-160 | 432  | 478  | 90 + | 265 | 723  | 10601  | 11075  |
| UN30056 | Rsa1.0.03238.1 | 589  | 24432  | 0         | 563  | 590  | 95 - | 2   | 589  | 4643   | 5228   |
| UN30057 | Rsa1.0.00080.1 | 1089 | 190437 | 0         | 431  | 441  | 97 + | 86  | 520  | 66742  | 67182  |
| UN30058 | Rsa1.0.01649.1 | 680  | 41624  | 1.00E-64  | 144  | 150  | 96 - | 5   | 154  | 20431  | 20580  |
| UN30059 | Rsa1.0.00159.1 | 571  | 431686 | 2.00E-60  | 166  | 184  | 90 - | 2   | 173  | 254060 | 254243 |
| UN30060 | Rsa1.0.00459.1 | 487  | 82580  | 0         | 481  | 484  | 99 - | 4   | 487  | 55654  | 56137  |
| UN30061 | Rsa1.0.05717.1 | 510  | 12849  | 0         | 460  | 472  | 97 - | 2   | 469  | 2099   | 2570   |
| UN30062 | Rsa1.0.00820.1 | 834  | 62911  | 1.00E-154 | 282  | 284  | 99 + | 551 | 834  | 52717  | 53000  |
| UN30063 | Rsa1.0.08160.1 | 828  | 7817   | 0         | 803  | 824  | 97 - | 1   | 824  | 6590   | 7412   |
| UN30064 | Rsa1.0.05947.1 | 435  | 12142  | 1.00E-131 | 293  | 311  | 94 + | 122 | 432  | 7245   | 7542   |
| UN30065 | Rsa1.0.66303.1 | 866  | 346    | 9.00E-60  | 210  | 238  | 88 - | 583 | 818  | 98     | 335    |
| UN30066 | Rsa1.0.00968.1 | 706  | 58020  | 1.00E-117 | 233  | 239  | 97 - | 36  | 274  | 37326  | 37564  |
| UN30067 | Rsa1.0.02784.1 | 831  | 27881  | 1.00E-110 | 304  | 333  | 91 + | 37  | 358  | 22192  | 22519  |

|         |                |      |        |           |      |      |      |     |      |        |        |
|---------|----------------|------|--------|-----------|------|------|------|-----|------|--------|--------|
| UN30068 | Rsa1.0.02236.1 | 1206 | 33558  | 0         | 664  | 680  | 97 - | 112 | 791  | 4494   | 5173   |
| UN30069 | Rsa1.0.00022.1 | 1104 | 200461 | 0         | 740  | 766  | 96 + | 154 | 919  | 162335 | 163100 |
| UN30070 | Rsa1.0.00414.1 | 1129 | 202190 | 0         | 480  | 502  | 95 + | 630 | 1129 | 11608  | 12097  |
| UN30071 | Rsa1.0.02070.1 | 427  | 158516 | 1.00E-112 | 218  | 222  | 98 - | 3   | 224  | 7937   | 8158   |
| UN30072 | Rsa1.0.01997.1 | 1216 | 158416 | 1.00E-111 | 217  | 221  | 98 + | 96  | 316  | 13760  | 13980  |
| UN30073 | Rsa1.0.00360.1 | 580  | 91190  | 1.00E-114 | 256  | 269  | 95 - | 312 | 580  | 33144  | 33410  |
| UN30074 | Rsa1.0.01699.1 | 787  | 40816  | 3.00E-59  | 236  | 273  | 86 - | 3   | 274  | 31294  | 31560  |
| UN30075 | Rsa1.0.03579.1 | 1146 | 21969  | 0         | 393  | 407  | 96 - | 740 | 1145 | 627    | 1028   |
| UN30076 | Rsa1.0.01827.1 | 548  | 143321 | 1.00E-128 | 259  | 268  | 96 - | 280 | 547  | 139923 | 140190 |
| UN30077 | Rsa1.0.02105.1 | 667  | 156953 | 0         | 562  | 621  | 90 - | 3   | 601  | 3269   | 3879   |
| UN30078 | Rsa1.0.08679.1 | 617  | 7047   | 2.00E-84  | 212  | 228  | 92 - | 395 | 617  | 4286   | 4513   |
| UN30079 | Rsa1.0.00403.1 | 370  | 87701  | 3.00E-64  | 221  | 255  | 86 + | 137 | 370  | 25249  | 25503  |
| UN30080 | Rsa1.0.13814.1 | 1000 | 4278   | 1.00E-120 | 223  | 224  | 99 + | 777 | 1000 | 3784   | 4007   |
| UN30081 | Rsa1.0.00258.1 | 564  | 102381 | 0         | 527  | 558  | 94 - | 4   | 561  | 43092  | 43632  |
| UN30082 | Rsa1.0.00549.1 | 748  | 76473  | 3.00E-93  | 183  | 186  | 98 - | 3   | 188  | 4437   | 4622   |
| UN30083 | Rsa1.0.01549.1 | 972  | 43543  | 0         | 433  | 444  | 97 + | 3   | 446  | 20207  | 20650  |
| UN30084 | Rsa1.0.00143.1 | 1180 | 121313 | 0         | 1005 | 1032 | 97 - | 154 | 1180 | 3784   | 4815   |
| UN30085 | Rsa1.0.51330.1 | 1131 | 443    | 1.00E-74  | 177  | 188  | 94 - | 948 | 1131 | 155    | 342    |
| UN30086 | Rsa1.0.02252.1 | 1168 | 33375  | 0         | 1106 | 1136 | 97 + | 30  | 1165 | 8642   | 9773   |
| UN30087 | #              | #    | #      | #         | #    | #    | #    | #   | #    | #      | #      |
| UN30088 | Rsa1.0.00107.1 | 411  | 431659 | 1.00E-165 | 385  | 412  | 93 + | 1   | 407  | 321539 | 321945 |
| UN30089 | Rsa1.0.00123.1 | 974  | 325650 | 1.00E-132 | 273  | 282  | 96 + | 12  | 290  | 127168 | 127448 |
| UN30090 | Rsa1.0.00609.1 | 936  | 72785  | 0         | 342  | 349  | 97 - | 51  | 399  | 58426  | 58774  |
| UN30091 | Rsa1.0.00276.1 | 850  | 100160 | 0         | 678  | 687  | 98 + | 164 | 850  | 47168  | 47854  |
| UN30092 | Rsa1.0.01712.1 | 692  | 154210 | 0         | 621  | 678  | 91 - | 3   | 676  | 36921  | 37576  |
| UN30093 | Rsa1.0.00473.1 | 925  | 212204 | 1.00E-156 | 325  | 339  | 95 + | 3   | 339  | 80359  | 80697  |
| UN30094 | Rsa1.0.00047.1 | 1156 | 168582 | 0         | 1123 | 1154 | 97 - | 5   | 1147 | 154406 | 155556 |
| UN30095 | Rsa1.0.03884.1 | 905  | 20274  | 0         | 860  | 876  | 98 + | 2   | 877  | 13433  | 14308  |
| UN30096 | Rsa1.0.00009.1 | 350  | 232558 | 5.00E-87  | 187  | 195  | 95 - | 8   | 202  | 53747  | 53941  |
| UN30097 | Rsa1.0.00123.1 | 701  | 325650 | 7.00E-88  | 180  | 185  | 97 - | 2   | 186  | 124643 | 124827 |
| UN30098 | Rsa1.0.00055.1 | 489  | 520193 | 3.00E-15  | 83   | 95   | 87 + | 365 | 458  | 180223 | 180317 |
| UN30099 | Rsa1.0.07836.1 | 1219 | 8451   | 8.00E-21  | 119  | 141  | 84 - | 655 | 795  | 1074   | 1214   |
| UN30100 | Rsa1.0.00071.1 | 790  | 345714 | 1.00E-123 | 275  | 288  | 95 - | 2   | 288  | 53091  | 53375  |
| UN30101 | Rsa1.0.00426.1 | 1224 | 85668  | 1.00E-138 | 280  | 290  | 96 + | 761 | 1050 | 31387  | 31676  |
| UN30102 | Rsa1.0.00055.1 | 491  | 520193 | 2.00E-25  | 112  | 128  | 87 - | 50  | 176  | 180191 | 180318 |
| UN30103 | Rsa1.0.00069.1 | 712  | 403561 | 0         | 456  | 462  | 98 + | 2   | 463  | 361007 | 361468 |
| UN30104 | Rsa1.0.00709.1 | 659  | 67329  | 0         | 399  | 417  | 95 - | 3   | 419  | 25330  | 25746  |
| UN30105 | Rsa1.0.00623.1 | 910  | 207630 | 1.00E-170 | 383  | 406  | 94 + | 495 | 899  | 168770 | 169172 |
| UN30106 | Rsa1.0.00015.1 | 1248 | 561803 | 1.00E-151 | 304  | 315  | 96 - | 939 | 1248 | 548925 | 549239 |

|         |                |      |        |           |      |      |       |     |      |        |        |
|---------|----------------|------|--------|-----------|------|------|-------|-----|------|--------|--------|
| UN30107 | Rsa1.0.02268.1 | 620  | 33172  | 1.00E-140 | 284  | 293  | 96 -  | 313 | 604  | 30936  | 31228  |
| UN30108 | Rsa1.0.00094.1 | 1084 | 139042 | 0         | 1050 | 1104 | 95 -  | 2   | 1084 | 47000  | 48094  |
| UN30109 | Rsa1.0.01408.1 | 1187 | 46383  | 0         | 836  | 881  | 94 +  | 1   | 877  | 35834  | 36714  |
| UN30110 | Rsa1.0.00065.1 | 865  | 454616 | 0         | 346  | 348  | 99 +  | 16  | 362  | 429560 | 429907 |
| UN30111 | Rsa1.0.07217.1 | 755  | 9703   | 0         | 567  | 603  | 94 -  | 146 | 744  | 5577   | 6166   |
| UN30112 | Rsa1.0.00932.1 | 877  | 59185  | 1.00E-106 | 227  | 236  | 96 +  | 639 | 873  | 34923  | 35158  |
| UN30113 | Rsa1.0.00142.1 | 780  | 121474 | 0         | 465  | 476  | 97 +  | 2   | 477  | 116150 | 116625 |
| UN30114 | Rsa1.0.01016.1 | 667  | 181422 | 1.00E-177 | 398  | 421  | 94 +  | 248 | 667  | 177066 | 177481 |
| UN30115 | Rsa1.0.00040.1 | 1252 | 324196 | 0         | 1209 | 1257 | 96 +  | 4   | 1252 | 229873 | 231129 |
| UN30116 | Rsa1.0.00330.1 | 573  | 94666  | 1.00E-164 | 336  | 347  | 96 -  | 229 | 572  | 45452  | 45797  |
| UN30117 | Rsa1.0.04846.1 | 575  | 15739  | 1.00E-122 | 256  | 265  | 96 -  | 3   | 267  | 7111   | 7372   |
| UN30118 | Rsa1.0.05127.1 | 609  | 147533 | 1.00E-101 | 230  | 249  | 92 +  | 379 | 608  | 6710   | 6958   |
| UN30119 | Rsa1.0.00469.1 | 896  | 82084  | 0         | 872  | 898  | 97 -  | 3   | 896  | 15857  | 16753  |
| UN30120 | Rsa1.0.07168.1 | 675  | 9790   | 3.00E-99  | 222  | 237  | 93 -  | 3   | 239  | 3361   | 3585   |
| UN30121 | Rsa1.0.00584.1 | 1237 | 74295  | 1.00E-127 | 317  | 344  | 92 +  | 904 | 1237 | 2066   | 2409   |
| UN30122 | Rsa1.0.06013.1 | 849  | 11931  | 0         | 849  | 849  | 100 + | 1   | 849  | 2242   | 3090   |
| UN30123 | Rsa1.0.00306.1 | 707  | 146760 | 1.00E-120 | 226  | 227  | 99 +  | 1   | 226  | 89337  | 89563  |
| UN30124 | Rsa1.0.04716.1 | 770  | 16262  | 0         | 716  | 731  | 97 -  | 4   | 733  | 5986   | 6713   |
| UN30125 | Rsa1.0.00096.1 | 1103 | 198773 | 0         | 1100 | 1100 | 100 + | 4   | 1103 | 177665 | 178764 |
| UN30126 | Rsa1.0.00051.1 | 825  | 258225 | 1.00E-175 | 311  | 311  | 100 - | 1   | 311  | 4854   | 5164   |
| UN30127 | Rsa1.0.00007.1 | 830  | 239325 | 1.00E-145 | 265  | 266  | 99 +  | 240 | 505  | 39409  | 39674  |
| UN30128 | Rsa1.0.02783.1 | 940  | 27927  | 0         | 805  | 818  | 98 -  | 123 | 940  | 8059   | 8873   |
| UN30129 | Rsa1.0.00407.1 | 724  | 191544 | 1.00E-160 | 287  | 287  | 100 - | 14  | 300  | 162783 | 163069 |
| UN30130 | Rsa1.0.03774.1 | 840  | 20932  | 0         | 530  | 543  | 97 +  | 6   | 548  | 16194  | 16736  |
| UN30131 | Rsa1.0.00176.1 | 768  | 240984 | 0         | 412  | 412  | 100 + | 357 | 768  | 187775 | 188186 |
| UN30132 | Rsa1.0.00250.1 | 834  | 273771 | 0         | 832  | 832  | 100 + | 3   | 834  | 251633 | 252464 |
| UN30133 | Rsa1.0.00753.1 | 993  | 65705  | 0         | 993  | 993  | 100 - | 1   | 993  | 15434  | 16426  |
| UN30134 | Rsa1.0.00722.1 | 970  | 66840  | 0         | 329  | 329  | 100 + | 1   | 329  | 2430   | 2758   |
| UN30135 | Rsa1.0.01220.1 | 488  | 161775 | 1.00E-153 | 283  | 286  | 98 -  | 162 | 447  | 13146  | 13431  |
| UN30136 | Rsa1.0.00122.1 | 869  | 265937 | 0         | 540  | 540  | 100 + | 330 | 869  | 45090  | 45629  |
| UN30137 | Rsa1.0.04660.1 | 885  | 16478  | 0         | 363  | 364  | 99 -  | 8   | 370  | 4148   | 4511   |
| UN30138 | Rsa1.0.00085.1 | 928  | 142226 | 0         | 928  | 929  | 99 -  | 1   | 928  | 122264 | 123192 |
| UN30139 | Rsa1.0.02057.1 | 864  | 35540  | 0         | 555  | 557  | 99 -  | 308 | 864  | 27390  | 27945  |
| UN30140 | Rsa1.0.03014.1 | 1188 | 26018  | 1.00E-138 | 276  | 282  | 97 +  | 1   | 281  | 5295   | 5575   |
| UN30141 | Rsa1.0.02161.1 | 998  | 34459  | 0         | 493  | 498  | 98 -  | 1   | 498  | 11324  | 11821  |
| UN30142 | Rsa1.0.00078.1 | 864  | 175053 | 0         | 620  | 620  | 100 + | 245 | 864  | 18817  | 19436  |
| UN30143 | Rsa1.0.00163.1 | 855  | 116847 | 0         | 497  | 508  | 97 +  | 339 | 846  | 37083  | 37587  |
| UN30144 | Rsa1.0.00818.1 | 888  | 62939  | 1.00E-104 | 199  | 200  | 99 +  | 1   | 199  | 60442  | 60641  |
| UN30145 | Rsa1.0.00252.1 | 559  | 102760 | 0         | 548  | 560  | 97 -  | 1   | 559  | 23499  | 24058  |







| UN30224 | #              | #    | #      | #         | #    | #    | #     | #    | #    | #      | #      | # |
|---------|----------------|------|--------|-----------|------|------|-------|------|------|--------|--------|---|
| UN30225 | Rsa1.0.06111.1 | 563  | 11723  | 0         | 555  | 564  | 98 +  | 1    | 561  | 5155   | 5718   |   |
| UN30226 | Rsa1.0.01196.1 | 448  | 51097  | 0         | 429  | 437  | 98 +  | 2    | 436  | 24241  | 24676  |   |
| UN30227 | Rsa1.0.00357.1 | 993  | 173671 | 0         | 671  | 671  | 100 - | 322  | 992  | 169807 | 170477 |   |
| UN30228 | Rsa1.0.26922.1 | 890  | 873    | 7.00E-67  | 130  | 130  | 100 + | 254  | 383  | 178    | 307    |   |
| UN30229 | Rsa1.0.13674.1 | 1478 | 4509   | 0         | 1340 | 1479 | 90 -  | 1    | 1478 | 1762   | 3230   |   |
| UN30230 | Rsa1.0.00138.1 | 907  | 247040 | 0         | 867  | 902  | 96 +  | 5    | 903  | 245439 | 246328 |   |
| UN30231 | Rsa1.0.00842.1 | 1273 | 62493  | 0         | 395  | 410  | 96 -  | 253  | 662  | 3019   | 3428   |   |
| UN30232 | Rsa1.0.00758.1 | 1072 | 65477  | 0         | 554  | 569  | 97 -  | 30   | 595  | 10622  | 11190  |   |
| UN30233 | Rsa1.0.00394.1 | 480  | 148426 | 1.00E-153 | 284  | 286  | 99 -  | 1    | 285  | 91116  | 91401  |   |
| UN30234 | Rsa1.0.00301.1 | 1313 | 365315 | 0         | 1309 | 1312 | 99 +  | 2    | 1313 | 334566 | 335877 |   |
| UN30235 | Rsa1.0.00034.1 | 1507 | 260119 | 0         | 1494 | 1494 | 100 - | 7    | 1500 | 98658  | 100151 |   |
| UN30236 | Rsa1.0.00160.1 | 1241 | 346678 | 0         | 522  | 555  | 94 -  | 16   | 555  | 195210 | 195761 |   |
| UN30237 | Rsa1.0.00426.1 | 659  | 85668  | 1.00E-140 | 288  | 300  | 96 +  | 91   | 390  | 23741  | 24040  |   |
| UN30238 | Rsa1.0.00816.1 | 1520 | 403350 | 0         | 462  | 480  | 96 -  | 1046 | 1520 | 114406 | 114882 |   |
| UN30239 | Rsa1.0.00964.1 | 839  | 316648 | 0         | 446  | 446  | 100 + | 394  | 839  | 144104 | 144549 |   |
| UN30240 | Rsa1.0.00112.1 | 785  | 132199 | 0         | 783  | 785  | 99 -  | 1    | 785  | 14916  | 15699  |   |
| UN30241 | Rsa1.0.00354.1 | 725  | 232005 | 0         | 725  | 725  | 100 + | 1    | 725  | 158241 | 158965 |   |
| UN30242 | Rsa1.0.00770.1 | 871  | 64900  | 0         | 871  | 871  | 100 + | 1    | 871  | 14871  | 15741  |   |
| UN30243 | Rsa1.0.00092.1 | 690  | 659932 | 0         | 690  | 690  | 100 + | 1    | 690  | 143956 | 144645 |   |
| UN30244 | Rsa1.0.00008.1 | 1012 | 358124 | 0         | 726  | 744  | 97 -  | 229  | 972  | 47604  | 48344  |   |
| UN30245 | Rsa1.0.00792.1 | 838  | 64163  | 0         | 834  | 835  | 99 +  | 5    | 838  | 7634   | 8468   |   |
| UN30246 | Rsa1.0.01452.1 | 783  | 45459  | 0         | 578  | 580  | 99 +  | 204  | 783  | 42427  | 43006  |   |
| UN30247 | Rsa1.0.01436.1 | 912  | 45894  | 0         | 551  | 551  | 100 - | 3    | 553  | 37055  | 37605  |   |
| UN30248 | Rsa1.0.00689.1 | 1303 | 68305  | 0         | 1303 | 1303 | 100 + | 1    | 1303 | 27093  | 28395  |   |
| UN30249 | Rsa1.0.02930.1 | 801  | 26668  | 0         | 570  | 577  | 98 +  | 225  | 801  | 25477  | 26053  |   |
| UN30250 | Rsa1.0.00655.1 | 874  | 195840 | 0         | 874  | 874  | 100 + | 1    | 874  | 18824  | 19697  |   |
| UN30251 | Rsa1.0.35576.1 | 1035 | 636    | 1.00E-154 | 313  | 326  | 96 +  | 1    | 326  | 75     | 393    |   |
| UN30252 | Rsa1.0.00857.1 | 1048 | 61904  | 0         | 658  | 668  | 98 -  | 382  | 1048 | 27200  | 27867  |   |
| UN30253 | Rsa1.0.02513.1 | 856  | 30643  | 0         | 488  | 504  | 96 +  | 353  | 856  | 10514  | 11017  |   |
| UN30254 | Rsa1.0.00324.1 | 649  | 218805 | 0         | 589  | 590  | 99 +  | 1    | 589  | 11418  | 12007  |   |
| UN30255 | Rsa1.0.00584.1 | 1365 | 74295  | 0         | 1318 | 1355 | 97 -  | 7    | 1360 | 9341   | 10690  |   |
| UN30256 | Rsa1.0.01180.1 | 547  | 51517  | 0         | 336  | 337  | 99 -  | 211  | 547  | 38943  | 39279  |   |
| UN30257 | Rsa1.0.01136.1 | 653  | 52724  | 0         | 642  | 646  | 99 -  | 3    | 648  | 36583  | 37228  |   |
| UN30258 | Rsa1.0.01707.1 | 648  | 40686  | 0         | 612  | 621  | 98 -  | 5    | 624  | 24712  | 25332  |   |
| UN30259 | Rsa1.0.00128.1 | 900  | 228675 | 0         | 899  | 900  | 99 -  | 1    | 900  | 193349 | 194247 |   |
| UN30260 | Rsa1.0.00454.1 | 525  | 216970 | 1.00E-147 | 265  | 265  | 100 + | 260  | 524  | 142992 | 143256 |   |
| UN30261 | Rsa1.0.06288.1 | 623  | 11302  | 0         | 609  | 635  | 95 -  | 1    | 623  | 648    | 1276   |   |
| UN30262 | Rsa1.0.03843.1 | 881  | 20496  | 0         | 348  | 352  | 98 +  | 410  | 761  | 16636  | 16987  |   |

|         |                |      |        |           |      |      |       |      |      |        |        |
|---------|----------------|------|--------|-----------|------|------|-------|------|------|--------|--------|
| UN30263 | Rsa1.0_58060.1 | 1321 | 394    | 1.00E-124 | 236  | 239  | 98 -  | 913  | 1151 | 83     | 321    |
| UN30264 | Rsa1.0_13478.1 | 1114 | 4790   | 0         | 735  | 751  | 97 +  | 364  | 1114 | 2277   | 3018   |
| UN30265 | Rsa1.0_00453.1 | 919  | 83031  | 0         | 874  | 874  | 100 + | 46   | 919  | 64710  | 65583  |
| UN30266 | Rsa1.0_01131.1 | 1436 | 52928  | 0         | 796  | 796  | 100 - | 641  | 1436 | 4101   | 4896   |
| UN30267 | Rsa1.0_00153.1 | 1027 | 192931 | 0         | 889  | 913  | 97 -  | 1    | 913  | 37616  | 38526  |
| UN30268 | Rsa1.0_00004.1 | 580  | 253996 | 0         | 573  | 579  | 98 +  | 2    | 578  | 54983  | 55561  |
| UN30269 | Rsa1.0_00501.1 | 853  | 79545  | 0         | 846  | 846  | 100 + | 8    | 853  | 40398  | 41243  |
| UN30270 | Rsa1.0_00429.1 | 1512 | 85559  | 9.00E-49  | 319  | 392  | 81 +  | 985  | 1376 | 23801  | 24192  |
| UN30271 | Rsa1.0_00617.1 | 1252 | 72199  | 0         | 855  | 866  | 98 -  | 32   | 897  | 34159  | 35024  |
| UN30272 | Rsa1.0_06761.1 | 864  | 10401  | 1.00E-134 | 242  | 242  | 100 + | 3    | 244  | 5509   | 5750   |
| UN30273 | Rsa1.0_06708.1 | 885  | 10502  | 0         | 832  | 885  | 94 +  | 4    | 885  | 5587   | 6471   |
| UN30274 | Rsa1.0_03429.1 | 1611 | 22984  | 0         | 1591 | 1604 | 99 -  | 9    | 1608 | 6808   | 8411   |
| UN30275 | Rsa1.0_25408.1 | 363  | 937    | 1.00E-176 | 318  | 320  | 99 -  | 44   | 363  | 618    | 937    |
| UN30276 | Rsa1.0_01632.1 | 1417 | 181224 | 0         | 477  | 477  | 100 - | 941  | 1417 | 828    | 1304   |
| UN30277 | Rsa1.0_00061.1 | 955  | 218685 | 0         | 942  | 953  | 98 -  | 3    | 951  | 190147 | 191099 |
| UN30278 | Rsa1.0_04536.1 | 874  | 16947  | 1.00E-108 | 199  | 199  | 100 - | 676  | 874  | 13432  | 13630  |
| UN30279 | Rsa1.0_00260.1 | 975  | 102021 | 0         | 950  | 975  | 97 -  | 14   | 975  | 11764  | 12735  |
| UN30280 | Rsa1.0_00209.1 | 813  | 108531 | 0         | 451  | 452  | 99 +  | 245  | 696  | 65750  | 66201  |
| UN30281 | Rsa1.0_00384.1 | 909  | 89278  | 0         | 888  | 910  | 97 -  | 1    | 905  | 28399  | 29307  |
| UN30282 | Rsa1.0_00404.1 | 843  | 87635  | 0         | 833  | 833  | 100 - | 11   | 843  | 5533   | 6365   |
| UN30283 | Rsa1.0_02649.1 | 819  | 29072  | 0         | 819  | 819  | 100 - | 1    | 819  | 27469  | 28287  |
| UN30284 | Rsa1.0_01585.1 | 1141 | 42806  | 0         | 518  | 518  | 100 + | 7    | 524  | 14641  | 15158  |
| UN30285 | Rsa1.0_07490.1 | 923  | 9261   | 0         | 321  | 321  | 100 + | 603  | 923  | 4752   | 5072   |
| UN30286 | Rsa1.0_02176.1 | 851  | 34291  | 0         | 448  | 448  | 100 - | 404  | 851  | 3326   | 3773   |
| UN30287 | Rsa1.0_02481.1 | 1019 | 31035  | 1.00E-40  | 144  | 160  | 90 -  | 278  | 433  | 11416  | 11574  |
| UN30288 | Rsa1.0_00247.1 | 845  | 103408 | 1.00E-130 | 236  | 236  | 100 + | 356  | 591  | 42740  | 42975  |
| UN30289 | Rsa1.0_00278.1 | 827  | 231896 | 0         | 754  | 810  | 93 +  | 23   | 827  | 184932 | 185735 |
| UN30290 | Rsa1.0_00179.1 | 873  | 393324 | 0         | 581  | 583  | 99 +  | 1    | 581  | 323446 | 324028 |
| UN30291 | Rsa1.0_00226.1 | 1621 | 105884 | 1.00E-176 | 321  | 322  | 99 +  | 1301 | 1621 | 75673  | 75994  |
| UN30292 | Rsa1.0_02503.1 | 894  | 30709  | 0         | 885  | 894  | 98 -  | 1    | 894  | 23667  | 24560  |
| UN30293 | Rsa1.0_00002.1 | 660  | 601661 | 0         | 624  | 651  | 95 -  | 11   | 660  | 86247  | 86893  |
| UN30294 | Rsa1.0_00255.1 | 867  | 204967 | 0         | 836  | 860  | 97 -  | 8    | 867  | 157568 | 158425 |
| UN30295 | Rsa1.0_05634.1 | 836  | 13114  | 0         | 466  | 473  | 98 +  | 1    | 473  | 12562  | 13034  |
| UN30296 | #              | #    | #      | #         | #    | #    | #     | #    | #    | #      | #      |
| UN30297 | Rsa1.0_01493.1 | 994  | 44670  | 0         | 450  | 467  | 96 -  | 414  | 880  | 20749  | 21215  |
| UN30298 | Rsa1.0_00227.1 | 1519 | 105849 | 0         | 1332 | 1349 | 98 +  | 173  | 1519 | 44790  | 46138  |
| UN30299 | Rsa1.0_01800.1 | 1260 | 39109  | 0         | 559  | 564  | 99 +  | 702  | 1260 | 25537  | 26100  |
| UN30300 | Rsa1.0_00651.1 | 1003 | 247766 | 0         | 767  | 767  | 100 + | 1    | 767  | 242255 | 243021 |
| UN30301 | Rsa1.0_04816.1 | 934  | 15872  | 0         | 896  | 896  | 100 + | 1    | 896  | 14977  | 15872  |

|         |                |      |        |           |      |      |       |     |      |        |        |
|---------|----------------|------|--------|-----------|------|------|-------|-----|------|--------|--------|
| UN30302 | Rsa1.0.00890.1 | 836  | 323870 | 0         | 621  | 647  | 95 -  | 193 | 836  | 200362 | 201008 |
| UN30303 | Rsa1.0.00713.1 | 945  | 158017 | 0         | 370  | 370  | 100 - | 5   | 374  | 52803  | 53172  |
| UN30304 | Rsa1.0.01090.1 | 541  | 54385  | 1.00E-154 | 276  | 276  | 100 + | 266 | 541  | 6183   | 6458   |
| UN30305 | Rsa1.0.00110.1 | 922  | 132719 | 0         | 507  | 507  | 100 - | 416 | 922  | 126633 | 127139 |
| UN30306 | Rsa1.0.01557.1 | 1149 | 43291  | 0         | 537  | 537  | 100 - | 1   | 537  | 23170  | 23706  |
| UN30307 | Rsa1.0.56316.1 | 848  | 406    | 0         | 331  | 331  | 100 - | 391 | 721  | 76     | 406    |
| UN30308 | Rsa1.0.02462.1 | 924  | 31158  | 0         | 715  | 744  | 96 +  | 91  | 834  | 5633   | 6376   |
| UN30309 | Rsa1.0.02165.1 | 842  | 34423  | 0         | 656  | 658  | 99 +  | 1   | 658  | 24956  | 25611  |
| UN30310 | Rsa1.0.00657.1 | 874  | 69858  | 0         | 636  | 636  | 100 - | 6   | 641  | 43257  | 43892  |
| UN30311 | Rsa1.0.00390.1 | 912  | 88681  | 0         | 471  | 472  | 99 +  | 441 | 912  | 32984  | 33455  |
| UN30312 | Rsa1.0.14179.1 | 855  | 3698   | 0         | 546  | 546  | 100 + | 310 | 855  | 1933   | 2478   |
| UN30313 | Rsa1.0.03466.1 | 865  | 22698  | 0         | 859  | 867  | 99 +  | 1   | 865  | 18643  | 19509  |
| UN30314 | Rsa1.0.01569.1 | 886  | 43029  | 0         | 885  | 887  | 99 -  | 1   | 886  | 33349  | 34235  |
| UN30315 | Rsa1.0.00179.1 | 863  | 393324 | 0         | 609  | 610  | 99 +  | 254 | 863  | 187042 | 187651 |
| UN30316 | Rsa1.0.04036.1 | 127  | 19473  | 1.00E-26  | 77   | 81   | 95 -  | 4   | 83   | 15012  | 15092  |
| UN30317 | Rsa1.0.26398.1 | 144  | 893    | 4.00E-76  | 144  | 144  | 100 + | 1   | 144  | 214    | 357    |
| UN30318 | Rsa1.0.00480.1 | 891  | 81325  | 0         | 805  | 829  | 97 -  | 63  | 891  | 63072  | 63899  |
| UN30319 | Rsa1.0.00006.1 | 864  | 396176 | 1.00E-125 | 234  | 236  | 99 -  | 326 | 561  | 364865 | 365100 |
| UN30320 | Rsa1.0.14681.1 | 871  | 3161   | 0         | 482  | 482  | 100 - | 7   | 488  | 2304   | 2785   |
| UN30321 | Rsa1.0.00351.1 | 872  | 413096 | 0         | 682  | 682  | 100 - | 1   | 682  | 194200 | 194881 |
| UN30322 | Rsa1.0.00135.1 | 1186 | 178077 | 1.00E-139 | 287  | 299  | 95 +  | 526 | 824  | 148552 | 148850 |
| UN30323 | Rsa1.0.00119.1 | 1270 | 467509 | 0         | 702  | 725  | 96 +  | 549 | 1270 | 125058 | 125776 |
| UN30324 | Rsa1.0.00277.1 | 1371 | 100132 | 0         | 394  | 394  | 100 + | 1   | 394  | 74332  | 74725  |
| UN30325 | #              | #    | #      | #         | #    | #    | #     | #   | #    | #      | #      |
| UN30326 | Rsa1.0.01589.1 | 872  | 42721  | 1.00E-112 | 224  | 230  | 97 +  | 12  | 241  | 33101  | 33330  |
| UN30327 | Rsa1.0.01101.1 | 899  | 54031  | 0         | 469  | 470  | 99 +  | 430 | 899  | 51274  | 51743  |
| UN30328 | Rsa1.0.01359.1 | 868  | 47271  | 1.00E-111 | 211  | 213  | 99 +  | 3   | 215  | 28770  | 28982  |
| UN30329 | #              | #    | #      | #         | #    | #    | #     | #   | #    | #      | #      |
| UN30330 | Rsa1.0.02858.1 | 1324 | 27246  | 0         | 1193 | 1196 | 99 +  | 130 | 1324 | 22920  | 24115  |
| UN30331 | Rsa1.0.00604.1 | 808  | 146282 | 3.00E-78  | 167  | 173  | 96 +  | 478 | 650  | 78519  | 78691  |
| UN30332 | #              | #    | #      | #         | #    | #    | #     | #   | #    | #      | #      |
| UN30333 | Rsa1.0.02328.1 | 995  | 32494  | 0         | 596  | 622  | 95 -  | 374 | 995  | 3717   | 4328   |
| UN30334 | Rsa1.0.12798.1 | 936  | 5122   | 1.00E-65  | 257  | 300  | 85 -  | 447 | 746  | 82     | 381    |
| UN30335 | Rsa1.0.07430.1 | 900  | 9409   | 0         | 872  | 901  | 96 -  | 6   | 900  | 776    | 1672   |
| UN30336 | Rsa1.0.00119.1 | 1343 | 467509 | 0         | 1157 | 1186 | 97 +  | 158 | 1332 | 295654 | 296831 |
| UN30337 | Rsa1.0.02200.1 | 878  | 33981  | 0         | 876  | 879  | 99 +  | 1   | 878  | 6394   | 7271   |
| UN30338 | Rsa1.0.00300.1 | 1384 | 97747  | 0         | 466  | 504  | 92 +  | 3   | 484  | 85279  | 85779  |
| UN30339 | Rsa1.0.01377.1 | 891  | 46967  | 0         | 651  | 653  | 99 -  | 239 | 891  | 11053  | 11705  |
| UN30340 | Rsa1.0.00085.1 | 855  | 142226 | 0         | 721  | 721  | 100 + | 89  | 809  | 120559 | 121279 |

|         |                |      |        |           |      |      |       |     |      |        |        |
|---------|----------------|------|--------|-----------|------|------|-------|-----|------|--------|--------|
| UN30341 | Rsa1.0_00006.1 | 902  | 396176 | 1.00E-170 | 307  | 308  | 99 +  | 1   | 308  | 311033 | 311340 |
| UN30342 | Rsa1.0_03297.1 | 896  | 23969  | 0         | 392  | 392  | 100 + | 194 | 585  | 21000  | 21391  |
| UN30343 | Rsa1.0_00672.1 | 855  | 69358  | 1.00E-178 | 317  | 317  | 100 - | 307 | 623  | 40408  | 40724  |
| UN30344 | Rsa1.0_02860.1 | 1347 | 27207  | 0         | 519  | 519  | 100 - | 433 | 951  | 1369   | 1887   |
| UN30345 | Rsa1.0_04994.1 | 1526 | 15199  | 0         | 1498 | 1526 | 98 -  | 2   | 1526 | 7236   | 8761   |
| UN30346 | Rsa1.0_02449.1 | 965  | 31292  | 0         | 962  | 965  | 99 -  | 1   | 964  | 18538  | 19502  |
| UN30347 | Rsa1.0_00108.1 | 881  | 478491 | 8.00E-82  | 170  | 174  | 97 +  | 64  | 235  | 36884  | 37057  |
| UN30348 | Rsa1.0_00123.1 | 1491 | 325650 | 0         | 1442 | 1489 | 96 +  | 3   | 1491 | 111835 | 113319 |
| UN30349 | Rsa1.0_04999.1 | 1522 | 15179  | 0         | 958  | 966  | 99 +  | 1   | 965  | 1942   | 2907   |
| UN30350 | Rsa1.0_04012.1 | 1289 | 19574  | 0         | 447  | 470  | 95 +  | 350 | 818  | 9075   | 9544   |
| UN30351 | Rsa1.0_02069.1 | 730  | 35425  | 0         | 561  | 561  | 100 - | 170 | 730  | 8838   | 9398   |
| UN30352 | Rsa1.0_00487.1 | 931  | 80674  | 0         | 591  | 591  | 100 - | 341 | 931  | 77246  | 77836  |
| UN30353 | Rsa1.0_02149.1 | 883  | 148330 | 0         | 417  | 417  | 100 + | 467 | 883  | 11448  | 11864  |
| UN30354 | Rsa1.0_02192.1 | 1595 | 171291 | 0         | 968  | 973  | 99 -  | 4   | 976  | 152494 | 153461 |
| UN30355 | Rsa1.0_01231.1 | 909  | 50208  | 0         | 909  | 909  | 100 - | 1   | 909  | 21050  | 21958  |
| UN30356 | Rsa1.0_02888.1 | 738  | 27020  | 0         | 521  | 532  | 97 -  | 32  | 563  | 11482  | 12010  |
| UN30357 | Rsa1.0_00271.1 | 1256 | 101125 | 0         | 902  | 902  | 100 + | 168 | 1069 | 11831  | 12732  |
| UN30358 | Rsa1.0_02063.1 | 906  | 35484  | 0         | 490  | 491  | 99 -  | 1   | 491  | 21280  | 21770  |
| UN30359 | Rsa1.0_11719.1 | 701  | 5430   | 1.00E-112 | 211  | 213  | 99 -  | 489 | 701  | 3733   | 3945   |
| UN30360 | Rsa1.0_00166.1 | 742  | 240912 | 1.00E-128 | 236  | 237  | 99 +  | 173 | 409  | 684    | 920    |
| UN30361 | Rsa1.0_00025.1 | 796  | 277312 | 0         | 506  | 506  | 100 - | 291 | 796  | 15124  | 15629  |
| UN30362 | #              | #    | #      | #         | #    | #    | #     | #   | #    | #      | #      |
| UN30363 | Rsa1.0_01526.1 | 766  | 43919  | 1.00E-180 | 322  | 323  | 99 +  | 55  | 377  | 24897  | 25219  |
| UN30364 | Rsa1.0_00876.1 | 837  | 61328  | 0         | 500  | 531  | 94 -  | 2   | 525  | 43573  | 44090  |
| UN30365 | Rsa1.0_04662.1 | 946  | 16477  | 0         | 921  | 950  | 96 -  | 1   | 946  | 145    | 1089   |
| UN30366 | Rsa1.0_00108.1 | 1048 | 478491 | 0         | 580  | 583  | 99 -  | 1   | 582  | 77201  | 77783  |
| UN30367 | Rsa1.0_00001.1 | 893  | 363028 | 0         | 397  | 397  | 100 - | 497 | 893  | 158336 | 158732 |
| UN30368 | Rsa1.0_00040.1 | 905  | 324196 | 0         | 707  | 708  | 99 -  | 183 | 890  | 167566 | 168273 |
| UN30369 | Rsa1.0_02542.1 | 832  | 30326  | 0         | 832  | 832  | 100 - | 1   | 832  | 14168  | 14999  |
| UN30370 | Rsa1.0_03503.1 | 880  | 22445  | 1.00E-174 | 310  | 310  | 100 - | 1   | 310  | 21299  | 21608  |
| UN30371 | Rsa1.0_05358.1 | 984  | 14060  | 0         | 978  | 984  | 99 -  | 1   | 984  | 8262   | 9244   |
| UN30372 | Rsa1.0_00190.1 | 909  | 318240 | 1.00E-65  | 128  | 128  | 100 + | 1   | 128  | 36680  | 36807  |
| UN30373 | Rsa1.0_02804.1 | 728  | 27712  | 1.00E-161 | 288  | 288  | 100 + | 11  | 298  | 11688  | 11975  |
| UN30374 | Rsa1.0_07826.1 | 888  | 8466   | 0         | 879  | 889  | 98 +  | 1   | 888  | 6026   | 6913   |
| UN30375 | Rsa1.0_00082.1 | 1024 | 237584 | 0         | 458  | 458  | 100 - | 131 | 588  | 26776  | 27233  |
| UN30376 | Rsa1.0_00074.1 | 882  | 147591 | 0         | 881  | 882  | 99 +  | 1   | 882  | 79381  | 80261  |
| UN30377 | Rsa1.0_00806.1 | 847  | 63674  | 0         | 847  | 848  | 99 +  | 1   | 847  | 34857  | 35704  |
| UN30378 | Rsa1.0_00010.1 | 855  | 294827 | 0         | 597  | 602  | 99 +  | 1   | 602  | 82880  | 83481  |
| UN30379 | Rsa1.0_01352.1 | 1189 | 47443  | 0         | 469  | 474  | 98 -  | 716 | 1189 | 16929  | 17402  |

|         |                |      |        |           |     |      |       |      |      |        |        |
|---------|----------------|------|--------|-----------|-----|------|-------|------|------|--------|--------|
| UN30380 | Rsa1.0_00253.1 | 1167 | 231292 | 0         | 977 | 1010 | 96 -  | 143  | 1146 | 199609 | 200615 |
| UN30381 | Rsa1.0_40732.1 | 1266 | 551    | 0         | 484 | 486  | 99 -  | 3    | 488  | 42     | 527    |
| UN30382 | Rsa1.0_02030.1 | 880  | 179909 | 0         | 867 | 877  | 98 -  | 4    | 880  | 28200  | 29076  |
| UN30383 | Rsa1.0_02872.1 | 1318 | 27080  | 0         | 662 | 664  | 99 -  | 653  | 1316 | 22161  | 22824  |
| UN30384 | Rsa1.0_00661.1 | 1344 | 213041 | 1.00E-170 | 304 | 304  | 100 - | 1037 | 1340 | 200207 | 200510 |
| UN30385 | Rsa1.0_00950.1 | 912  | 58547  | 0         | 909 | 912  | 99 +  | 1    | 912  | 36944  | 37853  |
| UN30386 | #              | #    | #      | #         | #   | #    | #     | #    | #    | #      | #      |
| UN30387 | Rsa1.0_08065.1 | 849  | 7968   | 0         | 476 | 478  | 99 -  | 1    | 476  | 105    | 582    |
| UN30388 | Rsa1.0_01515.1 | 733  | 170864 | 0         | 709 | 732  | 96 -  | 2    | 733  | 151802 | 152533 |
| UN30389 | Rsa1.0_01223.1 | 874  | 50392  | 0         | 542 | 560  | 96 +  | 318  | 874  | 5078   | 5636   |
| UN30390 | Rsa1.0_01580.1 | 950  | 42852  | 0         | 948 | 951  | 99 +  | 1    | 950  | 17494  | 18444  |
| UN30391 | Rsa1.0_03955.1 | 860  | 19884  | 0         | 860 | 862  | 99 +  | 1    | 860  | 4637   | 5498   |
| UN30392 | Rsa1.0_00250.1 | 825  | 273771 | 0         | 352 | 353  | 99 -  | 1    | 352  | 257782 | 258134 |
| UN30393 | Rsa1.0_00476.1 | 858  | 280966 | 0         | 724 | 724  | 100 + | 1    | 724  | 147099 | 147822 |
| UN30394 | Rsa1.0_03046.1 | 754  | 25784  | 1.00E-145 | 264 | 265  | 99 +  | 458  | 722  | 13643  | 13907  |
| UN30395 | Rsa1.0_00021.1 | 384  | 263655 | 0         | 384 | 384  | 100 + | 1    | 384  | 148390 | 148773 |
| UN30396 | Rsa1.0_02766.1 | 1166 | 28128  | 0         | 381 | 399  | 95 -  | 768  | 1166 | 928    | 1326   |
| UN30397 | Rsa1.0_00009.1 | 786  | 232558 | 1.00E-132 | 324 | 355  | 91 +  | 31   | 385  | 58939  | 59269  |
| UN30398 | Rsa1.0_15471.1 | 1028 | 2586   | 0         | 458 | 458  | 100 + | 450  | 907  | 926    | 1383   |
| UN30399 | Rsa1.0_01649.1 | 975  | 41624  | 1.00E-172 | 324 | 330  | 98 -  | 3    | 326  | 856    | 1185   |
| UN30400 | Rsa1.0_00042.1 | 1065 | 171507 | 0         | 553 | 567  | 97 +  | 497  | 1063 | 1718   | 2279   |
| UN30401 | Rsa1.0_03698.1 | 254  | 21302  | 1.00E-134 | 248 | 250  | 99 -  | 5    | 254  | 6108   | 6357   |
| UN30402 | Rsa1.0_56486.1 | 645  | 405    | 1.00E-107 | 197 | 197  | 100 + | 31   | 227  | 65     | 261    |
| UN30403 | Rsa1.0_00369.1 | 868  | 266462 | 0         | 349 | 349  | 100 + | 1    | 349  | 150785 | 151133 |
| UN30404 | Rsa1.0_00015.1 | 953  | 561803 | 0         | 919 | 941  | 97 -  | 13   | 953  | 212319 | 213259 |
| UN30405 | Rsa1.0_00352.1 | 904  | 92266  | 6.00E-18  | 90  | 104  | 86 -  | 391  | 494  | 41130  | 41233  |
| UN30406 | Rsa1.0_03678.1 | 595  | 21425  | 1.00E-173 | 308 | 308  | 100 + | 288  | 595  | 3994   | 4301   |
| UN30407 | Rsa1.0_01355.1 | 782  | 47303  | 0         | 739 | 771  | 95 -  | 1    | 755  | 36826  | 37593  |
| UN30408 | Rsa1.0_00832.1 | 1048 | 62622  | 0         | 756 | 757  | 99 +  | 292  | 1048 | 21143  | 21899  |
| UN30409 | Rsa1.0_03174.1 | 888  | 24809  | 1.00E-178 | 320 | 321  | 99 -  | 568  | 888  | 2581   | 2901   |
| UN30410 | Rsa1.0_00002.1 | 844  | 601661 | 0         | 466 | 467  | 99 +  | 378  | 844  | 239105 | 239571 |
| UN30411 | Rsa1.0_02651.1 | 842  | 29046  | 1.00E-128 | 281 | 297  | 94 +  | 435  | 731  | 26898  | 27194  |
| UN30412 | Rsa1.0_10402.1 | 997  | 5859   | 0         | 996 | 998  | 99 +  | 1    | 997  | 4286   | 5282   |
| UN30413 | Rsa1.0_00409.1 | 729  | 146788 | 0         | 355 | 362  | 98 +  | 370  | 728  | 110864 | 111223 |
| UN30414 | Rsa1.0_06939.1 | 791  | 10137  | 0         | 787 | 792  | 99 +  | 1    | 791  | 5804   | 6595   |
| UN30415 | Rsa1.0_01803.1 | 1303 | 173846 | 0         | 649 | 672  | 96 -  | 1    | 663  | 147463 | 148130 |
| UN30416 | Rsa1.0_00414.1 | 1264 | 202190 | 0         | 916 | 962  | 95 +  | 312  | 1264 | 45829  | 46785  |
| UN30417 | #              | #    | #      | #         | #   | #    | #     | #    | #    | #      | #      |
| UN30418 | Rsa1.0_00179.1 | 905  | 393324 | 0         | 497 | 499  | 99 -  | 1    | 499  | 325106 | 325604 |

|         |                |      |        |           |      |      |       |      |      |        |        |
|---------|----------------|------|--------|-----------|------|------|-------|------|------|--------|--------|
| UN30419 | Rsa1.0.00496.1 | 818  | 79834  | 8.00E-94  | 182  | 183  | 99 +  | 596  | 778  | 33766  | 33947  |
| UN30420 | Rsa1.0.00524.1 | 1233 | 169613 | 0         | 539  | 539  | 100 - | 695  | 1233 | 159922 | 160460 |
| UN30421 | Rsa1.0.00259.1 | 819  | 163204 | 1.00E-21  | 85   | 94   | 90 +  | 206  | 298  | 149095 | 149188 |
| UN30422 | Rsa1.0.02331.1 | 836  | 32449  | 2.00E-67  | 131  | 131  | 100 + | 91   | 221  | 8659   | 8789   |
| UN30423 | Rsa1.0.06619.1 | 1172 | 10650  | 0         | 348  | 354  | 98 -  | 543  | 896  | 9420   | 9773   |
| UN30424 | Rsa1.0.01674.1 | 782  | 168300 | 0         | 666  | 685  | 97 -  | 1    | 684  | 8103   | 8786   |
| UN30425 | Rsa1.0.00903.1 | 771  | 60228  | 1.00E-131 | 280  | 293  | 95 -  | 1    | 286  | 52193  | 52485  |
| UN30426 | Rsa1.0.25026.1 | 1596 | 955    | 0         | 646  | 664  | 97 +  | 95   | 758  | 1      | 656    |
| UN30427 | Rsa1.0.00693.1 | 834  | 161311 | 0         | 790  | 828  | 95 -  | 20   | 834  | 3033   | 3859   |
| UN30428 | Rsa1.0.01613.1 | 1316 | 182542 | 0         | 785  | 793  | 98 +  | 304  | 1092 | 11423  | 12215  |
| UN30429 | Rsa1.0.00675.1 | 1160 | 145590 | 1.00E-147 | 264  | 264  | 100 - | 29   | 292  | 49098  | 49361  |
| UN30430 | Rsa1.0.46224.1 | 866  | 488    | 1.00E-131 | 241  | 242  | 99 +  | 625  | 866  | 1      | 242    |
| UN30431 | Rsa1.0.00290.1 | 881  | 225096 | 0         | 600  | 601  | 99 +  | 4    | 604  | 1614   | 2214   |
| UN30432 | Rsa1.0.00739.1 | 903  | 66155  | 0         | 347  | 348  | 99 +  | 56   | 403  | 16570  | 16917  |
| UN30433 | Rsa1.0.00486.1 | 933  | 80875  | 0         | 928  | 931  | 99 +  | 3    | 933  | 23493  | 24423  |
| UN30434 | Rsa1.0.00383.1 | 735  | 398431 | 0         | 725  | 728  | 99 +  | 8    | 735  | 253290 | 254017 |
| UN30435 | Rsa1.0.00408.1 | 876  | 176752 | 0         | 599  | 614  | 97 +  | 2    | 614  | 100632 | 101240 |
| UN30436 | Rsa1.0.05805.1 | 676  | 12585  | 0         | 673  | 674  | 99 -  | 3    | 676  | 1777   | 2450   |
| UN30437 | Rsa1.0.02345.1 | 616  | 32337  | 0         | 615  | 616  | 99 -  | 1    | 616  | 7041   | 7656   |
| UN30438 | Rsa1.0.40655.1 | 904  | 552    | 0         | 493  | 493  | 100 - | 1    | 493  | 1      | 493    |
| UN30439 | Rsa1.0.00364.1 | 849  | 90951  | 0         | 701  | 716  | 97 +  | 1    | 714  | 23848  | 24560  |
| UN30440 | Rsa1.0.01070.1 | 740  | 55099  | 0         | 735  | 737  | 99 +  | 4    | 740  | 54332  | 55068  |
| UN30441 | Rsa1.0.65512.1 | 649  | 350    | 1.00E-153 | 278  | 279  | 99 +  | 1    | 279  | 72     | 350    |
| UN30442 | Rsa1.0.00806.1 | 1143 | 63674  | 0         | 392  | 392  | 100 + | 27   | 418  | 1912   | 2303   |
| UN30443 | Rsa1.0.00115.1 | 523  | 131321 | 0         | 424  | 428  | 99 -  | 3    | 430  | 96309  | 96736  |
| UN30444 | Rsa1.0.01156.1 | 1270 | 52147  | 0         | 422  | 431  | 97 -  | 325  | 755  | 22205  | 22635  |
| UN30445 | Rsa1.0.02171.1 | 847  | 167557 | 0         | 526  | 534  | 98 -  | 314  | 847  | 11583  | 12116  |
| UN30446 | Rsa1.0.03593.1 | 1292 | 21869  | 0         | 1292 | 1292 | 100 + | 1    | 1292 | 6343   | 7634   |
| UN30447 | Rsa1.0.01352.1 | 1457 | 47443  | 0         | 1407 | 1471 | 95 +  | 3    | 1457 | 44521  | 45991  |
| UN30448 | Rsa1.0.02269.1 | 798  | 33168  | 1.00E-174 | 310  | 310  | 100 + | 3    | 312  | 151    | 460    |
| UN30449 | Rsa1.0.13542.1 | 1235 | 4742   | 5.00E-84  | 162  | 163  | 99 -  | 293  | 455  | 1      | 163    |
| UN30450 | Rsa1.0.01386.1 | 898  | 46765  | 1.00E-176 | 314  | 314  | 100 + | 10   | 323  | 28436  | 28749  |
| UN30451 | Rsa1.0.03087.1 | 878  | 25478  | 0         | 710  | 724  | 98 -  | 155  | 878  | 18643  | 19366  |
| UN30452 | Rsa1.0.00252.1 | 847  | 102760 | 0         | 481  | 481  | 100 - | 1    | 481  | 5402   | 5882   |
| UN30453 | Rsa1.0.30513.1 | 892  | 752    | 0         | 514  | 526  | 97 -  | 198  | 723  | 1      | 521    |
| UN30454 | Rsa1.0.01641.1 | 287  | 188213 | 1.00E-77  | 147  | 147  | 100 - | 141  | 287  | 163548 | 163694 |
| UN30455 | Rsa1.0.01877.1 | 899  | 37789  | 0         | 863  | 899  | 95 -  | 1    | 899  | 32597  | 33495  |
| UN30456 | Rsa1.0.01687.1 | 829  | 40979  | 1.00E-134 | 243  | 243  | 100 - | 295  | 537  | 35531  | 35773  |
| UN30457 | Rsa1.0.02209.1 | 1628 | 33873  | 0         | 613  | 618  | 99 +  | 1011 | 1628 | 17041  | 17658  |

|         |                |      |        |           |      |      |       |     |      |        |        |
|---------|----------------|------|--------|-----------|------|------|-------|-----|------|--------|--------|
| UN30458 | Rsa1.0_14242.1 | 1446 | 3627   | 0         | 1398 | 1429 | 97 -  | 1   | 1416 | 802    | 2229   |
| UN30459 | Rsa1.0_00002.1 | 892  | 601661 | 0         | 480  | 490  | 97 +  | 403 | 892  | 598922 | 599411 |
| UN30460 | Rsa1.0_00079.1 | 623  | 606987 | 0         | 592  | 592  | 100 + | 1   | 592  | 188525 | 189116 |
| UN30461 | Rsa1.0_01890.1 | 603  | 37542  | 0         | 603  | 603  | 100 - | 1   | 603  | 36008  | 36610  |
| UN30462 | Rsa1.0_00441.1 | 732  | 84607  | 0         | 715  | 727  | 98 -  | 9   | 732  | 18787  | 19513  |
| UN30463 | Rsa1.0_00827.1 | 1023 | 62790  | 0         | 670  | 676  | 99 +  | 1   | 676  | 37343  | 38018  |
| UN30464 | Rsa1.0_00489.1 | 897  | 80434  | 0         | 610  | 610  | 100 + | 1   | 610  | 34882  | 35491  |
| UN30465 | Rsa1.0_00160.1 | 734  | 346678 | 0         | 430  | 430  | 100 + | 1   | 430  | 316926 | 317355 |
| UN30466 | Rsa1.0_24577.1 | 876  | 979    | 2.00E-14  | 42   | 42   | 100 - | 485 | 526  | 397    | 438    |
| UN30467 | Rsa1.0_07909.1 | 529  | 8315   | 0         | 504  | 507  | 99 -  | 1   | 506  | 1      | 507    |
| UN30468 | Rsa1.0_08460.1 | 811  | 7315   | 0         | 342  | 342  | 100 - | 300 | 641  | 4502   | 4843   |
| UN30469 | Rsa1.0_04396.1 | 936  | 17561  | 0         | 513  | 528  | 97 -  | 409 | 936  | 4233   | 4759   |
| UN30470 | #              | #    | #      | #         | #    | #    | #     | #   | #    | #      | #      |
| UN30471 | Rsa1.0_00236.1 | 901  | 104771 | 0         | 767  | 780  | 98 +  | 122 | 901  | 7614   | 8393   |
| UN30472 | Rsa1.0_02528.1 | 880  | 30452  | 1.00E-166 | 336  | 349  | 96 -  | 225 | 573  | 29188  | 29536  |
| UN30473 | Rsa1.0_06503.1 | 870  | 10881  | 0         | 591  | 591  | 100 + | 1   | 591  | 583    | 1173   |
| UN30474 | Rsa1.0_00495.1 | 275  | 79934  | 1.00E-148 | 268  | 269  | 99 -  | 1   | 269  | 74113  | 74381  |
| UN30475 | Rsa1.0_00354.1 | 826  | 232005 | 0         | 822  | 827  | 99 +  | 1   | 826  | 12055  | 12881  |
| UN30476 | Rsa1.0_02282.1 | 883  | 163951 | 0         | 836  | 839  | 99 -  | 45  | 883  | 136617 | 137455 |
| UN30477 | Rsa1.0_04540.1 | 819  | 16934  | 0         | 495  | 532  | 93 +  | 278 | 808  | 16097  | 16628  |
| UN30478 | Rsa1.0_69356.1 | 544  | 330    | 1.00E-168 | 325  | 331  | 98 -  | 211 | 540  | 1      | 330    |
| UN30479 | Rsa1.0_01270.1 | 822  | 49574  | 0         | 812  | 813  | 99 +  | 10  | 822  | 37784  | 38595  |
| UN30480 | Rsa1.0_00183.1 | 889  | 113277 | 0         | 888  | 889  | 99 -  | 1   | 889  | 108749 | 109637 |
| UN30481 | Rsa1.0_00215.1 | 209  | 201775 | 1.00E-114 | 209  | 209  | 100 + | 1   | 209  | 149883 | 150091 |
| UN30482 | Rsa1.0_00315.1 | 959  | 96426  | 0         | 932  | 970  | 96 -  | 1   | 959  | 4898   | 5867   |
| UN30483 | Rsa1.0_00008.1 | 896  | 358124 | 0         | 525  | 534  | 98 -  | 1   | 532  | 331942 | 332470 |
| UN30484 | Rsa1.0_00002.1 | 1310 | 601661 | 0         | 711  | 766  | 92 -  | 551 | 1310 | 182893 | 183643 |
| UN30485 | Rsa1.0_00247.1 | 837  | 103408 | 0         | 834  | 836  | 99 -  | 2   | 837  | 77898  | 78733  |
| UN30486 | Rsa1.0_24638.1 | 989  | 975    | 0         | 712  | 733  | 97 -  | 1   | 733  | 1      | 733    |
| UN30487 | Rsa1.0_00234.1 | 889  | 197060 | 0         | 885  | 885  | 100 - | 5   | 889  | 65501  | 66385  |
| UN30488 | #              | #    | #      | #         | #    | #    | #     | #   | #    | #      | #      |
| UN30489 | Rsa1.0_00200.1 | 1082 | 162016 | 0         | 720  | 722  | 99 -  | 1   | 722  | 55564  | 56285  |
| UN30490 | Rsa1.0_00664.1 | 863  | 69573  | 0         | 429  | 436  | 98 +  | 1   | 436  | 48225  | 48660  |
| UN30491 | Rsa1.0_13660.1 | 499  | 4542   | 1.00E-175 | 311  | 311  | 100 - | 1   | 311  | 3461   | 3771   |
| UN30492 | Rsa1.0_00620.1 | 441  | 71985  | 0         | 441  | 441  | 100 - | 1   | 441  | 10322  | 10762  |
| UN30493 | Rsa1.0_01865.1 | 303  | 37992  | 1.00E-170 | 303  | 303  | 100 + | 1   | 303  | 13771  | 14073  |
| UN30494 | Rsa1.0_13861.1 | 830  | 4189   | 1.00E-145 | 261  | 261  | 100 - | 290 | 550  | 502    | 762    |
| UN30495 | Rsa1.0_00387.1 | 525  | 495407 | 0         | 489  | 489  | 100 + | 1   | 489  | 338987 | 339475 |
| UN30496 | Rsa1.0_00011.1 | 905  | 225044 | 0         | 858  | 907  | 94 +  | 1   | 905  | 48233  | 49123  |



|         |                |      |        |           |      |      |       |     |      |        |        |
|---------|----------------|------|--------|-----------|------|------|-------|-----|------|--------|--------|
| UN30497 | Rsa1.0.07592.1 | 1175 | 9059   | 2.00E-98  | 201  | 207  | 97 +  | 901 | 1107 | 124    | 330    |
| UN30498 | Rsa1.0.01857.1 | 829  | 38103  | 0         | 701  | 707  | 99 +  | 3   | 709  | 28952  | 29658  |
| UN30499 | Rsa1.0.00076.1 | 680  | 146021 | 0         | 649  | 670  | 96 -  | 12  | 680  | 87512  | 88172  |
| UN30500 | Rsa1.0.62395.1 | 593  | 368    | 1.00E-166 | 300  | 301  | 99 -  | 293 | 593  | 66     | 366    |
| UN30501 | Rsa1.0.00161.1 | 722  | 116891 | 1.00E-107 | 197  | 197  | 100 + | 411 | 607  | 74443  | 74639  |
| UN30502 | Rsa1.0.00218.1 | 945  | 201480 | 0         | 785  | 822  | 95 +  | 117 | 935  | 21366  | 22175  |
| UN30503 | Rsa1.0.00051.1 | 838  | 258225 | 0         | 625  | 646  | 96 -  | 196 | 838  | 121031 | 121675 |
| UN30504 | Rsa1.0.02797.1 | 508  | 27800  | 0         | 503  | 504  | 99 +  | 3   | 505  | 8297   | 8800   |
| UN30505 | Rsa1.0.00351.1 | 1031 | 413096 | 0         | 1030 | 1031 | 99 -  | 1   | 1031 | 247169 | 248198 |
| UN30506 | Rsa1.0.01409.1 | 834  | 151595 | 0         | 359  | 359  | 100 + | 189 | 547  | 116100 | 116458 |
| UN30507 | Rsa1.0.00051.1 | 863  | 258225 | 8.00E-82  | 300  | 343  | 87 +  | 275 | 599  | 60850  | 61181  |
| UN30508 | Rsa1.0.00694.1 | 882  | 68074  | 0         | 384  | 387  | 99 +  | 496 | 882  | 29005  | 29390  |
| UN30509 | Rsa1.0.12468.1 | 1297 | 5217   | 1.00E-173 | 337  | 345  | 97 +  | 828 | 1172 | 1      | 344    |
| UN30510 | Rsa1.0.62546.1 | 874  | 367    | 1.00E-102 | 195  | 197  | 98 -  | 678 | 874  | 168    | 364    |
| UN30511 | Rsa1.0.00435.1 | 865  | 317579 | 0         | 381  | 387  | 98 -  | 1   | 383  | 66819  | 67205  |
| UN30512 | Rsa1.0.01138.1 | 541  | 190615 | 2.00E-96  | 285  | 318  | 89 +  | 4   | 318  | 30297  | 30594  |
| UN30513 | Rsa1.0.00006.1 | 144  | 396176 | 4.00E-76  | 144  | 144  | 100 + | 1   | 144  | 277316 | 277459 |
| UN30514 | Rsa1.0.02143.1 | 847  | 34632  | 1.00E-148 | 266  | 266  | 100 + | 426 | 691  | 1679   | 1944   |
| UN30515 | Rsa1.0.01508.1 | 632  | 44334  | 0         | 401  | 414  | 96 -  | 35  | 448  | 37681  | 38092  |
| UN30516 | Rsa1.0.00522.1 | 1026 | 78103  | 1.00E-157 | 300  | 306  | 98 -  | 700 | 1005 | 67053  | 67358  |
| UN30517 | Rsa1.0.06392.1 | 653  | 11104  | 0         | 424  | 425  | 99 -  | 1   | 425  | 131    | 555    |
| UN30518 | Rsa1.0.00060.1 | 879  | 502678 | 0         | 830  | 901  | 92 -  | 1   | 879  | 43613  | 44500  |
| UN30519 | Rsa1.0.00013.1 | 652  | 292129 | 0         | 639  | 652  | 98 -  | 1   | 651  | 120158 | 120809 |
| UN30520 | Rsa1.0.00564.1 | 844  | 75428  | 0         | 472  | 487  | 96 -  | 358 | 844  | 11004  | 11490  |
| UN30521 | Rsa1.0.01472.1 | 835  | 45099  | 0         | 835  | 835  | 100 - | 1   | 835  | 11631  | 12465  |
| UN30522 | Rsa1.0.01121.1 | 153  | 53407  | 2.00E-78  | 148  | 148  | 100 - | 6   | 153  | 27350  | 27497  |
| UN30523 | Rsa1.0.01236.1 | 863  | 50156  | 0         | 770  | 782  | 98 +  | 71  | 849  | 15624  | 16402  |
| UN30524 | Rsa1.0.05813.1 | 815  | 12569  | 0         | 763  | 765  | 99 +  | 53  | 815  | 3375   | 4139   |
| UN30525 | Rsa1.0.01266.1 | 835  | 49680  | 0         | 835  | 835  | 100 + | 1   | 835  | 5615   | 6449   |
| UN30526 | Rsa1.0.01026.1 | 864  | 171624 | 0         | 486  | 495  | 98 +  | 373 | 864  | 477    | 971    |
| UN30527 | Rsa1.0.01029.1 | 1219 | 256254 | 0         | 438  | 458  | 95 +  | 4   | 461  | 237966 | 238414 |
| UN30528 | Rsa1.0.03011.1 | 877  | 26048  | 0         | 877  | 878  | 99 -  | 1   | 877  | 12710  | 13587  |
| UN30529 | Rsa1.0.38718.1 | 727  | 581    | 0         | 580  | 581  | 99 -  | 143 | 723  | 1      | 581    |
| UN30530 | Rsa1.0.00673.1 | 992  | 69325  | 1.00E-116 | 381  | 438  | 86 +  | 1   | 411  | 56936  | 57372  |
| UN30531 | Rsa1.0.18170.1 | 768  | 1653   | 0         | 432  | 434  | 99 +  | 3   | 436  | 1220   | 1653   |
| UN30532 | Rsa1.0.01609.1 | 487  | 42280  | 0         | 487  | 488  | 99 +  | 1   | 487  | 7513   | 8000   |
| UN30533 | Rsa1.0.00520.1 | 701  | 78226  | 1.00E-119 | 236  | 242  | 97 +  | 107 | 348  | 36848  | 37089  |
| UN30534 | Rsa1.0.00344.1 | 378  | 191774 | 0         | 378  | 378  | 100 - | 1   | 378  | 163791 | 164168 |
| UN30535 | Rsa1.0.15497.1 | 918  | 2573   | 1.00E-171 | 308  | 309  | 99 +  | 610 | 918  | 1529   | 1837   |

|         |                |      |        |           |      |      |       |      |      |        |        |
|---------|----------------|------|--------|-----------|------|------|-------|------|------|--------|--------|
| UN30536 | Rsa1.0_01209.1 | 826  | 50668  | 1.00E-102 | 199  | 202  | 98 -  | 433  | 634  | 42458  | 42659  |
| UN30537 | Rsa1.0_00092.1 | 645  | 659932 | 1.00E-106 | 196  | 196  | 100 + | 450  | 645  | 183545 | 183740 |
| UN30538 | Rsa1.0_00594.1 | 901  | 73729  | 0         | 724  | 724  | 100 - | 178  | 901  | 45498  | 46221  |
| UN30539 | Rsa1.0_30628.1 | 880  | 749    | 0         | 741  | 749  | 98 +  | 117  | 865  | 1      | 749    |
| UN30540 | #              | #    | #      | #         | #    | #    | #     | #    | #    | #      | #      |
| UN30541 | Rsa1.0_02839.1 | 794  | 27391  | 0         | 791  | 794  | 99 -  | 1    | 794  | 16357  | 17150  |
| UN30542 | Rsa1.0_00329.1 | 841  | 222544 | 0         | 343  | 343  | 100 + | 220  | 562  | 25847  | 26189  |
| UN30543 | Rsa1.0_02046.1 | 842  | 162733 | 0         | 825  | 843  | 97 -  | 13   | 842  | 159042 | 159884 |
| UN30544 | Rsa1.0_00363.1 | 894  | 90968  | 1.00E-113 | 207  | 207  | 100 + | 1    | 207  | 39753  | 39959  |
| UN30545 | Rsa1.0_07073.1 | 1512 | 9944   | 0         | 537  | 555  | 96 +  | 841  | 1395 | 41     | 595    |
| UN30546 | Rsa1.0_06596.1 | 152  | 10699  | 2.00E-75  | 143  | 143  | 100 - | 10   | 152  | 8739   | 8881   |
| UN30547 | Rsa1.0_33623.1 | 670  | 674    | 1.00E-159 | 291  | 293  | 99 +  | 378  | 670  | 24     | 316    |
| UN30548 | Rsa1.0_01888.1 | 1263 | 37563  | 0         | 343  | 344  | 99 +  | 2    | 345  | 32793  | 33136  |
| UN30549 | Rsa1.0_04221.1 | 688  | 18414  | 0         | 688  | 688  | 100 - | 1    | 688  | 17382  | 18069  |
| UN30550 | Rsa1.0_00116.1 | 862  | 365886 | 0         | 590  | 590  | 100 + | 273  | 862  | 206775 | 207364 |
| UN30551 | Rsa1.0_00212.1 | 457  | 108350 | 0         | 455  | 476  | 95 -  | 3    | 457  | 32836  | 33311  |
| UN30552 | Rsa1.0_00124.1 | 971  | 262503 | 6.00E-83  | 170  | 173  | 98 +  | 16   | 187  | 93872  | 94044  |
| UN30553 | Rsa1.0_02575.1 | 903  | 29944  | 0         | 462  | 477  | 96 +  | 433  | 903  | 2668   | 3144   |
| UN30554 | Rsa1.0_02644.1 | 820  | 29176  | 0         | 819  | 820  | 99 +  | 1    | 820  | 7937   | 8756   |
| UN30555 | Rsa1.0_40889.1 | 426  | 549    | 0         | 414  | 416  | 99 -  | 1    | 416  | 53     | 468    |
| UN30556 | Rsa1.0_00947.1 | 561  | 58664  | 0         | 561  | 561  | 100 - | 1    | 561  | 21256  | 21816  |
| UN30557 | Rsa1.0_00476.1 | 1595 | 280966 | 0         | 560  | 560  | 100 - | 1036 | 1595 | 1456   | 2015   |
| UN30558 | Rsa1.0_00039.1 | 678  | 296927 | 0         | 519  | 529  | 98 +  | 4    | 532  | 75473  | 75994  |
| UN30559 | Rsa1.0_07973.1 | 848  | 8149   | 0         | 448  | 476  | 94 +  | 377  | 848  | 7132   | 7598   |
| UN30560 | Rsa1.0_01059.1 | 1196 | 55410  | 0         | 1160 | 1196 | 96 +  | 1    | 1196 | 28276  | 29458  |
| UN30561 | Rsa1.0_00273.1 | 1288 | 326186 | 0         | 783  | 796  | 98 -  | 497  | 1288 | 6245   | 7040   |
| UN30562 | Rsa1.0_03242.1 | 727  | 24415  | 1.00E-168 | 306  | 308  | 99 -  | 420  | 727  | 15758  | 16065  |
| UN30563 | Rsa1.0_01526.1 | 1003 | 43919  | 0         | 635  | 637  | 99 +  | 6    | 642  | 20161  | 20797  |
| UN30564 | Rsa1.0_08664.1 | 922  | 7064   | 0         | 543  | 551  | 98 -  | 1    | 551  | 1      | 551    |
| UN30565 | Rsa1.0_00960.1 | 1180 | 58199  | 0         | 413  | 413  | 100 + | 3    | 415  | 30631  | 31043  |
| UN30566 | Rsa1.0_00690.1 | 922  | 140527 | 0         | 906  | 928  | 97 +  | 3    | 922  | 20266  | 21192  |
| UN30567 | Rsa1.0_03751.1 | 276  | 21025  | 1.00E-62  | 131  | 134  | 97 +  | 109  | 242  | 13490  | 13623  |
| UN30568 | Rsa1.0_04285.1 | 883  | 18085  | 0         | 468  | 470  | 99 +  | 414  | 883  | 4173   | 4642   |
| UN30569 | Rsa1.0_34769.1 | 866  | 651    | 1.00E-137 | 260  | 264  | 98 +  | 169  | 432  | 149    | 412    |
| UN30570 | Rsa1.0_02494.1 | 681  | 132923 | 0         | 331  | 332  | 99 -  | 3    | 334  | 112658 | 112989 |
| UN30571 | Rsa1.0_00962.1 | 873  | 184909 | 1.00E-138 | 249  | 249  | 100 + | 625  | 873  | 24282  | 24530  |
| UN30572 | Rsa1.0_31998.1 | 711  | 713    | 0         | 413  | 414  | 99 +  | 298  | 711  | 1      | 414    |
| UN30573 | Rsa1.0_01289.1 | 1100 | 49181  | 0         | 848  | 894  | 94 -  | 208  | 1100 | 19501  | 20392  |
| UN30574 | Rsa1.0_01276.1 | 883  | 49384  | 0         | 811  | 812  | 99 +  | 72   | 883  | 8269   | 9080   |

|         |                |      |        |           |      |      |       |     |      |        |        |
|---------|----------------|------|--------|-----------|------|------|-------|-----|------|--------|--------|
| UN30575 | Rsa1.0_18395.1 | 880  | 1607   | 0         | 518  | 524  | 98 +  | 1   | 523  | 1087   | 1607   |
| UN30576 | Rsa1.0_00160.1 | 834  | 346678 | 0         | 833  | 834  | 99 -  | 1   | 834  | 18873  | 19706  |
| UN30577 | Rsa1.0_00734.1 | 976  | 66508  | 0         | 874  | 879  | 99 -  | 1   | 878  | 2991   | 3869   |
| UN30578 | Rsa1.0_00201.1 | 743  | 232851 | 0         | 412  | 428  | 96 +  | 315 | 742  | 86851  | 87278  |
| UN30579 | Rsa1.0_02173.1 | 475  | 34318  | 0         | 420  | 420  | 100 - | 56  | 475  | 23959  | 24378  |
| UN30580 | Rsa1.0_02100.1 | 1412 | 35024  | 0         | 1279 | 1279 | 100 + | 132 | 1410 | 29818  | 31096  |
| UN30581 | Rsa1.0_01182.1 | 617  | 167304 | 0         | 335  | 336  | 99 +  | 283 | 617  | 135429 | 135764 |
| UN30582 | #              | #    | #      | #         | #    | #    | #     | #   | #    | #      | #      |
| UN30583 | Rsa1.0_05393.1 | 885  | 13919  | 0         | 394  | 406  | 97 +  | 480 | 885  | 5123   | 5528   |
| UN30584 | Rsa1.0_00033.1 | 126  | 515811 | 2.00E-59  | 119  | 120  | 99 -  | 1   | 120  | 40363  | 40482  |
| UN30585 | Rsa1.0_01292.1 | 884  | 175783 | 0         | 548  | 561  | 97 -  | 8   | 568  | 150921 | 151481 |
| UN30586 | Rsa1.0_04288.1 | 460  | 18077  | 0         | 460  | 460  | 100 - | 1   | 460  | 16319  | 16778  |
| UN30587 | Rsa1.0_00595.1 | 1463 | 341648 | 0         | 691  | 724  | 95 -  | 744 | 1461 | 193477 | 194186 |
| UN30588 | Rsa1.0_00304.1 | 741  | 97429  | 0         | 722  | 733  | 98 +  | 11  | 741  | 64477  | 65209  |
| UN30589 | Rsa1.0_00008.1 | 750  | 358124 | 0         | 661  | 662  | 99 +  | 3   | 664  | 65933  | 66594  |
| UN30590 | Rsa1.0_02120.1 | 903  | 34819  | 0         | 566  | 574  | 98 -  | 322 | 895  | 30796  | 31369  |
| UN30591 | Rsa1.0_00706.1 | 834  | 291570 | 0         | 813  | 840  | 96 -  | 1   | 834  | 7624   | 8460   |
| UN30592 | Rsa1.0_02505.1 | 669  | 30703  | 0         | 539  | 570  | 94 -  | 114 | 669  | 6232   | 6799   |
| UN30593 | Rsa1.0_04616.1 | 1096 | 16627  | 1.00E-162 | 317  | 326  | 97 +  | 637 | 962  | 4890   | 5215   |
| UN30594 | Rsa1.0_02024.1 | 977  | 149168 | 0         | 487  | 488  | 99 -  | 38  | 525  | 129205 | 129692 |
| UN30595 | Rsa1.0_71815.1 | 963  | 319    | 1.00E-172 | 316  | 319  | 99 -  | 548 | 866  | 1      | 319    |
| UN30596 | Rsa1.0_07536.1 | 505  | 9178   | 0         | 499  | 502  | 99 +  | 3   | 504  | 4550   | 5049   |
| UN30597 | Rsa1.0_01195.1 | 1482 | 147988 | 0         | 1303 | 1323 | 98 +  | 134 | 1454 | 19918  | 21236  |
| UN30598 | Rsa1.0_01362.1 | 861  | 47217  | 0         | 747  | 748  | 99 +  | 114 | 861  | 36648  | 37395  |
| UN30599 | Rsa1.0_00360.1 | 918  | 91190  | 0         | 828  | 841  | 98 +  | 2   | 842  | 67993  | 68830  |
| UN30600 | Rsa1.0_00135.1 | 939  | 178077 | 0         | 343  | 343  | 100 + | 597 | 939  | 73536  | 73878  |
| UN30601 | Rsa1.0_01420.1 | 392  | 46210  | 2.00E-59  | 165  | 177  | 93 +  | 218 | 392  | 39918  | 40093  |
| UN30602 | Rsa1.0_00188.1 | 666  | 112020 | 0         | 666  | 666  | 100 - | 1   | 666  | 102203 | 102868 |
| UN30603 | Rsa1.0_01622.1 | 803  | 42071  | 0         | 802  | 803  | 99 -  | 1   | 803  | 3833   | 4635   |
| UN30604 | Rsa1.0_00007.1 | 733  | 239325 | 0         | 729  | 732  | 99 +  | 2   | 733  | 111530 | 112261 |
| UN30605 | Rsa1.0_03996.1 | 845  | 19654  | 0         | 536  | 536  | 100 - | 1   | 536  | 3155   | 3690   |
| UN30606 | Rsa1.0_09174.1 | 502  | 6580   | 4.00E-33  | 103  | 112  | 91 +  | 91  | 200  | 3612   | 3723   |
| UN30607 | Rsa1.0_17216.1 | 1050 | 1890   | 0         | 603  | 610  | 98 -  | 1   | 609  | 1      | 610    |
| UN30608 | Rsa1.0_01917.1 | 976  | 37303  | 0         | 975  | 976  | 99 -  | 1   | 976  | 33126  | 34101  |
| UN30609 | Rsa1.0_09394.1 | 666  | 6399   | 0         | 665  | 665  | 100 + | 2   | 666  | 5091   | 5755   |
| UN30610 | Rsa1.0_01821.1 | 890  | 38798  | 0         | 730  | 761  | 95 -  | 3   | 762  | 37439  | 38199  |
| UN30611 | Rsa1.0_00797.1 | 877  | 63959  | 0         | 876  | 877  | 99 +  | 1   | 877  | 24027  | 24903  |
| UN30612 | Rsa1.0_01515.1 | 1082 | 170864 | 0         | 1077 | 1081 | 99 -  | 2   | 1082 | 126781 | 127861 |
| UN30613 | Rsa1.0_00160.1 | 927  | 346678 | 0         | 925  | 925  | 100 + | 3   | 927  | 20653  | 21577  |

| UN30614 | #              | #    | #      | #         | #    | #    | #     | #   | #    | #      | #      | # |
|---------|----------------|------|--------|-----------|------|------|-------|-----|------|--------|--------|---|
| UN30615 | Rsa1.0_01725.1 | 877  | 40290  | 0         | 624  | 626  | 99 +  | 252 | 877  | 1219   | 1844   |   |
| UN30616 | Rsa1.0_04989.1 | 1100 | 15217  | 0         | 644  | 645  | 99 +  | 456 | 1100 | 8440   | 9084   |   |
| UN30617 | Rsa1.0_04924.1 | 879  | 15426  | 1.00E-172 | 316  | 319  | 99 +  | 1   | 319  | 14119  | 14437  |   |
| UN30618 | Rsa1.0_01032.1 | 901  | 56189  | 0         | 567  | 568  | 99 +  | 4   | 570  | 22650  | 23217  |   |
| UN30619 | Rsa1.0_07809.1 | 669  | 8503   | 0         | 660  | 662  | 99 +  | 3   | 664  | 1003   | 1664   |   |
| UN30620 | Rsa1.0_13438.1 | 595  | 4828   | 0         | 591  | 595  | 99 -  | 1   | 595  | 3304   | 3897   |   |
| UN30621 | Rsa1.0_12875.1 | 962  | 5091   | 0         | 465  | 465  | 100 + | 311 | 775  | 4627   | 5091   |   |
| UN30622 | Rsa1.0_00655.1 | 645  | 195840 | 0         | 382  | 402  | 95 -  | 264 | 645  | 131199 | 131600 |   |
| UN30623 | Rsa1.0_07588.1 | 800  | 9070   | 0         | 799  | 800  | 99 -  | 1   | 800  | 5085   | 5884   |   |
| UN30624 | Rsa1.0_00840.1 | 1041 | 62514  | 0         | 639  | 651  | 98 +  | 389 | 1039 | 10347  | 10996  |   |
| UN30625 | Rsa1.0_03541.1 | 1135 | 22194  | 3.00E-20  | 134  | 157  | 85 +  | 954 | 1107 | 6210   | 6362   |   |
| UN30626 | Rsa1.0_00662.1 | 1246 | 192183 | 0         | 518  | 531  | 97 +  | 509 | 1039 | 180815 | 181345 |   |
| UN30627 | Rsa1.0_00487.1 | 598  | 80674  | 0         | 597  | 598  | 99 +  | 1   | 598  | 25430  | 26026  |   |
| UN30628 | Rsa1.0_05233.1 | 783  | 14422  | 0         | 780  | 782  | 99 +  | 3   | 783  | 6314   | 7095   |   |
| UN30629 | Rsa1.0_01626.1 | 915  | 41989  | 0         | 749  | 751  | 99 -  | 165 | 915  | 28230  | 28979  |   |
| UN30630 | Rsa1.0_00089.1 | 904  | 406142 | 1.00E-160 | 287  | 287  | 100 - | 1   | 287  | 360701 | 360987 |   |
| UN30631 | Rsa1.0_02449.1 | 835  | 31292  | 0         | 357  | 358  | 99 -  | 1   | 358  | 23393  | 23750  |   |
| UN30632 | Rsa1.0_01257.1 | 273  | 49766  | 1.00E-150 | 272  | 273  | 99 +  | 1   | 273  | 27143  | 27415  |   |
| UN30633 | Rsa1.0_00419.1 | 1260 | 86562  | 0         | 648  | 648  | 100 + | 219 | 866  | 77469  | 78116  |   |
| UN30634 | Rsa1.0_00356.1 | 854  | 91521  | 0         | 854  | 854  | 100 - | 1   | 854  | 90661  | 91514  |   |
| UN30635 | Rsa1.0_00167.1 | 811  | 116000 | 0         | 810  | 811  | 99 +  | 1   | 811  | 28307  | 29116  |   |
| UN30636 | Rsa1.0_00431.1 | 906  | 85391  | 0         | 892  | 909  | 98 +  | 3   | 906  | 53199  | 54104  |   |
| UN30637 | Rsa1.0_00970.1 | 1372 | 57994  | 0         | 709  | 711  | 99 +  | 269 | 979  | 52516  | 53226  |   |
| UN30638 | Rsa1.0_04525.1 | 893  | 16965  | 0         | 597  | 597  | 100 + | 1   | 597  | 6446   | 7042   |   |
| UN30639 | Rsa1.0_01290.1 | 1465 | 49179  | 1.00E-137 | 249  | 249  | 100 - | 598 | 846  | 7547   | 7795   |   |
| UN30640 | Rsa1.0_05204.1 | 1192 | 14516  | 0         | 1154 | 1206 | 95 -  | 1   | 1191 | 12735  | 13937  |   |
| UN30641 | Rsa1.0_00098.1 | 723  | 349239 | 0         | 361  | 361  | 100 + | 353 | 713  | 250875 | 251235 |   |
| UN30642 | Rsa1.0_04854.1 | 783  | 131560 | 0         | 367  | 367  | 100 + | 417 | 783  | 15144  | 15510  |   |
| UN30643 | Rsa1.0_11952.1 | 694  | 5362   | 1.00E-166 | 306  | 308  | 99 +  | 1   | 308  | 206    | 512    |   |
| UN30644 | Rsa1.0_02334.1 | 872  | 32428  | 0         | 692  | 692  | 100 - | 1   | 692  | 1822   | 2513   |   |
| UN30645 | Rsa1.0_00142.1 | 784  | 121474 | 1.00E-180 | 344  | 352  | 97 -  | 2   | 353  | 90981  | 91332  |   |
| UN30646 | Rsa1.0_08259.1 | 845  | 7641   | 0         | 501  | 516  | 97 +  | 334 | 841  | 78     | 593    |   |
| UN30647 | Rsa1.0_01766.1 | 827  | 39617  | 1.00E-157 | 357  | 386  | 92 +  | 415 | 780  | 26519  | 26902  |   |
| UN30648 | Rsa1.0_13484.1 | 874  | 4782   | 1.00E-86  | 163  | 163  | 100 - | 209 | 371  | 1      | 163    |   |
| UN30649 | Rsa1.0_00586.1 | 536  | 163802 | 0         | 465  | 490  | 94 +  | 40  | 527  | 119194 | 119683 |   |
| UN30650 | Rsa1.0_00214.1 | 1227 | 107508 | 2.33E-156 | 288  | 296  | 97 -  | 189 | 484  | 41899  | 42194  |   |
| UN30651 | Rsa1.0_00821.1 | 838  | 62891  | 0         | 838  | 838  | 100 + | 1   | 838  | 40015  | 40852  |   |
| UN30652 | Rsa1.0_00804.1 | 1259 | 63726  | 0         | 414  | 414  | 100 + | 846 | 1259 | 43890  | 44303  |   |

|         |                |      |        |           |      |      |       |     |      |        |        |
|---------|----------------|------|--------|-----------|------|------|-------|-----|------|--------|--------|
| UN30653 | Rsa1.0_01854.1 | 885  | 38237  | 0         | 689  | 727  | 94 -  | 4   | 718  | 8879   | 9600   |
| UN30654 | Rsa1.0_00135.1 | 856  | 178077 | 0         | 455  | 456  | 99 -  | 7   | 462  | 68959  | 69414  |
| UN30655 | Rsa1.0_01717.1 | 777  | 143162 | 0         | 551  | 558  | 98 -  | 1   | 555  | 29473  | 30030  |
| UN30656 | Rsa1.0_01707.1 | 293  | 40686  | 1.00E-161 | 288  | 288  | 100 - | 6   | 293  | 457    | 744    |
| UN30657 | Rsa1.0_00938.1 | 527  | 193891 | 1.00E-48  | 186  | 215  | 86 +  | 129 | 343  | 180106 | 180320 |
| UN30658 | Rsa1.0_01261.1 | 517  | 49744  | 0         | 324  | 324  | 100 + | 194 | 517  | 46414  | 46737  |
| UN30659 | Rsa1.0_00892.1 | 1514 | 60703  | 0         | 608  | 630  | 96 -  | 813 | 1441 | 19902  | 20526  |
| UN30660 | Rsa1.0_00556.1 | 874  | 207212 | 0         | 448  | 462  | 96 +  | 6   | 466  | 10344  | 10803  |
| UN30661 | Rsa1.0_00450.1 | 880  | 139397 | 0         | 660  | 680  | 97 -  | 1   | 677  | 124390 | 125060 |
| UN30662 | Rsa1.0_00678.1 | 871  | 193163 | 0         | 836  | 877  | 95 +  | 1   | 871  | 5061   | 5931   |
| UN30663 | Rsa1.0_00086.1 | 868  | 439854 | 0         | 867  | 868  | 99 -  | 1   | 868  | 310525 | 311392 |
| UN30664 | Rsa1.0_00710.1 | 1215 | 67325  | 0         | 1006 | 1015 | 99 -  | 1   | 1015 | 43441  | 44455  |
| UN30665 | Rsa1.0_00699.1 | 916  | 184398 | 0         | 916  | 916  | 100 - | 1   | 916  | 173594 | 174509 |
| UN30666 | Rsa1.0_00369.1 | 891  | 266462 | 1.00E-106 | 238  | 252  | 94 +  | 194 | 445  | 203365 | 203616 |
| UN30667 | Rsa1.0_02533.1 | 896  | 30399  | 0         | 420  | 421  | 99 -  | 2   | 422  | 14100  | 14520  |
| UN30668 | Rsa1.0_00089.1 | 1332 | 406142 | 0         | 515  | 516  | 99 +  | 424 | 939  | 353333 | 353848 |
| UN30669 | Rsa1.0_00159.1 | 798  | 431686 | 0         | 796  | 796  | 100 - | 3   | 798  | 31420  | 32215  |
| UN30670 | Rsa1.0_02321.1 | 828  | 32572  | 0         | 828  | 829  | 99 +  | 1   | 828  | 17398  | 18226  |
| UN30671 | Rsa1.0_00387.1 | 965  | 495407 | 0         | 852  | 863  | 98 +  | 1   | 861  | 89588  | 90450  |
| UN30672 | Rsa1.0_01909.1 | 874  | 37417  | 0         | 870  | 872  | 99 +  | 3   | 874  | 26312  | 27183  |
| UN30673 | #              | #    | #      | #         | #    | #    | #     | #   | #    | #      | #      |
| UN30674 | Rsa1.0_00829.1 | 939  | 158305 | 0         | 357  | 357  | 100 - | 578 | 934  | 108304 | 108660 |
| UN30675 | Rsa1.0_00224.1 | 870  | 327530 | 1.00E-104 | 192  | 192  | 100 + | 597 | 788  | 60214  | 60405  |
| UN30676 | Rsa1.0_35572.1 | 567  | 636    | 1.00E-172 | 306  | 306  | 100 + | 262 | 567  | 242    | 547    |
| UN30677 | Rsa1.0_03029.1 | 951  | 25858  | 2.00E-67  | 146  | 151  | 96 +  | 204 | 354  | 12670  | 12820  |
| UN30678 | Rsa1.0_00017.1 | 1163 | 752458 | 0         | 542  | 590  | 91 +  | 601 | 1163 | 63213  | 63797  |
| UN30679 | Rsa1.0_00124.1 | 1342 | 262503 | 0         | 414  | 414  | 100 + | 929 | 1342 | 19648  | 20061  |
| UN30680 | Rsa1.0_01316.1 | 786  | 48325  | 0         | 426  | 426  | 100 + | 361 | 786  | 42403  | 42828  |
| UN30681 | Rsa1.0_01836.1 | 1059 | 38503  | 0         | 1057 | 1058 | 99 +  | 1   | 1057 | 28612  | 29669  |
| UN30682 | #              | #    | #      | #         | #    | #    | #     | #   | #    | #      | #      |
| UN30683 | Rsa1.0_00293.1 | 881  | 339294 | 0         | 394  | 395  | 99 +  | 167 | 561  | 311218 | 311612 |
| UN30684 | Rsa1.0_00253.1 | 716  | 231292 | 0         | 713  | 716  | 99 +  | 1   | 714  | 37287  | 38002  |
| UN30685 | Rsa1.0_00460.1 | 873  | 206387 | 0         | 822  | 845  | 97 -  | 29  | 873  | 56734  | 57578  |
| UN30686 | Rsa1.0_01865.1 | 777  | 37992  | 1.00E-172 | 307  | 307  | 100 + | 5   | 311  | 7096   | 7402   |
| UN30687 | Rsa1.0_00177.1 | 820  | 143394 | 1.00E-173 | 314  | 316  | 99 +  | 1   | 316  | 41301  | 41616  |
| UN30688 | Rsa1.0_00863.1 | 725  | 254535 | 1.00E-119 | 269  | 283  | 95 -  | 212 | 488  | 246432 | 246714 |
| UN30689 | Rsa1.0_00422.1 | 1011 | 86144  | 0         | 971  | 1024 | 94 +  | 1   | 1011 | 19168  | 20182  |
| UN30690 | Rsa1.0_00011.1 | 847  | 225044 | 0         | 756  | 756  | 100 + | 92  | 847  | 168895 | 169650 |
| UN30691 | Rsa1.0_00136.1 | 887  | 122464 | 0         | 557  | 557  | 100 - | 331 | 887  | 65352  | 65908  |

|         |                |      |        |           |      |      |       |   |     |      |        |        |
|---------|----------------|------|--------|-----------|------|------|-------|---|-----|------|--------|--------|
| UN30692 | Rsa1.0_04970.1 | 522  | 15277  | 0         | 513  | 514  | 99 +  |   | 1   | 514  | 10603  | 11116  |
| UN30693 | #              | #    | #      | #         | #    | #    | #     | # | #   | #    | #      | #      |
| UN30694 | Rsa1.0_04344.1 | 888  | 17822  | 0         | 408  | 408  | 100 - |   | 4   | 411  | 16034  | 16441  |
| UN30695 | Rsa1.0_03127.1 | 908  | 25191  | 0         | 900  | 908  | 99 +  |   | 1   | 908  | 21617  | 22524  |
| UN30696 | Rsa1.0_00414.1 | 753  | 202190 | 0         | 582  | 609  | 95 +  |   | 145 | 753  | 181977 | 182585 |
| UN30697 | Rsa1.0_00124.1 | 1276 | 262503 | 0         | 1129 | 1155 | 97 +  |   | 6   | 1153 | 72735  | 73888  |
| UN30698 | Rsa1.0_00123.1 | 882  | 325650 | 0         | 510  | 511  | 99 +  |   | 5   | 515  | 208290 | 208800 |
| UN30699 | #              | #    | #      | #         | #    | #    | #     | # | #   | #    | #      | #      |
| UN30700 | Rsa1.0_03594.1 | 893  | 21868  | 0         | 572  | 582  | 98 -  |   | 1   | 582  | 18686  | 19266  |
| UN30701 | Rsa1.0_30409.1 | 1357 | 754    | 0         | 410  | 410  | 100 - |   | 948 | 1357 | 345    | 754    |
| UN30702 | Rsa1.0_00527.1 | 1079 | 77733  | 0         | 745  | 818  | 91 +  |   | 139 | 943  | 62479  | 63293  |
| UN30703 | Rsa1.0_07874.1 | 1125 | 8375   | 0         | 362  | 365  | 99 -  |   | 759 | 1123 | 6129   | 6493   |
| UN30704 | Rsa1.0_00347.1 | 496  | 93048  | 1.00E-168 | 337  | 348  | 96 -  |   | 155 | 496  | 14611  | 14958  |
| UN30705 | Rsa1.0_03019.1 | 804  | 25987  | 9.00E-63  | 126  | 127  | 99 -  |   | 205 | 331  | 6631   | 6757   |
| UN30706 | Rsa1.0_20352.1 | 593  | 1314   | 4.00E-58  | 128  | 131  | 97 -  |   | 441 | 570  | 1184   | 1314   |
| UN30707 | Rsa1.0_00962.1 | 968  | 184909 | 0         | 962  | 968  | 99 +  |   | 1   | 968  | 41037  | 42004  |
| UN30708 | Rsa1.0_03834.1 | 1353 | 20572  | 0         | 876  | 893  | 98 +  |   | 449 | 1341 | 12302  | 13191  |
| UN30709 | Rsa1.0_00566.1 | 834  | 75325  | 1.00E-103 | 212  | 219  | 96 -  |   | 2   | 220  | 5832   | 6050   |
| UN30710 | Rsa1.0_08933.1 | 490  | 6772   | 0         | 452  | 490  | 92 +  |   | 2   | 482  | 4722   | 5205   |
| UN30711 | Rsa1.0_01045.1 | 1072 | 55853  | 0         | 609  | 611  | 99 -  |   | 1   | 611  | 54343  | 54953  |
| UN30712 | Rsa1.0_00576.1 | 647  | 178949 | 0         | 638  | 648  | 98 -  |   | 2   | 647  | 157357 | 158004 |
| UN30713 | Rsa1.0_00092.1 | 801  | 659932 | 1.00E-145 | 268  | 270  | 99 +  |   | 488 | 757  | 33604  | 33873  |
| UN30714 | Rsa1.0_00803.1 | 796  | 144228 | 0         | 755  | 792  | 95 -  |   | 1   | 792  | 58938  | 59723  |
| UN30715 | Rsa1.0_00752.1 | 924  | 65756  | 1.00E-180 | 377  | 396  | 95 -  |   | 3   | 398  | 42490  | 42885  |
| UN30716 | Rsa1.0_03898.1 | 974  | 20183  | 0         | 491  | 508  | 96 -  |   | 466 | 973  | 9932   | 10436  |
| UN30717 | Rsa1.0_05226.1 | 510  | 14438  | 0         | 506  | 522  | 96 +  |   | 1   | 510  | 10730  | 11251  |
| UN30718 | Rsa1.0_05903.1 | 1027 | 12280  | 0         | 598  | 600  | 99 -  |   | 428 | 1027 | 790    | 1389   |
| UN30719 | Rsa1.0_02544.1 | 704  | 30290  | 0         | 356  | 363  | 98 +  |   | 3   | 365  | 21679  | 22041  |
| UN30720 | Rsa1.0_00270.1 | 454  | 101236 | 0         | 451  | 453  | 99 +  |   | 3   | 454  | 67169  | 67621  |
| UN30721 | Rsa1.0_02246.1 | 422  | 33435  | 0         | 418  | 421  | 99 +  |   | 1   | 420  | 24844  | 25264  |
| UN30722 | Rsa1.0_09023.1 | 600  | 6703   | 0         | 581  | 581  | 100 - |   | 3   | 583  | 5864   | 6444   |
| UN30723 | Rsa1.0_00451.1 | 1057 | 322533 | 0         | 753  | 755  | 99 -  |   | 3   | 757  | 141917 | 142671 |
| UN30724 | Rsa1.0_00775.1 | 845  | 64793  | 0         | 456  | 456  | 100 + |   | 3   | 458  | 54993  | 55448  |
| UN30725 | Rsa1.0_10012.1 | 718  | 6039   | 0         | 677  | 711  | 95 -  |   | 21  | 718  | 5250   | 5959   |
| UN30726 | Rsa1.0_02249.1 | 841  | 33412  | 0         | 834  | 839  | 99 +  |   | 3   | 841  | 11992  | 12826  |
| UN30727 | Rsa1.0_00680.1 | 525  | 68969  | 0         | 521  | 521  | 100 - |   | 3   | 523  | 36984  | 37504  |
| UN30728 | Rsa1.0_01980.1 | 1131 | 36544  | 0         | 1119 | 1130 | 99 +  |   | 2   | 1131 | 22091  | 23220  |
| UN30729 | Rsa1.0_02784.1 | 1159 | 27881  | 0         | 350  | 352  | 99 -  |   | 807 | 1158 | 22168  | 22519  |
| UN30730 | Rsa1.0_00079.1 | 663  | 606987 | 0         | 613  | 682  | 89 +  |   | 3   | 663  | 100569 | 101228 |

|         |                |      |        |           |      |      |       |     |      |        |        |
|---------|----------------|------|--------|-----------|------|------|-------|-----|------|--------|--------|
| UN30731 | Rsa1.0_00221.1 | 1116 | 106972 | 0         | 1106 | 1114 | 99 +  | 2   | 1115 | 44915  | 46028  |
| UN30732 | Rsa1.0_10449.1 | 274  | 5847   | 1.00E-134 | 268  | 274  | 97 +  | 1   | 274  | 4064   | 4335   |
| UN30733 | Rsa1.0_00150.1 | 758  | 154416 | 0         | 745  | 767  | 97 -  | 3   | 758  | 63421  | 64187  |
| UN30734 | Rsa1.0_00884.1 | 1023 | 61150  | 5.00E-99  | 228  | 244  | 93 +  | 65  | 308  | 13042  | 13276  |
| UN30735 | Rsa1.0_01263.1 | 517  | 49703  | 0         | 514  | 515  | 99 -  | 3   | 517  | 16986  | 17500  |
| UN30736 | Rsa1.0_00197.1 | 1107 | 109714 | 1.00E-172 | 336  | 346  | 97 +  | 519 | 864  | 32757  | 33102  |
| UN30737 | Rsa1.0_01119.1 | 944  | 53459  | 0         | 482  | 495  | 97 +  | 452 | 944  | 52162  | 52655  |
| UN30738 | Rsa1.0_00906.1 | 631  | 178966 | 0         | 364  | 365  | 99 -  | 1   | 365  | 137934 | 138298 |
| UN30739 | Rsa1.0_01561.1 | 931  | 43227  | 0         | 462  | 484  | 95 -  | 2   | 478  | 34878  | 35358  |
| UN30740 | Rsa1.0_00350.1 | 641  | 92346  | 0         | 570  | 572  | 99 -  | 70  | 641  | 60541  | 61112  |
| UN30741 | Rsa1.0_01191.1 | 1193 | 51235  | 0         | 486  | 486  | 100 - | 299 | 784  | 8101   | 8586   |
| UN30742 | Rsa1.0_01714.1 | 805  | 40490  | 0         | 380  | 384  | 98 +  | 3   | 386  | 13787  | 14168  |
| UN30743 | Rsa1.0_00397.1 | 405  | 88189  | 1.00E-117 | 226  | 230  | 98 -  | 129 | 358  | 80282  | 80511  |
| UN30744 | Rsa1.0_02730.1 | 1128 | 28385  | 0         | 500  | 501  | 99 +  | 239 | 739  | 391    | 891    |
| UN30745 | Rsa1.0_01530.1 | 1109 | 43820  | 1.00E-163 | 389  | 416  | 93 +  | 54  | 467  | 17742  | 18151  |
| UN30746 | Rsa1.0_01524.1 | 749  | 43949  | 1.00E-132 | 243  | 244  | 99 -  | 344 | 587  | 43705  | 43948  |
| UN30747 | Rsa1.0_02180.1 | 682  | 34176  | 0         | 554  | 567  | 97 -  | 116 | 682  | 9391   | 9957   |
| UN30748 | Rsa1.0_00257.1 | 1109 | 102407 | 0         | 533  | 537  | 99 -  | 344 | 879  | 87541  | 88077  |
| UN30749 | Rsa1.0_00377.1 | 729  | 90038  | 0         | 592  | 606  | 97 -  | 1   | 600  | 69275  | 69880  |
| UN30750 | Rsa1.0_04794.1 | 530  | 15960  | 0         | 524  | 528  | 99 -  | 3   | 530  | 9913   | 10439  |
| UN30751 | Rsa1.0_14621.1 | 763  | 3222   | 0         | 717  | 737  | 97 +  | 14  | 750  | 241    | 977    |
| UN30752 | Rsa1.0_00236.1 | 800  | 104771 | 0         | 473  | 494  | 95 -  | 3   | 495  | 73950  | 74434  |
| UN30753 | Rsa1.0_62057.1 | 885  | 369    | 0         | 365  | 369  | 98 +  | 283 | 651  | 1      | 369    |
| UN30754 | Rsa1.0_05867.1 | 1038 | 12375  | 0         | 1007 | 1056 | 95 -  | 2   | 1036 | 10456  | 11510  |
| UN30755 | Rsa1.0_07999.1 | 788  | 8102   | 0         | 430  | 442  | 97 +  | 179 | 620  | 3639   | 4080   |
| UN30756 | Rsa1.0_00129.1 | 1061 | 126831 | 0         | 421  | 429  | 98 +  | 634 | 1061 | 49407  | 49834  |
| UN30757 | Rsa1.0_00336.1 | 409  | 445051 | 1.00E-154 | 389  | 419  | 92 +  | 3   | 409  | 277280 | 277694 |
| UN30758 | Rsa1.0_05861.1 | 973  | 12391  | 0         | 563  | 628  | 89 +  | 355 | 971  | 10410  | 11029  |
| UN30759 | Rsa1.0_00198.1 | 874  | 222963 | 0         | 686  | 692  | 99 +  | 1   | 692  | 8669   | 9360   |
| UN30760 | Rsa1.0_00303.1 | 1159 | 97468  | 0         | 671  | 691  | 97 -  | 2   | 692  | 6848   | 7538   |
| UN30761 | Rsa1.0_05480.1 | 585  | 13603  | 0         | 505  | 525  | 96 +  | 57  | 579  | 10430  | 10954  |
| UN30762 | Rsa1.0_04561.1 | 1003 | 16849  | 0         | 508  | 536  | 94 -  | 466 | 1001 | 1721   | 2253   |
| UN30763 | Rsa1.0_00239.1 | 1076 | 104332 | 0         | 585  | 600  | 97 -  | 1   | 600  | 4264   | 4863   |
| UN30764 | Rsa1.0_00111.1 | 1123 | 390088 | 0         | 839  | 843  | 99 +  | 279 | 1121 | 363797 | 364639 |
| UN30765 | Rsa1.0_00007.1 | 804  | 239325 | 1.00E-147 | 352  | 376  | 93 -  | 422 | 794  | 16310  | 16684  |
| UN30766 | Rsa1.0_01110.1 | 632  | 195852 | 0         | 384  | 400  | 96 +  | 235 | 632  | 16834  | 17233  |
| UN30767 | Rsa1.0_00919.1 | 464  | 59675  | 3.00E-98  | 215  | 226  | 95 -  | 238 | 463  | 33437  | 33662  |
| UN30768 | Rsa1.0_02269.1 | 783  | 33168  | 8.00E-60  | 124  | 126  | 98 -  | 370 | 495  | 15955  | 16080  |
| UN30769 | Rsa1.0_35888.1 | 667  | 630    | 1.00E-122 | 225  | 226  | 99 -  | 383 | 608  | 206    | 431    |

|         |                |      |        |           |      |      |       |     |      |        |        |
|---------|----------------|------|--------|-----------|------|------|-------|-----|------|--------|--------|
| UN30770 | Rsa1.0.00165.1 | 756  | 116466 | 0         | 386  | 397  | 97 +  | 362 | 756  | 41098  | 41494  |
| UN30771 | Rsa1.0.00219.1 | 667  | 106983 | 0         | 657  | 668  | 98 +  | 1   | 662  | 50211  | 50878  |
| UN30772 | Rsa1.0.00589.1 | 818  | 209965 | 0         | 674  | 678  | 99 -  | 78  | 752  | 181217 | 181894 |
| UN30773 | Rsa1.0.01170.1 | 1277 | 161131 | 0         | 1242 | 1263 | 98 +  | 3   | 1265 | 115816 | 117075 |
| UN30774 | Rsa1.0.02281.1 | 783  | 292576 | 0         | 778  | 785  | 99 -  | 2   | 783  | 155702 | 156485 |
| UN30775 | Rsa1.0.02222.1 | 987  | 152798 | 1.00E-144 | 260  | 260  | 100 + | 727 | 986  | 148326 | 148585 |
| UN30776 | Rsa1.0.06965.1 | 1107 | 10099  | 0         | 427  | 435  | 98 -  | 564 | 998  | 4252   | 4685   |
| UN30777 | Rsa1.0.01196.1 | 933  | 51097  | 0         | 475  | 480  | 98 +  | 456 | 932  | 14696  | 15175  |
| UN30778 | Rsa1.0.03453.1 | 808  | 22810  | 0         | 503  | 503  | 100 - | 304 | 806  | 6776   | 7278   |
| UN30779 | Rsa1.0.05412.1 | 642  | 13836  | 0         | 362  | 365  | 99 +  | 3   | 367  | 7403   | 7767   |
| UN30780 | Rsa1.0.00513.1 | 1216 | 78579  | 0         | 479  | 489  | 97 -  | 731 | 1216 | 73230  | 73717  |
| UN30781 | Rsa1.0.02750.1 | 655  | 28239  | 0         | 391  | 400  | 97 -  | 157 | 556  | 20935  | 21334  |
| UN30782 | Rsa1.0.04686.1 | 746  | 16396  | 0         | 742  | 744  | 99 +  | 3   | 744  | 7276   | 8019   |
| UN30783 | Rsa1.0.00873.1 | 672  | 61459  | 1.00E-117 | 248  | 258  | 96 -  | 30  | 287  | 40819  | 41075  |
| UN30784 | Rsa1.0.02854.1 | 690  | 27274  | 8.00E-26  | 79   | 85   | 92 -  | 202 | 286  | 5567   | 5651   |
| UN30785 | Rsa1.0.16924.1 | 454  | 1989   | 2.00E-78  | 149  | 149  | 100 + | 306 | 454  | 1067   | 1215   |
| UN30786 | Rsa1.0.00071.1 | 966  | 345714 | 0         | 422  | 432  | 97 +  | 536 | 966  | 31690  | 32119  |
| UN30787 | Rsa1.0.08429.1 | 763  | 7370   | 1.00E-123 | 230  | 232  | 99 +  | 92  | 323  | 2892   | 3123   |
| UN30788 | Rsa1.0.00167.1 | 829  | 116000 | 0         | 675  | 711  | 94 -  | 119 | 829  | 95026  | 95734  |
| UN30789 | Rsa1.0.00938.1 | 548  | 193891 | 1.00E-177 | 317  | 318  | 99 +  | 208 | 525  | 46381  | 46698  |
| UN30790 | Rsa1.0.59294.1 | 1233 | 386    | 1.00E-133 | 245  | 246  | 99 +  | 297 | 542  | 141    | 386    |
| UN30791 | Rsa1.0.03434.1 | 535  | 22960  | 0         | 358  | 365  | 98 -  | 171 | 535  | 10064  | 10427  |
| UN30792 | Rsa1.0.07981.1 | 648  | 8132   | 1.00E-113 | 223  | 228  | 97 -  | 3   | 230  | 3939   | 4166   |
| UN30793 | Rsa1.0.00191.1 | 323  | 316976 | 3.00E-94  | 215  | 229  | 93 +  | 94  | 322  | 33938  | 34159  |
| UN30794 | Rsa1.0.14690.1 | 1191 | 3155   | 0         | 1186 | 1191 | 99 +  | 1   | 1191 | 543    | 1733   |
| UN30795 | Rsa1.0.00148.1 | 1049 | 120234 | 0         | 1045 | 1048 | 99 -  | 1   | 1048 | 117532 | 118579 |
| UN30796 | Rsa1.0.00387.1 | 761  | 495407 | 1.00E-147 | 357  | 389  | 91 +  | 46  | 425  | 358361 | 358749 |
| UN30797 | Rsa1.0.01088.1 | 1199 | 54416  | 0         | 483  | 485  | 99 +  | 2   | 486  | 6911   | 7395   |
| UN30798 | Rsa1.0.00804.1 | 685  | 63726  | 0         | 412  | 420  | 98 -  | 1   | 420  | 46215  | 46634  |
| UN30799 | Rsa1.0.35238.1 | 631  | 642    | 1.00E-103 | 252  | 273  | 92 -  | 341 | 611  | 80     | 342    |
| UN30800 | Rsa1.0.02521.1 | 810  | 30562  | 1.00E-103 | 201  | 203  | 99 -  | 608 | 810  | 6591   | 6792   |
| UN30801 | Rsa1.0.08111.1 | 964  | 7888   | 1.00E-62  | 123  | 123  | 100 - | 639 | 761  | 245    | 367    |
| UN30802 | Rsa1.0.00067.1 | 401  | 415055 | 0         | 390  | 405  | 96 -  | 2   | 400  | 58946  | 59350  |
| UN30803 | Rsa1.0.00160.1 | 690  | 346678 | 1.00E-119 | 218  | 218  | 100 - | 3   | 220  | 189148 | 189365 |
| UN30804 | Rsa1.0.01110.1 | 1060 | 195852 | 0         | 1053 | 1057 | 99 -  | 2   | 1058 | 29158  | 30214  |
| UN30805 | Rsa1.0.03439.1 | 1119 | 22930  | 1.00E-169 | 330  | 339  | 97 +  | 3   | 333  | 16684  | 17021  |
| UN30806 | Rsa1.0.04607.1 | 1199 | 16662  | 0         | 980  | 1001 | 97 -  | 3   | 1002 | 6513   | 7507   |
| UN30807 | Rsa1.0.01005.1 | 1305 | 56967  | 0         | 520  | 520  | 100 - | 387 | 906  | 23530  | 24049  |
| UN30808 | Rsa1.0.20488.1 | 875  | 1300   | 8.00E-85  | 169  | 172  | 98 -  | 235 | 406  | 1003   | 1174   |



|         |                |      |        |           |      |      |       |     |      |        |        |
|---------|----------------|------|--------|-----------|------|------|-------|-----|------|--------|--------|
| UN30809 | Rsa1.0.05282.1 | 1010 | 14270  | 0         | 1005 | 1008 | 99 +  | 3   | 1010 | 10479  | 11486  |
| UN30810 | Rsa1.0.00537.1 | 1041 | 186980 | 0         | 493  | 495  | 99 +  | 2   | 496  | 130478 | 130972 |
| UN30811 | Rsa1.0.00863.1 | 630  | 254535 | 0         | 516  | 558  | 92 +  | 88  | 630  | 109792 | 110345 |
| UN30812 | Rsa1.0.00268.1 | 987  | 101470 | 0         | 439  | 441  | 99 -  | 549 | 987  | 1064   | 1504   |
| UN30813 | Rsa1.0.00022.1 | 711  | 200461 | 0         | 707  | 708  | 99 -  | 2   | 709  | 83463  | 84170  |
| UN30814 | Rsa1.0.16805.1 | 1198 | 2030   | 2.00E-46  | 132  | 144  | 91 -  | 426 | 569  | 285    | 428    |
| UN30815 | Rsa1.0.01013.1 | 812  | 56822  | 0         | 382  | 387  | 98 -  | 3   | 389  | 29533  | 29919  |
| UN30816 | Rsa1.0.01718.1 | 751  | 40389  | 2.00E-73  | 141  | 141  | 100 - | 129 | 269  | 39691  | 39831  |
| UN30817 | Rsa1.0.00332.1 | 867  | 94575  | 1.00E-123 | 283  | 305  | 92 -  | 575 | 867  | 77832  | 78136  |
| UN30818 | Rsa1.0.03337.1 | 598  | 23632  | 0         | 352  | 360  | 97 -  | 239 | 598  | 22232  | 22587  |
| UN30819 | Rsa1.0.00760.1 | 395  | 65267  | 1.00E-174 | 361  | 377  | 95 +  | 15  | 389  | 9806   | 10182  |
| UN30820 | Rsa1.0.05058.1 | 747  | 14977  | 0         | 448  | 453  | 98 +  | 291 | 743  | 4436   | 4888   |
| UN30821 | Rsa1.0.00136.1 | 730  | 122464 | 0         | 385  | 398  | 96 +  | 7   | 404  | 83056  | 83453  |
| UN30822 | Rsa1.0.03727.1 | 986  | 21158  | 0         | 525  | 530  | 99 -  | 3   | 532  | 11602  | 12131  |
| UN30823 | Rsa1.0.02559.1 | 738  | 30096  | 0         | 702  | 741  | 94 +  | 2   | 738  | 10833  | 11573  |
| UN30824 | Rsa1.0.00964.1 | 876  | 316648 | 1.00E-111 | 237  | 248  | 95 +  | 1   | 248  | 163982 | 164229 |
| UN30825 | Rsa1.0.05817.1 | 901  | 12552  | 2.00E-88  | 172  | 174  | 98 -  | 481 | 654  | 2902   | 3075   |
| UN30826 | Rsa1.0.05426.1 | 682  | 13793  | 2.00E-17  | 62   | 67   | 92 -  | 296 | 362  | 7273   | 7339   |
| UN30827 | Rsa1.0.00061.1 | 1323 | 218685 | 0         | 1298 | 1322 | 98 +  | 3   | 1321 | 74298  | 75619  |
| UN30828 | Rsa1.0.04925.1 | 875  | 15424  | 6.00E-27  | 73   | 75   | 97 +  | 4   | 78   | 13326  | 13399  |
| UN30829 | Rsa1.0.01301.1 | 728  | 169072 | 2.33E-156 | 274  | 278  | 98 -  | 448 | 725  | 46691  | 46968  |
| UN30830 | Rsa1.0.04219.1 | 1253 | 18421  | 0         | 1240 | 1249 | 99 +  | 5   | 1253 | 7842   | 9088   |
| UN30831 | Rsa1.0.01299.1 | 758  | 162028 | 1.00E-129 | 247  | 251  | 98 +  | 435 | 685  | 2606   | 2856   |
| UN30832 | Rsa1.0.03661.1 | 1180 | 21513  | 0         | 1169 | 1180 | 99 -  | 1   | 1180 | 10459  | 11638  |
| UN30833 | Rsa1.0.01659.1 | 530  | 164577 | 1.00E-137 | 253  | 255  | 99 -  | 275 | 529  | 145492 | 145746 |
| UN30834 | Rsa1.0.00728.1 | 660  | 66704  | 1.00E-119 | 221  | 222  | 99 +  | 1   | 222  | 46812  | 47033  |
| UN30835 | Rsa1.0.00915.1 | 635  | 194446 | 1.00E-149 | 344  | 367  | 93 +  | 279 | 634  | 171278 | 171643 |
| UN30836 | Rsa1.0.03686.1 | 675  | 21387  | 4.00E-92  | 172  | 172  | 100 - | 2   | 173  | 8466   | 8637   |
| UN30837 | Rsa1.0.02426.1 | 748  | 31564  | 1.00E-143 | 277  | 281  | 98 +  | 470 | 748  | 12921  | 13201  |
| UN30838 | Rsa1.0.00081.1 | 1373 | 143261 | 0         | 848  | 859  | 98 +  | 3   | 853  | 132878 | 133736 |
| UN30839 | Rsa1.0.41193.1 | 919  | 545    | 0         | 542  | 545  | 99 -  | 372 | 916  | 1      | 545    |
| UN30840 | Rsa1.0.00884.1 | 1027 | 61150  | 0         | 593  | 606  | 97 -  | 422 | 1027 | 58296  | 58899  |
| UN30841 | Rsa1.0.03846.1 | 704  | 20481  | 1.00E-116 | 223  | 225  | 99 +  | 5   | 228  | 9067   | 9291   |
| UN30842 | Rsa1.0.05893.1 | 1101 | 12306  | 0         | 499  | 506  | 98 +  | 5   | 510  | 5586   | 6091   |
| UN30843 | Rsa1.0.00573.1 | 936  | 74821  | 0         | 825  | 874  | 94 -  | 80  | 936  | 35859  | 36722  |
| UN30844 | Rsa1.0.02664.1 | 1246 | 28917  | 1.00E-166 | 321  | 329  | 97 +  | 530 | 858  | 12787  | 13115  |
| UN30845 | #              | #    | #      | #         | #    | #    | #     | #   | #    | #      | #      |
| UN30846 | Rsa1.0.02434.1 | 1017 | 31464  | 0         | 559  | 616  | 90 -  | 353 | 968  | 24022  | 24632  |
| UN30847 | Rsa1.0.00408.1 | 946  | 176752 | 0         | 771  | 801  | 96 -  | 3   | 792  | 141637 | 142437 |

|         |                |      |        |           |     |     |      |     |     |        |        |
|---------|----------------|------|--------|-----------|-----|-----|------|-----|-----|--------|--------|
| UN30848 | Rsa1.0.00053.1 | 864  | 263459 | 0         | 801 | 845 | 94 + | 2   | 846 | 72517  | 73360  |
| UN30849 | Rsa1.0.00301.1 | 750  | 365315 | 0         | 714 | 735 | 97 - | 5   | 738 | 325708 | 326442 |
| UN30850 | Rsa1.0.00006.1 | 828  | 396176 | 0         | 559 | 571 | 97 - | 55  | 624 | 271218 | 271788 |
| UN30851 | Rsa1.0.00596.1 | 1167 | 73578  | 1.00E-151 | 301 | 311 | 96 - | 340 | 650 | 37725  | 38035  |
| UN30852 | Rsa1.0.00651.1 | 541  | 247766 | 1.00E-174 | 327 | 333 | 98 + | 207 | 539 | 246547 | 246879 |
| UN30853 | Rsa1.0.01013.1 | 656  | 56822  | 0         | 641 | 655 | 97 + | 2   | 656 | 7308   | 7962   |
| UN30854 | Rsa1.0.00239.1 | 1033 | 104332 | 0         | 635 | 681 | 93 - | 4   | 681 | 13031  | 13694  |
| UN30855 | Rsa1.0.66472.1 | 797  | 345    | 1.00E-165 | 298 | 299 | 99 + | 177 | 475 | 1      | 299    |
| UN30856 | Rsa1.0.00823.1 | 617  | 62889  | 1.00E-144 | 315 | 332 | 94 - | 25  | 354 | 51344  | 51672  |
| UN30857 | Rsa1.0.01571.1 | 937  | 43000  | 1.00E-135 | 268 | 276 | 97 - | 660 | 935 | 7205   | 7474   |
| UN30858 | Rsa1.0.00301.1 | 592  | 365315 | 0         | 575 | 593 | 96 + | 2   | 592 | 362067 | 362654 |
| UN30859 | Rsa1.0.02280.1 | 1058 | 33063  | 0         | 538 | 561 | 95 + | 3   | 547 | 7956   | 8516   |
| UN30860 | Rsa1.0.03997.1 | 920  | 19652  | 0         | 465 | 492 | 94 + | 423 | 912 | 5103   | 5585   |
| UN30861 | Rsa1.0.00829.1 | 1154 | 158305 | 0         | 396 | 414 | 95 + | 577 | 987 | 21334  | 21742  |
| UN30862 | Rsa1.0.00295.1 | 921  | 152597 | 0         | 341 | 343 | 99 + | 577 | 919 | 23572  | 23914  |
| UN30863 | Rsa1.0.02223.1 | 961  | 152421 | 0         | 931 | 971 | 95 - | 1   | 961 | 15585  | 16547  |
| UN30864 | Rsa1.0.00240.1 | 516  | 104175 | 0         | 408 | 431 | 94 - | 3   | 430 | 23486  | 23916  |
| UN30865 | Rsa1.0.04124.1 | 1036 | 18945  | 1.00E-68  | 142 | 145 | 97 + | 394 | 538 | 2446   | 2590   |
| UN30866 | Rsa1.0.11103.1 | 1002 | 5614   | 0         | 455 | 491 | 92 - | 72  | 550 | 20     | 510    |
| UN30867 | Rsa1.0.02326.1 | 601  | 32503  | 0         | 478 | 495 | 96 - | 107 | 599 | 24471  | 24960  |
| UN30868 | Rsa1.0.03069.1 | 787  | 25615  | 2.00E-85  | 167 | 169 | 98 - | 151 | 319 | 16220  | 16388  |
| UN30869 | Rsa1.0.00211.1 | 955  | 228189 | 0         | 398 | 412 | 96 + | 544 | 955 | 195298 | 195708 |
| UN30870 | Rsa1.0.00491.1 | 1019 | 80219  | 1.00E-176 | 371 | 390 | 95 + | 574 | 963 | 36491  | 36880  |
| UN30871 | Rsa1.0.05015.1 | 1034 | 15125  | 1.00E-148 | 305 | 318 | 95 + | 390 | 707 | 12406  | 12723  |
| UN30872 | Rsa1.0.00919.1 | 533  | 59675  | 0         | 508 | 536 | 94 + | 3   | 533 | 33405  | 33931  |
| UN30873 | Rsa1.0.15364.1 | 726  | 2655   | 0         | 694 | 711 | 97 + | 3   | 710 | 1360   | 2069   |
| UN30874 | Rsa1.0.00518.1 | 821  | 78360  | 0         | 490 | 524 | 93 + | 314 | 821 | 76366  | 76882  |
| UN30875 | Rsa1.0.00777.1 | 793  | 191865 | 0         | 368 | 380 | 96 - | 372 | 744 | 131820 | 132199 |
| UN30876 | Rsa1.0.01261.1 | 919  | 49744  | 0         | 878 | 938 | 93 + | 4   | 919 | 7528   | 8465   |
| UN30877 | Rsa1.0.00359.1 | 335  | 91256  | 1.00E-113 | 279 | 303 | 92 + | 1   | 303 | 22446  | 22733  |
| UN30878 | Rsa1.0.68490.1 | 495  | 335    | 1.00E-147 | 279 | 283 | 98 - | 172 | 454 | 1      | 281    |
| UN30879 | Rsa1.0.01424.1 | 786  | 46139  | 1.00E-153 | 313 | 325 | 96 - | 445 | 767 | 16210  | 16534  |
| UN30880 | Rsa1.0.33613.1 | 1009 | 674    | 0         | 647 | 680 | 95 + | 295 | 969 | 1      | 674    |
| UN30881 | Rsa1.0.04522.1 | 639  | 16988  | 1.00E-42  | 100 | 103 | 97 - | 206 | 305 | 6149   | 6251   |
| UN30882 | Rsa1.0.55710.1 | 857  | 410    | 0         | 407 | 410 | 99 - | 314 | 723 | 1      | 410    |
| UN30883 | Rsa1.0.04268.1 | 559  | 18189  | 0         | 550 | 559 | 98 + | 2   | 559 | 5951   | 6509   |
| UN30884 | Rsa1.0.08559.1 | 885  | 7197   | 0         | 393 | 402 | 97 + | 484 | 885 | 1292   | 1685   |
| UN30885 | Rsa1.0.00949.1 | 613  | 58549  | 0         | 608 | 615 | 98 - | 1   | 613 | 12778  | 13390  |
| UN30886 | Rsa1.0.02488.1 | 671  | 30913  | 0         | 621 | 622 | 99 - | 42  | 663 | 1422   | 2043   |

|         |                |      |        |           |      |      |       |     |      |        |        |
|---------|----------------|------|--------|-----------|------|------|-------|-----|------|--------|--------|
| UN30887 | Rsa1.0_04670.1 | 1116 | 16453  | 0         | 586  | 633  | 92 -  | 497 | 1116 | 15277  | 15898  |
| UN30888 | Rsa1.0_00017.1 | 637  | 752458 | 1.00E-139 | 257  | 259  | 99 -  | 379 | 637  | 391671 | 391929 |
| UN30889 | Rsa1.0_00476.1 | 471  | 280966 | 0         | 430  | 458  | 93 -  | 2   | 459  | 19255  | 19697  |
| UN30890 | Rsa1.0_40227.1 | 801  | 558    | 1.00E-95  | 202  | 210  | 96 +  | 378 | 587  | 321    | 530    |
| UN30891 | Rsa1.0_01524.1 | 672  | 43949  | 1.00E-111 | 226  | 232  | 97 -  | 1   | 232  | 10439  | 10669  |
| UN30892 | Rsa1.0_01652.1 | 840  | 41579  | 0         | 838  | 840  | 99 -  | 1   | 840  | 35040  | 35879  |
| UN30893 | Rsa1.0_00091.1 | 785  | 139699 | 1.00E-137 | 308  | 328  | 93 +  | 274 | 601  | 84565  | 84892  |
| UN30894 | Rsa1.0_00083.1 | 1097 | 442773 | 1.00E-176 | 383  | 410  | 93 -  | 685 | 1094 | 391297 | 391689 |
| UN30895 | Rsa1.0_05276.1 | 759  | 14287  | 1.00E-178 | 316  | 316  | 100 + | 235 | 550  | 9155   | 9470   |
| UN30896 | Rsa1.0_00775.1 | 630  | 64793  | 0         | 577  | 625  | 92 -  | 1   | 618  | 55011  | 55622  |
| UN30897 | Rsa1.0_05105.1 | 600  | 14833  | 1.00E-163 | 331  | 342  | 96 -  | 12  | 351  | 6175   | 6510   |
| UN30898 | Rsa1.0_04430.1 | 872  | 17392  | 1.00E-52  | 176  | 199  | 88 +  | 24  | 222  | 13241  | 13435  |
| UN30899 | Rsa1.0_49682.1 | 683  | 457    | 1.00E-139 | 270  | 275  | 98 +  | 407 | 681  | 1      | 274    |
| UN30900 | Rsa1.0_03292.1 | 728  | 23977  | 0         | 428  | 440  | 97 +  | 291 | 728  | 10302  | 10741  |
| UN30901 | Rsa1.0_00003.1 | 765  | 340054 | 0         | 762  | 765  | 99 +  | 1   | 765  | 269859 | 270623 |
| UN30902 | Rsa1.0_00089.1 | 1155 | 406142 | 0         | 892  | 921  | 96 -  | 238 | 1155 | 356303 | 357223 |
| UN30903 | Rsa1.0_00053.1 | 1215 | 263459 | 0         | 521  | 571  | 91 +  | 1   | 570  | 192722 | 193292 |
| UN30904 | Rsa1.0_04097.1 | 263  | 19090  | 1.00E-31  | 76   | 78   | 97 -  | 10  | 87   | 14551  | 14628  |
| UN30905 | Rsa1.0_01905.1 | 637  | 37450  | 3.00E-59  | 201  | 230  | 87 +  | 114 | 343  | 21327  | 21543  |
| UN30906 | Rsa1.0_02235.1 | 635  | 33615  | 0         | 602  | 632  | 95 +  | 2   | 632  | 8709   | 9334   |
| UN30907 | Rsa1.0_00009.1 | 703  | 232558 | 0         | 547  | 562  | 97 +  | 1   | 560  | 97021  | 97580  |
| UN30908 | Rsa1.0_09522.1 | 701  | 6316   | 2.00E-51  | 188  | 216  | 87 -  | 486 | 701  | 5073   | 5288   |
| UN30909 | Rsa1.0_00008.1 | 1089 | 358124 | 0         | 765  | 779  | 98 -  | 185 | 963  | 281924 | 282702 |
| UN30910 | Rsa1.0_00827.1 | 829  | 62790  | 1.00E-168 | 350  | 366  | 95 +  | 102 | 464  | 52062  | 52427  |
| UN30911 | Rsa1.0_00215.1 | 658  | 201775 | 0         | 477  | 504  | 94 +  | 137 | 639  | 80357  | 80839  |
| UN30912 | Rsa1.0_03133.1 | 937  | 25135  | 1.00E-143 | 354  | 382  | 92 -  | 53  | 427  | 2494   | 2869   |
| UN30913 | Rsa1.0_00097.1 | 726  | 138858 | 0         | 511  | 541  | 94 +  | 1   | 541  | 92757  | 93297  |
| UN30914 | Rsa1.0_49110.1 | 1162 | 462    | 0         | 369  | 375  | 98 -  | 4   | 378  | 58     | 432    |
| UN30915 | Rsa1.0_00526.1 | 675  | 169279 | 6.00E-88  | 371  | 429  | 86 +  | 249 | 666  | 166675 | 167081 |
| UN30916 | Rsa1.0_00060.1 | 1090 | 502678 | 0         | 604  | 654  | 92 -  | 412 | 1062 | 371451 | 372079 |
| UN30917 | Rsa1.0_00706.1 | 676  | 291570 | 1.00E-168 | 314  | 319  | 98 -  | 12  | 330  | 254181 | 254499 |
| UN30918 | Rsa1.0_04255.1 | 702  | 18257  | 0         | 345  | 346  | 99 +  | 3   | 348  | 12092  | 12437  |
| UN30919 | Rsa1.0_00159.1 | 651  | 431686 | 4.00E-18  | 51   | 52   | 98 +  | 588 | 639  | 375176 | 375227 |
| UN30920 | Rsa1.0_00056.1 | 803  | 332604 | 0         | 434  | 471  | 92 -  | 345 | 803  | 59986  | 60456  |
| UN30921 | Rsa1.0_01048.1 | 478  | 55684  | 1.00E-165 | 359  | 377  | 95 +  | 103 | 478  | 33708  | 34081  |
| UN30922 | Rsa1.0_02165.1 | 673  | 34423  | 0         | 442  | 454  | 97 +  | 34  | 485  | 4890   | 5342   |
| UN30923 | Rsa1.0_05117.1 | 1195 | 14801  | 0         | 1148 | 1192 | 96 -  | 11  | 1195 | 4113   | 5298   |
| UN30924 | Rsa1.0_00108.1 | 654  | 478491 | 0         | 444  | 455  | 97 -  | 200 | 653  | 57346  | 57800  |
| UN30925 | Rsa1.0_06119.1 | 736  | 11693  | 0         | 603  | 603  | 100 - | 134 | 736  | 822    | 1424   |

|         |                |      |        |           |      |      |      |     |      |        |        |
|---------|----------------|------|--------|-----------|------|------|------|-----|------|--------|--------|
| UN30926 | Rsa1.0_10207.1 | 806  | 5943   | 0         | 755  | 795  | 94 + | 2   | 795  | 4695   | 5488   |
| UN30927 | Rsa1.0_14305.1 | 765  | 3554   | 0         | 523  | 558  | 93 + | 193 | 743  | 1354   | 1910   |
| UN30928 | Rsa1.0_07931.1 | 1139 | 8236   | 0         | 603  | 631  | 95 - | 1   | 625  | 4611   | 5240   |
| UN30929 | Rsa1.0_04440.1 | 716  | 17347  | 0         | 673  | 733  | 91 - | 5   | 713  | 14094  | 14807  |
| UN30930 | Rsa1.0_00037.1 | 827  | 307838 | 0         | 551  | 577  | 95 - | 233 | 809  | 41494  | 42067  |
| UN30931 | Rsa1.0_02480.1 | 448  | 31036  | 1.00E-117 | 223  | 226  | 98 + | 223 | 448  | 12697  | 12922  |
| UN30932 | Rsa1.0_01728.1 | 1076 | 40239  | 0         | 1072 | 1076 | 99 - | 2   | 1076 | 1417   | 2492   |
| UN30933 | Rsa1.0_00196.1 | 345  | 109960 | 1.00E-129 | 321  | 344  | 93 + | 3   | 345  | 96724  | 97061  |
| UN30934 | Rsa1.0_08211.1 | 867  | 7714   | 0         | 840  | 866  | 96 - | 2   | 867  | 3348   | 4212   |
| UN30935 | Rsa1.0_00269.1 | 495  | 341668 | 0         | 373  | 376  | 99 - | 120 | 495  | 308058 | 308433 |
| UN30936 | Rsa1.0_05942.1 | 1215 | 12158  | 0         | 1180 | 1220 | 96 - | 2   | 1215 | 6841   | 8058   |
| UN30937 | Rsa1.0_05146.1 | 1263 | 14678  | 0         | 713  | 725  | 98 - | 4   | 728  | 6424   | 7148   |
| UN30938 | Rsa1.0_00632.1 | 724  | 183777 | 1.00E-180 | 383  | 406  | 94 + | 1   | 396  | 150808 | 151203 |
| UN30939 | Rsa1.0_02034.1 | 376  | 35823  | 1.00E-142 | 303  | 318  | 95 - | 1   | 317  | 32444  | 32755  |
| UN30940 | Rsa1.0_00257.1 | 779  | 102407 | 0         | 731  | 776  | 94 + | 7   | 779  | 86014  | 86774  |
| UN30941 | Rsa1.0_02445.1 | 683  | 31345  | 0         | 484  | 511  | 94 + | 171 | 680  | 24849  | 25359  |
| UN30942 | Rsa1.0_00829.1 | 1158 | 158305 | 0         | 483  | 535  | 90 - | 1   | 519  | 110820 | 111335 |
| UN30943 | Rsa1.0_00028.1 | 606  | 293984 | 1.00E-175 | 317  | 319  | 99 - | 271 | 589  | 5039   | 5357   |
| UN30944 | Rsa1.0_00307.1 | 468  | 199003 | 0         | 457  | 460  | 99 + | 5   | 463  | 9300   | 9759   |
| UN30945 | Rsa1.0_01334.1 | 744  | 47904  | 1.00E-180 | 325  | 327  | 99 + | 1   | 327  | 2245   | 2571   |
| UN30946 | Rsa1.0_00055.1 | 407  | 520193 | 0         | 406  | 408  | 99 + | 1   | 406  | 328781 | 329188 |
| UN30947 | Rsa1.0_11762.1 | 1333 | 5416   | 0         | 1000 | 1011 | 98 + | 2   | 1012 | 2550   | 3557   |
| UN30948 | Rsa1.0_02575.1 | 1327 | 29944  | 0         | 1301 | 1335 | 97 + | 2   | 1327 | 16365  | 17698  |
| UN30949 | Rsa1.0_00049.1 | 813  | 167018 | 0         | 476  | 480  | 99 - | 334 | 813  | 135336 | 135815 |
| UN30950 | Rsa1.0_01354.1 | 964  | 47342  | 0         | 939  | 961  | 97 - | 2   | 962  | 38882  | 39842  |
| UN30951 | Rsa1.0_02939.1 | 887  | 26595  | 0         | 346  | 353  | 98 + | 155 | 507  | 10680  | 11032  |
| UN30952 | Rsa1.0_01099.1 | 912  | 158481 | 1.00E-152 | 285  | 289  | 98 + | 307 | 595  | 13222  | 13510  |
| UN30953 | Rsa1.0_11038.1 | 1040 | 5639   | 0         | 708  | 723  | 97 + | 325 | 1040 | 4516   | 5237   |
| UN30954 | Rsa1.0_02043.1 | 918  | 163754 | 0         | 584  | 585  | 99 - | 334 | 918  | 149658 | 150242 |
| UN30955 | Rsa1.0_06732.1 | 636  | 10449  | 0         | 516  | 544  | 94 + | 96  | 636  | 8112   | 8652   |
| UN30956 | Rsa1.0_00193.1 | 1134 | 194198 | 0         | 1074 | 1140 | 94 + | 2   | 1134 | 111959 | 113083 |
| UN30957 | Rsa1.0_02715.1 | 1002 | 28466  | 1.00E-120 | 222  | 223  | 99 - | 4   | 226  | 24208  | 24430  |
| UN30958 | Rsa1.0_00751.1 | 825  | 65759  | 0         | 756  | 759  | 99 - | 68  | 825  | 26330  | 27087  |
| UN30959 | Rsa1.0_01552.1 | 531  | 43396  | 0         | 477  | 484  | 98 + | 47  | 530  | 39872  | 40355  |
| UN30960 | Rsa1.0_03764.1 | 665  | 20971  | 0         | 557  | 561  | 99 - | 105 | 665  | 9790   | 10350  |
| UN30961 | Rsa1.0_01163.1 | 787  | 51946  | 1.00E-178 | 424  | 458  | 92 - | 10  | 462  | 6090   | 6547   |
| UN30962 | Rsa1.0_21518.1 | 823  | 1196   | 0         | 536  | 537  | 99 - | 1   | 537  | 1      | 537    |
| UN30963 | Rsa1.0_00193.1 | 848  | 194198 | 0         | 691  | 693  | 99 + | 1   | 693  | 140759 | 141451 |
| UN30964 | Rsa1.0_05412.1 | 841  | 13836  | 0         | 817  | 853  | 95 + | 1   | 841  | 1630   | 2479   |

| UN30965 | #              | #    | #      | #         | #    | #    | #     | #   | #    | #      | #      | # |
|---------|----------------|------|--------|-----------|------|------|-------|-----|------|--------|--------|---|
| UN30966 | Rsa1.0_09288.1 | 810  | 6494   | 0         | 680  | 695  | 97 +  | 115 | 807  | 1      | 693    |   |
| UN30967 | Rsa1.0_00071.1 | 859  | 345714 | 0         | 376  | 385  | 97 +  | 475 | 859  | 20482  | 20864  |   |
| UN30968 | Rsa1.0_01387.1 | 623  | 46745  | 0         | 414  | 415  | 99 -  | 1   | 415  | 34576  | 34990  |   |
| UN30969 | Rsa1.0_00505.1 | 901  | 79323  | 0         | 489  | 522  | 93 +  | 389 | 901  | 2831   | 3350   |   |
| UN30970 | Rsa1.0_00148.1 | 781  | 120234 | 0         | 763  | 780  | 97 +  | 3   | 781  | 55372  | 56145  |   |
| UN30971 | Rsa1.0_00627.1 | 742  | 71566  | 6.00E-79  | 285  | 330  | 86 -  | 368 | 684  | 25354  | 25671  |   |
| UN30972 | Rsa1.0_18364.1 | 461  | 1614   | 5.00E-97  | 202  | 209  | 96 -  | 257 | 461  | 687    | 895    |   |
| UN30973 | Rsa1.0_01528.1 | 1062 | 43882  | 0         | 466  | 488  | 95 +  | 3   | 488  | 19179  | 19663  |   |
| UN30974 | Rsa1.0_04519.1 | 1126 | 17004  | 1.00E-159 | 452  | 508  | 88 +  | 2   | 503  | 5986   | 6493   |   |
| UN30975 | Rsa1.0_00004.1 | 1055 | 253996 | 0         | 399  | 399  | 100 + | 657 | 1055 | 168690 | 169088 |   |
| UN30976 | Rsa1.0_00399.1 | 812  | 242951 | 1.00E-166 | 323  | 332  | 97 -  | 13  | 344  | 53810  | 54135  |   |
| UN30977 | Rsa1.0_01006.1 | 782  | 163670 | 0         | 480  | 495  | 96 -  | 289 | 782  | 31332  | 31816  |   |
| UN30978 | Rsa1.0_00377.1 | 803  | 90038  | 6.00E-70  | 159  | 163  | 97 -  | 577 | 736  | 2740   | 2902   |   |
| UN30979 | Rsa1.0_00426.1 | 725  | 85668  | 1.00E-128 | 239  | 240  | 99 -  | 487 | 725  | 35357  | 35596  |   |
| UN30980 | Rsa1.0_00816.1 | 419  | 403350 | 1.00E-132 | 242  | 243  | 99 -  | 175 | 417  | 374931 | 375173 |   |
| UN30981 | Rsa1.0_00019.1 | 529  | 301669 | 0         | 351  | 354  | 99 -  | 1   | 354  | 38258  | 38609  |   |
| UN30982 | Rsa1.0_01364.1 | 742  | 47172  | 6.00E-79  | 165  | 170  | 97 +  | 305 | 474  | 18800  | 18969  |   |
| UN30983 | Rsa1.0_14340.1 | 1059 | 3501   | 0         | 453  | 482  | 93 -  | 578 | 1059 | 294    | 770    |   |
| UN30984 | Rsa1.0_00538.1 | 941  | 77149  | 0         | 937  | 939  | 99 -  | 2   | 940  | 35869  | 36807  |   |
| UN30985 | Rsa1.0_00010.1 | 733  | 294827 | 0         | 365  | 366  | 99 +  | 41  | 406  | 119769 | 120134 |   |
| UN30986 | Rsa1.0_09206.1 | 770  | 6558   | 0         | 592  | 611  | 96 +  | 152 | 760  | 1      | 610    |   |
| UN30987 | Rsa1.0_01112.1 | 555  | 310601 | 1.00E-106 | 272  | 294  | 92 -  | 1   | 291  | 48635  | 48926  |   |
| UN30988 | Rsa1.0_07757.1 | 1028 | 8633   | 0         | 1015 | 1029 | 98 -  | 3   | 1028 | 4080   | 5107   |   |
| UN30989 | Rsa1.0_00566.1 | 582  | 75325  | 0         | 509  | 539  | 94 +  | 1   | 535  | 3121   | 3659   |   |
| UN30990 | Rsa1.0_00056.1 | 634  | 332604 | 0         | 489  | 489  | 100 + | 2   | 490  | 114302 | 114790 |   |
| UN30991 | Rsa1.0_00037.1 | 748  | 307838 | 1.00E-166 | 303  | 305  | 99 -  | 376 | 680  | 288128 | 288432 |   |
| UN30992 | Rsa1.0_00205.1 | 845  | 193401 | 1.00E-147 | 317  | 330  | 96 +  | 1   | 328  | 40402  | 40726  |   |
| UN30993 | Rsa1.0_02297.1 | 1081 | 160804 | 1.00E-50  | 125  | 131  | 95 -  | 944 | 1073 | 5011   | 5141   |   |
| UN30994 | Rsa1.0_00911.1 | 721  | 59943  | 1.00E-159 | 285  | 285  | 100 - | 1   | 285  | 38655  | 38939  |   |
| UN30995 | Rsa1.0_00502.1 | 725  | 204180 | 0         | 566  | 567  | 99 -  | 1   | 567  | 74440  | 75006  |   |
| UN30996 | Rsa1.0_00114.1 | 703  | 131330 | 3.00E-93  | 287  | 318  | 90 -  | 3   | 309  | 10782  | 11095  |   |
| UN30997 | Rsa1.0_01095.1 | 1381 | 54276  | 0         | 634  | 646  | 98 +  | 121 | 766  | 43621  | 44266  |   |
| UN30998 | Rsa1.0_02043.1 | 904  | 163754 | 0         | 901  | 903  | 99 -  | 2   | 904  | 2526   | 3428   |   |
| UN30999 | Rsa1.0_00348.1 | 796  | 92818  | 0         | 761  | 790  | 96 +  | 3   | 784  | 16001  | 16789  |   |
| UN31000 | Rsa1.0_02374.1 | 579  | 32043  | 1.00E-148 | 266  | 266  | 100 - | 314 | 579  | 17410  | 17675  |   |
| UN31001 | Rsa1.0_00731.1 | 922  | 66638  | 0         | 830  | 853  | 97 +  | 80  | 922  | 38528  | 39376  |   |
| UN31002 | Rsa1.0_00088.1 | 862  | 141341 | 4.00E-96  | 179  | 179  | 100 - | 232 | 410  | 12667  | 12845  |   |
| UN31003 | Rsa1.0_06610.1 | 795  | 10669  | 5.00E-86  | 165  | 166  | 99 +  | 3   | 168  | 10504  | 10669  |   |

|         |                |      |        |           |      |      |       |     |      |        |        |
|---------|----------------|------|--------|-----------|------|------|-------|-----|------|--------|--------|
| UN31004 | Rsa1.0.03487.1 | 705  | 22564  | 0         | 398  | 398  | 100 - | 2   | 399  | 1708   | 2105   |
| UN31005 | Rsa1.0.00107.1 | 1250 | 431659 | 1.00E-151 | 271  | 271  | 100 + | 455 | 725  | 7683   | 7953   |
| UN31006 | Rsa1.0.01182.1 | 670  | 167304 | 2.00E-72  | 203  | 222  | 91 +  | 3   | 217  | 155001 | 155221 |
| UN31007 | Rsa1.0.01331.1 | 979  | 47944  | 1.00E-159 | 318  | 330  | 96 +  | 3   | 332  | 44225  | 44546  |
| UN31008 | Rsa1.0_10012.1 | 783  | 6039   | 1.00E-129 | 246  | 250  | 98 +  | 459 | 708  | 4200   | 4449   |
| UN31009 | Rsa1.0_02117.1 | 876  | 34843  | 0         | 734  | 738  | 99 +  | 19  | 756  | 22956  | 23693  |
| UN31010 | Rsa1.0.00925.1 | 715  | 59481  | 0         | 656  | 683  | 96 +  | 39  | 715  | 23753  | 24435  |
| UN31011 | Rsa1.0.03140.1 | 550  | 25081  | 0         | 534  | 553  | 96 -  | 2   | 550  | 19479  | 20027  |
| UN31012 | Rsa1.0.00364.1 | 764  | 90951  | 0         | 717  | 736  | 97 -  | 3   | 732  | 49913  | 50648  |
| UN31013 | Rsa1.0.03632.1 | 1250 | 21645  | 0         | 906  | 970  | 93 -  | 2   | 956  | 11309  | 12275  |
| UN31014 | Rsa1.0.00053.1 | 713  | 263459 | 1.00E-125 | 276  | 291  | 94 +  | 397 | 687  | 95872  | 96156  |
| UN31015 | Rsa1.0.02001.1 | 1064 | 36198  | 1.00E-121 | 415  | 479  | 86 -  | 44  | 517  | 20235  | 20694  |
| UN31016 | Rsa1.0.03754.1 | 774  | 21005  | 1.00E-119 | 323  | 355  | 90 +  | 1   | 349  | 6401   | 6745   |
| UN31017 | Rsa1.0_12113.1 | 1230 | 5312   | 0         | 499  | 531  | 93 +  | 572 | 1089 | 1      | 531    |
| UN31018 | Rsa1.0.07943.1 | 759  | 8207   | 0         | 478  | 481  | 99 -  | 279 | 759  | 1226   | 1706   |
| UN31019 | Rsa1.0.00093.1 | 772  | 214962 | 0         | 724  | 771  | 93 +  | 2   | 772  | 183972 | 184733 |
| UN31020 | Rsa1.0.01878.1 | 653  | 37768  | 1.00E-18  | 80   | 89   | 89 -  | 463 | 551  | 21506  | 21593  |
| UN31021 | Rsa1.0.24802.1 | 951  | 967    | 0         | 524  | 531  | 98 +  | 1   | 531  | 341    | 871    |
| UN31022 | Rsa1.0.00101.1 | 739  | 267193 | 3.00E-93  | 384  | 441  | 87 -  | 287 | 709  | 110609 | 111046 |
| UN31023 | Rsa1.0.00655.1 | 890  | 195840 | 0         | 423  | 447  | 94 -  | 452 | 890  | 131154 | 131600 |
| UN31024 | Rsa1.0.01624.1 | 681  | 42064  | 1.00E-168 | 312  | 316  | 98 +  | 366 | 681  | 3604   | 3919   |
| UN31025 | Rsa1.0_11321.1 | 946  | 5543   | 0         | 599  | 611  | 98 -  | 335 | 944  | 536    | 1146   |
| UN31026 | Rsa1.0_02036.1 | 678  | 35731  | 0         | 660  | 703  | 93 -  | 2   | 677  | 11903  | 12605  |
| UN31027 | Rsa1.0_31951.1 | 878  | 714    | 0         | 703  | 713  | 98 -  | 109 | 821  | 2      | 714    |
| UN31028 | Rsa1.0.00122.1 | 539  | 265937 | 0         | 526  | 536  | 98 -  | 5   | 539  | 6817   | 7350   |
| UN31029 | Rsa1.0.31155.1 | 1149 | 735    | 0         | 385  | 385  | 100 - | 765 | 1149 | 96     | 480    |
| UN31030 | Rsa1.0.00250.1 | 685  | 273771 | 0         | 451  | 461  | 97 +  | 225 | 685  | 212475 | 212932 |
| UN31031 | Rsa1.0.00131.1 | 672  | 432233 | 0         | 598  | 627  | 95 -  | 26  | 648  | 177622 | 178245 |
| UN31032 | Rsa1.0.01628.1 | 873  | 41932  | 1.00E-18  | 86   | 97   | 88 -  | 228 | 323  | 26358  | 26454  |
| UN31033 | Rsa1.0.00626.1 | 591  | 71582  | 1.00E-105 | 194  | 194  | 100 - | 1   | 194  | 49728  | 49921  |
| UN31034 | Rsa1.0.01803.1 | 761  | 173846 | 1.00E-134 | 274  | 281  | 97 -  | 3   | 283  | 147871 | 148146 |
| UN31035 | Rsa1.0.00284.1 | 1033 | 323267 | 2.33E-156 | 281  | 287  | 97 +  | 527 | 813  | 243413 | 243699 |
| UN31036 | Rsa1.0.00107.1 | 1073 | 431659 | 0         | 1068 | 1070 | 99 -  | 2   | 1071 | 135941 | 137010 |
| UN31037 | Rsa1.0.05282.1 | 737  | 14270  | 1.00E-156 | 504  | 570  | 88 +  | 177 | 736  | 12646  | 13206  |
| UN31038 | Rsa1.0.00521.1 | 784  | 78191  | 1.00E-143 | 407  | 456  | 89 +  | 330 | 783  | 76300  | 76755  |
| UN31039 | Rsa1.0.01891.1 | 771  | 37530  | 0         | 400  | 400  | 100 + | 371 | 770  | 11913  | 12312  |
| UN31040 | Rsa1.0.00549.1 | 920  | 76473  | 0         | 885  | 941  | 94 +  | 2   | 920  | 33492  | 34429  |
| UN31041 | Rsa1.0.02341.1 | 549  | 32387  | 0         | 534  | 545  | 97 -  | 3   | 547  | 10814  | 11349  |
| UN31042 | Rsa1.0_00484.1 | 1005 | 203294 | 3.00E-97  | 219  | 231  | 94 +  | 755 | 985  | 123429 | 123656 |

|         |                |      |        |           |      |      |       |     |      |        |        |
|---------|----------------|------|--------|-----------|------|------|-------|-----|------|--------|--------|
| UN31043 | Rsa1.0.00685.1 | 1014 | 68515  | 0         | 367  | 375  | 97 +  | 640 | 1014 | 2413   | 2787   |
| UN31044 | Rsa1.0.00524.1 | 997  | 169613 | 0         | 587  | 599  | 97 +  | 290 | 888  | 98830  | 99428  |
| UN31045 | Rsa1.0.03953.1 | 572  | 19889  | 2.00E-72  | 172  | 183  | 93 -  | 193 | 375  | 1426   | 1608   |
| UN31046 | Rsa1.0.01092.1 | 1147 | 54348  | 0         | 1128 | 1143 | 98 +  | 2   | 1144 | 24234  | 25376  |
| UN31047 | Rsa1.0.02712.1 | 934  | 28474  | 0         | 774  | 795  | 97 -  | 144 | 934  | 15883  | 16677  |
| UN31048 | Rsa1.0.06056.1 | 621  | 137271 | 0         | 582  | 610  | 95 +  | 15  | 620  | 129312 | 129914 |
| UN31049 | Rsa1.0.00433.1 | 607  | 85381  | 0         | 366  | 367  | 99 -  | 240 | 606  | 67046  | 67412  |
| UN31050 | Rsa1.0.00494.1 | 590  | 79967  | 0         | 573  | 589  | 97 +  | 2   | 590  | 23574  | 24162  |
| UN31051 | Rsa1.0.00044.1 | 498  | 271658 | 1.00E-147 | 300  | 314  | 95 -  | 194 | 496  | 234018 | 234331 |
| UN31052 | Rsa1.0.00130.1 | 673  | 125737 | 4.00E-77  | 147  | 147  | 100 + | 1   | 147  | 15079  | 15225  |
| UN31053 | #              | #    | #      | #         | #    | #    | #     | #   | #    | #      | #      |
| UN31054 | Rsa1.0.01760.1 | 1240 | 39730  | 0         | 1182 | 1260 | 93 +  | 1   | 1240 | 5693   | 6930   |
| UN31055 | Rsa1.0.00087.1 | 1170 | 761073 | 1.00E-147 | 273  | 276  | 98 +  | 126 | 401  | 74696  | 74971  |
| UN31056 | Rsa1.0.00421.1 | 975  | 86365  | 1.00E-175 | 320  | 323  | 99 -  | 653 | 975  | 50442  | 50764  |
| UN31057 | Rsa1.0.00651.1 | 1223 | 247766 | 0         | 352  | 352  | 100 + | 2   | 353  | 216833 | 217184 |
| UN31058 | Rsa1.0.16905.1 | 880  | 1994   | 9.00E-97  | 212  | 221  | 95 -  | 665 | 880  | 1021   | 1241   |
| UN31059 | Rsa1.0.01173.1 | 540  | 51727  | 1.00E-155 | 277  | 277  | 100 - | 264 | 540  | 10384  | 10660  |
| UN31060 | Rsa1.0.00898.1 | 914  | 202772 | 0         | 532  | 544  | 97 -  | 220 | 763  | 36724  | 37267  |
| UN31061 | Rsa1.0.00243.1 | 659  | 103651 | 1.00E-129 | 322  | 348  | 92 -  | 258 | 604  | 92376  | 92718  |
| UN31062 | Rsa1.0.00278.1 | 727  | 231896 | 1.00E-143 | 293  | 304  | 96 -  | 427 | 727  | 84959  | 85262  |
| UN31063 | Rsa1.0.01638.1 | 759  | 41857  | 1.00E-157 | 329  | 342  | 96 +  | 419 | 758  | 7697   | 8038   |
| UN31064 | Rsa1.0.08652.1 | 671  | 7081   | 0         | 349  | 351  | 99 +  | 320 | 670  | 6527   | 6877   |
| UN31065 | Rsa1.0.13008.1 | 1290 | 5047   | 0         | 870  | 874  | 99 -  | 3   | 876  | 1455   | 2328   |
| UN31066 | Rsa1.0.01701.1 | 1029 | 162121 | 1.00E-127 | 278  | 291  | 95 -  | 3   | 291  | 22280  | 22569  |
| UN31067 | Rsa1.0.01108.1 | 780  | 53865  | 0         | 438  | 448  | 97 +  | 333 | 780  | 25560  | 26007  |
| UN31068 | Rsa1.0.02241.1 | 706  | 33520  | 0         | 695  | 708  | 98 +  | 1   | 706  | 21482  | 22186  |
| UN31069 | Rsa1.0.02430.1 | 1123 | 31506  | 0         | 674  | 694  | 97 +  | 430 | 1123 | 25830  | 26522  |
| UN31070 | Rsa1.0.04727.1 | 1029 | 16216  | 0         | 411  | 417  | 98 -  | 3   | 419  | 448    | 864    |
| UN31071 | Rsa1.0.00516.1 | 637  | 78417  | 1.00E-174 | 315  | 317  | 99 -  | 315 | 631  | 32829  | 33145  |
| UN31072 | Rsa1.0.01200.1 | 868  | 50895  | 1.00E-153 | 347  | 371  | 93 -  | 485 | 854  | 1165   | 1526   |
| UN31073 | Rsa1.0.08720.1 | 995  | 7001   | 0         | 762  | 764  | 99 +  | 232 | 995  | 1      | 763    |
| UN31074 | Rsa1.0.06208.1 | 1168 | 11492  | 0         | 991  | 1006 | 98 +  | 163 | 1166 | 9308   | 10313  |
| UN31075 | Rsa1.0.00714.1 | 683  | 67187  | 0         | 443  | 454  | 97 +  | 3   | 456  | 1266   | 1716   |
| UN31076 | Rsa1.0.01036.1 | 782  | 55978  | 1.00E-151 | 293  | 299  | 97 -  | 3   | 300  | 13317  | 13615  |
| UN31077 | Rsa1.0.00680.1 | 718  | 68969  | 0         | 663  | 726  | 91 -  | 2   | 718  | 43899  | 44624  |
| UN31078 | Rsa1.0.03249.1 | 865  | 146254 | 0         | 861  | 864  | 99 -  | 2   | 865  | 9635   | 10498  |
| UN31079 | Rsa1.0.00127.1 | 682  | 127446 | 1.00E-113 | 207  | 207  | 100 + | 93  | 299  | 82222  | 82428  |
| UN31080 | Rsa1.0.00089.1 | 1306 | 406142 | 0         | 657  | 658  | 99 -  | 6   | 663  | 276706 | 277363 |
| UN31081 | Rsa1.0.09176.1 | 1047 | 6579   | 1.00E-22  | 137  | 164  | 83 +  | 3   | 166  | 5797   | 5960   |

|         |                |      |        |           |      |      |       |     |      |        |        |
|---------|----------------|------|--------|-----------|------|------|-------|-----|------|--------|--------|
| UN31082 | Rsa1.0_04630.1 | 727  | 16595  | 0         | 473  | 476  | 99 +  | 241 | 716  | 12551  | 13026  |
| UN31083 | Rsa1.0_13988.1 | 1157 | 3954   | 1.00E-157 | 285  | 286  | 99 +  | 421 | 706  | 1369   | 1654   |
| UN31084 | Rsa1.0_00573.1 | 1377 | 74821  | 0         | 1355 | 1374 | 98 +  | 2   | 1375 | 42090  | 43463  |
| UN31085 | Rsa1.0_00251.1 | 811  | 303968 | 0         | 809  | 810  | 99 -  | 2   | 811  | 157852 | 158661 |
| UN31086 | Rsa1.0_01497.1 | 1161 | 44559  | 0         | 929  | 930  | 99 +  | 232 | 1161 | 6535   | 7464   |
| UN31087 | Rsa1.0_06124.1 | 1000 | 11681  | 0         | 608  | 613  | 99 -  | 388 | 1000 | 10574  | 11186  |
| UN31088 | Rsa1.0_02761.1 | 936  | 28151  | 0         | 930  | 936  | 99 -  | 2   | 936  | 12049  | 12984  |
| UN31089 | Rsa1.0_02116.1 | 678  | 34853  | 0         | 655  | 682  | 96 -  | 1   | 678  | 15450  | 16131  |
| UN31090 | Rsa1.0_00725.1 | 744  | 66757  | 0         | 399  | 406  | 98 +  | 209 | 614  | 19779  | 20184  |
| UN31091 | Rsa1.0_14943.1 | 1164 | 2944   | 0         | 427  | 438  | 97 +  | 1   | 438  | 1837   | 2272   |
| UN31092 | Rsa1.0_01007.1 | 722  | 56933  | 0         | 716  | 720  | 99 +  | 2   | 721  | 34897  | 35615  |
| UN31093 | Rsa1.0_00531.1 | 623  | 77387  | 1.00E-92  | 196  | 203  | 96 -  | 232 | 431  | 26303  | 26505  |
| UN31094 | Rsa1.0_00197.1 | 713  | 109714 | 1.00E-30  | 143  | 169  | 84 -  | 327 | 481  | 10242  | 10410  |
| UN31095 | Rsa1.0_00205.1 | 805  | 193401 | 0         | 709  | 737  | 96 +  | 4   | 730  | 57606  | 58339  |
| UN31096 | Rsa1.0_00876.1 | 567  | 61328  | 0         | 521  | 541  | 96 -  | 1   | 539  | 35058  | 35598  |
| UN31097 | Rsa1.0_02159.1 | 1237 | 34471  | 0         | 1221 | 1240 | 98 +  | 1   | 1236 | 27371  | 28605  |
| UN31098 | Rsa1.0_00632.1 | 590  | 183777 | 0         | 390  | 394  | 98 +  | 1   | 394  | 150810 | 151203 |
| UN31099 | Rsa1.0_00087.1 | 713  | 761073 | 0         | 556  | 571  | 97 -  | 146 | 713  | 561153 | 561722 |
| UN31100 | Rsa1.0_01792.1 | 599  | 39227  | 0         | 386  | 404  | 95 -  | 200 | 599  | 16595  | 16997  |
| UN31101 | Rsa1.0_02349.1 | 911  | 32312  | 0         | 556  | 557  | 99 +  | 3   | 559  | 14954  | 15510  |
| UN31102 | Rsa1.0_00741.1 | 472  | 66117  | 2.00E-93  | 208  | 216  | 96 -  | 5   | 219  | 20620  | 20831  |
| UN31103 | Rsa1.0_04516.1 | 1071 | 17018  | 0         | 452  | 455  | 99 -  | 2   | 454  | 2760   | 3214   |
| UN31104 | Rsa1.0_02228.1 | 697  | 33688  | 0         | 422  | 441  | 95 +  | 239 | 678  | 9745   | 10185  |
| UN31105 | Rsa1.0_00193.1 | 643  | 194198 | 0         | 435  | 436  | 99 -  | 208 | 643  | 129201 | 129636 |
| UN31106 | Rsa1.0_04854.1 | 901  | 131560 | 7.00E-70  | 144  | 147  | 97 +  | 624 | 770  | 10474  | 10620  |
| UN31107 | Rsa1.0_01982.1 | 483  | 36530  | 0         | 468  | 483  | 96 -  | 3   | 483  | 30261  | 30743  |
| UN31108 | Rsa1.0_00420.1 | 797  | 86496  | 0         | 510  | 534  | 95 -  | 157 | 672  | 41205  | 41738  |
| UN31109 | Rsa1.0_38397.1 | 505  | 586    | 1.00E-151 | 278  | 279  | 99 +  | 225 | 503  | 9      | 286    |
| UN31110 | Rsa1.0_00654.1 | 1169 | 70012  | 0         | 1164 | 1168 | 99 -  | 3   | 1168 | 38173  | 39340  |
| UN31111 | Rsa1.0_03394.1 | 1360 | 23247  | 0         | 409  | 416  | 98 -  | 945 | 1360 | 617    | 1032   |
| UN31112 | Rsa1.0_02107.1 | 807  | 34940  | 0         | 772  | 816  | 94 +  | 3   | 807  | 28059  | 28874  |
| UN31113 | Rsa1.0_02252.1 | 766  | 33375  | 0         | 665  | 700  | 95 -  | 69  | 766  | 11092  | 11785  |
| UN31114 | Rsa1.0_01505.1 | 876  | 44382  | 0         | 872  | 874  | 99 +  | 3   | 876  | 42125  | 42998  |
| UN31115 | Rsa1.0_00224.1 | 651  | 327530 | 0         | 619  | 643  | 96 +  | 4   | 644  | 211270 | 211911 |
| UN31116 | Rsa1.0_08323.1 | 1000 | 7540   | 0         | 994  | 999  | 99 -  | 1   | 998  | 1380   | 2377   |
| UN31117 | Rsa1.0_00170.1 | 662  | 179538 | 0         | 661  | 665  | 99 -  | 1   | 662  | 143505 | 144168 |
| UN31118 | Rsa1.0_00571.1 | 1133 | 329018 | 0         | 1108 | 1137 | 97 -  | 2   | 1133 | 31145  | 32280  |
| UN31119 | Rsa1.0_00310.1 | 251  | 96852  | 1.00E-128 | 231  | 231  | 100 - | 21  | 251  | 82487  | 82717  |
| UN31120 | Rsa1.0_01600.1 | 774  | 42537  | 1.00E-101 | 226  | 236  | 95 -  | 544 | 774  | 37535  | 37769  |



|         |                |      |        |           |      |      |       |     |      |        |        |
|---------|----------------|------|--------|-----------|------|------|-------|-----|------|--------|--------|
| UN31121 | Rsa1.0_01322.1 | 867  | 48166  | 0         | 639  | 639  | 100 + | 229 | 867  | 20315  | 20953  |
| UN31122 | Rsa1.0_09054.1 | 576  | 6680   | 2.00E-47  | 318  | 387  | 82 -  | 187 | 573  | 5198   | 5578   |
| UN31123 | Rsa1.0_15547.1 | 772  | 2549   | 0         | 339  | 345  | 98 -  | 4   | 348  | 1      | 345    |
| UN31124 | Rsa1.0_11694.1 | 1150 | 131228 | 0         | 881  | 884  | 99 -  | 267 | 1150 | 127811 | 128694 |
| UN31125 | Rsa1.0_00008.1 | 753  | 358124 | 0         | 743  | 751  | 98 +  | 3   | 753  | 295975 | 296725 |
| UN31126 | Rsa1.0_00302.1 | 767  | 97521  | 0         | 372  | 373  | 99 +  | 394 | 766  | 71445  | 71817  |
| UN31127 | Rsa1.0_00404.1 | 903  | 87635  | 1.00E-162 | 289  | 289  | 100 + | 613 | 901  | 8664   | 8952   |
| UN31128 | Rsa1.0_01293.1 | 747  | 49139  | 5.00E-92  | 184  | 188  | 97 -  | 313 | 500  | 33345  | 33532  |
| UN31129 | Rsa1.0_01254.1 | 644  | 49801  | 0         | 628  | 650  | 96 +  | 3   | 644  | 11747  | 12396  |
| UN31130 | Rsa1.0_00092.1 | 957  | 659932 | 0         | 863  | 873  | 98 +  | 1   | 873  | 654894 | 655765 |
| UN31131 | Rsa1.0_07831.1 | 688  | 8461   | 0         | 475  | 486  | 97 +  | 203 | 688  | 3963   | 4446   |
| UN31132 | Rsa1.0_00156.1 | 1031 | 118383 | 0         | 371  | 384  | 96 -  | 3   | 386  | 38466  | 38849  |
| UN31133 | Rsa1.0_03741.1 | 679  | 143933 | 0         | 391  | 403  | 97 -  | 277 | 679  | 11172  | 11574  |
| UN31134 | Rsa1.0_00036.1 | 774  | 176186 | 0         | 519  | 524  | 99 +  | 3   | 526  | 171539 | 172062 |
| UN31135 | Rsa1.0_00069.1 | 801  | 403561 | 1.00E-141 | 261  | 263  | 99 +  | 210 | 472  | 145729 | 145991 |
| UN31136 | #              | #    | #      | #         | #    | #    | #     | #   | #    | #      | #      |
| UN31137 | #              | #    | #      | #         | #    | #    | #     | #   | #    | #      | #      |
| UN31138 | Rsa1.0_04831.1 | 566  | 15799  | 1.00E-140 | 266  | 270  | 98 -  | 301 | 566  | 670    | 939    |
| UN31139 | Rsa1.0_02124.1 | 792  | 34780  | 0         | 492  | 496  | 99 -  | 297 | 792  | 7431   | 7926   |
| UN31140 | Rsa1.0_00576.1 | 969  | 178949 | 1.00E-157 | 291  | 294  | 98 +  | 3   | 296  | 36371  | 36664  |
| UN31141 | Rsa1.0_00153.1 | 653  | 192931 | 2.00E-94  | 197  | 204  | 96 +  | 134 | 337  | 76726  | 76929  |
| UN31142 | Rsa1.0_04196.1 | 1276 | 18515  | 3.00E-39  | 212  | 251  | 84 -  | 152 | 395  | 4502   | 4740   |
| UN31143 | Rsa1.0_00904.1 | 1223 | 180594 | 0         | 1036 | 1051 | 98 +  | 172 | 1222 | 7046   | 8096   |
| UN31144 | Rsa1.0_01514.1 | 995  | 44222  | 0         | 988  | 993  | 99 -  | 3   | 995  | 8065   | 9057   |
| UN31145 | Rsa1.0_00190.1 | 1214 | 318240 | 0         | 528  | 550  | 96 +  | 3   | 550  | 42025  | 42574  |
| UN31146 | Rsa1.0_00213.1 | 1254 | 108167 | 0         | 1230 | 1251 | 98 -  | 4   | 1252 | 34721  | 35959  |
| UN31147 | Rsa1.0_03225.1 | 721  | 24500  | 0         | 713  | 714  | 99 -  | 7   | 720  | 10591  | 11304  |
| UN31148 | Rsa1.0_00507.1 | 641  | 79074  | 0         | 507  | 538  | 94 +  | 104 | 641  | 50148  | 50684  |
| UN31149 | Rsa1.0_06168.1 | 1030 | 11580  | 1.00E-147 | 264  | 264  | 100 + | 767 | 1030 | 10865  | 11128  |
| UN31150 | Rsa1.0_51981.1 | 232  | 437    | 1.00E-12  | 47   | 50   | 94 -  | 131 | 180  | 45     | 94     |
| UN31151 | Rsa1.0_00763.1 | 1060 | 65121  | 0         | 1021 | 1038 | 98 -  | 22  | 1059 | 53638  | 54675  |
| UN31152 | Rsa1.0_54570.1 | 820  | 418    | 8.00E-57  | 113  | 113  | 100 + | 3   | 115  | 292    | 404    |
| UN31153 | Rsa1.0_00564.1 | 777  | 75428  | 3.00E-50  | 108  | 110  | 98 +  | 386 | 495  | 64144  | 64253  |
| UN31154 | Rsa1.0_07706.1 | 828  | 8752   | 0         | 539  | 568  | 94 +  | 271 | 828  | 3315   | 3876   |
| UN31155 | Rsa1.0_01285.1 | 508  | 172709 | 0         | 446  | 464  | 96 +  | 1   | 463  | 35379  | 35838  |
| UN31156 | Rsa1.0_00805.1 | 674  | 63724  | 0         | 344  | 345  | 99 +  | 329 | 673  | 12227  | 12570  |
| UN31157 | Rsa1.0_04155.1 | 641  | 134772 | 1.00E-144 | 334  | 358  | 93 +  | 1   | 352  | 130515 | 130871 |
| UN31158 | Rsa1.0_00798.1 | 520  | 63945  | 1.00E-153 | 275  | 275  | 100 - | 2   | 276  | 62189  | 62463  |
| UN31159 | Rsa1.0_00843.1 | 679  | 62411  | 1.00E-140 | 282  | 291  | 96 +  | 1   | 291  | 52662  | 52949  |

|         |                |      |        |           |      |      |       |     |      |        |        |
|---------|----------------|------|--------|-----------|------|------|-------|-----|------|--------|--------|
| UN31160 | Rsa1.0_00765.1 | 963  | 65029  | 6.00E-86  | 174  | 178  | 97 -  | 468 | 645  | 33947  | 34124  |
| UN31161 | Rsa1.0_00305.1 | 771  | 97308  | 0         | 636  | 641  | 99 +  | 131 | 771  | 13826  | 14466  |
| UN31162 | Rsa1.0_00223.1 | 597  | 106231 | 0         | 587  | 601  | 97 -  | 1   | 596  | 102653 | 103252 |
| UN31163 | Rsa1.0_13662.1 | 986  | 4542   | 0         | 566  | 624  | 90 -  | 269 | 892  | 3531   | 4154   |
| UN31164 | Rsa1.0_00078.1 | 863  | 175053 | 0         | 844  | 862  | 97 +  | 4   | 863  | 53609  | 54464  |
| UN31165 | Rsa1.0_01990.1 | 831  | 36431  | 1.00E-117 | 340  | 380  | 89 -  | 3   | 357  | 34873  | 35248  |
| UN31166 | Rsa1.0_02460.1 | 882  | 31169  | 0         | 562  | 579  | 97 -  | 3   | 572  | 6428   | 7006   |
| UN31167 | Rsa1.0_04734.1 | 791  | 16184  | 1.00E-103 | 242  | 257  | 94 -  | 484 | 740  | 14821  | 15073  |
| UN31168 | Rsa1.0_02987.1 | 841  | 26196  | 0         | 410  | 428  | 95 +  | 198 | 625  | 22775  | 23202  |
| UN31169 | Rsa1.0_30575.1 | 416  | 750    | 0         | 408  | 415  | 98 +  | 2   | 416  | 174    | 588    |
| UN31170 | Rsa1.0_00070.1 | 1079 | 150321 | 1.00E-150 | 275  | 277  | 99 -  | 137 | 413  | 5395   | 5671   |
| UN31171 | Rsa1.0_00519.1 | 799  | 197864 | 1.00E-154 | 327  | 341  | 95 -  | 5   | 343  | 19688  | 20023  |
| UN31172 | Rsa1.0_00504.1 | 743  | 79334  | 7.00E-85  | 229  | 253  | 90 -  | 3   | 255  | 29524  | 29763  |
| UN31173 | Rsa1.0_76051.1 | 1293 | 302    | 1.00E-19  | 72   | 79   | 91 +  | 5   | 83   | 30     | 108    |
| UN31174 | Rsa1.0_00729.1 | 1002 | 66690  | 0         | 951  | 1009 | 94 +  | 3   | 1000 | 64383  | 65385  |
| UN31175 | Rsa1.0_00113.1 | 537  | 131574 | 0         | 363  | 366  | 99 +  | 172 | 537  | 35466  | 35831  |
| UN31176 | Rsa1.0_00198.1 | 507  | 222963 | 1.00E-168 | 309  | 312  | 99 +  | 196 | 507  | 69717  | 70028  |
| UN31177 | Rsa1.0_02906.1 | 976  | 26866  | 0         | 489  | 490  | 99 -  | 487 | 976  | 7277   | 7766   |
| UN31178 | Rsa1.0_09279.1 | 963  | 6501   | 0         | 339  | 340  | 99 -  | 340 | 679  | 3001   | 3340   |
| UN31179 | Rsa1.0_00041.1 | 1394 | 186197 | 0         | 679  | 718  | 94 +  | 2   | 719  | 38062  | 38779  |
| UN31180 | Rsa1.0_00601.1 | 1163 | 177045 | 0         | 478  | 479  | 99 -  | 2   | 480  | 21593  | 22071  |
| UN31181 | Rsa1.0_00481.1 | 918  | 81316  | 0         | 686  | 708  | 96 +  | 2   | 705  | 68069  | 68773  |
| UN31182 | Rsa1.0_35401.1 | 725  | 639    | 0         | 387  | 389  | 99 -  | 25  | 413  | 251    | 639    |
| UN31183 | Rsa1.0_01243.1 | 1373 | 50061  | 0         | 507  | 507  | 100 + | 867 | 1373 | 47547  | 48053  |
| UN31184 | Rsa1.0_01164.1 | 398  | 51934  | 1.00E-136 | 360  | 398  | 90 +  | 2   | 398  | 49982  | 50360  |
| UN31185 | Rsa1.0_01962.1 | 829  | 153412 | 0         | 346  | 351  | 98 +  | 477 | 827  | 15561  | 15911  |
| UN31186 | Rsa1.0_00002.1 | 363  | 601661 | 1.00E-141 | 254  | 254  | 100 + | 110 | 363  | 172221 | 172474 |
| UN31187 | Rsa1.0_00342.1 | 491  | 93695  | 1.00E-159 | 285  | 285  | 100 + | 207 | 491  | 46790  | 47074  |
| UN31188 | Rsa1.0_23319.1 | 1012 | 1057   | 0         | 948  | 1011 | 93 +  | 5   | 1012 | 15     | 1017   |
| UN31189 | Rsa1.0_03248.1 | 395  | 24368  | 0         | 392  | 392  | 100 + | 2   | 393  | 1019   | 1410   |
| UN31190 | Rsa1.0_00128.1 | 335  | 228675 | 1.00E-123 | 256  | 266  | 96 -  | 63  | 327  | 180396 | 180654 |
| UN31191 | Rsa1.0_00298.1 | 688  | 349131 | 0         | 684  | 688  | 99 -  | 2   | 688  | 168616 | 169303 |
| UN31192 | Rsa1.0_00666.1 | 623  | 69505  | 0         | 621  | 622  | 99 -  | 3   | 623  | 31270  | 31891  |
| UN31193 | Rsa1.0_00596.1 | 662  | 73578  | 1.00E-153 | 312  | 326  | 95 +  | 337 | 662  | 66874  | 67189  |
| UN31194 | Rsa1.0_01141.1 | 1282 | 52530  | 0         | 1281 | 1285 | 99 -  | 1   | 1282 | 29862  | 31146  |
| UN31195 | Rsa1.0_04210.1 | 1132 | 18442  | 0         | 510  | 559  | 91 +  | 8   | 564  | 16015  | 16556  |
| UN31196 | Rsa1.0_00473.1 | 805  | 212204 | 1.00E-122 | 253  | 262  | 96 +  | 3   | 264  | 80442  | 80697  |
| UN31197 | Rsa1.0_00450.1 | 591  | 139397 | 1.00E-166 | 316  | 323  | 97 +  | 276 | 591  | 122996 | 123318 |
| UN31198 | Rsa1.0_03898.1 | 457  | 20183  | 1.00E-136 | 396  | 444  | 89 +  | 1   | 441  | 6080   | 6497   |

|         |                |      |        |           |     |     |      |     |      |        |        |
|---------|----------------|------|--------|-----------|-----|-----|------|-----|------|--------|--------|
| UN31199 | Rsa1.0_00045.1 | 798  | 328694 | 0         | 493 | 498 | 98 + | 300 | 797  | 314632 | 315129 |
| UN31200 | Rsa1.0_00566.1 | 654  | 75325  | 0         | 585 | 605 | 96 + | 1   | 600  | 64556  | 65159  |
| UN31201 | Rsa1.0_01163.1 | 806  | 51946  | 2.00E-66  | 155 | 165 | 93 + | 2   | 157  | 3394   | 3558   |
| UN31202 | Rsa1.0_00243.1 | 511  | 103651 | 1.00E-155 | 287 | 290 | 98 - | 219 | 508  | 56212  | 56501  |
| UN31203 | Rsa1.0_05890.1 | 694  | 12317  | 0         | 414 | 420 | 98 - | 275 | 694  | 2070   | 2489   |
| UN31204 | Rsa1.0_00483.1 | 745  | 81102  | 7.00E-82  | 288 | 331 | 87 - | 25  | 345  | 63959  | 64288  |
| UN31205 | Rsa1.0_00722.1 | 1151 | 66840  | 2.00E-21  | 96  | 110 | 87 - | 213 | 322  | 4312   | 4421   |
| UN31206 | Rsa1.0_00472.1 | 476  | 398134 | 0         | 476 | 477 | 99 + | 1   | 476  | 11751  | 12227  |
| UN31207 | Rsa1.0_00351.1 | 1030 | 413096 | 0         | 535 | 537 | 99 - | 494 | 1030 | 139805 | 140341 |
| UN31208 | Rsa1.0_01704.1 | 1207 | 40711  | 0         | 369 | 378 | 97 - | 5   | 382  | 15880  | 16257  |
| UN31209 | Rsa1.0_02470.1 | 964  | 31108  | 0         | 494 | 504 | 98 + | 463 | 964  | 7071   | 7567   |
| UN31210 | #              | #    | #      | #         | #   | #   | #    | #   | #    | #      | #      |
| UN31211 | Rsa1.0_11075.1 | 837  | 5625   | 0         | 487 | 495 | 98 + | 343 | 837  | 4243   | 4737   |
| UN31212 | Rsa1.0_07437.1 | 519  | 9394   | 0         | 484 | 506 | 95 - | 4   | 508  | 6952   | 7446   |
| UN31213 | Rsa1.0_01072.1 | 776  | 55068  | 5.00E-92  | 195 | 200 | 97 - | 558 | 755  | 43313  | 43512  |
| UN31214 | Rsa1.0_02392.1 | 710  | 152517 | 0         | 696 | 711 | 97 - | 1   | 710  | 4037   | 4743   |
| UN31215 | Rsa1.0_06115.1 | 848  | 11714  | 0         | 678 | 733 | 92 - | 2   | 729  | 10767  | 11495  |
| UN31216 | Rsa1.0_00136.1 | 725  | 122464 | 1.00E-124 | 349 | 387 | 90 - | 54  | 426  | 67294  | 67678  |
| UN31217 | Rsa1.0_00009.1 | 781  | 232558 | 0         | 748 | 777 | 96 - | 7   | 781  | 88456  | 89227  |
| UN31218 | Rsa1.0_19447.1 | 602  | 1430   | 1.00E-112 | 243 | 255 | 95 + | 166 | 420  | 159    | 410    |
| UN31219 | Rsa1.0_03454.1 | 927  | 149870 | 1.00E-114 | 226 | 231 | 97 - | 177 | 403  | 139613 | 139843 |
| UN31220 | Rsa1.0_02312.1 | 1160 | 32675  | 1.00E-123 | 257 | 264 | 97 - | 869 | 1131 | 17792  | 18052  |
| UN31221 | Rsa1.0_00454.1 | 772  | 216970 | 1.00E-122 | 270 | 284 | 95 - | 1   | 283  | 186626 | 186905 |
| UN31222 | Rsa1.0_01070.1 | 917  | 55099  | 0         | 724 | 755 | 95 - | 2   | 756  | 1391   | 2142   |
| UN31223 | Rsa1.0_01705.1 | 625  | 40710  | 0         | 585 | 624 | 93 + | 2   | 625  | 17610  | 18233  |
| UN31224 | Rsa1.0_00463.1 | 765  | 189177 | 0         | 365 | 379 | 96 + | 1   | 379  | 174729 | 175107 |
| UN31225 | Rsa1.0_08675.1 | 473  | 7054   | 0         | 435 | 467 | 93 + | 3   | 469  | 5745   | 6202   |
| UN31226 | Rsa1.0_04146.1 | 1096 | 18833  | 0         | 426 | 458 | 93 + | 18  | 471  | 17759  | 18202  |
| UN31227 | Rsa1.0_01752.1 | 988  | 39805  | 0         | 504 | 522 | 96 + | 467 | 988  | 29661  | 30182  |
| UN31228 | Rsa1.0_27781.1 | 731  | 840    | 0         | 342 | 344 | 99 + | 388 | 731  | 373    | 716    |
| UN31229 | Rsa1.0_00407.1 | 1066 | 191544 | 0         | 584 | 625 | 93 - | 1   | 610  | 52956  | 53580  |
| UN31230 | Rsa1.0_02716.1 | 638  | 28465  | 1.00E-67  | 149 | 155 | 96 + | 304 | 458  | 1935   | 2089   |
| UN31231 | Rsa1.0_07673.1 | 984  | 8850   | 0         | 599 | 630 | 95 - | 358 | 984  | 1467   | 2092   |
| UN31232 | Rsa1.0_08412.1 | 765  | 7404   | 0         | 500 | 524 | 95 - | 237 | 759  | 6270   | 6790   |
| UN31233 | Rsa1.0_07701.1 | 801  | 8758   | 0         | 515 | 529 | 97 + | 3   | 529  | 4615   | 5142   |
| UN31234 | Rsa1.0_00278.1 | 702  | 231896 | 1.00E-126 | 249 | 254 | 98 - | 450 | 702  | 152617 | 152870 |
| UN31235 | Rsa1.0_00220.1 | 837  | 192936 | 0         | 797 | 831 | 95 + | 4   | 834  | 11841  | 12666  |
| UN31236 | Rsa1.0_07560.1 | 725  | 9129   | 0         | 620 | 630 | 98 + | 96  | 725  | 7115   | 7744   |
| UN31237 | Rsa1.0_00985.1 | 520  | 161950 | 1.00E-139 | 298 | 314 | 94 + | 2   | 315  | 36157  | 36470  |

|         |                |      |        |           |      |      |       |      |      |        |        |
|---------|----------------|------|--------|-----------|------|------|-------|------|------|--------|--------|
| UN31238 | Rsa1.0.00387.1 | 796  | 495407 | 1.00E-144 | 316  | 331  | 95 +  | 1    | 325  | 389802 | 390130 |
| UN31239 | Rsa1.0.00543.1 | 746  | 76788  | 1.00E-148 | 334  | 349  | 95 -  | 61   | 405  | 52007  | 52352  |
| UN31240 | Rsa1.0.01000.1 | 1052 | 57140  | 1.00E-111 | 217  | 221  | 98 -  | 6    | 226  | 31822  | 32042  |
| UN31241 | Rsa1.0.09173.1 | 817  | 6582   | 1.00E-124 | 258  | 266  | 96 -  | 2    | 266  | 3328   | 3592   |
| UN31242 | Rsa1.0.00030.1 | 428  | 250988 | 2.00E-50  | 108  | 110  | 98 -  | 83   | 192  | 243053 | 243162 |
| UN31243 | Rsa1.0.01358.1 | 780  | 47278  | 0         | 534  | 541  | 98 -  | 212  | 747  | 1905   | 2445   |
| UN31244 | Rsa1.0.00611.1 | 1197 | 72410  | 0         | 1155 | 1192 | 96 -  | 6    | 1197 | 9434   | 10612  |
| UN31245 | Rsa1.0.05802.1 | 517  | 12591  | 0         | 404  | 427  | 94 +  | 101  | 517  | 12139  | 12564  |
| UN31246 | Rsa1.0.04083.1 | 784  | 19174  | 1.00E-30  | 172  | 205  | 83 -  | 100  | 303  | 7095   | 7299   |
| UN31247 | Rsa1.0.03738.1 | 403  | 21071  | 4.00E-63  | 188  | 204  | 92 +  | 201  | 403  | 7493   | 7689   |
| UN31248 | Rsa1.0.00180.1 | 1016 | 114581 | 0         | 947  | 1046 | 90 -  | 3    | 1014 | 100318 | 101339 |
| UN31249 | Rsa1.0.00023.1 | 791  | 194764 | 1.00E-177 | 314  | 314  | 100 - | 1    | 314  | 3993   | 4306   |
| UN31250 | Rsa1.0.00557.1 | 1092 | 75865  | 0         | 368  | 377  | 97 +  | 716  | 1092 | 46582  | 46957  |
| UN31251 | Rsa1.0.01717.1 | 765  | 143162 | 0         | 744  | 769  | 96 +  | 2    | 765  | 126973 | 127741 |
| UN31252 | Rsa1.0.02777.1 | 1053 | 27986  | 1.00E-87  | 186  | 193  | 96 -  | 439  | 631  | 26183  | 26375  |
| UN31253 | Rsa1.0.02252.1 | 559  | 33375  | 0         | 537  | 565  | 95 -  | 2    | 559  | 9800   | 10362  |
| UN31254 | Rsa1.0.04543.1 | 784  | 16929  | 1.00E-162 | 307  | 312  | 98 +  | 129  | 440  | 9499   | 9808   |
| UN31255 | Rsa1.0.01543.1 | 791  | 43645  | 1.00E-142 | 278  | 284  | 97 -  | 505  | 787  | 7903   | 8186   |
| UN31256 | Rsa1.0.00931.1 | 1199 | 59210  | 1.00E-177 | 365  | 380  | 96 -  | 827  | 1199 | 37389  | 37765  |
| UN31257 | Rsa1.0.00964.1 | 1204 | 316648 | 0         | 1135 | 1226 | 92 +  | 7    | 1204 | 272421 | 273634 |
| UN31258 | Rsa1.0.02300.1 | 926  | 32847  | 1.00E-154 | 391  | 420  | 93 +  | 517  | 926  | 25098  | 25514  |
| UN31259 | Rsa1.0.03329.1 | 1114 | 23676  | 7.00E-49  | 161  | 180  | 89 -  | 607  | 785  | 3653   | 3832   |
| UN31260 | Rsa1.0.00480.1 | 1105 | 81325  | 0         | 1101 | 1123 | 98 +  | 2    | 1105 | 18294  | 19416  |
| UN31261 | Rsa1.0.00097.1 | 752  | 138858 | 0         | 707  | 755  | 93 +  | 4    | 751  | 103546 | 104300 |
| UN31262 | Rsa1.0.04116.1 | 725  | 18971  | 0         | 385  | 395  | 97 -  | 333  | 725  | 11626  | 12019  |
| UN31263 | Rsa1.0.09178.1 | 601  | 6578   | 2.00E-57  | 126  | 130  | 96 +  | 117  | 246  | 5863   | 5992   |
| UN31264 | Rsa1.0.00627.1 | 180  | 71566  | 5.00E-64  | 143  | 148  | 96 +  | 31   | 178  | 60022  | 60168  |
| UN31265 | Rsa1.0.25067.1 | 1214 | 953    | 0         | 853  | 885  | 96 -  | 334  | 1214 | 75     | 953    |
| UN31266 | Rsa1.0.02478.1 | 812  | 150183 | 0         | 689  | 711  | 96 -  | 103  | 812  | 4191   | 4901   |
| UN31267 | Rsa1.0.01945.1 | 810  | 36989  | 1.00E-150 | 314  | 325  | 96 -  | 487  | 810  | 16152  | 16474  |
| UN31268 | Rsa1.0.04271.1 | 698  | 18148  | 1.00E-163 | 306  | 311  | 98 +  | 388  | 698  | 9133   | 9443   |
| UN31269 | Rsa1.0.00108.1 | 812  | 478491 | 0         | 506  | 531  | 95 +  | 280  | 808  | 108599 | 109117 |
| UN31270 | Rsa1.0.01851.1 | 746  | 38275  | 0         | 484  | 490  | 98 +  | 257  | 746  | 16273  | 16762  |
| UN31271 | Rsa1.0.01317.1 | 944  | 48287  | 1.00E-144 | 335  | 360  | 93 +  | 536  | 885  | 41470  | 41829  |
| UN31272 | Rsa1.0.00748.1 | 543  | 65983  | 7.00E-75  | 195  | 209  | 93 +  | 336  | 543  | 65464  | 65668  |
| UN31273 | Rsa1.0.00076.1 | 1369 | 146021 | 1.00E-157 | 302  | 309  | 97 +  | 1061 | 1369 | 40702  | 41010  |
| UN31274 | Rsa1.0.00182.1 | 1074 | 142305 | 0         | 1043 | 1080 | 96 +  | 2    | 1074 | 123126 | 124204 |
| UN31275 | Rsa1.0.00642.1 | 1258 | 201230 | 0         | 900  | 957  | 94 +  | 180  | 1114 | 2588   | 3542   |
| UN31276 | Rsa1.0.16435.1 | 958  | 2156   | 0         | 424  | 447  | 94 -  | 513  | 958  | 1526   | 1963   |

|         |                |      |        |           |      |      |      |     |      |        |        |
|---------|----------------|------|--------|-----------|------|------|------|-----|------|--------|--------|
| UN31277 | Rsa1.0.00167.1 | 337  | 116000 | 1.00E-141 | 311  | 325  | 95 - | 2   | 326  | 76353  | 76667  |
| UN31278 | Rsa1.0.00645.1 | 333  | 189716 | 1.00E-175 | 326  | 331  | 98 - | 3   | 333  | 182727 | 183057 |
| UN31279 | Rsa1.0.14352.1 | 661  | 3488   | 7.00E-60  | 170  | 186  | 91 - | 476 | 661  | 478    | 662    |
| UN31280 | Rsa1.0.00045.1 | 751  | 328694 | 2.00E-79  | 154  | 155  | 99 - | 3   | 157  | 7047   | 7201   |
| UN31281 | Rsa1.0.00799.1 | 1034 | 63918  | 0         | 1025 | 1033 | 99 - | 2   | 1034 | 58472  | 59503  |
| UN31282 | Rsa1.0.05841.1 | 1105 | 12465  | 0         | 913  | 968  | 94 - | 4   | 956  | 5426   | 6380   |
| UN31283 | Rsa1.0.05884.1 | 660  | 12337  | 0         | 630  | 661  | 95 - | 2   | 656  | 11639  | 12299  |
| UN31284 | Rsa1.0.04497.1 | 1399 | 17103  | 0         | 630  | 651  | 96 - | 754 | 1399 | 10944  | 11594  |
| UN31285 | Rsa1.0.00512.1 | 752  | 200277 | 1.00E-141 | 273  | 279  | 97 + | 159 | 437  | 22009  | 22287  |
| UN31286 | #              | #    | #      | #         | #    | #    | #    | #   | #    | #      | #      |
| UN31287 | Rsa1.0.03600.1 | 699  | 21857  | 2.00E-88  | 231  | 251  | 92 - | 448 | 698  | 16027  | 16272  |
| UN31288 | Rsa1.0.04819.1 | 984  | 140505 | 1.00E-154 | 321  | 335  | 95 - | 180 | 511  | 2927   | 3261   |
| UN31289 | Rsa1.0.04435.1 | 1310 | 17369  | 0         | 378  | 390  | 96 - | 924 | 1310 | 5940   | 6329   |
| UN31290 | Rsa1.0.00972.1 | 634  | 57937  | 2.00E-63  | 133  | 136  | 97 - | 376 | 511  | 47314  | 47449  |
| UN31291 | Rsa1.0.00111.1 | 859  | 390088 | 1.00E-160 | 309  | 315  | 98 - | 544 | 858  | 23759  | 24067  |
| UN31292 | Rsa1.0.00130.1 | 546  | 125737 | 6.00E-29  | 81   | 86   | 94 + | 321 | 406  | 50283  | 50368  |
| UN31293 | Rsa1.0.01489.1 | 938  | 44764  | 0         | 365  | 374  | 97 - | 565 | 938  | 14632  | 15005  |
| UN31294 | Rsa1.0.00628.1 | 1049 | 214360 | 0         | 481  | 489  | 98 - | 4   | 492  | 28914  | 29402  |
| UN31295 | Rsa1.0.00288.1 | 1262 | 98659  | 1.00E-162 | 340  | 355  | 95 - | 907 | 1259 | 52892  | 53243  |
| UN31296 | Rsa1.0.07840.1 | 800  | 8442   | 8.00E-54  | 145  | 156  | 92 - | 263 | 417  | 1454   | 1609   |
| UN31297 | Rsa1.0.00892.1 | 1107 | 60703  | 0         | 684  | 733  | 93 + | 105 | 833  | 57293  | 58014  |
| UN31298 | #              | #    | #      | #         | #    | #    | #    | #   | #    | #      | #      |
| UN31299 | Rsa1.0.00336.1 | 984  | 445051 | 1.00E-131 | 244  | 246  | 99 - | 689 | 934  | 441311 | 441556 |
| UN31300 | Rsa1.0.02856.1 | 591  | 27270  | 0         | 579  | 594  | 97 + | 3   | 591  | 17681  | 18274  |
| UN31301 | Rsa1.0.01344.1 | 1039 | 142535 | 0         | 987  | 1037 | 95 - | 3   | 1039 | 7440   | 8465   |
| UN31302 | Rsa1.0.00463.1 | 726  | 189177 | 0         | 396  | 406  | 97 - | 152 | 554  | 136347 | 136752 |
| UN31303 | Rsa1.0.01984.1 | 892  | 36491  | 0         | 454  | 464  | 97 - | 54  | 517  | 33332  | 33792  |
| UN31304 | Rsa1.0.03655.1 | 868  | 21557  | 5.00E-12  | 74   | 86   | 86 + | 171 | 256  | 15643  | 15728  |
| UN31305 | Rsa1.0.00069.1 | 792  | 403561 | 0         | 750  | 803  | 93 + | 3   | 792  | 56271  | 57063  |
| UN31306 | Rsa1.0.01046.1 | 767  | 152989 | 0         | 505  | 534  | 94 + | 234 | 767  | 150335 | 150857 |
| UN31307 | Rsa1.0.00317.1 | 599  | 218290 | 0         | 567  | 598  | 94 - | 1   | 592  | 37267  | 37863  |
| UN31308 | Rsa1.0.01957.1 | 1029 | 36844  | 0         | 982  | 1036 | 94 - | 2   | 1029 | 35332  | 36348  |
| UN31309 | Rsa1.0.03782.1 | 760  | 20891  | 0         | 713  | 719  | 99 - | 44  | 760  | 3680   | 4398   |
| UN31310 | Rsa1.0.04915.1 | 974  | 15461  | 3.00E-38  | 178  | 206  | 86 + | 749 | 953  | 2360   | 2563   |
| UN31311 | Rsa1.0.00726.1 | 896  | 66734  | 1.00E-143 | 264  | 266  | 99 + | 228 | 493  | 44023  | 44288  |
| UN31312 | Rsa1.0.00133.1 | 1035 | 123768 | 7.00E-98  | 405  | 479  | 84 + | 253 | 724  | 114004 | 114465 |
| UN31313 | Rsa1.0.02473.1 | 981  | 31083  | 5.00E-77  | 189  | 200  | 94 - | 786 | 981  | 20469  | 20666  |
| UN31314 | Rsa1.0.03333.1 | 537  | 23662  | 0         | 486  | 496  | 97 - | 3   | 498  | 776    | 1271   |
| UN31315 | Rsa1.0.01018.1 | 545  | 56685  | 0         | 522  | 568  | 91 + | 1   | 545  | 25204  | 25771  |

|         |                |      |        |           |      |      |       |     |      |        |        |
|---------|----------------|------|--------|-----------|------|------|-------|-----|------|--------|--------|
| UN31316 | Rsa1.0_01377.1 | 642  | 46967  | 0         | 458  | 490  | 93 -  | 106 | 583  | 13882  | 14371  |
| UN31317 | Rsa1.0_03399.1 | 1076 | 23204  | 0         | 380  | 386  | 98 +  | 303 | 688  | 20073  | 20458  |
| UN31318 | Rsa1.0_01247.1 | 1222 | 49934  | 0         | 1022 | 1077 | 94 +  | 157 | 1222 | 25761  | 26827  |
| UN31319 | Rsa1.0_00026.1 | 1258 | 327835 | 0         | 511  | 529  | 96 -  | 2   | 527  | 286841 | 287369 |
| UN31320 | Rsa1.0_03225.1 | 461  | 24500  | 0         | 447  | 463  | 96 +  | 2   | 461  | 14607  | 15068  |
| UN31321 | Rsa1.0_07263.1 | 743  | 9644   | 0         | 501  | 548  | 91 +  | 89  | 636  | 4446   | 4993   |
| UN31322 | Rsa1.0_02886.1 | 935  | 27026  | 0         | 697  | 727  | 95 -  | 224 | 935  | 4912   | 5636   |
| UN31323 | Rsa1.0_02170.1 | 990  | 34352  | 0         | 816  | 899  | 90 +  | 1   | 899  | 583    | 1481   |
| UN31324 | Rsa1.0_08729.1 | 1067 | 6994   | 0         | 532  | 539  | 98 -  | 3   | 541  | 4896   | 5434   |
| UN31325 | Rsa1.0_05380.1 | 1113 | 13968  | 1.00E-173 | 446  | 492  | 90 +  | 570 | 1033 | 9798   | 10287  |
| UN31326 | Rsa1.0_00162.1 | 1221 | 239935 | 3.00E-20  | 82   | 92   | 89 -  | 78  | 169  | 36859  | 36950  |
| UN31327 | Rsa1.0_01037.1 | 1354 | 55969  | 0         | 348  | 354  | 98 +  | 479 | 831  | 35713  | 36066  |
| UN31328 | Rsa1.0_03195.1 | 1135 | 24673  | 0         | 1091 | 1138 | 95 -  | 3   | 1135 | 12173  | 13293  |
| UN31329 | Rsa1.0_53634.1 | 724  | 425    | 2.00E-69  | 164  | 174  | 94 -  | 3   | 176  | 76     | 249    |
| UN31330 | Rsa1.0_03643.1 | 776  | 21607  | 0         | 501  | 503  | 99 -  | 2   | 504  | 388    | 890    |
| UN31331 | Rsa1.0_05701.1 | 1271 | 12884  | 0         | 557  | 581  | 95 -  | 464 | 1041 | 10156  | 10736  |
| UN31332 | Rsa1.0_15662.1 | 876  | 2495   | 0         | 522  | 543  | 96 +  | 3   | 531  | 1917   | 2459   |
| UN31333 | Rsa1.0_00991.1 | 878  | 143101 | 0         | 518  | 521  | 99 +  | 358 | 878  | 11971  | 12491  |
| UN31334 | Rsa1.0_00435.1 | 469  | 317579 | 1.00E-142 | 346  | 378  | 91 +  | 94  | 468  | 72603  | 72963  |
| UN31335 | Rsa1.0_00100.1 | 752  | 249232 | 0         | 402  | 412  | 97 -  | 239 | 650  | 188897 | 189308 |
| UN31336 | Rsa1.0_05897.1 | 523  | 12302  | 0         | 508  | 521  | 97 +  | 3   | 519  | 1044   | 1563   |
| UN31337 | Rsa1.0_01865.1 | 1021 | 37992  | 0         | 390  | 394  | 98 -  | 4   | 397  | 9241   | 9634   |
| UN31338 | Rsa1.0_01593.1 | 1096 | 150996 | 1.00E-164 | 302  | 305  | 99 -  | 420 | 724  | 118805 | 119109 |
| UN31339 | Rsa1.0_00920.1 | 705  | 601703 | 6.00E-85  | 202  | 216  | 93 +  | 484 | 699  | 447403 | 447618 |
| UN31340 | Rsa1.0_01628.1 | 1301 | 41932  | 0         | 1136 | 1196 | 94 -  | 3   | 1195 | 433    | 1627   |
| UN31341 | Rsa1.0_03362.1 | 1235 | 23453  | 0         | 502  | 512  | 98 +  | 724 | 1235 | 11585  | 12096  |
| UN31342 | Rsa1.0_16802.1 | 593  | 2030   | 2.00E-44  | 142  | 156  | 91 +  | 137 | 290  | 1116   | 1271   |
| UN31343 | Rsa1.0_00016.1 | 571  | 831256 | 4.00E-95  | 267  | 290  | 92 -  | 292 | 571  | 293073 | 293358 |
| UN31344 | Rsa1.0_00089.1 | 512  | 406142 | 0         | 415  | 427  | 97 -  | 88  | 512  | 279709 | 280135 |
| UN31345 | Rsa1.0_00204.1 | 694  | 109056 | 0         | 586  | 633  | 92 -  | 89  | 694  | 34434  | 35066  |
| UN31346 | Rsa1.0_00083.1 | 969  | 442773 | 0         | 657  | 728  | 90 -  | 106 | 830  | 432562 | 433286 |
| UN31347 | Rsa1.0_01963.1 | 1147 | 36719  | 1.00E-130 | 266  | 276  | 96 -  | 871 | 1146 | 22261  | 22536  |
| UN31348 | #              | #    | #      | #         | #    | #    | #     | #   | #    | #      | #      |
| UN31349 | Rsa1.0_01130.1 | 1058 | 52929  | 0         | 1046 | 1067 | 98 +  | 3   | 1058 | 30614  | 31680  |
| UN31350 | Rsa1.0_00226.1 | 745  | 105884 | 0         | 526  | 559  | 94 +  | 85  | 632  | 96851  | 97406  |
| UN31351 | Rsa1.0_00348.1 | 996  | 92818  | 0         | 829  | 882  | 93 +  | 2   | 882  | 16631  | 17509  |
| UN31352 | Rsa1.0_01855.1 | 1421 | 38204  | 0         | 575  | 604  | 95 -  | 824 | 1420 | 30531  | 31132  |
| UN31353 | Rsa1.0_00580.1 | 1067 | 74515  | 3.00E-94  | 362  | 422  | 85 +  | 38  | 453  | 58396  | 58814  |
| UN31354 | Rsa1.0_00034.1 | 785  | 260119 | 8.00E-88  | 165  | 165  | 100 - | 3   | 167  | 95930  | 96094  |

|         |                |      |        |           |      |      |       |     |      |        |        |
|---------|----------------|------|--------|-----------|------|------|-------|-----|------|--------|--------|
| UN31355 | Rsa1.0_11860.1 | 1074 | 5389   | 0         | 424  | 425  | 99 +  | 74  | 498  | 1      | 425    |
| UN31356 | Rsa1.0_00413.1 | 853  | 86921  | 1.00E-136 | 314  | 333  | 94 -  | 518 | 849  | 37458  | 37782  |
| UN31357 | Rsa1.0_00104.1 | 782  | 368722 | 1.00E-158 | 370  | 391  | 94 -  | 403 | 782  | 60375  | 60760  |
| UN31358 | #              | #    | #      | #         | #    | #    | #     | #   | #    | #      | #      |
| UN31359 | Rsa1.0_01148.1 | 970  | 52375  | 0         | 937  | 968  | 96 +  | 3   | 970  | 10006  | 10966  |
| UN31360 | Rsa1.0_00380.1 | 1633 | 89748  | 0         | 1536 | 1583 | 97 -  | 76  | 1633 | 56561  | 58139  |
| UN31361 | Rsa1.0_00270.1 | 779  | 101236 | 0         | 742  | 784  | 94 -  | 2   | 779  | 27554  | 28337  |
| UN31362 | Rsa1.0_00178.1 | 481  | 114861 | 1.00E-113 | 250  | 264  | 94 -  | 226 | 481  | 105971 | 106232 |
| UN31363 | Rsa1.0_00005.1 | 1081 | 353093 | 4.00E-87  | 174  | 176  | 98 +  | 3   | 177  | 186707 | 186882 |
| UN31364 | Rsa1.0_01002.1 | 822  | 57063  | 0         | 802  | 822  | 97 +  | 3   | 822  | 2737   | 3558   |
| UN31365 | Rsa1.0_04456.1 | 1262 | 17260  | 0         | 593  | 626  | 94 -  | 166 | 791  | 2992   | 3616   |
| UN31366 | Rsa1.0_00464.1 | 1170 | 82253  | 1.00E-105 | 239  | 253  | 94 -  | 288 | 540  | 55490  | 55739  |
| UN31367 | Rsa1.0_00121.1 | 568  | 278029 | 0         | 534  | 557  | 95 +  | 13  | 568  | 34359  | 34912  |
| UN31368 | Rsa1.0_02931.1 | 812  | 26654  | 0         | 546  | 569  | 95 +  | 97  | 662  | 22889  | 23457  |
| UN31369 | Rsa1.0_00519.1 | 733  | 197864 | 0         | 429  | 431  | 99 -  | 298 | 728  | 170470 | 170900 |
| UN31370 | Rsa1.0_01023.1 | 1277 | 56571  | 0         | 483  | 518  | 93 +  | 300 | 802  | 45113  | 45630  |
| UN31371 | Rsa1.0_01121.1 | 1383 | 53407  | 0         | 433  | 434  | 99 +  | 1   | 434  | 29085  | 29518  |
| UN31372 | Rsa1.0_03858.1 | 325  | 20423  | 6.00E-37  | 137  | 154  | 88 -  | 10  | 163  | 3868   | 4018   |
| UN31373 | Rsa1.0_00701.1 | 917  | 67691  | 6.00E-61  | 120  | 120  | 100 - | 1   | 120  | 24584  | 24703  |
| UN31374 | Rsa1.0_00728.1 | 720  | 66704  | 0         | 409  | 422  | 96 +  | 6   | 425  | 59939  | 60359  |
| UN31375 | Rsa1.0_18397.1 | 703  | 1606   | 1.00E-112 | 241  | 249  | 96 -  | 1   | 247  | 160    | 406    |
| UN31376 | Rsa1.0_06173.1 | 812  | 11574  | 0         | 795  | 812  | 97 +  | 1   | 812  | 4085   | 4892   |
| UN31377 | Rsa1.0_00034.1 | 362  | 260119 | 1.00E-144 | 280  | 287  | 97 +  | 1   | 287  | 21517  | 21803  |
| UN31378 | Rsa1.0_00872.1 | 657  | 61495  | 0         | 631  | 666  | 94 -  | 1   | 657  | 29338  | 30003  |
| UN31379 | Rsa1.0_00119.1 | 623  | 467509 | 0         | 602  | 645  | 93 -  | 1   | 623  | 296257 | 296895 |
| UN31380 | Rsa1.0_02964.1 | 772  | 26407  | 1.00E-71  | 141  | 142  | 99 -  | 70  | 211  | 24031  | 24172  |
| UN31381 | Rsa1.0_07157.1 | 765  | 9805   | 1.00E-171 | 310  | 312  | 99 -  | 126 | 437  | 4991   | 5302   |
| UN31382 | Rsa1.0_01993.1 | 1223 | 36384  | 0         | 1169 | 1224 | 95 -  | 5   | 1223 | 33868  | 35088  |
| UN31383 | Rsa1.0_00106.1 | 802  | 133916 | 1.00E-142 | 328  | 349  | 93 -  | 3   | 339  | 62520  | 62868  |
| UN31384 | Rsa1.0_20680.1 | 789  | 1280   | 3.00E-59  | 305  | 360  | 84 +  | 397 | 755  | 316    | 669    |
| UN31385 | Rsa1.0_00581.1 | 738  | 163575 | 0         | 716  | 739  | 96 +  | 2   | 738  | 64748  | 65486  |
| UN31386 | Rsa1.0_76465.1 | 688  | 300    | 3.00E-59  | 220  | 253  | 86 -  | 294 | 545  | 39     | 291    |
| UN31387 | Rsa1.0_00108.1 | 836  | 478491 | 1.00E-113 | 273  | 293  | 93 -  | 552 | 835  | 264650 | 264941 |
| UN31388 | Rsa1.0_00098.1 | 959  | 349239 | 0         | 928  | 934  | 99 +  | 26  | 959  | 141572 | 142505 |
| UN31389 | Rsa1.0_01076.1 | 1177 | 54835  | 0         | 1027 | 1079 | 95 -  | 2   | 1077 | 4130   | 5208   |
| UN31390 | Rsa1.0_14128.1 | 579  | 3772   | 0         | 466  | 484  | 96 +  | 99  | 578  | 2790   | 3272   |
| UN31391 | Rsa1.0_00371.1 | 506  | 90463  | 0         | 446  | 459  | 97 -  | 53  | 506  | 49896  | 50354  |
| UN31392 | Rsa1.0_00069.1 | 796  | 403561 | 1.00E-174 | 414  | 448  | 92 +  | 352 | 785  | 162099 | 162542 |
| UN31393 | Rsa1.0_08327.1 | 1320 | 7534   | 1.00E-103 | 197  | 199  | 98 +  | 376 | 574  | 975    | 1173   |

|         |                |      |        |           |      |      |       |     |      |        |        |
|---------|----------------|------|--------|-----------|------|------|-------|-----|------|--------|--------|
| UN31394 | Rsa1.0.00055.1 | 1028 | 520193 | 0         | 834  | 919  | 90 +  | 1   | 898  | 198287 | 199178 |
| UN31395 | Rsa1.0.00708.1 | 587  | 67366  | 1.00E-158 | 304  | 311  | 97 -  | 3   | 313  | 64990  | 65300  |
| UN31396 | Rsa1.0.00770.1 | 1201 | 64900  | 0         | 1162 | 1210 | 96 -  | 2   | 1201 | 38707  | 39915  |
| UN31397 | Rsa1.0.00179.1 | 322  | 393324 | 1.00E-116 | 224  | 227  | 98 +  | 98  | 322  | 2943   | 3169   |
| UN31398 | Rsa1.0.00196.1 | 344  | 109960 | 1.00E-151 | 304  | 314  | 96 +  | 32  | 343  | 17790  | 18103  |
| UN31399 | Rsa1.0.00323.1 | 863  | 159650 | 1.00E-166 | 354  | 367  | 96 +  | 500 | 863  | 41034  | 41396  |
| UN31400 | Rsa1.0.01829.1 | 731  | 166063 | 0         | 717  | 733  | 97 -  | 2   | 731  | 155596 | 156328 |
| UN31401 | Rsa1.0.02255.1 | 1192 | 148935 | 1.00E-163 | 295  | 296  | 99 -  | 553 | 848  | 30776  | 31071  |
| UN31402 | Rsa1.0.23640.1 | 989  | 1035   | 3.00E-26  | 164  | 194  | 84 +  | 529 | 719  | 600    | 793    |
| UN31403 | Rsa1.0.00202.1 | 1059 | 185895 | 0         | 510  | 554  | 92 -  | 378 | 925  | 109444 | 109981 |
| UN31404 | Rsa1.0.00959.1 | 725  | 58202  | 0         | 686  | 728  | 94 +  | 2   | 725  | 21529  | 22239  |
| UN31405 | Rsa1.0.01092.1 | 724  | 54348  | 1.00E-179 | 331  | 334  | 99 +  | 386 | 718  | 28430  | 28763  |
| UN31406 | Rsa1.0.00311.1 | 1224 | 96847  | 0         | 1196 | 1224 | 97 +  | 2   | 1224 | 67828  | 69048  |
| UN31407 | Rsa1.0.00329.1 | 510  | 222544 | 1.00E-127 | 276  | 289  | 95 +  | 145 | 431  | 212066 | 212352 |
| UN31408 | Rsa1.0.03113.1 | 891  | 25318  | 0         | 412  | 416  | 99 +  | 117 | 531  | 5606   | 6021   |
| UN31409 | Rsa1.0.01243.1 | 1050 | 50061  | 0         | 516  | 531  | 97 +  | 400 | 930  | 33338  | 33867  |
| UN31410 | Rsa1.0.05325.1 | 758  | 14141  | 0         | 504  | 539  | 93 -  | 227 | 757  | 5181   | 5711   |
| UN31411 | Rsa1.0.02117.1 | 358  | 34843  | 0         | 352  | 355  | 99 +  | 2   | 356  | 10466  | 10820  |
| UN31412 | Rsa1.0.00891.1 | 687  | 60724  | 3.00E-74  | 154  | 158  | 97 +  | 348 | 505  | 30048  | 30205  |
| UN31413 | Rsa1.0.00496.1 | 561  | 79834  | 1.00E-158 | 283  | 283  | 100 - | 46  | 328  | 27282  | 27564  |
| UN31414 | Rsa1.0.20321.1 | 902  | 1318   | 1.00E-136 | 294  | 310  | 94 +  | 233 | 542  | 880    | 1189   |
| UN31415 | Rsa1.0.00033.1 | 863  | 515811 | 0         | 736  | 809  | 90 -  | 2   | 795  | 36190  | 36972  |
| UN31416 | Rsa1.0.01404.1 | 665  | 46452  | 0         | 653  | 658  | 99 +  | 3   | 660  | 2955   | 3612   |
| UN31417 | Rsa1.0.00490.1 | 747  | 186713 | 0         | 703  | 746  | 94 -  | 2   | 745  | 951    | 1687   |
| UN31418 | Rsa1.0.01300.1 | 633  | 48942  | 0         | 403  | 427  | 94 +  | 209 | 632  | 4954   | 5376   |
| UN31419 | Rsa1.0.02860.1 | 982  | 27207  | 2.00E-55  | 261  | 311  | 83 -  | 188 | 498  | 1577   | 1887   |
| UN31420 | Rsa1.0.01294.1 | 884  | 49090  | 0         | 754  | 787  | 95 +  | 3   | 789  | 6067   | 6853   |
| UN31421 | Rsa1.0.01138.1 | 698  | 190615 | 0         | 489  | 506  | 96 -  | 2   | 506  | 41918  | 42419  |
| UN31422 | Rsa1.0.07621.1 | 863  | 9014   | 1.00E-155 | 311  | 322  | 96 -  | 132 | 453  | 5924   | 6245   |
| UN31423 | Rsa1.0.04594.1 | 762  | 16713  | 0         | 441  | 456  | 96 -  | 252 | 707  | 4849   | 5301   |
| UN31424 | Rsa1.0.00629.1 | 405  | 71381  | 2.00E-34  | 99   | 107  | 92 +  | 56  | 162  | 39296  | 39402  |
| UN31425 | Rsa1.0.03391.1 | 692  | 23251  | 1.00E-170 | 306  | 307  | 99 +  | 386 | 692  | 7167   | 7473   |
| UN31426 | Rsa1.0.01602.1 | 358  | 42503  | 1.00E-102 | 194  | 196  | 98 -  | 2   | 197  | 5974   | 6169   |
| UN31427 | Rsa1.0.02306.1 | 847  | 32776  | 0         | 564  | 571  | 98 -  | 2   | 571  | 10860  | 11430  |
| UN31428 | Rsa1.0.00092.1 | 799  | 659932 | 1.00E-111 | 211  | 213  | 99 -  | 176 | 388  | 159316 | 159528 |
| UN31429 | Rsa1.0.07427.1 | 1066 | 9413   | 0         | 482  | 486  | 99 -  | 582 | 1066 | 4782   | 5267   |
| UN31430 | Rsa1.0.01371.1 | 1017 | 47079  | 5.00E-28  | 186  | 224  | 83 -  | 751 | 963  | 9230   | 9451   |
| UN31431 | Rsa1.0.00055.1 | 604  | 520193 | 0         | 437  | 446  | 97 +  | 4   | 449  | 219322 | 219764 |
| UN31432 | Rsa1.0.00727.1 | 664  | 66724  | 0         | 527  | 540  | 97 -  | 125 | 664  | 56228  | 56764  |



|         |                |      |        |           |      |      |       |     |      |        |        |
|---------|----------------|------|--------|-----------|------|------|-------|-----|------|--------|--------|
| UN31433 | Rsa1.0.05217.1 | 952  | 142938 | 0         | 911  | 962  | 94 +  | 2   | 952  | 132581 | 133539 |
| UN31434 | Rsa1.0.00123.1 | 884  | 325650 | 0         | 540  | 569  | 94 -  | 328 | 884  | 27493  | 28056  |
| UN31435 | Rsa1.0.00074.1 | 489  | 147591 | 0         | 483  | 487  | 99 -  | 4   | 489  | 31816  | 32302  |
| UN31436 | Rsa1.0.00467.1 | 762  | 156542 | 0         | 660  | 680  | 97 -  | 38  | 715  | 98978  | 99657  |
| UN31437 | Rsa1.0.01945.1 | 353  | 36989  | 1.00E-135 | 328  | 356  | 92 -  | 3   | 352  | 34239  | 34580  |
| UN31438 | #              | #    | #      | #         | #    | #    | #     | #   | #    | #      | #      |
| UN31439 | Rsa1.0.01130.1 | 1325 | 52929  | 8.00E-83  | 176  | 181  | 97 -  | 575 | 754  | 36009  | 36189  |
| UN31440 | Rsa1.0.00768.1 | 790  | 64969  | 1.00E-77  | 169  | 176  | 96 -  | 113 | 288  | 52475  | 52650  |
| UN31441 | Rsa1.0.00001.1 | 857  | 363028 | 0         | 554  | 560  | 98 +  | 2   | 559  | 1252   | 1810   |
| UN31442 | Rsa1.0.00171.1 | 378  | 115622 | 1.00E-106 | 260  | 278  | 93 +  | 1   | 276  | 90863  | 91138  |
| UN31443 | Rsa1.0.00476.1 | 880  | 280966 | 0         | 402  | 426  | 94 +  | 17  | 430  | 220853 | 221278 |
| UN31444 | Rsa1.0.00497.1 | 702  | 79830  | 0         | 679  | 690  | 98 +  | 12  | 700  | 13715  | 14404  |
| UN31445 | Rsa1.0.00374.1 | 1233 | 165738 | 0         | 1188 | 1233 | 96 -  | 1   | 1231 | 163202 | 164428 |
| UN31446 | Rsa1.0.00727.1 | 889  | 66724  | 0         | 748  | 783  | 95 -  | 3   | 779  | 34131  | 34901  |
| UN31447 | Rsa1.0.00891.1 | 758  | 60724  | 1.00E-125 | 275  | 289  | 95 -  | 1   | 285  | 32482  | 32770  |
| UN31448 | Rsa1.0.00190.1 | 741  | 318240 | 1.00E-107 | 302  | 332  | 90 -  | 1   | 329  | 178690 | 179014 |
| UN31449 | Rsa1.0.01149.1 | 633  | 160459 | 0         | 471  | 518  | 90 -  | 114 | 623  | 4185   | 4696   |
| UN31450 | Rsa1.0.00016.1 | 755  | 831256 | 0         | 427  | 427  | 100 - | 324 | 750  | 509138 | 509564 |
| UN31451 | Rsa1.0.00256.1 | 928  | 102426 | 2.00E-36  | 124  | 138  | 89 +  | 726 | 863  | 86470  | 86605  |
| UN31452 | Rsa1.0.01797.1 | 730  | 39140  | 1.00E-148 | 326  | 344  | 94 -  | 388 | 730  | 36740  | 37080  |
| UN31453 | Rsa1.0.00228.1 | 696  | 105511 | 1.00E-160 | 305  | 311  | 98 -  | 386 | 696  | 47469  | 47779  |
| UN31454 | Rsa1.0.00706.1 | 760  | 291570 | 2.33E-156 | 265  | 266  | 99 +  | 183 | 448  | 252223 | 252488 |
| UN31455 | Rsa1.0.02796.1 | 1113 | 27805  | 1.00E-139 | 257  | 259  | 99 +  | 654 | 912  | 14770  | 15028  |
| UN31456 | Rsa1.0.00164.1 | 991  | 116642 | 0         | 462  | 485  | 95 +  | 1   | 470  | 652    | 1136   |
| UN31457 | Rsa1.0.03719.1 | 764  | 21194  | 0         | 713  | 729  | 97 +  | 5   | 732  | 19969  | 20697  |
| UN31458 | Rsa1.0.02179.1 | 1033 | 34188  | 0         | 512  | 546  | 93 +  | 485 | 1029 | 14825  | 15367  |
| UN31459 | Rsa1.0.03044.1 | 767  | 25791  | 4.00E-83  | 166  | 169  | 98 -  | 60  | 228  | 8928   | 9096   |
| UN31460 | Rsa1.0.04801.1 | 1200 | 15918  | 1.00E-132 | 252  | 256  | 98 +  | 122 | 377  | 6981   | 7236   |
| UN31461 | Rsa1.0.00319.1 | 1013 | 167331 | 1.00E-145 | 304  | 318  | 95 -  | 5   | 322  | 139312 | 139629 |
| UN31462 | Rsa1.0.00734.1 | 784  | 66508  | 0         | 504  | 546  | 92 -  | 240 | 784  | 8109   | 8634   |
| UN31463 | Rsa1.0.05947.1 | 496  | 12142  | 1.00E-134 | 255  | 259  | 98 +  | 238 | 496  | 656    | 914    |
| UN31464 | Rsa1.0.00710.1 | 541  | 67325  | 0         | 459  | 473  | 97 +  | 66  | 537  | 34879  | 35351  |
| UN31465 | Rsa1.0.07892.1 | 577  | 8350   | 1.00E-175 | 360  | 376  | 95 -  | 2   | 377  | 1253   | 1628   |
| UN31466 | Rsa1.0.14084.1 | 323  | 3822   | 5.00E-99  | 225  | 237  | 94 -  | 91  | 323  | 2559   | 2795   |
| UN31467 | Rsa1.0.01070.1 | 1124 | 55099  | 2.00E-92  | 230  | 248  | 92 -  | 224 | 465  | 7057   | 7303   |
| UN31468 | Rsa1.0.00835.1 | 1013 | 278058 | 2.00E-82  | 171  | 176  | 97 -  | 117 | 292  | 131761 | 131936 |
| UN31469 | Rsa1.0.02602.1 | 1286 | 29653  | 0         | 496  | 511  | 97 +  | 776 | 1286 | 13714  | 14222  |
| UN31470 | Rsa1.0.46067.1 | 855  | 490    | 0         | 389  | 390  | 99 +  | 466 | 855  | 1      | 390    |
| UN31471 | Rsa1.0.13909.1 | 798  | 4110   | 0         | 403  | 417  | 96 +  | 385 | 796  | 3100   | 3516   |

|         |                |      |        |           |      |      |       |     |      |        |        |
|---------|----------------|------|--------|-----------|------|------|-------|-----|------|--------|--------|
| UN31472 | Rsa1.0.00552.1 | 722  | 206757 | 0         | 383  | 394  | 97 -  | 3   | 396  | 75228  | 75621  |
| UN31473 | Rsa1.0.01959.1 | 718  | 36798  | 1.00E-133 | 377  | 417  | 90 +  | 305 | 718  | 10612  | 11017  |
| UN31474 | Rsa1.0.11808.1 | 688  | 5402   | 0         | 682  | 686  | 99 -  | 3   | 686  | 4290   | 4975   |
| UN31475 | Rsa1.0.01320.1 | 1306 | 48271  | 0         | 643  | 675  | 95 +  | 632 | 1306 | 10140  | 10788  |
| UN31476 | Rsa1.0.05707.1 | 1262 | 12872  | 0         | 775  | 802  | 96 +  | 2   | 800  | 12074  | 12872  |
| UN31477 | Rsa1.0.02183.1 | 1245 | 34170  | 0         | 1211 | 1244 | 97 +  | 3   | 1245 | 23329  | 24572  |
| UN31478 | Rsa1.0.03379.1 | 1450 | 23321  | 0         | 571  | 589  | 96 -  | 863 | 1450 | 13619  | 14204  |
| UN31479 | Rsa1.0.00170.1 | 956  | 179538 | 0         | 667  | 679  | 98 -  | 2   | 673  | 42788  | 43466  |
| UN31480 | Rsa1.0.00734.1 | 482  | 66508  | 0         | 453  | 484  | 93 +  | 2   | 481  | 9701   | 10177  |
| UN31481 | Rsa1.0.04557.1 | 1319 | 145048 | 4.00E-38  | 180  | 210  | 85 -  | 125 | 327  | 138733 | 138942 |
| UN31482 | Rsa1.0.05321.1 | 750  | 14154  | 0         | 652  | 659  | 98 +  | 1   | 659  | 12706  | 13364  |
| UN31483 | Rsa1.0.04590.1 | 775  | 16731  | 1.00E-89  | 168  | 168  | 100 + | 3   | 170  | 16344  | 16511  |
| UN31484 | Rsa1.0.00085.1 | 908  | 142226 | 1.00E-180 | 356  | 368  | 96 -  | 239 | 606  | 50813  | 51180  |
| UN31485 | Rsa1.0.10165.1 | 1289 | 5966   | 0         | 596  | 599  | 99 -  | 322 | 919  | 4642   | 5240   |
| UN31486 | Rsa1.0.22463.1 | 717  | 1119   | 0         | 506  | 513  | 98 +  | 172 | 683  | 437    | 949    |
| UN31487 | Rsa1.0.00047.1 | 558  | 168582 | 1.00E-169 | 485  | 548  | 88 -  | 1   | 536  | 5383   | 5907   |
| UN31488 | Rsa1.0.06010.1 | 784  | 11944  | 1.00E-125 | 261  | 272  | 95 +  | 253 | 524  | 2070   | 2341   |
| UN31489 | Rsa1.0.00001.1 | 706  | 363028 | 0         | 347  | 347  | 100 - | 360 | 706  | 3961   | 4307   |
| UN31490 | Rsa1.0.03992.1 | 268  | 19675  | 3.00E-97  | 244  | 263  | 92 -  | 7   | 268  | 16243  | 16493  |
| UN31491 | Rsa1.0.32277.1 | 1241 | 705    | 0         | 339  | 340  | 99 -  | 293 | 632  | 195    | 534    |
| UN31492 | Rsa1.0.01012.1 | 527  | 56836  | 1.00E-112 | 266  | 281  | 94 -  | 5   | 283  | 26363  | 26640  |
| UN31493 | Rsa1.0.00273.1 | 924  | 326186 | 0         | 578  | 602  | 96 +  | 330 | 924  | 135885 | 136485 |
| UN31494 | Rsa1.0.00073.1 | 631  | 240924 | 0         | 424  | 428  | 99 +  | 202 | 629  | 62674  | 63101  |
| UN31495 | Rsa1.0.03851.1 | 1291 | 20451  | 0         | 831  | 845  | 98 +  | 447 | 1291 | 2612   | 3455   |
| UN31496 | Rsa1.0.04519.1 | 881  | 17004  | 1.00E-137 | 347  | 380  | 91 +  | 319 | 698  | 15237  | 15616  |
| UN31497 | Rsa1.0.17091.1 | 569  | 1925   | 1.00E-111 | 227  | 235  | 96 -  | 52  | 286  | 1697   | 1925   |
| UN31498 | Rsa1.0.00040.1 | 586  | 324196 | 1.00E-116 | 256  | 268  | 95 +  | 260 | 527  | 265642 | 265906 |
| UN31499 | Rsa1.0.00401.1 | 584  | 244410 | 1.00E-95  | 200  | 206  | 97 +  | 345 | 550  | 198211 | 198415 |
| UN31500 | Rsa1.0.01703.1 | 1057 | 40713  | 0         | 594  | 604  | 98 +  | 453 | 1055 | 30831  | 31428  |
| UN31501 | Rsa1.0.00617.1 | 761  | 72199  | 0         | 714  | 763  | 93 +  | 7   | 761  | 65794  | 66537  |
| UN31502 | Rsa1.0.04123.1 | 822  | 18947  | 0         | 781  | 820  | 95 -  | 1   | 811  | 7664   | 8473   |
| UN31503 | Rsa1.0.01532.1 | 1128 | 43767  | 0         | 544  | 554  | 98 -  | 576 | 1128 | 18099  | 18652  |
| UN31504 | Rsa1.0.02686.1 | 1059 | 28666  | 2.00E-27  | 104  | 116  | 89 -  | 26  | 140  | 24441  | 24556  |
| UN31505 | Rsa1.0.00324.1 | 994  | 218805 | 1.00E-141 | 255  | 255  | 100 + | 3   | 257  | 134230 | 134484 |
| UN31506 | Rsa1.0.00493.1 | 432  | 80007  | 1.00E-151 | 273  | 274  | 99 -  | 153 | 426  | 33555  | 33828  |
| UN31507 | Rsa1.0.00062.1 | 1448 | 299291 | 0         | 325  | 325  | 100 - | 285 | 609  | 25254  | 25578  |
| UN31508 | Rsa1.0.00056.1 | 701  | 332604 | 7.00E-88  | 168  | 169  | 99 +  | 3   | 171  | 58302  | 58470  |
| UN31509 | Rsa1.0.06502.1 | 565  | 10884  | 0         | 560  | 562  | 99 -  | 4   | 565  | 9223   | 9782   |
| UN31510 | Rsa1.0.08079.1 | 838  | 7942   | 5.00E-86  | 351  | 405  | 86 -  | 263 | 652  | 3934   | 4320   |

|         |                |      |        |           |      |      |       |     |      |        |        |
|---------|----------------|------|--------|-----------|------|------|-------|-----|------|--------|--------|
| UN31511 | Rsa1.0.02294.1 | 1178 | 32940  | 1.00E-112 | 228  | 235  | 97 -  | 374 | 608  | 14742  | 14976  |
| UN31512 | Rsa1.0.03669.1 | 396  | 147114 | 1.00E-134 | 251  | 254  | 98 +  | 3   | 256  | 18910  | 19163  |
| UN31513 | Rsa1.0.00607.1 | 727  | 73146  | 8.00E-26  | 116  | 133  | 87 +  | 142 | 273  | 55128  | 55260  |
| UN31514 | Rsa1.0.01110.1 | 1257 | 195852 | 0         | 1025 | 1053 | 97 -  | 179 | 1229 | 41135  | 42178  |
| UN31515 | Rsa1.0.07311.1 | 1258 | 9567   | 0         | 803  | 821  | 97 +  | 435 | 1253 | 5239   | 6053   |
| UN31516 | Rsa1.0.16561.1 | 643  | 2111   | 0         | 350  | 351  | 99 -  | 293 | 643  | 473    | 823    |
| UN31517 | Rsa1.0.02685.1 | 1174 | 28669  | 0         | 1131 | 1167 | 96 -  | 1   | 1166 | 6980   | 8142   |
| UN31518 | Rsa1.0.00033.1 | 708  | 515811 | 0         | 432  | 448  | 96 -  | 261 | 707  | 13347  | 13790  |
| UN31519 | Rsa1.0.00469.1 | 1134 | 82084  | 0         | 453  | 490  | 92 -  | 4   | 493  | 29744  | 30210  |
| UN31520 | Rsa1.0.00304.1 | 879  | 97429  | 0         | 737  | 776  | 94 +  | 100 | 868  | 15440  | 16205  |
| UN31521 | Rsa1.0.00999.1 | 1023 | 57162  | 0         | 623  | 710  | 87 +  | 313 | 1019 | 24328  | 25037  |
| UN31522 | Rsa1.0.05122.1 | 1057 | 14791  | 3.00E-14  | 57   | 62   | 91 -  | 883 | 944  | 7784   | 7845   |
| UN31523 | Rsa1.0.00108.1 | 590  | 478491 | 0         | 572  | 587  | 97 -  | 2   | 588  | 139032 | 139616 |
| UN31524 | Rsa1.0.00005.1 | 755  | 353093 | 9.00E-66  | 143  | 148  | 96 -  | 422 | 569  | 123878 | 124025 |
| UN31525 | Rsa1.0.00092.1 | 1115 | 659932 | 0         | 573  | 604  | 94 +  | 523 | 1113 | 115128 | 115731 |
| UN31526 | #              | #    | #      | #         | #    | #    | #     | #   | #    | #      | #      |
| UN31527 | Rsa1.0.01990.1 | 656  | 36431  | 0         | 573  | 610  | 93 -  | 55  | 656  | 25295  | 25894  |
| UN31528 | Rsa1.0.00072.1 | 904  | 148743 | 1.00E-74  | 380  | 457  | 83 -  | 297 | 752  | 138451 | 138904 |
| UN31529 | Rsa1.0.01228.1 | 823  | 50238  | 1.00E-169 | 387  | 411  | 94 -  | 416 | 822  | 36590  | 36993  |
| UN31530 | Rsa1.0.00965.1 | 919  | 58139  | 5.00E-77  | 171  | 179  | 95 +  | 544 | 717  | 5450   | 5628   |
| UN31531 | Rsa1.0.02095.1 | 1307 | 35071  | 0         | 394  | 406  | 97 -  | 3   | 406  | 27513  | 27918  |
| UN31532 | Rsa1.0.00365.1 | 646  | 90902  | 1.00E-106 | 196  | 196  | 100 - | 13  | 208  | 76076  | 76271  |
| UN31533 | Rsa1.0.01172.1 | 860  | 51734  | 1.00E-157 | 423  | 471  | 89 +  | 29  | 475  | 43170  | 43637  |
| UN31534 | Rsa1.0.00028.1 | 1163 | 293984 | 0         | 1002 | 1062 | 94 +  | 121 | 1162 | 171366 | 172422 |
| UN31535 | Rsa1.0.02386.1 | 1095 | 31895  | 0         | 974  | 1019 | 95 -  | 60  | 1075 | 16107  | 17116  |
| UN31536 | Rsa1.0.08690.1 | 1041 | 7035   | 0         | 1014 | 1042 | 97 -  | 2   | 1041 | 1360   | 2401   |
| UN31537 | Rsa1.0.04790.1 | 1008 | 15979  | 1.00E-123 | 281  | 301  | 93 -  | 464 | 764  | 7655   | 7947   |
| UN31538 | Rsa1.0.00028.1 | 778  | 293984 | 0         | 393  | 406  | 96 +  | 77  | 474  | 35793  | 36198  |
| UN31539 | Rsa1.0.03074.1 | 716  | 25568  | 8.00E-60  | 124  | 126  | 98 -  | 61  | 186  | 18286  | 18411  |
| UN31540 | Rsa1.0.45805.1 | 646  | 492    | 0         | 462  | 499  | 92 +  | 130 | 613  | 1      | 492    |
| UN31541 | Rsa1.0.04428.1 | 810  | 17399  | 0         | 585  | 618  | 94 +  | 202 | 810  | 12946  | 13562  |
| UN31542 | Rsa1.0.02951.1 | 1187 | 26505  | 3.00E-66  | 180  | 197  | 91 +  | 155 | 342  | 12687  | 12882  |
| UN31543 | Rsa1.0.08015.1 | 878  | 8078   | 0         | 453  | 455  | 99 +  | 2   | 456  | 799    | 1253   |
| UN31544 | Rsa1.0.01453.1 | 776  | 45449  | 0         | 630  | 645  | 97 +  | 105 | 745  | 39836  | 40480  |
| UN31545 | Rsa1.0.03420.1 | 764  | 23090  | 7.00E-88  | 168  | 169  | 99 -  | 3   | 171  | 10212  | 10380  |
| UN31546 | Rsa1.0.01412.1 | 1036 | 46311  | 1.00E-130 | 240  | 241  | 99 +  | 382 | 622  | 44279  | 44519  |
| UN31547 | Rsa1.0.00099.1 | 1143 | 159619 | 0         | 455  | 484  | 94 +  | 670 | 1141 | 86577  | 87057  |
| UN31548 | Rsa1.0.02863.1 | 381  | 27160  | 1.00E-130 | 280  | 291  | 96 +  | 3   | 291  | 14533  | 14822  |
| UN31549 | Rsa1.0.00023.1 | 724  | 194764 | 1.00E-132 | 284  | 301  | 94 +  | 159 | 447  | 97015  | 97315  |

| UN31550 | #              | #    | #      | #         | #   | #    | #    | #   | #    | #      | #      | # |
|---------|----------------|------|--------|-----------|-----|------|------|-----|------|--------|--------|---|
| UN31551 | Rsa1.0_00790.1 | 1327 | 148693 | 1.00E-167 | 340 | 353  | 96 - | 531 | 883  | 57271  | 57620  |   |
| UN31552 | Rsa1.0_00202.1 | 1178 | 185895 | 1.00E-177 | 351 | 363  | 96 + | 343 | 705  | 132956 | 133318 |   |
| UN31553 | Rsa1.0_01801.1 | 813  | 39094  | 1.00E-177 | 402 | 426  | 94 + | 390 | 813  | 29263  | 29681  |   |
| UN31554 | Rsa1.0_06250.1 | 747  | 11392  | 1.00E-159 | 407 | 448  | 90 - | 264 | 711  | 10695  | 11142  |   |
| UN31555 | Rsa1.0_00016.1 | 704  | 831256 | 5.00E-21  | 162 | 197  | 82 - | 192 | 387  | 685056 | 685252 |   |
| UN31556 | Rsa1.0_00615.1 | 808  | 72235  | 0         | 470 | 472  | 99 + | 337 | 808  | 42388  | 42859  |   |
| UN31557 | Rsa1.0_04831.1 | 719  | 15799  | 1.00E-150 | 362 | 389  | 93 - | 339 | 719  | 551    | 939    |   |
| UN31558 | Rsa1.0_14127.1 | 861  | 3776   | 0         | 812 | 861  | 94 - | 1   | 861  | 54     | 913    |   |
| UN31559 | Rsa1.0_07185.1 | 487  | 9772   | 0         | 361 | 367  | 98 + | 118 | 484  | 8608   | 8974   |   |
| UN31560 | Rsa1.0_00034.1 | 869  | 260119 | 1.00E-112 | 249 | 261  | 95 - | 4   | 262  | 95930  | 96189  |   |
| UN31561 | Rsa1.0_01564.1 | 1068 | 43169  | 0         | 366 | 379  | 96 + | 375 | 750  | 39700  | 40078  |   |
| UN31562 | Rsa1.0_02739.1 | 435  | 28304  | 1.00E-115 | 249 | 259  | 96 + | 176 | 434  | 9186   | 9442   |   |
| UN31563 | Rsa1.0_03191.1 | 1275 | 145762 | 1.00E-130 | 299 | 317  | 94 - | 957 | 1271 | 22161  | 22472  |   |
| UN31564 | Rsa1.0_28940.1 | 663  | 798    | 0         | 365 | 375  | 97 + | 97  | 471  | 160    | 534    |   |
| UN31565 | Rsa1.0_00218.1 | 1368 | 201480 | 0         | 737 | 777  | 94 + | 1   | 775  | 106463 | 107239 |   |
| UN31566 | Rsa1.0_01236.1 | 722  | 50156  | 0         | 371 | 382  | 97 - | 342 | 722  | 18770  | 19151  |   |
| UN31567 | Rsa1.0_00002.1 | 1049 | 601661 | 0         | 453 | 467  | 97 + | 171 | 634  | 49764  | 50230  |   |
| UN31568 | Rsa1.0_00098.1 | 924  | 349239 | 0         | 429 | 458  | 93 - | 356 | 807  | 288875 | 289329 |   |
| UN31569 | Rsa1.0_60576.1 | 787  | 378    | 3.00E-93  | 196 | 201  | 97 - | 232 | 429  | 1      | 201    |   |
| UN31570 | Rsa1.0_04835.1 | 1096 | 15766  | 0         | 655 | 669  | 97 + | 244 | 909  | 2483   | 3151   |   |
| UN31571 | Rsa1.0_00119.1 | 1259 | 467509 | 1.00E-126 | 356 | 400  | 89 + | 689 | 1068 | 283987 | 284385 |   |
| UN31572 | Rsa1.0_31264.1 | 772  | 731    | 0         | 356 | 366  | 97 - | 34  | 399  | 105    | 470    |   |
| UN31573 | Rsa1.0_04372.1 | 658  | 17692  | 0         | 552 | 602  | 91 + | 1   | 599  | 9891   | 10481  |   |
| UN31574 | Rsa1.0_06075.1 | 522  | 11805  | 0         | 409 | 412  | 99 - | 111 | 522  | 6346   | 6757   |   |
| UN31575 | Rsa1.0_02960.1 | 1005 | 26440  | 0         | 971 | 1004 | 96 - | 2   | 999  | 7526   | 8528   |   |
| UN31576 | Rsa1.0_00341.1 | 715  | 249309 | 1.00E-116 | 292 | 314  | 92 + | 42  | 354  | 221644 | 221946 |   |
| UN31577 | Rsa1.0_00131.1 | 136  | 432233 | 4.00E-45  | 122 | 132  | 92 + | 1   | 132  | 414468 | 414599 |   |
| UN31578 | Rsa1.0_01893.1 | 808  | 37520  | 0         | 655 | 725  | 90 + | 1   | 697  | 5003   | 5713   |   |
| UN31579 | Rsa1.0_01824.1 | 543  | 38733  | 0         | 472 | 497  | 94 - | 48  | 543  | 26486  | 26981  |   |
| UN31580 | Rsa1.0_00912.1 | 538  | 59923  | 0         | 523 | 548  | 95 - | 2   | 538  | 47588  | 48133  |   |
| UN31581 | Rsa1.0_00266.1 | 730  | 163932 | 0         | 588 | 615  | 95 - | 1   | 615  | 155113 | 155719 |   |
| UN31582 | Rsa1.0_00037.1 | 732  | 307838 | 1.00E-149 | 299 | 309  | 96 + | 60  | 365  | 260310 | 260618 |   |
| UN31583 | Rsa1.0_12425.1 | 805  | 5229   | 0         | 403 | 421  | 95 - | 1   | 416  | 4583   | 5003   |   |
| UN31584 | Rsa1.0_00680.1 | 768  | 68969  | 1.00E-147 | 357 | 388  | 92 + | 350 | 737  | 38212  | 38599  |   |
| UN31585 | Rsa1.0_02500.1 | 1305 | 30768  | 0         | 869 | 912  | 95 + | 412 | 1305 | 10187  | 11097  |   |
| UN31586 | Rsa1.0_01796.1 | 715  | 39154  | 2.33E-156 | 287 | 295  | 97 + | 396 | 690  | 18541  | 18835  |   |
| UN31587 | Rsa1.0_00463.1 | 612  | 189177 | 1.00E-161 | 323 | 335  | 96 + | 238 | 572  | 135462 | 135796 |   |
| UN31588 | Rsa1.0_01474.1 | 1147 | 45070  | 0         | 463 | 480  | 96 - | 1   | 477  | 40421  | 40897  |   |

|         |                |      |        |           |      |      |      |     |      |        |        |
|---------|----------------|------|--------|-----------|------|------|------|-----|------|--------|--------|
| UN31589 | Rsa1.0.02769.1 | 656  | 28107  | 0         | 453  | 467  | 97 + | 1   | 466  | 10779  | 11239  |
| UN31590 | Rsa1.0.03393.1 | 735  | 23247  | 5.00E-95  | 201  | 209  | 96 + | 2   | 210  | 18252  | 18460  |
| UN31591 | Rsa1.0.00826.1 | 821  | 166736 | 1.00E-122 | 268  | 282  | 95 + | 1   | 281  | 152511 | 152792 |
| UN31592 | #              | #    | #      | #         | #    | #    | #    | #   | #    | #      | #      |
| UN31593 | Rsa1.0.00713.1 | 915  | 158017 | 0         | 437  | 446  | 97 - | 395 | 838  | 44813  | 45258  |
| UN31594 | Rsa1.0.00660.1 | 874  | 69688  | 0         | 814  | 878  | 92 + | 2   | 868  | 14759  | 15633  |
| UN31595 | Rsa1.0.00507.1 | 951  | 79074  | 1.00E-155 | 314  | 326  | 96 - | 51  | 376  | 10817  | 11142  |
| UN31596 | Rsa1.0.22545.1 | 917  | 1111   | 0         | 677  | 690  | 98 + | 228 | 917  | 186    | 875    |
| UN31597 | Rsa1.0.01034.1 | 1041 | 56046  | 1.00E-122 | 312  | 343  | 90 - | 723 | 1041 | 39790  | 40132  |
| UN31598 | Rsa1.0.01877.1 | 601  | 37789  | 1.00E-150 | 417  | 468  | 89 + | 135 | 601  | 28390  | 28823  |
| UN31599 | Rsa1.0.04153.1 | 529  | 18807  | 1.00E-114 | 430  | 499  | 86 + | 4   | 474  | 17746  | 18231  |
| UN31600 | Rsa1.0.00582.1 | 925  | 74333  | 0         | 766  | 797  | 96 + | 129 | 925  | 68711  | 69506  |
| UN31601 | Rsa1.0.00509.1 | 886  | 78829  | 0         | 855  | 903  | 94 + | 1   | 886  | 54960  | 55855  |
| UN31602 | Rsa1.0.00083.1 | 825  | 442773 | 0         | 814  | 824  | 98 - | 2   | 825  | 336419 | 337241 |
| UN31603 | Rsa1.0.00147.1 | 265  | 249503 | 5.00E-68  | 196  | 213  | 92 + | 58  | 265  | 155738 | 155949 |
| UN31604 | Rsa1.0.01307.1 | 682  | 48685  | 0         | 630  | 653  | 96 - | 30  | 682  | 47461  | 48108  |
| UN31605 | Rsa1.0.00964.1 | 503  | 316648 | 1.00E-171 | 459  | 509  | 90 + | 4   | 503  | 264774 | 265260 |
| UN31606 | Rsa1.0.00434.1 | 601  | 85171  | 1.00E-110 | 220  | 226  | 97 - | 258 | 483  | 23065  | 23290  |
| UN31607 | Rsa1.0.13478.1 | 874  | 4790   | 9.00E-17  | 79   | 90   | 87 - | 107 | 196  | 2784   | 2873   |
| UN31608 | Rsa1.0.03298.1 | 635  | 23956  | 0         | 405  | 418  | 96 - | 5   | 422  | 21716  | 22133  |
| UN31609 | Rsa1.0.00045.1 | 460  | 328694 | 6.00E-75  | 161  | 166  | 96 + | 1   | 164  | 2831   | 2996   |
| UN31610 | Rsa1.0.13350.1 | 1104 | 4897   | 0         | 587  | 618  | 94 + | 261 | 872  | 3063   | 3680   |
| UN31611 | Rsa1.0.00153.1 | 1052 | 192931 | 0         | 633  | 681  | 92 - | 377 | 1052 | 13944  | 14613  |
| UN31612 | Rsa1.0.08221.1 | 1238 | 7700   | 0         | 1018 | 1037 | 98 + | 2   | 1038 | 5425   | 6460   |
| UN31613 | Rsa1.0.00372.1 | 1115 | 90418  | 1.00E-118 | 259  | 273  | 94 - | 844 | 1111 | 81695  | 81967  |
| UN31614 | Rsa1.0.02116.1 | 1127 | 34853  | 0         | 1052 | 1082 | 97 + | 2   | 1079 | 2335   | 3405   |
| UN31615 | Rsa1.0.00243.1 | 554  | 103651 | 8.00E-84  | 188  | 198  | 94 + | 84  | 281  | 24031  | 24228  |
| UN31616 | Rsa1.0.03892.1 | 738  | 20221  | 0         | 364  | 370  | 98 + | 369 | 738  | 5809   | 6178   |
| UN31617 | Rsa1.0.03808.1 | 843  | 20732  | 8.00E-54  | 184  | 208  | 88 + | 536 | 742  | 5623   | 5830   |
| UN31618 | Rsa1.0.00549.1 | 1168 | 76473  | 0         | 432  | 462  | 93 + | 108 | 569  | 20132  | 20572  |
| UN31619 | Rsa1.0.02187.1 | 1152 | 34113  | 0         | 511  | 540  | 94 + | 613 | 1151 | 22094  | 22633  |
| UN31620 | Rsa1.0.00105.1 | 696  | 134138 | 0         | 649  | 687  | 94 - | 10  | 696  | 99013  | 99696  |
| UN31621 | Rsa1.0.01916.1 | 576  | 37305  | 0         | 414  | 421  | 98 - | 4   | 423  | 35097  | 35516  |
| UN31622 | Rsa1.0.00306.1 | 1017 | 146760 | 0         | 529  | 568  | 93 - | 12  | 567  | 88781  | 89346  |
| UN31623 | Rsa1.0.02196.1 | 699  | 34005  | 1.00E-156 | 311  | 320  | 97 + | 353 | 672  | 13487  | 13805  |
| UN31624 | Rsa1.0.00097.1 | 800  | 138858 | 0         | 526  | 556  | 94 - | 5   | 559  | 104581 | 105118 |
| UN31625 | Rsa1.0.03826.1 | 683  | 20614  | 0         | 545  | 590  | 92 + | 5   | 590  | 15449  | 16023  |
| UN31626 | Rsa1.0.00120.1 | 858  | 277288 | 0         | 841  | 852  | 98 + | 5   | 856  | 10514  | 11365  |
| UN31627 | Rsa1.0.00877.1 | 754  | 61305  | 0         | 395  | 415  | 95 - | 4   | 415  | 809    | 1223   |

|         |                |      |        |           |      |      |       |     |      |        |        |
|---------|----------------|------|--------|-----------|------|------|-------|-----|------|--------|--------|
| UN31628 | Rsa1.0.00160.1 | 802  | 346678 | 2.00E-91  | 192  | 199  | 96 -  | 604 | 802  | 188085 | 188283 |
| UN31629 | Rsa1.0.00124.1 | 717  | 262503 | 0         | 660  | 716  | 92 -  | 2   | 717  | 41036  | 41736  |
| UN31630 | Rsa1.0.08034.1 | 825  | 8041   | 1.00E-123 | 372  | 417  | 89 +  | 1   | 415  | 4267   | 4682   |
| UN31631 | Rsa1.0.00078.1 | 590  | 175053 | 0         | 555  | 584  | 95 +  | 15  | 589  | 47944  | 48524  |
| UN31632 | Rsa1.0.11948.1 | 565  | 5363   | 1.00E-110 | 233  | 243  | 95 -  | 1   | 243  | 3716   | 3958   |
| UN31633 | Rsa1.0.10681.1 | 697  | 5757   | 0         | 634  | 679  | 93 -  | 1   | 678  | 39     | 703    |
| UN31634 | Rsa1.0.02597.1 | 567  | 29694  | 1.00E-100 | 195  | 198  | 98 -  | 82  | 279  | 3796   | 3993   |
| UN31635 | Rsa1.0.03550.1 | 1239 | 22154  | 1.00E-135 | 293  | 306  | 95 -  | 8   | 307  | 4755   | 5060   |
| UN31636 | Rsa1.0.01410.1 | 832  | 46345  | 1.00E-128 | 293  | 311  | 94 +  | 2   | 302  | 25238  | 25545  |
| UN31637 | Rsa1.0.00278.1 | 573  | 231896 | 0         | 502  | 546  | 91 -  | 1   | 527  | 164062 | 164597 |
| UN31638 | Rsa1.0.00734.1 | 807  | 66508  | 1.00E-157 | 320  | 330  | 96 -  | 11  | 340  | 6515   | 6842   |
| UN31639 | Rsa1.0.05117.1 | 592  | 14801  | 0         | 573  | 596  | 96 +  | 1   | 591  | 4101   | 4696   |
| UN31640 | Rsa1.0.00137.1 | 465  | 122457 | 0         | 440  | 465  | 94 -  | 1   | 462  | 60912  | 61375  |
| UN31641 | Rsa1.0.00189.1 | 983  | 111830 | 7.00E-24  | 156  | 186  | 83 -  | 299 | 483  | 35350  | 35534  |
| UN31642 | Rsa1.0.02165.1 | 1072 | 34423  | 1.00E-132 | 275  | 288  | 95 -  | 1   | 279  | 11169  | 11456  |
| UN31643 | Rsa1.0.00812.1 | 1064 | 63233  | 1.00E-160 | 344  | 361  | 95 -  | 323 | 682  | 13929  | 14286  |
| UN31644 | Rsa1.0.00951.1 | 524  | 164588 | 2.00E-59  | 129  | 133  | 96 +  | 391 | 523  | 42769  | 42901  |
| UN31645 | Rsa1.0.00104.1 | 561  | 368722 | 1.00E-171 | 405  | 433  | 93 -  | 3   | 427  | 32684  | 33111  |
| UN31646 | Rsa1.0.01280.1 | 789  | 49321  | 1.00E-64  | 132  | 134  | 98 +  | 342 | 475  | 38226  | 38359  |
| UN31647 | Rsa1.0.00026.1 | 1120 | 327835 | 0         | 1063 | 1114 | 95 +  | 5   | 1118 | 287929 | 289041 |
| UN31648 | Rsa1.0.00008.1 | 982  | 358124 | 1.00E-178 | 467  | 514  | 90 +  | 81  | 581  | 3365   | 3876   |
| UN31649 | Rsa1.0.02196.1 | 909  | 34005  | 0         | 348  | 348  | 100 - | 3   | 350  | 9104   | 9451   |
| UN31650 | Rsa1.0.00682.1 | 1113 | 68680  | 1.00E-124 | 288  | 308  | 93 +  | 505 | 812  | 55293  | 55596  |
| UN31651 | #              | #    | #      | #         | #    | #    | #     | #   | #    | #      | #      |
| UN31652 | #              | #    | #      | #         | #    | #    | #     | #   | #    | #      | #      |
| UN31653 | Rsa1.0.00851.1 | 732  | 62181  | 0         | 696  | 739  | 94 +  | 1   | 731  | 20352  | 21071  |
| UN31654 | Rsa1.0.00338.1 | 1062 | 94109  | 0         | 541  | 579  | 93 -  | 4   | 567  | 67182  | 67749  |
| UN31655 | Rsa1.0.00537.1 | 513  | 186980 | 1.00E-109 | 350  | 402  | 87 -  | 45  | 443  | 17447  | 17810  |
| UN31656 | Rsa1.0.02632.1 | 1349 | 29316  | 1.00E-174 | 338  | 347  | 97 +  | 973 | 1319 | 6014   | 6360   |
| UN31657 | Rsa1.0.00330.1 | 824  | 94666  | 0         | 778  | 817  | 95 +  | 1   | 817  | 34794  | 35610  |
| UN31658 | Rsa1.0.03114.1 | 912  | 25318  | 0         | 643  | 674  | 95 -  | 252 | 912  | 24567  | 25240  |
| UN31659 | Rsa1.0.00092.1 | 977  | 659932 | 3.00E-81  | 180  | 189  | 95 +  | 787 | 975  | 134776 | 134958 |
| UN31660 | Rsa1.0.00203.1 | 536  | 109129 | 1.00E-106 | 243  | 258  | 94 +  | 3   | 257  | 79791  | 80043  |
| UN31661 | Rsa1.0.04739.1 | 601  | 16167  | 1.00E-58  | 280  | 336  | 83 +  | 147 | 445  | 10684  | 11017  |
| UN31662 | Rsa1.0.00266.1 | 815  | 163932 | 0         | 397  | 399  | 99 -  | 1   | 399  | 87765  | 88162  |
| UN31663 | Rsa1.0.03397.1 | 1423 | 23210  | 0         | 809  | 815  | 99 -  | 81  | 895  | 17115  | 17928  |
| UN31664 | Rsa1.0.00010.1 | 1036 | 294827 | 0         | 963  | 1003 | 96 -  | 1   | 1000 | 112702 | 113704 |
| UN31665 | Rsa1.0.01053.1 | 719  | 55483  | 1.00E-176 | 343  | 353  | 97 +  | 18  | 370  | 38475  | 38827  |
| UN31666 | Rsa1.0.04611.1 | 1118 | 16647  | 1.00E-177 | 331  | 336  | 98 -  | 1   | 332  | 14537  | 14872  |

|         |                |      |        |           |      |      |       |     |      |        |        |
|---------|----------------|------|--------|-----------|------|------|-------|-----|------|--------|--------|
| UN31667 | Rsa1.0.06156.1 | 838  | 11606  | 0         | 363  | 367  | 98 -  | 1   | 367  | 5698   | 6064   |
| UN31668 | Rsa1.0.08837.1 | 675  | 6874   | 2.00E-91  | 183  | 187  | 97 +  | 148 | 334  | 784    | 970    |
| UN31669 | Rsa1.0.00168.1 | 779  | 115870 | 2.00E-69  | 147  | 150  | 98 +  | 5   | 153  | 82135  | 82284  |
| UN31670 | Rsa1.0.01280.1 | 252  | 49321  | 1.00E-117 | 237  | 245  | 96 +  | 5   | 249  | 2815   | 3059   |
| UN31671 | Rsa1.0.00307.1 | 956  | 199003 | 1.00E-74  | 221  | 246  | 89 -  | 136 | 380  | 86697  | 86936  |
| UN31672 | Rsa1.0.01292.1 | 861  | 175783 | 0         | 570  | 599  | 95 -  | 258 | 848  | 158406 | 159003 |
| UN31673 | Rsa1.0.00041.1 | 806  | 186197 | 1.00E-172 | 412  | 447  | 92 -  | 43  | 489  | 108853 | 109299 |
| UN31674 | Rsa1.0.02228.1 | 1010 | 33688  | 1.00E-116 | 245  | 255  | 96 +  | 22  | 276  | 7874   | 8125   |
| UN31675 | Rsa1.0.03165.1 | 1119 | 24866  | 0         | 357  | 358  | 99 +  | 241 | 598  | 17754  | 18111  |
| UN31676 | Rsa1.0.00252.1 | 789  | 102760 | 5.00E-92  | 172  | 172  | 100 + | 237 | 408  | 97383  | 97554  |
| UN31677 | Rsa1.0.00201.1 | 790  | 232851 | 0         | 732  | 760  | 96 +  | 31  | 789  | 102218 | 102975 |
| UN31678 | Rsa1.0.54746.1 | 762  | 417    | 0         | 369  | 369  | 100 - | 79  | 447  | 13     | 381    |
| UN31679 | Rsa1.0.00638.1 | 772  | 71037  | 0         | 528  | 545  | 96 +  | 225 | 769  | 35562  | 36106  |
| UN31680 | Rsa1.0.02810.1 | 753  | 27671  | 0         | 749  | 753  | 99 +  | 2   | 752  | 20754  | 21506  |
| UN31681 | Rsa1.0.00398.1 | 289  | 88007  | 1.00E-133 | 276  | 288  | 95 -  | 1   | 288  | 70447  | 70734  |
| UN31682 | Rsa1.0.02903.1 | 440  | 26901  | 4.00E-82  | 273  | 308  | 88 -  | 16  | 319  | 6362   | 6656   |
| UN31683 | Rsa1.0.00066.1 | 674  | 152418 | 0         | 451  | 481  | 93 +  | 3   | 468  | 37144  | 37622  |
| UN31684 | Rsa1.0.00085.1 | 1083 | 142226 | 0         | 1014 | 1111 | 91 -  | 2   | 1082 | 83359  | 84445  |
| UN31685 | Rsa1.0.01452.1 | 781  | 45459  | 0         | 409  | 417  | 98 -  | 2   | 418  | 24572  | 24987  |
| UN31686 | Rsa1.0.33623.1 | 853  | 674    | 3.00E-93  | 250  | 274  | 91 -  | 1   | 273  | 24     | 282    |
| UN31687 | Rsa1.0.03569.1 | 832  | 22041  | 0         | 793  | 834  | 95 -  | 1   | 832  | 7659   | 8486   |
| UN31688 | Rsa1.0.02794.1 | 1055 | 27820  | 0         | 535  | 550  | 97 +  | 252 | 801  | 618    | 1167   |
| UN31689 | Rsa1.0.01191.1 | 772  | 51235  | 1.00E-107 | 256  | 274  | 93 -  | 18  | 290  | 11275  | 11543  |
| UN31690 | Rsa1.0.00938.1 | 1255 | 193891 | 0         | 690  | 745  | 92 +  | 516 | 1254 | 184299 | 185021 |
| UN31691 | Rsa1.0.02804.1 | 759  | 27712  | 1.00E-158 | 348  | 366  | 95 -  | 13  | 378  | 14662  | 15023  |
| UN31692 | Rsa1.0.01425.1 | 644  | 46136  | 1.00E-123 | 278  | 295  | 94 +  | 350 | 644  | 37603  | 37895  |
| UN31693 | Rsa1.0.06455.1 | 785  | 10983  | 0         | 431  | 446  | 96 -  | 2   | 447  | 3383   | 3826   |
| UN31694 | Rsa1.0.00090.1 | 748  | 273859 | 0         | 429  | 440  | 97 -  | 245 | 684  | 78888  | 79327  |
| UN31695 | Rsa1.0.07604.1 | 524  | 9041   | 3.00E-43  | 202  | 234  | 86 -  | 19  | 251  | 7520   | 7750   |
| UN31696 | Rsa1.0.01017.1 | 998  | 56714  | 1.00E-130 | 283  | 296  | 95 +  | 616 | 909  | 12736  | 13030  |
| UN31697 | Rsa1.0.07692.1 | 723  | 132338 | 0         | 647  | 717  | 90 +  | 1   | 714  | 4271   | 4982   |
| UN31698 | Rsa1.0.03646.1 | 841  | 21598  | 0         | 813  | 845  | 96 +  | 1   | 841  | 18024  | 18857  |
| UN31699 | Rsa1.0.04594.1 | 1085 | 16713  | 1.00E-110 | 211  | 214  | 98 -  | 837 | 1050 | 10437  | 10650  |
| UN31700 | Rsa1.0.04602.1 | 418  | 16684  | 1.00E-102 | 284  | 313  | 90 +  | 1   | 309  | 6712   | 7022   |
| UN31701 | Rsa1.0.00069.1 | 1106 | 403561 | 0         | 1079 | 1106 | 97 -  | 1   | 1103 | 61558  | 62663  |
| UN31702 | Rsa1.0.07834.1 | 521  | 8453   | 0         | 492  | 537  | 91 +  | 3   | 520  | 4876   | 5403   |
| UN31703 | Rsa1.0.01753.1 | 1201 | 39794  | 0         | 772  | 802  | 96 -  | 1   | 793  | 10586  | 11386  |
| UN31704 | Rsa1.0.01513.1 | 1002 | 44234  | 1.00E-126 | 276  | 291  | 94 -  | 50  | 337  | 20353  | 20643  |
| UN31705 | Rsa1.0.00604.1 | 1212 | 146282 | 1.00E-161 | 621  | 728  | 85 -  | 479 | 1173 | 36489  | 37205  |

|         |                |      |        |           |     |      |      |     |      |        |        |
|---------|----------------|------|--------|-----------|-----|------|------|-----|------|--------|--------|
| UN31706 | Rsa1.0_00341.1 | 939  | 249309 | 1.00E-119 | 242 | 250  | 96 + | 1   | 250  | 142116 | 142365 |
| UN31707 | Rsa1.0_05541.1 | 1172 | 139959 | 0         | 984 | 1032 | 95 + | 1   | 1024 | 622    | 1649   |
| UN31708 | Rsa1.0_00092.1 | 605  | 659932 | 1.00E-147 | 494 | 572  | 86 + | 11  | 555  | 145939 | 146488 |
| UN31709 | Rsa1.0_03848.1 | 886  | 20472  | 0         | 861 | 886  | 97 - | 1   | 886  | 17556  | 18441  |
| UN31710 | Rsa1.0_01930.1 | 740  | 37189  | 2.00E-32  | 84  | 88   | 95 + | 630 | 717  | 36867  | 36954  |
| UN31711 | Rsa1.0_00092.1 | 751  | 659932 | 1.00E-152 | 318 | 333  | 95 - | 237 | 569  | 191762 | 192094 |
| UN31712 | Rsa1.0_04118.1 | 1105 | 18968  | 4.00E-87  | 192 | 200  | 96 + | 497 | 696  | 5386   | 5584   |
| UN31713 | Rsa1.0_00270.1 | 462  | 101236 | 1.00E-133 | 277 | 289  | 95 - | 171 | 459  | 67160  | 67448  |
| UN31714 | Rsa1.0_02187.1 | 540  | 34113  | 1.00E-139 | 283 | 291  | 97 - | 1   | 291  | 26398  | 26686  |
| UN31715 | Rsa1.0_02005.1 | 575  | 36137  | 2.00E-81  | 237 | 267  | 88 - | 1   | 265  | 5599   | 5845   |
| UN31716 | Rsa1.0_06349.1 | 383  | 11199  | 1.00E-113 | 317 | 354  | 89 + | 13  | 342  | 7030   | 7381   |
| UN31717 | Rsa1.0_00115.1 | 686  | 131321 | 2.00E-51  | 131 | 140  | 93 + | 468 | 607  | 97626  | 97765  |
| UN31718 | Rsa1.0_00698.1 | 893  | 67816  | 5.00E-12  | 65  | 74   | 87 - | 377 | 450  | 46381  | 46454  |
| UN31719 | Rsa1.0_00837.1 | 610  | 62568  | 0         | 408 | 425  | 96 + | 42  | 464  | 47643  | 48067  |
| UN31720 | Rsa1.0_00991.1 | 621  | 143101 | 0         | 564 | 588  | 95 - | 6   | 582  | 29619  | 30205  |
| UN31721 | Rsa1.0_01677.1 | 776  | 41140  | 0         | 747 | 777  | 96 - | 1   | 775  | 25643  | 26418  |
| UN31722 | Rsa1.0_00018.1 | 670  | 410899 | 1.00E-135 | 384 | 428  | 89 - | 162 | 577  | 260194 | 260611 |
| UN31723 | Rsa1.0_00205.1 | 777  | 193401 | 0         | 741 | 783  | 94 + | 1   | 777  | 183995 | 184772 |
| UN31724 | Rsa1.0_00045.1 | 890  | 328694 | 0         | 731 | 747  | 97 + | 143 | 888  | 267123 | 267868 |
| UN31725 | Rsa1.0_02774.1 | 780  | 28038  | 0         | 381 | 384  | 99 - | 382 | 765  | 3942   | 4325   |
| UN31726 | Rsa1.0_00720.1 | 980  | 66931  | 7.00E-33  | 116 | 129  | 89 - | 608 | 735  | 32088  | 32216  |
| UN31727 | Rsa1.0_04762.1 | 687  | 16101  | 0         | 515 | 540  | 95 - | 2   | 539  | 12732  | 13270  |
| UN31728 | Rsa1.0_00479.1 | 807  | 81377  | 0         | 403 | 405  | 99 - | 2   | 406  | 32372  | 32776  |
| UN31729 | Rsa1.0_04773.1 | 938  | 16037  | 0         | 520 | 535  | 97 + | 1   | 535  | 15086  | 15620  |
| UN31730 | Rsa1.0_01297.1 | 609  | 49029  | 1.00E-129 | 278 | 290  | 95 + | 1   | 288  | 48114  | 48402  |
| UN31731 | Rsa1.0_15346.1 | 635  | 2667   | 0         | 629 | 635  | 99 - | 1   | 634  | 1787   | 2421   |
| UN31732 | Rsa1.0_00226.1 | 645  | 105884 | 0         | 616 | 660  | 93 + | 2   | 643  | 8894   | 9544   |
| UN31733 | Rsa1.0_03670.1 | 1050 | 21461  | 1.00E-105 | 357 | 410  | 87 + | 642 | 1048 | 5584   | 5985   |
| UN31734 | Rsa1.0_00487.1 | 741  | 80674  | 1.00E-162 | 351 | 373  | 94 + | 369 | 741  | 5689   | 6052   |
| UN31735 | Rsa1.0_00644.1 | 569  | 136881 | 0         | 552 | 567  | 97 + | 4   | 568  | 68709  | 69273  |
| UN31736 | Rsa1.0_00239.1 | 643  | 104332 | 1.00E-165 | 373 | 394  | 94 - | 242 | 633  | 52400  | 52791  |
| UN31737 | Rsa1.0_00683.1 | 1225 | 68638  | 0         | 874 | 900  | 97 + | 325 | 1224 | 39444  | 40343  |
| UN31738 | Rsa1.0_05140.1 | 841  | 14710  | 1.00E-122 | 274 | 290  | 94 - | 2   | 280  | 5331   | 5619   |
| UN31739 | Rsa1.0_00816.1 | 970  | 403350 | 0         | 583 | 622  | 93 - | 344 | 951  | 380010 | 380630 |
| UN31740 | Rsa1.0_03032.1 | 1188 | 25836  | 1.00E-176 | 353 | 365  | 96 + | 334 | 698  | 11564  | 11927  |
| UN31741 | Rsa1.0_00119.1 | 613  | 467509 | 0         | 391 | 411  | 95 - | 126 | 534  | 299443 | 299850 |
| UN31742 | Rsa1.0_00234.1 | 1092 | 197060 | 0         | 829 | 876  | 94 - | 23  | 890  | 146490 | 147359 |
| UN31743 | Rsa1.0_01315.1 | 874  | 48361  | 0         | 414 | 436  | 94 + | 9   | 439  | 45695  | 46129  |
| UN31744 | Rsa1.0_02415.1 | 1183 | 31609  | 0         | 780 | 821  | 95 + | 1   | 813  | 17718  | 18534  |



|         |                |      |        |           |      |      |       |     |      |        |        |
|---------|----------------|------|--------|-----------|------|------|-------|-----|------|--------|--------|
| UN31745 | Rsa1.0.00301.1 | 689  | 365315 | 0         | 666  | 689  | 96 -  | 1   | 689  | 84861  | 85537  |
| UN31746 | Rsa1.0.00687.1 | 238  | 68494  | 1.00E-101 | 228  | 240  | 95 +  | 1   | 238  | 1924   | 2160   |
| UN31747 | Rsa1.0.04444.1 | 763  | 17320  | 1.00E-140 | 258  | 260  | 99 +  | 2   | 261  | 8629   | 8888   |
| UN31748 | Rsa1.0.00373.1 | 656  | 90296  | 1.00E-116 | 275  | 292  | 94 +  | 86  | 374  | 72536  | 72827  |
| UN31749 | Rsa1.0.00302.1 | 772  | 97521  | 0         | 525  | 551  | 95 -  | 42  | 589  | 40480  | 41026  |
| UN31750 | Rsa1.0.11704.1 | 730  | 5437   | 1.00E-140 | 338  | 361  | 93 +  | 20  | 375  | 4913   | 5270   |
| UN31751 | Rsa1.0.00770.1 | 1075 | 64900  | 0         | 400  | 410  | 97 +  | 530 | 939  | 55415  | 55824  |
| UN31752 | Rsa1.0.00502.1 | 215  | 204180 | 3.00E-84  | 202  | 214  | 94 +  | 1   | 214  | 55521  | 55727  |
| UN31753 | Rsa1.0.00999.1 | 1062 | 57162  | 0         | 620  | 659  | 94 -  | 398 | 1056 | 22435  | 23087  |
| UN31754 | Rsa1.0.00748.1 | 795  | 65983  | 0         | 415  | 447  | 92 +  | 346 | 792  | 11037  | 11464  |
| UN31755 | Rsa1.0.00009.1 | 1186 | 232558 | 1.00E-151 | 298  | 306  | 97 -  | 170 | 472  | 231520 | 231825 |
| UN31756 | Rsa1.0.00302.1 | 562  | 97521  | 0         | 474  | 510  | 92 -  | 57  | 561  | 684    | 1192   |
| UN31757 | Rsa1.0.02682.1 | 1059 | 28711  | 0         | 608  | 641  | 94 +  | 219 | 858  | 18742  | 19380  |
| UN31758 | Rsa1.0.00586.1 | 1188 | 163802 | 0         | 1137 | 1171 | 97 -  | 27  | 1188 | 3987   | 5155   |
| UN31759 | Rsa1.0.00463.1 | 922  | 189177 | 1.00E-165 | 321  | 330  | 97 -  | 1   | 325  | 107992 | 108321 |
| UN31760 | Rsa1.0.00015.1 | 514  | 561803 | 1.00E-156 | 398  | 438  | 90 +  | 2   | 415  | 16508  | 16943  |
| UN31761 | Rsa1.0.06189.1 | 923  | 11525  | 0         | 476  | 486  | 97 +  | 1   | 486  | 8115   | 8599   |
| UN31762 | Rsa1.0.02190.1 | 608  | 34084  | 0         | 484  | 504  | 96 +  | 24  | 514  | 6059   | 6562   |
| UN31763 | Rsa1.0.09125.1 | 609  | 6625   | 0         | 578  | 610  | 94 -  | 1   | 609  | 1382   | 1990   |
| UN31764 | Rsa1.0.08840.1 | 1285 | 6871   | 1.00E-84  | 452  | 547  | 82 -  | 628 | 1172 | 6144   | 6689   |
| UN31765 | Rsa1.0.01140.1 | 264  | 52586  | 3.00E-44  | 150  | 167  | 89 -  | 94  | 260  | 24961  | 25125  |
| UN31766 | Rsa1.0.00188.1 | 862  | 112020 | 0         | 642  | 685  | 93 +  | 157 | 832  | 99632  | 100308 |
| UN31767 | Rsa1.0.02043.1 | 1163 | 163754 | 0         | 936  | 960  | 97 +  | 1   | 960  | 16874  | 17832  |
| UN31768 | #              | #    | #      | #         | #    | #    | #     | #   | #    | #      | #      |
| UN31769 | Rsa1.0.00412.1 | 1375 | 86935  | 0         | 924  | 981  | 94 -  | 14  | 983  | 18909  | 19871  |
| UN31770 | Rsa1.0.00538.1 | 1174 | 77149  | 0         | 917  | 1013 | 90 +  | 105 | 1108 | 64133  | 65118  |
| UN31771 | Rsa1.0.01626.1 | 1134 | 41989  | 0         | 495  | 506  | 97 +  | 309 | 814  | 23348  | 23850  |
| UN31772 | Rsa1.0.00021.1 | 777  | 263655 | 3.00E-50  | 372  | 462  | 80 +  | 258 | 719  | 143335 | 143796 |
| UN31773 | Rsa1.0.02930.1 | 1014 | 26668  | 0         | 988  | 1014 | 97 -  | 8   | 1014 | 8975   | 9985   |
| UN31774 | Rsa1.0.00019.1 | 1021 | 301669 | 0         | 454  | 482  | 94 +  | 379 | 860  | 279443 | 279908 |
| UN31775 | Rsa1.0.00274.1 | 914  | 210119 | 1.00E-156 | 279  | 279  | 100 + | 1   | 279  | 207286 | 207564 |
| UN31776 | Rsa1.0.00197.1 | 696  | 109714 | 1.00E-114 | 239  | 249  | 95 -  | 435 | 683  | 95708  | 95956  |
| UN31777 | Rsa1.0.01081.1 | 315  | 499226 | 1.00E-129 | 297  | 315  | 94 +  | 1   | 314  | 38484  | 38788  |
| UN31778 | Rsa1.0.00168.1 | 763  | 115870 | 1.00E-180 | 401  | 427  | 93 +  | 51  | 477  | 28692  | 29117  |
| UN31779 | Rsa1.0.08405.1 | 554  | 7413   | 0         | 391  | 411  | 95 -  | 142 | 552  | 6213   | 6623   |
| UN31780 | Rsa1.0.00020.1 | 307  | 283099 | 1.00E-126 | 235  | 236  | 99 +  | 1   | 236  | 54951  | 55185  |
| UN31781 | Rsa1.0.00333.1 | 488  | 94500  | 0         | 476  | 486  | 97 +  | 1   | 486  | 16680  | 17165  |
| UN31782 | Rsa1.0.00793.1 | 755  | 64103  | 0         | 382  | 383  | 99 +  | 9   | 391  | 38942  | 39324  |
| UN31783 | Rsa1.0.00341.1 | 556  | 249309 | 1.00E-135 | 285  | 295  | 96 -  | 264 | 555  | 246402 | 246695 |

|         |                |      |        |           |     |     |       |     |     |        |        |
|---------|----------------|------|--------|-----------|-----|-----|-------|-----|-----|--------|--------|
| UN31784 | Rsa1.0.08959.1 | 621  | 6751   | 0         | 381 | 386 | 98 -  | 236 | 619 | 2469   | 2853   |
| UN31785 | Rsa1.0.02228.1 | 561  | 33688  | 0         | 390 | 412 | 94 -  | 1   | 412 | 9744   | 10155  |
| UN31786 | Rsa1.0.02357.1 | 681  | 32220  | 1.00E-117 | 317 | 345 | 91 +  | 340 | 681 | 13699  | 14040  |
| UN31787 | Rsa1.0.00540.1 | 848  | 76895  | 1.00E-177 | 330 | 335 | 98 +  | 513 | 847 | 65522  | 65856  |
| UN31788 | Rsa1.0.00141.1 | 405  | 121494 | 2.00E-65  | 216 | 244 | 88 -  | 4   | 246 | 33901  | 34130  |
| UN31789 | Rsa1.0.00748.1 | 264  | 65983  | 1.00E-119 | 255 | 265 | 96 +  | 1   | 263 | 62331  | 62595  |
| UN31790 | Rsa1.0.00122.1 | 1166 | 265937 | 1.00E-177 | 354 | 367 | 96 +  | 592 | 958 | 19734  | 20100  |
| UN31791 | Rsa1.0.03366.1 | 553  | 23401  | 1.00E-152 | 317 | 331 | 95 -  | 222 | 552 | 10383  | 10710  |
| UN31792 | Rsa1.0.04428.1 | 799  | 17399  | 0         | 590 | 631 | 93 -  | 5   | 615 | 12948  | 13576  |
| UN31793 | Rsa1.0.10543.1 | 967  | 5808   | 0         | 486 | 503 | 96 -  | 3   | 505 | 4301   | 4795   |
| UN31794 | Rsa1.0.03430.1 | 1069 | 22977  | 2.00E-64  | 163 | 174 | 93 -  | 120 | 293 | 16984  | 17156  |
| UN31795 | Rsa1.0.00928.1 | 510  | 59293  | 1.00E-112 | 209 | 210 | 99 +  | 1   | 210 | 13734  | 13943  |
| UN31796 | Rsa1.0.00825.1 | 1167 | 62855  | 7.00E-89  | 247 | 270 | 91 -  | 7   | 272 | 16125  | 16389  |
| UN31797 | Rsa1.0.00169.1 | 854  | 274298 | 0         | 479 | 487 | 98 +  | 15  | 501 | 270701 | 271187 |
| UN31798 | Rsa1.0.02064.1 | 912  | 35476  | 1.00E-117 | 229 | 234 | 97 -  | 677 | 910 | 22819  | 23052  |
| UN31799 | Rsa1.0.03421.1 | 1017 | 23081  | 1.00E-147 | 301 | 313 | 96 -  | 486 | 790 | 17954  | 18265  |
| UN31800 | Rsa1.0.04557.1 | 1055 | 145048 | 3.00E-38  | 180 | 210 | 85 +  | 729 | 931 | 138733 | 138942 |
| UN31801 | Rsa1.0.00247.1 | 953  | 103408 | 0         | 913 | 960 | 95 +  | 1   | 950 | 15354  | 16304  |
| UN31802 | Rsa1.0.00065.1 | 382  | 454616 | 1.00E-109 | 222 | 228 | 97 -  | 1   | 228 | 426469 | 426694 |
| UN31803 | Rsa1.0.01256.1 | 667  | 49770  | 1.00E-166 | 311 | 315 | 98 +  | 1   | 315 | 2043   | 2354   |
| UN31804 | Rsa1.0.01006.1 | 1128 | 163670 | 1.00E-115 | 241 | 251 | 96 +  | 1   | 251 | 2035   | 2285   |
| UN31805 | Rsa1.0.01432.1 | 861  | 45977  | 0         | 409 | 426 | 96 +  | 273 | 698 | 32247  | 32671  |
| UN31806 | Rsa1.0.00119.1 | 734  | 467509 | 1.00E-131 | 315 | 338 | 93 -  | 407 | 733 | 233294 | 233630 |
| UN31807 | Rsa1.0.07861.1 | 522  | 8406   | 0         | 509 | 527 | 96 +  | 1   | 520 | 3307   | 3833   |
| UN31808 | Rsa1.0.01970.1 | 1076 | 36648  | 0         | 383 | 383 | 100 - | 349 | 731 | 24051  | 24433  |
| UN31809 | Rsa1.0.01226.1 | 888  | 50316  | 0         | 403 | 411 | 98 +  | 470 | 880 | 25452  | 25862  |
| UN31810 | Rsa1.0.01209.1 | 721  | 50668  | 0         | 718 | 720 | 99 -  | 1   | 720 | 24826  | 25545  |
| UN31811 | Rsa1.0.02625.1 | 640  | 139104 | 0         | 545 | 557 | 97 +  | 79  | 635 | 1      | 557    |
| UN31812 | Rsa1.0.08083.1 | 1100 | 7936   | 1.00E-174 | 310 | 310 | 100 + | 544 | 853 | 6983   | 7292   |
| UN31813 | Rsa1.0.01355.1 | 426  | 47303  | 0         | 421 | 424 | 99 +  | 1   | 424 | 42465  | 42888  |
| UN31814 | Rsa1.0.04968.1 | 1111 | 15286  | 6.00E-74  | 145 | 146 | 99 +  | 524 | 669 | 14458  | 14603  |
| UN31815 | Rsa1.0.00160.1 | 556  | 346678 | 1.00E-109 | 221 | 228 | 96 +  | 150 | 377 | 156196 | 156423 |
| UN31816 | Rsa1.0.00016.1 | 874  | 831256 | 0         | 370 | 379 | 97 +  | 496 | 874 | 795321 | 795699 |
| UN31817 | Rsa1.0.59988.1 | 854  | 382    | 7.00E-76  | 178 | 188 | 94 -  | 19  | 204 | 46     | 233    |
| UN31818 | Rsa1.0.31916.1 | 680  | 715    | 0         | 519 | 539 | 96 -  | 1   | 539 | 163    | 701    |
| UN31819 | Rsa1.0.01196.1 | 927  | 51097  | 1.00E-178 | 341 | 347 | 98 +  | 1   | 344 | 41380  | 41725  |
| UN31820 | Rsa1.0.09601.1 | 681  | 6259   | 0         | 508 | 539 | 94 -  | 3   | 530 | 3835   | 4372   |
| UN31821 | Rsa1.0.00626.1 | 961  | 71582  | 0         | 664 | 714 | 92 -  | 249 | 960 | 45647  | 46338  |
| UN31822 | Rsa1.0.03319.1 | 555  | 23767  | 1.00E-91  | 180 | 183 | 98 +  | 293 | 475 | 11651  | 11833  |

|         |                |      |        |           |      |      |       |     |      |        |        |
|---------|----------------|------|--------|-----------|------|------|-------|-----|------|--------|--------|
| UN31823 | Rsa1.0.00469.1 | 1011 | 82084  | 0         | 573  | 588  | 97 -  | 3   | 589  | 72175  | 72749  |
| UN31824 | Rsa1.0.02893.1 | 753  | 26999  | 2.00E-97  | 206  | 214  | 96 -  | 353 | 566  | 23620  | 23829  |
| UN31825 | Rsa1.0.03960.1 | 501  | 19864  | 1.00E-101 | 304  | 341  | 89 +  | 2   | 320  | 10798  | 11136  |
| UN31826 | Rsa1.0.00816.1 | 832  | 403350 | 0         | 732  | 774  | 94 +  | 1   | 768  | 242    | 1012   |
| UN31827 | Rsa1.0.01041.1 | 904  | 55910  | 0         | 882  | 901  | 97 -  | 3   | 902  | 14569  | 15469  |
| UN31828 | Rsa1.0.46029.1 | 741  | 490    | 1.00E-178 | 335  | 341  | 98 +  | 312 | 652  | 115    | 455    |
| UN31829 | Rsa1.0.11537.1 | 868  | 5476   | 0         | 372  | 383  | 97 +  | 1   | 378  | 464    | 846    |
| UN31830 | Rsa1.0.00719.1 | 662  | 66952  | 1.00E-154 | 279  | 280  | 99 +  | 51  | 330  | 62081  | 62360  |
| UN31831 | Rsa1.0.00742.1 | 778  | 66106  | 0         | 398  | 400  | 99 +  | 1   | 400  | 25565  | 25964  |
| UN31832 | Rsa1.0.12748.1 | 860  | 5138   | 0         | 387  | 391  | 98 +  | 474 | 860  | 1      | 391    |
| UN31833 | Rsa1.0.00055.1 | 1348 | 520193 | 0         | 558  | 578  | 96 +  | 550 | 1124 | 395526 | 396103 |
| UN31834 | Rsa1.0.00026.1 | 1058 | 327835 | 0         | 1007 | 1076 | 93 +  | 8   | 1058 | 6731   | 7801   |
| UN31835 | Rsa1.0.00008.1 | 907  | 358124 | 0         | 543  | 556  | 97 -  | 21  | 574  | 60758  | 61313  |
| UN31836 | Rsa1.0.00977.1 | 772  | 198001 | 1.00E-106 | 223  | 232  | 96 -  | 335 | 566  | 33211  | 33442  |
| UN31837 | Rsa1.0.03971.1 | 647  | 19788  | 6.00E-88  | 165  | 165  | 100 - | 483 | 647  | 12758  | 12922  |
| UN31838 | Rsa1.0.20803.1 | 954  | 1268   | 7.00E-64  | 215  | 241  | 89 -  | 715 | 954  | 595    | 833    |
| UN31839 | Rsa1.0.05653.1 | 908  | 13043  | 0         | 696  | 732  | 95 -  | 6   | 725  | 5272   | 5995   |
| UN31840 | Rsa1.0.02630.1 | 780  | 29349  | 1.00E-173 | 364  | 382  | 95 -  | 3   | 371  | 23497  | 23878  |
| UN31841 | Rsa1.0.02921.1 | 1027 | 26779  | 8.00E-76  | 151  | 153  | 98 +  | 48  | 200  | 18524  | 18676  |
| UN31842 | Rsa1.0.00246.1 | 771  | 103541 | 0         | 453  | 468  | 96 +  | 3   | 467  | 87118  | 87582  |
| UN31843 | Rsa1.0.08740.1 | 883  | 6980   | 0         | 604  | 629  | 96 +  | 30  | 655  | 6358   | 6980   |
| UN31844 | Rsa1.0.01122.1 | 1067 | 53369  | 1.00E-133 | 325  | 353  | 92 +  | 7   | 359  | 52562  | 52914  |
| UN31845 | #              | #    | #      | #         | #    | #    | #     | #   | #    | #      | #      |
| UN31846 | Rsa1.0.02683.1 | 1000 | 28679  | 0         | 431  | 453  | 95 +  | 119 | 566  | 25478  | 25925  |
| UN31847 | Rsa1.0.00323.1 | 815  | 159650 | 1.00E-139 | 273  | 279  | 97 +  | 3   | 281  | 139595 | 139872 |
| UN31848 | Rsa1.0.00383.1 | 538  | 398431 | 0         | 398  | 404  | 98 +  | 2   | 405  | 21385  | 21787  |
| UN31849 | Rsa1.0.69496.1 | 750  | 330    | 0         | 330  | 330  | 100 - | 396 | 725  | 1      | 330    |
| UN31850 | Rsa1.0.00008.1 | 805  | 358124 | 1.00E-101 | 227  | 237  | 95 +  | 263 | 495  | 217181 | 217415 |
| UN31851 | Rsa1.0.01666.1 | 385  | 173972 | 2.00E-56  | 213  | 244  | 87 +  | 3   | 246  | 13245  | 13466  |
| UN31852 | Rsa1.0.04448.1 | 794  | 17309  | 0         | 523  | 560  | 93 -  | 1   | 560  | 10600  | 11158  |
| UN31853 | Rsa1.0.00484.1 | 994  | 203294 | 1.00E-124 | 282  | 295  | 95 -  | 3   | 293  | 149877 | 150167 |
| UN31854 | Rsa1.0.00040.1 | 676  | 324196 | 0         | 619  | 698  | 88 -  | 16  | 675  | 170655 | 171352 |
| UN31855 | Rsa1.0.01156.1 | 424  | 52147  | 0         | 423  | 427  | 99 -  | 1   | 424  | 38376  | 38802  |
| UN31856 | Rsa1.0.15997.1 | 918  | 2328   | 0         | 386  | 400  | 96 -  | 518 | 916  | 1936   | 2328   |
| UN31857 | Rsa1.0.03546.1 | 751  | 22172  | 1.00E-109 | 261  | 278  | 93 +  | 1   | 274  | 12735  | 13006  |
| UN31858 | Rsa1.0.02463.1 | 755  | 31157  | 0         | 338  | 340  | 99 +  | 3   | 342  | 12309  | 12648  |
| UN31859 | Rsa1.0.03517.1 | 739  | 22337  | 0         | 493  | 537  | 91 -  | 208 | 735  | 3685   | 4212   |
| UN31860 | Rsa1.0.00128.1 | 475  | 228675 | 1.00E-51  | 159  | 176  | 90 +  | 5   | 180  | 86708  | 86882  |
| UN31861 | Rsa1.0.01446.1 | 787  | 45666  | 7.00E-42  | 88   | 88   | 100 - | 3   | 90   | 12354  | 12441  |

|         |                |      |        |           |      |      |       |     |      |        |        |
|---------|----------------|------|--------|-----------|------|------|-------|-----|------|--------|--------|
| UN31862 | Rsa1.0.02985.1 | 499  | 26256  | 0         | 491  | 496  | 98 +  | 1   | 496  | 18562  | 19057  |
| UN31863 | Rsa1.0.06764.1 | 320  | 10398  | 1.00E-128 | 297  | 318  | 93 -  | 2   | 316  | 4762   | 5074   |
| UN31864 | Rsa1.0.00152.1 | 828  | 257730 | 0         | 524  | 553  | 94 -  | 276 | 828  | 208885 | 209428 |
| UN31865 | Rsa1.0.02977.1 | 1032 | 26313  | 0         | 366  | 380  | 96 +  | 652 | 1031 | 14066  | 14445  |
| UN31866 | Rsa1.0.01433.1 | 654  | 45976  | 0         | 638  | 648  | 98 -  | 2   | 648  | 29722  | 30369  |
| UN31867 | #              | #    | #      | #         | #    | #    | #     | #   | #    | #      | #      |
| UN31868 | Rsa1.0.01377.1 | 738  | 46967  | 0         | 475  | 497  | 95 -  | 244 | 730  | 11206  | 11702  |
| UN31869 | Rsa1.0.01753.1 | 764  | 39794  | 0         | 541  | 563  | 96 -  | 3   | 565  | 37226  | 37770  |
| UN31870 | Rsa1.0.01976.1 | 910  | 36570  | 1.00E-160 | 382  | 412  | 92 +  | 165 | 576  | 2779   | 3186   |
| UN31871 | Rsa1.0.07000.1 | 333  | 10049  | 3.00E-76  | 292  | 340  | 85 +  | 1   | 329  | 2001   | 2319   |
| UN31872 | Rsa1.0.01544.1 | 561  | 185602 | 0         | 543  | 561  | 96 -  | 4   | 560  | 180559 | 181119 |
| UN31873 | Rsa1.0.00010.1 | 1093 | 294827 | 1.00E-123 | 264  | 275  | 96 +  | 819 | 1093 | 221654 | 221924 |
| UN31874 | Rsa1.0.00016.1 | 1010 | 831256 | 1.00E-138 | 280  | 290  | 96 +  | 348 | 637  | 395096 | 395385 |
| UN31875 | Rsa1.0.00013.1 | 993  | 292129 | 0         | 916  | 970  | 94 -  | 1   | 968  | 198704 | 199672 |
| UN31876 | Rsa1.0.09499.1 | 911  | 6331   | 0         | 414  | 428  | 96 +  | 473 | 896  | 2153   | 2579   |
| UN31877 | Rsa1.0.02685.1 | 729  | 28669  | 0         | 477  | 491  | 97 +  | 1   | 491  | 7143   | 7633   |
| UN31878 | Rsa1.0.00773.1 | 782  | 64839  | 6.00E-30  | 93   | 99   | 93 +  | 531 | 626  | 28020  | 28118  |
| UN31879 | Rsa1.0.00679.1 | 1164 | 68971  | 1.00E-162 | 332  | 346  | 95 -  | 817 | 1162 | 5072   | 5417   |
| UN31880 | Rsa1.0.00100.1 | 816  | 249232 | 1.00E-175 | 343  | 351  | 97 +  | 1   | 349  | 186150 | 186500 |
| UN31881 | Rsa1.0.00808.1 | 1082 | 63351  | 0         | 1044 | 1082 | 96 +  | 1   | 1082 | 29240  | 30313  |
| UN31882 | Rsa1.0.04245.1 | 1190 | 18299  | 0         | 1025 | 1057 | 96 +  | 1   | 1057 | 8064   | 9116   |
| UN31883 | Rsa1.0.00926.1 | 751  | 195072 | 0         | 408  | 422  | 96 +  | 330 | 751  | 48695  | 49116  |
| UN31884 | Rsa1.0.00644.1 | 265  | 136881 | 1.00E-123 | 253  | 263  | 96 -  | 2   | 264  | 60605  | 60867  |
| UN31885 | Rsa1.0.11093.1 | 1119 | 5619   | 0         | 977  | 989  | 98 +  | 1   | 988  | 1049   | 2035   |
| UN31886 | Rsa1.0.04372.1 | 659  | 17692  | 0         | 629  | 673  | 93 -  | 2   | 653  | 2583   | 3252   |
| UN31887 | Rsa1.0.00290.1 | 541  | 225096 | 0         | 535  | 548  | 97 +  | 3   | 540  | 202715 | 203262 |
| UN31888 | Rsa1.0.05050.1 | 980  | 15022  | 0         | 971  | 978  | 99 -  | 1   | 978  | 486    | 1462   |
| UN31889 | Rsa1.0.01726.1 | 759  | 40263  | 0         | 717  | 764  | 93 +  | 1   | 758  | 6816   | 7567   |
| UN31890 | Rsa1.0.04250.1 | 768  | 18264  | 0         | 381  | 381  | 100 + | 388 | 768  | 1110   | 1490   |
| UN31891 | Rsa1.0.05380.1 | 609  | 13968  | 0         | 579  | 606  | 95 +  | 1   | 595  | 8526   | 9130   |
| UN31892 | Rsa1.0.00407.1 | 507  | 191544 | 0         | 482  | 506  | 95 -  | 2   | 506  | 46937  | 47440  |
| UN31893 | Rsa1.0.05997.1 | 969  | 11994  | 0         | 930  | 962  | 96 -  | 8   | 969  | 8374   | 9333   |
| UN31894 | Rsa1.0.00040.1 | 1165 | 324196 | 0         | 1118 | 1173 | 95 -  | 1   | 1164 | 230070 | 231227 |
| UN31895 | Rsa1.0.00120.1 | 707  | 277288 | 0         | 496  | 508  | 97 +  | 195 | 702  | 13087  | 13594  |
| UN31896 | Rsa1.0.01110.1 | 1121 | 195852 | 0         | 965  | 1011 | 95 +  | 1   | 1006 | 178292 | 179301 |
| UN31897 | Rsa1.0.00457.1 | 920  | 337301 | 0         | 916  | 920  | 99 -  | 1   | 919  | 13558  | 14477  |
| UN31898 | Rsa1.0.03917.1 | 876  | 20114  | 0         | 869  | 874  | 99 -  | 1   | 874  | 14613  | 15486  |
| UN31899 | Rsa1.0.00990.1 | 699  | 57445  | 0         | 407  | 418  | 97 +  | 66  | 483  | 6915   | 7330   |
| UN31900 | Rsa1.0.01719.1 | 907  | 40388  | 0         | 409  | 423  | 96 -  | 106 | 528  | 21193  | 21615  |

|         |                |      |        |           |      |      |      |     |      |        |        |
|---------|----------------|------|--------|-----------|------|------|------|-----|------|--------|--------|
| UN31901 | Rsa1.0.03176.1 | 1044 | 24801  | 0         | 518  | 534  | 97 - | 512 | 1043 | 9901   | 10422  |
| UN31902 | Rsa1.0.08589.1 | 979  | 7154   | 3.00E-66  | 190  | 209  | 90 + | 462 | 670  | 6490   | 6697   |
| UN31903 | Rsa1.0.17847.1 | 543  | 1727   | 1.00E-117 | 325  | 367  | 88 - | 1   | 358  | 739    | 1084   |
| UN31904 | Rsa1.0.00124.1 | 847  | 262503 | 0         | 841  | 846  | 99 + | 2   | 847  | 40026  | 40869  |
| UN31905 | Rsa1.0.01580.1 | 587  | 42852  | 1.00E-172 | 400  | 429  | 93 - | 1   | 416  | 40018  | 40445  |
| UN31906 | Rsa1.0.03244.1 | 928  | 24413  | 0         | 410  | 439  | 93 - | 491 | 917  | 10841  | 11276  |
| UN31907 | Rsa1.0.08359.1 | 570  | 7483   | 1.00E-141 | 296  | 310  | 95 - | 1   | 310  | 3446   | 3749   |
| UN31908 | Rsa1.0.00134.1 | 925  | 390219 | 0         | 894  | 920  | 97 - | 1   | 920  | 168519 | 169437 |
| UN31909 | Rsa1.0.01351.1 | 736  | 47498  | 0         | 407  | 408  | 99 + | 328 | 735  | 34054  | 34461  |
| UN31910 | Rsa1.0.04384.1 | 584  | 17629  | 0         | 339  | 340  | 99 + | 243 | 582  | 7756   | 8095   |
| UN31911 | Rsa1.0.00571.1 | 549  | 329018 | 0         | 546  | 548  | 99 - | 1   | 548  | 194273 | 194820 |
| UN31912 | Rsa1.0.05360.1 | 1220 | 14053  | 0         | 411  | 421  | 97 - | 1   | 419  | 12218  | 12638  |
| UN31913 | Rsa1.0.00067.1 | 1203 | 415055 | 0         | 685  | 702  | 97 + | 164 | 864  | 34645  | 35345  |
| UN31914 | Rsa1.0.05969.1 | 467  | 12072  | 0         | 445  | 472  | 94 - | 1   | 466  | 3559   | 4028   |
| UN31915 | Rsa1.0.00529.1 | 831  | 77487  | 1.00E-100 | 227  | 238  | 95 - | 1   | 237  | 3610   | 3846   |
| UN31916 | Rsa1.0.01333.1 | 1302 | 47929  | 0         | 588  | 648  | 90 - | 669 | 1298 | 23396  | 24034  |
| UN31917 | Rsa1.0.00224.1 | 906  | 327530 | 0         | 621  | 641  | 96 - | 47  | 685  | 168875 | 169512 |
| UN31918 | Rsa1.0.00203.1 | 402  | 109129 | 1.00E-166 | 317  | 324  | 97 + | 34  | 357  | 80704  | 81027  |
| UN31919 | Rsa1.0.00778.1 | 716  | 196751 | 1.00E-170 | 358  | 373  | 95 + | 4   | 372  | 179027 | 179398 |
| UN31920 | Rsa1.0.01841.1 | 475  | 38430  | 0         | 467  | 472  | 98 + | 2   | 473  | 16703  | 17172  |
| UN31921 | Rsa1.0.00528.1 | 936  | 164755 | 1.00E-22  | 249  | 312  | 79 - | 610 | 920  | 152012 | 152323 |
| UN31922 | Rsa1.0.02390.1 | 773  | 31851  | 3.00E-38  | 100  | 106  | 94 + | 663 | 768  | 20538  | 20643  |
| UN31923 | Rsa1.0.02374.1 | 1133 | 32043  | 0         | 950  | 953  | 99 - | 2   | 953  | 17286  | 18238  |
| UN31924 | Rsa1.0.04664.1 | 661  | 16471  | 1.00E-141 | 344  | 375  | 91 + | 38  | 395  | 4057   | 4430   |
| UN31925 | Rsa1.0.01987.1 | 666  | 36446  | 0         | 392  | 399  | 98 - | 1   | 395  | 5416   | 5814   |
| UN31926 | Rsa1.0.01531.1 | 904  | 43778  | 0         | 363  | 375  | 96 + | 528 | 902  | 18942  | 19307  |
| UN31927 | Rsa1.0.06362.1 | 1052 | 11154  | 1.00E-144 | 294  | 304  | 96 + | 1   | 303  | 1335   | 1634   |
| UN31928 | Rsa1.0.02185.1 | 851  | 34150  | 0         | 793  | 811  | 97 + | 42  | 850  | 13560  | 14369  |
| UN31929 | Rsa1.0.07725.1 | 1038 | 8707   | 0         | 1012 | 1039 | 97 + | 1   | 1037 | 3292   | 4330   |
| UN31930 | Rsa1.0.01914.1 | 1148 | 37354  | 1.00E-174 | 367  | 386  | 95 - | 28  | 404  | 34579  | 34963  |
| UN31931 | Rsa1.0.00123.1 | 864  | 325650 | 7.00E-73  | 247  | 278  | 88 + | 367 | 628  | 28327  | 28604  |
| UN31932 | Rsa1.0.00040.1 | 1158 | 324196 | 0         | 404  | 420  | 96 + | 393 | 812  | 294237 | 294656 |
| UN31933 | Rsa1.0.00310.1 | 848  | 96852  | 1.00E-98  | 189  | 191  | 98 - | 500 | 690  | 81313  | 81503  |
| UN31934 | Rsa1.0.00079.1 | 398  | 606987 | 1.00E-141 | 331  | 355  | 93 - | 46  | 398  | 18914  | 19260  |
| UN31935 | Rsa1.0.03192.1 | 1261 | 24695  | 0         | 555  | 556  | 99 - | 3   | 558  | 11611  | 12166  |
| UN31936 | Rsa1.0.01085.1 | 607  | 54539  | 0         | 595  | 605  | 98 - | 2   | 606  | 42992  | 43594  |
| UN31937 | Rsa1.0.01514.1 | 897  | 44222  | 0         | 787  | 815  | 96 - | 74  | 888  | 2906   | 3716   |
| UN31938 | Rsa1.0.01138.1 | 681  | 190615 | 1.00E-130 | 261  | 268  | 97 - | 38  | 304  | 17260  | 17527  |
| UN31939 | Rsa1.0.00509.1 | 1286 | 78829  | 0         | 604  | 650  | 92 + | 16  | 660  | 40241  | 40880  |

|         |                |      |        |           |      |      |       |     |      |        |        |
|---------|----------------|------|--------|-----------|------|------|-------|-----|------|--------|--------|
| UN31940 | Rsa1.0_02157.1 | 651  | 149652 | 1.00E-24  | 92   | 103  | 89 +  | 426 | 528  | 140472 | 140574 |
| UN31941 | Rsa1.0_00621.1 | 990  | 71840  | 9.00E-82  | 311  | 359  | 86 -  | 624 | 981  | 34748  | 35104  |
| UN31942 | Rsa1.0_01206.1 | 958  | 50772  | 1.00E-166 | 307  | 309  | 99 +  | 423 | 731  | 14457  | 14764  |
| UN31943 | Rsa1.0_02232.1 | 1080 | 33659  | 1.00E-175 | 381  | 404  | 94 -  | 209 | 608  | 25751  | 26154  |
| UN31944 | Rsa1.0_00399.1 | 1198 | 242951 | 1.00E-114 | 243  | 254  | 95 -  | 939 | 1192 | 48530  | 48783  |
| UN31945 | Rsa1.0_01104.1 | 626  | 285480 | 0         | 620  | 624  | 99 -  | 1   | 622  | 17620  | 18243  |
| UN31946 | Rsa1.0_00059.1 | 814  | 159650 | 0         | 507  | 549  | 92 +  | 258 | 806  | 134007 | 134537 |
| UN31947 | Rsa1.0_00266.1 | 1043 | 163932 | 1.00E-56  | 216  | 248  | 87 -  | 807 | 1042 | 100064 | 100310 |
| UN31948 | Rsa1.0_11825.1 | 939  | 5396   | 0         | 674  | 732  | 92 -  | 10  | 738  | 1510   | 2232   |
| UN31949 | Rsa1.0_01476.1 | 998  | 172928 | 1.00E-116 | 219  | 220  | 99 -  | 82  | 301  | 148223 | 148441 |
| UN31950 | Rsa1.0_04898.1 | 266  | 15545  | 1.00E-124 | 257  | 266  | 96 -  | 1   | 265  | 2846   | 3111   |
| UN31951 | Rsa1.0_00840.1 | 992  | 62514  | 0         | 590  | 609  | 96 +  | 383 | 990  | 10347  | 10955  |
| UN31952 | Rsa1.0_02662.1 | 1378 | 28956  | 0         | 497  | 536  | 92 +  | 1   | 525  | 263    | 790    |
| UN31953 | Rsa1.0_01803.1 | 931  | 173846 | 0         | 366  | 380  | 96 -  | 551 | 930  | 146930 | 147309 |
| UN31954 | Rsa1.0_03765.1 | 696  | 20971  | 8.00E-69  | 151  | 157  | 96 -  | 539 | 695  | 8153   | 8309   |
| UN31955 | Rsa1.0_01865.1 | 1171 | 37992  | 0         | 681  | 683  | 99 -  | 489 | 1171 | 29436  | 30118  |
| UN31956 | Rsa1.0_00409.1 | 577  | 146788 | 0         | 561  | 574  | 97 +  | 2   | 575  | 122864 | 123437 |
| UN31957 | Rsa1.0_04931.1 | 505  | 15412  | 7.00E-78  | 175  | 184  | 95 +  | 93  | 276  | 14761  | 14944  |
| UN31958 | Rsa1.0_00733.1 | 1404 | 66583  | 0         | 758  | 762  | 99 +  | 643 | 1404 | 47304  | 48065  |
| UN31959 | Rsa1.0_02893.1 | 528  | 26999  | 2.00E-69  | 146  | 150  | 97 -  | 101 | 250  | 23925  | 24074  |
| UN31960 | Rsa1.0_02384.1 | 958  | 31917  | 1.00E-120 | 307  | 335  | 91 -  | 2   | 335  | 6907   | 7221   |
| UN31961 | Rsa1.0_28466.1 | 856  | 814    | 0         | 515  | 526  | 97 -  | 330 | 855  | 196    | 718    |
| UN31962 | Rsa1.0_00645.1 | 1280 | 189716 | 9.00E-98  | 204  | 210  | 97 +  | 45  | 253  | 5824   | 6033   |
| UN31963 | Rsa1.0_00784.1 | 713  | 64359  | 1.00E-163 | 298  | 300  | 99 +  | 6   | 305  | 53583  | 53882  |
| UN31964 | Rsa1.0_01092.1 | 1202 | 54348  | 1.00E-175 | 386  | 412  | 93 +  | 6   | 416  | 22694  | 23087  |
| UN31965 | Rsa1.0_00869.1 | 1017 | 61627  | 1.00E-96  | 223  | 235  | 94 -  | 6   | 239  | 59791  | 60023  |
| UN31966 | Rsa1.0_05541.1 | 711  | 139959 | 2.00E-66  | 270  | 318  | 84 +  | 115 | 426  | 653    | 958    |
| UN31967 | Rsa1.0_02927.1 | 304  | 26698  | 1.00E-117 | 277  | 293  | 94 +  | 1   | 286  | 8593   | 8883   |
| UN31968 | Rsa1.0_03130.1 | 1164 | 25145  | 0         | 526  | 532  | 98 -  | 1   | 532  | 24187  | 24718  |
| UN31969 | Rsa1.0_00652.1 | 519  | 70089  | 5.00E-82  | 229  | 257  | 89 -  | 4   | 260  | 64567  | 64808  |
| UN31970 | Rsa1.0_00094.1 | 800  | 139042 | 0         | 770  | 805  | 95 -  | 3   | 800  | 93900  | 94700  |
| UN31971 | Rsa1.0_03321.1 | 843  | 23755  | 0         | 454  | 471  | 96 +  | 226 | 690  | 20182  | 20652  |
| UN31972 | Rsa1.0_00784.1 | 744  | 64359  | 0         | 479  | 499  | 95 -  | 15  | 509  | 30357  | 30848  |
| UN31973 | Rsa1.0_00505.1 | 725  | 79323  | 0         | 501  | 528  | 94 -  | 177 | 703  | 77587  | 78111  |
| UN31974 | Rsa1.0_00009.1 | 677  | 232558 | 1.00E-155 | 277  | 277  | 100 - | 3   | 279  | 55858  | 56134  |
| UN31975 | Rsa1.0_01024.1 | 815  | 56569  | 0         | 413  | 416  | 99 -  | 66  | 481  | 35338  | 35753  |
| UN31976 | Rsa1.0_05841.1 | 967  | 12465  | 0         | 934  | 963  | 96 +  | 7   | 965  | 5404   | 6353   |
| UN31977 | Rsa1.0_00006.1 | 1361 | 396176 | 0         | 1006 | 1025 | 98 -  | 340 | 1360 | 35613  | 36633  |
| UN31978 | Rsa1.0_00139.1 | 760  | 357786 | 0         | 383  | 394  | 97 +  | 2   | 393  | 236294 | 236685 |

|         |                |      |        |           |      |      |       |     |      |        |        |
|---------|----------------|------|--------|-----------|------|------|-------|-----|------|--------|--------|
| UN31979 | Rsa1.0.02203.1 | 391  | 164532 | 0         | 377  | 390  | 96 +  | 3   | 390  | 149793 | 150182 |
| UN31980 | Rsa1.0.00709.1 | 732  | 67329  | 0         | 367  | 375  | 97 -  | 162 | 536  | 9314   | 9686   |
| UN31981 | Rsa1.0.00905.1 | 731  | 60110  | 1.00E-121 | 279  | 297  | 93 -  | 409 | 702  | 41989  | 42282  |
| UN31982 | Rsa1.0.02937.1 | 1150 | 26605  | 0         | 487  | 492  | 98 -  | 658 | 1149 | 11388  | 11876  |
| UN31983 | Rsa1.0_00079.1 | 475  | 606987 | 0         | 420  | 441  | 95 +  | 1   | 438  | 466228 | 466657 |
| UN31984 | Rsa1.0_00278.1 | 744  | 231896 | 1.00E-148 | 323  | 338  | 95 -  | 405 | 741  | 64782  | 65111  |
| UN31985 | Rsa1.0.02110.1 | 758  | 34919  | 0         | 732  | 765  | 95 +  | 3   | 758  | 31500  | 32262  |
| UN31986 | Rsa1.0.03357.1 | 1197 | 23478  | 0         | 361  | 370  | 97 -  | 740 | 1107 | 761    | 1130   |
| UN31987 | Rsa1.0.02348.1 | 636  | 32316  | 0         | 468  | 471  | 99 -  | 4   | 473  | 17380  | 17848  |
| UN31988 | Rsa1.0.01659.1 | 714  | 164577 | 0         | 380  | 382  | 99 +  | 1   | 382  | 126094 | 126475 |
| UN31989 | Rsa1.0.03775.1 | 691  | 20927  | 1.00E-157 | 287  | 289  | 99 +  | 162 | 450  | 629    | 917    |
| UN31990 | Rsa1.0.01103.1 | 723  | 53974  | 3.00E-93  | 180  | 182  | 98 +  | 368 | 549  | 37427  | 37608  |
| UN31991 | Rsa1.0.00087.1 | 781  | 761073 | 1.00E-112 | 218  | 222  | 98 -  | 559 | 780  | 558944 | 559165 |
| UN31992 | Rsa1.0.03899.1 | 458  | 20178  | 5.00E-66  | 173  | 188  | 92 +  | 19  | 206  | 2713   | 2900   |
| UN31993 | Rsa1.0.00019.1 | 958  | 301669 | 0         | 846  | 856  | 98 -  | 1   | 855  | 15415  | 16269  |
| UN31994 | Rsa1.0.01123.1 | 586  | 53359  | 2.00E-69  | 153  | 158  | 96 +  | 102 | 258  | 31859  | 32016  |
| UN31995 | Rsa1.0.03422.1 | 875  | 23076  | 0         | 835  | 877  | 95 +  | 2   | 873  | 12503  | 13370  |
| UN31996 | Rsa1.0_19692.1 | 820  | 1396   | 0         | 510  | 511  | 99 +  | 2   | 512  | 170    | 680    |
| UN31997 | Rsa1.0.03756.1 | 869  | 143061 | 0         | 547  | 582  | 93 -  | 2   | 567  | 140468 | 141047 |
| UN31998 | Rsa1.0.00329.1 | 1011 | 222544 | 1.00E-107 | 203  | 205  | 99 +  | 358 | 562  | 204139 | 204343 |
| UN31999 | Rsa1.0.00472.1 | 564  | 398134 | 0         | 468  | 470  | 99 -  | 93  | 562  | 129688 | 130156 |
| UN32000 | Rsa1.0.00056.1 | 860  | 332604 | 0         | 493  | 498  | 98 -  | 1   | 495  | 141016 | 141513 |
| UN32001 | Rsa1.0.05847.1 | 1034 | 12433  | 9.00E-76  | 275  | 319  | 86 -  | 3   | 305  | 5629   | 5932   |
| UN32002 | Rsa1.0.00111.1 | 607  | 390088 | 0         | 487  | 488  | 99 +  | 120 | 607  | 27468  | 27955  |
| UN32003 | Rsa1.0.01319.1 | 667  | 48273  | 0         | 644  | 661  | 97 -  | 16  | 667  | 16311  | 16971  |
| UN32004 | Rsa1.0.00009.1 | 806  | 232558 | 1.00E-104 | 252  | 269  | 93 -  | 1   | 269  | 57589  | 57850  |
| UN32005 | Rsa1.0.02619.1 | 991  | 29444  | 0         | 458  | 467  | 98 +  | 431 | 896  | 13263  | 13728  |
| UN32006 | Rsa1.0.01376.1 | 427  | 47004  | 1.00E-155 | 359  | 381  | 94 -  | 5   | 383  | 1643   | 2020   |
| UN32007 | Rsa1.0.00848.1 | 1062 | 152362 | 0         | 515  | 539  | 95 +  | 525 | 1062 | 31460  | 31995  |
| UN32008 | Rsa1.0.00242.1 | 775  | 103956 | 0         | 527  | 560  | 94 -  | 63  | 622  | 68055  | 68611  |
| UN32009 | Rsa1.0.00367.1 | 383  | 90750  | 1.00E-157 | 357  | 375  | 95 +  | 8   | 378  | 29364  | 29735  |
| UN32010 | Rsa1.0.00017.1 | 757  | 752458 | 0         | 741  | 757  | 97 -  | 1   | 756  | 477983 | 478739 |
| UN32011 | Rsa1.0.01071.1 | 595  | 166914 | 0         | 368  | 380  | 96 +  | 2   | 376  | 25423  | 25802  |
| UN32012 | Rsa1.0.00747.1 | 960  | 66030  | 0         | 337  | 338  | 99 -  | 2   | 339  | 21241  | 21578  |
| UN32013 | Rsa1.0.00016.1 | 383  | 831256 | 0         | 382  | 382  | 100 + | 1   | 382  | 238753 | 239134 |
| UN32014 | Rsa1.0.55099.1 | 1168 | 414    | 0         | 412  | 414  | 99 -  | 347 | 760  | 1      | 414    |
| UN32015 | Rsa1.0.01234.1 | 978  | 50183  | 0         | 920  | 978  | 94 -  | 3   | 978  | 15773  | 16729  |
| UN32016 | Rsa1.0.02945.1 | 1147 | 26548  | 0         | 609  | 627  | 97 +  | 526 | 1146 | 22857  | 23483  |
| UN32017 | Rsa1.0.05269.1 | 1042 | 14311  | 0         | 1020 | 1046 | 97 -  | 1   | 1042 | 9346   | 10389  |

|         |                |      |        |           |      |      |       |     |      |        |        |
|---------|----------------|------|--------|-----------|------|------|-------|-----|------|--------|--------|
| UN32018 | Rsa1.0.00340.1 | 317  | 305782 | 1.00E-152 | 310  | 323  | 95 +  | 1   | 317  | 6053   | 6375   |
| UN32019 | Rsa1.0.02456.1 | 873  | 31222  | 2.00E-23  | 112  | 128  | 87 -  | 682 | 808  | 29875  | 30000  |
| UN32020 | Rsa1.0.02847.1 | 658  | 27333  | 0         | 639  | 658  | 97 -  | 1   | 658  | 8081   | 8737   |
| UN32021 | Rsa1.0.00475.1 | 1024 | 81678  | 0         | 715  | 730  | 97 -  | 1   | 730  | 2218   | 2945   |
| UN32022 | Rsa1.0_10490.1 | 349  | 5830   | 3.00E-57  | 231  | 267  | 86 +  | 82  | 347  | 5510   | 5772   |
| UN32023 | Rsa1.0_01214.1 | 619  | 50599  | 0         | 461  | 489  | 94 +  | 130 | 618  | 23665  | 24150  |
| UN32024 | Rsa1.0.00026.1 | 549  | 327835 | 0         | 481  | 529  | 90 -  | 1   | 524  | 103795 | 104307 |
| UN32025 | Rsa1.0.00454.1 | 577  | 216970 | 1.00E-128 | 300  | 319  | 94 -  | 2   | 317  | 142994 | 143311 |
| UN32026 | Rsa1.0.01076.1 | 841  | 54835  | 0         | 793  | 835  | 94 +  | 20  | 841  | 19153  | 19987  |
| UN32027 | Rsa1.0.00141.1 | 1156 | 121494 | 0         | 1124 | 1164 | 96 +  | 1   | 1154 | 94703  | 95865  |
| UN32028 | Rsa1.0.06120.1 | 1124 | 11691  | 0         | 586  | 608  | 96 -  | 456 | 1063 | 3678   | 4282   |
| UN32029 | Rsa1.0.02488.1 | 575  | 30913  | 1.00E-98  | 266  | 287  | 92 -  | 298 | 573  | 29003  | 29285  |
| UN32030 | Rsa1.0.40739.1 | 1286 | 551    | 0         | 459  | 473  | 97 -  | 550 | 1022 | 82     | 551    |
| UN32031 | Rsa1.0.00009.1 | 767  | 232558 | 0         | 759  | 762  | 99 +  | 5   | 765  | 88471  | 89232  |
| UN32032 | Rsa1.0.03520.1 | 1368 | 22327  | 0         | 1086 | 1105 | 98 +  | 1   | 1104 | 5949   | 7049   |
| UN32033 | Rsa1.0.00594.1 | 499  | 73729  | 1.00E-150 | 273  | 274  | 99 -  | 1   | 274  | 53984  | 54257  |
| UN32034 | Rsa1.0.00386.1 | 1013 | 89134  | 1.00E-148 | 312  | 326  | 95 -  | 300 | 624  | 40382  | 40707  |
| UN32035 | Rsa1.0.02766.1 | 741  | 28128  | 8.00E-97  | 219  | 231  | 94 +  | 27  | 255  | 15132  | 15362  |
| UN32036 | Rsa1.0.06222.1 | 662  | 11452  | 3.00E-99  | 187  | 188  | 99 +  | 471 | 658  | 3811   | 3998   |
| UN32037 | Rsa1.0_18947.1 | 973  | 1506   | 0         | 498  | 530  | 93 +  | 1   | 504  | 414    | 943    |
| UN32038 | Rsa1.0.00030.1 | 763  | 250988 | 1.00E-166 | 329  | 339  | 97 -  | 4   | 342  | 152714 | 153049 |
| UN32039 | Rsa1.0.09522.1 | 1216 | 6316   | 0         | 642  | 670  | 95 -  | 8   | 673  | 2      | 670    |
| UN32040 | Rsa1.0_04703.1 | 784  | 16302  | 1.00E-127 | 240  | 243  | 98 +  | 540 | 782  | 9749   | 9991   |
| UN32041 | Rsa1.0_01029.1 | 702  | 256254 | 1.00E-122 | 289  | 307  | 94 -  | 12  | 313  | 144670 | 144974 |
| UN32042 | Rsa1.0_01285.1 | 744  | 172709 | 6.00E-70  | 138  | 139  | 99 +  | 306 | 444  | 157994 | 158132 |
| UN32043 | Rsa1.0.00025.1 | 260  | 277312 | 1.00E-99  | 226  | 237  | 95 +  | 19  | 253  | 158880 | 159112 |
| UN32044 | Rsa1.0.00066.1 | 871  | 152418 | 0         | 429  | 455  | 94 -  | 258 | 709  | 61805  | 62256  |
| UN32045 | Rsa1.0.02820.1 | 535  | 27629  | 1.00E-131 | 244  | 246  | 99 -  | 288 | 533  | 1595   | 1840   |
| UN32046 | Rsa1.0.00098.1 | 289  | 349239 | 6.00E-86  | 220  | 236  | 93 +  | 53  | 287  | 237790 | 238017 |
| UN32047 | Rsa1.0_01989.1 | 1050 | 36439  | 0         | 1045 | 1049 | 99 -  | 1   | 1048 | 12139  | 13186  |
| UN32048 | Rsa1.0.00006.1 | 875  | 396176 | 0         | 495  | 509  | 97 -  | 1   | 508  | 360905 | 361413 |
| UN32049 | Rsa1.0_11229.1 | 685  | 5576   | 1.00E-149 | 291  | 299  | 97 -  | 231 | 529  | 4418   | 4716   |
| UN32050 | Rsa1.0.00019.1 | 646  | 301669 | 0         | 622  | 648  | 95 +  | 1   | 643  | 32938  | 33572  |
| UN32051 | Rsa1.0.02321.1 | 876  | 32572  | 0         | 622  | 681  | 91 -  | 199 | 874  | 17351  | 18019  |
| UN32052 | Rsa1.0.03742.1 | 916  | 21062  | 3.00E-38  | 121  | 134  | 90 +  | 414 | 547  | 3944   | 4077   |
| UN32053 | Rsa1.0.00179.1 | 1094 | 393324 | 1.00E-142 | 528  | 615  | 85 -  | 21  | 631  | 19783  | 20392  |
| UN32054 | Rsa1.0.00007.1 | 260  | 239325 | 1.00E-102 | 241  | 259  | 93 -  | 4   | 255  | 44260  | 44518  |
| UN32055 | Rsa1.0_04424.1 | 1105 | 17415  | 8.00E-30  | 152  | 180  | 84 -  | 886 | 1065 | 13386  | 13565  |
| UN32056 | Rsa1.0_00547.1 | 171  | 76521  | 6.00E-91  | 169  | 169  | 100 + | 1   | 169  | 17995  | 18163  |



|         |                |      |        |           |     |     |       |     |      |        |        |
|---------|----------------|------|--------|-----------|-----|-----|-------|-----|------|--------|--------|
| UN32057 | Rsa1.0.00173.1 | 642  | 288743 | 0         | 564 | 595 | 94 +  | 45  | 635  | 32334  | 32919  |
| UN32058 | Rsa1.0.00054.1 | 1059 | 162053 | 1.00E-130 | 409 | 466 | 87 -  | 583 | 1045 | 101932 | 102397 |
| UN32059 | Rsa1.0.00059.1 | 658  | 159650 | 4.00E-61  | 170 | 184 | 92 +  | 21  | 203  | 96471  | 96653  |
| UN32060 | Rsa1.0.20774.1 | 921  | 1271   | 0         | 454 | 463 | 98 +  | 1   | 463  | 811    | 1271   |
| UN32061 | Rsa1.0.07425.1 | 689  | 9414   | 0         | 413 | 441 | 93 +  | 222 | 662  | 1      | 432    |
| UN32062 | Rsa1.0.00035.1 | 1003 | 176449 | 0         | 962 | 995 | 96 -  | 15  | 1002 | 83769  | 84759  |
| UN32063 | Rsa1.0.01726.1 | 812  | 40263  | 1.00E-43  | 112 | 119 | 94 +  | 487 | 605  | 2683   | 2801   |
| UN32064 | Rsa1.0.14951.1 | 1025 | 2939   | 2.00E-55  | 213 | 245 | 86 +  | 76  | 316  | 531    | 775    |
| UN32065 | Rsa1.0.00369.1 | 874  | 266462 | 0         | 824 | 874 | 94 -  | 1   | 873  | 198489 | 199350 |
| UN32066 | Rsa1.0.02416.1 | 932  | 31607  | 0         | 553 | 591 | 93 +  | 5   | 578  | 20739  | 21328  |
| UN32067 | Rsa1.0.00323.1 | 715  | 159650 | 0         | 687 | 715 | 96 +  | 1   | 714  | 56563  | 57272  |
| UN32068 | Rsa1.0.21164.1 | 666  | 1229   | 1.00E-110 | 242 | 253 | 95 -  | 5   | 257  | 836    | 1084   |
| UN32069 | Rsa1.0.00694.1 | 332  | 68074  | 1.00E-117 | 309 | 334 | 92 +  | 5   | 332  | 60921  | 61245  |
| UN32070 | Rsa1.0.00071.1 | 568  | 345714 | 1.00E-169 | 334 | 345 | 96 -  | 223 | 567  | 58420  | 58764  |
| UN32071 | Rsa1.0.00019.1 | 669  | 301669 | 0         | 414 | 423 | 97 +  | 1   | 423  | 32891  | 33312  |
| UN32072 | Rsa1.0.13707.1 | 1079 | 4448   | 1.00E-157 | 445 | 504 | 88 +  | 312 | 815  | 65     | 544    |
| UN32073 | Rsa1.0.00905.1 | 569  | 60110  | 1.00E-137 | 251 | 252 | 99 -  | 316 | 567  | 38456  | 38707  |
| UN32074 | Rsa1.0.00208.1 | 1033 | 108565 | 0         | 564 | 587 | 96 +  | 1   | 587  | 12211  | 12785  |
| UN32075 | Rsa1.0.02157.1 | 816  | 149652 | 1.00E-24  | 92  | 103 | 89 +  | 399 | 501  | 140472 | 140574 |
| UN32076 | Rsa1.0.00195.1 | 717  | 251884 | 0         | 696 | 719 | 96 -  | 1   | 716  | 233854 | 234572 |
| UN32077 | Rsa1.0.01701.1 | 901  | 162121 | 2.00E-95  | 238 | 257 | 92 -  | 76  | 327  | 18849  | 19103  |
| UN32078 | Rsa1.0.00066.1 | 943  | 152418 | 1.00E-142 | 272 | 277 | 98 -  | 457 | 733  | 138796 | 139072 |
| UN32079 | Rsa1.0.02260.1 | 1065 | 33260  | 0         | 920 | 926 | 99 -  | 1   | 924  | 25797  | 26722  |
| UN32080 | Rsa1.0.00593.1 | 1006 | 143463 | 1.00E-135 | 315 | 335 | 94 +  | 1   | 331  | 135834 | 136167 |
| UN32081 | Rsa1.0.06412.1 | 771  | 11060  | 1.00E-109 | 219 | 225 | 97 +  | 345 | 569  | 8074   | 8298   |
| UN32082 | Rsa1.0.15341.1 | 850  | 2672   | 0         | 328 | 328 | 100 + | 1   | 328  | 288    | 615    |
| UN32083 | Rsa1.0.00348.1 | 701  | 92818  | 0         | 554 | 570 | 97 -  | 132 | 701  | 16943  | 17509  |
| UN32084 | Rsa1.0.64191.1 | 525  | 357    | 1.00E-153 | 292 | 296 | 98 +  | 1   | 292  | 62     | 357    |
| UN32085 | Rsa1.0.00062.1 | 768  | 299291 | 0         | 594 | 604 | 98 +  | 1   | 604  | 72612  | 73215  |
| UN32086 | Rsa1.0.00457.1 | 1136 | 337301 | 0         | 396 | 403 | 98 -  | 734 | 1136 | 289889 | 290291 |
| UN32087 | Rsa1.0.00380.1 | 397  | 89748  | 3.00E-76  | 223 | 245 | 91 -  | 58  | 299  | 21870  | 22114  |
| UN32088 | Rsa1.0.00997.1 | 946  | 57190  | 1.00E-122 | 254 | 262 | 96 -  | 474 | 733  | 23309  | 23570  |
| UN32089 | Rsa1.0.00371.1 | 690  | 90463  | 0         | 686 | 689 | 99 -  | 1   | 689  | 2142   | 2828   |
| UN32090 | Rsa1.0.06602.1 | 1175 | 10683  | 0         | 945 | 997 | 94 +  | 148 | 1132 | 2533   | 3529   |
| UN32091 | Rsa1.0.07596.1 | 1043 | 9056   | 0         | 545 | 547 | 99 -  | 1   | 547  | 4498   | 5044   |
| UN32092 | Rsa1.0.00540.1 | 738  | 76895  | 0         | 721 | 733 | 98 +  | 8   | 736  | 57346  | 58078  |
| UN32093 | Rsa1.0.01659.1 | 867  | 164577 | 0         | 841 | 880 | 95 +  | 2   | 867  | 154582 | 155458 |
| UN32094 | Rsa1.0.35727.1 | 1224 | 633    | 0         | 431 | 437 | 98 +  | 284 | 720  | 197    | 633    |
| UN32095 | Rsa1.0.00360.1 | 868  | 91190  | 0         | 736 | 740 | 99 -  | 124 | 863  | 10864  | 11602  |

|         |                |      |        |           |      |      |       |     |      |        |        |
|---------|----------------|------|--------|-----------|------|------|-------|-----|------|--------|--------|
| UN32096 | Rsa1.0.00084.1 | 763  | 142338 | 0         | 401  | 402  | 99 -  | 358 | 759  | 120157 | 120558 |
| UN32097 | Rsa1.0.01786.1 | 1155 | 133324 | 0         | 730  | 730  | 100 - | 1   | 730  | 104472 | 105201 |
| UN32098 | Rsa1.0.00561.1 | 1145 | 75653  | 1.00E-152 | 316  | 329  | 96 -  | 262 | 590  | 53598  | 53925  |
| UN32099 | Rsa1.0.01971.1 | 931  | 36641  | 0         | 890  | 936  | 95 -  | 3   | 930  | 19941  | 20873  |
| UN32100 | Rsa1.0.00927.1 | 718  | 59312  | 9.00E-38  | 102  | 109  | 93 +  | 251 | 359  | 37354  | 37462  |
| UN32101 | Rsa1.0.08526.1 | 815  | 7236   | 0         | 639  | 656  | 97 -  | 9   | 660  | 5666   | 6321   |
| UN32102 | Rsa1.0.00203.1 | 620  | 109129 | 1.00E-135 | 362  | 395  | 91 -  | 2   | 388  | 45361  | 45751  |
| UN32103 | Rsa1.0.01036.1 | 622  | 55978  | 4.00E-92  | 178  | 180  | 98 +  | 223 | 402  | 12737  | 12916  |
| UN32104 | Rsa1.0.00114.1 | 461  | 131330 | 0         | 456  | 460  | 99 -  | 1   | 459  | 2767   | 3225   |
| UN32105 | #              | #    | #      | #         | #    | #    | #     | #   | #    | #      | #      |
| UN32106 | Rsa1.0.00473.1 | 557  | 212204 | 0         | 446  | 475  | 93 +  | 85  | 555  | 78970  | 79440  |
| UN32107 | Rsa1.0.00215.1 | 262  | 201775 | 1.00E-110 | 252  | 268  | 94 -  | 1   | 261  | 53455  | 53722  |
| UN32108 | Rsa1.0.03853.1 | 775  | 20447  | 1.00E-119 | 457  | 545  | 83 +  | 267 | 775  | 5057   | 5577   |
| UN32109 | Rsa1.0.00511.1 | 870  | 78616  | 1.00E-130 | 341  | 380  | 89 -  | 1   | 374  | 77067  | 77425  |
| UN32110 | Rsa1.0.01397.1 | 1047 | 183276 | 0         | 976  | 1032 | 94 -  | 16  | 1047 | 40543  | 41574  |
| UN32111 | Rsa1.0.01097.1 | 558  | 173349 | 0         | 544  | 566  | 96 +  | 2   | 557  | 22352  | 22917  |
| UN32112 | Rsa1.0.05839.1 | 1176 | 12479  | 5.00E-28  | 114  | 129  | 88 -  | 964 | 1092 | 3001   | 3128   |
| UN32113 | Rsa1.0.00296.1 | 924  | 97854  | 0         | 673  | 700  | 96 -  | 1   | 691  | 20174  | 20872  |
| UN32114 | Rsa1.0.16435.1 | 970  | 2156   | 0         | 497  | 520  | 95 +  | 42  | 552  | 1449   | 1963   |
| UN32115 | Rsa1.0.01970.1 | 1112 | 36648  | 0         | 749  | 751  | 99 -  | 1   | 749  | 19302  | 20052  |
| UN32116 | Rsa1.0.21884.1 | 1049 | 1166   | 0         | 640  | 643  | 99 -  | 407 | 1047 | 524    | 1166   |
| UN32117 | Rsa1.0.00222.1 | 352  | 172263 | 2.00E-71  | 175  | 185  | 94 -  | 1   | 183  | 138665 | 138844 |
| UN32118 | Rsa1.0.05612.1 | 925  | 13193  | 1.00E-160 | 287  | 287  | 100 + | 14  | 300  | 9339   | 9625   |
| UN32119 | Rsa1.0.00006.1 | 721  | 396176 | 1.00E-121 | 332  | 373  | 89 -  | 3   | 375  | 182642 | 182987 |
| UN32120 | Rsa1.0.02028.1 | 451  | 35857  | 1.00E-118 | 293  | 317  | 92 +  | 2   | 318  | 12275  | 12586  |
| UN32121 | Rsa1.0.00371.1 | 1007 | 90463  | 0         | 947  | 1013 | 93 -  | 3   | 1003 | 7942   | 8934   |
| UN32122 | Rsa1.0.00356.1 | 980  | 91521  | 4.00E-90  | 193  | 201  | 96 -  | 778 | 978  | 29572  | 29772  |
| UN32123 | Rsa1.0.02361.1 | 782  | 32190  | 1.00E-166 | 313  | 317  | 98 -  | 2   | 317  | 11102  | 11418  |
| UN32124 | Rsa1.0.01016.1 | 1096 | 181422 | 3.00E-14  | 60   | 66   | 90 +  | 866 | 931  | 161901 | 161966 |
| UN32125 | Rsa1.0.04022.1 | 621  | 19534  | 1.00E-128 | 317  | 344  | 92 +  | 21  | 357  | 15671  | 16014  |
| UN32126 | Rsa1.0.05274.1 | 1158 | 14293  | 0         | 1142 | 1159 | 98 -  | 1   | 1158 | 1649   | 2800   |
| UN32127 | Rsa1.0.16822.1 | 853  | 2022   | 0         | 419  | 441  | 95 -  | 229 | 667  | 1589   | 2022   |
| UN32128 | Rsa1.0.00949.1 | 627  | 58549  | 1.00E-166 | 306  | 309  | 99 -  | 1   | 309  | 57864  | 58172  |
| UN32129 | Rsa1.0.08339.1 | 616  | 7509   | 1.00E-100 | 217  | 229  | 94 -  | 388 | 616  | 1563   | 1782   |
| UN32130 | Rsa1.0.20900.1 | 872  | 1257   | 2.00E-73  | 216  | 241  | 89 +  | 362 | 602  | 382    | 622    |
| UN32131 | Rsa1.0.02900.1 | 1436 | 26928  | 0         | 667  | 690  | 96 +  | 1   | 690  | 299    | 988    |
| UN32132 | Rsa1.0.01553.1 | 479  | 43379  | 0         | 453  | 478  | 94 +  | 2   | 478  | 26934  | 27401  |
| UN32133 | Rsa1.0.04760.1 | 1190 | 16105  | 0         | 1122 | 1169 | 95 +  | 1   | 1168 | 7867   | 9029   |
| UN32134 | Rsa1.0.01285.1 | 789  | 172709 | 1.00E-92  | 278  | 309  | 89 +  | 10  | 316  | 157426 | 157713 |

|         |                |      |        |           |     |     |       |     |      |        |        |
|---------|----------------|------|--------|-----------|-----|-----|-------|-----|------|--------|--------|
| UN32135 | Rsa1.0.01164.1 | 751  | 51934  | 1.00E-150 | 291 | 297 | 97 -  | 2   | 298  | 43900  | 44195  |
| UN32136 | Rsa1.0.03554.1 | 741  | 22137  | 0         | 688 | 737 | 93 +  | 3   | 739  | 8631   | 9343   |
| UN32137 | Rsa1.0.00094.1 | 577  | 139042 | 0         | 531 | 567 | 93 +  | 16  | 577  | 83541  | 84106  |
| UN32138 | Rsa1.0.00107.1 | 772  | 431659 | 6.00E-70  | 144 | 147 | 97 +  | 256 | 402  | 8283   | 8429   |
| UN32139 | Rsa1.0.14741.1 | 628  | 3112   | 0         | 376 | 382 | 98 -  | 3   | 384  | 1429   | 1810   |
| UN32140 | Rsa1.0.06885.1 | 1044 | 10208  | 0         | 496 | 528 | 93 -  | 21  | 534  | 3708   | 4233   |
| UN32141 | Rsa1.0.01924.1 | 937  | 37226  | 1.00E-151 | 278 | 279 | 99 +  | 1   | 278  | 2279   | 2557   |
| UN32142 | Rsa1.0.04819.1 | 694  | 140505 | 1.00E-160 | 331 | 346 | 95 +  | 1   | 346  | 5621   | 5966   |
| UN32143 | Rsa1.0.01953.1 | 834  | 36881  | 0         | 336 | 337 | 99 -  | 496 | 832  | 4889   | 5225   |
| UN32144 | Rsa1.0.04299.1 | 715  | 18027  | 1.00E-166 | 367 | 389 | 94 +  | 36  | 423  | 11285  | 11663  |
| UN32145 | Rsa1.0.00477.1 | 445  | 81556  | 0         | 434 | 443 | 97 -  | 1   | 443  | 80475  | 80917  |
| UN32146 | Rsa1.0.02297.1 | 802  | 160804 | 0         | 778 | 801 | 97 +  | 2   | 801  | 150708 | 151506 |
| UN32147 | Rsa1.0.01531.1 | 932  | 43778  | 1.00E-165 | 295 | 295 | 100 - | 398 | 692  | 39867  | 40161  |
| UN32148 | Rsa1.0.01696.1 | 551  | 301850 | 0         | 519 | 550 | 94 -  | 1   | 550  | 4377   | 4908   |
| UN32149 | Rsa1.0.00053.1 | 636  | 263459 | 0         | 599 | 634 | 94 -  | 3   | 635  | 78660  | 79289  |
| UN32150 | Rsa1.0.00017.1 | 861  | 752458 | 1.00E-165 | 333 | 346 | 96 +  | 221 | 566  | 37967  | 38312  |
| UN32151 | Rsa1.0.00832.1 | 648  | 62622  | 1.00E-112 | 239 | 249 | 95 +  | 1   | 245  | 11842  | 12088  |
| UN32152 | Rsa1.0.02874.1 | 787  | 27070  | 1.00E-104 | 214 | 221 | 96 -  | 195 | 415  | 24497  | 24717  |
| UN32153 | Rsa1.0.01392.1 | 676  | 46665  | 9.00E-78  | 527 | 643 | 81 -  | 16  | 648  | 38083  | 38711  |
| UN32154 | Rsa1.0.05140.1 | 818  | 14710  | 1.00E-71  | 141 | 142 | 99 +  | 566 | 707  | 5327   | 5468   |
| UN32155 | Rsa1.0.03193.1 | 754  | 24690  | 0         | 441 | 476 | 92 +  | 266 | 726  | 21099  | 21567  |
| UN32156 | Rsa1.0.00008.1 | 878  | 358124 | 0         | 837 | 885 | 94 +  | 4   | 878  | 23860  | 24743  |
| UN32157 | Rsa1.0.01039.1 | 910  | 55946  | 0         | 366 | 377 | 97 -  | 1   | 377  | 49675  | 50050  |
| UN32158 | Rsa1.0.22046.1 | 859  | 1153   | 1.00E-145 | 282 | 289 | 97 -  | 569 | 857  | 40     | 328    |
| UN32159 | Rsa1.0.02329.1 | 1140 | 32474  | 1.00E-53  | 344 | 417 | 82 -  | 274 | 662  | 5399   | 5805   |
| UN32160 | Rsa1.0.00059.1 | 1020 | 159650 | 1.00E-172 | 374 | 402 | 93 +  | 618 | 1019 | 26889  | 27269  |
| UN32161 | Rsa1.0.04394.1 | 848  | 17571  | 0         | 436 | 450 | 96 +  | 1   | 449  | 7111   | 7560   |
| UN32162 | Rsa1.0.12087.1 | 133  | 5317   | 2.00E-41  | 105 | 110 | 95 -  | 1   | 110  | 4205   | 4313   |
| UN32163 | Rsa1.0.01668.1 | 741  | 41299  | 1.00E-134 | 275 | 286 | 96 -  | 236 | 521  | 35533  | 35818  |
| UN32164 | Rsa1.0.00433.1 | 607  | 85381  | 0         | 588 | 607 | 96 +  | 1   | 607  | 18411  | 19016  |
| UN32165 | Rsa1.0.00321.1 | 791  | 95671  | 5.00E-89  | 202 | 210 | 96 +  | 7   | 216  | 38189  | 38394  |
| UN32166 | Rsa1.0.37796.1 | 778  | 596    | 0         | 445 | 446 | 99 -  | 1   | 446  | 1      | 445    |
| UN32167 | Rsa1.0.00462.1 | 1074 | 82288  | 0         | 570 | 586 | 97 +  | 219 | 802  | 69558  | 70142  |
| UN32168 | Rsa1.0.02948.1 | 1170 | 26526  | 0         | 548 | 549 | 99 +  | 586 | 1134 | 4703   | 5251   |
| UN32169 | Rsa1.0.10719.1 | 1284 | 5747   | 0         | 669 | 682 | 98 +  | 20  | 700  | 4147   | 4828   |
| UN32170 | Rsa1.0.36359.1 | 654  | 620    | 1.00E-101 | 197 | 200 | 98 +  | 455 | 654  | 1      | 200    |
| UN32171 | Rsa1.0.03053.1 | 1040 | 25745  | 3.00E-60  | 137 | 143 | 95 -  | 64  | 206  | 13555  | 13697  |
| UN32172 | Rsa1.0.01263.1 | 394  | 49703  | 6.00E-50  | 150 | 165 | 90 -  | 161 | 322  | 25426  | 25587  |
| UN32173 | Rsa1.0.00878.1 | 490  | 330303 | 0         | 473 | 495 | 95 +  | 1   | 488  | 29283  | 29777  |

|         |                |      |        |           |      |      |      |     |      |        |        |
|---------|----------------|------|--------|-----------|------|------|------|-----|------|--------|--------|
| UN32174 | Rsa1.0_01732.1 | 634  | 40194  | 0         | 579  | 629  | 92 - | 14  | 634  | 35597  | 36213  |
| UN32175 | Rsa1.0_10077.1 | 441  | 6007   | 0         | 439  | 440  | 99 + | 1   | 440  | 15     | 454    |
| UN32176 | Rsa1.0_00269.1 | 518  | 341668 | 6.00E-66  | 216  | 244  | 88 + | 223 | 466  | 43578  | 43810  |
| UN32177 | Rsa1.0_06460.1 | 666  | 10974  | 0         | 649  | 662  | 98 - | 6   | 666  | 4747   | 5407   |
| UN32178 | Rsa1.0_00302.1 | 798  | 97521  | 0         | 777  | 804  | 96 + | 1   | 797  | 1421   | 2222   |
| UN32179 | Rsa1.0_00254.1 | 739  | 102600 | 2.33E-156 | 291  | 300  | 97 - | 440 | 739  | 73227  | 73523  |
| UN32180 | Rsa1.0_00019.1 | 883  | 301669 | 1.00E-159 | 348  | 369  | 94 + | 359 | 727  | 279554 | 279908 |
| UN32181 | Rsa1.0_00054.1 | 823  | 162053 | 0         | 790  | 835  | 94 + | 7   | 812  | 25549  | 26383  |
| UN32182 | Rsa1.0_07694.1 | 872  | 8776   | 1.00E-141 | 279  | 285  | 97 - | 1   | 284  | 8243   | 8524   |
| UN32183 | Rsa1.0_01569.1 | 638  | 43029  | 1.00E-139 | 272  | 279  | 97 - | 359 | 637  | 8561   | 8839   |
| UN32184 | Rsa1.0_00388.1 | 1183 | 88890  | 0         | 667  | 681  | 97 + | 376 | 1054 | 5811   | 6491   |
| UN32185 | Rsa1.0_00058.1 | 878  | 159921 | 0         | 677  | 698  | 96 + | 58  | 755  | 1745   | 2439   |
| UN32186 | Rsa1.0_00194.1 | 1373 | 110851 | 0         | 1328 | 1376 | 96 + | 1   | 1373 | 13748  | 15119  |
| UN32187 | Rsa1.0_06602.1 | 859  | 10683  | 0         | 648  | 682  | 95 + | 1   | 682  | 2530   | 3211   |
| UN32188 | Rsa1.0_00537.1 | 537  | 186980 | 0         | 510  | 537  | 94 + | 1   | 536  | 156106 | 156633 |
| UN32189 | Rsa1.0_04525.1 | 988  | 16965  | 0         | 920  | 967  | 95 + | 28  | 986  | 2350   | 3308   |
| UN32190 | Rsa1.0_00226.1 | 528  | 105884 | 1.00E-111 | 225  | 232  | 96 - | 168 | 399  | 26007  | 26238  |
| UN32191 | Rsa1.0_02874.1 | 817  | 27070  | 0         | 412  | 418  | 98 + | 1   | 418  | 22108  | 22524  |
| UN32192 | Rsa1.0_01006.1 | 1091 | 163670 | 0         | 638  | 686  | 93 + | 9   | 676  | 1600   | 2285   |
| UN32193 | Rsa1.0_02835.1 | 538  | 27491  | 0         | 447  | 473  | 94 + | 67  | 536  | 15915  | 16378  |
| UN32194 | #              | #    | #      | #         | #    | #    | #    | #   | #    | #      | #      |
| UN32195 | Rsa1.0_00079.1 | 576  | 606987 | 0         | 459  | 491  | 93 + | 1   | 476  | 100134 | 100623 |
| UN32196 | Rsa1.0_00088.1 | 576  | 141341 | 1.00E-172 | 347  | 359  | 96 + | 2   | 360  | 32955  | 33312  |
| UN32197 | Rsa1.0_00484.1 | 934  | 203294 | 1.00E-151 | 336  | 356  | 94 - | 432 | 784  | 60382  | 60734  |
| UN32198 | Rsa1.0_00215.1 | 474  | 201775 | 4.00E-85  | 196  | 204  | 96 - | 71  | 273  | 80326  | 80527  |
| UN32199 | Rsa1.0_00269.1 | 932  | 341668 | 0         | 702  | 753  | 93 + | 5   | 744  | 290355 | 291096 |
| UN32200 | Rsa1.0_06465.1 | 1086 | 10962  | 1.00E-134 | 270  | 278  | 97 + | 1   | 278  | 6799   | 7074   |
| UN32201 | Rsa1.0_00156.1 | 982  | 118383 | 1.00E-142 | 344  | 377  | 91 + | 626 | 981  | 38466  | 38842  |
| UN32202 | Rsa1.0_00890.1 | 841  | 323870 | 0         | 464  | 506  | 91 + | 104 | 609  | 205294 | 205799 |
| UN32203 | Rsa1.0_03481.1 | 683  | 22627  | 0         | 357  | 364  | 98 - | 318 | 681  | 9517   | 9879   |
| UN32204 | Rsa1.0_00965.1 | 837  | 58139  | 1.00E-135 | 289  | 306  | 94 - | 237 | 542  | 2060   | 2353   |
| UN32205 | Rsa1.0_00831.1 | 876  | 62673  | 0         | 390  | 398  | 97 + | 3   | 400  | 22716  | 23110  |
| UN32206 | Rsa1.0_02693.1 | 902  | 28617  | 0         | 878  | 914  | 96 + | 3   | 901  | 21008  | 21920  |
| UN32207 | Rsa1.0_04083.1 | 866  | 19174  | 1.00E-171 | 369  | 387  | 95 - | 1   | 385  | 16799  | 17183  |
| UN32208 | Rsa1.0_03242.1 | 701  | 24415  | 0         | 669  | 705  | 94 + | 1   | 700  | 15200  | 15904  |
| UN32209 | Rsa1.0_00049.1 | 800  | 167018 | 0         | 774  | 819  | 94 - | 1   | 799  | 86241  | 87058  |
| UN32210 | Rsa1.0_59882.1 | 730  | 382    | 0         | 372  | 379  | 98 + | 15  | 393  | 4      | 382    |
| UN32211 | Rsa1.0_00475.1 | 794  | 81678  | 2.00E-33  | 151  | 171  | 88 + | 166 | 331  | 659    | 826    |
| UN32212 | Rsa1.0_07620.1 | 581  | 9015   | 0         | 440  | 460  | 95 - | 1   | 458  | 3130   | 3581   |

|         |                |      |        |           |     |     |       |     |     |        |        |
|---------|----------------|------|--------|-----------|-----|-----|-------|-----|-----|--------|--------|
| UN32213 | Rsa1.0.02608.1 | 1054 | 29613  | 4.00E-96  | 251 | 273 | 91 +  | 44  | 310 | 9897   | 10166  |
| UN32214 | Rsa1.0.08518.1 | 833  | 7244   | 1.00E-158 | 368 | 393 | 93 -  | 116 | 506 | 5274   | 5658   |
| UN32215 | Rsa1.0.04166.1 | 1422 | 18757  | 0         | 360 | 366 | 98 +  | 48  | 411 | 8430   | 8795   |
| UN32216 | Rsa1.0.00068.1 | 910  | 151813 | 0         | 863 | 911 | 94 +  | 4   | 910 | 57501  | 58389  |
| UN32217 | Rsa1.0.02684.1 | 284  | 28676  | 1.00E-115 | 271 | 286 | 94 +  | 1   | 284 | 1796   | 2079   |
| UN32218 | Rsa1.0.06392.1 | 844  | 11104  | 1.00E-163 | 328 | 339 | 96 +  | 85  | 423 | 5253   | 5590   |
| UN32219 | Rsa1.0.02098.1 | 666  | 35032  | 1.00E-174 | 408 | 442 | 92 +  | 129 | 555 | 912    | 1344   |
| UN32220 | Rsa1.0.00332.1 | 217  | 94575  | 3.00E-96  | 205 | 214 | 95 -  | 2   | 215 | 49431  | 49644  |
| UN32221 | Rsa1.0.04219.1 | 565  | 18421  | 0         | 534 | 576 | 92 +  | 2   | 563 | 437    | 1006   |
| UN32222 | Rsa1.0.02785.1 | 643  | 27881  | 0         | 575 | 598 | 96 +  | 46  | 641 | 10157  | 10747  |
| UN32223 | Rsa1.0.00002.1 | 514  | 601661 | 0         | 432 | 457 | 94 +  | 63  | 513 | 182925 | 183381 |
| UN32224 | Rsa1.0.02061.1 | 898  | 35487  | 1.00E-105 | 285 | 318 | 89 +  | 1   | 316 | 23364  | 23655  |
| UN32225 | Rsa1.0.02997.1 | 732  | 26150  | 1.00E-89  | 183 | 188 | 97 -  | 205 | 392 | 2693   | 2880   |
| UN32226 | Rsa1.0.55541.1 | 642  | 411    | 0         | 407 | 411 | 99 -  | 107 | 517 | 1      | 411    |
| UN32227 | Rsa1.0.15757.1 | 626  | 2442   | 1.00E-177 | 323 | 326 | 99 -  | 1   | 326 | 482    | 807    |
| UN32228 | Rsa1.0.04540.1 | 284  | 16934  | 1.00E-145 | 273 | 276 | 98 -  | 8   | 283 | 3700   | 3974   |
| UN32229 | Rsa1.0.01200.1 | 790  | 50895  | 0         | 522 | 565 | 92 +  | 1   | 553 | 17023  | 17572  |
| UN32230 | Rsa1.0.01632.1 | 670  | 181224 | 3.00E-62  | 287 | 340 | 84 -  | 5   | 333 | 10480  | 10811  |
| UN32231 | Rsa1.0.03249.1 | 728  | 146254 | 1.00E-129 | 249 | 254 | 98 -  | 473 | 726 | 140075 | 140328 |
| UN32232 | Rsa1.0.03030.1 | 370  | 25850  | 0         | 358 | 367 | 97 +  | 4   | 370 | 11722  | 12086  |
| UN32233 | Rsa1.0.00882.1 | 716  | 61249  | 0         | 634 | 654 | 96 -  | 36  | 688 | 52901  | 53554  |
| UN32234 | Rsa1.0.00216.1 | 547  | 197563 | 0         | 543 | 548 | 99 +  | 1   | 545 | 186631 | 187178 |
| UN32235 | Rsa1.0.03974.1 | 797  | 19770  | 0         | 469 | 478 | 98 +  | 320 | 796 | 7105   | 7581   |
| UN32236 | Rsa1.0.02849.1 | 967  | 27327  | 0         | 441 | 458 | 96 +  | 7   | 462 | 3417   | 3874   |
| UN32237 | Rsa1.0.04652.1 | 835  | 16515  | 1.00E-164 | 350 | 369 | 94 -  | 466 | 834 | 6785   | 7153   |
| UN32238 | Rsa1.0.00033.1 | 883  | 515811 | 0         | 734 | 753 | 97 -  | 1   | 750 | 508236 | 508988 |
| UN32239 | Rsa1.0.13502.1 | 1144 | 4762   | 1.00E-90  | 173 | 174 | 99 -  | 563 | 736 | 4589   | 4762   |
| UN32240 | Rsa1.0.00116.1 | 805  | 365886 | 1.00E-127 | 300 | 319 | 94 -  | 3   | 320 | 223098 | 223404 |
| UN32241 | Rsa1.0.03479.1 | 640  | 22631  | 0         | 598 | 650 | 92 -  | 2   | 640 | 11181  | 11802  |
| UN32242 | Rsa1.0.48942.1 | 813  | 463    | 1.00E-161 | 288 | 288 | 100 - | 1   | 288 | 1      | 288    |
| UN32243 | Rsa1.0.00026.1 | 412  | 327835 | 4.00E-91  | 220 | 237 | 92 +  | 118 | 348 | 215085 | 215321 |
| UN32244 | Rsa1.0.00936.1 | 529  | 59078  | 0         | 518 | 521 | 99 -  | 1   | 521 | 309    | 829    |
| UN32245 | Rsa1.0.02314.1 | 866  | 32642  | 0         | 341 | 341 | 100 + | 1   | 341 | 29786  | 30126  |
| UN32246 | Rsa1.0.01434.1 | 246  | 45951  | 4.00E-25  | 100 | 113 | 88 +  | 126 | 238 | 1443   | 1552   |
| UN32247 | Rsa1.0.01780.1 | 519  | 39411  | 0         | 467 | 479 | 97 +  | 2   | 478 | 2685   | 3163   |
| UN32248 | Rsa1.0.01365.1 | 1026 | 47142  | 1.00E-135 | 272 | 280 | 97 +  | 4   | 282 | 41684  | 41963  |
| UN32249 | Rsa1.0.00645.1 | 709  | 189716 | 1.00E-43  | 282 | 338 | 83 -  | 13  | 340 | 162110 | 162440 |
| UN32250 | Rsa1.0.04862.1 | 728  | 15688  | 0         | 698 | 725 | 96 -  | 2   | 714 | 5082   | 5804   |
| UN32251 | Rsa1.0.00128.1 | 1158 | 228675 | 0         | 777 | 778 | 99 -  | 1   | 778 | 17565  | 18342  |

|         |                |      |        |           |      |      |       |     |      |        |        |
|---------|----------------|------|--------|-----------|------|------|-------|-----|------|--------|--------|
| UN32252 | Rsa1.0.00472.1 | 483  | 398134 | 0         | 458  | 492  | 93 -  | 1   | 481  | 297598 | 298071 |
| UN32253 | Rsa1.0.08677.1 | 852  | 7048   | 0         | 728  | 751  | 96 +  | 1   | 747  | 4662   | 5410   |
| UN32254 | Rsa1.0.00017.1 | 796  | 752458 | 0         | 510  | 569  | 89 +  | 1   | 542  | 375110 | 375669 |
| UN32255 | Rsa1.0.02273.1 | 928  | 140964 | 0         | 570  | 571  | 99 +  | 336 | 906  | 28308  | 28878  |
| UN32256 | Rsa1.0.01500.1 | 636  | 141844 | 3.00E-99  | 184  | 184  | 100 + | 13  | 196  | 1      | 184    |
| UN32257 | Rsa1.0.01474.1 | 949  | 45070  | 0         | 387  | 397  | 97 +  | 3   | 397  | 40875  | 41269  |
| UN32258 | Rsa1.0.29970.1 | 634  | 767    | 0         | 543  | 591  | 91 +  | 4   | 586  | 177    | 767    |
| UN32259 | Rsa1.0.00021.1 | 1269 | 263655 | 0         | 911  | 921  | 98 -  | 193 | 1112 | 147682 | 148602 |
| UN32260 | Rsa1.0.00715.1 | 1317 | 67116  | 0         | 1275 | 1325 | 96 -  | 2   | 1316 | 39054  | 40378  |
| UN32261 | Rsa1.0.03238.1 | 581  | 24432  | 2.00E-96  | 182  | 183  | 99 -  | 213 | 395  | 11687  | 11869  |
| UN32262 | Rsa1.0.00223.1 | 906  | 106231 | 0         | 868  | 901  | 96 -  | 5   | 905  | 35756  | 36641  |
| UN32263 | Rsa1.0.09451.1 | 834  | 6359   | 1.00E-149 | 274  | 276  | 99 +  | 250 | 525  | 6063   | 6338   |
| UN32264 | Rsa1.0.05649.1 | 833  | 13046  | 0         | 599  | 600  | 99 +  | 1   | 600  | 1055   | 1654   |
| UN32265 | Rsa1.0.00529.1 | 718  | 77487  | 1.00E-112 | 260  | 277  | 93 +  | 450 | 718  | 54597  | 54869  |
| UN32266 | Rsa1.0.01553.1 | 835  | 43379  | 0         | 721  | 774  | 93 -  | 77  | 834  | 13460  | 14228  |
| UN32267 | Rsa1.0.11554.1 | 391  | 5472   | 8.00E-77  | 149  | 150  | 99 +  | 2   | 151  | 4850   | 4999   |
| UN32268 | Rsa1.0.01596.1 | 441  | 42595  | 0         | 437  | 438  | 99 -  | 3   | 440  | 25379  | 25816  |
| UN32269 | Rsa1.0.00405.1 | 1189 | 202864 | 0         | 768  | 827  | 92 +  | 1   | 824  | 178350 | 179165 |
| UN32270 | Rsa1.0.00551.1 | 1291 | 76227  | 0         | 876  | 903  | 97 +  | 8   | 909  | 29976  | 30866  |
| UN32271 | Rsa1.0.00093.1 | 764  | 214962 | 0         | 741  | 768  | 96 +  | 1   | 762  | 24542  | 25309  |
| UN32272 | Rsa1.0.01909.1 | 933  | 37417  | 1.00E-89  | 436  | 516  | 84 -  | 66  | 571  | 29574  | 30087  |
| UN32273 | Rsa1.0.02556.1 | 703  | 30133  | 0         | 675  | 703  | 96 +  | 1   | 702  | 6668   | 7370   |
| UN32274 | Rsa1.0.00332.1 | 410  | 94575  | 1.00E-126 | 306  | 330  | 92 +  | 14  | 334  | 39472  | 39800  |
| UN32275 | Rsa1.0.12059.1 | 1144 | 5329   | 0         | 345  | 348  | 99 -  | 473 | 819  | 244    | 591    |
| UN32276 | Rsa1.0.04196.1 | 728  | 18515  | 0         | 443  | 475  | 93 +  | 227 | 698  | 6845   | 7298   |
| UN32277 | Rsa1.0.05018.1 | 668  | 15118  | 0         | 641  | 666  | 96 -  | 1   | 666  | 7745   | 8387   |
| UN32278 | Rsa1.0.04846.1 | 633  | 15739  | 4.00E-95  | 200  | 205  | 97 +  | 1   | 203  | 5615   | 5819   |
| UN32279 | Rsa1.0.00427.1 | 873  | 189678 | 0         | 513  | 528  | 97 +  | 344 | 871  | 57292  | 57819  |
| UN32280 | Rsa1.0.20556.1 | 967  | 1293   | 0         | 831  | 853  | 97 +  | 115 | 967  | 126    | 967    |
| UN32281 | Rsa1.0.00044.1 | 852  | 271658 | 1.00E-175 | 336  | 344  | 97 +  | 1   | 344  | 46747  | 47090  |
| UN32282 | Rsa1.0.00028.1 | 898  | 293984 | 0         | 742  | 799  | 92 -  | 123 | 897  | 206521 | 207317 |
| UN32283 | Rsa1.0.07722.1 | 706  | 8711   | 0         | 674  | 704  | 95 -  | 3   | 705  | 3734   | 4436   |
| UN32284 | Rsa1.0.54934.1 | 714  | 416    | 0         | 414  | 416  | 99 +  | 20  | 435  | 1      | 416    |
| UN32285 | Rsa1.0.04427.1 | 1034 | 17399  | 1.00E-166 | 319  | 325  | 98 -  | 113 | 436  | 9848   | 10172  |
| UN32286 | Rsa1.0.00030.1 | 960  | 250988 | 0         | 840  | 896  | 93 -  | 1   | 896  | 64566  | 65461  |
| UN32287 | Rsa1.0.00247.1 | 968  | 103408 | 0         | 803  | 815  | 98 +  | 1   | 815  | 92569  | 93383  |
| UN32288 | Rsa1.0.00184.1 | 769  | 218748 | 0         | 744  | 767  | 97 +  | 1   | 767  | 100477 | 101242 |
| UN32289 | Rsa1.0.26541.1 | 955  | 887    | 3.00E-23  | 93   | 104  | 89 -  | 449 | 550  | 457    | 560    |
| UN32290 | Rsa1.0.00093.1 | 529  | 214962 | 1.00E-156 | 333  | 351  | 94 -  | 24  | 368  | 76430  | 76780  |

|         |                |      |        |           |      |      |       |     |      |        |        |
|---------|----------------|------|--------|-----------|------|------|-------|-----|------|--------|--------|
| UN32291 | Rsa1.0.00034.1 | 932  | 260119 | 1.00E-166 | 372  | 396  | 93 +  | 538 | 932  | 48060  | 48455  |
| UN32292 | Rsa1.0.00224.1 | 727  | 327530 | 1.00E-135 | 260  | 265  | 98 -  | 318 | 582  | 146839 | 147103 |
| UN32293 | Rsa1.0.01165.1 | 1179 | 51898  | 0         | 334  | 337  | 99 +  | 359 | 694  | 12956  | 13292  |
| UN32294 | Rsa1.0.00706.1 | 662  | 291570 | 1.00E-165 | 324  | 333  | 97 -  | 329 | 658  | 289554 | 289886 |
| UN32295 | Rsa1.0.01419.1 | 249  | 167402 | 1.00E-80  | 217  | 233  | 93 +  | 18  | 248  | 133992 | 134218 |
| UN32296 | Rsa1.0.00701.1 | 751  | 67691  | 0         | 744  | 747  | 99 +  | 3   | 749  | 42096  | 42842  |
| UN32297 | Rsa1.0.00682.1 | 769  | 68680  | 0         | 353  | 362  | 97 -  | 406 | 767  | 11148  | 11508  |
| UN32298 | Rsa1.0.04378.1 | 863  | 17651  | 0         | 856  | 865  | 98 +  | 1   | 863  | 11230  | 12093  |
| UN32299 | Rsa1.0.00252.1 | 705  | 102760 | 0         | 388  | 391  | 99 +  | 314 | 704  | 65962  | 66352  |
| UN32300 | Rsa1.0.00101.1 | 1067 | 267193 | 1.00E-121 | 269  | 285  | 94 +  | 87  | 371  | 107511 | 107795 |
| UN32301 | Rsa1.0.00043.1 | 890  | 264937 | 0         | 870  | 888  | 97 -  | 1   | 888  | 233015 | 233902 |
| UN32302 | Rsa1.0.01053.1 | 1260 | 55483  | 0         | 1253 | 1260 | 99 +  | 1   | 1259 | 3379   | 4638   |
| UN32303 | Rsa1.0.00460.1 | 1284 | 206387 | 0         | 962  | 965  | 99 +  | 1   | 965  | 30406  | 31370  |
| UN32304 | Rsa1.0.01249.1 | 653  | 188432 | 0         | 577  | 584  | 98 +  | 69  | 651  | 48917  | 49500  |
| UN32305 | Rsa1.0.00237.1 | 908  | 235974 | 0         | 800  | 917  | 87 +  | 8   | 908  | 26536  | 27425  |
| UN32306 | Rsa1.0.04297.1 | 878  | 18030  | 0         | 690  | 756  | 91 +  | 1   | 727  | 16508  | 17257  |
| UN32307 | Rsa1.0.00878.1 | 894  | 330303 | 0         | 372  | 382  | 97 +  | 514 | 894  | 132355 | 132736 |
| UN32308 | Rsa1.0.02251.1 | 1021 | 33404  | 1.00E-170 | 395  | 424  | 93 +  | 34  | 443  | 30177  | 30598  |
| UN32309 | Rsa1.0.00243.1 | 1161 | 103651 | 0         | 952  | 970  | 98 +  | 1   | 968  | 12751  | 13717  |
| UN32310 | Rsa1.0.04535.1 | 785  | 136600 | 0         | 399  | 411  | 97 -  | 374 | 784  | 4590   | 5000   |
| UN32311 | Rsa1.0.00661.1 | 743  | 213041 | 0         | 632  | 644  | 98 -  | 78  | 718  | 44882  | 45525  |
| UN32312 | Rsa1.0.15315.1 | 1024 | 2690   | 3.00E-75  | 309  | 360  | 85 +  | 510 | 858  | 1814   | 2171   |
| UN32313 | Rsa1.0.08731.1 | 1151 | 6991   | 8.00E-98  | 258  | 285  | 90 -  | 882 | 1146 | 5654   | 5938   |
| UN32314 | Rsa1.0.00525.1 | 886  | 78030  | 3.00E-41  | 102  | 107  | 95 +  | 97  | 203  | 19462  | 19568  |
| UN32315 | Rsa1.0.00553.1 | 362  | 75983  | 2.00E-58  | 118  | 119  | 99 +  | 242 | 360  | 7539   | 7657   |
| UN32316 | Rsa1.0.05842.1 | 647  | 12461  | 0         | 596  | 617  | 96 +  | 30  | 646  | 11638  | 12254  |
| UN32317 | Rsa1.0.00909.1 | 1275 | 59976  | 1.00E-136 | 274  | 283  | 96 -  | 1   | 283  | 28769  | 29051  |
| UN32318 | Rsa1.0.45645.1 | 727  | 494    | 0         | 412  | 420  | 98 +  | 22  | 441  | 1      | 419    |
| UN32319 | Rsa1.0.08572.1 | 501  | 7184   | 8.00E-93  | 182  | 185  | 98 -  | 187 | 371  | 6112   | 6296   |
| UN32320 | Rsa1.0.00028.1 | 889  | 293984 | 0         | 491  | 491  | 100 - | 397 | 887  | 172618 | 173108 |
| UN32321 | Rsa1.0.04416.1 | 845  | 17458  | 0         | 842  | 844  | 99 -  | 1   | 844  | 14354  | 15197  |
| UN32322 | Rsa1.0.03297.1 | 705  | 23969  | 0         | 471  | 492  | 95 -  | 214 | 703  | 8203   | 8680   |
| UN32323 | Rsa1.0.00179.1 | 704  | 393324 | 0         | 701  | 703  | 99 -  | 1   | 703  | 194784 | 195486 |
| UN32324 | Rsa1.0.01072.1 | 647  | 55068  | 1.00E-103 | 229  | 240  | 95 -  | 146 | 377  | 1137   | 1375   |
| UN32325 | Rsa1.0.00023.1 | 898  | 194764 | 0         | 863  | 897  | 96 +  | 1   | 896  | 40449  | 41334  |
| UN32326 | Rsa1.0.00727.1 | 736  | 66724  | 1.00E-103 | 286  | 322  | 88 +  | 12  | 308  | 49346  | 49659  |
| UN32327 | Rsa1.0.08755.1 | 870  | 6955   | 0         | 815  | 849  | 95 -  | 1   | 846  | 3541   | 4380   |
| UN32328 | Rsa1.0.25979.1 | 1187 | 911    | 0         | 887  | 911  | 97 +  | 255 | 1156 | 1      | 911    |
| UN32329 | Rsa1.0.01000.1 | 554  | 57140  | 1.00E-127 | 300  | 326  | 92 +  | 3   | 326  | 5116   | 5420   |

|         |                |      |        |           |      |      |       |     |      |        |        |
|---------|----------------|------|--------|-----------|------|------|-------|-----|------|--------|--------|
| UN32330 | Rsa1.0_19157.1 | 1108 | 1472   | 0         | 578  | 588  | 98 +  | 519 | 1106 | 1      | 588    |
| UN32331 | Rsa1.0_04576.1 | 315  | 16783  | 1.00E-103 | 262  | 282  | 92 +  | 23  | 300  | 15663  | 15940  |
| UN32332 | Rsa1.0_00657.1 | 390  | 69858  | 0         | 385  | 389  | 98 +  | 1   | 388  | 9752   | 10140  |
| UN32333 | Rsa1.0_04794.1 | 544  | 15960  | 0         | 417  | 417  | 100 - | 126 | 542  | 8928   | 9344   |
| UN32334 | Rsa1.0_04223.1 | 985  | 18407  | 0         | 383  | 388  | 98 -  | 1   | 388  | 14083  | 14470  |
| UN32335 | Rsa1.0_05221.1 | 445  | 14452  | 3.00E-89  | 170  | 171  | 99 -  | 5   | 175  | 13499  | 13669  |
| UN32336 | Rsa1.0_03624.1 | 333  | 21706  | 1.00E-75  | 235  | 262  | 89 +  | 2   | 258  | 15700  | 15956  |
| UN32337 | Rsa1.0_00011.1 | 888  | 225044 | 0         | 881  | 887  | 99 +  | 1   | 886  | 96801  | 97686  |
| UN32338 | Rsa1.0_00063.1 | 794  | 156150 | 0         | 744  | 761  | 97 -  | 1   | 761  | 135610 | 136370 |
| UN32339 | Rsa1.0_15268.1 | 793  | 2720   | 0         | 618  | 621  | 99 -  | 3   | 623  | 1067   | 1687   |
| UN32340 | Rsa1.0_05346.1 | 600  | 14101  | 0         | 560  | 590  | 94 +  | 5   | 594  | 11634  | 12216  |
| UN32341 | Rsa1.0_01780.1 | 621  | 39411  | 4.00E-27  | 72   | 75   | 96 -  | 526 | 600  | 5662   | 5736   |
| UN32342 | Rsa1.0_01836.1 | 883  | 38503  | 0         | 857  | 881  | 97 -  | 1   | 880  | 24702  | 25577  |
| UN32343 | Rsa1.0_02473.1 | 801  | 31083  | 0         | 750  | 797  | 94 +  | 3   | 793  | 23534  | 24325  |
| UN32344 | Rsa1.0_00480.1 | 842  | 81325  | 1.00E-121 | 236  | 241  | 97 -  | 254 | 494  | 75741  | 75981  |
| UN32345 | Rsa1.0_01081.1 | 1156 | 499226 | 0         | 1118 | 1172 | 95 +  | 1   | 1154 | 163216 | 164378 |
| UN32346 | Rsa1.0_08260.1 | 986  | 7640   | 1.00E-157 | 298  | 304  | 98 -  | 247 | 544  | 6418   | 6721   |
| UN32347 | Rsa1.0_02997.1 | 617  | 26150  | 0         | 604  | 615  | 98 -  | 2   | 616  | 14416  | 15029  |
| UN32348 | Rsa1.0_27681.1 | 984  | 843    | 1.00E-176 | 319  | 321  | 99 +  | 16  | 336  | 1      | 321    |
| UN32349 | Rsa1.0_00383.1 | 1070 | 398431 | 0         | 390  | 390  | 100 - | 2   | 391  | 5585   | 5974   |
| UN32350 | Rsa1.0_01822.1 | 968  | 38784  | 2.00E-85  | 346  | 403  | 85 -  | 136 | 538  | 22037  | 22433  |
| UN32351 | Rsa1.0_00296.1 | 695  | 97854  | 0         | 453  | 487  | 93 -  | 36  | 519  | 20174  | 20656  |
| UN32352 | Rsa1.0_00347.1 | 477  | 93048  | 0         | 476  | 477  | 99 +  | 1   | 476  | 26819  | 27295  |
| UN32353 | Rsa1.0_02017.1 | 481  | 35999  | 0         | 468  | 487  | 96 -  | 6   | 480  | 32831  | 33315  |
| UN32354 | Rsa1.0_01040.1 | 1087 | 55926  | 0         | 655  | 657  | 99 +  | 430 | 1085 | 22822  | 23478  |
| UN32355 | Rsa1.0_06345.1 | 1168 | 11205  | 0         | 1146 | 1191 | 96 +  | 1   | 1168 | 930    | 2119   |
| UN32356 | Rsa1.0_01202.1 | 672  | 158825 | 1.00E-36  | 109  | 119  | 91 -  | 552 | 670  | 158111 | 158229 |
| UN32357 | Rsa1.0_04486.1 | 815  | 17161  | 0         | 773  | 811  | 95 +  | 5   | 813  | 8529   | 9339   |
| UN32358 | Rsa1.0_00038.1 | 735  | 314568 | 0         | 402  | 409  | 98 -  | 325 | 733  | 21148  | 21556  |
| UN32359 | Rsa1.0_05770.1 | 861  | 12678  | 0         | 497  | 497  | 100 + | 1   | 497  | 1372   | 1868   |
| UN32360 | Rsa1.0_55032.1 | 1031 | 415    | 1.00E-170 | 327  | 335  | 97 +  | 1   | 335  | 68     | 402    |
| UN32361 | Rsa1.0_00194.1 | 1143 | 110851 | 0         | 650  | 668  | 97 +  | 417 | 1084 | 62757  | 63424  |
| UN32362 | Rsa1.0_00195.1 | 950  | 251884 | 1.00E-103 | 200  | 203  | 98 -  | 395 | 597  | 43020  | 43222  |
| UN32363 | #              | #    | #      | #         | #    | #    | #     | #   | #    | #      | #      |
| UN32364 | Rsa1.0_17019.1 | 214  | 1951   | 1.00E-55  | 129  | 134  | 96 -  | 71  | 203  | 1731   | 1864   |
| UN32365 | Rsa1.0_07441.1 | 1273 | 9388   | 1.00E-136 | 249  | 250  | 99 +  | 758 | 1007 | 8156   | 8405   |
| UN32366 | Rsa1.0_05282.1 | 1273 | 14270  | 0         | 436  | 457  | 95 -  | 1   | 456  | 9974   | 10430  |
| UN32367 | Rsa1.0_00324.1 | 869  | 218805 | 0         | 497  | 498  | 99 -  | 370 | 867  | 911    | 1408   |
| UN32368 | Rsa1.0_00587.1 | 1147 | 73982  | 2.00E-46  | 139  | 152  | 91 -  | 763 | 913  | 28932  | 29083  |



|         |                |      |        |           |      |      |       |     |      |        |        |
|---------|----------------|------|--------|-----------|------|------|-------|-----|------|--------|--------|
| UN32369 | Rsa1.0.01419.1 | 632  | 167402 | 1.00E-67  | 287  | 340  | 84 -  | 15  | 334  | 31073  | 31409  |
| UN32370 | Rsa1.0.00002.1 | 1221 | 601661 | 3.00E-60  | 152  | 163  | 93 -  | 845 | 1007 | 181132 | 181294 |
| UN32371 | Rsa1.0.03638.1 | 772  | 21634  | 1.00E-163 | 331  | 340  | 97 -  | 1   | 338  | 11607  | 11945  |
| UN32372 | Rsa1.0.00218.1 | 1220 | 201480 | 1.00E-113 | 317  | 349  | 90 +  | 377 | 718  | 141424 | 141762 |
| UN32373 | Rsa1.0.00576.1 | 914  | 178949 | 0         | 484  | 487  | 99 +  | 5   | 491  | 39372  | 39856  |
| UN32374 | Rsa1.0.03618.1 | 730  | 21744  | 0         | 347  | 348  | 99 -  | 1   | 348  | 9250   | 9597   |
| UN32375 | Rsa1.0.00098.1 | 564  | 349239 | 1.00E-135 | 248  | 249  | 99 +  | 314 | 562  | 219191 | 219439 |
| UN32376 | Rsa1.0.01585.1 | 725  | 42806  | 0         | 365  | 370  | 98 +  | 158 | 527  | 7857   | 8226   |
| UN32377 | Rsa1.0.00275.1 | 734  | 210104 | 3.00E-96  | 515  | 616  | 83 +  | 119 | 725  | 189952 | 190559 |
| UN32378 | Rsa1.0.01898.1 | 1118 | 37491  | 0         | 681  | 687  | 99 +  | 1   | 686  | 18809  | 19494  |
| UN32379 | Rsa1.0.27336.1 | 757  | 857    | 1.00E-137 | 266  | 272  | 97 +  | 322 | 593  | 7      | 278    |
| UN32380 | Rsa1.0.01941.1 | 839  | 37069  | 1.00E-123 | 240  | 245  | 97 +  | 338 | 582  | 35043  | 35287  |
| UN32381 | Rsa1.0.00427.1 | 591  | 189678 | 0         | 347  | 348  | 99 -  | 242 | 589  | 5053   | 5400   |
| UN32382 | Rsa1.0.00422.1 | 801  | 86144  | 0         | 460  | 498  | 92 -  | 313 | 801  | 35298  | 35777  |
| UN32383 | Rsa1.0.00423.1 | 917  | 86138  | 0         | 475  | 475  | 100 - | 1   | 475  | 22823  | 23297  |
| UN32384 | Rsa1.0.01978.1 | 909  | 36546  | 0         | 791  | 806  | 98 +  | 104 | 909  | 498    | 1303   |
| UN32385 | Rsa1.0.00113.1 | 1243 | 131574 | 0         | 419  | 435  | 96 -  | 325 | 759  | 62642  | 63076  |
| UN32386 | Rsa1.0.03702.1 | 698  | 21292  | 0         | 680  | 705  | 96 +  | 1   | 697  | 13348  | 14049  |
| UN32387 | Rsa1.0.03644.1 | 697  | 21603  | 7.00E-14  | 59   | 65   | 90 +  | 627 | 691  | 3529   | 3593   |
| UN32388 | Rsa1.0.07843.1 | 820  | 8440   | 9.00E-63  | 135  | 139  | 97 -  | 470 | 608  | 2201   | 2339   |
| UN32389 | Rsa1.0.00145.1 | 798  | 261008 | 0         | 746  | 797  | 93 -  | 13  | 796  | 55669  | 56450  |
| UN32390 | Rsa1.0.01569.1 | 672  | 43029  | 0         | 437  | 473  | 92 +  | 3   | 471  | 19160  | 19624  |
| UN32391 | Rsa1.0.04510.1 | 980  | 17033  | 0         | 972  | 978  | 99 +  | 1   | 978  | 15242  | 16219  |
| UN32392 | Rsa1.0.04920.1 | 666  | 15434  | 0         | 389  | 397  | 97 +  | 3   | 399  | 12780  | 13173  |
| UN32393 | Rsa1.0.00851.1 | 1180 | 62181  | 0         | 1167 | 1180 | 98 +  | 2   | 1180 | 20312  | 21490  |
| UN32394 | Rsa1.0.01411.1 | 958  | 46326  | 1.00E-176 | 321  | 322  | 99 +  | 636 | 956  | 7472   | 7793   |
| UN32395 | Rsa1.0.00131.1 | 398  | 432233 | 7.00E-99  | 183  | 183  | 100 + | 216 | 398  | 115842 | 116024 |
| UN32396 | Rsa1.0.02107.1 | 740  | 34940  | 1.00E-123 | 252  | 261  | 96 +  | 477 | 737  | 5811   | 6071   |
| UN32397 | Rsa1.0.00304.1 | 1331 | 97429  | 2.00E-89  | 174  | 176  | 98 +  | 586 | 761  | 5680   | 5855   |
| UN32398 | Rsa1.0.01749.1 | 685  | 39822  | 2.00E-84  | 197  | 209  | 94 -  | 7   | 214  | 12245  | 12446  |
| UN32399 | Rsa1.0.02878.1 | 1018 | 27048  | 1.00E-161 | 309  | 316  | 97 -  | 125 | 440  | 19740  | 20055  |
| UN32400 | Rsa1.0.00172.1 | 652  | 115476 | 0         | 627  | 646  | 97 +  | 4   | 646  | 7777   | 8422   |
| UN32401 | Rsa1.0.00751.1 | 830  | 65759  | 6.00E-61  | 123  | 124  | 99 +  | 120 | 243  | 38055  | 38178  |
| UN32402 | Rsa1.0.00131.1 | 442  | 432233 | 0         | 368  | 369  | 99 -  | 74  | 442  | 285262 | 285630 |
| UN32403 | Rsa1.0.00964.1 | 867  | 316648 | 0         | 759  | 806  | 94 -  | 79  | 860  | 5408   | 6208   |
| UN32404 | Rsa1.0.08750.1 | 1159 | 6961   | 0         | 1080 | 1140 | 94 +  | 1   | 1117 | 833    | 1961   |
| UN32405 | Rsa1.0.00403.1 | 609  | 87701  | 1.00E-147 | 274  | 277  | 98 -  | 2   | 278  | 77599  | 77875  |
| UN32406 | Rsa1.0.00136.1 | 746  | 122464 | 2.00E-38  | 91   | 94   | 96 +  | 652 | 745  | 92052  | 92145  |
| UN32407 | Rsa1.0.00008.1 | 723  | 358124 | 0         | 688  | 715  | 96 -  | 12  | 721  | 177243 | 177956 |

|         |                |      |        |           |     |     |       |     |      |        |        |
|---------|----------------|------|--------|-----------|-----|-----|-------|-----|------|--------|--------|
| UN32408 | Rsa1.0_00109.1 | 1160 | 132735 | 0         | 504 | 505 | 99 -  | 656 | 1160 | 40842  | 41346  |
| UN32409 | Rsa1.0_03067.1 | 894  | 25651  | 0         | 605 | 614 | 98 +  | 2   | 615  | 7908   | 8521   |
| UN32410 | Rsa1.0_02086.1 | 787  | 35198  | 0         | 451 | 452 | 99 +  | 211 | 662  | 6825   | 7276   |
| UN32411 | Rsa1.0_00362.1 | 959  | 299497 | 0         | 426 | 437 | 97 +  | 1   | 432  | 33936  | 34372  |
| UN32412 | Rsa1.0_04275.1 | 638  | 18136  | 2.00E-91  | 192 | 199 | 96 -  | 17  | 215  | 571    | 769    |
| UN32413 | Rsa1.0_00099.1 | 1160 | 159619 | 0         | 779 | 809 | 96 -  | 352 | 1160 | 3179   | 3981   |
| UN32414 | Rsa1.0_01860.1 | 856  | 38057  | 0         | 803 | 835 | 96 +  | 1   | 817  | 25497  | 26331  |
| UN32415 | Rsa1.0_00420.1 | 614  | 86496  | 0         | 540 | 595 | 90 +  | 23  | 606  | 55660  | 56246  |
| UN32416 | Rsa1.0_29827.1 | 889  | 771    | 0         | 560 | 575 | 97 -  | 1   | 566  | 1      | 575    |
| UN32417 | Rsa1.0_00006.1 | 711  | 396176 | 0         | 573 | 588 | 97 -  | 128 | 709  | 296014 | 296601 |
| UN32418 | Rsa1.0_00552.1 | 1175 | 206757 | 1.00E-144 | 308 | 321 | 95 +  | 837 | 1151 | 189655 | 189975 |
| UN32419 | Rsa1.0_00637.1 | 972  | 71038  | 0         | 491 | 494 | 99 -  | 477 | 970  | 64286  | 64778  |
| UN32420 | Rsa1.0_06297.1 | 399  | 11280  | 1.00E-173 | 374 | 394 | 94 -  | 4   | 393  | 9135   | 9524   |
| UN32421 | Rsa1.0_00536.1 | 989  | 77199  | 0         | 637 | 671 | 94 +  | 318 | 987  | 24158  | 24828  |
| UN32422 | Rsa1.0_01444.1 | 928  | 169539 | 0         | 923 | 926 | 99 +  | 1   | 926  | 4694   | 5619   |
| UN32423 | Rsa1.0_03398.1 | 568  | 23207  | 1.00E-137 | 266 | 270 | 98 -  | 1   | 268  | 20819  | 21086  |
| UN32424 | Rsa1.0_00159.1 | 522  | 431686 | 0         | 513 | 521 | 98 -  | 1   | 521  | 162547 | 163066 |
| UN32425 | Rsa1.0_03689.1 | 1212 | 21354  | 3.00E-20  | 80  | 88  | 90 +  | 72  | 159  | 14905  | 14991  |
| UN32426 | Rsa1.0_00648.1 | 592  | 70351  | 0         | 579 | 592 | 97 +  | 1   | 592  | 54875  | 55465  |
| UN32427 | Rsa1.0_00033.1 | 623  | 515811 | 0         | 575 | 593 | 96 +  | 30  | 621  | 352669 | 353259 |
| UN32428 | Rsa1.0_00087.1 | 863  | 761073 | 0         | 478 | 512 | 93 +  | 1   | 500  | 748906 | 749417 |
| UN32429 | Rsa1.0_01311.1 | 1008 | 48456  | 0         | 590 | 613 | 96 +  | 82  | 686  | 27587  | 28193  |
| UN32430 | Rsa1.0_01391.1 | 655  | 46694  | 0         | 651 | 655 | 99 +  | 1   | 655  | 11792  | 12445  |
| UN32431 | Rsa1.0_00272.1 | 353  | 447836 | 5.00E-87  | 169 | 171 | 98 +  | 1   | 171  | 439712 | 439882 |
| UN32432 | Rsa1.0_00362.1 | 1420 | 299497 | 0         | 779 | 798 | 97 -  | 482 | 1279 | 220963 | 221755 |
| UN32433 | Rsa1.0_22179.1 | 205  | 1144   | 7.00E-82  | 154 | 154 | 100 - | 1   | 154  | 1      | 154    |
| UN32434 | Rsa1.0_65211.1 | 691  | 352    | 0         | 352 | 352 | 100 + | 157 | 508  | 1      | 352    |
| UN32435 | Rsa1.0_03801.1 | 827  | 20762  | 0         | 648 | 655 | 98 -  | 9   | 663  | 8054   | 8708   |
| UN32436 | Rsa1.0_02800.1 | 764  | 27760  | 1.00E-12  | 54  | 59  | 91 -  | 322 | 380  | 8932   | 8990   |
| UN32437 | Rsa1.0_00025.1 | 1035 | 277312 | 0         | 505 | 516 | 97 +  | 435 | 950  | 240771 | 241286 |
| UN32438 | Rsa1.0_00929.1 | 1041 | 137796 | 5.00E-37  | 146 | 164 | 89 +  | 488 | 650  | 82684  | 82845  |
| UN32439 | Rsa1.0_10168.1 | 776  | 5964   | 0         | 774 | 775 | 99 -  | 1   | 775  | 1257   | 2031   |
| UN32440 | Rsa1.0_02589.1 | 947  | 300828 | 0         | 490 | 502 | 97 -  | 1   | 494  | 25402  | 25903  |
| UN32441 | Rsa1.0_00053.1 | 948  | 263459 | 0         | 785 | 898 | 87 -  | 51  | 948  | 35297  | 36190  |
| UN32442 | Rsa1.0_00484.1 | 741  | 203294 | 4.00E-71  | 165 | 173 | 95 -  | 8   | 180  | 123427 | 123598 |
| UN32443 | Rsa1.0_55236.1 | 756  | 414    | 0         | 413 | 414 | 99 +  | 61  | 473  | 1      | 414    |
| UN32444 | Rsa1.0_00028.1 | 964  | 293984 | 0         | 951 | 963 | 98 -  | 1   | 961  | 220626 | 221587 |
| UN32445 | Rsa1.0_00222.1 | 830  | 172263 | 1.00E-138 | 315 | 332 | 94 +  | 164 | 486  | 26129  | 26459  |
| UN32446 | Rsa1.0_15499.1 | 810  | 2570   | 1.00E-134 | 260 | 266 | 97 +  | 350 | 615  | 1132   | 1397   |

|         |                |      |        |           |     |     |       |     |      |        |        |
|---------|----------------|------|--------|-----------|-----|-----|-------|-----|------|--------|--------|
| UN32447 | Rsa1.0.03446.1 | 837  | 22876  | 0         | 583 | 595 | 97 +  | 1   | 595  | 11901  | 12492  |
| UN32448 | Rsa1.0.00433.1 | 602  | 85381  | 0         | 596 | 599 | 99 +  | 3   | 601  | 4824   | 5422   |
| UN32449 | Rsa1.0_10543.1 | 822  | 5808   | 0         | 457 | 473 | 96 -  | 2   | 474  | 4301   | 4765   |
| UN32450 | Rsa1.0.03797.1 | 595  | 20806  | 0         | 397 | 413 | 96 +  | 188 | 595  | 796    | 1208   |
| UN32451 | Rsa1.0_23727.1 | 554  | 1029   | 2.00E-50  | 177 | 202 | 87 +  | 2   | 188  | 442    | 643    |
| UN32452 | Rsa1.0_01222.1 | 661  | 50398  | 0         | 390 | 400 | 97 +  | 1   | 400  | 9528   | 9927   |
| UN32453 | Rsa1.0.00092.1 | 807  | 659932 | 0         | 450 | 450 | 100 - | 2   | 451  | 28859  | 29308  |
| UN32454 | Rsa1.0.01839.1 | 274  | 38482  | 1.00E-135 | 259 | 263 | 98 +  | 12  | 274  | 13356  | 13616  |
| UN32455 | Rsa1.0.00101.1 | 445  | 267193 | 1.00E-167 | 333 | 342 | 97 +  | 3   | 342  | 90696  | 91037  |
| UN32456 | Rsa1.0.00001.1 | 874  | 363028 | 0         | 850 | 872 | 97 -  | 3   | 872  | 73736  | 74606  |
| UN32457 | Rsa1.0.00003.1 | 460  | 340054 | 0         | 435 | 460 | 94 +  | 1   | 460  | 208132 | 208588 |
| UN32458 | Rsa1.0.00019.1 | 1427 | 301669 | 0         | 629 | 638 | 98 -  | 536 | 1173 | 132036 | 132672 |
| UN32459 | Rsa1.0.00626.1 | 918  | 71582  | 1.00E-137 | 341 | 372 | 91 -  | 270 | 641  | 67979  | 68350  |
| UN32460 | Rsa1.0.00025.1 | 826  | 277312 | 0         | 372 | 383 | 97 +  | 1   | 382  | 275593 | 275974 |
| UN32461 | Rsa1.0.00279.1 | 850  | 100039 | 1.00E-121 | 291 | 317 | 91 +  | 550 | 848  | 37942  | 38258  |
| UN32462 | #              | #    | #      | #         | #   | #   | #     | #   | #    | #      | #      |
| UN32463 | Rsa1.0.01923.1 | 1228 | 37233  | 1.00E-143 | 314 | 329 | 95 +  | 1   | 326  | 20532  | 20858  |
| UN32464 | Rsa1.0.00577.1 | 601  | 174827 | 0         | 581 | 600 | 96 +  | 1   | 599  | 2549   | 3148   |
| UN32465 | Rsa1.0.02955.1 | 488  | 26484  | 1.00E-137 | 305 | 323 | 94 -  | 49  | 371  | 3983   | 4299   |
| UN32466 | Rsa1.0_14201.1 | 758  | 3670   | 0         | 712 | 727 | 97 +  | 19  | 745  | 1154   | 1880   |
| UN32467 | Rsa1.0_40489.1 | 269  | 554    | 4.00E-53  | 132 | 141 | 93 -  | 129 | 269  | 420    | 554    |
| UN32468 | Rsa1.0.04229.1 | 810  | 18389  | 2.00E-33  | 87  | 90  | 96 +  | 696 | 784  | 6335   | 6424   |
| UN32469 | Rsa1.0_26598.1 | 1063 | 884    | 0         | 668 | 695 | 96 -  | 374 | 1061 | 73     | 767    |
| UN32470 | Rsa1.0.02017.1 | 635  | 35999  | 0         | 474 | 483 | 98 -  | 151 | 633  | 21258  | 21738  |
| UN32471 | Rsa1.0.00284.1 | 1003 | 323267 | 3.00E-94  | 248 | 274 | 90 +  | 570 | 832  | 279443 | 279716 |
| UN32472 | Rsa1.0.00098.1 | 527  | 349239 | 0         | 439 | 454 | 96 -  | 12  | 464  | 253864 | 254316 |
| UN32473 | Rsa1.0.04399.1 | 843  | 17543  | 1.00E-113 | 216 | 219 | 98 +  | 370 | 588  | 5662   | 5880   |
| UN32474 | Rsa1.0.01769.1 | 1222 | 39568  | 0         | 473 | 513 | 92 +  | 375 | 871  | 35298  | 35808  |
| UN32475 | Rsa1.0.01416.1 | 540  | 46262  | 1.00E-158 | 378 | 407 | 92 +  | 55  | 451  | 24715  | 25119  |
| UN32476 | Rsa1.0.00107.1 | 809  | 431659 | 0         | 671 | 704 | 95 -  | 10  | 710  | 85557  | 86249  |
| UN32477 | Rsa1.0.00055.1 | 621  | 520193 | 1.00E-178 | 327 | 329 | 99 -  | 294 | 621  | 71781  | 72109  |
| UN32478 | Rsa1.0.37082.1 | 716  | 608    | 0         | 585 | 588 | 99 +  | 3   | 590  | 4      | 591    |
| UN32479 | Rsa1.0.01626.1 | 909  | 41989  | 0         | 353 | 353 | 100 - | 555 | 907  | 26647  | 26999  |
| UN32480 | Rsa1.0.01799.1 | 668  | 39127  | 1.00E-108 | 279 | 307 | 90 -  | 22  | 309  | 4074   | 4380   |
| UN32481 | Rsa1.0.04541.1 | 716  | 16931  | 0         | 516 | 557 | 92 +  | 2   | 558  | 12996  | 13543  |
| UN32482 | Rsa1.0.07168.1 | 601  | 9790   | 4.00E-98  | 220 | 235 | 93 +  | 365 | 599  | 3361   | 3583   |
| UN32483 | Rsa1.0.00438.1 | 664  | 84861  | 0         | 346 | 351 | 98 +  | 1   | 350  | 46961  | 47311  |
| UN32484 | Rsa1.0.01288.1 | 877  | 49188  | 1.00E-134 | 289 | 302 | 95 +  | 199 | 499  | 29523  | 29822  |
| UN32485 | Rsa1.0_00108.1 | 833  | 478491 | 1.00E-158 | 383 | 411 | 93 -  | 2   | 407  | 40645  | 41051  |

|         |                |      |        |           |      |      |       |     |      |        |        |
|---------|----------------|------|--------|-----------|------|------|-------|-----|------|--------|--------|
| UN32486 | Rsa1.0_17792.1 | 228  | 1740   | 1.00E-120 | 222  | 223  | 99 -  | 5   | 227  | 1164   | 1386   |
| UN32487 | Rsa1.0_00694.1 | 574  | 68074  | 2.00E-90  | 169  | 169  | 100 - | 1   | 169  | 4300   | 4468   |
| UN32488 | Rsa1.0_02975.1 | 453  | 26322  | 0         | 333  | 333  | 100 + | 2   | 334  | 25676  | 26008  |
| UN32489 | Rsa1.0_03511.1 | 501  | 22373  | 1.00E-137 | 316  | 339  | 93 -  | 145 | 483  | 7768   | 8106   |
| UN32490 | Rsa1.0_03075.1 | 684  | 25560  | 0         | 463  | 479  | 96 +  | 18  | 493  | 20037  | 20513  |
| UN32491 | Rsa1.0_02619.1 | 983  | 29444  | 0         | 496  | 528  | 93 +  | 456 | 982  | 695    | 1222   |
| UN32492 | Rsa1.0_13690.1 | 586  | 4476   | 1.00E-158 | 286  | 287  | 99 +  | 298 | 584  | 3409   | 3695   |
| UN32493 | Rsa1.0_00023.1 | 1334 | 194764 | 6.00E-96  | 345  | 399  | 86 -  | 946 | 1325 | 16086  | 16482  |
| UN32494 | Rsa1.0_05110.1 | 987  | 14814  | 0         | 961  | 983  | 97 -  | 3   | 985  | 9340   | 10319  |
| UN32495 | Rsa1.0_02185.1 | 626  | 34150  | 0         | 618  | 624  | 99 -  | 1   | 624  | 2781   | 3403   |
| UN32496 | Rsa1.0_00361.1 | 768  | 91181  | 0         | 719  | 737  | 97 -  | 2   | 738  | 10531  | 11264  |
| UN32497 | Rsa1.0_00243.1 | 994  | 103651 | 3.00E-72  | 169  | 179  | 94 -  | 684 | 862  | 25798  | 25976  |
| UN32498 | Rsa1.0_00225.1 | 750  | 105892 | 1.00E-180 | 404  | 435  | 92 +  | 3   | 420  | 47591  | 48023  |
| UN32499 | Rsa1.0_15443.1 | 838  | 2603   | 2.00E-97  | 269  | 295  | 91 +  | 487 | 774  | 1196   | 1487   |
| UN32500 | Rsa1.0_00051.1 | 1150 | 258225 | 0         | 1145 | 1149 | 99 -  | 1   | 1149 | 134799 | 135947 |
| UN32501 | Rsa1.0_00868.1 | 1402 | 61630  | 0         | 470  | 473  | 99 -  | 713 | 1183 | 34923  | 35395  |
| UN32502 | Rsa1.0_00192.1 | 826  | 278200 | 1.00E-166 | 419  | 455  | 92 +  | 9   | 456  | 80048  | 80499  |
| UN32503 | Rsa1.0_00737.1 | 1171 | 66432  | 0         | 398  | 405  | 98 -  | 1   | 405  | 11456  | 11858  |
| UN32504 | Rsa1.0_02955.1 | 372  | 26484  | 0         | 361  | 371  | 97 +  | 1   | 371  | 6235   | 6605   |
| UN32505 | Rsa1.0_03503.1 | 911  | 22445  | 0         | 358  | 359  | 99 +  | 128 | 486  | 16954  | 17312  |
| UN32506 | Rsa1.0_19398.1 | 623  | 1438   | 3.00E-31  | 138  | 158  | 87 +  | 15  | 172  | 528    | 683    |
| UN32507 | Rsa1.0_02062.1 | 605  | 35485  | 0         | 593  | 615  | 96 +  | 1   | 605  | 7588   | 8202   |
| UN32508 | Rsa1.0_02661.1 | 961  | 28964  | 0         | 894  | 902  | 99 -  | 2   | 899  | 5551   | 6452   |
| UN32509 | Rsa1.0_01484.1 | 1004 | 44806  | 0         | 964  | 1012 | 95 -  | 13  | 1004 | 13284  | 14294  |
| UN32510 | Rsa1.0_01955.1 | 936  | 36850  | 0         | 378  | 385  | 98 -  | 2   | 385  | 11415  | 11799  |
| UN32511 | Rsa1.0_05471.1 | 754  | 13641  | 2.00E-39  | 155  | 176  | 88 -  | 356 | 529  | 145    | 320    |
| UN32512 | Rsa1.0_00064.1 | 748  | 240927 | 1.00E-128 | 240  | 241  | 99 -  | 1   | 240  | 132976 | 133216 |
| UN32513 | Rsa1.0_01711.1 | 767  | 40578  | 1.00E-154 | 403  | 441  | 91 -  | 283 | 716  | 26451  | 26891  |
| UN32514 | Rsa1.0_02263.1 | 955  | 33238  | 1.00E-100 | 214  | 222  | 96 -  | 102 | 323  | 27313  | 27533  |
| UN32515 | Rsa1.0_02095.1 | 606  | 35071  | 1.00E-142 | 268  | 272  | 98 -  | 46  | 317  | 7779   | 8050   |
| UN32516 | Rsa1.0_01338.1 | 771  | 155644 | 0         | 497  | 516  | 96 -  | 2   | 513  | 115946 | 116460 |
| UN32517 | Rsa1.0_07786.1 | 1026 | 8569   | 1.00E-112 | 221  | 226  | 97 -  | 585 | 810  | 6737   | 6962   |
| UN32518 | Rsa1.0_01177.1 | 994  | 51572  | 1.00E-140 | 398  | 446  | 89 -  | 1   | 428  | 46559  | 46993  |
| UN32519 | Rsa1.0_08181.1 | 718  | 7777   | 1.00E-157 | 281  | 281  | 100 + | 1   | 281  | 3085   | 3365   |
| UN32520 | Rsa1.0_03855.1 | 544  | 20429  | 2.00E-16  | 48   | 49   | 97 +  | 496 | 544  | 11552  | 11600  |
| UN32521 | Rsa1.0_00487.1 | 1100 | 80674  | 2.00E-64  | 171  | 186  | 91 +  | 73  | 258  | 13053  | 13238  |
| UN32522 | Rsa1.0_00006.1 | 1284 | 396176 | 0         | 376  | 388  | 96 +  | 29  | 411  | 14353  | 14736  |
| UN32523 | Rsa1.0_02900.1 | 973  | 26928  | 0         | 949  | 971  | 97 +  | 8   | 971  | 2531   | 3497   |
| UN32524 | Rsa1.0_17488.1 | 1074 | 1816   | 1.00E-171 | 311  | 313  | 99 -  | 351 | 663  | 810    | 1122   |

|         |                |      |        |           |      |      |       |     |      |        |        |
|---------|----------------|------|--------|-----------|------|------|-------|-----|------|--------|--------|
| UN32525 | Rsa1.0_13934.1 | 778  | 4061   | 1.00E-106 | 198  | 199  | 99 -  | 479 | 677  | 1493   | 1691   |
| UN32526 | Rsa1.0_01893.1 | 1120 | 37520  | 1.00E-133 | 248  | 250  | 99 +  | 546 | 795  | 607    | 856    |
| UN32527 | Rsa1.0_00244.1 | 879  | 103590 | 0         | 871  | 879  | 99 +  | 2   | 877  | 81259  | 82136  |
| UN32528 | Rsa1.0_03231.1 | 997  | 24456  | 0         | 603  | 626  | 96 -  | 3   | 626  | 21022  | 21646  |
| UN32529 | Rsa1.0_00806.1 | 457  | 63674  | 0         | 441  | 467  | 94 +  | 1   | 456  | 42040  | 42506  |
| UN32530 | Rsa1.0_00115.1 | 837  | 131321 | 0         | 406  | 412  | 98 +  | 278 | 686  | 73634  | 74044  |
| UN32531 | Rsa1.0_03402.1 | 837  | 23188  | 2.00E-30  | 365  | 451  | 80 -  | 214 | 656  | 14577  | 15018  |
| UN32532 | Rsa1.0_00507.1 | 1160 | 79074  | 0         | 647  | 658  | 98 -  | 2   | 659  | 77475  | 78132  |
| UN32533 | Rsa1.0_01570.1 | 926  | 43015  | 0         | 920  | 921  | 99 +  | 3   | 923  | 7260   | 8180   |
| UN32534 | Rsa1.0_10779.1 | 607  | 5722   | 0         | 595  | 611  | 97 +  | 1   | 607  | 5071   | 5678   |
| UN32535 | Rsa1.0_02527.1 | 1237 | 177225 | 1.00E-158 | 284  | 284  | 100 + | 232 | 515  | 20066  | 20349  |
| UN32536 | Rsa1.0_01572.1 | 599  | 42995  | 9.00E-90  | 290  | 328  | 88 -  | 252 | 577  | 20582  | 20909  |
| UN32537 | Rsa1.0_00088.1 | 981  | 141341 | 0         | 361  | 367  | 98 +  | 616 | 979  | 121427 | 121793 |
| UN32538 | Rsa1.0_00038.1 | 470  | 314568 | 0         | 465  | 466  | 99 +  | 3   | 468  | 250610 | 251075 |
| UN32539 | Rsa1.0_00265.1 | 1160 | 220635 | 2.00E-76  | 149  | 150  | 99 +  | 592 | 741  | 211002 | 211151 |
| UN32540 | Rsa1.0_02020.1 | 566  | 173211 | 0         | 347  | 353  | 98 +  | 1   | 351  | 2846   | 3194   |
| UN32541 | Rsa1.0_00600.1 | 827  | 73395  | 0         | 456  | 479  | 95 -  | 2   | 470  | 34742  | 35220  |
| UN32542 | Rsa1.0_00114.1 | 956  | 131330 | 0         | 638  | 664  | 96 -  | 7   | 669  | 56824  | 57485  |
| UN32543 | Rsa1.0_00019.1 | 1083 | 301669 | 0         | 1056 | 1079 | 97 +  | 6   | 1082 | 282415 | 283492 |
| UN32544 | Rsa1.0_00577.1 | 648  | 174827 | 0         | 516  | 519  | 99 +  | 1   | 519  | 25262  | 25780  |
| UN32545 | Rsa1.0_00098.1 | 847  | 349239 | 0         | 673  | 708  | 95 +  | 146 | 841  | 255663 | 256370 |
| UN32546 | Rsa1.0_00184.1 | 818  | 218748 | 0         | 773  | 795  | 97 +  | 23  | 817  | 106039 | 106832 |
| UN32547 | Rsa1.0_01572.1 | 768  | 42995  | 1.00E-150 | 276  | 277  | 99 -  | 491 | 766  | 20615  | 20891  |
| UN32548 | Rsa1.0_00098.1 | 852  | 349239 | 0         | 603  | 637  | 94 -  | 4   | 632  | 294855 | 295484 |
| UN32549 | Rsa1.0_05573.1 | 986  | 13290  | 1.00E-100 | 195  | 198  | 98 -  | 256 | 453  | 11138  | 11335  |
| UN32550 | Rsa1.0_01524.1 | 1036 | 43949  | 4.00E-96  | 179  | 179  | 100 - | 31  | 209  | 42714  | 42892  |
| UN32551 | Rsa1.0_00734.1 | 1507 | 66508  | 0         | 385  | 393  | 97 -  | 613 | 1004 | 22616  | 23008  |
| UN32552 | Rsa1.0_00625.1 | 557  | 71672  | 0         | 541  | 556  | 97 +  | 1   | 556  | 7400   | 7955   |
| UN32553 | Rsa1.0_01820.1 | 815  | 38804  | 3.00E-90  | 181  | 185  | 97 -  | 1   | 185  | 36137  | 36321  |
| UN32554 | Rsa1.0_30821.1 | 440  | 744    | 0         | 424  | 432  | 98 +  | 3   | 434  | 315    | 744    |
| UN32555 | Rsa1.0_00151.1 | 788  | 119541 | 1.00E-136 | 311  | 332  | 93 +  | 351 | 682  | 47742  | 48070  |
| UN32556 | Rsa1.0_01321.1 | 1163 | 48248  | 0         | 438  | 442  | 99 +  | 1   | 442  | 34763  | 35202  |
| UN32557 | Rsa1.0_00002.1 | 807  | 601661 | 0         | 677  | 679  | 99 +  | 130 | 807  | 538860 | 539538 |
| UN32558 | Rsa1.0_04591.1 | 485  | 16717  | 7.00E-87  | 212  | 227  | 93 -  | 192 | 418  | 2892   | 3117   |
| UN32559 | Rsa1.0_00053.1 | 521  | 263459 | 8.00E-13  | 54   | 59   | 91 +  | 461 | 519  | 130126 | 130184 |
| UN32560 | Rsa1.0_16128.1 | 555  | 2271   | 2.00E-25  | 106  | 120  | 88 -  | 175 | 294  | 300    | 418    |
| UN32561 | Rsa1.0_00029.1 | 1339 | 272992 | 0         | 477  | 504  | 94 -  | 792 | 1292 | 260779 | 261279 |
| UN32562 | Rsa1.0_00119.1 | 309  | 467509 | 1.00E-166 | 305  | 308  | 99 +  | 1   | 308  | 346536 | 346843 |
| UN32563 | Rsa1.0_32074.1 | 1125 | 711    | 4.00E-81  | 277  | 318  | 87 +  | 661 | 978  | 378    | 695    |

|         |                |      |        |           |      |      |       |     |      |        |        |
|---------|----------------|------|--------|-----------|------|------|-------|-----|------|--------|--------|
| UN32564 | Rsa1.0_01987.1 | 916  | 36446  | 0         | 891  | 928  | 96 -  | 1   | 914  | 14512  | 15425  |
| UN32565 | Rsa1.0_01208.1 | 300  | 50718  | 1.00E-121 | 229  | 232  | 98 -  | 66  | 297  | 27893  | 28124  |
| UN32566 | Rsa1.0_00020.1 | 794  | 283099 | 0         | 765  | 795  | 96 +  | 1   | 794  | 97032  | 97818  |
| UN32567 | Rsa1.0_04249.1 | 1178 | 18269  | 1.00E-93  | 210  | 221  | 95 -  | 123 | 343  | 4144   | 4361   |
| UN32568 | Rsa1.0_00583.1 | 840  | 74309  | 1.00E-162 | 289  | 289  | 100 - | 1   | 289  | 2938   | 3226   |
| UN32569 | Rsa1.0_02528.1 | 690  | 30452  | 0         | 476  | 495  | 96 -  | 6   | 497  | 5295   | 5789   |
| UN32570 | Rsa1.0_02276.1 | 788  | 33098  | 0         | 769  | 789  | 97 -  | 2   | 787  | 5995   | 6783   |
| UN32571 | Rsa1.0_05687.1 | 687  | 12932  | 1.00E-123 | 249  | 257  | 96 +  | 35  | 291  | 4298   | 4554   |
| UN32572 | Rsa1.0_00005.1 | 1239 | 353093 | 0         | 433  | 435  | 99 -  | 804 | 1238 | 274110 | 274544 |
| UN32573 | Rsa1.0_03366.1 | 414  | 23401  | 4.00E-82  | 155  | 155  | 100 - | 3   | 157  | 21486  | 21640  |
| UN32574 | Rsa1.0_04594.1 | 1202 | 16713  | 0         | 966  | 1000 | 96 -  | 164 | 1163 | 12884  | 13880  |
| UN32575 | Rsa1.0_06170.1 | 787  | 11575  | 1.00E-132 | 243  | 244  | 99 -  | 501 | 744  | 2603   | 2846   |
| UN32576 | Rsa1.0_00372.1 | 799  | 90418  | 0         | 786  | 797  | 98 +  | 8   | 799  | 3773   | 4569   |
| UN32577 | Rsa1.0_00276.1 | 1013 | 100160 | 0         | 527  | 534  | 98 -  | 465 | 998  | 83905  | 84435  |
| UN32578 | Rsa1.0_00213.1 | 889  | 108167 | 0         | 349  | 352  | 99 +  | 536 | 887  | 13130  | 13480  |
| UN32579 | Rsa1.0_00645.1 | 1002 | 189716 | 0         | 515  | 535  | 96 -  | 12  | 546  | 3390   | 3923   |
| UN32580 | Rsa1.0_02776.1 | 861  | 27997  | 1.00E-138 | 255  | 257  | 99 -  | 2   | 258  | 18412  | 18668  |
| UN32581 | Rsa1.0_02433.1 | 940  | 158318 | 0         | 446  | 449  | 99 +  | 1   | 449  | 3156   | 3604   |
| UN32582 | Rsa1.0_07447.1 | 924  | 9380   | 0         | 471  | 481  | 97 +  | 3   | 483  | 7442   | 7922   |
| UN32583 | Rsa1.0_11517.1 | 1254 | 5481   | 0         | 509  | 511  | 99 -  | 743 | 1253 | 4756   | 5266   |
| UN32584 | Rsa1.0_00862.1 | 1092 | 61715  | 0         | 639  | 640  | 99 -  | 300 | 939  | 30911  | 31550  |
| UN32585 | Rsa1.0_03138.1 | 494  | 25092  | 0         | 462  | 470  | 98 -  | 26  | 493  | 24348  | 24816  |
| UN32586 | #              | #    | #      | #         | #    | #    | #     | #   | #    | #      | #      |
| UN32587 | Rsa1.0_07052.1 | 1128 | 9979   | 1.00E-106 | 202  | 204  | 99 +  | 430 | 633  | 7460   | 7663   |
| UN32588 | Rsa1.0_04776.1 | 1200 | 16017  | 0         | 544  | 580  | 93 +  | 370 | 935  | 2540   | 3119   |
| UN32589 | Rsa1.0_00116.1 | 738  | 365886 | 0         | 362  | 375  | 96 +  | 343 | 717  | 206778 | 207152 |
| UN32590 | Rsa1.0_03401.1 | 972  | 23191  | 0         | 970  | 971  | 99 -  | 1   | 971  | 14876  | 15845  |
| UN32591 | Rsa1.0_00301.1 | 992  | 365315 | 0         | 829  | 842  | 98 -  | 1   | 837  | 231350 | 232191 |
| UN32592 | Rsa1.0_00044.1 | 1255 | 271658 | 0         | 1217 | 1244 | 97 -  | 1   | 1241 | 67504  | 68747  |
| UN32593 | Rsa1.0_02820.1 | 766  | 27629  | 0         | 483  | 483  | 100 - | 1   | 483  | 1548   | 2030   |
| UN32594 | Rsa1.0_00019.1 | 751  | 301669 | 0         | 748  | 756  | 98 -  | 1   | 751  | 63150  | 63905  |
| UN32595 | Rsa1.0_00773.1 | 1177 | 64839  | 0         | 434  | 461  | 94 -  | 2   | 457  | 16595  | 17047  |
| UN32596 | Rsa1.0_00265.1 | 420  | 220635 | 1.00E-122 | 252  | 262  | 96 +  | 3   | 264  | 130236 | 130497 |
| UN32597 | Rsa1.0_00438.1 | 744  | 84861  | 0         | 370  | 382  | 96 +  | 1   | 381  | 397    | 777    |
| UN32598 | #              | #    | #      | #         | #    | #    | #     | #   | #    | #      | #      |
| UN32599 | Rsa1.0_01921.1 | 573  | 168088 | 0         | 506  | 556  | 91 +  | 41  | 571  | 155474 | 156027 |
| UN32600 | Rsa1.0_24240.1 | 676  | 998    | 0         | 334  | 335  | 99 -  | 1   | 335  | 144    | 478    |
| UN32601 | Rsa1.0_20172.1 | 809  | 1331   | 0         | 804  | 807  | 99 +  | 3   | 809  | 496    | 1302   |
| UN32602 | Rsa1.0_05211.1 | 717  | 14493  | 0         | 420  | 421  | 99 +  | 1   | 421  | 6045   | 6465   |

|         |                |      |        |           |      |      |       |     |      |        |        |
|---------|----------------|------|--------|-----------|------|------|-------|-----|------|--------|--------|
| UN32603 | Rsa1.0.00083.1 | 1087 | 442773 | 0         | 785  | 791  | 99 -  | 1   | 791  | 400121 | 400911 |
| UN32604 | Rsa1.0.22308.1 | 227  | 1132   | 1.00E-116 | 223  | 226  | 98 -  | 1   | 224  | 716    | 941    |
| UN32605 | Rsa1.0.03309.1 | 518  | 23852  | 0         | 505  | 520  | 97 +  | 1   | 517  | 11625  | 12143  |
| UN32606 | Rsa1.0.02356.1 | 622  | 141500 | 0         | 406  | 419  | 96 +  | 201 | 619  | 136513 | 136930 |
| UN32607 | Rsa1.0.02651.1 | 1386 | 29046  | 0         | 1334 | 1389 | 96 +  | 1   | 1385 | 11762  | 13150  |
| UN32608 | Rsa1.0.07473.1 | 997  | 9296   | 0         | 374  | 376  | 99 -  | 1   | 376  | 2370   | 2745   |
| UN32609 | Rsa1.0.38666.1 | 882  | 582    | 0         | 578  | 582  | 99 +  | 159 | 740  | 1      | 582    |
| UN32610 | Rsa1.0.02295.1 | 797  | 149884 | 1.00E-163 | 294  | 295  | 99 -  | 179 | 473  | 146899 | 147193 |
| UN32611 | Rsa1.0.00125.1 | 1208 | 253043 | 0         | 1179 | 1216 | 96 +  | 2   | 1208 | 226076 | 227290 |
| UN32612 | Rsa1.0.00915.1 | 826  | 194446 | 1.00E-77  | 168  | 174  | 96 -  | 654 | 824  | 32800  | 32973  |
| UN32613 | Rsa1.0.01624.1 | 978  | 42064  | 0         | 951  | 981  | 96 -  | 1   | 978  | 39891  | 40870  |
| UN32614 | Rsa1.0.00506.1 | 682  | 79106  | 1.00E-157 | 305  | 313  | 97 +  | 370 | 682  | 21609  | 21921  |
| UN32615 | Rsa1.0.00003.1 | 994  | 340054 | 0         | 937  | 1008 | 92 -  | 4   | 993  | 132564 | 133543 |
| UN32616 | Rsa1.0.38118.1 | 158  | 591    | 5.00E-39  | 112  | 122  | 91 +  | 37  | 158  | 349    | 470    |
| UN32617 | Rsa1.0.00123.1 | 807  | 325650 | 0         | 518  | 522  | 99 +  | 1   | 522  | 218198 | 218719 |
| UN32618 | Rsa1.0.00507.1 | 798  | 79074  | 0         | 745  | 804  | 92 -  | 1   | 798  | 8980   | 9758   |
| UN32619 | Rsa1.0.00419.1 | 777  | 86562  | 0         | 382  | 384  | 99 -  | 4   | 387  | 84790  | 85173  |
| UN32620 | Rsa1.0.00276.1 | 874  | 100160 | 0         | 688  | 698  | 98 -  | 3   | 699  | 62615  | 63312  |
| UN32621 | Rsa1.0.00985.1 | 254  | 161950 | 1.00E-139 | 253  | 254  | 99 +  | 1   | 254  | 44703  | 44956  |
| UN32622 | Rsa1.0.00223.1 | 829  | 106231 | 0         | 784  | 840  | 93 +  | 1   | 827  | 11528  | 12349  |
| UN32623 | Rsa1.0.01264.1 | 748  | 49697  | 0         | 741  | 748  | 99 +  | 2   | 748  | 18995  | 19741  |
| UN32624 | Rsa1.0.00363.1 | 846  | 90968  | 0         | 779  | 836  | 93 -  | 1   | 827  | 25096  | 25926  |
| UN32625 | Rsa1.0.00459.1 | 767  | 82580  | 0         | 736  | 750  | 98 -  | 19  | 767  | 11911  | 12659  |
| UN32626 | Rsa1.0.02681.1 | 1066 | 28711  | 0         | 502  | 544  | 92 -  | 535 | 1066 | 14747  | 15280  |
| UN32627 | Rsa1.0.00055.1 | 713  | 520193 | 0         | 708  | 709  | 99 +  | 3   | 710  | 344808 | 345516 |
| UN32628 | Rsa1.0.01123.1 | 776  | 53359  | 1.00E-100 | 240  | 254  | 94 +  | 12  | 260  | 31765  | 32016  |
| UN32629 | Rsa1.0.01838.1 | 889  | 38500  | 0         | 855  | 889  | 96 -  | 1   | 887  | 12952  | 13822  |
| UN32630 | Rsa1.0.15622.1 | 628  | 2515   | 1.00E-158 | 301  | 306  | 98 -  | 6   | 311  | 1      | 305    |
| UN32631 | Rsa1.0.12720.1 | 404  | 5145   | 1.00E-177 | 363  | 379  | 95 -  | 26  | 404  | 457    | 835    |
| UN32632 | Rsa1.0.01185.1 | 819  | 149842 | 2.00E-66  | 132  | 133  | 99 +  | 595 | 727  | 127774 | 127906 |
| UN32633 | Rsa1.0.08598.1 | 742  | 7143   | 0         | 572  | 595  | 96 -  | 1   | 593  | 1      | 595    |
| UN32634 | Rsa1.0.00101.1 | 878  | 267193 | 0         | 842  | 878  | 95 +  | 2   | 878  | 228065 | 228926 |
| UN32635 | Rsa1.0.00211.1 | 817  | 228189 | 0         | 362  | 363  | 99 -  | 2   | 364  | 221931 | 222293 |
| UN32636 | Rsa1.0.09681.1 | 730  | 6214   | 0         | 355  | 355  | 100 + | 5   | 359  | 1663   | 2017   |
| UN32637 | Rsa1.0.00626.1 | 782  | 71582  | 0         | 381  | 399  | 95 -  | 207 | 604  | 52343  | 52738  |
| UN32638 | Rsa1.0.00315.1 | 804  | 96426  | 0         | 781  | 803  | 97 -  | 1   | 803  | 60572  | 61368  |
| UN32639 | Rsa1.0.08837.1 | 538  | 6874   | 1.00E-147 | 270  | 272  | 99 +  | 194 | 465  | 699    | 970    |
| UN32640 | Rsa1.0.02472.1 | 1207 | 31085  | 0         | 542  | 558  | 97 -  | 6   | 557  | 3354   | 3911   |
| UN32641 | Rsa1.0.08286.1 | 763  | 7605   | 0         | 721  | 770  | 93 -  | 3   | 760  | 4485   | 5238   |

|         |                |      |        |           |     |      |       |     |      |        |        |
|---------|----------------|------|--------|-----------|-----|------|-------|-----|------|--------|--------|
| UN32642 | Rsa1.0.00199.1 | 1030 | 249604 | 0         | 999 | 1035 | 96 -  | 1   | 1028 | 184007 | 185039 |
| UN32643 | Rsa1.0.03997.1 | 843  | 19652  | 1.00E-113 | 295 | 322  | 91 -  | 520 | 838  | 4507   | 4822   |
| UN32644 | Rsa1.0.04695.1 | 895  | 16343  | 0         | 564 | 567  | 99 -  | 327 | 893  | 4389   | 4955   |
| UN32645 | Rsa1.0.00652.1 | 763  | 70089  | 0         | 758 | 763  | 99 -  | 1   | 763  | 35528  | 36290  |
| UN32646 | Rsa1.0.00055.1 | 725  | 520193 | 7.00E-91  | 239 | 262  | 91 +  | 286 | 547  | 5872   | 6133   |
| UN32647 | Rsa1.0.00898.1 | 1148 | 202772 | 0         | 494 | 517  | 95 -  | 2   | 513  | 21463  | 21974  |
| UN32648 | Rsa1.0.02692.1 | 836  | 28626  | 0         | 589 | 611  | 96 -  | 1   | 611  | 15216  | 15826  |
| UN32649 | Rsa1.0.00211.1 | 806  | 228189 | 7.00E-79  | 162 | 166  | 97 +  | 604 | 769  | 16287  | 16452  |
| UN32650 | Rsa1.0.00275.1 | 847  | 210104 | 2.00E-88  | 169 | 170  | 99 +  | 1   | 170  | 10275  | 10444  |
| UN32651 | Rsa1.0.05095.1 | 730  | 14869  | 0         | 470 | 470  | 100 + | 1   | 470  | 1402   | 1871   |
| UN32652 | Rsa1.0.66822.1 | 810  | 343    | 1.00E-177 | 317 | 318  | 99 -  | 328 | 645  | 26     | 343    |
| UN32653 | Rsa1.0.05947.1 | 497  | 12142  | 1.00E-45  | 169 | 193  | 87 -  | 16  | 208  | 7343   | 7523   |
| UN32654 | Rsa1.0.00092.1 | 1168 | 659932 | 0         | 565 | 569  | 99 +  | 544 | 1112 | 460761 | 461329 |
| UN32655 | Rsa1.0.07356.1 | 901  | 9517   | 0         | 889 | 908  | 97 -  | 1   | 899  | 4779   | 5682   |
| UN32656 | Rsa1.0.01794.1 | 857  | 39215  | 1.00E-137 | 276 | 284  | 97 +  | 1   | 283  | 27714  | 27997  |
| UN32657 | Rsa1.0.05013.1 | 709  | 15131  | 0         | 350 | 351  | 99 +  | 336 | 686  | 10111  | 10461  |
| UN32658 | Rsa1.0.02882.1 | 911  | 27039  | 0         | 535 | 562  | 95 +  | 2   | 554  | 1481   | 2042   |
| UN32659 | Rsa1.0.00549.1 | 687  | 76473  | 0         | 429 | 459  | 93 +  | 128 | 586  | 20132  | 20572  |
| UN32660 | Rsa1.0.17484.1 | 1098 | 1817   | 0         | 900 | 940  | 95 -  | 1   | 937  | 1      | 939    |
| UN32661 | Rsa1.0.00051.1 | 800  | 258225 | 0         | 800 | 801  | 99 +  | 1   | 800  | 151307 | 152107 |
| UN32662 | Rsa1.0.01876.1 | 1297 | 37800  | 0         | 397 | 397  | 100 - | 874 | 1270 | 17273  | 17669  |
| UN32663 | Rsa1.0.00736.1 | 537  | 66455  | 0         | 380 | 380  | 100 + | 1   | 380  | 36003  | 36382  |
| UN32664 | Rsa1.0.01274.1 | 789  | 49419  | 0         | 416 | 434  | 95 -  | 13  | 445  | 24409  | 24841  |
| UN32665 | Rsa1.0.00585.1 | 495  | 74164  | 0         | 484 | 486  | 99 +  | 9   | 494  | 687    | 1172   |
| UN32666 | Rsa1.0.00853.1 | 792  | 62101  | 0         | 408 | 415  | 98 -  | 1   | 415  | 19051  | 19462  |
| UN32667 | Rsa1.0.06398.1 | 776  | 11085  | 0         | 448 | 448  | 100 + | 329 | 776  | 1      | 448    |
| UN32668 | Rsa1.0.08939.1 | 1177 | 6769   | 1.00E-151 | 274 | 275  | 99 -  | 463 | 737  | 4748   | 5022   |
| UN32669 | Rsa1.0.00250.1 | 1017 | 273771 | 0         | 417 | 442  | 94 +  | 2   | 434  | 223541 | 223982 |
| UN32670 | Rsa1.0.05892.1 | 485  | 12309  | 0         | 434 | 434  | 100 + | 50  | 483  | 10344  | 10777  |
| UN32671 | Rsa1.0.00145.1 | 1058 | 261008 | 1.00E-130 | 306 | 323  | 94 +  | 1   | 322  | 19961  | 20277  |
| UN32672 | Rsa1.0.00655.1 | 586  | 195840 | 1.00E-152 | 357 | 384  | 92 +  | 195 | 577  | 148934 | 149311 |
| UN32673 | Rsa1.0.00419.1 | 664  | 86562  | 0         | 530 | 540  | 98 +  | 11  | 550  | 83778  | 84317  |
| UN32674 | Rsa1.0.16013.1 | 1049 | 2323   | 0         | 485 | 497  | 97 -  | 12  | 508  | 1      | 497    |
| UN32675 | Rsa1.0.02867.1 | 1041 | 27121  | 0         | 662 | 665  | 99 +  | 1   | 665  | 22104  | 22768  |
| UN32676 | Rsa1.0.01537.1 | 523  | 187285 | 0         | 470 | 475  | 98 -  | 3   | 477  | 171847 | 172321 |
| UN32677 | Rsa1.0.00538.1 | 973  | 77149  | 1.00E-175 | 312 | 312  | 100 - | 1   | 312  | 58625  | 58936  |
| UN32678 | Rsa1.0.01575.1 | 392  | 42924  | 1.00E-157 | 280 | 280  | 100 + | 2   | 281  | 37040  | 37319  |
| UN32679 | Rsa1.0.02083.1 | 1296 | 35216  | 1.00E-47  | 197 | 225  | 87 -  | 702 | 925  | 2091   | 2311   |
| UN32680 | Rsa1.0.00159.1 | 1043 | 431686 | 1.00E-144 | 291 | 300  | 97 -  | 1   | 299  | 418639 | 418938 |



|         |                |      |        |           |      |      |       |     |      |        |        |
|---------|----------------|------|--------|-----------|------|------|-------|-----|------|--------|--------|
| UN32681 | Rsa1.0_00040.1 | 548  | 324196 | 0         | 538  | 555  | 96 -  | 3   | 548  | 48137  | 48690  |
| UN32682 | Rsa1.0_01265.1 | 1139 | 49686  | 0         | 1029 | 1040 | 98 -  | 73  | 1112 | 30168  | 31207  |
| UN32683 | Rsa1.0_00668.1 | 1197 | 69421  | 0         | 1175 | 1201 | 97 +  | 1   | 1196 | 30374  | 31568  |
| UN32684 | Rsa1.0_03092.1 | 656  | 25448  | 0         | 651  | 654  | 99 +  | 1   | 654  | 8751   | 9404   |
| UN32685 | Rsa1.0_00035.1 | 1389 | 176449 | 0         | 1330 | 1386 | 95 +  | 20  | 1389 | 76687  | 78072  |
| UN32686 | Rsa1.0_00699.1 | 1262 | 184398 | 0         | 394  | 394  | 100 + | 1   | 394  | 52782  | 53175  |
| UN32687 | Rsa1.0_00111.1 | 1042 | 390088 | 2.00E-89  | 229  | 248  | 92 +  | 3   | 240  | 369976 | 370222 |
| UN32688 | Rsa1.0_00019.1 | 798  | 301669 | 0         | 505  | 509  | 99 -  | 3   | 511  | 75859  | 76367  |
| UN32689 | Rsa1.0_30628.1 | 758  | 749    | 0         | 667  | 673  | 99 -  | 2   | 673  | 1      | 673    |
| UN32690 | Rsa1.0_00967.1 | 717  | 58049  | 0         | 398  | 402  | 99 -  | 317 | 717  | 24015  | 24416  |
| UN32691 | Rsa1.0_00829.1 | 882  | 158305 | 0         | 695  | 723  | 96 -  | 1   | 723  | 146767 | 147483 |
| UN32692 | Rsa1.0_02393.1 | 752  | 31795  | 0         | 473  | 484  | 97 -  | 3   | 485  | 16251  | 16734  |
| UN32693 | Rsa1.0_00676.1 | 482  | 69166  | 0         | 478  | 479  | 99 +  | 4   | 482  | 23247  | 23725  |
| UN32694 | Rsa1.0_00618.1 | 949  | 72195  | 0         | 331  | 332  | 99 +  | 248 | 579  | 61024  | 61355  |
| UN32695 | Rsa1.0_00060.1 | 1359 | 502678 | 0         | 478  | 478  | 100 + | 1   | 478  | 371602 | 372079 |
| UN32696 | Rsa1.0_05545.1 | 1022 | 13379  | 0         | 1011 | 1019 | 99 -  | 3   | 1021 | 4360   | 5374   |
| UN32697 | Rsa1.0_00679.1 | 660  | 68971  | 1.00E-102 | 250  | 267  | 93 +  | 108 | 374  | 55145  | 55406  |
| UN32698 | Rsa1.0_00911.1 | 922  | 59943  | 0         | 625  | 629  | 99 -  | 1   | 626  | 42158  | 42785  |
| UN32699 | Rsa1.0_00225.1 | 859  | 105892 | 0         | 548  | 575  | 95 +  | 3   | 572  | 73270  | 73835  |
| UN32700 | Rsa1.0_00970.1 | 872  | 57994  | 0         | 587  | 588  | 99 -  | 1   | 588  | 10935  | 11522  |
| UN32701 | Rsa1.0_01021.1 | 1004 | 56610  | 0         | 616  | 622  | 99 -  | 1   | 621  | 24486  | 25107  |
| UN32702 | Rsa1.0_00107.1 | 320  | 431659 | 1.00E-178 | 318  | 319  | 99 -  | 1   | 319  | 1520   | 1838   |
| UN32703 | Rsa1.0_07639.1 | 827  | 8966   | 0         | 421  | 431  | 97 -  | 1   | 429  | 4982   | 5412   |
| UN32704 | Rsa1.0_01748.1 | 924  | 39855  | 0         | 469  | 478  | 98 +  | 1   | 478  | 27756  | 28233  |
| UN32705 | Rsa1.0_00527.1 | 988  | 77733  | 1.00E-161 | 412  | 452  | 91 -  | 465 | 915  | 59854  | 60305  |
| UN32706 | Rsa1.0_00882.1 | 624  | 61249  | 0         | 431  | 439  | 98 -  | 187 | 624  | 56815  | 57253  |
| UN32707 | Rsa1.0_59294.1 | 643  | 386    | 1.00E-131 | 245  | 246  | 99 -  | 152 | 396  | 141    | 386    |
| UN32708 | Rsa1.0_07783.1 | 784  | 8578   | 0         | 779  | 783  | 99 +  | 2   | 782  | 4492   | 5274   |
| UN32709 | Rsa1.0_01326.1 | 587  | 48072  | 0         | 504  | 514  | 98 +  | 1   | 511  | 3811   | 4321   |
| UN32710 | Rsa1.0_00031.1 | 489  | 179862 | 0         | 475  | 486  | 97 +  | 2   | 486  | 90863  | 91344  |
| UN32711 | Rsa1.0_01836.1 | 1329 | 38503  | 0         | 666  | 701  | 95 -  | 28  | 719  | 28854  | 29551  |
| UN32712 | Rsa1.0_14050.1 | 979  | 3867   | 0         | 604  | 610  | 99 -  | 30  | 639  | 3166   | 3775   |
| UN32713 | Rsa1.0_00301.1 | 751  | 365315 | 1.00E-116 | 237  | 245  | 96 -  | 167 | 411  | 363526 | 363770 |
| UN32714 | Rsa1.0_00535.1 | 1089 | 77239  | 0         | 800  | 843  | 94 -  | 254 | 1089 | 46692  | 47527  |
| UN32715 | Rsa1.0_01634.1 | 1152 | 41865  | 0         | 505  | 523  | 96 +  | 1   | 522  | 3613   | 4128   |
| UN32716 | Rsa1.0_00575.1 | 250  | 74791  | 1.00E-136 | 249  | 250  | 99 +  | 1   | 250  | 54366  | 54615  |
| UN32717 | Rsa1.0_08147.1 | 671  | 7835   | 0         | 555  | 579  | 95 -  | 80  | 654  | 6840   | 7405   |
| UN32718 | Rsa1.0_09002.1 | 1143 | 137863 | 0         | 710  | 720  | 98 -  | 2   | 721  | 135555 | 136273 |
| UN32719 | Rsa1.0_03751.1 | 988  | 21025  | 0         | 348  | 357  | 97 +  | 629 | 985  | 3635   | 3991   |

|         |                |      |        |           |      |      |       |     |      |        |        |
|---------|----------------|------|--------|-----------|------|------|-------|-----|------|--------|--------|
| UN32720 | Rsa1.0.42944.1 | 1310 | 523    | 0         | 521  | 522  | 99 +  | 389 | 910  | 2      | 523    |
| UN32721 | Rsa1.0.02515.1 | 658  | 30616  | 0         | 619  | 653  | 94 +  | 1   | 652  | 12614  | 13262  |
| UN32722 | Rsa1.0.02661.1 | 879  | 28964  | 1.00E-178 | 317  | 317  | 100 + | 1   | 317  | 14012  | 14328  |
| UN32723 | Rsa1.0.00064.1 | 644  | 240927 | 1.00E-115 | 213  | 214  | 99 +  | 400 | 613  | 46845  | 47058  |
| UN32724 | Rsa1.0.00848.1 | 1270 | 152362 | 0         | 581  | 588  | 98 +  | 4   | 591  | 888    | 1475   |
| UN32725 | Rsa1.0.00905.1 | 1227 | 60110  | 0         | 1204 | 1222 | 98 -  | 2   | 1223 | 36257  | 37478  |
| UN32726 | Rsa1.0.42250.1 | 1088 | 531    | 0         | 349  | 350  | 99 -  | 2   | 351  | 1      | 350    |
| UN32727 | Rsa1.0.04969.1 | 392  | 15283  | 0         | 361  | 371  | 97 -  | 1   | 364  | 11384  | 11754  |
| UN32728 | Rsa1.0.21016.1 | 776  | 1245   | 0         | 528  | 560  | 94 -  | 9   | 550  | 408    | 965    |
| UN32729 | Rsa1.0.00068.1 | 1007 | 151813 | 1.00E-131 | 322  | 346  | 93 -  | 1   | 343  | 71033  | 71373  |
| UN32730 | Rsa1.0.45006.1 | 1070 | 501    | 0         | 497  | 506  | 98 +  | 177 | 682  | 1      | 501    |
| UN32731 | Rsa1.0.00863.1 | 450  | 254535 | 0         | 339  | 341  | 99 -  | 7   | 347  | 1252   | 1591   |
| UN32732 | Rsa1.0.01992.1 | 1049 | 36424  | 0         | 771  | 830  | 92 +  | 222 | 1045 | 22584  | 23408  |
| UN32733 | Rsa1.0.00156.1 | 526  | 118383 | 1.00E-124 | 257  | 264  | 97 -  | 262 | 524  | 38966  | 39226  |
| UN32734 | Rsa1.0.01424.1 | 1057 | 46139  | 0         | 574  | 575  | 99 +  | 415 | 989  | 38132  | 38706  |
| UN32735 | Rsa1.0.05358.1 | 589  | 14060  | 0         | 586  | 591  | 99 -  | 1   | 589  | 3003   | 3593   |
| UN32736 | Rsa1.0.08015.1 | 1055 | 8078   | 1.00E-168 | 303  | 304  | 99 +  | 389 | 692  | 6790   | 7093   |
| UN32737 | Rsa1.0.02290.1 | 862  | 32971  | 3.00E-13  | 179  | 224  | 79 -  | 260 | 483  | 1143   | 1365   |
| UN32738 | Rsa1.0.01846.1 | 1105 | 38367  | 0         | 857  | 858  | 99 -  | 1   | 858  | 26031  | 26888  |
| UN32739 | Rsa1.0.03434.1 | 345  | 22960  | 1.00E-169 | 304  | 305  | 99 -  | 2   | 306  | 13754  | 14058  |
| UN32740 | Rsa1.0.00908.1 | 888  | 59987  | 0         | 882  | 886  | 99 +  | 1   | 886  | 29694  | 30578  |
| UN32741 | Rsa1.0.00194.1 | 813  | 110851 | 1.00E-110 | 214  | 218  | 98 +  | 341 | 558  | 69886  | 70103  |
| UN32742 | Rsa1.0.06049.1 | 508  | 11851  | 1.00E-113 | 229  | 235  | 97 +  | 272 | 504  | 10624  | 10858  |
| UN32743 | Rsa1.0.06330.1 | 324  | 11222  | 2.00E-98  | 182  | 182  | 100 + | 141 | 322  | 2815   | 2996   |
| UN32744 | Rsa1.0.00332.1 | 791  | 94575  | 0         | 491  | 512  | 95 -  | 279 | 789  | 47156  | 47661  |
| UN32745 | Rsa1.0.00336.1 | 1261 | 445051 | 0         | 738  | 754  | 97 -  | 2   | 755  | 144643 | 145396 |
| UN32746 | Rsa1.0.07636.1 | 740  | 8971   | 0         | 736  | 737  | 99 +  | 3   | 739  | 4772   | 5508   |
| UN32747 | Rsa1.0.06247.1 | 753  | 11395  | 1.00E-148 | 464  | 531  | 87 -  | 83  | 576  | 9150   | 9678   |
| UN32748 | Rsa1.0.02600.1 | 885  | 29657  | 0         | 820  | 867  | 94 +  | 21  | 885  | 91     | 934    |
| UN32749 | Rsa1.0.00068.1 | 482  | 151813 | 0         | 480  | 480  | 100 + | 1   | 480  | 6636   | 7115   |
| UN32750 | Rsa1.0.00385.1 | 519  | 89160  | 1.00E-144 | 443  | 503  | 88 +  | 5   | 471  | 82480  | 82981  |
| UN32751 | Rsa1.0.07213.1 | 1030 | 9711   | 0         | 874  | 896  | 97 +  | 1   | 896  | 4279   | 5173   |
| UN32752 | Rsa1.0.01553.1 | 998  | 43379  | 0         | 459  | 460  | 99 -  | 1   | 460  | 37657  | 38116  |
| UN32753 | Rsa1.0.00394.1 | 639  | 148426 | 0         | 450  | 461  | 97 -  | 6   | 466  | 134461 | 134921 |
| UN32754 | Rsa1.0.00265.1 | 1012 | 220635 | 0         | 640  | 641  | 99 +  | 1   | 641  | 12058  | 12698  |
| UN32755 | Rsa1.0.07437.1 | 433  | 9394   | 0         | 429  | 431  | 99 -  | 1   | 431  | 4835   | 5265   |
| UN32756 | Rsa1.0.01508.1 | 937  | 44334  | 0         | 928  | 934  | 99 +  | 1   | 934  | 26538  | 27471  |
| UN32757 | Rsa1.0.00015.1 | 385  | 561803 | 1.00E-135 | 250  | 252  | 99 -  | 134 | 385  | 202055 | 202306 |
| UN32758 | Rsa1.0.00701.1 | 219  | 67691  | 8.00E-51  | 111  | 114  | 97 -  | 106 | 219  | 39717  | 39830  |

|         |                |      |        |           |     |     |       |     |      |        |        |
|---------|----------------|------|--------|-----------|-----|-----|-------|-----|------|--------|--------|
| UN32759 | Rsa1.0.00107.1 | 823  | 431659 | 1.00E-151 | 292 | 299 | 97 -  | 453 | 751  | 85557  | 85855  |
| UN32760 | Rsa1.0.04405.1 | 545  | 17508  | 1.00E-129 | 251 | 256 | 98 -  | 1   | 253  | 8725   | 8980   |
| UN32761 | Rsa1.0.10233.1 | 239  | 5928   | 1.00E-126 | 237 | 239 | 99 -  | 1   | 237  | 274    | 512    |
| UN32762 | Rsa1.0.01170.1 | 592  | 161131 | 1.00E-130 | 258 | 265 | 97 +  | 1   | 265  | 114521 | 114782 |
| UN32763 | Rsa1.0.02257.1 | 924  | 33318  | 1.00E-125 | 249 | 255 | 97 -  | 1   | 253  | 8219   | 8473   |
| UN32764 | Rsa1.0.15414.1 | 451  | 2620   | 1.00E-129 | 286 | 302 | 94 +  | 3   | 304  | 368    | 668    |
| UN32765 | Rsa1.0.38120.1 | 1317 | 591    | 1.00E-163 | 295 | 296 | 99 -  | 169 | 464  | 167    | 462    |
| UN32766 | Rsa1.0.07450.1 | 959  | 9373   | 0         | 429 | 432 | 99 -  | 1   | 432  | 2430   | 2860   |
| UN32767 | Rsa1.0.01508.1 | 1129 | 44334  | 0         | 739 | 746 | 99 +  | 1   | 746  | 18034  | 18776  |
| UN32768 | Rsa1.0.01903.1 | 897  | 37451  | 0         | 340 | 341 | 99 +  | 1   | 341  | 23404  | 23744  |
| UN32769 | Rsa1.0.06287.1 | 1055 | 11303  | 0         | 643 | 737 | 87 -  | 322 | 1054 | 2244   | 2944   |
| UN32770 | Rsa1.0.01321.1 | 560  | 48248  | 0         | 555 | 560 | 99 -  | 1   | 558  | 10870  | 11429  |
| UN32771 | Rsa1.0.04446.1 | 698  | 17317  | 0         | 605 | 616 | 98 +  | 83  | 698  | 1      | 616    |
| UN32772 | Rsa1.0.01944.1 | 445  | 37037  | 1.00E-113 | 207 | 207 | 100 + | 238 | 444  | 26401  | 26607  |
| UN32773 | Rsa1.0.03947.1 | 453  | 19904  | 0         | 448 | 451 | 99 -  | 1   | 450  | 17917  | 18367  |
| UN32774 | Rsa1.0.08790.1 | 1048 | 6918   | 1.00E-123 | 320 | 348 | 91 -  | 380 | 719  | 4980   | 5327   |
| UN32775 | Rsa1.0.25230.1 | 740  | 946    | 5.00E-52  | 148 | 160 | 92 +  | 236 | 394  | 767    | 924    |
| UN32776 | Rsa1.0.02004.1 | 710  | 169138 | 0         | 481 | 484 | 99 -  | 2   | 484  | 160941 | 161424 |
| UN32777 | Rsa1.0.01920.1 | 354  | 158533 | 0         | 347 | 351 | 98 +  | 3   | 353  | 19065  | 19415  |
| UN32778 | Rsa1.0.19324.1 | 765  | 1447   | 1.00E-142 | 271 | 276 | 98 -  | 425 | 700  | 1029   | 1304   |
| UN32779 | Rsa1.0.01819.1 | 750  | 38834  | 0         | 377 | 380 | 99 +  | 8   | 387  | 4206   | 4585   |
| UN32780 | Rsa1.0.00017.1 | 958  | 752458 | 1.00E-165 | 431 | 473 | 91 +  | 2   | 469  | 375100 | 375552 |
| UN32781 | Rsa1.0.01782.1 | 909  | 39384  | 1.00E-86  | 226 | 247 | 91 -  | 663 | 909  | 9564   | 9810   |
| UN32782 | Rsa1.0.00024.1 | 826  | 188018 | 0         | 799 | 823 | 97 -  | 1   | 823  | 148464 | 149286 |
| UN32783 | Rsa1.0.01081.1 | 770  | 499226 | 0         | 708 | 720 | 98 +  | 52  | 770  | 21410  | 22129  |
| UN32784 | Rsa1.0.04027.1 | 325  | 19501  | 1.00E-169 | 321 | 327 | 98 +  | 1   | 325  | 12121  | 12447  |
| UN32785 | Rsa1.0.01363.1 | 274  | 47195  | 1.00E-107 | 206 | 208 | 99 -  | 66  | 272  | 28829  | 29036  |
| UN32786 | Rsa1.0.11808.1 | 481  | 5402   | 2.33E-156 | 274 | 277 | 98 +  | 3   | 277  | 4290   | 4566   |
| UN32787 | Rsa1.0.00754.1 | 979  | 65689  | 1.00E-147 | 281 | 285 | 98 -  | 318 | 602  | 6934   | 7217   |
| UN32788 | Rsa1.0.00079.1 | 401  | 606987 | 1.00E-148 | 375 | 404 | 92 -  | 2   | 401  | 18914  | 19308  |
| UN32789 | Rsa1.0.00058.1 | 682  | 159921 | 0         | 649 | 673 | 96 +  | 15  | 681  | 1745   | 2416   |
| UN32790 | Rsa1.0.03658.1 | 1069 | 21549  | 1.00E-155 | 279 | 279 | 100 - | 1   | 279  | 4404   | 4682   |
| UN32791 | Rsa1.0.00762.1 | 738  | 165246 | 1.00E-167 | 338 | 350 | 96 +  | 390 | 738  | 21989  | 22338  |
| UN32792 | Rsa1.0.46885.1 | 626  | 482    | 1.00E-122 | 267 | 280 | 95 -  | 347 | 626  | 52     | 327    |
| UN32793 | Rsa1.0.32744.1 | 644  | 695    | 0         | 377 | 381 | 98 +  | 2   | 382  | 171    | 551    |
| UN32794 | Rsa1.0.00817.1 | 405  | 62961  | 0         | 391 | 400 | 97 -  | 5   | 404  | 58247  | 58644  |
| UN32795 | Rsa1.0.03333.1 | 811  | 23662  | 0         | 799 | 810 | 98 +  | 3   | 809  | 14222  | 15031  |
| UN32796 | Rsa1.0.07021.1 | 856  | 10016  | 0         | 463 | 479 | 96 -  | 378 | 856  | 8692   | 9170   |
| UN32797 | Rsa1.0.00657.1 | 614  | 69858  | 1.00E-160 | 324 | 334 | 97 -  | 12  | 343  | 16050  | 16383  |

|         |                |      |        |           |      |      |       |     |      |        |        |
|---------|----------------|------|--------|-----------|------|------|-------|-----|------|--------|--------|
| UN32798 | Rsa1.0.01569.1 | 1456 | 43029  | 0         | 564  | 579  | 97 -  | 354 | 932  | 8261   | 8839   |
| UN32799 | Rsa1.0.01017.1 | 868  | 56714  | 0         | 404  | 409  | 98 +  | 459 | 867  | 35358  | 35766  |
| UN32800 | Rsa1.0.00686.1 | 843  | 68511  | 2.33E-156 | 276  | 279  | 98 +  | 1   | 278  | 53164  | 53442  |
| UN32801 | Rsa1.0.02297.1 | 863  | 160804 | 2.33E-156 | 407  | 455  | 89 -  | 408 | 862  | 7649   | 8103   |
| UN32802 | Rsa1.0.02024.1 | 706  | 149168 | 0         | 678  | 703  | 96 +  | 3   | 705  | 116365 | 117060 |
| UN32803 | Rsa1.0.00617.1 | 725  | 72199  | 0         | 573  | 585  | 97 -  | 1   | 585  | 56419  | 57002  |
| UN32804 | Rsa1.0.02478.1 | 1183 | 150183 | 6.00E-40  | 169  | 197  | 85 -  | 359 | 555  | 147737 | 147933 |
| UN32805 | Rsa1.0.04706.1 | 824  | 16293  | 0         | 739  | 776  | 95 -  | 1   | 775  | 13280  | 14055  |
| UN32806 | Rsa1.0.03082.1 | 832  | 25520  | 0         | 800  | 830  | 96 +  | 2   | 831  | 19911  | 20739  |
| UN32807 | Rsa1.0.09261.1 | 1356 | 6521   | 0         | 444  | 462  | 96 -  | 775 | 1235 | 1337   | 1798   |
| UN32808 | Rsa1.0.00990.1 | 631  | 57445  | 1.00E-165 | 342  | 355  | 96 +  | 2   | 350  | 44972  | 45326  |
| UN32809 | Rsa1.0.00070.1 | 688  | 150321 | 5.00E-58  | 203  | 225  | 90 +  | 467 | 686  | 49497  | 49718  |
| UN32810 | Rsa1.0.00114.1 | 1096 | 131330 | 0         | 570  | 624  | 91 -  | 4   | 602  | 34658  | 35281  |
| UN32811 | Rsa1.0.00376.1 | 568  | 90101  | 0         | 549  | 568  | 96 -  | 3   | 567  | 5710   | 6274   |
| UN32812 | Rsa1.0.00082.1 | 586  | 237584 | 0         | 550  | 596  | 92 +  | 1   | 586  | 29837  | 30414  |
| UN32813 | Rsa1.0.01366.1 | 1190 | 47139  | 0         | 1082 | 1100 | 98 -  | 1   | 1098 | 39164  | 40261  |
| UN32814 | Rsa1.0.00031.1 | 968  | 179862 | 0         | 916  | 929  | 98 -  | 40  | 967  | 120861 | 121788 |
| UN32815 | Rsa1.0.05853.1 | 1377 | 12417  | 1.00E-112 | 213  | 215  | 99 -  | 568 | 782  | 1137   | 1351   |
| UN32816 | Rsa1.0.07296.1 | 604  | 9599   | 1.00E-163 | 330  | 344  | 95 -  | 257 | 600  | 1490   | 1825   |
| UN32817 | Rsa1.0.00376.1 | 933  | 90101  | 0         | 579  | 590  | 98 -  | 343 | 932  | 39142  | 39731  |
| UN32818 | Rsa1.0.02983.1 | 1054 | 26268  | 1.00E-101 | 381  | 439  | 86 +  | 1   | 427  | 5215   | 5639   |
| UN32819 | Rsa1.0.03676.1 | 1048 | 21437  | 0         | 974  | 981  | 99 +  | 1   | 981  | 17257  | 18236  |
| UN32820 | Rsa1.0.07667.1 | 919  | 8863   | 5.00E-77  | 336  | 399  | 84 -  | 2   | 400  | 6240   | 6638   |
| UN32821 | Rsa1.0.09070.1 | 737  | 6671   | 8.00E-97  | 328  | 372  | 88 +  | 365 | 736  | 4453   | 4820   |
| UN32822 | Rsa1.0.03601.1 | 310  | 21850  | 5.00E-93  | 284  | 322  | 88 -  | 1   | 310  | 13705  | 14025  |
| UN32823 | Rsa1.0.02155.1 | 748  | 34522  | 8.00E-23  | 116  | 139  | 83 -  | 169 | 307  | 34372  | 34496  |
| UN32824 | Rsa1.0.00676.1 | 1026 | 69166  | 1.00E-132 | 239  | 239  | 100 + | 25  | 263  | 52224  | 52462  |
| UN32825 | Rsa1.0.02188.1 | 754  | 34104  | 5.00E-24  | 73   | 78   | 93 +  | 4   | 81   | 6362   | 6439   |
| UN32826 | Rsa1.0.01264.1 | 742  | 49697  | 0         | 717  | 759  | 94 +  | 2   | 742  | 16655  | 17413  |
| UN32827 | Rsa1.0.00098.1 | 768  | 349239 | 0         | 417  | 417  | 100 + | 1   | 417  | 224047 | 224463 |
| UN32828 | Rsa1.0.00251.1 | 451  | 303968 | 8.00E-65  | 168  | 182  | 92 -  | 258 | 439  | 113349 | 113530 |
| UN32829 | Rsa1.0.00413.1 | 813  | 86921  | 1.00E-111 | 401  | 459  | 87 +  | 60  | 507  | 64271  | 64718  |
| UN32830 | Rsa1.0.19551.1 | 1264 | 1416   | 0         | 701  | 729  | 96 +  | 330 | 1057 | 142    | 867    |
| UN32831 | Rsa1.0.00503.1 | 1148 | 79468  | 0         | 1140 | 1148 | 99 -  | 1   | 1147 | 37138  | 38284  |
| UN32832 | Rsa1.0.02212.1 | 1030 | 33840  | 0         | 532  | 551  | 96 +  | 6   | 554  | 20807  | 21357  |
| UN32833 | Rsa1.0.02360.1 | 629  | 32203  | 1.00E-151 | 312  | 325  | 96 +  | 296 | 620  | 22909  | 23230  |
| UN32834 | Rsa1.0.00367.1 | 538  | 90750  | 1.00E-109 | 322  | 362  | 88 +  | 63  | 423  | 72661  | 73000  |
| UN32835 | Rsa1.0.00306.1 | 505  | 146760 | 1.00E-178 | 331  | 336  | 98 -  | 167 | 502  | 76112  | 76447  |
| UN32836 | Rsa1.0.00651.1 | 792  | 247766 | 0         | 393  | 394  | 99 +  | 395 | 787  | 79083  | 79476  |

|         |                |      |        |           |     |      |      |     |      |        |        |
|---------|----------------|------|--------|-----------|-----|------|------|-----|------|--------|--------|
| UN32837 | Rsa1.0.01860.1 | 638  | 38057  | 0         | 626 | 640  | 97 - | 1   | 638  | 10542  | 11180  |
| UN32838 | Rsa1.0.03155.1 | 759  | 24958  | 0         | 416 | 435  | 95 + | 3   | 434  | 4651   | 5078   |
| UN32839 | Rsa1.0.02018.1 | 825  | 35994  | 0         | 814 | 820  | 99 + | 3   | 820  | 29150  | 29969  |
| UN32840 | Rsa1.0.00241.1 | 1104 | 104000 | 0         | 422 | 436  | 96 + | 196 | 630  | 11606  | 12041  |
| UN32841 | Rsa1.0.00064.1 | 591  | 240927 | 1.00E-143 | 296 | 309  | 95 - | 277 | 585  | 180978 | 181275 |
| UN32842 | Rsa1.0.00211.1 | 853  | 228189 | 0         | 707 | 712  | 99 - | 141 | 852  | 142265 | 142976 |
| UN32843 | Rsa1.0.00042.1 | 1276 | 171507 | 1.00E-123 | 252 | 260  | 96 - | 1   | 260  | 157980 | 158238 |
| UN32844 | Rsa1.0.00029.1 | 707  | 272992 | 1.00E-70  | 160 | 168  | 95 + | 287 | 454  | 175537 | 175704 |
| UN32845 | Rsa1.0.00246.1 | 696  | 103541 | 1.00E-115 | 352 | 401  | 87 - | 1   | 381  | 88841  | 89230  |
| UN32846 | Rsa1.0.00119.1 | 864  | 467509 | 1.00E-151 | 364 | 391  | 93 - | 271 | 661  | 170959 | 171336 |
| UN32847 | Rsa1.0.01666.1 | 574  | 173972 | 0         | 528 | 582  | 90 + | 1   | 572  | 145664 | 146237 |
| UN32848 | Rsa1.0.00230.1 | 652  | 105389 | 1.00E-154 | 323 | 338  | 95 + | 2   | 336  | 850    | 1187   |
| UN32849 | Rsa1.0.02510.1 | 925  | 30662  | 0         | 820 | 858  | 95 + | 1   | 850  | 23170  | 24024  |
| UN32850 | Rsa1.0.03061.1 | 446  | 25697  | 0         | 440 | 444  | 99 - | 1   | 444  | 22400  | 22841  |
| UN32851 | Rsa1.0.00280.1 | 964  | 99966  | 0         | 951 | 963  | 98 + | 1   | 962  | 67463  | 68425  |
| UN32852 | Rsa1.0.00013.1 | 1009 | 292129 | 1.00E-163 | 361 | 383  | 94 - | 627 | 1009 | 23022  | 23403  |
| UN32853 | Rsa1.0.00167.1 | 844  | 116000 | 0         | 689 | 719  | 95 + | 2   | 711  | 87208  | 87926  |
| UN32854 | Rsa1.0.00604.1 | 206  | 146282 | 3.00E-44  | 172 | 195  | 88 - | 12  | 196  | 96141  | 96332  |
| UN32855 | Rsa1.0.07168.1 | 588  | 9790   | 1.00E-111 | 274 | 296  | 92 + | 1   | 296  | 2153   | 2437   |
| UN32856 | Rsa1.0.00160.1 | 752  | 346678 | 0         | 370 | 384  | 96 + | 17  | 400  | 186431 | 186814 |
| UN32857 | Rsa1.0.00880.1 | 569  | 61271  | 0         | 553 | 570  | 97 + | 1   | 567  | 53467  | 54036  |
| UN32858 | Rsa1.0.00512.1 | 858  | 200277 | 0         | 830 | 868  | 95 + | 1   | 857  | 28830  | 29685  |
| UN32859 | Rsa1.0.01219.1 | 1089 | 50527  | 2.00E-64  | 171 | 186  | 91 + | 179 | 364  | 4981   | 5166   |
| UN32860 | Rsa1.0.02873.1 | 637  | 27077  | 0         | 499 | 530  | 94 - | 10  | 535  | 1333   | 1849   |
| UN32861 | Rsa1.0.00918.1 | 679  | 59720  | 0         | 521 | 533  | 97 + | 2   | 534  | 39592  | 40124  |
| UN32862 | Rsa1.0.00457.1 | 1008 | 337301 | 0         | 988 | 1021 | 96 - | 2   | 1004 | 184440 | 185459 |
| UN32863 | Rsa1.0.00456.1 | 987  | 82826  | 0         | 980 | 986  | 99 - | 1   | 984  | 58286  | 59271  |
| UN32864 | Rsa1.0.00087.1 | 571  | 761073 | 0         | 557 | 571  | 97 + | 1   | 571  | 548327 | 548896 |
| UN32865 | Rsa1.0.00019.1 | 597  | 301669 | 1.00E-166 | 318 | 324  | 98 + | 2   | 324  | 264340 | 264663 |
| UN32866 | Rsa1.0.01102.1 | 740  | 53987  | 0         | 483 | 489  | 98 + | 252 | 739  | 5603   | 6090   |
| UN32867 | Rsa1.0.05995.1 | 830  | 11997  | 0         | 458 | 470  | 97 - | 3   | 467  | 4717   | 5186   |
| UN32868 | Rsa1.0.00744.1 | 642  | 66084  | 0         | 460 | 465  | 98 + | 177 | 641  | 30070  | 30534  |
| UN32869 | Rsa1.0.02113.1 | 403  | 34890  | 1.00E-121 | 246 | 254  | 96 + | 1   | 254  | 9534   | 9784   |
| UN32870 | Rsa1.0.01242.1 | 543  | 50066  | 1.00E-157 | 343 | 366  | 93 + | 2   | 352  | 2369   | 2732   |
| UN32871 | Rsa1.0.00964.1 | 1020 | 316648 | 0         | 547 | 586  | 93 + | 1   | 583  | 12382  | 12945  |
| UN32872 | Rsa1.0.04709.1 | 972  | 16285  | 0         | 888 | 923  | 96 - | 54  | 972  | 1613   | 2519   |
| UN32873 | Rsa1.0.00345.1 | 798  | 93226  | 1.00E-107 | 296 | 326  | 90 + | 351 | 662  | 65738  | 66060  |
| UN32874 | Rsa1.0.00001.1 | 707  | 363028 | 0         | 670 | 694  | 96 + | 16  | 704  | 91723  | 92407  |
| UN32875 | Rsa1.0.14342.1 | 1062 | 3499   | 1.00E-155 | 318 | 331  | 96 + | 1   | 331  | 796    | 1126   |

|         |                |      |        |           |     |     |      |     |      |        |        |
|---------|----------------|------|--------|-----------|-----|-----|------|-----|------|--------|--------|
| UN32876 | Rsa1.0.01172.1 | 612  | 51734  | 0         | 596 | 612 | 97 + | 1   | 612  | 28442  | 29049  |
| UN32877 | Rsa1.0.06757.1 | 818  | 10411  | 0         | 764 | 794 | 96 + | 33  | 817  | 3139   | 3931   |
| UN32878 | Rsa1.0.16753.1 | 590  | 2046   | 2.33E-156 | 280 | 286 | 97 + | 305 | 590  | 1      | 286    |
| UN32879 | Rsa1.0.02197.1 | 1130 | 33996  | 1.00E-104 | 214 | 221 | 96 - | 400 | 620  | 1833   | 2053   |
| UN32880 | Rsa1.0.07593.1 | 999  | 9059   | 0         | 872 | 878 | 99 - | 122 | 997  | 1573   | 2450   |
| UN32881 | Rsa1.0.03351.1 | 754  | 23514  | 1.00E-155 | 362 | 386 | 93 - | 218 | 603  | 14289  | 14666  |
| UN32882 | Rsa1.0.03743.1 | 706  | 21062  | 0         | 397 | 416 | 95 + | 1   | 413  | 20521  | 20936  |
| UN32883 | Rsa1.0.00675.1 | 1216 | 145590 | 2.00E-49  | 208 | 246 | 84 + | 955 | 1188 | 140335 | 140580 |
| UN32884 | Rsa1.0.00429.1 | 834  | 85559  | 0         | 572 | 585 | 97 + | 1   | 585  | 53605  | 54189  |
| UN32885 | Rsa1.0.03755.1 | 545  | 21000  | 0         | 525 | 543 | 96 + | 3   | 545  | 9803   | 10345  |
| UN32886 | Rsa1.0.00405.1 | 621  | 202864 | 0         | 618 | 619 | 99 - | 1   | 619  | 62751  | 63369  |
| UN32887 | Rsa1.0.00053.1 | 865  | 263459 | 1.00E-130 | 263 | 272 | 96 - | 401 | 672  | 63729  | 64000  |
| UN32888 | Rsa1.0.08412.1 | 1123 | 7404   | 0         | 810 | 845 | 95 - | 282 | 1123 | 6459   | 7295   |
| UN32889 | Rsa1.0.01624.1 | 688  | 42064  | 0         | 505 | 511 | 98 + | 1   | 511  | 8476   | 8986   |
| UN32890 | Rsa1.0.00500.1 | 951  | 272308 | 6.00E-89  | 185 | 191 | 96 - | 760 | 950  | 2043   | 2233   |
| UN32891 | Rsa1.0.00581.1 | 1039 | 163575 | 0         | 661 | 683 | 96 - | 2   | 684  | 157546 | 158213 |
| UN32892 | Rsa1.0.07240.1 | 645  | 9676   | 2.33E-156 | 303 | 315 | 96 + | 3   | 316  | 2160   | 2470   |
| UN32893 | Rsa1.0.02528.1 | 772  | 30452  | 2.00E-48  | 102 | 103 | 99 + | 331 | 433  | 10564  | 10666  |
| UN32894 | Rsa1.0.01338.1 | 793  | 155644 | 0         | 377 | 382 | 98 - | 411 | 792  | 12363  | 12744  |
| UN32895 | Rsa1.0.00774.1 | 602  | 64831  | 0         | 597 | 598 | 99 + | 2   | 599  | 9259   | 9856   |
| UN32896 | Rsa1.0.00024.1 | 514  | 188018 | 0         | 452 | 493 | 91 + | 1   | 485  | 120960 | 121452 |
| UN32897 | Rsa1.0.05876.1 | 828  | 12348  | 1.00E-123 | 287 | 308 | 93 + | 28  | 333  | 8770   | 9069   |
| UN32898 | Rsa1.0.05884.1 | 699  | 12337  | 0         | 648 | 688 | 94 + | 5   | 684  | 11634  | 12316  |
| UN32899 | Rsa1.0.00136.1 | 1103 | 122464 | 1.00E-166 | 354 | 372 | 95 + | 92  | 461  | 10839  | 11210  |
| UN32900 | Rsa1.0.00338.1 | 375  | 94109  | 3.00E-39  | 179 | 207 | 86 + | 162 | 367  | 85645  | 85849  |
| UN32901 | Rsa1.0.00181.1 | 811  | 114269 | 0         | 793 | 812 | 97 + | 1   | 810  | 79067  | 79878  |
| UN32902 | Rsa1.0.00457.1 | 1251 | 337301 | 0         | 596 | 616 | 96 - | 37  | 651  | 320171 | 320778 |
| UN32903 | Rsa1.0.03954.1 | 1319 | 19886  | 5.00E-44  | 170 | 196 | 86 - | 172 | 367  | 7535   | 7730   |
| UN32904 | Rsa1.0.00838.1 | 702  | 153820 | 0         | 646 | 664 | 97 - | 1   | 664  | 7812   | 8475   |
| UN32905 | Rsa1.0.00642.1 | 755  | 201230 | 1.00E-159 | 396 | 427 | 92 + | 7   | 430  | 163593 | 164015 |
| UN32906 | Rsa1.0.00371.1 | 771  | 90463  | 0         | 410 | 431 | 95 - | 261 | 679  | 7772   | 8202   |
| UN32907 | Rsa1.0.06128.1 | 624  | 11671  | 0         | 606 | 623 | 97 + | 1   | 623  | 6644   | 7263   |
| UN32908 | Rsa1.0.00724.1 | 489  | 66789  | 3.00E-55  | 144 | 155 | 92 - | 41  | 195  | 52348  | 52498  |
| UN32909 | Rsa1.0.15030.1 | 668  | 2881   | 1.00E-160 | 289 | 290 | 99 + | 5   | 294  | 1500   | 1789   |
| UN32910 | #              | #    | #      | #         | #   | #   | #    | #   | #    | #      | #      |
| UN32911 | Rsa1.0.00524.1 | 753  | 169613 | 0         | 688 | 748 | 91 + | 6   | 753  | 163931 | 164656 |
| UN32912 | Rsa1.0.00563.1 | 639  | 75491  | 0         | 607 | 634 | 95 + | 3   | 636  | 22754  | 23383  |
| UN32913 | Rsa1.0.08628.1 | 842  | 7109   | 0         | 579 | 611 | 94 - | 3   | 612  | 2751   | 3361   |
| UN32914 | Rsa1.0.00748.1 | 715  | 65983  | 1.00E-177 | 374 | 393 | 95 + | 324 | 713  | 11037  | 11429  |

|         |                |      |        |           |      |      |       |     |      |        |        |
|---------|----------------|------|--------|-----------|------|------|-------|-----|------|--------|--------|
| UN32915 | Rsa1.0.03257.1 | 800  | 24305  | 0         | 784  | 795  | 98 +  | 9   | 800  | 6313   | 7106   |
| UN32916 | Rsa1.0.05415.1 | 1028 | 13830  | 0         | 816  | 843  | 96 +  | 184 | 1026 | 10745  | 11587  |
| UN32917 | Rsa1.0.05189.1 | 213  | 14545  | 2.00E-51  | 167  | 193  | 86 +  | 44  | 212  | 3167   | 3359   |
| UN32918 | Rsa1.0.00030.1 | 915  | 250988 | 1.00E-115 | 246  | 257  | 95 -  | 207 | 463  | 152706 | 152959 |
| UN32919 | Rsa1.0.00838.1 | 472  | 153820 | 1.00E-168 | 309  | 312  | 99 -  | 1   | 312  | 49408  | 49719  |
| UN32920 | Rsa1.0.01397.1 | 1300 | 183276 | 0         | 1080 | 1143 | 94 -  | 157 | 1299 | 40368  | 41506  |
| UN32921 | Rsa1.0.01456.1 | 696  | 45372  | 0         | 364  | 376  | 96 -  | 323 | 695  | 1357   | 1732   |
| UN32922 | Rsa1.0.01592.1 | 675  | 42685  | 0         | 615  | 617  | 99 +  | 57  | 673  | 16638  | 17254  |
| UN32923 | Rsa1.0.02957.1 | 851  | 26479  | 0         | 804  | 826  | 97 +  | 3   | 819  | 13699  | 14522  |
| UN32924 | Rsa1.0.00085.1 | 426  | 142226 | 1.00E-91  | 224  | 239  | 93 +  | 1   | 239  | 28413  | 28644  |
| UN32925 | Rsa1.0.01004.1 | 893  | 56975  | 0         | 572  | 592  | 96 +  | 89  | 680  | 56386  | 56975  |
| UN32926 | Rsa1.0.00116.1 | 506  | 365886 | 0         | 491  | 506  | 97 -  | 1   | 506  | 4774   | 5279   |
| UN32927 | Rsa1.0.29827.1 | 773  | 771    | 0         | 442  | 452  | 97 -  | 4   | 452  | 1      | 452    |
| UN32928 | Rsa1.0.00225.1 | 779  | 105892 | 1.00E-172 | 316  | 319  | 99 +  | 222 | 540  | 98398  | 98716  |
| UN32929 | Rsa1.0.23333.1 | 509  | 1056   | 1.00E-85  | 164  | 165  | 99 +  | 246 | 410  | 598    | 762    |
| UN32930 | Rsa1.0.00356.1 | 878  | 91521  | 1.00E-99  | 224  | 236  | 94 -  | 640 | 875  | 29542  | 29775  |
| UN32931 | Rsa1.0.01518.1 | 933  | 141402 | 6.00E-92  | 239  | 258  | 92 +  | 1   | 253  | 119817 | 120074 |
| UN32932 | Rsa1.0.10011.1 | 828  | 6040   | 0         | 804  | 842  | 95 +  | 1   | 828  | 4303   | 5144   |
| UN32933 | Rsa1.0.00275.1 | 1319 | 210104 | 0         | 677  | 678  | 99 -  | 402 | 1079 | 157269 | 157946 |
| UN32934 | Rsa1.0.00769.1 | 740  | 64911  | 0         | 555  | 558  | 99 +  | 3   | 560  | 5179   | 5736   |
| UN32935 | Rsa1.0.04288.1 | 967  | 18077  | 0         | 519  | 563  | 92 +  | 21  | 580  | 6581   | 7114   |
| UN32936 | Rsa1.0.00031.1 | 954  | 179862 | 0         | 554  | 571  | 97 -  | 61  | 631  | 86108  | 86676  |
| UN32937 | Rsa1.0.00825.1 | 943  | 62855  | 0         | 594  | 635  | 93 -  | 1   | 611  | 35580  | 36210  |
| UN32938 | Rsa1.0.00154.1 | 699  | 189461 | 0         | 600  | 672  | 89 +  | 42  | 692  | 10465  | 11127  |
| UN32939 | Rsa1.0.00472.1 | 868  | 398134 | 1.00E-138 | 292  | 307  | 95 +  | 1   | 295  | 306551 | 306856 |
| UN32940 | Rsa1.0.02791.1 | 855  | 27832  | 1.00E-126 | 254  | 262  | 96 -  | 593 | 854  | 16071  | 16332  |
| UN32941 | Rsa1.0.05488.1 | 1124 | 13567  | 1.00E-128 | 251  | 257  | 97 +  | 275 | 531  | 8828   | 9084   |
| UN32942 | #              | #    | #      | #         | #    | #    | #     | #   | #    | #      | #      |
| UN32943 | Rsa1.0.04816.1 | 943  | 15872  | 0         | 913  | 943  | 96 -  | 1   | 943  | 11787  | 12729  |
| UN32944 | Rsa1.0.00050.1 | 752  | 237174 | 7.00E-14  | 57   | 61   | 93 +  | 692 | 752  | 186052 | 186111 |
| UN32945 | Rsa1.0.00757.1 | 1222 | 65559  | 1.00E-160 | 308  | 315  | 97 -  | 727 | 1041 | 62121  | 62435  |
| UN32946 | Rsa1.0.07913.1 | 754  | 8303   | 1.00E-158 | 346  | 359  | 96 -  | 7   | 359  | 7185   | 7543   |
| UN32947 | Rsa1.0.00065.1 | 358  | 454616 | 1.00E-161 | 339  | 356  | 95 -  | 1   | 356  | 42318  | 42669  |
| UN32948 | Rsa1.0.15795.1 | 763  | 2418   | 1.00E-120 | 254  | 262  | 96 +  | 1   | 260  | 2160   | 2418   |
| UN32949 | Rsa1.0.00226.1 | 817  | 105884 | 1.00E-147 | 265  | 265  | 100 - | 1   | 265  | 48704  | 48968  |
| UN32950 | Rsa1.0.00804.1 | 997  | 63726  | 0         | 609  | 612  | 99 +  | 319 | 930  | 56954  | 57565  |
| UN32951 | Rsa1.0.00538.1 | 579  | 77149  | 0         | 576  | 581  | 99 -  | 1   | 579  | 13631  | 14211  |
| UN32952 | Rsa1.0.05719.1 | 1033 | 12836  | 1.00E-173 | 355  | 367  | 96 -  | 16  | 380  | 5953   | 6316   |
| UN32953 | Rsa1.0.19336.1 | 1107 | 1446   | 0         | 744  | 785  | 94 +  | 327 | 1106 | 1      | 763    |

|         |                |      |        |           |      |      |       |     |      |        |        |
|---------|----------------|------|--------|-----------|------|------|-------|-----|------|--------|--------|
| UN32954 | Rsa1.0.02785.1 | 750  | 27881  | 0         | 612  | 640  | 95 +  | 1   | 640  | 559    | 1186   |
| UN32955 | Rsa1.0.02215.1 | 928  | 33822  | 1.00E-170 | 306  | 307  | 99 +  | 621 | 927  | 17091  | 17397  |
| UN32956 | Rsa1.0.02532.1 | 1047 | 30403  | 1.00E-144 | 283  | 289  | 97 -  | 1   | 285  | 17632  | 17920  |
| UN32957 | Rsa1.0.00522.1 | 993  | 78103  | 0         | 663  | 713  | 92 -  | 64  | 774  | 21976  | 22683  |
| UN32958 | Rsa1.0.01023.1 | 920  | 56571  | 1.00E-137 | 368  | 401  | 91 -  | 1   | 383  | 20370  | 20764  |
| UN32959 | Rsa1.0.02725.1 | 817  | 28404  | 9.00E-29  | 137  | 158  | 86 -  | 418 | 574  | 7160   | 7316   |
| UN32960 | Rsa1.0.05883.1 | 1005 | 12337  | 0         | 931  | 950  | 98 -  | 4   | 953  | 8926   | 9875   |
| UN32961 | Rsa1.0.03050.1 | 358  | 25764  | 1.00E-160 | 304  | 309  | 98 +  | 1   | 308  | 24164  | 24472  |
| UN32962 | Rsa1.0.00280.1 | 739  | 99966  | 3.00E-96  | 418  | 488  | 85 +  | 258 | 734  | 84     | 541    |
| UN32963 | #              | #    | #      | #         | #    | #    | #     | #   | #    | #      | #      |
| UN32964 | Rsa1.0.01614.1 | 159  | 42238  | 7.00E-75  | 151  | 154  | 98 -  | 1   | 154  | 11340  | 11493  |
| UN32965 | Rsa1.0.10165.1 | 682  | 5966   | 0         | 423  | 424  | 99 -  | 1   | 424  | 363    | 786    |
| UN32966 | Rsa1.0.00056.1 | 602  | 332604 | 1.00E-177 | 390  | 414  | 94 -  | 1   | 408  | 24818  | 25230  |
| UN32967 | Rsa1.0.06841.1 | 1153 | 10286  | 0         | 990  | 1025 | 96 +  | 1   | 1023 | 5650   | 6670   |
| UN32968 | Rsa1.0.00070.1 | 1213 | 150321 | 1.00E-140 | 380  | 421  | 90 -  | 85  | 492  | 69183  | 69585  |
| UN32969 | Rsa1.0.04110.1 | 874  | 18998  | 4.00E-93  | 270  | 299  | 90 +  | 3   | 299  | 9396   | 9690   |
| UN32970 | Rsa1.0.22307.1 | 805  | 1132   | 2.33E-156 | 335  | 357  | 93 +  | 452 | 805  | 26     | 376    |
| UN32971 | Rsa1.0.00077.1 | 529  | 145005 | 1.00E-153 | 303  | 309  | 98 -  | 1   | 307  | 74268  | 74574  |
| UN32972 | Rsa1.0.03883.1 | 320  | 20282  | 3.00E-85  | 204  | 218  | 93 -  | 3   | 212  | 9232   | 9449   |
| UN32973 | Rsa1.0.27336.1 | 965  | 857    | 1.00E-129 | 264  | 274  | 96 +  | 150 | 423  | 5      | 278    |
| UN32974 | Rsa1.0.00442.1 | 577  | 84596  | 0         | 542  | 577  | 93 +  | 4   | 575  | 74679  | 75252  |
| UN32975 | Rsa1.0.59466.1 | 930  | 385    | 0         | 347  | 349  | 99 +  | 8   | 356  | 1      | 349    |
| UN32976 | Rsa1.0.05398.1 | 335  | 13885  | 1.00E-166 | 326  | 335  | 97 +  | 1   | 334  | 11900  | 12229  |
| UN32977 | Rsa1.0.00131.1 | 670  | 432233 | 0         | 348  | 351  | 99 +  | 6   | 356  | 273386 | 273735 |
| UN32978 | Rsa1.0.00859.1 | 690  | 61795  | 0         | 537  | 556  | 96 -  | 40  | 595  | 48538  | 49093  |
| UN32979 | Rsa1.0.08771.1 | 736  | 6938   | 1.00E-132 | 373  | 412  | 90 -  | 4   | 413  | 605    | 995    |
| UN32980 | Rsa1.0.00841.1 | 188  | 183065 | 8.00E-66  | 142  | 147  | 96 -  | 40  | 186  | 3134   | 3275   |
| UN32981 | Rsa1.0.09565.1 | 772  | 6285   | 1.00E-157 | 375  | 405  | 92 +  | 202 | 590  | 5859   | 6262   |
| UN32982 | Rsa1.0.05293.1 | 1315 | 14237  | 1.00E-158 | 290  | 292  | 99 +  | 287 | 578  | 837    | 1128   |
| UN32983 | Rsa1.0.00788.1 | 783  | 64237  | 0         | 476  | 500  | 95 -  | 1   | 490  | 34653  | 35152  |
| UN32984 | Rsa1.0.05738.1 | 593  | 12778  | 3.00E-40  | 192  | 225  | 85 -  | 143 | 366  | 9719   | 9942   |
| UN32985 | Rsa1.0.00179.1 | 619  | 393324 | 1.00E-132 | 293  | 307  | 95 +  | 6   | 311  | 359992 | 360295 |
| UN32986 | Rsa1.0.01156.1 | 846  | 52147  | 0         | 765  | 786  | 97 +  | 1   | 778  | 43454  | 44236  |
| UN32987 | Rsa1.0.00065.1 | 835  | 454616 | 0         | 811  | 837  | 96 +  | 1   | 834  | 132946 | 133782 |
| UN32988 | Rsa1.0.00042.1 | 1348 | 171507 | 0         | 1348 | 1348 | 100 - | 1   | 1348 | 102629 | 103976 |
| UN32989 | Rsa1.0.00301.1 | 621  | 365315 | 1.00E-140 | 302  | 317  | 95 -  | 1   | 317  | 189263 | 189578 |
| UN32990 | Rsa1.0.25955.1 | 725  | 912    | 1.00E-61  | 184  | 204  | 90 +  | 1   | 204  | 633    | 824    |
| UN32991 | Rsa1.0.14858.1 | 1478 | 3008   | 0         | 791  | 811  | 97 -  | 1   | 793  | 203    | 1013   |
| UN32992 | Rsa1.0.01289.1 | 1028 | 49181  | 1.00E-168 | 300  | 300  | 100 + | 484 | 783  | 46288  | 46587  |



|         |                |      |        |           |      |      |       |     |      |        |        |
|---------|----------------|------|--------|-----------|------|------|-------|-----|------|--------|--------|
| UN32993 | Rsa1.0.01469.1 | 541  | 45139  | 0         | 536  | 541  | 99 +  | 1   | 541  | 30996  | 31536  |
| UN32994 | Rsa1.0.06656.1 | 1141 | 10589  | 0         | 611  | 614  | 99 -  | 6   | 619  | 6002   | 6615   |
| UN32995 | Rsa1.0.00277.1 | 1030 | 100132 | 1.00E-133 | 245  | 246  | 99 -  | 1   | 246  | 82415  | 82660  |
| UN32996 | Rsa1.0.00099.1 | 781  | 159619 | 0         | 762  | 790  | 96 -  | 1   | 780  | 127406 | 128194 |
| UN32997 | Rsa1.0.03624.1 | 1053 | 21706  | 0         | 838  | 864  | 96 -  | 2   | 865  | 14843  | 15703  |
| UN32998 | Rsa1.0.00877.1 | 485  | 61305  | 0         | 376  | 377  | 99 +  | 1   | 377  | 18130  | 18506  |
| UN32999 | Rsa1.0.02360.1 | 583  | 32203  | 1.00E-144 | 280  | 287  | 97 +  | 296 | 582  | 22909  | 23195  |
| UN33000 | Rsa1.0.06165.1 | 930  | 11584  | 0         | 490  | 493  | 99 +  | 432 | 924  | 4711   | 5201   |
| UN33001 | Rsa1.0.00611.1 | 482  | 72410  | 1.00E-123 | 243  | 249  | 97 +  | 2   | 250  | 2534   | 2778   |
| UN33002 | Rsa1.0.00022.1 | 603  | 200461 | 0         | 510  | 554  | 92 -  | 60  | 603  | 141937 | 142479 |
| UN33003 | Rsa1.0.00713.1 | 991  | 158017 | 0         | 678  | 711  | 95 -  | 1   | 698  | 144676 | 145384 |
| UN33004 | Rsa1.0.03521.1 | 774  | 396204 | 0         | 524  | 527  | 99 -  | 4   | 530  | 133159 | 133685 |
| UN33005 | Rsa1.0.00989.1 | 925  | 57494  | 0         | 484  | 494  | 97 +  | 5   | 497  | 4242   | 4735   |
| UN33006 | Rsa1.0.00636.1 | 593  | 71113  | 0         | 570  | 598  | 95 +  | 1   | 592  | 66378  | 66972  |
| UN33007 | Rsa1.0.00121.1 | 645  | 278029 | 1.00E-155 | 343  | 361  | 95 -  | 292 | 644  | 89923  | 90283  |
| UN33008 | Rsa1.0.02449.1 | 1107 | 31292  | 0         | 700  | 725  | 96 +  | 1   | 718  | 8333   | 9049   |
| UN33009 | Rsa1.0.00123.1 | 435  | 325650 | 1.00E-137 | 259  | 263  | 98 -  | 1   | 263  | 113078 | 113340 |
| UN33010 | Rsa1.0.01989.1 | 1324 | 36439  | 0         | 352  | 352  | 100 + | 971 | 1322 | 6260   | 6611   |
| UN33011 | Rsa1.0.00032.1 | 886  | 306326 | 2.00E-97  | 342  | 395  | 86 +  | 231 | 598  | 245014 | 245407 |
| UN33012 | Rsa1.0.00282.1 | 459  | 177799 | 7.00E-90  | 168  | 168  | 100 - | 1   | 168  | 19965  | 20132  |
| UN33013 | Rsa1.0.00177.1 | 226  | 143394 | 1.00E-107 | 212  | 217  | 97 +  | 3   | 219  | 133945 | 134161 |
| UN33014 | Rsa1.0.17363.1 | 757  | 1849   | 0         | 643  | 653  | 98 +  | 1   | 648  | 224    | 875    |
| UN33015 | Rsa1.0.00802.1 | 1345 | 63846  | 0         | 1339 | 1343 | 99 +  | 1   | 1343 | 39268  | 40610  |
| UN33016 | Rsa1.0.04513.1 | 835  | 17029  | 0         | 825  | 834  | 98 -  | 1   | 834  | 11459  | 12292  |
| UN33017 | Rsa1.0.01361.1 | 929  | 47226  | 0         | 888  | 929  | 95 -  | 6   | 927  | 16677  | 17604  |
| UN33018 | Rsa1.0.02017.1 | 609  | 35999  | 0         | 477  | 484  | 98 -  | 126 | 607  | 21255  | 21738  |
| UN33019 | Rsa1.0.05762.1 | 1063 | 12715  | 0         | 1017 | 1065 | 95 -  | 1   | 1063 | 4280   | 5329   |
| UN33020 | Rsa1.0.07441.1 | 481  | 9388   | 1.00E-109 | 223  | 228  | 97 -  | 1   | 227  | 6706   | 6932   |
| UN33021 | Rsa1.0.06630.1 | 589  | 10633  | 1.00E-161 | 288  | 288  | 100 - | 1   | 288  | 476    | 763    |
| UN33022 | Rsa1.0.00145.1 | 1186 | 261008 | 0         | 1131 | 1213 | 93 -  | 1   | 1184 | 104305 | 105505 |
| UN33023 | Rsa1.0.06035.1 | 232  | 11874  | 2.00E-17  | 82   | 93   | 88 -  | 137 | 229  | 8609   | 8699   |
| UN33024 | Rsa1.0.03178.1 | 700  | 24798  | 7.00E-97  | 480  | 585  | 82 +  | 44  | 601  | 15172  | 15738  |
| UN33025 | Rsa1.0.04527.1 | 518  | 16958  | 0         | 514  | 519  | 99 -  | 1   | 516  | 14521  | 15039  |
| UN33026 | Rsa1.0.00139.1 | 661  | 357786 | 0         | 642  | 650  | 98 -  | 10  | 659  | 131951 | 132600 |
| UN33027 | Rsa1.0.02695.1 | 972  | 28605  | 0         | 951  | 971  | 97 +  | 2   | 969  | 14848  | 15812  |
| UN33028 | Rsa1.0.00208.1 | 667  | 108565 | 1.00E-134 | 252  | 255  | 98 +  | 4   | 258  | 100663 | 100917 |
| UN33029 | Rsa1.0.00613.1 | 719  | 209993 | 0         | 692  | 723  | 95 -  | 1   | 717  | 190954 | 191673 |
| UN33030 | Rsa1.0.03323.1 | 968  | 23751  | 1.00E-122 | 256  | 267  | 95 -  | 3   | 269  | 12306  | 12572  |
| UN33031 | Rsa1.0.01585.1 | 813  | 42806  | 0         | 806  | 812  | 99 +  | 1   | 812  | 39028  | 39839  |

|         |                |      |        |           |      |      |       |     |      |        |        |
|---------|----------------|------|--------|-----------|------|------|-------|-----|------|--------|--------|
| UN33032 | Rsa1.0_00040.1 | 880  | 324196 | 1.00E-113 | 211  | 212  | 99 +  | 1   | 212  | 88703  | 88914  |
| UN33033 | Rsa1.0_00113.1 | 851  | 131574 | 0         | 495  | 525  | 94 -  | 9   | 527  | 4687   | 5211   |
| UN33034 | Rsa1.0_00681.1 | 513  | 68779  | 2.00E-75  | 147  | 148  | 99 +  | 155 | 302  | 54522  | 54669  |
| UN33035 | Rsa1.0_00059.1 | 527  | 159650 | 0         | 510  | 528  | 96 -  | 1   | 527  | 150446 | 150966 |
| UN33036 | Rsa1.0_00351.1 | 787  | 413096 | 0         | 593  | 610  | 97 +  | 95  | 703  | 197578 | 198187 |
| UN33037 | Rsa1.0_00457.1 | 734  | 337301 | 0         | 402  | 406  | 99 +  | 332 | 734  | 323664 | 324068 |
| UN33038 | Rsa1.0_00081.1 | 792  | 143261 | 0         | 488  | 489  | 99 -  | 3   | 491  | 115639 | 116127 |
| UN33039 | Rsa1.0_00275.1 | 736  | 210104 | 2.00E-85  | 431  | 518  | 83 -  | 160 | 665  | 194797 | 195310 |
| UN33040 | Rsa1.0_00031.1 | 649  | 179862 | 0         | 529  | 533  | 99 +  | 2   | 534  | 37291  | 37823  |
| UN33041 | #              | #    | #      | #         | #    | #    | #     | #   | #    | #      | #      |
| UN33042 | Rsa1.0_00088.1 | 717  | 141341 | 0         | 453  | 461  | 98 -  | 258 | 717  | 119390 | 119847 |
| UN33043 | Rsa1.0_02062.1 | 746  | 35485  | 1.00E-162 | 289  | 289  | 100 - | 357 | 645  | 8670   | 8958   |
| UN33044 | Rsa1.0_01484.1 | 1005 | 44806  | 0         | 790  | 830  | 95 +  | 200 | 1005 | 12676  | 13505  |
| UN33045 | Rsa1.0_04109.1 | 795  | 19000  | 0         | 791  | 799  | 98 +  | 2   | 795  | 7194   | 7992   |
| UN33046 | Rsa1.0_01384.1 | 700  | 46803  | 0         | 367  | 367  | 100 - | 1   | 367  | 32107  | 32473  |
| UN33047 | Rsa1.0_02253.1 | 836  | 33356  | 0         | 571  | 574  | 99 -  | 262 | 835  | 324    | 897    |
| UN33048 | Rsa1.0_08178.1 | 794  | 7785   | 0         | 736  | 765  | 96 -  | 30  | 793  | 7030   | 7785   |
| UN33049 | Rsa1.0_02680.1 | 836  | 28721  | 0         | 470  | 482  | 97 +  | 24  | 504  | 3120   | 3601   |
| UN33050 | Rsa1.0_00686.1 | 861  | 68511  | 0         | 859  | 860  | 99 -  | 1   | 860  | 22653  | 23512  |
| UN33051 | Rsa1.0_02312.1 | 970  | 32675  | 0         | 516  | 536  | 96 -  | 258 | 790  | 11147  | 11682  |
| UN33052 | Rsa1.0_03912.1 | 864  | 135266 | 0         | 819  | 868  | 94 -  | 2   | 863  | 12000  | 12862  |
| UN33053 | Rsa1.0_00241.1 | 770  | 104000 | 8.00E-97  | 215  | 224  | 95 -  | 237 | 458  | 42746  | 42969  |
| UN33054 | Rsa1.0_01165.1 | 767  | 51898  | 0         | 691  | 772  | 89 +  | 2   | 747  | 8608   | 9373   |
| UN33055 | Rsa1.0_00216.1 | 1090 | 197563 | 0         | 360  | 360  | 100 - | 1   | 360  | 56354  | 56713  |
| UN33056 | Rsa1.0_00615.1 | 1042 | 72235  | 1.00E-156 | 297  | 303  | 98 -  | 359 | 661  | 59863  | 60165  |
| UN33057 | Rsa1.0_00465.1 | 678  | 82138  | 1.00E-171 | 351  | 364  | 96 +  | 314 | 676  | 26673  | 27035  |
| UN33058 | Rsa1.0_00084.1 | 769  | 142338 | 1.00E-175 | 346  | 357  | 96 -  | 1   | 348  | 30993  | 31349  |
| UN33059 | Rsa1.0_04046.1 | 1121 | 19399  | 0         | 824  | 986  | 83 +  | 121 | 1105 | 15995  | 16978  |
| UN33060 | Rsa1.0_00538.1 | 1083 | 77149  | 0         | 1079 | 1084 | 99 +  | 1   | 1082 | 68599  | 69682  |
| UN33061 | Rsa1.0_01226.1 | 853  | 50316  | 1.00E-111 | 212  | 213  | 99 +  | 361 | 572  | 43986  | 44198  |
| UN33062 | Rsa1.0_01588.1 | 1173 | 42724  | 1.00E-148 | 282  | 287  | 98 -  | 84  | 370  | 5074   | 5360   |
| UN33063 | Rsa1.0_04376.1 | 849  | 17659  | 0         | 840  | 876  | 95 -  | 2   | 849  | 14176  | 15050  |
| UN33064 | Rsa1.0_00973.1 | 899  | 57913  | 0         | 414  | 423  | 97 +  | 430 | 852  | 23573  | 23995  |
| UN33065 | Rsa1.0_04923.1 | 899  | 15426  | 1.00E-122 | 229  | 231  | 99 +  | 639 | 869  | 7393   | 7623   |
| UN33066 | Rsa1.0_19047.1 | 726  | 1488   | 1.00E-103 | 196  | 198  | 98 -  | 468 | 665  | 1291   | 1488   |
| UN33067 | Rsa1.0_01510.1 | 653  | 44237  | 0         | 384  | 390  | 98 -  | 3   | 392  | 21586  | 21974  |
| UN33068 | Rsa1.0_01658.1 | 705  | 41414  | 1.00E-132 | 261  | 268  | 97 +  | 441 | 704  | 4899   | 5166   |
| UN33069 | Rsa1.0_01113.1 | 606  | 53616  | 5.00E-79  | 150  | 150  | 100 - | 456 | 605  | 15910  | 16059  |
| UN33070 | Rsa1.0_05130.1 | 1198 | 14758  | 0         | 730  | 779  | 93 -  | 308 | 1083 | 13983  | 14758  |

|         |                |      |        |           |     |     |       |     |      |        |        |
|---------|----------------|------|--------|-----------|-----|-----|-------|-----|------|--------|--------|
| UN33071 | Rsa1.0_16060.1 | 796  | 2302   | 0         | 787 | 793 | 99 -  | 6   | 796  | 582    | 1374   |
| UN33072 | Rsa1.0_29811.1 | 850  | 771    | 0         | 410 | 417 | 98 +  | 2   | 418  | 6      | 422    |
| UN33073 | Rsa1.0_05511.1 | 730  | 13469  | 0         | 365 | 365 | 100 - | 365 | 729  | 584    | 948    |
| UN33074 | Rsa1.0_00283.1 | 828  | 183797 | 0         | 775 | 829 | 93 +  | 3   | 828  | 178030 | 178843 |
| UN33075 | Rsa1.0_02657.1 | 1018 | 29000  | 0         | 977 | 994 | 98 -  | 1   | 994  | 24373  | 25366  |
| UN33076 | Rsa1.0_00190.1 | 1178 | 318240 | 1.00E-108 | 208 | 211 | 98 +  | 393 | 603  | 70170  | 70380  |
| UN33077 | Rsa1.0_00948.1 | 604  | 58620  | 1.00E-155 | 308 | 318 | 96 -  | 287 | 604  | 47697  | 48014  |
| UN33078 | Rsa1.0_00541.1 | 602  | 76863  | 0         | 592 | 608 | 97 +  | 1   | 602  | 4320   | 4926   |
| UN33079 | Rsa1.0_01394.1 | 770  | 46641  | 2.00E-91  | 171 | 171 | 100 - | 2   | 172  | 6951   | 7121   |
| UN33080 | Rsa1.0_00079.1 | 802  | 606987 | 1.00E-144 | 312 | 329 | 94 +  | 298 | 626  | 84426  | 84751  |
| UN33081 | Rsa1.0_03448.1 | 841  | 22844  | 0         | 803 | 866 | 92 -  | 1   | 841  | 11208  | 12073  |
| UN33082 | Rsa1.0_00288.1 | 802  | 98659  | 0         | 771 | 813 | 94 -  | 7   | 802  | 40283  | 41094  |
| UN33083 | Rsa1.0_00167.1 | 984  | 116000 | 0         | 510 | 524 | 97 -  | 465 | 984  | 89949  | 90472  |
| UN33084 | Rsa1.0_00105.1 | 640  | 134138 | 0         | 637 | 639 | 99 +  | 1   | 639  | 7868   | 8506   |
| UN33085 | Rsa1.0_01510.1 | 531  | 44237  | 1.00E-148 | 293 | 302 | 97 +  | 138 | 439  | 19983  | 20284  |
| UN33086 | Rsa1.0_00157.1 | 782  | 245832 | 0         | 450 | 465 | 96 -  | 321 | 782  | 61254  | 61718  |
| UN33087 | Rsa1.0_00517.1 | 816  | 142790 | 1.00E-151 | 334 | 353 | 94 -  | 1   | 340  | 126290 | 126640 |
| UN33088 | Rsa1.0_00448.1 | 1246 | 84048  | 0         | 608 | 612 | 99 +  | 4   | 615  | 222    | 832    |
| UN33089 | Rsa1.0_00631.1 | 568  | 71277  | 1.00E-113 | 313 | 347 | 90 +  | 232 | 567  | 42671  | 43016  |
| UN33090 | Rsa1.0_00213.1 | 628  | 108167 | 0         | 374 | 377 | 99 -  | 49  | 425  | 73280  | 73656  |
| UN33091 | Rsa1.0_02794.1 | 1074 | 27820  | 0         | 601 | 605 | 99 +  | 1   | 605  | 5709   | 6313   |
| UN33092 | Rsa1.0_00089.1 | 724  | 406142 | 0         | 629 | 638 | 98 -  | 90  | 724  | 14208  | 14844  |
| UN33093 | Rsa1.0_00487.1 | 1125 | 80674  | 0         | 544 | 548 | 99 +  | 469 | 1014 | 30004  | 30551  |
| UN33094 | Rsa1.0_00183.1 | 1435 | 113277 | 0         | 501 | 520 | 96 -  | 2   | 518  | 96137  | 96648  |
| UN33095 | Rsa1.0_00384.1 | 551  | 89278  | 5.00E-42  | 275 | 336 | 81 +  | 29  | 359  | 87270  | 87584  |
| UN33096 | Rsa1.0_00413.1 | 844  | 86921  | 1.00E-153 | 284 | 287 | 98 -  | 1   | 287  | 67538  | 67824  |
| UN33097 | Rsa1.0_01318.1 | 609  | 48275  | 0         | 591 | 604 | 97 -  | 1   | 604  | 21157  | 21758  |
| UN33098 | Rsa1.0_00211.1 | 821  | 228189 | 3.00E-13  | 71  | 79  | 89 -  | 3   | 81   | 3807   | 3882   |
| UN33099 | Rsa1.0_02196.1 | 1052 | 34005  | 0         | 539 | 541 | 99 +  | 512 | 1052 | 2720   | 3259   |
| UN33100 | Rsa1.0_05942.1 | 607  | 12158  | 0         | 523 | 543 | 96 +  | 1   | 531  | 8954   | 9496   |
| UN33101 | Rsa1.0_00017.1 | 916  | 752458 | 0         | 892 | 916 | 97 +  | 1   | 915  | 530590 | 531497 |
| UN33102 | Rsa1.0_01903.1 | 1199 | 37451  | 0         | 728 | 733 | 99 +  | 42  | 774  | 9665   | 10397  |
| UN33103 | #              | #    | #      | #         | #   | #   | #     | #   | #    | #      | #      |
| UN33104 | Rsa1.0_05047.1 | 1051 | 15032  | 1.00E-163 | 363 | 386 | 94 +  | 676 | 1049 | 11264  | 11649  |
| UN33105 | Rsa1.0_02165.1 | 1136 | 34423  | 0         | 339 | 340 | 99 -  | 1   | 340  | 11169  | 11508  |
| UN33106 | Rsa1.0_07522.1 | 643  | 9204   | 0         | 639 | 643 | 99 +  | 1   | 642  | 4672   | 5313   |
| UN33107 | Rsa1.0_01644.1 | 950  | 41754  | 1.00E-123 | 238 | 241 | 98 +  | 678 | 917  | 40959  | 41199  |
| UN33108 | Rsa1.0_00088.1 | 710  | 141341 | 1.00E-107 | 208 | 210 | 99 -  | 1   | 210  | 9534   | 9742   |
| UN33109 | Rsa1.0_02865.1 | 856  | 27133  | 0         | 592 | 625 | 94 -  | 247 | 854  | 3951   | 4573   |

|         |                |      |        |           |      |      |       |     |      |        |        |
|---------|----------------|------|--------|-----------|------|------|-------|-----|------|--------|--------|
| UN33110 | Rsa1.0.02348.1 | 1013 | 32316  | 0         | 1003 | 1013 | 99 -  | 1   | 1012 | 23406  | 24418  |
| UN33111 | Rsa1.0.00150.1 | 1102 | 154416 | 0         | 578  | 604  | 95 +  | 463 | 1064 | 120240 | 120839 |
| UN33112 | Rsa1.0.00819.1 | 715  | 62918  | 0         | 634  | 661  | 95 -  | 60  | 714  | 23913  | 24572  |
| UN33113 | Rsa1.0.00279.1 | 854  | 100039 | 0         | 801  | 807  | 99 +  | 2   | 806  | 96617  | 97422  |
| UN33114 | Rsa1.0.00040.1 | 484  | 324196 | 1.00E-177 | 333  | 338  | 98 +  | 51  | 387  | 2037   | 2374   |
| UN33115 | Rsa1.0.00111.1 | 583  | 390088 | 0         | 343  | 348  | 98 -  | 1   | 347  | 156476 | 156823 |
| UN33116 | Rsa1.0.00134.1 | 460  | 390219 | 0         | 384  | 399  | 96 +  | 61  | 459  | 846    | 1233   |
| UN33117 | Rsa1.0.01292.1 | 976  | 175783 | 0         | 785  | 815  | 96 +  | 162 | 974  | 150428 | 151230 |
| UN33118 | Rsa1.0.01719.1 | 950  | 40388  | 2.00E-76  | 170  | 178  | 95 +  | 505 | 682  | 7137   | 7314   |
| UN33119 | Rsa1.0.03842.1 | 523  | 20503  | 0         | 491  | 529  | 92 -  | 1   | 522  | 12258  | 12778  |
| UN33120 | Rsa1.0.16897.1 | 515  | 1998   | 1.00E-137 | 261  | 265  | 98 -  | 4   | 268  | 600    | 860    |
| UN33121 | Rsa1.0.64972.1 | 790  | 353    | 1.00E-147 | 306  | 316  | 96 +  | 274 | 587  | 40     | 353    |
| UN33122 | Rsa1.0.01585.1 | 966  | 42806  | 0         | 789  | 797  | 98 -  | 1   | 797  | 9223   | 10019  |
| UN33123 | Rsa1.0.00451.1 | 1008 | 322533 | 0         | 607  | 618  | 98 +  | 273 | 886  | 263444 | 264061 |
| UN33124 | Rsa1.0.29512.1 | 912  | 780    | 1.00E-133 | 244  | 245  | 99 -  | 1   | 245  | 35     | 279    |
| UN33125 | Rsa1.0.00069.1 | 712  | 403561 | 0         | 709  | 711  | 99 +  | 1   | 711  | 96942  | 97651  |
| UN33126 | Rsa1.0.03026.1 | 707  | 25888  | 0         | 640  | 656  | 97 +  | 51  | 706  | 23447  | 24101  |
| UN33127 | Rsa1.0.05073.1 | 969  | 14925  | 0         | 466  | 473  | 98 +  | 385 | 857  | 9788   | 10259  |
| UN33128 | Rsa1.0.00744.1 | 611  | 66084  | 1.00E-113 | 240  | 249  | 96 +  | 359 | 605  | 36767  | 37013  |
| UN33129 | Rsa1.0.01331.1 | 904  | 47944  | 6.00E-98  | 182  | 182  | 100 - | 205 | 386  | 8405   | 8586   |
| UN33130 | Rsa1.0.00404.1 | 1104 | 87635  | 0         | 440  | 471  | 93 +  | 360 | 816  | 485    | 951    |
| UN33131 | Rsa1.0.00334.1 | 501  | 94445  | 1.00E-113 | 229  | 235  | 97 +  | 1   | 234  | 57360  | 57594  |
| UN33132 | Rsa1.0.05114.1 | 731  | 14804  | 0         | 553  | 565  | 97 -  | 1   | 562  | 9010   | 9574   |
| UN33133 | Rsa1.0.00254.1 | 759  | 102600 | 0         | 427  | 427  | 100 - | 1   | 427  | 73611  | 74037  |
| UN33134 | Rsa1.0.00622.1 | 411  | 71822  | 2.00E-80  | 155  | 156  | 99 -  | 254 | 409  | 60237  | 60392  |
| UN33135 | Rsa1.0.03451.1 | 1036 | 22828  | 0         | 595  | 607  | 98 -  | 430 | 1034 | 7637   | 8240   |
| UN33136 | Rsa1.0.03761.1 | 1201 | 20982  | 0         | 549  | 559  | 98 +  | 642 | 1200 | 10838  | 11396  |
| UN33137 | Rsa1.0.00451.1 | 834  | 322533 | 0         | 710  | 755  | 94 -  | 12  | 763  | 50954  | 51691  |
| UN33138 | Rsa1.0.00469.1 | 968  | 82084  | 1.00E-173 | 354  | 368  | 96 +  | 464 | 829  | 29744  | 30111  |
| UN33139 | Rsa1.0.04154.1 | 1097 | 18802  | 0         | 1082 | 1097 | 98 -  | 1   | 1097 | 13734  | 14830  |
| UN33140 | Rsa1.0.06294.1 | 812  | 11291  | 0         | 431  | 433  | 99 -  | 1   | 433  | 1145   | 1577   |
| UN33141 | Rsa1.0.00182.1 | 989  | 142305 | 0         | 345  | 347  | 99 +  | 526 | 872  | 95706  | 96052  |
| UN33142 | Rsa1.0.01178.1 | 819  | 51571  | 1.00E-172 | 361  | 380  | 95 -  | 354 | 721  | 25586  | 25965  |
| UN33143 | Rsa1.0.65111.1 | 337  | 352    | 1.00E-56  | 112  | 112  | 100 + | 195 | 306  | 63     | 174    |
| UN33144 | Rsa1.0.07537.1 | 816  | 9176   | 0         | 449  | 470  | 95 +  | 348 | 816  | 3697   | 4164   |
| UN33145 | Rsa1.0.00246.1 | 873  | 103541 | 0         | 522  | 533  | 97 -  | 1   | 530  | 19677  | 20205  |
| UN33146 | Rsa1.0.02965.1 | 775  | 26402  | 0         | 644  | 658  | 97 -  | 115 | 772  | 10534  | 11188  |
| UN33147 | Rsa1.0.00413.1 | 1077 | 86921  | 0         | 820  | 821  | 99 -  | 1   | 821  | 19179  | 19999  |
| UN33148 | Rsa1.0.00896.1 | 709  | 60509  | 0         | 421  | 429  | 98 -  | 6   | 430  | 44045  | 44473  |

|         |                |      |        |           |      |      |       |     |      |        |        |
|---------|----------------|------|--------|-----------|------|------|-------|-----|------|--------|--------|
| UN33149 | Rsa1.0.07616.1 | 909  | 9016   | 0         | 387  | 391  | 98 -  | 519 | 909  | 1726   | 2116   |
| UN33150 | Rsa1.0.00198.1 | 1174 | 222963 | 0         | 626  | 641  | 97 +  | 2   | 642  | 91856  | 92493  |
| UN33151 | Rsa1.0.06813.1 | 821  | 10312  | 0         | 766  | 821  | 93 -  | 1   | 820  | 3309   | 4129   |
| UN33152 | Rsa1.0.01178.1 | 792  | 51571  | 0         | 449  | 472  | 95 +  | 69  | 539  | 48629  | 49095  |
| UN33153 | Rsa1.0.00144.1 | 903  | 120708 | 0         | 830  | 858  | 96 +  | 45  | 902  | 86936  | 87791  |
| UN33154 | Rsa1.0.03265.1 | 1137 | 24258  | 0         | 480  | 485  | 98 +  | 19  | 503  | 8009   | 8493   |
| UN33155 | Rsa1.0.00473.1 | 1391 | 212204 | 0         | 452  | 467  | 96 +  | 3   | 463  | 77595  | 78061  |
| UN33156 | Rsa1.0.64256.1 | 698  | 357    | 1.00E-143 | 275  | 281  | 97 -  | 416 | 696  | 68     | 348    |
| UN33157 | Rsa1.0.03366.1 | 741  | 23401  | 0         | 365  | 367  | 99 +  | 202 | 568  | 18160  | 18526  |
| UN33158 | Rsa1.0.33678.1 | 543  | 673    | 1.00E-97  | 187  | 189  | 98 +  | 1   | 189  | 29     | 217    |
| UN33159 | Rsa1.0.00187.1 | 825  | 393093 | 0         | 722  | 757  | 95 -  | 47  | 790  | 8494   | 9247   |
| UN33160 | Rsa1.0.00372.1 | 545  | 90418  | 0         | 412  | 416  | 99 -  | 3   | 418  | 79910  | 80323  |
| UN33161 | Rsa1.0.02196.1 | 942  | 34005  | 0         | 566  | 568  | 99 +  | 1   | 568  | 12826  | 13393  |
| UN33162 | Rsa1.0.00951.1 | 702  | 164588 | 0         | 355  | 362  | 98 +  | 1   | 362  | 156749 | 157108 |
| UN33163 | Rsa1.0.01286.1 | 710  | 49209  | 0         | 690  | 691  | 99 +  | 1   | 691  | 12402  | 13092  |
| UN33164 | Rsa1.0.05179.1 | 878  | 14576  | 0         | 837  | 881  | 95 -  | 1   | 876  | 2997   | 3864   |
| UN33165 | Rsa1.0.11380.1 | 459  | 5526   | 1.00E-105 | 234  | 246  | 95 -  | 1   | 246  | 129    | 373    |
| UN33166 | Rsa1.0.00236.1 | 874  | 104771 | 0         | 430  | 437  | 98 -  | 1   | 435  | 5845   | 6281   |
| UN33167 | Rsa1.0.01545.1 | 654  | 43599  | 1.00E-114 | 288  | 313  | 92 -  | 4   | 315  | 40157  | 40454  |
| UN33168 | Rsa1.0.05488.1 | 1042 | 13567  | 1.00E-130 | 251  | 256  | 98 +  | 268 | 523  | 8829   | 9084   |
| UN33169 | Rsa1.0.00631.1 | 782  | 71277  | 0         | 748  | 775  | 96 +  | 6   | 780  | 54511  | 55282  |
| UN33170 | Rsa1.0.04990.1 | 858  | 15216  | 0         | 846  | 858  | 98 +  | 1   | 856  | 9990   | 10847  |
| UN33171 | Rsa1.0.02007.1 | 728  | 36130  | 0         | 448  | 448  | 100 + | 9   | 456  | 12341  | 12788  |
| UN33172 | Rsa1.0.00454.1 | 980  | 216970 | 0         | 931  | 1001 | 93 +  | 3   | 979  | 148709 | 149705 |
| UN33173 | Rsa1.0.00113.1 | 585  | 131574 | 0         | 582  | 584  | 99 +  | 3   | 585  | 100815 | 101398 |
| UN33174 | Rsa1.0.08961.1 | 1196 | 6750   | 0         | 823  | 887  | 92 -  | 1   | 887  | 1      | 878    |
| UN33175 | Rsa1.0.06416.1 | 788  | 11058  | 0         | 771  | 788  | 97 -  | 1   | 787  | 536    | 1314   |
| UN33176 | Rsa1.0.00179.1 | 714  | 393324 | 0         | 709  | 712  | 99 +  | 1   | 712  | 220699 | 221410 |
| UN33177 | Rsa1.0.00326.1 | 774  | 171955 | 0         | 387  | 390  | 99 -  | 374 | 763  | 51629  | 52017  |
| UN33178 | Rsa1.0.04235.1 | 1288 | 18373  | 0         | 1261 | 1293 | 97 +  | 1   | 1288 | 11442  | 12733  |
| UN33179 | Rsa1.0.00788.1 | 705  | 64237  | 1.00E-154 | 305  | 314  | 97 -  | 392 | 705  | 20902  | 21211  |
| UN33180 | Rsa1.0.00653.1 | 661  | 70029  | 1.00E-156 | 302  | 308  | 98 +  | 5   | 311  | 16118  | 16425  |
| UN33181 | Rsa1.0.00847.1 | 1078 | 62270  | 0         | 839  | 851  | 98 -  | 227 | 1077 | 43076  | 43926  |
| UN33182 | Rsa1.0.05111.1 | 458  | 14814  | 1.00E-145 | 281  | 287  | 97 -  | 172 | 456  | 1200   | 1486   |
| UN33183 | #              | #    | #      | #         | #    | #    | #     | #   | #    | #      | #      |
| UN33184 | Rsa1.0.00143.1 | 935  | 121313 | 0         | 321  | 321  | 100 + | 1   | 321  | 12626  | 12946  |
| UN33185 | Rsa1.0.13743.1 | 572  | 4394   | 1.00E-94  | 197  | 204  | 96 -  | 213 | 416  | 1151   | 1354   |
| UN33186 | Rsa1.0.00589.1 | 1020 | 209965 | 0         | 522  | 527  | 99 +  | 1   | 523  | 39214  | 39740  |
| UN33187 | Rsa1.0.01639.1 | 1129 | 41850  | 0         | 374  | 376  | 99 +  | 1   | 376  | 20244  | 20619  |

|         |                |      |        |           |      |      |       |     |      |        |        |
|---------|----------------|------|--------|-----------|------|------|-------|-----|------|--------|--------|
| UN33188 | Rsa1.0.02672.1 | 961  | 28884  | 0         | 736  | 757  | 97 -  | 205 | 961  | 11869  | 12623  |
| UN33189 | Rsa1.0.00050.1 | 1056 | 237174 | 2.33E-156 | 357  | 386  | 92 -  | 2   | 375  | 85312  | 85696  |
| UN33190 | Rsa1.0.00537.1 | 1223 | 186980 | 0         | 1151 | 1227 | 93 -  | 6   | 1223 | 17753  | 18977  |
| UN33191 | Rsa1.0.00018.1 | 1140 | 410899 | 1.00E-174 | 342  | 352  | 97 -  | 1   | 352  | 10550  | 10898  |
| UN33192 | Rsa1.0.09275.1 | 1323 | 6506   | 0         | 648  | 660  | 98 -  | 451 | 1110 | 2442   | 3098   |
| UN33193 | Rsa1.0.08333.1 | 488  | 7528   | 1.00E-132 | 390  | 439  | 88 +  | 49  | 487  | 1435   | 1872   |
| UN33194 | Rsa1.0.02791.1 | 1227 | 27832  | 0         | 707  | 736  | 96 +  | 488 | 1220 | 20423  | 21158  |
| UN33195 | Rsa1.0.03593.1 | 1243 | 21869  | 0         | 837  | 837  | 100 - | 1   | 837  | 82     | 918    |
| UN33196 | Rsa1.0.04514.1 | 438  | 17022  | 6.00E-47  | 144  | 160  | 90 +  | 151 | 310  | 2124   | 2283   |
| UN33197 | Rsa1.0.06476.1 | 1095 | 10946  | 0         | 565  | 578  | 97 -  | 516 | 1093 | 2752   | 3329   |
| UN33198 | Rsa1.0.00166.1 | 446  | 240912 | 1.00E-131 | 250  | 254  | 98 -  | 193 | 446  | 235720 | 235973 |
| UN33199 | Rsa1.0.03069.1 | 731  | 25615  | 0         | 439  | 476  | 92 +  | 160 | 635  | 8523   | 8973   |
| UN33200 | Rsa1.0.19954.1 | 1280 | 1360   | 1.00E-179 | 350  | 357  | 98 +  | 926 | 1280 | 541    | 894    |
| UN33201 | Rsa1.0.00878.1 | 1306 | 330303 | 0         | 1128 | 1177 | 95 +  | 2   | 1178 | 25409  | 26584  |
| UN33202 | Rsa1.0.03032.1 | 487  | 25836  | 0         | 479  | 482  | 99 -  | 6   | 487  | 7906   | 8387   |
| UN33203 | Rsa1.0.06390.1 | 513  | 11106  | 1.00E-121 | 277  | 296  | 93 +  | 29  | 324  | 8286   | 8581   |
| UN33204 | Rsa1.0.14747.1 | 1355 | 3107   | 0         | 933  | 948  | 98 -  | 58  | 1004 | 1270   | 2217   |
| UN33205 | Rsa1.0.07390.1 | 1152 | 9477   | 0         | 1072 | 1143 | 93 +  | 3   | 1124 | 3736   | 4855   |
| UN33206 | Rsa1.0.02544.1 | 566  | 30290  | 1.00E-155 | 302  | 309  | 97 -  | 4   | 312  | 6396   | 6703   |
| UN33207 | Rsa1.0.01192.1 | 646  | 51150  | 1.00E-159 | 321  | 330  | 97 +  | 295 | 621  | 35537  | 35863  |
| UN33208 | Rsa1.0.00195.1 | 591  | 251884 | 0         | 362  | 373  | 97 +  | 1   | 373  | 214105 | 214477 |
| UN33209 | Rsa1.0.00195.1 | 484  | 251884 | 0         | 467  | 482  | 96 -  | 5   | 483  | 221313 | 221792 |
| UN33210 | Rsa1.0.02070.1 | 1077 | 158516 | 4.00E-44  | 174  | 200  | 87 -  | 527 | 725  | 2423   | 2622   |
| UN33211 | Rsa1.0.05730.1 | 753  | 12798  | 2.00E-32  | 152  | 178  | 85 -  | 102 | 279  | 12287  | 12461  |
| UN33212 | Rsa1.0.07795.1 | 1010 | 8543   | 0         | 535  | 548  | 97 +  | 29  | 576  | 3276   | 3823   |
| UN33213 | Rsa1.0.02273.1 | 633  | 140964 | 0         | 624  | 634  | 98 +  | 2   | 633  | 8400   | 9033   |
| UN33214 | Rsa1.0.08349.1 | 782  | 7494   | 1.00E-107 | 200  | 201  | 99 -  | 3   | 203  | 6841   | 7041   |
| UN33215 | Rsa1.0.00151.1 | 453  | 119541 | 4.00E-42  | 155  | 177  | 87 -  | 242 | 410  | 54485  | 54660  |
| UN33216 | Rsa1.0.06933.1 | 486  | 10145  | 2.00E-78  | 212  | 229  | 92 +  | 1   | 222  | 4193   | 4420   |
| UN33217 | Rsa1.0.24446.1 | 1301 | 987    | 0         | 347  | 354  | 98 +  | 646 | 999  | 47     | 400    |
| UN33218 | Rsa1.0.00690.1 | 1564 | 140527 | 0         | 901  | 952  | 94 -  | 628 | 1562 | 8492   | 9432   |
| UN33219 | Rsa1.0.02488.1 | 720  | 30913  | 0         | 611  | 639  | 95 +  | 1   | 636  | 9437   | 10070  |
| UN33220 | Rsa1.0.02328.1 | 711  | 32494  | 1.00E-157 | 309  | 318  | 97 +  | 241 | 554  | 27445  | 27762  |
| UN33221 | Rsa1.0.00504.1 | 475  | 79334  | 1.00E-125 | 268  | 278  | 96 +  | 200 | 474  | 22252  | 22527  |
| UN33222 | Rsa1.0.01504.1 | 463  | 189978 | 1.00E-149 | 273  | 275  | 99 +  | 2   | 276  | 1775   | 2049   |
| UN33223 | Rsa1.0.00036.1 | 1053 | 176186 | 0         | 485  | 528  | 91 -  | 23  | 550  | 51189  | 51716  |
| UN33224 | Rsa1.0.04612.1 | 701  | 16647  | 1.00E-76  | 170  | 178  | 95 +  | 368 | 545  | 15528  | 15705  |
| UN33225 | Rsa1.0.01561.1 | 779  | 43227  | 4.00E-77  | 164  | 167  | 98 -  | 614 | 778  | 37856  | 38022  |
| UN33226 | Rsa1.0.32050.1 | 738  | 711    | 1.00E-138 | 262  | 266  | 98 +  | 137 | 402  | 1      | 266    |

|         |                |      |        |           |      |      |      |     |      |        |        |
|---------|----------------|------|--------|-----------|------|------|------|-----|------|--------|--------|
| UN33227 | Rsa1.0.01271.1 | 634  | 49569  | 1.00E-156 | 301  | 308  | 97 + | 313 | 620  | 28235  | 28542  |
| UN33228 | Rsa1.0.00550.1 | 809  | 210790 | 1.00E-156 | 297  | 302  | 98 + | 95  | 393  | 175213 | 175514 |
| UN33229 | Rsa1.0.00040.1 | 795  | 324196 | 1.00E-128 | 299  | 315  | 94 - | 475 | 785  | 40942  | 41253  |
| UN33230 | Rsa1.0.00131.1 | 320  | 432233 | 3.00E-60  | 130  | 134  | 97 - | 3   | 136  | 282496 | 282629 |
| UN33231 | Rsa1.0.07205.1 | 768  | 9726   | 3.00E-93  | 279  | 310  | 90 - | 392 | 693  | 7031   | 7335   |
| UN33232 | Rsa1.0.05211.1 | 876  | 14493  | 0         | 471  | 490  | 96 - | 387 | 876  | 9835   | 10321  |
| UN33233 | Rsa1.0.00251.1 | 601  | 303968 | 0         | 556  | 605  | 91 - | 3   | 601  | 299123 | 299709 |
| UN33234 | Rsa1.0.00122.1 | 1106 | 265937 | 0         | 373  | 389  | 95 + | 367 | 746  | 241883 | 242271 |
| UN33235 | Rsa1.0.00407.1 | 806  | 191544 | 0         | 413  | 419  | 98 + | 116 | 534  | 21027  | 21445  |
| UN33236 | Rsa1.0.02560.1 | 530  | 30091  | 1.00E-118 | 263  | 277  | 94 - | 3   | 275  | 5624   | 5894   |
| UN33237 | Rsa1.0.01935.1 | 908  | 37152  | 0         | 485  | 506  | 95 - | 384 | 886  | 4792   | 5290   |
| UN33238 | Rsa1.0.04165.1 | 950  | 18757  | 1.00E-172 | 323  | 327  | 98 - | 624 | 950  | 18311  | 18636  |
| UN33239 | Rsa1.0.00550.1 | 1152 | 210790 | 0         | 565  | 625  | 90 + | 2   | 614  | 36975  | 37596  |
| UN33240 | Rsa1.0.00159.1 | 957  | 431686 | 1.00E-130 | 352  | 390  | 90 + | 246 | 631  | 333967 | 334356 |
| UN33241 | Rsa1.0.01410.1 | 651  | 46345  | 0         | 609  | 653  | 93 - | 3   | 647  | 610    | 1255   |
| UN33242 | Rsa1.0.01221.1 | 754  | 50421  | 0         | 725  | 758  | 95 + | 2   | 754  | 18398  | 19154  |
| UN33243 | Rsa1.0.00325.1 | 1108 | 95371  | 1.00E-166 | 338  | 349  | 96 - | 760 | 1108 | 70069  | 70410  |
| UN33244 | Rsa1.0.17671.1 | 1070 | 1768   | 0         | 943  | 990  | 95 - | 99  | 1070 | 784    | 1768   |
| UN33245 | Rsa1.0.03175.1 | 1078 | 24802  | 0         | 1027 | 1087 | 94 + | 1   | 1078 | 15191  | 16267  |
| UN33246 | Rsa1.0.03876.1 | 496  | 20334  | 0         | 478  | 498  | 95 + | 5   | 496  | 16788  | 17284  |
| UN33247 | #              | #    | #      | #         | #    | #    | #    | #   | #    | #      | #      |
| UN33248 | Rsa1.0.00457.1 | 661  | 337301 | 1.00E-106 | 275  | 304  | 90 + | 379 | 660  | 179228 | 179530 |
| UN33249 | Rsa1.0.01124.1 | 1068 | 53295  | 0         | 1023 | 1080 | 94 - | 2   | 1068 | 30846  | 31918  |
| UN33250 | Rsa1.0.00359.1 | 564  | 91256  | 1.00E-122 | 237  | 241  | 98 + | 327 | 564  | 39993  | 40233  |
| UN33251 | Rsa1.0.01415.1 | 982  | 46263  | 0         | 472  | 477  | 98 - | 506 | 982  | 25830  | 26305  |
| UN33252 | Rsa1.0.01835.1 | 718  | 38542  | 0         | 387  | 391  | 98 + | 328 | 718  | 23455  | 23845  |
| UN33253 | Rsa1.0.01209.1 | 445  | 50668  | 1.00E-157 | 287  | 289  | 99 - | 157 | 445  | 5671   | 5959   |
| UN33254 | Rsa1.0.00748.1 | 806  | 65983  | 0         | 407  | 409  | 99 - | 399 | 806  | 10539  | 10947  |
| UN33255 | Rsa1.0.00008.1 | 1210 | 358124 | 0         | 1146 | 1208 | 94 + | 2   | 1209 | 61755  | 62951  |
| UN33256 | Rsa1.0.01153.1 | 837  | 52264  | 0         | 807  | 842  | 95 - | 1   | 837  | 10992  | 11833  |
| UN33257 | Rsa1.0.03743.1 | 769  | 21062  | 1.00E-132 | 261  | 268  | 97 - | 345 | 612  | 20661  | 20928  |
| UN33258 | Rsa1.0.04691.1 | 743  | 16362  | 0         | 495  | 536  | 92 + | 225 | 743  | 9409   | 9935   |
| UN33259 | Rsa1.0.25765.1 | 698  | 921    | 0         | 561  | 567  | 98 - | 3   | 566  | 3      | 569    |
| UN33260 | Rsa1.0.64191.1 | 557  | 357    | 1.00E-170 | 320  | 325  | 98 - | 234 | 555  | 33     | 357    |
| UN33261 | Rsa1.0.01960.1 | 1399 | 36766  | 1.00E-100 | 234  | 248  | 94 - | 3   | 246  | 34918  | 35165  |
| UN33262 | Rsa1.0.03087.1 | 1399 | 25478  | 0         | 1114 | 1168 | 95 + | 169 | 1335 | 4709   | 5876   |
| UN33263 | Rsa1.0.02943.1 | 1160 | 153598 | 0         | 1091 | 1170 | 93 + | 2   | 1159 | 127694 | 128841 |
| UN33264 | Rsa1.0.00042.1 | 1277 | 171507 | 0         | 514  | 547  | 93 - | 2   | 546  | 144822 | 145368 |
| UN33265 | Rsa1.0.05162.1 | 528  | 14631  | 1.00E-109 | 254  | 271  | 93 - | 153 | 411  | 9830   | 10099  |

|         |                |      |        |           |      |      |       |     |      |        |        |
|---------|----------------|------|--------|-----------|------|------|-------|-----|------|--------|--------|
| UN33266 | Rsa1.0.03025.1 | 1185 | 25910  | 0         | 1173 | 1176 | 99 -  | 11  | 1185 | 17713  | 18888  |
| UN33267 | Rsa1.0.00251.1 | 908  | 303968 | 0         | 566  | 585  | 96 -  | 169 | 752  | 182820 | 183403 |
| UN33268 | Rsa1.0.21003.1 | 1235 | 1246   | 0         | 411  | 432  | 95 +  | 116 | 546  | 1      | 431    |
| UN33269 | Rsa1.0.00108.1 | 812  | 478491 | 0         | 788  | 818  | 96 -  | 4   | 812  | 302427 | 303233 |
| UN33270 | Rsa1.0.00876.1 | 768  | 61328  | 0         | 494  | 509  | 97 +  | 260 | 768  | 46381  | 46889  |
| UN33271 | Rsa1.0.02387.1 | 535  | 31890  | 9.00E-93  | 179  | 181  | 98 +  | 355 | 535  | 27000  | 27180  |
| UN33272 | Rsa1.0.00344.1 | 1120 | 191774 | 0         | 535  | 540  | 99 +  | 471 | 1010 | 111096 | 111635 |
| UN33273 | Rsa1.0.01210.1 | 964  | 50663  | 5.00E-68  | 187  | 209  | 89 +  | 6   | 212  | 5082   | 5271   |
| UN33274 | Rsa1.0.03102.1 | 1193 | 25395  | 0         | 356  | 356  | 100 + | 838 | 1193 | 8033   | 8388   |
| UN33275 | Rsa1.0.01211.1 | 909  | 50646  | 0         | 520  | 539  | 96 +  | 330 | 865  | 49626  | 50163  |
| UN33276 | Rsa1.0.00085.1 | 934  | 142226 | 0         | 912  | 947  | 96 -  | 3   | 932  | 52807  | 53744  |
| UN33277 | Rsa1.0.00695.1 | 1099 | 68019  | 1.00E-133 | 278  | 289  | 96 -  | 2   | 288  | 54564  | 54852  |
| UN33278 | Rsa1.0.00454.1 | 1065 | 216970 | 1.00E-117 | 273  | 291  | 93 +  | 133 | 419  | 159894 | 160183 |
| UN33279 | Rsa1.0.06523.1 | 1042 | 10855  | 0         | 651  | 668  | 97 -  | 3   | 669  | 1479   | 2143   |
| UN33280 | Rsa1.0.03766.1 | 785  | 20970  | 0         | 693  | 738  | 93 -  | 45  | 781  | 18612  | 19332  |
| UN33281 | Rsa1.0.00238.1 | 905  | 193193 | 0         | 355  | 358  | 99 +  | 310 | 667  | 45025  | 45382  |
| UN33282 | Rsa1.0.00300.1 | 1069 | 97747  | 1.00E-158 | 491  | 561  | 87 +  | 87  | 627  | 51259  | 51807  |
| UN33283 | Rsa1.0.33400.1 | 632  | 679    | 1.00E-122 | 324  | 359  | 90 +  | 2   | 334  | 18     | 373    |
| UN33284 | Rsa1.0.01777.1 | 519  | 39511  | 2.00E-78  | 245  | 274  | 89 +  | 260 | 519  | 20986  | 21257  |
| UN33285 | Rsa1.0.00605.1 | 743  | 73199  | 7.00E-82  | 182  | 191  | 95 -  | 125 | 315  | 70449  | 70639  |
| UN33286 | Rsa1.0.00229.1 | 1170 | 105471 | 1.00E-114 | 275  | 294  | 93 -  | 882 | 1168 | 6379   | 6672   |
| UN33287 | Rsa1.0.01947.1 | 945  | 36977  | 0         | 649  | 672  | 96 -  | 276 | 944  | 21538  | 22204  |
| UN33288 | Rsa1.0.01113.1 | 1133 | 53616  | 0         | 1111 | 1133 | 98 +  | 1   | 1132 | 22402  | 23533  |
| UN33289 | Rsa1.0.06254.1 | 1276 | 11384  | 0         | 805  | 875  | 92 -  | 420 | 1275 | 1370   | 2230   |
| UN33290 | Rsa1.0.00241.1 | 1175 | 104000 | 0         | 424  | 444  | 95 +  | 727 | 1164 | 60543  | 60986  |
| UN33291 | #              | #    | #      | #         | #    | #    | #     | #   | #    | #      | #      |
| UN33292 | Rsa1.0.00363.1 | 1163 | 90968  | 0         | 588  | 608  | 96 -  | 1   | 608  | 63275  | 63876  |
| UN33293 | Rsa1.0.01510.1 | 1344 | 44237  | 0         | 1337 | 1343 | 99 +  | 1   | 1343 | 34196  | 35538  |
| UN33294 | Rsa1.0.03145.1 | 1247 | 25020  | 1.00E-107 | 341  | 386  | 88 +  | 864 | 1247 | 14786  | 15166  |
| UN33295 | Rsa1.0.05450.1 | 1117 | 13704  | 1.00E-118 | 219  | 220  | 99 +  | 263 | 482  | 8079   | 8298   |
| UN33296 | Rsa1.0.03883.1 | 765  | 20282  | 1.00E-161 | 415  | 456  | 91 -  | 317 | 765  | 8593   | 9029   |
| UN33297 | Rsa1.0.54139.1 | 1050 | 421    | 1.00E-145 | 275  | 278  | 98 +  | 264 | 541  | 1      | 277    |
| UN33298 | Rsa1.0.00010.1 | 1044 | 294827 | 1.00E-113 | 219  | 223  | 98 +  | 816 | 1038 | 221675 | 221897 |
| UN33299 | Rsa1.0.01199.1 | 1056 | 163576 | 0         | 461  | 473  | 97 +  | 584 | 1056 | 1540   | 2010   |
| UN33300 | Rsa1.0.00269.1 | 1249 | 341668 | 0         | 844  | 891  | 94 -  | 289 | 1167 | 282461 | 283338 |
| UN33301 | Rsa1.0.01687.1 | 927  | 40979  | 0         | 511  | 550  | 92 +  | 4   | 544  | 38020  | 38568  |
| UN33302 | Rsa1.0.02122.1 | 1223 | 34797  | 0         | 674  | 687  | 98 +  | 1   | 686  | 22566  | 23250  |
| UN33303 | Rsa1.0.00055.1 | 907  | 520193 | 0         | 424  | 433  | 97 -  | 304 | 736  | 393004 | 393436 |
| UN33304 | Rsa1.0.00141.1 | 1280 | 121494 | 1.00E-124 | 230  | 231  | 99 +  | 4   | 234  | 29593  | 29823  |





|         |                |      |        |           |      |      |       |     |      |        |        |
|---------|----------------|------|--------|-----------|------|------|-------|-----|------|--------|--------|
| UN33344 | Rsa1.0.00017.1 | 915  | 752458 | 0         | 876  | 915  | 95 +  | 1   | 914  | 80345  | 81258  |
| UN33345 | Rsa1.0.17937.1 | 473  | 1706   | 0         | 426  | 440  | 96 +  | 1   | 439  | 1266   | 1703   |
| UN33346 | Rsa1.0.09409.1 | 757  | 6390   | 1.00E-124 | 258  | 268  | 96 -  | 491 | 755  | 1174   | 1441   |
| UN33347 | Rsa1.0.01744.1 | 948  | 39910  | 0         | 880  | 937  | 93 +  | 1   | 917  | 35432  | 36353  |
| UN33348 | Rsa1.0.05947.1 | 1513 | 12142  | 0         | 1460 | 1518 | 96 +  | 2   | 1513 | 3768   | 5285   |
| UN33349 | Rsa1.0.00138.1 | 741  | 247040 | 2.00E-76  | 278  | 322  | 86 -  | 144 | 465  | 106229 | 106550 |
| UN33350 | Rsa1.0.14420.1 | 1394 | 3413   | 0         | 1347 | 1396 | 96 -  | 1   | 1393 | 597    | 1992   |
| UN33351 | Rsa1.0.01015.1 | 788  | 56752  | 0         | 656  | 686  | 95 -  | 34  | 719  | 4422   | 5107   |
| UN33352 | Rsa1.0.00816.1 | 707  | 403350 | 0         | 694  | 705  | 98 -  | 3   | 707  | 106848 | 107551 |
| UN33353 | Rsa1.0.00632.1 | 1552 | 183777 | 0         | 991  | 1066 | 92 +  | 1   | 1032 | 5407   | 6462   |
| UN33354 | Rsa1.0.07958.1 | 903  | 8174   | 0         | 705  | 797  | 88 +  | 1   | 793  | 2416   | 3211   |
| UN33355 | Rsa1.0.01007.1 | 1130 | 56933  | 1.00E-172 | 388  | 417  | 93 -  | 648 | 1048 | 30857  | 31269  |
| UN33356 | Rsa1.0.01559.1 | 1280 | 43262  | 0         | 795  | 844  | 94 -  | 239 | 1067 | 1328   | 2169   |
| UN33357 | Rsa1.0.00962.1 | 926  | 184909 | 0         | 546  | 587  | 93 -  | 364 | 922  | 49859  | 50445  |
| UN33358 | Rsa1.0.00279.1 | 803  | 100039 | 1.00E-109 | 222  | 229  | 96 +  | 320 | 548  | 37625  | 37853  |
| UN33359 | Rsa1.0.03011.1 | 979  | 26048  | 0         | 865  | 913  | 94 -  | 1   | 904  | 1543   | 2452   |
| UN33360 | Rsa1.0.00455.1 | 1458 | 224823 | 0         | 636  | 664  | 95 +  | 799 | 1456 | 147564 | 148218 |
| UN33361 | Rsa1.0.05146.1 | 1040 | 14678  | 0         | 969  | 1043 | 92 +  | 1   | 1035 | 3607   | 4646   |
| UN33362 | Rsa1.0.00341.1 | 1194 | 249309 | 0         | 955  | 1033 | 92 +  | 3   | 1017 | 3427   | 4450   |
| UN33363 | Rsa1.0.02867.1 | 1174 | 27121  | 0         | 463  | 491  | 94 -  | 679 | 1164 | 13901  | 14391  |
| UN33364 | Rsa1.0.05553.1 | 1213 | 13344  | 0         | 1166 | 1208 | 96 +  | 3   | 1209 | 905    | 2111   |
| UN33365 | #              | #    | #      | #         | #    | #    | #     | #   | #    | #      | #      |
| UN33366 | Rsa1.0.11632.1 | 1071 | 5454   | 1.00E-156 | 295  | 300  | 98 +  | 253 | 552  | 3107   | 3406   |
| UN33367 | Rsa1.0.17748.1 | 934  | 1750   | 0         | 867  | 913  | 94 +  | 23  | 933  | 107    | 1018   |
| UN33368 | Rsa1.0.16960.1 | 647  | 1973   | 1.00E-103 | 216  | 223  | 96 +  | 1   | 222  | 215    | 437    |
| UN33369 | Rsa1.0.02593.1 | 1502 | 29744  | 1.00E-160 | 328  | 342  | 95 +  | 328 | 669  | 4754   | 5095   |
| UN33370 | Rsa1.0.00178.1 | 557  | 114861 | 1.00E-133 | 270  | 278  | 97 -  | 1   | 276  | 7879   | 8154   |
| UN33371 | Rsa1.0.00566.1 | 1068 | 75325  | 0         | 642  | 677  | 94 +  | 1   | 674  | 73744  | 74415  |
| UN33372 | Rsa1.0.03921.1 | 1039 | 20080  | 6.00E-83  | 191  | 200  | 95 -  | 1   | 197  | 6528   | 6727   |
| UN33373 | Rsa1.0.00069.1 | 1201 | 403561 | 0         | 843  | 899  | 93 -  | 5   | 899  | 382221 | 383098 |
| UN33374 | Rsa1.0.01043.1 | 779  | 55893  | 0         | 760  | 779  | 97 +  | 1   | 778  | 22242  | 23019  |
| UN33375 | Rsa1.0.07398.1 | 907  | 9464   | 0         | 756  | 771  | 98 -  | 138 | 907  | 5238   | 6007   |
| UN33376 | Rsa1.0.00847.1 | 700  | 62270  | 3.00E-13  | 40   | 40   | 100 - | 55  | 94   | 18867  | 18906  |
| UN33377 | Rsa1.0.01303.1 | 1339 | 48853  | 0         | 819  | 842  | 97 -  | 500 | 1338 | 35286  | 36127  |
| UN33378 | Rsa1.0.05890.1 | 1502 | 12317  | 1.00E-174 | 356  | 371  | 95 -  | 265 | 635  | 23     | 393    |
| UN33379 | Rsa1.0.03778.1 | 1345 | 20908  | 0         | 586  | 612  | 95 -  | 735 | 1343 | 18599  | 19210  |
| UN33380 | Rsa1.0.02662.1 | 208  | 28956  | 3.00E-90  | 200  | 209  | 95 +  | 1   | 204  | 295    | 503    |
| UN33381 | Rsa1.0.06010.1 | 876  | 11944  | 0         | 656  | 732  | 89 -  | 126 | 857  | 4864   | 5595   |
| UN33382 | Rsa1.0.11663.1 | 1084 | 5446   | 0         | 891  | 928  | 96 +  | 1   | 927  | 4519   | 5446   |

|         |                |      |        |           |      |      |       |     |      |        |        |
|---------|----------------|------|--------|-----------|------|------|-------|-----|------|--------|--------|
| UN33383 | Rsa1.0_11439.1 | 871  | 5507   | 2.00E-36  | 79   | 79   | 100 - | 510 | 588  | 93     | 171    |
| UN33384 | Rsa1.0_00245.1 | 677  | 103569 | 0         | 433  | 435  | 99 +  | 238 | 672  | 59745  | 60178  |
| UN33385 | Rsa1.0_00646.1 | 727  | 70473  | 0         | 682  | 715  | 95 -  | 2   | 715  | 17994  | 18704  |
| UN33386 | #              | #    | #      | #         | #    | #    | #     | #   | #    | #      | #      |
| UN33387 | Rsa1.0_00216.1 | 1186 | 197563 | 0         | 857  | 857  | 100 + | 330 | 1186 | 92515  | 93371  |
| UN33388 | Rsa1.0_00046.1 | 871  | 320315 | 0         | 793  | 821  | 96 +  | 2   | 822  | 146862 | 147672 |
| UN33389 | Rsa1.0_02489.1 | 1396 | 30897  | 0         | 1363 | 1398 | 97 -  | 2   | 1396 | 17234  | 18631  |
| UN33390 | Rsa1.0_02712.1 | 157  | 28474  | 5.00E-76  | 153  | 156  | 98 -  | 2   | 157  | 15589  | 15744  |
| UN33391 | Rsa1.0_07418.1 | 844  | 9425   | 0         | 513  | 529  | 96 -  | 102 | 630  | 6891   | 7416   |
| UN33392 | Rsa1.0_02406.1 | 784  | 145276 | 0         | 760  | 788  | 96 -  | 1   | 784  | 29689  | 30470  |
| UN33393 | Rsa1.0_01147.1 | 551  | 52391  | 0         | 523  | 572  | 91 -  | 2   | 551  | 8124   | 8695   |
| UN33394 | Rsa1.0_00863.1 | 632  | 254535 | 0         | 523  | 569  | 91 +  | 89  | 632  | 109797 | 110362 |
| UN33395 | Rsa1.0_00353.1 | 532  | 92242  | 0         | 506  | 520  | 97 -  | 11  | 530  | 78061  | 78580  |
| UN33396 | Rsa1.0_04637.1 | 1044 | 16551  | 0         | 354  | 357  | 99 -  | 688 | 1044 | 9524   | 9880   |
| UN33397 | Rsa1.0_00565.1 | 904  | 75420  | 1.00E-153 | 299  | 306  | 97 +  | 598 | 903  | 10918  | 11222  |
| UN33398 | Rsa1.0_01757.1 | 854  | 39771  | 0         | 638  | 668  | 95 -  | 108 | 770  | 28330  | 28991  |
| UN33399 | Rsa1.0_00188.1 | 504  | 112020 | 1.00E-115 | 217  | 219  | 99 +  | 285 | 503  | 72648  | 72866  |
| UN33400 | Rsa1.0_00404.1 | 1362 | 87635  | 0         | 660  | 665  | 99 +  | 94  | 758  | 26371  | 27035  |
| UN33401 | Rsa1.0_00224.1 | 398  | 327530 | 0         | 388  | 396  | 97 -  | 2   | 396  | 6202   | 6595   |
| UN33402 | Rsa1.0_03177.1 | 905  | 24799  | 0         | 531  | 545  | 97 -  | 2   | 541  | 17786  | 18330  |
| UN33403 | Rsa1.0_04574.1 | 876  | 16786  | 1.00E-137 | 326  | 350  | 93 -  | 440 | 777  | 9534   | 9881   |
| UN33404 | Rsa1.0_05105.1 | 592  | 14833  | 2.00E-87  | 304  | 351  | 86 +  | 266 | 591  | 6175   | 6519   |
| UN33405 | Rsa1.0_02052.1 | 1309 | 35555  | 0         | 481  | 512  | 93 -  | 815 | 1309 | 32924  | 33435  |
| UN33406 | Rsa1.0_00235.1 | 1413 | 154696 | 0         | 352  | 354  | 99 +  | 510 | 863  | 142486 | 142839 |
| UN33407 | Rsa1.0_01451.1 | 791  | 45459  | 0         | 478  | 497  | 96 +  | 298 | 791  | 40577  | 41071  |
| UN33408 | Rsa1.0_00278.1 | 749  | 231896 | 1.00E-175 | 347  | 357  | 97 -  | 397 | 749  | 69610  | 69966  |
| UN33409 | Rsa1.0_00096.1 | 1580 | 198773 | 1.00E-127 | 247  | 251  | 98 +  | 658 | 907  | 175673 | 175923 |
| UN33410 | Rsa1.0_02912.1 | 709  | 26834  | 0         | 675  | 695  | 97 -  | 15  | 709  | 9932   | 10625  |
| UN33411 | Rsa1.0_07790.1 | 967  | 8563   | 1.00E-141 | 285  | 294  | 96 +  | 674 | 967  | 1      | 293    |
| UN33412 | Rsa1.0_00153.1 | 1004 | 192931 | 1.00E-115 | 238  | 247  | 96 -  | 745 | 991  | 6527   | 6773   |
| UN33413 | Rsa1.0_01645.1 | 870  | 41748  | 0         | 608  | 646  | 94 +  | 234 | 868  | 37094  | 37730  |
| UN33414 | Rsa1.0_03040.1 | 804  | 25812  | 4.00E-99  | 184  | 184  | 100 - | 251 | 434  | 18425  | 18608  |
| UN33415 | Rsa1.0_00019.1 | 605  | 301669 | 0         | 546  | 566  | 96 -  | 40  | 601  | 295490 | 296055 |
| UN33416 | Rsa1.0_02880.1 | 724  | 27045  | 0         | 479  | 480  | 99 -  | 238 | 717  | 7078   | 7557   |
| UN33417 | Rsa1.0_00108.1 | 1048 | 478491 | 1.00E-109 | 496  | 586  | 84 -  | 498 | 1048 | 442703 | 443258 |
| UN33418 | Rsa1.0_11498.1 | 642  | 5485   | 0         | 397  | 403  | 98 -  | 241 | 642  | 5084   | 5485   |
| UN33419 | Rsa1.0_00460.1 | 633  | 206387 | 7.00E-97  | 216  | 226  | 95 -  | 386 | 607  | 65467  | 65692  |
| UN33420 | Rsa1.0_00029.1 | 914  | 272992 | 1.00E-131 | 260  | 265  | 98 +  | 651 | 912  | 201760 | 202024 |
| UN33421 | Rsa1.0_03592.1 | 515  | 21878  | 4.00E-39  | 103  | 109  | 94 +  | 260 | 368  | 13788  | 13893  |

|         |                |      |        |           |      |      |      |      |      |        |        |
|---------|----------------|------|--------|-----------|------|------|------|------|------|--------|--------|
| UN33422 | Rsa1.0_70008.1 | 532  | 327    | 3.00E-80  | 170  | 176  | 96 - | 143  | 318  | 152    | 327    |
| UN33423 | Rsa1.0_19863.1 | 759  | 1373   | 0         | 639  | 663  | 96 + | 99   | 759  | 356    | 1018   |
| UN33424 | Rsa1.0_00086.1 | 809  | 439854 | 0         | 783  | 794  | 98 + | 5    | 795  | 434246 | 435039 |
| UN33425 | Rsa1.0_03310.1 | 1135 | 23851  | 0         | 1072 | 1128 | 95 + | 10   | 1135 | 21002  | 22128  |
| UN33426 | Rsa1.0_07363.1 | 981  | 9512   | 0         | 893  | 971  | 91 - | 2    | 972  | 5108   | 6078   |
| UN33427 | Rsa1.0_00661.1 | 789  | 213041 | 1.00E-117 | 253  | 266  | 95 - | 348  | 607  | 200599 | 200864 |
| UN33428 | Rsa1.0_01104.1 | 596  | 285480 | 1.00E-135 | 273  | 281  | 97 + | 272  | 552  | 126367 | 126646 |
| UN33429 | Rsa1.0_10319.1 | 1139 | 5888   | 1.00E-142 | 289  | 299  | 96 - | 811  | 1109 | 1983   | 2278   |
| UN33430 | Rsa1.0_07165.1 | 1317 | 9792   | 0         | 892  | 944  | 94 - | 371  | 1314 | 3769   | 4712   |
| UN33431 | Rsa1.0_01325.1 | 816  | 48131  | 0         | 378  | 387  | 97 + | 1    | 386  | 21395  | 21781  |
| UN33432 | Rsa1.0_01781.1 | 727  | 39410  | 1.00E-129 | 300  | 320  | 93 + | 422  | 727  | 30909  | 31228  |
| UN33433 | Rsa1.0_00846.1 | 495  | 62342  | 0         | 433  | 435  | 99 - | 61   | 495  | 45893  | 46327  |
| UN33434 | Rsa1.0_00375.1 | 1279 | 90207  | 0         | 803  | 813  | 98 - | 305  | 1117 | 12556  | 13368  |
| UN33435 | Rsa1.0_00042.1 | 1031 | 171507 | 0         | 330  | 331  | 99 - | 698  | 1028 | 153750 | 154079 |
| UN33436 | Rsa1.0_00035.1 | 861  | 176449 | 1.00E-101 | 218  | 228  | 95 - | 98   | 325  | 59050  | 59277  |
| UN33437 | Rsa1.0_00422.1 | 349  | 86144  | 7.00E-74  | 252  | 285  | 88 + | 73   | 341  | 34006  | 34288  |
| UN33438 | Rsa1.0_02340.1 | 678  | 32388  | 0         | 560  | 600  | 93 + | 82   | 678  | 6041   | 6637   |
| UN33439 | Rsa1.0_02198.1 | 1462 | 33989  | 2.33E-156 | 291  | 299  | 97 + | 1068 | 1366 | 33022  | 33319  |
| UN33440 | Rsa1.0_01064.1 | 1307 | 55295  | 0         | 1254 | 1309 | 95 - | 1    | 1307 | 33928  | 35235  |
| UN33441 | #              | #    | #      | #         | #    | #    | #    | #    | #    | #      | #      |
| UN33442 | Rsa1.0_00688.1 | 715  | 68396  | 1.00E-141 | 399  | 439  | 90 - | 280  | 715  | 15238  | 15664  |
| UN33443 | Rsa1.0_00312.1 | 822  | 96765  | 0         | 373  | 375  | 99 + | 448  | 822  | 96362  | 96736  |
| UN33444 | Rsa1.0_00520.1 | 627  | 78226  | 1.00E-119 | 233  | 238  | 97 + | 92   | 329  | 36848  | 37085  |
| UN33445 | Rsa1.0_01980.1 | 1277 | 36544  | 0         | 1233 | 1276 | 96 + | 2    | 1275 | 21951  | 23224  |
| UN33446 | Rsa1.0_00846.1 | 781  | 62342  | 0         | 746  | 777  | 96 - | 2    | 778  | 33361  | 34137  |
| UN33447 | Rsa1.0_00907.1 | 1116 | 60062  | 0         | 913  | 936  | 97 + | 24   | 958  | 32667  | 33599  |
| UN33448 | Rsa1.0_00067.1 | 1276 | 415055 | 0         | 647  | 678  | 95 - | 3    | 674  | 72663  | 73337  |
| UN33449 | Rsa1.0_24128.1 | 1349 | 1005   | 0         | 988  | 1005 | 98 + | 240  | 1241 | 1      | 1005   |
| UN33450 | Rsa1.0_00088.1 | 987  | 141341 | 1.00E-125 | 251  | 256  | 98 - | 185  | 439  | 63693  | 63947  |
| UN33451 | Rsa1.0_01011.1 | 518  | 56883  | 0         | 517  | 519  | 99 - | 1    | 518  | 4821   | 5339   |
| UN33452 | Rsa1.0_00299.1 | 1120 | 97770  | 1.00E-148 | 307  | 319  | 96 - | 455  | 772  | 15175  | 15493  |
| UN33453 | Rsa1.0_00212.1 | 675  | 108350 | 1.00E-149 | 276  | 279  | 98 + | 397  | 675  | 73325  | 73603  |
| UN33454 | Rsa1.0_01899.1 | 803  | 37474  | 0         | 390  | 400  | 97 + | 405  | 803  | 3382   | 3781   |
| UN33455 | Rsa1.0_00110.1 | 864  | 132719 | 1.00E-117 | 227  | 231  | 98 + | 166  | 396  | 26188  | 26418  |
| UN33456 | Rsa1.0_01121.1 | 473  | 53407  | 1.00E-131 | 264  | 273  | 96 - | 201  | 473  | 51242  | 51514  |
| UN33457 | Rsa1.0_01591.1 | 1125 | 42718  | 0         | 1102 | 1124 | 98 - | 2    | 1125 | 26878  | 27998  |
| UN33458 | Rsa1.0_00086.1 | 794  | 439854 | 0         | 793  | 795  | 99 + | 1    | 794  | 366534 | 367328 |
| UN33459 | Rsa1.0_71661.1 | 837  | 320    | 1.00E-173 | 317  | 320  | 99 + | 212  | 531  | 1      | 320    |
| UN33460 | Rsa1.0_32504.1 | 1176 | 700    | 0         | 672  | 692  | 97 - | 306  | 996  | 9      | 700    |

|         |                |      |        |           |     |     |      |     |      |        |        |
|---------|----------------|------|--------|-----------|-----|-----|------|-----|------|--------|--------|
| UN33461 | Rsa1.0.04352.1 | 813  | 17779  | 0         | 798 | 811 | 98 + | 3   | 813  | 4565   | 5375   |
| UN33462 | Rsa1.0.00394.1 | 1234 | 148426 | 0         | 758 | 806 | 94 - | 2   | 789  | 116352 | 117154 |
| UN33463 | Rsa1.0.08198.1 | 534  | 7748   | 6.00E-69  | 142 | 145 | 97 - | 14  | 158  | 3436   | 3580   |
| UN33464 | Rsa1.0.03177.1 | 943  | 24799  | 0         | 420 | 425 | 98 + | 349 | 773  | 23844  | 24267  |
| UN33465 | Rsa1.0.00671.1 | 370  | 397884 | 1.00E-126 | 246 | 252 | 97 + | 119 | 370  | 192204 | 192455 |
| UN33466 | Rsa1.0.00131.1 | 1437 | 432233 | 0         | 491 | 540 | 90 - | 458 | 981  | 395234 | 395752 |
| UN33467 | Rsa1.0.00727.1 | 853  | 66724  | 0         | 823 | 874 | 94 - | 1   | 837  | 43258  | 44130  |
| UN33468 | Rsa1.0.44490.1 | 1152 | 506    | 1.00E-176 | 396 | 422 | 93 - | 41  | 461  | 1      | 422    |
| UN33469 | Rsa1.0.06136.1 | 446  | 11659  | 0         | 424 | 458 | 92 - | 2   | 444  | 3173   | 3620   |
| UN33470 | Rsa1.0.00301.1 | 890  | 365315 | 1.00E-138 | 285 | 295 | 96 - | 582 | 871  | 63715  | 64009  |
| UN33471 | Rsa1.0.00299.1 | 766  | 97770  | 0         | 730 | 766 | 95 - | 3   | 760  | 43218  | 43979  |
| UN33472 | Rsa1.0.02859.1 | 754  | 162118 | 1.00E-125 | 242 | 247 | 97 - | 11  | 257  | 15898  | 16144  |
| UN33473 | Rsa1.0.03235.1 | 700  | 24442  | 0         | 471 | 480 | 98 + | 222 | 700  | 6018   | 6497   |
| UN33474 | Rsa1.0.00336.1 | 975  | 445051 | 6.00E-89  | 187 | 194 | 96 + | 788 | 975  | 297905 | 298098 |
| UN33475 | Rsa1.0.01203.1 | 1187 | 50848  | 0         | 500 | 515 | 97 - | 168 | 679  | 27749  | 28260  |
| UN33476 | Rsa1.0.00263.1 | 1035 | 224968 | 0         | 719 | 780 | 92 + | 270 | 1035 | 177214 | 177974 |
| UN33477 | Rsa1.0.20377.1 | 864  | 1312   | 1.00E-113 | 253 | 266 | 95 + | 3   | 268  | 90     | 352    |
| UN33478 | Rsa1.0.01975.1 | 622  | 36578  | 1.00E-152 | 348 | 368 | 94 - | 262 | 622  | 34997  | 35361  |
| UN33479 | Rsa1.0.00383.1 | 1059 | 398431 | 1.00E-160 | 322 | 334 | 96 - | 303 | 636  | 270655 | 270988 |
| UN33480 | Rsa1.0.02203.1 | 602  | 164532 | 0         | 584 | 592 | 98 - | 2   | 593  | 163398 | 163989 |
| UN33481 | Rsa1.0.04124.1 | 1196 | 18945  | 1.00E-163 | 311 | 316 | 98 + | 429 | 743  | 2275   | 2590   |
| UN33482 | Rsa1.0.20700.1 | 912  | 1278   | 0         | 384 | 391 | 98 - | 281 | 671  | 1      | 391    |
| UN33483 | Rsa1.0.01260.1 | 1185 | 49750  | 0         | 751 | 785 | 95 + | 412 | 1183 | 10822  | 11599  |
| UN33484 | Rsa1.0.01213.1 | 971  | 50616  | 0         | 928 | 972 | 95 - | 4   | 971  | 30883  | 31853  |
| UN33485 | Rsa1.0.04068.1 | 810  | 19253  | 0         | 804 | 808 | 99 - | 3   | 810  | 10527  | 11333  |
| UN33486 | Rsa1.0.00955.1 | 839  | 58358  | 1.00E-127 | 278 | 291 | 95 - | 3   | 292  | 35870  | 36159  |
| UN33487 | Rsa1.0.01679.1 | 808  | 146876 | 0         | 416 | 424 | 98 - | 2   | 424  | 123411 | 123832 |
| UN33488 | Rsa1.0.02315.1 | 1090 | 32618  | 8.00E-98  | 197 | 201 | 98 + | 888 | 1088 | 17383  | 17581  |
| UN33489 | Rsa1.0.00214.1 | 571  | 107508 | 1.00E-168 | 422 | 454 | 92 - | 121 | 567  | 75547  | 75993  |
| UN33490 | Rsa1.0.02854.1 | 275  | 27274  | 1.00E-142 | 269 | 273 | 98 - | 2   | 274  | 22271  | 22539  |
| UN33491 | Rsa1.0.01957.1 | 564  | 36844  | 1.00E-112 | 268 | 285 | 94 + | 2   | 285  | 28192  | 28473  |
| UN33492 | Rsa1.0.00062.1 | 990  | 299291 | 0         | 567 | 604 | 93 + | 390 | 990  | 190736 | 191328 |
| UN33493 | Rsa1.0.01019.1 | 824  | 56636  | 0         | 796 | 828 | 96 - | 2   | 824  | 23267  | 24091  |
| UN33494 | Rsa1.0.03073.1 | 824  | 25574  | 1.00E-89  | 207 | 216 | 95 - | 3   | 216  | 12140  | 12354  |
| UN33495 | Rsa1.0.00552.1 | 732  | 206757 | 0         | 402 | 403 | 99 - | 1   | 403  | 75228  | 75630  |
| UN33496 | Rsa1.0.04760.1 | 383  | 16105  | 1.00E-114 | 260 | 275 | 94 + | 1   | 275  | 8768   | 9038   |
| UN33497 | Rsa1.0.00556.1 | 529  | 207212 | 1.00E-133 | 244 | 245 | 99 + | 285 | 529  | 160591 | 160835 |
| UN33498 | Rsa1.0.00816.1 | 865  | 403350 | 0         | 488 | 522 | 93 + | 3   | 512  | 361693 | 362210 |
| UN33499 | Rsa1.0.00996.1 | 1085 | 57222  | 0         | 622 | 634 | 98 + | 452 | 1085 | 12865  | 13498  |

|         |                |      |        |           |      |      |      |      |      |        |        |
|---------|----------------|------|--------|-----------|------|------|------|------|------|--------|--------|
| UN33500 | Rsa1.0_00392.1 | 919  | 88523  | 0         | 408  | 430  | 94 - | 2    | 428  | 17035  | 17463  |
| UN33501 | Rsa1.0_04639.1 | 846  | 16550  | 1.00E-101 | 516  | 614  | 84 + | 238  | 844  | 4973   | 5582   |
| UN33502 | Rsa1.0_00217.1 | 1374 | 107079 | 0         | 426  | 437  | 97 + | 939  | 1374 | 29409  | 29845  |
| UN33503 | Rsa1.0_03627.1 | 1079 | 21658  | 0         | 543  | 545  | 99 + | 2    | 546  | 8753   | 9296   |
| UN33504 | Rsa1.0_01771.1 | 969  | 172709 | 1.00E-131 | 280  | 294  | 95 - | 484  | 777  | 8310   | 8603   |
| UN33505 | Rsa1.0_00087.1 | 939  | 761073 | 0         | 742  | 758  | 97 + | 181  | 937  | 597009 | 597763 |
| UN33506 | Rsa1.0_00333.1 | 383  | 94500  | 2.00E-31  | 96   | 104  | 92 - | 3    | 106  | 78738  | 78838  |
| UN33507 | Rsa1.0_01159.1 | 1502 | 52115  | 0         | 1098 | 1152 | 95 - | 315  | 1456 | 34628  | 35776  |
| UN33508 | Rsa1.0_05780.1 | 1175 | 12654  | 6.00E-40  | 140  | 162  | 86 - | 272  | 417  | 9887   | 10048  |
| UN33509 | Rsa1.0_00577.1 | 730  | 174827 | 0         | 608  | 636  | 95 - | 1    | 636  | 109705 | 110340 |
| UN33510 | Rsa1.0_00049.1 | 1096 | 167018 | 0         | 514  | 570  | 90 + | 85   | 640  | 94356  | 94916  |
| UN33511 | Rsa1.0_08424.1 | 779  | 7375   | 0         | 477  | 499  | 95 - | 278  | 776  | 2571   | 3063   |
| UN33512 | Rsa1.0_05937.1 | 836  | 12175  | 0         | 644  | 704  | 91 + | 2    | 704  | 10071  | 10767  |
| UN33513 | Rsa1.0_03327.1 | 1230 | 23707  | 0         | 501  | 510  | 98 + | 722  | 1230 | 8091   | 8600   |
| UN33514 | Rsa1.0_00814.1 | 713  | 63073  | 0         | 515  | 543  | 94 - | 2    | 543  | 5864   | 6405   |
| UN33515 | Rsa1.0_00007.1 | 1196 | 239325 | 0         | 986  | 1014 | 97 + | 196  | 1196 | 52943  | 53954  |
| UN33516 | Rsa1.0_06349.1 | 775  | 11199  | 1.00E-150 | 339  | 360  | 94 + | 279  | 636  | 3723   | 4081   |
| UN33517 | Rsa1.0_00016.1 | 1221 | 831256 | 0         | 457  | 474  | 96 + | 746  | 1216 | 202082 | 202554 |
| UN33518 | Rsa1.0_02248.1 | 653  | 33414  | 0         | 600  | 667  | 89 + | 14   | 652  | 9472   | 10127  |
| UN33519 | Rsa1.0_31520.1 | 720  | 725    | 0         | 553  | 577  | 95 + | 1    | 574  | 150    | 725    |
| UN33520 | Rsa1.0_02242.1 | 723  | 33512  | 0         | 691  | 724  | 95 + | 2    | 722  | 4494   | 5199   |
| UN33521 | Rsa1.0_00804.1 | 1070 | 63726  | 0         | 368  | 372  | 98 + | 334  | 704  | 42459  | 42830  |
| UN33522 | Rsa1.0_00110.1 | 919  | 132719 | 1.00E-136 | 268  | 275  | 97 - | 645  | 919  | 132    | 406    |
| UN33523 | Rsa1.0_00566.1 | 900  | 75325  | 0         | 687  | 713  | 96 - | 189  | 900  | 27236  | 27947  |
| UN33524 | Rsa1.0_07990.1 | 632  | 8119   | 1.00E-125 | 239  | 243  | 98 - | 390  | 632  | 5780   | 6022   |
| UN33525 | Rsa1.0_02228.1 | 1183 | 33688  | 1.00E-140 | 286  | 297  | 96 - | 261  | 557  | 29148  | 29444  |
| UN33526 | Rsa1.0_00252.1 | 1209 | 102760 | 0         | 1142 | 1188 | 96 - | 17   | 1197 | 37956  | 39124  |
| UN33527 | Rsa1.0_02930.1 | 1620 | 26668  | 0         | 425  | 446  | 95 + | 1178 | 1619 | 23089  | 23534  |
| UN33528 | Rsa1.0_00325.1 | 641  | 95371  | 0         | 635  | 642  | 98 + | 3    | 640  | 63854  | 64495  |
| UN33529 | Rsa1.0_03093.1 | 1101 | 25445  | 0         | 1058 | 1101 | 96 + | 1    | 1099 | 9863   | 10960  |
| UN33530 | Rsa1.0_04127.1 | 974  | 18932  | 0         | 970  | 973  | 99 - | 2    | 974  | 12535  | 13507  |
| UN33531 | Rsa1.0_02811.1 | 966  | 27669  | 1.00E-126 | 281  | 297  | 94 - | 671  | 966  | 16560  | 16856  |
| UN33532 | Rsa1.0_00819.1 | 601  | 62918  | 1.00E-100 | 343  | 391  | 87 - | 1    | 384  | 34356  | 34726  |
| UN33533 | Rsa1.0_00029.1 | 1423 | 272992 | 0         | 1179 | 1235 | 95 - | 197  | 1422 | 257525 | 258746 |
| UN33534 | Rsa1.0_00205.1 | 1185 | 193401 | 0         | 648  | 671  | 96 - | 2    | 671  | 184532 | 185202 |
| UN33535 | Rsa1.0_04819.1 | 907  | 140505 | 1.00E-168 | 333  | 344  | 96 - | 97   | 440  | 2924   | 3267   |
| UN33536 | Rsa1.0_06388.1 | 996  | 11110  | 1.00E-120 | 281  | 295  | 95 + | 407  | 698  | 1305   | 1597   |
| UN33537 | Rsa1.0_03134.1 | 832  | 145023 | 0         | 368  | 379  | 97 + | 432  | 808  | 4339   | 4716   |
| UN33538 | Rsa1.0_00172.1 | 771  | 115476 | 2.33E-156 | 341  | 367  | 92 - | 302  | 668  | 89539  | 89905  |

|         |                |      |        |           |      |      |       |      |      |        |        |
|---------|----------------|------|--------|-----------|------|------|-------|------|------|--------|--------|
| UN33539 | Rsa1.0.00643.1 | 926  | 70658  | 0         | 559  | 563  | 99 -  | 364  | 926  | 34797  | 35359  |
| UN33540 | Rsa1.0.02165.1 | 1237 | 34423  | 0         | 448  | 467  | 95 +  | 1    | 456  | 79     | 542    |
| UN33541 | Rsa1.0.01536.1 | 150  | 43747  | 2.00E-65  | 146  | 150  | 97 -  | 1    | 149  | 41347  | 41495  |
| UN33542 | Rsa1.0.09164.1 | 859  | 6595   | 0         | 788  | 806  | 97 +  | 52   | 857  | 1      | 804    |
| UN33543 | Rsa1.0.00796.1 | 1322 | 63997  | 0         | 1317 | 1321 | 99 -  | 3    | 1322 | 21080  | 22400  |
| UN33544 | Rsa1.0.00079.1 | 866  | 606987 | 0         | 485  | 493  | 98 -  | 374  | 866  | 599735 | 600227 |
| UN33545 | Rsa1.0.00816.1 | 928  | 403350 | 1.00E-104 | 217  | 224  | 96 -  | 2    | 224  | 399563 | 399786 |
| UN33546 | Rsa1.0.05793.1 | 1484 | 12611  | 1.00E-135 | 263  | 269  | 97 -  | 738  | 1006 | 11517  | 11785  |
| UN33547 | #              | #    | #      | #         | #    | #    | #     | #    | #    | #      | #      |
| UN33548 | Rsa1.0.03165.1 | 1101 | 24866  | 0         | 1068 | 1101 | 97 +  | 1    | 1101 | 22558  | 23654  |
| UN33549 | Rsa1.0.01372.1 | 363  | 47068  | 1.00E-155 | 341  | 361  | 94 +  | 1    | 361  | 22607  | 22961  |
| UN33550 | Rsa1.0.00703.1 | 864  | 67597  | 0         | 684  | 700  | 97 -  | 3    | 702  | 42103  | 42802  |
| UN33551 | Rsa1.0.00933.1 | 872  | 59164  | 1.00E-163 | 460  | 510  | 90 +  | 3    | 482  | 36153  | 36661  |
| UN33552 | Rsa1.0.00435.1 | 654  | 317579 | 1.00E-178 | 325  | 328  | 99 +  | 327  | 654  | 66876  | 67203  |
| UN33553 | Rsa1.0.00006.1 | 1153 | 396176 | 0         | 446  | 483  | 92 +  | 672  | 1153 | 312060 | 312525 |
| UN33554 | Rsa1.0.01551.1 | 746  | 43411  | 2.00E-32  | 148  | 172  | 86 +  | 372  | 543  | 5151   | 5321   |
| UN33555 | Rsa1.0.02229.1 | 928  | 33672  | 1.00E-104 | 211  | 217  | 97 +  | 352  | 568  | 8678   | 8894   |
| UN33556 | Rsa1.0.01155.1 | 571  | 52182  | 0         | 556  | 571  | 97 -  | 1    | 571  | 16129  | 16698  |
| UN33557 | Rsa1.0.00323.1 | 901  | 159650 | 0         | 856  | 904  | 94 -  | 3    | 900  | 56562  | 57456  |
| UN33558 | Rsa1.0.02625.1 | 1161 | 139104 | 1.00E-124 | 235  | 238  | 98 +  | 7    | 244  | 7321   | 7558   |
| UN33559 | Rsa1.0.02945.1 | 1272 | 26548  | 0         | 783  | 805  | 97 +  | 2    | 803  | 13162  | 13966  |
| UN33560 | Rsa1.0.17917.1 | 808  | 1710   | 0         | 577  | 584  | 98 +  | 229  | 808  | 814    | 1396   |
| UN33561 | Rsa1.0.27802.1 | 1339 | 839    | 1.00E-152 | 298  | 304  | 98 +  | 1038 | 1339 | 47     | 348    |
| UN33562 | Rsa1.0.00212.1 | 1224 | 108350 | 0         | 1198 | 1222 | 98 -  | 1    | 1222 | 100626 | 101843 |
| UN33563 | Rsa1.0.00081.1 | 891  | 143261 | 1.00E-122 | 235  | 239  | 98 -  | 649  | 887  | 956    | 1194   |
| UN33564 | Rsa1.0.02401.1 | 682  | 138425 | 0         | 560  | 617  | 90 +  | 5    | 611  | 7165   | 7777   |
| UN33565 | Rsa1.0.02148.1 | 872  | 34610  | 0         | 865  | 870  | 99 -  | 3    | 872  | 27703  | 28569  |
| UN33566 | Rsa1.0.04231.1 | 700  | 18380  | 0         | 398  | 406  | 98 +  | 294  | 698  | 15585  | 15990  |
| UN33567 | Rsa1.0.03820.1 | 857  | 20664  | 0         | 832  | 852  | 97 +  | 6    | 857  | 3416   | 4266   |
| UN33568 | Rsa1.0.08585.1 | 936  | 7157   | 4.00E-28  | 86   | 93   | 92 -  | 742  | 834  | 5434   | 5526   |
| UN33569 | Rsa1.0.00314.1 | 817  | 96472  | 0         | 469  | 499  | 93 -  | 319  | 817  | 14599  | 15092  |
| UN33570 | Rsa1.0.00025.1 | 624  | 277312 | 1.00E-176 | 388  | 408  | 95 +  | 210  | 609  | 14014  | 14419  |
| UN33571 | Rsa1.0.18125.1 | 590  | 1661   | 0         | 585  | 589  | 99 +  | 3    | 590  | 898    | 1486   |
| UN33572 | Rsa1.0.00935.1 | 988  | 59079  | 0         | 425  | 431  | 98 -  | 3    | 433  | 25066  | 25496  |
| UN33573 | Rsa1.0.01549.1 | 1203 | 43543  | 0         | 1129 | 1173 | 96 -  | 31   | 1203 | 35274  | 36439  |
| UN33574 | Rsa1.0.01149.1 | 1183 | 160459 | 0         | 1113 | 1182 | 94 -  | 3    | 1183 | 4222   | 5403   |
| UN33575 | Rsa1.0.00071.1 | 1287 | 345714 | 0         | 1262 | 1292 | 97 +  | 3    | 1286 | 123630 | 124920 |
| UN33576 | Rsa1.0.03140.1 | 1413 | 25081  | 0         | 674  | 693  | 97 -  | 723  | 1413 | 19479  | 20167  |
| UN33577 | Rsa1.0.02373.1 | 654  | 32048  | 0         | 363  | 363  | 100 + | 292  | 654  | 7685   | 8047   |

|         |                |      |        |           |      |      |       |     |      |        |        |
|---------|----------------|------|--------|-----------|------|------|-------|-----|------|--------|--------|
| UN33578 | Rsa1.0.00008.1 | 811  | 358124 | 0         | 639  | 663  | 96 -  | 2   | 661  | 301010 | 301669 |
| UN33579 | Rsa1.0.03188.1 | 1081 | 24722  | 0         | 514  | 547  | 93 -  | 538 | 1081 | 11911  | 12446  |
| UN33580 | Rsa1.0.01504.1 | 436  | 189978 | 1.00E-110 | 268  | 289  | 92 +  | 7   | 286  | 149391 | 149676 |
| UN33581 | Rsa1.0.02020.1 | 748  | 173211 | 0         | 526  | 549  | 95 -  | 2   | 550  | 137400 | 137948 |
| UN33582 | Rsa1.0.02680.1 | 763  | 28721  | 0         | 757  | 767  | 98 -  | 2   | 763  | 24845  | 25610  |
| UN33583 | Rsa1.0.00015.1 | 725  | 561803 | 0         | 559  | 586  | 95 -  | 2   | 587  | 418408 | 418993 |
| UN33584 | Rsa1.0.12279.1 | 1123 | 5266   | 0         | 546  | 578  | 94 +  | 132 | 709  | 4710   | 5266   |
| UN33585 | Rsa1.0.05719.1 | 822  | 12836  | 1.00E-156 | 333  | 350  | 95 +  | 436 | 785  | 9506   | 9852   |
| UN33586 | Rsa1.0.16880.1 | 695  | 2004   | 0         | 510  | 544  | 93 +  | 3   | 543  | 459    | 987    |
| UN33587 | Rsa1.0.02648.1 | 380  | 29073  | 6.00E-87  | 229  | 245  | 93 +  | 141 | 380  | 20802  | 21044  |
| UN33588 | Rsa1.0.00618.1 | 779  | 72195  | 0         | 496  | 499  | 99 +  | 25  | 523  | 25939  | 26437  |
| UN33589 | Rsa1.0.00069.1 | 941  | 403561 | 0         | 601  | 640  | 93 +  | 141 | 768  | 46995  | 47634  |
| UN33590 | Rsa1.0.00391.1 | 1028 | 183853 | 0         | 976  | 1015 | 96 -  | 5   | 1019 | 488    | 1498   |
| UN33591 | Rsa1.0.03700.1 | 712  | 21299  | 0         | 702  | 709  | 99 -  | 2   | 710  | 1810   | 2517   |
| UN33592 | Rsa1.0.00374.1 | 851  | 165738 | 0         | 456  | 475  | 96 -  | 382 | 851  | 131818 | 132291 |
| UN33593 | Rsa1.0.01744.1 | 799  | 39910  | 0         | 520  | 546  | 95 -  | 210 | 738  | 35427  | 35972  |
| UN33594 | Rsa1.0.23549.1 | 688  | 1041   | 1.00E-116 | 237  | 245  | 96 -  | 1   | 245  | 332    | 576    |
| UN33595 | Rsa1.0.03359.1 | 437  | 23466  | 1.00E-109 | 209  | 212  | 98 -  | 132 | 343  | 4834   | 5045   |
| UN33596 | Rsa1.0.01776.1 | 736  | 39511  | 0         | 696  | 719  | 96 +  | 2   | 717  | 7636   | 8351   |
| UN33597 | Rsa1.0.02291.1 | 957  | 32959  | 0         | 701  | 723  | 96 -  | 247 | 957  | 12752  | 13474  |
| UN33598 | Rsa1.0.03627.1 | 1206 | 21658  | 0         | 579  | 597  | 96 +  | 3   | 593  | 8700   | 9296   |
| UN33599 | Rsa1.0.00175.1 | 952  | 166121 | 0         | 635  | 647  | 98 +  | 307 | 952  | 110050 | 110693 |
| UN33600 | Rsa1.0.00839.1 | 659  | 62533  | 0         | 367  | 375  | 97 -  | 286 | 659  | 21229  | 21602  |
| UN33601 | Rsa1.0.00149.1 | 1371 | 305196 | 1.00E-161 | 337  | 351  | 96 +  | 3   | 353  | 134565 | 134911 |
| UN33602 | Rsa1.0.01655.1 | 726  | 41508  | 1.00E-100 | 214  | 221  | 96 +  | 3   | 222  | 40509  | 40728  |
| UN33603 | Rsa1.0.00087.1 | 1026 | 761073 | 0         | 649  | 678  | 95 -  | 335 | 1000 | 321381 | 322058 |
| UN33604 | Rsa1.0.00031.1 | 617  | 179862 | 1.00E-98  | 183  | 183  | 100 + | 1   | 183  | 83715  | 83897  |
| UN33605 | Rsa1.0.00573.1 | 1194 | 74821  | 0         | 494  | 504  | 98 +  | 1   | 501  | 31675  | 32177  |
| UN33606 | Rsa1.0.01171.1 | 1158 | 51752  | 0         | 1061 | 1081 | 98 -  | 77  | 1157 | 32448  | 33526  |
| UN33607 | Rsa1.0.01771.1 | 740  | 172709 | 1.00E-131 | 272  | 283  | 96 +  | 455 | 737  | 5834   | 6113   |
| UN33608 | Rsa1.0.01781.1 | 744  | 39410  | 1.00E-116 | 296  | 321  | 92 -  | 1   | 313  | 30909  | 31226  |
| UN33609 | Rsa1.0.19447.1 | 612  | 1430   | 1.00E-104 | 238  | 252  | 94 -  | 190 | 438  | 159    | 407    |
| UN33610 | Rsa1.0.01286.1 | 970  | 49209  | 1.00E-180 | 387  | 405  | 95 -  | 1   | 400  | 39922  | 40319  |
| UN33611 | Rsa1.0.01796.1 | 573  | 39154  | 0         | 559  | 573  | 97 -  | 1   | 573  | 13850  | 14420  |
| UN33612 | Rsa1.0.02141.1 | 1386 | 34677  | 0         | 538  | 558  | 96 -  | 827 | 1384 | 8942   | 9499   |
| UN33613 | Rsa1.0.00116.1 | 1210 | 365886 | 0         | 798  | 846  | 94 +  | 303 | 1148 | 207068 | 207912 |
| UN33614 | Rsa1.0.00737.1 | 674  | 66432  | 1.00E-165 | 294  | 294  | 100 + | 2   | 295  | 51335  | 51628  |
| UN33615 | Rsa1.0.00172.1 | 1261 | 115476 | 0         | 1200 | 1232 | 97 -  | 29  | 1260 | 34420  | 35649  |
| UN33616 | Rsa1.0.02581.1 | 610  | 29896  | 0         | 561  | 605  | 92 -  | 5   | 609  | 28650  | 29247  |



|         |                |      |        |           |      |      |      |     |      |        |        |
|---------|----------------|------|--------|-----------|------|------|------|-----|------|--------|--------|
| UN33617 | Rsa1.0_00522.1 | 611  | 78103  | 1.00E-124 | 273  | 287  | 95 - | 1   | 286  | 25952  | 26234  |
| UN33618 | #              | #    | #      | #         | #    | #    | #    | #   | #    | #      | #      |
| UN33619 | Rsa1.0_17048.1 | 583  | 1941   | 0         | 568  | 583  | 97 - | 1   | 583  | 216    | 797    |
| UN33620 | Rsa1.0_05975.1 | 573  | 12062  | 1.00E-132 | 261  | 267  | 97 + | 64  | 328  | 3798   | 4064   |
| UN33621 | Rsa1.0_00435.1 | 1024 | 317579 | 1.00E-147 | 277  | 281  | 98 - | 1   | 281  | 66819  | 67099  |
| UN33622 | Rsa1.0_00053.1 | 1273 | 263459 | 0         | 437  | 455  | 96 - | 1   | 455  | 160252 | 160703 |
| UN33623 | Rsa1.0_00098.1 | 1421 | 349239 | 0         | 544  | 576  | 94 - | 509 | 1081 | 232786 | 233360 |
| UN33624 | Rsa1.0_01668.1 | 1423 | 41299  | 0         | 745  | 780  | 95 + | 649 | 1420 | 21281  | 22058  |
| UN33625 | Rsa1.0_06873.1 | 1286 | 10230  | 0         | 1285 | 1286 | 99 + | 1   | 1286 | 8678   | 9963   |
| UN33626 | Rsa1.0_00088.1 | 880  | 141341 | 0         | 840  | 854  | 98 - | 25  | 878  | 134849 | 135702 |
| UN33627 | Rsa1.0_00019.1 | 562  | 301669 | 0         | 405  | 424  | 95 - | 152 | 562  | 29478  | 29901  |
| UN33628 | Rsa1.0_00725.1 | 1253 | 66757  | 1.00E-142 | 313  | 333  | 93 - | 653 | 976  | 14849  | 15181  |
| UN33629 | Rsa1.0_00394.1 | 892  | 148426 | 0         | 722  | 725  | 99 - | 3   | 725  | 147377 | 148101 |
| UN33630 | Rsa1.0_01078.1 | 1117 | 316910 | 0         | 648  | 688  | 94 + | 432 | 1116 | 123844 | 124528 |
| UN33631 | Rsa1.0_04028.1 | 1314 | 19493  | 0         | 636  | 659  | 96 - | 1   | 655  | 12346  | 13004  |
| UN33632 | Rsa1.0_01451.1 | 790  | 45459  | 0         | 787  | 790  | 99 + | 1   | 790  | 29000  | 29789  |
| UN33633 | Rsa1.0_00825.1 | 1217 | 62855  | 1.00E-153 | 291  | 295  | 98 - | 1   | 295  | 16123  | 16416  |
| UN33634 | Rsa1.0_02616.1 | 733  | 29542  | 1.00E-153 | 324  | 339  | 95 + | 313 | 650  | 18330  | 18668  |
| UN33635 | Rsa1.0_00211.1 | 311  | 228189 | 1.00E-110 | 232  | 244  | 95 - | 76  | 308  | 188950 | 189193 |
| UN33636 | Rsa1.0_01666.1 | 1286 | 173972 | 0         | 1282 | 1286 | 99 - | 1   | 1285 | 8116   | 9401   |
| UN33637 | Rsa1.0_00482.1 | 1253 | 81162  | 0         | 893  | 918  | 97 + | 3   | 914  | 70819  | 71736  |
| UN33638 | Rsa1.0_00028.1 | 814  | 293984 | 0         | 783  | 816  | 95 - | 1   | 813  | 290227 | 291033 |
| UN33639 | Rsa1.0_00243.1 | 757  | 103651 | 1.00E-122 | 289  | 312  | 92 + | 4   | 300  | 56192  | 56501  |
| UN33640 | Rsa1.0_03349.1 | 284  | 23534  | 1.00E-129 | 266  | 276  | 96 - | 8   | 283  | 21578  | 21851  |
| UN33641 | Rsa1.0_04236.1 | 1392 | 18370  | 0         | 672  | 702  | 95 - | 691 | 1392 | 14255  | 14950  |
| UN33642 | Rsa1.0_02642.1 | 1110 | 29181  | 0         | 652  | 685  | 95 - | 424 | 1108 | 24637  | 25319  |
| UN33643 | Rsa1.0_03521.1 | 963  | 396204 | 0         | 556  | 566  | 98 - | 1   | 566  | 133159 | 133719 |
| UN33644 | Rsa1.0_02588.1 | 1028 | 29840  | 0         | 894  | 930  | 96 + | 6   | 927  | 19022  | 19950  |
| UN33645 | Rsa1.0_00131.1 | 1439 | 432233 | 0         | 1432 | 1435 | 99 - | 4   | 1438 | 283142 | 284576 |
| UN33646 | Rsa1.0_01191.1 | 1104 | 51235  | 2.00E-55  | 170  | 187  | 90 + | 795 | 980  | 8904   | 9089   |
| UN33647 | Rsa1.0_00016.1 | 145  | 831256 | 1.00E-42  | 122  | 133  | 91 - | 6   | 134  | 58051  | 58183  |
| UN33648 | Rsa1.0_01094.1 | 1234 | 167285 | 0         | 629  | 696  | 90 - | 384 | 1070 | 31403  | 32074  |
| UN33649 | Rsa1.0_00981.1 | 1009 | 57700  | 0         | 945  | 1011 | 93 + | 15  | 1008 | 4840   | 5845   |
| UN33650 | Rsa1.0_00139.1 | 1338 | 357786 | 0         | 417  | 425  | 98 + | 3   | 427  | 24407  | 24826  |
| UN33651 | Rsa1.0_04440.1 | 582  | 17347  | 0         | 572  | 582  | 98 + | 1   | 580  | 14896  | 15476  |
| UN33652 | Rsa1.0_25346.1 | 885  | 940    | 0         | 335  | 338  | 99 + | 1   | 338  | 604    | 940    |
| UN33653 | Rsa1.0_00213.1 | 269  | 108167 | 8.00E-76  | 246  | 275  | 89 - | 2   | 269  | 46568  | 46834  |
| UN33654 | Rsa1.0_01651.1 | 787  | 41586  | 0         | 627  | 656  | 95 - | 33  | 684  | 19156  | 19808  |
| UN33655 | Rsa1.0_02917.1 | 705  | 159058 | 0         | 333  | 337  | 98 - | 8   | 344  | 158258 | 158594 |

|         |                |      |        |           |     |     |       |      |      |        |        |
|---------|----------------|------|--------|-----------|-----|-----|-------|------|------|--------|--------|
| UN33656 | Rsa1.0_00523.1 | 697  | 178770 | 1.00E-154 | 318 | 328 | 96 +  | 221  | 542  | 43184  | 43509  |
| UN33657 | Rsa1.0_00417.1 | 547  | 395068 | 1.00E-177 | 503 | 554 | 90 -  | 9    | 547  | 15538  | 16076  |
| UN33658 | Rsa1.0_00064.1 | 1265 | 240927 | 0         | 532 | 544 | 97 -  | 599  | 1137 | 25675  | 26218  |
| UN33659 | Rsa1.0_07316.1 | 1195 | 9562   | 2.00E-86  | 163 | 163 | 100 + | 228  | 390  | 1      | 163    |
| UN33660 | Rsa1.0_00936.1 | 667  | 59078  | 1.00E-161 | 329 | 340 | 96 +  | 2    | 340  | 58541  | 58874  |
| UN33661 | Rsa1.0_00668.1 | 903  | 69421  | 0         | 677 | 712 | 95 -  | 191  | 890  | 33883  | 34580  |
| UN33662 | Rsa1.0_00122.1 | 652  | 265937 | 1.00E-166 | 420 | 454 | 92 +  | 210  | 651  | 257160 | 257611 |
| UN33663 | Rsa1.0_01611.1 | 958  | 42269  | 0         | 456 | 473 | 96 -  | 2    | 474  | 24381  | 24851  |
| UN33664 | Rsa1.0_00107.1 | 664  | 431659 | 1.00E-141 | 298 | 308 | 96 -  | 18   | 320  | 85958  | 86264  |
| UN33665 | Rsa1.0_01701.1 | 929  | 162121 | 0         | 428 | 445 | 96 -  | 231  | 672  | 143136 | 143577 |
| UN33666 | Rsa1.0_00491.1 | 1064 | 80219  | 1.00E-135 | 261 | 265 | 98 -  | 1    | 265  | 33681  | 33944  |
| UN33667 | Rsa1.0_02340.1 | 744  | 32388  | 0         | 623 | 665 | 93 -  | 85   | 742  | 6039   | 6701   |
| UN33668 | Rsa1.0_00726.1 | 783  | 66734  | 0         | 535 | 555 | 96 +  | 73   | 626  | 14039  | 14586  |
| UN33669 | Rsa1.0_02756.1 | 1236 | 28202  | 6.00E-28  | 134 | 156 | 85 -  | 1001 | 1154 | 3494   | 3644   |
| UN33670 | Rsa1.0_02035.1 | 1312 | 35776  | 0         | 759 | 766 | 99 -  | 1    | 764  | 19826  | 20590  |
| UN33671 | Rsa1.0_01260.1 | 796  | 49750  | 0         | 778 | 817 | 95 -  | 1    | 794  | 10792  | 11601  |
| UN33672 | Rsa1.0_04545.1 | 374  | 146799 | 1.00E-130 | 263 | 271 | 97 +  | 3    | 273  | 15262  | 15531  |
| UN33673 | Rsa1.0_02983.1 | 737  | 26268  | 2.00E-72  | 245 | 274 | 89 +  | 1    | 268  | 5371   | 5639   |
| UN33674 | Rsa1.0_09074.1 | 1112 | 6670   | 1.00E-152 | 389 | 420 | 92 +  | 41   | 455  | 826    | 1243   |
| UN33675 | Rsa1.0_00435.1 | 1120 | 317579 | 0         | 377 | 378 | 99 -  | 743  | 1120 | 195723 | 196100 |
| UN33676 | Rsa1.0_03483.1 | 653  | 22621  | 3.00E-74  | 145 | 146 | 99 -  | 444  | 589  | 15195  | 15340  |
| UN33677 | Rsa1.0_00022.1 | 498  | 200461 | 1.00E-126 | 242 | 245 | 98 -  | 1    | 245  | 47676  | 47919  |
| UN33678 | Rsa1.0_09537.1 | 1086 | 6302   | 0         | 806 | 824 | 97 +  | 1    | 822  | 1178   | 2001   |
| UN33679 | Rsa1.0_00082.1 | 698  | 237584 | 0         | 670 | 692 | 96 -  | 1    | 692  | 40687  | 41378  |
| UN33680 | Rsa1.0_02783.1 | 911  | 27927  | 0         | 878 | 909 | 96 -  | 5    | 910  | 2823   | 3722   |
| UN33681 | Rsa1.0_00272.1 | 766  | 447836 | 0         | 381 | 398 | 95 +  | 366  | 763  | 47998  | 48395  |
| UN33682 | Rsa1.0_01313.1 | 578  | 48387  | 0         | 428 | 440 | 97 -  | 86   | 525  | 7828   | 8258   |
| UN33683 | Rsa1.0_00060.1 | 796  | 502678 | 0         | 717 | 736 | 97 +  | 62   | 796  | 476605 | 477337 |
| UN33684 | Rsa1.0_01380.1 | 873  | 155003 | 1.00E-151 | 313 | 326 | 96 -  | 421  | 743  | 25333  | 25658  |
| UN33685 | Rsa1.0_00785.1 | 836  | 64356  | 0         | 673 | 721 | 93 +  | 41   | 754  | 26043  | 26746  |
| UN33686 | Rsa1.0_03033.1 | 756  | 25835  | 0         | 592 | 611 | 96 -  | 8    | 615  | 10245  | 10854  |
| UN33687 | Rsa1.0_00604.1 | 902  | 146282 | 0         | 877 | 899 | 97 -  | 2    | 900  | 119513 | 120410 |
| UN33688 | Rsa1.0_00131.1 | 821  | 432233 | 1.00E-125 | 410 | 462 | 88 +  | 336  | 790  | 90285  | 90725  |
| UN33689 | Rsa1.0_00001.1 | 876  | 363028 | 0         | 383 | 394 | 97 +  | 1    | 391  | 333959 | 334351 |
| UN33690 | Rsa1.0_00835.1 | 573  | 278058 | 1.00E-152 | 279 | 281 | 99 +  | 49   | 329  | 181462 | 181742 |
| UN33691 | Rsa1.0_02549.1 | 632  | 30220  | 7.00E-60  | 139 | 146 | 95 +  | 249  | 394  | 4944   | 5089   |
| UN33692 | Rsa1.0_00601.1 | 808  | 177045 | 0         | 786 | 801 | 98 +  | 1    | 800  | 106186 | 106982 |
| UN33693 | Rsa1.0_00059.1 | 540  | 159650 | 1.00E-156 | 320 | 330 | 96 -  | 1    | 329  | 67310  | 67636  |
| UN33694 | Rsa1.0_00044.1 | 923  | 271658 | 0         | 410 | 431 | 95 -  | 1    | 431  | 120064 | 120482 |

|         |                |      |        |           |      |      |       |     |      |        |        |
|---------|----------------|------|--------|-----------|------|------|-------|-----|------|--------|--------|
| UN33695 | Rsa1.0_04250.1 | 1116 | 18264  | 0         | 979  | 988  | 99 -  | 131 | 1116 | 15916  | 16903  |
| UN33696 | Rsa1.0_00781.1 | 1014 | 64480  | 1.00E-170 | 306  | 307  | 99 +  | 71  | 377  | 9547   | 9853   |
| UN33697 | Rsa1.0_05585.1 | 850  | 13266  | 1.00E-157 | 285  | 286  | 99 +  | 1   | 286  | 12364  | 12649  |
| UN33698 | Rsa1.0_02840.1 | 1054 | 27386  | 0         | 748  | 748  | 100 + | 1   | 748  | 23828  | 24575  |
| UN33699 | Rsa1.0_03284.1 | 231  | 24069  | 7.00E-79  | 215  | 236  | 91 +  | 1   | 230  | 9022   | 9251   |
| UN33700 | Rsa1.0_00168.1 | 775  | 115870 | 1.00E-164 | 361  | 377  | 95 +  | 13  | 386  | 57813  | 58187  |
| UN33701 | Rsa1.0_00391.1 | 1159 | 183853 | 1.00E-149 | 322  | 340  | 94 +  | 384 | 723  | 51482  | 51821  |
| UN33702 | Rsa1.0_05487.1 | 511  | 13576  | 0         | 353  | 356  | 99 -  | 1   | 356  | 7293   | 7648   |
| UN33703 | Rsa1.0_01512.1 | 670  | 44234  | 0         | 655  | 670  | 97 +  | 1   | 669  | 14976  | 15644  |
| UN33704 | Rsa1.0_02070.1 | 454  | 158516 | 1.00E-119 | 232  | 234  | 99 +  | 1   | 234  | 7503   | 7734   |
| UN33705 | Rsa1.0_05924.1 | 894  | 12226  | 0         | 504  | 514  | 98 -  | 2   | 515  | 7912   | 8425   |
| UN33706 | Rsa1.0_02449.1 | 955  | 31292  | 0         | 452  | 483  | 93 -  | 241 | 723  | 21823  | 22298  |
| UN33707 | Rsa1.0_00120.1 | 694  | 277288 | 1.00E-135 | 361  | 401  | 90 -  | 1   | 398  | 75267  | 75656  |
| UN33708 | Rsa1.0_01087.1 | 1061 | 54508  | 0         | 707  | 717  | 98 +  | 2   | 711  | 23102  | 23818  |
| UN33709 | Rsa1.0_01959.1 | 732  | 36798  | 1.00E-162 | 305  | 309  | 98 -  | 1   | 309  | 36223  | 36530  |
| UN33710 | Rsa1.0_01027.1 | 831  | 56402  | 1.00E-135 | 267  | 274  | 97 +  | 289 | 562  | 21262  | 21532  |
| UN33711 | Rsa1.0_00816.1 | 830  | 403350 | 1.00E-139 | 278  | 286  | 97 +  | 2   | 287  | 154555 | 154838 |
| UN33712 | Rsa1.0_09791.1 | 1343 | 6147   | 0         | 1255 | 1300 | 96 +  | 37  | 1336 | 2817   | 4116   |
| UN33713 | Rsa1.0_00250.1 | 1053 | 273771 | 2.00E-21  | 118  | 140  | 84 -  | 465 | 597  | 229453 | 229592 |
| UN33714 | Rsa1.0_04533.1 | 773  | 16953  | 0         | 755  | 774  | 97 +  | 1   | 772  | 13423  | 14195  |
| UN33715 | Rsa1.0_01362.1 | 1180 | 47217  | 0         | 1132 | 1172 | 96 -  | 10  | 1180 | 38030  | 39185  |
| UN33716 | Rsa1.0_00018.1 | 540  | 410899 | 2.00E-32  | 109  | 121  | 90 -  | 171 | 287  | 365540 | 365660 |
| UN33717 | Rsa1.0_00703.1 | 581  | 67597  | 1.00E-159 | 345  | 362  | 95 +  | 2   | 361  | 22299  | 22657  |
| UN33718 | Rsa1.0_00303.1 | 1205 | 97468  | 0         | 647  | 698  | 92 -  | 466 | 1163 | 58805  | 59499  |
| UN33719 | Rsa1.0_51330.1 | 1047 | 443    | 2.00E-83  | 179  | 186  | 96 +  | 3   | 188  | 157    | 342    |
| UN33720 | Rsa1.0_04989.1 | 888  | 15217  | 0         | 565  | 581  | 97 -  | 44  | 624  | 8523   | 9100   |
| UN33721 | Rsa1.0_05200.1 | 920  | 14522  | 0         | 915  | 921  | 99 -  | 1   | 920  | 5497   | 6416   |
| UN33722 | Rsa1.0_00218.1 | 1050 | 201480 | 1.00E-161 | 301  | 305  | 98 +  | 1   | 305  | 126709 | 127013 |
| UN33723 | Rsa1.0_08048.1 | 893  | 137630 | 0         | 745  | 765  | 97 +  | 125 | 889  | 130361 | 131123 |
| UN33724 | Rsa1.0_16680.1 | 835  | 2067   | 0         | 460  | 488  | 94 +  | 1   | 487  | 1498   | 1985   |
| UN33725 | Rsa1.0_00030.1 | 922  | 250988 | 0         | 336  | 339  | 99 +  | 325 | 663  | 187351 | 187689 |
| UN33726 | Rsa1.0_00002.1 | 773  | 601661 | 0         | 752  | 769  | 97 +  | 3   | 771  | 86219  | 86986  |
| UN33727 | Rsa1.0_04602.1 | 772  | 16684  | 1.00E-161 | 321  | 332  | 96 -  | 105 | 436  | 12763  | 13094  |
| UN33728 | Rsa1.0_72939.1 | 953  | 314    | 1.00E-176 | 314  | 314  | 100 + | 210 | 523  | 1      | 314    |
| UN33729 | Rsa1.0_47592.1 | 1435 | 475    | 0         | 473  | 475  | 99 -  | 536 | 1010 | 1      | 475    |
| UN33730 | Rsa1.0_02451.1 | 748  | 31283  | 1.00E-175 | 326  | 331  | 98 +  | 329 | 659  | 29307  | 29637  |
| UN33731 | Rsa1.0_00201.1 | 1490 | 232851 | 0         | 1422 | 1506 | 94 +  | 5   | 1489 | 141711 | 143207 |
| UN33732 | Rsa1.0_08634.1 | 668  | 7101   | 0         | 657  | 667  | 98 +  | 1   | 667  | 4905   | 5571   |
| UN33733 | Rsa1.0_05565.1 | 1123 | 13319  | 0         | 606  | 607  | 99 -  | 513 | 1118 | 4429   | 5035   |

|         |                |      |        |           |      |      |      |     |      |        |        |
|---------|----------------|------|--------|-----------|------|------|------|-----|------|--------|--------|
| UN33734 | Rsa1.0.01121.1 | 899  | 53407  | 1.00E-164 | 352  | 369  | 95 - | 530 | 898  | 22939  | 23305  |
| UN33735 | Rsa1.0.00027.1 | 960  | 283362 | 0         | 800  | 844  | 94 + | 5   | 842  | 272321 | 273146 |
| UN33736 | Rsa1.0.03169.1 | 686  | 24826  | 1.00E-153 | 325  | 340  | 95 + | 1   | 340  | 19605  | 19940  |
| UN33737 | Rsa1.0.01014.1 | 1326 | 56762  | 0         | 618  | 653  | 94 + | 11  | 658  | 32364  | 33010  |
| UN33738 | Rsa1.0.02295.1 | 597  | 149884 | 0         | 438  | 442  | 99 - | 1   | 442  | 143860 | 144301 |
| UN33739 | Rsa1.0.16376.1 | 457  | 2172   | 1.00E-137 | 257  | 260  | 98 - | 52  | 311  | 1105   | 1364   |
| UN33740 | Rsa1.0.00020.1 | 859  | 283099 | 1.00E-170 | 355  | 369  | 96 + | 4   | 368  | 102922 | 103289 |
| UN33741 | Rsa1.0.00692.1 | 760  | 68151  | 0         | 454  | 458  | 99 + | 303 | 760  | 63312  | 63767  |
| UN33742 | Rsa1.0.27828.1 | 1197 | 838    | 1.00E-144 | 262  | 263  | 99 + | 1   | 263  | 429    | 691    |
| UN33743 | Rsa1.0.00080.1 | 1095 | 190437 | 1.00E-142 | 259  | 260  | 99 + | 23  | 282  | 52121  | 52380  |
| UN33744 | Rsa1.0.21386.1 | 639  | 1209   | 0         | 632  | 635  | 99 + | 3   | 637  | 138    | 772    |
| UN33745 | Rsa1.0.08253.1 | 677  | 7653   | 0         | 609  | 630  | 96 - | 57  | 677  | 394    | 1021   |
| UN33746 | Rsa1.0.00115.1 | 828  | 131321 | 1.00E-161 | 294  | 296  | 99 + | 533 | 828  | 123432 | 123727 |
| UN33747 | Rsa1.0.00221.1 | 802  | 106972 | 0         | 422  | 457  | 92 - | 346 | 802  | 30583  | 31014  |
| UN33748 | Rsa1.0.00020.1 | 1281 | 283099 | 0         | 704  | 725  | 97 - | 92  | 812  | 129849 | 130573 |
| UN33749 | Rsa1.0.00033.1 | 1452 | 515811 | 1.00E-122 | 263  | 274  | 95 - | 2   | 275  | 25930  | 26200  |
| UN33750 | Rsa1.0.00448.1 | 1102 | 84048  | 0         | 1087 | 1101 | 98 - | 1   | 1101 | 23710  | 24810  |
| UN33751 | Rsa1.0.00746.1 | 792  | 66044  | 1.00E-163 | 323  | 332  | 97 + | 3   | 334  | 22738  | 23068  |
| UN33752 | Rsa1.0.00635.1 | 505  | 175826 | 1.00E-161 | 336  | 353  | 95 - | 1   | 352  | 162423 | 162763 |
| UN33753 | Rsa1.0.00538.1 | 560  | 77149  | 4.00E-55  | 116  | 118  | 98 + | 443 | 560  | 4624   | 4741   |
| UN33754 | #              | #    | #      | #         | #    | #    | #    | #   | #    | #      | #      |
| UN33755 | Rsa1.0.04039.1 | 1385 | 19467  | 0         | 883  | 901  | 98 + | 483 | 1383 | 1443   | 2343   |
| UN33756 | Rsa1.0.01220.1 | 496  | 161775 | 0         | 482  | 499  | 96 + | 1   | 496  | 157817 | 158315 |
| UN33757 | Rsa1.0.00104.1 | 386  | 368722 | 1.00E-105 | 294  | 320  | 91 + | 3   | 314  | 60310  | 60625  |
| UN33758 | Rsa1.0.00722.1 | 1171 | 66840  | 0         | 604  | 635  | 95 + | 346 | 977  | 42766  | 43396  |
| UN33759 | Rsa1.0.01684.1 | 733  | 41044  | 0         | 709  | 734  | 96 - | 1   | 733  | 380    | 1112   |
| UN33760 | Rsa1.0.00290.1 | 798  | 225096 | 1.00E-68  | 412  | 505  | 81 + | 131 | 635  | 173482 | 173986 |
| UN33761 | Rsa1.0.20261.1 | 791  | 1323   | 0         | 660  | 705  | 93 + | 100 | 790  | 81     | 785    |
| UN33762 | Rsa1.0.00179.1 | 233  | 393324 | 1.00E-100 | 219  | 229  | 95 + | 2   | 229  | 68073  | 68301  |
| UN33763 | Rsa1.0.04535.1 | 543  | 136600 | 1.00E-122 | 252  | 262  | 96 - | 148 | 409  | 1447   | 1708   |
| UN33764 | Rsa1.0.03778.1 | 631  | 20908  | 1.00E-156 | 539  | 621  | 86 + | 32  | 629  | 14917  | 15534  |
| UN33765 | Rsa1.0.12966.1 | 1018 | 5062   | 2.00E-82  | 168  | 172  | 97 - | 163 | 334  | 287    | 458    |
| UN33766 | Rsa1.0.00964.1 | 678  | 316648 | 1.00E-153 | 299  | 307  | 97 - | 374 | 676  | 155426 | 155732 |
| UN33767 | Rsa1.0.00112.1 | 723  | 132199 | 0         | 698  | 714  | 97 + | 12  | 721  | 57114  | 57826  |
| UN33768 | Rsa1.0.03103.1 | 1302 | 25387  | 0         | 803  | 818  | 98 + | 1   | 816  | 12759  | 13576  |
| UN33769 | Rsa1.0.00020.1 | 891  | 283099 | 1.00E-116 | 234  | 241  | 97 + | 110 | 350  | 103083 | 103323 |
| UN33770 | Rsa1.0.03034.1 | 1123 | 157864 | 1.00E-158 | 394  | 428  | 92 + | 145 | 567  | 136546 | 136967 |
| UN33771 | Rsa1.0.02426.1 | 1133 | 31564  | 0         | 1094 | 1155 | 94 - | 3   | 1131 | 14040  | 15193  |
| UN33772 | Rsa1.0.00207.1 | 1203 | 248736 | 0         | 1010 | 1056 | 95 - | 148 | 1196 | 12424  | 13475  |

|         |                |      |        |           |      |      |      |     |      |        |        |
|---------|----------------|------|--------|-----------|------|------|------|-----|------|--------|--------|
| UN33773 | Rsa1.0_01803.1 | 1350 | 173846 | 0         | 1301 | 1353 | 96 - | 1   | 1350 | 148169 | 149521 |
| UN33774 | Rsa1.0_00325.1 | 596  | 95371  | 0         | 580  | 597  | 97 + | 1   | 595  | 49114  | 49700  |
| UN33775 | Rsa1.0_01196.1 | 1112 | 51097  | 1.00E-124 | 235  | 238  | 98 + | 3   | 240  | 7528   | 7765   |
| UN33776 | Rsa1.0_00531.1 | 885  | 77387  | 1.00E-165 | 297  | 298  | 99 + | 1   | 298  | 57887  | 58184  |
| UN33777 | Rsa1.0_01228.1 | 1124 | 50238  | 0         | 1039 | 1080 | 96 + | 55  | 1124 | 5671   | 6750   |
| UN33778 | Rsa1.0_00120.1 | 1229 | 277288 | 1.00E-90  | 176  | 178  | 98 + | 615 | 792  | 102321 | 102498 |
| UN33779 | Rsa1.0_00212.1 | 584  | 108350 | 0         | 569  | 584  | 97 - | 1   | 584  | 12575  | 13157  |
| UN33780 | Rsa1.0_01428.1 | 1028 | 46071  | 0         | 876  | 910  | 96 - | 1   | 904  | 42274  | 43174  |
| UN33781 | Rsa1.0_06924.1 | 1097 | 10158  | 1.00E-167 | 346  | 360  | 96 + | 497 | 855  | 6353   | 6709   |
| UN33782 | Rsa1.0_00222.1 | 876  | 172263 | 0         | 678  | 689  | 98 - | 186 | 874  | 148632 | 149318 |
| UN33783 | Rsa1.0_00308.1 | 1028 | 96915  | 0         | 1003 | 1036 | 96 + | 2   | 1028 | 31940  | 32973  |
| UN33784 | Rsa1.0_02860.1 | 1214 | 27207  | 5.00E-59  | 267  | 317  | 84 - | 50  | 366  | 1572   | 1888   |
| UN33785 | Rsa1.0_04831.1 | 549  | 15799  | 1.00E-125 | 234  | 236  | 99 - | 1   | 236  | 7982   | 8217   |
| UN33786 | Rsa1.0_00032.1 | 1146 | 306326 | 0         | 1122 | 1159 | 96 + | 1   | 1145 | 287070 | 288216 |
| UN33787 | Rsa1.0_35400.1 | 619  | 639    | 0         | 567  | 575  | 98 + | 43  | 617  | 1      | 575    |
| UN33788 | Rsa1.0_00300.1 | 633  | 97747  | 0         | 613  | 631  | 97 + | 1   | 631  | 74666  | 75291  |
| UN33789 | Rsa1.0_01297.1 | 1314 | 49029  | 0         | 1297 | 1315 | 98 - | 1   | 1313 | 3708   | 5020   |
| UN33790 | Rsa1.0_00381.1 | 1239 | 89718  | 0         | 965  | 1025 | 94 - | 246 | 1239 | 35659  | 36681  |
| UN33791 | Rsa1.0_00354.1 | 576  | 232005 | 1.00E-95  | 187  | 190  | 98 - | 149 | 338  | 191948 | 192137 |
| UN33792 | Rsa1.0_03483.1 | 557  | 22621  | 1.00E-136 | 256  | 258  | 99 + | 1   | 257  | 15718  | 15975  |
| UN33793 | Rsa1.0_00577.1 | 1393 | 174827 | 0         | 681  | 765  | 89 - | 544 | 1281 | 134088 | 134828 |
| UN33794 | Rsa1.0_01408.1 | 1160 | 46383  | 0         | 680  | 692  | 98 - | 468 | 1159 | 13253  | 13944  |
| UN33795 | Rsa1.0_00417.1 | 641  | 395068 | 1.00E-120 | 238  | 243  | 97 - | 397 | 639  | 278498 | 278739 |
| UN33796 | Rsa1.0_00112.1 | 622  | 132199 | 0         | 609  | 622  | 97 + | 3   | 620  | 9153   | 9774   |
| UN33797 | Rsa1.0_14046.1 | 926  | 3872   | 0         | 583  | 589  | 98 - | 330 | 915  | 803    | 1391   |
| UN33798 | Rsa1.0_01336.1 | 1556 | 47853  | 0         | 807  | 848  | 95 + | 1   | 830  | 40100  | 40947  |
| UN33799 | Rsa1.0_36377.1 | 1205 | 620    | 0         | 432  | 439  | 98 - | 753 | 1191 | 1      | 439    |
| UN33800 | Rsa1.0_02821.1 | 971  | 27602  | 1.00E-71  | 173  | 182  | 95 + | 3   | 183  | 11630  | 11810  |
| UN33801 | Rsa1.0_02661.1 | 584  | 28964  | 0         | 355  | 358  | 99 - | 225 | 582  | 19958  | 20315  |
| UN33802 | Rsa1.0_00517.1 | 852  | 142790 | 0         | 383  | 389  | 98 + | 1   | 389  | 76164  | 76548  |
| UN33803 | Rsa1.0_05050.1 | 832  | 15022  | 0         | 800  | 814  | 98 - | 1   | 814  | 12534  | 13347  |
| UN33804 | Rsa1.0_01515.1 | 433  | 170864 | 1.00E-119 | 280  | 297  | 94 + | 5   | 299  | 133681 | 133976 |
| UN33805 | Rsa1.0_00053.1 | 738  | 263459 | 0         | 720  | 738  | 97 - | 1   | 736  | 69039  | 69776  |
| UN33806 | Rsa1.0_00088.1 | 621  | 141341 | 0         | 404  | 407  | 99 + | 3   | 409  | 32908  | 33314  |
| UN33807 | Rsa1.0_00151.1 | 752  | 119541 | 0         | 677  | 719  | 94 - | 1   | 706  | 107676 | 108389 |
| UN33808 | Rsa1.0_00618.1 | 1043 | 72195  | 1.00E-149 | 296  | 303  | 97 - | 1   | 303  | 16030  | 16329  |
| UN33809 | Rsa1.0_00125.1 | 869  | 253043 | 0         | 477  | 503  | 94 + | 24  | 508  | 185036 | 185537 |
| UN33810 | Rsa1.0_00067.1 | 922  | 415055 | 2.00E-33  | 130  | 148  | 87 - | 290 | 437  | 318752 | 318896 |
| UN33811 | Rsa1.0_01196.1 | 1138 | 51097  | 1.00E-126 | 236  | 238  | 99 + | 3   | 240  | 7528   | 7765   |

|         |                |      |        |           |     |     |       |     |      |        |        |
|---------|----------------|------|--------|-----------|-----|-----|-------|-----|------|--------|--------|
| UN33812 | Rsa1.0.00027.1 | 534  | 283362 | 0         | 329 | 331 | 99 -  | 1   | 331  | 176313 | 176643 |
| UN33813 | Rsa1.0.03898.1 | 887  | 20183  | 0         | 537 | 569 | 94 +  | 1   | 567  | 9880   | 10436  |
| UN33814 | Rsa1.0.03873.1 | 1055 | 20360  | 0         | 348 | 349 | 99 +  | 698 | 1046 | 4285   | 4633   |
| UN33815 | Rsa1.0.00625.1 | 1378 | 71672  | 0         | 416 | 429 | 96 -  | 948 | 1376 | 69835  | 70260  |
| UN33816 | Rsa1.0.01538.1 | 705  | 43733  | 0         | 353 | 362 | 97 +  | 343 | 704  | 2759   | 3120   |
| UN33817 | Rsa1.0.00123.1 | 861  | 325650 | 0         | 441 | 443 | 99 -  | 2   | 444  | 182368 | 182810 |
| UN33818 | Rsa1.0.00064.1 | 850  | 240927 | 0         | 535 | 544 | 98 -  | 79  | 619  | 25675  | 26218  |
| UN33819 | Rsa1.0.05130.1 | 818  | 14758  | 1.00E-123 | 353 | 397 | 88 -  | 7   | 403  | 2034   | 2421   |
| UN33820 | Rsa1.0.03188.1 | 934  | 24722  | 0         | 881 | 943 | 93 -  | 4   | 927  | 3734   | 4660   |
| UN33821 | Rsa1.0.01715.1 | 621  | 40489  | 0         | 605 | 623 | 97 +  | 1   | 618  | 28702  | 29324  |
| UN33822 | Rsa1.0.08048.1 | 762  | 137630 | 0         | 581 | 609 | 95 +  | 153 | 761  | 130380 | 130986 |
| UN33823 | Rsa1.0.07931.1 | 1408 | 8236   | 0         | 872 | 909 | 95 -  | 232 | 1140 | 7184   | 8086   |
| UN33824 | Rsa1.0.00165.1 | 1319 | 116466 | 1.00E-121 | 246 | 253 | 97 -  | 1   | 253  | 60604  | 60855  |
| UN33825 | Rsa1.0.04846.1 | 616  | 15739  | 1.00E-113 | 226 | 231 | 97 +  | 2   | 231  | 5590   | 5820   |
| UN33826 | Rsa1.0.00504.1 | 892  | 79334  | 1.00E-153 | 304 | 314 | 96 -  | 578 | 891  | 23676  | 23989  |
| UN33827 | Rsa1.0.02803.1 | 783  | 27715  | 0         | 700 | 763 | 91 +  | 10  | 757  | 17278  | 18040  |
| UN33828 | Rsa1.0.01488.1 | 823  | 44766  | 0         | 786 | 802 | 98 +  | 1   | 800  | 34268  | 35064  |
| UN33829 | Rsa1.0.04867.1 | 728  | 15670  | 0         | 548 | 564 | 97 +  | 164 | 724  | 6708   | 7264   |
| UN33830 | Rsa1.0.02836.1 | 524  | 27481  | 1.00E-147 | 298 | 308 | 96 -  | 7   | 314  | 11729  | 12035  |
| UN33831 | Rsa1.0.01184.1 | 544  | 51452  | 0         | 349 | 349 | 100 + | 195 | 543  | 16797  | 17145  |
| UN33832 | Rsa1.0.00496.1 | 338  | 79834  | 1.00E-106 | 205 | 208 | 98 +  | 1   | 208  | 64129  | 64336  |
| UN33833 | Rsa1.0.09601.1 | 706  | 6259   | 7.00E-51  | 103 | 103 | 100 - | 30  | 132  | 1      | 103    |
| UN33834 | Rsa1.0.05383.1 | 403  | 13962  | 1.00E-69  | 191 | 207 | 92 +  | 14  | 215  | 1494   | 1699   |
| UN33835 | Rsa1.0.00192.1 | 770  | 278200 | 1.00E-112 | 247 | 258 | 95 -  | 200 | 455  | 72268  | 72525  |
| UN33836 | Rsa1.0.00217.1 | 720  | 107079 | 1.00E-126 | 282 | 298 | 94 +  | 423 | 714  | 66923  | 67220  |
| UN33837 | Rsa1.0.04444.1 | 525  | 17320  | 4.00E-79  | 160 | 162 | 98 +  | 269 | 429  | 8969   | 9130   |
| UN33838 | Rsa1.0.02969.1 | 1332 | 26390  | 1.00E-101 | 212 | 220 | 96 -  | 54  | 273  | 13425  | 13644  |
| UN33839 | Rsa1.0.00204.1 | 808  | 109056 | 0         | 786 | 813 | 96 -  | 1   | 807  | 81887  | 82699  |
| UN33840 | Rsa1.0.00094.1 | 721  | 139042 | 0         | 659 | 688 | 95 +  | 38  | 717  | 94046  | 94732  |
| UN33841 | Rsa1.0.04859.1 | 611  | 15699  | 2.00E-56  | 149 | 160 | 93 +  | 248 | 407  | 5689   | 5847   |
| UN33842 | Rsa1.0.01270.1 | 836  | 49574  | 0         | 797 | 833 | 95 +  | 9   | 834  | 31791  | 32620  |
| UN33843 | Rsa1.0.03949.1 | 690  | 19899  | 0         | 653 | 671 | 97 +  | 22  | 690  | 5319   | 5987   |
| UN33844 | Rsa1.0.00944.1 | 1499 | 58733  | 1.00E-139 | 258 | 260 | 99 +  | 471 | 730  | 13012  | 13271  |
| UN33845 | Rsa1.0.03781.1 | 788  | 20891  | 7.00E-11  | 51  | 56  | 91 +  | 219 | 274  | 19877  | 19932  |
| UN33846 | Rsa1.0.01719.1 | 669  | 40388  | 0         | 530 | 557 | 95 -  | 1   | 550  | 21193  | 21749  |
| UN33847 | Rsa1.0.01371.1 | 651  | 47079  | 2.00E-94  | 176 | 176 | 100 - | 1   | 176  | 16924  | 17099  |
| UN33848 | Rsa1.0.00269.1 | 1158 | 341668 | 0         | 780 | 835 | 93 +  | 1   | 808  | 270663 | 271494 |
| UN33849 | Rsa1.0.01591.1 | 647  | 42718  | 0         | 626 | 646 | 96 -  | 1   | 646  | 18344  | 18986  |
| UN33850 | Rsa1.0.25479.1 | 1155 | 934    | 0         | 359 | 367 | 97 -  | 676 | 1042 | 150    | 516    |

|         |                |      |        |           |     |     |      |     |      |        |        |
|---------|----------------|------|--------|-----------|-----|-----|------|-----|------|--------|--------|
| UN33851 | Rsa1.0.03423.1 | 792  | 23064  | 5.00E-18  | 137 | 164 | 83 - | 409 | 572  | 8934   | 9095   |
| UN33852 | Rsa1.0.00552.1 | 697  | 206757 | 0         | 335 | 339 | 98 - | 93  | 431  | 28632  | 28970  |
| UN33853 | Rsa1.0.00214.1 | 934  | 107508 | 1.00E-154 | 306 | 316 | 96 + | 1   | 316  | 28932  | 29247  |
| UN33854 | Rsa1.0.08923.1 | 895  | 6788   | 1.00E-103 | 253 | 271 | 93 + | 73  | 343  | 5615   | 5883   |
| UN33855 | Rsa1.0.00438.1 | 1403 | 84861  | 1.00E-130 | 260 | 267 | 97 + | 418 | 682  | 1058   | 1324   |
| UN33856 | Rsa1.0.02382.1 | 976  | 31969  | 0         | 939 | 988 | 95 + | 1   | 975  | 21176  | 22159  |
| UN33857 | Rsa1.0.01543.1 | 920  | 43645  | 1.00E-108 | 240 | 249 | 96 - | 3   | 246  | 15361  | 15608  |
| UN33858 | Rsa1.0.04753.1 | 1460 | 16124  | 0         | 711 | 750 | 94 - | 4   | 739  | 11084  | 11831  |
| UN33859 | Rsa1.0.03362.1 | 1169 | 23453  | 0         | 687 | 707 | 97 - | 3   | 707  | 11545  | 12245  |
| UN33860 | Rsa1.0.00342.1 | 451  | 93695  | 7.00E-96  | 247 | 265 | 93 - | 2   | 264  | 46790  | 47051  |
| UN33861 | Rsa1.0.00107.1 | 714  | 431659 | 1.00E-141 | 273 | 279 | 97 + | 280 | 558  | 149216 | 149494 |
| UN33862 | Rsa1.0.63464.1 | 1349 | 361    | 1.00E-163 | 295 | 296 | 99 - | 533 | 828  | 1      | 296    |
| UN33863 | Rsa1.0.01229.1 | 1098 | 50235  | 0         | 582 | 618 | 94 - | 486 | 1098 | 6570   | 7174   |
| UN33864 | Rsa1.0.00938.1 | 778  | 193891 | 0         | 549 | 594 | 92 + | 174 | 761  | 173070 | 173655 |
| UN33865 | Rsa1.0.02840.1 | 1357 | 27386  | 0         | 937 | 964 | 97 - | 393 | 1356 | 15354  | 16317  |
| UN33866 | Rsa1.0.00481.1 | 585  | 81316  | 0         | 574 | 578 | 99 + | 1   | 578  | 14652  | 15229  |
| UN33867 | Rsa1.0.02956.1 | 1057 | 26483  | 0         | 568 | 604 | 94 + | 134 | 737  | 7224   | 7816   |
| UN33868 | Rsa1.0.00321.1 | 657  | 95671  | 0         | 516 | 560 | 92 - | 6   | 560  | 76401  | 76943  |
| UN33869 | Rsa1.0.00095.1 | 446  | 283384 | 2.33E-156 | 293 | 302 | 97 + | 27  | 328  | 39230  | 39529  |
| UN33870 | Rsa1.0.11943.1 | 630  | 5365   | 8.00E-75  | 146 | 147 | 99 - | 158 | 304  | 570    | 716    |
| UN33871 | Rsa1.0.00263.1 | 573  | 224968 | 1.00E-113 | 297 | 321 | 92 - | 1   | 315  | 140880 | 141199 |
| UN33872 | Rsa1.0.32974.1 | 955  | 689    | 0         | 558 | 576 | 96 - | 360 | 932  | 114    | 689    |
| UN33873 | Rsa1.0.04028.1 | 705  | 19493  | 2.00E-94  | 200 | 208 | 96 - | 79  | 286  | 12064  | 12271  |
| UN33874 | Rsa1.0.00826.1 | 1018 | 166736 | 1.00E-137 | 340 | 368 | 92 - | 1   | 356  | 156527 | 156889 |
| UN33875 | Rsa1.0.00764.1 | 819  | 65056  | 0         | 533 | 541 | 98 - | 9   | 549  | 41245  | 41785  |
| UN33876 | Rsa1.0.01331.1 | 1307 | 47944  | 0         | 688 | 708 | 97 - | 605 | 1307 | 13239  | 13946  |
| UN33877 | Rsa1.0.13865.1 | 1137 | 4184   | 0         | 412 | 419 | 98 - | 103 | 521  | 1644   | 2061   |
| UN33878 | Rsa1.0.02471.1 | 607  | 31104  | 1.00E-108 | 249 | 262 | 95 - | 52  | 312  | 3907   | 4165   |
| UN33879 | Rsa1.0.00005.1 | 745  | 353093 | 0         | 719 | 751 | 95 + | 1   | 745  | 300330 | 301078 |
| UN33880 | Rsa1.0.27934.1 | 804  | 833    | 0         | 554 | 601 | 92 + | 215 | 803  | 213    | 810    |
| UN33881 | Rsa1.0.00529.1 | 888  | 77487  | 0         | 492 | 517 | 95 + | 376 | 888  | 52563  | 53079  |
| UN33882 | Rsa1.0.23319.1 | 753  | 1057   | 0         | 622 | 658 | 94 - | 1   | 657  | 370    | 1017   |
| UN33883 | Rsa1.0.00681.1 | 1219 | 68779  | 0         | 414 | 428 | 96 - | 1   | 428  | 37951  | 38374  |
| UN33884 | Rsa1.0.00451.1 | 935  | 322533 | 0         | 534 | 543 | 98 + | 337 | 879  | 28561  | 29099  |
| UN33885 | Rsa1.0.00122.1 | 1215 | 265937 | 0         | 660 | 719 | 91 + | 48  | 760  | 107077 | 107781 |
| UN33886 | Rsa1.0.04199.1 | 869  | 18501  | 0         | 750 | 790 | 94 - | 61  | 847  | 4288   | 5076   |
| UN33887 | Rsa1.0.13860.1 | 600  | 4190   | 0         | 587 | 600 | 97 + | 1   | 598  | 3026   | 3625   |
| UN33888 | Rsa1.0.00198.1 | 872  | 222963 | 0         | 583 | 621 | 93 + | 14  | 630  | 91879  | 92493  |
| UN33889 | Rsa1.0.03125.1 | 656  | 147978 | 0         | 347 | 351 | 98 - | 1   | 351  | 130250 | 130599 |

|         |                |      |        |           |      |      |      |     |      |        |        |
|---------|----------------|------|--------|-----------|------|------|------|-----|------|--------|--------|
| UN33890 | Rsa1.0_00618.1 | 632  | 72195  | 1.00E-173 | 332  | 340  | 97 - | 130 | 469  | 26098  | 26437  |
| UN33891 | Rsa1.0_01215.1 | 488  | 166813 | 1.00E-150 | 312  | 325  | 96 + | 1   | 325  | 41947  | 42270  |
| UN33892 | Rsa1.0_01929.1 | 777  | 37191  | 1.00E-140 | 520  | 605  | 85 - | 1   | 553  | 22135  | 22723  |
| UN33893 | Rsa1.0_02348.1 | 928  | 32316  | 0         | 593  | 611  | 97 + | 1   | 610  | 4302   | 4910   |
| UN33894 | Rsa1.0_03636.1 | 867  | 21638  | 1.00E-155 | 296  | 302  | 98 - | 1   | 302  | 17912  | 18213  |
| UN33895 | Rsa1.0_00976.1 | 1520 | 57809  | 0         | 652  | 679  | 96 + | 330 | 1007 | 15917  | 16595  |
| UN33896 | #              | #    | #      | #         | #    | #    | #    | #   | #    | #      | #      |
| UN33897 | Rsa1.0_00409.1 | 1133 | 146788 | 0         | 530  | 565  | 93 - | 8   | 563  | 106560 | 107119 |
| UN33898 | Rsa1.0_10022.1 | 995  | 6036   | 1.00E-105 | 205  | 207  | 99 + | 790 | 995  | 580    | 786    |
| UN33899 | Rsa1.0_01590.1 | 483  | 42719  | 1.00E-137 | 310  | 329  | 94 - | 33  | 358  | 37627  | 37948  |
| UN33900 | Rsa1.0_02398.1 | 1087 | 31766  | 0         | 1050 | 1088 | 96 - | 4   | 1086 | 10283  | 11354  |
| UN33901 | Rsa1.0_01648.1 | 1373 | 41635  | 1.00E-142 | 271  | 276  | 98 + | 355 | 630  | 31686  | 31961  |
| UN33902 | Rsa1.0_00002.1 | 1101 | 601661 | 0         | 849  | 883  | 96 - | 1   | 882  | 145814 | 146693 |
| UN33903 | Rsa1.0_04399.1 | 249  | 17543  | 5.00E-34  | 151  | 174  | 86 + | 5   | 177  | 7591   | 7763   |
| UN33904 | Rsa1.0_01846.1 | 1178 | 38367  | 1.00E-162 | 312  | 317  | 98 + | 1   | 314  | 21254  | 21570  |
| UN33905 | Rsa1.0_00964.1 | 577  | 316648 | 0         | 546  | 578  | 94 + | 3   | 576  | 167647 | 168213 |
| UN33906 | Rsa1.0_06948.1 | 1192 | 10125  | 0         | 672  | 729  | 92 - | 1   | 722  | 1      | 723    |
| UN33907 | Rsa1.0_01089.1 | 1098 | 142191 | 1.00E-138 | 276  | 285  | 96 + | 41  | 325  | 98672  | 98956  |
| UN33908 | Rsa1.0_00792.1 | 1226 | 64163  | 0         | 612  | 641  | 95 + | 7   | 643  | 7636   | 8263   |
| UN33909 | Rsa1.0_01923.1 | 1529 | 37233  | 0         | 429  | 456  | 94 - | 1   | 441  | 15156  | 15611  |
| UN33910 | Rsa1.0_00181.1 | 908  | 114269 | 0         | 663  | 721  | 91 - | 189 | 906  | 46557  | 47268  |
| UN33911 | Rsa1.0_00616.1 | 921  | 195713 | 8.00E-76  | 218  | 241  | 90 - | 683 | 917  | 153937 | 154177 |
| UN33912 | Rsa1.0_02248.1 | 489  | 33414  | 0         | 420  | 434  | 96 - | 56  | 487  | 2243   | 2676   |
| UN33913 | Rsa1.0_05293.1 | 1415 | 14237  | 1.00E-168 | 376  | 397  | 94 + | 1   | 389  | 335    | 727    |
| UN33914 | Rsa1.0_00137.1 | 1003 | 122457 | 1.00E-106 | 208  | 212  | 98 - | 1   | 212  | 32961  | 33172  |
| UN33915 | Rsa1.0_01638.1 | 785  | 41857  | 0         | 759  | 792  | 95 - | 1   | 783  | 2787   | 3576   |
| UN33916 | Rsa1.0_07612.1 | 560  | 9025   | 0         | 555  | 558  | 99 + | 1   | 558  | 1418   | 1975   |
| UN33917 | Rsa1.0_00290.1 | 649  | 225096 | 0         | 634  | 647  | 97 + | 1   | 647  | 202749 | 203395 |
| UN33918 | Rsa1.0_00172.1 | 589  | 115476 | 0         | 581  | 588  | 98 + | 1   | 588  | 96985  | 97571  |
| UN33919 | Rsa1.0_00232.1 | 870  | 104936 | 1.00E-113 | 216  | 219  | 98 - | 1   | 219  | 43947  | 44165  |
| UN33920 | Rsa1.0_03399.1 | 1171 | 23204  | 0         | 1146 | 1170 | 97 - | 1   | 1170 | 19406  | 20559  |
| UN33921 | Rsa1.0_03041.1 | 780  | 25804  | 0         | 411  | 418  | 98 + | 362 | 779  | 20160  | 20577  |
| UN33922 | Rsa1.0_00154.1 | 482  | 189461 | 0         | 450  | 469  | 95 - | 2   | 468  | 122832 | 123294 |
| UN33923 | Rsa1.0_00045.1 | 845  | 328694 | 0         | 472  | 491  | 96 + | 1   | 488  | 252584 | 253070 |
| UN33924 | Rsa1.0_01004.1 | 1136 | 56975  | 0         | 752  | 808  | 93 - | 1   | 793  | 39470  | 40266  |
| UN33925 | Rsa1.0_00013.1 | 1323 | 292129 | 0         | 657  | 699  | 93 - | 1   | 686  | 127784 | 128482 |
| UN33926 | Rsa1.0_00383.1 | 1103 | 398431 | 0         | 1052 | 1119 | 94 + | 1   | 1101 | 176245 | 177363 |
| UN33927 | Rsa1.0_01226.1 | 802  | 50316  | 1.00E-92  | 176  | 177  | 99 + | 166 | 342  | 43568  | 43744  |
| UN33928 | Rsa1.0_02213.1 | 1206 | 33824  | 0         | 485  | 525  | 92 - | 6   | 516  | 12822  | 13341  |



|         |                |      |        |           |      |      |       |     |      |        |        |
|---------|----------------|------|--------|-----------|------|------|-------|-----|------|--------|--------|
| UN33929 | Rsa1.0_16658.1 | 748  | 2073   | 0         | 394  | 412  | 95 -  | 1   | 401  | 895    | 1304   |
| UN33930 | Rsa1.0_29339.1 | 506  | 785    | 0         | 495  | 515  | 96 -  | 1   | 504  | 178    | 692    |
| UN33931 | Rsa1.0_04734.1 | 1111 | 16184  | 0         | 1056 | 1111 | 95 +  | 1   | 1111 | 4053   | 5148   |
| UN33932 | Rsa1.0_00694.1 | 636  | 68074  | 0         | 595  | 639  | 93 +  | 2   | 636  | 60915  | 61544  |
| UN33933 | Rsa1.0_00706.1 | 605  | 291570 | 1.00E-124 | 258  | 268  | 96 +  | 332 | 599  | 57604  | 57868  |
| UN33934 | Rsa1.0_02244.1 | 847  | 33494  | 1.00E-148 | 291  | 299  | 97 +  | 553 | 847  | 15282  | 15580  |
| UN33935 | Rsa1.0_01445.1 | 472  | 45671  | 1.00E-139 | 259  | 262  | 98 -  | 3   | 264  | 27136  | 27397  |
| UN33936 | Rsa1.0_00112.1 | 994  | 132199 | 1.00E-179 | 343  | 351  | 97 -  | 643 | 993  | 114297 | 114647 |
| UN33937 | Rsa1.0_03068.1 | 821  | 25620  | 0         | 448  | 483  | 92 +  | 119 | 584  | 9344   | 9821   |
| UN33938 | Rsa1.0_04329.1 | 814  | 17870  | 1.00E-175 | 330  | 336  | 98 +  | 5   | 340  | 6618   | 6953   |
| UN33939 | Rsa1.0_02500.1 | 1497 | 30768  | 0         | 437  | 463  | 94 -  | 1   | 463  | 4226   | 4684   |
| UN33940 | Rsa1.0_00450.1 | 1237 | 139397 | 0         | 683  | 714  | 95 +  | 518 | 1231 | 124390 | 125085 |
| UN33941 | Rsa1.0_00726.1 | 966  | 66734  | 0         | 374  | 385  | 97 +  | 1   | 384  | 8094   | 8476   |
| UN33942 | Rsa1.0_04538.1 | 806  | 16940  | 1.00E-134 | 243  | 243  | 100 - | 1   | 243  | 7173   | 7415   |
| UN33943 | Rsa1.0_03875.1 | 1159 | 20355  | 0         | 445  | 459  | 96 -  | 661 | 1117 | 14144  | 14602  |
| UN33944 | Rsa1.0_00214.1 | 1354 | 107508 | 0         | 674  | 711  | 94 +  | 642 | 1351 | 100665 | 101373 |
| UN33945 | Rsa1.0_00100.1 | 940  | 249232 | 0         | 884  | 920  | 96 -  | 28  | 938  | 25839  | 26752  |
| UN33946 | Rsa1.0_01344.1 | 650  | 142535 | 0         | 605  | 644  | 93 -  | 6   | 648  | 100722 | 101365 |
| UN33947 | Rsa1.0_05202.1 | 690  | 14518  | 0         | 366  | 370  | 98 +  | 3   | 371  | 188    | 557    |
| UN33948 | Rsa1.0_00237.1 | 925  | 235974 | 0         | 619  | 708  | 87 +  | 218 | 924  | 72539  | 73245  |
| UN33949 | Rsa1.0_01728.1 | 950  | 40239  | 0         | 911  | 941  | 96 -  | 1   | 941  | 3012   | 3950   |
| UN33950 | Rsa1.0_10582.1 | 607  | 5794   | 0         | 351  | 352  | 99 -  | 215 | 566  | 3974   | 4325   |
| UN33951 | Rsa1.0_00511.1 | 671  | 78616  | 0         | 500  | 510  | 98 -  | 1   | 510  | 62901  | 63408  |
| UN33952 | Rsa1.0_00364.1 | 472  | 90951  | 1.00E-154 | 312  | 321  | 97 -  | 155 | 470  | 6404   | 6723   |
| UN33953 | Rsa1.0_05939.1 | 1521 | 12170  | 0         | 1481 | 1492 | 99 +  | 31  | 1521 | 2893   | 4384   |
| UN33954 | Rsa1.0_09783.1 | 870  | 6152   | 0         | 867  | 869  | 99 -  | 1   | 868  | 701    | 1569   |
| UN33955 | Rsa1.0_00964.1 | 933  | 316648 | 1.00E-157 | 368  | 397  | 92 +  | 203 | 599  | 265154 | 265550 |
| UN33956 | Rsa1.0_00089.1 | 688  | 406142 | 0         | 431  | 449  | 95 -  | 3   | 450  | 132536 | 132979 |
| UN33957 | Rsa1.0_02382.1 | 1319 | 31969  | 0         | 1273 | 1317 | 96 +  | 1   | 1315 | 18178  | 19490  |
| UN33958 | Rsa1.0_30561.1 | 763  | 750    | 1.00E-143 | 269  | 272  | 98 +  | 1   | 270  | 479    | 750    |
| UN33959 | Rsa1.0_01482.1 | 1438 | 44855  | 9.00E-18  | 66   | 72   | 91 +  | 16  | 87   | 13688  | 13759  |
| UN33960 | Rsa1.0_04405.1 | 772  | 17508  | 0         | 348  | 350  | 99 +  | 6   | 355  | 16196  | 16544  |
| UN33961 | Rsa1.0_03900.1 | 1173 | 133221 | 0         | 403  | 404  | 99 -  | 1   | 404  | 12842  | 13245  |
| UN33962 | #              | #    | #      | #         | #    | #    | #     | #   | #    | #      | #      |
| UN33963 | Rsa1.0_00070.1 | 464  | 150321 | 0         | 447  | 462  | 96 -  | 3   | 455  | 111561 | 112022 |
| UN33964 | Rsa1.0_00019.1 | 690  | 301669 | 0         | 495  | 531  | 93 +  | 4   | 531  | 102187 | 102716 |
| UN33965 | Rsa1.0_00622.1 | 720  | 71822  | 0         | 699  | 726  | 96 -  | 1   | 720  | 24241  | 24963  |
| UN33966 | Rsa1.0_01090.1 | 871  | 54385  | 0         | 675  | 692  | 97 -  | 3   | 686  | 924    | 1615   |
| UN33967 | Rsa1.0_00600.1 | 1441 | 73395  | 0         | 762  | 773  | 98 +  | 40  | 812  | 8296   | 9068   |

|         |                |      |        |           |      |      |      |     |      |        |        |
|---------|----------------|------|--------|-----------|------|------|------|-----|------|--------|--------|
| UN33968 | Rsa1.0_20083.1 | 1204 | 1343   | 0         | 402  | 409  | 98 + | 599 | 1007 | 935    | 1343   |
| UN33969 | Rsa1.0_00358.1 | 1296 | 91293  | 0         | 589  | 607  | 97 - | 689 | 1295 | 48058  | 48664  |
| UN33970 | Rsa1.0_15378.1 | 439  | 2647   | 1.00E-103 | 246  | 260  | 94 - | 184 | 439  | 1573   | 1829   |
| UN33971 | Rsa1.0_02161.1 | 964  | 34459  | 0         | 712  | 796  | 89 + | 175 | 962  | 25393  | 26162  |
| UN33972 | Rsa1.0_00010.1 | 927  | 294827 | 0         | 769  | 875  | 87 - | 2   | 870  | 76502  | 77370  |
| UN33973 | Rsa1.0_04819.1 | 1306 | 140505 | 1.00E-129 | 248  | 251  | 98 - | 1   | 250  | 139907 | 140157 |
| UN33974 | Rsa1.0_00485.1 | 540  | 80937  | 1.00E-121 | 259  | 271  | 95 - | 165 | 435  | 27885  | 28152  |
| UN33975 | Rsa1.0_03885.1 | 1135 | 20256  | 0         | 989  | 1031 | 95 + | 1   | 1022 | 17835  | 18861  |
| UN33976 | Rsa1.0_00608.1 | 859  | 172672 | 0         | 602  | 626  | 96 + | 234 | 858  | 119644 | 120265 |
| UN33977 | Rsa1.0_02869.1 | 564  | 27109  | 0         | 512  | 560  | 91 - | 3   | 562  | 15549  | 16084  |
| UN33978 | Rsa1.0_08078.1 | 760  | 7944   | 1.00E-122 | 274  | 289  | 94 - | 1   | 285  | 2693   | 2981   |
| UN33979 | Rsa1.0_02950.1 | 732  | 26506  | 0         | 552  | 614  | 89 + | 10  | 587  | 2569   | 3181   |
| UN33980 | Rsa1.0_14096.1 | 889  | 3814   | 1.00E-168 | 343  | 355  | 96 + | 530 | 883  | 185    | 538    |
| UN33981 | Rsa1.0_00515.1 | 383  | 78417  | 1.00E-124 | 293  | 312  | 93 + | 6   | 314  | 72164  | 72473  |
| UN33982 | Rsa1.0_00243.1 | 803  | 103651 | 1.00E-141 | 332  | 360  | 92 + | 1   | 350  | 56148  | 56501  |
| UN33983 | Rsa1.0_00872.1 | 1184 | 61495  | 1.00E-134 | 261  | 267  | 97 - | 747 | 1013 | 15630  | 15896  |
| UN33984 | Rsa1.0_00463.1 | 659  | 189177 | 1.00E-126 | 276  | 290  | 95 - | 7   | 296  | 112650 | 112938 |
| UN33985 | Rsa1.0_01430.1 | 1021 | 46034  | 0         | 955  | 1020 | 93 + | 3   | 995  | 20094  | 21101  |
| UN33986 | Rsa1.0_07882.1 | 725  | 8363   | 1.00E-165 | 348  | 366  | 95 + | 356 | 721  | 7829   | 8189   |
| UN33987 | Rsa1.0_02244.1 | 731  | 33494  | 0         | 345  | 349  | 98 + | 383 | 731  | 4766   | 5114   |
| UN33988 | Rsa1.0_01451.1 | 585  | 45459  | 0         | 390  | 395  | 98 - | 2   | 396  | 42646  | 43040  |
| UN33989 | Rsa1.0_00066.1 | 1015 | 152418 | 0         | 877  | 907  | 96 + | 109 | 1014 | 112997 | 113903 |
| UN33990 | Rsa1.0_12937.1 | 918  | 5070   | 0         | 888  | 933  | 95 + | 1   | 918  | 1720   | 2649   |
| UN33991 | Rsa1.0_00921.1 | 707  | 59599  | 1.00E-156 | 337  | 355  | 94 - | 6   | 360  | 9703   | 10046  |
| UN33992 | Rsa1.0_14663.1 | 823  | 3175   | 1.00E-55  | 259  | 306  | 84 - | 24  | 327  | 1978   | 2282   |
| UN33993 | Rsa1.0_00312.1 | 961  | 96765  | 0         | 450  | 460  | 97 - | 1   | 454  | 68009  | 68467  |
| UN33994 | Rsa1.0_02187.1 | 779  | 34113  | 0         | 534  | 555  | 96 - | 1   | 555  | 26125  | 26679  |
| UN33995 | Rsa1.0_01032.1 | 1260 | 56189  | 1.00E-106 | 235  | 246  | 95 + | 1   | 246  | 13888  | 14129  |
| UN33996 | Rsa1.0_16859.1 | 820  | 2010   | 1.00E-95  | 205  | 214  | 95 + | 505 | 718  | 1      | 214    |
| UN33997 | Rsa1.0_00351.1 | 815  | 413096 | 1.00E-80  | 197  | 209  | 94 - | 609 | 815  | 142575 | 142783 |
| UN33998 | Rsa1.0_36111.1 | 627  | 625    | 0         | 567  | 599  | 94 - | 34  | 625  | 29     | 625    |
| UN33999 | Rsa1.0_49322.1 | 753  | 459    | 1.00E-159 | 364  | 382  | 95 + | 8   | 383  | 81     | 459    |
| UN34000 | Rsa1.0_01068.1 | 1112 | 55208  | 1.00E-31  | 101  | 111  | 90 - | 552 | 662  | 22088  | 22198  |
| UN34001 | Rsa1.0_08741.1 | 744  | 6977   | 2.00E-85  | 167  | 169  | 98 - | 573 | 741  | 5716   | 5884   |
| UN34002 | Rsa1.0_00368.1 | 710  | 90669  | 4.00E-80  | 189  | 198  | 95 - | 1   | 197  | 8923   | 9116   |
| UN34003 | Rsa1.0_00129.1 | 911  | 126831 | 0         | 731  | 767  | 95 + | 3   | 746  | 29019  | 29785  |
| UN34004 | Rsa1.0_00002.1 | 1521 | 601661 | 0         | 1401 | 1495 | 93 - | 23  | 1493 | 577406 | 578893 |
| UN34005 | Rsa1.0_01439.1 | 1377 | 45841  | 0         | 586  | 595  | 98 - | 719 | 1312 | 10403  | 10995  |
| UN34006 | Rsa1.0_01731.1 | 1286 | 40208  | 1.00E-106 | 205  | 208  | 98 - | 620 | 827  | 26410  | 26617  |

|         |                |      |        |           |      |      |       |     |      |        |        |
|---------|----------------|------|--------|-----------|------|------|-------|-----|------|--------|--------|
| UN34007 | Rsa1.0.00846.1 | 1084 | 62342  | 0         | 901  | 910  | 99 -  | 1   | 909  | 40524  | 41433  |
| UN34008 | Rsa1.0.32270.1 | 948  | 705    | 1.00E-101 | 220  | 230  | 95 -  | 710 | 939  | 9      | 236    |
| UN34009 | Rsa1.0.00048.1 | 916  | 167185 | 0         | 443  | 447  | 99 -  | 330 | 775  | 11201  | 11647  |
| UN34010 | Rsa1.0.01141.1 | 1206 | 52530  | 1.00E-178 | 355  | 367  | 96 -  | 776 | 1139 | 3589   | 3955   |
| UN34011 | Rsa1.0.00493.1 | 741  | 80007  | 0         | 529  | 538  | 98 -  | 3   | 538  | 62734  | 63269  |
| UN34012 | Rsa1.0.00280.1 | 842  | 99966  | 0         | 787  | 834  | 94 +  | 10  | 839  | 30053  | 30879  |
| UN34013 | Rsa1.0.07447.1 | 1042 | 9380   | 0         | 533  | 537  | 99 -  | 506 | 1042 | 7386   | 7922   |
| UN34014 | Rsa1.0.00202.1 | 513  | 185895 | 0         | 492  | 517  | 95 -  | 1   | 512  | 110699 | 111211 |
| UN34015 | Rsa1.0.00439.1 | 676  | 142776 | 0         | 593  | 606  | 97 -  | 69  | 674  | 46284  | 46881  |
| UN34016 | Rsa1.0.05687.1 | 153  | 12932  | 3.00E-52  | 135  | 144  | 93 -  | 9   | 152  | 3703   | 3845   |
| UN34017 | Rsa1.0.00028.1 | 777  | 293984 | 1.00E-153 | 411  | 454  | 90 +  | 1   | 448  | 137144 | 137576 |
| UN34018 | Rsa1.0.14314.1 | 1226 | 3539   | 0         | 741  | 742  | 99 +  | 1   | 742  | 1302   | 2042   |
| UN34019 | Rsa1.0.00156.1 | 775  | 118383 | 1.00E-119 | 271  | 289  | 93 +  | 23  | 311  | 42910  | 43188  |
| UN34020 | Rsa1.0.63300.1 | 1049 | 362    | 0         | 327  | 327  | 100 + | 721 | 1047 | 1      | 327    |
| UN34021 | Rsa1.0.04493.1 | 652  | 17137  | 7.00E-60  | 127  | 130  | 97 +  | 330 | 459  | 11728  | 11857  |
| UN34022 | Rsa1.0.00376.1 | 712  | 90101  | 1.00E-147 | 289  | 296  | 97 +  | 1   | 295  | 1372   | 1667   |
| UN34023 | Rsa1.0.00010.1 | 747  | 294827 | 0         | 714  | 747  | 95 +  | 1   | 747  | 171351 | 172093 |
| UN34024 | Rsa1.0.00651.1 | 710  | 247766 | 0         | 533  | 540  | 98 -  | 1   | 540  | 244774 | 245312 |
| UN34025 | Rsa1.0.00341.1 | 367  | 249309 | 1.00E-121 | 273  | 287  | 95 +  | 1   | 279  | 76593  | 76878  |
| UN34026 | Rsa1.0.00175.1 | 956  | 166121 | 0         | 930  | 956  | 97 +  | 3   | 955  | 42046  | 42999  |
| UN34027 | Rsa1.0.00123.1 | 640  | 325650 | 1.00E-117 | 266  | 281  | 94 +  | 11  | 289  | 241787 | 242061 |
| UN34028 | Rsa1.0.05590.1 | 1062 | 13242  | 0         | 1061 | 1062 | 99 -  | 1   | 1062 | 3700   | 4761   |
| UN34029 | Rsa1.0.00152.1 | 688  | 257730 | 0         | 616  | 641  | 96 -  | 49  | 687  | 113266 | 113906 |
| UN34030 | Rsa1.0.00387.1 | 841  | 495407 | 1.00E-141 | 277  | 283  | 97 -  | 236 | 518  | 352997 | 353278 |
| UN34031 | Rsa1.0.00991.1 | 806  | 143101 | 3.00E-50  | 124  | 130  | 95 +  | 101 | 230  | 127415 | 127543 |
| UN34032 | Rsa1.0.01350.1 | 419  | 47503  | 1.00E-23  | 78   | 85   | 91 -  | 225 | 309  | 21622  | 21706  |
| UN34033 | Rsa1.0.01193.1 | 596  | 51147  | 0         | 590  | 593  | 99 +  | 1   | 593  | 36101  | 36691  |
| UN34034 | Rsa1.0.03486.1 | 753  | 22573  | 0         | 542  | 551  | 98 -  | 1   | 551  | 20721  | 21269  |
| UN34035 | Rsa1.0.00303.1 | 753  | 97468  | 0         | 599  | 626  | 95 -  | 1   | 626  | 9636   | 10260  |
| UN34036 | Rsa1.0.00008.1 | 670  | 358124 | 1.00E-86  | 172  | 175  | 98 +  | 496 | 670  | 226500 | 226674 |
| UN34037 | Rsa1.0.00215.1 | 597  | 201775 | 0         | 347  | 348  | 99 -  | 250 | 597  | 192292 | 192638 |
| UN34038 | Rsa1.0.01586.1 | 691  | 42804  | 0         | 359  | 370  | 97 -  | 1   | 370  | 4803   | 5172   |
| UN34039 | Rsa1.0.04591.1 | 739  | 16717  | 3.00E-96  | 231  | 247  | 93 +  | 73  | 319  | 2892   | 3137   |
| UN34040 | Rsa1.0.00373.1 | 704  | 90296  | 0         | 385  | 401  | 96 +  | 106 | 500  | 68688  | 69088  |
| UN34041 | Rsa1.0.01439.1 | 885  | 45841  | 1.00E-170 | 393  | 422  | 93 -  | 27  | 441  | 45266  | 45681  |
| UN34042 | Rsa1.0.00688.1 | 759  | 68396  | 3.00E-87  | 176  | 180  | 97 +  | 2   | 181  | 35058  | 35237  |
| UN34043 | Rsa1.0.00352.1 | 849  | 92266  | 0         | 836  | 850  | 98 +  | 3   | 845  | 22087  | 22936  |
| UN34044 | Rsa1.0.00487.1 | 535  | 80674  | 0         | 375  | 375  | 100 + | 3   | 377  | 50080  | 50454  |
| UN34045 | Rsa1.0.00552.1 | 829  | 206757 | 0         | 475  | 477  | 99 -  | 353 | 829  | 180124 | 180600 |

|         |                |      |        |           |      |      |       |     |      |        |        |
|---------|----------------|------|--------|-----------|------|------|-------|-----|------|--------|--------|
| UN34046 | Rsa1.0.02574.1 | 838  | 29954  | 1.00E-55  | 486  | 611  | 79 +  | 137 | 747  | 1434   | 2044   |
| UN34047 | Rsa1.0.02252.1 | 183  | 33375  | 4.00E-58  | 162  | 178  | 91 -  | 1   | 178  | 8125   | 8302   |
| UN34048 | Rsa1.0.13618.1 | 785  | 4630   | 3.00E-99  | 349  | 404  | 86 -  | 377 | 780  | 1053   | 1456   |
| UN34049 | Rsa1.0.00653.1 | 1242 | 70029  | 1.00E-145 | 308  | 322  | 95 +  | 1   | 319  | 39751  | 40069  |
| UN34050 | Rsa1.0.01083.1 | 727  | 54617  | 0         | 466  | 472  | 98 +  | 130 | 601  | 8720   | 9188   |
| UN34051 | Rsa1.0.06732.1 | 748  | 10449  | 0         | 583  | 622  | 93 +  | 66  | 678  | 8112   | 8727   |
| UN34052 | Rsa1.0.00734.1 | 787  | 66508  | 0         | 706  | 742  | 95 +  | 2   | 727  | 1367   | 2104   |
| UN34053 | Rsa1.0.00388.1 | 584  | 88890  | 0         | 452  | 488  | 92 +  | 46  | 529  | 33256  | 33722  |
| UN34054 | Rsa1.0.05040.1 | 562  | 15055  | 0         | 517  | 559  | 92 +  | 4   | 561  | 3178   | 3729   |
| UN34055 | Rsa1.0.00083.1 | 834  | 442773 | 1.00E-106 | 219  | 224  | 97 -  | 6   | 227  | 392900 | 393123 |
| UN34056 | Rsa1.0.00336.1 | 1490 | 445051 | 9.00E-83  | 181  | 189  | 95 +  | 563 | 751  | 167523 | 167711 |
| UN34057 | Rsa1.0.03653.1 | 617  | 21564  | 0         | 615  | 623  | 98 +  | 2   | 617  | 11176  | 11798  |
| UN34058 | Rsa1.0.02054.1 | 744  | 35548  | 1.00E-138 | 340  | 366  | 92 +  | 1   | 358  | 34786  | 35146  |
| UN34059 | Rsa1.0.03037.1 | 977  | 25825  | 0         | 668  | 670  | 99 -  | 1   | 669  | 14421  | 15090  |
| UN34060 | Rsa1.0.16227.1 | 658  | 2237   | 0         | 552  | 559  | 98 -  | 3   | 560  | 1      | 557    |
| UN34061 | Rsa1.0.00644.1 | 857  | 136881 | 0         | 507  | 518  | 97 -  | 285 | 799  | 28046  | 28562  |
| UN34062 | Rsa1.0.00729.1 | 677  | 66690  | 0         | 656  | 674  | 97 -  | 3   | 676  | 19968  | 20639  |
| UN34063 | Rsa1.0.05519.1 | 687  | 13455  | 0         | 411  | 430  | 95 +  | 258 | 687  | 189    | 618    |
| UN34064 | Rsa1.0.00828.1 | 1165 | 62744  | 0         | 718  | 719  | 99 +  | 447 | 1165 | 51783  | 52501  |
| UN34065 | Rsa1.0.02678.1 | 787  | 135053 | 0         | 785  | 786  | 99 +  | 1   | 786  | 122280 | 123065 |
| UN34066 | Rsa1.0.00523.1 | 838  | 178770 | 0         | 429  | 437  | 98 -  | 3   | 438  | 161188 | 161623 |
| UN34067 | Rsa1.0.02054.1 | 908  | 35548  | 0         | 691  | 736  | 93 -  | 23  | 752  | 23273  | 24005  |
| UN34068 | Rsa1.0.00070.1 | 1285 | 150321 | 1.00E-133 | 270  | 278  | 97 +  | 711 | 988  | 5395   | 5671   |
| UN34069 | Rsa1.0.01935.1 | 1013 | 37152  | 0         | 516  | 521  | 99 +  | 310 | 830  | 5196   | 5715   |
| UN34070 | Rsa1.0.02402.1 | 946  | 31710  | 0         | 389  | 392  | 99 -  | 1   | 392  | 9117   | 9508   |
| UN34071 | Rsa1.0.00253.1 | 1057 | 231292 | 0         | 989  | 1051 | 94 +  | 1   | 1046 | 100825 | 101862 |
| UN34072 | Rsa1.0.00461.1 | 631  | 82509  | 0         | 376  | 376  | 100 - | 1   | 376  | 71471  | 71846  |
| UN34073 | Rsa1.0.06348.1 | 1367 | 11199  | 0         | 1218 | 1248 | 97 -  | 119 | 1366 | 4424   | 5670   |
| UN34074 | Rsa1.0.00016.1 | 559  | 831256 | 1.00E-124 | 233  | 234  | 99 +  | 3   | 236  | 293125 | 293357 |
| UN34075 | Rsa1.0.00751.1 | 287  | 65759  | 2.00E-80  | 152  | 152  | 100 + | 1   | 152  | 23329  | 23480  |
| UN34076 | Rsa1.0.02377.1 | 740  | 31994  | 0         | 479  | 496  | 96 +  | 5   | 500  | 14222  | 14715  |
| UN34077 | Rsa1.0.00938.1 | 812  | 193891 | 0         | 797  | 821  | 97 -  | 2   | 810  | 172988 | 173805 |
| UN34078 | Rsa1.0.00195.1 | 1229 | 251884 | 0         | 1150 | 1244 | 92 -  | 1   | 1226 | 42520  | 43734  |
| UN34079 | Rsa1.0.07810.1 | 1059 | 8503   | 1.00E-120 | 243  | 251  | 96 +  | 1   | 251  | 5278   | 5528   |
| UN34080 | Rsa1.0.06384.1 | 621  | 11116  | 0         | 350  | 352  | 99 +  | 5   | 356  | 10     | 361    |
| UN34081 | Rsa1.0.18513.1 | 746  | 1585   | 1.00E-163 | 391  | 429  | 91 +  | 5   | 433  | 786    | 1190   |
| UN34082 | Rsa1.0.00303.1 | 848  | 97468  | 1.00E-104 | 310  | 342  | 90 +  | 3   | 341  | 7956   | 8281   |
| UN34083 | Rsa1.0.03842.1 | 1381 | 20503  | 0         | 725  | 736  | 98 -  | 1   | 732  | 8299   | 9034   |
| UN34084 | Rsa1.0.00387.1 | 728  | 495407 | 1.00E-106 | 199  | 200  | 99 +  | 193 | 392  | 386830 | 387029 |

|         |                |      |        |           |      |      |       |     |      |        |        |
|---------|----------------|------|--------|-----------|------|------|-------|-----|------|--------|--------|
| UN34085 | Rsa1.0.03440.1 | 963  | 22928  | 0         | 913  | 963  | 94 -  | 1   | 963  | 16782  | 17738  |
| UN34086 | Rsa1.0.01083.1 | 608  | 54617  | 0         | 340  | 342  | 99 -  | 1   | 340  | 10462  | 10803  |
| UN34087 | Rsa1.0.00538.1 | 699  | 77149  | 1.00E-138 | 253  | 254  | 99 +  | 445 | 698  | 72086  | 72339  |
| UN34088 | Rsa1.0.00862.1 | 710  | 61715  | 0         | 697  | 700  | 99 -  | 11  | 710  | 28564  | 29263  |
| UN34089 | Rsa1.0.05911.1 | 488  | 12261  | 2.33E-156 | 290  | 299  | 96 -  | 37  | 335  | 7645   | 7943   |
| UN34090 | Rsa1.0.00729.1 | 172  | 66690  | 4.00E-55  | 156  | 168  | 92 -  | 1   | 166  | 16122  | 16287  |
| UN34091 | Rsa1.0.00020.1 | 665  | 283099 | 0         | 643  | 661  | 97 -  | 5   | 664  | 148852 | 149511 |
| UN34092 | Rsa1.0.00235.1 | 827  | 154696 | 0         | 567  | 572  | 99 -  | 224 | 795  | 66872  | 67443  |
| UN34093 | Rsa1.0.00414.1 | 1219 | 202190 | 0         | 1165 | 1226 | 95 +  | 8   | 1218 | 171233 | 172451 |
| UN34094 | Rsa1.0.01831.1 | 830  | 38628  | 0         | 736  | 758  | 97 -  | 1   | 739  | 23085  | 23842  |
| UN34095 | Rsa1.0.00157.1 | 666  | 245832 | 1.00E-172 | 390  | 414  | 94 -  | 1   | 412  | 54796  | 55197  |
| UN34096 | Rsa1.0.00236.1 | 625  | 104771 | 1.00E-168 | 334  | 344  | 97 -  | 245 | 587  | 55237  | 55580  |
| UN34097 | Rsa1.0.05205.1 | 814  | 14513  | 0         | 791  | 804  | 98 -  | 1   | 802  | 13151  | 13953  |
| UN34098 | Rsa1.0.00021.1 | 604  | 263655 | 2.00E-32  | 211  | 254  | 83 -  | 329 | 572  | 56845  | 57098  |
| UN34099 | Rsa1.0.03037.1 | 682  | 25825  | 0         | 677  | 680  | 99 -  | 1   | 680  | 17770  | 18449  |
| UN34100 | Rsa1.0.00208.1 | 945  | 108565 | 1.00E-122 | 264  | 278  | 94 +  | 381 | 658  | 34850  | 35127  |
| UN34101 | Rsa1.0.00340.1 | 1182 | 305782 | 0         | 542  | 543  | 99 -  | 2   | 544  | 287657 | 288199 |
| UN34102 | #              | #    | #      | #         | #    | #    | #     | #   | #    | #      | #      |
| UN34103 | Rsa1.0.00190.1 | 603  | 318240 | 0         | 453  | 453  | 100 + | 1   | 453  | 199854 | 200306 |
| UN34104 | Rsa1.0.00023.1 | 1099 | 194764 | 0         | 471  | 493  | 95 -  | 606 | 1098 | 34505  | 34994  |
| UN34105 | Rsa1.0.00784.1 | 654  | 64359  | 2.00E-69  | 274  | 311  | 88 +  | 9   | 311  | 53590  | 53882  |
| UN34106 | Rsa1.0.00190.1 | 1056 | 318240 | 0         | 355  | 358  | 99 -  | 1   | 356  | 51256  | 51613  |
| UN34107 | Rsa1.0.00173.1 | 676  | 288743 | 1.00E-144 | 385  | 422  | 91 -  | 75  | 495  | 197613 | 198030 |
| UN34108 | Rsa1.0.06240.1 | 780  | 11407  | 1.00E-178 | 366  | 379  | 96 +  | 268 | 644  | 9755   | 10130  |
| UN34109 | Rsa1.0.00930.1 | 727  | 59224  | 1.00E-141 | 372  | 407  | 91 +  | 1   | 394  | 45060  | 45457  |
| UN34110 | Rsa1.0.00269.1 | 1205 | 341668 | 0         | 753  | 760  | 99 +  | 443 | 1202 | 308760 | 309518 |
| UN34111 | Rsa1.0.01232.1 | 702  | 155185 | 1.00E-144 | 294  | 305  | 96 -  | 401 | 702  | 137582 | 137886 |
| UN34112 | Rsa1.0.00087.1 | 685  | 761073 | 0         | 560  | 572  | 97 +  | 1   | 571  | 275830 | 276401 |
| UN34113 | Rsa1.0.03527.1 | 977  | 22278  | 0         | 942  | 983  | 95 +  | 1   | 975  | 18931  | 19910  |
| UN34114 | Rsa1.0.00085.1 | 482  | 142226 | 1.00E-127 | 423  | 484  | 87 +  | 1   | 481  | 8191   | 8637   |
| UN34115 | Rsa1.0.13406.1 | 1251 | 4858   | 1.00E-141 | 273  | 278  | 98 -  | 956 | 1231 | 4581   | 4858   |
| UN34116 | Rsa1.0.00276.1 | 1180 | 100160 | 0         | 484  | 494  | 97 +  | 686 | 1179 | 6980   | 7472   |
| UN34117 | Rsa1.0.01007.1 | 1204 | 56933  | 0         | 493  | 496  | 99 -  | 1   | 496  | 39533  | 40028  |
| UN34118 | Rsa1.0.02811.1 | 847  | 27669  | 0         | 338  | 340  | 99 +  | 1   | 340  | 3449   | 3788   |
| UN34119 | Rsa1.0.01795.1 | 478  | 39171  | 7.00E-90  | 214  | 228  | 93 -  | 246 | 472  | 26572  | 26799  |
| UN34120 | Rsa1.0.02194.1 | 537  | 34029  | 0         | 332  | 334  | 99 +  | 1   | 334  | 12448  | 12781  |
| UN34121 | Rsa1.0.00162.1 | 645  | 239935 | 0         | 420  | 446  | 94 -  | 29  | 474  | 106933 | 107374 |
| UN34122 | Rsa1.0.00149.1 | 836  | 305196 | 1.00E-157 | 362  | 383  | 94 +  | 1   | 378  | 106872 | 107252 |
| UN34123 | Rsa1.0.00154.1 | 574  | 189461 | 0         | 488  | 495  | 98 -  | 78  | 572  | 154536 | 155030 |

|         |                |      |        |           |     |     |       |     |      |        |        |
|---------|----------------|------|--------|-----------|-----|-----|-------|-----|------|--------|--------|
| UN34124 | Rsa1.0_08014.1 | 740  | 8078   | 0         | 603 | 605 | 99 +  | 12  | 616  | 1041   | 1644   |
| UN34125 | Rsa1.0_01118.1 | 842  | 53460  | 0         | 460 | 475 | 96 -  | 170 | 642  | 42921  | 43392  |
| UN34126 | Rsa1.0_01112.1 | 536  | 310601 | 6.00E-66  | 131 | 132 | 99 +  | 398 | 529  | 16441  | 16572  |
| UN34127 | Rsa1.0_01735.1 | 1108 | 40128  | 1.00E-173 | 735 | 868 | 84 +  | 73  | 930  | 29574  | 30428  |
| UN34128 | Rsa1.0_00867.1 | 443  | 61635  | 2.00E-77  | 228 | 250 | 91 +  | 25  | 266  | 27754  | 28001  |
| UN34129 | Rsa1.0_01432.1 | 917  | 45977  | 0         | 904 | 924 | 97 -  | 1   | 914  | 34709  | 35632  |
| UN34130 | Rsa1.0_13471.1 | 627  | 4802   | 0         | 402 | 419 | 95 -  | 1   | 418  | 414    | 829    |
| UN34131 | Rsa1.0_00566.1 | 1065 | 75325  | 0         | 681 | 712 | 95 +  | 282 | 990  | 30486  | 31197  |
| UN34132 | Rsa1.0_01169.1 | 389  | 51829  | 0         | 385 | 394 | 97 -  | 1   | 388  | 26702  | 27095  |
| UN34133 | Rsa1.0_00145.1 | 933  | 261008 | 0         | 928 | 934 | 99 -  | 1   | 932  | 237163 | 238096 |
| UN34134 | Rsa1.0_03960.1 | 788  | 19864  | 0         | 582 | 598 | 97 -  | 193 | 787  | 522    | 1118   |
| UN34135 | Rsa1.0_02683.1 | 731  | 28679  | 1.00E-127 | 358 | 397 | 90 -  | 337 | 731  | 14077  | 14450  |
| UN34136 | Rsa1.0_00052.1 | 575  | 162771 | 0         | 572 | 574 | 99 +  | 1   | 574  | 97043  | 97616  |
| UN34137 | Rsa1.0_20310.1 | 731  | 1318   | 1.00E-153 | 290 | 295 | 98 -  | 1   | 295  | 217    | 511    |
| UN34138 | Rsa1.0_00648.1 | 813  | 70351  | 0         | 791 | 804 | 98 -  | 8   | 810  | 415    | 1217   |
| UN34139 | Rsa1.0_00153.1 | 934  | 192931 | 1.00E-135 | 299 | 315 | 94 +  | 1   | 315  | 6463   | 6773   |
| UN34140 | Rsa1.0_00772.1 | 917  | 64856  | 0         | 590 | 595 | 99 -  | 323 | 916  | 41464  | 42058  |
| UN34141 | Rsa1.0_01156.1 | 696  | 52147  | 1.00E-157 | 327 | 341 | 95 -  | 296 | 629  | 34400  | 34740  |
| UN34142 | Rsa1.0_01960.1 | 683  | 36766  | 2.00E-88  | 253 | 283 | 89 -  | 3   | 285  | 776    | 1040   |
| UN34143 | Rsa1.0_00277.1 | 588  | 100132 | 0         | 567 | 602 | 94 +  | 2   | 586  | 12935  | 13533  |
| UN34144 | Rsa1.0_06683.1 | 662  | 10549  | 1.00E-177 | 353 | 363 | 97 +  | 2   | 362  | 98     | 460    |
| UN34145 | Rsa1.0_34719.1 | 852  | 652    | 1.00E-123 | 236 | 240 | 98 -  | 613 | 852  | 392    | 631    |
| UN34146 | Rsa1.0_00631.1 | 836  | 71277  | 0         | 570 | 575 | 99 +  | 260 | 834  | 18179  | 18753  |
| UN34147 | Rsa1.0_00090.1 | 860  | 273859 | 0         | 528 | 529 | 99 -  | 1   | 529  | 6701   | 7229   |
| UN34148 | Rsa1.0_00118.1 | 555  | 130637 | 1.00E-121 | 220 | 220 | 100 - | 334 | 553  | 65270  | 65489  |
| UN34149 | Rsa1.0_00487.1 | 868  | 80674  | 0         | 359 | 360 | 99 +  | 3   | 362  | 59335  | 59694  |
| UN34150 | Rsa1.0_02712.1 | 1021 | 28474  | 0         | 962 | 995 | 96 +  | 28  | 1019 | 26276  | 27269  |
| UN34151 | Rsa1.0_00581.1 | 651  | 163575 | 0         | 586 | 658 | 89 -  | 5   | 649  | 48836  | 49493  |
| UN34152 | Rsa1.0_00556.1 | 894  | 207212 | 0         | 598 | 600 | 99 -  | 293 | 892  | 169205 | 169804 |
| UN34153 | Rsa1.0_00578.1 | 638  | 74581  | 0         | 630 | 637 | 98 -  | 2   | 638  | 37251  | 37887  |
| UN34154 | Rsa1.0_02328.1 | 855  | 32494  | 1.00E-165 | 312 | 317 | 98 +  | 258 | 572  | 27445  | 27761  |
| UN34155 | Rsa1.0_01506.1 | 716  | 44370  | 2.00E-97  | 323 | 368 | 87 +  | 2   | 359  | 31393  | 31747  |
| UN34156 | Rsa1.0_00033.1 | 617  | 515811 | 0         | 348 | 348 | 100 + | 3   | 350  | 13443  | 13790  |
| UN34157 | Rsa1.0_04444.1 | 449  | 17320  | 1.00E-113 | 248 | 260 | 95 +  | 4   | 258  | 8629   | 8888   |
| UN34158 | Rsa1.0_01035.1 | 663  | 56019  | 1.00E-168 | 315 | 320 | 98 +  | 309 | 628  | 48721  | 49040  |
| UN34159 | Rsa1.0_00681.1 | 638  | 68779  | 0         | 619 | 644 | 96 -  | 1   | 637  | 14915  | 15556  |
| UN34160 | Rsa1.0_00221.1 | 959  | 106972 | 0         | 945 | 953 | 99 +  | 12  | 959  | 13564  | 14516  |
| UN34161 | Rsa1.0_01684.1 | 1191 | 41044  | 0         | 752 | 782 | 96 -  | 412 | 1190 | 343    | 1124   |
| UN34162 | Rsa1.0_01741.1 | 771  | 39976  | 0         | 704 | 765 | 92 +  | 3   | 767  | 35994  | 36756  |

|         |                |      |        |           |      |      |       |     |      |        |        |
|---------|----------------|------|--------|-----------|------|------|-------|-----|------|--------|--------|
| UN34163 | Rsa1.0.01519.1 | 547  | 44144  | 0         | 545  | 546  | 99 +  | 2   | 547  | 29979  | 30524  |
| UN34164 | Rsa1.0.36263.1 | 854  | 622    | 0         | 524  | 548  | 95 +  | 191 | 730  | 79     | 622    |
| UN34165 | Rsa1.0.05429.1 | 852  | 13781  | 0         | 832  | 850  | 97 +  | 1   | 850  | 3984   | 4833   |
| UN34166 | Rsa1.0.12465.1 | 859  | 5217   | 0         | 662  | 671  | 98 +  | 189 | 859  | 4539   | 5207   |
| UN34167 | Rsa1.0.00089.1 | 503  | 406142 | 0         | 480  | 504  | 95 +  | 1   | 502  | 352875 | 353377 |
| UN34168 | Rsa1.0.15126.1 | 712  | 2810   | 0         | 337  | 339  | 99 +  | 73  | 410  | 364    | 702    |
| UN34169 | Rsa1.0.00865.1 | 935  | 61686  | 0         | 831  | 868  | 95 -  | 1   | 861  | 3988   | 4851   |
| UN34170 | Rsa1.0.04344.1 | 945  | 17822  | 0         | 942  | 943  | 99 -  | 1   | 943  | 16753  | 17695  |
| UN34171 | Rsa1.0.02131.1 | 1183 | 34754  | 0         | 537  | 541  | 99 -  | 441 | 981  | 26651  | 27190  |
| UN34172 | Rsa1.0.03154.1 | 512  | 24968  | 0         | 509  | 512  | 99 -  | 1   | 510  | 22582  | 23093  |
| UN34173 | Rsa1.0.08457.1 | 882  | 7325   | 0         | 548  | 563  | 97 +  | 1   | 563  | 5498   | 6058   |
| UN34174 | Rsa1.0.04097.1 | 779  | 19090  | 0         | 385  | 387  | 99 -  | 1   | 387  | 14551  | 14937  |
| UN34175 | Rsa1.0.37856.1 | 955  | 595    | 1.00E-142 | 270  | 273  | 98 +  | 682 | 953  | 119    | 391    |
| UN34176 | Rsa1.0.01795.1 | 763  | 39171  | 1.00E-116 | 265  | 282  | 93 -  | 481 | 762  | 32325  | 32603  |
| UN34177 | Rsa1.0.00476.1 | 716  | 280966 | 1.00E-77  | 205  | 224  | 91 +  | 200 | 423  | 266192 | 266415 |
| UN34178 | Rsa1.0.10112.1 | 467  | 5992   | 0         | 460  | 464  | 99 +  | 1   | 463  | 5529   | 5992   |
| UN34179 | Rsa1.0.00222.1 | 905  | 172263 | 0         | 370  | 375  | 98 +  | 8   | 382  | 53034  | 53408  |
| UN34180 | Rsa1.0.11358.1 | 1067 | 5533   | 0         | 544  | 556  | 97 +  | 511 | 1066 | 3701   | 4253   |
| UN34181 | Rsa1.0.20910.1 | 802  | 1256   | 0         | 691  | 694  | 99 +  | 18  | 709  | 563    | 1256   |
| UN34182 | Rsa1.0.05449.1 | 850  | 13711  | 0         | 524  | 537  | 97 -  | 7   | 543  | 8399   | 8931   |
| UN34183 | Rsa1.0.00860.1 | 591  | 61789  | 1.00E-143 | 305  | 321  | 95 +  | 27  | 347  | 59709  | 60029  |
| UN34184 | Rsa1.0.03109.1 | 714  | 25336  | 3.00E-65  | 148  | 155  | 95 +  | 1   | 155  | 8100   | 8254   |
| UN34185 | Rsa1.0.03770.1 | 525  | 20952  | 1.00E-142 | 420  | 468  | 89 -  | 60  | 525  | 1474   | 1938   |
| UN34186 | Rsa1.0.01026.1 | 1062 | 171624 | 0         | 783  | 795  | 98 -  | 4   | 797  | 8775   | 9569   |
| UN34187 | Rsa1.0.01039.1 | 1130 | 55946  | 1.00E-137 | 274  | 283  | 96 +  | 603 | 879  | 1313   | 1595   |
| UN34188 | Rsa1.0.06021.1 | 898  | 11911  | 1.00E-159 | 287  | 288  | 99 +  | 3   | 290  | 6682   | 6969   |
| UN34189 | Rsa1.0.00243.1 | 740  | 103651 | 1.00E-120 | 219  | 219  | 100 - | 491 | 709  | 68584  | 68802  |
| UN34190 | Rsa1.0.01004.1 | 416  | 56975  | 1.00E-148 | 284  | 290  | 97 +  | 3   | 292  | 32087  | 32376  |
| UN34191 | Rsa1.0.01654.1 | 527  | 41532  | 0         | 363  | 364  | 99 -  | 2   | 365  | 30737  | 31100  |
| UN34192 | Rsa1.0.06585.1 | 349  | 10715  | 1.00E-160 | 328  | 342  | 95 +  | 3   | 344  | 9258   | 9599   |
| UN34193 | #              | #    | #      | #         | #    | #    | #     | #   | #    | #      | #      |
| UN34194 | Rsa1.0.00084.1 | 710  | 142338 | 0         | 367  | 368  | 99 -  | 304 | 671  | 113436 | 113803 |
| UN34195 | Rsa1.0.01514.1 | 947  | 44222  | 0         | 887  | 944  | 93 +  | 1   | 943  | 8065   | 8998   |
| UN34196 | Rsa1.0.03410.1 | 861  | 23147  | 1.00E-173 | 345  | 353  | 97 -  | 1   | 353  | 7883   | 8232   |
| UN34197 | Rsa1.0.00560.1 | 699  | 75685  | 1.00E-137 | 250  | 251  | 99 -  | 155 | 405  | 70888  | 71138  |
| UN34198 | Rsa1.0.70920.1 | 557  | 323    | 1.00E-150 | 272  | 273  | 99 +  | 1   | 273  | 46     | 318    |
| UN34199 | Rsa1.0.10380.1 | 507  | 5866   | 0         | 476  | 477  | 99 +  | 29  | 505  | 4449   | 4925   |
| UN34200 | Rsa1.0.53419.1 | 777  | 427    | 0         | 400  | 402  | 99 +  | 1   | 402  | 26     | 427    |
| UN34201 | Rsa1.0.10113.1 | 1289 | 5992   | 0         | 1091 | 1151 | 94 +  | 137 | 1284 | 371    | 1521   |

|         |                |      |        |           |      |      |       |     |      |        |        |
|---------|----------------|------|--------|-----------|------|------|-------|-----|------|--------|--------|
| UN34202 | Rsa1.0.00139.1 | 571  | 357786 | 0         | 347  | 351  | 98 -  | 220 | 570  | 16417  | 16767  |
| UN34203 | Rsa1.0.01632.1 | 932  | 181224 | 0         | 411  | 428  | 96 -  | 214 | 637  | 172064 | 172487 |
| UN34204 | Rsa1.0.00134.1 | 817  | 390219 | 0         | 414  | 415  | 99 -  | 401 | 815  | 224120 | 224534 |
| UN34205 | Rsa1.0.05110.1 | 965  | 14814  | 0         | 525  | 533  | 98 -  | 428 | 960  | 9335   | 9867   |
| UN34206 | Rsa1.0.03166.1 | 1008 | 24863  | 0         | 969  | 1012 | 95 +  | 7   | 1008 | 2895   | 3901   |
| UN34207 | Rsa1.0.00994.1 | 1200 | 165189 | 0         | 429  | 430  | 99 -  | 770 | 1199 | 8798   | 9227   |
| UN34208 | Rsa1.0.00083.1 | 1088 | 442773 | 0         | 513  | 533  | 96 +  | 1   | 531  | 324045 | 324570 |
| UN34209 | Rsa1.0.16067.1 | 1427 | 2300   | 0         | 840  | 868  | 96 -  | 564 | 1425 | 309    | 1164   |
| UN34210 | Rsa1.0.01353.1 | 1101 | 47351  | 0         | 705  | 718  | 98 +  | 12  | 727  | 5396   | 6113   |
| UN34211 | Rsa1.0.00887.1 | 671  | 61048  | 0         | 579  | 630  | 91 -  | 53  | 660  | 44873  | 45502  |
| UN34212 | Rsa1.0.01704.1 | 1027 | 40711  | 0         | 340  | 341  | 99 -  | 2   | 342  | 18105  | 18445  |
| UN34213 | Rsa1.0.02279.1 | 1083 | 33069  | 0         | 780  | 801  | 97 +  | 251 | 1051 | 1      | 800    |
| UN34214 | Rsa1.0.00059.1 | 778  | 159650 | 0         | 428  | 441  | 97 +  | 11  | 451  | 113805 | 114239 |
| UN34215 | Rsa1.0.01996.1 | 1336 | 36327  | 0         | 1140 | 1149 | 99 +  | 189 | 1335 | 34554  | 35701  |
| UN34216 | Rsa1.0.00686.1 | 1192 | 68511  | 0         | 653  | 655  | 99 -  | 537 | 1191 | 45800  | 46454  |
| UN34217 | Rsa1.0.06188.1 | 1056 | 11531  | 0         | 575  | 580  | 99 +  | 357 | 935  | 197    | 776    |
| UN34218 | Rsa1.0.00284.1 | 501  | 323267 | 0         | 498  | 501  | 99 +  | 1   | 501  | 261544 | 262044 |
| UN34219 | Rsa1.0.07334.1 | 830  | 9547   | 0         | 702  | 705  | 99 -  | 124 | 828  | 8843   | 9547   |
| UN34220 | Rsa1.0.00978.1 | 478  | 57739  | 1.00E-158 | 310  | 317  | 97 -  | 1   | 313  | 25668  | 25984  |
| UN34221 | Rsa1.0.00180.1 | 608  | 114581 | 0         | 601  | 606  | 99 +  | 2   | 606  | 100317 | 100920 |
| UN34222 | Rsa1.0.00224.1 | 602  | 327530 | 1.00E-175 | 373  | 391  | 95 -  | 215 | 602  | 171352 | 171733 |
| UN34223 | Rsa1.0.00479.1 | 985  | 81377  | 0         | 945  | 969  | 97 +  | 19  | 983  | 64480  | 65447  |
| UN34224 | Rsa1.0.00016.1 | 1110 | 831256 | 0         | 886  | 894  | 99 -  | 1   | 894  | 46183  | 47074  |
| UN34225 | Rsa1.0.00594.1 | 665  | 73729  | 0         | 400  | 401  | 99 -  | 2   | 402  | 36889  | 37289  |
| UN34226 | Rsa1.0.11802.1 | 611  | 5404   | 0         | 605  | 610  | 99 -  | 2   | 611  | 2164   | 2773   |
| UN34227 | Rsa1.0.00036.1 | 879  | 176186 | 0         | 560  | 585  | 95 +  | 295 | 879  | 98981  | 99565  |
| UN34228 | Rsa1.0.01263.1 | 759  | 49703  | 1.00E-143 | 290  | 301  | 96 +  | 456 | 756  | 1553   | 1853   |
| UN34229 | Rsa1.0.01838.1 | 1089 | 38500  | 1.00E-144 | 280  | 287  | 97 -  | 22  | 308  | 25420  | 25706  |
| UN34230 | Rsa1.0.00447.1 | 881  | 84051  | 0         | 505  | 525  | 96 -  | 2   | 526  | 18892  | 19416  |
| UN34231 | Rsa1.0.02471.1 | 1415 | 31104  | 1.00E-140 | 291  | 303  | 96 -  | 6   | 300  | 19475  | 19777  |
| UN34232 | Rsa1.0.01428.1 | 1107 | 46071  | 1.00E-167 | 320  | 326  | 98 +  | 780 | 1105 | 26366  | 26689  |
| UN34233 | Rsa1.0.00382.1 | 377  | 251946 | 1.00E-134 | 277  | 289  | 95 -  | 1   | 283  | 60949  | 61237  |
| UN34234 | Rsa1.0.03544.1 | 636  | 22182  | 0         | 630  | 635  | 99 +  | 1   | 635  | 1585   | 2217   |
| UN34235 | Rsa1.0.03074.1 | 293  | 25568  | 4.00E-44  | 91   | 91   | 100 + | 163 | 253  | 17791  | 17881  |
| UN34236 | Rsa1.0.01104.1 | 818  | 285480 | 1.00E-144 | 260  | 260  | 100 + | 162 | 421  | 107190 | 107449 |
| UN34237 | Rsa1.0.01707.1 | 849  | 40686  | 0         | 846  | 848  | 99 -  | 3   | 848  | 13213  | 14060  |
| UN34238 | Rsa1.0.00056.1 | 848  | 332604 | 0         | 843  | 844  | 99 -  | 3   | 846  | 226578 | 227421 |
| UN34239 | Rsa1.0.03627.1 | 905  | 21658  | 0         | 895  | 904  | 99 -  | 1   | 904  | 13900  | 14800  |
| UN34240 | Rsa1.0.00198.1 | 961  | 222963 | 0         | 395  | 407  | 97 +  | 1   | 407  | 171220 | 171626 |



|         |                |      |        |           |      |      |       |     |      |        |        |
|---------|----------------|------|--------|-----------|------|------|-------|-----|------|--------|--------|
| UN34241 | Rsa1.0.00268.1 | 1353 | 101470 | 0         | 1165 | 1173 | 99 +  | 1   | 1173 | 6484   | 7656   |
| UN34242 | Rsa1.0.01017.1 | 985  | 56714  | 0         | 668  | 679  | 98 +  | 307 | 985  | 13718  | 14396  |
| UN34243 | Rsa1.0.01363.1 | 832  | 47195  | 1.00E-140 | 378  | 412  | 91 -  | 3   | 406  | 37133  | 37540  |
| UN34244 | Rsa1.0.00119.1 | 1352 | 467509 | 0         | 666  | 668  | 99 +  | 1   | 668  | 354197 | 354864 |
| UN34245 | Rsa1.0.00031.1 | 399  | 179862 | 1.00E-131 | 243  | 245  | 99 -  | 1   | 245  | 64897  | 65141  |
| UN34246 | Rsa1.0.01628.1 | 362  | 41932  | 1.00E-169 | 343  | 357  | 96 -  | 5   | 361  | 23191  | 23547  |
| UN34247 | Rsa1.0.00555.1 | 809  | 75920  | 1.00E-132 | 272  | 283  | 96 -  | 1   | 283  | 5540   | 5822   |
| UN34248 | Rsa1.0.12420.1 | 657  | 5230   | 1.00E-163 | 294  | 295  | 99 -  | 1   | 295  | 1647   | 1941   |
| UN34249 | Rsa1.0.07217.1 | 749  | 9703   | 0         | 746  | 749  | 99 -  | 1   | 748  | 52     | 800    |
| UN34250 | Rsa1.0.14323.1 | 572  | 3520   | 3.00E-34  | 90   | 95   | 94 +  | 1   | 95   | 3141   | 3235   |
| UN34251 | Rsa1.0.01110.1 | 304  | 195852 | 1.00E-142 | 292  | 302  | 96 +  | 2   | 303  | 41169  | 41466  |
| UN34252 | Rsa1.0.13663.1 | 834  | 4540   | 1.00E-117 | 281  | 302  | 93 -  | 36  | 337  | 2409   | 2699   |
| UN34253 | Rsa1.0.02340.1 | 692  | 32388  | 0         | 373  | 375  | 99 +  | 1   | 375  | 12222  | 12596  |
| UN34254 | Rsa1.0.05894.1 | 675  | 12306  | 0         | 657  | 673  | 97 +  | 1   | 671  | 1274   | 1945   |
| UN34255 | Rsa1.0.00127.1 | 1608 | 127446 | 0         | 1453 | 1541 | 94 +  | 3   | 1519 | 3528   | 5047   |
| UN34256 | Rsa1.0.02429.1 | 607  | 31527  | 1.00E-125 | 227  | 227  | 100 - | 1   | 227  | 17242  | 17468  |
| UN34257 | Rsa1.0.01722.1 | 789  | 40320  | 1.00E-131 | 238  | 238  | 100 + | 1   | 238  | 32951  | 33188  |
| UN34258 | Rsa1.0.01866.1 | 1032 | 37961  | 0         | 1027 | 1031 | 99 +  | 1   | 1030 | 973    | 2003   |
| UN34259 | Rsa1.0.05882.1 | 629  | 12340  | 5.00E-67  | 139  | 142  | 97 +  | 270 | 411  | 4896   | 5037   |
| UN34260 | Rsa1.0.03977.1 | 913  | 19758  | 0         | 349  | 350  | 99 -  | 3   | 352  | 3897   | 4246   |
| UN34261 | Rsa1.0.00541.1 | 771  | 76863  | 1.00E-148 | 269  | 270  | 99 +  | 465 | 734  | 74721  | 74990  |
| UN34262 | Rsa1.0.00149.1 | 1282 | 305196 | 0         | 505  | 542  | 93 +  | 353 | 883  | 45746  | 46280  |
| UN34263 | #              | #    | #      | #         | #    | #    | #     | #   | #    | #      | #      |
| UN34264 | Rsa1.0.36359.1 | 693  | 620    | 1.00E-100 | 204  | 209  | 97 +  | 485 | 691  | 1      | 209    |
| UN34265 | Rsa1.0.00853.1 | 442  | 62101  | 0         | 423  | 441  | 95 -  | 1   | 441  | 51174  | 51614  |
| UN34266 | Rsa1.0.00014.1 | 694  | 348985 | 0         | 679  | 694  | 97 +  | 1   | 694  | 194757 | 195448 |
| UN34267 | Rsa1.0.01856.1 | 1021 | 38181  | 0         | 1004 | 1034 | 97 -  | 1   | 1019 | 8026   | 9058   |
| UN34268 | Rsa1.0.04022.1 | 404  | 19534  | 1.00E-163 | 305  | 309  | 98 -  | 4   | 309  | 18148  | 18456  |
| UN34269 | Rsa1.0.00101.1 | 1347 | 267193 | 1.00E-93  | 175  | 175  | 100 - | 1   | 175  | 71383  | 71557  |
| UN34270 | Rsa1.0.01586.1 | 833  | 42804  | 1.00E-121 | 317  | 349  | 90 -  | 166 | 514  | 21211  | 21559  |
| UN34271 | Rsa1.0.07210.1 | 837  | 9716   | 0         | 425  | 428  | 99 +  | 1   | 428  | 4958   | 5384   |
| UN34272 | Rsa1.0.02288.1 | 912  | 32984  | 0         | 362  | 364  | 99 -  | 1   | 364  | 21003  | 21366  |
| UN34273 | Rsa1.0.01753.1 | 1033 | 39794  | 1.00E-141 | 255  | 255  | 100 - | 1   | 255  | 21205  | 21459  |
| UN34274 | Rsa1.0.00816.1 | 1066 | 403350 | 0         | 715  | 749  | 95 +  | 307 | 1055 | 1      | 744    |
| UN34275 | Rsa1.0.00099.1 | 842  | 159619 | 0         | 341  | 342  | 99 -  | 265 | 606  | 30593  | 30934  |
| UN34276 | Rsa1.0.04756.1 | 1148 | 16114  | 0         | 1142 | 1146 | 99 -  | 1   | 1146 | 2499   | 3644   |
| UN34277 | Rsa1.0.00100.1 | 1031 | 249232 | 0         | 370  | 380  | 97 +  | 651 | 1030 | 153466 | 153845 |
| UN34278 | Rsa1.0.01507.1 | 684  | 44361  | 0         | 403  | 421  | 95 +  | 1   | 421  | 17619  | 18034  |
| UN34279 | Rsa1.0.00070.1 | 1405 | 150321 | 0         | 602  | 632  | 95 +  | 1   | 629  | 122196 | 122818 |

|         |                |      |        |           |      |      |       |     |      |        |        |
|---------|----------------|------|--------|-----------|------|------|-------|-----|------|--------|--------|
| UN34280 | Rsa1.0.01549.1 | 677  | 43543  | 0         | 527  | 543  | 97 +  | 1   | 540  | 6249   | 6787   |
| UN34281 | Rsa1.0.00886.1 | 901  | 167350 | 0         | 598  | 609  | 98 +  | 1   | 600  | 155721 | 156329 |
| UN34282 | Rsa1.0.00017.1 | 688  | 752458 | 0         | 520  | 522  | 99 -  | 165 | 686  | 47031  | 47552  |
| UN34283 | Rsa1.0.00044.1 | 1249 | 271658 | 0         | 424  | 426  | 99 +  | 1   | 425  | 40447  | 40872  |
| UN34284 | Rsa1.0.00123.1 | 892  | 325650 | 1.00E-141 | 295  | 310  | 95 -  | 1   | 310  | 128148 | 128448 |
| UN34285 | Rsa1.0.01016.1 | 1481 | 181422 | 0         | 355  | 355  | 100 - | 2   | 356  | 52330  | 52684  |
| UN34286 | Rsa1.0.01324.1 | 965  | 48131  | 0         | 953  | 964  | 98 -  | 2   | 965  | 26684  | 27646  |
| UN34287 | Rsa1.0.10319.1 | 1025 | 5888   | 1.00E-175 | 312  | 312  | 100 + | 1   | 312  | 1967   | 2278   |
| UN34288 | Rsa1.0.13419.1 | 593  | 4847   | 0         | 458  | 478  | 95 +  | 1   | 462  | 184    | 661    |
| UN34289 | Rsa1.0.18517.1 | 506  | 1584   | 1.00E-121 | 230  | 232  | 99 -  | 3   | 234  | 744    | 974    |
| UN34290 | Rsa1.0.04446.1 | 1082 | 17317  | 0         | 391  | 398  | 98 +  | 83  | 480  | 1      | 398    |
| UN34291 | Rsa1.0.01452.1 | 986  | 45459  | 0         | 425  | 425  | 100 + | 2   | 426  | 20487  | 20911  |
| UN34292 | Rsa1.0.24774.1 | 437  | 968    | 0         | 432  | 448  | 96 +  | 3   | 435  | 444    | 891    |
| UN34293 | Rsa1.0.22398.1 | 879  | 1124   | 0         | 873  | 878  | 99 -  | 2   | 879  | 100    | 973    |
| UN34294 | Rsa1.0.00512.1 | 682  | 200277 | 1.00E-116 | 260  | 276  | 94 +  | 407 | 682  | 24322  | 24597  |
| UN34295 | Rsa1.0.01215.1 | 572  | 166813 | 1.00E-156 | 302  | 308  | 98 +  | 140 | 446  | 160029 | 160336 |
| UN34296 | Rsa1.0.00078.1 | 1555 | 175053 | 0         | 1188 | 1189 | 99 -  | 229 | 1417 | 27466  | 28654  |
| UN34297 | Rsa1.0.00038.1 | 825  | 314568 | 0         | 784  | 785  | 99 -  | 1   | 785  | 57155  | 57939  |
| UN34298 | Rsa1.0.02453.1 | 575  | 31271  | 0         | 455  | 477  | 95 -  | 1   | 474  | 16094  | 16564  |
| UN34299 | Rsa1.0.01452.1 | 822  | 45459  | 0         | 408  | 422  | 96 -  | 399 | 820  | 17362  | 17782  |
| UN34300 | Rsa1.0.00151.1 | 877  | 119541 | 1.00E-156 | 282  | 283  | 99 +  | 2   | 284  | 109653 | 109935 |
| UN34301 | Rsa1.0.03733.1 | 552  | 21108  | 1.00E-141 | 273  | 279  | 97 +  | 273 | 551  | 3885   | 4163   |
| UN34302 | Rsa1.0.13716.1 | 1019 | 4433   | 0         | 1015 | 1017 | 99 -  | 2   | 1018 | 1242   | 2258   |
| UN34303 | Rsa1.0.32646.1 | 1167 | 697    | 0         | 592  | 638  | 92 -  | 532 | 1166 | 65     | 697    |
| UN34304 | Rsa1.0.00546.1 | 1048 | 76523  | 6.00E-52  | 270  | 325  | 83 -  | 589 | 904  | 42186  | 42504  |
| UN34305 | Rsa1.0.00623.1 | 949  | 207630 | 0         | 346  | 349  | 99 +  | 1   | 349  | 150114 | 150462 |
| UN34306 | Rsa1.0.40203.1 | 600  | 559    | 0         | 353  | 356  | 99 +  | 38  | 393  | 1      | 356    |
| UN34307 | Rsa1.0.00163.1 | 348  | 116847 | 6.00E-68  | 161  | 171  | 94 +  | 177 | 347  | 76514  | 76684  |
| UN34308 | Rsa1.0.00965.1 | 1173 | 58139  | 1.00E-111 | 238  | 249  | 95 -  | 392 | 640  | 22517  | 22765  |
| UN34309 | Rsa1.0.01722.1 | 1281 | 40320  | 0         | 1271 | 1279 | 99 -  | 3   | 1280 | 32575  | 33853  |
| UN34310 | Rsa1.0.01825.1 | 772  | 38725  | 1.00E-114 | 219  | 222  | 98 +  | 1   | 222  | 14028  | 14249  |
| UN34311 | Rsa1.0.00139.1 | 448  | 357786 | 1.00E-142 | 395  | 438  | 90 +  | 1   | 434  | 309404 | 309836 |
| UN34312 | Rsa1.0.00627.1 | 609  | 71566  | 0         | 582  | 615  | 94 -  | 2   | 608  | 58378  | 58987  |
| UN34313 | Rsa1.0.02986.1 | 1276 | 26212  | 0         | 473  | 474  | 99 -  | 801 | 1274 | 16837  | 17310  |
| UN34314 | Rsa1.0.01518.1 | 1232 | 141402 | 0         | 1164 | 1165 | 99 -  | 1   | 1165 | 131381 | 132545 |
| UN34315 | Rsa1.0.00223.1 | 806  | 106231 | 0         | 437  | 471  | 92 +  | 2   | 469  | 70567  | 71011  |
| UN34316 | Rsa1.0.12537.1 | 1005 | 5199   | 1.00E-163 | 301  | 304  | 99 +  | 3   | 306  | 4473   | 4776   |
| UN34317 | Rsa1.0.00050.1 | 762  | 237174 | 0         | 433  | 433  | 100 + | 1   | 433  | 95725  | 96157  |
| UN34318 | Rsa1.0.04564.1 | 1167 | 16837  | 0         | 1138 | 1164 | 97 -  | 1   | 1163 | 8550   | 9712   |

|         |                |      |        |           |      |      |       |     |      |        |        |
|---------|----------------|------|--------|-----------|------|------|-------|-----|------|--------|--------|
| UN34319 | Rsa1.0.02010.1 | 899  | 36096  | 0         | 483  | 489  | 98 -  | 3   | 490  | 18230  | 18718  |
| UN34320 | Rsa1.0.04281.1 | 690  | 18107  | 0         | 528  | 555  | 95 +  | 1   | 552  | 5176   | 5714   |
| UN34321 | Rsa1.0.00202.1 | 262  | 185895 | 1.00E-139 | 260  | 262  | 99 -  | 1   | 261  | 11223  | 11484  |
| UN34322 | Rsa1.0.03862.1 | 1262 | 20400  | 0         | 359  | 361  | 99 -  | 3   | 363  | 6855   | 7215   |
| UN34323 | Rsa1.0.02453.1 | 844  | 31271  | 0         | 433  | 444  | 97 -  | 401 | 842  | 15436  | 15877  |
| UN34324 | Rsa1.0.03100.1 | 585  | 25411  | 1.00E-156 | 280  | 280  | 100 + | 2   | 281  | 2314   | 2593   |
| UN34325 | Rsa1.0.00387.1 | 314  | 495407 | 1.00E-157 | 306  | 314  | 97 +  | 1   | 311  | 324536 | 324849 |
| UN34326 | Rsa1.0.00363.1 | 1285 | 90968  | 0         | 1219 | 1277 | 95 +  | 13  | 1285 | 32266  | 33532  |
| UN34327 | Rsa1.0.04955.1 | 1235 | 15337  | 0         | 410  | 415  | 98 +  | 2   | 416  | 2905   | 3319   |
| UN34328 | Rsa1.0.00286.1 | 636  | 98709  | 0         | 611  | 632  | 96 -  | 2   | 633  | 7814   | 8440   |
| UN34329 | Rsa1.0.00143.1 | 1151 | 121313 | 0         | 856  | 867  | 98 +  | 284 | 1149 | 13098  | 13964  |
| UN34330 | Rsa1.0.01465.1 | 781  | 45175  | 0         | 724  | 775  | 93 -  | 1   | 768  | 30022  | 30787  |
| UN34331 | Rsa1.0.02945.1 | 900  | 26548  | 0         | 407  | 417  | 97 -  | 3   | 419  | 3184   | 3600   |
| UN34332 | Rsa1.0.06705.1 | 1307 | 10507  | 5.00E-81  | 154  | 154  | 100 - | 2   | 155  | 9329   | 9482   |
| UN34333 | Rsa1.0.00096.1 | 887  | 198773 | 1.00E-172 | 419  | 454  | 92 +  | 5   | 439  | 126328 | 126772 |
| UN34334 | Rsa1.0.01038.1 | 391  | 55956  | 1.00E-180 | 346  | 352  | 98 -  | 1   | 351  | 35176  | 35526  |
| UN34335 | Rsa1.0.07263.1 | 548  | 9644   | 1.00E-167 | 399  | 433  | 92 -  | 3   | 435  | 4485   | 4917   |
| UN34336 | Rsa1.0.01193.1 | 806  | 51147  | 0         | 777  | 815  | 95 +  | 1   | 806  | 27509  | 28311  |
| UN34337 | Rsa1.0.00005.1 | 435  | 353093 | 1.00E-168 | 302  | 303  | 99 -  | 104 | 406  | 228073 | 228375 |
| UN34338 | Rsa1.0.00205.1 | 857  | 193401 | 0         | 654  | 703  | 93 -  | 157 | 857  | 115681 | 116362 |
| UN34339 | Rsa1.0.00576.1 | 804  | 178949 | 0         | 797  | 806  | 98 -  | 1   | 804  | 61892  | 62697  |
| UN34340 | Rsa1.0.01960.1 | 981  | 36766  | 0         | 909  | 950  | 95 -  | 3   | 936  | 13754  | 14703  |
| UN34341 | Rsa1.0.00176.1 | 395  | 240984 | 1.00E-179 | 378  | 393  | 96 -  | 1   | 388  | 200348 | 200736 |
| UN34342 | Rsa1.0.00092.1 | 602  | 659932 | 0         | 574  | 627  | 91 -  | 1   | 601  | 172857 | 173472 |
| UN34343 | Rsa1.0.00301.1 | 636  | 365315 | 0         | 627  | 636  | 98 +  | 1   | 636  | 7866   | 8501   |
| UN34344 | Rsa1.0.00641.1 | 1168 | 208241 | 0         | 540  | 547  | 98 -  | 321 | 867  | 167083 | 167628 |
| UN34345 | Rsa1.0.01565.1 | 439  | 155447 | 1.00E-115 | 244  | 254  | 96 +  | 1   | 254  | 33792  | 34044  |
| UN34346 | Rsa1.0.00392.1 | 667  | 88523  | 0         | 563  | 620  | 90 -  | 5   | 597  | 65484  | 66094  |
| UN34347 | Rsa1.0.01471.1 | 1089 | 45101  | 0         | 1051 | 1065 | 98 -  | 24  | 1088 | 11987  | 13037  |
| UN34348 | Rsa1.0.00859.1 | 1048 | 61795  | 0         | 534  | 558  | 95 -  | 105 | 662  | 48538  | 49093  |
| UN34349 | Rsa1.0.00369.1 | 527  | 266462 | 8.00E-19  | 67   | 73   | 91 +  | 253 | 325  | 123887 | 123959 |
| UN34350 | Rsa1.0.00139.1 | 642  | 357786 | 1.00E-139 | 342  | 370  | 92 -  | 1   | 352  | 259343 | 259712 |
| UN34351 | Rsa1.0.00620.1 | 992  | 71985  | 5.00E-28  | 101  | 113  | 89 -  | 617 | 729  | 8295   | 8407   |
| UN34352 | Rsa1.0.71993.1 | 717  | 318    | 7.00E-14  | 113  | 136  | 83 +  | 181 | 314  | 146    | 281    |
| UN34353 | Rsa1.0.00058.1 | 905  | 159921 | 0         | 637  | 639  | 99 -  | 2   | 640  | 129853 | 130490 |
| UN34354 | Rsa1.0.01104.1 | 761  | 285480 | 1.00E-156 | 282  | 283  | 99 -  | 3   | 285  | 145189 | 145471 |
| UN34355 | Rsa1.0.03566.1 | 846  | 22050  | 8.00E-17  | 68   | 74   | 91 -  | 5   | 78   | 3708   | 3780   |
| UN34356 | Rsa1.0.01517.1 | 1265 | 44170  | 1.00E-174 | 337  | 344  | 97 +  | 1   | 340  | 25184  | 25527  |
| UN34357 | Rsa1.0.02784.1 | 668  | 27881  | 0         | 415  | 433  | 95 +  | 106 | 531  | 7504   | 7935   |

|         |                |      |        |           |      |      |       |     |      |        |        |
|---------|----------------|------|--------|-----------|------|------|-------|-----|------|--------|--------|
| UN34358 | Rsa1.0.05345.1 | 812  | 14103  | 0         | 386  | 387  | 99 +  | 1   | 387  | 10771  | 11157  |
| UN34359 | Rsa1.0.00684.1 | 803  | 141701 | 0         | 780  | 801  | 97 -  | 1   | 795  | 54254  | 55051  |
| UN34360 | Rsa1.0_11119.1 | 706  | 5610   | 0         | 607  | 623  | 97 +  | 87  | 706  | 4490   | 5107   |
| UN34361 | Rsa1.0_00222.1 | 700  | 172263 | 0         | 691  | 705  | 98 +  | 1   | 700  | 2872   | 3575   |
| UN34362 | Rsa1.0_00107.1 | 191  | 431659 | 3.00E-96  | 187  | 190  | 98 +  | 2   | 191  | 321787 | 321976 |
| UN34363 | Rsa1.0_00449.1 | 876  | 83863  | 1.00E-134 | 261  | 266  | 98 -  | 2   | 265  | 28292  | 28557  |
| UN34364 | Rsa1.0_00161.1 | 757  | 116891 | 0         | 753  | 757  | 99 +  | 1   | 757  | 41617  | 42373  |
| UN34365 | Rsa1.0_19199.1 | 589  | 1466   | 1.00E-98  | 226  | 238  | 94 +  | 353 | 589  | 1      | 236    |
| UN34366 | Rsa1.0_10452.1 | 1092 | 5846   | 0         | 482  | 485  | 99 +  | 1   | 483  | 428    | 912    |
| UN34367 | Rsa1.0_00207.1 | 682  | 248736 | 1.00E-158 | 289  | 291  | 99 -  | 8   | 298  | 200415 | 200705 |
| UN34368 | Rsa1.0_00862.1 | 787  | 61715  | 0         | 472  | 475  | 99 -  | 312 | 786  | 28528  | 29002  |
| UN34369 | Rsa1.0_05110.1 | 586  | 14814  | 0         | 442  | 449  | 98 +  | 1   | 449  | 10364  | 10811  |
| UN34370 | Rsa1.0_00833.1 | 990  | 62621  | 0         | 961  | 992  | 96 +  | 3   | 989  | 47305  | 48290  |
| UN34371 | Rsa1.0_00916.1 | 805  | 59789  | 0         | 797  | 804  | 99 +  | 1   | 804  | 55545  | 56348  |
| UN34372 | Rsa1.0_00977.1 | 653  | 198001 | 1.00E-170 | 321  | 327  | 98 +  | 1   | 327  | 32056  | 32382  |
| UN34373 | Rsa1.0_02016.1 | 817  | 36003  | 0         | 485  | 494  | 98 -  | 15  | 508  | 5549   | 6041   |
| UN34374 | Rsa1.0_00490.1 | 656  | 186713 | 1.00E-142 | 313  | 332  | 94 -  | 325 | 654  | 23006  | 23329  |
| UN34375 | Rsa1.0_03031.1 | 856  | 25839  | 1.00E-152 | 297  | 304  | 97 -  | 3   | 306  | 21511  | 21812  |
| UN34376 | Rsa1.0_00191.1 | 1228 | 316976 | 0         | 1046 | 1048 | 99 -  | 182 | 1227 | 157379 | 158426 |
| UN34377 | Rsa1.0_00107.1 | 588  | 431659 | 0         | 583  | 585  | 99 -  | 1   | 585  | 421769 | 422353 |
| UN34378 | Rsa1.0_00288.1 | 294  | 98659  | 1.00E-120 | 225  | 227  | 99 +  | 3   | 229  | 82020  | 82246  |
| UN34379 | Rsa1.0_01560.1 | 1040 | 43256  | 1.00E-163 | 393  | 426  | 92 +  | 4   | 423  | 7501   | 7920   |
| UN34380 | Rsa1.0_00231.1 | 793  | 105381 | 0         | 543  | 544  | 99 +  | 3   | 546  | 14690  | 15233  |
| UN34381 | Rsa1.0_04344.1 | 808  | 17822  | 0         | 768  | 793  | 96 -  | 14  | 806  | 4493   | 5281   |
| UN34382 | Rsa1.0_02409.1 | 659  | 31663  | 0         | 613  | 659  | 93 -  | 1   | 654  | 30766  | 31410  |
| UN34383 | Rsa1.0_04164.1 | 248  | 18767  | 9.00E-88  | 229  | 250  | 91 +  | 2   | 248  | 13273  | 13522  |
| UN34384 | Rsa1.0_00055.1 | 823  | 520193 | 4.00E-25  | 112  | 128  | 87 -  | 51  | 177  | 180191 | 180318 |
| UN34385 | Rsa1.0_04018.1 | 674  | 19551  | 0         | 672  | 672  | 100 - | 1   | 672  | 10180  | 10851  |
| UN34386 | Rsa1.0_01553.1 | 1331 | 43379  | 1.00E-178 | 385  | 407  | 94 -  | 97  | 500  | 34677  | 35083  |
| UN34387 | Rsa1.0_00040.1 | 955  | 324196 | 1.00E-172 | 313  | 315  | 99 +  | 1   | 315  | 309664 | 309978 |
| UN34388 | Rsa1.0_08097.1 | 545  | 7914   | 2.00E-19  | 92   | 106  | 86 +  | 249 | 354  | 2513   | 2618   |
| UN34389 | Rsa1.0_05774.1 | 698  | 12667  | 1.00E-144 | 314  | 332  | 94 -  | 47  | 369  | 6037   | 6367   |
| UN34390 | Rsa1.0_07717.1 | 713  | 8720   | 0         | 499  | 532  | 93 +  | 72  | 603  | 1      | 520    |
| UN34391 | Rsa1.0_09031.1 | 673  | 6699   | 0         | 670  | 672  | 99 -  | 1   | 672  | 2191   | 2862   |
| UN34392 | Rsa1.0_01269.1 | 451  | 49622  | 0         | 442  | 450  | 98 -  | 1   | 450  | 12330  | 12779  |
| UN34393 | Rsa1.0_02061.1 | 987  | 35487  | 1.00E-113 | 301  | 332  | 90 +  | 2   | 331  | 23335  | 23648  |
| UN34394 | #              | #    | #      | #         | #    | #    | #     | #   | #    | #      | #      |
| UN34395 | Rsa1.0_00243.1 | 1121 | 103651 | 1.00E-176 | 314  | 314  | 100 + | 354 | 667  | 36344  | 36657  |
| UN34396 | Rsa1.0_00877.1 | 672  | 61305  | 0         | 358  | 363  | 98 -  | 310 | 670  | 41127  | 41487  |

|         |                |      |        |           |      |      |       |     |      |        |        |
|---------|----------------|------|--------|-----------|------|------|-------|-----|------|--------|--------|
| UN34397 | Rsa1.0_04297.1 | 522  | 18030  | 1.00E-70  | 136  | 136  | 100 + | 236 | 371  | 17122  | 17257  |
| UN34398 | Rsa1.0_15313.1 | 835  | 2691   | 1.00E-123 | 410  | 469  | 87 -  | 9   | 476  | 1551   | 2018   |
| UN34399 | Rsa1.0_01723.1 | 905  | 40318  | 0         | 895  | 904  | 99 +  | 1   | 904  | 13305  | 14205  |
| UN34400 | Rsa1.0_02955.1 | 738  | 26484  | 1.00E-131 | 363  | 399  | 90 +  | 33  | 423  | 4343   | 4731   |
| UN34401 | Rsa1.0_02792.1 | 627  | 27829  | 0         | 592  | 629  | 94 -  | 3   | 625  | 21283  | 21905  |
| UN34402 | Rsa1.0_01326.1 | 1260 | 48072  | 0         | 557  | 600  | 92 +  | 1   | 580  | 19069  | 19668  |
| UN34403 | Rsa1.0_02181.1 | 1054 | 34172  | 0         | 696  | 720  | 96 +  | 1   | 720  | 28486  | 29204  |
| UN34404 | Rsa1.0_02301.1 | 1262 | 32835  | 0         | 595  | 618  | 96 +  | 1   | 618  | 28178  | 28794  |
| UN34405 | Rsa1.0_02903.1 | 1458 | 26901  | 0         | 1213 | 1281 | 94 -  | 3   | 1269 | 23202  | 24470  |
| UN34406 | Rsa1.0_02590.1 | 496  | 29752  | 0         | 473  | 496  | 95 +  | 1   | 496  | 18844  | 19337  |
| UN34407 | Rsa1.0_01000.1 | 1606 | 57140  | 0         | 391  | 408  | 95 +  | 19  | 422  | 2343   | 2750   |
| UN34408 | Rsa1.0_00940.1 | 1136 | 179946 | 1.00E-145 | 304  | 316  | 96 +  | 827 | 1134 | 165558 | 165873 |
| UN34409 | Rsa1.0_05510.1 | 735  | 13470  | 0         | 440  | 448  | 98 +  | 175 | 622  | 12423  | 12870  |
| UN34410 | Rsa1.0_02668.1 | 762  | 28895  | 0         | 448  | 460  | 97 +  | 2   | 461  | 6168   | 6622   |
| UN34411 | Rsa1.0_00309.1 | 739  | 96883  | 0         | 721  | 738  | 97 -  | 2   | 739  | 53111  | 53844  |
| UN34412 | Rsa1.0_07704.1 | 1298 | 8754   | 0         | 984  | 985  | 99 +  | 1   | 985  | 1363   | 2347   |
| UN34413 | Rsa1.0_00837.1 | 1109 | 62568  | 1.00E-127 | 287  | 305  | 94 -  | 803 | 1107 | 33188  | 33489  |
| UN34414 | Rsa1.0_02767.1 | 772  | 28111  | 1.00E-178 | 378  | 398  | 94 -  | 58  | 455  | 8164   | 8553   |
| UN34415 | Rsa1.0_37894.1 | 730  | 595    | 1.00E-163 | 422  | 456  | 92 +  | 278 | 728  | 114    | 563    |
| UN34416 | Rsa1.0_00474.1 | 1062 | 81731  | 0         | 990  | 1017 | 97 +  | 45  | 1061 | 16754  | 17770  |
| UN34417 | Rsa1.0_02712.1 | 981  | 28474  | 0         | 389  | 398  | 97 +  | 582 | 979  | 17364  | 17761  |
| UN34418 | Rsa1.0_02444.1 | 1443 | 31350  | 0         | 1144 | 1172 | 97 -  | 1   | 1172 | 3614   | 4785   |
| UN34419 | Rsa1.0_07636.1 | 1080 | 8971   | 0         | 606  | 652  | 92 +  | 161 | 807  | 4906   | 5547   |
| UN34420 | Rsa1.0_00752.1 | 1109 | 65756  | 1.00E-174 | 360  | 372  | 96 +  | 1   | 368  | 58758  | 59127  |
| UN34421 | Rsa1.0_00086.1 | 682  | 439854 | 0         | 663  | 681  | 97 -  | 1   | 680  | 322924 | 323603 |
| UN34422 | Rsa1.0_03883.1 | 844  | 20282  | 1.00E-176 | 472  | 527  | 89 -  | 344 | 844  | 8523   | 9029   |
| UN34423 | Rsa1.0_00583.1 | 636  | 74309  | 0         | 519  | 543  | 95 -  | 5   | 542  | 64130  | 64663  |
| UN34424 | Rsa1.0_00025.1 | 849  | 277312 | 0         | 576  | 652  | 88 -  | 1   | 625  | 44955  | 45583  |
| UN34425 | Rsa1.0_00159.1 | 810  | 431686 | 1.00E-113 | 241  | 250  | 96 -  | 2   | 247  | 349831 | 350080 |
| UN34426 | Rsa1.0_04790.1 | 766  | 15979  | 1.00E-122 | 258  | 270  | 95 +  | 436 | 705  | 10040  | 10309  |
| UN34427 | Rsa1.0_01709.1 | 822  | 40587  | 1.00E-154 | 503  | 572  | 87 -  | 12  | 581  | 12046  | 12614  |
| UN34428 | Rsa1.0_00070.1 | 1246 | 150321 | 1.00E-147 | 274  | 277  | 98 +  | 641 | 917  | 5395   | 5671   |
| UN34429 | Rsa1.0_33965.1 | 1035 | 667    | 1.00E-117 | 220  | 222  | 99 +  | 693 | 914  | 408    | 629    |
| UN34430 | Rsa1.0_00005.1 | 775  | 353093 | 0         | 721  | 769  | 93 -  | 3   | 771  | 117973 | 118706 |
| UN34431 | Rsa1.0_04626.1 | 1528 | 16611  | 0         | 793  | 798  | 99 -  | 448 | 1245 | 371    | 1168   |
| UN34432 | Rsa1.0_00037.1 | 827  | 307838 | 0         | 666  | 679  | 98 +  | 147 | 825  | 224610 | 225288 |
| UN34433 | Rsa1.0_01839.1 | 848  | 38482  | 0         | 384  | 393  | 97 -  | 454 | 846  | 37413  | 37804  |
| UN34434 | Rsa1.0_00110.1 | 1014 | 132719 | 0         | 675  | 760  | 88 +  | 22  | 767  | 49801  | 50556  |
| UN34435 | Rsa1.0_00175.1 | 810  | 166121 | 0         | 758  | 798  | 94 +  | 2   | 799  | 5183   | 5980   |

|         |                |      |        |           |      |      |      |     |      |        |        |
|---------|----------------|------|--------|-----------|------|------|------|-----|------|--------|--------|
| UN34436 | Rsa1.0_04897.1 | 857  | 15545  | 0         | 419  | 440  | 95 + | 1   | 432  | 771    | 1209   |
| UN34437 | Rsa1.0_00676.1 | 1206 | 69166  | 0         | 336  | 341  | 98 - | 338 | 678  | 12822  | 13162  |
| UN34438 | Rsa1.0_04104.1 | 833  | 19043  | 3.00E-38  | 112  | 122  | 91 - | 712 | 833  | 8998   | 9119   |
| UN34439 | Rsa1.0_17114.1 | 1131 | 1919   | 0         | 644  | 669  | 96 - | 465 | 1131 | 1029   | 1696   |
| UN34440 | Rsa1.0_00389.1 | 1114 | 88795  | 0         | 507  | 521  | 97 + | 2   | 522  | 53279  | 53799  |
| UN34441 | Rsa1.0_05496.1 | 803  | 13533  | 0         | 629  | 680  | 92 - | 8   | 680  | 9015   | 9681   |
| UN34442 | Rsa1.0_00145.1 | 888  | 261008 | 7.00E-73  | 195  | 216  | 90 + | 42  | 244  | 22266  | 22481  |
| UN34443 | Rsa1.0_00428.1 | 861  | 85599  | 0         | 828  | 868  | 95 - | 2   | 859  | 62593  | 63456  |
| UN34444 | Rsa1.0_01173.1 | 597  | 51727  | 0         | 430  | 436  | 98 + | 2   | 435  | 10400  | 10835  |
| UN34445 | Rsa1.0_01755.1 | 599  | 155581 | 4.00E-86  | 230  | 250  | 92 - | 321 | 569  | 35090  | 35338  |
| UN34446 | Rsa1.0_13971.1 | 641  | 3972   | 0         | 568  | 587  | 96 - | 59  | 640  | 3030   | 3616   |
| UN34447 | Rsa1.0_03314.1 | 1331 | 23804  | 1.00E-162 | 297  | 298  | 99 - | 2   | 299  | 14527  | 14823  |
| UN34448 | Rsa1.0_01625.1 | 700  | 42019  | 0         | 420  | 424  | 99 + | 2   | 425  | 29615  | 30035  |
| UN34449 | Rsa1.0_00450.1 | 1261 | 139397 | 0         | 941  | 957  | 98 + | 303 | 1259 | 124116 | 125063 |
| UN34450 | Rsa1.0_03884.1 | 966  | 20274  | 0         | 570  | 598  | 95 - | 370 | 966  | 17874  | 18458  |
| UN34451 | Rsa1.0_42214.1 | 994  | 532    | 0         | 399  | 404  | 98 + | 1   | 400  | 129    | 532    |
| UN34452 | Rsa1.0_01172.1 | 1125 | 51734  | 0         | 776  | 783  | 99 + | 1   | 783  | 21619  | 22400  |
| UN34453 | Rsa1.0_00402.1 | 1065 | 385315 | 0         | 495  | 511  | 96 - | 289 | 799  | 130906 | 131413 |
| UN34454 | Rsa1.0_00318.1 | 960  | 96094  | 1.00E-159 | 287  | 288  | 99 - | 1   | 288  | 70330  | 70617  |
| UN34455 | Rsa1.0_02116.1 | 581  | 34853  | 0         | 392  | 406  | 96 - | 1   | 403  | 13765  | 14169  |
| UN34456 | Rsa1.0_00474.1 | 241  | 81731  | 1.00E-109 | 235  | 245  | 95 - | 1   | 240  | 34006  | 34250  |
| UN34457 | Rsa1.0_00360.1 | 687  | 91190  | 1.00E-157 | 300  | 305  | 98 - | 1   | 305  | 71408  | 71711  |
| UN34458 | Rsa1.0_47885.1 | 1144 | 473    | 5.00E-93  | 203  | 212  | 95 + | 294 | 505  | 126    | 334    |
| UN34459 | Rsa1.0_08675.1 | 543  | 7054   | 1.00E-153 | 346  | 366  | 94 - | 173 | 536  | 1694   | 2058   |
| UN34460 | Rsa1.0_20661.1 | 1446 | 1282   | 0         | 1026 | 1104 | 92 + | 364 | 1444 | 1      | 1077   |
| UN34461 | Rsa1.0_00053.1 | 1412 | 263459 | 0         | 587  | 593  | 98 - | 3   | 594  | 24335  | 24927  |
| UN34462 | Rsa1.0_01073.1 | 704  | 55030  | 7.00E-23  | 168  | 199  | 84 + | 497 | 693  | 51414  | 51608  |
| UN34463 | Rsa1.0_02254.1 | 838  | 33344  | 1.00E-137 | 267  | 272  | 98 + | 566 | 836  | 12021  | 12292  |
| UN34464 | Rsa1.0_00247.1 | 719  | 103408 | 1.00E-144 | 287  | 295  | 97 - | 7   | 297  | 30209  | 30500  |
| UN34465 | #              | #    | #      | #         | #    | #    | #    | #   | #    | #      | #      |
| UN34466 | Rsa1.0_00565.1 | 913  | 75420  | 4.00E-34  | 162  | 191  | 84 - | 337 | 527  | 53256  | 53446  |
| UN34467 | Rsa1.0_02884.1 | 894  | 27034  | 0         | 412  | 421  | 97 + | 2   | 420  | 18732  | 19152  |
| UN34468 | Rsa1.0_49322.1 | 410  | 459    | 0         | 374  | 388  | 96 + | 2   | 386  | 79     | 459    |
| UN34469 | Rsa1.0_33424.1 | 662  | 679    | 1.00E-171 | 408  | 436  | 93 - | 1   | 431  | 1      | 431    |
| UN34470 | Rsa1.0_00571.1 | 1399 | 329018 | 1.00E-118 | 223  | 225  | 99 - | 509 | 733  | 39633  | 39857  |
| UN34471 | Rsa1.0_00030.1 | 867  | 250988 | 0         | 396  | 401  | 98 + | 197 | 597  | 122740 | 123140 |
| UN34472 | Rsa1.0_02894.1 | 574  | 26997  | 0         | 523  | 553  | 94 + | 4   | 543  | 16215  | 16765  |
| UN34473 | Rsa1.0_02981.1 | 607  | 26285  | 1.00E-95  | 240  | 255  | 94 - | 1   | 249  | 19173  | 19425  |
| UN34474 | Rsa1.0_02796.1 | 1445 | 27805  | 0         | 725  | 728  | 99 + | 717 | 1444 | 7627   | 8354   |

|         |                |      |        |           |      |      |       |      |      |        |        |
|---------|----------------|------|--------|-----------|------|------|-------|------|------|--------|--------|
| UN34475 | Rsa1.0.00216.1 | 760  | 197563 | 0         | 488  | 508  | 96 -  | 1    | 507  | 48673  | 49167  |
| UN34476 | Rsa1.0.01492.1 | 764  | 44704  | 0         | 514  | 518  | 99 -  | 246  | 763  | 32727  | 33244  |
| UN34477 | Rsa1.0.00183.1 | 849  | 113277 | 8.00E-91  | 206  | 218  | 94 +  | 166  | 383  | 111320 | 111537 |
| UN34478 | Rsa1.0.00339.1 | 1310 | 222974 | 0         | 746  | 765  | 97 +  | 47   | 807  | 91240  | 92003  |
| UN34479 | Rsa1.0_10080.1 | 941  | 6006   | 0         | 363  | 369  | 98 -  | 1    | 369  | 1      | 369    |
| UN34480 | Rsa1.0_00640.1 | 1088 | 70979  | 0         | 1007 | 1114 | 90 +  | 1    | 1086 | 57815  | 58900  |
| UN34481 | Rsa1.0.08959.1 | 936  | 6751   | 0         | 901  | 936  | 96 -  | 3    | 935  | 2439   | 3359   |
| UN34482 | Rsa1.0.04401.1 | 1330 | 17517  | 6.00E-28  | 86   | 91   | 94 +  | 1240 | 1328 | 2005   | 2093   |
| UN34483 | Rsa1.0.49499.1 | 973  | 458    | 0         | 452  | 458  | 98 +  | 35   | 491  | 1      | 458    |
| UN34484 | Rsa1.0.01865.1 | 870  | 37992  | 1.00E-152 | 276  | 277  | 99 -  | 160  | 436  | 16517  | 16793  |
| UN34485 | Rsa1.0.03319.1 | 1091 | 23767  | 1.00E-90  | 179  | 182  | 98 +  | 725  | 906  | 12202  | 12383  |
| UN34486 | Rsa1.0.00136.1 | 1189 | 122464 | 0         | 519  | 529  | 98 +  | 1    | 527  | 36266  | 36793  |
| UN34487 | Rsa1.0.06033.1 | 589  | 11879  | 0         | 558  | 597  | 93 +  | 2    | 587  | 6847   | 7429   |
| UN34488 | Rsa1.0.02294.1 | 469  | 32940  | 0         | 463  | 464  | 99 -  | 2    | 465  | 12751  | 13214  |
| UN34489 | Rsa1.0.02057.1 | 733  | 35540  | 0         | 718  | 730  | 98 -  | 3    | 731  | 5194   | 5922   |
| UN34490 | Rsa1.0.04719.1 | 832  | 16239  | 0         | 381  | 396  | 96 -  | 1    | 396  | 202    | 594    |
| UN34491 | Rsa1.0.02432.1 | 1032 | 31499  | 0         | 531  | 531  | 100 + | 501  | 1031 | 15382  | 15912  |
| UN34492 | Rsa1.0.62593.1 | 462  | 366    | 6.00E-81  | 313  | 362  | 86 -  | 100  | 456  | 12     | 366    |
| UN34493 | Rsa1.0.12036.1 | 681  | 5335   | 1.00E-101 | 188  | 188  | 100 - | 338  | 525  | 5002   | 5189   |
| UN34494 | Rsa1.0.01236.1 | 793  | 50156  | 0         | 771  | 799  | 96 -  | 1    | 792  | 47681  | 48472  |
| UN34495 | Rsa1.0.01646.1 | 950  | 41735  | 1.00E-105 | 260  | 278  | 93 +  | 167  | 444  | 10736  | 11010  |
| UN34496 | Rsa1.0.06311.1 | 829  | 11254  | 1.00E-147 | 301  | 312  | 96 +  | 1    | 312  | 4307   | 4611   |
| UN34497 | Rsa1.0_34008.1 | 887  | 666    | 1.00E-150 | 273  | 274  | 99 +  | 1    | 274  | 212    | 485    |
| UN34498 | Rsa1.0_13694.1 | 709  | 4469   | 0         | 691  | 708  | 97 +  | 3    | 707  | 3150   | 3857   |
| UN34499 | Rsa1.0.02039.1 | 351  | 35699  | 0         | 345  | 351  | 98 +  | 1    | 350  | 26990  | 27340  |
| UN34500 | Rsa1.0.01707.1 | 601  | 40686  | 1.00E-174 | 320  | 322  | 99 +  | 188  | 508  | 4395   | 4716   |
| UN34501 | Rsa1.0.00179.1 | 1058 | 393324 | 0         | 558  | 559  | 99 +  | 501  | 1058 | 21458  | 22016  |
| UN34502 | Rsa1.0.03112.1 | 606  | 25323  | 0         | 604  | 607  | 99 +  | 1    | 606  | 20140  | 20746  |
| UN34503 | Rsa1.0.00481.1 | 636  | 81316  | 0         | 619  | 637  | 97 +  | 1    | 636  | 19664  | 20296  |
| UN34504 | Rsa1.0.02093.1 | 657  | 35125  | 1.00E-135 | 287  | 299  | 95 +  | 1    | 295  | 25142  | 25440  |
| UN34505 | Rsa1.0.02165.1 | 794  | 34423  | 0         | 761  | 793  | 95 -  | 3    | 794  | 15155  | 15944  |
| UN34506 | Rsa1.0.02712.1 | 804  | 28474  | 0         | 755  | 806  | 93 -  | 3    | 800  | 26352  | 27156  |
| UN34507 | Rsa1.0_21096.1 | 1066 | 1235   | 0         | 430  | 441  | 97 -  | 522  | 961  | 1      | 441    |
| UN34508 | Rsa1.0.00703.1 | 760  | 67597  | 4.00E-71  | 149  | 153  | 97 +  | 108  | 260  | 22495  | 22647  |
| UN34509 | Rsa1.0.01126.1 | 1186 | 53127  | 0         | 1017 | 1063 | 95 +  | 135  | 1183 | 35534  | 36590  |
| UN34510 | Rsa1.0.00774.1 | 773  | 64831  | 0         | 463  | 466  | 99 +  | 3    | 465  | 59840  | 60305  |
| UN34511 | Rsa1.0.00361.1 | 658  | 91181  | 0         | 654  | 657  | 99 +  | 3    | 658  | 5318   | 5974   |
| UN34512 | Rsa1.0.00004.1 | 1214 | 253996 | 0         | 1181 | 1230 | 96 -  | 5    | 1213 | 9513   | 10734  |
| UN34513 | Rsa1.0_00068.1 | 257  | 151813 | 9.00E-88  | 235  | 257  | 91 -  | 1    | 256  | 118689 | 118931 |

|         |                |      |        |           |      |      |      |      |      |        |        |
|---------|----------------|------|--------|-----------|------|------|------|------|------|--------|--------|
| UN34514 | Rsa1.0_00706.1 | 1265 | 291570 | 0         | 1233 | 1273 | 96 + | 5    | 1264 | 7197   | 8466   |
| UN34515 | Rsa1.0_00039.1 | 711  | 296927 | 1.00E-101 | 228  | 240  | 95 - | 2    | 241  | 280028 | 280262 |
| UN34516 | Rsa1.0_00758.1 | 518  | 65477  | 0         | 498  | 512  | 97 + | 2    | 513  | 63005  | 63515  |
| UN34517 | Rsa1.0_02228.1 | 825  | 33688  | 0         | 387  | 388  | 99 + | 3    | 390  | 28329  | 28716  |
| UN34518 | Rsa1.0_03631.1 | 903  | 21647  | 0         | 395  | 416  | 94 + | 74   | 477  | 3273   | 3686   |
| UN34519 | Rsa1.0_00785.1 | 893  | 64356  | 0         | 677  | 716  | 94 + | 55   | 766  | 26048  | 26746  |
| UN34520 | Rsa1.0_00214.1 | 736  | 107508 | 0         | 418  | 422  | 99 + | 315  | 736  | 18934  | 19355  |
| UN34521 | Rsa1.0_00671.1 | 803  | 397884 | 0         | 494  | 513  | 96 + | 2    | 511  | 133545 | 134051 |
| UN34522 | Rsa1.0_13357.1 | 1442 | 4889   | 0         | 726  | 781  | 92 - | 13   | 782  | 1      | 779    |
| UN34523 | Rsa1.0_02079.1 | 268  | 35306  | 1.00E-65  | 151  | 159  | 94 + | 110  | 268  | 10004  | 10162  |
| UN34524 | Rsa1.0_00251.1 | 478  | 303968 | 0         | 457  | 479  | 95 - | 1    | 478  | 9312   | 9789   |
| UN34525 | Rsa1.0_01762.1 | 1133 | 39682  | 0         | 1127 | 1133 | 99 + | 1    | 1133 | 24874  | 26006  |
| UN34526 | Rsa1.0_00873.1 | 688  | 61459  | 0         | 645  | 680  | 94 + | 2    | 681  | 39570  | 40248  |
| UN34527 | Rsa1.0_00351.1 | 1345 | 413096 | 4.00E-72  | 191  | 207  | 92 + | 356  | 561  | 184389 | 184595 |
| UN34528 | Rsa1.0_18977.1 | 925  | 1501   | 0         | 373  | 389  | 95 + | 541  | 925  | 1081   | 1469   |
| UN34529 | Rsa1.0_00621.1 | 995  | 71840  | 1.00E-158 | 292  | 295  | 98 - | 698  | 992  | 15998  | 16292  |
| UN34530 | Rsa1.0_05699.1 | 920  | 12889  | 0         | 464  | 480  | 96 - | 213  | 692  | 12410  | 12889  |
| UN34531 | Rsa1.0_00244.1 | 1050 | 103590 | 1.00E-173 | 474  | 527  | 89 - | 3    | 528  | 75066  | 75589  |
| UN34532 | Rsa1.0_00873.1 | 1151 | 61459  | 0         | 767  | 806  | 95 + | 320  | 1125 | 39305  | 40108  |
| UN34533 | Rsa1.0_02896.1 | 1479 | 26970  | 0         | 369  | 376  | 98 + | 1110 | 1478 | 15279  | 15654  |
| UN34534 | Rsa1.0_00233.1 | 634  | 104918 | 0         | 554  | 578  | 95 - | 3    | 580  | 79070  | 79641  |
| UN34535 | Rsa1.0_00206.1 | 1356 | 109040 | 1.00E-169 | 311  | 314  | 99 + | 2    | 315  | 33978  | 34291  |
| UN34536 | Rsa1.0_16454.1 | 681  | 2149   | 0         | 395  | 407  | 97 - | 274  | 680  | 230    | 636    |
| UN34537 | Rsa1.0_00033.1 | 769  | 515811 | 0         | 597  | 609  | 98 + | 2    | 609  | 359975 | 360583 |
| UN34538 | #              | #    | #      | #         | #    | #    | #    | #    | #    | #      | #      |
| UN34539 | Rsa1.0_00038.1 | 433  | 314568 | 1.00E-148 | 341  | 363  | 93 + | 78   | 433  | 167369 | 167728 |
| UN34540 | Rsa1.0_00641.1 | 779  | 208241 | 0         | 460  | 467  | 98 + | 299  | 765  | 207696 | 208162 |
| UN34541 | Rsa1.0_00922.1 | 647  | 59588  | 6.00E-45  | 118  | 125  | 94 + | 273  | 397  | 21294  | 21417  |
| UN34542 | Rsa1.0_00175.1 | 803  | 166121 | 0         | 562  | 585  | 96 - | 220  | 803  | 6605   | 7189   |
| UN34543 | Rsa1.0_00300.1 | 853  | 97747  | 0         | 759  | 782  | 97 + | 73   | 853  | 1555   | 2335   |
| UN34544 | Rsa1.0_72353.1 | 1090 | 317    | 1.00E-62  | 267  | 309  | 86 - | 409  | 716  | 13     | 315    |
| UN34545 | #              | #    | #      | #         | #    | #    | #    | #    | #    | #      | #      |
| UN34546 | Rsa1.0_00140.1 | 515  | 121541 | 1.00E-141 | 303  | 317  | 95 - | 3    | 313  | 71178  | 71491  |
| UN34547 | Rsa1.0_00429.1 | 227  | 85559  | 8.00E-85  | 177  | 182  | 97 + | 48   | 227  | 24224  | 24405  |
| UN34548 | Rsa1.0_04614.1 | 776  | 16641  | 0         | 391  | 395  | 98 - | 2    | 396  | 8319   | 8713   |
| UN34549 | Rsa1.0_03780.1 | 764  | 20899  | 1.00E-110 | 269  | 293  | 91 - | 363  | 640  | 1842   | 2134   |
| UN34550 | Rsa1.0_00629.1 | 783  | 71381  | 0         | 407  | 421  | 96 + | 3    | 421  | 44567  | 44985  |
| UN34551 | Rsa1.0_02808.1 | 808  | 27677  | 1.00E-77  | 163  | 168  | 97 - | 487  | 654  | 17869  | 18036  |
| UN34552 | Rsa1.0_00182.1 | 417  | 142305 | 1.00E-84  | 178  | 183  | 97 + | 1    | 182  | 66816  | 66998  |



|         |                |      |        |           |      |      |       |     |      |        |        |
|---------|----------------|------|--------|-----------|------|------|-------|-----|------|--------|--------|
| UN34553 | Rsa1.0.00079.1 | 559  | 606987 | 0         | 508  | 557  | 91 -  | 4   | 556  | 59622  | 60169  |
| UN34554 | Rsa1.0.05595.1 | 1158 | 13228  | 1.00E-172 | 338  | 347  | 97 +  | 1   | 346  | 3219   | 3561   |
| UN34555 | Rsa1.0.02645.1 | 1176 | 29158  | 0         | 339  | 339  | 100 - | 3   | 341  | 3773   | 4111   |
| UN34556 | Rsa1.0.62698.1 | 881  | 366    | 0         | 359  | 361  | 99 +  | 304 | 664  | 6      | 366    |
| UN34557 | Rsa1.0.02991.1 | 992  | 26178  | 1.00E-80  | 267  | 303  | 88 -  | 473 | 769  | 871    | 1160   |
| UN34558 | Rsa1.0.00177.1 | 492  | 143394 | 0         | 430  | 446  | 96 +  | 27  | 468  | 104418 | 104862 |
| UN34559 | Rsa1.0.15522.1 | 1262 | 2559   | 0         | 415  | 429  | 96 -  | 664 | 1089 | 1      | 428    |
| UN34560 | Rsa1.0.00149.1 | 940  | 305196 | 3.00E-69  | 140  | 142  | 98 +  | 792 | 933  | 46726  | 46867  |
| UN34561 | Rsa1.0.00088.1 | 1256 | 141341 | 0         | 572  | 587  | 97 +  | 2   | 587  | 100653 | 101230 |
| UN34562 | Rsa1.0.05923.1 | 893  | 12230  | 1.00E-168 | 317  | 323  | 98 +  | 2   | 324  | 4209   | 4531   |
| UN34563 | Rsa1.0.00526.1 | 540  | 169279 | 8.00E-84  | 322  | 368  | 87 -  | 2   | 364  | 124599 | 124962 |
| UN34564 | Rsa1.0.34133.1 | 613  | 663    | 0         | 338  | 342  | 98 +  | 1   | 342  | 184    | 524    |
| UN34565 | Rsa1.0.00233.1 | 775  | 104918 | 0         | 460  | 498  | 92 +  | 165 | 659  | 11787  | 12274  |
| UN34566 | Rsa1.0.71832.1 | 388  | 319    | 3.00E-24  | 61   | 62   | 98 +  | 217 | 278  | 258    | 319    |
| UN34567 | Rsa1.0.02694.1 | 1018 | 28610  | 0         | 436  | 452  | 96 -  | 453 | 901  | 4461   | 4909   |
| UN34568 | Rsa1.0.01929.1 | 714  | 37191  | 0         | 690  | 714  | 96 -  | 1   | 713  | 23566  | 24279  |
| UN34569 | Rsa1.0.04773.1 | 617  | 16037  | 1.00E-170 | 398  | 428  | 92 +  | 185 | 605  | 3168   | 3592   |
| UN34570 | Rsa1.0.01006.1 | 1088 | 163670 | 0         | 633  | 708  | 89 +  | 1   | 652  | 1578   | 2285   |
| UN34571 | Rsa1.0.02129.1 | 614  | 34757  | 0         | 472  | 512  | 92 +  | 1   | 505  | 16628  | 17123  |
| UN34572 | Rsa1.0.01177.1 | 994  | 51572  | 0         | 751  | 769  | 97 -  | 220 | 985  | 5425   | 6192   |
| UN34573 | Rsa1.0.02186.1 | 857  | 34150  | 1.00E-162 | 318  | 325  | 97 +  | 2   | 325  | 13881  | 14203  |
| UN34574 | Rsa1.0.00674.1 | 655  | 193753 | 3.00E-56  | 142  | 152  | 93 +  | 89  | 240  | 124454 | 124605 |
| UN34575 | Rsa1.0.03633.1 | 1118 | 21644  | 0         | 574  | 579  | 99 -  | 1   | 579  | 8230   | 8807   |
| UN34576 | Rsa1.0.01285.1 | 1000 | 172709 | 0         | 576  | 595  | 96 -  | 12  | 603  | 25318  | 25912  |
| UN34577 | Rsa1.0.00069.1 | 853  | 403561 | 0         | 544  | 563  | 96 -  | 2   | 562  | 168707 | 169268 |
| UN34578 | Rsa1.0.00818.1 | 695  | 62939  | 0         | 436  | 450  | 96 -  | 6   | 446  | 23331  | 23780  |
| UN34579 | Rsa1.0.03061.1 | 444  | 25697  | 0         | 359  | 364  | 98 +  | 79  | 442  | 81     | 444    |
| UN34580 | Rsa1.0.00120.1 | 1227 | 277288 | 0         | 1007 | 1179 | 85 -  | 6   | 1166 | 90848  | 92017  |
| UN34581 | Rsa1.0.40422.1 | 1116 | 555    | 0         | 500  | 519  | 96 -  | 516 | 1033 | 1      | 518    |
| UN34582 | Rsa1.0.02699.1 | 776  | 28586  | 1.00E-157 | 282  | 282  | 100 + | 6   | 287  | 5397   | 5678   |
| UN34583 | Rsa1.0.07085.1 | 883  | 9915   | 0         | 869  | 881  | 98 -  | 1   | 881  | 5520   | 6400   |
| UN34584 | Rsa1.0.05789.1 | 1120 | 12620  | 1.00E-170 | 331  | 339  | 97 +  | 1   | 338  | 15     | 353    |
| UN34585 | Rsa1.0.00273.1 | 1005 | 326186 | 0         | 507  | 566  | 89 +  | 451 | 1004 | 117911 | 118476 |
| UN34586 | Rsa1.0.00700.1 | 647  | 67699  | 1.00E-158 | 289  | 291  | 99 -  | 355 | 645  | 3616   | 3906   |
| UN34587 | Rsa1.0.01344.1 | 711  | 142535 | 0         | 711  | 712  | 99 -  | 1   | 711  | 19407  | 20118  |
| UN34588 | Rsa1.0.02619.1 | 814  | 29444  | 0         | 802  | 812  | 98 +  | 3   | 814  | 5295   | 6105   |
| UN34589 | Rsa1.0.02894.1 | 630  | 26997  | 3.00E-34  | 191  | 226  | 84 +  | 284 | 499  | 25195  | 25416  |
| UN34590 | Rsa1.0.01184.1 | 739  | 51452  | 0         | 720  | 737  | 97 +  | 1   | 737  | 37529  | 38265  |
| UN34591 | Rsa1.0.00178.1 | 836  | 114861 | 0         | 594  | 622  | 95 +  | 29  | 647  | 93407  | 94025  |

|         |                |      |        |           |      |      |       |      |      |        |        |
|---------|----------------|------|--------|-----------|------|------|-------|------|------|--------|--------|
| UN34592 | Rsa1.0.00914.1 | 1041 | 59880  | 0         | 1010 | 1042 | 96 -  | 1    | 1041 | 13035  | 14076  |
| UN34593 | Rsa1.0.01143.1 | 250  | 52456  | 5.00E-12  | 40   | 41   | 97 -  | 142  | 182  | 41396  | 41436  |
| UN34594 | Rsa1.0.01115.1 | 1214 | 183545 | 0         | 690  | 749  | 92 +  | 472  | 1212 | 136991 | 137714 |
| UN34595 | Rsa1.0.03201.1 | 743  | 157656 | 0         | 500  | 505  | 99 -  | 4    | 508  | 1010   | 1514   |
| UN34596 | Rsa1.0.05694.1 | 1191 | 12903  | 1.00E-113 | 274  | 296  | 92 +  | 866  | 1161 | 8387   | 8682   |
| UN34597 | Rsa1.0.00026.1 | 917  | 327835 | 0         | 586  | 605  | 96 +  | 174  | 778  | 55916  | 56517  |
| UN34598 | Rsa1.0.08666.1 | 386  | 7063   | 1.00E-164 | 353  | 369  | 95 +  | 1    | 367  | 2591   | 2958   |
| UN34599 | Rsa1.0.14752.1 | 538  | 3100   | 0         | 477  | 503  | 94 -  | 36   | 537  | 2182   | 2675   |
| UN34600 | Rsa1.0.01336.1 | 651  | 47853  | 0         | 640  | 650  | 98 -  | 1    | 650  | 5086   | 5735   |
| UN34601 | Rsa1.0.15192.1 | 759  | 2768   | 1.00E-139 | 325  | 346  | 93 +  | 390  | 734  | 862    | 1204   |
| UN34602 | Rsa1.0.01403.1 | 1375 | 46453  | 0         | 1350 | 1387 | 97 +  | 1    | 1373 | 40781  | 42162  |
| UN34603 | Rsa1.0.00153.1 | 1028 | 192931 | 0         | 403  | 420  | 95 -  | 608  | 1027 | 113513 | 113926 |
| UN34604 | Rsa1.0.01945.1 | 997  | 36989  | 1.00E-148 | 326  | 349  | 93 -  | 543  | 891  | 7204   | 7537   |
| UN34605 | Rsa1.0.01513.1 | 1088 | 44234  | 0         | 692  | 713  | 97 +  | 1    | 707  | 36930  | 37641  |
| UN34606 | Rsa1.0.05133.1 | 853  | 14751  | 0         | 838  | 861  | 97 +  | 1    | 851  | 1760   | 2620   |
| UN34607 | Rsa1.0.01595.1 | 891  | 175383 | 0         | 387  | 395  | 97 -  | 241  | 634  | 156122 | 156512 |
| UN34608 | Rsa1.0.00917.1 | 973  | 182012 | 1.00E-71  | 166  | 174  | 95 +  | 1    | 174  | 181243 | 181415 |
| UN34609 | Rsa1.0.03207.1 | 589  | 24604  | 0         | 584  | 588  | 99 -  | 1    | 586  | 5529   | 6116   |
| UN34610 | Rsa1.0.08080.1 | 991  | 137363 | 0         | 944  | 996  | 94 +  | 2    | 990  | 6663   | 7644   |
| UN34611 | Rsa1.0.06185.1 | 760  | 11540  | 0         | 756  | 759  | 99 +  | 1    | 758  | 5391   | 6149   |
| UN34612 | Rsa1.0.00193.1 | 454  | 194198 | 0         | 450  | 472  | 95 +  | 3    | 453  | 111188 | 111659 |
| UN34613 | Rsa1.0.00946.1 | 1173 | 58666  | 0         | 1158 | 1181 | 98 -  | 3    | 1171 | 17984  | 19164  |
| UN34614 | Rsa1.0.40237.1 | 1114 | 558    | 1.00E-156 | 310  | 320  | 96 +  | 311  | 630  | 7      | 326    |
| UN34615 | Rsa1.0.00213.1 | 244  | 108167 | 5.00E-49  | 150  | 165  | 90 -  | 15   | 178  | 9890   | 10051  |
| UN34616 | Rsa1.0.01032.1 | 1069 | 56189  | 0         | 334  | 334  | 100 - | 306  | 639  | 24607  | 24940  |
| UN34617 | Rsa1.0.08716.1 | 628  | 7009   | 1.00E-156 | 285  | 287  | 99 -  | 3    | 289  | 6477   | 6763   |
| UN34618 | Rsa1.0.00524.1 | 1192 | 169613 | 0         | 1171 | 1193 | 98 +  | 6    | 1191 | 10352  | 11542  |
| UN34619 | Rsa1.0.00028.1 | 677  | 293984 | 2.00E-84  | 256  | 287  | 89 +  | 65   | 350  | 137207 | 137478 |
| UN34620 | Rsa1.0.17757.1 | 781  | 1748   | 0         | 778  | 781  | 99 +  | 1    | 780  | 147    | 927    |
| UN34621 | Rsa1.0.00182.1 | 908  | 142305 | 1.00E-160 | 318  | 325  | 97 -  | 1    | 325  | 66480  | 66799  |
| UN34622 | Rsa1.0.04274.1 | 988  | 18140  | 1.00E-125 | 242  | 246  | 98 +  | 638  | 880  | 1      | 246    |
| UN34623 | Rsa1.0.00394.1 | 895  | 148426 | 1.00E-168 | 317  | 322  | 98 +  | 10   | 329  | 68761  | 69082  |
| UN34624 | Rsa1.0.00012.1 | 408  | 222148 | 1.00E-153 | 378  | 408  | 92 +  | 1    | 405  | 103325 | 103719 |
| UN34625 | Rsa1.0.00261.1 | 1325 | 151157 | 1.00E-140 | 333  | 361  | 92 +  | 208  | 565  | 98875  | 99223  |
| UN34626 | Rsa1.0.00448.1 | 1176 | 84048  | 0         | 518  | 536  | 96 +  | 539  | 1073 | 78140  | 78675  |
| UN34627 | Rsa1.0.00059.1 | 887  | 159650 | 1.00E-128 | 431  | 495  | 87 +  | 1    | 477  | 105848 | 106336 |
| UN34628 | Rsa1.0.02908.1 | 527  | 26859  | 0         | 353  | 363  | 97 -  | 1    | 363  | 5105   | 5467   |
| UN34629 | Rsa1.0.03733.1 | 786  | 21108  | 0         | 687  | 794  | 86 +  | 1    | 785  | 2341   | 3127   |
| UN34630 | Rsa1.0.03795.1 | 1439 | 20818  | 1.00E-108 | 218  | 224  | 97 +  | 1118 | 1341 | 8274   | 8497   |

|         |                |      |        |           |     |     |       |     |     |        |        |
|---------|----------------|------|--------|-----------|-----|-----|-------|-----|-----|--------|--------|
| UN34631 | Rsa1.0.01651.1 | 793  | 41586  | 0         | 669 | 706 | 94 -  | 2   | 700 | 19156  | 19847  |
| UN34632 | Rsa1.0.06168.1 | 854  | 11580  | 1.00E-134 | 266 | 274 | 97 -  | 1   | 269 | 10865  | 11138  |
| UN34633 | Rsa1.0.00036.1 | 1020 | 176186 | 0         | 381 | 384 | 99 -  | 1   | 384 | 143783 | 144166 |
| UN34634 | Rsa1.0.00863.1 | 705  | 254535 | 0         | 699 | 702 | 99 +  | 1   | 702 | 194691 | 195390 |
| UN34635 | Rsa1.0.15615.1 | 765  | 2518   | 1.00E-126 | 233 | 234 | 99 +  | 532 | 765 | 1669   | 1902   |
| UN34636 | Rsa1.0.04936.1 | 1149 | 15403  | 0         | 814 | 814 | 100 - | 2   | 815 | 4402   | 5215   |
| UN34637 | Rsa1.0.02150.1 | 1107 | 34580  | 0         | 669 | 689 | 97 -  | 1   | 689 | 27648  | 28332  |
| UN34638 | Rsa1.0.00352.1 | 329  | 92266  | 3.00E-85  | 175 | 180 | 97 -  | 13  | 192 | 15442  | 15621  |
| UN34639 | Rsa1.0.05938.1 | 761  | 12173  | 1.00E-170 | 345 | 359 | 96 +  | 1   | 359 | 8316   | 8674   |
| UN34640 | Rsa1.0.00978.1 | 562  | 57739  | 0         | 539 | 574 | 93 +  | 1   | 561 | 46587  | 47157  |
| UN34641 | Rsa1.0.03120.1 | 1348 | 25269  | 0         | 413 | 418 | 98 +  | 3   | 420 | 22398  | 22815  |
| UN34642 | Rsa1.0.01958.1 | 460  | 261128 | 1.00E-149 | 300 | 311 | 96 -  | 5   | 315 | 127382 | 127687 |
| UN34643 | Rsa1.0.01235.1 | 769  | 50180  | 0         | 468 | 469 | 99 -  | 301 | 769 | 15039  | 15507  |
| UN34644 | Rsa1.0.03502.1 | 791  | 22446  | 0         | 469 | 502 | 93 -  | 292 | 790 | 15610  | 16111  |
| UN34645 | Rsa1.0.00651.1 | 711  | 247766 | 2.00E-44  | 110 | 116 | 94 -  | 15  | 130 | 82729  | 82844  |
| UN34646 | Rsa1.0.07381.1 | 615  | 9488   | 0         | 604 | 620 | 97 -  | 1   | 613 | 5403   | 6022   |
| UN34647 | Rsa1.0.02488.1 | 894  | 30913  | 0         | 565 | 569 | 99 +  | 38  | 606 | 1475   | 2043   |
| UN34648 | Rsa1.0.02004.1 | 1579 | 169138 | 0         | 740 | 787 | 94 -  | 1   | 787 | 156516 | 157283 |
| UN34649 | Rsa1.0.00668.1 | 706  | 69421  | 0         | 512 | 532 | 96 +  | 1   | 526 | 4542   | 5073   |
| UN34650 | Rsa1.0.00561.1 | 767  | 75653  | 0         | 439 | 447 | 98 -  | 319 | 765 | 36033  | 36473  |
| UN34651 | Rsa1.0.00556.1 | 1288 | 207212 | 1.00E-175 | 325 | 328 | 99 +  | 1   | 327 | 179319 | 179646 |
| UN34652 | Rsa1.0.04512.1 | 231  | 17031  | 1.00E-128 | 231 | 231 | 100 + | 1   | 231 | 3622   | 3852   |
| UN34653 | Rsa1.0.00143.1 | 1456 | 121313 | 0         | 680 | 702 | 96 -  | 1   | 702 | 51340  | 52039  |
| UN34654 | Rsa1.0.00438.1 | 357  | 84861  | 1.00E-150 | 346 | 372 | 93 +  | 2   | 355 | 18284  | 18652  |
| UN34655 | Rsa1.0.07345.1 | 837  | 9526   | 0         | 418 | 419 | 99 -  | 1   | 418 | 6808   | 7226   |
| UN34656 | Rsa1.0.04741.1 | 1423 | 16164  | 0         | 341 | 345 | 98 -  | 1   | 343 | 4356   | 4700   |
| UN34657 | Rsa1.0.00502.1 | 947  | 204180 | 0         | 419 | 422 | 99 -  | 527 | 947 | 73724  | 74145  |
| UN34658 | Rsa1.0.00519.1 | 583  | 197864 | 1.00E-134 | 366 | 406 | 90 +  | 36  | 440 | 43331  | 43720  |
| UN34659 | Rsa1.0.03376.1 | 340  | 23326  | 1.00E-155 | 307 | 316 | 97 -  | 25  | 340 | 9015   | 9328   |
| UN34660 | Rsa1.0.00122.1 | 935  | 265937 | 0         | 518 | 536 | 96 +  | 362 | 897 | 92603  | 93138  |
| UN34661 | Rsa1.0.01120.1 | 353  | 53438  | 0         | 349 | 351 | 99 +  | 2   | 352 | 33127  | 33477  |
| UN34662 | Rsa1.0.01632.1 | 432  | 181224 | 1.00E-174 | 358 | 371 | 96 +  | 1   | 370 | 36835  | 37201  |
| UN34663 | Rsa1.0.04789.1 | 860  | 15981  | 0         | 852 | 861 | 98 -  | 1   | 858 | 9700   | 10559  |
| UN34664 | Rsa1.0.00846.1 | 604  | 62342  | 0         | 376 | 386 | 97 -  | 1   | 386 | 1      | 386    |
| UN34665 | Rsa1.0.52355.1 | 1053 | 435    | 1.00E-121 | 227 | 229 | 99 +  | 412 | 640 | 1      | 229    |
| UN34666 | Rsa1.0.02690.1 | 888  | 28629  | 0         | 814 | 851 | 95 -  | 48  | 888 | 11192  | 12039  |
| UN34667 | Rsa1.0.04427.1 | 1059 | 17399  | 1.00E-142 | 391 | 437 | 89 -  | 99  | 519 | 16301  | 16725  |
| UN34668 | Rsa1.0.01318.1 | 796  | 48275  | 0         | 741 | 807 | 91 -  | 4   | 787 | 46307  | 47110  |
| UN34669 | Rsa1.0.00107.1 | 826  | 431659 | 1.00E-179 | 325 | 327 | 99 -  | 1   | 327 | 334765 | 335091 |

|         |                |      |        |           |      |      |       |     |      |        |        |
|---------|----------------|------|--------|-----------|------|------|-------|-----|------|--------|--------|
| UN34670 | Rsa1.0.00071.1 | 832  | 345714 | 3.00E-90  | 316  | 365  | 86 +  | 324 | 688  | 76287  | 76651  |
| UN34671 | Rsa1.0.04538.1 | 708  | 16940  | 4.00E-86  | 189  | 194  | 97 -  | 10  | 202  | 13829  | 14020  |
| UN34672 | Rsa1.0.00089.1 | 791  | 406142 | 1.00E-154 | 277  | 277  | 100 - | 235 | 511  | 224228 | 224504 |
| UN34673 | Rsa1.0.00254.1 | 1679 | 102600 | 0         | 1448 | 1507 | 96 +  | 1   | 1482 | 87148  | 88644  |
| UN34674 | Rsa1.0.11249.1 | 717  | 5569   | 1.00E-159 | 292  | 293  | 99 +  | 1   | 293  | 627    | 918    |
| UN34675 | Rsa1.0.00036.1 | 928  | 176186 | 0         | 832  | 863  | 96 -  | 1   | 844  | 62977  | 63837  |
| UN34676 | Rsa1.0.00507.1 | 1606 | 79074  | 1.00E-155 | 333  | 350  | 95 +  | 587 | 935  | 61694  | 62043  |
| UN34677 | Rsa1.0.00079.1 | 811  | 606987 | 1.00E-114 | 209  | 209  | 100 - | 601 | 809  | 55024  | 55232  |
| UN34678 | Rsa1.0.03591.1 | 1549 | 21888  | 0         | 1495 | 1571 | 95 +  | 1   | 1548 | 3359   | 4916   |
| UN34679 | Rsa1.0.03767.1 | 998  | 20969  | 0         | 950  | 992  | 95 +  | 1   | 991  | 5658   | 6621   |
| UN34680 | Rsa1.0.07402.1 | 999  | 9459   | 0         | 922  | 929  | 99 -  | 1   | 928  | 2762   | 3689   |
| UN34681 | Rsa1.0.40630.1 | 1202 | 552    | 1.00E-133 | 244  | 245  | 99 -  | 667 | 911  | 185    | 429    |
| UN34682 | Rsa1.0.06035.1 | 307  | 11874  | 2.00E-18  | 99   | 115  | 86 +  | 26  | 140  | 8587   | 8699   |
| UN34683 | Rsa1.0.03517.1 | 1068 | 22337  | 0         | 358  | 366  | 97 +  | 699 | 1064 | 11767  | 12132  |
| UN34684 | Rsa1.0.07501.1 | 468  | 9241   | 0         | 468  | 468  | 100 - | 1   | 468  | 6482   | 6949   |
| UN34685 | Rsa1.0.07706.1 | 910  | 8752   | 0         | 876  | 908  | 96 +  | 1   | 908  | 1139   | 2043   |
| UN34686 | Rsa1.0.00789.1 | 910  | 64233  | 0         | 492  | 504  | 97 -  | 370 | 869  | 26895  | 27395  |
| UN34687 | Rsa1.0.00577.1 | 412  | 174827 | 0         | 405  | 410  | 98 -  | 1   | 407  | 111654 | 112063 |
| UN34688 | Rsa1.0.03820.1 | 1171 | 20664  | 0         | 717  | 773  | 92 -  | 415 | 1169 | 9193   | 9961   |
| UN34689 | Rsa1.0.00116.1 | 1050 | 365886 | 1.00E-104 | 202  | 205  | 98 -  | 364 | 568  | 11968  | 12172  |
| UN34690 | Rsa1.0.00080.1 | 1445 | 190437 | 3.00E-98  | 204  | 211  | 96 -  | 521 | 731  | 65230  | 65440  |
| UN34691 | Rsa1.0.01664.1 | 608  | 41364  | 0         | 570  | 607  | 93 +  | 3   | 608  | 30791  | 31397  |
| UN34692 | Rsa1.0.00379.1 | 659  | 89865  | 0         | 636  | 658  | 96 -  | 1   | 658  | 84581  | 85238  |
| UN34693 | #              | #    | #      | #         | #    | #    | #     | #   | #    | #      | #      |
| UN34694 | Rsa1.0.00589.1 | 708  | 209965 | 0         | 696  | 708  | 98 -  | 1   | 706  | 170446 | 171152 |
| UN34695 | Rsa1.0.01052.1 | 598  | 55548  | 0         | 594  | 596  | 99 +  | 2   | 597  | 39072  | 39667  |
| UN34696 | Rsa1.0.00125.1 | 828  | 253043 | 0         | 531  | 568  | 93 -  | 1   | 568  | 201538 | 202099 |
| UN34697 | Rsa1.0.00740.1 | 637  | 215972 | 0         | 438  | 438  | 100 - | 2   | 439  | 177650 | 178087 |
| UN34698 | Rsa1.0.00838.1 | 705  | 153820 | 0         | 698  | 704  | 99 -  | 1   | 704  | 11150  | 11853  |
| UN34699 | Rsa1.0.00638.1 | 1047 | 71037  | 0         | 703  | 722  | 97 +  | 176 | 896  | 44460  | 45181  |
| UN34700 | Rsa1.0.03912.1 | 817  | 135266 | 0         | 611  | 651  | 93 -  | 2   | 646  | 12140  | 12786  |
| UN34701 | Rsa1.0.00017.1 | 919  | 752458 | 0         | 392  | 412  | 95 -  | 5   | 416  | 531225 | 531628 |
| UN34702 | Rsa1.0.02952.1 | 514  | 26492  | 0         | 512  | 514  | 99 +  | 1   | 514  | 1038   | 1551   |
| UN34703 | Rsa1.0.00204.1 | 646  | 109056 | 1.00E-92  | 296  | 335  | 88 -  | 1   | 316  | 46701  | 47035  |
| UN34704 | Rsa1.0.04833.1 | 937  | 148235 | 1.00E-110 | 216  | 219  | 98 -  | 2   | 220  | 5120   | 5337   |
| UN34705 | Rsa1.0.05428.1 | 1101 | 13789  | 0         | 693  | 711  | 97 +  | 391 | 1101 | 3217   | 3927   |
| UN34706 | Rsa1.0.05575.1 | 910  | 13288  | 0         | 417  | 431  | 96 +  | 71  | 501  | 8363   | 8793   |
| UN34707 | Rsa1.0.00520.1 | 884  | 78226  | 0         | 360  | 364  | 98 -  | 1   | 362  | 37747  | 38110  |
| UN34708 | Rsa1.0.00196.1 | 718  | 109960 | 0         | 495  | 549  | 90 +  | 1   | 533  | 51548  | 52079  |

|         |                |      |        |           |      |      |       |     |      |        |        |
|---------|----------------|------|--------|-----------|------|------|-------|-----|------|--------|--------|
| UN34709 | Rsa1.0.00190.1 | 1412 | 318240 | 0         | 1347 | 1412 | 95 -  | 1   | 1411 | 288624 | 290029 |
| UN34710 | Rsa1.0.04497.1 | 1065 | 17103  | 0         | 446  | 453  | 98 +  | 592 | 1044 | 11142  | 11594  |
| UN34711 | Rsa1.0.00040.1 | 968  | 324196 | 1.00E-167 | 392  | 419  | 93 +  | 438 | 849  | 310697 | 311109 |
| UN34712 | Rsa1.0.01348.1 | 260  | 47569  | 1.00E-145 | 260  | 260  | 100 + | 1   | 260  | 21956  | 22215  |
| UN34713 | Rsa1.0.04906.1 | 971  | 15503  | 0         | 803  | 813  | 98 +  | 1   | 812  | 9570   | 10382  |
| UN34714 | Rsa1.0.01521.1 | 482  | 142147 | 2.00E-50  | 203  | 233  | 87 -  | 246 | 475  | 16877  | 17108  |
| UN34715 | Rsa1.0.00069.1 | 686  | 403561 | 0         | 666  | 682  | 97 +  | 1   | 681  | 83304  | 83985  |
| UN34716 | Rsa1.0.00064.1 | 986  | 240927 | 0         | 966  | 986  | 97 +  | 1   | 984  | 75448  | 76432  |
| UN34717 | Rsa1.0.00422.1 | 1112 | 86144  | 0         | 1100 | 1126 | 97 -  | 1   | 1111 | 69648  | 70770  |
| UN34718 | Rsa1.0.00923.1 | 1071 | 153678 | 0         | 453  | 492  | 92 -  | 573 | 1064 | 36820  | 37284  |
| UN34719 | Rsa1.0.16633.1 | 858  | 2084   | 0         | 396  | 411  | 96 -  | 439 | 849  | 1485   | 1895   |
| UN34720 | Rsa1.0.00964.1 | 771  | 316648 | 0         | 742  | 797  | 93 -  | 5   | 771  | 292628 | 293414 |
| UN34721 | Rsa1.0.01566.1 | 813  | 43134  | 1.00E-128 | 254  | 260  | 97 +  | 1   | 258  | 15258  | 15517  |
| UN34722 | Rsa1.0.03018.1 | 662  | 25991  | 1.00E-155 | 299  | 305  | 98 +  | 355 | 658  | 16340  | 16644  |
| UN34723 | Rsa1.0.38397.1 | 1659 | 586    | 0         | 577  | 578  | 99 +  | 313 | 890  | 9      | 586    |
| UN34724 | #              | #    | #      | #         | #    | #    | #     | #   | #    | #      | #      |
| UN34725 | Rsa1.0.00842.1 | 621  | 62493  | 0         | 604  | 621  | 97 +  | 1   | 620  | 23767  | 24383  |
| UN34726 | Rsa1.0.02500.1 | 602  | 30768  | 0         | 550  | 592  | 92 +  | 21  | 602  | 12770  | 13360  |
| UN34727 | Rsa1.0.00017.1 | 292  | 752458 | 1.00E-147 | 273  | 276  | 98 +  | 17  | 292  | 751560 | 751835 |
| UN34728 | Rsa1.0.00002.1 | 797  | 601661 | 0         | 600  | 637  | 94 -  | 170 | 797  | 105492 | 106125 |
| UN34729 | Rsa1.0.00109.1 | 825  | 132735 | 0         | 361  | 364  | 99 +  | 460 | 823  | 68798  | 69161  |
| UN34730 | Rsa1.0.03229.1 | 1001 | 24470  | 0         | 358  | 369  | 97 -  | 1   | 369  | 15434  | 15801  |
| UN34731 | Rsa1.0.03636.1 | 1437 | 21638  | 0         | 392  | 405  | 96 +  | 993 | 1397 | 13532  | 13930  |
| UN34732 | Rsa1.0.01355.1 | 440  | 47303  | 0         | 421  | 446  | 94 +  | 1   | 438  | 42465  | 42907  |
| UN34733 | Rsa1.0.02461.1 | 640  | 31166  | 1.00E-137 | 258  | 260  | 99 +  | 379 | 638  | 6012   | 6270   |
| UN34734 | Rsa1.0.00002.1 | 1217 | 601661 | 0         | 350  | 351  | 99 -  | 339 | 689  | 181698 | 182048 |
| UN34735 | Rsa1.0.03494.1 | 826  | 22509  | 0         | 806  | 826  | 97 -  | 1   | 826  | 17464  | 18289  |
| UN34736 | Rsa1.0.06041.1 | 1051 | 11861  | 0         | 1010 | 1085 | 93 -  | 1   | 1050 | 3136   | 4217   |
| UN34737 | Rsa1.0.01945.1 | 958  | 36989  | 0         | 931  | 957  | 97 -  | 2   | 958  | 15103  | 16057  |
| UN34738 | Rsa1.0.08272.1 | 784  | 7617   | 0         | 405  | 422  | 95 -  | 235 | 656  | 4645   | 5066   |
| UN34739 | Rsa1.0.00523.1 | 1028 | 178770 | 0         | 496  | 505  | 98 +  | 5   | 505  | 29052  | 29554  |
| UN34740 | Rsa1.0.01608.1 | 1325 | 170540 | 0         | 1158 | 1162 | 99 -  | 1   | 1162 | 168885 | 170046 |
| UN34741 | Rsa1.0.00034.1 | 888  | 260119 | 0         | 447  | 483  | 92 +  | 1   | 482  | 33600  | 34066  |
| UN34742 | Rsa1.0.04281.1 | 1504 | 18107  | 0         | 1039 | 1071 | 97 +  | 435 | 1504 | 5962   | 7019   |
| UN34743 | Rsa1.0.00016.1 | 1170 | 831256 | 1.00E-170 | 381  | 404  | 94 -  | 336 | 727  | 57544  | 57943  |
| UN34744 | Rsa1.0.22040.1 | 821  | 1153   | 0         | 784  | 821  | 95 +  | 1   | 821  | 331    | 1146   |
| UN34745 | Rsa1.0.01013.1 | 765  | 56822  | 0         | 738  | 738  | 100 - | 28  | 765  | 41570  | 42307  |
| UN34746 | Rsa1.0.01194.1 | 253  | 51113  | 3.00E-63  | 188  | 208  | 90 -  | 49  | 253  | 44786  | 44986  |
| UN34747 | Rsa1.0.00474.1 | 828  | 81731  | 0         | 810  | 829  | 97 +  | 1   | 828  | 3391   | 4217   |

|         |                |      |        |           |     |      |      |     |      |        |        |
|---------|----------------|------|--------|-----------|-----|------|------|-----|------|--------|--------|
| UN34748 | Rsa1.0.03714.1 | 804  | 21217  | 0         | 405 | 407  | 99 - | 2   | 408  | 15909  | 16315  |
| UN34749 | Rsa1.0.02871.1 | 1276 | 27085  | 0         | 848 | 879  | 96 - | 2   | 879  | 20167  | 21045  |
| UN34750 | Rsa1.0.61124.1 | 1372 | 375    | 4.00E-63  | 275 | 326  | 84 + | 260 | 576  | 58     | 375    |
| UN34751 | Rsa1.0.00293.1 | 642  | 339294 | 1.00E-67  | 150 | 155  | 96 + | 323 | 476  | 303518 | 303672 |
| UN34752 | Rsa1.0.00005.1 | 915  | 353093 | 1.00E-159 | 316 | 325  | 97 + | 391 | 709  | 263134 | 263458 |
| UN34753 | Rsa1.0.07683.1 | 823  | 8804   | 0         | 764 | 807  | 94 - | 8   | 814  | 2905   | 3710   |
| UN34754 | Rsa1.0.25169.1 | 836  | 948    | 1.00E-125 | 272 | 286  | 95 + | 6   | 291  | 305    | 588    |
| UN34755 | Rsa1.0.15024.1 | 348  | 2885   | 4.00E-66  | 190 | 216  | 87 + | 58  | 252  | 2018   | 2233   |
| UN34756 | Rsa1.0.00034.1 | 678  | 260119 | 0         | 603 | 633  | 95 + | 2   | 634  | 107469 | 108091 |
| UN34757 | Rsa1.0.05151.1 | 737  | 14667  | 0         | 356 | 365  | 97 + | 373 | 737  | 10826  | 11188  |
| UN34758 | Rsa1.0.05918.1 | 600  | 12244  | 1.00E-98  | 226 | 241  | 93 - | 372 | 600  | 3509   | 3749   |
| UN34759 | Rsa1.0.01263.1 | 834  | 49703  | 1.00E-160 | 376 | 401  | 93 + | 441 | 834  | 23720  | 24111  |
| UN34760 | Rsa1.0.04369.1 | 301  | 17703  | 1.00E-106 | 234 | 247  | 94 + | 55  | 301  | 17185  | 17431  |
| UN34761 | Rsa1.0.15731.1 | 1251 | 2458   | 1.00E-127 | 238 | 240  | 99 - | 3   | 242  | 1859   | 2098   |
| UN34762 | Rsa1.0.04504.1 | 563  | 17069  | 1.00E-175 | 333 | 340  | 97 - | 4   | 343  | 7940   | 8279   |
| UN34763 | Rsa1.0.01014.1 | 437  | 56762  | 1.00E-139 | 260 | 263  | 98 - | 2   | 264  | 26951  | 27213  |
| UN34764 | Rsa1.0.00521.1 | 909  | 78191  | 0         | 539 | 549  | 98 - | 7   | 555  | 74362  | 74910  |
| UN34765 | Rsa1.0.00475.1 | 535  | 81678  | 0         | 407 | 410  | 99 - | 128 | 535  | 625    | 1034   |
| UN34766 | Rsa1.0.00367.1 | 853  | 90750  | 0         | 347 | 348  | 99 - | 289 | 636  | 63977  | 64324  |
| UN34767 | Rsa1.0.62159.1 | 725  | 369    | 0         | 345 | 348  | 99 - | 281 | 628  | 24     | 369    |
| UN34768 | Rsa1.0.06166.1 | 756  | 11583  | 0         | 749 | 752  | 99 + | 5   | 756  | 2728   | 3479   |
| UN34769 | Rsa1.0.00064.1 | 714  | 240927 | 0         | 696 | 713  | 97 + | 13  | 714  | 116651 | 117363 |
| UN34770 | Rsa1.0.00686.1 | 759  | 68511  | 0         | 750 | 752  | 99 - | 8   | 759  | 61788  | 62538  |
| UN34771 | Rsa1.0.06675.1 | 760  | 10561  | 1.00E-171 | 313 | 316  | 99 - | 445 | 760  | 10246  | 10561  |
| UN34772 | Rsa1.0.04622.1 | 673  | 16618  | 0         | 619 | 674  | 91 - | 6   | 673  | 6691   | 7362   |
| UN34773 | Rsa1.0.23015.1 | 831  | 1077   | 0         | 380 | 386  | 98 + | 265 | 650  | 692    | 1077   |
| UN34774 | Rsa1.0.03324.1 | 1165 | 23732  | 0         | 352 | 353  | 99 + | 601 | 953  | 17032  | 17384  |
| UN34775 | Rsa1.0.66280.1 | 465  | 346    | 1.00E-158 | 305 | 311  | 98 + | 153 | 463  | 1      | 310    |
| UN34776 | Rsa1.0.03722.1 | 958  | 21184  | 6.00E-95  | 414 | 488  | 84 - | 12  | 485  | 9328   | 9799   |
| UN34777 | Rsa1.0.00059.1 | 665  | 159650 | 1.00E-163 | 392 | 427  | 91 + | 6   | 415  | 113815 | 114239 |
| UN34778 | Rsa1.0.00087.1 | 872  | 761073 | 0         | 446 | 473  | 94 + | 1   | 456  | 362053 | 362524 |
| UN34779 | Rsa1.0.00321.1 | 1045 | 95671  | 0         | 999 | 1054 | 94 + | 1   | 1036 | 59679  | 60718  |
| UN34780 | Rsa1.0.08550.1 | 470  | 7211   | 0         | 448 | 487  | 91 - | 1   | 469  | 2086   | 2560   |
| UN34781 | Rsa1.0.00094.1 | 556  | 139042 | 4.00E-21  | 109 | 128  | 85 - | 211 | 332  | 42053  | 42180  |
| UN34782 | Rsa1.0.11054.1 | 1255 | 5632   | 1.00E-138 | 375 | 415  | 90 + | 806 | 1208 | 477    | 888    |
| UN34783 | Rsa1.0.21486.1 | 502  | 1199   | 1.00E-48  | 102 | 103  | 99 - | 398 | 500  | 1097   | 1199   |
| UN34784 | Rsa1.0.00030.1 | 598  | 250988 | 1.00E-147 | 273 | 276  | 98 - | 1   | 276  | 32456  | 32731  |
| UN34785 | Rsa1.0.00576.1 | 621  | 178949 | 1.00E-152 | 328 | 345  | 95 + | 2   | 346  | 63844  | 64187  |
| UN34786 | Rsa1.0.00734.1 | 593  | 66508  | 0         | 558 | 590  | 94 - | 2   | 591  | 9646   | 10212  |

|         |                |      |        |           |      |      |       |     |      |        |        |
|---------|----------------|------|--------|-----------|------|------|-------|-----|------|--------|--------|
| UN34787 | Rsa1.0.00509.1 | 1279 | 78829  | 0         | 485  | 486  | 99 +  | 448 | 933  | 27941  | 28426  |
| UN34788 | Rsa1.0.00017.1 | 710  | 752458 | 1.00E-150 | 294  | 302  | 97 -  | 409 | 710  | 326098 | 326399 |
| UN34789 | Rsa1.0.00306.1 | 537  | 146760 | 1.00E-126 | 319  | 347  | 91 +  | 4   | 349  | 76109  | 76447  |
| UN34790 | Rsa1.0.00639.1 | 1390 | 165873 | 0         | 724  | 751  | 96 +  | 1   | 741  | 152746 | 153495 |
| UN34791 | Rsa1.0.00383.1 | 994  | 398431 | 0         | 943  | 1008 | 93 +  | 2   | 992  | 253284 | 254284 |
| UN34792 | Rsa1.0.01531.1 | 875  | 43778  | 0         | 367  | 378  | 97 +  | 496 | 873  | 18942  | 19310  |
| UN34793 | Rsa1.0.00964.1 | 1245 | 316648 | 1.00E-164 | 318  | 326  | 97 +  | 375 | 700  | 27484  | 27809  |
| UN34794 | Rsa1.0.00306.1 | 651  | 146760 | 1.00E-95  | 229  | 246  | 93 -  | 154 | 399  | 87792  | 88037  |
| UN34795 | Rsa1.0.00842.1 | 558  | 62493  | 0         | 495  | 555  | 89 -  | 3   | 554  | 44587  | 45120  |
| UN34796 | Rsa1.0.02543.1 | 1262 | 30302  | 0         | 364  | 368  | 98 +  | 3   | 370  | 13886  | 14253  |
| UN34797 | Rsa1.0.00962.1 | 788  | 184909 | 1.00E-177 | 320  | 322  | 99 -  | 1   | 322  | 184057 | 184378 |
| UN34798 | Rsa1.0.03969.1 | 785  | 19797  | 0         | 782  | 784  | 99 +  | 1   | 783  | 16812  | 17595  |
| UN34799 | Rsa1.0.01892.1 | 1378 | 37526  | 0         | 522  | 543  | 96 -  | 16  | 554  | 26443  | 26985  |
| UN34800 | Rsa1.0.08225.1 | 1361 | 7695   | 0         | 687  | 712  | 96 +  | 3   | 714  | 4198   | 4907   |
| UN34801 | Rsa1.0.00595.1 | 1027 | 341648 | 4.00E-81  | 160  | 162  | 98 +  | 586 | 747  | 183872 | 184033 |
| UN34802 | Rsa1.0.00338.1 | 855  | 94109  | 2.00E-79  | 195  | 206  | 94 -  | 1   | 202  | 84867  | 85072  |
| UN34803 | Rsa1.0.00002.1 | 735  | 601661 | 8.00E-29  | 87   | 94   | 92 -  | 578 | 671  | 86289  | 86382  |
| UN34804 | Rsa1.0.14408.1 | 600  | 3423   | 1.00E-127 | 231  | 231  | 100 + | 3   | 233  | 1424   | 1654   |
| UN34805 | Rsa1.0.03397.1 | 1249 | 23210  | 0         | 649  | 649  | 100 + | 1   | 649  | 15901  | 16549  |
| UN34806 | Rsa1.0.00273.1 | 813  | 326186 | 4.00E-74  | 193  | 206  | 93 -  | 58  | 262  | 317824 | 318027 |
| UN34807 | Rsa1.0.04102.1 | 787  | 19048  | 1.00E-177 | 359  | 372  | 96 -  | 421 | 787  | 10842  | 11213  |
| UN34808 | Rsa1.0.00090.1 | 635  | 273859 | 1.00E-105 | 197  | 198  | 99 +  | 63  | 260  | 6183   | 6380   |
| UN34809 | Rsa1.0.02959.1 | 970  | 26441  | 2.00E-92  | 257  | 283  | 90 +  | 678 | 958  | 19731  | 20011  |
| UN34810 | Rsa1.0.00245.1 | 535  | 103569 | 0         | 343  | 349  | 98 -  | 1   | 348  | 58805  | 59153  |
| UN34811 | Rsa1.0.00335.1 | 756  | 94371  | 0         | 481  | 496  | 96 +  | 43  | 538  | 18628  | 19123  |
| UN34812 | Rsa1.0.00078.1 | 353  | 175053 | 1.00E-69  | 190  | 208  | 91 +  | 145 | 349  | 143317 | 143524 |
| UN34813 | Rsa1.0.00064.1 | 1106 | 240927 | 0         | 949  | 1011 | 93 -  | 103 | 1104 | 148644 | 149638 |
| UN34814 | Rsa1.0.02480.1 | 822  | 31036  | 2.00E-30  | 69   | 69   | 100 + | 138 | 206  | 10054  | 10122  |
| UN34815 | Rsa1.0.05367.1 | 1008 | 14010  | 0         | 631  | 655  | 96 -  | 3   | 651  | 11771  | 12424  |
| UN34816 | Rsa1.0.14214.1 | 477  | 3656   | 3.00E-67  | 142  | 146  | 97 +  | 2   | 147  | 18     | 163    |
| UN34817 | Rsa1.0.64289.1 | 1022 | 357    | 0         | 348  | 357  | 97 +  | 372 | 728  | 1      | 357    |
| UN34818 | Rsa1.0.03133.1 | 1029 | 25135  | 1.00E-111 | 293  | 327  | 89 -  | 709 | 1016 | 21260  | 21586  |
| UN34819 | Rsa1.0.00807.1 | 160  | 63607  | 3.00E-62  | 150  | 156  | 96 +  | 4   | 159  | 16968  | 17119  |
| UN34820 | Rsa1.0.02692.1 | 345  | 28626  | 4.00E-97  | 310  | 347  | 89 +  | 12  | 345  | 20634  | 20972  |
| UN34821 | Rsa1.0.06607.1 | 773  | 10674  | 1.00E-125 | 243  | 248  | 97 -  | 295 | 542  | 6739   | 6986   |
| UN34822 | Rsa1.0.04800.1 | 1207 | 15926  | 0         | 546  | 550  | 99 +  | 658 | 1207 | 14477  | 15026  |
| UN34823 | Rsa1.0.01749.1 | 1067 | 39822  | 0         | 1009 | 1062 | 95 +  | 3   | 1063 | 25508  | 26560  |
| UN34824 | Rsa1.0.00270.1 | 899  | 101236 | 1.00E-155 | 311  | 322  | 96 +  | 3   | 324  | 17931  | 18252  |
| UN34825 | Rsa1.0.14063.1 | 773  | 3852   | 1.00E-134 | 268  | 275  | 97 +  | 499 | 773  | 2623   | 2896   |

|         |                |      |        |           |      |      |      |     |      |        |        |
|---------|----------------|------|--------|-----------|------|------|------|-----|------|--------|--------|
| UN34826 | Rsa1.0.07397.1 | 1199 | 9464   | 0         | 513  | 564  | 90 + | 242 | 802  | 1540   | 2076   |
| UN34827 | Rsa1.0.00446.1 | 811  | 167829 | 0         | 713  | 776  | 91 + | 2   | 757  | 134768 | 135541 |
| UN34828 | Rsa1.0.03015.1 | 790  | 26006  | 0         | 786  | 791  | 99 + | 1   | 790  | 4934   | 5724   |
| UN34829 | Rsa1.0.02169.1 | 718  | 34367  | 0         | 379  | 393  | 96 - | 15  | 407  | 31821  | 32213  |
| UN34830 | Rsa1.0.02387.1 | 785  | 31890  | 5.00E-52  | 108  | 109  | 99 - | 558 | 666  | 25883  | 25991  |
| UN34831 | Rsa1.0.01487.1 | 844  | 44784  | 0         | 441  | 463  | 95 - | 1   | 460  | 2584   | 3042   |
| UN34832 | Rsa1.0.06262.1 | 884  | 11362  | 1.00E-129 | 276  | 289  | 95 - | 604 | 884  | 2661   | 2949   |
| UN34833 | Rsa1.0.16646.1 | 695  | 2080   | 1.00E-161 | 291  | 292  | 99 + | 110 | 401  | 58     | 349    |
| UN34834 | Rsa1.0.00300.1 | 1147 | 97747  | 1.00E-101 | 191  | 192  | 99 - | 1   | 192  | 55614  | 55805  |
| UN34835 | Rsa1.0.00919.1 | 604  | 59675  | 2.00E-32  | 156  | 184  | 84 + | 73  | 256  | 33460  | 33643  |
| UN34836 | Rsa1.0.00136.1 | 1178 | 122464 | 1.00E-115 | 220  | 223  | 98 + | 3   | 225  | 78848  | 79070  |
| UN34837 | Rsa1.0.00295.1 | 1207 | 152597 | 0         | 1154 | 1208 | 95 - | 2   | 1207 | 149955 | 151162 |
| UN34838 | Rsa1.0.01133.1 | 264  | 52916  | 1.00E-124 | 250  | 258  | 96 - | 3   | 260  | 6201   | 6458   |
| UN34839 | Rsa1.0.00195.1 | 713  | 251884 | 6.00E-79  | 209  | 227  | 92 + | 299 | 520  | 44579  | 44805  |
| UN34840 | Rsa1.0.00818.1 | 779  | 62939  | 8.00E-94  | 243  | 266  | 91 - | 234 | 493  | 53239  | 53504  |
| UN34841 | Rsa1.0.01774.1 | 920  | 39528  | 0         | 432  | 449  | 96 + | 473 | 920  | 20267  | 20715  |
| UN34842 | Rsa1.0.06138.1 | 755  | 11651  | 1.00E-170 | 306  | 307  | 99 + | 1   | 307  | 8612   | 8918   |
| UN34843 | Rsa1.0.00043.1 | 974  | 264937 | 0         | 542  | 549  | 98 - | 108 | 655  | 229692 | 230240 |
| UN34844 | Rsa1.0.00150.1 | 806  | 154416 | 1.00E-127 | 243  | 247  | 98 - | 263 | 509  | 153180 | 153426 |
| UN34845 | Rsa1.0.00182.1 | 920  | 142305 | 0         | 375  | 381  | 98 - | 74  | 454  | 120382 | 120762 |
| UN34846 | Rsa1.0.01306.1 | 922  | 48720  | 0         | 661  | 679  | 97 + | 4   | 682  | 3062   | 3740   |
| UN34847 | Rsa1.0.00116.1 | 330  | 365886 | 1.00E-110 | 211  | 214  | 98 - | 115 | 328  | 189122 | 189335 |
| UN34848 | Rsa1.0.01624.1 | 539  | 42064  | 1.00E-125 | 307  | 335  | 91 - | 60  | 384  | 5012   | 5346   |
| UN34849 | Rsa1.0.01098.1 | 760  | 54215  | 0         | 644  | 676  | 95 + | 78  | 752  | 32171  | 32831  |
| UN34850 | Rsa1.0.27763.1 | 655  | 840    | 0         | 637  | 672  | 94 - | 3   | 654  | 137    | 806    |
| UN34851 | Rsa1.0.04034.1 | 1085 | 19481  | 0         | 698  | 724  | 96 - | 4   | 727  | 8963   | 9680   |
| UN34852 | Rsa1.0.52498.1 | 811  | 434    | 0         | 352  | 356  | 98 + | 456 | 811  | 1      | 356    |
| UN34853 | Rsa1.0.01803.1 | 1251 | 173846 | 1.00E-144 | 275  | 280  | 98 - | 637 | 916  | 21881  | 22160  |
| UN34854 | Rsa1.0.02030.1 | 1204 | 179909 | 1.00E-115 | 226  | 231  | 97 - | 803 | 1033 | 30369  | 30599  |
| UN34855 | Rsa1.0.04817.1 | 578  | 15869  | 0         | 347  | 348  | 99 - | 229 | 576  | 10175  | 10522  |
| UN34856 | Rsa1.0.00576.1 | 642  | 178949 | 1.00E-110 | 234  | 242  | 96 + | 403 | 642  | 160143 | 160383 |
| UN34857 | Rsa1.0.64134.1 | 723  | 357    | 1.00E-134 | 254  | 258  | 98 - | 246 | 503  | 1      | 258    |
| UN34858 | Rsa1.0.00016.1 | 1045 | 831256 | 1.00E-110 | 295  | 322  | 91 + | 417 | 724  | 57626  | 57943  |
| UN34859 | Rsa1.0.00455.1 | 725  | 224823 | 0         | 394  | 406  | 97 + | 3   | 408  | 218614 | 219019 |
| UN34860 | Rsa1.0.34373.1 | 936  | 658    | 1.00E-151 | 286  | 291  | 98 - | 646 | 936  | 106    | 396    |
| UN34861 | Rsa1.0.05036.1 | 859  | 15058  | 0         | 350  | 354  | 98 + | 350 | 702  | 10089  | 10442  |
| UN34862 | Rsa1.0.04913.1 | 1008 | 15464  | 1.00E-129 | 670  | 815  | 82 + | 2   | 816  | 14376  | 15190  |
| UN34863 | Rsa1.0.01296.1 | 675  | 49035  | 0         | 671  | 677  | 99 + | 2   | 675  | 32398  | 33074  |
| UN34864 | Rsa1.0.09910.1 | 1114 | 6093   | 0         | 417  | 422  | 98 + | 693 | 1114 | 3130   | 3551   |



|         |                |      |        |           |      |      |       |     |      |        |        |
|---------|----------------|------|--------|-----------|------|------|-------|-----|------|--------|--------|
| UN34865 | Rsa1.0_02693.1 | 525  | 28617  | 4.00E-64  | 156  | 165  | 94 -  | 354 | 518  | 1832   | 1995   |
| UN34866 | Rsa1.0_15458.1 | 889  | 2591   | 0         | 660  | 692  | 95 -  | 33  | 719  | 1828   | 2518   |
| UN34867 | Rsa1.0_02840.1 | 759  | 27386  | 4.00E-68  | 248  | 286  | 86 -  | 377 | 662  | 7406   | 7688   |
| UN34868 | Rsa1.0_00002.1 | 1371 | 601661 | 0         | 429  | 451  | 95 +  | 8   | 454  | 124242 | 124691 |
| UN34869 | Rsa1.0_00223.1 | 837  | 106231 | 0         | 415  | 429  | 96 +  | 1   | 421  | 65942  | 66368  |
| UN34870 | Rsa1.0_00030.1 | 977  | 250988 | 1.00E-129 | 261  | 268  | 97 +  | 711 | 977  | 140611 | 140875 |
| UN34871 | Rsa1.0_00730.1 | 704  | 66673  | 1.00E-143 | 260  | 261  | 99 -  | 167 | 427  | 23940  | 24200  |
| UN34872 | Rsa1.0_00087.1 | 964  | 761073 | 0         | 949  | 963  | 98 +  | 2   | 964  | 553977 | 554939 |
| UN34873 | Rsa1.0_08327.1 | 1202 | 7534   | 1.00E-126 | 229  | 229  | 100 + | 974 | 1202 | 2397   | 2625   |
| UN34874 | Rsa1.0_01351.1 | 1011 | 47498  | 2.00E-70  | 305  | 357  | 85 -  | 627 | 966  | 23456  | 23807  |
| UN34875 | Rsa1.0_03588.1 | 749  | 21908  | 2.33E-156 | 275  | 279  | 98 -  | 1   | 279  | 1951   | 2229   |
| UN34876 | Rsa1.0_03238.1 | 1564 | 24432  | 0         | 667  | 742  | 89 +  | 231 | 933  | 3749   | 4484   |
| UN34877 | Rsa1.0_00525.1 | 898  | 78030  | 1.00E-122 | 300  | 320  | 93 -  | 41  | 358  | 33334  | 33647  |
| UN34878 | Rsa1.0_05130.1 | 1120 | 14758  | 0         | 690  | 709  | 97 -  | 309 | 1017 | 14050  | 14758  |
| UN34879 | Rsa1.0_01851.1 | 1008 | 38275  | 1.00E-168 | 390  | 416  | 93 -  | 593 | 1007 | 32711  | 33124  |
| UN34880 | Rsa1.0_01059.1 | 1148 | 55410  | 1.00E-158 | 342  | 361  | 94 -  | 89  | 449  | 14838  | 15195  |
| UN34881 | Rsa1.0_00705.1 | 786  | 67505  | 1.00E-140 | 306  | 319  | 95 -  | 470 | 786  | 17711  | 18025  |
| UN34882 | Rsa1.0_15268.1 | 918  | 2720   | 0         | 911  | 912  | 99 +  | 3   | 914  | 814    | 1725   |
| UN34883 | Rsa1.0_00510.1 | 213  | 78718  | 5.00E-98  | 200  | 205  | 97 +  | 1   | 204  | 37807  | 38011  |
| UN34884 | Rsa1.0_05787.1 | 1244 | 12625  | 1.00E-151 | 302  | 310  | 97 -  | 900 | 1209 | 975    | 1281   |
| UN34885 | Rsa1.0_00777.1 | 933  | 191865 | 0         | 559  | 571  | 97 +  | 363 | 933  | 142685 | 143254 |
| UN34886 | Rsa1.0_03264.1 | 276  | 145959 | 1.00E-117 | 266  | 283  | 93 -  | 1   | 276  | 137248 | 137528 |
| UN34887 | Rsa1.0_10447.1 | 663  | 5848   | 4.00E-86  | 201  | 213  | 94 -  | 1   | 206  | 4589   | 4801   |
| UN34888 | Rsa1.0_02478.1 | 1077 | 150183 | 0         | 1011 | 1080 | 93 +  | 2   | 1077 | 24947  | 26016  |
| UN34889 | Rsa1.0_00192.1 | 845  | 278200 | 0         | 770  | 809  | 95 -  | 37  | 845  | 249670 | 250474 |
| UN34890 | Rsa1.0_03249.1 | 801  | 146254 | 1.00E-170 | 431  | 468  | 92 +  | 1   | 461  | 141663 | 142124 |
| UN34891 | Rsa1.0_00217.1 | 682  | 107079 | 0         | 518  | 526  | 98 +  | 1   | 523  | 85935  | 86460  |
| UN34892 | Rsa1.0_00414.1 | 774  | 202190 | 0         | 496  | 537  | 92 +  | 255 | 773  | 187714 | 188241 |
| UN34893 | Rsa1.0_00720.1 | 1006 | 66931  | 0         | 473  | 502  | 94 +  | 363 | 863  | 47729  | 48224  |
| UN34894 | Rsa1.0_01247.1 | 349  | 49934  | 7.00E-74  | 204  | 222  | 91 -  | 6   | 218  | 4471   | 4690   |
| UN34895 | Rsa1.0_00178.1 | 886  | 114861 | 1.00E-126 | 272  | 285  | 95 -  | 2   | 286  | 89738  | 90021  |
| UN34896 | Rsa1.0_00352.1 | 742  | 92266  | 0         | 653  | 677  | 96 -  | 19  | 690  | 23135  | 23810  |
| UN34897 | Rsa1.0_01340.1 | 1127 | 47805  | 0         | 629  | 663  | 94 +  | 151 | 809  | 40453  | 41112  |
| UN34898 | Rsa1.0_06019.1 | 468  | 11916  | 0         | 461  | 466  | 98 +  | 1   | 466  | 10141  | 10606  |
| UN34899 | Rsa1.0_00684.1 | 905  | 141701 | 0         | 644  | 672  | 95 +  | 1   | 669  | 41587  | 42258  |
| UN34900 | Rsa1.0_00082.1 | 936  | 237584 | 0         | 702  | 729  | 96 -  | 208 | 936  | 518    | 1246   |
| UN34901 | Rsa1.0_00056.1 | 1102 | 332604 | 1.00E-164 | 315  | 322  | 97 -  | 772 | 1093 | 214231 | 214552 |
| UN34902 | Rsa1.0_02648.1 | 939  | 29073  | 1.00E-177 | 402  | 429  | 93 +  | 412 | 837  | 11052  | 11474  |
| UN34903 | Rsa1.0_10967.1 | 766  | 5661   | 1.00E-105 | 272  | 292  | 93 +  | 475 | 764  | 696    | 982    |

|         |                |      |        |           |     |     |      |     |      |        |        |
|---------|----------------|------|--------|-----------|-----|-----|------|-----|------|--------|--------|
| UN34904 | Rsa1.0.00093.1 | 927  | 214962 | 0         | 434 | 454 | 95 + | 473 | 926  | 208468 | 208912 |
| UN34905 | Rsa1.0.03997.1 | 731  | 19652  | 1.00E-131 | 311 | 333 | 93 + | 3   | 332  | 4494   | 4822   |
| UN34906 | Rsa1.0.02948.1 | 1120 | 26526  | 1.00E-116 | 249 | 259 | 96 + | 1   | 259  | 6942   | 7196   |
| UN34907 | Rsa1.0.00111.1 | 515  | 390088 | 1.00E-131 | 259 | 266 | 97 + | 249 | 514  | 137314 | 137579 |
| UN34908 | Rsa1.0.02932.1 | 475  | 26647  | 0         | 415 | 428 | 96 + | 35  | 460  | 17720  | 18144  |
| UN34909 | Rsa1.0.01033.1 | 813  | 56173  | 0         | 781 | 812 | 96 - | 1   | 808  | 6295   | 7106   |
| UN34910 | Rsa1.0.00229.1 | 705  | 105471 | 0         | 664 | 701 | 94 + | 13  | 703  | 51514  | 52212  |
| UN34911 | Rsa1.0.00451.1 | 962  | 322533 | 2.00E-33  | 110 | 122 | 90 + | 839 | 960  | 309419 | 309540 |
| UN34912 | Rsa1.0.07259.1 | 484  | 9650   | 1.00E-178 | 347 | 356 | 97 + | 10  | 364  | 1477   | 1832   |
| UN34913 | Rsa1.0.04250.1 | 982  | 18264  | 0         | 769 | 842 | 91 - | 6   | 844  | 715    | 1534   |
| UN34914 | Rsa1.0.00055.1 | 517  | 520193 | 2.00E-25  | 104 | 118 | 88 - | 39  | 153  | 94677  | 94794  |
| UN34915 | Rsa1.0.01591.1 | 780  | 42718  | 0         | 734 | 779 | 94 + | 2   | 780  | 25286  | 26061  |
| UN34916 | Rsa1.0.04288.1 | 637  | 18077  | 0         | 519 | 539 | 96 - | 97  | 632  | 6587   | 7114   |
| UN34917 | Rsa1.0.00240.1 | 664  | 104175 | 1.00E-36  | 99  | 105 | 94 + | 160 | 264  | 82763  | 82864  |
| UN34918 | Rsa1.0.02222.1 | 831  | 152798 | 0         | 470 | 494 | 95 + | 337 | 829  | 130048 | 130536 |
| UN34919 | Rsa1.0.00211.1 | 614  | 228189 | 0         | 349 | 356 | 98 - | 190 | 545  | 132176 | 132531 |
| UN34920 | Rsa1.0.00126.1 | 883  | 127534 | 1.00E-135 | 302 | 322 | 93 + | 527 | 840  | 405    | 726    |
| UN34921 | Rsa1.0.31794.1 | 574  | 718    | 3.00E-80  | 158 | 160 | 98 + | 110 | 269  | 430    | 589    |
| UN34922 | Rsa1.0.00238.1 | 745  | 193193 | 0         | 362 | 363 | 99 + | 324 | 686  | 45025  | 45387  |
| UN34923 | Rsa1.0.00025.1 | 625  | 277312 | 0         | 380 | 389 | 97 - | 238 | 625  | 60257  | 60645  |
| UN34924 | Rsa1.0.09643.1 | 941  | 6237   | 2.00E-55  | 192 | 215 | 89 + | 35  | 246  | 2628   | 2842   |
| UN34925 | Rsa1.0.02777.1 | 1026 | 27986  | 3.00E-91  | 180 | 183 | 98 + | 367 | 549  | 26183  | 26365  |
| UN34926 | Rsa1.0.03310.1 | 850  | 23851  | 1.00E-138 | 264 | 269 | 98 + | 2   | 270  | 8060   | 8328   |
| UN34927 | Rsa1.0.00207.1 | 487  | 248736 | 1.00E-167 | 373 | 396 | 94 + | 31  | 426  | 196532 | 196923 |
| UN34928 | Rsa1.0.00269.1 | 599  | 341668 | 0         | 416 | 420 | 99 + | 178 | 597  | 179253 | 179672 |
| UN34929 | Rsa1.0.01796.1 | 533  | 39154  | 0         | 369 | 373 | 98 - | 3   | 375  | 1      | 373    |
| UN34930 | Rsa1.0.00019.1 | 480  | 301669 | 1.00E-155 | 370 | 395 | 93 + | 91  | 480  | 295024 | 295415 |
| UN34931 | Rsa1.0.02125.1 | 804  | 34775  | 0         | 388 | 394 | 98 + | 2   | 395  | 14876  | 15269  |
| UN34932 | Rsa1.0.00286.1 | 558  | 98709  | 0         | 481 | 512 | 93 + | 3   | 512  | 7816   | 8323   |
| UN34933 | Rsa1.0.00757.1 | 580  | 65559  | 0         | 505 | 525 | 96 + | 1   | 518  | 9563   | 10087  |
| UN34934 | Rsa1.0.02129.1 | 1200 | 34757  | 1.00E-174 | 346 | 358 | 96 - | 843 | 1200 | 32524  | 32881  |
| UN34935 | Rsa1.0.02274.1 | 826  | 33109  | 1.00E-107 | 232 | 241 | 96 - | 586 | 824  | 23755  | 23994  |
| UN34936 | Rsa1.0.03885.1 | 906  | 20256  | 0         | 756 | 786 | 96 - | 2   | 786  | 18063  | 18845  |
| UN34937 | Rsa1.0.22945.1 | 536  | 1082   | 2.00E-99  | 237 | 252 | 94 + | 286 | 536  | 813    | 1063   |
| UN34938 | Rsa1.0.00457.1 | 1128 | 337301 | 0         | 492 | 532 | 92 + | 174 | 702  | 306499 | 307027 |
| UN34939 | Rsa1.0.05140.1 | 995  | 14710  | 0         | 483 | 523 | 92 + | 478 | 995  | 5142   | 5641   |
| UN34940 | Rsa1.0.02788.1 | 1101 | 27852  | 1.00E-151 | 350 | 374 | 93 + | 2   | 373  | 18296  | 18668  |
| UN34941 | Rsa1.0.00030.1 | 492  | 250988 | 1.00E-42  | 104 | 109 | 95 - | 137 | 245  | 243054 | 243162 |
| UN34942 | Rsa1.0.00556.1 | 790  | 207212 | 0         | 556 | 579 | 96 + | 3   | 581  | 149331 | 149907 |

|         |                |      |        |           |     |     |       |     |      |        |        |
|---------|----------------|------|--------|-----------|-----|-----|-------|-----|------|--------|--------|
| UN34943 | Rsa1.0_00229.1 | 662  | 105471 | 0         | 632 | 655 | 96 +  | 3   | 657  | 71237  | 71884  |
| UN34944 | Rsa1.0_04681.1 | 256  | 16428  | 3.00E-81  | 217 | 237 | 91 -  | 2   | 238  | 12304  | 12539  |
| UN34945 | #              | #    | #      | #         | #   | #   | #     | #   | #    | #      | #      |
| UN34946 | Rsa1.0_00003.1 | 970  | 340054 | 0         | 491 | 497 | 98 -  | 2   | 498  | 272616 | 273112 |
| UN34947 | Rsa1.0_00203.1 | 537  | 109129 | 1.00E-120 | 246 | 255 | 96 -  | 283 | 537  | 79789  | 80043  |
| UN34948 | Rsa1.0_00546.1 | 821  | 76523  | 2.00E-69  | 161 | 169 | 95 -  | 655 | 821  | 5412   | 5580   |
| UN34949 | Rsa1.0_00727.1 | 1327 | 66724  | 1.00E-130 | 273 | 285 | 95 +  | 3   | 287  | 16646  | 16925  |
| UN34950 | Rsa1.0_01451.1 | 759  | 45459  | 1.00E-101 | 257 | 276 | 93 +  | 485 | 754  | 40809  | 41083  |
| UN34951 | Rsa1.0_10475.1 | 750  | 5834   | 1.00E-118 | 246 | 256 | 96 +  | 453 | 708  | 113    | 368    |
| UN34952 | Rsa1.0_00008.1 | 1051 | 358124 | 0         | 754 | 774 | 97 -  | 281 | 1051 | 47574  | 48344  |
| UN34953 | Rsa1.0_01390.1 | 396  | 46695  | 2.00E-93  | 266 | 292 | 91 -  | 1   | 285  | 39386  | 39673  |
| UN34954 | Rsa1.0_00958.1 | 1050 | 58243  | 0         | 780 | 804 | 97 -  | 1   | 804  | 15390  | 16193  |
| UN34955 | Rsa1.0_01172.1 | 688  | 51734  | 0         | 662 | 692 | 95 -  | 2   | 681  | 44705  | 45392  |
| UN34956 | Rsa1.0_12849.1 | 533  | 5099   | 0         | 500 | 531 | 94 -  | 3   | 533  | 4323   | 4852   |
| UN34957 | Rsa1.0_01962.1 | 447  | 153412 | 1.00E-109 | 201 | 201 | 100 + | 244 | 444  | 141553 | 141753 |
| UN34958 | Rsa1.0_00089.1 | 610  | 406142 | 0         | 535 | 569 | 94 -  | 18  | 583  | 155534 | 156098 |
| UN34959 | Rsa1.0_00653.1 | 720  | 70029  | 7.00E-91  | 176 | 178 | 98 +  | 543 | 720  | 58546  | 58723  |
| UN34960 | Rsa1.0_04088.1 | 779  | 19150  | 1.00E-108 | 200 | 200 | 100 + | 416 | 615  | 16409  | 16608  |
| UN34961 | Rsa1.0_00340.1 | 672  | 305782 | 1.00E-102 | 216 | 225 | 96 -  | 438 | 662  | 283997 | 284221 |
| UN34962 | Rsa1.0_00019.1 | 1243 | 301669 | 0         | 643 | 670 | 95 +  | 100 | 766  | 276892 | 277557 |
| UN34963 | Rsa1.0_01010.1 | 1079 | 56906  | 0         | 501 | 501 | 100 + | 1   | 501  | 12357  | 12857  |
| UN34964 | Rsa1.0_31903.1 | 652  | 715    | 3.00E-31  | 106 | 118 | 89 +  | 46  | 163  | 63     | 180    |
| UN34965 | Rsa1.0_09664.1 | 759  | 6225   | 0         | 517 | 531 | 97 -  | 214 | 742  | 2289   | 2817   |
| UN34966 | Rsa1.0_04456.1 | 878  | 17260  | 1.00E-68  | 358 | 437 | 81 +  | 298 | 708  | 8880   | 9305   |
| UN34967 | Rsa1.0_00451.1 | 637  | 322533 | 0         | 607 | 634 | 95 -  | 6   | 637  | 153102 | 153732 |
| UN34968 | Rsa1.0_02331.1 | 1100 | 32449  | 4.00E-75  | 197 | 213 | 92 +  | 773 | 985  | 10694  | 10901  |
| UN34969 | Rsa1.0_00730.1 | 786  | 66673  | 0         | 419 | 427 | 98 +  | 360 | 786  | 50886  | 51312  |
| UN34970 | Rsa1.0_00353.1 | 703  | 92242  | 1.00E-154 | 306 | 316 | 96 -  | 221 | 536  | 6529   | 6844   |
| UN34971 | Rsa1.0_00919.1 | 384  | 59675  | 1.00E-153 | 274 | 274 | 100 + | 3   | 276  | 50357  | 50630  |
| UN34972 | Rsa1.0_03229.1 | 968  | 24470  | 1.00E-130 | 261 | 268 | 97 +  | 640 | 906  | 15434  | 15701  |
| UN34973 | Rsa1.0_01889.1 | 995  | 37562  | 0         | 990 | 994 | 99 +  | 3   | 995  | 5832   | 6825   |
| UN34974 | Rsa1.0_00119.1 | 988  | 467509 | 0         | 615 | 652 | 94 +  | 51  | 697  | 3266   | 3915   |
| UN34975 | Rsa1.0_00108.1 | 1088 | 478491 | 0         | 551 | 576 | 95 -  | 13  | 582  | 77201  | 77775  |
| UN34976 | Rsa1.0_01286.1 | 792  | 49209  | 0         | 408 | 416 | 98 -  | 377 | 792  | 8856   | 9271   |
| UN34977 | Rsa1.0_19625.1 | 573  | 1406   | 0         | 477 | 500 | 95 -  | 2   | 495  | 1      | 490    |
| UN34978 | Rsa1.0_00089.1 | 1031 | 406142 | 0         | 640 | 672 | 95 -  | 165 | 835  | 133317 | 133983 |
| UN34979 | Rsa1.0_00301.1 | 632  | 365315 | 0         | 608 | 633 | 96 -  | 2   | 632  | 85694  | 86323  |
| UN34980 | Rsa1.0_06859.1 | 894  | 10248  | 0         | 706 | 711 | 99 -  | 184 | 894  | 2949   | 3659   |
| UN34981 | Rsa1.0_02996.1 | 1065 | 26152  | 0         | 452 | 470 | 96 -  | 2   | 465  | 21663  | 22132  |

|         |                |      |        |           |      |      |      |     |      |        |        |
|---------|----------------|------|--------|-----------|------|------|------|-----|------|--------|--------|
| UN34982 | Rsa1.0.28730.1 | 847  | 805    | 1.00E-150 | 291  | 298  | 97 + | 251 | 548  | 395    | 692    |
| UN34983 | Rsa1.0.03471.1 | 1279 | 22678  | 0         | 879  | 917  | 95 - | 3   | 916  | 498    | 1414   |
| UN34984 | Rsa1.0.08237.1 | 846  | 7677   | 0         | 462  | 480  | 96 + | 2   | 478  | 4196   | 4672   |
| UN34985 | Rsa1.0.22363.1 | 722  | 1127   | 2.00E-88  | 180  | 184  | 97 + | 418 | 598  | 747    | 930    |
| UN34986 | Rsa1.0_01913.1 | 566  | 37363  | 0         | 364  | 378  | 96 + | 149 | 526  | 4208   | 4585   |
| UN34987 | Rsa1.0_00563.1 | 862  | 75491  | 2.00E-73  | 180  | 191  | 94 - | 637 | 823  | 71008  | 71198  |
| UN34988 | Rsa1.0.00225.1 | 959  | 105892 | 6.00E-18  | 79   | 88   | 89 - | 44  | 130  | 82637  | 82724  |
| UN34989 | Rsa1.0.00399.1 | 683  | 242951 | 0         | 431  | 444  | 97 - | 241 | 683  | 215486 | 215929 |
| UN34990 | Rsa1.0.01112.1 | 1315 | 310601 | 0         | 1275 | 1309 | 97 - | 10  | 1315 | 163854 | 165162 |
| UN34991 | Rsa1.0.03477.1 | 272  | 22635  | 2.00E-95  | 256  | 284  | 90 - | 3   | 271  | 8472   | 8755   |
| UN34992 | Rsa1.0.00722.1 | 784  | 66840  | 0         | 672  | 705  | 95 - | 3   | 697  | 14010  | 14708  |
| UN34993 | Rsa1.0.03634.1 | 863  | 145192 | 2.00E-45  | 133  | 146  | 91 + | 43  | 188  | 18295  | 18440  |
| UN34994 | Rsa1.0.04071.1 | 701  | 19243  | 1.00E-177 | 337  | 343  | 98 + | 10  | 351  | 1244   | 1586   |
| UN34995 | Rsa1.0.00154.1 | 491  | 189461 | 0         | 469  | 490  | 95 + | 5   | 491  | 122819 | 123295 |
| UN34996 | Rsa1.0.00237.1 | 720  | 235974 | 0         | 524  | 550  | 95 - | 173 | 717  | 531    | 1071   |
| UN34997 | Rsa1.0.03209.1 | 1155 | 24592  | 0         | 423  | 451  | 93 + | 78  | 523  | 5261   | 5708   |
| UN34998 | Rsa1.0.01771.1 | 746  | 172709 | 1.00E-177 | 445  | 485  | 91 - | 267 | 746  | 29068  | 29532  |
| UN34999 | Rsa1.0.00123.1 | 871  | 325650 | 1.00E-154 | 357  | 382  | 93 - | 2   | 382  | 213753 | 214131 |
| UN35000 | Rsa1.0.00040.1 | 527  | 324196 | 1.00E-141 | 391  | 427  | 91 + | 97  | 515  | 184448 | 184866 |
| UN35001 | Rsa1.0.00096.1 | 1141 | 198773 | 0         | 1107 | 1141 | 97 + | 1   | 1141 | 97483  | 98617  |
| UN35002 | Rsa1.0.00055.1 | 999  | 520193 | 1.00E-125 | 313  | 339  | 92 + | 669 | 997  | 54618  | 54953  |
| UN35003 | Rsa1.0.02349.1 | 407  | 32312  | 1.00E-117 | 344  | 382  | 90 + | 29  | 407  | 15606  | 15971  |
| UN35004 | Rsa1.0.01729.1 | 737  | 304246 | 0         | 688  | 751  | 91 - | 1   | 737  | 273700 | 274427 |
| UN35005 | Rsa1.0.05762.1 | 728  | 12715  | 1.00E-30  | 105  | 117  | 89 + | 550 | 666  | 9942   | 10058  |
| UN35006 | Rsa1.0.00016.1 | 1005 | 831256 | 1.00E-129 | 287  | 303  | 94 + | 661 | 962  | 224992 | 225294 |
| UN35007 | Rsa1.0.03623.1 | 1216 | 21714  | 0         | 435  | 446  | 97 + | 771 | 1216 | 11223  | 11667  |
| UN35008 | Rsa1.0.00223.1 | 1001 | 106231 | 0         | 954  | 1000 | 95 - | 3   | 1001 | 67262  | 68261  |
| UN35009 | Rsa1.0.00628.1 | 837  | 214360 | 1.00E-137 | 257  | 260  | 98 + | 5   | 264  | 17127  | 17386  |
| UN35010 | Rsa1.0.02236.1 | 719  | 33558  | 1.00E-134 | 275  | 286  | 96 + | 139 | 424  | 11986  | 12271  |
| UN35011 | Rsa1.0.01216.1 | 526  | 50580  | 0         | 446  | 457  | 97 + | 6   | 460  | 15449  | 15904  |
| UN35012 | Rsa1.0.02366.1 | 688  | 32110  | 1.00E-112 | 208  | 209  | 99 + | 3   | 211  | 15557  | 15765  |
| UN35013 | Rsa1.0.00027.1 | 810  | 283362 | 1.00E-160 | 326  | 339  | 96 + | 1   | 339  | 151081 | 151419 |
| UN35014 | Rsa1.0.02079.1 | 574  | 35306  | 7.00E-69  | 302  | 362  | 83 - | 43  | 378  | 8553   | 8914   |
| UN35015 | Rsa1.0.00161.1 | 925  | 116891 | 1.00E-143 | 323  | 348  | 92 + | 3   | 348  | 114174 | 114503 |
| UN35016 | Rsa1.0.00124.1 | 1117 | 262503 | 0         | 573  | 574  | 99 + | 2   | 575  | 208616 | 209189 |
| UN35017 | Rsa1.0.00013.1 | 758  | 292129 | 0         | 735  | 763  | 96 + | 2   | 757  | 177501 | 178263 |
| UN35018 | Rsa1.0.00015.1 | 938  | 561803 | 0         | 898  | 940  | 95 + | 1   | 936  | 443550 | 444487 |
| UN35019 | Rsa1.0.05920.1 | 800  | 12239  | 1.00E-74  | 192  | 209  | 91 + | 169 | 374  | 4367   | 4566   |
| UN35020 | Rsa1.0.00641.1 | 733  | 208241 | 7.00E-48  | 172  | 194  | 88 - | 435 | 627  | 205289 | 205481 |

|         |                |      |        |           |      |      |       |     |      |        |        |
|---------|----------------|------|--------|-----------|------|------|-------|-----|------|--------|--------|
| UN35021 | Rsa1.0.01222.1 | 758  | 50398  | 0         | 407  | 427  | 95 -  | 4   | 430  | 35308  | 35732  |
| UN35022 | Rsa1.0.02554.1 | 982  | 30187  | 0         | 610  | 622  | 98 +  | 363 | 982  | 14168  | 14787  |
| UN35023 | Rsa1.0.01249.1 | 1385 | 188432 | 0         | 1326 | 1381 | 96 +  | 5   | 1385 | 34958  | 36335  |
| UN35024 | Rsa1.0.02374.1 | 679  | 32043  | 0         | 590  | 614  | 96 +  | 37  | 648  | 24262  | 24875  |
| UN35025 | Rsa1.0.00575.1 | 843  | 74791  | 1.00E-18  | 100  | 115  | 86 +  | 3   | 116  | 7322   | 7433   |
| UN35026 | Rsa1.0.01277.1 | 963  | 49375  | 0         | 381  | 386  | 98 -  | 3   | 388  | 15881  | 16266  |
| UN35027 | Rsa1.0.07997.1 | 534  | 8106   | 0         | 427  | 429  | 99 +  | 104 | 532  | 3263   | 3691   |
| UN35028 | Rsa1.0.06656.1 | 1018 | 10589  | 0         | 667  | 671  | 99 +  | 349 | 1018 | 6002   | 6671   |
| UN35029 | Rsa1.0.01237.1 | 802  | 50124  | 0         | 630  | 708  | 88 -  | 107 | 796  | 25834  | 26536  |
| UN35030 | Rsa1.0.00859.1 | 813  | 61795  | 0         | 576  | 578  | 99 +  | 236 | 813  | 39088  | 39665  |
| UN35031 | Rsa1.0.19481.1 | 758  | 1426   | 0         | 382  | 395  | 96 -  | 9   | 403  | 943    | 1337   |
| UN35032 | Rsa1.0.04507.1 | 872  | 17045  | 0         | 330  | 330  | 100 - | 1   | 330  | 10820  | 11149  |
| UN35033 | Rsa1.0.01199.1 | 701  | 163576 | 0         | 453  | 481  | 94 -  | 1   | 476  | 128641 | 129121 |
| UN35034 | Rsa1.0.00079.1 | 592  | 606987 | 1.00E-160 | 304  | 309  | 98 -  | 282 | 590  | 574434 | 574740 |
| UN35035 | Rsa1.0.00556.1 | 740  | 207212 | 0         | 528  | 570  | 92 -  | 178 | 738  | 38005  | 38572  |
| UN35036 | Rsa1.0.08729.1 | 1053 | 6994   | 0         | 510  | 532  | 95 -  | 2   | 533  | 4896   | 5427   |
| UN35037 | Rsa1.0.06323.1 | 593  | 11236  | 0         | 434  | 441  | 98 +  | 2   | 442  | 9613   | 10053  |
| UN35038 | Rsa1.0.00309.1 | 710  | 96883  | 0         | 699  | 713  | 98 -  | 1   | 710  | 55572  | 56278  |
| UN35039 | Rsa1.0.11285.1 | 461  | 5556   | 0         | 437  | 465  | 93 +  | 3   | 461  | 2528   | 2992   |
| UN35040 | Rsa1.0.03237.1 | 875  | 24434  | 0         | 705  | 751  | 93 +  | 126 | 875  | 1749   | 2491   |
| UN35041 | Rsa1.0.05310.1 | 1210 | 14192  | 0         | 560  | 586  | 95 +  | 5   | 590  | 1896   | 2472   |
| UN35042 | Rsa1.0.00049.1 | 834  | 167018 | 0         | 416  | 420  | 99 +  | 415 | 834  | 45113  | 45532  |
| UN35043 | Rsa1.0.01632.1 | 967  | 181224 | 0         | 420  | 445  | 94 +  | 199 | 634  | 178773 | 179217 |
| UN35044 | Rsa1.0.04402.1 | 724  | 17511  | 0         | 517  | 530  | 97 +  | 1   | 530  | 16262  | 16788  |
| UN35045 | Rsa1.0.01904.1 | 664  | 37450  | 0         | 504  | 536  | 94 +  | 1   | 528  | 3170   | 3702   |
| UN35046 | Rsa1.0.00512.1 | 876  | 200277 | 0         | 422  | 424  | 99 +  | 302 | 725  | 35086  | 35509  |
| UN35047 | Rsa1.0.00067.1 | 799  | 415055 | 1.00E-153 | 289  | 294  | 98 +  | 264 | 557  | 391818 | 392111 |
| UN35048 | Rsa1.0.02024.1 | 697  | 149168 | 1.00E-169 | 301  | 301  | 100 - | 1   | 301  | 138065 | 138365 |
| UN35049 | Rsa1.0.00131.1 | 645  | 432233 | 1.00E-118 | 224  | 227  | 98 -  | 61  | 287  | 197558 | 197784 |
| UN35050 | Rsa1.0.01563.1 | 706  | 170823 | 0         | 686  | 713  | 96 -  | 1   | 705  | 41501  | 42212  |
| UN35051 | Rsa1.0.01175.1 | 693  | 51674  | 3.00E-90  | 178  | 181  | 98 -  | 176 | 356  | 37972  | 38152  |
| UN35052 | Rsa1.0.02253.1 | 807  | 33356  | 1.00E-148 | 278  | 282  | 98 -  | 526 | 807  | 31137  | 31418  |
| UN35053 | Rsa1.0.01029.1 | 678  | 256254 | 1.00E-115 | 265  | 281  | 94 +  | 401 | 678  | 144670 | 144950 |
| UN35054 | Rsa1.0.05041.1 | 941  | 15053  | 0         | 559  | 565  | 98 -  | 105 | 669  | 13738  | 14302  |
| UN35055 | Rsa1.0.00699.1 | 909  | 184398 | 0         | 620  | 665  | 93 -  | 263 | 909  | 31007  | 31666  |
| UN35056 | Rsa1.0.00718.1 | 1109 | 279335 | 2.33E-156 | 277  | 281  | 98 +  | 829 | 1109 | 13813  | 14090  |
| UN35057 | Rsa1.0.01309.1 | 1052 | 48556  | 0         | 639  | 677  | 94 -  | 300 | 975  | 45719  | 46386  |
| UN35058 | Rsa1.0.03011.1 | 721  | 26048  | 0         | 401  | 417  | 96 -  | 310 | 720  | 8634   | 9048   |
| UN35059 | Rsa1.0.00125.1 | 744  | 253043 | 8.00E-57  | 252  | 297  | 84 +  | 79  | 364  | 6897   | 7193   |

|         |                |      |        |           |      |      |       |     |      |        |        |
|---------|----------------|------|--------|-----------|------|------|-------|-----|------|--------|--------|
| UN35060 | Rsa1.0.01103.1 | 961  | 53974  | 0         | 379  | 387  | 97 -  | 565 | 951  | 44918  | 45304  |
| UN35061 | Rsa1.0.02084.1 | 595  | 35205  | 1.00E-101 | 471  | 562  | 83 -  | 5   | 566  | 34049  | 34606  |
| UN35062 | Rsa1.0.00104.1 | 733  | 368722 | 1.00E-156 | 341  | 357  | 95 +  | 3   | 353  | 242489 | 242844 |
| UN35063 | Rsa1.0.00162.1 | 826  | 239935 | 0         | 566  | 592  | 95 -  | 236 | 821  | 84185  | 84775  |
| UN35064 | Rsa1.0.00180.1 | 573  | 114581 | 0         | 541  | 583  | 92 +  | 2   | 572  | 100342 | 100919 |
| UN35065 | Rsa1.0.07569.1 | 632  | 9106   | 1.00E-174 | 367  | 386  | 95 -  | 177 | 559  | 4562   | 4941   |
| UN35066 | Rsa1.0.00645.1 | 1028 | 189716 | 0         | 510  | 522  | 97 -  | 507 | 1028 | 174252 | 174773 |
| UN35067 | Rsa1.0.01100.1 | 804  | 54113  | 0         | 724  | 789  | 91 +  | 9   | 797  | 37227  | 38003  |
| UN35068 | Rsa1.0.05024.1 | 870  | 15105  | 0         | 509  | 523  | 97 -  | 1   | 523  | 12481  | 13003  |
| UN35069 | Rsa1.0.03312.1 | 911  | 23841  | 0         | 411  | 411  | 100 - | 445 | 855  | 3882   | 4292   |
| UN35070 | Rsa1.0.00129.1 | 1100 | 126831 | 0         | 334  | 337  | 99 +  | 763 | 1099 | 88631  | 88967  |
| UN35071 | Rsa1.0.00347.1 | 975  | 93048  | 0         | 921  | 948  | 97 -  | 34  | 975  | 58881  | 59823  |
| UN35072 | Rsa1.0.00012.1 | 600  | 222148 | 0         | 435  | 448  | 97 +  | 152 | 598  | 175262 | 175709 |
| UN35073 | Rsa1.0.00583.1 | 1143 | 74309  | 0         | 571  | 597  | 95 -  | 1   | 588  | 2938   | 3532   |
| UN35074 | Rsa1.0.02379.1 | 617  | 150705 | 0         | 416  | 430  | 96 +  | 186 | 615  | 138122 | 138551 |
| UN35075 | Rsa1.0.00476.1 | 734  | 280966 | 0         | 657  | 666  | 98 +  | 1   | 666  | 215728 | 216390 |
| UN35076 | Rsa1.0.04881.1 | 809  | 15608  | 0         | 711  | 767  | 92 -  | 3   | 756  | 6872   | 7637   |
| UN35077 | Rsa1.0.01461.1 | 500  | 45240  | 0         | 482  | 515  | 93 +  | 1   | 500  | 2655   | 3165   |
| UN35078 | Rsa1.0.02004.1 | 952  | 169138 | 1.00E-62  | 216  | 246  | 87 -  | 41  | 285  | 26174  | 26408  |
| UN35079 | Rsa1.0.00265.1 | 746  | 220635 | 0         | 497  | 499  | 99 -  | 248 | 746  | 181744 | 182242 |
| UN35080 | Rsa1.0.03946.1 | 714  | 19912  | 0         | 549  | 592  | 92 +  | 135 | 713  | 16589  | 17173  |
| UN35081 | Rsa1.0.00042.1 | 513  | 171507 | 0         | 342  | 347  | 98 +  | 1   | 347  | 79538  | 79884  |
| UN35082 | Rsa1.0.02411.1 | 635  | 31655  | 1.00E-45  | 128  | 138  | 92 +  | 498 | 635  | 8406   | 8542   |
| UN35083 | Rsa1.0.00626.1 | 748  | 71582  | 1.00E-144 | 355  | 387  | 91 +  | 58  | 444  | 67981  | 68367  |
| UN35084 | Rsa1.0.00237.1 | 657  | 235974 | 0         | 619  | 650  | 95 -  | 3   | 651  | 170815 | 171455 |
| UN35085 | Rsa1.0.00703.1 | 357  | 67597  | 1.00E-109 | 242  | 256  | 94 -  | 83  | 338  | 27511  | 27766  |
| UN35086 | #              | #    | #      | #         | #    | #    | #     | #   | #    | #      | #      |
| UN35087 | Rsa1.0.73658.1 | 514  | 311    | 1.00E-100 | 226  | 237  | 95 +  | 60  | 295  | 76     | 311    |
| UN35088 | Rsa1.0.22382.1 | 876  | 1126   | 0         | 499  | 501  | 99 +  | 345 | 845  | 626    | 1126   |
| UN35089 | Rsa1.0.00469.1 | 595  | 82084  | 1.00E-165 | 294  | 294  | 100 + | 3   | 296  | 62303  | 62596  |
| UN35090 | Rsa1.0.00302.1 | 712  | 97521  | 0         | 674  | 722  | 93 +  | 4   | 705  | 76400  | 77110  |
| UN35091 | Rsa1.0.07317.1 | 725  | 9562   | 0         | 513  | 513  | 100 - | 108 | 620  | 4497   | 5009   |
| UN35092 | Rsa1.0.25140.1 | 507  | 950    | 5.00E-88  | 177  | 181  | 97 -  | 3   | 183  | 230    | 410    |
| UN35093 | Rsa1.0.00092.1 | 761  | 659932 | 0         | 492  | 518  | 94 +  | 245 | 761  | 238328 | 238832 |
| UN35094 | Rsa1.0.00910.1 | 1223 | 59975  | 0         | 1073 | 1100 | 97 -  | 130 | 1223 | 36141  | 37238  |
| UN35095 | Rsa1.0.00751.1 | 569  | 65759  | 0         | 361  | 364  | 99 -  | 206 | 569  | 33521  | 33884  |
| UN35096 | Rsa1.0.00047.1 | 1111 | 168582 | 0         | 1008 | 1035 | 97 -  | 1   | 1028 | 154406 | 155440 |
| UN35097 | Rsa1.0.01225.1 | 882  | 50381  | 0         | 867  | 881  | 98 +  | 2   | 882  | 18180  | 19059  |
| UN35098 | Rsa1.0.00062.1 | 1075 | 299291 | 1.00E-125 | 254  | 262  | 96 -  | 13  | 271  | 261493 | 261754 |

|         |                |      |        |           |      |      |       |      |      |        |        |
|---------|----------------|------|--------|-----------|------|------|-------|------|------|--------|--------|
| UN35099 | Rsa1.0.02220.1 | 662  | 176031 | 0         | 652  | 662  | 98 +  | 1    | 662  | 161625 | 162286 |
| UN35100 | Rsa1.0.02977.1 | 647  | 26313  | 0         | 625  | 651  | 96 +  | 3    | 647  | 12009  | 12659  |
| UN35101 | Rsa1.0.01667.1 | 743  | 41315  | 1.00E-110 | 202  | 202  | 100 - | 446  | 647  | 36356  | 36557  |
| UN35102 | Rsa1.0.00636.1 | 196  | 71113  | 1.00E-92  | 191  | 196  | 97 +  | 1    | 196  | 34052  | 34246  |
| UN35103 | Rsa1.0.01695.1 | 713  | 40848  | 0         | 687  | 709  | 96 +  | 3    | 710  | 13144  | 13844  |
| UN35104 | Rsa1.0.18389.1 | 1346 | 1608   | 0         | 1086 | 1121 | 96 -  | 3    | 1120 | 1      | 1120   |
| UN35105 | Rsa1.0.00218.1 | 989  | 201480 | 1.00E-157 | 288  | 290  | 99 +  | 700  | 989  | 9090   | 9379   |
| UN35106 | Rsa1.0.07281.1 | 504  | 9624   | 0         | 472  | 503  | 93 -  | 2    | 504  | 8315   | 8813   |
| UN35107 | Rsa1.0.00378.1 | 967  | 89892  | 0         | 666  | 692  | 96 +  | 4    | 693  | 75742  | 76433  |
| UN35108 | Rsa1.0.01435.1 | 813  | 45942  | 4.00E-74  | 203  | 222  | 91 -  | 180  | 401  | 44559  | 44779  |
| UN35109 | Rsa1.0.00247.1 | 1056 | 103408 | 0         | 584  | 623  | 93 -  | 438  | 1039 | 49595  | 50217  |
| UN35110 | Rsa1.0.00250.1 | 780  | 273771 | 0         | 749  | 795  | 94 +  | 2    | 780  | 249776 | 250564 |
| UN35111 | Rsa1.0.00492.1 | 691  | 80178  | 1.00E-89  | 225  | 239  | 94 +  | 450  | 687  | 15219  | 15453  |
| UN35112 | Rsa1.0.03391.1 | 513  | 23251  | 0         | 470  | 494  | 95 -  | 2    | 492  | 5433   | 5920   |
| UN35113 | Rsa1.0.00777.1 | 564  | 191865 | 0         | 558  | 563  | 99 +  | 2    | 564  | 20756  | 21317  |
| UN35114 | Rsa1.0.00556.1 | 889  | 207212 | 0         | 338  | 338  | 100 + | 552  | 889  | 144846 | 145183 |
| UN35115 | Rsa1.0.00034.1 | 827  | 260119 | 0         | 745  | 764  | 97 +  | 65   | 827  | 76197  | 76960  |
| UN35116 | Rsa1.0.01214.1 | 858  | 50599  | 1.00E-177 | 441  | 483  | 91 -  | 264  | 746  | 9509   | 9991   |
| UN35117 | Rsa1.0.03208.1 | 708  | 24599  | 0         | 389  | 407  | 95 +  | 302  | 708  | 20964  | 21360  |
| UN35118 | Rsa1.0.00067.1 | 1391 | 415055 | 0         | 342  | 346  | 98 -  | 1045 | 1388 | 138327 | 138672 |
| UN35119 | Rsa1.0.19811.1 | 642  | 1380   | 0         | 623  | 643  | 96 -  | 2    | 640  | 483    | 1124   |
| UN35120 | Rsa1.0.00380.1 | 883  | 89748  | 0         | 517  | 548  | 94 -  | 322  | 866  | 22265  | 22793  |
| UN35121 | Rsa1.0.00165.1 | 852  | 116466 | 4.00E-62  | 137  | 142  | 96 +  | 2    | 143  | 58274  | 58415  |
| UN35122 | Rsa1.0.00617.1 | 838  | 72199  | 0         | 759  | 795  | 95 +  | 44   | 838  | 56213  | 56985  |
| UN35123 | Rsa1.0.00743.1 | 803  | 177459 | 0         | 491  | 549  | 89 +  | 5    | 544  | 173909 | 174433 |
| UN35124 | Rsa1.0.00342.1 | 1022 | 93695  | 1.00E-173 | 312  | 313  | 99 -  | 660  | 972  | 4030   | 4342   |
| UN35125 | Rsa1.0.06064.1 | 1032 | 11832  | 0         | 614  | 643  | 95 -  | 411  | 1032 | 8039   | 8680   |
| UN35126 | Rsa1.0.00642.1 | 875  | 201230 | 0         | 755  | 810  | 93 +  | 5    | 812  | 2278   | 3070   |
| UN35127 | Rsa1.0.00472.1 | 1093 | 398134 | 0         | 1034 | 1056 | 97 +  | 2    | 1053 | 330551 | 331605 |
| UN35128 | Rsa1.0.08380.1 | 914  | 7446   | 1.00E-103 | 203  | 207  | 98 -  | 278  | 484  | 1425   | 1631   |
| UN35129 | Rsa1.0.01760.1 | 999  | 39730  | 0         | 813  | 866  | 93 -  | 136  | 999  | 21514  | 22353  |
| UN35130 | Rsa1.0.01188.1 | 502  | 51362  | 5.00E-57  | 113  | 113  | 100 - | 327  | 439  | 37068  | 37180  |
| UN35131 | Rsa1.0.00215.1 | 533  | 201775 | 1.00E-117 | 270  | 294  | 91 +  | 240  | 533  | 80326  | 80598  |
| UN35132 | Rsa1.0.01624.1 | 701  | 42064  | 1.00E-162 | 310  | 317  | 97 +  | 385  | 701  | 3604   | 3920   |
| UN35133 | Rsa1.0.06092.1 | 888  | 11756  | 0         | 586  | 592  | 98 +  | 1    | 592  | 49     | 640    |
| UN35134 | Rsa1.0.00744.1 | 830  | 66084  | 0         | 733  | 766  | 95 -  | 1    | 764  | 59940  | 60704  |
| UN35135 | Rsa1.0.02895.1 | 622  | 26979  | 0         | 331  | 334  | 99 +  | 289  | 622  | 25683  | 26016  |
| UN35136 | Rsa1.0.00383.1 | 1049 | 398431 | 0         | 712  | 779  | 91 -  | 6    | 746  | 4319   | 5090   |
| UN35137 | Rsa1.0.00930.1 | 691  | 59224  | 1.00E-129 | 371  | 412  | 90 -  | 304  | 691  | 45048  | 45457  |

|         |                |      |        |           |      |      |       |     |      |        |        |
|---------|----------------|------|--------|-----------|------|------|-------|-----|------|--------|--------|
| UN35138 | Rsa1.0.02199.1 | 933  | 33982  | 0         | 427  | 447  | 95 -  | 493 | 932  | 29542  | 29984  |
| UN35139 | Rsa1.0.00193.1 | 974  | 194198 | 0         | 414  | 418  | 99 -  | 2   | 419  | 107804 | 108221 |
| UN35140 | Rsa1.0.02593.1 | 367  | 29744  | 1.00E-108 | 247  | 261  | 94 -  | 114 | 367  | 4397   | 4656   |
| UN35141 | Rsa1.0.01671.1 | 1137 | 41243  | 0         | 1024 | 1128 | 90 +  | 2   | 1125 | 19606  | 20732  |
| UN35142 | Rsa1.0.00176.1 | 420  | 240984 | 0         | 419  | 419  | 100 - | 2   | 420  | 134493 | 134911 |
| UN35143 | Rsa1.0.01249.1 | 595  | 188432 | 1.00E-176 | 342  | 349  | 97 +  | 249 | 595  | 38609  | 38957  |
| UN35144 | Rsa1.0.00803.1 | 795  | 144228 | 0         | 733  | 784  | 93 +  | 2   | 776  | 30922  | 31693  |
| UN35145 | Rsa1.0.00173.1 | 1098 | 288743 | 1.00E-114 | 470  | 553  | 84 -  | 2   | 534  | 44125  | 44664  |
| UN35146 | Rsa1.0.01008.1 | 870  | 56924  | 2.00E-17  | 87   | 99   | 87 +  | 292 | 389  | 45932  | 46030  |
| UN35147 | Rsa1.0.05217.1 | 764  | 142938 | 0         | 508  | 537  | 94 +  | 230 | 764  | 138531 | 139061 |
| UN35148 | Rsa1.0.01047.1 | 911  | 55705  | 0         | 580  | 605  | 95 -  | 3   | 606  | 14824  | 15426  |
| UN35149 | Rsa1.0.00971.1 | 625  | 57973  | 0         | 396  | 410  | 96 -  | 220 | 625  | 21952  | 22361  |
| UN35150 | Rsa1.0.01594.1 | 957  | 42612  | 0         | 927  | 968  | 95 +  | 3   | 956  | 2602   | 3559   |
| UN35151 | #              | #    | #      | #         | #    | #    | #     | #   | #    | #      | #      |
| UN35152 | Rsa1.0.02141.1 | 785  | 34677  | 0         | 772  | 787  | 98 -  | 3   | 785  | 24911  | 25697  |
| UN35153 | Rsa1.0.01172.1 | 1074 | 51734  | 0         | 787  | 818  | 96 -  | 263 | 1074 | 21596  | 22400  |
| UN35154 | Rsa1.0.00104.1 | 724  | 368722 | 1.00E-159 | 320  | 332  | 96 -  | 1   | 332  | 239982 | 240313 |
| UN35155 | Rsa1.0.01681.1 | 1264 | 41092  | 0         | 415  | 416  | 99 -  | 410 | 825  | 19352  | 19767  |
| UN35156 | Rsa1.0.00026.1 | 589  | 327835 | 1.00E-160 | 319  | 329  | 96 -  | 3   | 329  | 253028 | 253356 |
| UN35157 | Rsa1.0.05083.1 | 768  | 14893  | 0         | 762  | 764  | 99 -  | 3   | 766  | 9130   | 9893   |
| UN35158 | Rsa1.0.00473.1 | 923  | 212204 | 1.00E-158 | 325  | 339  | 95 +  | 4   | 342  | 80359  | 80697  |
| UN35159 | Rsa1.0.00166.1 | 497  | 240912 | 0         | 466  | 509  | 91 +  | 2   | 497  | 219855 | 220352 |
| UN35160 | Rsa1.0.01931.1 | 891  | 37187  | 1.00E-131 | 272  | 282  | 96 -  | 398 | 679  | 3374   | 3650   |
| UN35161 | Rsa1.0.00046.1 | 752  | 320315 | 1.00E-172 | 335  | 342  | 97 -  | 413 | 751  | 93947  | 94288  |
| UN35162 | Rsa1.0.01466.1 | 429  | 45161  | 0         | 426  | 428  | 99 +  | 1   | 428  | 42346  | 42773  |
| UN35163 | Rsa1.0.00182.1 | 987  | 142305 | 0         | 974  | 984  | 98 +  | 2   | 985  | 123219 | 124202 |
| UN35164 | Rsa1.0.00069.1 | 860  | 403561 | 0         | 567  | 603  | 94 +  | 30  | 609  | 14364  | 14966  |
| UN35165 | Rsa1.0.26100.1 | 702  | 906    | 0         | 445  | 464  | 95 -  | 235 | 698  | 184    | 647    |
| UN35166 | Rsa1.0.00389.1 | 842  | 88795  | 0         | 816  | 859  | 94 -  | 2   | 836  | 43809  | 44666  |
| UN35167 | Rsa1.0.30269.1 | 875  | 759    | 0         | 496  | 496  | 100 - | 380 | 875  | 251    | 746    |
| UN35168 | Rsa1.0.00839.1 | 1223 | 62533  | 0         | 989  | 1059 | 93 +  | 33  | 1090 | 23250  | 24292  |
| UN35169 | Rsa1.0.02302.1 | 915  | 32823  | 6.00E-98  | 215  | 226  | 95 +  | 690 | 915  | 12865  | 13090  |
| UN35170 | Rsa1.0.00556.1 | 278  | 207212 | 1.00E-145 | 273  | 277  | 98 -  | 2   | 278  | 133204 | 133480 |
| UN35171 | Rsa1.0.02835.1 | 563  | 27491  | 0         | 556  | 565  | 98 -  | 3   | 563  | 23771  | 24335  |
| UN35172 | Rsa1.0.00880.1 | 733  | 61271  | 0         | 600  | 658  | 91 -  | 2   | 640  | 26231  | 26888  |
| UN35173 | Rsa1.0.03594.1 | 910  | 21868  | 1.00E-126 | 256  | 265  | 96 -  | 57  | 321  | 21398  | 21662  |
| UN35174 | Rsa1.0.13636.1 | 934  | 4601   | 0         | 389  | 404  | 96 +  | 58  | 461  | 815    | 1218   |
| UN35175 | Rsa1.0.02914.1 | 778  | 26815  | 0         | 524  | 543  | 96 +  | 2   | 544  | 20864  | 21406  |
| UN35176 | Rsa1.0.46257.1 | 1019 | 488    | 1.00E-119 | 239  | 245  | 97 -  | 195 | 437  | 1      | 245    |



|         |                |      |        |           |      |      |       |     |      |        |        |
|---------|----------------|------|--------|-----------|------|------|-------|-----|------|--------|--------|
| UN35177 | Rsa1.0.00043.1 | 858  | 264937 | 0         | 829  | 864  | 95 -  | 1   | 849  | 7342   | 8202   |
| UN35178 | Rsa1.0.00730.1 | 1193 | 66673  | 0         | 612  | 631  | 96 -  | 392 | 1022 | 30376  | 31003  |
| UN35179 | Rsa1.0.15249.1 | 783  | 2728   | 0         | 755  | 776  | 97 +  | 8   | 783  | 1235   | 2010   |
| UN35180 | Rsa1.0.01513.1 | 857  | 44234  | 1.00E-116 | 347  | 388  | 89 +  | 465 | 846  | 20353  | 20727  |
| UN35181 | Rsa1.0.01518.1 | 856  | 141402 | 0         | 774  | 822  | 94 +  | 1   | 803  | 131703 | 132514 |
| UN35182 | Rsa1.0.00113.1 | 696  | 131574 | 1.00E-154 | 289  | 293  | 98 +  | 257 | 549  | 36936  | 37228  |
| UN35183 | Rsa1.0.10500.1 | 815  | 5824   | 2.00E-69  | 197  | 217  | 90 -  | 7   | 221  | 4946   | 5162   |
| UN35184 | Rsa1.0.00013.1 | 945  | 292129 | 0         | 617  | 624  | 98 +  | 319 | 942  | 172984 | 173607 |
| UN35185 | Rsa1.0.00898.1 | 351  | 202772 | 1.00E-107 | 207  | 209  | 99 -  | 144 | 351  | 191384 | 191592 |
| UN35186 | Rsa1.0.00377.1 | 710  | 90038  | 1.00E-149 | 348  | 375  | 92 -  | 2   | 370  | 36352  | 36726  |
| UN35187 | Rsa1.0.08405.1 | 225  | 7413   | 3.00E-50  | 101  | 101  | 100 + | 125 | 225  | 6684   | 6784   |
| UN35188 | Rsa1.0.16013.1 | 1049 | 2323   | 0         | 504  | 508  | 99 +  | 542 | 1049 | 1      | 508    |
| UN35189 | Rsa1.0.00011.1 | 1094 | 225044 | 0         | 1085 | 1093 | 99 +  | 2   | 1094 | 53454  | 54546  |
| UN35190 | Rsa1.0.01383.1 | 977  | 46848  | 0         | 904  | 926  | 97 +  | 1   | 922  | 32008  | 32931  |
| UN35191 | Rsa1.0.02089.1 | 822  | 35163  | 0         | 584  | 591  | 98 -  | 3   | 593  | 5755   | 6345   |
| UN35192 | Rsa1.0.00016.1 | 783  | 831256 | 4.00E-71  | 137  | 137  | 100 - | 641 | 777  | 434574 | 434710 |
| UN35193 | Rsa1.0.00693.1 | 924  | 161311 | 2.00E-73  | 172  | 182  | 94 -  | 746 | 924  | 50614  | 50789  |
| UN35194 | Rsa1.0.00333.1 | 1186 | 94500  | 0         | 551  | 565  | 97 +  | 626 | 1186 | 21988  | 22552  |
| UN35195 | Rsa1.0.00043.1 | 973  | 264937 | 0         | 912  | 947  | 96 -  | 1   | 945  | 88329  | 89269  |
| UN35196 | Rsa1.0.00119.1 | 695  | 467509 | 0         | 616  | 644  | 95 +  | 3   | 641  | 310996 | 311638 |
| UN35197 | Rsa1.0.02386.1 | 963  | 31895  | 0         | 436  | 461  | 94 -  | 380 | 840  | 9020   | 9479   |
| UN35198 | Rsa1.0.01295.1 | 1113 | 49040  | 0         | 535  | 562  | 95 -  | 35  | 587  | 8398   | 8956   |
| UN35199 | Rsa1.0.00383.1 | 547  | 398431 | 1.00E-138 | 280  | 289  | 96 +  | 260 | 547  | 3111   | 3399   |
| UN35200 | Rsa1.0.00099.1 | 559  | 159619 | 0         | 542  | 559  | 96 +  | 1   | 559  | 117370 | 117928 |
| UN35201 | Rsa1.0.00293.1 | 1151 | 339294 | 0         | 376  | 377  | 99 -  | 3   | 379  | 15896  | 16272  |
| UN35202 | Rsa1.0.03084.1 | 320  | 25506  | 3.00E-39  | 147  | 167  | 88 -  | 132 | 297  | 9915   | 10071  |
| UN35203 | Rsa1.0.03883.1 | 872  | 20282  | 0         | 494  | 548  | 90 +  | 7   | 530  | 8502   | 9029   |
| UN35204 | Rsa1.0.66572.1 | 1036 | 344    | 4.00E-16  | 45   | 45   | 100 + | 2   | 46   | 300    | 344    |
| UN35205 | Rsa1.0.03846.1 | 648  | 20481  | 0         | 617  | 656  | 94 +  | 3   | 640  | 19667  | 20320  |
| UN35206 | Rsa1.0.02984.1 | 1138 | 26263  | 0         | 653  | 681  | 95 -  | 1   | 681  | 22601  | 23272  |
| UN35207 | Rsa1.0.10503.1 | 717  | 5824   | 0         | 540  | 555  | 97 -  | 3   | 557  | 995    | 1542   |
| UN35208 | Rsa1.0.00219.1 | 356  | 106983 | 0         | 348  | 352  | 98 -  | 3   | 354  | 31588  | 31937  |
| UN35209 | Rsa1.0.00744.1 | 790  | 66084  | 0         | 422  | 445  | 94 +  | 352 | 790  | 54853  | 55297  |
| UN35210 | Rsa1.0.07865.1 | 434  | 8400   | 7.00E-19  | 115  | 137  | 83 -  | 205 | 341  | 3952   | 4088   |
| UN35211 | Rsa1.0.00040.1 | 1144 | 324196 | 1.00E-132 | 282  | 295  | 95 +  | 848 | 1142 | 214894 | 215187 |
| UN35212 | Rsa1.0.00949.1 | 721  | 58549  | 0         | 706  | 718  | 98 +  | 4   | 721  | 53197  | 53914  |
| UN35213 | Rsa1.0.00798.1 | 896  | 63945  | 0         | 783  | 788  | 99 -  | 16  | 803  | 21539  | 22324  |
| UN35214 | Rsa1.0.13817.1 | 445  | 4268   | 1.00E-75  | 183  | 195  | 93 +  | 3   | 195  | 4074   | 4268   |
| UN35215 | Rsa1.0.03069.1 | 1067 | 25615  | 2.00E-27  | 177  | 212  | 83 +  | 41  | 251  | 12054  | 12264  |



|         |                |      |        |           |      |      |       |     |      |        |        |
|---------|----------------|------|--------|-----------|------|------|-------|-----|------|--------|--------|
| UN35255 | Rsa1.0.03685.1 | 858  | 21391  | 0         | 849  | 854  | 99 +  | 3   | 856  | 10456  | 11309  |
| UN35256 | Rsa1.0.01995.1 | 782  | 36347  | 0         | 600  | 605  | 99 -  | 42  | 646  | 27958  | 28562  |
| UN35257 | Rsa1.0.09186.1 | 720  | 6572   | 0         | 718  | 722  | 99 +  | 1   | 719  | 4945   | 5666   |
| UN35258 | Rsa1.0.02856.1 | 966  | 27270  | 0         | 910  | 967  | 94 -  | 2   | 966  | 2490   | 3427   |
| UN35259 | Rsa1.0.08001.1 | 870  | 8095   | 0         | 643  | 656  | 98 -  | 218 | 869  | 7440   | 8095   |
| UN35260 | Rsa1.0.02473.1 | 588  | 31083  | 1.00E-118 | 282  | 301  | 93 +  | 1   | 298  | 13354  | 13647  |
| UN35261 | Rsa1.0.02320.1 | 947  | 32575  | 0         | 464  | 475  | 97 -  | 472 | 946  | 17148  | 17622  |
| UN35262 | Rsa1.0.00548.1 | 834  | 76518  | 5.00E-12  | 65   | 73   | 89 -  | 761 | 833  | 3477   | 3547   |
| UN35263 | Rsa1.0.00137.1 | 1303 | 122457 | 0         | 1199 | 1303 | 92 +  | 3   | 1303 | 74847  | 76136  |
| UN35264 | Rsa1.0.03828.1 | 470  | 20588  | 1.00E-176 | 385  | 404  | 95 -  | 57  | 458  | 5980   | 6381   |
| UN35265 | Rsa1.0.03149.1 | 850  | 24983  | 0         | 499  | 524  | 95 +  | 327 | 850  | 13791  | 14314  |
| UN35266 | Rsa1.0.01088.1 | 775  | 54416  | 1.00E-169 | 314  | 318  | 98 -  | 245 | 562  | 16486  | 16803  |
| UN35267 | Rsa1.0.03093.1 | 727  | 25445  | 0         | 711  | 720  | 98 -  | 8   | 727  | 14620  | 15339  |
| UN35268 | Rsa1.0.02400.1 | 434  | 31750  | 0         | 403  | 426  | 94 -  | 9   | 433  | 16256  | 16681  |
| UN35269 | Rsa1.0.06060.1 | 211  | 11839  | 1.00E-89  | 197  | 207  | 95 +  | 5   | 211  | 667    | 873    |
| UN35270 | Rsa1.0.03400.1 | 813  | 23203  | 0         | 451  | 460  | 98 -  | 344 | 801  | 22744  | 23203  |
| UN35271 | Rsa1.0.00344.1 | 683  | 191774 | 0         | 553  | 578  | 95 -  | 6   | 577  | 8918   | 9495   |
| UN35272 | Rsa1.0.01739.1 | 595  | 40068  | 4.00E-89  | 170  | 171  | 99 -  | 303 | 473  | 37784  | 37954  |
| UN35273 | Rsa1.0.01352.1 | 934  | 47443  | 1.00E-114 | 218  | 221  | 98 -  | 420 | 640  | 12792  | 13012  |
| UN35274 | Rsa1.0.00040.1 | 505  | 324196 | 1.00E-109 | 244  | 257  | 94 +  | 249 | 505  | 265642 | 265897 |
| UN35275 | Rsa1.0.00001.1 | 537  | 363028 | 1.00E-153 | 309  | 318  | 97 +  | 1   | 316  | 250037 | 250354 |
| UN35276 | Rsa1.0.00061.1 | 855  | 218685 | 1.00E-131 | 294  | 312  | 94 +  | 4   | 303  | 63176  | 63487  |
| UN35277 | Rsa1.0.03956.1 | 856  | 19872  | 0         | 437  | 442  | 98 +  | 3   | 442  | 5687   | 6128   |
| UN35278 | Rsa1.0.03401.1 | 1023 | 23191  | 1.00E-137 | 255  | 256  | 99 +  | 676 | 930  | 20565  | 20820  |
| UN35279 | Rsa1.0.01263.1 | 1057 | 49703  | 0         | 468  | 470  | 99 +  | 181 | 650  | 13944  | 14413  |
| UN35280 | Rsa1.0.01145.1 | 819  | 149247 | 1.00E-31  | 74   | 75   | 98 -  | 3   | 77   | 102895 | 102969 |
| UN35281 | Rsa1.0.05971.1 | 1183 | 12068  | 1.00E-135 | 278  | 287  | 96 -  | 892 | 1175 | 2135   | 2421   |
| UN35282 | Rsa1.0.01117.1 | 721  | 53465  | 0         | 335  | 335  | 100 - | 25  | 359  | 14231  | 14565  |
| UN35283 | Rsa1.0.00092.1 | 726  | 659932 | 2.00E-35  | 120  | 132  | 90 -  | 130 | 261  | 9583   | 9711   |
| UN35284 | Rsa1.0.00055.1 | 528  | 520193 | 1.00E-161 | 371  | 396  | 93 +  | 7   | 399  | 170609 | 171000 |
| UN35285 | Rsa1.0.00049.1 | 1276 | 167018 | 1.00E-178 | 370  | 387  | 95 -  | 404 | 790  | 35247  | 35630  |
| UN35286 | Rsa1.0.01612.1 | 1037 | 42255  | 0         | 582  | 608  | 95 -  | 2   | 609  | 26024  | 26610  |
| UN35287 | Rsa1.0.00116.1 | 1104 | 365886 | 0         | 479  | 496  | 96 +  | 616 | 1104 | 144907 | 145400 |
| UN35288 | Rsa1.0.10780.1 | 914  | 5722   | 1.00E-119 | 386  | 442  | 87 +  | 4   | 445  | 4830   | 5271   |
| UN35289 | Rsa1.0.05906.1 | 802  | 12270  | 0         | 718  | 751  | 95 -  | 52  | 802  | 5628   | 6373   |
| UN35290 | Rsa1.0.02224.1 | 988  | 33758  | 1.00E-43  | 427  | 526  | 81 +  | 452 | 973  | 26033  | 26551  |
| UN35291 | Rsa1.0.00335.1 | 863  | 94371  | 3.00E-75  | 174  | 184  | 94 +  | 155 | 338  | 32897  | 33080  |
| UN35292 | Rsa1.0.01333.1 | 651  | 47929  | 0         | 577  | 608  | 94 -  | 1   | 598  | 22270  | 22876  |
| UN35293 | Rsa1.0.00419.1 | 809  | 86562  | 0         | 334  | 337  | 99 +  | 473 | 809  | 81603  | 81937  |

|         |                |      |        |           |      |      |      |     |      |        |        |
|---------|----------------|------|--------|-----------|------|------|------|-----|------|--------|--------|
| UN35294 | Rsa1.0.03185.1 | 696  | 24739  | 1.00E-143 | 283  | 290  | 97 + | 3   | 292  | 23269  | 23557  |
| UN35295 | Rsa1.0.15315.1 | 741  | 2690   | 1.00E-126 | 239  | 242  | 98 - | 187 | 428  | 1968   | 2209   |
| UN35296 | Rsa1.0.01234.1 | 860  | 50183  | 0         | 846  | 853  | 99 + | 9   | 860  | 38700  | 39552  |
| UN35297 | Rsa1.0.01267.1 | 584  | 49670  | 1.00E-174 | 361  | 375  | 96 - | 207 | 578  | 9570   | 9942   |
| UN35298 | Rsa1.0.04002.1 | 748  | 19608  | 4.00E-43  | 127  | 138  | 92 + | 253 | 389  | 3367   | 3504   |
| UN35299 | Rsa1.0.00689.1 | 770  | 68305  | 0         | 718  | 750  | 95 - | 3   | 752  | 34502  | 35247  |
| UN35300 | Rsa1.0.03325.1 | 1271 | 23720  | 0         | 1199 | 1282 | 93 + | 2   | 1271 | 12227  | 13484  |
| UN35301 | Rsa1.0.00243.1 | 970  | 103651 | 1.00E-179 | 334  | 338  | 98 - | 633 | 970  | 35464  | 35799  |
| UN35302 | Rsa1.0.00626.1 | 1188 | 71582  | 0         | 432  | 435  | 99 + | 280 | 714  | 26950  | 27384  |
| UN35303 | Rsa1.0.01881.1 | 690  | 37721  | 1.00E-180 | 326  | 328  | 99 + | 363 | 690  | 29443  | 29770  |
| UN35304 | Rsa1.0.00190.1 | 690  | 318240 | 2.00E-82  | 254  | 285  | 89 + | 390 | 673  | 52960  | 53220  |
| UN35305 | Rsa1.0.00069.1 | 1284 | 403561 | 0         | 1199 | 1230 | 97 + | 63  | 1282 | 17840  | 19069  |
| UN35306 | Rsa1.0.02749.1 | 249  | 28241  | 1.00E-131 | 246  | 249  | 98 + | 1   | 249  | 743    | 991    |
| UN35307 | Rsa1.0.00985.1 | 904  | 161950 | 1.00E-114 | 222  | 226  | 98 + | 11  | 236  | 33701  | 33926  |
| UN35308 | Rsa1.0.00018.1 | 1310 | 410899 | 0         | 1175 | 1196 | 98 + | 115 | 1308 | 77582  | 78769  |
| UN35309 | Rsa1.0.01209.1 | 778  | 50668  | 0         | 770  | 781  | 98 + | 2   | 778  | 24015  | 24795  |
| UN35310 | Rsa1.0.13704.1 | 662  | 4453   | 1.00E-152 | 359  | 386  | 93 + | 282 | 662  | 2579   | 2954   |
| UN35311 | Rsa1.0.07685.1 | 489  | 8797   | 1.00E-158 | 311  | 318  | 97 - | 173 | 489  | 8088   | 8404   |
| UN35312 | Rsa1.0.02504.1 | 857  | 30706  | 4.00E-68  | 275  | 319  | 86 + | 119 | 437  | 14596  | 14910  |
| UN35313 | Rsa1.0.00675.1 | 872  | 145590 | 1.00E-150 | 292  | 299  | 97 - | 1   | 295  | 63875  | 64173  |
| UN35314 | Rsa1.0.00201.1 | 961  | 232851 | 9.00E-88  | 291  | 333  | 87 - | 359 | 681  | 82027  | 82359  |
| UN35315 | Rsa1.0.00122.1 | 803  | 265937 | 0         | 799  | 801  | 99 + | 1   | 801  | 16809  | 17609  |
| UN35316 | Rsa1.0.01444.1 | 1281 | 169539 | 1.00E-154 | 320  | 332  | 96 + | 2   | 330  | 148985 | 149316 |
| UN35317 | Rsa1.0.01362.1 | 900  | 47217  | 1.00E-133 | 251  | 254  | 98 + | 1   | 254  | 3048   | 3301   |
| UN35318 | Rsa1.0.00918.1 | 901  | 59720  | 0         | 456  | 475  | 96 + | 1   | 475  | 6864   | 7338   |
| UN35319 | Rsa1.0.00552.1 | 936  | 206757 | 0         | 669  | 720  | 92 - | 41  | 735  | 62719  | 63433  |
| UN35320 | Rsa1.0.00295.1 | 745  | 152597 | 0         | 340  | 343  | 99 + | 402 | 743  | 23572  | 23914  |
| UN35321 | Rsa1.0.01156.1 | 662  | 52147  | 0         | 532  | 553  | 96 + | 128 | 662  | 34400  | 34952  |
| UN35322 | Rsa1.0.00113.1 | 701  | 131574 | 0         | 686  | 704  | 97 - | 1   | 701  | 37763  | 38463  |
| UN35323 | Rsa1.0.00625.1 | 795  | 71672  | 1.00E-156 | 314  | 322  | 97 + | 1   | 321  | 30706  | 31024  |
| UN35324 | Rsa1.0.00347.1 | 682  | 93048  | 0         | 649  | 683  | 95 + | 1   | 682  | 69357  | 70037  |
| UN35325 | Rsa1.0.00195.1 | 713  | 251884 | 0         | 413  | 414  | 99 - | 3   | 416  | 214546 | 214959 |
| UN35326 | Rsa1.0.05604.1 | 989  | 13204  | 0         | 422  | 434  | 97 + | 2   | 435  | 11770  | 12203  |
| UN35327 | Rsa1.0.02523.1 | 907  | 30527  | 1.00E-166 | 366  | 391  | 93 - | 529 | 907  | 902    | 1289   |
| UN35328 | Rsa1.0.01579.1 | 1140 | 42860  | 0         | 560  | 565  | 99 + | 3   | 566  | 10924  | 11486  |
| UN35329 | Rsa1.0.03189.1 | 1114 | 24710  | 0         | 1107 | 1112 | 99 + | 3   | 1114 | 12286  | 13397  |
| UN35330 | Rsa1.0.00212.1 | 581  | 108350 | 0         | 559  | 578  | 96 + | 3   | 579  | 36364  | 36941  |
| UN35331 | Rsa1.0.00574.1 | 1211 | 74797  | 0         | 471  | 485  | 97 - | 2   | 486  | 65563  | 66045  |
| UN35332 | Rsa1.0.08688.1 | 787  | 7037   | 0         | 454  | 471  | 96 + | 324 | 787  | 6223   | 6693   |

|         |                |      |        |           |     |     |       |     |      |        |        |
|---------|----------------|------|--------|-----------|-----|-----|-------|-----|------|--------|--------|
| UN35333 | Rsa1.0.00182.1 | 828  | 142305 | 0         | 438 | 438 | 100 - | 324 | 761  | 105345 | 105782 |
| UN35334 | Rsa1.0.03082.1 | 515  | 25520  | 0         | 409 | 430 | 95 -  | 85  | 514  | 16218  | 16644  |
| UN35335 | Rsa1.0.06619.1 | 773  | 10650  | 0         | 445 | 457 | 97 +  | 313 | 767  | 8286   | 8738   |
| UN35336 | Rsa1.0.00123.1 | 1196 | 325650 | 0         | 873 | 931 | 93 -  | 3   | 921  | 166959 | 167880 |
| UN35337 | Rsa1.0.01307.1 | 573  | 48685  | 0         | 571 | 571 | 100 + | 1   | 571  | 47563  | 48133  |
| UN35338 | Rsa1.0.00009.1 | 889  | 232558 | 1.00E-110 | 247 | 262 | 94 -  | 626 | 887  | 144909 | 145170 |
| UN35339 | Rsa1.0.05832.1 | 407  | 12491  | 1.00E-100 | 225 | 238 | 94 +  | 64  | 301  | 2996   | 3233   |
| UN35340 | Rsa1.0.00018.1 | 786  | 410899 | 1.00E-167 | 374 | 392 | 95 +  | 398 | 786  | 403692 | 404078 |
| UN35341 | Rsa1.0.08472.1 | 497  | 7300   | 0         | 483 | 501 | 96 -  | 2   | 497  | 6366   | 6865   |
| UN35342 | Rsa1.0.00880.1 | 745  | 61271  | 0         | 701 | 720 | 97 -  | 12  | 729  | 24218  | 24935  |
| UN35343 | Rsa1.0.00616.1 | 1167 | 195713 | 0         | 469 | 480 | 97 -  | 694 | 1167 | 183052 | 183530 |
| UN35344 | Rsa1.0.12579.1 | 1125 | 5185   | 0         | 459 | 467 | 98 -  | 574 | 1040 | 1      | 467    |
| UN35345 | Rsa1.0.00015.1 | 800  | 561803 | 0         | 770 | 803 | 95 +  | 3   | 800  | 250146 | 250948 |
| UN35346 | Rsa1.0.03225.1 | 1108 | 24500  | 0         | 767 | 814 | 94 +  | 296 | 1108 | 18747  | 19541  |
| UN35347 | Rsa1.0.04536.1 | 751  | 16947  | 1.00E-36  | 106 | 114 | 92 -  | 2   | 115  | 11689  | 11800  |
| UN35348 | Rsa1.0.00679.1 | 974  | 68971  | 1.00E-105 | 220 | 227 | 96 +  | 703 | 928  | 6467   | 6693   |
| UN35349 | Rsa1.0.00340.1 | 596  | 305782 | 1.00E-88  | 196 | 206 | 95 -  | 4   | 209  | 284820 | 285025 |
| UN35350 | Rsa1.0.00146.1 | 886  | 149343 | 1.00E-133 | 247 | 249 | 99 -  | 215 | 463  | 81705  | 81953  |
| UN35351 | Rsa1.0.01747.1 | 665  | 39881  | 0         | 619 | 659 | 93 +  | 12  | 663  | 38916  | 39571  |
| UN35352 | Rsa1.0.00018.1 | 1009 | 410899 | 0         | 794 | 831 | 95 +  | 179 | 1009 | 358769 | 359599 |
| UN35353 | Rsa1.0.17286.1 | 1068 | 1871   | 1.00E-116 | 294 | 318 | 92 -  | 733 | 1045 | 396    | 708    |
| UN35354 | Rsa1.0.00494.1 | 635  | 79967  | 0         | 623 | 636 | 97 -  | 1   | 635  | 48051  | 48686  |
| UN35355 | Rsa1.0.00571.1 | 647  | 329018 | 0         | 614 | 646 | 95 +  | 2   | 646  | 32930  | 33572  |
| UN35356 | Rsa1.0.70401.1 | 254  | 325    | 7.00E-67  | 141 | 145 | 97 -  | 80  | 224  | 1      | 145    |
| UN35357 | Rsa1.0.00651.1 | 506  | 247766 | 1.00E-130 | 300 | 318 | 94 +  | 190 | 506  | 246547 | 246860 |
| UN35358 | Rsa1.0.41779.1 | 1007 | 537    | 1.00E-138 | 255 | 257 | 99 -  | 520 | 776  | 281    | 537    |
| UN35359 | Rsa1.0.01215.1 | 683  | 166813 | 0         | 470 | 472 | 99 +  | 212 | 683  | 5751   | 6222   |
| UN35360 | Rsa1.0.03236.1 | 400  | 24441  | 1.00E-179 | 386 | 407 | 94 -  | 3   | 400  | 21530  | 21935  |
| UN35361 | Rsa1.0.00651.1 | 996  | 247766 | 1.00E-108 | 229 | 239 | 95 -  | 112 | 350  | 228108 | 228346 |
| UN35362 | Rsa1.0.00323.1 | 606  | 159650 | 1.00E-151 | 277 | 279 | 99 +  | 328 | 606  | 121300 | 121578 |
| UN35363 | Rsa1.0.02263.1 | 678  | 33238  | 1.00E-156 | 298 | 304 | 98 +  | 374 | 677  | 26026  | 26329  |
| UN35364 | Rsa1.0.01303.1 | 1107 | 48853  | 1.00E-137 | 248 | 248 | 100 + | 300 | 547  | 25443  | 25690  |
| UN35365 | Rsa1.0.00230.1 | 661  | 105389 | 0         | 473 | 520 | 90 +  | 135 | 653  | 33958  | 34446  |
| UN35366 | Rsa1.0.01195.1 | 782  | 147988 | 0         | 777 | 781 | 99 +  | 2   | 782  | 20601  | 21381  |
| UN35367 | Rsa1.0.08518.1 | 782  | 7244   | 1.00E-101 | 199 | 203 | 98 +  | 322 | 524  | 6688   | 6890   |
| UN35368 | Rsa1.0.00295.1 | 846  | 152597 | 0         | 647 | 677 | 95 -  | 170 | 846  | 21585  | 22260  |
| UN35369 | Rsa1.0.02185.1 | 766  | 34150  | 0         | 608 | 628 | 96 +  | 112 | 738  | 15560  | 16186  |
| UN35370 | Rsa1.0.05117.1 | 1231 | 14801  | 0         | 719 | 752 | 95 -  | 480 | 1230 | 4114   | 4859   |
| UN35371 | Rsa1.0.00006.1 | 608  | 396176 | 1.00E-174 | 351 | 365 | 96 -  | 1   | 365  | 362073 | 362437 |

|         |                |      |        |           |      |      |      |     |      |        |        |
|---------|----------------|------|--------|-----------|------|------|------|-----|------|--------|--------|
| UN35372 | Rsa1.0.00284.1 | 766  | 323267 | 1.00E-141 | 327  | 348  | 93 - | 422 | 764  | 2224   | 2571   |
| UN35373 | Rsa1.0.00992.1 | 1078 | 57419  | 0         | 467  | 478  | 97 - | 601 | 1078 | 44401  | 44878  |
| UN35374 | Rsa1.0.07959.1 | 441  | 8173   | 1.00E-137 | 316  | 337  | 93 + | 56  | 390  | 1540   | 1874   |
| UN35375 | Rsa1.0.00152.1 | 1023 | 257730 | 1.00E-124 | 252  | 258  | 97 - | 767 | 1023 | 246420 | 246675 |
| UN35376 | Rsa1.0.07447.1 | 962  | 9380   | 0         | 503  | 515  | 97 - | 447 | 961  | 7408   | 7922   |
| UN35377 | Rsa1.0.00899.1 | 634  | 60404  | 3.00E-22  | 93   | 104  | 89 + | 484 | 583  | 7929   | 8031   |
| UN35378 | Rsa1.0.00054.1 | 1244 | 162053 | 0         | 522  | 548  | 95 - | 2   | 543  | 136337 | 136883 |
| UN35379 | Rsa1.0.00749.1 | 768  | 65933  | 1.00E-140 | 291  | 302  | 96 - | 471 | 768  | 45770  | 46071  |
| UN35380 | Rsa1.0.04005.1 | 1207 | 19586  | 0         | 392  | 399  | 98 + | 805 | 1201 | 301    | 699    |
| UN35381 | Rsa1.0.01334.1 | 1054 | 47904  | 1.00E-113 | 256  | 271  | 94 - | 781 | 1051 | 36220  | 36489  |
| UN35382 | Rsa1.0.01175.1 | 688  | 51674  | 2.00E-85  | 176  | 181  | 97 - | 156 | 336  | 37972  | 38152  |
| UN35383 | Rsa1.0.00216.1 | 680  | 197563 | 1.00E-116 | 227  | 232  | 97 + | 124 | 355  | 88910  | 89141  |
| UN35384 | Rsa1.0.00253.1 | 870  | 231292 | 0         | 451  | 472  | 95 - | 100 | 571  | 210833 | 211304 |
| UN35385 | Rsa1.0.04186.1 | 660  | 18589  | 1.00E-150 | 272  | 273  | 99 - | 370 | 642  | 9190   | 9462   |
| UN35386 | Rsa1.0.02188.1 | 941  | 34104  | 0         | 917  | 941  | 97 + | 1   | 941  | 6332   | 7265   |
| UN35387 | Rsa1.0.02590.1 | 1057 | 29752  | 1.00E-156 | 439  | 497  | 88 - | 585 | 1057 | 12938  | 13434  |
| UN35388 | Rsa1.0.05175.1 | 930  | 14603  | 1.00E-101 | 466  | 559  | 83 + | 179 | 719  | 13492  | 14047  |
| UN35389 | Rsa1.0.00011.1 | 1240 | 225044 | 0         | 653  | 670  | 97 - | 6   | 675  | 26245  | 26914  |
| UN35390 | Rsa1.0.00556.1 | 949  | 207212 | 0         | 838  | 928  | 90 - | 39  | 947  | 176432 | 177342 |
| UN35391 | Rsa1.0.10589.1 | 445  | 5793   | 1.00E-170 | 410  | 439  | 93 + | 18  | 443  | 4896   | 5328   |
| UN35392 | Rsa1.0.01826.1 | 758  | 38700  | 0         | 480  | 502  | 95 + | 241 | 735  | 14064  | 14564  |
| UN35393 | Rsa1.0.00002.1 | 842  | 601661 | 0         | 804  | 845  | 95 + | 11  | 842  | 411315 | 412145 |
| UN35394 | Rsa1.0.02228.1 | 332  | 33688  | 2.00E-55  | 146  | 158  | 92 - | 23  | 180  | 30146  | 30303  |
| UN35395 | Rsa1.0.13606.1 | 625  | 4648   | 1.00E-14  | 51   | 54   | 94 - | 56  | 109  | 2630   | 2683   |
| UN35396 | Rsa1.0.00008.1 | 809  | 358124 | 0         | 581  | 621  | 93 - | 205 | 806  | 76863  | 77482  |
| UN35397 | Rsa1.0.01288.1 | 595  | 49188  | 1.00E-136 | 259  | 262  | 98 + | 35  | 295  | 42253  | 42514  |
| UN35398 | Rsa1.0.02063.1 | 1137 | 35484  | 1.00E-122 | 257  | 265  | 96 - | 877 | 1137 | 10469  | 10732  |
| UN35399 | Rsa1.0.15576.1 | 1025 | 2536   | 2.00E-18  | 101  | 117  | 86 + | 143 | 256  | 402    | 515    |
| UN35400 | Rsa1.0.00011.1 | 1003 | 225044 | 2.00E-55  | 117  | 119  | 98 - | 156 | 274  | 49292  | 49410  |
| UN35401 | Rsa1.0.04504.1 | 806  | 17069  | 0         | 780  | 812  | 96 - | 2   | 806  | 5239   | 6049   |
| UN35402 | Rsa1.0.00755.1 | 644  | 192559 | 2.00E-87  | 201  | 212  | 94 + | 70  | 281  | 10572  | 10777  |
| UN35403 | #              | #    | #      | #         | #    | #    | #    | #   | #    | #      | #      |
| UN35404 | Rsa1.0.00332.1 | 512  | 94575  | 2.33E-156 | 377  | 407  | 92 - | 113 | 512  | 73555  | 73958  |
| UN35405 | Rsa1.0.02164.1 | 540  | 34426  | 2.00E-93  | 312  | 356  | 87 + | 25  | 376  | 33123  | 33478  |
| UN35406 | Rsa1.0.05876.1 | 1369 | 12348  | 0         | 474  | 488  | 97 - | 412 | 896  | 9490   | 9974   |
| UN35407 | Rsa1.0.01919.1 | 1230 | 37272  | 1.00E-142 | 372  | 408  | 91 - | 7   | 402  | 8703   | 9100   |
| UN35408 | Rsa1.0.00055.1 | 1244 | 520193 | 0         | 1158 | 1223 | 94 - | 5   | 1223 | 385995 | 387201 |
| UN35409 | Rsa1.0.10486.1 | 957  | 5830   | 0         | 454  | 477  | 95 - | 482 | 957  | 2479   | 2954   |
| UN35410 | Rsa1.0.01672.1 | 1275 | 41229  | 1.00E-134 | 344  | 375  | 91 - | 598 | 962  | 20041  | 20413  |

|         |                |      |        |           |     |     |      |     |      |        |        |
|---------|----------------|------|--------|-----------|-----|-----|------|-----|------|--------|--------|
| UN35411 | Rsa1.0.01947.1 | 272  | 36977  | 1.00E-114 | 253 | 264 | 95 + | 10  | 272  | 22203  | 22464  |
| UN35412 | Rsa1.0.00280.1 | 690  | 99966  | 1.00E-154 | 314 | 325 | 96 - | 367 | 690  | 6006   | 6330   |
| UN35413 | Rsa1.0.02589.1 | 602  | 300828 | 1.00E-150 | 309 | 322 | 95 + | 12  | 333  | 154386 | 154707 |
| UN35414 | #              | #    | #      | #         | #   | #   | #    | #   | #    | #      | #      |
| UN35415 | Rsa1.0.04384.1 | 1033 | 17629  | 0         | 485 | 529 | 91 - | 529 | 1031 | 4643   | 5167   |
| UN35416 | Rsa1.0.00041.1 | 1048 | 186197 | 0         | 751 | 774 | 97 + | 263 | 1036 | 93412  | 94183  |
| UN35417 | Rsa1.0.00302.1 | 879  | 97521  | 0         | 538 | 557 | 96 - | 173 | 728  | 1481   | 2035   |
| UN35418 | Rsa1.0.01325.1 | 1115 | 48131  | 0         | 479 | 499 | 95 + | 39  | 537  | 21285  | 21781  |
| UN35419 | Rsa1.0.00512.1 | 792  | 200277 | 0         | 447 | 481 | 92 - | 1   | 464  | 71437  | 71916  |
| UN35420 | Rsa1.0.00610.1 | 798  | 72740  | 0         | 713 | 730 | 97 + | 1   | 730  | 68427  | 69153  |
| UN35421 | Rsa1.0.00015.1 | 637  | 561803 | 3.00E-22  | 95  | 107 | 88 + | 72  | 177  | 390332 | 390438 |
| UN35422 | Rsa1.0.00489.1 | 608  | 80434  | 0         | 373 | 378 | 98 + | 231 | 608  | 45530  | 45906  |
| UN35423 | Rsa1.0.73912.1 | 753  | 310    | 1.00E-58  | 134 | 140 | 95 - | 479 | 618  | 171    | 310    |
| UN35424 | Rsa1.0.02693.1 | 699  | 28617  | 0         | 682 | 701 | 97 + | 1   | 699  | 24192  | 24891  |
| UN35425 | Rsa1.0.03746.1 | 1114 | 21050  | 0         | 607 | 609 | 99 + | 2   | 610  | 4340   | 4948   |
| UN35426 | Rsa1.0.01274.1 | 1340 | 49419  | 0         | 493 | 531 | 92 - | 470 | 1000 | 27081  | 27592  |
| UN35427 | Rsa1.0.02197.1 | 748  | 33996  | 0         | 449 | 461 | 97 + | 77  | 535  | 3405   | 3865   |
| UN35428 | Rsa1.0.01466.1 | 829  | 45161  | 0         | 476 | 497 | 95 - | 41  | 537  | 16726  | 17222  |
| UN35429 | Rsa1.0.09273.1 | 635  | 6511   | 1.00E-117 | 236 | 242 | 97 - | 395 | 635  | 2647   | 2888   |
| UN35430 | Rsa1.0.00583.1 | 1225 | 74309  | 1.00E-118 | 240 | 248 | 96 - | 860 | 1107 | 50222  | 50469  |
| UN35431 | Rsa1.0.04124.1 | 489  | 18945  | 1.00E-133 | 253 | 257 | 98 - | 233 | 489  | 4680   | 4936   |
| UN35432 | Rsa1.0.15449.1 | 719  | 2599   | 0         | 692 | 715 | 96 + | 12  | 719  | 81     | 791    |
| UN35433 | Rsa1.0.42519.1 | 569  | 528    | 6.00E-66  | 227 | 260 | 87 + | 172 | 431  | 113    | 372    |
| UN35434 | Rsa1.0.00563.1 | 663  | 75491  | 0         | 659 | 662 | 99 - | 2   | 663  | 27404  | 28065  |
| UN35435 | Rsa1.0.01918.1 | 1026 | 37278  | 0         | 619 | 668 | 92 - | 359 | 1026 | 12808  | 13473  |
| UN35436 | Rsa1.0.02796.1 | 940  | 27805  | 0         | 927 | 946 | 97 - | 2   | 940  | 13785  | 14729  |
| UN35437 | Rsa1.0.03147.1 | 385  | 25001  | 1.00E-163 | 300 | 303 | 99 + | 83  | 385  | 3713   | 4015   |
| UN35438 | Rsa1.0.00032.1 | 953  | 306326 | 0         | 818 | 840 | 97 + | 124 | 953  | 190180 | 191019 |
| UN35439 | Rsa1.0.00146.1 | 903  | 149343 | 0         | 642 | 658 | 97 + | 2   | 657  | 46141  | 46796  |
| UN35440 | Rsa1.0.01829.1 | 677  | 166063 | 0         | 670 | 674 | 99 + | 4   | 677  | 127598 | 128271 |
| UN35441 | Rsa1.0.09141.1 | 671  | 6612   | 5.00E-98  | 247 | 270 | 91 - | 3   | 258  | 4437   | 4706   |
| UN35442 | Rsa1.0.01716.1 | 713  | 40483  | 0         | 696 | 713 | 97 - | 2   | 713  | 6612   | 7324   |
| UN35443 | Rsa1.0.18162.1 | 558  | 1654   | 1.00E-153 | 325 | 339 | 95 - | 221 | 557  | 442    | 780    |
| UN35444 | Rsa1.0.04444.1 | 573  | 17320  | 0         | 531 | 575 | 92 + | 2   | 571  | 14131  | 14705  |
| UN35445 | Rsa1.0.01352.1 | 1142 | 47443  | 0         | 505 | 528 | 95 + | 33  | 551  | 4605   | 5131   |
| UN35446 | Rsa1.0.00134.1 | 1384 | 390219 | 1.00E-112 | 210 | 211 | 99 - | 489 | 699  | 191649 | 191859 |
| UN35447 | Rsa1.0.09684.1 | 706  | 6213   | 0         | 380 | 393 | 96 + | 98  | 490  | 85     | 477    |
| UN35448 | Rsa1.0.01746.1 | 844  | 39887  | 0         | 803 | 864 | 92 - | 1   | 842  | 32023  | 32883  |
| UN35449 | Rsa1.0.10778.1 | 721  | 5722   | 0         | 361 | 364 | 99 + | 347 | 710  | 4479   | 4842   |

|         |                |      |        |           |     |     |      |     |      |        |        |
|---------|----------------|------|--------|-----------|-----|-----|------|-----|------|--------|--------|
| UN35450 | Rsa1.0_04065.1 | 1031 | 19275  | 0         | 368 | 371 | 99 + | 663 | 1031 | 18356  | 18726  |
| UN35451 | Rsa1.0_02191.1 | 471  | 34078  | 0         | 395 | 413 | 95 - | 68  | 467  | 4457   | 4869   |
| UN35452 | Rsa1.0_00055.1 | 683  | 520193 | 1.00E-12  | 114 | 139 | 82 - | 173 | 311  | 75582  | 75720  |
| UN35453 | Rsa1.0_03434.1 | 1107 | 22960  | 0         | 462 | 501 | 92 - | 2   | 502  | 17074  | 17574  |
| UN35454 | Rsa1.0_00053.1 | 1056 | 263459 | 0         | 591 | 613 | 96 - | 9   | 615  | 233623 | 234235 |
| UN35455 | Rsa1.0_45734.1 | 747  | 493    | 1.00E-64  | 129 | 130 | 99 - | 146 | 275  | 163    | 292    |
| UN35456 | Rsa1.0_02945.1 | 363  | 26548  | 1.00E-117 | 253 | 266 | 95 + | 2   | 267  | 3436   | 3701   |
| UN35457 | Rsa1.0_00894.1 | 1121 | 269700 | 0         | 395 | 400 | 98 + | 1   | 400  | 249737 | 250136 |
| UN35458 | Rsa1.0_01543.1 | 820  | 43645  | 1.00E-100 | 254 | 274 | 92 + | 253 | 525  | 14108  | 14375  |
| UN35459 | Rsa1.0_00813.1 | 716  | 63202  | 3.00E-47  | 109 | 113 | 96 + | 330 | 442  | 47296  | 47408  |
| UN35460 | Rsa1.0_00108.1 | 268  | 478491 | 2.00E-51  | 122 | 127 | 96 + | 5   | 131  | 8655   | 8780   |
| UN35461 | Rsa1.0_00653.1 | 732  | 70029  | 0         | 725 | 734 | 98 - | 1   | 732  | 58917  | 59650  |
| UN35462 | Rsa1.0_06447.1 | 535  | 10999  | 1.00E-158 | 303 | 307 | 98 - | 231 | 535  | 9093   | 9399   |
| UN35463 | Rsa1.0_52080.1 | 767  | 437    | 1.00E-130 | 248 | 252 | 98 - | 2   | 253  | 121    | 372    |
| UN35464 | Rsa1.0_02169.1 | 711  | 34367  | 1.00E-127 | 317 | 345 | 91 - | 28  | 360  | 3851   | 4189   |
| UN35465 | Rsa1.0_04243.1 | 983  | 18321  | 0         | 778 | 822 | 94 - | 174 | 983  | 7356   | 8172   |
| UN35466 | Rsa1.0_05925.1 | 1039 | 12221  | 1.00E-121 | 237 | 242 | 97 + | 343 | 584  | 4399   | 4640   |
| UN35467 | Rsa1.0_00107.1 | 1065 | 431659 | 1.00E-176 | 327 | 330 | 99 + | 736 | 1065 | 85958  | 86286  |
| UN35468 | Rsa1.0_03940.1 | 1082 | 19962  | 0         | 431 | 447 | 96 + | 637 | 1077 | 15946  | 16392  |
| UN35469 | Rsa1.0_01799.1 | 658  | 39127  | 0         | 573 | 602 | 95 - | 61  | 658  | 2443   | 3040   |
| UN35470 | Rsa1.0_00681.1 | 886  | 68779  | 0         | 460 | 468 | 98 + | 419 | 886  | 37951  | 38415  |
| UN35471 | Rsa1.0_04635.1 | 1397 | 16569  | 0         | 933 | 991 | 94 - | 3   | 986  | 376    | 1347   |
| UN35472 | Rsa1.0_16231.1 | 684  | 131890 | 0         | 539 | 609 | 88 + | 95  | 684  | 167    | 767    |
| UN35473 | Rsa1.0_04525.1 | 607  | 16965  | 0         | 500 | 548 | 91 - | 82  | 607  | 2324   | 2859   |
| UN35474 | Rsa1.0_00006.1 | 574  | 396176 | 1.00E-174 | 387 | 409 | 94 + | 6   | 412  | 18580  | 18981  |
| UN35475 | Rsa1.0_00087.1 | 629  | 761073 | 0         | 497 | 507 | 98 - | 126 | 629  | 275827 | 276330 |
| UN35476 | Rsa1.0_00518.1 | 637  | 78360  | 0         | 604 | 635 | 95 + | 6   | 637  | 76257  | 76882  |
| UN35477 | Rsa1.0_00252.1 | 819  | 102760 | 8.00E-94  | 240 | 259 | 92 - | 1   | 257  | 98134  | 98387  |
| UN35478 | Rsa1.0_00116.1 | 793  | 365886 | 8.00E-91  | 218 | 233 | 93 - | 85  | 316  | 14234  | 14460  |
| UN35479 | Rsa1.0_07947.1 | 517  | 8204   | 0         | 503 | 516 | 97 - | 1   | 516  | 6618   | 7131   |
| UN35480 | Rsa1.0_00030.1 | 728  | 250988 | 0         | 383 | 396 | 96 - | 163 | 558  | 122745 | 123140 |
| UN35481 | Rsa1.0_01677.1 | 1037 | 41140  | 0         | 668 | 706 | 94 - | 4   | 702  | 20597  | 21292  |
| UN35482 | Rsa1.0_00440.1 | 512  | 84723  | 0         | 463 | 490 | 94 + | 19  | 507  | 74638  | 75124  |
| UN35483 | Rsa1.0_24553.1 | 875  | 981    | 2.00E-61  | 361 | 438 | 82 + | 293 | 700  | 46     | 477    |
| UN35484 | Rsa1.0_01498.1 | 565  | 44558  | 0         | 537 | 547 | 98 + | 20  | 565  | 1      | 544    |
| UN35485 | Rsa1.0_00737.1 | 1057 | 66432  | 1.00E-132 | 264 | 271 | 97 + | 785 | 1055 | 25538  | 25806  |
| UN35486 | Rsa1.0_01419.1 | 499  | 167402 | 0         | 484 | 503 | 96 + | 1   | 499  | 131956 | 132453 |
| UN35487 | Rsa1.0_00247.1 | 835  | 103408 | 0         | 810 | 839 | 96 + | 2   | 832  | 77885  | 78722  |
| UN35488 | Rsa1.0_01433.1 | 929  | 45976  | 0         | 617 | 657 | 93 + | 253 | 907  | 8182   | 8818   |



|         |                |      |        |           |      |      |       |     |      |        |        |
|---------|----------------|------|--------|-----------|------|------|-------|-----|------|--------|--------|
| UN35489 | Rsa1.0.00081.1 | 1054 | 143261 | 1.00E-162 | 332  | 346  | 95 +  | 289 | 634  | 85804  | 86149  |
| UN35490 | Rsa1.0.03877.1 | 694  | 20318  | 0         | 518  | 545  | 95 -  | 2   | 543  | 37     | 581    |
| UN35491 | Rsa1.0.00837.1 | 588  | 62568  | 1.00E-171 | 344  | 357  | 96 -  | 176 | 532  | 47711  | 48067  |
| UN35492 | Rsa1.0.00690.1 | 821  | 140527 | 0         | 764  | 801  | 95 +  | 21  | 808  | 11481  | 12281  |
| UN35493 | Rsa1.0.00576.1 | 820  | 178949 | 0         | 545  | 578  | 94 +  | 246 | 820  | 62120  | 62682  |
| UN35494 | Rsa1.0.04428.1 | 1063 | 17399  | 0         | 1008 | 1065 | 94 +  | 1   | 1062 | 8536   | 9566   |
| UN35495 | Rsa1.0.05904.1 | 665  | 12279  | 0         | 610  | 625  | 97 -  | 3   | 627  | 8550   | 9174   |
| UN35496 | Rsa1.0.01482.1 | 1122 | 44855  | 1.00E-143 | 274  | 278  | 98 +  | 844 | 1121 | 30404  | 30680  |
| UN35497 | Rsa1.0.00025.1 | 1278 | 277312 | 0         | 364  | 369  | 98 +  | 914 | 1278 | 44610  | 44978  |
| UN35498 | Rsa1.0.02792.1 | 991  | 27829  | 0         | 364  | 365  | 99 -  | 3   | 367  | 312    | 676    |
| UN35499 | Rsa1.0.12341.1 | 726  | 5250   | 0         | 468  | 484  | 96 -  | 245 | 721  | 2132   | 2615   |
| UN35500 | Rsa1.0.00286.1 | 768  | 98709  | 8.00E-97  | 192  | 196  | 97 +  | 286 | 481  | 19488  | 19683  |
| UN35501 | Rsa1.0.00227.1 | 575  | 105849 | 0         | 487  | 501  | 97 +  | 75  | 573  | 73790  | 74290  |
| UN35502 | Rsa1.0.01710.1 | 798  | 40586  | 0         | 773  | 795  | 97 -  | 3   | 796  | 3519   | 4313   |
| UN35503 | Rsa1.0.00821.1 | 1177 | 62891  | 0         | 746  | 756  | 98 -  | 423 | 1174 | 54267  | 55021  |
| UN35504 | Rsa1.0.01232.1 | 606  | 155185 | 1.00E-148 | 298  | 308  | 96 -  | 302 | 606  | 137579 | 137886 |
| UN35505 | Rsa1.0.01118.1 | 755  | 53460  | 0         | 732  | 757  | 96 -  | 3   | 755  | 47273  | 48029  |
| UN35506 | Rsa1.0.03520.1 | 1024 | 22327  | 2.00E-88  | 176  | 178  | 98 -  | 799 | 975  | 3815   | 3992   |
| UN35507 | Rsa1.0.03407.1 | 675  | 23154  | 1.00E-100 | 192  | 194  | 98 -  | 1   | 194  | 5522   | 5715   |
| UN35508 | Rsa1.0.65913.1 | 1321 | 348    | 1.00E-173 | 315  | 317  | 99 +  | 449 | 765  | 32     | 348    |
| UN35509 | Rsa1.0.02043.1 | 634  | 163754 | 0         | 634  | 634  | 100 + | 1   | 634  | 13627  | 14260  |
| UN35510 | Rsa1.0.09229.1 | 736  | 6542   | 0         | 417  | 419  | 99 +  | 199 | 617  | 578    | 996    |
| UN35511 | Rsa1.0.00092.1 | 865  | 659932 | 0         | 342  | 342  | 100 + | 522 | 863  | 147665 | 148006 |
| UN35512 | Rsa1.0.01315.1 | 1037 | 48361  | 0         | 642  | 646  | 99 +  | 2   | 647  | 45696  | 46341  |
| UN35513 | Rsa1.0.00140.1 | 866  | 121541 | 0         | 456  | 462  | 98 +  | 1   | 459  | 3943   | 4403   |
| UN35514 | Rsa1.0.00143.1 | 535  | 121313 | 0         | 515  | 524  | 98 +  | 10  | 533  | 24752  | 25275  |
| UN35515 | Rsa1.0.58001.1 | 626  | 394    | 0         | 392  | 394  | 99 -  | 119 | 512  | 1      | 394    |
| UN35516 | Rsa1.0.05175.1 | 1124 | 14603  | 0         | 1118 | 1123 | 99 +  | 1   | 1123 | 1747   | 2869   |
| UN35517 | Rsa1.0.01674.1 | 620  | 168300 | 1.00E-92  | 179  | 181  | 98 +  | 440 | 620  | 2867   | 3047   |
| UN35518 | Rsa1.0.05701.1 | 831  | 12884  | 0         | 435  | 435  | 100 - | 314 | 748  | 11282  | 11716  |
| UN35519 | Rsa1.0.01535.1 | 1453 | 43750  | 0         | 908  | 912  | 99 -  | 539 | 1446 | 22048  | 22959  |
| UN35520 | Rsa1.0.00529.1 | 740  | 77487  | 0         | 661  | 703  | 94 -  | 1   | 698  | 52471  | 53173  |
| UN35521 | Rsa1.0.03777.1 | 667  | 20922  | 1.00E-131 | 287  | 303  | 94 -  | 137 | 439  | 7434   | 7733   |
| UN35522 | Rsa1.0.00173.1 | 632  | 288743 | 1.00E-172 | 325  | 329  | 98 +  | 306 | 631  | 32434  | 32762  |
| UN35523 | Rsa1.0.08611.1 | 918  | 7130   | 1.00E-147 | 280  | 285  | 98 -  | 287 | 571  | 2209   | 2493   |
| UN35524 | Rsa1.0.00081.1 | 518  | 143261 | 1.00E-170 | 339  | 350  | 96 -  | 1   | 349  | 46342  | 46691  |
| UN35525 | Rsa1.0.00476.1 | 1001 | 280966 | 0         | 406  | 425  | 95 +  | 576 | 1000 | 271894 | 272317 |
| UN35526 | Rsa1.0.01667.1 | 767  | 41315  | 0         | 748  | 769  | 97 -  | 1   | 767  | 30236  | 31003  |
| UN35527 | Rsa1.0.45629.1 | 536  | 494    | 1.00E-155 | 283  | 285  | 99 +  | 56  | 340  | 1      | 285    |

|         |                |      |        |           |     |      |       |     |      |        |        |
|---------|----------------|------|--------|-----------|-----|------|-------|-----|------|--------|--------|
| UN35528 | Rsa1.0.00006.1 | 661  | 396176 | 0         | 559 | 574  | 97 +  | 59  | 629  | 215506 | 216077 |
| UN35529 | Rsa1.0.00279.1 | 416  | 100039 | 1.00E-102 | 214 | 221  | 96 +  | 2   | 219  | 48429  | 48646  |
| UN35530 | Rsa1.0.01343.1 | 699  | 47735  | 0         | 363 | 363  | 100 + | 337 | 699  | 9134   | 9496   |
| UN35531 | Rsa1.0.11719.1 | 748  | 5430   | 1.00E-105 | 215 | 222  | 96 -  | 471 | 692  | 3724   | 3945   |
| UN35532 | Rsa1.0.00519.1 | 460  | 197864 | 0         | 443 | 450  | 98 -  | 12  | 460  | 65705  | 66153  |
| UN35533 | Rsa1.0.10441.1 | 653  | 5850   | 1.00E-171 | 338 | 348  | 97 +  | 307 | 653  | 1315   | 1662   |
| UN35534 | Rsa1.0.00069.1 | 824  | 403561 | 1.00E-131 | 273 | 284  | 96 -  | 12  | 295  | 192368 | 192648 |
| UN35535 | Rsa1.0.02958.1 | 821  | 26443  | 0         | 486 | 493  | 98 +  | 61  | 553  | 7659   | 8151   |
| UN35536 | Rsa1.0.08679.1 | 656  | 7047   | 1.00E-150 | 272 | 273  | 99 -  | 384 | 656  | 4241   | 4513   |
| UN35537 | Rsa1.0.16859.1 | 1263 | 2010   | 1.00E-129 | 281 | 295  | 95 -  | 3   | 294  | 1224   | 1515   |
| UN35538 | Rsa1.0.00382.1 | 760  | 251946 | 1.00E-70  | 195 | 214  | 91 -  | 471 | 684  | 168419 | 168629 |
| UN35539 | Rsa1.0.08363.1 | 1038 | 7474   | 0         | 632 | 645  | 97 +  | 2   | 646  | 3277   | 3921   |
| UN35540 | Rsa1.0.00810.1 | 694  | 63289  | 0         | 681 | 691  | 98 -  | 1   | 690  | 61408  | 62098  |
| UN35541 | Rsa1.0.00306.1 | 1129 | 146760 | 0         | 977 | 1004 | 97 -  | 1   | 1002 | 55152  | 56154  |
| UN35542 | Rsa1.0.00440.1 | 703  | 84723  | 0         | 699 | 702  | 99 -  | 2   | 703  | 45292  | 45993  |
| UN35543 | Rsa1.0.05229.1 | 841  | 14437  | 0         | 837 | 839  | 99 +  | 1   | 839  | 8165   | 9003   |
| UN35544 | Rsa1.0.32218.1 | 687  | 707    | 0         | 451 | 456  | 98 -  | 10  | 465  | 252    | 707    |
| UN35545 | Rsa1.0.01540.1 | 1109 | 151890 | 0         | 719 | 746  | 96 -  | 3   | 739  | 125351 | 126096 |
| UN35546 | Rsa1.0.02393.1 | 915  | 31795  | 0         | 825 | 852  | 96 +  | 2   | 852  | 20696  | 21547  |
| UN35547 | Rsa1.0.13885.1 | 750  | 4149   | 1.00E-169 | 304 | 305  | 99 +  | 444 | 748  | 1681   | 1985   |
| UN35548 | Rsa1.0.66377.1 | 833  | 345    | 0         | 343 | 345  | 99 -  | 91  | 434  | 1      | 345    |
| UN35549 | Rsa1.0.00081.1 | 873  | 143261 | 0         | 857 | 881  | 97 -  | 1   | 873  | 108090 | 108969 |
| UN35550 | Rsa1.0.01489.1 | 788  | 44764  | 0         | 668 | 671  | 99 -  | 1   | 671  | 8042   | 8712   |
| UN35551 | Rsa1.0.00069.1 | 713  | 403561 | 0         | 460 | 496  | 92 +  | 2   | 485  | 190541 | 191025 |
| UN35552 | Rsa1.0.00131.1 | 436  | 432233 | 1.00E-169 | 340 | 351  | 96 +  | 4   | 351  | 285281 | 285630 |
| UN35553 | Rsa1.0.01018.1 | 1052 | 56685  | 0         | 477 | 478  | 99 -  | 523 | 999  | 11     | 488    |
| UN35554 | Rsa1.0.20750.1 | 608  | 1273   | 1.00E-150 | 307 | 320  | 95 -  | 7   | 326  | 806    | 1119   |
| UN35555 | Rsa1.0.00359.1 | 944  | 91256  | 0         | 429 | 442  | 97 -  | 4   | 444  | 86965  | 87406  |
| UN35556 | Rsa1.0.17692.1 | 687  | 1764   | 0         | 352 | 363  | 96 -  | 3   | 354  | 1241   | 1603   |
| UN35557 | Rsa1.0.16067.1 | 1159 | 2300   | 1.00E-178 | 349 | 360  | 96 -  | 803 | 1157 | 344    | 703    |
| UN35558 | Rsa1.0.00344.1 | 684  | 191774 | 0         | 651 | 680  | 95 +  | 5   | 684  | 163777 | 164453 |
| UN35559 | Rsa1.0.00002.1 | 899  | 601661 | 0         | 372 | 385  | 96 +  | 512 | 894  | 421340 | 421720 |
| UN35560 | Rsa1.0.00030.1 | 1064 | 250988 | 0         | 954 | 1083 | 88 -  | 5   | 1045 | 233634 | 234708 |
| UN35561 | Rsa1.0.73452.1 | 776  | 312    | 1.00E-171 | 310 | 312  | 99 +  | 226 | 537  | 1      | 312    |
| UN35562 | Rsa1.0.03545.1 | 1152 | 147543 | 0         | 445 | 445  | 100 - | 3   | 447  | 8353   | 8797   |
| UN35563 | Rsa1.0.00031.1 | 683  | 179862 | 1.00E-106 | 265 | 288  | 92 -  | 328 | 612  | 3165   | 3446   |
| UN35564 | Rsa1.0.00789.1 | 953  | 64233  | 1.00E-142 | 271 | 276  | 98 +  | 1   | 276  | 49234  | 49509  |
| UN35565 | Rsa1.0.00164.1 | 850  | 116642 | 0         | 539 | 585  | 92 -  | 1   | 551  | 97910  | 98494  |
| UN35566 | Rsa1.0.00897.1 | 1306 | 60498  | 0         | 968 | 1034 | 93 -  | 272 | 1305 | 20446  | 21461  |

|         |                |      |        |           |      |      |       |     |      |        |        |
|---------|----------------|------|--------|-----------|------|------|-------|-----|------|--------|--------|
| UN35567 | Rsa1.0.00019.1 | 873  | 301669 | 0         | 867  | 874  | 99 -  | 1   | 873  | 142167 | 143040 |
| UN35568 | Rsa1.0.00237.1 | 664  | 235974 | 1.00E-155 | 315  | 330  | 95 -  | 333 | 662  | 23148  | 23465  |
| UN35569 | Rsa1.0.03150.1 | 829  | 24980  | 2.00E-54  | 152  | 165  | 92 -  | 1   | 164  | 7120   | 7284   |
| UN35570 | Rsa1.0.01225.1 | 1356 | 50381  | 1.00E-148 | 272  | 274  | 99 -  | 3   | 276  | 34965  | 35238  |
| UN35571 | Rsa1.0_00002.1 | 1144 | 601661 | 0         | 643  | 670  | 95 -  | 121 | 780  | 244418 | 245084 |
| UN35572 | Rsa1.0_00058.1 | 686  | 159921 | 1.00E-151 | 274  | 275  | 99 +  | 172 | 446  | 4238   | 4512   |
| UN35573 | Rsa1.0_00099.1 | 917  | 159619 | 0         | 831  | 890  | 93 -  | 43  | 915  | 28014  | 28898  |
| UN35574 | Rsa1.0.00248.1 | 625  | 163568 | 0         | 620  | 623  | 99 +  | 1   | 623  | 61349  | 61971  |
| UN35575 | #              | #    | #      | #         | #    | #    | #     | #   | #    | #      | #      |
| UN35576 | Rsa1.0.02562.1 | 617  | 30061  | 6.00E-51  | 124  | 131  | 94 +  | 255 | 385  | 17184  | 17314  |
| UN35577 | Rsa1.0.00573.1 | 1004 | 74821  | 0         | 972  | 1016 | 95 -  | 3   | 1004 | 40771  | 41786  |
| UN35578 | Rsa1.0.00614.1 | 1074 | 72276  | 1.00E-145 | 276  | 281  | 98 +  | 792 | 1072 | 60464  | 60744  |
| UN35579 | Rsa1.0.00934.1 | 533  | 193516 | 0         | 521  | 534  | 97 -  | 2   | 532  | 146295 | 146825 |
| UN35580 | Rsa1.0.00044.1 | 1261 | 271658 | 0         | 433  | 452  | 95 +  | 421 | 872  | 270014 | 270465 |
| UN35581 | Rsa1.0.01055.1 | 827  | 55466  | 1.00E-145 | 358  | 389  | 92 -  | 5   | 384  | 12613  | 12998  |
| UN35582 | Rsa1.0.07152.1 | 1014 | 9815   | 0         | 939  | 941  | 99 -  | 3   | 943  | 8037   | 8977   |
| UN35583 | Rsa1.0.00427.1 | 799  | 189678 | 0         | 465  | 466  | 99 -  | 1   | 466  | 61524  | 61989  |
| UN35584 | Rsa1.0_14314.1 | 1000 | 3539   | 0         | 379  | 383  | 98 +  | 1   | 383  | 1347   | 1729   |
| UN35585 | Rsa1.0.21047.1 | 1138 | 1242   | 1.00E-172 | 310  | 311  | 99 +  | 522 | 832  | 27     | 337    |
| UN35586 | Rsa1.0.00108.1 | 592  | 478491 | 0         | 450  | 460  | 97 -  | 131 | 590  | 247689 | 248141 |
| UN35587 | Rsa1.0.00374.1 | 807  | 165738 | 0         | 478  | 497  | 96 +  | 6   | 498  | 131794 | 132288 |
| UN35588 | Rsa1.0.01155.1 | 1172 | 52182  | 1.00E-161 | 292  | 293  | 99 +  | 230 | 522  | 24306  | 24598  |
| UN35589 | Rsa1.0.00417.1 | 644  | 395068 | 0         | 633  | 642  | 98 +  | 5   | 644  | 237450 | 238091 |
| UN35590 | Rsa1.0.00115.1 | 996  | 131321 | 0         | 970  | 991  | 97 -  | 5   | 995  | 124139 | 125128 |
| UN35591 | Rsa1.0.03963.1 | 649  | 19855  | 0         | 537  | 563  | 95 -  | 1   | 553  | 127    | 682    |
| UN35592 | Rsa1.0.00059.1 | 362  | 159650 | 1.00E-154 | 308  | 316  | 97 +  | 1   | 314  | 77335  | 77645  |
| UN35593 | Rsa1.0.00149.1 | 409  | 305196 | 1.00E-176 | 351  | 360  | 97 +  | 1   | 358  | 26585  | 26943  |
| UN35594 | Rsa1.0.00800.1 | 932  | 63868  | 0         | 449  | 449  | 100 - | 1   | 449  | 44481  | 44929  |
| UN35595 | Rsa1.0.02508.1 | 865  | 30675  | 1.00E-159 | 310  | 316  | 98 -  | 301 | 614  | 29574  | 29889  |
| UN35596 | Rsa1.0.00414.1 | 785  | 202190 | 0         | 641  | 670  | 95 +  | 52  | 708  | 73060  | 73726  |
| UN35597 | Rsa1.0.20922.1 | 1049 | 1254   | 0         | 391  | 394  | 99 -  | 1   | 394  | 159    | 552    |
| UN35598 | Rsa1.0.09595.1 | 1219 | 6263   | 0         | 1209 | 1216 | 99 -  | 3   | 1218 | 4062   | 5277   |
| UN35599 | Rsa1.0.02744.1 | 1043 | 28268  | 0         | 1039 | 1041 | 99 -  | 1   | 1041 | 15313  | 16353  |
| UN35600 | Rsa1.0.03798.1 | 837  | 20800  | 0         | 357  | 367  | 97 -  | 139 | 505  | 6041   | 6407   |
| UN35601 | Rsa1.0.01286.1 | 920  | 49209  | 0         | 429  | 452  | 94 -  | 467 | 918  | 27545  | 27992  |
| UN35602 | Rsa1.0.03836.1 | 838  | 20564  | 0         | 834  | 836  | 99 +  | 1   | 835  | 15946  | 16781  |
| UN35603 | Rsa1.0.16771.1 | 1107 | 2040   | 0         | 671  | 681  | 98 +  | 1   | 681  | 201    | 880    |
| UN35604 | Rsa1.0.00903.1 | 719  | 60228  | 1.00E-164 | 357  | 374  | 95 +  | 1   | 367  | 52756  | 53129  |
| UN35605 | Rsa1.0.00478.1 | 596  | 81419  | 0         | 338  | 339  | 99 +  | 3   | 341  | 40211  | 40549  |

|         |                |      |        |           |      |      |       |     |      |        |        |
|---------|----------------|------|--------|-----------|------|------|-------|-----|------|--------|--------|
| UN35606 | Rsa1.0.03175.1 | 761  | 24802  | 2.33E-156 | 367  | 406  | 90 -  | 1   | 405  | 22371  | 22754  |
| UN35607 | Rsa1.0.02477.1 | 1306 | 31058  | 0         | 552  | 567  | 97 -  | 705 | 1270 | 11427  | 11992  |
| UN35608 | Rsa1.0.00894.1 | 808  | 269700 | 1.00E-147 | 274  | 277  | 98 +  | 3   | 279  | 24219  | 24495  |
| UN35609 | Rsa1.0.03209.1 | 1199 | 24592  | 0         | 603  | 627  | 96 +  | 9   | 635  | 13273  | 13899  |
| UN35610 | Rsa1.0.07024.1 | 893  | 10013  | 1.00E-134 | 288  | 303  | 95 +  | 386 | 688  | 4023   | 4325   |
| UN35611 | Rsa1.0.00701.1 | 763  | 67691  | 1.00E-119 | 217  | 217  | 100 + | 2   | 218  | 25618  | 25834  |
| UN35612 | Rsa1.0.00016.1 | 766  | 831256 | 1.00E-131 | 267  | 276  | 96 -  | 490 | 765  | 740518 | 740790 |
| UN35613 | Rsa1.0.01146.1 | 818  | 163455 | 0         | 769  | 824  | 93 -  | 8   | 818  | 22529  | 23350  |
| UN35614 | Rsa1.0.02671.1 | 749  | 28887  | 0         | 515  | 530  | 97 -  | 2   | 529  | 8479   | 9008   |
| UN35615 | Rsa1.0.01361.1 | 652  | 47226  | 0         | 644  | 654  | 98 +  | 1   | 652  | 22762  | 23415  |
| UN35616 | Rsa1.0.00066.1 | 930  | 152418 | 0         | 525  | 561  | 93 -  | 338 | 889  | 61709  | 62260  |
| UN35617 | Rsa1.0.00006.1 | 1160 | 396176 | 0         | 440  | 456  | 96 -  | 706 | 1159 | 208588 | 209043 |
| UN35618 | Rsa1.0.67436.1 | 761  | 340    | 2.00E-94  | 185  | 187  | 98 +  | 292 | 478  | 156    | 340    |
| UN35619 | Rsa1.0.00551.1 | 771  | 76227  | 0         | 419  | 441  | 95 -  | 101 | 536  | 29432  | 29872  |
| UN35620 | Rsa1.0.02477.1 | 1321 | 31058  | 1.00E-116 | 320  | 355  | 90 +  | 968 | 1319 | 10884  | 11238  |
| UN35621 | Rsa1.0.01932.1 | 1228 | 37177  | 0         | 538  | 541  | 99 +  | 479 | 1019 | 11719  | 12258  |
| UN35622 | Rsa1.0.06271.1 | 1094 | 11351  | 1.00E-120 | 249  | 256  | 97 -  | 153 | 407  | 3374   | 3628   |
| UN35623 | Rsa1.0.00016.1 | 811  | 831256 | 0         | 471  | 471  | 100 - | 341 | 811  | 680720 | 681190 |
| UN35624 | Rsa1.0.04966.1 | 634  | 15307  | 1.00E-165 | 294  | 294  | 100 + | 1   | 294  | 1470   | 1763   |
| UN35625 | Rsa1.0.06383.1 | 743  | 11119  | 0         | 343  | 343  | 100 + | 401 | 743  | 3536   | 3878   |
| UN35626 | Rsa1.0.00221.1 | 896  | 106972 | 2.00E-11  | 46   | 49   | 93 -  | 316 | 364  | 7063   | 7111   |
| UN35627 | Rsa1.0.00031.1 | 734  | 179862 | 0         | 470  | 474  | 99 +  | 262 | 734  | 128053 | 128526 |
| UN35628 | Rsa1.0.03422.1 | 827  | 23076  | 3.00E-72  | 261  | 301  | 86 -  | 10  | 285  | 6979   | 7276   |
| UN35629 | Rsa1.0.17309.1 | 749  | 1864   | 0         | 481  | 481  | 100 - | 1   | 481  | 1      | 481    |
| UN35630 | Rsa1.0.03034.1 | 688  | 157864 | 0         | 433  | 453  | 95 -  | 2   | 450  | 134541 | 134991 |
| UN35631 | Rsa1.0.01632.1 | 1012 | 181224 | 0         | 389  | 407  | 95 -  | 405 | 803  | 9173   | 9579   |
| UN35632 | Rsa1.0.70008.1 | 1119 | 327    | 1.00E-153 | 281  | 283  | 99 +  | 2   | 284  | 45     | 327    |
| UN35633 | Rsa1.0.01654.1 | 1209 | 41532  | 0         | 355  | 364  | 97 -  | 2   | 364  | 30737  | 31100  |
| UN35634 | Rsa1.0.03238.1 | 1312 | 24432  | 1.00E-161 | 306  | 312  | 98 -  | 785 | 1096 | 10632  | 10943  |
| UN35635 | Rsa1.0.00397.1 | 767  | 88189  | 1.00E-156 | 300  | 307  | 97 +  | 459 | 765  | 4823   | 5129   |
| UN35636 | Rsa1.0.02093.1 | 754  | 35125  | 0         | 699  | 750  | 93 -  | 1   | 750  | 26709  | 27452  |
| UN35637 | Rsa1.0.22801.1 | 937  | 1093   | 1.00E-151 | 275  | 276  | 99 -  | 457 | 732  | 351    | 626    |
| UN35638 | Rsa1.0.03244.1 | 1115 | 24413  | 0         | 1091 | 1134 | 96 -  | 2   | 1114 | 5541   | 6668   |
| UN35639 | Rsa1.0.01803.1 | 933  | 173846 | 0         | 871  | 906  | 96 -  | 1   | 906  | 161296 | 162198 |
| UN35640 | Rsa1.0.00178.1 | 1389 | 114861 | 0         | 485  | 487  | 99 +  | 1   | 487  | 8221   | 8707   |
| UN35641 | Rsa1.0.01046.1 | 804  | 152989 | 0         | 512  | 565  | 90 -  | 15  | 567  | 136697 | 137240 |
| UN35642 | Rsa1.0.11107.1 | 1012 | 5613   | 0         | 385  | 400  | 96 -  | 1   | 398  | 3883   | 4282   |
| UN35643 | Rsa1.0.00045.1 | 1169 | 328694 | 0         | 623  | 639  | 97 +  | 528 | 1166 | 176091 | 176729 |
| UN35644 | Rsa1.0.04405.1 | 1074 | 17508  | 0         | 996  | 1032 | 96 -  | 1   | 1025 | 2068   | 3099   |

|         |                |      |        |           |      |      |       |     |      |        |        |
|---------|----------------|------|--------|-----------|------|------|-------|-----|------|--------|--------|
| UN35645 | Rsa1.0.02189.1 | 706  | 34098  | 1.00E-164 | 300  | 301  | 99 -  | 15  | 314  | 30540  | 30840  |
| UN35646 | Rsa1.0.01646.1 | 452  | 41735  | 0         | 442  | 451  | 98 -  | 2   | 452  | 38155  | 38605  |
| UN35647 | Rsa1.0.01727.1 | 645  | 40243  | 0         | 640  | 644  | 99 -  | 2   | 645  | 8807   | 9450   |
| UN35648 | Rsa1.0.02911.1 | 690  | 142461 | 1.00E-116 | 219  | 221  | 99 +  | 417 | 637  | 7223   | 7443   |
| UN35649 | Rsa1.0.05323.1 | 979  | 14149  | 1.00E-168 | 363  | 384  | 94 +  | 449 | 832  | 11206  | 11589  |
| UN35650 | Rsa1.0.03415.1 | 682  | 23117  | 1.00E-110 | 212  | 215  | 98 +  | 1   | 215  | 9011   | 9225   |
| UN35651 | #              | #    | #      | #         | #    | #    | #     | #   | #    | #      | #      |
| UN35652 | Rsa1.0.00441.1 | 716  | 84607  | 2.00E-69  | 280  | 327  | 85 +  | 303 | 623  | 75165  | 75487  |
| UN35653 | Rsa1.0.00014.1 | 1107 | 348985 | 0         | 1062 | 1101 | 96 +  | 7   | 1106 | 204533 | 205632 |
| UN35654 | Rsa1.0.00017.1 | 1054 | 752458 | 0         | 401  | 424  | 94 -  | 2   | 418  | 127505 | 127921 |
| UN35655 | Rsa1.0.01659.1 | 742  | 164577 | 0         | 394  | 394  | 100 + | 349 | 742  | 17516  | 17909  |
| UN35656 | Rsa1.0.00014.1 | 1196 | 348985 | 1.00E-153 | 281  | 283  | 99 +  | 887 | 1169 | 341327 | 341609 |
| UN35657 | Rsa1.0.00307.1 | 1245 | 199003 | 0         | 1201 | 1201 | 100 + | 1   | 1201 | 155550 | 156750 |
| UN35658 | Rsa1.0.00877.1 | 597  | 61305  | 2.33E-156 | 274  | 278  | 98 -  | 319 | 596  | 17349  | 17626  |
| UN35659 | Rsa1.0.02686.1 | 821  | 28666  | 0         | 471  | 472  | 99 +  | 2   | 473  | 23408  | 23879  |
| UN35660 | Rsa1.0.03334.1 | 779  | 23659  | 1.00E-159 | 440  | 490  | 89 +  | 52  | 536  | 14017  | 14506  |
| UN35661 | Rsa1.0.02545.1 | 603  | 30286  | 1.00E-135 | 257  | 260  | 98 +  | 1   | 259  | 9385   | 9644   |
| UN35662 | Rsa1.0.03877.1 | 1210 | 20318  | 0         | 667  | 707  | 94 +  | 75  | 778  | 123    | 829    |
| UN35663 | Rsa1.0.01336.1 | 538  | 47853  | 1.00E-110 | 243  | 257  | 94 +  | 2   | 258  | 43753  | 44003  |
| UN35664 | Rsa1.0.01700.1 | 931  | 40745  | 0         | 614  | 633  | 96 -  | 1   | 633  | 29549  | 30181  |
| UN35665 | Rsa1.0.00041.1 | 739  | 186197 | 0         | 331  | 334  | 99 +  | 406 | 739  | 73947  | 74280  |
| UN35666 | Rsa1.0.00619.1 | 340  | 71985  | 1.00E-100 | 194  | 197  | 98 +  | 132 | 328  | 63748  | 63944  |
| UN35667 | Rsa1.0.08845.1 | 774  | 6867   | 0         | 442  | 442  | 100 + | 1   | 442  | 2862   | 3303   |
| UN35668 | Rsa1.0.01633.1 | 595  | 41868  | 0         | 581  | 598  | 97 -  | 1   | 595  | 40396  | 40989  |
| UN35669 | Rsa1.0.04081.1 | 968  | 19193  | 0         | 546  | 549  | 99 +  | 1   | 548  | 18564  | 19112  |
| UN35670 | Rsa1.0.10348.1 | 904  | 5880   | 0         | 507  | 516  | 98 -  | 3   | 515  | 4436   | 4951   |
| UN35671 | Rsa1.0.01294.1 | 441  | 49090  | 0         | 438  | 439  | 99 +  | 3   | 441  | 6019   | 6457   |
| UN35672 | Rsa1.0.00835.1 | 751  | 278058 | 1.00E-128 | 239  | 241  | 99 -  | 427 | 667  | 140263 | 140503 |
| UN35673 | Rsa1.0.00301.1 | 657  | 365315 | 0         | 578  | 598  | 96 -  | 56  | 650  | 183530 | 184123 |
| UN35674 | Rsa1.0.01169.1 | 673  | 51829  | 0         | 659  | 668  | 98 -  | 7   | 673  | 26443  | 27110  |
| UN35675 | Rsa1.0.01468.1 | 647  | 45146  | 1.00E-152 | 317  | 333  | 95 +  | 1   | 325  | 30515  | 30847  |
| UN35676 | Rsa1.0.00495.1 | 675  | 79934  | 0         | 615  | 617  | 99 -  | 1   | 617  | 14814  | 15430  |
| UN35677 | Rsa1.0.02682.1 | 751  | 28711  | 0         | 425  | 431  | 98 +  | 7   | 437  | 20762  | 21192  |
| UN35678 | Rsa1.0.02197.1 | 908  | 33996  | 4.00E-56  | 281  | 332  | 84 +  | 530 | 859  | 25926  | 26255  |
| UN35679 | Rsa1.0.01720.1 | 791  | 40358  | 0         | 783  | 788  | 99 +  | 3   | 790  | 28041  | 28828  |
| UN35680 | Rsa1.0.05828.1 | 1094 | 12499  | 0         | 587  | 591  | 99 +  | 503 | 1093 | 8752   | 9342   |
| UN35681 | Rsa1.0.05909.1 | 1353 | 12265  | 0         | 399  | 412  | 96 -  | 2   | 403  | 9036   | 9446   |
| UN35682 | Rsa1.0.00059.1 | 630  | 159650 | 0         | 619  | 625  | 99 +  | 7   | 628  | 91599  | 92223  |
| UN35683 | Rsa1.0.01006.1 | 1121 | 163670 | 0         | 599  | 669  | 89 -  | 13  | 650  | 124188 | 124854 |

|         |                |      |        |           |     |     |       |      |      |        |        |
|---------|----------------|------|--------|-----------|-----|-----|-------|------|------|--------|--------|
| UN35684 | Rsa1.0_14554.1 | 793  | 3274   | 0         | 744 | 779 | 95 -  | 1    | 778  | 1880   | 2655   |
| UN35685 | Rsa1.0_00388.1 | 855  | 88890  | 1.00E-121 | 221 | 221 | 100 - | 632  | 852  | 34325  | 34545  |
| UN35686 | Rsa1.0_00440.1 | 1129 | 84723  | 0         | 846 | 860 | 98 -  | 3    | 862  | 34259  | 35118  |
| UN35687 | Rsa1.0_00991.1 | 947  | 143101 | 0         | 931 | 959 | 97 +  | 5    | 946  | 47499  | 48456  |
| UN35688 | Rsa1.0_00238.1 | 804  | 193193 | 2.00E-69  | 210 | 232 | 90 -  | 123  | 352  | 89248  | 89476  |
| UN35689 | Rsa1.0_02928.1 | 502  | 26680  | 1.00E-176 | 353 | 364 | 96 +  | 18   | 381  | 17090  | 17451  |
| UN35690 | Rsa1.0_01405.1 | 195  | 46445  | 2.00E-66  | 184 | 200 | 92 +  | 1    | 193  | 37017  | 37216  |
| UN35691 | Rsa1.0_00534.1 | 701  | 77361  | 1.00E-110 | 210 | 211 | 99 -  | 3    | 213  | 30678  | 30887  |
| UN35692 | Rsa1.0_02210.1 | 562  | 33857  | 0         | 532 | 564 | 94 -  | 2    | 560  | 29061  | 29616  |
| UN35693 | Rsa1.0_06083.1 | 1191 | 11780  | 1.00E-106 | 256 | 276 | 92 +  | 120  | 395  | 7909   | 8179   |
| UN35694 | Rsa1.0_00863.1 | 1215 | 254535 | 0         | 536 | 536 | 100 - | 680  | 1215 | 131400 | 131935 |
| UN35695 | Rsa1.0_01196.1 | 1189 | 51097  | 1.00E-120 | 233 | 237 | 98 +  | 954  | 1187 | 9284   | 9520   |
| UN35696 | Rsa1.0_02950.1 | 1080 | 26506  | 7.00E-89  | 191 | 199 | 95 +  | 337  | 535  | 20132  | 20330  |
| UN35697 | Rsa1.0_03985.1 | 899  | 19704  | 0         | 869 | 901 | 96 -  | 1    | 899  | 3677   | 4577   |
| UN35698 | Rsa1.0_04411.1 | 918  | 142979 | 0         | 657 | 670 | 98 +  | 3    | 672  | 137783 | 138452 |
| UN35699 | Rsa1.0_05079.1 | 659  | 14905  | 7.00E-26  | 73  | 77  | 94 -  | 65   | 141  | 10964  | 11040  |
| UN35700 | Rsa1.0_13686.1 | 1258 | 4480   | 1.00E-133 | 242 | 242 | 100 + | 1017 | 1258 | 4048   | 4289   |
| UN35701 | Rsa1.0_01788.1 | 952  | 39296  | 0         | 493 | 493 | 100 - | 458  | 950  | 11957  | 12449  |
| UN35702 | Rsa1.0_03423.1 | 802  | 23064  | 0         | 613 | 690 | 88 -  | 1    | 688  | 14278  | 14966  |
| UN35703 | Rsa1.0_00006.1 | 531  | 396176 | 2.00E-93  | 199 | 206 | 96 +  | 27   | 232  | 361430 | 361634 |
| UN35704 | Rsa1.0_06001.1 | 667  | 11979  | 0         | 665 | 665 | 100 - | 3    | 667  | 522    | 1186   |
| UN35705 | Rsa1.0_00693.1 | 917  | 161311 | 0         | 440 | 447 | 98 -  | 459  | 905  | 47484  | 47930  |
| UN35706 | Rsa1.0_00218.1 | 985  | 201480 | 0         | 832 | 860 | 96 +  | 5    | 858  | 157731 | 158585 |
| UN35707 | Rsa1.0_03985.1 | 673  | 19704  | 0         | 638 | 671 | 95 +  | 3    | 673  | 2990   | 3660   |
| UN35708 | Rsa1.0_00096.1 | 797  | 198773 | 1.00E-156 | 290 | 292 | 99 -  | 496  | 786  | 151261 | 151552 |
| UN35709 | Rsa1.0_00128.1 | 398  | 228675 | 0         | 394 | 396 | 99 -  | 3    | 398  | 62675  | 63070  |
| UN35710 | Rsa1.0_00407.1 | 793  | 191544 | 1.00E-104 | 224 | 229 | 97 +  | 541  | 765  | 41018  | 41246  |
| UN35711 | Rsa1.0_00108.1 | 720  | 478491 | 1.00E-157 | 352 | 372 | 94 -  | 349  | 720  | 15076  | 15443  |
| UN35712 | Rsa1.0_00095.1 | 316  | 283384 | 1.00E-166 | 313 | 318 | 98 +  | 1    | 315  | 113285 | 113602 |
| UN35713 | Rsa1.0_06421.1 | 616  | 11053  | 0         | 611 | 614 | 99 +  | 1    | 614  | 2968   | 3579   |
| UN35714 | Rsa1.0_01493.1 | 572  | 44670  | 1.00E-138 | 256 | 258 | 99 +  | 1    | 258  | 22099  | 22356  |
| UN35715 | Rsa1.0_00218.1 | 787  | 201480 | 0         | 696 | 700 | 99 -  | 86   | 785  | 181818 | 182517 |
| UN35716 | Rsa1.0_00071.1 | 786  | 345714 | 1.00E-163 | 291 | 291 | 100 - | 267  | 557  | 196509 | 196799 |
| UN35717 | Rsa1.0_10110.1 | 794  | 5994   | 0         | 775 | 795 | 97 -  | 1    | 793  | 3444   | 4237   |
| UN35718 | Rsa1.0_00107.1 | 752  | 431659 | 0         | 382 | 383 | 99 -  | 337  | 718  | 70829  | 71211  |
| UN35719 | Rsa1.0_01475.1 | 779  | 45044  | 0         | 625 | 683 | 91 -  | 2    | 671  | 39975  | 40640  |
| UN35720 | Rsa1.0_15845.1 | 669  | 2392   | 2.33E-156 | 268 | 270 | 99 +  | 6    | 275  | 1213   | 1482   |
| UN35721 | Rsa1.0_00765.1 | 1186 | 65029  | 1.00E-149 | 295 | 303 | 97 +  | 3    | 303  | 39074  | 39376  |
| UN35722 | Rsa1.0_00201.1 | 784  | 232851 | 1.00E-170 | 306 | 307 | 99 +  | 478  | 784  | 101096 | 101402 |

|         |                |      |        |           |      |      |       |     |      |        |        |
|---------|----------------|------|--------|-----------|------|------|-------|-----|------|--------|--------|
| UN35723 | Rsa1.0.00554.1 | 1048 | 150953 | 1.00E-179 | 345  | 351  | 98 +  | 699 | 1048 | 11993  | 12342  |
| UN35724 | Rsa1.0.01435.1 | 1349 | 45942  | 0         | 963  | 1009 | 95 -  | 3   | 987  | 12695  | 13701  |
| UN35725 | Rsa1.0.00020.1 | 477  | 283099 | 6.00E-41  | 95   | 98   | 96 -  | 373 | 470  | 96154  | 96251  |
| UN35726 | Rsa1.0.01311.1 | 916  | 48456  | 0         | 912  | 916  | 99 +  | 1   | 916  | 27618  | 28533  |
| UN35727 | Rsa1.0.09923.1 | 921  | 6089   | 1.00E-159 | 296  | 300  | 98 -  | 299 | 598  | 465    | 764    |
| UN35728 | Rsa1.0.00029.1 | 458  | 272992 | 2.00E-22  | 94   | 107  | 87 -  | 1   | 107  | 171190 | 171296 |
| UN35729 | Rsa1.0.01046.1 | 677  | 152989 | 1.00E-179 | 351  | 362  | 96 +  | 100 | 461  | 124876 | 125237 |
| UN35730 | Rsa1.0.01766.1 | 878  | 39617  | 0         | 439  | 440  | 99 -  | 1   | 440  | 26519  | 26958  |
| UN35731 | Rsa1.0.00134.1 | 936  | 390219 | 0         | 400  | 425  | 94 -  | 479 | 894  | 12462  | 12886  |
| UN35732 | Rsa1.0.00099.1 | 1089 | 159619 | 0         | 905  | 909  | 99 -  | 1   | 909  | 68689  | 69597  |
| UN35733 | Rsa1.0.00397.1 | 625  | 88189  | 0         | 480  | 521  | 92 -  | 100 | 613  | 25492  | 26011  |
| UN35734 | Rsa1.0.00979.1 | 512  | 57733  | 1.00E-173 | 310  | 311  | 99 +  | 200 | 510  | 19565  | 19875  |
| UN35735 | Rsa1.0.02924.1 | 738  | 26736  | 0         | 458  | 459  | 99 -  | 1   | 459  | 17552  | 18010  |
| UN35736 | Rsa1.0.00316.1 | 471  | 96264  | 0         | 378  | 385  | 98 -  | 1   | 382  | 23991  | 24375  |
| UN35737 | Rsa1.0.00490.1 | 742  | 186713 | 1.00E-159 | 361  | 380  | 95 -  | 1   | 378  | 23331  | 23702  |
| UN35738 | Rsa1.0.00295.1 | 810  | 152597 | 1.00E-150 | 273  | 274  | 99 -  | 117 | 390  | 19568  | 19841  |
| UN35739 | Rsa1.0.17645.1 | 1010 | 1775   | 0         | 478  | 488  | 97 -  | 206 | 693  | 8      | 495    |
| UN35740 | Rsa1.0.11413.1 | 1052 | 5515   | 0         | 873  | 919  | 94 +  | 149 | 1052 | 1      | 918    |
| UN35741 | Rsa1.0.01707.1 | 573  | 40686  | 3.00E-77  | 169  | 175  | 96 -  | 137 | 310  | 17545  | 17719  |
| UN35742 | Rsa1.0.00157.1 | 1018 | 245832 | 0         | 727  | 730  | 99 -  | 4   | 733  | 56488  | 57217  |
| UN35743 | Rsa1.0.00692.1 | 388  | 68151  | 1.00E-127 | 233  | 234  | 99 +  | 154 | 387  | 59145  | 59378  |
| UN35744 | Rsa1.0.36752.1 | 1321 | 613    | 0         | 563  | 566  | 99 +  | 1   | 566  | 48     | 613    |
| UN35745 | Rsa1.0.00454.1 | 616  | 216970 | 0         | 419  | 424  | 98 -  | 1   | 424  | 177589 | 178012 |
| UN35746 | Rsa1.0.00980.1 | 1226 | 57729  | 0         | 823  | 887  | 92 +  | 17  | 847  | 51461  | 52347  |
| UN35747 | Rsa1.0.11111.1 | 765  | 5612   | 1.00E-178 | 322  | 324  | 99 +  | 1   | 324  | 5289   | 5612   |
| UN35748 | Rsa1.0.00363.1 | 725  | 90968  | 2.00E-76  | 175  | 184  | 95 -  | 495 | 678  | 29698  | 29878  |
| UN35749 | Rsa1.0.00098.1 | 736  | 349239 | 3.00E-28  | 159  | 189  | 84 +  | 543 | 730  | 144002 | 144190 |
| UN35750 | Rsa1.0.09141.1 | 823  | 6612   | 0         | 554  | 557  | 99 -  | 4   | 560  | 2899   | 3454   |
| UN35751 | Rsa1.0.00310.1 | 1073 | 96852  | 0         | 1067 | 1074 | 99 +  | 1   | 1072 | 63138  | 64211  |
| UN35752 | Rsa1.0.01476.1 | 888  | 172928 | 0         | 380  | 386  | 98 -  | 1   | 385  | 160622 | 161006 |
| UN35753 | Rsa1.0.02299.1 | 740  | 32857  | 1.00E-125 | 251  | 259  | 96 -  | 173 | 431  | 20632  | 20890  |
| UN35754 | Rsa1.0.00270.1 | 698  | 101236 | 0         | 390  | 392  | 99 +  | 4   | 395  | 64727  | 65118  |
| UN35755 | Rsa1.0.00346.1 | 671  | 93130  | 1.00E-159 | 354  | 374  | 94 -  | 1   | 370  | 41611  | 41983  |
| UN35756 | Rsa1.0.71302.1 | 517  | 321    | 6.00E-69  | 178  | 193  | 92 +  | 30  | 217  | 106    | 298    |
| UN35757 | Rsa1.0.02605.1 | 687  | 29637  | 0         | 377  | 377  | 100 - | 306 | 682  | 14684  | 15060  |
| UN35758 | Rsa1.0.00191.1 | 919  | 316976 | 0         | 910  | 918  | 99 +  | 2   | 919  | 131684 | 132601 |
| UN35759 | Rsa1.0.01510.1 | 765  | 44237  | 1.00E-155 | 296  | 302  | 98 +  | 135 | 436  | 19983  | 20284  |
| UN35760 | Rsa1.0.00316.1 | 795  | 96264  | 0         | 359  | 364  | 98 -  | 296 | 659  | 4079   | 4442   |
| UN35761 | Rsa1.0.01720.1 | 652  | 40358  | 1.00E-108 | 214  | 219  | 97 -  | 10  | 228  | 35263  | 35481  |

|         |                |      |        |           |      |      |       |     |      |        |        |
|---------|----------------|------|--------|-----------|------|------|-------|-----|------|--------|--------|
| UN35762 | Rsa1.0.00436.1 | 908  | 85008  | 1.00E-131 | 247  | 250  | 98 -  | 280 | 529  | 84011  | 84260  |
| UN35763 | Rsa1.0.00093.1 | 588  | 214962 | 1.00E-110 | 202  | 202  | 100 - | 387 | 588  | 40811  | 41012  |
| UN35764 | Rsa1.0.00181.1 | 715  | 114269 | 0         | 704  | 714  | 98 +  | 2   | 715  | 2288   | 3001   |
| UN35765 | Rsa1.0.01162.1 | 1185 | 169104 | 0         | 528  | 541  | 97 -  | 645 | 1183 | 133960 | 134497 |
| UN35766 | Rsa1.0.00046.1 | 721  | 320315 | 0         | 579  | 619  | 93 -  | 3   | 611  | 47138  | 47746  |
| UN35767 | Rsa1.0.09164.1 | 831  | 6595   | 0         | 407  | 410  | 99 +  | 3   | 412  | 6186   | 6595   |
| UN35768 | Rsa1.0.00456.1 | 549  | 82826  | 1.00E-152 | 342  | 361  | 94 +  | 1   | 360  | 21374  | 21727  |
| UN35769 | Rsa1.0.00439.1 | 406  | 142776 | 0         | 394  | 411  | 95 -  | 1   | 405  | 6027   | 6437   |
| UN35770 | Rsa1.0.00138.1 | 553  | 247040 | 1.00E-158 | 320  | 330  | 96 -  | 1   | 328  | 230305 | 230633 |
| UN35771 | Rsa1.0.02392.1 | 1128 | 152517 | 0         | 1106 | 1132 | 97 +  | 1   | 1128 | 30697  | 31825  |
| UN35772 | Rsa1.0.02197.1 | 1124 | 33996  | 1.00E-150 | 317  | 330  | 96 -  | 1   | 330  | 2586   | 2913   |
| UN35773 | Rsa1.0.00798.1 | 1042 | 63945  | 0         | 351  | 352  | 99 -  | 1   | 352  | 14939  | 15290  |
| UN35774 | Rsa1.0.00692.1 | 771  | 68151  | 1.00E-70  | 183  | 197  | 92 -  | 51  | 242  | 21973  | 22169  |
| UN35775 | Rsa1.0.04189.1 | 710  | 18584  | 0         | 442  | 446  | 99 -  | 1   | 446  | 11571  | 12016  |
| UN35776 | Rsa1.0.05396.1 | 674  | 13893  | 0         | 339  | 344  | 98 +  | 278 | 621  | 5445   | 5788   |
| UN35777 | Rsa1.0.02298.1 | 832  | 32872  | 1.00E-162 | 302  | 306  | 98 +  | 183 | 488  | 1913   | 2218   |
| UN35778 | Rsa1.0.51929.1 | 1066 | 438    | 0         | 406  | 424  | 95 +  | 399 | 822  | 15     | 438    |
| UN35779 | Rsa1.0.05864.1 | 382  | 12387  | 1.00E-108 | 284  | 309  | 91 +  | 21  | 328  | 4321   | 4625   |
| UN35780 | Rsa1.0.05541.1 | 1049 | 139959 | 0         | 409  | 431  | 94 +  | 549 | 975  | 134704 | 135134 |
| UN35781 | Rsa1.0.01180.1 | 746  | 51517  | 1.00E-153 | 286  | 290  | 98 -  | 7   | 296  | 21836  | 22125  |
| UN35782 | Rsa1.0.00522.1 | 977  | 78103  | 1.00E-121 | 280  | 299  | 93 -  | 680 | 975  | 67060  | 67358  |
| UN35783 | Rsa1.0.05648.1 | 327  | 13049  | 6.00E-65  | 135  | 138  | 97 +  | 189 | 326  | 11501  | 11638  |
| UN35784 | Rsa1.0.02551.1 | 1048 | 30196  | 0         | 594  | 605  | 98 -  | 1   | 603  | 15919  | 16521  |
| UN35785 | Rsa1.0.06062.1 | 755  | 11836  | 1.00E-135 | 248  | 249  | 99 +  | 1   | 249  | 5286   | 5534   |
| UN35786 | Rsa1.0.00489.1 | 541  | 80434  | 1.00E-144 | 295  | 304  | 97 -  | 1   | 303  | 45533  | 45835  |
| UN35787 | Rsa1.0.00360.1 | 996  | 91190  | 1.00E-137 | 248  | 248  | 100 - | 2   | 249  | 67266  | 67513  |
| UN35788 | Rsa1.0.01083.1 | 920  | 54617  | 0         | 902  | 922  | 97 -  | 1   | 919  | 19810  | 20726  |
| UN35789 | Rsa1.0.00415.1 | 1196 | 86795  | 1.00E-118 | 223  | 225  | 99 -  | 186 | 410  | 49663  | 49887  |
| UN35790 | Rsa1.0.01999.1 | 822  | 36237  | 0         | 432  | 454  | 95 -  | 1   | 454  | 15342  | 15788  |
| UN35791 | Rsa1.0.02317.1 | 903  | 32600  | 0         | 856  | 905  | 94 +  | 1   | 903  | 9038   | 9933   |
| UN35792 | Rsa1.0.00540.1 | 432  | 76895  | 1.00E-155 | 317  | 325  | 97 -  | 6   | 327  | 69487  | 69810  |
| UN35793 | Rsa1.0.00017.1 | 1261 | 752458 | 0         | 717  | 728  | 98 -  | 542 | 1260 | 425226 | 425953 |
| UN35794 | Rsa1.0.00008.1 | 961  | 358124 | 0         | 606  | 606  | 100 - | 353 | 958  | 19990  | 20595  |
| UN35795 | Rsa1.0.00006.1 | 767  | 396176 | 0         | 704  | 706  | 99 -  | 11  | 716  | 359677 | 360381 |
| UN35796 | Rsa1.0.00745.1 | 1148 | 66067  | 0         | 1028 | 1076 | 95 -  | 78  | 1147 | 3389   | 4464   |
| UN35797 | Rsa1.0.48236.1 | 631  | 469    | 0         | 450  | 457  | 98 +  | 176 | 630  | 1      | 456    |
| UN35798 | Rsa1.0.03370.1 | 972  | 23379  | 0         | 416  | 416  | 100 + | 555 | 970  | 10129  | 10544  |
| UN35799 | Rsa1.0.00016.1 | 644  | 831256 | 1.00E-107 | 226  | 236  | 95 -  | 1   | 230  | 690203 | 690438 |
| UN35800 | Rsa1.0.11719.1 | 516  | 5430   | 2.00E-50  | 161  | 177  | 90 +  | 23  | 197  | 2085   | 2259   |



|         |                |      |        |           |      |      |       |     |      |        |        |
|---------|----------------|------|--------|-----------|------|------|-------|-----|------|--------|--------|
| UN35801 | Rsa1.0.00070.1 | 1296 | 150321 | 0         | 1199 | 1294 | 92 -  | 8   | 1294 | 67133  | 68415  |
| UN35802 | Rsa1.0.00341.1 | 903  | 249309 | 0         | 391  | 396  | 98 -  | 507 | 902  | 17600  | 17995  |
| UN35803 | Rsa1.0.00104.1 | 593  | 368722 | 2.00E-84  | 162  | 163  | 99 -  | 322 | 484  | 73427  | 73589  |
| UN35804 | Rsa1.0.01317.1 | 319  | 48287  | 1.00E-179 | 318  | 318  | 100 - | 1   | 318  | 11995  | 12312  |
| UN35805 | Rsa1.0_00336.1 | 752  | 445051 | 0         | 502  | 513  | 97 +  | 1   | 513  | 183752 | 184264 |
| UN35806 | #              | #    | #      | #         | #    | #    | #     | #   | #    | #      | #      |
| UN35807 | Rsa1.0.01950.1 | 526  | 36950  | 1.00E-111 | 207  | 208  | 99 +  | 319 | 526  | 20401  | 20608  |
| UN35808 | Rsa1.0.00166.1 | 1041 | 240912 | 0         | 1030 | 1040 | 99 -  | 1   | 1039 | 147610 | 148649 |
| UN35809 | Rsa1.0.00332.1 | 869  | 94575  | 0         | 445  | 449  | 99 -  | 420 | 868  | 52719  | 53167  |
| UN35810 | Rsa1.0.01214.1 | 730  | 50599  | 1.00E-153 | 280  | 282  | 99 -  | 7   | 288  | 42112  | 42393  |
| UN35811 | Rsa1.0.03898.1 | 790  | 20183  | 0         | 624  | 665  | 93 +  | 1   | 642  | 3022   | 3682   |
| UN35812 | Rsa1.0.00650.1 | 482  | 70235  | 0         | 478  | 481  | 99 -  | 1   | 481  | 44437  | 44917  |
| UN35813 | Rsa1.0.49212.1 | 723  | 461    | 1.00E-117 | 226  | 230  | 98 +  | 322 | 551  | 95     | 324    |
| UN35814 | Rsa1.0.00273.1 | 903  | 326186 | 0         | 465  | 487  | 95 +  | 9   | 490  | 110728 | 111209 |
| UN35815 | Rsa1.0.00548.1 | 769  | 76518  | 0         | 596  | 604  | 98 -  | 2   | 605  | 4570   | 5173   |
| UN35816 | Rsa1.0.00580.1 | 888  | 74515  | 0         | 773  | 790  | 97 -  | 3   | 792  | 21261  | 22050  |
| UN35817 | Rsa1.0.00277.1 | 1111 | 100132 | 3.00E-91  | 303  | 344  | 88 -  | 563 | 901  | 91746  | 92088  |
| UN35818 | Rsa1.0.00655.1 | 665  | 195840 | 2.00E-84  | 182  | 189  | 96 +  | 424 | 612  | 27135  | 27320  |
| UN35819 | Rsa1.0_13225.1 | 1065 | 4965   | 1.00E-109 | 744  | 925  | 80 +  | 103 | 1027 | 3968   | 4892   |
| UN35820 | Rsa1.0.01651.1 | 774  | 41586  | 0         | 574  | 594  | 96 -  | 12  | 598  | 19156  | 19747  |
| UN35821 | Rsa1.0.00096.1 | 671  | 198773 | 0         | 655  | 672  | 97 -  | 1   | 670  | 97966  | 98637  |
| UN35822 | Rsa1.0.01933.1 | 1240 | 37172  | 0         | 588  | 618  | 95 +  | 1   | 613  | 5056   | 5673   |
| UN35823 | Rsa1.0_00867.1 | 730  | 61635  | 1.00E-169 | 326  | 333  | 97 -  | 173 | 504  | 41702  | 42034  |
| UN35824 | Rsa1.0.00914.1 | 952  | 59880  | 0         | 405  | 406  | 99 -  | 1   | 406  | 13706  | 14111  |
| UN35825 | Rsa1.0.00594.1 | 913  | 73729  | 0         | 453  | 456  | 99 +  | 6   | 460  | 19027  | 19482  |
| UN35826 | Rsa1.0.08336.1 | 1277 | 7518   | 0         | 762  | 767  | 99 -  | 513 | 1276 | 6243   | 7009   |
| UN35827 | Rsa1.0.09003.1 | 539  | 6717   | 1.00E-153 | 277  | 278  | 99 +  | 1   | 278  | 1097   | 1374   |
| UN35828 | Rsa1.0.00452.1 | 1279 | 83201  | 0         | 1252 | 1280 | 97 -  | 2   | 1279 | 65901  | 67172  |
| UN35829 | Rsa1.0.01226.1 | 775  | 50316  | 0         | 766  | 776  | 98 +  | 1   | 775  | 34927  | 35695  |
| UN35830 | Rsa1.0.00576.1 | 823  | 178949 | 0         | 783  | 823  | 95 +  | 1   | 821  | 29822  | 30641  |
| UN35831 | Rsa1.0_15901.1 | 463  | 2368   | 1.00E-180 | 402  | 428  | 93 -  | 6   | 425  | 844    | 1268   |
| UN35832 | Rsa1.0.04854.1 | 788  | 131560 | 1.00E-71  | 193  | 213  | 90 -  | 581 | 781  | 9360   | 9569   |
| UN35833 | Rsa1.0.00776.1 | 719  | 64637  | 2.00E-88  | 177  | 180  | 98 -  | 482 | 661  | 10547  | 10723  |
| UN35834 | Rsa1.0.00069.1 | 1050 | 403561 | 0         | 359  | 359  | 100 - | 2   | 360  | 84307  | 84665  |
| UN35835 | #              | #    | #      | #         | #    | #    | #     | #   | #    | #      | #      |
| UN35836 | Rsa1.0.02194.1 | 831  | 34029  | 1.00E-166 | 339  | 352  | 96 +  | 479 | 828  | 28372  | 28723  |
| UN35837 | Rsa1.0.04556.1 | 1017 | 16864  | 0         | 600  | 602  | 99 -  | 416 | 1016 | 16263  | 16864  |
| UN35838 | Rsa1.0.00048.1 | 1303 | 167185 | 1.00E-149 | 342  | 370  | 92 +  | 1   | 350  | 129431 | 129800 |
| UN35839 | Rsa1.0_00225.1 | 943  | 105892 | 1.00E-144 | 303  | 314  | 96 +  | 403 | 714  | 82251  | 82562  |

|         |                |      |        |           |      |      |       |     |      |        |        |
|---------|----------------|------|--------|-----------|------|------|-------|-----|------|--------|--------|
| UN35840 | Rsa1.0_10946.1 | 682  | 5668   | 0         | 675  | 680  | 99 +  | 1   | 680  | 3420   | 4099   |
| UN35841 | Rsa1.0_02629.1 | 454  | 29350  | 1.00E-170 | 319  | 323  | 98 -  | 1   | 322  | 12412  | 12734  |
| UN35842 | Rsa1.0_05661.1 | 1191 | 13011  | 0         | 549  | 550  | 99 -  | 491 | 1040 | 823    | 1372   |
| UN35843 | Rsa1.0_00781.1 | 508  | 64480  | 0         | 421  | 430  | 97 -  | 78  | 507  | 15003  | 15425  |
| UN35844 | Rsa1.0_02767.1 | 1189 | 28111  | 0         | 334  | 335  | 99 +  | 1   | 335  | 15426  | 15760  |
| UN35845 | Rsa1.0_26622.1 | 1166 | 884    | 0         | 417  | 445  | 93 -  | 500 | 930  | 273    | 717    |
| UN35846 | Rsa1.0_05062.1 | 833  | 14960  | 0         | 602  | 614  | 98 -  | 3   | 615  | 9399   | 10012  |
| UN35847 | Rsa1.0_01844.1 | 819  | 38421  | 0         | 751  | 760  | 98 +  | 39  | 798  | 32027  | 32786  |
| UN35848 | #              | #    | #      | #         | #    | #    | #     | #   | #    | #      | #      |
| UN35849 | Rsa1.0_00992.1 | 745  | 57419  | 0         | 619  | 632  | 97 -  | 1   | 632  | 23490  | 24121  |
| UN35850 | Rsa1.0_00300.1 | 684  | 97747  | 0         | 432  | 432  | 100 + | 1   | 432  | 22868  | 23299  |
| UN35851 | Rsa1.0_05162.1 | 392  | 14631  | 3.00E-98  | 247  | 266  | 92 +  | 10  | 264  | 9833   | 10097  |
| UN35852 | Rsa1.0_01052.1 | 677  | 55548  | 1.00E-18  | 65   | 69   | 94 +  | 486 | 553  | 21050  | 21118  |
| UN35853 | Rsa1.0_00002.1 | 739  | 601661 | 0         | 574  | 607  | 94 +  | 132 | 738  | 594424 | 595027 |
| UN35854 | Rsa1.0_00383.1 | 846  | 398431 | 1.00E-117 | 290  | 311  | 93 +  | 510 | 819  | 152676 | 152984 |
| UN35855 | Rsa1.0_00646.1 | 459  | 70473  | 5.00E-66  | 291  | 342  | 85 +  | 61  | 391  | 2865   | 3202   |
| UN35856 | Rsa1.0_01526.1 | 802  | 43919  | 1.00E-89  | 215  | 227  | 94 -  | 17  | 240  | 27335  | 27560  |
| UN35857 | Rsa1.0_00427.1 | 760  | 189678 | 1.00E-144 | 283  | 292  | 96 +  | 476 | 759  | 24464  | 24755  |
| UN35858 | Rsa1.0_18057.1 | 766  | 1681   | 0         | 602  | 615  | 97 +  | 152 | 765  | 1      | 615    |
| UN35859 | Rsa1.0_01820.1 | 681  | 38804  | 0         | 387  | 390  | 99 +  | 290 | 679  | 18826  | 19215  |
| UN35860 | Rsa1.0_35058.1 | 717  | 645    | 1.00E-143 | 258  | 258  | 100 + | 1   | 258  | 388    | 645    |
| UN35861 | Rsa1.0_00657.1 | 658  | 69858  | 1.00E-117 | 220  | 222  | 99 +  | 5   | 226  | 21953  | 22174  |
| UN35862 | Rsa1.0_00672.1 | 1033 | 69358  | 0         | 998  | 1030 | 96 -  | 3   | 1031 | 22334  | 23358  |
| UN35863 | Rsa1.0_00274.1 | 660  | 210119 | 0         | 479  | 479  | 100 - | 1   | 479  | 67083  | 67561  |
| UN35864 | Rsa1.0_00224.1 | 561  | 327530 | 0         | 424  | 425  | 99 +  | 3   | 427  | 212009 | 212432 |
| UN35865 | Rsa1.0_04592.1 | 583  | 16716  | 0         | 577  | 582  | 99 +  | 1   | 582  | 15435  | 16016  |
| UN35866 | Rsa1.0_01564.1 | 956  | 43169  | 1.00E-176 | 363  | 379  | 95 -  | 225 | 600  | 39700  | 40078  |
| UN35867 | Rsa1.0_00722.1 | 466  | 66840  | 8.00E-96  | 247  | 267  | 92 +  | 1   | 264  | 13961  | 14219  |
| UN35868 | Rsa1.0_00516.1 | 1352 | 78417  | 0         | 1265 | 1303 | 97 -  | 6   | 1300 | 73599  | 74901  |
| UN35869 | Rsa1.0_02262.1 | 257  | 33239  | 5.00E-77  | 185  | 197  | 93 +  | 4   | 198  | 7558   | 7754   |
| UN35870 | Rsa1.0_00160.1 | 1091 | 346678 | 7.00E-52  | 314  | 386  | 81 -  | 74  | 447  | 171541 | 171926 |
| UN35871 | Rsa1.0_02562.1 | 783  | 30061  | 0         | 723  | 737  | 98 -  | 2   | 737  | 80     | 816    |
| UN35872 | Rsa1.0_14067.1 | 864  | 3845   | 0         | 862  | 872  | 98 +  | 2   | 864  | 2853   | 3724   |
| UN35873 | Rsa1.0_00818.1 | 646  | 62939  | 1.00E-169 | 383  | 406  | 94 -  | 81  | 480  | 53239  | 53643  |
| UN35874 | Rsa1.0_01110.1 | 1323 | 195852 | 0         | 561  | 584  | 96 -  | 3   | 583  | 33573  | 34146  |
| UN35875 | Rsa1.0_00273.1 | 937  | 326186 | 0         | 598  | 609  | 98 -  | 329 | 937  | 147850 | 148456 |
| UN35876 | Rsa1.0_07745.1 | 521  | 8662   | 3.00E-92  | 369  | 430  | 85 +  | 9   | 435  | 2368   | 2789   |
| UN35877 | Rsa1.0_00467.1 | 657  | 156542 | 0         | 467  | 483  | 96 -  | 176 | 655  | 125582 | 126061 |
| UN35878 | Rsa1.0_00796.1 | 761  | 63997  | 1.00E-98  | 235  | 249  | 94 -  | 428 | 674  | 58142  | 58387  |

|         |                |      |        |           |      |      |      |     |      |        |        |
|---------|----------------|------|--------|-----------|------|------|------|-----|------|--------|--------|
| UN35879 | Rsa1.0_00638.1 | 748  | 71037  | 2.00E-54  | 369  | 451  | 81 - | 170 | 602  | 21621  | 22053  |
| UN35880 | Rsa1.0_00081.1 | 671  | 143261 | 0         | 508  | 511  | 99 + | 3   | 513  | 97398  | 97908  |
| UN35881 | Rsa1.0_01549.1 | 1170 | 43543  | 0         | 1150 | 1163 | 98 + | 2   | 1164 | 23533  | 24691  |
| UN35882 | Rsa1.0_18368.1 | 166  | 1614   | 4.00E-86  | 164  | 165  | 99 - | 2   | 166  | 736    | 900    |
| UN35883 | Rsa1.0_03586.1 | 374  | 21913  | 0         | 368  | 375  | 98 + | 3   | 374  | 10388  | 10762  |
| UN35884 | Rsa1.0_10589.1 | 965  | 5793   | 0         | 606  | 637  | 95 + | 337 | 964  | 4693   | 5324   |
| UN35885 | Rsa1.0_00100.1 | 717  | 249232 | 0         | 698  | 702  | 99 - | 16  | 717  | 165820 | 166521 |
| UN35886 | Rsa1.0_01077.1 | 670  | 54772  | 7.00E-26  | 70   | 73   | 95 - | 66  | 138  | 46678  | 46750  |
| UN35887 | Rsa1.0_03011.1 | 866  | 26048  | 1.00E-158 | 320  | 331  | 96 + | 2   | 331  | 17514  | 17844  |
| UN35888 | Rsa1.0_00293.1 | 691  | 339294 | 1.00E-61  | 146  | 153  | 95 - | 161 | 312  | 303520 | 303672 |
| UN35889 | Rsa1.0_06388.1 | 366  | 11110  | 0         | 356  | 363  | 98 - | 4   | 365  | 10661  | 11023  |
| UN35890 | Rsa1.0_00002.1 | 1044 | 601661 | 0         | 512  | 522  | 98 + | 151 | 672  | 149091 | 149612 |
| UN35891 | Rsa1.0_00251.1 | 892  | 303968 | 0         | 546  | 581  | 93 - | 2   | 573  | 281097 | 281665 |
| UN35892 | Rsa1.0_02431.1 | 1106 | 31504  | 1.00E-176 | 365  | 381  | 95 - | 674 | 1053 | 3649   | 4029   |
| UN35893 | Rsa1.0_01100.1 | 901  | 54113  | 1.00E-109 | 226  | 233  | 96 - | 1   | 233  | 15065  | 15296  |
| UN35894 | Rsa1.0_00771.1 | 875  | 64870  | 0         | 863  | 875  | 98 - | 2   | 875  | 8443   | 9316   |
| UN35895 | Rsa1.0_55414.1 | 526  | 412    | 5.00E-85  | 213  | 228  | 93 - | 25  | 252  | 187    | 412    |
| UN35896 | Rsa1.0_00576.1 | 901  | 178949 | 0         | 461  | 463  | 99 + | 439 | 901  | 151241 | 151703 |
| UN35897 | Rsa1.0_08209.1 | 775  | 7718   | 0         | 549  | 558  | 98 - | 11  | 568  | 5210   | 5766   |
| UN35898 | Rsa1.0_01290.1 | 841  | 49179  | 0         | 570  | 604  | 94 - | 1   | 602  | 18710  | 19313  |
| UN35899 | Rsa1.0_01435.1 | 987  | 45942  | 0         | 979  | 986  | 99 + | 3   | 987  | 32314  | 33298  |
| UN35900 | Rsa1.0_00491.1 | 652  | 80219  | 1.00E-86  | 178  | 183  | 97 - | 356 | 538  | 17117  | 17299  |
| UN35901 | Rsa1.0_01274.1 | 650  | 49419  | 0         | 378  | 388  | 97 + | 263 | 650  | 24409  | 24796  |
| UN35902 | Rsa1.0_24177.1 | 165  | 1002   | 8.00E-81  | 161  | 164  | 98 + | 2   | 165  | 575    | 738    |
| UN35903 | Rsa1.0_00868.1 | 901  | 61630  | 0         | 886  | 900  | 98 - | 3   | 901  | 58159  | 59058  |
| UN35904 | Rsa1.0_00023.1 | 764  | 194764 | 0         | 488  | 499  | 97 - | 264 | 762  | 140141 | 140636 |
| UN35905 | Rsa1.0_03566.1 | 737  | 22050  | 0         | 474  | 477  | 99 + | 261 | 737  | 7482   | 7958   |
| UN35906 | Rsa1.0_00175.1 | 520  | 166121 | 1.00E-115 | 229  | 235  | 97 - | 3   | 237  | 34190  | 34424  |
| UN35907 | Rsa1.0_06631.1 | 407  | 10632  | 6.00E-81  | 215  | 241  | 89 + | 167 | 407  | 3907   | 4126   |
| UN35908 | Rsa1.0_08008.1 | 712  | 8086   | 5.00E-95  | 202  | 209  | 96 - | 501 | 709  | 2499   | 2706   |
| UN35909 | Rsa1.0_00039.1 | 803  | 296927 | 0         | 387  | 388  | 99 - | 416 | 803  | 228952 | 229339 |
| UN35910 | Rsa1.0_00046.1 | 521  | 320315 | 0         | 456  | 469  | 97 + | 53  | 521  | 63595  | 64061  |
| UN35911 | Rsa1.0_02212.1 | 343  | 33840  | 1.00E-81  | 227  | 254  | 89 + | 76  | 328  | 20539  | 20770  |
| UN35912 | Rsa1.0_01904.1 | 904  | 37450  | 0         | 683  | 726  | 94 - | 158 | 880  | 3975   | 4691   |
| UN35913 | Rsa1.0_01843.1 | 611  | 265131 | 0         | 568  | 614  | 92 - | 1   | 611  | 19938  | 20536  |
| UN35914 | Rsa1.0_03388.1 | 707  | 23277  | 0         | 378  | 385  | 98 - | 323 | 707  | 507    | 890    |
| UN35915 | Rsa1.0_00019.1 | 997  | 301669 | 0         | 599  | 619  | 96 + | 378 | 996  | 209811 | 210429 |
| UN35916 | Rsa1.0_00121.1 | 1135 | 278029 | 0         | 643  | 658  | 97 - | 1   | 652  | 253531 | 254185 |
| UN35917 | Rsa1.0_17692.1 | 951  | 1764   | 0         | 359  | 363  | 98 + | 588 | 949  | 1241   | 1603   |

|         |                |      |        |           |     |     |       |     |      |        |        |
|---------|----------------|------|--------|-----------|-----|-----|-------|-----|------|--------|--------|
| UN35918 | Rsa1.0.01884.1 | 1031 | 37659  | 0         | 370 | 384 | 96 -  | 3   | 386  | 8705   | 9088   |
| UN35919 | Rsa1.0.06508.1 | 753  | 10874  | 1.00E-135 | 251 | 253 | 99 +  | 3   | 255  | 342    | 594    |
| UN35920 | Rsa1.0.00098.1 | 811  | 349239 | 0         | 474 | 474 | 100 - | 336 | 809  | 313628 | 314101 |
| UN35921 | Rsa1.0.03843.1 | 1077 | 20496  | 1.00E-106 | 296 | 335 | 88 +  | 127 | 449  | 8116   | 8435   |
| UN35922 | Rsa1.0.02808.1 | 693  | 27677  | 0         | 656 | 673 | 97 -  | 4   | 676  | 26674  | 27345  |
| UN35923 | Rsa1.0.00264.1 | 914  | 101674 | 0         | 560 | 562 | 99 -  | 1   | 562  | 26830  | 27391  |
| UN35924 | Rsa1.0.02860.1 | 787  | 27207  | 0         | 383 | 406 | 94 -  | 66  | 471  | 17298  | 17688  |
| UN35925 | Rsa1.0.00234.1 | 899  | 197060 | 0         | 371 | 378 | 98 -  | 3   | 378  | 149581 | 149958 |
| UN35926 | Rsa1.0.01182.1 | 1127 | 167304 | 0         | 396 | 408 | 97 -  | 730 | 1127 | 19181  | 19588  |
| UN35927 | Rsa1.0.00419.1 | 704  | 86562  | 0         | 682 | 714 | 95 +  | 2   | 704  | 80552  | 81260  |
| UN35928 | Rsa1.0.00032.1 | 492  | 306326 | 0         | 393 | 411 | 95 -  | 82  | 490  | 142024 | 142429 |
| UN35929 | Rsa1.0.00645.1 | 1048 | 189716 | 0         | 630 | 652 | 96 -  | 403 | 1048 | 158308 | 158959 |
| UN35930 | #              | #    | #      | #         | #   | #   | #     | #   | #    | #      | #      |
| UN35931 | Rsa1.0.01072.1 | 701  | 55068  | 0         | 646 | 655 | 98 +  | 1   | 655  | 3298   | 3952   |
| UN35932 | Rsa1.0.00096.1 | 311  | 198773 | 1.00E-136 | 294 | 307 | 95 -  | 2   | 305  | 14798  | 15101  |
| UN35933 | Rsa1.0.00556.1 | 624  | 207212 | 0         | 584 | 596 | 97 -  | 25  | 620  | 158522 | 159116 |
| UN35934 | Rsa1.0.03081.1 | 737  | 25523  | 0         | 648 | 691 | 93 +  | 49  | 737  | 480    | 1154   |
| UN35935 | Rsa1.0.02982.1 | 426  | 26270  | 0         | 420 | 423 | 99 -  | 3   | 425  | 24730  | 25152  |
| UN35936 | Rsa1.0.03956.1 | 895  | 19872  | 0         | 845 | 875 | 96 -  | 1   | 874  | 9577   | 10450  |
| UN35937 | Rsa1.0.39645.1 | 759  | 567    | 0         | 530 | 544 | 97 +  | 217 | 759  | 1      | 544    |
| UN35938 | Rsa1.0.00002.1 | 683  | 601661 | 0         | 586 | 627 | 93 +  | 66  | 683  | 107870 | 108490 |
| UN35939 | Rsa1.0.00087.1 | 1180 | 761073 | 1.00E-130 | 236 | 236 | 100 - | 942 | 1177 | 239560 | 239795 |
| UN35940 | Rsa1.0.01941.1 | 638  | 37069  | 1.00E-139 | 269 | 275 | 97 -  | 51  | 325  | 33882  | 34156  |
| UN35941 | Rsa1.0.00677.1 | 828  | 69159  | 1.00E-171 | 389 | 415 | 93 -  | 416 | 827  | 54685  | 55098  |
| UN35942 | Rsa1.0.00961.1 | 845  | 58185  | 1.00E-137 | 316 | 335 | 94 -  | 511 | 845  | 18033  | 18364  |
| UN35943 | Rsa1.0.01140.1 | 242  | 52586  | 8.00E-82  | 154 | 154 | 100 + | 88  | 241  | 46520  | 46673  |
| UN35944 | Rsa1.0.00020.1 | 926  | 283099 | 1.00E-123 | 268 | 280 | 95 +  | 648 | 925  | 185305 | 185584 |
| UN35945 | Rsa1.0.02213.1 | 1090 | 33824  | 0         | 454 | 482 | 94 +  | 592 | 1064 | 12826  | 13307  |
| UN35946 | Rsa1.0.02141.1 | 827  | 34677  | 0         | 585 | 611 | 95 +  | 2   | 610  | 27045  | 27650  |
| UN35947 | Rsa1.0.00157.1 | 774  | 245832 | 1.00E-157 | 373 | 406 | 91 -  | 124 | 518  | 76910  | 77304  |
| UN35948 | Rsa1.0.00132.1 | 730  | 124299 | 1.00E-95  | 187 | 190 | 98 -  | 321 | 510  | 114672 | 114861 |
| UN35949 | Rsa1.0.04860.1 | 783  | 15696  | 0         | 744 | 760 | 97 -  | 3   | 761  | 1884   | 2641   |
| UN35950 | Rsa1.0.01725.1 | 631  | 40290  | 1.00E-141 | 307 | 321 | 95 -  | 4   | 324  | 16287  | 16602  |
| UN35951 | Rsa1.0.01561.1 | 792  | 43227  | 1.00E-110 | 224 | 231 | 96 -  | 1   | 231  | 38800  | 39030  |
| UN35952 | Rsa1.0.04103.1 | 503  | 19048  | 0         | 485 | 493 | 98 +  | 11  | 503  | 15494  | 15985  |
| UN35953 | Rsa1.0.15795.1 | 664  | 2418   | 1.00E-118 | 248 | 256 | 96 -  | 410 | 664  | 2164   | 2418   |
| UN35954 | Rsa1.0.17553.1 | 884  | 1798   | 0         | 857 | 889 | 96 +  | 9   | 884  | 572    | 1460   |
| UN35955 | Rsa1.0.02928.1 | 674  | 26680  | 0         | 647 | 673 | 96 -  | 2   | 674  | 10523  | 11195  |
| UN35956 | Rsa1.0.00426.1 | 917  | 85668  | 0         | 900 | 915 | 98 +  | 3   | 917  | 57112  | 58024  |

|         |                |      |        |           |      |      |       |     |      |        |        |
|---------|----------------|------|--------|-----------|------|------|-------|-----|------|--------|--------|
| UN35957 | Rsa1.0.00512.1 | 736  | 200277 | 1.00E-101 | 190  | 191  | 99 -  | 163 | 353  | 36889  | 37079  |
| UN35958 | Rsa1.0.00765.1 | 756  | 65029  | 2.00E-91  | 295  | 331  | 89 +  | 440 | 756  | 40889  | 41219  |
| UN35959 | Rsa1.0.00991.1 | 870  | 143101 | 1.00E-166 | 310  | 313  | 99 -  | 125 | 437  | 30720  | 31031  |
| UN35960 | Rsa1.0.01382.1 | 705  | 46877  | 0         | 675  | 702  | 96 -  | 3   | 703  | 22286  | 22986  |
| UN35961 | Rsa1.0.00158.1 | 703  | 117999 | 0         | 671  | 710  | 94 +  | 3   | 703  | 77463  | 78171  |
| UN35962 | Rsa1.0.16735.1 | 595  | 2050   | 1.00E-149 | 378  | 413  | 91 +  | 183 | 594  | 1088   | 1497   |
| UN35963 | Rsa1.0.01529.1 | 628  | 43871  | 2.00E-88  | 240  | 259  | 92 -  | 371 | 627  | 26085  | 26337  |
| UN35964 | Rsa1.0.00423.1 | 1012 | 86138  | 0         | 954  | 1020 | 93 -  | 2   | 1012 | 17584  | 18603  |
| UN35965 | Rsa1.0.49520.1 | 897  | 458    | 1.00E-162 | 309  | 314  | 98 +  | 8   | 320  | 1      | 314    |
| UN35966 | Rsa1.0.00425.1 | 1194 | 147080 | 0         | 1080 | 1109 | 97 -  | 56  | 1161 | 115552 | 116658 |
| UN35967 | Rsa1.0.03072.1 | 550  | 25577  | 3.00E-89  | 216  | 230  | 93 +  | 321 | 548  | 14936  | 15164  |
| UN35968 | Rsa1.0.00179.1 | 1329 | 393324 | 0         | 1293 | 1337 | 96 -  | 2   | 1328 | 342272 | 343605 |
| UN35969 | Rsa1.0.01287.1 | 746  | 49195  | 0         | 735  | 754  | 97 +  | 3   | 746  | 46615  | 47368  |
| UN35970 | Rsa1.0.02835.1 | 892  | 27491  | 0         | 327  | 327  | 100 - | 1   | 327  | 15923  | 16249  |
| UN35971 | Rsa1.0.03638.1 | 833  | 21634  | 1.00E-151 | 294  | 300  | 98 -  | 521 | 819  | 575    | 874    |
| UN35972 | Rsa1.0.00079.1 | 792  | 606987 | 0         | 777  | 797  | 97 +  | 4   | 792  | 120614 | 121406 |
| UN35973 | Rsa1.0.00472.1 | 778  | 398134 | 0         | 761  | 778  | 97 +  | 1   | 778  | 260609 | 261386 |
| UN35974 | Rsa1.0.00373.1 | 614  | 90296  | 8.00E-78  | 178  | 188  | 94 -  | 244 | 431  | 19601  | 19788  |
| UN35975 | Rsa1.0.00012.1 | 724  | 222148 | 2.33E-156 | 281  | 287  | 97 +  | 67  | 353  | 67976  | 68262  |
| UN35976 | Rsa1.0.00275.1 | 729  | 210104 | 1.00E-158 | 304  | 311  | 97 -  | 415 | 725  | 172122 | 172432 |
| UN35977 | Rsa1.0.00016.1 | 853  | 831256 | 1.00E-128 | 247  | 251  | 98 -  | 601 | 851  | 645565 | 645813 |
| UN35978 | Rsa1.0.00385.1 | 853  | 89160  | 0         | 371  | 377  | 98 -  | 480 | 852  | 88394  | 88770  |
| UN35979 | Rsa1.0.00077.1 | 879  | 145005 | 0         | 471  | 495  | 95 -  | 2   | 496  | 109765 | 110259 |
| UN35980 | Rsa1.0.01286.1 | 739  | 49209  | 0         | 330  | 333  | 99 -  | 407 | 739  | 8851   | 9183   |
| UN35981 | Rsa1.0.04594.1 | 1098 | 16713  | 1.00E-105 | 201  | 203  | 99 +  | 589 | 791  | 11582  | 11784  |
| UN35982 | Rsa1.0.03027.1 | 700  | 25883  | 0         | 525  | 538  | 97 -  | 168 | 700  | 9356   | 9891   |
| UN35983 | #              | #    | #      | #         | #    | #    | #     | #   | #    | #      | #      |
| UN35984 | Rsa1.0.13350.1 | 1180 | 4897   | 0         | 929  | 960  | 96 +  | 2   | 958  | 2724   | 3680   |
| UN35985 | Rsa1.0.00920.1 | 272  | 601703 | 1.00E-123 | 244  | 251  | 97 -  | 22  | 272  | 439768 | 440018 |
| UN35986 | Rsa1.0.00596.1 | 673  | 73578  | 0         | 417  | 443  | 94 -  | 231 | 673  | 43500  | 43936  |
| UN35987 | Rsa1.0.00525.1 | 823  | 78030  | 0         | 400  | 407  | 98 -  | 417 | 823  | 33964  | 34370  |
| UN35988 | Rsa1.0.01137.1 | 360  | 52655  | 0         | 355  | 359  | 98 +  | 2   | 360  | 50115  | 50472  |
| UN35989 | Rsa1.0.00365.1 | 1200 | 90902  | 0         | 689  | 722  | 95 -  | 2   | 712  | 3989   | 4710   |
| UN35990 | Rsa1.0.05768.1 | 771  | 141760 | 0         | 344  | 346  | 99 -  | 2   | 347  | 1      | 346    |
| UN35991 | Rsa1.0.00737.1 | 783  | 66432  | 1.00E-143 | 270  | 274  | 98 +  | 509 | 782  | 25538  | 25811  |
| UN35992 | Rsa1.0.00502.1 | 1017 | 204180 | 0         | 462  | 482  | 95 +  | 453 | 933  | 76262  | 76743  |
| UN35993 | Rsa1.0.03178.1 | 691  | 24798  | 1.00E-107 | 278  | 304  | 91 +  | 401 | 691  | 7587   | 7886   |
| UN35994 | Rsa1.0.02717.1 | 447  | 28458  | 1.00E-101 | 225  | 235  | 95 -  | 217 | 447  | 24977  | 25208  |
| UN35995 | Rsa1.0.11663.1 | 1099 | 5446   | 0         | 888  | 925  | 96 -  | 179 | 1099 | 4522   | 5446   |

|         |                |      |        |           |      |      |      |     |      |        |        |
|---------|----------------|------|--------|-----------|------|------|------|-----|------|--------|--------|
| UN35996 | Rsa1.0.00022.1 | 1160 | 200461 | 0         | 778  | 843  | 92 + | 332 | 1160 | 147780 | 148619 |
| UN35997 | Rsa1.0.00109.1 | 535  | 132735 | 3.00E-89  | 298  | 339  | 87 + | 30  | 367  | 38694  | 39031  |
| UN35998 | Rsa1.0.00301.1 | 707  | 365315 | 0         | 399  | 417  | 95 + | 1   | 411  | 185299 | 185715 |
| UN35999 | Rsa1.0.08334.1 | 1227 | 7525   | 0         | 1127 | 1177 | 95 + | 63  | 1225 | 1522   | 2691   |
| UN36000 | Rsa1.0.00401.1 | 722  | 244410 | 0         | 576  | 595  | 96 - | 132 | 722  | 166020 | 166614 |
| UN36001 | Rsa1.0.00860.1 | 691  | 61789  | 0         | 467  | 505  | 92 - | 2   | 501  | 18582  | 19084  |
| UN36002 | Rsa1.0.22724.1 | 992  | 1100   | 0         | 885  | 914  | 96 + | 87  | 990  | 1      | 901    |
| UN36003 | Rsa1.0.00275.1 | 708  | 210104 | 1.00E-137 | 433  | 492  | 88 - | 206 | 697  | 190479 | 190968 |
| UN36004 | Rsa1.0.00963.1 | 968  | 58176  | 0         | 779  | 830  | 93 + | 145 | 966  | 25292  | 26116  |
| UN36005 | Rsa1.0.03389.1 | 670  | 23273  | 1.00E-153 | 421  | 469  | 89 + | 170 | 621  | 14232  | 14699  |
| UN36006 | Rsa1.0.04773.1 | 645  | 16037  | 0         | 605  | 673  | 89 + | 3   | 645  | 9922   | 10583  |
| UN36007 | Rsa1.0.07568.1 | 1120 | 9108   | 1.00E-108 | 296  | 327  | 90 - | 281 | 607  | 4538   | 4863   |
| UN36008 | Rsa1.0.00287.1 | 894  | 98687  | 5.00E-52  | 138  | 149  | 92 - | 332 | 480  | 30464  | 30612  |
| UN36009 | Rsa1.0.01350.1 | 1240 | 47503  | 0         | 415  | 416  | 99 + | 3   | 418  | 28072  | 28487  |
| UN36010 | Rsa1.0.00048.1 | 661  | 167185 | 1.00E-104 | 213  | 217  | 98 + | 325 | 540  | 2647   | 2862   |
| UN36011 | Rsa1.0.00397.1 | 770  | 88189  | 1.00E-161 | 420  | 459  | 91 + | 5   | 453  | 25632  | 26090  |
| UN36012 | Rsa1.0.02202.1 | 707  | 33961  | 0         | 436  | 439  | 99 + | 258 | 696  | 30970  | 31408  |
| UN36013 | Rsa1.0.28998.1 | 793  | 796    | 1.00E-151 | 300  | 309  | 97 + | 2   | 306  | 2      | 310    |
| UN36014 | Rsa1.0.00419.1 | 1083 | 86562  | 1.00E-174 | 340  | 350  | 97 - | 441 | 790  | 73557  | 73906  |
| UN36015 | Rsa1.0.01081.1 | 512  | 499226 | 0         | 424  | 448  | 94 - | 1   | 446  | 332336 | 332783 |
| UN36016 | Rsa1.0.02299.1 | 1199 | 32857  | 1.00E-123 | 234  | 237  | 98 - | 714 | 950  | 18267  | 18503  |
| UN36017 | Rsa1.0.00407.1 | 415  | 191544 | 0         | 402  | 416  | 96 + | 2   | 415  | 42285  | 42697  |
| UN36018 | Rsa1.0.00534.1 | 856  | 77361  | 0         | 585  | 620  | 94 + | 245 | 856  | 39466  | 40075  |
| UN36019 | Rsa1.0.04762.1 | 607  | 16101  | 0         | 408  | 426  | 95 - | 183 | 605  | 9033   | 9450   |
| UN36020 | Rsa1.0.00383.1 | 1061 | 398431 | 0         | 685  | 689  | 99 + | 1   | 689  | 9845   | 10533  |
| UN36021 | Rsa1.0.05905.1 | 675  | 12277  | 0         | 656  | 670  | 97 + | 1   | 668  | 3      | 670    |
| UN36022 | Rsa1.0.12420.1 | 385  | 5230   | 0         | 376  | 384  | 97 + | 2   | 385  | 2380   | 2763   |
| UN36023 | Rsa1.0.00897.1 | 437  | 60498  | 2.00E-81  | 248  | 278  | 89 + | 2   | 278  | 37627  | 37904  |
| UN36024 | Rsa1.0.00008.1 | 1167 | 358124 | 0         | 515  | 563  | 91 - | 3   | 554  | 294531 | 295064 |
| UN36025 | Rsa1.0.01193.1 | 758  | 51147  | 0         | 368  | 377  | 97 + | 382 | 758  | 26420  | 26796  |
| UN36026 | Rsa1.0.00175.1 | 705  | 166121 | 0         | 433  | 443  | 97 + | 263 | 704  | 154618 | 155059 |
| UN36027 | Rsa1.0.14634.1 | 908  | 3205   | 1.00E-179 | 325  | 327  | 99 + | 3   | 329  | 641    | 967    |
| UN36028 | Rsa1.0.00425.1 | 1040 | 147080 | 1.00E-145 | 285  | 292  | 97 + | 3   | 292  | 123918 | 124209 |
| UN36029 | Rsa1.0.00186.1 | 709  | 112669 | 4.00E-92  | 214  | 227  | 94 + | 446 | 670  | 10420  | 10646  |
| UN36030 | Rsa1.0.04200.1 | 917  | 18490  | 8.00E-76  | 163  | 169  | 96 - | 435 | 603  | 10181  | 10349  |
| UN36031 | Rsa1.0.12555.1 | 871  | 5193   | 0         | 632  | 663  | 95 - | 1   | 662  | 177    | 838    |
| UN36032 | Rsa1.0.07990.1 | 371  | 8119   | 1.00E-157 | 313  | 321  | 97 + | 51  | 371  | 125    | 443    |
| UN36033 | Rsa1.0.01224.1 | 638  | 50388  | 5.00E-39  | 178  | 206  | 86 - | 103 | 307  | 39669  | 39871  |
| UN36034 | Rsa1.0.02098.1 | 452  | 35032  | 1.00E-177 | 428  | 459  | 93 - | 9   | 452  | 725    | 1183   |

|         |                |      |        |           |      |      |       |     |      |        |        |
|---------|----------------|------|--------|-----------|------|------|-------|-----|------|--------|--------|
| UN36035 | Rsa1.0.00448.1 | 426  | 84048  | 0         | 403  | 424  | 95 +  | 3   | 426  | 3251   | 3660   |
| UN36036 | Rsa1.0.00997.1 | 1221 | 57190  | 0         | 397  | 417  | 95 +  | 806 | 1219 | 24145  | 24554  |
| UN36037 | Rsa1.0.01058.1 | 789  | 55430  | 0         | 773  | 793  | 97 +  | 2   | 789  | 6159   | 6949   |
| UN36038 | Rsa1.0.00065.1 | 836  | 454616 | 0         | 444  | 462  | 96 +  | 280 | 741  | 43207  | 43661  |
| UN36039 | Rsa1.0.15486.1 | 418  | 2580   | 0         | 408  | 411  | 99 +  | 2   | 412  | 190    | 600    |
| UN36040 | Rsa1.0.00825.1 | 824  | 62855  | 0         | 799  | 833  | 95 -  | 1   | 824  | 19013  | 19834  |
| UN36041 | Rsa1.0.07600.1 | 701  | 9052   | 0         | 564  | 588  | 95 -  | 11  | 591  | 4780   | 5367   |
| UN36042 | Rsa1.0.00150.1 | 1163 | 154416 | 1.00E-105 | 227  | 237  | 95 -  | 214 | 447  | 119855 | 120091 |
| UN36043 | Rsa1.0.03436.1 | 462  | 22958  | 1.00E-108 | 241  | 259  | 93 -  | 149 | 391  | 474    | 732    |
| UN36044 | Rsa1.0.00022.1 | 692  | 200461 | 0         | 671  | 695  | 96 +  | 2   | 688  | 159519 | 160213 |
| UN36045 | Rsa1.0.00033.1 | 558  | 515811 | 0         | 547  | 556  | 98 -  | 3   | 558  | 361303 | 361858 |
| UN36046 | Rsa1.0.08021.1 | 752  | 8074   | 0         | 737  | 750  | 98 +  | 2   | 746  | 3011   | 3755   |
| UN36047 | Rsa1.0.00980.1 | 714  | 57729  | 1.00E-112 | 296  | 330  | 89 +  | 382 | 711  | 49031  | 49333  |
| UN36048 | Rsa1.0.02858.1 | 453  | 27246  | 0         | 381  | 392  | 97 +  | 68  | 452  | 23723  | 24114  |
| UN36049 | Rsa1.0.02548.1 | 736  | 30228  | 0         | 379  | 389  | 97 +  | 325 | 713  | 1406   | 1792   |
| UN36050 | Rsa1.0.01206.1 | 818  | 50772  | 0         | 514  | 522  | 98 -  | 89  | 607  | 27499  | 28020  |
| UN36051 | Rsa1.0.10367.1 | 860  | 5872   | 0         | 612  | 656  | 93 +  | 12  | 658  | 1066   | 1716   |
| UN36052 | Rsa1.0.00361.1 | 713  | 91181  | 1.00E-109 | 220  | 227  | 96 -  | 493 | 713  | 42383  | 42609  |
| UN36053 | Rsa1.0.00055.1 | 761  | 520193 | 0         | 428  | 447  | 95 -  | 2   | 448  | 278540 | 278971 |
| UN36054 | Rsa1.0.03570.1 | 1043 | 22040  | 0         | 932  | 957  | 97 +  | 88  | 1043 | 2120   | 3074   |
| UN36055 | Rsa1.0.00217.1 | 939  | 107079 | 0         | 905  | 947  | 95 +  | 2   | 939  | 99278  | 100215 |
| UN36056 | Rsa1.0.04987.1 | 876  | 15224  | 0         | 620  | 622  | 99 -  | 2   | 623  | 8899   | 9520   |
| UN36057 | Rsa1.0.00985.1 | 1313 | 161950 | 0         | 340  | 345  | 98 -  | 1   | 345  | 50364  | 50708  |
| UN36058 | Rsa1.0.00638.1 | 509  | 71037  | 0         | 355  | 356  | 99 +  | 1   | 356  | 40863  | 41218  |
| UN36059 | Rsa1.0.00018.1 | 694  | 410899 | 1.00E-147 | 271  | 272  | 99 +  | 2   | 272  | 366523 | 366794 |
| UN36060 | Rsa1.0.02336.1 | 788  | 32397  | 0         | 396  | 396  | 100 + | 391 | 786  | 3835   | 4230   |
| UN36061 | Rsa1.0.02286.1 | 1195 | 32993  | 3.00E-29  | 127  | 147  | 86 +  | 408 | 554  | 6616   | 6762   |
| UN36062 | Rsa1.0.08992.1 | 661  | 6727   | 0         | 370  | 372  | 99 -  | 1   | 372  | 1      | 372    |
| UN36063 | Rsa1.0.05164.1 | 1086 | 14628  | 0         | 1063 | 1086 | 97 +  | 1   | 1086 | 3628   | 4713   |
| UN36064 | Rsa1.0.17525.1 | 850  | 1808   | 0         | 811  | 817  | 99 -  | 3   | 819  | 1      | 817    |
| UN36065 | Rsa1.0.02505.1 | 1184 | 30703  | 1.00E-151 | 298  | 307  | 97 +  | 1   | 301  | 7637   | 7943   |
| UN36066 | Rsa1.0.02467.1 | 516  | 31141  | 0         | 513  | 514  | 99 -  | 1   | 514  | 12477  | 12990  |
| UN36067 | Rsa1.0.00530.1 | 1261 | 77389  | 0         | 1239 | 1267 | 97 -  | 1   | 1261 | 13592  | 14850  |
| UN36068 | Rsa1.0.03633.1 | 699  | 21644  | 7.00E-91  | 176  | 178  | 98 -  | 522 | 699  | 3094   | 3271   |
| UN36069 | Rsa1.0.00018.1 | 685  | 410899 | 0         | 656  | 670  | 97 +  | 14  | 682  | 252378 | 253046 |
| UN36070 | Rsa1.0.00010.1 | 757  | 294827 | 0         | 745  | 754  | 98 -  | 7   | 755  | 168118 | 168871 |
| UN36071 | Rsa1.0.00094.1 | 969  | 139042 | 1.00E-116 | 241  | 250  | 96 -  | 493 | 742  | 38214  | 38460  |
| UN36072 | Rsa1.0.01239.1 | 600  | 50107  | 0         | 341  | 345  | 98 -  | 255 | 599  | 2698   | 3042   |
| UN36073 | Rsa1.0.00233.1 | 663  | 104918 | 0         | 587  | 588  | 99 +  | 73  | 660  | 97152  | 97739  |

|         |                |      |        |           |      |      |       |     |      |        |        |
|---------|----------------|------|--------|-----------|------|------|-------|-----|------|--------|--------|
| UN36074 | Rsa1.0_45560.1 | 688  | 495    | 1.00E-128 | 250  | 256  | 97 -  | 1   | 256  | 85     | 340    |
| UN36075 | Rsa1.0_02345.1 | 1342 | 32337  | 0         | 415  | 426  | 97 -  | 918 | 1340 | 18766  | 19191  |
| UN36076 | Rsa1.0_02786.1 | 232  | 27880  | 1.00E-106 | 195  | 195  | 100 - | 36  | 230  | 27532  | 27726  |
| UN36077 | Rsa1.0_04910.1 | 870  | 15484  | 0         | 373  | 374  | 99 -  | 146 | 519  | 14541  | 14914  |
| UN36078 | Rsa1.0_11495.1 | 597  | 5485   | 0         | 592  | 595  | 99 +  | 3   | 597  | 4784   | 5377   |
| UN36079 | Rsa1.0_00013.1 | 735  | 292129 | 1.00E-100 | 420  | 491  | 85 +  | 18  | 496  | 92446  | 92929  |
| UN36080 | Rsa1.0_03305.1 | 275  | 147552 | 1.00E-145 | 273  | 277  | 98 -  | 1   | 273  | 7809   | 8085   |
| UN36081 | Rsa1.0_00064.1 | 571  | 240927 | 0         | 565  | 570  | 99 -  | 1   | 570  | 176180 | 176747 |
| UN36082 | Rsa1.0_01154.1 | 954  | 52249  | 0         | 651  | 691  | 94 -  | 1   | 685  | 15254  | 15938  |
| UN36083 | Rsa1.0_00410.1 | 1286 | 86957  | 0         | 1210 | 1241 | 97 -  | 10  | 1250 | 23529  | 24768  |
| UN36084 | Rsa1.0_01510.1 | 828  | 44237  | 0         | 425  | 442  | 96 -  | 18  | 459  | 16866  | 17306  |
| UN36085 | Rsa1.0_01650.1 | 898  | 41589  | 0         | 887  | 898  | 98 -  | 1   | 897  | 27913  | 28809  |
| UN36086 | Rsa1.0_00298.1 | 959  | 349131 | 0         | 470  | 477  | 98 -  | 1   | 477  | 322441 | 322917 |
| UN36087 | Rsa1.0_00758.1 | 874  | 65477  | 0         | 645  | 648  | 99 -  | 2   | 649  | 10622  | 11269  |
| UN36088 | Rsa1.0_00105.1 | 416  | 134138 | 7.00E-56  | 174  | 194  | 89 +  | 2   | 188  | 2411   | 2604   |
| UN36089 | Rsa1.0_09178.1 | 574  | 6578   | 0         | 340  | 342  | 99 -  | 231 | 572  | 1647   | 1987   |
| UN36090 | Rsa1.0_01769.1 | 830  | 39568  | 1.00E-171 | 401  | 434  | 92 -  | 405 | 825  | 32138  | 32571  |
| UN36091 | Rsa1.0_00008.1 | 703  | 358124 | 1.00E-21  | 81   | 89   | 91 +  | 608 | 696  | 3366   | 3452   |
| UN36092 | Rsa1.0_00107.1 | 694  | 431659 | 1.00E-170 | 316  | 319  | 99 -  | 2   | 319  | 85958  | 86276  |
| UN36093 | Rsa1.0_00017.1 | 1207 | 752458 | 1.00E-157 | 287  | 289  | 99 -  | 482 | 770  | 366273 | 366561 |
| UN36094 | Rsa1.0_00517.1 | 923  | 142790 | 0         | 917  | 928  | 98 -  | 2   | 923  | 138850 | 139777 |
| UN36095 | Rsa1.0_00037.1 | 1251 | 307838 | 0         | 1241 | 1254 | 98 +  | 1   | 1251 | 81418  | 82671  |
| UN36096 | Rsa1.0_00832.1 | 1308 | 62622  | 0         | 783  | 834  | 93 +  | 2   | 818  | 385    | 1203   |
| UN36097 | Rsa1.0_01605.1 | 683  | 42442  | 0         | 505  | 541  | 93 -  | 154 | 683  | 23549  | 24083  |
| UN36098 | Rsa1.0_00035.1 | 683  | 176449 | 0         | 410  | 420  | 97 -  | 260 | 679  | 158970 | 159389 |
| UN36099 | Rsa1.0_00549.1 | 820  | 76473  | 0         | 616  | 653  | 94 +  | 1   | 650  | 23809  | 24461  |
| UN36100 | Rsa1.0_01151.1 | 685  | 52268  | 1.00E-177 | 328  | 331  | 99 +  | 356 | 685  | 43301  | 43631  |
| UN36101 | Rsa1.0_00429.1 | 1059 | 85559  | 0         | 890  | 911  | 97 +  | 149 | 1059 | 73457  | 74360  |
| UN36102 | Rsa1.0_01488.1 | 850  | 44766  | 0         | 436  | 450  | 96 -  | 401 | 850  | 29321  | 29769  |
| UN36103 | Rsa1.0_00623.1 | 745  | 207630 | 0         | 728  | 745  | 97 -  | 2   | 745  | 160756 | 161500 |
| UN36104 | Rsa1.0_01683.1 | 887  | 41059  | 0         | 835  | 917  | 91 +  | 1   | 887  | 23958  | 24844  |
| UN36105 | Rsa1.0_14525.1 | 828  | 3302   | 0         | 826  | 827  | 99 -  | 2   | 828  | 728    | 1553   |
| UN36106 | Rsa1.0_11602.1 | 974  | 5461   | 1.00E-100 | 213  | 221  | 96 -  | 756 | 974  | 455    | 675    |
| UN36107 | Rsa1.0_00006.1 | 554  | 396176 | 0         | 400  | 408  | 98 -  | 147 | 554  | 313840 | 314247 |
| UN36108 | Rsa1.0_02388.1 | 449  | 31881  | 1.00E-137 | 379  | 417  | 90 +  | 2   | 417  | 15615  | 16025  |
| UN36109 | Rsa1.0_03594.1 | 773  | 21868  | 0         | 496  | 504  | 98 -  | 3   | 506  | 18813  | 19316  |
| UN36110 | Rsa1.0_03223.1 | 1210 | 24512  | 0         | 1108 | 1177 | 94 +  | 2   | 1159 | 12235  | 13411  |
| UN36111 | Rsa1.0_00160.1 | 437  | 346678 | 2.00E-19  | 97   | 110  | 88 -  | 327 | 435  | 251936 | 252044 |
| UN36112 | Rsa1.0_00128.1 | 752  | 228675 | 1.00E-180 | 400  | 424  | 94 -  | 293 | 710  | 67988  | 68411  |



|         |                |      |        |           |      |      |       |     |      |        |        |
|---------|----------------|------|--------|-----------|------|------|-------|-----|------|--------|--------|
| UN36113 | Rsa1.0.00897.1 | 747  | 60498  | 2.00E-72  | 160  | 167  | 95 +  | 456 | 622  | 52777  | 52943  |
| UN36114 | Rsa1.0.00770.1 | 555  | 64900  | 1.00E-163 | 303  | 307  | 98 +  | 249 | 555  | 55995  | 56301  |
| UN36115 | Rsa1.0.12167.1 | 938  | 5296   | 0         | 595  | 596  | 99 -  | 1   | 596  | 4230   | 4825   |
| UN36116 | Rsa1.0.05122.1 | 465  | 14791  | 0         | 457  | 464  | 98 -  | 1   | 464  | 8584   | 9047   |
| UN36117 | Rsa1.0.19354.1 | 995  | 1444   | 0         | 563  | 578  | 97 +  | 1   | 566  | 463    | 1040   |
| UN36118 | Rsa1.0.00293.1 | 407  | 339294 | 0         | 405  | 409  | 99 +  | 1   | 407  | 86024  | 86432  |
| UN36119 | Rsa1.0.02341.1 | 1005 | 32387  | 1.00E-134 | 650  | 787  | 82 +  | 256 | 1005 | 16274  | 17018  |
| UN36120 | Rsa1.0.02935.1 | 556  | 26621  | 3.00E-40  | 88   | 89   | 98 -  | 1   | 89   | 3940   | 4028   |
| UN36121 | Rsa1.0.06532.1 | 1036 | 10834  | 3.00E-60  | 119  | 119  | 100 - | 159 | 277  | 25     | 143    |
| UN36122 | #              | #    | #      | #         | #    | #    | #     | #   | #    | #      | #      |
| UN36123 | Rsa1.0.08742.1 | 800  | 6974   | 0         | 757  | 794  | 95 +  | 6   | 799  | 3648   | 4440   |
| UN36124 | Rsa1.0.01685.1 | 1032 | 175033 | 0         | 450  | 460  | 97 -  | 7   | 465  | 15769  | 16224  |
| UN36125 | Rsa1.0.09399.1 | 611  | 6394   | 0         | 610  | 610  | 100 - | 1   | 610  | 828    | 1437   |
| UN36126 | Rsa1.0.59589.1 | 950  | 384    | 1.00E-156 | 288  | 291  | 98 +  | 652 | 942  | 67     | 357    |
| UN36127 | Rsa1.0.11288.1 | 779  | 5556   | 0         | 504  | 525  | 96 +  | 258 | 774  | 2474   | 2997   |
| UN36128 | Rsa1.0.02079.1 | 708  | 35306  | 1.00E-177 | 378  | 395  | 95 -  | 1   | 392  | 29707  | 30101  |
| UN36129 | Rsa1.0.41181.1 | 1293 | 545    | 0         | 490  | 491  | 99 -  | 770 | 1260 | 1      | 491    |
| UN36130 | Rsa1.0.00645.1 | 964  | 189716 | 1.00E-102 | 237  | 251  | 94 +  | 2   | 250  | 20335  | 20582  |
| UN36131 | Rsa1.0.01900.1 | 934  | 37473  | 0         | 888  | 933  | 95 -  | 1   | 930  | 35180  | 36110  |
| UN36132 | Rsa1.0.09272.1 | 982  | 6512   | 0         | 530  | 552  | 96 -  | 430 | 981  | 5551   | 6102   |
| UN36133 | Rsa1.0.02515.1 | 341  | 30616  | 7.00E-80  | 154  | 155  | 99 -  | 2   | 156  | 3249   | 3403   |
| UN36134 | Rsa1.0.02790.1 | 581  | 27844  | 3.00E-83  | 337  | 397  | 84 -  | 170 | 566  | 11594  | 11990  |
| UN36135 | Rsa1.0.02114.1 | 976  | 34873  | 0         | 648  | 708  | 91 -  | 280 | 976  | 13142  | 13829  |
| UN36136 | Rsa1.0.02839.1 | 698  | 27391  | 0         | 458  | 472  | 97 -  | 227 | 696  | 15213  | 15678  |
| UN36137 | Rsa1.0.02865.1 | 765  | 27133  | 1.00E-12  | 78   | 91   | 85 +  | 235 | 325  | 12115  | 12205  |
| UN36138 | Rsa1.0.00878.1 | 516  | 330303 | 3.00E-40  | 122  | 133  | 91 +  | 356 | 488  | 118181 | 118312 |
| UN36139 | Rsa1.0.01522.1 | 781  | 157436 | 0         | 769  | 770  | 99 -  | 11  | 780  | 145266 | 146035 |
| UN36140 | Rsa1.0.00945.1 | 780  | 58714  | 0         | 435  | 459  | 94 +  | 1   | 457  | 30456  | 30912  |
| UN36141 | Rsa1.0.00010.1 | 889  | 294827 | 0         | 861  | 889  | 96 -  | 1   | 889  | 172574 | 173459 |
| UN36142 | Rsa1.0.05488.1 | 1087 | 13567  | 1.00E-139 | 258  | 260  | 99 +  | 535 | 794  | 9167   | 9426   |
| UN36143 | Rsa1.0.00014.1 | 289  | 348985 | 1.00E-128 | 232  | 232  | 100 - | 1   | 232  | 298558 | 298789 |
| UN36144 | #              | #    | #      | #         | #    | #    | #     | #   | #    | #      | #      |
| UN36145 | Rsa1.0.01165.1 | 1099 | 51898  | 0         | 1058 | 1101 | 96 +  | 1   | 1097 | 37929  | 39021  |
| UN36146 | Rsa1.0.02371.1 | 434  | 32069  | 1.00E-143 | 268  | 270  | 99 -  | 3   | 271  | 31652  | 31921  |
| UN36147 | Rsa1.0.00037.1 | 900  | 307838 | 0         | 891  | 899  | 99 -  | 1   | 899  | 274111 | 275008 |
| UN36148 | Rsa1.0.26100.1 | 1000 | 906    | 0         | 618  | 651  | 94 +  | 110 | 756  | 1      | 647    |
| UN36149 | Rsa1.0.00002.1 | 603  | 601661 | 0         | 353  | 362  | 97 -  | 237 | 598  | 252449 | 252810 |
| UN36150 | Rsa1.0.00958.1 | 1428 | 58243  | 0         | 1423 | 1428 | 99 -  | 1   | 1428 | 47284  | 48711  |
| UN36151 | Rsa1.0.01420.1 | 228  | 46210  | 1.00E-126 | 228  | 228  | 100 + | 1   | 228  | 23490  | 23717  |

|         |                |      |        |           |      |      |       |     |      |        |        |
|---------|----------------|------|--------|-----------|------|------|-------|-----|------|--------|--------|
| UN36152 | Rsa1.0.00560.1 | 791  | 75685  | 0         | 409  | 429  | 95 -  | 338 | 764  | 50954  | 51382  |
| UN36153 | Rsa1.0.03521.1 | 277  | 396204 | 1.00E-151 | 277  | 278  | 99 +  | 1   | 277  | 11948  | 12225  |
| UN36154 | Rsa1.0.00192.1 | 645  | 278200 | 1.00E-107 | 206  | 209  | 98 -  | 408 | 616  | 72268  | 72476  |
| UN36155 | Rsa1.0.00502.1 | 896  | 204180 | 0         | 872  | 888  | 98 +  | 6   | 893  | 34425  | 35302  |
| UN36156 | Rsa1.0.00632.1 | 955  | 183777 | 1.00E-108 | 206  | 208  | 99 +  | 748 | 955  | 5048   | 5255   |
| UN36157 | Rsa1.0.02309.1 | 855  | 32744  | 1.00E-173 | 391  | 416  | 93 +  | 437 | 852  | 20040  | 20442  |
| UN36158 | Rsa1.0.03449.1 | 1075 | 22839  | 1.00E-128 | 295  | 317  | 93 -  | 3   | 303  | 8635   | 8948   |
| UN36159 | Rsa1.0.00533.1 | 914  | 77375  | 0         | 910  | 914  | 99 -  | 1   | 914  | 65948  | 66860  |
| UN36160 | Rsa1.0.00637.1 | 1332 | 71038  | 1.00E-149 | 281  | 285  | 98 +  | 431 | 715  | 23549  | 23833  |
| UN36161 | Rsa1.0.04299.1 | 804  | 18027  | 0         | 355  | 357  | 99 -  | 1   | 357  | 1466   | 1822   |
| UN36162 | Rsa1.0.00116.1 | 600  | 365886 | 0         | 597  | 598  | 99 +  | 1   | 598  | 160095 | 160692 |
| UN36163 | Rsa1.0.00054.1 | 909  | 162053 | 1.00E-139 | 264  | 268  | 98 +  | 1   | 268  | 37293  | 37560  |
| UN36164 | Rsa1.0.01988.1 | 1155 | 36444  | 0         | 1084 | 1086 | 99 +  | 3   | 1088 | 12554  | 13639  |
| UN36165 | Rsa1.0.31019.1 | 1136 | 738    | 1.00E-162 | 357  | 378  | 94 +  | 751 | 1128 | 42     | 418    |
| UN36166 | Rsa1.0.17631.1 | 1046 | 1780   | 0         | 663  | 666  | 99 +  | 194 | 859  | 1      | 666    |
| UN36167 | Rsa1.0.01614.1 | 1092 | 42238  | 3.00E-51  | 422  | 528  | 79 -  | 559 | 1086 | 24142  | 24669  |
| UN36168 | Rsa1.0.03297.1 | 794  | 23969  | 0         | 452  | 485  | 93 -  | 316 | 792  | 8203   | 8680   |
| UN36169 | Rsa1.0.01318.1 | 647  | 48275  | 0         | 460  | 482  | 95 -  | 1   | 480  | 1614   | 2095   |
| UN36170 | Rsa1.0.04248.1 | 698  | 18287  | 1.00E-154 | 341  | 368  | 92 -  | 3   | 370  | 13803  | 14149  |
| UN36171 | Rsa1.0.00837.1 | 952  | 62568  | 1.00E-108 | 212  | 215  | 98 -  | 3   | 215  | 53363  | 53577  |
| UN36172 | Rsa1.0.07305.1 | 806  | 9578   | 1.00E-116 | 218  | 220  | 99 +  | 2   | 221  | 6330   | 6549   |
| UN36173 | Rsa1.0.00064.1 | 798  | 240927 | 0         | 474  | 488  | 97 +  | 313 | 790  | 111343 | 111829 |
| UN36174 | Rsa1.0.02125.1 | 1103 | 34775  | 1.00E-168 | 371  | 394  | 94 +  | 2   | 392  | 21024  | 21417  |
| UN36175 | Rsa1.0.10406.1 | 1039 | 5858   | 0         | 672  | 680  | 98 -  | 360 | 1039 | 4874   | 5553   |
| UN36176 | Rsa1.0.01103.1 | 1036 | 53974  | 0         | 425  | 442  | 96 -  | 2   | 437  | 46067  | 46507  |
| UN36177 | Rsa1.0.02526.1 | 731  | 30479  | 0         | 728  | 730  | 99 -  | 1   | 730  | 12321  | 13050  |
| UN36178 | Rsa1.0.03594.1 | 770  | 21868  | 0         | 736  | 769  | 95 +  | 2   | 770  | 17363  | 18126  |
| UN36179 | Rsa1.0.00101.1 | 755  | 267193 | 0         | 721  | 751  | 96 -  | 3   | 753  | 98588  | 99335  |
| UN36180 | Rsa1.0.00803.1 | 1035 | 144228 | 0         | 555  | 600  | 92 -  | 394 | 993  | 40053  | 40625  |
| UN36181 | Rsa1.0.02820.1 | 978  | 27629  | 0         | 758  | 773  | 98 -  | 1   | 770  | 1256   | 2027   |
| UN36182 | Rsa1.0.04472.1 | 1284 | 17198  | 0         | 1001 | 1057 | 94 +  | 6   | 1060 | 5160   | 6205   |
| UN36183 | Rsa1.0.01009.1 | 474  | 56922  | 1.00E-140 | 252  | 252  | 100 + | 221 | 472  | 32379  | 32630  |
| UN36184 | Rsa1.0.09023.1 | 635  | 6703   | 0         | 467  | 468  | 99 -  | 166 | 633  | 5072   | 5539   |
| UN36185 | Rsa1.0.01367.1 | 719  | 47135  | 0         | 651  | 659  | 98 +  | 65  | 719  | 28873  | 29531  |
| UN36186 | Rsa1.0.05892.1 | 782  | 12309  | 1.00E-150 | 279  | 282  | 98 -  | 3   | 284  | 5436   | 5717   |
| UN36187 | Rsa1.0.00428.1 | 778  | 85599  | 0         | 551  | 553  | 99 +  | 226 | 778  | 31030  | 31582  |
| UN36188 | Rsa1.0.02575.1 | 694  | 29944  | 0         | 668  | 691  | 96 +  | 6   | 693  | 15173  | 15856  |
| UN36189 | Rsa1.0.00087.1 | 927  | 761073 | 0         | 470  | 493  | 95 -  | 15  | 507  | 613175 | 613667 |
| UN36190 | Rsa1.0.00711.1 | 1155 | 67223  | 0         | 375  | 387  | 96 +  | 10  | 396  | 23907  | 24293  |

|         |                |      |        |           |      |      |       |      |      |        |        |
|---------|----------------|------|--------|-----------|------|------|-------|------|------|--------|--------|
| UN36191 | Rsa1.0_01967.1 | 894  | 36672  | 0         | 365  | 368  | 99 -  | 527  | 894  | 18393  | 18760  |
| UN36192 | Rsa1.0_26249.1 | 689  | 899    | 1.00E-112 | 217  | 221  | 98 -  | 2    | 222  | 319    | 539    |
| UN36193 | Rsa1.0_00051.1 | 913  | 258225 | 0         | 905  | 912  | 99 +  | 2    | 913  | 140054 | 140965 |
| UN36194 | Rsa1.0_01761.1 | 811  | 39717  | 0         | 357  | 368  | 97 -  | 2    | 369  | 15228  | 15595  |
| UN36195 | Rsa1.0_01413.1 | 955  | 46275  | 1.00E-133 | 376  | 422  | 89 -  | 60   | 472  | 36813  | 37219  |
| UN36196 | Rsa1.0_00128.1 | 791  | 228675 | 0         | 413  | 423  | 97 -  | 370  | 791  | 183544 | 183963 |
| UN36197 | Rsa1.0_00600.1 | 1325 | 73395  | 0         | 526  | 532  | 98 +  | 184  | 715  | 71877  | 72408  |
| UN36198 | Rsa1.0_06887.1 | 1073 | 10208  | 1.00E-156 | 299  | 304  | 98 +  | 554  | 856  | 3763   | 4066   |
| UN36199 | Rsa1.0_00373.1 | 1051 | 90296  | 0         | 972  | 1063 | 91 +  | 1    | 1051 | 4203   | 5217   |
| UN36200 | Rsa1.0_08264.1 | 628  | 7636   | 1.00E-15  | 71   | 80   | 88 -  | 538  | 617  | 3512   | 3591   |
| UN36201 | Rsa1.0_03145.1 | 1182 | 25020  | 0         | 1137 | 1178 | 96 +  | 2    | 1179 | 17016  | 18193  |
| UN36202 | Rsa1.0_01729.1 | 955  | 304246 | 1.00E-174 | 325  | 329  | 98 -  | 629  | 955  | 11     | 339    |
| UN36203 | Rsa1.0_04835.1 | 1388 | 15766  | 0         | 1352 | 1385 | 97 -  | 2    | 1386 | 10791  | 12175  |
| UN36204 | Rsa1.0_01004.1 | 1134 | 56975  | 0         | 695  | 714  | 97 -  | 2    | 709  | 14834  | 15547  |
| UN36205 | Rsa1.0_09309.1 | 787  | 6466   | 0         | 533  | 558  | 95 -  | 231  | 787  | 678    | 1220   |
| UN36206 | Rsa1.0_00207.1 | 989  | 248736 | 0         | 389  | 392  | 99 +  | 3    | 393  | 221866 | 222256 |
| UN36207 | Rsa1.0_01500.1 | 1004 | 141844 | 0         | 996  | 1001 | 99 +  | 3    | 1002 | 139693 | 140693 |
| UN36208 | Rsa1.0_08288.1 | 1067 | 7604   | 0         | 887  | 921  | 96 +  | 147  | 1066 | 3655   | 4571   |
| UN36209 | Rsa1.0_05074.1 | 815  | 14925  | 1.00E-137 | 288  | 299  | 96 +  | 3    | 300  | 830    | 1127   |
| UN36210 | Rsa1.0_08181.1 | 1495 | 7777   | 1.00E-134 | 275  | 283  | 97 -  | 1214 | 1495 | 3085   | 3365   |
| UN36211 | Rsa1.0_00682.1 | 708  | 68680  | 0         | 680  | 705  | 96 +  | 3    | 707  | 13345  | 14046  |
| UN36212 | Rsa1.0_00658.1 | 797  | 69740  | 0         | 463  | 502  | 92 -  | 302  | 797  | 11796  | 12286  |
| UN36213 | Rsa1.0_00013.1 | 764  | 292129 | 0         | 560  | 573  | 97 +  | 2    | 571  | 153336 | 153908 |
| UN36214 | Rsa1.0_04282.1 | 605  | 18100  | 1.00E-166 | 315  | 321  | 98 +  | 285  | 605  | 14419  | 14739  |
| UN36215 | Rsa1.0_00012.1 | 934  | 222148 | 0         | 907  | 933  | 97 -  | 1    | 933  | 74731  | 75658  |
| UN36216 | Rsa1.0_02993.1 | 773  | 26170  | 0         | 464  | 467  | 99 +  | 2    | 468  | 10770  | 11236  |
| UN36217 | Rsa1.0_01144.1 | 1186 | 52431  | 0         | 495  | 509  | 97 -  | 596  | 1103 | 29153  | 29657  |
| UN36218 | Rsa1.0_04924.1 | 1125 | 15426  | 0         | 371  | 374  | 99 -  | 751  | 1124 | 14064  | 14437  |
| UN36219 | Rsa1.0_14791.1 | 786  | 3064   | 0         | 771  | 782  | 98 +  | 2    | 782  | 197    | 978    |
| UN36220 | Rsa1.0_00221.1 | 1079 | 106972 | 1.00E-167 | 304  | 306  | 99 -  | 485  | 790  | 49720  | 50025  |
| UN36221 | Rsa1.0_00874.1 | 797  | 179723 | 0         | 502  | 538  | 93 -  | 258  | 795  | 15265  | 15802  |
| UN36222 | Rsa1.0_00370.1 | 961  | 90472  | 0         | 514  | 519  | 99 +  | 1    | 519  | 62678  | 63196  |
| UN36223 | Rsa1.0_00425.1 | 680  | 147080 | 1.00E-149 | 289  | 296  | 97 +  | 1    | 291  | 135466 | 135761 |
| UN36224 | Rsa1.0_06975.1 | 747  | 10074  | 0         | 733  | 752  | 97 -  | 5    | 745  | 1352   | 2102   |
| UN36225 | Rsa1.0_01257.1 | 1022 | 49766  | 0         | 1002 | 1030 | 97 -  | 1    | 1021 | 25501  | 26528  |
| UN36226 | Rsa1.0_02299.1 | 692  | 32857  | 0         | 401  | 401  | 100 + | 292  | 692  | 27626  | 28026  |
| UN36227 | Rsa1.0_01445.1 | 846  | 45671  | 2.00E-60  | 125  | 127  | 98 -  | 459  | 585  | 41989  | 42115  |
| UN36228 | Rsa1.0_00397.1 | 693  | 88189  | 1.00E-73  | 173  | 180  | 96 -  | 1    | 177  | 61837  | 62015  |
| UN36229 | Rsa1.0_02208.1 | 991  | 33875  | 0         | 605  | 697  | 86 +  | 317  | 987  | 29191  | 29855  |

|         |                |      |        |           |      |      |       |     |      |        |        |
|---------|----------------|------|--------|-----------|------|------|-------|-----|------|--------|--------|
| UN36230 | Rsa1.0.00085.1 | 803  | 142226 | 1.00E-77  | 195  | 204  | 95 +  | 594 | 792  | 97330  | 97533  |
| UN36231 | Rsa1.0.03126.1 | 774  | 25192  | 0         | 540  | 570  | 94 +  | 205 | 771  | 21736  | 22305  |
| UN36232 | Rsa1.0.03055.1 | 789  | 25730  | 0         | 494  | 500  | 98 +  | 280 | 776  | 8870   | 9368   |
| UN36233 | Rsa1.0.00060.1 | 1134 | 502678 | 0         | 754  | 784  | 96 +  | 342 | 1122 | 62957  | 63739  |
| UN36234 | Rsa1.0.00223.1 | 922  | 106231 | 0         | 919  | 921  | 99 +  | 1   | 921  | 54656  | 55576  |
| UN36235 | Rsa1.0.00008.1 | 835  | 358124 | 1.00E-98  | 192  | 195  | 98 -  | 55  | 249  | 317065 | 317259 |
| UN36236 | Rsa1.0.00032.1 | 474  | 306326 | 1.00E-108 | 212  | 215  | 98 -  | 260 | 474  | 215912 | 216125 |
| UN36237 | Rsa1.0.03378.1 | 674  | 23322  | 0         | 356  | 365  | 97 -  | 3   | 367  | 18997  | 19361  |
| UN36238 | Rsa1.0.00774.1 | 1047 | 64831  | 0         | 1039 | 1046 | 99 +  | 1   | 1046 | 53437  | 54482  |
| UN36239 | Rsa1.0.11253.1 | 654  | 5567   | 1.00E-120 | 292  | 312  | 93 -  | 6   | 315  | 325    | 631    |
| UN36240 | Rsa1.0.00354.1 | 575  | 232005 | 1.00E-142 | 326  | 348  | 93 +  | 229 | 575  | 191678 | 192025 |
| UN36241 | Rsa1.0.07341.1 | 643  | 9530   | 0         | 431  | 438  | 98 -  | 205 | 640  | 982    | 1417   |
| UN36242 | Rsa1.0.00016.1 | 770  | 831256 | 0         | 673  | 679  | 99 +  | 94  | 769  | 680063 | 680741 |
| UN36243 | Rsa1.0.00127.1 | 434  | 127446 | 0         | 432  | 432  | 100 - | 3   | 434  | 23428  | 23859  |
| UN36244 | Rsa1.0.01831.1 | 1324 | 38628  | 0         | 582  | 593  | 98 -  | 737 | 1322 | 15773  | 16365  |
| UN36245 | Rsa1.0.00675.1 | 636  | 145590 | 0         | 377  | 377  | 100 + | 2   | 378  | 5671   | 6047   |
| UN36246 | Rsa1.0.00551.1 | 780  | 76227  | 1.00E-168 | 330  | 340  | 97 +  | 441 | 780  | 28618  | 28957  |
| UN36247 | Rsa1.0.08412.1 | 1222 | 7404   | 0         | 1125 | 1169 | 96 -  | 7   | 1172 | 5233   | 6398   |
| UN36248 | Rsa1.0.00472.1 | 358  | 398134 | 0         | 355  | 356  | 99 -  | 3   | 358  | 322016 | 322371 |
| UN36249 | Rsa1.0.00442.1 | 615  | 84596  | 1.00E-121 | 229  | 232  | 98 +  | 346 | 577  | 6360   | 6591   |
| UN36250 | Rsa1.0.05146.1 | 998  | 14678  | 0         | 968  | 988  | 97 +  | 3   | 990  | 3663   | 4649   |
| UN36251 | Rsa1.0.04455.1 | 800  | 17266  | 0         | 795  | 798  | 99 +  | 1   | 798  | 15356  | 16153  |
| UN36252 | Rsa1.0.03229.1 | 607  | 24470  | 1.00E-85  | 164  | 165  | 99 +  | 266 | 430  | 10322  | 10486  |
| UN36253 | Rsa1.0.05612.1 | 1079 | 13193  | 1.00E-129 | 266  | 276  | 96 -  | 3   | 275  | 12186  | 12461  |
| UN36254 | Rsa1.0.02612.1 | 752  | 29559  | 0         | 654  | 673  | 97 +  | 3   | 673  | 28627  | 29298  |
| UN36255 | Rsa1.0.03524.1 | 691  | 22297  | 1.00E-108 | 286  | 316  | 90 -  | 13  | 315  | 6358   | 6668   |
| UN36256 | Rsa1.0.01200.1 | 852  | 50895  | 0         | 513  | 521  | 98 +  | 333 | 852  | 49808  | 50328  |
| UN36257 | Rsa1.0.22194.1 | 682  | 1143   | 0         | 339  | 340  | 99 +  | 151 | 490  | 804    | 1143   |
| UN36258 | Rsa1.0.00387.1 | 386  | 495407 | 0         | 366  | 376  | 97 -  | 15  | 386  | 156985 | 157360 |
| UN36259 | Rsa1.0.00015.1 | 752  | 561803 | 0         | 731  | 746  | 97 +  | 2   | 744  | 250249 | 250994 |
| UN36260 | Rsa1.0.02573.1 | 1108 | 29955  | 0         | 608  | 618  | 98 +  | 3   | 619  | 10806  | 11423  |
| UN36261 | Rsa1.0.00270.1 | 771  | 101236 | 0         | 433  | 433  | 100 - | 4   | 436  | 52435  | 52867  |
| UN36262 | Rsa1.0.13694.1 | 742  | 4469   | 1.00E-140 | 420  | 473  | 88 -  | 277 | 738  | 3055   | 3526   |
| UN36263 | Rsa1.0.00045.1 | 963  | 328694 | 0         | 434  | 453  | 95 -  | 115 | 567  | 255915 | 256367 |
| UN36264 | Rsa1.0.00964.1 | 999  | 316648 | 0         | 750  | 772  | 97 -  | 228 | 999  | 277564 | 278335 |
| UN36265 | Rsa1.0.10588.1 | 751  | 5794   | 0         | 669  | 694  | 96 +  | 2   | 692  | 1802   | 2495   |
| UN36266 | Rsa1.0.02079.1 | 763  | 35306  | 1.00E-132 | 309  | 331  | 93 -  | 73  | 397  | 18188  | 18517  |
| UN36267 | Rsa1.0.00526.1 | 871  | 169279 | 0         | 709  | 780  | 90 -  | 3   | 749  | 119293 | 120062 |
| UN36268 | Rsa1.0.04554.1 | 890  | 16876  | 0         | 503  | 527  | 95 -  | 4   | 527  | 3773   | 4293   |

|         |                |      |        |           |     |     |       |     |      |        |        |
|---------|----------------|------|--------|-----------|-----|-----|-------|-----|------|--------|--------|
| UN36269 | Rsa1.0.00092.1 | 682  | 659932 | 0         | 665 | 674 | 98 +  | 8   | 681  | 124744 | 125417 |
| UN36270 | Rsa1.0.01878.1 | 690  | 37768  | 0         | 494 | 507 | 97 -  | 183 | 689  | 28105  | 28607  |
| UN36271 | Rsa1.0.00277.1 | 562  | 100132 | 1.00E-128 | 315 | 339 | 92 -  | 224 | 561  | 76618  | 76948  |
| UN36272 | Rsa1.0.02922.1 | 961  | 26753  | 2.00E-39  | 102 | 108 | 94 +  | 403 | 510  | 10877  | 10984  |
| UN36273 | Rsa1.0.00376.1 | 1017 | 90101  | 1.00E-144 | 296 | 308 | 96 +  | 236 | 543  | 39667  | 39974  |
| UN36274 | Rsa1.0.00236.1 | 1226 | 104771 | 0         | 419 | 432 | 96 +  | 1   | 432  | 46581  | 47005  |
| UN36275 | Rsa1.0.04365.1 | 262  | 17732  | 2.00E-51  | 175 | 199 | 87 -  | 63  | 261  | 6045   | 6243   |
| UN36276 | Rsa1.0.03319.1 | 478  | 23767  | 1.00E-122 | 317 | 346 | 91 -  | 2   | 346  | 16935  | 17279  |
| UN36277 | Rsa1.0.02304.1 | 645  | 32793  | 6.00E-11  | 42  | 44  | 95 -  | 29  | 72   | 20184  | 20227  |
| UN36278 | Rsa1.0.05766.1 | 813  | 12708  | 0         | 538 | 552 | 97 +  | 1   | 549  | 5046   | 5594   |
| UN36279 | Rsa1.0.02429.1 | 847  | 31527  | 2.00E-20  | 74  | 80  | 92 -  | 515 | 593  | 31017  | 31096  |
| UN36280 | Rsa1.0.00495.1 | 1178 | 79934  | 2.00E-98  | 317 | 361 | 87 +  | 740 | 1100 | 14917  | 15274  |
| UN36281 | Rsa1.0.19723.1 | 858  | 1392   | 0         | 647 | 649 | 99 -  | 210 | 858  | 744    | 1392   |
| UN36282 | Rsa1.0.00239.1 | 946  | 104332 | 1.00E-148 | 300 | 310 | 96 +  | 637 | 946  | 21175  | 21482  |
| UN36283 | Rsa1.0.00084.1 | 570  | 142338 | 0         | 544 | 572 | 95 -  | 2   | 570  | 5427   | 5997   |
| UN36284 | Rsa1.0.00065.1 | 238  | 454616 | 2.00E-88  | 226 | 244 | 92 -  | 1   | 236  | 223130 | 223373 |
| UN36285 | Rsa1.0.08079.1 | 1100 | 7942   | 0         | 387 | 403 | 96 +  | 699 | 1098 | 5750   | 6150   |
| UN36286 | Rsa1.0.07600.1 | 1041 | 9052   | 0         | 449 | 463 | 96 -  | 579 | 1039 | 5512   | 5974   |
| UN36287 | Rsa1.0.01326.1 | 971  | 48072  | 1.00E-138 | 315 | 335 | 94 -  | 586 | 918  | 33022  | 33353  |
| UN36288 | Rsa1.0.00098.1 | 1107 | 349239 | 1.00E-136 | 253 | 255 | 99 -  | 853 | 1107 | 275569 | 275823 |
| UN36289 | Rsa1.0.10297.1 | 634  | 5900   | 0         | 596 | 633 | 94 +  | 2   | 634  | 1453   | 2085   |
| UN36290 | Rsa1.0.00050.1 | 896  | 237174 | 0         | 358 | 366 | 97 +  | 527 | 889  | 15272  | 15637  |
| UN36291 | Rsa1.0.00463.1 | 461  | 189177 | 1.00E-108 | 259 | 278 | 93 -  | 184 | 461  | 157322 | 157592 |
| UN36292 | Rsa1.0.00077.1 | 699  | 145005 | 0         | 420 | 433 | 96 +  | 219 | 650  | 32645  | 33072  |
| UN36293 | Rsa1.0.00571.1 | 803  | 329018 | 0         | 768 | 816 | 94 +  | 2   | 803  | 28322  | 29128  |
| UN36294 | Rsa1.0.14736.1 | 908  | 3116   | 1.00E-158 | 310 | 319 | 97 +  | 589 | 907  | 1970   | 2288   |
| UN36295 | Rsa1.0.14252.1 | 1012 | 3615   | 1.00E-114 | 237 | 246 | 96 +  | 400 | 645  | 248    | 493    |
| UN36296 | Rsa1.0.03031.1 | 1123 | 25839  | 1.00E-149 | 286 | 291 | 98 -  | 835 | 1123 | 705    | 995    |
| UN36297 | Rsa1.0.00782.1 | 860  | 64468  | 0         | 760 | 845 | 89 -  | 2   | 842  | 15637  | 16437  |
| UN36298 | Rsa1.0.00055.1 | 790  | 520193 | 1.00E-108 | 242 | 254 | 95 -  | 483 | 733  | 211437 | 211690 |
| UN36299 | Rsa1.0.00533.1 | 756  | 77375  | 1.00E-162 | 325 | 336 | 96 -  | 2   | 337  | 27870  | 28202  |
| UN36300 | Rsa1.0.01717.1 | 847  | 143162 | 1.00E-155 | 609 | 720 | 84 -  | 133 | 847  | 6573   | 7265   |
| UN36301 | Rsa1.0.04900.1 | 860  | 15528  | 0         | 832 | 851 | 97 +  | 1   | 848  | 7880   | 8730   |
| UN36302 | Rsa1.0.04305.1 | 922  | 18003  | 2.00E-51  | 143 | 156 | 91 +  | 605 | 760  | 15168  | 15323  |
| UN36303 | Rsa1.0.05105.1 | 654  | 14833  | 1.00E-111 | 204 | 204 | 100 - | 1   | 204  | 9381   | 9584   |
| UN36304 | Rsa1.0.01355.1 | 476  | 47303  | 0         | 456 | 474 | 96 +  | 5   | 473  | 10272  | 10745  |
| UN36305 | Rsa1.0.00019.1 | 1288 | 301669 | 0         | 896 | 924 | 96 -  | 134 | 1057 | 110059 | 110967 |
| UN36306 | Rsa1.0.00728.1 | 890  | 66704  | 0         | 841 | 925 | 90 -  | 3   | 890  | 18435  | 19349  |
| UN36307 | Rsa1.0.00255.1 | 845  | 204967 | 5.00E-15  | 94  | 111 | 84 -  | 323 | 433  | 155970 | 156080 |

|         |                |      |        |           |     |     |      |     |      |        |        |
|---------|----------------|------|--------|-----------|-----|-----|------|-----|------|--------|--------|
| UN36308 | Rsa1.0_04586.1 | 839  | 16748  | 0         | 334 | 336 | 99 - | 504 | 839  | 10093  | 10428  |
| UN36309 | Rsa1.0_00760.1 | 1217 | 65267  | 0         | 404 | 411 | 98 - | 380 | 790  | 61968  | 62378  |
| UN36310 | Rsa1.0_03093.1 | 720  | 25445  | 1.00E-24  | 134 | 159 | 84 - | 77  | 235  | 351    | 509    |
| UN36311 | Rsa1.0_01434.1 | 1107 | 45951  | 1.00E-166 | 365 | 386 | 94 + | 340 | 720  | 25280  | 25665  |
| UN36312 | Rsa1.0_00222.1 | 719  | 172263 | 1.00E-135 | 257 | 261 | 98 - | 458 | 718  | 129873 | 130133 |
| UN36313 | Rsa1.0_03099.1 | 1150 | 139424 | 0         | 487 | 534 | 91 + | 617 | 1149 | 9747   | 10269  |
| UN36314 | Rsa1.0_00507.1 | 934  | 79074  | 0         | 718 | 762 | 94 + | 180 | 934  | 5584   | 6331   |
| UN36315 | Rsa1.0_00048.1 | 1068 | 167185 | 0         | 375 | 376 | 99 + | 693 | 1068 | 18931  | 19306  |
| UN36316 | Rsa1.0_00339.1 | 473  | 222974 | 0         | 460 | 472 | 97 + | 3   | 471  | 193759 | 194229 |
| UN36317 | Rsa1.0_01229.1 | 553  | 50235  | 0         | 538 | 555 | 96 + | 3   | 553  | 18953  | 19507  |
| UN36318 | Rsa1.0_00523.1 | 733  | 178770 | 1.00E-176 | 325 | 329 | 98 - | 250 | 578  | 18172  | 18500  |
| UN36319 | Rsa1.0_03440.1 | 877  | 22928  | 0         | 657 | 688 | 95 + | 187 | 874  | 1      | 678    |
| UN36320 | Rsa1.0_00683.1 | 546  | 68638  | 1.00E-153 | 460 | 518 | 88 + | 3   | 516  | 3529   | 4031   |
| UN36321 | Rsa1.0_00567.1 | 933  | 75260  | 0         | 595 | 629 | 94 + | 273 | 889  | 66219  | 66842  |
| UN36322 | Rsa1.0_00034.1 | 1087 | 260119 | 0         | 545 | 558 | 97 - | 201 | 758  | 21894  | 22451  |
| UN36323 | Rsa1.0_00861.1 | 776  | 61759  | 0         | 458 | 470 | 97 - | 3   | 472  | 31356  | 31822  |
| UN36324 | Rsa1.0_00612.1 | 728  | 72376  | 0         | 707 | 711 | 99 - | 18  | 728  | 5401   | 6110   |
| UN36325 | Rsa1.0_01302.1 | 864  | 48907  | 0         | 502 | 529 | 94 + | 241 | 769  | 44053  | 44575  |
| UN36326 | Rsa1.0_01569.1 | 1066 | 43029  | 1.00E-120 | 234 | 239 | 97 + | 1   | 239  | 30203  | 30441  |
| UN36327 | Rsa1.0_00408.1 | 1176 | 176752 | 0         | 434 | 459 | 94 + | 723 | 1174 | 105237 | 105692 |
| UN36328 | Rsa1.0_07058.1 | 1156 | 9964   | 0         | 422 | 442 | 95 + | 476 | 913  | 3048   | 3489   |
| UN36329 | Rsa1.0_00043.1 | 837  | 264937 | 0         | 810 | 837 | 96 - | 3   | 837  | 88478  | 89313  |
| UN36330 | Rsa1.0_00053.1 | 866  | 263459 | 0         | 790 | 832 | 94 - | 2   | 819  | 236121 | 236947 |
| UN36331 | Rsa1.0_11943.1 | 654  | 5365   | 8.00E-75  | 146 | 147 | 99 + | 348 | 494  | 570    | 716    |
| UN36332 | Rsa1.0_00308.1 | 747  | 96915  | 2.00E-69  | 182 | 198 | 91 - | 343 | 540  | 14021  | 14218  |
| UN36333 | Rsa1.0_03674.1 | 854  | 21442  | 3.00E-87  | 167 | 168 | 99 + | 3   | 170  | 2078   | 2245   |
| UN36334 | Rsa1.0_05322.1 | 939  | 14154  | 0         | 902 | 941 | 95 + | 4   | 939  | 11327  | 12261  |
| UN36335 | Rsa1.0_08062.1 | 1335 | 7978   | 0         | 858 | 884 | 97 - | 465 | 1335 | 1022   | 1899   |
| UN36336 | Rsa1.0_00388.1 | 1267 | 88890  | 1.00E-164 | 322 | 330 | 97 - | 564 | 892  | 31435  | 31764  |
| UN36337 | Rsa1.0_00099.1 | 860  | 159619 | 0         | 655 | 736 | 88 - | 167 | 859  | 33545  | 34260  |
| UN36338 | Rsa1.0_00376.1 | 1008 | 90101  | 1.00E-111 | 274 | 293 | 93 + | 701 | 989  | 15971  | 16260  |
| UN36339 | Rsa1.0_00168.1 | 549  | 115870 | 0         | 543 | 548 | 99 + | 1   | 548  | 78928  | 79475  |
| UN36340 | Rsa1.0_00030.1 | 701  | 250988 | 0         | 579 | 612 | 94 + | 94  | 699  | 167985 | 168596 |
| UN36341 | Rsa1.0_05264.1 | 765  | 14327  | 1.00E-160 | 587 | 685 | 85 + | 77  | 761  | 3482   | 4157   |
| UN36342 | Rsa1.0_37757.1 | 748  | 597    | 1.00E-100 | 238 | 251 | 94 - | 503 | 748  | 26     | 275    |
| UN36343 | #              | #    | #      | #         | #   | #   | #    | #   | #    | #      | #      |
| UN36344 | Rsa1.0_01343.1 | 768  | 47735  | 0         | 573 | 627 | 91 + | 4   | 612  | 4087   | 4690   |
| UN36345 | Rsa1.0_00028.1 | 921  | 293984 | 2.00E-60  | 205 | 233 | 87 - | 360 | 589  | 34101  | 34333  |
| UN36346 | Rsa1.0_29312.1 | 338  | 786    | 1.00E-142 | 324 | 345 | 93 + | 2   | 338  | 391    | 733    |

|         |                |      |        |           |      |      |       |     |      |        |        |
|---------|----------------|------|--------|-----------|------|------|-------|-----|------|--------|--------|
| UN36347 | Rsa1.0_02004.1 | 1272 | 169138 | 1.00E-154 | 277  | 277  | 100 - | 4   | 280  | 1269   | 1545   |
| UN36348 | Rsa1.0_00990.1 | 661  | 57445  | 0         | 425  | 430  | 98 -  | 232 | 660  | 14980  | 15409  |
| UN36349 | Rsa1.0_00005.1 | 1008 | 353093 | 0         | 831  | 899  | 92 -  | 67  | 937  | 143387 | 144275 |
| UN36350 | Rsa1.0_17405.1 | 896  | 1838   | 0         | 839  | 901  | 93 +  | 1   | 895  | 119    | 1004   |
| UN36351 | Rsa1.0_00166.1 | 338  | 240912 | 0         | 335  | 338  | 99 -  | 2   | 338  | 153135 | 153472 |
| UN36352 | Rsa1.0_00448.1 | 704  | 84048  | 0         | 665  | 708  | 93 -  | 1   | 704  | 52839  | 53543  |
| UN36353 | Rsa1.0_00058.1 | 364  | 159921 | 1.00E-179 | 351  | 362  | 96 -  | 3   | 364  | 153383 | 153744 |
| UN36354 | Rsa1.0_02124.1 | 1222 | 34780  | 0         | 1181 | 1223 | 96 +  | 2   | 1222 | 29113  | 30324  |
| UN36355 | Rsa1.0_00146.1 | 803  | 149343 | 0         | 538  | 552  | 97 -  | 3   | 554  | 101985 | 102536 |
| UN36356 | Rsa1.0_03013.1 | 846  | 26026  | 0         | 703  | 709  | 99 -  | 139 | 846  | 16168  | 16876  |
| UN36357 | Rsa1.0_02599.1 | 773  | 29660  | 0         | 446  | 464  | 96 +  | 312 | 773  | 2198   | 2656   |
| UN36358 | Rsa1.0_17407.1 | 632  | 1838   | 0         | 584  | 630  | 92 +  | 3   | 612  | 32     | 660    |
| UN36359 | Rsa1.0_01733.1 | 879  | 40186  | 1.00E-43  | 140  | 155  | 90 -  | 725 | 879  | 20531  | 20684  |
| UN36360 | Rsa1.0_01469.1 | 796  | 45139  | 3.00E-47  | 139  | 151  | 92 -  | 284 | 433  | 37206  | 37353  |
| UN36361 | Rsa1.0_00280.1 | 598  | 99966  | 1.00E-167 | 325  | 333  | 97 -  | 2   | 332  | 75915  | 76247  |
| UN36362 | Rsa1.0_00425.1 | 682  | 147080 | 1.00E-165 | 400  | 426  | 93 +  | 35  | 459  | 141871 | 142289 |
| UN36363 | Rsa1.0_00828.1 | 797  | 62744  | 0         | 327  | 328  | 99 -  | 139 | 466  | 20572  | 20899  |
| UN36364 | Rsa1.0_00204.1 | 736  | 109056 | 1.00E-123 | 325  | 362  | 89 +  | 386 | 735  | 46701  | 47043  |
| UN36365 | Rsa1.0_02748.1 | 865  | 28242  | 0         | 816  | 844  | 96 -  | 15  | 854  | 18292  | 19135  |
| UN36366 | Rsa1.0_02014.1 | 743  | 36031  | 0         | 714  | 744  | 95 +  | 1   | 743  | 34807  | 35549  |
| UN36367 | Rsa1.0_00108.1 | 1276 | 478491 | 1.00E-157 | 386  | 418  | 92 -  | 189 | 594  | 40645  | 41062  |
| UN36368 | Rsa1.0_02148.1 | 1272 | 34610  | 0         | 1061 | 1107 | 95 -  | 164 | 1270 | 23583  | 24686  |
| UN36369 | Rsa1.0_00552.1 | 729  | 206757 | 0         | 423  | 446  | 94 +  | 1   | 442  | 180163 | 180600 |
| UN36370 | Rsa1.0_00001.1 | 358  | 363028 | 1.00E-149 | 338  | 359  | 94 -  | 1   | 358  | 336274 | 336630 |
| UN36371 | Rsa1.0_01722.1 | 851  | 40320  | 7.00E-79  | 168  | 174  | 96 -  | 61  | 234  | 34628  | 34801  |
| UN36372 | Rsa1.0_00303.1 | 1126 | 97468  | 0         | 595  | 624  | 95 +  | 2   | 613  | 26808  | 27431  |
| UN36373 | Rsa1.0_04272.1 | 653  | 18144  | 1.00E-107 | 306  | 337  | 90 +  | 2   | 334  | 4277   | 4598   |
| UN36374 | Rsa1.0_00324.1 | 1015 | 218805 | 0         | 486  | 492  | 98 -  | 2   | 493  | 30676  | 31167  |
| UN36375 | Rsa1.0_11948.1 | 841  | 5363   | 1.00E-110 | 247  | 261  | 94 -  | 581 | 841  | 3920   | 4178   |
| UN36376 | Rsa1.0_00936.1 | 1218 | 59078  | 0         | 386  | 396  | 97 -  | 824 | 1218 | 13436  | 13830  |
| UN36377 | Rsa1.0_10836.1 | 1152 | 5707   | 0         | 908  | 934  | 97 -  | 3   | 936  | 4133   | 5060   |
| UN36378 | Rsa1.0_00129.1 | 1656 | 126831 | 0         | 999  | 1030 | 96 -  | 641 | 1656 | 97286  | 98315  |
| UN36379 | Rsa1.0_01549.1 | 665  | 43543  | 0         | 625  | 665  | 93 +  | 2   | 665  | 25006  | 25670  |
| UN36380 | Rsa1.0_02845.1 | 478  | 27340  | 1.00E-121 | 227  | 229  | 99 +  | 3   | 231  | 2728   | 2956   |
| UN36381 | Rsa1.0_05740.1 | 510  | 12775  | 0         | 424  | 438  | 96 +  | 7   | 442  | 11749  | 12186  |
| UN36382 | Rsa1.0_00296.1 | 943  | 97854  | 0         | 924  | 950  | 97 +  | 1   | 943  | 49433  | 50380  |
| UN36383 | Rsa1.0_00277.1 | 516  | 100132 | 1.00E-130 | 342  | 372  | 91 -  | 150 | 516  | 10578  | 10946  |
| UN36384 | Rsa1.0_07250.1 | 780  | 9663   | 9.00E-66  | 197  | 224  | 87 +  | 329 | 530  | 524    | 747    |
| UN36385 | Rsa1.0_01929.1 | 878  | 37191  | 1.00E-92  | 182  | 185  | 98 +  | 2   | 186  | 8154   | 8338   |

|         |                |      |        |           |      |      |       |     |      |        |        |
|---------|----------------|------|--------|-----------|------|------|-------|-----|------|--------|--------|
| UN36386 | Rsa1.0.00121.1 | 1393 | 278029 | 0         | 848  | 874  | 97 -  | 2   | 875  | 81609  | 82482  |
| UN36387 | Rsa1.0.02791.1 | 739  | 27832  | 1.00E-148 | 285  | 291  | 97 +  | 286 | 576  | 19579  | 19869  |
| UN36388 | Rsa1.0.00080.1 | 673  | 190437 | 2.00E-84  | 184  | 191  | 96 +  | 3   | 192  | 92809  | 92999  |
| UN36389 | Rsa1.0.02787.1 | 990  | 27872  | 0         | 480  | 517  | 92 -  | 7   | 522  | 12233  | 12748  |
| UN36390 | Rsa1.0.00452.1 | 568  | 83201  | 6.00E-91  | 176  | 178  | 98 -  | 230 | 407  | 1053   | 1230   |
| UN36391 | Rsa1.0.00451.1 | 841  | 322533 | 0         | 816  | 855  | 95 +  | 3   | 841  | 274657 | 275510 |
| UN36392 | Rsa1.0.00234.1 | 661  | 197060 | 0         | 349  | 352  | 99 +  | 309 | 660  | 9964   | 10315  |
| UN36393 | Rsa1.0.01938.1 | 749  | 264018 | 1.00E-135 | 263  | 269  | 97 +  | 141 | 409  | 130889 | 131157 |
| UN36394 | Rsa1.0.10576.1 | 170  | 5797   | 1.00E-70  | 164  | 173  | 94 +  | 1   | 170  | 3356   | 3528   |
| UN36395 | Rsa1.0.00404.1 | 806  | 87635  | 1.00E-156 | 319  | 331  | 96 -  | 476 | 806  | 44385  | 44714  |
| UN36396 | Rsa1.0.04367.1 | 1003 | 17728  | 0         | 866  | 892  | 97 +  | 4   | 884  | 13760  | 14644  |
| UN36397 | Rsa1.0.01906.1 | 1122 | 37448  | 0         | 1107 | 1123 | 98 -  | 9   | 1122 | 3049   | 4170   |
| UN36398 | Rsa1.0.00139.1 | 934  | 357786 | 0         | 416  | 421  | 98 -  | 514 | 934  | 31738  | 32158  |
| UN36399 | Rsa1.0.00104.1 | 1003 | 368722 | 1.00E-163 | 422  | 457  | 92 -  | 555 | 1003 | 60311  | 60760  |
| UN36400 | Rsa1.0.02655.1 | 632  | 29027  | 1.00E-131 | 323  | 345  | 93 -  | 3   | 340  | 15215  | 15555  |
| UN36401 | Rsa1.0.08078.1 | 790  | 7944   | 1.00E-168 | 326  | 334  | 97 +  | 455 | 788  | 2693   | 3023   |
| UN36402 | Rsa1.0.03134.1 | 1068 | 145023 | 1.00E-122 | 290  | 310  | 93 -  | 766 | 1068 | 4859   | 5167   |
| UN36403 | Rsa1.0.00543.1 | 925  | 76788  | 0         | 889  | 932  | 95 +  | 2   | 925  | 75602  | 76531  |
| UN36404 | Rsa1.0.00195.1 | 716  | 251884 | 0         | 688  | 718  | 95 +  | 3   | 716  | 233974 | 234685 |
| UN36405 | Rsa1.0.00241.1 | 931  | 104000 | 1.00E-166 | 315  | 321  | 98 -  | 242 | 562  | 59904  | 60224  |
| UN36406 | #              | #    | #      | #         | #    | #    | #     | #   | #    | #      | #      |
| UN36407 | Rsa1.0.01285.1 | 1187 | 172709 | 0         | 667  | 699  | 95 +  | 490 | 1187 | 123481 | 124174 |
| UN36408 | Rsa1.0.00198.1 | 439  | 222963 | 1.00E-149 | 409  | 452  | 90 -  | 2   | 439  | 23537  | 23974  |
| UN36409 | Rsa1.0.00381.1 | 1044 | 89718  | 0         | 483  | 511  | 94 -  | 4   | 513  | 55578  | 56085  |
| UN36410 | Rsa1.0.00062.1 | 689  | 299291 | 1.00E-171 | 325  | 332  | 97 -  | 351 | 682  | 261773 | 262104 |
| UN36411 | Rsa1.0.33883.1 | 226  | 668    | 1.00E-80  | 211  | 227  | 92 +  | 5   | 223  | 16     | 241    |
| UN36412 | Rsa1.0.00301.1 | 1270 | 365315 | 1.00E-150 | 270  | 270  | 100 + | 999 | 1268 | 361634 | 361903 |
| UN36413 | Rsa1.0.03733.1 | 496  | 21108  | 0         | 463  | 477  | 97 -  | 3   | 477  | 1402   | 1875   |
| UN36414 | Rsa1.0.03748.1 | 948  | 21035  | 0         | 933  | 948  | 98 -  | 2   | 948  | 18903  | 19850  |
| UN36415 | Rsa1.0.03664.1 | 407  | 21487  | 1.00E-169 | 332  | 341  | 97 -  | 67  | 407  | 6094   | 6433   |
| UN36416 | Rsa1.0.00445.1 | 521  | 84317  | 2.00E-81  | 175  | 182  | 96 -  | 124 | 305  | 12745  | 12926  |
| UN36417 | Rsa1.0.04294.1 | 1275 | 18043  | 0         | 1265 | 1276 | 99 -  | 2   | 1274 | 13699  | 14974  |
| UN36418 | #              | #    | #      | #         | #    | #    | #     | #   | #    | #      | #      |
| UN36419 | Rsa1.0.03694.1 | 824  | 21336  | 0         | 500  | 514  | 97 -  | 28  | 541  | 6237   | 6749   |
| UN36420 | Rsa1.0.03169.1 | 870  | 24826  | 1.00E-153 | 321  | 336  | 95 +  | 5   | 340  | 19609  | 19940  |
| UN36421 | Rsa1.0.00318.1 | 476  | 96094  | 1.00E-115 | 363  | 408  | 88 +  | 65  | 470  | 81695  | 82096  |
| UN36422 | Rsa1.0.00008.1 | 801  | 358124 | 3.00E-44  | 98   | 100  | 98 +  | 282 | 381  | 226127 | 226226 |
| UN36423 | Rsa1.0.01123.1 | 1182 | 53359  | 0         | 1161 | 1181 | 98 +  | 3   | 1180 | 8616   | 9796   |
| UN36424 | Rsa1.0.00188.1 | 561  | 112020 | 1.00E-135 | 263  | 269  | 97 +  | 292 | 560  | 72648  | 72916  |



|         |                |      |        |           |     |     |       |     |      |        |        |
|---------|----------------|------|--------|-----------|-----|-----|-------|-----|------|--------|--------|
| UN36425 | Rsa1.0.05367.1 | 788  | 14010  | 2.00E-70  | 148 | 152 | 97 +  | 29  | 180  | 1071   | 1222   |
| UN36426 | Rsa1.0.05099.1 | 677  | 14855  | 1.00E-151 | 289 | 295 | 97 -  | 383 | 677  | 14359  | 14653  |
| UN36427 | Rsa1.0.02112.1 | 896  | 34904  | 0         | 884 | 893 | 98 -  | 2   | 894  | 13041  | 13933  |
| UN36428 | Rsa1.0.04847.1 | 986  | 15731  | 0         | 733 | 778 | 94 +  | 2   | 774  | 827    | 1602   |
| UN36429 | Rsa1.0.00039.1 | 895  | 296927 | 0         | 857 | 893 | 95 +  | 3   | 893  | 295894 | 296782 |
| UN36430 | Rsa1.0.03643.1 | 540  | 21607  | 0         | 495 | 496 | 99 +  | 45  | 540  | 9457   | 9952   |
| UN36431 | Rsa1.0.00016.1 | 830  | 831256 | 1.00E-113 | 222 | 227 | 97 -  | 220 | 446  | 503755 | 503981 |
| UN36432 | Rsa1.0.01917.1 | 672  | 37303  | 2.00E-63  | 142 | 148 | 95 -  | 335 | 482  | 18581  | 18728  |
| UN36433 | Rsa1.0.03506.1 | 652  | 22416  | 0         | 620 | 630 | 98 -  | 2   | 631  | 18405  | 19030  |
| UN36434 | Rsa1.0.03957.1 | 1124 | 19868  | 3.00E-23  | 99  | 113 | 87 -  | 542 | 654  | 19023  | 19135  |
| UN36435 | Rsa1.0.00132.1 | 469  | 124299 | 0         | 463 | 469 | 98 -  | 2   | 469  | 95979  | 96447  |
| UN36436 | Rsa1.0.00410.1 | 759  | 86957  | 0         | 743 | 746 | 99 +  | 3   | 748  | 34662  | 35407  |
| UN36437 | #              | #    | #      | #         | #   | #   | #     | #   | #    | #      | #      |
| UN36438 | Rsa1.0.00386.1 | 1036 | 89134  | 0         | 612 | 645 | 94 +  | 1   | 634  | 55938  | 56579  |
| UN36439 | Rsa1.0.00373.1 | 683  | 90296  | 1.00E-118 | 437 | 509 | 85 +  | 88  | 582  | 4568   | 5075   |
| UN36440 | Rsa1.0.00180.1 | 832  | 114581 | 3.00E-75  | 156 | 160 | 97 -  | 170 | 329  | 16125  | 16284  |
| UN36441 | Rsa1.0.10555.1 | 835  | 5802   | 1.00E-154 | 353 | 377 | 93 -  | 448 | 823  | 3790   | 4166   |
| UN36442 | Rsa1.0.03769.1 | 683  | 20955  | 0         | 664 | 682 | 97 -  | 2   | 682  | 16934  | 17612  |
| UN36443 | Rsa1.0.00304.1 | 894  | 97429  | 1.00E-177 | 324 | 326 | 99 -  | 304 | 627  | 32257  | 32582  |
| UN36444 | Rsa1.0.02001.1 | 1074 | 36198  | 1.00E-159 | 285 | 285 | 100 + | 775 | 1059 | 27894  | 28178  |
| UN36445 | Rsa1.0.00919.1 | 602  | 59675  | 3.00E-34  | 113 | 123 | 91 +  | 394 | 514  | 33718  | 33840  |
| UN36446 | Rsa1.0.00414.1 | 1124 | 202190 | 1.00E-163 | 391 | 419 | 93 +  | 710 | 1124 | 34844  | 35257  |
| UN36447 | Rsa1.0.00223.1 | 532  | 106231 | 1.00E-134 | 285 | 296 | 96 -  | 241 | 531  | 64429  | 64724  |
| UN36448 | Rsa1.0.06257.1 | 1214 | 11374  | 0         | 603 | 621 | 97 +  | 2   | 620  | 9632   | 10248  |
| UN36449 | Rsa1.0.09261.1 | 976  | 6521   | 0         | 401 | 415 | 96 +  | 177 | 591  | 1337   | 1751   |
| UN36450 | Rsa1.0.00087.1 | 804  | 761073 | 0         | 574 | 575 | 99 -  | 3   | 577  | 529589 | 530163 |
| UN36451 | Rsa1.0.01620.1 | 620  | 42091  | 4.00E-92  | 262 | 292 | 89 +  | 204 | 495  | 13430  | 13721  |
| UN36452 | Rsa1.0.01140.1 | 660  | 52586  | 0         | 454 | 472 | 96 +  | 191 | 660  | 31973  | 32436  |
| UN36453 | Rsa1.0.01024.1 | 754  | 56569  | 2.00E-48  | 112 | 115 | 97 +  | 3   | 117  | 6289   | 6402   |
| UN36454 | Rsa1.0.06113.1 | 826  | 11721  | 1.00E-125 | 239 | 242 | 98 -  | 585 | 826  | 5967   | 6206   |
| UN36455 | Rsa1.0.03892.1 | 839  | 20221  | 0         | 652 | 675 | 96 +  | 3   | 658  | 1215   | 1889   |
| UN36456 | Rsa1.0.00083.1 | 750  | 442773 | 1.00E-113 | 219 | 222 | 98 -  | 529 | 748  | 310473 | 310694 |
| UN36457 | Rsa1.0.25676.1 | 769  | 925    | 0         | 511 | 514 | 99 -  | 2   | 515  | 1      | 514    |
| UN36458 | Rsa1.0.00013.1 | 890  | 292129 | 4.00E-96  | 257 | 279 | 92 -  | 7   | 281  | 76552  | 76826  |
| UN36459 | Rsa1.0.01266.1 | 736  | 49680  | 0         | 472 | 485 | 97 +  | 1   | 484  | 24128  | 24611  |
| UN36460 | Rsa1.0.02222.1 | 619  | 152798 | 1.00E-177 | 385 | 409 | 94 +  | 1   | 398  | 10147  | 10555  |
| UN36461 | Rsa1.0.01130.1 | 802  | 52929  | 1.00E-123 | 246 | 252 | 97 +  | 1   | 252  | 35093  | 35343  |
| UN36462 | Rsa1.0.00816.1 | 714  | 403350 | 0         | 468 | 498 | 93 +  | 2   | 487  | 114390 | 114882 |
| UN36463 | Rsa1.0.00058.1 | 674  | 159921 | 0         | 652 | 674 | 96 +  | 1   | 674  | 51997  | 52666  |

|         |                |      |        |           |      |      |       |     |      |        |        |
|---------|----------------|------|--------|-----------|------|------|-------|-----|------|--------|--------|
| UN36464 | Rsa1.0.09446.1 | 732  | 6362   | 0         | 713  | 729  | 97 +  | 2   | 729  | 198    | 921    |
| UN36465 | Rsa1.0.01514.1 | 654  | 44222  | 0         | 418  | 426  | 98 -  | 26  | 451  | 41781  | 42200  |
| UN36466 | Rsa1.0.01072.1 | 1051 | 55068  | 0         | 561  | 571  | 98 +  | 469 | 1039 | 5418   | 5988   |
| UN36467 | Rsa1.0.05306.1 | 640  | 14205  | 0         | 377  | 394  | 95 +  | 247 | 640  | 5410   | 5788   |
| UN36468 | Rsa1.0_00079.1 | 1112 | 606987 | 0         | 1055 | 1098 | 96 -  | 1   | 1097 | 9031   | 10127  |
| UN36469 | Rsa1.0_00221.1 | 842  | 106972 | 0         | 608  | 638  | 95 +  | 187 | 816  | 82038  | 82667  |
| UN36470 | Rsa1.0.00626.1 | 857  | 71582  | 0         | 366  | 372  | 98 -  | 486 | 857  | 28086  | 28457  |
| UN36471 | Rsa1.0.00001.1 | 744  | 363028 | 0         | 417  | 441  | 94 +  | 25  | 456  | 303173 | 303611 |
| UN36472 | Rsa1.0.08436.1 | 1042 | 7357   | 0         | 420  | 440  | 95 -  | 610 | 1042 | 1607   | 2046   |
| UN36473 | Rsa1.0.01097.1 | 607  | 173349 | 0         | 607  | 607  | 100 - | 1   | 607  | 1749   | 2355   |
| UN36474 | Rsa1.0.00065.1 | 820  | 454616 | 0         | 411  | 421  | 97 +  | 1   | 421  | 402673 | 403093 |
| UN36475 | Rsa1.0.08907.1 | 986  | 6803   | 0         | 596  | 619  | 96 +  | 3   | 620  | 5491   | 6102   |
| UN36476 | Rsa1.0.00856.1 | 1273 | 62037  | 0         | 669  | 682  | 98 +  | 1   | 682  | 42925  | 43606  |
| UN36477 | Rsa1.0.02412.1 | 515  | 31643  | 0         | 507  | 512  | 99 +  | 2   | 513  | 6316   | 6827   |
| UN36478 | Rsa1.0.00173.1 | 772  | 288743 | 0         | 746  | 777  | 96 -  | 3   | 772  | 40130  | 40905  |
| UN36479 | Rsa1.0.03312.1 | 1116 | 23841  | 1.00E-111 | 315  | 345  | 91 +  | 705 | 1044 | 13129  | 13463  |
| UN36480 | Rsa1.0.00089.1 | 1101 | 406142 | 0         | 487  | 508  | 95 -  | 3   | 500  | 398394 | 398901 |
| UN36481 | Rsa1.0.01558.1 | 589  | 43287  | 2.00E-56  | 168  | 188  | 89 -  | 411 | 589  | 32790  | 32977  |
| UN36482 | Rsa1.0.01827.1 | 695  | 143321 | 1.00E-149 | 333  | 354  | 94 +  | 341 | 694  | 135719 | 136069 |
| UN36483 | Rsa1.0.02109.1 | 1174 | 34925  | 0         | 531  | 538  | 98 -  | 145 | 678  | 17011  | 17547  |
| UN36484 | Rsa1.0.00093.1 | 910  | 214962 | 2.00E-88  | 212  | 225  | 94 +  | 362 | 585  | 13257  | 13479  |
| UN36485 | Rsa1.0.00062.1 | 795  | 299291 | 0         | 378  | 381  | 99 +  | 415 | 795  | 191037 | 191417 |
| UN36486 | Rsa1.0.02273.1 | 1171 | 140964 | 0         | 787  | 828  | 95 -  | 2   | 823  | 28308  | 29130  |
| UN36487 | Rsa1.0.01519.1 | 581  | 44144  | 0         | 566  | 590  | 95 -  | 2   | 581  | 24156  | 24745  |
| UN36488 | Rsa1.0.00394.1 | 865  | 148426 | 3.00E-81  | 169  | 174  | 97 +  | 492 | 665  | 119847 | 120020 |
| UN36489 | Rsa1.0.02456.1 | 344  | 31222  | 1.00E-177 | 337  | 343  | 98 +  | 1   | 342  | 16286  | 16628  |
| UN36490 | #              | #    | #      | #         | #    | #    | #     | #   | #    | #      | #      |
| UN36491 | Rsa1.0.00191.1 | 618  | 316976 | 1.00E-180 | 366  | 380  | 96 +  | 100 | 476  | 49344  | 49720  |
| UN36492 | Rsa1.0.00454.1 | 503  | 216970 | 0         | 391  | 410  | 95 +  | 96  | 503  | 157076 | 157478 |
| UN36493 | Rsa1.0.01716.1 | 825  | 40483  | 0         | 412  | 420  | 98 +  | 3   | 417  | 9618   | 10037  |
| UN36494 | Rsa1.0.00409.1 | 769  | 146788 | 0         | 711  | 762  | 93 +  | 1   | 751  | 123774 | 124531 |
| UN36495 | Rsa1.0.02202.1 | 486  | 33961  | 0         | 402  | 406  | 99 -  | 82  | 486  | 17115  | 17520  |
| UN36496 | Rsa1.0.00016.1 | 1092 | 831256 | 1.00E-132 | 287  | 303  | 94 +  | 752 | 1054 | 224992 | 225294 |
| UN36497 | Rsa1.0.10576.1 | 369  | 5797   | 0         | 362  | 368  | 98 -  | 3   | 368  | 3753   | 4117   |
| UN36498 | Rsa1.0.01061.1 | 1026 | 55349  | 1.00E-154 | 289  | 292  | 98 +  | 138 | 428  | 52049  | 52340  |
| UN36499 | Rsa1.0.29142.1 | 351  | 791    | 1.00E-129 | 322  | 348  | 92 +  | 2   | 347  | 1      | 340    |
| UN36500 | Rsa1.0.02751.1 | 1088 | 28238  | 0         | 795  | 869  | 91 -  | 226 | 1084 | 15959  | 16823  |
| UN36501 | Rsa1.0.01450.1 | 440  | 144251 | 1.00E-148 | 399  | 443  | 90 +  | 1   | 432  | 10496  | 10926  |
| UN36502 | Rsa1.0.00450.1 | 638  | 139397 | 0         | 628  | 633  | 99 +  | 1   | 633  | 134092 | 134723 |

|         |                |      |        |           |      |      |      |     |      |        |        |
|---------|----------------|------|--------|-----------|------|------|------|-----|------|--------|--------|
| UN36503 | Rsa1.0.29059.1 | 1122 | 794    | 0         | 439  | 444  | 98 + | 679 | 1122 | 166    | 608    |
| UN36504 | Rsa1.0.01029.1 | 863  | 256254 | 1.00E-160 | 317  | 327  | 96 + | 14  | 340  | 117438 | 117764 |
| UN36505 | Rsa1.0.00211.1 | 1079 | 228189 | 0         | 1026 | 1029 | 99 + | 50  | 1078 | 215327 | 216355 |
| UN36506 | Rsa1.0.00329.1 | 996  | 222544 | 0         | 534  | 540  | 98 + | 413 | 952  | 222005 | 222544 |
| UN36507 | Rsa1.0.00552.1 | 757  | 206757 | 0         | 479  | 492  | 97 + | 266 | 757  | 28632  | 29123  |
| UN36508 | Rsa1.0.00001.1 | 1030 | 363028 | 0         | 481  | 512  | 93 - | 521 | 1027 | 44188  | 44695  |
| UN36509 | Rsa1.0.00376.1 | 878  | 90101  | 0         | 350  | 354  | 98 - | 524 | 877  | 1314   | 1667   |
| UN36510 | Rsa1.0.01737.1 | 929  | 40101  | 0         | 468  | 484  | 96 + | 172 | 643  | 2492   | 2975   |
| UN36511 | Rsa1.0.00418.1 | 583  | 215377 | 0         | 576  | 581  | 99 + | 3   | 583  | 60984  | 61564  |
| UN36512 | Rsa1.0.02204.1 | 1076 | 33930  | 0         | 1020 | 1079 | 94 + | 3   | 1074 | 14229  | 15297  |
| UN36513 | Rsa1.0.03394.1 | 723  | 23247  | 1.00E-112 | 259  | 273  | 94 + | 452 | 723  | 5938   | 6202   |
| UN36514 | Rsa1.0.00311.1 | 754  | 96847  | 1.00E-105 | 215  | 222  | 96 - | 259 | 480  | 26540  | 26761  |
| UN36515 | Rsa1.0.00836.1 | 941  | 185968 | 0         | 904  | 965  | 93 + | 2   | 940  | 22698  | 23662  |
| UN36516 | Rsa1.0.02358.1 | 722  | 32213  | 0         | 445  | 462  | 96 - | 263 | 722  | 8394   | 8855   |
| UN36517 | Rsa1.0.04260.1 | 977  | 18238  | 1.00E-176 | 321  | 322  | 99 + | 651 | 971  | 3017   | 3338   |
| UN36518 | Rsa1.0.00895.1 | 935  | 60615  | 1.00E-166 | 308  | 312  | 98 + | 402 | 713  | 59918  | 60229  |
| UN36519 | Rsa1.0.46238.1 | 681  | 488    | 2.00E-29  | 76   | 79   | 96 + | 387 | 465  | 1      | 79     |
| UN36520 | Rsa1.0.04594.1 | 1213 | 16713  | 0         | 1017 | 1050 | 96 + | 10  | 1056 | 12831  | 13876  |
| UN36521 | Rsa1.0.14435.1 | 891  | 3393   | 0         | 712  | 730  | 97 - | 2   | 724  | 1      | 729    |
| UN36522 | Rsa1.0.01249.1 | 982  | 188432 | 0         | 762  | 780  | 97 + | 10  | 789  | 35475  | 36254  |
| UN36523 | Rsa1.0.05696.1 | 936  | 12896  | 1.00E-130 | 267  | 277  | 96 + | 3   | 279  | 11886  | 12162  |
| UN36524 | Rsa1.0.00392.1 | 723  | 88523  | 0         | 711  | 722  | 98 - | 2   | 723  | 8160   | 8881   |
| UN36525 | Rsa1.0.01199.1 | 623  | 163576 | 0         | 582  | 619  | 94 + | 2   | 613  | 127207 | 127824 |
| UN36526 | Rsa1.0.06111.1 | 1211 | 11723  | 0         | 1198 | 1211 | 98 + | 1   | 1210 | 3926   | 5135   |
| UN36527 | Rsa1.0.25317.1 | 881  | 941    | 0         | 509  | 529  | 96 - | 355 | 881  | 341    | 867    |
| UN36528 | Rsa1.0.14639.1 | 584  | 3198   | 1.00E-143 | 279  | 286  | 97 + | 238 | 523  | 2913   | 3198   |
| UN36529 | Rsa1.0.00344.1 | 985  | 191774 | 1.00E-172 | 322  | 327  | 98 + | 362 | 688  | 112539 | 112865 |
| UN36530 | Rsa1.0.06619.1 | 827  | 10650  | 1.00E-113 | 322  | 357  | 90 + | 162 | 510  | 6822   | 7176   |
| UN36531 | #              | #    | #      | #         | #    | #    | #    | #   | #    | #      | #      |
| UN36532 | Rsa1.0.01181.1 | 1209 | 51496  | 0         | 428  | 435  | 98 + | 3   | 434  | 32429  | 32863  |
| UN36533 | Rsa1.0.00150.1 | 1171 | 154416 | 0         | 695  | 714  | 97 - | 453 | 1166 | 51694  | 52407  |
| UN36534 | Rsa1.0.00009.1 | 743  | 232558 | 0         | 740  | 745  | 99 - | 2   | 743  | 158507 | 159251 |
| UN36535 | #              | #    | #      | #         | #    | #    | #    | #   | #    | #      | #      |
| UN36536 | Rsa1.0.08216.1 | 1253 | 7709   | 0         | 1171 | 1248 | 93 + | 2   | 1249 | 463    | 1708   |
| UN36537 | Rsa1.0.00188.1 | 483  | 112020 | 0         | 438  | 461  | 95 - | 3   | 458  | 102454 | 102912 |
| UN36538 | Rsa1.0.28217.1 | 896  | 823    | 0         | 491  | 514  | 95 - | 2   | 515  | 67     | 580    |
| UN36539 | Rsa1.0.01796.1 | 745  | 39154  | 0         | 443  | 479  | 92 + | 53  | 515  | 18408  | 18886  |
| UN36540 | Rsa1.0.01957.1 | 839  | 36844  | 0         | 443  | 478  | 92 + | 4   | 460  | 27216  | 27692  |
| UN36541 | Rsa1.0.08634.1 | 847  | 7101   | 0         | 566  | 589  | 96 + | 261 | 847  | 115    | 701    |

|         |                |      |        |           |      |      |       |     |      |        |        |
|---------|----------------|------|--------|-----------|------|------|-------|-----|------|--------|--------|
| UN36542 | Rsa1.0.00990.1 | 977  | 57445  | 0         | 956  | 975  | 98 +  | 3   | 977  | 24354  | 25328  |
| UN36543 | Rsa1.0.02208.1 | 653  | 33875  | 2.00E-78  | 155  | 157  | 98 -  | 299 | 455  | 30142  | 30298  |
| UN36544 | Rsa1.0.00093.1 | 1201 | 214962 | 0         | 370  | 383  | 96 +  | 819 | 1201 | 180059 | 180440 |
| UN36545 | Rsa1.0.21046.1 | 986  | 1242   | 2.00E-79  | 208  | 226  | 92 +  | 13  | 238  | 507    | 730    |
| UN36546 | Rsa1.0.01798.1 | 1217 | 173909 | 1.00E-174 | 316  | 318  | 99 +  | 95  | 412  | 169028 | 169345 |
| UN36547 | Rsa1.0.00226.1 | 1070 | 105884 | 0         | 597  | 637  | 93 +  | 449 | 1070 | 96851  | 97478  |
| UN36548 | Rsa1.0.00097.1 | 1014 | 138858 | 0         | 491  | 519  | 94 -  | 202 | 720  | 4891   | 5409   |
| UN36549 | Rsa1.0.05189.1 | 381  | 14545  | 1.00E-142 | 372  | 416  | 89 -  | 1   | 381  | 4581   | 4995   |
| UN36550 | Rsa1.0.10663.1 | 659  | 5765   | 0         | 647  | 655  | 98 -  | 5   | 659  | 4797   | 5451   |
| UN36551 | Rsa1.0.01222.1 | 887  | 50398  | 0         | 424  | 434  | 97 +  | 313 | 746  | 34155  | 34585  |
| UN36552 | Rsa1.0.03711.1 | 1276 | 21237  | 1.00E-120 | 229  | 232  | 98 +  | 389 | 620  | 12134  | 12365  |
| UN36553 | Rsa1.0.01925.1 | 185  | 37220  | 4.00E-89  | 183  | 186  | 98 +  | 2   | 185  | 28619  | 28804  |
| UN36554 | Rsa1.0.00386.1 | 441  | 89134  | 1.00E-109 | 359  | 413  | 86 +  | 45  | 441  | 62867  | 63266  |
| UN36555 | Rsa1.0.00695.1 | 982  | 68019  | 0         | 387  | 393  | 98 -  | 579 | 971  | 416    | 808    |
| UN36556 | Rsa1.0.10606.1 | 750  | 5787   | 0         | 719  | 755  | 95 -  | 1   | 749  | 1250   | 2003   |
| UN36557 | Rsa1.0.00300.1 | 885  | 97747  | 8.00E-14  | 79   | 89   | 88 +  | 772 | 860  | 1134   | 1220   |
| UN36558 | Rsa1.0.02988.1 | 1254 | 26190  | 0         | 1209 | 1235 | 97 +  | 2   | 1231 | 22353  | 23580  |
| UN36559 | Rsa1.0.02932.1 | 628  | 26647  | 0         | 388  | 396  | 97 -  | 230 | 625  | 13804  | 14196  |
| UN36560 | Rsa1.0.02163.1 | 678  | 34427  | 1.00E-116 | 230  | 236  | 97 +  | 137 | 372  | 10177  | 10412  |
| UN36561 | Rsa1.0.05110.1 | 921  | 14814  | 1.00E-167 | 350  | 363  | 96 +  | 2   | 364  | 4687   | 5046   |
| UN36562 | Rsa1.0.00272.1 | 931  | 447836 | 0         | 447  | 460  | 97 -  | 475 | 931  | 431000 | 431459 |
| UN36563 | Rsa1.0.01583.1 | 719  | 156297 | 1.00E-131 | 249  | 253  | 98 +  | 320 | 572  | 114094 | 114346 |
| UN36564 | Rsa1.0.00067.1 | 1161 | 415055 | 0         | 944  | 980  | 96 -  | 171 | 1138 | 151670 | 152644 |
| UN36565 | Rsa1.0.07152.1 | 790  | 9815   | 0         | 436  | 443  | 98 -  | 349 | 790  | 530    | 971    |
| UN36566 | Rsa1.0.00211.1 | 718  | 228189 | 0         | 712  | 717  | 99 -  | 4   | 718  | 224343 | 225058 |
| UN36567 | Rsa1.0.04048.1 | 661  | 19394  | 0         | 494  | 517  | 95 -  | 98  | 612  | 1      | 509    |
| UN36568 | Rsa1.0.10517.1 | 887  | 5818   | 0         | 760  | 802  | 94 +  | 92  | 887  | 4690   | 5477   |
| UN36569 | Rsa1.0.00184.1 | 809  | 218748 | 0         | 779  | 814  | 95 -  | 1   | 809  | 100329 | 101140 |
| UN36570 | Rsa1.0.00212.1 | 412  | 108350 | 1.00E-141 | 349  | 383  | 91 -  | 42  | 412  | 36467  | 36849  |
| UN36571 | Rsa1.0.01191.1 | 834  | 51235  | 0         | 441  | 446  | 98 -  | 388 | 832  | 42669  | 43114  |
| UN36572 | Rsa1.0.00357.1 | 850  | 173671 | 5.00E-86  | 221  | 234  | 94 -  | 582 | 810  | 8557   | 8790   |
| UN36573 | Rsa1.0.00433.1 | 604  | 85381  | 0         | 599  | 603  | 99 -  | 2   | 604  | 83081  | 83683  |
| UN36574 | Rsa1.0.01104.1 | 827  | 285480 | 1.00E-135 | 257  | 261  | 98 -  | 409 | 669  | 107189 | 107449 |
| UN36575 | Rsa1.0.00070.1 | 823  | 150321 | 1.00E-148 | 409  | 455  | 89 +  | 208 | 662  | 94190  | 94638  |
| UN36576 | Rsa1.0.00940.1 | 694  | 179946 | 1.00E-156 | 326  | 339  | 96 +  | 2   | 338  | 4229   | 4567   |
| UN36577 | Rsa1.0.00634.1 | 628  | 71222  | 2.00E-51  | 127  | 134  | 94 +  | 494 | 624  | 44913  | 45046  |
| UN36578 | Rsa1.0.00792.1 | 1195 | 64163  | 0         | 587  | 594  | 98 -  | 602 | 1195 | 37843  | 38436  |
| UN36579 | Rsa1.0.01850.1 | 753  | 162224 | 1.00E-131 | 237  | 237  | 100 - | 3   | 239  | 35350  | 35586  |
| UN36580 | Rsa1.0.06010.1 | 722  | 11944  | 1.00E-179 | 474  | 526  | 90 -  | 197 | 722  | 5045   | 5570   |

|         |                |      |        |           |     |      |      |     |      |        |        |
|---------|----------------|------|--------|-----------|-----|------|------|-----|------|--------|--------|
| UN36581 | Rsa1.0.00034.1 | 810  | 260119 | 0         | 725 | 801  | 90 - | 23  | 810  | 86440  | 87226  |
| UN36582 | Rsa1.0.03801.1 | 700  | 20762  | 0         | 667 | 699  | 95 + | 2   | 700  | 8028   | 8725   |
| UN36583 | Rsa1.0.00307.1 | 659  | 199003 | 0         | 652 | 657  | 99 - | 2   | 657  | 60574  | 61230  |
| UN36584 | Rsa1.0.01590.1 | 712  | 42719  | 1.00E-135 | 309 | 329  | 93 + | 372 | 697  | 37627  | 37948  |
| UN36585 | Rsa1.0.02667.1 | 561  | 28910  | 3.00E-31  | 178 | 216  | 82 + | 365 | 559  | 22757  | 22972  |
| UN36586 | Rsa1.0.00423.1 | 652  | 86138  | 1.00E-175 | 454 | 497  | 91 - | 172 | 652  | 76290  | 76780  |
| UN36587 | Rsa1.0.27719.1 | 670  | 842    | 0         | 584 | 594  | 98 + | 3   | 595  | 249    | 842    |
| UN36588 | Rsa1.0.06320.1 | 802  | 11242  | 1.00E-120 | 243 | 251  | 96 + | 552 | 802  | 9815   | 10065  |
| UN36589 | Rsa1.0.01843.1 | 809  | 265131 | 0         | 746 | 821  | 90 - | 3   | 807  | 19729  | 20522  |
| UN36590 | Rsa1.0.04195.1 | 1045 | 18528  | 0         | 542 | 568  | 95 + | 479 | 1045 | 1806   | 2372   |
| UN36591 | #              | #    | #      | #         | #   | #    | #    | #   | #    | #      | #      |
| UN36592 | Rsa1.0.00013.1 | 764  | 292129 | 1.00E-112 | 224 | 230  | 97 - | 327 | 556  | 78092  | 78321  |
| UN36593 | Rsa1.0.00128.1 | 670  | 228675 | 1.00E-122 | 266 | 282  | 94 + | 175 | 443  | 131985 | 132265 |
| UN36594 | Rsa1.0.01517.1 | 1075 | 44170  | 1.00E-90  | 176 | 178  | 98 - | 545 | 722  | 25817  | 25994  |
| UN36595 | Rsa1.0.00626.1 | 733  | 71582  | 0         | 706 | 731  | 96 + | 7   | 733  | 8376   | 9105   |
| UN36596 | Rsa1.0.00321.1 | 611  | 95671  | 1.00E-70  | 193 | 212  | 91 + | 2   | 212  | 55609  | 55811  |
| UN36597 | Rsa1.0.01258.1 | 754  | 49755  | 1.00E-177 | 317 | 318  | 99 - | 3   | 320  | 20950  | 21267  |
| UN36598 | Rsa1.0.05541.1 | 1171 | 139959 | 1.00E-110 | 233 | 243  | 95 - | 548 | 790  | 134310 | 134552 |
| UN36599 | Rsa1.0.00906.1 | 860  | 178966 | 5.00E-40  | 128 | 141  | 90 - | 718 | 858  | 497    | 636    |
| UN36600 | Rsa1.0.00115.1 | 1024 | 131321 | 0         | 952 | 958  | 99 + | 68  | 1024 | 24263  | 25220  |
| UN36601 | Rsa1.0.00279.1 | 1036 | 100039 | 2.00E-42  | 135 | 148  | 91 + | 830 | 974  | 7038   | 7180   |
| UN36602 | Rsa1.0.00348.1 | 1023 | 92818  | 0         | 962 | 1037 | 92 + | 2   | 1023 | 60204  | 61219  |
| UN36603 | Rsa1.0.00931.1 | 553  | 59210  | 0         | 489 | 511  | 95 - | 6   | 516  | 27527  | 28037  |
| UN36604 | Rsa1.0.03596.1 | 715  | 21862  | 0         | 709 | 713  | 99 - | 2   | 714  | 16449  | 17160  |
| UN36605 | Rsa1.0.00108.1 | 1120 | 478491 | 0         | 897 | 934  | 96 - | 105 | 1034 | 240364 | 241297 |
| UN36606 | Rsa1.0.01833.1 | 1053 | 38555  | 1.00E-152 | 297 | 305  | 97 - | 422 | 726  | 2409   | 2713   |
| UN36607 | Rsa1.0.00913.1 | 865  | 59914  | 1.00E-89  | 174 | 176  | 98 + | 425 | 600  | 14377  | 14552  |
| UN36608 | Rsa1.0.00484.1 | 980  | 203294 | 0         | 360 | 370  | 97 + | 610 | 979  | 61023  | 61391  |
| UN36609 | Rsa1.0.00086.1 | 327  | 439854 | 1.00E-134 | 251 | 254  | 98 + | 74  | 327  | 130139 | 130392 |
| UN36610 | Rsa1.0.00671.1 | 576  | 397884 | 1.00E-131 | 241 | 242  | 99 + | 335 | 576  | 176136 | 176377 |
| UN36611 | Rsa1.0.00404.1 | 1059 | 87635  | 0         | 538 | 559  | 96 + | 216 | 774  | 76392  | 76950  |
| UN36612 | Rsa1.0.00156.1 | 1062 | 118383 | 1.00E-145 | 275 | 278  | 98 - | 785 | 1062 | 12757  | 13033  |
| UN36613 | Rsa1.0.00788.1 | 949  | 64237  | 0         | 541 | 545  | 99 + | 407 | 949  | 31106  | 31650  |
| UN36614 | Rsa1.0.01351.1 | 742  | 47498  | 3.00E-99  | 261 | 286  | 91 - | 465 | 740  | 9843   | 10125  |
| UN36615 | Rsa1.0.01937.1 | 1017 | 37147  | 0         | 477 | 504  | 94 - | 3   | 494  | 17520  | 18023  |
| UN36616 | Rsa1.0.11811.1 | 826  | 5401   | 0         | 799 | 825  | 96 - | 2   | 825  | 3754   | 4574   |
| UN36617 | Rsa1.0.25201.1 | 1022 | 947    | 2.00E-39  | 145 | 164  | 88 - | 609 | 771  | 723    | 886    |
| UN36618 | Rsa1.0.00903.1 | 164  | 60228  | 2.00E-38  | 104 | 109  | 95 - | 3   | 111  | 58466  | 58572  |
| UN36619 | Rsa1.0.00211.1 | 982  | 228189 | 1.00E-107 | 246 | 258  | 95 - | 21  | 277  | 203850 | 204105 |

|         |                |      |        |           |     |     |       |     |      |        |        |
|---------|----------------|------|--------|-----------|-----|-----|-------|-----|------|--------|--------|
| UN36620 | Rsa1.0.00050.1 | 396  | 237174 | 1.00E-108 | 204 | 206 | 99 -  | 183 | 388  | 185707 | 185912 |
| UN36621 | Rsa1.0.00011.1 | 1110 | 225044 | 4.00E-90  | 314 | 359 | 87 -  | 746 | 1100 | 47905  | 48252  |
| UN36622 | Rsa1.0.00245.1 | 946  | 103569 | 1.00E-149 | 284 | 288 | 98 -  | 3   | 289  | 57606  | 57893  |
| UN36623 | Rsa1.0.01452.1 | 676  | 45459  | 0         | 650 | 675 | 96 -  | 1   | 675  | 11947  | 12616  |
| UN36624 | Rsa1.0.00493.1 | 761  | 80007  | 0         | 398 | 410 | 97 -  | 353 | 761  | 77926  | 78332  |
| UN36625 | Rsa1.0.02059.1 | 1188 | 35532  | 1.00E-155 | 281 | 282 | 99 -  | 297 | 578  | 20829  | 21110  |
| UN36626 | Rsa1.0.01327.1 | 833  | 48033  | 0         | 813 | 844 | 96 +  | 3   | 833  | 4631   | 5472   |
| UN36627 | Rsa1.0.00032.1 | 880  | 306326 | 0         | 855 | 880 | 97 +  | 1   | 880  | 262958 | 263833 |
| UN36628 | Rsa1.0.02388.1 | 929  | 31881  | 0         | 370 | 384 | 96 +  | 4   | 387  | 4809   | 5192   |
| UN36629 | Rsa1.0.02655.1 | 759  | 29027  | 0         | 743 | 766 | 96 -  | 3   | 759  | 26689  | 27452  |
| UN36630 | Rsa1.0.00221.1 | 607  | 106972 | 0         | 577 | 594 | 97 +  | 3   | 595  | 86635  | 87221  |
| UN36631 | Rsa1.0.00106.1 | 777  | 133916 | 2.00E-42  | 161 | 184 | 87 -  | 194 | 375  | 104429 | 104612 |
| UN36632 | Rsa1.0.02515.1 | 604  | 30616  | 0         | 554 | 588 | 94 -  | 18  | 602  | 19935  | 20519  |
| UN36633 | Rsa1.0.13592.1 | 293  | 4685   | 2.00E-89  | 219 | 237 | 92 +  | 69  | 293  | 2791   | 3027   |
| UN36634 | Rsa1.0.07817.1 | 861  | 8483   | 0         | 825 | 868 | 95 +  | 2   | 861  | 787    | 1641   |
| UN36635 | Rsa1.0.01390.1 | 634  | 46695  | 1.00E-178 | 357 | 368 | 97 +  | 2   | 368  | 15063  | 15429  |
| UN36636 | Rsa1.0.05317.1 | 811  | 14160  | 0         | 763 | 773 | 98 -  | 41  | 811  | 7809   | 8581   |
| UN36637 | Rsa1.0.00081.1 | 850  | 143261 | 1.00E-119 | 232 | 237 | 97 -  | 610 | 846  | 956    | 1192   |
| UN36638 | Rsa1.0.03135.1 | 480  | 25114  | 0         | 474 | 478 | 99 -  | 3   | 480  | 920    | 1397   |
| UN36639 | Rsa1.0.03834.1 | 590  | 20572  | 1.00E-103 | 200 | 203 | 98 +  | 55  | 257  | 14833  | 15035  |
| UN36640 | Rsa1.0.00093.1 | 826  | 214962 | 0         | 795 | 827 | 96 +  | 3   | 826  | 103706 | 104528 |
| UN36641 | Rsa1.0.01211.1 | 936  | 50646  | 0         | 530 | 556 | 95 +  | 2   | 557  | 38133  | 38665  |
| UN36642 | Rsa1.0.00169.1 | 683  | 274298 | 1.00E-155 | 318 | 330 | 96 -  | 355 | 683  | 229374 | 229703 |
| UN36643 | Rsa1.0.00017.1 | 889  | 752458 | 1.00E-143 | 374 | 411 | 90 +  | 6   | 416  | 417312 | 417717 |
| UN36644 | Rsa1.0.07782.1 | 913  | 8579   | 1.00E-149 | 572 | 671 | 85 -  | 214 | 873  | 1222   | 1890   |
| UN36645 | Rsa1.0.00005.1 | 626  | 353093 | 0         | 339 | 340 | 99 +  | 286 | 625  | 137522 | 137860 |
| UN36646 | Rsa1.0.01425.1 | 491  | 46136  | 1.00E-164 | 311 | 317 | 98 +  | 4   | 320  | 45674  | 45990  |
| UN36647 | Rsa1.0.00133.1 | 561  | 123768 | 8.00E-81  | 156 | 157 | 99 -  | 166 | 322  | 52521  | 52677  |
| UN36648 | Rsa1.0.01590.1 | 639  | 42719  | 0         | 607 | 634 | 95 +  | 11  | 639  | 40845  | 41477  |
| UN36649 | Rsa1.0.03872.1 | 594  | 20361  | 0         | 586 | 613 | 95 -  | 1   | 594  | 15775  | 16385  |
| UN36650 | Rsa1.0.00123.1 | 704  | 325650 | 0         | 700 | 703 | 99 -  | 1   | 703  | 90127  | 90829  |
| UN36651 | Rsa1.0.03093.1 | 270  | 25445  | 2.00E-88  | 237 | 264 | 89 +  | 2   | 265  | 15076  | 15320  |
| UN36652 | Rsa1.0.01411.1 | 636  | 46326  | 1.00E-132 | 242 | 243 | 99 +  | 120 | 362  | 44658  | 44900  |
| UN36653 | Rsa1.0.00251.1 | 435  | 303968 | 1.00E-175 | 311 | 311 | 100 + | 2   | 312  | 104135 | 104445 |
| UN36654 | Rsa1.0.00740.1 | 902  | 215972 | 0         | 365 | 375 | 97 -  | 8   | 382  | 201837 | 202211 |
| UN36655 | Rsa1.0.00367.1 | 1234 | 90750  | 0         | 616 | 630 | 97 -  | 2   | 630  | 28492  | 29121  |
| UN36656 | Rsa1.0.00816.1 | 492  | 403350 | 8.00E-59  | 119 | 120 | 99 -  | 73  | 192  | 150295 | 150414 |
| UN36657 | Rsa1.0.01742.1 | 1000 | 39962  | 0         | 611 | 662 | 92 -  | 335 | 978  | 27038  | 27693  |
| UN36658 | Rsa1.0.00383.1 | 817  | 398431 | 0         | 778 | 816 | 95 +  | 5   | 817  | 174179 | 174981 |

|         |                |      |        |           |     |      |       |     |      |        |        |
|---------|----------------|------|--------|-----------|-----|------|-------|-----|------|--------|--------|
| UN36659 | Rsa1.0.01905.1 | 555  | 37450  | 0         | 432 | 448  | 96 -  | 111 | 555  | 7447   | 7894   |
| UN36660 | Rsa1.0.00070.1 | 781  | 150321 | 1.00E-67  | 134 | 135  | 99 -  | 208 | 342  | 39770  | 39904  |
| UN36661 | Rsa1.0.01543.1 | 534  | 43645  | 0         | 513 | 533  | 96 -  | 2   | 534  | 563    | 1082   |
| UN36662 | Rsa1.0.00237.1 | 1046 | 235974 | 0         | 794 | 809  | 98 -  | 2   | 810  | 20856  | 21658  |
| UN36663 | Rsa1.0.05127.1 | 478  | 147533 | 0         | 371 | 375  | 98 -  | 104 | 478  | 136402 | 136776 |
| UN36664 | Rsa1.0.04675.1 | 785  | 16447  | 0         | 729 | 765  | 95 -  | 22  | 785  | 13397  | 14160  |
| UN36665 | Rsa1.0.02185.1 | 613  | 34150  | 0         | 579 | 622  | 93 +  | 6   | 613  | 2788   | 3405   |
| UN36666 | Rsa1.0.01215.1 | 837  | 166813 | 0         | 789 | 831  | 94 +  | 14  | 835  | 1730   | 2556   |
| UN36667 | Rsa1.0.01533.1 | 877  | 43765  | 0         | 498 | 535  | 93 +  | 350 | 874  | 9229   | 9744   |
| UN36668 | Rsa1.0.00382.1 | 1256 | 251946 | 0         | 750 | 772  | 97 +  | 486 | 1256 | 38232  | 39003  |
| UN36669 | Rsa1.0.01405.1 | 676  | 46445  | 0         | 378 | 381  | 99 +  | 296 | 676  | 36446  | 36826  |
| UN36670 | Rsa1.0.02729.1 | 1048 | 28394  | 0         | 951 | 1045 | 91 +  | 2   | 1046 | 4752   | 5796   |
| UN36671 | Rsa1.0.01334.1 | 900  | 47904  | 0         | 489 | 490  | 99 -  | 3   | 491  | 26746  | 27235  |
| UN36672 | Rsa1.0.01921.1 | 1083 | 168088 | 0         | 527 | 580  | 90 -  | 15  | 592  | 155878 | 156435 |
| UN36673 | Rsa1.0.00284.1 | 459  | 323267 | 0         | 415 | 423  | 98 +  | 5   | 427  | 252004 | 252422 |
| UN36674 | Rsa1.0.01041.1 | 869  | 55910  | 0         | 806 | 872  | 92 -  | 4   | 869  | 14569  | 15437  |
| UN36675 | Rsa1.0.01549.1 | 972  | 43543  | 0         | 765 | 772  | 99 +  | 3   | 774  | 40959  | 41730  |
| UN36676 | Rsa1.0.14408.1 | 596  | 3423   | 1.00E-61  | 131 | 133  | 98 -  | 465 | 596  | 2543   | 2675   |
| UN36677 | Rsa1.0.00353.1 | 935  | 92242  | 1.00E-175 | 326 | 331  | 98 +  | 604 | 934  | 40425  | 40755  |
| UN36678 | Rsa1.0.00065.1 | 1135 | 454616 | 0         | 925 | 941  | 98 -  | 6   | 943  | 51349  | 52289  |
| UN36679 | Rsa1.0.16865.1 | 679  | 2009   | 1.00E-155 | 277 | 277  | 100 - | 403 | 679  | 1733   | 2009   |
| UN36680 | Rsa1.0.03134.1 | 762  | 145023 | 1.00E-168 | 344 | 359  | 95 +  | 301 | 659  | 2329   | 2687   |
| UN36681 | Rsa1.0.00992.1 | 531  | 57419  | 0         | 515 | 535  | 96 -  | 1   | 531  | 7280   | 7812   |
| UN36682 | Rsa1.0.00003.1 | 1105 | 340054 | 0         | 496 | 504  | 98 +  | 602 | 1105 | 320918 | 321421 |
| UN36683 | Rsa1.0.01177.1 | 859  | 51572  | 0         | 840 | 856  | 98 +  | 3   | 858  | 5466   | 6317   |
| UN36684 | Rsa1.0.00145.1 | 1099 | 261008 | 1.00E-172 | 309 | 310  | 99 -  | 235 | 544  | 21092  | 21401  |
| UN36685 | Rsa1.0.00006.1 | 652  | 396176 | 2.00E-87  | 179 | 184  | 97 +  | 149 | 332  | 61690  | 61873  |
| UN36686 | Rsa1.0.01315.1 | 870  | 48361  | 0         | 744 | 753  | 98 -  | 119 | 870  | 3171   | 3923   |
| UN36687 | Rsa1.0.01151.1 | 787  | 52268  | 0         | 773 | 787  | 98 -  | 3   | 786  | 3799   | 4585   |
| UN36688 | Rsa1.0.03137.1 | 343  | 25105  | 0         | 337 | 339  | 99 +  | 3   | 341  | 14324  | 14662  |
| UN36689 | Rsa1.0.00318.1 | 919  | 96094  | 2.00E-91  | 260 | 289  | 89 -  | 635 | 908  | 13339  | 13624  |
| UN36690 | Rsa1.0.01998.1 | 729  | 36276  | 0         | 587 | 634  | 92 -  | 3   | 630  | 2842   | 3472   |
| UN36691 | Rsa1.0.03703.1 | 1027 | 21282  | 0         | 966 | 984  | 98 -  | 2   | 985  | 5327   | 6310   |
| UN36692 | Rsa1.0.02559.1 | 782  | 30096  | 0         | 743 | 776  | 95 +  | 3   | 778  | 10565  | 11340  |
| UN36693 | Rsa1.0.00837.1 | 607  | 62568  | 1.00E-177 | 327 | 330  | 99 +  | 3   | 331  | 59504  | 59833  |
| UN36694 | Rsa1.0.03511.1 | 681  | 22373  | 9.00E-81  | 159 | 161  | 98 +  | 276 | 436  | 806    | 966    |
| UN36695 | Rsa1.0.04083.1 | 680  | 19174  | 0         | 532 | 535  | 99 -  | 144 | 678  | 8390   | 8924   |
| UN36696 | Rsa1.0.00087.1 | 735  | 761073 | 0         | 629 | 668  | 94 +  | 2   | 663  | 180748 | 181405 |
| UN36697 | Rsa1.0.02701.1 | 1006 | 28582  | 1.00E-170 | 306 | 307  | 99 -  | 700 | 1006 | 9342   | 9648   |

|         |                |      |        |           |     |      |      |     |      |        |        |
|---------|----------------|------|--------|-----------|-----|------|------|-----|------|--------|--------|
| UN36698 | Rsa1.0.01081.1 | 840  | 499226 | 2.00E-76  | 179 | 190  | 94 + | 220 | 409  | 31704  | 31893  |
| UN36699 | Rsa1.0.02475.1 | 797  | 31073  | 0         | 777 | 784  | 99 + | 2   | 785  | 12907  | 13690  |
| UN36700 | Rsa1.0.00861.1 | 707  | 61759  | 0         | 458 | 461  | 99 - | 2   | 461  | 30922  | 31382  |
| UN36701 | Rsa1.0.01882.1 | 583  | 37697  | 1.00E-134 | 288 | 299  | 96 + | 290 | 583  | 20903  | 21199  |
| UN36702 | Rsa1.0.02619.1 | 736  | 29444  | 0         | 412 | 431  | 95 - | 306 | 734  | 211    | 636    |
| UN36703 | Rsa1.0.11877.1 | 977  | 5383   | 0         | 372 | 375  | 99 + | 285 | 659  | 1      | 375    |
| UN36704 | Rsa1.0.02162.1 | 598  | 34431  | 0         | 486 | 498  | 97 - | 1   | 498  | 18930  | 19427  |
| UN36705 | Rsa1.0.15002.1 | 597  | 2899   | 0         | 584 | 597  | 97 + | 1   | 596  | 2215   | 2803   |
| UN36706 | Rsa1.0.04386.1 | 968  | 17627  | 1.00E-107 | 212 | 217  | 97 + | 324 | 540  | 9691   | 9907   |
| UN36707 | Rsa1.0.01217.1 | 1193 | 50554  | 1.00E-177 | 324 | 327  | 99 - | 851 | 1177 | 21132  | 21458  |
| UN36708 | Rsa1.0.03252.1 | 1045 | 24338  | 0         | 498 | 551  | 90 + | 45  | 594  | 16316  | 16860  |
| UN36709 | Rsa1.0.02619.1 | 570  | 29444  | 0         | 557 | 569  | 97 - | 3   | 570  | 11123  | 11689  |
| UN36710 | Rsa1.0.17309.1 | 790  | 1864   | 1.00E-166 | 308 | 312  | 98 - | 3   | 314  | 623    | 934    |
| UN36711 | Rsa1.0.15449.1 | 530  | 2599   | 1.00E-174 | 344 | 352  | 97 + | 178 | 529  | 501    | 847    |
| UN36712 | #              | #    | #      | #         | #   | #    | #    | #   | #    | #      | #      |
| UN36713 | Rsa1.0.03664.1 | 331  | 21487  | 1.00E-103 | 295 | 323  | 91 - | 3   | 317  | 6087   | 6408   |
| UN36714 | Rsa1.0.06803.1 | 844  | 10330  | 1.00E-130 | 313 | 334  | 93 - | 411 | 738  | 9751   | 10084  |
| UN36715 | Rsa1.0.00520.1 | 736  | 78226  | 1.00E-180 | 357 | 369  | 96 + | 368 | 736  | 37747  | 38112  |
| UN36716 | Rsa1.0.01041.1 | 889  | 55910  | 0         | 462 | 464  | 99 - | 426 | 889  | 567    | 1030   |
| UN36717 | Rsa1.0.01081.1 | 679  | 499226 | 1.00E-105 | 246 | 261  | 94 - | 425 | 678  | 5735   | 5994   |
| UN36718 | Rsa1.0.00033.1 | 756  | 515811 | 0         | 712 | 758  | 93 + | 8   | 754  | 349813 | 350563 |
| UN36719 | Rsa1.0.03952.1 | 785  | 19891  | 0         | 407 | 420  | 96 + | 253 | 672  | 19139  | 19558  |
| UN36720 | Rsa1.0.03953.1 | 1042 | 19889  | 0         | 984 | 990  | 99 - | 53  | 1042 | 13341  | 14330  |
| UN36721 | Rsa1.0.08538.1 | 1094 | 7220   | 0         | 613 | 624  | 98 + | 469 | 1092 | 1430   | 2050   |
| UN36722 | Rsa1.0.00087.1 | 739  | 761073 | 0         | 607 | 623  | 97 + | 120 | 739  | 543349 | 543970 |
| UN36723 | Rsa1.0.00281.1 | 653  | 99908  | 0         | 648 | 651  | 99 - | 3   | 653  | 28354  | 29004  |
| UN36724 | Rsa1.0.00940.1 | 282  | 179946 | 5.00E-71  | 173 | 184  | 94 - | 61  | 240  | 176839 | 177020 |
| UN36725 | Rsa1.0.01400.1 | 957  | 46560  | 1.00E-179 | 348 | 357  | 97 + | 329 | 685  | 30179  | 30533  |
| UN36726 | Rsa1.0.00101.1 | 775  | 267193 | 0         | 613 | 640  | 95 - | 147 | 766  | 228859 | 229498 |
| UN36727 | Rsa1.0.00366.1 | 701  | 90880  | 1.00E-12  | 78  | 91   | 85 + | 157 | 247  | 174    | 264    |
| UN36728 | Rsa1.0.00032.1 | 934  | 306326 | 0         | 464 | 469  | 98 + | 2   | 470  | 206807 | 207275 |
| UN36729 | Rsa1.0.00556.1 | 952  | 207212 | 0         | 920 | 957  | 96 - | 3   | 952  | 8381   | 9331   |
| UN36730 | Rsa1.0.04034.1 | 862  | 19481  | 0         | 842 | 869  | 96 - | 1   | 862  | 6087   | 6953   |
| UN36731 | Rsa1.0.00291.1 | 1179 | 172129 | 1.00E-142 | 262 | 264  | 99 - | 3   | 266  | 97014  | 97277  |
| UN36732 | Rsa1.0.04265.1 | 505  | 18199  | 0         | 482 | 503  | 95 - | 2   | 503  | 6203   | 6705   |
| UN36733 | Rsa1.0.00066.1 | 651  | 152418 | 0         | 431 | 456  | 94 + | 200 | 648  | 14309  | 14764  |
| UN36734 | Rsa1.0.00549.1 | 632  | 76473  | 3.00E-25  | 118 | 136  | 86 - | 133 | 267  | 26814  | 26949  |
| UN36735 | Rsa1.0.00211.1 | 706  | 228189 | 0         | 540 | 560  | 96 + | 156 | 706  | 220317 | 220869 |
| UN36736 | Rsa1.0.00026.1 | 1012 | 327835 | 0         | 955 | 1018 | 93 - | 3   | 1011 | 287929 | 288940 |



|         |                |      |        |           |     |     |      |     |      |        |        |
|---------|----------------|------|--------|-----------|-----|-----|------|-----|------|--------|--------|
| UN36737 | Rsa1.0_01249.1 | 715  | 188432 | 1.00E-151 | 335 | 356 | 94 + | 140 | 495  | 157688 | 158043 |
| UN36738 | Rsa1.0_00016.1 | 816  | 831256 | 3.00E-47  | 119 | 125 | 95 - | 393 | 517  | 788447 | 788570 |
| UN36739 | Rsa1.0_15083.1 | 458  | 2844   | 0         | 346 | 347 | 99 - | 112 | 458  | 2498   | 2844   |
| UN36740 | Rsa1.0_00964.1 | 576  | 316648 | 0         | 544 | 567 | 95 - | 2   | 565  | 167657 | 168213 |
| UN36741 | Rsa1.0_02043.1 | 727  | 163754 | 0         | 437 | 447 | 97 - | 282 | 727  | 143879 | 144322 |
| UN36742 | Rsa1.0_00040.1 | 578  | 324196 | 0         | 493 | 496 | 99 - | 83  | 578  | 154590 | 155085 |
| UN36743 | Rsa1.0_01362.1 | 811  | 47217  | 2.00E-97  | 218 | 229 | 95 - | 575 | 802  | 3073   | 3301   |
| UN36744 | Rsa1.0_03481.1 | 665  | 22627  | 0         | 350 | 357 | 98 + | 35  | 391  | 9524   | 9879   |
| UN36745 | Rsa1.0_01669.1 | 1235 | 41286  | 0         | 441 | 442 | 99 - | 357 | 798  | 9651   | 10092  |
| UN36746 | Rsa1.0_00829.1 | 529  | 158305 | 0         | 445 | 465 | 95 + | 3   | 465  | 144399 | 144862 |
| UN36747 | Rsa1.0_00193.1 | 648  | 194198 | 0         | 423 | 436 | 97 - | 214 | 648  | 129201 | 129636 |
| UN36748 | Rsa1.0_00017.1 | 1094 | 752458 | 0         | 646 | 666 | 96 - | 1   | 663  | 592738 | 593403 |
| UN36749 | Rsa1.0_00474.1 | 1065 | 81731  | 1.00E-111 | 213 | 216 | 98 - | 180 | 395  | 45726  | 45941  |
| UN36750 | Rsa1.0_00008.1 | 410  | 358124 | 0         | 404 | 415 | 97 + | 3   | 410  | 286627 | 287041 |
| UN36751 | Rsa1.0_00176.1 | 1037 | 240984 | 1.00E-117 | 250 | 259 | 96 + | 783 | 1037 | 223410 | 223665 |
| UN36752 | Rsa1.0_07004.1 | 807  | 10045  | 0         | 798 | 805 | 99 + | 3   | 807  | 8880   | 9684   |
| UN36753 | Rsa1.0_02680.1 | 979  | 28721  | 1.00E-130 | 278 | 292 | 95 - | 350 | 641  | 14053  | 14344  |
| UN36754 | Rsa1.0_01117.1 | 711  | 53465  | 1.00E-107 | 206 | 209 | 98 + | 503 | 711  | 44303  | 44511  |
| UN36755 | Rsa1.0_01449.1 | 534  | 45570  | 1.00E-73  | 150 | 153 | 98 - | 255 | 407  | 21860  | 22012  |
| UN36756 | Rsa1.0_01373.1 | 656  | 47052  | 0         | 634 | 657 | 96 - | 1   | 656  | 8900   | 9553   |
| UN36757 | Rsa1.0_00427.1 | 713  | 189678 | 1.00E-179 | 377 | 396 | 95 - | 309 | 704  | 22895  | 23287  |
| UN36758 | Rsa1.0_00301.1 | 774  | 365315 | 0         | 770 | 773 | 99 - | 3   | 774  | 81652  | 82424  |
| UN36759 | Rsa1.0_00786.1 | 925  | 64285  | 1.00E-157 | 425 | 467 | 91 - | 3   | 455  | 47790  | 48253  |
| UN36760 | Rsa1.0_05931.1 | 865  | 12210  | 0         | 466 | 501 | 93 - | 371 | 865  | 7423   | 7912   |
| UN36761 | Rsa1.0_00051.1 | 920  | 258225 | 0         | 638 | 673 | 94 + | 171 | 843  | 153307 | 153971 |
| UN36762 | Rsa1.0_02561.1 | 1176 | 30080  | 0         | 703 | 723 | 97 + | 454 | 1175 | 19152  | 19871  |
| UN36763 | Rsa1.0_24867.1 | 723  | 963    | 0         | 435 | 451 | 96 + | 123 | 566  | 327    | 777    |
| UN36764 | Rsa1.0_01613.1 | 1108 | 182542 | 0         | 550 | 571 | 96 + | 3   | 568  | 167220 | 167790 |
| UN36765 | Rsa1.0_05485.1 | 653  | 13584  | 0         | 338 | 341 | 99 + | 242 | 581  | 211    | 550    |
| UN36766 | Rsa1.0_03972.1 | 991  | 19787  | 0         | 560 | 573 | 97 + | 421 | 991  | 208    | 776    |
| UN36767 | Rsa1.0_04499.1 | 957  | 17084  | 0         | 683 | 688 | 99 - | 3   | 687  | 3248   | 3935   |
| UN36768 | Rsa1.0_12923.1 | 589  | 5075   | 1.00E-129 | 246 | 250 | 98 + | 138 | 387  | 1      | 250    |
| UN36769 | Rsa1.0_03073.1 | 504  | 25574  | 1.00E-149 | 273 | 275 | 99 + | 2   | 276  | 19541  | 19815  |
| UN36770 | Rsa1.0_02727.1 | 652  | 28404  | 0         | 592 | 600 | 98 + | 53  | 652  | 3533   | 4131   |
| UN36771 | Rsa1.0_00405.1 | 1168 | 202864 | 0         | 451 | 475 | 94 - | 690 | 1155 | 43484  | 43955  |
| UN36772 | Rsa1.0_00494.1 | 875  | 79967  | 0         | 435 | 438 | 99 - | 439 | 875  | 73781  | 74217  |
| UN36773 | Rsa1.0_00028.1 | 853  | 293984 | 0         | 662 | 698 | 94 - | 3   | 700  | 66786  | 67483  |
| UN36774 | Rsa1.0_00121.1 | 942  | 278029 | 0         | 374 | 377 | 99 - | 566 | 942  | 100447 | 100823 |
| UN36775 | Rsa1.0_54017.1 | 1252 | 422    | 0         | 421 | 422 | 99 + | 407 | 828  | 1      | 422    |

|         |                |      |        |           |      |      |       |     |      |        |        |
|---------|----------------|------|--------|-----------|------|------|-------|-----|------|--------|--------|
| UN36776 | Rsa1.0.01381.1 | 598  | 46908  | 1.00E-116 | 234  | 241  | 97 +  | 278 | 518  | 34959  | 35199  |
| UN36777 | Rsa1.0.00272.1 | 1038 | 447836 | 0         | 463  | 493  | 93 -  | 558 | 1035 | 430970 | 431459 |
| UN36778 | Rsa1.0.01751.1 | 1096 | 39806  | 0         | 525  | 546  | 96 -  | 431 | 976  | 34920  | 35464  |
| UN36779 | Rsa1.0.00116.1 | 889  | 365886 | 1.00E-128 | 294  | 314  | 93 +  | 562 | 865  | 313534 | 313844 |
| UN36780 | Rsa1.0.00744.1 | 840  | 66084  | 0         | 829  | 839  | 98 -  | 2   | 840  | 55611  | 56449  |
| UN36781 | Rsa1.0.00962.1 | 861  | 184909 | 0         | 390  | 392  | 99 +  | 470 | 861  | 183987 | 184378 |
| UN36782 | Rsa1.0.01424.1 | 769  | 46139  | 1.00E-163 | 378  | 409  | 92 +  | 373 | 767  | 13761  | 14162  |
| UN36783 | Rsa1.0.00451.1 | 1081 | 322533 | 0         | 425  | 433  | 98 -  | 649 | 1081 | 148069 | 148500 |
| UN36784 | Rsa1.0.00797.1 | 759  | 63959  | 0         | 565  | 586  | 96 +  | 173 | 757  | 17835  | 18420  |
| UN36785 | Rsa1.0.01575.1 | 1109 | 42924  | 0         | 814  | 854  | 95 -  | 189 | 1037 | 32030  | 32880  |
| UN36786 | Rsa1.0.00014.1 | 479  | 348985 | 0         | 476  | 477  | 99 +  | 2   | 478  | 214349 | 214825 |
| UN36787 | Rsa1.0.02713.1 | 461  | 28470  | 8.00E-96  | 238  | 256  | 92 -  | 2   | 255  | 27265  | 27513  |
| UN36788 | Rsa1.0.00089.1 | 910  | 406142 | 1.00E-153 | 414  | 461  | 89 -  | 118 | 578  | 209174 | 209628 |
| UN36789 | Rsa1.0.05823.1 | 546  | 12521  | 1.00E-132 | 289  | 303  | 95 -  | 240 | 541  | 7083   | 7384   |
| UN36790 | Rsa1.0.00635.1 | 960  | 175826 | 0         | 670  | 716  | 93 +  | 2   | 712  | 116392 | 117081 |
| UN36791 | Rsa1.0.00728.1 | 643  | 66704  | 1.00E-140 | 253  | 253  | 100 + | 390 | 642  | 1      | 253    |
| UN36792 | Rsa1.0.01429.1 | 634  | 46061  | 0         | 434  | 442  | 98 -  | 193 | 634  | 5735   | 6176   |
| UN36793 | Rsa1.0.00099.1 | 689  | 159619 | 0         | 379  | 391  | 96 -  | 298 | 688  | 137915 | 138305 |
| UN36794 | Rsa1.0.05831.1 | 537  | 12493  | 0         | 450  | 479  | 93 -  | 59  | 537  | 7268   | 7742   |
| UN36795 | Rsa1.0.00059.1 | 1073 | 159650 | 2.00E-42  | 110  | 117  | 94 -  | 179 | 295  | 80603  | 80719  |
| UN36796 | Rsa1.0.00121.1 | 964  | 278029 | 1.00E-159 | 294  | 297  | 98 -  | 668 | 964  | 247132 | 247428 |
| UN36797 | Rsa1.0.25509.1 | 994  | 933    | 0         | 401  | 408  | 98 +  | 585 | 992  | 498    | 905    |
| UN36798 | Rsa1.0.00213.1 | 671  | 108167 | 1.00E-168 | 333  | 342  | 97 -  | 321 | 662  | 85150  | 85488  |
| UN36799 | Rsa1.0.02587.1 | 572  | 156090 | 0         | 563  | 572  | 98 +  | 1   | 571  | 155520 | 156090 |
| UN36800 | Rsa1.0.00087.1 | 591  | 761073 | 1.00E-170 | 345  | 359  | 96 -  | 230 | 588  | 56199  | 56557  |
| UN36801 | Rsa1.0.00228.1 | 878  | 105511 | 0         | 734  | 765  | 95 -  | 124 | 878  | 48906  | 49664  |
| UN36802 | Rsa1.0.00063.1 | 1068 | 156150 | 3.00E-20  | 103  | 120  | 85 +  | 66  | 185  | 55228  | 55347  |
| UN36803 | Rsa1.0.01154.1 | 845  | 52249  | 0         | 348  | 353  | 98 +  | 493 | 845  | 2609   | 2961   |
| UN36804 | Rsa1.0.06573.1 | 984  | 10742  | 0         | 785  | 800  | 98 -  | 2   | 801  | 6236   | 7035   |
| UN36805 | Rsa1.0.08675.1 | 287  | 7054   | 2.00E-33  | 79   | 81   | 97 -  | 2   | 82   | 2416   | 2496   |
| UN36806 | Rsa1.0.00284.1 | 924  | 323267 | 0         | 898  | 927  | 96 +  | 2   | 924  | 276758 | 277684 |
| UN36807 | #              | #    | #      | #         | #    | #    | #     | #   | #    | #      | #      |
| UN36808 | Rsa1.0.00278.1 | 1089 | 231896 | 0         | 1022 | 1080 | 94 -  | 13  | 1089 | 86298  | 87368  |
| UN36809 | Rsa1.0.00071.1 | 761  | 345714 | 1.00E-156 | 309  | 318  | 97 -  | 450 | 759  | 221163 | 221480 |
| UN36810 | Rsa1.0.01553.1 | 1113 | 43379  | 0         | 899  | 936  | 96 -  | 165 | 1100 | 27016  | 27945  |
| UN36811 | Rsa1.0.04375.1 | 774  | 141717 | 0         | 417  | 419  | 99 -  | 356 | 774  | 3230   | 3648   |
| UN36812 | Rsa1.0.03632.1 | 647  | 21645  | 0         | 328  | 329  | 99 -  | 2   | 330  | 18752  | 19080  |
| UN36813 | Rsa1.0.00324.1 | 839  | 218805 | 0         | 831  | 837  | 99 +  | 2   | 838  | 160756 | 161592 |
| UN36814 | Rsa1.0.05109.1 | 569  | 14818  | 0         | 557  | 581  | 95 -  | 3   | 569  | 12175  | 12754  |

|         |                |      |        |           |     |     |       |     |      |        |        |
|---------|----------------|------|--------|-----------|-----|-----|-------|-----|------|--------|--------|
| UN36815 | Rsa1.0_00097.1 | 704  | 138858 | 0         | 677 | 706 | 95 +  | 3   | 704  | 60207  | 60912  |
| UN36816 | Rsa1.0_00001.1 | 958  | 363028 | 0         | 938 | 959 | 97 +  | 1   | 954  | 282662 | 283613 |
| UN36817 | Rsa1.0_00049.1 | 1270 | 167018 | 0         | 375 | 382 | 98 -  | 317 | 696  | 150748 | 151129 |
| UN36818 | Rsa1.0_00404.1 | 780  | 87635  | 0         | 523 | 531 | 98 +  | 251 | 778  | 73258  | 73788  |
| UN36819 | Rsa1.0_04541.1 | 997  | 16931  | 0         | 600 | 611 | 98 +  | 381 | 991  | 13614  | 14220  |
| UN36820 | Rsa1.0_00014.1 | 303  | 348985 | 1.00E-170 | 302 | 302 | 100 + | 2   | 303  | 294379 | 294680 |
| UN36821 | Rsa1.0_00874.1 | 710  | 179723 | 0         | 699 | 714 | 97 +  | 2   | 710  | 718    | 1429   |
| UN36822 | Rsa1.0_01263.1 | 969  | 49703  | 2.00E-42  | 119 | 127 | 93 +  | 26  | 149  | 25929  | 26054  |
| UN36823 | Rsa1.0_02034.1 | 833  | 35823  | 4.00E-77  | 213 | 235 | 90 +  | 24  | 258  | 12611  | 12845  |
| UN36824 | Rsa1.0_02471.1 | 505  | 31104  | 6.00E-63  | 145 | 150 | 96 +  | 290 | 436  | 3907   | 4056   |
| UN36825 | Rsa1.0_00634.1 | 1086 | 71222  | 0         | 598 | 630 | 94 +  | 239 | 864  | 7341   | 7961   |
| UN36826 | Rsa1.0_04139.1 | 843  | 18883  | 0         | 516 | 571 | 90 -  | 280 | 843  | 13124  | 13682  |
| UN36827 | Rsa1.0_01949.1 | 400  | 36960  | 1.00E-163 | 348 | 368 | 94 -  | 1   | 368  | 32085  | 32444  |
| UN36828 | Rsa1.0_00373.1 | 688  | 90296  | 0         | 375 | 385 | 97 +  | 19  | 403  | 27979  | 28361  |
| UN36829 | Rsa1.0_00385.1 | 335  | 89160  | 1.00E-133 | 258 | 264 | 97 +  | 77  | 335  | 29260  | 29523  |
| UN36830 | Rsa1.0_00089.1 | 875  | 406142 | 0         | 438 | 461 | 95 -  | 419 | 875  | 397363 | 397822 |
| UN36831 | Rsa1.0_04956.1 | 428  | 15331  | 1.00E-177 | 372 | 389 | 95 +  | 1   | 385  | 8546   | 8934   |
| UN36832 | Rsa1.0_02102.1 | 359  | 35009  | 9.00E-98  | 187 | 189 | 98 +  | 2   | 190  | 12562  | 12750  |
| UN36833 | Rsa1.0_01799.1 | 937  | 39127  | 0         | 903 | 932 | 96 +  | 7   | 937  | 1527   | 2458   |
| UN36834 | Rsa1.0_00059.1 | 697  | 159650 | 0         | 642 | 705 | 91 -  | 4   | 696  | 72491  | 73187  |
| UN36835 | Rsa1.0_00331.1 | 614  | 176754 | 0         | 585 | 609 | 96 -  | 3   | 611  | 37745  | 38345  |
| UN36836 | Rsa1.0_00045.1 | 656  | 328694 | 1.00E-112 | 232 | 241 | 96 +  | 188 | 428  | 225052 | 225292 |
| UN36837 | Rsa1.0_07345.1 | 532  | 9526   | 1.00E-137 | 284 | 296 | 95 -  | 110 | 405  | 7428   | 7719   |
| UN36838 | Rsa1.0_05505.1 | 1173 | 13500  | 2.00E-86  | 245 | 272 | 90 -  | 595 | 857  | 4441   | 4712   |
| UN36839 | Rsa1.0_00954.1 | 597  | 189536 | 0         | 585 | 599 | 97 +  | 2   | 597  | 186910 | 187507 |
| UN36840 | Rsa1.0_00372.1 | 695  | 90418  | 0         | 676 | 695 | 97 +  | 1   | 695  | 79632  | 80326  |
| UN36841 | Rsa1.0_05456.1 | 1239 | 13688  | 0         | 465 | 479 | 97 -  | 531 | 1001 | 1966   | 2444   |
| UN36842 | Rsa1.0_00771.1 | 909  | 64870  | 0         | 661 | 696 | 94 +  | 216 | 909  | 9605   | 10300  |
| UN36843 | Rsa1.0_04925.1 | 942  | 15424  | 0         | 716 | 778 | 92 -  | 2   | 775  | 456    | 1215   |
| UN36844 | Rsa1.0_00490.1 | 670  | 186713 | 1.00E-105 | 215 | 222 | 96 +  | 308 | 529  | 39915  | 40136  |
| UN36845 | Rsa1.0_02648.1 | 551  | 29073  | 5.00E-48  | 107 | 110 | 97 +  | 279 | 388  | 19853  | 19962  |
| UN36846 | Rsa1.0_28876.1 | 1568 | 800    | 0         | 761 | 761 | 100 - | 48  | 808  | 40     | 800    |
| UN36847 | Rsa1.0_00402.1 | 690  | 385315 | 0         | 398 | 408 | 97 -  | 3   | 406  | 253633 | 254040 |
| UN36848 | Rsa1.0_08631.1 | 976  | 7103   | 1.00E-114 | 289 | 315 | 91 -  | 665 | 976  | 1945   | 2253   |
| UN36849 | Rsa1.0_02532.1 | 1129 | 30403  | 1.00E-139 | 270 | 274 | 98 +  | 860 | 1129 | 17632  | 17905  |
| UN36850 | Rsa1.0_02972.1 | 796  | 165812 | 3.00E-16  | 87  | 101 | 86 -  | 2   | 102  | 1597   | 1697   |
| UN36851 | Rsa1.0_00609.1 | 625  | 72785  | 1.00E-177 | 367 | 381 | 96 -  | 246 | 624  | 4919   | 5297   |
| UN36852 | Rsa1.0_01645.1 | 898  | 41748  | 0         | 448 | 463 | 96 +  | 434 | 896  | 37085  | 37541  |
| UN36853 | Rsa1.0_00616.1 | 219  | 195713 | 3.00E-53  | 185 | 215 | 86 +  | 1   | 215  | 194634 | 194822 |

|         |                |      |        |           |      |      |      |     |      |        |        |
|---------|----------------|------|--------|-----------|------|------|------|-----|------|--------|--------|
| UN36854 | Rsa1.0.00305.1 | 787  | 97308  | 0         | 630  | 652  | 96 + | 137 | 785  | 13826  | 14477  |
| UN36855 | Rsa1.0.02386.1 | 752  | 31895  | 1.00E-107 | 220  | 226  | 97 - | 8   | 233  | 9957   | 10181  |
| UN36856 | Rsa1.0.02881.1 | 1122 | 27041  | 0         | 1073 | 1118 | 95 + | 2   | 1112 | 20580  | 21697  |
| UN36857 | Rsa1.0.00278.1 | 1043 | 231896 | 0         | 516  | 531  | 97 - | 509 | 1037 | 150877 | 151407 |
| UN36858 | Rsa1.0.01786.1 | 956  | 133324 | 0         | 784  | 888  | 88 - | 2   | 860  | 128845 | 129699 |
| UN36859 | Rsa1.0.01174.1 | 873  | 51696  | 0         | 812  | 837  | 97 - | 1   | 829  | 31589  | 32423  |
| UN36860 | Rsa1.0.02074.1 | 636  | 35370  | 0         | 588  | 614  | 95 + | 2   | 614  | 29473  | 30083  |
| UN36861 | Rsa1.0.00040.1 | 228  | 324196 | 3.00E-78  | 214  | 230  | 93 - | 2   | 224  | 167244 | 167473 |
| UN36862 | Rsa1.0.02794.1 | 714  | 27820  | 0         | 536  | 587  | 91 - | 131 | 714  | 2403   | 2986   |
| UN36863 | Rsa1.0.00602.1 | 696  | 73302  | 0         | 409  | 425  | 96 - | 266 | 690  | 4986   | 5409   |
| UN36864 | Rsa1.0.00119.1 | 728  | 467509 | 1.00E-122 | 244  | 251  | 97 + | 85  | 335  | 63813  | 64063  |
| UN36865 | Rsa1.0.00314.1 | 683  | 96472  | 0         | 433  | 441  | 98 + | 243 | 683  | 37587  | 38027  |
| UN36866 | Rsa1.0.00677.1 | 914  | 69159  | 1.00E-147 | 339  | 361  | 93 + | 555 | 914  | 20016  | 20370  |
| UN36867 | Rsa1.0.01067.1 | 1127 | 55230  | 1.00E-130 | 239  | 240  | 99 + | 888 | 1127 | 28453  | 28692  |
| UN36868 | #              | #    | #      | #         | #    | #    | #    | #   | #    | #      | #      |
| UN36869 | Rsa1.0.00543.1 | 1089 | 76788  | 0         | 816  | 838  | 97 + | 8   | 845  | 14744  | 15572  |
| UN36870 | Rsa1.0.04483.1 | 965  | 17174  | 0         | 449  | 486  | 92 - | 79  | 561  | 10674  | 11138  |
| UN36871 | Rsa1.0.01524.1 | 414  | 43949  | 0         | 383  | 399  | 95 - | 17  | 414  | 10846  | 11242  |
| UN36872 | Rsa1.0.10416.1 | 898  | 5856   | 1.00E-165 | 351  | 366  | 95 - | 522 | 886  | 4712   | 5069   |
| UN36873 | Rsa1.0.01696.1 | 602  | 301850 | 1.00E-169 | 375  | 404  | 92 - | 32  | 417  | 26660  | 27063  |
| UN36874 | Rsa1.0.05596.1 | 544  | 137912 | 1.00E-110 | 239  | 249  | 95 + | 297 | 543  | 136411 | 136658 |
| UN36875 | Rsa1.0.05692.1 | 707  | 12914  | 0         | 505  | 518  | 97 - | 1   | 518  | 2147   | 2664   |
| UN36876 | Rsa1.0.00347.1 | 457  | 93048  | 0         | 402  | 419  | 95 - | 4   | 421  | 69385  | 69803  |
| UN36877 | Rsa1.0.01779.1 | 913  | 39448  | 0         | 752  | 756  | 99 - | 6   | 761  | 8801   | 9556   |
| UN36878 | Rsa1.0.00697.1 | 464  | 67913  | 2.00E-65  | 139  | 143  | 97 - | 129 | 271  | 43648  | 43790  |
| UN36879 | Rsa1.0.02015.1 | 707  | 36008  | 0         | 677  | 691  | 97 - | 2   | 692  | 7828   | 8518   |
| UN36880 | Rsa1.0.00387.1 | 740  | 495407 | 0         | 388  | 402  | 96 + | 344 | 740  | 387101 | 387501 |
| UN36881 | Rsa1.0.00001.1 | 922  | 363028 | 1.00E-174 | 435  | 474  | 91 - | 65  | 529  | 37504  | 37974  |
| UN36882 | Rsa1.0.00016.1 | 722  | 831256 | 2.00E-41  | 96   | 99   | 96 - | 4   | 102  | 435660 | 435758 |
| UN36883 | Rsa1.0.00154.1 | 1058 | 189461 | 0         | 1028 | 1054 | 97 - | 5   | 1056 | 181970 | 183021 |
| UN36884 | Rsa1.0.00425.1 | 1349 | 147080 | 0         | 1333 | 1363 | 97 - | 3   | 1349 | 10090  | 11448  |
| UN36885 | Rsa1.0.00027.1 | 1065 | 283362 | 0         | 491  | 504  | 97 + | 100 | 603  | 115850 | 116350 |
| UN36886 | Rsa1.0.00326.1 | 912  | 171955 | 1.00E-151 | 325  | 342  | 95 - | 548 | 886  | 66206  | 66547  |
| UN36887 | Rsa1.0.03143.1 | 528  | 25024  | 0         | 513  | 527  | 97 - | 2   | 528  | 17318  | 17844  |
| UN36888 | Rsa1.0.61386.1 | 699  | 373    | 1.00E-114 | 253  | 265  | 95 - | 400 | 661  | 113    | 373    |
| UN36889 | Rsa1.0.02595.1 | 783  | 29715  | 0         | 739  | 759  | 97 + | 36  | 783  | 16253  | 17011  |
| UN36890 | Rsa1.0.00933.1 | 1005 | 59164  | 0         | 973  | 1004 | 96 - | 3   | 1005 | 31183  | 32186  |
| UN36891 | Rsa1.0.05122.1 | 691  | 14791  | 0         | 393  | 414  | 94 + | 281 | 691  | 417    | 827    |
| UN36892 | Rsa1.0.02079.1 | 402  | 35306  | 7.00E-62  | 213  | 238  | 89 + | 149 | 383  | 33684  | 33916  |

|         |                |      |        |           |      |      |      |     |      |        |        |
|---------|----------------|------|--------|-----------|------|------|------|-----|------|--------|--------|
| UN36893 | Rsa1.0.00189.1 | 1084 | 111830 | 0         | 362  | 372  | 97 + | 3   | 372  | 42070  | 42441  |
| UN36894 | Rsa1.0.00921.1 | 880  | 59599  | 0         | 496  | 509  | 97 + | 374 | 880  | 31394  | 31902  |
| UN36895 | Rsa1.0.02237.1 | 989  | 33544  | 0         | 681  | 704  | 96 + | 1   | 701  | 2722   | 3416   |
| UN36896 | Rsa1.0.01133.1 | 562  | 52916  | 1.00E-85  | 170  | 173  | 98 + | 54  | 226  | 40202  | 40374  |
| UN36897 | Rsa1.0.09304.1 | 1132 | 6469   | 1.00E-161 | 405  | 443  | 91 - | 3   | 444  | 4620   | 5041   |
| UN36898 | Rsa1.0.00307.1 | 533  | 199003 | 8.00E-53  | 174  | 198  | 87 - | 47  | 235  | 84992  | 85189  |
| UN36899 | Rsa1.0.00472.1 | 1003 | 398134 | 1.00E-154 | 375  | 405  | 92 + | 618 | 1002 | 175418 | 175821 |
| UN36900 | Rsa1.0.02651.1 | 1304 | 29046  | 0         | 495  | 505  | 98 + | 4   | 508  | 20947  | 21451  |
| UN36901 | Rsa1.0.00094.1 | 783  | 139042 | 0         | 754  | 787  | 95 - | 3   | 783  | 93952  | 94735  |
| UN36902 | Rsa1.0.00759.1 | 770  | 65465  | 0         | 391  | 400  | 97 - | 366 | 762  | 25327  | 25726  |
| UN36903 | Rsa1.0.01377.1 | 1125 | 46967  | 0         | 553  | 582  | 95 - | 534 | 1113 | 13119  | 13695  |
| UN36904 | Rsa1.0.03615.1 | 511  | 21766  | 0         | 499  | 522  | 95 - | 2   | 511  | 9381   | 9900   |
| UN36905 | Rsa1.0.15644.1 | 1230 | 2505   | 0         | 587  | 619  | 94 - | 6   | 612  | 577    | 1195   |
| UN36906 | Rsa1.0.01359.1 | 1267 | 47271  | 0         | 1195 | 1273 | 93 - | 2   | 1259 | 1267   | 2509   |
| UN36907 | Rsa1.0.04991.1 | 939  | 15215  | 0         | 579  | 582  | 99 - | 348 | 929  | 1      | 582    |
| UN36908 | Rsa1.0.09517.1 | 1028 | 6319   | 0         | 692  | 708  | 97 - | 134 | 841  | 2293   | 3000   |
| UN36909 | Rsa1.0.00026.1 | 1280 | 327835 | 0         | 1214 | 1250 | 97 - | 31  | 1280 | 8175   | 9422   |
| UN36910 | Rsa1.0.00040.1 | 710  | 324196 | 0         | 624  | 658  | 94 + | 46  | 699  | 33258  | 33908  |
| UN36911 | Rsa1.0.11942.1 | 1036 | 5365   | 1.00E-133 | 461  | 534  | 86 - | 179 | 712  | 70     | 603    |
| UN36912 | Rsa1.0.01907.1 | 983  | 37431  | 0         | 531  | 547  | 97 + | 437 | 983  | 29529  | 30072  |
| UN36913 | Rsa1.0.00145.1 | 835  | 261008 | 8.00E-54  | 158  | 174  | 90 + | 196 | 369  | 235535 | 235705 |
| UN36914 | Rsa1.0.04343.1 | 662  | 17827  | 0         | 650  | 665  | 97 - | 3   | 662  | 6530   | 7194   |
| UN36915 | Rsa1.0.00020.1 | 625  | 283099 | 0         | 614  | 625  | 98 + | 1   | 625  | 172840 | 173464 |
| UN36916 | Rsa1.0.00229.1 | 643  | 105471 | 0         | 547  | 560  | 97 + | 7   | 566  | 71241  | 71800  |
| UN36917 | Rsa1.0.01629.1 | 887  | 41917  | 1.00E-151 | 292  | 299  | 97 - | 3   | 301  | 16329  | 16627  |
| UN36918 | Rsa1.0.02525.1 | 769  | 30489  | 0         | 613  | 629  | 97 + | 140 | 768  | 9441   | 10069  |
| UN36919 | Rsa1.0.00119.1 | 1041 | 467509 | 1.00E-130 | 368  | 405  | 90 + | 612 | 1002 | 64536  | 64935  |
| UN36920 | Rsa1.0.00066.1 | 194  | 152418 | 5.00E-61  | 169  | 182  | 92 + | 1   | 182  | 139482 | 139654 |
| UN36921 | Rsa1.0.02514.1 | 717  | 30642  | 1.00E-173 | 335  | 344  | 97 - | 273 | 616  | 4603   | 4946   |
| UN36922 | Rsa1.0.00151.1 | 683  | 119541 | 0         | 652  | 699  | 93 + | 3   | 683  | 53450  | 54135  |
| UN36923 | Rsa1.0.01466.1 | 1026 | 45161  | 0         | 491  | 522  | 94 + | 320 | 833  | 20766  | 21283  |
| UN36924 | Rsa1.0.00176.1 | 829  | 240984 | 0         | 397  | 412  | 96 + | 9   | 413  | 134541 | 134947 |
| UN36925 | Rsa1.0.00556.1 | 562  | 207212 | 1.00E-167 | 330  | 337  | 97 - | 10  | 344  | 150913 | 151248 |
| UN36926 | Rsa1.0.02142.1 | 733  | 34633  | 1.00E-122 | 226  | 227  | 99 + | 1   | 227  | 26452  | 26678  |
| UN36927 | Rsa1.0.06443.1 | 743  | 11008  | 0         | 675  | 730  | 92 + | 27  | 742  | 9941   | 10645  |
| UN36928 | Rsa1.0.01363.1 | 489  | 47195  | 0         | 442  | 468  | 94 + | 32  | 489  | 37133  | 37596  |
| UN36929 | Rsa1.0.00704.1 | 1146 | 67567  | 4.00E-84  | 162  | 163  | 99 + | 927 | 1089 | 10562  | 10724  |
| UN36930 | Rsa1.0.09693.1 | 803  | 6208   | 1.00E-113 | 232  | 239  | 97 + | 391 | 629  | 4921   | 5158   |
| UN36931 | Rsa1.0.14861.1 | 552  | 3007   | 0         | 418  | 425  | 98 - | 128 | 550  | 1985   | 2408   |

|         |                |      |        |           |      |      |       |     |      |        |        |
|---------|----------------|------|--------|-----------|------|------|-------|-----|------|--------|--------|
| UN36932 | Rsa1.0_04155.1 | 686  | 134772 | 1.00E-137 | 247  | 247  | 100 - | 164 | 410  | 126247 | 126493 |
| UN36933 | Rsa1.0_02876.1 | 546  | 27062  | 1.00E-127 | 325  | 355  | 91 +  | 90  | 441  | 615    | 966    |
| UN36934 | Rsa1.0_00896.1 | 703  | 60509  | 3.00E-50  | 102  | 102  | 100 - | 40  | 141  | 23349  | 23450  |
| UN36935 | Rsa1.0_00163.1 | 843  | 116847 | 1.00E-119 | 264  | 277  | 95 -  | 476 | 749  | 79786  | 80062  |
| UN36936 | Rsa1.0_01710.1 | 675  | 40586  | 4.00E-12  | 77   | 90   | 85 -  | 586 | 675  | 14688  | 14777  |
| UN36937 | Rsa1.0_00419.1 | 1068 | 86562  | 0         | 508  | 522  | 97 +  | 3   | 524  | 55548  | 56068  |
| UN36938 | Rsa1.0_00113.1 | 1071 | 131574 | 1.00E-147 | 286  | 292  | 97 +  | 218 | 508  | 36936  | 37227  |
| UN36939 | Rsa1.0_08427.1 | 784  | 7371   | 0         | 397  | 402  | 98 -  | 2   | 403  | 1430   | 1831   |
| UN36940 | Rsa1.0_00336.1 | 1116 | 445051 | 0         | 933  | 972  | 95 -  | 16  | 973  | 14122  | 15091  |
| UN36941 | Rsa1.0_01327.1 | 730  | 48033  | 0         | 418  | 426  | 98 -  | 168 | 593  | 4602   | 5027   |
| UN36942 | Rsa1.0_00899.1 | 974  | 60404  | 0         | 793  | 803  | 98 -  | 172 | 972  | 20671  | 21473  |
| UN36943 | Rsa1.0_00671.1 | 357  | 397884 | 1.00E-134 | 316  | 338  | 93 +  | 2   | 333  | 192152 | 192483 |
| UN36944 | Rsa1.0_01530.1 | 713  | 43820  | 1.00E-109 | 221  | 227  | 97 -  | 489 | 713  | 35886  | 36112  |
| UN36945 | Rsa1.0_37754.1 | 535  | 597    | 1.00E-130 | 248  | 252  | 98 -  | 284 | 535  | 212    | 463    |
| UN36946 | Rsa1.0_18080.1 | 850  | 1673   | 0         | 528  | 532  | 99 -  | 318 | 849  | 1142   | 1673   |
| UN36947 | Rsa1.0_06185.1 | 697  | 11540  | 0         | 689  | 715  | 96 -  | 3   | 697  | 5432   | 6146   |
| UN36948 | Rsa1.0_02015.1 | 903  | 36008  | 0         | 869  | 901  | 96 -  | 3   | 903  | 32114  | 33014  |
| UN36949 | Rsa1.0_00087.1 | 536  | 761073 | 0         | 420  | 436  | 96 -  | 101 | 535  | 623064 | 623499 |
| UN36950 | Rsa1.0_00028.1 | 860  | 293984 | 0         | 590  | 606  | 97 +  | 251 | 853  | 31489  | 32094  |
| UN36951 | Rsa1.0_00123.1 | 816  | 325650 | 1.00E-144 | 331  | 354  | 93 -  | 305 | 652  | 251365 | 251717 |
| UN36952 | Rsa1.0_00707.1 | 541  | 190112 | 0         | 521  | 536  | 97 +  | 2   | 537  | 12981  | 13515  |
| UN36953 | Rsa1.0_11893.1 | 1125 | 5379   | 0         | 662  | 709  | 93 -  | 426 | 1122 | 4668   | 5360   |
| UN36954 | Rsa1.0_01105.1 | 1175 | 53958  | 0         | 375  | 378  | 99 +  | 799 | 1175 | 39099  | 39476  |
| UN36955 | Rsa1.0_00833.1 | 693  | 62621  | 0         | 590  | 609  | 96 -  | 76  | 684  | 38912  | 39520  |
| UN36956 | Rsa1.0_00190.1 | 743  | 318240 | 0         | 397  | 414  | 95 -  | 330 | 743  | 154659 | 155071 |
| UN36957 | Rsa1.0_00129.1 | 1151 | 126831 | 0         | 442  | 444  | 99 -  | 708 | 1151 | 36083  | 36526  |
| UN36958 | Rsa1.0_04817.1 | 973  | 15869  | 0         | 469  | 502  | 93 -  | 5   | 501  | 10622  | 11114  |
| UN36959 | Rsa1.0_00941.1 | 982  | 58891  | 1.00E-126 | 263  | 274  | 95 -  | 304 | 577  | 58119  | 58392  |
| UN36960 | Rsa1.0_00319.1 | 544  | 167331 | 0         | 508  | 538  | 94 -  | 12  | 544  | 133050 | 133584 |
| UN36961 | Rsa1.0_01452.1 | 843  | 45459  | 1.00E-169 | 507  | 576  | 88 -  | 277 | 843  | 10165  | 10717  |
| UN36962 | Rsa1.0_01733.1 | 504  | 40186  | 3.00E-95  | 193  | 197  | 97 -  | 308 | 504  | 17675  | 17870  |
| UN36963 | Rsa1.0_00564.1 | 731  | 75428  | 1.00E-114 | 228  | 233  | 97 +  | 499 | 731  | 67712  | 67943  |
| UN36964 | Rsa1.0_16971.1 | 1264 | 1969   | 0         | 1117 | 1226 | 91 -  | 2   | 1225 | 550    | 1769   |
| UN36965 | Rsa1.0_00179.1 | 340  | 393324 | 1.00E-115 | 246  | 255  | 96 +  | 88  | 336  | 2943   | 3197   |
| UN36966 | Rsa1.0_00028.1 | 774  | 293984 | 1.00E-89  | 183  | 188  | 97 -  | 2   | 189  | 297    | 484    |
| UN36967 | Rsa1.0_00154.1 | 535  | 189461 | 1.00E-97  | 308  | 344  | 89 +  | 103 | 432  | 153864 | 154205 |
| UN36968 | Rsa1.0_00218.1 | 931  | 201480 | 1.00E-150 | 364  | 393  | 92 +  | 542 | 929  | 13863  | 14253  |
| UN36969 | Rsa1.0_02016.1 | 679  | 36003  | 1.00E-163 | 315  | 323  | 97 -  | 50  | 372  | 6525   | 6847   |
| UN36970 | Rsa1.0_01556.1 | 625  | 163858 | 0         | 610  | 638  | 95 +  | 3   | 625  | 145283 | 145920 |

|         |                |      |        |           |     |      |       |     |      |        |        |
|---------|----------------|------|--------|-----------|-----|------|-------|-----|------|--------|--------|
| UN36971 | Rsa1.0.02342.1 | 912  | 32374  | 1.00E-135 | 288 | 301  | 95 -  | 613 | 912  | 23554  | 23854  |
| UN36972 | Rsa1.0.01211.1 | 778  | 50646  | 0         | 735 | 786  | 93 +  | 2   | 772  | 19064  | 19839  |
| UN36973 | Rsa1.0.00092.1 | 1371 | 659932 | 1.00E-140 | 291 | 303  | 96 +  | 828 | 1127 | 298360 | 298662 |
| UN36974 | Rsa1.0.02295.1 | 730  | 149884 | 0         | 673 | 741  | 90 -  | 3   | 727  | 4057   | 4770   |
| UN36975 | Rsa1.0.07859.1 | 799  | 8409   | 1.00E-122 | 309 | 338  | 91 +  | 303 | 640  | 3563   | 3900   |
| UN36976 | Rsa1.0.00065.1 | 923  | 454616 | 0         | 422 | 435  | 97 -  | 489 | 923  | 248974 | 249408 |
| UN36977 | Rsa1.0.02748.1 | 666  | 28242  | 1.00E-36  | 85  | 87   | 97 -  | 18  | 104  | 24848  | 24934  |
| UN36978 | Rsa1.0.00178.1 | 690  | 114861 | 0         | 683 | 694  | 98 +  | 1   | 690  | 19537  | 20230  |
| UN36979 | Rsa1.0.00977.1 | 1131 | 198001 | 1.00E-129 | 308 | 332  | 92 -  | 751 | 1075 | 32057  | 32382  |
| UN36980 | Rsa1.0.00128.1 | 881  | 228675 | 0         | 420 | 444  | 94 -  | 299 | 737  | 193191 | 193634 |
| UN36981 | Rsa1.0.00434.1 | 583  | 85171  | 0         | 484 | 523  | 92 -  | 2   | 516  | 66220  | 66733  |
| UN36982 | Rsa1.0.00738.1 | 561  | 66322  | 1.00E-172 | 354 | 366  | 96 +  | 190 | 552  | 3355   | 3719   |
| UN36983 | Rsa1.0.02054.1 | 563  | 35548  | 1.00E-113 | 319 | 355  | 89 -  | 9   | 356  | 5734   | 6088   |
| UN36984 | Rsa1.0.00208.1 | 1054 | 108565 | 1.00E-93  | 350 | 407  | 85 -  | 207 | 612  | 21769  | 22175  |
| UN36985 | Rsa1.0.00232.1 | 605  | 104936 | 0         | 576 | 605  | 95 +  | 10  | 605  | 17107  | 17711  |
| UN36986 | Rsa1.0.01531.1 | 1160 | 43778  | 1.00E-151 | 281 | 284  | 98 +  | 501 | 784  | 16827  | 17110  |
| UN36987 | Rsa1.0.20735.1 | 431  | 1275   | 1.00E-145 | 349 | 372  | 93 +  | 61  | 429  | 481    | 840    |
| UN36988 | Rsa1.0.05097.1 | 617  | 14864  | 6.00E-14  | 71  | 81   | 87 -  | 268 | 348  | 1630   | 1710   |
| UN36989 | Rsa1.0.01442.1 | 997  | 45776  | 0         | 948 | 997  | 95 -  | 2   | 997  | 16655  | 17651  |
| UN36990 | Rsa1.0.00920.1 | 747  | 601703 | 1.00E-140 | 259 | 261  | 99 -  | 2   | 262  | 18548  | 18808  |
| UN36991 | Rsa1.0.00068.1 | 517  | 151813 | 1.00E-131 | 266 | 275  | 96 -  | 245 | 516  | 91233  | 91507  |
| UN36992 | Rsa1.0.00017.1 | 1004 | 752458 | 0         | 883 | 943  | 93 +  | 1   | 929  | 96901  | 97838  |
| UN36993 | Rsa1.0.13973.1 | 632  | 3969   | 2.00E-87  | 280 | 320  | 87 +  | 30  | 340  | 1437   | 1756   |
| UN36994 | Rsa1.0.00273.1 | 375  | 326186 | 1.00E-179 | 348 | 358  | 97 -  | 18  | 375  | 255019 | 255376 |
| UN36995 | Rsa1.0.03090.1 | 769  | 25464  | 1.00E-160 | 290 | 291  | 99 -  | 4   | 294  | 23198  | 23488  |
| UN36996 | Rsa1.0.03645.1 | 557  | 21599  | 1.00E-172 | 390 | 413  | 94 -  | 153 | 556  | 14526  | 14932  |
| UN36997 | Rsa1.0.00095.1 | 713  | 283384 | 1.00E-120 | 269 | 286  | 94 -  | 435 | 713  | 21290  | 21575  |
| UN36998 | Rsa1.0.01976.1 | 824  | 36570  | 0         | 723 | 723  | 100 - | 102 | 824  | 33618  | 34340  |
| UN36999 | Rsa1.0.00099.1 | 444  | 159619 | 1.00E-94  | 198 | 204  | 97 +  | 242 | 444  | 146584 | 146787 |
| UN37000 | Rsa1.0.00085.1 | 802  | 142226 | 0         | 400 | 405  | 98 +  | 1   | 404  | 70114  | 70518  |
| UN37001 | Rsa1.0.00718.1 | 604  | 279335 | 0         | 597 | 602  | 99 -  | 3   | 604  | 227697 | 228298 |
| UN37002 | Rsa1.0.01536.1 | 941  | 43747  | 0         | 823 | 860  | 95 -  | 83  | 939  | 41443  | 42290  |
| UN37003 | Rsa1.0.00541.1 | 801  | 76863  | 0         | 791 | 799  | 98 -  | 3   | 801  | 30726  | 31524  |
| UN37004 | Rsa1.0.04527.1 | 1218 | 16958  | 0         | 718 | 722  | 99 -  | 3   | 723  | 6206   | 6927   |
| UN37005 | Rsa1.0.01921.1 | 1278 | 168088 | 0         | 559 | 568  | 98 -  | 2   | 566  | 156225 | 156792 |
| UN37006 | Rsa1.0.05269.1 | 1005 | 14311  | 0         | 998 | 1007 | 99 -  | 2   | 1005 | 6298   | 7304   |
| UN37007 | Rsa1.0.00638.1 | 855  | 71037  | 0         | 402 | 417  | 96 -  | 442 | 855  | 28229  | 28644  |
| UN37008 | Rsa1.0.03176.1 | 1224 | 24801  | 0         | 657 | 688  | 95 -  | 1   | 688  | 23514  | 24189  |
| UN37009 | Rsa1.0.00238.1 | 1137 | 193193 | 0         | 569 | 574  | 99 -  | 207 | 777  | 99555  | 100128 |

|         |                |      |        |           |      |      |       |     |      |        |        |
|---------|----------------|------|--------|-----------|------|------|-------|-----|------|--------|--------|
| UN37010 | Rsa1.0.02071.1 | 900  | 35409  | 0         | 874  | 895  | 97 +  | 2   | 896  | 19688  | 20582  |
| UN37011 | Rsa1.0.07881.1 | 1151 | 8369   | 0         | 1149 | 1150 | 99 +  | 2   | 1151 | 524    | 1673   |
| UN37012 | Rsa1.0.02745.1 | 679  | 28263  | 0         | 676  | 679  | 99 -  | 1   | 679  | 18306  | 18983  |
| UN37013 | Rsa1.0.00907.1 | 861  | 60062  | 0         | 846  | 859  | 98 -  | 4   | 861  | 1083   | 1936   |
| UN37014 | Rsa1.0.00464.1 | 871  | 82253  | 0         | 569  | 579  | 98 +  | 295 | 869  | 75570  | 76148  |
| UN37015 | Rsa1.0.04196.1 | 571  | 18515  | 0         | 538  | 557  | 96 -  | 7   | 562  | 16770  | 17325  |
| UN37016 | Rsa1.0.04156.1 | 1076 | 18799  | 0         | 787  | 819  | 96 -  | 244 | 1060 | 11663  | 12476  |
| UN37017 | Rsa1.0.01162.1 | 810  | 169104 | 0         | 453  | 458  | 98 -  | 355 | 810  | 144434 | 144890 |
| UN37018 | Rsa1.0.04776.1 | 1158 | 16017  | 0         | 1155 | 1158 | 99 +  | 2   | 1158 | 10755  | 11912  |
| UN37019 | Rsa1.0.04099.1 | 839  | 19060  | 2.00E-51  | 139  | 148  | 93 -  | 387 | 533  | 7785   | 7931   |
| UN37020 | Rsa1.0.01835.1 | 603  | 38542  | 6.00E-97  | 243  | 262  | 92 +  | 344 | 601  | 23455  | 23716  |
| UN37021 | Rsa1.0.02515.1 | 655  | 30616  | 0         | 650  | 652  | 99 -  | 3   | 654  | 12615  | 13266  |
| UN37022 | Rsa1.0.01806.1 | 749  | 39021  | 0         | 361  | 361  | 100 - | 126 | 486  | 35302  | 35662  |
| UN37023 | Rsa1.0.04084.1 | 1497 | 19174  | 0         | 373  | 374  | 99 -  | 220 | 593  | 6378   | 6751   |
| UN37024 | Rsa1.0.02485.1 | 809  | 30968  | 1.00E-137 | 271  | 279  | 97 -  | 276 | 554  | 23284  | 23562  |
| UN37025 | Rsa1.0.00073.1 | 414  | 240924 | 0         | 396  | 415  | 95 -  | 1   | 414  | 82613  | 83026  |
| UN37026 | Rsa1.0.00095.1 | 868  | 283384 | 1.00E-107 | 235  | 246  | 95 -  | 624 | 868  | 122422 | 122667 |
| UN37027 | Rsa1.0.03367.1 | 632  | 23387  | 1.00E-173 | 322  | 326  | 98 -  | 309 | 631  | 1159   | 1484   |
| UN37028 | Rsa1.0.00947.1 | 470  | 58664  | 2.00E-93  | 193  | 199  | 96 +  | 5   | 199  | 37448  | 37646  |
| UN37029 | Rsa1.0.10173.1 | 865  | 5961   | 0         | 777  | 867  | 89 +  | 4   | 855  | 4486   | 5350   |
| UN37030 | Rsa1.0.00543.1 | 813  | 76788  | 1.00E-154 | 292  | 297  | 98 -  | 253 | 549  | 53002  | 53298  |
| UN37031 | Rsa1.0.02711.1 | 696  | 28475  | 0         | 683  | 696  | 98 -  | 1   | 695  | 21631  | 22321  |
| UN37032 | Rsa1.0.00087.1 | 889  | 761073 | 0         | 886  | 887  | 99 +  | 3   | 889  | 368771 | 369656 |
| UN37033 | Rsa1.0.06772.1 | 813  | 10387  | 0         | 775  | 811  | 95 +  | 3   | 809  | 5567   | 6377   |
| UN37034 | Rsa1.0.01983.1 | 616  | 36509  | 1.00E-103 | 221  | 231  | 95 -  | 358 | 588  | 28504  | 28734  |
| UN37035 | Rsa1.0.00292.1 | 432  | 98141  | 0         | 429  | 432  | 99 +  | 1   | 432  | 26736  | 27167  |
| UN37036 | Rsa1.0.00131.1 | 890  | 432233 | 0         | 872  | 890  | 97 +  | 1   | 890  | 264245 | 265134 |
| UN37037 | Rsa1.0.00346.1 | 1005 | 93130  | 0         | 996  | 1005 | 99 +  | 2   | 1003 | 22070  | 23074  |
| UN37038 | Rsa1.0.03942.1 | 667  | 19948  | 1.00E-100 | 236  | 250  | 94 -  | 417 | 666  | 9932   | 10179  |
| UN37039 | Rsa1.0.00151.1 | 1457 | 119541 | 0         | 512  | 519  | 98 +  | 940 | 1455 | 57861  | 58377  |
| UN37040 | Rsa1.0.00003.1 | 699  | 340054 | 1.00E-126 | 309  | 338  | 91 +  | 250 | 584  | 328737 | 329059 |
| UN37041 | Rsa1.0.01821.1 | 714  | 38798  | 0         | 584  | 586  | 99 -  | 1   | 586  | 25258  | 25842  |
| UN37042 | Rsa1.0.00224.1 | 465  | 327530 | 0         | 451  | 465  | 96 -  | 2   | 465  | 6200   | 6663   |
| UN37043 | Rsa1.0.00173.1 | 868  | 288743 | 2.33E-156 | 263  | 263  | 100 - | 1   | 263  | 25595  | 25857  |
| UN37044 | Rsa1.0.00532.1 | 805  | 77384  | 1.00E-147 | 268  | 269  | 99 +  | 1   | 269  | 12835  | 13103  |
| UN37045 | Rsa1.0.02030.1 | 741  | 179909 | 0         | 739  | 741  | 99 +  | 1   | 741  | 163083 | 163822 |
| UN37046 | Rsa1.0.00028.1 | 728  | 293984 | 1.00E-130 | 239  | 240  | 99 +  | 487 | 726  | 54913  | 55152  |
| UN37047 | Rsa1.0.01120.1 | 1141 | 53438  | 5.00E-22  | 58   | 59   | 98 -  | 635 | 693  | 48790  | 48848  |
| UN37048 | Rsa1.0.00816.1 | 756  | 403350 | 0         | 391  | 394  | 99 -  | 363 | 756  | 263485 | 263878 |



|         |                |      |        |           |      |      |       |     |      |        |        |
|---------|----------------|------|--------|-----------|------|------|-------|-----|------|--------|--------|
| UN37049 | Rsa1.0_04236.1 | 1339 | 18370  | 0         | 362  | 362  | 100 - | 59  | 420  | 10966  | 11327  |
| UN37050 | Rsa1.0_02428.1 | 1296 | 31542  | 1.00E-114 | 222  | 226  | 98 -  | 340 | 565  | 20260  | 20485  |
| UN37051 | Rsa1.0_01772.1 | 1121 | 39557  | 1.00E-105 | 201  | 203  | 99 -  | 164 | 366  | 13945  | 14147  |
| UN37052 | Rsa1.0_00054.1 | 874  | 162053 | 0         | 845  | 875  | 96 +  | 3   | 874  | 83001  | 83870  |
| UN37053 | Rsa1.0_00254.1 | 825  | 102600 | 0         | 552  | 554  | 99 -  | 2   | 555  | 89673  | 90226  |
| UN37054 | Rsa1.0_02319.1 | 947  | 32580  | 0         | 946  | 947  | 99 -  | 1   | 947  | 7903   | 8849   |
| UN37055 | Rsa1.0_69440.1 | 815  | 330    | 1.00E-168 | 314  | 319  | 98 -  | 1   | 319  | 1      | 319    |
| UN37056 | Rsa1.0_03233.1 | 772  | 24446  | 0         | 655  | 670  | 97 -  | 104 | 772  | 21675  | 22342  |
| UN37057 | Rsa1.0_01882.1 | 569  | 37697  | 1.00E-113 | 246  | 257  | 95 +  | 312 | 563  | 20903  | 21159  |
| UN37058 | Rsa1.0_01179.1 | 968  | 51549  | 0         | 712  | 726  | 98 +  | 243 | 968  | 47086  | 47804  |
| UN37059 | Rsa1.0_00065.1 | 931  | 454616 | 1.00E-138 | 278  | 286  | 97 -  | 473 | 757  | 249123 | 249408 |
| UN37060 | Rsa1.0_05821.1 | 1050 | 12531  | 1.00E-151 | 284  | 288  | 98 -  | 605 | 892  | 8283   | 8570   |
| UN37061 | Rsa1.0_00159.1 | 640  | 431686 | 1.00E-166 | 316  | 320  | 98 +  | 319 | 638  | 385541 | 385858 |
| UN37062 | Rsa1.0_17102.1 | 486  | 1924   | 0         | 461  | 488  | 94 -  | 1   | 485  | 1161   | 1648   |
| UN37063 | Rsa1.0_00802.1 | 649  | 63846  | 7.00E-23  | 101  | 116  | 87 +  | 139 | 254  | 47994  | 48109  |
| UN37064 | Rsa1.0_00965.1 | 1160 | 58139  | 1.00E-121 | 242  | 249  | 97 +  | 436 | 684  | 22517  | 22765  |
| UN37065 | Rsa1.0_00799.1 | 907  | 63918  | 1.00E-135 | 248  | 249  | 99 -  | 1   | 249  | 16363  | 16611  |
| UN37066 | Rsa1.0_00157.1 | 430  | 245832 | 0         | 425  | 426  | 99 +  | 4   | 429  | 191979 | 192404 |
| UN37067 | Rsa1.0_00026.1 | 732  | 327835 | 1.00E-152 | 299  | 305  | 98 +  | 1   | 305  | 46282  | 46584  |
| UN37068 | Rsa1.0_20843.1 | 838  | 1263   | 1.00E-162 | 352  | 372  | 94 +  | 261 | 629  | 892    | 1263   |
| UN37069 | Rsa1.0_00770.1 | 751  | 64900  | 0         | 499  | 503  | 99 -  | 1   | 503  | 5041   | 5543   |
| UN37070 | Rsa1.0_10708.1 | 1070 | 5750   | 1.00E-138 | 250  | 250  | 100 - | 2   | 251  | 1895   | 2144   |
| UN37071 | Rsa1.0_01989.1 | 913  | 36439  | 1.00E-108 | 209  | 212  | 98 +  | 90  | 301  | 8874   | 9085   |
| UN37072 | Rsa1.0_00476.1 | 670  | 280966 | 0         | 338  | 340  | 99 -  | 190 | 529  | 204583 | 204922 |
| UN37073 | Rsa1.0_00108.1 | 746  | 478491 | 0         | 483  | 488  | 98 +  | 1   | 486  | 304736 | 305223 |
| UN37074 | Rsa1.0_00685.1 | 801  | 68515  | 0         | 797  | 800  | 99 +  | 3   | 801  | 23725  | 24524  |
| UN37075 | Rsa1.0_00836.1 | 716  | 185968 | 0         | 470  | 497  | 94 +  | 222 | 715  | 155703 | 156192 |
| UN37076 | Rsa1.0_01331.1 | 553  | 47944  | 1.00E-115 | 214  | 215  | 99 -  | 130 | 344  | 44993  | 45207  |
| UN37077 | Rsa1.0_03104.1 | 891  | 25374  | 1.00E-153 | 383  | 417  | 91 +  | 455 | 858  | 5215   | 5630   |
| UN37078 | Rsa1.0_00381.1 | 586  | 89718  | 0         | 496  | 507  | 97 -  | 81  | 586  | 75993  | 76498  |
| UN37079 | Rsa1.0_00198.1 | 1125 | 222963 | 0         | 1063 | 1136 | 93 -  | 2   | 1125 | 13520  | 14634  |
| UN37080 | Rsa1.0_05638.1 | 859  | 13098  | 0         | 537  | 547  | 98 -  | 2   | 548  | 328    | 874    |
| UN37081 | Rsa1.0_00069.1 | 551  | 403561 | 1.00E-151 | 334  | 354  | 94 +  | 1   | 347  | 9295   | 9648   |
| UN37082 | Rsa1.0_00014.1 | 773  | 348985 | 0         | 652  | 673  | 96 -  | 109 | 773  | 35237  | 35908  |
| UN37083 | Rsa1.0_01300.1 | 740  | 48942  | 1.00E-154 | 326  | 341  | 95 +  | 306 | 646  | 26044  | 26378  |
| UN37084 | Rsa1.0_00233.1 | 1024 | 104918 | 0         | 599  | 607  | 98 +  | 10  | 613  | 45564  | 46170  |
| UN37085 | Rsa1.0_00420.1 | 995  | 86496  | 0         | 829  | 878  | 94 +  | 136 | 995  | 77395  | 78262  |
| UN37086 | Rsa1.0_01006.1 | 922  | 163670 | 0         | 352  | 357  | 98 +  | 568 | 922  | 47827  | 48183  |
| UN37087 | Rsa1.0_01120.1 | 799  | 53438  | 0         | 564  | 565  | 99 -  | 3   | 567  | 33277  | 33840  |

|         |                |      |        |           |      |      |       |     |      |        |        |
|---------|----------------|------|--------|-----------|------|------|-------|-----|------|--------|--------|
| UN37088 | Rsa1.0.00131.1 | 583  | 432233 | 0         | 559  | 583  | 95 +  | 2   | 581  | 154490 | 155071 |
| UN37089 | Rsa1.0.00085.1 | 907  | 142226 | 0         | 366  | 368  | 99 -  | 252 | 619  | 50813  | 51180  |
| UN37090 | Rsa1.0.19447.1 | 651  | 1430   | 1.00E-79  | 172  | 179  | 96 +  | 473 | 651  | 638    | 816    |
| UN37091 | Rsa1.0.01674.1 | 757  | 168300 | 0         | 720  | 757  | 95 +  | 6   | 757  | 167149 | 167895 |
| UN37092 | Rsa1.0.02686.1 | 665  | 28666  | 9.00E-47  | 161  | 184  | 87 -  | 8   | 177  | 24039  | 24222  |
| UN37093 | Rsa1.0.01823.1 | 629  | 38765  | 7.00E-69  | 172  | 185  | 92 +  | 358 | 542  | 35793  | 35977  |
| UN37094 | Rsa1.0.14369.1 | 600  | 3472   | 1.00E-164 | 312  | 319  | 97 +  | 288 | 599  | 2627   | 2945   |
| UN37095 | Rsa1.0.02975.1 | 339  | 26322  | 3.00E-70  | 165  | 175  | 94 +  | 165 | 339  | 23003  | 23177  |
| UN37096 | Rsa1.0.00257.1 | 1098 | 102407 | 0         | 1090 | 1099 | 99 +  | 2   | 1098 | 48227  | 49325  |
| UN37097 | Rsa1.0.29195.1 | 1129 | 789    | 1.00E-147 | 308  | 324  | 95 -  | 3   | 324  | 1      | 312    |
| UN37098 | Rsa1.0.00858.1 | 467  | 61892  | 1.00E-102 | 191  | 192  | 99 +  | 45  | 236  | 14340  | 14531  |
| UN37099 | Rsa1.0.00781.1 | 757  | 64480  | 1.00E-103 | 190  | 190  | 100 + | 3   | 192  | 30018  | 30207  |
| UN37100 | Rsa1.0.02023.1 | 886  | 35922  | 0         | 374  | 376  | 99 -  | 3   | 378  | 15899  | 16274  |
| UN37101 | Rsa1.0.02840.1 | 948  | 27386  | 0         | 731  | 766  | 95 -  | 198 | 948  | 23810  | 24575  |
| UN37102 | Rsa1.0.01377.1 | 980  | 46967  | 0         | 958  | 997  | 96 -  | 3   | 979  | 44607  | 45600  |
| UN37103 | Rsa1.0.08008.1 | 365  | 8086   | 4.00E-97  | 192  | 196  | 97 -  | 170 | 365  | 2509   | 2704   |
| UN37104 | Rsa1.0.00427.1 | 1032 | 189678 | 0         | 399  | 409  | 97 -  | 1   | 406  | 24692  | 25100  |
| UN37105 | Rsa1.0.00990.1 | 724  | 57445  | 0         | 490  | 518  | 94 -  | 208 | 722  | 6815   | 7330   |
| UN37106 | Rsa1.0.00959.1 | 1065 | 58202  | 0         | 1060 | 1064 | 99 +  | 2   | 1065 | 21240  | 22303  |
| UN37107 | Rsa1.0.03442.1 | 1016 | 22927  | 0         | 1011 | 1018 | 99 +  | 3   | 1015 | 21658  | 22675  |
| UN37108 | Rsa1.0.00340.1 | 809  | 305782 | 0         | 781  | 820  | 95 -  | 3   | 808  | 109391 | 110191 |
| UN37109 | Rsa1.0.03550.1 | 507  | 22154  | 1.00E-127 | 263  | 274  | 95 -  | 1   | 274  | 5354   | 5627   |
| UN37110 | Rsa1.0.04161.1 | 687  | 18788  | 0         | 517  | 546  | 94 +  | 1   | 540  | 8919   | 9457   |
| UN37111 | Rsa1.0.00745.1 | 803  | 66067  | 0         | 666  | 719  | 92 -  | 2   | 718  | 2590   | 3290   |
| UN37112 | Rsa1.0.03784.1 | 1097 | 20887  | 0         | 1019 | 1032 | 98 +  | 3   | 1028 | 12822  | 13852  |
| UN37113 | Rsa1.0.00179.1 | 807  | 393324 | 0         | 719  | 758  | 94 -  | 8   | 761  | 251646 | 252391 |
| UN37114 | Rsa1.0.00522.1 | 896  | 78103  | 1.00E-141 | 308  | 323  | 95 +  | 216 | 532  | 43474  | 43796  |
| UN37115 | Rsa1.0.00886.1 | 503  | 167350 | 0         | 475  | 494  | 96 +  | 7   | 497  | 48152  | 48645  |
| UN37116 | Rsa1.0.00810.1 | 937  | 63289  | 1.00E-138 | 264  | 269  | 98 -  | 489 | 757  | 7679   | 7947   |
| UN37117 | Rsa1.0.02699.1 | 907  | 28586  | 0         | 896  | 910  | 98 -  | 3   | 907  | 5209   | 6118   |
| UN37118 | Rsa1.0.02356.1 | 726  | 141500 | 0         | 661  | 708  | 93 -  | 6   | 710  | 4994   | 5689   |
| UN37119 | Rsa1.0.01105.1 | 858  | 53958  | 0         | 753  | 771  | 97 -  | 86  | 855  | 40702  | 41472  |
| UN37120 | Rsa1.0.01046.1 | 595  | 152989 | 1.00E-171 | 325  | 332  | 97 -  | 268 | 594  | 124797 | 125128 |
| UN37121 | Rsa1.0.02224.1 | 808  | 33758  | 0         | 649  | 655  | 99 -  | 155 | 808  | 31664  | 32318  |
| UN37122 | Rsa1.0.04372.1 | 637  | 17692  | 0         | 522  | 574  | 90 +  | 2   | 571  | 9918   | 10481  |
| UN37123 | Rsa1.0.00177.1 | 368  | 143394 | 1.00E-167 | 347  | 362  | 95 +  | 2   | 363  | 28937  | 29297  |
| UN37124 | Rsa1.0.00836.1 | 970  | 185968 | 1.00E-169 | 328  | 334  | 98 -  | 638 | 970  | 17829  | 18161  |
| UN37125 | Rsa1.0.00120.1 | 541  | 277288 | 0         | 339  | 340  | 99 -  | 201 | 540  | 54678  | 55017  |
| UN37126 | Rsa1.0.00487.1 | 656  | 80674  | 0         | 404  | 405  | 99 -  | 39  | 443  | 17754  | 18158  |

|         |                |      |        |           |      |      |       |     |      |        |        |
|---------|----------------|------|--------|-----------|------|------|-------|-----|------|--------|--------|
| UN37127 | Rsa1.0.06165.1 | 1135 | 11584  | 0         | 1084 | 1144 | 94 -  | 3   | 1135 | 4084   | 5212   |
| UN37128 | Rsa1.0.00838.1 | 849  | 153820 | 1.00E-151 | 292  | 298  | 97 +  | 11  | 305  | 130782 | 131079 |
| UN37129 | Rsa1.0.00794.1 | 1024 | 64063  | 0         | 486  | 496  | 97 -  | 531 | 1022 | 22158  | 22653  |
| UN37130 | Rsa1.0.00010.1 | 734  | 294827 | 0         | 367  | 368  | 99 +  | 368 | 734  | 175510 | 175877 |
| UN37131 | Rsa1.0.03029.1 | 811  | 25858  | 1.00E-102 | 204  | 209  | 97 +  | 1   | 209  | 16773  | 16981  |
| UN37132 | Rsa1.0.00662.1 | 1165 | 192183 | 1.00E-140 | 279  | 287  | 97 -  | 882 | 1165 | 4963   | 5249   |
| UN37133 | Rsa1.0.00727.1 | 458  | 66724  | 0         | 444  | 457  | 97 -  | 2   | 458  | 46870  | 47326  |
| UN37134 | Rsa1.0.04862.1 | 408  | 15688  | 4.00E-97  | 180  | 180  | 100 + | 3   | 182  | 5061   | 5240   |
| UN37135 | Rsa1.0.04396.1 | 951  | 17561  | 0         | 369  | 379  | 97 -  | 1   | 376  | 3842   | 4220   |
| UN37136 | Rsa1.0.10927.1 | 496  | 5675   | 2.00E-47  | 112  | 117  | 95 +  | 2   | 118  | 17     | 133    |
| UN37137 | Rsa1.0.01525.1 | 602  | 43925  | 0         | 583  | 590  | 98 -  | 12  | 601  | 39840  | 40429  |
| UN37138 | Rsa1.0.00788.1 | 321  | 64237  | 2.00E-71  | 149  | 153  | 97 +  | 34  | 186  | 34653  | 34805  |
| UN37139 | Rsa1.0.00724.1 | 634  | 66789  | 0         | 531  | 567  | 93 +  | 67  | 633  | 44901  | 45466  |
| UN37140 | Rsa1.0.00806.1 | 375  | 63674  | 1.00E-166 | 349  | 368  | 94 +  | 8   | 375  | 58502  | 58861  |
| UN37141 | Rsa1.0.00759.1 | 888  | 65465  | 1.00E-122 | 244  | 251  | 97 +  | 212 | 462  | 42825  | 43075  |
| UN37142 | Rsa1.0.06433.1 | 713  | 11031  | 1.00E-129 | 253  | 259  | 97 +  | 175 | 433  | 6119   | 6377   |
| UN37143 | Rsa1.0.03236.1 | 828  | 24441  | 1.00E-159 | 303  | 308  | 98 -  | 522 | 828  | 15303  | 15610  |
| UN37144 | Rsa1.0.00341.1 | 928  | 249309 | 0         | 374  | 376  | 99 -  | 2   | 376  | 142437 | 142812 |
| UN37145 | Rsa1.0.03044.1 | 902  | 25791  | 0         | 546  | 573  | 95 +  | 336 | 902  | 22864  | 23436  |
| UN37146 | Rsa1.0.01903.1 | 682  | 37451  | 1.00E-165 | 309  | 314  | 98 -  | 252 | 565  | 23839  | 24152  |
| UN37147 | Rsa1.0.00881.1 | 782  | 61260  | 0         | 495  | 498  | 99 +  | 286 | 782  | 47365  | 47862  |
| UN37148 | Rsa1.0.00861.1 | 1099 | 61759  | 0         | 1096 | 1097 | 99 +  | 1   | 1097 | 22619  | 23715  |
| UN37149 | Rsa1.0.02029.1 | 797  | 35857  | 4.00E-80  | 548  | 680  | 80 +  | 5   | 684  | 4553   | 5232   |
| UN37150 | Rsa1.0.23752.1 | 1083 | 1027   | 1.00E-112 | 226  | 232  | 97 -  | 852 | 1083 | 80     | 308    |
| UN37151 | Rsa1.0.05871.1 | 613  | 12356  | 0         | 491  | 508  | 96 +  | 3   | 510  | 4421   | 4913   |
| UN37152 | Rsa1.0.00004.1 | 1192 | 253996 | 1.00E-164 | 330  | 342  | 96 +  | 3   | 344  | 19970  | 20307  |
| UN37153 | Rsa1.0.03912.1 | 1452 | 135266 | 0         | 380  | 383  | 99 -  | 3   | 385  | 15904  | 16286  |
| UN37154 | Rsa1.0.13743.1 | 585  | 4394   | 1.00E-102 | 201  | 204  | 98 +  | 159 | 360  | 1151   | 1354   |
| UN37155 | Rsa1.0.00840.1 | 579  | 62514  | 0         | 538  | 576  | 93 +  | 2   | 577  | 28526  | 29088  |
| UN37156 | Rsa1.0.01752.1 | 794  | 39805  | 0         | 775  | 794  | 97 +  | 2   | 794  | 31694  | 32487  |
| UN37157 | Rsa1.0.00096.1 | 1190 | 198773 | 1.00E-101 | 257  | 280  | 91 +  | 3   | 282  | 174078 | 174348 |
| UN37158 | Rsa1.0.00143.1 | 855  | 121313 | 0         | 399  | 418  | 95 -  | 440 | 855  | 98871  | 99287  |
| UN37159 | Rsa1.0.04324.1 | 763  | 17903  | 1.00E-80  | 368  | 435  | 84 +  | 51  | 480  | 12610  | 13043  |
| UN37160 | Rsa1.0.05415.1 | 925  | 13830  | 0         | 741  | 744  | 99 -  | 2   | 742  | 10745  | 11488  |
| UN37161 | Rsa1.0.00016.1 | 624  | 831256 | 1.00E-122 | 293  | 313  | 93 +  | 313 | 624  | 578847 | 579155 |
| UN37162 | Rsa1.0.07611.1 | 756  | 9025   | 0         | 756  | 756  | 100 + | 1   | 756  | 3715   | 4470   |
| UN37163 | Rsa1.0.00032.1 | 962  | 306326 | 1.00E-110 | 217  | 222  | 97 +  | 739 | 960  | 204411 | 204632 |
| UN37164 | Rsa1.0.04331.1 | 936  | 140984 | 1.00E-169 | 374  | 395  | 94 -  | 542 | 935  | 16781  | 17170  |
| UN37165 | Rsa1.0.00040.1 | 1208 | 324196 | 0         | 1202 | 1206 | 99 -  | 3   | 1208 | 322448 | 323653 |

|         |                |      |        |           |      |      |       |     |      |        |        |
|---------|----------------|------|--------|-----------|------|------|-------|-----|------|--------|--------|
| UN37166 | Rsa1.0.00067.1 | 624  | 415055 | 0         | 618  | 618  | 100 - | 2   | 619  | 347690 | 348307 |
| UN37167 | Rsa1.0.05762.1 | 851  | 12715  | 0         | 561  | 609  | 92 +  | 242 | 838  | 7475   | 8080   |
| UN37168 | Rsa1.0.05112.1 | 814  | 14814  | 1.00E-127 | 288  | 308  | 93 -  | 451 | 750  | 11207  | 11514  |
| UN37169 | Rsa1.0.01178.1 | 660  | 51571  | 0         | 510  | 522  | 97 -  | 137 | 658  | 48628  | 49146  |
| UN37170 | Rsa1.0.00713.1 | 840  | 158017 | 1.00E-111 | 281  | 304  | 92 -  | 540 | 840  | 31139  | 31442  |
| UN37171 | Rsa1.0.01455.1 | 655  | 45440  | 0         | 638  | 652  | 97 -  | 2   | 651  | 42217  | 42868  |
| UN37172 | Rsa1.0.03689.1 | 1024 | 21354  | 4.00E-87  | 321  | 372  | 86 -  | 1   | 371  | 15469  | 15840  |
| UN37173 | Rsa1.0.00215.1 | 890  | 201775 | 1.00E-104 | 204  | 208  | 98 +  | 628 | 835  | 80326  | 80533  |
| UN37174 | Rsa1.0.00740.1 | 852  | 215972 | 0         | 825  | 851  | 96 -  | 2   | 852  | 9256   | 10103  |
| UN37175 | Rsa1.0.33678.1 | 1024 | 673    | 0         | 640  | 651  | 98 -  | 240 | 886  | 24     | 673    |
| UN37176 | Rsa1.0.03032.1 | 703  | 25836  | 0         | 627  | 657  | 95 -  | 3   | 657  | 7741   | 8391   |
| UN37177 | Rsa1.0.00013.1 | 832  | 292129 | 0         | 382  | 391  | 97 +  | 290 | 680  | 143915 | 144305 |
| UN37178 | Rsa1.0.00878.1 | 832  | 330303 | 1.00E-150 | 303  | 313  | 96 -  | 1   | 311  | 113554 | 113866 |
| UN37179 | Rsa1.0.00876.1 | 779  | 61328  | 9.00E-69  | 193  | 213  | 90 +  | 1   | 213  | 42181  | 42393  |
| UN37180 | Rsa1.0.01095.1 | 1066 | 54276  | 0         | 734  | 794  | 92 -  | 303 | 1066 | 26334  | 27124  |
| UN37181 | Rsa1.0.02382.1 | 506  | 31969  | 0         | 379  | 380  | 99 -  | 127 | 506  | 28188  | 28567  |
| UN37182 | Rsa1.0.00087.1 | 1248 | 761073 | 1.00E-157 | 423  | 470  | 90 +  | 501 | 961  | 101080 | 101549 |
| UN37183 | Rsa1.0.00866.1 | 870  | 61676  | 1.00E-148 | 266  | 266  | 100 + | 604 | 869  | 28145  | 28410  |
| UN37184 | Rsa1.0.00258.1 | 663  | 102381 | 1.00E-100 | 218  | 231  | 94 -  | 23  | 242  | 9067   | 9297   |
| UN37185 | Rsa1.0.00552.1 | 643  | 206757 | 2.33E-156 | 277  | 281  | 98 -  | 362 | 640  | 51512  | 51792  |
| UN37186 | Rsa1.0.00751.1 | 1030 | 65759  | 0         | 331  | 332  | 99 +  | 698 | 1029 | 14946  | 15277  |
| UN37187 | Rsa1.0.00890.1 | 879  | 323870 | 0         | 571  | 574  | 99 -  | 305 | 877  | 205226 | 205799 |
| UN37188 | Rsa1.0.07542.1 | 803  | 9160   | 0         | 334  | 334  | 100 - | 469 | 802  | 7474   | 7807   |
| UN37189 | Rsa1.0.26579.1 | 816  | 885    | 0         | 411  | 424  | 96 -  | 272 | 695  | 462    | 883    |
| UN37190 | Rsa1.0.00169.1 | 650  | 274298 | 0         | 508  | 521  | 97 +  | 76  | 596  | 60050  | 60570  |
| UN37191 | Rsa1.0.00201.1 | 830  | 232851 | 0         | 801  | 847  | 94 +  | 3   | 826  | 138744 | 139587 |
| UN37192 | Rsa1.0.03117.1 | 822  | 25295  | 0         | 813  | 815  | 99 +  | 4   | 818  | 16896  | 17710  |
| UN37193 | Rsa1.0.00451.1 | 629  | 322533 | 0         | 560  | 583  | 96 -  | 51  | 629  | 248630 | 249205 |
| UN37194 | Rsa1.0.00376.1 | 774  | 90101  | 0         | 418  | 419  | 99 +  | 2   | 420  | 32436  | 32854  |
| UN37195 | Rsa1.0.00175.1 | 1027 | 166121 | 0         | 1020 | 1026 | 99 -  | 2   | 1027 | 42044  | 43068  |
| UN37196 | Rsa1.0.05909.1 | 554  | 12265  | 0         | 545  | 552  | 98 -  | 3   | 554  | 9630   | 10179  |
| UN37197 | Rsa1.0.00112.1 | 614  | 132199 | 0         | 418  | 418  | 100 - | 195 | 612  | 13739  | 14156  |
| UN37198 | Rsa1.0.00380.1 | 797  | 89748  | 1.00E-141 | 254  | 254  | 100 + | 544 | 797  | 47239  | 47492  |
| UN37199 | Rsa1.0.00101.1 | 1145 | 267193 | 0         | 1140 | 1144 | 99 -  | 2   | 1145 | 228038 | 229181 |
| UN37200 | Rsa1.0.01507.1 | 933  | 44361  | 0         | 497  | 506  | 98 -  | 428 | 933  | 17537  | 18041  |
| UN37201 | Rsa1.0.00071.1 | 701  | 345714 | 0         | 445  | 468  | 95 +  | 3   | 470  | 58298  | 58764  |
| UN37202 | Rsa1.0.02680.1 | 631  | 28721  | 1.00E-135 | 248  | 249  | 99 -  | 383 | 631  | 8539   | 8787   |
| UN37203 | Rsa1.0.04545.1 | 369  | 146799 | 1.00E-100 | 228  | 241  | 94 -  | 102 | 341  | 15291  | 15531  |
| UN37204 | Rsa1.0.00132.1 | 1026 | 124299 | 0         | 529  | 540  | 97 -  | 483 | 1022 | 88217  | 88755  |

|         |                |      |        |           |      |      |       |     |      |        |        |
|---------|----------------|------|--------|-----------|------|------|-------|-----|------|--------|--------|
| UN37205 | Rsa1.0.03193.1 | 1239 | 24690  | 0         | 798  | 805  | 99 -  | 273 | 1077 | 3258   | 4062   |
| UN37206 | Rsa1.0.01782.1 | 1286 | 39384  | 0         | 960  | 1004 | 95 +  | 282 | 1285 | 20788  | 21776  |
| UN37207 | Rsa1.0.05842.1 | 958  | 12461  | 0         | 446  | 456  | 97 -  | 267 | 722  | 5021   | 5473   |
| UN37208 | Rsa1.0.02158.1 | 1117 | 154841 | 0         | 1094 | 1101 | 99 -  | 18  | 1117 | 121551 | 122651 |
| UN37209 | Rsa1.0.06108.1 | 672  | 11730  | 0         | 511  | 518  | 98 +  | 155 | 672  | 1130   | 1644   |
| UN37210 | Rsa1.0.03058.1 | 1366 | 25715  | 0         | 365  | 372  | 98 +  | 716 | 1087 | 7715   | 8086   |
| UN37211 | Rsa1.0.10379.1 | 597  | 5866   | 1.00E-162 | 296  | 297  | 99 -  | 3   | 299  | 5435   | 5730   |
| UN37212 | Rsa1.0.01595.1 | 1568 | 175383 | 0         | 544  | 547  | 99 +  | 2   | 548  | 167493 | 168039 |
| UN37213 | Rsa1.0.01024.1 | 753  | 56569  | 3.00E-16  | 123  | 145  | 84 +  | 141 | 284  | 41445  | 41587  |
| UN37214 | Rsa1.0.00257.1 | 740  | 102407 | 1.00E-170 | 315  | 319  | 98 -  | 415 | 733  | 14675  | 14993  |
| UN37215 | Rsa1.0.03822.1 | 795  | 20640  | 1.00E-153 | 277  | 278  | 99 -  | 518 | 795  | 11977  | 12254  |
| UN37216 | Rsa1.0.02925.1 | 1147 | 26720  | 0         | 1063 | 1146 | 92 -  | 2   | 1147 | 9234   | 10373  |
| UN37217 | Rsa1.0.21197.1 | 698  | 1226   | 5.00E-98  | 200  | 206  | 97 -  | 255 | 460  | 1021   | 1226   |
| UN37218 | Rsa1.0.00528.1 | 794  | 164755 | 0         | 782  | 796  | 98 -  | 3   | 794  | 103335 | 104130 |
| UN37219 | Rsa1.0.01673.1 | 719  | 41197  | 0         | 455  | 486  | 93 +  | 140 | 621  | 15354  | 15832  |
| UN37220 | Rsa1.0.04041.1 | 1240 | 19430  | 0         | 1201 | 1249 | 96 +  | 4   | 1240 | 2004   | 3245   |
| UN37221 | Rsa1.0.00368.1 | 869  | 90669  | 0         | 624  | 671  | 92 -  | 81  | 747  | 11925  | 12569  |
| UN37222 | Rsa1.0.35727.1 | 859  | 633    | 1.00E-156 | 288  | 291  | 98 -  | 275 | 565  | 197    | 487    |
| UN37223 | Rsa1.0.03809.1 | 803  | 20731  | 0         | 772  | 799  | 96 -  | 8   | 803  | 4585   | 5383   |
| UN37224 | Rsa1.0.04483.1 | 852  | 17174  | 0         | 787  | 791  | 99 -  | 62  | 852  | 1002   | 1792   |
| UN37225 | Rsa1.0.00079.1 | 659  | 606987 | 0         | 591  | 592  | 99 -  | 68  | 659  | 100045 | 100636 |
| UN37226 | Rsa1.0.03362.1 | 1306 | 23453  | 0         | 1203 | 1208 | 99 +  | 99  | 1306 | 17895  | 19102  |
| UN37227 | Rsa1.0.50113.1 | 645  | 453    | 1.00E-118 | 227  | 231  | 98 -  | 415 | 645  | 75     | 305    |
| UN37228 | Rsa1.0.56882.1 | 888  | 402    | 2.00E-57  | 120  | 122  | 98 -  | 399 | 520  | 1      | 122    |
| UN37229 | Rsa1.0.00182.1 | 1121 | 142305 | 1.00E-147 | 403  | 447  | 90 -  | 665 | 1099 | 94978  | 95422  |
| UN37230 | Rsa1.0.03352.1 | 914  | 23506  | 0         | 337  | 337  | 100 + | 578 | 914  | 9339   | 9675   |
| UN37231 | Rsa1.0.00003.1 | 682  | 340054 | 1.00E-162 | 386  | 419  | 92 -  | 3   | 421  | 329831 | 330236 |
| UN37232 | Rsa1.0.00332.1 | 1011 | 94575  | 0         | 960  | 1016 | 94 +  | 2   | 1009 | 21241  | 22240  |
| UN37233 | Rsa1.0.10922.1 | 668  | 5677   | 0         | 588  | 589  | 99 -  | 3   | 591  | 541    | 1129   |
| UN37234 | Rsa1.0.06197.1 | 551  | 11510  | 0         | 430  | 436  | 98 -  | 1   | 436  | 4120   | 4555   |
| UN37235 | Rsa1.0.00112.1 | 970  | 132199 | 0         | 422  | 435  | 97 -  | 6   | 440  | 120069 | 120503 |
| UN37236 | Rsa1.0.00305.1 | 1003 | 97308  | 1.00E-90  | 170  | 170  | 100 - | 279 | 448  | 4967   | 5136   |
| UN37237 | Rsa1.0.01719.1 | 931  | 40388  | 0         | 406  | 423  | 95 +  | 383 | 805  | 21193  | 21615  |
| UN37238 | Rsa1.0.07837.1 | 510  | 8449   | 1.00E-150 | 307  | 318  | 96 -  | 191 | 508  | 6534   | 6850   |
| UN37239 | Rsa1.0.00117.1 | 1000 | 213118 | 4.00E-16  | 82   | 93   | 88 +  | 44  | 136  | 115907 | 115998 |
| UN37240 | Rsa1.0.02727.1 | 598  | 28404  | 1.00E-180 | 350  | 360  | 97 +  | 85  | 444  | 3533   | 3892   |
| UN37241 | Rsa1.0.00639.1 | 764  | 165873 | 1.00E-117 | 235  | 242  | 97 -  | 121 | 362  | 143616 | 143857 |
| UN37242 | Rsa1.0.01565.1 | 815  | 155447 | 0         | 640  | 644  | 99 -  | 172 | 815  | 23101  | 23740  |
| UN37243 | Rsa1.0.00027.1 | 642  | 283362 | 0         | 629  | 640  | 98 -  | 3   | 642  | 67016  | 67655  |

|         |                |      |        |           |      |      |       |     |      |        |        |
|---------|----------------|------|--------|-----------|------|------|-------|-----|------|--------|--------|
| UN37244 | Rsa1.0.00848.1 | 660  | 152362 | 1.00E-119 | 309  | 333  | 92 +  | 331 | 660  | 6512   | 6836   |
| UN37245 | Rsa1.0.06615.1 | 675  | 10659  | 0         | 330  | 331  | 99 -  | 343 | 673  | 5565   | 5894   |
| UN37246 | Rsa1.0.00085.1 | 263  | 142226 | 1.00E-139 | 259  | 262  | 98 +  | 2   | 263  | 57024  | 57285  |
| UN37247 | Rsa1.0.00376.1 | 750  | 90101  | 1.00E-123 | 240  | 245  | 97 +  | 137 | 381  | 62541  | 62785  |
| UN37248 | Rsa1.0.00047.1 | 816  | 168582 | 0         | 530  | 544  | 97 -  | 118 | 661  | 96256  | 96799  |
| UN37249 | Rsa1.0.16390.1 | 982  | 2169   | 0         | 950  | 977  | 97 -  | 3   | 977  | 383    | 1353   |
| UN37250 | Rsa1.0.00128.1 | 1257 | 228675 | 0         | 1209 | 1213 | 99 +  | 46  | 1256 | 31107  | 32319  |
| UN37251 | Rsa1.0.00261.1 | 745  | 151157 | 0         | 718  | 752  | 95 +  | 3   | 744  | 6874   | 7621   |
| UN37252 | Rsa1.0.03392.1 | 1015 | 23248  | 0         | 914  | 927  | 98 +  | 85  | 1011 | 16399  | 17325  |
| UN37253 | Rsa1.0.00435.1 | 582  | 317579 | 1.00E-168 | 306  | 307  | 99 +  | 277 | 582  | 72603  | 72909  |
| UN37254 | Rsa1.0.03283.1 | 870  | 24089  | 0         | 328  | 329  | 99 +  | 3   | 331  | 2702   | 3030   |
| UN37255 | Rsa1.0.03843.1 | 767  | 20496  | 1.00E-100 | 274  | 303  | 90 +  | 232 | 534  | 4496   | 4790   |
| UN37256 | Rsa1.0.00417.1 | 1104 | 395068 | 1.00E-141 | 317  | 338  | 93 +  | 554 | 891  | 4931   | 5268   |
| UN37257 | Rsa1.0.00701.1 | 786  | 67691  | 1.00E-165 | 536  | 601  | 89 -  | 191 | 781  | 64977  | 65568  |
| UN37258 | Rsa1.0.01148.1 | 1086 | 52375  | 1.00E-156 | 280  | 280  | 100 + | 334 | 613  | 27134  | 27413  |
| UN37259 | Rsa1.0.01899.1 | 812  | 37474  | 0         | 468  | 470  | 99 -  | 146 | 615  | 36248  | 36717  |
| UN37260 | Rsa1.0.04811.1 | 876  | 15885  | 0         | 625  | 628  | 99 -  | 249 | 876  | 10941  | 11568  |
| UN37261 | Rsa1.0.08935.1 | 907  | 6771   | 1.00E-125 | 282  | 300  | 94 +  | 17  | 313  | 2026   | 2319   |
| UN37262 | Rsa1.0.01201.1 | 943  | 50856  | 1.00E-152 | 285  | 289  | 98 -  | 1   | 289  | 1      | 289    |
| UN37263 | Rsa1.0.38291.1 | 1210 | 588    | 1.00E-161 | 325  | 337  | 96 +  | 131 | 467  | 1      | 337    |
| UN37264 | Rsa1.0.00093.1 | 884  | 214962 | 1.00E-160 | 296  | 298  | 99 -  | 3   | 298  | 71629  | 71926  |
| UN37265 | Rsa1.0.00034.1 | 643  | 260119 | 1.00E-145 | 301  | 313  | 96 -  | 12  | 323  | 21894  | 22206  |
| UN37266 | Rsa1.0.01202.1 | 1176 | 158825 | 0         | 708  | 720  | 98 +  | 2   | 721  | 158106 | 158825 |
| UN37267 | Rsa1.0.00383.1 | 705  | 398431 | 0         | 704  | 704  | 100 + | 2   | 705  | 197666 | 198369 |
| UN37268 | Rsa1.0.18123.1 | 793  | 1662   | 2.00E-79  | 151  | 151  | 100 - | 179 | 329  | 128    | 278    |
| UN37269 | Rsa1.0.03098.1 | 742  | 25431  | 0         | 398  | 400  | 99 -  | 2   | 401  | 5908   | 6307   |
| UN37270 | Rsa1.0.00015.1 | 720  | 561803 | 1.00E-113 | 322  | 360  | 89 -  | 371 | 711  | 22137  | 22495  |
| UN37271 | Rsa1.0.01921.1 | 683  | 168088 | 2.33E-156 | 294  | 304  | 96 -  | 285 | 585  | 144486 | 144789 |
| UN37272 | Rsa1.0.02009.1 | 994  | 36100  | 0         | 865  | 867  | 99 +  | 3   | 869  | 33095  | 33961  |
| UN37273 | Rsa1.0.07100.1 | 1234 | 9896   | 0         | 1186 | 1240 | 95 -  | 1   | 1234 | 4240   | 5466   |
| UN37274 | Rsa1.0.01099.1 | 1184 | 158481 | 1.00E-175 | 394  | 422  | 93 -  | 75  | 496  | 15569  | 15984  |
| UN37275 | Rsa1.0.00260.1 | 929  | 102021 | 0         | 412  | 421  | 97 -  | 1   | 418  | 73978  | 74396  |
| UN37276 | Rsa1.0.01880.1 | 624  | 37745  | 0         | 573  | 590  | 97 +  | 35  | 624  | 16488  | 17064  |
| UN37277 | Rsa1.0.02219.1 | 626  | 33798  | 1.00E-158 | 285  | 286  | 99 -  | 341 | 626  | 6870   | 7155   |
| UN37278 | Rsa1.0.01308.1 | 1026 | 48596  | 4.00E-50  | 134  | 142  | 94 +  | 516 | 656  | 4835   | 4975   |
| UN37279 | Rsa1.0.01223.1 | 930  | 50392  | 1.00E-175 | 326  | 331  | 98 +  | 3   | 333  | 32496  | 32826  |
| UN37280 | Rsa1.0.21164.1 | 684  | 1229   | 1.00E-138 | 294  | 305  | 96 +  | 344 | 647  | 836    | 1137   |
| UN37281 | Rsa1.0.19730.1 | 875  | 1391   | 1.00E-135 | 248  | 249  | 99 -  | 627 | 875  | 1143   | 1391   |
| UN37282 | Rsa1.0.03073.1 | 717  | 25574  | 1.00E-112 | 206  | 206  | 100 - | 4   | 209  | 12140  | 12345  |

|         |                |      |        |           |      |      |       |     |      |        |        |
|---------|----------------|------|--------|-----------|------|------|-------|-----|------|--------|--------|
| UN37283 | Rsa1.0.00668.1 | 824  | 69421  | 0         | 697  | 730  | 95 +  | 1   | 718  | 29271  | 29998  |
| UN37284 | Rsa1.0.00543.1 | 428  | 76788  | 0         | 340  | 343  | 99 +  | 86  | 428  | 51011  | 51353  |
| UN37285 | Rsa1.0.02653.1 | 898  | 29030  | 5.00E-37  | 104  | 112  | 92 -  | 102 | 213  | 232    | 343    |
| UN37286 | Rsa1.0.00449.1 | 1197 | 83863  | 0         | 595  | 610  | 97 +  | 1   | 609  | 32956  | 33563  |
| UN37287 | Rsa1.0.00338.1 | 636  | 94109  | 0         | 631  | 638  | 98 -  | 3   | 636  | 69391  | 70028  |
| UN37288 | Rsa1.0.07943.1 | 686  | 8207   | 0         | 673  | 678  | 99 +  | 1   | 678  | 4395   | 5072   |
| UN37289 | Rsa1.0.01865.1 | 537  | 37992  | 0         | 532  | 538  | 98 +  | 2   | 537  | 30607  | 31144  |
| UN37290 | Rsa1.0.00365.1 | 1227 | 90902  | 0         | 415  | 417  | 99 +  | 811 | 1227 | 14660  | 15076  |
| UN37291 | Rsa1.0.00089.1 | 818  | 406142 | 0         | 756  | 777  | 97 -  | 3   | 775  | 404284 | 405058 |
| UN37292 | Rsa1.0.00067.1 | 384  | 415055 | 1.00E-126 | 294  | 315  | 93 +  | 2   | 315  | 220073 | 220376 |
| UN37293 | Rsa1.0.03454.1 | 1396 | 149870 | 0         | 1387 | 1396 | 99 +  | 1   | 1396 | 136367 | 137762 |
| UN37294 | Rsa1.0.00006.1 | 593  | 396176 | 1.00E-58  | 168  | 184  | 91 -  | 42  | 224  | 182656 | 182839 |
| UN37295 | Rsa1.0.00032.1 | 1131 | 306326 | 1.00E-132 | 272  | 285  | 95 +  | 847 | 1131 | 293778 | 294051 |
| UN37296 | Rsa1.0.00858.1 | 541  | 61892  | 0         | 528  | 544  | 97 -  | 1   | 541  | 36381  | 36924  |
| UN37297 | Rsa1.0.03798.1 | 691  | 20800  | 0         | 407  | 410  | 99 +  | 3   | 412  | 3932   | 4341   |
| UN37298 | Rsa1.0.05140.1 | 607  | 14710  | 0         | 598  | 605  | 98 +  | 3   | 605  | 2889   | 3493   |
| UN37299 | Rsa1.0.00221.1 | 1004 | 106972 | 0         | 971  | 976  | 99 +  | 29  | 1004 | 82038  | 83013  |
| UN37300 | Rsa1.0.10033.1 | 866  | 6031   | 0         | 382  | 382  | 100 + | 450 | 831  | 1095   | 1476   |
| UN37301 | Rsa1.0.00127.1 | 476  | 127446 | 5.00E-60  | 165  | 180  | 91 +  | 104 | 280  | 25003  | 25182  |
| UN37302 | Rsa1.0.04464.1 | 718  | 17241  | 0         | 680  | 703  | 96 -  | 15  | 713  | 665    | 1367   |
| UN37303 | Rsa1.0.03264.1 | 951  | 145959 | 1.00E-158 | 294  | 297  | 98 -  | 1   | 297  | 127971 | 128264 |
| UN37304 | Rsa1.0.27606.1 | 684  | 846    | 1.00E-167 | 355  | 370  | 95 -  | 317 | 684  | 478    | 846    |
| UN37305 | Rsa1.0.02142.1 | 1277 | 34633  | 1.00E-157 | 322  | 335  | 96 -  | 2   | 336  | 27761  | 28092  |
| UN37306 | Rsa1.0.01240.1 | 1232 | 50075  | 0         | 431  | 435  | 99 +  | 798 | 1232 | 11712  | 12146  |
| UN37307 | Rsa1.0.08098.1 | 389  | 7914   | 1.00E-121 | 223  | 224  | 99 +  | 165 | 388  | 5202   | 5425   |
| UN37308 | Rsa1.0.01081.1 | 791  | 499226 | 0         | 473  | 477  | 99 +  | 311 | 786  | 154135 | 154611 |
| UN37309 | Rsa1.0.05913.1 | 439  | 12254  | 1.00E-121 | 232  | 236  | 98 -  | 204 | 439  | 3920   | 4155   |
| UN37310 | Rsa1.0.00018.1 | 1205 | 410899 | 0         | 935  | 941  | 99 -  | 84  | 1024 | 358769 | 359709 |
| UN37311 | Rsa1.0.05266.1 | 841  | 14320  | 0         | 823  | 826  | 99 +  | 3   | 828  | 5788   | 6613   |
| UN37312 | Rsa1.0.00648.1 | 899  | 70351  | 0         | 805  | 883  | 91 +  | 14  | 878  | 64432  | 65304  |
| UN37313 | Rsa1.0.01247.1 | 1143 | 49934  | 0         | 686  | 688  | 99 -  | 455 | 1142 | 32120  | 32807  |
| UN37314 | Rsa1.0.02826.1 | 660  | 27560  | 2.00E-85  | 203  | 217  | 93 -  | 250 | 466  | 21708  | 21924  |
| UN37315 | Rsa1.0.04758.1 | 575  | 16112  | 0         | 572  | 575  | 99 -  | 3   | 575  | 10404  | 10978  |
| UN37316 | Rsa1.0.02098.1 | 1176 | 35032  | 1.00E-122 | 247  | 255  | 96 -  | 785 | 1039 | 19495  | 19749  |
| UN37317 | Rsa1.0.04190.1 | 1000 | 18581  | 1.00E-144 | 269  | 271  | 99 +  | 731 | 1000 | 5603   | 5873   |
| UN37318 | Rsa1.0.03934.1 | 940  | 19984  | 0         | 633  | 669  | 94 -  | 2   | 666  | 3504   | 4162   |
| UN37319 | Rsa1.0.01460.1 | 947  | 45255  | 1.00E-171 | 320  | 325  | 98 -  | 622 | 946  | 27244  | 27568  |
| UN37320 | Rsa1.0.03923.1 | 492  | 20057  | 0         | 487  | 491  | 99 +  | 1   | 491  | 7714   | 8203   |
| UN37321 | Rsa1.0.01434.1 | 1069 | 45951  | 0         | 514  | 558  | 92 -  | 535 | 1069 | 27584  | 28132  |

|         |                |      |        |           |      |      |       |     |      |        |        |
|---------|----------------|------|--------|-----------|------|------|-------|-----|------|--------|--------|
| UN37322 | Rsa1.0.00193.1 | 552  | 194198 | 1.00E-164 | 306  | 309  | 99 -  | 243 | 551  | 102935 | 103242 |
| UN37323 | Rsa1.0.00220.1 | 1238 | 192936 | 1.00E-162 | 337  | 350  | 96 +  | 885 | 1233 | 180567 | 180915 |
| UN37324 | Rsa1.0.00032.1 | 654  | 306326 | 0         | 650  | 651  | 99 +  | 3   | 653  | 205715 | 206365 |
| UN37325 | Rsa1.0.00236.1 | 763  | 104771 | 2.00E-60  | 119  | 119  | 100 - | 2   | 120  | 24378  | 24496  |
| UN37326 | Rsa1.0.02169.1 | 285  | 34367  | 1.00E-128 | 251  | 256  | 98 -  | 30  | 285  | 3935   | 4189   |
| UN37327 | Rsa1.0.01191.1 | 1079 | 51235  | 1.00E-121 | 231  | 234  | 98 -  | 99  | 332  | 8901   | 9134   |
| UN37328 | Rsa1.0.00344.1 | 1221 | 191774 | 1.00E-166 | 299  | 300  | 99 +  | 922 | 1221 | 5045   | 5344   |
| UN37329 | Rsa1.0.00878.1 | 872  | 330303 | 0         | 590  | 602  | 98 -  | 272 | 872  | 302837 | 303436 |
| UN37330 | Rsa1.0.00539.1 | 836  | 76926  | 1.00E-167 | 310  | 314  | 98 -  | 154 | 467  | 34341  | 34654  |
| UN37331 | Rsa1.0.01152.1 | 403  | 52264  | 1.00E-112 | 304  | 337  | 90 -  | 67  | 403  | 8211   | 8547   |
| UN37332 | Rsa1.0.00837.1 | 682  | 62568  | 0         | 678  | 680  | 99 +  | 3   | 682  | 8735   | 9414   |
| UN37333 | Rsa1.0.01514.1 | 876  | 44222  | 0         | 872  | 874  | 99 +  | 3   | 876  | 2885   | 3758   |
| UN37334 | Rsa1.0.06014.1 | 770  | 11930  | 0         | 765  | 768  | 99 +  | 1   | 765  | 10246  | 11013  |
| UN37335 | Rsa1.0.01718.1 | 859  | 40389  | 2.00E-73  | 141  | 141  | 100 - | 136 | 276  | 39691  | 39831  |
| UN37336 | Rsa1.0.01365.1 | 540  | 47142  | 0         | 533  | 537  | 99 +  | 4   | 540  | 4613   | 5149   |
| UN37337 | Rsa1.0.03208.1 | 519  | 24599  | 5.00E-11  | 66   | 76   | 86 -  | 444 | 519  | 19171  | 19246  |
| UN37338 | Rsa1.0.00603.1 | 931  | 73299  | 3.00E-78  | 158  | 161  | 98 +  | 48  | 208  | 17269  | 17429  |
| UN37339 | Rsa1.0.00538.1 | 1283 | 77149  | 0         | 1058 | 1176 | 89 -  | 140 | 1283 | 63983  | 65124  |
| UN37340 | Rsa1.0.00108.1 | 692  | 478491 | 1.00E-83  | 379  | 447  | 84 +  | 247 | 671  | 436861 | 437301 |
| UN37341 | Rsa1.0.02032.1 | 1073 | 35830  | 0         | 923  | 925  | 99 -  | 149 | 1073 | 23332  | 24256  |
| UN37342 | Rsa1.0.00681.1 | 1003 | 68779  | 0         | 508  | 527  | 96 +  | 6   | 532  | 37343  | 37869  |
| UN37343 | Rsa1.0.00016.1 | 520  | 831256 | 0         | 494  | 519  | 95 +  | 3   | 520  | 673765 | 674274 |
| UN37344 | Rsa1.0.00064.1 | 1190 | 240927 | 0         | 609  | 657  | 92 -  | 533 | 1186 | 48595  | 49240  |
| UN37345 | Rsa1.0.04325.1 | 1045 | 17885  | 0         | 1040 | 1044 | 99 -  | 1   | 1044 | 12306  | 13348  |
| UN37346 | Rsa1.0.01806.1 | 1173 | 39021  | 0         | 1035 | 1126 | 91 +  | 67  | 1173 | 36391  | 37478  |
| UN37347 | Rsa1.0.01517.1 | 742  | 44170  | 0         | 562  | 572  | 98 +  | 3   | 574  | 19921  | 20492  |
| UN37348 | Rsa1.0.02836.1 | 740  | 27481  | 0         | 736  | 738  | 99 +  | 3   | 740  | 11299  | 12036  |
| UN37349 | Rsa1.0.00024.1 | 918  | 188018 | 0         | 649  | 665  | 97 -  | 3   | 667  | 19066  | 19730  |
| UN37350 | Rsa1.0.08095.1 | 632  | 7916   | 0         | 408  | 414  | 98 -  | 224 | 632  | 4566   | 4979   |
| UN37351 | Rsa1.0.00951.1 | 1157 | 164588 | 0         | 1150 | 1155 | 99 -  | 1   | 1155 | 40771  | 41923  |
| UN37352 | Rsa1.0.01364.1 | 739  | 47172  | 0         | 734  | 738  | 99 -  | 3   | 739  | 45233  | 45970  |
| UN37353 | Rsa1.0.00233.1 | 988  | 104918 | 0         | 577  | 583  | 98 +  | 407 | 986  | 95556  | 96138  |
| UN37354 | Rsa1.0.02965.1 | 1138 | 26402  | 1.00E-135 | 486  | 557  | 87 +  | 575 | 1126 | 1446   | 2000   |
| UN37355 | Rsa1.0.03922.1 | 618  | 20060  | 1.00E-154 | 324  | 340  | 95 +  | 279 | 618  | 2801   | 3140   |
| UN37356 | Rsa1.0.00007.1 | 372  | 239325 | 0         | 365  | 369  | 98 -  | 3   | 371  | 127459 | 127827 |
| UN37357 | Rsa1.0.00301.1 | 836  | 365315 | 0         | 485  | 491  | 98 +  | 349 | 835  | 182014 | 182504 |
| UN37358 | Rsa1.0.00948.1 | 1141 | 58620  | 0         | 987  | 991  | 99 +  | 2   | 992  | 47024  | 48014  |
| UN37359 | Rsa1.0.01514.1 | 796  | 44222  | 5.00E-92  | 271  | 300  | 90 +  | 279 | 571  | 4353   | 4651   |
| UN37360 | Rsa1.0.12301.1 | 998  | 5261   | 0         | 691  | 712  | 97 +  | 287 | 998  | 1      | 712    |



|         |                |      |        |           |     |     |      |     |      |        |        |
|---------|----------------|------|--------|-----------|-----|-----|------|-----|------|--------|--------|
| UN37361 | Rsa1.0.01312.1 | 995  | 48401  | 0         | 646 | 688 | 93 + | 307 | 994  | 45223  | 45893  |
| UN37362 | Rsa1.0.28982.1 | 909  | 797    | 0         | 762 | 797 | 95 + | 94  | 889  | 1      | 797    |
| UN37363 | Rsa1.0.01493.1 | 835  | 44670  | 1.00E-160 | 377 | 400 | 94 - | 315 | 708  | 21960  | 22356  |
| UN37364 | Rsa1.0.14996.1 | 942  | 2904   | 0         | 849 | 894 | 94 - | 52  | 940  | 2023   | 2904   |
| UN37365 | Rsa1.0.00940.1 | 763  | 179946 | 0         | 669 | 719 | 93 + | 52  | 762  | 10505  | 11220  |
| UN37366 | Rsa1.0.16755.1 | 831  | 2045   | 0         | 769 | 812 | 94 + | 1   | 810  | 433    | 1243   |
| UN37367 | Rsa1.0.00189.1 | 1055 | 111830 | 1.00E-124 | 236 | 239 | 98 - | 1   | 239  | 78943  | 79181  |
| UN37368 | Rsa1.0.00016.1 | 440  | 831256 | 1.00E-120 | 243 | 251 | 96 + | 44  | 294  | 647365 | 647615 |
| UN37369 | Rsa1.0.29977.1 | 1175 | 766    | 0         | 581 | 600 | 96 - | 583 | 1175 | 168    | 766    |
| UN37370 | Rsa1.0.00736.1 | 862  | 66455  | 1.00E-115 | 383 | 437 | 87 + | 9   | 440  | 7219   | 7650   |
| UN37371 | Rsa1.0.01059.1 | 1027 | 55410  | 0         | 347 | 355 | 97 - | 3   | 357  | 14840  | 15194  |
| UN37372 | Rsa1.0.02142.1 | 590  | 34633  | 0         | 587 | 596 | 98 + | 2   | 590  | 12206  | 12801  |
| UN37373 | Rsa1.0.00570.1 | 827  | 75002  | 0         | 554 | 607 | 91 + | 41  | 633  | 34601  | 35189  |
| UN37374 | Rsa1.0.01023.1 | 957  | 56571  | 0         | 361 | 362 | 99 + | 595 | 956  | 11208  | 11569  |
| UN37375 | Rsa1.0.10601.1 | 840  | 5789   | 0         | 405 | 425 | 95 - | 1   | 420  | 4886   | 5308   |
| UN37376 | Rsa1.0.02911.1 | 474  | 142461 | 1.00E-174 | 411 | 445 | 92 + | 8   | 452  | 9283   | 9712   |
| UN37377 | Rsa1.0.00111.1 | 754  | 390088 | 0         | 547 | 569 | 96 - | 2   | 563  | 260659 | 261227 |
| UN37378 | Rsa1.0.00983.1 | 481  | 57586  | 1.00E-103 | 289 | 321 | 90 + | 26  | 344  | 53275  | 53589  |
| UN37379 | Rsa1.0.00630.1 | 515  | 71281  | 0         | 478 | 514 | 92 - | 6   | 515  | 67837  | 68350  |
| UN37380 | Rsa1.0.00019.1 | 943  | 301669 | 1.00E-86  | 206 | 221 | 93 - | 259 | 479  | 111255 | 111463 |
| UN37381 | Rsa1.0.01303.1 | 501  | 48853  | 0         | 493 | 495 | 99 + | 1   | 495  | 48196  | 48690  |
| UN37382 | Rsa1.0.01422.1 | 753  | 46172  | 1.00E-129 | 247 | 251 | 98 + | 501 | 751  | 13     | 263    |
| UN37383 | Rsa1.0.46461.1 | 962  | 486    | 0         | 467 | 489 | 95 - | 406 | 891  | 1      | 486    |
| UN37384 | Rsa1.0.02578.1 | 531  | 29934  | 0         | 478 | 482 | 99 + | 2   | 483  | 25705  | 26186  |
| UN37385 | Rsa1.0.02179.1 | 389  | 34188  | 5.00E-47  | 99  | 100 | 99 + | 39  | 138  | 22942  | 23041  |
| UN37386 | Rsa1.0.28906.1 | 1415 | 799    | 0         | 776 | 799 | 97 + | 121 | 919  | 1      | 799    |
| UN37387 | Rsa1.0.00161.1 | 407  | 116891 | 1.00E-131 | 250 | 253 | 98 + | 104 | 355  | 56777  | 57029  |
| UN37388 | Rsa1.0.01008.1 | 754  | 56924  | 0         | 665 | 686 | 96 + | 2   | 685  | 29630  | 30315  |
| UN37389 | Rsa1.0.02178.1 | 759  | 156197 | 0         | 393 | 395 | 99 - | 365 | 759  | 153911 | 154305 |
| UN37390 | Rsa1.0.00030.1 | 873  | 250988 | 0         | 838 | 884 | 94 + | 2   | 873  | 180759 | 181628 |
| UN37391 | Rsa1.0.02428.1 | 1231 | 31542  | 1.00E-147 | 311 | 327 | 95 - | 908 | 1231 | 18892  | 19209  |
| UN37392 | Rsa1.0.05282.1 | 449  | 14270  | 5.00E-26  | 88  | 97  | 90 + | 17  | 113  | 10764  | 10860  |
| UN37393 | Rsa1.0.02379.1 | 578  | 150705 | 1.00E-158 | 339 | 356 | 95 - | 231 | 578  | 130304 | 130658 |
| UN37394 | Rsa1.0.00205.1 | 340  | 193401 | 1.00E-69  | 143 | 146 | 97 - | 137 | 282  | 44024  | 44169  |
| UN37395 | Rsa1.0.05889.1 | 970  | 12319  | 0         | 722 | 751 | 96 - | 1   | 750  | 7024   | 7772   |
| UN37396 | Rsa1.0.00476.1 | 359  | 280966 | 1.00E-135 | 335 | 360 | 93 + | 3   | 358  | 31260  | 31614  |
| UN37397 | Rsa1.0.00796.1 | 834  | 63997  | 1.00E-137 | 250 | 251 | 99 - | 3   | 253  | 50890  | 51140  |
| UN37398 | Rsa1.0.01541.1 | 792  | 43682  | 0         | 395 | 409 | 96 + | 345 | 752  | 42206  | 42609  |
| UN37399 | Rsa1.0.01327.1 | 760  | 48033  | 0         | 480 | 495 | 96 + | 3   | 489  | 4631   | 5125   |

|         |                |      |        |           |      |      |       |     |      |        |        |
|---------|----------------|------|--------|-----------|------|------|-------|-----|------|--------|--------|
| UN37400 | Rsa1.0.00660.1 | 790  | 69688  | 0         | 759  | 809  | 93 +  | 2   | 788  | 14833  | 15641  |
| UN37401 | Rsa1.0.00172.1 | 781  | 115476 | 0         | 746  | 783  | 95 +  | 3   | 781  | 7808   | 8588   |
| UN37402 | Rsa1.0.00058.1 | 802  | 159921 | 0         | 532  | 562  | 94 -  | 3   | 557  | 53312  | 53868  |
| UN37403 | Rsa1.0.00770.1 | 579  | 64900  | 0         | 549  | 587  | 93 -  | 2   | 579  | 32376  | 32947  |
| UN37404 | Rsa1.0.00094.1 | 623  | 139042 | 0         | 402  | 420  | 95 -  | 2   | 421  | 84710  | 85129  |
| UN37405 | Rsa1.0.06185.1 | 593  | 11540  | 0         | 383  | 387  | 98 -  | 207 | 593  | 5461   | 5847   |
| UN37406 | Rsa1.0.01646.1 | 888  | 41735  | 1.00E-46  | 303  | 368  | 82 +  | 362 | 726  | 12322  | 12689  |
| UN37407 | Rsa1.0.00262.1 | 507  | 101906 | 3.00E-80  | 207  | 225  | 92 +  | 294 | 507  | 46229  | 46450  |
| UN37408 | Rsa1.0.00507.1 | 733  | 79074  | 0         | 700  | 735  | 95 +  | 2   | 733  | 5597   | 6327   |
| UN37409 | Rsa1.0.00881.1 | 966  | 61260  | 0         | 960  | 964  | 99 +  | 3   | 966  | 46899  | 47862  |
| UN37410 | Rsa1.0.05081.1 | 959  | 136103 | 0         | 937  | 945  | 99 -  | 2   | 946  | 134114 | 135058 |
| UN37411 | Rsa1.0.00284.1 | 758  | 323267 | 0         | 727  | 750  | 96 +  | 12  | 758  | 261580 | 262329 |
| UN37412 | Rsa1.0.01238.1 | 1458 | 50120  | 0         | 1067 | 1069 | 99 +  | 1   | 1069 | 22140  | 23207  |
| UN37413 | Rsa1.0.01181.1 | 679  | 51496  | 1.00E-110 | 258  | 275  | 93 +  | 405 | 679  | 32779  | 33052  |
| UN37414 | Rsa1.0.00005.1 | 814  | 353093 | 1.00E-165 | 324  | 334  | 97 -  | 113 | 446  | 118786 | 119119 |
| UN37415 | Rsa1.0.65394.1 | 372  | 351    | 1.00E-162 | 289  | 289  | 100 + | 2   | 290  | 63     | 351    |
| UN37416 | Rsa1.0.04065.1 | 969  | 19275  | 0         | 378  | 386  | 97 +  | 583 | 968  | 18356  | 18740  |
| UN37417 | Rsa1.0.02352.1 | 941  | 32301  | 0         | 445  | 453  | 98 +  | 489 | 941  | 30582  | 31031  |
| UN37418 | Rsa1.0.10640.1 | 766  | 5772   | 0         | 359  | 370  | 97 -  | 402 | 764  | 1946   | 2314   |
| UN37419 | Rsa1.0.06330.1 | 663  | 11222  | 0         | 647  | 661  | 97 -  | 3   | 663  | 2290   | 2948   |
| UN37420 | Rsa1.0.00193.1 | 1238 | 194198 | 0         | 560  | 602  | 93 -  | 272 | 870  | 130080 | 130663 |
| UN37421 | Rsa1.0.03195.1 | 600  | 24673  | 1.00E-173 | 317  | 320  | 99 -  | 5   | 324  | 11638  | 11957  |
| UN37422 | Rsa1.0.00208.1 | 716  | 108565 | 0         | 702  | 715  | 98 -  | 2   | 716  | 53136  | 53850  |
| UN37423 | Rsa1.0.01017.1 | 1073 | 56714  | 0         | 1041 | 1066 | 97 +  | 2   | 1065 | 16477  | 17537  |
| UN37424 | Rsa1.0.00006.1 | 502  | 396176 | 0         | 492  | 501  | 98 +  | 2   | 502  | 198736 | 199236 |
| UN37425 | Rsa1.0.00366.1 | 599  | 90880  | 0         | 595  | 598  | 99 -  | 2   | 599  | 88011  | 88608  |
| UN37426 | Rsa1.0.00195.1 | 778  | 251884 | 1.00E-126 | 233  | 234  | 99 +  | 141 | 374  | 44267  | 44500  |
| UN37427 | Rsa1.0.01924.1 | 850  | 37226  | 1.00E-160 | 300  | 303  | 99 +  | 549 | 850  | 22415  | 22717  |
| UN37428 | Rsa1.0.05599.1 | 872  | 143653 | 0         | 360  | 363  | 99 +  | 2   | 364  | 141205 | 141567 |
| UN37429 | Rsa1.0.01264.1 | 847  | 49697  | 0         | 496  | 509  | 97 -  | 2   | 510  | 26693  | 27198  |
| UN37430 | Rsa1.0.10295.1 | 1056 | 5901   | 1.00E-151 | 331  | 347  | 95 +  | 1   | 341  | 226    | 570    |
| UN37431 | Rsa1.0.00658.1 | 741  | 69740  | 1.00E-153 | 318  | 329  | 96 +  | 1   | 329  | 15710  | 16029  |
| UN37432 | Rsa1.0.00065.1 | 764  | 454616 | 2.00E-76  | 217  | 237  | 91 -  | 1   | 229  | 162365 | 162600 |
| UN37433 | Rsa1.0.00082.1 | 587  | 237584 | 0         | 565  | 586  | 96 -  | 2   | 587  | 120548 | 121133 |
| UN37434 | Rsa1.0.01315.1 | 819  | 48361  | 0         | 620  | 647  | 95 +  | 1   | 643  | 45697  | 46341  |
| UN37435 | #              | #    | #      | #         | #    | #    | #     | #   | #    | #      | #      |
| UN37436 | Rsa1.0.00362.1 | 248  | 299497 | 1.00E-125 | 226  | 226  | 100 + | 21  | 246  | 16040  | 16265  |
| UN37437 | Rsa1.0.02195.1 | 995  | 34024  | 1.00E-101 | 313  | 355  | 88 +  | 273 | 627  | 26221  | 26575  |
| UN37438 | Rsa1.0.00101.1 | 762  | 267193 | 0         | 636  | 711  | 89 -  | 5   | 713  | 177259 | 177966 |

|         |                |      |        |           |      |      |       |     |      |        |        |
|---------|----------------|------|--------|-----------|------|------|-------|-----|------|--------|--------|
| UN37439 | Rsa1.0_00283.1 | 703  | 183797 | 8.00E-26  | 61   | 61   | 100 + | 643 | 703  | 52537  | 52597  |
| UN37440 | Rsa1.0_02630.1 | 903  | 29349  | 0         | 589  | 630  | 93 +  | 2   | 626  | 22593  | 23215  |
| UN37441 | Rsa1.0_00119.1 | 707  | 467509 | 0         | 401  | 418  | 95 -  | 290 | 707  | 224551 | 224959 |
| UN37442 | Rsa1.0_03399.1 | 596  | 23204  | 0         | 582  | 595  | 97 -  | 2   | 596  | 4609   | 5202   |
| UN37443 | Rsa1.0_02038.1 | 749  | 35715  | 0         | 600  | 622  | 96 +  | 131 | 745  | 7868   | 8489   |
| UN37444 | Rsa1.0_00856.1 | 806  | 62037  | 0         | 491  | 497  | 98 +  | 1   | 494  | 6394   | 6889   |
| UN37445 | Rsa1.0_00399.1 | 872  | 242951 | 0         | 417  | 435  | 95 +  | 104 | 538  | 73197  | 73631  |
| UN37446 | Rsa1.0_52120.1 | 670  | 436    | 1.00E-130 | 242  | 244  | 99 -  | 427 | 670  | 93     | 336    |
| UN37447 | Rsa1.0_00509.1 | 809  | 78829  | 0         | 444  | 458  | 96 +  | 353 | 808  | 55583  | 56037  |
| UN37448 | Rsa1.0_00273.1 | 857  | 326186 | 0         | 635  | 650  | 97 -  | 208 | 857  | 267517 | 268166 |
| UN37449 | Rsa1.0_03341.1 | 642  | 23604  | 0         | 496  | 503  | 98 -  | 2   | 501  | 4894   | 5396   |
| UN37450 | Rsa1.0_17744.1 | 586  | 1752   | 0         | 554  | 583  | 95 +  | 4   | 586  | 627    | 1209   |
| UN37451 | Rsa1.0_76156.1 | 1201 | 301    | 1.00E-100 | 186  | 186  | 100 - | 379 | 564  | 116    | 301    |
| UN37452 | Rsa1.0_01587.1 | 490  | 42789  | 0         | 484  | 491  | 98 +  | 3   | 490  | 14816  | 15306  |
| UN37453 | Rsa1.0_15164.1 | 636  | 2786   | 6.00E-82  | 207  | 223  | 92 -  | 414 | 634  | 2017   | 2230   |
| UN37454 | Rsa1.0_00007.1 | 690  | 239325 | 0         | 491  | 517  | 94 +  | 175 | 690  | 62827  | 63328  |
| UN37455 | Rsa1.0_01475.1 | 768  | 45044  | 0         | 396  | 410  | 96 -  | 358 | 767  | 25130  | 25538  |
| UN37456 | Rsa1.0_00041.1 | 282  | 186197 | 4.00E-47  | 141  | 151  | 93 -  | 32  | 179  | 174533 | 174681 |
| UN37457 | Rsa1.0_03843.1 | 865  | 20496  | 2.00E-36  | 155  | 178  | 87 +  | 505 | 680  | 6367   | 6543   |
| UN37458 | Rsa1.0_00460.1 | 886  | 206387 | 0         | 522  | 574  | 90 -  | 327 | 886  | 65133  | 65692  |
| UN37459 | #              | #    | #      | #         | #    | #    | #     | #   | #    | #      | #      |
| UN37460 | Rsa1.0_00336.1 | 746  | 445051 | 2.00E-11  | 82   | 97   | 84 -  | 357 | 453  | 170950 | 171046 |
| UN37461 | Rsa1.0_01016.1 | 1182 | 181422 | 1.00E-155 | 358  | 386  | 92 +  | 116 | 492  | 162631 | 163016 |
| UN37462 | Rsa1.0_00718.1 | 334  | 279335 | 1.00E-116 | 314  | 350  | 89 -  | 1   | 334  | 276524 | 276873 |
| UN37463 | Rsa1.0_00327.1 | 1052 | 94892  | 1.00E-108 | 284  | 305  | 93 +  | 762 | 1052 | 18711  | 19011  |
| UN37464 | Rsa1.0_00407.1 | 1057 | 191544 | 0         | 458  | 473  | 96 -  | 2   | 474  | 63665  | 64135  |
| UN37465 | Rsa1.0_03541.1 | 1041 | 22194  | 0         | 1021 | 1044 | 97 -  | 1   | 1041 | 1833   | 2876   |
| UN37466 | Rsa1.0_00036.1 | 901  | 176186 | 0         | 872  | 888  | 98 -  | 16  | 901  | 81012  | 81897  |
| UN37467 | Rsa1.0_00138.1 | 699  | 247040 | 0         | 679  | 691  | 98 +  | 3   | 693  | 45965  | 46655  |
| UN37468 | Rsa1.0_06349.1 | 614  | 11199  | 1.00E-169 | 350  | 365  | 95 +  | 251 | 614  | 10478  | 10837  |
| UN37469 | Rsa1.0_00111.1 | 901  | 390088 | 0         | 342  | 345  | 99 -  | 556 | 900  | 23762  | 24105  |
| UN37470 | Rsa1.0_01939.1 | 1177 | 37124  | 0         | 1098 | 1155 | 95 +  | 10  | 1162 | 840    | 1993   |
| UN37471 | Rsa1.0_00131.1 | 658  | 432233 | 9.00E-84  | 158  | 158  | 100 + | 11  | 168  | 119025 | 119182 |
| UN37472 | Rsa1.0_02173.1 | 1079 | 34318  | 0         | 637  | 664  | 95 +  | 415 | 1077 | 20994  | 21656  |
| UN37473 | Rsa1.0_00602.1 | 726  | 73302  | 0         | 412  | 427  | 96 -  | 287 | 712  | 1434   | 1855   |
| UN37474 | Rsa1.0_02662.1 | 920  | 28956  | 0         | 474  | 484  | 97 -  | 439 | 920  | 307    | 790    |
| UN37475 | Rsa1.0_08334.1 | 1263 | 7525   | 0         | 709  | 714  | 99 +  | 271 | 984  | 6803   | 7516   |
| UN37476 | Rsa1.0_01983.1 | 721  | 36509  | 0         | 435  | 449  | 96 -  | 2   | 448  | 8189   | 8637   |
| UN37477 | Rsa1.0_01629.1 | 852  | 41917  | 1.00E-168 | 299  | 299  | 100 - | 3   | 301  | 16329  | 16627  |

|         |                |      |        |           |     |     |       |     |      |        |        |
|---------|----------------|------|--------|-----------|-----|-----|-------|-----|------|--------|--------|
| UN37478 | Rsa1.0.00429.1 | 849  | 85559  | 1.00E-95  | 213 | 223 | 95 -  | 623 | 843  | 45859  | 46078  |
| UN37479 | Rsa1.0.01053.1 | 631  | 55483  | 1.00E-157 | 284 | 285 | 99 -  | 346 | 630  | 54108  | 54392  |
| UN37480 | Rsa1.0.00228.1 | 836  | 105511 | 0         | 483 | 500 | 96 +  | 336 | 835  | 56954  | 57445  |
| UN37481 | Rsa1.0.00144.1 | 825  | 120708 | 0         | 666 | 707 | 94 -  | 142 | 825  | 25748  | 26451  |
| UN37482 | Rsa1.0.01266.1 | 781  | 49680  | 1.00E-169 | 344 | 358 | 96 -  | 197 | 554  | 25726  | 26083  |
| UN37483 | Rsa1.0.08560.1 | 493  | 7195   | 1.00E-88  | 178 | 182 | 97 +  | 12  | 193  | 5768   | 5949   |
| UN37484 | Rsa1.0.02353.1 | 364  | 32300  | 1.00E-162 | 313 | 321 | 97 -  | 1   | 321  | 30151  | 30466  |
| UN37485 | Rsa1.0.04022.1 | 801  | 19534  | 1.00E-168 | 333 | 344 | 96 -  | 91  | 434  | 9521   | 9864   |
| UN37486 | Rsa1.0.01397.1 | 822  | 183276 | 1.00E-155 | 299 | 306 | 97 -  | 2   | 307  | 18781  | 19086  |
| UN37487 | Rsa1.0.00713.1 | 1002 | 158017 | 0         | 956 | 992 | 96 -  | 9   | 1000 | 44759  | 45734  |
| UN37488 | Rsa1.0.00199.1 | 586  | 249604 | 1.00E-168 | 412 | 448 | 91 -  | 138 | 584  | 27248  | 27690  |
| UN37489 | Rsa1.0.09063.1 | 1012 | 6675   | 0         | 574 | 595 | 96 +  | 421 | 1012 | 442    | 1032   |
| UN37490 | Rsa1.0.12767.1 | 1448 | 5133   | 1.00E-179 | 346 | 355 | 97 -  | 199 | 553  | 1      | 355    |
| UN37491 | Rsa1.0.00096.1 | 1043 | 198773 | 0         | 323 | 323 | 100 - | 720 | 1042 | 32943  | 33265  |
| UN37492 | Rsa1.0.00402.1 | 635  | 385315 | 0         | 324 | 324 | 100 + | 3   | 326  | 218542 | 218865 |
| UN37493 | Rsa1.0.01673.1 | 1080 | 41197  | 0         | 694 | 730 | 95 +  | 353 | 1080 | 15223  | 15949  |
| UN37494 | Rsa1.0.01170.1 | 566  | 161131 | 4.00E-95  | 203 | 211 | 96 -  | 356 | 566  | 114578 | 114785 |
| UN37495 | Rsa1.0.01969.1 | 465  | 153351 | 1.00E-124 | 255 | 265 | 96 +  | 189 | 453  | 130    | 394    |
| UN37496 | Rsa1.0.04658.1 | 1021 | 16487  | 0         | 883 | 894 | 98 +  | 133 | 1021 | 15554  | 16446  |
| UN37497 | Rsa1.0.01147.1 | 738  | 52391  | 0         | 708 | 743 | 95 -  | 1   | 738  | 41462  | 42199  |
| UN37498 | Rsa1.0.00171.1 | 558  | 115622 | 1.00E-125 | 267 | 277 | 96 -  | 235 | 508  | 94951  | 95225  |
| UN37499 | Rsa1.0.00327.1 | 730  | 94892  | 0         | 462 | 469 | 98 -  | 261 | 728  | 76673  | 77141  |
| UN37500 | Rsa1.0.04007.1 | 784  | 19585  | 2.00E-35  | 90  | 93  | 96 +  | 691 | 782  | 5570   | 5662   |
| UN37501 | Rsa1.0.01814.1 | 799  | 38917  | 1.00E-126 | 247 | 253 | 97 -  | 3   | 255  | 20940  | 21192  |
| UN37502 | Rsa1.0.01751.1 | 792  | 39806  | 1.00E-150 | 278 | 281 | 98 +  | 13  | 293  | 29061  | 29341  |
| UN37503 | Rsa1.0.07437.1 | 361  | 9394   | 1.00E-173 | 340 | 351 | 96 +  | 3   | 353  | 4835   | 5185   |
| UN37504 | Rsa1.0.00816.1 | 772  | 403350 | 1.00E-77  | 199 | 208 | 95 -  | 571 | 772  | 115334 | 115541 |
| UN37505 | Rsa1.0.00383.1 | 602  | 398431 | 0         | 588 | 604 | 97 -  | 2   | 601  | 176059 | 176662 |
| UN37506 | Rsa1.0.00285.1 | 1068 | 149638 | 1.00E-136 | 506 | 594 | 85 +  | 165 | 740  | 131502 | 132088 |
| UN37507 | #              | #    | #      | #         | #   | #   | #     | #   | #    | #      | #      |
| UN37508 | Rsa1.0.01813.1 | 800  | 38924  | 1.00E-178 | 343 | 350 | 98 +  | 3   | 348  | 30064  | 30413  |
| UN37509 | Rsa1.0.21963.1 | 923  | 1160   | 0         | 799 | 838 | 95 -  | 69  | 894  | 334    | 1160   |
| UN37510 | Rsa1.0.06254.1 | 835  | 11384  | 0         | 807 | 834 | 96 +  | 2   | 835  | 10403  | 11229  |
| UN37511 | Rsa1.0.04134.1 | 1043 | 149811 | 0         | 597 | 608 | 98 -  | 435 | 1042 | 9247   | 9854   |
| UN37512 | Rsa1.0.01443.1 | 957  | 45705  | 1.00E-176 | 557 | 627 | 88 +  | 2   | 621  | 30347  | 30969  |
| UN37513 | Rsa1.0.01239.1 | 740  | 50107  | 0         | 482 | 486 | 99 +  | 1   | 486  | 2810   | 3295   |
| UN37514 | Rsa1.0.08668.1 | 849  | 7059   | 0         | 558 | 567 | 98 -  | 11  | 577  | 1      | 566    |
| UN37515 | Rsa1.0.00333.1 | 642  | 94500  | 0         | 520 | 552 | 94 -  | 1   | 549  | 76672  | 77218  |
| UN37516 | Rsa1.0.00294.1 | 998  | 144860 | 0         | 950 | 997 | 95 +  | 7   | 998  | 81440  | 82431  |

|         |                |      |        |           |      |      |       |     |      |        |        |
|---------|----------------|------|--------|-----------|------|------|-------|-----|------|--------|--------|
| UN37517 | Rsa1.0_00915.1 | 1034 | 194446 | 7.00E-18  | 87   | 100  | 87 +  | 517 | 616  | 173425 | 173524 |
| UN37518 | Rsa1.0_00123.1 | 570  | 325650 | 0         | 331  | 333  | 99 +  | 1   | 333  | 197772 | 198103 |
| UN37519 | #              | #    | #      | #         | #    | #    | #     | #   | #    | #      | #      |
| UN37520 | Rsa1.0_01865.1 | 1098 | 37992  | 1.00E-133 | 259  | 265  | 97 +  | 494 | 758  | 27970  | 28234  |
| UN37521 | Rsa1.0_00324.1 | 883  | 218805 | 0         | 856  | 883  | 96 +  | 1   | 882  | 864    | 1738   |
| UN37522 | Rsa1.0_01008.1 | 587  | 56924  | 0         | 586  | 586  | 100 + | 2   | 587  | 791    | 1376   |
| UN37523 | Rsa1.0_00352.1 | 1176 | 92266  | 0         | 1065 | 1088 | 97 -  | 89  | 1176 | 33930  | 35011  |
| UN37524 | Rsa1.0_00060.1 | 756  | 502678 | 1.00E-114 | 290  | 320  | 90 -  | 353 | 672  | 253618 | 253922 |
| UN37525 | #              | #    | #      | #         | #    | #    | #     | #   | #    | #      | #      |
| UN37526 | Rsa1.0_01310.1 | 647  | 164719 | 1.00E-106 | 204  | 207  | 98 +  | 437 | 643  | 141272 | 141478 |
| UN37527 | Rsa1.0_00085.1 | 914  | 142226 | 1.00E-171 | 350  | 364  | 96 -  | 259 | 620  | 50813  | 51176  |
| UN37528 | Rsa1.0_31717.1 | 847  | 720    | 6.00E-67  | 136  | 138  | 98 -  | 710 | 847  | 492    | 629    |
| UN37529 | Rsa1.0_00001.1 | 909  | 363028 | 0         | 491  | 509  | 96 +  | 398 | 904  | 333079 | 333584 |
| UN37530 | Rsa1.0_01514.1 | 832  | 44222  | 0         | 378  | 379  | 99 +  | 451 | 828  | 40737  | 41115  |
| UN37531 | Rsa1.0_18046.1 | 849  | 1682   | 1.00E-110 | 255  | 272  | 93 -  | 1   | 269  | 1135   | 1406   |
| UN37532 | Rsa1.0_00879.1 | 977  | 61297  | 2.00E-24  | 89   | 99   | 89 -  | 466 | 564  | 34636  | 34734  |
| UN37533 | Rsa1.0_05073.1 | 653  | 14925  | 1.00E-105 | 236  | 250  | 94 +  | 351 | 600  | 5489   | 5738   |
| UN37534 | Rsa1.0_01434.1 | 1102 | 45951  | 0         | 484  | 524  | 92 -  | 71  | 577  | 10212  | 10730  |
| UN37535 | Rsa1.0_00556.1 | 1133 | 207212 | 0         | 1095 | 1133 | 96 -  | 2   | 1133 | 35672  | 36796  |
| UN37536 | Rsa1.0_20631.1 | 853  | 1286   | 3.00E-32  | 292  | 359  | 81 -  | 462 | 819  | 829    | 1172   |
| UN37537 | Rsa1.0_00168.1 | 475  | 115870 | 1.00E-164 | 345  | 360  | 95 -  | 115 | 473  | 90861  | 91213  |
| UN37538 | Rsa1.0_00020.1 | 437  | 283099 | 1.00E-88  | 220  | 232  | 94 +  | 208 | 437  | 59685  | 59911  |
| UN37539 | Rsa1.0_00053.1 | 915  | 263459 | 1.00E-128 | 262  | 272  | 96 +  | 239 | 510  | 63729  | 64000  |
| UN37540 | Rsa1.0_00087.1 | 710  | 761073 | 0         | 531  | 543  | 97 -  | 168 | 710  | 561195 | 561735 |
| UN37541 | Rsa1.0_00370.1 | 1125 | 90472  | 1.00E-144 | 289  | 299  | 96 -  | 670 | 968  | 55110  | 55408  |
| UN37542 | Rsa1.0_05247.1 | 721  | 14385  | 3.00E-87  | 185  | 192  | 96 -  | 5   | 196  | 10636  | 10827  |
| UN37543 | Rsa1.0_00044.1 | 714  | 271658 | 0         | 466  | 471  | 98 +  | 245 | 714  | 123738 | 124208 |
| UN37544 | Rsa1.0_02666.1 | 1111 | 28915  | 0         | 637  | 643  | 99 +  | 44  | 686  | 5834   | 6476   |
| UN37545 | Rsa1.0_00253.1 | 832  | 231292 | 0         | 793  | 816  | 97 +  | 2   | 815  | 109501 | 110316 |
| UN37546 | Rsa1.0_00411.1 | 1037 | 86944  | 1.00E-118 | 258  | 272  | 94 -  | 2   | 273  | 66940  | 67211  |
| UN37547 | Rsa1.0_00387.1 | 759  | 495407 | 0         | 436  | 448  | 97 -  | 3   | 450  | 402479 | 402926 |
| UN37548 | Rsa1.0_52967.1 | 698  | 430    | 0         | 413  | 430  | 96 +  | 153 | 582  | 1      | 430    |
| UN37549 | Rsa1.0_02296.1 | 551  | 32920  | 0         | 515  | 552  | 93 +  | 3   | 551  | 13332  | 13866  |
| UN37550 | Rsa1.0_00011.1 | 868  | 225044 | 1.00E-175 | 327  | 332  | 98 -  | 8   | 339  | 183543 | 183874 |
| UN37551 | Rsa1.0_00570.1 | 815  | 75002  | 0         | 492  | 502  | 98 +  | 3   | 502  | 52822  | 53323  |
| UN37552 | Rsa1.0_00002.1 | 530  | 601661 | 1.00E-115 | 253  | 266  | 95 -  | 189 | 454  | 380947 | 381211 |
| UN37553 | Rsa1.0_01043.1 | 707  | 55893  | 0         | 405  | 423  | 95 +  | 290 | 706  | 48633  | 49047  |
| UN37554 | Rsa1.0_03460.1 | 749  | 22747  | 0         | 550  | 586  | 93 +  | 167 | 749  | 5521   | 6083   |
| UN37555 | Rsa1.0_00033.1 | 631  | 515811 | 0         | 598  | 638  | 93 -  | 2   | 631  | 391940 | 392576 |

|         |                |      |        |           |      |      |       |     |      |        |        |
|---------|----------------|------|--------|-----------|------|------|-------|-----|------|--------|--------|
| UN37556 | Rsa1.0.01477.1 | 1141 | 45008  | 0         | 575  | 587  | 97 -  | 218 | 804  | 39084  | 39670  |
| UN37557 | Rsa1.0.00038.1 | 797  | 314568 | 0         | 568  | 594  | 95 +  | 210 | 797  | 307386 | 307968 |
| UN37558 | Rsa1.0.01256.1 | 756  | 49770  | 1.00E-109 | 203  | 204  | 99 -  | 171 | 374  | 9043   | 9246   |
| UN37559 | Rsa1.0.00512.1 | 631  | 200277 | 0         | 449  | 471  | 95 +  | 163 | 631  | 76351  | 76821  |
| UN37560 | Rsa1.0.00146.1 | 755  | 149343 | 7.00E-14  | 81   | 93   | 87 -  | 507 | 593  | 119960 | 120052 |
| UN37561 | Rsa1.0.18022.1 | 529  | 1687   | 1.00E-126 | 232  | 233  | 99 -  | 297 | 529  | 456    | 688    |
| UN37562 | Rsa1.0.04589.1 | 1094 | 16739  | 0         | 1059 | 1094 | 96 -  | 1   | 1094 | 11888  | 12981  |
| UN37563 | Rsa1.0.00001.1 | 794  | 363028 | 0         | 793  | 795  | 99 -  | 1   | 794  | 252326 | 253120 |
| UN37564 | Rsa1.0.00399.1 | 1034 | 242951 | 0         | 619  | 657  | 94 +  | 375 | 1030 | 189886 | 190530 |
| UN37565 | Rsa1.0.23300.1 | 720  | 1058   | 0         | 655  | 686  | 95 -  | 2   | 674  | 1      | 686    |
| UN37566 | Rsa1.0.00081.1 | 690  | 143261 | 0         | 676  | 680  | 99 +  | 3   | 681  | 100505 | 101184 |
| UN37567 | Rsa1.0.02991.1 | 668  | 26178  | 0         | 646  | 692  | 93 +  | 1   | 666  | 8895   | 9586   |
| UN37568 | Rsa1.0.00749.1 | 1261 | 65933  | 0         | 780  | 792  | 98 -  | 236 | 1027 | 35985  | 36773  |
| UN37569 | Rsa1.0.00107.1 | 717  | 431659 | 1.00E-180 | 399  | 428  | 93 +  | 301 | 717  | 81609  | 82024  |
| UN37570 | Rsa1.0.00311.1 | 596  | 96847  | 0         | 581  | 596  | 97 -  | 1   | 596  | 20067  | 20661  |
| UN37571 | Rsa1.0.00084.1 | 667  | 142338 | 0         | 446  | 452  | 98 -  | 215 | 666  | 135369 | 135820 |
| UN37572 | Rsa1.0.00301.1 | 898  | 365315 | 0         | 840  | 897  | 93 +  | 2   | 898  | 334254 | 335150 |
| UN37573 | Rsa1.0.00481.1 | 887  | 81316  | 3.00E-75  | 150  | 152  | 98 -  | 3   | 154  | 24855  | 25006  |
| UN37574 | Rsa1.0.00293.1 | 782  | 339294 | 0         | 465  | 467  | 99 +  | 2   | 468  | 227141 | 227607 |
| UN37575 | Rsa1.0.02307.1 | 733  | 32775  | 0         | 724  | 732  | 98 +  | 2   | 733  | 11085  | 11816  |
| UN37576 | Rsa1.0.06243.1 | 753  | 11401  | 0         | 593  | 599  | 98 -  | 3   | 600  | 737    | 1334   |
| UN37577 | Rsa1.0.03502.1 | 1108 | 22446  | 0         | 624  | 625  | 99 +  | 483 | 1107 | 13365  | 13989  |
| UN37578 | Rsa1.0.02783.1 | 846  | 27927  | 0         | 828  | 849  | 97 -  | 1   | 844  | 610    | 1458   |
| UN37579 | Rsa1.0.04602.1 | 824  | 16684  | 0         | 429  | 443  | 96 +  | 1   | 442  | 3185   | 3627   |
| UN37580 | Rsa1.0.13458.1 | 1281 | 4814   | 0         | 904  | 941  | 96 +  | 349 | 1279 | 1      | 935    |
| UN37581 | Rsa1.0.00931.1 | 735  | 59210  | 0         | 730  | 734  | 99 +  | 2   | 735  | 36576  | 37309  |
| UN37582 | Rsa1.0.00593.1 | 1088 | 143463 | 0         | 403  | 417  | 96 -  | 673 | 1088 | 135751 | 136167 |
| UN37583 | Rsa1.0.00069.1 | 812  | 403561 | 0         | 638  | 641  | 99 +  | 126 | 766  | 46995  | 47635  |
| UN37584 | Rsa1.0.02161.1 | 685  | 34459  | 0         | 571  | 579  | 98 +  | 100 | 677  | 1529   | 2106   |
| UN37585 | Rsa1.0.01043.1 | 676  | 55893  | 1.00E-168 | 332  | 343  | 96 -  | 3   | 345  | 49809  | 50151  |
| UN37586 | Rsa1.0.01264.1 | 799  | 49697  | 0         | 360  | 371  | 97 +  | 288 | 658  | 25052  | 25422  |
| UN37587 | Rsa1.0.00204.1 | 996  | 109056 | 1.00E-145 | 291  | 299  | 97 -  | 436 | 733  | 20436  | 20731  |
| UN37588 | Rsa1.0.01430.1 | 1198 | 46034  | 0         | 1191 | 1195 | 99 +  | 3   | 1197 | 17867  | 19061  |
| UN37589 | Rsa1.0.51424.1 | 770  | 442    | 1.00E-132 | 251  | 255  | 98 -  | 253 | 507  | 10     | 264    |
| UN37590 | Rsa1.0.00199.1 | 466  | 249604 | 0         | 465  | 465  | 100 - | 2   | 466  | 27487  | 27951  |
| UN37591 | Rsa1.0.00026.1 | 748  | 327835 | 0         | 521  | 540  | 96 +  | 212 | 748  | 106555 | 107093 |
| UN37592 | Rsa1.0.29724.1 | 681  | 774    | 0         | 373  | 377  | 98 +  | 196 | 572  | 312    | 688    |
| UN37593 | Rsa1.0.10589.1 | 578  | 5793   | 0         | 472  | 485  | 97 +  | 95  | 578  | 4693   | 5176   |
| UN37594 | Rsa1.0.13686.1 | 1375 | 4480   | 1.00E-170 | 317  | 321  | 98 +  | 1   | 321  | 2243   | 2560   |

|         |                |      |        |           |      |      |       |     |      |        |        |
|---------|----------------|------|--------|-----------|------|------|-------|-----|------|--------|--------|
| UN37595 | Rsa1.0.01869.1 | 731  | 37928  | 0         | 717  | 731  | 98 +  | 1   | 731  | 6694   | 7424   |
| UN37596 | Rsa1.0.08190.1 | 830  | 7764   | 1.00E-145 | 269  | 270  | 99 -  | 9   | 278  | 4646   | 4914   |
| UN37597 | Rsa1.0.35705.1 | 590  | 633    | 1.00E-135 | 248  | 249  | 99 +  | 40  | 288  | 1      | 249    |
| UN37598 | Rsa1.0.01352.1 | 520  | 47443  | 2.00E-69  | 137  | 138  | 99 -  | 312 | 449  | 13238  | 13375  |
| UN37599 | Rsa1.0.02777.1 | 1301 | 27986  | 0         | 543  | 566  | 95 -  | 1   | 564  | 15700  | 16257  |
| UN37600 | Rsa1.0.01060.1 | 745  | 55368  | 0         | 715  | 746  | 95 -  | 2   | 740  | 42891  | 43628  |
| UN37601 | Rsa1.0.00672.1 | 808  | 69358  | 0         | 623  | 686  | 90 +  | 9   | 673  | 38664  | 39339  |
| UN37602 | Rsa1.0.05995.1 | 676  | 11997  | 0         | 566  | 611  | 92 -  | 1   | 590  | 4575   | 5181   |
| UN37603 | Rsa1.0.01565.1 | 1118 | 155447 | 0         | 779  | 796  | 97 +  | 3   | 792  | 33765  | 34558  |
| UN37604 | Rsa1.0.00336.1 | 995  | 445051 | 1.00E-172 | 354  | 370  | 95 -  | 626 | 995  | 4163   | 4532   |
| UN37605 | Rsa1.0.03594.1 | 855  | 21868  | 0         | 597  | 623  | 95 -  | 2   | 624  | 17348  | 17967  |
| UN37606 | Rsa1.0.02174.1 | 781  | 34316  | 0         | 716  | 757  | 94 -  | 3   | 746  | 5478   | 6231   |
| UN37607 | Rsa1.0.00476.1 | 684  | 280966 | 0         | 481  | 486  | 98 -  | 1   | 486  | 148789 | 149273 |
| UN37608 | Rsa1.0.00010.1 | 699  | 294827 | 1.00E-175 | 345  | 356  | 96 -  | 269 | 624  | 129411 | 129766 |
| UN37609 | Rsa1.0.02444.1 | 641  | 31350  | 1.00E-138 | 284  | 294  | 96 +  | 352 | 640  | 18485  | 18777  |
| UN37610 | Rsa1.0.01451.1 | 731  | 45459  | 1.00E-168 | 307  | 308  | 99 +  | 425 | 731  | 14788  | 15095  |
| UN37611 | Rsa1.0.02871.1 | 550  | 27085  | 0         | 539  | 549  | 98 -  | 2   | 550  | 24865  | 25413  |
| UN37612 | Rsa1.0.12047.1 | 707  | 5331   | 1.00E-98  | 202  | 207  | 97 -  | 428 | 633  | 76     | 282    |
| UN37613 | Rsa1.0.00457.1 | 833  | 337301 | 1.00E-64  | 126  | 126  | 100 + | 2   | 127  | 1134   | 1259   |
| UN37614 | Rsa1.0.01344.1 | 921  | 142535 | 0         | 754  | 763  | 98 -  | 1   | 763  | 138814 | 139576 |
| UN37615 | Rsa1.0.00282.1 | 825  | 177799 | 0         | 595  | 646  | 92 +  | 83  | 693  | 38607  | 39252  |
| UN37616 | Rsa1.0.15642.1 | 1052 | 2506   | 1.00E-121 | 257  | 268  | 95 +  | 765 | 1032 | 2008   | 2273   |
| UN37617 | #              | #    | #      | #         | #    | #    | #     | #   | #    | #      | #      |
| UN37618 | Rsa1.0.00544.1 | 1063 | 76787  | 0         | 1057 | 1063 | 99 -  | 1   | 1063 | 26374  | 27436  |
| UN37619 | Rsa1.0.04831.1 | 936  | 15799  | 0         | 781  | 796  | 98 -  | 141 | 936  | 9638   | 10430  |
| UN37620 | Rsa1.0.08359.1 | 907  | 7483   | 1.00E-140 | 253  | 253  | 100 + | 410 | 662  | 3236   | 3488   |
| UN37621 | Rsa1.0.00509.1 | 1195 | 78829  | 0         | 630  | 657  | 95 -  | 540 | 1195 | 40225  | 40880  |
| UN37622 | Rsa1.0.00211.1 | 733  | 228189 | 0         | 712  | 731  | 97 +  | 3   | 733  | 188488 | 189218 |
| UN37623 | Rsa1.0.06682.1 | 835  | 10551  | 0         | 782  | 836  | 93 +  | 3   | 835  | 741    | 1559   |
| UN37624 | Rsa1.0.00467.1 | 543  | 156542 | 1.00E-140 | 482  | 559  | 86 +  | 15  | 536  | 86366  | 86920  |
| UN37625 | Rsa1.0.04514.1 | 476  | 17022  | 3.00E-27  | 140  | 168  | 83 +  | 203 | 358  | 2124   | 2291   |
| UN37626 | Rsa1.0.03912.1 | 645  | 135266 | 0         | 378  | 381  | 99 -  | 1   | 380  | 9970   | 10350  |
| UN37627 | Rsa1.0.25616.1 | 752  | 928    | 1.00E-150 | 279  | 282  | 98 +  | 1   | 282  | 132    | 413    |
| UN37628 | Rsa1.0.01360.1 | 843  | 47246  | 0         | 805  | 844  | 95 +  | 1   | 835  | 12033  | 12873  |
| UN37629 | Rsa1.0.00047.1 | 569  | 168582 | 1.00E-123 | 266  | 278  | 95 +  | 9   | 286  | 157699 | 157972 |
| UN37630 | Rsa1.0.03342.1 | 387  | 23600  | 0         | 386  | 386  | 100 - | 1   | 386  | 17361  | 17746  |
| UN37631 | Rsa1.0.02174.1 | 660  | 34316  | 0         | 634  | 659  | 96 +  | 4   | 660  | 4383   | 5041   |
| UN37632 | Rsa1.0.03848.1 | 1219 | 20472  | 0         | 477  | 485  | 98 +  | 84  | 568  | 4563   | 5047   |
| UN37633 | Rsa1.0.03175.1 | 1170 | 24802  | 1.00E-164 | 451  | 511  | 88 +  | 2   | 491  | 21194  | 21683  |

|         |                |      |        |           |      |      |       |      |      |        |        |
|---------|----------------|------|--------|-----------|------|------|-------|------|------|--------|--------|
| UN37634 | Rsa1.0.03614.1 | 948  | 21773  | 0         | 681  | 703  | 96 +  | 248  | 946  | 19788  | 20489  |
| UN37635 | Rsa1.0.01832.1 | 1336 | 38581  | 0         | 994  | 997  | 99 +  | 2    | 998  | 16699  | 17694  |
| UN37636 | Rsa1.0.00059.1 | 994  | 159650 | 0         | 650  | 726  | 89 -  | 72   | 789  | 134007 | 134687 |
| UN37637 | Rsa1.0.00169.1 | 685  | 274298 | 0         | 675  | 691  | 97 -  | 2    | 684  | 95904  | 96594  |
| UN37638 | Rsa1.0.00547.1 | 1393 | 76521  | 1.00E-117 | 215  | 215  | 100 + | 1002 | 1216 | 21264  | 21478  |
| UN37639 | Rsa1.0.00949.1 | 788  | 58549  | 0         | 786  | 788  | 99 +  | 2    | 788  | 57364  | 58151  |
| UN37640 | Rsa1.0.05622.1 | 1104 | 13145  | 0         | 997  | 1067 | 93 +  | 39   | 1104 | 7469   | 8514   |
| UN37641 | Rsa1.0.01680.1 | 679  | 41122  | 0         | 406  | 406  | 100 + | 273  | 678  | 19654  | 20059  |
| UN37642 | Rsa1.0.03670.1 | 1292 | 21461  | 0         | 932  | 938  | 99 -  | 2    | 938  | 1      | 938    |
| UN37643 | Rsa1.0.20619.1 | 990  | 1286   | 1.00E-156 | 291  | 294  | 98 -  | 700  | 990  | 433    | 726    |
| UN37644 | Rsa1.0.01707.1 | 667  | 40686  | 0         | 639  | 673  | 94 +  | 4    | 662  | 24675  | 25347  |
| UN37645 | Rsa1.0.30748.1 | 575  | 745    | 1.00E-168 | 305  | 307  | 99 -  | 269  | 575  | 3      | 309    |
| UN37646 | Rsa1.0.00372.1 | 1095 | 90418  | 1.00E-120 | 279  | 295  | 94 -  | 80   | 367  | 83939  | 84231  |
| UN37647 | Rsa1.0.00031.1 | 516  | 179862 | 1.00E-128 | 235  | 236  | 99 -  | 281  | 516  | 58813  | 59048  |
| UN37648 | Rsa1.0.00139.1 | 564  | 357786 | 1.00E-149 | 283  | 287  | 98 -  | 280  | 564  | 136994 | 137280 |
| UN37649 | Rsa1.0.00090.1 | 793  | 273859 | 1.00E-144 | 320  | 340  | 94 +  | 60   | 399  | 78983  | 79322  |
| UN37650 | Rsa1.0.04527.1 | 1024 | 16958  | 0         | 427  | 430  | 99 -  | 3    | 432  | 6527   | 6954   |
| UN37651 | Rsa1.0.00465.1 | 1108 | 82138  | 0         | 1086 | 1108 | 98 -  | 2    | 1108 | 1672   | 2775   |
| UN37652 | Rsa1.0.00092.1 | 1099 | 659932 | 0         | 571  | 649  | 87 -  | 2    | 650  | 447748 | 448396 |
| UN37653 | Rsa1.0.02477.1 | 714  | 31058  | 0         | 561  | 562  | 99 -  | 152  | 713  | 29799  | 30360  |
| UN37654 | Rsa1.0.00025.1 | 886  | 277312 | 0         | 881  | 884  | 99 +  | 3    | 886  | 28605  | 29488  |
| UN37655 | Rsa1.0.01988.1 | 939  | 36444  | 0         | 927  | 941  | 98 +  | 1    | 939  | 14083  | 15020  |
| UN37656 | Rsa1.0.00050.1 | 1202 | 237174 | 0         | 1199 | 1202 | 99 +  | 2    | 1202 | 209762 | 210963 |
| UN37657 | Rsa1.0.33526.1 | 865  | 676    | 0         | 675  | 676  | 99 +  | 161  | 836  | 1      | 676    |
| UN37658 | Rsa1.0.00201.1 | 709  | 232851 | 0         | 676  | 706  | 95 -  | 4    | 709  | 31737  | 32439  |
| UN37659 | Rsa1.0.07481.1 | 346  | 9280   | 1.00E-158 | 305  | 310  | 98 -  | 38   | 346  | 828    | 1136   |
| UN37660 | Rsa1.0.02748.1 | 838  | 28242  | 0         | 349  | 356  | 98 -  | 400  | 755  | 12855  | 13210  |
| UN37661 | Rsa1.0.00082.1 | 660  | 237584 | 1.00E-132 | 251  | 255  | 98 +  | 401  | 655  | 120016 | 120270 |
| UN37662 | Rsa1.0.02241.1 | 674  | 33520  | 1.00E-161 | 300  | 304  | 98 +  | 371  | 674  | 20022  | 20325  |
| UN37663 | Rsa1.0.27127.1 | 377  | 865    | 1.00E-47  | 177  | 203  | 87 -  | 126  | 315  | 661    | 863    |
| UN37664 | Rsa1.0.00002.1 | 667  | 601661 | 1.00E-103 | 215  | 223  | 96 -  | 102  | 324  | 118126 | 118348 |
| UN37665 | Rsa1.0.04233.1 | 1205 | 18379  | 0         | 1090 | 1152 | 94 -  | 6    | 1140 | 13121  | 14259  |
| UN37666 | Rsa1.0.01761.1 | 1051 | 39717  | 3.00E-35  | 158  | 185  | 85 -  | 759  | 943  | 1436   | 1620   |
| UN37667 | Rsa1.0.05606.1 | 553  | 13202  | 0         | 351  | 351  | 100 - | 203  | 553  | 3034   | 3384   |
| UN37668 | Rsa1.0.01294.1 | 952  | 49090  | 0         | 498  | 499  | 99 +  | 403  | 901  | 15115  | 15613  |
| UN37669 | Rsa1.0.00044.1 | 541  | 271658 | 0         | 511  | 534  | 95 +  | 4    | 537  | 166008 | 166527 |
| UN37670 | Rsa1.0.22750.1 | 837  | 1098   | 1.00E-131 | 266  | 274  | 97 +  | 3    | 276  | 441    | 713    |
| UN37671 | Rsa1.0.00509.1 | 778  | 78829  | 1.00E-155 | 313  | 323  | 96 +  | 5    | 322  | 48909  | 49231  |
| UN37672 | Rsa1.0.00018.1 | 725  | 410899 | 1.00E-120 | 235  | 240  | 97 -  | 238  | 477  | 58607  | 58846  |



|         |                |      |        |           |      |      |       |     |      |        |        |
|---------|----------------|------|--------|-----------|------|------|-------|-----|------|--------|--------|
| UN37673 | Rsa1.0.02142.1 | 685  | 34633  | 0         | 591  | 593  | 99 -  | 3   | 595  | 13010  | 13602  |
| UN37674 | Rsa1.0.01637.1 | 1238 | 41862  | 0         | 547  | 572  | 95 -  | 381 | 943  | 1      | 572    |
| UN37675 | Rsa1.0.14978.1 | 1145 | 2918   | 0         | 1143 | 1144 | 99 -  | 2   | 1145 | 1496   | 2639   |
| UN37676 | Rsa1.0.07780.1 | 744  | 8589   | 0         | 500  | 501  | 99 -  | 244 | 744  | 5705   | 6205   |
| UN37677 | Rsa1.0.01808.1 | 1143 | 39007  | 0         | 985  | 988  | 99 -  | 1   | 988  | 14631  | 15617  |
| UN37678 | Rsa1.0.02377.1 | 1247 | 31994  | 1.00E-143 | 366  | 402  | 91 +  | 866 | 1247 | 18791  | 19186  |
| UN37679 | Rsa1.0.00123.1 | 855  | 325650 | 0         | 429  | 430  | 99 +  | 426 | 855  | 67672  | 68101  |
| UN37680 | Rsa1.0.00688.1 | 536  | 68396  | 1.00E-131 | 332  | 365  | 90 +  | 171 | 535  | 37797  | 38147  |
| UN37681 | Rsa1.0.00916.1 | 1207 | 59789  | 0         | 774  | 774  | 100 - | 2   | 775  | 31531  | 32304  |
| UN37682 | Rsa1.0.00001.1 | 633  | 363028 | 0         | 417  | 421  | 99 +  | 215 | 633  | 139439 | 139859 |
| UN37683 | Rsa1.0.01234.1 | 960  | 50183  | 1.00E-154 | 283  | 285  | 99 +  | 501 | 785  | 37502  | 37786  |
| UN37684 | Rsa1.0.00926.1 | 878  | 195072 | 0         | 709  | 716  | 99 -  | 161 | 876  | 43596  | 44309  |
| UN37685 | Rsa1.0.10066.1 | 1327 | 6016   | 0         | 897  | 916  | 97 -  | 413 | 1327 | 1607   | 2521   |
| UN37686 | Rsa1.0.00006.1 | 1042 | 396176 | 0         | 1032 | 1037 | 99 -  | 4   | 1040 | 353624 | 354659 |
| UN37687 | Rsa1.0.00632.1 | 925  | 183777 | 0         | 470  | 474  | 99 +  | 417 | 890  | 172896 | 173369 |
| UN37688 | Rsa1.0.00058.1 | 634  | 159921 | 0         | 612  | 629  | 97 +  | 6   | 634  | 110006 | 110634 |
| UN37689 | Rsa1.0.13119.1 | 451  | 5003   | 0         | 449  | 449  | 100 + | 3   | 451  | 2591   | 3039   |
| UN37690 | Rsa1.0.02322.1 | 602  | 32555  | 1.00E-128 | 238  | 240  | 99 +  | 363 | 602  | 26961  | 27200  |
| UN37691 | Rsa1.0.00325.1 | 312  | 95371  | 8.00E-92  | 234  | 249  | 93 -  | 65  | 310  | 37143  | 37387  |
| UN37692 | Rsa1.0.00029.1 | 1316 | 272992 | 1.00E-154 | 322  | 334  | 96 -  | 974 | 1303 | 175109 | 175440 |
| UN37693 | Rsa1.0.03257.1 | 558  | 24305  | 0         | 543  | 557  | 97 -  | 2   | 558  | 6493   | 7049   |
| UN37694 | Rsa1.0.01904.1 | 912  | 37450  | 1.00E-114 | 376  | 432  | 87 +  | 494 | 911  | 9148   | 9561   |
| UN37695 | Rsa1.0.03843.1 | 1056 | 20496  | 0         | 922  | 953  | 96 +  | 106 | 1056 | 18048  | 18995  |
| UN37696 | Rsa1.0.00016.1 | 1030 | 831256 | 0         | 1016 | 1029 | 98 +  | 3   | 1030 | 311537 | 312565 |
| UN37697 | Rsa1.0.03974.1 | 869  | 19770  | 1.00E-132 | 300  | 320  | 93 -  | 148 | 467  | 13052  | 13371  |
| UN37698 | Rsa1.0.02524.1 | 810  | 30496  | 2.00E-45  | 249  | 295  | 84 -  | 517 | 810  | 15647  | 15929  |
| UN37699 | Rsa1.0.01588.1 | 1197 | 42724  | 0         | 882  | 886  | 99 -  | 312 | 1197 | 34970  | 35855  |
| UN37700 | Rsa1.0.02943.1 | 1084 | 153598 | 0         | 494  | 513  | 96 -  | 456 | 968  | 136586 | 137097 |
| UN37701 | Rsa1.0.01565.1 | 1180 | 155447 | 0         | 1129 | 1179 | 95 -  | 2   | 1180 | 20360  | 21523  |
| UN37702 | Rsa1.0.00792.1 | 464  | 64163  | 1.00E-26  | 65   | 66   | 98 +  | 3   | 68   | 45848  | 45913  |
| UN37703 | Rsa1.0.01887.1 | 164  | 37564  | 8.00E-78  | 162  | 166  | 97 +  | 1   | 164  | 23504  | 23669  |
| UN37704 | Rsa1.0.00105.1 | 785  | 134138 | 0         | 436  | 438  | 99 +  | 346 | 783  | 97288  | 97725  |
| UN37705 | Rsa1.0.00247.1 | 675  | 103408 | 0         | 630  | 661  | 95 -  | 2   | 653  | 15364  | 16020  |
| UN37706 | Rsa1.0.00632.1 | 756  | 183777 | 0         | 755  | 756  | 99 +  | 1   | 756  | 56668  | 57423  |
| UN37707 | Rsa1.0.00001.1 | 756  | 363028 | 0         | 753  | 755  | 99 +  | 2   | 756  | 235563 | 236317 |
| UN37708 | Rsa1.0.66891.1 | 555  | 343    | 1.00E-98  | 215  | 223  | 96 +  | 147 | 368  | 1      | 222    |
| UN37709 | Rsa1.0.00128.1 | 918  | 228675 | 1.00E-117 | 217  | 218  | 99 -  | 442 | 659  | 118115 | 118332 |
| UN37710 | Rsa1.0.00251.1 | 596  | 303968 | 0         | 518  | 537  | 96 -  | 6   | 538  | 139714 | 140250 |
| UN37711 | Rsa1.0.00081.1 | 635  | 143261 | 0         | 537  | 560  | 95 +  | 86  | 633  | 136889 | 137448 |

|         |                |      |        |           |      |      |       |     |      |        |        |
|---------|----------------|------|--------|-----------|------|------|-------|-----|------|--------|--------|
| UN37712 | Rsa1.0.00767.1 | 817  | 64980  | 1.00E-162 | 310  | 315  | 98 -  | 3   | 312  | 2364   | 2678   |
| UN37713 | Rsa1.0.00389.1 | 932  | 88795  | 0         | 868  | 901  | 96 +  | 1   | 897  | 16737  | 17636  |
| UN37714 | Rsa1.0.00222.1 | 399  | 172263 | 1.00E-75  | 233  | 258  | 90 -  | 139 | 396  | 41907  | 42153  |
| UN37715 | Rsa1.0.00004.1 | 781  | 253996 | 4.00E-34  | 111  | 123  | 90 -  | 470 | 592  | 209494 | 209616 |
| UN37716 | Rsa1.0.13471.1 | 564  | 4802   | 0         | 544  | 575  | 94 +  | 3   | 564  | 1018   | 1581   |
| UN37717 | Rsa1.0.06868.1 | 644  | 10234  | 1.00E-157 | 349  | 368  | 94 -  | 2   | 355  | 8369   | 8736   |
| UN37718 | Rsa1.0.00413.1 | 728  | 86921  | 1.00E-138 | 300  | 313  | 95 -  | 418 | 728  | 37477  | 37782  |
| UN37719 | Rsa1.0.00349.1 | 714  | 92621  | 0         | 499  | 499  | 100 - | 216 | 714  | 7669   | 8167   |
| UN37720 | Rsa1.0.06019.1 | 841  | 11916  | 1.00E-130 | 297  | 319  | 93 +  | 3   | 312  | 11038  | 11350  |
| UN37721 | Rsa1.0.00089.1 | 1053 | 406142 | 0         | 429  | 433  | 99 +  | 620 | 1052 | 132536 | 132968 |
| UN37722 | Rsa1.0.01160.1 | 768  | 52068  | 0         | 767  | 767  | 100 + | 2   | 768  | 7412   | 8178   |
| UN37723 | Rsa1.0.00253.1 | 829  | 231292 | 0         | 527  | 536  | 98 +  | 298 | 829  | 145110 | 145645 |
| UN37724 | Rsa1.0.00930.1 | 543  | 59224  | 9.00E-93  | 225  | 237  | 94 +  | 309 | 543  | 51680  | 51914  |
| UN37725 | Rsa1.0.14421.1 | 1092 | 3413   | 0         | 380  | 391  | 97 +  | 702 | 1092 | 1      | 391    |
| UN37726 | #              | #    | #      | #         | #    | #    | #     | #   | #    | #      | #      |
| UN37727 | Rsa1.0.00043.1 | 1344 | 264937 | 0         | 878  | 915  | 95 -  | 441 | 1342 | 254392 | 255306 |
| UN37728 | Rsa1.0.00556.1 | 662  | 207212 | 1.00E-153 | 303  | 311  | 97 +  | 353 | 662  | 150913 | 151223 |
| UN37729 | Rsa1.0.02595.1 | 800  | 29715  | 1.00E-171 | 332  | 340  | 97 +  | 463 | 800  | 939    | 1278   |
| UN37730 | Rsa1.0.00673.1 | 787  | 69325  | 0         | 774  | 779  | 99 -  | 2   | 780  | 9649   | 10427  |
| UN37731 | Rsa1.0.04591.1 | 944  | 16717  | 0         | 412  | 412  | 100 - | 2   | 413  | 9932   | 10343  |
| UN37732 | Rsa1.0.02412.1 | 930  | 31643  | 6.00E-24  | 88   | 98   | 89 +  | 784 | 881  | 2260   | 2357   |
| UN37733 | Rsa1.0.00493.1 | 607  | 80007  | 1.00E-178 | 371  | 386  | 96 +  | 219 | 600  | 12009  | 12392  |
| UN37734 | Rsa1.0.00029.1 | 1255 | 272992 | 2.00E-55  | 163  | 177  | 92 +  | 955 | 1127 | 228818 | 228993 |
| UN37735 | Rsa1.0.01979.1 | 677  | 36545  | 0         | 406  | 410  | 99 +  | 268 | 677  | 36007  | 36416  |
| UN37736 | Rsa1.0.00486.1 | 979  | 80875  | 0         | 552  | 556  | 99 +  | 3   | 556  | 26235  | 26789  |
| UN37737 | Rsa1.0.15356.1 | 1130 | 2661   | 0         | 806  | 877  | 91 +  | 250 | 1117 | 1807   | 2661   |
| UN37738 | Rsa1.0.02251.1 | 655  | 33404  | 0         | 552  | 553  | 99 -  | 2   | 554  | 19894  | 20446  |
| UN37739 | Rsa1.0.01724.1 | 793  | 40292  | 0         | 766  | 795  | 96 -  | 1   | 792  | 25299  | 26092  |
| UN37740 | Rsa1.0.07335.1 | 978  | 9545   | 0         | 969  | 978  | 99 -  | 1   | 978  | 8254   | 9227   |
| UN37741 | Rsa1.0.10802.1 | 454  | 5716   | 0         | 452  | 454  | 99 -  | 1   | 454  | 33     | 486    |
| UN37742 | Rsa1.0.01175.1 | 772  | 51674  | 1.00E-145 | 275  | 278  | 98 +  | 495 | 772  | 27729  | 28005  |
| UN37743 | Rsa1.0.00541.1 | 840  | 76863  | 0         | 441  | 466  | 94 +  | 379 | 836  | 39056  | 39517  |
| UN37744 | Rsa1.0.00912.1 | 1341 | 59923  | 0         | 761  | 805  | 94 -  | 1   | 803  | 47347  | 48142  |
| UN37745 | Rsa1.0.14764.1 | 1283 | 3084   | 0         | 668  | 697  | 95 -  | 591 | 1281 | 188    | 882    |
| UN37746 | Rsa1.0.00806.1 | 935  | 63674  | 0         | 931  | 939  | 99 +  | 3   | 935  | 42057  | 42995  |
| UN37747 | Rsa1.0.00457.1 | 1430 | 337301 | 0         | 1417 | 1423 | 99 +  | 8   | 1429 | 191250 | 192672 |
| UN37748 | Rsa1.0.00445.1 | 674  | 84317  | 0         | 666  | 668  | 99 +  | 5   | 672  | 55460  | 56127  |
| UN37749 | Rsa1.0.02402.1 | 811  | 31710  | 0         | 738  | 758  | 97 -  | 55  | 811  | 23950  | 24706  |
| UN37750 | Rsa1.0.00516.1 | 1019 | 78417  | 1.00E-114 | 244  | 255  | 95 -  | 2   | 253  | 7335   | 7589   |

|         |                |      |        |           |      |      |       |     |      |        |        |
|---------|----------------|------|--------|-----------|------|------|-------|-----|------|--------|--------|
| UN37751 | Rsa1.0.04519.1 | 1023 | 17004  | 0         | 743  | 758  | 98 +  | 3   | 759  | 4259   | 5016   |
| UN37752 | Rsa1.0.04112.1 | 1424 | 18989  | 1.00E-163 | 353  | 370  | 95 +  | 2   | 362  | 4032   | 4400   |
| UN37753 | Rsa1.0.00421.1 | 1035 | 86365  | 1.00E-122 | 223  | 223  | 100 + | 1   | 223  | 55670  | 55892  |
| UN37754 | Rsa1.0.02121.1 | 1847 | 34813  | 0         | 412  | 416  | 99 +  | 694 | 1109 | 14172  | 14587  |
| UN37755 | Rsa1.0.00975.1 | 1057 | 57865  | 0         | 504  | 512  | 98 +  | 546 | 1057 | 6741   | 7249   |
| UN37756 | Rsa1.0.06323.1 | 1389 | 11236  | 0         | 645  | 668  | 96 -  | 727 | 1389 | 7472   | 8138   |
| UN37757 | Rsa1.0.00080.1 | 845  | 190437 | 1.00E-153 | 275  | 275  | 100 + | 1   | 275  | 35366  | 35640  |
| UN37758 | Rsa1.0.00078.1 | 1289 | 175053 | 0         | 374  | 389  | 96 +  | 907 | 1289 | 56039  | 56427  |
| UN37759 | Rsa1.0.00162.1 | 1247 | 239935 | 0         | 695  | 741  | 93 -  | 525 | 1247 | 38547  | 39286  |
| UN37760 | Rsa1.0.02428.1 | 837  | 31542  | 0         | 539  | 556  | 96 -  | 2   | 557  | 12309  | 12864  |
| UN37761 | Rsa1.0.00211.1 | 1149 | 228189 | 0         | 410  | 416  | 98 -  | 738 | 1149 | 146419 | 146834 |
| UN37762 | Rsa1.0.01717.1 | 996  | 143162 | 0         | 958  | 996  | 96 +  | 2   | 996  | 127961 | 128951 |
| UN37763 | Rsa1.0.07823.1 | 1001 | 8468   | 0         | 839  | 843  | 99 +  | 161 | 1001 | 4771   | 5613   |
| UN37764 | Rsa1.0.00560.1 | 983  | 75685  | 1.00E-147 | 304  | 313  | 97 -  | 4   | 314  | 44093  | 44404  |
| UN37765 | Rsa1.0.00720.1 | 949  | 66931  | 1.00E-132 | 251  | 254  | 98 +  | 695 | 948  | 37937  | 38188  |
| UN37766 | Rsa1.0.00218.1 | 990  | 201480 | 0         | 504  | 546  | 92 -  | 2   | 544  | 111393 | 111916 |
| UN37767 | Rsa1.0.00441.1 | 826  | 84607  | 0         | 538  | 569  | 94 +  | 258 | 826  | 29577  | 30145  |
| UN37768 | Rsa1.0.03513.1 | 930  | 22349  | 1.00E-138 | 376  | 418  | 89 -  | 511 | 928  | 12707  | 13124  |
| UN37769 | Rsa1.0.00003.1 | 815  | 340054 | 0         | 393  | 413  | 95 +  | 403 | 815  | 87090  | 87486  |
| UN37770 | Rsa1.0.01773.1 | 1084 | 39546  | 0         | 1018 | 1083 | 93 -  | 1   | 1083 | 17706  | 18763  |
| UN37771 | Rsa1.0.00050.1 | 889  | 237174 | 0         | 419  | 421  | 99 +  | 468 | 888  | 33432  | 33852  |
| UN37772 | Rsa1.0.00442.1 | 1155 | 84596  | 1.00E-105 | 225  | 235  | 95 -  | 1   | 235  | 62079  | 62308  |
| UN37773 | Rsa1.0.05192.1 | 1356 | 136195 | 0         | 486  | 498  | 97 -  | 1   | 498  | 124985 | 125482 |
| UN37774 | Rsa1.0.17558.1 | 1275 | 1798   | 0         | 658  | 727  | 90 -  | 552 | 1275 | 1071   | 1797   |
| UN37775 | Rsa1.0.00630.1 | 1157 | 71281  | 0         | 939  | 952  | 98 +  | 209 | 1157 | 23790  | 24739  |
| UN37776 | Rsa1.0.04156.1 | 1288 | 18799  | 1.00E-117 | 232  | 238  | 97 +  | 17  | 254  | 15261  | 15498  |
| UN37777 | Rsa1.0.03826.1 | 1103 | 20614  | 0         | 668  | 689  | 96 +  | 415 | 1103 | 16092  | 16780  |
| UN37778 | Rsa1.0.02026.1 | 1199 | 35896  | 0         | 595  | 641  | 92 +  | 567 | 1199 | 22658  | 23288  |
| UN37779 | Rsa1.0.00243.1 | 768  | 103651 | 0         | 724  | 761  | 95 +  | 8   | 763  | 87347  | 88105  |
| UN37780 | Rsa1.0.00015.1 | 933  | 561803 | 0         | 799  | 827  | 96 +  | 113 | 933  | 282849 | 283673 |
| UN37781 | Rsa1.0.00387.1 | 1286 | 495407 | 1.00E-96  | 189  | 192  | 98 +  | 1   | 192  | 159264 | 159455 |
| UN37782 | Rsa1.0.00110.1 | 1122 | 132719 | 0         | 373  | 373  | 100 - | 748 | 1120 | 93140  | 93512  |
| UN37783 | Rsa1.0.00108.1 | 1040 | 478491 | 3.00E-97  | 208  | 217  | 95 -  | 822 | 1038 | 418791 | 419007 |
| UN37784 | Rsa1.0.00131.1 | 1052 | 432233 | 1.00E-145 | 319  | 337  | 94 +  | 1   | 336  | 151927 | 152252 |
| UN37785 | Rsa1.0.00829.1 | 1195 | 158305 | 0         | 1142 | 1194 | 95 +  | 16  | 1180 | 146351 | 147544 |
| UN37786 | Rsa1.0.01855.1 | 1083 | 38204  | 0         | 904  | 947  | 95 +  | 141 | 1083 | 6485   | 7426   |
| UN37787 | Rsa1.0.16203.1 | 990  | 2246   | 0         | 924  | 945  | 97 -  | 40  | 984  | 995    | 1939   |
| UN37788 | Rsa1.0.04340.1 | 990  | 17831  | 1.00E-149 | 313  | 326  | 96 -  | 540 | 861  | 12935  | 13260  |
| UN37789 | Rsa1.0.00127.1 | 1023 | 127446 | 1.00E-151 | 301  | 310  | 97 +  | 2   | 309  | 79218  | 79527  |

|         |                |      |        |           |      |      |       |      |      |        |        |
|---------|----------------|------|--------|-----------|------|------|-------|------|------|--------|--------|
| UN37790 | Rsa1.0.00678.1 | 1131 | 193163 | 0         | 1099 | 1125 | 97 +  | 5    | 1129 | 155011 | 156130 |
| UN37791 | Rsa1.0.01081.1 | 794  | 499226 | 2.00E-94  | 176  | 176  | 100 + | 3    | 178  | 321156 | 321331 |
| UN37792 | Rsa1.0.00825.1 | 987  | 62855  | 0         | 382  | 398  | 95 +  | 68   | 465  | 49249  | 49643  |
| UN37793 | Rsa1.0.01601.1 | 781  | 42519  | 0         | 427  | 441  | 96 -  | 342  | 781  | 11148  | 11588  |
| UN37794 | Rsa1.0.00019.1 | 1618 | 301669 | 0         | 1560 | 1618 | 96 +  | 1    | 1618 | 229417 | 231007 |
| UN37795 | Rsa1.0.06127.1 | 605  | 11675  | 0         | 369  | 370  | 99 -  | 3    | 372  | 3128   | 3497   |
| UN37796 | Rsa1.0.00552.1 | 1171 | 206757 | 3.00E-94  | 204  | 212  | 96 +  | 763  | 973  | 187055 | 187266 |
| UN37797 | Rsa1.0.04249.1 | 859  | 18269  | 1.00E-178 | 369  | 385  | 95 +  | 1    | 382  | 4445   | 4827   |
| UN37798 | Rsa1.0.00562.1 | 1252 | 75565  | 0         | 708  | 735  | 96 -  | 2    | 736  | 8259   | 8992   |
| UN37799 | Rsa1.0.02212.1 | 1288 | 33840  | 1.00E-109 | 223  | 230  | 96 -  | 694  | 923  | 18942  | 19171  |
| UN37800 | Rsa1.0.02365.1 | 754  | 32118  | 0         | 529  | 593  | 89 +  | 18   | 582  | 29274  | 29863  |
| UN37801 | Rsa1.0.01217.1 | 831  | 50554  | 0         | 358  | 367  | 97 +  | 1    | 367  | 21092  | 21458  |
| UN37802 | Rsa1.0.00197.1 | 873  | 109714 | 0         | 456  | 458  | 99 -  | 414  | 871  | 66072  | 66529  |
| UN37803 | Rsa1.0.00305.1 | 1032 | 97308  | 0         | 955  | 1017 | 93 -  | 19   | 1022 | 37454  | 38443  |
| UN37804 | Rsa1.0.15644.1 | 1254 | 2505   | 0         | 617  | 646  | 95 +  | 607  | 1252 | 577    | 1213   |
| UN37805 | Rsa1.0.03997.1 | 1075 | 19652  | 1.00E-136 | 282  | 294  | 95 +  | 22   | 315  | 2575   | 2868   |
| UN37806 | Rsa1.0.07157.1 | 842  | 9805   | 1.00E-157 | 305  | 313  | 97 -  | 117  | 429  | 4990   | 5302   |
| UN37807 | Rsa1.0.08223.1 | 1457 | 7700   | 6.00E-90  | 181  | 185  | 97 +  | 557  | 741  | 3991   | 4175   |
| UN37808 | Rsa1.0.00805.1 | 1208 | 63724  | 1.00E-170 | 303  | 303  | 100 - | 906  | 1208 | 43808  | 44110  |
| UN37809 | Rsa1.0.02015.1 | 1039 | 36008  | 1.00E-127 | 238  | 240  | 99 -  | 536  | 775  | 2837   | 3076   |
| UN37810 | Rsa1.0.00028.1 | 1079 | 293984 | 0         | 624  | 645  | 96 -  | 435  | 1079 | 282595 | 283237 |
| UN37811 | Rsa1.0.00021.1 | 1165 | 263655 | 0         | 538  | 562  | 95 +  | 105  | 654  | 186306 | 186867 |
| UN37812 | Rsa1.0.14201.1 | 905  | 3670   | 0         | 483  | 484  | 99 -  | 422  | 905  | 594    | 1077   |
| UN37813 | Rsa1.0.00028.1 | 1066 | 293984 | 4.00E-81  | 163  | 166  | 98 +  | 255  | 420  | 43878  | 44043  |
| UN37814 | Rsa1.0.02859.1 | 1324 | 162118 | 0         | 531  | 547  | 97 +  | 3    | 544  | 24303  | 24844  |
| UN37815 | Rsa1.0.03072.1 | 1347 | 25577  | 0         | 780  | 780  | 100 - | 366  | 1145 | 19503  | 20282  |
| UN37816 | Rsa1.0.00778.1 | 675  | 196751 | 1.00E-145 | 308  | 325  | 94 +  | 351  | 675  | 165400 | 165715 |
| UN37817 | Rsa1.0.00457.1 | 927  | 337301 | 1.00E-114 | 222  | 226  | 98 +  | 590  | 815  | 2588   | 2813   |
| UN37818 | Rsa1.0.08001.1 | 746  | 8095   | 1.00E-123 | 248  | 256  | 96 +  | 39   | 294  | 2878   | 3133   |
| UN37819 | Rsa1.0.00399.1 | 1144 | 242951 | 0         | 415  | 428  | 96 +  | 243  | 664  | 79753  | 80180  |
| UN37820 | Rsa1.0.03639.1 | 798  | 21629  | 1.00E-144 | 300  | 312  | 96 -  | 3    | 314  | 4990   | 5300   |
| UN37821 | Rsa1.0.00303.1 | 1491 | 97468  | 0         | 517  | 535  | 96 +  | 958  | 1491 | 30230  | 30761  |
| UN37822 | Rsa1.0.00090.1 | 936  | 273859 | 1.00E-156 | 313  | 324  | 96 +  | 614  | 936  | 2718   | 3033   |
| UN37823 | Rsa1.0.00344.1 | 857  | 191774 | 1.00E-147 | 331  | 355  | 93 +  | 517  | 857  | 104082 | 104435 |
| UN37824 | Rsa1.0.01884.1 | 1710 | 37659  | 0         | 528  | 551  | 95 -  | 1160 | 1710 | 14438  | 14986  |
| UN37825 | Rsa1.0.00955.1 | 1026 | 58358  | 1.00E-104 | 202  | 205  | 98 -  | 302  | 506  | 35143  | 35347  |
| UN37826 | Rsa1.0.00082.1 | 1553 | 237584 | 0         | 528  | 528  | 100 + | 2    | 529  | 19585  | 20112  |
| UN37827 | Rsa1.0.01526.1 | 615  | 43919  | 0         | 433  | 448  | 96 +  | 158  | 605  | 2497   | 2944   |
| UN37828 | Rsa1.0.11411.1 | 1050 | 5515   | 0         | 876  | 926  | 94 -  | 124  | 1049 | 4596   | 5515   |

|         |                |      |        |           |      |      |       |     |      |        |        |
|---------|----------------|------|--------|-----------|------|------|-------|-----|------|--------|--------|
| UN37829 | Rsa1.0.00476.1 | 699  | 280966 | 1.00E-113 | 293  | 319  | 91 +  | 376 | 687  | 166138 | 166455 |
| UN37830 | Rsa1.0.02276.1 | 1272 | 33098  | 0         | 1113 | 1169 | 95 -  | 1   | 1163 | 12207  | 13370  |
| UN37831 | Rsa1.0.00526.1 | 1008 | 169279 | 0         | 947  | 1024 | 92 -  | 1   | 1008 | 165055 | 166071 |
| UN37832 | Rsa1.0.00874.1 | 971  | 179723 | 0         | 938  | 978  | 95 -  | 3   | 970  | 23730  | 24707  |
| UN37833 | Rsa1.0.37975.1 | 1150 | 593    | 0         | 574  | 584  | 98 -  | 198 | 781  | 1      | 582    |
| UN37834 | Rsa1.0.00457.1 | 925  | 337301 | 1.00E-140 | 265  | 269  | 98 -  | 657 | 925  | 289889 | 290157 |
| UN37835 | Rsa1.0.03249.1 | 519  | 146254 | 0         | 442  | 450  | 98 -  | 67  | 514  | 141647 | 142094 |
| UN37836 | Rsa1.0.00210.1 | 1768 | 108424 | 1.00E-164 | 363  | 386  | 94 +  | 334 | 719  | 13479  | 13864  |
| UN37837 | Rsa1.0.00740.1 | 1015 | 215972 | 3.00E-97  | 190  | 192  | 98 +  | 198 | 387  | 31259  | 31450  |
| UN37838 | Rsa1.0.00305.1 | 1296 | 97308  | 9.00E-95  | 233  | 250  | 93 +  | 3   | 250  | 94455  | 94696  |
| UN37839 | Rsa1.0.03524.1 | 1380 | 22297  | 0         | 629  | 647  | 97 +  | 734 | 1380 | 14064  | 14710  |
| UN37840 | Rsa1.0.03319.1 | 1246 | 23767  | 1.00E-178 | 388  | 412  | 94 +  | 173 | 584  | 16981  | 17392  |
| UN37841 | Rsa1.0.00069.1 | 787  | 403561 | 1.00E-132 | 263  | 271  | 97 -  | 1   | 271  | 192368 | 192638 |
| UN37842 | Rsa1.0.00512.1 | 908  | 200277 | 1.00E-175 | 311  | 311  | 100 + | 595 | 905  | 27880  | 28190  |
| UN37843 | Rsa1.0.11393.1 | 910  | 5521   | 1.00E-149 | 271  | 272  | 99 +  | 3   | 274  | 1097   | 1368   |
| UN37844 | Rsa1.0.04140.1 | 1255 | 18879  | 1.00E-108 | 212  | 216  | 98 +  | 258 | 473  | 7286   | 7501   |
| UN37845 | Rsa1.0.00191.1 | 1705 | 316976 | 0         | 623  | 653  | 95 -  | 923 | 1570 | 49335  | 49971  |
| UN37846 | Rsa1.0.00992.1 | 539  | 57419  | 0         | 537  | 539  | 99 -  | 1   | 539  | 7274   | 7812   |
| UN37847 | Rsa1.0.04262.1 | 961  | 18220  | 0         | 490  | 493  | 99 -  | 1   | 493  | 3395   | 3887   |
| UN37848 | Rsa1.0.00131.1 | 844  | 432233 | 1.00E-147 | 380  | 416  | 91 -  | 1   | 416  | 8503   | 8905   |
| UN37849 | Rsa1.0.01403.1 | 950  | 46453  | 1.00E-150 | 272  | 273  | 99 -  | 2   | 274  | 20145  | 20417  |
| UN37850 | Rsa1.0.03327.1 | 881  | 23707  | 0         | 699  | 723  | 96 +  | 6   | 723  | 17677  | 18399  |
| UN37851 | Rsa1.0.00101.1 | 822  | 267193 | 0         | 330  | 331  | 99 -  | 221 | 551  | 140948 | 141278 |
| UN37852 | Rsa1.0.00348.1 | 1283 | 92818  | 0         | 1241 | 1281 | 96 +  | 4   | 1281 | 32483  | 33758  |
| UN37853 | Rsa1.0.01338.1 | 920  | 155644 | 0         | 556  | 591  | 94 -  | 1   | 576  | 128152 | 128742 |
| UN37854 | Rsa1.0.13944.1 | 782  | 4039   | 4.00E-34  | 321  | 396  | 81 -  | 213 | 602  | 504    | 896    |
| UN37855 | Rsa1.0.00490.1 | 788  | 186713 | 0         | 744  | 747  | 99 -  | 3   | 748  | 181001 | 181747 |
| UN37856 | Rsa1.0.01565.1 | 1250 | 155447 | 0         | 870  | 872  | 99 -  | 2   | 873  | 34665  | 35536  |
| UN37857 | Rsa1.0.28433.1 | 1052 | 815    | 0         | 561  | 569  | 98 +  | 487 | 1052 | 1      | 569    |
| UN37858 | Rsa1.0.10110.1 | 1056 | 5994   | 0         | 902  | 951  | 94 -  | 118 | 1056 | 3444   | 4392   |
| UN37859 | Rsa1.0.02625.1 | 797  | 139104 | 1.00E-115 | 211  | 211  | 100 + | 4   | 214  | 7333   | 7543   |
| UN37860 | Rsa1.0.09409.1 | 822  | 6390   | 1.00E-134 | 258  | 263  | 98 +  | 560 | 822  | 2135   | 2397   |
| UN37861 | Rsa1.0.01090.1 | 1448 | 54385  | 0         | 694  | 720  | 96 -  | 1   | 714  | 28191  | 28906  |
| UN37862 | Rsa1.0.30745.1 | 1379 | 746    | 1.00E-130 | 520  | 610  | 85 -  | 187 | 778  | 144    | 730    |
| UN37863 | Rsa1.0.00707.1 | 981  | 190112 | 1.00E-151 | 345  | 369  | 93 -  | 3   | 365  | 55985  | 56345  |
| UN37864 | Rsa1.0.01254.1 | 1016 | 49801  | 1.00E-151 | 447  | 496  | 90 -  | 524 | 1010 | 13794  | 14282  |
| UN37865 | Rsa1.0.00793.1 | 676  | 64103  | 4.00E-86  | 217  | 233  | 93 -  | 10  | 231  | 15598  | 15828  |
| UN37866 | Rsa1.0.00006.1 | 672  | 396176 | 0         | 464  | 475  | 97 -  | 1   | 467  | 210887 | 211360 |
| UN37867 | Rsa1.0.01316.1 | 1040 | 48325  | 1.00E-101 | 205  | 210  | 97 -  | 750 | 959  | 1183   | 1389   |

|         |                |      |        |           |      |      |       |      |      |        |        |
|---------|----------------|------|--------|-----------|------|------|-------|------|------|--------|--------|
| UN37868 | Rsa1.0.03375.1 | 1523 | 23332  | 0         | 587  | 614  | 95 -  | 917  | 1521 | 16084  | 16693  |
| UN37869 | Rsa1.0.01506.1 | 1396 | 44370  | 1.00E-102 | 198  | 201  | 98 +  | 1086 | 1286 | 30359  | 30559  |
| UN37870 | Rsa1.0.01567.1 | 1014 | 43090  | 0         | 515  | 517  | 99 -  | 496  | 1012 | 19887  | 20402  |
| UN37871 | Rsa1.0.01861.1 | 1194 | 38031  | 0         | 743  | 754  | 98 -  | 443  | 1193 | 14090  | 14843  |
| UN37872 | Rsa1.0.03483.1 | 1004 | 22621  | 0         | 373  | 379  | 98 -  | 626  | 1004 | 18280  | 18658  |
| UN37873 | Rsa1.0.52224.1 | 1092 | 436    | 1.00E-107 | 221  | 229  | 96 -  | 442  | 670  | 1      | 229    |
| UN37874 | Rsa1.0.18823.1 | 640  | 1527   | 1.00E-92  | 250  | 276  | 90 -  | 208  | 480  | 14     | 276    |
| UN37875 | Rsa1.0.00565.1 | 878  | 75420  | 0         | 342  | 346  | 98 +  | 1    | 345  | 34392  | 34737  |
| UN37876 | Rsa1.0.01641.1 | 1485 | 188213 | 0         | 945  | 952  | 99 -  | 3    | 954  | 15891  | 16842  |
| UN37877 | Rsa1.0.02386.1 | 1165 | 31895  | 1.00E-169 | 312  | 314  | 99 +  | 3    | 316  | 10424  | 10736  |
| UN37878 | Rsa1.0.00925.1 | 786  | 59481  | 1.00E-150 | 308  | 317  | 97 -  | 2    | 318  | 38881  | 39194  |
| UN37879 | Rsa1.0.00002.1 | 1014 | 601661 | 0         | 943  | 943  | 100 + | 72   | 1014 | 145814 | 146756 |
| UN37880 | Rsa1.0.00025.1 | 1041 | 277312 | 0         | 775  | 809  | 95 -  | 1    | 803  | 226330 | 227138 |
| UN37881 | Rsa1.0.00050.1 | 1061 | 237174 | 0         | 633  | 664  | 95 +  | 404  | 1061 | 4619   | 5276   |
| UN37882 | Rsa1.0.00387.1 | 1296 | 495407 | 1.00E-179 | 367  | 381  | 96 +  | 2    | 379  | 398905 | 399285 |
| UN37883 | Rsa1.0.01756.1 | 1271 | 39779  | 0         | 382  | 382  | 100 - | 1    | 382  | 10169  | 10550  |
| UN37884 | Rsa1.0.00635.1 | 1030 | 175826 | 0         | 650  | 677  | 96 +  | 352  | 1028 | 106336 | 107011 |
| UN37885 | Rsa1.0.00386.1 | 1471 | 89134  | 1.00E-137 | 248  | 248  | 100 - | 328  | 575  | 67310  | 67557  |
| UN37886 | Rsa1.0.03367.1 | 937  | 23387  | 1.00E-89  | 199  | 208  | 95 -  | 485  | 692  | 1583   | 1789   |
| UN37887 | Rsa1.0.02236.1 | 369  | 33558  | 1.00E-158 | 297  | 302  | 98 -  | 1    | 302  | 19567  | 19868  |
| UN37888 | Rsa1.0.00378.1 | 821  | 89892  | 1.00E-168 | 348  | 362  | 96 -  | 248  | 606  | 64565  | 64920  |
| UN37889 | Rsa1.0.02418.1 | 837  | 31590  | 0         | 800  | 823  | 97 -  | 5    | 823  | 9671   | 10485  |
| UN37890 | Rsa1.0.02038.1 | 606  | 35715  | 1.00E-169 | 347  | 362  | 95 -  | 5    | 358  | 9722   | 10082  |
| UN37891 | Rsa1.0.00058.1 | 906  | 159921 | 1.00E-178 | 354  | 365  | 96 +  | 9    | 373  | 65126  | 65489  |
| UN37892 | Rsa1.0.00075.1 | 1135 | 146680 | 0         | 436  | 465  | 93 +  | 672  | 1133 | 17393  | 17839  |
| UN37893 | Rsa1.0.01104.1 | 830  | 285480 | 1.00E-111 | 249  | 262  | 95 -  | 402  | 663  | 107192 | 107449 |
| UN37894 | Rsa1.0.00108.1 | 1264 | 478491 | 0         | 387  | 394  | 98 +  | 704  | 1097 | 66756  | 67149  |
| UN37895 | Rsa1.0.00082.1 | 979  | 237584 | 0         | 684  | 722  | 94 -  | 203  | 913  | 106443 | 107155 |
| UN37896 | Rsa1.0.00452.1 | 1109 | 83201  | 0         | 585  | 595  | 98 -  | 1    | 592  | 77985  | 78579  |
| UN37897 | Rsa1.0.00092.1 | 1026 | 659932 | 1.00E-80  | 185  | 196  | 94 -  | 3    | 198  | 134776 | 134965 |
| UN37898 | Rsa1.0.05753.1 | 1054 | 12732  | 0         | 562  | 565  | 99 +  | 490  | 1054 | 11407  | 11971  |
| UN37899 | Rsa1.0.03448.1 | 761  | 22844  | 0         | 671  | 676  | 99 -  | 2    | 677  | 3267   | 3942   |
| UN37900 | Rsa1.0.22870.1 | 935  | 1087   | 1.00E-154 | 344  | 369  | 93 -  | 582  | 935  | 474    | 839    |
| UN37901 | Rsa1.0.00451.1 | 1043 | 322533 | 0         | 435  | 444  | 97 +  | 598  | 1041 | 298552 | 298995 |
| UN37902 | Rsa1.0.03798.1 | 1328 | 20800  | 0         | 1256 | 1264 | 99 +  | 1    | 1264 | 331    | 1594   |
| UN37903 | Rsa1.0.01724.1 | 1369 | 40292  | 1.00E-123 | 239  | 244  | 97 +  | 1124 | 1367 | 2086   | 2329   |
| UN37904 | Rsa1.0.52224.1 | 675  | 436    | 1.00E-107 | 224  | 229  | 97 -  | 447  | 672  | 1      | 229    |
| UN37905 | Rsa1.0.04670.1 | 1235 | 16453  | 0         | 398  | 408  | 97 -  | 829  | 1235 | 6521   | 6927   |
| UN37906 | Rsa1.0.00017.1 | 2094 | 752458 | 0         | 1392 | 1462 | 95 -  | 643  | 2090 | 317321 | 318774 |

|         |                |      |        |           |      |      |       |      |      |        |        |
|---------|----------------|------|--------|-----------|------|------|-------|------|------|--------|--------|
| UN37907 | Rsa1.0.00098.1 | 571  | 349239 | 0         | 475  | 505  | 94 +  | 1    | 500  | 234730 | 235222 |
| UN37908 | Rsa1.0.00218.1 | 729  | 201480 | 0         | 704  | 732  | 96 -  | 1    | 729  | 36905  | 37629  |
| UN37909 | Rsa1.0.00921.1 | 935  | 59599  | 1.00E-136 | 293  | 307  | 95 +  | 631  | 935  | 26225  | 26528  |
| UN37910 | Rsa1.0.03193.1 | 2559 | 24690  | 0         | 531  | 537  | 98 +  | 942  | 1478 | 19257  | 19793  |
| UN37911 | Rsa1.0.01556.1 | 933  | 163858 | 0         | 453  | 490  | 92 +  | 246  | 726  | 24979  | 25456  |
| UN37912 | Rsa1.0.00389.1 | 1438 | 88795  | 0         | 1195 | 1246 | 95 +  | 199  | 1438 | 61128  | 62372  |
| UN37913 | Rsa1.0.01105.1 | 1079 | 53958  | 0         | 610  | 623  | 97 +  | 2    | 624  | 19726  | 20345  |
| UN37914 | Rsa1.0.00322.1 | 1015 | 212233 | 0         | 1002 | 1012 | 99 -  | 2    | 1013 | 63679  | 64689  |
| UN37915 | Rsa1.0.01311.1 | 904  | 48456  | 0         | 358  | 360  | 99 +  | 545  | 904  | 16788  | 17147  |
| UN37916 | Rsa1.0.00673.1 | 1057 | 69325  | 1.00E-149 | 289  | 296  | 97 +  | 249  | 544  | 47441  | 47736  |
| UN37917 | Rsa1.0.00154.1 | 311  | 189461 | 1.00E-114 | 286  | 308  | 92 -  | 3    | 308  | 181971 | 182272 |
| UN37918 | Rsa1.0.36989.1 | 694  | 610    | 1.00E-102 | 297  | 330  | 90 -  | 1    | 320  | 1      | 324    |
| UN37919 | Rsa1.0.00001.1 | 1403 | 363028 | 0         | 996  | 1057 | 94 -  | 366  | 1401 | 234955 | 236008 |
| UN37920 | Rsa1.0.64191.1 | 530  | 357    | 1.00E-158 | 301  | 307  | 98 +  | 1    | 302  | 31     | 337    |
| UN37921 | Rsa1.0.13438.1 | 1224 | 4828   | 3.00E-97  | 184  | 185  | 99 +  | 538  | 722  | 1816   | 2000   |
| UN37922 | Rsa1.0.02183.1 | 681  | 34170  | 0         | 380  | 382  | 99 -  | 3    | 384  | 13946  | 14327  |
| UN37923 | Rsa1.0.00152.1 | 1311 | 257730 | 0         | 572  | 585  | 97 -  | 2    | 586  | 230931 | 231515 |
| UN37924 | Rsa1.0.01010.1 | 1230 | 56906  | 1.00E-119 | 221  | 222  | 99 +  | 449  | 670  | 29281  | 29502  |
| UN37925 | Rsa1.0.03834.1 | 890  | 20572  | 0         | 782  | 789  | 99 -  | 102  | 890  | 18748  | 19536  |
| UN37926 | Rsa1.0.01652.1 | 781  | 41579  | 0         | 428  | 438  | 97 -  | 336  | 770  | 1055   | 1489   |
| UN37927 | Rsa1.0.00029.1 | 872  | 272992 | 0         | 618  | 649  | 95 -  | 1    | 647  | 3110   | 3752   |
| UN37928 | Rsa1.0.00350.1 | 755  | 92346  | 1.00E-116 | 228  | 233  | 97 +  | 138  | 370  | 49125  | 49357  |
| UN37929 | Rsa1.0.00108.1 | 971  | 478491 | 1.00E-110 | 286  | 311  | 91 -  | 2    | 306  | 45777  | 46086  |
| UN37930 | Rsa1.0.00162.1 | 1507 | 239935 | 0         | 493  | 511  | 96 +  | 808  | 1315 | 19100  | 19610  |
| UN37931 | Rsa1.0.00041.1 | 1455 | 186197 | 1.00E-158 | 283  | 283  | 100 - | 1172 | 1454 | 51647  | 51929  |
| UN37932 | Rsa1.0.00002.1 | 741  | 601661 | 0         | 706  | 733  | 96 +  | 1    | 733  | 145942 | 146674 |
| UN37933 | Rsa1.0.02756.1 | 931  | 28202  | 1.00E-141 | 360  | 398  | 90 -  | 547  | 925  | 19092  | 19474  |
| UN37934 | Rsa1.0.01724.1 | 949  | 40292  | 1.00E-93  | 257  | 282  | 91 +  | 11   | 281  | 6763   | 7042   |
| UN37935 | Rsa1.0.24446.1 | 786  | 987    | 0         | 533  | 547  | 97 -  | 141  | 687  | 184    | 730    |
| UN37936 | Rsa1.0.00148.1 | 1131 | 120234 | 0         | 476  | 487  | 97 +  | 630  | 1115 | 78     | 564    |
| UN37937 | Rsa1.0.23756.1 | 1116 | 1027   | 0         | 980  | 1025 | 95 +  | 48   | 1071 | 1      | 1025   |
| UN37938 | Rsa1.0.00441.1 | 1537 | 84607  | 0         | 521  | 554  | 94 +  | 989  | 1537 | 29577  | 30126  |
| UN37939 | Rsa1.0.48078.1 | 733  | 471    | 1.00E-144 | 259  | 259  | 100 + | 6    | 264  | 213    | 471    |
| UN37940 | Rsa1.0.00698.1 | 944  | 67816  | 0         | 552  | 562  | 98 +  | 1    | 562  | 43151  | 43709  |
| UN37941 | Rsa1.0.28998.1 | 1278 | 796    | 0         | 346  | 346  | 100 - | 617  | 962  | 435    | 780    |
| UN37942 | Rsa1.0.01261.1 | 804  | 49744  | 0         | 450  | 469  | 95 +  | 3    | 471  | 35452  | 35917  |
| UN37943 | Rsa1.0.01487.1 | 884  | 44784  | 0         | 442  | 447  | 98 -  | 3    | 449  | 28502  | 28948  |
| UN37944 | Rsa1.0.01679.1 | 1363 | 146876 | 1.00E-172 | 323  | 327  | 98 +  | 524  | 850  | 133767 | 134092 |
| UN37945 | Rsa1.0.03639.1 | 1128 | 21629  | 0         | 401  | 414  | 96 +  | 715  | 1128 | 3159   | 3572   |

|         |                |      |        |           |      |      |      |      |      |        |        |
|---------|----------------|------|--------|-----------|------|------|------|------|------|--------|--------|
| UN37946 | Rsa1.0_04578.1 | 775  | 16774  | 0         | 401  | 415  | 96 - | 1    | 415  | 16195  | 16605  |
| UN37947 | Rsa1.0_00116.1 | 915  | 365886 | 0         | 525  | 527  | 99 + | 3    | 529  | 54884  | 55410  |
| UN37948 | Rsa1.0_00016.1 | 722  | 831256 | 0         | 488  | 504  | 96 + | 219  | 722  | 509739 | 510242 |
| UN37949 | Rsa1.0_01126.1 | 854  | 53127  | 0         | 825  | 853  | 96 - | 4    | 854  | 36446  | 37294  |
| UN37950 | Rsa1.0_01220.1 | 1195 | 161775 | 0         | 554  | 566  | 97 + | 629  | 1193 | 27217  | 27782  |
| UN37951 | Rsa1.0_00644.1 | 1014 | 136881 | 1.00E-145 | 283  | 290  | 97 + | 57   | 346  | 26141  | 26430  |
| UN37952 | Rsa1.0_00067.1 | 1037 | 415055 | 1.00E-180 | 356  | 367  | 97 + | 614  | 978  | 160465 | 160831 |
| UN37953 | Rsa1.0_00251.1 | 959  | 303968 | 0         | 953  | 959  | 99 - | 1    | 959  | 11057  | 12015  |
| UN37954 | Rsa1.0_25317.1 | 723  | 941    | 0         | 623  | 646  | 96 + | 1    | 644  | 298    | 941    |
| UN37955 | Rsa1.0_00111.1 | 898  | 390088 | 0         | 433  | 459  | 94 + | 448  | 898  | 71526  | 71980  |
| UN37956 | Rsa1.0_03647.1 | 1215 | 21597  | 0         | 497  | 541  | 91 - | 328  | 859  | 2779   | 3304   |
| UN37957 | Rsa1.0_01237.1 | 1070 | 50124  | 0         | 724  | 739  | 97 + | 333  | 1068 | 44585  | 45319  |
| UN37958 | Rsa1.0_01967.1 | 1745 | 36672  | 0         | 1657 | 1698 | 97 - | 18   | 1711 | 23205  | 24902  |
| UN37959 | Rsa1.0_00816.1 | 275  | 403350 | 1.00E-110 | 244  | 258  | 94 - | 1    | 258  | 271515 | 271772 |
| UN37960 | Rsa1.0_00170.1 | 1423 | 179538 | 1.00E-133 | 297  | 314  | 94 - | 1056 | 1368 | 24440  | 24753  |
| UN37961 | Rsa1.0_66654.1 | 1153 | 344    | 0         | 342  | 344  | 99 + | 37   | 380  | 1      | 344    |
| UN37962 | Rsa1.0_00724.1 | 955  | 66789  | 0         | 766  | 780  | 98 + | 179  | 954  | 58679  | 59458  |
| UN37963 | Rsa1.0_00192.1 | 875  | 278200 | 0         | 797  | 828  | 96 + | 44   | 871  | 251255 | 252081 |
| UN37964 | Rsa1.0_02053.1 | 1668 | 35554  | 0         | 727  | 734  | 99 + | 4    | 736  | 8292   | 9025   |
| UN37965 | Rsa1.0_04090.1 | 865  | 19145  | 0         | 860  | 863  | 99 - | 3    | 865  | 5949   | 6811   |
| UN37966 | Rsa1.0_07811.1 | 898  | 8496   | 0         | 522  | 573  | 91 + | 338  | 898  | 1308   | 1862   |
| UN37967 | Rsa1.0_00256.1 | 980  | 102426 | 0         | 367  | 371  | 98 - | 610  | 980  | 23430  | 23800  |
| UN37968 | Rsa1.0_04142.1 | 892  | 18861  | 0         | 483  | 502  | 96 + | 391  | 892  | 1699   | 2200   |
| UN37969 | Rsa1.0_00108.1 | 1358 | 478491 | 0         | 419  | 422  | 99 + | 574  | 995  | 11346  | 11767  |
| UN37970 | Rsa1.0_10764.1 | 1133 | 5726   | 1.00E-106 | 315  | 359  | 87 - | 651  | 1009 | 2505   | 2845   |
| UN37971 | Rsa1.0_00399.1 | 726  | 242951 | 1.00E-117 | 242  | 251  | 96 - | 475  | 725  | 60860  | 61110  |
| UN37972 | Rsa1.0_13999.1 | 828  | 3934   | 1.00E-166 | 345  | 361  | 95 - | 468  | 828  | 1801   | 2157   |
| UN37973 | Rsa1.0_03727.1 | 1021 | 21158  | 0         | 613  | 646  | 94 - | 1    | 626  | 11110  | 11755  |
| UN37974 | Rsa1.0_10868.1 | 896  | 5695   | 1.00E-160 | 323  | 332  | 97 + | 1    | 332  | 1686   | 2011   |
| UN37975 | Rsa1.0_08755.1 | 875  | 6955   | 0         | 744  | 766  | 97 + | 112  | 875  | 3627   | 4388   |
| UN37976 | Rsa1.0_03191.1 | 990  | 145762 | 0         | 615  | 630  | 97 + | 2    | 631  | 20823  | 21452  |
| UN37977 | Rsa1.0_00305.1 | 777  | 97308  | 0         | 477  | 484  | 98 - | 3    | 486  | 39688  | 40171  |
| UN37978 | Rsa1.0_00526.1 | 895  | 169279 | 0         | 522  | 561  | 93 + | 49   | 588  | 165051 | 165611 |
| UN37979 | Rsa1.0_00916.1 | 418  | 59789  | 0         | 407  | 421  | 96 + | 1    | 418  | 15525  | 15939  |
| UN37980 | Rsa1.0_00497.1 | 794  | 79830  | 0         | 546  | 550  | 99 - | 244  | 793  | 28673  | 29222  |
| UN37981 | Rsa1.0_00297.1 | 799  | 97836  | 1.00E-122 | 283  | 301  | 94 + | 2    | 296  | 54721  | 55019  |
| UN37982 | Rsa1.0_00130.1 | 1078 | 125737 | 0         | 378  | 381  | 99 + | 698  | 1077 | 88567  | 88947  |
| UN37983 | Rsa1.0_00416.1 | 923  | 86772  | 5.00E-74  | 151  | 154  | 98 - | 142  | 295  | 49230  | 49383  |
| UN37984 | Rsa1.0_00187.1 | 1013 | 393093 | 0         | 476  | 492  | 96 - | 221  | 712  | 234611 | 235102 |



|         |                |      |        |           |     |     |       |      |      |        |        |
|---------|----------------|------|--------|-----------|-----|-----|-------|------|------|--------|--------|
| UN37985 | Rsa1.0_01949.1 | 1099 | 36960  | 1.00E-173 | 376 | 394 | 95 -  | 709  | 1098 | 20440  | 20826  |
| UN37986 | Rsa1.0_01540.1 | 1354 | 151890 | 0         | 334 | 335 | 99 -  | 1020 | 1354 | 113768 | 114102 |
| UN37987 | Rsa1.0_03093.1 | 703  | 25445  | 0         | 660 | 704 | 93 +  | 2    | 703  | 14667  | 15351  |
| UN37988 | Rsa1.0_01388.1 | 1172 | 46741  | 0         | 490 | 492 | 99 +  | 682  | 1172 | 29300  | 29791  |
| UN37989 | Rsa1.0_14203.1 | 1121 | 3670   | 0         | 435 | 441 | 98 +  | 330  | 769  | 1903   | 2342   |
| UN37990 | Rsa1.0_03134.1 | 1060 | 145023 | 0         | 471 | 472 | 99 -  | 1    | 472  | 132294 | 132765 |
| UN37991 | Rsa1.0_03506.1 | 740  | 22416  | 3.00E-99  | 199 | 204 | 97 -  | 537  | 740  | 8998   | 9201   |
| UN37992 | Rsa1.0_04482.1 | 1155 | 17175  | 1.00E-142 | 288 | 296 | 97 +  | 1    | 294  | 8833   | 9128   |
| UN37993 | Rsa1.0_00131.1 | 1296 | 432233 | 0         | 512 | 512 | 100 + | 783  | 1294 | 289720 | 290231 |
| UN37994 | Rsa1.0_00104.1 | 787  | 368722 | 1.00E-123 | 304 | 325 | 93 -  | 3    | 323  | 219468 | 219792 |
| UN37995 | Rsa1.0_00011.1 | 801  | 225044 | 2.00E-91  | 177 | 179 | 98 +  | 623  | 801  | 200725 | 200903 |
| UN37996 | Rsa1.0_00159.1 | 1274 | 431686 | 1.00E-122 | 238 | 243 | 97 -  | 221  | 463  | 349496 | 349738 |
| UN37997 | Rsa1.0_00088.1 | 1189 | 141341 | 0         | 449 | 462 | 97 +  | 105  | 566  | 94765  | 95226  |
| UN37998 | Rsa1.0_16891.1 | 823  | 1999   | 1.00E-31  | 111 | 123 | 90 +  | 213  | 334  | 1429   | 1551   |
| UN37999 | Rsa1.0_00179.1 | 1139 | 393324 | 0         | 843 | 875 | 96 +  | 266  | 1137 | 319884 | 320757 |
| UN38000 | Rsa1.0_03940.1 | 412  | 19962  | 0         | 383 | 395 | 96 +  | 5    | 399  | 8030   | 8423   |
| UN38001 | Rsa1.0_05984.1 | 758  | 12031  | 0         | 343 | 349 | 98 -  | 410  | 758  | 8465   | 8813   |
| UN38002 | Rsa1.0_00001.1 | 795  | 363028 | 0         | 730 | 759 | 96 +  | 9    | 767  | 235653 | 236411 |
| UN38003 | Rsa1.0_00596.1 | 654  | 73578  | 1.00E-169 | 314 | 317 | 99 -  | 222  | 538  | 45423  | 45738  |
| UN38004 | Rsa1.0_01625.1 | 903  | 42019  | 0         | 856 | 886 | 96 -  | 18   | 903  | 29675  | 30556  |
| UN38005 | Rsa1.0_00105.1 | 912  | 134138 | 0         | 728 | 745 | 97 +  | 1    | 740  | 62078  | 62819  |
| UN38006 | Rsa1.0_00344.1 | 869  | 191774 | 0         | 827 | 857 | 96 -  | 3    | 859  | 129868 | 130711 |
| UN38007 | Rsa1.0_00251.1 | 1200 | 303968 | 1.00E-173 | 377 | 395 | 95 +  | 807  | 1198 | 61888  | 62280  |
| UN38008 | Rsa1.0_00632.1 | 1306 | 183777 | 0         | 564 | 570 | 98 -  | 2    | 571  | 160327 | 160896 |
| UN38009 | Rsa1.0_00212.1 | 895  | 108350 | 0         | 352 | 352 | 100 + | 544  | 895  | 101939 | 102290 |
| UN38010 | Rsa1.0_01527.1 | 650  | 43905  | 0         | 644 | 651 | 98 -  | 2    | 650  | 20314  | 20964  |
| UN38011 | Rsa1.0_03701.1 | 634  | 21296  | 0         | 449 | 470 | 95 -  | 2    | 467  | 10638  | 11107  |
| UN38012 | Rsa1.0_00250.1 | 833  | 273771 | 0         | 541 | 557 | 97 -  | 275  | 831  | 249892 | 250448 |
| UN38013 | Rsa1.0_00064.1 | 1032 | 240927 | 0         | 503 | 506 | 99 +  | 2    | 507  | 78992  | 79496  |
| UN38014 | Rsa1.0_02073.1 | 808  | 35386  | 0         | 795 | 807 | 98 +  | 1    | 807  | 20700  | 21505  |
| UN38015 | Rsa1.0_03513.1 | 891  | 22349  | 0         | 393 | 402 | 97 +  | 2    | 403  | 12723  | 13124  |
| UN38016 | Rsa1.0_00585.1 | 797  | 74164  | 0         | 702 | 710 | 98 -  | 88   | 797  | 60681  | 61387  |
| UN38017 | Rsa1.0_02119.1 | 1004 | 34833  | 0         | 885 | 913 | 96 -  | 1    | 913  | 7087   | 7999   |
| UN38018 | Rsa1.0_07630.1 | 1099 | 8988   | 0         | 396 | 414 | 95 +  | 686  | 1095 | 4068   | 4479   |
| UN38019 | Rsa1.0_03133.1 | 1507 | 25135  | 0         | 926 | 948 | 97 +  | 208  | 1155 | 11284  | 12231  |
| UN38020 | Rsa1.0_03353.1 | 888  | 23496  | 0         | 588 | 597 | 98 -  | 293  | 888  | 18965  | 19561  |
| UN38021 | Rsa1.0_00127.1 | 973  | 127446 | 2.00E-98  | 224 | 235 | 95 -  | 13   | 246  | 73899  | 74132  |
| UN38022 | Rsa1.0_00001.1 | 762  | 363028 | 1.00E-156 | 316 | 328 | 96 +  | 98   | 425  | 143880 | 144207 |
| UN38023 | Rsa1.0_00224.1 | 821  | 327530 | 0         | 405 | 427 | 94 +  | 154  | 575  | 146839 | 147263 |

|         |                |      |        |           |     |     |       |     |      |        |        |
|---------|----------------|------|--------|-----------|-----|-----|-------|-----|------|--------|--------|
| UN38024 | Rsa1.0.00329.1 | 2081 | 222544 | 0         | 987 | 989 | 99 -  | 1   | 988  | 161754 | 162742 |
| UN38025 | Rsa1.0.00020.1 | 1182 | 283099 | 0         | 452 | 461 | 98 +  | 1   | 460  | 128236 | 128696 |
| UN38026 | Rsa1.0.01295.1 | 1040 | 49040  | 0         | 948 | 964 | 98 -  | 77  | 1040 | 46900  | 47863  |
| UN38027 | Rsa1.0.01220.1 | 843  | 161775 | 1.00E-178 | 381 | 397 | 95 +  | 3   | 395  | 126070 | 126462 |
| UN38028 | Rsa1.0.00028.1 | 803  | 293984 | 0         | 782 | 802 | 97 +  | 2   | 803  | 71335  | 72134  |
| UN38029 | Rsa1.0.01434.1 | 1002 | 45951  | 1.00E-175 | 353 | 367 | 96 +  | 633 | 999  | 5302   | 5668   |
| UN38030 | Rsa1.0.04383.1 | 886  | 17631  | 0         | 604 | 604 | 100 - | 4   | 607  | 11934  | 12537  |
| UN38031 | Rsa1.0.11462.1 | 837  | 5500   | 0         | 647 | 648 | 99 +  | 3   | 650  | 2183   | 2830   |
| UN38032 | Rsa1.0.01416.1 | 467  | 46262  | 0         | 385 | 386 | 99 +  | 1   | 386  | 24734  | 25119  |
| UN38033 | Rsa1.0.02987.1 | 776  | 26196  | 0         | 489 | 536 | 91 +  | 34  | 539  | 24943  | 25473  |
| UN38034 | Rsa1.0.07243.1 | 839  | 9673   | 1.00E-120 | 271 | 285 | 95 +  | 559 | 839  | 3533   | 3815   |
| UN38035 | Rsa1.0.01013.1 | 1126 | 56822  | 0         | 523 | 524 | 99 +  | 1   | 523  | 45682  | 46205  |
| UN38036 | Rsa1.0.09359.1 | 1431 | 6427   | 0         | 749 | 776 | 96 +  | 3   | 778  | 298    | 1073   |
| UN38037 | Rsa1.0.01436.1 | 831  | 45894  | 1.00E-123 | 303 | 325 | 93 +  | 510 | 829  | 16901  | 17218  |
| UN38038 | Rsa1.0.00706.1 | 679  | 291570 | 0         | 408 | 427 | 95 +  | 253 | 679  | 181304 | 181729 |
| UN38039 | Rsa1.0.15913.1 | 1167 | 2362   | 0         | 550 | 589 | 93 -  | 575 | 1162 | 785    | 1363   |
| UN38040 | Rsa1.0.01589.1 | 941  | 42721  | 1.00E-176 | 352 | 364 | 96 +  | 1   | 361  | 28608  | 28971  |
| UN38041 | Rsa1.0.00016.1 | 924  | 831256 | 1.00E-170 | 407 | 443 | 91 -  | 351 | 793  | 356997 | 357430 |
| UN38042 | Rsa1.0.06955.1 | 859  | 10111  | 0         | 394 | 395 | 99 -  | 168 | 562  | 7836   | 8230   |
| UN38043 | Rsa1.0.04954.1 | 900  | 15347  | 1.00E-136 | 247 | 247 | 100 - | 651 | 897  | 10404  | 10650  |
| UN38044 | Rsa1.0.05442.1 | 777  | 13741  | 1.00E-122 | 226 | 227 | 99 +  | 343 | 569  | 934    | 1160   |
| UN38045 | Rsa1.0.00964.1 | 757  | 316648 | 1.00E-135 | 245 | 245 | 100 + | 512 | 756  | 165354 | 165598 |
| UN38046 | Rsa1.0.01273.1 | 814  | 49464  | 1.00E-168 | 300 | 300 | 100 + | 1   | 300  | 40125  | 40424  |
| UN38047 | Rsa1.0.00990.1 | 803  | 57445  | 0         | 419 | 420 | 99 -  | 1   | 420  | 21325  | 21744  |
| UN38048 | Rsa1.0.00201.1 | 819  | 232851 | 1.00E-104 | 289 | 321 | 90 +  | 331 | 651  | 42192  | 42512  |
| UN38049 | Rsa1.0.01060.1 | 743  | 55368  | 0         | 326 | 326 | 100 + | 314 | 639  | 21378  | 21703  |
| UN38050 | Rsa1.0.00468.1 | 1335 | 82095  | 0         | 437 | 448 | 97 +  | 887 | 1334 | 12803  | 13250  |
| UN38051 | Rsa1.0.01682.1 | 1308 | 41090  | 1.00E-167 | 375 | 395 | 94 -  | 919 | 1307 | 8566   | 8957   |
| UN38052 | Rsa1.0.00124.1 | 1057 | 262503 | 0         | 843 | 881 | 95 +  | 187 | 1057 | 169209 | 170084 |
| UN38053 | Rsa1.0.02604.1 | 583  | 29638  | 1.00E-82  | 156 | 156 | 100 + | 3   | 158  | 23442  | 23597  |
| UN38054 | Rsa1.0.00050.1 | 758  | 237174 | 0         | 419 | 449 | 93 +  | 4   | 448  | 31090  | 31520  |
| UN38055 | Rsa1.0.02412.1 | 911  | 31643  | 0         | 664 | 681 | 97 -  | 1   | 681  | 14291  | 14971  |
| UN38056 | Rsa1.0.02544.1 | 888  | 30290  | 0         | 334 | 338 | 98 -  | 3   | 340  | 8180   | 8517   |
| UN38057 | Rsa1.0.01589.1 | 852  | 42721  | 0         | 339 | 344 | 98 +  | 342 | 685  | 29038  | 29381  |
| UN38058 | Rsa1.0.00467.1 | 632  | 156542 | 0         | 419 | 419 | 100 + | 1   | 419  | 134066 | 134484 |
| UN38059 | Rsa1.0.00114.1 | 974  | 131330 | 0         | 432 | 433 | 99 +  | 1   | 433  | 84224  | 84656  |
| UN38060 | Rsa1.0.00246.1 | 877  | 103541 | 0         | 830 | 830 | 100 - | 48  | 877  | 43095  | 43924  |
| UN38061 | Rsa1.0.02682.1 | 641  | 28711  | 0         | 518 | 542 | 95 +  | 100 | 641  | 16960  | 17501  |
| UN38062 | Rsa1.0.01887.1 | 945  | 37564  | 1.00E-135 | 319 | 344 | 92 -  | 602 | 945  | 23906  | 24249  |

|         |                |      |        |           |      |      |       |     |      |        |        |
|---------|----------------|------|--------|-----------|------|------|-------|-----|------|--------|--------|
| UN38063 | Rsa1.0.00002.1 | 849  | 601661 | 1.00E-173 | 308  | 308  | 100 - | 542 | 849  | 92326  | 92633  |
| UN38064 | Rsa1.0.00860.1 | 983  | 61789  | 0         | 932  | 968  | 96 -  | 3   | 968  | 44982  | 45946  |
| UN38065 | Rsa1.0.14538.1 | 916  | 3287   | 0         | 901  | 918  | 98 -  | 3   | 916  | 585    | 1502   |
| UN38066 | Rsa1.0.02906.1 | 771  | 26866  | 0         | 445  | 455  | 97 -  | 1   | 454  | 5317   | 5764   |
| UN38067 | Rsa1.0.00645.1 | 814  | 189716 | 1.00E-140 | 304  | 319  | 95 +  | 54  | 369  | 149516 | 149833 |
| UN38068 | Rsa1.0.00522.1 | 739  | 78103  | 0         | 385  | 391  | 98 -  | 1   | 391  | 45218  | 45608  |
| UN38069 | Rsa1.0.00211.1 | 1305 | 228189 | 0         | 1243 | 1305 | 95 -  | 1   | 1302 | 140050 | 141352 |
| UN38070 | Rsa1.0.01093.1 | 916  | 54312  | 1.00E-122 | 395  | 452  | 87 +  | 339 | 790  | 26474  | 26922  |
| UN38071 | Rsa1.0.00228.1 | 933  | 105511 | 0         | 497  | 505  | 98 +  | 429 | 933  | 82494  | 82998  |
| UN38072 | Rsa1.0.04977.1 | 1358 | 15260  | 1.00E-132 | 246  | 248  | 99 +  | 964 | 1211 | 6953   | 7200   |
| UN38073 | Rsa1.0.00028.1 | 727  | 293984 | 0         | 553  | 567  | 97 -  | 161 | 727  | 137233 | 137788 |
| UN38074 | Rsa1.0.00414.1 | 525  | 202190 | 1.00E-136 | 306  | 325  | 94 -  | 200 | 521  | 172431 | 172746 |
| UN38075 | Rsa1.0.00153.1 | 845  | 192931 | 0         | 799  | 846  | 94 +  | 1   | 841  | 13970  | 14809  |
| UN38076 | Rsa1.0.00638.1 | 1058 | 71037  | 0         | 883  | 891  | 99 -  | 168 | 1058 | 22302  | 23191  |
| UN38077 | Rsa1.0.10941.1 | 764  | 5670   | 0         | 709  | 721  | 98 -  | 26  | 742  | 4854   | 5574   |
| UN38078 | Rsa1.0.04525.1 | 1052 | 16965  | 0         | 999  | 1060 | 94 -  | 3   | 1051 | 2249   | 3302   |
| UN38079 | Rsa1.0.10922.1 | 1049 | 5677   | 1.00E-68  | 269  | 312  | 86 +  | 129 | 435  | 1579   | 1887   |
| UN38080 | Rsa1.0.00336.1 | 807  | 445051 | 1.00E-153 | 347  | 371  | 93 +  | 8   | 361  | 166516 | 166884 |
| UN38081 | Rsa1.0.00340.1 | 1204 | 305782 | 0         | 712  | 712  | 100 - | 145 | 856  | 101672 | 102383 |
| UN38082 | Rsa1.0.00182.1 | 871  | 142305 | 1.00E-175 | 370  | 389  | 95 -  | 484 | 871  | 119855 | 120230 |
| UN38083 | Rsa1.0.07851.1 | 919  | 8423   | 1.00E-178 | 332  | 337  | 98 -  | 236 | 572  | 5251   | 5587   |
| UN38084 | Rsa1.0.02116.1 | 829  | 34853  | 0         | 495  | 507  | 97 +  | 315 | 821  | 14502  | 15008  |
| UN38085 | Rsa1.0.31019.1 | 1228 | 738    | 1.00E-179 | 400  | 425  | 94 -  | 3   | 427  | 42     | 463    |
| UN38086 | Rsa1.0.06968.1 | 788  | 10090  | 0         | 569  | 626  | 90 -  | 3   | 613  | 8768   | 9375   |
| UN38087 | Rsa1.0.04165.1 | 707  | 18757  | 1.00E-165 | 306  | 310  | 98 -  | 2   | 311  | 613    | 922    |
| UN38088 | Rsa1.0.01328.1 | 752  | 48021  | 4.00E-68  | 135  | 136  | 99 +  | 617 | 752  | 23159  | 23294  |
| UN38089 | Rsa1.0.02996.1 | 549  | 26152  | 0         | 530  | 547  | 96 -  | 3   | 549  | 15192  | 15735  |
| UN38090 | Rsa1.0.00301.1 | 769  | 365315 | 1.00E-170 | 491  | 544  | 90 +  | 216 | 738  | 182014 | 182552 |
| UN38091 | Rsa1.0.02041.1 | 772  | 163634 | 1.00E-142 | 312  | 329  | 94 +  | 5   | 328  | 31593  | 31921  |
| UN38092 | Rsa1.0.06389.1 | 795  | 11107  | 0         | 507  | 515  | 98 -  | 1   | 515  | 942    | 1453   |
| UN38093 | Rsa1.0.02769.1 | 736  | 28107  | 1.00E-177 | 388  | 409  | 94 -  | 5   | 399  | 13370  | 13778  |
| UN38094 | Rsa1.0.00377.1 | 1109 | 90038  | 1.00E-109 | 226  | 233  | 96 -  | 562 | 793  | 28480  | 28712  |
| UN38095 | Rsa1.0.01171.1 | 1056 | 51752  | 0         | 438  | 450  | 97 -  | 2   | 451  | 28832  | 29281  |
| UN38096 | Rsa1.0.01485.1 | 798  | 44797  | 0         | 381  | 392  | 97 +  | 407 | 798  | 11613  | 12003  |
| UN38097 | Rsa1.0.00821.1 | 357  | 62891  | 1.00E-165 | 346  | 361  | 95 +  | 2   | 356  | 55348  | 55706  |
| UN38098 | Rsa1.0.16203.1 | 780  | 2246   | 0         | 568  | 632  | 89 -  | 63  | 691  | 1196   | 1827   |
| UN38099 | Rsa1.0.02019.1 | 832  | 35983  | 0         | 785  | 811  | 96 -  | 1   | 801  | 18331  | 19141  |
| UN38100 | Rsa1.0.00011.1 | 762  | 225044 | 0         | 452  | 452  | 100 - | 311 | 762  | 219176 | 219627 |
| UN38101 | Rsa1.0.02289.1 | 1255 | 32981  | 0         | 939  | 991  | 94 +  | 285 | 1255 | 10760  | 11749  |

|         |                |      |        |           |      |      |       |     |      |        |        |
|---------|----------------|------|--------|-----------|------|------|-------|-----|------|--------|--------|
| UN38102 | Rsa1.0.00017.1 | 1119 | 752458 | 0         | 487  | 516  | 94 -  | 132 | 625  | 297949 | 298464 |
| UN38103 | Rsa1.0.00065.1 | 874  | 454616 | 0         | 842  | 885  | 95 -  | 2   | 874  | 58594  | 59477  |
| UN38104 | Rsa1.0.02041.1 | 893  | 163634 | 0         | 527  | 561  | 93 -  | 333 | 893  | 30343  | 30889  |
| UN38105 | Rsa1.0.00543.1 | 858  | 76788  | 2.00E-88  | 181  | 186  | 97 +  | 322 | 507  | 41633  | 41818  |
| UN38106 | Rsa1.0.06887.1 | 1148 | 10208  | 0         | 1122 | 1153 | 97 +  | 1   | 1143 | 8138   | 9290   |
| UN38107 | Rsa1.0.00191.1 | 256  | 316976 | 1.00E-142 | 256  | 256  | 100 + | 1   | 256  | 204533 | 204788 |
| UN38108 | Rsa1.0.00244.1 | 834  | 103590 | 1.00E-111 | 205  | 205  | 100 + | 630 | 834  | 52291  | 52495  |
| UN38109 | Rsa1.0.00464.1 | 795  | 82253  | 0         | 402  | 413  | 97 -  | 1   | 410  | 27170  | 27580  |
| UN38110 | Rsa1.0.08606.1 | 908  | 7133   | 0         | 415  | 422  | 98 -  | 3   | 424  | 6441   | 6862   |
| UN38111 | Rsa1.0.00806.1 | 1105 | 63674  | 0         | 1064 | 1104 | 96 +  | 2   | 1105 | 47280  | 48379  |
| UN38112 | Rsa1.0.01739.1 | 488  | 40068  | 0         | 483  | 487  | 99 +  | 2   | 488  | 8910   | 9396   |
| UN38113 | Rsa1.0.02414.1 | 495  | 31625  | 1.00E-152 | 284  | 288  | 98 +  | 208 | 495  | 19263  | 19550  |
| UN38114 | Rsa1.0.01082.1 | 799  | 54640  | 0         | 438  | 439  | 99 +  | 1   | 439  | 14558  | 14996  |
| UN38115 | Rsa1.0.04852.1 | 683  | 15712  | 0         | 669  | 682  | 98 +  | 2   | 683  | 10     | 691    |
| UN38116 | Rsa1.0.00630.1 | 995  | 71281  | 0         | 466  | 487  | 95 +  | 4   | 490  | 20897  | 21383  |
| UN38117 | Rsa1.0.00476.1 | 829  | 280966 | 0         | 444  | 449  | 98 +  | 42  | 490  | 231601 | 232049 |
| UN38118 | Rsa1.0.01421.1 | 790  | 46197  | 1.00E-141 | 255  | 255  | 100 - | 167 | 421  | 30027  | 30281  |
| UN38119 | Rsa1.0.00157.1 | 1057 | 245832 | 1.00E-176 | 377  | 393  | 95 -  | 664 | 1053 | 147056 | 147446 |
| UN38120 | Rsa1.0.01438.1 | 961  | 45882  | 0         | 491  | 517  | 94 +  | 452 | 961  | 15044  | 15558  |
| UN38121 | Rsa1.0.08217.1 | 1129 | 7707   | 0         | 391  | 395  | 98 +  | 684 | 1077 | 177    | 571    |
| UN38122 | Rsa1.0.17063.1 | 566  | 1937   | 0         | 522  | 546  | 95 +  | 9   | 552  | 180    | 725    |
| UN38123 | Rsa1.0.00197.1 | 752  | 109714 | 0         | 496  | 505  | 98 +  | 171 | 675  | 47701  | 48205  |
| UN38124 | Rsa1.0.06619.1 | 968  | 10650  | 0         | 482  | 508  | 94 +  | 461 | 968  | 959    | 1451   |
| UN38125 | Rsa1.0.04578.1 | 1318 | 16774  | 1.00E-149 | 269  | 269  | 100 + | 81  | 349  | 8527   | 8795   |
| UN38126 | Rsa1.0.00649.1 | 879  | 70263  | 1.00E-120 | 249  | 259  | 96 +  | 236 | 494  | 24617  | 24875  |
| UN38127 | Rsa1.0.00466.1 | 852  | 82132  | 0         | 830  | 860  | 96 +  | 1   | 852  | 55355  | 56214  |
| UN38128 | Rsa1.0.00351.1 | 867  | 413096 | 0         | 813  | 830  | 97 +  | 1   | 830  | 404872 | 405699 |
| UN38129 | Rsa1.0.00002.1 | 797  | 601661 | 0         | 770  | 792  | 97 +  | 5   | 796  | 436645 | 437433 |
| UN38130 | Rsa1.0.01284.1 | 1381 | 49231  | 0         | 394  | 394  | 100 + | 515 | 908  | 20033  | 20426  |
| UN38131 | Rsa1.0.03387.1 | 1171 | 23278  | 0         | 1052 | 1090 | 96 -  | 21  | 1110 | 7459   | 8547   |
| UN38132 | Rsa1.0.03244.1 | 909  | 24413  | 0         | 844  | 904  | 93 -  | 5   | 908  | 20042  | 20924  |
| UN38133 | Rsa1.0.02503.1 | 764  | 30709  | 4.00E-74  | 154  | 158  | 97 -  | 82  | 239  | 29418  | 29575  |
| UN38134 | Rsa1.0.02663.1 | 1152 | 169243 | 0         | 1146 | 1152 | 99 -  | 1   | 1152 | 142463 | 143613 |
| UN38135 | Rsa1.0.00272.1 | 896  | 447836 | 0         | 856  | 900  | 95 +  | 6   | 896  | 425161 | 426060 |
| UN38136 | Rsa1.0.03402.1 | 1009 | 23188  | 1.00E-116 | 275  | 299  | 91 +  | 1   | 299  | 11331  | 11614  |
| UN38137 | Rsa1.0.01902.1 | 838  | 37455  | 0         | 523  | 538  | 97 +  | 2   | 539  | 2809   | 3342   |
| UN38138 | Rsa1.0.00817.1 | 639  | 62961  | 0         | 622  | 639  | 97 -  | 2   | 639  | 44955  | 45590  |
| UN38139 | Rsa1.0.00524.1 | 662  | 169613 | 1.00E-159 | 373  | 404  | 92 -  | 10  | 410  | 152018 | 152404 |
| UN38140 | Rsa1.0.12096.1 | 1029 | 5315   | 0         | 397  | 415  | 95 -  | 1   | 413  | 2161   | 2569   |

|         |                |      |        |           |     |      |       |     |      |        |        |
|---------|----------------|------|--------|-----------|-----|------|-------|-----|------|--------|--------|
| UN38141 | Rsa1.0.01560.1 | 921  | 43256  | 0         | 874 | 911  | 95 -  | 2   | 909  | 19521  | 20428  |
| UN38142 | Rsa1.0.01959.1 | 1330 | 36798  | 0         | 764 | 815  | 93 +  | 4   | 818  | 15251  | 16060  |
| UN38143 | Rsa1.0.01004.1 | 1112 | 56975  | 0         | 403 | 409  | 98 -  | 704 | 1109 | 48516  | 48924  |
| UN38144 | Rsa1.0.01470.1 | 847  | 45108  | 1.00E-145 | 264 | 265  | 99 -  | 110 | 374  | 36430  | 36694  |
| UN38145 | Rsa1.0.04438.1 | 306  | 17361  | 5.00E-56  | 114 | 115  | 99 +  | 135 | 249  | 15099  | 15213  |
| UN38146 | Rsa1.0.02039.1 | 1371 | 35699  | 0         | 646 | 692  | 93 +  | 1   | 686  | 2757   | 3430   |
| UN38147 | Rsa1.0.01762.1 | 984  | 39682  | 1.00E-165 | 330 | 339  | 97 +  | 4   | 341  | 15237  | 15574  |
| UN38148 | Rsa1.0.09155.1 | 803  | 6605   | 0         | 599 | 625  | 95 -  | 179 | 803  | 22     | 646    |
| UN38149 | Rsa1.0.00131.1 | 764  | 432233 | 1.00E-174 | 336 | 345  | 97 +  | 191 | 535  | 428390 | 428734 |
| UN38150 | Rsa1.0.05549.1 | 1091 | 13366  | 0         | 380 | 394  | 96 -  | 700 | 1091 | 12973  | 13366  |
| UN38151 | Rsa1.0.00128.1 | 886  | 228675 | 1.00E-131 | 244 | 246  | 99 +  | 1   | 246  | 56946  | 57191  |
| UN38152 | Rsa1.0.00977.1 | 817  | 198001 | 0         | 322 | 322  | 100 - | 323 | 644  | 157438 | 157759 |
| UN38153 | Rsa1.0.02266.1 | 922  | 33195  | 0         | 412 | 424  | 97 -  | 1   | 422  | 4483   | 4906   |
| UN38154 | Rsa1.0.02294.1 | 1284 | 32940  | 1.00E-105 | 225 | 235  | 95 +  | 634 | 868  | 14742  | 14976  |
| UN38155 | Rsa1.0.00695.1 | 656  | 68019  | 0         | 443 | 461  | 96 -  | 5   | 464  | 50092  | 50549  |
| UN38156 | Rsa1.0.00556.1 | 1216 | 207212 | 0         | 506 | 522  | 96 -  | 693 | 1214 | 193417 | 193935 |
| UN38157 | Rsa1.0.00008.1 | 1141 | 358124 | 0         | 431 | 432  | 99 +  | 708 | 1139 | 294531 | 294962 |
| UN38158 | Rsa1.0.05355.1 | 588  | 14069  | 1.00E-180 | 336 | 340  | 98 +  | 248 | 587  | 285    | 623    |
| UN38159 | Rsa1.0.00827.1 | 931  | 62790  | 1.00E-119 | 234 | 238  | 98 +  | 1   | 237  | 41776  | 42013  |
| UN38160 | Rsa1.0.00387.1 | 1281 | 495407 | 1.00E-166 | 497 | 554  | 89 -  | 733 | 1278 | 384371 | 384917 |
| UN38161 | Rsa1.0.00816.1 | 1000 | 403350 | 0         | 944 | 994  | 94 +  | 1   | 981  | 394006 | 394984 |
| UN38162 | Rsa1.0.02586.1 | 585  | 29856  | 0         | 494 | 496  | 99 -  | 1   | 496  | 19482  | 19977  |
| UN38163 | Rsa1.0.00237.1 | 696  | 235974 | 1.00E-115 | 241 | 250  | 96 +  | 94  | 342  | 184709 | 184958 |
| UN38164 | Rsa1.0.08557.1 | 884  | 7199   | 2.00E-76  | 152 | 154  | 98 -  | 396 | 549  | 5654   | 5807   |
| UN38165 | Rsa1.0.04282.1 | 1084 | 18100  | 0         | 984 | 1008 | 97 -  | 1   | 1008 | 13726  | 14733  |
| UN38166 | Rsa1.0.00049.1 | 881  | 167018 | 0         | 373 | 374  | 99 +  | 31  | 404  | 127004 | 127377 |
| UN38167 | Rsa1.0.02413.1 | 1181 | 31628  | 1.00E-164 | 459 | 522  | 87 -  | 593 | 1105 | 6634   | 7125   |
| UN38168 | Rsa1.0.00026.1 | 789  | 327835 | 2.00E-85  | 167 | 169  | 98 -  | 189 | 357  | 171501 | 171669 |
| UN38169 | Rsa1.0.01416.1 | 497  | 46262  | 1.00E-173 | 383 | 407  | 94 +  | 12  | 407  | 24713  | 25119  |
| UN38170 | Rsa1.0.00737.1 | 1215 | 66432  | 1.00E-164 | 318 | 325  | 97 -  | 2   | 326  | 30743  | 31065  |
| UN38171 | Rsa1.0.00849.1 | 823  | 62212  | 1.00E-165 | 341 | 357  | 95 +  | 31  | 387  | 9755   | 10099  |
| UN38172 | Rsa1.0.00645.1 | 651  | 189716 | 0         | 406 | 407  | 99 +  | 119 | 525  | 151484 | 151890 |
| UN38173 | Rsa1.0.01316.1 | 1137 | 48325  | 1.00E-110 | 303 | 335  | 90 -  | 721 | 1036 | 1061   | 1389   |
| UN38174 | Rsa1.0.02085.1 | 744  | 35198  | 7.00E-51  | 125 | 131  | 95 -  | 78  | 208  | 32382  | 32511  |
| UN38175 | Rsa1.0.03751.1 | 794  | 21025  | 0         | 447 | 462  | 96 -  | 2   | 455  | 15342  | 15801  |
| UN38176 | Rsa1.0.02053.1 | 1024 | 35554  | 0         | 343 | 348  | 98 -  | 675 | 1022 | 8292   | 8639   |
| UN38177 | Rsa1.0.00915.1 | 267  | 194446 | 2.00E-70  | 245 | 271  | 90 +  | 1   | 266  | 39750  | 40012  |
| UN38178 | Rsa1.0.02586.1 | 1271 | 29856  | 0         | 441 | 474  | 93 +  | 138 | 611  | 6810   | 7280   |
| UN38179 | Rsa1.0.13819.1 | 698  | 4264   | 0         | 497 | 512  | 97 -  | 1   | 511  | 1651   | 2159   |

|         |                |      |        |           |     |     |       |     |      |        |        |
|---------|----------------|------|--------|-----------|-----|-----|-------|-----|------|--------|--------|
| UN38180 | Rsa1.0.01156.1 | 637  | 52147  | 1.00E-143 | 326 | 345 | 94 -  | 1   | 338  | 38844  | 39186  |
| UN38181 | Rsa1.0.01301.1 | 1176 | 169072 | 0         | 510 | 511 | 99 +  | 1   | 511  | 47364  | 47874  |
| UN38182 | Rsa1.0.00020.1 | 776  | 283099 | 0         | 766 | 773 | 99 -  | 3   | 775  | 59129  | 59900  |
| UN38183 | Rsa1.0.00343.1 | 1157 | 93570  | 0         | 433 | 449 | 96 -  | 693 | 1138 | 4591   | 5039   |
| UN38184 | Rsa1.0.01668.1 | 669  | 41299  | 0         | 645 | 670 | 96 +  | 2   | 669  | 13930  | 14590  |
| UN38185 | Rsa1.0.00031.1 | 984  | 179862 | 0         | 473 | 473 | 100 + | 510 | 982  | 55124  | 55596  |
| UN38186 | Rsa1.0.03184.1 | 1235 | 24750  | 1.00E-152 | 306 | 315 | 97 -  | 2   | 316  | 17085  | 17395  |
| UN38187 | Rsa1.0.03616.1 | 937  | 21756  | 0         | 407 | 411 | 99 -  | 294 | 704  | 9082   | 9492   |
| UN38188 | Rsa1.0.03521.1 | 1129 | 396204 | 0         | 479 | 488 | 98 +  | 473 | 960  | 15137  | 15624  |
| UN38189 | Rsa1.0.00101.1 | 1106 | 267193 | 0         | 703 | 703 | 100 + | 9   | 711  | 194394 | 195096 |
| UN38190 | Rsa1.0.00017.1 | 1073 | 752458 | 1.00E-114 | 401 | 460 | 87 -  | 461 | 894  | 717709 | 718168 |
| UN38191 | Rsa1.0.02210.1 | 952  | 33857  | 0         | 571 | 573 | 99 -  | 377 | 949  | 2695   | 3267   |
| UN38192 | Rsa1.0.00079.1 | 967  | 606987 | 1.00E-159 | 310 | 316 | 98 +  | 616 | 930  | 190876 | 191190 |
| UN38193 | Rsa1.0.00041.1 | 866  | 186197 | 1.00E-134 | 310 | 331 | 93 -  | 536 | 866  | 168140 | 168459 |
| UN38194 | Rsa1.0.02246.1 | 971  | 33435  | 1.00E-179 | 358 | 371 | 96 +  | 2   | 372  | 4757   | 5127   |
| UN38195 | Rsa1.0.01727.1 | 1221 | 40243  | 0         | 372 | 375 | 99 -  | 847 | 1221 | 11142  | 11516  |
| UN38196 | Rsa1.0.02043.1 | 780  | 163754 | 0         | 501 | 510 | 98 -  | 271 | 780  | 143816 | 144322 |
| UN38197 | Rsa1.0.06482.1 | 976  | 10937  | 1.00E-107 | 214 | 218 | 98 +  | 520 | 736  | 5002   | 5219   |
| UN38198 | Rsa1.0.00123.1 | 741  | 325650 | 1.00E-107 | 303 | 342 | 88 +  | 410 | 741  | 128148 | 128468 |
| UN38199 | Rsa1.0.11532.1 | 1014 | 5477   | 7.00E-95  | 180 | 181 | 99 +  | 309 | 489  | 4712   | 4892   |
| UN38200 | Rsa1.0.02756.1 | 744  | 28202  | 1.00E-161 | 309 | 316 | 97 -  | 294 | 609  | 22631  | 22946  |
| UN38201 | Rsa1.0.01783.1 | 428  | 39383  | 1.00E-177 | 344 | 354 | 97 +  | 1   | 354  | 33833  | 34186  |
| UN38202 | Rsa1.0.00867.1 | 653  | 61635  | 1.00E-147 | 341 | 361 | 94 +  | 289 | 647  | 19660  | 20014  |
| UN38203 | Rsa1.0.00436.1 | 866  | 85008  | 1.00E-119 | 241 | 249 | 96 +  | 1   | 249  | 32925  | 33173  |
| UN38204 | Rsa1.0.00055.1 | 771  | 520193 | 1.00E-138 | 292 | 304 | 96 +  | 139 | 438  | 5829   | 6132   |
| UN38205 | Rsa1.0.01855.1 | 757  | 38204  | 1.00E-147 | 464 | 522 | 88 -  | 93  | 589  | 12699  | 13211  |
| UN38206 | Rsa1.0.04156.1 | 1027 | 18799  | 1.00E-123 | 265 | 275 | 96 +  | 2   | 275  | 15227  | 15498  |
| UN38207 | Rsa1.0.00058.1 | 670  | 159921 | 0         | 441 | 446 | 98 +  | 225 | 668  | 135516 | 135961 |
| UN38208 | Rsa1.0.00295.1 | 694  | 152597 | 1.00E-150 | 309 | 321 | 96 +  | 377 | 694  | 49059  | 49376  |
| UN38209 | Rsa1.0.00188.1 | 1069 | 112020 | 0         | 460 | 460 | 100 + | 444 | 903  | 74179  | 74638  |
| UN38210 | Rsa1.0.00069.1 | 816  | 403561 | 0         | 444 | 464 | 95 -  | 2   | 465  | 162099 | 162559 |
| UN38211 | Rsa1.0.00055.1 | 697  | 520193 | 2.00E-91  | 187 | 191 | 97 +  | 387 | 576  | 211948 | 212138 |
| UN38212 | Rsa1.0.01251.1 | 1112 | 49873  | 0         | 676 | 706 | 95 +  | 3   | 708  | 1007   | 1712   |
| UN38213 | Rsa1.0.01400.1 | 888  | 46560  | 0         | 347 | 355 | 97 -  | 182 | 536  | 822    | 1176   |
| UN38214 | Rsa1.0.00260.1 | 760  | 102021 | 0         | 409 | 419 | 97 +  | 236 | 653  | 72077  | 72495  |
| UN38215 | Rsa1.0.00937.1 | 354  | 59061  | 1.00E-127 | 250 | 254 | 98 -  | 1   | 251  | 14115  | 14368  |
| UN38216 | Rsa1.0.01026.1 | 311  | 171624 | 1.00E-75  | 196 | 215 | 91 +  | 88  | 302  | 33486  | 33685  |
| UN38217 | Rsa1.0.04806.1 | 1137 | 15898  | 1.00E-143 | 307 | 320 | 95 +  | 651 | 966  | 1095   | 1413   |
| UN38218 | Rsa1.0.00128.1 | 835  | 228675 | 1.00E-160 | 316 | 325 | 97 +  | 122 | 446  | 116359 | 116680 |

|         |                |      |        |           |      |      |       |     |      |        |        |
|---------|----------------|------|--------|-----------|------|------|-------|-----|------|--------|--------|
| UN38219 | Rsa1.0.00075.1 | 1030 | 146680 | 1.00E-123 | 254  | 263  | 96 +  | 758 | 1020 | 69234  | 69494  |
| UN38220 | Rsa1.0.03546.1 | 756  | 22172  | 0         | 388  | 394  | 98 -  | 1   | 394  | 14336  | 14728  |
| UN38221 | Rsa1.0.01298.1 | 1130 | 48999  | 7.00E-58  | 259  | 303  | 85 -  | 818 | 1115 | 42758  | 43052  |
| UN38222 | Rsa1.0.02036.1 | 751  | 35731  | 1.00E-101 | 187  | 187  | 100 + | 145 | 331  | 6103   | 6289   |
| UN38223 | Rsa1.0.01935.1 | 1166 | 37152  | 0         | 505  | 520  | 97 +  | 646 | 1165 | 21610  | 22128  |
| UN38224 | Rsa1.0.00294.1 | 927  | 144860 | 1.00E-157 | 281  | 281  | 100 + | 271 | 551  | 38794  | 39074  |
| UN38225 | Rsa1.0.04578.1 | 931  | 16774  | 9.00E-91  | 176  | 178  | 98 +  | 675 | 852  | 14218  | 14395  |
| UN38226 | Rsa1.0.00251.1 | 852  | 303968 | 0         | 843  | 850  | 99 -  | 1   | 850  | 139247 | 140096 |
| UN38227 | Rsa1.0.00619.1 | 737  | 71985  | 0         | 711  | 740  | 96 -  | 1   | 735  | 67205  | 67944  |
| UN38228 | Rsa1.0.03759.1 | 1222 | 20987  | 0         | 719  | 763  | 94 -  | 1   | 741  | 5009   | 5764   |
| UN38229 | Rsa1.0.00399.1 | 538  | 242951 | 1.00E-178 | 326  | 329  | 99 +  | 209 | 537  | 79753  | 80081  |
| UN38230 | Rsa1.0.06206.1 | 716  | 11494  | 2.33E-156 | 349  | 381  | 91 +  | 43  | 404  | 9201   | 9581   |
| UN38231 | Rsa1.0.04630.1 | 758  | 16595  | 0         | 516  | 528  | 97 -  | 231 | 758  | 13496  | 14023  |
| UN38232 | Rsa1.0.00600.1 | 1107 | 73395  | 0         | 420  | 437  | 96 -  | 531 | 967  | 29420  | 29856  |
| UN38233 | Rsa1.0.00360.1 | 1106 | 91190  | 1.00E-164 | 297  | 298  | 99 +  | 624 | 921  | 2261   | 2558   |
| UN38234 | Rsa1.0.01946.1 | 1131 | 36982  | 0         | 651  | 676  | 96 -  | 454 | 1116 | 35216  | 35891  |
| UN38235 | Rsa1.0.08395.1 | 1505 | 7428   | 0         | 722  | 746  | 96 -  | 449 | 1194 | 1407   | 2152   |
| UN38236 | Rsa1.0.01251.1 | 1043 | 49873  | 3.00E-88  | 200  | 210  | 95 -  | 486 | 694  | 48822  | 49031  |
| UN38237 | Rsa1.0.03560.1 | 660  | 22092  | 1.00E-134 | 288  | 303  | 95 -  | 209 | 511  | 6156   | 6458   |
| UN38238 | Rsa1.0.06148.1 | 1178 | 11616  | 0         | 1121 | 1181 | 94 -  | 11  | 1178 | 3932   | 5108   |
| UN38239 | Rsa1.0.01146.1 | 1131 | 163455 | 0         | 460  | 476  | 96 +  | 1   | 476  | 159533 | 160008 |
| UN38240 | Rsa1.0.00042.1 | 1144 | 171507 | 0         | 1067 | 1091 | 97 +  | 1   | 1083 | 50395  | 51485  |
| UN38241 | Rsa1.0.03964.1 | 915  | 19835  | 1.00E-154 | 345  | 368  | 93 -  | 68  | 435  | 5629   | 5996   |
| UN38242 | Rsa1.0.00058.1 | 697  | 159921 | 0         | 396  | 413  | 95 +  | 244 | 656  | 135526 | 135938 |
| UN38243 | Rsa1.0.00134.1 | 1022 | 390219 | 0         | 398  | 415  | 95 -  | 1   | 414  | 5772   | 6178   |
| UN38244 | Rsa1.0.00439.1 | 1682 | 142776 | 0         | 1202 | 1259 | 95 -  | 1   | 1250 | 122840 | 124082 |
| UN38245 | Rsa1.0.04823.1 | 944  | 15840  | 1.00E-135 | 282  | 294  | 95 -  | 644 | 934  | 11446  | 11739  |
| UN38246 | Rsa1.0.00251.1 | 1241 | 303968 | 1.00E-142 | 358  | 390  | 91 +  | 1   | 387  | 55603  | 55975  |
| UN38247 | Rsa1.0.06148.1 | 950  | 11616  | 0         | 842  | 912  | 92 -  | 50  | 948  | 3798   | 4696   |
| UN38248 | Rsa1.0.00577.1 | 1204 | 174827 | 9.00E-70  | 138  | 139  | 99 -  | 133 | 271  | 173422 | 173560 |
| UN38249 | Rsa1.0.07604.1 | 579  | 9041   | 0         | 514  | 529  | 97 +  | 18  | 545  | 3121   | 3647   |
| UN38250 | Rsa1.0.01857.1 | 1269 | 38103  | 0         | 829  | 850  | 97 +  | 1   | 850  | 25078  | 25927  |
| UN38251 | Rsa1.0.00044.1 | 1023 | 271658 | 0         | 716  | 770  | 92 +  | 197 | 944  | 164316 | 165083 |
| UN38252 | Rsa1.0.02412.1 | 1186 | 31643  | 1.00E-172 | 359  | 374  | 95 -  | 814 | 1184 | 12900  | 13273  |
| UN38253 | Rsa1.0.00058.1 | 1289 | 159921 | 1.00E-124 | 302  | 327  | 92 -  | 522 | 848  | 120961 | 121287 |
| UN38254 | Rsa1.0.00092.1 | 1200 | 659932 | 1.00E-22  | 80   | 88   | 90 -  | 827 | 914  | 439324 | 439411 |
| UN38255 | Rsa1.0.02883.1 | 669  | 27035  | 1.00E-168 | 312  | 316  | 98 +  | 2   | 317  | 7186   | 7501   |
| UN38256 | Rsa1.0.02222.1 | 848  | 152798 | 0         | 425  | 437  | 97 -  | 332 | 767  | 10966  | 11402  |
| UN38257 | Rsa1.0.07795.1 | 1138 | 8543   | 0         | 919  | 945  | 97 +  | 30  | 973  | 3276   | 4220   |

|         |                |      |        |           |      |      |      |     |      |        |        |
|---------|----------------|------|--------|-----------|------|------|------|-----|------|--------|--------|
| UN38258 | Rsa1.0.03569.1 | 847  | 22041  | 1.00E-166 | 433  | 468  | 92 - | 386 | 846  | 12462  | 12922  |
| UN38259 | Rsa1.0.07829.1 | 1252 | 8462   | 1.00E-130 | 319  | 350  | 91 + | 836 | 1180 | 4627   | 4961   |
| UN38260 | Rsa1.0.01513.1 | 1018 | 44234  | 1.00E-113 | 344  | 386  | 89 + | 624 | 1003 | 20355  | 20727  |
| UN38261 | Rsa1.0.00167.1 | 1165 | 116000 | 0         | 465  | 470  | 98 + | 697 | 1164 | 17177  | 17646  |
| UN38262 | Rsa1.0.00134.1 | 842  | 390219 | 1.00E-159 | 308  | 315  | 97 - | 81  | 392  | 178041 | 178355 |
| UN38263 | Rsa1.0.04429.1 | 976  | 17393  | 1.00E-125 | 259  | 269  | 96 + | 337 | 605  | 11732  | 11997  |
| UN38264 | Rsa1.0.00583.1 | 939  | 74309  | 0         | 560  | 569  | 98 - | 371 | 939  | 59417  | 59985  |
| UN38265 | Rsa1.0.00865.1 | 766  | 61686  | 1.00E-135 | 313  | 336  | 93 + | 436 | 765  | 9542   | 9877   |
| UN38266 | Rsa1.0.01957.1 | 869  | 36844  | 0         | 499  | 515  | 96 + | 26  | 535  | 24120  | 24629  |
| UN38267 | Rsa1.0.01167.1 | 784  | 51859  | 0         | 525  | 531  | 98 - | 1   | 529  | 3492   | 4022   |
| UN38268 | Rsa1.0.00473.1 | 975  | 212204 | 1.00E-114 | 237  | 245  | 96 - | 70  | 313  | 44099  | 44343  |
| UN38269 | Rsa1.0.00146.1 | 986  | 149343 | 1.00E-111 | 300  | 329  | 91 + | 1   | 316  | 69140  | 69464  |
| UN38270 | Rsa1.0.00335.1 | 1262 | 94371  | 0         | 936  | 970  | 96 + | 1   | 970  | 10669  | 11633  |
| UN38271 | Rsa1.0.01166.1 | 1123 | 51877  | 0         | 602  | 607  | 99 + | 3   | 608  | 24337  | 24943  |
| UN38272 | Rsa1.0.05725.1 | 1401 | 12809  | 0         | 447  | 466  | 95 + | 370 | 828  | 216    | 680    |
| UN38273 | Rsa1.0.08332.1 | 782  | 7528   | 0         | 574  | 590  | 97 + | 2   | 589  | 4139   | 4728   |
| UN38274 | Rsa1.0.00124.1 | 989  | 262503 | 0         | 745  | 769  | 96 + | 221 | 989  | 194245 | 195007 |
| UN38275 | Rsa1.0.00348.1 | 1255 | 92818  | 0         | 1208 | 1255 | 96 - | 4   | 1254 | 32512  | 33765  |
| UN38276 | Rsa1.0.00422.1 | 253  | 86144  | 1.00E-96  | 206  | 213  | 96 + | 1   | 213  | 82939  | 83147  |
| UN38277 | Rsa1.0.02309.1 | 768  | 32744  | 1.00E-135 | 280  | 290  | 96 + | 1   | 286  | 19065  | 19353  |
| UN38278 | Rsa1.0.04538.1 | 682  | 16940  | 6.00E-85  | 190  | 196  | 96 - | 3   | 196  | 13826  | 14020  |
| UN38279 | Rsa1.0.02975.1 | 713  | 26322  | 0         | 681  | 712  | 95 + | 3   | 711  | 23704  | 24410  |
| UN38280 | Rsa1.0.01484.1 | 517  | 44806  | 1.00E-129 | 246  | 250  | 98 - | 1   | 250  | 28137  | 28386  |
| UN38281 | Rsa1.0.01390.1 | 474  | 46695  | 1.00E-133 | 343  | 374  | 91 - | 1   | 372  | 36004  | 36358  |
| UN38282 | Rsa1.0.00329.1 | 1298 | 222544 | 0         | 338  | 343  | 98 - | 3   | 345  | 129584 | 129926 |
| UN38283 | Rsa1.0.00017.1 | 816  | 752458 | 1.00E-98  | 201  | 207  | 97 + | 502 | 708  | 644525 | 644731 |
| UN38284 | Rsa1.0.00556.1 | 1304 | 207212 | 0         | 495  | 524  | 94 - | 786 | 1302 | 193417 | 193935 |
| UN38285 | #              | #    | #      | #         | #    | #    | #    | #   | #    | #      | #      |
| UN38286 | Rsa1.0.00288.1 | 965  | 98659  | 1.00E-156 | 366  | 393  | 93 + | 194 | 574  | 82915  | 83305  |
| UN38287 | Rsa1.0.05981.1 | 756  | 12043  | 1.00E-162 | 317  | 326  | 97 - | 428 | 753  | 7311   | 7636   |
| UN38288 | Rsa1.0.17780.1 | 1261 | 1742   | 1.00E-127 | 282  | 294  | 95 + | 2   | 293  | 1093   | 1383   |
| UN38289 | Rsa1.0.00060.1 | 795  | 502678 | 0         | 464  | 483  | 96 + | 2   | 484  | 371602 | 372079 |
| UN38290 | Rsa1.0.05707.1 | 911  | 12872  | 0         | 499  | 513  | 97 - | 399 | 911  | 12360  | 12872  |
| UN38291 | Rsa1.0.01256.1 | 967  | 49770  | 1.00E-15  | 63   | 68   | 92 - | 565 | 632  | 29391  | 29457  |
| UN38292 | Rsa1.0.00037.1 | 890  | 307838 | 0         | 392  | 404  | 97 + | 488 | 890  | 252726 | 253128 |
| UN38293 | Rsa1.0.04282.1 | 1149 | 18100  | 0         | 845  | 905  | 93 - | 247 | 1145 | 14107  | 15006  |
| UN38294 | Rsa1.0.02808.1 | 1110 | 27677  | 1.00E-101 | 306  | 345  | 88 + | 31  | 372  | 17280  | 17614  |
| UN38295 | Rsa1.0.00832.1 | 1014 | 62622  | 1.00E-132 | 285  | 295  | 96 - | 2   | 293  | 15429  | 15722  |
| UN38296 | Rsa1.0.06072.1 | 870  | 11811  | 0         | 496  | 533  | 93 + | 3   | 532  | 11168  | 11690  |



|         |                |      |        |           |     |     |       |     |      |        |        |
|---------|----------------|------|--------|-----------|-----|-----|-------|-----|------|--------|--------|
| UN38297 | Rsa1.0_04910.1 | 1014 | 15484  | 1.00E-176 | 332 | 337 | 98 -  | 676 | 1012 | 9169   | 9504   |
| UN38298 | Rsa1.0_04022.1 | 593  | 19534  | 0         | 447 | 450 | 99 +  | 143 | 592  | 6621   | 7070   |
| UN38299 | Rsa1.0_00040.1 | 656  | 324196 | 1.00E-152 | 313 | 327 | 95 -  | 77  | 396  | 163649 | 163975 |
| UN38300 | Rsa1.0_00136.1 | 887  | 122464 | 0         | 739 | 742 | 99 -  | 1   | 740  | 8480   | 9221   |
| UN38301 | Rsa1.0_00126.1 | 1128 | 127534 | 0         | 494 | 496 | 99 -  | 64  | 559  | 41116  | 41611  |
| UN38302 | Rsa1.0_00006.1 | 578  | 396176 | 0         | 556 | 580 | 95 -  | 5   | 578  | 18572  | 19151  |
| UN38303 | Rsa1.0_02927.1 | 826  | 26698  | 0         | 511 | 512 | 99 +  | 1   | 512  | 8625   | 9136   |
| UN38304 | Rsa1.0_00622.1 | 903  | 71822  | 0         | 600 | 625 | 96 -  | 1   | 619  | 60810  | 61433  |
| UN38305 | Rsa1.0_00463.1 | 937  | 189177 | 0         | 548 | 556 | 98 -  | 366 | 921  | 115738 | 116293 |
| UN38306 | Rsa1.0_00034.1 | 806  | 260119 | 4.00E-74  | 145 | 146 | 99 -  | 1   | 146  | 6565   | 6710   |
| UN38307 | Rsa1.0_03263.1 | 933  | 24268  | 0         | 905 | 926 | 97 +  | 1   | 925  | 21907  | 22829  |
| UN38308 | Rsa1.0_00023.1 | 798  | 194764 | 0         | 752 | 780 | 96 -  | 19  | 798  | 52380  | 53142  |
| UN38309 | Rsa1.0_00065.1 | 1017 | 454616 | 0         | 473 | 473 | 100 - | 415 | 887  | 207651 | 208123 |
| UN38310 | Rsa1.0_03414.1 | 846  | 23125  | 0         | 604 | 623 | 96 +  | 2   | 624  | 13638  | 14258  |
| UN38311 | Rsa1.0_00976.1 | 728  | 57809  | 0         | 422 | 433 | 97 +  | 295 | 727  | 15917  | 16349  |
| UN38312 | Rsa1.0_02871.1 | 578  | 27085  | 1.00E-148 | 344 | 365 | 94 +  | 2   | 364  | 564    | 925    |
| UN38313 | Rsa1.0_04881.1 | 814  | 15608  | 1.00E-164 | 367 | 389 | 94 -  | 1   | 389  | 7577   | 7963   |
| UN38314 | Rsa1.0_02937.1 | 745  | 26605  | 1.00E-138 | 358 | 391 | 91 -  | 363 | 744  | 25436  | 25825  |
| UN38315 | Rsa1.0_00170.1 | 934  | 179538 | 1.00E-171 | 332 | 342 | 97 -  | 593 | 934  | 57828  | 58161  |
| UN38316 | Rsa1.0_05963.1 | 596  | 12090  | 1.00E-133 | 248 | 249 | 99 -  | 2   | 250  | 3256   | 3503   |
| UN38317 | Rsa1.0_00366.1 | 828  | 90880  | 0         | 421 | 435 | 96 +  | 393 | 827  | 37810  | 38244  |
| UN38318 | Rsa1.0_03323.1 | 850  | 23751  | 1.00E-117 | 227 | 231 | 98 +  | 2   | 232  | 10670  | 10900  |
| UN38319 | Rsa1.0_01561.1 | 822  | 43227  | 1.00E-137 | 370 | 409 | 90 +  | 1   | 393  | 37830  | 38234  |
| UN38320 | Rsa1.0_03307.1 | 1301 | 23872  | 0         | 381 | 393 | 96 -  | 4   | 395  | 17877  | 18266  |
| UN38321 | Rsa1.0_03425.1 | 756  | 23043  | 0         | 659 | 667 | 98 -  | 88  | 754  | 21431  | 22097  |
| UN38322 | Rsa1.0_04630.1 | 785  | 16595  | 0         | 413 | 428 | 96 -  | 358 | 784  | 13466  | 13893  |
| UN38323 | Rsa1.0_27336.1 | 1125 | 857    | 1.00E-129 | 267 | 277 | 96 +  | 383 | 659  | 5      | 278    |
| UN38324 | Rsa1.0_18790.1 | 1064 | 1533   | 0         | 914 | 957 | 95 -  | 1   | 937  | 528    | 1478   |
| UN38325 | Rsa1.0_00912.1 | 1328 | 59923  | 0         | 752 | 794 | 94 -  | 2   | 792  | 47347  | 48128  |
| UN38326 | Rsa1.0_04422.1 | 1331 | 17423  | 0         | 595 | 596 | 99 +  | 1   | 596  | 4756   | 5351   |
| UN38327 | Rsa1.0_01244.1 | 1030 | 50061  | 0         | 416 | 448 | 92 -  | 3   | 429  | 27345  | 27789  |
| UN38328 | Rsa1.0_01090.1 | 1421 | 54385  | 0         | 700 | 734 | 95 -  | 1   | 728  | 28191  | 28922  |
| UN38329 | Rsa1.0_02431.1 | 746  | 31504  | 1.00E-157 | 397 | 424 | 93 -  | 8   | 427  | 2926   | 3343   |
| UN38330 | Rsa1.0_01913.1 | 544  | 37363  | 0         | 494 | 543 | 90 +  | 2   | 544  | 24171  | 24678  |
| UN38331 | Rsa1.0_01179.1 | 519  | 51549  | 0         | 486 | 516 | 94 -  | 16  | 519  | 17592  | 18106  |
| UN38332 | Rsa1.0_00421.1 | 1465 | 86365  | 2.00E-86  | 178 | 183 | 97 +  | 795 | 977  | 37110  | 37292  |
| UN38333 | Rsa1.0_02750.1 | 814  | 28239  | 1.00E-124 | 242 | 246 | 98 -  | 425 | 669  | 16978  | 17223  |
| UN38334 | Rsa1.0_00479.1 | 781  | 81377  | 0         | 765 | 778 | 98 +  | 3   | 780  | 62298  | 63072  |
| UN38335 | Rsa1.0_00347.1 | 737  | 93048  | 0         | 672 | 689 | 97 -  | 49  | 736  | 80611  | 81296  |

|         |                |      |        |           |      |      |       |     |      |        |        |
|---------|----------------|------|--------|-----------|------|------|-------|-----|------|--------|--------|
| UN38336 | Rsa1.0.00736.1 | 519  | 66455  | 0         | 469  | 487  | 96 -  | 34  | 516  | 57629  | 58114  |
| UN38337 | Rsa1.0.09897.1 | 1291 | 6100   | 0         | 1142 | 1185 | 96 -  | 22  | 1191 | 4006   | 5184   |
| UN38338 | Rsa1.0.01430.1 | 612  | 46034  | 0         | 381  | 389  | 97 +  | 222 | 610  | 20236  | 20624  |
| UN38339 | Rsa1.0.04483.1 | 362  | 17174  | 6.00E-99  | 195  | 199  | 97 +  | 6   | 204  | 9891   | 10089  |
| UN38340 | Rsa1.0.00524.1 | 654  | 169613 | 0         | 413  | 423  | 97 -  | 1   | 423  | 141781 | 142202 |
| UN38341 | Rsa1.0.00472.1 | 821  | 398134 | 1.00E-122 | 243  | 250  | 97 +  | 424 | 673  | 271666 | 271915 |
| UN38342 | Rsa1.0.01388.1 | 1160 | 46741  | 0         | 489  | 525  | 93 -  | 5   | 524  | 29300  | 29814  |
| UN38343 | Rsa1.0.00083.1 | 716  | 442773 | 7.00E-94  | 208  | 215  | 96 +  | 3   | 215  | 407633 | 407846 |
| UN38344 | Rsa1.0.00996.1 | 1108 | 57222  | 0         | 356  | 363  | 98 +  | 744 | 1106 | 53540  | 53902  |
| UN38345 | Rsa1.0.00686.1 | 912  | 68511  | 0         | 908  | 912  | 99 +  | 1   | 912  | 60294  | 61204  |
| UN38346 | Rsa1.0.00275.1 | 958  | 210104 | 1.00E-156 | 345  | 363  | 95 +  | 66  | 427  | 149312 | 149671 |
| UN38347 | Rsa1.0.00826.1 | 995  | 166736 | 1.00E-135 | 277  | 286  | 96 -  | 349 | 631  | 156199 | 156483 |
| UN38348 | Rsa1.0.00486.1 | 660  | 80875  | 1.00E-149 | 280  | 284  | 98 +  | 363 | 646  | 62345  | 62628  |
| UN38349 | Rsa1.0.03483.1 | 868  | 22621  | 1.00E-109 | 210  | 213  | 98 +  | 2   | 214  | 18446  | 18658  |
| UN38350 | Rsa1.0.13789.1 | 823  | 4332   | 0         | 570  | 577  | 98 +  | 247 | 822  | 3288   | 3864   |
| UN38351 | #              | #    | #      | #         | #    | #    | #     | #   | #    | #      | #      |
| UN38352 | Rsa1.0.00005.1 | 840  | 353093 | 0         | 799  | 843  | 94 +  | 1   | 838  | 300310 | 301143 |
| UN38353 | Rsa1.0.04808.1 | 519  | 15893  | 1.00E-122 | 229  | 231  | 99 -  | 287 | 517  | 4948   | 5178   |
| UN38354 | Rsa1.0.01004.1 | 824  | 56975  | 0         | 486  | 489  | 99 +  | 339 | 824  | 3551   | 4039   |
| UN38355 | Rsa1.0.24446.1 | 789  | 987    | 1.00E-121 | 325  | 367  | 88 -  | 355 | 699  | 49     | 400    |
| UN38356 | Rsa1.0.00464.1 | 801  | 82253  | 1.00E-126 | 308  | 338  | 91 -  | 1   | 338  | 61933  | 62254  |
| UN38357 | Rsa1.0.00124.1 | 875  | 262503 | 0         | 745  | 778  | 95 -  | 55  | 831  | 86565  | 87340  |
| UN38358 | Rsa1.0.00341.1 | 882  | 249309 | 2.33E-156 | 325  | 345  | 94 -  | 80  | 424  | 208697 | 209038 |
| UN38359 | Rsa1.0.07824.1 | 1103 | 8467   | 0         | 659  | 689  | 95 +  | 3   | 690  | 291    | 979    |
| UN38360 | Rsa1.0.08259.1 | 485  | 7641   | 2.00E-84  | 194  | 205  | 94 +  | 51  | 255  | 6833   | 7034   |
| UN38361 | Rsa1.0.01616.1 | 720  | 42137  | 0         | 538  | 557  | 96 -  | 1   | 557  | 478    | 1027   |
| UN38362 | Rsa1.0.10640.1 | 835  | 5772   | 1.00E-166 | 392  | 422  | 92 -  | 425 | 835  | 1910   | 2328   |
| UN38363 | Rsa1.0.00058.1 | 773  | 159921 | 1.00E-152 | 312  | 325  | 96 +  | 392 | 716  | 120963 | 121287 |
| UN38364 | Rsa1.0.02254.1 | 774  | 33344  | 0         | 336  | 337  | 99 +  | 1   | 337  | 73     | 409    |
| UN38365 | Rsa1.0.02507.1 | 845  | 30696  | 1.00E-104 | 230  | 239  | 96 -  | 607 | 844  | 15178  | 15413  |
| UN38366 | Rsa1.0.00611.1 | 941  | 72410  | 0         | 480  | 491  | 97 +  | 450 | 940  | 6791   | 7281   |
| UN38367 | Rsa1.0.00545.1 | 656  | 189649 | 0         | 487  | 504  | 96 -  | 155 | 656  | 44746  | 45243  |
| UN38368 | Rsa1.0.00018.1 | 843  | 410899 | 0         | 478  | 499  | 95 +  | 341 | 836  | 51112  | 51608  |
| UN38369 | Rsa1.0.15860.1 | 696  | 2385   | 1.00E-116 | 234  | 241  | 97 -  | 452 | 692  | 1161   | 1401   |
| UN38370 | Rsa1.0.00031.1 | 730  | 179862 | 0         | 361  | 363  | 99 +  | 1   | 363  | 117362 | 117724 |
| UN38371 | Rsa1.0.00869.1 | 773  | 61627  | 1.00E-131 | 285  | 301  | 94 +  | 479 | 773  | 42825  | 43125  |
| UN38372 | Rsa1.0.00165.1 | 800  | 116466 | 1.00E-122 | 244  | 251  | 97 -  | 94  | 344  | 95256  | 95506  |
| UN38373 | Rsa1.0.00278.1 | 666  | 231896 | 0         | 442  | 472  | 93 -  | 1   | 471  | 23956  | 24403  |
| UN38374 | Rsa1.0.00836.1 | 752  | 185968 | 1.00E-145 | 261  | 261  | 100 - | 326 | 586  | 142041 | 142301 |

|         |                |      |        |           |     |     |       |     |      |        |        |
|---------|----------------|------|--------|-----------|-----|-----|-------|-----|------|--------|--------|
| UN38375 | Rsa1.0.00604.1 | 726  | 146282 | 7.00E-91  | 179 | 182 | 98 -  | 1   | 182  | 82213  | 82394  |
| UN38376 | Rsa1.0.00390.1 | 633  | 88681  | 1.00E-124 | 228 | 229 | 99 -  | 311 | 539  | 35102  | 35330  |
| UN38377 | Rsa1.0.01035.1 | 981  | 56019  | 0         | 886 | 979 | 90 -  | 1   | 973  | 43920  | 44888  |
| UN38378 | Rsa1.0.00236.1 | 998  | 104771 | 0         | 501 | 518 | 96 +  | 228 | 744  | 49907  | 50424  |
| UN38379 | Rsa1.0.08840.1 | 912  | 6871   | 0         | 637 | 656 | 97 -  | 259 | 910  | 4213   | 4864   |
| UN38380 | Rsa1.0.02080.1 | 261  | 35297  | 1.00E-117 | 250 | 261 | 95 +  | 2   | 261  | 20180  | 20440  |
| UN38381 | Rsa1.0.00423.1 | 623  | 86138  | 0         | 406 | 424 | 95 -  | 205 | 623  | 38227  | 38646  |
| UN38382 | Rsa1.0.00304.1 | 1120 | 97429  | 1.00E-102 | 225 | 237 | 94 -  | 387 | 623  | 25354  | 25590  |
| UN38383 | Rsa1.0.04629.1 | 739  | 16595  | 4.00E-77  | 167 | 171 | 97 +  | 537 | 705  | 8842   | 9012   |
| UN38384 | Rsa1.0.00154.1 | 1157 | 189461 | 0         | 507 | 558 | 90 +  | 628 | 1157 | 21595  | 22148  |
| UN38385 | Rsa1.0.00020.1 | 789  | 283099 | 0         | 762 | 810 | 94 +  | 2   | 789  | 74741  | 75548  |
| UN38386 | Rsa1.0.00633.1 | 824  | 71250  | 0         | 395 | 403 | 98 -  | 416 | 818  | 4702   | 5104   |
| UN38387 | Rsa1.0.28235.1 | 795  | 823    | 0         | 469 | 480 | 97 +  | 313 | 791  | 1      | 475    |
| UN38388 | Rsa1.0.03107.1 | 979  | 25349  | 1.00E-101 | 307 | 340 | 90 -  | 637 | 970  | 14762  | 15097  |
| UN38389 | Rsa1.0.00409.1 | 531  | 146788 | 1.00E-131 | 252 | 257 | 98 -  | 173 | 429  | 90528  | 90784  |
| UN38390 | Rsa1.0.00045.1 | 702  | 328694 | 1.00E-180 | 353 | 364 | 96 +  | 3   | 366  | 15047  | 15410  |
| UN38391 | Rsa1.0.06619.1 | 493  | 10650  | 1.00E-100 | 259 | 283 | 91 -  | 221 | 493  | 4511   | 4790   |
| UN38392 | Rsa1.0.00593.1 | 617  | 143463 | 1.00E-159 | 326 | 336 | 97 -  | 217 | 550  | 2923   | 3257   |
| UN38393 | Rsa1.0.01506.1 | 621  | 44370  | 1.00E-166 | 309 | 313 | 98 -  | 307 | 619  | 3084   | 3396   |
| UN38394 | Rsa1.0.00386.1 | 1017 | 89134  | 6.00E-89  | 185 | 191 | 96 +  | 707 | 897  | 29431  | 29621  |
| UN38395 | Rsa1.0.03593.1 | 740  | 21869  | 1.00E-163 | 385 | 416 | 92 -  | 320 | 735  | 2186   | 2601   |
| UN38396 | Rsa1.0.00744.1 | 673  | 66084  | 8.00E-72  | 150 | 154 | 97 -  | 168 | 321  | 48388  | 48541  |
| UN38397 | Rsa1.0.01180.1 | 921  | 51517  | 0         | 655 | 663 | 98 -  | 4   | 661  | 45916  | 46578  |
| UN38398 | Rsa1.0.00622.1 | 1097 | 71822  | 0         | 790 | 790 | 100 - | 1   | 790  | 60856  | 61645  |
| UN38399 | Rsa1.0.00243.1 | 1094 | 103651 | 1.00E-74  | 170 | 178 | 95 -  | 2   | 179  | 26911  | 27086  |
| UN38400 | Rsa1.0.00286.1 | 1025 | 98709  | 1.00E-114 | 212 | 213 | 99 -  | 462 | 674  | 60573  | 60785  |
| UN38401 | Rsa1.0.06056.1 | 815  | 137271 | 0         | 394 | 414 | 95 -  | 285 | 695  | 128425 | 128838 |
| UN38402 | Rsa1.0.01726.1 | 1016 | 40263  | 0         | 388 | 398 | 97 -  | 1   | 398  | 28264  | 28660  |
| UN38403 | Rsa1.0.00199.1 | 797  | 249604 | 0         | 377 | 384 | 98 +  | 1   | 383  | 12895  | 13278  |
| UN38404 | Rsa1.0.03081.1 | 821  | 25523  | 1.00E-128 | 251 | 257 | 97 -  | 450 | 706  | 20848  | 21104  |
| UN38405 | Rsa1.0.00111.1 | 697  | 390088 | 1.00E-144 | 263 | 264 | 99 -  | 7   | 270  | 373311 | 373574 |
| UN38406 | Rsa1.0.01576.1 | 1220 | 42923  | 1.00E-127 | 249 | 254 | 98 -  | 563 | 816  | 24402  | 24653  |
| UN38407 | #              | #    | #      | #         | #   | #   | #     | #   | #    | #      | #      |
| UN38408 | Rsa1.0.00017.1 | 822  | 752458 | 1.00E-127 | 237 | 239 | 99 +  | 418 | 656  | 351264 | 351502 |
| UN38409 | Rsa1.0.00999.1 | 1115 | 57162  | 0         | 598 | 618 | 96 +  | 1   | 618  | 24782  | 25399  |
| UN38410 | Rsa1.0.00127.1 | 1232 | 127446 | 0         | 467 | 475 | 98 -  | 759 | 1232 | 79053  | 79527  |
| UN38411 | Rsa1.0.01414.1 | 700  | 149508 | 1.00E-126 | 238 | 241 | 98 +  | 441 | 681  | 17288  | 17528  |
| UN38412 | Rsa1.0.01588.1 | 1117 | 42724  | 0         | 409 | 415 | 98 +  | 42  | 454  | 10075  | 10489  |
| UN38413 | Rsa1.0.00336.1 | 631  | 445051 | 0         | 622 | 631 | 98 -  | 1   | 631  | 41231  | 41861  |

|         |                |      |        |           |      |      |       |      |      |        |        |
|---------|----------------|------|--------|-----------|------|------|-------|------|------|--------|--------|
| UN38414 | Rsa1.0_00863.1 | 748  | 254535 | 0         | 561  | 600  | 93 +  | 159  | 743  | 109790 | 110385 |
| UN38415 | Rsa1.0_02026.1 | 727  | 35896  | 0         | 376  | 387  | 97 +  | 193  | 579  | 22147  | 22533  |
| UN38416 | Rsa1.0_15087.1 | 768  | 2842   | 3.00E-93  | 201  | 210  | 95 +  | 2    | 211  | 2492   | 2701   |
| UN38417 | Rsa1.0_07474.1 | 717  | 9294   | 0         | 677  | 706  | 95 -  | 2    | 705  | 5431   | 6135   |
| UN38418 | Rsa1.0_02299.1 | 1220 | 32857  | 0         | 354  | 356  | 99 +  | 1    | 356  | 1543   | 1898   |
| UN38419 | Rsa1.0_00387.1 | 744  | 495407 | 1.00E-173 | 437  | 474  | 92 +  | 29   | 498  | 354531 | 354981 |
| UN38420 | Rsa1.0_00224.1 | 809  | 327530 | 1.00E-129 | 240  | 242  | 99 -  | 419  | 660  | 44232  | 44473  |
| UN38421 | Rsa1.0_01081.1 | 685  | 499226 | 0         | 491  | 499  | 98 -  | 1    | 499  | 322635 | 323133 |
| UN38422 | Rsa1.0_00044.1 | 812  | 271658 | 0         | 447  | 473  | 94 +  | 2    | 468  | 157790 | 158261 |
| UN38423 | Rsa1.0_00085.1 | 758  | 142226 | 0         | 377  | 377  | 100 - | 1    | 377  | 23242  | 23618  |
| UN38424 | Rsa1.0_02906.1 | 683  | 26866  | 0         | 388  | 389  | 99 -  | 1    | 389  | 23940  | 24328  |
| UN38425 | Rsa1.0_02008.1 | 821  | 36109  | 0         | 611  | 612  | 99 -  | 1    | 612  | 19767  | 20378  |
| UN38426 | Rsa1.0_03020.1 | 1165 | 25984  | 0         | 1042 | 1044 | 99 -  | 123  | 1165 | 1462   | 2505   |
| UN38427 | Rsa1.0_01112.1 | 888  | 310601 | 7.00E-70  | 197  | 214  | 92 +  | 3    | 207  | 290260 | 290473 |
| UN38428 | Rsa1.0_02396.1 | 1123 | 31783  | 0         | 423  | 438  | 96 +  | 585  | 1022 | 16638  | 17072  |
| UN38429 | Rsa1.0_00878.1 | 1014 | 330303 | 1.00E-59  | 145  | 153  | 94 -  | 241  | 393  | 113643 | 113793 |
| UN38430 | Rsa1.0_00418.1 | 803  | 215377 | 1.00E-15  | 60   | 64   | 93 +  | 736  | 798  | 200009 | 200072 |
| UN38431 | Rsa1.0_05725.1 | 738  | 12809  | 9.00E-75  | 149  | 151  | 98 -  | 422  | 572  | 772    | 922    |
| UN38432 | Rsa1.0_01196.1 | 1012 | 51097  | 1.00E-177 | 336  | 343  | 97 -  | 670  | 1012 | 2568   | 2910   |
| UN38433 | Rsa1.0_00312.1 | 470  | 96765  | 0         | 336  | 340  | 98 +  | 1    | 340  | 13970  | 14309  |
| UN38434 | Rsa1.0_04823.1 | 1275 | 15840  | 0         | 597  | 615  | 97 -  | 656  | 1267 | 11427  | 12039  |
| UN38435 | Rsa1.0_00061.1 | 808  | 218685 | 0         | 559  | 569  | 98 +  | 125  | 693  | 99301  | 99865  |
| UN38436 | Rsa1.0_00326.1 | 870  | 171955 | 0         | 653  | 655  | 99 +  | 211  | 864  | 45447  | 46101  |
| UN38437 | Rsa1.0_02735.1 | 1021 | 28344  | 0         | 839  | 867  | 96 +  | 114  | 974  | 12732  | 13598  |
| UN38438 | Rsa1.0_00025.1 | 708  | 277312 | 1.00E-151 | 280  | 283  | 98 +  | 290  | 572  | 60785  | 61067  |
| UN38439 | Rsa1.0_00478.1 | 981  | 81419  | 0         | 936  | 983  | 95 +  | 2    | 981  | 68704  | 69676  |
| UN38440 | Rsa1.0_00201.1 | 1311 | 232851 | 0         | 1276 | 1323 | 96 -  | 3    | 1308 | 87175  | 88497  |
| UN38441 | Rsa1.0_00098.1 | 719  | 349239 | 1.00E-105 | 212  | 218  | 97 -  | 310  | 527  | 315176 | 315393 |
| UN38442 | Rsa1.0_00017.1 | 712  | 752458 | 1.00E-160 | 319  | 332  | 96 +  | 13   | 332  | 204584 | 204915 |
| UN38443 | Rsa1.0_00123.1 | 948  | 325650 | 0         | 839  | 887  | 94 -  | 12   | 894  | 230064 | 230947 |
| UN38444 | Rsa1.0_03252.1 | 834  | 24338  | 0         | 484  | 490  | 98 +  | 2    | 491  | 344    | 833    |
| UN38445 | Rsa1.0_05241.1 | 1070 | 14405  | 0         | 381  | 395  | 96 -  | 676  | 1070 | 3031   | 3421   |
| UN38446 | Rsa1.0_02695.1 | 1154 | 28605  | 0         | 617  | 636  | 97 -  | 520  | 1154 | 8142   | 8777   |
| UN38447 | Rsa1.0_01356.1 | 896  | 47287  | 0         | 772  | 808  | 95 -  | 91   | 896  | 8248   | 9053   |
| UN38448 | Rsa1.0_00019.1 | 1085 | 301669 | 1.00E-105 | 197  | 198  | 99 -  | 834  | 1031 | 181302 | 181499 |
| UN38449 | Rsa1.0_00008.1 | 1047 | 358124 | 0         | 517  | 518  | 99 -  | 530  | 1047 | 232018 | 232535 |
| UN38450 | Rsa1.0_01041.1 | 742  | 55910  | 0         | 424  | 425  | 99 -  | 6    | 430  | 9579   | 10003  |
| UN38451 | Rsa1.0_03688.1 | 1433 | 143676 | 1.00E-114 | 236  | 245  | 96 -  | 1178 | 1422 | 3875   | 4119   |
| UN38452 | Rsa1.0_09625.1 | 559  | 6245   | 1.00E-122 | 295  | 314  | 93 -  | 248  | 558  | 1050   | 1361   |

|         |                |      |        |           |      |      |       |     |      |        |        |
|---------|----------------|------|--------|-----------|------|------|-------|-----|------|--------|--------|
| UN38453 | Rsa1.0_00027.1 | 1240 | 283362 | 0         | 507  | 519  | 97 -  | 332 | 850  | 51034  | 51552  |
| UN38454 | Rsa1.0_00179.1 | 1539 | 393324 | 0         | 499  | 512  | 97 +  | 818 | 1329 | 211561 | 212072 |
| UN38455 | Rsa1.0_00100.1 | 1082 | 249232 | 0         | 556  | 579  | 96 -  | 379 | 957  | 183048 | 183626 |
| UN38456 | Rsa1.0_00813.1 | 1193 | 63202  | 0         | 1145 | 1192 | 96 -  | 3   | 1191 | 38614  | 39801  |
| UN38457 | Rsa1.0_01963.1 | 763  | 36719  | 1.00E-143 | 291  | 301  | 96 -  | 464 | 762  | 22237  | 22537  |
| UN38458 | Rsa1.0_00402.1 | 1285 | 385315 | 1.00E-168 | 372  | 393  | 94 +  | 845 | 1231 | 267425 | 267812 |
| UN38459 | Rsa1.0_01669.1 | 1176 | 41286  | 0         | 549  | 552  | 99 -  | 625 | 1176 | 11499  | 12050  |
| UN38460 | Rsa1.0_04991.1 | 1024 | 15215  | 1.00E-123 | 287  | 308  | 93 -  | 713 | 1017 | 99     | 398    |
| UN38461 | Rsa1.0_01613.1 | 1061 | 182542 | 1.00E-108 | 211  | 215  | 98 +  | 39  | 253  | 27799  | 28013  |
| UN38462 | Rsa1.0_00183.1 | 703  | 113277 | 1.00E-174 | 316  | 318  | 99 -  | 384 | 701  | 69845  | 70162  |
| UN38463 | Rsa1.0_00321.1 | 1068 | 95671  | 1.00E-141 | 286  | 296  | 96 +  | 270 | 561  | 59741  | 60036  |
| UN38464 | Rsa1.0_02074.1 | 1246 | 35370  | 1.00E-114 | 219  | 222  | 98 +  | 241 | 462  | 9790   | 10011  |
| UN38465 | Rsa1.0_01164.1 | 812  | 51934  | 8.00E-88  | 214  | 229  | 93 +  | 23  | 245  | 41766  | 41994  |
| UN38466 | Rsa1.0_00738.1 | 953  | 66322  | 1.00E-127 | 395  | 444  | 88 +  | 511 | 953  | 17969  | 18395  |
| UN38467 | Rsa1.0_01530.1 | 954  | 43820  | 6.00E-58  | 142  | 151  | 94 -  | 279 | 429  | 20950  | 21100  |
| UN38468 | Rsa1.0_01907.1 | 1212 | 37431  | 0         | 516  | 528  | 97 +  | 687 | 1212 | 17829  | 18356  |
| UN38469 | Rsa1.0_02729.1 | 972  | 28394  | 0         | 572  | 601  | 95 +  | 382 | 970  | 17109  | 17709  |
| UN38470 | Rsa1.0_00273.1 | 816  | 326186 | 1.00E-95  | 216  | 229  | 94 -  | 239 | 467  | 10008  | 10230  |
| UN38471 | Rsa1.0_00065.1 | 886  | 454616 | 1.00E-171 | 378  | 398  | 94 -  | 496 | 886  | 249011 | 249408 |
| UN38472 | Rsa1.0_00270.1 | 963  | 101236 | 1.00E-138 | 345  | 373  | 92 -  | 10  | 379  | 65636  | 66007  |
| UN38473 | Rsa1.0_00930.1 | 772  | 59224  | 7.00E-79  | 209  | 230  | 90 -  | 509 | 738  | 52077  | 52297  |
| UN38474 | Rsa1.0_00021.1 | 1176 | 263655 | 1.00E-121 | 234  | 238  | 98 -  | 343 | 580  | 18708  | 18945  |
| UN38475 | Rsa1.0_00581.1 | 680  | 163575 | 0         | 621  | 652  | 95 +  | 3   | 654  | 5298   | 5949   |
| UN38476 | Rsa1.0_01537.1 | 678  | 187285 | 0         | 404  | 417  | 96 -  | 197 | 613  | 165561 | 165977 |
| UN38477 | Rsa1.0_00053.1 | 891  | 263459 | 0         | 389  | 406  | 95 +  | 488 | 891  | 160252 | 160656 |
| UN38478 | Rsa1.0_00006.1 | 865  | 396176 | 0         | 445  | 462  | 96 +  | 406 | 865  | 210887 | 211347 |
| UN38479 | Rsa1.0_00555.1 | 1084 | 75920  | 0         | 506  | 537  | 94 -  | 257 | 790  | 2504   | 3040   |
| UN38480 | Rsa1.0_00195.1 | 987  | 251884 | 0         | 838  | 867  | 96 +  | 118 | 979  | 233846 | 234710 |
| UN38481 | Rsa1.0_00498.1 | 711  | 79746  | 0         | 697  | 711  | 98 -  | 3   | 706  | 50238  | 50947  |
| UN38482 | Rsa1.0_00123.1 | 1026 | 325650 | 1.00E-100 | 204  | 210  | 97 -  | 1   | 210  | 4469   | 4678   |
| UN38483 | Rsa1.0_03828.1 | 945  | 20588  | 0         | 679  | 699  | 97 +  | 227 | 925  | 14875  | 15572  |
| UN38484 | Rsa1.0_01602.1 | 1440 | 42503  | 0         | 424  | 443  | 95 -  | 249 | 691  | 10730  | 11172  |
| UN38485 | Rsa1.0_01579.1 | 795  | 42860  | 0         | 469  | 487  | 96 +  | 307 | 793  | 23243  | 23721  |
| UN38486 | Rsa1.0_00116.1 | 1042 | 365886 | 1.00E-111 | 222  | 228  | 97 -  | 280 | 507  | 168038 | 168265 |
| UN38487 | Rsa1.0_00028.1 | 1370 | 293984 | 0         | 1323 | 1367 | 96 -  | 3   | 1369 | 230301 | 231665 |
| UN38488 | Rsa1.0_00829.1 | 926  | 158305 | 0         | 537  | 552  | 97 +  | 3   | 546  | 39868  | 40419  |
| UN38489 | Rsa1.0_00132.1 | 715  | 124299 | 1.00E-174 | 339  | 348  | 97 -  | 176 | 523  | 91186  | 91530  |
| UN38490 | Rsa1.0_31905.1 | 714  | 715    | 0         | 333  | 333  | 100 + | 1   | 333  | 383    | 715    |
| UN38491 | Rsa1.0_13693.1 | 773  | 4469   | 0         | 706  | 759  | 93 -  | 23  | 773  | 3246   | 3997   |

|         |                |      |        |           |      |      |       |      |      |        |        |
|---------|----------------|------|--------|-----------|------|------|-------|------|------|--------|--------|
| UN38492 | Rsa1.0.00029.1 | 1141 | 272992 | 0         | 616  | 641  | 96 +  | 503  | 1141 | 3110   | 3744   |
| UN38493 | Rsa1.0.01286.1 | 915  | 49209  | 0         | 446  | 461  | 96 -  | 15   | 474  | 25577  | 26036  |
| UN38494 | Rsa1.0.00575.1 | 1089 | 74791  | 0         | 404  | 413  | 97 +  | 666  | 1076 | 21031  | 21443  |
| UN38495 | Rsa1.0.02634.1 | 769  | 29299  | 0         | 437  | 442  | 98 +  | 328  | 769  | 16745  | 17186  |
| UN38496 | Rsa1.0.00293.1 | 1085 | 339294 | 0         | 498  | 519  | 95 +  | 1    | 519  | 313981 | 314499 |
| UN38497 | Rsa1.0.00739.1 | 1005 | 66155  | 1.00E-172 | 307  | 307  | 100 - | 698  | 1004 | 41995  | 42301  |
| UN38498 | Rsa1.0.02668.1 | 561  | 28895  | 1.00E-101 | 187  | 187  | 100 + | 347  | 533  | 11051  | 11237  |
| UN38499 | Rsa1.0.04948.1 | 868  | 15356  | 0         | 695  | 698  | 99 -  | 3    | 700  | 12946  | 13643  |
| UN38500 | Rsa1.0.00369.1 | 898  | 266462 | 0         | 486  | 490  | 99 +  | 407  | 896  | 180846 | 181333 |
| UN38501 | Rsa1.0.02074.1 | 695  | 35370  | 0         | 651  | 688  | 94 +  | 1    | 688  | 29419  | 30103  |
| UN38502 | Rsa1.0.00516.1 | 1237 | 78417  | 1.00E-164 | 299  | 301  | 99 -  | 935  | 1235 | 45629  | 45929  |
| UN38503 | Rsa1.0.00224.1 | 1076 | 327530 | 0         | 1066 | 1092 | 97 +  | 2    | 1075 | 227300 | 228391 |
| UN38504 | Rsa1.0.00125.1 | 1350 | 253043 | 1.00E-161 | 304  | 309  | 98 -  | 647  | 955  | 20060  | 20368  |
| UN38505 | Rsa1.0.00984.1 | 1298 | 57580  | 0         | 886  | 889  | 99 -  | 2    | 889  | 4416   | 5304   |
| UN38506 | Rsa1.0.00931.1 | 831  | 59210  | 0         | 719  | 739  | 97 -  | 93   | 831  | 19167  | 19895  |
| UN38507 | Rsa1.0.00681.1 | 774  | 68779  | 0         | 419  | 421  | 99 -  | 354  | 774  | 26846  | 27266  |
| UN38508 | Rsa1.0.00706.1 | 813  | 291570 | 1.00E-158 | 329  | 345  | 95 -  | 476  | 813  | 51663  | 52007  |
| UN38509 | Rsa1.0.00100.1 | 848  | 249232 | 0         | 363  | 369  | 98 -  | 479  | 847  | 186132 | 186500 |
| UN38510 | Rsa1.0.08841.1 | 632  | 6870   | 0         | 509  | 514  | 99 +  | 118  | 631  | 1013   | 1526   |
| UN38511 | Rsa1.0.00451.1 | 703  | 322533 | 0         | 439  | 447  | 98 +  | 2    | 447  | 247455 | 247901 |
| UN38512 | Rsa1.0.00321.1 | 817  | 95671  | 1.00E-175 | 329  | 334  | 98 +  | 3    | 333  | 63115  | 63448  |
| UN38513 | Rsa1.0.00021.1 | 889  | 263655 | 1.00E-123 | 234  | 237  | 98 +  | 531  | 767  | 18708  | 18944  |
| UN38514 | Rsa1.0.02992.1 | 743  | 26176  | 1.00E-159 | 288  | 289  | 99 +  | 310  | 598  | 20329  | 20617  |
| UN38515 | Rsa1.0.01958.1 | 1439 | 261128 | 2.00E-80  | 182  | 191  | 95 -  | 1247 | 1437 | 253786 | 253973 |
| UN38516 | Rsa1.0.00310.1 | 819  | 96852  | 0         | 781  | 812  | 96 -  | 3    | 814  | 12952  | 13763  |
| UN38517 | Rsa1.0.00058.1 | 893  | 159921 | 1.00E-144 | 308  | 325  | 94 -  | 525  | 836  | 120963 | 121287 |
| UN38518 | Rsa1.0.00128.1 | 743  | 228675 | 0         | 403  | 423  | 95 -  | 321  | 743  | 80521  | 80931  |
| UN38519 | Rsa1.0.00344.1 | 891  | 191774 | 1.00E-124 | 244  | 250  | 97 +  | 469  | 718  | 182012 | 182261 |
| UN38520 | Rsa1.0.00176.1 | 625  | 240984 | 0         | 421  | 442  | 95 -  | 187  | 625  | 1820   | 2261   |
| UN38521 | #              | #    | #      | #         | #    | #    | #     | #    | #    | #      | #      |
| UN38522 | Rsa1.0.00329.1 | 605  | 222544 | 1.00E-137 | 340  | 363  | 93 +  | 8    | 367  | 64082  | 64440  |
| UN38523 | Rsa1.0.02769.1 | 477  | 28107  | 1.00E-150 | 275  | 277  | 99 +  | 1    | 277  | 20965  | 21241  |
| UN38524 | Rsa1.0.00727.1 | 664  | 66724  | 0         | 457  | 478  | 95 +  | 195  | 664  | 6587   | 7064   |
| UN38525 | Rsa1.0.00190.1 | 604  | 318240 | 0         | 573  | 598  | 95 +  | 9    | 604  | 93218  | 93811  |
| UN38526 | Rsa1.0.03832.1 | 1080 | 20577  | 0         | 456  | 477  | 95 +  | 100  | 576  | 8373   | 8849   |
| UN38527 | Rsa1.0.00035.1 | 766  | 176449 | 0         | 630  | 638  | 98 -  | 1    | 638  | 90394  | 91031  |
| UN38528 | Rsa1.0.05654.1 | 940  | 13042  | 0         | 495  | 503  | 98 -  | 321  | 823  | 8195   | 8697   |
| UN38529 | Rsa1.0.03407.1 | 985  | 23154  | 1.00E-138 | 250  | 250  | 100 + | 3    | 252  | 3668   | 3917   |
| UN38530 | Rsa1.0.01381.1 | 559  | 46908  | 2.33E-156 | 309  | 323  | 95 +  | 3    | 325  | 34568  | 34889  |

|         |                |      |        |           |      |      |       |     |      |        |        |
|---------|----------------|------|--------|-----------|------|------|-------|-----|------|--------|--------|
| UN38531 | Rsa1.0.00427.1 | 1167 | 189678 | 0         | 926  | 965  | 95 -  | 205 | 1167 | 32841  | 33793  |
| UN38532 | Rsa1.0.06403.1 | 882  | 11078  | 1.00E-164 | 375  | 403  | 93 -  | 44  | 434  | 298    | 700    |
| UN38533 | Rsa1.0.00750.1 | 322  | 190548 | 1.00E-179 | 318  | 318  | 100 - | 5   | 322  | 144360 | 144677 |
| UN38534 | Rsa1.0.03192.1 | 862  | 24695  | 0         | 858  | 861  | 99 +  | 2   | 862  | 11316  | 12176  |
| UN38535 | Rsa1.0.04179.1 | 367  | 18633  | 0         | 358  | 367  | 97 -  | 1   | 367  | 16947  | 17313  |
| UN38536 | Rsa1.0.00916.1 | 849  | 59789  | 0         | 518  | 529  | 97 -  | 2   | 527  | 15473  | 16000  |
| UN38537 | Rsa1.0.01960.1 | 745  | 36766  | 1.00E-134 | 252  | 254  | 99 -  | 492 | 745  | 32753  | 33005  |
| UN38538 | Rsa1.0.00653.1 | 754  | 70029  | 0         | 744  | 751  | 99 -  | 5   | 754  | 41934  | 42684  |
| UN38539 | Rsa1.0.00740.1 | 534  | 215972 | 1.00E-164 | 305  | 308  | 99 +  | 2   | 309  | 31867  | 32173  |
| UN38540 | Rsa1.0.00273.1 | 942  | 326186 | 0         | 591  | 596  | 99 -  | 347 | 942  | 235640 | 236235 |
| UN38541 | Rsa1.0.01771.1 | 836  | 172709 | 1.00E-98  | 204  | 211  | 96 -  | 450 | 660  | 8310   | 8520   |
| UN38542 | Rsa1.0.01273.1 | 956  | 49464  | 1.00E-127 | 237  | 239  | 99 -  | 33  | 271  | 24253  | 24491  |
| UN38543 | Rsa1.0.00803.1 | 784  | 144228 | 0         | 759  | 789  | 96 -  | 1   | 783  | 58938  | 59723  |
| UN38544 | #              | #    | #      | #         | #    | #    | #     | #   | #    | #      | #      |
| UN38545 | Rsa1.0.00935.1 | 709  | 59079  | 0         | 459  | 479  | 95 -  | 108 | 583  | 55903  | 56377  |
| UN38546 | Rsa1.0.00720.1 | 1051 | 66931  | 1.00E-90  | 224  | 242  | 92 +  | 714 | 945  | 62325  | 62566  |
| UN38547 | Rsa1.0.02966.1 | 762  | 135126 | 1.00E-160 | 321  | 331  | 96 +  | 1   | 330  | 132552 | 132882 |
| UN38548 | Rsa1.0.01588.1 | 1147 | 42724  | 0         | 545  | 568  | 95 +  | 296 | 848  | 10356  | 10923  |
| UN38549 | Rsa1.0.00016.1 | 635  | 831256 | 6.00E-82  | 176  | 182  | 96 -  | 175 | 354  | 293810 | 293991 |
| UN38550 | Rsa1.0.02825.1 | 718  | 27568  | 1.00E-143 | 310  | 325  | 95 -  | 3   | 326  | 1476   | 1799   |
| UN38551 | Rsa1.0.00339.1 | 526  | 222974 | 1.00E-111 | 227  | 232  | 97 -  | 297 | 526  | 37882  | 38113  |
| UN38552 | Rsa1.0.00321.1 | 930  | 95671  | 0         | 921  | 931  | 98 +  | 1   | 930  | 25888  | 26817  |
| UN38553 | Rsa1.0.04399.1 | 1028 | 17543  | 0         | 1020 | 1033 | 98 -  | 3   | 1027 | 13381  | 14413  |
| UN38554 | Rsa1.0.01146.1 | 820  | 163455 | 0         | 435  | 450  | 96 +  | 372 | 816  | 160805 | 161254 |
| UN38555 | Rsa1.0.00100.1 | 694  | 249232 | 1.00E-175 | 332  | 336  | 98 -  | 360 | 693  | 179430 | 179765 |
| UN38556 | Rsa1.0.02931.1 | 1172 | 26654  | 1.00E-117 | 267  | 284  | 94 +  | 53  | 333  | 2638   | 2921   |
| UN38557 | Rsa1.0.23894.1 | 986  | 1018   | 0         | 416  | 426  | 97 +  | 272 | 688  | 555    | 980    |
| UN38558 | Rsa1.0.01285.1 | 1402 | 172709 | 0         | 1016 | 1050 | 96 +  | 246 | 1289 | 139725 | 140771 |
| UN38559 | Rsa1.0.00251.1 | 586  | 303968 | 6.00E-88  | 261  | 285  | 91 -  | 2   | 282  | 127337 | 127614 |
| UN38560 | Rsa1.0.08183.1 | 631  | 7775   | 0         | 406  | 416  | 97 -  | 205 | 617  | 4893   | 5306   |
| UN38561 | Rsa1.0.02386.1 | 970  | 31895  | 0         | 633  | 634  | 99 -  | 336 | 969  | 16054  | 16687  |
| UN38562 | Rsa1.0.06048.1 | 635  | 11854  | 0         | 379  | 381  | 99 -  | 1   | 381  | 3649   | 4029   |
| UN38563 | Rsa1.0.18402.1 | 1049 | 1605   | 1.00E-138 | 273  | 281  | 97 -  | 774 | 1048 | 246    | 526    |
| UN38564 | Rsa1.0.08922.1 | 1220 | 6788   | 0         | 419  | 431  | 97 +  | 790 | 1220 | 2449   | 2879   |
| UN38565 | Rsa1.0.00622.1 | 984  | 71822  | 0         | 944  | 960  | 98 -  | 24  | 981  | 21474  | 22432  |
| UN38566 | Rsa1.0.00015.1 | 547  | 561803 | 1.00E-172 | 336  | 346  | 97 -  | 202 | 547  | 200459 | 200804 |
| UN38567 | Rsa1.0.19487.1 | 1298 | 1425   | 0         | 450  | 468  | 96 +  | 2   | 469  | 465    | 929    |
| UN38568 | Rsa1.0.03467.1 | 980  | 22687  | 0         | 660  | 660  | 100 - | 1   | 660  | 10718  | 11377  |
| UN38569 | Rsa1.0.00484.1 | 283  | 203294 | 1.00E-110 | 262  | 280  | 93 +  | 4   | 283  | 49807  | 50082  |

|         |                |      |        |           |     |     |       |     |      |        |        |
|---------|----------------|------|--------|-----------|-----|-----|-------|-----|------|--------|--------|
| UN38570 | Rsa1.0.00182.1 | 938  | 142305 | 0         | 920 | 946 | 97 -  | 1   | 938  | 35849  | 36793  |
| UN38571 | Rsa1.0.09320.1 | 1133 | 6457   | 0         | 426 | 439 | 97 -  | 167 | 602  | 1368   | 1806   |
| UN38572 | Rsa1.0.06683.1 | 1439 | 10549  | 0         | 450 | 458 | 98 +  | 203 | 660  | 7735   | 8192   |
| UN38573 | Rsa1.0.00577.1 | 984  | 174827 | 0         | 624 | 634 | 98 +  | 346 | 978  | 131000 | 131633 |
| UN38574 | Rsa1.0.00111.1 | 901  | 390088 | 0         | 850 | 898 | 94 +  | 15  | 901  | 189323 | 190220 |
| UN38575 | Rsa1.0.00413.1 | 958  | 86921  | 0         | 724 | 758 | 95 +  | 185 | 940  | 15935  | 16690  |
| UN38576 | Rsa1.0.01474.1 | 1084 | 45070  | 1.00E-151 | 299 | 307 | 97 -  | 3   | 308  | 1666   | 1972   |
| UN38577 | Rsa1.0.00750.1 | 1238 | 190548 | 1.00E-176 | 320 | 322 | 99 +  | 98  | 419  | 144548 | 144869 |
| UN38578 | Rsa1.0.04801.1 | 764  | 15918  | 1.00E-158 | 361 | 387 | 93 +  | 5   | 390  | 6869   | 7236   |
| UN38579 | Rsa1.0.01016.1 | 921  | 181422 | 0         | 380 | 387 | 98 +  | 98  | 484  | 162631 | 163016 |
| UN38580 | Rsa1.0.08220.1 | 657  | 7701   | 0         | 516 | 531 | 97 +  | 2   | 530  | 5779   | 6306   |
| UN38581 | Rsa1.0.00245.1 | 1232 | 103569 | 0         | 511 | 526 | 97 -  | 705 | 1230 | 100095 | 100620 |
| UN38582 | Rsa1.0.01151.1 | 746  | 52268  | 1.00E-103 | 246 | 262 | 93 -  | 450 | 708  | 40359  | 40620  |
| UN38583 | Rsa1.0.01424.1 | 1243 | 46139  | 0         | 613 | 622 | 98 +  | 217 | 838  | 43607  | 44228  |
| UN38584 | Rsa1.0.10601.1 | 1067 | 5789   | 1.00E-127 | 288 | 304 | 94 +  | 1   | 298  | 5313   | 5615   |
| UN38585 | Rsa1.0.02168.1 | 836  | 34367  | 0         | 443 | 443 | 100 + | 2   | 444  | 4776   | 5218   |
| UN38586 | Rsa1.0.00243.1 | 1060 | 103651 | 0         | 817 | 856 | 95 -  | 207 | 1060 | 87288  | 88142  |
| UN38587 | Rsa1.0.03249.1 | 1266 | 146254 | 0         | 428 | 438 | 97 +  | 829 | 1266 | 142766 | 143203 |
| UN38588 | Rsa1.0.03319.1 | 881  | 23767  | 0         | 450 | 473 | 95 +  | 48  | 514  | 16921  | 17392  |
| UN38589 | Rsa1.0.01235.1 | 761  | 50180  | 0         | 743 | 764 | 97 -  | 1   | 761  | 20988  | 21751  |
| UN38590 | Rsa1.0.00016.1 | 963  | 831256 | 0         | 452 | 468 | 96 +  | 89  | 553  | 426938 | 427401 |
| UN38591 | Rsa1.0.00570.1 | 732  | 75002  | 0         | 496 | 515 | 96 -  | 218 | 732  | 14860  | 15374  |
| UN38592 | Rsa1.0.02351.1 | 930  | 32305  | 0         | 801 | 820 | 97 -  | 111 | 930  | 4948   | 5767   |
| UN38593 | Rsa1.0.01601.1 | 1223 | 42519  | 0         | 472 | 487 | 96 +  | 1   | 485  | 11105  | 11588  |
| UN38594 | Rsa1.0.02588.1 | 914  | 29840  | 0         | 432 | 432 | 100 + | 1   | 432  | 28179  | 28610  |
| UN38595 | Rsa1.0.06715.1 | 876  | 10485  | 1.00E-95  | 193 | 198 | 97 -  | 404 | 601  | 3912   | 4109   |
| UN38596 | Rsa1.0.03971.1 | 413  | 19788  | 1.00E-88  | 175 | 178 | 98 -  | 5   | 182  | 19509  | 19686  |
| UN38597 | Rsa1.0.06323.1 | 1115 | 11236  | 0         | 425 | 429 | 99 -  | 241 | 669  | 8502   | 8930   |
| UN38598 | Rsa1.0.00382.1 | 1085 | 251946 | 1.00E-164 | 333 | 346 | 96 +  | 218 | 563  | 33538  | 33883  |
| UN38599 | Rsa1.0.00341.1 | 1189 | 249309 | 0         | 886 | 939 | 94 +  | 8   | 933  | 113279 | 114217 |
| UN38600 | Rsa1.0.00427.1 | 1220 | 189678 | 1.00E-155 | 370 | 403 | 91 -  | 840 | 1220 | 38492  | 38894  |
| UN38601 | Rsa1.0.05660.1 | 1078 | 13012  | 0         | 534 | 556 | 96 +  | 180 | 735  | 4118   | 4673   |
| UN38602 | Rsa1.0.00803.1 | 1287 | 144228 | 0         | 377 | 389 | 96 -  | 602 | 990  | 52682  | 53070  |
| UN38603 | Rsa1.0.00527.1 | 1058 | 77733  | 1.00E-138 | 296 | 308 | 96 -  | 752 | 1058 | 57526  | 57830  |
| UN38604 | Rsa1.0.06918.1 | 959  | 10166  | 0         | 383 | 385 | 99 +  | 575 | 959  | 1350   | 1734   |
| UN38605 | Rsa1.0.01881.1 | 470  | 37721  | 0         | 454 | 475 | 95 +  | 1   | 470  | 32969  | 33443  |
| UN38606 | Rsa1.0.01034.1 | 1166 | 56046  | 0         | 398 | 401 | 99 +  | 253 | 653  | 14083  | 14483  |
| UN38607 | Rsa1.0.02528.1 | 1113 | 30452  | 0         | 562 | 564 | 99 +  | 110 | 673  | 17022  | 17585  |
| UN38608 | Rsa1.0.01717.1 | 833  | 143162 | 0         | 805 | 836 | 96 -  | 1   | 833  | 128007 | 128841 |



|         |                |      |        |           |      |      |       |      |      |        |        |
|---------|----------------|------|--------|-----------|------|------|-------|------|------|--------|--------|
| UN38609 | Rsa1.0.06865.1 | 851  | 10240  | 0         | 846  | 856  | 98 +  | 1    | 851  | 8565   | 9420   |
| UN38610 | Rsa1.0.00305.1 | 1026 | 97308  | 0         | 954  | 1022 | 93 -  | 1    | 1013 | 37471  | 38456  |
| UN38611 | Rsa1.0.01182.1 | 804  | 167304 | 1.00E-157 | 306  | 312  | 98 +  | 2    | 310  | 165233 | 165544 |
| UN38612 | Rsa1.0.02158.1 | 1450 | 154841 | 0         | 537  | 546  | 98 +  | 2    | 547  | 153296 | 153841 |
| UN38613 | Rsa1.0.00937.1 | 810  | 59061  | 0         | 794  | 797  | 99 +  | 1    | 796  | 15725  | 16521  |
| UN38614 | Rsa1.0.12214.1 | 1226 | 5287   | 1.00E-165 | 319  | 327  | 97 +  | 142  | 468  | 2639   | 2965   |
| UN38615 | Rsa1.0.05070.1 | 909  | 14933  | 1.00E-147 | 321  | 336  | 95 +  | 1    | 335  | 2639   | 2972   |
| UN38616 | Rsa1.0.07823.1 | 1119 | 8468   | 0         | 1053 | 1057 | 99 -  | 3    | 1059 | 4559   | 5615   |
| UN38617 | Rsa1.0.04272.1 | 651  | 18144  | 1.00E-138 | 268  | 274  | 97 -  | 378  | 651  | 9533   | 9806   |
| UN38618 | Rsa1.0.03483.1 | 1203 | 22621  | 1.00E-164 | 293  | 293  | 100 - | 909  | 1201 | 16856  | 17148  |
| UN38619 | Rsa1.0.00628.1 | 1098 | 214360 | 0         | 1091 | 1097 | 99 -  | 2    | 1098 | 8364   | 9460   |
| UN38620 | Rsa1.0.00218.1 | 913  | 201480 | 1.00E-151 | 427  | 478  | 89 -  | 1    | 476  | 111393 | 111844 |
| UN38621 | Rsa1.0.00183.1 | 1233 | 113277 | 0         | 638  | 676  | 94 +  | 568  | 1229 | 24804  | 25479  |
| UN38622 | Rsa1.0.00350.1 | 834  | 92346  | 1.00E-107 | 279  | 306  | 91 +  | 535  | 832  | 10176  | 10480  |
| UN38623 | Rsa1.0.03362.1 | 1171 | 23453  | 0         | 794  | 811  | 97 +  | 359  | 1169 | 11300  | 12104  |
| UN38624 | Rsa1.0.00038.1 | 1016 | 314568 | 1.00E-124 | 251  | 259  | 96 +  | 722  | 980  | 166217 | 166475 |
| UN38625 | Rsa1.0.04626.1 | 775  | 16611  | 0         | 632  | 632  | 100 - | 1    | 632  | 14781  | 15412  |
| UN38626 | Rsa1.0.00837.1 | 1369 | 62568  | 0         | 1265 | 1326 | 95 -  | 2    | 1321 | 23081  | 24402  |
| UN38627 | Rsa1.0.01527.1 | 480  | 43905  | 3.00E-89  | 250  | 275  | 90 -  | 19   | 285  | 7299   | 7569   |
| UN38628 | Rsa1.0.00067.1 | 1220 | 415055 | 0         | 497  | 507  | 98 +  | 1    | 507  | 251819 | 252321 |
| UN38629 | Rsa1.0.00151.1 | 874  | 119541 | 1.00E-117 | 217  | 218  | 99 +  | 1    | 218  | 109716 | 109933 |
| UN38630 | Rsa1.0.01504.1 | 1077 | 189978 | 0         | 413  | 427  | 96 -  | 653  | 1077 | 168530 | 168956 |
| UN38631 | Rsa1.0.00028.1 | 810  | 293984 | 1.00E-145 | 409  | 456  | 89 +  | 27   | 475  | 137142 | 137576 |
| UN38632 | Rsa1.0.01390.1 | 1234 | 46695  | 0         | 724  | 725  | 99 -  | 87   | 811  | 37886  | 38610  |
| UN38633 | Rsa1.0.01343.1 | 676  | 47735  | 0         | 548  | 564  | 97 +  | 1    | 564  | 5062   | 5623   |
| UN38634 | Rsa1.0.19310.1 | 911  | 1449   | 2.00E-73  | 156  | 161  | 96 -  | 391  | 551  | 100    | 260    |
| UN38635 | Rsa1.0.01269.1 | 873  | 49622  | 1.00E-135 | 271  | 279  | 97 -  | 593  | 871  | 14028  | 14304  |
| UN38636 | Rsa1.0.00163.1 | 1258 | 116847 | 0         | 1194 | 1257 | 94 -  | 3    | 1257 | 48261  | 49509  |
| UN38637 | Rsa1.0.13816.1 | 852  | 4270   | 1.00E-150 | 272  | 273  | 99 -  | 1    | 273  | 2558   | 2830   |
| UN38638 | Rsa1.0.00250.1 | 591  | 273771 | 1.00E-150 | 305  | 317  | 96 +  | 28   | 344  | 243035 | 243351 |
| UN38639 | Rsa1.0.00121.1 | 1316 | 278029 | 0         | 395  | 396  | 99 +  | 921  | 1316 | 31815  | 32210  |
| UN38640 | Rsa1.0.00122.1 | 695  | 265937 | 1.00E-132 | 283  | 295  | 95 -  | 2    | 295  | 41283  | 41576  |
| UN38641 | Rsa1.0.00899.1 | 1437 | 60404  | 0         | 405  | 409  | 99 +  | 1029 | 1437 | 51380  | 51785  |
| UN38642 | Rsa1.0.03302.1 | 983  | 23898  | 1.00E-116 | 230  | 236  | 97 -  | 357  | 592  | 18166  | 18401  |
| UN38643 | Rsa1.0.00811.1 | 561  | 63242  | 1.00E-101 | 212  | 219  | 96 -  | 85   | 302  | 32156  | 32374  |
| UN38644 | Rsa1.0.00515.1 | 1024 | 78417  | 1.00E-80  | 196  | 211  | 92 -  | 1    | 211  | 59161  | 59359  |
| UN38645 | Rsa1.0.00551.1 | 931  | 76227  | 1.00E-119 | 250  | 261  | 95 +  | 671  | 931  | 19877  | 20137  |
| UN38646 | Rsa1.0.04037.1 | 1312 | 19471  | 1.00E-122 | 226  | 227  | 99 -  | 1086 | 1312 | 9759   | 9985   |
| UN38647 | Rsa1.0.02229.1 | 906  | 33672  | 1.00E-141 | 338  | 361  | 93 +  | 541  | 899  | 14457  | 14813  |

|         |                |      |        |           |     |     |       |     |      |        |        |
|---------|----------------|------|--------|-----------|-----|-----|-------|-----|------|--------|--------|
| UN38648 | Rsa1.0.00378.1 | 576  | 89892  | 1.00E-130 | 297 | 314 | 94 -  | 264 | 576  | 80350  | 80659  |
| UN38649 | Rsa1.0.02735.1 | 1432 | 28344  | 1.00E-128 | 270 | 280 | 96 +  | 3   | 279  | 25378  | 25657  |
| UN38650 | Rsa1.0.00075.1 | 662  | 146680 | 0         | 451 | 483 | 93 +  | 175 | 656  | 17393  | 17856  |
| UN38651 | Rsa1.0.06171.1 | 647  | 11575  | 0         | 455 | 495 | 91 +  | 3   | 496  | 1240   | 1714   |
| UN38652 | Rsa1.0.17558.1 | 706  | 1798   | 0         | 626 | 702 | 89 -  | 2   | 697  | 996    | 1697   |
| UN38653 | Rsa1.0.00214.1 | 689  | 107508 | 2.00E-97  | 196 | 201 | 97 +  | 488 | 688  | 41592  | 41792  |
| UN38654 | Rsa1.0.01377.1 | 1058 | 46967  | 1.00E-123 | 256 | 266 | 96 +  | 704 | 969  | 1262   | 1524   |
| UN38655 | Rsa1.0.00013.1 | 798  | 292129 | 1.00E-141 | 329 | 350 | 94 +  | 4   | 346  | 120907 | 121255 |
| UN38656 | Rsa1.0.00507.1 | 815  | 79074  | 1.00E-170 | 315 | 319 | 98 -  | 496 | 814  | 59451  | 59769  |
| UN38657 | Rsa1.0.00911.1 | 1153 | 59943  | 0         | 599 | 624 | 95 -  | 4   | 620  | 42158  | 42781  |
| UN38658 | Rsa1.0.09320.1 | 1070 | 6457   | 0         | 431 | 442 | 97 -  | 99  | 540  | 1368   | 1806   |
| UN38659 | Rsa1.0.02748.1 | 828  | 28242  | 0         | 527 | 537 | 98 +  | 3   | 539  | 17531  | 18067  |
| UN38660 | Rsa1.0.06292.1 | 1059 | 11293  | 0         | 681 | 695 | 97 +  | 1   | 695  | 4229   | 4919   |
| UN38661 | Rsa1.0.00010.1 | 527  | 294827 | 1.00E-121 | 261 | 274 | 95 +  | 58  | 328  | 217079 | 217352 |
| UN38662 | Rsa1.0.00504.1 | 1078 | 79334  | 0         | 397 | 412 | 96 +  | 337 | 747  | 12539  | 12950  |
| UN38663 | Rsa1.0.08707.1 | 961  | 7018   | 0         | 691 | 709 | 97 +  | 254 | 959  | 1      | 709    |
| UN38664 | Rsa1.0.00017.1 | 1073 | 752458 | 0         | 435 | 449 | 96 -  | 181 | 629  | 494221 | 494662 |
| UN38665 | Rsa1.0.00307.1 | 666  | 199003 | 1.00E-143 | 297 | 305 | 97 -  | 3   | 303  | 50440  | 50743  |
| UN38666 | Rsa1.0.00592.1 | 923  | 73788  | 0         | 706 | 728 | 96 +  | 195 | 922  | 62231  | 62958  |
| UN38667 | Rsa1.0.02229.1 | 1021 | 33672  | 0         | 459 | 469 | 97 -  | 1   | 468  | 22889  | 23357  |
| UN38668 | Rsa1.0.00087.1 | 1100 | 761073 | 1.00E-155 | 304 | 311 | 97 +  | 47  | 357  | 344812 | 345121 |
| UN38669 | Rsa1.0.00178.1 | 858  | 114861 | 0         | 845 | 860 | 98 -  | 1   | 858  | 13499  | 14358  |
| UN38670 | Rsa1.0.01717.1 | 847  | 143162 | 0         | 751 | 756 | 99 -  | 92  | 847  | 128088 | 128843 |
| UN38671 | Rsa1.0.00092.1 | 1072 | 659932 | 1.00E-100 | 186 | 186 | 100 + | 885 | 1070 | 134776 | 134961 |
| UN38672 | Rsa1.0.00440.1 | 1152 | 84723  | 1.00E-150 | 311 | 326 | 95 -  | 155 | 480  | 24477  | 24793  |
| UN38673 | Rsa1.0.00027.1 | 968  | 283362 | 0         | 487 | 501 | 97 -  | 371 | 871  | 115850 | 116350 |
| UN38674 | Rsa1.0.00136.1 | 766  | 122464 | 1.00E-126 | 263 | 272 | 96 +  | 2   | 272  | 66936  | 67204  |
| UN38675 | Rsa1.0.08309.1 | 1277 | 7565   | 0         | 587 | 622 | 94 -  | 652 | 1273 | 5432   | 6039   |
| UN38676 | Rsa1.0.00651.1 | 310  | 247766 | 1.00E-126 | 284 | 308 | 92 +  | 3   | 310  | 92737  | 93022  |
| UN38677 | Rsa1.0.01728.1 | 741  | 40239  | 0         | 682 | 719 | 94 -  | 16  | 734  | 3241   | 3959   |
| UN38678 | Rsa1.0.01316.1 | 960  | 48325  | 6.00E-95  | 205 | 213 | 96 -  | 712 | 924  | 1183   | 1389   |
| UN38679 | Rsa1.0.01786.1 | 743  | 133324 | 2.00E-79  | 154 | 155 | 99 +  | 122 | 276  | 123813 | 123967 |
| UN38680 | Rsa1.0.00793.1 | 383  | 64103  | 2.00E-86  | 217 | 233 | 93 +  | 158 | 379  | 15598  | 15828  |
| UN38681 | Rsa1.0.00382.1 | 1086 | 251946 | 1.00E-179 | 370 | 385 | 96 -  | 1   | 382  | 34180  | 34564  |
| UN38682 | Rsa1.0.03921.1 | 938  | 20080  | 3.00E-60  | 134 | 139 | 96 +  | 5   | 143  | 4916   | 5054   |
| UN38683 | Rsa1.0.00080.1 | 1283 | 190437 | 0         | 433 | 437 | 99 +  | 6   | 442  | 84177  | 84613  |
| UN38684 | Rsa1.0.01352.1 | 627  | 47443  | 0         | 598 | 620 | 96 +  | 9   | 626  | 7744   | 8361   |
| UN38685 | Rsa1.0.01168.1 | 955  | 153765 | 0         | 908 | 982 | 92 -  | 1   | 954  | 21050  | 22031  |
| UN38686 | Rsa1.0.00131.1 | 941  | 432233 | 0         | 704 | 730 | 96 -  | 52  | 781  | 205231 | 205959 |

|         |                |      |        |           |      |      |       |     |      |        |        |
|---------|----------------|------|--------|-----------|------|------|-------|-----|------|--------|--------|
| UN38687 | Rsa1.0.08869.1 | 1136 | 6840   | 0         | 910  | 942  | 96 +  | 194 | 1134 | 2930   | 3870   |
| UN38688 | Rsa1.0.00161.1 | 1181 | 116891 | 1.00E-110 | 342  | 392  | 87 -  | 765 | 1153 | 30472  | 30835  |
| UN38689 | Rsa1.0.13438.1 | 998  | 4828   | 0         | 922  | 930  | 99 -  | 75  | 998  | 3873   | 4802   |
| UN38690 | Rsa1.0.01573.1 | 1262 | 42964  | 0         | 709  | 743  | 95 -  | 97  | 838  | 13460  | 14198  |
| UN38691 | Rsa1.0.02625.1 | 784  | 139104 | 1.00E-127 | 240  | 243  | 98 +  | 542 | 784  | 8676   | 8918   |
| UN38692 | Rsa1.0.01153.1 | 934  | 52264  | 1.00E-136 | 281  | 290  | 96 -  | 647 | 934  | 42605  | 42893  |
| UN38693 | Rsa1.0.02582.1 | 1291 | 29889  | 1.00E-151 | 301  | 311  | 96 -  | 981 | 1291 | 7487   | 7797   |
| UN38694 | Rsa1.0.00178.1 | 1103 | 114861 | 0         | 1047 | 1105 | 94 -  | 1   | 1098 | 82124  | 83218  |
| UN38695 | Rsa1.0.10275.1 | 934  | 5907   | 2.00E-64  | 162  | 174  | 93 +  | 545 | 718  | 887    | 1060   |
| UN38696 | Rsa1.0.07345.1 | 957  | 9526   | 0         | 915  | 958  | 95 +  | 3   | 957  | 6222   | 7162   |
| UN38697 | Rsa1.0.00773.1 | 1063 | 64839  | 0         | 1034 | 1058 | 97 +  | 5   | 1062 | 8132   | 9189   |
| UN38698 | Rsa1.0.01750.1 | 932  | 39816  | 8.00E-42  | 107  | 112  | 95 +  | 449 | 559  | 18559  | 18670  |
| UN38699 | Rsa1.0.08143.1 | 1454 | 7836   | 1.00E-106 | 253  | 269  | 94 -  | 6   | 274  | 4649   | 4911   |
| UN38700 | Rsa1.0.03072.1 | 1410 | 25577  | 0         | 760  | 781  | 97 +  | 240 | 1020 | 19503  | 20282  |
| UN38701 | Rsa1.0.06004.1 | 955  | 11961  | 1.00E-165 | 324  | 333  | 97 +  | 5   | 337  | 7372   | 7701   |
| UN38702 | Rsa1.0.05136.1 | 1038 | 14729  | 1.00E-170 | 367  | 385  | 95 +  | 17  | 396  | 1914   | 2297   |
| UN38703 | Rsa1.0.02381.1 | 1095 | 31972  | 1.00E-173 | 308  | 308  | 100 - | 2   | 309  | 25756  | 26063  |
| UN38704 | Rsa1.0.00429.1 | 1149 | 85559  | 1.00E-125 | 259  | 267  | 97 +  | 11  | 276  | 13146  | 13410  |
| UN38705 | Rsa1.0.03167.1 | 841  | 24858  | 0         | 608  | 610  | 99 +  | 224 | 832  | 24249  | 24858  |
| UN38706 | Rsa1.0.05504.1 | 1096 | 13508  | 0         | 380  | 395  | 96 +  | 702 | 1096 | 5846   | 6240   |
| UN38707 | Rsa1.0.02486.1 | 913  | 30965  | 0         | 390  | 394  | 98 -  | 518 | 911  | 4262   | 4655   |
| UN38708 | Rsa1.0.04333.1 | 1153 | 17865  | 0         | 451  | 454  | 99 +  | 3   | 456  | 6695   | 7147   |
| UN38709 | Rsa1.0.01641.1 | 925  | 188213 | 1.00E-165 | 328  | 338  | 97 +  | 587 | 923  | 179558 | 179895 |
| UN38710 | Rsa1.0.00762.1 | 1121 | 165246 | 1.00E-136 | 291  | 304  | 95 +  | 580 | 883  | 29770  | 30068  |
| UN38711 | Rsa1.0.14674.1 | 960  | 3167   | 1.00E-160 | 380  | 408  | 93 -  | 6   | 407  | 374    | 776    |
| UN38712 | Rsa1.0.00101.1 | 769  | 267193 | 1.00E-166 | 325  | 332  | 97 -  | 173 | 503  | 140948 | 141278 |
| UN38713 | Rsa1.0.03608.1 | 1039 | 21804  | 1.00E-131 | 276  | 288  | 95 -  | 750 | 1037 | 13259  | 13543  |
| UN38714 | Rsa1.0.01031.1 | 837  | 56236  | 0         | 391  | 406  | 96 -  | 3   | 407  | 47429  | 47834  |
| UN38715 | Rsa1.0.00178.1 | 896  | 114861 | 0         | 554  | 574  | 96 -  | 325 | 895  | 42544  | 43105  |
| UN38716 | Rsa1.0.00304.1 | 722  | 97429  | 0         | 707  | 719  | 98 -  | 3   | 720  | 19154  | 19870  |
| UN38717 | Rsa1.0.03375.1 | 1024 | 23332  | 0         | 587  | 601  | 97 -  | 417 | 1015 | 17109  | 17709  |
| UN38718 | Rsa1.0.02651.1 | 917  | 29046  | 1.00E-141 | 335  | 357  | 93 -  | 35  | 386  | 6906   | 7256   |
| UN38719 | Rsa1.0.05665.1 | 846  | 13003  | 3.00E-93  | 174  | 174  | 100 - | 315 | 488  | 11754  | 11927  |
| UN38720 | Rsa1.0.01747.1 | 909  | 39881  | 0         | 530  | 540  | 98 +  | 1   | 540  | 15990  | 16528  |
| UN38721 | Rsa1.0.01053.1 | 885  | 55483  | 1.00E-140 | 299  | 310  | 96 +  | 3   | 308  | 40468  | 40774  |
| UN38722 | Rsa1.0.00154.1 | 1411 | 189461 | 1.00E-155 | 288  | 291  | 98 -  | 254 | 544  | 174178 | 174468 |
| UN38723 | Rsa1.0.08259.1 | 1343 | 7641   | 0         | 505  | 509  | 99 -  | 1   | 509  | 6833   | 7341   |
| UN38724 | Rsa1.0.02105.1 | 1199 | 156953 | 0         | 407  | 426  | 95 -  | 2   | 424  | 28045  | 28461  |
| UN38725 | Rsa1.0.00562.1 | 1456 | 75565  | 0         | 664  | 685  | 96 +  | 500 | 1184 | 8259   | 8943   |

|         |                |      |        |           |      |      |       |     |      |        |        |
|---------|----------------|------|--------|-----------|------|------|-------|-----|------|--------|--------|
| UN38726 | Rsa1.0.00275.1 | 788  | 210104 | 1.00E-130 | 306  | 328  | 93 -  | 246 | 573  | 152106 | 152432 |
| UN38727 | Rsa1.0.00778.1 | 457  | 196751 | 1.00E-107 | 291  | 322  | 90 +  | 140 | 451  | 165400 | 165712 |
| UN38728 | Rsa1.0.00549.1 | 852  | 76473  | 0         | 518  | 534  | 97 -  | 319 | 852  | 33965  | 34495  |
| UN38729 | Rsa1.0.00816.1 | 1023 | 403350 | 0         | 966  | 1025 | 94 -  | 1   | 1022 | 393967 | 394976 |
| UN38730 | Rsa1.0.00088.1 | 1050 | 141341 | 0         | 665  | 689  | 96 +  | 1   | 688  | 45832  | 46517  |
| UN38731 | Rsa1.0.00693.1 | 622  | 161311 | 0         | 460  | 478  | 96 +  | 145 | 622  | 41435  | 41906  |
| UN38732 | Rsa1.0.00121.1 | 856  | 278029 | 0         | 850  | 858  | 99 +  | 3   | 856  | 34356  | 35213  |
| UN38733 | Rsa1.0.02203.1 | 1017 | 164532 | 1.00E-176 | 319  | 321  | 99 -  | 697 | 1017 | 163315 | 163635 |
| UN38734 | Rsa1.0.02256.1 | 1037 | 33329  | 1.00E-179 | 395  | 418  | 94 +  | 622 | 1037 | 15140  | 15547  |
| UN38735 | Rsa1.0.00959.1 | 913  | 58202  | 1.00E-150 | 291  | 298  | 97 -  | 4   | 297  | 11986  | 12283  |
| UN38736 | Rsa1.0.01294.1 | 1181 | 49090  | 1.00E-135 | 284  | 296  | 95 +  | 11  | 306  | 42176  | 42470  |
| UN38737 | Rsa1.0.04801.1 | 1102 | 15918  | 0         | 371  | 379  | 97 -  | 1   | 379  | 8483   | 8858   |
| UN38738 | Rsa1.0.00060.1 | 856  | 502678 | 1.00E-147 | 310  | 325  | 95 -  | 2   | 326  | 387112 | 387436 |
| UN38739 | Rsa1.0.00964.1 | 895  | 316648 | 1.00E-164 | 296  | 297  | 99 +  | 3   | 299  | 163907 | 164203 |
| UN38740 | Rsa1.0.00563.1 | 1230 | 75491  | 0         | 1157 | 1198 | 96 -  | 31  | 1228 | 25519  | 26705  |
| UN38741 | Rsa1.0.01761.1 | 1210 | 39717  | 0         | 895  | 920  | 97 -  | 33  | 952  | 25093  | 26009  |
| UN38742 | Rsa1.0.01223.1 | 1094 | 50392  | 0         | 370  | 385  | 96 -  | 1   | 385  | 30265  | 30644  |
| UN38743 | Rsa1.0.03821.1 | 660  | 20643  | 1.00E-76  | 161  | 166  | 96 -  | 495 | 660  | 5334   | 5499   |
| UN38744 | Rsa1.0.00437.1 | 765  | 84879  | 1.00E-148 | 266  | 266  | 100 - | 1   | 266  | 31311  | 31576  |
| UN38745 | Rsa1.0.01134.1 | 1040 | 52829  | 0         | 1035 | 1040 | 99 +  | 1   | 1039 | 25942  | 26981  |
| UN38746 | Rsa1.0.00104.1 | 1123 | 368722 | 2.00E-86  | 234  | 252  | 92 +  | 17  | 258  | 334691 | 334939 |
| UN38747 | Rsa1.0.00046.1 | 844  | 320315 | 0         | 476  | 498  | 95 +  | 348 | 843  | 80028  | 80520  |
| UN38748 | Rsa1.0.00955.1 | 847  | 58358  | 2.00E-97  | 199  | 205  | 97 -  | 125 | 329  | 35143  | 35347  |
| UN38749 | Rsa1.0.03953.1 | 1085 | 19889  | 1.00E-115 | 247  | 261  | 94 +  | 1   | 261  | 220    | 469    |
| UN38750 | Rsa1.0.02706.1 | 1096 | 28522  | 0         | 460  | 473  | 97 +  | 626 | 1095 | 14012  | 14484  |
| UN38751 | Rsa1.0.02496.1 | 731  | 30814  | 1.00E-109 | 226  | 233  | 96 +  | 35  | 266  | 8802   | 9034   |
| UN38752 | Rsa1.0.02961.1 | 988  | 26435  | 0         | 442  | 461  | 95 +  | 533 | 988  | 15780  | 16237  |
| UN38753 | Rsa1.0.00921.1 | 714  | 59599  | 1.00E-128 | 269  | 277  | 97 +  | 2   | 277  | 25551  | 25825  |
| UN38754 | Rsa1.0.08402.1 | 1041 | 7417   | 0         | 361  | 366  | 98 +  | 219 | 583  | 4202   | 4567   |
| UN38755 | Rsa1.0.00377.1 | 992  | 90038  | 1.00E-175 | 333  | 339  | 98 +  | 655 | 992  | 18271  | 18609  |
| UN38756 | Rsa1.0.14201.1 | 797  | 3670   | 0         | 475  | 509  | 93 -  | 297 | 796  | 569    | 1077   |
| UN38757 | Rsa1.0.00136.1 | 787  | 122464 | 1.00E-107 | 272  | 299  | 90 -  | 2   | 283  | 68244  | 68542  |
| UN38758 | Rsa1.0.01729.1 | 700  | 304246 | 1.00E-135 | 312  | 330  | 94 -  | 376 | 699  | 145998 | 146322 |
| UN38759 | Rsa1.0.00305.1 | 706  | 97308  | 1.00E-112 | 271  | 293  | 92 +  | 10  | 290  | 94407  | 94696  |
| UN38760 | Rsa1.0.08225.1 | 757  | 7695   | 0         | 727  | 752  | 96 -  | 4   | 755  | 4158   | 4907   |
| UN38761 | Rsa1.0.04140.1 | 1286 | 18879  | 1.00E-103 | 210  | 216  | 97 +  | 294 | 509  | 7286   | 7501   |
| UN38762 | Rsa1.0.00160.1 | 928  | 346678 | 0         | 854  | 888  | 96 -  | 48  | 915  | 144927 | 145814 |
| UN38763 | Rsa1.0.13841.1 | 1024 | 4232   | 0         | 978  | 1032 | 94 +  | 2   | 1023 | 88     | 1117   |
| UN38764 | Rsa1.0.00097.1 | 907  | 138858 | 1.00E-113 | 207  | 207  | 100 - | 1   | 207  | 102934 | 103140 |

|         |                |      |        |           |      |      |       |     |      |        |        |
|---------|----------------|------|--------|-----------|------|------|-------|-----|------|--------|--------|
| UN38765 | Rsa1.0.01753.1 | 949  | 39794  | 2.00E-95  | 264  | 289  | 91 -  | 2   | 283  | 21205  | 21481  |
| UN38766 | Rsa1.0.02648.1 | 1159 | 29073  | 1.00E-130 | 315  | 335  | 94 +  | 829 | 1159 | 20666  | 20997  |
| UN38767 | Rsa1.0.02085.1 | 649  | 35198  | 0         | 622  | 659  | 94 -  | 2   | 649  | 18242  | 18897  |
| UN38768 | Rsa1.0.01471.1 | 1173 | 45101  | 0         | 623  | 650  | 95 -  | 203 | 852  | 23441  | 24090  |
| UN38769 | Rsa1.0.01338.1 | 411  | 155644 | 0         | 408  | 411  | 99 +  | 2   | 411  | 128378 | 128786 |
| UN38770 | Rsa1.0.02276.1 | 705  | 33098  | 0         | 581  | 606  | 95 +  | 1   | 603  | 12564  | 13169  |
| UN38771 | Rsa1.0.00526.1 | 1000 | 169279 | 0         | 945  | 1021 | 92 -  | 3   | 1000 | 165046 | 166059 |
| UN38772 | Rsa1.0.04511.1 | 861  | 17032  | 0         | 861  | 861  | 100 - | 1   | 861  | 6205   | 7065   |
| UN38773 | Rsa1.0.02265.1 | 1399 | 33233  | 0         | 446  | 447  | 99 -  | 28  | 474  | 5156   | 5602   |
| UN38774 | Rsa1.0.00725.1 | 1266 | 66757  | 1.00E-114 | 215  | 217  | 99 -  | 231 | 447  | 29406  | 29622  |
| UN38775 | Rsa1.0.00490.1 | 906  | 186713 | 0         | 673  | 674  | 99 +  | 2   | 675  | 180015 | 180688 |
| UN38776 | Rsa1.0.00762.1 | 851  | 165246 | 0         | 731  | 759  | 96 -  | 104 | 851  | 1387   | 2145   |
| UN38777 | Rsa1.0.01321.1 | 840  | 48248  | 0         | 839  | 840  | 99 -  | 1   | 840  | 19333  | 20172  |
| UN38778 | Rsa1.0.01453.1 | 965  | 45449  | 0         | 955  | 971  | 98 +  | 1   | 965  | 17030  | 18000  |
| UN38779 | Rsa1.0.00049.1 | 1103 | 167018 | 1.00E-178 | 339  | 345  | 98 +  | 756 | 1100 | 95494  | 95837  |
| UN38780 | Rsa1.0.00955.1 | 996  | 58358  | 3.00E-97  | 199  | 205  | 97 -  | 221 | 425  | 35143  | 35347  |
| UN38781 | Rsa1.0.00067.1 | 1327 | 415055 | 0         | 513  | 534  | 96 -  | 216 | 746  | 252597 | 253130 |
| UN38782 | Rsa1.0.00336.1 | 1044 | 445051 | 1.00E-108 | 243  | 256  | 94 -  | 767 | 1019 | 553    | 805    |
| UN38783 | Rsa1.0.00131.1 | 885  | 432233 | 1.00E-123 | 276  | 290  | 95 +  | 487 | 773  | 152975 | 153261 |
| UN38784 | Rsa1.0.00073.1 | 1060 | 240924 | 0         | 604  | 666  | 90 +  | 421 | 1059 | 96788  | 97447  |
| UN38785 | Rsa1.0.01390.1 | 1152 | 46695  | 1.00E-174 | 331  | 338  | 97 -  | 329 | 666  | 37463  | 37800  |
| UN38786 | Rsa1.0.03433.1 | 718  | 22966  | 0         | 530  | 533  | 99 -  | 185 | 717  | 12029  | 12561  |
| UN38787 | Rsa1.0.02159.1 | 624  | 34471  | 2.00E-23  | 148  | 176  | 84 +  | 99  | 274  | 11938  | 12110  |
| UN38788 | Rsa1.0.01352.1 | 1132 | 47443  | 0         | 734  | 779  | 94 +  | 11  | 774  | 7703   | 8479   |
| UN38789 | Rsa1.0.00066.1 | 869  | 152418 | 1.00E-175 | 406  | 439  | 92 +  | 345 | 771  | 11265  | 11700  |
| UN38790 | Rsa1.0.01709.1 | 1264 | 40587  | 0         | 1264 | 1264 | 100 + | 1   | 1264 | 11343  | 12606  |
| UN38791 | Rsa1.0.05139.1 | 817  | 14718  | 2.00E-76  | 187  | 200  | 93 +  | 36  | 235  | 4552   | 4748   |
| UN38792 | Rsa1.0.05081.1 | 962  | 136103 | 4.00E-99  | 198  | 202  | 98 -  | 759 | 960  | 2153   | 2351   |
| UN38793 | Rsa1.0.15679.1 | 843  | 2485   | 1.00E-118 | 246  | 256  | 96 -  | 589 | 839  | 1512   | 1767   |
| UN38794 | Rsa1.0.00520.1 | 1594 | 78226  | 0         | 1493 | 1544 | 96 +  | 54  | 1591 | 1854   | 3397   |
| UN38795 | Rsa1.0.00284.1 | 1300 | 323267 | 0         | 621  | 644  | 96 +  | 174 | 817  | 273139 | 273781 |
| UN38796 | Rsa1.0.00017.1 | 1284 | 752458 | 0         | 423  | 427  | 99 -  | 2   | 426  | 744921 | 745347 |
| UN38797 | Rsa1.0.05599.1 | 1345 | 143653 | 0         | 443  | 445  | 99 -  | 1   | 445  | 4266   | 4710   |
| UN38798 | Rsa1.0.08922.1 | 847  | 6788   | 1.00E-130 | 251  | 256  | 98 +  | 1   | 256  | 279    | 534    |
| UN38799 | Rsa1.0.00413.1 | 1048 | 86921  | 0         | 807  | 839  | 96 -  | 5   | 842  | 15935  | 16765  |
| UN38800 | Rsa1.0.01424.1 | 1075 | 46139  | 0         | 594  | 624  | 95 +  | 325 | 948  | 43605  | 44228  |
| UN38801 | Rsa1.0.00243.1 | 1102 | 103651 | 0         | 818  | 850  | 96 +  | 14  | 861  | 87294  | 88142  |
| UN38802 | Rsa1.0.05753.1 | 1026 | 12732  | 1.00E-137 | 266  | 272  | 97 +  | 2   | 273  | 12101  | 12372  |
| UN38803 | Rsa1.0.02575.1 | 647  | 29944  | 1.00E-128 | 272  | 284  | 95 +  | 366 | 647  | 24000  | 24279  |

|         |                |      |        |           |      |      |       |      |      |        |        |
|---------|----------------|------|--------|-----------|------|------|-------|------|------|--------|--------|
| UN38804 | Rsa1.0.01530.1 | 829  | 43820  | 1.00E-120 | 232  | 235  | 98 -  | 1    | 234  | 5090   | 5324   |
| UN38805 | Rsa1.0.01504.1 | 830  | 189978 | 1.00E-147 | 364  | 395  | 92 -  | 447  | 830  | 168565 | 168956 |
| UN38806 | Rsa1.0.00706.1 | 549  | 291570 | 1.00E-122 | 252  | 262  | 96 -  | 99   | 360  | 1      | 262    |
| UN38807 | Rsa1.0.00811.1 | 902  | 63242  | 0         | 586  | 587  | 99 -  | 8    | 593  | 36652  | 37238  |
| UN38808 | Rsa1.0.00068.1 | 771  | 151813 | 0         | 768  | 771  | 99 -  | 1    | 771  | 104285 | 105055 |
| UN38809 | Rsa1.0.03821.1 | 1181 | 20643  | 7.00E-80  | 170  | 176  | 96 -  | 718  | 893  | 4155   | 4330   |
| UN38810 | Rsa1.0.04262.1 | 923  | 18220  | 0         | 400  | 421  | 95 -  | 3    | 409  | 3395   | 3815   |
| UN38811 | Rsa1.0.00251.1 | 1062 | 303968 | 1.00E-179 | 331  | 335  | 98 -  | 224  | 558  | 141398 | 141732 |
| UN38812 | Rsa1.0.09409.1 | 793  | 6390   | 1.00E-154 | 280  | 281  | 99 -  | 511  | 791  | 1161   | 1441   |
| UN38813 | Rsa1.0.01526.1 | 1395 | 43919  | 0         | 495  | 518  | 95 +  | 390  | 907  | 1209   | 1726   |
| UN38814 | Rsa1.0.00193.1 | 952  | 194198 | 0         | 947  | 952  | 99 -  | 2    | 952  | 188415 | 189366 |
| UN38815 | Rsa1.0.04864.1 | 1371 | 15684  | 0         | 1047 | 1222 | 85 +  | 39   | 1236 | 1741   | 2956   |
| UN38816 | Rsa1.0.00214.1 | 1228 | 107508 | 1.00E-132 | 281  | 295  | 95 +  | 725  | 1019 | 41899  | 42193  |
| UN38817 | Rsa1.0.11411.1 | 1022 | 5515   | 0         | 862  | 910  | 94 +  | 4    | 913  | 4612   | 5515   |
| UN38818 | Rsa1.0.02478.1 | 955  | 150183 | 0         | 473  | 516  | 91 +  | 54   | 569  | 130877 | 131368 |
| UN38819 | Rsa1.0.00201.1 | 1241 | 232851 | 0         | 690  | 714  | 96 +  | 416  | 1129 | 211    | 921    |
| UN38820 | Rsa1.0.00729.1 | 1171 | 66690  | 0         | 615  | 616  | 99 +  | 1    | 616  | 57669  | 58284  |
| UN38821 | Rsa1.0.00712.1 | 861  | 67217  | 0         | 451  | 465  | 96 -  | 2    | 465  | 18091  | 18553  |
| UN38822 | Rsa1.0.02735.1 | 1238 | 28344  | 1.00E-87  | 186  | 192  | 96 +  | 1033 | 1224 | 28008  | 28197  |
| UN38823 | Rsa1.0.13762.1 | 1445 | 4370   | 0         | 613  | 630  | 97 -  | 816  | 1445 | 3741   | 4370   |
| UN38824 | Rsa1.0.00108.1 | 1532 | 478491 | 0         | 682  | 702  | 97 -  | 831  | 1532 | 65417  | 66118  |
| UN38825 | Rsa1.0.00250.1 | 716  | 273771 | 0         | 422  | 443  | 95 -  | 2    | 444  | 243035 | 243471 |
| UN38826 | Rsa1.0.00122.1 | 703  | 265937 | 1.00E-122 | 302  | 327  | 92 +  | 377  | 702  | 223063 | 223389 |
| UN38827 | Rsa1.0.03319.1 | 1143 | 23767  | 1.00E-177 | 401  | 427  | 93 +  | 159  | 584  | 16967  | 17392  |
| UN38828 | Rsa1.0.00090.1 | 885  | 273859 | 1.00E-179 | 319  | 319  | 100 - | 1    | 319  | 2718   | 3036   |
| UN38829 | Rsa1.0.00018.1 | 1472 | 410899 | 0         | 705  | 705  | 100 + | 559  | 1263 | 249118 | 249822 |
| UN38830 | Rsa1.0.00825.1 | 855  | 62855  | 0         | 479  | 480  | 99 -  | 376  | 855  | 49164  | 49643  |
| UN38831 | Rsa1.0.02550.1 | 1185 | 291051 | 1.00E-109 | 254  | 270  | 94 -  | 3    | 272  | 21418  | 21681  |
| UN38832 | Rsa1.0.00030.1 | 868  | 250988 | 1.00E-101 | 254  | 275  | 92 -  | 600  | 868  | 104239 | 104512 |
| UN38833 | Rsa1.0.00110.1 | 1086 | 132719 | 1.00E-144 | 299  | 311  | 96 +  | 777  | 1086 | 94584  | 94894  |
| UN38834 | Rsa1.0.00627.1 | 475  | 71566  | 1.00E-157 | 343  | 361  | 95 +  | 116  | 475  | 63670  | 64029  |
| UN38835 | Rsa1.0.01689.1 | 1024 | 40944  | 1.00E-142 | 365  | 404  | 90 +  | 22   | 425  | 52     | 432    |
| UN38836 | Rsa1.0.06683.1 | 823  | 10549  | 0         | 441  | 454  | 97 +  | 203  | 656  | 7735   | 8188   |
| UN38837 | Rsa1.0.07440.1 | 630  | 9389   | 0         | 551  | 605  | 91 +  | 1    | 597  | 4734   | 5335   |
| UN38838 | Rsa1.0.07569.1 | 1373 | 9106   | 0         | 378  | 380  | 99 -  | 175  | 554  | 4562   | 4941   |
| UN38839 | Rsa1.0.42756.1 | 632  | 525    | 1.00E-134 | 265  | 271  | 97 -  | 361  | 630  | 235    | 505    |
| UN38840 | Rsa1.0.01682.1 | 1361 | 41090  | 0         | 383  | 393  | 97 -  | 2    | 393  | 10171  | 10559  |
| UN38841 | Rsa1.0.02662.1 | 665  | 28956  | 0         | 584  | 607  | 96 +  | 2    | 608  | 8644   | 9250   |
| UN38842 | Rsa1.0.00213.1 | 777  | 108167 | 1.00E-166 | 429  | 467  | 91 +  | 1    | 456  | 36360  | 36811  |

|         |                |      |        |           |      |      |       |      |      |        |        |
|---------|----------------|------|--------|-----------|------|------|-------|------|------|--------|--------|
| UN38843 | Rsa1.0_17558.1 | 912  | 1798   | 0         | 908  | 910  | 99 +  | 2    | 911  | 824    | 1733   |
| UN38844 | Rsa1.0_01236.1 | 819  | 50156  | 4.00E-71  | 170  | 181  | 93 +  | 13   | 193  | 42366  | 42546  |
| UN38845 | Rsa1.0_09507.1 | 912  | 6326   | 0         | 699  | 736  | 94 +  | 92   | 824  | 2564   | 3294   |
| UN38846 | Rsa1.0_00523.1 | 1556 | 178770 | 0         | 406  | 412  | 98 +  | 1145 | 1556 | 161189 | 161599 |
| UN38847 | Rsa1.0_00064.1 | 1310 | 240927 | 0         | 836  | 905  | 92 -  | 18   | 918  | 232169 | 233033 |
| UN38848 | Rsa1.0_00111.1 | 929  | 390088 | 0         | 919  | 920  | 99 +  | 11   | 929  | 270695 | 271614 |
| UN38849 | Rsa1.0_28855.1 | 1196 | 801    | 1.00E-150 | 276  | 278  | 99 +  | 384  | 661  | 468    | 745    |
| UN38850 | Rsa1.0_02367.1 | 1124 | 32106  | 0         | 586  | 617  | 94 -  | 5    | 619  | 25289  | 25880  |
| UN38851 | Rsa1.0_07073.1 | 1246 | 9944   | 1.00E-147 | 289  | 295  | 97 +  | 954  | 1246 | 5673   | 5965   |
| UN38852 | Rsa1.0_02913.1 | 1166 | 26816  | 0         | 1076 | 1077 | 99 -  | 90   | 1166 | 24559  | 25635  |
| UN38853 | Rsa1.0_04519.1 | 909  | 17004  | 0         | 621  | 636  | 97 +  | 2    | 636  | 4381   | 5016   |
| UN38854 | Rsa1.0_04876.1 | 1342 | 15631  | 1.00E-129 | 246  | 249  | 98 +  | 913  | 1161 | 3072   | 3317   |
| UN38855 | Rsa1.0_20282.1 | 1281 | 1321   | 1.00E-124 | 226  | 226  | 100 - | 1    | 226  | 226    | 451    |
| UN38856 | Rsa1.0_00017.1 | 977  | 752458 | 1.00E-153 | 292  | 298  | 97 -  | 20   | 317  | 744921 | 745218 |
| UN38857 | Rsa1.0_03826.1 | 1224 | 20614  | 0         | 772  | 803  | 96 -  | 4    | 806  | 16092  | 16892  |
| UN38858 | Rsa1.0_00686.1 | 620  | 68511  | 1.00E-118 | 256  | 269  | 95 +  | 114  | 381  | 57560  | 57821  |
| UN38859 | Rsa1.0_00332.1 | 772  | 94575  | 5.00E-86  | 181  | 186  | 97 -  | 59   | 243  | 41933  | 42118  |
| UN38860 | Rsa1.0_01376.1 | 588  | 47004  | 2.33E-156 | 352  | 378  | 93 -  | 1    | 370  | 320    | 696    |
| UN38861 | Rsa1.0_01016.1 | 1369 | 181422 | 1.00E-166 | 334  | 344  | 97 -  | 1    | 344  | 164149 | 164490 |
| UN38862 | Rsa1.0_00059.1 | 864  | 159650 | 0         | 785  | 829  | 94 -  | 48   | 864  | 63389  | 64217  |
| UN38863 | Rsa1.0_00265.1 | 991  | 220635 | 1.00E-154 | 288  | 291  | 98 +  | 1    | 289  | 142234 | 142524 |
| UN38864 | Rsa1.0_06715.1 | 992  | 10485  | 0         | 374  | 384  | 97 +  | 16   | 399  | 3439   | 3822   |
| UN38865 | Rsa1.0_02228.1 | 1311 | 33688  | 0         | 530  | 555  | 95 -  | 646  | 1199 | 13284  | 13838  |
| UN38866 | Rsa1.0_12005.1 | 881  | 5344   | 0         | 818  | 878  | 93 -  | 6    | 881  | 4270   | 5147   |
| UN38867 | Rsa1.0_00712.1 | 875  | 67217  | 0         | 474  | 487  | 97 -  | 395  | 875  | 41156  | 41642  |
| UN38868 | Rsa1.0_01352.1 | 781  | 47443  | 0         | 752  | 788  | 95 +  | 2    | 779  | 6950   | 7736   |
| UN38869 | Rsa1.0_00038.1 | 2561 | 314568 | 0         | 2369 | 2395 | 98 +  | 166  | 2559 | 144545 | 146939 |
| UN38870 | Rsa1.0_03366.1 | 943  | 23401  | 0         | 799  | 821  | 97 -  | 125  | 943  | 4526   | 5341   |
| UN38871 | Rsa1.0_00332.1 | 1293 | 94575  | 0         | 547  | 586  | 93 +  | 718  | 1293 | 59905  | 60478  |
| UN38872 | Rsa1.0_00035.1 | 1438 | 176449 | 0         | 911  | 940  | 96 -  | 66   | 991  | 43572  | 44507  |
| UN38873 | Rsa1.0_01364.1 | 984  | 47172  | 0         | 478  | 483  | 98 -  | 500  | 982  | 43461  | 43943  |
| UN38874 | Rsa1.0_01768.1 | 708  | 138463 | 1.00E-100 | 252  | 272  | 92 +  | 65   | 334  | 120036 | 120300 |
| UN38875 | Rsa1.0_64336.1 | 779  | 356    | 1.00E-126 | 235  | 237  | 99 -  | 356  | 592  | 21     | 257    |
| UN38876 | Rsa1.0_07074.1 | 780  | 9944   | 0         | 759  | 782  | 97 -  | 1    | 778  | 3096   | 3875   |
| UN38877 | Rsa1.0_00877.1 | 1566 | 61305  | 0         | 1320 | 1321 | 99 -  | 244  | 1564 | 490    | 1810   |
| UN38878 | Rsa1.0_04518.1 | 706  | 17005  | 0         | 433  | 436  | 99 -  | 2    | 437  | 7319   | 7754   |
| UN38879 | Rsa1.0_00064.1 | 1211 | 240927 | 0         | 855  | 886  | 96 -  | 1    | 884  | 232169 | 233054 |
| UN38880 | Rsa1.0_01421.1 | 1443 | 46197  | 0         | 387  | 388  | 99 +  | 1    | 388  | 41787  | 42174  |
| UN38881 | Rsa1.0_01421.1 | 779  | 46197  | 1.00E-155 | 287  | 290  | 98 -  | 340  | 629  | 41885  | 42174  |

|         |                |      |        |           |      |      |       |      |      |        |        |
|---------|----------------|------|--------|-----------|------|------|-------|------|------|--------|--------|
| UN38882 | Rsa1.0.05122.1 | 2057 | 14791  | 0         | 1102 | 1118 | 98 +  | 943  | 2057 | 4596   | 5713   |
| UN38883 | Rsa1.0.00235.1 | 906  | 154696 | 0         | 425  | 431  | 98 -  | 6    | 435  | 153574 | 154004 |
| UN38884 | Rsa1.0.00112.1 | 849  | 132199 | 0         | 843  | 849  | 99 +  | 1    | 849  | 31667  | 32515  |
| UN38885 | Rsa1.0.01436.1 | 964  | 45894  | 0         | 362  | 370  | 97 +  | 277  | 646  | 9970   | 10339  |
| UN38886 | Rsa1.0.00765.1 | 1346 | 65029  | 0         | 378  | 382  | 98 +  | 965  | 1346 | 40123  | 40504  |
| UN38887 | Rsa1.0.01638.1 | 911  | 41857  | 0         | 845  | 916  | 92 +  | 17   | 911  | 2114   | 3028   |
| UN38888 | Rsa1.0.02810.1 | 885  | 27671  | 1.00E-157 | 285  | 286  | 99 -  | 600  | 885  | 23887  | 24172  |
| UN38889 | Rsa1.0.00083.1 | 858  | 442773 | 0         | 323  | 323  | 100 - | 1    | 323  | 312965 | 313287 |
| UN38890 | Rsa1.0.00661.1 | 562  | 213041 | 0         | 560  | 561  | 99 +  | 1    | 561  | 199182 | 199742 |
| UN38891 | Rsa1.0.00083.1 | 812  | 442773 | 0         | 738  | 742  | 99 -  | 71   | 812  | 141413 | 142154 |
| UN38892 | Rsa1.0.07624.1 | 696  | 9009   | 1.00E-174 | 330  | 337  | 97 +  | 4    | 340  | 5298   | 5634   |
| UN38893 | Rsa1.0.06732.1 | 832  | 10449  | 0         | 775  | 777  | 99 +  | 46   | 822  | 8073   | 8849   |
| UN38894 | Rsa1.0.00718.1 | 919  | 279335 | 0         | 520  | 521  | 99 +  | 352  | 872  | 222655 | 223175 |
| UN38895 | Rsa1.0.07185.1 | 861  | 9772   | 0         | 398  | 403  | 98 -  | 3    | 405  | 8608   | 9009   |
| UN38896 | Rsa1.0.36111.1 | 537  | 625    | 0         | 525  | 533  | 98 -  | 3    | 535  | 14     | 546    |
| UN38897 | Rsa1.0.00037.1 | 1350 | 307838 | 1.00E-154 | 277  | 277  | 100 - | 1    | 277  | 195549 | 195825 |
| UN38898 | Rsa1.0.00651.1 | 1572 | 247766 | 0         | 1188 | 1217 | 97 -  | 36   | 1252 | 220982 | 222196 |
| UN38899 | Rsa1.0.00211.1 | 928  | 228189 | 0         | 611  | 638  | 95 +  | 1    | 638  | 189277 | 189900 |
| UN38900 | Rsa1.0.01641.1 | 1645 | 188213 | 0         | 453  | 458  | 98 +  | 1137 | 1594 | 28173  | 28630  |
| UN38901 | Rsa1.0.00409.1 | 864  | 146788 | 0         | 864  | 864  | 100 + | 1    | 864  | 118472 | 119335 |
| UN38902 | Rsa1.0.00409.1 | 907  | 146788 | 1.00E-157 | 353  | 374  | 94 -  | 530  | 901  | 109686 | 110049 |
| UN38903 | Rsa1.0.05305.1 | 687  | 14207  | 0         | 572  | 602  | 95 -  | 1    | 584  | 1015   | 1615   |
| UN38904 | Rsa1.0.00506.1 | 888  | 79106  | 0         | 509  | 522  | 97 +  | 367  | 887  | 21609  | 22130  |
| UN38905 | Rsa1.0.00100.1 | 932  | 249232 | 0         | 913  | 943  | 96 -  | 1    | 932  | 193287 | 194225 |
| UN38906 | Rsa1.0.00243.1 | 816  | 103651 | 1.00E-132 | 240  | 240  | 100 - | 3    | 242  | 51674  | 51913  |
| UN38907 | Rsa1.0.02961.1 | 1871 | 26435  | 0         | 1563 | 1571 | 99 +  | 1    | 1568 | 13980  | 15550  |
| UN38908 | #              | #    | #      | #         | #    | #    | #     | #    | #    | #      | #      |
| UN38909 | Rsa1.0.01286.1 | 1123 | 49209  | 1.00E-141 | 255  | 255  | 100 - | 1    | 255  | 3049   | 3303   |
| UN38910 | Rsa1.0.00939.1 | 886  | 185227 | 0         | 587  | 591  | 99 -  | 1    | 591  | 159083 | 159673 |
| UN38911 | Rsa1.0.02943.1 | 1778 | 153598 | 0         | 639  | 664  | 96 -  | 29   | 692  | 134827 | 135484 |
| UN38912 | Rsa1.0.00022.1 | 1155 | 200461 | 0         | 1126 | 1157 | 97 -  | 1    | 1155 | 167526 | 168682 |
| UN38913 | Rsa1.0.23656.1 | 857  | 1033   | 0         | 614  | 616  | 99 -  | 242  | 857  | 304    | 919    |
| UN38914 | Rsa1.0.11940.1 | 848  | 5365   | 0         | 841  | 848  | 99 -  | 1    | 848  | 4443   | 5290   |
| UN38915 | Rsa1.0.01933.1 | 1541 | 37172  | 0         | 838  | 841  | 99 -  | 6    | 846  | 17173  | 18013  |
| UN38916 | Rsa1.0.03148.1 | 847  | 24989  | 0         | 396  | 397  | 99 -  | 64   | 460  | 21012  | 21408  |
| UN38917 | Rsa1.0.00938.1 | 747  | 193891 | 0         | 741  | 747  | 99 -  | 3    | 747  | 172931 | 173676 |
| UN38918 | Rsa1.0.21935.1 | 1475 | 1162   | 0         | 473  | 489  | 96 -  | 1    | 479  | 656    | 1144   |
| UN38919 | Rsa1.0.00300.1 | 997  | 97747  | 0         | 877  | 884  | 99 -  | 1    | 877  | 44278  | 45161  |
| UN38920 | Rsa1.0.02097.1 | 1065 | 35036  | 0         | 371  | 371  | 100 - | 9    | 379  | 11365  | 11735  |



| UN38921 | #              | #    | #      | #         | #    | #    | #     | #   | #    | #      | #      | # |
|---------|----------------|------|--------|-----------|------|------|-------|-----|------|--------|--------|---|
| UN38922 | Rsa1.0.00876.1 | 632  | 61328  | 0         | 521  | 535  | 97 +  | 98  | 632  | 35058  | 35591  |   |
| UN38923 | Rsa1.0.30148.1 | 654  | 761    | 0         | 429  | 429  | 100 + | 226 | 654  | 1      | 429    |   |
| UN38924 | Rsa1.0.01869.1 | 704  | 37928  | 0         | 697  | 702  | 99 -  | 3   | 704  | 7563   | 8264   |   |
| UN38925 | Rsa1.0.01460.1 | 461  | 45255  | 1.00E-163 | 339  | 355  | 95 -  | 103 | 457  | 32288  | 32642  |   |
| UN38926 | Rsa1.0.02656.1 | 849  | 29018  | 0         | 572  | 576  | 99 -  | 4   | 579  | 23781  | 24356  |   |
| UN38927 | Rsa1.0.02663.1 | 523  | 169243 | 1.00E-153 | 289  | 293  | 98 +  | 10  | 300  | 148943 | 149235 |   |
| UN38928 | Rsa1.0.07744.1 | 1317 | 8667   | 0         | 1317 | 1318 | 99 +  | 1   | 1317 | 2799   | 4116   |   |
| UN38929 | Rsa1.0.00387.1 | 800  | 495407 | 0         | 498  | 498  | 100 + | 4   | 501  | 243888 | 244385 |   |
| UN38930 | Rsa1.0.01662.1 | 1344 | 41382  | 0         | 1340 | 1348 | 99 +  | 1   | 1344 | 19320  | 20667  |   |
| UN38931 | Rsa1.0.01982.1 | 819  | 36530  | 0         | 819  | 820  | 99 -  | 1   | 819  | 30196  | 31015  |   |
| UN38932 | Rsa1.0.01249.1 | 905  | 188432 | 0         | 512  | 513  | 99 -  | 394 | 905  | 147394 | 147906 |   |
| UN38933 | Rsa1.0.05739.1 | 450  | 12778  | 0         | 445  | 448  | 99 -  | 3   | 450  | 3462   | 3909   |   |
| UN38934 | Rsa1.0.08518.1 | 822  | 7244   | 1.00E-101 | 199  | 203  | 98 -  | 294 | 496  | 6688   | 6890   |   |
| UN38935 | Rsa1.0.00711.1 | 1306 | 67223  | 0         | 532  | 533  | 99 -  | 1   | 532  | 25142  | 25674  |   |
| UN38936 | Rsa1.0.01504.1 | 909  | 189978 | 0         | 545  | 553  | 98 +  | 357 | 909  | 1239   | 1791   |   |
| UN38937 | Rsa1.0.00154.1 | 1186 | 189461 | 1.00E-157 | 288  | 290  | 99 -  | 447 | 736  | 173695 | 173984 |   |
| UN38938 | Rsa1.0.02806.1 | 1122 | 27696  | 0         | 856  | 876  | 97 +  | 246 | 1121 | 18043  | 18918  |   |
| UN38939 | Rsa1.0.00263.1 | 1150 | 224968 | 0         | 490  | 491  | 99 -  | 660 | 1150 | 6701   | 7191   |   |
| UN38940 | Rsa1.0.03624.1 | 420  | 21706  | 1.00E-173 | 386  | 408  | 94 +  | 2   | 403  | 15738  | 16143  |   |
| UN38941 | Rsa1.0.02622.1 | 1420 | 142402 | 0         | 647  | 655  | 98 -  | 22  | 676  | 13374  | 14025  |   |
| UN38942 | Rsa1.0.01037.1 | 918  | 55969  | 0         | 739  | 750  | 98 -  | 168 | 915  | 53891  | 54636  |   |
| UN38943 | Rsa1.0.04618.1 | 864  | 16623  | 0         | 825  | 825  | 100 + | 2   | 826  | 961    | 1785   |   |
| UN38944 | Rsa1.0.00084.1 | 679  | 142338 | 1.00E-147 | 270  | 272  | 99 -  | 408 | 679  | 127580 | 127851 |   |
| UN38945 | Rsa1.0.00734.1 | 1282 | 66508  | 0         | 524  | 535  | 97 +  | 733 | 1265 | 50269  | 50801  |   |
| UN38946 | Rsa1.0.00342.1 | 818  | 93695  | 0         | 647  | 649  | 99 -  | 169 | 817  | 2919   | 3567   |   |
| UN38947 | Rsa1.0.00327.1 | 891  | 94892  | 1.00E-135 | 278  | 289  | 96 -  | 603 | 891  | 22681  | 22969  |   |
| UN38948 | Rsa1.0.00024.1 | 1468 | 188018 | 0         | 1455 | 1456 | 99 +  | 7   | 1461 | 180664 | 182119 |   |
| UN38949 | Rsa1.0.01690.1 | 844  | 40939  | 1.00E-129 | 234  | 234  | 100 - | 137 | 370  | 8862   | 9095   |   |
| UN38950 | Rsa1.0.00384.1 | 827  | 89278  | 0         | 446  | 482  | 92 +  | 279 | 738  | 82326  | 82807  |   |
| UN38951 | Rsa1.0.00226.1 | 971  | 105884 | 0         | 584  | 647  | 90 +  | 3   | 615  | 18261  | 18891  |   |
| UN38952 | Rsa1.0.01425.1 | 764  | 46136  | 0         | 372  | 386  | 96 -  | 4   | 389  | 37603  | 37988  |   |
| UN38953 | Rsa1.0.00005.1 | 832  | 353093 | 0         | 804  | 833  | 96 -  | 3   | 831  | 300316 | 301143 |   |
| UN38954 | Rsa1.0.00331.1 | 642  | 176754 | 4.00E-24  | 76   | 82   | 92 -  | 475 | 556  | 114412 | 114493 |   |
| UN38955 | Rsa1.0.05160.1 | 1415 | 14637  | 0         | 581  | 612  | 94 -  | 174 | 776  | 13452  | 14051  |   |
| UN38956 | Rsa1.0.00373.1 | 1346 | 90296  | 0         | 518  | 523  | 99 -  | 824 | 1346 | 65443  | 65965  |   |
| UN38957 | Rsa1.0.01668.1 | 896  | 41299  | 0         | 896  | 897  | 99 +  | 1   | 896  | 5086   | 5982   |   |
| UN38958 | Rsa1.0.00462.1 | 847  | 82288  | 1.00E-135 | 253  | 256  | 98 +  | 1   | 256  | 65636  | 65891  |   |
| UN38959 | Rsa1.0.02937.1 | 1058 | 26605  | 0         | 700  | 702  | 99 -  | 357 | 1058 | 22531  | 23232  |   |

|         |                |      |        |           |      |      |       |     |      |        |        |
|---------|----------------|------|--------|-----------|------|------|-------|-----|------|--------|--------|
| UN38960 | Rsa1.0.65490.1 | 702  | 350    | 8.00E-66  | 128  | 128  | 100 - | 223 | 350  | 7      | 134    |
| UN38961 | Rsa1.0.00234.1 | 891  | 197060 | 0         | 435  | 461  | 94 -  | 1   | 456  | 22781  | 23234  |
| UN38962 | Rsa1.0.01870.1 | 620  | 37919  | 0         | 572  | 587  | 97 +  | 3   | 588  | 17818  | 18404  |
| UN38963 | Rsa1.0.13264.1 | 1093 | 4951   | 0         | 912  | 931  | 97 +  | 166 | 1092 | 1863   | 2793   |
| UN38964 | Rsa1.0.00157.1 | 965  | 245832 | 0         | 362  | 362  | 100 + | 3   | 364  | 38122  | 38483  |
| UN38965 | Rsa1.0.01864.1 | 1341 | 37998  | 0         | 445  | 445  | 100 - | 895 | 1339 | 28770  | 29214  |
| UN38966 | Rsa1.0.00017.1 | 871  | 752458 | 1.00E-148 | 318  | 331  | 96 -  | 21  | 350  | 503128 | 503456 |
| UN38967 | Rsa1.0.00348.1 | 1418 | 92818  | 0         | 1343 | 1439 | 93 -  | 1   | 1417 | 59803  | 61219  |
| UN38968 | Rsa1.0.00002.1 | 1259 | 601661 | 0         | 789  | 789  | 100 - | 1   | 789  | 105480 | 106268 |
| UN38969 | Rsa1.0.71037.1 | 914  | 323    | 1.00E-166 | 296  | 296  | 100 + | 1   | 296  | 27     | 322    |
| UN38970 | Rsa1.0.00325.1 | 903  | 95371  | 0         | 899  | 903  | 99 +  | 1   | 903  | 37095  | 37997  |
| UN38971 | Rsa1.0.01500.1 | 1401 | 141844 | 0         | 582  | 584  | 99 +  | 3   | 586  | 8444   | 9027   |
| UN38972 | Rsa1.0.02260.1 | 663  | 33260  | 0         | 372  | 380  | 97 -  | 2   | 381  | 26343  | 26722  |
| UN38973 | Rsa1.0.00045.1 | 951  | 328694 | 0         | 518  | 543  | 95 +  | 1   | 539  | 175473 | 176015 |
| UN38974 | #              | #    | #      | #         | #    | #    | #     | #   | #    | #      | #      |
| UN38975 | Rsa1.0.06747.1 | 1095 | 10426  | 1.00E-156 | 283  | 284  | 99 -  | 812 | 1095 | 8799   | 9082   |
| UN38976 | Rsa1.0.00007.1 | 570  | 239325 | 0         | 392  | 398  | 98 +  | 172 | 568  | 92559  | 92953  |
| UN38977 | Rsa1.0.05564.1 | 1103 | 13319  | 0         | 440  | 448  | 98 -  | 1   | 446  | 4682   | 5129   |
| UN38978 | Rsa1.0.00413.1 | 1221 | 86921  | 1.00E-163 | 338  | 348  | 97 +  | 1   | 346  | 33489  | 33834  |
| UN38979 | Rsa1.0.00054.1 | 861  | 162053 | 5.00E-80  | 158  | 160  | 98 +  | 576 | 735  | 152750 | 152909 |
| UN38980 | Rsa1.0.01905.1 | 698  | 37450  | 0         | 501  | 501  | 100 + | 12  | 512  | 7394   | 7894   |
| UN38981 | Rsa1.0.00118.1 | 1497 | 130637 | 0         | 1492 | 1495 | 99 -  | 3   | 1497 | 115870 | 117363 |
| UN38982 | Rsa1.0.10267.1 | 1245 | 5910   | 0         | 349  | 355  | 98 +  | 257 | 611  | 4255   | 4609   |
| UN38983 | Rsa1.0.09517.1 | 813  | 6319   | 1.00E-165 | 334  | 347  | 96 +  | 307 | 653  | 2293   | 2639   |
| UN38984 | Rsa1.0.28594.1 | 953  | 809    | 1.00E-123 | 242  | 247  | 97 +  | 703 | 946  | 563    | 809    |
| UN38985 | Rsa1.0.03616.1 | 841  | 21756  | 0         | 736  | 739  | 99 -  | 4   | 741  | 9085   | 9823   |
| UN38986 | Rsa1.0.00224.1 | 1208 | 327530 | 0         | 438  | 439  | 99 -  | 1   | 439  | 237641 | 238078 |
| UN38987 | Rsa1.0.00136.1 | 817  | 122464 | 0         | 495  | 500  | 99 -  | 1   | 499  | 84856  | 85355  |
| UN38988 | Rsa1.0.00979.1 | 1310 | 57733  | 0         | 973  | 976  | 99 +  | 335 | 1309 | 16133  | 17107  |
| UN38989 | Rsa1.0.00074.1 | 862  | 147591 | 2.00E-17  | 53   | 55   | 96 -  | 305 | 359  | 92022  | 92076  |
| UN38990 | Rsa1.0.00743.1 | 800  | 177459 | 1.00E-160 | 302  | 307  | 98 -  | 26  | 332  | 176880 | 177186 |
| UN38991 | Rsa1.0.01475.1 | 792  | 45044  | 0         | 453  | 466  | 97 -  | 329 | 792  | 25074  | 25538  |
| UN38992 | Rsa1.0.00613.1 | 801  | 209993 | 0         | 381  | 383  | 99 +  | 419 | 801  | 193144 | 193526 |
| UN38993 | Rsa1.0.00960.1 | 1389 | 58199  | 0         | 422  | 452  | 93 -  | 927 | 1376 | 30600  | 31043  |
| UN38994 | Rsa1.0.06968.1 | 1559 | 10090  | 0         | 749  | 780  | 96 -  | 784 | 1559 | 7647   | 8421   |
| UN38995 | Rsa1.0.00123.1 | 1324 | 325650 | 0         | 1288 | 1322 | 97 -  | 4   | 1324 | 112084 | 113403 |
| UN38996 | Rsa1.0.01005.1 | 1292 | 56967  | 0         | 333  | 333  | 100 + | 324 | 656  | 8492   | 8824   |
| UN38997 | Rsa1.0.00576.1 | 496  | 178949 | 0         | 495  | 495  | 100 + | 1   | 495  | 26597  | 27091  |
| UN38998 | Rsa1.0.05727.1 | 914  | 12808  | 0         | 327  | 327  | 100 + | 414 | 740  | 5006   | 5332   |

|         |                |      |        |           |     |     |       |     |      |        |        |
|---------|----------------|------|--------|-----------|-----|-----|-------|-----|------|--------|--------|
| UN38999 | Rsa1.0.02527.1 | 1176 | 177225 | 1.00E-127 | 232 | 232 | 100 + | 1   | 232  | 19740  | 19971  |
| UN39000 | Rsa1.0.00082.1 | 513  | 237584 | 5.00E-57  | 122 | 125 | 97 +  | 233 | 357  | 42042  | 42166  |
| UN39001 | Rsa1.0.00373.1 | 728  | 90296  | 0         | 352 | 355 | 99 +  | 1   | 355  | 72474  | 72827  |
| UN39002 | Rsa1.0.01004.1 | 850  | 56975  | 0         | 580 | 598 | 96 +  | 9   | 602  | 50176  | 50773  |
| UN39003 | Rsa1.0.01866.1 | 772  | 37961  | 4.00E-43  | 144 | 162 | 88 +  | 501 | 662  | 14976  | 15137  |
| UN39004 | Rsa1.0.00351.1 | 720  | 413096 | 0         | 492 | 543 | 90 -  | 131 | 654  | 235339 | 235872 |
| UN39005 | Rsa1.0.00019.1 | 716  | 301669 | 0         | 533 | 541 | 98 -  | 51  | 590  | 295543 | 296083 |
| UN39006 | Rsa1.0.14868.1 | 938  | 3001   | 0         | 383 | 383 | 100 + | 556 | 938  | 1      | 383    |
| UN39007 | Rsa1.0.00902.1 | 848  | 60241  | 0         | 713 | 720 | 99 -  | 2   | 721  | 6572   | 7290   |
| UN39008 | Rsa1.0.07098.1 | 945  | 9896   | 0         | 344 | 350 | 98 +  | 1   | 346  | 484    | 833    |
| UN39009 | Rsa1.0.00972.1 | 1053 | 57937  | 3.00E-88  | 250 | 274 | 91 +  | 7   | 276  | 9922   | 10191  |
| UN39010 | Rsa1.0.01848.1 | 569  | 38312  | 1.00E-167 | 306 | 309 | 99 -  | 7   | 315  | 148    | 456    |
| UN39011 | Rsa1.0.00196.1 | 844  | 109960 | 1.00E-127 | 286 | 301 | 95 -  | 69  | 367  | 87618  | 87915  |
| UN39012 | Rsa1.0.09625.1 | 582  | 6245   | 0         | 329 | 331 | 99 -  | 252 | 582  | 1031   | 1361   |
| UN39013 | Rsa1.0.00516.1 | 1201 | 78417  | 0         | 371 | 374 | 99 +  | 830 | 1200 | 20048  | 20421  |
| UN39014 | Rsa1.0.00241.1 | 766  | 104000 | 1.00E-30  | 175 | 209 | 83 +  | 356 | 564  | 68864  | 69071  |
| UN39015 | Rsa1.0.00157.1 | 919  | 245832 | 1.00E-148 | 284 | 290 | 97 +  | 1   | 290  | 234817 | 235106 |
| UN39016 | Rsa1.0.00848.1 | 1290 | 152362 | 0         | 459 | 461 | 99 +  | 830 | 1290 | 141300 | 141760 |
| UN39017 | Rsa1.0.03982.1 | 1280 | 19723  | 1.00E-143 | 259 | 259 | 100 + | 1   | 259  | 3516   | 3774   |
| UN39018 | Rsa1.0.00529.1 | 889  | 77487  | 4.00E-93  | 210 | 221 | 95 +  | 1   | 221  | 1853   | 2071   |
| UN39019 | Rsa1.0.01740.1 | 781  | 39986  | 0         | 644 | 644 | 100 + | 2   | 645  | 2393   | 3036   |
| UN39020 | Rsa1.0.00306.1 | 762  | 146760 | 0         | 509 | 554 | 91 -  | 195 | 744  | 135607 | 136147 |
| UN39021 | Rsa1.0.01271.1 | 911  | 49569  | 1.00E-151 | 277 | 279 | 99 +  | 315 | 593  | 21832  | 22110  |
| UN39022 | Rsa1.0.00018.1 | 1627 | 410899 | 0         | 385 | 399 | 96 +  | 635 | 1033 | 367394 | 367789 |
| UN39023 | Rsa1.0.01658.1 | 1510 | 41414  | 4.00E-63  | 124 | 124 | 100 + | 478 | 601  | 37617  | 37740  |
| UN39024 | Rsa1.0.00147.1 | 1093 | 249503 | 0         | 551 | 553 | 99 -  | 5   | 557  | 163895 | 164446 |
| UN39025 | Rsa1.0.06571.1 | 491  | 10750  | 6.00E-72  | 204 | 225 | 90 -  | 1   | 225  | 6156   | 6373   |
| UN39026 | Rsa1.0.01949.1 | 1221 | 36960  | 0         | 406 | 408 | 99 -  | 1   | 408  | 11484  | 11891  |
| UN39027 | Rsa1.0.01274.1 | 955  | 49419  | 1.00E-171 | 311 | 313 | 99 +  | 641 | 953  | 37166  | 37478  |
| UN39028 | Rsa1.0.02094.1 | 946  | 35116  | 0         | 602 | 604 | 99 -  | 12  | 614  | 29811  | 30414  |
| UN39029 | Rsa1.0.00118.1 | 617  | 130637 | 0         | 614 | 617 | 99 +  | 2   | 617  | 57333  | 57949  |
| UN39030 | Rsa1.0.00053.1 | 855  | 263459 | 0         | 528 | 541 | 97 +  | 164 | 703  | 24335  | 24875  |
| UN39031 | Rsa1.0.06286.1 | 945  | 11307  | 0         | 602 | 603 | 99 -  | 2   | 604  | 9695   | 10297  |
| UN39032 | Rsa1.0.01442.1 | 839  | 45776  | 0         | 822 | 837 | 98 +  | 1   | 834  | 3577   | 4413   |
| UN39033 | Rsa1.0.01405.1 | 798  | 46445  | 0         | 395 | 406 | 97 +  | 260 | 664  | 27825  | 28230  |
| UN39034 | Rsa1.0.00414.1 | 853  | 202190 | 0         | 772 | 779 | 99 -  | 75  | 853  | 72948  | 73726  |
| UN39035 | Rsa1.0.00805.1 | 816  | 63724  | 0         | 654 | 659 | 99 +  | 1   | 659  | 13354  | 14012  |
| UN39036 | Rsa1.0.00796.1 | 673  | 63997  | 0         | 478 | 479 | 99 +  | 7   | 485  | 41     | 519    |
| UN39037 | Rsa1.0.00179.1 | 717  | 393324 | 3.00E-90  | 169 | 169 | 100 - | 163 | 331  | 65790  | 65958  |

|         |                |      |        |           |     |     |       |     |      |        |        |
|---------|----------------|------|--------|-----------|-----|-----|-------|-----|------|--------|--------|
| UN39038 | Rsa1.0.00065.1 | 586  | 454616 | 0         | 432 | 438 | 98 -  | 81  | 516  | 125205 | 125642 |
| UN39039 | Rsa1.0.01039.1 | 870  | 55946  | 0         | 626 | 632 | 99 -  | 239 | 870  | 33342  | 33972  |
| UN39040 | Rsa1.0.01491.1 | 823  | 44718  | 0         | 581 | 594 | 97 -  | 233 | 820  | 4162   | 4750   |
| UN39041 | Rsa1.0.03624.1 | 1226 | 21706  | 1.00E-50  | 187 | 215 | 86 +  | 940 | 1154 | 20565  | 20779  |
| UN39042 | Rsa1.0.01182.1 | 726  | 167304 | 0         | 361 | 371 | 97 +  | 354 | 724  | 135429 | 135796 |
| UN39043 | Rsa1.0.03662.1 | 445  | 21492  | 1.00E-133 | 240 | 240 | 100 - | 206 | 445  | 10685  | 10924  |
| UN39044 | Rsa1.0.00019.1 | 959  | 301669 | 1.00E-153 | 290 | 294 | 98 +  | 188 | 481  | 177005 | 177297 |
| UN39045 | Rsa1.0.00382.1 | 985  | 251946 | 1.00E-127 | 275 | 286 | 96 +  | 1   | 285  | 242963 | 243245 |
| UN39046 | Rsa1.0.00330.1 | 810  | 94666  | 1.00E-169 | 307 | 309 | 99 +  | 221 | 529  | 27466  | 27774  |
| UN39047 | Rsa1.0.02766.1 | 711  | 28128  | 0         | 538 | 557 | 96 -  | 154 | 709  | 13392  | 13947  |
| UN39048 | Rsa1.0.00135.1 | 597  | 178077 | 1.00E-158 | 341 | 362 | 94 -  | 242 | 597  | 2955   | 3307   |
| UN39049 | Rsa1.0.06839.1 | 1107 | 10286  | 3.00E-97  | 289 | 324 | 89 -  | 798 | 1105 | 6323   | 6640   |
| UN39050 | Rsa1.0.24055.1 | 830  | 1009   | 1.00E-142 | 266 | 269 | 98 -  | 2   | 270  | 527    | 795    |
| UN39051 | Rsa1.0.01635.1 | 654  | 41865  | 0         | 492 | 518 | 94 +  | 3   | 514  | 7293   | 7801   |
| UN39052 | Rsa1.0.50581.1 | 923  | 449    | 1.00E-175 | 350 | 363 | 96 -  | 81  | 443  | 87     | 449    |
| UN39053 | Rsa1.0.01248.1 | 769  | 154103 | 1.00E-110 | 264 | 282 | 93 +  | 468 | 749  | 11758  | 12032  |
| UN39054 | Rsa1.0.00121.1 | 688  | 278029 | 1.00E-112 | 208 | 209 | 99 +  | 316 | 524  | 123394 | 123602 |
| UN39055 | Rsa1.0.03031.1 | 166  | 25839  | 9.00E-50  | 127 | 135 | 94 -  | 1   | 133  | 24689  | 24823  |
| UN39056 | Rsa1.0.00503.1 | 1050 | 79468  | 1.00E-175 | 411 | 437 | 94 -  | 17  | 449  | 69177  | 69604  |
| UN39057 | Rsa1.0.03258.1 | 836  | 24302  | 1.00E-113 | 229 | 235 | 97 -  | 603 | 836  | 11076  | 11310  |
| UN39058 | Rsa1.0.00262.1 | 802  | 101906 | 0         | 350 | 351 | 99 +  | 453 | 802  | 33151  | 33501  |
| UN39059 | Rsa1.0.00041.1 | 1223 | 186197 | 0         | 871 | 897 | 97 -  | 1   | 886  | 157067 | 157962 |
| UN39060 | Rsa1.0.00341.1 | 699  | 249309 | 1.00E-114 | 209 | 209 | 100 - | 207 | 415  | 128945 | 129153 |
| UN39061 | Rsa1.0.00707.1 | 956  | 190112 | 1.00E-123 | 259 | 269 | 96 +  | 2   | 270  | 181048 | 181315 |
| UN39062 | Rsa1.0.08419.1 | 919  | 7381   | 0         | 407 | 421 | 96 -  | 312 | 732  | 6961   | 7381   |
| UN39063 | Rsa1.0.02994.1 | 647  | 26168  | 0         | 600 | 631 | 95 -  | 14  | 644  | 2159   | 2780   |
| UN39064 | Rsa1.0.00343.1 | 729  | 93570  | 0         | 465 | 490 | 94 +  | 239 | 727  | 2493   | 2973   |
| UN39065 | Rsa1.0.19592.1 | 1268 | 1410   | 1.00E-132 | 300 | 320 | 93 -  | 730 | 1049 | 169    | 488    |
| UN39066 | Rsa1.0.00602.1 | 1228 | 73302  | 0         | 646 | 665 | 97 +  | 564 | 1228 | 29563  | 30226  |
| UN39067 | Rsa1.0.00697.1 | 1402 | 67913  | 1.00E-120 | 240 | 247 | 97 -  | 876 | 1122 | 57659  | 57905  |
| UN39068 | Rsa1.0.00265.1 | 1118 | 220635 | 0         | 947 | 994 | 95 -  | 119 | 1112 | 207981 | 208965 |
| UN39069 | Rsa1.0.00438.1 | 707  | 84861  | 1.00E-144 | 280 | 287 | 97 +  | 336 | 622  | 2602   | 2888   |
| UN39070 | Rsa1.0.00014.1 | 698  | 348985 | 1.00E-106 | 210 | 215 | 97 +  | 482 | 696  | 220714 | 220928 |
| UN39071 | Rsa1.0.00522.1 | 628  | 78103  | 1.00E-70  | 176 | 186 | 94 -  | 1   | 182  | 36235  | 36419  |
| UN39072 | Rsa1.0.00451.1 | 544  | 322533 | 1.00E-136 | 273 | 282 | 96 -  | 134 | 415  | 996    | 1277   |
| UN39073 | Rsa1.0.00055.1 | 693  | 520193 | 1.00E-125 | 328 | 356 | 92 -  | 343 | 693  | 153886 | 154237 |
| UN39074 | Rsa1.0.01595.1 | 585  | 175383 | 1.00E-163 | 318 | 329 | 96 -  | 257 | 585  | 41014  | 41331  |
| UN39075 | Rsa1.0.00920.1 | 813  | 601703 | 1.00E-139 | 295 | 309 | 95 +  | 1   | 309  | 447492 | 447797 |
| UN39076 | Rsa1.0.12394.1 | 422  | 5237   | 1.00E-101 | 187 | 187 | 100 + | 47  | 233  | 108    | 294    |

|         |                |      |        |           |      |      |       |      |      |        |        |
|---------|----------------|------|--------|-----------|------|------|-------|------|------|--------|--------|
| UN39077 | Rsa1.0_02086.1 | 970  | 35198  | 0         | 822  | 834  | 98 +  | 2    | 834  | 19790  | 20622  |
| UN39078 | Rsa1.0_05653.1 | 669  | 13043  | 0         | 633  | 669  | 94 +  | 3    | 666  | 10801  | 11467  |
| UN39079 | Rsa1.0_02045.1 | 652  | 35650  | 0         | 404  | 414  | 97 -  | 245  | 652  | 23432  | 23845  |
| UN39080 | Rsa1.0_00611.1 | 1261 | 72410  | 0         | 1196 | 1265 | 94 +  | 1    | 1261 | 14613  | 15846  |
| UN39081 | Rsa1.0_00570.1 | 1338 | 75002  | 0         | 1324 | 1325 | 99 +  | 11   | 1335 | 20370  | 21694  |
| UN39082 | Rsa1.0_02450.1 | 965  | 31288  | 0         | 761  | 800  | 95 +  | 167  | 965  | 16924  | 17696  |
| UN39083 | Rsa1.0_04342.1 | 1677 | 17828  | 0         | 420  | 444  | 94 -  | 1234 | 1668 | 7660   | 8103   |
| UN39084 | Rsa1.0_08609.1 | 789  | 7132   | 0         | 390  | 393  | 99 +  | 1    | 393  | 6741   | 7132   |
| UN39085 | Rsa1.0_02072.1 | 1008 | 35401  | 1.00E-165 | 295  | 295  | 100 - | 714  | 1008 | 5405   | 5699   |
| UN39086 | Rsa1.0_00017.1 | 681  | 752458 | 1.00E-116 | 225  | 228  | 98 +  | 455  | 681  | 661547 | 661774 |
| UN39087 | Rsa1.0_05789.1 | 835  | 12620  | 0         | 792  | 828  | 95 +  | 1    | 827  | 7833   | 8660   |
| UN39088 | Rsa1.0_00244.1 | 851  | 103590 | 0         | 339  | 339  | 100 + | 1    | 339  | 71185  | 71523  |
| UN39089 | Rsa1.0_00224.1 | 561  | 327530 | 1.00E-149 | 368  | 401  | 91 +  | 154  | 552  | 221387 | 221766 |
| UN39090 | Rsa1.0_00454.1 | 834  | 216970 | 0         | 799  | 832  | 96 +  | 3    | 834  | 158096 | 158925 |
| UN39091 | Rsa1.0_00132.1 | 1495 | 124299 | 0         | 495  | 514  | 96 +  | 286  | 785  | 99696  | 100209 |
| UN39092 | Rsa1.0_00664.1 | 665  | 69573  | 1.00E-141 | 255  | 255  | 100 - | 405  | 659  | 25549  | 25803  |
| UN39093 | Rsa1.0_00647.1 | 600  | 70440  | 0         | 332  | 332  | 100 - | 269  | 600  | 67327  | 67658  |
| UN39094 | Rsa1.0_00059.1 | 945  | 159650 | 0         | 431  | 431  | 100 - | 3    | 433  | 2240   | 2670   |
| UN39095 | Rsa1.0_01519.1 | 508  | 44144  | 0         | 487  | 506  | 96 +  | 2    | 507  | 11680  | 12185  |
| UN39096 | Rsa1.0_00015.1 | 1146 | 561803 | 0         | 351  | 351  | 100 - | 796  | 1146 | 190528 | 190878 |
| UN39097 | Rsa1.0_00066.1 | 949  | 152418 | 0         | 438  | 456  | 96 -  | 3    | 450  | 12155  | 12610  |
| UN39098 | Rsa1.0_00482.1 | 747  | 81162  | 0         | 742  | 745  | 99 +  | 3    | 747  | 50137  | 50881  |
| UN39099 | Rsa1.0_00341.1 | 1238 | 249309 | 1.00E-176 | 390  | 413  | 94 -  | 832  | 1238 | 125738 | 126149 |
| UN39100 | Rsa1.0_01778.1 | 1094 | 39509  | 6.00E-77  | 147  | 147  | 100 - | 246  | 392  | 17248  | 17394  |
| UN39101 | Rsa1.0_01234.1 | 719  | 50183  | 1.00E-131 | 237  | 237  | 100 - | 15   | 251  | 11958  | 12194  |
| UN39102 | Rsa1.0_02425.1 | 1097 | 31567  | 1.00E-164 | 300  | 302  | 99 -  | 796  | 1097 | 13612  | 13913  |
| UN39103 | Rsa1.0_00204.1 | 1341 | 109056 | 0         | 844  | 868  | 97 +  | 467  | 1334 | 105257 | 106124 |
| UN39104 | Rsa1.0_01034.1 | 1104 | 56046  | 0         | 735  | 757  | 97 -  | 236  | 992  | 19416  | 20172  |
| UN39105 | Rsa1.0_00833.1 | 898  | 62621  | 5.00E-49  | 100  | 100  | 100 + | 643  | 742  | 112    | 211    |
| UN39106 | Rsa1.0_00802.1 | 1305 | 63846  | 0         | 376  | 382  | 98 -  | 66   | 444  | 26567  | 26948  |
| UN39107 | Rsa1.0_32838.1 | 1123 | 693    | 0         | 609  | 619  | 98 -  | 505  | 1123 | 76     | 693    |
| UN39108 | Rsa1.0_03434.1 | 628  | 22960  | 1.00E-144 | 327  | 347  | 94 -  | 288  | 628  | 12132  | 12476  |
| UN39109 | Rsa1.0_00012.1 | 852  | 222148 | 1.00E-126 | 295  | 316  | 93 +  | 535  | 849  | 69957  | 70261  |
| UN39110 | Rsa1.0_03037.1 | 1340 | 25825  | 0         | 1339 | 1341 | 99 +  | 1    | 1339 | 15334  | 16674  |
| UN39111 | Rsa1.0_00016.1 | 785  | 831256 | 0         | 446  | 456  | 97 -  | 264  | 719  | 786136 | 786591 |
| UN39112 | Rsa1.0_01080.1 | 681  | 54752  | 0         | 677  | 677  | 100 - | 5    | 681  | 26129  | 26805  |
| UN39113 | Rsa1.0_00056.1 | 934  | 332604 | 0         | 931  | 932  | 99 +  | 1    | 932  | 240674 | 241605 |
| UN39114 | Rsa1.0_01004.1 | 700  | 56975  | 1.00E-138 | 282  | 292  | 96 -  | 3    | 291  | 17608  | 17899  |
| UN39115 | Rsa1.0_07389.1 | 858  | 9479   | 0         | 527  | 529  | 99 -  | 328  | 856  | 517    | 1045   |

|         |                |      |        |           |     |     |       |     |      |        |        |
|---------|----------------|------|--------|-----------|-----|-----|-------|-----|------|--------|--------|
| UN39116 | Rsa1.0.02923.1 | 795  | 26736  | 0         | 791 | 792 | 99 +  | 1   | 792  | 14866  | 15657  |
| UN39117 | Rsa1.0.00184.1 | 867  | 218748 | 1.00E-83  | 186 | 190 | 97 -  | 634 | 819  | 211267 | 211456 |
| UN39118 | Rsa1.0.07385.1 | 1071 | 9485   | 1.00E-144 | 321 | 338 | 94 -  | 4   | 338  | 5009   | 5345   |
| UN39119 | Rsa1.0.00456.1 | 507  | 82826  | 0         | 481 | 502 | 95 +  | 6   | 504  | 24584  | 25082  |
| UN39120 | Rsa1.0_13633.1 | 606  | 4605   | 9.00E-90  | 241 | 265 | 90 -  | 340 | 604  | 1103   | 1358   |
| UN39121 | Rsa1.0_00234.1 | 1174 | 197060 | 0         | 402 | 415 | 96 +  | 329 | 743  | 144150 | 144564 |
| UN39122 | Rsa1.0.00786.1 | 818  | 64285  | 1.00E-100 | 197 | 201 | 98 +  | 360 | 560  | 41596  | 41796  |
| UN39123 | Rsa1.0.00521.1 | 820  | 78191  | 0         | 473 | 496 | 95 +  | 14  | 491  | 3389   | 3884   |
| UN39124 | Rsa1.0.01331.1 | 1050 | 47944  | 0         | 824 | 828 | 99 -  | 223 | 1050 | 45524  | 46351  |
| UN39125 | Rsa1.0.01701.1 | 656  | 162121 | 1.00E-133 | 304 | 324 | 93 -  | 24  | 333  | 13837  | 14157  |
| UN39126 | Rsa1.0.32803.1 | 1471 | 693    | 0         | 677 | 705 | 96 -  | 213 | 911  | 1      | 693    |
| UN39127 | Rsa1.0.00782.1 | 1338 | 64468  | 0         | 517 | 545 | 94 -  | 6   | 550  | 28205  | 28736  |
| UN39128 | Rsa1.0_10960.1 | 967  | 5664   | 2.33E-156 | 282 | 286 | 98 -  | 1   | 285  | 5138   | 5421   |
| UN39129 | Rsa1.0.03410.1 | 803  | 23147  | 0         | 612 | 662 | 92 -  | 1   | 640  | 10247  | 10905  |
| UN39130 | Rsa1.0.00401.1 | 991  | 244410 | 0         | 391 | 399 | 97 -  | 591 | 989  | 178047 | 178445 |
| UN39131 | Rsa1.0.37242.1 | 953  | 605    | 0         | 337 | 338 | 99 +  | 11  | 348  | 1      | 337    |
| UN39132 | Rsa1.0.20065.1 | 929  | 1346   | 0         | 863 | 893 | 96 -  | 3   | 895  | 347    | 1236   |
| UN39133 | Rsa1.0.02858.1 | 944  | 27246  | 1.00E-119 | 327 | 357 | 91 -  | 6   | 348  | 1699   | 2049   |
| UN39134 | Rsa1.0.03137.1 | 870  | 25105  | 1.00E-161 | 297 | 300 | 99 +  | 571 | 870  | 16833  | 17132  |
| UN39135 | Rsa1.0.04223.1 | 817  | 18407  | 1.00E-160 | 287 | 287 | 100 + | 2   | 288  | 5513   | 5799   |
| UN39136 | Rsa1.0.14624.1 | 924  | 3217   | 1.00E-130 | 281 | 297 | 94 +  | 627 | 922  | 1350   | 1634   |
| UN39137 | Rsa1.0.01296.1 | 1143 | 49035  | 0         | 709 | 709 | 100 - | 3   | 711  | 19219  | 19927  |
| UN39138 | Rsa1.0.03079.1 | 1302 | 25545  | 0         | 687 | 688 | 99 -  | 1   | 688  | 10325  | 11012  |
| UN39139 | Rsa1.0.05030.1 | 734  | 15088  | 0         | 680 | 728 | 93 -  | 5   | 731  | 10907  | 11611  |
| UN39140 | Rsa1.0.07689.1 | 682  | 8790   | 0         | 564 | 567 | 99 -  | 8   | 574  | 3290   | 3856   |
| UN39141 | Rsa1.0.00522.1 | 1161 | 78103  | 1.00E-136 | 280 | 289 | 96 +  | 877 | 1161 | 49920  | 50208  |
| UN39142 | Rsa1.0.20924.1 | 952  | 1254   | 0         | 475 | 479 | 99 +  | 476 | 952  | 332    | 810    |
| UN39143 | Rsa1.0.05070.1 | 696  | 14933  | 0         | 385 | 385 | 100 - | 306 | 690  | 5316   | 5700   |
| UN39144 | Rsa1.0.00118.1 | 828  | 130637 | 0         | 458 | 468 | 97 -  | 60  | 524  | 90339  | 90806  |
| UN39145 | Rsa1.0.04806.1 | 608  | 15898  | 1.00E-24  | 95  | 107 | 88 +  | 288 | 394  | 7365   | 7471   |
| UN39146 | Rsa1.0.02340.1 | 597  | 32388  | 0         | 592 | 605 | 97 -  | 5   | 597  | 4997   | 5601   |
| UN39147 | Rsa1.0.00017.1 | 830  | 752458 | 0         | 397 | 403 | 98 +  | 358 | 755  | 187371 | 187773 |
| UN39148 | Rsa1.0.02901.1 | 710  | 26909  | 1.00E-128 | 329 | 357 | 92 +  | 358 | 708  | 21294  | 21643  |
| UN39149 | Rsa1.0.01121.1 | 901  | 53407  | 0         | 746 | 778 | 95 -  | 4   | 781  | 19076  | 19852  |
| UN39150 | Rsa1.0.00421.1 | 1226 | 86365  | 0         | 350 | 350 | 100 + | 1   | 350  | 75825  | 76174  |
| UN39151 | Rsa1.0.02487.1 | 779  | 30928  | 0         | 773 | 777 | 99 +  | 3   | 779  | 20443  | 21218  |
| UN39152 | Rsa1.0.02041.1 | 1006 | 163634 | 1.00E-126 | 296 | 314 | 94 +  | 1   | 312  | 18720  | 19032  |
| UN39153 | Rsa1.0.00073.1 | 1556 | 240924 | 0         | 694 | 745 | 93 +  | 1   | 742  | 118405 | 119124 |
| UN39154 | Rsa1.0.00928.1 | 1076 | 59293  | 3.00E-69  | 158 | 165 | 95 -  | 787 | 949  | 30855  | 31019  |

|         |                |      |        |           |      |      |       |      |      |        |        |
|---------|----------------|------|--------|-----------|------|------|-------|------|------|--------|--------|
| UN39155 | Rsa1.0_00224.1 | 470  | 327530 | 1.00E-107 | 290  | 319  | 90 +  | 118  | 435  | 221387 | 221687 |
| UN39156 | Rsa1.0_00978.1 | 949  | 57739  | 0         | 621  | 640  | 97 -  | 308  | 947  | 41966  | 42599  |
| UN39157 | Rsa1.0_11152.1 | 594  | 5602   | 1.00E-159 | 344  | 360  | 95 -  | 2    | 358  | 5016   | 5374   |
| UN39158 | Rsa1.0_00073.1 | 1176 | 240924 | 0         | 623  | 631  | 98 +  | 1    | 631  | 81065  | 81695  |
| UN39159 | Rsa1.0_00609.1 | 1281 | 72785  | 0         | 1240 | 1270 | 97 +  | 21   | 1281 | 220    | 1488   |
| UN39160 | Rsa1.0_02312.1 | 1392 | 32675  | 0         | 398  | 400  | 99 +  | 993  | 1392 | 14711  | 15110  |
| UN39161 | Rsa1.0_01876.1 | 997  | 37800  | 1.00E-144 | 281  | 287  | 97 +  | 3    | 288  | 6989   | 7275   |
| UN39162 | Rsa1.0_00271.1 | 747  | 101125 | 1.00E-158 | 310  | 319  | 97 +  | 227  | 545  | 60726  | 61044  |
| UN39163 | Rsa1.0_01786.1 | 1139 | 133324 | 0         | 798  | 837  | 95 -  | 307  | 1139 | 95991  | 96827  |
| UN39164 | Rsa1.0_00828.1 | 857  | 62744  | 1.00E-158 | 283  | 283  | 100 + | 1    | 283  | 8742   | 9024   |
| UN39165 | Rsa1.0_00801.1 | 1188 | 63861  | 0         | 337  | 337  | 100 - | 1    | 337  | 24598  | 24934  |
| UN39166 | Rsa1.0_00075.1 | 1791 | 146680 | 0         | 1195 | 1365 | 87 -  | 312  | 1667 | 127796 | 129145 |
| UN39167 | Rsa1.0_00022.1 | 870  | 200461 | 0         | 460  | 485  | 94 +  | 2    | 481  | 86020  | 86504  |
| UN39168 | Rsa1.0_00397.1 | 730  | 88189  | 1.00E-152 | 273  | 273  | 100 + | 451  | 723  | 54834  | 55106  |
| UN39169 | Rsa1.0_01491.1 | 609  | 44718  | 0         | 486  | 502  | 96 +  | 106  | 607  | 33428  | 33928  |
| UN39170 | Rsa1.0_00087.1 | 883  | 761073 | 1.00E-156 | 280  | 280  | 100 + | 603  | 882  | 225356 | 225635 |
| UN39171 | Rsa1.0_04727.1 | 914  | 16216  | 0         | 907  | 918  | 98 -  | 6    | 914  | 13721  | 14637  |
| UN39172 | Rsa1.0_01867.1 | 963  | 37960  | 1.00E-164 | 335  | 349  | 95 -  | 424  | 772  | 17218  | 17566  |
| UN39173 | Rsa1.0_26775.1 | 522  | 878    | 1.00E-162 | 293  | 294  | 99 -  | 227  | 520  | 585    | 878    |
| UN39174 | Rsa1.0_00749.1 | 878  | 65933  | 0         | 815  | 889  | 91 +  | 1    | 876  | 27964  | 28845  |
| UN39175 | Rsa1.0_00179.1 | 832  | 393324 | 0         | 481  | 507  | 94 +  | 1    | 500  | 45033  | 45538  |
| UN39176 | Rsa1.0_01837.1 | 724  | 38502  | 0         | 622  | 628  | 99 -  | 97   | 724  | 3769   | 4396   |
| UN39177 | Rsa1.0_00159.1 | 958  | 431686 | 1.00E-130 | 252  | 257  | 98 -  | 19   | 275  | 427719 | 427975 |
| UN39178 | Rsa1.0_01112.1 | 682  | 310601 | 1.00E-118 | 247  | 255  | 96 -  | 126  | 380  | 176919 | 177171 |
| UN39179 | Rsa1.0_05871.1 | 1478 | 12356  | 1.00E-180 | 393  | 419  | 93 +  | 36   | 451  | 4513   | 4913   |
| UN39180 | Rsa1.0_00937.1 | 1555 | 59061  | 0         | 481  | 481  | 100 + | 1075 | 1555 | 28096  | 28576  |
| UN39181 | Rsa1.0_08421.1 | 1024 | 7380   | 0         | 348  | 350  | 99 -  | 12   | 361  | 4123   | 4472   |
| UN39182 | Rsa1.0_02165.1 | 885  | 34423  | 0         | 383  | 401  | 95 -  | 494  | 883  | 75     | 474    |
| UN39183 | Rsa1.0_00201.1 | 468  | 232851 | 2.00E-68  | 205  | 225  | 91 +  | 32   | 249  | 203744 | 203968 |
| UN39184 | Rsa1.0_00784.1 | 1090 | 64359  | 0         | 447  | 450  | 99 -  | 641  | 1090 | 7561   | 8009   |
| UN39185 | Rsa1.0_00055.1 | 635  | 520193 | 0         | 460  | 462  | 99 -  | 174  | 635  | 383492 | 383953 |
| UN39186 | Rsa1.0_00409.1 | 1064 | 146788 | 0         | 998  | 1046 | 95 -  | 32   | 1064 | 145670 | 146712 |
| UN39187 | Rsa1.0_02201.1 | 1202 | 33981  | 1.00E-108 | 230  | 240  | 95 -  | 730  | 969  | 30288  | 30527  |
| UN39188 | Rsa1.0_00921.1 | 726  | 59599  | 1.00E-134 | 312  | 333  | 93 -  | 394  | 723  | 2029   | 2355   |
| UN39189 | Rsa1.0_01452.1 | 1261 | 45459  | 1.00E-139 | 258  | 260  | 99 -  | 1    | 260  | 39627  | 39886  |
| UN39190 | Rsa1.0_02166.1 | 1207 | 34414  | 0         | 344  | 344  | 100 + | 458  | 801  | 14012  | 14355  |
| UN39191 | Rsa1.0_00067.1 | 845  | 415055 | 1.00E-131 | 270  | 281  | 96 +  | 260  | 540  | 226623 | 226903 |
| UN39192 | Rsa1.0_01829.1 | 893  | 166063 | 0         | 862  | 898  | 95 +  | 1    | 893  | 160881 | 161778 |
| UN39193 | Rsa1.0_04512.1 | 625  | 17031  | 1.00E-150 | 333  | 356  | 93 -  | 261  | 606  | 12588  | 12943  |

|         |                |      |        |           |      |      |      |     |      |        |        |
|---------|----------------|------|--------|-----------|------|------|------|-----|------|--------|--------|
| UN39194 | Rsa1.0.00017.1 | 638  | 752458 | 0         | 634  | 637  | 99 - | 1   | 636  | 536286 | 536922 |
| UN39195 | Rsa1.0.00033.1 | 737  | 515811 | 1.00E-160 | 314  | 323  | 97 - | 320 | 642  | 366513 | 366835 |
| UN39196 | Rsa1.0.00494.1 | 683  | 79967  | 0         | 650  | 683  | 95 + | 2   | 681  | 3770   | 4449   |
| UN39197 | Rsa1.0.01172.1 | 1189 | 51734  | 0         | 411  | 423  | 97 - | 1   | 418  | 9538   | 9959   |
| UN39198 | Rsa1.0.00351.1 | 791  | 413096 | 1.00E-131 | 312  | 337  | 92 + | 466 | 791  | 242921 | 243252 |
| UN39199 | Rsa1.0.00773.1 | 1097 | 64839  | 1.00E-93  | 213  | 225  | 94 + | 469 | 693  | 58210  | 58431  |
| UN39200 | Rsa1.0.00026.1 | 1578 | 327835 | 0         | 1074 | 1099 | 97 - | 478 | 1576 | 45488  | 46584  |
| UN39201 | Rsa1.0.02501.1 | 798  | 30764  | 0         | 500  | 536  | 93 - | 280 | 798  | 10542  | 11072  |
| UN39202 | Rsa1.0.00838.1 | 508  | 153820 | 0         | 367  | 375  | 97 - | 134 | 508  | 146489 | 146863 |
| UN39203 | Rsa1.0.16338.1 | 641  | 2190   | 1.00E-156 | 316  | 326  | 96 + | 2   | 326  | 414    | 737    |
| UN39204 | Rsa1.0.01339.1 | 845  | 47813  | 1.00E-71  | 151  | 154  | 98 + | 226 | 379  | 28483  | 28635  |
| UN39205 | Rsa1.0.00697.1 | 1006 | 67913  | 0         | 777  | 819  | 94 + | 19  | 837  | 42303  | 43121  |
| UN39206 | Rsa1.0.00816.1 | 1285 | 403350 | 0         | 702  | 728  | 96 - | 554 | 1277 | 139078 | 139801 |
| UN39207 | Rsa1.0.01786.1 | 1224 | 133324 | 0         | 1208 | 1218 | 99 + | 1   | 1218 | 116665 | 117881 |
| UN39208 | Rsa1.0.01835.1 | 772  | 38542  | 2.33E-156 | 345  | 369  | 93 - | 410 | 772  | 21290  | 21654  |
| UN39209 | Rsa1.0.03860.1 | 621  | 20407  | 4.00E-98  | 238  | 256  | 92 - | 355 | 610  | 14095  | 14347  |
| UN39210 | Rsa1.0.01534.1 | 792  | 43764  | 0         | 604  | 626  | 96 - | 140 | 760  | 10839  | 11464  |
| UN39211 | Rsa1.0.16137.1 | 1061 | 2269   | 1.00E-167 | 353  | 368  | 95 - | 703 | 1061 | 1904   | 2269   |
| UN39212 | Rsa1.0.03471.1 | 575  | 22678  | 1.00E-106 | 225  | 234  | 96 + | 178 | 408  | 14969  | 15202  |
| UN39213 | Rsa1.0.08558.1 | 1049 | 7198   | 1.00E-141 | 418  | 463  | 90 - | 593 | 1049 | 2270   | 2721   |
| UN39214 | Rsa1.0.03191.1 | 1418 | 145762 | 0         | 459  | 461  | 99 - | 959 | 1418 | 22012  | 22472  |
| UN39215 | Rsa1.0.00714.1 | 1474 | 67187  | 0         | 1246 | 1255 | 99 - | 220 | 1474 | 18956  | 20210  |
| UN39216 | Rsa1.0.00296.1 | 1150 | 97854  | 0         | 371  | 377  | 98 + | 11  | 386  | 42853  | 43229  |
| UN39217 | Rsa1.0.00833.1 | 1197 | 62621  | 1.00E-122 | 236  | 239  | 98 - | 960 | 1197 | 5183   | 5421   |
| UN39218 | Rsa1.0.01958.1 | 821  | 261128 | 0         | 467  | 477  | 97 - | 3   | 474  | 131033 | 131509 |
| UN39219 | Rsa1.0.01252.1 | 1109 | 49847  | 0         | 404  | 410  | 98 + | 2   | 411  | 35393  | 35799  |
| UN39220 | Rsa1.0.00169.1 | 1147 | 274298 | 1.00E-175 | 319  | 320  | 99 - | 829 | 1147 | 267872 | 268191 |
| UN39221 | Rsa1.0.00405.1 | 1230 | 202864 | 0         | 1167 | 1183 | 98 + | 3   | 1174 | 154089 | 155271 |
| UN39222 | Rsa1.0.02757.1 | 839  | 28187  | 0         | 821  | 839  | 97 + | 1   | 839  | 15833  | 16661  |
| UN39223 | Rsa1.0.01938.1 | 889  | 264018 | 0         | 602  | 626  | 96 + | 33  | 658  | 156750 | 157365 |
| UN39224 | Rsa1.0.00303.1 | 1037 | 97468  | 3.00E-72  | 160  | 167  | 95 - | 821 | 987  | 38565  | 38731  |
| UN39225 | Rsa1.0.01540.1 | 897  | 151890 | 0         | 471  | 480  | 98 - | 243 | 722  | 144792 | 145271 |
| UN39226 | Rsa1.0.02855.1 | 743  | 27271  | 0         | 595  | 596  | 99 - | 7   | 602  | 17755  | 18350  |
| UN39227 | Rsa1.0.00018.1 | 2325 | 410899 | 0         | 1422 | 1444 | 98 + | 801 | 2244 | 71395  | 72838  |
| UN39228 | Rsa1.0.08194.1 | 1089 | 7757   | 1.00E-145 | 297  | 309  | 96 - | 774 | 1077 | 5035   | 5343   |
| UN39229 | Rsa1.0.02930.1 | 634  | 26668  | 0         | 592  | 632  | 93 + | 1   | 632  | 1717   | 2331   |
| UN39230 | Rsa1.0.00019.1 | 1381 | 301669 | 0         | 604  | 621  | 97 - | 695 | 1314 | 100107 | 100727 |
| UN39231 | Rsa1.0.00722.1 | 779  | 66840  | 1.00E-175 | 374  | 394  | 94 - | 381 | 772  | 49756  | 50149  |
| UN39232 | Rsa1.0.08192.1 | 893  | 7762   | 0         | 473  | 506  | 93 + | 1   | 482  | 2194   | 2698   |



|         |                |      |        |           |      |      |       |      |      |        |        |
|---------|----------------|------|--------|-----------|------|------|-------|------|------|--------|--------|
| UN39233 | Rsa1.0_13824.1 | 1026 | 4259   | 0         | 429  | 456  | 94 -  | 571  | 1026 | 2080   | 2534   |
| UN39234 | Rsa1.0_02694.1 | 1157 | 28610  | 0         | 1142 | 1155 | 98 -  | 3    | 1157 | 9128   | 10282  |
| UN39235 | Rsa1.0_00140.1 | 703  | 121541 | 1.00E-133 | 299  | 315  | 94 -  | 390  | 701  | 21983  | 22295  |
| UN39236 | Rsa1.0_03981.1 | 488  | 19724  | 1.00E-173 | 363  | 376  | 96 +  | 117  | 488  | 17481  | 17852  |
| UN39237 | Rsa1.0_00053.1 | 1212 | 263459 | 1.00E-160 | 325  | 338  | 96 +  | 3    | 340  | 32114  | 32451  |
| UN39238 | Rsa1.0_00497.1 | 851  | 79830  | 0         | 498  | 503  | 99 +  | 290  | 791  | 62413  | 62915  |
| UN39239 | Rsa1.0_03600.1 | 689  | 21857  | 5.00E-67  | 220  | 246  | 89 -  | 99   | 342  | 2129   | 2373   |
| UN39240 | Rsa1.0_01958.1 | 890  | 261128 | 0         | 356  | 365  | 97 +  | 6    | 370  | 129324 | 129688 |
| UN39241 | Rsa1.0_00316.1 | 1058 | 96264  | 0         | 436  | 469  | 92 +  | 7    | 466  | 30643  | 31108  |
| UN39242 | Rsa1.0_01550.1 | 1997 | 43443  | 0         | 435  | 437  | 99 -  | 1557 | 1993 | 14594  | 15030  |
| UN39243 | Rsa1.0_06160.1 | 744  | 11596  | 1.00E-167 | 385  | 414  | 92 -  | 66   | 479  | 10937  | 11350  |
| UN39244 | Rsa1.0_13514.1 | 912  | 4757   | 0         | 634  | 634  | 100 + | 279  | 912  | 836    | 1469   |
| UN39245 | Rsa1.0_02640.1 | 619  | 29220  | 1.00E-157 | 294  | 297  | 98 -  | 323  | 619  | 21772  | 22067  |
| UN39246 | Rsa1.0_01389.1 | 991  | 46716  | 0         | 365  | 372  | 98 +  | 10   | 381  | 9794   | 10165  |
| UN39247 | Rsa1.0_00978.1 | 814  | 57739  | 1.00E-166 | 517  | 590  | 87 +  | 59   | 639  | 42010  | 42599  |
| UN39248 | Rsa1.0_01519.1 | 988  | 44144  | 0         | 586  | 589  | 99 +  | 400  | 988  | 39374  | 39962  |
| UN39249 | Rsa1.0_03294.1 | 947  | 23971  | 0         | 453  | 477  | 94 -  | 477  | 945  | 5085   | 5558   |
| UN39250 | Rsa1.0_02333.1 | 649  | 32431  | 1.00E-114 | 328  | 359  | 91 -  | 79   | 429  | 29979  | 30331  |
| UN39251 | Rsa1.0_00524.1 | 808  | 169613 | 1.00E-160 | 369  | 394  | 93 -  | 393  | 785  | 161710 | 162096 |
| UN39252 | Rsa1.0_00030.1 | 490  | 250988 | 1.00E-125 | 293  | 314  | 93 +  | 53   | 354  | 149332 | 149644 |
| UN39253 | Rsa1.0_00343.1 | 762  | 93570  | 0         | 523  | 533  | 98 -  | 1    | 533  | 2493   | 3025   |
| UN39254 | Rsa1.0_00557.1 | 627  | 75865  | 0         | 398  | 407  | 97 +  | 203  | 609  | 69508  | 69912  |
| UN39255 | Rsa1.0_04378.1 | 784  | 17651  | 1.00E-178 | 343  | 352  | 97 +  | 288  | 639  | 4630   | 4981   |
| UN39256 | Rsa1.0_00092.1 | 487  | 659932 | 0         | 330  | 330  | 100 - | 158  | 487  | 190009 | 190338 |
| UN39257 | Rsa1.0_03149.1 | 648  | 24983  | 2.33E-156 | 284  | 292  | 97 -  | 3    | 287  | 19482  | 19773  |
| UN39258 | Rsa1.0_00219.1 | 1275 | 106983 | 0         | 338  | 338  | 100 - | 1    | 338  | 45690  | 46027  |
| UN39259 | Rsa1.0_00632.1 | 621  | 183777 | 1.00E-150 | 321  | 337  | 95 -  | 285  | 621  | 149103 | 149438 |
| UN39260 | Rsa1.0_03346.1 | 235  | 23589  | 1.00E-89  | 215  | 229  | 93 -  | 9    | 235  | 10868  | 11094  |
| UN39261 | Rsa1.0_00868.1 | 1194 | 61630  | 0         | 496  | 497  | 99 -  | 1    | 497  | 32742  | 33238  |
| UN39262 | Rsa1.0_00893.1 | 735  | 60626  | 1.00E-120 | 241  | 248  | 97 +  | 2    | 249  | 46660  | 46907  |
| UN39263 | Rsa1.0_00092.1 | 756  | 659932 | 1.00E-141 | 269  | 274  | 98 -  | 97   | 370  | 14484  | 14757  |
| UN39264 | Rsa1.0_01010.1 | 757  | 56906  | 1.00E-164 | 374  | 394  | 94 -  | 372  | 756  | 15518  | 15911  |
| UN39265 | Rsa1.0_03781.1 | 811  | 20891  | 0         | 724  | 766  | 94 -  | 4    | 752  | 11400  | 12165  |
| UN39266 | Rsa1.0_00018.1 | 1255 | 410899 | 0         | 501  | 535  | 93 +  | 725  | 1255 | 115333 | 115861 |
| UN39267 | Rsa1.0_03476.1 | 1313 | 22646  | 0         | 726  | 749  | 96 +  | 566  | 1313 | 13257  | 14005  |
| UN39268 | Rsa1.0_00039.1 | 1079 | 296927 | 0         | 657  | 657  | 100 + | 1    | 657  | 254868 | 255524 |
| UN39269 | Rsa1.0_00003.1 | 706  | 340054 | 0         | 660  | 707  | 93 -  | 3    | 706  | 136744 | 137446 |
| UN39270 | Rsa1.0_00009.1 | 1151 | 232558 | 0         | 640  | 640  | 100 - | 512  | 1151 | 117251 | 117890 |
| UN39271 | Rsa1.0_15363.1 | 613  | 2655   | 0         | 598  | 617  | 96 +  | 4    | 613  | 1688   | 2304   |

|         |                |      |        |           |      |      |       |     |      |        |        |
|---------|----------------|------|--------|-----------|------|------|-------|-----|------|--------|--------|
| UN39272 | Rsa1.0.00136.1 | 723  | 122464 | 1.00E-109 | 351  | 403  | 87 -  | 332 | 721  | 81369  | 81754  |
| UN39273 | Rsa1.0.00773.1 | 1004 | 64839  | 0         | 337  | 341  | 98 -  | 660 | 1000 | 10102  | 10440  |
| UN39274 | Rsa1.0.00269.1 | 822  | 341668 | 0         | 450  | 469  | 95 +  | 354 | 822  | 275838 | 276299 |
| UN39275 | Rsa1.0.00294.1 | 925  | 144860 | 0         | 491  | 499  | 98 +  | 3   | 500  | 59118  | 59616  |
| UN39276 | Rsa1.0.06521.1 | 807  | 10856  | 0         | 495  | 497  | 99 -  | 1   | 497  | 6144   | 6640   |
| UN39277 | Rsa1.0.05354.1 | 840  | 14073  | 0         | 658  | 693  | 94 -  | 151 | 840  | 4668   | 5350   |
| UN39278 | Rsa1.0.40827.1 | 754  | 550    | 1.00E-119 | 257  | 270  | 95 -  | 365 | 634  | 110    | 379    |
| UN39279 | Rsa1.0.00191.1 | 606  | 316976 | 1.00E-161 | 317  | 327  | 96 +  | 141 | 467  | 140127 | 140453 |
| UN39280 | Rsa1.0.00032.1 | 1558 | 306326 | 0         | 988  | 1070 | 92 -  | 322 | 1391 | 192601 | 193670 |
| UN39281 | Rsa1.0.00510.1 | 682  | 78718  | 0         | 359  | 367  | 97 -  | 75  | 441  | 53847  | 54213  |
| UN39282 | Rsa1.0.02053.1 | 712  | 35554  | 0         | 361  | 370  | 97 +  | 24  | 392  | 31852  | 32221  |
| UN39283 | Rsa1.0.01104.1 | 1253 | 285480 | 0         | 500  | 500  | 100 + | 750 | 1249 | 274158 | 274657 |
| UN39284 | Rsa1.0.00107.1 | 709  | 431659 | 0         | 702  | 707  | 99 -  | 1   | 707  | 86591  | 87297  |
| UN39285 | Rsa1.0.00269.1 | 915  | 341668 | 1.00E-101 | 219  | 227  | 96 +  | 638 | 862  | 323318 | 323544 |
| UN39286 | Rsa1.0.05282.1 | 677  | 14270  | 1.00E-180 | 426  | 463  | 92 +  | 224 | 676  | 10479  | 10941  |
| UN39287 | Rsa1.0.00006.1 | 689  | 396176 | 0         | 431  | 460  | 93 -  | 228 | 685  | 307659 | 308106 |
| UN39288 | Rsa1.0.00963.1 | 827  | 58176  | 3.00E-38  | 88   | 90   | 97 +  | 200 | 289  | 26927  | 27016  |
| UN39289 | Rsa1.0.07630.1 | 1177 | 8988   | 0         | 428  | 436  | 98 +  | 742 | 1177 | 4068   | 4499   |
| UN39290 | Rsa1.0.54025.1 | 982  | 422    | 0         | 403  | 425  | 94 -  | 339 | 751  | 1      | 422    |
| UN39291 | Rsa1.0.11525.1 | 855  | 5479   | 1.00E-120 | 579  | 699  | 82 -  | 146 | 844  | 4544   | 5242   |
| UN39292 | Rsa1.0.02688.1 | 844  | 28644  | 1.00E-137 | 292  | 307  | 95 +  | 290 | 596  | 26861  | 27167  |
| UN39293 | Rsa1.0.00715.1 | 491  | 67116  | 2.00E-96  | 267  | 291  | 91 -  | 207 | 488  | 40291  | 40581  |
| UN39294 | Rsa1.0.00472.1 | 872  | 398134 | 1.00E-134 | 308  | 325  | 94 -  | 1   | 323  | 168065 | 168385 |
| UN39295 | Rsa1.0.01843.1 | 743  | 265131 | 1.00E-157 | 299  | 305  | 98 +  | 131 | 435  | 9831   | 10135  |
| UN39296 | Rsa1.0.01536.1 | 592  | 43747  | 0         | 348  | 349  | 99 -  | 83  | 431  | 39543  | 39891  |
| UN39297 | Rsa1.0.00033.1 | 760  | 515811 | 1.00E-160 | 314  | 323  | 97 +  | 114 | 436  | 366513 | 366835 |
| UN39298 | Rsa1.0.01073.1 | 953  | 55030  | 2.00E-88  | 266  | 293  | 90 -  | 669 | 953  | 12762  | 13046  |
| UN39299 | Rsa1.0.01134.1 | 1164 | 52829  | 0         | 368  | 378  | 97 +  | 785 | 1162 | 43276  | 43652  |
| UN39300 | Rsa1.0.03338.1 | 701  | 136346 | 0         | 482  | 483  | 99 -  | 1   | 483  | 1672   | 2154   |
| UN39301 | Rsa1.0.01934.1 | 453  | 37162  | 1.00E-160 | 361  | 382  | 94 +  | 6   | 385  | 3564   | 3939   |
| UN39302 | Rsa1.0.01230.1 | 1344 | 50221  | 1.00E-124 | 251  | 259  | 96 -  | 572 | 830  | 23481  | 23739  |
| UN39303 | Rsa1.0.01021.1 | 1098 | 56610  | 7.00E-52  | 249  | 291  | 85 +  | 115 | 401  | 24758  | 25045  |
| UN39304 | Rsa1.0.01196.1 | 856  | 51097  | 1.00E-143 | 328  | 352  | 93 -  | 505 | 856  | 32491  | 32835  |
| UN39305 | Rsa1.0.03738.1 | 2294 | 21071  | 0         | 1004 | 1004 | 100 - | 13  | 1016 | 10785  | 11788  |
| UN39306 | Rsa1.0.01318.1 | 708  | 48275  | 1.00E-112 | 237  | 245  | 96 +  | 458 | 701  | 4086   | 4329   |
| UN39307 | Rsa1.0.04254.1 | 512  | 18258  | 1.00E-110 | 203  | 203  | 100 + | 188 | 390  | 5539   | 5741   |
| UN39308 | Rsa1.0.00421.1 | 693  | 86365  | 1.00E-73  | 169  | 177  | 95 -  | 3   | 178  | 84375  | 84551  |
| UN39309 | Rsa1.0.00380.1 | 701  | 89748  | 1.00E-131 | 334  | 364  | 91 -  | 4   | 364  | 88068  | 88415  |
| UN39310 | Rsa1.0.30563.1 | 604  | 750    | 0         | 598  | 600  | 99 +  | 3   | 602  | 35     | 634    |

|         |                |      |        |           |     |     |       |     |      |        |        |
|---------|----------------|------|--------|-----------|-----|-----|-------|-----|------|--------|--------|
| UN39311 | Rsa1.0.02829.1 | 848  | 27541  | 0         | 358 | 368 | 97 -  | 440 | 807  | 3414   | 3781   |
| UN39312 | Rsa1.0.02658.1 | 1033 | 28978  | 0         | 404 | 408 | 99 +  | 1   | 408  | 21926  | 22330  |
| UN39313 | Rsa1.0.18032.1 | 728  | 1686   | 1.00E-108 | 205 | 207 | 99 +  | 139 | 345  | 1291   | 1497   |
| UN39314 | Rsa1.0.00427.1 | 564  | 189678 | 0         | 408 | 418 | 97 +  | 147 | 563  | 153301 | 153718 |
| UN39315 | Rsa1.0.03668.1 | 585  | 21483  | 0         | 422 | 436 | 96 -  | 1   | 435  | 11438  | 11872  |
| UN39316 | Rsa1.0.02064.1 | 878  | 35476  | 1.00E-138 | 249 | 249 | 100 - | 1   | 249  | 9518   | 9766   |
| UN39317 | Rsa1.0.01649.1 | 1366 | 41624  | 2.00E-99  | 191 | 193 | 98 +  | 1   | 193  | 39526  | 39718  |
| UN39318 | Rsa1.0.07200.1 | 703  | 9734   | 0         | 663 | 689 | 96 -  | 9   | 697  | 6120   | 6808   |
| UN39319 | Rsa1.0.00623.1 | 1117 | 207630 | 0         | 492 | 510 | 96 -  | 1   | 503  | 164904 | 165413 |
| UN39320 | Rsa1.0.02648.1 | 626  | 29073  | 3.00E-80  | 216 | 237 | 91 +  | 312 | 546  | 12514  | 12733  |
| UN39321 | Rsa1.0.00833.1 | 949  | 62621  | 3.00E-72  | 139 | 139 | 100 + | 809 | 947  | 7554   | 7692   |
| UN39322 | Rsa1.0.00900.1 | 1021 | 60367  | 1.00E-175 | 318 | 320 | 99 -  | 2   | 321  | 29910  | 30229  |
| UN39323 | Rsa1.0.00915.1 | 1437 | 194446 | 0         | 930 | 930 | 100 - | 1   | 930  | 159810 | 160739 |
| UN39324 | Rsa1.0.00073.1 | 1174 | 240924 | 0         | 625 | 631 | 99 -  | 543 | 1173 | 81065  | 81695  |
| UN39325 | Rsa1.0.05653.1 | 491  | 13043  | 0         | 427 | 428 | 99 +  | 64  | 491  | 10008  | 10435  |
| UN39326 | Rsa1.0.00812.1 | 537  | 63233  | 1.00E-114 | 230 | 237 | 97 +  | 56  | 292  | 17213  | 17449  |
| UN39327 | Rsa1.0.00032.1 | 1262 | 306326 | 1.00E-115 | 259 | 272 | 95 -  | 993 | 1262 | 177607 | 177874 |
| UN39328 | Rsa1.0.00039.1 | 784  | 296927 | 1.00E-173 | 308 | 308 | 100 - | 284 | 591  | 256501 | 256808 |
| UN39329 | Rsa1.0.35376.1 | 1175 | 640    | 1.00E-163 | 316 | 324 | 97 -  | 442 | 765  | 164    | 487    |
| UN39330 | Rsa1.0.05095.1 | 925  | 14869  | 1.00E-129 | 279 | 293 | 95 -  | 2   | 292  | 773    | 1065   |
| UN39331 | Rsa1.0.00006.1 | 675  | 396176 | 0         | 442 | 444 | 99 -  | 233 | 675  | 307663 | 308106 |
| UN39332 | Rsa1.0.02975.1 | 1379 | 26322  | 1.00E-120 | 353 | 390 | 90 +  | 539 | 920  | 22100  | 22484  |
| UN39333 | Rsa1.0.27528.1 | 921  | 849    | 1.00E-107 | 203 | 205 | 99 +  | 118 | 322  | 3      | 207    |
| UN39334 | Rsa1.0.00644.1 | 1073 | 136881 | 1.00E-155 | 306 | 314 | 97 +  | 760 | 1073 | 52173  | 52485  |
| UN39335 | Rsa1.0.00694.1 | 660  | 68074  | 0         | 604 | 629 | 96 -  | 4   | 631  | 57553  | 58181  |
| UN39336 | Rsa1.0.01835.1 | 663  | 38542  | 1.00E-161 | 372 | 394 | 94 +  | 20  | 407  | 24246  | 24638  |
| UN39337 | Rsa1.0.02395.1 | 758  | 31785  | 1.00E-156 | 358 | 383 | 93 -  | 17  | 382  | 8334   | 8716   |
| UN39338 | Rsa1.0.02901.1 | 1309 | 26909  | 1.00E-142 | 344 | 369 | 93 +  | 938 | 1302 | 21290  | 21654  |
| UN39339 | Rsa1.0.04223.1 | 894  | 18407  | 0         | 410 | 433 | 94 -  | 1   | 429  | 6198   | 6629   |
| UN39340 | Rsa1.0.00340.1 | 1057 | 305782 | 1.00E-179 | 346 | 356 | 97 +  | 2   | 357  | 194306 | 194653 |
| UN39341 | Rsa1.0.00067.1 | 1254 | 415055 | 0         | 496 | 509 | 97 +  | 15  | 523  | 375821 | 376327 |
| UN39342 | Rsa1.0.02503.1 | 567  | 30709  | 1.00E-156 | 288 | 291 | 98 +  | 275 | 565  | 26808  | 27098  |
| UN39343 | Rsa1.0.02648.1 | 750  | 29073  | 1.00E-98  | 229 | 246 | 93 +  | 368 | 613  | 12514  | 12744  |
| UN39344 | Rsa1.0.02901.1 | 725  | 26909  | 1.00E-112 | 212 | 214 | 99 -  | 291 | 504  | 20016  | 20229  |
| UN39345 | Rsa1.0.00545.1 | 296  | 189649 | 3.00E-51  | 112 | 115 | 97 +  | 126 | 240  | 35589  | 35703  |
| UN39346 | Rsa1.0.00972.1 | 1122 | 57937  | 0         | 466 | 492 | 94 +  | 631 | 1119 | 53820  | 54311  |
| UN39347 | Rsa1.0.02425.1 | 1078 | 31567  | 2.00E-98  | 214 | 222 | 96 +  | 55  | 275  | 13694  | 13913  |
| UN39348 | Rsa1.0.00727.1 | 627  | 66724  | 1.00E-116 | 266 | 279 | 95 +  | 1   | 273  | 14962  | 15240  |
| UN39349 | Rsa1.0.00549.1 | 1147 | 76473  | 1.00E-179 | 341 | 347 | 98 -  | 7   | 352  | 303    | 649    |

|         |                |      |        |           |      |      |       |      |      |        |        |
|---------|----------------|------|--------|-----------|------|------|-------|------|------|--------|--------|
| UN39350 | Rsa1.0_00833.1 | 786  | 62621  | 1.00E-168 | 302  | 303  | 99 -  | 484  | 786  | 8603   | 8905   |
| UN39351 | Rsa1.0_03878.1 | 788  | 20305  | 0         | 439  | 442  | 99 -  | 2    | 443  | 12290  | 12730  |
| UN39352 | Rsa1.0_00079.1 | 931  | 606987 | 1.00E-110 | 257  | 274  | 93 -  | 8    | 275  | 41618  | 41891  |
| UN39353 | Rsa1.0_00281.1 | 1123 | 99908  | 0         | 391  | 394  | 99 +  | 730  | 1123 | 91900  | 92293  |
| UN39354 | Rsa1.0_00549.1 | 664  | 76473  | 1.00E-143 | 279  | 286  | 97 +  | 263  | 548  | 26664  | 26949  |
| UN39355 | Rsa1.0_00092.1 | 1074 | 659932 | 0         | 385  | 399  | 96 +  | 461  | 859  | 30460  | 30858  |
| UN39356 | Rsa1.0_06258.1 | 543  | 11371  | 0         | 481  | 503  | 95 +  | 3    | 502  | 3899   | 4401   |
| UN39357 | Rsa1.0_00101.1 | 241  | 267193 | 1.00E-102 | 227  | 237  | 95 -  | 1    | 236  | 211686 | 211921 |
| UN39358 | Rsa1.0_01295.1 | 1068 | 49040  | 0         | 456  | 483  | 94 -  | 2    | 477  | 29327  | 29807  |
| UN39359 | Rsa1.0_00130.1 | 851  | 125737 | 1.00E-102 | 226  | 237  | 95 +  | 146  | 381  | 38366  | 38602  |
| UN39360 | Rsa1.0_00026.1 | 579  | 327835 | 1.00E-119 | 287  | 306  | 93 -  | 22   | 324  | 174424 | 174725 |
| UN39361 | Rsa1.0_00480.1 | 1460 | 81325  | 0         | 1458 | 1459 | 99 -  | 2    | 1460 | 7009   | 8467   |
| UN39362 | Rsa1.0_11741.1 | 1486 | 5423   | 1.00E-161 | 448  | 500  | 89 -  | 416  | 914  | 4597   | 5096   |
| UN39363 | Rsa1.0_00813.1 | 735  | 63202  | 2.00E-72  | 224  | 249  | 89 +  | 408  | 642  | 49627  | 49874  |
| UN39364 | Rsa1.0_00457.1 | 1451 | 337301 | 0         | 367  | 371  | 98 -  | 1    | 371  | 142321 | 142690 |
| UN39365 | Rsa1.0_13708.1 | 990  | 4447   | 1.00E-116 | 266  | 279  | 95 +  | 3    | 281  | 3624   | 3897   |
| UN39366 | Rsa1.0_02141.1 | 1114 | 34677  | 0         | 1021 | 1110 | 91 +  | 10   | 1113 | 25979  | 27077  |
| UN39367 | Rsa1.0_00497.1 | 1114 | 79830  | 1.00E-132 | 298  | 316  | 94 +  | 13   | 328  | 50771  | 51081  |
| UN39368 | Rsa1.0_00381.1 | 933  | 89718  | 1.00E-107 | 243  | 256  | 94 +  | 681  | 933  | 62649  | 62904  |
| UN39369 | Rsa1.0_05482.1 | 788  | 13595  | 1.00E-117 | 223  | 226  | 98 -  | 40   | 265  | 5246   | 5471   |
| UN39370 | Rsa1.0_00190.1 | 636  | 318240 | 1.00E-160 | 294  | 295  | 99 +  | 343  | 636  | 103223 | 103517 |
| UN39371 | Rsa1.0_04652.1 | 752  | 16515  | 0         | 449  | 467  | 96 -  | 9    | 475  | 10530  | 10996  |
| UN39372 | Rsa1.0_05482.1 | 742  | 13595  | 1.00E-129 | 257  | 262  | 98 +  | 1    | 262  | 4294   | 4552   |
| UN39373 | Rsa1.0_08102.1 | 1260 | 7901   | 1.00E-81  | 206  | 219  | 94 -  | 1042 | 1260 | 766    | 981    |
| UN39374 | Rsa1.0_00593.1 | 1173 | 143463 | 0         | 1123 | 1170 | 95 -  | 2    | 1170 | 64260  | 65419  |
| UN39375 | Rsa1.0_01857.1 | 789  | 38103  | 1.00E-150 | 278  | 281  | 98 -  | 366  | 646  | 22513  | 22793  |
| UN39376 | Rsa1.0_00670.1 | 571  | 69371  | 1.00E-111 | 207  | 208  | 99 +  | 363  | 570  | 39606  | 39813  |
| UN39377 | Rsa1.0_02648.1 | 650  | 29073  | 1.00E-89  | 171  | 172  | 99 +  | 30   | 201  | 11938  | 12109  |
| UN39378 | Rsa1.0_03169.1 | 837  | 24826  | 1.00E-116 | 228  | 233  | 97 -  | 397  | 629  | 17574  | 17806  |
| UN39379 | Rsa1.0_01650.1 | 599  | 41589  | 0         | 409  | 415  | 98 +  | 3    | 417  | 27292  | 27705  |
| UN39380 | Rsa1.0_00800.1 | 955  | 63868  | 1.00E-169 | 367  | 386  | 95 -  | 3    | 388  | 21908  | 22281  |
| UN39381 | Rsa1.0_00813.1 | 930  | 63202  | 0         | 526  | 558  | 94 +  | 378  | 929  | 51191  | 51738  |
| UN39382 | Rsa1.0_00142.1 | 788  | 121474 | 0         | 363  | 372  | 97 -  | 409  | 780  | 62549  | 62920  |
| UN39383 | Rsa1.0_01660.1 | 641  | 41400  | 2.00E-81  | 166  | 170  | 97 -  | 108  | 277  | 32286  | 32455  |
| UN39384 | Rsa1.0_00019.1 | 758  | 301669 | 0         | 458  | 458  | 100 - | 301  | 758  | 293041 | 293498 |
| UN39385 | Rsa1.0_00679.1 | 1231 | 68971  | 1.00E-103 | 197  | 199  | 98 +  | 358  | 556  | 33672  | 33870  |
| UN39386 | Rsa1.0_08553.1 | 926  | 7210   | 1.00E-118 | 222  | 224  | 99 +  | 571  | 794  | 588    | 811    |
| UN39387 | Rsa1.0_00447.1 | 836  | 84051  | 1.00E-100 | 213  | 222  | 95 -  | 7    | 228  | 26801  | 27022  |
| UN39388 | Rsa1.0_02848.1 | 1579 | 27329  | 0         | 606  | 615  | 98 +  | 577  | 1191 | 23818  | 24432  |

|         |                |      |        |           |      |      |       |     |      |        |        |
|---------|----------------|------|--------|-----------|------|------|-------|-----|------|--------|--------|
| UN39389 | Rsa1.0.00258.1 | 740  | 102381 | 1.00E-92  | 195  | 201  | 97 +  | 1   | 200  | 45443  | 45643  |
| UN39390 | Rsa1.0.00202.1 | 605  | 185895 | 1.00E-119 | 221  | 222  | 99 -  | 1   | 222  | 12228  | 12449  |
| UN39391 | Rsa1.0.02404.1 | 880  | 31702  | 0         | 504  | 518  | 97 -  | 301 | 817  | 809    | 1324   |
| UN39392 | Rsa1.0.00420.1 | 944  | 86496  | 0         | 810  | 811  | 99 +  | 134 | 944  | 54425  | 55235  |
| UN39393 | Rsa1.0.01376.1 | 923  | 47004  | 1.00E-101 | 228  | 238  | 95 +  | 76  | 312  | 22550  | 22778  |
| UN39394 | Rsa1.0.00017.1 | 967  | 752458 | 1.00E-12  | 39   | 39   | 100 + | 105 | 143  | 32269  | 32307  |
| UN39395 | Rsa1.0.02259.1 | 220  | 33299  | 1.00E-100 | 209  | 217  | 96 -  | 4   | 220  | 16692  | 16908  |
| UN39396 | Rsa1.0.00092.1 | 689  | 659932 | 1.00E-133 | 271  | 282  | 96 +  | 346 | 627  | 14484  | 14757  |
| UN39397 | Rsa1.0.00280.1 | 1444 | 99966  | 0         | 1349 | 1350 | 99 +  | 95  | 1444 | 37385  | 38733  |
| UN39398 | Rsa1.0.03491.1 | 687  | 22541  | 5.00E-95  | 393  | 465  | 84 +  | 146 | 610  | 9071   | 9535   |
| UN39399 | Rsa1.0.00179.1 | 794  | 393324 | 1.00E-159 | 322  | 335  | 96 +  | 468 | 792  | 250660 | 250993 |
| UN39400 | Rsa1.0.00180.1 | 835  | 114581 | 0         | 341  | 341  | 100 + | 495 | 835  | 63449  | 63789  |
| UN39401 | Rsa1.0.02689.1 | 938  | 28638  | 1.00E-138 | 298  | 314  | 94 +  | 580 | 893  | 4141   | 4454   |
| UN39402 | Rsa1.0.00716.1 | 681  | 67078  | 1.00E-159 | 360  | 385  | 93 +  | 263 | 647  | 36370  | 36754  |
| UN39403 | Rsa1.0.02900.1 | 729  | 26928  | 1.00E-122 | 301  | 321  | 93 -  | 1   | 319  | 16858  | 17174  |
| UN39404 | Rsa1.0.04218.1 | 725  | 18423  | 2.33E-156 | 327  | 343  | 95 -  | 28  | 367  | 8963   | 9304   |
| UN39405 | Rsa1.0.02053.1 | 775  | 35554  | 0         | 384  | 398  | 96 -  | 377 | 771  | 31825  | 32221  |
| UN39406 | Rsa1.0.01116.1 | 758  | 142088 | 0         | 677  | 708  | 95 -  | 55  | 758  | 129749 | 130455 |
| UN39407 | Rsa1.0.00467.1 | 833  | 156542 | 0         | 794  | 823  | 96 +  | 3   | 819  | 92930  | 93745  |
| UN39408 | Rsa1.0.00197.1 | 632  | 109714 | 1.00E-129 | 253  | 259  | 97 +  | 1   | 259  | 78040  | 78298  |
| UN39409 | Rsa1.0.03740.1 | 550  | 21065  | 0         | 521  | 540  | 96 -  | 13  | 542  | 14484  | 15023  |
| UN39410 | Rsa1.0.00356.1 | 702  | 91521  | 0         | 486  | 511  | 95 +  | 192 | 698  | 34979  | 35485  |
| UN39411 | Rsa1.0.21756.1 | 822  | 1175   | 1.00E-102 | 204  | 209  | 97 +  | 528 | 736  | 453    | 661    |
| UN39412 | Rsa1.0.00251.1 | 756  | 303968 | 1.00E-139 | 324  | 348  | 93 +  | 421 | 754  | 147121 | 147468 |
| UN39413 | Rsa1.0.03607.1 | 819  | 21817  | 5.00E-52  | 108  | 109  | 99 +  | 149 | 257  | 1914   | 2022   |
| UN39414 | Rsa1.0.08259.1 | 1074 | 7641   | 1.00E-153 | 337  | 356  | 94 +  | 722 | 1068 | 3089   | 3443   |
| UN39415 | Rsa1.0.04319.1 | 725  | 17944  | 0         | 525  | 535  | 98 -  | 3   | 537  | 16581  | 17115  |
| UN39416 | Rsa1.0.00595.1 | 1484 | 341648 | 0         | 578  | 588  | 98 -  | 895 | 1482 | 2386   | 2973   |
| UN39417 | Rsa1.0.05815.1 | 791  | 12563  | 8.00E-91  | 194  | 202  | 96 -  | 306 | 507  | 8883   | 9084   |
| UN39418 | Rsa1.0.37242.1 | 927  | 605    | 1.00E-161 | 329  | 339  | 97 -  | 573 | 909  | 1      | 337    |
| UN39419 | Rsa1.0.00374.1 | 665  | 165738 | 0         | 382  | 382  | 100 + | 3   | 384  | 158296 | 158677 |
| UN39420 | Rsa1.0.00002.1 | 635  | 601661 | 0         | 604  | 629  | 96 +  | 11  | 633  | 273872 | 274500 |
| UN39421 | Rsa1.0.02197.1 | 1153 | 33996  | 1.00E-126 | 439  | 514  | 85 -  | 627 | 1119 | 30444  | 30957  |
| UN39422 | Rsa1.0.08946.1 | 1876 | 6763   | 0         | 542  | 543  | 99 +  | 382 | 924  | 4367   | 4909   |
| UN39423 | Rsa1.0.00341.1 | 699  | 249309 | 1.00E-140 | 252  | 252  | 100 + | 1   | 252  | 128445 | 128696 |
| UN39424 | Rsa1.0.01010.1 | 735  | 56906  | 1.00E-166 | 348  | 365  | 95 -  | 374 | 734  | 15547  | 15911  |
| UN39425 | Rsa1.0.12394.1 | 447  | 5237   | 1.00E-101 | 187  | 187  | 100 + | 57  | 243  | 108    | 294    |
| UN39426 | Rsa1.0.00901.1 | 1243 | 60363  | 0         | 419  | 419  | 100 - | 437 | 855  | 15639  | 16057  |
| UN39427 | Rsa1.0.14327.1 | 653  | 3518   | 0         | 398  | 415  | 95 +  | 237 | 651  | 233    | 642    |

|         |                |      |        |           |     |     |       |     |      |        |        |
|---------|----------------|------|--------|-----------|-----|-----|-------|-----|------|--------|--------|
| UN39428 | Rsa1.0_10978.1 | 1101 | 5657   | 0         | 640 | 645 | 99 +  | 2   | 646  | 430    | 1074   |
| UN39429 | Rsa1.0_01292.1 | 715  | 175783 | 0         | 561 | 578 | 97 +  | 1   | 575  | 144783 | 145360 |
| UN39430 | Rsa1.0_03579.1 | 1102 | 21969  | 1.00E-156 | 377 | 403 | 93 -  | 1   | 398  | 18958  | 19359  |
| UN39431 | Rsa1.0_01482.1 | 289  | 44855  | 1.00E-108 | 266 | 286 | 93 +  | 4   | 289  | 11984  | 12266  |
| UN39432 | Rsa1.0_00269.1 | 919  | 341668 | 1.00E-121 | 284 | 300 | 94 -  | 1   | 297  | 45769  | 46066  |
| UN39433 | Rsa1.0_00380.1 | 700  | 89748  | 1.00E-127 | 336 | 369 | 91 +  | 334 | 700  | 88066  | 88417  |
| UN39434 | Rsa1.0_03424.1 | 674  | 23064  | 0         | 660 | 661 | 99 -  | 12  | 672  | 8653   | 9313   |
| UN39435 | Rsa1.0_00645.1 | 1615 | 189716 | 4.00E-94  | 176 | 176 | 100 + | 406 | 581  | 146824 | 146999 |
| UN39436 | Rsa1.0_00059.1 | 643  | 159650 | 1.00E-149 | 304 | 311 | 97 +  | 4   | 310  | 123648 | 123957 |
| UN39437 | Rsa1.0_02379.1 | 798  | 150705 | 0         | 373 | 383 | 97 -  | 81  | 463  | 140540 | 140922 |
| UN39438 | Rsa1.0_01668.1 | 804  | 41299  | 1.00E-139 | 281 | 291 | 96 -  | 90  | 380  | 40399  | 40689  |
| UN39439 | Rsa1.0_02105.1 | 808  | 156953 | 1.00E-172 | 346 | 359 | 96 -  | 230 | 588  | 149700 | 150058 |
| UN39440 | Rsa1.0_00869.1 | 673  | 61627  | 1.00E-125 | 336 | 366 | 91 -  | 316 | 672  | 53858  | 54221  |
| UN39441 | Rsa1.0_00079.1 | 599  | 606987 | 1.00E-145 | 309 | 323 | 95 +  | 279 | 599  | 536507 | 536827 |
| UN39442 | Rsa1.0_00244.1 | 1036 | 103590 | 0         | 444 | 476 | 93 -  | 562 | 1034 | 29933  | 30395  |
| UN39443 | Rsa1.0_01843.1 | 751  | 265131 | 1.00E-164 | 302 | 305 | 99 -  | 360 | 664  | 9831   | 10135  |
| UN39444 | Rsa1.0_00026.1 | 939  | 327835 | 0         | 930 | 937 | 99 -  | 3   | 939  | 25718  | 26654  |
| UN39445 | Rsa1.0_00502.1 | 741  | 204180 | 0         | 527 | 578 | 91 -  | 68  | 633  | 63796  | 64361  |
| UN39446 | Rsa1.0_04890.1 | 1243 | 15591  | 1.00E-118 | 259 | 273 | 94 +  | 971 | 1238 | 11260  | 11532  |
| UN39447 | Rsa1.0_03503.1 | 717  | 22445  | 1.00E-175 | 312 | 312 | 100 + | 406 | 717  | 10636  | 10947  |
| UN39448 | Rsa1.0_00058.1 | 1427 | 159921 | 1.00E-117 | 230 | 235 | 97 +  | 697 | 931  | 92939  | 93173  |
| UN39449 | Rsa1.0_00241.1 | 996  | 104000 | 1.00E-145 | 321 | 339 | 94 -  | 660 | 996  | 65480  | 65816  |
| UN39450 | Rsa1.0_01716.1 | 878  | 40483  | 1.00E-154 | 326 | 340 | 95 -  | 3   | 334  | 33499  | 33838  |
| UN39451 | Rsa1.0_02345.1 | 725  | 32337  | 4.00E-89  | 252 | 279 | 90 -  | 5   | 270  | 15392  | 15667  |
| UN39452 | Rsa1.0_00248.1 | 884  | 163568 | 0         | 665 | 697 | 95 -  | 193 | 884  | 40144  | 40834  |
| UN39453 | Rsa1.0_00017.1 | 692  | 752458 | 4.00E-92  | 188 | 192 | 97 +  | 471 | 662  | 661547 | 661737 |
| UN39454 | Rsa1.0_00698.1 | 1063 | 67816  | 1.00E-102 | 202 | 206 | 98 +  | 619 | 824  | 21216  | 21421  |
| UN39455 | Rsa1.0_00651.1 | 1022 | 247766 | 6.00E-83  | 282 | 317 | 88 -  | 702 | 1013 | 90223  | 90524  |
| UN39456 | Rsa1.0_00055.1 | 552  | 520193 | 1.00E-149 | 282 | 287 | 98 -  | 229 | 515  | 353    | 639    |
| UN39457 | Rsa1.0_02367.1 | 379  | 32106  | 9.00E-89  | 203 | 214 | 94 -  | 1   | 214  | 27423  | 27635  |
| UN39458 | Rsa1.0_01009.1 | 623  | 56922  | 1.00E-142 | 274 | 280 | 97 -  | 4   | 283  | 3613   | 3892   |
| UN39459 | Rsa1.0_00069.1 | 797  | 403561 | 1.00E-110 | 256 | 270 | 94 +  | 1   | 266  | 169766 | 170031 |
| UN39460 | Rsa1.0_01116.1 | 874  | 142088 | 0         | 665 | 703 | 94 -  | 176 | 871  | 129756 | 130455 |
| UN39461 | Rsa1.0_00071.1 | 722  | 345714 | 1.00E-122 | 258 | 267 | 96 -  | 463 | 722  | 324470 | 324736 |
| UN39462 | Rsa1.0_03491.1 | 692  | 22541  | 7.00E-94  | 397 | 471 | 84 -  | 93  | 563  | 9065   | 9535   |
| UN39463 | Rsa1.0_00116.1 | 526  | 365886 | 1.00E-104 | 232 | 244 | 95 +  | 283 | 526  | 33998  | 34240  |
| UN39464 | Rsa1.0_00332.1 | 1249 | 94575  | 0         | 526 | 527 | 99 -  | 1   | 527  | 73460  | 73985  |
| UN39465 | Rsa1.0_04121.1 | 605  | 18951  | 0         | 462 | 481 | 96 -  | 5   | 485  | 13882  | 14362  |
| UN39466 | Rsa1.0_00869.1 | 684  | 61627  | 1.00E-128 | 345 | 373 | 92 -  | 322 | 680  | 53852  | 54222  |

|         |                |      |        |           |      |      |       |      |      |        |        |
|---------|----------------|------|--------|-----------|------|------|-------|------|------|--------|--------|
| UN39467 | Rsa1.0.02922.1 | 870  | 26753  | 1.00E-120 | 277  | 294  | 94 -  | 547  | 839  | 12399  | 12689  |
| UN39468 | Rsa1.0.05653.1 | 604  | 13043  | 0         | 576  | 603  | 95 +  | 3    | 603  | 10801  | 11402  |
| UN39469 | Rsa1.0.00088.1 | 972  | 141341 | 0         | 324  | 324  | 100 + | 1    | 324  | 5585   | 5908   |
| UN39470 | Rsa1.0.42411.1 | 687  | 529    | 1.00E-112 | 216  | 218  | 99 -  | 1    | 218  | 2      | 218    |
| UN39471 | Rsa1.0.02923.1 | 745  | 26736  | 1.00E-124 | 328  | 356  | 92 -  | 392  | 745  | 15751  | 16101  |
| UN39472 | Rsa1.0.00528.1 | 716  | 164755 | 1.00E-177 | 315  | 315  | 100 - | 402  | 716  | 154920 | 155234 |
| UN39473 | Rsa1.0.02252.1 | 1103 | 33375  | 0         | 583  | 583  | 100 - | 521  | 1103 | 27417  | 27999  |
| UN39474 | Rsa1.0.02226.1 | 903  | 33726  | 1.00E-102 | 277  | 306  | 90 -  | 605  | 901  | 10100  | 10395  |
| UN39475 | Rsa1.0.07936.1 | 657  | 8228   | 6.00E-85  | 169  | 171  | 98 +  | 489  | 657  | 4275   | 4445   |
| UN39476 | Rsa1.0.00015.1 | 751  | 561803 | 1.00E-149 | 416  | 468  | 88 +  | 115  | 569  | 483122 | 483579 |
| UN39477 | Rsa1.0.01246.1 | 863  | 49968  | 0         | 488  | 503  | 97 +  | 54   | 556  | 26897  | 27399  |
| UN39478 | Rsa1.0.00602.1 | 825  | 73302  | 0         | 567  | 568  | 99 +  | 3    | 570  | 28643  | 29210  |
| UN39479 | Rsa1.0.01526.1 | 1460 | 43919  | 0         | 1413 | 1466 | 96 +  | 3    | 1459 | 29403  | 30860  |
| UN39480 | Rsa1.0.00978.1 | 467  | 57739  | 1.00E-35  | 112  | 121  | 92 -  | 4    | 123  | 4434   | 4553   |
| UN39481 | Rsa1.0.04153.1 | 706  | 18807  | 0         | 703  | 704  | 99 -  | 3    | 706  | 15748  | 16451  |
| UN39482 | Rsa1.0.00281.1 | 846  | 99908  | 0         | 419  | 439  | 95 -  | 414  | 846  | 24104  | 24539  |
| UN39483 | Rsa1.0.00251.1 | 1504 | 303968 | 0         | 564  | 564  | 100 - | 387  | 950  | 142909 | 143472 |
| UN39484 | Rsa1.0.00663.1 | 489  | 164969 | 0         | 336  | 337  | 99 +  | 3    | 339  | 120782 | 121117 |
| UN39485 | Rsa1.0.03605.1 | 768  | 21827  | 1.00E-122 | 343  | 376  | 91 -  | 371  | 733  | 14390  | 14765  |
| UN39486 | Rsa1.0.00742.1 | 808  | 66106  | 1.00E-128 | 265  | 275  | 96 -  | 536  | 808  | 16575  | 16849  |
| UN39487 | Rsa1.0.00727.1 | 974  | 66724  | 0         | 349  | 354  | 98 +  | 3    | 355  | 30084  | 30437  |
| UN39488 | Rsa1.0.00253.1 | 904  | 231292 | 9.00E-57  | 119  | 121  | 98 -  | 204  | 324  | 86232  | 86352  |
| UN39489 | Rsa1.0.00679.1 | 989  | 68971  | 0         | 987  | 987  | 100 - | 1    | 987  | 64437  | 65423  |
| UN39490 | Rsa1.0.00005.1 | 514  | 353093 | 1.00E-144 | 260  | 260  | 100 - | 3    | 262  | 143016 | 143275 |
| UN39491 | Rsa1.0.03381.1 | 755  | 23306  | 0         | 465  | 465  | 100 - | 291  | 755  | 11568  | 12032  |
| UN39492 | Rsa1.0.00171.1 | 818  | 115622 | 1.00E-130 | 242  | 244  | 99 -  | 575  | 818  | 1283   | 1526   |
| UN39493 | Rsa1.0.00061.1 | 685  | 218685 | 0         | 454  | 455  | 99 -  | 1    | 455  | 186019 | 186473 |
| UN39494 | Rsa1.0.00089.1 | 958  | 406142 | 0         | 622  | 622  | 100 - | 337  | 958  | 232197 | 232818 |
| UN39495 | Rsa1.0.04110.1 | 728  | 18998  | 1.00E-119 | 254  | 265  | 95 -  | 462  | 726  | 4839   | 5102   |
| UN39496 | Rsa1.0.00630.1 | 1068 | 71281  | 1.00E-171 | 347  | 359  | 96 +  | 2    | 356  | 59325  | 59683  |
| UN39497 | Rsa1.0.19770.1 | 1068 | 1385   | 1.00E-169 | 350  | 368  | 95 +  | 3    | 370  | 452    | 808    |
| UN39498 | Rsa1.0.00194.1 | 1289 | 110851 | 1.00E-136 | 247  | 247  | 100 - | 2    | 248  | 102093 | 102339 |
| UN39499 | Rsa1.0.02573.1 | 522  | 29955  | 0         | 381  | 381  | 100 + | 1    | 381  | 9289   | 9669   |
| UN39500 | Rsa1.0.01880.1 | 1028 | 37745  | 0         | 1024 | 1026 | 99 +  | 3    | 1028 | 18262  | 19287  |
| UN39501 | Rsa1.0.00347.1 | 1690 | 93048  | 0         | 435  | 435  | 100 + | 1256 | 1690 | 12000  | 12434  |
| UN39502 | Rsa1.0.04378.1 | 807  | 17651  | 0         | 344  | 351  | 98 -  | 136  | 486  | 4630   | 4980   |
| UN39503 | Rsa1.0.01020.1 | 1584 | 56619  | 0         | 354  | 354  | 100 + | 1230 | 1583 | 34373  | 34726  |
| UN39504 | Rsa1.0.00772.1 | 928  | 64856  | 7.00E-64  | 140  | 145  | 96 +  | 167  | 311  | 6216   | 6360   |
| UN39505 | Rsa1.0.03264.1 | 713  | 145959 | 1.00E-156 | 282  | 283  | 99 +  | 415  | 697  | 134142 | 134424 |

|         |                |      |        |           |     |     |       |      |      |        |        |
|---------|----------------|------|--------|-----------|-----|-----|-------|------|------|--------|--------|
| UN39506 | Rsa1.0.02320.1 | 765  | 32575  | 0         | 378 | 380 | 99 -  | 3    | 382  | 16369  | 16748  |
| UN39507 | Rsa1.0.02280.1 | 876  | 33063  | 0         | 790 | 816 | 96 -  | 1    | 812  | 310    | 1124   |
| UN39508 | Rsa1.0.03583.1 | 643  | 21946  | 0         | 347 | 351 | 98 +  | 281  | 631  | 21107  | 21457  |
| UN39509 | Rsa1.0.10378.1 | 1128 | 5866   | 1.00E-123 | 296 | 318 | 93 +  | 811  | 1126 | 5556   | 5861   |
| UN39510 | Rsa1.0.05789.1 | 840  | 12620  | 0         | 795 | 829 | 95 -  | 11   | 839  | 7833   | 8660   |
| UN39511 | Rsa1.0.00010.1 | 519  | 294827 | 3.00E-89  | 200 | 211 | 94 +  | 186  | 396  | 247813 | 248023 |
| UN39512 | Rsa1.0.00651.1 | 881  | 247766 | 2.00E-94  | 176 | 176 | 100 - | 4    | 179  | 91917  | 92092  |
| UN39513 | Rsa1.0.18611.1 | 885  | 1565   | 0         | 429 | 450 | 95 -  | 1    | 450  | 957    | 1402   |
| UN39514 | Rsa1.0.00179.1 | 715  | 393324 | 1.00E-154 | 277 | 277 | 100 + | 439  | 715  | 250660 | 250936 |
| UN39515 | Rsa1.0.00381.1 | 723  | 89718  | 1.00E-168 | 338 | 351 | 96 +  | 371  | 721  | 75167  | 75517  |
| UN39516 | Rsa1.0.00693.1 | 983  | 161311 | 0         | 383 | 392 | 97 +  | 592  | 981  | 61031  | 61422  |
| UN39517 | Rsa1.0.01611.1 | 972  | 42269  | 0         | 384 | 388 | 98 -  | 585  | 972  | 24971  | 25358  |
| UN39518 | Rsa1.0.02834.1 | 700  | 27493  | 1.00E-176 | 369 | 384 | 96 +  | 315  | 696  | 24286  | 24667  |
| UN39519 | Rsa1.0.00213.1 | 704  | 108167 | 1.00E-110 | 287 | 311 | 92 -  | 399  | 704  | 14646  | 14954  |
| UN39520 | Rsa1.0.01880.1 | 1031 | 37745  | 0         | 953 | 999 | 95 +  | 36   | 1031 | 18288  | 19286  |
| UN39521 | Rsa1.0.00001.1 | 849  | 363028 | 1.00E-164 | 349 | 364 | 95 +  | 4    | 367  | 314900 | 315259 |
| UN39522 | Rsa1.0.00793.1 | 1047 | 64103  | 4.00E-93  | 201 | 209 | 96 +  | 99   | 305  | 36923  | 37131  |
| UN39523 | Rsa1.0.13891.1 | 428  | 4144   | 0         | 414 | 431 | 96 +  | 3    | 428  | 754    | 1181   |
| UN39524 | Rsa1.0.01078.1 | 513  | 316910 | 1.00E-144 | 266 | 267 | 99 -  | 11   | 276  | 290400 | 290666 |
| UN39525 | Rsa1.0.07051.1 | 715  | 9980   | 1.00E-118 | 216 | 216 | 100 - | 22   | 237  | 9243   | 9458   |
| UN39526 | Rsa1.0.05815.1 | 1166 | 12563  | 1.00E-148 | 267 | 267 | 100 + | 302  | 568  | 8883   | 9149   |
| UN39527 | Rsa1.0.01031.1 | 941  | 56236  | 1.00E-117 | 254 | 267 | 95 -  | 139  | 405  | 18106  | 18372  |
| UN39528 | Rsa1.0.02173.1 | 1126 | 34318  | 8.00E-98  | 267 | 297 | 89 +  | 828  | 1124 | 17284  | 17560  |
| UN39529 | Rsa1.0.18647.1 | 847  | 1560   | 1.00E-156 | 345 | 365 | 94 -  | 468  | 827  | 568    | 932    |
| UN39530 | Rsa1.0.00038.1 | 839  | 314568 | 1.00E-171 | 308 | 309 | 99 +  | 529  | 837  | 16997  | 17305  |
| UN39531 | Rsa1.0.05739.1 | 1010 | 12778  | 0         | 379 | 382 | 99 -  | 534  | 915  | 2243   | 2624   |
| UN39532 | Rsa1.0.02404.1 | 548  | 31702  | 0         | 348 | 356 | 97 +  | 140  | 495  | 907    | 1262   |
| UN39533 | Rsa1.0.00981.1 | 1554 | 57700  | 1.00E-140 | 278 | 284 | 97 -  | 1165 | 1446 | 13044  | 13326  |
| UN39534 | Rsa1.0.01896.1 | 763  | 37512  | 0         | 544 | 550 | 98 -  | 9    | 557  | 19518  | 20066  |
| UN39535 | Rsa1.0.00278.1 | 1359 | 231896 | 1.00E-161 | 291 | 292 | 99 +  | 772  | 1063 | 16257  | 16548  |
| UN39536 | Rsa1.0.00135.1 | 1292 | 178077 | 1.00E-159 | 288 | 289 | 99 +  | 343  | 631  | 165548 | 165836 |
| UN39537 | Rsa1.0.01214.1 | 1189 | 50599  | 0         | 418 | 423 | 98 +  | 770  | 1189 | 46274  | 46695  |
| UN39538 | Rsa1.0.00417.1 | 1216 | 395068 | 0         | 661 | 692 | 95 -  | 537  | 1214 | 258489 | 259179 |
| UN39539 | Rsa1.0.00027.1 | 1018 | 283362 | 0         | 332 | 332 | 100 - | 313  | 644  | 99118  | 99449  |
| UN39540 | Rsa1.0.00243.1 | 695  | 103651 | 1.00E-112 | 262 | 280 | 93 +  | 416  | 694  | 23261  | 23534  |
| UN39541 | Rsa1.0.01376.1 | 525  | 47004  | 1.00E-156 | 356 | 378 | 94 +  | 148  | 524  | 46244  | 46613  |
| UN39542 | Rsa1.0.19895.1 | 1122 | 1369   | 1.00E-126 | 244 | 249 | 97 -  | 874  | 1122 | 1099   | 1342   |
| UN39543 | Rsa1.0.00200.1 | 834  | 162016 | 1.00E-144 | 301 | 311 | 96 +  | 525  | 834  | 104953 | 105261 |
| UN39544 | Rsa1.0.11720.1 | 1647 | 5430   | 0         | 338 | 339 | 99 -  | 1309 | 1647 | 2358   | 2696   |



|         |                |      |        |           |     |     |       |     |     |        |        |
|---------|----------------|------|--------|-----------|-----|-----|-------|-----|-----|--------|--------|
| UN39545 | Rsa1.0.00079.1 | 824  | 606987 | 1.00E-120 | 278 | 295 | 94 -  | 3   | 291 | 41618  | 41911  |
| UN39546 | Rsa1.0.00088.1 | 807  | 141341 | 1.00E-161 | 288 | 288 | 100 + | 105 | 392 | 19012  | 19299  |
| UN39547 | Rsa1.0.01549.1 | 1222 | 43543  | 0         | 692 | 702 | 98 +  | 10  | 711 | 341    | 1042   |
| UN39548 | Rsa1.0.16704.1 | 888  | 2060   | 1.00E-165 | 356 | 376 | 94 -  | 513 | 888 | 121    | 493    |
| UN39549 | Rsa1.0.02053.1 | 808  | 35554  | 0         | 377 | 392 | 96 -  | 7   | 397 | 32532  | 32920  |
| UN39550 | Rsa1.0.00385.1 | 954  | 89160  | 1.00E-140 | 325 | 352 | 92 +  | 603 | 954 | 51732  | 52069  |
| UN39551 | Rsa1.0.18413.1 | 714  | 1603   | 1.00E-165 | 349 | 367 | 95 +  | 240 | 606 | 1151   | 1517   |
| UN39552 | Rsa1.0.00341.1 | 640  | 249309 | 1.00E-118 | 257 | 267 | 96 -  | 376 | 640 | 123974 | 124239 |
| UN39553 | Rsa1.0.00583.1 | 813  | 74309  | 1.00E-124 | 276 | 290 | 95 -  | 525 | 813 | 68474  | 68762  |
| UN39554 | Rsa1.0.03191.1 | 988  | 145762 | 1.00E-124 | 340 | 369 | 92 +  | 620 | 986 | 16325  | 16682  |
| UN39555 | Rsa1.0.00652.1 | 894  | 70089  | 1.00E-160 | 335 | 349 | 95 +  | 527 | 871 | 47920  | 48268  |
| UN39556 | Rsa1.0.00375.1 | 889  | 90207  | 0         | 421 | 438 | 96 +  | 453 | 889 | 2405   | 2837   |
| UN39557 | Rsa1.0.02226.1 | 858  | 33726  | 4.00E-71  | 242 | 281 | 86 +  | 1   | 260 | 10126  | 10395  |
| UN39558 | Rsa1.0.02282.1 | 926  | 163951 | 1.00E-171 | 311 | 313 | 99 +  | 614 | 926 | 150366 | 150678 |
| UN39559 | Rsa1.0.14083.1 | 599  | 3824   | 0         | 441 | 455 | 96 -  | 147 | 599 | 1214   | 1667   |
| UN39560 | Rsa1.0.10067.1 | 597  | 6015   | 1.00E-144 | 260 | 260 | 100 + | 337 | 596 | 24     | 283    |
| UN39561 | Rsa1.0.00594.1 | 760  | 73729  | 1.00E-118 | 222 | 224 | 99 +  | 3   | 226 | 29264  | 29487  |
| UN39562 | Rsa1.0.00706.1 | 815  | 291570 | 0         | 369 | 371 | 99 +  | 3   | 373 | 20669  | 21038  |
| UN39563 | Rsa1.0.01668.1 | 824  | 41299  | 0         | 414 | 431 | 96 -  | 397 | 824 | 33667  | 34096  |
| UN39564 | Rsa1.0.00060.1 | 821  | 502678 | 0         | 783 | 819 | 95 +  | 3   | 821 | 64706  | 65518  |
| UN39565 | Rsa1.0.02690.1 | 957  | 28629  | 1.00E-102 | 235 | 252 | 93 -  | 2   | 238 | 17941  | 18191  |
| UN39566 | Rsa1.0.03890.1 | 1138 | 20223  | 0         | 690 | 718 | 96 +  | 3   | 720 | 10379  | 11090  |
| UN39567 | Rsa1.0.00707.1 | 825  | 190112 | 1.00E-126 | 271 | 282 | 96 -  | 544 | 825 | 181036 | 181315 |
| UN39568 | Rsa1.0.00822.1 | 802  | 62891  | 1.00E-74  | 178 | 189 | 94 +  | 18  | 203 | 29940  | 30128  |
| UN39569 | Rsa1.0.00061.1 | 616  | 218685 | 0         | 598 | 619 | 96 +  | 2   | 615 | 185820 | 186436 |
| UN39570 | Rsa1.0.04450.1 | 788  | 17297  | 8.00E-94  | 175 | 175 | 100 + | 25  | 199 | 7472   | 7646   |
| UN39571 | Rsa1.0.00011.1 | 680  | 225044 | 0         | 518 | 539 | 96 -  | 145 | 680 | 213313 | 213851 |
| UN39572 | Rsa1.0.08459.1 | 1341 | 7315   | 0         | 325 | 325 | 100 - | 1   | 325 | 4884   | 5208   |
| UN39573 | Rsa1.0.01412.1 | 284  | 46311  | 1.00E-130 | 270 | 281 | 96 -  | 1   | 281 | 2358   | 2635   |
| UN39574 | Rsa1.0.00011.1 | 790  | 225044 | 0         | 549 | 583 | 94 -  | 200 | 779 | 213269 | 213851 |
| UN39575 | Rsa1.0.02253.1 | 608  | 33356  | 1.00E-100 | 198 | 202 | 98 -  | 331 | 532 | 25141  | 25342  |
| UN39576 | Rsa1.0.09527.1 | 1073 | 6311   | 1.00E-143 | 297 | 310 | 95 -  | 512 | 821 | 5870   | 6179   |
| UN39577 | Rsa1.0.00158.1 | 750  | 117999 | 1.00E-83  | 177 | 182 | 97 -  | 74  | 255 | 100334 | 100514 |
| UN39578 | Rsa1.0.00317.1 | 740  | 218290 | 6.00E-70  | 147 | 151 | 97 -  | 80  | 230 | 73990  | 74140  |
| UN39579 | Rsa1.0.00480.1 | 1253 | 81325  | 1.00E-167 | 313 | 318 | 98 +  | 74  | 391 | 52512  | 52829  |
| UN39580 | Rsa1.0.03640.1 | 861  | 21624  | 1.00E-145 | 406 | 457 | 88 -  | 430 | 861 | 15552  | 16000  |
| UN39581 | Rsa1.0.01389.1 | 1008 | 46716  | 0         | 378 | 391 | 96 +  | 4   | 392 | 9775   | 10165  |
| UN39582 | Rsa1.0.02173.1 | 1158 | 34318  | 1.00E-110 | 215 | 218 | 98 +  | 3   | 220 | 15521  | 15737  |
| UN39583 | Rsa1.0.00078.1 | 1064 | 175053 | 0         | 494 | 509 | 97 -  | 51  | 559 | 41372  | 41880  |

|         |                |      |        |           |     |     |       |      |      |        |        |
|---------|----------------|------|--------|-----------|-----|-----|-------|------|------|--------|--------|
| UN39584 | Rsa1.0.00275.1 | 755  | 210104 | 0         | 370 | 378 | 97 +  | 2    | 376  | 164418 | 164795 |
| UN39585 | Rsa1.0.00111.1 | 1508 | 390088 | 1.00E-112 | 225 | 231 | 97 -  | 614  | 844  | 382034 | 382264 |
| UN39586 | Rsa1.0.00197.1 | 634  | 109714 | 1.00E-127 | 252 | 259 | 97 -  | 376  | 634  | 78040  | 78298  |
| UN39587 | Rsa1.0.03306.1 | 658  | 23873  | 0         | 404 | 429 | 94 +  | 221  | 649  | 12625  | 13045  |
| UN39588 | Rsa1.0.00459.1 | 789  | 82580  | 0         | 424 | 443 | 95 -  | 7    | 439  | 41955  | 42397  |
| UN39589 | Rsa1.0.00552.1 | 640  | 206757 | 1.00E-124 | 308 | 332 | 92 -  | 313  | 640  | 70044  | 70374  |
| UN39590 | Rsa1.0.00644.1 | 1031 | 136881 | 2.00E-95  | 196 | 202 | 97 -  | 430  | 631  | 63427  | 63628  |
| UN39591 | Rsa1.0.00394.1 | 801  | 148426 | 2.00E-85  | 182 | 189 | 96 -  | 135  | 323  | 123689 | 123877 |
| UN39592 | #              | #    | #      | #         | #   | #   | #     | #    | #    | #      | #      |
| UN39593 | Rsa1.0.00030.1 | 406  | 250988 | 1.00E-91  | 243 | 258 | 94 -  | 150  | 406  | 149394 | 149644 |
| UN39594 | Rsa1.0.03818.1 | 829  | 20668  | 0         | 806 | 856 | 94 -  | 1    | 829  | 19676  | 20531  |
| UN39595 | Rsa1.0.06386.1 | 996  | 140583 | 0         | 995 | 996 | 99 -  | 1    | 996  | 134507 | 135502 |
| UN39596 | Rsa1.0.02146.1 | 866  | 34625  | 0         | 768 | 774 | 99 +  | 93   | 866  | 17172  | 17945  |
| UN39597 | Rsa1.0.00301.1 | 795  | 365315 | 1.00E-141 | 337 | 367 | 91 -  | 3    | 357  | 346680 | 347040 |
| UN39598 | Rsa1.0.00480.1 | 740  | 81325  | 0         | 459 | 478 | 96 +  | 281  | 740  | 18939  | 19416  |
| UN39599 | Rsa1.0.02859.1 | 755  | 162118 | 0         | 741 | 751 | 98 -  | 7    | 753  | 153886 | 154635 |
| UN39600 | Rsa1.0.03605.1 | 683  | 21827  | 1.00E-113 | 291 | 313 | 92 +  | 26   | 332  | 14455  | 14765  |
| UN39601 | Rsa1.0.15186.1 | 896  | 2772   | 1.00E-74  | 155 | 159 | 97 -  | 110  | 268  | 1966   | 2124   |
| UN39602 | Rsa1.0.00112.1 | 979  | 132199 | 0         | 683 | 731 | 93 +  | 256  | 975  | 55783  | 56503  |
| UN39603 | Rsa1.0.06336.1 | 857  | 11215  | 0         | 645 | 676 | 95 +  | 184  | 857  | 6954   | 7624   |
| UN39604 | Rsa1.0.09762.1 | 738  | 6164   | 0         | 327 | 329 | 99 -  | 410  | 738  | 1102   | 1430   |
| UN39605 | Rsa1.0.00104.1 | 555  | 368722 | 1.00E-128 | 232 | 232 | 100 - | 126  | 357  | 211493 | 211724 |
| UN39606 | Rsa1.0.00589.1 | 1581 | 209965 | 0         | 478 | 478 | 100 + | 1104 | 1581 | 152952 | 153429 |
| UN39607 | Rsa1.0.01488.1 | 1493 | 44766  | 0         | 725 | 725 | 100 - | 769  | 1493 | 32304  | 33028  |
| UN39608 | Rsa1.0.18748.1 | 684  | 1541   | 1.00E-148 | 309 | 322 | 95 +  | 364  | 684  | 186    | 507    |
| UN39609 | Rsa1.0.00760.1 | 945  | 65267  | 8.00E-76  | 223 | 254 | 87 -  | 692  | 937  | 51880  | 52116  |
| UN39610 | Rsa1.0.02658.1 | 1354 | 28978  | 1.00E-175 | 387 | 415 | 93 -  | 958  | 1353 | 5432   | 5846   |
| UN39611 | Rsa1.0.00079.1 | 938  | 606987 | 1.00E-133 | 270 | 279 | 96 -  | 20   | 295  | 41618  | 41896  |
| UN39612 | Rsa1.0.03001.1 | 746  | 26108  | 1.00E-119 | 276 | 295 | 93 -  | 455  | 744  | 9416   | 9707   |
| UN39613 | Rsa1.0.00472.1 | 1230 | 398134 | 0         | 367 | 376 | 97 -  | 559  | 934  | 166845 | 167220 |
| UN39614 | Rsa1.0.09200.1 | 786  | 6562   | 1.00E-155 | 317 | 330 | 96 -  | 457  | 786  | 5984   | 6313   |
| UN39615 | Rsa1.0.03439.1 | 816  | 22930  | 0         | 715 | 741 | 96 +  | 76   | 815  | 14985  | 15723  |
| UN39616 | Rsa1.0.02040.1 | 1508 | 35684  | 0         | 446 | 449 | 99 -  | 5    | 453  | 15642  | 16090  |
| UN39617 | Rsa1.0.01292.1 | 842  | 175783 | 1.00E-120 | 259 | 271 | 95 +  | 579  | 842  | 149086 | 149356 |
| UN39618 | Rsa1.0.00552.1 | 579  | 206757 | 1.00E-102 | 262 | 283 | 92 +  | 4    | 280  | 72824  | 73102  |
| UN39619 | Rsa1.0.00131.1 | 559  | 432233 | 1.00E-132 | 263 | 271 | 97 -  | 289  | 559  | 259328 | 259598 |
| UN39620 | Rsa1.0.01187.1 | 750  | 51377  | 1.00E-123 | 243 | 248 | 97 -  | 2    | 249  | 31230  | 31475  |
| UN39621 | Rsa1.0.01005.1 | 623  | 56967  | 1.00E-105 | 194 | 194 | 100 - | 143  | 336  | 36763  | 36956  |
| UN39622 | Rsa1.0.00526.1 | 746  | 169279 | 0         | 560 | 583 | 96 +  | 3    | 578  | 126167 | 126742 |

|         |                |      |        |           |     |      |       |     |      |        |        |
|---------|----------------|------|--------|-----------|-----|------|-------|-----|------|--------|--------|
| UN39623 | Rsa1.0.02105.1 | 842  | 156953 | 0         | 394 | 407  | 96 +  | 14  | 420  | 150761 | 151165 |
| UN39624 | Rsa1.0.00089.1 | 956  | 406142 | 8.00E-73  | 140 | 140  | 100 + | 176 | 315  | 162197 | 162336 |
| UN39625 | Rsa1.0.00707.1 | 800  | 190112 | 1.00E-133 | 265 | 273  | 97 +  | 395 | 667  | 188378 | 188650 |
| UN39626 | Rsa1.0.00008.1 | 339  | 358124 | 1.00E-151 | 306 | 318  | 96 -  | 1   | 318  | 39412  | 39729  |
| UN39627 | Rsa1.0.00863.1 | 978  | 254535 | 0         | 596 | 620  | 96 -  | 362 | 978  | 251954 | 252566 |
| UN39628 | Rsa1.0.00363.1 | 409  | 90968  | 1.00E-172 | 306 | 306  | 100 + | 104 | 409  | 53874  | 54179  |
| UN39629 | Rsa1.0.01928.1 | 1629 | 37192  | 6.00E-53  | 172 | 192  | 89 -  | 380 | 571  | 6227   | 6413   |
| UN39630 | Rsa1.0.01377.1 | 1072 | 46967  | 1.00E-179 | 325 | 327  | 99 -  | 44  | 370  | 24880  | 25206  |
| UN39631 | Rsa1.0.00197.1 | 639  | 109714 | 1.00E-177 | 314 | 314  | 100 - | 45  | 358  | 78615  | 78928  |
| UN39632 | Rsa1.0.00163.1 | 700  | 116847 | 1.00E-135 | 287 | 301  | 95 -  | 314 | 614  | 66573  | 66873  |
| UN39633 | Rsa1.0.01068.1 | 884  | 55208  | 1.00E-164 | 330 | 342  | 96 +  | 541 | 882  | 46500  | 46837  |
| UN39634 | Rsa1.0.12119.1 | 887  | 5311   | 1.00E-135 | 276 | 285  | 96 +  | 14  | 298  | 4573   | 4856   |
| UN39635 | Rsa1.0.13819.1 | 993  | 4264   | 1.00E-126 | 233 | 234  | 99 +  | 3   | 236  | 2313   | 2546   |
| UN39636 | Rsa1.0.00812.1 | 548  | 63233  | 2.33E-156 | 293 | 302  | 97 +  | 10  | 310  | 17154  | 17455  |
| UN39637 | Rsa1.0.00394.1 | 946  | 148426 | 0         | 381 | 391  | 97 -  | 242 | 629  | 129296 | 129686 |
| UN39638 | Rsa1.0.00203.1 | 838  | 109129 | 1.00E-131 | 237 | 237  | 100 - | 602 | 838  | 2786   | 3022   |
| UN39639 | Rsa1.0.01880.1 | 1152 | 37745  | 0         | 960 | 1013 | 94 +  | 88  | 1097 | 18294  | 19297  |
| UN39640 | Rsa1.0.02455.1 | 886  | 31262  | 0         | 468 | 495  | 94 +  | 365 | 839  | 25408  | 25902  |
| UN39641 | Rsa1.0.01286.1 | 698  | 49209  | 0         | 535 | 555  | 96 -  | 143 | 696  | 3970   | 4521   |
| UN39642 | Rsa1.0.25755.1 | 586  | 922    | 0         | 476 | 488  | 97 +  | 99  | 586  | 1      | 488    |
| UN39643 | Rsa1.0.07936.1 | 687  | 8228   | 6.00E-85  | 187 | 196  | 95 +  | 5   | 200  | 3335   | 3530   |
| UN39644 | Rsa1.0.00387.1 | 674  | 495407 | 0         | 662 | 672  | 98 -  | 1   | 672  | 468131 | 468797 |
| UN39645 | Rsa1.0.01123.1 | 1282 | 53359  | 0         | 404 | 405  | 99 +  | 2   | 405  | 14653  | 15057  |
| UN39646 | Rsa1.0.02226.1 | 850  | 33726  | 2.00E-64  | 158 | 166  | 95 -  | 604 | 767  | 10230  | 10395  |
| UN39647 | Rsa1.0.02442.1 | 482  | 31355  | 1.00E-111 | 241 | 255  | 94 -  | 238 | 482  | 12550  | 12804  |
| UN39648 | Rsa1.0.00583.1 | 807  | 74309  | 1.00E-113 | 275 | 293  | 93 +  | 1   | 288  | 68471  | 68762  |
| UN39649 | Rsa1.0.03618.1 | 1054 | 21744  | 1.00E-123 | 234 | 236  | 99 +  | 5   | 240  | 11086  | 11319  |
| UN39650 | Rsa1.0.00142.1 | 891  | 121474 | 0         | 435 | 447  | 97 -  | 69  | 515  | 62984  | 63430  |
| UN39651 | Rsa1.0.10313.1 | 807  | 5892   | 1.00E-179 | 387 | 407  | 95 +  | 403 | 807  | 639    | 1040   |
| UN39652 | Rsa1.0.07591.1 | 668  | 9060   | 1.00E-119 | 275 | 292  | 94 +  | 377 | 664  | 6177   | 6468   |
| UN39653 | Rsa1.0.06619.1 | 764  | 10650  | 1.00E-161 | 336 | 349  | 96 -  | 415 | 762  | 528    | 871    |
| UN39654 | Rsa1.0.04714.1 | 994  | 146738 | 0         | 489 | 506  | 96 +  | 487 | 992  | 139509 | 140009 |
| UN39655 | Rsa1.0.00731.1 | 856  | 66638  | 1.00E-116 | 216 | 217  | 99 +  | 640 | 856  | 12178  | 12394  |
| UN39656 | Rsa1.0.00594.1 | 726  | 73729  | 5.00E-92  | 248 | 267  | 92 -  | 1   | 263  | 30039  | 30303  |
| UN39657 | Rsa1.0.07984.1 | 1053 | 8130   | 0         | 420 | 430  | 97 -  | 13  | 442  | 5900   | 6329   |
| UN39658 | Rsa1.0.33878.1 | 900  | 669    | 1.00E-174 | 319 | 322  | 99 +  | 418 | 739  | 161    | 482    |
| UN39659 | Rsa1.0.00007.1 | 924  | 239325 | 0         | 428 | 444  | 96 -  | 19  | 462  | 210122 | 210565 |
| UN39660 | Rsa1.0.00088.1 | 721  | 141341 | 1.00E-116 | 218 | 220  | 99 +  | 351 | 570  | 19396  | 19615  |
| UN39661 | Rsa1.0.05633.1 | 430  | 13118  | 1.00E-111 | 280 | 303  | 92 -  | 1   | 297  | 4032   | 4333   |

|         |                |      |        |           |     |     |       |     |      |        |        |
|---------|----------------|------|--------|-----------|-----|-----|-------|-----|------|--------|--------|
| UN39662 | Rsa1.0.01042.1 | 723  | 293264 | 0         | 436 | 472 | 92 -  | 250 | 720  | 154039 | 154510 |
| UN39663 | Rsa1.0.01921.1 | 878  | 168088 | 0         | 428 | 435 | 98 +  | 444 | 878  | 150633 | 151067 |
| UN39664 | Rsa1.0.00552.1 | 633  | 206757 | 6.00E-91  | 188 | 194 | 96 -  | 300 | 493  | 72909  | 73102  |
| UN39665 | Rsa1.0.01292.1 | 789  | 175783 | 1.00E-108 | 215 | 220 | 97 -  | 26  | 245  | 149086 | 149305 |
| UN39666 | Rsa1.0.00380.1 | 710  | 89748  | 0         | 362 | 365 | 99 -  | 1   | 365  | 88066  | 88430  |
| UN39667 | Rsa1.0.03306.1 | 658  | 23873  | 0         | 404 | 429 | 94 +  | 221 | 649  | 12625  | 13045  |
| UN39668 | Rsa1.0.00019.1 | 787  | 301669 | 0         | 431 | 465 | 92 -  | 324 | 786  | 293049 | 293498 |
| UN39669 | Rsa1.0.03278.1 | 983  | 24125  | 1.00E-117 | 269 | 284 | 94 -  | 707 | 981  | 1989   | 2271   |
| UN39670 | Rsa1.0.01938.1 | 885  | 264018 | 0         | 595 | 636 | 93 -  | 252 | 885  | 159646 | 160265 |
| UN39671 | Rsa1.0.03297.1 | 568  | 23969  | 1.00E-125 | 309 | 333 | 92 +  | 16  | 343  | 14220  | 14552  |
| UN39672 | Rsa1.0.02105.1 | 1064 | 156953 | 0         | 356 | 367 | 97 -  | 225 | 591  | 149700 | 150066 |
| UN39673 | Rsa1.0.06213.1 | 822  | 11478  | 0         | 426 | 448 | 95 +  | 25  | 465  | 1089   | 1535   |
| UN39674 | Rsa1.0.01410.1 | 765  | 46345  | 1.00E-171 | 328 | 336 | 97 +  | 111 | 446  | 33684  | 34019  |
| UN39675 | Rsa1.0.00344.1 | 624  | 191774 | 1.00E-89  | 206 | 219 | 94 -  | 412 | 624  | 156243 | 156461 |
| UN39676 | Rsa1.0.01660.1 | 675  | 41400  | 1.00E-113 | 272 | 292 | 93 +  | 371 | 661  | 32286  | 32573  |
| UN39677 | Rsa1.0.00552.1 | 732  | 206757 | 1.00E-141 | 327 | 348 | 93 -  | 390 | 732  | 70027  | 70374  |
| UN39678 | Rsa1.0.00097.1 | 675  | 138858 | 0         | 360 | 363 | 99 -  | 313 | 675  | 13991  | 14353  |
| UN39679 | Rsa1.0.22508.1 | 591  | 1115   | 0         | 480 | 481 | 99 +  | 1   | 481  | 625    | 1105   |
| UN39680 | Rsa1.0.02505.1 | 718  | 30703  | 0         | 437 | 441 | 99 +  | 278 | 718  | 21664  | 22104  |
| UN39681 | Rsa1.0.00241.1 | 592  | 104000 | 2.00E-93  | 180 | 182 | 98 -  | 358 | 539  | 64432  | 64613  |
| UN39682 | Rsa1.0.00553.1 | 967  | 75983  | 1.00E-90  | 170 | 170 | 100 + | 544 | 713  | 2493   | 2662   |
| UN39683 | Rsa1.0.00203.1 | 1148 | 109129 | 0         | 631 | 648 | 97 -  | 1   | 647  | 38683  | 39328  |
| UN39684 | Rsa1.0.02205.1 | 764  | 33923  | 0         | 654 | 676 | 96 -  | 4   | 679  | 5335   | 6007   |
| UN39685 | Rsa1.0.02872.1 | 899  | 27080  | 0         | 518 | 531 | 97 +  | 1   | 531  | 11219  | 11749  |
| UN39686 | Rsa1.0.00029.1 | 698  | 272992 | 1.00E-156 | 306 | 314 | 97 -  | 388 | 698  | 10255  | 10568  |
| UN39687 | Rsa1.0.01635.1 | 683  | 41865  | 0         | 646 | 682 | 94 -  | 3   | 683  | 15918  | 16592  |
| UN39688 | Rsa1.0.00351.1 | 189  | 413096 | 2.00E-88  | 183 | 189 | 96 -  | 1   | 189  | 269302 | 269490 |
| UN39689 | Rsa1.0.01295.1 | 240  | 49040  | 1.00E-110 | 231 | 240 | 96 -  | 2   | 239  | 40223  | 40462  |
| UN39690 | Rsa1.0.04224.1 | 864  | 18402  | 1.00E-165 | 335 | 346 | 96 -  | 3   | 348  | 703    | 1046   |
| UN39691 | Rsa1.0.00369.1 | 771  | 266462 | 2.33E-156 | 371 | 407 | 91 +  | 269 | 675  | 192839 | 193245 |
| UN39692 | Rsa1.0.10503.1 | 1022 | 5824   | 1.00E-143 | 318 | 339 | 93 -  | 670 | 1007 | 1941   | 2262   |
| UN39693 | Rsa1.0.00639.1 | 961  | 165873 | 0         | 913 | 945 | 96 +  | 16  | 960  | 128431 | 129375 |
| UN39694 | Rsa1.0.00646.1 | 934  | 70473  | 1.00E-108 | 281 | 303 | 92 -  | 640 | 934  | 5952   | 6253   |
| UN39695 | Rsa1.0.00384.1 | 938  | 89278  | 1.00E-147 | 327 | 352 | 92 -  | 3   | 336  | 62852  | 63203  |
| UN39696 | Rsa1.0.06303.1 | 943  | 11268  | 1.00E-122 | 240 | 246 | 97 -  | 164 | 409  | 9882   | 10127  |
| UN39697 | Rsa1.0.00088.1 | 732  | 141341 | 1.00E-125 | 277 | 292 | 94 +  | 53  | 343  | 19012  | 19299  |
| UN39698 | Rsa1.0.00483.1 | 934  | 81102  | 1.00E-127 | 289 | 302 | 95 +  | 579 | 877  | 51013  | 51311  |
| UN39699 | Rsa1.0.00160.1 | 576  | 346678 | 1.00E-149 | 271 | 272 | 99 +  | 1   | 272  | 184623 | 184894 |
| UN39700 | Rsa1.0.01092.1 | 1188 | 54348  | 0         | 391 | 391 | 100 + | 798 | 1188 | 53690  | 54080  |

|         |                |      |        |           |     |     |       |      |      |        |        |
|---------|----------------|------|--------|-----------|-----|-----|-------|------|------|--------|--------|
| UN39701 | Rsa1.0.00029.1 | 745  | 272992 | 1.00E-162 | 359 | 378 | 94 -  | 370  | 745  | 10192  | 10568  |
| UN39702 | Rsa1.0.00002.1 | 945  | 601661 | 1.00E-117 | 224 | 227 | 98 -  | 1    | 227  | 255597 | 255823 |
| UN39703 | Rsa1.0.00601.1 | 755  | 177045 | 1.00E-168 | 354 | 371 | 95 -  | 388  | 755  | 26139  | 26496  |
| UN39704 | Rsa1.0.13702.1 | 979  | 4456   | 1.00E-120 | 271 | 287 | 94 -  | 691  | 977  | 1738   | 2017   |
| UN39705 | Rsa1.0.01376.1 | 977  | 47004  | 0         | 445 | 460 | 96 +  | 3    | 462  | 40123  | 40582  |
| UN39706 | Rsa1.0.01803.1 | 957  | 173846 | 0         | 440 | 455 | 96 +  | 504  | 957  | 137460 | 137911 |
| UN39707 | Rsa1.0.01246.1 | 864  | 49968  | 0         | 488 | 503 | 97 +  | 53   | 555  | 26897  | 27399  |
| UN39708 | Rsa1.0.01835.1 | 582  | 38542  | 1.00E-159 | 312 | 320 | 97 +  | 190  | 509  | 20857  | 21175  |
| UN39709 | Rsa1.0.01934.1 | 812  | 37162  | 0         | 444 | 470 | 94 -  | 318  | 780  | 1822   | 2291   |
| UN39710 | Rsa1.0.00646.1 | 960  | 70473  | 1.00E-116 | 285 | 304 | 93 -  | 662  | 959  | 5953   | 6253   |
| UN39711 | Rsa1.0.00644.1 | 957  | 136881 | 1.00E-126 | 329 | 357 | 92 -  | 612  | 957  | 62725  | 63077  |
| UN39712 | Rsa1.0.09186.1 | 1576 | 6572   | 0         | 583 | 612 | 95 -  | 13   | 613  | 5556   | 6167   |
| UN39713 | Rsa1.0.02923.1 | 703  | 26736  | 1.00E-122 | 292 | 312 | 93 -  | 395  | 703  | 15792  | 16101  |
| UN39714 | Rsa1.0.00654.1 | 1481 | 70012  | 1.00E-111 | 217 | 221 | 98 +  | 606  | 826  | 966    | 1186   |
| UN39715 | Rsa1.0.00017.1 | 1017 | 752458 | 1.00E-125 | 282 | 296 | 95 -  | 10   | 304  | 11197  | 11490  |
| UN39716 | Rsa1.0.01789.1 | 763  | 39250  | 0         | 436 | 456 | 95 +  | 2    | 453  | 6152   | 6607   |
| UN39717 | Rsa1.0.08750.1 | 983  | 6961   | 1.00E-173 | 333 | 340 | 97 +  | 13   | 350  | 6080   | 6419   |
| UN39718 | Rsa1.0.02455.1 | 802  | 31262  | 0         | 484 | 494 | 97 -  | 1    | 493  | 25408  | 25901  |
| UN39719 | Rsa1.0.00179.1 | 1072 | 393324 | 1.00E-135 | 347 | 384 | 90 -  | 703  | 1063 | 51786  | 52169  |
| UN39720 | Rsa1.0.26340.1 | 903  | 896    | 1.00E-92  | 200 | 209 | 95 -  | 106  | 314  | 333    | 541    |
| UN39721 | Rsa1.0.02923.1 | 730  | 26736  | 1.00E-126 | 314 | 338 | 92 -  | 389  | 723  | 15768  | 16101  |
| UN39722 | Rsa1.0.00200.1 | 642  | 162016 | 6.00E-85  | 274 | 306 | 89 +  | 342  | 642  | 104953 | 105256 |
| UN39723 | Rsa1.0.18598.1 | 724  | 1567   | 0         | 614 | 622 | 98 +  | 103  | 724  | 258    | 879    |
| UN39724 | Rsa1.0.06513.1 | 1021 | 10869  | 4.00E-84  | 162 | 163 | 99 +  | 301  | 463  | 604    | 766    |
| UN39725 | Rsa1.0.00237.1 | 560  | 235974 | 1.00E-161 | 355 | 376 | 94 +  | 183  | 558  | 58852  | 59226  |
| UN39726 | Rsa1.0.00679.1 | 912  | 68971  | 1.00E-147 | 310 | 320 | 96 +  | 1    | 316  | 65782  | 66100  |
| UN39727 | Rsa1.0.00251.1 | 543  | 303968 | 1.00E-165 | 302 | 303 | 99 -  | 242  | 543  | 120919 | 121221 |
| UN39728 | Rsa1.0.00273.1 | 715  | 326186 | 1.00E-165 | 350 | 367 | 95 +  | 70   | 432  | 113973 | 114338 |
| UN39729 | Rsa1.0.06438.1 | 736  | 11017  | 0         | 593 | 593 | 100 + | 141  | 733  | 1531   | 2123   |
| UN39730 | Rsa1.0.00079.1 | 684  | 606987 | 1.00E-124 | 288 | 306 | 94 +  | 1    | 306  | 198825 | 199128 |
| UN39731 | Rsa1.0.06175.1 | 1194 | 11569  | 1.00E-158 | 302 | 308 | 98 -  | 1    | 308  | 8552   | 8859   |
| UN39732 | Rsa1.0.00105.1 | 950  | 134138 | 1.00E-105 | 283 | 306 | 92 +  | 642  | 946  | 68958  | 69258  |
| UN39733 | Rsa1.0.00002.1 | 772  | 601661 | 3.00E-78  | 227 | 248 | 91 +  | 67   | 303  | 18075  | 18318  |
| UN39734 | Rsa1.0.00192.1 | 745  | 278200 | 0         | 412 | 414 | 99 +  | 2    | 415  | 26672  | 27085  |
| UN39735 | Rsa1.0.01249.1 | 763  | 188432 | 8.00E-97  | 186 | 188 | 98 +  | 258  | 445  | 151131 | 151318 |
| UN39736 | Rsa1.0.00804.1 | 1314 | 63726  | 1.00E-163 | 294 | 295 | 99 +  | 1019 | 1313 | 15548  | 15842  |
| UN39737 | Rsa1.0.00351.1 | 666  | 413096 | 1.00E-158 | 365 | 392 | 93 -  | 293  | 666  | 244437 | 244827 |
| UN39738 | Rsa1.0.00029.1 | 762  | 272992 | 1.00E-167 | 372 | 389 | 95 -  | 370  | 757  | 10187  | 10569  |
| UN39739 | Rsa1.0.00601.1 | 773  | 177045 | 1.00E-131 | 349 | 382 | 91 -  | 387  | 762  | 26131  | 26496  |

|         |                |      |        |           |     |     |       |     |      |        |        |
|---------|----------------|------|--------|-----------|-----|-----|-------|-----|------|--------|--------|
| UN39740 | Rsa1.0_00204.1 | 793  | 109056 | 1.00E-175 | 331 | 336 | 98 +  | 458 | 793  | 93161  | 93495  |
| UN39741 | Rsa1.0_02254.1 | 700  | 33344  | 1.00E-116 | 294 | 316 | 93 -  | 9   | 315  | 4778   | 5092   |
| UN39742 | Rsa1.0_04194.1 | 758  | 132734 | 0         | 550 | 580 | 94 -  | 180 | 758  | 123413 | 123988 |
| UN39743 | Rsa1.0_00679.1 | 708  | 68971  | 3.00E-96  | 194 | 199 | 97 +  | 321 | 519  | 33672  | 33870  |
| UN39744 | Rsa1.0_00468.1 | 608  | 82095  | 1.00E-143 | 313 | 325 | 96 -  | 287 | 608  | 75616  | 75937  |
| UN39745 | Rsa1.0_03618.1 | 842  | 21744  | 1.00E-102 | 216 | 222 | 97 +  | 1   | 221  | 11094  | 11314  |
| UN39746 | Rsa1.0_00662.1 | 956  | 192183 | 1.00E-162 | 343 | 361 | 95 +  | 575 | 930  | 2200   | 2560   |
| UN39747 | Rsa1.0_01172.1 | 846  | 51734  | 1.00E-145 | 270 | 273 | 98 -  | 139 | 411  | 12391  | 12663  |
| UN39748 | Rsa1.0_04194.1 | 710  | 132734 | 0         | 561 | 588 | 95 -  | 127 | 709  | 123402 | 123988 |
| UN39749 | Rsa1.0_00875.1 | 898  | 61371  | 0         | 837 | 896 | 93 -  | 3   | 898  | 6901   | 7779   |
| UN39750 | Rsa1.0_00527.1 | 916  | 77733  | 0         | 441 | 453 | 97 -  | 471 | 916  | 24575  | 25027  |
| UN39751 | Rsa1.0_02496.1 | 738  | 30814  | 1.00E-138 | 289 | 301 | 96 +  | 22  | 322  | 14686  | 14984  |
| UN39752 | Rsa1.0_00107.1 | 727  | 431659 | 1.00E-148 | 318 | 333 | 95 +  | 408 | 727  | 148415 | 148747 |
| UN39753 | Rsa1.0_00131.1 | 1150 | 432233 | 1.00E-156 | 367 | 396 | 92 -  | 473 | 868  | 194264 | 194659 |
| UN39754 | Rsa1.0_00265.1 | 714  | 220635 | 1.00E-140 | 315 | 337 | 93 +  | 388 | 710  | 197596 | 197932 |
| UN39755 | Rsa1.0_00028.1 | 1246 | 293984 | 1.00E-138 | 338 | 362 | 93 +  | 333 | 690  | 20828  | 21185  |
| UN39756 | Rsa1.0_05878.1 | 703  | 12344  | 0         | 376 | 376 | 100 - | 322 | 697  | 1375   | 1750   |
| UN39757 | Rsa1.0_00178.1 | 660  | 114861 | 1.00E-157 | 288 | 290 | 99 +  | 371 | 660  | 12165  | 12454  |
| UN39758 | Rsa1.0_01117.1 | 932  | 53465  | 1.00E-175 | 442 | 482 | 91 -  | 471 | 930  | 40120  | 40598  |
| UN39759 | Rsa1.0_00734.1 | 776  | 66508  | 1.00E-168 | 447 | 493 | 90 -  | 3   | 488  | 44653  | 45142  |
| UN39760 | Rsa1.0_00337.1 | 902  | 143174 | 0         | 462 | 479 | 96 +  | 417 | 889  | 4654   | 5132   |
| UN39761 | Rsa1.0_00163.1 | 719  | 116847 | 1.00E-155 | 296 | 302 | 98 -  | 297 | 598  | 66573  | 66874  |
| UN39762 | Rsa1.0_00805.1 | 1236 | 63724  | 0         | 846 | 856 | 98 -  | 1   | 849  | 57517  | 58372  |
| UN39763 | Rsa1.0_00218.1 | 1030 | 201480 | 1.00E-127 | 241 | 244 | 98 -  | 565 | 808  | 172495 | 172738 |
| UN39764 | Rsa1.0_06438.1 | 685  | 11017  | 0         | 486 | 530 | 91 +  | 141 | 664  | 1531   | 2053   |
| UN39765 | Rsa1.0_08429.1 | 931  | 7370   | 2.00E-91  | 223 | 237 | 94 +  | 112 | 346  | 5519   | 5752   |
| UN39766 | Rsa1.0_00396.1 | 753  | 88242  | 1.00E-116 | 265 | 280 | 94 +  | 34  | 311  | 20263  | 20541  |
| UN39767 | Rsa1.0_00384.1 | 880  | 89278  | 1.00E-153 | 312 | 324 | 96 +  | 543 | 862  | 62852  | 63175  |
| UN39768 | Rsa1.0_00552.1 | 562  | 206757 | 1.00E-88  | 209 | 222 | 94 +  | 47  | 267  | 72881  | 73102  |
| UN39769 | Rsa1.0_03297.1 | 588  | 23969  | 1.00E-129 | 312 | 334 | 93 -  | 229 | 561  | 14221  | 14552  |
| UN39770 | Rsa1.0_04477.1 | 1002 | 17183  | 1.00E-110 | 260 | 274 | 94 -  | 737 | 1002 | 5258   | 5529   |
| UN39771 | Rsa1.0_52681.1 | 831  | 432    | 0         | 333 | 334 | 99 -  | 91  | 424  | 99     | 432    |
| UN39772 | Rsa1.0_00679.1 | 1113 | 68971  | 1.00E-101 | 196 | 199 | 98 +  | 334 | 532  | 33672  | 33870  |
| UN39773 | Rsa1.0_00813.1 | 776  | 63202  | 1.00E-100 | 198 | 202 | 98 -  | 373 | 574  | 14295  | 14496  |
| UN39774 | Rsa1.0_00026.1 | 619  | 327835 | 1.00E-133 | 298 | 312 | 95 -  | 312 | 619  | 29231  | 29541  |
| UN39775 | Rsa1.0_02836.1 | 915  | 27481  | 1.00E-111 | 228 | 236 | 96 -  | 419 | 654  | 13279  | 13514  |
| UN39776 | Rsa1.0_00383.1 | 900  | 398431 | 0         | 346 | 346 | 100 - | 555 | 900  | 182059 | 182404 |
| UN39777 | Rsa1.0_13471.1 | 1381 | 4802   | 0         | 401 | 422 | 95 +  | 960 | 1380 | 3895   | 4308   |
| UN39778 | Rsa1.0_00628.1 | 672  | 214360 | 0         | 347 | 347 | 100 - | 326 | 672  | 34412  | 34758  |

|         |                |      |        |           |     |     |       |      |      |        |        |
|---------|----------------|------|--------|-----------|-----|-----|-------|------|------|--------|--------|
| UN39779 | Rsa1.0.00382.1 | 867  | 251946 | 1.00E-136 | 289 | 303 | 95 -  | 56   | 358  | 246902 | 247204 |
| UN39780 | Rsa1.0.01958.1 | 982  | 261128 | 1.00E-122 | 262 | 275 | 95 +  | 322  | 596  | 132443 | 132717 |
| UN39781 | Rsa1.0.00163.1 | 684  | 116847 | 1.00E-136 | 288 | 302 | 95 +  | 93   | 394  | 66573  | 66874  |
| UN39782 | Rsa1.0.01835.1 | 636  | 38542  | 1.00E-155 | 303 | 311 | 97 -  | 137  | 447  | 20857  | 21164  |
| UN39783 | Rsa1.0.00214.1 | 855  | 107508 | 1.00E-153 | 296 | 303 | 97 +  | 1    | 303  | 69405  | 69707  |
| UN39784 | Rsa1.0.00082.1 | 938  | 237584 | 1.00E-169 | 320 | 325 | 98 +  | 40   | 363  | 53623  | 53947  |
| UN39785 | Rsa1.0.01146.1 | 938  | 163455 | 1.00E-103 | 203 | 207 | 98 -  | 225  | 431  | 24783  | 24989  |
| UN39786 | Rsa1.0.00010.1 | 881  | 294827 | 1.00E-110 | 220 | 226 | 97 -  | 63   | 288  | 248372 | 248597 |
| UN39787 | Rsa1.0.02072.1 | 605  | 35401  | 1.00E-103 | 257 | 275 | 93 +  | 5    | 277  | 18080  | 18353  |
| UN39788 | Rsa1.0.19040.1 | 1664 | 1491   | 1.00E-168 | 370 | 392 | 94 -  | 839  | 1229 | 953    | 1344   |
| UN39789 | Rsa1.0.00571.1 | 849  | 329018 | 0         | 473 | 481 | 98 -  | 369  | 849  | 48797  | 49277  |
| UN39790 | Rsa1.0.00212.1 | 682  | 108350 | 8.00E-69  | 164 | 172 | 95 -  | 381  | 549  | 37909  | 38080  |
| UN39791 | Rsa1.0.00254.1 | 885  | 102600 | 2.00E-94  | 182 | 184 | 98 +  | 282  | 465  | 77858  | 78041  |
| UN39792 | Rsa1.0.01117.1 | 840  | 53465  | 0         | 366 | 367 | 99 -  | 475  | 840  | 40232  | 40598  |
| UN39793 | Rsa1.0.02226.1 | 596  | 33726  | 1.00E-156 | 280 | 280 | 100 + | 317  | 596  | 27340  | 27619  |
| UN39794 | Rsa1.0.04630.1 | 746  | 16595  | 0         | 379 | 388 | 97 -  | 341  | 727  | 14513  | 14895  |
| UN39795 | Rsa1.0.01635.1 | 745  | 41865  | 0         | 604 | 605 | 99 -  | 141  | 745  | 7197   | 7801   |
| UN39796 | Rsa1.0.00632.1 | 668  | 183777 | 1.00E-153 | 286 | 290 | 98 -  | 1    | 290  | 15549  | 15838  |
| UN39797 | Rsa1.0.01171.1 | 858  | 51752  | 1.00E-135 | 244 | 244 | 100 + | 615  | 858  | 51040  | 51283  |
| UN39798 | Rsa1.0.01997.1 | 1247 | 158416 | 1.00E-135 | 308 | 326 | 94 -  | 2    | 323  | 9828   | 10146  |
| UN39799 | Rsa1.0.00890.1 | 720  | 323870 | 1.00E-126 | 264 | 273 | 96 +  | 1    | 273  | 160762 | 161032 |
| UN39800 | Rsa1.0.01448.1 | 966  | 45645  | 5.00E-80  | 214 | 231 | 92 +  | 81   | 308  | 39384  | 39613  |
| UN39801 | Rsa1.0.05812.1 | 983  | 12571  | 0         | 909 | 940 | 96 -  | 45   | 983  | 2609   | 3548   |
| UN39802 | Rsa1.0.02989.1 | 659  | 26187  | 1.00E-149 | 267 | 267 | 100 + | 242  | 508  | 3252   | 3518   |
| UN39803 | Rsa1.0.00111.1 | 904  | 390088 | 2.00E-88  | 207 | 216 | 95 +  | 1    | 213  | 77447  | 77659  |
| UN39804 | Rsa1.0.00632.1 | 716  | 183777 | 0         | 338 | 340 | 99 +  | 379  | 716  | 15549  | 15888  |
| UN39805 | Rsa1.0.01249.1 | 1784 | 188432 | 2.00E-84  | 228 | 252 | 90 -  | 1179 | 1416 | 176150 | 176401 |
| UN39806 | Rsa1.0.00019.1 | 770  | 301669 | 1.00E-151 | 407 | 453 | 89 -  | 316  | 767  | 293072 | 293498 |
| UN39807 | #              | #    | #      | #         | #   | #   | #     | #    | #    | #      | #      |
| UN39808 | Rsa1.0.07105.1 | 248  | 9886   | 1.00E-107 | 235 | 248 | 94 +  | 1    | 248  | 1527   | 1774   |
| UN39809 | Rsa1.0.01519.1 | 812  | 44144  | 0         | 553 | 589 | 93 +  | 229  | 811  | 39374  | 39961  |
| UN39810 | Rsa1.0.00813.1 | 903  | 63202  | 0         | 529 | 557 | 94 +  | 356  | 903  | 51191  | 51741  |
| UN39811 | Rsa1.0.00414.1 | 691  | 202190 | 0         | 689 | 691 | 99 -  | 1    | 691  | 180654 | 181344 |
| UN39812 | Rsa1.0.00273.1 | 697  | 326186 | 0         | 428 | 446 | 95 -  | 254  | 697  | 26631  | 27076  |
| UN39813 | Rsa1.0.01448.1 | 974  | 45645  | 1.00E-130 | 285 | 301 | 94 -  | 672  | 972  | 39313  | 39613  |
| UN39814 | Rsa1.0.01895.1 | 934  | 37512  | 1.00E-165 | 361 | 383 | 94 +  | 558  | 934  | 10218  | 10597  |
| UN39815 | Rsa1.0.00111.1 | 897  | 390088 | 0         | 532 | 556 | 95 -  | 231  | 780  | 383658 | 384207 |
| UN39816 | Rsa1.0.00203.1 | 823  | 109129 | 3.00E-75  | 217 | 238 | 91 -  | 587  | 818  | 2794   | 3022   |
| UN39817 | Rsa1.0.03539.1 | 951  | 22199  | 1.00E-130 | 268 | 277 | 96 -  | 1    | 277  | 7072   | 7347   |

|         |                |      |        |           |      |      |       |      |      |        |        |
|---------|----------------|------|--------|-----------|------|------|-------|------|------|--------|--------|
| UN39818 | Rsa1.0.00016.1 | 921  | 831256 | 0         | 373  | 377  | 98 +  | 546  | 921  | 576420 | 576796 |
| UN39819 | Rsa1.0.04194.1 | 772  | 132734 | 0         | 555  | 587  | 94 -  | 187  | 770  | 123402 | 123988 |
| UN39820 | Rsa1.0.05878.1 | 721  | 12344  | 1.00E-131 | 265  | 274  | 96 -  | 321  | 594  | 1477   | 1750   |
| UN39821 | Rsa1.0.00813.1 | 811  | 63202  | 0         | 773  | 811  | 95 -  | 1    | 810  | 18511  | 19320  |
| UN39822 | Rsa1.0.02662.1 | 720  | 28956  | 2.00E-94  | 185  | 188  | 98 +  | 233  | 420  | 10660  | 10847  |
| UN39823 | Rsa1.0.08994.1 | 911  | 6724   | 0         | 413  | 438  | 94 -  | 1    | 434  | 3405   | 3838   |
| UN39824 | Rsa1.0.00977.1 | 471  | 198001 | 0         | 441  | 471  | 93 +  | 3    | 471  | 50769  | 51232  |
| UN39825 | Rsa1.0.00078.1 | 823  | 175053 | 1.00E-147 | 298  | 309  | 96 +  | 237  | 545  | 47230  | 47538  |
| UN39826 | Rsa1.0.00286.1 | 824  | 98709  | 0         | 823  | 823  | 100 + | 1    | 823  | 4953   | 5775   |
| UN39827 | Rsa1.0.00198.1 | 990  | 222963 | 1.00E-147 | 294  | 303  | 97 +  | 62   | 361  | 154878 | 155180 |
| UN39828 | Rsa1.0.00860.1 | 1021 | 61789  | 0         | 575  | 577  | 99 +  | 445  | 1021 | 44091  | 44667  |
| UN39829 | Rsa1.0.00421.1 | 644  | 86365  | 1.00E-115 | 254  | 272  | 93 +  | 1    | 257  | 14761  | 15032  |
| UN39830 | Rsa1.0.05204.1 | 763  | 14516  | 1.00E-147 | 283  | 289  | 97 +  | 291  | 579  | 6647   | 6935   |
| UN39831 | Rsa1.0.00942.1 | 787  | 58873  | 1.00E-144 | 336  | 358  | 93 -  | 2    | 358  | 3175   | 3529   |
| UN39832 | Rsa1.0.00977.1 | 549  | 198001 | 0         | 509  | 556  | 91 +  | 5    | 548  | 47145  | 47693  |
| UN39833 | Rsa1.0.00361.1 | 907  | 91181  | 1.00E-139 | 267  | 272  | 98 +  | 152  | 423  | 12179  | 12450  |
| UN39834 | Rsa1.0.01536.1 | 854  | 43747  | 0         | 544  | 563  | 96 +  | 1    | 563  | 18787  | 19349  |
| UN39835 | Rsa1.0.03352.1 | 700  | 23506  | 4.00E-92  | 184  | 188  | 97 -  | 295  | 482  | 18148  | 18335  |
| UN39836 | Rsa1.0.00101.1 | 514  | 267193 | 1.00E-91  | 198  | 207  | 95 +  | 1    | 207  | 249709 | 249915 |
| UN39837 | Rsa1.0.00027.1 | 764  | 283362 | 1.00E-121 | 297  | 324  | 91 -  | 449  | 757  | 279841 | 280164 |
| UN39838 | Rsa1.0.01553.1 | 719  | 43379  | 1.00E-106 | 266  | 287  | 92 +  | 440  | 719  | 26451  | 26737  |
| UN39839 | Rsa1.0.04085.1 | 949  | 19168  | 1.00E-148 | 358  | 383  | 93 -  | 568  | 945  | 1523   | 1901   |
| UN39840 | Rsa1.0.00110.1 | 894  | 132719 | 0         | 341  | 344  | 99 +  | 551  | 893  | 92532  | 92875  |
| UN39841 | Rsa1.0.02874.1 | 801  | 27070  | 0         | 484  | 505  | 95 -  | 255  | 756  | 26439  | 26943  |
| UN39842 | Rsa1.0.00251.1 | 755  | 303968 | 1.00E-140 | 326  | 350  | 93 +  | 418  | 755  | 147121 | 147468 |
| UN39843 | Rsa1.0.14656.1 | 886  | 3183   | 1.00E-149 | 316  | 329  | 96 +  | 564  | 886  | 2283   | 2611   |
| UN39844 | Rsa1.0.00001.1 | 1075 | 363028 | 0         | 446  | 487  | 91 +  | 594  | 1075 | 266567 | 267040 |
| UN39845 | Rsa1.0.00414.1 | 1203 | 202190 | 1.00E-114 | 240  | 248  | 96 +  | 98   | 344  | 195818 | 196062 |
| UN39846 | Rsa1.0.02173.1 | 898  | 34318  | 0         | 385  | 386  | 99 -  | 381  | 766  | 30793  | 31178  |
| UN39847 | Rsa1.0.03776.1 | 1127 | 20926  | 1.00E-140 | 307  | 325  | 94 -  | 425  | 749  | 80     | 404    |
| UN39848 | Rsa1.0.00009.1 | 1273 | 232558 | 0         | 595  | 623  | 95 -  | 538  | 1160 | 8662   | 9284   |
| UN39849 | Rsa1.0.03565.1 | 1310 | 22062  | 1.00E-177 | 362  | 379  | 95 -  | 29   | 398  | 3777   | 4155   |
| UN39850 | Rsa1.0.00381.1 | 1424 | 89718  | 1.00E-176 | 319  | 321  | 99 +  | 1104 | 1424 | 42027  | 42347  |
| UN39851 | Rsa1.0.01339.1 | 857  | 47813  | 9.00E-63  | 147  | 155  | 94 +  | 281  | 435  | 28483  | 28637  |
| UN39852 | Rsa1.0.04811.1 | 1176 | 15885  | 7.00E-89  | 185  | 191  | 96 +  | 621  | 811  | 9717   | 9907   |
| UN39853 | Rsa1.0.04194.1 | 1197 | 132734 | 1.00E-101 | 219  | 228  | 96 -  | 971  | 1197 | 117319 | 117546 |
| UN39854 | Rsa1.0.01408.1 | 1041 | 46383  | 0         | 716  | 741  | 96 -  | 3    | 743  | 17109  | 17849  |
| UN39855 | Rsa1.0.03044.1 | 1532 | 25791  | 0         | 1055 | 1065 | 99 +  | 468  | 1532 | 5637   | 6701   |
| UN39856 | Rsa1.0.08285.1 | 1061 | 7606   | 1.00E-176 | 389  | 411  | 94 -  | 12   | 413  | 6676   | 7085   |



|         |                |      |        |           |      |      |       |      |      |        |        |
|---------|----------------|------|--------|-----------|------|------|-------|------|------|--------|--------|
| UN39857 | Rsa1.0.00701.1 | 1419 | 67691  | 0         | 593  | 594  | 99 +  | 1    | 593  | 21380  | 21973  |
| UN39858 | Rsa1.0.01092.1 | 1198 | 54348  | 0         | 378  | 392  | 96 -  | 1    | 392  | 53690  | 54080  |
| UN39859 | Rsa1.0.16460.1 | 1027 | 2148   | 0         | 783  | 803  | 97 +  | 161  | 958  | 1      | 803    |
| UN39860 | Rsa1.0.01282.1 | 1111 | 49304  | 0         | 1058 | 1114 | 94 -  | 5    | 1107 | 30175  | 31288  |
| UN39861 | Rsa1.0.01303.1 | 1152 | 48853  | 0         | 574  | 579  | 99 -  | 2    | 580  | 15291  | 15869  |
| UN39862 | Rsa1.0.01955.1 | 941  | 36850  | 4.00E-99  | 355  | 404  | 87 +  | 6    | 389  | 13138  | 13540  |
| UN39863 | Rsa1.0.00060.1 | 1043 | 502678 | 7.00E-98  | 197  | 202  | 97 +  | 462  | 663  | 494424 | 494625 |
| UN39864 | Rsa1.0.00552.1 | 1150 | 206757 | 0         | 552  | 569  | 97 +  | 5    | 573  | 68043  | 68611  |
| UN39865 | Rsa1.0.00223.1 | 1316 | 106231 | 0         | 1068 | 1068 | 100 - | 8    | 1075 | 2967   | 4034   |
| UN39866 | Rsa1.0.00131.1 | 994  | 432233 | 0         | 687  | 697  | 98 -  | 298  | 994  | 258902 | 259598 |
| UN39867 | Rsa1.0.00480.1 | 1434 | 81325  | 0         | 389  | 409  | 95 -  | 1024 | 1431 | 36861  | 37264  |
| UN39868 | Rsa1.0.07314.1 | 1181 | 9563   | 0         | 430  | 440  | 97 +  | 2    | 441  | 5968   | 6407   |
| UN39869 | Rsa1.0.01155.1 | 1043 | 52182  | 0         | 744  | 764  | 97 +  | 3    | 766  | 12181  | 12944  |
| UN39870 | Rsa1.0.00462.1 | 1219 | 82288  | 1.00E-151 | 278  | 280  | 99 -  | 376  | 655  | 37812  | 38091  |
| UN39871 | Rsa1.0.01941.1 | 887  | 37069  | 1.00E-131 | 255  | 261  | 97 -  | 621  | 881  | 30987  | 31247  |
| UN39872 | Rsa1.0.04772.1 | 1647 | 16040  | 1.00E-112 | 206  | 206  | 100 - | 3    | 208  | 8237   | 8442   |
| UN39873 | Rsa1.0.00697.1 | 1458 | 67913  | 1.00E-163 | 319  | 327  | 97 -  | 1061 | 1387 | 31833  | 32157  |
| UN39874 | Rsa1.0.05822.1 | 1047 | 12521  | 1.00E-163 | 321  | 328  | 97 +  | 620  | 945  | 7677   | 8004   |
| UN39875 | Rsa1.0.00719.1 | 1176 | 66952  | 0         | 373  | 387  | 96 -  | 3    | 389  | 47331  | 47711  |
| UN39876 | Rsa1.0.01773.1 | 1534 | 39546  | 0         | 480  | 500  | 96 -  | 3    | 496  | 21580  | 22078  |
| UN39877 | Rsa1.0.04458.1 | 1062 | 17255  | 1.00E-130 | 276  | 288  | 95 +  | 39   | 326  | 6609   | 6894   |
| UN39878 | Rsa1.0.00755.1 | 1136 | 192559 | 1.00E-109 | 207  | 209  | 99 +  | 1    | 209  | 395    | 603    |
| UN39879 | Rsa1.0.01453.1 | 1110 | 45449  | 1.00E-134 | 279  | 287  | 97 +  | 1    | 285  | 10636  | 10921  |
| UN39880 | Rsa1.0.09789.1 | 907  | 6148   | 3.00E-87  | 277  | 311  | 89 -  | 595  | 898  | 5832   | 6130   |
| UN39881 | Rsa1.0.01540.1 | 1272 | 151890 | 0         | 1184 | 1257 | 94 +  | 1    | 1249 | 142570 | 143823 |
| UN39882 | Rsa1.0.01359.1 | 1107 | 47271  | 1.00E-143 | 314  | 331  | 94 +  | 774  | 1104 | 33553  | 33878  |
| UN39883 | Rsa1.0.00326.1 | 925  | 171955 | 1.00E-136 | 255  | 258  | 98 -  | 3    | 260  | 69918  | 70175  |
| UN39884 | Rsa1.0.01539.1 | 1333 | 43698  | 0         | 440  | 450  | 97 +  | 732  | 1180 | 4616   | 5064   |
| UN39885 | Rsa1.0.04224.1 | 1012 | 18402  | 0         | 382  | 394  | 96 +  | 610  | 1001 | 704    | 1095   |
| UN39886 | Rsa1.0.01945.1 | 1446 | 36989  | 0         | 1407 | 1447 | 97 +  | 1    | 1445 | 25701  | 27147  |
| UN39887 | Rsa1.0.03878.1 | 1210 | 20305  | 0         | 401  | 403  | 99 -  | 1    | 403  | 4840   | 5242   |
| UN39888 | Rsa1.0.01022.1 | 963  | 56606  | 1.00E-172 | 410  | 447  | 91 -  | 319  | 750  | 29073  | 29516  |
| UN39889 | Rsa1.0.39889.1 | 914  | 563    | 1.00E-96  | 204  | 211  | 96 +  | 256  | 464  | 104    | 314    |
| UN39890 | Rsa1.0.07577.1 | 1115 | 9092   | 1.00E-176 | 370  | 389  | 95 -  | 1    | 389  | 7519   | 7907   |
| UN39891 | Rsa1.0.03075.1 | 1086 | 25560  | 1.00E-125 | 297  | 320  | 92 +  | 500  | 819  | 14646  | 14965  |
| UN39892 | Rsa1.0.00016.1 | 1092 | 831256 | 1.00E-144 | 299  | 310  | 96 +  | 781  | 1087 | 663581 | 663890 |
| UN39893 | Rsa1.0.00176.1 | 819  | 240984 | 0         | 385  | 387  | 99 +  | 3    | 389  | 230972 | 231358 |
| UN39894 | Rsa1.0.02883.1 | 1002 | 27035  | 0         | 370  | 386  | 95 -  | 257  | 642  | 3528   | 3913   |
| UN39895 | Rsa1.0.00007.1 | 1190 | 239325 | 1.00E-161 | 366  | 386  | 94 +  | 806  | 1183 | 29997  | 30378  |

|         |                |      |        |           |      |      |       |      |      |        |        |
|---------|----------------|------|--------|-----------|------|------|-------|------|------|--------|--------|
| UN39896 | Rsa1.0.00119.1 | 1114 | 467509 | 0         | 492  | 498  | 98 -  | 238  | 735  | 386219 | 386716 |
| UN39897 | Rsa1.0.01000.1 | 1488 | 57140  | 0         | 396  | 408  | 97 -  | 1066 | 1473 | 2343   | 2750   |
| UN39898 | Rsa1.0.00065.1 | 1196 | 454616 | 1.00E-115 | 238  | 247  | 96 +  | 313  | 559  | 241068 | 241314 |
| UN39899 | Rsa1.0.14172.1 | 872  | 3708   | 0         | 680  | 705  | 96 +  | 6    | 706  | 993    | 1695   |
| UN39900 | Rsa1.0.01212.1 | 1344 | 50622  | 0         | 365  | 375  | 97 -  | 969  | 1343 | 16152  | 16525  |
| UN39901 | Rsa1.0.06313.1 | 1053 | 11252  | 1.00E-154 | 326  | 341  | 95 +  | 316  | 650  | 6081   | 6421   |
| UN39902 | Rsa1.0.01363.1 | 1141 | 47195  | 0         | 415  | 426  | 97 -  | 5    | 430  | 674    | 1099   |
| UN39903 | Rsa1.0.00009.1 | 1659 | 232558 | 0         | 446  | 474  | 94 -  | 1200 | 1659 | 60735  | 61202  |
| UN39904 | Rsa1.0.02118.1 | 1330 | 34839  | 0         | 453  | 455  | 99 +  | 874  | 1328 | 3249   | 3703   |
| UN39905 | Rsa1.0.02399.1 | 1487 | 31763  | 0         | 706  | 727  | 97 +  | 761  | 1487 | 12962  | 13688  |
| UN39906 | Rsa1.0.00101.1 | 885  | 267193 | 1.00E-125 | 284  | 306  | 92 -  | 28   | 319  | 208637 | 208942 |
| UN39907 | Rsa1.0.06160.1 | 739  | 11596  | 0         | 451  | 486  | 92 +  | 246  | 730  | 10936  | 11421  |
| UN39908 | Rsa1.0.00141.1 | 873  | 121494 | 0         | 457  | 474  | 96 +  | 1    | 474  | 82243  | 82714  |
| UN39909 | Rsa1.0.05139.1 | 1423 | 14718  | 1.00E-154 | 277  | 277  | 100 + | 630  | 906  | 5752   | 6028   |
| UN39910 | Rsa1.0.02901.1 | 880  | 26909  | 2.00E-82  | 183  | 192  | 95 +  | 270  | 461  | 14384  | 14575  |
| UN39911 | Rsa1.0.17714.1 | 979  | 1759   | 1.00E-148 | 270  | 271  | 99 +  | 6    | 276  | 945    | 1215   |
| UN39912 | Rsa1.0.02287.1 | 1109 | 32986  | 0         | 347  | 348  | 99 +  | 300  | 647  | 7095   | 7442   |
| UN39913 | Rsa1.0.01466.1 | 976  | 45161  | 1.00E-132 | 316  | 336  | 94 -  | 60   | 393  | 25169  | 25502  |
| UN39914 | Rsa1.0.02064.1 | 1063 | 35476  | 1.00E-158 | 320  | 332  | 96 +  | 278  | 609  | 5466   | 5797   |
| UN39915 | Rsa1.0.11974.1 | 1513 | 5357   | 0         | 478  | 484  | 98 +  | 2    | 485  | 4186   | 4667   |
| UN39916 | Rsa1.0.01825.1 | 1111 | 38725  | 0         | 602  | 629  | 95 -  | 481  | 1109 | 26222  | 26838  |
| UN39917 | Rsa1.0.09255.1 | 1092 | 6525   | 0         | 580  | 603  | 96 +  | 330  | 927  | 1257   | 1859   |
| UN39918 | Rsa1.0.24540.1 | 951  | 982    | 0         | 827  | 871  | 94 +  | 4    | 874  | 85     | 955    |
| UN39919 | Rsa1.0.25306.1 | 1041 | 942    | 0         | 487  | 493  | 98 -  | 549  | 1041 | 243    | 735    |
| UN39920 | Rsa1.0.00104.1 | 1138 | 368722 | 0         | 1094 | 1134 | 96 +  | 1    | 1133 | 71818  | 72950  |
| UN39921 | Rsa1.0.00734.1 | 811  | 66508  | 0         | 524  | 543  | 96 -  | 270  | 811  | 62123  | 62665  |
| UN39922 | Rsa1.0.00460.1 | 750  | 206387 | 0         | 611  | 627  | 97 -  | 5    | 631  | 194477 | 195103 |
| UN39923 | Rsa1.0.36296.1 | 1309 | 621    | 0         | 355  | 359  | 98 -  | 355  | 713  | 1      | 358    |
| UN39924 | Rsa1.0.00048.1 | 922  | 167185 | 1.00E-128 | 269  | 280  | 96 -  | 120  | 398  | 8087   | 8366   |
| UN39925 | Rsa1.0.00097.1 | 885  | 138858 | 1.00E-101 | 250  | 268  | 93 -  | 82   | 344  | 120893 | 121159 |
| UN39926 | Rsa1.0.01341.1 | 1240 | 47764  | 1.00E-114 | 233  | 241  | 96 -  | 726  | 966  | 15738  | 15978  |
| UN39927 | Rsa1.0.03890.1 | 995  | 20223  | 0         | 955  | 1003 | 95 +  | 1    | 994  | 1388   | 2383   |
| UN39928 | Rsa1.0.00888.1 | 964  | 60978  | 1.00E-155 | 305  | 312  | 97 -  | 657  | 964  | 13812  | 14123  |
| UN39929 | Rsa1.0.03170.1 | 643  | 24824  | 0         | 568  | 607  | 93 -  | 42   | 643  | 12891  | 13490  |
| UN39930 | Rsa1.0.00054.1 | 1019 | 162053 | 1.00E-111 | 227  | 233  | 97 -  | 787  | 1019 | 5589   | 5820   |
| UN39931 | Rsa1.0.08018.1 | 1793 | 8075   | 1.00E-127 | 316  | 345  | 91 -  | 1253 | 1588 | 5142   | 5477   |
| UN39932 | Rsa1.0.01591.1 | 1068 | 42718  | 1.00E-113 | 269  | 286  | 94 +  | 21   | 305  | 22523  | 22805  |
| UN39933 | Rsa1.0.19895.1 | 1131 | 1369   | 1.00E-135 | 254  | 257  | 98 +  | 1    | 257  | 1086   | 1342   |
| UN39934 | Rsa1.0.00336.1 | 1005 | 445051 | 1.00E-110 | 309  | 343  | 90 +  | 1    | 341  | 162030 | 162354 |

|         |                |      |        |           |     |     |       |      |      |        |        |
|---------|----------------|------|--------|-----------|-----|-----|-------|------|------|--------|--------|
| UN39935 | Rsa1.0.02730.1 | 1178 | 28385  | 0         | 423 | 447 | 94 +  | 2    | 448  | 2448   | 2880   |
| UN39936 | Rsa1.0.00457.1 | 823  | 337301 | 1.00E-171 | 314 | 316 | 99 -  | 1    | 314  | 130569 | 130884 |
| UN39937 | Rsa1.0.00145.1 | 843  | 261008 | 6.00E-95  | 198 | 205 | 96 -  | 97   | 301  | 39719  | 39923  |
| UN39938 | Rsa1.0.00028.1 | 1952 | 293984 | 1.00E-115 | 232 | 239 | 97 -  | 205  | 443  | 266590 | 266828 |
| UN39939 | Rsa1.0.02228.1 | 1280 | 33688  | 0         | 569 | 575 | 98 -  | 55   | 629  | 16770  | 17344  |
| UN39940 | Rsa1.0.00483.1 | 755  | 81102  | 2.00E-94  | 216 | 227 | 95 -  | 530  | 755  | 56368  | 56592  |
| UN39941 | Rsa1.0.15735.1 | 1560 | 2455   | 1.00E-120 | 219 | 219 | 100 + | 1223 | 1441 | 128    | 346    |
| UN39942 | Rsa1.0.00065.1 | 1326 | 454616 | 0         | 471 | 494 | 95 +  | 32   | 523  | 26222  | 26712  |
| UN39943 | Rsa1.0.01295.1 | 1498 | 49040  | 1.00E-159 | 300 | 305 | 98 -  | 362  | 666  | 23660  | 23964  |
| UN39944 | Rsa1.0.00406.1 | 1094 | 87398  | 1.00E-169 | 350 | 365 | 95 +  | 730  | 1092 | 53296  | 53660  |
| UN39945 | Rsa1.0.00265.1 | 1144 | 220635 | 0         | 494 | 495 | 99 -  | 648  | 1142 | 171371 | 171865 |
| UN39946 | Rsa1.0.00486.1 | 1181 | 80875  | 0         | 900 | 957 | 94 -  | 239  | 1179 | 15256  | 16200  |
| UN39947 | Rsa1.0.03639.1 | 1228 | 21629  | 1.00E-118 | 284 | 304 | 93 +  | 3    | 302  | 1984   | 2278   |
| UN39948 | Rsa1.0.00001.1 | 1011 | 363028 | 0         | 460 | 474 | 97 +  | 543  | 1011 | 335254 | 335726 |
| UN39949 | Rsa1.0.00437.1 | 878  | 84879  | 1.00E-144 | 351 | 377 | 93 -  | 499  | 873  | 70243  | 70609  |
| UN39950 | Rsa1.0.00108.1 | 878  | 478491 | 0         | 427 | 447 | 95 +  | 10   | 456  | 285756 | 286199 |
| UN39951 | Rsa1.0.00363.1 | 1131 | 90968  | 0         | 496 | 522 | 95 -  | 609  | 1127 | 9266   | 9780   |
| UN39952 | Rsa1.0.03218.1 | 1069 | 24539  | 0         | 386 | 389 | 99 -  | 3    | 389  | 5213   | 5601   |
| UN39953 | Rsa1.0.00385.1 | 907  | 89160  | 0         | 563 | 566 | 99 +  | 3    | 568  | 47349  | 47914  |
| UN39954 | Rsa1.0.04181.1 | 1229 | 18615  | 0         | 694 | 723 | 95 +  | 203  | 925  | 936    | 1658   |
| UN39955 | Rsa1.0.02841.1 | 1009 | 27383  | 1.00E-133 | 251 | 254 | 98 +  | 756  | 1009 | 5500   | 5753   |
| UN39956 | Rsa1.0.00175.1 | 1253 | 166121 | 0         | 445 | 456 | 97 +  | 1    | 456  | 139805 | 140254 |
| UN39957 | Rsa1.0.00322.1 | 1242 | 212233 | 1.00E-105 | 208 | 211 | 98 -  | 839  | 1048 | 80183  | 80393  |
| UN39958 | Rsa1.0.00010.1 | 939  | 294827 | 0         | 672 | 675 | 99 +  | 1    | 675  | 90156  | 90830  |
| UN39959 | Rsa1.0.00163.1 | 1034 | 116847 | 1.00E-134 | 329 | 351 | 93 +  | 18   | 361  | 25865  | 26212  |
| UN39960 | Rsa1.0.00453.1 | 1131 | 83031  | 0         | 559 | 577 | 96 +  | 437  | 1012 | 75551  | 76127  |
| UN39961 | Rsa1.0.03843.1 | 872  | 20496  | 3.00E-81  | 209 | 225 | 92 -  | 632  | 856  | 6124   | 6345   |
| UN39962 | Rsa1.0.03702.1 | 1724 | 21292  | 0         | 560 | 560 | 100 + | 346  | 905  | 11676  | 12235  |
| UN39963 | Rsa1.0.00789.1 | 1081 | 64233  | 1.00E-102 | 223 | 230 | 96 +  | 3    | 230  | 43045  | 43273  |
| UN39964 | Rsa1.0.00360.1 | 1099 | 91190  | 0         | 417 | 420 | 99 +  | 1    | 420  | 43700  | 44119  |
| UN39965 | Rsa1.0.00196.1 | 906  | 109960 | 1.00E-121 | 262 | 272 | 96 +  | 633  | 903  | 72827  | 73095  |
| UN39966 | Rsa1.0.02841.1 | 844  | 27383  | 7.00E-79  | 191 | 202 | 94 -  | 647  | 844  | 287    | 485    |
| UN39967 | Rsa1.0.00112.1 | 939  | 132199 | 0         | 703 | 731 | 96 -  | 213  | 939  | 105230 | 105957 |
| UN39968 | Rsa1.0.14298.1 | 592  | 3561   | 1.00E-100 | 185 | 185 | 100 + | 1    | 185  | 88     | 272    |
| UN39969 | Rsa1.0.00416.1 | 886  | 86772  | 1.00E-174 | 372 | 389 | 95 +  | 499  | 886  | 50852  | 51237  |
| UN39970 | Rsa1.0.00224.1 | 831  | 327530 | 0         | 369 | 380 | 97 +  | 5    | 382  | 38886  | 39264  |
| UN39971 | Rsa1.0.00773.1 | 948  | 64839  | 1.00E-109 | 264 | 288 | 91 -  | 661  | 948  | 10167  | 10440  |
| UN39972 | Rsa1.0.21236.1 | 1006 | 1222   | 1.00E-153 | 290 | 295 | 98 +  | 121  | 415  | 786    | 1080   |
| UN39973 | Rsa1.0.15691.1 | 1219 | 2479   | 1.00E-112 | 248 | 260 | 95 +  | 2    | 260  | 1416   | 1672   |

|         |                |      |        |           |      |      |       |     |      |        |        |
|---------|----------------|------|--------|-----------|------|------|-------|-----|------|--------|--------|
| UN39974 | Rsa1.0.01042.1 | 938  | 293264 | 0         | 539  | 561  | 96 -  | 27  | 585  | 141476 | 142031 |
| UN39975 | Rsa1.0.02128.1 | 1057 | 34758  | 0         | 496  | 504  | 98 +  | 552 | 1055 | 25609  | 26112  |
| UN39976 | Rsa1.0.00332.1 | 1336 | 94575  | 0         | 528  | 559  | 94 +  | 2   | 558  | 22437  | 22989  |
| UN39977 | Rsa1.0.00087.1 | 635  | 761073 | 0         | 601  | 629  | 95 +  | 3   | 631  | 580717 | 581343 |
| UN39978 | Rsa1.0.02071.1 | 716  | 35409  | 0         | 425  | 425  | 100 - | 292 | 716  | 22453  | 22877  |
| UN39979 | Rsa1.0.01502.1 | 1171 | 44519  | 0         | 451  | 474  | 95 +  | 688 | 1158 | 36621  | 37094  |
| UN39980 | Rsa1.0.01476.1 | 1193 | 172928 | 1.00E-124 | 419  | 476  | 88 -  | 186 | 654  | 9187   | 9650   |
| UN39981 | Rsa1.0.00571.1 | 1282 | 329018 | 0         | 880  | 902  | 97 +  | 315 | 1215 | 143271 | 144172 |
| UN39982 | Rsa1.0.00096.1 | 1283 | 198773 | 1.00E-173 | 347  | 359  | 96 +  | 48  | 406  | 113949 | 114304 |
| UN39983 | Rsa1.0.03971.1 | 898  | 19788  | 1.00E-140 | 310  | 325  | 95 -  | 2   | 326  | 3924   | 4245   |
| UN39984 | Rsa1.0.01877.1 | 1143 | 37789  | 1.00E-111 | 223  | 229  | 97 +  | 2   | 230  | 33270  | 33498  |
| UN39985 | Rsa1.0.20282.1 | 1121 | 1321   | 7.00E-95  | 177  | 177  | 100 + | 943 | 1119 | 226    | 402    |
| UN39986 | Rsa1.0.01719.1 | 936  | 40388  | 1.00E-130 | 240  | 241  | 99 -  | 695 | 935  | 27224  | 27464  |
| UN39987 | Rsa1.0.02163.1 | 1040 | 34427  | 0         | 688  | 707  | 97 -  | 1   | 706  | 17830  | 18536  |
| UN39988 | Rsa1.0.02735.1 | 1303 | 28344  | 0         | 480  | 526  | 91 +  | 1   | 525  | 2752   | 3265   |
| UN39989 | Rsa1.0.07499.1 | 899  | 9244   | 0         | 389  | 406  | 95 +  | 492 | 897  | 6510   | 6906   |
| UN39990 | Rsa1.0.00015.1 | 1181 | 561803 | 0         | 400  | 403  | 99 +  | 777 | 1179 | 264496 | 264898 |
| UN39991 | Rsa1.0.00065.1 | 922  | 454616 | 0         | 609  | 624  | 97 +  | 299 | 922  | 254496 | 255117 |
| UN39992 | Rsa1.0.00744.1 | 995  | 66084  | 1.00E-129 | 266  | 274  | 97 +  | 2   | 274  | 57829  | 58101  |
| UN39993 | Rsa1.0.00460.1 | 1027 | 206387 | 1.00E-160 | 303  | 308  | 98 +  | 3   | 307  | 200445 | 200752 |
| UN39994 | Rsa1.0.01476.1 | 1227 | 172928 | 1.00E-159 | 291  | 293  | 99 -  | 935 | 1227 | 137462 | 137754 |
| UN39995 | Rsa1.0.00169.1 | 990  | 274298 | 0         | 633  | 640  | 98 -  | 1   | 640  | 87856  | 88495  |
| UN39996 | Rsa1.0.04580.1 | 1237 | 16773  | 0         | 364  | 364  | 100 + | 109 | 472  | 7343   | 7706   |
| UN39997 | Rsa1.0.01214.1 | 1023 | 50599  | 0         | 609  | 623  | 97 -  | 3   | 625  | 49762  | 50384  |
| UN39998 | Rsa1.0.00048.1 | 1076 | 167185 | 6.00E-86  | 190  | 198  | 95 -  | 5   | 201  | 6601   | 6798   |
| UN39999 | Rsa1.0.00222.1 | 1136 | 172263 | 0         | 413  | 426  | 96 +  | 93  | 518  | 39867  | 40291  |
| UN40000 | Rsa1.0.01261.1 | 1308 | 49744  | 1.00E-151 | 274  | 275  | 99 -  | 4   | 278  | 25172  | 25446  |
| UN40001 | Rsa1.0.00609.1 | 1184 | 72785  | 0         | 568  | 568  | 100 - | 1   | 568  | 52619  | 53186  |
| UN40002 | Rsa1.0.00526.1 | 1188 | 169279 | 1.00E-157 | 282  | 282  | 100 - | 1   | 282  | 141137 | 141418 |
| UN40003 | Rsa1.0.00343.1 | 850  | 93570  | 0         | 436  | 437  | 99 +  | 414 | 850  | 49115  | 49551  |
| UN40004 | Rsa1.0.00391.1 | 1273 | 183853 | 0         | 783  | 798  | 98 -  | 108 | 905  | 64156  | 64947  |
| UN40005 | Rsa1.0.01529.1 | 1225 | 43871  | 0         | 390  | 396  | 98 -  | 824 | 1218 | 31678  | 32073  |
| UN40006 | Rsa1.0.01453.1 | 1085 | 45449  | 2.00E-98  | 333  | 383  | 86 -  | 718 | 1080 | 25076  | 25448  |
| UN40007 | Rsa1.0.07959.1 | 740  | 8173   | 1.00E-170 | 321  | 327  | 98 +  | 197 | 523  | 5595   | 5921   |
| UN40008 | Rsa1.0.00162.1 | 1052 | 239935 | 0         | 1017 | 1053 | 96 -  | 2   | 1052 | 14939  | 15982  |
| UN40009 | Rsa1.0.00541.1 | 1104 | 76863  | 0         | 554  | 582  | 95 -  | 177 | 752  | 34322  | 34903  |
| UN40010 | Rsa1.0.03237.1 | 756  | 24434  | 1.00E-129 | 267  | 274  | 97 -  | 483 | 754  | 4661   | 4933   |
| UN40011 | Rsa1.0.00243.1 | 1245 | 103651 | 0         | 1206 | 1245 | 96 +  | 2   | 1245 | 85902  | 87136  |
| UN40012 | Rsa1.0.07848.1 | 970  | 8429   | 0         | 414  | 433  | 95 -  | 541 | 968  | 2374   | 2806   |

|         |                |      |        |           |     |     |       |     |      |        |        |
|---------|----------------|------|--------|-----------|-----|-----|-------|-----|------|--------|--------|
| UN40013 | Rsa1.0_00237.1 | 869  | 235974 | 1.00E-105 | 240 | 254 | 94 +  | 38  | 290  | 4718   | 4971   |
| UN40014 | Rsa1.0_01104.1 | 1115 | 285480 | 1.00E-134 | 294 | 311 | 94 +  | 773 | 1083 | 10212  | 10522  |
| UN40015 | Rsa1.0_00296.1 | 1229 | 97854  | 1.00E-163 | 327 | 339 | 96 -  | 385 | 723  | 52385  | 52717  |
| UN40016 | Rsa1.0_00341.1 | 1152 | 249309 | 1.00E-138 | 332 | 362 | 91 +  | 38  | 382  | 125788 | 126149 |
| UN40017 | Rsa1.0_04126.1 | 1051 | 18939  | 0         | 485 | 510 | 95 +  | 538 | 1043 | 17402  | 17911  |
| UN40018 | Rsa1.0_02675.1 | 602  | 28852  | 2.00E-75  | 184 | 194 | 94 +  | 66  | 257  | 17492  | 17682  |
| UN40019 | Rsa1.0_00340.1 | 1346 | 305782 | 1.00E-121 | 250 | 259 | 96 +  | 3   | 258  | 188897 | 189155 |
| UN40020 | Rsa1.0_00296.1 | 981  | 97854  | 0         | 515 | 515 | 100 - | 3   | 517  | 17737  | 18251  |
| UN40021 | Rsa1.0_00970.1 | 1152 | 57994  | 0         | 464 | 490 | 94 -  | 4   | 487  | 24535  | 25018  |
| UN40022 | Rsa1.0_34219.1 | 1378 | 662    | 0         | 563 | 570 | 98 -  | 734 | 1301 | 93     | 662    |
| UN40023 | Rsa1.0_00129.1 | 795  | 126831 | 3.00E-84  | 227 | 242 | 93 -  | 548 | 785  | 113646 | 113884 |
| UN40024 | Rsa1.0_02575.1 | 883  | 29944  | 0         | 860 | 900 | 95 +  | 3   | 883  | 19899  | 20798  |
| UN40025 | Rsa1.0_00015.1 | 1067 | 561803 | 1.00E-108 | 218 | 223 | 97 +  | 842 | 1063 | 463749 | 463971 |
| UN40026 | Rsa1.0_00425.1 | 779  | 147080 | 0         | 559 | 565 | 98 +  | 41  | 605  | 75125  | 75689  |
| UN40027 | Rsa1.0_04384.1 | 1161 | 17629  | 0         | 375 | 388 | 96 +  | 750 | 1135 | 4187   | 4574   |
| UN40028 | Rsa1.0_00417.1 | 938  | 395068 | 0         | 827 | 832 | 99 -  | 107 | 938  | 386807 | 387638 |
| UN40029 | Rsa1.0_01846.1 | 652  | 38367  | 0         | 640 | 656 | 97 -  | 2   | 652  | 35556  | 36209  |
| UN40030 | Rsa1.0_00512.1 | 1063 | 200277 | 1.00E-119 | 236 | 242 | 97 -  | 499 | 740  | 63228  | 63469  |
| UN40031 | Rsa1.0_00036.1 | 1275 | 176186 | 0         | 360 | 369 | 97 +  | 478 | 846  | 102434 | 102802 |
| UN40032 | Rsa1.0_00293.1 | 460  | 339294 | 0         | 394 | 395 | 99 +  | 9   | 403  | 177088 | 177482 |
| UN40033 | Rsa1.0_02165.1 | 1113 | 34423  | 1.00E-136 | 363 | 402 | 90 -  | 717 | 1107 | 77     | 474    |
| UN40034 | Rsa1.0_03809.1 | 1130 | 20731  | 0         | 744 | 792 | 93 -  | 1   | 786  | 19080  | 19870  |
| UN40035 | Rsa1.0_00016.1 | 915  | 831256 | 1.00E-179 | 445 | 486 | 91 +  | 28  | 512  | 426926 | 427401 |
| UN40036 | Rsa1.0_00561.1 | 1249 | 75653  | 0         | 914 | 961 | 95 -  | 297 | 1249 | 4094   | 5053   |
| UN40037 | Rsa1.0_03352.1 | 1047 | 23506  | 1.00E-119 | 306 | 333 | 91 -  | 5   | 333  | 17500  | 17829  |
| UN40038 | Rsa1.0_02367.1 | 1186 | 32106  | 0         | 577 | 592 | 97 +  | 606 | 1186 | 25289  | 25880  |
| UN40039 | Rsa1.0_01121.1 | 860  | 53407  | 0         | 703 | 746 | 94 +  | 115 | 860  | 19076  | 19814  |
| UN40040 | Rsa1.0_00171.1 | 730  | 115622 | 1.00E-157 | 329 | 343 | 95 -  | 4   | 342  | 52232  | 52574  |
| UN40041 | Rsa1.0_00232.1 | 816  | 104936 | 1.00E-168 | 340 | 354 | 96 -  | 1   | 354  | 38388  | 38735  |
| UN40042 | Rsa1.0_00058.1 | 850  | 159921 | 0         | 410 | 412 | 99 +  | 1   | 411  | 84742  | 85153  |
| UN40043 | Rsa1.0_00237.1 | 1156 | 235974 | 1.00E-154 | 349 | 368 | 94 +  | 1   | 366  | 17771  | 18135  |
| UN40044 | Rsa1.0_00032.1 | 891  | 306326 | 1.00E-107 | 228 | 236 | 96 +  | 1   | 236  | 177643 | 177874 |
| UN40045 | Rsa1.0_00213.1 | 908  | 108167 | 1.00E-132 | 255 | 260 | 98 -  | 1   | 260  | 5743   | 6002   |
| UN40046 | Rsa1.0_00425.1 | 692  | 147080 | 0         | 516 | 518 | 99 -  | 1   | 518  | 1408   | 1925   |
| UN40047 | Rsa1.0_00237.1 | 827  | 235974 | 0         | 411 | 423 | 97 -  | 3   | 424  | 225556 | 225975 |
| UN40048 | Rsa1.0_00017.1 | 1141 | 752458 | 1.00E-150 | 336 | 356 | 94 -  | 1   | 355  | 578918 | 579270 |
| UN40049 | Rsa1.0_01803.1 | 1022 | 173846 | 1.00E-117 | 323 | 359 | 89 -  | 662 | 1016 | 18815  | 19153  |
| UN40050 | Rsa1.0_13661.1 | 984  | 4542   | 0         | 445 | 469 | 94 -  | 3   | 471  | 1405   | 1872   |
| UN40051 | Rsa1.0_03884.1 | 1099 | 20274  | 1.00E-167 | 423 | 467 | 90 -  | 1   | 467  | 19654  | 20098  |

|         |                |      |        |           |      |      |       |      |      |        |        |
|---------|----------------|------|--------|-----------|------|------|-------|------|------|--------|--------|
| UN40052 | Rsa1.0_02717.1 | 885  | 28458  | 1.00E-124 | 235  | 238  | 98 -  | 379  | 616  | 23912  | 24149  |
| UN40053 | Rsa1.0_00616.1 | 608  | 195713 | 0         | 465  | 466  | 99 -  | 1    | 466  | 181777 | 182242 |
| UN40054 | Rsa1.0_00337.1 | 1165 | 143174 | 0         | 384  | 390  | 98 +  | 2    | 391  | 139871 | 140259 |
| UN40055 | Rsa1.0_00894.1 | 1129 | 269700 | 1.00E-101 | 215  | 222  | 96 -  | 792  | 1011 | 128137 | 128357 |
| UN40056 | Rsa1.0_06185.1 | 610  | 11540  | 1.00E-154 | 339  | 360  | 94 +  | 2    | 361  | 3968   | 4327   |
| UN40057 | Rsa1.0_00105.1 | 1240 | 134138 | 0         | 1110 | 1125 | 98 -  | 4    | 1125 | 80589  | 81712  |
| UN40058 | Rsa1.0_02378.1 | 1038 | 31991  | 0         | 411  | 426  | 96 -  | 19   | 444  | 13753  | 14176  |
| UN40059 | Rsa1.0_00006.1 | 795  | 396176 | 0         | 482  | 530  | 90 +  | 1    | 514  | 368515 | 369036 |
| UN40060 | Rsa1.0_04169.1 | 1263 | 18712  | 0         | 440  | 465  | 94 -  | 797  | 1253 | 997    | 1460   |
| UN40061 | Rsa1.0_00394.1 | 1320 | 148426 | 0         | 530  | 553  | 95 -  | 772  | 1320 | 135145 | 135689 |
| UN40062 | Rsa1.0_01034.1 | 1181 | 56046  | 0         | 740  | 757  | 97 +  | 192  | 948  | 19416  | 20172  |
| UN40063 | Rsa1.0_14624.1 | 917  | 3217   | 1.00E-150 | 288  | 292  | 98 +  | 622  | 912  | 1334   | 1623   |
| UN40064 | Rsa1.0_00326.1 | 1423 | 171955 | 0         | 776  | 779  | 99 -  | 645  | 1422 | 18835  | 19613  |
| UN40065 | Rsa1.0_00384.1 | 1155 | 89278  | 0         | 418  | 448  | 93 -  | 2    | 433  | 48409  | 48852  |
| UN40066 | Rsa1.0_01313.1 | 1300 | 48387  | 1.00E-121 | 221  | 221  | 100 + | 945  | 1165 | 19753  | 19973  |
| UN40067 | Rsa1.0_05977.1 | 1065 | 12056  | 0         | 375  | 375  | 100 - | 3    | 377  | 5863   | 6237   |
| UN40068 | Rsa1.0_09236.1 | 1059 | 6540   | 0         | 647  | 647  | 100 + | 115  | 761  | 1      | 647    |
| UN40069 | Rsa1.0_03990.1 | 1112 | 19676  | 1.00E-175 | 432  | 466  | 92 +  | 653  | 1112 | 4681   | 5131   |
| UN40070 | Rsa1.0_02041.1 | 998  | 163634 | 2.00E-98  | 245  | 262  | 93 +  | 1    | 259  | 18772  | 19032  |
| UN40071 | Rsa1.0_02722.1 | 1089 | 28417  | 1.00E-169 | 395  | 425  | 92 -  | 668  | 1089 | 266    | 687    |
| UN40072 | Rsa1.0_00060.1 | 847  | 502678 | 0         | 404  | 417  | 96 +  | 30   | 443  | 390372 | 390786 |
| UN40073 | Rsa1.0_00551.1 | 1541 | 76227  | 1.00E-177 | 428  | 463  | 92 +  | 1060 | 1517 | 20659  | 21118  |
| UN40074 | Rsa1.0_01543.1 | 750  | 43645  | 0         | 591  | 606  | 97 +  | 1    | 604  | 5907   | 6510   |
| UN40075 | Rsa1.0_00046.1 | 795  | 320315 | 0         | 792  | 795  | 99 -  | 1    | 793  | 22151  | 22945  |
| UN40076 | Rsa1.0_10407.1 | 1390 | 5858   | 0         | 607  | 610  | 99 +  | 781  | 1390 | 546    | 1155   |
| UN40077 | Rsa1.0_01085.1 | 860  | 54539  | 1.00E-159 | 314  | 324  | 96 -  | 248  | 571  | 13646  | 13969  |
| UN40078 | Rsa1.0_07795.1 | 1146 | 8543   | 0         | 622  | 645  | 96 -  | 496  | 1140 | 579    | 1223   |
| UN40079 | Rsa1.0_05489.1 | 1159 | 13562  | 0         | 557  | 564  | 98 -  | 217  | 780  | 6625   | 7188   |
| UN40080 | Rsa1.0_00206.1 | 1405 | 109040 | 0         | 381  | 384  | 99 -  | 1    | 382  | 52087  | 52470  |
| UN40081 | Rsa1.0_04288.1 | 964  | 18077  | 0         | 381  | 398  | 95 +  | 1    | 397  | 4826   | 5222   |
| UN40082 | Rsa1.0_00789.1 | 1114 | 64233  | 1.00E-151 | 359  | 384  | 93 -  | 1    | 380  | 53473  | 53847  |
| UN40083 | Rsa1.0_00552.1 | 1030 | 206757 | 1.00E-102 | 295  | 328  | 89 -  | 703  | 1019 | 193060 | 193385 |
| UN40084 | Rsa1.0_00058.1 | 1219 | 159921 | 0         | 475  | 476  | 99 -  | 3    | 478  | 119077 | 119552 |
| UN40085 | Rsa1.0_00014.1 | 1183 | 348985 | 0         | 630  | 675  | 93 +  | 523  | 1183 | 323604 | 324270 |
| UN40086 | Rsa1.0_01883.1 | 947  | 37661  | 1.00E-141 | 347  | 375  | 92 +  | 583  | 945  | 22302  | 22676  |
| UN40087 | Rsa1.0_02280.1 | 1021 | 33063  | 0         | 963  | 1024 | 94 +  | 3    | 1020 | 106    | 1127   |
| UN40088 | Rsa1.0_00611.1 | 1381 | 72410  | 0         | 811  | 821  | 98 -  | 352  | 1169 | 43471  | 44291  |
| UN40089 | Rsa1.0_08538.1 | 1029 | 7220   | 0         | 358  | 365  | 98 -  | 49   | 413  | 3099   | 3463   |
| UN40090 | Rsa1.0_00066.1 | 724  | 152418 | 0         | 501  | 536  | 93 +  | 1    | 532  | 14990  | 15509  |

|         |                |      |        |           |      |      |       |     |      |        |        |
|---------|----------------|------|--------|-----------|------|------|-------|-----|------|--------|--------|
| UN40091 | Rsa1.0.01806.1 | 935  | 39021  | 1.00E-172 | 398  | 428  | 92 -  | 524 | 935  | 21744  | 22163  |
| UN40092 | Rsa1.0.03400.1 | 1532 | 23203  | 0         | 1400 | 1417 | 98 +  | 9   | 1419 | 13841  | 15257  |
| UN40093 | Rsa1.0.00118.1 | 1310 | 130637 | 0         | 576  | 598  | 96 -  | 715 | 1308 | 28806  | 29403  |
| UN40094 | Rsa1.0.15589.1 | 962  | 2532   | 1.00E-96  | 231  | 244  | 94 +  | 720 | 960  | 1358   | 1601   |
| UN40095 | Rsa1.0.00037.1 | 1025 | 307838 | 0         | 490  | 491  | 99 -  | 533 | 1023 | 238867 | 239357 |
| UN40096 | Rsa1.0.00816.1 | 920  | 403350 | 1.00E-123 | 239  | 244  | 97 +  | 677 | 920  | 271515 | 271758 |
| UN40097 | Rsa1.0.03640.1 | 877  | 21624  | 0         | 430  | 439  | 97 +  | 1   | 437  | 15558  | 15995  |
| UN40098 | Rsa1.0.00005.1 | 899  | 353093 | 0         | 360  | 360  | 100 - | 540 | 899  | 122008 | 122367 |
| UN40099 | Rsa1.0.00009.1 | 818  | 232558 | 1.00E-80  | 156  | 157  | 99 -  | 242 | 398  | 118548 | 118704 |
| UN40100 | Rsa1.0.09385.1 | 984  | 6405   | 0         | 809  | 824  | 98 -  | 5   | 828  | 3183   | 4004   |
| UN40101 | Rsa1.0.00114.1 | 1170 | 131330 | 0         | 374  | 374  | 100 + | 795 | 1168 | 86061  | 86434  |
| UN40102 | Rsa1.0.00088.1 | 800  | 141341 | 1.00E-143 | 313  | 331  | 94 -  | 479 | 800  | 108320 | 108650 |
| UN40103 | Rsa1.0.00464.1 | 1063 | 82253  | 1.00E-155 | 375  | 404  | 92 -  | 664 | 1057 | 37198  | 37600  |
| UN40104 | Rsa1.0.00065.1 | 1199 | 454616 | 0         | 352  | 360  | 97 +  | 839 | 1198 | 191624 | 191983 |
| UN40105 | Rsa1.0.00842.1 | 1096 | 62493  | 4.00E-87  | 167  | 168  | 99 +  | 1   | 168  | 27730  | 27897  |
| UN40106 | Rsa1.0.02200.1 | 702  | 33981  | 0         | 489  | 507  | 96 +  | 201 | 702  | 24077  | 24581  |
| UN40107 | Rsa1.0.02728.1 | 959  | 28400  | 1.00E-164 | 319  | 326  | 97 +  | 638 | 958  | 26853  | 27178  |
| UN40108 | Rsa1.0.01242.1 | 864  | 50066  | 1.00E-113 | 214  | 216  | 99 +  | 324 | 539  | 17101  | 17316  |
| UN40109 | Rsa1.0.00585.1 | 1038 | 74164  | 1.00E-165 | 347  | 363  | 95 -  | 2   | 363  | 59736  | 60098  |
| UN40110 | Rsa1.0.05319.1 | 934  | 14158  | 1.00E-126 | 271  | 285  | 95 -  | 592 | 876  | 418    | 702    |
| UN40111 | Rsa1.0.00556.1 | 1507 | 207212 | 0         | 935  | 975  | 95 +  | 202 | 1173 | 51917  | 52888  |
| UN40112 | Rsa1.0.00931.1 | 1030 | 59210  | 0         | 386  | 406  | 95 -  | 607 | 998  | 47841  | 48246  |
| UN40113 | Rsa1.0.00635.1 | 1169 | 175826 | 0         | 678  | 678  | 100 + | 1   | 678  | 121662 | 122339 |
| UN40114 | Rsa1.0.01283.1 | 817  | 49257  | 0         | 392  | 409  | 95 +  | 413 | 815  | 7067   | 7475   |
| UN40115 | Rsa1.0.01081.1 | 766  | 499226 | 0         | 744  | 780  | 95 +  | 1   | 764  | 318606 | 319383 |
| UN40116 | Rsa1.0.72124.1 | 681  | 318    | 1.00E-153 | 307  | 318  | 96 -  | 134 | 451  | 1      | 318    |
| UN40117 | Rsa1.0.00045.1 | 902  | 328694 | 0         | 574  | 599  | 95 +  | 249 | 841  | 229947 | 230542 |
| UN40118 | Rsa1.0.01166.1 | 1158 | 51877  | 4.00E-72  | 145  | 147  | 98 -  | 13  | 159  | 41193  | 41339  |
| UN40119 | Rsa1.0.00181.1 | 778  | 114269 | 0         | 438  | 446  | 98 +  | 332 | 776  | 53500  | 53945  |
| UN40120 | Rsa1.0.01001.1 | 594  | 57077  | 6.00E-94  | 331  | 382  | 86 +  | 2   | 369  | 23258  | 23621  |
| UN40121 | Rsa1.0.03955.1 | 1023 | 19884  | 9.00E-79  | 263  | 293  | 89 -  | 739 | 1023 | 5838   | 6126   |
| UN40122 | Rsa1.0.01468.1 | 1092 | 45146  | 0         | 476  | 476  | 100 - | 3   | 478  | 16769  | 17244  |
| UN40123 | Rsa1.0.04387.1 | 1328 | 17625  | 0         | 713  | 752  | 94 +  | 586 | 1328 | 7389   | 8137   |
| UN40124 | Rsa1.0.00265.1 | 1128 | 220635 | 0         | 353  | 355  | 99 -  | 769 | 1123 | 188893 | 189247 |
| UN40125 | Rsa1.0.04235.1 | 1047 | 18373  | 0         | 658  | 679  | 96 +  | 4   | 682  | 11398  | 12072  |
| UN40126 | Rsa1.0.04405.1 | 644  | 17508  | 1.00E-124 | 350  | 385  | 90 -  | 267 | 644  | 14239  | 14619  |
| UN40127 | Rsa1.0.00136.1 | 1163 | 122464 | 1.00E-150 | 270  | 270  | 100 + | 894 | 1163 | 30698  | 30967  |
| UN40128 | Rsa1.0.00890.1 | 900  | 323870 | 0         | 788  | 871  | 90 +  | 1   | 871  | 176057 | 176919 |
| UN40129 | Rsa1.0.02027.1 | 1100 | 35869  | 0         | 466  | 487  | 95 +  | 11  | 497  | 8109   | 8586   |

|         |                |      |        |           |      |      |      |      |      |        |        |
|---------|----------------|------|--------|-----------|------|------|------|------|------|--------|--------|
| UN40130 | Rsa1.0_00275.1 | 1267 | 210104 | 1.00E-129 | 249  | 253  | 98 - | 1014 | 1263 | 176489 | 176741 |
| UN40131 | Rsa1.0_02874.1 | 1166 | 27070  | 0         | 925  | 951  | 97 + | 42   | 989  | 4410   | 5357   |
| UN40132 | Rsa1.0_05423.1 | 1260 | 13800  | 0         | 470  | 483  | 97 + | 778  | 1258 | 8891   | 9373   |
| UN40133 | Rsa1.0_00092.1 | 1114 | 659932 | 0         | 1088 | 1131 | 96 - | 3    | 1114 | 175641 | 176766 |
| UN40134 | Rsa1.0_00137.1 | 847  | 122457 | 2.00E-63  | 142  | 148  | 95 - | 1    | 148  | 5329   | 5476   |
| UN40135 | Rsa1.0_00339.1 | 1084 | 222974 | 0         | 374  | 380  | 98 + | 706  | 1084 | 177617 | 177996 |
| UN40136 | Rsa1.0_01845.1 | 1263 | 38415  | 7.00E-80  | 218  | 235  | 92 - | 2    | 233  | 8035   | 8267   |
| UN40137 | Rsa1.0_03567.1 | 705  | 22049  | 0         | 443  | 448  | 98 + | 1    | 448  | 3416   | 3863   |
| UN40138 | Rsa1.0_00926.1 | 859  | 195072 | 0         | 452  | 479  | 94 + | 1    | 478  | 41595  | 42061  |
| UN40139 | Rsa1.0_13979.1 | 810  | 3964   | 1.00E-151 | 357  | 375  | 95 + | 444  | 810  | 2932   | 3306   |
| UN40140 | Rsa1.0_02217.1 | 1470 | 33812  | 0         | 1060 | 1093 | 96 + | 228  | 1320 | 30433  | 31522  |
| UN40141 | Rsa1.0_01758.1 | 1088 | 39747  | 0         | 401  | 415  | 96 + | 338  | 752  | 37154  | 37568  |
| UN40142 | Rsa1.0_00032.1 | 893  | 306326 | 0         | 836  | 893  | 93 + | 3    | 892  | 192340 | 193209 |
| UN40143 | Rsa1.0_00041.1 | 901  | 186197 | 0         | 409  | 428  | 95 + | 1    | 428  | 151557 | 151983 |
| UN40144 | Rsa1.0_01484.1 | 967  | 44806  | 0         | 507  | 527  | 96 + | 438  | 952  | 40748  | 41274  |
| UN40145 | Rsa1.0_03781.1 | 926  | 20891  | 0         | 704  | 733  | 96 - | 17   | 749  | 11400  | 12130  |
| UN40146 | Rsa1.0_01331.1 | 988  | 47944  | 1.00E-169 | 380  | 403  | 94 + | 1    | 397  | 29251  | 29653  |
| UN40147 | Rsa1.0_00498.1 | 928  | 79746  | 0         | 471  | 493  | 95 + | 438  | 928  | 49512  | 49994  |
| UN40148 | Rsa1.0_01431.1 | 730  | 167877 | 0         | 697  | 728  | 95 + | 1    | 728  | 36798  | 37517  |
| UN40149 | Rsa1.0_02616.1 | 1183 | 29542  | 0         | 926  | 942  | 98 - | 9    | 950  | 23314  | 24251  |
| UN40150 | Rsa1.0_02341.1 | 896  | 32387  | 1.00E-123 | 270  | 281  | 96 + | 1    | 278  | 31212  | 31492  |
| UN40151 | Rsa1.0_00080.1 | 838  | 190437 | 1.00E-115 | 218  | 219  | 99 + | 621  | 838  | 65806  | 66024  |
| UN40152 | Rsa1.0_00305.1 | 1146 | 97308  | 0         | 1016 | 1113 | 91 - | 2    | 1096 | 37471  | 38539  |
| UN40153 | Rsa1.0_00026.1 | 988  | 327835 | 0         | 576  | 578  | 99 - | 94   | 671  | 43975  | 44552  |
| UN40154 | Rsa1.0_01701.1 | 909  | 162121 | 4.00E-96  | 188  | 191  | 98 - | 127  | 317  | 26072  | 26262  |
| UN40155 | Rsa1.0_01937.1 | 1095 | 37147  | 1.00E-155 | 303  | 311  | 97 + | 783  | 1093 | 32247  | 32557  |
| UN40156 | Rsa1.0_27735.1 | 860  | 841    | 0         | 374  | 375  | 99 - | 2    | 376  | 446    | 820    |
| UN40157 | Rsa1.0_00897.1 | 1098 | 60498  | 1.00E-122 | 238  | 243  | 97 + | 492  | 734  | 22614  | 22856  |
| UN40158 | Rsa1.0_00088.1 | 888  | 141341 | 1.00E-133 | 284  | 297  | 95 + | 592  | 887  | 6655   | 6951   |
| UN40159 | Rsa1.0_01104.1 | 1383 | 285480 | 0         | 855  | 857  | 99 - | 527  | 1383 | 263892 | 264748 |
| UN40160 | Rsa1.0_01553.1 | 724  | 43379  | 1.00E-120 | 258  | 269  | 95 + | 458  | 723  | 26451  | 26718  |
| UN40161 | Rsa1.0_47960.1 | 991  | 472    | 1.00E-115 | 226  | 231  | 97 - | 404  | 634  | 135    | 365    |
| UN40162 | Rsa1.0_00151.1 | 1219 | 119541 | 0         | 429  | 436  | 98 - | 784  | 1219 | 61517  | 61952  |
| UN40163 | Rsa1.0_01796.1 | 1220 | 39154  | 0         | 345  | 351  | 98 + | 870  | 1220 | 38212  | 38558  |
| UN40164 | Rsa1.0_00384.1 | 1019 | 89278  | 1.00E-152 | 304  | 313  | 97 - | 3    | 315  | 12264  | 12575  |
| UN40165 | Rsa1.0_00911.1 | 1280 | 59943  | 0         | 1125 | 1156 | 97 - | 125  | 1279 | 56165  | 57318  |
| UN40166 | Rsa1.0_05573.1 | 1451 | 13290  | 0         | 471  | 489  | 96 - | 41   | 523  | 4157   | 4642   |
| UN40167 | Rsa1.0_02070.1 | 737  | 158516 | 0         | 712  | 716  | 99 + | 21   | 735  | 13130  | 13844  |
| UN40168 | Rsa1.0_00110.1 | 1113 | 132719 | 1.00E-160 | 370  | 394  | 93 - | 3    | 396  | 4280   | 4669   |



|         |                |      |        |           |      |      |       |      |      |        |        |
|---------|----------------|------|--------|-----------|------|------|-------|------|------|--------|--------|
| UN40169 | Rsa1.0.00568.1 | 1224 | 75219  | 1.00E-158 | 308  | 316  | 97 +  | 299  | 614  | 4251   | 4566   |
| UN40170 | Rsa1.0.00119.1 | 637  | 467509 | 0         | 467  | 493  | 94 +  | 144  | 636  | 374988 | 375478 |
| UN40171 | Rsa1.0.00078.1 | 944  | 175053 | 0         | 380  | 388  | 97 +  | 557  | 944  | 137160 | 137547 |
| UN40172 | Rsa1.0.07321.1 | 856  | 9559   | 0         | 416  | 440  | 94 -  | 428  | 856  | 4888   | 5326   |
| UN40173 | Rsa1.0.00453.1 | 1064 | 83031  | 8.00E-73  | 158  | 164  | 96 -  | 250  | 413  | 70878  | 71041  |
| UN40174 | Rsa1.0.00737.1 | 819  | 66432  | 1.00E-168 | 300  | 300  | 100 + | 1    | 300  | 11909  | 12208  |
| UN40175 | Rsa1.0.01458.1 | 1064 | 175719 | 1.00E-179 | 367  | 379  | 96 -  | 688  | 1063 | 33176  | 33554  |
| UN40176 | Rsa1.0.00894.1 | 1258 | 269700 | 1.00E-138 | 295  | 309  | 95 +  | 950  | 1257 | 118055 | 118363 |
| UN40177 | Rsa1.0.02165.1 | 1150 | 34423  | 1.00E-135 | 333  | 356  | 93 -  | 790  | 1141 | 4989   | 5342   |
| UN40178 | Rsa1.0.00476.1 | 901  | 280966 | 0         | 565  | 580  | 97 +  | 322  | 901  | 249078 | 249657 |
| UN40179 | Rsa1.0.01254.1 | 964  | 49801  | 1.00E-125 | 436  | 497  | 87 -  | 473  | 958  | 13794  | 14282  |
| UN40180 | Rsa1.0.04404.1 | 831  | 17510  | 0         | 670  | 688  | 97 +  | 144  | 831  | 9475   | 10161  |
| UN40181 | Rsa1.0.01311.1 | 1046 | 48456  | 0         | 1042 | 1046 | 99 +  | 1    | 1045 | 38895  | 39940  |
| UN40182 | Rsa1.0.00747.1 | 1185 | 66030  | 0         | 747  | 773  | 96 +  | 2    | 769  | 35941  | 36713  |
| UN40183 | Rsa1.0.00522.1 | 910  | 78103  | 0         | 324  | 324  | 100 + | 1    | 324  | 60084  | 60407  |
| UN40184 | Rsa1.0.01295.1 | 922  | 49040  | 0         | 426  | 427  | 99 +  | 496  | 922  | 21320  | 21746  |
| UN40185 | Rsa1.0.13767.1 | 895  | 4361   | 0         | 451  | 466  | 96 +  | 86   | 551  | 653    | 1118   |
| UN40186 | Rsa1.0.02939.1 | 1415 | 26595  | 0         | 506  | 542  | 93 +  | 2    | 529  | 16742  | 17273  |
| UN40187 | Rsa1.0.00189.1 | 1272 | 111830 | 0         | 376  | 377  | 99 -  | 3    | 379  | 57598  | 57974  |
| UN40188 | Rsa1.0.01696.1 | 1120 | 301850 | 0         | 710  | 737  | 96 -  | 1    | 732  | 273492 | 274228 |
| UN40189 | Rsa1.0.44085.1 | 1209 | 510    | 0         | 337  | 337  | 100 - | 249  | 585  | 70     | 406    |
| UN40190 | Rsa1.0.01989.1 | 943  | 36439  | 0         | 371  | 384  | 96 +  | 1    | 384  | 21637  | 22020  |
| UN40191 | Rsa1.0.02680.1 | 1479 | 28721  | 0         | 1417 | 1448 | 97 -  | 31   | 1478 | 17591  | 19036  |
| UN40192 | Rsa1.0.18563.1 | 1179 | 1574   | 1.00E-162 | 347  | 365  | 95 +  | 816  | 1178 | 528    | 892    |
| UN40193 | Rsa1.0.06797.1 | 1274 | 10342  | 1.00E-153 | 312  | 322  | 96 +  | 1    | 319  | 5085   | 5406   |
| UN40194 | Rsa1.0.00388.1 | 1206 | 88890  | 1.00E-127 | 246  | 251  | 98 -  | 945  | 1195 | 63420  | 63670  |
| UN40195 | Rsa1.0.02092.1 | 1414 | 35135  | 0         | 861  | 888  | 96 +  | 531  | 1414 | 27152  | 28036  |
| UN40196 | Rsa1.0.00677.1 | 546  | 69159  | 1.00E-110 | 215  | 219  | 98 +  | 326  | 544  | 20837  | 21055  |
| UN40197 | Rsa1.0.01785.1 | 1081 | 39368  | 0         | 678  | 720  | 94 -  | 334  | 1050 | 28295  | 29000  |
| UN40198 | Rsa1.0.07453.1 | 972  | 9368   | 0         | 594  | 608  | 97 -  | 1    | 608  | 2199   | 2804   |
| UN40199 | Rsa1.0.04773.1 | 1069 | 16037  | 0         | 647  | 671  | 96 -  | 395  | 1065 | 10619  | 11288  |
| UN40200 | Rsa1.0.00706.1 | 967  | 291570 | 0         | 670  | 699  | 95 -  | 262  | 957  | 23266  | 23961  |
| UN40201 | Rsa1.0.00592.1 | 1173 | 73788  | 0         | 482  | 488  | 98 +  | 680  | 1166 | 25616  | 26101  |
| UN40202 | Rsa1.0.01111.1 | 1056 | 53669  | 1.00E-166 | 344  | 357  | 96 +  | 1    | 353  | 39891  | 40244  |
| UN40203 | Rsa1.0.00275.1 | 1248 | 210104 | 0         | 457  | 482  | 94 -  | 613  | 1091 | 206518 | 206995 |
| UN40204 | Rsa1.0.00476.1 | 2101 | 280966 | 0         | 891  | 921  | 96 -  | 1186 | 2101 | 232346 | 233264 |
| UN40205 | Rsa1.0.05366.1 | 971  | 14036  | 0         | 360  | 362  | 99 -  | 333  | 694  | 8072   | 8433   |
| UN40206 | Rsa1.0.00034.1 | 922  | 260119 | 0         | 412  | 421  | 97 -  | 503  | 922  | 15166  | 15586  |
| UN40207 | Rsa1.0.02134.1 | 1189 | 34726  | 0         | 614  | 615  | 99 +  | 574  | 1188 | 15296  | 15910  |

|         |                |      |        |           |     |      |       |     |      |        |        |
|---------|----------------|------|--------|-----------|-----|------|-------|-----|------|--------|--------|
| UN40208 | Rsa1.0.00012.1 | 1125 | 222148 | 0         | 784 | 856  | 91 +  | 130 | 972  | 110283 | 111109 |
| UN40209 | Rsa1.0.00135.1 | 1335 | 178077 | 2.33E-156 | 448 | 506  | 88 -  | 266 | 765  | 165807 | 166298 |
| UN40210 | Rsa1.0.00207.1 | 927  | 248736 | 0         | 483 | 486  | 99 +  | 444 | 927  | 22526  | 23011  |
| UN40211 | Rsa1.0.02064.1 | 946  | 35476  | 1.00E-96  | 257 | 280  | 91 -  | 6   | 278  | 9518   | 9792   |
| UN40212 | Rsa1.0.02101.1 | 1013 | 35017  | 0         | 966 | 1013 | 95 +  | 3   | 1013 | 20148  | 21148  |
| UN40213 | Rsa1.0.01049.1 | 419  | 55655  | 1.00E-145 | 389 | 426  | 91 +  | 1   | 419  | 39587  | 40002  |
| UN40214 | Rsa1.0.06939.1 | 776  | 10137  | 0         | 332 | 333  | 99 +  | 2   | 334  | 3507   | 3838   |
| UN40215 | Rsa1.0.05360.1 | 1208 | 14053  | 1.00E-161 | 298 | 301  | 99 -  | 123 | 423  | 12218  | 12518  |
| UN40216 | Rsa1.0.02045.1 | 1400 | 35650  | 0         | 565 | 619  | 91 -  | 516 | 1134 | 34229  | 34847  |
| UN40217 | Rsa1.0.02658.1 | 1132 | 28978  | 1.00E-172 | 341 | 351  | 97 +  | 1   | 351  | 11694  | 12043  |
| UN40218 | Rsa1.0.02111.1 | 691  | 34913  | 0         | 339 | 339  | 100 + | 353 | 691  | 34570  | 34908  |
| UN40219 | Rsa1.0.00001.1 | 386  | 363028 | 6.00E-56  | 117 | 119  | 98 +  | 111 | 229  | 313972 | 314090 |
| UN40220 | Rsa1.0.00270.1 | 1090 | 101236 | 1.00E-114 | 325 | 360  | 90 +  | 3   | 362  | 62757  | 63106  |
| UN40221 | Rsa1.0.00006.1 | 730  | 396176 | 0         | 465 | 488  | 95 +  | 1   | 485  | 307629 | 308106 |
| UN40222 | Rsa1.0.05081.1 | 825  | 136103 | 0         | 350 | 350  | 100 - | 1   | 350  | 5006   | 5355   |
| UN40223 | Rsa1.0.00347.1 | 1176 | 93048  | 1.00E-172 | 413 | 447  | 92 +  | 3   | 449  | 90999  | 91440  |
| UN40224 | Rsa1.0.00570.1 | 1333 | 75002  | 0         | 718 | 731  | 98 -  | 4   | 734  | 31697  | 32424  |
| UN40225 | Rsa1.0.05049.1 | 1094 | 15025  | 0         | 402 | 403  | 99 +  | 1   | 403  | 8807   | 9209   |
| UN40226 | Rsa1.0.01487.1 | 951  | 44784  | 3.00E-78  | 158 | 161  | 98 +  | 704 | 864  | 1518   | 1678   |
| UN40227 | Rsa1.0.11393.1 | 1076 | 5521   | 1.00E-176 | 364 | 381  | 95 -  | 1   | 381  | 205    | 585    |
| UN40228 | Rsa1.0.00224.1 | 1234 | 327530 | 0         | 504 | 528  | 95 -  | 403 | 930  | 13085  | 13605  |
| UN40229 | Rsa1.0.00083.1 | 809  | 442773 | 1.00E-137 | 344 | 377  | 91 +  | 1   | 376  | 251627 | 251986 |
| UN40230 | Rsa1.0.27704.1 | 1206 | 842    | 0         | 356 | 356  | 100 + | 851 | 1206 | 442    | 797    |
| UN40231 | Rsa1.0.00486.1 | 740  | 80875  | 0         | 430 | 449  | 95 +  | 5   | 452  | 32579  | 33022  |
| UN40232 | Rsa1.0.06831.1 | 912  | 10294  | 1.00E-130 | 313 | 337  | 92 -  | 576 | 907  | 4166   | 4497   |
| UN40233 | Rsa1.0.00001.1 | 792  | 363028 | 0         | 470 | 496  | 94 -  | 297 | 788  | 240616 | 241099 |
| UN40234 | Rsa1.0.00088.1 | 817  | 141341 | 1.00E-101 | 212 | 218  | 97 +  | 600 | 817  | 108001 | 108215 |
| UN40235 | Rsa1.0.01978.1 | 797  | 36546  | 1.00E-123 | 249 | 256  | 97 +  | 542 | 797  | 12510  | 12764  |
| UN40236 | Rsa1.0.00194.1 | 725  | 110851 | 0         | 656 | 690  | 95 -  | 1   | 683  | 54321  | 54997  |
| UN40237 | Rsa1.0.00207.1 | 619  | 248736 | 0         | 515 | 533  | 96 +  | 34  | 560  | 194305 | 194836 |
| UN40238 | Rsa1.0.05804.1 | 635  | 12586  | 0         | 600 | 637  | 94 -  | 3   | 635  | 9664   | 10300  |
| UN40239 | Rsa1.0.00087.1 | 695  | 761073 | 5.00E-95  | 240 | 257  | 93 +  | 6   | 261  | 191417 | 191671 |
| UN40240 | Rsa1.0.00816.1 | 915  | 403350 | 0         | 574 | 583  | 98 -  | 3   | 585  | 127627 | 128209 |
| UN40241 | Rsa1.0.38612.1 | 851  | 583    | 1.00E-129 | 246 | 250  | 98 -  | 600 | 849  | 98     | 347    |
| UN40242 | Rsa1.0.00975.1 | 899  | 57865  | 0         | 734 | 758  | 96 +  | 3   | 759  | 55288  | 56041  |
| UN40243 | Rsa1.0.01418.1 | 1090 | 46237  | 1.00E-168 | 303 | 304  | 99 +  | 484 | 787  | 6787   | 7090   |
| UN40244 | Rsa1.0.00030.1 | 1137 | 250988 | 0         | 770 | 798  | 96 +  | 1   | 795  | 141399 | 142194 |
| UN40245 | Rsa1.0.02648.1 | 1021 | 29073  | 1.00E-152 | 320 | 333  | 96 +  | 689 | 1021 | 20666  | 20996  |
| UN40246 | Rsa1.0.01600.1 | 796  | 42537  | 1.00E-122 | 304 | 326  | 93 -  | 381 | 704  | 8671   | 8994   |

|         |                |      |        |           |      |      |       |      |      |        |        |
|---------|----------------|------|--------|-----------|------|------|-------|------|------|--------|--------|
| UN40247 | Rsa1.0.00351.1 | 1260 | 413096 | 0         | 436  | 445  | 97 +  | 490  | 934  | 234253 | 234697 |
| UN40248 | Rsa1.0.02897.1 | 1267 | 26967  | 0         | 567  | 570  | 99 +  | 103  | 672  | 20103  | 20671  |
| UN40249 | Rsa1.0.00122.1 | 915  | 265937 | 1.00E-113 | 241  | 252  | 95 -  | 417  | 668  | 99996  | 100247 |
| UN40250 | Rsa1.0.00893.1 | 1056 | 60626  | 0         | 651  | 681  | 95 -  | 378  | 1056 | 43119  | 43797  |
| UN40251 | Rsa1.0.02893.1 | 583  | 26999  | 7.00E-75  | 236  | 264  | 89 -  | 326  | 583  | 24351  | 24614  |
| UN40252 | Rsa1.0.01970.1 | 1093 | 36648  | 0         | 1078 | 1096 | 98 +  | 3    | 1093 | 30312  | 31406  |
| UN40253 | Rsa1.0.00471.1 | 1501 | 81897  | 1.00E-158 | 327  | 340  | 96 +  | 1156 | 1492 | 1928   | 2265   |
| UN40254 | Rsa1.0.11280.1 | 786  | 5558   | 0         | 357  | 368  | 97 +  | 343  | 710  | 4869   | 5236   |
| UN40255 | Rsa1.0.05398.1 | 1181 | 13885  | 1.00E-107 | 296  | 327  | 90 +  | 3    | 326  | 13504  | 13819  |
| UN40256 | Rsa1.0.02170.1 | 1787 | 34352  | 0         | 910  | 928  | 98 +  | 518  | 1445 | 28526  | 29444  |
| UN40257 | Rsa1.0.00529.1 | 393  | 77487  | 1.00E-57  | 147  | 156  | 94 +  | 9    | 160  | 25138  | 25293  |
| UN40258 | Rsa1.0.00596.1 | 720  | 73578  | 0         | 487  | 488  | 99 +  | 2    | 489  | 45251  | 45738  |
| UN40259 | Rsa1.0.00190.1 | 1228 | 318240 | 2.00E-64  | 135  | 138  | 97 -  | 117  | 254  | 198961 | 199098 |
| UN40260 | Rsa1.0.00784.1 | 1053 | 64359  | 0         | 433  | 446  | 97 -  | 615  | 1053 | 7565   | 8009   |
| UN40261 | Rsa1.0.00331.1 | 810  | 176754 | 1.00E-153 | 284  | 287  | 98 +  | 192  | 478  | 99092  | 99378  |
| UN40262 | Rsa1.0.00525.1 | 1119 | 78030  | 0         | 1081 | 1126 | 96 +  | 1    | 1119 | 47430  | 48554  |
| UN40263 | Rsa1.0.00412.1 | 1156 | 86935  | 0         | 390  | 391  | 99 -  | 3    | 393  | 49290  | 49680  |
| UN40264 | Rsa1.0.03594.1 | 1639 | 21868  | 0         | 796  | 823  | 96 -  | 273  | 1095 | 15258  | 16080  |
| UN40265 | Rsa1.0.00693.1 | 1233 | 161311 | 0         | 1053 | 1065 | 98 -  | 34   | 1096 | 41422  | 42480  |
| UN40266 | Rsa1.0.01957.1 | 1962 | 36844  | 0         | 931  | 938  | 99 -  | 230  | 1165 | 25211  | 26148  |
| UN40267 | Rsa1.0.00119.1 | 874  | 467509 | 6.00E-95  | 276  | 306  | 90 +  | 310  | 603  | 247326 | 247627 |
| UN40268 | Rsa1.0.15767.1 | 1046 | 2435   | 1.00E-135 | 280  | 292  | 95 -  | 633  | 924  | 258    | 549    |
| UN40269 | Rsa1.0.00663.1 | 868  | 164969 | 1.00E-99  | 212  | 221  | 95 -  | 648  | 868  | 126484 | 126704 |
| UN40270 | Rsa1.0.00238.1 | 1245 | 193193 | 0         | 691  | 759  | 91 -  | 38   | 771  | 4529   | 5264   |
| UN40271 | Rsa1.0.01026.1 | 791  | 171624 | 1.00E-116 | 224  | 228  | 98 +  | 1    | 228  | 158799 | 159026 |
| UN40272 | Rsa1.0.03956.1 | 1231 | 19872  | 0         | 464  | 499  | 92 +  | 1    | 488  | 17831  | 18323  |
| UN40273 | Rsa1.0.00857.1 | 990  | 61904  | 0         | 507  | 535  | 94 -  | 335  | 866  | 44584  | 45110  |
| UN40274 | Rsa1.0.00084.1 | 546  | 142338 | 0         | 321  | 321  | 100 + | 224  | 544  | 39553  | 39873  |
| UN40275 | Rsa1.0.00122.1 | 1073 | 265937 | 0         | 855  | 900  | 95 +  | 176  | 1073 | 239355 | 240245 |
| UN40276 | Rsa1.0.07775.1 | 835  | 8594   | 0         | 357  | 363  | 98 +  | 472  | 834  | 614    | 973    |
| UN40277 | Rsa1.0.13492.1 | 1012 | 4775   | 0         | 445  | 445  | 100 - | 1    | 445  | 3396   | 3840   |
| UN40278 | Rsa1.0.04022.1 | 1370 | 19534  | 0         | 472  | 492  | 95 -  | 878  | 1362 | 1103   | 1594   |
| UN40279 | Rsa1.0.00101.1 | 1255 | 267193 | 0         | 1197 | 1263 | 94 -  | 2    | 1251 | 89126  | 90379  |
| UN40280 | Rsa1.0.00041.1 | 630  | 186197 | 1.00E-132 | 275  | 287  | 95 -  | 39   | 325  | 27167  | 27453  |
| UN40281 | Rsa1.0.00197.1 | 1701 | 109714 | 0         | 1482 | 1499 | 98 -  | 2    | 1500 | 84124  | 85622  |
| UN40282 | Rsa1.0.04478.1 | 1406 | 17183  | 0         | 721  | 753  | 95 +  | 654  | 1406 | 3267   | 4014   |
| UN40283 | Rsa1.0.00086.1 | 604  | 439854 | 0         | 376  | 389  | 96 +  | 42   | 427  | 342217 | 342604 |
| UN40284 | Rsa1.0.01387.1 | 1026 | 46745  | 1.00E-120 | 252  | 259  | 97 +  | 549  | 805  | 31955  | 32212  |
| UN40285 | Rsa1.0.01571.1 | 1375 | 43000  | 0         | 397  | 417  | 95 +  | 975  | 1373 | 13732  | 14148  |

|         |                |      |        |           |      |      |       |      |      |        |        |
|---------|----------------|------|--------|-----------|------|------|-------|------|------|--------|--------|
| UN40286 | Rsa1.0.36744.1 | 1111 | 614    | 0         | 399  | 418  | 95 +  | 153  | 570  | 94     | 511    |
| UN40287 | Rsa1.0.01435.1 | 1471 | 45942  | 0         | 539  | 582  | 92 +  | 901  | 1469 | 41020  | 41596  |
| UN40288 | Rsa1.0.04057.1 | 1081 | 19333  | 0         | 566  | 575  | 98 +  | 507  | 1081 | 18260  | 18833  |
| UN40289 | Rsa1.0.31506.1 | 1180 | 725    | 0         | 699  | 737  | 94 -  | 74   | 801  | 1      | 725    |
| UN40290 | Rsa1.0.01448.1 | 842  | 45645  | 0         | 825  | 869  | 94 +  | 3    | 842  | 15660  | 16528  |
| UN40291 | Rsa1.0.00019.1 | 778  | 301669 | 0         | 664  | 675  | 98 -  | 1    | 675  | 273565 | 274239 |
| UN40292 | Rsa1.0.02099.1 | 1271 | 35030  | 1.00E-134 | 264  | 270  | 97 +  | 932  | 1201 | 2291   | 2558   |
| UN40293 | Rsa1.0.01516.1 | 1649 | 44196  | 0         | 631  | 663  | 95 -  | 76   | 734  | 37369  | 38031  |
| UN40294 | Rsa1.0.00119.1 | 803  | 467509 | 0         | 543  | 562  | 96 +  | 248  | 803  | 56896  | 57450  |
| UN40295 | Rsa1.0.02450.1 | 916  | 31288  | 0         | 740  | 785  | 94 +  | 133  | 916  | 16924  | 17682  |
| UN40296 | Rsa1.0.00505.1 | 971  | 79323  | 0         | 342  | 342  | 100 + | 625  | 966  | 76389  | 76730  |
| UN40297 | Rsa1.0.00269.1 | 1022 | 341668 | 0         | 447  | 475  | 94 -  | 506  | 979  | 323921 | 324393 |
| UN40298 | Rsa1.0.00493.1 | 741  | 80007  | 0         | 649  | 667  | 97 -  | 81   | 741  | 77205  | 77868  |
| UN40299 | Rsa1.0.00181.1 | 865  | 114269 | 0         | 583  | 598  | 97 -  | 268  | 865  | 92862  | 93454  |
| UN40300 | Rsa1.0.01050.1 | 961  | 55651  | 1.00E-143 | 273  | 278  | 98 -  | 1    | 278  | 27609  | 27886  |
| UN40301 | Rsa1.0.00192.1 | 840  | 278200 | 0         | 436  | 458  | 95 +  | 4    | 461  | 37931  | 38378  |
| UN40302 | Rsa1.0.65165.1 | 444  | 352    | 6.00E-84  | 182  | 188  | 96 -  | 4    | 187  | 7      | 194    |
| UN40303 | Rsa1.0.00616.1 | 854  | 195713 | 1.00E-147 | 271  | 273  | 99 +  | 582  | 854  | 194554 | 194826 |
| UN40304 | Rsa1.0.04235.1 | 962  | 18373  | 0         | 786  | 805  | 97 +  | 3    | 806  | 16326  | 17121  |
| UN40305 | Rsa1.0.00175.1 | 1021 | 166121 | 0         | 497  | 504  | 98 -  | 518  | 1021 | 61841  | 62344  |
| UN40306 | Rsa1.0.00779.1 | 937  | 64568  | 1.00E-141 | 295  | 308  | 95 +  | 161  | 468  | 32275  | 32579  |
| UN40307 | Rsa1.0.00386.1 | 606  | 89134  | 0         | 588  | 605  | 97 -  | 1    | 605  | 68766  | 69370  |
| UN40308 | Rsa1.0.01058.1 | 697  | 55430  | 0         | 567  | 587  | 96 -  | 5    | 581  | 34454  | 35038  |
| UN40309 | Rsa1.0.00211.1 | 824  | 228189 | 1.00E-153 | 284  | 287  | 98 -  | 143  | 429  | 213634 | 213920 |
| UN40310 | Rsa1.0.00044.1 | 719  | 271658 | 2.33E-156 | 277  | 282  | 98 -  | 17   | 298  | 57062  | 57343  |
| UN40311 | Rsa1.0.00497.1 | 859  | 79830  | 1.00E-171 | 367  | 385  | 95 +  | 461  | 843  | 73170  | 73554  |
| UN40312 | Rsa1.0.00082.1 | 1008 | 237584 | 1.00E-173 | 367  | 384  | 95 +  | 3    | 385  | 55288  | 55670  |
| UN40313 | Rsa1.0.00589.1 | 1110 | 209965 | 1.00E-136 | 270  | 278  | 97 -  | 357  | 634  | 197377 | 197654 |
| UN40314 | Rsa1.0.00435.1 | 1406 | 317579 | 0         | 557  | 558  | 99 +  | 352  | 909  | 51331  | 51888  |
| UN40315 | Rsa1.0.00164.1 | 1164 | 116642 | 0         | 1064 | 1109 | 95 -  | 59   | 1163 | 70421  | 71529  |
| UN40316 | Rsa1.0.00642.1 | 979  | 201230 | 0         | 940  | 977  | 96 +  | 2    | 978  | 154505 | 155470 |
| UN40317 | Rsa1.0.00087.1 | 1021 | 761073 | 1.00E-163 | 291  | 291  | 100 - | 368  | 658  | 729346 | 729636 |
| UN40318 | Rsa1.0.02867.1 | 997  | 27121  | 0         | 899  | 922  | 97 +  | 75   | 995  | 682    | 1591   |
| UN40319 | Rsa1.0.05496.1 | 1300 | 13533  | 1.00E-148 | 269  | 270  | 99 +  | 1028 | 1297 | 13075  | 13344  |
| UN40320 | Rsa1.0.07541.1 | 1611 | 9167   | 0         | 1312 | 1332 | 98 -  | 96   | 1427 | 1730   | 3061   |
| UN40321 | Rsa1.0.03668.1 | 598  | 21483  | 0         | 421  | 446  | 94 -  | 3    | 442  | 11438  | 11881  |
| UN40322 | Rsa1.0.00625.1 | 1026 | 71672  | 0         | 588  | 617  | 95 -  | 414  | 1026 | 14860  | 15475  |
| UN40323 | Rsa1.0.01721.1 | 1279 | 40345  | 0         | 593  | 605  | 98 -  | 5    | 608  | 24212  | 24814  |
| UN40324 | Rsa1.0.00790.1 | 789  | 148693 | 0         | 563  | 564  | 99 +  | 225  | 788  | 49119  | 49682  |

|         |                |      |        |           |      |      |       |     |      |        |        |
|---------|----------------|------|--------|-----------|------|------|-------|-----|------|--------|--------|
| UN40325 | Rsa1.0.02645.1 | 1122 | 29158  | 0         | 882  | 908  | 97 -  | 215 | 1122 | 17502  | 18408  |
| UN40326 | Rsa1.0.02383.1 | 935  | 31931  | 0         | 609  | 650  | 93 +  | 1   | 634  | 15229  | 15878  |
| UN40327 | Rsa1.0.01626.1 | 927  | 41989  | 1.00E-110 | 217  | 222  | 97 +  | 13  | 234  | 714    | 935    |
| UN40328 | Rsa1.0.02396.1 | 872  | 31783  | 1.00E-118 | 252  | 264  | 95 +  | 609 | 872  | 27111  | 27374  |
| UN40329 | Rsa1.0.00108.1 | 1179 | 478491 | 0         | 448  | 461  | 97 +  | 717 | 1177 | 91768  | 92226  |
| UN40330 | Rsa1.0.10792.1 | 1340 | 5719   | 0         | 359  | 365  | 98 -  | 976 | 1340 | 1300   | 1664   |
| UN40331 | Rsa1.0.00662.1 | 1131 | 192183 | 1.00E-101 | 241  | 255  | 94 -  | 1   | 253  | 53109  | 53361  |
| UN40332 | Rsa1.0.00453.1 | 850  | 83031  | 1.00E-135 | 319  | 337  | 94 +  | 508 | 841  | 19304  | 19634  |
| UN40333 | Rsa1.0.03465.1 | 852  | 22700  | 0         | 361  | 366  | 98 -  | 487 | 851  | 9959   | 10324  |
| UN40334 | Rsa1.0.00123.1 | 902  | 325650 | 1.00E-163 | 327  | 338  | 96 -  | 122 | 456  | 305219 | 305556 |
| UN40335 | Rsa1.0.00194.1 | 1138 | 110851 | 1.00E-127 | 266  | 277  | 96 -  | 429 | 705  | 96995  | 97268  |
| UN40336 | Rsa1.0.00593.1 | 903  | 143463 | 0         | 632  | 681  | 92 -  | 1   | 659  | 55065  | 55743  |
| UN40337 | Rsa1.0.00482.1 | 803  | 81162  | 8.00E-51  | 103  | 103  | 100 - | 407 | 509  | 5789   | 5891   |
| UN40338 | Rsa1.0.00427.1 | 557  | 189678 | 0         | 405  | 417  | 97 +  | 144 | 557  | 153301 | 153717 |
| UN40339 | Rsa1.0.08080.1 | 1024 | 137363 | 0         | 1022 | 1023 | 99 +  | 2   | 1024 | 3272   | 4294   |
| UN40340 | Rsa1.0.00423.1 | 270  | 86138  | 4.00E-81  | 216  | 232  | 93 -  | 38  | 269  | 10889  | 11115  |
| UN40341 | Rsa1.0.00336.1 | 1050 | 445051 | 0         | 586  | 624  | 93 +  | 61  | 681  | 25324  | 25940  |
| UN40342 | Rsa1.0.31858.1 | 655  | 716    | 0         | 498  | 510  | 97 +  | 3   | 511  | 207    | 716    |
| UN40343 | Rsa1.0.00197.1 | 841  | 109714 | 0         | 567  | 601  | 94 +  | 140 | 740  | 64829  | 65425  |
| UN40344 | Rsa1.0.01206.1 | 875  | 50772  | 0         | 800  | 836  | 95 -  | 17  | 846  | 25627  | 26462  |
| UN40345 | Rsa1.0.02196.1 | 1195 | 34005  | 0         | 480  | 496  | 96 +  | 699 | 1194 | 8945   | 9436   |
| UN40346 | Rsa1.0.00502.1 | 785  | 204180 | 0         | 524  | 541  | 96 -  | 192 | 732  | 181112 | 181649 |
| UN40347 | Rsa1.0.00015.1 | 782  | 561803 | 0         | 737  | 782  | 94 +  | 1   | 782  | 253961 | 254718 |
| UN40348 | Rsa1.0.05819.1 | 1253 | 12543  | 0         | 698  | 714  | 97 +  | 3   | 713  | 2207   | 2917   |
| UN40349 | Rsa1.0.02812.1 | 999  | 27660  | 0         | 390  | 409  | 95 +  | 591 | 998  | 16559  | 16961  |
| UN40350 | Rsa1.0.16840.1 | 1466 | 2017   | 0         | 1108 | 1117 | 99 -  | 5   | 1120 | 2      | 1117   |
| UN40351 | Rsa1.0.02346.1 | 514  | 32337  | 1.00E-159 | 317  | 328  | 96 +  | 1   | 328  | 10193  | 10520  |
| UN40352 | Rsa1.0.01417.1 | 1065 | 46252  | 0         | 406  | 419  | 96 +  | 617 | 1035 | 20533  | 20947  |
| UN40353 | Rsa1.0.34075.1 | 993  | 665    | 0         | 458  | 482  | 95 -  | 3   | 481  | 9      | 489    |
| UN40354 | Rsa1.0.47220.1 | 761  | 479    | 1.00E-136 | 264  | 269  | 98 -  | 494 | 760  | 108    | 376    |
| UN40355 | Rsa1.0.00304.1 | 782  | 97429  | 0         | 746  | 766  | 97 -  | 2   | 764  | 19168  | 19929  |
| UN40356 | Rsa1.0.00217.1 | 1166 | 107079 | 0         | 489  | 492  | 99 +  | 635 | 1126 | 60711  | 61202  |
| UN40357 | Rsa1.0.04653.1 | 1031 | 16509  | 1.00E-152 | 350  | 373  | 93 +  | 648 | 1019 | 2773   | 3139   |
| UN40358 | Rsa1.0.04111.1 | 559  | 18991  | 0         | 528  | 566  | 93 +  | 2   | 559  | 11207  | 11765  |
| UN40359 | Rsa1.0.01282.1 | 1074 | 49304  | 1.00E-117 | 294  | 316  | 93 -  | 767 | 1072 | 28018  | 28331  |
| UN40360 | Rsa1.0.01986.1 | 485  | 36489  | 1.00E-180 | 354  | 364  | 97 +  | 118 | 479  | 23647  | 24007  |
| UN40361 | Rsa1.0.00170.1 | 859  | 179538 | 1.00E-163 | 294  | 295  | 99 -  | 565 | 859  | 28575  | 28869  |
| UN40362 | Rsa1.0.05163.1 | 525  | 14628  | 3.00E-92  | 172  | 172  | 100 - | 172 | 343  | 14457  | 14628  |
| UN40363 | Rsa1.0.00192.1 | 828  | 278200 | 0         | 755  | 755  | 100 + | 74  | 828  | 251255 | 252009 |

|         |                |      |        |           |      |      |       |     |      |        |        |
|---------|----------------|------|--------|-----------|------|------|-------|-----|------|--------|--------|
| UN40364 | Rsa1.0.00863.1 | 1011 | 254535 | 1.00E-175 | 369  | 387  | 95 -  | 1   | 386  | 213547 | 213933 |
| UN40365 | Rsa1.0.08538.1 | 885  | 7220   | 0         | 629  | 647  | 97 -  | 254 | 884  | 2071   | 2717   |
| UN40366 | Rsa1.0.08776.1 | 962  | 6932   | 1.00E-169 | 305  | 306  | 99 -  | 1   | 306  | 2706   | 3011   |
| UN40367 | Rsa1.0.00494.1 | 693  | 79967  | 0         | 601  | 636  | 94 -  | 3   | 623  | 3814   | 4449   |
| UN40368 | Rsa1.0.00116.1 | 457  | 365886 | 0         | 436  | 457  | 95 -  | 3   | 457  | 154854 | 155308 |
| UN40369 | Rsa1.0.21516.1 | 1748 | 1196   | 0         | 1037 | 1052 | 98 +  | 313 | 1360 | 148    | 1196   |
| UN40370 | Rsa1.0.01094.1 | 1096 | 167285 | 0         | 545  | 552  | 98 -  | 187 | 738  | 53683  | 54234  |
| UN40371 | Rsa1.0.01294.1 | 588  | 49090  | 9.00E-53  | 127  | 134  | 94 +  | 167 | 300  | 11942  | 12075  |
| UN40372 | Rsa1.0.00476.1 | 560  | 280966 | 1.00E-107 | 275  | 298  | 92 +  | 271 | 558  | 157895 | 158191 |
| UN40373 | Rsa1.0.00018.1 | 832  | 410899 | 1.00E-112 | 282  | 306  | 92 +  | 535 | 832  | 262610 | 262912 |
| UN40374 | Rsa1.0.00576.1 | 1324 | 178949 | 0         | 1313 | 1322 | 99 -  | 1   | 1321 | 163132 | 164453 |
| UN40375 | Rsa1.0.00040.1 | 608  | 324196 | 0         | 543  | 564  | 96 -  | 16  | 579  | 163973 | 164535 |
| UN40376 | Rsa1.0.00251.1 | 1123 | 303968 | 0         | 564  | 574  | 98 +  | 550 | 1123 | 142909 | 143482 |
| UN40377 | Rsa1.0.00861.1 | 1526 | 61759  | 0         | 1215 | 1266 | 95 +  | 270 | 1525 | 22432  | 23681  |
| UN40378 | Rsa1.0.00101.1 | 950  | 267193 | 0         | 423  | 425  | 99 -  | 1   | 425  | 208637 | 209061 |
| UN40379 | Rsa1.0.00979.1 | 878  | 57733  | 0         | 402  | 409  | 98 -  | 470 | 877  | 1000   | 1407   |
| UN40380 | Rsa1.0.09224.1 | 1128 | 6545   | 0         | 558  | 558  | 100 + | 1   | 558  | 663    | 1220   |
| UN40381 | Rsa1.0.01146.1 | 670  | 163455 | 0         | 330  | 330  | 100 - | 1   | 330  | 162766 | 163095 |
| UN40382 | Rsa1.0.00014.1 | 1142 | 348985 | 0         | 555  | 623  | 89 -  | 517 | 1136 | 331467 | 332065 |
| UN40383 | Rsa1.0.03439.1 | 858  | 22930  | 0         | 737  | 769  | 95 +  | 92  | 858  | 14985  | 15748  |
| UN40384 | Rsa1.0.00016.1 | 888  | 831256 | 0         | 483  | 493  | 97 -  | 268 | 757  | 786099 | 786591 |
| UN40385 | Rsa1.0.00813.1 | 793  | 63202  | 1.00E-103 | 202  | 206  | 98 +  | 198 | 403  | 14295  | 14500  |
| UN40386 | Rsa1.0.00112.1 | 1064 | 132199 | 1.00E-164 | 392  | 428  | 91 -  | 376 | 803  | 116397 | 116809 |
| UN40387 | Rsa1.0.03646.1 | 1077 | 21598  | 1.00E-159 | 312  | 321  | 97 +  | 286 | 606  | 11101  | 11421  |
| UN40388 | Rsa1.0.02020.1 | 1012 | 173211 | 1.00E-162 | 358  | 379  | 94 +  | 537 | 911  | 172619 | 172996 |
| UN40389 | Rsa1.0.00447.1 | 1046 | 84051  | 1.00E-106 | 217  | 224  | 96 +  | 821 | 1044 | 26801  | 27024  |
| UN40390 | Rsa1.0.04399.1 | 1151 | 17543  | 0         | 597  | 645  | 92 -  | 1   | 645  | 13835  | 14467  |
| UN40391 | Rsa1.0.00238.1 | 945  | 193193 | 0         | 492  | 503  | 97 -  | 444 | 943  | 192126 | 192627 |
| UN40392 | Rsa1.0.00067.1 | 791  | 415055 | 0         | 388  | 402  | 96 +  | 76  | 477  | 313494 | 313895 |
| UN40393 | Rsa1.0.00398.1 | 1031 | 88007  | 1.00E-170 | 341  | 352  | 96 -  | 3   | 354  | 44624  | 44974  |
| UN40394 | Rsa1.0.02365.1 | 1076 | 32118  | 0         | 662  | 713  | 92 -  | 355 | 1053 | 18005  | 18715  |
| UN40395 | Rsa1.0.00088.1 | 898  | 141341 | 0         | 887  | 888  | 99 +  | 1   | 887  | 45721  | 46608  |
| UN40396 | Rsa1.0.00660.1 | 413  | 69688  | 5.00E-66  | 134  | 136  | 98 -  | 214 | 349  | 46315  | 46450  |
| UN40397 | Rsa1.0.00015.1 | 1908 | 561803 | 0         | 449  | 464  | 96 +  | 2   | 465  | 291495 | 291952 |
| UN40398 | Rsa1.0.00293.1 | 500  | 339294 | 0         | 494  | 497  | 99 +  | 2   | 498  | 301567 | 302062 |
| UN40399 | Rsa1.0.01251.1 | 1073 | 49873  | 0         | 424  | 433  | 97 +  | 598 | 1029 | 7546   | 7978   |
| UN40400 | Rsa1.0.00210.1 | 1047 | 108424 | 1.00E-164 | 339  | 354  | 95 +  | 100 | 453  | 50760  | 51109  |
| UN40401 | Rsa1.0.00188.1 | 1555 | 112020 | 0         | 1494 | 1574 | 94 -  | 3   | 1555 | 22007  | 23564  |
| UN40402 | Rsa1.0.01316.1 | 817  | 48325  | 2.00E-88  | 211  | 223  | 94 +  | 2   | 223  | 5571   | 5788   |

|         |                |      |        |           |      |      |       |     |      |        |        |
|---------|----------------|------|--------|-----------|------|------|-------|-----|------|--------|--------|
| UN40403 | Rsa1.0.00010.1 | 896  | 294827 | 1.00E-112 | 221  | 226  | 97 +  | 605 | 830  | 248372 | 248597 |
| UN40404 | Rsa1.0.05822.1 | 742  | 12521  | 0         | 530  | 576  | 92 +  | 175 | 738  | 11655  | 12214  |
| UN40405 | Rsa1.0.01660.1 | 883  | 41400  | 0         | 386  | 396  | 97 -  | 1   | 396  | 27246  | 27638  |
| UN40406 | Rsa1.0.00018.1 | 1032 | 410899 | 1.00E-133 | 280  | 290  | 96 -  | 741 | 1030 | 102834 | 103121 |
| UN40407 | Rsa1.0.02955.1 | 861  | 26484  | 0         | 380  | 394  | 96 -  | 367 | 760  | 8      | 401    |
| UN40408 | Rsa1.0.00913.1 | 1251 | 59914  | 0         | 600  | 600  | 100 - | 1   | 600  | 17896  | 18495  |
| UN40409 | Rsa1.0.00203.1 | 824  | 109129 | 1.00E-101 | 196  | 199  | 98 -  | 3   | 201  | 4021   | 4219   |
| UN40410 | Rsa1.0.00556.1 | 730  | 207212 | 0         | 701  | 735  | 95 -  | 2   | 726  | 43742  | 44474  |
| UN40411 | Rsa1.0.00637.1 | 963  | 71038  | 0         | 536  | 568  | 94 -  | 3   | 565  | 29637  | 30202  |
| UN40412 | Rsa1.0.01119.1 | 646  | 53459  | 1.00E-118 | 267  | 280  | 95 +  | 371 | 643  | 42440  | 42718  |
| UN40413 | Rsa1.0.01043.1 | 1192 | 55893  | 0         | 570  | 574  | 99 -  | 619 | 1192 | 20999  | 21572  |
| UN40414 | Rsa1.0.29217.1 | 974  | 789    | 1.00E-107 | 306  | 343  | 89 +  | 606 | 935  | 335    | 677    |
| UN40415 | Rsa1.0.05217.1 | 604  | 142938 | 0         | 601  | 601  | 100 - | 4   | 604  | 134917 | 135517 |
| UN40416 | Rsa1.0.03355.1 | 1122 | 23489  | 0         | 802  | 822  | 97 +  | 1   | 822  | 13889  | 14710  |
| UN40417 | Rsa1.0.00607.1 | 1348 | 73146  | 0         | 390  | 396  | 98 -  | 921 | 1316 | 69384  | 69779  |
| UN40418 | Rsa1.0.00153.1 | 1281 | 192931 | 0         | 537  | 539  | 99 +  | 5   | 543  | 86727  | 87265  |
| UN40419 | Rsa1.0.01220.1 | 468  | 161775 | 1.00E-118 | 322  | 351  | 91 +  | 125 | 467  | 138711 | 139049 |
| UN40420 | Rsa1.0.08429.1 | 889  | 7370   | 0         | 352  | 355  | 99 -  | 1   | 355  | 1371   | 1725   |
| UN40421 | Rsa1.0.04099.1 | 1128 | 19060  | 1.00E-110 | 255  | 271  | 94 +  | 843 | 1108 | 12639  | 12908  |
| UN40422 | Rsa1.0.01026.1 | 888  | 171624 | 1.00E-177 | 345  | 353  | 97 +  | 12  | 360  | 2997   | 3349   |
| UN40423 | Rsa1.0.00722.1 | 863  | 66840  | 0         | 683  | 691  | 98 -  | 1   | 689  | 3803   | 4493   |
| UN40424 | Rsa1.0.00014.1 | 1417 | 348985 | 0         | 1170 | 1181 | 99 +  | 238 | 1415 | 164032 | 165212 |
| UN40425 | Rsa1.0.01768.1 | 954  | 138463 | 1.00E-128 | 239  | 241  | 99 +  | 53  | 293  | 103423 | 103663 |
| UN40426 | Rsa1.0.02768.1 | 1036 | 28110  | 0         | 430  | 451  | 95 +  | 585 | 1035 | 26304  | 26749  |
| UN40427 | Rsa1.0.00123.1 | 901  | 325650 | 0         | 391  | 397  | 98 +  | 461 | 857  | 248385 | 248781 |
| UN40428 | Rsa1.0.17771.1 | 1329 | 1744   | 0         | 810  | 857  | 94 -  | 482 | 1329 | 337    | 1193   |
| UN40429 | Rsa1.0.04214.1 | 1917 | 18437  | 0         | 1087 | 1110 | 97 -  | 1   | 1104 | 4036   | 5145   |
| UN40430 | Rsa1.0.00307.1 | 1364 | 199003 | 1.00E-121 | 341  | 379  | 89 -  | 989 | 1364 | 80030  | 80391  |
| UN40431 | Rsa1.0.00387.1 | 1337 | 495407 | 1.00E-110 | 215  | 219  | 98 -  | 155 | 373  | 392287 | 392505 |
| UN40432 | Rsa1.0.00464.1 | 732  | 82253  | 0         | 708  | 717  | 98 -  | 18  | 731  | 64411  | 65126  |
| UN40433 | Rsa1.0.02467.1 | 1576 | 31141  | 1.00E-72  | 146  | 148  | 98 -  | 613 | 760  | 9764   | 9911   |
| UN40434 | Rsa1.0.00095.1 | 838  | 283384 | 0         | 800  | 848  | 94 +  | 7   | 838  | 96423  | 97259  |
| UN40435 | Rsa1.0.01047.1 | 1129 | 55705  | 0         | 1092 | 1130 | 96 +  | 9   | 1127 | 39412  | 40541  |
| UN40436 | Rsa1.0.00104.1 | 1218 | 368722 | 0         | 1215 | 1216 | 99 -  | 1   | 1216 | 152958 | 154173 |
| UN40437 | Rsa1.0.00198.1 | 1178 | 222963 | 1.00E-101 | 261  | 283  | 92 +  | 908 | 1178 | 127560 | 127841 |
| UN40438 | Rsa1.0.02929.1 | 1496 | 26673  | 0         | 1484 | 1494 | 99 -  | 3   | 1496 | 13880  | 15372  |
| UN40439 | Rsa1.0.00252.1 | 939  | 102760 | 0         | 480  | 498  | 96 +  | 446 | 939  | 57128  | 57623  |
| UN40440 | Rsa1.0.00087.1 | 990  | 761073 | 0         | 586  | 588  | 99 +  | 403 | 990  | 41123  | 41710  |
| UN40441 | Rsa1.0.00017.1 | 1104 | 752458 | 0         | 652  | 688  | 94 +  | 357 | 1034 | 187371 | 188058 |

|         |                |      |        |           |     |     |       |     |      |        |        |
|---------|----------------|------|--------|-----------|-----|-----|-------|-----|------|--------|--------|
| UN40442 | Rsa1.0.05964.1 | 1000 | 12087  | 1.00E-90  | 345 | 403 | 85 -  | 582 | 981  | 6240   | 6636   |
| UN40443 | Rsa1.0.00710.1 | 567  | 67325  | 1.00E-116 | 237 | 244 | 97 +  | 325 | 567  | 1773   | 2016   |
| UN40444 | Rsa1.0.00911.1 | 1024 | 59943  | 0         | 714 | 749 | 95 +  | 110 | 858  | 28829  | 29574  |
| UN40445 | Rsa1.0.00059.1 | 1215 | 159650 | 0         | 476 | 492 | 96 -  | 730 | 1215 | 121140 | 121628 |
| UN40446 | Rsa1.0.00949.1 | 813  | 58549  | 1.00E-155 | 319 | 329 | 96 +  | 481 | 808  | 39561  | 39886  |
| UN40447 | Rsa1.0.02684.1 | 1764 | 28676  | 0         | 708 | 709 | 99 +  | 434 | 1142 | 26292  | 27000  |
| UN40448 | Rsa1.0.00048.1 | 1006 | 167185 | 0         | 654 | 662 | 98 +  | 345 | 1006 | 162537 | 163197 |
| UN40449 | Rsa1.0.09303.1 | 605  | 6469   | 0         | 345 | 353 | 97 +  | 1   | 353  | 6117   | 6469   |
| UN40450 | Rsa1.0.00069.1 | 726  | 403561 | 1.00E-89  | 216 | 230 | 93 +  | 495 | 720  | 200655 | 200884 |
| UN40451 | Rsa1.0.00545.1 | 945  | 189649 | 0         | 408 | 411 | 99 -  | 3   | 413  | 32439  | 32849  |
| UN40452 | Rsa1.0.05100.1 | 1076 | 14853  | 1.00E-124 | 255 | 264 | 96 -  | 801 | 1061 | 1926   | 2189   |
| UN40453 | Rsa1.0.08909.1 | 772  | 6799   | 1.00E-171 | 473 | 526 | 89 +  | 3   | 519  | 4803   | 5296   |
| UN40454 | Rsa1.0.15782.1 | 926  | 2423   | 0         | 776 | 781 | 99 +  | 2   | 782  | 602    | 1382   |
| UN40455 | Rsa1.0.00007.1 | 936  | 239325 | 0         | 691 | 726 | 95 -  | 211 | 935  | 50213  | 50936  |
| UN40456 | Rsa1.0.00012.1 | 924  | 222148 | 1.00E-172 | 392 | 425 | 92 +  | 391 | 803  | 110697 | 111109 |
| UN40457 | Rsa1.0.05811.1 | 539  | 12572  | 1.00E-170 | 378 | 400 | 94 +  | 149 | 539  | 11595  | 11992  |
| UN40458 | Rsa1.0.08001.1 | 956  | 8095   | 0         | 390 | 400 | 97 +  | 557 | 956  | 1475   | 1874   |
| UN40459 | Rsa1.0.04910.1 | 1289 | 15484  | 0         | 637 | 660 | 96 +  | 634 | 1286 | 5632   | 6291   |
| UN40460 | Rsa1.0.04215.1 | 1062 | 18437  | 0         | 801 | 887 | 90 +  | 3   | 868  | 7587   | 8451   |
| UN40461 | Rsa1.0.01938.1 | 870  | 264018 | 0         | 592 | 627 | 94 -  | 245 | 870  | 159652 | 160265 |
| UN40462 | Rsa1.0.00734.1 | 844  | 66508  | 0         | 465 | 488 | 95 -  | 3   | 490  | 44653  | 45139  |
| UN40463 | Rsa1.0.02041.1 | 1076 | 163634 | 0         | 420 | 421 | 99 -  | 1   | 420  | 33067  | 33487  |
| UN40464 | Rsa1.0.09538.1 | 883  | 6301   | 1.00E-166 | 317 | 321 | 98 -  | 565 | 883  | 2111   | 2431   |
| UN40465 | Rsa1.0.00804.1 | 919  | 63726  | 1.00E-139 | 255 | 256 | 99 -  | 3   | 258  | 53121  | 53376  |
| UN40466 | Rsa1.0.13762.1 | 816  | 4370   | 0         | 590 | 609 | 96 -  | 208 | 816  | 3762   | 4370   |
| UN40467 | Rsa1.0.00089.1 | 999  | 406142 | 1.00E-100 | 213 | 220 | 96 +  | 784 | 999  | 342938 | 343157 |
| UN40468 | Rsa1.0.00047.1 | 778  | 168582 | 3.00E-90  | 190 | 197 | 96 +  | 80  | 276  | 97866  | 98062  |
| UN40469 | Rsa1.0.08317.1 | 780  | 7554   | 0         | 748 | 762 | 98 -  | 18  | 778  | 1844   | 2605   |
| UN40470 | Rsa1.0.37069.1 | 617  | 608    | 0         | 462 | 466 | 99 -  | 152 | 617  | 144    | 608    |
| UN40471 | Rsa1.0.00323.1 | 856  | 159650 | 0         | 414 | 433 | 95 +  | 430 | 855  | 148152 | 148581 |
| UN40472 | Rsa1.0.00205.1 | 573  | 193401 | 1.00E-133 | 297 | 313 | 94 -  | 262 | 572  | 79323  | 79635  |
| UN40473 | Rsa1.0.00140.1 | 1579 | 121541 | 0         | 376 | 379 | 99 +  | 402 | 780  | 117693 | 118071 |
| UN40474 | Rsa1.0.05739.1 | 903  | 12778  | 0         | 377 | 382 | 98 -  | 476 | 857  | 2243   | 2624   |
| UN40475 | Rsa1.0.02803.1 | 887  | 27715  | 0         | 772 | 787 | 98 -  | 98  | 884  | 17275  | 18061  |
| UN40476 | Rsa1.0.25309.1 | 765  | 942    | 1.00E-106 | 199 | 200 | 99 +  | 241 | 440  | 402    | 601    |
| UN40477 | Rsa1.0.00387.1 | 811  | 495407 | 1.00E-127 | 231 | 231 | 100 - | 470 | 700  | 340053 | 340283 |
| UN40478 | Rsa1.0.01783.1 | 958  | 39383  | 0         | 500 | 520 | 96 +  | 439 | 958  | 33733  | 34250  |
| UN40479 | Rsa1.0.10932.1 | 501  | 5673   | 0         | 405 | 419 | 96 +  | 78  | 495  | 2610   | 3028   |
| UN40480 | Rsa1.0.02393.1 | 689  | 31795  | 0         | 421 | 421 | 100 - | 265 | 685  | 6799   | 7219   |



|         |                |      |        |           |     |     |       |     |      |        |        |
|---------|----------------|------|--------|-----------|-----|-----|-------|-----|------|--------|--------|
| UN40481 | Rsa1.0.00740.1 | 525  | 215972 | 2.00E-87  | 228 | 244 | 93 +  | 284 | 525  | 1704   | 1945   |
| UN40482 | Rsa1.0.00017.1 | 787  | 752458 | 0         | 453 | 478 | 94 -  | 41  | 518  | 222799 | 223275 |
| UN40483 | Rsa1.0.00055.1 | 680  | 520193 | 1.00E-64  | 265 | 321 | 82 -  | 2   | 283  | 180121 | 180441 |
| UN40484 | Rsa1.0.03491.1 | 688  | 22541  | 7.00E-97  | 393 | 464 | 84 -  | 78  | 541  | 9072   | 9535   |
| UN40485 | Rsa1.0.00612.1 | 1410 | 72376  | 0         | 612 | 646 | 94 +  | 771 | 1410 | 18645  | 19290  |
| UN40486 | Rsa1.0.01339.1 | 784  | 47813  | 1.00E-136 | 323 | 345 | 93 -  | 21  | 365  | 14806  | 15141  |
| UN40487 | Rsa1.0.07790.1 | 574  | 8563   | 1.00E-176 | 363 | 378 | 96 -  | 188 | 560  | 695    | 1072   |
| UN40488 | Rsa1.0.00925.1 | 762  | 59481  | 0         | 463 | 482 | 96 +  | 3   | 484  | 20078  | 20551  |
| UN40489 | Rsa1.0.19807.1 | 728  | 1380   | 2.00E-66  | 165 | 177 | 93 -  | 552 | 728  | 524    | 700    |
| UN40490 | Rsa1.0.01119.1 | 923  | 53459  | 1.00E-117 | 251 | 261 | 96 -  | 5   | 261  | 13992  | 14252  |
| UN40491 | Rsa1.0.00133.1 | 717  | 123768 | 1.00E-120 | 324 | 355 | 91 -  | 1   | 346  | 36170  | 36514  |
| UN40492 | Rsa1.0.01459.1 | 651  | 45277  | 3.00E-99  | 287 | 316 | 90 -  | 337 | 651  | 42957  | 43259  |
| UN40493 | Rsa1.0.01559.1 | 434  | 43262  | 2.00E-71  | 254 | 290 | 87 +  | 158 | 434  | 27156  | 27437  |
| UN40494 | Rsa1.0.00660.1 | 619  | 69688  | 1.00E-98  | 214 | 223 | 95 +  | 24  | 245  | 15771  | 15993  |
| UN40495 | Rsa1.0.02777.1 | 797  | 27986  | 1.00E-139 | 272 | 279 | 97 -  | 24  | 302  | 25025  | 25303  |
| UN40496 | Rsa1.0.03958.1 | 529  | 19868  | 1.00E-125 | 274 | 288 | 95 +  | 235 | 516  | 16483  | 16770  |
| UN40497 | Rsa1.0.02269.1 | 1248 | 33168  | 1.00E-117 | 280 | 299 | 93 +  | 954 | 1248 | 18242  | 18538  |
| UN40498 | Rsa1.0.00146.1 | 888  | 149343 | 0         | 415 | 416 | 99 -  | 473 | 888  | 53961  | 54375  |
| UN40499 | Rsa1.0.05049.1 | 756  | 15025  | 1.00E-175 | 417 | 438 | 95 +  | 332 | 756  | 4126   | 4563   |
| UN40500 | Rsa1.0.00087.1 | 891  | 761073 | 1.00E-135 | 308 | 326 | 94 +  | 569 | 890  | 225356 | 225679 |
| UN40501 | Rsa1.0.00123.1 | 1056 | 325650 | 0         | 440 | 466 | 94 -  | 1   | 452  | 47946  | 48405  |
| UN40502 | Rsa1.0.00173.1 | 925  | 288743 | 1.00E-133 | 242 | 242 | 100 - | 1   | 242  | 44823  | 45064  |
| UN40503 | Rsa1.0.07309.1 | 940  | 9572   | 0         | 481 | 513 | 93 +  | 429 | 940  | 4292   | 4801   |
| UN40504 | Rsa1.0.00826.1 | 1049 | 166736 | 0         | 449 | 486 | 92 +  | 569 | 1046 | 130040 | 130521 |
| UN40505 | Rsa1.0.00040.1 | 1134 | 324196 | 0         | 606 | 634 | 95 +  | 501 | 1133 | 33258  | 33889  |
| UN40506 | Rsa1.0.07207.1 | 579  | 9720   | 1.00E-141 | 279 | 287 | 97 +  | 292 | 578  | 8629   | 8915   |
| UN40507 | Rsa1.0.05984.1 | 1082 | 12031  | 2.00E-61  | 139 | 145 | 95 -  | 868 | 1012 | 8669   | 8813   |
| UN40508 | Rsa1.0.00102.1 | 866  | 135497 | 0         | 369 | 377 | 97 -  | 3   | 379  | 58088  | 58460  |
| UN40509 | Rsa1.0.00131.1 | 1160 | 432233 | 1.00E-135 | 300 | 317 | 94 +  | 310 | 623  | 408531 | 408844 |
| UN40510 | Rsa1.0.00333.1 | 1451 | 94500  | 1.00E-157 | 285 | 286 | 99 -  | 57  | 342  | 50447  | 50732  |
| UN40511 | Rsa1.0.02599.1 | 822  | 29660  | 0         | 571 | 598 | 95 -  | 81  | 672  | 4092   | 4684   |
| UN40512 | Rsa1.0.03036.1 | 1044 | 25826  | 0         | 599 | 622 | 96 -  | 317 | 937  | 20418  | 21033  |
| UN40513 | Rsa1.0.00309.1 | 861  | 96883  | 6.00E-95  | 260 | 287 | 90 -  | 1   | 271  | 66985  | 67269  |
| UN40514 | Rsa1.0.00828.1 | 930  | 62744  | 1.00E-126 | 229 | 229 | 100 - | 3   | 231  | 9576   | 9804   |
| UN40515 | Rsa1.0.04319.1 | 488  | 17944  | 3.00E-83  | 172 | 177 | 97 -  | 310 | 486  | 14754  | 14930  |
| UN40516 | Rsa1.0.00707.1 | 907  | 190112 | 4.00E-65  | 142 | 147 | 96 -  | 4   | 150  | 182523 | 182669 |
| UN40517 | Rsa1.0.00622.1 | 880  | 71822  | 0         | 719 | 769 | 93 +  | 2   | 770  | 52553  | 53317  |
| UN40518 | Rsa1.0.00152.1 | 700  | 257730 | 0         | 631 | 718 | 87 -  | 1   | 698  | 75856  | 76544  |
| UN40519 | Rsa1.0.00575.1 | 1143 | 74791  | 0         | 374 | 387 | 96 +  | 1   | 381  | 58647  | 59033  |

|         |                |      |        |           |      |      |       |     |      |        |        |
|---------|----------------|------|--------|-----------|------|------|-------|-----|------|--------|--------|
| UN40520 | Rsa1.0.00110.1 | 776  | 132719 | 1.00E-141 | 300  | 315  | 95 -  | 8   | 322  | 92532  | 92846  |
| UN40521 | Rsa1.0.00088.1 | 775  | 141341 | 0         | 461  | 463  | 99 +  | 1   | 463  | 66408  | 66870  |
| UN40522 | Rsa1.0.00228.1 | 1161 | 105511 | 1.00E-175 | 311  | 311  | 100 + | 1   | 311  | 92504  | 92814  |
| UN40523 | Rsa1.0.06728.1 | 1108 | 10455  | 1.00E-102 | 232  | 244  | 95 +  | 5   | 248  | 6340   | 6579   |
| UN40524 | Rsa1.0.05321.1 | 1264 | 14154  | 1.00E-75  | 154  | 157  | 98 +  | 740 | 896  | 6323   | 6479   |
| UN40525 | Rsa1.0.04134.1 | 299  | 149811 | 1.00E-108 | 220  | 226  | 97 +  | 75  | 299  | 8952   | 9177   |
| UN40526 | Rsa1.0.00063.1 | 926  | 156150 | 1.00E-150 | 294  | 302  | 97 +  | 621 | 922  | 138349 | 138650 |
| UN40527 | Rsa1.0.04779.1 | 885  | 16008  | 8.00E-85  | 238  | 261  | 91 -  | 630 | 885  | 9506   | 9765   |
| UN40528 | Rsa1.0.00454.1 | 969  | 216970 | 0         | 658  | 717  | 91 -  | 271 | 969  | 187199 | 187900 |
| UN40529 | Rsa1.0.07809.1 | 1039 | 8503   | 0         | 982  | 1036 | 94 +  | 25  | 1039 | 1020   | 2047   |
| UN40530 | Rsa1.0.01476.1 | 791  | 172928 | 1.00E-131 | 291  | 300  | 97 -  | 490 | 781  | 134328 | 134627 |
| UN40531 | Rsa1.0.00652.1 | 932  | 70089  | 1.00E-142 | 257  | 257  | 100 + | 1   | 257  | 22777  | 23033  |
| UN40532 | Rsa1.0.04397.1 | 1059 | 17555  | 0         | 536  | 553  | 96 +  | 506 | 1057 | 3221   | 3768   |
| UN40533 | Rsa1.0.00029.1 | 1237 | 272992 | 0         | 619  | 670  | 92 -  | 215 | 859  | 258085 | 258746 |
| UN40534 | Rsa1.0.00055.1 | 1412 | 520193 | 0         | 1092 | 1118 | 97 +  | 24  | 1138 | 198067 | 199178 |
| UN40535 | Rsa1.0.01305.1 | 1297 | 48730  | 0         | 485  | 503  | 96 -  | 314 | 816  | 18860  | 19362  |
| UN40536 | Rsa1.0.06247.1 | 685  | 11395  | 1.00E-102 | 250  | 268  | 93 +  | 11  | 275  | 8608   | 8875   |
| UN40537 | Rsa1.0.00056.1 | 900  | 332604 | 1.00E-110 | 236  | 247  | 95 -  | 167 | 413  | 20195  | 20441  |
| UN40538 | Rsa1.0.01286.1 | 590  | 49209  | 0         | 483  | 512  | 94 -  | 38  | 549  | 4034   | 4529   |
| UN40539 | Rsa1.0.00706.1 | 567  | 291570 | 1.00E-139 | 352  | 376  | 93 -  | 202 | 566  | 20668  | 21038  |
| UN40540 | Rsa1.0.00482.1 | 897  | 81162  | 1.00E-108 | 214  | 219  | 97 +  | 676 | 894  | 6470   | 6688   |
| UN40541 | Rsa1.0.00387.1 | 729  | 495407 | 1.00E-118 | 228  | 232  | 98 -  | 414 | 645  | 344428 | 344659 |
| UN40542 | Rsa1.0.03191.1 | 1326 | 145762 | 0         | 400  | 402  | 99 -  | 923 | 1324 | 22071  | 22472  |
| UN40543 | Rsa1.0.00111.1 | 1013 | 390088 | 1.00E-129 | 410  | 460  | 89 +  | 591 | 1013 | 56041  | 56497  |
| UN40544 | Rsa1.0.30083.1 | 1116 | 763    | 0         | 364  | 374  | 97 +  | 8   | 381  | 1      | 373    |
| UN40545 | Rsa1.0.02606.1 | 760  | 29635  | 0         | 369  | 379  | 97 +  | 373 | 748  | 7554   | 7927   |
| UN40546 | Rsa1.0.20105.1 | 1113 | 1340   | 0         | 373  | 384  | 97 +  | 730 | 1113 | 457    | 839    |
| UN40547 | Rsa1.0.03422.1 | 667  | 23076  | 1.00E-122 | 385  | 432  | 89 -  | 20  | 433  | 9861   | 10291  |
| UN40548 | Rsa1.0.05122.1 | 956  | 14791  | 1.00E-102 | 201  | 205  | 98 +  | 276 | 480  | 9372   | 9576   |
| UN40549 | Rsa1.0.05713.1 | 792  | 12855  | 3.00E-81  | 184  | 190  | 96 +  | 559 | 745  | 2417   | 2606   |
| UN40550 | Rsa1.0.00419.1 | 949  | 86562  | 1.00E-113 | 231  | 236  | 97 -  | 73  | 308  | 15075  | 15308  |
| UN40551 | Rsa1.0.01750.1 | 994  | 39816  | 1.00E-129 | 266  | 275  | 96 -  | 663 | 937  | 25469  | 25742  |
| UN40552 | Rsa1.0.03422.1 | 613  | 23076  | 1.00E-145 | 398  | 437  | 91 -  | 2   | 426  | 9861   | 10289  |
| UN40553 | Rsa1.0.27356.1 | 784  | 856    | 1.00E-160 | 522  | 583  | 89 -  | 7   | 576  | 94     | 666    |
| UN40554 | Rsa1.0.00123.1 | 995  | 325650 | 1.00E-149 | 309  | 320  | 96 +  | 1   | 319  | 216022 | 216340 |
| UN40555 | Rsa1.0.04218.1 | 433  | 18423  | 3.00E-70  | 138  | 139  | 99 -  | 70  | 208  | 14295  | 14433  |
| UN40556 | Rsa1.0.19562.1 | 727  | 1414   | 1.00E-100 | 191  | 193  | 98 +  | 533 | 725  | 1      | 193    |
| UN40557 | Rsa1.0.02616.1 | 810  | 29542  | 0         | 524  | 524  | 100 - | 164 | 687  | 78     | 601    |
| UN40558 | Rsa1.0.00416.1 | 931  | 86772  | 9.00E-51  | 124  | 131  | 94 +  | 800 | 930  | 77990  | 78120  |

|         |                |      |        |           |      |      |       |     |      |        |        |
|---------|----------------|------|--------|-----------|------|------|-------|-----|------|--------|--------|
| UN40559 | Rsa1.0.01651.1 | 700  | 41586  | 5.00E-95  | 190  | 193  | 98 -  | 2   | 193  | 37065  | 37257  |
| UN40560 | Rsa1.0.00415.1 | 1573 | 86795  | 0         | 1134 | 1160 | 97 -  | 417 | 1572 | 72573  | 73729  |
| UN40561 | Rsa1.0.00789.1 | 454  | 64233  | 0         | 436  | 475  | 91 -  | 1   | 454  | 13089  | 13560  |
| UN40562 | Rsa1.0.00040.1 | 1108 | 324196 | 1.00E-135 | 290  | 307  | 94 -  | 418 | 724  | 70238  | 70534  |
| UN40563 | Rsa1.0.18678.1 | 1620 | 1553   | 0         | 356  | 357  | 99 +  | 985 | 1341 | 1      | 357    |
| UN40564 | Rsa1.0.03352.1 | 1026 | 23506  | 0         | 944  | 1017 | 92 -  | 3   | 1015 | 4620   | 5603   |
| UN40565 | Rsa1.0.00429.1 | 677  | 85559  | 1.00E-110 | 203  | 203  | 100 + | 1   | 203  | 16447  | 16649  |
| UN40566 | Rsa1.0.02628.1 | 1082 | 29369  | 1.00E-144 | 275  | 280  | 98 +  | 491 | 770  | 7499   | 7778   |
| UN40567 | Rsa1.0.02268.1 | 605  | 33172  | 1.00E-153 | 284  | 287  | 98 -  | 319 | 605  | 17290  | 17576  |
| UN40568 | Rsa1.0.00016.1 | 1018 | 831256 | 1.00E-158 | 374  | 405  | 92 +  | 601 | 1005 | 785585 | 785967 |
| UN40569 | Rsa1.0.01149.1 | 781  | 160459 | 1.00E-102 | 231  | 245  | 94 -  | 27  | 271  | 43118  | 43362  |
| UN40570 | Rsa1.0.00963.1 | 1009 | 58176  | 6.00E-86  | 231  | 249  | 92 +  | 13  | 259  | 26300  | 26545  |
| UN40571 | Rsa1.0.00064.1 | 830  | 240927 | 6.00E-70  | 162  | 171  | 94 -  | 659 | 829  | 58889  | 59059  |
| UN40572 | Rsa1.0.00529.1 | 1291 | 77487  | 1.00E-139 | 270  | 275  | 98 +  | 1   | 274  | 15487  | 15761  |
| UN40573 | Rsa1.0.01668.1 | 1055 | 41299  | 0         | 865  | 889  | 97 +  | 159 | 1047 | 14368  | 15256  |
| UN40574 | Rsa1.0.00218.1 | 665  | 201480 | 0         | 455  | 468  | 97 +  | 138 | 603  | 151868 | 152334 |
| UN40575 | Rsa1.0.00124.1 | 1051 | 262503 | 0         | 777  | 842  | 92 +  | 237 | 1051 | 60323  | 61164  |
| UN40576 | Rsa1.0.06732.1 | 1239 | 10449  | 0         | 360  | 374  | 96 +  | 866 | 1239 | 6813   | 7176   |
| UN40577 | Rsa1.0.03826.1 | 1346 | 20614  | 1.00E-158 | 290  | 292  | 99 +  | 848 | 1139 | 14877  | 15168  |
| UN40578 | Rsa1.0.01146.1 | 829  | 163455 | 1.00E-141 | 348  | 378  | 92 -  | 460 | 822  | 16434  | 16809  |
| UN40579 | Rsa1.0.14871.1 | 686  | 2999   | 1.00E-107 | 212  | 217  | 97 +  | 389 | 605  | 2735   | 2951   |
| UN40580 | Rsa1.0.00304.1 | 1248 | 97429  | 2.33E-156 | 300  | 308  | 97 +  | 939 | 1246 | 70399  | 70703  |
| UN40581 | Rsa1.0.00120.1 | 741  | 277288 | 1.00E-150 | 356  | 383  | 92 +  | 365 | 734  | 266327 | 266707 |
| UN40582 | Rsa1.0.00203.1 | 1139 | 109129 | 1.00E-158 | 284  | 284  | 100 - | 3   | 286  | 23222  | 23505  |
| UN40583 | Rsa1.0.00586.1 | 1017 | 163802 | 0         | 536  | 557  | 96 +  | 3   | 557  | 145622 | 146177 |
| UN40584 | Rsa1.0.00218.1 | 999  | 201480 | 0         | 460  | 473  | 97 -  | 527 | 999  | 101413 | 101883 |
| UN40585 | Rsa1.0.08430.1 | 1293 | 7367   | 0         | 517  | 550  | 94 +  | 24  | 562  | 5277   | 5821   |
| UN40586 | Rsa1.0.02420.1 | 704  | 31580  | 1.00E-179 | 590  | 675  | 87 +  | 4   | 670  | 15996  | 16655  |
| UN40587 | Rsa1.0.18758.1 | 1012 | 1540   | 0         | 381  | 384  | 99 -  | 628 | 1011 | 428    | 811    |
| UN40588 | Rsa1.0.02684.1 | 1048 | 28676  | 1.00E-164 | 294  | 294  | 100 - | 2   | 295  | 3552   | 3845   |
| UN40589 | Rsa1.0.01280.1 | 988  | 49321  | 0         | 640  | 669  | 95 +  | 322 | 987  | 36964  | 37629  |
| UN40590 | Rsa1.0.00050.1 | 456  | 237174 | 1.00E-180 | 369  | 382  | 96 +  | 77  | 456  | 180825 | 181204 |
| UN40591 | Rsa1.0.09683.1 | 1353 | 6213   | 0         | 668  | 757  | 88 +  | 615 | 1352 | 2086   | 2828   |
| UN40592 | Rsa1.0.00235.1 | 796  | 154696 | 0         | 414  | 436  | 94 -  | 362 | 796  | 139939 | 140365 |
| UN40593 | Rsa1.0.00677.1 | 987  | 69159  | 1.00E-168 | 309  | 312  | 99 +  | 676 | 987  | 20016  | 20327  |
| UN40594 | Rsa1.0.00012.1 | 828  | 222148 | 1.00E-162 | 289  | 289  | 100 + | 2   | 290  | 10311  | 10599  |
| UN40595 | Rsa1.0.00786.1 | 1114 | 64285  | 0         | 441  | 444  | 99 +  | 671 | 1114 | 63348  | 63791  |
| UN40596 | Rsa1.0.01414.1 | 923  | 149508 | 1.00E-172 | 364  | 380  | 95 +  | 544 | 923  | 115746 | 116120 |
| UN40597 | Rsa1.0.03005.1 | 685  | 26082  | 0         | 629  | 650  | 96 +  | 3   | 650  | 19679  | 20324  |

|         |                |      |        |           |      |      |       |      |      |        |        |
|---------|----------------|------|--------|-----------|------|------|-------|------|------|--------|--------|
| UN40598 | Rsa1.0.01261.1 | 801  | 49744  | 0         | 753  | 767  | 98 -  | 35   | 801  | 30867  | 31629  |
| UN40599 | Rsa1.0.00199.1 | 689  | 249604 | 0         | 462  | 481  | 96 +  | 3    | 483  | 31869  | 32349  |
| UN40600 | Rsa1.0.04943.1 | 688  | 15376  | 0         | 674  | 688  | 97 -  | 5    | 687  | 6022   | 6708   |
| UN40601 | Rsa1.0.17967.1 | 863  | 1699   | 1.00E-110 | 312  | 347  | 89 +  | 191  | 536  | 817    | 1163   |
| UN40602 | Rsa1.0.15215.1 | 860  | 2752   | 1.00E-163 | 328  | 342  | 95 +  | 509  | 850  | 1684   | 2015   |
| UN40603 | Rsa1.0.04581.1 | 1137 | 16772  | 1.00E-154 | 320  | 333  | 96 -  | 12   | 341  | 6485   | 6814   |
| UN40604 | Rsa1.0.01650.1 | 579  | 41589  | 0         | 530  | 574  | 92 +  | 8    | 579  | 27296  | 27865  |
| UN40605 | Rsa1.0.00651.1 | 881  | 247766 | 0         | 451  | 451  | 100 - | 3    | 453  | 207681 | 208131 |
| UN40606 | Rsa1.0.00757.1 | 551  | 65559  | 0         | 524  | 549  | 95 +  | 3    | 551  | 41585  | 42122  |
| UN40607 | Rsa1.0.04808.1 | 1242 | 15893  | 1.00E-176 | 333  | 339  | 98 -  | 907  | 1241 | 4840   | 5178   |
| UN40608 | Rsa1.0.05653.1 | 598  | 13043  | 0         | 550  | 583  | 94 +  | 2    | 582  | 10811  | 11392  |
| UN40609 | Rsa1.0.00188.1 | 509  | 112020 | 1.00E-168 | 461  | 510  | 90 -  | 3    | 507  | 4408   | 4906   |
| UN40610 | Rsa1.0.01666.1 | 777  | 173972 | 0         | 774  | 774  | 100 - | 2    | 775  | 18516  | 19289  |
| UN40611 | Rsa1.0.07444.1 | 826  | 9386   | 1.00E-149 | 289  | 296  | 97 -  | 279  | 574  | 524    | 819    |
| UN40612 | Rsa1.0.00934.1 | 1376 | 193516 | 0         | 758  | 772  | 98 -  | 1    | 771  | 175856 | 176622 |
| UN40613 | Rsa1.0.05782.1 | 1095 | 12646  | 0         | 337  | 338  | 99 -  | 612  | 949  | 8062   | 8399   |
| UN40614 | Rsa1.0.34344.1 | 1113 | 659    | 0         | 466  | 466  | 100 - | 3    | 468  | 112    | 577    |
| UN40615 | Rsa1.0.04191.1 | 962  | 18578  | 0         | 426  | 429  | 99 +  | 524  | 952  | 7426   | 7854   |
| UN40616 | Rsa1.0.01270.1 | 599  | 49574  | 0         | 584  | 597  | 97 -  | 3    | 598  | 32025  | 32620  |
| UN40617 | #              | #    | #      | #         | #    | #    | #     | #    | #    | #      | #      |
| UN40618 | Rsa1.0.00033.1 | 832  | 515811 | 0         | 445  | 445  | 100 + | 388  | 832  | 476598 | 477042 |
| UN40619 | Rsa1.0.00644.1 | 936  | 136881 | 1.00E-134 | 267  | 275  | 97 -  | 406  | 680  | 51437  | 51711  |
| UN40620 | Rsa1.0.00078.1 | 897  | 175053 | 1.00E-128 | 295  | 316  | 93 +  | 5    | 320  | 140373 | 140677 |
| UN40621 | Rsa1.0.04022.1 | 821  | 19534  | 1.00E-134 | 246  | 247  | 99 -  | 3    | 249  | 6268   | 6514   |
| UN40622 | Rsa1.0.04763.1 | 1570 | 16094  | 3.00E-64  | 145  | 150  | 96 +  | 1421 | 1570 | 388    | 536    |
| UN40623 | Rsa1.0.05239.1 | 1394 | 14410  | 0         | 1368 | 1400 | 97 +  | 1    | 1393 | 11688  | 13078  |
| UN40624 | Rsa1.0.00867.1 | 1092 | 61635  | 1.00E-150 | 273  | 274  | 99 -  | 1    | 274  | 37898  | 38171  |
| UN40625 | Rsa1.0.41105.1 | 976  | 546    | 1.00E-173 | 340  | 349  | 97 -  | 629  | 976  | 197    | 545    |
| UN40626 | Rsa1.0.02803.1 | 1217 | 27715  | 1.00E-136 | 262  | 267  | 98 +  | 336  | 602  | 25322  | 25588  |
| UN40627 | Rsa1.0.00284.1 | 653  | 323267 | 0         | 602  | 645  | 93 -  | 3    | 644  | 232426 | 233058 |
| UN40628 | Rsa1.0.00180.1 | 930  | 114581 | 0         | 402  | 413  | 97 +  | 517  | 929  | 111408 | 111816 |
| UN40629 | Rsa1.0.02428.1 | 1600 | 31542  | 0         | 391  | 399  | 97 +  | 1    | 399  | 15082  | 15479  |
| UN40630 | Rsa1.0.00092.1 | 723  | 659932 | 0         | 418  | 445  | 93 -  | 233  | 675  | 242851 | 243294 |
| UN40631 | Rsa1.0.00059.1 | 822  | 159650 | 0         | 676  | 694  | 97 +  | 3    | 696  | 101545 | 102234 |
| UN40632 | Rsa1.0.00320.1 | 926  | 95784  | 1.00E-160 | 355  | 371  | 95 -  | 561  | 926  | 61029  | 61399  |
| UN40633 | Rsa1.0.03813.1 | 1043 | 20708  | 1.00E-135 | 244  | 244  | 100 + | 800  | 1043 | 2017   | 2260   |
| UN40634 | Rsa1.0.05076.1 | 570  | 14916  | 1.00E-160 | 301  | 306  | 98 -  | 2    | 307  | 7475   | 7780   |
| UN40635 | Rsa1.0.02320.1 | 1256 | 32575  | 0         | 1098 | 1141 | 96 +  | 2    | 1142 | 28833  | 29973  |
| UN40636 | Rsa1.0.00097.1 | 1638 | 138858 | 1.00E-173 | 427  | 458  | 93 -  | 1183 | 1638 | 76009  | 76458  |

|         |                |      |        |           |      |      |       |     |      |        |        |
|---------|----------------|------|--------|-----------|------|------|-------|-----|------|--------|--------|
| UN40637 | Rsa1.0.00991.1 | 925  | 143101 | 0         | 496  | 524  | 94 +  | 5   | 528  | 125225 | 125748 |
| UN40638 | Rsa1.0.00095.1 | 770  | 283384 | 0         | 738  | 771  | 95 -  | 4   | 768  | 96419  | 97187  |
| UN40639 | Rsa1.0.01104.1 | 778  | 285480 | 0         | 357  | 358  | 99 +  | 419 | 776  | 35112  | 35469  |
| UN40640 | Rsa1.0.00363.1 | 1246 | 90968  | 1.00E-156 | 292  | 296  | 98 +  | 3   | 298  | 5375   | 5670   |
| UN40641 | Rsa1.0.01600.1 | 797  | 42537  | 0         | 393  | 398  | 98 -  | 401 | 797  | 8598   | 8994   |
| UN40642 | Rsa1.0.00737.1 | 820  | 66432  | 3.00E-87  | 288  | 332  | 86 -  | 490 | 820  | 11909  | 12208  |
| UN40643 | Rsa1.0.08250.1 | 1167 | 7658   | 0         | 551  | 586  | 94 -  | 576 | 1159 | 2554   | 3121   |
| UN40644 | Rsa1.0.00113.1 | 1193 | 131574 | 0         | 582  | 584  | 99 +  | 610 | 1192 | 86939  | 87522  |
| UN40645 | Rsa1.0.04643.1 | 1101 | 16546  | 0         | 676  | 707  | 95 +  | 1   | 706  | 1665   | 2371   |
| UN40646 | Rsa1.0.01484.1 | 1337 | 44806  | 5.00E-53  | 256  | 302  | 84 +  | 805 | 1102 | 15951  | 16252  |
| UN40647 | Rsa1.0.16246.1 | 1408 | 2228   | 0         | 881  | 926  | 95 -  | 487 | 1407 | 1133   | 2048   |
| UN40648 | Rsa1.0.05595.1 | 1165 | 13228  | 1.00E-160 | 287  | 287  | 100 - | 874 | 1160 | 8904   | 9190   |
| UN40649 | Rsa1.0.02289.1 | 966  | 32981  | 1.00E-157 | 296  | 301  | 98 +  | 308 | 608  | 15317  | 15617  |
| UN40650 | Rsa1.0.00341.1 | 1701 | 249309 | 0         | 937  | 945  | 99 -  | 749 | 1693 | 192890 | 193834 |
| UN40651 | Rsa1.0.00306.1 | 1036 | 146760 | 0         | 449  | 450  | 99 -  | 151 | 600  | 133202 | 133651 |
| UN40652 | Rsa1.0.05938.1 | 1308 | 12173  | 0         | 745  | 748  | 99 -  | 557 | 1303 | 6548   | 7295   |
| UN40653 | Rsa1.0.00525.1 | 654  | 78030  | 4.00E-89  | 329  | 383  | 85 -  | 290 | 652  | 24008  | 24385  |
| UN40654 | Rsa1.0.00251.1 | 1508 | 303968 | 0         | 716  | 718  | 99 -  | 6   | 723  | 154064 | 154781 |
| UN40655 | Rsa1.0.04355.1 | 788  | 146733 | 1.00E-89  | 184  | 188  | 97 +  | 165 | 351  | 4258   | 4445   |
| UN40656 | Rsa1.0.00715.1 | 573  | 67116  | 0         | 474  | 519  | 91 -  | 52  | 570  | 63635  | 64137  |
| UN40657 | Rsa1.0.00223.1 | 1205 | 106231 | 0         | 968  | 1005 | 96 -  | 190 | 1191 | 41540  | 42541  |
| UN40658 | Rsa1.0.00500.1 | 1257 | 272308 | 0         | 1240 | 1258 | 98 -  | 4   | 1257 | 109867 | 111120 |
| UN40659 | Rsa1.0.00404.1 | 715  | 87635  | 1.00E-126 | 329  | 367  | 89 +  | 8   | 353  | 85844  | 86207  |
| UN40660 | Rsa1.0.01373.1 | 1155 | 47052  | 2.00E-67  | 160  | 170  | 94 +  | 430 | 599  | 2046   | 2209   |
| UN40661 | Rsa1.0.01168.1 | 1233 | 153765 | 0         | 1230 | 1231 | 99 -  | 3   | 1233 | 7023   | 8253   |
| UN40662 | Rsa1.0.04215.1 | 661  | 18437  | 0         | 604  | 605  | 99 -  | 1   | 605  | 8205   | 8809   |
| UN40663 | Rsa1.0.00067.1 | 795  | 415055 | 0         | 753  | 754  | 99 +  | 1   | 754  | 436    | 1189   |
| UN40664 | Rsa1.0.37242.1 | 935  | 605    | 1.00E-153 | 329  | 345  | 95 +  | 19  | 363  | 1      | 337    |
| UN40665 | Rsa1.0.00011.1 | 717  | 225044 | 0         | 475  | 496  | 95 -  | 222 | 717  | 213358 | 213851 |
| UN40666 | Rsa1.0.12341.1 | 813  | 5250   | 1.00E-130 | 290  | 306  | 94 +  | 516 | 812  | 2307   | 2612   |
| UN40667 | Rsa1.0.00279.1 | 1616 | 100039 | 0         | 868  | 868  | 100 - | 749 | 1616 | 1711   | 2578   |
| UN40668 | Rsa1.0.04356.1 | 1278 | 17764  | 0         | 1276 | 1277 | 99 +  | 1   | 1276 | 2636   | 3912   |
| UN40669 | Rsa1.0.00020.1 | 1146 | 283099 | 0         | 451  | 466  | 96 -  | 113 | 577  | 152621 | 153083 |
| UN40670 | Rsa1.0.00615.1 | 772  | 72235  | 1.00E-159 | 315  | 325  | 96 +  | 187 | 511  | 25400  | 25724  |
| UN40671 | Rsa1.0.00168.1 | 753  | 115870 | 1.00E-122 | 280  | 296  | 94 -  | 2   | 293  | 38162  | 38455  |
| UN40672 | Rsa1.0.00381.1 | 766  | 89718  | 0         | 400  | 420  | 95 +  | 348 | 764  | 75167  | 75586  |
| UN40673 | Rsa1.0.00878.1 | 1081 | 330303 | 0         | 927  | 1030 | 90 -  | 67  | 1078 | 121172 | 122199 |
| UN40674 | Rsa1.0.00048.1 | 601  | 167185 | 1.00E-113 | 318  | 352  | 90 -  | 253 | 601  | 144479 | 144821 |
| UN40675 | Rsa1.0.02020.1 | 925  | 173211 | 1.00E-161 | 365  | 387  | 94 +  | 537 | 923  | 172619 | 173001 |

|         |                |      |        |           |      |      |       |      |      |        |        |
|---------|----------------|------|--------|-----------|------|------|-------|------|------|--------|--------|
| UN40676 | Rsa1.0.00173.1 | 737  | 288743 | 1.00E-126 | 263  | 274  | 95 +  | 118  | 387  | 41089  | 41362  |
| UN40677 | Rsa1.0.07066.1 | 1573 | 9954   | 1.00E-153 | 316  | 327  | 96 -  | 1245 | 1571 | 5842   | 6161   |
| UN40678 | Rsa1.0.33048.1 | 1203 | 687    | 1.00E-109 | 523  | 627  | 83 -  | 347  | 970  | 1      | 614    |
| UN40679 | Rsa1.0.00556.1 | 1144 | 207212 | 0         | 406  | 428  | 94 +  | 1    | 423  | 33444  | 33859  |
| UN40680 | Rsa1.0.03569.1 | 638  | 22041  | 2.00E-75  | 192  | 208  | 92 +  | 3    | 209  | 9061   | 9259   |
| UN40681 | Rsa1.0.00384.1 | 939  | 89278  | 1.00E-171 | 335  | 345  | 97 -  | 3    | 347  | 62852  | 63196  |
| UN40682 | Rsa1.0.00744.1 | 716  | 66084  | 1.00E-177 | 397  | 421  | 94 +  | 1    | 418  | 56503  | 56916  |
| UN40683 | Rsa1.0.19002.1 | 747  | 1496   | 3.00E-96  | 207  | 215  | 96 +  | 534  | 747  | 1041   | 1255   |
| UN40684 | Rsa1.0.00339.1 | 1171 | 222974 | 0         | 496  | 517  | 95 -  | 1    | 503  | 179296 | 179810 |
| UN40685 | Rsa1.0.00120.1 | 959  | 277288 | 1.00E-119 | 281  | 298  | 94 -  | 672  | 959  | 92214  | 92509  |
| UN40686 | Rsa1.0.06088.1 | 972  | 11767  | 1.00E-118 | 237  | 244  | 97 -  | 445  | 688  | 4054   | 4297   |
| UN40687 | Rsa1.0.00025.1 | 651  | 277312 | 1.00E-138 | 312  | 329  | 94 +  | 283  | 609  | 17353  | 17680  |
| UN40688 | Rsa1.0.01104.1 | 578  | 285480 | 1.00E-152 | 348  | 372  | 93 -  | 139  | 506  | 135402 | 135766 |
| UN40689 | Rsa1.0.00130.1 | 1295 | 125737 | 1.00E-127 | 304  | 328  | 92 -  | 1    | 326  | 5499   | 5809   |
| UN40690 | Rsa1.0.00189.1 | 860  | 111830 | 0         | 536  | 560  | 95 -  | 3    | 562  | 110542 | 111100 |
| UN40691 | Rsa1.0.00883.1 | 964  | 61230  | 0         | 479  | 493  | 97 +  | 1    | 491  | 29814  | 30306  |
| UN40692 | Rsa1.0.00623.1 | 1472 | 207630 | 1.00E-133 | 261  | 265  | 98 -  | 1    | 263  | 14945  | 15209  |
| UN40693 | Rsa1.0.00198.1 | 910  | 222963 | 0         | 864  | 891  | 96 -  | 3    | 887  | 100506 | 101391 |
| UN40694 | Rsa1.0.03100.1 | 910  | 25411  | 0         | 442  | 474  | 93 -  | 223  | 687  | 19710  | 20183  |
| UN40695 | Rsa1.0.00067.1 | 788  | 415055 | 1.00E-165 | 334  | 347  | 96 -  | 121  | 467  | 82824  | 83170  |
| UN40696 | Rsa1.0.00192.1 | 750  | 278200 | 0         | 339  | 343  | 98 +  | 4    | 346  | 11747  | 12089  |
| UN40697 | Rsa1.0.00269.1 | 1042 | 341668 | 1.00E-123 | 293  | 311  | 94 +  | 732  | 1040 | 289954 | 290260 |
| UN40698 | Rsa1.0.01704.1 | 915  | 40711  | 0         | 766  | 808  | 94 +  | 110  | 900  | 31435  | 32242  |
| UN40699 | Rsa1.0.01731.1 | 486  | 40208  | 4.00E-85  | 187  | 196  | 95 +  | 3    | 198  | 34880  | 35075  |
| UN40700 | Rsa1.0.00024.1 | 1261 | 188018 | 1.00E-154 | 398  | 443  | 89 -  | 411  | 832  | 84667  | 85097  |
| UN40701 | Rsa1.0.05696.1 | 1150 | 12896  | 1.00E-145 | 262  | 262  | 100 + | 211  | 472  | 6608   | 6869   |
| UN40702 | Rsa1.0.00139.1 | 1046 | 357786 | 0         | 343  | 345  | 99 -  | 367  | 711  | 307381 | 307725 |
| UN40703 | Rsa1.0.00104.1 | 600  | 368722 | 0         | 598  | 600  | 99 +  | 1    | 600  | 201262 | 201861 |
| UN40704 | Rsa1.0.05419.1 | 913  | 13809  | 0         | 707  | 711  | 99 +  | 174  | 884  | 2108   | 2815   |
| UN40705 | Rsa1.0.00960.1 | 932  | 58199  | 0         | 424  | 424  | 100 + | 6    | 429  | 22883  | 23306  |
| UN40706 | Rsa1.0.01740.1 | 1016 | 39986  | 1.00E-133 | 275  | 286  | 96 -  | 131  | 416  | 27598  | 27883  |
| UN40707 | Rsa1.0.02673.1 | 1181 | 28877  | 4.00E-41  | 145  | 163  | 88 +  | 3    | 165  | 7272   | 7433   |
| UN40708 | Rsa1.0.05758.1 | 1074 | 12721  | 0         | 1004 | 1048 | 95 +  | 39   | 1069 | 442    | 1489   |
| UN40709 | Rsa1.0.17040.1 | 570  | 1944   | 0         | 401  | 421  | 95 +  | 155  | 567  | 1207   | 1624   |
| UN40710 | Rsa1.0.07679.1 | 714  | 8811   | 1.00E-157 | 301  | 307  | 98 -  | 403  | 709  | 46     | 348    |
| UN40711 | Rsa1.0.01711.1 | 739  | 40578  | 0         | 414  | 442  | 93 -  | 31   | 472  | 19491  | 19926  |
| UN40712 | Rsa1.0.00190.1 | 712  | 318240 | 0         | 382  | 401  | 95 +  | 313  | 712  | 191430 | 191830 |
| UN40713 | Rsa1.0.05166.1 | 1542 | 14624  | 0         | 818  | 841  | 97 +  | 700  | 1540 | 6861   | 7686   |
| UN40714 | Rsa1.0.00180.1 | 779  | 114581 | 1.00E-103 | 212  | 219  | 96 +  | 178  | 396  | 110422 | 110640 |

|         |                |      |        |           |     |     |       |     |      |        |        |
|---------|----------------|------|--------|-----------|-----|-----|-------|-----|------|--------|--------|
| UN40715 | Rsa1.0_12930.1 | 1001 | 5072   | 0         | 688 | 700 | 98 -  | 304 | 1001 | 4373   | 5072   |
| UN40716 | Rsa1.0_03288.1 | 830  | 24016  | 1.00E-151 | 306 | 316 | 96 -  | 385 | 699  | 15307  | 15622  |
| UN40717 | Rsa1.0_09568.1 | 1030 | 6284   | 1.00E-100 | 186 | 186 | 100 + | 845 | 1030 | 5564   | 5749   |
| UN40718 | Rsa1.0_05134.1 | 1019 | 143181 | 0         | 396 | 412 | 96 -  | 611 | 1018 | 12659  | 13069  |
| UN40719 | Rsa1.0_08520.1 | 784  | 7241   | 0         | 535 | 554 | 96 +  | 230 | 783  | 6156   | 6701   |
| UN40720 | Rsa1.0_02771.1 | 1229 | 28079  | 0         | 561 | 562 | 99 +  | 666 | 1227 | 19328  | 19889  |
| UN40721 | Rsa1.0_02754.1 | 1010 | 28213  | 0         | 369 | 381 | 96 -  | 151 | 531  | 10678  | 11058  |
| UN40722 | Rsa1.0_57470.1 | 1111 | 398    | 1.00E-136 | 246 | 246 | 100 + | 110 | 355  | 1      | 246    |
| UN40723 | Rsa1.0_00370.1 | 787  | 90472  | 0         | 400 | 411 | 97 -  | 379 | 787  | 8067   | 8477   |
| UN40724 | Rsa1.0_00046.1 | 1132 | 320315 | 0         | 570 | 575 | 99 +  | 558 | 1132 | 87977  | 88551  |
| UN40725 | Rsa1.0_00003.1 | 272  | 340054 | 3.00E-94  | 181 | 183 | 98 +  | 89  | 271  | 4726   | 4908   |
| UN40726 | Rsa1.0_10218.1 | 753  | 5935   | 0         | 628 | 634 | 99 +  | 121 | 753  | 3888   | 4520   |
| UN40727 | Rsa1.0_03369.1 | 925  | 23381  | 0         | 393 | 405 | 97 +  | 1   | 404  | 10293  | 10691  |
| UN40728 | Rsa1.0_00092.1 | 1641 | 659932 | 0         | 846 | 847 | 99 +  | 3   | 849  | 232702 | 233548 |
| UN40729 | Rsa1.0_02260.1 | 1303 | 33260  | 1.00E-180 | 341 | 348 | 97 +  | 3   | 350  | 32005  | 32346  |
| UN40730 | Rsa1.0_02107.1 | 562  | 34940  | 1.00E-134 | 302 | 319 | 94 +  | 248 | 561  | 8719   | 9035   |
| UN40731 | Rsa1.0_00211.1 | 1067 | 228189 | 1.00E-162 | 316 | 324 | 97 -  | 345 | 665  | 10691  | 11014  |
| UN40732 | Rsa1.0_01466.1 | 758  | 45161  | 1.00E-108 | 247 | 263 | 93 +  | 367 | 629  | 25169  | 25431  |
| UN40733 | Rsa1.0_01976.1 | 566  | 36570  | 7.00E-72  | 153 | 158 | 96 +  | 82  | 239  | 747    | 904    |
| UN40734 | Rsa1.0_28111.1 | 718  | 827    | 0         | 329 | 329 | 100 + | 390 | 718  | 200    | 528    |
| UN40735 | Rsa1.0_02593.1 | 544  | 29744  | 1.00E-161 | 288 | 288 | 100 - | 257 | 544  | 1430   | 1717   |
| UN40736 | Rsa1.0_00097.1 | 1011 | 138858 | 0         | 350 | 351 | 99 +  | 661 | 1011 | 136383 | 136733 |
| UN40737 | Rsa1.0_01876.1 | 872  | 37800  | 0         | 692 | 726 | 95 +  | 158 | 867  | 36310  | 37022  |
| UN40738 | Rsa1.0_00064.1 | 886  | 240927 | 1.00E-144 | 300 | 311 | 96 -  | 1   | 311  | 30039  | 30342  |
| UN40739 | Rsa1.0_03242.1 | 793  | 24415  | 0         | 435 | 441 | 98 -  | 302 | 742  | 1634   | 2074   |
| UN40740 | Rsa1.0_00664.1 | 1070 | 69573  | 0         | 383 | 392 | 97 +  | 6   | 396  | 16709  | 17100  |
| UN40741 | Rsa1.0_00662.1 | 676  | 192183 | 4.00E-86  | 207 | 222 | 93 +  | 369 | 590  | 12138  | 12359  |
| UN40742 | Rsa1.0_02748.1 | 420  | 28242  | 1.00E-115 | 259 | 275 | 94 +  | 145 | 419  | 11725  | 11999  |
| UN40743 | Rsa1.0_00780.1 | 789  | 147795 | 0         | 504 | 535 | 94 -  | 2   | 536  | 25606  | 26118  |
| UN40744 | Rsa1.0_17662.1 | 889  | 1770   | 0         | 479 | 481 | 99 +  | 409 | 889  | 459    | 938    |
| UN40745 | Rsa1.0_00142.1 | 678  | 121474 | 1.00E-135 | 259 | 264 | 98 -  | 143 | 406  | 64267  | 64530  |
| UN40746 | Rsa1.0_14621.1 | 811  | 3222   | 0         | 764 | 813 | 93 +  | 9   | 811  | 241    | 1049   |
| UN40747 | Rsa1.0_04584.1 | 778  | 16756  | 6.00E-64  | 193 | 217 | 88 +  | 3   | 207  | 9600   | 9809   |
| UN40748 | Rsa1.0_00415.1 | 775  | 86795  | 0         | 772 | 775 | 99 -  | 1   | 775  | 74848  | 75622  |
| UN40749 | Rsa1.0_02879.1 | 690  | 27047  | 0         | 422 | 436 | 96 -  | 3   | 438  | 18068  | 18500  |
| UN40750 | Rsa1.0_00124.1 | 575  | 262503 | 1.00E-168 | 345 | 358 | 96 +  | 1   | 358  | 162556 | 162910 |
| UN40751 | Rsa1.0_00110.1 | 904  | 132719 | 0         | 847 | 916 | 92 -  | 2   | 901  | 60627  | 61523  |
| UN40752 | Rsa1.0_00142.1 | 864  | 121474 | 0         | 402 | 411 | 97 +  | 3   | 413  | 62507  | 62916  |
| UN40753 | Rsa1.0_07504.1 | 853  | 9237   | 2.33E-156 | 284 | 291 | 97 -  | 529 | 819  | 8004   | 8294   |

|         |                |      |        |           |     |     |       |     |      |        |        |
|---------|----------------|------|--------|-----------|-----|-----|-------|-----|------|--------|--------|
| UN40754 | Rsa1.0.02757.1 | 829  | 28187  | 0         | 824 | 829 | 99 +  | 3   | 829  | 15833  | 16661  |
| UN40755 | Rsa1.0.14535.1 | 650  | 3289   | 0         | 610 | 636 | 95 +  | 15  | 650  | 477    | 1111   |
| UN40756 | Rsa1.0.00125.1 | 948  | 253043 | 1.00E-104 | 221 | 228 | 96 -  | 723 | 948  | 181954 | 182181 |
| UN40757 | Rsa1.0.22271.1 | 806  | 1135   | 0         | 411 | 424 | 96 +  | 384 | 806  | 546    | 966    |
| UN40758 | Rsa1.0.03162.1 | 835  | 24895  | 0         | 382 | 389 | 98 +  | 1   | 389  | 17212  | 17595  |
| UN40759 | Rsa1.0.38965.1 | 653  | 577    | 1.00E-124 | 232 | 234 | 99 -  | 419 | 652  | 121    | 354    |
| UN40760 | Rsa1.0.00592.1 | 1312 | 73788  | 0         | 863 | 910 | 94 -  | 21  | 927  | 20791  | 21696  |
| UN40761 | Rsa1.0.06751.1 | 600  | 10417  | 1.00E-169 | 302 | 302 | 100 + | 222 | 523  | 9247   | 9548   |
| UN40762 | Rsa1.0.52876.1 | 1051 | 431    | 0         | 384 | 389 | 98 +  | 279 | 667  | 37     | 425    |
| UN40763 | Rsa1.0.00706.1 | 944  | 291570 | 1.00E-170 | 327 | 335 | 97 -  | 12  | 346  | 240972 | 241306 |
| UN40764 | Rsa1.0.00315.1 | 1153 | 96426  | 0         | 349 | 351 | 99 +  | 437 | 787  | 19802  | 20152  |
| UN40765 | Rsa1.0.18655.1 | 983  | 1558   | 2.33E-156 | 311 | 329 | 94 -  | 12  | 329  | 805    | 1133   |
| UN40766 | Rsa1.0.00407.1 | 1004 | 191544 | 0         | 759 | 796 | 95 -  | 221 | 1004 | 155570 | 156357 |
| UN40767 | Rsa1.0.18032.1 | 661  | 1686   | 1.00E-108 | 205 | 207 | 99 +  | 137 | 343  | 1291   | 1497   |
| UN40768 | Rsa1.0.00089.1 | 801  | 406142 | 0         | 401 | 408 | 98 +  | 1   | 408  | 232204 | 232611 |
| UN40769 | Rsa1.0.00203.1 | 1062 | 109129 | 0         | 432 | 442 | 97 +  | 4   | 444  | 54534  | 54975  |
| UN40770 | Rsa1.0.00094.1 | 826  | 139042 | 1.00E-135 | 244 | 244 | 100 + | 581 | 824  | 119349 | 119592 |
| UN40771 | Rsa1.0.00168.1 | 644  | 115870 | 0         | 606 | 634 | 95 +  | 15  | 644  | 39841  | 40471  |
| UN40772 | Rsa1.0.05727.1 | 825  | 12808  | 9.00E-97  | 180 | 180 | 100 - | 164 | 343  | 6858   | 7037   |
| UN40773 | Rsa1.0.02803.1 | 724  | 27715  | 1.00E-160 | 331 | 346 | 95 -  | 189 | 534  | 8863   | 9208   |
| UN40774 | Rsa1.0.01346.1 | 1001 | 47618  | 0         | 432 | 451 | 95 +  | 548 | 998  | 7627   | 8077   |
| UN40775 | Rsa1.0.00699.1 | 754  | 184398 | 0         | 497 | 501 | 99 +  | 253 | 753  | 127772 | 128272 |
| UN40776 | Rsa1.0.00475.1 | 700  | 81678  | 0         | 634 | 671 | 94 +  | 1   | 663  | 38102  | 38758  |
| UN40777 | Rsa1.0.02320.1 | 619  | 32575  | 0         | 364 | 374 | 97 -  | 1   | 374  | 16369  | 16742  |
| UN40778 | Rsa1.0.01481.1 | 774  | 184562 | 0         | 385 | 387 | 99 -  | 388 | 774  | 151851 | 152237 |
| UN40779 | Rsa1.0.00150.1 | 843  | 154416 | 1.00E-171 | 376 | 399 | 94 -  | 9   | 407  | 60307  | 60703  |
| UN40780 | Rsa1.0.01016.1 | 787  | 181422 | 0         | 530 | 557 | 95 +  | 222 | 777  | 171865 | 172411 |
| UN40781 | Rsa1.0.00931.1 | 573  | 59210  | 1.00E-128 | 270 | 280 | 96 -  | 259 | 530  | 26419  | 26698  |
| UN40782 | Rsa1.0.16200.1 | 646  | 2246   | 0         | 363 | 373 | 97 -  | 274 | 646  | 1874   | 2246   |
| UN40783 | Rsa1.0.01759.1 | 1273 | 39745  | 0         | 464 | 466 | 99 -  | 8   | 472  | 12148  | 12613  |
| UN40784 | Rsa1.0.00936.1 | 472  | 59078  | 1.00E-145 | 308 | 321 | 95 -  | 156 | 470  | 36828  | 37147  |
| UN40785 | Rsa1.0.23487.1 | 1271 | 1045   | 0         | 727 | 776 | 93 +  | 38  | 813  | 278    | 1041   |
| UN40786 | Rsa1.0.01099.1 | 866  | 158481 | 0         | 417 | 430 | 96 -  | 435 | 864  | 152231 | 152660 |
| UN40787 | Rsa1.0.06047.1 | 579  | 11854  | 1.00E-159 | 293 | 296 | 98 +  | 1   | 296  | 292    | 587    |
| UN40788 | Rsa1.0.01876.1 | 1000 | 37800  | 1.00E-133 | 266 | 275 | 96 +  | 20  | 286  | 7001   | 7275   |
| UN40789 | Rsa1.0.02480.1 | 828  | 31036  | 0         | 453 | 462 | 98 +  | 371 | 828  | 12060  | 12521  |
| UN40790 | Rsa1.0.00457.1 | 944  | 337301 | 0         | 936 | 952 | 98 -  | 4   | 944  | 317863 | 318814 |
| UN40791 | Rsa1.0.00168.1 | 852  | 115870 | 1.00E-133 | 269 | 277 | 97 +  | 1   | 277  | 53318  | 53593  |
| UN40792 | Rsa1.0.00188.1 | 667  | 112020 | 0         | 667 | 667 | 100 + | 1   | 667  | 4374   | 5040   |



|         |                |      |        |           |      |      |       |      |      |        |        |
|---------|----------------|------|--------|-----------|------|------|-------|------|------|--------|--------|
| UN40793 | Rsa1.0.00434.1 | 1007 | 85171  | 0         | 992  | 1023 | 96 +  | 3    | 1007 | 45400  | 46419  |
| UN40794 | Rsa1.0.00500.1 | 1352 | 272308 | 0         | 1323 | 1350 | 98 -  | 2    | 1349 | 90718  | 92067  |
| UN40795 | Rsa1.0.05692.1 | 1059 | 12914  | 0         | 338  | 338  | 100 - | 295  | 632  | 10387  | 10724  |
| UN40796 | Rsa1.0.02900.1 | 739  | 26928  | 1.00E-173 | 332  | 336  | 98 -  | 1    | 335  | 16858  | 17191  |
| UN40797 | Rsa1.0.01917.1 | 709  | 37303  | 0         | 420  | 445  | 94 +  | 2    | 441  | 9985   | 10425  |
| UN40798 | Rsa1.0.00790.1 | 709  | 148693 | 0         | 565  | 587  | 96 -  | 51   | 631  | 17529  | 18114  |
| UN40799 | Rsa1.0.00528.1 | 727  | 164755 | 1.00E-123 | 246  | 253  | 97 -  | 467  | 719  | 121565 | 121817 |
| UN40800 | Rsa1.0.04057.1 | 670  | 19333  | 0         | 400  | 416  | 96 +  | 231  | 646  | 3626   | 4041   |
| UN40801 | Rsa1.0.00251.1 | 735  | 303968 | 1.00E-121 | 330  | 362  | 91 +  | 380  | 735  | 128883 | 129238 |
| UN40802 | Rsa1.0.00054.1 | 636  | 162053 | 8.00E-78  | 229  | 254  | 90 -  | 391  | 635  | 86576  | 86824  |
| UN40803 | Rsa1.0.00067.1 | 669  | 415055 | 7.00E-94  | 194  | 200  | 97 -  | 389  | 588  | 142469 | 142664 |
| UN40804 | Rsa1.0.17403.1 | 812  | 1839   | 0         | 474  | 501  | 94 -  | 1    | 492  | 1196   | 1684   |
| UN40805 | Rsa1.0.02160.1 | 784  | 34468  | 0         | 384  | 399  | 96 +  | 389  | 784  | 21426  | 21824  |
| UN40806 | Rsa1.0.01081.1 | 892  | 499226 | 1.00E-168 | 313  | 316  | 99 -  | 578  | 892  | 16506  | 16821  |
| UN40807 | Rsa1.0.02178.1 | 1140 | 156197 | 0         | 722  | 758  | 95 +  | 390  | 1140 | 150274 | 151031 |
| UN40808 | Rsa1.0.02267.1 | 1026 | 33194  | 0         | 556  | 556  | 100 + | 471  | 1026 | 8666   | 9221   |
| UN40809 | Rsa1.0.02803.1 | 745  | 27715  | 1.00E-141 | 323  | 346  | 93 -  | 184  | 529  | 8863   | 9208   |
| UN40810 | Rsa1.0.01115.1 | 683  | 183545 | 0         | 353  | 357  | 98 +  | 5    | 361  | 174044 | 174400 |
| UN40811 | Rsa1.0.00554.1 | 527  | 150953 | 3.00E-86  | 189  | 197  | 95 +  | 318  | 512  | 141702 | 141898 |
| UN40812 | Rsa1.0.11921.1 | 1319 | 5369   | 1.00E-142 | 371  | 404  | 91 -  | 366  | 768  | 4572   | 4967   |
| UN40813 | Rsa1.0.03211.1 | 1095 | 24591  | 0         | 464  | 475  | 97 +  | 49   | 523  | 7354   | 7828   |
| UN40814 | Rsa1.0.01604.1 | 1047 | 42461  | 0         | 774  | 812  | 95 +  | 233  | 1043 | 38216  | 39010  |
| UN40815 | Rsa1.0.00191.1 | 1063 | 316976 | 0         | 1022 | 1092 | 93 -  | 2    | 1063 | 203943 | 205028 |
| UN40816 | Rsa1.0.04200.1 | 1288 | 18490  | 1.00E-127 | 249  | 255  | 97 -  | 456  | 710  | 12935  | 13189  |
| UN40817 | Rsa1.0.00196.1 | 1209 | 109960 | 0         | 365  | 378  | 96 +  | 832  | 1209 | 37671  | 38043  |
| UN40818 | Rsa1.0.03294.1 | 747  | 23971  | 1.00E-105 | 240  | 254  | 94 +  | 488  | 735  | 21081  | 21334  |
| UN40819 | Rsa1.0.02426.1 | 1207 | 31564  | 0         | 1186 | 1213 | 97 -  | 3    | 1207 | 23119  | 24331  |
| UN40820 | Rsa1.0.00179.1 | 611  | 393324 | 1.00E-125 | 273  | 286  | 95 +  | 309  | 591  | 351933 | 352218 |
| UN40821 | Rsa1.0.01724.1 | 674  | 40292  | 3.00E-59  | 157  | 168  | 93 +  | 490  | 654  | 19668  | 19835  |
| UN40822 | Rsa1.0.02798.1 | 778  | 27792  | 0         | 426  | 456  | 93 +  | 1    | 454  | 5376   | 5823   |
| UN40823 | Rsa1.0.03290.1 | 1209 | 24011  | 0         | 1141 | 1189 | 95 +  | 39   | 1209 | 5725   | 6904   |
| UN40824 | Rsa1.0.47284.1 | 535  | 478    | 1.00E-129 | 269  | 278  | 96 +  | 258  | 534  | 68     | 344    |
| UN40825 | Rsa1.0.03856.1 | 466  | 20429  | 8.00E-28  | 86   | 92   | 93 -  | 213  | 303  | 19304  | 19395  |
| UN40826 | Rsa1.0.00965.1 | 1315 | 58139  | 3.00E-76  | 228  | 251  | 90 +  | 996  | 1244 | 9265   | 9505   |
| UN40827 | Rsa1.0.01819.1 | 779  | 38834  | 0         | 414  | 439  | 94 -  | 151  | 589  | 15079  | 15517  |
| UN40828 | Rsa1.0.05522.1 | 507  | 13441  | 4.00E-70  | 181  | 195  | 92 +  | 319  | 507  | 9116   | 9310   |
| UN40829 | Rsa1.0.00577.1 | 847  | 174827 | 0         | 843  | 845  | 99 +  | 3    | 847  | 415    | 1259   |
| UN40830 | Rsa1.0.01000.1 | 1597 | 57140  | 0         | 495  | 514  | 96 -  | 1090 | 1597 | 35214  | 35726  |
| UN40831 | Rsa1.0.00025.1 | 612  | 277312 | 1.00E-127 | 309  | 330  | 93 +  | 284  | 611  | 17353  | 17679  |

|         |                |      |        |           |     |      |       |      |      |        |        |
|---------|----------------|------|--------|-----------|-----|------|-------|------|------|--------|--------|
| UN40832 | Rsa1.0.00224.1 | 985  | 327530 | 0         | 956 | 1000 | 95 +  | 2    | 985  | 227371 | 228364 |
| UN40833 | Rsa1.0.01783.1 | 544  | 39383  | 1.00E-73  | 214 | 237  | 90 -  | 287  | 523  | 19850  | 20085  |
| UN40834 | Rsa1.0.15703.1 | 589  | 2470   | 1.00E-109 | 203 | 204  | 99 -  | 193  | 396  | 2267   | 2470   |
| UN40835 | Rsa1.0.02508.1 | 1020 | 30675  | 0         | 608 | 616  | 98 +  | 405  | 1020 | 24669  | 25284  |
| UN40836 | Rsa1.0.00199.1 | 719  | 249604 | 0         | 475 | 475  | 100 + | 244  | 718  | 164371 | 164845 |
| UN40837 | Rsa1.0.03890.1 | 846  | 20223  | 0         | 397 | 402  | 98 +  | 446  | 846  | 11314  | 11715  |
| UN40838 | Rsa1.0.00300.1 | 761  | 97747  | 0         | 440 | 471  | 93 +  | 291  | 758  | 31675  | 32143  |
| UN40839 | Rsa1.0.00038.1 | 1324 | 314568 | 1.00E-124 | 304 | 326  | 93 +  | 1003 | 1322 | 49081  | 49403  |
| UN40840 | Rsa1.0.00611.1 | 813  | 72410  | 0         | 786 | 800  | 98 -  | 15   | 813  | 15041  | 15834  |
| UN40841 | Rsa1.0.02754.1 | 527  | 28213  | 1.00E-148 | 299 | 310  | 96 -  | 121  | 430  | 8708   | 9017   |
| UN40842 | Rsa1.0.02449.1 | 937  | 31292  | 3.00E-69  | 155 | 160  | 96 +  | 59   | 217  | 13303  | 13459  |
| UN40843 | Rsa1.0.00518.1 | 726  | 78360  | 1.00E-114 | 250 | 261  | 95 -  | 467  | 726  | 59625  | 59883  |
| UN40844 | Rsa1.0.05580.1 | 1033 | 13274  | 0         | 487 | 500  | 97 -  | 531  | 1029 | 6557   | 7055   |
| UN40845 | Rsa1.0.16193.1 | 462  | 2250   | 2.33E-156 | 279 | 283  | 98 -  | 181  | 462  | 1161   | 1443   |
| UN40846 | Rsa1.0.01718.1 | 557  | 40389  | 9.00E-96  | 194 | 198  | 97 -  | 3    | 199  | 35804  | 36001  |
| UN40847 | Rsa1.0.01510.1 | 641  | 44237  | 0         | 566 | 640  | 88 +  | 3    | 623  | 18872  | 19486  |
| UN40848 | Rsa1.0.00847.1 | 641  | 62270  | 1.00E-109 | 224 | 232  | 96 +  | 144  | 375  | 52454  | 52685  |
| UN40849 | Rsa1.0.00525.1 | 1030 | 78030  | 0         | 425 | 427  | 99 +  | 605  | 1030 | 14410  | 14836  |
| UN40850 | Rsa1.0.01485.1 | 454  | 44797  | 9.00E-74  | 170 | 177  | 96 +  | 190  | 365  | 31451  | 31626  |
| UN40851 | Rsa1.0.03658.1 | 475  | 21549  | 0         | 332 | 334  | 99 -  | 141  | 474  | 21037  | 21370  |
| UN40852 | Rsa1.0.00039.1 | 660  | 296927 | 1.00E-107 | 247 | 261  | 94 +  | 395  | 654  | 18816  | 19075  |
| UN40853 | Rsa1.0.02803.1 | 752  | 27715  | 1.00E-165 | 333 | 346  | 96 -  | 187  | 532  | 8863   | 9208   |
| UN40854 | Rsa1.0.00503.1 | 591  | 79468  | 1.00E-175 | 347 | 355  | 97 +  | 2    | 353  | 61110  | 61463  |
| UN40855 | Rsa1.0.00564.1 | 848  | 75428  | 0         | 506 | 514  | 98 -  | 336  | 848  | 60616  | 61124  |
| UN40856 | Rsa1.0.07295.1 | 961  | 9599   | 0         | 908 | 949  | 95 +  | 1    | 947  | 5516   | 6462   |
| UN40857 | Rsa1.0.00741.1 | 1061 | 66117  | 0         | 979 | 1057 | 92 -  | 2    | 1036 | 32560  | 33614  |
| UN40858 | Rsa1.0.00497.1 | 1032 | 79830  | 0         | 854 | 883  | 96 +  | 3    | 884  | 2745   | 3625   |
| UN40859 | Rsa1.0.01234.1 | 703  | 50183  | 0         | 498 | 521  | 95 +  | 159  | 678  | 8898   | 9411   |
| UN40860 | Rsa1.0.00829.1 | 695  | 158305 | 1.00E-133 | 306 | 326  | 93 -  | 1    | 316  | 102339 | 102664 |
| UN40861 | Rsa1.0.08140.1 | 762  | 7845   | 0         | 375 | 388  | 96 +  | 53   | 437  | 5806   | 6191   |
| UN40862 | Rsa1.0.00648.1 | 724  | 70351  | 1.00E-131 | 302 | 320  | 94 +  | 3    | 314  | 21675  | 21992  |
| UN40863 | Rsa1.0.02431.1 | 719  | 31504  | 0         | 667 | 698  | 95 -  | 3    | 697  | 12936  | 13631  |
| UN40864 | Rsa1.0.12010.1 | 1047 | 5342   | 0         | 713 | 762  | 93 -  | 35   | 792  | 1      | 752    |
| UN40865 | Rsa1.0.00278.1 | 453  | 231896 | 1.00E-132 | 331 | 356  | 92 +  | 1    | 351  | 183845 | 184192 |
| UN40866 | Rsa1.0.23760.1 | 614  | 1027   | 1.00E-118 | 270 | 286  | 94 -  | 241  | 517  | 601    | 886    |
| UN40867 | Rsa1.0.01263.1 | 476  | 49703  | 1.00E-82  | 225 | 245  | 91 +  | 242  | 475  | 40157  | 40401  |
| UN40868 | Rsa1.0.01488.1 | 1368 | 44766  | 0         | 577 | 610  | 94 -  | 759  | 1367 | 32428  | 33028  |
| UN40869 | Rsa1.0.00529.1 | 976  | 77487  | 1.00E-122 | 322 | 354  | 90 +  | 557  | 910  | 65172  | 65514  |
| UN40870 | Rsa1.0.00471.1 | 511  | 81897  | 1.00E-150 | 368 | 399  | 92 -  | 104  | 499  | 73378  | 73769  |

|         |                |      |        |           |     |     |       |     |      |        |        |
|---------|----------------|------|--------|-----------|-----|-----|-------|-----|------|--------|--------|
| UN40871 | Rsa1.0.00528.1 | 946  | 164755 | 2.00E-67  | 150 | 155 | 96 -  | 374 | 527  | 147355 | 147509 |
| UN40872 | Rsa1.0.00307.1 | 855  | 199003 | 0         | 707 | 710 | 99 -  | 4   | 712  | 86191  | 86900  |
| UN40873 | Rsa1.0.01168.1 | 509  | 153765 | 1.00E-66  | 221 | 247 | 89 -  | 268 | 504  | 23488  | 23728  |
| UN40874 | Rsa1.0.02600.1 | 1158 | 29657  | 0         | 632 | 665 | 95 +  | 460 | 1122 | 4595   | 5254   |
| UN40875 | Rsa1.0.00548.1 | 969  | 76518  | 0         | 942 | 950 | 99 -  | 14  | 963  | 62584  | 63533  |
| UN40876 | Rsa1.0.23397.1 | 985  | 1052   | 0         | 509 | 521 | 97 -  | 48  | 565  | 492    | 1012   |
| UN40877 | Rsa1.0.00099.1 | 778  | 159619 | 0         | 465 | 471 | 98 +  | 1   | 470  | 3511   | 3981   |
| UN40878 | Rsa1.0.00994.1 | 1122 | 165189 | 0         | 481 | 488 | 98 -  | 164 | 651  | 38704  | 39191  |
| UN40879 | Rsa1.0.00571.1 | 615  | 329018 | 1.00E-109 | 261 | 280 | 93 +  | 194 | 472  | 35755  | 36029  |
| UN40880 | Rsa1.0.02107.1 | 508  | 34940  | 0         | 387 | 388 | 99 +  | 121 | 508  | 9809   | 10196  |
| UN40881 | Rsa1.0.01857.1 | 574  | 38103  | 1.00E-164 | 373 | 399 | 93 +  | 188 | 570  | 4693   | 5090   |
| UN40882 | Rsa1.0.00275.1 | 656  | 210104 | 4.00E-92  | 211 | 223 | 94 +  | 350 | 570  | 157269 | 157486 |
| UN40883 | Rsa1.0.06488.1 | 683  | 141774 | 1.00E-172 | 348 | 361 | 96 +  | 3   | 363  | 1023   | 1380   |
| UN40884 | Rsa1.0.00179.1 | 432  | 393324 | 1.00E-32  | 90  | 96  | 93 +  | 2   | 97   | 212734 | 212829 |
| UN40885 | Rsa1.0.66369.1 | 1002 | 345    | 1.00E-150 | 270 | 270 | 100 + | 731 | 1000 | 50     | 319    |
| UN40886 | Rsa1.0.01936.1 | 462  | 37151  | 9.00E-74  | 194 | 213 | 91 -  | 12  | 215  | 18530  | 18742  |
| UN40887 | Rsa1.0.14302.1 | 828  | 3558   | 0         | 446 | 461 | 96 +  | 372 | 828  | 1424   | 1884   |
| UN40888 | Rsa1.0.00580.1 | 1035 | 74515  | 0         | 419 | 427 | 98 -  | 609 | 1035 | 63935  | 64360  |
| UN40889 | Rsa1.0.02017.1 | 1404 | 35999  | 1.00E-106 | 196 | 196 | 100 + | 378 | 573  | 28582  | 28777  |
| UN40890 | Rsa1.0.03898.1 | 1016 | 20183  | 0         | 452 | 452 | 100 + | 565 | 1016 | 2513   | 2964   |
| UN40891 | Rsa1.0.00479.1 | 986  | 81377  | 0         | 870 | 936 | 92 +  | 1   | 908  | 28339  | 29268  |
| UN40892 | Rsa1.0.02069.1 | 658  | 35425  | 1.00E-171 | 364 | 382 | 95 -  | 275 | 656  | 20696  | 21072  |
| UN40893 | Rsa1.0.00116.1 | 947  | 365886 | 8.00E-79  | 150 | 150 | 100 - | 722 | 871  | 353829 | 353978 |
| UN40894 | Rsa1.0.00221.1 | 825  | 106972 | 0         | 557 | 562 | 99 +  | 210 | 771  | 53911  | 54472  |
| UN40895 | Rsa1.0.00323.1 | 903  | 159650 | 0         | 430 | 431 | 99 -  | 4   | 434  | 48893  | 49323  |
| UN40896 | Rsa1.0.02085.1 | 371  | 35198  | 1.00E-117 | 300 | 329 | 91 +  | 30  | 349  | 33816  | 34137  |
| UN40897 | Rsa1.0.04808.1 | 1344 | 15893  | 0         | 894 | 922 | 96 -  | 423 | 1341 | 11539  | 12460  |
| UN40898 | Rsa1.0.02772.1 | 989  | 28047  | 6.00E-89  | 195 | 203 | 96 -  | 696 | 897  | 2872   | 3074   |
| UN40899 | Rsa1.0.00248.1 | 1124 | 163568 | 4.00E-87  | 164 | 164 | 100 + | 720 | 883  | 53706  | 53869  |
| UN40900 | Rsa1.0.03692.1 | 561  | 21338  | 1.00E-110 | 238 | 248 | 95 -  | 311 | 558  | 6384   | 6627   |
| UN40901 | Rsa1.0.02050.1 | 811  | 35570  | 1.00E-172 | 360 | 375 | 96 +  | 436 | 808  | 10046  | 10420  |
| UN40902 | Rsa1.0.00100.1 | 705  | 249232 | 1.00E-154 | 452 | 508 | 88 -  | 224 | 705  | 181505 | 182000 |
| UN40903 | Rsa1.0.00422.1 | 857  | 86144  | 0         | 588 | 623 | 94 +  | 235 | 854  | 54119  | 54728  |
| UN40904 | Rsa1.0.00416.1 | 1003 | 86772  | 1.00E-172 | 320 | 323 | 99 +  | 679 | 1001 | 41330  | 41651  |
| UN40905 | Rsa1.0.00026.1 | 721  | 327835 | 1.00E-125 | 317 | 340 | 93 +  | 381 | 717  | 174424 | 174757 |
| UN40906 | Rsa1.0.02020.1 | 264  | 173211 | 3.00E-69  | 168 | 178 | 94 +  | 5   | 182  | 148963 | 149135 |
| UN40907 | Rsa1.0.01702.1 | 2038 | 40722  | 0         | 545 | 545 | 100 - | 971 | 1515 | 18252  | 18796  |
| UN40908 | Rsa1.0.03890.1 | 880  | 20223  | 0         | 429 | 433 | 99 -  | 446 | 878  | 3424   | 3856   |
| UN40909 | Rsa1.0.00090.1 | 772  | 273859 | 1.00E-159 | 344 | 362 | 95 +  | 371 | 729  | 141630 | 141984 |

|         |                |      |        |           |      |      |       |     |      |        |        |
|---------|----------------|------|--------|-----------|------|------|-------|-----|------|--------|--------|
| UN40910 | Rsa1.0_01233.1 | 1079 | 50184  | 1.00E-104 | 224  | 233  | 96 +  | 835 | 1067 | 22267  | 22498  |
| UN40911 | Rsa1.0_02584.1 | 818  | 29877  | 0         | 418  | 442  | 94 +  | 377 | 817  | 806    | 1240   |
| UN40912 | Rsa1.0_01605.1 | 723  | 42442  | 0         | 511  | 522  | 97 +  | 2   | 518  | 13419  | 13940  |
| UN40913 | Rsa1.0_08744.1 | 732  | 6970   | 0         | 575  | 600  | 95 -  | 96  | 691  | 5337   | 5934   |
| UN40914 | Rsa1.0_01343.1 | 653  | 47735  | 1.00E-162 | 331  | 342  | 96 +  | 309 | 648  | 30311  | 30647  |
| UN40915 | Rsa1.0_01122.1 | 724  | 53369  | 1.00E-178 | 336  | 341  | 98 -  | 328 | 668  | 28154  | 28493  |
| UN40916 | Rsa1.0_00039.1 | 667  | 296927 | 0         | 527  | 544  | 96 +  | 121 | 664  | 206911 | 207449 |
| UN40917 | Rsa1.0_00343.1 | 815  | 93570  | 0         | 517  | 539  | 95 +  | 286 | 815  | 84281  | 84817  |
| UN40918 | Rsa1.0_00457.1 | 901  | 337301 | 0         | 890  | 920  | 96 +  | 3   | 901  | 184473 | 185391 |
| UN40919 | Rsa1.0_13633.1 | 593  | 4605   | 1.00E-109 | 242  | 256  | 94 +  | 3   | 258  | 1103   | 1358   |
| UN40920 | Rsa1.0_01034.1 | 360  | 56046  | 1.00E-178 | 348  | 358  | 97 -  | 3   | 360  | 32565  | 32919  |
| UN40921 | Rsa1.0_03277.1 | 777  | 24138  | 1.00E-143 | 264  | 266  | 99 +  | 512 | 777  | 14788  | 15053  |
| UN40922 | Rsa1.0_04934.1 | 662  | 143962 | 0         | 638  | 667  | 95 -  | 3   | 660  | 141896 | 142561 |
| UN40923 | Rsa1.0_00879.1 | 570  | 61297  | 1.00E-122 | 265  | 277  | 95 -  | 296 | 570  | 54956  | 55230  |
| UN40924 | Rsa1.0_00410.1 | 728  | 86957  | 1.00E-118 | 219  | 220  | 99 +  | 2   | 221  | 27488  | 27707  |
| UN40925 | Rsa1.0_06677.1 | 677  | 10560  | 1.00E-147 | 312  | 328  | 95 -  | 348 | 675  | 55     | 382    |
| UN40926 | Rsa1.0_03491.1 | 681  | 22541  | 1.00E-160 | 426  | 471  | 90 -  | 70  | 539  | 9065   | 9535   |
| UN40927 | Rsa1.0_23047.1 | 747  | 1075   | 1.00E-106 | 198  | 199  | 99 -  | 548 | 746  | 113    | 311    |
| UN40928 | Rsa1.0_01340.1 | 1038 | 47805  | 0         | 507  | 513  | 98 +  | 526 | 1038 | 29388  | 29900  |
| UN40929 | Rsa1.0_03890.1 | 752  | 20223  | 0         | 658  | 690  | 95 +  | 19  | 707  | 10404  | 11090  |
| UN40930 | Rsa1.0_01880.1 | 1049 | 37745  | 5.00E-34  | 159  | 179  | 88 +  | 555 | 729  | 18793  | 18969  |
| UN40931 | Rsa1.0_02179.1 | 949  | 34188  | 0         | 935  | 947  | 98 -  | 4   | 949  | 15263  | 16209  |
| UN40932 | Rsa1.0_00528.1 | 563  | 164755 | 0         | 488  | 514  | 94 +  | 1   | 513  | 100821 | 101328 |
| UN40933 | Rsa1.0_00117.1 | 948  | 213118 | 1.00E-142 | 292  | 300  | 97 -  | 651 | 947  | 202641 | 202940 |
| UN40934 | Rsa1.0_00005.1 | 1171 | 353093 | 0         | 1167 | 1169 | 99 -  | 1   | 1169 | 55286  | 56454  |
| UN40935 | Rsa1.0_13608.1 | 417  | 4645   | 0         | 408  | 417  | 97 +  | 1   | 417  | 3037   | 3453   |
| UN40936 | Rsa1.0_20437.1 | 1031 | 1305   | 0         | 437  | 446  | 97 -  | 585 | 1029 | 325    | 767    |
| UN40937 | Rsa1.0_00412.1 | 877  | 86935  | 1.00E-92  | 214  | 226  | 94 +  | 651 | 876  | 71685  | 71905  |
| UN40938 | Rsa1.0_01458.1 | 836  | 175719 | 1.00E-152 | 309  | 319  | 96 -  | 519 | 836  | 33239  | 33554  |
| UN40939 | Rsa1.0_00683.1 | 476  | 68638  | 1.00E-154 | 303  | 312  | 97 -  | 7   | 318  | 59047  | 59358  |
| UN40940 | Rsa1.0_00063.1 | 541  | 156150 | 1.00E-113 | 226  | 232  | 97 +  | 113 | 344  | 3494   | 3725   |
| UN40941 | Rsa1.0_03471.1 | 599  | 22678  | 1.00E-111 | 227  | 234  | 97 -  | 154 | 384  | 14969  | 15202  |
| UN40942 | Rsa1.0_00067.1 | 1006 | 415055 | 1.00E-153 | 390  | 424  | 91 +  | 591 | 1006 | 7421   | 7840   |
| UN40943 | Rsa1.0_01139.1 | 1183 | 52601  | 0         | 439  | 443  | 99 -  | 3   | 445  | 18673  | 19115  |
| UN40944 | Rsa1.0_00159.1 | 403  | 431686 | 7.00E-25  | 59   | 59   | 100 + | 223 | 281  | 268310 | 268368 |
| UN40945 | Rsa1.0_00821.1 | 606  | 62891  | 0         | 434  | 459  | 94 +  | 42  | 493  | 5144   | 5601   |
| UN40946 | Rsa1.0_05695.1 | 788  | 12899  | 1.00E-108 | 200  | 200  | 100 - | 255 | 454  | 1549   | 1748   |
| UN40947 | Rsa1.0_00526.1 | 713  | 169279 | 1.00E-95  | 285  | 314  | 90 +  | 405 | 713  | 148049 | 148362 |
| UN40948 | Rsa1.0_01941.1 | 1991 | 37069  | 0         | 786  | 787  | 99 +  | 1   | 786  | 10383  | 11169  |

|         |                |      |        |           |      |      |       |     |      |        |        |
|---------|----------------|------|--------|-----------|------|------|-------|-----|------|--------|--------|
| UN40949 | Rsa1.0.01806.1 | 697  | 39021  | 0         | 362  | 369  | 98 -  | 331 | 696  | 12077  | 12444  |
| UN40950 | Rsa1.0.02888.1 | 887  | 27020  | 1.00E-150 | 399  | 441  | 90 +  | 1   | 427  | 4030   | 4463   |
| UN40951 | Rsa1.0.03672.1 | 1025 | 21452  | 1.00E-144 | 475  | 542  | 87 -  | 453 | 993  | 13327  | 13859  |
| UN40952 | Rsa1.0.16302.1 | 1085 | 2207   | 0         | 384  | 394  | 97 -  | 651 | 1044 | 831    | 1224   |
| UN40953 | Rsa1.0.00492.1 | 1007 | 80178  | 1.00E-101 | 194  | 196  | 98 -  | 2   | 197  | 71129  | 71324  |
| UN40954 | Rsa1.0.03057.1 | 1209 | 25724  | 0         | 482  | 491  | 98 -  | 448 | 938  | 11914  | 12404  |
| UN40955 | Rsa1.0.01175.1 | 1629 | 51674  | 0         | 674  | 700  | 96 -  | 827 | 1525 | 39025  | 39718  |
| UN40956 | Rsa1.0.01147.1 | 1165 | 52391  | 0         | 375  | 378  | 99 +  | 247 | 624  | 37794  | 38171  |
| UN40957 | Rsa1.0.02965.1 | 1112 | 26402  | 1.00E-122 | 427  | 487  | 87 +  | 596 | 1078 | 1492   | 1976   |
| UN40958 | Rsa1.0.03541.1 | 725  | 22194  | 0         | 624  | 652  | 95 +  | 2   | 650  | 16779  | 17430  |
| UN40959 | Rsa1.0.04116.1 | 750  | 18971  | 0         | 416  | 428  | 97 +  | 3   | 427  | 614    | 1041   |
| UN40960 | Rsa1.0.00440.1 | 941  | 84723  | 4.00E-96  | 229  | 247  | 92 -  | 9   | 255  | 26966  | 27198  |
| UN40961 | Rsa1.0.00057.1 | 712  | 160473 | 0         | 466  | 470  | 99 -  | 243 | 712  | 46145  | 46614  |
| UN40962 | Rsa1.0.00434.1 | 842  | 85171  | 0         | 364  | 365  | 99 +  | 339 | 703  | 71294  | 71658  |
| UN40963 | Rsa1.0.01936.1 | 545  | 37151  | 0         | 519  | 550  | 94 -  | 3   | 545  | 18249  | 18797  |
| UN40964 | Rsa1.0.01058.1 | 835  | 55430  | 0         | 794  | 826  | 96 +  | 20  | 834  | 34209  | 35033  |
| UN40965 | Rsa1.0.25951.1 | 659  | 912    | 0         | 406  | 424  | 95 +  | 237 | 654  | 77     | 497    |
| UN40966 | Rsa1.0.01153.1 | 900  | 52264  | 0         | 676  | 703  | 96 +  | 201 | 898  | 36760  | 37460  |
| UN40967 | Rsa1.0.01872.1 | 853  | 37908  | 0         | 415  | 431  | 96 -  | 1   | 431  | 9035   | 9458   |
| UN40968 | Rsa1.0.03600.1 | 743  | 21857  | 1.00E-119 | 301  | 333  | 90 +  | 432 | 742  | 2130   | 2462   |
| UN40969 | Rsa1.0.03944.1 | 1233 | 19926  | 0         | 428  | 462  | 92 -  | 759 | 1215 | 10180  | 10629  |
| UN40970 | Rsa1.0.02593.1 | 573  | 29744  | 2.00E-66  | 141  | 145  | 97 -  | 3   | 147  | 2365   | 2509   |
| UN40971 | Rsa1.0.00269.1 | 935  | 341668 | 1.00E-123 | 366  | 412  | 88 -  | 462 | 872  | 323982 | 324393 |
| UN40972 | Rsa1.0.21974.1 | 911  | 1159   | 0         | 510  | 511  | 99 +  | 111 | 621  | 1      | 511    |
| UN40973 | Rsa1.0.00087.1 | 1161 | 761073 | 0         | 598  | 598  | 100 + | 3   | 600  | 439408 | 440005 |
| UN40974 | Rsa1.0.00552.1 | 842  | 206757 | 0         | 479  | 517  | 92 -  | 211 | 727  | 66081  | 66597  |
| UN40975 | Rsa1.0.02431.1 | 698  | 31504  | 0         | 691  | 696  | 99 -  | 3   | 698  | 12941  | 13635  |
| UN40976 | Rsa1.0.04285.1 | 1125 | 18085  | 0         | 1078 | 1123 | 95 +  | 5   | 1123 | 16470  | 17581  |
| UN40977 | Rsa1.0.02655.1 | 1010 | 29027  | 1.00E-171 | 308  | 309  | 99 -  | 701 | 1009 | 10114  | 10422  |
| UN40978 | Rsa1.0.01488.1 | 552  | 44766  | 0         | 540  | 551  | 98 -  | 3   | 552  | 4474   | 5024   |
| UN40979 | Rsa1.0.01727.1 | 846  | 40243  | 0         | 754  | 756  | 99 -  | 3   | 758  | 24715  | 25469  |
| UN40980 | Rsa1.0.00012.1 | 637  | 222148 | 0         | 336  | 337  | 99 -  | 1   | 337  | 210339 | 210675 |
| UN40981 | Rsa1.0.02275.1 | 967  | 33107  | 0         | 470  | 520  | 90 +  | 482 | 963  | 30103  | 30622  |
| UN40982 | Rsa1.0.00248.1 | 1113 | 163568 | 0         | 429  | 430  | 99 -  | 633 | 1062 | 66844  | 67273  |
| UN40983 | Rsa1.0.00003.1 | 880  | 340054 | 0         | 846  | 873  | 96 -  | 6   | 878  | 235072 | 235928 |
| UN40984 | Rsa1.0.00740.1 | 765  | 215972 | 0         | 726  | 769  | 94 +  | 3   | 765  | 35208  | 35976  |
| UN40985 | Rsa1.0.00040.1 | 1024 | 324196 | 0         | 645  | 703  | 91 -  | 328 | 1020 | 296582 | 297259 |
| UN40986 | Rsa1.0.01672.1 | 1083 | 41229  | 0         | 354  | 356  | 99 -  | 728 | 1083 | 10206  | 10561  |
| UN40987 | Rsa1.0.01149.1 | 1170 | 160459 | 0         | 643  | 646  | 99 -  | 525 | 1170 | 33272  | 33915  |

|         |                |      |        |           |      |      |       |     |      |        |        |
|---------|----------------|------|--------|-----------|------|------|-------|-----|------|--------|--------|
| UN40988 | Rsa1.0_23144.1 | 877  | 1068   | 1.00E-141 | 297  | 310  | 95 -  | 149 | 457  | 758    | 1067   |
| UN40989 | Rsa1.0_00476.1 | 650  | 280966 | 1.00E-156 | 371  | 398  | 93 +  | 1   | 388  | 31639  | 32036  |
| UN40990 | Rsa1.0_01509.1 | 727  | 44258  | 0         | 523  | 582  | 89 -  | 13  | 594  | 30790  | 31346  |
| UN40991 | Rsa1.0_02855.1 | 793  | 27271  | 0         | 727  | 750  | 96 -  | 1   | 746  | 17597  | 18341  |
| UN40992 | Rsa1.0_01076.1 | 528  | 54835  | 1.00E-85  | 161  | 161  | 100 - | 249 | 409  | 4130   | 4290   |
| UN40993 | Rsa1.0_00192.1 | 950  | 278200 | 0         | 780  | 812  | 96 -  | 134 | 937  | 98257  | 99068  |
| UN40994 | Rsa1.0_00040.1 | 711  | 324196 | 0         | 569  | 607  | 93 -  | 3   | 603  | 166240 | 166846 |
| UN40995 | Rsa1.0_04011.1 | 255  | 19575  | 1.00E-116 | 243  | 252  | 96 -  | 1   | 251  | 4969   | 5220   |
| UN40996 | Rsa1.0_01248.1 | 579  | 154103 | 0         | 508  | 560  | 90 -  | 25  | 577  | 30754  | 31294  |
| UN40997 | Rsa1.0_00007.1 | 1109 | 239325 | 0         | 1081 | 1143 | 94 -  | 1   | 1107 | 41511  | 42648  |
| UN40998 | Rsa1.0_02696.1 | 833  | 28600  | 1.00E-175 | 349  | 361  | 96 -  | 480 | 833  | 12234  | 12592  |
| UN40999 | Rsa1.0_02421.1 | 909  | 31579  | 1.00E-165 | 463  | 514  | 90 -  | 329 | 837  | 28684  | 29188  |
| UN41000 | Rsa1.0_04602.1 | 1131 | 16684  | 0         | 424  | 442  | 95 -  | 5   | 445  | 3198   | 3639   |
| UN41001 | Rsa1.0_01648.1 | 758  | 41635  | 0         | 523  | 556  | 94 -  | 96  | 651  | 15739  | 16283  |
| UN41002 | Rsa1.0_02185.1 | 579  | 34150  | 0         | 410  | 418  | 98 -  | 162 | 579  | 27251  | 27667  |
| UN41003 | Rsa1.0_00332.1 | 1183 | 94575  | 0         | 489  | 534  | 91 +  | 671 | 1183 | 73467  | 73994  |
| UN41004 | Rsa1.0_02103.1 | 790  | 35006  | 1.00E-164 | 315  | 321  | 98 +  | 466 | 785  | 24076  | 24396  |
| UN41005 | Rsa1.0_01335.1 | 408  | 47894  | 0         | 365  | 377  | 96 +  | 33  | 406  | 29219  | 29595  |
| UN41006 | Rsa1.0_00579.1 | 771  | 148308 | 0         | 396  | 397  | 99 -  | 375 | 771  | 66623  | 67019  |
| UN41007 | Rsa1.0_01774.1 | 1107 | 39528  | 0         | 376  | 379  | 99 -  | 730 | 1107 | 20673  | 21051  |
| UN41008 | Rsa1.0_04892.1 | 1094 | 15573  | 0         | 351  | 356  | 98 +  | 739 | 1094 | 1633   | 1987   |
| UN41009 | Rsa1.0_04396.1 | 564  | 17561  | 0         | 470  | 488  | 96 -  | 78  | 564  | 17078  | 17556  |
| UN41010 | Rsa1.0_03477.1 | 1031 | 22635  | 0         | 433  | 462  | 93 -  | 3   | 461  | 5499   | 5954   |
| UN41011 | Rsa1.0_05570.1 | 1013 | 13301  | 0         | 939  | 993  | 94 +  | 25  | 1012 | 10577  | 11556  |
| UN41012 | Rsa1.0_00235.1 | 891  | 154696 | 0         | 507  | 509  | 99 -  | 383 | 891  | 139857 | 140365 |
| UN41013 | Rsa1.0_00878.1 | 1034 | 330303 | 1.00E-117 | 214  | 214  | 100 - | 819 | 1032 | 325953 | 326166 |
| UN41014 | Rsa1.0_00896.1 | 947  | 60509  | 0         | 781  | 782  | 99 -  | 1   | 781  | 49984  | 50765  |
| UN41015 | Rsa1.0_01400.1 | 1301 | 46560  | 0         | 978  | 1004 | 97 +  | 12  | 1014 | 26218  | 27215  |
| UN41016 | Rsa1.0_00068.1 | 918  | 151813 | 0         | 360  | 364  | 98 -  | 556 | 918  | 121733 | 122096 |
| UN41017 | Rsa1.0_00333.1 | 1147 | 94500  | 1.00E-166 | 345  | 357  | 96 +  | 792 | 1145 | 80864  | 81220  |
| UN41018 | Rsa1.0_01124.1 | 631  | 53295  | 1.00E-154 | 276  | 276  | 100 + | 356 | 631  | 50201  | 50476  |
| UN41019 | Rsa1.0_02487.1 | 1339 | 30928  | 0         | 861  | 863  | 99 -  | 1   | 863  | 22194  | 23056  |
| UN41020 | Rsa1.0_02754.1 | 557  | 28213  | 1.00E-158 | 303  | 310  | 97 -  | 117 | 426  | 8708   | 9017   |
| UN41021 | Rsa1.0_34128.1 | 624  | 664    | 2.00E-66  | 179  | 193  | 92 -  | 343 | 530  | 1      | 191    |
| UN41022 | Rsa1.0_01482.1 | 1024 | 44855  | 0         | 918  | 955  | 96 -  | 71  | 1024 | 12016  | 12963  |
| UN41023 | Rsa1.0_01087.1 | 673  | 54508  | 0         | 337  | 338  | 99 +  | 1   | 338  | 22977  | 23314  |
| UN41024 | Rsa1.0_05417.1 | 911  | 13820  | 0         | 787  | 813  | 96 -  | 107 | 911  | 5274   | 6080   |
| UN41025 | Rsa1.0_00263.1 | 1140 | 224968 | 0         | 1039 | 1065 | 97 +  | 2   | 1058 | 178145 | 179206 |
| UN41026 | Rsa1.0_00002.1 | 861  | 601661 | 1.00E-107 | 213  | 218  | 97 -  | 347 | 564  | 149395 | 149612 |

|         |                |      |        |           |      |      |       |      |      |        |        |
|---------|----------------|------|--------|-----------|------|------|-------|------|------|--------|--------|
| UN41027 | Rsa1.0_04493.1 | 1308 | 17137  | 3.00E-79  | 196  | 209  | 93 +  | 1098 | 1304 | 4233   | 4434   |
| UN41028 | Rsa1.0_00869.1 | 1227 | 61627  | 0         | 883  | 884  | 99 +  | 342  | 1225 | 30830  | 31713  |
| UN41029 | Rsa1.0_01155.1 | 1960 | 52182  | 1.00E-110 | 242  | 251  | 96 +  | 1711 | 1959 | 22388  | 22637  |
| UN41030 | Rsa1.0_00147.1 | 1046 | 249503 | 1.00E-154 | 306  | 314  | 97 -  | 1    | 309  | 130918 | 131231 |
| UN41031 | Rsa1.0_02991.1 | 708  | 26178  | 1.00E-106 | 274  | 295  | 92 -  | 1    | 291  | 4393   | 4677   |
| UN41032 | Rsa1.0_01759.1 | 867  | 39745  | 0         | 435  | 440  | 98 -  | 1    | 440  | 12148  | 12585  |
| UN41033 | Rsa1.0_00136.1 | 821  | 122464 | 0         | 571  | 596  | 95 +  | 173  | 768  | 115441 | 116036 |
| UN41034 | Rsa1.0_02085.1 | 905  | 35198  | 2.00E-97  | 260  | 285  | 91 -  | 1    | 275  | 17654  | 17932  |
| UN41035 | Rsa1.0_00146.1 | 1299 | 149343 | 0         | 411  | 418  | 98 +  | 106  | 522  | 631    | 1048   |
| UN41036 | Rsa1.0_04810.1 | 603  | 15887  | 0         | 389  | 405  | 96 +  | 198  | 602  | 12553  | 12955  |
| UN41037 | Rsa1.0_01434.1 | 945  | 45951  | 0         | 369  | 369  | 100 + | 460  | 828  | 28840  | 29208  |
| UN41038 | Rsa1.0_00542.1 | 960  | 76831  | 1.00E-145 | 262  | 262  | 100 - | 1    | 262  | 64221  | 64482  |
| UN41039 | Rsa1.0_25258.1 | 1236 | 944    | 1.00E-159 | 285  | 285  | 100 - | 235  | 519  | 660    | 944    |
| UN41040 | Rsa1.0_00460.1 | 619  | 206387 | 0         | 403  | 424  | 95 +  | 3    | 420  | 202235 | 202658 |
| UN41041 | Rsa1.0_00835.1 | 986  | 278058 | 1.00E-170 | 309  | 311  | 99 -  | 395  | 705  | 50498  | 50808  |
| UN41042 | Rsa1.0_04600.1 | 1084 | 16694  | 0         | 583  | 586  | 99 +  | 1    | 586  | 632    | 1217   |
| UN41043 | Rsa1.0_02429.1 | 927  | 31527  | 0         | 673  | 772  | 87 -  | 151  | 887  | 9755   | 10511  |
| UN41044 | Rsa1.0_02891.1 | 817  | 27010  | 8.00E-94  | 181  | 183  | 98 -  | 516  | 698  | 17139  | 17321  |
| UN41045 | Rsa1.0_03831.1 | 881  | 20579  | 1.00E-134 | 299  | 314  | 95 +  | 215  | 521  | 16520  | 16832  |
| UN41046 | Rsa1.0_07642.1 | 894  | 8953   | 1.00E-102 | 196  | 198  | 98 +  | 224  | 421  | 2624   | 2821   |
| UN41047 | Rsa1.0_01625.1 | 802  | 42019  | 1.00E-135 | 269  | 276  | 97 -  | 524  | 799  | 20454  | 20728  |
| UN41048 | Rsa1.0_00173.1 | 801  | 288743 | 1.00E-102 | 216  | 225  | 96 +  | 263  | 487  | 282451 | 282675 |
| UN41049 | Rsa1.0_01227.1 | 917  | 50263  | 0         | 635  | 646  | 98 -  | 268  | 913  | 3749   | 4394   |
| UN41050 | Rsa1.0_01847.1 | 873  | 38346  | 0         | 830  | 833  | 99 -  | 2    | 831  | 11878  | 12710  |
| UN41051 | Rsa1.0_59164.1 | 252  | 387    | 1.00E-110 | 217  | 222  | 97 -  | 1    | 218  | 1      | 222    |
| UN41052 | Rsa1.0_00717.1 | 808  | 67051  | 1.00E-120 | 271  | 287  | 94 +  | 3    | 283  | 22730  | 23016  |
| UN41053 | Rsa1.0_00039.1 | 871  | 296927 | 0         | 396  | 400  | 99 +  | 1    | 400  | 234694 | 235093 |
| UN41054 | Rsa1.0_00706.1 | 909  | 291570 | 0         | 394  | 395  | 99 -  | 1    | 395  | 245835 | 246229 |
| UN41055 | Rsa1.0_01015.1 | 699  | 56752  | 0         | 681  | 695  | 97 +  | 3    | 697  | 45754  | 46447  |
| UN41056 | Rsa1.0_03028.1 | 727  | 25872  | 0         | 654  | 674  | 97 +  | 55   | 725  | 16412  | 17082  |
| UN41057 | Rsa1.0_37761.1 | 496  | 597    | 0         | 450  | 458  | 98 +  | 39   | 496  | 1      | 458    |
| UN41058 | Rsa1.0_02043.1 | 1112 | 163754 | 0         | 828  | 864  | 95 -  | 1    | 864  | 131101 | 131958 |
| UN41059 | Rsa1.0_30688.1 | 881  | 747    | 0         | 660  | 664  | 99 +  | 218  | 881  | 1      | 664    |
| UN41060 | Rsa1.0_00741.1 | 854  | 66117  | 0         | 354  | 357  | 99 -  | 453  | 809  | 45211  | 45567  |
| UN41061 | Rsa1.0_00198.1 | 1212 | 222963 | 0         | 1030 | 1101 | 93 +  | 124  | 1208 | 138000 | 139091 |
| UN41062 | Rsa1.0_00645.1 | 397  | 189716 | 1.00E-102 | 188  | 188  | 100 + | 167  | 354  | 35226  | 35413  |
| UN41063 | Rsa1.0_02939.1 | 1021 | 26595  | 1.00E-167 | 349  | 364  | 95 -  | 2    | 362  | 4851   | 5213   |
| UN41064 | Rsa1.0_00662.1 | 692  | 192183 | 4.00E-83  | 198  | 210  | 94 +  | 73   | 277  | 8051   | 8260   |
| UN41065 | Rsa1.0_00940.1 | 629  | 179946 | 0         | 627  | 627  | 100 - | 1    | 627  | 53940  | 54566  |

|         |                |      |        |           |      |      |       |     |      |        |        |
|---------|----------------|------|--------|-----------|------|------|-------|-----|------|--------|--------|
| UN41066 | Rsa1.0.02196.1 | 971  | 34005  | 0         | 698  | 700  | 99 -  | 270 | 969  | 23477  | 24175  |
| UN41067 | Rsa1.0.06168.1 | 868  | 11580  | 0         | 413  | 437  | 94 -  | 1   | 433  | 8500   | 8925   |
| UN41068 | Rsa1.0.08397.1 | 832  | 7427   | 0         | 380  | 381  | 99 +  | 3   | 382  | 4826   | 5206   |
| UN41069 | Rsa1.0.00518.1 | 782  | 78360  | 5.00E-58  | 142  | 151  | 94 +  | 1   | 151  | 15848  | 15998  |
| UN41070 | Rsa1.0.02099.1 | 658  | 35030  | 1.00E-125 | 231  | 232  | 99 +  | 425 | 656  | 18481  | 18712  |
| UN41071 | Rsa1.0.00157.1 | 1072 | 245832 | 1.00E-128 | 278  | 291  | 95 -  | 784 | 1070 | 29203  | 29493  |
| UN41072 | Rsa1.0.01419.1 | 580  | 167402 | 0         | 507  | 521  | 97 +  | 1   | 520  | 132931 | 133448 |
| UN41073 | Rsa1.0.00200.1 | 996  | 162016 | 1.00E-100 | 215  | 224  | 95 -  | 29  | 252  | 103491 | 103711 |
| UN41074 | Rsa1.0.02022.1 | 711  | 35923  | 1.00E-110 | 306  | 338  | 90 -  | 6   | 340  | 5722   | 6044   |
| UN41075 | Rsa1.0.00327.1 | 680  | 94892  | 2.00E-97  | 219  | 233  | 93 -  | 1   | 224  | 20157  | 20389  |
| UN41076 | Rsa1.0.00002.1 | 1382 | 601661 | 0         | 1364 | 1379 | 98 -  | 3   | 1381 | 436515 | 437893 |
| UN41077 | Rsa1.0.00782.1 | 550  | 64468  | 1.00E-137 | 247  | 247  | 100 - | 1   | 247  | 23070  | 23316  |
| UN41078 | Rsa1.0.01613.1 | 810  | 182542 | 1.00E-150 | 277  | 278  | 99 +  | 3   | 279  | 160622 | 160899 |
| UN41079 | Rsa1.0.00092.1 | 1016 | 659932 | 1.00E-124 | 257  | 267  | 96 -  | 392 | 658  | 189112 | 189378 |
| UN41080 | Rsa1.0.02217.1 | 959  | 33812  | 2.33E-156 | 362  | 391  | 92 +  | 563 | 951  | 5429   | 5813   |
| UN41081 | Rsa1.0.14634.1 | 818  | 3205   | 0         | 337  | 337  | 100 + | 482 | 818  | 1772   | 2108   |
| UN41082 | Rsa1.0.02655.1 | 1140 | 29027  | 1.00E-149 | 293  | 301  | 97 +  | 1   | 297  | 10122  | 10422  |
| UN41083 | Rsa1.0.00044.1 | 467  | 271658 | 0         | 333  | 333  | 100 - | 1   | 333  | 233501 | 233833 |
| UN41084 | Rsa1.0.02080.1 | 1118 | 35297  | 0         | 1076 | 1111 | 96 -  | 11  | 1117 | 11969  | 13076  |
| UN41085 | Rsa1.0.00653.1 | 1355 | 70029  | 0         | 1348 | 1355 | 99 -  | 1   | 1355 | 13510  | 14859  |
| UN41086 | Rsa1.0.01549.1 | 685  | 43543  | 0         | 639  | 678  | 94 +  | 6   | 681  | 16578  | 17239  |
| UN41087 | Rsa1.0.01603.1 | 689  | 42468  | 0         | 644  | 676  | 95 -  | 27  | 687  | 8934   | 9608   |
| UN41088 | Rsa1.0.00524.1 | 929  | 169613 | 0         | 546  | 549  | 99 +  | 336 | 884  | 7515   | 8063   |
| UN41089 | Rsa1.0.00282.1 | 1010 | 177799 | 0         | 700  | 743  | 94 +  | 268 | 1007 | 139180 | 139910 |
| UN41090 | Rsa1.0.00028.1 | 771  | 293984 | 0         | 445  | 462  | 96 -  | 10  | 471  | 281443 | 281904 |
| UN41091 | Rsa1.0.02224.1 | 722  | 33758  | 0         | 714  | 720  | 99 +  | 3   | 721  | 25846  | 26565  |
| UN41092 | Rsa1.0.01090.1 | 647  | 54385  | 0         | 492  | 511  | 96 -  | 135 | 645  | 7038   | 7548   |
| UN41093 | Rsa1.0.05522.1 | 520  | 13441  | 1.00E-106 | 195  | 195  | 100 + | 326 | 520  | 9116   | 9310   |
| UN41094 | Rsa1.0.00414.1 | 979  | 202190 | 0         | 848  | 887  | 95 -  | 80  | 963  | 56632  | 57517  |
| UN41095 | Rsa1.0.00703.1 | 1342 | 67597  | 0         | 943  | 1032 | 91 -  | 320 | 1335 | 30862  | 31867  |
| UN41096 | Rsa1.0.00564.1 | 1060 | 75428  | 0         | 843  | 863  | 97 -  | 198 | 1060 | 73602  | 74460  |
| UN41097 | Rsa1.0.14556.1 | 785  | 3273   | 0         | 649  | 665  | 97 -  | 1   | 662  | 2387   | 3051   |
| UN41098 | Rsa1.0.05218.1 | 706  | 14457  | 1.00E-128 | 256  | 264  | 96 -  | 1   | 259  | 5701   | 5964   |
| UN41099 | Rsa1.0.00173.1 | 699  | 288743 | 0         | 357  | 357  | 100 + | 3   | 359  | 60857  | 61213  |
| UN41100 | Rsa1.0.02819.1 | 1224 | 27629  | 0         | 1063 | 1122 | 94 +  | 109 | 1224 | 26157  | 27273  |
| UN41101 | Rsa1.0.09079.1 | 574  | 6665   | 1.00E-179 | 379  | 399  | 94 -  | 179 | 573  | 5198   | 5596   |
| UN41102 | Rsa1.0.14712.1 | 816  | 3134   | 1.00E-121 | 334  | 367  | 91 +  | 3   | 354  | 1514   | 1869   |
| UN41103 | Rsa1.0.02746.1 | 919  | 28256  | 0         | 698  | 725  | 96 -  | 191 | 914  | 908    | 1630   |
| UN41104 | Rsa1.0.00431.1 | 504  | 85391  | 0         | 431  | 431  | 100 - | 1   | 431  | 14961  | 15391  |



|         |                |      |        |           |      |      |       |     |      |        |        |
|---------|----------------|------|--------|-----------|------|------|-------|-----|------|--------|--------|
| UN41105 | Rsa1.0.00107.1 | 1205 | 431659 | 0         | 1199 | 1200 | 99 +  | 5   | 1204 | 336362 | 337561 |
| UN41106 | Rsa1.0.00469.1 | 1314 | 82084  | 0         | 407  | 408  | 99 -  | 3   | 410  | 69792  | 70199  |
| UN41107 | Rsa1.0.00101.1 | 1120 | 267193 | 0         | 735  | 765  | 96 -  | 1   | 764  | 74484  | 75242  |
| UN41108 | Rsa1.0.58357.1 | 821  | 392    | 1.00E-120 | 238  | 243  | 97 -  | 1   | 243  | 1      | 242    |
| UN41109 | Rsa1.0.00605.1 | 975  | 73199  | 0         | 735  | 769  | 95 -  | 127 | 894  | 26419  | 27187  |
| UN41110 | Rsa1.0.08642.1 | 1196 | 7096   | 0         | 665  | 690  | 96 +  | 206 | 894  | 1102   | 1791   |
| UN41111 | Rsa1.0.02320.1 | 1088 | 32575  | 0         | 503  | 515  | 97 +  | 576 | 1088 | 5336   | 5850   |
| UN41112 | Rsa1.0.02725.1 | 689  | 28404  | 5.00E-70  | 141  | 143  | 98 +  | 254 | 396  | 7526   | 7668   |
| UN41113 | Rsa1.0.00049.1 | 959  | 167018 | 0         | 392  | 392  | 100 + | 199 | 590  | 145601 | 145992 |
| UN41114 | Rsa1.0.07440.1 | 523  | 9389   | 1.00E-143 | 263  | 265  | 99 -  | 8   | 272  | 6319   | 6583   |
| UN41115 | Rsa1.0.02964.1 | 909  | 26407  | 2.00E-94  | 179  | 180  | 99 +  | 730 | 909  | 14541  | 14720  |
| UN41116 | Rsa1.0.00024.1 | 553  | 188018 | 1.00E-121 | 290  | 309  | 93 -  | 3   | 305  | 18068  | 18375  |
| UN41117 | Rsa1.0.04981.1 | 979  | 15250  | 1.00E-145 | 330  | 352  | 93 +  | 13  | 357  | 6046   | 6397   |
| UN41118 | Rsa1.0.04288.1 | 354  | 18077  | 1.00E-123 | 271  | 282  | 96 -  | 76  | 354  | 17798  | 18077  |
| UN41119 | Rsa1.0.00019.1 | 636  | 301669 | 1.00E-131 | 306  | 330  | 92 -  | 307 | 636  | 119704 | 120014 |
| UN41120 | Rsa1.0.00067.1 | 542  | 415055 | 1.00E-170 | 363  | 382  | 95 -  | 22  | 400  | 209269 | 209647 |
| UN41121 | Rsa1.0.11824.1 | 633  | 5396   | 2.00E-84  | 159  | 159  | 100 - | 408 | 566  | 66     | 224    |
| UN41122 | Rsa1.0.00380.1 | 922  | 89748  | 0         | 687  | 715  | 96 +  | 2   | 715  | 74690  | 75387  |
| UN41123 | Rsa1.0.00913.1 | 1275 | 59914  | 1.00E-160 | 384  | 416  | 92 +  | 5   | 398  | 19797  | 20210  |
| UN41124 | Rsa1.0.01702.1 | 709  | 40722  | 0         | 477  | 496  | 96 -  | 218 | 708  | 17674  | 18168  |
| UN41125 | Rsa1.0.00031.1 | 766  | 179862 | 0         | 736  | 787  | 93 +  | 2   | 766  | 145692 | 146457 |
| UN41126 | Rsa1.0.00800.1 | 1118 | 63868  | 2.33E-156 | 356  | 385  | 92 +  | 740 | 1118 | 21908  | 22279  |
| UN41127 | Rsa1.0.00161.1 | 803  | 116891 | 0         | 526  | 528  | 99 -  | 208 | 733  | 26076  | 26603  |
| UN41128 | Rsa1.0.00214.1 | 666  | 107508 | 0         | 382  | 400  | 95 +  | 1   | 394  | 36732  | 37127  |
| UN41129 | Rsa1.0.00048.1 | 891  | 167185 | 0         | 825  | 913  | 90 +  | 1   | 889  | 146193 | 147080 |
| UN41130 | Rsa1.0.01991.1 | 1300 | 36425  | 1.00E-163 | 292  | 292  | 100 - | 1   | 292  | 11567  | 11858  |
| UN41131 | Rsa1.0.01514.1 | 714  | 44222  | 0         | 390  | 392  | 99 -  | 3   | 393  | 27674  | 28065  |
| UN41132 | Rsa1.0.01896.1 | 1532 | 37512  | 0         | 1043 | 1065 | 97 +  | 467 | 1531 | 30506  | 31570  |
| UN41133 | Rsa1.0.02803.1 | 778  | 27715  | 1.00E-161 | 333  | 348  | 95 +  | 237 | 584  | 8863   | 9210   |
| UN41134 | Rsa1.0.02180.1 | 784  | 34176  | 1.00E-141 | 255  | 255  | 100 + | 1   | 255  | 18121  | 18375  |
| UN41135 | Rsa1.0.09779.1 | 1128 | 6154   | 1.00E-106 | 212  | 216  | 98 +  | 1   | 215  | 751    | 966    |
| UN41136 | Rsa1.0.00026.1 | 381  | 327835 | 1.00E-137 | 282  | 292  | 96 +  | 84  | 375  | 306356 | 306646 |
| UN41137 | Rsa1.0.00205.1 | 913  | 193401 | 1.00E-167 | 359  | 374  | 95 +  | 542 | 913  | 92527  | 92893  |
| UN41138 | Rsa1.0.02923.1 | 889  | 26736  | 0         | 508  | 526  | 96 -  | 1   | 521  | 10816  | 11339  |
| UN41139 | Rsa1.0.00029.1 | 589  | 272992 | 1.00E-124 | 313  | 338  | 92 -  | 257 | 588  | 249663 | 249998 |
| UN41140 | Rsa1.0.00265.1 | 700  | 220635 | 1.00E-111 | 294  | 326  | 90 +  | 391 | 700  | 195831 | 196156 |
| UN41141 | Rsa1.0.01876.1 | 711  | 37800  | 1.00E-141 | 254  | 254  | 100 - | 456 | 709  | 6992   | 7245   |
| UN41142 | Rsa1.0.03552.1 | 700  | 22151  | 0         | 488  | 510  | 95 +  | 192 | 700  | 15663  | 16169  |
| UN41143 | Rsa1.0.02605.1 | 1168 | 29637  | 0         | 850  | 893  | 95 -  | 1   | 876  | 25609  | 26492  |

|         |                |      |        |           |      |      |       |      |      |        |        |
|---------|----------------|------|--------|-----------|------|------|-------|------|------|--------|--------|
| UN41144 | Rsa1.0.03576.1 | 699  | 21986  | 1.00E-115 | 240  | 249  | 96 +  | 3    | 244  | 10405  | 10653  |
| UN41145 | Rsa1.0.00261.1 | 1229 | 151157 | 0         | 640  | 642  | 99 +  | 587  | 1228 | 2607   | 3248   |
| UN41146 | Rsa1.0.02867.1 | 726  | 27121  | 0         | 343  | 343  | 100 + | 384  | 726  | 3467   | 3809   |
| UN41147 | Rsa1.0.02605.1 | 1357 | 29637  | 0         | 765  | 769  | 99 +  | 590  | 1357 | 13844  | 14612  |
| UN41148 | Rsa1.0.01769.1 | 902  | 39568  | 9.00E-94  | 178  | 179  | 99 +  | 207  | 385  | 8078   | 8256   |
| UN41149 | Rsa1.0.02310.1 | 602  | 32735  | 0         | 341  | 344  | 99 -  | 3    | 346  | 30017  | 30360  |
| UN41150 | Rsa1.0.27281.1 | 674  | 859    | 1.00E-132 | 249  | 252  | 98 +  | 423  | 674  | 518    | 769    |
| UN41151 | Rsa1.0.00224.1 | 874  | 327530 | 0         | 469  | 472  | 99 +  | 1    | 472  | 26103  | 26573  |
| UN41152 | Rsa1.0.44971.1 | 892  | 501    | 0         | 433  | 436  | 99 +  | 457  | 892  | 1      | 435    |
| UN41153 | Rsa1.0.03550.1 | 987  | 22154  | 1.00E-117 | 285  | 309  | 92 -  | 5    | 310  | 6701   | 7001   |
| UN41154 | Rsa1.0.00699.1 | 796  | 184398 | 1.00E-151 | 382  | 418  | 91 +  | 118  | 535  | 121731 | 122145 |
| UN41155 | Rsa1.0.00351.1 | 433  | 413096 | 1.00E-106 | 244  | 260  | 93 -  | 173  | 432  | 120726 | 120985 |
| UN41156 | Rsa1.0.00182.1 | 874  | 142305 | 1.00E-157 | 352  | 377  | 93 -  | 448  | 818  | 119867 | 120230 |
| UN41157 | Rsa1.0.00601.1 | 1014 | 177045 | 0         | 581  | 584  | 99 +  | 2    | 583  | 167561 | 168144 |
| UN41158 | Rsa1.0.00082.1 | 762  | 237584 | 0         | 736  | 766  | 96 +  | 1    | 762  | 46725  | 47486  |
| UN41159 | Rsa1.0.00069.1 | 1993 | 403561 | 0         | 475  | 476  | 99 -  | 1179 | 1654 | 188191 | 188666 |
| UN41160 | Rsa1.0.03498.1 | 884  | 22480  | 0         | 592  | 642  | 92 +  | 7    | 637  | 18211  | 18833  |
| UN41161 | Rsa1.0.00038.1 | 805  | 314568 | 0         | 653  | 664  | 98 +  | 141  | 804  | 292541 | 293201 |
| UN41162 | Rsa1.0.00718.1 | 784  | 279335 | 0         | 439  | 463  | 94 +  | 326  | 784  | 34460  | 34922  |
| UN41163 | Rsa1.0.03199.1 | 932  | 24640  | 0         | 419  | 428  | 97 -  | 53   | 480  | 16239  | 16666  |
| UN41164 | Rsa1.0.00055.1 | 860  | 520193 | 1.00E-179 | 321  | 322  | 99 +  | 278  | 599  | 352662 | 352983 |
| UN41165 | Rsa1.0.00221.1 | 1258 | 106972 | 0         | 610  | 613  | 99 +  | 2    | 614  | 92580  | 93191  |
| UN41166 | Rsa1.0.02229.1 | 864  | 33672  | 0         | 364  | 376  | 96 -  | 3    | 378  | 17849  | 18224  |
| UN41167 | Rsa1.0.00075.1 | 1470 | 146680 | 0         | 351  | 352  | 99 +  | 585  | 936  | 18710  | 19061  |
| UN41168 | Rsa1.0.00492.1 | 1110 | 80178  | 0         | 1105 | 1106 | 99 -  | 2    | 1107 | 65021  | 66126  |
| UN41169 | Rsa1.0.00580.1 | 1195 | 74515  | 0         | 971  | 1005 | 96 -  | 1    | 993  | 18131  | 19133  |
| UN41170 | Rsa1.0.01855.1 | 610  | 38204  | 0         | 449  | 461  | 97 +  | 150  | 610  | 14990  | 15448  |
| UN41171 | Rsa1.0.00228.1 | 714  | 105511 | 1.00E-109 | 223  | 228  | 97 -  | 490  | 714  | 37076  | 37303  |
| UN41172 | Rsa1.0.03074.1 | 619  | 25568  | 1.00E-142 | 259  | 260  | 99 -  | 358  | 617  | 9986   | 10245  |
| UN41173 | Rsa1.0.04734.1 | 873  | 16184  | 0         | 871  | 874  | 99 -  | 1    | 873  | 4253   | 5126   |
| UN41174 | Rsa1.0.00329.1 | 957  | 222544 | 1.00E-172 | 312  | 314  | 99 +  | 1    | 314  | 79567  | 79880  |
| UN41175 | Rsa1.0.06438.1 | 650  | 11017  | 0         | 488  | 527  | 92 -  | 1    | 510  | 1531   | 2057   |
| UN41176 | Rsa1.0.00324.1 | 804  | 218805 | 0         | 803  | 803  | 100 - | 1    | 803  | 212244 | 213046 |
| UN41177 | Rsa1.0.14637.1 | 832  | 3201   | 0         | 595  | 610  | 97 +  | 229  | 832  | 819    | 1428   |
| UN41178 | Rsa1.0.00040.1 | 452  | 324196 | 1.00E-132 | 249  | 251  | 99 +  | 203  | 452  | 17904  | 18154  |
| UN41179 | Rsa1.0.01878.1 | 719  | 37768  | 1.00E-119 | 253  | 262  | 96 +  | 78   | 337  | 26943  | 27204  |
| UN41180 | Rsa1.0.00082.1 | 708  | 237584 | 0         | 537  | 576  | 93 +  | 1    | 563  | 68422  | 68996  |
| UN41181 | Rsa1.0.00011.1 | 1627 | 225044 | 0         | 605  | 631  | 95 +  | 1006 | 1627 | 169873 | 170499 |
| UN41182 | Rsa1.0.02401.1 | 400  | 138425 | 1.00E-128 | 240  | 241  | 99 +  | 158  | 398  | 14881  | 15120  |

|         |                |      |        |           |      |      |       |     |      |        |        |
|---------|----------------|------|--------|-----------|------|------|-------|-----|------|--------|--------|
| UN41183 | Rsa1.0.02812.1 | 751  | 27660  | 2.33E-156 | 314  | 327  | 96 +  | 1   | 325  | 14254  | 14579  |
| UN41184 | Rsa1.0.00194.1 | 621  | 110851 | 0         | 608  | 639  | 95 +  | 1   | 621  | 10782  | 11420  |
| UN41185 | Rsa1.0.05037.1 | 1116 | 15057  | 1.00E-155 | 303  | 310  | 97 -  | 806 | 1114 | 14115  | 14424  |
| UN41186 | Rsa1.0.02929.1 | 1444 | 26673  | 0         | 1439 | 1445 | 99 -  | 1   | 1444 | 11558  | 13001  |
| UN41187 | Rsa1.0.00256.1 | 777  | 102426 | 1.00E-104 | 192  | 192  | 100 - | 4   | 195  | 26184  | 26375  |
| UN41188 | Rsa1.0.00645.1 | 404  | 189716 | 0         | 399  | 402  | 99 -  | 1   | 402  | 31530  | 31930  |
| UN41189 | Rsa1.0.00707.1 | 932  | 190112 | 1.00E-105 | 235  | 246  | 95 -  | 686 | 931  | 181072 | 181315 |
| UN41190 | Rsa1.0.00006.1 | 707  | 396176 | 1.00E-156 | 295  | 299  | 98 +  | 44  | 341  | 308967 | 309265 |
| UN41191 | Rsa1.0.05181.1 | 1267 | 14574  | 0         | 861  | 905  | 95 -  | 229 | 1117 | 234    | 1135   |
| UN41192 | Rsa1.0.09321.1 | 1114 | 6456   | 1.00E-113 | 262  | 274  | 95 -  | 798 | 1066 | 4823   | 5095   |
| UN41193 | Rsa1.0.00434.1 | 1409 | 85171  | 0         | 643  | 646  | 99 +  | 463 | 1107 | 65969  | 66613  |
| UN41194 | Rsa1.0.04398.1 | 1308 | 17550  | 0         | 457  | 461  | 99 -  | 3   | 463  | 11218  | 11678  |
| UN41195 | Rsa1.0.04033.1 | 1038 | 19481  | 0         | 752  | 787  | 95 -  | 21  | 804  | 3592   | 4372   |
| UN41196 | Rsa1.0.01476.1 | 726  | 172928 | 0         | 405  | 409  | 99 +  | 48  | 456  | 171219 | 171627 |
| UN41197 | Rsa1.0.00048.1 | 564  | 167185 | 1.00E-109 | 308  | 344  | 89 -  | 224 | 564  | 144490 | 144821 |
| UN41198 | Rsa1.0.00648.1 | 486  | 70351  | 1.00E-156 | 289  | 292  | 98 -  | 1   | 292  | 22840  | 23131  |
| UN41199 | Rsa1.0.00128.1 | 476  | 228675 | 2.00E-93  | 180  | 182  | 98 +  | 40  | 221  | 60734  | 60915  |
| UN41200 | Rsa1.0.02507.1 | 752  | 30696  | 1.00E-138 | 278  | 285  | 97 +  | 13  | 296  | 15125  | 15408  |
| UN41201 | Rsa1.0.00071.1 | 955  | 345714 | 0         | 655  | 674  | 97 -  | 280 | 953  | 41923  | 42594  |
| UN41202 | Rsa1.0.02239.1 | 652  | 33534  | 0         | 393  | 409  | 96 +  | 1   | 407  | 14847  | 15252  |
| UN41203 | Rsa1.0.00790.1 | 760  | 148693 | 1.00E-112 | 224  | 230  | 97 -  | 318 | 547  | 135658 | 135887 |
| UN41204 | Rsa1.0.00810.1 | 959  | 63289  | 0         | 543  | 544  | 99 +  | 416 | 959  | 57632  | 58175  |
| UN41205 | Rsa1.0.00033.1 | 774  | 515811 | 0         | 695  | 703  | 98 -  | 5   | 707  | 481856 | 482558 |
| UN41206 | Rsa1.0.00266.1 | 751  | 163932 | 0         | 442  | 446  | 99 -  | 2   | 447  | 110213 | 110658 |
| UN41207 | Rsa1.0.00175.1 | 1002 | 166121 | 1.00E-135 | 278  | 285  | 97 +  | 28  | 310  | 56275  | 56558  |
| UN41208 | Rsa1.0.03618.1 | 1078 | 21744  | 2.00E-30  | 118  | 133  | 88 -  | 546 | 678  | 7327   | 7458   |
| UN41209 | Rsa1.0.00010.1 | 751  | 294827 | 5.00E-98  | 239  | 255  | 93 -  | 3   | 257  | 134067 | 134315 |
| UN41210 | Rsa1.0.01094.1 | 797  | 167285 | 1.00E-120 | 271  | 291  | 93 +  | 225 | 502  | 10863  | 11153  |
| UN41211 | Rsa1.0.02212.1 | 722  | 33840  | 1.00E-110 | 307  | 337  | 91 -  | 4   | 335  | 30764  | 31090  |
| UN41212 | Rsa1.0.01561.1 | 720  | 43227  | 0         | 541  | 563  | 96 +  | 156 | 718  | 82     | 643    |
| UN41213 | Rsa1.0.00017.1 | 1222 | 752458 | 0         | 474  | 474  | 100 - | 1   | 474  | 192717 | 193190 |
| UN41214 | Rsa1.0.04524.1 | 1090 | 16981  | 0         | 437  | 437  | 100 + | 653 | 1089 | 5653   | 6089   |
| UN41215 | Rsa1.0.02070.1 | 754  | 158516 | 8.00E-63  | 123  | 123  | 100 - | 245 | 367  | 140749 | 140871 |
| UN41216 | Rsa1.0.00538.1 | 664  | 77149  | 1.00E-92  | 191  | 197  | 96 +  | 294 | 490  | 54995  | 55191  |
| UN41217 | Rsa1.0.02674.1 | 946  | 28860  | 0         | 513  | 513  | 100 + | 434 | 946  | 3286   | 3798   |
| UN41218 | Rsa1.0.00010.1 | 722  | 294827 | 0         | 502  | 517  | 97 -  | 1   | 517  | 246894 | 247409 |
| UN41219 | Rsa1.0.01484.1 | 596  | 44806  | 1.00E-163 | 342  | 360  | 95 -  | 1   | 347  | 28137  | 28496  |
| UN41220 | Rsa1.0.00125.1 | 965  | 253043 | 1.00E-128 | 245  | 249  | 98 +  | 3   | 251  | 181933 | 182181 |
| UN41221 | Rsa1.0.61042.1 | 726  | 375    | 0         | 370  | 378  | 97 -  | 334 | 711  | 1      | 375    |

|         |                 |      |        |           |      |      |       |     |      |        |        |
|---------|-----------------|------|--------|-----------|------|------|-------|-----|------|--------|--------|
| UN41222 | Rsa1.0.01412.1  | 886  | 46311  | 0         | 418  | 428  | 97 -  | 3   | 430  | 2359   | 2786   |
| UN41223 | Rsa1.0.00190.1  | 1172 | 318240 | 1.00E-163 | 291  | 291  | 100 - | 380 | 670  | 198116 | 198406 |
| UN41224 | Rsa1.0.00044.1  | 730  | 271658 | 0         | 357  | 358  | 99 +  | 3   | 360  | 185706 | 186063 |
| UN41225 | Rsa1.0.01833.1  | 1111 | 38555  | 1.00E-173 | 324  | 329  | 98 -  | 1   | 324  | 16525  | 16853  |
| UN41226 | Rsa1.0.02471.1  | 1135 | 31104  | 0         | 680  | 710  | 95 +  | 1   | 710  | 24033  | 24739  |
| UN41227 | Rsa1.0.00032.1  | 908  | 306326 | 0         | 878  | 910  | 96 -  | 2   | 908  | 279473 | 280374 |
| UN41228 | Rsa1.0.00130.1  | 1305 | 125737 | 1.00E-170 | 320  | 324  | 98 +  | 980 | 1303 | 5499   | 5821   |
| UN41229 | Rsa1.0.04189.1  | 1037 | 18584  | 1.00E-110 | 294  | 322  | 91 -  | 4   | 312  | 4224   | 4545   |
| UN41230 | Rsa1.0.00159.1  | 837  | 431686 | 1.00E-157 | 311  | 321  | 96 +  | 299 | 619  | 268819 | 269139 |
| UN41231 | Rsa1.0.00938.1  | 1360 | 193891 | 0         | 1292 | 1327 | 97 -  | 2   | 1313 | 171354 | 172680 |
| UN41232 | Rsa1.0.00119.1  | 621  | 467509 | 0         | 460  | 481  | 95 -  | 1   | 481  | 374988 | 375464 |
| UN41233 | Rsa1.0.06088.1  | 1367 | 11767  | 0         | 472  | 474  | 99 +  | 1   | 474  | 3824   | 4297   |
| UN41234 | Rsa1.0.01106.1  | 752  | 53916  | 0         | 659  | 680  | 96 -  | 63  | 741  | 10996  | 11675  |
| UN41235 | Rsa1.0.04692.1  | 1252 | 16357  | 0         | 1207 | 1266 | 95 +  | 17  | 1252 | 11856  | 13120  |
| UN41236 | Rsa1.0.00728.1  | 1126 | 66704  | 1.00E-106 | 331  | 376  | 88 +  | 294 | 669  | 36055  | 36420  |
| UN41237 | Rsa1.0.02672.1  | 694  | 28884  | 0         | 396  | 412  | 96 -  | 3   | 414  | 27705  | 28112  |
| UN41238 | Rsa1.0.00192.1  | 683  | 278200 | 1.00E-126 | 262  | 272  | 96 +  | 304 | 572  | 98759  | 99030  |
| UN41239 | Rsa1.0.01263.1  | 942  | 49703  | 0         | 323  | 323  | 100 - | 620 | 942  | 30557  | 30879  |
| UN41240 | Rsa1.0.00028.1  | 812  | 293984 | 0         | 394  | 405  | 97 +  | 409 | 810  | 252130 | 252534 |
| UN41241 | Rsa1.0.05728.1  | 1291 | 12805  | 0         | 465  | 469  | 99 +  | 824 | 1290 | 11177  | 11645  |
| UN41242 | Rsa1.0.02658.1  | 1143 | 28978  | 0         | 356  | 360  | 98 +  | 2   | 361  | 21972  | 22330  |
| UN41243 | Rsa1.0.04286.1  | 764  | 18084  | 1.00E-163 | 361  | 380  | 95 +  | 392 | 764  | 2131   | 2510   |
| UN41244 | Rsa1.0.04325.1  | 1457 | 17885  | 0         | 575  | 575  | 100 - | 883 | 1457 | 9723   | 10297  |
| UN41245 | Rsa1.0.00050.1  | 867  | 237174 | 0         | 625  | 625  | 100 + | 243 | 867  | 7595   | 8219   |
| UN41246 | Rsa1.0.020789.1 | 845  | 1269   | 1.00E-174 | 309  | 309  | 100 + | 535 | 843  | 1      | 309    |
| UN41247 | Rsa1.0.00016.1  | 630  | 831256 | 0         | 508  | 511  | 99 +  | 3   | 513  | 766949 | 767459 |
| UN41248 | Rsa1.0.03297.1  | 880  | 23969  | 1.00E-138 | 259  | 262  | 98 +  | 3   | 264  | 2953   | 3214   |
| UN41249 | Rsa1.0.00566.1  | 584  | 75325  | 0         | 489  | 522  | 93 +  | 63  | 583  | 26261  | 26771  |
| UN41250 | Rsa1.0.03028.1  | 685  | 25872  | 0         | 481  | 498  | 96 -  | 3   | 498  | 16585  | 17082  |
| UN41251 | Rsa1.0.00001.1  | 973  | 363028 | 1.00E-161 | 295  | 296  | 99 -  | 1   | 296  | 322377 | 322671 |
| UN41252 | Rsa1.0.02867.1  | 666  | 27121  | 0         | 658  | 661  | 99 +  | 5   | 664  | 8500   | 9160   |
| UN41253 | Rsa1.0.00459.1  | 1300 | 82580  | 0         | 1295 | 1300 | 99 -  | 1   | 1300 | 41023  | 42321  |
| UN41254 | Rsa1.0.32399.1  | 1250 | 703    | 0         | 690  | 690  | 100 + | 81  | 770  | 1      | 690    |
| UN41255 | Rsa1.0.00129.1  | 964  | 126831 | 0         | 915  | 969  | 94 +  | 2   | 964  | 61478  | 62440  |
| UN41256 | Rsa1.0.01201.1  | 694  | 50856  | 0         | 682  | 696  | 97 -  | 1   | 694  | 5731   | 6425   |
| UN41257 | Rsa1.0.02294.1  | 1287 | 32940  | 1.00E-115 | 229  | 235  | 97 -  | 417 | 651  | 14742  | 14976  |
| UN41258 | Rsa1.0.00046.1  | 831  | 320315 | 0         | 718  | 722  | 99 -  | 108 | 829  | 20311  | 21032  |
| UN41259 | Rsa1.0.05503.1  | 506  | 13510  | 0         | 459  | 477  | 96 +  | 1   | 473  | 2758   | 3233   |
| UN41260 | Rsa1.0.00025.1  | 914  | 277312 | 1.00E-113 | 240  | 251  | 95 -  | 2   | 252  | 153562 | 153812 |

|         |                |      |        |           |      |      |       |     |      |        |        |
|---------|----------------|------|--------|-----------|------|------|-------|-----|------|--------|--------|
| UN41261 | Rsa1.0.56381.1 | 587  | 406    | 0         | 369  | 373  | 98 -  | 215 | 587  | 34     | 406    |
| UN41262 | Rsa1.0.00387.1 | 1391 | 495407 | 0         | 472  | 478  | 98 -  | 917 | 1391 | 401016 | 401493 |
| UN41263 | Rsa1.0.18326.1 | 1166 | 1620   | 0         | 488  | 492  | 99 -  | 537 | 1028 | 526    | 1017   |
| UN41264 | Rsa1.0.01459.1 | 643  | 45277  | 1.00E-156 | 305  | 314  | 97 -  | 330 | 643  | 42953  | 43259  |
| UN41265 | Rsa1.0.01435.1 | 406  | 45942  | 1.00E-145 | 381  | 419  | 90 +  | 1   | 406  | 41184  | 41597  |
| UN41266 | Rsa1.0.00383.1 | 984  | 398431 | 0         | 676  | 719  | 94 +  | 152 | 868  | 192474 | 193180 |
| UN41267 | Rsa1.0.04639.1 | 820  | 16550  | 1.00E-135 | 567  | 661  | 85 +  | 166 | 820  | 4915   | 5566   |
| UN41268 | Rsa1.0.42546.1 | 882  | 527    | 1.00E-138 | 252  | 253  | 99 -  | 3   | 255  | 131    | 383    |
| UN41269 | Rsa1.0.02178.1 | 1119 | 156197 | 0         | 791  | 800  | 98 -  | 1   | 800  | 150274 | 151073 |
| UN41270 | Rsa1.0.02551.1 | 534  | 30196  | 3.00E-55  | 110  | 110  | 100 + | 423 | 532  | 18294  | 18403  |
| UN41271 | Rsa1.0.00350.1 | 1447 | 92346  | 0         | 1366 | 1448 | 94 +  | 3   | 1445 | 57734  | 59157  |
| UN41272 | Rsa1.0.03646.1 | 561  | 21598  | 1.00E-110 | 279  | 304  | 91 -  | 255 | 558  | 12479  | 12779  |
| UN41273 | Rsa1.0.01786.1 | 1008 | 133324 | 0         | 797  | 850  | 93 -  | 173 | 1008 | 98712  | 99561  |
| UN41274 | Rsa1.0.06131.1 | 650  | 11665  | 0         | 527  | 559  | 94 -  | 5   | 563  | 8438   | 8995   |
| UN41275 | Rsa1.0.09577.1 | 1258 | 6275   | 0         | 627  | 655  | 95 -  | 209 | 854  | 1281   | 1935   |
| UN41276 | Rsa1.0.00040.1 | 996  | 324196 | 0         | 579  | 600  | 96 -  | 1   | 599  | 246545 | 247140 |
| UN41277 | Rsa1.0.04218.1 | 691  | 18423  | 1.00E-152 | 317  | 330  | 96 -  | 363 | 691  | 16987  | 17308  |
| UN41278 | Rsa1.0.12250.1 | 639  | 5276   | 0         | 483  | 516  | 93 -  | 131 | 638  | 466    | 977    |
| UN41279 | Rsa1.0.01536.1 | 234  | 43747  | 1.00E-117 | 230  | 234  | 98 -  | 1   | 233  | 25972  | 26205  |
| UN41280 | Rsa1.0.01708.1 | 757  | 40622  | 1.00E-110 | 215  | 219  | 98 -  | 1   | 219  | 21625  | 21843  |
| UN41281 | Rsa1.0.08366.1 | 588  | 7466   | 1.00E-128 | 235  | 236  | 99 +  | 352 | 587  | 5695   | 5930   |
| UN41282 | Rsa1.0.00556.1 | 841  | 207212 | 1.00E-171 | 351  | 363  | 96 -  | 2   | 359  | 155358 | 155720 |
| UN41283 | Rsa1.0.02265.1 | 831  | 33233  | 0         | 540  | 554  | 97 -  | 253 | 805  | 9675   | 10228  |
| UN41284 | Rsa1.0.00335.1 | 480  | 94371  | 1.00E-170 | 373  | 392  | 95 +  | 82  | 471  | 50290  | 50677  |
| UN41285 | Rsa1.0.00108.1 | 927  | 478491 | 1.00E-141 | 279  | 286  | 97 -  | 170 | 455  | 8496   | 8780   |
| UN41286 | Rsa1.0.01071.1 | 689  | 166914 | 0         | 404  | 421  | 95 +  | 272 | 687  | 24488  | 24906  |
| UN41287 | Rsa1.0.01042.1 | 954  | 293264 | 0         | 567  | 593  | 95 -  | 3   | 592  | 141476 | 142066 |
| UN41288 | Rsa1.0.05076.1 | 682  | 14916  | 1.00E-160 | 368  | 395  | 93 +  | 126 | 520  | 584    | 978    |
| UN41289 | Rsa1.0.00492.1 | 898  | 80178  | 0         | 477  | 480  | 99 -  | 417 | 896  | 64930  | 65409  |
| UN41290 | Rsa1.0.00451.1 | 817  | 322533 | 0         | 784  | 838  | 93 +  | 1   | 817  | 249765 | 250601 |
| UN41291 | Rsa1.0.02794.1 | 701  | 27820  | 0         | 467  | 473  | 98 -  | 228 | 699  | 11385  | 11857  |
| UN41292 | Rsa1.0.00132.1 | 751  | 124299 | 0         | 416  | 418  | 99 +  | 334 | 751  | 46280  | 46697  |
| UN41293 | Rsa1.0.19594.1 | 649  | 1410   | 0         | 390  | 390  | 100 + | 260 | 649  | 356    | 745    |
| UN41294 | Rsa1.0.38780.1 | 1338 | 580    | 3.00E-85  | 209  | 225  | 92 -  | 200 | 424  | 1      | 225    |
| UN41295 | Rsa1.0.01418.1 | 1111 | 46237  | 0         | 332  | 333  | 99 +  | 4   | 336  | 5579   | 5911   |
| UN41296 | Rsa1.0.01754.1 | 716  | 39792  | 0         | 434  | 453  | 95 -  | 184 | 636  | 16426  | 16873  |
| UN41297 | Rsa1.0.02848.1 | 625  | 27329  | 0         | 604  | 624  | 96 +  | 3   | 621  | 8325   | 8945   |
| UN41298 | Rsa1.0.06190.1 | 1286 | 11525  | 0         | 655  | 686  | 95 -  | 8   | 680  | 9895   | 10570  |
| UN41299 | Rsa1.0.00224.1 | 639  | 327530 | 1.00E-152 | 449  | 514  | 87 +  | 154 | 639  | 221387 | 221880 |

|         |                |      |        |           |     |     |       |     |      |        |        |
|---------|----------------|------|--------|-----------|-----|-----|-------|-----|------|--------|--------|
| UN41300 | Rsa1.0.01333.1 | 1064 | 47929  | 0         | 528 | 558 | 94 -  | 1   | 545  | 29669  | 30226  |
| UN41301 | Rsa1.0.00374.1 | 860  | 165738 | 0         | 366 | 371 | 98 +  | 1   | 371  | 128292 | 128662 |
| UN41302 | Rsa1.0.03387.1 | 726  | 23278  | 1.00E-140 | 325 | 350 | 92 +  | 385 | 722  | 19355  | 19703  |
| UN41303 | Rsa1.0.37069.1 | 567  | 608    | 1.00E-165 | 348 | 363 | 95 -  | 157 | 519  | 252    | 608    |
| UN41304 | Rsa1.0.08151.1 | 770  | 7830   | 0         | 757 | 770 | 98 +  | 1   | 770  | 1132   | 1900   |
| UN41305 | Rsa1.0.00218.1 | 1642 | 201480 | 0         | 493 | 508 | 97 -  | 2   | 508  | 180348 | 180854 |
| UN41306 | Rsa1.0.24219.1 | 593  | 999    | 0         | 365 | 379 | 96 +  | 1   | 367  | 621    | 999    |
| UN41307 | Rsa1.0.00145.1 | 793  | 261008 | 0         | 631 | 683 | 92 -  | 9   | 669  | 75191  | 75867  |
| UN41308 | Rsa1.0.00056.1 | 662  | 332604 | 0         | 349 | 350 | 99 +  | 3   | 352  | 231673 | 232022 |
| UN41309 | Rsa1.0.00481.1 | 840  | 81316  | 0         | 449 | 450 | 99 +  | 3   | 452  | 27793  | 28242  |
| UN41310 | Rsa1.0.02944.1 | 504  | 26553  | 1.00E-106 | 243 | 255 | 95 -  | 204 | 456  | 1083   | 1336   |
| UN41311 | Rsa1.0.01355.1 | 580  | 47303  | 1.00E-88  | 223 | 237 | 94 -  | 11  | 242  | 7405   | 7641   |
| UN41312 | Rsa1.0.00486.1 | 632  | 80875  | 1.00E-177 | 343 | 351 | 97 +  | 1   | 351  | 15851  | 16200  |
| UN41313 | Rsa1.0.02939.1 | 868  | 26595  | 0         | 522 | 522 | 100 + | 1   | 522  | 16752  | 17273  |
| UN41314 | Rsa1.0.08388.1 | 890  | 7436   | 0         | 509 | 518 | 98 -  | 371 | 886  | 3048   | 3563   |
| UN41315 | Rsa1.0.01651.1 | 1076 | 41586  | 0         | 367 | 379 | 96 +  | 702 | 1074 | 33679  | 34057  |
| UN41316 | Rsa1.0.00213.1 | 274  | 108167 | 1.00E-99  | 187 | 188 | 99 +  | 1   | 188  | 58558  | 58745  |
| UN41317 | Rsa1.0.24055.1 | 924  | 1009   | 0         | 386 | 395 | 97 -  | 1   | 395  | 527    | 921    |
| UN41318 | Rsa1.0.00056.1 | 867  | 332604 | 0         | 772 | 806 | 95 -  | 27  | 827  | 7983   | 8785   |
| UN41319 | Rsa1.0.14674.1 | 851  | 3167   | 0         | 454 | 482 | 94 +  | 3   | 466  | 2302   | 2779   |
| UN41320 | Rsa1.0.00030.1 | 861  | 250988 | 0         | 525 | 541 | 97 -  | 245 | 782  | 212991 | 213529 |
| UN41321 | Rsa1.0.00716.1 | 585  | 67078  | 0         | 375 | 391 | 95 +  | 57  | 445  | 37523  | 37913  |
| UN41322 | Rsa1.0.04602.1 | 1077 | 16684  | 0         | 426 | 444 | 95 -  | 6   | 448  | 3198   | 3639   |
| UN41323 | Rsa1.0.00004.1 | 879  | 253996 | 0         | 435 | 436 | 99 -  | 5   | 440  | 37761  | 38196  |
| UN41324 | Rsa1.0.01082.1 | 503  | 54640  | 0         | 502 | 503 | 99 +  | 1   | 503  | 17719  | 18221  |
| UN41325 | Rsa1.0.02658.1 | 1056 | 28978  | 1.00E-144 | 263 | 264 | 99 +  | 791 | 1054 | 19372  | 19635  |
| UN41326 | Rsa1.0.01958.1 | 712  | 261128 | 0         | 508 | 509 | 99 +  | 203 | 711  | 240735 | 241243 |
| UN41327 | Rsa1.0.00345.1 | 871  | 93226  | 0         | 500 | 500 | 100 - | 372 | 871  | 74435  | 74934  |
| UN41328 | Rsa1.0.09523.1 | 1185 | 6315   | 0         | 471 | 481 | 97 +  | 74  | 554  | 2211   | 2691   |
| UN41329 | Rsa1.0.00105.1 | 894  | 134138 | 1.00E-157 | 285 | 286 | 99 -  | 1   | 286  | 13599  | 13884  |
| UN41330 | Rsa1.0.02548.1 | 695  | 30228  | 1.00E-134 | 266 | 272 | 97 +  | 428 | 695  | 10200  | 10471  |
| UN41331 | Rsa1.0.01462.1 | 601  | 45231  | 1.00E-76  | 177 | 189 | 93 -  | 285 | 473  | 25547  | 25725  |
| UN41332 | Rsa1.0.01094.1 | 1186 | 167285 | 0         | 676 | 680 | 99 +  | 135 | 814  | 31398  | 32077  |
| UN41333 | Rsa1.0.15993.1 | 630  | 2329   | 1.00E-125 | 364 | 405 | 89 +  | 223 | 622  | 1900   | 2287   |
| UN41334 | Rsa1.0.00554.1 | 1006 | 150953 | 1.00E-124 | 253 | 262 | 96 +  | 551 | 812  | 120274 | 120535 |
| UN41335 | Rsa1.0.02485.1 | 825  | 30968  | 0         | 523 | 534 | 97 +  | 1   | 534  | 21484  | 22014  |
| UN41336 | Rsa1.0.00034.1 | 922  | 260119 | 0         | 417 | 421 | 99 -  | 502 | 922  | 15166  | 15586  |
| UN41337 | Rsa1.0.00094.1 | 721  | 139042 | 1.00E-166 | 418 | 448 | 93 -  | 2   | 442  | 92426  | 92861  |
| UN41338 | Rsa1.0.00270.1 | 662  | 101236 | 0         | 639 | 662 | 96 -  | 4   | 662  | 25079  | 25738  |

|         |                |      |        |           |      |      |       |     |      |        |        |
|---------|----------------|------|--------|-----------|------|------|-------|-----|------|--------|--------|
| UN41339 | Rsa1.0.08727.1 | 655  | 6996   | 1.00E-178 | 320  | 321  | 99 +  | 1   | 321  | 808    | 1128   |
| UN41340 | Rsa1.0.00344.1 | 828  | 191774 | 1.00E-83  | 158  | 158  | 100 + | 671 | 828  | 154180 | 154337 |
| UN41341 | Rsa1.0.04159.1 | 1006 | 18795  | 0         | 910  | 911  | 99 -  | 94  | 1004 | 5713   | 6623   |
| UN41342 | Rsa1.0.01783.1 | 460  | 39383  | 1.00E-155 | 292  | 297  | 98 -  | 164 | 460  | 19900  | 20196  |
| UN41343 | Rsa1.0.00192.1 | 1160 | 278200 | 0         | 375  | 380  | 98 +  | 360 | 739  | 75232  | 75611  |
| UN41344 | Rsa1.0.00009.1 | 723  | 232558 | 1.00E-178 | 349  | 360  | 96 -  | 161 | 520  | 98138  | 98497  |
| UN41345 | Rsa1.0.01119.1 | 845  | 53459  | 0         | 804  | 845  | 95 +  | 13  | 843  | 718    | 1559   |
| UN41346 | Rsa1.0.59058.1 | 666  | 387    | 1.00E-149 | 309  | 319  | 96 +  | 351 | 666  | 1      | 318    |
| UN41347 | Rsa1.0.00009.1 | 813  | 232558 | 0         | 466  | 472  | 98 +  | 345 | 813  | 11517  | 11988  |
| UN41348 | Rsa1.0.00017.1 | 687  | 752458 | 0         | 683  | 684  | 99 +  | 1   | 684  | 700507 | 701190 |
| UN41349 | Rsa1.0.02429.1 | 719  | 31527  | 0         | 490  | 539  | 90 +  | 17  | 549  | 9755   | 10293  |
| UN41350 | Rsa1.0.39426.1 | 713  | 570    | 0         | 410  | 427  | 96 +  | 300 | 713  | 46     | 472    |
| UN41351 | Rsa1.0.07863.1 | 500  | 8404   | 0         | 496  | 496  | 100 - | 3   | 498  | 2563   | 3058   |
| UN41352 | Rsa1.0.05093.1 | 884  | 14876  | 1.00E-168 | 305  | 307  | 99 +  | 1   | 307  | 11047  | 11353  |
| UN41353 | Rsa1.0.02069.1 | 708  | 35425  | 1.00E-170 | 401  | 433  | 92 -  | 276 | 707  | 20657  | 21072  |
| UN41354 | Rsa1.0.01328.1 | 772  | 48021  | 0         | 770  | 770  | 100 + | 3   | 772  | 46011  | 46780  |
| UN41355 | Rsa1.0.02253.1 | 1100 | 33356  | 1.00E-102 | 196  | 198  | 98 +  | 43  | 240  | 23377  | 23574  |
| UN41356 | Rsa1.0.29217.1 | 1019 | 789    | 1.00E-129 | 398  | 454  | 87 +  | 336 | 764  | 335    | 788    |
| UN41357 | Rsa1.0.02231.1 | 689  | 33661  | 0         | 622  | 657  | 94 -  | 37  | 689  | 27228  | 27884  |
| UN41358 | Rsa1.0.05365.1 | 892  | 14040  | 1.00E-140 | 326  | 345  | 94 +  | 562 | 892  | 11967  | 12311  |
| UN41359 | Rsa1.0.00582.1 | 924  | 74333  | 1.00E-170 | 319  | 324  | 98 +  | 190 | 513  | 4766   | 5089   |
| UN41360 | Rsa1.0.04387.1 | 1110 | 17625  | 0         | 1106 | 1109 | 99 -  | 1   | 1109 | 1741   | 2849   |
| UN41361 | Rsa1.0.05262.1 | 892  | 14334  | 0         | 463  | 474  | 97 -  | 1   | 472  | 11075  | 11542  |
| UN41362 | Rsa1.0.01913.1 | 778  | 37363  | 1.00E-110 | 314  | 351  | 89 -  | 3   | 351  | 27662  | 27995  |
| UN41363 | Rsa1.0.05477.1 | 785  | 13613  | 5.00E-86  | 165  | 166  | 99 -  | 365 | 530  | 4693   | 4858   |
| UN41364 | Rsa1.0.00017.1 | 448  | 752458 | 0         | 327  | 327  | 100 + | 122 | 448  | 536573 | 536899 |
| UN41365 | Rsa1.0.00159.1 | 727  | 431686 | 8.00E-97  | 271  | 297  | 91 +  | 442 | 727  | 325900 | 326195 |
| UN41366 | Rsa1.0.00382.1 | 897  | 251946 | 0         | 360  | 360  | 100 - | 538 | 897  | 242886 | 243245 |
| UN41367 | Rsa1.0.02428.1 | 794  | 31542  | 8.00E-94  | 181  | 183  | 98 -  | 207 | 389  | 25949  | 26131  |
| UN41368 | Rsa1.0.02313.1 | 463  | 32653  | 0         | 454  | 459  | 98 -  | 1   | 459  | 24544  | 25000  |
| UN41369 | Rsa1.0.02020.1 | 887  | 173211 | 0         | 404  | 417  | 96 +  | 103 | 519  | 166801 | 167212 |
| UN41370 | Rsa1.0.06494.1 | 929  | 10902  | 1.00E-167 | 301  | 302  | 99 +  | 1   | 302  | 10106  | 10407  |
| UN41371 | Rsa1.0.14378.1 | 783  | 3455   | 0         | 430  | 439  | 97 +  | 3   | 433  | 2948   | 3386   |
| UN41372 | Rsa1.0.02369.1 | 857  | 32075  | 0         | 379  | 380  | 99 +  | 415 | 794  | 4228   | 4607   |
| UN41373 | Rsa1.0.01511.1 | 743  | 44235  | 1.00E-165 | 294  | 294  | 100 + | 450 | 743  | 30182  | 30475  |
| UN41374 | Rsa1.0.00024.1 | 814  | 188018 | 1.00E-171 | 373  | 398  | 93 -  | 413 | 810  | 84712  | 85097  |
| UN41375 | Rsa1.0.00145.1 | 733  | 261008 | 1.00E-160 | 391  | 426  | 91 -  | 316 | 731  | 8528   | 8953   |
| UN41376 | Rsa1.0.02248.1 | 714  | 33414  | 1.00E-162 | 311  | 318  | 97 +  | 397 | 714  | 12478  | 12795  |
| UN41377 | Rsa1.0.00706.1 | 808  | 291570 | 0         | 808  | 808  | 100 + | 1   | 808  | 178104 | 178911 |

|         |                |      |        |           |      |      |       |      |      |        |        |
|---------|----------------|------|--------|-----------|------|------|-------|------|------|--------|--------|
| UN41378 | Rsa1.0.02379.1 | 983  | 150705 | 0         | 561  | 561  | 100 - | 423  | 983  | 141596 | 142156 |
| UN41379 | Rsa1.0.03736.1 | 927  | 21081  | 1.00E-154 | 316  | 329  | 96 -  | 18   | 346  | 9487   | 9815   |
| UN41380 | Rsa1.0.00951.1 | 1639 | 164588 | 0         | 413  | 414  | 99 -  | 1227 | 1639 | 48228  | 48641  |
| UN41381 | Rsa1.0.00063.1 | 845  | 156150 | 0         | 811  | 816  | 99 +  | 30   | 845  | 76915  | 77730  |
| UN41382 | Rsa1.0.00387.1 | 566  | 495407 | 0         | 557  | 579  | 96 -  | 1    | 564  | 468209 | 468787 |
| UN41383 | Rsa1.0.01082.1 | 486  | 54640  | 0         | 466  | 483  | 96 -  | 4    | 486  | 2443   | 2921   |
| UN41384 | Rsa1.0.00058.1 | 755  | 159921 | 1.00E-119 | 227  | 230  | 98 +  | 3    | 232  | 88467  | 88696  |
| UN41385 | Rsa1.0.00472.1 | 638  | 398134 | 0         | 541  | 541  | 100 - | 1    | 541  | 4539   | 5079   |
| UN41386 | Rsa1.0.01228.1 | 442  | 50238  | 1.00E-94  | 244  | 260  | 93 +  | 162  | 416  | 733    | 992    |
| UN41387 | Rsa1.0.03926.1 | 815  | 20024  | 7.00E-11  | 87   | 104  | 83 +  | 246  | 349  | 18903  | 19006  |
| UN41388 | Rsa1.0.01705.1 | 1201 | 40710  | 2.00E-46  | 108  | 112  | 96 +  | 483  | 594  | 37592  | 37703  |
| UN41389 | Rsa1.0.01540.1 | 1094 | 151890 | 0         | 629  | 629  | 100 + | 198  | 826  | 119493 | 120121 |
| UN41390 | Rsa1.0.00710.1 | 1428 | 67325  | 1.00E-130 | 245  | 248  | 98 -  | 1181 | 1428 | 16985  | 17232  |
| UN41391 | Rsa1.0.00529.1 | 298  | 77487  | 7.00E-95  | 258  | 289  | 89 -  | 1    | 286  | 69546  | 69816  |
| UN41392 | Rsa1.0.03981.1 | 476  | 19724  | 1.00E-137 | 347  | 375  | 92 +  | 104  | 475  | 17481  | 17848  |
| UN41393 | Rsa1.0.00465.1 | 894  | 82138  | 0         | 869  | 903  | 96 -  | 1    | 894  | 47450  | 48352  |
| UN41394 | Rsa1.0.00294.1 | 1157 | 144860 | 1.00E-163 | 338  | 351  | 96 -  | 519  | 869  | 64661  | 65008  |
| UN41395 | Rsa1.0.00273.1 | 867  | 326186 | 0         | 866  | 867  | 99 +  | 2    | 867  | 822    | 1688   |
| UN41396 | Rsa1.0.00467.1 | 847  | 156542 | 0         | 794  | 826  | 96 -  | 28   | 847  | 92934  | 93755  |
| UN41397 | Rsa1.0.00127.1 | 895  | 127446 | 0         | 610  | 616  | 99 -  | 279  | 894  | 98494  | 99109  |
| UN41398 | Rsa1.0.01139.1 | 1027 | 52601  | 0         | 513  | 525  | 97 -  | 503  | 1027 | 38561  | 39083  |
| UN41399 | Rsa1.0.63101.1 | 583  | 364    | 5.00E-76  | 170  | 176  | 96 +  | 9    | 182  | 1      | 175    |
| UN41400 | Rsa1.0.05606.1 | 895  | 13202  | 0         | 458  | 489  | 93 +  | 425  | 893  | 11672  | 12160  |
| UN41401 | Rsa1.0.01335.1 | 1004 | 47894  | 1.00E-126 | 236  | 238  | 99 +  | 405  | 642  | 15228  | 15465  |
| UN41402 | Rsa1.0.01220.1 | 468  | 161775 | 1.00E-171 | 344  | 358  | 96 +  | 124  | 468  | 138711 | 139068 |
| UN41403 | Rsa1.0.00107.1 | 1367 | 431659 | 0         | 326  | 326  | 100 - | 1042 | 1367 | 270199 | 270524 |
| UN41404 | Rsa1.0.03566.1 | 1428 | 22050  | 0         | 1327 | 1373 | 96 +  | 59   | 1428 | 16008  | 17380  |
| UN41405 | Rsa1.0.05866.1 | 1391 | 12376  | 0         | 489  | 507  | 96 +  | 4    | 504  | 4019   | 4525   |
| UN41406 | Rsa1.0.05180.1 | 900  | 14575  | 0         | 670  | 713  | 93 -  | 2    | 705  | 4728   | 5415   |
| UN41407 | Rsa1.0.00566.1 | 1308 | 75325  | 0         | 723  | 723  | 100 - | 244  | 966  | 34366  | 35088  |
| UN41408 | Rsa1.0.04008.1 | 958  | 19584  | 0         | 603  | 615  | 98 -  | 343  | 957  | 4620   | 5228   |
| UN41409 | Rsa1.0.05243.1 | 590  | 14399  | 0         | 347  | 347  | 100 + | 1    | 347  | 528    | 874    |
| UN41410 | Rsa1.0.00579.1 | 743  | 148308 | 1.00E-159 | 292  | 293  | 99 -  | 450  | 741  | 13862  | 14154  |
| UN41411 | Rsa1.0.01318.1 | 736  | 48275  | 1.00E-121 | 266  | 277  | 96 +  | 462  | 736  | 4086   | 4361   |
| UN41412 | Rsa1.0.00956.1 | 911  | 58304  | 0         | 772  | 772  | 100 - | 55   | 826  | 38836  | 39607  |
| UN41413 | Rsa1.0.10267.1 | 1140 | 5910   | 1.00E-136 | 328  | 355  | 92 -  | 547  | 901  | 4255   | 4609   |
| UN41414 | Rsa1.0.01626.1 | 1632 | 41989  | 0         | 545  | 545  | 100 + | 682  | 1226 | 12270  | 12814  |
| UN41415 | Rsa1.0.04542.1 | 939  | 16930  | 1.00E-148 | 321  | 335  | 95 -  | 3    | 337  | 16072  | 16399  |
| UN41416 | Rsa1.0.00816.1 | 1039 | 403350 | 1.00E-136 | 316  | 334  | 94 -  | 4    | 334  | 370200 | 370527 |



|         |                |      |        |           |      |      |       |     |      |        |        |
|---------|----------------|------|--------|-----------|------|------|-------|-----|------|--------|--------|
| UN41417 | Rsa1.0_00786.1 | 1017 | 64285  | 1.00E-121 | 257  | 269  | 95 -  | 361 | 629  | 49995  | 50263  |
| UN41418 | Rsa1.0_03133.1 | 633  | 25135  | 1.00E-138 | 250  | 250  | 100 - | 384 | 633  | 8985   | 9234   |
| UN41419 | Rsa1.0_03769.1 | 860  | 20955  | 0         | 480  | 488  | 98 +  | 375 | 860  | 8339   | 8826   |
| UN41420 | Rsa1.0_00301.1 | 885  | 365315 | 0         | 465  | 499  | 93 -  | 399 | 885  | 54315  | 54807  |
| UN41421 | Rsa1.0_02425.1 | 778  | 31567  | 8.00E-54  | 114  | 116  | 98 -  | 502 | 617  | 14279  | 14394  |
| UN41422 | Rsa1.0_00241.1 | 513  | 104000 | 3.00E-61  | 123  | 124  | 99 +  | 180 | 303  | 34619  | 34742  |
| UN41423 | Rsa1.0_00239.1 | 1101 | 104332 | 0         | 435  | 445  | 97 +  | 253 | 697  | 94648  | 95092  |
| UN41424 | Rsa1.0_02245.1 | 1066 | 33478  | 0         | 728  | 769  | 94 -  | 301 | 1066 | 11478  | 12231  |
| UN41425 | Rsa1.0_00394.1 | 856  | 148426 | 0         | 375  | 388  | 96 -  | 129 | 516  | 129296 | 129683 |
| UN41426 | Rsa1.0_03125.1 | 959  | 147978 | 0         | 606  | 622  | 97 -  | 2   | 623  | 131175 | 131796 |
| UN41427 | Rsa1.0_00083.1 | 850  | 442773 | 0         | 512  | 523  | 97 -  | 327 | 849  | 323897 | 324417 |
| UN41428 | Rsa1.0_00436.1 | 1298 | 85008  | 0         | 1235 | 1236 | 99 -  | 1   | 1236 | 24613  | 25847  |
| UN41429 | Rsa1.0_00342.1 | 1156 | 93695  | 1.00E-176 | 420  | 456  | 92 -  | 48  | 485  | 15020  | 15471  |
| UN41430 | Rsa1.0_00284.1 | 761  | 323267 | 0         | 735  | 760  | 96 -  | 2   | 759  | 321074 | 321832 |
| UN41431 | Rsa1.0_02389.1 | 912  | 146428 | 0         | 469  | 469  | 100 + | 3   | 471  | 130568 | 131036 |
| UN41432 | Rsa1.0_01055.1 | 1411 | 55466  | 0         | 1341 | 1413 | 94 -  | 1   | 1404 | 25321  | 26727  |
| UN41433 | Rsa1.0_00628.1 | 932  | 214360 | 1.00E-96  | 224  | 234  | 95 +  | 4   | 235  | 34505  | 34734  |
| UN41434 | Rsa1.0_02164.1 | 1622 | 34426  | 0         | 786  | 839  | 93 +  | 167 | 996  | 6255   | 7086   |
| UN41435 | Rsa1.0_21397.1 | 1164 | 1208   | 1.00E-151 | 295  | 301  | 98 -  | 868 | 1163 | 237    | 537    |
| UN41436 | Rsa1.0_01052.1 | 1087 | 55548  | 0         | 810  | 811  | 99 -  | 277 | 1087 | 5834   | 6644   |
| UN41437 | Rsa1.0_04079.1 | 563  | 19202  | 1.00E-51  | 125  | 132  | 94 -  | 38  | 169  | 15519  | 15650  |
| UN41438 | Rsa1.0_03336.1 | 815  | 23648  | 0         | 494  | 540  | 91 -  | 272 | 808  | 13930  | 14466  |
| UN41439 | Rsa1.0_00179.1 | 909  | 393324 | 2.00E-73  | 153  | 157  | 97 +  | 381 | 537  | 204930 | 205086 |
| UN41440 | Rsa1.0_00092.1 | 753  | 659932 | 1.00E-95  | 250  | 275  | 90 -  | 472 | 745  | 627152 | 627409 |
| UN41441 | Rsa1.0_02723.1 | 542  | 28408  | 1.00E-138 | 320  | 342  | 93 -  | 207 | 542  | 2561   | 2902   |
| UN41442 | Rsa1.0_02882.1 | 1337 | 27039  | 0         | 723  | 736  | 98 +  | 3   | 738  | 3419   | 4150   |
| UN41443 | Rsa1.0_07780.1 | 946  | 8589   | 0         | 491  | 491  | 100 - | 1   | 491  | 3045   | 3535   |
| UN41444 | Rsa1.0_00220.1 | 864  | 192936 | 6.00E-64  | 149  | 157  | 94 +  | 313 | 469  | 152131 | 152287 |
| UN41445 | Rsa1.0_00545.1 | 843  | 189649 | 1.00E-166 | 321  | 328  | 97 +  | 516 | 843  | 2122   | 2448   |
| UN41446 | Rsa1.0_01800.1 | 984  | 39109  | 0         | 523  | 538  | 97 -  | 448 | 984  | 6692   | 7227   |
| UN41447 | Rsa1.0_00916.1 | 670  | 59789  | 1.00E-129 | 287  | 303  | 94 +  | 7   | 304  | 22087  | 22389  |
| UN41448 | Rsa1.0_00497.1 | 473  | 79830  | 1.00E-109 | 233  | 244  | 95 +  | 8   | 251  | 43615  | 43858  |
| UN41449 | Rsa1.0_01778.1 | 1061 | 39509  | 1.00E-74  | 146  | 147  | 99 -  | 222 | 368  | 17248  | 17394  |
| UN41450 | Rsa1.0_00066.1 | 716  | 152418 | 0         | 389  | 391  | 99 +  | 306 | 696  | 11265  | 11655  |
| UN41451 | Rsa1.0_02020.1 | 1097 | 173211 | 0         | 516  | 528  | 97 +  | 25  | 552  | 153388 | 153915 |
| UN41452 | Rsa1.0_02157.1 | 537  | 149652 | 1.00E-147 | 276  | 280  | 98 +  | 84  | 363  | 11588  | 11867  |
| UN41453 | Rsa1.0_05748.1 | 663  | 12749  | 1.00E-178 | 317  | 317  | 100 - | 1   | 317  | 8886   | 9202   |
| UN41454 | Rsa1.0_00086.1 | 1161 | 439854 | 2.00E-83  | 194  | 204  | 95 +  | 3   | 203  | 429    | 631    |
| UN41455 | Rsa1.0_00025.1 | 708  | 277312 | 0         | 642  | 676  | 94 +  | 3   | 677  | 39139  | 39798  |

|         |                |      |        |           |      |      |       |      |      |        |        |
|---------|----------------|------|--------|-----------|------|------|-------|------|------|--------|--------|
| UN41456 | Rsa1.0.05721.1 | 826  | 12821  | 1.00E-137 | 250  | 251  | 99 +  | 576  | 826  | 5909   | 6159   |
| UN41457 | Rsa1.0.00151.1 | 1191 | 119541 | 1.00E-145 | 274  | 278  | 98 +  | 714  | 991  | 44479  | 44756  |
| UN41458 | Rsa1.0.00118.1 | 739  | 130637 | 0         | 344  | 344  | 100 + | 59   | 402  | 119178 | 119521 |
| UN41459 | Rsa1.0.02754.1 | 523  | 28213  | 1.00E-148 | 299  | 310  | 96 +  | 95   | 404  | 8708   | 9017   |
| UN41460 | Rsa1.0.01077.1 | 709  | 54772  | 0         | 431  | 443  | 97 -  | 267  | 709  | 51190  | 51628  |
| UN41461 | Rsa1.0.04252.1 | 1137 | 18262  | 1.00E-123 | 246  | 253  | 97 +  | 171  | 423  | 4528   | 4780   |
| UN41462 | Rsa1.0.00087.1 | 1131 | 761073 | 0         | 906  | 982  | 92 -  | 1    | 960  | 103868 | 104840 |
| UN41463 | Rsa1.0.00055.1 | 716  | 520193 | 1.00E-122 | 265  | 279  | 94 -  | 1    | 279  | 336224 | 336493 |
| UN41464 | Rsa1.0.00422.1 | 651  | 86144  | 0         | 352  | 353  | 99 -  | 213  | 565  | 83575  | 83927  |
| UN41465 | Rsa1.0.02268.1 | 1518 | 33172  | 0         | 567  | 567  | 100 + | 60   | 626  | 10445  | 11011  |
| UN41466 | Rsa1.0.02777.1 | 784  | 27986  | 1.00E-145 | 289  | 298  | 96 -  | 4    | 301  | 25025  | 25322  |
| UN41467 | Rsa1.0.32536.1 | 963  | 699    | 0         | 692  | 699  | 98 -  | 66   | 764  | 1      | 699    |
| UN41468 | Rsa1.0.00182.1 | 975  | 142305 | 0         | 873  | 954  | 91 +  | 49   | 975  | 35104  | 36050  |
| UN41469 | Rsa1.0.00220.1 | 602  | 192936 | 2.00E-94  | 278  | 312  | 89 -  | 160  | 471  | 4428   | 4739   |
| UN41470 | Rsa1.0.00018.1 | 1102 | 410899 | 0         | 459  | 459  | 100 + | 1    | 459  | 354798 | 355256 |
| UN41471 | Rsa1.0.00398.1 | 763  | 88007  | 0         | 396  | 411  | 96 -  | 56   | 461  | 63410  | 63818  |
| UN41472 | Rsa1.0.00207.1 | 463  | 248736 | 0         | 461  | 463  | 99 +  | 1    | 463  | 196517 | 196979 |
| UN41473 | Rsa1.0.01789.1 | 787  | 39250  | 0         | 472  | 496  | 95 +  | 1    | 488  | 6114   | 6607   |
| UN41474 | Rsa1.0.00062.1 | 542  | 299291 | 0         | 534  | 540  | 98 +  | 3    | 542  | 175985 | 176524 |
| UN41475 | Rsa1.0.00048.1 | 879  | 167185 | 0         | 871  | 890  | 97 -  | 3    | 879  | 146193 | 147080 |
| UN41476 | #              | #    | #      | #         | #    | #    | #     | #    | #    | #      | #      |
| UN41477 | Rsa1.0.05762.1 | 1302 | 12715  | 0         | 1236 | 1313 | 94 +  | 1    | 1300 | 6745   | 8051   |
| UN41478 | Rsa1.0.00202.1 | 694  | 185895 | 0         | 463  | 463  | 100 + | 6    | 468  | 11683  | 12145  |
| UN41479 | Rsa1.0.00685.1 | 807  | 68515  | 0         | 358  | 368  | 97 +  | 443  | 807  | 2413   | 2780   |
| UN41480 | Rsa1.0.06054.1 | 739  | 11847  | 1.00E-12  | 60   | 67   | 89 +  | 348  | 414  | 1384   | 1450   |
| UN41481 | Rsa1.0.04744.1 | 1262 | 16154  | 0         | 598  | 598  | 100 + | 1    | 598  | 2708   | 3305   |
| UN41482 | Rsa1.0.03605.1 | 701  | 21827  | 1.00E-162 | 378  | 407  | 92 -  | 289  | 693  | 17751  | 18145  |
| UN41483 | Rsa1.0.02377.1 | 861  | 31994  | 1.00E-151 | 277  | 279  | 99 +  | 583  | 861  | 10248  | 10526  |
| UN41484 | Rsa1.0.01397.1 | 617  | 183276 | 1.00E-162 | 289  | 289  | 100 + | 329  | 617  | 172580 | 172868 |
| UN41485 | Rsa1.0.00522.1 | 737  | 78103  | 0         | 701  | 706  | 99 -  | 35   | 737  | 38649  | 39354  |
| UN41486 | Rsa1.0.04652.1 | 775  | 16515  | 0         | 464  | 486  | 95 -  | 3    | 487  | 10530  | 11015  |
| UN41487 | Rsa1.0.00451.1 | 769  | 322533 | 0         | 701  | 727  | 96 -  | 3    | 725  | 318162 | 318887 |
| UN41488 | Rsa1.0.02831.1 | 813  | 27533  | 1.00E-171 | 578  | 669  | 86 -  | 119  | 787  | 13714  | 14382  |
| UN41489 | Rsa1.0.00602.1 | 679  | 73302  | 0         | 679  | 679  | 100 - | 1    | 679  | 64335  | 65013  |
| UN41490 | Rsa1.0.09236.1 | 1106 | 6540   | 0         | 868  | 943  | 92 -  | 50   | 992  | 1      | 937    |
| UN41491 | Rsa1.0.00420.1 | 1273 | 86496  | 2.33E-156 | 264  | 264  | 100 + | 1010 | 1273 | 43127  | 43390  |
| UN41492 | Rsa1.0.02870.1 | 812  | 27102  | 0         | 573  | 594  | 96 -  | 1    | 594  | 6398   | 6991   |
| UN41493 | Rsa1.0.00592.1 | 886  | 73788  | 0         | 433  | 459  | 94 +  | 62   | 511  | 22125  | 22583  |
| UN41494 | Rsa1.0.01198.1 | 578  | 51029  | 1.00E-167 | 297  | 297  | 100 - | 282  | 578  | 7589   | 7885   |

|         |                |      |        |           |      |      |       |     |      |        |        |
|---------|----------------|------|--------|-----------|------|------|-------|-----|------|--------|--------|
| UN41495 | Rsa1.0_00213.1 | 337  | 108167 | 4.00E-72  | 196  | 210  | 93 +  | 2   | 208  | 101860 | 102068 |
| UN41496 | Rsa1.0_00568.1 | 863  | 75219  | 0         | 477  | 477  | 100 + | 384 | 860  | 14560  | 15036  |
| UN41497 | Rsa1.0_04285.1 | 864  | 18085  | 0         | 864  | 866  | 99 -  | 1   | 864  | 16514  | 17379  |
| UN41498 | Rsa1.0_00863.1 | 878  | 254535 | 0         | 377  | 387  | 97 +  | 492 | 878  | 213547 | 213933 |
| UN41499 | Rsa1.0_05632.1 | 812  | 13120  | 0         | 542  | 555  | 97 -  | 1   | 553  | 9530   | 10084  |
| UN41500 | Rsa1.0_02432.1 | 926  | 31499  | 1.00E-164 | 317  | 325  | 97 -  | 348 | 672  | 24312  | 24636  |
| UN41501 | Rsa1.0_00273.1 | 368  | 326186 | 2.33E-156 | 340  | 365  | 93 +  | 2   | 361  | 45551  | 45908  |
| UN41502 | Rsa1.0_02529.1 | 884  | 30437  | 7.00E-76  | 163  | 169  | 96 +  | 337 | 505  | 22816  | 22984  |
| UN41503 | Rsa1.0_07943.1 | 1162 | 8207   | 0         | 431  | 437  | 98 +  | 726 | 1162 | 7526   | 7961   |
| UN41504 | Rsa1.0_00017.1 | 1160 | 752458 | 0         | 506  | 530  | 95 +  | 631 | 1160 | 58376  | 58893  |
| UN41505 | Rsa1.0_02969.1 | 579  | 26390  | 1.00E-130 | 316  | 339  | 93 -  | 243 | 573  | 10016  | 10349  |
| UN41506 | Rsa1.0_00683.1 | 492  | 68638  | 0         | 492  | 492  | 100 - | 1   | 492  | 58847  | 59338  |
| UN41507 | Rsa1.0_00247.1 | 1159 | 103408 | 2.33E-156 | 263  | 263  | 100 + | 897 | 1159 | 74920  | 75182  |
| UN41508 | Rsa1.0_00191.1 | 1055 | 316976 | 0         | 538  | 540  | 99 +  | 1   | 540  | 216076 | 216615 |
| UN41509 | Rsa1.0_00108.1 | 626  | 478491 | 0         | 577  | 626  | 92 +  | 7   | 623  | 70435  | 71044  |
| UN41510 | Rsa1.0_00005.1 | 847  | 353093 | 0         | 409  | 410  | 99 +  | 3   | 411  | 346070 | 346479 |
| UN41511 | Rsa1.0_01237.1 | 857  | 50124  | 0         | 345  | 349  | 98 +  | 509 | 857  | 3524   | 3871   |
| UN41512 | Rsa1.0_00348.1 | 906  | 92818  | 0         | 440  | 462  | 95 -  | 8   | 466  | 5116   | 5577   |
| UN41513 | Rsa1.0_02200.1 | 1015 | 33981  | 0         | 1005 | 1010 | 99 +  | 1   | 1009 | 13587  | 14596  |
| UN41514 | Rsa1.0_00546.1 | 530  | 76523  | 0         | 522  | 525  | 99 +  | 1   | 525  | 58473  | 58997  |
| UN41515 | Rsa1.0_00151.1 | 1029 | 119541 | 0         | 386  | 395  | 97 -  | 3   | 392  | 45328  | 45722  |
| UN41516 | Rsa1.0_03958.1 | 572  | 19868  | 1.00E-147 | 284  | 289  | 98 +  | 263 | 551  | 16483  | 16770  |
| UN41517 | Rsa1.0_00816.1 | 905  | 403350 | 0         | 557  | 563  | 98 -  | 342 | 904  | 130282 | 130844 |
| UN41518 | Rsa1.0_01635.1 | 774  | 41865  | 3.00E-90  | 169  | 169  | 100 - | 324 | 492  | 18928  | 19096  |
| UN41519 | Rsa1.0_15062.1 | 557  | 2857   | 1.00E-165 | 453  | 497  | 91 -  | 50  | 539  | 1      | 495    |
| UN41520 | Rsa1.0_02948.1 | 1382 | 26526  | 0         | 489  | 502  | 97 -  | 861 | 1360 | 14957  | 15458  |
| UN41521 | Rsa1.0_04573.1 | 845  | 16789  | 1.00E-111 | 218  | 221  | 98 +  | 612 | 831  | 5270   | 5490   |
| UN41522 | Rsa1.0_00991.1 | 1168 | 143101 | 0         | 424  | 427  | 99 -  | 3   | 429  | 20055  | 20481  |
| UN41523 | Rsa1.0_00048.1 | 1246 | 167185 | 0         | 1236 | 1245 | 99 +  | 3   | 1244 | 25711  | 26955  |
| UN41524 | Rsa1.0_07352.1 | 666  | 9518   | 1.00E-113 | 211  | 212  | 99 +  | 454 | 665  | 9280   | 9491   |
| UN41525 | Rsa1.0_01340.1 | 1154 | 47805  | 0         | 554  | 600  | 92 -  | 5   | 600  | 46060  | 46659  |
| UN41526 | Rsa1.0_00145.1 | 701  | 261008 | 1.00E-116 | 401  | 463  | 86 -  | 263 | 701  | 95894  | 96342  |
| UN41527 | Rsa1.0_01073.1 | 930  | 55030  | 8.00E-82  | 167  | 171  | 97 +  | 412 | 582  | 13441  | 13611  |
| UN41528 | Rsa1.0_00345.1 | 713  | 93226  | 0         | 561  | 597  | 93 +  | 1   | 582  | 74338  | 74934  |
| UN41529 | Rsa1.0_04971.1 | 802  | 15273  | 0         | 358  | 358  | 100 + | 1   | 358  | 6433   | 6790   |
| UN41530 | Rsa1.0_10909.1 | 592  | 5681   | 0         | 450  | 455  | 98 -  | 1   | 455  | 85     | 539    |
| UN41531 | Rsa1.0_01785.1 | 691  | 39368  | 0         | 442  | 442  | 100 - | 248 | 689  | 35727  | 36168  |
| UN41532 | Rsa1.0_01675.1 | 1515 | 41155  | 0         | 930  | 940  | 98 +  | 576 | 1512 | 11052  | 11989  |
| UN41533 | Rsa1.0_01257.1 | 820  | 49766  | 0         | 661  | 674  | 98 +  | 1   | 674  | 483    | 1151   |

|         |                |      |        |           |     |     |       |     |      |        |        |
|---------|----------------|------|--------|-----------|-----|-----|-------|-----|------|--------|--------|
| UN41534 | Rsa1.0.00016.1 | 792  | 831256 | 0         | 763 | 814 | 93 -  | 3   | 792  | 499327 | 500136 |
| UN41535 | Rsa1.0.00006.1 | 1109 | 396176 | 0         | 551 | 573 | 96 +  | 1   | 566  | 261367 | 261939 |
| UN41536 | Rsa1.0.00135.1 | 732  | 178077 | 0         | 462 | 507 | 91 -  | 1   | 507  | 9006   | 9512   |
| UN41537 | Rsa1.0.00134.1 | 875  | 390219 | 0         | 476 | 495 | 96 +  | 381 | 875  | 172579 | 173073 |
| UN41538 | Rsa1.0.00657.1 | 700  | 69858  | 1.00E-165 | 321 | 330 | 97 -  | 371 | 700  | 36962  | 37291  |
| UN41539 | Rsa1.0.01014.1 | 823  | 56762  | 1.00E-132 | 240 | 240 | 100 - | 584 | 823  | 39980  | 40219  |
| UN41540 | Rsa1.0.00036.1 | 804  | 176186 | 0         | 648 | 655 | 98 +  | 2   | 655  | 94056  | 94710  |
| UN41541 | Rsa1.0.01326.1 | 1214 | 48072  | 0         | 449 | 455 | 98 +  | 26  | 480  | 16707  | 17161  |
| UN41542 | Rsa1.0.00025.1 | 1034 | 277312 | 1.00E-180 | 320 | 320 | 100 - | 1   | 320  | 153562 | 153881 |
| UN41543 | Rsa1.0.08744.1 | 877  | 6970   | 0         | 660 | 689 | 95 -  | 103 | 790  | 5252   | 5934   |
| UN41544 | Rsa1.0.07295.1 | 722  | 9599   | 0         | 589 | 616 | 95 +  | 3   | 618  | 5763   | 6378   |
| UN41545 | Rsa1.0.01228.1 | 436  | 50238  | 1.00E-124 | 252 | 260 | 96 +  | 154 | 410  | 733    | 992    |
| UN41546 | Rsa1.0.14400.1 | 1050 | 3430   | 0         | 654 | 714 | 91 +  | 331 | 1033 | 1      | 696    |
| UN41547 | Rsa1.0.14283.1 | 1361 | 3580   | 0         | 480 | 480 | 100 - | 1   | 480  | 402    | 881    |
| UN41548 | Rsa1.0.00017.1 | 765  | 752458 | 0         | 640 | 667 | 95 +  | 99  | 765  | 465365 | 466014 |
| UN41549 | Rsa1.0.00006.1 | 684  | 396176 | 0         | 398 | 408 | 97 +  | 37  | 442  | 307699 | 308106 |
| UN41550 | Rsa1.0.00315.1 | 1096 | 96426  | 0         | 485 | 488 | 99 +  | 2   | 489  | 60572  | 61059  |
| UN41551 | Rsa1.0.00092.1 | 780  | 659932 | 1.00E-150 | 300 | 309 | 97 -  | 470 | 778  | 29576  | 29883  |
| UN41552 | Rsa1.0.23760.1 | 985  | 1027   | 0         | 392 | 410 | 95 -  | 585 | 985  | 618    | 1027   |
| UN41553 | Rsa1.0.01301.1 | 745  | 169072 | 0         | 360 | 365 | 98 -  | 382 | 745  | 19529  | 19893  |
| UN41554 | Rsa1.0.00697.1 | 907  | 67913  | 0         | 737 | 772 | 95 +  | 1   | 769  | 42350  | 43121  |
| UN41555 | Rsa1.0.03122.1 | 565  | 25207  | 0         | 547 | 566 | 96 -  | 3   | 565  | 14294  | 14851  |
| UN41556 | Rsa1.0.00146.1 | 743  | 149343 | 1.00E-103 | 220 | 230 | 95 +  | 97  | 326  | 87293  | 87522  |
| UN41557 | Rsa1.0.00063.1 | 624  | 156150 | 1.00E-111 | 225 | 232 | 96 +  | 120 | 351  | 3494   | 3725   |
| UN41558 | Rsa1.0.03810.1 | 933  | 20727  | 0         | 407 | 407 | 100 + | 251 | 657  | 20321  | 20727  |
| UN41559 | Rsa1.0.00212.1 | 617  | 108350 | 1.00E-131 | 254 | 257 | 98 -  | 363 | 617  | 37824  | 38080  |
| UN41560 | Rsa1.0.00654.1 | 860  | 70012  | 1.00E-157 | 332 | 348 | 95 -  | 326 | 670  | 41118  | 41465  |
| UN41561 | Rsa1.0.02099.1 | 621  | 35030  | 1.00E-143 | 331 | 350 | 94 -  | 268 | 614  | 29860  | 30208  |
| UN41562 | Rsa1.0.00093.1 | 1417 | 214962 | 0         | 428 | 444 | 96 -  | 9   | 452  | 97147  | 97587  |
| UN41563 | Rsa1.0.02521.1 | 799  | 30562  | 2.00E-63  | 124 | 124 | 100 - | 165 | 288  | 24319  | 24442  |
| UN41564 | Rsa1.0.01702.1 | 1221 | 40722  | 0         | 525 | 545 | 96 -  | 161 | 705  | 18252  | 18796  |
| UN41565 | Rsa1.0.02820.1 | 1018 | 27629  | 0         | 353 | 358 | 98 +  | 660 | 1016 | 3469   | 3826   |
| UN41566 | Rsa1.0.00168.1 | 698  | 115870 | 1.00E-102 | 278 | 307 | 90 +  | 397 | 698  | 38162  | 38455  |
| UN41567 | Rsa1.0.01019.1 | 884  | 56636  | 0         | 882 | 885 | 99 -  | 1   | 884  | 23797  | 24681  |
| UN41568 | Rsa1.0.00015.1 | 710  | 561803 | 1.00E-152 | 419 | 469 | 89 +  | 104 | 563  | 483122 | 483580 |
| UN41569 | Rsa1.0.00007.1 | 826  | 239325 | 0         | 782 | 824 | 94 +  | 3   | 821  | 224903 | 225716 |
| UN41570 | Rsa1.0.00827.1 | 897  | 62790  | 0         | 653 | 660 | 98 -  | 7   | 664  | 30875  | 31534  |
| UN41571 | Rsa1.0.05221.1 | 981  | 14452  | 1.00E-99  | 201 | 205 | 98 +  | 776 | 979  | 8530   | 8734   |
| UN41572 | Rsa1.0.01435.1 | 1490 | 45942  | 0         | 487 | 489 | 99 +  | 431 | 919  | 42964  | 43452  |

|         |                |      |        |           |      |      |       |     |      |        |        |
|---------|----------------|------|--------|-----------|------|------|-------|-----|------|--------|--------|
| UN41573 | Rsa1.0_00204.1 | 747  | 109056 | 0         | 695  | 738  | 94 +  | 2   | 734  | 64989  | 65726  |
| UN41574 | Rsa1.0_04483.1 | 670  | 17174  | 1.00E-108 | 211  | 215  | 98 -  | 204 | 418  | 8253   | 8467   |
| UN41575 | Rsa1.0_01566.1 | 438  | 43134  | 1.00E-158 | 282  | 282  | 100 + | 157 | 438  | 14234  | 14515  |
| UN41576 | Rsa1.0_00435.1 | 582  | 317579 | 0         | 361  | 375  | 96 +  | 1   | 368  | 70706  | 71080  |
| UN41577 | Rsa1.0_00421.1 | 489  | 86365  | 1.00E-54  | 127  | 133  | 95 +  | 141 | 273  | 42623  | 42755  |
| UN41578 | Rsa1.0_03853.1 | 667  | 20447  | 0         | 347  | 348  | 99 +  | 3   | 350  | 13326  | 13672  |
| UN41579 | Rsa1.0_00480.1 | 926  | 81325  | 0         | 359  | 369  | 97 +  | 7   | 375  | 28360  | 28728  |
| UN41580 | Rsa1.0_00501.1 | 1066 | 79545  | 0         | 600  | 601  | 99 +  | 210 | 810  | 24411  | 25011  |
| UN41581 | Rsa1.0_01016.1 | 741  | 181422 | 0         | 615  | 648  | 94 +  | 3   | 627  | 158108 | 158755 |
| UN41582 | Rsa1.0_00278.1 | 940  | 231896 | 1.00E-168 | 300  | 300  | 100 + | 493 | 792  | 15864  | 16163  |
| UN41583 | Rsa1.0_27162.1 | 814  | 863    | 1.00E-130 | 284  | 298  | 95 -  | 3   | 299  | 506    | 800    |
| UN41584 | Rsa1.0_00372.1 | 651  | 90418  | 1.00E-152 | 302  | 311  | 97 -  | 1   | 310  | 85878  | 86182  |
| UN41585 | Rsa1.0_00055.1 | 760  | 520193 | 1.00E-129 | 306  | 329  | 93 +  | 1   | 325  | 49455  | 49780  |
| UN41586 | Rsa1.0_02950.1 | 1103 | 26506  | 0         | 473  | 515  | 91 +  | 569 | 1079 | 7276   | 7775   |
| UN41587 | Rsa1.0_00092.1 | 1176 | 659932 | 0         | 727  | 747  | 97 -  | 422 | 1168 | 334736 | 335480 |
| UN41588 | Rsa1.0_02266.1 | 979  | 33195  | 0         | 404  | 424  | 95 +  | 25  | 439  | 19857  | 20280  |
| UN41589 | Rsa1.0_04252.1 | 944  | 18262  | 0         | 944  | 944  | 100 + | 1   | 944  | 2115   | 3058   |
| UN41590 | Rsa1.0_00021.1 | 1142 | 263655 | 0         | 1118 | 1143 | 97 -  | 3   | 1142 | 63410  | 64552  |
| UN41591 | Rsa1.0_00720.1 | 753  | 66931  | 0         | 752  | 752  | 100 - | 1   | 752  | 27050  | 27801  |
| UN41592 | Rsa1.0_06097.1 | 1020 | 11751  | 1.00E-16  | 95   | 110  | 86 +  | 687 | 795  | 10398  | 10507  |
| UN41593 | Rsa1.0_01488.1 | 843  | 44766  | 0         | 560  | 579  | 96 +  | 3   | 579  | 6347   | 6922   |
| UN41594 | Rsa1.0_00351.1 | 845  | 413096 | 1.00E-113 | 266  | 283  | 93 +  | 563 | 845  | 269242 | 269521 |
| UN41595 | Rsa1.0_02869.1 | 703  | 27109  | 0         | 358  | 362  | 98 -  | 341 | 699  | 25547  | 25908  |
| UN41596 | Rsa1.0_00734.1 | 823  | 66508  | 0         | 442  | 442  | 100 - | 8   | 449  | 44655  | 45096  |
| UN41597 | Rsa1.0_00336.1 | 609  | 445051 | 1.00E-160 | 376  | 404  | 93 -  | 179 | 576  | 149181 | 149576 |
| UN41598 | Rsa1.0_00415.1 | 644  | 86795  | 0         | 537  | 578  | 92 +  | 77  | 642  | 8987   | 9564   |
| UN41599 | Rsa1.0_01110.1 | 889  | 195852 | 6.00E-98  | 185  | 186  | 99 +  | 156 | 341  | 50935  | 51120  |
| UN41600 | Rsa1.0_00833.1 | 929  | 62621  | 7.00E-73  | 146  | 148  | 98 +  | 529 | 676  | 9523   | 9670   |
| UN41601 | Rsa1.0_00397.1 | 1325 | 88189  | 0         | 673  | 702  | 95 +  | 451 | 1141 | 4548   | 5249   |
| UN41602 | Rsa1.0_00104.1 | 1049 | 368722 | 1.00E-121 | 224  | 225  | 99 +  | 3   | 227  | 18537  | 18761  |
| UN41603 | Rsa1.0_00509.1 | 818  | 78829  | 1.00E-112 | 304  | 333  | 91 -  | 504 | 818  | 42569  | 42900  |
| UN41604 | Rsa1.0_02964.1 | 935  | 26407  | 0         | 373  | 385  | 96 -  | 2   | 386  | 21786  | 22170  |
| UN41605 | Rsa1.0_02027.1 | 1131 | 35869  | 0         | 472  | 506  | 93 -  | 1   | 492  | 9075   | 9575   |
| UN41606 | Rsa1.0_08366.1 | 588  | 7466   | 1.00E-76  | 161  | 165  | 97 +  | 5   | 167  | 4380   | 4544   |
| UN41607 | Rsa1.0_02648.1 | 652  | 29073  | 9.00E-47  | 102  | 104  | 98 +  | 241 | 344  | 28066  | 28169  |
| UN41608 | Rsa1.0_00342.1 | 513  | 93695  | 0         | 491  | 514  | 95 -  | 4   | 513  | 12449  | 12962  |
| UN41609 | Rsa1.0_00234.1 | 597  | 197060 | 0         | 572  | 595  | 96 +  | 3   | 597  | 29670  | 30255  |
| UN41610 | Rsa1.0_02672.1 | 712  | 28884  | 0         | 518  | 536  | 96 -  | 3   | 535  | 27575  | 28110  |
| UN41611 | Rsa1.0_00178.1 | 1177 | 114861 | 7.00E-89  | 308  | 353  | 87 +  | 3   | 355  | 66277  | 66605  |

|         |                |      |        |           |     |     |       |     |      |        |        |
|---------|----------------|------|--------|-----------|-----|-----|-------|-----|------|--------|--------|
| UN41612 | Rsa1.0.06675.1 | 781  | 10561  | 0         | 524 | 549 | 95 -  | 235 | 781  | 9554   | 10101  |
| UN41613 | Rsa1.0.00645.1 | 475  | 189716 | 5.00E-97  | 186 | 188 | 98 -  | 40  | 227  | 35226  | 35413  |
| UN41614 | Rsa1.0.02892.1 | 578  | 27000  | 0         | 569 | 575 | 98 -  | 3   | 576  | 497    | 1071   |
| UN41615 | Rsa1.0.00123.1 | 911  | 325650 | 0         | 596 | 613 | 97 -  | 1   | 612  | 272248 | 272859 |
| UN41616 | Rsa1.0.02099.1 | 552  | 35030  | 1.00E-161 | 300 | 304 | 98 -  | 249 | 552  | 32705  | 33008  |
| UN41617 | Rsa1.0.09707.1 | 767  | 6199   | 1.00E-123 | 309 | 338 | 91 +  | 430 | 767  | 5205   | 5529   |
| UN41618 | Rsa1.0.00802.1 | 1076 | 63846  | 1.00E-102 | 246 | 261 | 94 +  | 818 | 1076 | 17081  | 17340  |
| UN41619 | Rsa1.0.08339.1 | 607  | 7509   | 0         | 488 | 514 | 94 -  | 4   | 511  | 2566   | 3079   |
| UN41620 | Rsa1.0.00038.1 | 752  | 314568 | 1.00E-143 | 278 | 282 | 98 -  | 465 | 745  | 307194 | 307474 |
| UN41621 | Rsa1.0.04218.1 | 770  | 18423  | 1.00E-180 | 374 | 391 | 95 -  | 384 | 770  | 16926  | 17308  |
| UN41622 | Rsa1.0.00135.1 | 811  | 178077 | 0         | 353 | 354 | 99 -  | 3   | 356  | 113811 | 114164 |
| UN41623 | Rsa1.0.00555.1 | 732  | 75920  | 0         | 578 | 599 | 96 -  | 91  | 683  | 51205  | 51801  |
| UN41624 | Rsa1.0.01510.1 | 1100 | 44237  | 0         | 614 | 682 | 90 -  | 1   | 679  | 18824  | 19474  |
| UN41625 | Rsa1.0.02964.1 | 872  | 26407  | 1.00E-151 | 281 | 283 | 99 +  | 590 | 872  | 14541  | 14822  |
| UN41626 | Rsa1.0.00073.1 | 718  | 240924 | 1.00E-86  | 214 | 231 | 92 +  | 365 | 594  | 95380  | 95601  |
| UN41627 | Rsa1.0.75894.1 | 689  | 302    | 1.00E-112 | 205 | 205 | 100 - | 485 | 689  | 98     | 302    |
| UN41628 | Rsa1.0.03157.1 | 911  | 24955  | 1.00E-147 | 287 | 294 | 97 +  | 457 | 746  | 1625   | 1918   |
| UN41629 | Rsa1.0.00335.1 | 838  | 94371  | 1.00E-120 | 247 | 252 | 98 -  | 586 | 836  | 33599  | 33848  |
| UN41630 | Rsa1.0.00692.1 | 969  | 68151  | 0         | 615 | 679 | 90 -  | 3   | 681  | 52276  | 52954  |
| UN41631 | Rsa1.0.00108.1 | 907  | 478491 | 1.00E-89  | 168 | 168 | 100 + | 351 | 518  | 279007 | 279174 |
| UN41632 | Rsa1.0.00008.1 | 1326 | 358124 | 1.00E-129 | 324 | 356 | 91 -  | 966 | 1306 | 162278 | 162632 |
| UN41633 | Rsa1.0.01286.1 | 776  | 49209  | 1.00E-151 | 271 | 271 | 100 + | 506 | 776  | 3049   | 3319   |
| UN41634 | Rsa1.0.04961.1 | 666  | 15316  | 1.00E-159 | 288 | 289 | 99 +  | 374 | 662  | 13226  | 13514  |
| UN41635 | Rsa1.0.00469.1 | 651  | 82084  | 0         | 620 | 660 | 93 -  | 1   | 649  | 56543  | 57193  |
| UN41636 | Rsa1.0.00798.1 | 832  | 63945  | 0         | 427 | 438 | 97 -  | 144 | 581  | 45476  | 45913  |
| UN41637 | Rsa1.0.00124.1 | 762  | 262503 | 1.00E-109 | 222 | 229 | 96 +  | 211 | 439  | 16355  | 16583  |
| UN41638 | Rsa1.0.01492.1 | 815  | 44704  | 3.00E-81  | 166 | 170 | 97 -  | 362 | 531  | 27037  | 27206  |
| UN41639 | Rsa1.0.00065.1 | 964  | 454616 | 1.00E-139 | 296 | 310 | 95 -  | 655 | 964  | 172359 | 172666 |
| UN41640 | Rsa1.0.02428.1 | 952  | 31542  | 8.00E-76  | 151 | 153 | 98 -  | 543 | 695  | 16105  | 16257  |
| UN41641 | Rsa1.0.27652.1 | 888  | 844    | 0         | 500 | 501 | 99 +  | 1   | 501  | 267    | 767    |
| UN41642 | Rsa1.0.02345.1 | 525  | 32337  | 1.00E-103 | 227 | 238 | 95 +  | 264 | 499  | 17017  | 17254  |
| UN41643 | Rsa1.0.00108.1 | 1143 | 478491 | 2.00E-70  | 171 | 182 | 93 -  | 795 | 973  | 422701 | 422882 |
| UN41644 | Rsa1.0.02133.1 | 559  | 34726  | 0         | 448 | 454 | 98 +  | 3   | 456  | 33538  | 33989  |
| UN41645 | Rsa1.0.05418.1 | 712  | 13816  | 0         | 377 | 379 | 99 +  | 335 | 712  | 2041   | 2419   |
| UN41646 | Rsa1.0.01838.1 | 838  | 38500  | 1.00E-143 | 306 | 322 | 95 -  | 106 | 427  | 17537  | 17858  |
| UN41647 | Rsa1.0.02817.1 | 746  | 27644  | 0         | 741 | 744 | 99 +  | 3   | 746  | 8965   | 9708   |
| UN41648 | Rsa1.0.00286.1 | 495  | 98709  | 2.00E-72  | 160 | 167 | 95 +  | 49  | 215  | 11286  | 11452  |
| UN41649 | Rsa1.0.02846.1 | 779  | 27338  | 0         | 696 | 706 | 98 +  | 1   | 703  | 19946  | 20651  |
| UN41650 | Rsa1.0.00017.1 | 404  | 752458 | 5.00E-78  | 201 | 217 | 92 -  | 33  | 247  | 271555 | 271768 |

|         |                |      |        |           |      |      |       |     |      |        |        |
|---------|----------------|------|--------|-----------|------|------|-------|-----|------|--------|--------|
| UN41651 | Rsa1.0.00629.1 | 560  | 71381  | 1.00E-85  | 170  | 173  | 98 +  | 3   | 175  | 39232  | 39404  |
| UN41652 | Rsa1.0.02923.1 | 720  | 26736  | 0         | 617  | 664  | 92 -  | 25  | 688  | 14986  | 15645  |
| UN41653 | Rsa1.0.01126.1 | 710  | 53127  | 0         | 684  | 710  | 96 -  | 1   | 710  | 37566  | 38275  |
| UN41654 | Rsa1.0.00720.1 | 614  | 66931  | 1.00E-151 | 336  | 355  | 94 +  | 263 | 613  | 26080  | 26431  |
| UN41655 | Rsa1.0.01828.1 | 912  | 38681  | 0         | 817  | 834  | 97 -  | 79  | 912  | 6850   | 7683   |
| UN41656 | Rsa1.0.01523.1 | 921  | 43959  | 7.00E-67  | 133  | 134  | 99 -  | 350 | 483  | 3644   | 3777   |
| UN41657 | Rsa1.0.06160.1 | 847  | 11596  | 0         | 818  | 853  | 95 +  | 1   | 847  | 3984   | 4835   |
| UN41658 | Rsa1.0.00092.1 | 539  | 659932 | 0         | 515  | 532  | 96 +  | 4   | 535  | 650841 | 651366 |
| UN41659 | Rsa1.0.01786.1 | 1106 | 133324 | 0         | 826  | 868  | 95 +  | 20  | 881  | 98696  | 99561  |
| UN41660 | Rsa1.0.00152.1 | 1118 | 257730 | 1.00E-162 | 444  | 500  | 88 -  | 196 | 683  | 76320  | 76807  |
| UN41661 | Rsa1.0.01832.1 | 1079 | 38581  | 1.00E-157 | 321  | 331  | 96 +  | 751 | 1077 | 35460  | 35788  |
| UN41662 | Rsa1.0.00179.1 | 302  | 393324 | 2.00E-89  | 198  | 207  | 95 -  | 97  | 302  | 352534 | 352740 |
| UN41663 | Rsa1.0.02178.1 | 777  | 156197 | 1.00E-144 | 260  | 260  | 100 - | 249 | 508  | 12722  | 12981  |
| UN41664 | Rsa1.0.05894.1 | 629  | 12306  | 0         | 609  | 628  | 96 -  | 3   | 629  | 8532   | 9158   |
| UN41665 | Rsa1.0.01951.1 | 653  | 36941  | 1.00E-141 | 331  | 361  | 91 +  | 3   | 349  | 12706  | 13057  |
| UN41666 | Rsa1.0.00340.1 | 701  | 305782 | 0         | 390  | 407  | 95 -  | 301 | 699  | 159687 | 160093 |
| UN41667 | Rsa1.0.00145.1 | 823  | 261008 | 0         | 409  | 414  | 98 -  | 408 | 821  | 95930  | 96342  |
| UN41668 | Rsa1.0.00294.1 | 506  | 144860 | 1.00E-103 | 279  | 309  | 90 +  | 5   | 304  | 54796  | 55096  |
| UN41669 | Rsa1.0.00301.1 | 558  | 365315 | 0         | 529  | 557  | 94 +  | 3   | 558  | 27291  | 27843  |
| UN41670 | Rsa1.0.00690.1 | 615  | 140527 | 0         | 376  | 390  | 96 -  | 226 | 615  | 12354  | 12743  |
| UN41671 | Rsa1.0.36260.1 | 707  | 622    | 8.00E-69  | 184  | 201  | 91 -  | 171 | 371  | 422    | 622    |
| UN41672 | Rsa1.0.18460.1 | 489  | 1595   | 1.00E-165 | 445  | 492  | 90 -  | 2   | 487  | 760    | 1231   |
| UN41673 | Rsa1.0.01512.1 | 889  | 44234  | 1.00E-159 | 365  | 394  | 92 -  | 3   | 385  | 32378  | 32765  |
| UN41674 | Rsa1.0.00130.1 | 1114 | 125737 | 1.00E-113 | 311  | 343  | 90 -  | 4   | 345  | 80395  | 80735  |
| UN41675 | Rsa1.0.00171.1 | 700  | 115622 | 0         | 475  | 491  | 96 +  | 113 | 603  | 113874 | 114364 |
| UN41676 | Rsa1.0.14327.1 | 703  | 3518   | 0         | 660  | 692  | 95 -  | 11  | 702  | 621    | 1297   |
| UN41677 | Rsa1.0.00562.1 | 1303 | 75565  | 0         | 1138 | 1215 | 93 -  | 115 | 1300 | 23842  | 25040  |
| UN41678 | Rsa1.0.04123.1 | 675  | 18947  | 0         | 644  | 676  | 95 +  | 2   | 673  | 11874  | 12549  |
| UN41679 | Rsa1.0.04602.1 | 1056 | 16684  | 0         | 451  | 465  | 96 +  | 591 | 1054 | 3198   | 3662   |
| UN41680 | Rsa1.0.00230.1 | 215  | 105389 | 3.00E-53  | 144  | 153  | 94 -  | 54  | 205  | 2566   | 2715   |
| UN41681 | Rsa1.0.01552.1 | 646  | 43396  | 3.00E-99  | 260  | 284  | 91 +  | 374 | 646  | 12725  | 13008  |
| UN41682 | Rsa1.0.00503.1 | 611  | 79468  | 4.00E-64  | 159  | 169  | 94 +  | 11  | 176  | 65501  | 65666  |
| UN41683 | Rsa1.0.00457.1 | 884  | 337301 | 0         | 876  | 883  | 99 +  | 2   | 884  | 159608 | 160489 |
| UN41684 | Rsa1.0.02117.1 | 1504 | 34843  | 1.00E-145 | 271  | 274  | 98 -  | 272 | 545  | 15985  | 16258  |
| UN41685 | Rsa1.0.04542.1 | 868  | 16930  | 2.00E-98  | 270  | 303  | 89 +  | 3   | 298  | 14616  | 14898  |
| UN41686 | Rsa1.0.00250.1 | 838  | 273771 | 0         | 480  | 484  | 99 -  | 8   | 491  | 32014  | 32496  |
| UN41687 | Rsa1.0.02493.1 | 646  | 30854  | 1.00E-137 | 274  | 281  | 97 +  | 121 | 396  | 6059   | 6339   |
| UN41688 | Rsa1.0.01997.1 | 1422 | 158416 | 1.00E-149 | 305  | 316  | 96 -  | 1   | 314  | 9830   | 10145  |
| UN41689 | Rsa1.0.04588.1 | 1268 | 16739  | 0         | 412  | 432  | 95 +  | 842 | 1268 | 1662   | 2093   |

|         |                |      |        |           |      |      |       |     |      |        |        |
|---------|----------------|------|--------|-----------|------|------|-------|-----|------|--------|--------|
| UN41690 | Rsa1.0.00065.1 | 1097 | 454616 | 0         | 446  | 460  | 96 -  | 638 | 1097 | 195255 | 195711 |
| UN41691 | Rsa1.0.00273.1 | 609  | 326186 | 1.00E-104 | 220  | 229  | 96 -  | 381 | 609  | 26850  | 27078  |
| UN41692 | Rsa1.0.00029.1 | 698  | 272992 | 1.00E-67  | 155  | 163  | 95 +  | 179 | 341  | 13039  | 13201  |
| UN41693 | Rsa1.0.00593.1 | 713  | 143463 | 1.00E-147 | 265  | 265  | 100 - | 447 | 711  | 54715  | 54979  |
| UN41694 | Rsa1.0.02504.1 | 694  | 30706  | 4.00E-40  | 97   | 101  | 96 -  | 400 | 500  | 7197   | 7297   |
| UN41695 | Rsa1.0.01282.1 | 682  | 49304  | 0         | 633  | 681  | 92 +  | 1   | 680  | 26601  | 27257  |
| UN41696 | Rsa1.0.02605.1 | 707  | 29637  | 1.00E-117 | 271  | 288  | 94 +  | 3   | 289  | 12918  | 13202  |
| UN41697 | Rsa1.0.02392.1 | 746  | 152517 | 1.00E-160 | 329  | 338  | 97 +  | 4   | 339  | 25808  | 26143  |
| UN41698 | Rsa1.0.14042.1 | 732  | 3881   | 0         | 725  | 731  | 99 -  | 2   | 732  | 1641   | 2371   |
| UN41699 | Rsa1.0.38721.1 | 588  | 581    | 1.00E-147 | 285  | 291  | 97 +  | 8   | 296  | 291    | 581    |
| UN41700 | Rsa1.0.13686.1 | 489  | 4480   | 0         | 474  | 491  | 96 +  | 1   | 489  | 404    | 892    |
| UN41701 | Rsa1.0.01527.1 | 1218 | 43905  | 1.00E-143 | 308  | 322  | 95 -  | 897 | 1218 | 31237  | 31556  |
| UN41702 | Rsa1.0.00991.1 | 1206 | 143101 | 0         | 910  | 961  | 94 -  | 2   | 946  | 34237  | 35183  |
| UN41703 | Rsa1.0.00124.1 | 500  | 262503 | 3.00E-74  | 234  | 256  | 91 -  | 252 | 500  | 47449  | 47697  |
| UN41704 | Rsa1.0.03256.1 | 810  | 24305  | 1.00E-132 | 263  | 271  | 97 -  | 31  | 301  | 23207  | 23477  |
| UN41705 | Rsa1.0.02429.1 | 752  | 31527  | 0         | 497  | 526  | 94 +  | 45  | 570  | 9762   | 10284  |
| UN41706 | Rsa1.0.03330.1 | 1131 | 23671  | 1.00E-147 | 322  | 340  | 94 +  | 793 | 1130 | 11643  | 11978  |
| UN41707 | Rsa1.0.03826.1 | 835  | 20614  | 3.00E-87  | 252  | 281  | 89 +  | 2   | 282  | 13341  | 13607  |
| UN41708 | Rsa1.0.00283.1 | 1110 | 183797 | 1.00E-134 | 246  | 247  | 99 +  | 172 | 418  | 173019 | 173265 |
| UN41709 | Rsa1.0.01728.1 | 1335 | 40239  | 0         | 1256 | 1353 | 92 -  | 1   | 1334 | 3994   | 5337   |
| UN41710 | Rsa1.0.00271.1 | 621  | 101125 | 1.00E-98  | 225  | 238  | 94 +  | 380 | 615  | 80400  | 80637  |
| UN41711 | Rsa1.0.02813.1 | 490  | 27656  | 3.00E-80  | 220  | 246  | 89 +  | 123 | 368  | 25679  | 25909  |
| UN41712 | Rsa1.0.06168.1 | 815  | 11580  | 1.00E-140 | 342  | 371  | 92 +  | 437 | 790  | 8500   | 8870   |
| UN41713 | Rsa1.0.01313.1 | 769  | 48387  | 1.00E-114 | 240  | 249  | 96 +  | 1   | 248  | 12996  | 13244  |
| UN41714 | Rsa1.0.00342.1 | 732  | 93695  | 0         | 400  | 414  | 96 -  | 75  | 488  | 15061  | 15471  |
| UN41715 | Rsa1.0.03958.1 | 457  | 19868  | 2.00E-93  | 214  | 226  | 94 +  | 232 | 457  | 16483  | 16702  |
| UN41716 | Rsa1.0.54025.1 | 872  | 422    | 0         | 411  | 422  | 97 +  | 219 | 637  | 1      | 422    |
| UN41717 | Rsa1.0.00104.1 | 761  | 368722 | 2.00E-91  | 192  | 199  | 96 -  | 563 | 761  | 333261 | 333459 |
| UN41718 | Rsa1.0.01239.1 | 1185 | 50107  | 0         | 1114 | 1158 | 96 -  | 3   | 1159 | 19411  | 20553  |
| UN41719 | Rsa1.0.02003.1 | 868  | 36171  | 1.00E-77  | 307  | 357  | 85 -  | 512 | 867  | 31514  | 31850  |
| UN41720 | Rsa1.0.01838.1 | 789  | 38500  | 0         | 745  | 759  | 98 -  | 1   | 759  | 8300   | 9057   |
| UN41721 | Rsa1.0.00077.1 | 654  | 145005 | 0         | 573  | 588  | 97 +  | 3   | 589  | 1855   | 2442   |
| UN41722 | Rsa1.0.02271.1 | 821  | 157424 | 1.00E-155 | 386  | 420  | 91 -  | 6   | 424  | 147642 | 148058 |
| UN41723 | Rsa1.0.00026.1 | 720  | 327835 | 0         | 458  | 467  | 98 -  | 256 | 720  | 177110 | 177576 |
| UN41724 | Rsa1.0.00048.1 | 572  | 167185 | 1.00E-141 | 319  | 337  | 94 -  | 239 | 572  | 144486 | 144821 |
| UN41725 | Rsa1.0.03452.1 | 1042 | 22817  | 0         | 927  | 951  | 97 +  | 2   | 951  | 2654   | 3604   |
| UN41726 | Rsa1.0.00645.1 | 702  | 189716 | 2.00E-91  | 202  | 211  | 95 -  | 285 | 494  | 148236 | 148446 |
| UN41727 | Rsa1.0.00796.1 | 613  | 63997  | 1.00E-153 | 306  | 316  | 96 -  | 292 | 607  | 35846  | 36158  |
| UN41728 | Rsa1.0.00533.1 | 737  | 77375  | 0         | 533  | 546  | 97 -  | 192 | 735  | 4487   | 5028   |



|         |                |      |        |           |      |      |      |      |      |        |        |
|---------|----------------|------|--------|-----------|------|------|------|------|------|--------|--------|
| UN41729 | Rsa1.0.01361.1 | 1306 | 47226  | 0         | 1025 | 1078 | 95 - | 210  | 1287 | 36994  | 38050  |
| UN41730 | Rsa1.0.02872.1 | 794  | 27080  | 0         | 356  | 366  | 97 - | 3    | 368  | 12112  | 12477  |
| UN41731 | Rsa1.0.03664.1 | 583  | 21487  | 1.00E-106 | 211  | 216  | 97 - | 327  | 542  | 7048   | 7263   |
| UN41732 | Rsa1.0.00964.1 | 867  | 316648 | 1.00E-175 | 348  | 360  | 96 + | 506  | 865  | 304161 | 304520 |
| UN41733 | Rsa1.0.02935.1 | 473  | 26621  | 2.00E-78  | 181  | 191  | 94 + | 3    | 193  | 24481  | 24668  |
| UN41734 | Rsa1.0.14767.1 | 464  | 3079   | 1.00E-138 | 307  | 324  | 94 - | 139  | 460  | 2587   | 2909   |
| UN41735 | Rsa1.0.00601.1 | 884  | 177045 | 1.00E-165 | 352  | 370  | 95 - | 517  | 883  | 26140  | 26496  |
| UN41736 | Rsa1.0.01836.1 | 593  | 38503  | 0         | 567  | 595  | 95 - | 1    | 590  | 17891  | 18485  |
| UN41737 | Rsa1.0.00323.1 | 1088 | 159650 | 0         | 816  | 865  | 94 + | 225  | 1086 | 148966 | 149828 |
| UN41738 | Rsa1.0.00502.1 | 718  | 204180 | 6.00E-82  | 181  | 187  | 96 - | 533  | 718  | 182264 | 182449 |
| UN41739 | Rsa1.0.05938.1 | 866  | 12173  | 0         | 832  | 870  | 95 + | 1    | 866  | 3002   | 3866   |
| UN41740 | Rsa1.0.00235.1 | 877  | 154696 | 0         | 431  | 452  | 95 - | 385  | 835  | 139922 | 140365 |
| UN41741 | Rsa1.0.01617.1 | 1280 | 42127  | 0         | 380  | 396  | 95 + | 378  | 766  | 24907  | 25302  |
| UN41742 | Rsa1.0.01454.1 | 1370 | 45440  | 1.00E-148 | 322  | 338  | 95 + | 1037 | 1366 | 12955  | 13292  |
| UN41743 | Rsa1.0.00683.1 | 523  | 68638  | 0         | 492  | 515  | 95 - | 3    | 516  | 58854  | 59368  |
| UN41744 | Rsa1.0.00285.1 | 1675 | 149638 | 1.00E-154 | 294  | 300  | 98 + | 1350 | 1649 | 56343  | 56642  |
| UN41745 | Rsa1.0.36399.1 | 578  | 620    | 1.00E-164 | 327  | 335  | 97 - | 1    | 335  | 2      | 332    |
| UN41746 | Rsa1.0.02508.1 | 816  | 30675  | 0         | 381  | 391  | 97 + | 3    | 393  | 20157  | 20545  |
| UN41747 | Rsa1.0.00421.1 | 745  | 86365  | 1.00E-74  | 248  | 276  | 89 - | 470  | 738  | 82660  | 82933  |
| UN41748 | Rsa1.0.01536.1 | 661  | 43747  | 0         | 338  | 339  | 99 - | 323  | 661  | 23585  | 23923  |
| UN41749 | Rsa1.0.00023.1 | 1358 | 194764 | 1.00E-166 | 324  | 332  | 97 + | 3    | 333  | 182540 | 182871 |
| UN41750 | Rsa1.0.01655.1 | 767  | 41508  | 0         | 397  | 413  | 96 + | 1    | 411  | 1676   | 2088   |
| UN41751 | Rsa1.0.00266.1 | 879  | 163932 | 1.00E-100 | 195  | 198  | 98 + | 465  | 662  | 7175   | 7372   |
| UN41752 | Rsa1.0.08192.1 | 837  | 7762   | 0         | 425  | 433  | 98 - | 405  | 837  | 2266   | 2698   |
| UN41753 | Rsa1.0.09048.1 | 739  | 6683   | 0         | 703  | 738  | 95 + | 2    | 738  | 4024   | 4758   |
| UN41754 | Rsa1.0.00046.1 | 737  | 320315 | 0         | 736  | 737  | 99 - | 1    | 737  | 316077 | 316813 |
| UN41755 | Rsa1.0.00964.1 | 672  | 316648 | 0         | 638  | 668  | 95 - | 1    | 667  | 264786 | 265435 |
| UN41756 | Rsa1.0.05795.1 | 1114 | 12609  | 0         | 1107 | 1113 | 99 - | 3    | 1114 | 7706   | 8818   |
| UN41757 | Rsa1.0.02893.1 | 510  | 26999  | 1.00E-144 | 262  | 263  | 99 - | 248  | 510  | 24352  | 24614  |
| UN41758 | Rsa1.0.02642.1 | 819  | 29181  | 0         | 412  | 416  | 99 + | 3    | 417  | 14546  | 14961  |
| UN41759 | Rsa1.0.02928.1 | 873  | 26680  | 0         | 505  | 538  | 93 - | 336  | 873  | 20005  | 20537  |
| UN41760 | Rsa1.0.01034.1 | 588  | 56046  | 1.00E-108 | 214  | 219  | 97 - | 3    | 221  | 35993  | 36211  |
| UN41761 | Rsa1.0.01422.1 | 776  | 46172  | 0         | 690  | 723  | 95 + | 59   | 771  | 39272  | 39991  |
| UN41762 | Rsa1.0.00373.1 | 1350 | 90296  | 1.00E-167 | 337  | 350  | 96 - | 323  | 672  | 71492  | 71841  |
| UN41763 | Rsa1.0.08779.1 | 651  | 6929   | 0         | 608  | 628  | 96 + | 19   | 646  | 2716   | 3340   |
| UN41764 | Rsa1.0.02551.1 | 575  | 30196  | 2.00E-97  | 242  | 261  | 92 + | 1    | 258  | 16656  | 16908  |
| UN41765 | Rsa1.0.02884.1 | 759  | 27034  | 0         | 642  | 678  | 94 - | 3    | 668  | 12569  | 13242  |
| UN41766 | Rsa1.0.00092.1 | 370  | 659932 | 2.00E-71  | 200  | 215  | 93 - | 162  | 370  | 190125 | 190338 |
| UN41767 | Rsa1.0.00201.1 | 743  | 232851 | 5.00E-92  | 215  | 229  | 93 + | 510  | 738  | 4150   | 4369   |

|         |                |      |        |           |     |     |       |     |      |        |        |
|---------|----------------|------|--------|-----------|-----|-----|-------|-----|------|--------|--------|
| UN41768 | Rsa1.0.01146.1 | 635  | 163455 | 1.00E-103 | 276 | 299 | 92 +  | 341 | 633  | 162766 | 163062 |
| UN41769 | Rsa1.0.00662.1 | 619  | 192183 | 1.00E-155 | 300 | 305 | 98 -  | 315 | 619  | 11331  | 11633  |
| UN41770 | Rsa1.0.00978.1 | 782  | 57739  | 0         | 492 | 507 | 97 -  | 1   | 507  | 1744   | 2250   |
| UN41771 | Rsa1.0.00394.1 | 1340 | 148426 | 1.00E-172 | 374 | 396 | 94 -  | 3   | 395  | 107052 | 107447 |
| UN41772 | Rsa1.0.00949.1 | 513  | 58549  | 1.00E-97  | 250 | 269 | 92 -  | 254 | 513  | 15587  | 15851  |
| UN41773 | Rsa1.0.00744.1 | 650  | 66084  | 1.00E-73  | 147 | 149 | 98 +  | 2   | 150  | 31989  | 32137  |
| UN41774 | Rsa1.0.00821.1 | 602  | 62891  | 0         | 439 | 460 | 95 -  | 71  | 529  | 5144   | 5601   |
| UN41775 | Rsa1.0.00240.1 | 1029 | 104175 | 0         | 539 | 548 | 98 -  | 482 | 1029 | 96799  | 97346  |
| UN41776 | Rsa1.0.00387.1 | 642  | 495407 | 0         | 540 | 543 | 99 +  | 5   | 547  | 468167 | 468709 |
| UN41777 | Rsa1.0.01022.1 | 814  | 56606  | 0         | 370 | 382 | 96 -  | 433 | 814  | 14341  | 14719  |
| UN41778 | Rsa1.0.02045.1 | 776  | 35650  | 0         | 757 | 780 | 97 -  | 2   | 775  | 15147  | 15923  |
| UN41779 | Rsa1.0.01993.1 | 712  | 36384  | 0         | 685 | 724 | 94 -  | 7   | 712  | 8987   | 9708   |
| UN41780 | Rsa1.0.00799.1 | 868  | 63918  | 6.00E-95  | 225 | 239 | 94 -  | 611 | 843  | 10667  | 10902  |
| UN41781 | Rsa1.0.00352.1 | 682  | 92266  | 0         | 405 | 406 | 99 -  | 277 | 682  | 63746  | 64151  |
| UN41782 | Rsa1.0.00842.1 | 520  | 62493  | 2.00E-53  | 128 | 135 | 94 -  | 131 | 265  | 39447  | 39581  |
| UN41783 | Rsa1.0.01561.1 | 853  | 43227  | 1.00E-129 | 277 | 291 | 95 -  | 35  | 325  | 28427  | 28717  |
| UN41784 | Rsa1.0.00176.1 | 1144 | 240984 | 2.00E-43  | 121 | 131 | 92 +  | 895 | 1025 | 18131  | 18261  |
| UN41785 | Rsa1.0.03100.1 | 1049 | 25411  | 1.00E-142 | 294 | 305 | 96 +  | 612 | 916  | 1871   | 2174   |
| UN41786 | Rsa1.0.01605.1 | 1140 | 42442  | 0         | 427 | 431 | 99 -  | 710 | 1138 | 7045   | 7475   |
| UN41787 | Rsa1.0.03238.1 | 766  | 24432  | 0         | 669 | 736 | 90 +  | 1   | 725  | 3548   | 4256   |
| UN41788 | Rsa1.0.02855.1 | 775  | 27271  | 0         | 383 | 391 | 97 +  | 94  | 484  | 10359  | 10749  |
| UN41789 | Rsa1.0.02806.1 | 795  | 27696  | 1.00E-125 | 301 | 318 | 94 +  | 2   | 315  | 4909   | 5223   |
| UN41790 | Rsa1.0.00205.1 | 1354 | 193401 | 0         | 612 | 629 | 97 -  | 557 | 1185 | 181764 | 182392 |
| UN41791 | Rsa1.0.00173.1 | 534  | 288743 | 1.00E-177 | 370 | 390 | 94 -  | 138 | 518  | 39208  | 39597  |
| UN41792 | Rsa1.0.03135.1 | 595  | 25114  | 0         | 589 | 592 | 99 -  | 1   | 592  | 2092   | 2683   |
| UN41793 | Rsa1.0.01182.1 | 795  | 167304 | 1.00E-118 | 225 | 228 | 98 +  | 234 | 461  | 165655 | 165882 |
| UN41794 | Rsa1.0.01732.1 | 1226 | 40194  | 0         | 746 | 747 | 99 +  | 1   | 746  | 24242  | 24988  |
| UN41795 | Rsa1.0.02794.1 | 785  | 27820  | 0         | 472 | 477 | 98 -  | 2   | 478  | 618    | 1094   |
| UN41796 | Rsa1.0.34213.1 | 827  | 662    | 1.00E-105 | 273 | 300 | 91 -  | 48  | 341  | 161    | 454    |
| UN41797 | Rsa1.0.02722.1 | 920  | 28417  | 0         | 413 | 422 | 97 -  | 502 | 920  | 266    | 687    |
| UN41798 | Rsa1.0.03247.1 | 1161 | 24371  | 0         | 729 | 758 | 96 +  | 1   | 752  | 11700  | 12457  |
| UN41799 | Rsa1.0.00090.1 | 685  | 273859 | 0         | 494 | 508 | 97 -  | 5   | 511  | 148579 | 149086 |
| UN41800 | Rsa1.0.00253.1 | 698  | 231292 | 7.00E-97  | 180 | 180 | 100 + | 144 | 323  | 90022  | 90201  |
| UN41801 | Rsa1.0.01675.1 | 1476 | 41155  | 1.00E-152 | 298 | 306 | 97 -  | 271 | 576  | 40809  | 41114  |
| UN41802 | Rsa1.0.00094.1 | 701  | 139042 | 5.00E-95  | 198 | 205 | 96 +  | 153 | 357  | 118743 | 118947 |
| UN41803 | Rsa1.0.00619.1 | 628  | 71985  | 1.00E-156 | 299 | 304 | 98 +  | 1   | 303  | 69770  | 70073  |
| UN41804 | Rsa1.0.00316.1 | 1082 | 96264  | 0         | 413 | 432 | 95 -  | 637 | 1064 | 83931  | 84355  |
| UN41805 | Rsa1.0.00208.1 | 516  | 108565 | 1.00E-139 | 382 | 426 | 89 -  | 101 | 501  | 20228  | 20652  |
| UN41806 | Rsa1.0.00614.1 | 623  | 72276  | 1.00E-130 | 272 | 280 | 97 -  | 10  | 288  | 44076  | 44353  |

|         |                |      |        |           |      |      |       |     |      |        |        |
|---------|----------------|------|--------|-----------|------|------|-------|-----|------|--------|--------|
| UN41807 | Rsa1.0.02874.1 | 869  | 27070  | 1.00E-148 | 266  | 266  | 100 - | 1   | 266  | 3255   | 3520   |
| UN41808 | Rsa1.0.00370.1 | 845  | 90472  | 0         | 395  | 421  | 93 +  | 1   | 421  | 41151  | 41561  |
| UN41809 | Rsa1.0.02449.1 | 982  | 31292  | 2.00E-42  | 99   | 101  | 98 +  | 57  | 156  | 13359  | 13459  |
| UN41810 | Rsa1.0.00782.1 | 357  | 64468  | 1.00E-147 | 294  | 303  | 97 +  | 54  | 354  | 13384  | 13686  |
| UN41811 | Rsa1.0.00681.1 | 1372 | 68779  | 1.00E-107 | 225  | 234  | 96 +  | 46  | 279  | 52497  | 52730  |
| UN41812 | Rsa1.0.00016.1 | 503  | 831256 | 0         | 494  | 519  | 95 +  | 1   | 501  | 267946 | 268461 |
| UN41813 | Rsa1.0.01603.1 | 931  | 42468  | 0         | 484  | 485  | 99 -  | 3   | 486  | 17728  | 18212  |
| UN41814 | Rsa1.0.01712.1 | 814  | 154210 | 0         | 390  | 392  | 99 -  | 3   | 394  | 24389  | 24780  |
| UN41815 | Rsa1.0.00793.1 | 811  | 64103  | 1.00E-133 | 297  | 313  | 94 -  | 3   | 313  | 61222  | 61529  |
| UN41816 | Rsa1.0.04641.1 | 680  | 268012 | 0         | 383  | 383  | 100 - | 3   | 385  | 261463 | 261845 |
| UN41817 | Rsa1.0.02851.1 | 901  | 27295  | 0         | 406  | 408  | 99 +  | 208 | 615  | 11791  | 12198  |
| UN41818 | Rsa1.0.17720.1 | 916  | 1757   | 1.00E-135 | 269  | 278  | 96 -  | 5   | 275  | 1100   | 1377   |
| UN41819 | Rsa1.0.05036.1 | 844  | 15058  | 0         | 549  | 564  | 97 -  | 9   | 571  | 14000  | 14563  |
| UN41820 | Rsa1.0.00128.1 | 1158 | 228675 | 0         | 1152 | 1157 | 99 -  | 1   | 1155 | 177257 | 178413 |
| UN41821 | Rsa1.0.05518.1 | 790  | 13459  | 1.00E-132 | 242  | 243  | 99 -  | 375 | 617  | 5665   | 5907   |
| UN41822 | Rsa1.0.01904.1 | 852  | 37450  | 0         | 472  | 499  | 94 -  | 1   | 494  | 11929  | 12426  |
| UN41823 | Rsa1.0.02855.1 | 732  | 27271  | 0         | 693  | 730  | 94 -  | 3   | 732  | 22151  | 22874  |
| UN41824 | Rsa1.0.03664.1 | 595  | 21487  | 1.00E-107 | 212  | 217  | 97 +  | 25  | 241  | 7047   | 7263   |
| UN41825 | Rsa1.0.01251.1 | 998  | 49873  | 0         | 937  | 969  | 96 -  | 35  | 997  | 27202  | 28165  |
| UN41826 | Rsa1.0.00827.1 | 630  | 62790  | 0         | 624  | 630  | 99 +  | 2   | 630  | 38409  | 39038  |
| UN41827 | Rsa1.0.24305.1 | 965  | 994    | 1.00E-140 | 268  | 273  | 98 +  | 427 | 699  | 655    | 927    |
| UN41828 | Rsa1.0.00879.1 | 570  | 61297  | 1.00E-103 | 208  | 213  | 97 +  | 358 | 568  | 55990  | 56202  |
| UN41829 | Rsa1.0.01031.1 | 692  | 56236  | 5.00E-67  | 156  | 164  | 95 +  | 502 | 662  | 41501  | 41664  |
| UN41830 | Rsa1.0.02229.1 | 824  | 33672  | 1.00E-116 | 226  | 230  | 98 +  | 7   | 236  | 15374  | 15600  |
| UN41831 | Rsa1.0.00179.1 | 648  | 393324 | 1.00E-151 | 293  | 300  | 97 -  | 3   | 302  | 351933 | 352228 |
| UN41832 | Rsa1.0.01717.1 | 653  | 143162 | 1.00E-134 | 266  | 274  | 97 -  | 116 | 389  | 15706  | 15979  |
| UN41833 | #              | #    | #      | #         | #    | #    | #     | #   | #    | #      | #      |
| UN41834 | Rsa1.0.00821.1 | 923  | 62891  | 2.00E-98  | 207  | 215  | 96 +  | 389 | 603  | 49645  | 49859  |
| UN41835 | Rsa1.0.02820.1 | 944  | 27629  | 0         | 358  | 366  | 97 -  | 579 | 944  | 22435  | 22799  |
| UN41836 | Rsa1.0.00152.1 | 513  | 257730 | 1.00E-45  | 230  | 273  | 84 -  | 248 | 510  | 77855  | 78119  |
| UN41837 | Rsa1.0.06455.1 | 580  | 10983  | 3.00E-71  | 152  | 157  | 96 -  | 198 | 354  | 71     | 227    |
| UN41838 | Rsa1.0.22307.1 | 870  | 1132   | 1.00E-176 | 381  | 404  | 94 -  | 11  | 414  | 26     | 418    |
| UN41839 | Rsa1.0.01454.1 | 1121 | 45440  | 1.00E-129 | 325  | 354  | 91 -  | 766 | 1119 | 11011  | 11343  |
| UN41840 | Rsa1.0.00007.1 | 803  | 239325 | 1.00E-132 | 252  | 255  | 98 +  | 1   | 255  | 27778  | 28031  |
| UN41841 | Rsa1.0.12809.1 | 782  | 5119   | 1.00E-113 | 238  | 248  | 95 +  | 533 | 780  | 4445   | 4692   |
| UN41842 | Rsa1.0.00205.1 | 599  | 193401 | 2.00E-93  | 201  | 210  | 95 -  | 377 | 586  | 155377 | 155586 |
| UN41843 | Rsa1.0.03870.1 | 379  | 20362  | 1.00E-170 | 360  | 379  | 94 -  | 1   | 379  | 719    | 1097   |
| UN41844 | Rsa1.0.00637.1 | 1510 | 71038  | 0         | 859  | 872  | 98 +  | 2   | 873  | 2335   | 3204   |
| UN41845 | Rsa1.0.00385.1 | 558  | 89160  | 1.00E-125 | 274  | 286  | 95 +  | 272 | 557  | 31104  | 31384  |

|         |                |      |        |           |      |      |       |     |      |        |        |
|---------|----------------|------|--------|-----------|------|------|-------|-----|------|--------|--------|
| UN41846 | Rsa1.0.09388.1 | 1113 | 6405   | 1.00E-120 | 364  | 419  | 86 +  | 25  | 425  | 2808   | 3208   |
| UN41847 | Rsa1.0.00116.1 | 875  | 365886 | 0         | 467  | 480  | 97 -  | 400 | 875  | 350800 | 351278 |
| UN41848 | Rsa1.0.00253.1 | 702  | 231292 | 0         | 658  | 698  | 94 -  | 1   | 694  | 196761 | 197444 |
| UN41849 | Rsa1.0.00727.1 | 680  | 66724  | 0         | 397  | 402  | 98 +  | 275 | 676  | 43745  | 44146  |
| UN41850 | Rsa1.0.05123.1 | 682  | 14790  | 0         | 659  | 685  | 96 +  | 3   | 681  | 13959  | 14641  |
| UN41851 | Rsa1.0.00107.1 | 960  | 431659 | 0         | 701  | 704  | 99 +  | 114 | 817  | 14321  | 15024  |
| UN41852 | Rsa1.0.01516.1 | 981  | 44196  | 1.00E-151 | 320  | 335  | 95 +  | 646 | 980  | 36762  | 37094  |
| UN41853 | Rsa1.0.00067.1 | 666  | 415055 | 4.00E-80  | 169  | 175  | 96 +  | 1   | 175  | 388732 | 388900 |
| UN41854 | Rsa1.0.00568.1 | 824  | 75219  | 1.00E-134 | 266  | 274  | 97 -  | 1   | 274  | 17733  | 18006  |
| UN41855 | Rsa1.0.01230.1 | 770  | 50221  | 0         | 757  | 770  | 98 +  | 1   | 770  | 15053  | 15822  |
| UN41856 | Rsa1.0.00080.1 | 1028 | 190437 | 0         | 502  | 516  | 97 +  | 511 | 1026 | 96870  | 97382  |
| UN41857 | Rsa1.0.03418.1 | 869  | 147293 | 1.00E-124 | 226  | 226  | 100 - | 644 | 869  | 10112  | 10337  |
| UN41858 | Rsa1.0.03736.1 | 654  | 21081  | 1.00E-139 | 309  | 326  | 94 +  | 53  | 375  | 9944   | 10269  |
| UN41859 | Rsa1.0.00772.1 | 567  | 64856  | 5.00E-76  | 161  | 165  | 97 -  | 404 | 567  | 52932  | 53096  |
| UN41860 | Rsa1.0.01541.1 | 853  | 43682  | 0         | 743  | 783  | 94 +  | 3   | 781  | 6818   | 7585   |
| UN41861 | Rsa1.0.11428.1 | 1767 | 5511   | 0         | 1042 | 1043 | 99 -  | 2   | 1044 | 4231   | 5273   |
| UN41862 | Rsa1.0.06677.1 | 720  | 10560  | 1.00E-135 | 307  | 328  | 93 -  | 391 | 718  | 55     | 382    |
| UN41863 | Rsa1.0.00077.1 | 759  | 145005 | 0         | 426  | 441  | 96 -  | 319 | 759  | 138803 | 139241 |
| UN41864 | Rsa1.0.00660.1 | 1014 | 69688  | 1.00E-112 | 206  | 206  | 100 - | 445 | 650  | 63166  | 63371  |
| UN41865 | Rsa1.0.00928.1 | 628  | 59293  | 1.00E-104 | 263  | 285  | 92 -  | 351 | 625  | 30736  | 31019  |
| UN41866 | Rsa1.0.00069.1 | 923  | 403561 | 0         | 600  | 640  | 93 -  | 305 | 920  | 68462  | 69096  |
| UN41867 | Rsa1.0.00505.1 | 378  | 79323  | 7.00E-74  | 168  | 177  | 94 -  | 82  | 258  | 13080  | 13256  |
| UN41868 | Rsa1.0.03005.1 | 651  | 26082  | 0         | 630  | 669  | 94 +  | 1   | 651  | 23387  | 24052  |
| UN41869 | Rsa1.0.00182.1 | 782  | 142305 | 0         | 462  | 481  | 96 -  | 303 | 782  | 52821  | 53301  |
| UN41870 | Rsa1.0.01175.1 | 958  | 51674  | 1.00E-135 | 287  | 298  | 96 -  | 666 | 958  | 14569  | 14866  |
| UN41871 | Rsa1.0.06936.1 | 1123 | 10143  | 0         | 402  | 402  | 100 - | 1   | 402  | 502    | 903    |
| UN41872 | Rsa1.0.00071.1 | 1040 | 345714 | 1.00E-162 | 321  | 329  | 97 +  | 1   | 327  | 311411 | 311738 |
| UN41873 | Rsa1.0.21660.1 | 565  | 1184   | 1.00E-159 | 306  | 313  | 97 +  | 3   | 315  | 99     | 411    |
| UN41874 | Rsa1.0.03098.1 | 1171 | 25431  | 0         | 1107 | 1153 | 96 -  | 1   | 1136 | 12742  | 13894  |
| UN41875 | Rsa1.0.01977.1 | 442  | 36559  | 1.00E-110 | 229  | 238  | 96 +  | 111 | 348  | 23106  | 23343  |
| UN41876 | Rsa1.0.00003.1 | 306  | 340054 | 1.00E-90  | 245  | 271  | 90 +  | 36  | 306  | 190660 | 190918 |
| UN41877 | Rsa1.0.00510.1 | 912  | 78718  | 0         | 836  | 861  | 97 -  | 56  | 912  | 37773  | 38633  |
| UN41878 | Rsa1.0.02244.1 | 739  | 33494  | 0         | 406  | 419  | 96 -  | 321 | 739  | 10208  | 10626  |
| UN41879 | Rsa1.0.00385.1 | 633  | 89160  | 0         | 401  | 425  | 94 -  | 203 | 624  | 68845  | 69265  |
| UN41880 | Rsa1.0.01217.1 | 661  | 50554  | 0         | 629  | 661  | 95 +  | 2   | 661  | 47326  | 47976  |
| UN41881 | Rsa1.0.01149.1 | 637  | 160459 | 1.00E-128 | 329  | 359  | 91 +  | 5   | 359  | 152820 | 153168 |
| UN41882 | Rsa1.0.00415.1 | 744  | 86795  | 1.00E-160 | 342  | 359  | 95 -  | 1   | 359  | 4549   | 4906   |
| UN41883 | Rsa1.0.04489.1 | 879  | 17145  | 1.00E-162 | 292  | 293  | 99 -  | 585 | 877  | 8189   | 8481   |
| UN41884 | Rsa1.0.00604.1 | 688  | 146282 | 0         | 357  | 362  | 98 +  | 169 | 530  | 123280 | 123639 |

|         |                |      |        |           |      |      |       |     |      |        |        |
|---------|----------------|------|--------|-----------|------|------|-------|-----|------|--------|--------|
| UN41885 | Rsa1.0.02114.1 | 782  | 34873  | 1.00E-151 | 322  | 338  | 95 +  | 445 | 780  | 4142   | 4479   |
| UN41886 | Rsa1.0.00710.1 | 1197 | 67325  | 1.00E-115 | 293  | 316  | 92 +  | 883 | 1194 | 38377  | 38688  |
| UN41887 | Rsa1.0.02505.1 | 736  | 30703  | 0         | 700  | 737  | 94 +  | 3   | 736  | 6233   | 6948   |
| UN41888 | Rsa1.0.00779.1 | 879  | 64568  | 0         | 678  | 678  | 100 - | 202 | 879  | 51257  | 51934  |
| UN41889 | Rsa1.0.00308.1 | 710  | 96915  | 0         | 367  | 369  | 99 +  | 342 | 710  | 81326  | 81693  |
| UN41890 | Rsa1.0.03735.1 | 1629 | 21087  | 0         | 1624 | 1641 | 98 +  | 1   | 1629 | 8013   | 9653   |
| UN41891 | Rsa1.0.15504.1 | 1168 | 2567   | 1.00E-161 | 310  | 316  | 98 -  | 851 | 1166 | 2253   | 2567   |
| UN41892 | Rsa1.0.01606.1 | 886  | 42432  | 0         | 846  | 891  | 94 +  | 3   | 886  | 1028   | 1901   |
| UN41893 | Rsa1.0.00342.1 | 601  | 93695  | 1.00E-45  | 97   | 98   | 98 +  | 253 | 350  | 32012  | 32109  |
| UN41894 | Rsa1.0.05315.1 | 1151 | 14166  | 0         | 527  | 527  | 100 + | 625 | 1151 | 8973   | 9499   |
| UN41895 | Rsa1.0.00567.1 | 876  | 75260  | 0         | 676  | 676  | 100 + | 201 | 876  | 66219  | 66894  |
| UN41896 | Rsa1.0.02950.1 | 1599 | 26506  | 0         | 743  | 752  | 98 +  | 655 | 1406 | 9506   | 10257  |
| UN41897 | Rsa1.0.00278.1 | 781  | 231896 | 1.00E-111 | 246  | 260  | 94 +  | 436 | 695  | 15864  | 16123  |
| UN41898 | Rsa1.0.00079.1 | 949  | 606987 | 0         | 943  | 948  | 99 +  | 1   | 947  | 488377 | 489322 |
| UN41899 | Rsa1.0.00662.1 | 681  | 192183 | 2.00E-45  | 100  | 102  | 98 -  | 422 | 523  | 8159   | 8260   |
| UN41900 | Rsa1.0.00406.1 | 1041 | 87398  | 0         | 373  | 379  | 98 +  | 661 | 1039 | 35992  | 36370  |
| UN41901 | Rsa1.0.00152.1 | 1274 | 257730 | 1.00E-152 | 303  | 312  | 97 +  | 957 | 1268 | 66795  | 67104  |
| UN41902 | Rsa1.0.02040.1 | 818  | 35684  | 1.00E-122 | 228  | 230  | 99 +  | 235 | 464  | 15056  | 15285  |
| UN41903 | Rsa1.0.00593.1 | 616  | 143463 | 1.00E-121 | 257  | 265  | 96 -  | 352 | 616  | 54718  | 54979  |
| UN41904 | Rsa1.0.00218.1 | 764  | 201480 | 1.00E-147 | 339  | 360  | 94 -  | 1   | 347  | 173202 | 173561 |
| UN41905 | Rsa1.0.03398.1 | 891  | 23207  | 1.00E-151 | 274  | 275  | 99 +  | 617 | 891  | 10860  | 11134  |
| UN41906 | Rsa1.0.00550.1 | 871  | 210790 | 1.00E-140 | 268  | 273  | 98 -  | 151 | 423  | 980    | 1252   |
| UN41907 | Rsa1.0.03826.1 | 673  | 20614  | 1.00E-142 | 283  | 292  | 96 -  | 216 | 507  | 14877  | 15168  |
| UN41908 | Rsa1.0.00457.1 | 881  | 337301 | 0         | 569  | 609  | 93 +  | 8   | 613  | 317274 | 317875 |
| UN41909 | Rsa1.0.00237.1 | 789  | 235974 | 0         | 596  | 613  | 97 -  | 180 | 789  | 14748  | 15360  |
| UN41910 | Rsa1.0.00058.1 | 938  | 159921 | 0         | 374  | 381  | 98 -  | 1   | 381  | 139467 | 139847 |
| UN41911 | Rsa1.0.00888.1 | 1063 | 60978  | 1.00E-129 | 255  | 262  | 97 -  | 802 | 1063 | 54593  | 54854  |
| UN41912 | Rsa1.0.02722.1 | 929  | 28417  | 4.00E-68  | 162  | 172  | 94 -  | 523 | 694  | 15844  | 16015  |
| UN41913 | Rsa1.0.00240.1 | 685  | 104175 | 1.00E-100 | 219  | 229  | 95 -  | 428 | 654  | 48284  | 48512  |
| UN41914 | Rsa1.0.00427.1 | 868  | 189678 | 0         | 515  | 531  | 96 -  | 2   | 532  | 57292  | 57822  |
| UN41915 | Rsa1.0.00351.1 | 832  | 413096 | 0         | 382  | 394  | 96 +  | 439 | 831  | 267204 | 267593 |
| UN41916 | Rsa1.0.11551.1 | 672  | 5472   | 0         | 647  | 669  | 96 +  | 4   | 671  | 591    | 1256   |
| UN41917 | Rsa1.0.15993.1 | 634  | 2329   | 1.00E-165 | 377  | 402  | 93 +  | 218 | 619  | 1900   | 2288   |
| UN41918 | Rsa1.0.01818.1 | 606  | 38837  | 0         | 386  | 398  | 96 -  | 109 | 506  | 7228   | 7625   |
| UN41919 | Rsa1.0.00017.1 | 762  | 752458 | 0         | 478  | 504  | 94 -  | 118 | 621  | 124431 | 124925 |
| UN41920 | Rsa1.0.00111.1 | 1110 | 390088 | 1.00E-119 | 261  | 272  | 95 -  | 26  | 295  | 349791 | 350059 |
| UN41921 | Rsa1.0.00179.1 | 580  | 393324 | 1.00E-128 | 239  | 241  | 99 -  | 1   | 241  | 40330  | 40570  |
| UN41922 | Rsa1.0.04356.1 | 814  | 17764  | 0         | 669  | 726  | 92 -  | 95  | 814  | 10481  | 11191  |
| UN41923 | Rsa1.0.03204.1 | 852  | 24622  | 1.00E-161 | 403  | 439  | 91 -  | 346 | 770  | 6112   | 6541   |

|         |                |      |        |           |     |     |       |     |      |        |        |
|---------|----------------|------|--------|-----------|-----|-----|-------|-----|------|--------|--------|
| UN41924 | Rsa1.0.01137.1 | 605  | 52655  | 1.00E-118 | 228 | 232 | 98 +  | 144 | 375  | 51348  | 51579  |
| UN41925 | Rsa1.0.02406.1 | 850  | 145276 | 1.00E-150 | 420 | 465 | 90 +  | 387 | 850  | 14630  | 15080  |
| UN41926 | Rsa1.0.00347.1 | 876  | 93048  | 1.00E-142 | 328 | 348 | 94 +  | 528 | 870  | 12000  | 12343  |
| UN41927 | Rsa1.0.00121.1 | 882  | 278029 | 7.00E-73  | 149 | 152 | 98 +  | 700 | 851  | 86793  | 86944  |
| UN41928 | Rsa1.0.14001.1 | 568  | 3933   | 4.00E-98  | 200 | 205 | 97 +  | 366 | 568  | 2406   | 2610   |
| UN41929 | Rsa1.0.01137.1 | 641  | 52655  | 1.00E-123 | 230 | 232 | 99 -  | 268 | 499  | 51348  | 51579  |
| UN41930 | Rsa1.0.00707.1 | 1182 | 190112 | 0         | 397 | 413 | 96 -  | 3   | 415  | 179614 | 180022 |
| UN41931 | Rsa1.0.01302.1 | 661  | 48907  | 1.00E-174 | 349 | 362 | 96 -  | 73  | 434  | 4012   | 4373   |
| UN41932 | Rsa1.0.01568.1 | 1087 | 43077  | 0         | 774 | 777 | 99 -  | 311 | 1087 | 494    | 1270   |
| UN41933 | Rsa1.0.01329.1 | 1421 | 47982  | 0         | 914 | 921 | 99 +  | 501 | 1421 | 22593  | 23512  |
| UN41934 | Rsa1.0.01391.1 | 916  | 46694  | 0         | 881 | 919 | 95 -  | 3   | 916  | 12295  | 13213  |
| UN41935 | Rsa1.0.02253.1 | 761  | 33356  | 0         | 456 | 461 | 98 +  | 300 | 760  | 13144  | 13604  |
| UN41936 | Rsa1.0.01434.1 | 919  | 45951  | 0         | 618 | 637 | 97 +  | 6   | 642  | 7337   | 7966   |
| UN41937 | Rsa1.0.01198.1 | 895  | 51029  | 0         | 468 | 471 | 99 -  | 1   | 471  | 11641  | 12111  |
| UN41938 | Rsa1.0.08909.1 | 496  | 6799   | 3.00E-95  | 245 | 263 | 93 +  | 218 | 473  | 5387   | 5645   |
| UN41939 | Rsa1.0.00467.1 | 1084 | 156542 | 0         | 634 | 649 | 97 -  | 3   | 651  | 88257  | 88900  |
| UN41940 | Rsa1.0.00994.1 | 1210 | 165189 | 1.00E-157 | 317 | 329 | 96 -  | 3   | 331  | 316    | 639    |
| UN41941 | Rsa1.0.05621.1 | 649  | 13145  | 0         | 636 | 662 | 96 +  | 3   | 649  | 2038   | 2699   |
| UN41942 | Rsa1.0.00527.1 | 1457 | 77733  | 0         | 369 | 379 | 97 -  | 227 | 605  | 66784  | 67162  |
| UN41943 | Rsa1.0.04981.1 | 1208 | 15250  | 0         | 347 | 350 | 99 -  | 1   | 350  | 3452   | 3801   |
| UN41944 | Rsa1.0.00190.1 | 739  | 318240 | 3.00E-99  | 199 | 204 | 97 -  | 15  | 218  | 165006 | 165209 |
| UN41945 | Rsa1.0.00130.1 | 738  | 125737 | 1.00E-138 | 303 | 316 | 95 +  | 3   | 317  | 38236  | 38547  |
| UN41946 | Rsa1.0.02355.1 | 666  | 32260  | 0         | 426 | 429 | 99 -  | 239 | 666  | 16628  | 17056  |
| UN41947 | Rsa1.0.17775.1 | 894  | 1743   | 0         | 544 | 571 | 95 -  | 324 | 893  | 1179   | 1743   |
| UN41948 | Rsa1.0.00163.1 | 680  | 116847 | 1.00E-135 | 287 | 301 | 95 -  | 266 | 566  | 66573  | 66873  |
| UN41949 | Rsa1.0.00419.1 | 1075 | 86562  | 1.00E-152 | 361 | 389 | 92 -  | 584 | 971  | 15539  | 15927  |
| UN41950 | Rsa1.0.00525.1 | 703  | 78030  | 0         | 424 | 427 | 99 -  | 276 | 702  | 19738  | 20163  |
| UN41951 | Rsa1.0.01209.1 | 1027 | 50668  | 1.00E-151 | 343 | 364 | 94 -  | 1   | 356  | 40043  | 40402  |
| UN41952 | Rsa1.0.00650.1 | 724  | 70235  | 0         | 609 | 632 | 96 -  | 3   | 633  | 44324  | 44946  |
| UN41953 | Rsa1.0.00017.1 | 619  | 752458 | 1.00E-167 | 486 | 545 | 89 +  | 76  | 617  | 700595 | 701138 |
| UN41954 | Rsa1.0.05574.1 | 1311 | 13290  | 1.00E-110 | 245 | 263 | 93 +  | 355 | 600  | 3147   | 3409   |
| UN41955 | Rsa1.0.01543.1 | 548  | 43645  | 0         | 400 | 421 | 95 -  | 5   | 423  | 6110   | 6530   |
| UN41956 | Rsa1.0.02159.1 | 925  | 34471  | 0         | 841 | 841 | 100 - | 1   | 841  | 568    | 1408   |
| UN41957 | Rsa1.0.04905.1 | 857  | 15507  | 1.00E-165 | 304 | 307 | 99 -  | 13  | 319  | 436    | 742    |
| UN41958 | Rsa1.0.00500.1 | 874  | 272308 | 0         | 449 | 453 | 99 -  | 3   | 454  | 91357  | 91809  |
| UN41959 | Rsa1.0.06348.1 | 1358 | 11199  | 0         | 765 | 767 | 99 +  | 7   | 773  | 874    | 1640   |
| UN41960 | Rsa1.0.00157.1 | 910  | 245832 | 0         | 872 | 916 | 95 +  | 1   | 908  | 194556 | 195467 |
| UN41961 | Rsa1.0.00110.1 | 873  | 132719 | 1.00E-156 | 307 | 316 | 97 +  | 556 | 871  | 92551  | 92866  |
| UN41962 | Rsa1.0.01412.1 | 472  | 46311  | 0         | 454 | 472 | 96 -  | 1   | 472  | 2324   | 2786   |

|         |                |      |        |           |      |      |       |     |      |        |        |
|---------|----------------|------|--------|-----------|------|------|-------|-----|------|--------|--------|
| UN41963 | Rsa1.0.00481.1 | 1161 | 81316  | 0         | 331  | 333  | 99 +  | 827 | 1159 | 73294  | 73626  |
| UN41964 | Rsa1.0.15801.1 | 1183 | 2415   | 0         | 1175 | 1198 | 98 -  | 3   | 1181 | 422    | 1618   |
| UN41965 | Rsa1.0.01613.1 | 1114 | 182542 | 0         | 421  | 444  | 94 +  | 1   | 439  | 4282   | 4725   |
| UN41966 | Rsa1.0.00139.1 | 701  | 357786 | 0         | 697  | 699  | 99 +  | 1   | 699  | 297306 | 298004 |
| UN41967 | Rsa1.0.00570.1 | 818  | 75002  | 0         | 521  | 537  | 97 +  | 3   | 539  | 71863  | 72395  |
| UN41968 | Rsa1.0.11005.1 | 759  | 5650   | 3.00E-99  | 208  | 215  | 96 -  | 353 | 567  | 98     | 310    |
| UN41969 | Rsa1.0.01719.1 | 676  | 40388  | 0         | 426  | 439  | 97 +  | 238 | 676  | 22514  | 22951  |
| UN41970 | Rsa1.0.03436.1 | 1069 | 22958  | 0         | 531  | 572  | 92 -  | 499 | 1069 | 3679   | 4225   |
| UN41971 | Rsa1.0.00351.1 | 663  | 413096 | 1.00E-120 | 231  | 235  | 98 +  | 415 | 649  | 267204 | 267438 |
| UN41972 | Rsa1.0.00718.1 | 959  | 279335 | 1.00E-157 | 291  | 294  | 98 +  | 662 | 955  | 119976 | 120269 |
| UN41973 | Rsa1.0.05653.1 | 623  | 13043  | 0         | 565  | 595  | 94 +  | 2   | 594  | 10803  | 11396  |
| UN41974 | Rsa1.0.20960.1 | 478  | 1250   | 0         | 430  | 437  | 98 +  | 44  | 477  | 542    | 978    |
| UN41975 | Rsa1.0.00079.1 | 1153 | 606987 | 0         | 394  | 405  | 97 -  | 750 | 1153 | 585063 | 585467 |
| UN41976 | Rsa1.0.00198.1 | 494  | 222963 | 5.00E-94  | 229  | 244  | 93 +  | 199 | 441  | 136413 | 136651 |
| UN41977 | Rsa1.0.00427.1 | 566  | 189678 | 0         | 408  | 438  | 93 +  | 149 | 565  | 153301 | 153738 |
| UN41978 | Rsa1.0.00757.1 | 567  | 65559  | 0         | 476  | 504  | 94 +  | 67  | 567  | 41627  | 42123  |
| UN41979 | Rsa1.0.13923.1 | 1358 | 4082   | 0         | 898  | 985  | 91 +  | 112 | 1090 | 3120   | 4082   |
| UN41980 | Rsa1.0.04892.1 | 1153 | 15573  | 0         | 340  | 343  | 99 -  | 1   | 343  | 1633   | 1975   |
| UN41981 | Rsa1.0.02340.1 | 1068 | 32388  | 0         | 644  | 675  | 95 -  | 400 | 1066 | 19773  | 20445  |
| UN41982 | Rsa1.0.08255.1 | 1298 | 7652   | 0         | 413  | 440  | 93 -  | 27  | 456  | 2723   | 3162   |
| UN41983 | Rsa1.0.00663.1 | 234  | 164969 | 9.00E-91  | 223  | 236  | 94 +  | 2   | 234  | 124105 | 124338 |
| UN41984 | Rsa1.0.02605.1 | 757  | 29637  | 1.00E-135 | 279  | 289  | 96 +  | 3   | 290  | 12914  | 13202  |
| UN41985 | Rsa1.0.01081.1 | 1420 | 499226 | 0         | 1134 | 1199 | 94 +  | 18  | 1198 | 18437  | 19620  |
| UN41986 | Rsa1.0.03264.1 | 1052 | 145959 | 0         | 745  | 746  | 99 +  | 1   | 746  | 141163 | 141908 |
| UN41987 | Rsa1.0.00167.1 | 1225 | 116000 | 0         | 577  | 599  | 96 -  | 48  | 646  | 46321  | 46919  |
| UN41988 | Rsa1.0.00793.1 | 569  | 64103  | 6.00E-97  | 204  | 211  | 96 +  | 8   | 218  | 23512  | 23720  |
| UN41989 | Rsa1.0.18021.1 | 593  | 1688   | 0         | 575  | 590  | 97 +  | 4   | 592  | 445    | 1034   |
| UN41990 | Rsa1.0.00330.1 | 1188 | 94666  | 0         | 624  | 642  | 97 +  | 1   | 633  | 26742  | 27383  |
| UN41991 | Rsa1.0.00730.1 | 877  | 66673  | 1.00E-122 | 278  | 294  | 94 -  | 587 | 877  | 24775  | 25068  |
| UN41992 | Rsa1.0.00235.1 | 553  | 154696 | 1.00E-170 | 369  | 394  | 93 +  | 1   | 394  | 61579  | 61948  |
| UN41993 | Rsa1.0.01595.1 | 674  | 175383 | 1.00E-149 | 268  | 268  | 100 - | 1   | 268  | 3542   | 3809   |
| UN41994 | Rsa1.0.00481.1 | 1009 | 81316  | 1.00E-129 | 238  | 239  | 99 +  | 771 | 1009 | 38198  | 38436  |
| UN41995 | Rsa1.0.00412.1 | 950  | 86935  | 0         | 950  | 953  | 99 +  | 1   | 950  | 24303  | 25255  |
| UN41996 | Rsa1.0.00538.1 | 645  | 77149  | 1.00E-61  | 121  | 121  | 100 + | 106 | 226  | 19371  | 19491  |
| UN41997 | Rsa1.0.00122.1 | 496  | 265937 | 0         | 470  | 513  | 91 +  | 3   | 496  | 224795 | 225303 |
| UN41998 | Rsa1.0.02319.1 | 641  | 32580  | 1.00E-86  | 212  | 224  | 94 -  | 314 | 531  | 6518   | 6740   |
| UN41999 | Rsa1.0.00412.1 | 623  | 86935  | 0         | 617  | 636  | 97 -  | 3   | 623  | 34471  | 35106  |
| UN42000 | Rsa1.0.00868.1 | 537  | 61630  | 5.00E-85  | 229  | 252  | 90 -  | 186 | 437  | 28178  | 28429  |
| UN42001 | Rsa1.0.00547.1 | 854  | 76521  | 0         | 839  | 857  | 97 -  | 1   | 852  | 74087  | 74941  |

|         |                |      |        |           |     |     |       |     |      |        |        |
|---------|----------------|------|--------|-----------|-----|-----|-------|-----|------|--------|--------|
| UN42002 | Rsa1.0_06009.1 | 1045 | 11950  | 0         | 789 | 846 | 93 +  | 6   | 835  | 8489   | 9326   |
| UN42003 | Rsa1.0_02563.1 | 1053 | 30050  | 2.00E-79  | 214 | 235 | 91 -  | 293 | 527  | 28554  | 28788  |
| UN42004 | Rsa1.0_04786.1 | 976  | 15988  | 0         | 353 | 359 | 98 -  | 3   | 361  | 1623   | 1978   |
| UN42005 | Rsa1.0_01660.1 | 698  | 41400  | 1.00E-174 | 356 | 370 | 96 +  | 338 | 698  | 32286  | 32654  |
| UN42006 | Rsa1.0_00999.1 | 954  | 57162  | 4.00E-87  | 278 | 310 | 89 -  | 1   | 301  | 31755  | 32056  |
| UN42007 | Rsa1.0_00108.1 | 621  | 478491 | 0         | 613 | 625 | 98 -  | 1   | 619  | 70431  | 71054  |
| UN42008 | Rsa1.0_00741.1 | 811  | 66117  | 0         | 717 | 768 | 93 +  | 51  | 811  | 32567  | 33332  |
| UN42009 | Rsa1.0_01031.1 | 711  | 56236  | 9.00E-78  | 192 | 204 | 94 +  | 513 | 709  | 41501  | 41704  |
| UN42010 | Rsa1.0_00469.1 | 858  | 82084  | 0         | 406 | 408 | 99 +  | 1   | 408  | 21562  | 21968  |
| UN42011 | Rsa1.0_00038.1 | 616  | 314568 | 0         | 611 | 614 | 99 +  | 1   | 614  | 238642 | 239255 |
| UN42012 | Rsa1.0_02094.1 | 665  | 35116  | 1.00E-149 | 283 | 288 | 98 -  | 10  | 297  | 4562   | 4849   |
| UN42013 | Rsa1.0_07880.1 | 915  | 8369   | 1.00E-120 | 219 | 219 | 100 - | 1   | 219  | 7318   | 7536   |
| UN42014 | Rsa1.0_00079.1 | 632  | 606987 | 1.00E-111 | 256 | 272 | 94 -  | 362 | 632  | 198857 | 199128 |
| UN42015 | Rsa1.0_00213.1 | 562  | 108167 | 1.00E-64  | 165 | 176 | 93 +  | 7   | 182  | 39052  | 39223  |
| UN42016 | Rsa1.0_00111.1 | 1096 | 390088 | 0         | 472 | 486 | 97 -  | 287 | 772  | 348911 | 349396 |
| UN42017 | Rsa1.0_00087.1 | 1002 | 761073 | 1.00E-156 | 283 | 284 | 99 -  | 719 | 1002 | 11732  | 12015  |
| UN42018 | Rsa1.0_43921.1 | 1201 | 512    | 3.00E-54  | 112 | 113 | 99 -  | 757 | 869  | 25     | 137    |
| UN42019 | Rsa1.0_38173.1 | 890  | 590    | 1.00E-169 | 307 | 309 | 99 -  | 359 | 667  | 1      | 309    |
| UN42020 | Rsa1.0_00048.1 | 633  | 167185 | 0         | 382 | 384 | 99 +  | 1   | 384  | 146189 | 146572 |
| UN42021 | Rsa1.0_01363.1 | 623  | 47195  | 1.00E-159 | 437 | 493 | 88 -  | 166 | 619  | 13986  | 14477  |
| UN42022 | Rsa1.0_00773.1 | 1340 | 64839  | 0         | 658 | 706 | 93 +  | 643 | 1340 | 50257  | 50942  |
| UN42023 | Rsa1.0_08066.1 | 798  | 7964   | 0         | 343 | 346 | 99 -  | 454 | 798  | 7125   | 7470   |
| UN42024 | Rsa1.0_01198.1 | 1048 | 51029  | 0         | 483 | 495 | 97 +  | 424 | 918  | 30487  | 30981  |
| UN42025 | Rsa1.0_02816.1 | 321  | 27649  | 1.00E-124 | 292 | 316 | 92 +  | 22  | 321  | 5363   | 5678   |
| UN42026 | Rsa1.0_00003.1 | 1297 | 340054 | 1.00E-129 | 377 | 421 | 89 -  | 882 | 1297 | 276991 | 277397 |
| UN42027 | Rsa1.0_01094.1 | 633  | 167285 | 3.00E-37  | 183 | 216 | 84 -  | 169 | 384  | 143774 | 143988 |
| UN42028 | Rsa1.0_03514.1 | 693  | 22346  | 0         | 689 | 692 | 99 +  | 2   | 693  | 9199   | 9887   |
| UN42029 | Rsa1.0_00033.1 | 487  | 515811 | 3.00E-86  | 256 | 287 | 89 +  | 206 | 482  | 33139  | 33421  |
| UN42030 | Rsa1.0_00918.1 | 618  | 59720  | 0         | 389 | 392 | 99 -  | 1   | 392  | 41373  | 41761  |
| UN42031 | Rsa1.0_00108.1 | 955  | 478491 | 0         | 366 | 366 | 100 + | 3   | 368  | 264576 | 264941 |
| UN42032 | Rsa1.0_00207.1 | 857  | 248736 | 0         | 448 | 449 | 99 -  | 1   | 449  | 22554  | 23002  |
| UN42033 | Rsa1.0_00554.1 | 588  | 150953 | 7.00E-75  | 176 | 186 | 94 +  | 338 | 521  | 141702 | 141887 |
| UN42034 | Rsa1.0_00196.1 | 659  | 109960 | 1.00E-163 | 390 | 423 | 92 +  | 2   | 418  | 3878   | 4296   |
| UN42035 | Rsa1.0_00327.1 | 1019 | 94892  | 0         | 343 | 344 | 99 +  | 3   | 346  | 34058  | 34401  |
| UN42036 | Rsa1.0_02723.1 | 867  | 28408  | 0         | 512 | 526 | 97 -  | 342 | 866  | 7664   | 8189   |
| UN42037 | Rsa1.0_00280.1 | 1003 | 99966  | 0         | 428 | 455 | 94 -  | 526 | 962  | 98620  | 99074  |
| UN42038 | Rsa1.0_00114.1 | 1004 | 131330 | 1.00E-122 | 295 | 315 | 93 +  | 670 | 983  | 86104  | 86416  |
| UN42039 | Rsa1.0_46619.1 | 689  | 484    | 0         | 463 | 484 | 95 -  | 211 | 688  | 2      | 484    |
| UN42040 | Rsa1.0_00439.1 | 595  | 142776 | 1.00E-121 | 220 | 220 | 100 + | 376 | 595  | 63119  | 63338  |



|         |                |      |        |           |     |     |       |     |     |        |        |
|---------|----------------|------|--------|-----------|-----|-----|-------|-----|-----|--------|--------|
| UN42041 | Rsa1.0.00191.1 | 541  | 316976 | 0         | 501 | 548 | 91 +  | 3   | 540 | 139726 | 140250 |
| UN42042 | Rsa1.0.02099.1 | 635  | 35030  | 0         | 362 | 362 | 100 - | 273 | 634 | 32647  | 33008  |
| UN42043 | Rsa1.0.09171.1 | 970  | 6586   | 1.00E-137 | 274 | 282 | 97 -  | 629 | 910 | 5831   | 6109   |
| UN42044 | Rsa1.0.03317.1 | 515  | 23782  | 1.00E-161 | 373 | 407 | 91 -  | 108 | 514 | 7571   | 7956   |
| UN42045 | Rsa1.0.00271.1 | 802  | 101125 | 0         | 472 | 504 | 93 -  | 63  | 565 | 60726  | 61220  |
| UN42046 | Rsa1.0.05360.1 | 324  | 14053  | 1.00E-59  | 141 | 149 | 94 +  | 24  | 172 | 12987  | 13135  |
| UN42047 | Rsa1.0.02340.1 | 781  | 32388  | 0         | 612 | 614 | 99 -  | 166 | 779 | 8614   | 9227   |
| UN42048 | Rsa1.0.05067.1 | 661  | 14941  | 0         | 421 | 423 | 99 -  | 239 | 661 | 5734   | 6156   |
| UN42049 | Rsa1.0.07813.1 | 504  | 8493   | 0         | 489 | 498 | 98 +  | 6   | 503 | 1025   | 1520   |
| UN42050 | Rsa1.0.00477.1 | 517  | 81556  | 0         | 495 | 518 | 95 +  | 4   | 516 | 22028  | 22541  |
| UN42051 | Rsa1.0.00011.1 | 890  | 225044 | 1.00E-96  | 186 | 188 | 98 -  | 477 | 664 | 50685  | 50872  |
| UN42052 | Rsa1.0.00155.1 | 1032 | 118465 | 0         | 616 | 617 | 99 +  | 141 | 757 | 12377  | 12993  |
| UN42053 | Rsa1.0.00801.1 | 1064 | 63861  | 0         | 593 | 603 | 98 -  | 3   | 605 | 54079  | 54672  |
| UN42054 | Rsa1.0.14746.1 | 494  | 3110   | 1.00E-145 | 260 | 260 | 100 - | 232 | 491 | 1582   | 1841   |
| UN42055 | Rsa1.0.02365.1 | 632  | 32118  | 1.00E-113 | 207 | 207 | 100 - | 1   | 207 | 16962  | 17168  |
| UN42056 | Rsa1.0.08871.1 | 883  | 6839   | 0         | 761 | 798 | 95 +  | 86  | 883 | 214    | 1007   |
| UN42057 | Rsa1.0.00740.1 | 507  | 215972 | 0         | 453 | 473 | 95 +  | 35  | 507 | 11279  | 11748  |
| UN42058 | Rsa1.0.06312.1 | 484  | 11253  | 0         | 361 | 365 | 98 +  | 120 | 484 | 2461   | 2825   |
| UN42059 | Rsa1.0.00119.1 | 821  | 467509 | 1.00E-86  | 166 | 167 | 99 +  | 614 | 780 | 7309   | 7475   |
| UN42060 | Rsa1.0.00683.1 | 467  | 68638  | 1.00E-158 | 346 | 368 | 94 -  | 3   | 369 | 59008  | 59363  |
| UN42061 | Rsa1.0.03436.1 | 717  | 22958  | 0         | 584 | 620 | 94 +  | 1   | 619 | 3620   | 4216   |
| UN42062 | Rsa1.0.00134.1 | 845  | 390219 | 1.00E-162 | 327 | 339 | 96 +  | 510 | 845 | 13216  | 13554  |
| UN42063 | Rsa1.0.00202.1 | 620  | 185895 | 4.00E-98  | 214 | 222 | 96 +  | 401 | 620 | 12228  | 12449  |
| UN42064 | Rsa1.0.04405.1 | 643  | 17508  | 1.00E-118 | 254 | 265 | 95 -  | 232 | 496 | 14359  | 14619  |
| UN42065 | Rsa1.0.03870.1 | 1044 | 20362  | 1.00E-102 | 231 | 243 | 95 -  | 571 | 810 | 17843  | 18083  |
| UN42066 | Rsa1.0.00789.1 | 1142 | 64233  | 3.00E-88  | 268 | 299 | 89 +  | 210 | 500 | 43342  | 43637  |
| UN42067 | Rsa1.0.00566.1 | 1400 | 75325  | 0         | 875 | 901 | 97 +  | 1   | 899 | 68617  | 69517  |
| UN42068 | Rsa1.0.55541.1 | 479  | 411    | 1.00E-169 | 387 | 414 | 93 +  | 48  | 449 | 1      | 411    |
| UN42069 | Rsa1.0.02269.1 | 782  | 33168  | 0         | 456 | 468 | 97 +  | 315 | 782 | 12865  | 13332  |
| UN42070 | Rsa1.0.00266.1 | 966  | 163932 | 1.00E-116 | 241 | 248 | 97 +  | 695 | 942 | 7466   | 7711   |
| UN42071 | Rsa1.0.02674.1 | 880  | 28860  | 0         | 437 | 438 | 99 +  | 442 | 879 | 3363   | 3800   |
| UN42072 | Rsa1.0.00213.1 | 1004 | 108167 | 1.00E-114 | 216 | 218 | 99 +  | 1   | 218 | 93937  | 94154  |
| UN42073 | Rsa1.0.00580.1 | 791  | 74515  | 0         | 351 | 351 | 100 - | 441 | 791 | 33899  | 34249  |
| UN42074 | Rsa1.0.00504.1 | 886  | 79334  | 0         | 840 | 853 | 98 +  | 3   | 853 | 75259  | 76110  |
| UN42075 | Rsa1.0.02222.1 | 590  | 152798 | 0         | 586 | 588 | 99 -  | 3   | 590 | 23611  | 24198  |
| UN42076 | Rsa1.0.00159.1 | 609  | 431686 | 0         | 598 | 614 | 97 -  | 2   | 609 | 350410 | 351023 |
| UN42077 | Rsa1.0.00007.1 | 999  | 239325 | 1.00E-174 | 455 | 497 | 91 +  | 523 | 995 | 52943  | 53437  |
| UN42078 | Rsa1.0.01175.1 | 746  | 51674  | 1.00E-151 | 338 | 355 | 95 +  | 14  | 366 | 35950  | 36301  |
| UN42079 | Rsa1.0.00179.1 | 328  | 393324 | 3.00E-73  | 206 | 225 | 91 +  | 8   | 227 | 352517 | 352740 |

|         |                |      |        |           |     |     |       |     |      |        |        |
|---------|----------------|------|--------|-----------|-----|-----|-------|-----|------|--------|--------|
| UN42080 | Rsa1.0.03581.1 | 761  | 21965  | 0         | 395 | 412 | 95 +  | 173 | 583  | 1557   | 1965   |
| UN42081 | Rsa1.0.00100.1 | 676  | 249232 | 1.00E-79  | 212 | 229 | 92 +  | 433 | 660  | 115618 | 115842 |
| UN42082 | Rsa1.0.00583.1 | 831  | 74309  | 0         | 454 | 492 | 92 +  | 226 | 709  | 71796  | 72285  |
| UN42083 | Rsa1.0.02129.1 | 708  | 34757  | 1.00E-135 | 270 | 280 | 96 -  | 400 | 670  | 5631   | 5910   |
| UN42084 | Rsa1.0.00777.1 | 853  | 191865 | 1.00E-179 | 363 | 376 | 96 -  | 4   | 375  | 182385 | 182759 |
| UN42085 | Rsa1.0.02952.1 | 585  | 26492  | 0         | 585 | 585 | 100 + | 1   | 585  | 20507  | 21091  |
| UN42086 | Rsa1.0.00111.1 | 404  | 390088 | 1.00E-164 | 352 | 371 | 94 -  | 32  | 402  | 174815 | 175177 |
| UN42087 | Rsa1.0.00569.1 | 808  | 75060  | 1.00E-143 | 302 | 317 | 95 +  | 2   | 318  | 64318  | 64628  |
| UN42088 | Rsa1.0.05811.1 | 546  | 12572  | 0         | 387 | 399 | 96 +  | 148 | 545  | 11595  | 11991  |
| UN42089 | Rsa1.0.07579.1 | 718  | 9086   | 1.00E-120 | 231 | 234 | 98 -  | 4   | 235  | 1      | 234    |
| UN42090 | Rsa1.0.00207.1 | 486  | 248736 | 1.00E-126 | 404 | 456 | 88 -  | 4   | 452  | 196533 | 196974 |
| UN42091 | Rsa1.0.00453.1 | 761  | 83031  | 1.00E-125 | 237 | 239 | 99 -  | 521 | 758  | 39323  | 39561  |
| UN42092 | Rsa1.0.00584.1 | 883  | 74295  | 0         | 548 | 554 | 98 +  | 331 | 883  | 46233  | 46786  |
| UN42093 | Rsa1.0.00647.1 | 602  | 70440  | 3.00E-96  | 205 | 213 | 96 +  | 78  | 287  | 67446  | 67658  |
| UN42094 | Rsa1.0.07481.1 | 1048 | 9280   | 1.00E-129 | 299 | 318 | 94 -  | 505 | 819  | 4144   | 4461   |
| UN42095 | Rsa1.0.00593.1 | 938  | 143463 | 0         | 497 | 515 | 96 -  | 150 | 662  | 55065  | 55579  |
| UN42096 | Rsa1.0.04371.1 | 641  | 17700  | 0         | 623 | 642 | 97 +  | 3   | 641  | 14356  | 14994  |
| UN42097 | Rsa1.0.00008.1 | 989  | 358124 | 1.00E-156 | 295 | 299 | 98 -  | 29  | 327  | 294659 | 294956 |
| UN42098 | Rsa1.0.00644.1 | 1020 | 136881 | 0         | 412 | 416 | 99 -  | 607 | 1020 | 62662  | 63077  |
| UN42099 | Rsa1.0.00056.1 | 690  | 332604 | 1.00E-156 | 336 | 353 | 95 -  | 343 | 688  | 231673 | 232022 |
| UN42100 | Rsa1.0.00094.1 | 642  | 139042 | 0         | 378 | 388 | 97 +  | 256 | 642  | 75565  | 75952  |
| UN42101 | Rsa1.0.05181.1 | 776  | 14574  | 0         | 648 | 676 | 95 -  | 2   | 665  | 234    | 909    |
| UN42102 | Rsa1.0.02836.1 | 827  | 27481  | 1.00E-111 | 228 | 236 | 96 -  | 323 | 558  | 13279  | 13514  |
| UN42103 | Rsa1.0.07446.1 | 773  | 9384   | 0         | 431 | 434 | 99 +  | 35  | 468  | 1078   | 1511   |
| UN42104 | Rsa1.0.02944.1 | 773  | 26553  | 1.00E-153 | 322 | 338 | 95 +  | 5   | 342  | 12724  | 13055  |
| UN42105 | Rsa1.0.03574.1 | 430  | 22004  | 2.00E-96  | 269 | 299 | 89 +  | 1   | 293  | 17889  | 18178  |
| UN42106 | Rsa1.0.01396.1 | 1116 | 151624 | 0         | 517 | 540 | 95 -  | 584 | 1116 | 143421 | 143960 |
| UN42107 | Rsa1.0.20960.1 | 675  | 1250   | 0         | 466 | 466 | 100 - | 2   | 467  | 513    | 978    |
| UN42108 | Rsa1.0.00773.1 | 850  | 64839  | 0         | 359 | 362 | 99 -  | 300 | 661  | 23153  | 23514  |
| UN42109 | Rsa1.0.05367.1 | 985  | 14010  | 0         | 429 | 431 | 99 +  | 3   | 433  | 2726   | 3156   |
| UN42110 | Rsa1.0.01682.1 | 782  | 41090  | 0         | 390 | 392 | 99 -  | 111 | 502  | 39800  | 40191  |
| UN42111 | Rsa1.0.00237.1 | 1077 | 235974 | 1.00E-150 | 329 | 347 | 94 -  | 1   | 344  | 62409  | 62753  |
| UN42112 | Rsa1.0.03959.1 | 398  | 19866  | 1.00E-128 | 232 | 232 | 100 - | 167 | 398  | 19554  | 19785  |
| UN42113 | Rsa1.0.00367.1 | 1030 | 90750  | 0         | 920 | 955 | 96 +  | 3   | 956  | 20733  | 21672  |
| UN42114 | Rsa1.0.04458.1 | 1323 | 17255  | 0         | 417 | 420 | 99 +  | 1   | 420  | 6476   | 6894   |
| UN42115 | Rsa1.0.01769.1 | 786  | 39568  | 3.00E-75  | 144 | 144 | 100 + | 24  | 167  | 7643   | 7786   |
| UN42116 | Rsa1.0.00369.1 | 1033 | 266462 | 1.00E-102 | 207 | 212 | 97 +  | 3   | 212  | 165222 | 165433 |
| UN42117 | Rsa1.0.02310.1 | 602  | 32735  | 0         | 368 | 377 | 97 -  | 3   | 374  | 13010  | 13386  |
| UN42118 | Rsa1.0.41382.1 | 1050 | 543    | 1.00E-166 | 357 | 375 | 95 -  | 505 | 876  | 1      | 369    |

|         |                |      |        |           |     |     |       |     |      |        |        |
|---------|----------------|------|--------|-----------|-----|-----|-------|-----|------|--------|--------|
| UN42119 | Rsa1.0.02421.1 | 630  | 31579  | 1.00E-159 | 291 | 293 | 99 -  | 335 | 627  | 28905  | 29197  |
| UN42120 | Rsa1.0.00437.1 | 696  | 84879  | 1.00E-124 | 247 | 254 | 97 +  | 442 | 695  | 44218  | 44471  |
| UN42121 | Rsa1.0.00251.1 | 764  | 303968 | 2.00E-91  | 174 | 175 | 99 +  | 3   | 177  | 122519 | 122693 |
| UN42122 | Rsa1.0.00741.1 | 786  | 66117  | 0         | 721 | 772 | 93 +  | 18  | 786  | 32567  | 33332  |
| UN42123 | Rsa1.0.04794.1 | 613  | 15960  | 1.00E-124 | 225 | 225 | 100 + | 181 | 405  | 9120   | 9344   |
| UN42124 | Rsa1.0.00497.1 | 699  | 79830  | 1.00E-166 | 299 | 300 | 99 +  | 400 | 699  | 59282  | 59581  |
| UN42125 | Rsa1.0.00283.1 | 714  | 183797 | 0         | 500 | 502 | 99 +  | 213 | 714  | 66230  | 66731  |
| UN42126 | Rsa1.0.00074.1 | 499  | 147591 | 1.00E-152 | 372 | 404 | 92 -  | 92  | 494  | 14549  | 14952  |
| UN42127 | Rsa1.0.03986.1 | 660  | 19703  | 0         | 630 | 658 | 95 +  | 3   | 660  | 666    | 1323   |
| UN42128 | Rsa1.0.00394.1 | 702  | 148426 | 1.00E-117 | 302 | 330 | 91 -  | 373 | 702  | 120713 | 121030 |
| UN42129 | Rsa1.0.17704.1 | 877  | 1762   | 1.00E-129 | 247 | 251 | 98 +  | 440 | 690  | 1      | 251    |
| UN42130 | Rsa1.0.01685.1 | 909  | 175033 | 0         | 460 | 464 | 99 -  | 446 | 909  | 24669  | 25132  |
| UN42131 | Rsa1.0.01519.1 | 855  | 44144  | 1.00E-124 | 306 | 335 | 91 -  | 2   | 331  | 39645  | 39962  |
| UN42132 | Rsa1.0.00934.1 | 1002 | 193516 | 0         | 482 | 492 | 97 +  | 1   | 492  | 175211 | 175702 |
| UN42133 | Rsa1.0.04564.1 | 946  | 16837  | 2.00E-21  | 69  | 74  | 93 +  | 146 | 219  | 2329   | 2402   |
| UN42134 | Rsa1.0.00171.1 | 785  | 115622 | 7.00E-42  | 100 | 104 | 96 +  | 559 | 662  | 41352  | 41455  |
| UN42135 | Rsa1.0.00124.1 | 624  | 262503 | 0         | 590 | 643 | 91 -  | 3   | 618  | 142949 | 143590 |
| UN42136 | Rsa1.0.07639.1 | 779  | 8966   | 0         | 367 | 370 | 99 +  | 2   | 369  | 6030   | 6399   |
| UN42137 | Rsa1.0.15552.1 | 880  | 2546   | 0         | 333 | 333 | 100 + | 1   | 333  | 2214   | 2546   |
| UN42138 | Rsa1.0.00073.1 | 754  | 240924 | 2.00E-75  | 162 | 168 | 96 +  | 406 | 573  | 95380  | 95547  |
| UN42139 | Rsa1.0.01310.1 | 706  | 164719 | 0         | 702 | 706 | 99 -  | 1   | 706  | 159799 | 160504 |
| UN42140 | Rsa1.0.00407.1 | 849  | 191544 | 1.00E-155 | 368 | 389 | 94 -  | 462 | 847  | 155490 | 155873 |
| UN42141 | Rsa1.0.00296.1 | 1110 | 97854  | 1.00E-147 | 314 | 329 | 95 +  | 1   | 328  | 42901  | 43229  |
| UN42142 | Rsa1.0.06113.1 | 1011 | 11721  | 0         | 645 | 659 | 97 -  | 355 | 1011 | 8912   | 9569   |
| UN42143 | Rsa1.0.01737.1 | 830  | 40101  | 0         | 441 | 450 | 98 +  | 379 | 828  | 17129  | 17577  |
| UN42144 | Rsa1.0.00751.1 | 439  | 65759  | 1.00E-122 | 239 | 243 | 98 -  | 197 | 438  | 42564  | 42806  |
| UN42145 | Rsa1.0.04557.1 | 788  | 145048 | 0         | 520 | 538 | 96 -  | 252 | 786  | 133856 | 134388 |
| UN42146 | Rsa1.0.00948.1 | 742  | 58620  | 0         | 401 | 409 | 98 -  | 3   | 411  | 44940  | 45348  |
| UN42147 | Rsa1.0.05862.1 | 825  | 12390  | 0         | 604 | 611 | 98 +  | 1   | 611  | 1471   | 2080   |
| UN42148 | Rsa1.0.00002.1 | 842  | 601661 | 0         | 484 | 504 | 96 +  | 155 | 657  | 290177 | 290680 |
| UN42149 | Rsa1.0.00869.1 | 642  | 61627  | 1.00E-177 | 321 | 323 | 99 +  | 317 | 639  | 44607  | 44929  |
| UN42150 | Rsa1.0.04885.1 | 789  | 15599  | 2.00E-17  | 63  | 66  | 95 -  | 14  | 79   | 6210   | 6272   |
| UN42151 | Rsa1.0.03746.1 | 643  | 21050  | 1.00E-139 | 327 | 346 | 94 -  | 3   | 342  | 15114  | 15454  |
| UN42152 | Rsa1.0.03985.1 | 469  | 19704  | 0         | 383 | 383 | 100 - | 3   | 385  | 15765  | 16147  |
| UN42153 | Rsa1.0.00564.1 | 1086 | 75428  | 0         | 898 | 956 | 93 +  | 59  | 998  | 71117  | 72066  |
| UN42154 | Rsa1.0.03400.1 | 854  | 23203  | 0         | 521 | 542 | 96 -  | 302 | 843  | 4015   | 4553   |
| UN42155 | Rsa1.0.06044.1 | 548  | 11859  | 2.00E-81  | 167 | 170 | 98 +  | 379 | 548  | 3048   | 3216   |
| UN42156 | Rsa1.0.00173.1 | 415  | 288743 | 0         | 381 | 397 | 95 -  | 2   | 393  | 203686 | 204081 |
| UN42157 | Rsa1.0.11595.1 | 827  | 5463   | 1.00E-163 | 316 | 323 | 97 +  | 256 | 578  | 1201   | 1521   |

|         |                |      |        |           |     |     |       |     |      |        |        |
|---------|----------------|------|--------|-----------|-----|-----|-------|-----|------|--------|--------|
| UN42158 | Rsa1.0_00056.1 | 827  | 332604 | 1.00E-171 | 304 | 304 | 100 + | 524 | 827  | 310177 | 310480 |
| UN42159 | Rsa1.0_15016.1 | 452  | 2892   | 0         | 446 | 449 | 99 +  | 3   | 451  | 660    | 1108   |
| UN42160 | Rsa1.0_04198.1 | 811  | 18504  | 0         | 606 | 631 | 96 +  | 1   | 631  | 12879  | 13509  |
| UN42161 | Rsa1.0_00027.1 | 589  | 283362 | 0         | 583 | 587 | 99 +  | 3   | 589  | 279141 | 279726 |
| UN42162 | Rsa1.0_02803.1 | 748  | 27715  | 1.00E-155 | 377 | 407 | 92 +  | 1   | 397  | 18710  | 19115  |
| UN42163 | Rsa1.0_00682.1 | 1234 | 68680  | 0         | 657 | 666 | 98 +  | 572 | 1233 | 37339  | 38004  |
| UN42164 | Rsa1.0_02459.1 | 641  | 31185  | 0         | 395 | 405 | 97 +  | 236 | 640  | 13461  | 13861  |
| UN42165 | Rsa1.0_00017.1 | 981  | 752458 | 1.00E-164 | 297 | 298 | 99 +  | 684 | 981  | 578918 | 579215 |
| UN42166 | Rsa1.0_00466.1 | 654  | 82132  | 0         | 573 | 578 | 99 +  | 78  | 654  | 27152  | 27729  |
| UN42167 | Rsa1.0_00217.1 | 1424 | 107079 | 0         | 583 | 591 | 98 -  | 8   | 595  | 53336  | 53926  |
| UN42168 | Rsa1.0_03865.1 | 732  | 20373  | 1.00E-114 | 225 | 230 | 97 -  | 183 | 412  | 15975  | 16204  |
| UN42169 | Rsa1.0_00553.1 | 696  | 75983  | 1.00E-147 | 268 | 269 | 99 -  | 1   | 269  | 68683  | 68951  |
| UN42170 | Rsa1.0_00067.1 | 773  | 415055 | 1.00E-156 | 283 | 284 | 99 +  | 4   | 287  | 241274 | 241557 |
| UN42171 | Rsa1.0_02211.1 | 623  | 33857  | 0         | 327 | 327 | 100 + | 4   | 330  | 31005  | 31331  |
| UN42172 | Rsa1.0_00094.1 | 1055 | 139042 | 0         | 596 | 617 | 96 -  | 436 | 1052 | 83505  | 84120  |
| UN42173 | Rsa1.0_00159.1 | 836  | 431686 | 0         | 779 | 840 | 92 +  | 16  | 833  | 267218 | 268052 |
| UN42174 | Rsa1.0_04649.1 | 814  | 16538  | 2.00E-88  | 178 | 182 | 97 -  | 92  | 273  | 12025  | 12206  |
| UN42175 | Rsa1.0_02009.1 | 849  | 36100  | 0         | 428 | 438 | 97 -  | 156 | 593  | 35107  | 35544  |
| UN42176 | Rsa1.0_01835.1 | 134  | 38542  | 4.00E-45  | 129 | 140 | 92 -  | 1   | 134  | 21297  | 21436  |
| UN42177 | Rsa1.0_02486.1 | 876  | 30965  | 6.00E-67  | 130 | 130 | 100 + | 3   | 132  | 9798   | 9927   |
| UN42178 | Rsa1.0_00848.1 | 709  | 152362 | 1.00E-106 | 198 | 199 | 99 +  | 364 | 562  | 48145  | 48343  |
| UN42179 | Rsa1.0_00571.1 | 942  | 329018 | 0         | 670 | 680 | 98 -  | 261 | 940  | 48842  | 49521  |
| UN42180 | Rsa1.0_00685.1 | 731  | 68515  | 0         | 500 | 516 | 96 +  | 224 | 730  | 64046  | 64561  |
| UN42181 | Rsa1.0_00140.1 | 618  | 121541 | 1.00E-167 | 298 | 298 | 100 - | 319 | 616  | 21998  | 22295  |
| UN42182 | Rsa1.0_00817.1 | 743  | 62961  | 0         | 460 | 460 | 100 + | 284 | 743  | 30885  | 31344  |
| UN42183 | Rsa1.0_00118.1 | 466  | 130637 | 1.00E-148 | 426 | 470 | 90 -  | 1   | 461  | 45777  | 46229  |
| UN42184 | Rsa1.0_00736.1 | 762  | 66455  | 1.00E-177 | 342 | 351 | 97 +  | 252 | 602  | 6494   | 6844   |
| UN42185 | Rsa1.0_02160.1 | 897  | 34468  | 0         | 547 | 550 | 99 -  | 22  | 571  | 10197  | 10744  |
| UN42186 | Rsa1.0_00316.1 | 736  | 96264  | 0         | 507 | 509 | 99 -  | 3   | 511  | 85542  | 86050  |
| UN42187 | Rsa1.0_00706.1 | 752  | 291570 | 6.00E-70  | 162 | 171 | 94 +  | 326 | 496  | 161836 | 162006 |
| UN42188 | Rsa1.0_12250.1 | 571  | 5276   | 0         | 425 | 429 | 99 +  | 9   | 437  | 549    | 977    |
| UN42189 | Rsa1.0_07403.1 | 1136 | 9455   | 0         | 505 | 517 | 97 -  | 620 | 1134 | 4820   | 5336   |
| UN42190 | Rsa1.0_01836.1 | 969  | 38503  | 1.00E-175 | 397 | 420 | 94 +  | 1   | 417  | 5091   | 5509   |
| UN42191 | Rsa1.0_00157.1 | 1017 | 245832 | 3.00E-91  | 174 | 175 | 99 +  | 650 | 824  | 229901 | 230075 |
| UN42192 | Rsa1.0_00059.1 | 832  | 159650 | 1.00E-168 | 454 | 507 | 89 +  | 3   | 482  | 121125 | 121628 |
| UN42193 | Rsa1.0_00260.1 | 1137 | 102021 | 0         | 815 | 852 | 95 +  | 206 | 1056 | 27623  | 28462  |
| UN42194 | Rsa1.0_08255.1 | 856  | 7652   | 0         | 462 | 490 | 94 +  | 99  | 581  | 3772   | 4257   |
| UN42195 | Rsa1.0_00097.1 | 192  | 138858 | 1.00E-70  | 141 | 143 | 98 -  | 19  | 161  | 26961  | 27103  |
| UN42196 | Rsa1.0_00869.1 | 884  | 61627  | 1.00E-159 | 287 | 288 | 99 -  | 597 | 884  | 52069  | 52356  |

|         |                |      |        |           |     |     |       |     |      |        |        |
|---------|----------------|------|--------|-----------|-----|-----|-------|-----|------|--------|--------|
| UN42197 | Rsa1.0.00022.1 | 535  | 200461 | 1.00E-173 | 310 | 311 | 99 -  | 225 | 535  | 31136  | 31446  |
| UN42198 | Rsa1.0.02114.1 | 780  | 34873  | 0         | 338 | 342 | 98 -  | 3   | 342  | 4142   | 4483   |
| UN42199 | Rsa1.0.00020.1 | 953  | 283099 | 1.00E-178 | 319 | 320 | 99 +  | 1   | 320  | 42665  | 42984  |
| UN42200 | Rsa1.0.09388.1 | 692  | 6405   | 1.00E-128 | 321 | 354 | 90 +  | 1   | 354  | 2870   | 3208   |
| UN42201 | Rsa1.0.00021.1 | 647  | 263655 | 1.00E-101 | 263 | 290 | 90 -  | 1   | 289  | 16881  | 17151  |
| UN42202 | Rsa1.0.00270.1 | 917  | 101236 | 1.00E-161 | 329 | 344 | 95 -  | 301 | 644  | 1233   | 1567   |
| UN42203 | Rsa1.0.01046.1 | 618  | 152989 | 0         | 365 | 378 | 96 -  | 181 | 558  | 116420 | 116797 |
| UN42204 | Rsa1.0.00030.1 | 918  | 250988 | 1.00E-152 | 311 | 323 | 96 +  | 6   | 328  | 150151 | 150470 |
| UN42205 | Rsa1.0.00247.1 | 744  | 103408 | 0         | 733 | 770 | 95 +  | 1   | 744  | 66546  | 67311  |
| UN42206 | Rsa1.0.03491.1 | 615  | 22541  | 1.00E-169 | 362 | 382 | 94 -  | 5   | 376  | 9209   | 9590   |
| UN42207 | Rsa1.0.00389.1 | 919  | 88795  | 4.00E-93  | 210 | 219 | 95 +  | 702 | 919  | 68854  | 69067  |
| UN42208 | Rsa1.0.03646.1 | 748  | 21598  | 3.00E-93  | 251 | 274 | 91 +  | 439 | 705  | 13560  | 13833  |
| UN42209 | Rsa1.0.08831.1 | 753  | 6887   | 1.00E-124 | 238 | 241 | 98 -  | 515 | 753  | 4463   | 4703   |
| UN42210 | Rsa1.0.12087.1 | 955  | 5317   | 0         | 597 | 612 | 97 +  | 343 | 954  | 4448   | 5059   |
| UN42211 | Rsa1.0.00985.1 | 593  | 161950 | 1.00E-145 | 311 | 327 | 95 +  | 268 | 591  | 32823  | 33149  |
| UN42212 | Rsa1.0.03572.1 | 512  | 146346 | 0         | 505 | 509 | 99 -  | 4   | 512  | 136990 | 137498 |
| UN42213 | Rsa1.0.00235.1 | 693  | 154696 | 1.00E-140 | 285 | 296 | 96 -  | 199 | 494  | 139093 | 139388 |
| UN42214 | Rsa1.0.03990.1 | 356  | 19676  | 5.00E-84  | 216 | 234 | 92 +  | 1   | 221  | 8886   | 9116   |
| UN42215 | Rsa1.0.00222.1 | 815  | 172263 | 0         | 767 | 814 | 94 +  | 26  | 815  | 65105  | 65913  |
| UN42216 | Rsa1.0.00717.1 | 1177 | 67051  | 1.00E-104 | 343 | 397 | 86 +  | 781 | 1177 | 26216  | 26581  |
| UN42217 | Rsa1.0.00651.1 | 728  | 247766 | 0         | 383 | 384 | 99 -  | 346 | 728  | 105155 | 105538 |
| UN42218 | Rsa1.0.06056.1 | 569  | 137271 | 0         | 402 | 420 | 95 -  | 58  | 474  | 128419 | 128838 |
| UN42219 | Rsa1.0.01382.1 | 526  | 46877  | 1.00E-168 | 380 | 405 | 93 -  | 13  | 413  | 13890  | 14293  |
| UN42220 | Rsa1.0.00124.1 | 576  | 262503 | 0         | 453 | 467 | 97 +  | 3   | 469  | 85908  | 86374  |
| UN42221 | Rsa1.0.10067.1 | 645  | 6015   | 0         | 341 | 343 | 99 -  | 302 | 644  | 705    | 1047   |
| UN42222 | Rsa1.0.00019.1 | 349  | 301669 | 5.00E-78  | 202 | 220 | 91 -  | 127 | 346  | 119771 | 119980 |
| UN42223 | Rsa1.0.00810.1 | 758  | 63289  | 0         | 417 | 432 | 96 +  | 246 | 677  | 6634   | 7065   |
| UN42224 | Rsa1.0.04538.1 | 1814 | 16940  | 0         | 390 | 406 | 96 -  | 1   | 404  | 7026   | 7429   |
| UN42225 | Rsa1.0.01396.1 | 768  | 151624 | 1.00E-172 | 403 | 433 | 93 +  | 93  | 523  | 142859 | 143290 |
| UN42226 | Rsa1.0.03672.1 | 893  | 21452  | 1.00E-147 | 473 | 540 | 87 -  | 357 | 886  | 13327  | 13863  |
| UN42227 | Rsa1.0.00092.1 | 974  | 659932 | 0         | 727 | 728 | 99 +  | 1   | 727  | 334753 | 335480 |
| UN42228 | Rsa1.0.05923.1 | 554  | 12230  | 0         | 522 | 554 | 94 -  | 3   | 554  | 10414  | 10964  |
| UN42229 | Rsa1.0.00261.1 | 534  | 151157 | 0         | 420 | 421 | 99 +  | 113 | 533  | 117132 | 117552 |
| UN42230 | Rsa1.0.00486.1 | 423  | 80875  | 1.00E-122 | 245 | 250 | 98 -  | 1   | 248  | 35708  | 35956  |
| UN42231 | Rsa1.0.03050.1 | 883  | 25764  | 0         | 880 | 883 | 99 +  | 1   | 883  | 24212  | 25093  |
| UN42232 | Rsa1.0.01840.1 | 718  | 38449  | 1.00E-127 | 401 | 454 | 88 -  | 281 | 718  | 4070   | 4520   |
| UN42233 | Rsa1.0.01552.1 | 778  | 43396  | 0         | 514 | 538 | 95 -  | 259 | 778  | 35219  | 35756  |
| UN42234 | Rsa1.0.00133.1 | 677  | 123768 | 0         | 411 | 431 | 95 +  | 254 | 676  | 9867   | 10296  |
| UN42235 | Rsa1.0.14826.1 | 458  | 3040   | 9.00E-74  | 141 | 141 | 100 + | 317 | 457  | 190    | 330    |

|         |                |      |        |           |     |     |       |     |      |        |        |
|---------|----------------|------|--------|-----------|-----|-----|-------|-----|------|--------|--------|
| UN42236 | Rsa1.0.03550.1 | 1237 | 22154  | 0         | 459 | 466 | 98 -  | 773 | 1237 | 10307  | 10768  |
| UN42237 | Rsa1.0.01960.1 | 743  | 36766  | 1.00E-137 | 251 | 252 | 99 +  | 65  | 316  | 5891   | 6142   |
| UN42238 | Rsa1.0.04934.1 | 586  | 143962 | 0         | 522 | 549 | 95 +  | 41  | 584  | 141889 | 142435 |
| UN42239 | Rsa1.0.03111.1 | 729  | 25327  | 1.00E-132 | 245 | 247 | 99 +  | 213 | 459  | 4759   | 5005   |
| UN42240 | Rsa1.0.00040.1 | 777  | 324196 | 0         | 724 | 725 | 99 -  | 1   | 725  | 110449 | 111173 |
| UN42241 | Rsa1.0.00049.1 | 1253 | 167018 | 0         | 406 | 416 | 97 -  | 1   | 415  | 75160  | 75575  |
| UN42242 | Rsa1.0.01065.1 | 737  | 55264  | 0         | 734 | 737 | 99 +  | 1   | 737  | 29589  | 30325  |
| UN42243 | Rsa1.0.01029.1 | 988  | 256254 | 0         | 941 | 964 | 97 -  | 11  | 966  | 149895 | 150854 |
| UN42244 | Rsa1.0.01026.1 | 677  | 171624 | 4.00E-58  | 115 | 115 | 100 - | 140 | 254  | 169301 | 169415 |
| UN42245 | Rsa1.0.00111.1 | 897  | 390088 | 1.00E-102 | 238 | 254 | 93 +  | 528 | 771  | 349143 | 349396 |
| UN42246 | Rsa1.0.02207.1 | 773  | 33914  | 0         | 339 | 340 | 99 -  | 3   | 342  | 15884  | 16223  |
| UN42247 | Rsa1.0.00332.1 | 667  | 94575  | 1.00E-83  | 176 | 182 | 96 +  | 145 | 326  | 61373  | 61554  |
| UN42248 | Rsa1.0.04905.1 | 772  | 15507  | 1.00E-122 | 235 | 239 | 98 -  | 24  | 262  | 436    | 674    |
| UN42249 | Rsa1.0.04588.1 | 638  | 16739  | 4.00E-98  | 194 | 198 | 97 -  | 417 | 614  | 7101   | 7298   |
| UN42250 | Rsa1.0.01845.1 | 606  | 38415  | 2.00E-72  | 149 | 151 | 98 -  | 252 | 401  | 37490  | 37640  |
| UN42251 | Rsa1.0.00344.1 | 458  | 191774 | 0         | 456 | 457 | 99 +  | 2   | 458  | 157450 | 157906 |
| UN42252 | Rsa1.0.01559.1 | 981  | 43262  | 0         | 601 | 612 | 98 -  | 371 | 980  | 15331  | 15942  |
| UN42253 | Rsa1.0.02068.1 | 765  | 35432  | 0         | 553 | 558 | 99 +  | 207 | 764  | 11601  | 12158  |
| UN42254 | Rsa1.0.00035.1 | 297  | 176449 | 8.00E-98  | 238 | 257 | 92 +  | 42  | 297  | 49123  | 49370  |
| UN42255 | Rsa1.0.00154.1 | 665  | 189461 | 1.00E-148 | 284 | 290 | 97 +  | 333 | 622  | 174179 | 174468 |
| UN42256 | Rsa1.0.00124.1 | 543  | 262503 | 1.00E-131 | 363 | 394 | 92 -  | 151 | 535  | 47509  | 47894  |
| UN42257 | Rsa1.0.00608.1 | 678  | 172672 | 1.00E-153 | 322 | 335 | 96 +  | 131 | 465  | 120841 | 121173 |
| UN42258 | Rsa1.0.17720.1 | 847  | 1757   | 1.00E-130 | 236 | 236 | 100 - | 456 | 691  | 134    | 369    |
| UN42259 | Rsa1.0.03843.1 | 697  | 20496  | 1.00E-160 | 300 | 304 | 98 +  | 3   | 303  | 8132   | 8435   |
| UN42260 | Rsa1.0.00644.1 | 716  | 136881 | 1.00E-120 | 278 | 296 | 93 +  | 424 | 716  | 31393  | 31685  |
| UN42261 | Rsa1.0.00417.1 | 1068 | 395068 | 0         | 929 | 973 | 95 -  | 96  | 1068 | 386678 | 387638 |
| UN42262 | Rsa1.0.01469.1 | 307  | 45139  | 2.00E-49  | 132 | 140 | 94 -  | 112 | 249  | 19815  | 19954  |
| UN42263 | Rsa1.0.00410.1 | 1030 | 86957  | 0         | 493 | 504 | 97 -  | 286 | 789  | 31827  | 32330  |
| UN42264 | Rsa1.0.01270.1 | 667  | 49574  | 0         | 428 | 445 | 96 -  | 224 | 667  | 27613  | 28056  |
| UN42265 | Rsa1.0.00351.1 | 625  | 413096 | 0         | 399 | 399 | 100 - | 2   | 400  | 3047   | 3445   |
| UN42266 | Rsa1.0.00285.1 | 759  | 149638 | 0         | 755 | 758 | 99 +  | 3   | 759  | 71331  | 72088  |
| UN42267 | Rsa1.0.00637.1 | 510  | 71038  | 1.00E-162 | 289 | 289 | 100 + | 1   | 289  | 3878   | 4166   |
| UN42268 | Rsa1.0.00076.1 | 719  | 146021 | 0         | 534 | 538 | 99 +  | 182 | 719  | 32873  | 33409  |
| UN42269 | Rsa1.0.00706.1 | 1185 | 291570 | 1.00E-160 | 294 | 295 | 99 -  | 1   | 294  | 28795  | 29089  |
| UN42270 | Rsa1.0.00376.1 | 653  | 90101  | 1.00E-168 | 359 | 377 | 95 +  | 216 | 589  | 49639  | 50013  |
| UN42271 | Rsa1.0.00067.1 | 973  | 415055 | 0         | 344 | 344 | 100 - | 630 | 973  | 38331  | 38674  |
| UN42272 | Rsa1.0.00782.1 | 614  | 64468  | 1.00E-152 | 272 | 272 | 100 - | 343 | 614  | 11901  | 12172  |
| UN42273 | Rsa1.0.00683.1 | 581  | 68638  | 1.00E-156 | 417 | 462 | 90 +  | 49  | 498  | 24142  | 24597  |
| UN42274 | Rsa1.0.01219.1 | 1016 | 50527  | 0         | 675 | 698 | 96 +  | 321 | 1016 | 39455  | 40152  |

|         |                |      |        |           |     |     |       |     |      |        |        |
|---------|----------------|------|--------|-----------|-----|-----|-------|-----|------|--------|--------|
| UN42275 | Rsa1.0.02340.1 | 977  | 32388  | 0         | 441 | 444 | 99 -  | 534 | 977  | 28158  | 28601  |
| UN42276 | Rsa1.0.00416.1 | 377  | 86772  | 1.00E-108 | 204 | 206 | 99 -  | 172 | 377  | 76205  | 76410  |
| UN42277 | Rsa1.0.00026.1 | 636  | 327835 | 1.00E-121 | 328 | 356 | 92 -  | 6   | 355  | 174424 | 174773 |
| UN42278 | Rsa1.0.02454.1 | 422  | 31263  | 0         | 420 | 421 | 99 -  | 2   | 422  | 8774   | 9194   |
| UN42279 | Rsa1.0.00082.1 | 639  | 237584 | 0         | 481 | 498 | 96 +  | 3   | 500  | 68502  | 68996  |
| UN42280 | Rsa1.0.00894.1 | 575  | 269700 | 1.00E-79  | 163 | 167 | 97 +  | 25  | 191  | 128191 | 128357 |
| UN42281 | Rsa1.0.10947.1 | 654  | 5668   | 0         | 653 | 654 | 99 +  | 1   | 654  | 882    | 1535   |
| UN42282 | Rsa1.0.00500.1 | 510  | 272308 | 1.00E-164 | 358 | 379 | 94 -  | 1   | 362  | 102394 | 102771 |
| UN42283 | Rsa1.0.03769.1 | 722  | 20955  | 1.00E-135 | 247 | 248 | 99 -  | 473 | 720  | 7459   | 7706   |
| UN42284 | Rsa1.0.00088.1 | 936  | 141341 | 1.00E-178 | 322 | 324 | 99 -  | 613 | 936  | 5585   | 5908   |
| UN42285 | Rsa1.0.02340.1 | 443  | 32388  | 0         | 438 | 440 | 99 -  | 2   | 441  | 27335  | 27774  |
| UN42286 | Rsa1.0.00271.1 | 669  | 101125 | 1.00E-100 | 227 | 240 | 94 +  | 402 | 641  | 80400  | 80637  |
| UN42287 | Rsa1.0.02280.1 | 485  | 33063  | 0         | 454 | 474 | 95 +  | 2   | 463  | 23762  | 24235  |
| UN42288 | Rsa1.0.01917.1 | 736  | 37303  | 0         | 381 | 386 | 98 +  | 351 | 736  | 6743   | 7128   |
| UN42289 | Rsa1.0.00211.1 | 1050 | 228189 | 1.00E-166 | 404 | 440 | 91 -  | 345 | 771  | 144872 | 145299 |
| UN42290 | #              | #    | #      | #         | #   | #   | #     | #   | #    | #      | #      |
| UN42291 | Rsa1.0.03521.1 | 500  | 396204 | 0         | 476 | 494 | 96 +  | 2   | 492  | 7413   | 7903   |
| UN42292 | Rsa1.0.04584.1 | 912  | 16756  | 1.00E-101 | 223 | 236 | 94 +  | 3   | 238  | 9580   | 9807   |
| UN42293 | Rsa1.0.24059.1 | 784  | 1009   | 1.00E-174 | 345 | 350 | 98 -  | 439 | 783  | 317    | 666    |
| UN42294 | Rsa1.0.05398.1 | 906  | 13885  | 0         | 871 | 908 | 95 -  | 2   | 906  | 9268   | 10162  |
| UN42295 | Rsa1.0.02039.1 | 512  | 35699  | 4.00E-82  | 248 | 271 | 91 +  | 1   | 266  | 940    | 1204   |
| UN42296 | Rsa1.0.00918.1 | 703  | 59720  | 1.00E-114 | 212 | 213 | 99 +  | 14  | 226  | 2461   | 2673   |
| UN42297 | Rsa1.0.03664.1 | 608  | 21487  | 1.00E-114 | 255 | 272 | 93 +  | 337 | 608  | 7897   | 8158   |
| UN42298 | Rsa1.0.02387.1 | 685  | 31890  | 0         | 418 | 436 | 95 +  | 252 | 679  | 17300  | 17735  |
| UN42299 | Rsa1.0.08339.1 | 657  | 7509   | 0         | 581 | 583 | 99 -  | 1   | 583  | 2535   | 3117   |
| UN42300 | Rsa1.0.01679.1 | 811  | 146876 | 0         | 796 | 831 | 95 -  | 2   | 810  | 145889 | 146716 |
| UN42301 | Rsa1.0.01004.1 | 754  | 56975  | 0         | 596 | 643 | 92 +  | 2   | 632  | 25820  | 26462  |
| UN42302 | Rsa1.0.03709.1 | 716  | 21247  | 0         | 714 | 716 | 99 -  | 2   | 716  | 9170   | 9885   |
| UN42303 | Rsa1.0.19147.1 | 950  | 1473   | 0         | 446 | 451 | 98 +  | 3   | 453  | 1023   | 1473   |
| UN42304 | Rsa1.0.00439.1 | 730  | 142776 | 0         | 482 | 504 | 95 +  | 224 | 722  | 118059 | 118559 |
| UN42305 | Rsa1.0.00040.1 | 795  | 324196 | 0         | 793 | 793 | 100 - | 3   | 795  | 166078 | 166870 |
| UN42306 | Rsa1.0.00370.1 | 845  | 90472  | 0         | 486 | 500 | 97 -  | 346 | 845  | 4797   | 5296   |
| UN42307 | Rsa1.0.01435.1 | 782  | 45942  | 0         | 540 | 581 | 92 +  | 215 | 782  | 41020  | 41595  |
| UN42308 | Rsa1.0.01765.1 | 1103 | 39640  | 0         | 747 | 757 | 98 -  | 3   | 759  | 14483  | 15238  |
| UN42309 | Rsa1.0.00875.1 | 1436 | 61371  | 0         | 435 | 441 | 98 -  | 998 | 1436 | 58193  | 58631  |
| UN42310 | Rsa1.0.01081.1 | 524  | 499226 | 1.00E-124 | 243 | 248 | 97 -  | 3   | 248  | 456701 | 456948 |
| UN42311 | Rsa1.0.00016.1 | 277  | 831256 | 5.00E-34  | 198 | 235 | 84 +  | 48  | 277  | 648298 | 648525 |
| UN42312 | Rsa1.0.07361.1 | 706  | 9514   | 0         | 702 | 704 | 99 +  | 3   | 706  | 8763   | 9466   |
| UN42313 | Rsa1.0.00552.1 | 1205 | 206757 | 1.00E-163 | 294 | 295 | 99 -  | 911 | 1205 | 20656  | 20950  |

|         |                |      |        |           |     |      |       |     |      |        |        |
|---------|----------------|------|--------|-----------|-----|------|-------|-----|------|--------|--------|
| UN42314 | Rsa1.0_03506.1 | 506  | 22416  | 0         | 444 | 459  | 96 -  | 52  | 503  | 21884  | 22340  |
| UN42315 | Rsa1.0_00163.1 | 926  | 116847 | 0         | 827 | 833  | 99 -  | 6   | 838  | 51378  | 52210  |
| UN42316 | Rsa1.0_06543.1 | 959  | 10805  | 0         | 948 | 959  | 98 -  | 2   | 959  | 2794   | 3748   |
| UN42317 | Rsa1.0_04520.1 | 429  | 16995  | 2.00E-96  | 225 | 237  | 94 -  | 3   | 234  | 11580  | 11816  |
| UN42318 | Rsa1.0_01199.1 | 805  | 163576 | 1.00E-162 | 362 | 386  | 93 -  | 56  | 441  | 154725 | 155110 |
| UN42319 | Rsa1.0_03890.1 | 660  | 20223  | 1.00E-165 | 345 | 361  | 95 -  | 34  | 381  | 8045   | 8405   |
| UN42320 | Rsa1.0_00736.1 | 696  | 66455  | 1.00E-104 | 254 | 273  | 93 -  | 410 | 681  | 7379   | 7651   |
| UN42321 | Rsa1.0_00247.1 | 1195 | 103408 | 0         | 595 | 602  | 98 -  | 594 | 1195 | 20088  | 20689  |
| UN42322 | Rsa1.0_00017.1 | 628  | 752458 | 1.00E-14  | 98  | 114  | 85 +  | 242 | 354  | 204805 | 204917 |
| UN42323 | Rsa1.0_05252.1 | 735  | 14366  | 0         | 398 | 402  | 99 +  | 334 | 733  | 9956   | 10357  |
| UN42324 | Rsa1.0_01282.1 | 1051 | 49304  | 1.00E-100 | 289 | 314  | 92 +  | 1   | 301  | 28022  | 28331  |
| UN42325 | Rsa1.0_00505.1 | 1144 | 79323  | 1.00E-151 | 292 | 299  | 97 -  | 845 | 1143 | 4231   | 4529   |
| UN42326 | Rsa1.0_00817.1 | 659  | 62961  | 0         | 635 | 665  | 95 -  | 1   | 657  | 26935  | 27589  |
| UN42327 | Rsa1.0_25951.1 | 625  | 912    | 1.00E-174 | 398 | 424  | 93 +  | 208 | 624  | 77     | 497    |
| UN42328 | Rsa1.0_00843.1 | 568  | 62411  | 0         | 548 | 568  | 96 +  | 2   | 568  | 44252  | 44807  |
| UN42329 | Rsa1.0_06454.1 | 701  | 10987  | 2.00E-97  | 190 | 193  | 98 +  | 190 | 382  | 6403   | 6595   |
| UN42330 | Rsa1.0_00604.1 | 781  | 146282 | 8.00E-97  | 225 | 240  | 93 -  | 3   | 242  | 113696 | 113935 |
| UN42331 | Rsa1.0_00457.1 | 417  | 337301 | 1.00E-120 | 255 | 265  | 96 -  | 130 | 394  | 198553 | 198814 |
| UN42332 | Rsa1.0_00277.1 | 1197 | 100132 | 1.00E-118 | 295 | 319  | 92 -  | 878 | 1195 | 76637  | 76948  |
| UN42333 | Rsa1.0_17910.1 | 1255 | 1712   | 0         | 588 | 589  | 99 -  | 209 | 797  | 1      | 589    |
| UN42334 | Rsa1.0_19550.1 | 561  | 1416   | 0         | 554 | 564  | 98 -  | 3   | 561  | 195    | 758    |
| UN42335 | Rsa1.0_02937.1 | 475  | 26605  | 1.00E-173 | 329 | 334  | 98 -  | 143 | 475  | 6890   | 7221   |
| UN42336 | Rsa1.0_00097.1 | 836  | 138858 | 4.00E-59  | 129 | 133  | 96 +  | 542 | 674  | 136170 | 136302 |
| UN42337 | Rsa1.0_03943.1 | 1010 | 19931  | 0         | 982 | 1024 | 95 +  | 1   | 1010 | 11559  | 12577  |
| UN42338 | Rsa1.0_03238.1 | 645  | 24432  | 0         | 589 | 631  | 93 +  | 21  | 645  | 3534   | 4149   |
| UN42339 | Rsa1.0_01742.1 | 511  | 39962  | 1.00E-111 | 210 | 212  | 99 -  | 297 | 508  | 25941  | 26152  |
| UN42340 | Rsa1.0_02157.1 | 765  | 149652 | 4.00E-83  | 183 | 191  | 95 -  | 235 | 425  | 143968 | 144155 |
| UN42341 | Rsa1.0_00241.1 | 810  | 104000 | 1.00E-104 | 212 | 218  | 97 -  | 554 | 768  | 65599  | 65816  |
| UN42342 | Rsa1.0_00044.1 | 742  | 271658 | 1.00E-135 | 278 | 287  | 96 +  | 6   | 290  | 185776 | 186061 |
| UN42343 | Rsa1.0_02191.1 | 803  | 34078  | 0         | 787 | 805  | 97 +  | 2   | 803  | 17367  | 18170  |
| UN42344 | Rsa1.0_03130.1 | 694  | 25145  | 1.00E-100 | 186 | 186  | 100 + | 509 | 694  | 2282   | 2467   |
| UN42345 | Rsa1.0_00001.1 | 917  | 363028 | 1.00E-180 | 341 | 348  | 97 -  | 3   | 350  | 315688 | 316035 |
| UN42346 | Rsa1.0_02061.1 | 724  | 35487  | 0         | 507 | 513  | 98 -  | 213 | 724  | 7942   | 8452   |
| UN42347 | Rsa1.0_00626.1 | 717  | 71582  | 0         | 652 | 692  | 94 +  | 4   | 691  | 51818  | 52495  |
| UN42348 | Rsa1.0_00071.1 | 750  | 345714 | 1.00E-128 | 258 | 264  | 97 +  | 489 | 750  | 51617  | 51880  |
| UN42349 | Rsa1.0_03242.1 | 842  | 24415  | 0         | 434 | 444  | 97 -  | 403 | 841  | 1632   | 2074   |
| UN42350 | Rsa1.0_00682.1 | 728  | 68680  | 0         | 652 | 725  | 89 -  | 24  | 721  | 15642  | 16361  |
| UN42351 | Rsa1.0_00196.1 | 1143 | 109960 | 0         | 365 | 378  | 96 +  | 766 | 1143 | 37671  | 38043  |
| UN42352 | Rsa1.0_00442.1 | 771  | 84596  | 0         | 765 | 769  | 99 -  | 3   | 771  | 26023  | 26791  |



|         |                |      |        |           |      |      |       |     |      |        |        |
|---------|----------------|------|--------|-----------|------|------|-------|-----|------|--------|--------|
| UN42353 | Rsa1.0_15301.1 | 724  | 2703   | 0         | 431  | 458  | 94 +  | 25  | 480  | 779    | 1224   |
| UN42354 | Rsa1.0_23752.1 | 923  | 1027   | 1.00E-105 | 223  | 232  | 96 -  | 692 | 923  | 80     | 308    |
| UN42355 | Rsa1.0_00008.1 | 600  | 358124 | 0         | 477  | 504  | 94 +  | 110 | 600  | 142909 | 143412 |
| UN42356 | Rsa1.0_01679.1 | 2300 | 146876 | 0         | 1811 | 1885 | 96 +  | 1   | 1875 | 145003 | 146876 |
| UN42357 | Rsa1.0_02941.1 | 672  | 26583  | 1.00E-178 | 382  | 401  | 95 -  | 3   | 400  | 20945  | 21342  |
| UN42358 | Rsa1.0_03064.1 | 916  | 25657  | 0         | 839  | 900  | 93 +  | 2   | 900  | 24482  | 25380  |
| UN42359 | Rsa1.0_24495.1 | 801  | 985    | 1.00E-138 | 285  | 297  | 95 +  | 252 | 548  | 469    | 765    |
| UN42360 | Rsa1.0_01164.1 | 878  | 51934  | 0         | 851  | 876  | 97 -  | 2   | 876  | 36838  | 37708  |
| UN42361 | Rsa1.0_00205.1 | 820  | 193401 | 1.00E-117 | 254  | 264  | 96 +  | 553 | 812  | 92527  | 92789  |
| UN42362 | Rsa1.0_00111.1 | 708  | 390088 | 1.00E-153 | 343  | 362  | 94 -  | 336 | 692  | 383652 | 384005 |
| UN42363 | Rsa1.0_01412.1 | 705  | 46311  | 5.00E-64  | 252  | 293  | 86 +  | 65  | 356  | 11288  | 11580  |
| UN42364 | Rsa1.0_00413.1 | 821  | 86921  | 0         | 781  | 827  | 94 +  | 1   | 820  | 48084  | 48889  |
| UN42365 | Rsa1.0_00094.1 | 522  | 139042 | 1.00E-161 | 438  | 482  | 90 -  | 55  | 521  | 60601  | 61075  |
| UN42366 | Rsa1.0_01119.1 | 634  | 53459  | 1.00E-113 | 236  | 243  | 97 -  | 381 | 622  | 11683  | 11924  |
| UN42367 | Rsa1.0_00146.1 | 768  | 149343 | 1.00E-103 | 220  | 230  | 95 -  | 439 | 668  | 87293  | 87522  |
| UN42368 | Rsa1.0_00637.1 | 855  | 71038  | 0         | 497  | 506  | 98 -  | 303 | 807  | 3278   | 3783   |
| UN42369 | Rsa1.0_00388.1 | 975  | 88890  | 0         | 496  | 506  | 98 +  | 1   | 503  | 55134  | 55638  |
| UN42370 | Rsa1.0_05418.1 | 1194 | 13816  | 1.00E-134 | 246  | 247  | 99 -  | 2   | 248  | 5567   | 5813   |
| UN42371 | Rsa1.0_19162.1 | 774  | 1471   | 1.00E-165 | 460  | 516  | 89 -  | 248 | 762  | 191    | 680    |
| UN42372 | Rsa1.0_00005.1 | 474  | 353093 | 1.00E-105 | 239  | 254  | 94 +  | 140 | 393  | 342416 | 342669 |
| UN42373 | Rsa1.0_00127.1 | 862  | 127446 | 0         | 593  | 685  | 86 -  | 71  | 740  | 4118   | 4757   |
| UN42374 | Rsa1.0_00409.1 | 672  | 146788 | 0         | 378  | 387  | 97 +  | 3   | 387  | 130226 | 130612 |
| UN42375 | Rsa1.0_02197.1 | 694  | 33996  | 1.00E-95  | 213  | 224  | 95 +  | 374 | 597  | 1833   | 2053   |
| UN42376 | Rsa1.0_14210.1 | 1032 | 3660   | 1.00E-142 | 297  | 310  | 95 +  | 174 | 480  | 924    | 1233   |
| UN42377 | Rsa1.0_00644.1 | 520  | 136881 | 1.00E-136 | 300  | 316  | 94 +  | 4   | 312  | 51038  | 51352  |
| UN42378 | Rsa1.0_34801.1 | 561  | 650    | 0         | 516  | 575  | 89 -  | 1   | 560  | 71     | 625    |
| UN42379 | Rsa1.0_00092.1 | 704  | 659932 | 7.00E-88  | 180  | 185  | 97 -  | 2   | 186  | 633664 | 633848 |
| UN42380 | Rsa1.0_01954.1 | 894  | 145554 | 1.00E-165 | 511  | 571  | 89 -  | 236 | 800  | 13902  | 14464  |
| UN42381 | Rsa1.0_00683.1 | 526  | 68638  | 1.00E-180 | 462  | 506  | 91 +  | 29  | 526  | 7723   | 8227   |
| UN42382 | Rsa1.0_01662.1 | 897  | 41382  | 1.00E-150 | 293  | 301  | 97 +  | 121 | 421  | 12123  | 12423  |
| UN42383 | Rsa1.0_01466.1 | 633  | 45161  | 0         | 579  | 603  | 96 -  | 21  | 622  | 38758  | 39353  |
| UN42384 | Rsa1.0_30991.1 | 976  | 739    | 1.00E-126 | 229  | 229  | 100 - | 3   | 231  | 1      | 229    |
| UN42385 | Rsa1.0_01095.1 | 613  | 54276  | 1.00E-88  | 202  | 214  | 94 -  | 114 | 327  | 34795  | 35008  |
| UN42386 | Rsa1.0_01801.1 | 780  | 39094  | 1.00E-104 | 212  | 219  | 96 -  | 313 | 525  | 20432  | 20650  |
| UN42387 | Rsa1.0_00832.1 | 871  | 62622  | 1.00E-179 | 355  | 366  | 96 +  | 502 | 867  | 33766  | 34130  |
| UN42388 | Rsa1.0_00065.1 | 973  | 454616 | 0         | 488  | 510  | 95 +  | 379 | 886  | 231646 | 232151 |
| UN42389 | Rsa1.0_06842.1 | 901  | 10285  | 0         | 901  | 901  | 100 + | 1   | 901  | 3874   | 4774   |
| UN42390 | Rsa1.0_02784.1 | 785  | 27881  | 3.00E-78  | 175  | 183  | 95 -  | 148 | 330  | 24460  | 24639  |
| UN42391 | Rsa1.0_03736.1 | 863  | 21081  | 0         | 382  | 384  | 99 -  | 479 | 862  | 9886   | 10269  |

|         |                |      |        |           |      |      |       |     |      |        |        |
|---------|----------------|------|--------|-----------|------|------|-------|-----|------|--------|--------|
| UN42392 | Rsa1.0.01141.1 | 546  | 52530  | 1.00E-135 | 308  | 325  | 94 -  | 225 | 543  | 39276  | 39599  |
| UN42393 | Rsa1.0.04493.1 | 911  | 17137  | 0         | 874  | 913  | 95 -  | 2   | 911  | 14984  | 15885  |
| UN42394 | Rsa1.0.00964.1 | 729  | 316648 | 1.00E-126 | 245  | 250  | 98 -  | 269 | 518  | 162522 | 162771 |
| UN42395 | Rsa1.0.00910.1 | 581  | 59975  | 0         | 392  | 413  | 94 +  | 65  | 474  | 30391  | 30803  |
| UN42396 | Rsa1.0.09314.1 | 564  | 6461   | 0         | 541  | 566  | 95 +  | 1   | 562  | 4709   | 5263   |
| UN42397 | Rsa1.0.00017.1 | 741  | 752458 | 0         | 600  | 684  | 87 -  | 52  | 717  | 353266 | 353927 |
| UN42398 | Rsa1.0.00347.1 | 512  | 93048  | 1.00E-167 | 453  | 498  | 90 +  | 22  | 512  | 65456  | 65930  |
| UN42399 | Rsa1.0.01838.1 | 1306 | 38500  | 1.00E-170 | 367  | 389  | 94 +  | 930 | 1304 | 17537  | 17921  |
| UN42400 | Rsa1.0.00198.1 | 1070 | 222963 | 0         | 921  | 1021 | 90 +  | 86  | 1069 | 133941 | 134951 |
| UN42401 | Rsa1.0.00184.1 | 761  | 218748 | 1.00E-159 | 410  | 446  | 91 +  | 52  | 485  | 214590 | 215035 |
| UN42402 | Rsa1.0.01674.1 | 1048 | 168300 | 1.00E-137 | 266  | 272  | 97 -  | 4   | 275  | 147439 | 147710 |
| UN42403 | Rsa1.0.00911.1 | 857  | 59943  | 0         | 409  | 418  | 97 +  | 2   | 417  | 13355  | 13772  |
| UN42404 | Rsa1.0.01368.1 | 822  | 47129  | 1.00E-115 | 242  | 250  | 96 -  | 4   | 250  | 3486   | 3735   |
| UN42405 | Rsa1.0.00340.1 | 855  | 305782 | 0         | 594  | 594  | 100 - | 1   | 594  | 29254  | 29847  |
| UN42406 | Rsa1.0.00650.1 | 864  | 70235  | 0         | 658  | 680  | 96 -  | 186 | 864  | 14287  | 14962  |
| UN42407 | Rsa1.0.13433.1 | 615  | 4832   | 1.00E-166 | 297  | 297  | 100 + | 319 | 615  | 2625   | 2921   |
| UN42408 | Rsa1.0.04244.1 | 819  | 18314  | 0         | 512  | 517  | 99 -  | 267 | 783  | 3087   | 3603   |
| UN42409 | Rsa1.0.00675.1 | 462  | 145590 | 1.00E-133 | 380  | 426  | 89 +  | 40  | 461  | 28828  | 29224  |
| UN42410 | Rsa1.0.00603.1 | 671  | 73299  | 0         | 453  | 467  | 97 +  | 206 | 671  | 32629  | 33094  |
| UN42411 | Rsa1.0.01236.1 | 787  | 50156  | 2.00E-72  | 139  | 139  | 100 - | 3   | 141  | 41803  | 41941  |
| UN42412 | Rsa1.0.11551.1 | 610  | 5472   | 0         | 589  | 625  | 94 +  | 3   | 610  | 591    | 1214   |
| UN42413 | Rsa1.0.04785.1 | 500  | 15993  | 1.00E-167 | 300  | 301  | 99 -  | 200 | 500  | 7196   | 7496   |
| UN42414 | Rsa1.0.00056.1 | 1161 | 332604 | 0         | 1114 | 1165 | 95 +  | 3   | 1161 | 73652  | 74816  |
| UN42415 | Rsa1.0.00730.1 | 667  | 66673  | 1.00E-107 | 222  | 229  | 96 -  | 440 | 667  | 28375  | 28603  |
| UN42416 | Rsa1.0.04511.1 | 911  | 17032  | 1.00E-108 | 229  | 238  | 96 +  | 677 | 911  | 4974   | 5211   |
| UN42417 | Rsa1.0.01059.1 | 425  | 55410  | 1.00E-137 | 283  | 293  | 96 -  | 134 | 424  | 10086  | 10375  |
| UN42418 | Rsa1.0.00111.1 | 982  | 390088 | 1.00E-162 | 409  | 443  | 92 +  | 564 | 980  | 56041  | 56482  |
| UN42419 | Rsa1.0.00201.1 | 717  | 232851 | 1.00E-140 | 268  | 272  | 98 -  | 447 | 717  | 19108  | 19379  |
| UN42420 | Rsa1.0.02505.1 | 937  | 30703  | 1.00E-163 | 297  | 299  | 99 -  | 638 | 936  | 10018  | 10316  |
| UN42421 | Rsa1.0.00420.1 | 796  | 86496  | 1.00E-149 | 268  | 268  | 100 + | 1   | 268  | 9195   | 9462   |
| UN42422 | Rsa1.0.00920.1 | 780  | 601703 | 1.00E-151 | 326  | 344  | 94 +  | 434 | 777  | 449831 | 450169 |
| UN42423 | Rsa1.0.00193.1 | 1261 | 194198 | 1.00E-117 | 283  | 302  | 93 +  | 968 | 1261 | 102524 | 102824 |
| UN42424 | Rsa1.0.01271.1 | 952  | 49569  | 0         | 893  | 951  | 93 +  | 2   | 942  | 27624  | 28559  |
| UN42425 | Rsa1.0.09063.1 | 743  | 6675   | 1.00E-171 | 381  | 405  | 94 -  | 352 | 741  | 1774   | 2178   |
| UN42426 | Rsa1.0.01563.1 | 799  | 170823 | 1.00E-162 | 323  | 334  | 96 -  | 2   | 331  | 23547  | 23880  |
| UN42427 | Rsa1.0.01974.1 | 934  | 36583  | 1.00E-144 | 350  | 386  | 90 +  | 292 | 677  | 12535  | 12893  |
| UN42428 | Rsa1.0.00136.1 | 706  | 122464 | 3.00E-90  | 218  | 232  | 93 -  | 1   | 232  | 82615  | 82843  |
| UN42429 | Rsa1.0.00089.1 | 775  | 406142 | 1.00E-172 | 330  | 338  | 97 +  | 2   | 339  | 161999 | 162336 |
| UN42430 | Rsa1.0.04085.1 | 838  | 19168  | 1.00E-165 | 458  | 516  | 88 -  | 32  | 520  | 755    | 1267   |

|         |                |      |        |           |      |      |      |     |      |        |        |
|---------|----------------|------|--------|-----------|------|------|------|-----|------|--------|--------|
| UN42431 | Rsa1.0.02310.1 | 717  | 32735  | 0         | 677  | 730  | 92 - | 3   | 717  | 29673  | 30387  |
| UN42432 | Rsa1.0.04905.1 | 763  | 15507  | 0         | 378  | 401  | 94 - | 62  | 442  | 5642   | 6042   |
| UN42433 | Rsa1.0.00451.1 | 962  | 322533 | 0         | 577  | 583  | 98 + | 384 | 962  | 244823 | 245405 |
| UN42434 | Rsa1.0.23144.1 | 795  | 1068   | 1.00E-131 | 294  | 312  | 94 + | 336 | 647  | 758    | 1067   |
| UN42435 | Rsa1.0.00509.1 | 679  | 78829  | 1.00E-155 | 302  | 309  | 97 - | 371 | 679  | 6477   | 6784   |
| UN42436 | Rsa1.0.02396.1 | 890  | 31783  | 1.00E-137 | 257  | 260  | 98 + | 631 | 890  | 27105  | 27364  |
| UN42437 | Rsa1.0.00044.1 | 337  | 271658 | 3.00E-73  | 155  | 159  | 97 - | 53  | 209  | 14325  | 14483  |
| UN42438 | Rsa1.0.00601.1 | 1236 | 177045 | 0         | 1029 | 1086 | 94 - | 178 | 1236 | 26180  | 27249  |
| UN42439 | Rsa1.0.03535.1 | 832  | 22242  | 3.00E-87  | 275  | 309  | 88 - | 527 | 832  | 7516   | 7811   |
| UN42440 | Rsa1.0.05897.1 | 666  | 12302  | 1.00E-159 | 564  | 656  | 85 - | 10  | 664  | 4612   | 5267   |
| UN42441 | Rsa1.0.04352.1 | 858  | 17779  | 0         | 819  | 870  | 94 + | 2   | 858  | 11805  | 12666  |
| UN42442 | Rsa1.0.00978.1 | 703  | 57739  | 1.00E-157 | 313  | 322  | 97 + | 383 | 703  | 42690  | 43011  |
| UN42443 | Rsa1.0.04426.1 | 698  | 17399  | 1.00E-92  | 203  | 213  | 95 - | 8   | 220  | 14213  | 14425  |
| UN42444 | Rsa1.0.00722.1 | 847  | 66840  | 1.00E-158 | 307  | 315  | 97 - | 336 | 650  | 41419  | 41733  |
| UN42445 | Rsa1.0.00011.1 | 1024 | 225044 | 1.00E-104 | 364  | 425  | 85 - | 3   | 394  | 215935 | 216356 |
| UN42446 | Rsa1.0.00347.1 | 888  | 93048  | 1.00E-135 | 287  | 301  | 95 + | 322 | 622  | 68684  | 68984  |
| UN42447 | Rsa1.0.03074.1 | 960  | 25568  | 0         | 442  | 450  | 98 + | 512 | 960  | 11031  | 11480  |
| UN42448 | Rsa1.0.00707.1 | 408  | 190112 | 2.00E-87  | 220  | 234  | 94 - | 174 | 406  | 67065  | 67293  |
| UN42449 | Rsa1.0.00484.1 | 676  | 203294 | 0         | 531  | 569  | 93 - | 132 | 676  | 156564 | 157128 |
| UN42450 | Rsa1.0.01198.1 | 315  | 51029  | 1.00E-114 | 284  | 308  | 92 - | 2   | 304  | 25785  | 26085  |
| UN42451 | Rsa1.0.00100.1 | 666  | 249232 | 0         | 594  | 634  | 93 - | 53  | 666  | 181505 | 182130 |
| UN42452 | Rsa1.0.00016.1 | 1187 | 831256 | 1.00E-151 | 307  | 318  | 96 + | 673 | 988  | 429113 | 429430 |
| UN42453 | Rsa1.0.01563.1 | 716  | 170823 | 1.00E-170 | 345  | 358  | 96 - | 28  | 383  | 23547  | 23904  |
| UN42454 | Rsa1.0.01536.1 | 712  | 43747  | 0         | 383  | 391  | 97 - | 322 | 712  | 23533  | 23923  |
| UN42455 | Rsa1.0.01806.1 | 966  | 39021  | 0         | 399  | 407  | 98 - | 561 | 966  | 21761  | 22163  |
| UN42456 | Rsa1.0.00652.1 | 990  | 70089  | 1.00E-106 | 228  | 238  | 95 - | 740 | 977  | 22798  | 23032  |
| UN42457 | Rsa1.0.00642.1 | 985  | 201230 | 1.00E-123 | 268  | 282  | 95 - | 227 | 505  | 163117 | 163398 |
| UN42458 | Rsa1.0.00133.1 | 466  | 123768 | 5.00E-63  | 143  | 149  | 95 - | 133 | 281  | 52532  | 52677  |
| UN42459 | Rsa1.0.00384.1 | 643  | 89278  | 0         | 620  | 664  | 93 - | 4   | 643  | 79099  | 79757  |
| UN42460 | Rsa1.0.04404.1 | 892  | 17510  | 0         | 723  | 745  | 97 + | 148 | 892  | 9475   | 10217  |
| UN42461 | Rsa1.0.00016.1 | 722  | 831256 | 0         | 698  | 730  | 95 + | 12  | 722  | 505370 | 506098 |
| UN42462 | Rsa1.0.02737.1 | 684  | 28325  | 1.00E-95  | 232  | 246  | 94 + | 6   | 247  | 6926   | 7167   |
| UN42463 | Rsa1.0.01126.1 | 843  | 53127  | 0         | 484  | 525  | 92 + | 330 | 843  | 7555   | 8062   |
| UN42464 | Rsa1.0.00147.1 | 814  | 249503 | 1.00E-137 | 269  | 276  | 97 + | 543 | 814  | 130918 | 131193 |
| UN42465 | Rsa1.0.00047.1 | 545  | 168582 | 1.00E-167 | 356  | 380  | 93 + | 181 | 542  | 43362  | 43741  |
| UN42466 | Rsa1.0.01591.1 | 607  | 42718  | 0         | 451  | 472  | 95 + | 49  | 520  | 14788  | 15258  |
| UN42467 | Rsa1.0.01666.1 | 654  | 173972 | 7.00E-66  | 143  | 148  | 96 - | 216 | 363  | 25290  | 25437  |
| UN42468 | Rsa1.0.00772.1 | 700  | 64856  | 1.00E-128 | 299  | 317  | 94 - | 386 | 700  | 52791  | 53096  |
| UN42469 | Rsa1.0.07342.1 | 435  | 9530   | 1.00E-143 | 272  | 277  | 98 - | 102 | 378  | 8256   | 8532   |

|         |                |      |        |           |      |      |      |     |      |        |        |
|---------|----------------|------|--------|-----------|------|------|------|-----|------|--------|--------|
| UN42470 | Rsa1.0.01335.1 | 284  | 47894  | 1.00E-90  | 218  | 234  | 93 + | 38  | 263  | 2434   | 2666   |
| UN42471 | Rsa1.0.01035.1 | 891  | 56019  | 1.00E-174 | 421  | 449  | 93 + | 458 | 891  | 47064  | 47509  |
| UN42472 | Rsa1.0.00544.1 | 668  | 76787  | 1.00E-67  | 140  | 143  | 97 + | 362 | 504  | 445    | 587    |
| UN42473 | Rsa1.0.02125.1 | 1106 | 34775  | 1.00E-159 | 291  | 293  | 99 - | 490 | 782  | 1907   | 2199   |
| UN42474 | Rsa1.0.11743.1 | 767  | 5421   | 1.00E-100 | 236  | 248  | 95 + | 268 | 512  | 4530   | 4775   |
| UN42475 | Rsa1.0.00260.1 | 576  | 102021 | 2.33E-156 | 320  | 339  | 94 - | 5   | 343  | 27047  | 27385  |
| UN42476 | Rsa1.0.02101.1 | 995  | 35017  | 0         | 399  | 412  | 96 + | 84  | 495  | 28859  | 29270  |
| UN42477 | Rsa1.0.00419.1 | 954  | 86562  | 0         | 403  | 411  | 98 - | 527 | 936  | 15435  | 15844  |
| UN42478 | Rsa1.0.00067.1 | 1141 | 415055 | 0         | 1090 | 1147 | 95 - | 1   | 1141 | 227656 | 228800 |
| UN42479 | #              | #    | #      | #         | #    | #    | #    | #   | #    | #      | #      |
| UN42480 | Rsa1.0.00140.1 | 1143 | 121541 | 1.00E-112 | 238  | 246  | 96 - | 900 | 1143 | 117152 | 117397 |
| UN42481 | Rsa1.0.00456.1 | 770  | 82826  | 0         | 514  | 542  | 94 + | 225 | 752  | 18300  | 18841  |
| UN42482 | Rsa1.0.03686.1 | 866  | 21387  | 1.00E-150 | 300  | 307  | 97 - | 564 | 865  | 9035   | 9340   |
| UN42483 | Rsa1.0.00082.1 | 783  | 237584 | 0         | 647  | 715  | 90 - | 91  | 783  | 68494  | 69198  |
| UN42484 | Rsa1.0.00316.1 | 966  | 96264  | 0         | 353  | 359  | 98 + | 3   | 361  | 53780  | 54138  |
| UN42485 | Rsa1.0.00423.1 | 271  | 86138  | 4.00E-84  | 221  | 236  | 93 - | 35  | 270  | 10887  | 11115  |
| UN42486 | Rsa1.0.00395.1 | 715  | 214466 | 0         | 692  | 710  | 97 + | 4   | 713  | 33351  | 34060  |
| UN42487 | Rsa1.0.00944.1 | 1012 | 58733  | 0         | 961  | 996  | 96 + | 19  | 1012 | 32277  | 33262  |
| UN42488 | Rsa1.0.00081.1 | 639  | 143261 | 0         | 370  | 377  | 98 + | 263 | 639  | 123845 | 124221 |
| UN42489 | Rsa1.0.01004.1 | 836  | 56975  | 0         | 519  | 572  | 90 - | 294 | 836  | 16944  | 17510  |
| UN42490 | Rsa1.0.00131.1 | 662  | 432233 | 1.00E-175 | 345  | 356  | 96 - | 49  | 404  | 196713 | 197068 |
| UN42491 | Rsa1.0.01397.1 | 631  | 183276 | 9.00E-87  | 166  | 167  | 99 + | 70  | 236  | 171639 | 171805 |
| UN42492 | Rsa1.0.00078.1 | 342  | 175053 | 4.00E-75  | 193  | 210  | 91 - | 2   | 211  | 78928  | 79131  |
| UN42493 | Rsa1.0.10947.1 | 587  | 5668   | 0         | 458  | 481  | 95 + | 103 | 580  | 933    | 1409   |
| UN42494 | Rsa1.0.01447.1 | 583  | 45654  | 1.00E-119 | 298  | 319  | 93 - | 266 | 581  | 4534   | 4838   |
| UN42495 | Rsa1.0.01936.1 | 497  | 37151  | 0         | 486  | 496  | 97 - | 4   | 497  | 18303  | 18798  |
| UN42496 | Rsa1.0.01380.1 | 622  | 155003 | 0         | 550  | 563  | 97 + | 64  | 622  | 18401  | 18963  |
| UN42497 | Rsa1.0.00066.1 | 996  | 152418 | 0         | 579  | 604  | 95 + | 3   | 604  | 20871  | 21465  |
| UN42498 | Rsa1.0.02754.1 | 481  | 28213  | 1.00E-138 | 337  | 363  | 92 - | 126 | 478  | 8655   | 9017   |
| UN42499 | Rsa1.0.01600.1 | 745  | 42537  | 1.00E-120 | 337  | 376  | 89 + | 359 | 728  | 11045  | 11406  |
| UN42500 | Rsa1.0.00001.1 | 740  | 363028 | 1.00E-135 | 308  | 329  | 93 + | 221 | 540  | 323550 | 323878 |
| UN42501 | Rsa1.0.00029.1 | 571  | 272992 | 1.00E-149 | 439  | 492  | 89 - | 105 | 571  | 249679 | 250167 |
| UN42502 | Rsa1.0.01005.1 | 664  | 56967  | 1.00E-156 | 320  | 333  | 96 + | 332 | 664  | 39743  | 40072  |
| UN42503 | Rsa1.0.00017.1 | 1664 | 752458 | 0         | 668  | 720  | 92 + | 952 | 1664 | 352440 | 353138 |
| UN42504 | Rsa1.0.00060.1 | 1025 | 502678 | 0         | 671  | 737  | 91 - | 306 | 1025 | 128114 | 128836 |
| UN42505 | Rsa1.0.00824.1 | 957  | 188447 | 0         | 454  | 469  | 96 + | 70  | 538  | 154496 | 154963 |
| UN42506 | Rsa1.0.01860.1 | 865  | 38057  | 0         | 823  | 869  | 94 - | 2   | 865  | 21671  | 22524  |
| UN42507 | Rsa1.0.00467.1 | 590  | 156542 | 1.00E-115 | 247  | 259  | 95 + | 46  | 304  | 91014  | 91272  |
| UN42508 | Rsa1.0.00223.1 | 1217 | 106231 | 0         | 996  | 1048 | 95 + | 4   | 1039 | 41507  | 42541  |

|         |                |      |        |           |     |      |      |     |      |        |        |
|---------|----------------|------|--------|-----------|-----|------|------|-----|------|--------|--------|
| UN42509 | Rsa1.0.00437.1 | 748  | 84879  | 3.00E-81  | 181 | 190  | 95 + | 104 | 293  | 44758  | 44947  |
| UN42510 | Rsa1.0.11893.1 | 805  | 5379   | 0         | 398 | 412  | 96 + | 394 | 805  | 3964   | 4373   |
| UN42511 | Rsa1.0.00323.1 | 544  | 159650 | 1.00E-107 | 236 | 248  | 95 + | 239 | 486  | 56193  | 56437  |
| UN42512 | Rsa1.0.05418.1 | 849  | 13816  | 0         | 768 | 874  | 87 - | 23  | 849  | 1554   | 2418   |
| UN42513 | Rsa1.0.00055.1 | 615  | 520193 | 3.00E-65  | 351 | 437  | 80 + | 218 | 615  | 180014 | 180430 |
| UN42514 | Rsa1.0.00279.1 | 1096 | 100039 | 0         | 981 | 1009 | 97 - | 1   | 1006 | 21542  | 22545  |
| UN42515 | Rsa1.0.08919.1 | 554  | 6788   | 0         | 439 | 458  | 95 + | 2   | 459  | 484    | 937    |
| UN42516 | Rsa1.0.01154.1 | 676  | 52249  | 0         | 380 | 385  | 98 - | 294 | 676  | 34280  | 34664  |
| UN42517 | Rsa1.0.47220.1 | 560  | 479    | 1.00E-136 | 264 | 269  | 98 + | 3   | 269  | 108    | 376    |
| UN42518 | Rsa1.0.01453.1 | 818  | 45449  | 0         | 715 | 741  | 96 + | 76  | 816  | 28437  | 29174  |
| UN42519 | Rsa1.0.00038.1 | 986  | 314568 | 0         | 692 | 707  | 97 + | 289 | 986  | 209873 | 210579 |
| UN42520 | Rsa1.0.00934.1 | 656  | 193516 | 3.00E-68  | 156 | 163  | 95 + | 8   | 168  | 34535  | 34697  |
| UN42521 | Rsa1.0.02493.1 | 622  | 30854  | 1.00E-134 | 275 | 285  | 96 + | 129 | 410  | 6059   | 6339   |
| UN42522 | Rsa1.0.02077.1 | 784  | 35328  | 0         | 443 | 444  | 99 - | 2   | 445  | 21211  | 21654  |
| UN42523 | Rsa1.0.00301.1 | 623  | 365315 | 1.00E-161 | 332 | 344  | 96 + | 273 | 616  | 215181 | 215522 |
| UN42524 | Rsa1.0.02711.1 | 764  | 28475  | 1.00E-121 | 242 | 249  | 97 + | 1   | 249  | 4007   | 4255   |
| UN42525 | Rsa1.0.01691.1 | 865  | 40921  | 2.33E-156 | 275 | 279  | 98 - | 289 | 567  | 5609   | 5887   |
| UN42526 | Rsa1.0.02216.1 | 471  | 33816  | 1.00E-124 | 272 | 286  | 95 - | 1   | 281  | 30306  | 30591  |
| UN42527 | Rsa1.0.00592.1 | 833  | 73788  | 1.00E-83  | 367 | 432  | 84 - | 7   | 429  | 21332  | 21756  |
| UN42528 | Rsa1.0.00155.1 | 778  | 118465 | 0         | 418 | 421  | 99 - | 358 | 778  | 31397  | 31817  |
| UN42529 | Rsa1.0.03552.1 | 1096 | 22151  | 0         | 444 | 449  | 98 - | 565 | 1013 | 12029  | 12475  |
| UN42530 | Rsa1.0.00093.1 | 676  | 214962 | 0         | 411 | 421  | 97 - | 260 | 674  | 11392  | 11812  |
| UN42531 | Rsa1.0.00157.1 | 824  | 245832 | 3.00E-44  | 98  | 100  | 98 - | 419 | 518  | 136230 | 136329 |
| UN42532 | Rsa1.0.00078.1 | 394  | 175053 | 1.00E-119 | 241 | 249  | 96 + | 146 | 394  | 34786  | 35034  |
| UN42533 | Rsa1.0.00124.1 | 502  | 262503 | 1.00E-102 | 203 | 208  | 97 - | 63  | 270  | 17063  | 17270  |
| UN42534 | Rsa1.0.01774.1 | 798  | 39528  | 1.00E-163 | 334 | 346  | 96 + | 3   | 347  | 22988  | 23331  |
| UN42535 | Rsa1.0.03890.1 | 613  | 20223  | 0         | 350 | 357  | 98 - | 5   | 361  | 8045   | 8401   |
| UN42536 | Rsa1.0.13610.1 | 963  | 4644   | 1.00E-153 | 290 | 295  | 98 + | 386 | 680  | 2827   | 3121   |
| UN42537 | Rsa1.0.00001.1 | 814  | 363028 | 0         | 508 | 517  | 98 - | 298 | 813  | 287292 | 287808 |
| UN42538 | Rsa1.0.16845.1 | 855  | 2015   | 3.00E-78  | 192 | 206  | 93 + | 649 | 853  | 517    | 714    |
| UN42539 | Rsa1.0.00634.1 | 716  | 71222  | 0         | 367 | 371  | 98 + | 342 | 712  | 57160  | 57530  |
| UN42540 | Rsa1.0.04095.1 | 654  | 19095  | 0         | 387 | 391  | 98 - | 264 | 654  | 6581   | 6971   |
| UN42541 | Rsa1.0.00215.1 | 865  | 201775 | 1.00E-121 | 325 | 356  | 91 + | 512 | 865  | 2172   | 2510   |
| UN42542 | Rsa1.0.33152.1 | 878  | 685    | 4.00E-99  | 187 | 188  | 99 - | 126 | 313  | 13     | 200    |
| UN42543 | Rsa1.0.01498.1 | 520  | 44558  | 0         | 367 | 368  | 99 - | 153 | 520  | 35691  | 36058  |
| UN42544 | Rsa1.0.00247.1 | 694  | 103408 | 1.00E-156 | 372 | 401  | 92 - | 5   | 391  | 66969  | 67368  |
| UN42545 | Rsa1.0.00198.1 | 825  | 222963 | 0         | 794 | 830  | 95 - | 3   | 824  | 108596 | 109416 |
| UN42546 | Rsa1.0.16482.1 | 1127 | 2141   | 0         | 688 | 763  | 90 + | 1   | 763  | 247    | 1009   |
| UN42547 | Rsa1.0.00237.1 | 628  | 235974 | 0         | 479 | 494  | 96 - | 133 | 626  | 41582  | 42075  |

|         |                |      |        |           |      |      |       |     |      |        |        |
|---------|----------------|------|--------|-----------|------|------|-------|-----|------|--------|--------|
| UN42548 | Rsa1.0.01914.1 | 802  | 37354  | 1.00E-114 | 222  | 225  | 98 -  | 578 | 802  | 9497   | 9720   |
| UN42549 | Rsa1.0.23101.1 | 788  | 1071   | 3.00E-93  | 174  | 174  | 100 - | 186 | 359  | 674    | 847    |
| UN42550 | Rsa1.0.39826.1 | 889  | 564    | 2.00E-57  | 145  | 153  | 94 +  | 6   | 155  | 393    | 545    |
| UN42551 | Rsa1.0.00100.1 | 574  | 249232 | 0         | 467  | 492  | 94 +  | 1   | 488  | 221757 | 222245 |
| UN42552 | Rsa1.0.05467.1 | 457  | 13649  | 1.00E-112 | 272  | 289  | 94 +  | 173 | 451  | 11542  | 11830  |
| UN42553 | Rsa1.0.00139.1 | 595  | 357786 | 1.00E-169 | 405  | 439  | 92 -  | 171 | 595  | 16935  | 17368  |
| UN42554 | Rsa1.0.00979.1 | 798  | 57733  | 1.00E-74  | 198  | 215  | 92 -  | 406 | 620  | 1177   | 1390   |
| UN42555 | Rsa1.0.00008.1 | 1082 | 358124 | 0         | 579  | 601  | 96 -  | 491 | 1081 | 89991  | 90591  |
| UN42556 | Rsa1.0.01437.1 | 695  | 45887  | 0         | 631  | 682  | 92 +  | 1   | 676  | 36829  | 37480  |
| UN42557 | Rsa1.0.00251.1 | 608  | 303968 | 1.00E-144 | 287  | 295  | 97 +  | 316 | 608  | 82182  | 82476  |
| UN42558 | Rsa1.0.13774.1 | 666  | 4351   | 2.00E-84  | 171  | 175  | 97 -  | 235 | 409  | 1424   | 1598   |
| UN42559 | Rsa1.0.01580.1 | 1148 | 42852  | 1.00E-118 | 226  | 229  | 98 -  | 920 | 1148 | 35815  | 36043  |
| UN42560 | Rsa1.0.00863.1 | 945  | 254535 | 2.00E-67  | 233  | 262  | 88 -  | 692 | 945  | 110397 | 110656 |
| UN42561 | Rsa1.0.27229.1 | 865  | 861    | 0         | 441  | 441  | 100 + | 1   | 441  | 87     | 527    |
| UN42562 | Rsa1.0.00959.1 | 721  | 58202  | 0         | 700  | 712  | 98 +  | 1   | 712  | 23114  | 23823  |
| UN42563 | Rsa1.0.03865.1 | 784  | 20373  | 1.00E-114 | 225  | 230  | 97 -  | 204 | 433  | 15975  | 16204  |
| UN42564 | Rsa1.0.00129.1 | 768  | 126831 | 1.00E-129 | 289  | 303  | 95 -  | 458 | 758  | 113583 | 113884 |
| UN42565 | Rsa1.0.28048.1 | 738  | 830    | 0         | 666  | 697  | 95 -  | 42  | 738  | 134    | 830    |
| UN42566 | Rsa1.0.02814.1 | 314  | 27656  | 1.00E-22  | 88   | 99   | 88 -  | 208 | 306  | 17631  | 17729  |
| UN42567 | Rsa1.0.00050.1 | 604  | 237174 | 1.00E-79  | 263  | 301  | 87 -  | 329 | 603  | 133683 | 133982 |
| UN42568 | Rsa1.0.00115.1 | 603  | 131321 | 0         | 417  | 437  | 95 +  | 170 | 603  | 34041  | 34473  |
| UN42569 | Rsa1.0.00472.1 | 583  | 398134 | 1.00E-110 | 241  | 253  | 95 +  | 91  | 340  | 166312 | 166564 |
| UN42570 | Rsa1.0.02600.1 | 1045 | 29657  | 0         | 482  | 497  | 96 +  | 548 | 1044 | 16402  | 16897  |
| UN42571 | Rsa1.0.00095.1 | 706  | 283384 | 0         | 706  | 706  | 100 + | 1   | 706  | 86736  | 87441  |
| UN42572 | Rsa1.0.00449.1 | 944  | 83863  | 0         | 929  | 934  | 99 -  | 11  | 944  | 55527  | 56460  |
| UN42573 | Rsa1.0.08193.1 | 1119 | 7758   | 1.00E-145 | 339  | 364  | 93 +  | 126 | 487  | 7064   | 7427   |
| UN42574 | Rsa1.0.00660.1 | 893  | 69688  | 1.00E-169 | 324  | 331  | 97 -  | 560 | 887  | 62359  | 62689  |
| UN42575 | Rsa1.0.03940.1 | 812  | 19962  | 1.00E-128 | 232  | 232  | 100 - | 129 | 360  | 4058   | 4289   |
| UN42576 | Rsa1.0.00040.1 | 976  | 324196 | 0         | 614  | 640  | 95 +  | 4   | 636  | 296581 | 297216 |
| UN42577 | Rsa1.0.00071.1 | 714  | 345714 | 4.00E-80  | 166  | 170  | 97 -  | 304 | 470  | 22243  | 22412  |
| UN42578 | Rsa1.0.00347.1 | 338  | 93048  | 1.00E-177 | 315  | 315  | 100 - | 24  | 338  | 12596  | 12910  |
| UN42579 | Rsa1.0.02915.1 | 873  | 26813  | 1.00E-136 | 362  | 398  | 90 +  | 326 | 717  | 1434   | 1825   |
| UN42580 | Rsa1.0.02852.1 | 994  | 27287  | 0         | 953  | 1004 | 94 -  | 1   | 994  | 693    | 1681   |
| UN42581 | Rsa1.0.00069.1 | 955  | 403561 | 0         | 635  | 638  | 99 -  | 1   | 638  | 387083 | 387720 |
| UN42582 | Rsa1.0.05641.1 | 728  | 13077  | 0         | 688  | 728  | 94 +  | 6   | 728  | 7252   | 7958   |
| UN42583 | Rsa1.0.05279.1 | 753  | 14277  | 0         | 423  | 423  | 100 - | 3   | 425  | 3897   | 4319   |
| UN42584 | Rsa1.0.08729.1 | 836  | 6994   | 8.00E-85  | 160  | 160  | 100 + | 252 | 411  | 1720   | 1879   |
| UN42585 | Rsa1.0.01544.1 | 1283 | 185602 | 0         | 1258 | 1293 | 97 -  | 11  | 1281 | 20648  | 21939  |
| UN42586 | Rsa1.0.01077.1 | 1061 | 54772  | 0         | 447  | 447  | 100 - | 54  | 500  | 25418  | 25864  |

|         |                |      |        |           |      |      |       |     |      |        |        |
|---------|----------------|------|--------|-----------|------|------|-------|-----|------|--------|--------|
| UN42587 | Rsa1.0.00127.1 | 855  | 127446 | 0         | 703  | 733  | 95 -  | 123 | 855  | 125378 | 126110 |
| UN42588 | Rsa1.0.07647.1 | 853  | 8942   | 0         | 814  | 833  | 97 -  | 1   | 833  | 280    | 1098   |
| UN42589 | Rsa1.0.00899.1 | 1241 | 60404  | 0         | 496  | 496  | 100 - | 626 | 1121 | 56656  | 57151  |
| UN42590 | Rsa1.0.00979.1 | 1281 | 57733  | 1.00E-69  | 324  | 383  | 84 -  | 879 | 1259 | 1014   | 1390   |
| UN42591 | Rsa1.0.00544.1 | 201  | 76787  | 9.00E-35  | 75   | 75   | 100 + | 127 | 201  | 23418  | 23492  |
| UN42592 | Rsa1.0.06842.1 | 916  | 10285  | 0         | 332  | 332  | 100 - | 474 | 805  | 8044   | 8375   |
| UN42593 | Rsa1.0.00055.1 | 742  | 520193 | 0         | 521  | 552  | 94 +  | 6   | 556  | 383405 | 383953 |
| UN42594 | Rsa1.0.00655.1 | 880  | 195840 | 0         | 870  | 883  | 98 -  | 1   | 880  | 141606 | 142485 |
| UN42595 | Rsa1.0.00067.1 | 1339 | 415055 | 0         | 540  | 545  | 99 -  | 797 | 1339 | 363940 | 364484 |
| UN42596 | Rsa1.0.04980.1 | 988  | 15251  | 0         | 424  | 424  | 100 + | 565 | 988  | 6458   | 6881   |
| UN42597 | Rsa1.0.01112.1 | 870  | 310601 | 0         | 617  | 617  | 100 + | 1   | 617  | 44309  | 44925  |
| UN42598 | Rsa1.0.01072.1 | 1068 | 55068  | 0         | 566  | 571  | 99 +  | 491 | 1061 | 5418   | 5988   |
| UN42599 | Rsa1.0.00380.1 | 641  | 89748  | 0         | 540  | 544  | 99 +  | 1   | 543  | 22250  | 22793  |
| UN42600 | Rsa1.0.00610.1 | 845  | 72740  | 0         | 374  | 380  | 98 -  | 466 | 845  | 62386  | 62763  |
| UN42601 | Rsa1.0.02976.1 | 536  | 26315  | 1.00E-114 | 215  | 217  | 99 -  | 2   | 218  | 18887  | 19103  |
| UN42602 | Rsa1.0.00889.1 | 909  | 60978  | 0         | 908  | 908  | 100 + | 2   | 909  | 43279  | 44186  |
| UN42603 | Rsa1.0.00073.1 | 779  | 240924 | 0         | 442  | 454  | 97 -  | 86  | 539  | 208060 | 208512 |
| UN42604 | Rsa1.0.00656.1 | 904  | 69968  | 0         | 896  | 897  | 99 +  | 8   | 904  | 43686  | 44582  |
| UN42605 | Rsa1.0.01081.1 | 848  | 499226 | 1.00E-118 | 257  | 270  | 95 -  | 581 | 847  | 16552  | 16821  |
| UN42606 | Rsa1.0.00497.1 | 1158 | 79830  | 0         | 1103 | 1119 | 98 -  | 41  | 1158 | 2745   | 3855   |
| UN42607 | Rsa1.0.00179.1 | 857  | 393324 | 0         | 851  | 857  | 99 -  | 1   | 857  | 5986   | 6841   |
| UN42608 | Rsa1.0.00284.1 | 609  | 323267 | 0         | 473  | 474  | 99 -  | 1   | 474  | 273139 | 273612 |
| UN42609 | Rsa1.0.04890.1 | 1165 | 15591  | 1.00E-114 | 233  | 241  | 96 +  | 695 | 935  | 10910  | 11150  |
| UN42610 | Rsa1.0.00071.1 | 629  | 345714 | 1.00E-138 | 250  | 250  | 100 + | 380 | 629  | 22598  | 22847  |
| UN42611 | Rsa1.0.03529.1 | 909  | 22277  | 6.00E-52  | 408  | 509  | 80 -  | 230 | 738  | 15991  | 16499  |
| UN42612 | Rsa1.0.00635.1 | 706  | 175826 | 1.00E-100 | 186  | 186  | 100 - | 103 | 288  | 15994  | 16179  |
| UN42613 | Rsa1.0.00118.1 | 825  | 130637 | 0         | 489  | 489  | 100 + | 5   | 493  | 42575  | 43063  |
| UN42614 | Rsa1.0.00152.1 | 837  | 257730 | 0         | 705  | 706  | 99 -  | 132 | 837  | 76102  | 76807  |
| UN42615 | Rsa1.0.00008.1 | 884  | 358124 | 0         | 491  | 508  | 96 +  | 5   | 512  | 136570 | 137076 |
| UN42616 | Rsa1.0.00979.1 | 1267 | 57733  | 4.00E-72  | 325  | 383  | 84 +  | 6   | 386  | 1014   | 1390   |
| UN42617 | Rsa1.0.03605.1 | 584  | 21827  | 0         | 584  | 593  | 98 +  | 1   | 584  | 11287  | 11879  |
| UN42618 | Rsa1.0.00713.1 | 206  | 158017 | 1.00E-52  | 115  | 117  | 98 +  | 1   | 116  | 150455 | 150571 |
| UN42619 | Rsa1.0.01362.1 | 848  | 47217  | 0         | 847  | 849  | 99 -  | 1   | 848  | 20230  | 21077  |
| UN42620 | Rsa1.0.00019.1 | 767  | 301669 | 0         | 765  | 765  | 100 - | 1   | 765  | 237111 | 237875 |
| UN42621 | Rsa1.0.07943.1 | 828  | 8207   | 1.00E-138 | 258  | 260  | 99 -  | 58  | 317  | 7526   | 7783   |
| UN42622 | Rsa1.0.00184.1 | 1051 | 218748 | 1.00E-154 | 277  | 277  | 100 + | 1   | 277  | 49084  | 49360  |
| UN42623 | Rsa1.0.01908.1 | 659  | 37427  | 0         | 627  | 655  | 95 -  | 1   | 655  | 35768  | 36419  |
| UN42624 | Rsa1.0.07391.1 | 909  | 9477   | 0         | 883  | 883  | 100 + | 1   | 883  | 6449   | 7331   |
| UN42625 | Rsa1.0.28906.1 | 967  | 799    | 0         | 630  | 651  | 96 +  | 317 | 967  | 1      | 650    |

|         |                |      |        |           |      |      |       |     |      |        |        |
|---------|----------------|------|--------|-----------|------|------|-------|-----|------|--------|--------|
| UN42626 | Rsa1.0.00034.1 | 1026 | 260119 | 0         | 976  | 987  | 98 +  | 1   | 987  | 3585   | 4571   |
| UN42627 | Rsa1.0.00005.1 | 843  | 353093 | 0         | 469  | 469  | 100 + | 375 | 843  | 129667 | 130135 |
| UN42628 | Rsa1.0.00655.1 | 810  | 195840 | 0         | 512  | 546  | 93 -  | 60  | 604  | 144521 | 145066 |
| UN42629 | Rsa1.0_00182.1 | 808  | 142305 | 0         | 581  | 581  | 100 + | 228 | 808  | 35883  | 36463  |
| UN42630 | #              | #    | #      | #         | #    | #    | #     | #   | #    | #      | #      |
| UN42631 | #              | #    | #      | #         | #    | #    | #     | #   | #    | #      | #      |
| UN42632 | Rsa1.0.03378.1 | 879  | 23322  | 0         | 787  | 810  | 97 +  | 2   | 809  | 22522  | 23322  |
| UN42633 | Rsa1.0.00507.1 | 824  | 79074  | 0         | 364  | 374  | 97 -  | 364 | 737  | 43278  | 43648  |
| UN42634 | Rsa1.0.16310.1 | 817  | 2205   | 0         | 490  | 491  | 99 -  | 327 | 817  | 1276   | 1766   |
| UN42635 | Rsa1.0.03067.1 | 1104 | 25651  | 0         | 546  | 565  | 96 -  | 538 | 1102 | 15405  | 15968  |
| UN42636 | Rsa1.0.00720.1 | 845  | 66931  | 0         | 621  | 621  | 100 + | 103 | 723  | 49514  | 50134  |
| UN42637 | Rsa1.0.01026.1 | 865  | 171624 | 0         | 865  | 865  | 100 + | 1   | 865  | 155537 | 156401 |
| UN42638 | Rsa1.0.01033.1 | 807  | 56173  | 0         | 790  | 791  | 99 -  | 3   | 793  | 49115  | 49904  |
| UN42639 | Rsa1.0.00977.1 | 889  | 198001 | 1.00E-163 | 306  | 311  | 98 +  | 1   | 311  | 30120  | 30430  |
| UN42640 | Rsa1.0.02514.1 | 878  | 30642  | 0         | 798  | 798  | 100 - | 81  | 878  | 9748   | 10545  |
| UN42641 | Rsa1.0.00131.1 | 773  | 432233 | 1.00E-110 | 254  | 271  | 93 -  | 503 | 773  | 104966 | 105236 |
| UN42642 | Rsa1.0.10487.1 | 881  | 5830   | 0         | 881  | 881  | 100 + | 1   | 881  | 4547   | 5427   |
| UN42643 | Rsa1.0.00175.1 | 886  | 166121 | 0         | 648  | 649  | 99 -  | 238 | 886  | 64811  | 65458  |
| UN42644 | Rsa1.0.01432.1 | 640  | 45977  | 0         | 637  | 638  | 99 +  | 3   | 640  | 34724  | 35360  |
| UN42645 | Rsa1.0.02810.1 | 873  | 27671  | 1.00E-160 | 287  | 287  | 100 + | 224 | 510  | 17019  | 17305  |
| UN42646 | Rsa1.0.00812.1 | 2000 | 63233  | 0         | 1937 | 2005 | 96 +  | 1   | 2000 | 33412  | 35406  |
| UN42647 | Rsa1.0.20157.1 | 642  | 1333   | 0         | 600  | 602  | 99 -  | 1   | 602  | 470    | 1071   |
| UN42648 | Rsa1.0.00630.1 | 781  | 71281  | 1.00E-125 | 231  | 232  | 99 +  | 225 | 456  | 1507   | 1738   |
| UN42649 | Rsa1.0.12866.1 | 728  | 5093   | 0         | 726  | 728  | 99 +  | 1   | 728  | 1102   | 1829   |
| UN42650 | Rsa1.0.01112.1 | 867  | 310601 | 0         | 384  | 386  | 99 -  | 236 | 621  | 298239 | 298624 |
| UN42651 | Rsa1.0.00654.1 | 901  | 70012  | 1.00E-177 | 315  | 315  | 100 - | 267 | 581  | 31309  | 31623  |
| UN42652 | Rsa1.0.02413.1 | 826  | 31628  | 0         | 697  | 697  | 100 - | 14  | 710  | 7802   | 8498   |
| UN42653 | Rsa1.0.00343.1 | 869  | 93570  | 0         | 750  | 750  | 100 + | 1   | 750  | 14187  | 14936  |
| UN42654 | Rsa1.0.02774.1 | 673  | 28038  | 3.00E-90  | 169  | 169  | 100 - | 222 | 390  | 17004  | 17172  |
| UN42655 | Rsa1.0.04849.1 | 1040 | 15726  | 0         | 485  | 510  | 95 +  | 432 | 939  | 4584   | 5087   |
| UN42656 | Rsa1.0.20111.1 | 806  | 1340   | 0         | 348  | 348  | 100 - | 249 | 596  | 1      | 348    |
| UN42657 | Rsa1.0.00501.1 | 845  | 79545  | 0         | 688  | 689  | 99 -  | 158 | 845  | 41804  | 42492  |
| UN42658 | Rsa1.0.00213.1 | 528  | 108167 | 2.00E-72  | 154  | 159  | 96 -  | 369 | 527  | 39065  | 39223  |
| UN42659 | Rsa1.0.01806.1 | 830  | 39021  | 5.00E-92  | 292  | 333  | 87 -  | 521 | 830  | 30777  | 31104  |
| UN42660 | Rsa1.0.01249.1 | 890  | 188432 | 0         | 342  | 342  | 100 + | 549 | 890  | 43045  | 43386  |
| UN42661 | Rsa1.0.00288.1 | 839  | 98659  | 0         | 759  | 786  | 96 +  | 48  | 833  | 39297  | 40079  |
| UN42662 | Rsa1.0.00853.1 | 1593 | 62101  | 0         | 1444 | 1456 | 99 -  | 138 | 1593 | 44411  | 45865  |
| UN42663 | Rsa1.0.00886.1 | 930  | 167350 | 0         | 917  | 936  | 97 +  | 1   | 930  | 12531  | 13466  |
| UN42664 | Rsa1.0.01202.1 | 372  | 158825 | 2.00E-15  | 76   | 87   | 87 -  | 283 | 369  | 50441  | 50527  |



|         |                |      |        |           |      |      |       |     |      |        |        |
|---------|----------------|------|--------|-----------|------|------|-------|-----|------|--------|--------|
| UN42665 | Rsa1.0.01149.1 | 997  | 160459 | 1.00E-127 | 232  | 232  | 100 - | 294 | 525  | 131080 | 131311 |
| UN42666 | Rsa1.0.00521.1 | 798  | 78191  | 0         | 792  | 799  | 99 +  | 1   | 798  | 3378   | 4176   |
| UN42667 | Rsa1.0.06213.1 | 468  | 11478  | 1.00E-126 | 232  | 233  | 99 +  | 236 | 468  | 10894  | 11126  |
| UN42668 | Rsa1.0.03477.1 | 787  | 22635  | 0         | 402  | 423  | 95 +  | 369 | 785  | 5497   | 5916   |
| UN42669 | Rsa1.0.00017.1 | 1134 | 752458 | 0         | 1129 | 1133 | 99 +  | 1   | 1133 | 571549 | 572680 |
| UN42670 | Rsa1.0.00181.1 | 850  | 114269 | 0         | 847  | 854  | 99 +  | 1   | 850  | 77783  | 78636  |
| UN42671 | Rsa1.0.01009.1 | 695  | 56922  | 0         | 405  | 408  | 99 +  | 1   | 408  | 3115   | 3521   |
| UN42672 | Rsa1.0.00042.1 | 816  | 171507 | 0         | 816  | 816  | 100 - | 1   | 816  | 85238  | 86053  |
| UN42673 | Rsa1.0.00051.1 | 874  | 258225 | 0         | 665  | 665  | 100 + | 1   | 665  | 118257 | 118921 |
| UN42674 | Rsa1.0.00707.1 | 869  | 190112 | 0         | 378  | 378  | 100 - | 1   | 378  | 179614 | 179991 |
| UN42675 | Rsa1.0.00087.1 | 876  | 761073 | 0         | 356  | 356  | 100 + | 261 | 616  | 635680 | 636035 |
| UN42676 | Rsa1.0.01880.1 | 934  | 37745  | 4.00E-22  | 154  | 179  | 86 +  | 455 | 629  | 18793  | 18969  |
| UN42677 | Rsa1.0.03766.1 | 681  | 20970  | 0         | 518  | 521  | 99 +  | 161 | 681  | 13393  | 13912  |
| UN42678 | Rsa1.0.02348.1 | 507  | 32316  | 1.00E-143 | 257  | 257  | 100 - | 251 | 507  | 26384  | 26640  |
| UN42679 | Rsa1.0.04033.1 | 598  | 19481  | 0         | 578  | 613  | 94 +  | 1   | 598  | 3731   | 4337   |
| UN42680 | Rsa1.0.02123.1 | 804  | 149053 | 0         | 802  | 802  | 100 - | 3   | 804  | 3497   | 4298   |
| UN42681 | Rsa1.0.00418.1 | 700  | 215377 | 0         | 550  | 569  | 96 +  | 11  | 576  | 201857 | 202422 |
| UN42682 | Rsa1.0.02174.1 | 1219 | 34316  | 1.00E-153 | 275  | 275  | 100 + | 945 | 1219 | 13678  | 13952  |
| UN42683 | Rsa1.0.00082.1 | 592  | 237584 | 0         | 492  | 492  | 100 + | 1   | 492  | 68505  | 68996  |
| UN42684 | Rsa1.0.00883.1 | 842  | 61230  | 2.00E-97  | 181  | 181  | 100 + | 159 | 339  | 52523  | 52703  |
| UN42685 | Rsa1.0.00892.1 | 797  | 60703  | 0         | 771  | 797  | 96 -  | 3   | 797  | 48115  | 48902  |
| UN42686 | Rsa1.0.00425.1 | 999  | 147080 | 0         | 665  | 669  | 99 -  | 322 | 990  | 125707 | 126375 |
| UN42687 | Rsa1.0.00187.1 | 620  | 393093 | 0         | 332  | 332  | 100 + | 1   | 332  | 32810  | 33141  |
| UN42688 | Rsa1.0.01424.1 | 643  | 46139  | 0         | 453  | 454  | 99 +  | 190 | 643  | 42149  | 42602  |
| UN42689 | Rsa1.0.00483.1 | 1405 | 81102  | 0         | 668  | 668  | 100 + | 1   | 668  | 76928  | 77595  |
| UN42690 | Rsa1.0.01601.1 | 868  | 42519  | 1.00E-107 | 218  | 225  | 96 -  | 4   | 228  | 19058  | 19282  |
| UN42691 | Rsa1.0.04919.1 | 522  | 15440  | 0         | 347  | 349  | 99 +  | 174 | 522  | 624    | 972    |
| UN42692 | Rsa1.0.00951.1 | 1139 | 164588 | 1.00E-171 | 315  | 317  | 99 -  | 1   | 316  | 124973 | 125289 |
| UN42693 | Rsa1.0.01901.1 | 821  | 37472  | 0         | 569  | 569  | 100 - | 1   | 569  | 20156  | 20724  |
| UN42694 | Rsa1.0.02017.1 | 601  | 35999  | 1.00E-169 | 301  | 301  | 100 + | 301 | 601  | 34477  | 34777  |
| UN42695 | Rsa1.0.00112.1 | 1052 | 132199 | 0         | 676  | 677  | 99 +  | 87  | 763  | 98872  | 99548  |
| UN42696 | Rsa1.0.00544.1 | 1060 | 76787  | 0         | 894  | 906  | 98 -  | 155 | 1060 | 8476   | 9371   |
| UN42697 | Rsa1.0.00948.1 | 573  | 58620  | 2.00E-97  | 196  | 201  | 97 +  | 126 | 326  | 50390  | 50590  |
| UN42698 | Rsa1.0.00813.1 | 800  | 63202  | 0         | 784  | 813  | 96 -  | 3   | 800  | 18508  | 19320  |
| UN42699 | Rsa1.0.08714.1 | 859  | 7010   | 0         | 363  | 370  | 98 +  | 1   | 369  | 1243   | 1610   |
| UN42700 | Rsa1.0.02446.1 | 649  | 31330  | 0         | 339  | 344  | 98 -  | 309 | 649  | 28228  | 28571  |
| UN42701 | Rsa1.0.00964.1 | 1143 | 316648 | 0         | 429  | 429  | 100 - | 13  | 441  | 264071 | 264499 |
| UN42702 | Rsa1.0.12851.1 | 829  | 5098   | 0         | 433  | 433  | 100 + | 397 | 829  | 1      | 433    |
| UN42703 | Rsa1.0.00496.1 | 1288 | 79834  | 0         | 419  | 428  | 97 -  | 642 | 1069 | 27282  | 27706  |

|         |                |      |        |           |      |      |       |     |      |        |        |
|---------|----------------|------|--------|-----------|------|------|-------|-----|------|--------|--------|
| UN42704 | Rsa1.0.00490.1 | 1164 | 186713 | 0         | 1159 | 1164 | 99 -  | 1   | 1163 | 52270  | 53432  |
| UN42705 | Rsa1.0.09308.1 | 640  | 6466   | 0         | 606  | 609  | 99 -  | 1   | 609  | 617    | 1225   |
| UN42706 | Rsa1.0.00414.1 | 824  | 202190 | 0         | 403  | 403  | 100 + | 422 | 824  | 22123  | 22525  |
| UN42707 | Rsa1.0.02196.1 | 873  | 34005  | 0         | 790  | 791  | 99 +  | 62  | 852  | 6722   | 7512   |
| UN42708 | Rsa1.0.00098.1 | 842  | 349239 | 0         | 568  | 568  | 100 + | 275 | 842  | 232786 | 233353 |
| UN42709 | Rsa1.0.00341.1 | 891  | 249309 | 0         | 543  | 559  | 97 +  | 333 | 891  | 117699 | 118257 |
| UN42710 | Rsa1.0.06032.1 | 644  | 11886  | 1.00E-152 | 278  | 280  | 99 -  | 361 | 640  | 7580   | 7859   |
| UN42711 | Rsa1.0.00146.1 | 852  | 149343 | 0         | 377  | 377  | 100 - | 476 | 852  | 87146  | 87522  |
| UN42712 | Rsa1.0.00016.1 | 509  | 831256 | 0         | 508  | 511  | 99 -  | 1   | 509  | 267917 | 268427 |
| UN42713 | Rsa1.0.03890.1 | 788  | 20223  | 1.00E-138 | 362  | 397  | 91 -  | 376 | 751  | 11314  | 11709  |
| UN42714 | Rsa1.0.00343.1 | 617  | 93570  | 1.00E-145 | 279  | 285  | 97 +  | 81  | 365  | 74178  | 74462  |
| UN42715 | Rsa1.0.02110.1 | 1244 | 34919  | 0         | 1232 | 1235 | 99 +  | 9   | 1243 | 22291  | 23525  |
| UN42716 | Rsa1.0.15363.1 | 470  | 2655   | 1.00E-167 | 385  | 410  | 93 +  | 68  | 470  | 1072   | 1476   |
| UN42717 | Rsa1.0.00038.1 | 745  | 314568 | 6.00E-70  | 169  | 178  | 94 -  | 566 | 743  | 50122  | 50296  |
| UN42718 | Rsa1.0.00067.1 | 1308 | 415055 | 0         | 517  | 517  | 100 + | 1   | 517  | 360522 | 361038 |
| UN42719 | Rsa1.0.01556.1 | 868  | 163858 | 0         | 868  | 868  | 100 + | 1   | 868  | 18617  | 19484  |
| UN42720 | Rsa1.0.03447.1 | 571  | 22857  | 1.00E-113 | 230  | 236  | 97 -  | 337 | 571  | 21409  | 21644  |
| UN42721 | Rsa1.0.02898.1 | 681  | 26958  | 1.00E-165 | 306  | 310  | 98 +  | 372 | 681  | 24320  | 24629  |
| UN42722 | Rsa1.0.02299.1 | 679  | 32857  | 0         | 433  | 444  | 97 +  | 1   | 444  | 13706  | 14146  |
| UN42723 | Rsa1.0.38134.1 | 626  | 591    | 0         | 362  | 380  | 95 +  | 7   | 368  | 33     | 412    |
| UN42724 | Rsa1.0.00012.1 | 664  | 222148 | 0         | 341  | 341  | 100 + | 1   | 341  | 123071 | 123411 |
| UN42725 | Rsa1.0.01435.1 | 899  | 45942  | 0         | 713  | 713  | 100 + | 187 | 899  | 23424  | 24136  |
| UN42726 | Rsa1.0.00517.1 | 781  | 142790 | 1.00E-104 | 253  | 277  | 91 -  | 1   | 255  | 69988  | 70264  |
| UN42727 | Rsa1.0.00030.1 | 843  | 250988 | 0         | 842  | 843  | 99 -  | 1   | 843  | 117217 | 118059 |
| UN42728 | Rsa1.0.00207.1 | 829  | 248736 | 1.00E-143 | 261  | 262  | 99 +  | 511 | 772  | 244784 | 245045 |
| UN42729 | Rsa1.0.01719.1 | 824  | 40388  | 0         | 533  | 534  | 99 -  | 243 | 775  | 15318  | 15851  |
| UN42730 | Rsa1.0.10862.1 | 1141 | 5698   | 8.00E-24  | 151  | 182  | 82 +  | 275 | 456  | 533    | 714    |
| UN42731 | Rsa1.0.14728.1 | 435  | 3118   | 0         | 432  | 432  | 100 + | 4   | 435  | 778    | 1209   |
| UN42732 | Rsa1.0.01104.1 | 527  | 285480 | 1.00E-148 | 269  | 270  | 99 -  | 1   | 270  | 3157   | 3426   |
| UN42733 | Rsa1.0.00712.1 | 703  | 67217  | 0         | 534  | 557  | 95 -  | 1   | 555  | 5202   | 5749   |
| UN42734 | Rsa1.0.00601.1 | 928  | 177045 | 0         | 581  | 582  | 99 -  | 173 | 754  | 26668  | 27249  |
| UN42735 | Rsa1.0.00706.1 | 746  | 291570 | 0         | 746  | 747  | 99 +  | 1   | 746  | 179229 | 179975 |
| UN42736 | Rsa1.0.01296.1 | 894  | 49035  | 0         | 890  | 894  | 99 +  | 1   | 894  | 26072  | 26965  |
| UN42737 | Rsa1.0.03410.1 | 1033 | 23147  | 1.00E-159 | 325  | 338  | 96 +  | 696 | 1033 | 7836   | 8169   |
| UN42738 | Rsa1.0.04600.1 | 551  | 16694  | 0         | 468  | 469  | 99 +  | 81  | 549  | 11338  | 11806  |
| UN42739 | Rsa1.0.16566.1 | 813  | 2110   | 0         | 572  | 572  | 100 + | 1   | 572  | 401    | 972    |
| UN42740 | Rsa1.0.00450.1 | 516  | 139397 | 0         | 516  | 516  | 100 + | 1   | 516  | 40945  | 41460  |
| UN42741 | Rsa1.0.00105.1 | 897  | 134138 | 0         | 407  | 408  | 99 -  | 213 | 620  | 5657   | 6064   |
| UN42742 | Rsa1.0.01731.1 | 869  | 40208  | 0         | 814  | 814  | 100 + | 56  | 869  | 9310   | 10123  |

|         |                |      |        |           |     |      |       |     |      |        |        |
|---------|----------------|------|--------|-----------|-----|------|-------|-----|------|--------|--------|
| UN42743 | Rsa1.0.00190.1 | 917  | 318240 | 0         | 454 | 472  | 96 +  | 34  | 500  | 314315 | 314786 |
| UN42744 | Rsa1.0.00529.1 | 402  | 77487  | 3.00E-95  | 177 | 177  | 100 - | 226 | 402  | 25117  | 25293  |
| UN42745 | Rsa1.0.02378.1 | 946  | 31991  | 0         | 936 | 938  | 99 -  | 3   | 940  | 1223   | 2160   |
| UN42746 | Rsa1.0.02239.1 | 746  | 33534  | 0         | 720 | 743  | 96 -  | 3   | 742  | 5953   | 6692   |
| UN42747 | Rsa1.0.00341.1 | 733  | 249309 | 1.00E-106 | 242 | 259  | 93 +  | 28  | 277  | 5025   | 5283   |
| UN42748 | Rsa1.0.00067.1 | 666  | 415055 | 1.00E-118 | 290 | 313  | 92 -  | 368 | 666  | 142357 | 142664 |
| UN42749 | Rsa1.0.26477.1 | 660  | 890    | 1.00E-129 | 238 | 239  | 99 +  | 422 | 660  | 1      | 239    |
| UN42750 | Rsa1.0.01355.1 | 729  | 47303  | 0         | 555 | 585  | 94 +  | 7   | 588  | 39409  | 39993  |
| UN42751 | Rsa1.0.02060.1 | 785  | 35528  | 0         | 774 | 784  | 98 -  | 3   | 785  | 4043   | 4826   |
| UN42752 | Rsa1.0.00170.1 | 1052 | 179538 | 0         | 695 | 723  | 96 +  | 336 | 1052 | 74805  | 75527  |
| UN42753 | Rsa1.0.00397.1 | 1131 | 88189  | 1.00E-130 | 236 | 236  | 100 + | 3   | 238  | 53853  | 54088  |
| UN42754 | Rsa1.0.01425.1 | 811  | 46136  | 0         | 363 | 364  | 99 -  | 446 | 809  | 42279  | 42642  |
| UN42755 | Rsa1.0.00183.1 | 828  | 113277 | 0         | 494 | 495  | 99 -  | 333 | 827  | 5023   | 5517   |
| UN42756 | Rsa1.0.02570.1 | 1021 | 30000  | 0         | 985 | 1021 | 96 -  | 3   | 1018 | 5545   | 6556   |
| UN42757 | Rsa1.0.02648.1 | 607  | 29073  | 1.00E-98  | 295 | 336  | 87 +  | 282 | 601  | 28376  | 28696  |
| UN42758 | Rsa1.0.00497.1 | 904  | 79830  | 0         | 407 | 414  | 98 +  | 496 | 904  | 67322  | 67735  |
| UN42759 | Rsa1.0.00045.1 | 996  | 328694 | 0         | 776 | 780  | 99 +  | 217 | 996  | 231988 | 232767 |
| UN42760 | Rsa1.0.00152.1 | 532  | 257730 | 6.00E-69  | 237 | 269  | 88 -  | 259 | 524  | 77855  | 78119  |
| UN42761 | Rsa1.0.02185.1 | 639  | 34150  | 1.00E-121 | 269 | 282  | 95 -  | 360 | 636  | 4009   | 4290   |
| UN42762 | Rsa1.0.00030.1 | 759  | 250988 | 1.00E-121 | 250 | 259  | 96 +  | 3   | 258  | 150138 | 150396 |
| UN42763 | Rsa1.0.00469.1 | 1098 | 82084  | 0         | 605 | 605  | 100 - | 494 | 1098 | 71357  | 71961  |
| UN42764 | Rsa1.0.09048.1 | 707  | 6683   | 0         | 647 | 662  | 97 +  | 44  | 704  | 5245   | 5903   |
| UN42765 | Rsa1.0.01086.1 | 796  | 54509  | 0         | 790 | 796  | 99 -  | 1   | 796  | 36444  | 37233  |
| UN42766 | Rsa1.0.01299.1 | 929  | 162028 | 0         | 555 | 594  | 93 -  | 351 | 929  | 157994 | 158576 |
| UN42767 | Rsa1.0.02420.1 | 705  | 31580  | 1.00E-143 | 285 | 293  | 97 +  | 1   | 292  | 7437   | 7729   |
| UN42768 | Rsa1.0.00831.1 | 711  | 62673  | 0         | 402 | 426  | 94 -  | 286 | 711  | 2947   | 3353   |
| UN42769 | Rsa1.0.00286.1 | 494  | 98709  | 8.00E-93  | 247 | 266  | 92 +  | 228 | 489  | 11606  | 11867  |
| UN42770 | Rsa1.0.06403.1 | 873  | 11078  | 1.00E-158 | 320 | 332  | 96 -  | 549 | 871  | 5649   | 5980   |
| UN42771 | Rsa1.0.00623.1 | 1227 | 207630 | 1.00E-129 | 258 | 266  | 96 +  | 310 | 575  | 137515 | 137780 |
| UN42772 | Rsa1.0.01958.1 | 533  | 261128 | 2.00E-96  | 286 | 318  | 89 +  | 199 | 510  | 110198 | 110502 |
| UN42773 | Rsa1.0.02319.1 | 761  | 32580  | 5.00E-98  | 188 | 190  | 98 -  | 572 | 761  | 28456  | 28645  |
| UN42774 | Rsa1.0.00489.1 | 731  | 80434  | 1.00E-119 | 240 | 246  | 97 -  | 1   | 245  | 48244  | 48489  |
| UN42775 | Rsa1.0.01613.1 | 278  | 182542 | 1.00E-155 | 277 | 277  | 100 + | 1   | 277  | 6572   | 6848   |
| UN42776 | Rsa1.0.00689.1 | 910  | 68305  | 0         | 368 | 381  | 96 +  | 3   | 382  | 23499  | 23878  |
| UN42777 | Rsa1.0.02045.1 | 1223 | 35650  | 0         | 728 | 730  | 99 +  | 1   | 730  | 34118  | 34847  |
| UN42778 | Rsa1.0.02234.1 | 770  | 33618  | 1.00E-145 | 375 | 415  | 90 -  | 266 | 679  | 4145   | 4534   |
| UN42779 | Rsa1.0.03566.1 | 508  | 22050  | 0         | 485 | 508  | 95 -  | 2   | 508  | 15945  | 16452  |
| UN42780 | Rsa1.0.03338.1 | 837  | 136346 | 0         | 507 | 537  | 94 +  | 295 | 818  | 4543   | 5077   |
| UN42781 | Rsa1.0.00029.1 | 969  | 272992 | 0         | 580 | 582  | 99 +  | 3   | 584  | 260698 | 261279 |

|         |                |      |        |           |     |      |       |     |      |        |        |
|---------|----------------|------|--------|-----------|-----|------|-------|-----|------|--------|--------|
| UN42782 | Rsa1.0.02392.1 | 1082 | 152517 | 1.00E-165 | 330 | 338  | 97 -  | 744 | 1079 | 25808  | 26143  |
| UN42783 | Rsa1.0.00878.1 | 644  | 330303 | 0         | 512 | 525  | 97 -  | 126 | 641  | 148379 | 148903 |
| UN42784 | Rsa1.0.06113.1 | 660  | 11721  | 0         | 515 | 543  | 94 +  | 2   | 544  | 11178  | 11720  |
| UN42785 | Rsa1.0.00156.1 | 307  | 118383 | 1.00E-158 | 299 | 304  | 98 +  | 2   | 305  | 60191  | 60491  |
| UN42786 | Rsa1.0.05494.1 | 1013 | 13547  | 1.00E-129 | 247 | 251  | 98 +  | 150 | 400  | 3338   | 3588   |
| UN42787 | Rsa1.0.14748.1 | 759  | 3105   | 1.00E-147 | 277 | 281  | 98 +  | 307 | 587  | 1110   | 1390   |
| UN42788 | Rsa1.0.03713.1 | 700  | 21221  | 0         | 328 | 328  | 100 - | 373 | 700  | 10577  | 10904  |
| UN42789 | Rsa1.0.05169.1 | 872  | 14620  | 1.00E-135 | 247 | 248  | 99 +  | 625 | 872  | 7103   | 7350   |
| UN42790 | Rsa1.0.00114.1 | 880  | 131330 | 0         | 876 | 878  | 99 +  | 2   | 879  | 82723  | 83600  |
| UN42791 | Rsa1.0.01570.1 | 1089 | 43015  | 2.00E-64  | 126 | 126  | 100 - | 431 | 556  | 12707  | 12832  |
| UN42792 | Rsa1.0.00214.1 | 1025 | 107508 | 0         | 400 | 412  | 97 +  | 607 | 1018 | 103190 | 103600 |
| UN42793 | Rsa1.0.11602.1 | 830  | 5461   | 1.00E-122 | 272 | 289  | 94 +  | 14  | 302  | 4023   | 4305   |
| UN42794 | Rsa1.0.00204.1 | 1298 | 109056 | 1.00E-130 | 242 | 244  | 99 -  | 150 | 393  | 95321  | 95564  |
| UN42795 | Rsa1.0.00081.1 | 649  | 143261 | 0         | 636 | 638  | 99 +  | 1   | 638  | 123489 | 124126 |
| UN42796 | Rsa1.0.06303.1 | 1372 | 11268  | 0         | 995 | 1062 | 93 -  | 1   | 1037 | 1741   | 2802   |
| UN42797 | Rsa1.0.03388.1 | 682  | 23277  | 3.00E-59  | 117 | 117  | 100 - | 1   | 117  | 19371  | 19487  |
| UN42798 | Rsa1.0.00040.1 | 753  | 324196 | 4.00E-83  | 160 | 161  | 99 +  | 21  | 181  | 307977 | 308137 |
| UN42799 | Rsa1.0.00568.1 | 704  | 75219  | 1.00E-115 | 213 | 214  | 99 +  | 490 | 703  | 63689  | 63902  |
| UN42800 | Rsa1.0.00205.1 | 616  | 193401 | 1.00E-144 | 337 | 359  | 93 +  | 250 | 607  | 38432  | 38778  |
| UN42801 | Rsa1.0.05491.1 | 785  | 13554  | 0         | 367 | 369  | 99 -  | 63  | 431  | 9307   | 9675   |
| UN42802 | Rsa1.0.00978.1 | 679  | 57739  | 1.00E-173 | 323 | 328  | 98 +  | 132 | 459  | 42272  | 42599  |
| UN42803 | Rsa1.0.00019.1 | 556  | 301669 | 0         | 475 | 488  | 97 -  | 70  | 556  | 286200 | 286681 |
| UN42804 | Rsa1.0.02672.1 | 835  | 28884  | 0         | 830 | 833  | 99 +  | 3   | 835  | 10738  | 11570  |
| UN42805 | Rsa1.0.00059.1 | 737  | 159650 | 0         | 552 | 603  | 91 +  | 152 | 736  | 134007 | 134602 |
| UN42806 | Rsa1.0.04025.1 | 677  | 19511  | 0         | 671 | 676  | 99 -  | 2   | 677  | 2110   | 2785   |
| UN42807 | Rsa1.0.00478.1 | 991  | 81419  | 0         | 502 | 503  | 99 +  | 489 | 991  | 68044  | 68546  |
| UN42808 | Rsa1.0.03869.1 | 666  | 20365  | 0         | 453 | 457  | 99 -  | 6   | 462  | 4022   | 4478   |
| UN42809 | Rsa1.0.32803.1 | 673  | 693    | 0         | 412 | 425  | 96 -  | 246 | 670  | 272    | 693    |
| UN42810 | Rsa1.0.01061.1 | 748  | 55349  | 0         | 422 | 429  | 98 +  | 31  | 458  | 18730  | 19158  |
| UN42811 | Rsa1.0.01275.1 | 487  | 49405  | 1.00E-133 | 256 | 261  | 98 -  | 226 | 486  | 8119   | 8379   |
| UN42812 | Rsa1.0.00020.1 | 874  | 283099 | 1.00E-122 | 237 | 242  | 97 -  | 3   | 244  | 171755 | 171996 |
| UN42813 | Rsa1.0.00553.1 | 681  | 75983  | 6.00E-85  | 163 | 164  | 99 +  | 259 | 422  | 68316  | 68479  |
| UN42814 | Rsa1.0.00092.1 | 644  | 659932 | 1.00E-79  | 222 | 243  | 91 -  | 3   | 244  | 56364  | 56600  |
| UN42815 | Rsa1.0.00512.1 | 763  | 200277 | 0         | 647 | 722  | 89 +  | 32  | 752  | 32153  | 32874  |
| UN42816 | Rsa1.0.02295.1 | 620  | 149884 | 1.00E-155 | 308 | 318  | 96 +  | 5   | 322  | 118839 | 119156 |
| UN42817 | Rsa1.0.01124.1 | 558  | 53295  | 1.00E-172 | 371 | 389  | 95 -  | 173 | 558  | 50472  | 50858  |
| UN42818 | Rsa1.0.08888.1 | 1190 | 6824   | 1.00E-178 | 332 | 336  | 98 +  | 856 | 1190 | 1286   | 1621   |
| UN42819 | Rsa1.0.00701.1 | 764  | 67691  | 2.00E-72  | 187 | 204  | 91 +  | 7   | 210  | 21350  | 21540  |
| UN42820 | Rsa1.0.05076.1 | 1067 | 14916  | 0         | 781 | 882  | 88 +  | 128 | 995  | 584    | 1431   |

|         |                |      |        |           |     |      |       |     |      |        |        |
|---------|----------------|------|--------|-----------|-----|------|-------|-----|------|--------|--------|
| UN42821 | Rsa1.0.00218.1 | 659  | 201480 | 1.00E-106 | 268 | 293  | 91 -  | 164 | 455  | 170910 | 171190 |
| UN42822 | Rsa1.0.00058.1 | 389  | 159921 | 1.00E-143 | 264 | 266  | 99 +  | 124 | 389  | 136723 | 136988 |
| UN42823 | Rsa1.0.03475.1 | 714  | 22653  | 7.00E-48  | 151 | 166  | 90 -  | 3   | 161  | 22098  | 22263  |
| UN42824 | Rsa1.0.04218.1 | 564  | 18423  | 0         | 429 | 438  | 97 -  | 133 | 564  | 15843  | 16280  |
| UN42825 | Rsa1.0.01221.1 | 742  | 50421  | 1.00E-159 | 366 | 391  | 93 -  | 356 | 736  | 10801  | 11188  |
| UN42826 | Rsa1.0.00301.1 | 465  | 365315 | 1.00E-100 | 237 | 253  | 93 -  | 2   | 248  | 69917  | 70169  |
| UN42827 | Rsa1.0.01600.1 | 728  | 42537  | 1.00E-140 | 290 | 304  | 95 +  | 3   | 297  | 10057  | 10360  |
| UN42828 | Rsa1.0.00552.1 | 740  | 206757 | 1.00E-154 | 327 | 343  | 95 -  | 402 | 739  | 68050  | 68390  |
| UN42829 | Rsa1.0.00278.1 | 644  | 231896 | 0         | 445 | 480  | 92 -  | 148 | 621  | 21557  | 22018  |
| UN42830 | Rsa1.0.19461.1 | 688  | 1428   | 1.00E-138 | 264 | 268  | 98 +  | 421 | 688  | 1      | 266    |
| UN42831 | Rsa1.0.01613.1 | 635  | 182542 | 1.00E-180 | 320 | 320  | 100 + | 226 | 545  | 6684   | 7003   |
| UN42832 | Rsa1.0.02231.1 | 980  | 33661  | 0         | 369 | 372  | 99 -  | 4   | 375  | 22003  | 22374  |
| UN42833 | Rsa1.0.00048.1 | 900  | 167185 | 0         | 491 | 543  | 90 -  | 366 | 898  | 146194 | 146716 |
| UN42834 | Rsa1.0.03783.1 | 668  | 20890  | 1.00E-175 | 336 | 342  | 98 +  | 3   | 341  | 19472  | 19812  |
| UN42835 | Rsa1.0.00437.1 | 992  | 84879  | 0         | 973 | 1005 | 96 -  | 1   | 992  | 36993  | 37991  |
| UN42836 | Rsa1.0.03289.1 | 768  | 24011  | 0         | 754 | 765  | 98 +  | 3   | 765  | 19403  | 20164  |
| UN42837 | Rsa1.0.02534.1 | 1003 | 30396  | 1.00E-140 | 256 | 257  | 99 -  | 3   | 259  | 5455   | 5711   |
| UN42838 | Rsa1.0.01318.1 | 697  | 48275  | 1.00E-117 | 240 | 247  | 97 +  | 451 | 697  | 4086   | 4331   |
| UN42839 | Rsa1.0.00110.1 | 708  | 132719 | 0         | 648 | 683  | 94 -  | 5   | 687  | 6835   | 7500   |
| UN42840 | Rsa1.0.00027.1 | 545  | 283362 | 5.00E-91  | 224 | 243  | 92 -  | 305 | 539  | 48302  | 48544  |
| UN42841 | Rsa1.0.01300.1 | 695  | 48942  | 1.00E-144 | 296 | 307  | 96 +  | 385 | 691  | 30918  | 31222  |
| UN42842 | Rsa1.0.00782.1 | 933  | 64468  | 0         | 536 | 576  | 93 -  | 2   | 564  | 37791  | 38360  |
| UN42843 | Rsa1.0.02896.1 | 816  | 26970  | 0         | 350 | 361  | 96 +  | 346 | 696  | 16798  | 17158  |
| UN42844 | Rsa1.0.05884.1 | 718  | 12337  | 1.00E-151 | 307 | 319  | 96 +  | 3   | 321  | 7057   | 7375   |
| UN42845 | Rsa1.0.02224.1 | 567  | 33758  | 0         | 353 | 353  | 100 - | 1   | 353  | 12220  | 12572  |
| UN42846 | Rsa1.0.04229.1 | 633  | 18389  | 1.00E-100 | 298 | 333  | 89 -  | 304 | 633  | 16359  | 16671  |
| UN42847 | Rsa1.0.00935.1 | 312  | 59079  | 8.00E-95  | 229 | 242  | 94 +  | 69  | 310  | 23754  | 23989  |
| UN42848 | Rsa1.0.00211.1 | 785  | 228189 | 1.00E-160 | 287 | 287  | 100 + | 400 | 686  | 213634 | 213920 |
| UN42849 | Rsa1.0.00144.1 | 792  | 120708 | 1.00E-171 | 308 | 309  | 99 -  | 484 | 792  | 85667  | 85975  |
| UN42850 | Rsa1.0.00512.1 | 685  | 200277 | 1.00E-162 | 576 | 672  | 85 -  | 10  | 673  | 32831  | 33483  |
| UN42851 | Rsa1.0.03873.1 | 435  | 20360  | 0         | 399 | 402  | 99 -  | 34  | 435  | 9556   | 9957   |
| UN42852 | Rsa1.0.01439.1 | 113  | 45841  | 9.00E-46  | 108 | 113  | 95 -  | 1   | 113  | 28436  | 28548  |
| UN42853 | Rsa1.0.01769.1 | 1119 | 39568  | 1.00E-118 | 216 | 216  | 100 + | 902 | 1117 | 9241   | 9456   |
| UN42854 | Rsa1.0.01425.1 | 1280 | 46136  | 0         | 484 | 488  | 99 -  | 464 | 951  | 43088  | 43575  |
| UN42855 | Rsa1.0.00137.1 | 988  | 122457 | 1.00E-142 | 319 | 340  | 93 +  | 556 | 895  | 41739  | 42078  |
| UN42856 | Rsa1.0.03605.1 | 665  | 21827  | 1.00E-122 | 232 | 235  | 98 -  | 268 | 502  | 17911  | 18145  |
| UN42857 | Rsa1.0.00646.1 | 791  | 70473  | 1.00E-49  | 110 | 113  | 97 -  | 678 | 790  | 8834   | 8946   |
| UN42858 | Rsa1.0.00645.1 | 739  | 189716 | 0         | 738 | 739  | 99 +  | 1   | 739  | 23583  | 24321  |
| UN42859 | Rsa1.0.02946.1 | 545  | 26537  | 1.00E-101 | 188 | 188  | 100 + | 185 | 372  | 26012  | 26199  |

|         |                |      |        |           |      |      |       |     |      |        |        |
|---------|----------------|------|--------|-----------|------|------|-------|-----|------|--------|--------|
| UN42860 | Rsa1.0.00012.1 | 892  | 222148 | 0         | 336  | 339  | 99 +  | 3   | 341  | 206533 | 206871 |
| UN42861 | Rsa1.0.00006.1 | 605  | 396176 | 0         | 576  | 600  | 96 +  | 12  | 605  | 261373 | 261972 |
| UN42862 | Rsa1.0.00152.1 | 672  | 257730 | 3.00E-65  | 298  | 355  | 83 -  | 254 | 607  | 77794  | 78119  |
| UN42863 | Rsa1.0.00315.1 | 701  | 96426  | 1.00E-115 | 226  | 231  | 97 -  | 262 | 492  | 3001   | 3231   |
| UN42864 | Rsa1.0.04325.1 | 745  | 17885  | 0         | 570  | 624  | 91 +  | 11  | 621  | 9692   | 10297  |
| UN42865 | Rsa1.0.00016.1 | 513  | 831256 | 1.00E-161 | 484  | 540  | 89 -  | 3   | 513  | 267929 | 268461 |
| UN42866 | Rsa1.0.01970.1 | 664  | 36648  | 0         | 643  | 661  | 97 -  | 4   | 664  | 2829   | 3485   |
| UN42867 | Rsa1.0.00347.1 | 502  | 93048  | 0         | 472  | 498  | 94 -  | 3   | 500  | 66867  | 67353  |
| UN42868 | Rsa1.0.00157.1 | 506  | 245832 | 0         | 435  | 467  | 93 +  | 36  | 500  | 239149 | 239601 |
| UN42869 | Rsa1.0.00087.1 | 894  | 761073 | 0         | 524  | 542  | 96 -  | 189 | 730  | 357392 | 357933 |
| UN42870 | Rsa1.0.06190.1 | 970  | 11525  | 0         | 443  | 452  | 98 +  | 5   | 456  | 8942   | 9389   |
| UN42871 | Rsa1.0.02681.1 | 845  | 28711  | 0         | 752  | 756  | 99 +  | 1   | 755  | 12430  | 13185  |
| UN42872 | Rsa1.0.00755.1 | 789  | 192559 | 0         | 756  | 800  | 94 -  | 3   | 788  | 150560 | 151358 |
| UN42873 | Rsa1.0.01666.1 | 888  | 173972 | 0         | 338  | 338  | 100 + | 550 | 887  | 158050 | 158387 |
| UN42874 | Rsa1.0.02564.1 | 809  | 30047  | 0         | 798  | 824  | 96 -  | 2   | 809  | 8957   | 9779   |
| UN42875 | Rsa1.0.00270.1 | 755  | 101236 | 7.00E-82  | 155  | 155  | 100 + | 201 | 355  | 23891  | 24045  |
| UN42876 | Rsa1.0.00028.1 | 861  | 293984 | 0         | 439  | 463  | 94 +  | 402 | 859  | 276975 | 277432 |
| UN42877 | Rsa1.0.01006.1 | 870  | 163670 | 1.00E-172 | 306  | 306  | 100 - | 3   | 308  | 25073  | 25378  |
| UN42878 | Rsa1.0.01026.1 | 1038 | 171624 | 0         | 1003 | 1050 | 95 +  | 3   | 1036 | 3016   | 4047   |
| UN42879 | Rsa1.0.02083.1 | 753  | 35216  | 0         | 375  | 386  | 97 +  | 367 | 752  | 400    | 782    |
| UN42880 | Rsa1.0.21673.1 | 756  | 1183   | 3.00E-56  | 426  | 519  | 82 -  | 244 | 745  | 274    | 779    |
| UN42881 | Rsa1.0.00737.1 | 799  | 66432  | 0         | 347  | 348  | 99 +  | 312 | 658  | 1275   | 1622   |
| UN42882 | Rsa1.0.05819.1 | 996  | 12543  | 0         | 373  | 377  | 98 -  | 618 | 994  | 10932  | 11305  |
| UN42883 | Rsa1.0.02429.1 | 1012 | 31527  | 1.00E-163 | 291  | 291  | 100 - | 526 | 816  | 29556  | 29846  |
| UN42884 | Rsa1.0.03671.1 | 747  | 21459  | 0         | 740  | 745  | 99 -  | 3   | 747  | 6197   | 6941   |
| UN42885 | Rsa1.0.00420.1 | 839  | 86496  | 0         | 790  | 820  | 96 +  | 1   | 815  | 39913  | 40730  |
| UN42886 | Rsa1.0.03471.1 | 557  | 22678  | 1.00E-109 | 226  | 234  | 96 -  | 168 | 398  | 14969  | 15202  |
| UN42887 | Rsa1.0.04051.1 | 1001 | 19375  | 0         | 336  | 339  | 99 -  | 662 | 999  | 11803  | 12141  |
| UN42888 | Rsa1.0.00842.1 | 739  | 62493  | 7.00E-54  | 111  | 112  | 99 +  | 370 | 481  | 53906  | 54017  |
| UN42889 | Rsa1.0.00493.1 | 809  | 80007  | 0         | 386  | 386  | 100 + | 424 | 809  | 6139   | 6524   |
| UN42890 | Rsa1.0.26930.1 | 389  | 872    | 1.00E-170 | 308  | 310  | 99 +  | 79  | 388  | 251    | 560    |
| UN42891 | Rsa1.0.05354.1 | 942  | 14073  | 0         | 598  | 615  | 97 -  | 331 | 942  | 4740   | 5354   |
| UN42892 | Rsa1.0.03669.1 | 863  | 147114 | 0         | 424  | 427  | 99 +  | 437 | 863  | 17855  | 18281  |
| UN42893 | Rsa1.0.00190.1 | 1164 | 318240 | 1.00E-164 | 360  | 378  | 95 -  | 791 | 1164 | 134847 | 135221 |
| UN42894 | Rsa1.0.00068.1 | 689  | 151813 | 0         | 393  | 397  | 98 +  | 1   | 397  | 125039 | 125435 |
| UN42895 | Rsa1.0.00119.1 | 936  | 467509 | 1.00E-117 | 231  | 234  | 98 +  | 705 | 936  | 7580   | 7813   |
| UN42896 | Rsa1.0.02513.1 | 936  | 30643  | 0         | 580  | 602  | 96 -  | 3   | 596  | 29577  | 30178  |
| UN42897 | Rsa1.0.02280.1 | 603  | 33063  | 0         | 602  | 603  | 99 +  | 1   | 603  | 23776  | 24377  |
| UN42898 | Rsa1.0.02267.1 | 501  | 33194  | 0         | 462  | 489  | 94 -  | 4   | 477  | 11932  | 12416  |

|         |                |      |        |           |     |     |       |     |      |        |        |
|---------|----------------|------|--------|-----------|-----|-----|-------|-----|------|--------|--------|
| UN42899 | Rsa1.0.00047.1 | 707  | 168582 | 1.00E-122 | 244 | 251 | 97 +  | 218 | 468  | 32849  | 33099  |
| UN42900 | Rsa1.0.00336.1 | 590  | 445051 | 0         | 579 | 592 | 97 -  | 1   | 589  | 178524 | 179114 |
| UN42901 | Rsa1.0.00734.1 | 573  | 66508  | 1.00E-127 | 293 | 311 | 94 +  | 1   | 308  | 55171  | 55478  |
| UN42902 | Rsa1.0.01405.1 | 630  | 46445  | 0         | 399 | 417 | 95 +  | 109 | 522  | 7111   | 7515   |
| UN42903 | Rsa1.0.57812.1 | 574  | 396    | 2.00E-90  | 181 | 185 | 97 -  | 1   | 185  | 34     | 218    |
| UN42904 | Rsa1.0.00155.1 | 1065 | 118465 | 0         | 469 | 471 | 99 +  | 230 | 699  | 31347  | 31817  |
| UN42905 | Rsa1.0.03605.1 | 774  | 21827  | 0         | 699 | 736 | 94 -  | 42  | 772  | 17740  | 18471  |
| UN42906 | Rsa1.0.00409.1 | 856  | 146788 | 0         | 485 | 506 | 95 +  | 355 | 856  | 130747 | 131252 |
| UN42907 | Rsa1.0.01201.1 | 680  | 50856  | 0         | 574 | 611 | 93 -  | 1   | 604  | 39575  | 40171  |
| UN42908 | Rsa1.0.02168.1 | 1147 | 34367  | 0         | 417 | 422 | 98 -  | 726 | 1147 | 13400  | 13820  |
| UN42909 | Rsa1.0.00476.1 | 470  | 280966 | 1.00E-113 | 211 | 212 | 99 -  | 1   | 212  | 157895 | 158106 |
| UN42910 | Rsa1.0.00138.1 | 912  | 247040 | 0         | 525 | 534 | 98 -  | 378 | 911  | 3727   | 4257   |
| UN42911 | Rsa1.0.04097.1 | 1031 | 19090  | 0         | 660 | 668 | 98 -  | 360 | 1027 | 16088  | 16752  |
| UN42912 | Rsa1.0.00368.1 | 1314 | 90669  | 0         | 518 | 533 | 97 +  | 690 | 1219 | 84175  | 84707  |
| UN42913 | Rsa1.0.00213.1 | 974  | 108167 | 0         | 401 | 402 | 99 +  | 3   | 404  | 67496  | 67897  |
| UN42914 | Rsa1.0.01264.1 | 867  | 49697  | 0         | 715 | 719 | 99 -  | 140 | 855  | 19590  | 20308  |
| UN42915 | Rsa1.0.00642.1 | 566  | 201230 | 0         | 356 | 356 | 100 + | 211 | 566  | 161709 | 162064 |
| UN42916 | Rsa1.0.02067.1 | 575  | 35451  | 1.00E-159 | 288 | 289 | 99 +  | 2   | 290  | 737    | 1025   |
| UN42917 | Rsa1.0.00034.1 | 436  | 260119 | 1.00E-157 | 401 | 437 | 91 +  | 2   | 421  | 28444  | 28879  |
| UN42918 | Rsa1.0.67368.1 | 558  | 340    | 6.00E-57  | 116 | 117 | 99 +  | 294 | 410  | 10     | 126    |
| UN42919 | Rsa1.0.05241.1 | 889  | 14405  | 0         | 472 | 489 | 96 +  | 405 | 889  | 918    | 1406   |
| UN42920 | Rsa1.0.32336.1 | 734  | 704    | 1.00E-120 | 280 | 298 | 93 -  | 449 | 734  | 367    | 663    |
| UN42921 | Rsa1.0.01895.1 | 1288 | 37512  | 0         | 912 | 933 | 97 +  | 190 | 1122 | 23772  | 24704  |
| UN42922 | Rsa1.0.00207.1 | 688  | 248736 | 2.00E-44  | 104 | 108 | 96 +  | 199 | 306  | 55089  | 55196  |
| UN42923 | Rsa1.0.00985.1 | 560  | 161950 | 0         | 326 | 327 | 99 -  | 3   | 329  | 32823  | 33149  |
| UN42924 | Rsa1.0.00011.1 | 788  | 225044 | 0         | 333 | 333 | 100 - | 3   | 335  | 215934 | 216266 |
| UN42925 | Rsa1.0.00777.1 | 1085 | 191865 | 0         | 915 | 918 | 99 -  | 168 | 1085 | 128036 | 128953 |
| UN42926 | Rsa1.0.04169.1 | 1081 | 18712  | 1.00E-133 | 271 | 280 | 96 +  | 496 | 775  | 2082   | 2358   |
| UN42927 | Rsa1.0.02297.1 | 696  | 160804 | 1.00E-106 | 266 | 288 | 92 +  | 108 | 394  | 4854   | 5141   |
| UN42928 | Rsa1.0.00618.1 | 1201 | 72195  | 1.00E-154 | 321 | 333 | 96 +  | 868 | 1199 | 16030  | 16361  |
| UN42929 | Rsa1.0.07894.1 | 954  | 8347   | 1.00E-160 | 302 | 307 | 98 -  | 257 | 563  | 6736   | 7042   |
| UN42930 | Rsa1.0.00255.1 | 739  | 204967 | 0         | 478 | 485 | 98 +  | 253 | 737  | 45829  | 46313  |
| UN42931 | Rsa1.0.00580.1 | 645  | 74515  | 0         | 350 | 354 | 98 -  | 1   | 354  | 18780  | 19133  |
| UN42932 | Rsa1.0.04426.1 | 1150 | 17399  | 0         | 886 | 888 | 99 -  | 3   | 890  | 13522  | 14409  |
| UN42933 | Rsa1.0.01053.1 | 1013 | 55483  | 0         | 515 | 535 | 96 +  | 484 | 1013 | 46899  | 47432  |
| UN42934 | Rsa1.0.14001.1 | 752  | 3933   | 0         | 417 | 423 | 98 +  | 3   | 425  | 1388   | 1810   |
| UN42935 | Rsa1.0.03241.1 | 548  | 24423  | 2.00E-90  | 205 | 215 | 95 -  | 333 | 547  | 10248  | 10458  |
| UN42936 | Rsa1.0.01923.1 | 593  | 37233  | 6.00E-60  | 243 | 288 | 84 -  | 2   | 273  | 28069  | 28342  |
| UN42937 | Rsa1.0.00329.1 | 814  | 222544 | 1.00E-101 | 188 | 188 | 100 + | 377 | 564  | 148408 | 148595 |

|         |                |      |        |           |      |      |       |     |      |        |        |
|---------|----------------|------|--------|-----------|------|------|-------|-----|------|--------|--------|
| UN42938 | Rsa1.0.01071.1 | 712  | 166914 | 1.00E-131 | 267  | 275  | 97 +  | 10  | 279  | 23965  | 24239  |
| UN42939 | Rsa1.0.03983.1 | 758  | 19715  | 0         | 740  | 756  | 97 +  | 3   | 758  | 14445  | 15195  |
| UN42940 | Rsa1.0.02945.1 | 690  | 26548  | 0         | 610  | 619  | 98 +  | 41  | 658  | 8782   | 9400   |
| UN42941 | Rsa1.0.00150.1 | 863  | 154416 | 0         | 501  | 514  | 97 -  | 3   | 515  | 60307  | 60816  |
| UN42942 | Rsa1.0.01340.1 | 1049 | 47805  | 1.00E-147 | 317  | 334  | 94 +  | 715 | 1048 | 41112  | 41442  |
| UN42943 | Rsa1.0.00063.1 | 937  | 156150 | 0         | 790  | 792  | 99 -  | 147 | 937  | 103658 | 104449 |
| UN42944 | Rsa1.0.06072.1 | 691  | 11811  | 1.00E-147 | 382  | 415  | 92 -  | 282 | 691  | 11278  | 11690  |
| UN42945 | Rsa1.0.40209.1 | 943  | 559    | 0         | 390  | 390  | 100 - | 322 | 711  | 170    | 559    |
| UN42946 | Rsa1.0.00492.1 | 1287 | 80178  | 1.00E-126 | 235  | 237  | 99 +  | 11  | 247  | 899    | 1135   |
| UN42947 | Rsa1.0.01390.1 | 841  | 46695  | 1.00E-147 | 264  | 264  | 100 + | 228 | 491  | 22456  | 22719  |
| UN42948 | Rsa1.0.01220.1 | 830  | 161775 | 1.00E-110 | 208  | 210  | 99 +  | 2   | 211  | 115926 | 116135 |
| UN42949 | Rsa1.0.00828.1 | 895  | 62744  | 6.00E-98  | 254  | 272  | 93 +  | 624 | 894  | 55356  | 55621  |
| UN42950 | Rsa1.0.02655.1 | 720  | 29027  | 1.00E-131 | 307  | 331  | 92 +  | 397 | 714  | 16785  | 17110  |
| UN42951 | Rsa1.0.00069.1 | 635  | 403561 | 0         | 372  | 381  | 97 -  | 255 | 633  | 353536 | 353914 |
| UN42952 | Rsa1.0.01591.1 | 488  | 42718  | 1.00E-158 | 289  | 291  | 99 -  | 198 | 488  | 8943   | 9233   |
| UN42953 | Rsa1.0.00628.1 | 529  | 214360 | 8.00E-93  | 246  | 268  | 91 +  | 263 | 529  | 203239 | 203494 |
| UN42954 | Rsa1.0.03297.1 | 759  | 23969  | 1.00E-159 | 304  | 310  | 98 +  | 443 | 752  | 3924   | 4230   |
| UN42955 | Rsa1.0.01468.1 | 1048 | 45146  | 1.00E-127 | 231  | 231  | 100 - | 252 | 482  | 35150  | 35380  |
| UN42956 | Rsa1.0.00896.1 | 917  | 60509  | 0         | 684  | 709  | 96 +  | 209 | 915  | 51567  | 52267  |
| UN42957 | Rsa1.0.16547.1 | 586  | 2117   | 0         | 584  | 584  | 100 - | 3   | 586  | 962    | 1545   |
| UN42958 | Rsa1.0.00793.1 | 730  | 64103  | 1.00E-158 | 289  | 291  | 99 +  | 439 | 729  | 61222  | 61512  |
| UN42959 | Rsa1.0.05605.1 | 813  | 13202  | 0         | 655  | 656  | 99 -  | 158 | 813  | 8388   | 9043   |
| UN42960 | Rsa1.0.05741.1 | 1071 | 12773  | 0         | 793  | 847  | 93 -  | 133 | 970  | 2995   | 3817   |
| UN42961 | Rsa1.0.00007.1 | 804  | 239325 | 1.00E-163 | 295  | 296  | 99 -  | 342 | 637  | 219265 | 219560 |
| UN42962 | Rsa1.0.00457.1 | 913  | 337301 | 0         | 489  | 493  | 99 +  | 424 | 913  | 304216 | 304708 |
| UN42963 | Rsa1.0.00141.1 | 1115 | 121494 | 0         | 386  | 389  | 99 +  | 520 | 908  | 3582   | 3970   |
| UN42964 | Rsa1.0.00111.1 | 695  | 390088 | 1.00E-122 | 223  | 223  | 100 + | 149 | 371  | 320341 | 320563 |
| UN42965 | Rsa1.0.04123.1 | 467  | 18947  | 1.00E-129 | 234  | 234  | 100 + | 3   | 236  | 14518  | 14751  |
| UN42966 | Rsa1.0.00039.1 | 528  | 296927 | 1.00E-112 | 205  | 205  | 100 + | 324 | 528  | 20208  | 20412  |
| UN42967 | Rsa1.0.07969.1 | 905  | 8157   | 1.00E-114 | 220  | 222  | 99 -  | 3   | 224  | 5913   | 6133   |
| UN42968 | Rsa1.0.01025.1 | 994  | 56471  | 3.00E-35  | 356  | 433  | 82 +  | 459 | 884  | 7410   | 7832   |
| UN42969 | Rsa1.0.06368.1 | 763  | 11143  | 0         | 541  | 546  | 99 -  | 221 | 763  | 6431   | 6976   |
| UN42970 | Rsa1.0.00045.1 | 421  | 328694 | 1.00E-112 | 257  | 273  | 94 -  | 3   | 275  | 316898 | 317159 |
| UN42971 | Rsa1.0.02133.1 | 577  | 34726  | 0         | 446  | 454  | 98 +  | 3   | 452  | 33536  | 33989  |
| UN42972 | Rsa1.0.00389.1 | 706  | 88795  | 1.00E-141 | 254  | 254  | 100 - | 453 | 706  | 40427  | 40680  |
| UN42973 | Rsa1.0.00019.1 | 513  | 301669 | 1.00E-112 | 230  | 238  | 96 +  | 280 | 513  | 116246 | 116483 |
| UN42974 | Rsa1.0.00094.1 | 628  | 139042 | 1.00E-118 | 341  | 381  | 89 +  | 244 | 602  | 92426  | 92804  |
| UN42975 | Rsa1.0.02984.1 | 1135 | 26263  | 0         | 1020 | 1056 | 96 -  | 80  | 1135 | 4578   | 5623   |
| UN42976 | Rsa1.0.05870.1 | 823  | 146055 | 1.00E-174 | 346  | 358  | 96 -  | 393 | 750  | 10705  | 11062  |



|         |                |      |        |           |      |      |      |     |      |        |        |
|---------|----------------|------|--------|-----------|------|------|------|-----|------|--------|--------|
| UN42977 | Rsa1.0.00398.1 | 576  | 88007  | 0         | 416  | 424  | 98 + | 154 | 576  | 63410  | 63833  |
| UN42978 | Rsa1.0.04266.1 | 786  | 18195  | 0         | 771  | 800  | 96 + | 1   | 786  | 51     | 846    |
| UN42979 | Rsa1.0.06938.1 | 395  | 10140  | 2.00E-65  | 183  | 199  | 91 - | 184 | 380  | 9781   | 9979   |
| UN42980 | Rsa1.0.00221.1 | 1161 | 106972 | 0         | 1147 | 1160 | 98 - | 3   | 1161 | 17236  | 18395  |
| UN42981 | Rsa1.0.00056.1 | 866  | 332604 | 0         | 437  | 439  | 99 + | 427 | 865  | 206060 | 206498 |
| UN42982 | Rsa1.0.00582.1 | 658  | 74333  | 0         | 653  | 658  | 99 + | 1   | 658  | 31772  | 32429  |
| UN42983 | Rsa1.0.01591.1 | 883  | 42718  | 1.00E-106 | 254  | 268  | 94 + | 243 | 508  | 15980  | 16245  |
| UN42984 | Rsa1.0.02105.1 | 856  | 156953 | 0         | 392  | 403  | 97 + | 6   | 407  | 150764 | 151165 |
| UN42985 | Rsa1.0.00097.1 | 930  | 138858 | 2.00E-94  | 233  | 250  | 93 + | 1   | 243  | 54525  | 54772  |
| UN42986 | Rsa1.0.32587.1 | 855  | 698    | 1.00E-120 | 259  | 270  | 95 - | 3   | 269  | 115    | 384    |
| UN42987 | Rsa1.0.00867.1 | 734  | 61635  | 1.00E-120 | 257  | 268  | 95 - | 3   | 265  | 45036  | 45303  |
| UN42988 | Rsa1.0.06021.1 | 486  | 11911  | 1.00E-116 | 307  | 338  | 90 - | 152 | 486  | 4649   | 4976   |
| UN42989 | Rsa1.0.00651.1 | 507  | 247766 | 1.00E-105 | 222  | 231  | 96 + | 152 | 382  | 81983  | 82210  |
| UN42990 | Rsa1.0.00817.1 | 766  | 62961  | 0         | 726  | 772  | 94 - | 7   | 763  | 26941  | 27698  |
| UN42991 | Rsa1.0.01696.1 | 621  | 301850 | 0         | 426  | 437  | 97 + | 184 | 620  | 286436 | 286865 |
| UN42992 | Rsa1.0.27096.1 | 773  | 866    | 1.00E-174 | 367  | 385  | 95 + | 390 | 773  | 335    | 714    |
| UN42993 | Rsa1.0.00026.1 | 689  | 327835 | 1.00E-151 | 363  | 392  | 92 - | 300 | 677  | 209434 | 209819 |
| UN42994 | Rsa1.0.02458.1 | 761  | 31197  | 1.00E-148 | 323  | 340  | 95 - | 2   | 341  | 9247   | 9582   |
| UN42995 | Rsa1.0.00102.1 | 451  | 135497 | 1.00E-177 | 358  | 372  | 96 - | 85  | 450  | 29146  | 29515  |
| UN42996 | Rsa1.0.00119.1 | 588  | 467509 | 1.00E-145 | 303  | 317  | 95 + | 236 | 552  | 346154 | 346470 |
| UN42997 | Rsa1.0.00020.1 | 624  | 283099 | 0         | 382  | 387  | 98 + | 229 | 613  | 278264 | 278650 |
| UN42998 | Rsa1.0.01234.1 | 720  | 50183  | 5.00E-98  | 225  | 238  | 94 - | 2   | 239  | 11958  | 12194  |
| UN42999 | Rsa1.0.00629.1 | 848  | 71381  | 0         | 384  | 398  | 96 - | 414 | 810  | 45791  | 46186  |
| UN43000 | Rsa1.0.01203.1 | 783  | 50848  | 1.00E-100 | 223  | 233  | 95 + | 24  | 255  | 38701  | 38932  |
| UN43001 | Rsa1.0.00388.1 | 578  | 88890  | 1.00E-173 | 336  | 346  | 97 + | 232 | 577  | 56286  | 56624  |
| UN43002 | Rsa1.0.04002.1 | 885  | 19608  | 0         | 570  | 583  | 97 - | 304 | 885  | 4568   | 5148   |
| UN43003 | Rsa1.0.00480.1 | 697  | 81325  | 1.00E-149 | 317  | 332  | 95 + | 3   | 333  | 30819  | 31150  |
| UN43004 | Rsa1.0.01126.1 | 704  | 53127  | 0         | 667  | 692  | 96 - | 2   | 693  | 51583  | 52272  |
| UN43005 | Rsa1.0.00123.1 | 733  | 325650 | 0         | 559  | 627  | 89 + | 1   | 601  | 246641 | 247264 |
| UN43006 | Rsa1.0.00519.1 | 895  | 197864 | 0         | 419  | 420  | 99 - | 475 | 893  | 191661 | 192080 |
| UN43007 | Rsa1.0.00541.1 | 798  | 76863  | 0         | 755  | 796  | 94 - | 2   | 796  | 11162  | 11938  |
| UN43008 | Rsa1.0.00139.1 | 1087 | 357786 | 1.00E-175 | 337  | 345  | 97 - | 376 | 717  | 307381 | 307725 |
| UN43009 | Rsa1.0.02029.1 | 912  | 35857  | 0         | 523  | 544  | 96 + | 376 | 912  | 26086  | 26629  |
| UN43010 | Rsa1.0.00247.1 | 788  | 103408 | 3.00E-81  | 163  | 166  | 98 + | 201 | 366  | 74405  | 74570  |
| UN43011 | Rsa1.0.01955.1 | 762  | 36850  | 4.00E-68  | 172  | 184  | 93 + | 278 | 455  | 13085  | 13268  |
| UN43012 | Rsa1.0.01441.1 | 613  | 45790  | 0         | 446  | 458  | 97 - | 156 | 611  | 26335  | 26789  |
| UN43013 | Rsa1.0.02114.1 | 800  | 34873  | 0         | 409  | 430  | 95 - | 377 | 800  | 3165   | 3592   |
| UN43014 | Rsa1.0.00168.1 | 766  | 115870 | 1.00E-134 | 274  | 283  | 96 - | 484 | 766  | 53312  | 53593  |
| UN43015 | Rsa1.0.00179.1 | 704  | 393324 | 1.00E-166 | 378  | 403  | 93 + | 295 | 696  | 63299  | 63689  |

|         |                |      |        |           |     |     |       |      |      |        |        |
|---------|----------------|------|--------|-----------|-----|-----|-------|------|------|--------|--------|
| UN43016 | Rsa1.0_00243.1 | 712  | 103651 | 5.00E-92  | 247 | 268 | 92 +  | 397  | 654  | 23261  | 23525  |
| UN43017 | Rsa1.0_00170.1 | 1185 | 179538 | 0         | 636 | 658 | 96 -  | 533  | 1184 | 161548 | 162205 |
| UN43018 | Rsa1.0_25951.1 | 677  | 912    | 0         | 449 | 477 | 94 +  | 206  | 670  | 80     | 555    |
| UN43019 | Rsa1.0_18326.1 | 809  | 1620   | 0         | 403 | 424 | 95 +  | 3    | 423  | 274    | 697    |
| UN43020 | Rsa1.0_02310.1 | 595  | 32735  | 1.00E-132 | 276 | 288 | 95 +  | 308  | 595  | 12079  | 12362  |
| UN43021 | Rsa1.0_00027.1 | 658  | 283362 | 1.00E-129 | 259 | 267 | 97 +  | 10   | 276  | 135324 | 135590 |
| UN43022 | Rsa1.0_02841.1 | 1290 | 27383  | 6.00E-99  | 217 | 227 | 95 +  | 1066 | 1290 | 8321   | 8547   |
| UN43023 | Rsa1.0_02383.1 | 622  | 31931  | 0         | 527 | 570 | 92 -  | 70   | 622  | 22596  | 23164  |
| UN43024 | Rsa1.0_20599.1 | 805  | 1288   | 2.00E-17  | 179 | 220 | 81 -  | 551  | 764  | 361    | 580    |
| UN43025 | Rsa1.0_01435.1 | 590  | 45942  | 1.00E-131 | 270 | 280 | 96 +  | 3    | 282  | 24559  | 24835  |
| UN43026 | Rsa1.0_02299.1 | 720  | 32857  | 0         | 429 | 441 | 97 -  | 281  | 720  | 13707  | 14146  |
| UN43027 | Rsa1.0_00190.1 | 712  | 318240 | 0         | 389 | 401 | 97 +  | 313  | 712  | 191430 | 191830 |
| UN43028 | Rsa1.0_00009.1 | 728  | 232558 | 1.00E-139 | 263 | 267 | 98 -  | 118  | 384  | 132659 | 132925 |
| UN43029 | Rsa1.0_36118.1 | 634  | 625    | 1.00E-144 | 271 | 275 | 98 +  | 6    | 280  | 22     | 296    |
| UN43030 | Rsa1.0_01035.1 | 511  | 56019  | 1.00E-109 | 276 | 296 | 93 +  | 222  | 506  | 47064  | 47355  |
| UN43031 | Rsa1.0_04415.1 | 875  | 147889 | 1.00E-161 | 312 | 320 | 97 -  | 3    | 322  | 144332 | 144651 |
| UN43032 | Rsa1.0_00917.1 | 865  | 182012 | 1.00E-141 | 274 | 279 | 98 -  | 585  | 863  | 181130 | 181407 |
| UN43033 | Rsa1.0_00842.1 | 417  | 62493  | 4.00E-51  | 127 | 135 | 94 -  | 115  | 249  | 39447  | 39581  |
| UN43034 | Rsa1.0_06968.1 | 707  | 10090  | 1.00E-180 | 366 | 381 | 96 -  | 1    | 377  | 8762   | 9142   |
| UN43035 | Rsa1.0_00112.1 | 1008 | 132199 | 0         | 688 | 758 | 90 +  | 257  | 1000 | 55783  | 56507  |
| UN43036 | Rsa1.0_03605.1 | 688  | 21827  | 1.00E-179 | 386 | 406 | 95 -  | 274  | 677  | 17740  | 18145  |
| UN43037 | Rsa1.0_01595.1 | 566  | 175383 | 1.00E-133 | 309 | 331 | 93 -  | 236  | 566  | 41014  | 41331  |
| UN43038 | Rsa1.0_11811.1 | 541  | 5401   | 5.00E-91  | 179 | 182 | 98 +  | 50   | 231  | 2094   | 2275   |
| UN43039 | Rsa1.0_00113.1 | 661  | 131574 | 1.00E-156 | 307 | 316 | 97 +  | 3    | 318  | 73138  | 73453  |
| UN43040 | #              | #    | #      | #         | #   | #   | #     | #    | #    | #      | #      |
| UN43041 | Rsa1.0_01976.1 | 607  | 36570  | 1.00E-132 | 325 | 350 | 92 +  | 247  | 593  | 1119   | 1461   |
| UN43042 | Rsa1.0_01373.1 | 1087 | 47052  | 1.00E-154 | 311 | 321 | 96 +  | 755  | 1074 | 2996   | 3316   |
| UN43043 | Rsa1.0_00342.1 | 632  | 93695  | 6.00E-48  | 98  | 98  | 100 + | 255  | 352  | 32012  | 32109  |
| UN43044 | Rsa1.0_00037.1 | 677  | 307838 | 1.00E-134 | 286 | 301 | 95 -  | 3    | 291  | 150842 | 151142 |
| UN43045 | Rsa1.0_00480.1 | 701  | 81325  | 7.00E-94  | 261 | 286 | 91 +  | 274  | 552  | 1280   | 1563   |
| UN43046 | Rsa1.0_03155.1 | 1083 | 24958  | 0         | 449 | 457 | 98 -  | 628  | 1082 | 9973   | 10426  |
| UN43047 | Rsa1.0_00718.1 | 634  | 279335 | 3.00E-93  | 183 | 186 | 98 -  | 225  | 410  | 6364   | 6549   |
| UN43048 | Rsa1.0_00580.1 | 761  | 74515  | 1.00E-143 | 303 | 316 | 95 -  | 432  | 744  | 33934  | 34249  |
| UN43049 | Rsa1.0_01893.1 | 742  | 37520  | 1.00E-109 | 210 | 213 | 98 -  | 488  | 700  | 6363   | 6575   |
| UN43050 | Rsa1.0_07481.1 | 1016 | 9280   | 1.00E-153 | 307 | 318 | 96 -  | 463  | 780  | 4144   | 4461   |
| UN43051 | Rsa1.0_00486.1 | 496  | 80875  | 1.00E-109 | 235 | 245 | 95 +  | 15   | 257  | 34922  | 35163  |
| UN43052 | Rsa1.0_00015.1 | 715  | 561803 | 1.00E-142 | 366 | 405 | 90 +  | 123  | 520  | 483122 | 483516 |
| UN43053 | Rsa1.0_00066.1 | 659  | 152418 | 0         | 568 | 591 | 96 +  | 60   | 646  | 63404  | 63994  |
| UN43054 | Rsa1.0_07858.1 | 857  | 8411   | 2.00E-27  | 73  | 76  | 96 -  | 782  | 857  | 5057   | 5132   |

|         |                |     |        |           |     |     |       |     |     |        |        |
|---------|----------------|-----|--------|-----------|-----|-----|-------|-----|-----|--------|--------|
| UN43055 | Rsa1.0_00603.1 | 802 | 73299  | 0         | 771 | 802 | 96 -  | 5   | 802 | 58534  | 59327  |
| UN43056 | Rsa1.0_00034.1 | 703 | 260119 | 0         | 617 | 650 | 94 -  | 71  | 703 | 32922  | 33569  |
| UN43057 | Rsa1.0_05050.1 | 783 | 15022  | 1.00E-112 | 249 | 262 | 95 -  | 3   | 263 | 6127   | 6388   |
| UN43058 | Rsa1.0_00204.1 | 718 | 109056 | 1.00E-162 | 438 | 480 | 91 +  | 246 | 718 | 17526  | 17994  |
| UN43059 | Rsa1.0_00645.1 | 461 | 189716 | 1.00E-94  | 185 | 188 | 98 -  | 16  | 203 | 35226  | 35413  |
| UN43060 | Rsa1.0_00016.1 | 573 | 831256 | 1.00E-118 | 336 | 374 | 89 +  | 187 | 559 | 767229 | 767580 |
| UN43061 | Rsa1.0_02421.1 | 928 | 31579  | 0         | 337 | 340 | 99 +  | 589 | 928 | 13101  | 13440  |
| UN43062 | Rsa1.0_00132.1 | 682 | 124299 | 1.00E-166 | 348 | 363 | 95 +  | 329 | 682 | 46280  | 46642  |
| UN43063 | Rsa1.0_01157.1 | 740 | 52121  | 1.00E-112 | 292 | 319 | 91 -  | 431 | 736 | 42521  | 42837  |
| UN43064 | Rsa1.0_00058.1 | 671 | 159921 | 1.00E-83  | 187 | 196 | 95 +  | 365 | 560 | 89801  | 89993  |
| UN43065 | Rsa1.0_00017.1 | 626 | 752458 | 2.00E-78  | 184 | 193 | 95 +  | 402 | 594 | 661547 | 661737 |
| UN43066 | Rsa1.0_01260.1 | 677 | 49750  | 1.00E-114 | 276 | 297 | 92 +  | 382 | 677 | 47322  | 47618  |
| UN43067 | Rsa1.0_63101.1 | 591 | 364    | 4.00E-58  | 152 | 161 | 94 -  | 392 | 549 | 17     | 175    |
| UN43068 | Rsa1.0_00446.1 | 707 | 167829 | 1.00E-169 | 336 | 346 | 97 +  | 284 | 629 | 129961 | 130305 |
| UN43069 | Rsa1.0_00056.1 | 616 | 332604 | 0         | 353 | 362 | 97 +  | 258 | 616 | 1868   | 2229   |
| UN43070 | Rsa1.0_00931.1 | 741 | 59210  | 0         | 639 | 748 | 85 +  | 3   | 739 | 48532  | 49218  |
| UN43071 | Rsa1.0_01360.1 | 835 | 47246  | 1.00E-123 | 266 | 280 | 95 +  | 509 | 788 | 37242  | 37521  |
| UN43072 | Rsa1.0_00473.1 | 882 | 212204 | 0         | 496 | 518 | 95 +  | 367 | 882 | 8150   | 8667   |
| UN43073 | Rsa1.0_00434.1 | 587 | 85171  | 0         | 583 | 588 | 99 -  | 3   | 587 | 27751  | 28338  |
| UN43074 | Rsa1.0_03709.1 | 830 | 21247  | 1.00E-159 | 336 | 352 | 95 -  | 470 | 821 | 18550  | 18900  |
| UN43075 | Rsa1.0_00033.1 | 850 | 515811 | 0         | 821 | 851 | 96 +  | 1   | 850 | 476071 | 476909 |
| UN43076 | Rsa1.0_00896.1 | 822 | 60509  | 0         | 793 | 825 | 96 -  | 3   | 822 | 13385  | 14206  |
| UN43077 | Rsa1.0_01872.1 | 704 | 37908  | 9.00E-72  | 138 | 138 | 100 + | 426 | 563 | 9035   | 9172   |
| UN43078 | Rsa1.0_00022.1 | 911 | 200461 | 0         | 447 | 456 | 98 -  | 104 | 559 | 180877 | 181332 |
| UN43079 | Rsa1.0_00779.1 | 551 | 64568  | 0         | 500 | 526 | 95 +  | 36  | 551 | 47624  | 48147  |
| UN43080 | Rsa1.0_00376.1 | 919 | 90101  | 1.00E-119 | 239 | 246 | 97 -  | 441 | 686 | 6655   | 6900   |
| UN43081 | Rsa1.0_00833.1 | 855 | 62621  | 5.00E-89  | 184 | 187 | 98 -  | 671 | 855 | 5235   | 5421   |
| UN43082 | Rsa1.0_02671.1 | 707 | 28887  | 1.00E-117 | 229 | 234 | 97 -  | 232 | 465 | 13185  | 13418  |
| UN43083 | Rsa1.0_00144.1 | 680 | 120708 | 1.00E-175 | 367 | 384 | 95 +  | 287 | 670 | 86553  | 86935  |
| UN43084 | Rsa1.0_11429.1 | 458 | 5511   | 0         | 354 | 356 | 99 +  | 102 | 457 | 4740   | 5095   |
| UN43085 | Rsa1.0_06168.1 | 741 | 11580  | 1.00E-106 | 292 | 321 | 90 +  | 429 | 740 | 8617   | 8926   |
| UN43086 | Rsa1.0_01530.1 | 543 | 43820  | 5.00E-88  | 168 | 169 | 99 +  | 82  | 250 | 6287   | 6455   |
| UN43087 | Rsa1.0_01541.1 | 684 | 43682  | 0         | 658 | 686 | 95 -  | 3   | 684 | 1414   | 2091   |
| UN43088 | Rsa1.0_00066.1 | 194 | 152418 | 5.00E-70  | 134 | 134 | 100 - | 61  | 194 | 139885 | 140018 |
| UN43089 | Rsa1.0_00116.1 | 890 | 365886 | 1.00E-111 | 222 | 228 | 97 +  | 78  | 305 | 129470 | 129697 |
| UN43090 | Rsa1.0_00647.1 | 583 | 70440  | 1.00E-141 | 308 | 326 | 94 -  | 258 | 583 | 67344  | 67658  |
| UN43091 | Rsa1.0_00472.1 | 935 | 398134 | 0         | 390 | 403 | 96 +  | 536 | 935 | 3801   | 4202   |
| UN43092 | Rsa1.0_00069.1 | 663 | 403561 | 1.00E-137 | 300 | 316 | 94 -  | 1   | 308 | 136004 | 136317 |
| UN43093 | Rsa1.0_65705.1 | 807 | 349    | 1.00E-130 | 266 | 275 | 96 +  | 533 | 807 | 38     | 310    |

|         |                |      |        |           |     |     |      |     |      |        |        |
|---------|----------------|------|--------|-----------|-----|-----|------|-----|------|--------|--------|
| UN43094 | Rsa1.0.00008.1 | 870  | 358124 | 0         | 372 | 384 | 96 + | 490 | 870  | 323035 | 323418 |
| UN43095 | Rsa1.0.00727.1 | 907  | 66724  | 0         | 412 | 415 | 99 + | 481 | 895  | 46287  | 46701  |
| UN43096 | Rsa1.0.02017.1 | 686  | 35999  | 0         | 464 | 483 | 96 + | 3   | 485  | 21258  | 21738  |
| UN43097 | Rsa1.0.02672.1 | 775  | 28884  | 0         | 593 | 669 | 88 + | 123 | 775  | 10841  | 11482  |
| UN43098 | Rsa1.0.22366.1 | 801  | 1127   | 1.00E-129 | 257 | 263 | 97 + | 536 | 797  | 1      | 263    |
| UN43099 | Rsa1.0.00093.1 | 896  | 214962 | 0         | 893 | 899 | 99 + | 2   | 896  | 80637  | 81535  |
| UN43100 | Rsa1.0.04201.1 | 1106 | 18487  | 0         | 765 | 797 | 95 + | 309 | 1105 | 3461   | 4246   |
| UN43101 | Rsa1.0.00528.1 | 997  | 164755 | 0         | 525 | 539 | 97 - | 366 | 904  | 109483 | 110021 |
| UN43102 | Rsa1.0.00128.1 | 984  | 228675 | 0         | 512 | 517 | 99 + | 1   | 517  | 137232 | 137748 |
| UN43103 | Rsa1.0.00038.1 | 628  | 314568 | 1.00E-172 | 345 | 355 | 97 - | 280 | 628  | 307281 | 307635 |
| UN43104 | Rsa1.0.01769.1 | 626  | 39568  | 1.00E-82  | 249 | 280 | 88 + | 171 | 450  | 32292  | 32571  |
| UN43105 | Rsa1.0.00812.1 | 741  | 63233  | 0         | 351 | 358 | 98 - | 296 | 653  | 13929  | 14286  |
| UN43106 | Rsa1.0.00110.1 | 780  | 132719 | 0         | 483 | 488 | 98 - | 4   | 491  | 6854   | 7340   |
| UN43107 | Rsa1.0.14210.1 | 698  | 3660   | 1.00E-143 | 302 | 317 | 95 - | 244 | 560  | 1303   | 1619   |
| UN43108 | Rsa1.0.00258.1 | 789  | 102381 | 0         | 688 | 705 | 97 + | 74  | 777  | 93390  | 94094  |
| UN43109 | Rsa1.0.00002.1 | 487  | 601661 | 1.00E-124 | 283 | 301 | 94 - | 188 | 487  | 290380 | 290680 |
| UN43110 | Rsa1.0.03771.1 | 1235 | 20942  | 1.00E-149 | 294 | 301 | 97 + | 1   | 300  | 10370  | 10670  |
| UN43111 | Rsa1.0.00341.1 | 749  | 249309 | 0         | 563 | 589 | 95 + | 1   | 579  | 207039 | 207626 |
| UN43112 | Rsa1.0.00920.1 | 911  | 601703 | 0         | 357 | 359 | 99 - | 1   | 359  | 33028  | 33386  |
| UN43113 | Rsa1.0.21865.1 | 670  | 1168   | 0         | 655 | 675 | 97 + | 1   | 669  | 80     | 754    |
| UN43114 | Rsa1.0.06106.1 | 503  | 11735  | 0         | 425 | 447 | 95 - | 4   | 446  | 9780   | 10224  |
| UN43115 | Rsa1.0.00017.1 | 1012 | 752458 | 1.00E-117 | 285 | 304 | 93 - | 619 | 921  | 154973 | 155271 |
| UN43116 | Rsa1.0.01742.1 | 778  | 39962  | 1.00E-165 | 405 | 436 | 92 - | 3   | 428  | 26371  | 26799  |
| UN43117 | Rsa1.0.00812.1 | 756  | 63233  | 0         | 352 | 358 | 98 + | 101 | 458  | 13929  | 14286  |
| UN43118 | Rsa1.0.01179.1 | 677  | 51549  | 0         | 517 | 533 | 96 - | 1   | 529  | 42587  | 43119  |
| UN43119 | Rsa1.0.00100.1 | 541  | 249232 | 1.00E-161 | 299 | 302 | 99 + | 18  | 319  | 229324 | 229623 |
| UN43120 | Rsa1.0.01141.1 | 1062 | 52530  | 0         | 359 | 367 | 97 - | 322 | 688  | 39694  | 40060  |
| UN43121 | Rsa1.0.00153.1 | 1075 | 192931 | 0         | 821 | 830 | 98 + | 246 | 1075 | 123102 | 123931 |
| UN43122 | Rsa1.0.04784.1 | 686  | 15995  | 0         | 512 | 523 | 97 - | 164 | 686  | 9199   | 9721   |
| UN43123 | Rsa1.0.00090.1 | 723  | 273859 | 0         | 486 | 510 | 95 + | 217 | 720  | 148579 | 149086 |
| UN43124 | Rsa1.0.00195.1 | 611  | 251884 | 1.00E-101 | 216 | 225 | 96 + | 385 | 606  | 83583  | 83807  |
| UN43125 | Rsa1.0.00002.1 | 419  | 601661 | 1.00E-97  | 199 | 204 | 97 - | 3   | 204  | 141464 | 141667 |
| UN43126 | Rsa1.0.00751.1 | 960  | 65759  | 1.00E-114 | 219 | 222 | 98 + | 739 | 960  | 15009  | 15230  |
| UN43127 | Rsa1.0.02020.1 | 1136 | 173211 | 0         | 521 | 529 | 98 + | 2   | 530  | 153385 | 153913 |
| UN43128 | Rsa1.0.00507.1 | 725  | 79074  | 1.00E-154 | 300 | 308 | 97 - | 284 | 591  | 42907  | 43214  |
| UN43129 | Rsa1.0.00259.1 | 392  | 163204 | 0         | 380 | 392 | 96 - | 8   | 391  | 154163 | 154554 |
| UN43130 | Rsa1.0.02071.1 | 859  | 35409  | 0         | 846 | 857 | 98 - | 2   | 857  | 22453  | 23309  |
| UN43131 | Rsa1.0.00949.1 | 716  | 58549  | 1.00E-130 | 315 | 342 | 92 + | 8   | 337  | 38366  | 38702  |
| UN43132 | Rsa1.0.00139.1 | 680  | 357786 | 0         | 375 | 380 | 98 - | 301 | 679  | 45791  | 46170  |

|         |                |      |        |           |     |     |       |     |      |        |        |
|---------|----------------|------|--------|-----------|-----|-----|-------|-----|------|--------|--------|
| UN43133 | Rsa1.0.00054.1 | 666  | 162053 | 4.00E-55  | 136 | 144 | 94 -  | 3   | 146  | 87400  | 87540  |
| UN43134 | Rsa1.0.00029.1 | 652  | 272992 | 2.00E-54  | 150 | 164 | 91 +  | 3   | 166  | 12817  | 12969  |
| UN43135 | Rsa1.0.23167.1 | 420  | 1067   | 1.00E-101 | 193 | 195 | 98 +  | 1   | 195  | 510    | 704    |
| UN43136 | Rsa1.0.06424.1 | 1355 | 11045  | 0         | 423 | 426 | 99 -  | 1   | 425  | 10322  | 10747  |
| UN43137 | Rsa1.0.00877.1 | 743  | 61305  | 1.00E-177 | 314 | 314 | 100 - | 430 | 743  | 4956   | 5269   |
| UN43138 | Rsa1.0.00651.1 | 705  | 247766 | 1.00E-147 | 290 | 297 | 97 +  | 410 | 705  | 231955 | 232251 |
| UN43139 | Rsa1.0.37761.1 | 499  | 597    | 0         | 435 | 451 | 96 +  | 44  | 494  | 3      | 451    |
| UN43140 | Rsa1.0.01465.1 | 740  | 45175  | 1.00E-113 | 241 | 252 | 95 +  | 220 | 471  | 28909  | 29160  |
| UN43141 | Rsa1.0.05410.1 | 440  | 13840  | 1.00E-164 | 419 | 449 | 93 -  | 2   | 432  | 6013   | 6460   |
| UN43142 | Rsa1.0.03132.1 | 838  | 25142  | 0         | 605 | 655 | 92 -  | 1   | 639  | 9632   | 10273  |
| UN43143 | Rsa1.0.03626.1 | 650  | 160993 | 0         | 624 | 652 | 95 +  | 2   | 650  | 3926   | 4573   |
| UN43144 | Rsa1.0.02941.1 | 630  | 26583  | 1.00E-152 | 290 | 296 | 97 -  | 1   | 296  | 20945  | 21240  |
| UN43145 | Rsa1.0.18647.1 | 861  | 1560   | 1.00E-149 | 325 | 342 | 95 -  | 520 | 857  | 591    | 932    |
| UN43146 | Rsa1.0.00207.1 | 555  | 248736 | 1.00E-128 | 247 | 252 | 98 -  | 1   | 252  | 11456  | 11707  |
| UN43147 | Rsa1.0.02360.1 | 789  | 32203  | 0         | 415 | 438 | 94 -  | 40  | 468  | 24666  | 25100  |
| UN43148 | Rsa1.0.00954.1 | 1037 | 189536 | 1.00E-142 | 309 | 327 | 94 -  | 3   | 329  | 155715 | 156035 |
| UN43149 | Rsa1.0.04603.1 | 814  | 16682  | 1.00E-180 | 335 | 340 | 98 +  | 2   | 341  | 6745   | 7084   |
| UN43150 | Rsa1.0.01178.1 | 797  | 51571  | 1.00E-64  | 132 | 134 | 98 -  | 420 | 553  | 20862  | 20995  |
| UN43151 | Rsa1.0.05822.1 | 697  | 12521  | 0         | 519 | 537 | 96 +  | 169 | 697  | 11655  | 12189  |
| UN43152 | Rsa1.0.00014.1 | 1237 | 348985 | 0         | 674 | 674 | 100 - | 564 | 1237 | 331392 | 332065 |
| UN43153 | Rsa1.0.00624.1 | 981  | 71773  | 0         | 847 | 866 | 97 +  | 109 | 974  | 28945  | 29810  |
| UN43154 | Rsa1.0.12336.1 | 726  | 5251   | 1.00E-92  | 202 | 209 | 96 -  | 219 | 426  | 1958   | 2165   |
| UN43155 | Rsa1.0.13478.1 | 712  | 4790   | 0         | 591 | 606 | 97 -  | 107 | 712  | 3055   | 3658   |
| UN43156 | Rsa1.0.00009.1 | 674  | 232558 | 0         | 407 | 411 | 99 +  | 262 | 672  | 101168 | 101578 |
| UN43157 | Rsa1.0.19248.1 | 839  | 1457   | 0         | 352 | 358 | 98 +  | 190 | 547  | 1      | 358    |
| UN43158 | Rsa1.0.04229.1 | 1022 | 18389  | 0         | 328 | 329 | 99 +  | 251 | 579  | 1      | 329    |
| UN43159 | Rsa1.0.00826.1 | 772  | 166736 | 1.00E-127 | 393 | 445 | 88 +  | 1   | 439  | 130526 | 130952 |
| UN43160 | Rsa1.0.00017.1 | 1396 | 752458 | 0         | 631 | 669 | 94 -  | 1   | 659  | 352440 | 353108 |
| UN43161 | Rsa1.0.00067.1 | 684  | 415055 | 0         | 347 | 352 | 98 +  | 332 | 683  | 82824  | 83175  |
| UN43162 | Rsa1.0.00462.1 | 540  | 82288  | 1.00E-107 | 239 | 251 | 95 -  | 288 | 538  | 36026  | 36272  |
| UN43163 | Rsa1.0.11519.1 | 1141 | 5480   | 0         | 793 | 813 | 97 -  | 2   | 811  | 4461   | 5269   |
| UN43164 | Rsa1.0.01650.1 | 603  | 41589  | 0         | 521 | 540 | 96 +  | 64  | 603  | 27378  | 27916  |
| UN43165 | Rsa1.0.00130.1 | 822  | 125737 | 0         | 471 | 506 | 93 +  | 329 | 822  | 28245  | 28744  |
| UN43166 | Rsa1.0.00939.1 | 871  | 185227 | 7.00E-76  | 186 | 199 | 93 -  | 669 | 859  | 170312 | 170510 |
| UN43167 | Rsa1.0.01258.1 | 425  | 49755  | 9.00E-77  | 168 | 174 | 96 -  | 237 | 409  | 22315  | 22488  |
| UN43168 | Rsa1.0.14452.1 | 738  | 3375   | 1.00E-141 | 271 | 275 | 98 +  | 442 | 715  | 234    | 508    |
| UN43169 | Rsa1.0.00098.1 | 874  | 349239 | 1.00E-147 | 271 | 273 | 99 -  | 600 | 872  | 142872 | 143144 |
| UN43170 | Rsa1.0.05758.1 | 864  | 12721  | 0         | 816 | 843 | 96 -  | 25  | 864  | 617    | 1457   |
| UN43171 | Rsa1.0.04092.1 | 1216 | 19128  | 0         | 548 | 561 | 97 +  | 658 | 1215 | 6109   | 6669   |

|         |                |      |        |           |      |      |      |     |      |        |        |
|---------|----------------|------|--------|-----------|------|------|------|-----|------|--------|--------|
| UN43172 | Rsa1.0.00088.1 | 682  | 141341 | 1.00E-120 | 240  | 247  | 97 + | 403 | 649  | 7725   | 7971   |
| UN43173 | Rsa1.0.00833.1 | 661  | 62621  | 1.00E-164 | 296  | 297  | 99 - | 363 | 659  | 8605   | 8901   |
| UN43174 | Rsa1.0.08750.1 | 669  | 6961   | 1.00E-171 | 331  | 339  | 97 - | 326 | 664  | 6080   | 6416   |
| UN43175 | Rsa1.0.00470.1 | 928  | 81968  | 1.00E-123 | 368  | 414  | 88 + | 525 | 926  | 50852  | 51252  |
| UN43176 | Rsa1.0_11921.1 | 940  | 5369   | 6.00E-24  | 73   | 78   | 93 + | 466 | 543  | 4560   | 4637   |
| UN43177 | Rsa1.0_05015.1 | 579  | 15125  | 0         | 398  | 411  | 96 - | 53  | 463  | 9628   | 10038  |
| UN43178 | Rsa1.0.07692.1 | 628  | 132338 | 0         | 338  | 342  | 98 - | 287 | 628  | 6725   | 7066   |
| UN43179 | Rsa1.0.02282.1 | 583  | 163951 | 2.00E-59  | 174  | 193  | 90 + | 212 | 404  | 150366 | 150558 |
| UN43180 | Rsa1.0.00624.1 | 1018 | 71773  | 0         | 354  | 357  | 99 - | 3   | 359  | 25394  | 25750  |
| UN43181 | Rsa1.0.00302.1 | 607  | 97521  | 1.00E-176 | 439  | 480  | 91 - | 24  | 501  | 92198  | 92677  |
| UN43182 | Rsa1.0.01549.1 | 1142 | 43543  | 0         | 585  | 593  | 98 + | 3   | 595  | 341    | 933    |
| UN43183 | Rsa1.0.01352.1 | 795  | 47443  | 1.00E-155 | 312  | 320  | 97 + | 448 | 767  | 38486  | 38800  |
| UN43184 | Rsa1.0.04806.1 | 558  | 15898  | 0         | 333  | 335  | 99 + | 216 | 550  | 7309   | 7643   |
| UN43185 | Rsa1.0.03876.1 | 838  | 20334  | 1.00E-113 | 269  | 286  | 94 + | 554 | 837  | 7346   | 7629   |
| UN43186 | Rsa1.0.00489.1 | 738  | 80434  | 1.00E-110 | 243  | 255  | 95 + | 484 | 737  | 48244  | 48498  |
| UN43187 | Rsa1.0.03870.1 | 615  | 20362  | 0         | 425  | 444  | 95 + | 175 | 615  | 654    | 1097   |
| UN43188 | Rsa1.0.01236.1 | 881  | 50156  | 6.00E-98  | 262  | 284  | 92 + | 3   | 284  | 40332  | 40601  |
| UN43189 | Rsa1.0.00029.1 | 743  | 272992 | 1.00E-141 | 301  | 314  | 95 - | 431 | 743  | 10257  | 10568  |
| UN43190 | Rsa1.0.00310.1 | 761  | 96852  | 0         | 370  | 380  | 97 + | 384 | 761  | 34572  | 34949  |
| UN43191 | Rsa1.0.04520.1 | 470  | 16995  | 1.00E-91  | 240  | 258  | 93 + | 197 | 451  | 11580  | 11835  |
| UN43192 | Rsa1.0.01868.1 | 973  | 150904 | 1.00E-177 | 324  | 327  | 99 + | 541 | 867  | 12107  | 12433  |
| UN43193 | Rsa1.0.10100.1 | 374  | 5998   | 1.00E-164 | 336  | 349  | 96 + | 6   | 349  | 1026   | 1374   |
| UN43194 | Rsa1.0.00483.1 | 996  | 81102  | 1.00E-168 | 386  | 412  | 93 + | 588 | 995  | 51013  | 51416  |
| UN43195 | Rsa1.0.01313.1 | 574  | 48387  | 1.00E-111 | 302  | 333  | 90 + | 236 | 567  | 13937  | 14260  |
| UN43196 | Rsa1.0.01153.1 | 621  | 52264  | 0         | 476  | 483  | 98 + | 1   | 483  | 7824   | 8306   |
| UN43197 | Rsa1.0.01112.1 | 635  | 310601 | 0         | 531  | 540  | 98 - | 94  | 633  | 287648 | 288187 |
| UN43198 | Rsa1.0.00116.1 | 440  | 365886 | 1.00E-157 | 330  | 346  | 95 - | 97  | 439  | 309    | 648    |
| UN43199 | Rsa1.0.02069.1 | 749  | 35425  | 0         | 447  | 477  | 93 - | 272 | 748  | 20613  | 21072  |
| UN43200 | Rsa1.0.08102.1 | 907  | 7901   | 0         | 416  | 421  | 98 + | 487 | 907  | 5712   | 6132   |
| UN43201 | Rsa1.0.01696.1 | 826  | 301850 | 0         | 341  | 347  | 98 - | 468 | 814  | 159026 | 159372 |
| UN43202 | Rsa1.0.00124.1 | 538  | 262503 | 0         | 348  | 353  | 98 + | 1   | 353  | 162573 | 162925 |
| UN43203 | Rsa1.0.00772.1 | 694  | 64856  | 0         | 686  | 694  | 98 + | 2   | 694  | 55214  | 55905  |
| UN43204 | Rsa1.0.01082.1 | 440  | 54640  | 0         | 430  | 438  | 98 + | 3   | 440  | 27791  | 28228  |
| UN43205 | Rsa1.0.17444.1 | 864  | 1828   | 1.00E-135 | 315  | 341  | 92 + | 3   | 325  | 1453   | 1793   |
| UN43206 | Rsa1.0.01004.1 | 1370 | 56975  | 0         | 1258 | 1270 | 99 + | 1   | 1267 | 9776   | 11044  |
| UN43207 | Rsa1.0.01923.1 | 498  | 37233  | 9.00E-71  | 148  | 152  | 97 - | 36  | 187  | 28508  | 28659  |
| UN43208 | Rsa1.0.00105.1 | 808  | 134138 | 0         | 624  | 648  | 96 - | 3   | 649  | 123747 | 124385 |
| UN43209 | Rsa1.0.01649.1 | 676  | 41624  | 1.00E-120 | 247  | 255  | 96 + | 414 | 668  | 27705  | 27958  |
| UN43210 | Rsa1.0.02655.1 | 335  | 29027  | 1.00E-141 | 302  | 317  | 95 - | 12  | 327  | 10106  | 10422  |

|         |                |      |        |           |     |     |       |     |      |        |        |
|---------|----------------|------|--------|-----------|-----|-----|-------|-----|------|--------|--------|
| UN43211 | Rsa1.0.09895.1 | 658  | 6101   | 0         | 627 | 667 | 94 -  | 5   | 658  | 4951   | 5610   |
| UN43212 | Rsa1.0.02036.1 | 440  | 35731  | 0         | 389 | 398 | 97 +  | 4   | 401  | 26464  | 26861  |
| UN43213 | Rsa1.0.00066.1 | 1073 | 152418 | 1.00E-105 | 246 | 264 | 93 +  | 810 | 1073 | 60921  | 61172  |
| UN43214 | Rsa1.0.00890.1 | 529  | 323870 | 5.00E-82  | 185 | 194 | 95 +  | 336 | 529  | 306236 | 306427 |
| UN43215 | Rsa1.0.01119.1 | 757  | 53459  | 0         | 475 | 495 | 95 -  | 4   | 498  | 1103   | 1595   |
| UN43216 | Rsa1.0.02544.1 | 526  | 30290  | 0         | 513 | 529 | 96 +  | 1   | 524  | 28268  | 28795  |
| UN43217 | Rsa1.0.00069.1 | 1016 | 403561 | 1.00E-142 | 271 | 276 | 98 -  | 53  | 328  | 179274 | 179549 |
| UN43218 | Rsa1.0.00486.1 | 685  | 80875  | 1.00E-178 | 389 | 412 | 94 -  | 281 | 684  | 32614  | 33022  |
| UN43219 | Rsa1.0.02633.1 | 598  | 29315  | 1.00E-141 | 289 | 299 | 96 -  | 300 | 595  | 472    | 768    |
| UN43220 | Rsa1.0.03297.1 | 734  | 23969  | 1.00E-116 | 260 | 274 | 94 +  | 463 | 734  | 3924   | 4194   |
| UN43221 | Rsa1.0.00196.1 | 689  | 109960 | 1.00E-175 | 341 | 348 | 97 +  | 121 | 467  | 50865  | 51211  |
| UN43222 | Rsa1.0.33589.1 | 779  | 675    | 1.00E-151 | 310 | 320 | 96 +  | 458 | 776  | 45     | 363    |
| UN43223 | Rsa1.0.00401.1 | 968  | 244410 | 0         | 378 | 394 | 95 -  | 572 | 965  | 178052 | 178445 |
| UN43224 | Rsa1.0.02212.1 | 698  | 33840  | 1.00E-95  | 201 | 207 | 97 +  | 57  | 258  | 29438  | 29644  |
| UN43225 | Rsa1.0.01965.1 | 717  | 36698  | 0         | 687 | 709 | 96 +  | 9   | 717  | 3518   | 4222   |
| UN43226 | Rsa1.0.18598.1 | 744  | 1567   | 0         | 433 | 462 | 93 +  | 103 | 564  | 258    | 719    |
| UN43227 | Rsa1.0.00159.1 | 940  | 431686 | 1.00E-129 | 250 | 255 | 98 +  | 634 | 888  | 427721 | 427975 |
| UN43228 | Rsa1.0.00392.1 | 604  | 88523  | 1.00E-137 | 257 | 259 | 99 -  | 2   | 260  | 31693  | 31950  |
| UN43229 | Rsa1.0.00124.1 | 453  | 262503 | 2.00E-56  | 170 | 185 | 91 -  | 256 | 437  | 47513  | 47693  |
| UN43230 | Rsa1.0.00782.1 | 601  | 64468  | 1.00E-101 | 208 | 215 | 96 -  | 11  | 225  | 12658  | 12872  |
| UN43231 | Rsa1.0.00139.1 | 649  | 357786 | 7.00E-60  | 118 | 118 | 100 - | 38  | 155  | 291334 | 291451 |
| UN43232 | Rsa1.0.00020.1 | 422  | 283099 | 1.00E-114 | 271 | 289 | 93 -  | 113 | 401  | 151642 | 151928 |
| UN43233 | Rsa1.0.03853.1 | 708  | 20447  | 1.00E-138 | 273 | 281 | 97 +  | 341 | 621  | 14042  | 14322  |
| UN43234 | Rsa1.0.01400.1 | 942  | 46560  | 1.00E-156 | 318 | 330 | 96 +  | 283 | 612  | 37213  | 37539  |
| UN43235 | Rsa1.0.05081.1 | 860  | 136103 | 1.00E-134 | 358 | 391 | 91 +  | 447 | 834  | 5006   | 5395   |
| UN43236 | Rsa1.0.00741.1 | 866  | 66117  | 1.00E-157 | 330 | 346 | 95 +  | 3   | 338  | 49402  | 49747  |
| UN43237 | Rsa1.0.00152.1 | 544  | 257730 | 1.00E-120 | 266 | 282 | 94 +  | 72  | 353  | 118021 | 118296 |
| UN43238 | Rsa1.0.00079.1 | 652  | 606987 | 8.00E-72  | 153 | 158 | 96 -  | 25  | 182  | 200027 | 200184 |
| UN43239 | Rsa1.0.02233.1 | 440  | 33658  | 0         | 414 | 429 | 96 -  | 5   | 433  | 11337  | 11762  |
| UN43240 | Rsa1.0.01313.1 | 1197 | 48387  | 1.00E-155 | 437 | 490 | 89 +  | 419 | 879  | 13351  | 13838  |
| UN43241 | Rsa1.0.05078.1 | 970  | 14912  | 0         | 572 | 595 | 96 +  | 233 | 823  | 9687   | 10281  |
| UN43242 | Rsa1.0.04782.1 | 456  | 16005  | 1.00E-151 | 314 | 329 | 95 +  | 126 | 448  | 4927   | 5255   |
| UN43243 | Rsa1.0.03623.1 | 627  | 21714  | 0         | 609 | 618 | 98 -  | 10  | 627  | 19168  | 19784  |
| UN43244 | Rsa1.0.05599.1 | 585  | 143653 | 1.00E-112 | 286 | 308 | 92 +  | 278 | 583  | 139259 | 139563 |
| UN43245 | Rsa1.0.01358.1 | 692  | 47278  | 9.00E-75  | 149 | 151 | 98 +  | 3   | 153  | 1620   | 1770   |
| UN43246 | Rsa1.0.00554.1 | 902  | 150953 | 9.00E-88  | 244 | 263 | 92 -  | 20  | 277  | 121603 | 121862 |
| UN43247 | Rsa1.0.07344.1 | 645  | 9528   | 0         | 624 | 652 | 95 -  | 1   | 644  | 6103   | 6754   |
| UN43248 | Rsa1.0.00457.1 | 985  | 337301 | 0         | 373 | 382 | 97 +  | 597 | 975  | 128787 | 129167 |
| UN43249 | Rsa1.0.04264.1 | 793  | 18207  | 0         | 373 | 383 | 97 +  | 412 | 793  | 5766   | 6148   |

|         |                |      |        |           |     |     |      |     |      |        |        |
|---------|----------------|------|--------|-----------|-----|-----|------|-----|------|--------|--------|
| UN43250 | Rsa1.0.00570.1 | 808  | 75002  | 0         | 531 | 561 | 94 + | 251 | 808  | 73116  | 73671  |
| UN43251 | Rsa1.0.01800.1 | 971  | 39109  | 1.00E-114 | 216 | 218 | 99 - | 328 | 545  | 10179  | 10396  |
| UN43252 | Rsa1.0.04542.1 | 848  | 16930  | 1.00E-102 | 260 | 280 | 92 - | 3   | 275  | 16130  | 16402  |
| UN43253 | Rsa1.0.00790.1 | 818  | 148693 | 0         | 554 | 575 | 96 + | 250 | 818  | 49119  | 49690  |
| UN43254 | Rsa1.0.01706.1 | 766  | 40694  | 1.00E-125 | 236 | 239 | 98 + | 118 | 356  | 28390  | 28628  |
| UN43255 | Rsa1.0.02356.1 | 805  | 141500 | 0         | 775 | 803 | 96 + | 3   | 805  | 127920 | 128722 |
| UN43256 | Rsa1.0.01743.1 | 499  | 39926  | 0         | 468 | 501 | 93 + | 6   | 499  | 5084   | 5578   |
| UN43257 | Rsa1.0.00009.1 | 643  | 232558 | 1.00E-172 | 377 | 397 | 94 + | 7   | 399  | 70667  | 71063  |
| UN43258 | Rsa1.0.00601.1 | 826  | 177045 | 1.00E-137 | 338 | 366 | 92 + | 2   | 357  | 26139  | 26496  |
| UN43259 | Rsa1.0.00164.1 | 674  | 116642 | 0         | 644 | 676 | 95 - | 1   | 674  | 48513  | 49185  |
| UN43260 | Rsa1.0.00005.1 | 746  | 353093 | 2.00E-88  | 181 | 186 | 97 + | 44  | 229  | 122026 | 122211 |
| UN43261 | Rsa1.0.03520.1 | 894  | 22327  | 1.00E-110 | 276 | 299 | 92 + | 595 | 893  | 10242  | 10539  |
| UN43262 | Rsa1.0.00757.1 | 567  | 65559  | 0         | 487 | 506 | 96 - | 2   | 507  | 41624  | 42121  |
| UN43263 | Rsa1.0.00467.1 | 801  | 156542 | 1.00E-105 | 228 | 239 | 95 - | 3   | 241  | 81087  | 81325  |
| UN43264 | Rsa1.0.00847.1 | 663  | 62270  | 1.00E-118 | 228 | 232 | 98 + | 123 | 354  | 52454  | 52685  |
| UN43265 | Rsa1.0.10516.1 | 393  | 5818   | 4.00E-94  | 208 | 219 | 94 - | 119 | 337  | 4538   | 4756   |
| UN43266 | Rsa1.0.01536.1 | 846  | 43747  | 0         | 416 | 435 | 95 - | 233 | 667  | 18915  | 19349  |
| UN43267 | Rsa1.0.01563.1 | 517  | 170823 | 1.00E-109 | 207 | 209 | 99 + | 307 | 515  | 39388  | 39596  |
| UN43268 | Rsa1.0.02900.1 | 662  | 26928  | 1.00E-118 | 249 | 259 | 96 + | 404 | 662  | 16858  | 17115  |
| UN43269 | Rsa1.0.00002.1 | 776  | 601661 | 1.00E-175 | 357 | 371 | 96 + | 300 | 669  | 290310 | 290680 |
| UN43270 | Rsa1.0.01146.1 | 769  | 163455 | 0         | 719 | 774 | 92 - | 1   | 769  | 17667  | 18420  |
| UN43271 | Rsa1.0.05995.1 | 615  | 11997  | 1.00E-144 | 398 | 441 | 90 + | 178 | 615  | 8577   | 8990   |
| UN43272 | Rsa1.0.00744.1 | 694  | 66084  | 1.00E-178 | 397 | 420 | 94 - | 278 | 694  | 56503  | 56916  |
| UN43273 | Rsa1.0.01716.1 | 705  | 40483  | 1.00E-137 | 323 | 349 | 92 + | 10  | 355  | 17529  | 17868  |
| UN43274 | Rsa1.0.00294.1 | 524  | 144860 | 4.00E-67  | 254 | 295 | 86 - | 239 | 524  | 54817  | 55096  |
| UN43275 | Rsa1.0.02873.1 | 523  | 27077  | 1.00E-147 | 282 | 288 | 97 + | 109 | 396  | 15590  | 15877  |
| UN43276 | Rsa1.0.07159.1 | 589  | 9796   | 1.00E-122 | 232 | 234 | 99 - | 3   | 236  | 1197   | 1429   |
| UN43277 | Rsa1.0.01236.1 | 746  | 50156  | 9.00E-66  | 196 | 218 | 89 - | 529 | 745  | 40396  | 40601  |
| UN43278 | Rsa1.0.08165.1 | 608  | 7806   | 1.00E-124 | 294 | 315 | 93 - | 3   | 308  | 2878   | 3192   |
| UN43279 | Rsa1.0.02398.1 | 397  | 31766  | 1.00E-144 | 334 | 363 | 92 - | 14  | 355  | 27196  | 27557  |
| UN43280 | Rsa1.0.03664.1 | 593  | 21487  | 1.00E-111 | 213 | 216 | 98 + | 49  | 264  | 7048   | 7263   |
| UN43281 | Rsa1.0.03856.1 | 871  | 20429  | 1.00E-107 | 221 | 226 | 97 - | 646 | 869  | 18985  | 19210  |
| UN43282 | Rsa1.0.07622.1 | 827  | 9012   | 0         | 477 | 498 | 95 - | 339 | 827  | 4300   | 4797   |
| UN43283 | Rsa1.0.06140.1 | 1298 | 11646  | 0         | 512 | 536 | 95 + | 513 | 1047 | 6938   | 7469   |
| UN43284 | Rsa1.0.17009.1 | 762  | 1954   | 0         | 458 | 483 | 94 + | 12  | 493  | 1123   | 1598   |
| UN43285 | Rsa1.0.02285.1 | 883  | 33001  | 0         | 646 | 688 | 93 - | 1   | 670  | 31812  | 32493  |
| UN43286 | Rsa1.0.01460.1 | 812  | 45255  | 1.00E-172 | 348 | 364 | 95 - | 326 | 678  | 2762   | 3125   |
| UN43287 | Rsa1.0.00395.1 | 586  | 214466 | 1.00E-151 | 292 | 299 | 97 + | 287 | 585  | 203107 | 203405 |
| UN43288 | Rsa1.0.02952.1 | 651  | 26492  | 0         | 600 | 619 | 96 + | 25  | 643  | 20486  | 21101  |



|         |                |      |        |           |     |     |       |     |     |        |        |
|---------|----------------|------|--------|-----------|-----|-----|-------|-----|-----|--------|--------|
| UN43289 | Rsa1.0_10940.1 | 510  | 5670   | 2.00E-87  | 170 | 172 | 98 -  | 92  | 263 | 5499   | 5670   |
| UN43290 | Rsa1.0_00095.1 | 768  | 283384 | 1.00E-142 | 271 | 276 | 98 -  | 491 | 766 | 21300  | 21575  |
| UN43291 | Rsa1.0_00743.1 | 634  | 177459 | 5.00E-70  | 211 | 234 | 90 -  | 19  | 250 | 1203   | 1425   |
| UN43292 | Rsa1.0_05252.1 | 798  | 14366  | 0         | 433 | 444 | 97 +  | 350 | 793 | 9953   | 10396  |
| UN43293 | Rsa1.0_03860.1 | 658  | 20407  | 1.00E-107 | 240 | 253 | 94 -  | 392 | 643 | 14095  | 14347  |
| UN43294 | Rsa1.0_00228.1 | 847  | 105511 | 0         | 436 | 442 | 98 +  | 3   | 441 | 75162  | 75603  |
| UN43295 | Rsa1.0_03016.1 | 745  | 26000  | 0         | 714 | 746 | 95 -  | 3   | 744 | 4818   | 5557   |
| UN43296 | Rsa1.0_03700.1 | 1043 | 21299  | 1.00E-124 | 292 | 310 | 94 -  | 1   | 307 | 1331   | 1639   |
| UN43297 | Rsa1.0_03843.1 | 216  | 20496  | 5.00E-49  | 120 | 127 | 94 +  | 26  | 152 | 6801   | 6927   |
| UN43298 | Rsa1.0_00878.1 | 604  | 330303 | 1.00E-145 | 318 | 337 | 94 +  | 146 | 482 | 148561 | 148897 |
| UN43299 | Rsa1.0_02057.1 | 1056 | 35540  | 1.00E-109 | 204 | 205 | 99 +  | 553 | 757 | 20224  | 20428  |
| UN43300 | Rsa1.0_00762.1 | 327  | 165246 | 1.00E-105 | 208 | 213 | 97 -  | 113 | 325 | 25872  | 26084  |
| UN43301 | Rsa1.0_00662.1 | 578  | 192183 | 2.00E-50  | 102 | 102 | 100 + | 175 | 276 | 8159   | 8260   |
| UN43302 | Rsa1.0_00079.1 | 816  | 606987 | 1.00E-134 | 272 | 282 | 96 +  | 1   | 282 | 464264 | 464545 |
| UN43303 | Rsa1.0_00554.1 | 951  | 150953 | 9.00E-54  | 146 | 157 | 92 -  | 717 | 868 | 140654 | 140810 |
| UN43304 | Rsa1.0_00661.1 | 482  | 213041 | 8.00E-56  | 149 | 160 | 93 +  | 321 | 479 | 65949  | 66104  |
| UN43305 | Rsa1.0_00733.1 | 726  | 66583  | 0         | 350 | 358 | 97 -  | 221 | 577 | 59113  | 59470  |
| UN43306 | Rsa1.0_01819.1 | 808  | 38834  | 1.00E-163 | 378 | 404 | 93 +  | 236 | 634 | 7492   | 7893   |
| UN43307 | Rsa1.0_03204.1 | 421  | 24622  | 1.00E-109 | 257 | 273 | 94 +  | 1   | 269 | 5264   | 5534   |
| UN43308 | Rsa1.0_00033.1 | 752  | 515811 | 0         | 409 | 430 | 95 +  | 1   | 429 | 366408 | 366835 |
| UN43309 | Rsa1.0_00476.1 | 480  | 280966 | 1.00E-79  | 196 | 207 | 94 -  | 1   | 199 | 157895 | 158101 |
| UN43310 | Rsa1.0_00577.1 | 830  | 174827 | 0         | 787 | 827 | 95 -  | 1   | 827 | 460    | 1275   |
| UN43311 | Rsa1.0_01536.1 | 948  | 43747  | 0         | 612 | 696 | 87 +  | 21  | 696 | 23983  | 24665  |
| UN43312 | Rsa1.0_03727.1 | 917  | 21158  | 0         | 613 | 613 | 100 + | 3   | 615 | 2904   | 3516   |
| UN43313 | Rsa1.0_00437.1 | 907  | 84879  | 6.00E-92  | 193 | 200 | 96 -  | 706 | 905 | 44579  | 44778  |
| UN43314 | Rsa1.0_00614.1 | 949  | 72276  | 0         | 372 | 385 | 96 +  | 434 | 818 | 27549  | 27933  |
| UN43315 | Rsa1.0_01752.1 | 1274 | 39805  | 1.00E-141 | 303 | 316 | 95 -  | 1   | 312 | 4489   | 4802   |
| UN43316 | Rsa1.0_07899.1 | 427  | 8335   | 2.00E-86  | 165 | 166 | 99 -  | 261 | 426 | 5725   | 5890   |
| UN43317 | Rsa1.0_00254.1 | 1238 | 102600 | 1.00E-127 | 290 | 308 | 94 +  | 1   | 305 | 77306  | 77601  |
| UN43318 | Rsa1.0_00011.1 | 979  | 225044 | 1.00E-151 | 377 | 414 | 91 +  | 579 | 976 | 207085 | 207489 |
| UN43319 | Rsa1.0_03476.1 | 730  | 22646  | 0         | 453 | 460 | 98 +  | 1   | 460 | 10249  | 10707  |
| UN43320 | Rsa1.0_10817.1 | 840  | 5712   | 5.00E-92  | 214 | 224 | 95 +  | 27  | 250 | 4053   | 4273   |
| UN43321 | Rsa1.0_06136.1 | 841  | 11659  | 0         | 831 | 838 | 99 +  | 4   | 841 | 1213   | 2049   |
| UN43322 | Rsa1.0_00131.1 | 480  | 432233 | 1.00E-151 | 334 | 354 | 94 +  | 40  | 392 | 285283 | 285630 |
| UN43323 | Rsa1.0_01566.1 | 1077 | 43134  | 1.00E-132 | 362 | 398 | 90 +  | 1   | 391 | 30361  | 30744  |
| UN43324 | Rsa1.0_01341.1 | 1142 | 47764  | 0         | 399 | 419 | 95 +  | 410 | 827 | 13478  | 13887  |
| UN43325 | Rsa1.0_02874.1 | 811  | 27070  | 4.00E-62  | 151 | 160 | 94 -  | 650 | 806 | 1731   | 1890   |
| UN43326 | Rsa1.0_00416.1 | 1065 | 86772  | 8.00E-70  | 135 | 135 | 100 - | 163 | 297 | 38799  | 38933  |
| UN43327 | Rsa1.0_00518.1 | 738  | 78360  | 1.00E-118 | 258 | 272 | 94 -  | 465 | 736 | 58509  | 58780  |

|         |                |      |        |           |     |     |       |     |     |        |        |
|---------|----------------|------|--------|-----------|-----|-----|-------|-----|-----|--------|--------|
| UN43328 | Rsa1.0_24662.1 | 635  | 974    | 1.00E-115 | 216 | 218 | 99 +  | 417 | 634 | 193    | 410    |
| UN43329 | Rsa1.0_02346.1 | 682  | 32337  | 0         | 444 | 464 | 95 -  | 9   | 468 | 6069   | 6524   |
| UN43330 | Rsa1.0_01180.1 | 780  | 51517  | 1.00E-141 | 344 | 367 | 93 +  | 8   | 367 | 33802  | 34166  |
| UN43331 | Rsa1.0_01119.1 | 688  | 53459  | 0         | 617 | 670 | 92 -  | 1   | 668 | 4528   | 5181   |
| UN43332 | Rsa1.0_00236.1 | 799  | 104771 | 5.00E-95  | 192 | 197 | 97 +  | 318 | 514 | 96974  | 97170  |
| UN43333 | Rsa1.0_04470.1 | 755  | 17204  | 1.00E-113 | 262 | 278 | 94 -  | 34  | 311 | 4465   | 4733   |
| UN43334 | Rsa1.0_00181.1 | 719  | 114269 | 0         | 663 | 721 | 91 -  | 6   | 711 | 77823  | 78518  |
| UN43335 | Rsa1.0_02052.1 | 777  | 35555  | 2.00E-57  | 165 | 182 | 90 -  | 77  | 258 | 19884  | 20065  |
| UN43336 | Rsa1.0_02314.1 | 1041 | 32642  | 0         | 359 | 370 | 97 +  | 1   | 366 | 14283  | 14652  |
| UN43337 | Rsa1.0_00645.1 | 926  | 189716 | 0         | 594 | 641 | 92 -  | 32  | 662 | 23006  | 23642  |
| UN43338 | Rsa1.0_15378.1 | 620  | 2647   | 0         | 367 | 374 | 98 -  | 14  | 387 | 1      | 373    |
| UN43339 | Rsa1.0_00121.1 | 667  | 278029 | 1.00E-141 | 264 | 266 | 99 +  | 3   | 268 | 122859 | 123123 |
| UN43340 | Rsa1.0_02239.1 | 657  | 33534  | 1.00E-175 | 373 | 390 | 95 +  | 6   | 391 | 14863  | 15252  |
| UN43341 | Rsa1.0_00326.1 | 916  | 171955 | 1.00E-123 | 234 | 237 | 98 -  | 193 | 429 | 82742  | 82978  |
| UN43342 | Rsa1.0_04286.1 | 871  | 18084  | 0         | 831 | 878 | 94 +  | 1   | 869 | 7591   | 8445   |
| UN43343 | Rsa1.0_00707.1 | 586  | 190112 | 2.00E-59  | 126 | 129 | 97 +  | 456 | 584 | 16479  | 16607  |
| UN43344 | Rsa1.0_00215.1 | 912  | 201775 | 0         | 551 | 551 | 100 - | 359 | 909 | 88262  | 88812  |
| UN43345 | Rsa1.0_15165.1 | 715  | 2785   | 0         | 496 | 528 | 93 -  | 8   | 533 | 1550   | 2063   |
| UN43346 | Rsa1.0_00066.1 | 886  | 152418 | 0         | 427 | 442 | 96 +  | 339 | 780 | 11265  | 11700  |
| UN43347 | Rsa1.0_02204.1 | 882  | 33930  | 1.00E-159 | 332 | 345 | 96 +  | 4   | 348 | 20577  | 20915  |
| UN43348 | Rsa1.0_01559.1 | 627  | 43262  | 4.00E-86  | 221 | 238 | 92 +  | 390 | 623 | 2268   | 2502   |
| UN43349 | Rsa1.0_00989.1 | 764  | 57494  | 0         | 756 | 765 | 98 +  | 1   | 764 | 20120  | 20884  |
| UN43350 | Rsa1.0_00438.1 | 719  | 84861  | 0         | 412 | 431 | 95 -  | 6   | 436 | 76921  | 77345  |
| UN43351 | Rsa1.0_01938.1 | 756  | 264018 | 1.00E-143 | 355 | 387 | 91 +  | 5   | 390 | 159673 | 160042 |
| UN43352 | Rsa1.0_01125.1 | 246  | 53193  | 1.00E-105 | 204 | 206 | 99 +  | 1   | 205 | 41011  | 41216  |
| UN43353 | Rsa1.0_00409.1 | 389  | 146788 | 1.00E-125 | 227 | 227 | 100 - | 1   | 227 | 87848  | 88074  |
| UN43354 | Rsa1.0_03976.1 | 327  | 19759  | 1.00E-111 | 293 | 323 | 90 -  | 1   | 323 | 9587   | 9888   |
| UN43355 | Rsa1.0_07809.1 | 998  | 8503   | 0         | 871 | 928 | 93 -  | 67  | 975 | 1020   | 1941   |
| UN43356 | Rsa1.0_00253.1 | 714  | 231292 | 1.00E-122 | 237 | 242 | 97 -  | 223 | 464 | 123819 | 124060 |
| UN43357 | Rsa1.0_01675.1 | 720  | 41155  | 0         | 346 | 347 | 99 +  | 372 | 718 | 9381   | 9727   |
| UN43358 | Rsa1.0_00066.1 | 574  | 152418 | 0         | 458 | 479 | 95 -  | 7   | 481 | 19638  | 20111  |
| UN43359 | Rsa1.0_03400.1 | 727  | 23203  | 0         | 338 | 342 | 98 -  | 201 | 542 | 14916  | 15257  |
| UN43360 | Rsa1.0_03213.1 | 1034 | 24568  | 0         | 950 | 996 | 95 +  | 1   | 979 | 3267   | 4262   |
| UN43361 | Rsa1.0_02966.1 | 1070 | 135126 | 0         | 555 | 582 | 95 -  | 1   | 574 | 127100 | 127681 |
| UN43362 | Rsa1.0_03191.1 | 948  | 145762 | 1.00E-162 | 374 | 401 | 93 +  | 7   | 398 | 22074  | 22472  |
| UN43363 | Rsa1.0_00931.1 | 744  | 59210  | 7.00E-82  | 230 | 255 | 90 +  | 488 | 742 | 45356  | 45610  |
| UN43364 | Rsa1.0_07256.1 | 771  | 9655   | 1.00E-134 | 252 | 255 | 98 -  | 366 | 620 | 4393   | 4647   |
| UN43365 | Rsa1.0_01236.1 | 872  | 50156  | 1.00E-160 | 431 | 480 | 89 +  | 183 | 634 | 41067  | 41542  |
| UN43366 | Rsa1.0_02052.1 | 928  | 35555  | 1.00E-160 | 308 | 315 | 97 -  | 351 | 665 | 19722  | 20036  |

|         |                |      |        |           |     |     |      |     |      |        |        |
|---------|----------------|------|--------|-----------|-----|-----|------|-----|------|--------|--------|
| UN43367 | Rsa1.0.00038.1 | 820  | 314568 | 1.00E-102 | 263 | 286 | 91 - | 5   | 280  | 16997  | 17282  |
| UN43368 | Rsa1.0.00888.1 | 434  | 60978  | 1.00E-69  | 159 | 166 | 95 + | 84  | 248  | 14607  | 14772  |
| UN43369 | Rsa1.0.00124.1 | 569  | 262503 | 8.00E-87  | 177 | 181 | 97 - | 390 | 567  | 9266   | 9446   |
| UN43370 | Rsa1.0.01439.1 | 949  | 45841  | 0         | 553 | 558 | 99 - | 1   | 558  | 27926  | 28483  |
| UN43371 | Rsa1.0.00080.1 | 583  | 190437 | 1.00E-101 | 311 | 352 | 88 - | 1   | 340  | 33248  | 33587  |
| UN43372 | Rsa1.0.14775.1 | 717  | 3074   | 1.00E-122 | 232 | 234 | 99 - | 3   | 235  | 2772   | 3005   |
| UN43373 | Rsa1.0.03890.1 | 767  | 20223  | 1.00E-177 | 369 | 385 | 95 - | 3   | 385  | 11318  | 11701  |
| UN43374 | Rsa1.0.00093.1 | 342  | 214962 | 1.00E-103 | 288 | 315 | 91 - | 2   | 310  | 134460 | 134772 |
| UN43375 | Rsa1.0.00512.1 | 980  | 200277 | 1.00E-104 | 235 | 249 | 94 - | 682 | 930  | 61460  | 61708  |
| UN43376 | Rsa1.0.00205.1 | 602  | 193401 | 1.00E-147 | 327 | 345 | 94 - | 1   | 345  | 38432  | 38769  |
| UN43377 | Rsa1.0.11168.1 | 878  | 5597   | 1.00E-119 | 221 | 222 | 99 + | 657 | 878  | 541    | 762    |
| UN43378 | Rsa1.0.00663.1 | 586  | 164969 | 1.00E-161 | 342 | 357 | 95 - | 32  | 387  | 123984 | 124335 |
| UN43379 | Rsa1.0.00030.1 | 768  | 250988 | 5.00E-92  | 315 | 360 | 87 - | 28  | 366  | 151418 | 151776 |
| UN43380 | Rsa1.0.01071.1 | 1237 | 166914 | 0         | 534 | 562 | 95 + | 1   | 558  | 14045  | 14590  |
| UN43381 | Rsa1.0.04998.1 | 677  | 15180  | 0         | 508 | 548 | 92 - | 132 | 674  | 14466  | 14997  |
| UN43382 | Rsa1.0.00194.1 | 617  | 110851 | 1.00E-101 | 320 | 359 | 89 - | 1   | 350  | 56294  | 56652  |
| UN43383 | Rsa1.0.00170.1 | 610  | 179538 | 6.00E-91  | 234 | 253 | 92 - | 1   | 250  | 28251  | 28503  |
| UN43384 | Rsa1.0.00331.1 | 864  | 176754 | 1.00E-153 | 284 | 287 | 98 + | 290 | 576  | 99092  | 99378  |
| UN43385 | Rsa1.0.00179.1 | 666  | 393324 | 1.00E-122 | 249 | 255 | 97 - | 7   | 259  | 40330  | 40584  |
| UN43386 | Rsa1.0.09422.1 | 757  | 6381   | 0         | 452 | 456 | 99 - | 1   | 456  | 2245   | 2700   |
| UN43387 | Rsa1.0.05482.1 | 637  | 13595  | 1.00E-118 | 251 | 260 | 96 + | 1   | 259  | 13337  | 13595  |
| UN43388 | Rsa1.0.07379.1 | 677  | 9492   | 5.00E-67  | 200 | 220 | 90 - | 22  | 236  | 3308   | 3527   |
| UN43389 | Rsa1.0.01976.1 | 565  | 36570  | 1.00E-119 | 300 | 326 | 92 + | 61  | 380  | 32468  | 32793  |
| UN43390 | Rsa1.0.03114.1 | 736  | 25318  | 0         | 501 | 527 | 95 - | 8   | 532  | 6565   | 7084   |
| UN43391 | Rsa1.0.02178.1 | 855  | 156197 | 1.00E-150 | 326 | 343 | 95 + | 1   | 341  | 12298  | 12632  |
| UN43392 | Rsa1.0.00301.1 | 580  | 365315 | 1.00E-168 | 331 | 344 | 96 + | 1   | 332  | 207823 | 208166 |
| UN43393 | Rsa1.0.00413.1 | 1099 | 86921  | 1.00E-150 | 302 | 312 | 96 + | 784 | 1095 | 10794  | 11103  |
| UN43394 | Rsa1.0.00021.1 | 821  | 263655 | 1.00E-155 | 288 | 290 | 99 - | 1   | 289  | 89444  | 89733  |
| UN43395 | Rsa1.0.00879.1 | 696  | 61297  | 0         | 650 | 692 | 93 - | 4   | 694  | 53175  | 53849  |
| UN43396 | Rsa1.0.03577.1 | 627  | 143993 | 1.00E-144 | 356 | 389 | 91 + | 259 | 625  | 8695   | 9082   |
| UN43397 | Rsa1.0.06246.1 | 847  | 11395  | 0         | 832 | 848 | 98 + | 1   | 847  | 7456   | 8302   |
| UN43398 | Rsa1.0.00794.1 | 673  | 64063  | 1.00E-178 | 355 | 367 | 96 - | 307 | 673  | 39660  | 40024  |
| UN43399 | Rsa1.0.02157.1 | 1036 | 149652 | 1.00E-176 | 320 | 321 | 99 + | 1   | 320  | 142999 | 143319 |
| UN43400 | Rsa1.0.02333.1 | 636  | 32431  | 1.00E-115 | 374 | 424 | 88 - | 7   | 416  | 29979  | 30390  |
| UN43401 | Rsa1.0.01374.1 | 778  | 47047  | 0         | 478 | 483 | 98 - | 3   | 485  | 32469  | 32951  |
| UN43402 | Rsa1.0.00260.1 | 876  | 102021 | 0         | 350 | 356 | 98 - | 1   | 356  | 67044  | 67397  |
| UN43403 | Rsa1.0.01632.1 | 1181 | 181224 | 0         | 376 | 380 | 98 - | 804 | 1181 | 6048   | 6427   |
| UN43404 | Rsa1.0.03422.1 | 675  | 23076  | 1.00E-109 | 260 | 277 | 93 + | 1   | 274  | 7545   | 7817   |
| UN43405 | Rsa1.0.02812.1 | 537  | 27660  | 1.00E-165 | 324 | 334 | 97 + | 194 | 527  | 16592  | 16925  |

|         |                |      |        |           |      |      |       |     |      |        |        |
|---------|----------------|------|--------|-----------|------|------|-------|-----|------|--------|--------|
| UN43406 | Rsa1.0_00296.1 | 682  | 97854  | 0         | 651  | 682  | 95 -  | 3   | 681  | 80016  | 80686  |
| UN43407 | Rsa1.0_03579.1 | 920  | 21969  | 3.00E-32  | 78   | 80   | 97 +  | 542 | 621  | 1761   | 1840   |
| UN43408 | Rsa1.0_03982.1 | 764  | 19723  | 0         | 561  | 581  | 96 +  | 1   | 580  | 17038  | 17616  |
| UN43409 | Rsa1.0_05614.1 | 859  | 13191  | 1.00E-120 | 331  | 366  | 90 +  | 103 | 465  | 5941   | 6306   |
| UN43410 | Rsa1.0_03890.1 | 713  | 20223  | 1.00E-163 | 366  | 394  | 92 +  | 330 | 702  | 8045   | 8435   |
| UN43411 | Rsa1.0_05572.1 | 558  | 13291  | 1.00E-100 | 211  | 218  | 96 +  | 276 | 492  | 11854  | 12071  |
| UN43412 | Rsa1.0_00088.1 | 863  | 141341 | 1.00E-166 | 354  | 370  | 95 +  | 2   | 365  | 108281 | 108650 |
| UN43413 | Rsa1.0_00896.1 | 878  | 60509  | 1.00E-160 | 302  | 307  | 98 -  | 339 | 645  | 16899  | 17205  |
| UN43414 | Rsa1.0_02540.1 | 630  | 30344  | 1.00E-125 | 274  | 290  | 94 +  | 1   | 290  | 4034   | 4312   |
| UN43415 | Rsa1.0_00079.1 | 1012 | 606987 | 0         | 704  | 781  | 90 -  | 243 | 1012 | 488373 | 489152 |
| UN43416 | Rsa1.0_01081.1 | 915  | 499226 | 0         | 405  | 416  | 97 -  | 261 | 676  | 19206  | 19621  |
| UN43417 | Rsa1.0_00789.1 | 484  | 64233  | 0         | 452  | 482  | 93 +  | 1   | 482  | 13090  | 13560  |
| UN43418 | Rsa1.0_04238.1 | 619  | 18352  | 0         | 379  | 387  | 97 +  | 2   | 388  | 3897   | 4282   |
| UN43419 | Rsa1.0_00793.1 | 407  | 64103  | 4.00E-48  | 104  | 106  | 98 +  | 243 | 348  | 59524  | 59629  |
| UN43420 | Rsa1.0_00055.1 | 570  | 520193 | 1.00E-54  | 121  | 125  | 96 +  | 172 | 296  | 207569 | 207693 |
| UN43421 | Rsa1.0_01239.1 | 604  | 50107  | 1.00E-179 | 380  | 398  | 95 -  | 20  | 417  | 18949  | 19339  |
| UN43422 | Rsa1.0_01591.1 | 492  | 42718  | 1.00E-162 | 419  | 466  | 89 -  | 27  | 491  | 14911  | 15356  |
| UN43423 | Rsa1.0_03834.1 | 575  | 20572  | 1.00E-143 | 323  | 342  | 94 +  | 1   | 337  | 17673  | 18013  |
| UN43424 | Rsa1.0_00101.1 | 1009 | 267193 | 1.00E-118 | 240  | 248  | 96 +  | 617 | 864  | 121181 | 121428 |
| UN43425 | Rsa1.0_00899.1 | 901  | 60404  | 1.00E-86  | 238  | 262  | 90 -  | 71  | 329  | 51380  | 51632  |
| UN43426 | Rsa1.0_00237.1 | 1075 | 235974 | 0         | 1046 | 1110 | 94 +  | 2   | 1074 | 187736 | 188833 |
| UN43427 | Rsa1.0_24495.1 | 859  | 985    | 1.00E-140 | 274  | 281  | 97 +  | 459 | 739  | 464    | 744    |
| UN43428 | Rsa1.0_00706.1 | 779  | 291570 | 1.00E-160 | 360  | 379  | 94 +  | 4   | 378  | 20665  | 21038  |
| UN43429 | Rsa1.0_00762.1 | 529  | 165246 | 1.00E-166 | 314  | 320  | 98 +  | 80  | 399  | 28981  | 29300  |
| UN43430 | Rsa1.0_02981.1 | 895  | 26285  | 1.00E-150 | 319  | 335  | 95 +  | 91  | 421  | 4731   | 5065   |
| UN43431 | Rsa1.0_02129.1 | 908  | 34757  | 1.00E-164 | 373  | 399  | 93 -  | 373 | 753  | 5631   | 6029   |
| UN43432 | Rsa1.0_00200.1 | 1179 | 162016 | 0         | 602  | 629  | 95 -  | 1   | 628  | 108697 | 109323 |
| UN43433 | Rsa1.0_00171.1 | 847  | 115622 | 1.00E-112 | 227  | 234  | 97 +  | 19  | 252  | 1293   | 1526   |
| UN43434 | Rsa1.0_00867.1 | 664  | 61635  | 1.00E-134 | 272  | 282  | 96 -  | 381 | 662  | 61133  | 61414  |
| UN43435 | Rsa1.0_00332.1 | 697  | 94575  | 3.00E-90  | 181  | 185  | 97 -  | 347 | 531  | 61370  | 61554  |
| UN43436 | Rsa1.0_00051.1 | 761  | 258225 | 1.00E-150 | 410  | 454  | 90 -  | 226 | 652  | 118336 | 118784 |
| UN43437 | Rsa1.0_00382.1 | 813  | 251946 | 1.00E-154 | 319  | 332  | 96 +  | 1   | 332  | 173018 | 173347 |
| UN43438 | Rsa1.0_01430.1 | 1109 | 46034  | 0         | 1030 | 1116 | 92 +  | 1   | 1099 | 20146  | 21231  |
| UN43439 | Rsa1.0_00628.1 | 1177 | 214360 | 0         | 1123 | 1174 | 95 +  | 3   | 1176 | 7809   | 8978   |
| UN43440 | Rsa1.0_01952.1 | 808  | 36940  | 1.00E-157 | 311  | 321  | 96 -  | 1   | 321  | 13578  | 13893  |
| UN43441 | Rsa1.0_01884.1 | 665  | 37659  | 1.00E-122 | 272  | 285  | 95 -  | 105 | 385  | 23644  | 23923  |
| UN43442 | Rsa1.0_08642.1 | 788  | 7096   | 0         | 576  | 578  | 99 +  | 210 | 787  | 1102   | 1679   |
| UN43443 | Rsa1.0_15656.1 | 412  | 2500   | 0         | 404  | 428  | 94 +  | 1   | 412  | 570    | 997    |
| UN43444 | Rsa1.0_00228.1 | 475  | 105511 | 1.00E-159 | 284  | 284  | 100 - | 3   | 286  | 66874  | 67157  |

|         |                |      |        |           |     |      |       |      |      |        |        |
|---------|----------------|------|--------|-----------|-----|------|-------|------|------|--------|--------|
| UN43445 | Rsa1.0.01904.1 | 625  | 37450  | 0         | 591 | 622  | 95 +  | 9    | 618  | 1928   | 2548   |
| UN43446 | Rsa1.0.00900.1 | 764  | 60367  | 1.00E-113 | 272 | 292  | 93 +  | 2    | 284  | 12156  | 12446  |
| UN43447 | Rsa1.0.00127.1 | 475  | 127446 | 0         | 461 | 478  | 96 +  | 3    | 474  | 29907  | 30382  |
| UN43448 | Rsa1.0.31443.1 | 768  | 727    | 2.00E-94  | 219 | 231  | 94 +  | 1    | 228  | 479    | 709    |
| UN43449 | Rsa1.0.44070.1 | 953  | 510    | 0         | 326 | 326  | 100 - | 378  | 703  | 181    | 506    |
| UN43450 | Rsa1.0.00302.1 | 1065 | 97521  | 1.00E-105 | 268 | 290  | 92 +  | 728  | 1014 | 85022  | 85302  |
| UN43451 | Rsa1.0.06086.1 | 1161 | 11768  | 0         | 346 | 348  | 99 -  | 321  | 667  | 6768   | 7115   |
| UN43452 | Rsa1.0.01137.1 | 765  | 52655  | 1.00E-174 | 367 | 383  | 95 -  | 244  | 622  | 51348  | 51729  |
| UN43453 | Rsa1.0.00754.1 | 655  | 65689  | 1.00E-151 | 368 | 399  | 92 -  | 27   | 424  | 59897  | 60285  |
| UN43454 | Rsa1.0.01954.1 | 760  | 145554 | 1.00E-116 | 274 | 291  | 94 +  | 1    | 289  | 13012  | 13295  |
| UN43455 | Rsa1.0.00047.1 | 1014 | 168582 | 0         | 984 | 1013 | 97 +  | 1    | 1012 | 73679  | 74691  |
| UN43456 | Rsa1.0.00278.1 | 756  | 231896 | 0         | 740 | 752  | 98 -  | 3    | 754  | 183526 | 184273 |
| UN43457 | Rsa1.0.02343.1 | 930  | 32374  | 0         | 874 | 959  | 91 -  | 7    | 928  | 24172  | 25121  |
| UN43458 | Rsa1.0.00047.1 | 941  | 168582 | 1.00E-165 | 388 | 413  | 93 -  | 2    | 409  | 99362  | 99767  |
| UN43459 | Rsa1.0.00019.1 | 461  | 301669 | 2.00E-81  | 163 | 166  | 98 +  | 165  | 330  | 120142 | 120307 |
| UN43460 | Rsa1.0.00472.1 | 827  | 398134 | 0         | 790 | 827  | 95 -  | 1    | 820  | 175007 | 175832 |
| UN43461 | Rsa1.0.00002.1 | 899  | 601661 | 0         | 897 | 900  | 99 +  | 1    | 898  | 453711 | 454610 |
| UN43462 | Rsa1.0.00277.1 | 805  | 100132 | 1.00E-116 | 257 | 270  | 95 +  | 63   | 331  | 88459  | 88725  |
| UN43463 | Rsa1.0.00124.1 | 706  | 262503 | 0         | 374 | 377  | 99 +  | 10   | 385  | 83792  | 84167  |
| UN43464 | Rsa1.0.00944.1 | 830  | 58733  | 0         | 400 | 414  | 96 +  | 5    | 417  | 41332  | 41743  |
| UN43465 | Rsa1.0.00066.1 | 649  | 152418 | 0         | 605 | 628  | 96 -  | 2    | 626  | 63377  | 64004  |
| UN43466 | Rsa1.0.00178.1 | 657  | 114861 | 1.00E-155 | 344 | 365  | 94 -  | 286  | 647  | 66245  | 66605  |
| UN43467 | Rsa1.0.00469.1 | 615  | 82084  | 0         | 483 | 496  | 97 +  | 15   | 509  | 20507  | 21002  |
| UN43468 | Rsa1.0.03482.1 | 934  | 22625  | 1.00E-167 | 348 | 364  | 95 -  | 572  | 932  | 4787   | 5150   |
| UN43469 | Rsa1.0.00762.1 | 838  | 165246 | 0         | 790 | 830  | 95 -  | 2    | 817  | 22136  | 22960  |
| UN43470 | Rsa1.0.01319.1 | 933  | 48273  | 0         | 633 | 670  | 94 +  | 35   | 695  | 10934  | 11594  |
| UN43471 | Rsa1.0.02174.1 | 1312 | 34316  | 1.00E-152 | 289 | 293  | 98 +  | 1022 | 1312 | 13678  | 13970  |
| UN43472 | Rsa1.0.00119.1 | 965  | 467509 | 1.00E-150 | 299 | 306  | 97 -  | 4    | 308  | 105011 | 105315 |
| UN43473 | Rsa1.0.01414.1 | 579  | 149508 | 0         | 501 | 518  | 96 +  | 63   | 578  | 142256 | 142772 |
| UN43474 | Rsa1.0.00218.1 | 664  | 201480 | 1.00E-153 | 323 | 338  | 95 -  | 146  | 483  | 170855 | 171190 |
| UN43475 | Rsa1.0.06151.1 | 858  | 11612  | 1.00E-135 | 251 | 252  | 99 -  | 3    | 253  | 10276  | 10527  |
| UN43476 | Rsa1.0.00133.1 | 734  | 123768 | 2.00E-97  | 190 | 193  | 98 -  | 542  | 734  | 66303  | 66495  |
| UN43477 | Rsa1.0.01496.1 | 481  | 44595  | 1.00E-152 | 298 | 306  | 97 -  | 2    | 307  | 15510  | 15811  |
| UN43478 | Rsa1.0.11795.1 | 770  | 5406   | 1.00E-114 | 218 | 221  | 98 -  | 159  | 379  | 5170   | 5390   |
| UN43479 | Rsa1.0.05595.1 | 720  | 13228  | 0         | 535 | 560  | 95 -  | 32   | 587  | 5046   | 5604   |
| UN43480 | Rsa1.0.00387.1 | 672  | 495407 | 1.00E-125 | 286 | 305  | 93 +  | 238  | 539  | 394313 | 394617 |
| UN43481 | Rsa1.0.00593.1 | 680  | 143463 | 1.00E-114 | 221 | 225  | 98 +  | 232  | 456  | 55065  | 55289  |
| UN43482 | Rsa1.0.01092.1 | 768  | 54348  | 1.00E-107 | 350 | 397  | 88 -  | 350  | 722  | 7601   | 7993   |
| UN43483 | Rsa1.0.03479.1 | 722  | 22631  | 1.00E-160 | 312 | 318  | 98 -  | 404  | 720  | 9869   | 10185  |

|         |                |      |        |           |      |      |       |     |      |        |        |
|---------|----------------|------|--------|-----------|------|------|-------|-----|------|--------|--------|
| UN43484 | Rsa1.0.00564.1 | 651  | 75428  | 1.00E-126 | 230  | 230  | 100 - | 3   | 232  | 67712  | 67941  |
| UN43485 | Rsa1.0.01175.1 | 786  | 51674  | 1.00E-117 | 221  | 223  | 99 +  | 322 | 544  | 478    | 700    |
| UN43486 | Rsa1.0.02400.1 | 887  | 31750  | 0         | 685  | 689  | 99 +  | 198 | 886  | 4467   | 5153   |
| UN43487 | Rsa1.0.02785.1 | 672  | 27881  | 1.00E-135 | 257  | 261  | 98 -  | 243 | 503  | 1970   | 2230   |
| UN43488 | Rsa1.0.00810.1 | 739  | 63289  | 0         | 406  | 418  | 97 -  | 62  | 479  | 6634   | 7051   |
| UN43489 | Rsa1.0.03955.1 | 1255 | 19884  | 0         | 403  | 422  | 95 +  | 3   | 420  | 12342  | 12761  |
| UN43490 | Rsa1.0.01835.1 | 668  | 38542  | 0         | 390  | 404  | 96 -  | 257 | 656  | 24235  | 24638  |
| UN43491 | Rsa1.0.05365.1 | 1153 | 14040  | 0         | 574  | 587  | 97 -  | 4   | 590  | 11967  | 12545  |
| UN43492 | Rsa1.0.00813.1 | 837  | 63202  | 0         | 813  | 829  | 98 +  | 1   | 829  | 18486  | 19314  |
| UN43493 | Rsa1.0.00031.1 | 706  | 179862 | 0         | 653  | 714  | 91 -  | 9   | 700  | 145960 | 146673 |
| UN43494 | Rsa1.0.00007.1 | 729  | 239325 | 2.00E-91  | 198  | 207  | 95 -  | 518 | 724  | 41363  | 41569  |
| UN43495 | Rsa1.0.00217.1 | 746  | 107079 | 1.00E-116 | 215  | 216  | 99 -  | 1   | 216  | 53473  | 53688  |
| UN43496 | Rsa1.0.04022.1 | 1326 | 19534  | 0         | 442  | 456  | 96 +  | 1   | 454  | 1139   | 1594   |
| UN43497 | Rsa1.0.00347.1 | 883  | 93048  | 0         | 486  | 508  | 95 +  | 352 | 856  | 41494  | 41998  |
| UN43498 | Rsa1.0.02101.1 | 263  | 35017  | 6.00E-92  | 222  | 239  | 92 +  | 9   | 239  | 34194  | 34430  |
| UN43499 | Rsa1.0.02488.1 | 559  | 30913  | 1.00E-100 | 186  | 186  | 100 + | 1   | 186  | 28144  | 28329  |
| UN43500 | Rsa1.0.02496.1 | 701  | 30814  | 1.00E-144 | 308  | 323  | 95 +  | 7   | 329  | 14668  | 14984  |
| UN43501 | Rsa1.0.00743.1 | 613  | 177459 | 4.00E-61  | 133  | 136  | 97 -  | 231 | 365  | 613    | 748    |
| UN43502 | Rsa1.0.01010.1 | 699  | 56906  | 0         | 324  | 324  | 100 - | 374 | 697  | 15588  | 15911  |
| UN43503 | Rsa1.0.00804.1 | 762  | 63726  | 1.00E-147 | 329  | 350  | 94 +  | 22  | 368  | 59320  | 59669  |
| UN43504 | Rsa1.0.01562.1 | 935  | 43196  | 1.00E-111 | 217  | 221  | 98 -  | 713 | 933  | 7738   | 7958   |
| UN43505 | Rsa1.0.00879.1 | 689  | 61297  | 0         | 668  | 689  | 96 +  | 4   | 687  | 20664  | 21341  |
| UN43506 | Rsa1.0.00173.1 | 559  | 288743 | 1.00E-172 | 366  | 383  | 95 -  | 162 | 543  | 39208  | 39589  |
| UN43507 | Rsa1.0.00341.1 | 868  | 249309 | 1.00E-106 | 202  | 204  | 99 -  | 385 | 588  | 22152  | 22355  |
| UN43508 | Rsa1.0.03178.1 | 965  | 24798  | 1.00E-180 | 421  | 456  | 92 +  | 371 | 825  | 10971  | 11403  |
| UN43509 | Rsa1.0.01136.1 | 599  | 52724  | 1.00E-133 | 310  | 329  | 94 -  | 1   | 327  | 14179  | 14501  |
| UN43510 | Rsa1.0.01743.1 | 489  | 39926  | 0         | 459  | 485  | 94 -  | 1   | 479  | 5100   | 5578   |
| UN43511 | Rsa1.0.02377.1 | 692  | 31994  | 1.00E-103 | 237  | 252  | 94 -  | 16  | 264  | 10248  | 10499  |
| UN43512 | Rsa1.0.01092.1 | 604  | 54348  | 4.00E-64  | 148  | 155  | 95 +  | 450 | 604  | 8661   | 8812   |
| UN43513 | Rsa1.0.00589.1 | 981  | 209965 | 0         | 945  | 985  | 95 +  | 1   | 979  | 6225   | 7209   |
| UN43514 | Rsa1.0.09951.1 | 812  | 6072   | 0         | 465  | 471  | 98 +  | 5   | 475  | 2186   | 2656   |
| UN43515 | Rsa1.0.01119.1 | 586  | 53459  | 1.00E-140 | 300  | 318  | 94 -  | 213 | 530  | 42043  | 42348  |
| UN43516 | Rsa1.0.14560.1 | 675  | 3267   | 1.00E-112 | 277  | 302  | 91 +  | 13  | 314  | 1443   | 1731   |
| UN43517 | Rsa1.0.00079.1 | 709  | 606987 | 1.00E-83  | 177  | 182  | 97 +  | 3   | 184  | 40470  | 40650  |
| UN43518 | Rsa1.0.00678.1 | 708  | 193163 | 1.00E-55  | 120  | 123  | 97 -  | 391 | 513  | 166959 | 167081 |
| UN43519 | Rsa1.0.01538.1 | 531  | 43733  | 1.00E-106 | 239  | 250  | 95 +  | 35  | 284  | 38573  | 38818  |
| UN43520 | Rsa1.0.00250.1 | 854  | 273771 | 0         | 439  | 449  | 97 -  | 1   | 449  | 32014  | 32461  |
| UN43521 | Rsa1.0.03842.1 | 1032 | 20503  | 0         | 515  | 530  | 97 -  | 454 | 983  | 8299   | 8822   |
| UN43522 | Rsa1.0.00195.1 | 1767 | 251884 | 0         | 1764 | 1767 | 99 -  | 1   | 1767 | 247617 | 249383 |

|         |                |      |        |           |     |     |      |      |      |        |        |
|---------|----------------|------|--------|-----------|-----|-----|------|------|------|--------|--------|
| UN43523 | Rsa1.0.00002.1 | 603  | 601661 | 1.00E-156 | 282 | 283 | 99 + | 1    | 283  | 405977 | 406259 |
| UN43524 | Rsa1.0.12420.1 | 713  | 5230   | 1.00E-103 | 221 | 230 | 96 - | 267  | 496  | 1921   | 2143   |
| UN43525 | Rsa1.0.00173.1 | 744  | 288743 | 1.00E-89  | 186 | 192 | 96 + | 381  | 572  | 41444  | 41635  |
| UN43526 | Rsa1.0.04984.1 | 765  | 15240  | 0         | 461 | 475 | 97 + | 1    | 471  | 827    | 1301   |
| UN43527 | Rsa1.0.01194.1 | 1335 | 51113  | 0         | 676 | 689 | 98 + | 131  | 819  | 26678  | 27366  |
| UN43528 | Rsa1.0.00351.1 | 709  | 413096 | 1.00E-169 | 401 | 431 | 93 - | 75   | 500  | 268207 | 268622 |
| UN43529 | Rsa1.0.19550.1 | 801  | 1416   | 1.00E-140 | 255 | 256 | 99 + | 544  | 799  | 343    | 598    |
| UN43530 | Rsa1.0.00008.1 | 534  | 358124 | 0         | 388 | 400 | 97 - | 46   | 445  | 142943 | 143342 |
| UN43531 | Rsa1.0.00608.1 | 638  | 172672 | 1.00E-169 | 394 | 419 | 94 - | 68   | 479  | 3539   | 3956   |
| UN43532 | Rsa1.0.00056.1 | 691  | 332604 | 0         | 402 | 414 | 97 - | 4    | 411  | 1858   | 2271   |
| UN43533 | Rsa1.0.00166.1 | 861  | 240912 | 0         | 796 | 812 | 98 - | 2    | 813  | 213403 | 214214 |
| UN43534 | Rsa1.0.00282.1 | 989  | 177799 | 0         | 713 | 731 | 97 + | 269  | 987  | 139180 | 139910 |
| UN43535 | Rsa1.0.02855.1 | 970  | 27271  | 1.00E-178 | 441 | 479 | 92 - | 18   | 480  | 10770  | 11239  |
| UN43536 | Rsa1.0.00409.1 | 752  | 146788 | 0         | 606 | 630 | 96 - | 1    | 628  | 80588  | 81200  |
| UN43537 | Rsa1.0.00992.1 | 820  | 57419  | 4.00E-71  | 333 | 392 | 84 + | 26   | 408  | 21065  | 21429  |
| UN43538 | Rsa1.0.05419.1 | 823  | 13809  | 0         | 627 | 675 | 92 - | 2    | 668  | 2108   | 2777   |
| UN43539 | Rsa1.0.03261.1 | 459  | 24281  | 3.00E-95  | 204 | 213 | 95 + | 245  | 457  | 15427  | 15639  |
| UN43540 | Rsa1.0.02387.1 | 598  | 31890  | 1.00E-156 | 310 | 321 | 96 - | 3    | 315  | 17415  | 17735  |
| UN43541 | Rsa1.0.01438.1 | 618  | 45882  | 0         | 391 | 410 | 95 - | 207  | 616  | 32813  | 33216  |
| UN43542 | Rsa1.0.00879.1 | 614  | 61297  | 1.00E-101 | 270 | 291 | 92 + | 1    | 288  | 54943  | 55230  |
| UN43543 | Rsa1.0.01302.1 | 670  | 48907  | 1.00E-180 | 353 | 364 | 96 + | 194  | 557  | 4012   | 4375   |
| UN43544 | Rsa1.0.01701.1 | 662  | 162121 | 1.00E-149 | 369 | 399 | 92 - | 39   | 427  | 20185  | 20580  |
| UN43545 | Rsa1.0.02697.1 | 763  | 28595  | 1.00E-137 | 313 | 335 | 93 + | 318  | 652  | 11670  | 12004  |
| UN43546 | Rsa1.0.00179.1 | 665  | 393324 | 1.00E-171 | 377 | 397 | 94 + | 2    | 397  | 200487 | 200876 |
| UN43547 | Rsa1.0.05684.1 | 631  | 12943  | 6.00E-85  | 178 | 184 | 96 - | 46   | 229  | 12129  | 12312  |
| UN43548 | Rsa1.0.00979.1 | 802  | 57733  | 0         | 634 | 635 | 99 - | 168  | 802  | 27128  | 27762  |
| UN43549 | Rsa1.0.00841.1 | 780  | 183065 | 1.00E-119 | 239 | 245 | 97 + | 6    | 248  | 1062   | 1306   |
| UN43550 | Rsa1.0.06872.1 | 894  | 10231  | 4.00E-90  | 218 | 235 | 92 + | 470  | 701  | 1961   | 2186   |
| UN43551 | Rsa1.0.04542.1 | 479  | 16930  | 1.00E-145 | 315 | 331 | 95 - | 1    | 331  | 13253  | 13579  |
| UN43552 | Rsa1.0.03436.1 | 786  | 22958  | 1.00E-141 | 298 | 312 | 95 + | 1    | 305  | 14642  | 14952  |
| UN43553 | Rsa1.0.00180.1 | 997  | 114581 | 1.00E-138 | 275 | 281 | 97 - | 8    | 286  | 111546 | 111825 |
| UN43554 | Rsa1.0.00714.1 | 736  | 67187  | 0         | 732 | 736 | 99 - | 1    | 734  | 59820  | 60554  |
| UN43555 | Rsa1.0.00772.1 | 649  | 64856  | 0         | 382 | 394 | 96 - | 1    | 394  | 29253  | 29644  |
| UN43556 | Rsa1.0.00677.1 | 738  | 69159  | 1.00E-145 | 380 | 422 | 90 - | 3    | 412  | 17242  | 17663  |
| UN43557 | Rsa1.0.18355.1 | 587  | 1616   | 4.00E-89  | 183 | 187 | 97 - | 402  | 587  | 1168   | 1354   |
| UN43558 | Rsa1.0.00360.1 | 815  | 91190  | 0         | 501 | 512 | 97 + | 57   | 568  | 75843  | 76354  |
| UN43559 | Rsa1.0.16906.1 | 1323 | 1993   | 1.00E-66  | 142 | 146 | 97 + | 1178 | 1323 | 77     | 222    |
| UN43560 | Rsa1.0.03032.1 | 1304 | 25836  | 0         | 620 | 625 | 99 + | 2    | 626  | 23623  | 24247  |
| UN43561 | Rsa1.0.01462.1 | 362  | 45231  | 4.00E-72  | 175 | 189 | 92 + | 122  | 310  | 25547  | 25725  |

|         |                |      |        |           |     |      |       |     |      |        |        |
|---------|----------------|------|--------|-----------|-----|------|-------|-----|------|--------|--------|
| UN43562 | Rsa1.0_17344.1 | 735  | 1853   | 1.00E-116 | 225 | 229  | 98 +  | 444 | 672  | 228    | 456    |
| UN43563 | Rsa1.0_02319.1 | 756  | 32580  | 1.00E-163 | 310 | 315  | 98 -  | 1   | 314  | 19826  | 20140  |
| UN43564 | Rsa1.0_00198.1 | 1049 | 222963 | 0         | 949 | 1003 | 94 -  | 1   | 973  | 133941 | 134939 |
| UN43565 | Rsa1.0_04057.1 | 853  | 19333  | 0         | 564 | 582  | 96 +  | 272 | 853  | 18260  | 18835  |
| UN43566 | Rsa1.0_02992.1 | 833  | 26176  | 1.00E-115 | 337 | 373  | 90 +  | 23  | 390  | 1509   | 1874   |
| UN43567 | Rsa1.0_00804.1 | 739  | 63726  | 1.00E-173 | 317 | 320  | 99 +  | 418 | 737  | 59947  | 60266  |
| UN43568 | Rsa1.0_20550.1 | 977  | 1294   | 6.00E-95  | 217 | 229  | 94 +  | 1   | 228  | 620    | 848    |
| UN43569 | Rsa1.0_00128.1 | 635  | 228675 | 0         | 384 | 400  | 96 +  | 238 | 634  | 198952 | 199351 |
| UN43570 | Rsa1.0_00266.1 | 931  | 163932 | 4.00E-96  | 233 | 247  | 94 -  | 24  | 268  | 7466   | 7711   |
| UN43571 | Rsa1.0_19029.1 | 881  | 1493   | 2.00E-79  | 364 | 431  | 84 +  | 418 | 836  | 335    | 764    |
| UN43572 | Rsa1.0_01048.1 | 759  | 55684  | 8.00E-60  | 137 | 142  | 96 -  | 7   | 147  | 46755  | 46896  |
| UN43573 | Rsa1.0_00842.1 | 765  | 62493  | 4.00E-49  | 109 | 112  | 97 -  | 267 | 378  | 53906  | 54017  |
| UN43574 | Rsa1.0_01642.1 | 634  | 41772  | 1.00E-177 | 366 | 380  | 96 +  | 1   | 376  | 10421  | 10799  |
| UN43575 | Rsa1.0_06482.1 | 800  | 10937  | 0         | 431 | 457  | 94 +  | 256 | 712  | 8153   | 8598   |
| UN43576 | Rsa1.0_01581.1 | 661  | 42833  | 1.00E-157 | 297 | 302  | 98 -  | 277 | 578  | 7614   | 7915   |
| UN43577 | Rsa1.0_02144.1 | 697  | 34630  | 1.00E-178 | 346 | 356  | 97 +  | 339 | 694  | 9429   | 9784   |
| UN43578 | Rsa1.0_04806.1 | 592  | 15898  | 0         | 354 | 355  | 99 +  | 238 | 592  | 7282   | 7636   |
| UN43579 | Rsa1.0_00642.1 | 803  | 201230 | 0         | 382 | 402  | 95 +  | 12  | 413  | 156916 | 157309 |
| UN43580 | Rsa1.0_00355.1 | 902  | 92038  | 0         | 894 | 905  | 98 +  | 2   | 902  | 4962   | 5866   |
| UN43581 | Rsa1.0_02521.1 | 787  | 30562  | 1.00E-64  | 161 | 172  | 93 -  | 2   | 173  | 25380  | 25548  |
| UN43582 | Rsa1.0_00933.1 | 307  | 59164  | 8.00E-64  | 127 | 128  | 99 +  | 5   | 132  | 52223  | 52350  |
| UN43583 | Rsa1.0_00119.1 | 824  | 467509 | 1.00E-123 | 289 | 306  | 94 +  | 254 | 556  | 247326 | 247627 |
| UN43584 | Rsa1.0_00977.1 | 508  | 198001 | 0         | 441 | 475  | 92 -  | 1   | 463  | 47174  | 47648  |
| UN43585 | Rsa1.0_01247.1 | 949  | 49934  | 0         | 663 | 682  | 97 -  | 3   | 683  | 45156  | 45833  |
| UN43586 | Rsa1.0_00357.1 | 1168 | 173671 | 1.00E-163 | 323 | 333  | 96 +  | 834 | 1166 | 125400 | 125728 |
| UN43587 | Rsa1.0_00999.1 | 962  | 57162  | 1.00E-139 | 299 | 314  | 95 -  | 2   | 315  | 31755  | 32056  |
| UN43588 | Rsa1.0_01453.1 | 783  | 45449  | 0         | 719 | 739  | 97 -  | 1   | 739  | 28442  | 29178  |
| UN43589 | Rsa1.0_03769.1 | 694  | 20955  | 6.00E-76  | 294 | 344  | 85 -  | 23  | 362  | 5729   | 6040   |
| UN43590 | Rsa1.0_00007.1 | 797  | 239325 | 0         | 716 | 758  | 94 -  | 38  | 794  | 224907 | 225657 |
| UN43591 | Rsa1.0_05024.1 | 876  | 15105  | 1.00E-149 | 296 | 304  | 97 +  | 418 | 721  | 6679   | 6981   |
| UN43592 | Rsa1.0_00959.1 | 596  | 58202  | 1.00E-45  | 170 | 193  | 88 -  | 389 | 581  | 56871  | 57055  |
| UN43593 | Rsa1.0_00018.1 | 1024 | 410899 | 0         | 355 | 360  | 98 -  | 1   | 360  | 53597  | 53956  |
| UN43594 | Rsa1.0_00593.1 | 952  | 143463 | 1.00E-164 | 305 | 309  | 98 +  | 1   | 309  | 57024  | 57332  |
| UN43595 | Rsa1.0_03015.1 | 839  | 26006  | 1.00E-176 | 336 | 343  | 97 -  | 498 | 837  | 11871  | 12213  |
| UN43596 | Rsa1.0_18987.1 | 1204 | 1499   | 0         | 553 | 553  | 100 - | 652 | 1204 | 874    | 1426   |
| UN43597 | Rsa1.0_00582.1 | 797  | 74333  | 1.00E-170 | 330 | 339  | 97 -  | 457 | 795  | 49086  | 49424  |
| UN43598 | Rsa1.0_03435.1 | 699  | 22958  | 1.00E-133 | 281 | 293  | 95 -  | 85  | 376  | 20711  | 21003  |
| UN43599 | Rsa1.0_00002.1 | 575  | 601661 | 1.00E-145 | 277 | 281  | 98 +  | 24  | 303  | 140397 | 140677 |
| UN43600 | Rsa1.0_00178.1 | 750  | 114861 | 3.00E-87  | 272 | 299  | 90 -  | 17  | 309  | 67988  | 68284  |



|         |                |      |        |           |      |      |       |     |      |        |        |
|---------|----------------|------|--------|-----------|------|------|-------|-----|------|--------|--------|
| UN43601 | Rsa1.0.03722.1 | 816  | 21184  | 1.00E-108 | 300  | 331  | 90 -  | 365 | 694  | 20176  | 20495  |
| UN43602 | Rsa1.0.00240.1 | 1046 | 104175 | 0         | 553  | 616  | 89 -  | 421 | 1028 | 44006  | 44592  |
| UN43603 | Rsa1.0.00190.1 | 480  | 318240 | 1.00E-143 | 357  | 385  | 92 +  | 1   | 381  | 4028   | 4406   |
| UN43604 | Rsa1.0.02389.1 | 935  | 146428 | 1.00E-132 | 242  | 243  | 99 -  | 1   | 243  | 986    | 1228   |
| UN43605 | Rsa1.0.00596.1 | 1085 | 73578  | 1.00E-169 | 334  | 343  | 97 -  | 741 | 1083 | 9140   | 9478   |
| UN43606 | Rsa1.0.02468.1 | 676  | 31122  | 0         | 514  | 542  | 94 +  | 3   | 528  | 28520  | 29061  |
| UN43607 | Rsa1.0.00359.1 | 847  | 91256  | 0         | 630  | 639  | 98 -  | 1   | 639  | 47430  | 48068  |
| UN43608 | Rsa1.0.01126.1 | 791  | 53127  | 1.00E-174 | 467  | 521  | 89 -  | 182 | 699  | 28018  | 28511  |
| UN43609 | Rsa1.0.11019.1 | 971  | 5646   | 0         | 369  | 383  | 96 -  | 340 | 720  | 463    | 845    |
| UN43610 | Rsa1.0.06166.1 | 815  | 11583  | 1.00E-143 | 314  | 328  | 95 +  | 2   | 319  | 6768   | 7094   |
| UN43611 | Rsa1.0.00170.1 | 783  | 179538 | 0         | 759  | 790  | 96 -  | 1   | 781  | 10754  | 11541  |
| UN43612 | Rsa1.0.00119.1 | 690  | 467509 | 1.00E-164 | 319  | 325  | 98 -  | 10  | 333  | 62711  | 63034  |
| UN43613 | Rsa1.0.01600.1 | 727  | 42537  | 1.00E-153 | 347  | 365  | 95 -  | 12  | 368  | 11045  | 11406  |
| UN43614 | Rsa1.0.01240.1 | 298  | 50075  | 1.00E-141 | 290  | 300  | 96 +  | 1   | 297  | 41276  | 41574  |
| UN43615 | Rsa1.0.01877.1 | 733  | 37789  | 0         | 516  | 528  | 97 +  | 206 | 731  | 1153   | 1680   |
| UN43616 | Rsa1.0.03188.1 | 504  | 24722  | 0         | 434  | 454  | 95 +  | 2   | 455  | 1953   | 2406   |
| UN43617 | Rsa1.0.00467.1 | 483  | 156542 | 3.00E-86  | 174  | 178  | 97 +  | 71  | 248  | 87509  | 87686  |
| UN43618 | Rsa1.0.03099.1 | 961  | 139424 | 0         | 478  | 505  | 94 +  | 413 | 905  | 1853   | 2350   |
| UN43619 | Rsa1.0.05194.1 | 540  | 14536  | 0         | 533  | 536  | 99 -  | 3   | 538  | 9839   | 10373  |
| UN43620 | Rsa1.0.00070.1 | 621  | 150321 | 1.00E-132 | 313  | 336  | 93 +  | 24  | 349  | 41809  | 42144  |
| UN43621 | Rsa1.0.01660.1 | 674  | 41400  | 1.00E-115 | 273  | 292  | 93 -  | 16  | 306  | 32286  | 32573  |
| UN43622 | Rsa1.0.06454.1 | 1034 | 10987  | 1.00E-169 | 361  | 378  | 95 -  | 345 | 721  | 6219   | 6595   |
| UN43623 | Rsa1.0.08779.1 | 761  | 6929   | 1.00E-172 | 358  | 373  | 95 -  | 1   | 371  | 2962   | 3333   |
| UN43624 | Rsa1.0.00301.1 | 440  | 365315 | 0         | 424  | 446  | 95 -  | 1   | 440  | 336642 | 337082 |
| UN43625 | Rsa1.0.01377.1 | 740  | 46967  | 1.00E-86  | 193  | 202  | 95 -  | 55  | 254  | 24880  | 25081  |
| UN43626 | Rsa1.0.05605.1 | 1094 | 13202  | 1.00E-158 | 323  | 336  | 96 +  | 445 | 780  | 8690   | 9025   |
| UN43627 | Rsa1.0.05522.1 | 507  | 13441  | 2.00E-59  | 152  | 163  | 93 -  | 343 | 505  | 8277   | 8436   |
| UN43628 | Rsa1.0.05545.1 | 931  | 13379  | 0         | 864  | 927  | 93 -  | 5   | 913  | 4330   | 5238   |
| UN43629 | Rsa1.0.01149.1 | 706  | 160459 | 5.00E-64  | 205  | 227  | 90 -  | 1   | 217  | 43118  | 43338  |
| UN43630 | Rsa1.0.05425.1 | 459  | 13797  | 0         | 452  | 458  | 98 +  | 1   | 458  | 5689   | 6146   |
| UN43631 | Rsa1.0.04884.1 | 928  | 15599  | 0         | 422  | 437  | 96 -  | 1   | 437  | 9290   | 9714   |
| UN43632 | Rsa1.0.01488.1 | 453  | 44766  | 1.00E-153 | 328  | 346  | 94 +  | 120 | 450  | 4638   | 4983   |
| UN43633 | Rsa1.0.01201.1 | 1057 | 50856  | 0         | 499  | 509  | 98 -  | 363 | 871  | 45904  | 46412  |
| UN43634 | Rsa1.0.07790.1 | 805  | 8563   | 1.00E-155 | 331  | 348  | 95 -  | 1   | 345  | 1      | 348    |
| UN43635 | Rsa1.0.01691.1 | 682  | 40921  | 1.00E-153 | 278  | 279  | 99 -  | 283 | 561  | 5609   | 5887   |
| UN43636 | Rsa1.0.17847.1 | 670  | 1727   | 0         | 499  | 499  | 100 - | 3   | 501  | 739    | 1237   |
| UN43637 | Rsa1.0.02188.1 | 865  | 34104  | 0         | 809  | 840  | 96 +  | 4   | 843  | 2607   | 3445   |
| UN43638 | Rsa1.0.00175.1 | 790  | 166121 | 0         | 616  | 624  | 98 -  | 1   | 624  | 35218  | 35838  |
| UN43639 | Rsa1.0.01440.1 | 1127 | 45807  | 0         | 1072 | 1132 | 94 -  | 3   | 1122 | 7007   | 8121   |

|         |                |      |        |           |      |      |       |     |      |        |        |
|---------|----------------|------|--------|-----------|------|------|-------|-----|------|--------|--------|
| UN43640 | Rsa1.0.01462.1 | 514  | 45231  | 2.00E-62  | 164  | 177  | 92 +  | 61  | 237  | 25551  | 25725  |
| UN43641 | Rsa1.0.02064.1 | 895  | 35476  | 1.00E-178 | 320  | 321  | 99 +  | 573 | 893  | 9518   | 9838   |
| UN43642 | Rsa1.0.00048.1 | 583  | 167185 | 1.00E-111 | 342  | 388  | 88 +  | 1   | 378  | 146131 | 146498 |
| UN43643 | Rsa1.0.00231.1 | 761  | 105381 | 0         | 354  | 363  | 97 +  | 295 | 657  | 2754   | 3116   |
| UN43644 | Rsa1.0.01117.1 | 856  | 53465  | 1.00E-116 | 344  | 382  | 90 +  | 1   | 363  | 40108  | 40485  |
| UN43645 | Rsa1.0.04578.1 | 930  | 16774  | 0         | 866  | 868  | 99 -  | 3   | 870  | 2877   | 3744   |
| UN43646 | Rsa1.0.33396.1 | 485  | 679    | 1.00E-170 | 303  | 303  | 100 - | 3   | 305  | 205    | 507    |
| UN43647 | Rsa1.0.01070.1 | 557  | 55099  | 0         | 536  | 557  | 96 -  | 3   | 556  | 29903  | 30459  |
| UN43648 | Rsa1.0.01238.1 | 808  | 50120  | 0         | 722  | 723  | 99 +  | 3   | 725  | 46659  | 47381  |
| UN43649 | Rsa1.0.03141.1 | 884  | 25061  | 0         | 569  | 593  | 95 +  | 2   | 587  | 16314  | 16897  |
| UN43650 | Rsa1.0.00067.1 | 766  | 415055 | 1.00E-124 | 229  | 230  | 99 +  | 535 | 764  | 244288 | 244517 |
| UN43651 | Rsa1.0.00741.1 | 875  | 66117  | 0         | 581  | 583  | 99 -  | 1   | 583  | 61278  | 61859  |
| UN43652 | Rsa1.0.05890.1 | 712  | 12317  | 0         | 511  | 512  | 99 -  | 1   | 512  | 7143   | 7653   |
| UN43653 | Rsa1.0.00224.1 | 1064 | 327530 | 1.00E-117 | 238  | 246  | 96 -  | 792 | 1037 | 36620  | 36865  |
| UN43654 | Rsa1.0.03028.1 | 954  | 25872  | 1.00E-122 | 271  | 285  | 95 +  | 26  | 306  | 20174  | 20458  |
| UN43655 | Rsa1.0.01095.1 | 673  | 54276  | 5.00E-98  | 206  | 214  | 96 +  | 266 | 479  | 34795  | 35008  |
| UN43656 | Rsa1.0.00746.1 | 976  | 66044  | 1.00E-108 | 206  | 208  | 99 -  | 767 | 974  | 20751  | 20958  |
| UN43657 | Rsa1.0.00222.1 | 594  | 172263 | 1.00E-178 | 360  | 374  | 96 -  | 3   | 376  | 40803  | 41173  |
| UN43658 | Rsa1.0.00416.1 | 718  | 86772  | 5.00E-70  | 135  | 135  | 100 - | 231 | 365  | 38799  | 38933  |
| UN43659 | Rsa1.0.01251.1 | 525  | 49873  | 1.00E-130 | 254  | 259  | 98 -  | 3   | 260  | 7711   | 7969   |
| UN43660 | Rsa1.0.00016.1 | 661  | 831256 | 0         | 608  | 662  | 91 -  | 1   | 659  | 766949 | 767590 |
| UN43661 | Rsa1.0.00017.1 | 841  | 752458 | 1.00E-150 | 320  | 334  | 95 -  | 513 | 840  | 40835  | 41168  |
| UN43662 | Rsa1.0.02302.1 | 843  | 32823  | 0         | 819  | 842  | 97 -  | 1   | 842  | 5311   | 6143   |
| UN43663 | Rsa1.0.00797.1 | 908  | 63959  | 0         | 506  | 552  | 91 +  | 5   | 543  | 51751  | 52289  |
| UN43664 | Rsa1.0.08265.1 | 741  | 7630   | 0         | 445  | 449  | 99 +  | 2   | 450  | 6610   | 7058   |
| UN43665 | Rsa1.0.04810.1 | 535  | 15887  | 0         | 352  | 353  | 99 -  | 1   | 353  | 12553  | 12905  |
| UN43666 | Rsa1.0.00298.1 | 518  | 349131 | 2.00E-87  | 185  | 192  | 96 +  | 322 | 513  | 303630 | 303821 |
| UN43667 | Rsa1.0.03089.1 | 480  | 25465  | 1.00E-165 | 321  | 329  | 97 -  | 3   | 329  | 8781   | 9109   |
| UN43668 | Rsa1.0.00033.1 | 684  | 515811 | 6.00E-48  | 127  | 134  | 94 +  | 521 | 654  | 35164  | 35295  |
| UN43669 | Rsa1.0.28445.1 | 554  | 815    | 0         | 389  | 401  | 97 -  | 154 | 552  | 409    | 805    |
| UN43670 | Rsa1.0.00029.1 | 675  | 272992 | 1.00E-140 | 312  | 331  | 94 -  | 5   | 335  | 23298  | 23621  |
| UN43671 | Rsa1.0.00034.1 | 559  | 260119 | 1.00E-131 | 240  | 241  | 99 +  | 1   | 241  | 32939  | 33179  |
| UN43672 | Rsa1.0.01618.1 | 620  | 42118  | 1.00E-115 | 278  | 302  | 92 +  | 1   | 292  | 17286  | 17587  |
| UN43673 | Rsa1.0.02229.1 | 669  | 33672  | 3.00E-53  | 152  | 167  | 91 -  | 238 | 404  | 26114  | 26280  |
| UN43674 | Rsa1.0.01611.1 | 726  | 42269  | 1.00E-169 | 305  | 306  | 99 +  | 3   | 308  | 15232  | 15537  |
| UN43675 | Rsa1.0.00049.1 | 1071 | 167018 | 0         | 656  | 686  | 95 +  | 1   | 681  | 7061   | 7728   |
| UN43676 | Rsa1.0.03263.1 | 1107 | 24268  | 0         | 1062 | 1106 | 96 +  | 11  | 1106 | 3131   | 4232   |
| UN43677 | Rsa1.0.00564.1 | 835  | 75428  | 1.00E-111 | 267  | 283  | 94 +  | 12  | 290  | 55550  | 55830  |
| UN43678 | Rsa1.0.00009.1 | 654  | 232558 | 0         | 367  | 380  | 96 -  | 3   | 381  | 216337 | 216716 |

|         |                |      |        |           |     |     |      |     |      |        |        |
|---------|----------------|------|--------|-----------|-----|-----|------|-----|------|--------|--------|
| UN43679 | Rsa1.0.00533.1 | 620  | 77375  | 0         | 502 | 532 | 94 - | 83  | 614  | 49406  | 49937  |
| UN43680 | Rsa1.0.00369.1 | 730  | 266462 | 0         | 726 | 730 | 99 + | 1   | 730  | 146430 | 147157 |
| UN43681 | Rsa1.0.02588.1 | 688  | 29840  | 0         | 531 | 549 | 96 - | 92  | 635  | 28806  | 29354  |
| UN43682 | Rsa1.0.01610.1 | 662  | 42274  | 0         | 383 | 389 | 98 + | 1   | 384  | 11408  | 11796  |
| UN43683 | Rsa1.0_10587.1 | 743  | 5794   | 0         | 433 | 448 | 96 - | 1   | 448  | 234    | 679    |
| UN43684 | Rsa1.0_02069.1 | 615  | 35425  | 1.00E-131 | 314 | 340 | 92 + | 1   | 340  | 20702  | 21024  |
| UN43685 | Rsa1.0.02895.1 | 776  | 26979  | 5.00E-86  | 219 | 240 | 91 - | 1   | 240  | 11384  | 11607  |
| UN43686 | Rsa1.0.04153.1 | 469  | 18807  | 1.00E-140 | 301 | 316 | 95 - | 1   | 315  | 16043  | 16358  |
| UN43687 | Rsa1.0.05822.1 | 570  | 12521  | 0         | 454 | 472 | 96 + | 103 | 567  | 11655  | 12123  |
| UN43688 | Rsa1.0.27103.1 | 988  | 865    | 0         | 398 | 414 | 96 + | 372 | 785  | 1      | 414    |
| UN43689 | Rsa1.0.03107.1 | 962  | 25349  | 0         | 508 | 510 | 99 - | 2   | 511  | 13819  | 14328  |
| UN43690 | Rsa1.0.00817.1 | 609  | 62961  | 0         | 428 | 444 | 96 + | 1   | 442  | 26802  | 27243  |
| UN43691 | Rsa1.0.03615.1 | 618  | 21766  | 1.00E-180 | 326 | 328 | 99 - | 1   | 328  | 6065   | 6392   |
| UN43692 | Rsa1.0.02398.1 | 1185 | 31766  | 1.00E-151 | 423 | 475 | 89 - | 109 | 576  | 29870  | 30326  |
| UN43693 | Rsa1.0.00155.1 | 742  | 118465 | 1.00E-157 | 329 | 340 | 96 + | 404 | 741  | 96670  | 97006  |
| UN43694 | Rsa1.0.00401.1 | 980  | 244410 | 1.00E-170 | 376 | 398 | 94 + | 5   | 402  | 178052 | 178445 |
| UN43695 | Rsa1.0.00079.1 | 417  | 606987 | 2.00E-74  | 177 | 185 | 95 - | 1   | 184  | 22395  | 22576  |
| UN43696 | Rsa1.0.00592.1 | 510  | 73788  | 0         | 469 | 494 | 94 - | 21  | 510  | 21212  | 21696  |
| UN43697 | Rsa1.0.02606.1 | 797  | 29635  | 1.00E-174 | 354 | 368 | 96 + | 3   | 370  | 5867   | 6226   |
| UN43698 | Rsa1.0_13843.1 | 552  | 4225   | 1.00E-115 | 234 | 243 | 96 + | 307 | 549  | 1426   | 1660   |
| UN43699 | Rsa1.0.01857.1 | 576  | 38103  | 1.00E-157 | 373 | 401 | 93 + | 186 | 572  | 4693   | 5090   |
| UN43700 | Rsa1.0.00415.1 | 1485 | 86795  | 0         | 943 | 975 | 96 - | 392 | 1366 | 72755  | 73729  |
| UN43701 | Rsa1.0_00859.1 | 711  | 61795  | 0         | 374 | 387 | 96 - | 52  | 438  | 61329  | 61715  |
| UN43702 | Rsa1.0.00345.1 | 841  | 93226  | 1.00E-126 | 256 | 265 | 96 + | 536 | 800  | 85769  | 86033  |
| UN43703 | Rsa1.0.02720.1 | 806  | 28427  | 1.00E-125 | 254 | 263 | 96 - | 204 | 466  | 27893  | 28155  |
| UN43704 | Rsa1.0.00124.1 | 716  | 262503 | 1.00E-164 | 363 | 385 | 94 + | 2   | 386  | 16205  | 16583  |
| UN43705 | Rsa1.0.00894.1 | 646  | 269700 | 3.00E-77  | 182 | 193 | 94 + | 454 | 646  | 127219 | 127408 |
| UN43706 | Rsa1.0.03467.1 | 1070 | 22687  | 1.00E-169 | 328 | 337 | 97 + | 732 | 1068 | 13282  | 13618  |
| UN43707 | Rsa1.0.03733.1 | 789  | 21108  | 5.00E-61  | 189 | 209 | 90 - | 128 | 326  | 723    | 930    |
| UN43708 | Rsa1.0.00055.1 | 769  | 520193 | 0         | 530 | 565 | 93 + | 2   | 545  | 153884 | 154445 |
| UN43709 | Rsa1.0.01073.1 | 259  | 55030  | 8.00E-79  | 161 | 165 | 97 + | 95  | 259  | 13441  | 13605  |
| UN43710 | Rsa1.0.03892.1 | 1103 | 20221  | 1.00E-175 | 330 | 335 | 98 - | 2   | 336  | 9147   | 9480   |
| UN43711 | Rsa1.0.00828.1 | 750  | 62744  | 1.00E-101 | 206 | 212 | 97 + | 263 | 474  | 54485  | 54696  |
| UN43712 | Rsa1.0.03491.1 | 621  | 22541  | 2.00E-90  | 328 | 381 | 86 + | 183 | 563  | 9155   | 9535   |
| UN43713 | Rsa1.0.02965.1 | 773  | 26402  | 0         | 654 | 696 | 93 - | 87  | 773  | 16737  | 17422  |
| UN43714 | Rsa1.0.00828.1 | 959  | 62744  | 6.00E-86  | 183 | 190 | 96 - | 408 | 597  | 58872  | 59061  |
| UN43715 | Rsa1.0.00291.1 | 502  | 172129 | 5.00E-88  | 189 | 193 | 97 + | 1   | 193  | 17428  | 17617  |
| UN43716 | Rsa1.0.00498.1 | 881  | 79746  | 0         | 389 | 394 | 98 - | 488 | 879  | 65592  | 65985  |
| UN43717 | Rsa1.0_04786.1 | 757  | 15988  | 1.00E-114 | 252 | 265 | 95 + | 35  | 292  | 2630   | 2894   |

|         |                |      |        |           |     |     |      |     |      |        |        |
|---------|----------------|------|--------|-----------|-----|-----|------|-----|------|--------|--------|
| UN43718 | Rsa1.0.00037.1 | 943  | 307838 | 0         | 460 | 464 | 99 + | 4   | 467  | 153305 | 153768 |
| UN43719 | Rsa1.0.00079.1 | 989  | 606987 | 0         | 676 | 740 | 91 - | 2   | 727  | 488659 | 489396 |
| UN43720 | Rsa1.0.08385.1 | 838  | 7439   | 1.00E-128 | 269 | 280 | 96 + | 557 | 836  | 4331   | 4609   |
| UN43721 | Rsa1.0.05798.1 | 613  | 12600  | 0         | 553 | 577 | 95 - | 1   | 562  | 424    | 1000   |
| UN43722 | Rsa1.0.01750.1 | 847  | 39816  | 0         | 401 | 414 | 96 - | 294 | 699  | 14991  | 15402  |
| UN43723 | Rsa1.0.00356.1 | 904  | 91521  | 0         | 505 | 519 | 97 - | 1   | 517  | 5333   | 5847   |
| UN43724 | Rsa1.0.01129.1 | 884  | 52949  | 0         | 718 | 729 | 98 + | 1   | 723  | 37518  | 38246  |
| UN43725 | Rsa1.0.01806.1 | 945  | 39021  | 4.00E-96  | 185 | 187 | 98 + | 727 | 913  | 32010  | 32196  |
| UN43726 | Rsa1.0.00192.1 | 803  | 278200 | 0         | 429 | 432 | 99 - | 1   | 431  | 36748  | 37179  |
| UN43727 | Rsa1.0.00618.1 | 395  | 72195  | 1.00E-157 | 373 | 397 | 93 - | 2   | 394  | 62714  | 63099  |
| UN43728 | Rsa1.0.01796.1 | 865  | 39154  | 0         | 624 | 648 | 96 - | 136 | 780  | 16176  | 16814  |
| UN43729 | Rsa1.0.00208.1 | 772  | 108565 | 0         | 563 | 578 | 97 - | 7   | 584  | 20397  | 20973  |
| UN43730 | Rsa1.0.00453.1 | 940  | 83031  | 1.00E-176 | 596 | 689 | 86 - | 264 | 940  | 27310  | 27974  |
| UN43731 | Rsa1.0.00566.1 | 704  | 75325  | 1.00E-70  | 154 | 159 | 96 + | 477 | 635  | 38342  | 38498  |
| UN43732 | Rsa1.0.04121.1 | 634  | 18951  | 1.00E-171 | 415 | 452 | 91 + | 131 | 582  | 13877  | 14328  |
| UN43733 | Rsa1.0.01410.1 | 666  | 46345  | 1.00E-159 | 293 | 296 | 98 - | 227 | 522  | 14374  | 14669  |
| UN43734 | Rsa1.0.00058.1 | 458  | 159921 | 1.00E-115 | 298 | 322 | 92 - | 1   | 319  | 139467 | 139781 |
| UN43735 | Rsa1.0.00026.1 | 660  | 327835 | 1.00E-151 | 351 | 373 | 94 + | 1   | 366  | 209451 | 209819 |
| UN43736 | Rsa1.0.00265.1 | 1057 | 220635 | 1.00E-104 | 274 | 301 | 91 + | 1   | 287  | 146322 | 146622 |
| UN43737 | Rsa1.0.00795.1 | 956  | 64022  | 0         | 558 | 567 | 98 + | 1   | 567  | 19629  | 20194  |
| UN43738 | Rsa1.0.08902.1 | 751  | 6805   | 0         | 506 | 524 | 96 + | 228 | 751  | 4643   | 5166   |
| UN43739 | Rsa1.0.00341.1 | 1093 | 249309 | 1.00E-139 | 306 | 322 | 95 + | 4   | 322  | 125829 | 126149 |
| UN43740 | Rsa1.0.00988.1 | 1039 | 57525  | 0         | 510 | 535 | 95 + | 508 | 1037 | 50667  | 51199  |
| UN43741 | Rsa1.0.00942.1 | 391  | 58873  | 1.00E-121 | 288 | 307 | 93 - | 1   | 306  | 3175   | 3478   |
| UN43742 | Rsa1.0.00012.1 | 459  | 222148 | 1.00E-114 | 250 | 264 | 94 + | 195 | 458  | 85501  | 85764  |
| UN43743 | Rsa1.0.05155.1 | 952  | 14653  | 0         | 501 | 528 | 94 + | 343 | 861  | 9355   | 9880   |
| UN43744 | Rsa1.0.00428.1 | 431  | 85599  | 8.00E-68  | 191 | 210 | 90 + | 22  | 225  | 32148  | 32351  |
| UN43745 | Rsa1.0.00544.1 | 718  | 76787  | 0         | 699 | 726 | 96 + | 1   | 718  | 8440   | 9162   |
| UN43746 | Rsa1.0.00596.1 | 641  | 73578  | 1.00E-156 | 322 | 333 | 96 + | 3   | 334  | 29159  | 29486  |
| UN43747 | Rsa1.0.00944.1 | 552  | 58733  | 0         | 492 | 509 | 96 + | 1   | 505  | 250    | 756    |
| UN43748 | Rsa1.0.20776.1 | 561  | 1270   | 1.00E-143 | 323 | 345 | 93 - | 1   | 344  | 115    | 449    |
| UN43749 | Rsa1.0.01087.1 | 547  | 54508  | 1.00E-134 | 268 | 276 | 97 + | 1   | 276  | 23043  | 23314  |
| UN43750 | Rsa1.0.00251.1 | 843  | 303968 | 1.00E-125 | 285 | 302 | 94 - | 334 | 634  | 123095 | 123394 |
| UN43751 | Rsa1.0.01021.1 | 1085 | 56610  | 6.00E-49  | 241 | 282 | 85 - | 712 | 989  | 24758  | 25036  |
| UN43752 | Rsa1.0.00124.1 | 624  | 262503 | 1.00E-166 | 338 | 348 | 97 + | 3   | 343  | 83821  | 84167  |
| UN43753 | Rsa1.0.00821.1 | 616  | 62891  | 0         | 414 | 437 | 94 + | 58  | 493  | 5156   | 5590   |
| UN43754 | Rsa1.0.00593.1 | 554  | 143463 | 1.00E-103 | 254 | 271 | 93 + | 1   | 267  | 60961  | 61228  |
| UN43755 | Rsa1.0.01937.1 | 312  | 37147  | 1.00E-101 | 192 | 194 | 98 - | 3   | 196  | 21282  | 21475  |
| UN43756 | Rsa1.0.01583.1 | 784  | 156297 | 2.00E-60  | 149 | 159 | 93 + | 555 | 713  | 130377 | 130535 |

|         |                |      |        |           |     |     |       |     |     |        |        |
|---------|----------------|------|--------|-----------|-----|-----|-------|-----|-----|--------|--------|
| UN43757 | Rsa1.0.00185.1 | 524  | 248445 | 1.00E-51  | 119 | 124 | 95 -  | 130 | 253 | 238605 | 238728 |
| UN43758 | Rsa1.0.00330.1 | 694  | 94666  | 0         | 443 | 453 | 97 -  | 4   | 456 | 17165  | 17617  |
| UN43759 | Rsa1.0.00003.1 | 700  | 340054 | 0         | 666 | 699 | 95 +  | 2   | 697 | 136754 | 137446 |
| UN43760 | Rsa1.0.01583.1 | 876  | 156297 | 1.00E-133 | 254 | 257 | 98 -  | 37  | 293 | 114091 | 114346 |
| UN43761 | Rsa1.0.08255.1 | 780  | 7652   | 0         | 477 | 513 | 92 +  | 4   | 501 | 3749   | 4257   |
| UN43762 | Rsa1.0.00040.1 | 427  | 324196 | 2.00E-71  | 190 | 204 | 93 -  | 1   | 201 | 17921  | 18123  |
| UN43763 | Rsa1.0.02580.1 | 738  | 29909  | 0         | 710 | 746 | 95 -  | 1   | 738 | 20992  | 21728  |
| UN43764 | Rsa1.0.00657.1 | 760  | 69858  | 0         | 710 | 751 | 94 +  | 2   | 738 | 43868  | 44616  |
| UN43765 | Rsa1.0.00211.1 | 525  | 228189 | 1.00E-116 | 250 | 261 | 95 +  | 1   | 258 | 151676 | 151934 |
| UN43766 | Rsa1.0.01341.1 | 959  | 47764  | 1.00E-168 | 333 | 344 | 96 -  | 596 | 939 | 10488  | 10831  |
| UN43767 | Rsa1.0.02991.1 | 837  | 26178  | 5.00E-92  | 221 | 237 | 93 -  | 569 | 805 | 19286  | 19513  |
| UN43768 | Rsa1.0.00589.1 | 353  | 209965 | 1.00E-168 | 339 | 350 | 96 +  | 4   | 351 | 9710   | 10058  |
| UN43769 | Rsa1.0.00920.1 | 757  | 601703 | 0         | 657 | 720 | 91 +  | 20  | 731 | 441948 | 442658 |
| UN43770 | Rsa1.0.01054.1 | 488  | 55470  | 1.00E-167 | 361 | 381 | 94 -  | 4   | 374 | 26047  | 26425  |
| UN43771 | Rsa1.0.01208.1 | 923  | 50718  | 1.00E-145 | 317 | 333 | 95 +  | 3   | 334 | 30581  | 30911  |
| UN43772 | Rsa1.0.00038.1 | 533  | 314568 | 0         | 406 | 410 | 99 +  | 1   | 410 | 249354 | 249763 |
| UN43773 | Rsa1.0.01301.1 | 927  | 169072 | 0         | 490 | 491 | 99 +  | 317 | 807 | 19977  | 20467  |
| UN43774 | Rsa1.0.00254.1 | 514  | 102600 | 0         | 392 | 405 | 96 +  | 2   | 405 | 90265  | 90668  |
| UN43775 | Rsa1.0.00559.1 | 1013 | 190486 | 3.00E-63  | 410 | 499 | 82 +  | 395 | 890 | 182463 | 182958 |
| UN43776 | Rsa1.0.13747.1 | 736  | 4388   | 0         | 396 | 396 | 100 + | 1   | 396 | 2129   | 2524   |
| UN43777 | Rsa1.0.01513.1 | 1034 | 44234  | 0         | 712 | 731 | 97 +  | 1   | 730 | 2397   | 3127   |
| UN43778 | Rsa1.0.00205.1 | 605  | 193401 | 4.00E-67  | 166 | 174 | 95 +  | 1   | 172 | 79328  | 79500  |
| UN43779 | Rsa1.0.01696.1 | 996  | 301850 | 8.00E-76  | 262 | 301 | 87 -  | 151 | 451 | 8101   | 8401   |
| UN43780 | Rsa1.0.00026.1 | 693  | 327835 | 1.00E-101 | 346 | 388 | 89 +  | 282 | 648 | 174424 | 174809 |
| UN43781 | Rsa1.0.02589.1 | 881  | 300828 | 0         | 874 | 879 | 99 -  | 2   | 879 | 15642  | 16519  |
| UN43782 | Rsa1.0.01737.1 | 752  | 40101  | 1.00E-125 | 236 | 238 | 99 +  | 515 | 750 | 17336  | 17573  |
| UN43783 | Rsa1.0.00251.1 | 738  | 303968 | 2.00E-75  | 197 | 212 | 92 -  | 1   | 202 | 124151 | 124360 |
| UN43784 | Rsa1.0.00663.1 | 269  | 164969 | 8.00E-76  | 205 | 221 | 92 -  | 48  | 263 | 120787 | 121000 |
| UN43785 | Rsa1.0.00486.1 | 566  | 80875  | 1.00E-120 | 291 | 311 | 93 -  | 1   | 306 | 35708  | 36015  |
| UN43786 | Rsa1.0.03952.1 | 574  | 19891  | 0         | 421 | 423 | 99 -  | 1   | 422 | 4378   | 4800   |
| UN43787 | Rsa1.0.01294.1 | 736  | 49090  | 2.00E-60  | 125 | 127 | 98 -  | 274 | 400 | 26747  | 26873  |
| UN43788 | Rsa1.0.00394.1 | 942  | 148426 | 0         | 789 | 857 | 92 +  | 110 | 940 | 136438 | 137277 |
| UN43789 | Rsa1.0.08609.1 | 723  | 7132   | 1.00E-175 | 330 | 335 | 98 +  | 6   | 340 | 6799   | 7132   |
| UN43790 | Rsa1.0.02316.1 | 826  | 32608  | 1.00E-145 | 279 | 285 | 97 +  | 1   | 285 | 6012   | 6296   |
| UN43791 | Rsa1.0.04153.1 | 493  | 18807  | 1.00E-134 | 276 | 287 | 96 -  | 1   | 287 | 16098  | 16384  |
| UN43792 | Rsa1.0.04568.1 | 747  | 16805  | 0         | 713 | 738 | 96 +  | 10  | 747 | 4947   | 5681   |
| UN43793 | Rsa1.0.04998.1 | 663  | 15180  | 0         | 607 | 649 | 93 -  | 1   | 646 | 14289  | 14919  |
| UN43794 | Rsa1.0.01119.1 | 658  | 53459  | 0         | 540 | 574 | 94 -  | 87  | 658 | 41794  | 42348  |
| UN43795 | Rsa1.0.02681.1 | 539  | 28711  | 2.00E-66  | 147 | 153 | 96 -  | 273 | 425 | 19902  | 20054  |

|         |                |      |        |           |     |     |       |     |      |        |        |
|---------|----------------|------|--------|-----------|-----|-----|-------|-----|------|--------|--------|
| UN43796 | Rsa1.0.03161.1 | 589  | 24905  | 2.00E-93  | 207 | 218 | 94 +  | 12  | 229  | 7948   | 8165   |
| UN43797 | Rsa1.0.00270.1 | 832  | 101236 | 1.00E-156 | 318 | 334 | 95 -  | 1   | 334  | 24450  | 24768  |
| UN43798 | Rsa1.0.02626.1 | 908  | 29387  | 0         | 425 | 450 | 94 +  | 1   | 440  | 22846  | 23293  |
| UN43799 | Rsa1.0.00140.1 | 683  | 121541 | 0         | 365 | 366 | 99 +  | 210 | 575  | 61550  | 61914  |
| UN43800 | Rsa1.0.02314.1 | 573  | 32642  | 1.00E-140 | 328 | 351 | 93 +  | 3   | 349  | 14307  | 14652  |
| UN43801 | Rsa1.0.05487.1 | 1156 | 13576  | 0         | 944 | 959 | 98 -  | 196 | 1154 | 3527   | 4482   |
| UN43802 | Rsa1.0.09470.1 | 930  | 6345   | 0         | 375 | 385 | 97 -  | 217 | 598  | 1451   | 1831   |
| UN43803 | Rsa1.0.00339.1 | 1107 | 222974 | 1.00E-131 | 250 | 254 | 98 -  | 425 | 678  | 40128  | 40381  |
| UN43804 | Rsa1.0.06739.1 | 584  | 10441  | 0         | 549 | 582 | 94 +  | 1   | 582  | 6557   | 7117   |
| UN43805 | Rsa1.0.00387.1 | 592  | 495407 | 1.00E-144 | 290 | 299 | 96 +  | 4   | 301  | 250433 | 250731 |
| UN43806 | Rsa1.0.00370.1 | 885  | 90472  | 0         | 489 | 511 | 95 +  | 1   | 510  | 17834  | 18343  |
| UN43807 | Rsa1.0.11019.1 | 555  | 5646   | 1.00E-138 | 294 | 307 | 95 -  | 75  | 381  | 1      | 302    |
| UN43808 | Rsa1.0.00409.1 | 1012 | 146788 | 0         | 744 | 793 | 93 -  | 220 | 1006 | 124303 | 125092 |
| UN43809 | Rsa1.0.00991.1 | 1209 | 143101 | 0         | 406 | 422 | 96 +  | 781 | 1201 | 20055  | 20476  |
| UN43810 | Rsa1.0.01104.1 | 852  | 285480 | 0         | 507 | 526 | 96 +  | 2   | 523  | 130252 | 130777 |
| UN43811 | Rsa1.0.00159.1 | 780  | 431686 | 1.00E-52  | 124 | 130 | 95 -  | 243 | 372  | 325676 | 325805 |
| UN43812 | Rsa1.0.00654.1 | 679  | 70012  | 0         | 659 | 683 | 96 +  | 1   | 675  | 41870  | 42549  |
| UN43813 | Rsa1.0.02855.1 | 848  | 27271  | 0         | 558 | 572 | 97 -  | 2   | 573  | 10684  | 11254  |
| UN43814 | Rsa1.0.01296.1 | 481  | 49035  | 1.00E-104 | 212 | 216 | 98 -  | 29  | 244  | 13384  | 13597  |
| UN43815 | Rsa1.0.00407.1 | 708  | 191544 | 1.00E-153 | 351 | 370 | 94 +  | 3   | 370  | 155505 | 155866 |
| UN43816 | Rsa1.0.04801.1 | 675  | 15918  | 0         | 439 | 462 | 95 +  | 221 | 673  | 9295   | 9756   |
| UN43817 | Rsa1.0.03448.1 | 560  | 22844  | 1.00E-118 | 252 | 264 | 95 -  | 1   | 260  | 1263   | 1526   |
| UN43818 | Rsa1.0.03607.1 | 912  | 21817  | 1.00E-116 | 266 | 280 | 95 -  | 1   | 278  | 3946   | 4223   |
| UN43819 | Rsa1.0.00675.1 | 428  | 145590 | 1.00E-132 | 336 | 371 | 90 -  | 1   | 368  | 28833  | 29183  |
| UN43820 | Rsa1.0.04857.1 | 925  | 15703  | 0         | 613 | 628 | 97 -  | 2   | 620  | 6838   | 7465   |
| UN43821 | Rsa1.0.00746.1 | 546  | 66044  | 1.00E-132 | 274 | 284 | 96 +  | 1   | 283  | 63335  | 63614  |
| UN43822 | Rsa1.0.00646.1 | 337  | 70473  | 4.00E-78  | 191 | 202 | 94 +  | 1   | 198  | 4148   | 4348   |
| UN43823 | Rsa1.0.06630.1 | 840  | 10633  | 0         | 404 | 417 | 96 +  | 423 | 838  | 2463   | 2876   |
| UN43824 | Rsa1.0.17174.1 | 596  | 1901   | 1.00E-129 | 257 | 264 | 97 +  | 10  | 270  | 782    | 1045   |
| UN43825 | Rsa1.0.01828.1 | 755  | 38681  | 0         | 356 | 357 | 99 -  | 191 | 547  | 37120  | 37476  |
| UN43826 | Rsa1.0.01090.1 | 843  | 54385  | 0         | 540 | 581 | 92 -  | 262 | 842  | 3212   | 3776   |
| UN43827 | Rsa1.0.00414.1 | 716  | 202190 | 0         | 334 | 334 | 100 + | 1   | 334  | 185478 | 185811 |
| UN43828 | Rsa1.0.00418.1 | 518  | 215377 | 1.00E-104 | 199 | 200 | 99 +  | 1   | 199  | 201899 | 202098 |
| UN43829 | Rsa1.0.06664.1 | 867  | 10576  | 0         | 840 | 871 | 96 -  | 1   | 864  | 9192   | 10054  |
| UN43830 | Rsa1.0.11510.1 | 782  | 5482   | 0         | 477 | 483 | 98 -  | 298 | 780  | 2032   | 2514   |
| UN43831 | Rsa1.0.00879.1 | 583  | 61297  | 6.00E-94  | 261 | 288 | 90 +  | 1   | 273  | 54920  | 55207  |
| UN43832 | Rsa1.0.03971.1 | 937  | 19788  | 1.00E-138 | 312 | 326 | 95 -  | 1   | 325  | 3924   | 4245   |
| UN43833 | Rsa1.0.00772.1 | 894  | 64856  | 0         | 346 | 350 | 98 -  | 1   | 350  | 52504  | 52853  |
| UN43834 | Rsa1.0.00196.1 | 717  | 109960 | 1.00E-130 | 318 | 340 | 93 -  | 5   | 338  | 82154  | 82490  |

|         |                |      |        |           |      |      |       |     |      |        |        |
|---------|----------------|------|--------|-----------|------|------|-------|-----|------|--------|--------|
| UN43835 | Rsa1.0_00337.1 | 507  | 143174 | 1.00E-126 | 275  | 289  | 95 -  | 1   | 288  | 2366   | 2654   |
| UN43836 | Rsa1.0_00391.1 | 842  | 183853 | 0         | 483  | 522  | 92 +  | 7   | 527  | 68658  | 69163  |
| UN43837 | Rsa1.0_01637.1 | 802  | 41862  | 0         | 412  | 413  | 99 -  | 388 | 800  | 35083  | 35495  |
| UN43838 | Rsa1.0_02849.1 | 611  | 27327  | 0         | 421  | 421  | 100 + | 4   | 424  | 3454   | 3874   |
| UN43839 | Rsa1.0_00596.1 | 234  | 73578  | 3.00E-66  | 166  | 175  | 94 -  | 4   | 174  | 28929  | 29103  |
| UN43840 | Rsa1.0_00089.1 | 939  | 406142 | 0         | 521  | 531  | 98 +  | 3   | 533  | 232203 | 232733 |
| UN43841 | Rsa1.0_01435.1 | 759  | 45942  | 5.00E-95  | 207  | 216  | 95 -  | 442 | 655  | 25284  | 25499  |
| UN43842 | Rsa1.0_00753.1 | 577  | 65705  | 0         | 390  | 398  | 97 -  | 2   | 399  | 4382   | 4778   |
| UN43843 | Rsa1.0_00016.1 | 662  | 831256 | 1.00E-164 | 293  | 293  | 100 + | 294 | 586  | 543655 | 543947 |
| UN43844 | Rsa1.0_03156.1 | 739  | 24956  | 0         | 691  | 741  | 93 +  | 1   | 737  | 4617   | 5330   |
| UN43845 | Rsa1.0_00211.1 | 1072 | 228189 | 0         | 663  | 663  | 100 + | 2   | 664  | 144637 | 145299 |
| UN43846 | Rsa1.0_00370.1 | 545  | 90472  | 1.00E-48  | 149  | 164  | 90 +  | 121 | 283  | 23272  | 23426  |
| UN43847 | Rsa1.0_01360.1 | 849  | 47246  | 0         | 475  | 499  | 95 -  | 1   | 491  | 45573  | 46062  |
| UN43848 | Rsa1.0_01310.1 | 759  | 164719 | 0         | 603  | 634  | 95 -  | 3   | 634  | 138386 | 139007 |
| UN43849 | Rsa1.0_27119.1 | 719  | 865    | 0         | 436  | 445  | 97 +  | 3   | 443  | 340    | 784    |
| UN43850 | Rsa1.0_04355.1 | 498  | 146733 | 0         | 376  | 387  | 97 +  | 2   | 386  | 1834   | 2219   |
| UN43851 | Rsa1.0_08685.1 | 1225 | 7041   | 0         | 1046 | 1068 | 97 -  | 6   | 1064 | 1927   | 2993   |
| UN43852 | Rsa1.0_02302.1 | 423  | 32823  | 0         | 348  | 352  | 98 -  | 1   | 349  | 14430  | 14781  |
| UN43853 | Rsa1.0_00370.1 | 797  | 90472  | 0         | 413  | 422  | 97 +  | 3   | 422  | 8056   | 8477   |
| UN43854 | Rsa1.0_00328.1 | 644  | 224661 | 0         | 613  | 642  | 95 +  | 1   | 642  | 203111 | 203733 |
| UN43855 | Rsa1.0_08598.1 | 771  | 7143   | 0         | 521  | 532  | 97 -  | 3   | 534  | 109    | 640    |
| UN43856 | Rsa1.0_00460.1 | 643  | 206387 | 3.00E-62  | 131  | 134  | 97 -  | 412 | 545  | 187529 | 187662 |
| UN43857 | Rsa1.0_08421.1 | 867  | 7380   | 1.00E-128 | 243  | 245  | 99 -  | 622 | 865  | 2832   | 3076   |
| UN43858 | Rsa1.0_00024.1 | 1160 | 188018 | 1.00E-115 | 248  | 260  | 95 -  | 3   | 262  | 85516  | 85775  |
| UN43859 | Rsa1.0_02851.1 | 1147 | 27295  | 1.00E-126 | 288  | 302  | 95 +  | 1   | 297  | 8899   | 9196   |
| UN43860 | Rsa1.0_23866.1 | 765  | 1021   | 8.00E-57  | 116  | 117  | 99 +  | 72  | 188  | 552    | 668    |
| UN43861 | Rsa1.0_11007.1 | 641  | 5650   | 0         | 615  | 654  | 94 -  | 2   | 639  | 131    | 784    |
| UN43862 | Rsa1.0_06872.1 | 1105 | 10231  | 0         | 339  | 343  | 98 +  | 762 | 1104 | 200    | 540    |
| UN43863 | Rsa1.0_00105.1 | 493  | 134138 | 1.00E-130 | 250  | 252  | 99 +  | 1   | 251  | 116966 | 117216 |
| UN43864 | Rsa1.0_10336.1 | 683  | 5882   | 1.00E-144 | 339  | 363  | 93 +  | 293 | 655  | 4863   | 5218   |
| UN43865 | Rsa1.0_00228.1 | 850  | 105511 | 1.00E-120 | 260  | 270  | 96 -  | 581 | 848  | 37037  | 37303  |
| UN43866 | Rsa1.0_00146.1 | 516  | 149343 | 0         | 500  | 520  | 96 -  | 3   | 516  | 86606  | 87124  |
| UN43867 | Rsa1.0_00790.1 | 779  | 148693 | 0         | 703  | 730  | 96 +  | 7   | 732  | 131769 | 132498 |
| UN43868 | Rsa1.0_00940.1 | 530  | 179946 | 0         | 505  | 526  | 96 -  | 3   | 528  | 53970  | 54494  |
| UN43869 | Rsa1.0_06424.1 | 747  | 11045  | 1.00E-104 | 298  | 336  | 88 +  | 1   | 309  | 8819   | 9152   |
| UN43870 | Rsa1.0_00618.1 | 590  | 72195  | 0         | 333  | 335  | 99 -  | 3   | 337  | 2951   | 3285   |
| UN43871 | Rsa1.0_00648.1 | 662  | 70351  | 1.00E-116 | 249  | 261  | 95 -  | 2   | 262  | 22840  | 23096  |
| UN43872 | Rsa1.0_03407.1 | 1103 | 23154  | 0         | 577  | 608  | 94 +  | 496 | 1103 | 9568   | 10168  |
| UN43873 | Rsa1.0_00005.1 | 830  | 353093 | 1.00E-159 | 348  | 370  | 94 -  | 3   | 369  | 124216 | 124576 |

|         |                |      |        |           |      |      |       |     |      |        |        |
|---------|----------------|------|--------|-----------|------|------|-------|-----|------|--------|--------|
| UN43874 | Rsa1.0.01581.1 | 671  | 42833  | 1.00E-148 | 293  | 302  | 97 +  | 82  | 383  | 7614   | 7915   |
| UN43875 | Rsa1.0.00683.1 | 531  | 68638  | 0         | 488  | 504  | 96 -  | 12  | 515  | 6283   | 6786   |
| UN43876 | Rsa1.0.01835.1 | 737  | 38542  | 0         | 701  | 735  | 95 -  | 1   | 735  | 4515   | 5233   |
| UN43877 | Rsa1.0.00122.1 | 679  | 265937 | 1.00E-135 | 363  | 395  | 91 +  | 1   | 392  | 18808  | 19187  |
| UN43878 | Rsa1.0.04999.1 | 786  | 15179  | 0         | 722  | 725  | 99 -  | 61  | 784  | 1904   | 2628   |
| UN43879 | Rsa1.0.08230.1 | 898  | 7688   | 1.00E-154 | 280  | 281  | 99 -  | 1   | 281  | 5325   | 5605   |
| UN43880 | Rsa1.0.01713.1 | 1108 | 40564  | 0         | 659  | 662  | 99 +  | 2   | 661  | 26573  | 27234  |
| UN43881 | Rsa1.0.02372.1 | 590  | 32053  | 1.00E-131 | 253  | 257  | 98 -  | 332 | 588  | 7055   | 7309   |
| UN43882 | Rsa1.0.00176.1 | 828  | 240984 | 1.00E-102 | 219  | 225  | 97 -  | 6   | 226  | 186687 | 186911 |
| UN43883 | Rsa1.0.00048.1 | 1048 | 167185 | 0         | 897  | 942  | 95 -  | 110 | 1046 | 102602 | 103542 |
| UN43884 | Rsa1.0.00282.1 | 399  | 177799 | 2.00E-49  | 146  | 160  | 91 +  | 243 | 399  | 139180 | 139336 |
| UN43885 | Rsa1.0.00136.1 | 647  | 122464 | 1.00E-178 | 323  | 325  | 99 +  | 2   | 326  | 81430  | 81754  |
| UN43886 | Rsa1.0.01126.1 | 547  | 53127  | 0         | 509  | 551  | 92 -  | 8   | 546  | 28077  | 28606  |
| UN43887 | Rsa1.0.00116.1 | 1197 | 365886 | 0         | 1158 | 1205 | 96 +  | 1   | 1195 | 199694 | 200887 |
| UN43888 | Rsa1.0.00368.1 | 841  | 90669  | 0         | 517  | 533  | 96 -  | 39  | 568  | 84175  | 84707  |
| UN43889 | Rsa1.0.11936.1 | 667  | 5366   | 0         | 609  | 631  | 96 +  | 38  | 667  | 1      | 631    |
| UN43890 | Rsa1.0.02884.1 | 623  | 27034  | 0         | 416  | 437  | 95 -  | 42  | 474  | 6764   | 7198   |
| UN43891 | Rsa1.0.00037.1 | 453  | 307838 | 2.00E-65  | 130  | 131  | 99 +  | 207 | 337  | 200706 | 200836 |
| UN43892 | Rsa1.0.00759.1 | 833  | 65465  | 1.00E-168 | 332  | 343  | 96 +  | 3   | 345  | 10767  | 11109  |
| UN43893 | Rsa1.0.01466.1 | 628  | 45161  | 0         | 599  | 621  | 96 +  | 2   | 622  | 38740  | 39353  |
| UN43894 | Rsa1.0.03213.1 | 1141 | 24568  | 0         | 961  | 990  | 97 +  | 1   | 984  | 3267   | 4256   |
| UN43895 | Rsa1.0.00142.1 | 895  | 121474 | 1.00E-137 | 260  | 264  | 98 -  | 291 | 554  | 64267  | 64530  |
| UN43896 | Rsa1.0.06376.1 | 523  | 11135  | 1.00E-110 | 298  | 326  | 91 +  | 1   | 316  | 10819  | 11135  |
| UN43897 | Rsa1.0.02099.1 | 915  | 35030  | 0         | 913  | 915  | 99 +  | 1   | 914  | 17798  | 18712  |
| UN43898 | Rsa1.0.00026.1 | 706  | 327835 | 1.00E-153 | 371  | 397  | 93 -  | 314 | 706  | 209431 | 209819 |
| UN43899 | Rsa1.0.08044.1 | 571  | 8017   | 0         | 557  | 567  | 98 +  | 1   | 565  | 662    | 1228   |
| UN43900 | Rsa1.0.00079.1 | 338  | 606987 | 6.00E-99  | 239  | 262  | 91 +  | 42  | 285  | 140768 | 141029 |
| UN43901 | Rsa1.0.01647.1 | 813  | 41645  | 5.00E-95  | 180  | 181  | 99 -  | 1   | 181  | 41036  | 41216  |
| UN43902 | Rsa1.0.02928.1 | 1119 | 26680  | 0         | 434  | 438  | 99 -  | 528 | 965  | 14519  | 14956  |
| UN43903 | Rsa1.0.04218.1 | 702  | 18423  | 1.00E-110 | 319  | 350  | 91 -  | 7   | 347  | 12805  | 13146  |
| UN43904 | Rsa1.0.01754.1 | 782  | 39792  | 0         | 642  | 659  | 97 -  | 126 | 781  | 13161  | 13815  |
| UN43905 | Rsa1.0.00073.1 | 423  | 240924 | 7.00E-56  | 125  | 127  | 98 +  | 1   | 127  | 98844  | 98968  |
| UN43906 | Rsa1.0.01857.1 | 738  | 38103  | 3.00E-56  | 112  | 112  | 100 - | 297 | 408  | 7990   | 8101   |
| UN43907 | Rsa1.0.00155.1 | 982  | 118465 | 0         | 951  | 999  | 95 -  | 3   | 981  | 97311  | 98299  |
| UN43908 | Rsa1.0.01332.1 | 1219 | 47936  | 0         | 343  | 347  | 98 -  | 5   | 351  | 5385   | 5731   |
| UN43909 | Rsa1.0.02265.1 | 679  | 33233  | 0         | 358  | 359  | 99 -  | 320 | 678  | 1254   | 1612   |
| UN43910 | Rsa1.0.15675.1 | 746  | 2488   | 1.00E-108 | 205  | 207  | 99 +  | 321 | 527  | 1969   | 2175   |
| UN43911 | Rsa1.0.00375.1 | 860  | 90207  | 1.00E-147 | 282  | 288  | 97 -  | 1   | 288  | 34140  | 34427  |
| UN43912 | Rsa1.0.01167.1 | 706  | 51859  | 0         | 701  | 703  | 99 +  | 3   | 704  | 48979  | 49681  |



|         |                |      |        |           |      |      |       |     |      |        |        |
|---------|----------------|------|--------|-----------|------|------|-------|-----|------|--------|--------|
| UN43913 | Rsa1.0.01065.1 | 415  | 55264  | 0         | 408  | 415  | 98 -  | 1   | 414  | 47011  | 47425  |
| UN43914 | Rsa1.0.00782.1 | 529  | 64468  | 3.00E-52  | 111  | 113  | 98 -  | 264 | 376  | 14970  | 15082  |
| UN43915 | Rsa1.0.01929.1 | 756  | 37191  | 0         | 595  | 637  | 93 +  | 17  | 651  | 27590  | 28215  |
| UN43916 | Rsa1.0.04524.1 | 628  | 16981  | 2.00E-26  | 86   | 94   | 91 -  | 205 | 298  | 16643  | 16736  |
| UN43917 | Rsa1.0.00682.1 | 589  | 68680  | 1.00E-140 | 253  | 253  | 100 + | 1   | 253  | 36438  | 36690  |
| UN43918 | Rsa1.0.00376.1 | 957  | 90101  | 0         | 330  | 333  | 99 +  | 623 | 955  | 17667  | 17999  |
| UN43919 | Rsa1.0.00016.1 | 745  | 831256 | 0         | 693  | 723  | 95 +  | 3   | 717  | 505359 | 506074 |
| UN43920 | Rsa1.0.00710.1 | 534  | 67325  | 1.00E-126 | 270  | 281  | 96 +  | 27  | 306  | 65840  | 66119  |
| UN43921 | Rsa1.0.00308.1 | 749  | 96915  | 1.00E-151 | 361  | 393  | 91 -  | 25  | 416  | 81326  | 81698  |
| UN43922 | Rsa1.0.00351.1 | 728  | 413096 | 1.00E-172 | 347  | 360  | 96 -  | 98  | 457  | 198749 | 199105 |
| UN43923 | Rsa1.0.00389.1 | 867  | 88795  | 4.00E-96  | 197  | 203  | 97 -  | 663 | 865  | 74105  | 74307  |
| UN43924 | Rsa1.0.03943.1 | 902  | 19931  | 0         | 655  | 658  | 99 +  | 1   | 657  | 4678   | 5334   |
| UN43925 | Rsa1.0.00026.1 | 799  | 327835 | 0         | 619  | 632  | 97 +  | 76  | 707  | 25861  | 26492  |
| UN43926 | Rsa1.0.00251.1 | 471  | 303968 | 1.00E-112 | 261  | 276  | 94 -  | 2   | 273  | 147199 | 147469 |
| UN43927 | Rsa1.0.03781.1 | 711  | 20891  | 0         | 421  | 447  | 94 +  | 10  | 452  | 5119   | 5562   |
| UN43928 | Rsa1.0.00105.1 | 554  | 134138 | 0         | 525  | 552  | 95 -  | 1   | 545  | 81170  | 81720  |
| UN43929 | Rsa1.0.04235.1 | 1067 | 18373  | 0         | 396  | 398  | 99 +  | 668 | 1065 | 7648   | 8045   |
| UN43930 | Rsa1.0.01180.1 | 794  | 51517  | 1.00E-125 | 239  | 243  | 98 +  | 1   | 243  | 30306  | 30548  |
| UN43931 | Rsa1.0.00320.1 | 886  | 95784  | 1.00E-139 | 264  | 268  | 98 -  | 614 | 881  | 59045  | 59312  |
| UN43932 | Rsa1.0.00079.1 | 440  | 606987 | 0         | 396  | 418  | 94 +  | 1   | 404  | 140612 | 141029 |
| UN43933 | Rsa1.0.56363.1 | 641  | 406    | 0         | 345  | 352  | 98 +  | 1   | 352  | 13     | 364    |
| UN43934 | Rsa1.0.00539.1 | 801  | 76926  | 1.00E-151 | 281  | 284  | 98 +  | 516 | 799  | 57963  | 58246  |
| UN43935 | Rsa1.0.04200.1 | 862  | 18490  | 0         | 350  | 358  | 97 +  | 503 | 860  | 2813   | 3170   |
| UN43936 | Rsa1.0.03566.1 | 1299 | 22050  | 0         | 1289 | 1299 | 99 +  | 1   | 1299 | 15974  | 17272  |
| UN43937 | Rsa1.0.02223.1 | 596  | 152421 | 1.00E-104 | 260  | 283  | 91 -  | 3   | 275  | 129665 | 129945 |
| UN43938 | Rsa1.0.01941.1 | 484  | 37069  | 0         | 397  | 403  | 98 -  | 2   | 404  | 11479  | 11881  |
| UN43939 | Rsa1.0.01835.1 | 741  | 38542  | 1.00E-128 | 313  | 334  | 93 +  | 22  | 350  | 24246  | 24576  |
| UN43940 | Rsa1.0.00046.1 | 757  | 320315 | 0         | 542  | 542  | 100 - | 1   | 542  | 80028  | 80569  |
| UN43941 | Rsa1.0.03140.1 | 338  | 25081  | 1.00E-163 | 309  | 313  | 98 -  | 1   | 311  | 12499  | 12809  |
| UN43942 | Rsa1.0.03107.1 | 982  | 25349  | 0         | 429  | 446  | 96 +  | 5   | 450  | 12860  | 13305  |
| UN43943 | Rsa1.0.00684.1 | 444  | 141701 | 1.00E-127 | 233  | 234  | 99 -  | 2   | 235  | 32546  | 32779  |
| UN43944 | Rsa1.0.04761.1 | 790  | 16103  | 1.00E-122 | 259  | 271  | 95 +  | 461 | 731  | 9186   | 9456   |
| UN43945 | Rsa1.0.00115.1 | 481  | 131321 | 1.00E-131 | 247  | 250  | 98 +  | 4   | 253  | 49343  | 49592  |
| UN43946 | Rsa1.0.00543.1 | 711  | 76788  | 0         | 656  | 662  | 99 -  | 1   | 660  | 35876  | 36537  |
| UN43947 | Rsa1.0.00662.1 | 973  | 192183 | 6.00E-83  | 198  | 210  | 94 +  | 73  | 277  | 8051   | 8260   |
| UN43948 | Rsa1.0.02265.1 | 877  | 33233  | 0         | 877  | 877  | 100 + | 1   | 877  | 15641  | 16517  |
| UN43949 | Rsa1.0.00181.1 | 386  | 114269 | 0         | 342  | 342  | 100 + | 1   | 342  | 92836  | 93177  |
| UN43950 | Rsa1.0.00579.1 | 455  | 148308 | 1.00E-121 | 244  | 253  | 96 -  | 1   | 253  | 63387  | 63631  |
| UN43951 | Rsa1.0.02428.1 | 822  | 31542  | 1.00E-174 | 313  | 314  | 99 +  | 2   | 315  | 25277  | 25590  |

|         |                |      |        |           |     |     |      |     |      |        |        |
|---------|----------------|------|--------|-----------|-----|-----|------|-----|------|--------|--------|
| UN43952 | Rsa1.0.05049.1 | 753  | 15025  | 1.00E-153 | 277 | 278 | 99 - | 474 | 751  | 3284   | 3561   |
| UN43953 | Rsa1.0.00678.1 | 609  | 193163 | 1.00E-67  | 134 | 135 | 99 - | 355 | 489  | 23509  | 23643  |
| UN43954 | Rsa1.0.04140.1 | 616  | 18879  | 0         | 334 | 335 | 99 - | 3   | 337  | 4568   | 4902   |
| UN43955 | Rsa1.0.00066.1 | 625  | 152418 | 0         | 609 | 625 | 97 - | 2   | 621  | 63360  | 63983  |
| UN43956 | Rsa1.0.00034.1 | 1176 | 260119 | 0         | 592 | 604 | 98 + | 2   | 605  | 1458   | 2061   |
| UN43957 | Rsa1.0.00317.1 | 1146 | 218290 | 0         | 936 | 954 | 98 + | 194 | 1144 | 10951  | 11901  |
| UN43958 | Rsa1.0.00006.1 | 892  | 396176 | 0         | 876 | 893 | 98 - | 1   | 890  | 296014 | 296898 |
| UN43959 | Rsa1.0.00991.1 | 1226 | 143101 | 0         | 524 | 552 | 94 - | 1   | 546  | 34643  | 35186  |
| UN43960 | Rsa1.0.00104.1 | 519  | 368722 | 0         | 514 | 517 | 99 - | 1   | 517  | 3962   | 4478   |
| UN43961 | Rsa1.0.03284.1 | 866  | 24069  | 0         | 396 | 408 | 97 + | 11  | 418  | 18443  | 18847  |
| UN43962 | Rsa1.0.02516.1 | 886  | 30608  | 1.00E-103 | 254 | 272 | 93 - | 7   | 274  | 1723   | 1992   |
| UN43963 | Rsa1.0.01387.1 | 677  | 46745  | 3.00E-99  | 242 | 263 | 92 + | 10  | 253  | 2620   | 2881   |
| UN43964 | Rsa1.0.01452.1 | 796  | 45459  | 3.00E-99  | 199 | 204 | 97 - | 251 | 454  | 39336  | 39539  |
| UN43965 | Rsa1.0.00022.1 | 805  | 200461 | 0         | 776 | 820 | 94 + | 1   | 805  | 189648 | 190457 |
| UN43966 | Rsa1.0.00028.1 | 784  | 293984 | 0         | 546 | 553 | 98 - | 1   | 553  | 32387  | 32939  |
| UN43967 | Rsa1.0.01440.1 | 286  | 45807  | 1.00E-135 | 246 | 247 | 99 + | 2   | 248  | 5982   | 6228   |
| UN43968 | Rsa1.0.04845.1 | 441  | 15747  | 1.00E-94  | 211 | 219 | 96 - | 13  | 227  | 6110   | 6328   |
| UN43969 | Rsa1.0.00182.1 | 951  | 142305 | 0         | 451 | 470 | 95 + | 2   | 463  | 131695 | 132156 |
| UN43970 | Rsa1.0.00107.1 | 676  | 431659 | 0         | 353 | 357 | 98 + | 2   | 358  | 41694  | 42047  |
| UN43971 | Rsa1.0.00187.1 | 774  | 393093 | 1.00E-113 | 214 | 216 | 99 + | 439 | 654  | 212599 | 212814 |
| UN43972 | Rsa1.0.00301.1 | 610  | 365315 | 0         | 387 | 393 | 98 + | 218 | 610  | 321028 | 321420 |
| UN43973 | Rsa1.0.00554.1 | 599  | 150953 | 1.00E-95  | 231 | 245 | 94 - | 4   | 240  | 121603 | 121846 |
| UN43974 | Rsa1.0.00211.1 | 848  | 228189 | 0         | 388 | 390 | 99 + | 1   | 390  | 129494 | 129883 |
| UN43975 | Rsa1.0.06501.1 | 741  | 10886  | 5.00E-18  | 51  | 52  | 98 - | 432 | 483  | 10827  | 10878  |
| UN43976 | Rsa1.0.03520.1 | 444  | 22327  | 1.00E-108 | 275 | 299 | 91 + | 145 | 443  | 10242  | 10539  |
| UN43977 | Rsa1.0.01355.1 | 710  | 47303  | 0         | 540 | 583 | 92 - | 138 | 708  | 39411  | 39993  |
| UN43978 | Rsa1.0.37374.1 | 708  | 603    | 1.00E-169 | 320 | 326 | 98 + | 375 | 700  | 1      | 326    |
| UN43979 | Rsa1.0.00100.1 | 940  | 249232 | 0         | 390 | 405 | 96 + | 451 | 855  | 221841 | 222245 |
| UN43980 | Rsa1.0.05049.1 | 490  | 15025  | 0         | 476 | 487 | 97 - | 1   | 487  | 11949  | 12434  |
| UN43981 | Rsa1.0.02836.1 | 727  | 27481  | 1.00E-147 | 278 | 281 | 98 + | 1   | 281  | 12896  | 13175  |
| UN43982 | Rsa1.0.01097.1 | 548  | 173349 | 3.00E-89  | 195 | 201 | 97 + | 9   | 209  | 8582   | 8777   |
| UN43983 | Rsa1.0.00492.1 | 821  | 80178  | 0         | 408 | 421 | 96 - | 398 | 818  | 64992  | 65409  |
| UN43984 | Rsa1.0.09321.1 | 801  | 6456   | 0         | 505 | 506 | 99 + | 2   | 506  | 4590   | 5095   |
| UN43985 | Rsa1.0.02355.1 | 670  | 32260  | 0         | 355 | 361 | 98 + | 57  | 417  | 16689  | 17049  |
| UN43986 | Rsa1.0.00577.1 | 699  | 174827 | 1.00E-105 | 200 | 202 | 99 + | 438 | 639  | 117949 | 118150 |
| UN43987 | Rsa1.0.00173.1 | 901  | 288743 | 0         | 664 | 671 | 98 + | 212 | 881  | 282465 | 283135 |
| UN43988 | Rsa1.0.02355.1 | 741  | 32260  | 0         | 367 | 371 | 98 - | 248 | 617  | 16686  | 17056  |
| UN43989 | Rsa1.0.00525.1 | 947  | 78030  | 1.00E-151 | 274 | 275 | 99 - | 503 | 777  | 25800  | 26074  |
| UN43990 | Rsa1.0.04353.1 | 675  | 138437 | 4.00E-52  | 108 | 109 | 99 - | 155 | 263  | 132460 | 132568 |

|         |                |      |        |           |     |     |       |     |      |        |        |
|---------|----------------|------|--------|-----------|-----|-----|-------|-----|------|--------|--------|
| UN43991 | Rsa1.0_00273.1 | 751  | 326186 | 1.00E-145 | 291 | 301 | 96 +  | 1   | 301  | 46035  | 46335  |
| UN43992 | Rsa1.0_00141.1 | 739  | 121494 | 0         | 432 | 457 | 94 +  | 1   | 457  | 82262  | 82714  |
| UN43993 | Rsa1.0_04214.1 | 636  | 18437  | 9.00E-50  | 182 | 208 | 87 -  | 352 | 559  | 3247   | 3452   |
| UN43994 | Rsa1.0_00736.1 | 754  | 66455  | 1.00E-175 | 335 | 343 | 97 -  | 174 | 516  | 6494   | 6836   |
| UN43995 | Rsa1.0_00377.1 | 805  | 90038  | 1.00E-144 | 304 | 318 | 95 +  | 3   | 317  | 10257  | 10574  |
| UN43996 | Rsa1.0_00215.1 | 785  | 201775 | 0         | 406 | 432 | 93 +  | 346 | 776  | 24023  | 24441  |
| UN43997 | Rsa1.0_08338.1 | 706  | 7511   | 1.00E-122 | 256 | 266 | 96 -  | 252 | 516  | 1645   | 1910   |
| UN43998 | Rsa1.0_00192.1 | 549  | 278200 | 0         | 486 | 513 | 94 -  | 46  | 547  | 18342  | 18853  |
| UN43999 | Rsa1.0_00087.1 | 380  | 761073 | 0         | 375 | 376 | 99 -  | 1   | 376  | 565228 | 565603 |
| UN44000 | Rsa1.0_00387.1 | 595  | 495407 | 0         | 363 | 365 | 99 +  | 2   | 365  | 250462 | 250826 |
| UN44001 | Rsa1.0_00790.1 | 1089 | 148693 | 0         | 731 | 731 | 100 + | 1   | 731  | 131768 | 132498 |
| UN44002 | Rsa1.0_01466.1 | 471  | 45161  | 0         | 470 | 470 | 100 + | 1   | 470  | 23951  | 24420  |
| UN44003 | Rsa1.0_00715.1 | 576  | 67116  | 0         | 574 | 574 | 100 - | 1   | 574  | 63615  | 64188  |
| UN44004 | Rsa1.0_00073.1 | 932  | 240924 | 0         | 396 | 400 | 99 +  | 228 | 627  | 97926  | 98325  |
| UN44005 | Rsa1.0_00278.1 | 701  | 231896 | 0         | 691 | 707 | 97 -  | 2   | 699  | 183526 | 184232 |
| UN44006 | Rsa1.0_00284.1 | 1496 | 323267 | 0         | 861 | 892 | 96 -  | 336 | 1215 | 316783 | 317674 |
| UN44007 | Rsa1.0_01876.1 | 460  | 37800  | 1.00E-51  | 171 | 192 | 89 -  | 260 | 451  | 12033  | 12223  |
| UN44008 | Rsa1.0_01509.1 | 810  | 44258  | 0         | 449 | 467 | 96 -  | 1   | 464  | 16019  | 16482  |
| UN44009 | Rsa1.0_01363.1 | 889  | 47195  | 1.00E-133 | 261 | 266 | 98 -  | 225 | 489  | 21977  | 22242  |
| UN44010 | Rsa1.0_00215.1 | 539  | 201775 | 1.00E-171 | 312 | 313 | 99 -  | 1   | 313  | 2172   | 2483   |
| UN44011 | Rsa1.0_09236.1 | 966  | 6540   | 1.00E-178 | 320 | 321 | 99 -  | 339 | 659  | 5496   | 5816   |
| UN44012 | Rsa1.0_18393.1 | 596  | 1607   | 1.00E-106 | 218 | 225 | 96 -  | 1   | 225  | 111    | 332    |
| UN44013 | Rsa1.0_00208.1 | 800  | 108565 | 0         | 795 | 810 | 98 +  | 1   | 798  | 2670   | 3479   |
| UN44014 | Rsa1.0_00089.1 | 783  | 406142 | 0         | 378 | 378 | 100 + | 1   | 378  | 179377 | 179754 |
| UN44015 | Rsa1.0_00097.1 | 609  | 138858 | 0         | 602 | 603 | 99 -  | 3   | 605  | 123374 | 123976 |
| UN44016 | Rsa1.0_02681.1 | 777  | 28711  | 0         | 616 | 625 | 98 +  | 2   | 624  | 12431  | 13055  |
| UN44017 | Rsa1.0_00383.1 | 1155 | 398431 | 1.00E-175 | 321 | 324 | 99 -  | 3   | 326  | 3111   | 3434   |
| UN44018 | Rsa1.0_00070.1 | 838  | 150321 | 1.00E-156 | 315 | 323 | 97 +  | 1   | 323  | 59108  | 59427  |
| UN44019 | Rsa1.0_00571.1 | 579  | 329018 | 0         | 475 | 476 | 99 +  | 1   | 476  | 204948 | 205423 |
| UN44020 | Rsa1.0_01778.1 | 565  | 39509  | 0         | 562 | 563 | 99 +  | 1   | 563  | 17606  | 18168  |
| UN44021 | Rsa1.0_00744.1 | 692  | 66084  | 0         | 420 | 420 | 100 + | 1   | 420  | 56497  | 56916  |
| UN44022 | Rsa1.0_00619.1 | 567  | 71985  | 4.00E-67  | 196 | 216 | 90 +  | 40  | 251  | 69858  | 70073  |
| UN44023 | Rsa1.0_00069.1 | 762  | 403561 | 0         | 338 | 339 | 99 +  | 261 | 599  | 68758  | 69096  |
| UN44024 | Rsa1.0_02534.1 | 732  | 30396  | 1.00E-139 | 254 | 255 | 99 +  | 1   | 255  | 2956   | 3210   |
| UN44025 | Rsa1.0_07149.1 | 798  | 9824   | 0         | 422 | 436 | 96 +  | 1   | 427  | 810    | 1245   |
| UN44026 | Rsa1.0_29006.1 | 816  | 796    | 1.00E-145 | 270 | 273 | 98 +  | 237 | 509  | 41     | 313    |
| UN44027 | Rsa1.0_51383.1 | 855  | 442    | 1.00E-176 | 360 | 372 | 96 +  | 474 | 841  | 71     | 442    |
| UN44028 | Rsa1.0_01198.1 | 210  | 51029  | 1.00E-89  | 195 | 203 | 96 +  | 8   | 210  | 21077  | 21278  |
| UN44029 | Rsa1.0_03884.1 | 1144 | 20274  | 0         | 446 | 480 | 92 -  | 1   | 480  | 19654  | 20113  |

|         |                |      |        |           |     |     |       |     |     |        |        |
|---------|----------------|------|--------|-----------|-----|-----|-------|-----|-----|--------|--------|
| UN44030 | Rsa1.0_17354.1 | 558  | 1851   | 1.00E-144 | 285 | 291 | 97 +  | 131 | 419 | 420    | 710    |
| UN44031 | Rsa1.0_02358.1 | 947  | 32213  | 0         | 373 | 386 | 96 -  | 562 | 943 | 9784   | 10169  |
| UN44032 | Rsa1.0_03418.1 | 846  | 147293 | 1.00E-143 | 258 | 258 | 100 + | 3   | 260 | 10080  | 10337  |
| UN44033 | Rsa1.0_00863.1 | 604  | 254535 | 1.00E-61  | 220 | 248 | 88 +  | 3   | 242 | 110411 | 110656 |
| UN44034 | Rsa1.0_04714.1 | 759  | 146738 | 0         | 714 | 757 | 94 +  | 1   | 757 | 143499 | 144238 |
| UN44035 | Rsa1.0_04200.1 | 770  | 18490  | 0         | 472 | 492 | 95 +  | 1   | 492 | 2217   | 2707   |
| UN44036 | Rsa1.0_00017.1 | 816  | 752458 | 1.00E-74  | 164 | 171 | 95 -  | 646 | 816 | 514888 | 515058 |
| UN44037 | Rsa1.0_04714.1 | 791  | 146738 | 0         | 507 | 536 | 94 -  | 46  | 572 | 139509 | 140037 |
| UN44038 | Rsa1.0_00324.1 | 480  | 218805 | 1.00E-180 | 340 | 346 | 98 -  | 1   | 346 | 182824 | 183167 |
| UN44039 | Rsa1.0_01397.1 | 715  | 183276 | 1.00E-143 | 333 | 360 | 92 -  | 5   | 364 | 172580 | 172923 |
| UN44040 | Rsa1.0_01650.1 | 707  | 41589  | 1.00E-119 | 238 | 244 | 97 +  | 256 | 499 | 7077   | 7318   |
| UN44041 | Rsa1.0_00016.1 | 690  | 831256 | 0         | 500 | 544 | 91 -  | 61  | 590 | 773029 | 773570 |
| UN44042 | Rsa1.0_00334.1 | 962  | 94445  | 0         | 411 | 415 | 99 +  | 1   | 415 | 15197  | 15611  |
| UN44043 | Rsa1.0_02400.1 | 692  | 31750  | 0         | 674 | 678 | 99 -  | 16  | 691 | 9236   | 9913   |
| UN44044 | Rsa1.0_05453.1 | 638  | 13696  | 1.00E-162 | 308 | 313 | 98 +  | 1   | 312 | 11908  | 12220  |
| UN44045 | Rsa1.0_00303.1 | 464  | 97468  | 0         | 457 | 464 | 98 -  | 1   | 462 | 71122  | 71583  |
| UN44046 | Rsa1.0_01239.1 | 839  | 50107  | 0         | 386 | 398 | 96 -  | 13  | 410 | 18949  | 19340  |
| UN44047 | Rsa1.0_01341.1 | 874  | 47764  | 1.00E-170 | 328 | 334 | 98 +  | 1   | 331 | 43210  | 43543  |
| UN44048 | Rsa1.0_08286.1 | 751  | 7605   | 0         | 701 | 764 | 91 -  | 2   | 748 | 4490   | 5240   |
| UN44049 | Rsa1.0_01882.1 | 790  | 37697  | 0         | 750 | 798 | 93 -  | 9   | 788 | 10961  | 11755  |
| UN44050 | Rsa1.0_00502.1 | 568  | 204180 | 0         | 549 | 566 | 96 +  | 1   | 566 | 55506  | 56060  |
| UN44051 | Rsa1.0_00015.1 | 687  | 561803 | 1.00E-166 | 363 | 381 | 95 +  | 1   | 375 | 478353 | 478732 |
| UN44052 | Rsa1.0_01949.1 | 972  | 36960  | 1.00E-120 | 231 | 235 | 98 +  | 2   | 236 | 16850  | 17084  |
| UN44053 | Rsa1.0_32651.1 | 676  | 697    | 1.00E-109 | 210 | 213 | 98 +  | 10  | 222 | 265    | 477    |
| UN44054 | Rsa1.0_00494.1 | 494  | 79967  | 0         | 469 | 507 | 92 -  | 3   | 494 | 3794   | 4296   |
| UN44055 | Rsa1.0_00398.1 | 1144 | 88007  | 0         | 601 | 632 | 95 +  | 45  | 674 | 70745  | 71370  |
| UN44056 | Rsa1.0_00302.1 | 756  | 97521  | 0         | 741 | 754 | 98 -  | 3   | 756 | 87782  | 88535  |
| UN44057 | Rsa1.0_20960.1 | 545  | 1250   | 1.00E-131 | 264 | 272 | 97 -  | 234 | 502 | 542    | 813    |
| UN44058 | Rsa1.0_04355.1 | 546  | 146733 | 0         | 401 | 414 | 96 +  | 13  | 426 | 1806   | 2219   |
| UN44059 | Rsa1.0_02196.1 | 957  | 34005  | 0         | 724 | 725 | 99 -  | 233 | 957 | 25512  | 26236  |
| UN44060 | Rsa1.0_01712.1 | 917  | 154210 | 1.00E-114 | 225 | 230 | 97 +  | 431 | 660 | 3261   | 3490   |
| UN44061 | Rsa1.0_00337.1 | 706  | 143174 | 0         | 705 | 706 | 99 -  | 1   | 706 | 139978 | 140683 |
| UN44062 | Rsa1.0_09775.1 | 611  | 6156   | 1.00E-152 | 275 | 276 | 99 -  | 4   | 279 | 5613   | 5888   |
| UN44063 | Rsa1.0_08356.1 | 619  | 7485   | 2.33E-156 | 266 | 267 | 99 +  | 1   | 267 | 5125   | 5391   |
| UN44064 | Rsa1.0_00252.1 | 604  | 102760 | 0         | 591 | 601 | 98 +  | 2   | 602 | 745    | 1344   |
| UN44065 | Rsa1.0_01405.1 | 806  | 46445  | 0         | 410 | 424 | 96 +  | 1   | 422 | 37009  | 37432  |
| UN44066 | Rsa1.0_02455.1 | 788  | 31262  | 0         | 465 | 493 | 94 -  | 1   | 473 | 25408  | 25900  |
| UN44067 | Rsa1.0_00246.1 | 1015 | 103541 | 0         | 387 | 387 | 100 + | 2   | 388 | 942    | 1328   |
| UN44068 | Rsa1.0_15363.1 | 616  | 2655   | 0         | 612 | 614 | 99 -  | 1   | 614 | 1688   | 2301   |

|         |                |      |        |           |      |      |       |     |      |        |        |
|---------|----------------|------|--------|-----------|------|------|-------|-----|------|--------|--------|
| UN44069 | Rsa1.0.02666.1 | 1039 | 28915  | 1.00E-123 | 245  | 252  | 97 -  | 318 | 569  | 24244  | 24495  |
| UN44070 | Rsa1.0.01249.1 | 722  | 188432 | 1.00E-125 | 265  | 275  | 96 -  | 66  | 340  | 40576  | 40848  |
| UN44071 | Rsa1.0.00022.1 | 744  | 200461 | 1.00E-155 | 348  | 368  | 94 +  | 10  | 373  | 40149  | 40515  |
| UN44072 | Rsa1.0.00800.1 | 552  | 63868  | 1.00E-117 | 220  | 222  | 99 +  | 329 | 550  | 19924  | 20145  |
| UN44073 | Rsa1.0.02895.1 | 741  | 26979  | 8.00E-94  | 216  | 229  | 94 -  | 3   | 228  | 11384  | 11612  |
| UN44074 | Rsa1.0.03518.1 | 1165 | 22337  | 0         | 592  | 611  | 96 +  | 559 | 1163 | 1348   | 1958   |
| UN44075 | Rsa1.0.00251.1 | 483  | 303968 | 2.00E-96  | 252  | 272  | 92 -  | 1   | 271  | 128883 | 129148 |
| UN44076 | Rsa1.0.10720.1 | 786  | 5746   | 0         | 328  | 329  | 99 +  | 1   | 329  | 5418   | 5746   |
| UN44077 | Rsa1.0.04218.1 | 442  | 18423  | 1.00E-72  | 139  | 139  | 100 + | 230 | 368  | 14295  | 14433  |
| UN44078 | Rsa1.0.00054.1 | 1047 | 162053 | 0         | 1039 | 1045 | 99 -  | 2   | 1045 | 33741  | 34785  |
| UN44079 | Rsa1.0.04025.1 | 890  | 19511  | 0         | 354  | 361  | 98 +  | 2   | 356  | 11904  | 12264  |
| UN44080 | Rsa1.0.00790.1 | 1021 | 148693 | 0         | 515  | 540  | 95 -  | 483 | 1021 | 135029 | 135553 |
| UN44081 | Rsa1.0.03981.1 | 840  | 19724  | 1.00E-164 | 374  | 396  | 94 -  | 1   | 396  | 2255   | 2640   |
| UN44082 | Rsa1.0.00863.1 | 1023 | 254535 | 0         | 326  | 327  | 99 -  | 2   | 328  | 213547 | 213873 |
| UN44083 | Rsa1.0.00749.1 | 1150 | 65933  | 0         | 582  | 584  | 99 +  | 2   | 584  | 2670   | 3253   |
| UN44084 | Rsa1.0.00055.1 | 814  | 520193 | 0         | 377  | 387  | 97 -  | 38  | 424  | 349414 | 349797 |
| UN44085 | Rsa1.0.10086.1 | 721  | 6004   | 1.00E-169 | 305  | 306  | 99 +  | 414 | 719  | 4653   | 4958   |
| UN44086 | Rsa1.0.04325.1 | 657  | 17885  | 0         | 346  | 354  | 97 +  | 302 | 655  | 11667  | 12020  |
| UN44087 | Rsa1.0.00033.1 | 640  | 515811 | 1.00E-134 | 246  | 247  | 99 -  | 1   | 247  | 469201 | 469447 |
| UN44088 | Rsa1.0.00190.1 | 560  | 318240 | 1.00E-158 | 286  | 287  | 99 -  | 234 | 520  | 28703  | 28989  |
| UN44089 | Rsa1.0.49914.1 | 960  | 455    | 1.00E-173 | 312  | 313  | 99 -  | 647 | 959  | 143    | 455    |
| UN44090 | Rsa1.0.01106.1 | 724  | 53916  | 0         | 709  | 720  | 98 -  | 3   | 722  | 36038  | 36757  |
| UN44091 | Rsa1.0.00080.1 | 787  | 190437 | 0         | 411  | 425  | 96 +  | 1   | 425  | 104346 | 104766 |
| UN44092 | Rsa1.0.03781.1 | 283  | 20891  | 1.00E-68  | 183  | 196  | 93 -  | 89  | 281  | 10617  | 10807  |
| UN44093 | Rsa1.0.03944.1 | 642  | 19926  | 1.00E-103 | 273  | 300  | 91 -  | 335 | 631  | 9380   | 9679   |
| UN44094 | Rsa1.0.01281.1 | 657  | 49313  | 0         | 602  | 638  | 94 -  | 25  | 655  | 26768  | 27401  |
| UN44095 | Rsa1.0.13944.1 | 833  | 4039   | 0         | 748  | 772  | 96 +  | 2   | 770  | 258    | 1028   |
| UN44096 | Rsa1.0.06247.1 | 760  | 11395  | 1.00E-100 | 251  | 271  | 92 -  | 482 | 750  | 8608   | 8875   |
| UN44097 | Rsa1.0.00801.1 | 958  | 63861  | 0         | 705  | 776  | 90 -  | 4   | 751  | 61888  | 62650  |
| UN44098 | Rsa1.0.06356.1 | 832  | 11178  | 1.00E-145 | 278  | 283  | 98 +  | 1   | 279  | 8815   | 9097   |
| UN44099 | Rsa1.0.00339.1 | 285  | 222974 | 1.00E-127 | 277  | 289  | 95 -  | 1   | 284  | 212019 | 212302 |
| UN44100 | Rsa1.0.04126.1 | 530  | 18939  | 0         | 361  | 373  | 96 +  | 156 | 528  | 15519  | 15888  |
| UN44101 | Rsa1.0.62824.1 | 541  | 365    | 1.00E-177 | 356  | 368  | 96 +  | 172 | 538  | 1      | 365    |
| UN44102 | Rsa1.0.46258.1 | 783  | 488    | 1.00E-133 | 244  | 245  | 99 -  | 2   | 246  | 1      | 245    |
| UN44103 | Rsa1.0.00476.1 | 501  | 280966 | 2.00E-50  | 200  | 227  | 88 -  | 18  | 239  | 157895 | 158113 |
| UN44104 | Rsa1.0.00020.1 | 768  | 283099 | 0         | 552  | 605  | 91 -  | 163 | 767  | 63659  | 64247  |
| UN44105 | Rsa1.0.72479.1 | 939  | 316    | 1.00E-107 | 263  | 284  | 92 +  | 613 | 896  | 6      | 286    |
| UN44106 | Rsa1.0.01595.1 | 787  | 175383 | 1.00E-103 | 194  | 195  | 99 +  | 2   | 196  | 4079   | 4273   |
| UN44107 | Rsa1.0.00228.1 | 428  | 105511 | 2.33E-156 | 340  | 363  | 93 +  | 6   | 362  | 13183  | 13545  |

|         |                |      |        |           |      |      |       |     |      |        |        |
|---------|----------------|------|--------|-----------|------|------|-------|-----|------|--------|--------|
| UN44108 | Rsa1.0.05495.1 | 839  | 13534  | 0         | 461  | 481  | 95 +  | 1   | 481  | 468    | 941    |
| UN44109 | Rsa1.0.00192.1 | 794  | 278200 | 0         | 437  | 464  | 94 -  | 4   | 467  | 25299  | 25744  |
| UN44110 | Rsa1.0.00044.1 | 785  | 271658 | 1.00E-177 | 315  | 315  | 100 - | 328 | 642  | 13554  | 13868  |
| UN44111 | Rsa1.0.01875.1 | 692  | 37849  | 0         | 406  | 420  | 96 -  | 3   | 422  | 25024  | 25442  |
| UN44112 | Rsa1.0.00163.1 | 823  | 116847 | 0         | 690  | 725  | 95 -  | 101 | 823  | 7967   | 8685   |
| UN44113 | Rsa1.0.00144.1 | 909  | 120708 | 0         | 871  | 907  | 96 -  | 5   | 907  | 63754  | 64653  |
| UN44114 | Rsa1.0.03487.1 | 689  | 22564  | 0         | 378  | 378  | 100 - | 311 | 688  | 17805  | 18182  |
| UN44115 | Rsa1.0.04741.1 | 731  | 16164  | 1.00E-123 | 230  | 232  | 99 +  | 496 | 727  | 8092   | 8323   |
| UN44116 | Rsa1.0.00713.1 | 306  | 158017 | 1.00E-135 | 290  | 301  | 96 -  | 6   | 302  | 150405 | 150702 |
| UN44117 | Rsa1.0.00128.1 | 821  | 228675 | 1.00E-132 | 240  | 240  | 100 - | 302 | 541  | 89116  | 89355  |
| UN44118 | Rsa1.0.03762.1 | 722  | 20976  | 1.00E-153 | 332  | 347  | 95 +  | 18  | 363  | 4841   | 5180   |
| UN44119 | Rsa1.0.02395.1 | 590  | 31785  | 1.00E-131 | 309  | 333  | 92 -  | 17  | 333  | 8384   | 8716   |
| UN44120 | Rsa1.0.00043.1 | 740  | 264937 | 0         | 457  | 498  | 91 +  | 177 | 663  | 225423 | 225909 |
| UN44121 | Rsa1.0.00394.1 | 651  | 148426 | 1.00E-138 | 293  | 308  | 95 +  | 336 | 643  | 137048 | 137349 |
| UN44122 | Rsa1.0.00083.1 | 239  | 442773 | 1.00E-103 | 208  | 214  | 97 +  | 25  | 238  | 251696 | 251909 |
| UN44123 | Rsa1.0.00179.1 | 714  | 393324 | 0         | 598  | 633  | 94 -  | 37  | 660  | 195560 | 196183 |
| UN44124 | Rsa1.0.00010.1 | 721  | 294827 | 1.00E-113 | 238  | 244  | 97 -  | 1   | 243  | 120313 | 120554 |
| UN44125 | Rsa1.0.00019.1 | 1554 | 301669 | 1.00E-173 | 332  | 338  | 98 +  | 1   | 338  | 176964 | 177297 |
| UN44126 | Rsa1.0.03469.1 | 1408 | 22681  | 0         | 378  | 399  | 94 +  | 403 | 789  | 4079   | 4477   |
| UN44127 | Rsa1.0.00307.1 | 648  | 199003 | 0         | 634  | 648  | 97 +  | 1   | 648  | 57722  | 58369  |
| UN44128 | Rsa1.0.00568.1 | 565  | 75219  | 3.00E-89  | 216  | 232  | 93 -  | 46  | 268  | 63277  | 63508  |
| UN44129 | Rsa1.0.00130.1 | 660  | 125737 | 0         | 467  | 483  | 96 +  | 170 | 646  | 117675 | 118157 |
| UN44130 | Rsa1.0.19040.1 | 737  | 1491   | 1.00E-163 | 368  | 392  | 93 -  | 39  | 429  | 953    | 1344   |
| UN44131 | Rsa1.0.03452.1 | 892  | 22817  | 0         | 714  | 717  | 99 -  | 2   | 718  | 2907   | 3623   |
| UN44132 | Rsa1.0.00339.1 | 676  | 222974 | 0         | 640  | 680  | 94 +  | 7   | 674  | 214095 | 214774 |
| UN44133 | Rsa1.0.00564.1 | 1016 | 75428  | 0         | 848  | 863  | 98 +  | 2   | 862  | 73602  | 74460  |
| UN44134 | Rsa1.0.03890.1 | 836  | 20223  | 0         | 423  | 445  | 95 +  | 1   | 444  | 3422   | 3856   |
| UN44135 | Rsa1.0.05574.1 | 883  | 13290  | 0         | 505  | 517  | 97 -  | 42  | 557  | 7539   | 8051   |
| UN44136 | Rsa1.0.00392.1 | 509  | 88523  | 0         | 456  | 473  | 96 +  | 2   | 472  | 79616  | 80077  |
| UN44137 | Rsa1.0.00568.1 | 808  | 75219  | 0         | 355  | 356  | 99 -  | 452 | 807  | 709    | 1064   |
| UN44138 | Rsa1.0.02345.1 | 647  | 32337  | 0         | 386  | 389  | 99 -  | 4   | 392  | 11529  | 11917  |
| UN44139 | Rsa1.0.00671.1 | 579  | 397884 | 1.00E-155 | 295  | 301  | 98 +  | 276 | 576  | 946    | 1246   |
| UN44140 | Rsa1.0.13478.1 | 793  | 4790   | 0         | 757  | 800  | 94 +  | 1   | 791  | 3057   | 3842   |
| UN44141 | Rsa1.0.32629.1 | 394  | 697    | 1.00E-136 | 249  | 250  | 99 +  | 1   | 250  | 448    | 697    |
| UN44142 | Rsa1.0.08265.1 | 1251 | 7630   | 0         | 1124 | 1135 | 99 -  | 117 | 1250 | 6496   | 7630   |
| UN44143 | Rsa1.0.00416.1 | 1077 | 86772  | 1.00E-130 | 242  | 244  | 99 -  | 834 | 1077 | 66615  | 66858  |
| UN44144 | Rsa1.0.04031.1 | 601  | 19489  | 0         | 572  | 596  | 95 +  | 2   | 597  | 960    | 1554   |
| UN44145 | Rsa1.0.00589.1 | 673  | 209965 | 0         | 383  | 398  | 96 +  | 273 | 670  | 155264 | 155659 |
| UN44146 | Rsa1.0.02663.1 | 620  | 169243 | 0         | 532  | 554  | 96 -  | 71  | 619  | 7811   | 8362   |

|         |                |      |        |           |      |      |       |      |      |        |        |
|---------|----------------|------|--------|-----------|------|------|-------|------|------|--------|--------|
| UN44147 | Rsa1.0.00099.1 | 1252 | 159619 | 0         | 1132 | 1152 | 98 +  | 2    | 1153 | 80964  | 82115  |
| UN44148 | Rsa1.0.00227.1 | 702  | 105849 | 0         | 345  | 347  | 99 -  | 354  | 700  | 77967  | 78313  |
| UN44149 | Rsa1.0.10909.1 | 609  | 5681   | 0         | 449  | 469  | 95 +  | 142  | 607  | 85     | 553    |
| UN44150 | Rsa1.0.01428.1 | 1009 | 46071  | 0         | 784  | 797  | 98 -  | 222  | 1009 | 15544  | 16340  |
| UN44151 | Rsa1.0.00437.1 | 732  | 84879  | 7.00E-88  | 186  | 193  | 96 -  | 368  | 560  | 38943  | 39135  |
| UN44152 | Rsa1.0.00277.1 | 863  | 100132 | 1.00E-156 | 279  | 279  | 100 - | 1    | 279  | 50440  | 50718  |
| UN44153 | Rsa1.0.00195.1 | 358  | 251884 | 0         | 356  | 358  | 99 -  | 1    | 358  | 98949  | 99306  |
| UN44154 | Rsa1.0.00372.1 | 745  | 90418  | 1.00E-55  | 120  | 123  | 97 -  | 194  | 316  | 85876  | 85998  |
| UN44155 | Rsa1.0.17114.1 | 537  | 1919   | 0         | 512  | 550  | 93 -  | 6    | 536  | 90     | 633    |
| UN44156 | Rsa1.0.00192.1 | 618  | 278200 | 1.00E-180 | 319  | 319  | 100 + | 4    | 322  | 16396  | 16714  |
| UN44157 | Rsa1.0.00469.1 | 810  | 82084  | 0         | 572  | 578  | 98 +  | 1    | 575  | 71384  | 71961  |
| UN44158 | Rsa1.0.00176.1 | 639  | 240984 | 0         | 516  | 558  | 92 +  | 98   | 637  | 9868   | 10424  |
| UN44159 | Rsa1.0.00092.1 | 859  | 659932 | 1.00E-176 | 346  | 353  | 98 -  | 2    | 351  | 238480 | 238832 |
| UN44160 | Rsa1.0.00451.1 | 790  | 322533 | 1.00E-111 | 214  | 217  | 98 -  | 284  | 500  | 284872 | 285088 |
| UN44161 | Rsa1.0.00033.1 | 725  | 515811 | 0         | 384  | 402  | 95 -  | 325  | 725  | 366440 | 366835 |
| UN44162 | Rsa1.0.00053.1 | 884  | 263459 | 0         | 696  | 738  | 94 +  | 1    | 736  | 192617 | 193352 |
| UN44163 | Rsa1.0.00349.1 | 739  | 92621  | 0         | 718  | 737  | 97 -  | 3    | 739  | 7463   | 8199   |
| UN44164 | Rsa1.0.00194.1 | 1164 | 110851 | 1.00E-154 | 314  | 325  | 96 +  | 3    | 325  | 96139  | 96460  |
| UN44165 | Rsa1.0.00026.1 | 755  | 327835 | 1.00E-157 | 394  | 432  | 91 +  | 22   | 432  | 174948 | 175379 |
| UN44166 | Rsa1.0.02893.1 | 582  | 26999  | 1.00E-127 | 316  | 340  | 92 -  | 249  | 582  | 24276  | 24614  |
| UN44167 | Rsa1.0.06304.1 | 694  | 11267  | 2.00E-35  | 119  | 133  | 89 +  | 93   | 225  | 398    | 530    |
| UN44168 | Rsa1.0.00039.1 | 664  | 296927 | 1.00E-107 | 197  | 197  | 100 - | 468  | 664  | 18131  | 18327  |
| UN44169 | Rsa1.0.32888.1 | 641  | 691    | 0         | 474  | 493  | 96 -  | 71   | 559  | 199    | 691    |
| UN44170 | Rsa1.0.00387.1 | 797  | 495407 | 0         | 388  | 393  | 98 -  | 103  | 495  | 409944 | 410336 |
| UN44171 | Rsa1.0.05398.1 | 430  | 13885  | 1.00E-152 | 362  | 385  | 94 -  | 2    | 383  | 12825  | 13197  |
| UN44172 | Rsa1.0.14140.1 | 815  | 3748   | 0         | 330  | 332  | 99 +  | 482  | 813  | 2370   | 2701   |
| UN44173 | Rsa1.0.00381.1 | 747  | 89718  | 0         | 547  | 553  | 98 -  | 193  | 745  | 63683  | 64235  |
| UN44174 | Rsa1.0.00928.1 | 993  | 59293  | 1.00E-164 | 401  | 437  | 91 +  | 575  | 991  | 32258  | 32694  |
| UN44175 | Rsa1.0.00706.1 | 872  | 291570 | 0         | 355  | 356  | 99 -  | 3    | 358  | 59656  | 60011  |
| UN44176 | Rsa1.0.00754.1 | 815  | 65689  | 3.00E-93  | 181  | 182  | 99 -  | 320  | 501  | 7037   | 7217   |
| UN44177 | Rsa1.0.01026.1 | 840  | 171624 | 1.00E-120 | 230  | 232  | 99 -  | 1    | 231  | 159554 | 159785 |
| UN44178 | Rsa1.0.00039.1 | 739  | 296927 | 0         | 579  | 588  | 98 +  | 148  | 735  | 206911 | 207498 |
| UN44179 | Rsa1.0.06018.1 | 1266 | 11923  | 1.00E-134 | 258  | 263  | 98 -  | 1003 | 1265 | 11001  | 11263  |
| UN44180 | Rsa1.0.00541.1 | 1277 | 76863  | 0         | 391  | 408  | 95 -  | 1    | 398  | 56543  | 56949  |
| UN44181 | Rsa1.0.00269.1 | 686  | 341668 | 0         | 433  | 439  | 98 +  | 246  | 684  | 43330  | 43768  |
| UN44182 | Rsa1.0.08796.1 | 695  | 6916   | 0         | 412  | 413  | 99 -  | 3    | 415  | 4101   | 4513   |
| UN44183 | Rsa1.0.00236.1 | 874  | 104771 | 0         | 483  | 483  | 100 - | 1    | 483  | 100657 | 101139 |
| UN44184 | Rsa1.0.02413.1 | 1011 | 31628  | 1.00E-169 | 355  | 372  | 95 +  | 176  | 547  | 8130   | 8498   |
| UN44185 | Rsa1.0.01043.1 | 895  | 55893  | 0         | 480  | 489  | 98 +  | 1    | 489  | 34911  | 35398  |

|         |                |      |        |           |     |     |       |     |      |        |        |
|---------|----------------|------|--------|-----------|-----|-----|-------|-----|------|--------|--------|
| UN44186 | Rsa1.0_19257.1 | 627  | 1455   | 1.00E-150 | 276 | 278 | 99 +  | 349 | 626  | 210    | 487    |
| UN44187 | Rsa1.0_09302.1 | 953  | 6470   | 0         | 456 | 457 | 99 -  | 325 | 780  | 823    | 1279   |
| UN44188 | Rsa1.0_00084.1 | 502  | 142338 | 0         | 494 | 500 | 98 +  | 3   | 502  | 74059  | 74556  |
| UN44189 | Rsa1.0_01785.1 | 617  | 39368  | 0         | 454 | 486 | 93 -  | 1   | 484  | 27142  | 27618  |
| UN44190 | Rsa1.0_15114.1 | 1130 | 2815   | 0         | 625 | 626 | 99 -  | 503 | 1128 | 2190   | 2815   |
| UN44191 | Rsa1.0_00252.1 | 710  | 102760 | 4.00E-83  | 235 | 259 | 90 +  | 456 | 708  | 78418  | 78673  |
| UN44192 | Rsa1.0_02727.1 | 533  | 28404  | 0         | 533 | 533 | 100 + | 1   | 533  | 26237  | 26769  |
| UN44193 | Rsa1.0_01156.1 | 688  | 52147  | 1.00E-142 | 295 | 304 | 97 +  | 288 | 590  | 33411  | 33712  |
| UN44194 | Rsa1.0_01070.1 | 542  | 55099  | 0         | 500 | 525 | 95 -  | 1   | 520  | 29913  | 30437  |
| UN44195 | Rsa1.0_01092.1 | 589  | 54348  | 3.00E-46  | 115 | 121 | 95 +  | 469 | 589  | 8661   | 8778   |
| UN44196 | Rsa1.0_02618.1 | 663  | 29526  | 0         | 657 | 661 | 99 +  | 1   | 661  | 23454  | 24114  |
| UN44197 | Rsa1.0_29217.1 | 712  | 789    | 5.00E-64  | 125 | 125 | 100 - | 87  | 211  | 63     | 187    |
| UN44198 | Rsa1.0_04142.1 | 738  | 18861  | 0         | 428 | 433 | 98 -  | 5   | 437  | 13126  | 13558  |
| UN44199 | Rsa1.0_00557.1 | 626  | 75865  | 1.00E-169 | 374 | 396 | 94 -  | 2   | 394  | 69597  | 69992  |
| UN44200 | Rsa1.0_06213.1 | 741  | 11478  | 1.00E-180 | 478 | 523 | 91 -  | 6   | 524  | 7641   | 8135   |
| UN44201 | Rsa1.0_00451.1 | 751  | 322533 | 0         | 503 | 532 | 94 +  | 1   | 511  | 311691 | 312222 |
| UN44202 | Rsa1.0_00281.1 | 726  | 99908  | 1.00E-126 | 230 | 230 | 100 - | 5   | 234  | 6793   | 7022   |
| UN44203 | Rsa1.0_43457.1 | 790  | 517    | 0         | 431 | 435 | 99 -  | 82  | 516  | 83     | 517    |
| UN44204 | Rsa1.0_01327.1 | 340  | 48033  | 3.00E-94  | 208 | 215 | 96 +  | 1   | 215  | 14654  | 14865  |
| UN44205 | Rsa1.0_01835.1 | 723  | 38542  | 0         | 720 | 723 | 99 +  | 1   | 723  | 12809  | 13531  |
| UN44206 | Rsa1.0_00386.1 | 955  | 89134  | 0         | 908 | 958 | 94 -  | 1   | 954  | 26116  | 27059  |
| UN44207 | Rsa1.0_00416.1 | 851  | 86772  | 3.00E-75  | 144 | 144 | 100 - | 116 | 259  | 77716  | 77859  |
| UN44208 | Rsa1.0_18548.1 | 1000 | 1577   | 0         | 522 | 552 | 94 +  | 448 | 999  | 204    | 755    |
| UN44209 | Rsa1.0_00683.1 | 570  | 68638  | 0         | 546 | 569 | 95 +  | 1   | 568  | 4516   | 5081   |
| UN44210 | Rsa1.0_23229.1 | 712  | 1063   | 0         | 385 | 391 | 98 -  | 2   | 391  | 288    | 678    |
| UN44211 | Rsa1.0_00577.1 | 873  | 174827 | 1.00E-150 | 269 | 269 | 100 - | 604 | 872  | 157013 | 157281 |
| UN44212 | Rsa1.0_35166.1 | 576  | 643    | 1.00E-156 | 311 | 324 | 95 -  | 3   | 314  | 1      | 324    |
| UN44213 | Rsa1.0_01732.1 | 322  | 40194  | 1.00E-155 | 278 | 278 | 100 + | 1   | 278  | 37262  | 37539  |
| UN44214 | Rsa1.0_00713.1 | 1017 | 158017 | 0         | 734 | 743 | 98 +  | 1   | 742  | 140567 | 141308 |
| UN44215 | Rsa1.0_01991.1 | 868  | 36425  | 0         | 476 | 488 | 97 +  | 1   | 488  | 12198  | 12685  |
| UN44216 | Rsa1.0_00002.1 | 665  | 601661 | 1.00E-151 | 309 | 324 | 95 -  | 1   | 312  | 270307 | 270630 |
| UN44217 | Rsa1.0_00484.1 | 781  | 203294 | 0         | 649 | 674 | 96 +  | 1   | 671  | 156464 | 157128 |
| UN44218 | Rsa1.0_01983.1 | 563  | 36509  | 0         | 544 | 582 | 93 +  | 2   | 563  | 12677  | 13254  |
| UN44219 | Rsa1.0_01447.1 | 593  | 45654  | 1.00E-105 | 291 | 316 | 92 +  | 1   | 313  | 4528   | 4838   |
| UN44220 | Rsa1.0_00719.1 | 339  | 66952  | 1.00E-177 | 330 | 335 | 98 -  | 2   | 336  | 21505  | 21835  |
| UN44221 | Rsa1.0_03471.1 | 538  | 22678  | 1.00E-101 | 223 | 234 | 95 +  | 158 | 388  | 14969  | 15202  |
| UN44222 | Rsa1.0_00437.1 | 662  | 84879  | 0         | 479 | 489 | 97 +  | 6   | 490  | 42875  | 43363  |
| UN44223 | Rsa1.0_00098.1 | 775  | 349239 | 0         | 391 | 403 | 97 +  | 7   | 406  | 221005 | 221405 |
| UN44224 | Rsa1.0_01876.1 | 612  | 37800  | 1.00E-156 | 286 | 287 | 99 -  | 325 | 610  | 6989   | 7275   |



|         |                |      |        |           |     |      |       |     |     |        |        |
|---------|----------------|------|--------|-----------|-----|------|-------|-----|-----|--------|--------|
| UN44225 | Rsa1.0.00545.1 | 621  | 189649 | 0         | 530 | 537  | 98 +  | 1   | 537 | 25117  | 25653  |
| UN44226 | Rsa1.0.04775.1 | 985  | 16025  | 0         | 928 | 1004 | 92 -  | 3   | 985 | 4062   | 5052   |
| UN44227 | Rsa1.0.00170.1 | 668  | 179538 | 7.00E-91  | 241 | 261  | 92 -  | 53  | 309 | 28251  | 28511  |
| UN44228 | Rsa1.0.00084.1 | 557  | 142338 | 1.00E-164 | 304 | 308  | 98 -  | 1   | 308 | 74174  | 74481  |
| UN44229 | Rsa1.0.00463.1 | 674  | 189177 | 0         | 671 | 673  | 99 +  | 1   | 673 | 122419 | 123091 |
| UN44230 | Rsa1.0.04450.1 | 672  | 17297  | 1.00E-140 | 340 | 364  | 93 -  | 1   | 364 | 8254   | 8607   |
| UN44231 | Rsa1.0.06356.1 | 863  | 11178  | 1.00E-122 | 244 | 251  | 97 +  | 286 | 536 | 9177   | 9427   |
| UN44232 | Rsa1.0.01304.1 | 411  | 48790  | 0         | 353 | 353  | 100 + | 1   | 353 | 38025  | 38377  |
| UN44233 | Rsa1.0.00002.1 | 906  | 601661 | 0         | 692 | 732  | 94 +  | 4   | 719 | 289952 | 290680 |
| UN44234 | Rsa1.0.00845.1 | 1116 | 62346  | 1.00E-125 | 234 | 236  | 99 -  | 405 | 640 | 12349  | 12584  |
| UN44235 | Rsa1.0.00172.1 | 435  | 115476 | 0         | 408 | 408  | 100 + | 1   | 408 | 25541  | 25948  |
| UN44236 | Rsa1.0.00522.1 | 1047 | 78103  | 1.00E-77  | 154 | 156  | 98 -  | 275 | 430 | 49624  | 49779  |
| UN44237 | Rsa1.0.01494.1 | 883  | 44641  | 0         | 373 | 374  | 99 +  | 244 | 617 | 36591  | 36964  |
| UN44238 | Rsa1.0.00087.1 | 955  | 761073 | 1.00E-175 | 333 | 339  | 98 -  | 616 | 954 | 728764 | 729101 |
| UN44239 | Rsa1.0.00741.1 | 855  | 66117  | 0         | 558 | 561  | 99 +  | 295 | 855 | 64093  | 64653  |
| UN44240 | Rsa1.0.00031.1 | 310  | 179862 | 1.00E-135 | 296 | 312  | 94 +  | 2   | 310 | 138887 | 139190 |
| UN44241 | Rsa1.0.00011.1 | 689  | 225044 | 0         | 664 | 711  | 93 -  | 3   | 688 | 124182 | 124891 |
| UN44242 | Rsa1.0.00332.1 | 594  | 94575  | 8.00E-84  | 176 | 182  | 96 +  | 122 | 303 | 61373  | 61554  |
| UN44243 | Rsa1.0.00332.1 | 582  | 94575  | 1.00E-153 | 373 | 400  | 93 +  | 186 | 577 | 74767  | 75157  |
| UN44244 | Rsa1.0.03070.1 | 722  | 25578  | 0         | 438 | 455  | 96 +  | 81  | 535 | 13276  | 13730  |
| UN44245 | Rsa1.0.01211.1 | 971  | 50646  | 0         | 602 | 631  | 95 +  | 341 | 958 | 7598   | 8227   |
| UN44246 | Rsa1.0.00063.1 | 606  | 156150 | 1.00E-106 | 223 | 232  | 96 +  | 120 | 351 | 3494   | 3725   |
| UN44247 | Rsa1.0.00186.1 | 1094 | 112669 | 0         | 464 | 488  | 95 -  | 3   | 487 | 60747  | 61232  |
| UN44248 | Rsa1.0.00003.1 | 630  | 340054 | 0         | 427 | 433  | 98 +  | 180 | 612 | 54543  | 54973  |
| UN44249 | Rsa1.0.74470.1 | 633  | 308    | 1.00E-156 | 301 | 308  | 97 +  | 224 | 531 | 1      | 308    |
| UN44250 | Rsa1.0.00347.1 | 981  | 93048  | 0         | 889 | 1040 | 85 +  | 3   | 981 | 65442  | 66426  |
| UN44251 | Rsa1.0.01338.1 | 674  | 155644 | 5.00E-64  | 259 | 301  | 86 -  | 381 | 674 | 13819  | 14109  |
| UN44252 | Rsa1.0.04438.1 | 508  | 17361  | 3.00E-83  | 192 | 203  | 94 -  | 263 | 464 | 15019  | 15214  |
| UN44253 | Rsa1.0.00265.1 | 699  | 220635 | 4.00E-80  | 281 | 324  | 86 +  | 390 | 699 | 195833 | 196155 |
| UN44254 | Rsa1.0.00005.1 | 413  | 353093 | 1.00E-100 | 201 | 206  | 97 +  | 14  | 219 | 142584 | 142789 |
| UN44255 | Rsa1.0.08630.1 | 175  | 7104   | 5.00E-76  | 165 | 172  | 95 +  | 2   | 173 | 6005   | 6176   |
| UN44256 | Rsa1.0.00381.1 | 621  | 89718  | 0         | 395 | 403  | 98 +  | 3   | 405 | 63833  | 64235  |
| UN44257 | Rsa1.0.00197.1 | 859  | 109714 | 1.00E-158 | 289 | 291  | 99 +  | 3   | 293 | 76232  | 76522  |
| UN44258 | Rsa1.0.00962.1 | 589  | 184909 | 0         | 566 | 590  | 95 -  | 1   | 583 | 20030  | 20616  |
| UN44259 | Rsa1.0.00793.1 | 415  | 64103  | 1.00E-51  | 118 | 120  | 98 +  | 118 | 236 | 59307  | 59425  |
| UN44260 | Rsa1.0.00122.1 | 1054 | 265937 | 3.00E-63  | 395 | 482  | 81 -  | 385 | 858 | 237314 | 237793 |
| UN44261 | Rsa1.0.04098.1 | 819  | 19078  | 1.00E-127 | 301 | 319  | 94 +  | 1   | 312 | 11237  | 11553  |
| UN44262 | Rsa1.0.01146.1 | 613  | 163455 | 1.00E-106 | 231 | 240  | 96 -  | 375 | 613 | 20555  | 20793  |
| UN44263 | Rsa1.0.00243.1 | 789  | 103651 | 1.00E-89  | 241 | 264  | 91 -  | 86  | 344 | 23261  | 23518  |

|         |                |      |        |           |     |     |       |     |      |        |        |
|---------|----------------|------|--------|-----------|-----|-----|-------|-----|------|--------|--------|
| UN44264 | Rsa1.0.02490.1 | 627  | 30885  | 1.00E-126 | 261 | 270 | 96 +  | 8   | 277  | 13628  | 13896  |
| UN44265 | Rsa1.0.02314.1 | 1097 | 32642  | 0         | 943 | 981 | 96 -  | 128 | 1097 | 4781   | 5758   |
| UN44266 | Rsa1.0.01196.1 | 849  | 51097  | 1.00E-157 | 329 | 347 | 94 +  | 2   | 343  | 32502  | 32837  |
| UN44267 | Rsa1.0.00579.1 | 738  | 148308 | 0         | 508 | 548 | 92 +  | 83  | 626  | 66432  | 66976  |
| UN44268 | Rsa1.0.00017.1 | 831  | 752458 | 1.00E-137 | 262 | 267 | 98 +  | 408 | 674  | 272503 | 272769 |
| UN44269 | Rsa1.0.00166.1 | 625  | 240912 | 0         | 493 | 513 | 96 +  | 6   | 516  | 131084 | 131595 |
| UN44270 | Rsa1.0.00018.1 | 753  | 410899 | 0         | 728 | 770 | 94 +  | 5   | 753  | 228724 | 229488 |
| UN44271 | Rsa1.0.12650.1 | 802  | 5164   | 1.00E-107 | 203 | 205 | 99 -  | 597 | 801  | 105    | 309    |
| UN44272 | Rsa1.0.19378.1 | 925  | 1441   | 0         | 583 | 624 | 93 -  | 303 | 924  | 833    | 1441   |
| UN44273 | Rsa1.0.25309.1 | 809  | 942    | 1.00E-108 | 233 | 243 | 95 -  | 126 | 368  | 687    | 928    |
| UN44274 | Rsa1.0.00879.1 | 581  | 61297  | 2.00E-94  | 270 | 295 | 91 +  | 2   | 294  | 54940  | 55230  |
| UN44275 | Rsa1.0.04905.1 | 874  | 15507  | 9.00E-91  | 179 | 182 | 98 +  | 282 | 463  | 5373   | 5554   |
| UN44276 | Rsa1.0.00384.1 | 439  | 89278  | 1.00E-88  | 193 | 202 | 95 -  | 3   | 204  | 79556  | 79757  |
| UN44277 | Rsa1.0.15816.1 | 1015 | 2409   | 0         | 482 | 486 | 99 -  | 530 | 1015 | 405    | 889    |
| UN44278 | Rsa1.0.04033.1 | 700  | 19481  | 1.00E-135 | 250 | 252 | 99 -  | 209 | 460  | 9206   | 9457   |
| UN44279 | Rsa1.0.04928.1 | 885  | 15420  | 1.00E-134 | 313 | 331 | 94 -  | 559 | 883  | 9554   | 9881   |
| UN44280 | Rsa1.0.00961.1 | 1279 | 58185  | 0         | 465 | 478 | 97 +  | 275 | 748  | 43239  | 43714  |
| UN44281 | Rsa1.0.11313.1 | 950  | 5546   | 3.00E-81  | 175 | 182 | 96 +  | 476 | 657  | 5208   | 5389   |
| UN44282 | Rsa1.0.01516.1 | 402  | 44196  | 2.00E-92  | 211 | 224 | 94 -  | 2   | 225  | 23645  | 23868  |
| UN44283 | Rsa1.0.00042.1 | 776  | 171507 | 0         | 739 | 772 | 95 -  | 3   | 765  | 85339  | 86108  |
| UN44284 | Rsa1.0.01897.1 | 974  | 37499  | 0         | 921 | 977 | 94 -  | 10  | 974  | 35521  | 36494  |
| UN44285 | Rsa1.0.02901.1 | 1143 | 26909  | 0         | 453 | 457 | 99 -  | 688 | 1143 | 4787   | 5243   |
| UN44286 | Rsa1.0.00553.1 | 721  | 75983  | 1.00E-89  | 190 | 196 | 96 +  | 4   | 198  | 67626  | 67821  |
| UN44287 | Rsa1.0.07657.1 | 761  | 8896   | 0         | 759 | 761 | 99 +  | 1   | 761  | 2059   | 2819   |
| UN44288 | Rsa1.0.02891.1 | 692  | 27010  | 1.00E-102 | 198 | 201 | 98 +  | 492 | 692  | 692    | 892    |
| UN44289 | Rsa1.0.02270.1 | 546  | 249821 | 1.00E-124 | 253 | 262 | 96 -  | 219 | 480  | 141121 | 141382 |
| UN44290 | Rsa1.0.05684.1 | 647  | 12943  | 1.00E-114 | 215 | 217 | 99 +  | 4   | 220  | 11134  | 11350  |
| UN44291 | Rsa1.0.10771.1 | 1035 | 5723   | 0         | 395 | 413 | 95 -  | 10  | 420  | 1882   | 2290   |
| UN44292 | Rsa1.0.02206.1 | 705  | 33922  | 3.00E-62  | 261 | 306 | 85 +  | 338 | 642  | 7728   | 8033   |
| UN44293 | Rsa1.0.00117.1 | 392  | 213118 | 0         | 383 | 390 | 98 +  | 3   | 392  | 203834 | 204221 |
| UN44294 | Rsa1.0.00153.1 | 885  | 192931 | 1.00E-139 | 251 | 251 | 100 + | 2   | 252  | 87390  | 87640  |
| UN44295 | Rsa1.0.07359.1 | 693  | 9515   | 0         | 632 | 688 | 91 -  | 2   | 680  | 4288   | 4969   |
| UN44296 | Rsa1.0.01212.1 | 565  | 50622  | 4.00E-95  | 183 | 185 | 98 -  | 260 | 444  | 1311   | 1495   |
| UN44297 | Rsa1.0.00373.1 | 1025 | 90296  | 0         | 392 | 397 | 98 +  | 631 | 1025 | 71921  | 72317  |
| UN44298 | Rsa1.0.01431.1 | 793  | 167877 | 0         | 761 | 792 | 96 -  | 3   | 793  | 36796  | 37581  |
| UN44299 | Rsa1.0.04154.1 | 744  | 18802  | 0         | 419 | 422 | 99 +  | 11  | 431  | 14944  | 15365  |
| UN44300 | Rsa1.0.25357.1 | 853  | 940    | 0         | 438 | 461 | 95 +  | 25  | 481  | 478    | 932    |
| UN44301 | Rsa1.0.00582.1 | 782  | 74333  | 0         | 445 | 456 | 97 +  | 2   | 456  | 63563  | 64017  |
| UN44302 | Rsa1.0.00139.1 | 982  | 357786 | 2.00E-82  | 210 | 229 | 91 -  | 7   | 235  | 292094 | 292314 |

|         |                |      |        |           |     |     |      |     |      |        |        |
|---------|----------------|------|--------|-----------|-----|-----|------|-----|------|--------|--------|
| UN44303 | Rsa1.0.03711.1 | 761  | 21237  | 0         | 408 | 416 | 98 - | 344 | 759  | 4758   | 5169   |
| UN44304 | Rsa1.0.02198.1 | 840  | 33989  | 1.00E-145 | 298 | 309 | 96 + | 23  | 330  | 23969  | 24277  |
| UN44305 | Rsa1.0.01563.1 | 749  | 170823 | 0         | 678 | 713 | 95 - | 42  | 744  | 25309  | 26018  |
| UN44306 | Rsa1.0.00602.1 | 738  | 73302  | 1.00E-154 | 426 | 474 | 89 - | 267 | 738  | 4958   | 5409   |
| UN44307 | Rsa1.0.23101.1 | 801  | 1071   | 1.00E-126 | 336 | 370 | 90 - | 437 | 801  | 29     | 383    |
| UN44308 | Rsa1.0.01144.1 | 408  | 52431  | 1.00E-173 | 371 | 387 | 95 + | 2   | 382  | 30615  | 30997  |
| UN44309 | Rsa1.0.00163.1 | 725  | 116847 | 1.00E-149 | 327 | 347 | 94 + | 40  | 385  | 63132  | 63469  |
| UN44310 | Rsa1.0.06179.1 | 827  | 11548  | 7.00E-73  | 192 | 203 | 94 + | 630 | 827  | 7322   | 7523   |
| UN44311 | Rsa1.0.00501.1 | 1059 | 79545  | 1.00E-149 | 376 | 416 | 90 + | 406 | 797  | 24598  | 25010  |
| UN44312 | Rsa1.0.15858.1 | 675  | 2385   | 0         | 474 | 492 | 96 + | 3   | 494  | 1174   | 1659   |
| UN44313 | Rsa1.0.00373.1 | 826  | 90296  | 1.00E-168 | 332 | 342 | 97 - | 485 | 826  | 19109  | 19442  |
| UN44314 | Rsa1.0.02430.1 | 848  | 31506  | 0         | 836 | 842 | 99 + | 7   | 848  | 29947  | 30788  |
| UN44315 | Rsa1.0.10272.1 | 555  | 5909   | 0         | 517 | 543 | 95 + | 15  | 555  | 284    | 822    |
| UN44316 | Rsa1.0.02521.1 | 903  | 30562  | 1.00E-68  | 139 | 141 | 98 - | 58  | 198  | 25380  | 25520  |
| UN44317 | Rsa1.0.00220.1 | 632  | 192936 | 0         | 480 | 513 | 93 + | 124 | 628  | 4428   | 4937   |
| UN44318 | Rsa1.0.01317.1 | 679  | 48287  | 1.00E-113 | 236 | 244 | 96 + | 435 | 678  | 15387  | 15629  |
| UN44319 | Rsa1.0.01198.1 | 721  | 51029  | 0         | 448 | 473 | 94 - | 1   | 473  | 11641  | 12100  |
| UN44320 | Rsa1.0.05204.1 | 670  | 14516  | 1.00E-124 | 250 | 258 | 96 + | 221 | 478  | 6678   | 6935   |
| UN44321 | Rsa1.0.02777.1 | 604  | 27986  | 2.33E-156 | 283 | 290 | 97 + | 309 | 598  | 25025  | 25314  |
| UN44322 | Rsa1.0.01635.1 | 773  | 41865  | 0         | 662 | 678 | 97 + | 1   | 677  | 7345   | 8021   |
| UN44323 | Rsa1.0.00010.1 | 648  | 294827 | 1.00E-104 | 202 | 205 | 98 + | 1   | 205  | 90153  | 90357  |
| UN44324 | Rsa1.0.04002.1 | 1091 | 19608  | 0         | 510 | 535 | 95 - | 7   | 528  | 17634  | 18168  |
| UN44325 | Rsa1.0.00900.1 | 934  | 60367  | 1.00E-129 | 268 | 276 | 97 + | 633 | 902  | 13294  | 13569  |
| UN44326 | Rsa1.0.02379.1 | 528  | 150705 | 1.00E-130 | 315 | 346 | 91 + | 8   | 330  | 139702 | 140047 |
| UN44327 | Rsa1.0.00274.1 | 956  | 210119 | 1.00E-174 | 319 | 322 | 99 + | 1   | 322  | 207243 | 207564 |
| UN44328 | Rsa1.0.01016.1 | 1032 | 181422 | 0         | 498 | 508 | 98 - | 211 | 713  | 18736  | 19243  |
| UN44329 | Rsa1.0.01186.1 | 654  | 51418  | 0         | 481 | 492 | 97 - | 153 | 643  | 32132  | 32620  |
| UN44330 | Rsa1.0.01199.1 | 748  | 163576 | 2.00E-35  | 83  | 85  | 97 - | 2   | 86   | 161930 | 162014 |
| UN44331 | Rsa1.0.05782.1 | 822  | 12646  | 1.00E-103 | 210 | 215 | 97 - | 466 | 679  | 8062   | 8276   |
| UN44332 | Rsa1.0.00477.1 | 537  | 81556  | 4.00E-64  | 158 | 169 | 93 + | 345 | 513  | 11275  | 11443  |
| UN44333 | Rsa1.0.00044.1 | 705  | 271658 | 0         | 665 | 713 | 93 - | 2   | 703  | 169983 | 170683 |
| UN44334 | Rsa1.0.02517.1 | 638  | 30600  | 0         | 609 | 634 | 96 + | 1   | 629  | 4879   | 5508   |
| UN44335 | Rsa1.0.01081.1 | 560  | 499226 | 0         | 536 | 581 | 92 + | 1   | 558  | 456368 | 456946 |
| UN44336 | Rsa1.0.00228.1 | 813  | 105511 | 1.00E-117 | 227 | 231 | 98 + | 2   | 232  | 38651  | 38881  |
| UN44337 | Rsa1.0.00014.1 | 927  | 348985 | 1.00E-135 | 313 | 328 | 95 + | 604 | 925  | 332887 | 333213 |
| UN44338 | Rsa1.0.00253.1 | 882  | 231292 | 1.00E-130 | 273 | 284 | 96 + | 45  | 328  | 204548 | 204825 |
| UN44339 | Rsa1.0.10909.1 | 528  | 5681   | 1.00E-157 | 376 | 404 | 93 + | 124 | 523  | 146    | 549    |
| UN44340 | Rsa1.0.09451.1 | 1011 | 6359   | 0         | 925 | 983 | 94 - | 35  | 1008 | 4613   | 5586   |
| UN44341 | Rsa1.0.01861.1 | 897  | 38031  | 1.00E-160 | 341 | 359 | 94 - | 274 | 632  | 32331  | 32689  |

|         |                |      |        |           |     |      |       |     |      |        |        |
|---------|----------------|------|--------|-----------|-----|------|-------|-----|------|--------|--------|
| UN44342 | Rsa1.0_00067.1 | 667  | 415055 | 1.00E-123 | 294 | 316  | 93 +  | 1   | 307  | 142357 | 142664 |
| UN44343 | Rsa1.0_01642.1 | 634  | 41772  | 1.00E-168 | 367 | 387  | 94 +  | 1   | 385  | 10419  | 10799  |
| UN44344 | Rsa1.0_00019.1 | 745  | 301669 | 0         | 701 | 726  | 96 -  | 9   | 732  | 237147 | 237868 |
| UN44345 | Rsa1.0_00015.1 | 921  | 561803 | 0         | 501 | 526  | 95 +  | 1   | 526  | 181710 | 182234 |
| UN44346 | Rsa1.0_00010.1 | 1012 | 294827 | 8.00E-73  | 140 | 140  | 100 + | 627 | 766  | 214668 | 214807 |
| UN44347 | Rsa1.0_01861.1 | 956  | 38031  | 1.00E-165 | 343 | 359  | 95 -  | 309 | 667  | 32331  | 32689  |
| UN44348 | Rsa1.0_00870.1 | 771  | 61606  | 1.00E-136 | 280 | 290  | 96 +  | 2   | 290  | 24777  | 25066  |
| UN44349 | Rsa1.0_00803.1 | 772  | 144228 | 0         | 699 | 771  | 90 -  | 23  | 771  | 51892  | 52643  |
| UN44350 | Rsa1.0_09063.1 | 649  | 6675   | 1.00E-125 | 267 | 280  | 95 +  | 304 | 583  | 2858   | 3137   |
| UN44351 | Rsa1.0_02697.1 | 756  | 28595  | 1.00E-127 | 309 | 335  | 92 +  | 307 | 641  | 11670  | 12004  |
| UN44352 | Rsa1.0_00301.1 | 801  | 365315 | 1.00E-138 | 321 | 342  | 93 +  | 27  | 365  | 27860  | 28188  |
| UN44353 | Rsa1.0_00594.1 | 758  | 73729  | 0         | 729 | 759  | 96 +  | 1   | 756  | 26981  | 27736  |
| UN44354 | Rsa1.0_00743.1 | 632  | 177459 | 2.00E-66  | 198 | 218  | 90 -  | 36  | 251  | 1203   | 1411   |
| UN44355 | Rsa1.0_01199.1 | 600  | 163576 | 9.00E-90  | 220 | 235  | 93 +  | 17  | 248  | 124483 | 124717 |
| UN44356 | Rsa1.0_60459.1 | 938  | 379    | 5.00E-74  | 164 | 170  | 96 -  | 141 | 309  | 194    | 363    |
| UN44357 | Rsa1.0_00205.1 | 833  | 193401 | 1.00E-134 | 371 | 410  | 90 -  | 1   | 405  | 77712  | 78102  |
| UN44358 | Rsa1.0_03163.1 | 796  | 24894  | 0         | 761 | 789  | 96 +  | 1   | 785  | 4477   | 5261   |
| UN44359 | Rsa1.0_00112.1 | 439  | 132199 | 1.00E-118 | 308 | 331  | 93 -  | 1   | 325  | 118956 | 119280 |
| UN44360 | Rsa1.0_01386.1 | 543  | 46765  | 1.00E-131 | 256 | 261  | 98 -  | 25  | 285  | 21078  | 21336  |
| UN44361 | Rsa1.0_02377.1 | 827  | 31994  | 1.00E-102 | 214 | 221  | 96 -  | 605 | 825  | 8896   | 9115   |
| UN44362 | Rsa1.0_00047.1 | 1024 | 168582 | 0         | 972 | 1030 | 94 +  | 1   | 1024 | 32493  | 33503  |
| UN44363 | Rsa1.0_00988.1 | 731  | 57525  | 0         | 369 | 381  | 96 +  | 340 | 720  | 50774  | 51154  |
| UN44364 | Rsa1.0_00603.1 | 693  | 73299  | 0         | 453 | 469  | 96 -  | 3   | 469  | 53726  | 54193  |
| UN44365 | Rsa1.0_03400.1 | 877  | 23203  | 0         | 521 | 542  | 96 +  | 44  | 585  | 4015   | 4553   |
| UN44366 | Rsa1.0_00045.1 | 627  | 328694 | 3.00E-99  | 200 | 204  | 98 +  | 6   | 209  | 148689 | 148891 |
| UN44367 | Rsa1.0_00382.1 | 780  | 251946 | 1.00E-117 | 233 | 238  | 97 -  | 1   | 237  | 20014  | 20251  |
| UN44368 | Rsa1.0_00341.1 | 1502 | 249309 | 0         | 777 | 803  | 96 -  | 427 | 1229 | 117699 | 118500 |
| UN44369 | Rsa1.0_01513.1 | 791  | 44234  | 1.00E-169 | 302 | 302  | 100 - | 488 | 789  | 17197  | 17498  |
| UN44370 | Rsa1.0_05815.1 | 1217 | 12563  | 1.00E-127 | 258 | 267  | 96 -  | 613 | 879  | 8883   | 9149   |
| UN44371 | Rsa1.0_00067.1 | 729  | 415055 | 0         | 706 | 730  | 96 -  | 1   | 729  | 182852 | 183579 |
| UN44372 | Rsa1.0_00047.1 | 1531 | 168582 | 0         | 527 | 544  | 96 +  | 898 | 1441 | 96256  | 96799  |
| UN44373 | Rsa1.0_11103.1 | 861  | 5614   | 1.00E-89  | 230 | 250  | 92 +  | 463 | 709  | 25     | 274    |
| UN44374 | Rsa1.0_00060.1 | 616  | 502678 | 0         | 525 | 551  | 95 -  | 2   | 549  | 366144 | 366693 |
| UN44375 | Rsa1.0_00247.1 | 918  | 103408 | 1.00E-162 | 316 | 325  | 97 +  | 348 | 672  | 69083  | 69407  |
| UN44376 | Rsa1.0_00273.1 | 705  | 326186 | 0         | 397 | 410  | 96 -  | 5   | 413  | 45505  | 45911  |
| UN44377 | Rsa1.0_00248.1 | 885  | 163568 | 0         | 662 | 696  | 95 -  | 196 | 885  | 40143  | 40834  |
| UN44378 | Rsa1.0_04568.1 | 748  | 16805  | 1.00E-161 | 323 | 334  | 96 -  | 1   | 334  | 5339   | 5669   |
| UN44379 | Rsa1.0_02220.1 | 821  | 176031 | 1.00E-169 | 313 | 317  | 98 -  | 2   | 318  | 168068 | 168384 |
| UN44380 | Rsa1.0_00087.1 | 895  | 761073 | 0         | 489 | 501  | 97 -  | 1   | 500  | 96052  | 96552  |

|         |                |      |        |           |      |      |      |     |      |        |        |
|---------|----------------|------|--------|-----------|------|------|------|-----|------|--------|--------|
| UN44381 | Rsa1.0_01195.1 | 747  | 147988 | 0         | 430  | 449  | 95 - | 305 | 745  | 15404  | 15851  |
| UN44382 | Rsa1.0_00168.1 | 587  | 115870 | 1.00E-169 | 361  | 380  | 95 + | 6   | 382  | 113976 | 114351 |
| UN44383 | Rsa1.0_26323.1 | 714  | 896    | 8.00E-32  | 101  | 111  | 90 - | 167 | 277  | 385    | 495    |
| UN44384 | Rsa1.0_00153.1 | 567  | 192931 | 1.00E-128 | 313  | 338  | 92 + | 16  | 351  | 192211 | 192540 |
| UN44385 | Rsa1.0_00026.1 | 633  | 327835 | 1.00E-149 | 366  | 392  | 93 + | 1   | 384  | 209435 | 209819 |
| UN44386 | Rsa1.0_02239.1 | 919  | 33534  | 0         | 879  | 928  | 94 + | 3   | 917  | 5769   | 6689   |
| UN44387 | Rsa1.0_02022.1 | 522  | 35923  | 4.00E-98  | 210  | 218  | 96 - | 304 | 517  | 4698   | 4913   |
| UN44388 | Rsa1.0_00012.1 | 743  | 222148 | 1.00E-113 | 332  | 375  | 88 + | 1   | 348  | 49602  | 49974  |
| UN44389 | Rsa1.0_00813.1 | 772  | 63202  | 0         | 598  | 631  | 94 + | 141 | 770  | 18690  | 19320  |
| UN44390 | Rsa1.0_01090.1 | 605  | 54385  | 0         | 500  | 513  | 97 - | 90  | 602  | 7036   | 7548   |
| UN44391 | Rsa1.0_00920.1 | 784  | 601703 | 0         | 447  | 465  | 96 - | 9   | 471  | 439756 | 440218 |
| UN44392 | Rsa1.0_00392.1 | 1304 | 88523  | 0         | 1185 | 1199 | 98 - | 112 | 1302 | 82814  | 84012  |
| UN44393 | Rsa1.0_00197.1 | 698  | 109714 | 1.00E-162 | 311  | 318  | 97 - | 380 | 697  | 77977  | 78294  |
| UN44394 | Rsa1.0_07219.1 | 932  | 9702   | 0         | 444  | 450  | 98 + | 483 | 930  | 1740   | 2189   |
| UN44395 | Rsa1.0_00522.1 | 629  | 78103  | 3.00E-80  | 155  | 156  | 99 - | 275 | 430  | 49624  | 49779  |
| UN44396 | Rsa1.0_00627.1 | 808  | 71566  | 0         | 560  | 570  | 98 - | 3   | 572  | 18404  | 18973  |
| UN44397 | Rsa1.0_01978.1 | 848  | 36546  | 1.00E-150 | 306  | 317  | 96 + | 532 | 848  | 12510  | 12825  |
| UN44398 | Rsa1.0_00734.1 | 636  | 66508  | 1.00E-107 | 278  | 305  | 91 - | 117 | 415  | 38631  | 38935  |
| UN44399 | Rsa1.0_01292.1 | 736  | 175783 | 1.00E-139 | 266  | 271  | 98 - | 1   | 271  | 3978   | 4248   |
| UN44400 | Rsa1.0_00529.1 | 765  | 77487  | 1.00E-100 | 200  | 205  | 97 - | 557 | 761  | 64207  | 64411  |
| UN44401 | Rsa1.0_04126.1 | 521  | 18939  | 1.00E-157 | 336  | 353  | 95 + | 170 | 519  | 15539  | 15888  |
| UN44402 | Rsa1.0_01230.1 | 753  | 50221  | 0         | 440  | 448  | 98 + | 305 | 752  | 18363  | 18810  |
| UN44403 | Rsa1.0_02467.1 | 896  | 31141  | 7.00E-73  | 146  | 148  | 98 + | 367 | 514  | 9764   | 9911   |
| UN44404 | Rsa1.0_01936.1 | 581  | 37151  | 0         | 551  | 587  | 93 - | 1   | 581  | 18213  | 18798  |
| UN44405 | Rsa1.0_06141.1 | 665  | 11644  | 0         | 569  | 613  | 92 - | 63  | 663  | 6552   | 7150   |
| UN44406 | Rsa1.0_00202.1 | 758  | 185895 | 1.00E-122 | 259  | 270  | 95 + | 390 | 658  | 12228  | 12497  |
| UN44407 | Rsa1.0_01647.1 | 1042 | 41645  | 0         | 484  | 497  | 97 + | 544 | 1040 | 12151  | 12640  |
| UN44408 | Rsa1.0_00123.1 | 858  | 325650 | 1.00E-145 | 303  | 314  | 96 + | 1   | 313  | 216028 | 216340 |
| UN44409 | Rsa1.0_32336.1 | 778  | 704    | 3.00E-90  | 204  | 212  | 96 + | 3   | 211  | 453    | 663    |
| UN44410 | Rsa1.0_01434.1 | 539  | 45951  | 1.00E-115 | 226  | 231  | 97 + | 114 | 344  | 36401  | 36631  |
| UN44411 | Rsa1.0_02377.1 | 768  | 31994  | 1.00E-124 | 338  | 377  | 89 - | 1   | 359  | 18791  | 19160  |
| UN44412 | Rsa1.0_15993.1 | 448  | 2329   | 1.00E-119 | 376  | 428  | 87 - | 5   | 418  | 1900   | 2308   |
| UN44413 | Rsa1.0_00192.1 | 653  | 278200 | 0         | 374  | 375  | 99 + | 279 | 653  | 19564  | 19937  |
| UN44414 | Rsa1.0_02991.1 | 629  | 26178  | 2.00E-75  | 206  | 220  | 93 - | 1   | 215  | 4393   | 4607   |
| UN44415 | Rsa1.0_10576.1 | 628  | 5797   | 1.00E-112 | 254  | 266  | 95 - | 1   | 259  | 3248   | 3512   |
| UN44416 | Rsa1.0_01408.1 | 961  | 46383  | 0         | 629  | 656  | 95 + | 307 | 960  | 17196  | 17849  |
| UN44417 | Rsa1.0_01523.1 | 771  | 43959  | 1.00E-108 | 249  | 264  | 94 - | 1   | 258  | 20541  | 20804  |
| UN44418 | Rsa1.0_00511.1 | 869  | 78616  | 0         | 447  | 448  | 99 + | 1   | 448  | 34980  | 35427  |
| UN44419 | Rsa1.0_02346.1 | 772  | 32337  | 0         | 441  | 461  | 95 - | 312 | 772  | 3994   | 4454   |

|         |                |      |        |           |     |     |      |     |      |        |        |
|---------|----------------|------|--------|-----------|-----|-----|------|-----|------|--------|--------|
| UN44420 | Rsa1.0_03956.1 | 1138 | 19872  | 0         | 502 | 542 | 92 - | 599 | 1136 | 17799  | 18323  |
| UN44421 | Rsa1.0_00638.1 | 525  | 71037  | 4.00E-98  | 191 | 194 | 98 + | 210 | 403  | 1      | 194    |
| UN44422 | Rsa1.0_02711.1 | 870  | 28475  | 1.00E-167 | 345 | 358 | 96 + | 514 | 870  | 24537  | 24893  |
| UN44423 | Rsa1.0_00130.1 | 585  | 125737 | 0         | 500 | 525 | 95 - | 3   | 518  | 117636 | 118160 |
| UN44424 | Rsa1.0_02003.1 | 1127 | 36171  | 1.00E-132 | 272 | 283 | 96 - | 16  | 298  | 33675  | 33957  |
| UN44425 | Rsa1.0_02316.1 | 703  | 32608  | 0         | 363 | 370 | 98 - | 328 | 697  | 6027   | 6396   |
| UN44426 | Rsa1.0_02397.1 | 1296 | 31778  | 1.00E-179 | 355 | 365 | 97 + | 929 | 1290 | 25855  | 26218  |
| UN44427 | Rsa1.0_02269.1 | 677  | 33168  | 0         | 637 | 678 | 93 + | 3   | 674  | 30036  | 30708  |
| UN44428 | Rsa1.0_00284.1 | 643  | 323267 | 0         | 601 | 627 | 95 - | 3   | 624  | 232430 | 233055 |
| UN44429 | Rsa1.0_02054.1 | 842  | 35548  | 1.00E-138 | 270 | 277 | 97 - | 424 | 700  | 27078  | 27354  |
| UN44430 | Rsa1.0_00271.1 | 738  | 101125 | 0         | 475 | 499 | 95 + | 231 | 728  | 60726  | 61215  |
| UN44431 | Rsa1.0_01031.1 | 919  | 56236  | 1.00E-129 | 242 | 243 | 99 + | 677 | 918  | 9641   | 9883   |
| UN44432 | Rsa1.0_06168.1 | 858  | 11580  | 1.00E-171 | 406 | 438 | 92 + | 423 | 857  | 8500   | 8925   |
| UN44433 | Rsa1.0_01595.1 | 869  | 175383 | 1.00E-116 | 250 | 259 | 96 - | 601 | 857  | 4018   | 4273   |
| UN44434 | Rsa1.0_04378.1 | 741  | 17651  | 1.00E-178 | 344 | 353 | 97 + | 285 | 637  | 4630   | 4982   |
| UN44435 | Rsa1.0_00661.1 | 1118 | 213041 | 1.00E-151 | 340 | 360 | 94 - | 3   | 358  | 195844 | 196201 |
| UN44436 | Rsa1.0_00360.1 | 967  | 91190  | 1.00E-138 | 296 | 309 | 95 + | 18  | 323  | 43709  | 44013  |
| UN44437 | Rsa1.0_00119.1 | 795  | 467509 | 1.00E-123 | 287 | 304 | 94 - | 25  | 324  | 247841 | 248144 |
| UN44438 | Rsa1.0_02043.1 | 836  | 163754 | 1.00E-119 | 239 | 246 | 97 + | 247 | 492  | 145291 | 145536 |
| UN44439 | Rsa1.0_00006.1 | 681  | 396176 | 1.00E-139 | 306 | 319 | 95 - | 365 | 681  | 275843 | 276159 |
| UN44440 | Rsa1.0_00504.1 | 851  | 79334  | 0         | 495 | 517 | 95 + | 339 | 851  | 27053  | 27564  |
| UN44441 | Rsa1.0_25951.1 | 802  | 912    | 0         | 602 | 614 | 98 + | 190 | 801  | 77     | 690    |
| UN44442 | Rsa1.0_02420.1 | 752  | 31580  | 1.00E-177 | 584 | 669 | 87 - | 34  | 694  | 15999  | 16655  |
| UN44443 | Rsa1.0_00566.1 | 763  | 75325  | 0         | 682 | 779 | 87 + | 3   | 763  | 26029  | 26770  |
| UN44444 | Rsa1.0_00810.1 | 638  | 63289  | 0         | 615 | 639 | 96 - | 3   | 637  | 30720  | 31356  |
| UN44445 | Rsa1.0_02672.1 | 769  | 28884  | 1.00E-163 | 298 | 300 | 99 + | 470 | 769  | 16648  | 16947  |
| UN44446 | Rsa1.0_02422.1 | 827  | 161122 | 1.00E-118 | 250 | 259 | 96 - | 570 | 827  | 157971 | 158227 |
| UN44447 | Rsa1.0_00354.1 | 601  | 232005 | 0         | 558 | 607 | 91 - | 1   | 597  | 199674 | 200264 |
| UN44448 | Rsa1.0_01571.1 | 1505 | 43000  | 0         | 917 | 933 | 98 - | 573 | 1505 | 22259  | 23179  |
| UN44449 | Rsa1.0_00421.1 | 531  | 86365  | 4.00E-64  | 131 | 133 | 98 + | 213 | 345  | 42623  | 42755  |
| UN44450 | Rsa1.0_05087.1 | 894  | 14885  | 1.00E-113 | 309 | 337 | 91 + | 561 | 894  | 2360   | 2687   |
| UN44451 | Rsa1.0_04288.1 | 715  | 18077  | 1.00E-114 | 286 | 307 | 93 + | 414 | 715  | 13754  | 14058  |
| UN44452 | Rsa1.0_11519.1 | 624  | 5480   | 0         | 394 | 406 | 97 - | 59  | 460  | 4924   | 5329   |
| UN44453 | Rsa1.0_04218.1 | 614  | 18423  | 1.00E-166 | 399 | 437 | 91 - | 173 | 594  | 15856  | 16280  |
| UN44454 | Rsa1.0_00139.1 | 724  | 357786 | 0         | 584 | 593 | 98 - | 134 | 723  | 301273 | 301865 |
| UN44455 | Rsa1.0_02365.1 | 755  | 32118  | 2.00E-54  | 140 | 149 | 93 + | 6   | 153  | 15625  | 15773  |
| UN44456 | Rsa1.0_00180.1 | 929  | 114581 | 0         | 500 | 520 | 96 - | 415 | 929  | 92195  | 92713  |
| UN44457 | Rsa1.0_08775.1 | 714  | 6933   | 1.00E-141 | 286 | 295 | 96 - | 421 | 714  | 2320   | 2610   |
| UN44458 | Rsa1.0_01469.1 | 855  | 45139  | 0         | 835 | 862 | 96 + | 2   | 855  | 19313  | 20165  |

|         |                |      |        |           |     |     |       |     |      |        |        |
|---------|----------------|------|--------|-----------|-----|-----|-------|-----|------|--------|--------|
| UN44459 | Rsa1.0.06311.1 | 776  | 11254  | 1.00E-158 | 300 | 305 | 98 -  | 475 | 776  | 4307   | 4611   |
| UN44460 | Rsa1.0.02611.1 | 678  | 29586  | 0         | 398 | 417 | 95 -  | 12  | 426  | 19755  | 20170  |
| UN44461 | Rsa1.0.00879.1 | 1363 | 61297  | 0         | 500 | 539 | 92 +  | 362 | 898  | 37598  | 38121  |
| UN44462 | Rsa1.0.05572.1 | 772  | 13291  | 0         | 554 | 592 | 93 -  | 54  | 627  | 11471  | 12059  |
| UN44463 | Rsa1.0.03398.1 | 763  | 23207  | 1.00E-152 | 279 | 281 | 99 +  | 483 | 763  | 10860  | 11140  |
| UN44464 | Rsa1.0.00301.1 | 731  | 365315 | 0         | 617 | 648 | 95 -  | 38  | 678  | 312101 | 312745 |
| UN44465 | Rsa1.0.00654.1 | 877  | 70012  | 0         | 847 | 886 | 95 -  | 2   | 873  | 41871  | 42751  |
| UN44466 | Rsa1.0.01882.1 | 585  | 37697  | 1.00E-166 | 359 | 378 | 94 +  | 205 | 578  | 11378  | 11755  |
| UN44467 | Rsa1.0.00040.1 | 1217 | 324196 | 0         | 418 | 432 | 96 +  | 265 | 696  | 15014  | 15445  |
| UN44468 | Rsa1.0.03594.1 | 820  | 21868  | 1.00E-127 | 237 | 239 | 99 -  | 3   | 241  | 13099  | 13337  |
| UN44469 | Rsa1.0.00092.1 | 618  | 659932 | 7.00E-97  | 265 | 294 | 90 -  | 329 | 618  | 627134 | 627409 |
| UN44470 | Rsa1.0.00067.1 | 811  | 415055 | 0         | 479 | 479 | 100 - | 328 | 806  | 38333  | 38811  |
| UN44471 | Rsa1.0.00191.1 | 700  | 316976 | 0         | 572 | 614 | 93 -  | 114 | 700  | 121972 | 122582 |
| UN44472 | Rsa1.0.03347.1 | 564  | 23588  | 7.00E-72  | 161 | 169 | 95 -  | 396 | 564  | 20420  | 20582  |
| UN44473 | Rsa1.0.03204.1 | 608  | 24622  | 1.00E-172 | 414 | 453 | 91 -  | 186 | 608  | 6109   | 6561   |
| UN44474 | Rsa1.0.00017.1 | 767  | 752458 | 3.00E-81  | 183 | 193 | 94 +  | 3   | 189  | 514866 | 515058 |
| UN44475 | Rsa1.0.00387.1 | 720  | 495407 | 1.00E-102 | 286 | 320 | 89 -  | 403 | 720  | 339991 | 340287 |
| UN44476 | Rsa1.0.01355.1 | 627  | 47303  | 0         | 579 | 591 | 97 -  | 41  | 627  | 25888  | 26478  |
| UN44477 | Rsa1.0.05398.1 | 501  | 13885  | 1.00E-152 | 390 | 423 | 92 +  | 70  | 489  | 12820  | 13228  |
| UN44478 | Rsa1.0.07905.1 | 909  | 8320   | 0         | 645 | 698 | 92 +  | 2   | 697  | 2479   | 3176   |
| UN44479 | Rsa1.0.01481.1 | 721  | 184562 | 1.00E-132 | 240 | 240 | 100 - | 3   | 242  | 182559 | 182798 |
| UN44480 | Rsa1.0.00222.1 | 377  | 172263 | 9.00E-86  | 218 | 234 | 93 -  | 143 | 376  | 41926  | 42153  |
| UN44481 | Rsa1.0.00116.1 | 861  | 365886 | 0         | 611 | 612 | 99 +  | 1   | 611  | 323536 | 324147 |
| UN44482 | Rsa1.0.01889.1 | 956  | 37562  | 6.00E-95  | 177 | 177 | 100 - | 5   | 181  | 22624  | 22800  |
| UN44483 | Rsa1.0.00127.1 | 486  | 127446 | 1.00E-130 | 272 | 283 | 96 +  | 204 | 485  | 35697  | 35979  |
| UN44484 | Rsa1.0.00115.1 | 844  | 131321 | 1.00E-92  | 244 | 270 | 90 +  | 56  | 325  | 34940  | 35197  |
| UN44485 | Rsa1.0.03297.1 | 760  | 23969  | 1.00E-122 | 278 | 297 | 93 +  | 464 | 760  | 3924   | 4209   |
| UN44486 | Rsa1.0.00113.1 | 670  | 131574 | 1.00E-154 | 292 | 296 | 98 +  | 3   | 298  | 51929  | 52223  |
| UN44487 | Rsa1.0.04786.1 | 1027 | 15988  | 0         | 391 | 391 | 100 - | 1   | 391  | 1623   | 2013   |
| UN44488 | Rsa1.0.02168.1 | 1087 | 34367  | 0         | 458 | 460 | 99 -  | 4   | 462  | 15354  | 15813  |
| UN44489 | Rsa1.0.00134.1 | 703  | 390219 | 1.00E-169 | 338 | 348 | 97 -  | 360 | 703  | 230194 | 230541 |
| UN44490 | Rsa1.0.04048.1 | 748  | 19394  | 1.00E-113 | 500 | 600 | 83 -  | 79  | 639  | 6183   | 6748   |
| UN44491 | Rsa1.0.04945.1 | 1094 | 15370  | 0         | 837 | 872 | 95 +  | 225 | 1092 | 8767   | 9635   |
| UN44492 | Rsa1.0.02026.1 | 971  | 35896  | 0         | 591 | 624 | 94 +  | 353 | 971  | 22657  | 23273  |
| UN44493 | Rsa1.0.00070.1 | 899  | 150321 | 0         | 468 | 505 | 92 +  | 64  | 559  | 37003  | 37507  |
| UN44494 | Rsa1.0.02322.1 | 642  | 32555  | 0         | 376 | 388 | 96 +  | 199 | 586  | 6211   | 6598   |
| UN44495 | Rsa1.0.01026.1 | 693  | 171624 | 0         | 562 | 601 | 93 -  | 69  | 644  | 159970 | 160566 |
| UN44496 | Rsa1.0.00327.1 | 1099 | 94892  | 1.00E-147 | 319 | 335 | 95 +  | 3   | 336  | 34070  | 34401  |
| UN44497 | Rsa1.0.00243.1 | 767  | 103651 | 0         | 399 | 415 | 96 -  | 355 | 766  | 63730  | 64143  |

|         |                |      |        |           |     |      |       |     |      |        |        |
|---------|----------------|------|--------|-----------|-----|------|-------|-----|------|--------|--------|
| UN44498 | Rsa1.0.00316.1 | 1033 | 96264  | 0         | 441 | 465  | 94 -  | 579 | 1032 | 30644  | 31108  |
| UN44499 | Rsa1.0.00977.1 | 546  | 198001 | 0         | 517 | 560  | 92 +  | 4   | 544  | 47124  | 47683  |
| UN44500 | Rsa1.0.02477.1 | 890  | 31058  | 0         | 586 | 593  | 98 -  | 55  | 647  | 24174  | 24766  |
| UN44501 | Rsa1.0.06386.1 | 623  | 140583 | 0         | 465 | 468  | 99 -  | 156 | 623  | 134603 | 135070 |
| UN44502 | Rsa1.0.01343.1 | 616  | 47735  | 1.00E-144 | 300 | 310  | 96 +  | 309 | 616  | 30311  | 30617  |
| UN44503 | Rsa1.0.00713.1 | 649  | 158017 | 0         | 401 | 418  | 95 +  | 225 | 640  | 153615 | 154031 |
| UN44504 | Rsa1.0.00679.1 | 611  | 68971  | 3.00E-68  | 171 | 179  | 95 -  | 436 | 610  | 65779  | 65956  |
| UN44505 | Rsa1.0.00124.1 | 604  | 262503 | 1.00E-156 | 357 | 378  | 94 -  | 227 | 602  | 16215  | 16583  |
| UN44506 | Rsa1.0.09414.1 | 770  | 6386   | 0         | 691 | 719  | 96 -  | 3   | 718  | 646    | 1349   |
| UN44507 | Rsa1.0.02290.1 | 1207 | 32971  | 0         | 424 | 428  | 99 +  | 3   | 430  | 21786  | 22213  |
| UN44508 | Rsa1.0.00198.1 | 1078 | 222963 | 0         | 978 | 1057 | 92 +  | 35  | 1078 | 138002 | 139043 |
| UN44509 | Rsa1.0.64999.1 | 406  | 353    | 2.00E-46  | 126 | 134  | 94 +  | 276 | 406  | 6      | 139    |
| UN44510 | Rsa1.0.01094.1 | 1012 | 167285 | 0         | 613 | 655  | 93 +  | 2   | 645  | 48824  | 49477  |
| UN44511 | Rsa1.0.02041.1 | 735  | 163634 | 0         | 612 | 694  | 88 +  | 47  | 711  | 11519  | 12192  |
| UN44512 | Rsa1.0.02114.1 | 1274 | 34873  | 1.00E-161 | 311 | 317  | 98 +  | 2   | 318  | 10832  | 11147  |
| UN44513 | Rsa1.0.02282.1 | 1095 | 163951 | 1.00E-111 | 441 | 515  | 85 +  | 580 | 1084 | 150167 | 150666 |
| UN44514 | Rsa1.0.02050.1 | 445  | 35570  | 0         | 414 | 437  | 94 -  | 14  | 445  | 30941  | 31372  |
| UN44515 | Rsa1.0.00082.1 | 759  | 237584 | 0         | 701 | 763  | 91 -  | 1   | 759  | 68507  | 69255  |
| UN44516 | Rsa1.0.02493.1 | 644  | 30854  | 1.00E-124 | 235 | 238  | 98 -  | 276 | 513  | 6059   | 6296   |
| UN44517 | Rsa1.0.01989.1 | 624  | 36439  | 2.00E-81  | 182 | 190  | 95 +  | 428 | 616  | 22889  | 23078  |
| UN44518 | Rsa1.0.01185.1 | 626  | 149842 | 1.00E-110 | 214 | 218  | 98 +  | 150 | 367  | 11147  | 11364  |
| UN44519 | Rsa1.0.30311.1 | 749  | 757    | 1.00E-172 | 324 | 329  | 98 +  | 3   | 329  | 215    | 543    |
| UN44520 | Rsa1.0.01036.1 | 545  | 55978  | 2.00E-84  | 243 | 266  | 91 -  | 285 | 545  | 26497  | 26757  |
| UN44521 | Rsa1.0.02874.1 | 1178 | 27070  | 1.00E-108 | 378 | 437  | 86 +  | 539 | 975  | 4915   | 5348   |
| UN44522 | Rsa1.0.00092.1 | 680  | 659932 | 4.00E-80  | 205 | 223  | 91 -  | 11  | 233  | 56364  | 56580  |
| UN44523 | Rsa1.0.01618.1 | 809  | 42118  | 1.00E-110 | 297 | 328  | 90 -  | 493 | 809  | 17381  | 17706  |
| UN44524 | Rsa1.0.00221.1 | 934  | 106972 | 1.00E-157 | 478 | 542  | 88 +  | 48  | 589  | 37064  | 37604  |
| UN44525 | Rsa1.0.05320.1 | 1028 | 14158  | 0         | 520 | 526  | 98 -  | 182 | 705  | 2257   | 2781   |
| UN44526 | Rsa1.0.00413.1 | 772  | 86921  | 0         | 387 | 399  | 96 -  | 376 | 772  | 20423  | 20821  |
| UN44527 | Rsa1.0.02310.1 | 564  | 32735  | 1.00E-178 | 362 | 377  | 96 -  | 2   | 378  | 30017  | 30393  |
| UN44528 | Rsa1.0.00407.1 | 839  | 191544 | 1.00E-174 | 387 | 406  | 95 -  | 433 | 838  | 155496 | 155891 |
| UN44529 | Rsa1.0.15363.1 | 465  | 2655   | 1.00E-164 | 377 | 403  | 93 +  | 69  | 464  | 1072   | 1473   |
| UN44530 | Rsa1.0.00485.1 | 843  | 80937  | 0         | 408 | 420  | 97 -  | 1   | 417  | 37393  | 37812  |
| UN44531 | Rsa1.0.00350.1 | 1013 | 92346  | 0         | 336 | 339  | 99 +  | 1   | 339  | 53921  | 54259  |
| UN44532 | Rsa1.0.00548.1 | 663  | 76518  | 4.00E-83  | 172 | 177  | 97 -  | 258 | 434  | 59496  | 59672  |
| UN44533 | Rsa1.0.00002.1 | 557  | 601661 | 0         | 529 | 546  | 96 -  | 1   | 546  | 442897 | 443442 |
| UN44534 | Rsa1.0.00391.1 | 677  | 183853 | 1.00E-128 | 312 | 333  | 93 +  | 1   | 326  | 68831  | 69162  |
| UN44535 | Rsa1.0.02299.1 | 725  | 32857  | 0         | 404 | 423  | 95 +  | 3   | 417  | 13726  | 14146  |
| UN44536 | Rsa1.0.02874.1 | 387  | 27070  | 2.00E-89  | 167 | 167  | 100 - | 2   | 168  | 5450   | 5616   |



|         |                |      |        |           |      |      |       |     |      |        |        |
|---------|----------------|------|--------|-----------|------|------|-------|-----|------|--------|--------|
| UN44537 | Rsa1.0.02314.1 | 611  | 32642  | 1.00E-128 | 260  | 269  | 96 +  | 1   | 269  | 11563  | 11831  |
| UN44538 | Rsa1.0.00163.1 | 730  | 116847 | 1.00E-153 | 295  | 302  | 97 -  | 371 | 672  | 66573  | 66874  |
| UN44539 | Rsa1.0.01376.1 | 980  | 47004  | 1.00E-180 | 360  | 370  | 97 -  | 612 | 980  | 22413  | 22778  |
| UN44540 | Rsa1.0.00026.1 | 1221 | 327835 | 0         | 532  | 536  | 99 +  | 516 | 1051 | 43975  | 44510  |
| UN44541 | Rsa1.0.02565.1 | 1018 | 30046  | 0         | 867  | 918  | 94 +  | 92  | 990  | 272    | 1189   |
| UN44542 | Rsa1.0.01860.1 | 1249 | 38057  | 0         | 1211 | 1250 | 96 -  | 1   | 1248 | 9087   | 10336  |
| UN44543 | Rsa1.0.02813.1 | 527  | 27656  | 5.00E-82  | 180  | 187  | 96 +  | 347 | 527  | 25915  | 26101  |
| UN44544 | Rsa1.0.00710.1 | 730  | 67325  | 0         | 396  | 399  | 99 -  | 1   | 399  | 28163  | 28559  |
| UN44545 | Rsa1.0.30083.1 | 486  | 763    | 1.00E-136 | 280  | 290  | 96 +  | 6   | 295  | 32     | 320    |
| UN44546 | Rsa1.0.00015.1 | 1352 | 561803 | 0         | 457  | 470  | 97 +  | 2   | 467  | 178644 | 179113 |
| UN44547 | Rsa1.0.00277.1 | 475  | 100132 | 1.00E-140 | 258  | 260  | 99 -  | 38  | 297  | 8930   | 9189   |
| UN44548 | Rsa1.0.00026.1 | 721  | 327835 | 0         | 621  | 671  | 92 -  | 1   | 671  | 167371 | 168020 |
| UN44549 | Rsa1.0.24219.1 | 440  | 999    | 5.00E-23  | 93   | 104  | 89 +  | 35  | 138  | 605    | 702    |
| UN44550 | Rsa1.0.01153.1 | 739  | 52264  | 0         | 353  | 356  | 99 +  | 3   | 358  | 24198  | 24552  |
| UN44551 | Rsa1.0.02178.1 | 630  | 156197 | 0         | 390  | 400  | 97 +  | 172 | 571  | 1613   | 2012   |
| UN44552 | Rsa1.0.00645.1 | 878  | 189716 | 1.00E-128 | 233  | 233  | 100 - | 1   | 233  | 148716 | 148948 |
| UN44553 | Rsa1.0.00857.1 | 625  | 61904  | 0         | 570  | 609  | 93 -  | 14  | 618  | 16875  | 17468  |
| UN44554 | Rsa1.0.02552.1 | 512  | 30191  | 2.00E-68  | 135  | 136  | 99 -  | 376 | 511  | 21394  | 21529  |
| UN44555 | Rsa1.0.04189.1 | 863  | 18584  | 1.00E-113 | 257  | 273  | 94 -  | 2   | 265  | 4224   | 4496   |
| UN44556 | Rsa1.0.01242.1 | 1130 | 50066  | 1.00E-112 | 218  | 222  | 98 +  | 908 | 1129 | 10743  | 10964  |
| UN44557 | Rsa1.0.01835.1 | 587  | 38542  | 1.00E-159 | 312  | 320  | 97 +  | 190 | 509  | 20857  | 21175  |
| UN44558 | Rsa1.0.00604.1 | 792  | 146282 | 1.00E-107 | 210  | 214  | 98 -  | 475 | 688  | 36992  | 37205  |
| UN44559 | Rsa1.0.01702.1 | 1391 | 40722  | 0         | 529  | 569  | 92 +  | 1   | 547  | 17609  | 18168  |
| UN44560 | Rsa1.0.11595.1 | 1095 | 5463   | 0         | 569  | 596  | 95 +  | 268 | 857  | 933    | 1521   |
| UN44561 | Rsa1.0.07696.1 | 805  | 8769   | 1.00E-144 | 297  | 309  | 96 -  | 499 | 803  | 6362   | 6670   |
| UN44562 | Rsa1.0.02387.1 | 1081 | 31890  | 6.00E-49  | 127  | 136  | 93 +  | 929 | 1064 | 30212  | 30347  |
| UN44563 | Rsa1.0.00247.1 | 989  | 103408 | 1.00E-166 | 320  | 328  | 97 +  | 359 | 686  | 69080  | 69407  |
| UN44564 | Rsa1.0.00646.1 | 1187 | 70473  | 0         | 898  | 935  | 96 +  | 191 | 1125 | 4441   | 5375   |
| UN44565 | Rsa1.0.01917.1 | 519  | 37303  | 1.00E-153 | 314  | 327  | 96 +  | 6   | 332  | 10103  | 10425  |
| UN44566 | Rsa1.0.01081.1 | 606  | 499226 | 8.00E-81  | 232  | 252  | 92 +  | 3   | 250  | 323232 | 323476 |
| UN44567 | Rsa1.0.01098.1 | 926  | 54215  | 1.00E-173 | 531  | 604  | 87 +  | 1   | 594  | 34601  | 35192  |
| UN44568 | Rsa1.0.00555.1 | 708  | 75920  | 0         | 572  | 600  | 95 +  | 23  | 620  | 51205  | 51801  |
| UN44569 | Rsa1.0.00403.1 | 637  | 87701  | 0         | 592  | 636  | 93 -  | 1   | 636  | 44847  | 45459  |
| UN44570 | Rsa1.0.00060.1 | 877  | 502678 | 1.00E-137 | 260  | 264  | 98 -  | 398 | 661  | 126419 | 126682 |
| UN44571 | Rsa1.0.00302.1 | 868  | 97521  | 0         | 700  | 775  | 90 +  | 32  | 804  | 92063  | 92829  |
| UN44572 | Rsa1.0.00192.1 | 708  | 278200 | 1.00E-179 | 340  | 345  | 98 -  | 362 | 706  | 11747  | 12088  |
| UN44573 | Rsa1.0.01234.1 | 838  | 50183  | 0         | 492  | 507  | 97 -  | 1   | 507  | 8898   | 9404   |
| UN44574 | Rsa1.0.05410.1 | 781  | 13840  | 0         | 607  | 667  | 91 +  | 1   | 637  | 5557   | 6219   |
| UN44575 | Rsa1.0.00370.1 | 829  | 90472  | 0         | 455  | 467  | 97 +  | 1   | 467  | 10132  | 10596  |

|         |                |      |        |           |     |     |       |     |      |        |        |
|---------|----------------|------|--------|-----------|-----|-----|-------|-----|------|--------|--------|
| UN44576 | Rsa1.0.02803.1 | 752  | 27715  | 1.00E-123 | 316 | 346 | 91 +  | 236 | 578  | 8863   | 9208   |
| UN44577 | Rsa1.0.11046.1 | 808  | 5635   | 8.00E-91  | 170 | 170 | 100 - | 1   | 170  | 3263   | 3432   |
| UN44578 | Rsa1.0.01214.1 | 871  | 50599  | 0         | 412 | 430 | 95 +  | 3   | 430  | 35133  | 35561  |
| UN44579 | Rsa1.0.01277.1 | 813  | 49375  | 0         | 755 | 779 | 96 -  | 1   | 771  | 21421  | 22197  |
| UN44580 | Rsa1.0.00087.1 | 791  | 761073 | 1.00E-135 | 244 | 244 | 100 + | 546 | 789  | 103404 | 103647 |
| UN44581 | Rsa1.0.00683.1 | 548  | 68638  | 1.00E-115 | 274 | 295 | 92 +  | 1   | 289  | 8513   | 8804   |
| UN44582 | Rsa1.0.02455.1 | 959  | 31262  | 0         | 653 | 700 | 93 -  | 63  | 739  | 25212  | 25902  |
| UN44583 | Rsa1.0.01193.1 | 868  | 51147  | 1.00E-154 | 316 | 328 | 96 +  | 394 | 721  | 15668  | 15993  |
| UN44584 | Rsa1.0.03826.1 | 873  | 20614  | 0         | 444 | 446 | 99 +  | 2   | 447  | 10707  | 11152  |
| UN44585 | Rsa1.0.01166.1 | 766  | 51877  | 1.00E-173 | 362 | 378 | 95 -  | 5   | 379  | 26795  | 27171  |
| UN44586 | Rsa1.0.06677.1 | 760  | 10560  | 1.00E-135 | 309 | 331 | 93 -  | 435 | 759  | 52     | 382    |
| UN44587 | Rsa1.0.02658.1 | 1106 | 28978  | 1.00E-161 | 319 | 328 | 97 +  | 1   | 328  | 11717  | 12043  |
| UN44588 | Rsa1.0.01778.1 | 1085 | 39509  | 2.33E-156 | 302 | 315 | 95 -  | 2   | 316  | 9400   | 9704   |
| UN44589 | Rsa1.0.04511.1 | 769  | 17032  | 1.00E-108 | 259 | 277 | 93 -  | 1   | 271  | 4974   | 5247   |
| UN44590 | Rsa1.0.00388.1 | 1066 | 88890  | 0         | 359 | 363 | 98 -  | 1   | 363  | 49408  | 49770  |
| UN44591 | Rsa1.0.00190.1 | 866  | 318240 | 1.00E-163 | 357 | 374 | 95 +  | 1   | 371  | 134849 | 135220 |
| UN44592 | Rsa1.0.08338.1 | 627  | 7511   | 0         | 577 | 629 | 91 +  | 4   | 625  | 393    | 989    |
| UN44593 | Rsa1.0.72029.1 | 680  | 318    | 1.00E-141 | 257 | 258 | 99 +  | 71  | 328  | 1      | 258    |
| UN44594 | Rsa1.0.02389.1 | 690  | 146428 | 0         | 437 | 446 | 97 -  | 243 | 688  | 137834 | 138279 |
| UN44595 | Rsa1.0.19044.1 | 589  | 1490   | 1.00E-134 | 243 | 243 | 100 - | 1   | 243  | 1016   | 1258   |
| UN44596 | Rsa1.0.03711.1 | 705  | 21237  | 1.00E-176 | 325 | 329 | 98 -  | 377 | 705  | 19545  | 19873  |
| UN44597 | Rsa1.0.00094.1 | 695  | 139042 | 2.00E-97  | 199 | 205 | 97 -  | 348 | 552  | 118743 | 118947 |
| UN44598 | Rsa1.0.02735.1 | 1047 | 28344  | 0         | 437 | 473 | 92 -  | 576 | 1047 | 2751   | 3205   |
| UN44599 | Rsa1.0.03713.1 | 834  | 21221  | 0         | 426 | 453 | 94 +  | 5   | 452  | 10454  | 10903  |
| UN44600 | Rsa1.0.09168.1 | 413  | 6590   | 1.00E-127 | 250 | 254 | 98 -  | 5   | 258  | 5409   | 5659   |
| UN44601 | Rsa1.0.00979.1 | 736  | 57733  | 4.00E-77  | 199 | 215 | 92 +  | 191 | 405  | 1177   | 1390   |
| UN44602 | Rsa1.0.01164.1 | 959  | 51934  | 1.00E-124 | 241 | 246 | 97 +  | 85  | 330  | 610    | 855    |
| UN44603 | Rsa1.0.03004.1 | 548  | 26091  | 0         | 539 | 562 | 95 -  | 1   | 548  | 2456   | 3013   |
| UN44604 | Rsa1.0.00603.1 | 541  | 73299  | 0         | 455 | 469 | 97 -  | 1   | 468  | 32629  | 33096  |
| UN44605 | Rsa1.0.00191.1 | 887  | 316976 | 1.00E-127 | 267 | 279 | 95 -  | 232 | 510  | 145775 | 146053 |
| UN44606 | Rsa1.0.00612.1 | 1189 | 72376  | 0         | 552 | 575 | 96 +  | 1   | 574  | 54456  | 55020  |
| UN44607 | Rsa1.0.00090.1 | 785  | 273859 | 1.00E-100 | 189 | 190 | 99 +  | 218 | 407  | 36101  | 36290  |
| UN44608 | Rsa1.0.11907.1 | 381  | 5374   | 9.00E-89  | 184 | 190 | 96 -  | 191 | 380  | 177    | 366    |
| UN44609 | Rsa1.0.00245.1 | 844  | 103569 | 1.00E-92  | 185 | 189 | 97 -  | 656 | 844  | 13634  | 13822  |
| UN44610 | Rsa1.0.03241.1 | 880  | 24423  | 0         | 460 | 465 | 98 -  | 11  | 475  | 23915  | 24378  |
| UN44611 | Rsa1.0.00632.1 | 770  | 183777 | 0         | 411 | 423 | 97 +  | 322 | 744  | 37301  | 37723  |
| UN44612 | Rsa1.0.01124.1 | 616  | 53295  | 0         | 487 | 505 | 96 +  | 1   | 502  | 25546  | 26048  |
| UN44613 | Rsa1.0.01934.1 | 1163 | 37162  | 1.00E-171 | 324 | 330 | 98 +  | 1   | 326  | 1839   | 2168   |
| UN44614 | Rsa1.0.00985.1 | 1277 | 161950 | 0         | 774 | 778 | 99 +  | 1   | 778  | 16469  | 17246  |

|         |                |      |        |           |      |      |      |     |      |        |        |
|---------|----------------|------|--------|-----------|------|------|------|-----|------|--------|--------|
| UN44615 | Rsa1.0.03722.1 | 947  | 21184  | 0         | 942  | 946  | 99 - | 1   | 945  | 19983  | 20927  |
| UN44616 | Rsa1.0.01119.1 | 1279 | 53459  | 1.00E-117 | 217  | 218  | 99 - | 359 | 576  | 23345  | 23562  |
| UN44617 | Rsa1.0.08986.1 | 844  | 6733   | 0         | 473  | 496  | 95 - | 349 | 841  | 5029   | 5514   |
| UN44618 | Rsa1.0.02180.1 | 560  | 34176  | 0         | 460  | 466  | 98 - | 1   | 465  | 17502  | 17967  |
| UN44619 | Rsa1.0.00065.1 | 1172 | 454616 | 0         | 361  | 369  | 97 - | 3   | 371  | 191624 | 191992 |
| UN44620 | Rsa1.0.00804.1 | 884  | 63726  | 0         | 440  | 452  | 97 + | 1   | 440  | 15916  | 16367  |
| UN44621 | Rsa1.0.00416.1 | 930  | 86772  | 1.00E-173 | 348  | 356  | 97 - | 1   | 352  | 41330  | 41684  |
| UN44622 | Rsa1.0.02406.1 | 766  | 145276 | 1.00E-123 | 228  | 229  | 99 + | 1   | 229  | 7574   | 7802   |
| UN44623 | Rsa1.0.00025.1 | 995  | 277312 | 1.00E-104 | 366  | 424  | 86 - | 570 | 993  | 259206 | 259629 |
| UN44624 | Rsa1.0.05884.1 | 717  | 12337  | 0         | 654  | 696  | 93 + | 4   | 687  | 11642  | 12337  |
| UN44625 | Rsa1.0.04169.1 | 909  | 18712  | 7.00E-70  | 147  | 151  | 97 + | 423 | 573  | 3817   | 3967   |
| UN44626 | Rsa1.0.00035.1 | 1102 | 176449 | 1.00E-170 | 366  | 383  | 95 + | 721 | 1102 | 156806 | 157185 |
| UN44627 | Rsa1.0.08250.1 | 686  | 7658   | 0         | 621  | 676  | 91 - | 4   | 671  | 3868   | 4535   |
| UN44628 | Rsa1.0.00244.1 | 1250 | 103590 | 0         | 1094 | 1173 | 93 + | 3   | 1158 | 77045  | 78216  |
| UN44629 | Rsa1.0.03199.1 | 791  | 24640  | 0         | 424  | 427  | 99 - | 1   | 427  | 16315  | 16741  |
| UN44630 | Rsa1.0.01425.1 | 762  | 46136  | 1.00E-165 | 304  | 307  | 99 + | 1   | 307  | 34291  | 34597  |
| UN44631 | Rsa1.0.00594.1 | 745  | 73729  | 0         | 708  | 759  | 93 + | 1   | 743  | 27060  | 27816  |
| UN44632 | Rsa1.0.01560.1 | 851  | 43256  | 1.00E-105 | 213  | 218  | 97 - | 18  | 233  | 30828  | 31045  |
| UN44633 | Rsa1.0.01949.1 | 1284 | 36960  | 1.00E-179 | 396  | 420  | 94 - | 5   | 421  | 27763  | 28176  |
| UN44634 | Rsa1.0.00087.1 | 839  | 761073 | 0         | 521  | 551  | 94 + | 201 | 748  | 357392 | 357933 |
| UN44635 | Rsa1.0.04079.1 | 750  | 19202  | 0         | 534  | 576  | 92 + | 4   | 576  | 16215  | 16772  |
| UN44636 | Rsa1.0.00476.1 | 644  | 280966 | 1.00E-171 | 326  | 333  | 97 - | 312 | 644  | 157078 | 157405 |
| UN44637 | Rsa1.0.05441.1 | 459  | 13742  | 1.00E-94  | 248  | 273  | 90 - | 1   | 264  | 11330  | 11593  |
| UN44638 | Rsa1.0.00710.1 | 307  | 67325  | 1.00E-105 | 240  | 254  | 94 - | 7   | 259  | 1773   | 2022   |
| UN44639 | Rsa1.0.00635.1 | 706  | 175826 | 0         | 444  | 454  | 97 - | 2   | 454  | 122704 | 123155 |
| UN44640 | Rsa1.0.00436.1 | 408  | 85008  | 2.00E-31  | 103  | 114  | 90 - | 293 | 406  | 64255  | 64368  |
| UN44641 | Rsa1.0.04021.1 | 701  | 19536  | 1.00E-119 | 220  | 221  | 99 - | 3   | 223  | 4926   | 5146   |
| UN44642 | Rsa1.0.00364.1 | 825  | 90951  | 1.00E-168 | 331  | 342  | 96 + | 56  | 391  | 49205  | 49546  |
| UN44643 | Rsa1.0.08424.1 | 975  | 7375   | 0         | 470  | 486  | 96 + | 104 | 589  | 4052   | 4533   |
| UN44644 | Rsa1.0.00192.1 | 586  | 278200 | 0         | 557  | 572  | 97 - | 2   | 573  | 273279 | 273850 |
| UN44645 | Rsa1.0.02430.1 | 1078 | 31506  | 0         | 1063 | 1077 | 98 + | 1   | 1076 | 12907  | 13981  |
| UN44646 | Rsa1.0.00841.1 | 782  | 183065 | 1.00E-131 | 259  | 265  | 97 + | 5   | 268  | 1041   | 1305   |
| UN44647 | Rsa1.0.05545.1 | 802  | 13379  | 0         | 629  | 669  | 94 + | 124 | 792  | 11237  | 11902  |
| UN44648 | Rsa1.0.00818.1 | 593  | 62939  | 0         | 559  | 599  | 93 - | 1   | 592  | 36548  | 37127  |
| UN44649 | Rsa1.0.00058.1 | 437  | 159921 | 8.00E-65  | 182  | 194  | 93 - | 85  | 276  | 136723 | 136913 |
| UN44650 | Rsa1.0.00713.1 | 603  | 158017 | 1.00E-156 | 306  | 314  | 97 - | 69  | 379  | 153615 | 153928 |
| UN44651 | Rsa1.0.00146.1 | 809  | 149343 | 1.00E-128 | 245  | 249  | 98 - | 270 | 518  | 81705  | 81953  |
| UN44652 | Rsa1.0.01896.1 | 803  | 37512  | 0         | 584  | 610  | 95 - | 1   | 610  | 19518  | 20127  |
| UN44653 | Rsa1.0.00211.1 | 475  | 228189 | 1.00E-100 | 207  | 214  | 96 + | 1   | 214  | 151721 | 151934 |

|         |                |      |        |           |      |      |       |     |      |        |        |
|---------|----------------|------|--------|-----------|------|------|-------|-----|------|--------|--------|
| UN44654 | Rsa1.0_00409.1 | 702  | 146788 | 0         | 418  | 449  | 93 -  | 235 | 683  | 84613  | 85061  |
| UN44655 | Rsa1.0_59435.1 | 753  | 385    | 1.00E-135 | 258  | 261  | 98 -  | 248 | 507  | 3      | 263    |
| UN44656 | Rsa1.0_01789.1 | 760  | 39250  | 0         | 436  | 457  | 95 +  | 3   | 456  | 6152   | 6607   |
| UN44657 | Rsa1.0_00025.1 | 895  | 277312 | 2.00E-85  | 202  | 212  | 95 -  | 106 | 317  | 153562 | 153769 |
| UN44658 | Rsa1.0_00483.1 | 1064 | 81102  | 1.00E-175 | 383  | 403  | 95 -  | 494 | 895  | 50366  | 50766  |
| UN44659 | Rsa1.0_00273.1 | 543  | 326186 | 1.00E-150 | 325  | 341  | 95 -  | 13  | 352  | 110417 | 110755 |
| UN44660 | Rsa1.0_01506.1 | 989  | 44370  | 1.00E-99  | 282  | 314  | 89 +  | 9   | 320  | 34097  | 34398  |
| UN44661 | Rsa1.0_03024.1 | 424  | 25931  | 0         | 350  | 354  | 98 -  | 70  | 423  | 11834  | 12187  |
| UN44662 | Rsa1.0_01466.1 | 903  | 45161  | 1.00E-162 | 301  | 305  | 98 -  | 2   | 306  | 28487  | 28791  |
| UN44663 | Rsa1.0_00278.1 | 886  | 231896 | 0         | 448  | 476  | 94 +  | 243 | 716  | 21557  | 22018  |
| UN44664 | Rsa1.0_01923.1 | 480  | 37233  | 2.00E-74  | 160  | 166  | 96 +  | 303 | 468  | 28508  | 28673  |
| UN44665 | Rsa1.0_00675.1 | 990  | 145590 | 0         | 879  | 991  | 88 -  | 32  | 988  | 28279  | 29231  |
| UN44666 | Rsa1.0_03181.1 | 1121 | 24763  | 1.00E-123 | 268  | 280  | 95 +  | 1   | 275  | 15087  | 15363  |
| UN44667 | Rsa1.0_04880.1 | 665  | 15612  | 6.00E-85  | 220  | 238  | 92 -  | 34  | 267  | 1      | 238    |
| UN44668 | Rsa1.0_02234.1 | 800  | 33618  | 1.00E-175 | 471  | 519  | 90 +  | 10  | 526  | 4038   | 4534   |
| UN44669 | Rsa1.0_00543.1 | 773  | 76788  | 0         | 570  | 621  | 91 -  | 1   | 592  | 35920  | 36538  |
| UN44670 | Rsa1.0_00396.1 | 931  | 88242  | 1.00E-135 | 262  | 265  | 98 +  | 1   | 265  | 6402   | 6664   |
| UN44671 | Rsa1.0_10199.1 | 698  | 5948   | 0         | 464  | 476  | 97 -  | 2   | 476  | 5363   | 5838   |
| UN44672 | Rsa1.0_02662.1 | 1389 | 28956  | 0         | 1174 | 1175 | 99 +  | 212 | 1385 | 8640   | 9814   |
| UN44673 | Rsa1.0_02931.1 | 782  | 26654  | 1.00E-105 | 194  | 194  | 100 + | 1   | 194  | 1075   | 1268   |
| UN44674 | Rsa1.0_00047.1 | 881  | 168582 | 0         | 581  | 614  | 94 +  | 1   | 610  | 32495  | 33099  |
| UN44675 | Rsa1.0_00305.1 | 639  | 97308  | 2.00E-88  | 228  | 242  | 94 -  | 225 | 465  | 91981  | 92213  |
| UN44676 | Rsa1.0_01920.1 | 799  | 158533 | 0         | 361  | 368  | 98 +  | 1   | 368  | 31676  | 32043  |
| UN44677 | Rsa1.0_00275.1 | 878  | 210104 | 1.00E-102 | 205  | 210  | 97 -  | 593 | 802  | 164586 | 164795 |
| UN44678 | Rsa1.0_00471.1 | 1145 | 81897  | 0         | 400  | 410  | 97 -  | 3   | 409  | 36198  | 36605  |
| UN44679 | Rsa1.0_00402.1 | 922  | 385315 | 1.00E-141 | 275  | 282  | 97 -  | 80  | 361  | 76818  | 77099  |
| UN44680 | Rsa1.0_04004.1 | 463  | 19594  | 0         | 441  | 460  | 95 +  | 2   | 461  | 15178  | 15634  |
| UN44681 | Rsa1.0_01904.1 | 543  | 37450  | 0         | 478  | 508  | 94 +  | 1   | 501  | 1940   | 2444   |
| UN44682 | Rsa1.0_00477.1 | 845  | 81556  | 1.00E-110 | 236  | 247  | 95 -  | 474 | 720  | 21683  | 21929  |
| UN44683 | Rsa1.0_01272.1 | 780  | 49553  | 1.00E-116 | 254  | 266  | 95 +  | 3   | 267  | 36853  | 37115  |
| UN44684 | Rsa1.0_08001.1 | 1056 | 8095   | 1.00E-116 | 255  | 267  | 95 -  | 227 | 489  | 7784   | 8050   |
| UN44685 | Rsa1.0_00220.1 | 988  | 192936 | 0         | 410  | 426  | 96 +  | 372 | 791  | 16394  | 16819  |
| UN44686 | Rsa1.0_02254.1 | 690  | 33344  | 1.00E-147 | 298  | 308  | 96 -  | 1   | 308  | 4778   | 5084   |
| UN44687 | Rsa1.0_00034.1 | 665  | 260119 | 0         | 403  | 418  | 96 +  | 9   | 426  | 15171  | 15586  |
| UN44688 | Rsa1.0_00086.1 | 776  | 439854 | 1.00E-136 | 275  | 285  | 96 -  | 10  | 288  | 326612 | 326896 |
| UN44689 | Rsa1.0_03188.1 | 758  | 24722  | 1.00E-178 | 467  | 515  | 90 -  | 4   | 511  | 9229   | 9721   |
| UN44690 | Rsa1.0_00675.1 | 478  | 145590 | 1.00E-147 | 374  | 413  | 90 -  | 3   | 412  | 28833  | 29220  |
| UN44691 | Rsa1.0_00265.1 | 588  | 220635 | 7.00E-75  | 146  | 147  | 99 -  | 2   | 148  | 4993   | 5139   |
| UN44692 | Rsa1.0_01340.1 | 949  | 47805  | 4.00E-68  | 269  | 315  | 85 +  | 30  | 332  | 20624  | 20919  |

|         |                |      |        |           |     |     |       |     |      |        |        |
|---------|----------------|------|--------|-----------|-----|-----|-------|-----|------|--------|--------|
| UN44693 | Rsa1.0_04238.1 | 1137 | 18352  | 0         | 403 | 415 | 97 -  | 3   | 412  | 8709   | 9121   |
| UN44694 | Rsa1.0_06168.1 | 753  | 11580  | 1.00E-138 | 392 | 439 | 89 -  | 1   | 419  | 8500   | 8924   |
| UN44695 | Rsa1.0_00016.1 | 823  | 831256 | 1.00E-145 | 309 | 324 | 95 +  | 303 | 626  | 253037 | 253357 |
| UN44696 | Rsa1.0_02229.1 | 812  | 33672  | 4.00E-74  | 172 | 182 | 94 +  | 484 | 665  | 17849  | 18030  |
| UN44697 | Rsa1.0_02848.1 | 712  | 27329  | 0         | 456 | 480 | 95 +  | 1   | 471  | 12574  | 13050  |
| UN44698 | Rsa1.0_07630.1 | 488  | 8988   | 1.00E-180 | 409 | 434 | 94 -  | 5   | 429  | 4068   | 4495   |
| UN44699 | Rsa1.0_00951.1 | 1046 | 164588 | 0         | 802 | 844 | 95 +  | 3   | 840  | 126399 | 127237 |
| UN44700 | Rsa1.0_00300.1 | 748  | 97747  | 1.00E-159 | 327 | 341 | 95 -  | 118 | 458  | 31675  | 32015  |
| UN44701 | Rsa1.0_00081.1 | 638  | 143261 | 0         | 607 | 642 | 94 -  | 1   | 636  | 123489 | 124124 |
| UN44702 | Rsa1.0_01126.1 | 795  | 53127  | 0         | 493 | 519 | 94 -  | 1   | 517  | 7555   | 8062   |
| UN44703 | Rsa1.0_00878.1 | 657  | 330303 | 1.00E-147 | 326 | 346 | 94 -  | 147 | 492  | 148561 | 148903 |
| UN44704 | Rsa1.0_01077.1 | 654  | 54772  | 0         | 378 | 390 | 96 +  | 1   | 389  | 51244  | 51629  |
| UN44705 | Rsa1.0_00013.1 | 1256 | 292129 | 0         | 501 | 514 | 97 -  | 585 | 1097 | 166626 | 167139 |
| UN44706 | Rsa1.0_04142.1 | 612  | 18861  | 1.00E-125 | 236 | 239 | 98 +  | 278 | 516  | 13126  | 13364  |
| UN44707 | Rsa1.0_00724.1 | 923  | 66789  | 0         | 591 | 622 | 95 -  | 320 | 922  | 4424   | 5045   |
| UN44708 | Rsa1.0_00410.1 | 739  | 86957  | 1.00E-140 | 344 | 369 | 93 -  | 1   | 364  | 28659  | 29023  |
| UN44709 | Rsa1.0_00480.1 | 865  | 81325  | 0         | 375 | 381 | 98 -  | 300 | 680  | 4443   | 4823   |
| UN44710 | Rsa1.0_15018.1 | 775  | 2889   | 1.00E-143 | 282 | 290 | 97 -  | 232 | 521  | 2384   | 2673   |
| UN44711 | Rsa1.0_00344.1 | 782  | 191774 | 0         | 556 | 582 | 95 -  | 12  | 589  | 155554 | 156135 |
| UN44712 | Rsa1.0_00034.1 | 1000 | 260119 | 1.00E-162 | 410 | 448 | 91 -  | 40  | 471  | 28435  | 28879  |
| UN44713 | Rsa1.0_00047.1 | 917  | 168582 | 0         | 366 | 374 | 97 +  | 4   | 377  | 53932  | 54305  |
| UN44714 | Rsa1.0_03477.1 | 769  | 22635  | 0         | 422 | 422 | 100 - | 3   | 424  | 5497   | 5918   |
| UN44715 | Rsa1.0_01553.1 | 726  | 43379  | 1.00E-120 | 283 | 304 | 93 -  | 7   | 297  | 26451  | 26753  |
| UN44716 | Rsa1.0_00071.1 | 581  | 345714 | 2.00E-75  | 164 | 170 | 96 -  | 203 | 369  | 22243  | 22412  |
| UN44717 | Rsa1.0_01244.1 | 776  | 50061  | 0         | 479 | 494 | 96 -  | 35  | 527  | 45952  | 46442  |
| UN44718 | Rsa1.0_04626.1 | 1065 | 16611  | 0         | 614 | 640 | 95 -  | 1   | 640  | 14781  | 15412  |
| UN44719 | Rsa1.0_09063.1 | 732  | 6675   | 1.00E-175 | 397 | 425 | 93 +  | 1   | 412  | 1754   | 2178   |
| UN44720 | Rsa1.0_00045.1 | 627  | 328694 | 1.00E-173 | 329 | 336 | 97 -  | 281 | 616  | 186934 | 187269 |
| UN44721 | Rsa1.0_01824.1 | 812  | 38733  | 1.00E-112 | 224 | 230 | 97 +  | 351 | 580  | 8413   | 8642   |
| UN44722 | Rsa1.0_00205.1 | 868  | 193401 | 0         | 412 | 435 | 94 -  | 56  | 482  | 92527  | 92958  |
| UN44723 | Rsa1.0_00006.1 | 638  | 396176 | 1.00E-100 | 269 | 292 | 92 +  | 1   | 291  | 275878 | 276159 |
| UN44724 | Rsa1.0_00017.1 | 742  | 752458 | 2.00E-91  | 194 | 201 | 96 -  | 204 | 401  | 274013 | 274213 |
| UN44725 | Rsa1.0_03925.1 | 710  | 20025  | 1.00E-167 | 344 | 356 | 96 +  | 332 | 687  | 3816   | 4166   |
| UN44726 | Rsa1.0_00077.1 | 1202 | 145005 | 0         | 593 | 602 | 98 -  | 599 | 1200 | 89588  | 90189  |
| UN44727 | Rsa1.0_02085.1 | 752  | 35198  | 1.00E-107 | 235 | 245 | 95 +  | 5   | 248  | 15845  | 16087  |
| UN44728 | Rsa1.0_00043.1 | 758  | 264937 | 0         | 653 | 687 | 95 -  | 1   | 670  | 8942   | 9628   |
| UN44729 | Rsa1.0_02103.1 | 702  | 35006  | 1.00E-121 | 259 | 269 | 96 -  | 3   | 270  | 24076  | 24343  |
| UN44730 | Rsa1.0_01338.1 | 782  | 155644 | 1.00E-126 | 256 | 265 | 96 +  | 517 | 781  | 142949 | 143213 |
| UN44731 | Rsa1.0_03425.1 | 433  | 23043  | 1.00E-156 | 291 | 295 | 98 -  | 38  | 332  | 21793  | 22087  |

|         |                |      |        |           |     |     |      |     |      |        |        |
|---------|----------------|------|--------|-----------|-----|-----|------|-----|------|--------|--------|
| UN44732 | Rsa1.0.00019.1 | 799  | 301669 | 0         | 765 | 795 | 96 - | 3   | 797  | 237106 | 237896 |
| UN44733 | Rsa1.0.00639.1 | 689  | 165873 | 0         | 667 | 692 | 96 - | 1   | 688  | 164511 | 165200 |
| UN44734 | Rsa1.0.01539.1 | 555  | 43698  | 1.00E-91  | 187 | 191 | 97 + | 363 | 552  | 6460   | 6650   |
| UN44735 | Rsa1.0.00128.1 | 528  | 228675 | 0         | 515 | 528 | 97 - | 1   | 526  | 11663  | 12188  |
| UN44736 | Rsa1.0.00770.1 | 821  | 64900  | 1.00E-153 | 290 | 295 | 98 - | 229 | 523  | 9808   | 10102  |
| UN44737 | Rsa1.0.03338.1 | 666  | 136346 | 0         | 429 | 446 | 96 - | 7   | 444  | 2767   | 3209   |
| UN44738 | Rsa1.0.00253.1 | 685  | 231292 | 3.00E-59  | 120 | 121 | 99 - | 147 | 267  | 86232  | 86352  |
| UN44739 | Rsa1.0.00082.1 | 705  | 237584 | 0         | 518 | 557 | 92 + | 21  | 575  | 68443  | 68996  |
| UN44740 | Rsa1.0.02586.1 | 677  | 29856  | 1.00E-103 | 211 | 218 | 96 + | 220 | 437  | 6810   | 7027   |
| UN44741 | Rsa1.0.02874.1 | 511  | 27070  | 6.00E-38  | 99  | 105 | 94 + | 395 | 499  | 6372   | 6476   |
| UN44742 | Rsa1.0.02991.1 | 880  | 26178  | 1.00E-65  | 239 | 270 | 88 + | 5   | 261  | 6959   | 7224   |
| UN44743 | Rsa1.0.02360.1 | 1109 | 32203  | 0         | 619 | 629 | 98 - | 481 | 1109 | 23953  | 24578  |
| UN44744 | Rsa1.0.00002.1 | 1168 | 601661 | 0         | 472 | 477 | 98 - | 1   | 475  | 289129 | 289605 |
| UN44745 | Rsa1.0.02231.1 | 590  | 33661  | 1.00E-106 | 230 | 239 | 96 + | 2   | 238  | 33347  | 33585  |
| UN44746 | Rsa1.0.03890.1 | 733  | 20223  | 2.00E-66  | 178 | 193 | 92 + | 260 | 452  | 3665   | 3856   |
| UN44747 | Rsa1.0.14714.1 | 1167 | 3134   | 1.00E-138 | 297 | 313 | 94 + | 1   | 313  | 2833   | 3134   |
| UN44748 | Rsa1.0.00198.1 | 1074 | 222963 | 1.00E-104 | 219 | 228 | 96 + | 3   | 230  | 125340 | 125567 |
| UN44749 | Rsa1.0.00056.1 | 708  | 332604 | 1.00E-160 | 365 | 388 | 94 - | 318 | 702  | 231642 | 232022 |
| UN44750 | Rsa1.0.00694.1 | 557  | 68074  | 1.00E-121 | 273 | 287 | 95 + | 3   | 284  | 60990  | 61276  |
| UN44751 | Rsa1.0.00282.1 | 686  | 177799 | 2.00E-45  | 101 | 102 | 99 + | 2   | 103  | 92822  | 92922  |
| UN44752 | Rsa1.0.00107.1 | 392  | 431659 | 1.00E-165 | 320 | 325 | 98 - | 62  | 384  | 298694 | 299015 |
| UN44753 | Rsa1.0.01691.1 | 363  | 40921  | 1.00E-100 | 237 | 254 | 93 - | 3   | 241  | 5888   | 6141   |
| UN44754 | Rsa1.0.00909.1 | 685  | 59976  | 1.00E-147 | 341 | 366 | 93 + | 1   | 364  | 56371  | 56724  |
| UN44755 | Rsa1.0.00002.1 | 737  | 601661 | 0         | 417 | 447 | 93 + | 1   | 447  | 240873 | 241305 |
| UN44756 | Rsa1.0.02093.1 | 673  | 35125  | 1.00E-134 | 285 | 299 | 95 - | 380 | 673  | 25142  | 25440  |
| UN44757 | Rsa1.0.02769.1 | 705  | 28107  | 0         | 378 | 387 | 97 - | 3   | 388  | 7186   | 7569   |
| UN44758 | Rsa1.0.02908.1 | 607  | 26859  | 1.00E-176 | 365 | 379 | 96 - | 2   | 377  | 9465   | 9841   |
| UN44759 | Rsa1.0.02848.1 | 534  | 27329  | 1.00E-107 | 218 | 225 | 96 - | 108 | 332  | 8638   | 8862   |
| UN44760 | Rsa1.0.01667.1 | 900  | 41315  | 0         | 720 | 772 | 93 + | 1   | 765  | 3035   | 3792   |
| UN44761 | Rsa1.0.01565.1 | 1363 | 155447 | 0         | 469 | 481 | 97 - | 688 | 1168 | 1771   | 2251   |
| UN44762 | Rsa1.0.02955.1 | 899  | 26484  | 8.00E-82  | 280 | 316 | 88 - | 3   | 315  | 21585  | 21885  |
| UN44763 | Rsa1.0.01263.1 | 763  | 49703  | 1.00E-155 | 327 | 342 | 95 - | 2   | 343  | 42751  | 43091  |
| UN44764 | Rsa1.0.00116.1 | 502  | 365886 | 4.00E-67  | 158 | 166 | 95 - | 9   | 173  | 130174 | 130339 |
| UN44765 | Rsa1.0.00213.1 | 477  | 108167 | 2.00E-65  | 251 | 289 | 86 - | 1   | 260  | 39822  | 40109  |
| UN44766 | Rsa1.0.02174.1 | 843  | 34316  | 2.00E-60  | 165 | 179 | 92 - | 106 | 281  | 13678  | 13853  |
| UN44767 | Rsa1.0.00228.1 | 544  | 105511 | 1.00E-142 | 279 | 286 | 97 - | 1   | 283  | 66874  | 67159  |
| UN44768 | Rsa1.0.00012.1 | 802  | 222148 | 1.00E-131 | 350 | 387 | 90 + | 2   | 368  | 49592  | 49974  |
| UN44769 | Rsa1.0.01292.1 | 765  | 175783 | 0         | 660 | 684 | 96 + | 8   | 691  | 145973 | 146655 |
| UN44770 | Rsa1.0.01552.1 | 617  | 43396  | 4.00E-98  | 209 | 217 | 96 - | 333 | 549  | 11645  | 11859  |

|         |                |      |        |           |     |     |      |     |      |        |        |
|---------|----------------|------|--------|-----------|-----|-----|------|-----|------|--------|--------|
| UN44771 | Rsa1.0.00318.1 | 387  | 96094  | 6.00E-96  | 181 | 182 | 99 - | 1   | 182  | 29707  | 29888  |
| UN44772 | Rsa1.0.00811.1 | 1125 | 63242  | 0         | 392 | 413 | 94 - | 718 | 1123 | 30464  | 30876  |
| UN44773 | Rsa1.0.00962.1 | 758  | 184909 | 0         | 711 | 742 | 95 - | 2   | 743  | 12657  | 13398  |
| UN44774 | Rsa1.0.02350.1 | 690  | 32309  | 0         | 661 | 689 | 95 - | 1   | 687  | 14829  | 15505  |
| UN44775 | Rsa1.0.00344.1 | 598  | 191774 | 6.00E-94  | 187 | 191 | 97 + | 202 | 392  | 156563 | 156753 |
| UN44776 | Rsa1.0.04033.1 | 946  | 19481  | 2.00E-67  | 198 | 225 | 88 + | 44  | 268  | 5000   | 5205   |
| UN44777 | Rsa1.0.01425.1 | 914  | 46136  | 1.00E-159 | 307 | 313 | 98 + | 1   | 313  | 34286  | 34597  |
| UN44778 | Rsa1.0.00040.1 | 813  | 324196 | 1.00E-156 | 334 | 351 | 95 - | 63  | 412  | 224533 | 224883 |
| UN44779 | Rsa1.0.00883.1 | 835  | 61230  | 1.00E-133 | 526 | 617 | 85 - | 214 | 828  | 7614   | 8229   |
| UN44780 | Rsa1.0.01272.1 | 863  | 49553  | 1.00E-123 | 290 | 307 | 94 + | 561 | 862  | 37758  | 38063  |
| UN44781 | Rsa1.0.00089.1 | 730  | 406142 | 0         | 400 | 412 | 97 + | 16  | 427  | 58408  | 58818  |
| UN44782 | Rsa1.0.02008.1 | 894  | 36109  | 1.00E-138 | 255 | 257 | 99 + | 6   | 262  | 16940  | 17196  |
| UN44783 | Rsa1.0.00985.1 | 977  | 161950 | 0         | 426 | 441 | 96 - | 535 | 975  | 141792 | 142228 |
| UN44784 | Rsa1.0.00204.1 | 1155 | 109056 | 2.00E-86  | 178 | 183 | 97 + | 832 | 1014 | 95382  | 95564  |
| UN44785 | Rsa1.0.04134.1 | 731  | 149811 | 0         | 526 | 556 | 94 - | 1   | 556  | 135585 | 136128 |
| UN44786 | Rsa1.0.00434.1 | 688  | 85171  | 2.00E-75  | 176 | 186 | 94 - | 501 | 686  | 65159  | 65341  |
| UN44787 | Rsa1.0.39138.1 | 1227 | 575    | 1.00E-144 | 325 | 340 | 95 - | 1   | 336  | 1      | 339    |
| UN44788 | Rsa1.0.01825.1 | 717  | 38725  | 0         | 551 | 587 | 93 + | 26  | 611  | 26370  | 26947  |
| UN44789 | Rsa1.0.02045.1 | 740  | 35650  | 0         | 499 | 541 | 92 + | 214 | 740  | 23658  | 24183  |
| UN44790 | Rsa1.0.03137.1 | 868  | 25105  | 1.00E-151 | 281 | 284 | 98 - | 581 | 864  | 12703  | 12986  |
| UN44791 | Rsa1.0.01964.1 | 774  | 36702  | 1.00E-157 | 400 | 429 | 93 + | 1   | 416  | 6957   | 7379   |
| UN44792 | Rsa1.0.00179.1 | 1060 | 393324 | 0         | 518 | 520 | 99 + | 1   | 519  | 296521 | 297040 |
| UN44793 | Rsa1.0.02862.1 | 534  | 27163  | 1.00E-134 | 268 | 275 | 97 + | 1   | 275  | 21439  | 21712  |
| UN44794 | Rsa1.0.03618.1 | 761  | 21744  | 1.00E-137 | 257 | 259 | 99 + | 1   | 259  | 11063  | 11319  |
| UN44795 | Rsa1.0.00329.1 | 507  | 222544 | 1.00E-133 | 290 | 304 | 95 + | 1   | 300  | 79576  | 79875  |
| UN44796 | Rsa1.0.05874.1 | 849  | 12351  | 0         | 431 | 444 | 97 + | 177 | 620  | 9389   | 9832   |
| UN44797 | Rsa1.0.00038.1 | 836  | 314568 | 1.00E-105 | 298 | 327 | 91 + | 518 | 833  | 16997  | 17320  |
| UN44798 | Rsa1.0.00013.1 | 698  | 292129 | 1.00E-105 | 225 | 233 | 96 - | 2   | 234  | 159602 | 159831 |
| UN44799 | Rsa1.0.00008.1 | 1194 | 358124 | 0         | 647 | 686 | 94 - | 514 | 1194 | 196704 | 197386 |
| UN44800 | Rsa1.0.00061.1 | 741  | 218685 | 0         | 507 | 523 | 96 + | 1   | 518  | 2083   | 2605   |
| UN44801 | Rsa1.0.03221.1 | 651  | 24535  | 1.00E-166 | 340 | 353 | 96 - | 2   | 353  | 18929  | 19281  |
| UN44802 | Rsa1.0.00301.1 | 733  | 365315 | 0         | 376 | 383 | 98 - | 272 | 654  | 214376 | 214758 |
| UN44803 | Rsa1.0.02935.1 | 504  | 26621  | 1.00E-117 | 227 | 230 | 98 + | 1   | 230  | 24440  | 24668  |
| UN44804 | Rsa1.0.04741.1 | 629  | 16164  | 2.00E-87  | 205 | 216 | 94 + | 1   | 216  | 7162   | 7370   |
| UN44805 | Rsa1.0.08429.1 | 836  | 7370   | 1.00E-154 | 291 | 296 | 98 + | 1   | 296  | 5457   | 5752   |
| UN44806 | Rsa1.0.00326.1 | 1224 | 171955 | 0         | 452 | 456 | 99 + | 1   | 456  | 89140  | 89595  |
| UN44807 | Rsa1.0.00133.1 | 799  | 123768 | 0         | 782 | 799 | 97 - | 1   | 798  | 66298  | 67096  |
| UN44808 | Rsa1.0.04161.1 | 520  | 18788  | 1.00E-139 | 273 | 279 | 97 - | 170 | 448  | 9630   | 9907   |
| UN44809 | Rsa1.0.01185.1 | 1015 | 149842 | 0         | 734 | 740 | 99 - | 1   | 740  | 2504   | 3243   |

|         |                |      |        |           |     |     |       |     |      |        |        |
|---------|----------------|------|--------|-----------|-----|-----|-------|-----|------|--------|--------|
| UN44810 | Rsa1.0.00632.1 | 834  | 183777 | 0         | 819 | 827 | 99 +  | 1   | 825  | 36443  | 37267  |
| UN44811 | Rsa1.0.00800.1 | 539  | 63868  | 0         | 422 | 434 | 97 -  | 9   | 441  | 12647  | 13077  |
| UN44812 | Rsa1.0.64802.1 | 808  | 354    | 1.00E-171 | 313 | 315 | 99 -  | 1   | 313  | 1      | 315    |
| UN44813 | Rsa1.0.00258.1 | 737  | 102381 | 0         | 476 | 488 | 97 -  | 9   | 496  | 41725  | 42212  |
| UN44814 | Rsa1.0.04882.1 | 756  | 15606  | 1.00E-123 | 242 | 248 | 97 +  | 240 | 487  | 7553   | 7800   |
| UN44815 | Rsa1.0.01991.1 | 614  | 36425  | 1.00E-76  | 155 | 158 | 98 +  | 373 | 530  | 8630   | 8787   |
| UN44816 | Rsa1.0.00502.1 | 602  | 204180 | 1.00E-122 | 265 | 278 | 95 +  | 3   | 280  | 181152 | 181428 |
| UN44817 | Rsa1.0.00539.1 | 536  | 76926  | 0         | 535 | 536 | 99 -  | 1   | 536  | 68498  | 69033  |
| UN44818 | Rsa1.0.00888.1 | 667  | 60978  | 1.00E-166 | 333 | 344 | 96 -  | 190 | 533  | 54512  | 54854  |
| UN44819 | Rsa1.0.01635.1 | 670  | 41865  | 0         | 529 | 539 | 98 +  | 131 | 668  | 16055  | 16592  |
| UN44820 | Rsa1.0.02967.1 | 601  | 26395  | 1.00E-173 | 328 | 334 | 98 -  | 1   | 331  | 20341  | 20674  |
| UN44821 | Rsa1.0.00909.1 | 828  | 59976  | 0         | 448 | 448 | 100 - | 1   | 448  | 4592   | 5039   |
| UN44822 | #              | #    | #      | #         | #   | #   | #     | #   | #    | #      | #      |
| UN44823 | Rsa1.0.00184.1 | 632  | 218748 | 1.00E-115 | 303 | 332 | 91 -  | 309 | 621  | 213949 | 214279 |
| UN44824 | Rsa1.0.00790.1 | 615  | 148693 | 1.00E-148 | 289 | 296 | 97 -  | 269 | 561  | 17540  | 17835  |
| UN44825 | Rsa1.0.02694.1 | 839  | 28610  | 1.00E-169 | 380 | 404 | 94 +  | 175 | 572  | 6542   | 6943   |
| UN44826 | Rsa1.0.00204.1 | 840  | 109056 | 2.00E-85  | 227 | 247 | 91 -  | 144 | 384  | 95321  | 95564  |
| UN44827 | Rsa1.0.00001.1 | 788  | 363028 | 1.00E-174 | 398 | 430 | 92 -  | 1   | 428  | 315496 | 315910 |
| UN44828 | Rsa1.0.00413.1 | 811  | 86921  | 1.00E-144 | 351 | 384 | 91 -  | 3   | 383  | 34661  | 35019  |
| UN44829 | Rsa1.0.00001.1 | 836  | 363028 | 1.00E-165 | 328 | 334 | 98 +  | 5   | 334  | 153219 | 153551 |
| UN44830 | Rsa1.0.14741.1 | 370  | 3112   | 9.00E-92  | 216 | 227 | 95 +  | 144 | 369  | 122    | 346    |
| UN44831 | Rsa1.0.00038.1 | 615  | 314568 | 0         | 431 | 435 | 99 +  | 181 | 615  | 209873 | 210306 |
| UN44832 | Rsa1.0.01509.1 | 750  | 44258  | 0         | 714 | 745 | 95 -  | 15  | 750  | 34098  | 34841  |
| UN44833 | Rsa1.0.00788.1 | 756  | 64237  | 1.00E-103 | 191 | 191 | 100 + | 191 | 381  | 1094   | 1284   |
| UN44834 | Rsa1.0.00106.1 | 759  | 133916 | 0         | 721 | 745 | 96 -  | 23  | 759  | 20056  | 20800  |
| UN44835 | Rsa1.0.01165.1 | 952  | 51898  | 1.00E-128 | 295 | 315 | 93 +  | 598 | 912  | 51405  | 51711  |
| UN44836 | Rsa1.0.00810.1 | 845  | 63289  | 0         | 411 | 421 | 97 -  | 5   | 416  | 57632  | 58052  |
| UN44837 | Rsa1.0.01536.1 | 679  | 43747  | 1.00E-147 | 296 | 305 | 97 +  | 362 | 666  | 24193  | 24496  |
| UN44838 | Rsa1.0.02022.1 | 752  | 35923  | 1.00E-128 | 318 | 344 | 92 -  | 3   | 344  | 5722   | 6049   |
| UN44839 | Rsa1.0.00835.1 | 901  | 278058 | 0         | 563 | 570 | 98 -  | 2   | 568  | 35713  | 36282  |
| UN44840 | Rsa1.0.00111.1 | 604  | 390088 | 1.00E-125 | 228 | 228 | 100 - | 2   | 229  | 321110 | 321337 |
| UN44841 | Rsa1.0.24219.1 | 501  | 999    | 3.00E-21  | 93  | 105 | 88 +  | 3   | 107  | 605    | 703    |
| UN44842 | Rsa1.0.00341.1 | 1011 | 249309 | 1.00E-126 | 283 | 298 | 94 -  | 251 | 546  | 6207   | 6504   |
| UN44843 | Rsa1.0.02400.1 | 762  | 31750  | 0         | 474 | 488 | 97 -  | 2   | 489  | 4649   | 5136   |
| UN44844 | Rsa1.0.03887.1 | 1095 | 20247  | 0         | 393 | 394 | 99 +  | 700 | 1093 | 4347   | 4740   |
| UN44845 | Rsa1.0.00507.1 | 937  | 79074  | 0         | 387 | 395 | 97 +  | 543 | 937  | 24837  | 25231  |
| UN44846 | Rsa1.0.04369.1 | 540  | 17703  | 1.00E-141 | 288 | 300 | 96 -  | 238 | 537  | 9577   | 9869   |
| UN44847 | Rsa1.0.16063.1 | 879  | 2301   | 0         | 424 | 436 | 97 +  | 413 | 842  | 1866   | 2301   |
| UN44848 | Rsa1.0.03780.1 | 632  | 20899  | 6.00E-51  | 119 | 123 | 96 +  | 182 | 303  | 452    | 574    |



|         |                |      |        |           |      |      |       |      |      |        |        |
|---------|----------------|------|--------|-----------|------|------|-------|------|------|--------|--------|
| UN44849 | Rsa1.0.00110.1 | 672  | 132719 | 0         | 390  | 395  | 98 -  | 1    | 395  | 6883   | 7276   |
| UN44850 | Rsa1.0.00087.1 | 944  | 761073 | 1.00E-176 | 353  | 366  | 96 -  | 578  | 943  | 621071 | 621436 |
| UN44851 | Rsa1.0.06124.1 | 848  | 11681  | 0         | 705  | 706  | 99 -  | 1    | 706  | 6976   | 7681   |
| UN44852 | Rsa1.0.00112.1 | 659  | 132199 | 1.00E-115 | 314  | 342  | 91 +  | 293  | 625  | 118955 | 119289 |
| UN44853 | Rsa1.0.01895.1 | 577  | 37512  | 1.00E-103 | 194  | 195  | 99 -  | 381  | 575  | 9145   | 9339   |
| UN44854 | Rsa1.0.12809.1 | 1044 | 5119   | 0         | 622  | 659  | 94 +  | 387  | 1042 | 4130   | 4779   |
| UN44855 | Rsa1.0.00056.1 | 692  | 332604 | 0         | 362  | 369  | 98 +  | 3    | 371  | 214184 | 214552 |
| UN44856 | Rsa1.0.01943.1 | 1101 | 37042  | 1.00E-157 | 362  | 385  | 94 +  | 1    | 384  | 4724   | 5105   |
| UN44857 | Rsa1.0.00561.1 | 904  | 75653  | 0         | 803  | 816  | 98 +  | 4    | 819  | 66759  | 67571  |
| UN44858 | Rsa1.0.01648.1 | 493  | 41635  | 0         | 362  | 370  | 97 +  | 125  | 491  | 29251  | 29620  |
| UN44859 | Rsa1.0.06092.1 | 934  | 11756  | 0         | 486  | 502  | 96 -  | 1    | 500  | 2635   | 3135   |
| UN44860 | Rsa1.0.00848.1 | 746  | 152362 | 0         | 462  | 491  | 94 +  | 8    | 496  | 57384  | 57865  |
| UN44861 | Rsa1.0.03093.1 | 775  | 25445  | 0         | 719  | 740  | 97 +  | 1    | 731  | 1791   | 2530   |
| UN44862 | Rsa1.0.01529.1 | 870  | 43871  | 0         | 448  | 455  | 98 +  | 1    | 455  | 38227  | 38678  |
| UN44863 | Rsa1.0.00425.1 | 1304 | 147080 | 0         | 1105 | 1150 | 96 +  | 185  | 1304 | 75798  | 76943  |
| UN44864 | Rsa1.0.00087.1 | 785  | 761073 | 0         | 389  | 400  | 97 +  | 273  | 672  | 357392 | 357791 |
| UN44865 | Rsa1.0.01506.1 | 577  | 44370  | 0         | 439  | 472  | 93 +  | 1    | 464  | 17889  | 18360  |
| UN44866 | Rsa1.0.01875.1 | 536  | 37849  | 1.00E-147 | 275  | 277  | 99 -  | 3    | 279  | 25024  | 25299  |
| UN44867 | Rsa1.0.00010.1 | 1452 | 294827 | 0         | 432  | 435  | 99 -  | 1018 | 1450 | 132223 | 132657 |
| UN44868 | Rsa1.0.08559.1 | 905  | 7197   | 0         | 401  | 403  | 99 -  | 499  | 901  | 2885   | 3287   |
| UN44869 | Rsa1.0.01116.1 | 762  | 142088 | 0         | 671  | 700  | 95 +  | 1    | 695  | 129741 | 130438 |
| UN44870 | Rsa1.0.00221.1 | 1071 | 106972 | 0         | 1020 | 1079 | 94 +  | 2    | 1068 | 17339  | 18399  |
| UN44871 | Rsa1.0.01997.1 | 767  | 158416 | 5.00E-98  | 264  | 284  | 92 -  | 2    | 281  | 7533   | 7812   |
| UN44872 | Rsa1.0.02757.1 | 645  | 28187  | 0         | 504  | 512  | 98 -  | 1    | 510  | 16150  | 16661  |
| UN44873 | Rsa1.0.02961.1 | 734  | 26435  | 0         | 537  | 555  | 96 +  | 1    | 554  | 3391   | 3943   |
| UN44874 | Rsa1.0.03005.1 | 763  | 26082  | 1.00E-172 | 335  | 343  | 97 +  | 32   | 373  | 23208  | 23550  |
| UN44875 | Rsa1.0.07849.1 | 757  | 8425   | 1.00E-151 | 327  | 341  | 95 +  | 1    | 341  | 3622   | 3956   |
| UN44876 | Rsa1.0.06563.1 | 922  | 10765  | 1.00E-175 | 338  | 346  | 97 +  | 577  | 919  | 2187   | 2532   |
| UN44877 | Rsa1.0.01390.1 | 728  | 46695  | 0         | 336  | 336  | 100 + | 1    | 336  | 1306   | 1641   |
| UN44878 | Rsa1.0.00716.1 | 519  | 67078  | 0         | 462  | 494  | 93 +  | 35   | 519  | 37528  | 38021  |
| UN44879 | Rsa1.0.04130.1 | 803  | 18924  | 1.00E-157 | 307  | 314  | 97 +  | 1    | 314  | 10839  | 11151  |
| UN44880 | Rsa1.0.04326.1 | 1169 | 17884  | 1.00E-161 | 289  | 289  | 100 - | 3    | 291  | 6161   | 6449   |
| UN44881 | Rsa1.0.00195.1 | 836  | 251884 | 0         | 549  | 567  | 96 -  | 274  | 834  | 209490 | 210050 |
| UN44882 | Rsa1.0.00237.1 | 689  | 235974 | 0         | 412  | 412  | 100 - | 4    | 415  | 225556 | 225967 |
| UN44883 | Rsa1.0.00049.1 | 927  | 167018 | 0         | 517  | 517  | 100 - | 3    | 519  | 134071 | 134587 |
| UN44884 | Rsa1.0.00579.1 | 1106 | 148308 | 0         | 363  | 364  | 99 +  | 3    | 366  | 66656  | 67019  |
| UN44885 | Rsa1.0.00415.1 | 668  | 86795  | 0         | 433  | 444  | 97 +  | 228  | 668  | 75174  | 75617  |
| UN44886 | Rsa1.0.00579.1 | 663  | 148308 | 1.00E-160 | 375  | 401  | 93 +  | 3    | 398  | 66632  | 67027  |
| UN44887 | Rsa1.0.00285.1 | 654  | 149638 | 1.00E-166 | 338  | 352  | 96 -  | 1    | 348  | 109850 | 110195 |

|         |                |      |        |           |      |      |       |     |      |        |        |
|---------|----------------|------|--------|-----------|------|------|-------|-----|------|--------|--------|
| UN44888 | Rsa1.0_01786.1 | 780  | 133324 | 0         | 705  | 727  | 96 -  | 23  | 745  | 116689 | 117414 |
| UN44889 | Rsa1.0_01895.1 | 870  | 37512  | 1.00E-112 | 235  | 241  | 97 -  | 117 | 356  | 33809  | 34046  |
| UN44890 | Rsa1.0_06388.1 | 737  | 11110  | 0         | 367  | 376  | 97 +  | 1   | 376  | 10731  | 11106  |
| UN44891 | Rsa1.0_18032.1 | 719  | 1686   | 1.00E-112 | 206  | 206  | 100 - | 379 | 584  | 1291   | 1496   |
| UN44892 | Rsa1.0_04934.1 | 554  | 143962 | 0         | 523  | 556  | 94 +  | 3   | 552  | 141883 | 142435 |
| UN44893 | Rsa1.0_00854.1 | 1032 | 62100  | 0         | 989  | 1037 | 95 -  | 3   | 1030 | 48088  | 49106  |
| UN44894 | Rsa1.0_01188.1 | 1017 | 51362  | 0         | 1015 | 1016 | 99 +  | 1   | 1016 | 47219  | 48234  |
| UN44895 | Rsa1.0_00047.1 | 696  | 168582 | 0         | 331  | 332  | 99 +  | 2   | 333  | 87631  | 87962  |
| UN44896 | Rsa1.0_22508.1 | 815  | 1115   | 1.00E-92  | 196  | 203  | 96 +  | 507 | 706  | 903    | 1105   |
| UN44897 | Rsa1.0_00101.1 | 812  | 267193 | 1.00E-132 | 257  | 263  | 97 -  | 289 | 551  | 3820   | 4082   |
| UN44898 | Rsa1.0_01650.1 | 597  | 41589  | 0         | 528  | 577  | 91 -  | 28  | 595  | 34730  | 35299  |
| UN44899 | Rsa1.0_00690.1 | 761  | 140527 | 0         | 522  | 564  | 92 -  | 1   | 558  | 33220  | 33782  |
| UN44900 | Rsa1.0_08744.1 | 756  | 6970   | 0         | 616  | 630  | 97 +  | 1   | 630  | 5305   | 5934   |
| UN44901 | Rsa1.0_11595.1 | 807  | 5463   | 1.00E-177 | 314  | 314  | 100 + | 1   | 314  | 505    | 818    |
| UN44902 | Rsa1.0_00027.1 | 605  | 283362 | 0         | 554  | 600  | 92 +  | 1   | 600  | 272312 | 272893 |
| UN44903 | Rsa1.0_00604.1 | 652  | 146282 | 5.00E-70  | 141  | 143  | 98 +  | 27  | 169  | 112705 | 112847 |
| UN44904 | Rsa1.0_01752.1 | 656  | 39805  | 3.00E-59  | 249  | 291  | 85 -  | 43  | 325  | 20927  | 21216  |
| UN44905 | Rsa1.0_00772.1 | 662  | 64856  | 1.00E-137 | 250  | 251  | 99 +  | 164 | 414  | 53272  | 53522  |
| UN44906 | Rsa1.0_00184.1 | 649  | 218748 | 1.00E-165 | 310  | 315  | 98 +  | 2   | 316  | 213969 | 214279 |
| UN44907 | Rsa1.0_01712.1 | 526  | 154210 | 1.00E-170 | 303  | 303  | 100 - | 3   | 305  | 25257  | 25559  |
| UN44908 | Rsa1.0_05140.1 | 939  | 14710  | 0         | 400  | 402  | 99 +  | 284 | 685  | 9862   | 10263  |
| UN44909 | Rsa1.0_01825.1 | 818  | 38725  | 7.00E-45  | 162  | 182  | 89 -  | 231 | 407  | 21837  | 22017  |
| UN44910 | Rsa1.0_48565.1 | 941  | 466    | 0         | 340  | 341  | 99 +  | 3   | 343  | 99     | 439    |
| UN44911 | Rsa1.0_00019.1 | 812  | 301669 | 0         | 756  | 830  | 91 -  | 2   | 810  | 127116 | 127930 |
| UN44912 | Rsa1.0_00019.1 | 739  | 301669 | 0         | 413  | 414  | 99 -  | 324 | 737  | 17829  | 18242  |
| UN44913 | Rsa1.0_01958.1 | 787  | 261128 | 1.00E-118 | 252  | 264  | 95 -  | 522 | 785  | 133736 | 133999 |
| UN44914 | Rsa1.0_17040.1 | 553  | 1944   | 1.00E-152 | 279  | 281  | 99 -  | 25  | 305  | 1324   | 1604   |
| UN44915 | Rsa1.0_02573.1 | 512  | 29955  | 0         | 371  | 371  | 100 + | 1   | 371  | 9317   | 9687   |
| UN44916 | Rsa1.0_00058.1 | 739  | 159921 | 1.00E-144 | 262  | 263  | 99 +  | 1   | 263  | 150865 | 151127 |
| UN44917 | Rsa1.0_00112.1 | 851  | 132199 | 1.00E-145 | 342  | 364  | 93 -  | 2   | 362  | 56151  | 56507  |
| UN44918 | Rsa1.0_00830.1 | 793  | 62685  | 0         | 496  | 530  | 93 -  | 246 | 769  | 56995  | 57512  |
| UN44919 | Rsa1.0_00546.1 | 985  | 76523  | 0         | 702  | 772  | 90 +  | 223 | 985  | 73519  | 74278  |
| UN44920 | Rsa1.0_03633.1 | 700  | 21644  | 1.00E-117 | 224  | 226  | 99 +  | 476 | 700  | 18297  | 18522  |
| UN44921 | Rsa1.0_00208.1 | 1054 | 108565 | 1.00E-137 | 269  | 276  | 97 +  | 98  | 373  | 7693   | 7968   |
| UN44922 | Rsa1.0_00097.1 | 944  | 138858 | 1.00E-179 | 319  | 319  | 100 + | 626 | 944  | 65577  | 65895  |
| UN44923 | Rsa1.0_00204.1 | 801  | 109056 | 0         | 546  | 554  | 98 -  | 1   | 553  | 17525  | 18075  |
| UN44924 | Rsa1.0_00819.1 | 986  | 62918  | 0         | 572  | 605  | 94 -  | 241 | 830  | 33028  | 33631  |
| UN44925 | Rsa1.0_09270.1 | 902  | 6513   | 0         | 877  | 917  | 95 +  | 1   | 895  | 5290   | 6201   |
| UN44926 | Rsa1.0_01836.1 | 839  | 38503  | 0         | 387  | 400  | 96 -  | 385 | 784  | 28287  | 28685  |

|         |                |      |        |           |     |     |       |     |      |        |        |
|---------|----------------|------|--------|-----------|-----|-----|-------|-----|------|--------|--------|
| UN44927 | Rsa1.0.00387.1 | 755  | 495407 | 0         | 425 | 426 | 99 +  | 328 | 753  | 224934 | 225359 |
| UN44928 | Rsa1.0.02425.1 | 1178 | 31567  | 0         | 862 | 874 | 98 -  | 303 | 1176 | 7389   | 8262   |
| UN44929 | Rsa1.0.02955.1 | 585  | 26484  | 0         | 531 | 582 | 91 -  | 1   | 550  | 13371  | 13945  |
| UN44930 | Rsa1.0.09363.1 | 828  | 6425   | 1.00E-125 | 237 | 239 | 99 +  | 339 | 576  | 5732   | 5970   |
| UN44931 | Rsa1.0_10503.1 | 1102 | 5824   | 1.00E-135 | 264 | 269 | 98 +  | 1   | 268  | 1994   | 2262   |
| UN44932 | Rsa1.0_03664.1 | 548  | 21487  | 1.00E-131 | 276 | 288 | 95 -  | 3   | 287  | 7897   | 8180   |
| UN44933 | Rsa1.0.00135.1 | 454  | 178077 | 0         | 453 | 453 | 100 + | 2   | 454  | 168794 | 169246 |
| UN44934 | Rsa1.0.00699.1 | 714  | 184398 | 0         | 384 | 391 | 98 +  | 5   | 395  | 146308 | 146698 |
| UN44935 | Rsa1.0.03514.1 | 886  | 22346  | 0         | 596 | 615 | 96 +  | 275 | 885  | 19157  | 19769  |
| UN44936 | Rsa1.0.00017.1 | 978  | 752458 | 0         | 717 | 749 | 95 +  | 1   | 749  | 510955 | 511702 |
| UN44937 | Rsa1.0.02573.1 | 661  | 29955  | 1.00E-151 | 340 | 364 | 93 -  | 3   | 358  | 1806   | 2169   |
| UN44938 | Rsa1.0.00077.1 | 624  | 145005 | 0         | 385 | 407 | 94 -  | 223 | 622  | 33231  | 33637  |
| UN44939 | Rsa1.0.01315.1 | 838  | 48361  | 0         | 344 | 349 | 98 +  | 489 | 837  | 14860  | 15208  |
| UN44940 | Rsa1.0.03410.1 | 713  | 23147  | 0         | 499 | 517 | 96 -  | 40  | 556  | 10247  | 10760  |
| UN44941 | Rsa1.0.03270.1 | 898  | 24193  | 1.00E-132 | 269 | 278 | 96 +  | 1   | 276  | 7136   | 7413   |
| UN44942 | Rsa1.0.09170.1 | 811  | 6588   | 1.00E-109 | 213 | 217 | 98 +  | 31  | 247  | 81     | 297    |
| UN44943 | Rsa1.0.01440.1 | 678  | 45807  | 0         | 486 | 488 | 99 +  | 1   | 487  | 13708  | 14194  |
| UN44944 | Rsa1.0.09451.1 | 742  | 6359   | 1.00E-147 | 265 | 265 | 100 + | 251 | 515  | 6063   | 6327   |
| UN44945 | Rsa1.0.00648.1 | 896  | 70351  | 0         | 487 | 489 | 99 -  | 2   | 490  | 9530   | 10018  |
| UN44946 | Rsa1.0.00519.1 | 625  | 197864 | 0         | 383 | 385 | 99 -  | 240 | 624  | 191696 | 192080 |
| UN44947 | Rsa1.0.03122.1 | 469  | 25207  | 2.00E-96  | 186 | 187 | 99 -  | 1   | 187  | 7659   | 7844   |
| UN44948 | Rsa1.0.00589.1 | 699  | 209965 | 0         | 433 | 457 | 94 -  | 62  | 509  | 9243   | 9698   |
| UN44949 | Rsa1.0.00651.1 | 932  | 247766 | 1.00E-170 | 309 | 311 | 99 +  | 2   | 312  | 90214  | 90524  |
| UN44950 | Rsa1.0.00662.1 | 791  | 192183 | 1.00E-86  | 204 | 216 | 94 -  | 517 | 731  | 58373  | 58584  |
| UN44951 | Rsa1.0.02678.1 | 1091 | 135053 | 0         | 520 | 526 | 98 +  | 564 | 1089 | 130452 | 130977 |
| UN44952 | Rsa1.0.02852.1 | 438  | 27287  | 1.00E-139 | 279 | 286 | 97 +  | 1   | 284  | 21258  | 21542  |
| UN44953 | Rsa1.0.00707.1 | 1081 | 190112 | 0         | 333 | 335 | 99 +  | 7   | 341  | 160282 | 160616 |
| UN44954 | Rsa1.0.05945.1 | 1163 | 12149  | 0         | 366 | 366 | 100 - | 759 | 1124 | 11752  | 12117  |
| UN44955 | Rsa1.0.02079.1 | 481  | 35306  | 1.00E-155 | 298 | 305 | 97 +  | 3   | 307  | 3681   | 3985   |
| UN44956 | Rsa1.0.00369.1 | 662  | 266462 | 0         | 409 | 411 | 99 +  | 1   | 411  | 147120 | 147530 |
| UN44957 | Rsa1.0.00301.1 | 919  | 365315 | 2.00E-51  | 146 | 159 | 91 +  | 720 | 878  | 219835 | 219991 |
| UN44958 | Rsa1.0.01374.1 | 621  | 47047  | 0         | 430 | 431 | 99 +  | 1   | 431  | 30838  | 31268  |
| UN44959 | Rsa1.0.00471.1 | 610  | 81897  | 0         | 608 | 614 | 99 +  | 1   | 610  | 73355  | 73968  |
| UN44960 | Rsa1.0.00314.1 | 824  | 96472  | 1.00E-122 | 268 | 281 | 95 -  | 98  | 378  | 30151  | 30427  |
| UN44961 | Rsa1.0.00011.1 | 838  | 225044 | 1.00E-144 | 372 | 406 | 91 +  | 1   | 393  | 177282 | 177686 |
| UN44962 | Rsa1.0.00067.1 | 769  | 415055 | 0         | 426 | 447 | 95 -  | 332 | 769  | 46411  | 46853  |
| UN44963 | Rsa1.0.00071.1 | 878  | 345714 | 2.33E-156 | 266 | 267 | 99 +  | 3   | 269  | 216722 | 216988 |
| UN44964 | Rsa1.0_14871.1 | 383  | 2999   | 5.00E-84  | 203 | 217 | 93 -  | 50  | 259  | 2735   | 2951   |
| UN44965 | Rsa1.0_01321.1 | 889  | 48248  | 0         | 457 | 463 | 98 -  | 289 | 748  | 46635  | 47097  |

|         |                |      |        |           |     |     |       |     |      |        |        |
|---------|----------------|------|--------|-----------|-----|-----|-------|-----|------|--------|--------|
| UN44966 | Rsa1.0.00869.1 | 851  | 61627  | 1.00E-105 | 202 | 203 | 99 +  | 650 | 851  | 53448  | 53650  |
| UN44967 | Rsa1.0.03194.1 | 349  | 24674  | 1.00E-163 | 338 | 353 | 95 +  | 1   | 349  | 2068   | 2416   |
| UN44968 | Rsa1.0.09224.1 | 1098 | 6545   | 0         | 552 | 559 | 98 -  | 539 | 1096 | 663    | 1220   |
| UN44969 | Rsa1.0.00798.1 | 730  | 63945  | 0         | 725 | 729 | 99 -  | 1   | 728  | 60987  | 61715  |
| UN44970 | Rsa1.0.09250.1 | 1363 | 6528   | 0         | 452 | 455 | 99 -  | 707 | 1161 | 3462   | 3916   |
| UN44971 | Rsa1.0.00497.1 | 486  | 79830  | 1.00E-110 | 229 | 238 | 96 -  | 242 | 479  | 43615  | 43852  |
| UN44972 | Rsa1.0.00015.1 | 951  | 561803 | 0         | 418 | 418 | 100 - | 1   | 418  | 526505 | 526922 |
| UN44973 | Rsa1.0.00083.1 | 467  | 442773 | 0         | 450 | 465 | 96 +  | 2   | 466  | 152909 | 153366 |
| UN44974 | Rsa1.0.00017.1 | 1026 | 752458 | 0         | 623 | 635 | 98 -  | 150 | 784  | 363078 | 363712 |
| UN44975 | Rsa1.0.14203.1 | 1340 | 3670   | 0         | 523 | 527 | 99 +  | 815 | 1340 | 2544   | 3070   |
| UN44976 | Rsa1.0.00323.1 | 457  | 159650 | 3.00E-55  | 110 | 110 | 100 - | 245 | 354  | 55795  | 55904  |
| UN44977 | Rsa1.0.11027.1 | 575  | 5642   | 1.00E-103 | 193 | 194 | 99 -  | 211 | 404  | 1132   | 1325   |
| UN44978 | Rsa1.0.01513.1 | 685  | 44234  | 1.00E-103 | 271 | 295 | 91 +  | 4   | 283  | 17206  | 17498  |
| UN44979 | Rsa1.0.00972.1 | 823  | 57937  | 0         | 679 | 684 | 99 +  | 1   | 682  | 52180  | 52862  |
| UN44980 | Rsa1.0.02157.1 | 792  | 149652 | 0         | 354 | 361 | 98 +  | 19  | 377  | 147910 | 148269 |
| UN44981 | Rsa1.0.01666.1 | 1097 | 173972 | 0         | 572 | 606 | 94 -  | 440 | 1045 | 5108   | 5712   |
| UN44982 | Rsa1.0.02935.1 | 731  | 26621  | 0         | 675 | 769 | 87 -  | 1   | 728  | 24787  | 25545  |
| UN44983 | Rsa1.0.00937.1 | 862  | 59061  | 0         | 422 | 424 | 99 -  | 2   | 424  | 30166  | 30589  |
| UN44984 | Rsa1.0.00003.1 | 950  | 340054 | 0         | 344 | 344 | 100 + | 3   | 346  | 277062 | 277405 |
| UN44985 | Rsa1.0.00716.1 | 431  | 67078  | 1.00E-119 | 220 | 221 | 99 +  | 1   | 221  | 33213  | 33433  |
| UN44986 | Rsa1.0.13028.1 | 654  | 5039   | 0         | 403 | 409 | 98 -  | 1   | 405  | 12     | 419    |
| UN44987 | Rsa1.0.02600.1 | 803  | 29657  | 0         | 544 | 546 | 99 -  | 1   | 546  | 18019  | 18564  |
| UN44988 | Rsa1.0.00353.1 | 757  | 92242  | 0         | 413 | 414 | 99 -  | 342 | 755  | 82865  | 83278  |
| UN44989 | Rsa1.0.02040.1 | 718  | 35684  | 1.00E-169 | 302 | 302 | 100 - | 4   | 305  | 13231  | 13532  |
| UN44990 | Rsa1.0.03856.1 | 502  | 20429  | 3.00E-98  | 229 | 242 | 94 +  | 1   | 241  | 15601  | 15841  |
| UN44991 | Rsa1.0.00485.1 | 996  | 80937  | 0         | 623 | 626 | 99 +  | 1   | 625  | 71061  | 71684  |
| UN44992 | Rsa1.0.04245.1 | 925  | 18299  | 0         | 575 | 596 | 96 +  | 1   | 596  | 8022   | 8613   |
| UN44993 | Rsa1.0.00661.1 | 409  | 213041 | 1.00E-114 | 273 | 290 | 94 +  | 16  | 301  | 65278  | 65565  |
| UN44994 | Rsa1.0.03673.1 | 1192 | 21448  | 0         | 769 | 785 | 97 +  | 1   | 782  | 4075   | 4858   |
| UN44995 | Rsa1.0.01326.1 | 384  | 48072  | 1.00E-154 | 275 | 275 | 100 - | 3   | 277  | 10896  | 11170  |
| UN44996 | Rsa1.0.00329.1 | 897  | 222544 | 1.00E-157 | 376 | 407 | 92 +  | 504 | 897  | 177614 | 178019 |
| UN44997 | Rsa1.0.03137.1 | 751  | 25105  | 1.00E-149 | 271 | 272 | 99 -  | 1   | 272  | 16833  | 17104  |
| UN44998 | Rsa1.0.01182.1 | 885  | 167304 | 1.00E-159 | 297 | 300 | 99 -  | 584 | 882  | 39726  | 40025  |
| UN44999 | Rsa1.0.02592.1 | 830  | 29751  | 1.00E-163 | 294 | 295 | 99 -  | 487 | 781  | 17131  | 17425  |
| UN45000 | Rsa1.0.01088.1 | 499  | 54416  | 1.00E-121 | 224 | 225 | 99 +  | 228 | 452  | 30619  | 30843  |
| UN45001 | Rsa1.0.00173.1 | 522  | 288743 | 0         | 383 | 386 | 99 -  | 137 | 522  | 39212  | 39597  |
| UN45002 | Rsa1.0.00518.1 | 1159 | 78360  | 1.00E-105 | 198 | 199 | 99 +  | 960 | 1158 | 17620  | 17818  |
| UN45003 | Rsa1.0.00847.1 | 920  | 62270  | 1.00E-148 | 377 | 413 | 91 +  | 520 | 920  | 55145  | 55557  |
| UN45004 | Rsa1.0.03956.1 | 621  | 19872  | 1.00E-163 | 318 | 327 | 97 +  | 293 | 619  | 16858  | 17184  |

|         |                |      |        |           |     |     |       |     |      |        |        |
|---------|----------------|------|--------|-----------|-----|-----|-------|-----|------|--------|--------|
| UN45005 | Rsa1.0_15693.1 | 677  | 2478   | 1.00E-172 | 307 | 307 | 100 - | 2   | 308  | 109    | 415    |
| UN45006 | Rsa1.0_04696.1 | 795  | 16339  | 1.00E-112 | 349 | 396 | 88 -  | 400 | 795  | 11934  | 12321  |
| UN45007 | Rsa1.0_01005.1 | 545  | 56967  | 0         | 407 | 409 | 99 -  | 1   | 409  | 37619  | 38027  |
| UN45008 | Rsa1.0_01167.1 | 729  | 51859  | 0         | 691 | 731 | 94 +  | 3   | 706  | 48979  | 49708  |
| UN45009 | Rsa1.0_00782.1 | 669  | 64468  | 1.00E-180 | 366 | 383 | 95 +  | 1   | 374  | 647    | 1029   |
| UN45010 | Rsa1.0_13353.1 | 530  | 4894   | 1.00E-165 | 318 | 326 | 97 -  | 198 | 523  | 3894   | 4219   |
| UN45011 | Rsa1.0_02855.1 | 727  | 27271  | 0         | 350 | 354 | 98 -  | 1   | 351  | 10919  | 11272  |
| UN45012 | Rsa1.0_00689.1 | 1010 | 68305  | 0         | 455 | 458 | 99 -  | 1   | 458  | 43611  | 44067  |
| UN45013 | Rsa1.0_00177.1 | 969  | 143394 | 1.00E-56  | 116 | 117 | 99 -  | 783 | 899  | 36020  | 36136  |
| UN45014 | Rsa1.0_01296.1 | 700  | 49035  | 1.00E-161 | 288 | 288 | 100 + | 282 | 569  | 36040  | 36327  |
| UN45015 | Rsa1.0_01311.1 | 803  | 48456  | 0         | 353 | 359 | 98 -  | 1   | 359  | 16794  | 17152  |
| UN45016 | Rsa1.0_00464.1 | 937  | 82253  | 0         | 655 | 659 | 99 -  | 1   | 659  | 26503  | 27161  |
| UN45017 | Rsa1.0_00332.1 | 646  | 94575  | 1.00E-103 | 221 | 230 | 96 -  | 91  | 319  | 61648  | 61877  |
| UN45018 | Rsa1.0_01094.1 | 691  | 167285 | 0         | 411 | 416 | 98 +  | 1   | 415  | 162962 | 163377 |
| UN45019 | Rsa1.0_04323.1 | 1185 | 17915  | 5.00E-99  | 208 | 216 | 96 +  | 968 | 1183 | 15646  | 15861  |
| UN45020 | Rsa1.0_03348.1 | 975  | 23559  | 0         | 595 | 615 | 96 -  | 2   | 612  | 9056   | 9664   |
| UN45021 | Rsa1.0_03777.1 | 872  | 20922  | 0         | 770 | 786 | 97 -  | 1   | 784  | 1957   | 2741   |
| UN45022 | Rsa1.0_00525.1 | 781  | 78030  | 1.00E-162 | 289 | 289 | 100 + | 493 | 781  | 5794   | 6082   |
| UN45023 | Rsa1.0_05326.1 | 726  | 14139  | 1.00E-126 | 321 | 351 | 91 -  | 21  | 362  | 5288   | 5629   |
| UN45024 | Rsa1.0_00010.1 | 761  | 294827 | 1.00E-129 | 261 | 270 | 96 +  | 1   | 270  | 270962 | 271226 |
| UN45025 | Rsa1.0_00509.1 | 662  | 78829  | 1.00E-138 | 273 | 280 | 97 +  | 3   | 282  | 6507   | 6784   |
| UN45026 | Rsa1.0_00602.1 | 1142 | 73302  | 0         | 565 | 568 | 99 -  | 573 | 1140 | 28643  | 29210  |
| UN45027 | Rsa1.0_04288.1 | 577  | 18077  | 1.00E-121 | 302 | 324 | 93 -  | 1   | 316  | 13754  | 14075  |
| UN45028 | Rsa1.0_04229.1 | 612  | 18389  | 0         | 361 | 365 | 98 +  | 2   | 363  | 16318  | 16682  |
| UN45029 | Rsa1.0_19248.1 | 727  | 1457   | 1.00E-179 | 348 | 358 | 97 -  | 207 | 564  | 1      | 358    |
| UN45030 | Rsa1.0_00637.1 | 512  | 71038  | 1.00E-125 | 231 | 232 | 99 -  | 1   | 232  | 27778  | 28009  |
| UN45031 | Rsa1.0_05614.1 | 772  | 13191  | 1.00E-128 | 335 | 368 | 91 +  | 78  | 443  | 5941   | 6308   |
| UN45032 | Rsa1.0_01633.1 | 1330 | 41868  | 0         | 354 | 355 | 99 +  | 975 | 1329 | 8461   | 8814   |
| UN45033 | Rsa1.0_32526.1 | 1105 | 700    | 1.00E-157 | 290 | 293 | 98 -  | 811 | 1103 | 38     | 330    |
| UN45034 | Rsa1.0_00807.1 | 762  | 63607  | 1.00E-171 | 307 | 308 | 99 -  | 311 | 618  | 48409  | 48716  |
| UN45035 | Rsa1.0_03809.1 | 829  | 20731  | 0         | 581 | 598 | 97 -  | 2   | 597  | 3075   | 3670   |
| UN45036 | Rsa1.0_00324.1 | 628  | 218805 | 0         | 625 | 626 | 99 -  | 2   | 627  | 202469 | 203094 |
| UN45037 | Rsa1.0_01835.1 | 743  | 38542  | 1.00E-137 | 336 | 361 | 93 -  | 389 | 742  | 21298  | 21654  |
| UN45038 | Rsa1.0_01660.1 | 579  | 41400  | 1.00E-106 | 269 | 292 | 92 -  | 19  | 309  | 32286  | 32573  |
| UN45039 | Rsa1.0_01560.1 | 758  | 43256  | 1.00E-118 | 219 | 220 | 99 -  | 1   | 220  | 30828  | 31047  |
| UN45040 | Rsa1.0_00594.1 | 648  | 73729  | 0         | 472 | 499 | 94 +  | 2   | 494  | 27112  | 27610  |
| UN45041 | Rsa1.0_05753.1 | 785  | 12732  | 2.33E-156 | 284 | 291 | 97 +  | 495 | 785  | 11407  | 11697  |
| UN45042 | Rsa1.0_00502.1 | 805  | 204180 | 0         | 502 | 544 | 92 +  | 272 | 805  | 59117  | 59641  |
| UN45043 | Rsa1.0_00323.1 | 501  | 159650 | 1.00E-156 | 286 | 287 | 99 +  | 213 | 499  | 56193  | 56478  |

|         |                |      |        |           |     |     |       |     |      |        |        |
|---------|----------------|------|--------|-----------|-----|-----|-------|-----|------|--------|--------|
| UN45044 | Rsa1.0.00827.1 | 639  | 62790  | 1.00E-175 | 318 | 320 | 99 +  | 320 | 639  | 38722  | 39041  |
| UN45045 | Rsa1.0.02510.1 | 798  | 30662  | 0         | 675 | 712 | 94 -  | 65  | 776  | 2193   | 2889   |
| UN45046 | Rsa1.0.04477.1 | 466  | 17183  | 1.00E-131 | 244 | 245 | 99 +  | 2   | 246  | 5286   | 5529   |
| UN45047 | Rsa1.0.07863.1 | 737  | 8404   | 1.00E-142 | 332 | 353 | 94 +  | 1   | 348  | 2596   | 2946   |
| UN45048 | Rsa1.0.00916.1 | 566  | 59789  | 2.00E-96  | 232 | 248 | 93 -  | 14  | 256  | 35590  | 35837  |
| UN45049 | Rsa1.0.00351.1 | 1014 | 413096 | 0         | 366 | 372 | 98 -  | 2   | 373  | 242921 | 243292 |
| UN45050 | Rsa1.0.06541.1 | 690  | 10806  | 1.00E-165 | 302 | 303 | 99 -  | 389 | 690  | 10070  | 10372  |
| UN45051 | Rsa1.0.00480.1 | 879  | 81325  | 0         | 516 | 520 | 99 -  | 358 | 877  | 549    | 1068   |
| UN45052 | Rsa1.0.69270.1 | 653  | 331    | 1.00E-152 | 292 | 296 | 98 +  | 339 | 632  | 37     | 331    |
| UN45053 | Rsa1.0.11549.1 | 1087 | 5473   | 0         | 997 | 998 | 99 +  | 1   | 998  | 4476   | 5473   |
| UN45054 | Rsa1.0.00301.1 | 549  | 365315 | 1.00E-109 | 247 | 261 | 94 +  | 235 | 489  | 69917  | 70177  |
| UN45055 | Rsa1.0.00120.1 | 1214 | 277288 | 0         | 712 | 721 | 98 +  | 4   | 723  | 118250 | 118969 |
| UN45056 | Rsa1.0.03435.1 | 664  | 22958  | 1.00E-154 | 303 | 311 | 97 +  | 152 | 462  | 21985  | 22293  |
| UN45057 | Rsa1.0.03029.1 | 760  | 25858  | 0         | 543 | 554 | 98 +  | 206 | 759  | 5290   | 5843   |
| UN45058 | Rsa1.0.09126.1 | 775  | 6625   | 0         | 450 | 455 | 98 +  | 2   | 456  | 5254   | 5707   |
| UN45059 | Rsa1.0.01376.1 | 938  | 47004  | 0         | 932 | 937 | 99 +  | 1   | 937  | 4188   | 5124   |
| UN45060 | Rsa1.0.02393.1 | 567  | 31795  | 1.00E-141 | 255 | 255 | 100 - | 1   | 255  | 26844  | 27098  |
| UN45061 | Rsa1.0.01608.1 | 761  | 170540 | 1.00E-172 | 321 | 326 | 98 +  | 418 | 743  | 38402  | 38727  |
| UN45062 | Rsa1.0.01651.1 | 999  | 41586  | 1.00E-123 | 248 | 256 | 96 +  | 1   | 256  | 34469  | 34724  |
| UN45063 | Rsa1.0.08339.1 | 668  | 7509   | 0         | 568 | 596 | 95 -  | 5   | 600  | 2560   | 3138   |
| UN45064 | Rsa1.0.00071.1 | 615  | 345714 | 2.00E-97  | 271 | 298 | 90 +  | 1   | 279  | 66070  | 66365  |
| UN45065 | Rsa1.0.02981.1 | 675  | 26285  | 6.00E-85  | 197 | 209 | 94 -  | 1   | 200  | 5587   | 5795   |
| UN45066 | Rsa1.0.00662.1 | 430  | 192183 | 1.00E-81  | 205 | 222 | 92 +  | 150 | 371  | 12138  | 12359  |
| UN45067 | Rsa1.0.00615.1 | 1167 | 72235  | 1.00E-171 | 320 | 325 | 98 -  | 826 | 1150 | 25400  | 25724  |
| UN45068 | Rsa1.0.00926.1 | 573  | 195072 | 4.00E-95  | 192 | 197 | 97 -  | 247 | 443  | 32227  | 32423  |
| UN45069 | Rsa1.0.00147.1 | 934  | 249503 | 1.00E-157 | 306 | 314 | 97 -  | 1   | 310  | 130918 | 131231 |
| UN45070 | Rsa1.0.00301.1 | 542  | 365315 | 1.00E-131 | 270 | 278 | 97 -  | 68  | 345  | 215181 | 215456 |
| UN45071 | Rsa1.0.00495.1 | 820  | 79934  | 3.00E-53  | 123 | 127 | 96 +  | 376 | 502  | 16598  | 16723  |
| UN45072 | Rsa1.0.01638.1 | 773  | 41857  | 3.00E-87  | 200 | 212 | 94 -  | 368 | 579  | 35702  | 35913  |
| UN45073 | Rsa1.0.00108.1 | 804  | 478491 | 0         | 564 | 582 | 96 -  | 143 | 724  | 143323 | 143904 |
| UN45074 | Rsa1.0.03413.1 | 673  | 23137  | 0         | 668 | 673 | 99 -  | 1   | 673  | 18839  | 19511  |
| UN45075 | Rsa1.0.02247.1 | 831  | 33427  | 1.00E-128 | 271 | 282 | 96 -  | 100 | 380  | 28646  | 28924  |
| UN45076 | Rsa1.0.03813.1 | 1026 | 20708  | 2.00E-95  | 196 | 202 | 97 -  | 823 | 1024 | 170    | 371    |
| UN45077 | Rsa1.0.00006.1 | 590  | 396176 | 1.00E-104 | 237 | 249 | 95 +  | 72  | 318  | 309017 | 309265 |
| UN45078 | Rsa1.0.02406.1 | 997  | 145276 | 0         | 425 | 440 | 96 -  | 508 | 947  | 14082  | 14515  |
| UN45079 | Rsa1.0.00123.1 | 741  | 325650 | 6.00E-79  | 159 | 162 | 98 -  | 212 | 373  | 142857 | 143018 |
| UN45080 | Rsa1.0.00407.1 | 849  | 191544 | 0         | 432 | 450 | 96 -  | 1   | 440  | 154691 | 155140 |
| UN45081 | Rsa1.0.41400.1 | 528  | 543    | 0         | 519 | 520 | 99 +  | 1   | 520  | 24     | 543    |
| UN45082 | Rsa1.0.00329.1 | 781  | 222544 | 1.00E-124 | 295 | 318 | 92 +  | 2   | 311  | 178082 | 178397 |

|         |                |      |        |           |      |      |       |     |      |        |        |
|---------|----------------|------|--------|-----------|------|------|-------|-----|------|--------|--------|
| UN45083 | Rsa1.0.00108.1 | 746  | 478491 | 1.00E-169 | 311  | 314  | 99 -  | 2   | 315  | 270630 | 270943 |
| UN45084 | Rsa1.0.00925.1 | 887  | 59481  | 0         | 822  | 882  | 93 +  | 3   | 869  | 52761  | 53618  |
| UN45085 | Rsa1.0.00707.1 | 884  | 190112 | 1.00E-176 | 391  | 419  | 93 +  | 481 | 883  | 179614 | 180032 |
| UN45086 | Rsa1.0.12729.1 | 421  | 5142   | 1.00E-120 | 228  | 230  | 99 +  | 1   | 228  | 2533   | 2762   |
| UN45087 | Rsa1.0.01298.1 | 530  | 48999  | 1.00E-163 | 303  | 307  | 98 -  | 1   | 307  | 24692  | 24998  |
| UN45088 | Rsa1.0.00767.1 | 466  | 64980  | 0         | 441  | 459  | 96 +  | 3   | 461  | 15148  | 15591  |
| UN45089 | Rsa1.0.00016.1 | 664  | 831256 | 1.00E-129 | 246  | 249  | 98 +  | 1   | 247  | 204642 | 204890 |
| UN45090 | Rsa1.0.01405.1 | 426  | 46445  | 8.00E-71  | 139  | 140  | 99 +  | 135 | 274  | 13173  | 13312  |
| UN45091 | Rsa1.0.00343.1 | 222  | 93570  | 6.00E-67  | 150  | 155  | 96 -  | 1   | 151  | 74843  | 74997  |
| UN45092 | Rsa1.0.16384.1 | 942  | 2170   | 1.00E-176 | 400  | 427  | 93 -  | 3   | 425  | 249    | 674    |
| UN45093 | Rsa1.0.00131.1 | 1043 | 432233 | 1.00E-153 | 275  | 275  | 100 + | 252 | 526  | 194264 | 194538 |
| UN45094 | Rsa1.0.02266.1 | 1111 | 33195  | 1.00E-172 | 382  | 402  | 95 -  | 2   | 400  | 13845  | 14240  |
| UN45095 | Rsa1.0.04116.1 | 724  | 18971  | 0         | 418  | 429  | 97 -  | 295 | 722  | 614    | 1041   |
| UN45096 | Rsa1.0.01109.1 | 663  | 53793  | 0         | 331  | 332  | 99 +  | 7   | 338  | 50285  | 50616  |
| UN45097 | Rsa1.0.01199.1 | 673  | 163576 | 1.00E-143 | 297  | 314  | 94 +  | 1   | 314  | 558    | 854    |
| UN45098 | Rsa1.0.00568.1 | 354  | 75219  | 1.00E-166 | 345  | 358  | 96 -  | 3   | 354  | 14589  | 14942  |
| UN45099 | Rsa1.0.01515.1 | 969  | 170864 | 0         | 429  | 461  | 93 -  | 17  | 474  | 134882 | 135342 |
| UN45100 | Rsa1.0.00327.1 | 776  | 94892  | 1.00E-112 | 233  | 241  | 96 +  | 330 | 568  | 70836  | 71076  |
| UN45101 | Rsa1.0.00679.1 | 984  | 68971  | 0         | 500  | 539  | 92 +  | 119 | 657  | 701    | 1229   |
| UN45102 | Rsa1.0.00701.1 | 1148 | 67691  | 1.00E-160 | 371  | 394  | 94 -  | 8   | 399  | 23226  | 23616  |
| UN45103 | Rsa1.0.00180.1 | 980  | 114581 | 4.00E-90  | 256  | 280  | 91 -  | 1   | 280  | 61516  | 61790  |
| UN45104 | Rsa1.0.00111.1 | 987  | 390088 | 1.00E-164 | 309  | 314  | 98 -  | 670 | 983  | 6032   | 6345   |
| UN45105 | Rsa1.0.00082.1 | 1183 | 237584 | 0         | 744  | 794  | 93 +  | 3   | 770  | 55288  | 56077  |
| UN45106 | Rsa1.0.00362.1 | 1207 | 299497 | 0         | 1037 | 1058 | 98 -  | 158 | 1206 | 297138 | 298194 |
| UN45107 | Rsa1.0.00217.1 | 812  | 107079 | 0         | 331  | 333  | 99 +  | 1   | 332  | 59367  | 59699  |
| UN45108 | Rsa1.0.00058.1 | 544  | 159921 | 0         | 482  | 515  | 93 +  | 1   | 506  | 49043  | 49550  |
| UN45109 | Rsa1.0.02652.1 | 1613 | 29038  | 1.00E-125 | 333  | 362  | 91 -  | 4   | 359  | 9047   | 9406   |
| UN45110 | Rsa1.0.08196.1 | 768  | 7753   | 0         | 741  | 771  | 96 -  | 1   | 768  | 570    | 1337   |
| UN45111 | Rsa1.0.00773.1 | 1377 | 64839  | 0         | 491  | 506  | 97 -  | 855 | 1360 | 12562  | 13067  |
| UN45112 | Rsa1.0.28805.1 | 792  | 803    | 5.00E-98  | 188  | 190  | 98 +  | 1   | 190  | 423    | 612    |
| UN45113 | Rsa1.0.01170.1 | 826  | 161131 | 1.00E-131 | 294  | 311  | 94 -  | 54  | 363  | 129391 | 129693 |
| UN45114 | Rsa1.0.03382.1 | 1380 | 23299  | 0         | 394  | 411  | 95 +  | 1   | 408  | 16814  | 17220  |
| UN45115 | Rsa1.0.00394.1 | 641  | 148426 | 1.00E-127 | 260  | 266  | 97 +  | 2   | 266  | 122827 | 123089 |
| UN45116 | Rsa1.0.01483.1 | 692  | 44826  | 1.00E-159 | 342  | 359  | 95 -  | 1   | 352  | 27554  | 27910  |
| UN45117 | Rsa1.0.00744.1 | 676  | 66084  | 1.00E-180 | 392  | 416  | 94 +  | 1   | 404  | 56503  | 56916  |
| UN45118 | Rsa1.0.00016.1 | 663  | 831256 | 3.00E-93  | 323  | 371  | 87 +  | 1   | 348  | 225417 | 225775 |
| UN45119 | Rsa1.0.03368.1 | 1019 | 23382  | 0         | 586  | 602  | 97 -  | 1   | 600  | 19959  | 20558  |
| UN45120 | Rsa1.0.00251.1 | 443  | 303968 | 1.00E-102 | 218  | 230  | 94 +  | 1   | 218  | 120992 | 121221 |
| UN45121 | Rsa1.0.00081.1 | 608  | 143261 | 0         | 605  | 636  | 95 -  | 1   | 606  | 123484 | 124119 |

|         |                |      |        |           |      |      |       |     |      |        |        |
|---------|----------------|------|--------|-----------|------|------|-------|-----|------|--------|--------|
| UN45122 | Rsa1.0.00122.1 | 979  | 265937 | 0         | 555  | 576  | 96 +  | 1   | 575  | 62627  | 63190  |
| UN45123 | Rsa1.0.02267.1 | 268  | 33194  | 2.00E-67  | 142  | 146  | 97 +  | 1   | 146  | 9448   | 9593   |
| UN45124 | Rsa1.0.02841.1 | 784  | 27383  | 0         | 752  | 798  | 94 +  | 1   | 782  | 6570   | 7357   |
| UN45125 | Rsa1.0.00096.1 | 694  | 198773 | 1.00E-122 | 254  | 264  | 96 +  | 50  | 310  | 155937 | 156194 |
| UN45126 | Rsa1.0.00655.1 | 614  | 195840 | 1.00E-147 | 324  | 343  | 94 +  | 250 | 590  | 163505 | 163847 |
| UN45127 | Rsa1.0.22264.1 | 743  | 1136   | 1.00E-107 | 232  | 243  | 95 -  | 1   | 243  | 285    | 523    |
| UN45128 | Rsa1.0.01292.1 | 640  | 175783 | 6.00E-88  | 177  | 181  | 97 +  | 460 | 640  | 3978   | 4158   |
| UN45129 | Rsa1.0.18563.1 | 1105 | 1574   | 1.00E-132 | 333  | 361  | 92 -  | 3   | 361  | 528    | 879    |
| UN45130 | Rsa1.0.05969.1 | 964  | 12072  | 0         | 462  | 467  | 98 -  | 489 | 955  | 5465   | 5931   |
| UN45131 | Rsa1.0.00229.1 | 1187 | 105471 | 0         | 340  | 344  | 98 -  | 1   | 344  | 43350  | 43693  |
| UN45132 | Rsa1.0.09813.1 | 815  | 6138   | 0         | 426  | 434  | 98 -  | 59  | 492  | 5191   | 5624   |
| UN45133 | Rsa1.0.01073.1 | 788  | 55030  | 0         | 754  | 783  | 96 +  | 11  | 788  | 6031   | 6807   |
| UN45134 | Rsa1.0.00069.1 | 696  | 403561 | 1.00E-105 | 256  | 274  | 93 -  | 427 | 696  | 169766 | 170031 |
| UN45135 | Rsa1.0.01214.1 | 868  | 50599  | 1.00E-172 | 388  | 414  | 93 +  | 3   | 415  | 35154  | 35561  |
| UN45136 | Rsa1.0.02777.1 | 816  | 27986  | 1.00E-110 | 252  | 268  | 94 -  | 158 | 422  | 6968   | 7235   |
| UN45137 | Rsa1.0.00601.1 | 837  | 177045 | 1.00E-134 | 343  | 373  | 91 -  | 470 | 837  | 26139  | 26496  |
| UN45138 | Rsa1.0.00028.1 | 772  | 293984 | 1.00E-158 | 286  | 287  | 99 +  | 3   | 289  | 280008 | 280294 |
| UN45139 | Rsa1.0.09946.1 | 680  | 6076   | 1.00E-163 | 307  | 312  | 98 +  | 3   | 314  | 497    | 808    |
| UN45140 | Rsa1.0.04200.1 | 961  | 18490  | 0         | 796  | 848  | 93 -  | 3   | 844  | 2331   | 3178   |
| UN45141 | Rsa1.0.04493.1 | 719  | 17137  | 2.00E-72  | 142  | 143  | 99 +  | 2   | 144  | 528    | 670    |
| UN45142 | Rsa1.0.01325.1 | 806  | 48131  | 9.00E-29  | 117  | 134  | 87 +  | 43  | 176  | 16497  | 16630  |
| UN45143 | Rsa1.0.75906.1 | 455  | 302    | 1.00E-151 | 276  | 278  | 99 +  | 178 | 455  | 2      | 279    |
| UN45144 | Rsa1.0.00131.1 | 1280 | 432233 | 0         | 1103 | 1129 | 97 +  | 2   | 1118 | 258470 | 259598 |
| UN45145 | Rsa1.0.02267.1 | 844  | 33194  | 1.00E-130 | 291  | 310  | 93 -  | 3   | 312  | 10467  | 10764  |
| UN45146 | Rsa1.0.02841.1 | 848  | 27383  | 0         | 583  | 599  | 97 -  | 2   | 597  | 7754   | 8347   |
| UN45147 | Rsa1.0.07535.1 | 850  | 9183   | 0         | 592  | 612  | 96 +  | 12  | 623  | 8580   | 9183   |
| UN45148 | Rsa1.0.25172.1 | 621  | 948    | 1.00E-82  | 199  | 212  | 93 -  | 2   | 213  | 1      | 211    |
| UN45149 | Rsa1.0.04787.1 | 444  | 15987  | 7.00E-93  | 227  | 244  | 93 +  | 1   | 233  | 3102   | 3344   |
| UN45150 | Rsa1.0.00329.1 | 884  | 222544 | 0         | 406  | 417  | 97 +  | 353 | 769  | 194066 | 194482 |
| UN45151 | Rsa1.0.01263.1 | 746  | 49703  | 1.00E-150 | 337  | 357  | 94 -  | 1   | 356  | 42751  | 43105  |
| UN45152 | Rsa1.0.00944.1 | 1145 | 58733  | 1.00E-120 | 219  | 219  | 100 + | 122 | 340  | 55582  | 55800  |
| UN45153 | Rsa1.0.00321.1 | 823  | 95671  | 1.00E-168 | 315  | 318  | 99 -  | 1   | 315  | 40671  | 40988  |
| UN45154 | Rsa1.0.05745.1 | 693  | 12750  | 0         | 675  | 698  | 96 -  | 1   | 692  | 6887   | 7580   |
| UN45155 | Rsa1.0.08837.1 | 1068 | 6874   | 1.00E-147 | 306  | 318  | 96 +  | 31  | 347  | 2945   | 3258   |
| UN45156 | Rsa1.0.00274.1 | 970  | 210119 | 0         | 331  | 331  | 100 - | 1   | 331  | 46547  | 46877  |
| UN45157 | Rsa1.0.02726.1 | 1045 | 28404  | 0         | 596  | 603  | 98 +  | 3   | 604  | 8533   | 9135   |
| UN45158 | Rsa1.0.00009.1 | 370  | 232558 | 1.00E-149 | 329  | 346  | 95 +  | 27  | 368  | 9554   | 9899   |
| UN45159 | Rsa1.0.01949.1 | 342  | 36960  | 1.00E-124 | 231  | 233  | 99 +  | 1   | 233  | 23223  | 23455  |
| UN45160 | Rsa1.0.00308.1 | 599  | 96915  | 2.00E-63  | 133  | 136  | 97 -  | 226 | 361  | 80101  | 80236  |



|         |                |      |        |           |     |     |       |     |      |        |        |
|---------|----------------|------|--------|-----------|-----|-----|-------|-----|------|--------|--------|
| UN45161 | Rsa1.0_04057.1 | 305  | 19333  | 1.00E-111 | 209 | 211 | 99 -  | 3   | 213  | 3706   | 3916   |
| UN45162 | Rsa1.0_00065.1 | 545  | 454616 | 0         | 498 | 547 | 91 +  | 3   | 545  | 26175  | 26708  |
| UN45163 | Rsa1.0_00021.1 | 667  | 263655 | 0         | 479 | 492 | 97 -  | 1   | 492  | 150098 | 150583 |
| UN45164 | Rsa1.0_02191.1 | 1132 | 34078  | 0         | 370 | 373 | 99 -  | 758 | 1130 | 17155  | 17527  |
| UN45165 | Rsa1.0_00273.1 | 808  | 326186 | 9.00E-97  | 193 | 196 | 98 +  | 70  | 264  | 2608   | 2803   |
| UN45166 | Rsa1.0_03572.1 | 569  | 146346 | 1.00E-144 | 302 | 318 | 94 +  | 265 | 567  | 137177 | 137494 |
| UN45167 | Rsa1.0_00130.1 | 676  | 125737 | 1.00E-177 | 358 | 369 | 97 +  | 3   | 370  | 38238  | 38602  |
| UN45168 | Rsa1.0_00136.1 | 935  | 122464 | 1.00E-148 | 269 | 270 | 99 -  | 1   | 270  | 30698  | 30967  |
| UN45169 | Rsa1.0_06488.1 | 703  | 141774 | 1.00E-174 | 347 | 359 | 96 -  | 343 | 701  | 1025   | 1380   |
| UN45170 | Rsa1.0_00697.1 | 1412 | 67913  | 0         | 443 | 464 | 95 -  | 350 | 812  | 62104  | 62562  |
| UN45171 | Rsa1.0_04142.1 | 889  | 18861  | 0         | 641 | 662 | 96 +  | 2   | 660  | 7227   | 7888   |
| UN45172 | Rsa1.0_01389.1 | 1049 | 46716  | 1.00E-163 | 312 | 318 | 98 +  | 538 | 852  | 10431  | 10748  |
| UN45173 | Rsa1.0_02855.1 | 825  | 27271  | 0         | 539 | 555 | 97 -  | 2   | 555  | 10734  | 11284  |
| UN45174 | Rsa1.0_00080.1 | 805  | 190437 | 1.00E-120 | 233 | 236 | 98 +  | 1   | 235  | 33655  | 33890  |
| UN45175 | Rsa1.0_58003.1 | 572  | 394    | 1.00E-91  | 193 | 199 | 96 +  | 17  | 215  | 117    | 314    |
| UN45176 | Rsa1.0_00926.1 | 590  | 195072 | 1.00E-131 | 246 | 249 | 98 -  | 3   | 251  | 32525  | 32773  |
| UN45177 | Rsa1.0_00008.1 | 839  | 358124 | 1.00E-171 | 311 | 313 | 99 +  | 1   | 313  | 316247 | 316559 |
| UN45178 | Rsa1.0_00507.1 | 804  | 79074  | 1.00E-132 | 269 | 279 | 96 +  | 434 | 712  | 60983  | 61261  |
| UN45179 | Rsa1.0_05812.1 | 834  | 12571  | 0         | 644 | 662 | 97 +  | 3   | 663  | 2611   | 3272   |
| UN45180 | Rsa1.0_00166.1 | 798  | 240912 | 0         | 751 | 792 | 94 -  | 9   | 798  | 191771 | 192561 |
| UN45181 | Rsa1.0_39292.1 | 517  | 572    | 0         | 362 | 371 | 97 -  | 146 | 516  | 158    | 528    |
| UN45182 | Rsa1.0_04258.1 | 808  | 18254  | 0         | 404 | 415 | 97 -  | 395 | 807  | 2361   | 2775   |
| UN45183 | Rsa1.0_00152.1 | 540  | 257730 | 1.00E-144 | 272 | 275 | 98 +  | 2   | 276  | 77846  | 78119  |
| UN45184 | Rsa1.0_00025.1 | 808  | 277312 | 0         | 443 | 443 | 100 - | 364 | 806  | 77667  | 78109  |
| UN45185 | Rsa1.0_00243.1 | 373  | 103651 | 1.00E-127 | 259 | 268 | 96 +  | 1   | 264  | 77767  | 78034  |
| UN45186 | Rsa1.0_05995.1 | 841  | 11997  | 1.00E-108 | 240 | 251 | 95 -  | 152 | 400  | 8577   | 8821   |
| UN45187 | Rsa1.0_00577.1 | 739  | 174827 | 1.00E-111 | 210 | 212 | 99 -  | 1   | 212  | 148899 | 149110 |
| UN45188 | Rsa1.0_03681.1 | 978  | 21405  | 0         | 684 | 693 | 98 +  | 2   | 693  | 672    | 1361   |
| UN45189 | Rsa1.0_00722.1 | 585  | 66840  | 4.00E-55  | 130 | 136 | 95 +  | 448 | 583  | 14572  | 14704  |
| UN45190 | Rsa1.0_03448.1 | 539  | 22844  | 5.00E-79  | 215 | 235 | 91 -  | 3   | 228  | 1239   | 1472   |
| UN45191 | Rsa1.0_07441.1 | 826  | 9388   | 1.00E-132 | 249 | 252 | 98 -  | 1   | 252  | 149    | 400    |
| UN45192 | Rsa1.0_03668.1 | 414  | 21483  | 4.00E-63  | 135 | 139 | 97 -  | 195 | 333  | 19585  | 19723  |
| UN45193 | Rsa1.0_01251.1 | 743  | 49873  | 0         | 473 | 491 | 96 +  | 1   | 485  | 27215  | 27701  |
| UN45194 | Rsa1.0_01151.1 | 850  | 52268  | 0         | 834 | 853 | 97 -  | 1   | 849  | 39126  | 39974  |
| UN45195 | Rsa1.0_21324.1 | 907  | 1216   | 0         | 755 | 787 | 95 -  | 120 | 906  | 431    | 1216   |
| UN45196 | Rsa1.0_00451.1 | 871  | 322533 | 0         | 343 | 343 | 100 - | 356 | 698  | 156756 | 157098 |
| UN45197 | Rsa1.0_00542.1 | 965  | 76831  | 2.00E-98  | 257 | 283 | 90 -  | 1   | 283  | 64221  | 64489  |
| UN45198 | Rsa1.0_03900.1 | 373  | 133221 | 1.00E-143 | 338 | 369 | 91 +  | 5   | 373  | 6916   | 7257   |
| UN45199 | Rsa1.0_03504.1 | 958  | 22443  | 1.00E-176 | 352 | 363 | 96 +  | 1   | 363  | 3899   | 4256   |

|         |                |      |        |           |      |      |      |     |      |        |        |
|---------|----------------|------|--------|-----------|------|------|------|-----|------|--------|--------|
| UN45200 | Rsa1.0.09414.1 | 812  | 6386   | 0         | 737  | 743  | 99 + | 70  | 811  | 607    | 1349   |
| UN45201 | Rsa1.0.03964.1 | 668  | 19835  | 9.00E-44  | 157  | 179  | 87 + | 1   | 168  | 13163  | 13337  |
| UN45202 | Rsa1.0.03053.1 | 1452 | 25745  | 0         | 588  | 591  | 99 - | 453 | 1043 | 23455  | 24044  |
| UN45203 | Rsa1.0.02103.1 | 848  | 35006  | 0         | 438  | 473  | 92 - | 390 | 846  | 23197  | 23659  |
| UN45204 | Rsa1.0.00522.1 | 862  | 78103  | 1.00E-129 | 240  | 242  | 99 - | 559 | 800  | 57158  | 57399  |
| UN45205 | Rsa1.0.01604.1 | 1048 | 42461  | 0         | 849  | 896  | 94 - | 1   | 890  | 38216  | 39088  |
| UN45206 | Rsa1.0.03738.1 | 747  | 21071  | 0         | 709  | 746  | 95 - | 1   | 745  | 19575  | 20312  |
| UN45207 | Rsa1.0.01882.1 | 741  | 37697  | 0         | 684  | 724  | 94 - | 1   | 721  | 10995  | 11712  |
| UN45208 | Rsa1.0.02769.1 | 1010 | 28107  | 1.00E-164 | 649  | 760  | 85 + | 1   | 738  | 16083  | 16841  |
| UN45209 | Rsa1.0.30432.1 | 593  | 754    | 1.00E-127 | 272  | 287  | 94 + | 316 | 593  | 286    | 572    |
| UN45210 | Rsa1.0.13874.1 | 829  | 4176   | 1.00E-105 | 255  | 271  | 94 + | 3   | 272  | 1121   | 1389   |
| UN45211 | Rsa1.0.01846.1 | 609  | 38367  | 5.00E-73  | 166  | 174  | 95 + | 109 | 282  | 2597   | 2767   |
| UN45212 | Rsa1.0.04392.1 | 756  | 17575  | 3.00E-78  | 210  | 230  | 91 + | 526 | 755  | 5133   | 5358   |
| UN45213 | Rsa1.0.09522.1 | 800  | 6316   | 0         | 763  | 805  | 94 + | 1   | 800  | 4853   | 5655   |
| UN45214 | Rsa1.0.00248.1 | 766  | 163568 | 1.00E-166 | 399  | 432  | 92 + | 2   | 412  | 40148  | 40578  |
| UN45215 | Rsa1.0.00074.1 | 854  | 147591 | 0         | 630  | 633  | 99 - | 221 | 852  | 145268 | 145900 |
| UN45216 | Rsa1.0.01201.1 | 869  | 50856  | 0         | 497  | 502  | 99 - | 262 | 761  | 45913  | 46414  |
| UN45217 | Rsa1.0.01516.1 | 333  | 44196  | 3.00E-79  | 156  | 158  | 98 + | 82  | 239  | 27872  | 28029  |
| UN45218 | Rsa1.0.00013.1 | 890  | 292129 | 0         | 712  | 725  | 98 + | 5   | 727  | 105150 | 105874 |
| UN45219 | Rsa1.0.00696.1 | 776  | 68010  | 0         | 405  | 425  | 95 + | 110 | 533  | 26678  | 27100  |
| UN45220 | Rsa1.0.02768.1 | 727  | 28110  | 0         | 524  | 526  | 99 + | 201 | 726  | 12309  | 12834  |
| UN45221 | Rsa1.0.01887.1 | 666  | 37564  | 0         | 640  | 665  | 96 + | 1   | 664  | 2327   | 2981   |
| UN45222 | Rsa1.0.01326.1 | 621  | 48072  | 0         | 390  | 393  | 99 + | 1   | 393  | 43760  | 44152  |
| UN45223 | Rsa1.0.02901.1 | 777  | 26909  | 0         | 393  | 404  | 97 + | 373 | 775  | 25992  | 26395  |
| UN45224 | Rsa1.0.11160.1 | 696  | 5600   | 1.00E-143 | 304  | 316  | 96 - | 2   | 315  | 134    | 447    |
| UN45225 | Rsa1.0.06213.1 | 622  | 11478  | 0         | 363  | 364  | 99 + | 257 | 620  | 1640   | 2003   |
| UN45226 | Rsa1.0.00294.1 | 450  | 144860 | 4.00E-88  | 203  | 214  | 94 - | 236 | 449  | 58234  | 58442  |
| UN45227 | Rsa1.0.01033.1 | 763  | 56173  | 0         | 388  | 406  | 95 - | 3   | 398  | 49510  | 49914  |
| UN45228 | Rsa1.0.05631.1 | 1109 | 13127  | 0         | 1107 | 1108 | 99 - | 1   | 1107 | 3668   | 4775   |
| UN45229 | Rsa1.0.00959.1 | 626  | 58202  | 8.00E-41  | 168  | 193  | 87 - | 374 | 566  | 56871  | 57055  |
| UN45230 | Rsa1.0.00612.1 | 660  | 72376  | 0         | 556  | 563  | 98 - | 6   | 568  | 13983  | 14540  |
| UN45231 | Rsa1.0.00045.1 | 1305 | 328694 | 0         | 931  | 937  | 99 - | 3   | 939  | 299837 | 300771 |
| UN45232 | Rsa1.0.00373.1 | 777  | 90296  | 1.00E-178 | 490  | 547  | 89 + | 66  | 607  | 88249  | 88783  |
| UN45233 | Rsa1.0.02633.1 | 788  | 29315  | 1.00E-169 | 414  | 450  | 92 + | 2   | 439  | 336    | 771    |
| UN45234 | Rsa1.0.00881.1 | 800  | 61260  | 0         | 533  | 543  | 98 - | 6   | 548  | 39350  | 39886  |
| UN45235 | Rsa1.0.02641.1 | 655  | 29191  | 1.00E-130 | 295  | 314  | 93 + | 1   | 311  | 5585   | 5898   |
| UN45236 | Rsa1.0.00453.1 | 641  | 83031  | 1.00E-155 | 287  | 290  | 98 - | 1   | 290  | 19330  | 19619  |
| UN45237 | Rsa1.0.00110.1 | 488  | 132719 | 3.00E-89  | 185  | 191  | 96 + | 240 | 430  | 111112 | 111302 |
| UN45238 | Rsa1.0.04692.1 | 1305 | 16357  | 0         | 1262 | 1303 | 96 - | 5   | 1302 | 11816  | 13115  |

|         |                |      |        |           |     |     |       |     |      |        |        |
|---------|----------------|------|--------|-----------|-----|-----|-------|-----|------|--------|--------|
| UN45239 | Rsa1.0.00340.1 | 738  | 305782 | 1.00E-144 | 325 | 348 | 93 +  | 237 | 584  | 194319 | 194653 |
| UN45240 | Rsa1.0.02263.1 | 905  | 33238  | 0         | 417 | 421 | 99 -  | 4   | 424  | 19170  | 19590  |
| UN45241 | Rsa1.0.00283.1 | 776  | 183797 | 1.00E-77  | 172 | 180 | 95 -  | 469 | 648  | 11455  | 11634  |
| UN45242 | Rsa1.0.00011.1 | 966  | 225044 | 1.00E-166 | 444 | 495 | 89 +  | 485 | 964  | 215935 | 216423 |
| UN45243 | Rsa1.0.00720.1 | 607  | 66931  | 1.00E-85  | 183 | 189 | 96 +  | 63  | 250  | 18555  | 18743  |
| UN45244 | Rsa1.0.05846.1 | 625  | 12434  | 1.00E-89  | 177 | 180 | 98 -  | 173 | 352  | 7562   | 7741   |
| UN45245 | Rsa1.0.00124.1 | 1006 | 262503 | 0         | 770 | 807 | 95 -  | 208 | 1004 | 9266   | 10071  |
| UN45246 | Rsa1.0.00224.1 | 1166 | 327530 | 0         | 736 | 745 | 98 -  | 243 | 986  | 194804 | 195547 |
| UN45247 | Rsa1.0.73985.1 | 794  | 310    | 3.00E-75  | 185 | 196 | 94 -  | 7   | 197  | 1      | 194    |
| UN45248 | Rsa1.0.03853.1 | 446  | 20447  | 1.00E-104 | 192 | 192 | 100 - | 88  | 279  | 14131  | 14322  |
| UN45249 | Rsa1.0.00033.1 | 794  | 515811 | 0         | 457 | 487 | 93 +  | 4   | 480  | 366363 | 366843 |
| UN45250 | Rsa1.0.03422.1 | 594  | 23076  | 1.00E-143 | 388 | 426 | 91 -  | 1   | 410  | 9861   | 10284  |
| UN45251 | Rsa1.0.00651.1 | 900  | 247766 | 1.00E-158 | 385 | 419 | 91 +  | 445 | 851  | 207681 | 208096 |
| UN45252 | Rsa1.0.00497.1 | 1006 | 79830  | 1.00E-108 | 220 | 227 | 96 +  | 120 | 346  | 76631  | 76857  |
| UN45253 | Rsa1.0.17217.1 | 779  | 1889   | 0         | 745 | 796 | 93 +  | 1   | 770  | 87     | 875    |
| UN45254 | Rsa1.0.00635.1 | 572  | 175826 | 2.00E-97  | 187 | 189 | 98 +  | 314 | 502  | 111536 | 111724 |
| UN45255 | Rsa1.0.00178.1 | 1225 | 114861 | 0         | 717 | 723 | 99 -  | 1   | 723  | 67544  | 68263  |
| UN45256 | Rsa1.0.01788.1 | 946  | 39296  | 0         | 363 | 363 | 100 + | 319 | 681  | 15792  | 16154  |
| UN45257 | Rsa1.0.02053.1 | 734  | 35554  | 0         | 375 | 380 | 98 +  | 355 | 734  | 32532  | 32907  |
| UN45258 | Rsa1.0.16326.1 | 818  | 2198   | 1.00E-98  | 198 | 203 | 97 -  | 1   | 198  | 111    | 313    |
| UN45259 | Rsa1.0.05938.1 | 764  | 12173  | 0         | 557 | 607 | 91 -  | 161 | 762  | 11604  | 12173  |
| UN45260 | Rsa1.0.03155.1 | 808  | 24958  | 0         | 414 | 414 | 100 + | 1   | 414  | 10013  | 10426  |
| UN45261 | Rsa1.0.00562.1 | 804  | 75565  | 0         | 500 | 516 | 96 -  | 292 | 804  | 9028   | 9537   |
| UN45262 | Rsa1.0.03073.1 | 774  | 25574  | 0         | 734 | 789 | 93 -  | 3   | 774  | 14699  | 15485  |
| UN45263 | Rsa1.0.06386.1 | 648  | 140583 | 1.00E-180 | 326 | 328 | 99 +  | 2   | 329  | 134508 | 134835 |
| UN45264 | Rsa1.0.01440.1 | 607  | 45807  | 1.00E-164 | 299 | 301 | 99 +  | 2   | 302  | 11033  | 11333  |
| UN45265 | Rsa1.0.01367.1 | 1193 | 47135  | 0         | 574 | 582 | 98 +  | 612 | 1193 | 24091  | 24672  |
| UN45266 | Rsa1.0.34547.1 | 679  | 655    | 0         | 370 | 370 | 100 + | 1   | 370  | 286    | 655    |
| UN45267 | Rsa1.0.04517.1 | 813  | 17015  | 1.00E-117 | 261 | 275 | 94 +  | 24  | 298  | 21     | 294    |
| UN45268 | Rsa1.0.02648.1 | 383  | 29073  | 9.00E-49  | 105 | 107 | 98 -  | 177 | 283  | 28063  | 28169  |
| UN45269 | Rsa1.0.00277.1 | 680  | 100132 | 1.00E-171 | 329 | 337 | 97 -  | 2   | 338  | 50520  | 50856  |
| UN45270 | Rsa1.0.03137.1 | 806  | 25105  | 1.00E-129 | 268 | 274 | 97 -  | 2   | 272  | 16500  | 16771  |
| UN45271 | Rsa1.0.00100.1 | 501  | 249232 | 1.00E-102 | 295 | 330 | 89 +  | 19  | 333  | 181624 | 181944 |
| UN45272 | Rsa1.0.00025.1 | 943  | 277312 | 0         | 584 | 586 | 99 -  | 357 | 942  | 77624  | 78209  |
| UN45273 | Rsa1.0.00069.1 | 884  | 403561 | 0         | 464 | 472 | 98 +  | 406 | 873  | 396292 | 396763 |
| UN45274 | Rsa1.0.00100.1 | 572  | 249232 | 1.00E-175 | 383 | 405 | 94 -  | 108 | 508  | 221841 | 222245 |
| UN45275 | Rsa1.0.05076.1 | 497  | 14916  | 1.00E-107 | 230 | 242 | 95 -  | 1   | 242  | 7475   | 7707   |
| UN45276 | Rsa1.0.00650.1 | 958  | 70235  | 1.00E-118 | 579 | 687 | 84 -  | 161 | 840  | 18906  | 19583  |
| UN45277 | Rsa1.0.00467.1 | 705  | 156542 | 1.00E-121 | 227 | 229 | 99 +  | 475 | 703  | 81087  | 81315  |

|         |                |      |        |           |     |     |       |     |      |        |        |
|---------|----------------|------|--------|-----------|-----|-----|-------|-----|------|--------|--------|
| UN45278 | Rsa1.0.00016.1 | 583  | 831256 | 0         | 545 | 581 | 93 +  | 1   | 567  | 498993 | 499572 |
| UN45279 | Rsa1.0.01701.1 | 912  | 162121 | 1.00E-156 | 315 | 323 | 97 +  | 6   | 325  | 24997  | 25318  |
| UN45280 | Rsa1.0.00139.1 | 640  | 357786 | 1.00E-89  | 171 | 172 | 99 +  | 261 | 432  | 16596  | 16767  |
| UN45281 | Rsa1.0.00126.1 | 769  | 127534 | 0         | 700 | 751 | 93 -  | 7   | 756  | 36233  | 36962  |
| UN45282 | Rsa1.0.00069.1 | 996  | 403561 | 1.00E-93  | 464 | 560 | 82 -  | 246 | 777  | 231220 | 231778 |
| UN45283 | Rsa1.0.04933.1 | 868  | 15410  | 0         | 466 | 483 | 96 +  | 264 | 746  | 9327   | 9809   |
| UN45284 | Rsa1.0.00480.1 | 543  | 81325  | 0         | 531 | 542 | 97 -  | 1   | 541  | 619    | 1157   |
| UN45285 | Rsa1.0.02406.1 | 413  | 145276 | 1.00E-170 | 374 | 397 | 94 +  | 17  | 413  | 15094  | 15478  |
| UN45286 | Rsa1.0.02468.1 | 648  | 31122  | 0         | 493 | 529 | 93 -  | 129 | 638  | 28536  | 29061  |
| UN45287 | Rsa1.0.00166.1 | 979  | 240912 | 0         | 783 | 813 | 96 +  | 169 | 976  | 151241 | 152050 |
| UN45288 | Rsa1.0.13779.1 | 577  | 4345   | 1.00E-162 | 295 | 297 | 99 +  | 3   | 299  | 773    | 1069   |
| UN45289 | Rsa1.0.00220.1 | 773  | 192936 | 1.00E-142 | 317 | 336 | 94 -  | 449 | 773  | 143125 | 143460 |
| UN45290 | Rsa1.0.26211.1 | 738  | 901    | 0         | 730 | 735 | 99 +  | 4   | 737  | 136    | 870    |
| UN45291 | Rsa1.0.00690.1 | 606  | 140527 | 1.00E-164 | 380 | 407 | 93 -  | 210 | 604  | 12338  | 12743  |
| UN45292 | Rsa1.0.12292.1 | 918  | 5263   | 0         | 603 | 607 | 99 +  | 312 | 918  | 102    | 708    |
| UN45293 | Rsa1.0.11048.1 | 845  | 5634   | 0         | 438 | 439 | 99 +  | 164 | 602  | 28     | 466    |
| UN45294 | Rsa1.0.01803.1 | 801  | 173846 | 4.00E-80  | 253 | 283 | 89 +  | 102 | 378  | 18874  | 19153  |
| UN45295 | Rsa1.0.17420.1 | 1081 | 1833   | 4.00E-93  | 174 | 174 | 100 - | 1   | 174  | 1      | 174    |
| UN45296 | Rsa1.0.00394.1 | 909  | 148426 | 1.00E-169 | 376 | 403 | 93 -  | 237 | 639  | 129296 | 129686 |
| UN45297 | Rsa1.0.05669.1 | 978  | 12993  | 0         | 400 | 409 | 97 +  | 441 | 849  | 6854   | 7262   |
| UN45298 | Rsa1.0.01199.1 | 738  | 163576 | 6.00E-76  | 155 | 157 | 98 -  | 2   | 158  | 125483 | 125638 |
| UN45299 | Rsa1.0.00005.1 | 531  | 353093 | 0         | 484 | 532 | 90 -  | 4   | 531  | 67918  | 68441  |
| UN45300 | Rsa1.0.03627.1 | 764  | 21658  | 1.00E-180 | 376 | 392 | 95 -  | 4   | 394  | 8024   | 8414   |
| UN45301 | Rsa1.0.00890.1 | 900  | 323870 | 1.00E-151 | 323 | 340 | 95 +  | 564 | 894  | 213285 | 213623 |
| UN45302 | Rsa1.0.00018.1 | 1059 | 410899 | 0         | 416 | 440 | 94 +  | 2   | 439  | 53500  | 53928  |
| UN45303 | Rsa1.0.01359.1 | 1254 | 47271  | 0         | 489 | 541 | 90 +  | 2   | 530  | 32300  | 32833  |
| UN45304 | Rsa1.0.02425.1 | 645  | 31567  | 0         | 598 | 623 | 95 +  | 2   | 614  | 8221   | 8843   |
| UN45305 | Rsa1.0.00035.1 | 1151 | 176449 | 1.00E-164 | 359 | 377 | 95 +  | 770 | 1145 | 156806 | 157179 |
| UN45306 | Rsa1.0.07936.1 | 647  | 8228   | 8.00E-72  | 200 | 218 | 91 +  | 439 | 647  | 4275   | 4489   |
| UN45307 | Rsa1.0.01611.1 | 900  | 42269  | 1.00E-141 | 368 | 402 | 91 -  | 486 | 880  | 24958  | 25358  |
| UN45308 | Rsa1.0.37455.1 | 281  | 602    | 1.00E-107 | 205 | 208 | 98 +  | 74  | 281  | 1      | 208    |
| UN45309 | Rsa1.0.01104.1 | 438  | 285480 | 5.00E-69  | 136 | 137 | 99 +  | 26  | 162  | 2638   | 2774   |
| UN45310 | Rsa1.0.06363.1 | 649  | 11152  | 1.00E-114 | 227 | 233 | 97 +  | 417 | 649  | 1      | 233    |
| UN45311 | Rsa1.0.00438.1 | 686  | 84861  | 1.00E-170 | 377 | 401 | 94 +  | 295 | 686  | 76921  | 77317  |
| UN45312 | Rsa1.0.00985.1 | 634  | 161950 | 1.00E-151 | 312 | 326 | 95 -  | 7   | 332  | 32823  | 33142  |
| UN45313 | Rsa1.0.01618.1 | 634  | 42118  | 4.00E-95  | 265 | 288 | 92 -  | 348 | 634  | 17310  | 17587  |
| UN45314 | Rsa1.0.00303.1 | 563  | 97468  | 5.00E-79  | 195 | 206 | 94 -  | 360 | 563  | 56989  | 57193  |
| UN45315 | Rsa1.0.01253.1 | 988  | 49812  | 0         | 414 | 419 | 98 +  | 286 | 704  | 17916  | 18334  |
| UN45316 | Rsa1.0.01012.1 | 569  | 56836  | 1.00E-136 | 307 | 324 | 94 -  | 1   | 323  | 40013  | 40332  |

|         |                |      |        |           |     |     |      |     |      |        |        |
|---------|----------------|------|--------|-----------|-----|-----|------|-----|------|--------|--------|
| UN45317 | Rsa1.0.03669.1 | 828  | 147114 | 0         | 376 | 387 | 97 + | 442 | 828  | 17870  | 18254  |
| UN45318 | Rsa1.0.00722.1 | 661  | 66840  | 1.00E-170 | 312 | 315 | 99 - | 12  | 326  | 15919  | 16233  |
| UN45319 | Rsa1.0.26893.1 | 737  | 874    | 1.00E-142 | 279 | 286 | 97 + | 351 | 633  | 589    | 874    |
| UN45320 | Rsa1.0.02929.1 | 823  | 26673  | 0         | 770 | 798 | 96 - | 3   | 795  | 14575  | 15372  |
| UN45321 | Rsa1.0.01091.1 | 1114 | 54383  | 0         | 508 | 562 | 90 - | 568 | 1113 | 11350  | 11894  |
| UN45322 | Rsa1.0.07704.1 | 598  | 8754   | 1.00E-171 | 342 | 353 | 96 - | 250 | 597  | 3539   | 3891   |
| UN45323 | Rsa1.0.01106.1 | 551  | 53916  | 0         | 359 | 363 | 98 + | 1   | 363  | 36046  | 36408  |
| UN45324 | Rsa1.0.09707.1 | 834  | 6199   | 0         | 396 | 404 | 98 - | 2   | 403  | 5205   | 5608   |
| UN45325 | Rsa1.0.02160.1 | 730  | 34468  | 0         | 392 | 398 | 98 - | 2   | 399  | 21426  | 21823  |
| UN45326 | Rsa1.0.01740.1 | 603  | 39986  | 1.00E-100 | 196 | 198 | 98 + | 403 | 599  | 31782  | 31979  |
| UN45327 | Rsa1.0.00641.1 | 1006 | 208241 | 5.00E-31  | 88  | 94  | 93 + | 89  | 182  | 183246 | 183339 |
| UN45328 | Rsa1.0.00220.1 | 944  | 192936 | 5.00E-83  | 251 | 275 | 91 + | 666 | 934  | 152562 | 152829 |
| UN45329 | Rsa1.0.03395.1 | 1085 | 23243  | 1.00E-172 | 377 | 396 | 95 + | 691 | 1085 | 21042  | 21432  |
| UN45330 | Rsa1.0.00971.1 | 505  | 57973  | 0         | 432 | 440 | 98 - | 68  | 505  | 43071  | 43509  |
| UN45331 | Rsa1.0.00570.1 | 496  | 75002  | 0         | 485 | 507 | 95 - | 1   | 496  | 54083  | 54588  |
| UN45332 | Rsa1.0.00069.1 | 624  | 403561 | 1.00E-153 | 310 | 318 | 97 + | 1   | 315  | 169707 | 170023 |
| UN45333 | Rsa1.0.00133.1 | 682  | 123768 | 0         | 469 | 483 | 97 + | 3   | 485  | 66333  | 66811  |
| UN45334 | Rsa1.0.26382.1 | 701  | 894    | 1.00E-122 | 238 | 242 | 98 - | 462 | 701  | 562    | 803    |
| UN45335 | Rsa1.0.00009.1 | 912  | 232558 | 1.00E-170 | 325 | 332 | 97 + | 579 | 910  | 10163  | 10494  |
| UN45336 | Rsa1.0.08613.1 | 264  | 7128   | 2.00E-76  | 250 | 282 | 88 - | 1   | 263  | 4460   | 4739   |
| UN45337 | Rsa1.0.06795.1 | 789  | 10346  | 1.00E-123 | 242 | 248 | 97 - | 542 | 789  | 5161   | 5408   |
| UN45338 | Rsa1.0.04377.1 | 594  | 17658  | 0         | 555 | 606 | 91 + | 2   | 594  | 15092  | 15685  |
| UN45339 | Rsa1.0.01069.1 | 553  | 55113  | 1.00E-130 | 260 | 267 | 97 - | 288 | 553  | 17701  | 17967  |
| UN45340 | Rsa1.0.00021.1 | 577  | 263655 | 1.00E-167 | 316 | 322 | 98 + | 24  | 345  | 80165  | 80486  |
| UN45341 | Rsa1.0.16547.1 | 515  | 2117   | 0         | 489 | 516 | 94 + | 1   | 515  | 958    | 1471   |
| UN45342 | Rsa1.0.02688.1 | 725  | 28644  | 0         | 471 | 505 | 93 - | 127 | 613  | 16216  | 16718  |
| UN45343 | Rsa1.0.05611.1 | 872  | 13193  | 0         | 495 | 525 | 94 - | 349 | 869  | 9261   | 9785   |
| UN45344 | Rsa1.0.00480.1 | 624  | 81325  | 1.00E-154 | 292 | 296 | 98 + | 3   | 297  | 612    | 907    |
| UN45345 | Rsa1.0.00140.1 | 964  | 121541 | 1.00E-175 | 318 | 320 | 99 - | 244 | 563  | 117701 | 118020 |
| UN45346 | Rsa1.0.00546.1 | 554  | 76523  | 1.00E-156 | 346 | 366 | 94 + | 196 | 553  | 11385  | 11750  |
| UN45347 | Rsa1.0.01084.1 | 599  | 54605  | 0         | 509 | 522 | 97 + | 80  | 598  | 16843  | 17362  |
| UN45348 | Rsa1.0.00363.1 | 581  | 90968  | 1.00E-79  | 235 | 259 | 90 + | 1   | 255  | 73706  | 73950  |
| UN45349 | Rsa1.0.00179.1 | 1311 | 393324 | 0         | 405 | 427 | 94 + | 200 | 625  | 204310 | 204727 |
| UN45350 | Rsa1.0.02756.1 | 809  | 28202  | 1.00E-166 | 349 | 366 | 95 + | 148 | 510  | 24137  | 24502  |
| UN45351 | Rsa1.0.00030.1 | 730  | 250988 | 0         | 575 | 619 | 92 - | 11  | 626  | 167985 | 168596 |
| UN45352 | Rsa1.0.00139.1 | 508  | 357786 | 0         | 427 | 444 | 96 + | 2   | 436  | 16925  | 17368  |
| UN45353 | Rsa1.0.03576.1 | 1071 | 21986  | 0         | 549 | 559 | 98 + | 3   | 558  | 10405  | 10961  |
| UN45354 | Rsa1.0.00033.1 | 774  | 515811 | 0         | 699 | 763 | 91 + | 3   | 754  | 460    | 1203   |
| UN45355 | Rsa1.0.00526.1 | 750  | 169279 | 1.00E-165 | 346 | 363 | 95 + | 2   | 364  | 148168 | 148530 |

|         |                |      |        |           |     |     |      |     |      |        |        |
|---------|----------------|------|--------|-----------|-----|-----|------|-----|------|--------|--------|
| UN45356 | Rsa1.0.00471.1 | 1119 | 81897  | 0         | 701 | 740 | 94 - | 394 | 1119 | 66753  | 67492  |
| UN45357 | Rsa1.0.00046.1 | 731  | 320315 | 1.00E-116 | 320 | 356 | 89 + | 395 | 725  | 29574  | 29929  |
| UN45358 | Rsa1.0.00012.1 | 861  | 222148 | 0         | 523 | 557 | 93 - | 173 | 729  | 85501  | 86042  |
| UN45359 | Rsa1.0.03613.1 | 772  | 21773  | 1.00E-140 | 277 | 284 | 97 - | 495 | 772  | 16649  | 16932  |
| UN45360 | Rsa1.0.00100.1 | 549  | 249232 | 0         | 439 | 470 | 93 - | 87  | 549  | 221776 | 222245 |
| UN45361 | Rsa1.0.05482.1 | 581  | 13595  | 1.00E-115 | 249 | 259 | 96 - | 320 | 577  | 13338  | 13595  |
| UN45362 | Rsa1.0.43643.1 | 747  | 515    | 0         | 511 | 515 | 99 + | 172 | 686  | 1      | 515    |
| UN45363 | Rsa1.0.01967.1 | 908  | 36672  | 0         | 601 | 633 | 94 + | 3   | 624  | 15958  | 16589  |
| UN45364 | Rsa1.0.00157.1 | 743  | 245832 | 1.00E-117 | 233 | 238 | 97 - | 1   | 238  | 33190  | 33426  |
| UN45365 | Rsa1.0.00544.1 | 631  | 76787  | 7.00E-69  | 157 | 165 | 95 - | 329 | 493  | 21002  | 21166  |
| UN45366 | Rsa1.0.01800.1 | 1048 | 39109  | 0         | 390 | 406 | 96 - | 328 | 728  | 9996   | 10396  |
| UN45367 | Rsa1.0.00905.1 | 1018 | 60110  | 0         | 632 | 672 | 94 + | 355 | 1018 | 5365   | 6030   |
| UN45368 | Rsa1.0.02018.1 | 1264 | 35994  | 1.00E-147 | 292 | 300 | 97 + | 965 | 1264 | 4095   | 4392   |
| UN45369 | Rsa1.0.06468.1 | 780  | 10958  | 0         | 499 | 511 | 97 - | 260 | 769  | 6364   | 6873   |
| UN45370 | Rsa1.0.00978.1 | 824  | 57739  | 0         | 425 | 440 | 96 + | 244 | 683  | 1744   | 2183   |
| UN45371 | Rsa1.0.04196.1 | 655  | 18515  | 1.00E-177 | 351 | 362 | 96 - | 295 | 655  | 16993  | 17354  |
| UN45372 | Rsa1.0.03204.1 | 1257 | 24622  | 0         | 449 | 481 | 93 + | 458 | 926  | 6070   | 6541   |
| UN45373 | Rsa1.0.03170.1 | 752  | 24824  | 1.00E-86  | 233 | 257 | 90 + | 506 | 745  | 12992  | 13248  |
| UN45374 | Rsa1.0.00001.1 | 715  | 363028 | 0         | 669 | 718 | 93 - | 6   | 714  | 91736  | 92436  |
| UN45375 | Rsa1.0.00505.1 | 513  | 79323  | 1.00E-128 | 335 | 362 | 92 + | 102 | 461  | 13080  | 13430  |
| UN45376 | Rsa1.0.00032.1 | 491  | 306326 | 1.00E-106 | 262 | 277 | 94 + | 213 | 487  | 204411 | 204680 |
| UN45377 | Rsa1.0.00205.1 | 1241 | 193401 | 1.00E-75  | 253 | 285 | 88 + | 952 | 1234 | 33441  | 33719  |
| UN45378 | Rsa1.0.00071.1 | 740  | 345714 | 1.00E-153 | 287 | 291 | 98 + | 449 | 739  | 218534 | 218824 |
| UN45379 | Rsa1.0.00485.1 | 796  | 80937  | 0         | 384 | 400 | 96 + | 403 | 796  | 37393  | 37788  |
| UN45380 | Rsa1.0.00075.1 | 843  | 146680 | 1.00E-143 | 331 | 352 | 94 - | 5   | 354  | 26868  | 27206  |
| UN45381 | Rsa1.0.01560.1 | 771  | 43256  | 5.00E-86  | 206 | 218 | 94 + | 547 | 762  | 30828  | 31045  |
| UN45382 | Rsa1.0.03539.1 | 633  | 22199  | 2.00E-84  | 182 | 189 | 96 + | 74  | 259  | 6007   | 6195   |
| UN45383 | Rsa1.0.00589.1 | 545  | 209965 | 0         | 526 | 553 | 95 - | 3   | 544  | 203938 | 204486 |
| UN45384 | Rsa1.0.00045.1 | 646  | 328694 | 0         | 528 | 560 | 94 - | 100 | 646  | 261152 | 261705 |
| UN45385 | Rsa1.0.00901.1 | 903  | 60363  | 0         | 455 | 463 | 98 - | 440 | 899  | 15595  | 16057  |
| UN45386 | Rsa1.0.01456.1 | 977  | 45372  | 1.00E-172 | 327 | 334 | 97 + | 233 | 566  | 30819  | 31152  |
| UN45387 | Rsa1.0.02229.1 | 806  | 33672  | 0         | 374 | 377 | 99 + | 2   | 378  | 2296   | 2672   |
| UN45388 | Rsa1.0.00920.1 | 765  | 601703 | 9.00E-66  | 137 | 140 | 97 + | 461 | 600  | 449831 | 449970 |
| UN45389 | Rsa1.0.06213.1 | 738  | 11478  | 0         | 490 | 494 | 99 + | 241 | 734  | 7641   | 8134   |
| UN45390 | Rsa1.0.01466.1 | 860  | 45161  | 1.00E-161 | 300 | 304 | 98 + | 555 | 858  | 28487  | 28790  |
| UN45391 | Rsa1.0.02221.1 | 599  | 33796  | 0         | 449 | 471 | 95 - | 138 | 599  | 17851  | 18321  |
| UN45392 | Rsa1.0.00100.1 | 522  | 249232 | 1.00E-122 | 237 | 242 | 97 - | 13  | 254  | 197040 | 197281 |
| UN45393 | Rsa1.0.00241.1 | 540  | 104000 | 5.00E-91  | 179 | 182 | 98 + | 42  | 223  | 64432  | 64613  |
| UN45394 | Rsa1.0.00715.1 | 590  | 67116  | 0         | 500 | 549 | 91 + | 3   | 551  | 63608  | 64137  |

|         |                |      |        |           |      |      |       |     |      |        |        |
|---------|----------------|------|--------|-----------|------|------|-------|-----|------|--------|--------|
| UN45395 | Rsa1.0_04142.1 | 934  | 18861  | 0         | 608  | 640  | 95 -  | 295 | 933  | 7256   | 7888   |
| UN45396 | Rsa1.0_03605.1 | 693  | 21827  | 0         | 690  | 691  | 99 +  | 3   | 693  | 11172  | 11862  |
| UN45397 | Rsa1.0_03191.1 | 795  | 145762 | 1.00E-168 | 309  | 312  | 99 -  | 483 | 794  | 22161  | 22472  |
| UN45398 | Rsa1.0_01482.1 | 801  | 44855  | 0         | 412  | 426  | 96 -  | 374 | 799  | 11983  | 12404  |
| UN45399 | Rsa1.0_00332.1 | 1218 | 94575  | 0         | 500  | 532  | 93 +  | 688 | 1218 | 73460  | 73990  |
| UN45400 | Rsa1.0_03605.1 | 727  | 21827  | 1.00E-137 | 325  | 353  | 92 +  | 352 | 688  | 20342  | 20693  |
| UN45401 | Rsa1.0_00006.1 | 662  | 396176 | 6.00E-85  | 166  | 168  | 98 -  | 356 | 523  | 309098 | 309265 |
| UN45402 | Rsa1.0_00075.1 | 709  | 146680 | 0         | 632  | 677  | 93 +  | 33  | 709  | 141238 | 141900 |
| UN45403 | Rsa1.0_00081.1 | 458  | 143261 | 1.00E-152 | 273  | 273  | 100 + | 186 | 458  | 123869 | 124141 |
| UN45404 | Rsa1.0_00251.1 | 460  | 303968 | 4.00E-79  | 182  | 191  | 95 +  | 273 | 460  | 147254 | 147442 |
| UN45405 | Rsa1.0_00039.1 | 707  | 296927 | 0         | 544  | 555  | 98 +  | 4   | 557  | 89     | 643    |
| UN45406 | Rsa1.0_00474.1 | 440  | 81731  | 1.00E-134 | 330  | 354  | 93 +  | 74  | 421  | 33857  | 34207  |
| UN45407 | Rsa1.0_02859.1 | 529  | 162118 | 0         | 411  | 434  | 94 +  | 98  | 529  | 154217 | 154639 |
| UN45408 | Rsa1.0_00978.1 | 747  | 57739  | 1.00E-119 | 273  | 290  | 94 +  | 29  | 318  | 41982  | 42270  |
| UN45409 | Rsa1.0_01313.1 | 847  | 48387  | 1.00E-132 | 287  | 303  | 94 +  | 545 | 847  | 16151  | 16448  |
| UN45410 | Rsa1.0_02360.1 | 1248 | 32203  | 0         | 1146 | 1210 | 94 -  | 58  | 1246 | 23830  | 25036  |
| UN45411 | Rsa1.0_21301.1 | 941  | 1217   | 1.00E-150 | 297  | 306  | 97 +  | 3   | 308  | 72     | 377    |
| UN45412 | Rsa1.0_02859.1 | 653  | 162118 | 1.00E-144 | 283  | 291  | 97 -  | 3   | 293  | 138640 | 138930 |
| UN45413 | Rsa1.0_00940.1 | 562  | 179946 | 1.00E-107 | 244  | 256  | 95 +  | 307 | 561  | 176275 | 176527 |
| UN45414 | Rsa1.0_00163.1 | 994  | 116847 | 0         | 579  | 628  | 92 +  | 27  | 649  | 62852  | 63469  |
| UN45415 | Rsa1.0_01136.1 | 625  | 52724  | 1.00E-92  | 290  | 326  | 88 -  | 1   | 311  | 14179  | 14498  |
| UN45416 | Rsa1.0_00375.1 | 1127 | 90207  | 1.00E-133 | 283  | 292  | 96 +  | 838 | 1127 | 34140  | 34427  |
| UN45417 | Rsa1.0_01538.1 | 863  | 43733  | 1.00E-159 | 297  | 301  | 98 -  | 34  | 334  | 40507  | 40807  |
| UN45418 | Rsa1.0_04051.1 | 860  | 19375  | 0         | 412  | 413  | 99 -  | 449 | 860  | 11729  | 12141  |
| UN45419 | Rsa1.0_00213.1 | 931  | 108167 | 1.00E-168 | 303  | 304  | 99 -  | 1   | 304  | 5743   | 6046   |
| UN45420 | Rsa1.0_00127.1 | 971  | 127446 | 1.00E-156 | 313  | 323  | 96 +  | 9   | 331  | 36393  | 36713  |
| UN45421 | Rsa1.0_03169.1 | 446  | 24826  | 1.00E-152 | 397  | 435  | 91 -  | 10  | 444  | 17971  | 18386  |
| UN45422 | Rsa1.0_03433.1 | 472  | 22966  | 2.00E-71  | 210  | 236  | 88 +  | 254 | 469  | 11192  | 11427  |
| UN45423 | Rsa1.0_17064.1 | 829  | 1937   | 0         | 797  | 830  | 96 +  | 2   | 829  | 139    | 953    |
| UN45424 | Rsa1.0_01355.1 | 1184 | 47303  | 0         | 459  | 462  | 99 +  | 328 | 789  | 33389  | 33850  |
| UN45425 | Rsa1.0_02735.1 | 719  | 28344  | 0         | 637  | 666  | 95 -  | 40  | 704  | 4304   | 4959   |
| UN45426 | Rsa1.0_13950.1 | 779  | 4028   | 0         | 509  | 538  | 94 -  | 242 | 779  | 2261   | 2786   |
| UN45427 | Rsa1.0_00321.1 | 740  | 95671  | 1.00E-102 | 268  | 289  | 92 -  | 441 | 728  | 27061  | 27341  |
| UN45428 | Rsa1.0_15363.1 | 467  | 2655   | 1.00E-170 | 363  | 381  | 95 +  | 64  | 441  | 1072   | 1452   |
| UN45429 | Rsa1.0_00128.1 | 714  | 228675 | 1.00E-107 | 227  | 237  | 95 +  | 203 | 439  | 106484 | 106720 |
| UN45430 | Rsa1.0_00522.1 | 735  | 78103  | 0         | 679  | 713  | 95 -  | 29  | 729  | 38652  | 39354  |
| UN45431 | Rsa1.0_03956.1 | 1294 | 19872  | 0         | 465  | 490  | 94 -  | 813 | 1294 | 17836  | 18323  |
| UN45432 | Rsa1.0_01936.1 | 567  | 37151  | 0         | 551  | 571  | 96 -  | 3   | 567  | 18218  | 18788  |
| UN45433 | Rsa1.0_13774.1 | 647  | 4351   | 1.00E-109 | 201  | 201  | 100 - | 446 | 646  | 1134   | 1334   |

|         |                |      |        |           |     |      |       |     |      |        |        |
|---------|----------------|------|--------|-----------|-----|------|-------|-----|------|--------|--------|
| UN45434 | Rsa1.0.00637.1 | 794  | 71038  | 0         | 487 | 506  | 96 -  | 220 | 723  | 3278   | 3783   |
| UN45435 | Rsa1.0.00876.1 | 718  | 61328  | 1.00E-171 | 366 | 385  | 95 -  | 327 | 710  | 23628  | 24012  |
| UN45436 | Rsa1.0.00228.1 | 790  | 105511 | 1.00E-89  | 258 | 285  | 90 +  | 3   | 283  | 37036  | 37303  |
| UN45437 | Rsa1.0.00166.1 | 640  | 240912 | 0         | 545 | 545  | 100 - | 96  | 640  | 131054 | 131598 |
| UN45438 | Rsa1.0.02149.1 | 690  | 148330 | 0         | 643 | 675  | 95 +  | 16  | 690  | 28737  | 29390  |
| UN45439 | Rsa1.0.01282.1 | 629  | 49304  | 0         | 609 | 626  | 97 -  | 1   | 626  | 14157  | 14781  |
| UN45440 | Rsa1.0.00090.1 | 798  | 273859 | 0         | 495 | 509  | 97 +  | 288 | 793  | 148579 | 149086 |
| UN45441 | Rsa1.0.01691.1 | 583  | 40921  | 1.00E-144 | 274 | 279  | 98 +  | 13  | 291  | 5609   | 5887   |
| UN45442 | Rsa1.0.00533.1 | 705  | 77375  | 1.00E-105 | 203 | 206  | 98 -  | 488 | 693  | 52463  | 52668  |
| UN45443 | Rsa1.0.56381.1 | 729  | 406    | 0         | 370 | 372  | 99 -  | 332 | 703  | 35     | 406    |
| UN45444 | Rsa1.0.04192.1 | 695  | 18572  | 0         | 424 | 448  | 94 -  | 145 | 588  | 10446  | 10893  |
| UN45445 | Rsa1.0.04033.1 | 1200 | 19481  | 0         | 446 | 446  | 100 - | 4   | 449  | 10632  | 11077  |
| UN45446 | Rsa1.0.00477.1 | 519  | 81556  | 3.00E-71  | 140 | 141  | 99 -  | 185 | 325  | 52836  | 52976  |
| UN45447 | Rsa1.0.00582.1 | 581  | 74333  | 8.00E-84  | 168 | 170  | 98 -  | 413 | 581  | 49170  | 49339  |
| UN45448 | Rsa1.0.04580.1 | 754  | 16773  | 1.00E-178 | 322 | 324  | 99 -  | 414 | 737  | 7383   | 7706   |
| UN45449 | Rsa1.0.00583.1 | 992  | 74309  | 1.00E-168 | 312 | 316  | 98 +  | 480 | 795  | 13328  | 13643  |
| UN45450 | Rsa1.0.02700.1 | 610  | 28584  | 1.00E-103 | 231 | 242  | 95 +  | 370 | 610  | 6214   | 6453   |
| UN45451 | Rsa1.0.00612.1 | 800  | 72376  | 0         | 795 | 800  | 99 -  | 1   | 800  | 706    | 1505   |
| UN45452 | Rsa1.0.03044.1 | 838  | 25791  | 1.00E-105 | 270 | 295  | 91 -  | 187 | 478  | 15710  | 15992  |
| UN45453 | Rsa1.0.02312.1 | 1002 | 32675  | 0         | 508 | 516  | 98 -  | 491 | 1002 | 20152  | 20667  |
| UN45454 | Rsa1.0.00608.1 | 852  | 172672 | 1.00E-169 | 331 | 341  | 97 +  | 510 | 850  | 113895 | 114235 |
| UN45455 | Rsa1.0.00335.1 | 808  | 94371  | 1.00E-120 | 240 | 247  | 97 -  | 1   | 247  | 30455  | 30701  |
| UN45456 | Rsa1.0.56882.1 | 686  | 402    | 1.00E-162 | 312 | 318  | 98 -  | 2   | 318  | 1      | 318    |
| UN45457 | Rsa1.0.00329.1 | 677  | 222544 | 0         | 660 | 677  | 97 +  | 3   | 677  | 210282 | 210955 |
| UN45458 | Rsa1.0.00964.1 | 822  | 316648 | 0         | 658 | 727  | 90 +  | 111 | 808  | 156169 | 156886 |
| UN45459 | Rsa1.0.01054.1 | 655  | 55470  | 0         | 617 | 641  | 96 +  | 8   | 645  | 25801  | 26435  |
| UN45460 | Rsa1.0.01090.1 | 1015 | 54385  | 0         | 988 | 1017 | 97 +  | 3   | 1015 | 3230   | 4246   |
| UN45461 | Rsa1.0.00253.1 | 589  | 231292 | 6.00E-91  | 182 | 186  | 97 -  | 198 | 383  | 206050 | 206235 |
| UN45462 | Rsa1.0.00278.1 | 473  | 231896 | 1.00E-119 | 230 | 234  | 98 -  | 3   | 236  | 16257  | 16490  |
| UN45463 | Rsa1.0.00506.1 | 717  | 79106  | 7.00E-88  | 187 | 193  | 96 +  | 159 | 351  | 10903  | 11094  |
| UN45464 | Rsa1.0.03314.1 | 446  | 23804  | 1.00E-126 | 238 | 241  | 98 +  | 83  | 323  | 23411  | 23651  |
| UN45465 | Rsa1.0.31728.1 | 1201 | 720    | 1.00E-178 | 374 | 385  | 97 +  | 1   | 380  | 341    | 720    |
| UN45466 | Rsa1.0.00037.1 | 732  | 307838 | 1.00E-106 | 266 | 286  | 93 -  | 411 | 695  | 267027 | 267309 |
| UN45467 | #              | #    | #      | #         | #   | #    | #     | #   | #    | #      | #      |
| UN45468 | Rsa1.0.00139.1 | 764  | 357786 | 0         | 733 | 760  | 96 +  | 5   | 764  | 68032  | 68789  |
| UN45469 | Rsa1.0.02072.1 | 610  | 35401  | 1.00E-85  | 167 | 169  | 98 +  | 3   | 171  | 23734  | 23902  |
| UN45470 | Rsa1.0.00370.1 | 657  | 90472  | 1.00E-167 | 336 | 346  | 97 -  | 312 | 656  | 41217  | 41561  |
| UN45471 | Rsa1.0.06563.1 | 914  | 10765  | 2.33E-156 | 328 | 349  | 93 -  | 1   | 349  | 2187   | 2527   |
| UN45472 | Rsa1.0.00863.1 | 638  | 254535 | 2.33E-156 | 278 | 283  | 98 +  | 2   | 284  | 212165 | 212447 |



|         |                |      |        |           |     |     |       |     |      |        |        |
|---------|----------------|------|--------|-----------|-----|-----|-------|-----|------|--------|--------|
| UN45473 | Rsa1.0.01666.1 | 721  | 173972 | 2.00E-63  | 142 | 148 | 95 -  | 251 | 398  | 25290  | 25437  |
| UN45474 | Rsa1.0.00601.1 | 662  | 177045 | 1.00E-163 | 352 | 369 | 95 +  | 179 | 547  | 38439  | 38802  |
| UN45475 | Rsa1.0.13774.1 | 689  | 4351   | 1.00E-102 | 267 | 291 | 91 -  | 403 | 689  | 1044   | 1334   |
| UN45476 | Rsa1.0.15250.1 | 683  | 2727   | 1.00E-169 | 386 | 412 | 93 +  | 272 | 681  | 1092   | 1496   |
| UN45477 | Rsa1.0.00162.1 | 531  | 239935 | 1.00E-149 | 305 | 316 | 96 -  | 94  | 409  | 12315  | 12624  |
| UN45478 | Rsa1.0.00009.1 | 981  | 232558 | 1.00E-178 | 346 | 356 | 97 +  | 1   | 356  | 146446 | 146801 |
| UN45479 | Rsa1.0.02890.1 | 520  | 27018  | 1.00E-120 | 243 | 249 | 97 -  | 48  | 294  | 2886   | 3132   |
| UN45480 | Rsa1.0.00224.1 | 569  | 327530 | 3.00E-89  | 203 | 212 | 95 -  | 2   | 209  | 195632 | 195841 |
| UN45481 | Rsa1.0.00101.1 | 711  | 267193 | 1.00E-140 | 285 | 296 | 96 +  | 2   | 297  | 194795 | 195090 |
| UN45482 | Rsa1.0.02400.1 | 705  | 31750  | 0         | 677 | 706 | 95 -  | 1   | 696  | 4472   | 5177   |
| UN45483 | Rsa1.0.16553.1 | 383  | 2115   | 1.00E-32  | 90  | 96  | 93 +  | 200 | 295  | 174    | 269    |
| UN45484 | Rsa1.0.01321.1 | 902  | 48248  | 0         | 868 | 906 | 95 -  | 3   | 901  | 7913   | 8812   |
| UN45485 | Rsa1.0.00121.1 | 528  | 278029 | 3.00E-40  | 95  | 97  | 97 +  | 75  | 171  | 5655   | 5750   |
| UN45486 | Rsa1.0.00486.1 | 907  | 80875  | 1.00E-100 | 209 | 216 | 96 -  | 652 | 867  | 34966  | 35178  |
| UN45487 | Rsa1.0.07389.1 | 790  | 9479   | 1.00E-108 | 231 | 242 | 95 -  | 549 | 790  | 553    | 787    |
| UN45488 | Rsa1.0.00664.1 | 561  | 69573  | 1.00E-94  | 185 | 188 | 98 -  | 374 | 561  | 25616  | 25803  |
| UN45489 | Rsa1.0.03454.1 | 792  | 149870 | 0         | 689 | 700 | 98 -  | 93  | 792  | 136957 | 137655 |
| UN45490 | Rsa1.0.01090.1 | 783  | 54385  | 1.00E-168 | 377 | 404 | 93 +  | 1   | 404  | 3232   | 3626   |
| UN45491 | Rsa1.0.00979.1 | 1167 | 57733  | 1.00E-157 | 324 | 338 | 95 -  | 212 | 549  | 31552  | 31889  |
| UN45492 | Rsa1.0.00009.1 | 1104 | 232558 | 0         | 706 | 716 | 98 -  | 3   | 714  | 97891  | 98606  |
| UN45493 | Rsa1.0.00038.1 | 633  | 314568 | 3.00E-62  | 122 | 122 | 100 + | 328 | 449  | 255346 | 255467 |
| UN45494 | Rsa1.0.01451.1 | 836  | 45459  | 0         | 505 | 528 | 95 +  | 317 | 836  | 18789  | 19314  |
| UN45495 | Rsa1.0.08426.1 | 724  | 7373   | 0         | 687 | 733 | 93 +  | 2   | 704  | 5471   | 6194   |
| UN45496 | Rsa1.0.02930.1 | 656  | 26668  | 0         | 481 | 496 | 96 -  | 3   | 498  | 1840   | 2335   |
| UN45497 | Rsa1.0.00123.1 | 609  | 325650 | 1.00E-148 | 282 | 286 | 98 +  | 3   | 288  | 198548 | 198832 |
| UN45498 | Rsa1.0.06386.1 | 446  | 140583 | 1.00E-118 | 224 | 227 | 98 -  | 2   | 228  | 135287 | 135513 |
| UN45499 | Rsa1.0.00863.1 | 1076 | 254535 | 1.00E-179 | 424 | 456 | 92 -  | 611 | 1056 | 1696   | 2141   |
| UN45500 | Rsa1.0.02955.1 | 894  | 26484  | 0         | 396 | 396 | 100 + | 359 | 754  | 6      | 401    |
| UN45501 | Rsa1.0.04806.1 | 576  | 15898  | 1.00E-159 | 342 | 360 | 95 +  | 218 | 574  | 7224   | 7574   |
| UN45502 | Rsa1.0.00360.1 | 847  | 91190  | 0         | 586 | 611 | 95 +  | 238 | 847  | 60799  | 61409  |
| UN45503 | Rsa1.0.01878.1 | 688  | 37768  | 1.00E-120 | 252 | 262 | 96 +  | 363 | 622  | 27356  | 27617  |
| UN45504 | Rsa1.0.00210.1 | 920  | 108424 | 9.00E-91  | 206 | 216 | 95 +  | 23  | 237  | 50760  | 50972  |
| UN45505 | Rsa1.0.04371.1 | 764  | 17700  | 1.00E-149 | 292 | 300 | 97 +  | 3   | 302  | 11835  | 12134  |
| UN45506 | Rsa1.0.01783.1 | 724  | 39383  | 1.00E-144 | 288 | 295 | 97 -  | 432 | 724  | 9571   | 9865   |
| UN45507 | Rsa1.0.00127.1 | 1218 | 127446 | 3.00E-94  | 210 | 220 | 95 -  | 739 | 958  | 46742  | 46960  |
| UN45508 | Rsa1.0.01732.1 | 1013 | 40194  | 1.00E-161 | 404 | 438 | 92 -  | 21  | 453  | 15549  | 15980  |
| UN45509 | Rsa1.0.03958.1 | 563  | 19868  | 1.00E-132 | 280 | 294 | 95 +  | 266 | 559  | 16483  | 16770  |
| UN45510 | Rsa1.0.04892.1 | 963  | 15573  | 1.00E-174 | 326 | 330 | 98 +  | 634 | 963  | 1633   | 1961   |
| UN45511 | Rsa1.0.00030.1 | 623  | 250988 | 5.00E-79  | 168 | 174 | 96 +  | 32  | 205  | 123959 | 124132 |

|         |                |      |        |           |      |      |       |     |      |        |        |
|---------|----------------|------|--------|-----------|------|------|-------|-----|------|--------|--------|
| UN45512 | Rsa1.0.00022.1 | 745  | 200461 | 0         | 374  | 374  | 100 - | 370 | 743  | 40145  | 40518  |
| UN45513 | Rsa1.0.01190.1 | 305  | 194501 | 1.00E-105 | 199  | 201  | 99 +  | 2   | 202  | 10680  | 10880  |
| UN45514 | Rsa1.0.06190.1 | 1049 | 11525  | 1.00E-172 | 364  | 384  | 94 +  | 562 | 942  | 9882   | 10256  |
| UN45515 | Rsa1.0.01882.1 | 743  | 37697  | 0         | 709  | 759  | 93 +  | 1   | 740  | 10997  | 11755  |
| UN45516 | Rsa1.0.00339.1 | 898  | 222974 | 2.00E-94  | 182  | 184  | 98 +  | 17  | 200  | 39246  | 39429  |
| UN45517 | Rsa1.0.03122.1 | 763  | 25207  | 0         | 720  | 776  | 92 +  | 2   | 763  | 6233   | 6991   |
| UN45518 | Rsa1.0.00370.1 | 829  | 90472  | 0         | 463  | 479  | 96 -  | 351 | 829  | 17865  | 18343  |
| UN45519 | Rsa1.0.00040.1 | 684  | 324196 | 0         | 554  | 578  | 95 -  | 5   | 576  | 166240 | 166817 |
| UN45520 | Rsa1.0.00045.1 | 850  | 328694 | 1.00E-120 | 248  | 256  | 96 -  | 94  | 349  | 166098 | 166352 |
| UN45521 | Rsa1.0.02633.1 | 691  | 29315  | 1.00E-132 | 315  | 333  | 94 -  | 356 | 684  | 361    | 684    |
| UN45522 | Rsa1.0.24755.1 | 842  | 969    | 4.00E-68  | 150  | 155  | 96 -  | 1   | 155  | 228    | 380    |
| UN45523 | Rsa1.0.00027.1 | 1549 | 283362 | 0         | 1465 | 1527 | 95 +  | 10  | 1534 | 42802  | 44316  |
| UN45524 | Rsa1.0.00959.1 | 837  | 58202  | 0         | 552  | 573  | 96 -  | 265 | 837  | 23767  | 24339  |
| UN45525 | Rsa1.0.00131.1 | 460  | 432233 | 1.00E-102 | 218  | 228  | 95 -  | 3   | 230  | 388897 | 389124 |
| UN45526 | Rsa1.0.02791.1 | 1754 | 27832  | 0         | 1742 | 1748 | 99 +  | 3   | 1749 | 24497  | 26244  |
| UN45527 | Rsa1.0.03149.1 | 722  | 24983  | 6.00E-42  | 207  | 244  | 84 -  | 377 | 618  | 15465  | 15698  |
| UN45528 | Rsa1.0.00015.1 | 533  | 561803 | 1.00E-119 | 272  | 288  | 94 +  | 213 | 497  | 323683 | 323970 |
| UN45529 | Rsa1.0.00505.1 | 809  | 79323  | 2.00E-76  | 156  | 158  | 98 -  | 645 | 802  | 21785  | 21941  |
| UN45530 | Rsa1.0.00034.1 | 691  | 260119 | 1.00E-127 | 262  | 271  | 96 +  | 3   | 272  | 54685  | 54955  |
| UN45531 | Rsa1.0.01256.1 | 837  | 49770  | 0         | 546  | 582  | 93 +  | 3   | 570  | 39702  | 40274  |
| UN45532 | Rsa1.0.03576.1 | 663  | 21986  | 0         | 469  | 485  | 96 +  | 16  | 496  | 10422  | 10906  |
| UN45533 | Rsa1.0.00793.1 | 398  | 64103  | 9.00E-52  | 107  | 108  | 99 -  | 59  | 166  | 59524  | 59631  |
| UN45534 | Rsa1.0.03668.1 | 409  | 21483  | 7.00E-59  | 131  | 136  | 96 +  | 75  | 210  | 19588  | 19723  |
| UN45535 | Rsa1.0.01127.1 | 564  | 53124  | 0         | 519  | 523  | 99 +  | 39  | 559  | 3400   | 3922   |
| UN45536 | Rsa1.0.05811.1 | 840  | 12572  | 0         | 526  | 586  | 89 +  | 7   | 589  | 273    | 818    |
| UN45537 | Rsa1.0.04934.1 | 586  | 143962 | 1.00E-118 | 281  | 304  | 92 -  | 87  | 381  | 142052 | 142355 |
| UN45538 | Rsa1.0.01467.1 | 844  | 45161  | 1.00E-105 | 267  | 294  | 90 +  | 570 | 844  | 23046  | 23339  |
| UN45539 | Rsa1.0.07704.1 | 728  | 8754   | 1.00E-151 | 293  | 300  | 97 -  | 230 | 529  | 3802   | 4101   |
| UN45540 | Rsa1.0.10199.1 | 809  | 5948   | 1.00E-162 | 303  | 306  | 99 +  | 505 | 809  | 5538   | 5843   |
| UN45541 | Rsa1.0.04801.1 | 958  | 15918  | 0         | 470  | 497  | 94 +  | 464 | 956  | 4138   | 4627   |
| UN45542 | Rsa1.0.01434.1 | 531  | 45951  | 1.00E-109 | 294  | 320  | 91 +  | 205 | 523  | 8195   | 8511   |
| UN45543 | Rsa1.0.00161.1 | 1163 | 116891 | 1.00E-172 | 310  | 311  | 99 +  | 850 | 1160 | 38827  | 39137  |
| UN45544 | Rsa1.0.08129.1 | 689  | 7859   | 1.00E-147 | 518  | 602  | 86 +  | 6   | 607  | 1476   | 2074   |
| UN45545 | Rsa1.0.03447.1 | 477  | 22857  | 2.00E-68  | 148  | 152  | 97 -  | 3   | 153  | 22469  | 22620  |
| UN45546 | Rsa1.0.00001.1 | 531  | 363028 | 1.00E-143 | 275  | 279  | 98 +  | 256 | 530  | 168108 | 168386 |
| UN45547 | Rsa1.0.00456.1 | 1322 | 82826  | 0         | 471  | 506  | 93 +  | 829 | 1322 | 18300  | 18801  |
| UN45548 | Rsa1.0.03538.1 | 370  | 22204  | 0         | 327  | 328  | 99 +  | 43  | 370  | 19974  | 20301  |
| UN45549 | Rsa1.0.02178.1 | 721  | 156197 | 0         | 693  | 714  | 97 -  | 2   | 712  | 903    | 1616   |
| UN45550 | Rsa1.0.11178.1 | 787  | 5593   | 0         | 633  | 639  | 99 -  | 151 | 786  | 1566   | 2203   |

|         |                |      |        |           |     |     |       |     |      |        |        |
|---------|----------------|------|--------|-----------|-----|-----|-------|-----|------|--------|--------|
| UN45551 | Rsa1.0.08072.1 | 445  | 7955   | 1.00E-164 | 352 | 368 | 95 -  | 78  | 445  | 5959   | 6322   |
| UN45552 | Rsa1.0.54025.1 | 900  | 422    | 1.00E-155 | 341 | 362 | 94 +  | 232 | 581  | 1      | 359    |
| UN45553 | Rsa1.0.02735.1 | 792  | 28344  | 0         | 539 | 549 | 98 +  | 2   | 549  | 2745   | 3290   |
| UN45554 | Rsa1.0.00075.1 | 948  | 146680 | 1.00E-162 | 338 | 353 | 95 +  | 222 | 572  | 26436  | 26788  |
| UN45555 | Rsa1.0.06900.1 | 575  | 131268 | 0         | 343 | 343 | 100 - | 233 | 575  | 129912 | 130254 |
| UN45556 | Rsa1.0.22759.1 | 865  | 1097   | 0         | 609 | 621 | 98 -  | 5   | 625  | 80     | 697    |
| UN45557 | Rsa1.0.01317.1 | 647  | 48287  | 0         | 531 | 549 | 96 +  | 34  | 582  | 34128  | 34676  |
| UN45558 | Rsa1.0.00053.1 | 909  | 263459 | 1.00E-157 | 303 | 310 | 97 -  | 4   | 313  | 231766 | 232075 |
| UN45559 | Rsa1.0.02797.1 | 613  | 27800  | 1.00E-145 | 291 | 301 | 96 +  | 3   | 303  | 661    | 961    |
| UN45560 | Rsa1.0.00322.1 | 776  | 212233 | 1.00E-131 | 277 | 290 | 95 +  | 255 | 544  | 206966 | 207255 |
| UN45561 | Rsa1.0.00893.1 | 461  | 60626  | 1.00E-105 | 245 | 258 | 94 +  | 201 | 455  | 47601  | 47854  |
| UN45562 | Rsa1.0.26323.1 | 552  | 896    | 0         | 500 | 549 | 91 +  | 5   | 547  | 107    | 654    |
| UN45563 | Rsa1.0.15714.1 | 687  | 2466   | 0         | 446 | 456 | 97 -  | 2   | 455  | 73     | 527    |
| UN45564 | Rsa1.0.01461.1 | 924  | 45240  | 0         | 331 | 333 | 99 +  | 1   | 333  | 196    | 528    |
| UN45565 | Rsa1.0.01418.1 | 813  | 46237  | 8.00E-94  | 181 | 183 | 98 +  | 631 | 813  | 7008   | 7190   |
| UN45566 | Rsa1.0.02213.1 | 802  | 33824  | 0         | 553 | 561 | 98 -  | 243 | 800  | 2562   | 3122   |
| UN45567 | Rsa1.0.00281.1 | 810  | 99908  | 0         | 735 | 737 | 99 +  | 74  | 810  | 9326   | 10062  |
| UN45568 | Rsa1.0.02600.1 | 633  | 29657  | 0         | 485 | 504 | 96 +  | 112 | 613  | 27779  | 28278  |
| UN45569 | Rsa1.0.00561.1 | 862  | 75653  | 0         | 411 | 413 | 99 -  | 450 | 862  | 66757  | 67169  |
| UN45570 | Rsa1.0.00476.1 | 933  | 280966 | 1.00E-168 | 381 | 406 | 93 +  | 296 | 689  | 165661 | 166064 |
| UN45571 | Rsa1.0.00158.1 | 897  | 117999 | 0         | 579 | 611 | 94 +  | 4   | 608  | 38509  | 39118  |
| UN45572 | Rsa1.0.09186.1 | 1044 | 6572   | 0         | 432 | 455 | 94 -  | 13  | 457  | 5713   | 6167   |
| UN45573 | Rsa1.0.26211.1 | 427  | 901    | 1.00E-102 | 198 | 200 | 99 +  | 229 | 427  | 696    | 895    |
| UN45574 | Rsa1.0.02431.1 | 610  | 31504  | 1.00E-124 | 345 | 376 | 91 +  | 245 | 609  | 26607  | 26980  |
| UN45575 | Rsa1.0.01600.1 | 660  | 42537  | 0         | 378 | 385 | 98 +  | 272 | 655  | 24623  | 25007  |
| UN45576 | Rsa1.0.00959.1 | 1001 | 58202  | 0         | 640 | 643 | 99 +  | 3   | 645  | 56791  | 57430  |
| UN45577 | Rsa1.0.00055.1 | 946  | 520193 | 1.00E-162 | 302 | 305 | 99 +  | 644 | 946  | 321596 | 321900 |
| UN45578 | Rsa1.0.00493.1 | 652  | 80007  | 0         | 588 | 622 | 94 +  | 33  | 642  | 3787   | 4408   |
| UN45579 | Rsa1.0.02144.1 | 241  | 34630  | 1.00E-86  | 169 | 170 | 99 +  | 73  | 241  | 3318   | 3487   |
| UN45580 | Rsa1.0.01287.1 | 1075 | 49195  | 0         | 496 | 499 | 99 -  | 576 | 1074 | 5838   | 6336   |
| UN45581 | Rsa1.0.04225.1 | 882  | 18400  | 0         | 346 | 349 | 99 -  | 1   | 348  | 10919  | 11267  |
| UN45582 | Rsa1.0.02055.1 | 813  | 35546  | 1.00E-137 | 255 | 256 | 99 -  | 2   | 256  | 23577  | 23832  |
| UN45583 | Rsa1.0.04126.1 | 522  | 18939  | 0         | 473 | 514 | 92 -  | 9   | 507  | 15382  | 15888  |
| UN45584 | Rsa1.0.00593.1 | 592  | 143463 | 1.00E-107 | 218 | 225 | 96 -  | 150 | 374  | 55065  | 55289  |
| UN45585 | Rsa1.0.01572.1 | 808  | 42995  | 0         | 597 | 602 | 99 -  | 212 | 808  | 6716   | 7317   |
| UN45586 | Rsa1.0.02448.1 | 897  | 31315  | 0         | 496 | 501 | 99 +  | 324 | 821  | 24478  | 24978  |
| UN45587 | Rsa1.0.00911.1 | 867  | 59943  | 1.00E-124 | 250 | 258 | 96 +  | 93  | 350  | 13349  | 13606  |
| UN45588 | Rsa1.0.04489.1 | 764  | 17145  | 1.00E-52  | 215 | 247 | 87 +  | 3   | 241  | 12659  | 12901  |
| UN45589 | Rsa1.0.00097.1 | 433  | 138858 | 0         | 422 | 437 | 96 +  | 2   | 433  | 84000  | 84431  |

|         |                |      |        |           |     |     |       |     |      |        |        |
|---------|----------------|------|--------|-----------|-----|-----|-------|-----|------|--------|--------|
| UN45590 | Rsa1.0.00090.1 | 1069 | 273859 | 1.00E-104 | 193 | 193 | 100 - | 1   | 193  | 36678  | 36870  |
| UN45591 | Rsa1.0.00132.1 | 635  | 124299 | 1.00E-138 | 288 | 304 | 94 +  | 345 | 634  | 99696  | 99999  |
| UN45592 | Rsa1.0.09269.1 | 1353 | 6514   | 0         | 439 | 444 | 98 +  | 910 | 1353 | 1082   | 1523   |
| UN45593 | Rsa1.0.02185.1 | 732  | 34150  | 0         | 704 | 737 | 95 -  | 3   | 732  | 27262  | 27998  |
| UN45594 | Rsa1.0.01559.1 | 676  | 43262  | 0         | 660 | 674 | 97 -  | 2   | 674  | 8342   | 9007   |
| UN45595 | Rsa1.0.04282.1 | 728  | 18100  | 0         | 690 | 730 | 94 +  | 3   | 726  | 12131  | 12858  |
| UN45596 | Rsa1.0.02270.1 | 596  | 249821 | 0         | 370 | 385 | 96 +  | 3   | 387  | 141003 | 141382 |
| UN45597 | Rsa1.0.05208.1 | 318  | 14504  | 5.00E-87  | 178 | 183 | 97 +  | 136 | 318  | 4025   | 4207   |
| UN45598 | Rsa1.0.15079.1 | 316  | 2849   | 1.00E-164 | 310 | 316 | 98 -  | 1   | 316  | 824    | 1139   |
| UN45599 | Rsa1.0.06454.1 | 888  | 10987  | 1.00E-127 | 339 | 375 | 90 +  | 515 | 886  | 6861   | 7218   |
| UN45600 | Rsa1.0.03377.1 | 742  | 23322  | 0         | 732 | 762 | 96 -  | 3   | 742  | 16978  | 17738  |
| UN45601 | Rsa1.0.01559.1 | 646  | 43262  | 1.00E-178 | 345 | 352 | 98 +  | 292 | 643  | 17333  | 17682  |
| UN45602 | Rsa1.0.02165.1 | 1101 | 34423  | 1.00E-179 | 404 | 435 | 92 -  | 478 | 897  | 23089  | 23521  |
| UN45603 | Rsa1.0.00721.1 | 676  | 66918  | 1.00E-172 | 320 | 323 | 99 +  | 355 | 676  | 59464  | 59786  |
| UN45604 | Rsa1.0.00087.1 | 713  | 761073 | 1.00E-132 | 242 | 243 | 99 -  | 469 | 711  | 102299 | 102541 |
| UN45605 | Rsa1.0.02259.1 | 674  | 33299  | 1.00E-157 | 301 | 306 | 98 +  | 11  | 316  | 20369  | 20673  |
| UN45606 | Rsa1.0.00645.1 | 735  | 189716 | 5.00E-61  | 136 | 140 | 97 -  | 211 | 349  | 4503   | 4642   |
| UN45607 | Rsa1.0.20380.1 | 959  | 1311   | 1.00E-140 | 262 | 265 | 98 -  | 695 | 959  | 520    | 784    |
| UN45608 | Rsa1.0.00016.1 | 1053 | 831256 | 1.00E-154 | 312 | 323 | 96 -  | 602 | 921  | 353888 | 354210 |
| UN45609 | Rsa1.0.03043.1 | 774  | 130531 | 1.00E-155 | 348 | 367 | 94 -  | 412 | 774  | 128240 | 128603 |
| UN45610 | Rsa1.0.05379.1 | 785  | 13968  | 0         | 435 | 446 | 97 -  | 341 | 785  | 7972   | 8411   |
| UN45611 | Rsa1.0.01339.1 | 651  | 47813  | 1.00E-137 | 323 | 345 | 93 +  | 310 | 650  | 29756  | 30093  |
| UN45612 | Rsa1.0.01958.1 | 973  | 261128 | 1.00E-170 | 364 | 378 | 96 -  | 596 | 969  | 119362 | 119737 |
| UN45613 | Rsa1.0.04121.1 | 691  | 18951  | 1.00E-173 | 416 | 452 | 92 -  | 52  | 503  | 13877  | 14328  |
| UN45614 | Rsa1.0.02089.1 | 775  | 35163  | 0         | 738 | 774 | 95 +  | 2   | 775  | 4827   | 5597   |
| UN45615 | Rsa1.0.00407.1 | 719  | 191544 | 1.00E-125 | 297 | 318 | 93 -  | 3   | 317  | 9694   | 10000  |
| UN45616 | Rsa1.0.07295.1 | 703  | 9599   | 0         | 692 | 694 | 99 +  | 3   | 696  | 5757   | 6450   |
| UN45617 | Rsa1.0.00008.1 | 766  | 358124 | 1.00E-134 | 246 | 247 | 99 +  | 1   | 247  | 178343 | 178589 |
| UN45618 | Rsa1.0.00665.1 | 898  | 69539  | 0         | 514 | 516 | 99 -  | 2   | 516  | 15983  | 16498  |
| UN45619 | Rsa1.0.00387.1 | 791  | 495407 | 0         | 765 | 792 | 96 -  | 2   | 790  | 95952  | 96739  |
| UN45620 | Rsa1.0.04033.1 | 914  | 19481  | 1.00E-106 | 214 | 220 | 97 -  | 183 | 402  | 6617   | 6836   |
| UN45621 | Rsa1.0.00071.1 | 1113 | 345714 | 0         | 401 | 413 | 97 -  | 702 | 1113 | 324499 | 324911 |
| UN45622 | Rsa1.0.00116.1 | 747  | 365886 | 0         | 661 | 677 | 97 +  | 27  | 700  | 69573  | 70248  |
| UN45623 | Rsa1.0.20494.1 | 353  | 1299   | 1.00E-114 | 249 | 260 | 95 -  | 90  | 347  | 640    | 899    |
| UN45624 | Rsa1.0.01651.1 | 854  | 41586  | 0         | 638 | 642 | 99 -  | 211 | 852  | 31342  | 31983  |
| UN45625 | Rsa1.0.00369.1 | 321  | 266462 | 1.00E-120 | 263 | 276 | 95 +  | 27  | 298  | 136397 | 136671 |
| UN45626 | Rsa1.0.06128.1 | 989  | 11671  | 0         | 743 | 806 | 92 -  | 4   | 809  | 10606  | 11408  |
| UN45627 | Rsa1.0.00113.1 | 996  | 131574 | 0         | 928 | 997 | 93 +  | 5   | 995  | 59764  | 60747  |
| UN45628 | Rsa1.0.00205.1 | 575  | 193401 | 1.00E-127 | 293 | 310 | 94 -  | 268 | 575  | 79327  | 79635  |

|         |                |      |        |           |     |      |      |     |      |        |        |
|---------|----------------|------|--------|-----------|-----|------|------|-----|------|--------|--------|
| UN45629 | Rsa1.0.05217.1 | 1005 | 142938 | 0         | 458 | 477  | 96 - | 531 | 1005 | 129735 | 130211 |
| UN45630 | Rsa1.0.02186.1 | 799  | 34150  | 1.00E-140 | 262 | 265  | 98 - | 379 | 643  | 12226  | 12490  |
| UN45631 | Rsa1.0.02131.1 | 833  | 34754  | 0         | 801 | 837  | 95 - | 3   | 826  | 18021  | 18853  |
| UN45632 | Rsa1.0.02157.1 | 841  | 149652 | 3.00E-81  | 179 | 186  | 96 + | 553 | 738  | 149388 | 149572 |
| UN45633 | Rsa1.0.05326.1 | 744  | 14139  | 1.00E-118 | 320 | 354  | 90 + | 362 | 706  | 5288   | 5632   |
| UN45634 | Rsa1.0.00115.1 | 539  | 131321 | 1.00E-171 | 359 | 376  | 95 - | 19  | 388  | 34041  | 34416  |
| UN45635 | Rsa1.0.01591.1 | 610  | 42718  | 0         | 447 | 460  | 97 + | 71  | 530  | 14800  | 15259  |
| UN45636 | Rsa1.0.02383.1 | 615  | 31931  | 0         | 566 | 617  | 91 - | 11  | 610  | 22605  | 23220  |
| UN45637 | Rsa1.0.00599.1 | 686  | 73418  | 3.00E-99  | 193 | 196  | 98 + | 34  | 229  | 41449  | 41644  |
| UN45638 | Rsa1.0.05415.1 | 525  | 13830  | 1.00E-91  | 438 | 524  | 83 + | 3   | 525  | 6191   | 6694   |
| UN45639 | Rsa1.0.00677.1 | 665  | 69159  | 1.00E-144 | 377 | 416  | 90 - | 3   | 404  | 17242  | 17657  |
| UN45640 | Rsa1.0.00112.1 | 1019 | 132199 | 1.00E-160 | 392 | 431  | 90 - | 387 | 814  | 116397 | 116809 |
| UN45641 | Rsa1.0.01016.1 | 615  | 181422 | 6.00E-88  | 228 | 245  | 93 - | 360 | 597  | 44046  | 44289  |
| UN45642 | Rsa1.0.00294.1 | 481  | 144860 | 7.00E-87  | 242 | 265  | 91 + | 217 | 481  | 28240  | 28489  |
| UN45643 | Rsa1.0.00585.1 | 906  | 74164  | 0         | 390 | 406  | 96 - | 3   | 404  | 53737  | 54141  |
| UN45644 | Rsa1.0.18074.1 | 690  | 1677   | 3.00E-71  | 146 | 149  | 97 - | 149 | 297  | 204    | 352    |
| UN45645 | Rsa1.0.03944.1 | 653  | 19926  | 0         | 355 | 356  | 99 + | 1   | 356  | 9324   | 9679   |
| UN45646 | Rsa1.0.00332.1 | 624  | 94575  | 1.00E-152 | 369 | 396  | 93 + | 223 | 613  | 74767  | 75157  |
| UN45647 | Rsa1.0.03114.1 | 696  | 25318  | 0         | 431 | 444  | 97 + | 238 | 679  | 6565   | 7006   |
| UN45648 | Rsa1.0.00293.1 | 693  | 339294 | 0         | 521 | 560  | 93 + | 129 | 681  | 301492 | 302043 |
| UN45649 | Rsa1.0.01221.1 | 688  | 50421  | 1.00E-49  | 107 | 109  | 98 + | 210 | 318  | 48087  | 48195  |
| UN45650 | Rsa1.0.04193.1 | 883  | 18571  | 1.00E-129 | 287 | 302  | 95 - | 584 | 883  | 4722   | 5023   |
| UN45651 | Rsa1.0.00522.1 | 926  | 78103  | 5.00E-80  | 155 | 156  | 99 + | 502 | 657  | 49624  | 49779  |
| UN45652 | Rsa1.0.00302.1 | 741  | 97521  | 1.00E-157 | 349 | 369  | 94 + | 3   | 366  | 33881  | 34246  |
| UN45653 | Rsa1.0.00361.1 | 770  | 91181  | 3.00E-96  | 248 | 269  | 92 + | 2   | 256  | 45744  | 46012  |
| UN45654 | Rsa1.0.00101.1 | 1003 | 267193 | 0         | 961 | 1017 | 94 + | 3   | 1003 | 46546  | 47557  |
| UN45655 | Rsa1.0.02089.1 | 711  | 35163  | 0         | 686 | 711  | 96 - | 4   | 711  | 4827   | 5537   |
| UN45656 | Rsa1.0.00528.1 | 868  | 164755 | 1.00E-180 | 339 | 344  | 98 + | 3   | 346  | 137841 | 138183 |
| UN45657 | Rsa1.0.07444.1 | 942  | 9386   | 1.00E-147 | 288 | 296  | 97 - | 404 | 699  | 524    | 819    |
| UN45658 | Rsa1.0.00080.1 | 1129 | 190437 | 0         | 614 | 616  | 99 + | 512 | 1127 | 188970 | 189585 |
| UN45659 | Rsa1.0.00494.1 | 598  | 79967  | 0         | 569 | 598  | 95 - | 3   | 598  | 3858   | 4449   |
| UN45660 | Rsa1.0.00159.1 | 699  | 431686 | 2.00E-75  | 267 | 306  | 87 + | 401 | 692  | 325900 | 326205 |
| UN45661 | Rsa1.0.00716.1 | 426  | 67078  | 8.00E-68  | 137 | 139  | 98 - | 77  | 215  | 33613  | 33751  |
| UN45662 | Rsa1.0.00425.1 | 478  | 147080 | 9.00E-71  | 161 | 168  | 95 + | 312 | 478  | 24938  | 25105  |
| UN45663 | Rsa1.0.05181.1 | 1119 | 14574  | 0         | 845 | 903  | 93 - | 234 | 1109 | 234    | 1133   |
| UN45664 | Rsa1.0.00377.1 | 776  | 90038  | 0         | 520 | 538  | 96 - | 240 | 774  | 79419  | 79953  |
| UN45665 | Rsa1.0.00116.1 | 890  | 365886 | 0         | 415 | 442  | 93 + | 214 | 640  | 323709 | 324147 |
| UN45666 | Rsa1.0.00325.1 | 822  | 95371  | 0         | 517 | 550  | 94 - | 283 | 822  | 59982  | 60523  |
| UN45667 | Rsa1.0.00056.1 | 872  | 332604 | 1.00E-120 | 296 | 320  | 92 + | 553 | 872  | 108444 | 108757 |

|         |                |      |        |           |     |     |      |     |      |        |        |
|---------|----------------|------|--------|-----------|-----|-----|------|-----|------|--------|--------|
| UN45668 | Rsa1.0.00817.1 | 780  | 62961  | 0         | 470 | 492 | 95 - | 286 | 774  | 53842  | 54331  |
| UN45669 | Rsa1.0.01070.1 | 556  | 55099  | 0         | 510 | 535 | 95 + | 27  | 556  | 29899  | 30432  |
| UN45670 | Rsa1.0.03833.1 | 501  | 20575  | 5.00E-97  | 314 | 352 | 89 + | 160 | 501  | 11313  | 11659  |
| UN45671 | Rsa1.0.04159.1 | 977  | 18795  | 0         | 885 | 913 | 96 - | 63  | 975  | 5713   | 6623   |
| UN45672 | Rsa1.0.06054.1 | 738  | 11847  | 1.00E-173 | 373 | 394 | 94 + | 338 | 728  | 1351   | 1744   |
| UN45673 | Rsa1.0.00273.1 | 785  | 326186 | 0         | 755 | 786 | 96 + | 2   | 781  | 45173  | 45957  |
| UN45674 | Rsa1.0.13604.1 | 464  | 4657   | 6.00E-78  | 178 | 188 | 94 - | 192 | 379  | 2072   | 2259   |
| UN45675 | Rsa1.0.01054.1 | 856  | 55470  | 0         | 822 | 863 | 95 - | 3   | 856  | 23643  | 24505  |
| UN45676 | Rsa1.0.38361.1 | 770  | 587    | 0         | 357 | 360 | 99 - | 351 | 710  | 1      | 360    |
| UN45677 | Rsa1.0.01585.1 | 504  | 42806  | 1.00E-115 | 225 | 229 | 98 + | 2   | 230  | 14580  | 14806  |
| UN45678 | Rsa1.0.00350.1 | 702  | 92346  | 3.00E-71  | 150 | 153 | 98 - | 547 | 698  | 79965  | 80117  |
| UN45679 | Rsa1.0.00218.1 | 1094 | 201480 | 0         | 874 | 875 | 99 + | 219 | 1092 | 177033 | 177907 |
| UN45680 | Rsa1.0.04806.1 | 518  | 15898  | 0         | 345 | 346 | 99 - | 1   | 346  | 7295   | 7640   |
| UN45681 | Rsa1.0.00254.1 | 1346 | 102600 | 0         | 529 | 557 | 94 + | 1   | 554  | 52292  | 52845  |
| UN45682 | Rsa1.0.05605.1 | 839  | 13202  | 0         | 728 | 771 | 94 - | 82  | 835  | 8277   | 9044   |
| UN45683 | Rsa1.0.00179.1 | 834  | 393324 | 0         | 802 | 849 | 94 - | 3   | 832  | 373936 | 374784 |
| UN45684 | Rsa1.0.04870.1 | 942  | 135142 | 1.00E-159 | 313 | 321 | 97 - | 326 | 645  | 638    | 958    |
| UN45685 | Rsa1.0.31506.1 | 1361 | 725    | 0         | 560 | 561 | 99 + | 801 | 1361 | 1      | 561    |
| UN45686 | Rsa1.0.00038.1 | 828  | 314568 | 3.00E-84  | 178 | 184 | 96 - | 462 | 641  | 16227  | 16410  |
| UN45687 | Rsa1.0.01529.1 | 1126 | 43871  | 4.00E-75  | 185 | 198 | 93 + | 930 | 1124 | 34610  | 34807  |
| UN45688 | Rsa1.0.00157.1 | 585  | 245832 | 1.00E-147 | 286 | 293 | 97 + | 200 | 492  | 160498 | 160785 |
| UN45689 | Rsa1.0.01233.1 | 748  | 50184  | 0         | 459 | 492 | 93 + | 1   | 490  | 41791  | 42278  |
| UN45690 | Rsa1.0.00889.1 | 667  | 60978  | 0         | 428 | 431 | 99 - | 3   | 433  | 44040  | 44470  |
| UN45691 | Rsa1.0.08957.1 | 792  | 6754   | 0         | 498 | 511 | 97 + | 276 | 786  | 5841   | 6350   |
| UN45692 | Rsa1.0.00207.1 | 753  | 248736 | 0         | 458 | 472 | 97 + | 271 | 742  | 22544  | 23010  |
| UN45693 | Rsa1.0.09236.1 | 1093 | 6540   | 1.00E-113 | 291 | 321 | 90 + | 366 | 674  | 5496   | 5816   |
| UN45694 | Rsa1.0.00657.1 | 719  | 69858  | 1.00E-108 | 312 | 348 | 89 - | 371 | 712  | 3223   | 3556   |
| UN45695 | Rsa1.0.04291.1 | 1136 | 18055  | 1.00E-103 | 241 | 254 | 94 + | 885 | 1136 | 6256   | 6502   |
| UN45696 | Rsa1.0.00898.1 | 969  | 202772 | 0         | 758 | 820 | 92 + | 161 | 969  | 17461  | 18265  |
| UN45697 | Rsa1.0.10909.1 | 627  | 5681   | 0         | 396 | 417 | 94 - | 41  | 457  | 87     | 503    |
| UN45698 | Rsa1.0.01105.1 | 659  | 53958  | 3.00E-99  | 190 | 192 | 98 + | 94  | 285  | 10354  | 10545  |
| UN45699 | Rsa1.0.32375.1 | 737  | 703    | 1.00E-131 | 330 | 363 | 90 + | 384 | 737  | 7      | 352    |
| UN45700 | Rsa1.0.00583.1 | 695  | 74309  | 1.00E-166 | 327 | 336 | 97 - | 123 | 457  | 71950  | 72285  |
| UN45701 | Rsa1.0.00287.1 | 709  | 98687  | 1.00E-162 | 296 | 298 | 99 + | 204 | 501  | 15492  | 15789  |
| UN45702 | Rsa1.0.00154.1 | 578  | 189461 | 1.00E-119 | 254 | 265 | 95 - | 314 | 578  | 79520  | 79782  |
| UN45703 | Rsa1.0.03976.1 | 800  | 19759  | 1.00E-178 | 338 | 344 | 98 + | 459 | 800  | 12264  | 12607  |
| UN45704 | Rsa1.0.02265.1 | 833  | 33233  | 0         | 803 | 830 | 96 + | 3   | 831  | 15650  | 16479  |
| UN45705 | Rsa1.0.00543.1 | 720  | 76788  | 0         | 651 | 683 | 95 + | 46  | 720  | 35876  | 36553  |
| UN45706 | Rsa1.0.00476.1 | 608  | 280966 | 1.00E-118 | 219 | 220 | 99 - | 389 | 608  | 236963 | 237182 |

|         |                |      |        |           |     |     |       |     |      |        |        |
|---------|----------------|------|--------|-----------|-----|-----|-------|-----|------|--------|--------|
| UN45707 | Rsa1.0.01355.1 | 671  | 47303  | 0         | 534 | 576 | 92 -  | 105 | 671  | 39415  | 39990  |
| UN45708 | Rsa1.0.02053.1 | 306  | 35554  | 1.00E-74  | 189 | 201 | 94 +  | 108 | 305  | 32689  | 32883  |
| UN45709 | Rsa1.0.00967.1 | 634  | 58049  | 1.00E-171 | 327 | 334 | 97 -  | 61  | 394  | 49368  | 49698  |
| UN45710 | Rsa1.0.05482.1 | 631  | 13595  | 1.00E-126 | 235 | 237 | 99 -  | 394 | 630  | 4316   | 4552   |
| UN45711 | Rsa1.0.02221.1 | 779  | 33796  | 0         | 726 | 770 | 94 -  | 10  | 777  | 18421  | 19184  |
| UN45712 | Rsa1.0.05336.1 | 838  | 14117  | 1.00E-102 | 313 | 351 | 89 -  | 1   | 344  | 11121  | 11457  |
| UN45713 | Rsa1.0.07055.1 | 801  | 9970   | 1.00E-169 | 350 | 366 | 95 -  | 78  | 443  | 2701   | 3061   |
| UN45714 | Rsa1.0.00124.1 | 886  | 262503 | 0         | 802 | 833 | 96 +  | 6   | 838  | 56753  | 57579  |
| UN45715 | Rsa1.0.01272.1 | 826  | 49553  | 1.00E-138 | 282 | 292 | 96 -  | 535 | 826  | 36826  | 37115  |
| UN45716 | Rsa1.0.01647.1 | 1026 | 41645  | 0         | 495 | 495 | 100 - | 3   | 497  | 12151  | 12645  |
| UN45717 | Rsa1.0.00800.1 | 625  | 63868  | 1.00E-143 | 355 | 388 | 91 -  | 240 | 625  | 19320  | 19688  |
| UN45718 | Rsa1.0.00335.1 | 854  | 94371  | 1.00E-159 | 302 | 307 | 98 -  | 51  | 354  | 34545  | 34851  |
| UN45719 | Rsa1.0.02504.1 | 730  | 30706  | 6.00E-45  | 99  | 101 | 98 -  | 437 | 537  | 7197   | 7297   |
| UN45720 | Rsa1.0.00220.1 | 630  | 192936 | 1.00E-85  | 295 | 337 | 87 -  | 274 | 589  | 152921 | 153256 |
| UN45721 | Rsa1.0.19409.1 | 515  | 1436   | 5.00E-88  | 174 | 177 | 98 +  | 50  | 226  | 1      | 177    |
| UN45722 | Rsa1.0.02110.1 | 993  | 34919  | 1.00E-120 | 261 | 274 | 95 +  | 8   | 281  | 14053  | 14324  |
| UN45723 | Rsa1.0.00722.1 | 607  | 66840  | 1.00E-153 | 329 | 345 | 95 -  | 259 | 603  | 49808  | 50149  |
| UN45724 | Rsa1.0.01604.1 | 775  | 42461  | 0         | 401 | 410 | 97 +  | 12  | 421  | 28874  | 29283  |
| UN45725 | Rsa1.0.01185.1 | 922  | 149842 | 0         | 907 | 922 | 98 -  | 2   | 922  | 134703 | 135622 |
| UN45726 | Rsa1.0.00040.1 | 765  | 324196 | 0         | 424 | 445 | 95 +  | 318 | 762  | 223524 | 223967 |
| UN45727 | Rsa1.0.00341.1 | 711  | 249309 | 1.00E-107 | 206 | 209 | 98 -  | 174 | 382  | 128945 | 129153 |
| UN45728 | Rsa1.0.02378.1 | 648  | 31991  | 2.33E-156 | 377 | 409 | 92 -  | 244 | 648  | 14234  | 14634  |
| UN45729 | Rsa1.0.01435.1 | 858  | 45942  | 0         | 555 | 587 | 94 -  | 4   | 588  | 41024  | 41595  |
| UN45730 | Rsa1.0.03577.1 | 921  | 143993 | 0         | 882 | 943 | 93 -  | 3   | 921  | 8172   | 9111   |
| UN45731 | Rsa1.0.01376.1 | 523  | 47004  | 1.00E-164 | 353 | 369 | 95 +  | 154 | 521  | 46244  | 46606  |
| UN45732 | Rsa1.0.05546.1 | 1116 | 13379  | 1.00E-167 | 302 | 303 | 99 -  | 418 | 720  | 7592   | 7894   |
| UN45733 | Rsa1.0.04377.1 | 676  | 17658  | 0         | 403 | 425 | 94 +  | 252 | 673  | 5747   | 6170   |
| UN45734 | Rsa1.0.00122.1 | 711  | 265937 | 0         | 533 | 574 | 92 -  | 151 | 708  | 62624  | 63190  |
| UN45735 | Rsa1.0.00174.1 | 837  | 115363 | 0         | 588 | 598 | 98 +  | 240 | 837  | 38178  | 38771  |
| UN45736 | Rsa1.0.01411.1 | 1022 | 46326  | 0         | 676 | 705 | 95 -  | 324 | 1022 | 30171  | 30869  |
| UN45737 | Rsa1.0.02422.1 | 1033 | 161122 | 0         | 526 | 595 | 88 -  | 43  | 614  | 158865 | 159432 |
| UN45738 | Rsa1.0.01263.1 | 740  | 49703  | 1.00E-161 | 330 | 346 | 95 +  | 406 | 740  | 42751  | 43096  |
| UN45739 | Rsa1.0.00139.1 | 750  | 357786 | 0         | 726 | 757 | 95 -  | 1   | 749  | 297244 | 297993 |
| UN45740 | Rsa1.0.04051.1 | 1012 | 19375  | 1.00E-151 | 325 | 340 | 95 -  | 673 | 1011 | 11803  | 12141  |
| UN45741 | Rsa1.0.06663.1 | 532  | 10576  | 1.00E-54  | 246 | 288 | 85 -  | 14  | 293  | 8602   | 8883   |
| UN45742 | Rsa1.0.01478.1 | 731  | 44991  | 0         | 551 | 577 | 95 +  | 159 | 729  | 31257  | 31830  |
| UN45743 | Rsa1.0.71239.1 | 781  | 322    | 1.00E-111 | 223 | 229 | 97 +  | 3   | 231  | 8      | 236    |
| UN45744 | Rsa1.0.03258.1 | 866  | 24302  | 1.00E-101 | 221 | 231 | 95 -  | 633 | 862  | 11080  | 11310  |
| UN45745 | Rsa1.0.02057.1 | 855  | 35540  | 3.00E-44  | 107 | 112 | 95 +  | 536 | 647  | 10641  | 10752  |

|         |                |      |        |           |     |     |       |     |     |        |        |
|---------|----------------|------|--------|-----------|-----|-----|-------|-----|-----|--------|--------|
| UN45746 | Rsa1.0.00089.1 | 759  | 406142 | 1.00E-173 | 357 | 372 | 95 -  | 3   | 374 | 179756 | 180126 |
| UN45747 | Rsa1.0.00543.1 | 620  | 76788  | 0         | 547 | 575 | 95 +  | 53  | 618 | 35876  | 36446  |
| UN45748 | Rsa1.0.00307.1 | 512  | 199003 | 1.00E-139 | 373 | 409 | 91 -  | 105 | 511 | 57706  | 58110  |
| UN45749 | Rsa1.0.00122.1 | 627  | 265937 | 1.00E-164 | 436 | 475 | 91 -  | 127 | 586 | 247406 | 247866 |
| UN45750 | Rsa1.0.00270.1 | 666  | 101236 | 0         | 632 | 671 | 94 -  | 3   | 665 | 25065  | 25728  |
| UN45751 | Rsa1.0.00215.1 | 718  | 201775 | 1.00E-159 | 306 | 313 | 97 -  | 4   | 316 | 194883 | 195195 |
| UN45752 | Rsa1.0.00446.1 | 742  | 167829 | 1.00E-172 | 380 | 400 | 95 +  | 343 | 742 | 129961 | 130354 |
| UN45753 | Rsa1.0.00044.1 | 940  | 271658 | 1.00E-93  | 201 | 207 | 97 +  | 651 | 857 | 156101 | 156305 |
| UN45754 | Rsa1.0.05545.1 | 873  | 13379  | 1.00E-179 | 358 | 370 | 96 +  | 30  | 399 | 4330   | 4693   |
| UN45755 | Rsa1.0.00030.1 | 672  | 250988 | 1.00E-117 | 240 | 248 | 96 +  | 12  | 259 | 150152 | 150396 |
| UN45756 | Rsa1.0.00701.1 | 546  | 67691  | 0         | 540 | 544 | 99 +  | 1   | 544 | 5908   | 6451   |
| UN45757 | Rsa1.0.00176.1 | 642  | 240984 | 1.00E-103 | 220 | 226 | 97 -  | 1   | 223 | 186687 | 186911 |
| UN45758 | Rsa1.0.00614.1 | 690  | 72276  | 0         | 364 | 368 | 98 +  | 322 | 688 | 44076  | 44443  |
| UN45759 | Rsa1.0.01245.1 | 911  | 149868 | 1.00E-158 | 373 | 395 | 94 +  | 9   | 400 | 36309  | 36695  |
| UN45760 | Rsa1.0.06392.1 | 617  | 11104  | 1.00E-163 | 375 | 404 | 92 -  | 8   | 393 | 10628  | 11030  |
| UN45761 | Rsa1.0.00125.1 | 678  | 253043 | 1.00E-174 | 364 | 379 | 96 +  | 3   | 380 | 169663 | 170036 |
| UN45762 | Rsa1.0.02387.1 | 778  | 31890  | 0         | 482 | 523 | 92 -  | 1   | 507 | 17300  | 17818  |
| UN45763 | Rsa1.0.00012.1 | 687  | 222148 | 1.00E-131 | 328 | 357 | 91 -  | 5   | 356 | 69957  | 70301  |
| UN45764 | Rsa1.0.13538.1 | 664  | 4746   | 6.00E-79  | 150 | 150 | 100 + | 503 | 652 | 1      | 150    |
| UN45765 | Rsa1.0.04103.1 | 740  | 19048  | 0         | 373 | 378 | 98 -  | 325 | 702 | 9022   | 9399   |
| UN45766 | Rsa1.0.01560.1 | 774  | 43256  | 1.00E-117 | 231 | 236 | 97 -  | 8   | 239 | 30828  | 31063  |
| UN45767 | Rsa1.0.00564.1 | 1063 | 75428  | 0         | 836 | 861 | 97 +  | 1   | 859 | 73602  | 74460  |
| UN45768 | Rsa1.0.02177.1 | 680  | 34262  | 0         | 679 | 680 | 99 +  | 1   | 679 | 14544  | 15223  |
| UN45769 | Rsa1.0.00194.1 | 624  | 110851 | 0         | 603 | 647 | 93 -  | 1   | 622 | 75125  | 75767  |
| UN45770 | Rsa1.0.00213.1 | 532  | 108167 | 8.00E-87  | 241 | 260 | 92 -  | 71  | 322 | 39776  | 40034  |
| UN45771 | Rsa1.0.00098.1 | 537  | 349239 | 1.00E-121 | 260 | 272 | 95 -  | 267 | 537 | 234166 | 234437 |
| UN45772 | Rsa1.0.01410.1 | 678  | 46345  | 0         | 528 | 552 | 95 +  | 133 | 678 | 44525  | 45075  |
| UN45773 | Rsa1.0.00800.1 | 821  | 63868  | 0         | 574 | 594 | 96 +  | 239 | 821 | 56110  | 56703  |
| UN45774 | Rsa1.0.00071.1 | 355  | 345714 | 1.00E-78  | 192 | 204 | 94 +  | 51  | 250 | 206313 | 206512 |
| UN45775 | Rsa1.0.00544.1 | 730  | 76787  | 3.00E-90  | 181 | 184 | 98 +  | 4   | 185 | 44976  | 45159  |
| UN45776 | Rsa1.0.01143.1 | 688  | 52456  | 0         | 683 | 689 | 99 +  | 1   | 688 | 7608   | 8296   |
| UN45777 | Rsa1.0.00017.1 | 1029 | 752458 | 0         | 352 | 357 | 98 -  | 1   | 357 | 41954  | 42310  |
| UN45778 | Rsa1.0.00110.1 | 1150 | 132719 | 1.00E-164 | 382 | 408 | 93 -  | 16  | 423 | 4280   | 4683   |
| UN45779 | Rsa1.0.05085.1 | 681  | 14889  | 5.00E-70  | 166 | 175 | 94 +  | 18  | 192 | 13813  | 13986  |
| UN45780 | Rsa1.0.01881.1 | 525  | 37721  | 1.00E-130 | 235 | 235 | 100 - | 291 | 525 | 22879  | 23113  |
| UN45781 | Rsa1.0.00130.1 | 697  | 125737 | 0         | 342 | 343 | 99 +  | 1   | 343 | 10687  | 11029  |
| UN45782 | Rsa1.0.00894.1 | 886  | 269700 | 1.00E-147 | 513 | 593 | 86 +  | 257 | 811 | 130217 | 130795 |
| UN45783 | Rsa1.0.00084.1 | 566  | 142338 | 0         | 555 | 556 | 99 -  | 9   | 564 | 39377  | 39932  |
| UN45784 | Rsa1.0.01263.1 | 719  | 49703  | 0         | 336 | 341 | 98 -  | 2   | 342 | 42751  | 43091  |



|         |                |      |        |           |     |     |       |     |      |        |        |
|---------|----------------|------|--------|-----------|-----|-----|-------|-----|------|--------|--------|
| UN45785 | Rsa1.0_03978.1 | 691  | 19753  | 1.00E-149 | 294 | 302 | 97 -  | 9   | 307  | 11983  | 12284  |
| UN45786 | Rsa1.0_00120.1 | 982  | 277288 | 1.00E-167 | 311 | 314 | 99 +  | 1   | 314  | 118237 | 118549 |
| UN45787 | Rsa1.0_00588.1 | 746  | 73939  | 1.00E-114 | 266 | 282 | 94 +  | 3   | 282  | 53285  | 53566  |
| UN45788 | Rsa1.0_06503.1 | 917  | 10881  | 0         | 824 | 859 | 95 +  | 2   | 853  | 6459   | 7312   |
| UN45789 | Rsa1.0_02173.1 | 380  | 34318  | 4.00E-60  | 139 | 145 | 95 -  | 160 | 302  | 15924  | 16068  |
| UN45790 | Rsa1.0_01281.1 | 671  | 49313  | 0         | 610 | 623 | 97 -  | 47  | 669  | 26768  | 27383  |
| UN45791 | Rsa1.0_22782.1 | 790  | 1095   | 0         | 433 | 434 | 99 +  | 1   | 433  | 437    | 870    |
| UN45792 | Rsa1.0_04079.1 | 445  | 19202  | 7.00E-96  | 196 | 202 | 97 +  | 1   | 202  | 14315  | 14516  |
| UN45793 | Rsa1.0_06032.1 | 646  | 11886  | 5.00E-73  | 222 | 247 | 89 +  | 16  | 251  | 7615   | 7859   |
| UN45794 | Rsa1.0_00011.1 | 1093 | 225044 | 0         | 371 | 384 | 96 +  | 719 | 1093 | 215934 | 216316 |
| UN45795 | Rsa1.0_00863.1 | 735  | 254535 | 0         | 350 | 351 | 99 +  | 39  | 389  | 239463 | 239813 |
| UN45796 | Rsa1.0_00045.1 | 813  | 328694 | 0         | 445 | 482 | 92 -  | 3   | 481  | 232292 | 232756 |
| UN45797 | Rsa1.0_07530.1 | 864  | 9191   | 1.00E-151 | 275 | 276 | 99 +  | 1   | 276  | 2377   | 2652   |
| UN45798 | Rsa1.0_00066.1 | 1379 | 152418 | 2.33E-156 | 339 | 361 | 93 -  | 1   | 360  | 60921  | 61266  |
| UN45799 | Rsa1.0_03520.1 | 873  | 22327  | 1.00E-99  | 270 | 297 | 90 +  | 2   | 296  | 1459   | 1741   |
| UN45800 | Rsa1.0_02909.1 | 868  | 26856  | 1.00E-169 | 317 | 322 | 98 -  | 541 | 862  | 10343  | 10664  |
| UN45801 | Rsa1.0_00066.1 | 1004 | 152418 | 1.00E-137 | 345 | 374 | 92 -  | 110 | 476  | 66556  | 66926  |
| UN45802 | Rsa1.0_00168.1 | 652  | 115870 | 1.00E-115 | 211 | 211 | 100 - | 271 | 481  | 35634  | 35844  |
| UN45803 | Rsa1.0_39987.1 | 608  | 562    | 1.00E-175 | 327 | 332 | 98 -  | 79  | 410  | 231    | 562    |
| UN45804 | Rsa1.0_00275.1 | 588  | 210104 | 1.00E-100 | 251 | 275 | 91 -  | 14  | 277  | 157269 | 157538 |
| UN45805 | Rsa1.0_04318.1 | 1201 | 17947  | 1.00E-117 | 237 | 244 | 97 +  | 1   | 244  | 4049   | 4288   |
| UN45806 | Rsa1.0_00909.1 | 748  | 59976  | 0         | 459 | 460 | 99 -  | 3   | 461  | 4592   | 5051   |
| UN45807 | Rsa1.0_01403.1 | 660  | 46453  | 2.00E-81  | 157 | 158 | 99 +  | 363 | 520  | 26104  | 26261  |
| UN45808 | Rsa1.0_03605.1 | 694  | 21827  | 0         | 688 | 697 | 98 +  | 1   | 694  | 17748  | 18443  |
| UN45809 | Rsa1.0_02420.1 | 833  | 31580  | 0         | 664 | 664 | 100 + | 2   | 665  | 15980  | 16643  |
| UN45810 | Rsa1.0_00173.1 | 667  | 288743 | 1.00E-127 | 237 | 239 | 99 +  | 194 | 432  | 282437 | 282675 |
| UN45811 | Rsa1.0_00374.1 | 877  | 165738 | 0         | 444 | 454 | 97 +  | 424 | 874  | 96360  | 96813  |
| UN45812 | Rsa1.0_00886.1 | 1071 | 167350 | 0         | 519 | 543 | 95 +  | 1   | 537  | 12539  | 13077  |
| UN45813 | Rsa1.0_08338.1 | 741  | 7511   | 1.00E-160 | 292 | 294 | 99 -  | 3   | 296  | 1989   | 2282   |
| UN45814 | Rsa1.0_00336.1 | 950  | 445051 | 1.00E-159 | 334 | 350 | 95 -  | 373 | 719  | 25591  | 25940  |
| UN45815 | Rsa1.0_37098.1 | 689  | 608    | 1.00E-170 | 303 | 303 | 100 + | 1   | 303  | 136    | 438    |
| UN45816 | Rsa1.0_02128.1 | 1001 | 34758  | 0         | 461 | 510 | 90 +  | 520 | 999  | 25609  | 26118  |
| UN45817 | Rsa1.0_02607.1 | 728  | 29629  | 0         | 639 | 717 | 89 -  | 8   | 714  | 21581  | 22296  |
| UN45818 | Rsa1.0_02792.1 | 542  | 27829  | 1.00E-170 | 328 | 334 | 98 -  | 1   | 333  | 21579  | 21910  |
| UN45819 | Rsa1.0_33589.1 | 776  | 675    | 1.00E-120 | 298 | 324 | 91 -  | 1   | 315  | 45     | 368    |
| UN45820 | Rsa1.0_01154.1 | 1074 | 52249  | 0         | 399 | 405 | 98 +  | 391 | 795  | 34910  | 35314  |
| UN45821 | Rsa1.0_01387.1 | 1024 | 46745  | 1.00E-164 | 312 | 317 | 98 +  | 450 | 766  | 31760  | 32075  |
| UN45822 | Rsa1.0_01981.1 | 560  | 36537  | 0         | 525 | 535 | 98 +  | 25  | 559  | 3619   | 4149   |
| UN45823 | Rsa1.0_00213.1 | 801  | 108167 | 0         | 457 | 483 | 94 -  | 5   | 479  | 62067  | 62547  |

|         |                |      |        |           |     |      |       |      |      |        |        |
|---------|----------------|------|--------|-----------|-----|------|-------|------|------|--------|--------|
| UN45824 | Rsa1.0.00407.1 | 652  | 191544 | 0         | 640 | 661  | 96 +  | 1    | 652  | 166096 | 166754 |
| UN45825 | Rsa1.0.04396.1 | 1236 | 17561  | 1.00E-84  | 204 | 216  | 94 -  | 1022 | 1236 | 7412   | 7626   |
| UN45826 | Rsa1.0.00684.1 | 608  | 141701 | 1.00E-106 | 279 | 310  | 90 -  | 65   | 350  | 32546  | 32855  |
| UN45827 | Rsa1.0.00470.1 | 849  | 81968  | 0         | 602 | 644  | 93 -  | 208  | 844  | 51443  | 52075  |
| UN45828 | Rsa1.0.00055.1 | 855  | 520193 | 6.00E-98  | 182 | 182  | 100 - | 541  | 722  | 309877 | 310058 |
| UN45829 | Rsa1.0.00055.1 | 946  | 520193 | 1.00E-168 | 319 | 324  | 98 +  | 623  | 946  | 336224 | 336546 |
| UN45830 | Rsa1.0.03455.1 | 606  | 22804  | 0         | 599 | 606  | 98 -  | 1    | 605  | 2417   | 3017   |
| UN45831 | Rsa1.0.07504.1 | 765  | 9237   | 1.00E-173 | 308 | 308  | 100 + | 2    | 309  | 7987   | 8294   |
| UN45832 | Rsa1.0.00054.1 | 593  | 162053 | 1.00E-107 | 198 | 198  | 100 + | 394  | 591  | 85898  | 86095  |
| UN45833 | Rsa1.0.22665.1 | 1026 | 1104   | 0         | 946 | 1017 | 93 +  | 1    | 1013 | 106    | 1104   |
| UN45834 | Rsa1.0.00008.1 | 619  | 358124 | 0         | 484 | 487  | 99 +  | 129  | 615  | 142935 | 143420 |
| UN45835 | Rsa1.0.00054.1 | 688  | 162053 | 1.00E-153 | 281 | 283  | 99 +  | 1    | 283  | 86542  | 86824  |
| UN45836 | Rsa1.0.00693.1 | 1138 | 161311 | 0         | 471 | 473  | 99 +  | 665  | 1136 | 64456  | 64928  |
| UN45837 | Rsa1.0.00878.1 | 772  | 330303 | 0         | 597 | 629  | 94 +  | 12   | 633  | 9075   | 9703   |
| UN45838 | Rsa1.0.04203.1 | 888  | 18479  | 0         | 436 | 450  | 96 -  | 26   | 475  | 14477  | 14920  |
| UN45839 | Rsa1.0.00236.1 | 849  | 104771 | 0         | 415 | 428  | 96 -  | 21   | 448  | 100657 | 101084 |
| UN45840 | Rsa1.0.00105.1 | 1168 | 134138 | 0         | 516 | 543  | 95 +  | 159  | 701  | 60017  | 60550  |
| UN45841 | Rsa1.0.01171.1 | 840  | 51752  | 1.00E-112 | 215 | 218  | 98 +  | 189  | 406  | 49854  | 50071  |
| UN45842 | Rsa1.0.03569.1 | 652  | 22041  | 9.00E-81  | 226 | 250  | 90 +  | 3    | 247  | 9019   | 9259   |
| UN45843 | Rsa1.0.03352.1 | 652  | 23506  | 0         | 560 | 579  | 96 -  | 74   | 652  | 14552  | 15130  |
| UN45844 | Rsa1.0.21578.1 | 710  | 1190   | 1.00E-98  | 289 | 329  | 87 +  | 1    | 329  | 545    | 844    |
| UN45845 | Rsa1.0.03431.1 | 784  | 22974  | 0         | 472 | 474  | 99 +  | 1    | 474  | 16417  | 16890  |
| UN45846 | Rsa1.0.01552.1 | 735  | 43396  | 0         | 385 | 388  | 99 -  | 347  | 733  | 11472  | 11859  |
| UN45847 | Rsa1.0.03843.1 | 854  | 20496  | 1.00E-89  | 266 | 296  | 89 -  | 140  | 434  | 4496   | 4790   |
| UN45848 | Rsa1.0.00409.1 | 505  | 146788 | 1.00E-179 | 320 | 321  | 99 -  | 2    | 322  | 87749  | 88069  |
| UN45849 | Rsa1.0.05522.1 | 515  | 13441  | 4.00E-76  | 168 | 175  | 96 -  | 339  | 513  | 8265   | 8436   |
| UN45850 | Rsa1.0.03661.1 | 841  | 21513  | 0         | 830 | 841  | 98 +  | 1    | 841  | 20502  | 21341  |
| UN45851 | Rsa1.0.00589.1 | 775  | 209965 | 1.00E-137 | 257 | 260  | 98 +  | 506  | 765  | 10558  | 10817  |
| UN45852 | Rsa1.0.07809.1 | 1014 | 8503   | 0         | 956 | 1014 | 94 -  | 1    | 990  | 1020   | 2026   |
| UN45853 | Rsa1.0.03819.1 | 1204 | 20668  | 0         | 724 | 729  | 99 -  | 1    | 728  | 19043  | 19771  |
| UN45854 | Rsa1.0.01119.1 | 711  | 53459  | 1.00E-131 | 266 | 273  | 97 +  | 226  | 497  | 12039  | 12310  |
| UN45855 | Rsa1.0.00033.1 | 685  | 515811 | 5.00E-70  | 168 | 181  | 92 -  | 5    | 174  | 35164  | 35344  |
| UN45856 | Rsa1.0.00061.1 | 555  | 218685 | 2.33E-156 | 269 | 270  | 99 -  | 285  | 553  | 63222  | 63491  |
| UN45857 | Rsa1.0.00782.1 | 417  | 64468  | 1.00E-174 | 350 | 362  | 96 -  | 1    | 362  | 13384  | 13744  |
| UN45858 | Rsa1.0.04561.1 | 671  | 16849  | 1.00E-73  | 144 | 145  | 99 -  | 55   | 199  | 9818   | 9962   |
| UN45859 | Rsa1.0.00663.1 | 891  | 164969 | 1.00E-168 | 306 | 307  | 99 -  | 583  | 889  | 126399 | 126704 |
| UN45860 | Rsa1.0.02267.1 | 531  | 33194  | 1.00E-134 | 310 | 332  | 93 -  | 4    | 321  | 12085  | 12416  |
| UN45861 | Rsa1.0.02948.1 | 603  | 26526  | 1.00E-170 | 303 | 303  | 100 + | 301  | 603  | 6495   | 6797   |
| UN45862 | Rsa1.0.01985.1 | 550  | 36491  | 0         | 368 | 374  | 98 +  | 177  | 550  | 25011  | 25384  |

|         |                |      |        |           |     |     |       |     |     |        |        |
|---------|----------------|------|--------|-----------|-----|-----|-------|-----|-----|--------|--------|
| UN45863 | Rsa1.0.00343.1 | 1014 | 93570  | 1.00E-142 | 256 | 256 | 100 + | 1   | 256 | 69798  | 70053  |
| UN45864 | Rsa1.0.02592.1 | 733  | 29751  | 1.00E-161 | 291 | 292 | 99 -  | 338 | 629 | 17131  | 17422  |
| UN45865 | Rsa1.0.00405.1 | 993  | 202864 | 0         | 593 | 620 | 95 -  | 1   | 601 | 154781 | 155400 |
| UN45866 | Rsa1.0.00040.1 | 534  | 324196 | 1.00E-177 | 338 | 346 | 97 +  | 3   | 348 | 291990 | 292335 |
| UN45867 | Rsa1.0.02859.1 | 473  | 162118 | 1.00E-166 | 359 | 378 | 94 -  | 2   | 376 | 154217 | 154588 |
| UN45868 | Rsa1.0.00139.1 | 762  | 357786 | 0         | 422 | 425 | 99 -  | 339 | 762 | 314386 | 314810 |
| UN45869 | Rsa1.0.14744.1 | 780  | 3111   | 1.00E-130 | 427 | 488 | 87 -  | 294 | 780 | 743    | 1229   |
| UN45870 | Rsa1.0.01026.1 | 692  | 171624 | 0         | 357 | 359 | 99 -  | 333 | 691 | 166493 | 166851 |
| UN45871 | Rsa1.0.00637.1 | 638  | 71038  | 1.00E-143 | 348 | 370 | 94 +  | 276 | 638 | 27777  | 28143  |
| UN45872 | Rsa1.0.00833.1 | 765  | 62621  | 1.00E-148 | 276 | 278 | 99 -  | 1   | 278 | 9801   | 10077  |
| UN45873 | Rsa1.0.01270.1 | 859  | 49574  | 1.00E-171 | 317 | 320 | 99 -  | 540 | 858 | 26262  | 26581  |
| UN45874 | Rsa1.0.00451.1 | 1280 | 322533 | 0         | 368 | 379 | 97 +  | 369 | 747 | 161829 | 162207 |
| UN45875 | Rsa1.0.00336.1 | 605  | 445051 | 0         | 525 | 574 | 91 -  | 40  | 591 | 174778 | 175351 |
| UN45876 | Rsa1.0.00396.1 | 235  | 88242  | 3.00E-81  | 178 | 185 | 96 -  | 1   | 185 | 49389  | 49572  |
| UN45877 | Rsa1.0.01484.1 | 530  | 44806  | 1.00E-131 | 248 | 250 | 99 -  | 2   | 251 | 28137  | 28385  |
| UN45878 | Rsa1.0.00280.1 | 425  | 99966  | 0         | 403 | 418 | 96 -  | 9   | 423 | 38323  | 38739  |
| UN45879 | Rsa1.0.07319.1 | 781  | 9561   | 0         | 765 | 779 | 98 +  | 2   | 779 | 4450   | 5222   |
| UN45880 | Rsa1.0.00670.1 | 269  | 69371  | 1.00E-113 | 215 | 217 | 99 +  | 2   | 216 | 35182  | 35398  |
| UN45881 | Rsa1.0.02175.1 | 690  | 34312  | 1.00E-128 | 238 | 240 | 99 +  | 5   | 244 | 29383  | 29622  |
| UN45882 | Rsa1.0.08744.1 | 607  | 6970   | 0         | 492 | 511 | 96 +  | 10  | 518 | 5426   | 5934   |
| UN45883 | Rsa1.0.00539.1 | 1203 | 76926  | 0         | 560 | 562 | 99 -  | 1   | 562 | 8668   | 9229   |
| UN45884 | Rsa1.0.02358.1 | 561  | 32213  | 1.00E-164 | 295 | 296 | 99 +  | 217 | 512 | 14881  | 15176  |
| UN45885 | Rsa1.0.53358.1 | 882  | 427    | 2.00E-73  | 141 | 141 | 100 + | 340 | 480 | 211    | 351    |
| UN45886 | Rsa1.0.00014.1 | 877  | 348985 | 0         | 593 | 602 | 98 -  | 2   | 599 | 164692 | 165293 |
| UN45887 | Rsa1.0.01763.1 | 887  | 39659  | 1.00E-173 | 308 | 308 | 100 - | 580 | 887 | 39352  | 39659  |
| UN45888 | Rsa1.0.10442.1 | 892  | 5849   | 1.00E-136 | 307 | 328 | 93 -  | 563 | 889 | 1194   | 1510   |
| UN45889 | Rsa1.0.00773.1 | 968  | 64839  | 1.00E-96  | 201 | 208 | 96 +  | 370 | 577 | 58210  | 58417  |
| UN45890 | Rsa1.0.01220.1 | 1122 | 161775 | 1.00E-124 | 318 | 347 | 91 -  | 1   | 345 | 7326   | 7659   |
| UN45891 | Rsa1.0.00048.1 | 1361 | 167185 | 0         | 513 | 522 | 98 -  | 382 | 900 | 109464 | 109985 |
| UN45892 | Rsa1.0.00594.1 | 366  | 73729  | 0         | 365 | 366 | 99 -  | 1   | 366 | 48209  | 48573  |
| UN45893 | Rsa1.0.00119.1 | 827  | 467509 | 0         | 467 | 467 | 100 - | 1   | 467 | 47686  | 48152  |
| UN45894 | Rsa1.0.07201.1 | 670  | 9732   | 0         | 401 | 401 | 100 - | 1   | 401 | 159    | 559    |
| UN45895 | Rsa1.0.01168.1 | 461  | 153765 | 3.00E-70  | 224 | 251 | 89 -  | 214 | 457 | 23488  | 23728  |
| UN45896 | Rsa1.0.08223.1 | 686  | 7700   | 0         | 412 | 433 | 95 +  | 235 | 667 | 6338   | 6765   |
| UN45897 | Rsa1.0.00487.1 | 829  | 80674  | 0         | 610 | 652 | 93 +  | 184 | 827 | 75550  | 76201  |
| UN45898 | Rsa1.0.00877.1 | 1069 | 61305  | 0         | 630 | 644 | 97 +  | 3   | 643 | 13969  | 14612  |
| UN45899 | Rsa1.0.01434.1 | 913  | 45951  | 6.00E-89  | 180 | 183 | 98 -  | 1   | 182 | 33268  | 33450  |
| UN45900 | Rsa1.0.00169.1 | 682  | 274298 | 0         | 591 | 651 | 90 -  | 28  | 658 | 109181 | 109822 |
| UN45901 | Rsa1.0.00356.1 | 765  | 91521  | 0         | 471 | 494 | 95 -  | 1   | 490 | 35009  | 35497  |

|         |                |      |        |           |     |     |       |     |      |        |        |
|---------|----------------|------|--------|-----------|-----|-----|-------|-----|------|--------|--------|
| UN45902 | Rsa1.0_01929.1 | 914  | 37191  | 0         | 600 | 640 | 93 +  | 32  | 669  | 27590  | 28219  |
| UN45903 | Rsa1.0_00203.1 | 1018 | 109129 | 9.00E-85  | 184 | 192 | 95 +  | 138 | 329  | 21777  | 21968  |
| UN45904 | Rsa1.0_02914.1 | 430  | 26815  | 1.00E-140 | 348 | 375 | 92 -  | 4   | 369  | 25036  | 25408  |
| UN45905 | Rsa1.0_00343.1 | 541  | 93570  | 1.00E-141 | 283 | 293 | 96 -  | 253 | 539  | 62864  | 63156  |
| UN45906 | Rsa1.0_00420.1 | 603  | 86496  | 0         | 460 | 471 | 97 -  | 132 | 602  | 54592  | 55062  |
| UN45907 | Rsa1.0_08078.1 | 582  | 7944   | 1.00E-180 | 401 | 425 | 94 -  | 8   | 425  | 6746   | 7167   |
| UN45908 | Rsa1.0_00019.1 | 753  | 301669 | 0         | 539 | 586 | 91 +  | 7   | 590  | 119747 | 120307 |
| UN45909 | Rsa1.0_01948.1 | 780  | 36966  | 0         | 420 | 421 | 99 -  | 358 | 778  | 15165  | 15585  |
| UN45910 | Rsa1.0_01018.1 | 427  | 56685  | 2.33E-156 | 405 | 448 | 90 +  | 1   | 425  | 43096  | 43539  |
| UN45911 | Rsa1.0_00451.1 | 972  | 322533 | 6.00E-89  | 278 | 314 | 88 +  | 670 | 970  | 13841  | 14145  |
| UN45912 | Rsa1.0_00071.1 | 701  | 345714 | 1.00E-130 | 276 | 287 | 96 +  | 12  | 297  | 66081  | 66365  |
| UN45913 | Rsa1.0_01253.1 | 701  | 49812  | 0         | 696 | 697 | 99 +  | 1   | 697  | 37217  | 37913  |
| UN45914 | Rsa1.0_04124.1 | 858  | 18945  | 1.00E-164 | 302 | 305 | 99 +  | 552 | 856  | 8363   | 8667   |
| UN45915 | Rsa1.0_00622.1 | 723  | 71822  | 0         | 499 | 505 | 98 +  | 1   | 500  | 36279  | 36783  |
| UN45916 | Rsa1.0_00205.1 | 843  | 193401 | 0         | 799 | 841 | 95 +  | 2   | 842  | 183984 | 184806 |
| UN45917 | Rsa1.0_13958.1 | 847  | 4005   | 0         | 398 | 399 | 99 +  | 447 | 845  | 2529   | 2927   |
| UN45918 | Rsa1.0_00043.1 | 831  | 264937 | 0         | 340 | 344 | 98 +  | 1   | 342  | 123233 | 123576 |
| UN45919 | Rsa1.0_00141.1 | 859  | 121494 | 0         | 651 | 653 | 99 -  | 205 | 857  | 15613  | 16265  |
| UN45920 | Rsa1.0_00316.1 | 1047 | 96264  | 0         | 377 | 382 | 98 +  | 7   | 388  | 30658  | 31039  |
| UN45921 | Rsa1.0_06133.1 | 1195 | 11663  | 0         | 566 | 570 | 99 -  | 2   | 571  | 9656   | 10225  |
| UN45922 | Rsa1.0_04949.1 | 741  | 15356  | 0         | 386 | 391 | 98 +  | 16  | 406  | 889    | 1279   |
| UN45923 | Rsa1.0_00252.1 | 663  | 102760 | 0         | 630 | 653 | 96 +  | 1   | 646  | 670    | 1322   |
| UN45924 | Rsa1.0_00942.1 | 739  | 58873  | 0         | 470 | 504 | 93 -  | 7   | 504  | 2905   | 3405   |
| UN45925 | Rsa1.0_01606.1 | 754  | 42432  | 1.00E-137 | 287 | 298 | 96 -  | 6   | 303  | 29730  | 30019  |
| UN45926 | Rsa1.0_01750.1 | 763  | 39816  | 1.00E-135 | 281 | 290 | 96 +  | 103 | 388  | 25450  | 25738  |
| UN45927 | Rsa1.0_00058.1 | 580  | 159921 | 0         | 390 | 402 | 97 +  | 1   | 402  | 49043  | 49442  |
| UN45928 | Rsa1.0_05510.1 | 916  | 13470  | 1.00E-139 | 267 | 272 | 98 +  | 3   | 274  | 1624   | 1895   |
| UN45929 | Rsa1.0_33257.1 | 966  | 683    | 1.00E-71  | 144 | 146 | 98 +  | 82  | 227  | 1      | 146    |
| UN45930 | Rsa1.0_47762.1 | 966  | 474    | 0         | 471 | 474 | 99 -  | 401 | 874  | 1      | 474    |
| UN45931 | Rsa1.0_00056.1 | 563  | 332604 | 1.00E-165 | 298 | 299 | 99 -  | 1   | 299  | 310249 | 310547 |
| UN45932 | Rsa1.0_00173.1 | 787  | 288743 | 1.00E-179 | 440 | 479 | 91 -  | 1   | 476  | 64738  | 65214  |
| UN45933 | Rsa1.0_00263.1 | 927  | 224968 | 1.00E-135 | 335 | 369 | 90 +  | 7   | 355  | 125154 | 125521 |
| UN45934 | Rsa1.0_00304.1 | 834  | 97429  | 0         | 351 | 356 | 98 -  | 1   | 353  | 70392  | 70747  |
| UN45935 | Rsa1.0_00075.1 | 830  | 146680 | 0         | 453 | 454 | 99 +  | 2   | 455  | 6940   | 7393   |
| UN45936 | Rsa1.0_00121.1 | 844  | 278029 | 0         | 460 | 460 | 100 + | 186 | 645  | 104589 | 105048 |
| UN45937 | Rsa1.0_00017.1 | 851  | 752458 | 0         | 418 | 426 | 98 +  | 3   | 428  | 138949 | 139373 |
| UN45938 | Rsa1.0_00637.1 | 767  | 71038  | 0         | 703 | 768 | 91 -  | 5   | 740  | 4591   | 5347   |
| UN45939 | Rsa1.0_09063.1 | 717  | 6675   | 1.00E-166 | 360 | 382 | 94 +  | 1   | 370  | 1797   | 2178   |
| UN45940 | Rsa1.0_00350.1 | 1116 | 92346  | 0         | 567 | 576 | 98 -  | 519 | 1091 | 41589  | 42164  |

|         |                |      |        |           |     |     |       |     |      |        |        |
|---------|----------------|------|--------|-----------|-----|-----|-------|-----|------|--------|--------|
| UN45941 | Rsa1.0_00099.1 | 727  | 159619 | 0         | 725 | 726 | 99 +  | 1   | 726  | 33432  | 34157  |
| UN45942 | Rsa1.0_00478.1 | 704  | 81419  | 0         | 372 | 383 | 97 +  | 1   | 382  | 62347  | 62725  |
| UN45943 | Rsa1.0_00910.1 | 663  | 59975  | 0         | 517 | 554 | 93 -  | 22  | 565  | 30391  | 30943  |
| UN45944 | Rsa1.0_04029.1 | 756  | 19491  | 0         | 486 | 521 | 93 +  | 1   | 516  | 8457   | 8963   |
| UN45945 | Rsa1.0_07863.1 | 1107 | 8404   | 0         | 462 | 484 | 95 -  | 623 | 1105 | 631    | 1095   |
| UN45946 | Rsa1.0_00476.1 | 710  | 280966 | 0         | 459 | 468 | 98 +  | 1   | 468  | 259644 | 260111 |
| UN45947 | Rsa1.0_02048.1 | 1086 | 35605  | 0         | 472 | 474 | 99 -  | 231 | 704  | 24818  | 25291  |
| UN45948 | Rsa1.0_01248.1 | 617  | 154103 | 1.00E-157 | 333 | 345 | 96 -  | 240 | 581  | 42881  | 43224  |
| UN45949 | Rsa1.0_02851.1 | 652  | 27295  | 1.00E-126 | 292 | 308 | 94 +  | 1   | 304  | 17653  | 17958  |
| UN45950 | Rsa1.0_08151.1 | 573  | 7830   | 1.00E-155 | 321 | 333 | 96 +  | 244 | 573  | 2513   | 2845   |
| UN45951 | Rsa1.0_06247.1 | 714  | 11395  | 1.00E-92  | 197 | 205 | 96 +  | 5   | 209  | 8671   | 8875   |
| UN45952 | Rsa1.0_07732.1 | 899  | 8695   | 1.00E-159 | 302 | 307 | 98 -  | 1   | 307  | 1309   | 1612   |
| UN45953 | Rsa1.0_00094.1 | 880  | 139042 | 0         | 435 | 438 | 99 -  | 1   | 437  | 92426  | 92863  |
| UN45954 | Rsa1.0_01077.1 | 843  | 54772  | 0         | 656 | 696 | 94 +  | 3   | 686  | 7435   | 8129   |
| UN45955 | Rsa1.0_02681.1 | 681  | 28711  | 0         | 357 | 360 | 99 +  | 9   | 367  | 5925   | 6284   |
| UN45956 | Rsa1.0_02857.1 | 420  | 27254  | 0         | 416 | 424 | 98 +  | 1   | 419  | 13184  | 13607  |
| UN45957 | Rsa1.0_00305.1 | 891  | 97308  | 1.00E-156 | 342 | 362 | 94 +  | 17  | 375  | 78733  | 79094  |
| UN45958 | Rsa1.0_16677.1 | 671  | 2069   | 4.00E-89  | 184 | 189 | 97 -  | 321 | 506  | 1746   | 1934   |
| UN45959 | Rsa1.0_00257.1 | 724  | 102407 | 0         | 682 | 729 | 93 +  | 12  | 722  | 14790  | 15502  |
| UN45960 | Rsa1.0_00546.1 | 591  | 76523  | 1.00E-168 | 350 | 365 | 95 -  | 5   | 364  | 11381  | 11745  |
| UN45961 | Rsa1.0_00402.1 | 1329 | 385315 | 1.00E-177 | 322 | 324 | 99 -  | 1   | 324  | 86468  | 86791  |
| UN45962 | Rsa1.0_00265.1 | 864  | 220635 | 0         | 813 | 854 | 95 -  | 29  | 863  | 187795 | 188644 |
| UN45963 | Rsa1.0_01553.1 | 753  | 43379  | 1.00E-132 | 246 | 248 | 99 -  | 1   | 248  | 7944   | 8191   |
| UN45964 | Rsa1.0_00272.1 | 598  | 447836 | 0         | 366 | 368 | 99 -  | 7   | 374  | 83797  | 84164  |
| UN45965 | Rsa1.0_00437.1 | 915  | 84879  | 0         | 324 | 324 | 100 + | 545 | 868  | 22576  | 22899  |
| UN45966 | Rsa1.0_04066.1 | 641  | 19262  | 0         | 370 | 373 | 99 -  | 267 | 639  | 7131   | 7503   |
| UN45967 | Rsa1.0_01170.1 | 751  | 161131 | 0         | 716 | 728 | 98 +  | 17  | 738  | 130492 | 131218 |
| UN45968 | Rsa1.0_00477.1 | 868  | 81556  | 0         | 569 | 573 | 99 -  | 3   | 575  | 38195  | 38766  |
| UN45969 | Rsa1.0_00274.1 | 777  | 210119 | 1.00E-137 | 251 | 252 | 99 -  | 289 | 540  | 207848 | 208099 |
| UN45970 | Rsa1.0_01301.1 | 729  | 169072 | 1.00E-112 | 218 | 222 | 98 -  | 314 | 535  | 12980  | 13201  |
| UN45971 | Rsa1.0_02114.1 | 756  | 34873  | 1.00E-139 | 270 | 275 | 98 -  | 354 | 628  | 3319   | 3592   |
| UN45972 | Rsa1.0_01277.1 | 828  | 49375  | 0         | 796 | 826 | 96 +  | 6   | 820  | 21373  | 22194  |
| UN45973 | Rsa1.0_01883.1 | 687  | 37661  | 1.00E-143 | 355 | 385 | 92 -  | 4   | 382  | 22302  | 22680  |
| UN45974 | Rsa1.0_09538.1 | 838  | 6301   | 3.00E-87  | 228 | 246 | 92 -  | 594 | 838  | 2190   | 2431   |
| UN45975 | Rsa1.0_09943.1 | 589  | 6076   | 1.00E-73  | 171 | 181 | 94 +  | 1   | 181  | 413    | 593    |
| UN45976 | Rsa1.0_01706.1 | 749  | 40694  | 1.00E-127 | 237 | 239 | 99 +  | 106 | 344  | 28390  | 28628  |
| UN45977 | Rsa1.0_00183.1 | 549  | 113277 | 1.00E-165 | 303 | 306 | 99 +  | 243 | 548  | 53484  | 53789  |
| UN45978 | Rsa1.0_01481.1 | 1049 | 184562 | 0         | 380 | 384 | 98 -  | 664 | 1047 | 180895 | 181276 |
| UN45979 | Rsa1.0_00500.1 | 1038 | 272308 | 0         | 335 | 337 | 99 -  | 702 | 1038 | 3724   | 4060   |

|         |                |      |        |           |     |     |       |     |      |        |        |
|---------|----------------|------|--------|-----------|-----|-----|-------|-----|------|--------|--------|
| UN45980 | Rsa1.0_00247.1 | 966  | 103408 | 1.00E-171 | 346 | 359 | 96 -  | 606 | 964  | 68639  | 68989  |
| UN45981 | Rsa1.0_03137.1 | 1012 | 25105  | 0         | 461 | 466 | 98 +  | 549 | 1012 | 16351  | 16815  |
| UN45982 | Rsa1.0_00802.1 | 739  | 63846  | 0         | 373 | 379 | 98 +  | 311 | 686  | 26570  | 26948  |
| UN45983 | Rsa1.0_19040.1 | 833  | 1491   | 1.00E-168 | 370 | 392 | 94 +  | 329 | 719  | 953    | 1344   |
| UN45984 | Rsa1.0_02948.1 | 495  | 26526  | 1.00E-91  | 188 | 191 | 98 +  | 296 | 486  | 6495   | 6683   |
| UN45985 | Rsa1.0_13462.1 | 1189 | 4808   | 0         | 618 | 641 | 96 -  | 3   | 641  | 1      | 639    |
| UN45986 | Rsa1.0_00734.1 | 700  | 66508  | 0         | 446 | 449 | 99 -  | 1   | 449  | 44657  | 45105  |
| UN45987 | Rsa1.0_00486.1 | 430  | 80875  | 1.00E-94  | 226 | 241 | 93 +  | 2   | 242  | 34933  | 35163  |
| UN45988 | Rsa1.0_09006.1 | 760  | 6715   | 0         | 590 | 613 | 96 -  | 147 | 749  | 4295   | 4906   |
| UN45989 | Rsa1.0_00678.1 | 609  | 193163 | 1.00E-124 | 249 | 255 | 97 -  | 193 | 443  | 26837  | 27091  |
| UN45990 | Rsa1.0_14084.1 | 1283 | 3822   | 0         | 442 | 452 | 97 -  | 370 | 821  | 281    | 732    |
| UN45991 | Rsa1.0_08909.1 | 621  | 6799   | 0         | 434 | 459 | 94 +  | 165 | 613  | 5192   | 5646   |
| UN45992 | Rsa1.0_07059.1 | 619  | 9962   | 4.00E-89  | 257 | 284 | 90 -  | 276 | 555  | 3573   | 3854   |
| UN45993 | Rsa1.0_00369.1 | 593  | 266462 | 1.00E-95  | 225 | 238 | 94 +  | 327 | 564  | 10326  | 10556  |
| UN45994 | Rsa1.0_00161.1 | 740  | 116891 | 0         | 720 | 755 | 95 +  | 2   | 740  | 55266  | 56006  |
| UN45995 | Rsa1.0_07931.1 | 653  | 8236   | 1.00E-67  | 167 | 179 | 93 +  | 38  | 211  | 429    | 607    |
| UN45996 | Rsa1.0_00654.1 | 700  | 70012  | 1.00E-152 | 333 | 350 | 95 +  | 294 | 638  | 41118  | 41467  |
| UN45997 | #              | #    | #      | #         | #   | #   | #     | #   | #    | #      | #      |
| UN45998 | Rsa1.0_00178.1 | 855  | 114861 | 0         | 578 | 602 | 96 +  | 266 | 852  | 6063   | 6663   |
| UN45999 | Rsa1.0_04279.1 | 1264 | 18113  | 1.00E-172 | 319 | 323 | 98 +  | 942 | 1264 | 16443  | 16765  |
| UN46000 | Rsa1.0_00203.1 | 653  | 109129 | 0         | 586 | 637 | 91 +  | 11  | 645  | 54511  | 55143  |
| UN46001 | Rsa1.0_01059.1 | 791  | 55410  | 0         | 747 | 789 | 94 -  | 2   | 790  | 28351  | 29119  |
| UN46002 | Rsa1.0_04136.1 | 904  | 18901  | 0         | 379 | 381 | 99 -  | 523 | 903  | 7773   | 8153   |
| UN46003 | Rsa1.0_00019.1 | 737  | 301669 | 0         | 648 | 668 | 97 +  | 8   | 674  | 237115 | 237782 |
| UN46004 | Rsa1.0_05056.1 | 652  | 14981  | 0         | 346 | 346 | 100 - | 3   | 348  | 9065   | 9410   |
| UN46005 | Rsa1.0_01126.1 | 827  | 53127  | 0         | 394 | 407 | 96 -  | 358 | 763  | 51583  | 51988  |
| UN46006 | Rsa1.0_03569.1 | 925  | 22041  | 1.00E-115 | 252 | 267 | 94 -  | 594 | 851  | 10367  | 10633  |
| UN46007 | Rsa1.0_01591.1 | 645  | 42718  | 0         | 593 | 650 | 91 +  | 8   | 641  | 14305  | 14942  |
| UN46008 | Rsa1.0_04340.1 | 830  | 17831  | 1.00E-134 | 323 | 353 | 91 +  | 478 | 828  | 16410  | 16745  |
| UN46009 | Rsa1.0_02199.1 | 1044 | 33982  | 1.00E-121 | 238 | 242 | 98 +  | 804 | 1044 | 13929  | 14170  |
| UN46010 | Rsa1.0_14634.1 | 841  | 3205   | 6.00E-98  | 273 | 299 | 91 +  | 540 | 834  | 1772   | 2062   |
| UN46011 | Rsa1.0_02373.1 | 1139 | 32048  | 1.00E-142 | 277 | 284 | 97 -  | 2   | 285  | 10289  | 10572  |
| UN46012 | Rsa1.0_00292.1 | 830  | 98141  | 1.00E-147 | 274 | 276 | 99 -  | 1   | 274  | 21932  | 22207  |
| UN46013 | Rsa1.0_03600.1 | 700  | 21857  | 1.00E-153 | 308 | 318 | 96 +  | 385 | 700  | 2130   | 2447   |
| UN46014 | Rsa1.0_02811.1 | 729  | 27669  | 0         | 481 | 499 | 96 -  | 236 | 729  | 13304  | 13793  |
| UN46015 | Rsa1.0_06288.1 | 946  | 11302  | 0         | 878 | 918 | 95 -  | 44  | 946  | 3092   | 4008   |
| UN46016 | Rsa1.0_00082.1 | 461  | 237584 | 0         | 459 | 464 | 98 -  | 1   | 461  | 52336  | 52799  |
| UN46017 | Rsa1.0_00109.1 | 913  | 132735 | 1.00E-170 | 544 | 618 | 88 +  | 165 | 777  | 43934  | 44549  |
| UN46018 | Rsa1.0_00345.1 | 904  | 93226  | 1.00E-168 | 399 | 426 | 93 +  | 481 | 904  | 85600  | 86016  |

|         |                |      |        |           |     |     |       |     |      |        |        |
|---------|----------------|------|--------|-----------|-----|-----|-------|-----|------|--------|--------|
| UN46019 | Rsa1.0.02629.1 | 593  | 29350  | 1.00E-175 | 325 | 328 | 99 +  | 4   | 331  | 4941   | 5267   |
| UN46020 | Rsa1.0.01735.1 | 662  | 40128  | 1.00E-162 | 305 | 310 | 98 -  | 4   | 313  | 9587   | 9896   |
| UN46021 | Rsa1.0.00113.1 | 1064 | 131574 | 0         | 419 | 435 | 96 +  | 332 | 766  | 62642  | 63076  |
| UN46022 | Rsa1.0.00044.1 | 733  | 271658 | 0         | 699 | 734 | 95 +  | 3   | 733  | 169986 | 170714 |
| UN46023 | Rsa1.0.00564.1 | 509  | 75428  | 0         | 495 | 509 | 97 -  | 1   | 509  | 10073  | 10577  |
| UN46024 | Rsa1.0.00410.1 | 725  | 86957  | 1.00E-131 | 328 | 355 | 92 +  | 380 | 721  | 28659  | 29011  |
| UN46025 | Rsa1.0.07122.1 | 956  | 9866   | 1.00E-152 | 315 | 325 | 96 -  | 634 | 956  | 6640   | 6963   |
| UN46026 | Rsa1.0.01274.1 | 354  | 49419  | 3.00E-85  | 186 | 192 | 96 +  | 145 | 336  | 21348  | 21537  |
| UN46027 | Rsa1.0.02777.1 | 777  | 27986  | 2.00E-73  | 181 | 194 | 93 -  | 586 | 777  | 6331   | 6517   |
| UN46028 | Rsa1.0.00192.1 | 365  | 278200 | 1.00E-161 | 312 | 320 | 97 +  | 43  | 362  | 25425  | 25744  |
| UN46029 | Rsa1.0.74770.1 | 680  | 307    | 7.00E-91  | 216 | 227 | 95 +  | 460 | 680  | 33     | 258    |
| UN46030 | Rsa1.0.00502.1 | 512  | 204180 | 1.00E-178 | 409 | 435 | 94 -  | 69  | 501  | 63947  | 64372  |
| UN46031 | Rsa1.0.00844.1 | 878  | 62403  | 8.00E-88  | 180 | 185 | 97 +  | 549 | 733  | 3899   | 4083   |
| UN46032 | Rsa1.0.00986.1 | 796  | 57571  | 0         | 384 | 388 | 98 -  | 409 | 795  | 40105  | 40491  |
| UN46033 | Rsa1.0.04110.1 | 778  | 18998  | 0         | 489 | 511 | 95 +  | 280 | 778  | 5227   | 5737   |
| UN46034 | Rsa1.0.00673.1 | 846  | 69325  | 0         | 459 | 476 | 96 +  | 370 | 845  | 8697   | 9166   |
| UN46035 | Rsa1.0.00056.1 | 909  | 332604 | 2.00E-60  | 209 | 235 | 88 -  | 20  | 244  | 315726 | 315957 |
| UN46036 | Rsa1.0.01527.1 | 723  | 43905  | 1.00E-154 | 301 | 308 | 97 -  | 416 | 723  | 31251  | 31556  |
| UN46037 | Rsa1.0.03237.1 | 676  | 24434  | 1.00E-169 | 310 | 313 | 99 +  | 26  | 338  | 27     | 339    |
| UN46038 | Rsa1.0.03454.1 | 779  | 149870 | 0         | 443 | 481 | 92 -  | 313 | 778  | 5964   | 6443   |
| UN46039 | Rsa1.0.00707.1 | 631  | 190112 | 1.00E-107 | 226 | 234 | 96 -  | 403 | 631  | 15493  | 15726  |
| UN46040 | Rsa1.0.00015.1 | 612  | 561803 | 1.00E-157 | 423 | 472 | 89 +  | 101 | 565  | 483122 | 483580 |
| UN46041 | Rsa1.0.00549.1 | 500  | 76473  | 8.00E-93  | 189 | 193 | 97 -  | 304 | 495  | 8050   | 8242   |
| UN46042 | Rsa1.0.01414.1 | 866  | 149508 | 0         | 531 | 545 | 97 +  | 322 | 865  | 115530 | 116074 |
| UN46043 | Rsa1.0.00173.1 | 847  | 288743 | 1.00E-120 | 228 | 231 | 98 +  | 616 | 846  | 44823  | 45053  |
| UN46044 | Rsa1.0.00593.1 | 893  | 143463 | 1.00E-168 | 410 | 444 | 92 -  | 457 | 888  | 57103  | 57542  |
| UN46045 | Rsa1.0.04382.1 | 1118 | 17635  | 0         | 516 | 523 | 98 -  | 596 | 1118 | 4874   | 5396   |
| UN46046 | Rsa1.0.08259.1 | 1013 | 7641   | 1.00E-164 | 350 | 366 | 95 -  | 3   | 368  | 3089   | 3443   |
| UN46047 | Rsa1.0.03665.1 | 949  | 21487  | 1.00E-59  | 163 | 178 | 91 -  | 709 | 886  | 12882  | 13059  |
| UN46048 | Rsa1.0.00214.1 | 581  | 107508 | 1.00E-143 | 267 | 270 | 98 -  | 311 | 580  | 36858  | 37127  |
| UN46049 | Rsa1.0.00512.1 | 1074 | 200277 | 2.00E-92  | 185 | 189 | 97 -  | 14  | 202  | 199512 | 199700 |
| UN46050 | Rsa1.0.01523.1 | 806  | 43959  | 8.00E-88  | 165 | 165 | 100 - | 526 | 690  | 7030   | 7194   |
| UN46051 | Rsa1.0.08916.1 | 798  | 6792   | 0         | 516 | 569 | 90 +  | 230 | 792  | 5181   | 5749   |
| UN46052 | Rsa1.0.01136.1 | 556  | 52724  | 8.00E-84  | 170 | 173 | 98 +  | 3   | 175  | 13432  | 13602  |
| UN46053 | Rsa1.0.00213.1 | 915  | 108167 | 4.00E-93  | 187 | 190 | 98 +  | 666 | 855  | 5743   | 5931   |
| UN46054 | Rsa1.0.00635.1 | 697  | 175826 | 0         | 680 | 697 | 97 +  | 2   | 697  | 15609  | 16303  |
| UN46055 | Rsa1.0.00714.1 | 709  | 67187  | 0         | 337 | 338 | 99 +  | 83  | 420  | 19781  | 20118  |
| UN46056 | Rsa1.0.00154.1 | 964  | 189461 | 0         | 519 | 529 | 98 -  | 3   | 531  | 24514  | 25041  |
| UN46057 | Rsa1.0.02858.1 | 854  | 27246  | 1.00E-121 | 300 | 324 | 92 -  | 3   | 325  | 1710   | 2021   |

|         |                |      |        |           |     |      |      |     |      |        |        |
|---------|----------------|------|--------|-----------|-----|------|------|-----|------|--------|--------|
| UN46058 | Rsa1.0.00017.1 | 581  | 752458 | 0         | 573 | 580  | 98 - | 2   | 581  | 392529 | 393108 |
| UN46059 | Rsa1.0.00793.1 | 556  | 64103  | 0         | 528 | 582  | 90 - | 3   | 555  | 59208  | 59787  |
| UN46060 | Rsa1.0.00040.1 | 843  | 324196 | 1.00E-132 | 265 | 271  | 97 - | 10  | 279  | 308714 | 308982 |
| UN46061 | Rsa1.0.13483.1 | 1120 | 4782   | 0         | 416 | 422  | 98 - | 140 | 559  | 3113   | 3534   |
| UN46062 | Rsa1.0.00089.1 | 619  | 406142 | 0         | 572 | 577  | 99 - | 41  | 617  | 232181 | 232757 |
| UN46063 | Rsa1.0.00314.1 | 672  | 96472  | 0         | 357 | 366  | 97 + | 273 | 638  | 19994  | 20358  |
| UN46064 | Rsa1.0.05217.1 | 588  | 142938 | 0         | 574 | 598  | 95 - | 3   | 588  | 134929 | 135520 |
| UN46065 | Rsa1.0.02841.1 | 1261 | 27383  | 7.00E-46  | 104 | 107  | 97 + | 247 | 353  | 3289   | 3395   |
| UN46066 | Rsa1.0.04395.1 | 651  | 17570  | 1.00E-121 | 235 | 240  | 97 - | 78  | 317  | 10374  | 10613  |
| UN46067 | Rsa1.0.01026.1 | 736  | 171624 | 0         | 713 | 744  | 95 + | 3   | 733  | 3032   | 3770   |
| UN46068 | Rsa1.0.02040.1 | 939  | 35684  | 1.00E-108 | 251 | 267  | 94 - | 682 | 937  | 13810  | 14076  |
| UN46069 | Rsa1.0.00642.1 | 829  | 201230 | 1.00E-125 | 257 | 265  | 96 + | 567 | 828  | 161688 | 161951 |
| UN46070 | Rsa1.0.00270.1 | 490  | 101236 | 0         | 474 | 488  | 97 - | 2   | 488  | 25032  | 25518  |
| UN46071 | Rsa1.0.01072.1 | 1190 | 55068  | 0         | 515 | 516  | 99 - | 675 | 1190 | 34652  | 35167  |
| UN46072 | Rsa1.0.03569.1 | 582  | 22041  | 2.00E-94  | 182 | 184  | 98 - | 2   | 185  | 20627  | 20810  |
| UN46073 | Rsa1.0.03075.1 | 555  | 25560  | 1.00E-118 | 288 | 314  | 91 + | 257 | 555  | 7735   | 8043   |
| UN46074 | Rsa1.0.00853.1 | 705  | 62101  | 0         | 621 | 642  | 96 - | 10  | 648  | 41685  | 42326  |
| UN46075 | Rsa1.0.01996.1 | 483  | 36327  | 1.00E-174 | 410 | 441  | 92 - | 45  | 479  | 5497   | 5936   |
| UN46076 | Rsa1.0.00374.1 | 590  | 165738 | 0         | 374 | 387  | 96 + | 1   | 387  | 128276 | 128662 |
| UN46077 | Rsa1.0.02852.1 | 560  | 27287  | 9.00E-90  | 201 | 210  | 95 - | 353 | 560  | 21344  | 21551  |
| UN46078 | Rsa1.0.00058.1 | 941  | 159921 | 1.00E-165 | 329 | 338  | 97 + | 605 | 941  | 119077 | 119413 |
| UN46079 | Rsa1.0.03414.1 | 1018 | 23125  | 0         | 767 | 785  | 97 + | 238 | 1018 | 20780  | 21564  |
| UN46080 | Rsa1.0.03051.1 | 413  | 25758  | 6.00E-90  | 214 | 227  | 94 + | 153 | 376  | 1571   | 1797   |
| UN46081 | Rsa1.0.03465.1 | 820  | 22700  | 0         | 502 | 522  | 96 + | 87  | 605  | 9803   | 10324  |
| UN46082 | Rsa1.0.02210.1 | 668  | 33857  | 0         | 569 | 577  | 98 + | 9   | 585  | 2678   | 3254   |
| UN46083 | Rsa1.0.01626.1 | 717  | 41989  | 0         | 475 | 499  | 95 - | 222 | 715  | 4500   | 4998   |
| UN46084 | Rsa1.0.33589.1 | 828  | 675    | 1.00E-160 | 345 | 362  | 95 + | 467 | 827  | 45     | 404    |
| UN46085 | Rsa1.0.00256.1 | 900  | 102426 | 0         | 475 | 507  | 93 - | 3   | 509  | 100748 | 101254 |
| UN46086 | Rsa1.0.00047.1 | 1072 | 168582 | 1.00E-162 | 330 | 342  | 96 - | 457 | 797  | 165390 | 165731 |
| UN46087 | Rsa1.0.02606.1 | 1332 | 29635  | 0         | 633 | 691  | 91 + | 3   | 671  | 5877   | 6550   |
| UN46088 | Rsa1.0.01534.1 | 674  | 43764  | 3.00E-96  | 242 | 259  | 93 - | 417 | 672  | 8034   | 8287   |
| UN46089 | Rsa1.0.01969.1 | 479  | 153351 | 1.00E-113 | 271 | 292  | 92 + | 200 | 478  | 22253  | 22543  |
| UN46090 | Rsa1.0.00718.1 | 611  | 279335 | 1.00E-104 | 209 | 212  | 98 - | 401 | 611  | 6037   | 6247   |
| UN46091 | Rsa1.0.00065.1 | 574  | 454616 | 1.00E-136 | 252 | 254  | 99 - | 3   | 256  | 198196 | 198449 |
| UN46092 | Rsa1.0.01951.1 | 840  | 36941  | 1.00E-122 | 288 | 312  | 92 + | 2   | 305  | 12755  | 13057  |
| UN46093 | Rsa1.0.00196.1 | 624  | 109960 | 2.00E-81  | 184 | 194  | 94 + | 168 | 361  | 51018  | 51211  |
| UN46094 | Rsa1.0.00341.1 | 1164 | 249309 | 0         | 967 | 1063 | 90 - | 48  | 1082 | 179642 | 180671 |
| UN46095 | Rsa1.0.00828.1 | 983  | 62744  | 1.00E-125 | 276 | 294  | 93 + | 3   | 286  | 53932  | 54225  |
| UN46096 | Rsa1.0.00457.1 | 1133 | 337301 | 0         | 589 | 598  | 98 + | 2   | 599  | 159612 | 160208 |



|         |                |      |        |           |     |     |       |     |      |        |        |
|---------|----------------|------|--------|-----------|-----|-----|-------|-----|------|--------|--------|
| UN46097 | Rsa1.0.00509.1 | 1316 | 78829  | 0         | 423 | 445 | 95 +  | 654 | 1097 | 57392  | 57835  |
| UN46098 | Rsa1.0.02592.1 | 435  | 29751  | 0         | 428 | 434 | 98 -  | 1   | 434  | 19460  | 19893  |
| UN46099 | Rsa1.0.01700.1 | 935  | 40745  | 2.00E-14  | 167 | 209 | 79 +  | 582 | 790  | 31534  | 31736  |
| UN46100 | Rsa1.0.00020.1 | 632  | 283099 | 1.00E-117 | 280 | 298 | 93 +  | 1   | 297  | 75565  | 75860  |
| UN46101 | Rsa1.0.03699.1 | 667  | 21301  | 7.00E-91  | 188 | 194 | 96 -  | 1   | 194  | 2357   | 2550   |
| UN46102 | Rsa1.0.02177.1 | 920  | 34262  | 0         | 870 | 921 | 94 +  | 2   | 919  | 14545  | 15450  |
| UN46103 | Rsa1.0.00016.1 | 644  | 831256 | 0         | 637 | 641 | 99 -  | 2   | 642  | 766949 | 767589 |
| UN46104 | Rsa1.0.00465.1 | 687  | 82138  | 0         | 530 | 562 | 94 -  | 2   | 563  | 21482  | 22037  |
| UN46105 | Rsa1.0.00201.1 | 621  | 232851 | 2.00E-72  | 241 | 272 | 88 +  | 251 | 517  | 1480   | 1740   |
| UN46106 | Rsa1.0.00073.1 | 1131 | 240924 | 0         | 754 | 789 | 95 -  | 355 | 1131 | 81216  | 82004  |
| UN46107 | Rsa1.0.01594.1 | 703  | 42612  | 1.00E-142 | 358 | 389 | 92 +  | 2   | 382  | 7193   | 7573   |
| UN46108 | Rsa1.0.15314.1 | 756  | 2690   | 1.00E-113 | 210 | 211 | 99 +  | 197 | 407  | 2162   | 2372   |
| UN46109 | Rsa1.0.00661.1 | 412  | 213041 | 1.00E-126 | 295 | 313 | 94 -  | 105 | 412  | 65256  | 65565  |
| UN46110 | Rsa1.0.01570.1 | 760  | 43015  | 1.00E-154 | 285 | 288 | 98 -  | 344 | 631  | 32273  | 32560  |
| UN46111 | Rsa1.0.00851.1 | 807  | 62181  | 0         | 480 | 509 | 94 -  | 1   | 500  | 8664   | 9168   |
| UN46112 | Rsa1.0.00065.1 | 852  | 454616 | 0         | 841 | 851 | 98 +  | 2   | 852  | 204138 | 204988 |
| UN46113 | Rsa1.0.06471.1 | 785  | 10954  | 0         | 670 | 680 | 98 -  | 115 | 785  | 1310   | 1989   |
| UN46114 | Rsa1.0.00157.1 | 529  | 245832 | 1.00E-178 | 456 | 503 | 90 +  | 23  | 523  | 239124 | 239601 |
| UN46115 | Rsa1.0.02754.1 | 708  | 28213  | 1.00E-125 | 356 | 399 | 89 -  | 294 | 682  | 10059  | 10451  |
| UN46116 | Rsa1.0.00087.1 | 1195 | 761073 | 0         | 598 | 618 | 96 +  | 3   | 606  | 439387 | 440004 |
| UN46117 | Rsa1.0.02717.1 | 1034 | 28458  | 1.00E-119 | 350 | 394 | 88 +  | 638 | 1029 | 24218  | 24588  |
| UN46118 | Rsa1.0.01541.1 | 696  | 43682  | 0         | 686 | 688 | 99 +  | 3   | 690  | 6818   | 7504   |
| UN46119 | Rsa1.0.00269.1 | 774  | 341668 | 1.00E-168 | 333 | 344 | 96 +  | 137 | 480  | 192836 | 193179 |
| UN46120 | Rsa1.0.01188.1 | 854  | 51362  | 5.00E-92  | 172 | 172 | 100 + | 215 | 386  | 30279  | 30450  |
| UN46121 | Rsa1.0.00247.1 | 709  | 103408 | 0         | 650 | 711 | 91 -  | 1   | 670  | 66689  | 67385  |
| UN46122 | Rsa1.0.02874.1 | 897  | 27070  | 0         | 687 | 725 | 94 +  | 172 | 895  | 16196  | 16900  |
| UN46123 | Rsa1.0.01091.1 | 795  | 54383  | 0         | 691 | 721 | 95 +  | 75  | 794  | 49165  | 49877  |
| UN46124 | Rsa1.0.01752.1 | 1131 | 39805  | 7.00E-55  | 211 | 244 | 86 -  | 473 | 709  | 20974  | 21216  |
| UN46125 | Rsa1.0.02142.1 | 580  | 34633  | 0         | 571 | 572 | 99 +  | 1   | 572  | 5238   | 5809   |
| UN46126 | Rsa1.0.01674.1 | 865  | 168300 | 0         | 674 | 709 | 95 -  | 2   | 692  | 3689   | 4393   |
| UN46127 | Rsa1.0.01236.1 | 274  | 50156  | 5.00E-77  | 146 | 146 | 100 - | 127 | 272  | 1357   | 1502   |
| UN46128 | Rsa1.0.00120.1 | 624  | 277288 | 0         | 452 | 466 | 96 -  | 1   | 465  | 225101 | 225566 |
| UN46129 | Rsa1.0.32336.1 | 606  | 704    | 1.00E-116 | 269 | 287 | 93 +  | 3   | 277  | 377    | 663    |
| UN46130 | Rsa1.0.04234.1 | 755  | 18378  | 0         | 571 | 605 | 94 -  | 151 | 755  | 7521   | 8114   |
| UN46131 | Rsa1.0.10500.1 | 672  | 5824   | 0         | 627 | 675 | 92 -  | 2   | 672  | 3547   | 4206   |
| UN46132 | #              | #    | #      | #         | #   | #   | #     | #   | #    | #      | #      |
| UN46133 | Rsa1.0.00464.1 | 925  | 82253  | 0         | 597 | 628 | 95 -  | 3   | 627  | 26503  | 27130  |
| UN46134 | Rsa1.0.00041.1 | 637  | 186197 | 1.00E-119 | 290 | 307 | 94 +  | 5   | 310  | 56700  | 56999  |
| UN46135 | Rsa1.0.02229.1 | 723  | 33672  | 0         | 389 | 390 | 99 -  | 2   | 391  | 2778   | 3167   |

|         |                |      |        |           |     |     |      |     |      |        |        |
|---------|----------------|------|--------|-----------|-----|-----|------|-----|------|--------|--------|
| UN46136 | Rsa1.0.00697.1 | 1289 | 67913  | 1.00E-151 | 292 | 298 | 97 + | 1   | 298  | 31862  | 32157  |
| UN46137 | Rsa1.0.00612.1 | 698  | 72376  | 0         | 692 | 694 | 99 - | 3   | 696  | 18598  | 19291  |
| UN46138 | Rsa1.0.02206.1 | 877  | 33922  | 1.00E-142 | 266 | 269 | 98 + | 467 | 735  | 24814  | 25082  |
| UN46139 | Rsa1.0.01803.1 | 226  | 173846 | 1.00E-86  | 195 | 206 | 94 - | 11  | 216  | 137460 | 137665 |
| UN46140 | Rsa1.0.00683.1 | 759  | 68638  | 0         | 737 | 759 | 97 + | 1   | 759  | 30897  | 31652  |
| UN46141 | Rsa1.0.03831.1 | 739  | 20579  | 2.00E-79  | 158 | 159 | 99 + | 1   | 158  | 16218  | 16376  |
| UN46142 | Rsa1.0.00816.1 | 1009 | 403350 | 1.00E-102 | 322 | 366 | 87 - | 630 | 974  | 368923 | 369285 |
| UN46143 | Rsa1.0.01650.1 | 593  | 41589  | 0         | 531 | 582 | 91 - | 8   | 587  | 27296  | 27864  |
| UN46144 | Rsa1.0.00262.1 | 968  | 101906 | 0         | 510 | 517 | 98 - | 4   | 519  | 28029  | 28545  |
| UN46145 | Rsa1.0.02901.1 | 907  | 26909  | 1.00E-92  | 237 | 255 | 92 - | 19  | 270  | 21294  | 21541  |
| UN46146 | Rsa1.0.13471.1 | 867  | 4802   | 1.00E-118 | 234 | 240 | 97 + | 290 | 529  | 2722   | 2961   |
| UN46147 | Rsa1.0.00170.1 | 777  | 179538 | 1.00E-109 | 233 | 241 | 96 - | 509 | 747  | 142306 | 142546 |
| UN46148 | Rsa1.0.14744.1 | 741  | 3111   | 1.00E-119 | 392 | 451 | 86 - | 294 | 737  | 779    | 1229   |
| UN46149 | Rsa1.0.15323.1 | 691  | 2685   | 1.00E-39  | 100 | 104 | 96 - | 506 | 609  | 2507   | 2609   |
| UN46150 | Rsa1.0.00128.1 | 576  | 228675 | 1.00E-67  | 152 | 159 | 95 + | 198 | 356  | 106484 | 106642 |
| UN46151 | Rsa1.0.00556.1 | 641  | 207212 | 0         | 398 | 399 | 99 - | 243 | 641  | 137376 | 137774 |
| UN46152 | Rsa1.0.05611.1 | 362  | 13193  | 1.00E-50  | 120 | 126 | 95 - | 1   | 126  | 2850   | 2975   |
| UN46153 | Rsa1.0.00022.1 | 907  | 200461 | 1.00E-134 | 246 | 247 | 99 - | 3   | 249  | 7997   | 8243   |
| UN46154 | Rsa1.0.06495.1 | 598  | 10899  | 1.00E-140 | 256 | 257 | 99 + | 55  | 311  | 5284   | 5540   |
| UN46155 | Rsa1.0.01958.1 | 752  | 261128 | 8.00E-97  | 186 | 188 | 98 + | 313 | 500  | 134526 | 134713 |
| UN46156 | Rsa1.0.05605.1 | 732  | 13202  | 0         | 598 | 618 | 96 + | 1   | 616  | 8430   | 9044   |
| UN46157 | Rsa1.0.02600.1 | 531  | 29657  | 0         | 515 | 519 | 99 + | 1   | 519  | 16265  | 16782  |
| UN46158 | Rsa1.0.04647.1 | 720  | 16541  | 1.00E-106 | 234 | 244 | 95 + | 468 | 709  | 8197   | 8440   |
| UN46159 | Rsa1.0.00663.1 | 240  | 164969 | 1.00E-99  | 226 | 240 | 94 - | 1   | 240  | 101008 | 101247 |
| UN46160 | Rsa1.0.01760.1 | 1080 | 39730  | 1.00E-116 | 300 | 325 | 92 - | 13  | 334  | 26012  | 26327  |
| UN46161 | Rsa1.0.00185.1 | 640  | 248445 | 0         | 594 | 646 | 91 - | 2   | 640  | 241332 | 241959 |
| UN46162 | Rsa1.0.10841.1 | 665  | 5705   | 1.00E-164 | 424 | 465 | 91 + | 4   | 468  | 451    | 913    |
| UN46163 | Rsa1.0.06454.1 | 854  | 10987  | 1.00E-133 | 244 | 245 | 99 + | 3   | 247  | 5779   | 6023   |
| UN46164 | Rsa1.0.01121.1 | 635  | 53407  | 0         | 400 | 420 | 95 + | 208 | 627  | 19404  | 19822  |
| UN46165 | Rsa1.0.00447.1 | 792  | 84051  | 0         | 439 | 465 | 94 + | 4   | 456  | 12840  | 13295  |
| UN46166 | Rsa1.0.01461.1 | 1151 | 45240  | 0         | 761 | 780 | 97 + | 372 | 1149 | 731    | 1510   |
| UN46167 | Rsa1.0.00237.1 | 741  | 235974 | 0         | 403 | 422 | 95 + | 3   | 421  | 212350 | 212762 |
| UN46168 | Rsa1.0.00285.1 | 878  | 149638 | 0         | 652 | 694 | 93 - | 200 | 878  | 81491  | 82178  |
| UN46169 | Rsa1.0.00165.1 | 421  | 116466 | 1.00E-66  | 150 | 157 | 95 - | 4   | 160  | 78644  | 78800  |
| UN46170 | Rsa1.0.01047.1 | 850  | 55705  | 0         | 825 | 855 | 96 - | 1   | 850  | 39716  | 40564  |
| UN46171 | Rsa1.0.00197.1 | 805  | 109714 | 0         | 558 | 574 | 97 + | 3   | 576  | 22536  | 23109  |
| UN46172 | Rsa1.0.02616.1 | 766  | 29542  | 1.00E-145 | 352 | 379 | 92 - | 390 | 766  | 231    | 601    |
| UN46173 | Rsa1.0.00201.1 | 643  | 232851 | 0         | 512 | 539 | 94 - | 112 | 643  | 72723  | 73249  |
| UN46174 | Rsa1.0.04225.1 | 655  | 18400  | 0         | 342 | 344 | 99 + | 312 | 655  | 10919  | 11260  |

|         |                |     |        |           |     |     |      |     |     |        |        |
|---------|----------------|-----|--------|-----------|-----|-----|------|-----|-----|--------|--------|
| UN46175 | Rsa1.0.03381.1 | 693 | 23306  | 1.00E-116 | 243 | 251 | 96 - | 88  | 338 | 19673  | 19919  |
| UN46176 | Rsa1.0.05847.1 | 769 | 12433  | 0         | 485 | 490 | 98 + | 95  | 584 | 7163   | 7652   |
| UN46177 | Rsa1.0.04529.1 | 661 | 16957  | 4.00E-86  | 192 | 203 | 94 + | 3   | 205 | 8577   | 8771   |
| UN46178 | Rsa1.0.00006.1 | 743 | 396176 | 0         | 344 | 351 | 98 + | 342 | 692 | 299313 | 299663 |
| UN46179 | Rsa1.0.01825.1 | 461 | 38725  | 1.00E-122 | 226 | 227 | 99 - | 6   | 232 | 23642  | 23868  |
| UN46180 | Rsa1.0.01075.1 | 675 | 156953 | 1.00E-179 | 321 | 322 | 99 - | 3   | 324 | 21721  | 22042  |
| UN46181 | Rsa1.0.01931.1 | 675 | 37187  | 1.00E-138 | 286 | 300 | 95 - | 3   | 302 | 32029  | 32318  |
| UN46182 | Rsa1.0.00485.1 | 798 | 80937  | 1.00E-171 | 331 | 339 | 97 - | 58  | 393 | 37393  | 37731  |
| UN46183 | Rsa1.0.02411.1 | 737 | 31655  | 0         | 408 | 427 | 95 - | 3   | 428 | 29046  | 29469  |
| UN46184 | Rsa1.0.00294.1 | 575 | 144860 | 1.00E-158 | 337 | 354 | 95 - | 234 | 575 | 54743  | 55096  |
| UN46185 | Rsa1.0.04896.1 | 911 | 15552  | 0         | 631 | 636 | 99 + | 1   | 636 | 5598   | 6231   |
| UN46186 | Rsa1.0.00001.1 | 503 | 363028 | 5.00E-85  | 163 | 164 | 99 - | 340 | 503 | 253424 | 253587 |
| UN46187 | Rsa1.0.00045.1 | 289 | 328694 | 1.00E-129 | 277 | 289 | 95 - | 3   | 287 | 188641 | 188925 |
| UN46188 | Rsa1.0.00341.1 | 968 | 249309 | 0         | 584 | 640 | 91 - | 187 | 815 | 186561 | 187175 |
| UN46189 | Rsa1.0.14273.1 | 614 | 3588   | 1.00E-163 | 348 | 366 | 95 + | 248 | 610 | 1869   | 2234   |
| UN46190 | Rsa1.0.00437.1 | 821 | 84879  | 0         | 814 | 818 | 99 + | 4   | 821 | 59658  | 60475  |
| UN46191 | Rsa1.0.00221.1 | 892 | 106972 | 1.00E-133 | 259 | 265 | 97 + | 384 | 648 | 864    | 1128   |
| UN46192 | Rsa1.0.33870.1 | 735 | 669    | 1.00E-101 | 212 | 219 | 96 - | 516 | 732 | 286    | 504    |
| UN46193 | Rsa1.0.03238.1 | 781 | 24432  | 1.00E-103 | 248 | 265 | 93 - | 508 | 771 | 12785  | 13047  |
| UN46194 | Rsa1.0.00457.1 | 816 | 337301 | 1.00E-116 | 223 | 225 | 99 + | 1   | 224 | 140566 | 140790 |
| UN46195 | Rsa1.0.01729.1 | 422 | 304246 | 1.00E-117 | 221 | 222 | 99 - | 201 | 422 | 124047 | 124267 |
| UN46196 | Rsa1.0.10563.1 | 932 | 5800   | 5.00E-71  | 283 | 324 | 87 - | 510 | 829 | 5338   | 5653   |
| UN46197 | Rsa1.0.00879.1 | 651 | 61297  | 6.00E-79  | 403 | 487 | 82 + | 124 | 610 | 53309  | 53791  |
| UN46198 | Rsa1.0.00038.1 | 687 | 314568 | 1.00E-112 | 242 | 252 | 96 - | 62  | 309 | 49081  | 49332  |
| UN46199 | Rsa1.0.08555.1 | 812 | 7208   | 0         | 758 | 763 | 99 - | 3   | 761 | 20     | 782    |
| UN46200 | Rsa1.0.11824.1 | 484 | 5396   | 1.00E-122 | 239 | 244 | 97 + | 233 | 473 | 3655   | 3898   |
| UN46201 | Rsa1.0.00840.1 | 720 | 62514  | 0         | 447 | 452 | 98 + | 269 | 718 | 38395  | 38846  |
| UN46202 | Rsa1.0.00949.1 | 506 | 58549  | 1.00E-130 | 287 | 299 | 95 + | 2   | 300 | 15557  | 15851  |
| UN46203 | Rsa1.0.01081.1 | 638 | 499226 | 0         | 609 | 634 | 96 + | 3   | 632 | 18453  | 19074  |
| UN46204 | Rsa1.0.23642.1 | 649 | 1035   | 0         | 543 | 566 | 95 + | 101 | 649 | 15     | 580    |
| UN46205 | Rsa1.0.00576.1 | 643 | 178949 | 1.00E-127 | 237 | 239 | 99 + | 183 | 421 | 5241   | 5479   |
| UN46206 | Rsa1.0.01955.1 | 617 | 36850  | 0         | 452 | 463 | 97 + | 156 | 614 | 18179  | 18641  |
| UN46207 | Rsa1.0.00593.1 | 799 | 143463 | 1.00E-126 | 245 | 250 | 98 - | 549 | 798 | 54556  | 54805  |
| UN46208 | Rsa1.0.00141.1 | 861 | 121494 | 0         | 419 | 437 | 95 + | 430 | 858 | 20677  | 21112  |
| UN46209 | Rsa1.0.00659.1 | 704 | 69733  | 1.00E-151 | 342 | 368 | 92 + | 340 | 704 | 55176  | 55524  |
| UN46210 | Rsa1.0.00301.1 | 565 | 365315 | 1.00E-143 | 286 | 293 | 97 + | 272 | 564 | 215219 | 215509 |
| UN46211 | Rsa1.0.00564.1 | 880 | 75428  | 0         | 531 | 551 | 96 - | 332 | 879 | 71126  | 71674  |
| UN46212 | Rsa1.0.00266.1 | 797 | 163932 | 1.00E-123 | 236 | 240 | 98 + | 346 | 585 | 7133   | 7372   |
| UN46213 | Rsa1.0.00569.1 | 814 | 75060  | 0         | 811 | 814 | 99 - | 1   | 814 | 72163  | 72976  |

|         |                |      |        |           |     |     |       |     |      |        |        |
|---------|----------------|------|--------|-----------|-----|-----|-------|-----|------|--------|--------|
| UN46214 | Rsa1.0.07453.1 | 767  | 9368   | 0         | 506 | 519 | 97 +  | 248 | 766  | 2199   | 2714   |
| UN46215 | Rsa1.0.02039.1 | 662  | 35699  | 0         | 469 | 487 | 96 -  | 3   | 487  | 4230   | 4716   |
| UN46216 | Rsa1.0.03015.1 | 686  | 26006  | 1.00E-172 | 333 | 341 | 97 +  | 3   | 340  | 11865  | 12205  |
| UN46217 | Rsa1.0.00112.1 | 850  | 132199 | 1.00E-164 | 337 | 348 | 96 +  | 497 | 841  | 56161  | 56507  |
| UN46218 | Rsa1.0.01610.1 | 639  | 42274  | 0         | 364 | 365 | 99 -  | 274 | 638  | 11411  | 11775  |
| UN46219 | Rsa1.0.00335.1 | 803  | 94371  | 1.00E-126 | 260 | 268 | 97 -  | 539 | 803  | 33581  | 33848  |
| UN46220 | Rsa1.0.02170.1 | 572  | 34352  | 1.00E-153 | 296 | 303 | 97 -  | 3   | 305  | 16025  | 16327  |
| UN46221 | Rsa1.0.09457.1 | 632  | 6353   | 0         | 612 | 625 | 97 +  | 2   | 626  | 4328   | 4951   |
| UN46222 | Rsa1.0.02012.1 | 590  | 36084  | 1.00E-126 | 265 | 276 | 96 +  | 254 | 522  | 21933  | 22208  |
| UN46223 | Rsa1.0.01029.1 | 759  | 256254 | 1.00E-167 | 385 | 414 | 92 +  | 365 | 759  | 2344   | 2756   |
| UN46224 | Rsa1.0.01094.1 | 589  | 167285 | 0         | 439 | 453 | 96 -  | 138 | 589  | 5278   | 5730   |
| UN46225 | Rsa1.0.02794.1 | 596  | 27820  | 1.00E-149 | 283 | 288 | 98 -  | 38  | 325  | 618    | 905    |
| UN46226 | Rsa1.0.00306.1 | 702  | 146760 | 1.00E-135 | 425 | 486 | 87 -  | 5   | 478  | 92285  | 92749  |
| UN46227 | Rsa1.0.01168.1 | 321  | 153765 | 6.00E-37  | 88  | 91  | 96 -  | 5   | 95   | 24243  | 24333  |
| UN46228 | Rsa1.0.01937.1 | 604  | 37147  | 1.00E-159 | 284 | 284 | 100 + | 321 | 604  | 14663  | 14946  |
| UN46229 | Rsa1.0.00516.1 | 582  | 78417  | 6.00E-60  | 124 | 126 | 98 -  | 335 | 460  | 12013  | 12138  |
| UN46230 | Rsa1.0.22803.1 | 983  | 1093   | 1.00E-109 | 207 | 209 | 99 -  | 775 | 983  | 260    | 468    |
| UN46231 | Rsa1.0.74778.1 | 636  | 307    | 1.00E-100 | 222 | 231 | 96 -  | 336 | 565  | 4      | 229    |
| UN46232 | Rsa1.0.02852.1 | 705  | 27287  | 0         | 659 | 693 | 95 +  | 10  | 699  | 15229  | 15908  |
| UN46233 | Rsa1.0.01220.1 | 940  | 161775 | 0         | 886 | 946 | 93 -  | 3   | 937  | 157459 | 158403 |
| UN46234 | Rsa1.0.01696.1 | 546  | 301850 | 1.00E-144 | 308 | 324 | 95 +  | 2   | 325  | 31621  | 31944  |
| UN46235 | Rsa1.0.00321.1 | 434  | 95671  | 5.00E-97  | 259 | 287 | 90 +  | 157 | 433  | 56950  | 57226  |
| UN46236 | Rsa1.0.00009.1 | 946  | 232558 | 1.00E-151 | 346 | 369 | 93 +  | 514 | 873  | 53021  | 53384  |
| UN46237 | Rsa1.0.00361.1 | 874  | 91181  | 0         | 533 | 540 | 98 +  | 2   | 541  | 24147  | 24683  |
| UN46238 | Rsa1.0.00646.1 | 831  | 70473  | 0         | 419 | 436 | 96 -  | 195 | 630  | 4443   | 4878   |
| UN46239 | Rsa1.0.00909.1 | 659  | 59976  | 1.00E-123 | 314 | 339 | 92 +  | 210 | 541  | 43852  | 44186  |
| UN46240 | Rsa1.0.00216.1 | 817  | 197563 | 5.00E-86  | 168 | 170 | 98 -  | 53  | 222  | 51876  | 52045  |
| UN46241 | Rsa1.0.08585.1 | 896  | 7157   | 2.00E-33  | 101 | 110 | 91 -  | 686 | 795  | 5466   | 5575   |
| UN46242 | Rsa1.0.01282.1 | 892  | 49304  | 0         | 458 | 476 | 96 -  | 37  | 512  | 11086  | 11561  |
| UN46243 | Rsa1.0.00134.1 | 1118 | 390219 | 9.00E-76  | 212 | 232 | 91 -  | 459 | 690  | 156787 | 157015 |
| UN46244 | Rsa1.0.00039.1 | 708  | 296927 | 4.00E-92  | 190 | 196 | 96 -  | 499 | 694  | 210893 | 211088 |
| UN46245 | Rsa1.0.18154.1 | 328  | 1655   | 1.00E-177 | 320 | 322 | 99 +  | 7   | 328  | 803    | 1124   |
| UN46246 | Rsa1.0.00002.1 | 703  | 601661 | 6.00E-82  | 223 | 244 | 91 -  | 455 | 688  | 18075  | 18318  |
| UN46247 | Rsa1.0.01180.1 | 726  | 51517  | 1.00E-103 | 231 | 243 | 95 -  | 446 | 687  | 30294  | 30531  |
| UN46248 | Rsa1.0.00585.1 | 885  | 74164  | 0         | 380 | 386 | 98 +  | 502 | 885  | 59736  | 60121  |
| UN46249 | Rsa1.0.00163.1 | 1191 | 116847 | 0         | 612 | 630 | 97 -  | 561 | 1190 | 7910   | 8536   |
| UN46250 | Rsa1.0.00001.1 | 715  | 363028 | 0         | 534 | 561 | 95 +  | 146 | 706  | 62099  | 62655  |
| UN46251 | Rsa1.0.00017.1 | 751  | 752458 | 1.00E-140 | 318 | 339 | 93 +  | 250 | 588  | 222799 | 223134 |
| UN46252 | Rsa1.0.00463.1 | 873  | 189177 | 2.00E-82  | 171 | 176 | 97 +  | 226 | 401  | 180605 | 180780 |

|         |                |      |        |           |      |      |      |     |      |        |        |
|---------|----------------|------|--------|-----------|------|------|------|-----|------|--------|--------|
| UN46253 | Rsa1.0.00144.1 | 353  | 120708 | 2.33E-156 | 341  | 363  | 93 - | 1   | 353  | 47346  | 47705  |
| UN46254 | Rsa1.0.04126.1 | 539  | 18939  | 0         | 500  | 545  | 91 - | 2   | 537  | 15349  | 15888  |
| UN46255 | Rsa1.0.00118.1 | 995  | 130637 | 0         | 473  | 492  | 96 - | 495 | 983  | 42576  | 43063  |
| UN46256 | Rsa1.0.00920.1 | 826  | 601703 | 1.00E-110 | 251  | 263  | 95 + | 2   | 262  | 448806 | 449067 |
| UN46257 | Rsa1.0.00139.1 | 1202 | 357786 | 0         | 1163 | 1206 | 96 + | 2   | 1200 | 270991 | 272196 |
| UN46258 | Rsa1.0.00066.1 | 487  | 152418 | 2.00E-93  | 195  | 202  | 96 - | 158 | 359  | 91810  | 92011  |
| UN46259 | Rsa1.0.01151.1 | 764  | 52268  | 0         | 424  | 449  | 94 + | 106 | 554  | 25331  | 25761  |
| UN46260 | Rsa1.0.00609.1 | 955  | 72785  | 0         | 498  | 505  | 98 - | 67  | 571  | 52619  | 53123  |
| UN46261 | Rsa1.0.03410.1 | 733  | 23147  | 0         | 519  | 556  | 93 + | 157 | 704  | 10247  | 10795  |
| UN46262 | Rsa1.0.01296.1 | 607  | 49035  | 1.00E-105 | 225  | 235  | 95 + | 53  | 283  | 5353   | 5587   |
| UN46263 | Rsa1.0.00246.1 | 845  | 103541 | 1.00E-110 | 214  | 218  | 98 - | 628 | 845  | 1111   | 1328   |
| UN46264 | Rsa1.0.04456.1 | 719  | 17260  | 4.00E-80  | 170  | 176  | 96 + | 467 | 642  | 7706   | 7881   |
| UN46265 | Rsa1.0.00240.1 | 909  | 104175 | 0         | 489  | 506  | 96 - | 408 | 909  | 48286  | 48791  |
| UN46266 | Rsa1.0.00163.1 | 920  | 116847 | 0         | 914  | 918  | 99 - | 3   | 920  | 15947  | 16864  |
| UN46267 | Rsa1.0.02373.1 | 606  | 32048  | 0         | 546  | 581  | 93 - | 33  | 602  | 8540   | 9119   |
| UN46268 | Rsa1.0.21759.1 | 860  | 1175   | 0         | 688  | 740  | 92 - | 126 | 860  | 135    | 868    |
| UN46269 | Rsa1.0.04513.1 | 704  | 17029  | 5.00E-61  | 336  | 410  | 81 + | 120 | 511  | 10433  | 10839  |
| UN46270 | Rsa1.0.01166.1 | 818  | 51877  | 1.00E-179 | 384  | 404  | 95 - | 428 | 817  | 41484  | 41886  |
| UN46271 | Rsa1.0.00033.1 | 761  | 515811 | 1.00E-157 | 350  | 369  | 94 - | 362 | 726  | 485242 | 485610 |
| UN46272 | Rsa1.0.00067.1 | 569  | 415055 | 0         | 560  | 568  | 98 + | 1   | 568  | 183012 | 183579 |
| UN46273 | Rsa1.0.38989.1 | 750  | 577    | 2.00E-54  | 115  | 117  | 98 - | 178 | 294  | 443    | 559    |
| UN46274 | Rsa1.0.06900.1 | 570  | 131268 | 1.00E-121 | 247  | 256  | 96 - | 158 | 413  | 623    | 878    |
| UN46275 | Rsa1.0.03890.1 | 968  | 20223  | 0         | 894  | 975  | 91 + | 3   | 968  | 1395   | 2344   |
| UN46276 | Rsa1.0.02103.1 | 994  | 35006  | 0         | 561  | 598  | 93 - | 403 | 994  | 13502  | 14094  |
| UN46277 | Rsa1.0.04905.1 | 771  | 15507  | 1.00E-127 | 259  | 267  | 97 - | 3   | 268  | 436    | 702    |
| UN46278 | Rsa1.0.00714.1 | 1081 | 67187  | 1.00E-84  | 248  | 277  | 89 + | 57  | 332  | 13175  | 13433  |
| UN46279 | Rsa1.0.00017.1 | 783  | 752458 | 1.00E-134 | 261  | 267  | 97 + | 376 | 642  | 272503 | 272769 |
| UN46280 | Rsa1.0.26595.1 | 859  | 885    | 2.00E-97  | 266  | 293  | 90 + | 6   | 298  | 301    | 592    |
| UN46281 | Rsa1.0.00557.1 | 850  | 75865  | 1.00E-176 | 323  | 326  | 99 - | 523 | 848  | 74482  | 74807  |
| UN46282 | Rsa1.0.02884.1 | 657  | 27034  | 0         | 422  | 435  | 97 + | 152 | 585  | 6764   | 7198   |
| UN46283 | Rsa1.0.14252.1 | 972  | 3615   | 0         | 469  | 500  | 93 - | 20  | 513  | 1887   | 2384   |
| UN46284 | Rsa1.0.00731.1 | 1005 | 66638  | 1.00E-130 | 270  | 277  | 97 + | 731 | 1005 | 12178  | 12453  |
| UN46285 | Rsa1.0.07555.1 | 938  | 9139   | 1.00E-105 | 206  | 210  | 98 - | 728 | 937  | 3234   | 3443   |
| UN46286 | Rsa1.0.05683.1 | 1207 | 12944  | 0         | 620  | 643  | 96 - | 3   | 645  | 4930   | 5554   |
| UN46287 | Rsa1.0.21867.1 | 989  | 1168   | 0         | 500  | 541  | 92 + | 462 | 989  | 1      | 530    |
| UN46288 | Rsa1.0.00322.1 | 752  | 212233 | 1.00E-143 | 282  | 290  | 97 + | 272 | 561  | 206966 | 207255 |
| UN46289 | Rsa1.0.00015.1 | 327  | 561803 | 1.00E-116 | 245  | 252  | 97 - | 78  | 327  | 211479 | 211729 |
| UN46290 | Rsa1.0.01696.1 | 879  | 301850 | 0         | 599  | 632  | 94 - | 216 | 840  | 159028 | 159651 |
| UN46291 | Rsa1.0.18032.1 | 657  | 1686   | 1.00E-108 | 205  | 207  | 99 + | 115 | 321  | 1291   | 1497   |

|         |                |      |        |           |     |      |       |     |      |        |        |
|---------|----------------|------|--------|-----------|-----|------|-------|-----|------|--------|--------|
| UN46292 | Rsa1.0.02349.1 | 948  | 32312  | 1.00E-160 | 379 | 411  | 92 -  | 29  | 427  | 26844  | 27248  |
| UN46293 | Rsa1.0.05163.1 | 661  | 14628  | 0         | 481 | 495  | 97 +  | 112 | 605  | 14134  | 14628  |
| UN46294 | Rsa1.0.00237.1 | 837  | 235974 | 1.00E-157 | 405 | 443  | 91 +  | 399 | 835  | 225556 | 225984 |
| UN46295 | Rsa1.0.00543.1 | 863  | 76788  | 0         | 608 | 665  | 91 +  | 226 | 861  | 35876  | 36535  |
| UN46296 | Rsa1.0.03334.1 | 732  | 23659  | 6.00E-82  | 167 | 171  | 97 +  | 3   | 173  | 18879  | 19049  |
| UN46297 | Rsa1.0.06194.1 | 1669 | 11516  | 0         | 561 | 566  | 99 +  | 83  | 648  | 5193   | 5758   |
| UN46298 | Rsa1.0.00305.1 | 452  | 97308  | 4.00E-39  | 95  | 99   | 95 -  | 68  | 166  | 94879  | 94977  |
| UN46299 | Rsa1.0.00226.1 | 899  | 105884 | 0         | 545 | 591  | 92 +  | 3   | 566  | 18304  | 18891  |
| UN46300 | Rsa1.0.15301.1 | 694  | 2703   | 1.00E-180 | 422 | 449  | 93 -  | 238 | 676  | 779    | 1224   |
| UN46301 | Rsa1.0.00190.1 | 764  | 318240 | 0         | 359 | 369  | 97 +  | 228 | 595  | 211050 | 211418 |
| UN46302 | Rsa1.0.00228.1 | 534  | 105511 | 0         | 450 | 467  | 96 -  | 67  | 533  | 13085  | 13545  |
| UN46303 | Rsa1.0.01233.1 | 940  | 50184  | 0         | 835 | 878  | 95 -  | 33  | 905  | 23496  | 24367  |
| UN46304 | Rsa1.0.22665.1 | 676  | 1104   | 0         | 423 | 444  | 95 -  | 2   | 445  | 361    | 803    |
| UN46305 | Rsa1.0.00248.1 | 887  | 163568 | 0         | 673 | 696  | 96 -  | 187 | 882  | 40143  | 40834  |
| UN46306 | Rsa1.0.02554.1 | 528  | 30187  | 2.00E-72  | 160 | 167  | 95 +  | 362 | 528  | 21157  | 21323  |
| UN46307 | Rsa1.0.00345.1 | 749  | 93226  | 1.00E-133 | 277 | 289  | 95 +  | 457 | 745  | 85769  | 86057  |
| UN46308 | Rsa1.0.09159.1 | 931  | 6599   | 1.00E-117 | 273 | 288  | 94 +  | 2   | 287  | 2355   | 2638   |
| UN46309 | Rsa1.0.02468.1 | 634  | 31122  | 0         | 510 | 542  | 94 -  | 104 | 632  | 28520  | 29061  |
| UN46310 | Rsa1.0.11822.1 | 647  | 5397   | 1.00E-178 | 371 | 388  | 95 +  | 262 | 647  | 4170   | 4553   |
| UN46311 | Rsa1.0.01874.1 | 1053 | 37853  | 0         | 927 | 964  | 96 +  | 102 | 1053 | 21170  | 22131  |
| UN46312 | Rsa1.0.01947.1 | 631  | 36977  | 1.00E-174 | 363 | 377  | 96 -  | 260 | 631  | 23187  | 23560  |
| UN46313 | Rsa1.0.00016.1 | 1239 | 831256 | 1.00E-162 | 311 | 318  | 97 +  | 657 | 974  | 429113 | 429430 |
| UN46314 | Rsa1.0.00478.1 | 682  | 81419  | 1.00E-101 | 203 | 208  | 97 +  | 372 | 579  | 28796  | 29003  |
| UN46315 | Rsa1.0.02355.1 | 681  | 32260  | 0         | 369 | 371  | 99 -  | 181 | 551  | 16686  | 17056  |
| UN46316 | Rsa1.0.00045.1 | 765  | 328694 | 1.00E-151 | 330 | 349  | 94 +  | 362 | 704  | 230197 | 230542 |
| UN46317 | Rsa1.0.00678.1 | 1166 | 193163 | 0         | 999 | 1016 | 98 -  | 154 | 1166 | 139224 | 140235 |
| UN46318 | Rsa1.0.01778.1 | 807  | 39509  | 2.00E-76  | 300 | 345  | 86 -  | 457 | 798  | 16191  | 16512  |
| UN46319 | Rsa1.0.03460.1 | 1440 | 22747  | 0         | 734 | 778  | 94 +  | 1   | 773  | 12128  | 12897  |
| UN46320 | Rsa1.0.00149.1 | 767  | 305196 | 0         | 704 | 755  | 93 +  | 23  | 765  | 103777 | 104515 |
| UN46321 | Rsa1.0.00131.1 | 1152 | 432233 | 1.00E-155 | 369 | 392  | 94 -  | 763 | 1149 | 423573 | 423955 |
| UN46322 | Rsa1.0.00752.1 | 624  | 65756  | 0         | 591 | 650  | 90 -  | 2   | 624  | 12816  | 13461  |
| UN46323 | Rsa1.0.00752.1 | 1310 | 65756  | 0         | 395 | 418  | 94 +  | 38  | 455  | 49490  | 49907  |
| UN46324 | Rsa1.0.06530.1 | 1012 | 10840  | 0         | 361 | 361  | 100 - | 652 | 1012 | 5598   | 5958   |
| UN46325 | Rsa1.0.02772.1 | 720  | 28047  | 0         | 503 | 509  | 98 -  | 3   | 511  | 24232  | 24739  |
| UN46326 | Rsa1.0.01768.1 | 628  | 138463 | 4.00E-83  | 157 | 157  | 100 + | 2   | 158  | 118862 | 119018 |
| UN46327 | Rsa1.0.00758.1 | 433  | 65477  | 1.00E-128 | 238 | 240  | 99 -  | 194 | 433  | 36597  | 36836  |
| UN46328 | Rsa1.0.00715.1 | 576  | 67116  | 0         | 513 | 572  | 89 +  | 6   | 576  | 63610  | 64163  |
| UN46329 | Rsa1.0.01519.1 | 610  | 44144  | 0         | 479 | 506  | 94 +  | 2   | 499  | 39398  | 39903  |
| UN46330 | Rsa1.0.00016.1 | 1167 | 831256 | 1.00E-121 | 306 | 332  | 92 +  | 8   | 337  | 370678 | 371003 |

|         |                |      |        |           |      |      |       |     |      |        |        |
|---------|----------------|------|--------|-----------|------|------|-------|-----|------|--------|--------|
| UN46331 | Rsa1.0.00082.1 | 828  | 237584 | 5.00E-95  | 186  | 189  | 98 +  | 529 | 717  | 133006 | 133194 |
| UN46332 | Rsa1.0.00098.1 | 729  | 349239 | 1.00E-158 | 286  | 287  | 99 +  | 372 | 658  | 230277 | 230563 |
| UN46333 | Rsa1.0.02001.1 | 690  | 36198  | 1.00E-100 | 218  | 227  | 96 +  | 465 | 690  | 32186  | 32408  |
| UN46334 | Rsa1.0.03853.1 | 778  | 20447  | 0         | 728  | 759  | 95 -  | 1   | 759  | 13200  | 13954  |
| UN46335 | Rsa1.0.00019.1 | 766  | 301669 | 0         | 702  | 724  | 96 +  | 44  | 766  | 237147 | 237869 |
| UN46336 | Rsa1.0.00028.1 | 738  | 293984 | 1.00E-150 | 351  | 373  | 94 +  | 368 | 738  | 259291 | 259655 |
| UN46337 | Rsa1.0.00409.1 | 367  | 146788 | 1.00E-120 | 224  | 226  | 99 +  | 142 | 367  | 87804  | 88029  |
| UN46338 | Rsa1.0.00026.1 | 766  | 327835 | 0         | 459  | 470  | 97 +  | 3   | 472  | 45493  | 45962  |
| UN46339 | Rsa1.0.00262.1 | 805  | 101906 | 0         | 527  | 535  | 98 -  | 271 | 805  | 94623  | 95156  |
| UN46340 | Rsa1.0.04288.1 | 588  | 18077  | 3.00E-83  | 244  | 266  | 91 +  | 330 | 588  | 13754  | 14017  |
| UN46341 | Rsa1.0.04977.1 | 837  | 15260  | 1.00E-95  | 190  | 194  | 97 +  | 196 | 389  | 5120   | 5313   |
| UN46342 | Rsa1.0.01977.1 | 460  | 36559  | 1.00E-111 | 233  | 243  | 95 +  | 128 | 370  | 23106  | 23348  |
| UN46343 | Rsa1.0.01236.1 | 742  | 50156  | 1.00E-123 | 291  | 308  | 94 +  | 435 | 740  | 1966   | 2271   |
| UN46344 | Rsa1.0.00716.1 | 475  | 67078  | 1.00E-82  | 172  | 176  | 97 +  | 271 | 445  | 46014  | 46189  |
| UN46345 | Rsa1.0.00196.1 | 978  | 109960 | 1.00E-100 | 198  | 202  | 98 +  | 113 | 314  | 72049  | 72250  |
| UN46346 | Rsa1.0.02356.1 | 587  | 141500 | 0         | 575  | 586  | 98 +  | 2   | 587  | 127902 | 128487 |
| UN46347 | Rsa1.0.01123.1 | 829  | 53359  | 1.00E-148 | 299  | 310  | 96 +  | 325 | 628  | 30869  | 31178  |
| UN46348 | Rsa1.0.00336.1 | 575  | 445051 | 1.00E-121 | 309  | 338  | 91 -  | 158 | 491  | 163120 | 163457 |
| UN46349 | Rsa1.0.00056.1 | 1317 | 332604 | 0         | 661  | 695  | 95 -  | 1   | 690  | 24496  | 25189  |
| UN46350 | Rsa1.0.01766.1 | 552  | 39617  | 0         | 524  | 535  | 97 -  | 21  | 552  | 34212  | 34746  |
| UN46351 | Rsa1.0.05162.1 | 733  | 14631  | 3.00E-47  | 124  | 132  | 93 +  | 3   | 132  | 697    | 828    |
| UN46352 | Rsa1.0.00211.1 | 1006 | 228189 | 0         | 560  | 603  | 92 +  | 3   | 605  | 179334 | 179912 |
| UN46353 | Rsa1.0.00684.1 | 610  | 141701 | 2.00E-87  | 231  | 255  | 90 +  | 366 | 610  | 135333 | 135587 |
| UN46354 | Rsa1.0.01068.1 | 694  | 55208  | 1.00E-150 | 276  | 277  | 99 +  | 419 | 694  | 9670   | 9946   |
| UN46355 | Rsa1.0.00050.1 | 728  | 237174 | 1.00E-149 | 282  | 286  | 98 +  | 421 | 704  | 19315  | 19600  |
| UN46356 | Rsa1.0.00134.1 | 874  | 390219 | 1.00E-132 | 261  | 268  | 97 +  | 57  | 324  | 230274 | 230541 |
| UN46357 | Rsa1.0.03981.1 | 480  | 19724  | 1.00E-118 | 231  | 236  | 97 +  | 111 | 346  | 17483  | 17718  |
| UN46358 | Rsa1.0.00759.1 | 356  | 65465  | 1.00E-151 | 329  | 349  | 94 -  | 1   | 338  | 64660  | 65008  |
| UN46359 | Rsa1.0.01101.1 | 686  | 54031  | 0         | 389  | 395  | 98 -  | 109 | 503  | 20468  | 20862  |
| UN46360 | Rsa1.0.02399.1 | 759  | 31763  | 1.00E-86  | 388  | 466  | 83 +  | 249 | 693  | 13016  | 13478  |
| UN46361 | Rsa1.0.05442.1 | 867  | 13741  | 0         | 416  | 439  | 94 +  | 429 | 867  | 1778   | 2200   |
| UN46362 | Rsa1.0.06312.1 | 525  | 11253  | 1.00E-149 | 366  | 393  | 93 +  | 137 | 523  | 1      | 392    |
| UN46363 | Rsa1.0.09388.1 | 684  | 6405   | 9.00E-41  | 110  | 118  | 93 +  | 393 | 510  | 3641   | 3758   |
| UN46364 | Rsa1.0.02593.1 | 474  | 29744  | 1.00E-63  | 124  | 124  | 100 - | 143 | 266  | 1807   | 1930   |
| UN46365 | Rsa1.0.29006.1 | 849  | 796    | 1.00E-166 | 324  | 333  | 97 -  | 356 | 688  | 1      | 333    |
| UN46366 | Rsa1.0.08429.1 | 767  | 7370   | 1.00E-117 | 240  | 246  | 97 -  | 518 | 761  | 5507   | 5752   |
| UN46367 | Rsa1.0.00078.1 | 796  | 175053 | 1.00E-147 | 298  | 309  | 96 +  | 238 | 546  | 47230  | 47538  |
| UN46368 | Rsa1.0.17370.1 | 1109 | 1847   | 0         | 1080 | 1080 | 100 - | 3   | 1082 | 363    | 1442   |
| UN46369 | Rsa1.0.00869.1 | 596  | 61627  | 1.00E-109 | 222  | 229  | 96 -  | 297 | 525  | 53994  | 54222  |

|         |                |      |        |           |     |     |       |     |     |        |        |
|---------|----------------|------|--------|-----------|-----|-----|-------|-----|-----|--------|--------|
| UN46370 | Rsa1.0.01635.1 | 607  | 41865  | 4.00E-95  | 214 | 226 | 94 -  | 182 | 407 | 15877  | 16098  |
| UN46371 | Rsa1.0.00023.1 | 879  | 194764 | 1.00E-157 | 281 | 281 | 100 + | 597 | 877 | 189949 | 190229 |
| UN46372 | Rsa1.0.02488.1 | 550  | 30913  | 9.00E-93  | 176 | 177 | 99 -  | 52  | 228 | 28741  | 28917  |
| UN46373 | Rsa1.0.00100.1 | 598  | 249232 | 1.00E-180 | 445 | 484 | 91 -  | 119 | 598 | 221770 | 222245 |
| UN46374 | Rsa1.0.03662.1 | 469  | 21492  | 3.00E-92  | 187 | 192 | 97 +  | 215 | 406 | 11528  | 11719  |
| UN46375 | Rsa1.0.05984.1 | 1013 | 12031  | 1.00E-179 | 384 | 401 | 95 -  | 588 | 982 | 2551   | 2947   |
| UN46376 | Rsa1.0.00093.1 | 826  | 214962 | 0         | 517 | 554 | 93 -  | 291 | 826 | 11264  | 11812  |
| UN46377 | Rsa1.0.00010.1 | 630  | 294827 | 1.00E-116 | 258 | 271 | 95 -  | 2   | 269 | 90921  | 91190  |
| UN46378 | Rsa1.0.00138.1 | 651  | 247040 | 1.00E-156 | 308 | 315 | 97 -  | 340 | 651 | 61967  | 62281  |
| UN46379 | Rsa1.0.00935.1 | 287  | 59079  | 1.00E-108 | 215 | 219 | 98 +  | 69  | 287 | 23754  | 23971  |
| UN46380 | Rsa1.0.02663.1 | 746  | 169243 | 0         | 438 | 445 | 98 +  | 303 | 746 | 7957   | 8401   |
| UN46381 | Rsa1.0.01073.1 | 802  | 55030  | 4.00E-68  | 186 | 204 | 91 -  | 243 | 446 | 34236  | 34439  |
| UN46382 | Rsa1.0.00159.1 | 575  | 431686 | 0         | 551 | 578 | 95 -  | 1   | 575 | 240926 | 241497 |
| UN46383 | Rsa1.0.04535.1 | 783  | 136600 | 1.00E-170 | 337 | 347 | 97 +  | 3   | 348 | 125112 | 125458 |
| UN46384 | Rsa1.0.05611.1 | 874  | 13193  | 0         | 462 | 483 | 95 -  | 392 | 874 | 9304   | 9785   |
| UN46385 | Rsa1.0.00636.1 | 825  | 71113  | 1.00E-132 | 242 | 243 | 99 -  | 3   | 245 | 12995  | 13237  |
| UN46386 | Rsa1.0.03294.1 | 979  | 23971  | 0         | 455 | 462 | 98 -  | 518 | 979 | 5095   | 5556   |
| UN46387 | Rsa1.0.04172.1 | 1031 | 18679  | 1.00E-25  | 88  | 97  | 90 +  | 406 | 502 | 10487  | 10583  |
| UN46388 | Rsa1.0.01888.1 | 413  | 37563  | 1.00E-131 | 320 | 345 | 92 -  | 3   | 344 | 7890   | 8234   |
| UN46389 | Rsa1.0.00179.1 | 915  | 393324 | 0         | 907 | 914 | 99 -  | 3   | 913 | 373862 | 374775 |
| UN46390 | Rsa1.0.00214.1 | 402  | 107508 | 0         | 399 | 409 | 97 +  | 2   | 402 | 6516   | 6924   |
| UN46391 | Rsa1.0.00285.1 | 1164 | 149638 | 0         | 873 | 915 | 95 -  | 2   | 913 | 86554  | 87465  |
| UN46392 | Rsa1.0.00714.1 | 646  | 67187  | 0         | 624 | 664 | 93 +  | 3   | 638 | 59823  | 60486  |
| UN46393 | Rsa1.0.00583.1 | 727  | 74309  | 1.00E-174 | 330 | 336 | 98 -  | 123 | 456 | 71950  | 72285  |
| UN46394 | Rsa1.0.00387.1 | 985  | 495407 | 0         | 896 | 933 | 96 -  | 53  | 985 | 341925 | 342845 |
| UN46395 | Rsa1.0.00079.1 | 930  | 606987 | 0         | 496 | 535 | 92 +  | 3   | 525 | 488364 | 488895 |
| UN46396 | Rsa1.0.03613.1 | 730  | 21773  | 1.00E-101 | 247 | 266 | 92 -  | 1   | 266 | 17738  | 17995  |
| UN46397 | Rsa1.0.00211.1 | 1012 | 228189 | 0         | 956 | 996 | 95 +  | 2   | 994 | 155434 | 156424 |
| UN46398 | Rsa1.0.02393.1 | 925  | 31795  | 1.00E-177 | 520 | 584 | 89 +  | 3   | 580 | 26000  | 26577  |
| UN46399 | Rsa1.0.03955.1 | 698  | 19884  | 6.00E-79  | 282 | 323 | 87 -  | 396 | 698 | 5810   | 6126   |
| UN46400 | Rsa1.0.00848.1 | 958  | 152362 | 0         | 459 | 489 | 93 -  | 472 | 958 | 57384  | 57865  |
| UN46401 | Rsa1.0.00131.1 | 510  | 432233 | 4.00E-79  | 248 | 280 | 88 -  | 252 | 510 | 77337  | 77614  |
| UN46402 | Rsa1.0.00251.1 | 739  | 303968 | 3.00E-99  | 230 | 246 | 93 -  | 505 | 739 | 148043 | 148287 |
| UN46403 | Rsa1.0.00297.1 | 1100 | 97836  | 1.00E-141 | 314 | 334 | 94 +  | 107 | 440 | 26401  | 26734  |
| UN46404 | Rsa1.0.06213.1 | 828  | 11478  | 1.00E-170 | 349 | 362 | 96 -  | 3   | 362 | 1640   | 2000   |
| UN46405 | Rsa1.0.00321.1 | 401  | 95671  | 8.00E-80  | 224 | 250 | 89 +  | 160 | 399 | 56950  | 57189  |
| UN46406 | Rsa1.0.01221.1 | 754  | 50421  | 1.00E-150 | 371 | 400 | 92 -  | 365 | 753 | 10791  | 11186  |
| UN46407 | Rsa1.0.03600.1 | 806  | 21857  | 1.00E-165 | 404 | 446 | 90 +  | 391 | 804 | 2130   | 2575   |
| UN46408 | Rsa1.0.00375.1 | 759  | 90207  | 1.00E-120 | 273 | 286 | 95 +  | 478 | 757 | 34140  | 34421  |



|         |                |      |        |           |      |      |       |     |      |        |        |
|---------|----------------|------|--------|-----------|------|------|-------|-----|------|--------|--------|
| UN46409 | Rsa1.0.00708.1 | 714  | 67366  | 0         | 667  | 701  | 95 -  | 18  | 714  | 53329  | 54023  |
| UN46410 | Rsa1.0.03225.1 | 925  | 24500  | 0         | 814  | 866  | 93 +  | 41  | 906  | 18747  | 19594  |
| UN46411 | Rsa1.0.06168.1 | 828  | 11580  | 1.00E-136 | 392  | 438  | 89 +  | 411 | 828  | 8500   | 8925   |
| UN46412 | Rsa1.0.08203.1 | 836  | 7742   | 1.00E-113 | 217  | 220  | 98 -  | 385 | 604  | 6099   | 6318   |
| UN46413 | Rsa1.0.05782.1 | 700  | 12646  | 1.00E-128 | 233  | 233  | 100 + | 468 | 700  | 9159   | 9391   |
| UN46414 | Rsa1.0.01997.1 | 737  | 158416 | 0         | 385  | 397  | 96 +  | 347 | 735  | 1881   | 2277   |
| UN46415 | Rsa1.0.00070.1 | 738  | 150321 | 0         | 479  | 526  | 91 +  | 51  | 567  | 36985  | 37507  |
| UN46416 | Rsa1.0.00205.1 | 552  | 193401 | 1.00E-64  | 138  | 141  | 97 -  | 277 | 417  | 79497  | 79635  |
| UN46417 | Rsa1.0.03149.1 | 691  | 24983  | 1.00E-177 | 315  | 315  | 100 - | 3   | 317  | 15975  | 16289  |
| UN46418 | Rsa1.0.00030.1 | 606  | 250988 | 1.00E-124 | 247  | 254  | 97 +  | 134 | 387  | 152706 | 152959 |
| UN46419 | Rsa1.0.00150.1 | 866  | 154416 | 0         | 468  | 486  | 96 -  | 3   | 487  | 60159  | 60641  |
| UN46420 | Rsa1.0.02234.1 | 223  | 33618  | 8.00E-20  | 60   | 62   | 96 -  | 6   | 66   | 4387   | 4448   |
| UN46421 | Rsa1.0.00039.1 | 659  | 296927 | 0         | 505  | 535  | 94 +  | 124 | 657  | 206911 | 207435 |
| UN46422 | Rsa1.0.00409.1 | 641  | 146788 | 0         | 466  | 466  | 100 + | 1   | 466  | 90319  | 90784  |
| UN46423 | Rsa1.0.01674.1 | 762  | 168300 | 0         | 542  | 550  | 98 +  | 215 | 762  | 19673  | 20222  |
| UN46424 | Rsa1.0.00736.1 | 825  | 66455  | 0         | 344  | 351  | 98 +  | 309 | 659  | 6494   | 6844   |
| UN46425 | Rsa1.0.01148.1 | 771  | 52375  | 0         | 753  | 781  | 96 -  | 2   | 771  | 34830  | 35607  |
| UN46426 | Rsa1.0.00480.1 | 810  | 81325  | 0         | 405  | 416  | 97 +  | 3   | 418  | 3549   | 3964   |
| UN46427 | Rsa1.0.00729.1 | 832  | 66690  | 1.00E-164 | 311  | 317  | 98 +  | 3   | 319  | 55930  | 56246  |
| UN46428 | Rsa1.0.02032.1 | 486  | 35830  | 1.00E-148 | 334  | 354  | 94 +  | 133 | 485  | 3825   | 4177   |
| UN46429 | Rsa1.0.09548.1 | 648  | 6295   | 1.00E-137 | 287  | 300  | 95 -  | 1   | 300  | 4391   | 4690   |
| UN46430 | Rsa1.0.00197.1 | 612  | 109714 | 1.00E-169 | 368  | 385  | 95 -  | 50  | 434  | 94811  | 95190  |
| UN46431 | Rsa1.0.00339.1 | 761  | 222974 | 1.00E-169 | 320  | 326  | 98 +  | 160 | 485  | 65177  | 65502  |
| UN46432 | Rsa1.0.00179.1 | 766  | 393324 | 1.00E-119 | 226  | 229  | 98 +  | 537 | 765  | 205617 | 205845 |
| UN46433 | Rsa1.0.01305.1 | 314  | 48730  | 5.00E-62  | 121  | 121  | 100 - | 2   | 122  | 12106  | 12226  |
| UN46434 | Rsa1.0.00092.1 | 345  | 659932 | 2.00E-46  | 104  | 107  | 97 -  | 57  | 163  | 190625 | 190731 |
| UN46435 | Rsa1.0.00300.1 | 324  | 97747  | 1.00E-138 | 305  | 320  | 95 +  | 6   | 322  | 31819  | 32138  |
| UN46436 | Rsa1.0.01883.1 | 1017 | 37661  | 0         | 368  | 375  | 98 +  | 2   | 375  | 21388  | 21759  |
| UN46437 | Rsa1.0.04651.1 | 919  | 16516  | 1.00E-123 | 258  | 269  | 95 -  | 649 | 917  | 9268   | 9536   |
| UN46438 | Rsa1.0.03781.1 | 717  | 20891  | 0         | 436  | 461  | 94 -  | 260 | 712  | 5104   | 5562   |
| UN46439 | Rsa1.0.03981.1 | 472  | 19724  | 7.00E-93  | 221  | 237  | 93 +  | 102 | 338  | 17481  | 17717  |
| UN46440 | Rsa1.0.05918.1 | 1003 | 12244  | 0         | 1001 | 1002 | 99 -  | 2   | 1003 | 8666   | 9667   |
| UN46441 | Rsa1.0.00487.1 | 688  | 80674  | 3.00E-96  | 179  | 179  | 100 - | 201 | 379  | 65469  | 65647  |
| UN46442 | Rsa1.0.33576.1 | 657  | 675    | 0         | 395  | 414  | 95 -  | 2   | 415  | 1      | 408    |
| UN46443 | Rsa1.0.01512.1 | 844  | 44234  | 1.00E-175 | 325  | 329  | 98 -  | 519 | 844  | 31345  | 31673  |
| UN46444 | Rsa1.0.00335.1 | 433  | 94371  | 0         | 351  | 361  | 97 +  | 71  | 431  | 50290  | 50650  |
| UN46445 | Rsa1.0.00016.1 | 525  | 831256 | 1.00E-179 | 463  | 502  | 92 -  | 33  | 525  | 267929 | 268417 |
| UN46446 | Rsa1.0.02245.1 | 721  | 33478  | 1.00E-161 | 384  | 411  | 93 -  | 307 | 715  | 6318   | 6725   |
| UN46447 | Rsa1.0.33333.1 | 667  | 681    | 0         | 572  | 616  | 92 +  | 23  | 632  | 76     | 681    |

|         |                |      |        |           |     |     |       |     |      |        |        |
|---------|----------------|------|--------|-----------|-----|-----|-------|-----|------|--------|--------|
| UN46448 | Rsa1.0_04153.1 | 551  | 18807  | 1.00E-170 | 320 | 326 | 98 +  | 226 | 551  | 16104  | 16429  |
| UN46449 | Rsa1.0_00540.1 | 949  | 76895  | 1.00E-168 | 303 | 304 | 99 -  | 646 | 949  | 20508  | 20811  |
| UN46450 | Rsa1.0_00069.1 | 640  | 403561 | 0         | 399 | 404 | 98 -  | 204 | 607  | 262859 | 263262 |
| UN46451 | Rsa1.0_00896.1 | 792  | 60509  | 0         | 364 | 366 | 99 -  | 428 | 792  | 19952  | 20317  |
| UN46452 | Rsa1.0_03925.1 | 680  | 20025  | 1.00E-132 | 331 | 357 | 92 +  | 330 | 680  | 3816   | 4156   |
| UN46453 | Rsa1.0_02756.1 | 563  | 28202  | 1.00E-139 | 307 | 325 | 94 -  | 5   | 326  | 23023  | 23347  |
| UN46454 | Rsa1.0_01454.1 | 454  | 45440  | 1.00E-136 | 313 | 334 | 93 +  | 123 | 446  | 12955  | 13288  |
| UN46455 | Rsa1.0_06179.1 | 660  | 11548  | 0         | 492 | 515 | 95 -  | 133 | 647  | 8510   | 9006   |
| UN46456 | Rsa1.0_00412.1 | 623  | 86935  | 0         | 601 | 622 | 96 -  | 3   | 623  | 34488  | 35106  |
| UN46457 | Rsa1.0_00720.1 | 516  | 66931  | 1.00E-85  | 184 | 189 | 97 -  | 267 | 453  | 18555  | 18743  |
| UN46458 | Rsa1.0_01355.1 | 364  | 47303  | 2.00E-98  | 208 | 214 | 97 -  | 142 | 353  | 41387  | 41600  |
| UN46459 | Rsa1.0_00017.1 | 507  | 752458 | 1.00E-158 | 343 | 360 | 95 +  | 142 | 501  | 539126 | 539479 |
| UN46460 | Rsa1.0_03711.1 | 295  | 21237  | 1.00E-87  | 189 | 196 | 96 +  | 97  | 292  | 10384  | 10578  |
| UN46461 | Rsa1.0_04403.1 | 826  | 17511  | 0         | 417 | 422 | 98 -  | 405 | 826  | 3307   | 3728   |
| UN46462 | Rsa1.0_01152.1 | 816  | 52264  | 8.00E-94  | 238 | 259 | 91 -  | 431 | 685  | 42726  | 42973  |
| UN46463 | Rsa1.0_16671.1 | 1087 | 2070   | 0         | 921 | 939 | 98 +  | 149 | 1087 | 3      | 938    |
| UN46464 | Rsa1.0_02593.1 | 557  | 29744  | 9.00E-59  | 122 | 124 | 98 -  | 161 | 284  | 1807   | 1930   |
| UN46465 | Rsa1.0_02812.1 | 1010 | 27660  | 1.00E-156 | 282 | 283 | 99 -  | 720 | 1002 | 14297  | 14579  |
| UN46466 | Rsa1.0_04340.1 | 808  | 17831  | 1.00E-150 | 327 | 345 | 94 +  | 466 | 808  | 16410  | 16750  |
| UN46467 | Rsa1.0_00104.1 | 987  | 368722 | 3.00E-94  | 239 | 260 | 91 +  | 566 | 825  | 201374 | 201633 |
| UN46468 | Rsa1.0_18748.1 | 691  | 1541   | 1.00E-154 | 298 | 305 | 97 -  | 88  | 392  | 230    | 534    |
| UN46469 | Rsa1.0_19592.1 | 628  | 1410   | 1.00E-135 | 269 | 276 | 97 -  | 197 | 471  | 101    | 376    |
| UN46470 | Rsa1.0_00038.1 | 1042 | 314568 | 0         | 734 | 734 | 100 - | 97  | 830  | 249021 | 249754 |
| UN46471 | Rsa1.0_01843.1 | 734  | 265131 | 1.00E-141 | 295 | 308 | 95 +  | 97  | 404  | 9831   | 10135  |
| UN46472 | Rsa1.0_00476.1 | 681  | 280966 | 1.00E-139 | 311 | 326 | 95 -  | 308 | 632  | 31715  | 32036  |
| UN46473 | Rsa1.0_00648.1 | 497  | 70351  | 1.00E-122 | 288 | 307 | 93 -  | 202 | 497  | 10049  | 10354  |
| UN46474 | Rsa1.0_05594.1 | 560  | 13229  | 1.00E-149 | 311 | 323 | 96 +  | 240 | 560  | 664    | 985    |
| UN46475 | Rsa1.0_00161.1 | 652  | 116891 | 0         | 648 | 651 | 99 +  | 2   | 652  | 55301  | 55951  |
| UN46476 | Rsa1.0_01123.1 | 691  | 53359  | 0         | 355 | 360 | 98 -  | 326 | 685  | 3266   | 3625   |
| UN46477 | #              | #    | #      | #         | #   | #   | #     | #   | #    | #      | #      |
| UN46478 | Rsa1.0_01059.1 | 521  | 55410  | 1.00E-171 | 451 | 501 | 90 +  | 3   | 503  | 36195  | 36686  |
| UN46479 | Rsa1.0_00399.1 | 701  | 242951 | 1.00E-149 | 315 | 331 | 95 +  | 22  | 352  | 226460 | 226790 |
| UN46480 | Rsa1.0_01318.1 | 826  | 48275  | 1.00E-113 | 213 | 215 | 99 +  | 612 | 826  | 4290   | 4504   |
| UN46481 | Rsa1.0_00336.1 | 740  | 445051 | 5.00E-64  | 128 | 129 | 99 +  | 202 | 330  | 305579 | 305707 |
| UN46482 | Rsa1.0_00093.1 | 1130 | 214962 | 0         | 450 | 468 | 96 -  | 612 | 1072 | 95861  | 96328  |
| UN46483 | Rsa1.0_00350.1 | 752  | 92346  | 0         | 440 | 455 | 96 +  | 299 | 752  | 51776  | 52227  |
| UN46484 | Rsa1.0_02586.1 | 1040 | 29856  | 1.00E-148 | 278 | 282 | 98 -  | 340 | 621  | 8030   | 8311   |
| UN46485 | Rsa1.0_02625.1 | 696  | 139104 | 1.00E-101 | 207 | 212 | 97 -  | 2   | 213  | 24065  | 24275  |
| UN46486 | Rsa1.0_00413.1 | 953  | 86921  | 0         | 732 | 778 | 94 -  | 184 | 953  | 76239  | 77006  |

|         |                |      |        |           |     |     |       |     |      |        |        |
|---------|----------------|------|--------|-----------|-----|-----|-------|-----|------|--------|--------|
| UN46487 | Rsa1.0.00453.1 | 1013 | 83031  | 6.00E-80  | 164 | 168 | 97 -  | 194 | 361  | 70878  | 71045  |
| UN46488 | Rsa1.0.01146.1 | 969  | 163455 | 0         | 937 | 967 | 96 -  | 3   | 969  | 26517  | 27483  |
| UN46489 | Rsa1.0.33873.1 | 967  | 669    | 0         | 658 | 658 | 100 + | 310 | 967  | 1      | 658    |
| UN46490 | Rsa1.0.10978.1 | 1028 | 5657   | 0         | 477 | 481 | 99 -  | 548 | 1028 | 593    | 1073   |
| UN46491 | Rsa1.0.00015.1 | 699  | 561803 | 8.00E-69  | 268 | 313 | 85 -  | 99  | 411  | 223204 | 223516 |
| UN46492 | Rsa1.0.00822.1 | 585  | 62891  | 1.00E-127 | 261 | 269 | 97 +  | 317 | 585  | 47514  | 47778  |
| UN46493 | Rsa1.0.06125.1 | 872  | 11680  | 1.00E-25  | 156 | 183 | 85 -  | 694 | 872  | 3542   | 3722   |
| UN46494 | Rsa1.0.00601.1 | 430  | 177045 | 2.00E-84  | 168 | 171 | 98 -  | 66  | 236  | 27079  | 27249  |
| UN46495 | Rsa1.0.00734.1 | 969  | 66508  | 0         | 938 | 978 | 95 +  | 3   | 969  | 27948  | 28905  |
| UN46496 | Rsa1.0.00191.1 | 661  | 316976 | 1.00E-113 | 273 | 296 | 92 +  | 8   | 303  | 140976 | 141262 |
| UN46497 | Rsa1.0.02319.1 | 564  | 32580  | 1.00E-104 | 245 | 258 | 94 -  | 302 | 548  | 6485   | 6741   |
| UN46498 | Rsa1.0.00198.1 | 1182 | 222963 | 1.00E-171 | 332 | 341 | 97 +  | 1   | 341  | 125227 | 125567 |
| UN46499 | Rsa1.0.00508.1 | 505  | 194352 | 1.00E-151 | 295 | 303 | 97 +  | 194 | 496  | 184654 | 184956 |
| UN46500 | Rsa1.0.02810.1 | 860  | 27671  | 0         | 569 | 570 | 99 -  | 138 | 707  | 21496  | 22065  |
| UN46501 | Rsa1.0.01101.1 | 1163 | 54031  | 6.00E-80  | 169 | 172 | 98 +  | 3   | 173  | 40410  | 40580  |
| UN46502 | Rsa1.0.02930.1 | 671  | 26668  | 0         | 664 | 670 | 99 +  | 2   | 671  | 15632  | 16301  |
| UN46503 | Rsa1.0.00155.1 | 751  | 118465 | 1.00E-140 | 323 | 343 | 94 +  | 403 | 743  | 96670  | 97004  |
| UN46504 | Rsa1.0.00614.1 | 511  | 72276  | 1.00E-103 | 200 | 202 | 99 -  | 310 | 511  | 26606  | 26806  |
| UN46505 | Rsa1.0.02805.1 | 710  | 27698  | 0         | 466 | 481 | 96 +  | 230 | 710  | 12893  | 13372  |
| UN46506 | Rsa1.0.00009.1 | 948  | 232558 | 1.00E-165 | 331 | 343 | 96 -  | 603 | 945  | 146459 | 146801 |
| UN46507 | Rsa1.0.00152.1 | 928  | 257730 | 0         | 587 | 650 | 90 -  | 282 | 923  | 75874  | 76505  |
| UN46508 | Rsa1.0.13610.1 | 960  | 4644   | 0         | 428 | 452 | 94 +  | 518 | 960  | 3065   | 3516   |
| UN46509 | Rsa1.0.00153.1 | 573  | 192931 | 1.00E-166 | 345 | 356 | 96 -  | 216 | 571  | 192189 | 192540 |
| UN46510 | Rsa1.0.00181.1 | 479  | 114269 | 0         | 332 | 333 | 99 +  | 147 | 479  | 66365  | 66697  |
| UN46511 | Rsa1.0.03469.1 | 1015 | 22681  | 2.00E-79  | 330 | 393 | 83 -  | 282 | 644  | 4085   | 4477   |
| UN46512 | Rsa1.0.00113.1 | 353  | 131574 | 4.00E-72  | 150 | 153 | 98 +  | 191 | 343  | 60568  | 60718  |
| UN46513 | Rsa1.0.00747.1 | 919  | 66030  | 0         | 422 | 438 | 96 +  | 481 | 917  | 21199  | 21634  |
| UN46514 | Rsa1.0.02593.1 | 697  | 29744  | 1.00E-140 | 253 | 253 | 100 - | 445 | 697  | 2912   | 3164   |
| UN46515 | Rsa1.0.00140.1 | 653  | 121541 | 1.00E-132 | 292 | 307 | 95 +  | 17  | 323  | 21991  | 22295  |
| UN46516 | Rsa1.0.00251.1 | 607  | 303968 | 0         | 380 | 380 | 100 + | 228 | 607  | 128883 | 129262 |
| UN46517 | Rsa1.0.02198.1 | 819  | 33989  | 0         | 417 | 431 | 96 +  | 389 | 819  | 16350  | 16778  |
| UN46518 | Rsa1.0.00178.1 | 1061 | 114861 | 1.00E-150 | 282 | 286 | 98 -  | 776 | 1061 | 84684  | 84969  |
| UN46519 | Rsa1.0.08386.1 | 666  | 7438   | 0         | 664 | 666 | 99 +  | 1   | 666  | 236    | 901    |
| UN46520 | Rsa1.0.00734.1 | 610  | 66508  | 0         | 581 | 622 | 93 -  | 3   | 608  | 7368   | 7983   |
| UN46521 | Rsa1.0.06113.1 | 613  | 11721  | 0         | 507 | 536 | 94 +  | 2   | 529  | 11185  | 11720  |
| UN46522 | Rsa1.0.00007.1 | 766  | 239325 | 0         | 712 | 747 | 95 +  | 2   | 748  | 224903 | 225639 |
| UN46523 | Rsa1.0.04254.1 | 325  | 18258  | 1.00E-78  | 195 | 207 | 94 -  | 119 | 321  | 5187   | 5392   |
| UN46524 | Rsa1.0.00109.1 | 927  | 132735 | 0         | 419 | 426 | 98 -  | 502 | 927  | 52344  | 52765  |
| UN46525 | Rsa1.0.01144.1 | 988  | 52431  | 2.00E-17  | 65  | 71  | 91 +  | 496 | 566  | 40196  | 40266  |

|         |                |      |        |           |      |      |       |     |      |        |        |
|---------|----------------|------|--------|-----------|------|------|-------|-----|------|--------|--------|
| UN46526 | Rsa1.0_10795.1 | 926  | 5718   | 0         | 463  | 471  | 98 -  | 2   | 471  | 481    | 951    |
| UN46527 | Rsa1.0_01515.1 | 593  | 170864 | 0         | 553  | 590  | 93 -  | 4   | 593  | 136037 | 136623 |
| UN46528 | Rsa1.0_00005.1 | 510  | 353093 | 1.00E-104 | 195  | 196  | 99 -  | 315 | 510  | 311824 | 312019 |
| UN46529 | Rsa1.0_05648.1 | 760  | 13049  | 1.00E-122 | 246  | 253  | 97 +  | 507 | 757  | 2285   | 2537   |
| UN46530 | Rsa1.0_00896.1 | 453  | 60509  | 3.00E-83  | 163  | 165  | 98 +  | 3   | 167  | 51281  | 51445  |
| UN46531 | Rsa1.0_02917.1 | 700  | 159058 | 0         | 369  | 379  | 97 -  | 321 | 699  | 144051 | 144429 |
| UN46532 | Rsa1.0_00582.1 | 779  | 74333  | 1.00E-180 | 357  | 368  | 97 +  | 3   | 370  | 4727   | 5089   |
| UN46533 | Rsa1.0_04066.1 | 642  | 19262  | 0         | 392  | 402  | 97 +  | 3   | 404  | 3128   | 3527   |
| UN46534 | Rsa1.0_00107.1 | 822  | 431659 | 8.00E-94  | 230  | 246  | 93 -  | 2   | 242  | 255374 | 255611 |
| UN46535 | Rsa1.0_01749.1 | 520  | 39822  | 0         | 483  | 516  | 93 -  | 5   | 519  | 30391  | 30889  |
| UN46536 | Rsa1.0_01836.1 | 1414 | 38503  | 0         | 1116 | 1153 | 96 +  | 1   | 1148 | 17888  | 19040  |
| UN46537 | Rsa1.0_02766.1 | 725  | 28128  | 0         | 438  | 462  | 94 +  | 216 | 677  | 17310  | 17769  |
| UN46538 | Rsa1.0_04600.1 | 955  | 16694  | 1.00E-150 | 335  | 354  | 94 +  | 602 | 953  | 12273  | 12626  |
| UN46539 | Rsa1.0_06488.1 | 695  | 141774 | 0         | 364  | 364  | 100 + | 3   | 366  | 1025   | 1388   |
| UN46540 | Rsa1.0_00788.1 | 608  | 64237  | 1.00E-143 | 310  | 324  | 95 +  | 287 | 607  | 23433  | 23754  |
| UN46541 | Rsa1.0_00469.1 | 697  | 82084  | 0         | 587  | 612  | 95 -  | 89  | 697  | 52213  | 52819  |
| UN46542 | Rsa1.0_16818.1 | 508  | 2024   | 5.00E-91  | 340  | 398  | 85 +  | 135 | 501  | 1260   | 1654   |
| UN46543 | Rsa1.0_00016.1 | 736  | 831256 | 0         | 715  | 742  | 96 +  | 3   | 734  | 505359 | 506096 |
| UN46544 | Rsa1.0_01653.1 | 846  | 41536  | 0         | 641  | 643  | 99 +  | 204 | 846  | 18134  | 18776  |
| UN46545 | Rsa1.0_00037.1 | 795  | 307838 | 1.00E-107 | 294  | 322  | 91 -  | 463 | 779  | 266991 | 267309 |
| UN46546 | Rsa1.0_00048.1 | 600  | 167185 | 0         | 371  | 377  | 98 -  | 224 | 600  | 144446 | 144821 |
| UN46547 | Rsa1.0_00067.1 | 1065 | 415055 | 1.00E-158 | 302  | 307  | 98 -  | 5   | 310  | 233891 | 234197 |
| UN46548 | Rsa1.0_00233.1 | 875  | 104918 | 0         | 454  | 493  | 92 +  | 70  | 557  | 53106  | 53586  |
| UN46549 | Rsa1.0_05766.1 | 733  | 12708  | 0         | 494  | 507  | 97 +  | 141 | 647  | 3550   | 4056   |
| UN46550 | Rsa1.0_08211.1 | 739  | 7714   | 0         | 344  | 352  | 97 +  | 387 | 738  | 1995   | 2340   |
| UN46551 | Rsa1.0_00179.1 | 742  | 393324 | 1.00E-113 | 225  | 231  | 97 -  | 266 | 496  | 200646 | 200876 |
| UN46552 | Rsa1.0_04095.1 | 671  | 19095  | 0         | 387  | 390  | 99 -  | 282 | 671  | 6583   | 6971   |
| UN46553 | Rsa1.0_26211.1 | 654  | 901    | 1.00E-89  | 199  | 208  | 95 +  | 402 | 605  | 696    | 901    |
| UN46554 | Rsa1.0_01438.1 | 573  | 45882  | 0         | 351  | 355  | 98 +  | 1   | 355  | 32839  | 33193  |
| UN46555 | Rsa1.0_16137.1 | 753  | 2269   | 1.00E-122 | 237  | 242  | 97 -  | 512 | 753  | 621    | 862    |
| UN46556 | Rsa1.0_06663.1 | 761  | 10576  | 0         | 339  | 339  | 100 - | 123 | 461  | 7952   | 8290   |
| UN46557 | Rsa1.0_01180.1 | 638  | 51517  | 0         | 475  | 480  | 98 +  | 3   | 482  | 10116  | 10595  |
| UN46558 | Rsa1.0_15301.1 | 592  | 2703   | 0         | 397  | 419  | 94 -  | 177 | 589  | 813    | 1227   |
| UN46559 | Rsa1.0_13633.1 | 1064 | 4605   | 1.00E-169 | 430  | 469  | 91 +  | 3   | 465  | 1143   | 1604   |
| UN46560 | Rsa1.0_00923.1 | 637  | 153678 | 1.00E-107 | 200  | 201  | 99 +  | 337 | 537  | 21102  | 21302  |
| UN46561 | Rsa1.0_14712.1 | 833  | 3134   | 1.00E-125 | 305  | 328  | 92 -  | 507 | 832  | 1557   | 1869   |
| UN46562 | Rsa1.0_01737.1 | 614  | 40101  | 3.00E-80  | 152  | 152  | 100 - | 188 | 339  | 16793  | 16944  |
| UN46563 | Rsa1.0_00378.1 | 1002 | 89892  | 0         | 485  | 497  | 97 +  | 2   | 498  | 49573  | 50066  |
| UN46564 | Rsa1.0_00603.1 | 734  | 73299  | 0         | 513  | 530  | 96 -  | 5   | 534  | 42565  | 43088  |

|         |                |      |        |           |     |     |      |     |      |        |        |
|---------|----------------|------|--------|-----------|-----|-----|------|-----|------|--------|--------|
| UN46565 | Rsa1.0.05700.1 | 716  | 12886  | 0         | 675 | 707 | 95 - | 10  | 716  | 4679   | 5384   |
| UN46566 | Rsa1.0.08122.1 | 1184 | 7873   | 0         | 380 | 382 | 99 - | 803 | 1184 | 4314   | 4695   |
| UN46567 | Rsa1.0.02748.1 | 696  | 28242  | 0         | 427 | 445 | 95 - | 244 | 688  | 11618  | 12062  |
| UN46568 | Rsa1.0.01106.1 | 825  | 53916  | 0         | 383 | 391 | 97 + | 424 | 814  | 12412  | 12802  |
| UN46569 | Rsa1.0.06455.1 | 595  | 10983  | 7.00E-69  | 151 | 157 | 96 - | 219 | 375  | 71     | 227    |
| UN46570 | Rsa1.0.01201.1 | 1041 | 50856  | 0         | 497 | 512 | 97 + | 155 | 665  | 45904  | 46414  |
| UN46571 | Rsa1.0.18566.1 | 715  | 1573   | 1.00E-138 | 268 | 274 | 97 + | 3   | 276  | 925    | 1198   |
| UN46572 | Rsa1.0.06978.1 | 599  | 10073  | 1.00E-159 | 306 | 313 | 97 - | 49  | 361  | 2434   | 2746   |
| UN46573 | Rsa1.0.00262.1 | 690  | 101906 | 2.00E-85  | 197 | 207 | 95 + | 26  | 229  | 46458  | 46663  |
| UN46574 | Rsa1.0.00296.1 | 627  | 97854  | 1.00E-171 | 349 | 361 | 96 + | 190 | 547  | 80425  | 80781  |
| UN46575 | Rsa1.0.00409.1 | 674  | 146788 | 0         | 467 | 500 | 93 + | 173 | 669  | 80743  | 81225  |
| UN46576 | Rsa1.0.13774.1 | 680  | 4351   | 1.00E-113 | 277 | 298 | 92 - | 385 | 680  | 1044   | 1334   |
| UN46577 | Rsa1.0.01606.1 | 787  | 42432  | 1.00E-154 | 342 | 360 | 95 - | 16  | 371  | 29730  | 30080  |
| UN46578 | Rsa1.0.03435.1 | 591  | 22958  | 1.00E-134 | 279 | 291 | 95 - | 72  | 362  | 21987  | 22277  |
| UN46579 | Rsa1.0.00157.1 | 608  | 245832 | 0         | 578 | 593 | 97 - | 3   | 594  | 222674 | 223266 |
| UN46580 | Rsa1.0.01180.1 | 738  | 51517  | 1.00E-140 | 320 | 338 | 94 - | 405 | 737  | 33830  | 34166  |
| UN46581 | Rsa1.0.01116.1 | 766  | 142088 | 0         | 668 | 712 | 93 - | 55  | 762  | 129757 | 130463 |
| UN46582 | Rsa1.0.04689.1 | 636  | 16376  | 1.00E-143 | 272 | 277 | 98 + | 309 | 585  | 1      | 277    |
| UN46583 | Rsa1.0.00108.1 | 691  | 478491 | 8.00E-29  | 78  | 82  | 95 - | 277 | 358  | 135502 | 135583 |
| UN46584 | Rsa1.0.17040.1 | 459  | 1944   | 2.00E-77  | 173 | 180 | 96 + | 281 | 458  | 1393   | 1569   |
| UN46585 | Rsa1.0.00292.1 | 770  | 98141  | 1.00E-95  | 246 | 265 | 92 + | 516 | 770  | 21932  | 22192  |
| UN46586 | Rsa1.0.00662.1 | 634  | 192183 | 1.00E-151 | 304 | 313 | 97 - | 311 | 620  | 11322  | 11633  |
| UN46587 | Rsa1.0.00327.1 | 694  | 94892  | 1.00E-159 | 343 | 363 | 94 + | 116 | 478  | 15925  | 16281  |
| UN46588 | Rsa1.0.00469.1 | 617  | 82084  | 0         | 373 | 384 | 97 - | 87  | 470  | 20619  | 21002  |
| UN46589 | Rsa1.0.00076.1 | 592  | 146021 | 0         | 564 | 593 | 95 + | 7   | 591  | 100578 | 101169 |
| UN46590 | Rsa1.0.06034.1 | 651  | 11877  | 1.00E-95  | 194 | 198 | 97 + | 2   | 198  | 5688   | 5885   |
| UN46591 | Rsa1.0.00438.1 | 689  | 84861  | 1.00E-141 | 279 | 287 | 97 - | 57  | 343  | 2602   | 2888   |
| UN46592 | Rsa1.0.00289.1 | 783  | 98620  | 1.00E-141 | 266 | 270 | 98 - | 445 | 714  | 26980  | 27249  |
| UN46593 | Rsa1.0.00327.1 | 719  | 94892  | 1.00E-76  | 164 | 170 | 96 - | 330 | 499  | 21366  | 21535  |
| UN46594 | Rsa1.0.00036.1 | 710  | 176186 | 1.00E-172 | 617 | 714 | 86 + | 1   | 710  | 163186 | 163892 |
| UN46595 | Rsa1.0.01509.1 | 761  | 44258  | 0         | 416 | 436 | 95 + | 326 | 761  | 16019  | 16453  |
| UN46596 | Rsa1.0.01363.1 | 1051 | 47195  | 0         | 572 | 611 | 93 + | 443 | 1050 | 23866  | 24466  |
| UN46597 | Rsa1.0.00628.1 | 546  | 214360 | 6.00E-60  | 127 | 130 | 97 + | 77  | 206  | 24915  | 25044  |
| UN46598 | Rsa1.0.03022.1 | 717  | 25968  | 0         | 696 | 717 | 97 + | 3   | 714  | 14518  | 15234  |
| UN46599 | Rsa1.0.00471.1 | 1176 | 81897  | 0         | 394 | 409 | 96 + | 2   | 404  | 34841  | 35249  |
| UN46600 | Rsa1.0.00165.1 | 684  | 116466 | 2.00E-88  | 175 | 178 | 98 - | 242 | 419  | 26990  | 27167  |
| UN46601 | Rsa1.0.02941.1 | 714  | 26583  | 1.00E-177 | 379 | 397 | 95 - | 5   | 398  | 20945  | 21340  |
| UN46602 | Rsa1.0.05482.1 | 967  | 13595  | 1.00E-169 | 349 | 365 | 95 - | 103 | 467  | 12266  | 12630  |
| UN46603 | Rsa1.0.00816.1 | 898  | 403350 | 0         | 388 | 403 | 96 + | 473 | 874  | 268834 | 269233 |

|         |                |      |        |           |     |     |      |     |     |        |        |
|---------|----------------|------|--------|-----------|-----|-----|------|-----|-----|--------|--------|
| UN46604 | Rsa1.0.00097.1 | 882  | 138858 | 0         | 781 | 830 | 94 + | 68  | 881 | 29952  | 30766  |
| UN46605 | Rsa1.0.03520.1 | 680  | 22327  | 1.00E-110 | 276 | 299 | 92 - | 2   | 300 | 10242  | 10539  |
| UN46606 | Rsa1.0.02884.1 | 983  | 27034  | 0         | 601 | 633 | 94 - | 367 | 983 | 7557   | 8188   |
| UN46607 | Rsa1.0.14400.1 | 655  | 3430   | 4.00E-83  | 262 | 300 | 87 + | 339 | 629 | 1      | 285    |
| UN46608 | Rsa1.0.00038.1 | 597  | 314568 | 6.00E-60  | 158 | 169 | 93 + | 429 | 595 | 141847 | 142014 |
| UN46609 | Rsa1.0.00247.1 | 719  | 103408 | 0         | 555 | 595 | 93 + | 127 | 716 | 14550  | 15128  |
| UN46610 | Rsa1.0.01674.1 | 729  | 168300 | 1.00E-131 | 383 | 432 | 88 + | 12  | 421 | 1858   | 2279   |
| UN46611 | Rsa1.0.00058.1 | 689  | 159921 | 0         | 505 | 540 | 93 - | 160 | 689 | 49015  | 49550  |
| UN46612 | Rsa1.0.00301.1 | 723  | 365315 | 1.00E-128 | 334 | 369 | 90 - | 3   | 359 | 346680 | 347037 |
| UN46613 | Rsa1.0.00045.1 | 638  | 328694 | 0         | 343 | 344 | 99 - | 293 | 636 | 186927 | 187269 |
| UN46614 | Rsa1.0.00426.1 | 747  | 85668  | 1.00E-106 | 208 | 212 | 98 - | 173 | 384 | 34554  | 34765  |
| UN46615 | Rsa1.0.00201.1 | 372  | 232851 | 3.00E-88  | 212 | 224 | 94 - | 157 | 372 | 109850 | 110072 |
| UN46616 | Rsa1.0.00382.1 | 606  | 251946 | 1.00E-180 | 373 | 389 | 95 + | 3   | 385 | 155234 | 155618 |
| UN46617 | Rsa1.0.05766.1 | 733  | 12708  | 1.00E-166 | 323 | 332 | 97 + | 148 | 479 | 3550   | 3881   |
| UN46618 | Rsa1.0.00484.1 | 243  | 203294 | 2.00E-61  | 144 | 152 | 94 + | 36  | 187 | 139436 | 139587 |
| UN46619 | Rsa1.0.00571.1 | 657  | 329018 | 2.33E-156 | 299 | 310 | 96 + | 3   | 311 | 158790 | 159099 |
| UN46620 | Rsa1.0.01412.1 | 439  | 46311  | 1.00E-109 | 235 | 246 | 95 + | 194 | 439 | 2544   | 2786   |
| UN46621 | Rsa1.0.00709.1 | 663  | 67329  | 0         | 469 | 485 | 96 + | 6   | 489 | 46586  | 47070  |
| UN46622 | Rsa1.0.00798.1 | 784  | 63945  | 0         | 659 | 678 | 97 + | 39  | 716 | 61017  | 61691  |
| UN46623 | Rsa1.0.06160.1 | 859  | 11596  | 0         | 810 | 866 | 93 + | 3   | 859 | 3984   | 4835   |
| UN46624 | Rsa1.0.00874.1 | 563  | 179723 | 2.00E-84  | 190 | 198 | 95 - | 165 | 362 | 179051 | 179245 |
| UN46625 | Rsa1.0.01774.1 | 958  | 39528  | 0         | 635 | 645 | 98 - | 314 | 958 | 16886  | 17530  |
| UN46626 | Rsa1.0.00009.1 | 740  | 232558 | 0         | 440 | 465 | 94 - | 3   | 461 | 98138  | 98602  |
| UN46627 | Rsa1.0.14871.1 | 661  | 2999   | 2.00E-85  | 207 | 220 | 94 + | 398 | 617 | 2735   | 2951   |
| UN46628 | Rsa1.0.00545.1 | 740  | 189649 | 3.00E-93  | 210 | 220 | 95 + | 521 | 740 | 2122   | 2337   |
| UN46629 | Rsa1.0.00015.1 | 1098 | 561803 | 0         | 497 | 512 | 97 - | 3   | 511 | 377107 | 377618 |
| UN46630 | Rsa1.0.11169.1 | 730  | 5596   | 1.00E-160 | 348 | 364 | 95 + | 367 | 728 | 18     | 377    |
| UN46631 | Rsa1.0.00122.1 | 482  | 265937 | 1.00E-179 | 423 | 458 | 92 + | 7   | 458 | 224824 | 225273 |
| UN46632 | Rsa1.0.03100.1 | 910  | 25411  | 0         | 440 | 477 | 92 - | 221 | 679 | 19710  | 20183  |
| UN46633 | Rsa1.0.00875.1 | 691  | 61371  | 0         | 511 | 525 | 97 - | 2   | 523 | 1411   | 1935   |
| UN46634 | Rsa1.0.00359.1 | 793  | 91256  | 1.00E-102 | 201 | 205 | 98 + | 11  | 215 | 81860  | 82064  |
| UN46635 | Rsa1.0.01366.1 | 1087 | 47139  | 0         | 841 | 844 | 99 + | 1   | 844 | 33480  | 34323  |
| UN46636 | Rsa1.0.07606.1 | 692  | 9035   | 0         | 617 | 640 | 96 - | 44  | 680 | 1995   | 2628   |
| UN46637 | Rsa1.0.05878.1 | 520  | 12344  | 2.00E-96  | 207 | 215 | 96 - | 8   | 222 | 2128   | 2341   |
| UN46638 | Rsa1.0.03491.1 | 759  | 22541  | 1.00E-165 | 427 | 471 | 90 - | 96  | 566 | 9065   | 9535   |
| UN46639 | Rsa1.0.02909.1 | 945  | 26856  | 0         | 500 | 507 | 98 + | 3   | 509 | 10158  | 10664  |
| UN46640 | Rsa1.0.00251.1 | 718  | 303968 | 3.00E-65  | 180 | 193 | 93 + | 527 | 714 | 124151 | 124342 |
| UN46641 | Rsa1.0.00436.1 | 824  | 85008  | 1.00E-173 | 399 | 423 | 94 - | 222 | 639 | 3815   | 4236   |
| UN46642 | Rsa1.0.05326.1 | 671  | 14139  | 1.00E-131 | 283 | 297 | 95 - | 377 | 671 | 4918   | 5214   |

|         |                |      |        |           |     |     |      |     |      |        |        |
|---------|----------------|------|--------|-----------|-----|-----|------|-----|------|--------|--------|
| UN46643 | Rsa1.0.01666.1 | 745  | 173972 | 3.00E-53  | 116 | 119 | 97 + | 281 | 399  | 2523   | 2641   |
| UN46644 | Rsa1.0.00913.1 | 796  | 59914  | 0         | 438 | 462 | 94 + | 333 | 791  | 58728  | 59189  |
| UN46645 | Rsa1.0.00251.1 | 740  | 303968 | 1.00E-138 | 300 | 315 | 95 - | 8   | 322  | 114989 | 115298 |
| UN46646 | Rsa1.0.02871.1 | 804  | 27085  | 0         | 532 | 553 | 96 + | 14  | 563  | 22776  | 23328  |
| UN46647 | Rsa1.0.01292.1 | 861  | 175783 | 1.00E-128 | 243 | 245 | 99 + | 616 | 859  | 149086 | 149330 |
| UN46648 | Rsa1.0.00484.1 | 806  | 203294 | 1.00E-139 | 300 | 317 | 94 + | 149 | 458  | 62407  | 62723  |
| UN46649 | Rsa1.0.00189.1 | 697  | 111830 | 1.00E-142 | 377 | 410 | 91 - | 296 | 697  | 491    | 890    |
| UN46650 | Rsa1.0.00582.1 | 748  | 74333  | 2.00E-60  | 128 | 131 | 97 + | 419 | 549  | 63731  | 63861  |
| UN46651 | Rsa1.0.00592.1 | 789  | 73788  | 0         | 421 | 423 | 99 - | 369 | 789  | 22161  | 22583  |
| UN46652 | Rsa1.0.01702.1 | 741  | 40722  | 1.00E-157 | 436 | 488 | 89 - | 277 | 741  | 17694  | 18168  |
| UN46653 | Rsa1.0.01077.1 | 662  | 54772  | 0         | 553 | 590 | 93 + | 79  | 662  | 21078  | 21659  |
| UN46654 | Rsa1.0.00116.1 | 750  | 365886 | 1.00E-113 | 236 | 244 | 96 + | 512 | 750  | 36206  | 36449  |
| UN46655 | Rsa1.0.00115.1 | 1066 | 131321 | 1.00E-150 | 306 | 317 | 96 + | 705 | 1020 | 48839  | 49155  |
| UN46656 | Rsa1.0.00029.1 | 562  | 272992 | 3.00E-65  | 151 | 159 | 94 + | 151 | 309  | 13043  | 13201  |
| UN46657 | Rsa1.0.00711.1 | 907  | 67223  | 1.00E-133 | 328 | 350 | 93 - | 559 | 907  | 6580   | 6921   |
| UN46658 | Rsa1.0.02928.1 | 901  | 26680  | 0         | 509 | 520 | 97 - | 385 | 901  | 23408  | 23927  |
| UN46659 | Rsa1.0.15085.1 | 683  | 2843   | 0         | 346 | 351 | 98 - | 329 | 679  | 1738   | 2086   |
| UN46660 | Rsa1.0.19770.1 | 912  | 1385   | 1.00E-144 | 311 | 329 | 94 - | 582 | 910  | 492    | 808    |
| UN46661 | Rsa1.0.00344.1 | 665  | 191774 | 0         | 464 | 466 | 99 - | 200 | 665  | 156290 | 156753 |
| UN46662 | Rsa1.0.35228.1 | 730  | 642    | 1.00E-24  | 134 | 159 | 84 - | 73  | 231  | 4      | 162    |
| UN46663 | Rsa1.0.02812.1 | 757  | 27660  | 1.00E-135 | 299 | 313 | 95 + | 25  | 335  | 14273  | 14579  |
| UN46664 | Rsa1.0.39534.1 | 870  | 569    | 1.00E-159 | 312 | 320 | 97 - | 3   | 322  | 1      | 318    |
| UN46665 | Rsa1.0.00457.1 | 626  | 337301 | 0         | 508 | 554 | 91 + | 80  | 626  | 334197 | 334731 |
| UN46666 | Rsa1.0.00594.1 | 215  | 73729  | 9.00E-63  | 186 | 205 | 90 - | 1   | 205  | 30089  | 30290  |
| UN46667 | Rsa1.0.16435.1 | 559  | 2156   | 1.00E-117 | 239 | 246 | 97 + | 312 | 557  | 1198   | 1442   |
| UN46668 | Rsa1.0.08606.1 | 567  | 7133   | 1.00E-132 | 306 | 324 | 94 - | 247 | 567  | 5591   | 5910   |
| UN46669 | Rsa1.0.00802.1 | 873  | 63846  | 1.00E-129 | 265 | 273 | 97 + | 605 | 873  | 29300  | 29572  |
| UN46670 | Rsa1.0.02941.1 | 680  | 26583  | 0         | 390 | 401 | 97 - | 3   | 401  | 20945  | 21345  |
| UN46671 | Rsa1.0.00545.1 | 797  | 189649 | 1.00E-109 | 245 | 258 | 94 + | 536 | 789  | 212    | 468    |
| UN46672 | Rsa1.0.00173.1 | 523  | 288743 | 1.00E-144 | 339 | 365 | 92 + | 171 | 522  | 203686 | 204049 |
| UN46673 | Rsa1.0.01397.1 | 660  | 183276 | 4.00E-89  | 263 | 297 | 88 + | 357 | 652  | 172580 | 172861 |
| UN46674 | Rsa1.0.01509.1 | 752  | 44258  | 0         | 653 | 695 | 93 - | 23  | 704  | 34151  | 34844  |
| UN46675 | Rsa1.0.00100.1 | 930  | 249232 | 3.00E-44  | 188 | 220 | 85 + | 81  | 300  | 202997 | 203216 |
| UN46676 | Rsa1.0.00829.1 | 619  | 158305 | 0         | 477 | 524 | 91 - | 64  | 581  | 47446  | 47954  |
| UN46677 | Rsa1.0.03487.1 | 781  | 22564  | 0         | 772 | 802 | 96 - | 3   | 780  | 2370   | 3171   |
| UN46678 | Rsa1.0.00437.1 | 642  | 84879  | 1.00E-117 | 257 | 272 | 94 - | 374 | 638  | 64087  | 64358  |
| UN46679 | Rsa1.0.05052.1 | 306  | 15016  | 1.00E-142 | 283 | 290 | 97 - | 19  | 305  | 1965   | 2253   |
| UN46680 | Rsa1.0.02748.1 | 747  | 28242  | 1.00E-159 | 406 | 445 | 91 - | 271 | 705  | 11618  | 12062  |
| UN46681 | Rsa1.0.02275.1 | 698  | 33107  | 1.00E-175 | 383 | 405 | 94 + | 281 | 676  | 30103  | 30507  |

|         |                |      |        |           |     |     |       |     |      |        |        |
|---------|----------------|------|--------|-----------|-----|-----|-------|-----|------|--------|--------|
| UN46682 | Rsa1.0.00812.1 | 520  | 63233  | 1.00E-115 | 236 | 243 | 97 +  | 78  | 320  | 17214  | 17455  |
| UN46683 | Rsa1.0.00415.1 | 873  | 86795  | 1.00E-179 | 585 | 672 | 87 -  | 42  | 692  | 74960  | 75597  |
| UN46684 | Rsa1.0.01124.1 | 579  | 53295  | 2.00E-75  | 210 | 226 | 92 +  | 350 | 570  | 50201  | 50424  |
| UN46685 | Rsa1.0.00027.1 | 810  | 283362 | 0         | 759 | 815 | 93 +  | 2   | 810  | 278926 | 279720 |
| UN46686 | Rsa1.0.49161.1 | 935  | 461    | 1.00E-113 | 243 | 253 | 96 +  | 203 | 454  | 14     | 262    |
| UN46687 | Rsa1.0.03338.1 | 917  | 136346 | 0         | 413 | 439 | 94 +  | 362 | 800  | 1672   | 2110   |
| UN46688 | Rsa1.0.00557.1 | 723  | 75865  | 1.00E-138 | 295 | 309 | 95 +  | 374 | 680  | 69722  | 70030  |
| UN46689 | Rsa1.0.00583.1 | 734  | 74309  | 1.00E-167 | 325 | 334 | 97 -  | 125 | 458  | 71952  | 72285  |
| UN46690 | Rsa1.0.01126.1 | 734  | 53127  | 1.00E-150 | 324 | 342 | 94 +  | 104 | 445  | 28025  | 28366  |
| UN46691 | Rsa1.0.05218.1 | 681  | 14457  | 8.00E-72  | 147 | 150 | 98 +  | 123 | 272  | 4482   | 4631   |
| UN46692 | Rsa1.0.00330.1 | 817  | 94666  | 0         | 434 | 465 | 93 -  | 373 | 817  | 42585  | 43042  |
| UN46693 | Rsa1.0.00894.1 | 561  | 269700 | 3.00E-83  | 166 | 169 | 98 -  | 1   | 169  | 127216 | 127384 |
| UN46694 | Rsa1.0.02194.1 | 562  | 34029  | 1.00E-98  | 192 | 195 | 98 -  | 368 | 562  | 31623  | 31817  |
| UN46695 | Rsa1.0.01839.1 | 660  | 38482  | 1.00E-104 | 253 | 269 | 94 -  | 393 | 658  | 24166  | 24434  |
| UN46696 | Rsa1.0.21825.1 | 839  | 1170   | 0         | 505 | 525 | 96 -  | 316 | 839  | 645    | 1163   |
| UN46697 | Rsa1.0.00332.1 | 517  | 94575  | 1.00E-116 | 346 | 392 | 88 +  | 139 | 512  | 74767  | 75157  |
| UN46698 | Rsa1.0.00594.1 | 701  | 73729  | 1.00E-103 | 239 | 253 | 94 +  | 448 | 700  | 30039  | 30288  |
| UN46699 | Rsa1.0.06455.1 | 562  | 10983  | 2.00E-66  | 150 | 157 | 95 -  | 197 | 353  | 71     | 227    |
| UN46700 | Rsa1.0.02471.1 | 1425 | 31104  | 0         | 916 | 949 | 96 -  | 491 | 1425 | 17903  | 18851  |
| UN46701 | Rsa1.0.07149.1 | 872  | 9824   | 0         | 390 | 392 | 99 -  | 481 | 870  | 854    | 1245   |
| UN46702 | Rsa1.0.01412.1 | 597  | 46311  | 0         | 384 | 392 | 97 +  | 206 | 597  | 2377   | 2768   |
| UN46703 | Rsa1.0.02422.1 | 976  | 161122 | 0         | 427 | 431 | 99 -  | 122 | 552  | 158865 | 159295 |
| UN46704 | Rsa1.0.15806.1 | 782  | 2414   | 1.00E-101 | 242 | 260 | 93 -  | 282 | 541  | 648    | 907    |
| UN46705 | Rsa1.0.01263.1 | 916  | 49703  | 1.00E-102 | 257 | 276 | 93 -  | 627 | 900  | 30606  | 30878  |
| UN46706 | Rsa1.0.00586.1 | 590  | 163802 | 0         | 478 | 479 | 99 +  | 112 | 590  | 108888 | 109366 |
| UN46707 | Rsa1.0.02613.1 | 836  | 29557  | 1.00E-134 | 277 | 286 | 96 -  | 553 | 836  | 21088  | 21373  |
| UN46708 | Rsa1.0.00171.1 | 857  | 115622 | 0         | 385 | 388 | 99 -  | 471 | 857  | 33598  | 33984  |
| UN46709 | Rsa1.0.00058.1 | 652  | 159921 | 1.00E-155 | 324 | 334 | 97 +  | 83  | 415  | 86889  | 87219  |
| UN46710 | Rsa1.0.00470.1 | 845  | 81968  | 3.00E-78  | 250 | 281 | 88 -  | 567 | 845  | 51197  | 51477  |
| UN46711 | Rsa1.0.04098.1 | 792  | 19078  | 0         | 535 | 569 | 94 +  | 218 | 776  | 10141  | 10707  |
| UN46712 | Rsa1.0.01382.1 | 569  | 46877  | 1.00E-114 | 265 | 282 | 93 +  | 280 | 557  | 14013  | 14293  |
| UN46713 | Rsa1.0.01959.1 | 643  | 36798  | 1.00E-140 | 258 | 260 | 99 -  | 377 | 636  | 31343  | 31602  |
| UN46714 | Rsa1.0.08909.1 | 864  | 6799   | 0         | 804 | 876 | 91 +  | 3   | 860  | 4803   | 5646   |
| UN46715 | Rsa1.0.00222.1 | 866  | 172263 | 2.00E-85  | 170 | 173 | 98 -  | 194 | 366  | 59426  | 59598  |
| UN46716 | Rsa1.0.03577.1 | 653  | 143993 | 0         | 648 | 653 | 99 -  | 1   | 653  | 16776  | 17428  |
| UN46717 | Rsa1.0.00265.1 | 1087 | 220635 | 0         | 698 | 699 | 99 +  | 389 | 1087 | 202132 | 202830 |
| UN46718 | Rsa1.0.03607.1 | 749  | 21817  | 0         | 646 | 712 | 90 +  | 38  | 733  | 1550   | 2239   |
| UN46719 | Rsa1.0.01263.1 | 486  | 49703  | 4.00E-85  | 160 | 160 | 100 + | 86  | 245  | 39811  | 39970  |
| UN46720 | Rsa1.0.01403.1 | 906  | 46453  | 0         | 596 | 619 | 96 +  | 295 | 906  | 2825   | 3443   |



|         |                |      |        |           |     |     |       |      |      |        |        |
|---------|----------------|------|--------|-----------|-----|-----|-------|------|------|--------|--------|
| UN46721 | Rsa1.0_17040.1 | 381  | 1944   | 6.00E-96  | 187 | 190 | 98 +  | 172  | 361  | 1413   | 1602   |
| UN46722 | Rsa1.0_08740.1 | 1016 | 6980   | 0         | 494 | 521 | 94 -  | 500  | 1016 | 4321   | 4841   |
| UN46723 | Rsa1.0_05100.1 | 933  | 14853  | 0         | 502 | 502 | 100 - | 2    | 503  | 2787   | 3288   |
| UN46724 | Rsa1.0_00033.1 | 773  | 515811 | 0         | 391 | 394 | 99 -  | 379  | 772  | 33649  | 34042  |
| UN46725 | Rsa1.0_00045.1 | 1050 | 328694 | 0         | 528 | 551 | 95 -  | 498  | 1041 | 261157 | 261701 |
| UN46726 | Rsa1.0_00161.1 | 600  | 116891 | 1.00E-122 | 254 | 263 | 96 -  | 273  | 535  | 25283  | 25544  |
| UN46727 | Rsa1.0_00226.1 | 1064 | 105884 | 0         | 524 | 561 | 93 +  | 197  | 749  | 18337  | 18891  |
| UN46728 | Rsa1.0_08572.1 | 547  | 7184   | 0         | 401 | 409 | 98 +  | 139  | 547  | 6117   | 6525   |
| UN46729 | Rsa1.0_00205.1 | 456  | 193401 | 4.00E-73  | 146 | 148 | 98 -  | 260  | 407  | 79488  | 79635  |
| UN46730 | Rsa1.0_00453.1 | 1452 | 83031  | 0         | 337 | 340 | 99 -  | 1113 | 1452 | 69715  | 70054  |
| UN46731 | Rsa1.0_00069.1 | 986  | 403561 | 0         | 673 | 688 | 97 -  | 311  | 986  | 68409  | 69096  |
| UN46732 | Rsa1.0_05908.1 | 1033 | 12266  | 0         | 556 | 561 | 99 -  | 473  | 1033 | 10154  | 10713  |
| UN46733 | Rsa1.0_00342.1 | 623  | 93695  | 1.00E-107 | 207 | 210 | 98 +  | 412  | 621  | 32258  | 32467  |
| UN46734 | Rsa1.0_00541.1 | 376  | 76863  | 1.00E-149 | 352 | 376 | 93 +  | 1    | 375  | 2853   | 3212   |
| UN46735 | Rsa1.0_09986.1 | 621  | 6049   | 1.00E-104 | 195 | 196 | 99 -  | 1    | 196  | 1974   | 2169   |
| UN46736 | Rsa1.0_01511.1 | 774  | 44235  | 1.00E-153 | 281 | 283 | 99 -  | 378  | 660  | 29317  | 29599  |
| UN46737 | Rsa1.0_09490.1 | 736  | 6335   | 0         | 679 | 733 | 92 -  | 3    | 728  | 4803   | 5510   |
| UN46738 | Rsa1.0_00609.1 | 1233 | 72785  | 1.00E-139 | 284 | 294 | 96 -  | 943  | 1233 | 1843   | 2136   |
| UN46739 | Rsa1.0_01954.1 | 729  | 145554 | 1.00E-113 | 244 | 254 | 96 -  | 476  | 728  | 13045  | 13295  |
| UN46740 | Rsa1.0_02756.1 | 912  | 28202  | 0         | 696 | 740 | 94 +  | 3    | 724  | 16228  | 16966  |
| UN46741 | Rsa1.0_00157.1 | 499  | 245832 | 1.00E-115 | 284 | 307 | 92 +  | 101  | 406  | 239298 | 239590 |
| UN46742 | Rsa1.0_06227.1 | 1032 | 11442  | 0         | 949 | 962 | 98 +  | 31   | 990  | 3871   | 4822   |
| UN46743 | Rsa1.0_00002.1 | 551  | 601661 | 1.00E-136 | 264 | 269 | 98 -  | 211  | 478  | 140391 | 140659 |
| UN46744 | Rsa1.0_00660.1 | 414  | 69688  | 8.00E-74  | 141 | 141 | 100 + | 204  | 344  | 47031  | 47171  |
| UN46745 | Rsa1.0_00078.1 | 901  | 175053 | 1.00E-150 | 388 | 429 | 90 +  | 476  | 901  | 137160 | 137567 |
| UN46746 | Rsa1.0_01774.1 | 751  | 39528  | 0         | 452 | 471 | 95 -  | 1    | 461  | 7477   | 7943   |
| UN46747 | Rsa1.0_01415.1 | 773  | 46263  | 0         | 448 | 462 | 96 -  | 317  | 771  | 17581  | 18042  |
| UN46748 | Rsa1.0_06267.1 | 564  | 11356  | 0         | 389 | 390 | 99 +  | 174  | 563  | 9805   | 10194  |
| UN46749 | Rsa1.0_00222.1 | 748  | 172263 | 0         | 350 | 354 | 98 +  | 3    | 356  | 39659  | 40012  |
| UN46750 | Rsa1.0_00214.1 | 1076 | 107508 | 0         | 416 | 421 | 98 +  | 19   | 439  | 93330  | 93750  |
| UN46751 | Rsa1.0_00364.1 | 578  | 90951  | 1.00E-140 | 262 | 265 | 98 +  | 311  | 575  | 63260  | 63524  |
| UN46752 | Rsa1.0_00395.1 | 962  | 214466 | 0         | 387 | 396 | 97 +  | 337  | 732  | 70256  | 70651  |
| UN46753 | Rsa1.0_02586.1 | 643  | 29856  | 0         | 483 | 491 | 98 +  | 3    | 489  | 9987   | 10477  |
| UN46754 | Rsa1.0_01258.1 | 471  | 49755  | 1.00E-125 | 230 | 231 | 99 -  | 241  | 471  | 22258  | 22488  |
| UN46755 | Rsa1.0_00748.1 | 735  | 65983  | 1.00E-129 | 270 | 279 | 96 -  | 447  | 725  | 63653  | 63929  |
| UN46756 | Rsa1.0_00741.1 | 554  | 66117  | 0         | 378 | 384 | 98 -  | 172  | 553  | 52556  | 52938  |
| UN46757 | Rsa1.0_02911.1 | 784  | 142461 | 0         | 417 | 426 | 97 +  | 147  | 571  | 22345  | 22770  |
| UN46758 | Rsa1.0_03736.1 | 1169 | 21081  | 0         | 441 | 452 | 97 +  | 187  | 638  | 7765   | 8216   |
| UN46759 | Rsa1.0_00055.1 | 621  | 520193 | 7.00E-97  | 180 | 180 | 100 + | 442  | 621  | 156494 | 156673 |

|         |                |      |        |           |      |      |       |     |      |        |        |
|---------|----------------|------|--------|-----------|------|------|-------|-----|------|--------|--------|
| UN46760 | Rsa1.0.00642.1 | 567  | 201230 | 1.00E-140 | 253  | 253  | 100 - | 315 | 567  | 22971  | 23223  |
| UN46761 | Rsa1.0.00321.1 | 489  | 95671  | 1.00E-117 | 290  | 318  | 91 +  | 181 | 488  | 56950  | 57254  |
| UN46762 | Rsa1.0.01937.1 | 1062 | 37147  | 1.00E-165 | 298  | 299  | 99 +  | 761 | 1059 | 14633  | 14931  |
| UN46763 | Rsa1.0.02231.1 | 730  | 33661  | 0         | 700  | 710  | 98 -  | 3   | 708  | 27200  | 27909  |
| UN46764 | Rsa1.0.02114.1 | 696  | 34873  | 1.00E-123 | 284  | 304  | 93 -  | 22  | 325  | 4142   | 4439   |
| UN46765 | Rsa1.0.00827.1 | 576  | 62790  | 0         | 568  | 580  | 97 -  | 3   | 576  | 23913  | 24492  |
| UN46766 | Rsa1.0.03568.1 | 456  | 22048  | 1.00E-110 | 235  | 246  | 95 +  | 212 | 455  | 19013  | 19250  |
| UN46767 | Rsa1.0.02858.1 | 790  | 27246  | 1.00E-140 | 376  | 414  | 90 -  | 390 | 784  | 2267   | 2679   |
| UN46768 | Rsa1.0.00961.1 | 860  | 58185  | 1.00E-142 | 270  | 273  | 98 -  | 589 | 860  | 48803  | 49075  |
| UN46769 | Rsa1.0.14440.1 | 384  | 3390   | 2.00E-96  | 249  | 270  | 92 -  | 107 | 374  | 1397   | 1665   |
| UN46770 | Rsa1.0.00890.1 | 855  | 323870 | 0         | 411  | 412  | 99 -  | 444 | 855  | 292154 | 292565 |
| UN46771 | Rsa1.0.00069.1 | 616  | 403561 | 1.00E-147 | 268  | 269  | 99 +  | 42  | 310  | 163049 | 163317 |
| UN46772 | Rsa1.0.05089.1 | 732  | 14881  | 4.00E-86  | 165  | 166  | 99 -  | 567 | 732  | 12558  | 12723  |
| UN46773 | Rsa1.0.02107.1 | 651  | 34940  | 0         | 368  | 378  | 97 +  | 1   | 372  | 8117   | 8493   |
| UN46774 | Rsa1.0.29331.1 | 900  | 786    | 1.00E-140 | 285  | 295  | 96 +  | 2   | 296  | 495    | 786    |
| UN46775 | Rsa1.0.01189.1 | 604  | 51358  | 0         | 491  | 502  | 97 -  | 101 | 602  | 18088  | 18587  |
| UN46776 | Rsa1.0.02474.1 | 955  | 31076  | 0         | 422  | 422  | 100 - | 532 | 953  | 19880  | 20301  |
| UN46777 | Rsa1.0.04806.1 | 444  | 15898  | 1.00E-130 | 235  | 235  | 100 + | 210 | 444  | 7406   | 7640   |
| UN46778 | Rsa1.0.01424.1 | 628  | 46139  | 0         | 623  | 625  | 99 +  | 4   | 628  | 7792   | 8416   |
| UN46779 | Rsa1.0.00307.1 | 917  | 199003 | 1.00E-55  | 236  | 280  | 84 +  | 252 | 512  | 86209  | 86485  |
| UN46780 | Rsa1.0.26582.1 | 961  | 885    | 0         | 679  | 700  | 97 +  | 256 | 954  | 1      | 700    |
| UN46781 | Rsa1.0.01949.1 | 839  | 36960  | 1.00E-113 | 240  | 248  | 96 -  | 592 | 838  | 28261  | 28507  |
| UN46782 | Rsa1.0.04998.1 | 707  | 15180  | 1.00E-131 | 303  | 325  | 93 +  | 104 | 428  | 14293  | 14607  |
| UN46783 | Rsa1.0.00716.1 | 700  | 67078  | 1.00E-169 | 366  | 386  | 94 +  | 263 | 648  | 36370  | 36754  |
| UN46784 | Rsa1.0.00262.1 | 1088 | 101906 | 0         | 1049 | 1087 | 96 +  | 3   | 1088 | 65558  | 66641  |
| UN46785 | Rsa1.0.00959.1 | 1023 | 58202  | 0         | 468  | 485  | 96 +  | 503 | 983  | 39340  | 39824  |
| UN46786 | Rsa1.0.09422.1 | 630  | 6381   | 0         | 432  | 434  | 99 -  | 185 | 618  | 5361   | 5792   |
| UN46787 | Rsa1.0.15339.1 | 468  | 2673   | 0         | 466  | 467  | 99 -  | 1   | 467  | 1942   | 2408   |
| UN46788 | Rsa1.0.00301.1 | 549  | 365315 | 1.00E-164 | 344  | 362  | 95 +  | 187 | 548  | 215181 | 215530 |
| UN46789 | Rsa1.0.00425.1 | 498  | 147080 | 1.00E-161 | 356  | 381  | 93 +  | 135 | 498  | 24733  | 25113  |
| UN46790 | Rsa1.0.06421.1 | 639  | 11053  | 0         | 343  | 343  | 100 - | 297 | 639  | 3889   | 4231   |
| UN46791 | Rsa1.0.13754.1 | 913  | 4380   | 0         | 490  | 502  | 97 +  | 412 | 913  | 2956   | 3454   |
| UN46792 | Rsa1.0.00965.1 | 985  | 58139  | 0         | 927  | 983  | 94 -  | 3   | 976  | 49441  | 50413  |
| UN46793 | Rsa1.0.00801.1 | 1156 | 63861  | 0         | 896  | 992  | 90 +  | 4   | 959  | 61451  | 62417  |
| UN46794 | Rsa1.0.01552.1 | 705  | 43396  | 1.00E-139 | 272  | 279  | 97 -  | 427 | 705  | 35230  | 35508  |
| UN46795 | Rsa1.0.17662.1 | 938  | 1770   | 0         | 416  | 419  | 99 +  | 520 | 938  | 553    | 971    |
| UN46796 | Rsa1.0.00016.1 | 895  | 831256 | 0         | 629  | 643  | 97 -  | 251 | 893  | 696349 | 696988 |
| UN46797 | Rsa1.0.02431.1 | 555  | 31504  | 0         | 409  | 426  | 96 +  | 141 | 555  | 26601  | 27026  |
| UN46798 | Rsa1.0.01687.1 | 739  | 40979  | 0         | 455  | 458  | 99 -  | 1   | 458  | 18653  | 19110  |

|         |                |      |        |           |     |     |       |     |      |        |        |
|---------|----------------|------|--------|-----------|-----|-----|-------|-----|------|--------|--------|
| UN46799 | Rsa1.0.00111.1 | 697  | 390088 | 0         | 597 | 664 | 89 -  | 36  | 697  | 352606 | 353259 |
| UN46800 | Rsa1.0.00362.1 | 639  | 299497 | 2.00E-88  | 198 | 206 | 96 -  | 174 | 377  | 16658  | 16863  |
| UN46801 | Rsa1.0.00417.1 | 806  | 395068 | 0         | 445 | 465 | 95 +  | 347 | 806  | 228539 | 229003 |
| UN46802 | Rsa1.0.00642.1 | 718  | 201230 | 0         | 367 | 372 | 98 +  | 3   | 374  | 156905 | 157273 |
| UN46803 | Rsa1.0.42836.1 | 634  | 524    | 1.00E-116 | 218 | 220 | 99 -  | 415 | 634  | 305    | 524    |
| UN46804 | Rsa1.0.01976.1 | 523  | 36570  | 1.00E-174 | 329 | 333 | 98 +  | 190 | 521  | 1127   | 1457   |
| UN46805 | Rsa1.0.03284.1 | 928  | 24069  | 0         | 368 | 379 | 97 -  | 548 | 926  | 19718  | 20096  |
| UN46806 | Rsa1.0.00067.1 | 874  | 415055 | 2.33E-156 | 334 | 359 | 93 -  | 2   | 358  | 49054  | 49390  |
| UN46807 | Rsa1.0.00385.1 | 557  | 89160  | 1.00E-88  | 189 | 196 | 96 +  | 365 | 557  | 48576  | 48771  |
| UN46808 | Rsa1.0.00381.1 | 617  | 89718  | 0         | 385 | 388 | 99 +  | 1   | 388  | 63848  | 64235  |
| UN46809 | Rsa1.0.00069.1 | 1133 | 403561 | 0         | 495 | 506 | 97 -  | 628 | 1133 | 353534 | 354037 |
| UN46810 | Rsa1.0.00089.1 | 367  | 406142 | 2.00E-55  | 180 | 201 | 89 -  | 177 | 367  | 210461 | 210658 |
| UN46811 | Rsa1.0.06278.1 | 1078 | 11333  | 0         | 455 | 468 | 97 +  | 614 | 1078 | 5822   | 6289   |
| UN46812 | Rsa1.0.02648.1 | 741  | 29073  | 5.00E-55  | 128 | 134 | 95 +  | 594 | 727  | 28667  | 28800  |
| UN46813 | Rsa1.0.02104.1 | 409  | 34985  | 2.00E-71  | 170 | 179 | 94 +  | 4   | 182  | 22860  | 23034  |
| UN46814 | Rsa1.0.04131.1 | 489  | 18923  | 0         | 485 | 486 | 99 -  | 3   | 488  | 11327  | 11812  |
| UN46815 | Rsa1.0.00467.1 | 673  | 156542 | 1.00E-163 | 301 | 303 | 99 -  | 4   | 305  | 11344  | 11646  |
| UN46816 | Rsa1.0.00049.1 | 1217 | 167018 | 0         | 819 | 863 | 94 -  | 362 | 1216 | 78822  | 79681  |
| UN46817 | Rsa1.0.00212.1 | 890  | 108350 | 1.00E-131 | 254 | 257 | 98 -  | 636 | 890  | 37824  | 38080  |
| UN46818 | Rsa1.0.00104.1 | 632  | 368722 | 0         | 352 | 353 | 99 +  | 3   | 355  | 255681 | 256033 |
| UN46819 | Rsa1.0.00784.1 | 811  | 64359  | 0         | 797 | 811 | 98 -  | 1   | 811  | 5856   | 6661   |
| UN46820 | Rsa1.0.01458.1 | 538  | 175719 | 0         | 386 | 390 | 98 +  | 1   | 390  | 26207  | 26596  |
| UN46821 | Rsa1.0.02811.1 | 783  | 27669  | 1.00E-180 | 343 | 348 | 98 -  | 437 | 782  | 13305  | 13652  |
| UN46822 | Rsa1.0.06541.1 | 502  | 10806  | 1.00E-149 | 268 | 268 | 100 - | 234 | 501  | 10105  | 10372  |
| UN46823 | Rsa1.0.01440.1 | 610  | 45807  | 1.00E-165 | 303 | 306 | 99 -  | 304 | 609  | 11028  | 11333  |
| UN46824 | Rsa1.0.38764.1 | 697  | 580    | 1.00E-111 | 240 | 252 | 95 -  | 446 | 697  | 145    | 396    |
| UN46825 | Rsa1.0.00034.1 | 374  | 260119 | 1.00E-112 | 216 | 218 | 99 +  | 157 | 374  | 89248  | 89464  |
| UN46826 | Rsa1.0.01338.1 | 398  | 155644 | 3.00E-45  | 162 | 185 | 87 -  | 2   | 186  | 15760  | 15944  |
| UN46827 | Rsa1.0.02141.1 | 961  | 34677  | 0         | 939 | 979 | 95 +  | 2   | 961  | 26087  | 27063  |
| UN46828 | Rsa1.0.08397.1 | 664  | 7427   | 0         | 379 | 379 | 100 - | 286 | 664  | 4828   | 5206   |
| UN46829 | Rsa1.0.00025.1 | 817  | 277312 | 1.00E-133 | 265 | 273 | 97 +  | 121 | 393  | 115742 | 116014 |
| UN46830 | Rsa1.0.00049.1 | 803  | 167018 | 1.00E-135 | 302 | 320 | 94 +  | 475 | 793  | 74432  | 74751  |
| UN46831 | Rsa1.0.01328.1 | 757  | 48021  | 0         | 689 | 735 | 93 -  | 3   | 728  | 46087  | 46803  |
| UN46832 | Rsa1.0.04033.1 | 1081 | 19481  | 1.00E-175 | 426 | 464 | 91 -  | 5   | 468  | 10629  | 11083  |
| UN46833 | Rsa1.0.05017.1 | 441  | 15121  | 0         | 428 | 439 | 97 -  | 3   | 439  | 3089   | 3524   |
| UN46834 | Rsa1.0.01711.1 | 709  | 40578  | 0         | 568 | 568 | 100 + | 141 | 708  | 35200  | 35767  |
| UN46835 | Rsa1.0.01846.1 | 1009 | 38367  | 0         | 396 | 396 | 100 - | 182 | 577  | 36064  | 36459  |
| UN46836 | Rsa1.0.00458.1 | 801  | 82717  | 1.00E-145 | 310 | 326 | 95 -  | 17  | 342  | 68501  | 68826  |
| UN46837 | Rsa1.0.00896.1 | 532  | 60509  | 1.00E-102 | 232 | 243 | 95 +  | 290 | 532  | 52074  | 52311  |

|         |                |      |        |           |      |      |       |     |      |        |        |
|---------|----------------|------|--------|-----------|------|------|-------|-----|------|--------|--------|
| UN46838 | Rsa1.0_00292.1 | 869  | 98141  | 6.00E-24  | 99   | 109  | 90 +  | 696 | 804  | 18608  | 18712  |
| UN46839 | Rsa1.0_00235.1 | 764  | 154696 | 1.00E-180 | 423  | 456  | 92 +  | 213 | 667  | 139087 | 139542 |
| UN46840 | Rsa1.0_00339.1 | 821  | 222974 | 1.00E-129 | 235  | 235  | 100 + | 3   | 237  | 39195  | 39429  |
| UN46841 | Rsa1.0_01695.1 | 769  | 40848  | 0         | 424  | 454  | 93 -  | 285 | 734  | 9107   | 9557   |
| UN46842 | Rsa1.0_00329.1 | 900  | 222544 | 0         | 404  | 405  | 99 +  | 496 | 900  | 177615 | 178019 |
| UN46843 | Rsa1.0_04192.1 | 1106 | 18572  | 0         | 577  | 584  | 98 -  | 527 | 1106 | 8538   | 9121   |
| UN46844 | Rsa1.0_00441.1 | 801  | 84607  | 1.00E-132 | 249  | 252  | 98 +  | 550 | 801  | 16076  | 16327  |
| UN46845 | Rsa1.0_00873.1 | 1089 | 61459  | 0         | 478  | 484  | 98 +  | 606 | 1089 | 7684   | 8167   |
| UN46846 | Rsa1.0_00236.1 | 843  | 104771 | 0         | 438  | 464  | 94 +  | 395 | 843  | 100657 | 101120 |
| UN46847 | Rsa1.0_02221.1 | 817  | 33796  | 0         | 385  | 396  | 97 -  | 423 | 817  | 17931  | 18326  |
| UN46848 | Rsa1.0_37069.1 | 601  | 608    | 0         | 439  | 458  | 95 -  | 161 | 601  | 151    | 608    |
| UN46849 | Rsa1.0_05366.1 | 816  | 14036  | 1.00E-174 | 318  | 321  | 99 -  | 231 | 551  | 8072   | 8392   |
| UN46850 | Rsa1.0_04322.1 | 582  | 17917  | 1.00E-98  | 189  | 191  | 98 -  | 392 | 582  | 16295  | 16485  |
| UN46851 | Rsa1.0_56773.1 | 552  | 403    | 0         | 342  | 342  | 100 - | 210 | 551  | 1      | 342    |
| UN46852 | Rsa1.0_00127.1 | 994  | 127446 | 1.00E-117 | 273  | 294  | 92 -  | 627 | 914  | 113121 | 113405 |
| UN46853 | Rsa1.0_14129.1 | 662  | 3769   | 1.00E-171 | 317  | 320  | 99 +  | 3   | 322  | 2701   | 3018   |
| UN46854 | Rsa1.0_03990.1 | 283  | 19676  | 1.00E-101 | 224  | 233  | 96 -  | 50  | 281  | 8888   | 9116   |
| UN46855 | Rsa1.0_00145.1 | 603  | 261008 | 1.00E-158 | 343  | 364  | 94 -  | 253 | 603  | 246148 | 246511 |
| UN46856 | Rsa1.0_05015.1 | 790  | 15125  | 0         | 681  | 779  | 87 +  | 30  | 790  | 1002   | 1742   |
| UN46857 | Rsa1.0_00482.1 | 1216 | 81162  | 0         | 1188 | 1215 | 97 -  | 2   | 1214 | 70920  | 72134  |
| UN46858 | Rsa1.0_00451.1 | 674  | 322533 | 0         | 511  | 516  | 99 -  | 159 | 674  | 318145 | 318659 |
| UN46859 | Rsa1.0_01732.1 | 1213 | 40194  | 0         | 477  | 514  | 92 +  | 716 | 1213 | 35777  | 36285  |
| UN46860 | Rsa1.0_58620.1 | 1020 | 390    | 8.00E-76  | 233  | 261  | 89 +  | 713 | 973  | 6      | 265    |
| UN46861 | Rsa1.0_00090.1 | 840  | 273859 | 0         | 835  | 840  | 99 -  | 1   | 840  | 140408 | 141247 |
| UN46862 | Rsa1.0_01058.1 | 1195 | 55430  | 3.00E-91  | 209  | 219  | 95 +  | 928 | 1145 | 29543  | 29760  |
| UN46863 | Rsa1.0_05030.1 | 709  | 15088  | 0         | 691  | 706  | 97 -  | 3   | 708  | 10916  | 11620  |
| UN46864 | Rsa1.0_04890.1 | 806  | 15591  | 0         | 434  | 441  | 98 +  | 2   | 442  | 10288  | 10724  |
| UN46865 | Rsa1.0_01923.1 | 973  | 37233  | 1.00E-163 | 297  | 299  | 99 -  | 675 | 973  | 18013  | 18311  |
| UN46866 | Rsa1.0_39888.1 | 848  | 563    | 0         | 379  | 385  | 98 +  | 426 | 810  | 1      | 385    |
| UN46867 | Rsa1.0_00247.1 | 601  | 103408 | 0         | 592  | 601  | 98 -  | 2   | 601  | 49580  | 50180  |
| UN46868 | Rsa1.0_02672.1 | 720  | 28884  | 0         | 660  | 726  | 90 +  | 1   | 718  | 10872  | 11567  |
| UN46869 | Rsa1.0_02994.1 | 529  | 26168  | 1.00E-151 | 274  | 275  | 99 -  | 255 | 529  | 2234   | 2508   |
| UN46870 | Rsa1.0_00150.1 | 391  | 154416 | 1.00E-115 | 216  | 218  | 99 -  | 172 | 389  | 20367  | 20584  |
| UN46871 | Rsa1.0_40627.1 | 661  | 552    | 1.00E-115 | 223  | 227  | 98 +  | 265 | 491  | 326    | 552    |
| UN46872 | Rsa1.0_00140.1 | 1101 | 121541 | 1.00E-154 | 379  | 417  | 90 +  | 707 | 1101 | 11145  | 11561  |
| UN46873 | Rsa1.0_00152.1 | 1036 | 257730 | 1.00E-127 | 251  | 256  | 98 -  | 49  | 303  | 201609 | 201864 |
| UN46874 | Rsa1.0_08909.1 | 455  | 6799   | 7.00E-90  | 188  | 194  | 96 +  | 208 | 398  | 5387   | 5580   |
| UN46875 | Rsa1.0_02268.1 | 616  | 33172  | 9.00E-90  | 203  | 212  | 95 -  | 352 | 561  | 17363  | 17574  |
| UN46876 | Rsa1.0_01487.1 | 759  | 44784  | 3.00E-84  | 207  | 221  | 93 +  | 19  | 239  | 24906  | 25122  |

|         |                |      |        |           |      |      |       |     |      |        |        |
|---------|----------------|------|--------|-----------|------|------|-------|-----|------|--------|--------|
| UN46877 | Rsa1.0.01299.1 | 1025 | 162028 | 1.00E-111 | 205  | 205  | 100 + | 1   | 205  | 157143 | 157347 |
| UN46878 | Rsa1.0.00708.1 | 845  | 67366  | 0         | 403  | 421  | 95 +  | 100 | 520  | 13816  | 14236  |
| UN46879 | Rsa1.0.06454.1 | 843  | 10987  | 0         | 404  | 412  | 98 +  | 432 | 842  | 6861   | 7272   |
| UN46880 | Rsa1.0.07743.1 | 683  | 8670   | 1.00E-162 | 317  | 326  | 97 +  | 319 | 644  | 6574   | 6899   |
| UN46881 | Rsa1.0.00048.1 | 523  | 167185 | 1.00E-102 | 330  | 378  | 87 -  | 156 | 522  | 146194 | 146554 |
| UN46882 | Rsa1.0.07201.1 | 510  | 9732   | 1.00E-155 | 284  | 286  | 99 -  | 1   | 286  | 264    | 549    |
| UN46883 | Rsa1.0.01845.1 | 987  | 38415  | 0         | 419  | 426  | 98 -  | 287 | 712  | 10301  | 10726  |
| UN46884 | Rsa1.0.12068.1 | 853  | 5326   | 0         | 590  | 597  | 98 -  | 254 | 850  | 4193   | 4789   |
| UN46885 | Rsa1.0.00988.1 | 296  | 57525  | 7.00E-95  | 203  | 211  | 96 -  | 37  | 241  | 49624  | 49833  |
| UN46886 | Rsa1.0.02422.1 | 885  | 161122 | 0         | 426  | 432  | 98 -  | 131 | 562  | 158867 | 159295 |
| UN46887 | Rsa1.0.00213.1 | 806  | 108167 | 0         | 508  | 533  | 95 -  | 279 | 806  | 14625  | 15156  |
| UN46888 | Rsa1.0.00038.1 | 932  | 314568 | 1.00E-138 | 250  | 250  | 100 - | 1   | 250  | 255570 | 255819 |
| UN46889 | Rsa1.0.24162.1 | 851  | 1003   | 1.00E-135 | 248  | 249  | 99 -  | 601 | 849  | 368    | 616    |
| UN46890 | Rsa1.0.00336.1 | 1141 | 445051 | 0         | 422  | 450  | 93 -  | 413 | 846  | 164694 | 165143 |
| UN46891 | Rsa1.0.00652.1 | 516  | 70089  | 0         | 442  | 457  | 96 -  | 3   | 458  | 64888  | 65344  |
| UN46892 | Rsa1.0.00006.1 | 1012 | 396176 | 1.00E-138 | 289  | 300  | 96 -  | 495 | 791  | 368738 | 369036 |
| UN46893 | Rsa1.0.02820.1 | 885  | 27629  | 0         | 350  | 350  | 100 + | 536 | 885  | 3469   | 3818   |
| UN46894 | Rsa1.0.00054.1 | 679  | 162053 | 5.00E-67  | 146  | 150  | 97 -  | 18  | 166  | 87400  | 87549  |
| UN46895 | Rsa1.0.04714.1 | 674  | 146738 | 0         | 517  | 518  | 99 -  | 3   | 520  | 143709 | 144226 |
| UN46896 | Rsa1.0.01480.1 | 1064 | 44926  | 0         | 565  | 602  | 93 -  | 2   | 597  | 26422  | 27002  |
| UN46897 | Rsa1.0.08258.1 | 675  | 7649   | 1.00E-112 | 263  | 278  | 94 +  | 401 | 670  | 6849   | 7126   |
| UN46898 | Rsa1.0.06312.1 | 561  | 11253  | 0         | 441  | 443  | 99 +  | 119 | 561  | 6117   | 6559   |
| UN46899 | Rsa1.0.00066.1 | 1020 | 152418 | 0         | 1011 | 1036 | 97 -  | 2   | 1020 | 20610  | 21645  |
| UN46900 | Rsa1.0.00128.1 | 1335 | 228675 | 0         | 656  | 670  | 97 -  | 185 | 854  | 191158 | 191827 |
| UN46901 | Rsa1.0.02174.1 | 686  | 34316  | 0         | 672  | 687  | 97 -  | 4   | 686  | 10484  | 11169  |
| UN46902 | Rsa1.0.00133.1 | 930  | 123768 | 0         | 726  | 727  | 99 +  | 204 | 930  | 70814  | 71540  |
| UN46903 | Rsa1.0.00457.1 | 474  | 337301 | 6.00E-78  | 170  | 175  | 97 -  | 302 | 473  | 129393 | 129567 |
| UN46904 | Rsa1.0.02681.1 | 1071 | 28711  | 0         | 924  | 958  | 96 -  | 124 | 1071 | 12430  | 13370  |
| UN46905 | Rsa1.0.01835.1 | 714  | 38542  | 1.00E-111 | 265  | 284  | 93 -  | 407 | 690  | 21372  | 21654  |
| UN46906 | Rsa1.0.04111.1 | 521  | 18991  | 0         | 468  | 502  | 93 +  | 21  | 511  | 11233  | 11732  |
| UN46907 | Rsa1.0.00047.1 | 776  | 168582 | 0         | 754  | 772  | 97 -  | 6   | 776  | 73677  | 74446  |
| UN46908 | Rsa1.0.03873.1 | 922  | 20360  | 0         | 919  | 921  | 99 -  | 3   | 922  | 9572   | 10491  |
| UN46909 | Rsa1.0.00336.1 | 713  | 445051 | 1.00E-115 | 211  | 211  | 100 + | 503 | 713  | 306387 | 306597 |
| UN46910 | Rsa1.0.00017.1 | 753  | 752458 | 2.00E-69  | 143  | 146  | 97 +  | 24  | 169  | 514913 | 515058 |
| UN46911 | Rsa1.0.05885.1 | 817  | 12333  | 0         | 808  | 818  | 98 +  | 1   | 817  | 5961   | 6777   |
| UN46912 | Rsa1.0.01453.1 | 711  | 45449  | 0         | 377  | 384  | 98 +  | 332 | 711  | 28795  | 29178  |
| UN46913 | Rsa1.0.01174.1 | 727  | 51696  | 0         | 417  | 420  | 99 -  | 3   | 422  | 35988  | 36407  |
| UN46914 | Rsa1.0.00108.1 | 853  | 478491 | 0         | 816  | 860  | 94 +  | 1   | 853  | 143365 | 144222 |
| UN46915 | Rsa1.0.03422.1 | 312  | 23076  | 1.00E-163 | 291  | 291  | 100 - | 22  | 312  | 7529   | 7819   |

|         |                |      |        |           |      |      |       |     |      |        |        |
|---------|----------------|------|--------|-----------|------|------|-------|-----|------|--------|--------|
| UN46916 | Rsa1.0.00472.1 | 821  | 398134 | 1.00E-120 | 219  | 219  | 100 + | 219 | 437  | 130323 | 130541 |
| UN46917 | Rsa1.0.03168.1 | 577  | 24827  | 5.00E-48  | 127  | 134  | 94 +  | 421 | 553  | 6822   | 6954   |
| UN46918 | Rsa1.0.00517.1 | 1127 | 142790 | 0         | 1121 | 1128 | 99 +  | 3   | 1127 | 68816  | 69943  |
| UN46919 | Rsa1.0.32235.1 | 802  | 706    | 0         | 381  | 394  | 96 +  | 410 | 802  | 310    | 698    |
| UN46920 | Rsa1.0.01374.1 | 830  | 47047  | 0         | 495  | 505  | 98 +  | 324 | 828  | 32469  | 32973  |
| UN46921 | Rsa1.0.00951.1 | 1011 | 164588 | 0         | 816  | 822  | 99 -  | 191 | 1011 | 122861 | 123682 |
| UN46922 | Rsa1.0.00300.1 | 408  | 97747  | 1.00E-128 | 247  | 252  | 98 -  | 3   | 254  | 64063  | 64314  |
| UN46923 | Rsa1.0.00079.1 | 535  | 606987 | 0         | 413  | 414  | 99 -  | 122 | 535  | 140616 | 141029 |
| UN46924 | Rsa1.0.00614.1 | 675  | 72276  | 1.00E-139 | 418  | 480  | 87 -  | 24  | 502  | 43629  | 44065  |
| UN46925 | Rsa1.0.01469.1 | 842  | 45139  | 9.00E-94  | 175  | 175  | 100 - | 418 | 592  | 43939  | 44113  |
| UN46926 | Rsa1.0.01943.1 | 523  | 37042  | 2.00E-78  | 260  | 297  | 87 -  | 23  | 304  | 6159   | 6455   |
| UN46927 | Rsa1.0.01435.1 | 997  | 45942  | 0         | 520  | 524  | 99 +  | 472 | 995  | 43533  | 44055  |
| UN46928 | Rsa1.0.00094.1 | 709  | 139042 | 0         | 412  | 425  | 96 +  | 1   | 425  | 39858  | 40279  |
| UN46929 | Rsa1.0.01527.1 | 698  | 43905  | 1.00E-95  | 199  | 206  | 96 -  | 348 | 553  | 36096  | 36301  |
| UN46930 | Rsa1.0.02179.1 | 793  | 34188  | 0         | 755  | 789  | 95 -  | 3   | 789  | 15437  | 16225  |
| UN46931 | Rsa1.0.00391.1 | 912  | 183853 | 0         | 854  | 887  | 96 -  | 1   | 882  | 41336  | 42222  |
| UN46932 | Rsa1.0.00157.1 | 587  | 245832 | 1.00E-152 | 291  | 297  | 97 +  | 3   | 299  | 50684  | 50980  |
| UN46933 | Rsa1.0.06968.1 | 774  | 10090  | 0         | 656  | 674  | 97 +  | 2   | 675  | 7748   | 8421   |
| UN46934 | Rsa1.0.01997.1 | 738  | 158416 | 5.00E-55  | 154  | 167  | 92 +  | 23  | 184  | 7969   | 8135   |
| UN46935 | Rsa1.0.00097.1 | 846  | 138858 | 0         | 468  | 478  | 97 +  | 4   | 481  | 75985  | 76458  |
| UN46936 | Rsa1.0.01440.1 | 680  | 45807  | 5.00E-98  | 243  | 262  | 92 -  | 419 | 680  | 15058  | 15313  |
| UN46937 | Rsa1.0.00483.1 | 892  | 81102  | 1.00E-99  | 208  | 213  | 97 +  | 678 | 890  | 3156   | 3366   |
| UN46938 | Rsa1.0.00419.1 | 1316 | 86562  | 0         | 486  | 500  | 97 -  | 819 | 1315 | 15415  | 15912  |
| UN46939 | Rsa1.0.00040.1 | 683  | 324196 | 4.00E-77  | 153  | 155  | 98 +  | 166 | 320  | 223264 | 223418 |
| UN46940 | Rsa1.0.16338.1 | 625  | 2190   | 1.00E-152 | 305  | 314  | 97 -  | 310 | 623  | 428    | 737    |
| UN46941 | Rsa1.0.00092.1 | 822  | 659932 | 0         | 538  | 555  | 96 -  | 267 | 820  | 20328  | 20882  |
| UN46942 | Rsa1.0.02658.1 | 278  | 28978  | 3.00E-75  | 188  | 201  | 93 -  | 81  | 278  | 17726  | 17925  |
| UN46943 | Rsa1.0.00147.1 | 732  | 249503 | 1.00E-138 | 255  | 257  | 99 +  | 471 | 727  | 130918 | 131174 |
| UN46944 | Rsa1.0.00685.1 | 982  | 68515  | 0         | 941  | 973  | 96 +  | 15  | 978  | 63616  | 64582  |
| UN46945 | Rsa1.0.01064.1 | 506  | 55295  | 0         | 463  | 464  | 99 +  | 43  | 506  | 38358  | 38820  |
| UN46946 | Rsa1.0.01775.1 | 631  | 39519  | 6.00E-94  | 208  | 217  | 95 +  | 413 | 629  | 6860   | 7072   |
| UN46947 | Rsa1.0.00433.1 | 699  | 85381  | 3.00E-96  | 245  | 263  | 93 -  | 439 | 699  | 65221  | 65477  |
| UN46948 | Rsa1.0.02041.1 | 955  | 163634 | 1.00E-121 | 238  | 243  | 97 -  | 711 | 953  | 18793  | 19032  |
| UN46949 | Rsa1.0.02508.1 | 696  | 30675  | 0         | 672  | 699  | 96 +  | 3   | 696  | 20166  | 20864  |
| UN46950 | Rsa1.0.00476.1 | 894  | 280966 | 1.00E-167 | 380  | 406  | 93 +  | 335 | 726  | 165661 | 166064 |
| UN46951 | Rsa1.0.14273.1 | 433  | 3588   | 3.00E-61  | 193  | 214  | 90 -  | 137 | 346  | 2294   | 2506   |
| UN46952 | Rsa1.0.02071.1 | 925  | 35409  | 0         | 812  | 840  | 96 +  | 89  | 925  | 15282  | 16121  |
| UN46953 | Rsa1.0.02169.1 | 849  | 34367  | 1.00E-129 | 255  | 262  | 97 +  | 435 | 696  | 20586  | 20847  |
| UN46954 | Rsa1.0.03157.1 | 706  | 24955  | 1.00E-105 | 204  | 206  | 99 +  | 3   | 207  | 961    | 1166   |

|         |                |      |        |           |     |     |       |     |      |        |        |
|---------|----------------|------|--------|-----------|-----|-----|-------|-----|------|--------|--------|
| UN46955 | Rsa1.0.06100.1 | 1395 | 11746  | 6.00E-90  | 172 | 173 | 99 +  | 944 | 1116 | 1076   | 1248   |
| UN46956 | Rsa1.0.00827.1 | 699  | 62790  | 5.00E-95  | 177 | 177 | 100 - | 517 | 693  | 17369  | 17545  |
| UN46957 | Rsa1.0.13836.1 | 689  | 4242   | 0         | 663 | 687 | 96 +  | 3   | 689  | 489    | 1175   |
| UN46958 | Rsa1.0.00224.1 | 688  | 327530 | 1.00E-115 | 243 | 250 | 97 +  | 439 | 688  | 201452 | 201698 |
| UN46959 | Rsa1.0.03007.1 | 663  | 26070  | 1.00E-139 | 287 | 299 | 95 -  | 63  | 361  | 3366   | 3664   |
| UN46960 | Rsa1.0.21880.1 | 842  | 1167   | 0         | 354 | 356 | 99 -  | 3   | 356  | 1      | 356    |
| UN46961 | Rsa1.0.00196.1 | 745  | 109960 | 0         | 357 | 369 | 96 +  | 377 | 745  | 82154  | 82522  |
| UN46962 | Rsa1.0.04008.1 | 575  | 19584  | 0         | 375 | 377 | 99 -  | 199 | 575  | 8060   | 8436   |
| UN46963 | Rsa1.0.01247.1 | 1001 | 49934  | 0         | 527 | 531 | 99 +  | 325 | 855  | 48036  | 48566  |
| UN46964 | Rsa1.0.00364.1 | 737  | 90951  | 0         | 632 | 639 | 98 -  | 28  | 666  | 77079  | 77717  |
| UN46965 | Rsa1.0.00236.1 | 658  | 104771 | 1.00E-107 | 206 | 209 | 98 +  | 2   | 210  | 46328  | 46536  |
| UN46966 | Rsa1.0.03674.1 | 403  | 21442  | 7.00E-62  | 186 | 205 | 90 -  | 7   | 200  | 7706   | 7909   |
| UN46967 | Rsa1.0.01971.1 | 746  | 36641  | 0         | 720 | 746 | 96 -  | 3   | 746  | 20994  | 21738  |
| UN46968 | Rsa1.0.00891.1 | 636  | 60724  | 1.00E-36  | 94  | 99  | 94 +  | 9   | 107  | 3995   | 4093   |
| UN46969 | Rsa1.0.01154.1 | 754  | 52249  | 0         | 491 | 499 | 98 -  | 256 | 754  | 34387  | 34885  |
| UN46970 | Rsa1.0.00678.1 | 606  | 193163 | 0         | 368 | 368 | 100 - | 20  | 387  | 26837  | 27204  |
| UN46971 | Rsa1.0.01431.1 | 396  | 167877 | 3.00E-82  | 200 | 212 | 94 +  | 189 | 394  | 12084  | 12295  |
| UN46972 | Rsa1.0.00374.1 | 786  | 165738 | 0         | 560 | 563 | 99 -  | 222 | 784  | 100956 | 101518 |
| UN46973 | Rsa1.0.03738.1 | 799  | 21071  | 0         | 750 | 806 | 93 +  | 3   | 797  | 19581  | 20374  |
| UN46974 | Rsa1.0.02681.1 | 638  | 28711  | 1.00E-128 | 259 | 268 | 96 +  | 152 | 419  | 6017   | 6284   |
| UN46975 | Rsa1.0.00425.1 | 741  | 147080 | 0         | 630 | 654 | 96 +  | 83  | 734  | 122978 | 123620 |
| UN46976 | Rsa1.0.00627.1 | 803  | 71566  | 0         | 550 | 569 | 96 +  | 228 | 796  | 18405  | 18972  |
| UN46977 | Rsa1.0.02969.1 | 621  | 26390  | 2.33E-156 | 339 | 361 | 93 -  | 250 | 599  | 9993   | 10349  |
| UN46978 | Rsa1.0.00465.1 | 1026 | 82138  | 0         | 632 | 655 | 96 +  | 375 | 1026 | 21396  | 22047  |
| UN46979 | Rsa1.0.02786.1 | 842  | 27880  | 0         | 464 | 480 | 96 -  | 358 | 836  | 18712  | 19185  |
| UN46980 | Rsa1.0.00084.1 | 862  | 142338 | 0         | 495 | 507 | 97 +  | 357 | 862  | 92610  | 93112  |
| UN46981 | Rsa1.0.00067.1 | 927  | 415055 | 0         | 391 | 392 | 99 -  | 536 | 927  | 38302  | 38693  |
| UN46982 | Rsa1.0.00123.1 | 350  | 325650 | 1.00E-35  | 95  | 101 | 94 +  | 5   | 105  | 197343 | 197443 |
| UN46983 | Rsa1.0.00429.1 | 410  | 85559  | 1.00E-103 | 206 | 211 | 97 -  | 2   | 212  | 13508  | 13718  |
| UN46984 | Rsa1.0.02552.1 | 600  | 30191  | 1.00E-155 | 403 | 439 | 91 +  | 169 | 599  | 21612  | 22050  |
| UN46985 | Rsa1.0.02253.1 | 810  | 33356  | 1.00E-104 | 220 | 229 | 96 -  | 3   | 231  | 21387  | 21615  |
| UN46986 | Rsa1.0.00409.1 | 830  | 146788 | 0         | 417 | 448 | 93 +  | 24  | 471  | 84614  | 85061  |
| UN46987 | Rsa1.0.04588.1 | 1324 | 16739  | 0         | 387 | 390 | 99 +  | 3   | 392  | 226    | 615    |
| UN46988 | Rsa1.0.00081.1 | 625  | 143261 | 0         | 611 | 638 | 95 +  | 3   | 625  | 123489 | 124121 |
| UN46989 | Rsa1.0.03435.1 | 725  | 22958  | 1.00E-172 | 316 | 319 | 99 -  | 161 | 479  | 21975  | 22293  |
| UN46990 | Rsa1.0.00890.1 | 583  | 323870 | 7.00E-32  | 143 | 167 | 85 -  | 142 | 308  | 18046  | 18212  |
| UN46991 | Rsa1.0.00782.1 | 570  | 64468  | 1.00E-91  | 189 | 195 | 96 -  | 3   | 197  | 12658  | 12852  |
| UN46992 | Rsa1.0.07476.1 | 934  | 9286   | 0         | 456 | 478 | 95 +  | 465 | 933  | 6549   | 7020   |
| UN46993 | Rsa1.0.00045.1 | 577  | 328694 | 1.00E-155 | 289 | 293 | 98 +  | 1   | 293  | 186976 | 187268 |

|         |                |      |        |           |     |      |       |     |      |        |        |
|---------|----------------|------|--------|-----------|-----|------|-------|-----|------|--------|--------|
| UN46994 | Rsa1.0.33333.1 | 662  | 681    | 0         | 559 | 593  | 94 +  | 25  | 616  | 90     | 681    |
| UN46995 | Rsa1.0.02377.1 | 620  | 31994  | 0         | 607 | 628  | 96 -  | 1   | 618  | 19529  | 20156  |
| UN46996 | Rsa1.0.02061.1 | 632  | 35487  | 2.00E-84  | 165 | 167  | 98 +  | 459 | 625  | 31628  | 31794  |
| UN46997 | Rsa1.0.01705.1 | 1104 | 40710  | 3.00E-69  | 229 | 258  | 88 +  | 347 | 598  | 37830  | 38081  |
| UN46998 | Rsa1.0.06439.1 | 719  | 11015  | 0         | 701 | 734  | 95 -  | 8   | 719  | 6118   | 6851   |
| UN46999 | Rsa1.0.00019.1 | 795  | 301669 | 0         | 454 | 476  | 95 -  | 1   | 475  | 102815 | 103276 |
| UN47000 | Rsa1.0.09270.1 | 794  | 6513   | 0         | 761 | 793  | 95 -  | 3   | 792  | 5303   | 6084   |
| UN47001 | Rsa1.0.03435.1 | 631  | 22958  | 1.00E-161 | 300 | 303  | 99 -  | 82  | 383  | 21975  | 22277  |
| UN47002 | Rsa1.0.02648.1 | 646  | 29073  | 1.00E-145 | 279 | 284  | 98 +  | 365 | 646  | 5937   | 6220   |
| UN47003 | Rsa1.0.07634.1 | 880  | 8979   | 1.00E-179 | 333 | 338  | 98 -  | 1   | 338  | 5114   | 5451   |
| UN47004 | Rsa1.0.01951.1 | 657  | 36941  | 1.00E-131 | 309 | 335  | 92 +  | 7   | 333  | 12732  | 13057  |
| UN47005 | Rsa1.0.00147.1 | 956  | 249503 | 1.00E-157 | 306 | 314  | 97 +  | 647 | 956  | 130918 | 131231 |
| UN47006 | Rsa1.0.00294.1 | 1166 | 144860 | 0         | 357 | 357  | 100 - | 3   | 359  | 62616  | 62972  |
| UN47007 | Rsa1.0.07058.1 | 719  | 9964   | 0         | 428 | 444  | 96 +  | 229 | 672  | 3048   | 3489   |
| UN47008 | Rsa1.0.00260.1 | 397  | 102021 | 3.00E-64  | 147 | 153  | 96 +  | 5   | 157  | 27867  | 28018  |
| UN47009 | Rsa1.0.16560.1 | 844  | 2112   | 1.00E-164 | 299 | 301  | 99 -  | 544 | 844  | 1072   | 1372   |
| UN47010 | Rsa1.0.00185.1 | 530  | 248445 | 1.00E-67  | 141 | 143  | 98 +  | 275 | 416  | 238605 | 238747 |
| UN47011 | Rsa1.0.03204.1 | 570  | 24622  | 0         | 561 | 569  | 98 -  | 3   | 570  | 11748  | 12314  |
| UN47012 | Rsa1.0.00032.1 | 809  | 306326 | 0         | 423 | 453  | 93 -  | 363 | 809  | 265441 | 265888 |
| UN47013 | Rsa1.0.00734.1 | 587  | 66508  | 0         | 420 | 445  | 94 +  | 143 | 584  | 38631  | 39056  |
| UN47014 | Rsa1.0.00133.1 | 819  | 123768 | 1.00E-142 | 282 | 289  | 97 +  | 121 | 408  | 28838  | 29126  |
| UN47015 | Rsa1.0.00034.1 | 590  | 260119 | 1.00E-157 | 281 | 281  | 100 + | 308 | 588  | 67803  | 68083  |
| UN47016 | Rsa1.0.00779.1 | 1039 | 64568  | 1.00E-151 | 292 | 299  | 97 -  | 145 | 443  | 47827  | 48125  |
| UN47017 | Rsa1.0.00071.1 | 772  | 345714 | 1.00E-175 | 356 | 368  | 96 -  | 405 | 771  | 336511 | 336877 |
| UN47018 | Rsa1.0.01946.1 | 777  | 36982  | 1.00E-101 | 219 | 230  | 95 +  | 169 | 398  | 31304  | 31527  |
| UN47019 | Rsa1.0.00111.1 | 884  | 390088 | 0         | 457 | 489  | 93 -  | 125 | 604  | 348911 | 349396 |
| UN47020 | Rsa1.0.04600.1 | 1055 | 16694  | 1.00E-150 | 354 | 378  | 93 +  | 679 | 1053 | 12270  | 12647  |
| UN47021 | Rsa1.0.00110.1 | 600  | 132719 | 0         | 428 | 433  | 98 +  | 168 | 600  | 6912   | 7343   |
| UN47022 | Rsa1.0.04234.1 | 901  | 18378  | 0         | 850 | 900  | 94 +  | 3   | 901  | 7570   | 8459   |
| UN47023 | Rsa1.0.18393.1 | 539  | 1607   | 5.00E-88  | 174 | 177  | 98 +  | 363 | 539  | 111    | 287    |
| UN47024 | Rsa1.0.00978.1 | 770  | 57739  | 0         | 451 | 476  | 94 +  | 302 | 770  | 14018  | 14493  |
| UN47025 | Rsa1.0.00519.1 | 727  | 197864 | 0         | 666 | 706  | 94 -  | 37  | 723  | 69817  | 70512  |
| UN47026 | Rsa1.0.00087.1 | 621  | 761073 | 0         | 581 | 626  | 92 -  | 2   | 618  | 730637 | 731259 |
| UN47027 | Rsa1.0.05326.1 | 600  | 14139  | 0         | 382 | 386  | 98 +  | 210 | 595  | 2284   | 2669   |
| UN47028 | Rsa1.0.00234.1 | 695  | 197060 | 0         | 660 | 694  | 95 +  | 1   | 691  | 71713  | 72403  |
| UN47029 | Rsa1.0.08630.1 | 1011 | 7104   | 0         | 968 | 1017 | 95 +  | 2   | 1011 | 5319   | 6335   |
| UN47030 | Rsa1.0.05870.1 | 783  | 146055 | 0         | 443 | 469  | 94 +  | 1   | 466  | 10604  | 11062  |
| UN47031 | Rsa1.0.00685.1 | 859  | 68515  | 0         | 455 | 488  | 93 +  | 25  | 493  | 1751   | 2238   |
| UN47032 | Rsa1.0.05447.1 | 783  | 13713  | 0         | 663 | 680  | 97 +  | 104 | 782  | 3222   | 3901   |



|         |                |      |        |           |     |      |       |     |      |        |        |
|---------|----------------|------|--------|-----------|-----|------|-------|-----|------|--------|--------|
| UN47033 | Rsa1.0.02409.1 | 753  | 31663  | 1.00E-124 | 256 | 265  | 96 +  | 428 | 692  | 29045  | 29307  |
| UN47034 | Rsa1.0.00675.1 | 465  | 145590 | 1.00E-153 | 365 | 395  | 92 +  | 72  | 465  | 28843  | 29218  |
| UN47035 | Rsa1.0.01000.1 | 798  | 57140  | 3.00E-72  | 139 | 139  | 100 + | 1   | 139  | 16793  | 16931  |
| UN47036 | Rsa1.0.06125.1 | 850  | 11680  | 2.00E-29  | 154 | 181  | 85 -  | 672 | 849  | 3543   | 3722   |
| UN47037 | Rsa1.0.01591.1 | 816  | 42718  | 1.00E-128 | 246 | 250  | 98 +  | 3   | 249  | 15644  | 15893  |
| UN47038 | Rsa1.0.00409.1 | 1021 | 146788 | 0         | 987 | 1021 | 96 -  | 2   | 1021 | 130112 | 131122 |
| UN47039 | Rsa1.0.03738.1 | 632  | 21071  | 1.00E-100 | 259 | 285  | 90 +  | 348 | 632  | 6129   | 6393   |
| UN47040 | Rsa1.0.14272.1 | 737  | 3590   | 0         | 736 | 737  | 99 -  | 1   | 737  | 753    | 1489   |
| UN47041 | Rsa1.0.62358.1 | 953  | 368    | 0         | 354 | 355  | 99 -  | 176 | 530  | 1      | 355    |
| UN47042 | Rsa1.0.04342.1 | 758  | 17828  | 1.00E-170 | 389 | 416  | 93 -  | 353 | 758  | 7688   | 8103   |
| UN47043 | Rsa1.0.00016.1 | 880  | 831256 | 0         | 653 | 670  | 97 -  | 2   | 671  | 828912 | 829581 |
| UN47044 | Rsa1.0.36100.1 | 536  | 625    | 1.00E-104 | 231 | 241  | 95 -  | 296 | 535  | 295    | 534    |
| UN47045 | Rsa1.0.11795.1 | 782  | 5406   | 0         | 337 | 340  | 99 +  | 335 | 673  | 5051   | 5390   |
| UN47046 | Rsa1.0.08149.1 | 1006 | 7833   | 0         | 544 | 587  | 92 -  | 3   | 562  | 5681   | 6261   |
| UN47047 | Rsa1.0.04010.1 | 322  | 19576  | 6.00E-71  | 154 | 160  | 96 -  | 160 | 319  | 906    | 1065   |
| UN47048 | Rsa1.0.00077.1 | 931  | 145005 | 0         | 873 | 946  | 92 +  | 4   | 931  | 33239  | 34165  |
| UN47049 | Rsa1.0.02991.1 | 841  | 26178  | 1.00E-173 | 406 | 431  | 94 -  | 418 | 839  | 13902  | 14329  |
| UN47050 | Rsa1.0.09810.1 | 656  | 6140   | 1.00E-158 | 391 | 423  | 92 -  | 225 | 636  | 433    | 849    |
| UN47051 | Rsa1.0.00546.1 | 538  | 76523  | 0         | 470 | 483  | 97 -  | 3   | 485  | 58516  | 58997  |
| UN47052 | Rsa1.0.00076.1 | 1152 | 146021 | 0         | 622 | 627  | 99 +  | 2   | 626  | 34001  | 34625  |
| UN47053 | Rsa1.0.00027.1 | 1318 | 283362 | 1.00E-166 | 326 | 332  | 98 -  | 987 | 1317 | 167589 | 167917 |
| UN47054 | Rsa1.0.02093.1 | 688  | 35125  | 1.00E-130 | 292 | 310  | 94 +  | 3   | 310  | 25142  | 25440  |
| UN47055 | Rsa1.0.00121.1 | 724  | 278029 | 1.00E-112 | 208 | 209  | 99 -  | 186 | 394  | 123394 | 123602 |
| UN47056 | Rsa1.0.07606.1 | 686  | 9035   | 1.00E-165 | 336 | 349  | 96 -  | 344 | 684  | 2794   | 3142   |
| UN47057 | Rsa1.0.00839.1 | 759  | 62533  | 0         | 727 | 759  | 95 -  | 2   | 759  | 8506   | 9259   |
| UN47058 | Rsa1.0.00233.1 | 777  | 104918 | 0         | 407 | 414  | 98 +  | 3   | 415  | 52969  | 53381  |
| UN47059 | Rsa1.0.00147.1 | 1066 | 249503 | 0         | 527 | 543  | 97 +  | 533 | 1066 | 130689 | 131231 |
| UN47060 | Rsa1.0.00544.1 | 740  | 76787  | 0         | 433 | 435  | 99 -  | 306 | 740  | 9263   | 9697   |
| UN47061 | Rsa1.0.00190.1 | 353  | 318240 | 1.00E-142 | 258 | 259  | 99 -  | 94  | 352  | 91483  | 91741  |
| UN47062 | Rsa1.0.04342.1 | 955  | 17828  | 0         | 408 | 422  | 96 -  | 52  | 471  | 442    | 863    |
| UN47063 | Rsa1.0.03831.1 | 804  | 20579  | 3.00E-90  | 172 | 173  | 99 -  | 194 | 366  | 17021  | 17193  |
| UN47064 | Rsa1.0.00030.1 | 763  | 250988 | 1.00E-122 | 282 | 297  | 94 +  | 453 | 739  | 151418 | 151713 |
| UN47065 | Rsa1.0.00181.1 | 777  | 114269 | 0         | 403 | 408  | 98 +  | 10  | 417  | 65748  | 66155  |
| UN47066 | Rsa1.0.03699.1 | 824  | 21301  | 1.00E-141 | 280 | 287  | 97 +  | 543 | 823  | 2353   | 2639   |
| UN47067 | Rsa1.0.00526.1 | 634  | 169279 | 0         | 323 | 323  | 100 - | 312 | 634  | 126452 | 126774 |
| UN47068 | Rsa1.0.02110.1 | 589  | 34919  | 1.00E-175 | 311 | 311  | 100 + | 277 | 587  | 14397  | 14707  |
| UN47069 | Rsa1.0.00959.1 | 559  | 58202  | 1.00E-170 | 471 | 529  | 89 -  | 26  | 526  | 40544  | 41064  |
| UN47070 | Rsa1.0.00711.1 | 707  | 67223  | 0         | 441 | 475  | 92 +  | 233 | 707  | 15004  | 15469  |
| UN47071 | Rsa1.0.00716.1 | 425  | 67078  | 1.00E-81  | 202 | 218  | 92 -  | 213 | 425  | 33216  | 33433  |

|         |                |      |        |           |      |      |       |     |      |        |        |
|---------|----------------|------|--------|-----------|------|------|-------|-----|------|--------|--------|
| UN47072 | Rsa1.0_04237.1 | 1016 | 18361  | 0         | 523  | 539  | 97 -  | 348 | 880  | 17823  | 18361  |
| UN47073 | Rsa1.0_01126.1 | 1056 | 53127  | 0         | 539  | 540  | 99 -  | 1   | 540  | 37749  | 38288  |
| UN47074 | Rsa1.0_00192.1 | 739  | 278200 | 0         | 395  | 396  | 99 +  | 344 | 739  | 13716  | 14111  |
| UN47075 | Rsa1.0_02022.1 | 680  | 35923  | 1.00E-164 | 299  | 301  | 99 +  | 380 | 680  | 5722   | 6022   |
| UN47076 | Rsa1.0_00710.1 | 536  | 67325  | 1.00E-133 | 279  | 290  | 96 -  | 228 | 514  | 65831  | 66119  |
| UN47077 | Rsa1.0_00139.1 | 1033 | 357786 | 0         | 577  | 577  | 100 + | 456 | 1032 | 68182  | 68758  |
| UN47078 | Rsa1.0_00003.1 | 709  | 340054 | 1.00E-169 | 308  | 310  | 99 -  | 1   | 310  | 74887  | 75196  |
| UN47079 | Rsa1.0_04161.1 | 690  | 18788  | 0         | 685  | 690  | 99 -  | 1   | 690  | 9616   | 10305  |
| UN47080 | Rsa1.0_17399.1 | 764  | 1839   | 5.00E-64  | 143  | 149  | 95 +  | 562 | 710  | 1383   | 1531   |
| UN47081 | Rsa1.0_00370.1 | 711  | 90472  | 0         | 514  | 533  | 96 -  | 42  | 572  | 21262  | 21794  |
| UN47082 | Rsa1.0_02930.1 | 683  | 26668  | 0         | 350  | 358  | 97 -  | 1   | 358  | 1991   | 2348   |
| UN47083 | Rsa1.0_00173.1 | 809  | 288743 | 1.00E-92  | 231  | 252  | 91 -  | 415 | 651  | 41110  | 41361  |
| UN47084 | Rsa1.0_03646.1 | 1243 | 21598  | 0         | 376  | 377  | 99 -  | 867 | 1243 | 20950  | 21326  |
| UN47085 | Rsa1.0_00020.1 | 752  | 283099 | 1.00E-169 | 302  | 302  | 100 - | 3   | 304  | 159657 | 159958 |
| UN47086 | Rsa1.0_01923.1 | 515  | 37233  | 1.00E-143 | 275  | 281  | 97 -  | 234 | 514  | 17962  | 18242  |
| UN47087 | Rsa1.0_02360.1 | 760  | 32203  | 1.00E-135 | 362  | 400  | 90 -  | 381 | 759  | 23954  | 24353  |
| UN47088 | Rsa1.0_00270.1 | 762  | 101236 | 1.00E-74  | 152  | 155  | 98 +  | 184 | 338  | 23891  | 24045  |
| UN47089 | Rsa1.0_02001.1 | 894  | 36198  | 0         | 539  | 572  | 94 +  | 327 | 894  | 31942  | 32504  |
| UN47090 | Rsa1.0_04002.1 | 707  | 19608  | 1.00E-105 | 197  | 198  | 99 +  | 510 | 707  | 17610  | 17807  |
| UN47091 | Rsa1.0_04064.1 | 487  | 19297  | 0         | 478  | 515  | 92 +  | 2   | 487  | 17898  | 18412  |
| UN47092 | Rsa1.0_01530.1 | 698  | 43820  | 1.00E-154 | 283  | 285  | 99 +  | 414 | 698  | 6829   | 7113   |
| UN47093 | Rsa1.0_28203.1 | 664  | 824    | 2.00E-91  | 177  | 179  | 98 -  | 141 | 319  | 258    | 436    |
| UN47094 | Rsa1.0_00316.1 | 1164 | 96264  | 0         | 584  | 619  | 94 -  | 555 | 1164 | 57209  | 57814  |
| UN47095 | Rsa1.0_01405.1 | 738  | 46445  | 0         | 476  | 490  | 97 +  | 3   | 492  | 15777  | 16259  |
| UN47096 | Rsa1.0_00066.1 | 1079 | 152418 | 2.00E-49  | 170  | 190  | 89 -  | 886 | 1065 | 141163 | 141351 |
| UN47097 | Rsa1.0_03005.1 | 843  | 26082  | 0         | 427  | 440  | 97 -  | 406 | 843  | 23165  | 23603  |
| UN47098 | Rsa1.0_00157.1 | 722  | 245832 | 1.00E-86  | 172  | 175  | 98 -  | 201 | 375  | 229901 | 230075 |
| UN47099 | Rsa1.0_01099.1 | 824  | 158481 | 0         | 424  | 424  | 100 - | 401 | 824  | 4730   | 5153   |
| UN47100 | Rsa1.0_00505.1 | 844  | 79323  | 1.00E-95  | 184  | 186  | 98 -  | 658 | 843  | 21756  | 21941  |
| UN47101 | Rsa1.0_00047.1 | 1035 | 168582 | 1.00E-175 | 322  | 324  | 99 +  | 711 | 1033 | 5017   | 5340   |
| UN47102 | Rsa1.0_00425.1 | 1068 | 147080 | 0         | 1067 | 1067 | 100 + | 2   | 1068 | 112291 | 113357 |
| UN47103 | Rsa1.0_13520.1 | 1161 | 4755   | 0         | 956  | 988  | 96 -  | 3   | 989  | 2115   | 3096   |
| UN47104 | Rsa1.0_01050.1 | 727  | 55651  | 0         | 688  | 710  | 96 -  | 3   | 712  | 26458  | 27157  |
| UN47105 | Rsa1.0_03900.1 | 771  | 133221 | 0         | 746  | 767  | 97 -  | 3   | 767  | 6905   | 7666   |
| UN47106 | Rsa1.0_03338.1 | 839  | 136346 | 0         | 473  | 475  | 99 +  | 365 | 837  | 1672   | 2146   |
| UN47107 | Rsa1.0_02155.1 | 961  | 34522  | 1.00E-173 | 354  | 369  | 95 -  | 593 | 961  | 16316  | 16680  |
| UN47108 | Rsa1.0_13737.1 | 1200 | 4403   | 1.00E-152 | 322  | 335  | 96 -  | 3   | 337  | 3954   | 4282   |
| UN47109 | Rsa1.0_05748.1 | 500  | 12749  | 0         | 491  | 496  | 98 +  | 2   | 497  | 8625   | 9120   |
| UN47110 | Rsa1.0_00524.1 | 473  | 169613 | 1.00E-143 | 337  | 364  | 92 -  | 76  | 439  | 161744 | 162096 |

|         |                |      |        |           |      |      |       |     |      |        |        |
|---------|----------------|------|--------|-----------|------|------|-------|-----|------|--------|--------|
| UN47111 | Rsa1.0.01006.1 | 754  | 163670 | 4.00E-86  | 168  | 170  | 98 +  | 155 | 324  | 24121  | 24290  |
| UN47112 | Rsa1.0.05624.1 | 737  | 13140  | 7.00E-91  | 391  | 464  | 84 -  | 258 | 715  | 3783   | 4199   |
| UN47113 | Rsa1.0.10978.1 | 899  | 5657   | 0         | 493  | 498  | 98 -  | 400 | 897  | 577    | 1074   |
| UN47114 | Rsa1.0.01990.1 | 294  | 36431  | 5.00E-96  | 181  | 182  | 99 +  | 111 | 292  | 3858   | 4039   |
| UN47115 | Rsa1.0.01092.1 | 695  | 54348  | 0         | 489  | 518  | 94 -  | 186 | 695  | 22737  | 23240  |
| UN47116 | Rsa1.0.00293.1 | 640  | 339294 | 0         | 636  | 642  | 99 -  | 1   | 639  | 69443  | 70084  |
| UN47117 | Rsa1.0.00570.1 | 815  | 75002  | 1.00E-172 | 321  | 326  | 98 -  | 135 | 460  | 35959  | 36284  |
| UN47118 | Rsa1.0.00059.1 | 1027 | 159650 | 1.00E-143 | 261  | 262  | 99 +  | 766 | 1027 | 86606  | 86867  |
| UN47119 | Rsa1.0.02807.1 | 916  | 27680  | 1.00E-170 | 318  | 322  | 98 +  | 3   | 324  | 2648   | 2966   |
| UN47120 | Rsa1.0.02192.1 | 667  | 171291 | 1.00E-106 | 232  | 239  | 97 -  | 429 | 666  | 10258  | 10492  |
| UN47121 | Rsa1.0.00454.1 | 597  | 216970 | 0         | 461  | 465  | 99 +  | 128 | 592  | 158285 | 158748 |
| UN47122 | Rsa1.0.00451.1 | 472  | 322533 | 9.00E-68  | 188  | 207  | 90 +  | 226 | 432  | 293086 | 293292 |
| UN47123 | Rsa1.0.41020.1 | 727  | 548    | 1.00E-179 | 330  | 334  | 98 +  | 390 | 723  | 1      | 334    |
| UN47124 | Rsa1.0.00613.1 | 922  | 209993 | 0         | 627  | 642  | 97 -  | 3   | 640  | 186113 | 186754 |
| UN47125 | Rsa1.0.03606.1 | 702  | 21818  | 0         | 340  | 341  | 99 -  | 361 | 701  | 1746   | 2085   |
| UN47126 | Rsa1.0.65165.1 | 483  | 352    | 9.00E-65  | 188  | 210  | 89 +  | 286 | 481  | 1      | 210    |
| UN47127 | Rsa1.0.02662.1 | 863  | 28956  | 0         | 718  | 721  | 99 +  | 143 | 862  | 9105   | 9825   |
| UN47128 | Rsa1.0.00254.1 | 744  | 102600 | 0         | 322  | 322  | 100 + | 18  | 339  | 73202  | 73523  |
| UN47129 | Rsa1.0.00199.1 | 1016 | 249604 | 0         | 1007 | 1014 | 99 -  | 3   | 1016 | 31917  | 32927  |
| UN47130 | Rsa1.0.00409.1 | 826  | 146788 | 0         | 351  | 355  | 98 -  | 474 | 826  | 2442   | 2796   |
| UN47131 | Rsa1.0.05611.1 | 762  | 13193  | 0         | 495  | 517  | 95 -  | 258 | 762  | 2613   | 3128   |
| UN47132 | Rsa1.0.00310.1 | 778  | 96852  | 1.00E-161 | 359  | 381  | 94 +  | 7   | 384  | 3224   | 3602   |
| UN47133 | Rsa1.0.04984.1 | 593  | 15240  | 0         | 458  | 474  | 96 -  | 124 | 592  | 830    | 1301   |
| UN47134 | Rsa1.0.01094.1 | 975  | 167285 | 0         | 630  | 631  | 99 +  | 343 | 973  | 49207  | 49837  |
| UN47135 | Rsa1.0.02360.1 | 1176 | 32203  | 0         | 1107 | 1148 | 96 -  | 35  | 1173 | 23959  | 25100  |
| UN47136 | Rsa1.0.01963.1 | 916  | 36719  | 1.00E-141 | 277  | 284  | 97 +  | 3   | 283  | 19437  | 19720  |
| UN47137 | Rsa1.0.03418.1 | 844  | 147293 | 4.00E-65  | 142  | 147  | 96 -  | 3   | 149  | 11737  | 11883  |
| UN47138 | Rsa1.0.00398.1 | 824  | 88007  | 1.00E-122 | 231  | 233  | 99 -  | 592 | 822  | 43436  | 43668  |
| UN47139 | Rsa1.0.02022.1 | 650  | 35923  | 0         | 638  | 648  | 98 -  | 3   | 650  | 18309  | 18955  |
| UN47140 | Rsa1.0.00006.1 | 715  | 396176 | 1.00E-165 | 317  | 323  | 98 -  | 348 | 669  | 308942 | 309264 |
| UN47141 | Rsa1.0.00562.1 | 463  | 75565  | 1.00E-167 | 348  | 363  | 95 -  | 107 | 463  | 9178   | 9537   |
| UN47142 | Rsa1.0.00173.1 | 833  | 288743 | 5.00E-95  | 232  | 252  | 92 -  | 431 | 667  | 41110  | 41361  |
| UN47143 | Rsa1.0.00437.1 | 595  | 84879  | 1.00E-149 | 293  | 300  | 97 +  | 294 | 592  | 50629  | 50928  |
| UN47144 | Rsa1.0.00944.1 | 872  | 58733  | 0         | 440  | 460  | 95 +  | 422 | 872  | 35701  | 36160  |
| UN47145 | Rsa1.0.01923.1 | 618  | 37233  | 1.00E-144 | 262  | 263  | 99 +  | 354 | 616  | 36457  | 36719  |
| UN47146 | Rsa1.0.00143.1 | 825  | 121313 | 1.00E-142 | 262  | 264  | 99 +  | 560 | 823  | 87223  | 87486  |
| UN47147 | Rsa1.0.00336.1 | 595  | 445051 | 0         | 594  | 598  | 99 -  | 1   | 595  | 174757 | 175354 |
| UN47148 | Rsa1.0.06303.1 | 1023 | 11268  | 0         | 756  | 787  | 96 +  | 1   | 787  | 4871   | 5657   |
| UN47149 | Rsa1.0.04882.1 | 1912 | 15606  | 0         | 489  | 490  | 99 +  | 1   | 490  | 14116  | 14604  |

|         |                |      |        |           |     |     |       |      |      |        |        |
|---------|----------------|------|--------|-----------|-----|-----|-------|------|------|--------|--------|
| UN47150 | Rsa1.0.00152.1 | 921  | 257730 | 0         | 707 | 777 | 90 +  | 24   | 781  | 201925 | 202676 |
| UN47151 | Rsa1.0.03655.1 | 1851 | 21557  | 0         | 351 | 356 | 98 -  | 776  | 1131 | 8466   | 8821   |
| UN47152 | Rsa1.0.08194.1 | 1145 | 7757   | 1.00E-125 | 278 | 296 | 93 -  | 850  | 1145 | 5057   | 5343   |
| UN47153 | Rsa1.0.00502.1 | 605  | 204180 | 0         | 481 | 502 | 95 -  | 69   | 568  | 63874  | 64372  |
| UN47154 | Rsa1.0.24740.1 | 1011 | 969    | 0         | 477 | 494 | 96 +  | 346  | 839  | 476    | 969    |
| UN47155 | Rsa1.0.00092.1 | 1172 | 659932 | 0         | 414 | 441 | 93 +  | 67   | 501  | 504572 | 505012 |
| UN47156 | Rsa1.0.01454.1 | 1165 | 45440  | 1.00E-157 | 341 | 360 | 94 +  | 806  | 1165 | 32801  | 33143  |
| UN47157 | Rsa1.0.02267.1 | 832  | 33194  | 1.00E-141 | 255 | 255 | 100 - | 578  | 832  | 28524  | 28778  |
| UN47158 | Rsa1.0.02295.1 | 1829 | 149884 | 0         | 773 | 819 | 94 +  | 1001 | 1801 | 12460  | 13272  |
| UN47159 | Rsa1.0.03122.1 | 876  | 25207  | 2.00E-85  | 164 | 165 | 99 +  | 421  | 585  | 7333   | 7497   |
| UN47160 | Rsa1.0.01140.1 | 1183 | 52586  | 0         | 591 | 592 | 99 +  | 592  | 1183 | 4637   | 5228   |
| UN47161 | Rsa1.0.05445.1 | 966  | 13718  | 0         | 784 | 791 | 99 -  | 176  | 966  | 12928  | 13718  |
| UN47162 | Rsa1.0.00260.1 | 1182 | 102021 | 0         | 427 | 436 | 97 +  | 300  | 735  | 63807  | 64242  |
| UN47163 | Rsa1.0.03831.1 | 1133 | 20579  | 1.00E-119 | 277 | 293 | 94 -  | 848  | 1132 | 18129  | 18420  |
| UN47164 | Rsa1.0.08910.1 | 1378 | 6798   | 5.00E-84  | 171 | 175 | 97 +  | 365  | 539  | 1064   | 1238   |
| UN47165 | Rsa1.0.02209.1 | 1067 | 33873  | 1.00E-180 | 343 | 350 | 98 -  | 721  | 1067 | 26608  | 26957  |
| UN47166 | Rsa1.0.00369.1 | 1124 | 266462 | 0         | 434 | 447 | 97 -  | 372  | 818  | 169356 | 169802 |
| UN47167 | Rsa1.0.01512.1 | 1208 | 44234  | 0         | 363 | 363 | 100 + | 497  | 859  | 9997   | 10359  |
| UN47168 | Rsa1.0.07877.1 | 1037 | 8373   | 3.00E-72  | 145 | 147 | 98 +  | 214  | 360  | 4515   | 4661   |
| UN47169 | Rsa1.0.04458.1 | 790  | 17255  | 2.00E-94  | 206 | 215 | 95 +  | 80   | 294  | 6682   | 6894   |
| UN47170 | Rsa1.0.05978.1 | 1005 | 12053  | 1.00E-122 | 228 | 230 | 99 +  | 1    | 230  | 2033   | 2262   |
| UN47171 | Rsa1.0.01762.1 | 1035 | 39682  | 0         | 401 | 413 | 97 -  | 585  | 995  | 6859   | 7267   |
| UN47172 | Rsa1.0.00183.1 | 1133 | 113277 | 1.00E-122 | 258 | 268 | 96 -  | 1    | 263  | 67148  | 67415  |
| UN47173 | Rsa1.0.00638.1 | 910  | 71037  | 1.00E-139 | 269 | 275 | 97 +  | 306  | 580  | 9032   | 9306   |
| UN47174 | Rsa1.0.00068.1 | 1228 | 151813 | 0         | 713 | 723 | 98 -  | 507  | 1228 | 97097  | 97819  |
| UN47175 | Rsa1.0.03556.1 | 1195 | 22121  | 0         | 548 | 563 | 97 -  | 2    | 564  | 14573  | 15135  |
| UN47176 | Rsa1.0.01363.1 | 1018 | 47195  | 1.00E-145 | 281 | 286 | 98 -  | 2    | 286  | 674    | 959    |
| UN47177 | Rsa1.0.01172.1 | 848  | 51734  | 1.00E-140 | 268 | 273 | 98 +  | 442  | 714  | 12391  | 12663  |
| UN47178 | Rsa1.0.01696.1 | 1034 | 301850 | 4.00E-56  | 133 | 140 | 95 -  | 729  | 868  | 291899 | 292038 |
| UN47179 | Rsa1.0.05161.1 | 1406 | 14631  | 0         | 508 | 509 | 99 -  | 896  | 1404 | 8345   | 8853   |
| UN47180 | Rsa1.0.04128.1 | 1143 | 18927  | 0         | 505 | 539 | 93 +  | 610  | 1142 | 12414  | 12952  |
| UN47181 | Rsa1.0.00096.1 | 904  | 198773 | 1.00E-120 | 229 | 232 | 98 -  | 61   | 292  | 15954  | 16185  |
| UN47182 | Rsa1.0.23487.1 | 817  | 1045   | 0         | 727 | 762 | 95 +  | 51   | 811  | 280    | 1041   |
| UN47183 | Rsa1.0.00033.1 | 1029 | 515811 | 1.00E-126 | 265 | 276 | 96 +  | 1    | 272  | 41408  | 41679  |
| UN47184 | Rsa1.0.05541.1 | 1122 | 139959 | 1.00E-160 | 327 | 338 | 96 +  | 2    | 338  | 2771   | 3107   |
| UN47185 | Rsa1.0.00026.1 | 945  | 327835 | 1.00E-123 | 268 | 283 | 94 -  | 668  | 944  | 191630 | 191906 |
| UN47186 | Rsa1.0.00512.1 | 1370 | 200277 | 1.00E-166 | 305 | 308 | 99 -  | 528  | 835  | 65170  | 65477  |
| UN47187 | Rsa1.0.01727.1 | 1299 | 40243  | 1.00E-172 | 318 | 322 | 98 +  | 978  | 1299 | 7333   | 7654   |
| UN47188 | Rsa1.0.00228.1 | 896  | 105511 | 1.00E-120 | 220 | 220 | 100 + | 475  | 694  | 39328  | 39547  |

|         |                |      |        |           |     |     |       |      |      |        |        |
|---------|----------------|------|--------|-----------|-----|-----|-------|------|------|--------|--------|
| UN47189 | Rsa1.0_00966.1 | 1694 | 58136  | 0         | 547 | 550 | 99 -  | 1145 | 1693 | 50250  | 50799  |
| UN47190 | Rsa1.0_00707.1 | 961  | 190112 | 0         | 816 | 840 | 97 -  | 122  | 959  | 52301  | 53136  |
| UN47191 | Rsa1.0_00645.1 | 1314 | 189716 | 0         | 435 | 447 | 97 -  | 127  | 573  | 34408  | 34854  |
| UN47192 | Rsa1.0_07464.1 | 922  | 9328   | 1.00E-120 | 265 | 274 | 96 +  | 655  | 922  | 4      | 277    |
| UN47193 | Rsa1.0_00038.1 | 947  | 314568 | 1.00E-167 | 307 | 310 | 99 -  | 121  | 430  | 249454 | 249763 |
| UN47194 | Rsa1.0_00302.1 | 863  | 97521  | 6.00E-98  | 191 | 194 | 98 -  | 417  | 610  | 84056  | 84249  |
| UN47195 | Rsa1.0_07849.1 | 809  | 8425   | 0         | 436 | 455 | 95 -  | 18   | 470  | 4233   | 4687   |
| UN47196 | Rsa1.0_00464.1 | 924  | 82253  | 1.00E-116 | 278 | 297 | 93 -  | 628  | 923  | 14659  | 14950  |
| UN47197 | Rsa1.0_00119.1 | 1335 | 467509 | 0         | 904 | 909 | 99 -  | 1    | 909  | 386218 | 387126 |
| UN47198 | Rsa1.0_29830.1 | 1017 | 770    | 1.00E-140 | 299 | 311 | 96 -  | 79   | 386  | 114    | 422    |
| UN47199 | Rsa1.0_04286.1 | 1288 | 18084  | 0         | 546 | 561 | 97 -  | 558  | 1118 | 13076  | 13636  |
| UN47200 | Rsa1.0_02608.1 | 1071 | 29613  | 0         | 421 | 450 | 93 +  | 3    | 445  | 24664  | 25105  |
| UN47201 | Rsa1.0_01294.1 | 885  | 49090  | 1.00E-102 | 269 | 294 | 91 +  | 526  | 808  | 26968  | 27257  |
| UN47202 | Rsa1.0_01949.1 | 937  | 36960  | 2.00E-98  | 232 | 247 | 93 +  | 14   | 260  | 23210  | 23455  |
| UN47203 | Rsa1.0_02901.1 | 1140 | 26909  | 1.00E-104 | 193 | 193 | 100 + | 946  | 1138 | 15810  | 16002  |
| UN47204 | Rsa1.0_00035.1 | 1070 | 176449 | 1.00E-179 | 347 | 354 | 98 -  | 1    | 353  | 156806 | 157158 |
| UN47205 | Rsa1.0_13737.1 | 1271 | 4403   | 1.00E-112 | 299 | 331 | 90 -  | 3    | 317  | 3954   | 4282   |
| UN47206 | Rsa1.0_00376.1 | 1011 | 90101  | 0         | 444 | 457 | 97 +  | 542  | 995  | 49557  | 50013  |
| UN47207 | Rsa1.0_03170.1 | 782  | 24824  | 1.00E-114 | 279 | 300 | 93 -  | 3    | 296  | 12994  | 13291  |
| UN47208 | Rsa1.0_00979.1 | 1272 | 57733  | 1.00E-101 | 259 | 281 | 92 +  | 827  | 1104 | 41925  | 42199  |
| UN47209 | Rsa1.0_00503.1 | 703  | 79468  | 1.00E-157 | 281 | 281 | 100 + | 423  | 703  | 66553  | 66833  |
| UN47210 | Rsa1.0_00546.1 | 994  | 76523  | 1.00E-115 | 242 | 250 | 96 -  | 42   | 291  | 51920  | 52166  |
| UN47211 | Rsa1.0_21327.1 | 829  | 1215   | 1.00E-105 | 195 | 195 | 100 + | 633  | 827  | 2      | 196    |
| UN47212 | Rsa1.0_01400.1 | 922  | 46560  | 1.00E-152 | 343 | 364 | 94 -  | 559  | 921  | 44010  | 44371  |
| UN47213 | Rsa1.0_00369.1 | 725  | 266462 | 0         | 404 | 417 | 96 +  | 257  | 673  | 192827 | 193243 |
| UN47214 | Rsa1.0_01519.1 | 911  | 44144  | 0         | 498 | 521 | 95 -  | 393  | 909  | 11636  | 12151  |
| UN47215 | Rsa1.0_00571.1 | 1092 | 329018 | 0         | 965 | 991 | 97 +  | 1    | 991  | 143183 | 144173 |
| UN47216 | Rsa1.0_03981.1 | 1066 | 19724  | 1.00E-108 | 220 | 227 | 96 -  | 288  | 514  | 19277  | 19503  |
| UN47217 | Rsa1.0_00336.1 | 949  | 445051 | 2.00E-91  | 255 | 283 | 90 +  | 1    | 282  | 162086 | 162354 |
| UN47218 | Rsa1.0_25939.1 | 787  | 913    | 1.00E-83  | 218 | 236 | 92 -  | 6    | 236  | 519    | 745    |
| UN47219 | Rsa1.0_00065.1 | 848  | 454616 | 1.00E-101 | 198 | 200 | 99 +  | 3    | 201  | 114556 | 114755 |
| UN47220 | Rsa1.0_00016.1 | 1243 | 831256 | 1.00E-159 | 297 | 301 | 98 +  | 1    | 301  | 370703 | 371003 |
| UN47221 | Rsa1.0_01278.1 | 890  | 49370  | 2.00E-88  | 178 | 182 | 97 -  | 55   | 236  | 20617  | 20798  |
| UN47222 | Rsa1.0_16090.1 | 835  | 2289   | 0         | 711 | 739 | 96 -  | 46   | 779  | 941    | 1678   |
| UN47223 | Rsa1.0_00913.1 | 1421 | 59914  | 0         | 456 | 479 | 95 -  | 946  | 1421 | 54250  | 54717  |
| UN47224 | Rsa1.0_01129.1 | 1338 | 52949  | 1.00E-130 | 260 | 268 | 97 +  | 1    | 268  | 31983  | 32250  |
| UN47225 | Rsa1.0_01200.1 | 726  | 50895  | 0         | 375 | 390 | 96 -  | 338  | 726  | 30798  | 31187  |
| UN47226 | Rsa1.0_00040.1 | 980  | 324196 | 0         | 581 | 602 | 96 +  | 377  | 977  | 246545 | 247142 |
| UN47227 | Rsa1.0_05571.1 | 1157 | 13298  | 1.00E-111 | 213 | 216 | 98 +  | 258  | 473  | 12821  | 13036  |

|         |                |      |        |           |      |      |       |      |      |        |        |
|---------|----------------|------|--------|-----------|------|------|-------|------|------|--------|--------|
| UN47228 | Rsa1.0.01422.1 | 1194 | 46172  | 0         | 485  | 506  | 95 -  | 688  | 1193 | 10159  | 10663  |
| UN47229 | Rsa1.0.00127.1 | 881  | 127446 | 1.00E-175 | 358  | 373  | 95 +  | 26   | 389  | 113033 | 113405 |
| UN47230 | Rsa1.0.00027.1 | 1225 | 283362 | 1.00E-128 | 248  | 253  | 98 -  | 130  | 382  | 169310 | 169562 |
| UN47231 | Rsa1.0.01955.1 | 1044 | 36850  | 0         | 965  | 999  | 96 -  | 47   | 1042 | 12729  | 13717  |
| UN47232 | Rsa1.0.00104.1 | 997  | 368722 | 0         | 961  | 991  | 96 +  | 1    | 988  | 74316  | 75304  |
| UN47233 | Rsa1.0.01046.1 | 1031 | 152989 | 1.00E-163 | 315  | 323  | 97 -  | 541  | 863  | 127928 | 128250 |
| UN47234 | Rsa1.0.03634.1 | 962  | 145192 | 1.00E-151 | 309  | 321  | 96 -  | 643  | 961  | 133588 | 133901 |
| UN47235 | Rsa1.0.00340.1 | 1019 | 305782 | 1.00E-126 | 302  | 325  | 92 -  | 688  | 1011 | 194335 | 194649 |
| UN47236 | Rsa1.0.00075.1 | 1203 | 146680 | 0         | 913  | 1032 | 88 +  | 175  | 1196 | 127796 | 128824 |
| UN47237 | Rsa1.0.02550.1 | 1115 | 291051 | 0         | 477  | 510  | 93 -  | 612  | 1115 | 18047  | 18543  |
| UN47238 | Rsa1.0.00991.1 | 1083 | 143101 | 0         | 458  | 481  | 95 -  | 1    | 473  | 34650  | 35127  |
| UN47239 | Rsa1.0.00175.1 | 1168 | 166121 | 0         | 355  | 365  | 97 +  | 1    | 365  | 139894 | 140257 |
| UN47240 | Rsa1.0.00107.1 | 781  | 431659 | 0         | 700  | 700  | 100 + | 82   | 781  | 337025 | 337724 |
| UN47241 | Rsa1.0.01945.1 | 1441 | 36989  | 0         | 1372 | 1441 | 95 +  | 3    | 1440 | 25689  | 27128  |
| UN47242 | Rsa1.0.00363.1 | 1098 | 90968  | 0         | 421  | 427  | 98 -  | 609  | 1035 | 9354   | 9780   |
| UN47243 | Rsa1.0.00038.1 | 1120 | 314568 | 0         | 484  | 506  | 95 +  | 1    | 506  | 237798 | 238293 |
| UN47244 | Rsa1.0.00311.1 | 1122 | 96847  | 0         | 397  | 407  | 97 -  | 2    | 408  | 34780  | 35186  |
| UN47245 | Rsa1.0.00002.1 | 1069 | 601661 | 1.00E-138 | 351  | 381  | 92 +  | 5    | 379  | 264130 | 264507 |
| UN47246 | Rsa1.0.05262.1 | 1165 | 14334  | 0         | 394  | 402  | 98 +  | 763  | 1164 | 5964   | 6365   |
| UN47247 | Rsa1.0.00547.1 | 1063 | 76521  | 0         | 407  | 420  | 96 +  | 1    | 420  | 54318  | 54737  |
| UN47248 | Rsa1.0.00086.1 | 1317 | 439854 | 2.00E-80  | 191  | 202  | 94 -  | 888  | 1085 | 431    | 631    |
| UN47249 | Rsa1.0.14881.1 | 1151 | 2995   | 0         | 458  | 466  | 98 -  | 1    | 466  | 2323   | 2787   |
| UN47250 | Rsa1.0.00078.1 | 1088 | 175053 | 0         | 1070 | 1108 | 96 -  | 1    | 1088 | 78763  | 79870  |
| UN47251 | Rsa1.0.01537.1 | 906  | 187285 | 1.00E-137 | 294  | 307  | 95 -  | 593  | 899  | 38677  | 38980  |
| UN47252 | Rsa1.0.05382.1 | 965  | 13963  | 1.00E-129 | 246  | 250  | 98 -  | 307  | 556  | 8823   | 9072   |
| UN47253 | Rsa1.0.01502.1 | 1197 | 44519  | 0         | 455  | 478  | 95 +  | 691  | 1165 | 36621  | 37095  |
| UN47254 | Rsa1.0.00222.1 | 1383 | 172263 | 0         | 597  | 631  | 94 +  | 4    | 619  | 39661  | 40291  |
| UN47255 | Rsa1.0.01422.1 | 1260 | 46172  | 0         | 602  | 643  | 93 -  | 616  | 1258 | 27036  | 27664  |
| UN47256 | Rsa1.0.00175.1 | 1294 | 166121 | 5.00E-84  | 233  | 261  | 89 +  | 1051 | 1291 | 28735  | 28995  |
| UN47257 | Rsa1.0.36296.1 | 1201 | 621    | 0         | 358  | 358  | 100 - | 360  | 717  | 1      | 358    |
| UN47258 | Rsa1.0.00675.1 | 1062 | 145590 | 1.00E-157 | 426  | 470  | 90 -  | 592  | 1059 | 45278  | 45726  |
| UN47259 | Rsa1.0.00371.1 | 640  | 90463  | 0         | 394  | 408  | 96 +  | 29   | 434  | 73365  | 73770  |
| UN47260 | Rsa1.0.00147.1 | 1224 | 249503 | 1.00E-163 | 704  | 841  | 83 +  | 306  | 1143 | 209487 | 210327 |
| UN47261 | Rsa1.0.00132.1 | 1498 | 124299 | 0         | 494  | 516  | 95 -  | 726  | 1232 | 99696  | 100209 |
| UN47262 | Rsa1.0.00460.1 | 1008 | 206387 | 1.00E-136 | 292  | 308  | 94 +  | 3    | 298  | 200445 | 200752 |
| UN47263 | Rsa1.0.18628.1 | 980  | 1562   | 0         | 914  | 962  | 95 -  | 2    | 959  | 377    | 1333   |
| UN47264 | Rsa1.0.00777.1 | 976  | 191865 | 0         | 417  | 436  | 95 -  | 175  | 610  | 128527 | 128962 |
| UN47265 | Rsa1.0.01668.1 | 946  | 41299  | 1.00E-104 | 264  | 288  | 91 -  | 123  | 410  | 40402  | 40689  |
| UN47266 | Rsa1.0.00470.1 | 958  | 81968  | 4.00E-90  | 187  | 193  | 96 +  | 359  | 551  | 50362  | 50554  |

|         |                |      |        |           |      |      |       |     |      |        |        |
|---------|----------------|------|--------|-----------|------|------|-------|-----|------|--------|--------|
| UN47267 | Rsa1.0_00305.1 | 876  | 97308  | 1.00E-174 | 355  | 370  | 95 +  | 1   | 370  | 78725  | 79094  |
| UN47268 | Rsa1.0_11462.1 | 1176 | 5500   | 0         | 963  | 1021 | 94 -  | 180 | 1176 | 2312   | 3331   |
| UN47269 | Rsa1.0_00301.1 | 1176 | 365315 | 1.00E-173 | 384  | 407  | 94 -  | 685 | 1088 | 194144 | 194545 |
| UN47270 | Rsa1.0_00213.1 | 899  | 108167 | 1.00E-113 | 232  | 239  | 97 +  | 654 | 891  | 5743   | 5981   |
| UN47271 | Rsa1.0_00681.1 | 1404 | 68779  | 1.00E-152 | 309  | 321  | 96 +  | 7   | 322  | 42546  | 42866  |
| UN47272 | Rsa1.0_03352.1 | 1248 | 23506  | 0         | 339  | 342  | 99 -  | 1   | 342  | 17500  | 17841  |
| UN47273 | Rsa1.0_00176.1 | 823  | 240984 | 0         | 532  | 550  | 96 -  | 12  | 558  | 232410 | 232959 |
| UN47274 | Rsa1.0_00646.1 | 938  | 70473  | 0         | 566  | 578  | 97 -  | 236 | 812  | 1840   | 2417   |
| UN47275 | Rsa1.0_00706.1 | 1455 | 291570 | 0         | 408  | 417  | 97 +  | 1   | 417  | 26833  | 27244  |
| UN47276 | Rsa1.0_00116.1 | 1033 | 365886 | 1.00E-132 | 242  | 243  | 99 -  | 388 | 630  | 239724 | 239966 |
| UN47277 | Rsa1.0_00221.1 | 1001 | 106972 | 0         | 529  | 543  | 97 +  | 60  | 602  | 37067  | 37609  |
| UN47278 | Rsa1.0_00552.1 | 1012 | 206757 | 1.00E-119 | 298  | 320  | 93 -  | 701 | 1012 | 193069 | 193385 |
| UN47279 | Rsa1.0_08133.1 | 1309 | 7852   | 0         | 483  | 496  | 97 +  | 490 | 983  | 1307   | 1802   |
| UN47280 | Rsa1.0_00124.1 | 896  | 262503 | 1.00E-138 | 301  | 317  | 94 -  | 3   | 313  | 29622  | 29938  |
| UN47281 | Rsa1.0_02896.1 | 835  | 26970  | 1.00E-145 | 274  | 278  | 98 +  | 405 | 682  | 16798  | 17075  |
| UN47282 | Rsa1.0_01958.1 | 1090 | 261128 | 5.00E-99  | 219  | 230  | 95 -  | 200 | 426  | 114876 | 115105 |
| UN47283 | Rsa1.0_16832.1 | 1028 | 2019   | 2.00E-86  | 200  | 213  | 93 +  | 820 | 1025 | 122    | 334    |
| UN47284 | Rsa1.0_00033.1 | 965  | 515811 | 0         | 415  | 427  | 97 -  | 102 | 528  | 146527 | 146950 |
| UN47285 | Rsa1.0_00178.1 | 985  | 114861 | 1.00E-120 | 293  | 316  | 92 -  | 640 | 943  | 84657  | 84969  |
| UN47286 | Rsa1.0_00332.1 | 1133 | 94575  | 1.00E-169 | 348  | 361  | 96 +  | 1   | 360  | 22631  | 22989  |
| UN47287 | Rsa1.0_01882.1 | 777  | 37697  | 0         | 423  | 437  | 96 +  | 341 | 773  | 23907  | 24342  |
| UN47288 | Rsa1.0_00759.1 | 1346 | 65465  | 0         | 629  | 665  | 94 +  | 694 | 1346 | 64601  | 65257  |
| UN47289 | Rsa1.0_01419.1 | 1211 | 167402 | 0         | 784  | 821  | 95 +  | 39  | 854  | 130447 | 131261 |
| UN47290 | Rsa1.0_00009.1 | 784  | 232558 | 1.00E-86  | 223  | 238  | 93 -  | 519 | 751  | 117653 | 117890 |
| UN47291 | Rsa1.0_00414.1 | 1309 | 202190 | 0         | 1263 | 1307 | 96 -  | 2   | 1307 | 14829  | 16134  |
| UN47292 | Rsa1.0_00110.1 | 800  | 132719 | 1.00E-98  | 183  | 183  | 100 + | 2   | 184  | 31034  | 31216  |
| UN47293 | Rsa1.0_00006.1 | 880  | 396176 | 1.00E-128 | 351  | 390  | 90 -  | 500 | 871  | 368653 | 369036 |
| UN47294 | Rsa1.0_15067.1 | 998  | 2854   | 0         | 531  | 552  | 96 +  | 1   | 550  | 715    | 1260   |
| UN47295 | Rsa1.0_00721.1 | 1341 | 66918  | 1.00E-140 | 393  | 442  | 88 +  | 352 | 766  | 918    | 1359   |
| UN47296 | Rsa1.0_00434.1 | 1446 | 85171  | 1.00E-152 | 427  | 472  | 90 +  | 319 | 769  | 8097   | 8558   |
| UN47297 | Rsa1.0_00647.1 | 1308 | 70440  | 0         | 580  | 584  | 99 -  | 2   | 585  | 6501   | 7084   |
| UN47298 | Rsa1.0_03695.1 | 906  | 21329  | 0         | 353  | 354  | 99 -  | 552 | 905  | 9772   | 10125  |
| UN47299 | Rsa1.0_00066.1 | 1101 | 152418 | 0         | 461  | 463  | 99 -  | 639 | 1101 | 15042  | 15504  |
| UN47300 | Rsa1.0_00377.1 | 996  | 90038  | 4.00E-84  | 313  | 364  | 85 +  | 632 | 979  | 9787   | 10142  |
| UN47301 | Rsa1.0_00244.1 | 1289 | 103590 | 0         | 758  | 767  | 98 +  | 3   | 766  | 76979  | 77745  |
| UN47302 | Rsa1.0_11872.1 | 905  | 5384   | 1.00E-136 | 310  | 328  | 94 -  | 586 | 905  | 622    | 947    |
| UN47303 | Rsa1.0_01877.1 | 1317 | 37789  | 1.00E-121 | 307  | 334  | 91 +  | 887 | 1218 | 28390  | 28705  |
| UN47304 | Rsa1.0_02128.1 | 851  | 34758  | 4.00E-99  | 205  | 212  | 96 +  | 457 | 668  | 25609  | 25820  |
| UN47305 | Rsa1.0_00360.1 | 1113 | 91190  | 1.00E-162 | 390  | 420  | 92 +  | 18  | 431  | 43709  | 44119  |

|         |                |      |        |           |     |     |       |     |      |        |        |
|---------|----------------|------|--------|-----------|-----|-----|-------|-----|------|--------|--------|
| UN47306 | Rsa1.0.00011.1 | 861  | 225044 | 0         | 411 | 412 | 99 -  | 3   | 414  | 207085 | 207496 |
| UN47307 | Rsa1.0.00414.1 | 1004 | 202190 | 1.00E-120 | 219 | 219 | 100 + | 4   | 222  | 77715  | 77933  |
| UN47308 | Rsa1.0.00010.1 | 1031 | 294827 | 1.00E-180 | 320 | 320 | 100 - | 712 | 1031 | 135518 | 135837 |
| UN47309 | Rsa1.0.00010.1 | 908  | 294827 | 1.00E-179 | 349 | 359 | 97 -  | 4   | 362  | 124006 | 124364 |
| UN47310 | Rsa1.0.02399.1 | 900  | 31763  | 0         | 663 | 699 | 94 -  | 4   | 701  | 12962  | 13656  |
| UN47311 | Rsa1.0.00005.1 | 962  | 353093 | 1.00E-162 | 296 | 298 | 99 -  | 3   | 300  | 124216 | 124513 |
| UN47312 | Rsa1.0.03180.1 | 1137 | 24764  | 1.00E-140 | 281 | 289 | 97 +  | 849 | 1136 | 21745  | 22033  |
| UN47313 | Rsa1.0.00425.1 | 1120 | 147080 | 0         | 531 | 562 | 94 +  | 223 | 769  | 75128  | 75689  |
| UN47314 | Rsa1.0.03589.1 | 1080 | 21893  | 1.00E-161 | 357 | 375 | 95 -  | 708 | 1077 | 547    | 920    |
| UN47315 | Rsa1.0.03646.1 | 1194 | 21598  | 1.00E-101 | 242 | 258 | 93 +  | 936 | 1193 | 15624  | 15878  |
| UN47316 | Rsa1.0.17040.1 | 1073 | 1944   | 1.00E-164 | 335 | 348 | 96 +  | 729 | 1073 | 195    | 542    |
| UN47317 | Rsa1.0.00016.1 | 878  | 831256 | 0         | 434 | 465 | 93 -  | 412 | 875  | 426945 | 427401 |
| UN47318 | Rsa1.0.00970.1 | 918  | 57994  | 1.00E-111 | 269 | 290 | 92 -  | 616 | 902  | 23509  | 23798  |
| UN47319 | Rsa1.0.00316.1 | 1199 | 96264  | 0         | 561 | 584 | 96 +  | 31  | 612  | 57242  | 57814  |
| UN47320 | Rsa1.0.03191.1 | 981  | 145762 | 1.00E-136 | 326 | 350 | 93 -  | 4   | 352  | 16325  | 16663  |
| UN47321 | Rsa1.0.00025.1 | 1102 | 277312 | 0         | 811 | 845 | 95 +  | 261 | 1101 | 64914  | 65753  |
| UN47322 | Rsa1.0.00341.1 | 1018 | 249309 | 4.00E-87  | 251 | 276 | 90 -  | 751 | 1018 | 114521 | 114796 |
| UN47323 | Rsa1.0.00314.1 | 274  | 96472  | 4.00E-84  | 219 | 238 | 92 +  | 37  | 273  | 56253  | 56490  |
| UN47324 | Rsa1.0.00065.1 | 1140 | 454616 | 1.00E-173 | 352 | 366 | 96 +  | 773 | 1138 | 191624 | 191986 |
| UN47325 | Rsa1.0.01758.1 | 1099 | 39747  | 0         | 394 | 409 | 96 -  | 349 | 757  | 37160  | 37568  |
| UN47326 | Rsa1.0.00232.1 | 888  | 104936 | 1.00E-124 | 255 | 265 | 96 +  | 624 | 888  | 38388  | 38646  |
| UN47327 | Rsa1.0.05546.1 | 1125 | 13379  | 2.33E-156 | 290 | 299 | 96 -  | 450 | 748  | 7596   | 7894   |
| UN47328 | Rsa1.0.00037.1 | 935  | 307838 | 1.00E-175 | 401 | 432 | 92 +  | 518 | 935  | 239665 | 240086 |
| UN47329 | Rsa1.0.14656.1 | 965  | 3183   | 2.33E-156 | 365 | 401 | 91 -  | 1   | 376  | 2283   | 2682   |
| UN47330 | Rsa1.0.11907.1 | 953  | 5374   | 0         | 441 | 460 | 95 +  | 449 | 906  | 1101   | 1554   |
| UN47331 | Rsa1.0.01121.1 | 869  | 53407  | 0         | 720 | 757 | 95 +  | 114 | 869  | 19076  | 19832  |
| UN47332 | Rsa1.0.02565.1 | 942  | 30046  | 6.00E-98  | 185 | 186 | 99 +  | 387 | 572  | 26965  | 27150  |
| UN47333 | Rsa1.0.00394.1 | 716  | 148426 | 0         | 534 | 553 | 96 -  | 3   | 550  | 67486  | 68035  |
| UN47334 | Rsa1.0.00111.1 | 1249 | 390088 | 1.00E-152 | 336 | 356 | 94 +  | 894 | 1248 | 139323 | 139671 |
| UN47335 | Rsa1.0.01978.1 | 796  | 36546  | 1.00E-148 | 276 | 279 | 98 -  | 1   | 279  | 12510  | 12788  |
| UN47336 | Rsa1.0.00663.1 | 796  | 164969 | 1.00E-116 | 222 | 225 | 98 -  | 6   | 230  | 16367  | 16591  |
| UN47337 | Rsa1.0.00335.1 | 1017 | 94371  | 2.00E-70  | 151 | 156 | 96 +  | 494 | 649  | 28536  | 28691  |
| UN47338 | Rsa1.0.00285.1 | 882  | 149638 | 7.00E-73  | 213 | 235 | 90 -  | 649 | 882  | 80910  | 81127  |
| UN47339 | Rsa1.0.00058.1 | 922  | 159921 | 0         | 579 | 581 | 99 -  | 1   | 581  | 71350  | 71930  |
| UN47340 | Rsa1.0.18035.1 | 1261 | 1685   | 0         | 600 | 635 | 94 -  | 627 | 1255 | 463    | 1094   |
| UN47341 | Rsa1.0.00017.1 | 885  | 752458 | 0         | 570 | 604 | 94 -  | 279 | 882  | 616165 | 616762 |
| UN47342 | Rsa1.0.01561.1 | 1161 | 43227  | 1.00E-81  | 164 | 167 | 98 +  | 588 | 754  | 26162  | 26328  |
| UN47343 | Rsa1.0.00179.1 | 1063 | 393324 | 1.00E-179 | 380 | 398 | 95 -  | 594 | 990  | 2      | 398    |
| UN47344 | Rsa1.0.00686.1 | 1289 | 68511  | 1.00E-171 | 371 | 393 | 94 +  | 1   | 393  | 28010  | 28402  |



|         |                |      |        |           |      |      |       |     |      |        |        |
|---------|----------------|------|--------|-----------|------|------|-------|-----|------|--------|--------|
| UN47345 | Rsa1.0_01233.1 | 1109 | 50184  | 2.33E-156 | 263  | 263  | 100 + | 846 | 1108 | 22267  | 22529  |
| UN47346 | Rsa1.0_00115.1 | 1109 | 131321 | 1.00E-136 | 271  | 278  | 97 +  | 1   | 278  | 47489  | 47765  |
| UN47347 | Rsa1.0_01466.1 | 1002 | 45161  | 1.00E-138 | 295  | 310  | 95 -  | 91  | 400  | 25169  | 25478  |
| UN47348 | Rsa1.0_00092.1 | 958  | 659932 | 0         | 358  | 360  | 99 +  | 588 | 947  | 517900 | 518259 |
| UN47349 | Rsa1.0_00058.1 | 874  | 159921 | 0         | 429  | 444  | 96 +  | 2   | 443  | 84712  | 85153  |
| UN47350 | Rsa1.0_00317.1 | 1027 | 218290 | 1.00E-106 | 302  | 338  | 89 -  | 698 | 1025 | 72596  | 72921  |
| UN47351 | Rsa1.0_00410.1 | 1137 | 86957  | 1.00E-126 | 323  | 355  | 90 +  | 806 | 1137 | 21084  | 21438  |
| UN47352 | Rsa1.0_00078.1 | 1442 | 175053 | 0         | 423  | 445  | 95 -  | 269 | 712  | 38368  | 38812  |
| UN47353 | Rsa1.0_00429.1 | 784  | 85559  | 1.00E-143 | 279  | 286  | 97 +  | 426 | 711  | 23140  | 23425  |
| UN47354 | Rsa1.0_03884.1 | 1115 | 20274  | 1.00E-169 | 438  | 482  | 90 +  | 637 | 1114 | 19654  | 20114  |
| UN47355 | Rsa1.0_00200.1 | 993  | 162016 | 1.00E-142 | 297  | 310  | 95 +  | 682 | 991  | 96962  | 97268  |
| UN47356 | Rsa1.0_00047.1 | 1784 | 168582 | 0         | 958  | 975  | 98 -  | 6   | 980  | 4911   | 5882   |
| UN47357 | Rsa1.0_33317.1 | 710  | 681    | 1.00E-128 | 364  | 406  | 89 -  | 171 | 567  | 1      | 401    |
| UN47358 | Rsa1.0_03290.1 | 1260 | 24011  | 0         | 1246 | 1256 | 99 -  | 1   | 1256 | 22630  | 23881  |
| UN47359 | Rsa1.0_00917.1 | 1378 | 182012 | 1.00E-129 | 258  | 266  | 96 +  | 274 | 539  | 154788 | 155053 |
| UN47360 | Rsa1.0_01440.1 | 784  | 45807  | 0         | 549  | 560  | 98 -  | 227 | 784  | 13701  | 14260  |
| UN47361 | Rsa1.0_00015.1 | 1161 | 561803 | 0         | 375  | 376  | 99 +  | 784 | 1159 | 264496 | 264871 |
| UN47362 | Rsa1.0_02768.1 | 941  | 28110  | 1.00E-104 | 224  | 234  | 95 +  | 706 | 939  | 6687   | 6917   |
| UN47363 | Rsa1.0_01217.1 | 740  | 50554  | 0         | 721  | 740  | 97 +  | 1   | 740  | 47377  | 48115  |
| UN47364 | Rsa1.0_02027.1 | 1077 | 35869  | 0         | 453  | 473  | 95 +  | 26  | 493  | 8117   | 8586   |
| UN47365 | Rsa1.0_01401.1 | 1095 | 142441 | 0         | 696  | 723  | 96 -  | 2   | 724  | 132155 | 132877 |
| UN47366 | Rsa1.0_04387.1 | 1154 | 17625  | 0         | 434  | 455  | 95 -  | 1   | 452  | 7587   | 8040   |
| UN47367 | Rsa1.0_00069.1 | 853  | 403561 | 0         | 827  | 861  | 96 -  | 1   | 853  | 48397  | 49254  |
| UN47368 | Rsa1.0_00195.1 | 1315 | 251884 | 0         | 454  | 459  | 98 +  | 854 | 1312 | 208307 | 208765 |
| UN47369 | Rsa1.0_00991.1 | 819  | 143101 | 0         | 486  | 513  | 94 +  | 3   | 512  | 133448 | 133953 |
| UN47370 | Rsa1.0_00198.1 | 1212 | 222963 | 0         | 985  | 1035 | 95 +  | 183 | 1210 | 138000 | 139025 |
| UN47371 | Rsa1.0_00270.1 | 975  | 101236 | 1.00E-113 | 269  | 289  | 93 +  | 3   | 286  | 62827  | 63106  |
| UN47372 | Rsa1.0_09897.1 | 778  | 6100   | 0         | 746  | 748  | 99 +  | 31  | 778  | 4394   | 5141   |
| UN47373 | Rsa1.0_00145.1 | 1307 | 261008 | 0         | 385  | 385  | 100 - | 9   | 393  | 247625 | 248009 |
| UN47374 | Rsa1.0_05360.1 | 1191 | 14053  | 0         | 396  | 408  | 97 -  | 1   | 403  | 12218  | 12625  |
| UN47375 | Rsa1.0_01688.1 | 1032 | 40965  | 1.00E-154 | 286  | 289  | 98 -  | 5   | 293  | 36521  | 36809  |
| UN47376 | Rsa1.0_00290.1 | 1301 | 225096 | 0         | 432  | 448  | 96 +  | 845 | 1289 | 190346 | 190793 |
| UN47377 | Rsa1.0_00240.1 | 1067 | 104175 | 1.00E-132 | 264  | 270  | 97 -  | 2   | 270  | 69794  | 70060  |
| UN47378 | Rsa1.0_02375.1 | 906  | 32026  | 0         | 581  | 582  | 99 -  | 1   | 582  | 29253  | 29834  |
| UN47379 | Rsa1.0_00875.1 | 1080 | 61371  | 2.00E-98  | 189  | 191  | 98 -  | 528 | 718  | 18473  | 18663  |
| UN47380 | Rsa1.0_00280.1 | 1206 | 99966  | 0         | 696  | 728  | 95 +  | 2   | 729  | 37775  | 38502  |
| UN47381 | Rsa1.0_05002.1 | 842  | 15173  | 4.00E-96  | 185  | 187  | 98 +  | 312 | 498  | 8410   | 8596   |
| UN47382 | Rsa1.0_09927.1 | 684  | 6087   | 1.00E-152 | 272  | 272  | 100 + | 413 | 684  | 2764   | 3035   |
| UN47383 | Rsa1.0_03728.1 | 967  | 21147  | 0         | 404  | 429  | 94 -  | 540 | 967  | 671    | 1092   |

|         |                |      |        |           |      |      |       |     |      |        |        |
|---------|----------------|------|--------|-----------|------|------|-------|-----|------|--------|--------|
| UN47384 | Rsa1.0_08018.1 | 1076 | 8075   | 1.00E-169 | 330  | 339  | 97 +  | 205 | 543  | 5142   | 5477   |
| UN47385 | Rsa1.0_01553.1 | 828  | 43379  | 1.00E-162 | 358  | 377  | 94 +  | 457 | 827  | 26451  | 26825  |
| UN47386 | Rsa1.0_06463.1 | 831  | 10968  | 1.00E-89  | 168  | 168  | 100 + | 268 | 435  | 7644   | 7811   |
| UN47387 | Rsa1.0_00153.1 | 778  | 192931 | 0         | 372  | 381  | 97 -  | 4   | 383  | 125256 | 125636 |
| UN47388 | Rsa1.0_01091.1 | 988  | 54383  | 0         | 450  | 483  | 93 -  | 506 | 988  | 11424  | 11894  |
| UN47389 | Rsa1.0_00060.1 | 695  | 502678 | 0         | 431  | 455  | 94 +  | 3   | 454  | 390337 | 390786 |
| UN47390 | Rsa1.0_01230.1 | 1342 | 50221  | 1.00E-127 | 252  | 259  | 97 +  | 507 | 765  | 23481  | 23739  |
| UN47391 | Rsa1.0_14172.1 | 873  | 3708   | 0         | 667  | 703  | 94 +  | 1   | 697  | 999    | 1699   |
| UN47392 | Rsa1.0_00656.1 | 842  | 69968  | 1.00E-129 | 281  | 297  | 94 -  | 545 | 840  | 49221  | 49506  |
| UN47393 | Rsa1.0_00105.1 | 717  | 134138 | 0         | 422  | 445  | 94 +  | 271 | 709  | 81280  | 81721  |
| UN47394 | Rsa1.0_06715.1 | 1096 | 10485  | 0         | 540  | 548  | 98 +  | 545 | 1090 | 2804   | 3351   |
| UN47395 | Rsa1.0_00190.1 | 1053 | 318240 | 0         | 734  | 757  | 96 -  | 2   | 758  | 191430 | 192186 |
| UN47396 | Rsa1.0_00027.1 | 942  | 283362 | 0         | 914  | 942  | 97 +  | 1   | 942  | 182990 | 183928 |
| UN47397 | Rsa1.0_00747.1 | 846  | 66030  | 1.00E-169 | 371  | 384  | 96 -  | 450 | 823  | 36330  | 36713  |
| UN47398 | Rsa1.0_02036.1 | 1090 | 35731  | 0         | 540  | 549  | 98 -  | 2   | 549  | 24917  | 25465  |
| UN47399 | Rsa1.0_00190.1 | 1595 | 318240 | 0         | 818  | 843  | 97 -  | 2   | 843  | 5556   | 6398   |
| UN47400 | Rsa1.0_00088.1 | 837  | 141341 | 1.00E-167 | 352  | 368  | 95 -  | 474 | 837  | 108283 | 108650 |
| UN47401 | Rsa1.0_00036.1 | 1150 | 176186 | 1.00E-171 | 354  | 369  | 95 +  | 342 | 709  | 102434 | 102802 |
| UN47402 | Rsa1.0_01005.1 | 851  | 56967  | 1.00E-132 | 258  | 264  | 97 -  | 318 | 581  | 19291  | 19554  |
| UN47403 | Rsa1.0_00122.1 | 1373 | 265937 | 0         | 1314 | 1373 | 95 -  | 3   | 1371 | 30234  | 31597  |
| UN47404 | Rsa1.0_00047.1 | 1120 | 168582 | 1.00E-114 | 263  | 280  | 93 +  | 835 | 1112 | 115947 | 116226 |
| UN47405 | Rsa1.0_00737.1 | 1033 | 66432  | 1.00E-143 | 315  | 329  | 95 -  | 710 | 1033 | 14245  | 14573  |
| UN47406 | Rsa1.0_00642.1 | 1005 | 201230 | 0         | 917  | 944  | 97 -  | 61  | 1004 | 154468 | 155411 |
| UN47407 | Rsa1.0_01569.1 | 1278 | 43029  | 1.00E-115 | 256  | 271  | 94 -  | 629 | 899  | 37369  | 37639  |
| UN47408 | Rsa1.0_03981.1 | 1381 | 19724  | 0         | 1030 | 1054 | 97 -  | 274 | 1327 | 14411  | 15464  |
| UN47409 | Rsa1.0_02314.1 | 2172 | 32642  | 0         | 738  | 754  | 97 -  | 203 | 944  | 31338  | 32091  |
| UN47410 | Rsa1.0_00265.1 | 1130 | 220635 | 0         | 449  | 486  | 92 -  | 642 | 1122 | 171385 | 171865 |
| UN47411 | Rsa1.0_00615.1 | 946  | 72235  | 0         | 596  | 642  | 92 -  | 324 | 946  | 54768  | 55402  |
| UN47412 | Rsa1.0_03267.1 | 1232 | 24230  | 0         | 707  | 726  | 97 +  | 495 | 1219 | 12074  | 12793  |
| UN47413 | Rsa1.0_03567.1 | 568  | 22049  | 1.00E-113 | 241  | 252  | 95 -  | 317 | 568  | 3612   | 3863   |
| UN47414 | Rsa1.0_00642.1 | 1104 | 201230 | 0         | 609  | 631  | 96 +  | 474 | 1104 | 180069 | 180698 |
| UN47415 | Rsa1.0_03535.1 | 1128 | 22242  | 1.00E-111 | 235  | 244  | 96 +  | 878 | 1120 | 1      | 244    |
| UN47416 | Rsa1.0_00281.1 | 849  | 99908  | 0         | 486  | 491  | 98 +  | 3   | 493  | 71663  | 72153  |
| UN47417 | Rsa1.0_00585.1 | 1104 | 74164  | 1.00E-175 | 360  | 374  | 96 +  | 732 | 1101 | 59726  | 60099  |
| UN47418 | Rsa1.0_00137.1 | 1629 | 122457 | 0         | 1330 | 1331 | 99 +  | 88  | 1418 | 25491  | 26821  |
| UN47419 | Rsa1.0_01453.1 | 959  | 45449  | 0         | 928  | 960  | 96 +  | 1   | 959  | 5460   | 6415   |
| UN47420 | Rsa1.0_03736.1 | 1733 | 21081  | 0         | 504  | 504  | 100 + | 208 | 711  | 7755   | 8258   |
| UN47421 | Rsa1.0_00297.1 | 1034 | 97836  | 1.00E-172 | 356  | 371  | 95 -  | 664 | 1029 | 33828  | 34198  |
| UN47422 | Rsa1.0_00009.1 | 1000 | 232558 | 0         | 656  | 668  | 98 +  | 333 | 1000 | 138504 | 139171 |

|         |                |      |        |           |     |      |       |      |      |        |        |
|---------|----------------|------|--------|-----------|-----|------|-------|------|------|--------|--------|
| UN47423 | Rsa1.0_00265.1 | 1198 | 220635 | 0         | 365 | 376  | 97 -  | 827  | 1197 | 188872 | 189247 |
| UN47424 | Rsa1.0_00055.1 | 1242 | 520193 | 0         | 895 | 920  | 97 +  | 336  | 1242 | 163773 | 164692 |
| UN47425 | Rsa1.0_00545.1 | 1271 | 189649 | 0         | 536 | 558  | 96 +  | 2    | 559  | 37227  | 37783  |
| UN47426 | Rsa1.0_00249.1 | 719  | 153740 | 1.00E-70  | 163 | 171  | 95 -  | 488  | 656  | 53018  | 53188  |
| UN47427 | Rsa1.0_01061.1 | 1148 | 55349  | 0         | 641 | 654  | 98 +  | 1    | 653  | 29588  | 30241  |
| UN47428 | Rsa1.0_00067.1 | 952  | 415055 | 0         | 643 | 659  | 97 -  | 292  | 949  | 247472 | 248130 |
| UN47429 | Rsa1.0_00894.1 | 1033 | 269700 | 4.00E-84  | 208 | 222  | 93 -  | 700  | 919  | 128137 | 128357 |
| UN47430 | Rsa1.0_00015.1 | 1070 | 561803 | 0         | 903 | 952  | 94 +  | 1    | 949  | 253976 | 254907 |
| UN47431 | Rsa1.0_00227.1 | 1056 | 105849 | 0         | 498 | 501  | 99 -  | 1    | 501  | 97890  | 98388  |
| UN47432 | Rsa1.0_03860.1 | 1437 | 20407  | 0         | 512 | 513  | 99 +  | 1    | 513  | 15804  | 16316  |
| UN47433 | Rsa1.0_00065.1 | 1914 | 454616 | 0         | 846 | 871  | 97 +  | 1    | 869  | 211421 | 212285 |
| UN47434 | Rsa1.0_00222.1 | 1334 | 172263 | 1.00E-126 | 248 | 252  | 98 +  | 1    | 249  | 57593  | 57843  |
| UN47435 | Rsa1.0_00546.1 | 780  | 76523  | 1.00E-101 | 274 | 299  | 91 -  | 11   | 305  | 74240  | 74534  |
| UN47436 | Rsa1.0_00087.1 | 636  | 761073 | 0         | 559 | 576  | 97 +  | 3    | 578  | 580717 | 581292 |
| UN47437 | Rsa1.0_00005.1 | 1241 | 353093 | 1.00E-157 | 308 | 317  | 97 -  | 153  | 469  | 51852  | 52168  |
| UN47438 | Rsa1.0_00050.1 | 848  | 237174 | 0         | 578 | 622  | 92 -  | 3    | 605  | 7598   | 8208   |
| UN47439 | Rsa1.0_02177.1 | 1039 | 34262  | 1.00E-77  | 169 | 176  | 96 -  | 516  | 691  | 14545  | 14720  |
| UN47440 | Rsa1.0_00227.1 | 1029 | 105849 | 1.00E-136 | 276 | 285  | 96 -  | 747  | 1029 | 102312 | 102596 |
| UN47441 | Rsa1.0_00779.1 | 1083 | 64568  | 7.00E-89  | 216 | 232  | 93 +  | 649  | 880  | 33078  | 33300  |
| UN47442 | Rsa1.0_00139.1 | 962  | 357786 | 6.00E-92  | 195 | 202  | 96 +  | 762  | 960  | 292094 | 292295 |
| UN47443 | Rsa1.0_01228.1 | 1097 | 50238  | 1.00E-134 | 348 | 382  | 91 -  | 2    | 383  | 2669   | 3038   |
| UN47444 | Rsa1.0_00038.1 | 1052 | 314568 | 1.00E-126 | 374 | 420  | 89 +  | 3    | 419  | 252498 | 252902 |
| UN47445 | Rsa1.0_06968.1 | 1074 | 10090  | 0         | 676 | 705  | 95 -  | 358  | 1058 | 7721   | 8421   |
| UN47446 | Rsa1.0_00398.1 | 781  | 88007  | 0         | 551 | 574  | 95 +  | 206  | 779  | 86395  | 86963  |
| UN47447 | Rsa1.0_01431.1 | 757  | 167877 | 0         | 711 | 757  | 93 +  | 1    | 757  | 36804  | 37540  |
| UN47448 | Rsa1.0_02874.1 | 1345 | 27070  | 1.00E-114 | 230 | 237  | 97 +  | 842  | 1078 | 464    | 700    |
| UN47449 | Rsa1.0_14107.1 | 1033 | 3802   | 0         | 585 | 590  | 99 +  | 444  | 1033 | 477    | 1066   |
| UN47450 | Rsa1.0_01382.1 | 1432 | 46877  | 1.00E-152 | 333 | 354  | 94 -  | 1075 | 1417 | 37450  | 37801  |
| UN47451 | Rsa1.0_10640.1 | 780  | 5772   | 1.00E-116 | 261 | 279  | 93 +  | 502  | 780  | 1603   | 1871   |
| UN47452 | Rsa1.0_71002.1 | 1132 | 323    | 6.00E-83  | 160 | 161  | 99 +  | 556  | 716  | 2      | 162    |
| UN47453 | Rsa1.0_24540.1 | 700  | 982    | 0         | 635 | 657  | 96 +  | 1    | 657  | 323    | 979    |
| UN47454 | Rsa1.0_04524.1 | 1152 | 16981  | 0         | 400 | 422  | 94 -  | 37   | 454  | 5653   | 6069   |
| UN47455 | Rsa1.0_13994.1 | 917  | 3941   | 0         | 349 | 357  | 97 +  | 324  | 680  | 1610   | 1966   |
| UN47456 | Rsa1.0_02859.1 | 1077 | 162118 | 1.00E-171 | 349 | 361  | 96 -  | 1    | 361  | 144252 | 144610 |
| UN47457 | Rsa1.0_01242.1 | 946  | 50066  | 0         | 336 | 336  | 100 + | 611  | 946  | 17542  | 17877  |
| UN47458 | Rsa1.0_00382.1 | 1032 | 251946 | 0         | 977 | 1024 | 95 +  | 2    | 1025 | 108559 | 109577 |
| UN47459 | Rsa1.0_00005.1 | 1187 | 353093 | 1.00E-150 | 288 | 294  | 97 -  | 773  | 1066 | 129278 | 129571 |
| UN47460 | Rsa1.0_00541.1 | 829  | 76863  | 0         | 671 | 676  | 99 +  | 1    | 676  | 61278  | 61952  |
| UN47461 | Rsa1.0_08961.1 | 962  | 6750   | 1.00E-175 | 372 | 388  | 95 -  | 563  | 948  | 4366   | 4752   |

|         |                |      |        |           |     |     |      |      |      |        |        |
|---------|----------------|------|--------|-----------|-----|-----|------|------|------|--------|--------|
| UN47462 | Rsa1.0.00104.1 | 1339 | 368722 | 0         | 655 | 695 | 94 + | 3    | 687  | 11728  | 12409  |
| UN47463 | Rsa1.0.03127.1 | 766  | 25191  | 0         | 689 | 727 | 94 + | 1    | 711  | 22838  | 23561  |
| UN47464 | Rsa1.0.28401.1 | 822  | 817    | 7.00E-73  | 149 | 152 | 98 + | 439  | 590  | 513    | 664    |
| UN47465 | Rsa1.0.04355.1 | 942  | 146733 | 0         | 553 | 557 | 99 + | 1    | 556  | 3275   | 3831   |
| UN47466 | Rsa1.0.01328.1 | 1209 | 48021  | 4.00E-84  | 255 | 279 | 91 + | 934  | 1206 | 44706  | 44979  |
| UN47467 | Rsa1.0.00886.1 | 1735 | 167350 | 0         | 689 | 733 | 93 - | 384  | 1102 | 12242  | 12964  |
| UN47468 | Rsa1.0.00642.1 | 935  | 201230 | 1.00E-130 | 270 | 279 | 96 + | 133  | 408  | 162621 | 162898 |
| UN47469 | Rsa1.0.01773.1 | 1529 | 39546  | 0         | 455 | 462 | 98 + | 1071 | 1529 | 21580  | 22041  |
| UN47470 | Rsa1.0.00087.1 | 1022 | 761073 | 0         | 652 | 673 | 96 + | 2    | 673  | 18831  | 19503  |
| UN47471 | Rsa1.0.02616.1 | 588  | 29542  | 0         | 365 | 371 | 98 + | 218  | 588  | 23314  | 23684  |
| UN47472 | Rsa1.0.00699.1 | 871  | 184398 | 0         | 756 | 783 | 96 + | 1    | 783  | 2245   | 3027   |
| UN47473 | Rsa1.0.00341.1 | 1251 | 249309 | 1.00E-125 | 290 | 313 | 92 + | 952  | 1249 | 25557  | 25867  |
| UN47474 | Rsa1.0.04483.1 | 798  | 17174  | 1.00E-105 | 210 | 215 | 97 - | 203  | 417  | 8253   | 8467   |
| UN47475 | Rsa1.0.00083.1 | 972  | 442773 | 0         | 560 | 627 | 89 - | 118  | 735  | 319657 | 320280 |
| UN47476 | Rsa1.0.05282.1 | 1046 | 14270  | 1.00E-153 | 327 | 343 | 95 - | 705  | 1046 | 4132   | 4474   |
| UN47477 | Rsa1.0.00108.1 | 831  | 478491 | 0         | 338 | 339 | 99 - | 1    | 339  | 270627 | 270965 |
| UN47478 | Rsa1.0.05217.1 | 1026 | 142938 | 1.00E-162 | 371 | 395 | 93 + | 24   | 415  | 136382 | 136763 |
| UN47479 | Rsa1.0.00453.1 | 1001 | 83031  | 0         | 334 | 338 | 98 + | 663  | 1000 | 19304  | 19641  |
| UN47480 | Rsa1.0.01591.1 | 677  | 42718  | 7.00E-57  | 116 | 117 | 99 - | 190  | 306  | 16521  | 16637  |
| UN47481 | Rsa1.0.01249.1 | 762  | 188432 | 5.00E-64  | 145 | 151 | 96 + | 3    | 153  | 175553 | 175700 |
| UN47482 | Rsa1.0.06872.1 | 868  | 10231  | 1.00E-106 | 219 | 226 | 96 + | 453  | 675  | 1961   | 2186   |
| UN47483 | Rsa1.0.00324.1 | 972  | 218805 | 0         | 929 | 966 | 96 - | 2    | 965  | 214978 | 215939 |
| UN47484 | Rsa1.0.01173.1 | 995  | 51727  | 0         | 481 | 526 | 91 - | 1    | 513  | 30217  | 30722  |
| UN47485 | Rsa1.0.07617.1 | 905  | 9015   | 0         | 787 | 817 | 96 + | 100  | 905  | 3201   | 4013   |
| UN47486 | Rsa1.0.00425.1 | 987  | 147080 | 0         | 686 | 717 | 95 + | 263  | 968  | 96148  | 96864  |
| UN47487 | Rsa1.0.01828.1 | 839  | 38681  | 0         | 638 | 639 | 99 - | 201  | 839  | 36838  | 37476  |
| UN47488 | Rsa1.0.00020.1 | 767  | 283099 | 1.00E-120 | 229 | 232 | 98 - | 478  | 709  | 91309  | 91540  |
| UN47489 | Rsa1.0.01946.1 | 1248 | 36982  | 0         | 383 | 401 | 95 + | 848  | 1248 | 33540  | 33934  |
| UN47490 | Rsa1.0.25306.1 | 1177 | 942    | 0         | 394 | 410 | 96 - | 674  | 1079 | 328    | 735    |
| UN47491 | Rsa1.0.00206.1 | 1081 | 109040 | 1.00E-118 | 242 | 248 | 97 - | 835  | 1081 | 50442  | 50687  |
| UN47492 | Rsa1.0.00115.1 | 1219 | 131321 | 1.00E-155 | 319 | 331 | 96 + | 888  | 1217 | 54113  | 54443  |
| UN47493 | Rsa1.0.01997.1 | 1091 | 158416 | 1.00E-159 | 313 | 321 | 97 - | 773  | 1089 | 151780 | 152098 |
| UN47494 | Rsa1.0.00032.1 | 914  | 306326 | 1.00E-111 | 280 | 302 | 92 - | 29   | 329  | 279058 | 279354 |
| UN47495 | Rsa1.0.00015.1 | 937  | 561803 | 1.00E-166 | 387 | 415 | 93 + | 479  | 889  | 526505 | 526905 |
| UN47496 | Rsa1.0.00079.1 | 764  | 606987 | 1.00E-135 | 365 | 400 | 91 + | 359  | 741  | 22253  | 22650  |
| UN47497 | Rsa1.0.00112.1 | 948  | 132199 | 1.00E-177 | 389 | 413 | 94 - | 369  | 778  | 116397 | 116809 |
| UN47498 | Rsa1.0.00010.1 | 750  | 294827 | 0         | 444 | 471 | 94 - | 284  | 747  | 132190 | 132653 |
| UN47499 | Rsa1.0.01125.1 | 737  | 53193  | 1.00E-110 | 206 | 207 | 99 - | 531  | 737  | 41028  | 41234  |
| UN47500 | Rsa1.0.00077.1 | 765  | 145005 | 0         | 567 | 588 | 96 + | 1    | 579  | 89602  | 90189  |

|         |                |      |        |           |      |      |       |     |      |        |        |
|---------|----------------|------|--------|-----------|------|------|-------|-----|------|--------|--------|
| UN47501 | Rsa1.0_00293.1 | 812  | 339294 | 0         | 417  | 434  | 96 +  | 364 | 794  | 301492 | 301921 |
| UN47502 | Rsa1.0_01405.1 | 1141 | 46445  | 0         | 533  | 536  | 99 +  | 605 | 1140 | 27825  | 28360  |
| UN47503 | Rsa1.0_01419.1 | 1341 | 167402 | 0         | 963  | 994  | 96 -  | 348 | 1341 | 159790 | 160768 |
| UN47504 | Rsa1.0_00342.1 | 584  | 93695  | 5.00E-73  | 173  | 180  | 96 -  | 28  | 207  | 32256  | 32432  |
| UN47505 | Rsa1.0_00336.1 | 834  | 445051 | 0         | 778  | 827  | 94 +  | 3   | 826  | 146854 | 147662 |
| UN47506 | Rsa1.0_23843.1 | 1070 | 1022   | 0         | 573  | 589  | 97 +  | 483 | 1070 | 77     | 665    |
| UN47507 | Rsa1.0_06133.1 | 1217 | 11663  | 1.00E-169 | 305  | 306  | 99 +  | 609 | 914  | 8879   | 9184   |
| UN47508 | Rsa1.0_04123.1 | 707  | 18947  | 0         | 682  | 705  | 96 -  | 2   | 705  | 11838  | 12539  |
| UN47509 | Rsa1.0_01740.1 | 1241 | 39986  | 0         | 451  | 459  | 98 -  | 383 | 841  | 13886  | 14344  |
| UN47510 | Rsa1.0_00017.1 | 996  | 752458 | 1.00E-172 | 384  | 408  | 94 -  | 589 | 996  | 293408 | 293810 |
| UN47511 | Rsa1.0_00162.1 | 939  | 239935 | 0         | 900  | 929  | 96 -  | 1   | 925  | 15397  | 16325  |
| UN47512 | Rsa1.0_01101.1 | 621  | 54031  | 0         | 414  | 422  | 98 +  | 1   | 421  | 15225  | 15645  |
| UN47513 | Rsa1.0_00017.1 | 913  | 752458 | 0         | 601  | 618  | 97 -  | 296 | 912  | 313630 | 314244 |
| UN47514 | Rsa1.0_00375.1 | 861  | 90207  | 0         | 390  | 405  | 96 -  | 2   | 406  | 2405   | 2808   |
| UN47515 | Rsa1.0_00009.1 | 671  | 232558 | 0         | 398  | 410  | 97 +  | 263 | 671  | 138504 | 138913 |
| UN47516 | Rsa1.0_00127.1 | 779  | 127446 | 1.00E-174 | 398  | 426  | 93 -  | 3   | 427  | 21412  | 21828  |
| UN47517 | Rsa1.0_02280.1 | 956  | 33063  | 0         | 607  | 614  | 98 +  | 343 | 956  | 511    | 1124   |
| UN47518 | Rsa1.0_05745.1 | 1029 | 12750  | 2.00E-79  | 212  | 233  | 90 -  | 802 | 1018 | 2840   | 3071   |
| UN47519 | Rsa1.0_00059.1 | 1069 | 159650 | 1.00E-106 | 233  | 244  | 95 +  | 1   | 243  | 147722 | 147965 |
| UN47520 | Rsa1.0_02978.1 | 1302 | 26304  | 1.00E-154 | 308  | 316  | 97 -  | 987 | 1302 | 11766  | 12079  |
| UN47521 | Rsa1.0_00011.1 | 1047 | 225044 | 1.00E-119 | 223  | 225  | 99 +  | 1   | 225  | 50370  | 50594  |
| UN47522 | Rsa1.0_00873.1 | 1024 | 61459  | 0         | 497  | 527  | 94 -  | 13  | 539  | 46323  | 46844  |
| UN47523 | Rsa1.0_00907.1 | 656  | 60062  | 0         | 351  | 354  | 99 +  | 246 | 599  | 1479   | 1829   |
| UN47524 | Rsa1.0_10201.1 | 1211 | 5946   | 0         | 1165 | 1212 | 96 -  | 2   | 1203 | 389    | 1598   |
| UN47525 | Rsa1.0_02101.1 | 1011 | 35017  | 0         | 1005 | 1011 | 99 -  | 1   | 1009 | 20154  | 21164  |
| UN47526 | Rsa1.0_01110.1 | 986  | 195852 | 0         | 593  | 622  | 95 -  | 366 | 975  | 36405  | 37025  |
| UN47527 | Rsa1.0_03821.1 | 1144 | 20643  | 1.00E-127 | 274  | 284  | 96 +  | 1   | 284  | 12660  | 12940  |
| UN47528 | Rsa1.0_00939.1 | 1077 | 185227 | 1.00E-133 | 242  | 242  | 100 - | 335 | 576  | 39136  | 39377  |
| UN47529 | Rsa1.0_00748.1 | 1097 | 65983  | 0         | 666  | 697  | 95 -  | 392 | 1085 | 33492  | 34182  |
| UN47530 | Rsa1.0_00596.1 | 1142 | 73578  | 5.00E-90  | 239  | 262  | 91 +  | 884 | 1142 | 10496  | 10746  |
| UN47531 | Rsa1.0_00501.1 | 1074 | 79545  | 0         | 568  | 606  | 93 +  | 219 | 803  | 24411  | 25010  |
| UN47532 | Rsa1.0_01023.1 | 1047 | 56571  | 1.00E-177 | 373  | 393  | 94 -  | 1   | 381  | 15639  | 16031  |
| UN47533 | Rsa1.0_00622.1 | 1033 | 71822  | 0         | 952  | 1030 | 92 -  | 3   | 1032 | 52553  | 53573  |
| UN47534 | Rsa1.0_03344.1 | 1066 | 23593  | 0         | 435  | 461  | 94 -  | 1   | 461  | 12154  | 12612  |
| UN47535 | Rsa1.0_00447.1 | 744  | 84051  | 1.00E-110 | 220  | 226  | 97 -  | 3   | 228  | 26801  | 27026  |
| UN47536 | Rsa1.0_01656.1 | 757  | 41494  | 3.00E-93  | 189  | 194  | 97 -  | 348 | 541  | 12318  | 12511  |
| UN47537 | Rsa1.0_00064.1 | 1369 | 240927 | 1.00E-136 | 378  | 419  | 90 -  | 956 | 1365 | 124812 | 125217 |
| UN47538 | Rsa1.0_00364.1 | 853  | 90951  | 0         | 723  | 750  | 96 +  | 2   | 743  | 76967  | 77714  |
| UN47539 | Rsa1.0_01536.1 | 1245 | 43747  | 0         | 868  | 892  | 97 +  | 1   | 892  | 31792  | 32683  |

|         |                |      |        |           |     |      |       |     |      |        |        |
|---------|----------------|------|--------|-----------|-----|------|-------|-----|------|--------|--------|
| UN47540 | Rsa1.0.00007.1 | 1009 | 239325 | 0         | 980 | 1031 | 95 +  | 2   | 1009 | 50067  | 51096  |
| UN47541 | Rsa1.0.34213.1 | 906  | 662    | 1.00E-152 | 288 | 293  | 98 -  | 66  | 358  | 162    | 454    |
| UN47542 | Rsa1.0.00979.1 | 2060 | 57733  | 0         | 838 | 873  | 95 +  | 987 | 1856 | 26891  | 27762  |
| UN47543 | Rsa1.0.00101.1 | 856  | 267193 | 3.00E-90  | 229 | 251  | 91 -  | 1   | 235  | 208637 | 208887 |
| UN47544 | Rsa1.0.01937.1 | 1495 | 37147  | 0         | 476 | 486  | 97 +  | 1   | 477  | 30186  | 30671  |
| UN47545 | Rsa1.0.07849.1 | 736  | 8425   | 0         | 367 | 374  | 98 +  | 1   | 372  | 1255   | 1628   |
| UN47546 | Rsa1.0.02955.1 | 989  | 26484  | 0         | 376 | 394  | 95 -  | 361 | 754  | 8      | 401    |
| UN47547 | Rsa1.0.01540.1 | 1229 | 151890 | 1.00E-104 | 213 | 220  | 96 +  | 779 | 998  | 129408 | 129627 |
| UN47548 | Rsa1.0.01294.1 | 1265 | 49090  | 0         | 377 | 377  | 100 + | 1   | 377  | 42094  | 42470  |
| UN47549 | Rsa1.0.00326.1 | 923  | 171955 | 0         | 399 | 405  | 98 -  | 492 | 896  | 19723  | 20125  |
| UN47550 | Rsa1.0.04486.1 | 922  | 17161  | 0         | 467 | 483  | 96 +  | 1   | 483  | 12770  | 13249  |
| UN47551 | Rsa1.0.01848.1 | 1029 | 38312  | 1.00E-148 | 287 | 291  | 98 -  | 1   | 290  | 3194   | 3483   |
| UN47552 | Rsa1.0.36118.1 | 675  | 625    | 1.00E-150 | 272 | 273  | 99 -  | 403 | 675  | 24     | 296    |
| UN47553 | Rsa1.0.02450.1 | 915  | 31288  | 0         | 745 | 783  | 95 +  | 133 | 914  | 16924  | 17683  |
| UN47554 | Rsa1.0.00122.1 | 1439 | 265937 | 0         | 475 | 494  | 96 -  | 947 | 1437 | 247380 | 247866 |
| UN47555 | Rsa1.0.00391.1 | 780  | 183853 | 0         | 602 | 622  | 96 -  | 158 | 775  | 64326  | 64947  |
| UN47556 | Rsa1.0.01492.1 | 902  | 44704  | 1.00E-116 | 215 | 216  | 99 -  | 1   | 216  | 6004   | 6219   |
| UN47557 | Rsa1.0.01530.1 | 794  | 43820  | 0         | 775 | 777  | 99 +  | 10  | 786  | 31418  | 32193  |
| UN47558 | Rsa1.0.00087.1 | 995  | 761073 | 1.00E-152 | 286 | 289  | 98 -  | 705 | 993  | 728814 | 729101 |
| UN47559 | Rsa1.0.03955.1 | 780  | 19884  | 1.00E-138 | 308 | 328  | 93 -  | 3   | 324  | 13268  | 13595  |
| UN47560 | Rsa1.0.03640.1 | 1082 | 21624  | 0         | 436 | 450  | 96 +  | 1   | 449  | 15552  | 15995  |
| UN47561 | Rsa1.0.18025.1 | 1403 | 1687   | 0         | 520 | 529  | 98 +  | 729 | 1257 | 1162   | 1687   |
| UN47562 | Rsa1.0.01967.1 | 1006 | 36672  | 0         | 641 | 647  | 99 +  | 3   | 649  | 15944  | 16589  |
| UN47563 | Rsa1.0.05778.1 | 911  | 12656  | 0         | 694 | 712  | 97 -  | 2   | 713  | 7      | 718    |
| UN47564 | Rsa1.0.00197.1 | 839  | 109714 | 0         | 517 | 540  | 95 +  | 153 | 692  | 64829  | 65368  |
| UN47565 | Rsa1.0.00113.1 | 952  | 131574 | 0         | 534 | 538  | 99 +  | 1   | 538  | 13053  | 13590  |
| UN47566 | Rsa1.0.03123.1 | 949  | 25207  | 0         | 607 | 627  | 96 -  | 9   | 632  | 22210  | 22836  |
| UN47567 | Rsa1.0.00056.1 | 1172 | 332604 | 1.00E-96  | 201 | 208  | 96 +  | 796 | 1003 | 313940 | 314147 |
| UN47568 | Rsa1.0.00654.1 | 854  | 70012  | 1.00E-157 | 332 | 348  | 95 +  | 299 | 643  | 41118  | 41465  |
| UN47569 | Rsa1.0.00048.1 | 949  | 167185 | 0         | 341 | 343  | 99 +  | 9   | 351  | 7217   | 7559   |
| UN47570 | Rsa1.0.00761.1 | 866  | 65133  | 0         | 559 | 582  | 96 +  | 163 | 744  | 12489  | 13055  |
| UN47571 | Rsa1.0.00662.1 | 944  | 192183 | 1.00E-173 | 376 | 399  | 94 +  | 557 | 944  | 2200   | 2598   |
| UN47572 | Rsa1.0.00218.1 | 798  | 201480 | 0         | 794 | 796  | 99 +  | 1   | 796  | 158001 | 158796 |
| UN47573 | Rsa1.0.00679.1 | 954  | 68971  | 4.00E-99  | 187 | 188  | 99 -  | 286 | 473  | 34260  | 34447  |
| UN47574 | Rsa1.0.00979.1 | 1000 | 57733  | 0         | 679 | 692  | 98 +  | 3   | 693  | 1022   | 1712   |
| UN47575 | Rsa1.0.01077.1 | 1126 | 54772  | 0         | 576 | 605  | 95 +  | 3   | 602  | 10741  | 11340  |
| UN47576 | Rsa1.0.00634.1 | 948  | 71222  | 0         | 345 | 353  | 97 -  | 1   | 353  | 70500  | 70852  |
| UN47577 | Rsa1.0.10817.1 | 1046 | 5712   | 1.00E-132 | 280 | 291  | 96 -  | 758 | 1046 | 3984   | 4273   |
| UN47578 | Rsa1.0.00175.1 | 1139 | 166121 | 0         | 656 | 679  | 96 -  | 461 | 1139 | 61672  | 62344  |

|         |                |      |        |           |     |     |       |     |      |        |        |
|---------|----------------|------|--------|-----------|-----|-----|-------|-----|------|--------|--------|
| UN47579 | Rsa1.0.00039.1 | 878  | 296927 | 0         | 569 | 596 | 95 -  | 278 | 869  | 11857  | 12448  |
| UN47580 | Rsa1.0.02499.1 | 844  | 30774  | 1.00E-117 | 237 | 243 | 97 -  | 576 | 818  | 1181   | 1422   |
| UN47581 | Rsa1.0.00825.1 | 1092 | 62855  | 1.00E-175 | 312 | 312 | 100 + | 1   | 312  | 36282  | 36593  |
| UN47582 | Rsa1.0.01907.1 | 820  | 37431  | 1.00E-159 | 315 | 324 | 97 -  | 220 | 543  | 17877  | 18199  |
| UN47583 | Rsa1.0.00710.1 | 340  | 67325  | 1.00E-87  | 212 | 227 | 93 +  | 115 | 339  | 1773   | 1999   |
| UN47584 | Rsa1.0.00045.1 | 971  | 328694 | 0         | 642 | 660 | 97 -  | 1   | 660  | 229947 | 230589 |
| UN47585 | Rsa1.0.00336.1 | 1375 | 445051 | 0         | 505 | 511 | 98 +  | 863 | 1373 | 221235 | 221742 |
| UN47586 | Rsa1.0.00104.1 | 872  | 368722 | 0         | 345 | 349 | 98 -  | 166 | 511  | 201064 | 201412 |
| UN47587 | Rsa1.0.02735.1 | 1115 | 28344  | 0         | 583 | 602 | 96 +  | 3   | 603  | 2751   | 3346   |
| UN47588 | Rsa1.0.04179.1 | 720  | 18633  | 1.00E-112 | 220 | 225 | 97 -  | 308 | 532  | 16849  | 17073  |
| UN47589 | Rsa1.0.00275.1 | 1003 | 210104 | 0         | 905 | 974 | 92 +  | 32  | 1003 | 205304 | 206257 |
| UN47590 | Rsa1.0.05159.1 | 1145 | 14642  | 0         | 474 | 490 | 96 -  | 656 | 1145 | 7701   | 8179   |
| UN47591 | Rsa1.0.00128.1 | 975  | 228675 | 1.00E-96  | 187 | 188 | 99 +  | 1   | 188  | 150639 | 150825 |
| UN47592 | Rsa1.0.14319.1 | 1132 | 3529   | 1.00E-159 | 470 | 531 | 88 -  | 306 | 836  | 2316   | 2843   |
| UN47593 | Rsa1.0.05510.1 | 847  | 13470  | 1.00E-129 | 266 | 274 | 97 -  | 1   | 273  | 12012  | 12284  |
| UN47594 | Rsa1.0.00928.1 | 1157 | 59293  | 1.00E-138 | 300 | 317 | 94 -  | 1   | 317  | 32258  | 32574  |
| UN47595 | Rsa1.0.01124.1 | 628  | 53295  | 0         | 617 | 627 | 98 -  | 2   | 628  | 25577  | 26202  |
| UN47596 | Rsa1.0.00107.1 | 818  | 431659 | 1.00E-74  | 224 | 251 | 89 -  | 566 | 812  | 254239 | 254478 |
| UN47597 | Rsa1.0.00502.1 | 737  | 204180 | 0         | 518 | 544 | 95 -  | 189 | 731  | 181107 | 181649 |
| UN47598 | Rsa1.0.00020.1 | 813  | 283099 | 4.00E-71  | 175 | 187 | 93 -  | 3   | 189  | 63221  | 63399  |
| UN47599 | Rsa1.0.00740.1 | 1098 | 215972 | 0         | 539 | 561 | 96 -  | 540 | 1097 | 11288  | 11848  |
| UN47600 | Rsa1.0.05741.1 | 844  | 12773  | 1.00E-168 | 364 | 382 | 95 -  | 462 | 842  | 3053   | 3430   |
| UN47601 | Rsa1.0.01580.1 | 777  | 42852  | 1.00E-104 | 211 | 217 | 97 +  | 347 | 563  | 37225  | 37441  |
| UN47602 | Rsa1.0.05217.1 | 551  | 142938 | 0         | 512 | 533 | 96 -  | 18  | 550  | 134944 | 135473 |
| UN47603 | Rsa1.0.01716.1 | 1138 | 40483  | 0         | 393 | 409 | 96 -  | 2   | 404  | 33499  | 33903  |
| UN47604 | Rsa1.0.01989.1 | 849  | 36439  | 0         | 404 | 406 | 99 +  | 444 | 849  | 22889  | 23294  |
| UN47605 | Rsa1.0.01578.1 | 925  | 42880  | 0         | 367 | 371 | 98 -  | 178 | 547  | 12484  | 12854  |
| UN47606 | Rsa1.0.08717.1 | 860  | 7008   | 0         | 479 | 506 | 94 -  | 50  | 553  | 2884   | 3388   |
| UN47607 | Rsa1.0.00025.1 | 1301 | 277312 | 0         | 754 | 812 | 92 +  | 1   | 788  | 251346 | 252153 |
| UN47608 | Rsa1.0.00323.1 | 796  | 159650 | 0         | 420 | 436 | 96 -  | 1   | 429  | 148155 | 148587 |
| UN47609 | Rsa1.0.00725.1 | 972  | 66757  | 0         | 854 | 950 | 89 +  | 26  | 972  | 45580  | 46524  |
| UN47610 | Rsa1.0.03900.1 | 1041 | 133221 | 1.00E-172 | 345 | 355 | 97 -  | 1   | 354  | 3917   | 4270   |
| UN47611 | Rsa1.0.00133.1 | 1357 | 123768 | 0         | 445 | 447 | 99 +  | 908 | 1354 | 9867   | 10312  |
| UN47612 | Rsa1.0.00104.1 | 864  | 368722 | 0         | 718 | 742 | 96 -  | 9   | 750  | 153424 | 154163 |
| UN47613 | Rsa1.0.00100.1 | 555  | 249232 | 0         | 476 | 476 | 100 - | 80  | 555  | 221770 | 222245 |
| UN47614 | Rsa1.0.00363.1 | 871  | 90968  | 1.00E-136 | 265 | 269 | 98 -  | 4   | 269  | 69009  | 69277  |
| UN47615 | Rsa1.0.00116.1 | 1053 | 365886 | 1.00E-174 | 337 | 346 | 97 +  | 245 | 590  | 35488  | 35833  |
| UN47616 | Rsa1.0.01783.1 | 754  | 39383  | 0         | 546 | 601 | 90 -  | 2   | 599  | 15244  | 15817  |
| UN47617 | Rsa1.0.01026.1 | 791  | 171624 | 1.00E-138 | 255 | 257 | 99 -  | 533 | 789  | 158770 | 159026 |

|         |                |      |        |           |     |     |       |      |      |        |        |
|---------|----------------|------|--------|-----------|-----|-----|-------|------|------|--------|--------|
| UN47618 | Rsa1.0_00493.1 | 1062 | 80007  | 0         | 798 | 826 | 96 +  | 220  | 1035 | 77117  | 77935  |
| UN47619 | Rsa1.0_15466.1 | 835  | 2589   | 0         | 685 | 710 | 96 -  | 134  | 835  | 1042   | 1751   |
| UN47620 | Rsa1.0_00119.1 | 1270 | 467509 | 0         | 367 | 379 | 96 -  | 1    | 379  | 91915  | 92289  |
| UN47621 | Rsa1.0_05918.1 | 851  | 12244  | 0         | 767 | 789 | 97 -  | 43   | 831  | 8543   | 9325   |
| UN47622 | Rsa1.0_02274.1 | 842  | 33109  | 1.00E-134 | 326 | 356 | 91 +  | 488  | 842  | 22370  | 22705  |
| UN47623 | Rsa1.0_02209.1 | 956  | 33873  | 1.00E-162 | 349 | 370 | 94 +  | 18   | 384  | 26599  | 26957  |
| UN47624 | Rsa1.0_00124.1 | 662  | 262503 | 1.00E-116 | 279 | 296 | 94 -  | 369  | 662  | 14152  | 14444  |
| UN47625 | Rsa1.0_00037.1 | 838  | 307838 | 0         | 470 | 473 | 99 -  | 369  | 838  | 198183 | 198655 |
| UN47626 | Rsa1.0_03646.1 | 1280 | 21598  | 0         | 390 | 406 | 96 -  | 875  | 1280 | 20921  | 21326  |
| UN47627 | Rsa1.0_02144.1 | 1332 | 34630  | 0         | 390 | 390 | 100 - | 7    | 396  | 23103  | 23492  |
| UN47628 | Rsa1.0_00252.1 | 769  | 102760 | 0         | 483 | 515 | 93 -  | 134  | 639  | 94671  | 95185  |
| UN47629 | Rsa1.0_00095.1 | 1028 | 283384 | 0         | 597 | 622 | 95 -  | 327  | 947  | 96573  | 97193  |
| UN47630 | Rsa1.0_01340.1 | 595  | 47805  | 1.00E-67  | 257 | 301 | 85 +  | 8    | 298  | 20630  | 20919  |
| UN47631 | Rsa1.0_07130.1 | 1795 | 9861   | 0         | 450 | 468 | 96 +  | 1332 | 1795 | 5298   | 5763   |
| UN47632 | Rsa1.0_00136.1 | 1131 | 122464 | 1.00E-128 | 264 | 272 | 97 -  | 1    | 272  | 30698  | 30966  |
| UN47633 | Rsa1.0_00253.1 | 990  | 231292 | 0         | 892 | 940 | 94 +  | 1    | 938  | 101584 | 102522 |
| UN47634 | Rsa1.0_03943.1 | 982  | 19931  | 0         | 333 | 334 | 99 +  | 1    | 334  | 9560   | 9893   |
| UN47635 | Rsa1.0_00152.1 | 886  | 257730 | 0         | 620 | 666 | 93 -  | 1    | 664  | 118021 | 118672 |
| UN47636 | Rsa1.0_00329.1 | 1206 | 222544 | 5.00E-93  | 205 | 216 | 94 -  | 1    | 216  | 149718 | 149926 |
| UN47637 | Rsa1.0_00911.1 | 957  | 59943  | 1.00E-143 | 258 | 258 | 100 - | 616  | 873  | 13349  | 13606  |
| UN47638 | Rsa1.0_00032.1 | 669  | 306326 | 1.00E-119 | 270 | 287 | 94 +  | 31   | 317  | 154752 | 155035 |
| UN47639 | Rsa1.0_00484.1 | 716  | 203294 | 1.00E-111 | 207 | 208 | 99 +  | 123  | 330  | 150959 | 151166 |
| UN47640 | Rsa1.0_00745.1 | 836  | 66067  | 1.00E-147 | 274 | 277 | 98 +  | 371  | 647  | 47034  | 47310  |
| UN47641 | Rsa1.0_01515.1 | 750  | 170864 | 0         | 733 | 762 | 96 -  | 2    | 749  | 140654 | 141415 |
| UN47642 | Rsa1.0_00203.1 | 850  | 109129 | 4.00E-68  | 178 | 190 | 93 -  | 7    | 193  | 28753  | 28940  |
| UN47643 | Rsa1.0_00108.1 | 1035 | 478491 | 0         | 902 | 957 | 94 +  | 3    | 946  | 448316 | 449256 |
| UN47644 | Rsa1.0_00119.1 | 719  | 467509 | 1.00E-162 | 318 | 325 | 97 +  | 387  | 710  | 62711  | 63034  |
| UN47645 | Rsa1.0_10093.1 | 799  | 6001   | 0         | 454 | 477 | 95 +  | 312  | 787  | 4459   | 4934   |
| UN47646 | Rsa1.0_01013.1 | 864  | 56822  | 0         | 451 | 455 | 99 +  | 1    | 454  | 22839  | 23293  |
| UN47647 | Rsa1.0_00017.1 | 1018 | 752458 | 6.00E-83  | 264 | 297 | 88 -  | 71   | 352  | 30157  | 30441  |
| UN47648 | Rsa1.0_01753.1 | 1082 | 39794  | 0         | 803 | 844 | 95 +  | 259  | 1082 | 10586  | 11429  |
| UN47649 | Rsa1.0_00811.1 | 1101 | 63242  | 1.00E-161 | 371 | 399 | 92 +  | 3    | 389  | 30478  | 30876  |
| UN47650 | Rsa1.0_00252.1 | 976  | 102760 | 0         | 544 | 559 | 97 +  | 382  | 940  | 57128  | 57686  |
| UN47651 | Rsa1.0_00453.1 | 1089 | 83031  | 1.00E-107 | 203 | 205 | 99 -  | 750  | 954  | 69850  | 70054  |
| UN47652 | Rsa1.0_00161.1 | 858  | 116891 | 0         | 615 | 653 | 94 +  | 219  | 858  | 32535  | 33187  |
| UN47653 | Rsa1.0_00248.1 | 1066 | 163568 | 0         | 495 | 495 | 100 - | 572  | 1066 | 66779  | 67273  |
| UN47654 | Rsa1.0_00331.1 | 848  | 176754 | 2.33E-156 | 281 | 287 | 97 +  | 195  | 481  | 99092  | 99378  |
| UN47655 | Rsa1.0_07972.1 | 643  | 8151   | 4.00E-61  | 162 | 176 | 92 +  | 68   | 243  | 3877   | 4052   |
| UN47656 | Rsa1.0_07795.1 | 878  | 8543   | 1.00E-119 | 324 | 360 | 90 +  | 530  | 878  | 1620   | 1973   |



|         |                |      |        |           |     |     |       |     |      |        |        |
|---------|----------------|------|--------|-----------|-----|-----|-------|-----|------|--------|--------|
| UN47657 | Rsa1.0.01149.1 | 879  | 160459 | 0         | 372 | 376 | 98 +  | 1   | 375  | 154019 | 154392 |
| UN47658 | Rsa1.0.00635.1 | 1072 | 175826 | 0         | 471 | 481 | 97 -  | 1   | 481  | 122704 | 123180 |
| UN47659 | Rsa1.0.00497.1 | 487  | 79830  | 1.00E-106 | 244 | 258 | 94 +  | 7   | 263  | 43604  | 43858  |
| UN47660 | Rsa1.0.00978.1 | 965  | 57739  | 0         | 595 | 619 | 96 -  | 322 | 940  | 41982  | 42599  |
| UN47661 | Rsa1.0.01530.1 | 1231 | 43820  | 0         | 935 | 946 | 98 -  | 286 | 1230 | 5514   | 6455   |
| UN47662 | Rsa1.0.00047.1 | 844  | 168582 | 1.00E-168 | 311 | 315 | 98 +  | 529 | 843  | 99362  | 99676  |
| UN47663 | Rsa1.0.00421.1 | 1101 | 86365  | 1.00E-100 | 186 | 186 | 100 - | 469 | 654  | 76518  | 76703  |
| UN47664 | Rsa1.0.00343.1 | 1076 | 93570  | 0         | 459 | 464 | 98 -  | 1   | 464  | 74535  | 74997  |
| UN47665 | Rsa1.0.01340.1 | 695  | 47805  | 1.00E-122 | 235 | 239 | 98 -  | 413 | 651  | 25094  | 25332  |
| UN47666 | Rsa1.0.03122.1 | 1209 | 25207  | 0         | 715 | 724 | 98 -  | 4   | 727  | 22352  | 23075  |
| UN47667 | Rsa1.0.00476.1 | 295  | 280966 | 1.00E-150 | 288 | 293 | 98 -  | 2   | 294  | 161083 | 161374 |
| UN47668 | Rsa1.0.00529.1 | 404  | 77487  | 3.00E-79  | 159 | 162 | 98 +  | 1   | 162  | 25132  | 25293  |
| UN47669 | Rsa1.0.00186.1 | 818  | 112669 | 0         | 683 | 689 | 99 +  | 130 | 818  | 107284 | 107970 |
| UN47670 | Rsa1.0.00026.1 | 802  | 327835 | 0         | 562 | 590 | 95 +  | 191 | 780  | 1485   | 2074   |
| UN47671 | Rsa1.0.02365.1 | 1079 | 32118  | 0         | 686 | 752 | 91 -  | 335 | 1079 | 17969  | 18715  |
| UN47672 | Rsa1.0.19257.1 | 711  | 1455   | 1.00E-166 | 369 | 392 | 94 +  | 318 | 709  | 108    | 487    |
| UN47673 | Rsa1.0.01814.1 | 408  | 38917  | 0         | 403 | 407 | 99 +  | 1   | 407  | 37195  | 37601  |
| UN47674 | Rsa1.0.00190.1 | 1253 | 318240 | 1.00E-179 | 392 | 415 | 94 +  | 1   | 414  | 196709 | 197113 |
| UN47675 | Rsa1.0.00017.1 | 900  | 752458 | 1.00E-174 | 353 | 366 | 96 -  | 539 | 900  | 466125 | 466483 |
| UN47676 | Rsa1.0.01077.1 | 1116 | 54772  | 0         | 582 | 583 | 99 +  | 1   | 583  | 10758  | 11340  |
| UN47677 | Rsa1.0.01593.1 | 1287 | 150996 | 0         | 383 | 391 | 97 +  | 1   | 391  | 149461 | 149850 |
| UN47678 | Rsa1.0.00737.1 | 814  | 66432  | 2.00E-91  | 252 | 282 | 89 -  | 520 | 795  | 11940  | 12208  |
| UN47679 | Rsa1.0.04819.1 | 1092 | 140505 | 0         | 890 | 909 | 97 -  | 2   | 910  | 1503   | 2410   |
| UN47680 | Rsa1.0.02045.1 | 1304 | 35650  | 0         | 667 | 752 | 88 -  | 518 | 1264 | 34106  | 34847  |
| UN47681 | Rsa1.0.03673.1 | 837  | 21448  | 0         | 438 | 454 | 96 -  | 379 | 829  | 4140   | 4589   |
| UN47682 | Rsa1.0.00398.1 | 568  | 88007  | 0         | 341 | 342 | 99 -  | 1   | 342  | 86628  | 86969  |
| UN47683 | Rsa1.0.00060.1 | 744  | 502678 | 1.00E-121 | 245 | 253 | 96 +  | 5   | 257  | 499426 | 499678 |
| UN47684 | Rsa1.0.00748.1 | 1132 | 65983  | 0         | 658 | 699 | 94 -  | 424 | 1113 | 33490  | 34182  |
| UN47685 | Rsa1.0.00201.1 | 478  | 232851 | 1.00E-105 | 245 | 257 | 95 -  | 227 | 478  | 203712 | 203968 |
| UN47686 | Rsa1.0.02681.1 | 1122 | 28711  | 0         | 528 | 528 | 100 - | 595 | 1122 | 12843  | 13370  |
| UN47687 | Rsa1.0.03499.1 | 1366 | 22462  | 0         | 426 | 434 | 98 +  | 24  | 457  | 21275  | 21708  |
| UN47688 | Rsa1.0.00923.1 | 740  | 153678 | 0         | 509 | 532 | 95 -  | 51  | 582  | 45727  | 46257  |
| UN47689 | Rsa1.0.00188.1 | 651  | 112020 | 0         | 623 | 645 | 96 +  | 2   | 644  | 22923  | 23566  |
| UN47690 | Rsa1.0.00118.1 | 561  | 130637 | 0         | 524 | 563 | 93 +  | 12  | 561  | 28823  | 29384  |
| UN47691 | Rsa1.0.01196.1 | 809  | 51097  | 1.00E-117 | 235 | 242 | 97 -  | 508 | 749  | 32596  | 32837  |
| UN47692 | Rsa1.0.00911.1 | 824  | 59943  | 0         | 785 | 825 | 95 -  | 1   | 823  | 29024  | 29845  |
| UN47693 | Rsa1.0.00752.1 | 858  | 65756  | 1.00E-166 | 318 | 325 | 97 -  | 3   | 327  | 14187  | 14511  |
| UN47694 | Rsa1.0.00548.1 | 848  | 76518  | 1.00E-179 | 330 | 334 | 98 -  | 34  | 367  | 65913  | 66246  |
| UN47695 | Rsa1.0.00245.1 | 1034 | 103569 | 0         | 400 | 406 | 98 +  | 629 | 1033 | 14936  | 15341  |

|         |                |      |        |           |      |      |       |     |      |        |        |
|---------|----------------|------|--------|-----------|------|------|-------|-----|------|--------|--------|
| UN47696 | Rsa1.0.00010.1 | 866  | 294827 | 0         | 457  | 490  | 93 +  | 11  | 492  | 132170 | 132657 |
| UN47697 | Rsa1.0.06989.1 | 1053 | 10060  | 0         | 555  | 555  | 100 + | 499 | 1053 | 6587   | 7141   |
| UN47698 | Rsa1.0.04116.1 | 1006 | 18971  | 1.00E-154 | 326  | 340  | 95 -  | 3   | 342  | 3060   | 3396   |
| UN47699 | Rsa1.0.00454.1 | 914  | 216970 | 1.00E-104 | 247  | 260  | 95 +  | 1   | 255  | 184336 | 184595 |
| UN47700 | Rsa1.0.01992.1 | 937  | 36424  | 0         | 835  | 855  | 97 -  | 83  | 937  | 5480   | 6332   |
| UN47701 | Rsa1.0.01536.1 | 819  | 43747  | 1.00E-169 | 336  | 346  | 97 -  | 40  | 385  | 28390  | 28734  |
| UN47702 | Rsa1.0.01536.1 | 798  | 43747  | 1.00E-165 | 336  | 347  | 96 +  | 421 | 767  | 28390  | 28734  |
| UN47703 | Rsa1.0.00379.1 | 850  | 89865  | 1.00E-145 | 287  | 294  | 97 +  | 557 | 849  | 52324  | 52617  |
| UN47704 | Rsa1.0.00661.1 | 695  | 213041 | 0         | 415  | 437  | 94 +  | 143 | 578  | 66549  | 66981  |
| UN47705 | Rsa1.0.13019.1 | 750  | 5042   | 0         | 730  | 751  | 97 +  | 2   | 750  | 2161   | 2911   |
| UN47706 | Rsa1.0.00855.1 | 1375 | 62047  | 1.00E-163 | 312  | 316  | 98 -  | 3   | 317  | 18514  | 18828  |
| UN47707 | Rsa1.0.02820.1 | 936  | 27629  | 0         | 359  | 369  | 97 -  | 568 | 936  | 22435  | 22799  |
| UN47708 | Rsa1.0.00025.1 | 1220 | 277312 | 1.00E-119 | 236  | 242  | 97 +  | 313 | 554  | 156364 | 156605 |
| UN47709 | Rsa1.0.36744.1 | 973  | 614    | 0         | 401  | 418  | 95 +  | 115 | 532  | 94     | 511    |
| UN47710 | Rsa1.0.02536.1 | 1212 | 30368  | 0         | 1141 | 1183 | 96 +  | 13  | 1194 | 19551  | 20733  |
| UN47711 | Rsa1.0.10478.1 | 1033 | 5832   | 1.00E-118 | 267  | 282  | 94 -  | 1   | 273  | 5140   | 5416   |
| UN47712 | Rsa1.0.00269.1 | 1678 | 341668 | 0         | 497  | 521  | 95 -  | 505 | 1007 | 316281 | 316801 |
| UN47713 | Rsa1.0.00022.1 | 1171 | 200461 | 0         | 449  | 449  | 100 + | 1   | 449  | 17596  | 18044  |
| UN47714 | Rsa1.0.02253.1 | 770  | 33356  | 1.00E-165 | 374  | 402  | 93 +  | 1   | 392  | 10438  | 10839  |
| UN47715 | Rsa1.0.40008.1 | 894  | 562    | 0         | 350  | 350  | 100 - | 275 | 624  | 1      | 350    |
| UN47716 | Rsa1.0.00790.1 | 611  | 148693 | 0         | 500  | 508  | 98 -  | 103 | 610  | 49134  | 49641  |
| UN47717 | Rsa1.0.00620.1 | 1031 | 71985  | 0         | 491  | 507  | 96 -  | 376 | 882  | 55327  | 55832  |
| UN47718 | Rsa1.0.02301.1 | 893  | 32835  | 0         | 879  | 884  | 99 -  | 6   | 889  | 20262  | 21145  |
| UN47719 | Rsa1.0.05326.1 | 957  | 14139  | 0         | 353  | 353  | 100 + | 3   | 355  | 4862   | 5214   |
| UN47720 | Rsa1.0.03925.1 | 247  | 20025  | 6.00E-61  | 219  | 246  | 89 -  | 9   | 247  | 3907   | 4148   |
| UN47721 | Rsa1.0.04371.1 | 596  | 17700  | 1.00E-127 | 257  | 266  | 96 +  | 24  | 289  | 613    | 878    |
| UN47722 | Rsa1.0.02386.1 | 576  | 31895  | 0         | 573  | 575  | 99 +  | 2   | 576  | 10512  | 11086  |
| UN47723 | Rsa1.0.01382.1 | 1487 | 46877  | 1.00E-134 | 333  | 361  | 92 +  | 4   | 355  | 37442  | 37801  |
| UN47724 | Rsa1.0.01836.1 | 868  | 38503  | 1.00E-154 | 317  | 328  | 96 -  | 542 | 868  | 5091   | 5416   |
| UN47725 | Rsa1.0.00121.1 | 906  | 278029 | 0         | 400  | 407  | 98 -  | 500 | 906  | 120184 | 120590 |
| UN47726 | Rsa1.0.02841.1 | 1307 | 27383  | 7.00E-46  | 104  | 107  | 97 -  | 909 | 1015 | 3289   | 3395   |
| UN47727 | Rsa1.0.00107.1 | 944  | 431659 | 0         | 523  | 536  | 97 +  | 2   | 530  | 165626 | 166159 |
| UN47728 | Rsa1.0.01740.1 | 1514 | 39986  | 0         | 710  | 724  | 98 -  | 1   | 724  | 36882  | 37605  |
| UN47729 | Rsa1.0.09091.1 | 666  | 6656   | 0         | 463  | 485  | 95 -  | 1   | 467  | 2634   | 3118   |
| UN47730 | Rsa1.0.00293.1 | 940  | 339294 | 0         | 443  | 446  | 99 +  | 496 | 940  | 254540 | 254985 |
| UN47731 | Rsa1.0.03553.1 | 1171 | 22150  | 1.00E-139 | 255  | 256  | 99 -  | 264 | 519  | 16199  | 16454  |
| UN47732 | Rsa1.0.03640.1 | 490  | 21624  | 0         | 490  | 490  | 100 + | 1   | 490  | 15552  | 16041  |
| UN47733 | Rsa1.0.00307.1 | 851  | 199003 | 0         | 352  | 352  | 100 + | 1   | 352  | 183205 | 183556 |
| UN47734 | Rsa1.0.00890.1 | 748  | 323870 | 0         | 504  | 524  | 96 +  | 4   | 527  | 16745  | 17268  |

|         |                |      |        |           |     |     |       |     |      |        |        |
|---------|----------------|------|--------|-----------|-----|-----|-------|-----|------|--------|--------|
| UN47735 | Rsa1.0_03952.1 | 883  | 19891  | 0         | 551 | 570 | 96 -  | 172 | 741  | 3722   | 4288   |
| UN47736 | Rsa1.0_00154.1 | 1187 | 189461 | 0         | 620 | 652 | 95 +  | 535 | 1186 | 24514  | 25144  |
| UN47737 | Rsa1.0_03471.1 | 616  | 22678  | 1.00E-113 | 228 | 234 | 97 +  | 226 | 456  | 14969  | 15202  |
| UN47738 | Rsa1.0_00108.1 | 1231 | 478491 | 0         | 437 | 460 | 95 +  | 769 | 1226 | 91768  | 92224  |
| UN47739 | Rsa1.0_00104.1 | 908  | 368722 | 0         | 807 | 829 | 97 -  | 3   | 830  | 205967 | 206793 |
| UN47740 | Rsa1.0_01387.1 | 933  | 46745  | 1.00E-108 | 246 | 263 | 93 -  | 684 | 932  | 31058  | 31320  |
| UN47741 | Rsa1.0_00307.1 | 515  | 199003 | 1.00E-174 | 338 | 346 | 97 +  | 3   | 348  | 171089 | 171433 |
| UN47742 | Rsa1.0_01434.1 | 878  | 45951  | 0         | 833 | 889 | 93 -  | 2   | 875  | 276    | 1151   |
| UN47743 | Rsa1.0_01492.1 | 938  | 44704  | 1.00E-126 | 261 | 272 | 95 -  | 2   | 267  | 6004   | 6275   |
| UN47744 | Rsa1.0_00055.1 | 1054 | 520193 | 0         | 738 | 771 | 95 +  | 3   | 771  | 64614  | 65377  |
| UN47745 | Rsa1.0_20913.1 | 1011 | 1256   | 0         | 906 | 908 | 99 -  | 100 | 1006 | 1      | 908    |
| UN47746 | Rsa1.0_02231.1 | 689  | 33661  | 0         | 627 | 659 | 95 -  | 32  | 688  | 27235  | 27884  |
| UN47747 | Rsa1.0_07321.1 | 867  | 9559   | 0         | 389 | 395 | 98 +  | 1   | 395  | 4933   | 5326   |
| UN47748 | Rsa1.0_00051.1 | 727  | 258225 | 1.00E-166 | 427 | 467 | 91 +  | 1   | 463  | 62905  | 63361  |
| UN47749 | Rsa1.0_00425.1 | 825  | 147080 | 0         | 552 | 569 | 97 -  | 257 | 825  | 113931 | 114494 |
| UN47750 | Rsa1.0_01196.1 | 913  | 51097  | 1.00E-102 | 216 | 225 | 96 -  | 478 | 702  | 32613  | 32837  |
| UN47751 | Rsa1.0_02045.1 | 534  | 35650  | 0         | 367 | 369 | 99 +  | 6   | 374  | 23477  | 23845  |
| UN47752 | Rsa1.0_01964.1 | 883  | 36702  | 0         | 501 | 544 | 92 -  | 356 | 883  | 35684  | 36221  |
| UN47753 | Rsa1.0_00715.1 | 567  | 67116  | 0         | 497 | 546 | 91 -  | 24  | 566  | 63608  | 64137  |
| UN47754 | Rsa1.0_04405.1 | 618  | 17508  | 1.00E-113 | 252 | 265 | 95 -  | 259 | 523  | 14359  | 14619  |
| UN47755 | Rsa1.0_04478.1 | 917  | 17183  | 1.00E-152 | 310 | 321 | 96 +  | 596 | 915  | 3267   | 3587   |
| UN47756 | Rsa1.0_04220.1 | 822  | 18421  | 0         | 485 | 489 | 99 -  | 336 | 822  | 9494   | 9982   |
| UN47757 | Rsa1.0_00145.1 | 812  | 261008 | 1.00E-128 | 308 | 330 | 93 +  | 4   | 317  | 38533  | 38862  |
| UN47758 | Rsa1.0_00770.1 | 605  | 64900  | 1.00E-147 | 286 | 292 | 97 +  | 57  | 347  | 9808   | 10099  |
| UN47759 | Rsa1.0_07309.1 | 787  | 9572   | 0         | 490 | 510 | 96 -  | 1   | 504  | 4292   | 4801   |
| UN47760 | Rsa1.0_02365.1 | 743  | 32118  | 0         | 432 | 441 | 97 +  | 306 | 743  | 12194  | 12634  |
| UN47761 | Rsa1.0_01515.1 | 724  | 170864 | 0         | 617 | 648 | 95 -  | 5   | 641  | 140753 | 141399 |
| UN47762 | Rsa1.0_01524.1 | 689  | 43949  | 1.00E-172 | 306 | 306 | 100 + | 1   | 306  | 20481  | 20786  |
| UN47763 | Rsa1.0_01466.1 | 837  | 45161  | 3.00E-69  | 143 | 146 | 97 -  | 211 | 356  | 28487  | 28632  |
| UN47764 | Rsa1.0_00028.1 | 694  | 293984 | 0         | 675 | 699 | 96 +  | 2   | 694  | 64967  | 65664  |
| UN47765 | Rsa1.0_03290.1 | 887  | 24011  | 1.00E-128 | 274 | 285 | 96 +  | 591 | 874  | 18991  | 19274  |
| UN47766 | Rsa1.0_00306.1 | 1011 | 146760 | 1.00E-167 | 420 | 462 | 90 -  | 151 | 600  | 133202 | 133651 |
| UN47767 | Rsa1.0_00012.1 | 978  | 222148 | 0         | 529 | 558 | 94 +  | 23  | 573  | 169628 | 170177 |
| UN47768 | Rsa1.0_00619.1 | 1271 | 71985  | 0         | 909 | 942 | 96 -  | 331 | 1270 | 14069  | 14998  |
| UN47769 | Rsa1.0_00913.1 | 1414 | 59914  | 0         | 568 | 589 | 96 -  | 164 | 749  | 17896  | 18483  |
| UN47770 | Rsa1.0_00048.1 | 921  | 167185 | 0         | 442 | 446 | 99 +  | 478 | 921  | 162537 | 162982 |
| UN47771 | Rsa1.0_00164.1 | 802  | 116642 | 0         | 773 | 804 | 96 -  | 1   | 802  | 70422  | 71220  |
| UN47772 | Rsa1.0_00125.1 | 623  | 253043 | 1.00E-107 | 288 | 316 | 91 +  | 27  | 335  | 190669 | 190983 |
| UN47773 | Rsa1.0_01484.1 | 1269 | 44806  | 1.00E-62  | 260 | 302 | 86 -  | 92  | 389  | 15951  | 16252  |

|         |                |      |        |           |     |     |       |     |      |        |        |
|---------|----------------|------|--------|-----------|-----|-----|-------|-----|------|--------|--------|
| UN47774 | Rsa1.0.02670.1 | 1145 | 28887  | 1.00E-164 | 402 | 431 | 93 +  | 1   | 424  | 3780   | 4204   |
| UN47775 | Rsa1.0.29517.1 | 867  | 780    | 1.00E-113 | 207 | 207 | 100 - | 661 | 867  | 543    | 749    |
| UN47776 | Rsa1.0.13828.1 | 775  | 4254   | 0         | 487 | 514 | 94 +  | 10  | 522  | 2006   | 2516   |
| UN47777 | Rsa1.0.03181.1 | 943  | 24763  | 2.33E-156 | 341 | 363 | 93 -  | 270 | 631  | 19289  | 19649  |
| UN47778 | Rsa1.0.00112.1 | 751  | 132199 | 0         | 358 | 364 | 98 +  | 1   | 364  | 72986  | 73349  |
| UN47779 | Rsa1.0.04191.1 | 794  | 18578  | 0         | 437 | 451 | 96 -  | 3   | 453  | 7426   | 7864   |
| UN47780 | Rsa1.0.00059.1 | 1216 | 159650 | 0         | 453 | 467 | 97 -  | 753 | 1216 | 121165 | 121628 |
| UN47781 | Rsa1.0.00112.1 | 1003 | 132199 | 0         | 413 | 413 | 100 - | 394 | 806  | 116397 | 116809 |
| UN47782 | Rsa1.0.03347.1 | 732  | 23588  | 1.00E-100 | 227 | 242 | 93 -  | 497 | 728  | 20344  | 20582  |
| UN47783 | Rsa1.0.04291.1 | 1142 | 18055  | 1.00E-140 | 256 | 257 | 99 +  | 886 | 1142 | 6256   | 6512   |
| UN47784 | Rsa1.0.00017.1 | 1149 | 752458 | 0         | 646 | 688 | 93 -  | 84  | 758  | 187371 | 188058 |
| UN47785 | Rsa1.0.02157.1 | 890  | 149652 | 1.00E-142 | 256 | 256 | 100 - | 152 | 407  | 13750  | 14005  |
| UN47786 | Rsa1.0.07182.1 | 860  | 9777   | 0         | 845 | 858 | 98 +  | 2   | 859  | 4386   | 5242   |
| UN47787 | Rsa1.0.02645.1 | 762  | 29158  | 0         | 689 | 690 | 99 -  | 71  | 760  | 17506  | 18195  |
| UN47788 | Rsa1.0.00127.1 | 945  | 127446 | 1.00E-135 | 299 | 317 | 94 -  | 632 | 944  | 36402  | 36713  |
| UN47789 | Rsa1.0.03700.1 | 981  | 21299  | 1.00E-135 | 257 | 261 | 98 +  | 377 | 637  | 954    | 1214   |
| UN47790 | Rsa1.0.03132.1 | 606  | 25142  | 1.00E-155 | 316 | 327 | 96 -  | 281 | 606  | 20995  | 21318  |
| UN47791 | Rsa1.0.00394.1 | 906  | 148426 | 6.00E-95  | 207 | 217 | 95 -  | 3   | 219  | 107239 | 107455 |
| UN47792 | Rsa1.0.01831.1 | 1108 | 38628  | 6.00E-83  | 166 | 169 | 98 +  | 833 | 1001 | 32354  | 32522  |
| UN47793 | Rsa1.0.01434.1 | 1096 | 45951  | 1.00E-144 | 266 | 268 | 99 +  | 1   | 268  | 45521  | 45788  |
| UN47794 | Rsa1.0.01651.1 | 689  | 41586  | 0         | 334 | 335 | 99 +  | 7   | 341  | 14353  | 14687  |
| UN47795 | Rsa1.0.05745.1 | 928  | 12750  | 1.00E-114 | 223 | 226 | 98 -  | 702 | 926  | 2846   | 3071   |
| UN47796 | Rsa1.0.15504.1 | 1083 | 2567   | 0         | 346 | 348 | 99 -  | 737 | 1083 | 2220   | 2567   |
| UN47797 | Rsa1.0.00526.1 | 1096 | 169279 | 0         | 450 | 482 | 93 -  | 182 | 662  | 148049 | 148530 |
| UN47798 | Rsa1.0.00272.1 | 1051 | 447836 | 0         | 603 | 604 | 99 -  | 3   | 606  | 78070  | 78673  |
| UN47799 | Rsa1.0.00687.1 | 868  | 68494  | 0         | 664 | 675 | 98 +  | 3   | 677  | 42407  | 43081  |
| UN47800 | Rsa1.0.31506.1 | 1108 | 725    | 0         | 689 | 721 | 95 +  | 393 | 1106 | 1      | 710    |
| UN47801 | Rsa1.0.01355.1 | 842  | 47303  | 0         | 782 | 839 | 93 +  | 25  | 838  | 39323  | 40154  |
| UN47802 | Rsa1.0.00326.1 | 780  | 171955 | 5.00E-92  | 172 | 172 | 100 - | 195 | 366  | 82742  | 82913  |
| UN47803 | Rsa1.0.00333.1 | 791  | 94500  | 1.00E-129 | 259 | 267 | 97 +  | 102 | 368  | 68164  | 68430  |
| UN47804 | Rsa1.0.00315.1 | 1443 | 96426  | 0         | 743 | 748 | 99 +  | 667 | 1412 | 89500  | 90247  |
| UN47805 | Rsa1.0.00318.1 | 968  | 96094  | 0         | 368 | 375 | 98 +  | 9   | 383  | 28422  | 28796  |
| UN47806 | Rsa1.0.07453.1 | 682  | 9368   | 1.00E-180 | 356 | 368 | 96 +  | 3   | 370  | 890    | 1257   |
| UN47807 | Rsa1.0.00191.1 | 799  | 316976 | 1.00E-114 | 220 | 222 | 99 -  | 386 | 606  | 216878 | 217099 |
| UN47808 | Rsa1.0.03258.1 | 764  | 24302  | 5.00E-86  | 168 | 170 | 98 -  | 393 | 562  | 11405  | 11574  |
| UN47809 | Rsa1.0.00646.1 | 704  | 70473  | 0         | 417 | 418 | 99 +  | 1   | 418  | 22421  | 22838  |
| UN47810 | Rsa1.0.00625.1 | 1005 | 71672  | 0         | 583 | 610 | 95 +  | 1   | 608  | 14866  | 15475  |
| UN47811 | Rsa1.0.05743.1 | 952  | 12768  | 0         | 867 | 904 | 95 -  | 1   | 903  | 5078   | 5978   |
| UN47812 | Rsa1.0.14856.1 | 815  | 3010   | 0         | 391 | 396 | 98 -  | 338 | 733  | 1797   | 2192   |

|         |                |      |        |           |     |     |      |     |      |        |        |
|---------|----------------|------|--------|-----------|-----|-----|------|-----|------|--------|--------|
| UN47813 | Rsa1.0.06791.1 | 980  | 10350  | 0         | 791 | 835 | 94 + | 9   | 843  | 6591   | 7421   |
| UN47814 | Rsa1.0.00122.1 | 907  | 265937 | 1.00E-157 | 284 | 285 | 99 - | 2   | 286  | 100614 | 100898 |
| UN47815 | Rsa1.0.01566.1 | 929  | 43134  | 0         | 450 | 451 | 99 + | 1   | 451  | 33228  | 33678  |
| UN47816 | Rsa1.0.00010.1 | 896  | 294827 | 1.00E-114 | 222 | 226 | 98 + | 580 | 805  | 248372 | 248597 |
| UN47817 | Rsa1.0.03355.1 | 746  | 23489  | 0         | 617 | 642 | 96 + | 106 | 735  | 14054  | 14695  |
| UN47818 | Rsa1.0.00119.1 | 890  | 467509 | 1.00E-115 | 281 | 301 | 93 - | 262 | 559  | 247334 | 247627 |
| UN47819 | Rsa1.0.00637.1 | 1105 | 71038  | 0         | 455 | 465 | 97 + | 3   | 467  | 28592  | 29056  |
| UN47820 | Rsa1.0.00439.1 | 527  | 142776 | 9.00E-99  | 241 | 255 | 94 - | 8   | 254  | 59312  | 59565  |
| UN47821 | Rsa1.0.00033.1 | 705  | 515811 | 5.00E-61  | 223 | 256 | 87 + | 3   | 254  | 33615  | 33858  |
| UN47822 | Rsa1.0.00713.1 | 731  | 158017 | 1.00E-174 | 352 | 366 | 96 + | 1   | 366  | 558    | 923    |
| UN47823 | Rsa1.0.00018.1 | 654  | 410899 | 5.00E-70  | 190 | 206 | 92 + | 1   | 204  | 102917 | 103121 |
| UN47824 | Rsa1.0.00454.1 | 767  | 216970 | 0         | 739 | 761 | 97 + | 1   | 760  | 187141 | 187900 |
| UN47825 | Rsa1.0.05559.1 | 546  | 13329  | 0         | 406 | 411 | 98 - | 70  | 480  | 7926   | 8336   |
| UN47826 | Rsa1.0.04925.1 | 832  | 15424  | 0         | 422 | 427 | 98 - | 407 | 832  | 9278   | 9704   |
| UN47827 | Rsa1.0.00720.1 | 822  | 66931  | 1.00E-144 | 337 | 361 | 93 - | 92  | 447  | 2953   | 3313   |
| UN47828 | Rsa1.0.11720.1 | 1033 | 5430   | 1.00E-119 | 293 | 318 | 92 + | 3   | 319  | 2397   | 2696   |
| UN47829 | Rsa1.0.00316.1 | 1167 | 96264  | 0         | 576 | 601 | 95 + | 1   | 592  | 57215  | 57814  |
| UN47830 | Rsa1.0.62130.1 | 849  | 369    | 0         | 365 | 369 | 98 + | 236 | 604  | 1      | 369    |
| UN47831 | Rsa1.0.00451.1 | 1003 | 322533 | 0         | 945 | 979 | 96 + | 27  | 1003 | 261558 | 262527 |
| UN47832 | Rsa1.0.01254.1 | 1107 | 49801  | 1.00E-134 | 441 | 498 | 88 - | 613 | 1101 | 13794  | 14282  |
| UN47833 | Rsa1.0.01487.1 | 1212 | 44784  | 1.00E-166 | 303 | 305 | 99 - | 1   | 305  | 2584   | 2888   |
| UN47834 | Rsa1.0.02424.1 | 385  | 31570  | 6.00E-87  | 197 | 207 | 95 + | 2   | 208  | 6672   | 6877   |
| UN47835 | Rsa1.0.27735.1 | 627  | 841    | 1.00E-174 | 341 | 349 | 97 + | 251 | 598  | 446    | 793    |
| UN47836 | Rsa1.0.00010.1 | 762  | 294827 | 0         | 484 | 516 | 93 - | 255 | 762  | 132145 | 132653 |
| UN47837 | Rsa1.0.00243.1 | 1314 | 103651 | 0         | 828 | 862 | 96 - | 458 | 1314 | 20464  | 21316  |
| UN47838 | Rsa1.0.00688.1 | 1002 | 68396  | 1.00E-80  | 222 | 241 | 92 + | 769 | 1002 | 14822  | 15061  |
| UN47839 | Rsa1.0.04396.1 | 653  | 17561  | 0         | 572 | 596 | 95 + | 2   | 583  | 16966  | 17561  |
| UN47840 | Rsa1.0.02599.1 | 799  | 29660  | 1.00E-149 | 333 | 352 | 94 + | 388 | 735  | 4092   | 4440   |
| UN47841 | Rsa1.0.00990.1 | 840  | 57445  | 0         | 527 | 546 | 96 - | 105 | 646  | 42846  | 43389  |
| UN47842 | Rsa1.0.25475.1 | 722  | 934    | 8.00E-66  | 134 | 136 | 98 - | 271 | 406  | 28     | 163    |
| UN47843 | Rsa1.0.01600.1 | 807  | 42537  | 1.00E-122 | 274 | 291 | 94 - | 399 | 689  | 8704   | 8994   |
| UN47844 | Rsa1.0.00525.1 | 849  | 78030  | 0         | 414 | 416 | 99 - | 428 | 843  | 19748  | 20163  |
| UN47845 | Rsa1.0.00173.1 | 929  | 288743 | 0         | 481 | 525 | 91 - | 41  | 551  | 41437  | 41952  |
| UN47846 | Rsa1.0.00788.1 | 716  | 64237  | 0         | 451 | 468 | 96 - | 250 | 712  | 4310   | 4773   |
| UN47847 | Rsa1.0.00788.1 | 671  | 64237  | 0         | 440 | 461 | 95 + | 5   | 462  | 4320   | 4773   |
| UN47848 | Rsa1.0.00718.1 | 703  | 279335 | 4.00E-86  | 177 | 182 | 97 + | 286 | 467  | 6368   | 6549   |
| UN47849 | Rsa1.0.01305.1 | 670  | 48730  | 3.00E-87  | 182 | 188 | 96 + | 483 | 670  | 18861  | 19048  |
| UN47850 | Rsa1.0.00812.1 | 807  | 63233  | 1.00E-179 | 348 | 358 | 97 - | 316 | 673  | 13929  | 14286  |
| UN47851 | Rsa1.0.00883.1 | 855  | 61230  | 1.00E-107 | 219 | 225 | 97 + | 81  | 304  | 46769  | 46993  |

|         |                |      |        |           |     |     |       |     |      |        |        |
|---------|----------------|------|--------|-----------|-----|-----|-------|-----|------|--------|--------|
| UN47852 | Rsa1.0.00275.1 | 859  | 210104 | 0         | 758 | 799 | 94 -  | 1   | 798  | 205481 | 206259 |
| UN47853 | Rsa1.0.00575.1 | 1122 | 74791  | 0         | 378 | 378 | 100 + | 1   | 378  | 58656  | 59033  |
| UN47854 | Rsa1.0.05366.1 | 1324 | 14036  | 0         | 360 | 362 | 99 +  | 264 | 625  | 8072   | 8433   |
| UN47855 | Rsa1.0.00203.1 | 1074 | 109129 | 0         | 429 | 442 | 97 -  | 631 | 1072 | 54534  | 54975  |
| UN47856 | Rsa1.0.00017.1 | 741  | 752458 | 1.00E-106 | 219 | 226 | 96 +  | 519 | 741  | 462733 | 462958 |
| UN47857 | Rsa1.0.00114.1 | 787  | 131330 | 2.00E-82  | 159 | 160 | 99 +  | 445 | 604  | 30746  | 30905  |
| UN47858 | Rsa1.0.06740.1 | 1273 | 10439  | 0         | 472 | 472 | 100 + | 1   | 472  | 7324   | 7795   |
| UN47859 | Rsa1.0.00069.1 | 787  | 403561 | 1.00E-174 | 356 | 369 | 96 -  | 410 | 776  | 395709 | 396077 |
| UN47860 | Rsa1.0.02550.1 | 1108 | 291051 | 1.00E-90  | 246 | 270 | 91 -  | 404 | 672  | 18638  | 18907  |
| UN47861 | Rsa1.0.00234.1 | 794  | 197060 | 0         | 746 | 782 | 95 +  | 15  | 792  | 43267  | 44048  |
| UN47862 | Rsa1.0.14083.1 | 552  | 3824   | 1.00E-174 | 391 | 415 | 94 -  | 149 | 552  | 1253   | 1667   |
| UN47863 | Rsa1.0.02186.1 | 781  | 34150  | 0         | 335 | 339 | 98 -  | 380 | 718  | 12152  | 12490  |
| UN47864 | Rsa1.0.04224.1 | 986  | 18402  | 0         | 387 | 397 | 97 -  | 3   | 398  | 703    | 1096   |
| UN47865 | Rsa1.0.00343.1 | 1163 | 93570  | 0         | 908 | 910 | 99 -  | 75  | 984  | 48437  | 49346  |
| UN47866 | Rsa1.0.00836.1 | 1056 | 185968 | 1.00E-176 | 436 | 481 | 90 -  | 3   | 458  | 169741 | 170213 |
| UN47867 | Rsa1.0.00285.1 | 1396 | 149638 | 1.00E-160 | 313 | 319 | 98 +  | 1   | 317  | 146493 | 146811 |
| UN47868 | Rsa1.0.53010.1 | 742  | 430    | 2.00E-88  | 166 | 166 | 100 + | 359 | 524  | 265    | 430    |
| UN47869 | Rsa1.0.00171.1 | 944  | 115622 | 1.00E-110 | 243 | 254 | 95 -  | 1   | 253  | 42172  | 42424  |
| UN47870 | Rsa1.0.00110.1 | 865  | 132719 | 0         | 822 | 870 | 94 -  | 3   | 863  | 60670  | 61521  |
| UN47871 | Rsa1.0.00134.1 | 918  | 390219 | 0         | 426 | 436 | 97 -  | 483 | 918  | 45259  | 45694  |
| UN47872 | Rsa1.0.00528.1 | 1055 | 164755 | 2.00E-67  | 150 | 155 | 96 -  | 488 | 641  | 147355 | 147509 |
| UN47873 | Rsa1.0.02481.1 | 1272 | 31035  | 0         | 705 | 705 | 100 - | 568 | 1272 | 17827  | 18531  |
| UN47874 | Rsa1.0.00897.1 | 1049 | 60498  | 1.00E-116 | 238 | 246 | 96 -  | 327 | 572  | 22614  | 22856  |
| UN47875 | Rsa1.0.00082.1 | 992  | 237584 | 1.00E-127 | 303 | 325 | 93 -  | 641 | 955  | 55346  | 55670  |
| UN47876 | Rsa1.0.00034.1 | 1262 | 260119 | 0         | 499 | 511 | 97 -  | 750 | 1260 | 129228 | 129738 |
| UN47877 | Rsa1.0.00014.1 | 892  | 348985 | 0         | 864 | 894 | 96 -  | 1   | 892  | 332283 | 333172 |
| UN47878 | Rsa1.0.00250.1 | 857  | 273771 | 0         | 418 | 423 | 98 +  | 61  | 483  | 184651 | 185073 |
| UN47879 | Rsa1.0.00426.1 | 970  | 85668  | 1.00E-136 | 262 | 267 | 98 -  | 703 | 969  | 32311  | 32577  |
| UN47880 | Rsa1.0.01328.1 | 1438 | 48021  | 0         | 416 | 417 | 99 +  | 292 | 708  | 20477  | 20893  |
| UN47881 | Rsa1.0.00294.1 | 825  | 144860 | 0         | 566 | 574 | 98 -  | 253 | 825  | 57869  | 58442  |
| UN47882 | Rsa1.0.00070.1 | 812  | 150321 | 0         | 462 | 476 | 97 +  | 2   | 477  | 37044  | 37507  |
| UN47883 | Rsa1.0.00954.1 | 922  | 189536 | 1.00E-130 | 245 | 248 | 98 -  | 658 | 905  | 154684 | 154931 |
| UN47884 | Rsa1.0.01220.1 | 417  | 161775 | 1.00E-126 | 286 | 302 | 94 -  | 1   | 293  | 138711 | 139010 |
| UN47885 | Rsa1.0.00609.1 | 1233 | 72785  | 1.00E-159 | 298 | 301 | 99 -  | 3   | 303  | 31775  | 32074  |
| UN47886 | Rsa1.0.00303.1 | 564  | 97468  | 1.00E-76  | 155 | 158 | 98 -  | 198 | 355  | 57321  | 57478  |
| UN47887 | Rsa1.0.01279.1 | 924  | 180330 | 0         | 920 | 922 | 99 -  | 1   | 922  | 32460  | 33380  |
| UN47888 | Rsa1.0.03956.1 | 1228 | 19872  | 0         | 499 | 529 | 94 -  | 706 | 1223 | 17799  | 18323  |
| UN47889 | Rsa1.0.01321.1 | 1094 | 48248  | 0         | 675 | 709 | 95 -  | 3   | 711  | 19485  | 20193  |
| UN47890 | Rsa1.0.33048.1 | 872  | 687    | 1.00E-123 | 500 | 589 | 84 +  | 234 | 819  | 1      | 576    |

|         |                |      |        |           |     |     |       |     |      |        |        |
|---------|----------------|------|--------|-----------|-----|-----|-------|-----|------|--------|--------|
| UN47891 | Rsa1.0.01730.1 | 648  | 40223  | 1.00E-165 | 333 | 346 | 96 +  | 300 | 645  | 35176  | 35521  |
| UN47892 | Rsa1.0.00165.1 | 1185 | 116466 | 1.00E-139 | 271 | 276 | 98 +  | 909 | 1184 | 7613   | 7887   |
| UN47893 | Rsa1.0.04524.1 | 1122 | 16981  | 0         | 422 | 448 | 94 +  | 682 | 1122 | 5653   | 6087   |
| UN47894 | Rsa1.0.00008.1 | 1233 | 358124 | 0         | 599 | 618 | 96 +  | 623 | 1233 | 7205   | 7821   |
| UN47895 | Rsa1.0.00149.1 | 1233 | 305196 | 0         | 343 | 343 | 100 + | 891 | 1233 | 176264 | 176606 |
| UN47896 | Rsa1.0.00089.1 | 1092 | 406142 | 0         | 608 | 632 | 96 -  | 331 | 956  | 58191  | 58821  |
| UN47897 | Rsa1.0.00169.1 | 1027 | 274298 | 0         | 628 | 653 | 96 +  | 370 | 1022 | 87856  | 88507  |
| UN47898 | Rsa1.0.08080.1 | 886  | 137363 | 0         | 564 | 572 | 98 +  | 314 | 884  | 3699   | 4269   |
| UN47899 | Rsa1.0.00133.1 | 1258 | 123768 | 0         | 865 | 879 | 98 +  | 3   | 877  | 23124  | 24002  |
| UN47900 | Rsa1.0.01184.1 | 1135 | 51452  | 0         | 382 | 383 | 99 +  | 253 | 635  | 26949  | 27331  |
| UN47901 | Rsa1.0.02561.1 | 570  | 30080  | 1.00E-104 | 212 | 216 | 98 -  | 357 | 570  | 15372  | 15586  |
| UN47902 | Rsa1.0.00122.1 | 926  | 265937 | 1.00E-163 | 303 | 307 | 98 +  | 620 | 926  | 100614 | 100920 |
| UN47903 | Rsa1.0.04653.1 | 726  | 16509  | 1.00E-116 | 225 | 228 | 98 -  | 204 | 430  | 2773   | 3000   |
| UN47904 | Rsa1.0.00031.1 | 974  | 179862 | 0         | 967 | 974 | 99 +  | 3   | 974  | 145536 | 146509 |
| UN47905 | Rsa1.0.00754.1 | 895  | 65689  | 0         | 700 | 739 | 94 -  | 1   | 733  | 53743  | 54479  |
| UN47906 | Rsa1.0.02008.1 | 896  | 36109  | 1.00E-130 | 239 | 240 | 99 -  | 657 | 896  | 16956  | 17195  |
| UN47907 | Rsa1.0.06751.1 | 498  | 10417  | 2.00E-99  | 258 | 278 | 92 +  | 221 | 498  | 9247   | 9518   |
| UN47908 | Rsa1.0.06900.1 | 590  | 131268 | 1.00E-125 | 250 | 256 | 97 -  | 279 | 533  | 129999 | 130254 |
| UN47909 | Rsa1.0.04022.1 | 747  | 19534  | 0         | 476 | 492 | 96 +  | 8   | 492  | 1106   | 1594   |
| UN47910 | Rsa1.0.02165.1 | 1142 | 34423  | 0         | 424 | 425 | 99 -  | 7   | 430  | 1808   | 2232   |
| UN47911 | Rsa1.0.00762.1 | 399  | 165246 | 2.00E-59  | 117 | 117 | 100 + | 84  | 200  | 51738  | 51854  |
| UN47912 | Rsa1.0.01536.1 | 755  | 43747  | 0         | 383 | 390 | 98 +  | 1   | 390  | 5587   | 5976   |
| UN47913 | Rsa1.0.00571.1 | 901  | 329018 | 0         | 358 | 359 | 99 +  | 114 | 472  | 203882 | 204240 |
| UN47914 | Rsa1.0.00132.1 | 823  | 124299 | 0         | 625 | 637 | 98 +  | 183 | 819  | 25765  | 26398  |
| UN47915 | Rsa1.0.12445.1 | 946  | 5224   | 0         | 432 | 446 | 96 -  | 100 | 544  | 3411   | 3856   |
| UN47916 | Rsa1.0.01339.1 | 782  | 47813  | 1.00E-118 | 320 | 352 | 90 -  | 68  | 414  | 14806  | 15145  |
| UN47917 | Rsa1.0.00571.1 | 693  | 329018 | 1.00E-162 | 305 | 310 | 98 +  | 3   | 312  | 158790 | 159099 |
| UN47918 | Rsa1.0.00425.1 | 1496 | 147080 | 0         | 745 | 757 | 98 -  | 488 | 1241 | 2361   | 3114   |
| UN47919 | Rsa1.0.00223.1 | 1131 | 106231 | 0         | 929 | 984 | 94 +  | 1   | 970  | 41604  | 42574  |
| UN47920 | Rsa1.0.00053.1 | 1019 | 263459 | 0         | 543 | 560 | 96 +  | 3   | 556  | 144739 | 145298 |
| UN47921 | Rsa1.0.01921.1 | 940  | 168088 | 0         | 612 | 639 | 95 +  | 1   | 630  | 152202 | 152838 |
| UN47922 | Rsa1.0.00275.1 | 1028 | 210104 | 1.00E-107 | 207 | 210 | 98 -  | 702 | 911  | 164586 | 164795 |
| UN47923 | Rsa1.0.00103.1 | 664  | 135304 | 0         | 640 | 661 | 96 -  | 3   | 662  | 116241 | 116899 |
| UN47924 | Rsa1.0.02513.1 | 1008 | 30643  | 0         | 534 | 558 | 95 -  | 3   | 549  | 29577  | 30134  |
| UN47925 | Rsa1.0.02430.1 | 840  | 31506  | 1.00E-172 | 400 | 431 | 92 -  | 177 | 607  | 13146  | 13576  |
| UN47926 | Rsa1.0.00025.1 | 1030 | 277312 | 0         | 394 | 408 | 96 -  | 606 | 1013 | 46962  | 47362  |
| UN47927 | Rsa1.0.01701.1 | 915  | 162121 | 9.00E-94  | 187 | 191 | 97 -  | 134 | 324  | 26072  | 26262  |
| UN47928 | Rsa1.0.01119.1 | 932  | 53459  | 1.00E-151 | 329 | 344 | 95 -  | 3   | 345  | 23849  | 24186  |
| UN47929 | Rsa1.0.00664.1 | 624  | 69573  | 4.00E-92  | 204 | 214 | 95 -  | 3   | 216  | 26645  | 26855  |

|         |                |      |        |           |     |     |       |     |      |        |        |
|---------|----------------|------|--------|-----------|-----|-----|-------|-----|------|--------|--------|
| UN47930 | Rsa1.0_00192.1 | 423  | 278200 | 1.00E-165 | 403 | 444 | 90 +  | 2   | 421  | 19492  | 19935  |
| UN47931 | Rsa1.0_15455.1 | 893  | 2595   | 0         | 874 | 895 | 97 +  | 2   | 893  | 1550   | 2441   |
| UN47932 | Rsa1.0_05418.1 | 1182 | 13816  | 1.00E-109 | 201 | 201 | 100 - | 1   | 201  | 5567   | 5767   |
| UN47933 | Rsa1.0_00008.1 | 652  | 358124 | 1.00E-158 | 331 | 345 | 95 -  | 308 | 652  | 194937 | 195277 |
| UN47934 | Rsa1.0_00693.1 | 843  | 161311 | 0         | 433 | 459 | 94 -  | 5   | 452  | 64456  | 64914  |
| UN47935 | Rsa1.0_02678.1 | 695  | 135053 | 1.00E-152 | 332 | 352 | 94 -  | 337 | 688  | 129625 | 129976 |
| UN47936 | Rsa1.0_03325.1 | 466  | 23720  | 1.00E-106 | 243 | 257 | 94 -  | 213 | 465  | 20035  | 20290  |
| UN47937 | Rsa1.0_00241.1 | 1028 | 104000 | 0         | 341 | 341 | 100 + | 1   | 341  | 65476  | 65816  |
| UN47938 | Rsa1.0_01702.1 | 1007 | 40722  | 0         | 459 | 473 | 97 -  | 2   | 474  | 18252  | 18724  |
| UN47939 | Rsa1.0_00008.1 | 813  | 358124 | 1.00E-178 | 370 | 387 | 95 +  | 2   | 380  | 86911  | 87297  |
| UN47940 | Rsa1.0_02716.1 | 803  | 28465  | 2.00E-69  | 200 | 220 | 90 +  | 535 | 751  | 1935   | 2153   |
| UN47941 | Rsa1.0_05496.1 | 1305 | 13533  | 1.00E-152 | 341 | 361 | 94 +  | 944 | 1303 | 13075  | 13423  |
| UN47942 | Rsa1.0_02252.1 | 624  | 33375  | 0         | 432 | 444 | 97 -  | 89  | 532  | 27556  | 27999  |
| UN47943 | Rsa1.0_18598.1 | 705  | 1567   | 0         | 437 | 462 | 94 +  | 44  | 505  | 258    | 719    |
| UN47944 | Rsa1.0_02648.1 | 1128 | 29073  | 0         | 405 | 408 | 99 -  | 2   | 408  | 20665  | 21072  |
| UN47945 | Rsa1.0_00245.1 | 934  | 103569 | 1.00E-89  | 177 | 180 | 98 +  | 15  | 194  | 13643  | 13822  |
| UN47946 | Rsa1.0_00196.1 | 898  | 109960 | 1.00E-101 | 289 | 316 | 91 -  | 1   | 312  | 72827  | 73132  |
| UN47947 | Rsa1.0_00205.1 | 761  | 193401 | 1.00E-126 | 295 | 308 | 95 -  | 457 | 761  | 14413  | 14714  |
| UN47948 | Rsa1.0_01081.1 | 927  | 499226 | 1.00E-133 | 285 | 298 | 95 -  | 631 | 927  | 323179 | 323476 |
| UN47949 | Rsa1.0_03075.1 | 935  | 25560  | 1.00E-120 | 295 | 320 | 92 -  | 335 | 654  | 14646  | 14965  |
| UN47950 | Rsa1.0_02212.1 | 892  | 33840  | 1.00E-117 | 226 | 230 | 98 +  | 415 | 644  | 18942  | 19171  |
| UN47951 | Rsa1.0_02826.1 | 1027 | 27560  | 1.00E-179 | 322 | 323 | 99 -  | 704 | 1026 | 14753  | 15075  |
| UN47952 | Rsa1.0_02663.1 | 769  | 169243 | 0         | 599 | 618 | 96 -  | 3   | 618  | 7793   | 8407   |
| UN47953 | Rsa1.0_01000.1 | 554  | 57140  | 4.00E-73  | 189 | 203 | 93 -  | 210 | 411  | 4269   | 4459   |
| UN47954 | Rsa1.0_06278.1 | 793  | 11333  | 0         | 369 | 375 | 98 -  | 9   | 383  | 9370   | 9743   |
| UN47955 | Rsa1.0_07536.1 | 1254 | 9178   | 0         | 422 | 444 | 95 -  | 4   | 439  | 7818   | 8260   |
| UN47956 | Rsa1.0_00594.1 | 1068 | 73729  | 0         | 838 | 839 | 99 +  | 3   | 841  | 4135   | 4973   |
| UN47957 | Rsa1.0_01536.1 | 470  | 43747  | 0         | 444 | 470 | 94 +  | 3   | 470  | 25749  | 26208  |
| UN47958 | Rsa1.0_00107.1 | 801  | 431659 | 0         | 541 | 546 | 99 -  | 252 | 794  | 14742  | 15287  |
| UN47959 | Rsa1.0_00417.1 | 996  | 395068 | 0         | 802 | 848 | 94 -  | 141 | 988  | 386809 | 387638 |
| UN47960 | Rsa1.0_00416.1 | 1048 | 86772  | 2.33E-156 | 273 | 275 | 99 -  | 139 | 412  | 77585  | 77859  |
| UN47961 | Rsa1.0_00134.1 | 933  | 390219 | 1.00E-161 | 326 | 336 | 97 -  | 3   | 337  | 157266 | 157600 |
| UN47962 | Rsa1.0_00433.1 | 775  | 85381  | 8.00E-97  | 256 | 275 | 93 -  | 479 | 748  | 65209  | 65477  |
| UN47963 | Rsa1.0_00657.1 | 1408 | 69858  | 0         | 410 | 410 | 100 + | 680 | 1089 | 4196   | 4605   |
| UN47964 | Rsa1.0_01295.1 | 870  | 49040  | 1.00E-171 | 395 | 421 | 93 +  | 457 | 869  | 21320  | 21740  |
| UN47965 | Rsa1.0_00894.1 | 1033 | 269700 | 1.00E-90  | 212 | 225 | 94 +  | 809 | 1033 | 117852 | 118074 |
| UN47966 | Rsa1.0_03969.1 | 463  | 19797  | 1.00E-173 | 326 | 332 | 98 -  | 132 | 463  | 16665  | 16996  |
| UN47967 | Rsa1.0_00512.1 | 965  | 200277 | 1.00E-120 | 238 | 244 | 97 +  | 324 | 567  | 63228  | 63471  |
| UN47968 | Rsa1.0_00184.1 | 1199 | 218748 | 0         | 617 | 629 | 98 -  | 572 | 1199 | 210828 | 211456 |



|         |                |      |        |           |      |      |       |      |      |        |        |
|---------|----------------|------|--------|-----------|------|------|-------|------|------|--------|--------|
| UN47969 | Rsa1.0.00576.1 | 929  | 178949 | 0         | 810  | 823  | 98 -  | 87   | 905  | 163152 | 163974 |
| UN47970 | Rsa1.0.00318.1 | 729  | 96094  | 0         | 438  | 447  | 97 -  | 213  | 658  | 20836  | 21282  |
| UN47971 | Rsa1.0.38099.1 | 972  | 591    | 0         | 552  | 579  | 95 -  | 50   | 626  | 15     | 591    |
| UN47972 | Rsa1.0.00093.1 | 1290 | 214962 | 1.00E-130 | 236  | 236  | 100 - | 1055 | 1290 | 97739  | 97974  |
| UN47973 | Rsa1.0.02981.1 | 671  | 26285  | 1.00E-55  | 114  | 115  | 99 +  | 185  | 299  | 4759   | 4873   |
| UN47974 | Rsa1.0.00078.1 | 891  | 175053 | 0         | 400  | 418  | 95 +  | 481  | 891  | 137160 | 137577 |
| UN47975 | Rsa1.0.00032.1 | 1486 | 306326 | 0         | 1275 | 1276 | 99 +  | 1    | 1276 | 192395 | 193670 |
| UN47976 | Rsa1.0.01759.1 | 987  | 39745  | 0         | 331  | 332  | 99 -  | 656  | 987  | 10523  | 10854  |
| UN47977 | Rsa1.0.00059.1 | 755  | 159650 | 5.00E-98  | 214  | 227  | 94 -  | 6    | 232  | 133120 | 133334 |
| UN47978 | Rsa1.0.00470.1 | 875  | 81968  | 9.00E-94  | 206  | 215  | 95 -  | 259  | 473  | 31385  | 31598  |
| UN47979 | Rsa1.0.00343.1 | 669  | 93570  | 1.00E-128 | 233  | 233  | 100 + | 358  | 590  | 49114  | 49346  |
| UN47980 | Rsa1.0.00067.1 | 929  | 415055 | 0         | 927  | 927  | 100 - | 3    | 929  | 34842  | 35768  |
| UN47981 | Rsa1.0.00387.1 | 1290 | 495407 | 1.00E-132 | 279  | 292  | 95 -  | 999  | 1290 | 389839 | 390130 |
| UN47982 | Rsa1.0.01690.1 | 727  | 40939  | 0         | 718  | 727  | 98 +  | 8    | 727  | 5845   | 6571   |
| UN47983 | Rsa1.0.03462.1 | 1021 | 22725  | 1.00E-130 | 253  | 258  | 98 -  | 8    | 265  | 15190  | 15444  |
| UN47984 | Rsa1.0.01329.1 | 1396 | 47982  | 1.00E-160 | 289  | 290  | 99 +  | 195  | 484  | 23143  | 23432  |
| UN47985 | Rsa1.0.01328.1 | 692  | 48021  | 1.00E-148 | 317  | 332  | 95 +  | 360  | 690  | 12124  | 12452  |
| UN47986 | Rsa1.0.01112.1 | 744  | 310601 | 1.00E-135 | 267  | 274  | 97 +  | 169  | 439  | 45140  | 45413  |
| UN47987 | Rsa1.0.01876.1 | 842  | 37800  | 0         | 804  | 838  | 95 +  | 3    | 840  | 20244  | 21081  |
| UN47988 | Rsa1.0.00114.1 | 856  | 131330 | 0         | 346  | 346  | 100 + | 1    | 346  | 84257  | 84602  |
| UN47989 | Rsa1.0.00027.1 | 803  | 283362 | 1.00E-120 | 255  | 267  | 95 +  | 16   | 282  | 135324 | 135590 |
| UN47990 | Rsa1.0.01412.1 | 1134 | 46311  | 1.00E-166 | 305  | 308  | 99 -  | 717  | 1024 | 45571  | 45878  |
| UN47991 | Rsa1.0.00135.1 | 887  | 178077 | 0         | 881  | 886  | 99 -  | 2    | 887  | 169212 | 170096 |
| UN47992 | Rsa1.0.00549.1 | 727  | 76473  | 1.00E-180 | 341  | 347  | 98 -  | 382  | 727  | 26146  | 26492  |
| UN47993 | Rsa1.0.01549.1 | 822  | 43543  | 0         | 785  | 813  | 96 +  | 11   | 822  | 375    | 1178   |
| UN47994 | Rsa1.0.02480.1 | 1179 | 31036  | 0         | 451  | 454  | 99 -  | 310  | 763  | 12060  | 12513  |
| UN47995 | Rsa1.0.02144.1 | 662  | 34630  | 1.00E-150 | 303  | 313  | 96 -  | 1    | 312  | 9429   | 9741   |
| UN47996 | Rsa1.0.01600.1 | 808  | 42537  | 1.00E-106 | 232  | 244  | 95 +  | 4    | 247  | 24298  | 24541  |
| UN47997 | Rsa1.0.02479.1 | 404  | 31038  | 1.00E-122 | 222  | 222  | 100 + | 35   | 256  | 15623  | 15844  |
| UN47998 | Rsa1.0.04808.1 | 900  | 15893  | 0         | 688  | 712  | 96 +  | 199  | 898  | 11631  | 12342  |
| UN47999 | Rsa1.0.00167.1 | 814  | 116000 | 1.00E-114 | 234  | 242  | 96 -  | 260  | 501  | 14023  | 14264  |
| UN48000 | Rsa1.0.07110.1 | 621  | 9880   | 1.00E-109 | 235  | 246  | 95 +  | 1    | 246  | 9150   | 9391   |
| UN48001 | Rsa1.0.00036.1 | 1121 | 176186 | 0         | 365  | 369  | 98 +  | 321  | 689  | 102434 | 102802 |
| UN48002 | Rsa1.0.01668.1 | 951  | 41299  | 1.00E-106 | 265  | 288  | 92 -  | 114  | 401  | 40402  | 40689  |
| UN48003 | Rsa1.0.03270.1 | 756  | 24193  | 2.00E-94  | 176  | 176  | 100 - | 1    | 176  | 8845   | 9020   |
| UN48004 | Rsa1.0.01033.1 | 940  | 56173  | 0         | 574  | 590  | 97 -  | 354  | 940  | 48501  | 49090  |
| UN48005 | Rsa1.0.03216.1 | 780  | 24540  | 5.00E-58  | 118  | 119  | 99 -  | 499  | 617  | 12558  | 12676  |
| UN48006 | Rsa1.0.05494.1 | 771  | 13547  | 1.00E-159 | 304  | 308  | 98 -  | 457  | 761  | 7795   | 8102   |
| UN48007 | Rsa1.0.00041.1 | 603  | 186197 | 0         | 436  | 452  | 96 +  | 18   | 469  | 54322  | 54773  |

|         |                |      |        |           |      |      |       |     |      |        |        |
|---------|----------------|------|--------|-----------|------|------|-------|-----|------|--------|--------|
| UN48008 | Rsa1.0_00340.1 | 818  | 305782 | 1.00E-173 | 407  | 448  | 90 -  | 1   | 434  | 190468 | 190890 |
| UN48009 | Rsa1.0_03005.1 | 656  | 26082  | 1.00E-111 | 213  | 216  | 98 -  | 277 | 492  | 23970  | 24185  |
| UN48010 | Rsa1.0_00198.1 | 1005 | 222963 | 0         | 911  | 951  | 95 +  | 2   | 948  | 138007 | 138949 |
| UN48011 | Rsa1.0_00093.1 | 822  | 214962 | 9.00E-63  | 135  | 139  | 97 -  | 521 | 659  | 99063  | 99201  |
| UN48012 | Rsa1.0_04220.1 | 850  | 18421  | 0         | 478  | 518  | 92 -  | 323 | 837  | 9484   | 9982   |
| UN48013 | Rsa1.0_01023.1 | 733  | 56571  | 0         | 710  | 741  | 95 -  | 5   | 731  | 49588  | 50322  |
| UN48014 | Rsa1.0_05106.1 | 1003 | 14828  | 0         | 997  | 1002 | 99 -  | 1   | 1001 | 9177   | 10178  |
| UN48015 | Rsa1.0_08916.1 | 574  | 6792   | 0         | 557  | 581  | 95 +  | 1   | 573  | 5879   | 6454   |
| UN48016 | Rsa1.0_57433.1 | 1302 | 398    | 1.00E-168 | 315  | 320  | 98 -  | 283 | 602  | 68     | 387    |
| UN48017 | Rsa1.0_00865.1 | 1315 | 61686  | 0         | 435  | 454  | 95 -  | 25  | 477  | 2371   | 2824   |
| UN48018 | Rsa1.0_05411.1 | 815  | 13838  | 0         | 529  | 544  | 97 -  | 272 | 815  | 7555   | 8097   |
| UN48019 | Rsa1.0_04271.1 | 986  | 18148  | 0         | 561  | 580  | 96 -  | 408 | 986  | 12446  | 13021  |
| UN48020 | Rsa1.0_15602.1 | 1269 | 2523   | 0         | 672  | 678  | 99 +  | 595 | 1267 | 1648   | 2325   |
| UN48021 | Rsa1.0_00124.1 | 1242 | 262503 | 0         | 1107 | 1184 | 93 +  | 23  | 1182 | 59992  | 61173  |
| UN48022 | Rsa1.0_00556.1 | 1001 | 207212 | 0         | 422  | 439  | 96 +  | 566 | 999  | 155358 | 155796 |
| UN48023 | Rsa1.0_00358.1 | 996  | 91293  | 0         | 398  | 401  | 99 +  | 596 | 996  | 1111   | 1511   |
| UN48024 | Rsa1.0_07453.1 | 751  | 9368   | 0         | 490  | 501  | 97 -  | 6   | 506  | 2198   | 2696   |
| UN48025 | Rsa1.0_00685.1 | 570  | 68515  | 0         | 508  | 529  | 96 -  | 2   | 526  | 64083  | 64604  |
| UN48026 | Rsa1.0_00679.1 | 997  | 68971  | 0         | 942  | 980  | 96 -  | 18  | 997  | 611    | 1584   |
| UN48027 | Rsa1.0_01355.1 | 822  | 47303  | 1.00E-150 | 269  | 269  | 100 - | 552 | 820  | 34841  | 35109  |
| UN48028 | Rsa1.0_00093.1 | 1255 | 214962 | 0         | 436  | 461  | 94 -  | 779 | 1232 | 95868  | 96328  |
| UN48029 | Rsa1.0_00792.1 | 393  | 64163  | 0         | 388  | 394  | 98 +  | 2   | 393  | 27199  | 27592  |
| UN48030 | Rsa1.0_00086.1 | 1088 | 439854 | 0         | 446  | 453  | 98 +  | 636 | 1088 | 234282 | 234734 |
| UN48031 | Rsa1.0_00797.1 | 905  | 63959  | 0         | 518  | 562  | 92 -  | 364 | 905  | 51738  | 52289  |
| UN48032 | Rsa1.0_02493.1 | 1131 | 30854  | 0         | 347  | 349  | 99 -  | 781 | 1127 | 28292  | 28640  |
| UN48033 | Rsa1.0_00277.1 | 761  | 100132 | 1.00E-103 | 245  | 262  | 93 +  | 16  | 274  | 48137  | 48395  |
| UN48034 | Rsa1.0_03615.1 | 771  | 21766  | 1.00E-140 | 256  | 257  | 99 +  | 515 | 771  | 6065   | 6321   |
| UN48035 | Rsa1.0_00648.1 | 727  | 70351  | 1.00E-162 | 314  | 321  | 97 +  | 1   | 321  | 21674  | 21992  |
| UN48036 | Rsa1.0_03536.1 | 1114 | 22232  | 0         | 702  | 728  | 96 +  | 387 | 1114 | 7055   | 7781   |
| UN48037 | Rsa1.0_00176.1 | 809  | 240984 | 1.00E-133 | 265  | 273  | 97 +  | 66  | 338  | 184052 | 184324 |
| UN48038 | Rsa1.0_01638.1 | 543  | 41857  | 1.00E-130 | 314  | 336  | 93 -  | 2   | 333  | 36877  | 37208  |
| UN48039 | Rsa1.0_09160.1 | 833  | 6599   | 1.00E-160 | 304  | 309  | 98 +  | 437 | 742  | 1109   | 1417   |
| UN48040 | Rsa1.0_08203.1 | 970  | 7742   | 1.00E-144 | 306  | 318  | 96 -  | 653 | 966  | 5061   | 5378   |
| UN48041 | Rsa1.0_00796.1 | 499  | 63997  | 1.00E-125 | 269  | 283  | 95 +  | 214 | 496  | 36559  | 36841  |
| UN48042 | Rsa1.0_00454.1 | 615  | 216970 | 0         | 413  | 432  | 95 +  | 5   | 435  | 184166 | 184595 |
| UN48043 | Rsa1.0_03692.1 | 523  | 21338  | 1.00E-106 | 234  | 245  | 95 -  | 278 | 522  | 6388   | 6627   |
| UN48044 | Rsa1.0_04474.1 | 668  | 17191  | 6.00E-88  | 165  | 165  | 100 - | 501 | 665  | 15347  | 15511  |
| UN48045 | Rsa1.0_73802.1 | 851  | 310    | 1.00E-162 | 298  | 301  | 99 +  | 551 | 851  | 5      | 305    |
| UN48046 | Rsa1.0_02893.1 | 509  | 26999  | 1.00E-119 | 252  | 261  | 96 -  | 250 | 508  | 24354  | 24614  |

|         |                |      |        |           |     |      |       |     |      |        |        |
|---------|----------------|------|--------|-----------|-----|------|-------|-----|------|--------|--------|
| UN48047 | Rsa1.0.00305.1 | 828  | 97308  | 1.00E-109 | 283 | 309  | 91 -  | 1   | 308  | 80767  | 81060  |
| UN48048 | Rsa1.0.00420.1 | 797  | 86496  | 1.00E-108 | 281 | 305  | 92 -  | 8   | 299  | 45120  | 45421  |
| UN48049 | Rsa1.0.00237.1 | 878  | 235974 | 1.00E-154 | 358 | 385  | 92 +  | 510 | 877  | 225556 | 225937 |
| UN48050 | Rsa1.0.00110.1 | 840  | 132719 | 0         | 813 | 852  | 95 -  | 3   | 839  | 60668  | 61519  |
| UN48051 | Rsa1.0.00548.1 | 796  | 76518  | 1.00E-154 | 292 | 297  | 98 -  | 101 | 397  | 65914  | 66210  |
| UN48052 | Rsa1.0.04103.1 | 732  | 19048  | 1.00E-166 | 306 | 308  | 99 +  | 425 | 731  | 11473  | 11780  |
| UN48053 | Rsa1.0.00114.1 | 1040 | 131330 | 0         | 371 | 374  | 99 -  | 3   | 376  | 86061  | 86434  |
| UN48054 | Rsa1.0.04193.1 | 933  | 18571  | 0         | 323 | 323  | 100 + | 609 | 931  | 5730   | 6052   |
| UN48055 | Rsa1.0.00838.1 | 1125 | 153820 | 1.00E-132 | 257 | 262  | 98 +  | 371 | 632  | 34535  | 34794  |
| UN48056 | Rsa1.0.00380.1 | 759  | 89748  | 1.00E-141 | 333 | 361  | 92 -  | 399 | 759  | 38700  | 39039  |
| UN48057 | Rsa1.0.01275.1 | 714  | 49405  | 1.00E-168 | 317 | 323  | 98 -  | 373 | 695  | 8096   | 8418   |
| UN48058 | Rsa1.0.00164.1 | 743  | 116642 | 0         | 617 | 635  | 97 +  | 111 | 743  | 47430  | 48061  |
| UN48059 | Rsa1.0.08424.1 | 876  | 7375   | 0         | 506 | 525  | 96 -  | 352 | 876  | 4010   | 4533   |
| UN48060 | Rsa1.0.00145.1 | 1133 | 261008 | 5.00E-62  | 131 | 134  | 97 -  | 182 | 315  | 95121  | 95254  |
| UN48061 | Rsa1.0.02730.1 | 621  | 28385  | 0         | 423 | 447  | 94 -  | 175 | 621  | 2448   | 2880   |
| UN48062 | Rsa1.0.00139.1 | 720  | 357786 | 0         | 347 | 350  | 99 -  | 164 | 513  | 128608 | 128957 |
| UN48063 | Rsa1.0.09339.1 | 700  | 6444   | 0         | 456 | 456  | 100 - | 1   | 456  | 4672   | 5127   |
| UN48064 | Rsa1.0.00196.1 | 841  | 109960 | 1.00E-101 | 234 | 246  | 95 +  | 573 | 817  | 72827  | 73068  |
| UN48065 | Rsa1.0.00234.1 | 648  | 197060 | 0         | 599 | 609  | 98 -  | 2   | 610  | 43436  | 44044  |
| UN48066 | Rsa1.0.02012.1 | 1088 | 36084  | 0         | 419 | 426  | 98 -  | 3   | 428  | 14711  | 15136  |
| UN48067 | Rsa1.0.00002.1 | 877  | 601661 | 1.00E-131 | 253 | 258  | 98 +  | 619 | 876  | 150569 | 150826 |
| UN48068 | Rsa1.0.05822.1 | 464  | 12521  | 1.00E-176 | 342 | 352  | 97 +  | 78  | 429  | 7677   | 8028   |
| UN48069 | Rsa1.0.00009.1 | 653  | 232558 | 0         | 462 | 469  | 98 -  | 3   | 468  | 98138  | 98606  |
| UN48070 | Rsa1.0.02925.1 | 981  | 26720  | 1.00E-159 | 285 | 285  | 100 - | 459 | 743  | 21062  | 21346  |
| UN48071 | Rsa1.0.08401.1 | 334  | 7418   | 1.00E-155 | 277 | 277  | 100 - | 58  | 334  | 293    | 569    |
| UN48072 | Rsa1.0.07444.1 | 534  | 9386   | 1.00E-129 | 260 | 265  | 98 -  | 271 | 533  | 184    | 446    |
| UN48073 | Rsa1.0.02268.1 | 974  | 33172  | 0         | 586 | 606  | 96 -  | 1   | 601  | 17971  | 18575  |
| UN48074 | Rsa1.0.10771.1 | 855  | 5723   | 1.00E-179 | 318 | 318  | 100 - | 1   | 318  | 1882   | 2199   |
| UN48075 | Rsa1.0.22522.1 | 1404 | 1114   | 0         | 996 | 1013 | 98 -  | 313 | 1323 | 102    | 1114   |
| UN48076 | Rsa1.0.04381.1 | 875  | 17639  | 1.00E-168 | 419 | 465  | 90 -  | 421 | 875  | 12852  | 13293  |
| UN48077 | Rsa1.0.00570.1 | 735  | 75002  | 0         | 692 | 737  | 93 +  | 4   | 731  | 20357  | 21073  |
| UN48078 | Rsa1.0.04073.1 | 646  | 19238  | 1.00E-172 | 360 | 378  | 95 -  | 9   | 386  | 16757  | 17134  |
| UN48079 | Rsa1.0.01727.1 | 930  | 40243  | 0         | 380 | 384  | 98 +  | 10  | 393  | 11133  | 11516  |
| UN48080 | Rsa1.0.00711.1 | 815  | 67223  | 1.00E-153 | 291 | 296  | 98 -  | 517 | 812  | 6629   | 6921   |
| UN48081 | Rsa1.0.00179.1 | 895  | 393324 | 0         | 325 | 325  | 100 + | 3   | 327  | 247407 | 247731 |
| UN48082 | Rsa1.0.00737.1 | 1043 | 66432  | 1.00E-144 | 307 | 318  | 96 -  | 720 | 1032 | 14256  | 14573  |
| UN48083 | Rsa1.0.01448.1 | 731  | 45645  | 0         | 494 | 498  | 99 -  | 235 | 731  | 20981  | 21478  |
| UN48084 | Rsa1.0.01453.1 | 717  | 45449  | 1.00E-132 | 268 | 277  | 96 -  | 411 | 684  | 11450  | 11726  |
| UN48085 | Rsa1.0.10407.1 | 1213 | 5858   | 0         | 496 | 535  | 92 +  | 680 | 1213 | 546    | 1068   |

|         |                |      |        |           |      |      |       |     |      |        |        |
|---------|----------------|------|--------|-----------|------|------|-------|-----|------|--------|--------|
| UN48086 | Rsa1.0.00145.1 | 410  | 261008 | 1.00E-118 | 216  | 216  | 100 + | 194 | 409  | 242934 | 243149 |
| UN48087 | Rsa1.0.00343.1 | 832  | 93570  | 0         | 430  | 437  | 98 +  | 398 | 832  | 49115  | 49551  |
| UN48088 | Rsa1.0.01116.1 | 1192 | 142088 | 0         | 1108 | 1174 | 94 -  | 11  | 1173 | 129858 | 131020 |
| UN48089 | Rsa1.0.05827.1 | 713  | 12503  | 0         | 638  | 643  | 99 +  | 71  | 713  | 6485   | 7127   |
| UN48090 | Rsa1.0.00867.1 | 1103 | 61635  | 1.00E-102 | 204  | 209  | 97 +  | 279 | 487  | 36502  | 36710  |
| UN48091 | Rsa1.0.00119.1 | 862  | 467509 | 1.00E-92  | 275  | 306  | 89 -  | 285 | 578  | 247326 | 247627 |
| UN48092 | Rsa1.0.00543.1 | 806  | 76788  | 5.00E-86  | 180  | 186  | 96 +  | 287 | 472  | 41633  | 41818  |
| UN48093 | Rsa1.0.01335.1 | 983  | 47894  | 1.00E-141 | 269  | 274  | 98 -  | 366 | 639  | 18969  | 19242  |
| UN48094 | Rsa1.0.00748.1 | 753  | 65983  | 1.00E-179 | 397  | 418  | 94 +  | 334 | 751  | 34880  | 35288  |
| UN48095 | Rsa1.0.02378.1 | 1014 | 31991  | 0         | 614  | 637  | 96 +  | 378 | 1013 | 13448  | 14083  |
| UN48096 | Rsa1.0.02698.1 | 759  | 28593  | 1.00E-107 | 216  | 222  | 97 +  | 81  | 302  | 9033   | 9254   |
| UN48097 | Rsa1.0.00019.1 | 912  | 301669 | 0         | 570  | 595  | 95 +  | 319 | 912  | 59571  | 60149  |
| UN48098 | Rsa1.0.03325.1 | 516  | 23720  | 1.00E-168 | 308  | 311  | 99 -  | 206 | 516  | 19980  | 20290  |
| UN48099 | Rsa1.0.00262.1 | 691  | 101906 | 0         | 422  | 442  | 95 +  | 2   | 439  | 94718  | 95156  |
| UN48100 | Rsa1.0.02398.1 | 1144 | 31766  | 0         | 891  | 953  | 93 +  | 117 | 1066 | 16780  | 17726  |
| UN48101 | Rsa1.0.00017.1 | 727  | 752458 | 0         | 660  | 710  | 92 -  | 1   | 704  | 352440 | 353128 |
| UN48102 | Rsa1.0.03981.1 | 489  | 19724  | 1.00E-147 | 352  | 376  | 93 -  | 1   | 373  | 17481  | 17849  |
| UN48103 | Rsa1.0.00326.1 | 797  | 171955 | 6.00E-70  | 135  | 135  | 100 + | 112 | 246  | 68750  | 68884  |
| UN48104 | Rsa1.0.01166.1 | 671  | 51877  | 1.00E-104 | 202  | 204  | 99 +  | 1   | 203  | 38829  | 39032  |
| UN48105 | Rsa1.0.00204.1 | 856  | 109056 | 0         | 821  | 860  | 95 -  | 1   | 856  | 65430  | 66289  |
| UN48106 | Rsa1.0.00622.1 | 843  | 71822  | 0         | 772  | 841  | 91 -  | 5   | 843  | 52706  | 53540  |
| UN48107 | Rsa1.0.01860.1 | 799  | 38057  | 1.00E-64  | 126  | 126  | 100 - | 552 | 677  | 23863  | 23988  |
| UN48108 | Rsa1.0.00127.1 | 1000 | 127446 | 0         | 401  | 425  | 94 -  | 61  | 484  | 21412  | 21827  |
| UN48109 | Rsa1.0.01735.1 | 1429 | 40128  | 0         | 681  | 693  | 98 -  | 43  | 734  | 26502  | 27193  |
| UN48110 | Rsa1.0.01845.1 | 1223 | 38415  | 2.00E-67  | 140  | 143  | 97 -  | 359 | 501  | 7415   | 7557   |
| UN48111 | Rsa1.0.07577.1 | 730  | 9092   | 0         | 556  | 559  | 99 -  | 1   | 559  | 7519   | 8076   |
| UN48112 | Rsa1.0.00360.1 | 833  | 91190  | 0         | 528  | 537  | 98 -  | 260 | 796  | 75819  | 76354  |
| UN48113 | Rsa1.0.02358.1 | 864  | 32213  | 0         | 460  | 475  | 96 -  | 390 | 864  | 242    | 712    |
| UN48114 | Rsa1.0.02560.1 | 860  | 30091  | 1.00E-178 | 346  | 356  | 97 -  | 2   | 357  | 2023   | 2378   |
| UN48115 | Rsa1.0.00407.1 | 653  | 191544 | 1.00E-103 | 203  | 207  | 98 -  | 365 | 571  | 9058   | 9264   |
| UN48116 | Rsa1.0.00938.1 | 752  | 193891 | 0         | 414  | 425  | 97 +  | 143 | 565  | 50748  | 51172  |
| UN48117 | Rsa1.0.00476.1 | 646  | 280966 | 1.00E-157 | 314  | 324  | 96 +  | 21  | 344  | 31715  | 32036  |
| UN48118 | Rsa1.0.01724.1 | 915  | 40292  | 4.00E-99  | 202  | 208  | 97 +  | 352 | 559  | 10412  | 10619  |
| UN48119 | Rsa1.0.05653.1 | 889  | 13043  | 0         | 828  | 880  | 94 +  | 17  | 888  | 11416  | 12282  |
| UN48120 | Rsa1.0.00496.1 | 676  | 79834  | 0         | 396  | 416  | 95 +  | 3   | 412  | 62036  | 62451  |
| UN48121 | Rsa1.0.00020.1 | 906  | 283099 | 0         | 475  | 480  | 98 -  | 1   | 480  | 54266  | 54745  |
| UN48122 | Rsa1.0.00483.1 | 1221 | 81102  | 2.00E-83  | 254  | 284  | 89 -  | 941 | 1221 | 32616  | 32898  |
| UN48123 | Rsa1.0.01137.1 | 555  | 52655  | 1.00E-118 | 228  | 232  | 98 -  | 184 | 415  | 51348  | 51579  |
| UN48124 | Rsa1.0.00296.1 | 1064 | 97854  | 1.00E-157 | 365  | 392  | 93 -  | 680 | 1062 | 51437  | 51825  |

|         |                |      |        |           |     |     |       |     |      |        |        |
|---------|----------------|------|--------|-----------|-----|-----|-------|-----|------|--------|--------|
| UN48125 | Rsa1.0.05595.1 | 851  | 13228  | 0         | 373 | 380 | 98 +  | 1   | 380  | 3219   | 3596   |
| UN48126 | Rsa1.0.00163.1 | 1011 | 116847 | 1.00E-151 | 332 | 347 | 95 -  | 666 | 1011 | 25869  | 26212  |
| UN48127 | Rsa1.0.00273.1 | 896  | 326186 | 0         | 447 | 484 | 92 +  | 44  | 525  | 26599  | 27078  |
| UN48128 | Rsa1.0.14974.1 | 757  | 2919   | 1.00E-168 | 368 | 393 | 93 -  | 125 | 505  | 2513   | 2905   |
| UN48129 | Rsa1.0.00083.1 | 1005 | 442773 | 0         | 558 | 631 | 88 -  | 140 | 761  | 319656 | 320280 |
| UN48130 | Rsa1.0.00193.1 | 911  | 194198 | 0         | 909 | 911 | 99 -  | 2   | 911  | 184828 | 185738 |
| UN48131 | Rsa1.0.00433.1 | 765  | 85381  | 1.00E-175 | 390 | 412 | 94 -  | 1   | 410  | 19788  | 20194  |
| UN48132 | Rsa1.0.03506.1 | 1183 | 22416  | 0         | 525 | 555 | 94 -  | 1   | 545  | 8413   | 8964   |
| UN48133 | Rsa1.0.15552.1 | 826  | 2546   | 1.00E-71  | 141 | 142 | 99 +  | 94  | 235  | 2405   | 2546   |
| UN48134 | Rsa1.0.00250.1 | 746  | 273771 | 1.00E-129 | 279 | 290 | 96 -  | 14  | 302  | 186945 | 187231 |
| UN48135 | Rsa1.0.03475.1 | 683  | 22653  | 7.00E-60  | 130 | 134 | 97 -  | 3   | 136  | 22098  | 22231  |
| UN48136 | Rsa1.0.02717.1 | 822  | 28458  | 1.00E-119 | 233 | 238 | 97 +  | 398 | 635  | 23912  | 24149  |
| UN48137 | Rsa1.0.02934.1 | 974  | 26627  | 0         | 608 | 656 | 92 -  | 31  | 682  | 23640  | 24283  |
| UN48138 | Rsa1.0.00407.1 | 960  | 191544 | 0         | 718 | 783 | 91 +  | 1   | 757  | 155586 | 156357 |
| UN48139 | Rsa1.0.07849.1 | 815  | 8425   | 1.00E-137 | 263 | 267 | 98 +  | 3   | 267  | 5614   | 5880   |
| UN48140 | Rsa1.0.08776.1 | 637  | 6932   | 4.00E-92  | 172 | 172 | 100 - | 308 | 479  | 2190   | 2361   |
| UN48141 | Rsa1.0.00586.1 | 838  | 163802 | 0         | 410 | 415 | 98 -  | 422 | 836  | 108211 | 108625 |
| UN48142 | Rsa1.0.00265.1 | 1167 | 220635 | 0         | 461 | 495 | 93 +  | 2   | 488  | 171372 | 171865 |
| UN48143 | Rsa1.0.00699.1 | 322  | 184398 | 6.00E-40  | 184 | 215 | 85 +  | 26  | 237  | 127042 | 127256 |
| UN48144 | Rsa1.0.14734.1 | 719  | 3116   | 0         | 487 | 510 | 95 -  | 78  | 587  | 139    | 642    |
| UN48145 | Rsa1.0.01248.1 | 534  | 154103 | 0         | 494 | 538 | 91 -  | 3   | 534  | 30816  | 31337  |
| UN48146 | Rsa1.0.01166.1 | 1213 | 51877  | 1.00E-150 | 289 | 294 | 98 -  | 837 | 1130 | 38913  | 39205  |
| UN48147 | Rsa1.0.03750.1 | 870  | 21027  | 5.00E-80  | 214 | 231 | 92 +  | 3   | 230  | 6318   | 6547   |
| UN48148 | Rsa1.0.00425.1 | 757  | 147080 | 0         | 589 | 595 | 98 +  | 12  | 606  | 113901 | 114494 |
| UN48149 | Rsa1.0.00122.1 | 594  | 265937 | 0         | 558 | 597 | 93 -  | 2   | 585  | 224738 | 225329 |
| UN48150 | Rsa1.0.00069.1 | 736  | 403561 | 5.00E-98  | 245 | 264 | 92 -  | 53  | 309  | 200655 | 200916 |
| UN48151 | Rsa1.0.01508.1 | 918  | 44334  | 3.00E-13  | 109 | 132 | 82 -  | 222 | 353  | 39209  | 39340  |
| UN48152 | Rsa1.0.19257.1 | 714  | 1455   | 1.00E-165 | 368 | 394 | 93 +  | 319 | 712  | 108    | 487    |
| UN48153 | Rsa1.0.00105.1 | 868  | 134138 | 0         | 412 | 433 | 95 -  | 1   | 427  | 91785  | 92211  |
| UN48154 | Rsa1.0.00486.1 | 842  | 80875  | 0         | 488 | 505 | 96 +  | 2   | 506  | 32522  | 33022  |
| UN48155 | Rsa1.0.00780.1 | 847  | 147795 | 0         | 493 | 518 | 95 +  | 330 | 847  | 25606  | 26111  |
| UN48156 | Rsa1.0.04785.1 | 632  | 15993  | 1.00E-156 | 309 | 319 | 96 +  | 313 | 631  | 7584   | 7902   |
| UN48157 | Rsa1.0.00332.1 | 372  | 94575  | 8.00E-86  | 173 | 177 | 97 -  | 2   | 178  | 55359  | 55535  |
| UN48158 | Rsa1.0.00017.1 | 160  | 752458 | 2.00E-66  | 153 | 159 | 96 -  | 1   | 159  | 314501 | 314656 |
| UN48159 | Rsa1.0.01696.1 | 1111 | 301850 | 0         | 727 | 737 | 98 +  | 375 | 1111 | 273492 | 274228 |
| UN48160 | Rsa1.0.00040.1 | 471  | 324196 | 0         | 409 | 425 | 96 +  | 1   | 423  | 62073  | 62495  |
| UN48161 | Rsa1.0.05526.1 | 907  | 13431  | 0         | 634 | 664 | 95 +  | 239 | 902  | 5046   | 5706   |
| UN48162 | Rsa1.0.05559.1 | 759  | 13329  | 8.00E-60  | 187 | 210 | 89 -  | 268 | 477  | 8473   | 8682   |
| UN48163 | Rsa1.0.00377.1 | 724  | 90038  | 0         | 669 | 677 | 98 -  | 7   | 683  | 33903  | 34576  |

|         |                |      |        |           |      |      |      |     |      |        |        |
|---------|----------------|------|--------|-----------|------|------|------|-----|------|--------|--------|
| UN48164 | Rsa1.0.00182.1 | 1118 | 142305 | 0         | 1075 | 1121 | 95 + | 1   | 1118 | 66837  | 67950  |
| UN48165 | Rsa1.0.00067.1 | 878  | 415055 | 0         | 871  | 909  | 95 + | 1   | 878  | 415    | 1323   |
| UN48166 | Rsa1.0.00679.1 | 342  | 68971  | 8.00E-89  | 214  | 230  | 93 - | 58  | 287  | 34534  | 34763  |
| UN48167 | Rsa1.0.00873.1 | 724  | 61459  | 1.00E-149 | 270  | 271  | 99 + | 303 | 573  | 60323  | 60593  |
| UN48168 | Rsa1.0.01459.1 | 556  | 45277  | 4.00E-73  | 203  | 224  | 90 + | 1   | 224  | 43046  | 43259  |
| UN48169 | Rsa1.0.05819.1 | 1247 | 12543  | 1.00E-179 | 324  | 326  | 99 - | 922 | 1247 | 11043  | 11368  |
| UN48170 | Rsa1.0.00398.1 | 682  | 88007  | 0         | 650  | 682  | 95 + | 1   | 681  | 70691  | 71367  |
| UN48171 | Rsa1.0.00751.1 | 805  | 65759  | 8.00E-94  | 181  | 183  | 98 + | 324 | 506  | 43104  | 43286  |
| UN48172 | Rsa1.0.03672.1 | 1040 | 21452  | 1.00E-158 | 481  | 542  | 88 + | 49  | 589  | 13327  | 13859  |
| UN48173 | Rsa1.0.00313.1 | 821  | 96745  | 0         | 348  | 353  | 98 - | 310 | 660  | 79236  | 79588  |
| UN48174 | Rsa1.0.08727.1 | 825  | 6996   | 0         | 503  | 515  | 97 + | 313 | 823  | 1205   | 1715   |
| UN48175 | Rsa1.0.02008.1 | 744  | 36109  | 0         | 639  | 649  | 98 - | 96  | 744  | 19661  | 20309  |
| UN48176 | Rsa1.0.02365.1 | 463  | 32118  | 6.00E-78  | 217  | 236  | 91 + | 1   | 230  | 16961  | 17194  |
| UN48177 | Rsa1.0.00373.1 | 1203 | 90296  | 0         | 525  | 537  | 97 + | 62  | 598  | 88249  | 88783  |
| UN48178 | Rsa1.0.00875.1 | 810  | 61371  | 1.00E-171 | 337  | 347  | 97 + | 186 | 530  | 58285  | 58631  |
| UN48179 | Rsa1.0.01403.1 | 779  | 46453  | 1.00E-180 | 378  | 394  | 95 - | 2   | 393  | 3064   | 3455   |
| UN48180 | Rsa1.0.00007.1 | 1144 | 239325 | 0         | 366  | 371  | 98 + | 772 | 1142 | 108872 | 109242 |
| UN48181 | Rsa1.0.01633.1 | 867  | 41868  | 1.00E-126 | 247  | 253  | 97 + | 354 | 606  | 7450   | 7702   |
| UN48182 | Rsa1.0.01174.1 | 652  | 51696  | 0         | 354  | 362  | 97 + | 289 | 650  | 35988  | 36349  |
| UN48183 | Rsa1.0.01230.1 | 672  | 50221  | 2.00E-69  | 146  | 150  | 97 + | 363 | 512  | 23590  | 23739  |
| UN48184 | Rsa1.0.00577.1 | 724  | 174827 | 7.00E-94  | 247  | 267  | 92 + | 1   | 265  | 168316 | 168571 |
| UN48185 | Rsa1.0.00212.1 | 653  | 108350 | 3.00E-71  | 165  | 172  | 95 + | 117 | 285  | 37909  | 38080  |
| UN48186 | Rsa1.0.00959.1 | 1121 | 58202  | 1.00E-179 | 445  | 482  | 92 - | 8   | 484  | 17162  | 17639  |
| UN48187 | Rsa1.0.03238.1 | 772  | 24432  | 1.00E-101 | 240  | 255  | 94 + | 1   | 253  | 12793  | 13047  |
| UN48188 | Rsa1.0.03869.1 | 1011 | 20365  | 1.00E-156 | 290  | 292  | 99 - | 508 | 799  | 216    | 506    |
| UN48189 | Rsa1.0.00010.1 | 858  | 294827 | 1.00E-103 | 206  | 211  | 97 + | 191 | 401  | 247813 | 248023 |
| UN48190 | Rsa1.0.00116.1 | 724  | 365886 | 3.00E-84  | 201  | 211  | 95 + | 11  | 219  | 53090  | 53299  |
| UN48191 | Rsa1.0.02814.1 | 486  | 27656  | 0         | 480  | 486  | 98 + | 1   | 484  | 25868  | 26353  |
| UN48192 | Rsa1.0.02855.1 | 941  | 27271  | 0         | 794  | 848  | 93 - | 28  | 845  | 10359  | 11204  |
| UN48193 | Rsa1.0.08151.1 | 842  | 7830   | 0         | 831  | 846  | 98 - | 1   | 842  | 2000   | 2845   |
| UN48194 | Rsa1.0.02245.1 | 720  | 33478  | 1.00E-157 | 388  | 418  | 92 + | 2   | 417  | 6315   | 6725   |
| UN48195 | Rsa1.0.00016.1 | 610  | 831256 | 0         | 541  | 593  | 91 - | 18  | 608  | 766949 | 767528 |
| UN48196 | Rsa1.0.00473.1 | 889  | 212204 | 0         | 496  | 516  | 96 - | 2   | 517  | 15771  | 16278  |
| UN48197 | Rsa1.0.00048.1 | 727  | 167185 | 0         | 359  | 370  | 97 - | 359 | 725  | 12809  | 13178  |
| UN48198 | Rsa1.0.00012.1 | 1168 | 222148 | 0         | 755  | 848  | 89 - | 217 | 1039 | 110283 | 111109 |
| UN48199 | Rsa1.0.00321.1 | 815  | 95671  | 0         | 368  | 380  | 96 + | 4   | 380  | 26962  | 27341  |
| UN48200 | Rsa1.0.23144.1 | 579  | 1068   | 1.00E-135 | 298  | 314  | 94 - | 154 | 466  | 758    | 1068   |
| UN48201 | Rsa1.0.00801.1 | 1105 | 63861  | 1.00E-145 | 318  | 339  | 93 + | 764 | 1102 | 24598  | 24924  |
| UN48202 | Rsa1.0.03856.1 | 517  | 20429  | 8.00E-93  | 192  | 198  | 96 + | 322 | 515  | 19889  | 20086  |

|         |                |      |        |           |     |     |      |     |     |        |        |
|---------|----------------|------|--------|-----------|-----|-----|------|-----|-----|--------|--------|
| UN48203 | Rsa1.0.00417.1 | 933  | 395068 | 1.00E-129 | 254 | 260 | 97 + | 1   | 257 | 228519 | 228778 |
| UN48204 | Rsa1.0.00662.1 | 1045 | 192183 | 0         | 650 | 692 | 93 - | 1   | 674 | 1924   | 2615   |
| UN48205 | Rsa1.0.16051.1 | 822  | 2305   | 1.00E-176 | 396 | 421 | 94 + | 1   | 415 | 1887   | 2305   |
| UN48206 | Rsa1.0.01942.1 | 857  | 37048  | 0         | 520 | 546 | 95 - | 12  | 556 | 3757   | 4294   |
| UN48207 | Rsa1.0.02085.1 | 820  | 35198  | 3.00E-96  | 237 | 257 | 92 + | 205 | 458 | 30157  | 30404  |
| UN48208 | Rsa1.0.00497.1 | 835  | 79830  | 0         | 489 | 503 | 97 + | 283 | 785 | 62413  | 62915  |
| UN48209 | Rsa1.0.01536.1 | 989  | 43747  | 0         | 808 | 862 | 93 + | 117 | 970 | 18915  | 19767  |
| UN48210 | Rsa1.0.00179.1 | 846  | 393324 | 1.00E-110 | 230 | 238 | 96 + | 8   | 244 | 188735 | 188972 |
| UN48211 | Rsa1.0.01492.1 | 863  | 44704  | 7.00E-73  | 152 | 156 | 97 - | 437 | 592 | 34696  | 34851  |
| UN48212 | Rsa1.0.04223.1 | 621  | 18407  | 1.00E-113 | 356 | 401 | 88 - | 2   | 383 | 6198   | 6595   |
| UN48213 | Rsa1.0.31506.1 | 1223 | 725    | 0         | 691 | 741 | 93 - | 126 | 848 | 1      | 725    |
| UN48214 | Rsa1.0.00190.1 | 695  | 318240 | 1.00E-110 | 297 | 326 | 91 + | 63  | 379 | 91484  | 91801  |
| UN48215 | Rsa1.0.02276.1 | 436  | 33098  | 0         | 423 | 436 | 97 + | 1   | 435 | 23003  | 23438  |
| UN48216 | Rsa1.0.00108.1 | 818  | 478491 | 0         | 648 | 683 | 94 - | 40  | 718 | 143491 | 144172 |
| UN48217 | Rsa1.0.00254.1 | 750  | 102600 | 0         | 493 | 497 | 99 - | 1   | 497 | 12642  | 13138  |
| UN48218 | Rsa1.0.00707.1 | 670  | 190112 | 1.00E-73  | 152 | 155 | 98 + | 453 | 604 | 16479  | 16633  |
| UN48219 | Rsa1.0.01521.1 | 811  | 142147 | 1.00E-141 | 260 | 262 | 99 - | 298 | 559 | 7693   | 7954   |
| UN48220 | Rsa1.0.00202.1 | 711  | 185895 | 0         | 692 | 713 | 97 + | 3   | 708 | 82897  | 83608  |
| UN48221 | Rsa1.0.01514.1 | 843  | 44222  | 0         | 346 | 347 | 99 - | 3   | 349 | 27674  | 28020  |
| UN48222 | Rsa1.0.05894.1 | 960  | 12306  | 0         | 956 | 958 | 99 + | 3   | 960 | 8330   | 9287   |
| UN48223 | Rsa1.0.01331.1 | 572  | 47944  | 0         | 566 | 568 | 99 - | 4   | 571 | 17110  | 17677  |
| UN48224 | Rsa1.0.03072.1 | 901  | 25577  | 0         | 592 | 594 | 99 + | 1   | 594 | 15272  | 15865  |
| UN48225 | Rsa1.0.01666.1 | 739  | 173972 | 1.00E-111 | 213 | 216 | 98 + | 279 | 494 | 23960  | 24175  |
| UN48226 | Rsa1.0.01651.1 | 768  | 41586  | 1.00E-119 | 247 | 257 | 96 + | 3   | 259 | 34468  | 34724  |
| UN48227 | Rsa1.0.21948.1 | 1212 | 1161   | 1.00E-121 | 246 | 253 | 97 + | 9   | 261 | 779    | 1030   |
| UN48228 | Rsa1.0.01702.1 | 995  | 40722  | 0         | 956 | 989 | 96 + | 16  | 991 | 17655  | 18640  |
| UN48229 | Rsa1.0.02452.1 | 956  | 31280  | 2.00E-92  | 185 | 189 | 97 + | 595 | 783 | 2695   | 2883   |
| UN48230 | Rsa1.0.00163.1 | 882  | 116847 | 1.00E-125 | 245 | 251 | 97 + | 382 | 632 | 11140  | 11390  |
| UN48231 | Rsa1.0.01100.1 | 748  | 54113  | 1.00E-160 | 329 | 343 | 95 - | 10  | 348 | 11952  | 12294  |
| UN48232 | Rsa1.0.00457.1 | 706  | 337301 | 0         | 549 | 581 | 94 + | 10  | 587 | 334157 | 334731 |
| UN48233 | Rsa1.0.00120.1 | 736  | 277288 | 3.00E-59  | 126 | 129 | 97 + | 4   | 132 | 16747  | 16875  |
| UN48234 | Rsa1.0.00335.1 | 432  | 94371  | 1.00E-150 | 331 | 348 | 95 + | 82  | 428 | 50290  | 50634  |
| UN48235 | Rsa1.0.03070.1 | 692  | 25578  | 0         | 539 | 593 | 90 + | 72  | 652 | 13284  | 13866  |
| UN48236 | Rsa1.0.02769.1 | 820  | 28107  | 0         | 435 | 440 | 98 + | 383 | 820 | 9897   | 10336  |
| UN48237 | Rsa1.0.00270.1 | 478  | 101236 | 0         | 407 | 415 | 98 - | 65  | 478 | 25052  | 25465  |
| UN48238 | Rsa1.0.01719.1 | 629  | 40388  | 1.00E-120 | 231 | 235 | 98 + | 395 | 629 | 30549  | 30783  |
| UN48239 | Rsa1.0.00181.1 | 683  | 114269 | 0         | 583 | 611 | 95 - | 82  | 683 | 77849  | 78450  |
| UN48240 | Rsa1.0.00196.1 | 880  | 109960 | 0         | 477 | 508 | 93 - | 379 | 880 | 18515  | 19020  |
| UN48241 | Rsa1.0.01111.1 | 679  | 53669  | 1.00E-148 | 344 | 366 | 93 - | 318 | 678 | 31368  | 31730  |

|         |                |      |        |           |      |      |       |     |      |        |        |
|---------|----------------|------|--------|-----------|------|------|-------|-----|------|--------|--------|
| UN48242 | Rsa1.0.09224.1 | 563  | 6545   | 0         | 462  | 465  | 99 +  | 4   | 468  | 663    | 1127   |
| UN48243 | Rsa1.0.00042.1 | 847  | 171507 | 1.00E-169 | 301  | 301  | 100 - | 547 | 847  | 158233 | 158533 |
| UN48244 | Rsa1.0.02655.1 | 973  | 29027  | 1.00E-172 | 309  | 310  | 99 +  | 1   | 310  | 10113  | 10422  |
| UN48245 | Rsa1.0.00199.1 | 613  | 249604 | 0         | 429  | 434  | 98 +  | 1   | 434  | 31916  | 32349  |
| UN48246 | Rsa1.0.03890.1 | 849  | 20223  | 0         | 430  | 435  | 98 +  | 1   | 435  | 3422   | 3856   |
| UN48247 | Rsa1.0.02518.1 | 493  | 30586  | 3.00E-61  | 123  | 124  | 99 +  | 251 | 374  | 25939  | 26062  |
| UN48248 | Rsa1.0.16984.1 | 1084 | 1963   | 0         | 732  | 813  | 90 +  | 266 | 1076 | 1077   | 1886   |
| UN48249 | Rsa1.0.01600.1 | 902  | 42537  | 0         | 512  | 536  | 95 -  | 366 | 891  | 24302  | 24835  |
| UN48250 | Rsa1.0.02379.1 | 582  | 150705 | 0         | 381  | 385  | 98 +  | 198 | 582  | 147073 | 147456 |
| UN48251 | Rsa1.0.05522.1 | 515  | 13441  | 4.00E-76  | 168  | 175  | 96 +  | 2   | 176  | 8265   | 8436   |
| UN48252 | Rsa1.0.02658.1 | 778  | 28978  | 0         | 360  | 362  | 99 -  | 417 | 778  | 5462   | 5823   |
| UN48253 | Rsa1.0.01281.1 | 749  | 49313  | 0         | 675  | 713  | 94 +  | 3   | 715  | 26768  | 27469  |
| UN48254 | Rsa1.0.01635.1 | 1049 | 41865  | 0         | 625  | 651  | 96 +  | 169 | 818  | 17057  | 17703  |
| UN48255 | Rsa1.0.00047.1 | 915  | 168582 | 0         | 477  | 481  | 99 +  | 134 | 614  | 93874  | 94354  |
| UN48256 | Rsa1.0.00022.1 | 817  | 200461 | 0         | 813  | 815  | 99 +  | 3   | 817  | 67682  | 68495  |
| UN48257 | Rsa1.0.00199.1 | 785  | 249604 | 0         | 657  | 657  | 100 - | 1   | 657  | 164167 | 164823 |
| UN48258 | Rsa1.0.00182.1 | 908  | 142305 | 0         | 908  | 909  | 99 -  | 1   | 908  | 67284  | 68192  |
| UN48259 | Rsa1.0.00433.1 | 674  | 85381  | 1.00E-157 | 285  | 286  | 99 +  | 1   | 286  | 77456  | 77741  |
| UN48260 | Rsa1.0.00040.1 | 293  | 324196 | 1.00E-44  | 128  | 138  | 92 -  | 155 | 291  | 17141  | 17275  |
| UN48261 | Rsa1.0.06675.1 | 680  | 10561  | 0         | 534  | 564  | 94 +  | 1   | 558  | 9540   | 10101  |
| UN48262 | Rsa1.0.00350.1 | 791  | 92346  | 1.00E-139 | 257  | 259  | 99 +  | 67  | 325  | 79619  | 79877  |
| UN48263 | Rsa1.0.00079.1 | 739  | 606987 | 0         | 739  | 741  | 99 +  | 1   | 739  | 823    | 1563   |
| UN48264 | Rsa1.0.00358.1 | 752  | 91293  | 1.00E-132 | 247  | 248  | 99 +  | 1   | 247  | 9333   | 9580   |
| UN48265 | Rsa1.0.00063.1 | 1095 | 156150 | 1.00E-172 | 516  | 592  | 87 +  | 134 | 722  | 12232  | 12772  |
| UN48266 | Rsa1.0.02345.1 | 859  | 32337  | 0         | 611  | 612  | 99 +  | 2   | 613  | 21077  | 21688  |
| UN48267 | Rsa1.0.00278.1 | 653  | 231896 | 0         | 590  | 632  | 93 -  | 27  | 650  | 183544 | 184166 |
| UN48268 | Rsa1.0.00184.1 | 772  | 218748 | 0         | 441  | 456  | 96 +  | 4   | 459  | 211005 | 211456 |
| UN48269 | Rsa1.0.00070.1 | 839  | 150321 | 0         | 466  | 505  | 92 -  | 339 | 834  | 37003  | 37507  |
| UN48270 | Rsa1.0.02526.1 | 926  | 30479  | 0         | 397  | 398  | 99 +  | 2   | 398  | 13166  | 13563  |
| UN48271 | Rsa1.0.07969.1 | 1011 | 8157   | 1.00E-159 | 320  | 329  | 97 +  | 682 | 1009 | 5913   | 6235   |
| UN48272 | Rsa1.0.01335.1 | 965  | 47894  | 1.00E-143 | 271  | 274  | 98 +  | 321 | 593  | 18969  | 19242  |
| UN48273 | Rsa1.0.00161.1 | 721  | 116891 | 0         | 483  | 511  | 94 -  | 208 | 717  | 26093  | 26603  |
| UN48274 | Rsa1.0.00001.1 | 384  | 363028 | 1.00E-53  | 116  | 119  | 97 +  | 133 | 251  | 313972 | 314090 |
| UN48275 | Rsa1.0.01061.1 | 1005 | 55349  | 1.00E-178 | 322  | 324  | 99 -  | 2   | 325  | 21470  | 21793  |
| UN48276 | Rsa1.0.01963.1 | 797  | 36719  | 0         | 404  | 419  | 96 -  | 383 | 797  | 31887  | 32302  |
| UN48277 | Rsa1.0.00033.1 | 871  | 515811 | 0         | 868  | 870  | 99 -  | 1   | 870  | 30681  | 31550  |
| UN48278 | Rsa1.0.05366.1 | 1250 | 14036  | 0         | 358  | 362  | 98 +  | 269 | 630  | 8072   | 8433   |
| UN48279 | Rsa1.0.04775.1 | 1371 | 16025  | 0         | 1083 | 1145 | 94 -  | 192 | 1329 | 3759   | 4902   |
| UN48280 | Rsa1.0.15955.1 | 772  | 2341   | 0         | 375  | 376  | 99 -  | 3   | 378  | 1230   | 1605   |



|         |                |      |        |           |     |     |       |     |      |        |        |
|---------|----------------|------|--------|-----------|-----|-----|-------|-----|------|--------|--------|
| UN48281 | Rsa1.0.01983.1 | 870  | 36509  | 0         | 452 | 455 | 99 -  | 1   | 455  | 31893  | 32347  |
| UN48282 | Rsa1.0.00065.1 | 1035 | 454616 | 1.00E-115 | 238 | 247 | 96 -  | 514 | 760  | 241068 | 241314 |
| UN48283 | Rsa1.0.00470.1 | 663  | 81968  | 0         | 372 | 373 | 99 +  | 4   | 376  | 27997  | 28369  |
| UN48284 | Rsa1.0.21497.1 | 755  | 1197   | 0         | 723 | 739 | 97 +  | 18  | 754  | 1      | 739    |
| UN48285 | Rsa1.0.01118.1 | 852  | 53460  | 0         | 388 | 403 | 96 +  | 284 | 686  | 13141  | 13536  |
| UN48286 | Rsa1.0.01618.1 | 599  | 42118  | 1.00E-155 | 278 | 278 | 100 - | 322 | 599  | 17310  | 17587  |
| UN48287 | Rsa1.0.01340.1 | 896  | 47805  | 1.00E-166 | 299 | 300 | 99 +  | 1   | 300  | 20620  | 20919  |
| UN48288 | Rsa1.0.01867.1 | 726  | 37960  | 1.00E-112 | 224 | 230 | 97 -  | 277 | 506  | 19834  | 20063  |
| UN48289 | Rsa1.0.01702.1 | 776  | 40722  | 0         | 376 | 389 | 96 -  | 2   | 390  | 18252  | 18640  |
| UN48290 | Rsa1.0.13949.1 | 698  | 4028   | 1.00E-132 | 335 | 364 | 92 +  | 12  | 371  | 1108   | 1468   |
| UN48291 | Rsa1.0.00965.1 | 1120 | 58139  | 1.00E-59  | 118 | 118 | 100 + | 909 | 1026 | 9265   | 9382   |
| UN48292 | Rsa1.0.00033.1 | 539  | 515811 | 1.00E-112 | 296 | 321 | 92 +  | 221 | 539  | 476597 | 476914 |
| UN48293 | Rsa1.0.01228.1 | 444  | 50238  | 1.00E-109 | 247 | 260 | 95 +  | 159 | 416  | 733    | 992    |
| UN48294 | Rsa1.0.01400.1 | 674  | 46560  | 1.00E-162 | 360 | 382 | 94 -  | 293 | 674  | 26849  | 27215  |
| UN48295 | Rsa1.0.01634.1 | 1299 | 41865  | 0         | 430 | 459 | 93 -  | 843 | 1299 | 1107   | 1551   |
| UN48296 | Rsa1.0.00596.1 | 742  | 73578  | 3.00E-78  | 194 | 205 | 94 +  | 539 | 740  | 28856  | 29060  |
| UN48297 | Rsa1.0.02171.1 | 696  | 167557 | 1.00E-107 | 210 | 214 | 98 -  | 3   | 216  | 13935  | 14148  |
| UN48298 | Rsa1.0.00556.1 | 1137 | 207212 | 0         | 424 | 424 | 100 - | 713 | 1136 | 137351 | 137774 |
| UN48299 | Rsa1.0.06362.1 | 1037 | 11154  | 1.00E-152 | 323 | 342 | 94 -  | 81  | 421  | 7960   | 8285   |
| UN48300 | Rsa1.0.02600.1 | 1039 | 29657  | 0         | 404 | 410 | 98 -  | 628 | 1037 | 1240   | 1649   |
| UN48301 | Rsa1.0.00821.1 | 604  | 62891  | 0         | 430 | 449 | 95 -  | 112 | 559  | 5144   | 5590   |
| UN48302 | Rsa1.0.50346.1 | 312  | 451    | 1.00E-116 | 230 | 235 | 97 -  | 3   | 235  | 1      | 235    |
| UN48303 | Rsa1.0.03890.1 | 720  | 20223  | 1.00E-179 | 374 | 389 | 96 +  | 335 | 720  | 11318  | 11705  |
| UN48304 | Rsa1.0.01800.1 | 754  | 39109  | 0         | 389 | 405 | 96 +  | 350 | 754  | 6664   | 7068   |
| UN48305 | Rsa1.0.00149.1 | 797  | 305196 | 0         | 490 | 524 | 93 +  | 264 | 787  | 104054 | 104564 |
| UN48306 | Rsa1.0.00220.1 | 1093 | 192936 | 1.00E-147 | 334 | 353 | 94 +  | 743 | 1093 | 180567 | 180918 |
| UN48307 | Rsa1.0.04198.1 | 1188 | 18504  | 0         | 549 | 587 | 93 -  | 3   | 570  | 13939  | 14524  |
| UN48308 | Rsa1.0.04027.1 | 496  | 19501  | 1.00E-119 | 266 | 277 | 96 -  | 1   | 275  | 6649   | 6922   |
| UN48309 | Rsa1.0.03541.1 | 885  | 22194  | 0         | 853 | 882 | 96 +  | 3   | 883  | 16591  | 17469  |
| UN48310 | Rsa1.0.00001.1 | 630  | 363028 | 4.00E-92  | 175 | 176 | 99 -  | 349 | 524  | 334824 | 334999 |
| UN48311 | Rsa1.0.01467.1 | 1585 | 45161  | 1.00E-131 | 300 | 317 | 94 -  | 5   | 321  | 15493  | 15805  |
| UN48312 | Rsa1.0.02092.1 | 536  | 35135  | 1.00E-144 | 326 | 344 | 94 +  | 3   | 342  | 30368  | 30708  |
| UN48313 | Rsa1.0.01247.1 | 1113 | 49934  | 0         | 586 | 596 | 98 -  | 367 | 962  | 48036  | 48631  |
| UN48314 | Rsa1.0.01135.1 | 773  | 52799  | 0         | 561 | 588 | 95 -  | 186 | 769  | 41650  | 42235  |
| UN48315 | Rsa1.0.01881.1 | 962  | 37721  | 0         | 787 | 822 | 95 -  | 140 | 961  | 7717   | 8531   |
| UN48316 | Rsa1.0.00786.1 | 898  | 64285  | 1.00E-125 | 261 | 272 | 95 -  | 269 | 540  | 49992  | 50263  |
| UN48317 | Rsa1.0.00453.1 | 860  | 83031  | 0         | 705 | 762 | 92 -  | 48  | 807  | 75551  | 76285  |
| UN48318 | Rsa1.0.01299.1 | 904  | 162028 | 2.00E-11  | 85  | 101 | 84 -  | 298 | 398  | 159430 | 159530 |
| UN48319 | Rsa1.0.00684.1 | 986  | 141701 | 0         | 533 | 547 | 97 +  | 438 | 984  | 66961  | 67507  |

|         |                |      |        |           |      |      |       |     |      |        |        |
|---------|----------------|------|--------|-----------|------|------|-------|-----|------|--------|--------|
| UN48320 | Rsa1.0.03341.1 | 638  | 23604  | 1.00E-143 | 278  | 285  | 97 +  | 354 | 638  | 2950   | 3234   |
| UN48321 | Rsa1.0.01431.1 | 690  | 167877 | 1.00E-172 | 392  | 419  | 93 -  | 1   | 407  | 32135  | 32550  |
| UN48322 | Rsa1.0.00205.1 | 911  | 193401 | 1.00E-114 | 291  | 310  | 93 +  | 1   | 307  | 14413  | 14714  |
| UN48323 | Rsa1.0.06133.1 | 836  | 11663  | 1.00E-103 | 225  | 231  | 97 +  | 47  | 274  | 8017   | 8246   |
| UN48324 | Rsa1.0.06604.1 | 790  | 10681  | 0         | 508  | 549  | 92 -  | 243 | 790  | 5949   | 6474   |
| UN48325 | Rsa1.0.00608.1 | 880  | 172672 | 0         | 753  | 811  | 92 +  | 21  | 817  | 3169   | 3956   |
| UN48326 | Rsa1.0.04033.1 | 828  | 19481  | 0         | 493  | 507  | 97 -  | 316 | 821  | 9206   | 9712   |
| UN48327 | Rsa1.0.02068.1 | 1268 | 35432  | 1.00E-112 | 232  | 240  | 96 +  | 275 | 514  | 7294   | 7530   |
| UN48328 | Rsa1.0.00473.1 | 891  | 212204 | 1.00E-99  | 221  | 232  | 95 -  | 3   | 233  | 73604  | 73829  |
| UN48329 | Rsa1.0.01021.1 | 1002 | 56610  | 6.00E-52  | 249  | 291  | 85 -  | 608 | 894  | 24758  | 25045  |
| UN48330 | Rsa1.0.00122.1 | 565  | 265937 | 0         | 527  | 576  | 91 -  | 3   | 560  | 224806 | 225374 |
| UN48331 | Rsa1.0.01414.1 | 216  | 149508 | 8.00E-88  | 203  | 215  | 94 -  | 1   | 215  | 143491 | 143703 |
| UN48332 | Rsa1.0.00026.1 | 815  | 327835 | 0         | 405  | 414  | 97 +  | 3   | 416  | 150290 | 150701 |
| UN48333 | Rsa1.0.00011.1 | 666  | 225044 | 0         | 623  | 662  | 94 +  | 17  | 664  | 124227 | 124888 |
| UN48334 | Rsa1.0.06677.1 | 917  | 10560  | 0         | 488  | 508  | 96 -  | 410 | 917  | 9838   | 10344  |
| UN48335 | Rsa1.0.13580.1 | 680  | 4711   | 4.00E-86  | 168  | 170  | 98 +  | 272 | 441  | 4004   | 4173   |
| UN48336 | Rsa1.0.01198.1 | 581  | 51029  | 1.00E-88  | 218  | 236  | 92 -  | 284 | 517  | 7660   | 7885   |
| UN48337 | Rsa1.0.00270.1 | 809  | 101236 | 2.00E-97  | 276  | 311  | 88 +  | 502 | 800  | 24450  | 24752  |
| UN48338 | Rsa1.0.07894.1 | 974  | 8347   | 0         | 399  | 405  | 98 -  | 569 | 972  | 5556   | 5959   |
| UN48339 | Rsa1.0.01855.1 | 500  | 38204  | 0         | 495  | 500  | 99 -  | 1   | 500  | 14844  | 15343  |
| UN48340 | Rsa1.0.04489.1 | 814  | 17145  | 2.00E-97  | 238  | 252  | 94 +  | 567 | 814  | 10022  | 10272  |
| UN48341 | Rsa1.0.04405.1 | 1177 | 17508  | 0         | 1100 | 1179 | 93 -  | 7   | 1177 | 3077   | 4225   |
| UN48342 | Rsa1.0.01506.1 | 854  | 44370  | 1.00E-144 | 274  | 279  | 98 -  | 534 | 812  | 34116  | 34394  |
| UN48343 | Rsa1.0.01832.1 | 686  | 38581  | 0         | 410  | 412  | 99 -  | 1   | 412  | 31573  | 31984  |
| UN48344 | Rsa1.0.04218.1 | 332  | 18423  | 2.00E-52  | 105  | 105  | 100 - | 2   | 106  | 14295  | 14399  |
| UN48345 | Rsa1.0.00297.1 | 605  | 97836  | 1.00E-159 | 367  | 394  | 93 -  | 216 | 605  | 26341  | 26734  |
| UN48346 | Rsa1.0.01981.1 | 593  | 36537  | 1.00E-177 | 388  | 411  | 94 -  | 4   | 413  | 34741  | 35142  |
| UN48347 | Rsa1.0.00088.1 | 1318 | 141341 | 1.00E-142 | 266  | 269  | 98 -  | 4   | 272  | 68076  | 68344  |
| UN48348 | Rsa1.0.01096.1 | 1004 | 54266  | 1.00E-148 | 326  | 346  | 94 -  | 2   | 347  | 2669   | 3014   |
| UN48349 | Rsa1.0.02231.1 | 609  | 33661  | 1.00E-116 | 231  | 236  | 97 +  | 22  | 256  | 33350  | 33585  |
| UN48350 | Rsa1.0.09568.1 | 529  | 6284   | 9.00E-99  | 277  | 304  | 91 -  | 1   | 299  | 5564   | 5860   |
| UN48351 | Rsa1.0.00048.1 | 673  | 167185 | 1.00E-123 | 272  | 286  | 95 -  | 2   | 283  | 4502   | 4786   |
| UN48352 | Rsa1.0.00328.1 | 679  | 224661 | 1.00E-107 | 251  | 263  | 95 +  | 1   | 258  | 217151 | 217411 |
| UN48353 | Rsa1.0.04399.1 | 1106 | 17543  | 0         | 1007 | 1117 | 90 +  | 15  | 1105 | 13373  | 14473  |
| UN48354 | Rsa1.0.01214.1 | 949  | 50599  | 0         | 663  | 669  | 99 -  | 2   | 667  | 49762  | 50430  |
| UN48355 | Rsa1.0.00136.1 | 837  | 122464 | 1.00E-95  | 199  | 206  | 96 -  | 533 | 738  | 34923  | 35128  |
| UN48356 | Rsa1.0.00325.1 | 870  | 95371  | 0         | 473  | 498  | 94 +  | 1   | 492  | 59866  | 60350  |
| UN48357 | Rsa1.0.06740.1 | 721  | 10439  | 0         | 404  | 424  | 95 +  | 1   | 424  | 7374   | 7795   |
| UN48358 | Rsa1.0.00435.1 | 640  | 317579 | 0         | 499  | 499  | 100 - | 142 | 640  | 62554  | 63052  |

|         |                |      |        |           |     |      |      |     |      |        |        |
|---------|----------------|------|--------|-----------|-----|------|------|-----|------|--------|--------|
| UN48359 | Rsa1.0.00620.1 | 1027 | 71985  | 0         | 878 | 917  | 95 - | 1   | 916  | 8178   | 9087   |
| UN48360 | Rsa1.0.01060.1 | 1120 | 55368  | 2.00E-89  | 216 | 230  | 93 - | 9   | 235  | 22830  | 23053  |
| UN48361 | Rsa1.0.30549.1 | 776  | 751    | 1.00E-124 | 277 | 295  | 93 + | 493 | 774  | 64     | 358    |
| UN48362 | Rsa1.0.02430.1 | 852  | 31506  | 1.00E-115 | 214 | 215  | 99 - | 1   | 215  | 12388  | 12602  |
| UN48363 | Rsa1.0.00805.1 | 1229 | 63724  | 0         | 433 | 437  | 99 - | 793 | 1229 | 6952   | 7388   |
| UN48364 | Rsa1.0.01566.1 | 829  | 43134  | 0         | 561 | 599  | 93 - | 87  | 667  | 34060  | 34652  |
| UN48365 | Rsa1.0.00123.1 | 975  | 325650 | 1.00E-111 | 252 | 266  | 94 + | 275 | 534  | 216442 | 216704 |
| UN48366 | Rsa1.0.00812.1 | 580  | 63233  | 1.00E-142 | 277 | 284  | 97 - | 296 | 579  | 14003  | 14286  |
| UN48367 | Rsa1.0.01523.1 | 824  | 43959  | 0         | 357 | 358  | 99 - | 2   | 359  | 20541  | 20897  |
| UN48368 | Rsa1.0.00484.1 | 924  | 203294 | 1.00E-158 | 303 | 309  | 98 + | 1   | 306  | 40132  | 40440  |
| UN48369 | Rsa1.0.00662.1 | 1024 | 192183 | 0         | 428 | 459  | 93 - | 10  | 450  | 2200   | 2658   |
| UN48370 | Rsa1.0.00456.1 | 1317 | 82826  | 0         | 478 | 506  | 94 - | 24  | 516  | 18300  | 18804  |
| UN48371 | Rsa1.0.01026.1 | 674  | 171624 | 0         | 542 | 569  | 95 + | 3   | 564  | 14049  | 14614  |
| UN48372 | Rsa1.0.02101.1 | 876  | 35017  | 0         | 649 | 678  | 95 + | 1   | 667  | 15803  | 16478  |
| UN48373 | Rsa1.0.03101.1 | 898  | 25410  | 0         | 370 | 384  | 96 - | 97  | 480  | 7075   | 7458   |
| UN48374 | Rsa1.0.03759.1 | 822  | 20987  | 0         | 690 | 712  | 96 + | 110 | 821  | 16068  | 16779  |
| UN48375 | Rsa1.0.01022.1 | 706  | 56606  | 1.00E-175 | 366 | 383  | 95 + | 1   | 383  | 36902  | 37278  |
| UN48376 | Rsa1.0.00233.1 | 857  | 104918 | 1.00E-80  | 187 | 197  | 94 - | 1   | 196  | 9694   | 9890   |
| UN48377 | Rsa1.0.00786.1 | 1033 | 64285  | 1.00E-121 | 260 | 272  | 95 + | 473 | 742  | 49992  | 50263  |
| UN48378 | Rsa1.0.00387.1 | 1263 | 495407 | 0         | 531 | 597  | 88 - | 113 | 700  | 377227 | 377818 |
| UN48379 | Rsa1.0.21295.1 | 1155 | 1218   | 1.00E-122 | 236 | 239  | 98 - | 1   | 238  | 1      | 239    |
| UN48380 | Rsa1.0.54025.1 | 835  | 422    | 0         | 407 | 416  | 97 - | 293 | 705  | 4      | 419    |
| UN48381 | Rsa1.0.01481.1 | 693  | 184562 | 1.00E-89  | 183 | 188  | 97 + | 118 | 305  | 152050 | 152237 |
| UN48382 | Rsa1.0.00013.1 | 795  | 292129 | 0         | 598 | 622  | 96 + | 1   | 622  | 191218 | 191831 |
| UN48383 | Rsa1.0.01228.1 | 747  | 50238  | 0         | 418 | 444  | 94 + | 304 | 747  | 2716   | 3159   |
| UN48384 | Rsa1.0.02500.1 | 772  | 30768  | 0         | 455 | 486  | 93 - | 1   | 480  | 7770   | 8244   |
| UN48385 | Rsa1.0.04819.1 | 793  | 140505 | 0         | 766 | 795  | 96 - | 1   | 792  | 1617   | 2410   |
| UN48386 | Rsa1.0.00132.1 | 600  | 124299 | 0         | 471 | 492  | 95 - | 1   | 492  | 25714  | 26191  |
| UN48387 | Rsa1.0.04404.1 | 790  | 17510  | 0         | 673 | 691  | 97 - | 1   | 691  | 9475   | 10161  |
| UN48388 | Rsa1.0.04057.1 | 1016 | 19333  | 0         | 968 | 1017 | 95 + | 1   | 1015 | 3252   | 4260   |
| UN48389 | Rsa1.0.02600.1 | 757  | 29657  | 0         | 485 | 515  | 94 - | 2   | 506  | 27845  | 28355  |
| UN48390 | Rsa1.0.00233.1 | 704  | 104918 | 0         | 689 | 705  | 97 - | 1   | 704  | 78950  | 79645  |
| UN48391 | Rsa1.0.01796.1 | 542  | 39154  | 4.00E-61  | 204 | 228  | 89 - | 33  | 247  | 6789   | 7016   |
| UN48392 | Rsa1.0.00681.1 | 714  | 68779  | 1.00E-137 | 281 | 292  | 96 - | 271 | 562  | 44501  | 44792  |
| UN48393 | Rsa1.0.00460.1 | 590  | 206387 | 1.00E-106 | 226 | 236  | 95 - | 316 | 551  | 4308   | 4534   |
| UN48394 | Rsa1.0.03352.1 | 924  | 23506  | 0         | 851 | 877  | 97 + | 49  | 922  | 4677   | 5547   |
| UN48395 | Rsa1.0.02670.1 | 1385 | 28887  | 1.00E-151 | 368 | 395  | 93 + | 53  | 441  | 3818   | 4204   |
| UN48396 | Rsa1.0.04238.1 | 728  | 18352  | 0         | 415 | 430  | 96 - | 3   | 427  | 8709   | 9135   |
| UN48397 | Rsa1.0.04552.1 | 805  | 16878  | 0         | 737 | 763  | 96 + | 3   | 760  | 11048  | 11806  |

|         |                |      |        |           |      |      |       |     |      |        |        |
|---------|----------------|------|--------|-----------|------|------|-------|-----|------|--------|--------|
| UN48398 | Rsa1.0.07504.1 | 838  | 9237   | 1.00E-153 | 287  | 291  | 98 +  | 7   | 297  | 8004   | 8294   |
| UN48399 | Rsa1.0.01435.1 | 1081 | 45942  | 0         | 422  | 441  | 95 -  | 138 | 578  | 41024  | 41464  |
| UN48400 | Rsa1.0.00040.1 | 943  | 324196 | 0         | 540  | 567  | 95 +  | 66  | 628  | 296697 | 297259 |
| UN48401 | Rsa1.0.00589.1 | 1276 | 209965 | 0         | 573  | 615  | 93 +  | 200 | 804  | 193047 | 193658 |
| UN48402 | Rsa1.0.00888.1 | 540  | 60978  | 1.00E-169 | 335  | 344  | 97 +  | 12  | 353  | 54512  | 54854  |
| UN48403 | Rsa1.0.00168.1 | 522  | 115870 | 1.00E-119 | 278  | 295  | 94 -  | 1   | 284  | 38162  | 38456  |
| UN48404 | Rsa1.0.00060.1 | 601  | 502678 | 2.00E-69  | 143  | 146  | 97 -  | 237 | 382  | 500151 | 500296 |
| UN48405 | Rsa1.0.01341.1 | 980  | 47764  | 0         | 334  | 337  | 99 +  | 2   | 338  | 43207  | 43543  |
| UN48406 | Rsa1.0.06247.1 | 781  | 11395  | 1.00E-105 | 233  | 245  | 95 -  | 524 | 766  | 8629   | 8873   |
| UN48407 | Rsa1.0.00026.1 | 787  | 327835 | 0         | 577  | 601  | 96 -  | 1   | 601  | 1485   | 2085   |
| UN48408 | Rsa1.0.00009.1 | 726  | 232558 | 0         | 454  | 459  | 98 +  | 268 | 726  | 215525 | 215983 |
| UN48409 | Rsa1.0.00211.1 | 443  | 228189 | 0         | 415  | 421  | 98 +  | 2   | 422  | 10206  | 10624  |
| UN48410 | Rsa1.0.06213.1 | 728  | 11478  | 0         | 511  | 553  | 92 +  | 184 | 711  | 7641   | 8190   |
| UN48411 | Rsa1.0.02201.1 | 1290 | 33981  | 1.00E-118 | 253  | 265  | 95 -  | 2   | 266  | 31757  | 32021  |
| UN48412 | Rsa1.0.00593.1 | 314  | 143463 | 4.00E-78  | 163  | 168  | 97 +  | 1   | 168  | 55122  | 55289  |
| UN48413 | Rsa1.0.00138.1 | 867  | 247040 | 1.00E-159 | 300  | 305  | 98 +  | 4   | 308  | 61977  | 62281  |
| UN48414 | Rsa1.0.13737.1 | 1284 | 4403   | 1.00E-111 | 267  | 291  | 91 -  | 20  | 295  | 3954   | 4244   |
| UN48415 | Rsa1.0.36118.1 | 591  | 625    | 1.00E-137 | 268  | 275  | 97 -  | 312 | 586  | 22     | 296    |
| UN48416 | Rsa1.0.01958.1 | 680  | 261128 | 6.00E-85  | 190  | 200  | 95 -  | 1   | 200  | 134810 | 135004 |
| UN48417 | Rsa1.0.00045.1 | 589  | 328694 | 1.00E-164 | 336  | 352  | 95 -  | 87  | 438  | 225052 | 225394 |
| UN48418 | Rsa1.0.01292.1 | 648  | 175783 | 1.00E-124 | 236  | 238  | 99 +  | 1   | 237  | 147836 | 148073 |
| UN48419 | Rsa1.0.00715.1 | 789  | 67116  | 0         | 559  | 564  | 99 +  | 1   | 563  | 21273  | 21836  |
| UN48420 | Rsa1.0.01649.1 | 564  | 41624  | 1.00E-94  | 200  | 208  | 96 -  | 183 | 390  | 27386  | 27593  |
| UN48421 | Rsa1.0.00162.1 | 1085 | 239935 | 1.00E-127 | 392  | 446  | 87 +  | 175 | 620  | 64015  | 64443  |
| UN48422 | Rsa1.0.00552.1 | 756  | 206757 | 1.00E-120 | 290  | 312  | 92 +  | 14  | 320  | 70063  | 70374  |
| UN48423 | Rsa1.0.00101.1 | 837  | 267193 | 1.00E-136 | 275  | 284  | 96 +  | 1   | 281  | 120546 | 120829 |
| UN48424 | Rsa1.0.00124.1 | 1231 | 262503 | 1.00E-96  | 228  | 243  | 93 -  | 35  | 275  | 19648  | 19890  |
| UN48425 | Rsa1.0.02166.1 | 1145 | 34414  | 1.00E-180 | 338  | 344  | 98 +  | 459 | 802  | 14012  | 14355  |
| UN48426 | Rsa1.0.00056.1 | 1154 | 332604 | 0         | 1037 | 1038 | 99 -  | 116 | 1153 | 84564  | 85601  |
| UN48427 | Rsa1.0.05580.1 | 901  | 13274  | 0         | 473  | 490  | 96 +  | 5   | 493  | 6575   | 7055   |
| UN48428 | Rsa1.0.02378.1 | 848  | 31991  | 0         | 735  | 781  | 94 +  | 86  | 846  | 1382   | 2160   |
| UN48429 | Rsa1.0.02969.1 | 954  | 26390  | 1.00E-135 | 288  | 300  | 96 -  | 11  | 310  | 17574  | 17870  |
| UN48430 | Rsa1.0.09899.1 | 843  | 6099   | 0         | 509  | 514  | 99 -  | 1   | 512  | 3385   | 3898   |
| UN48431 | Rsa1.0.00151.1 | 1088 | 119541 | 0         | 444  | 459  | 96 +  | 1   | 459  | 61494  | 61952  |
| UN48432 | Rsa1.0.01146.1 | 777  | 163455 | 1.00E-95  | 227  | 242  | 93 +  | 2   | 243  | 20553  | 20793  |
| UN48433 | Rsa1.0.00014.1 | 679  | 348985 | 1.00E-174 | 578  | 672  | 86 -  | 1   | 656  | 331418 | 332052 |
| UN48434 | Rsa1.0.02798.1 | 673  | 27792  | 1.00E-145 | 353  | 378  | 93 +  | 1   | 378  | 5459   | 5823   |
| UN48435 | Rsa1.0.00660.1 | 622  | 69688  | 1.00E-101 | 187  | 187  | 100 + | 434 | 620  | 16400  | 16586  |
| UN48436 | Rsa1.0.00541.1 | 958  | 76863  | 1.00E-101 | 249  | 267  | 93 +  | 1   | 264  | 9084   | 9341   |

|         |                |      |        |           |     |     |       |     |     |        |        |
|---------|----------------|------|--------|-----------|-----|-----|-------|-----|-----|--------|--------|
| UN48437 | Rsa1.0.00121.1 | 996  | 278029 | 1.00E-157 | 296 | 301 | 98 +  | 695 | 995 | 38373  | 38673  |
| UN48438 | Rsa1.0.17040.1 | 572  | 1944   | 0         | 395 | 399 | 98 -  | 4   | 402 | 1207   | 1605   |
| UN48439 | Rsa1.0.00651.1 | 533  | 247766 | 1.00E-111 | 222 | 228 | 97 -  | 157 | 384 | 81983  | 82210  |
| UN48440 | Rsa1.0.00398.1 | 1033 | 88007  | 1.00E-173 | 359 | 372 | 96 -  | 89  | 453 | 63410  | 63780  |
| UN48441 | Rsa1.0.03347.1 | 855  | 23588  | 0         | 810 | 852 | 95 -  | 1   | 848 | 8126   | 8965   |
| UN48442 | Rsa1.0.00220.1 | 768  | 192936 | 1.00E-130 | 279 | 292 | 95 +  | 30  | 315 | 152921 | 153212 |
| UN48443 | Rsa1.0.00497.1 | 1338 | 79830  | 0         | 804 | 812 | 99 +  | 1   | 812 | 26958  | 27765  |
| UN48444 | Rsa1.0.00327.1 | 787  | 94892  | 0         | 678 | 712 | 95 +  | 71  | 782 | 75691  | 76402  |
| UN48445 | Rsa1.0.00011.1 | 793  | 225044 | 0         | 414 | 417 | 99 +  | 377 | 791 | 207085 | 207501 |
| UN48446 | Rsa1.0.01306.1 | 891  | 48720  | 1.00E-164 | 336 | 350 | 96 -  | 1   | 346 | 755    | 1104   |
| UN48447 | Rsa1.0.00307.1 | 800  | 199003 | 1.00E-125 | 387 | 434 | 89 +  | 11  | 436 | 87252  | 87662  |
| UN48448 | Rsa1.0.00713.1 | 949  | 158017 | 0         | 480 | 488 | 98 +  | 433 | 919 | 1180   | 1667   |
| UN48449 | Rsa1.0.01248.1 | 629  | 154103 | 0         | 627 | 627 | 100 - | 3   | 629 | 30711  | 31337  |
| UN48450 | Rsa1.0.05631.1 | 794  | 13127  | 0         | 467 | 467 | 100 - | 1   | 467 | 4309   | 4775   |
| UN48451 | Rsa1.0.19149.1 | 787  | 1472   | 1.00E-83  | 176 | 181 | 97 +  | 136 | 316 | 2      | 180    |
| UN48452 | Rsa1.0.01488.1 | 835  | 44766  | 0         | 626 | 656 | 95 +  | 1   | 655 | 32382  | 33028  |
| UN48453 | Rsa1.0.00001.1 | 867  | 363028 | 1.00E-130 | 323 | 351 | 92 +  | 515 | 864 | 93769  | 94108  |
| UN48454 | Rsa1.0.00243.1 | 964  | 103651 | 1.00E-93  | 178 | 179 | 99 -  | 11  | 189 | 12353  | 12531  |
| UN48455 | Rsa1.0.00451.1 | 711  | 322533 | 0         | 570 | 602 | 94 +  | 112 | 711 | 249848 | 250445 |
| UN48456 | Rsa1.0.08339.1 | 642  | 7509   | 0         | 490 | 514 | 95 -  | 33  | 542 | 2566   | 3079   |
| UN48457 | Rsa1.0.00284.1 | 441  | 323267 | 1.00E-177 | 415 | 444 | 93 +  | 1   | 441 | 232413 | 232852 |
| UN48458 | Rsa1.0.13774.1 | 754  | 4351   | 1.00E-120 | 331 | 368 | 89 -  | 402 | 751 | 969    | 1334   |
| UN48459 | Rsa1.0.04011.1 | 940  | 19575  | 0         | 891 | 966 | 92 +  | 2   | 938 | 4946   | 5901   |
| UN48460 | Rsa1.0.00425.1 | 909  | 147080 | 0         | 508 | 520 | 97 -  | 1   | 519 | 1391   | 1904   |
| UN48461 | Rsa1.0.00964.1 | 1004 | 316648 | 0         | 550 | 584 | 94 -  | 393 | 962 | 3915   | 4496   |
| UN48462 | Rsa1.0.03422.1 | 631  | 23076  | 1.00E-117 | 262 | 276 | 94 +  | 1   | 273 | 7545   | 7819   |
| UN48463 | Rsa1.0.00556.1 | 936  | 207212 | 1.00E-128 | 273 | 286 | 95 -  | 405 | 690 | 194148 | 194430 |
| UN48464 | Rsa1.0.05611.1 | 759  | 13193  | 0         | 502 | 542 | 92 +  | 2   | 540 | 9251   | 9785   |
| UN48465 | Rsa1.0.00952.1 | 1117 | 58450  | 0         | 546 | 561 | 97 -  | 1   | 561 | 43425  | 43985  |
| UN48466 | Rsa1.0.00058.1 | 581  | 159921 | 1.00E-101 | 204 | 208 | 98 -  | 1   | 207 | 119113 | 119320 |
| UN48467 | Rsa1.0.00041.1 | 828  | 186197 | 1.00E-135 | 277 | 288 | 96 -  | 383 | 670 | 33067  | 33354  |
| UN48468 | Rsa1.0.00190.1 | 920  | 318240 | 0         | 390 | 396 | 98 +  | 1   | 393 | 4014   | 4406   |
| UN48469 | Rsa1.0.00079.1 | 686  | 606987 | 1.00E-134 | 310 | 328 | 94 -  | 55  | 374 | 18891  | 19215  |
| UN48470 | Rsa1.0.02858.1 | 722  | 27246  | 1.00E-132 | 375 | 416 | 90 +  | 7   | 412 | 2267   | 2679   |
| UN48471 | Rsa1.0.00154.1 | 804  | 189461 | 1.00E-177 | 454 | 501 | 90 +  | 305 | 802 | 10643  | 11134  |
| UN48472 | Rsa1.0.00082.1 | 1061 | 237584 | 1.00E-167 | 394 | 420 | 93 +  | 2   | 411 | 55258  | 55670  |
| UN48473 | Rsa1.0.01604.1 | 776  | 42461  | 0         | 505 | 505 | 100 + | 271 | 775 | 2594   | 3098   |
| UN48474 | Rsa1.0.00552.1 | 489  | 206757 | 1.00E-142 | 263 | 264 | 99 +  | 2   | 264 | 72839  | 73102  |
| UN48475 | Rsa1.0.03826.1 | 924  | 20614  | 0         | 497 | 500 | 99 +  | 423 | 922 | 4582   | 5081   |

|         |                |      |        |           |     |     |       |     |      |        |        |
|---------|----------------|------|--------|-----------|-----|-----|-------|-----|------|--------|--------|
| UN48476 | Rsa1.0.00198.1 | 882  | 222963 | 0         | 878 | 882 | 99 +  | 1   | 880  | 100510 | 101391 |
| UN48477 | Rsa1.0.00185.1 | 1231 | 248445 | 1.00E-123 | 254 | 263 | 96 -  | 1   | 255  | 10314  | 10576  |
| UN48478 | Rsa1.0.00033.1 | 852  | 515811 | 3.00E-81  | 188 | 198 | 94 -  | 1   | 198  | 43101  | 43297  |
| UN48479 | Rsa1.0.00979.1 | 911  | 57733  | 0         | 400 | 409 | 97 +  | 2   | 409  | 1000   | 1407   |
| UN48480 | Rsa1.0.00207.1 | 675  | 248736 | 0         | 670 | 674 | 99 -  | 3   | 675  | 194313 | 194984 |
| UN48481 | Rsa1.0.00225.1 | 1251 | 105892 | 0         | 350 | 351 | 99 +  | 901 | 1251 | 55265  | 55615  |
| UN48482 | Rsa1.0.00024.1 | 557  | 188018 | 1.00E-111 | 242 | 253 | 95 -  | 303 | 555  | 17567  | 17814  |
| UN48483 | Rsa1.0.01434.1 | 803  | 45951  | 1.00E-156 | 285 | 287 | 99 -  | 271 | 557  | 29290  | 29576  |
| UN48484 | Rsa1.0.02379.1 | 796  | 150705 | 1.00E-148 | 355 | 382 | 92 +  | 24  | 393  | 139667 | 140047 |
| UN48485 | Rsa1.0.00275.1 | 566  | 210104 | 6.00E-91  | 282 | 317 | 88 -  | 11  | 309  | 157269 | 157585 |
| UN48486 | Rsa1.0.00240.1 | 964  | 104175 | 1.00E-163 | 301 | 303 | 99 -  | 1   | 303  | 86112  | 86413  |
| UN48487 | Rsa1.0.00001.1 | 635  | 363028 | 1.00E-104 | 220 | 225 | 97 +  | 280 | 503  | 335254 | 335476 |
| UN48488 | Rsa1.0.02129.1 | 858  | 34757  | 0         | 396 | 402 | 98 -  | 381 | 782  | 5631   | 6029   |
| UN48489 | Rsa1.0.00286.1 | 512  | 98709  | 2.00E-56  | 255 | 300 | 85 -  | 1   | 279  | 29363  | 29651  |
| UN48490 | Rsa1.0.01256.1 | 1214 | 49770  | 0         | 554 | 554 | 100 + | 201 | 754  | 28746  | 29299  |
| UN48491 | Rsa1.0.00344.1 | 1265 | 191774 | 0         | 439 | 441 | 99 +  | 340 | 778  | 175912 | 176352 |
| UN48492 | Rsa1.0.00087.1 | 1418 | 761073 | 0         | 712 | 712 | 100 - | 705 | 1416 | 733531 | 734242 |
| UN48493 | Rsa1.0.03422.1 | 764  | 23076  | 1.00E-155 | 397 | 432 | 91 +  | 319 | 740  | 9861   | 10291  |
| UN48494 | Rsa1.0.01066.1 | 834  | 55235  | 4.00E-68  | 220 | 252 | 87 +  | 315 | 551  | 26155  | 26403  |
| UN48495 | Rsa1.0.13243.1 | 760  | 4957   | 0         | 593 | 607 | 97 -  | 107 | 713  | 1      | 606    |
| UN48496 | Rsa1.0.48665.1 | 613  | 465    | 7.00E-63  | 129 | 131 | 98 -  | 483 | 613  | 307    | 437    |
| UN48497 | Rsa1.0.04161.1 | 638  | 18788  | 2.00E-60  | 155 | 163 | 95 +  | 409 | 570  | 2612   | 2772   |
| UN48498 | Rsa1.0.00181.1 | 772  | 114269 | 0         | 381 | 391 | 97 +  | 385 | 771  | 53498  | 53888  |
| UN48499 | Rsa1.0.00205.1 | 605  | 193401 | 1.00E-147 | 334 | 351 | 95 +  | 251 | 599  | 38432  | 38778  |
| UN48500 | Rsa1.0.00152.1 | 1079 | 257730 | 0         | 518 | 535 | 96 +  | 547 | 1076 | 240049 | 240580 |
| UN48501 | Rsa1.0.04428.1 | 1097 | 17399  | 1.00E-104 | 225 | 234 | 96 -  | 803 | 1036 | 10071  | 10299  |
| UN48502 | Rsa1.0.01461.1 | 640  | 45240  | 0         | 582 | 605 | 96 +  | 35  | 639  | 27469  | 28073  |
| UN48503 | Rsa1.0.00391.1 | 728  | 183853 | 1.00E-101 | 194 | 196 | 98 +  | 530 | 725  | 87082  | 87277  |
| UN48504 | Rsa1.0.02320.1 | 1181 | 32575  | 0         | 499 | 516 | 96 -  | 666 | 1181 | 28855  | 29370  |
| UN48505 | Rsa1.0.00873.1 | 1100 | 61459  | 1.00E-179 | 328 | 331 | 99 -  | 3   | 333  | 60914  | 61244  |
| UN48506 | Rsa1.0.01239.1 | 942  | 50107  | 0         | 528 | 553 | 95 +  | 11  | 562  | 9793   | 10345  |
| UN48507 | Rsa1.0.02392.1 | 1000 | 152517 | 1.00E-117 | 259 | 269 | 96 -  | 735 | 1000 | 25877  | 26143  |
| UN48508 | Rsa1.0.00344.1 | 782  | 191774 | 0         | 595 | 635 | 93 +  | 2   | 618  | 128678 | 129311 |
| UN48509 | Rsa1.0.01875.1 | 598  | 37849  | 1.00E-142 | 304 | 318 | 95 -  | 1   | 318  | 25024  | 25337  |
| UN48510 | Rsa1.0.01974.1 | 1184 | 36583  | 0         | 388 | 399 | 97 +  | 18  | 416  | 11641  | 12039  |
| UN48511 | Rsa1.0.00748.1 | 725  | 65983  | 0         | 448 | 454 | 98 -  | 1   | 454  | 63996  | 64449  |
| UN48512 | Rsa1.0.00253.1 | 554  | 231292 | 0         | 396 | 414 | 95 +  | 8   | 421  | 132047 | 132460 |
| UN48513 | Rsa1.0.04450.1 | 789  | 17297  | 0         | 562 | 597 | 94 +  | 194 | 782  | 11963  | 12553  |
| UN48514 | Rsa1.0.00150.1 | 620  | 154416 | 1.00E-177 | 330 | 335 | 98 +  | 15  | 349  | 151424 | 151758 |

|         |                |      |        |           |      |      |       |     |      |        |        |
|---------|----------------|------|--------|-----------|------|------|-------|-----|------|--------|--------|
| UN48515 | Rsa1.0.00504.1 | 738  | 79334  | 0         | 430  | 436  | 98 -  | 305 | 738  | 55852  | 56286  |
| UN48516 | Rsa1.0.00194.1 | 866  | 110851 | 0         | 841  | 884  | 95 +  | 2   | 865  | 54079  | 54962  |
| UN48517 | Rsa1.0.02282.1 | 952  | 163951 | 1.00E-129 | 325  | 352  | 92 -  | 1   | 341  | 150366 | 150717 |
| UN48518 | Rsa1.0.00235.1 | 831  | 154696 | 0         | 418  | 440  | 95 -  | 392 | 830  | 139931 | 140365 |
| UN48519 | Rsa1.0.02552.1 | 1148 | 30191  | 0         | 428  | 444  | 96 +  | 705 | 1148 | 21612  | 22051  |
| UN48520 | Rsa1.0.00359.1 | 885  | 91256  | 0         | 587  | 598  | 98 +  | 219 | 816  | 47430  | 48027  |
| UN48521 | Rsa1.0.02742.1 | 1255 | 28284  | 0         | 1093 | 1129 | 96 -  | 1   | 1123 | 26376  | 27504  |
| UN48522 | Rsa1.0.00533.1 | 1130 | 77375  | 0         | 524  | 545  | 96 -  | 1   | 545  | 45912  | 46456  |
| UN48523 | Rsa1.0.09277.1 | 1127 | 6504   | 0         | 509  | 546  | 93 +  | 292 | 823  | 3      | 539    |
| UN48524 | Rsa1.0.00089.1 | 893  | 406142 | 4.00E-68  | 138  | 140  | 98 +  | 144 | 283  | 162197 | 162336 |
| UN48525 | Rsa1.0.00326.1 | 1179 | 171955 | 1.00E-173 | 337  | 344  | 97 -  | 839 | 1179 | 19270  | 19613  |
| UN48526 | Rsa1.0.00087.1 | 511  | 761073 | 1.00E-142 | 306  | 323  | 94 +  | 5   | 327  | 580763 | 581085 |
| UN48527 | Rsa1.0.00087.1 | 650  | 761073 | 2.00E-69  | 143  | 146  | 97 -  | 272 | 417  | 12106  | 12251  |
| UN48528 | Rsa1.0.24929.1 | 778  | 960    | 1.00E-136 | 279  | 290  | 96 +  | 54  | 343  | 159    | 448    |
| UN48529 | Rsa1.0.00786.1 | 567  | 64285  | 1.00E-159 | 431  | 469  | 91 +  | 105 | 564  | 63348  | 63808  |
| UN48530 | Rsa1.0.00614.1 | 622  | 72276  | 1.00E-124 | 276  | 292  | 94 -  | 1   | 281  | 44076  | 44366  |
| UN48531 | Rsa1.0.00017.1 | 640  | 752458 | 1.00E-158 | 361  | 385  | 93 -  | 262 | 639  | 661836 | 662218 |
| UN48532 | Rsa1.0.00686.1 | 412  | 68511  | 4.00E-97  | 186  | 188  | 98 -  | 55  | 242  | 61089  | 61276  |
| UN48533 | Rsa1.0.05076.1 | 465  | 14916  | 3.00E-98  | 220  | 230  | 95 +  | 238 | 465  | 7475   | 7704   |
| UN48534 | Rsa1.0.00196.1 | 811  | 109960 | 0         | 760  | 799  | 95 +  | 16  | 811  | 11131  | 11929  |
| UN48535 | Rsa1.0.23144.1 | 623  | 1068   | 1.00E-126 | 294  | 314  | 93 +  | 162 | 473  | 758    | 1068   |
| UN48536 | Rsa1.0.13820.1 | 810  | 4264   | 2.00E-82  | 177  | 184  | 96 +  | 405 | 588  | 3180   | 3363   |
| UN48537 | Rsa1.0.02288.1 | 724  | 32984  | 1.00E-163 | 307  | 311  | 98 +  | 415 | 724  | 14023  | 14333  |
| UN48538 | Rsa1.0.01106.1 | 657  | 53916  | 0         | 414  | 428  | 96 +  | 234 | 657  | 30833  | 31259  |
| UN48539 | Rsa1.0.00420.1 | 619  | 86496  | 0         | 584  | 619  | 94 +  | 1   | 617  | 54491  | 55106  |
| UN48540 | Rsa1.0.05721.1 | 807  | 12821  | 0         | 411  | 420  | 97 +  | 388 | 807  | 5611   | 6030   |
| UN48541 | Rsa1.0.00894.1 | 597  | 269700 | 1.00E-122 | 269  | 279  | 96 -  | 327 | 597  | 126578 | 126855 |
| UN48542 | Rsa1.0.00960.1 | 680  | 58199  | 1.00E-101 | 191  | 192  | 99 +  | 235 | 426  | 13844  | 14035  |
| UN48543 | Rsa1.0.00652.1 | 885  | 70089  | 1.00E-179 | 369  | 386  | 95 +  | 511 | 885  | 47920  | 48305  |
| UN48544 | Rsa1.0.02367.1 | 385  | 32106  | 1.00E-106 | 226  | 236  | 95 +  | 150 | 385  | 27423  | 27658  |
| UN48545 | Rsa1.0.03465.1 | 1154 | 22700  | 0         | 500  | 522  | 95 +  | 96  | 614  | 9803   | 10324  |
| UN48546 | Rsa1.0.04002.1 | 1330 | 19608  | 0         | 687  | 687  | 100 - | 644 | 1330 | 3656   | 4342   |
| UN48547 | Rsa1.0.00040.1 | 506  | 324196 | 8.00E-56  | 139  | 147  | 94 -  | 138 | 284  | 228160 | 228305 |
| UN48548 | Rsa1.0.03623.1 | 783  | 21714  | 0         | 495  | 521  | 95 -  | 263 | 781  | 3295   | 3803   |
| UN48549 | Rsa1.0.00398.1 | 659  | 88007  | 1.00E-180 | 362  | 376  | 96 +  | 280 | 655  | 62692  | 63067  |
| UN48550 | Rsa1.0.08429.1 | 855  | 7370   | 1.00E-100 | 220  | 229  | 96 -  | 605 | 833  | 5527   | 5752   |
| UN48551 | Rsa1.0.06010.1 | 803  | 11944  | 0         | 583  | 660  | 88 +  | 2   | 661  | 4933   | 5592   |
| UN48552 | Rsa1.0.05100.1 | 1058 | 14853  | 1.00E-124 | 256  | 264  | 96 +  | 14  | 272  | 1926   | 2189   |
| UN48553 | Rsa1.0.00168.1 | 770  | 115870 | 1.00E-147 | 290  | 296  | 97 +  | 475 | 769  | 38162  | 38455  |

|         |                |      |        |           |     |     |       |     |      |        |        |
|---------|----------------|------|--------|-----------|-----|-----|-------|-----|------|--------|--------|
| UN48554 | Rsa1.0_00323.1 | 523  | 159650 | 1.00E-131 | 282 | 296 | 95 -  | 230 | 523  | 61652  | 61947  |
| UN48555 | Rsa1.0_05546.1 | 1164 | 13379  | 1.00E-141 | 288 | 299 | 96 -  | 496 | 794  | 7596   | 7894   |
| UN48556 | Rsa1.0_38361.1 | 872  | 587    | 0         | 419 | 436 | 96 -  | 385 | 815  | 2      | 437    |
| UN48557 | Rsa1.0_00500.1 | 464  | 272308 | 1.00E-125 | 250 | 257 | 97 +  | 83  | 339  | 102401 | 102654 |
| UN48558 | Rsa1.0_00782.1 | 764  | 64468  | 5.00E-52  | 114 | 117 | 97 +  | 101 | 217  | 26251  | 26367  |
| UN48559 | Rsa1.0_00744.1 | 788  | 66084  | 1.00E-154 | 320 | 336 | 95 +  | 1   | 326  | 51340  | 51675  |
| UN48560 | Rsa1.0_00214.1 | 805  | 107508 | 7.00E-79  | 176 | 184 | 95 -  | 192 | 372  | 67033  | 67216  |
| UN48561 | Rsa1.0_00737.1 | 818  | 66432  | 1.00E-115 | 289 | 319 | 90 +  | 1   | 316  | 11909  | 12208  |
| UN48562 | Rsa1.0_00569.1 | 891  | 75060  | 0         | 482 | 498 | 96 +  | 398 | 891  | 65107  | 65600  |
| UN48563 | Rsa1.0_01419.1 | 964  | 167402 | 0         | 816 | 817 | 99 +  | 130 | 946  | 130447 | 131262 |
| UN48564 | Rsa1.0_03673.1 | 1007 | 21448  | 0         | 532 | 565 | 94 -  | 455 | 1004 | 4029   | 4589   |
| UN48565 | Rsa1.0_00064.1 | 703  | 240927 | 1.00E-119 | 247 | 257 | 96 -  | 239 | 495  | 126299 | 126555 |
| UN48566 | Rsa1.0_00430.1 | 908  | 85453  | 0         | 807 | 851 | 94 -  | 58  | 908  | 44178  | 45025  |
| UN48567 | Rsa1.0_00476.1 | 529  | 280966 | 1.00E-147 | 285 | 292 | 97 -  | 157 | 448  | 223112 | 223403 |
| UN48568 | Rsa1.0_00451.1 | 1043 | 322533 | 1.00E-147 | 326 | 342 | 95 +  | 700 | 1039 | 301659 | 301995 |
| UN48569 | Rsa1.0_01119.1 | 941  | 53459  | 1.00E-126 | 285 | 301 | 94 -  | 2   | 298  | 13988  | 14285  |
| UN48570 | Rsa1.0_24305.1 | 1033 | 994    | 1.00E-138 | 267 | 273 | 97 +  | 374 | 646  | 655    | 927    |
| UN48571 | Rsa1.0_00939.1 | 1108 | 185227 | 1.00E-110 | 229 | 238 | 96 -  | 362 | 599  | 39140  | 39377  |
| UN48572 | Rsa1.0_00731.1 | 806  | 66638  | 1.00E-110 | 219 | 223 | 98 +  | 87  | 308  | 10741  | 10963  |
| UN48573 | Rsa1.0_00820.1 | 869  | 62911  | 0         | 443 | 446 | 99 -  | 1   | 446  | 24909  | 25354  |
| UN48574 | Rsa1.0_03572.1 | 813  | 146346 | 5.00E-86  | 221 | 240 | 92 +  | 444 | 680  | 138843 | 139082 |
| UN48575 | Rsa1.0_02641.1 | 880  | 29191  | 1.00E-128 | 299 | 319 | 93 -  | 564 | 878  | 5580   | 5898   |
| UN48576 | Rsa1.0_00467.1 | 1237 | 156542 | 0         | 590 | 604 | 97 +  | 632 | 1235 | 88257  | 88857  |
| UN48577 | Rsa1.0_00343.1 | 826  | 93570  | 1.00E-125 | 231 | 232 | 99 -  | 75  | 306  | 49115  | 49346  |
| UN48578 | Rsa1.0_00358.1 | 898  | 91293  | 0         | 451 | 483 | 93 -  | 427 | 896  | 32065  | 32539  |
| UN48579 | Rsa1.0_02266.1 | 665  | 33195  | 1.00E-117 | 295 | 317 | 93 +  | 360 | 665  | 21051  | 21363  |
| UN48580 | Rsa1.0_00484.1 | 764  | 203294 | 1.00E-132 | 319 | 346 | 92 -  | 39  | 381  | 137471 | 137807 |
| UN48581 | Rsa1.0_00309.1 | 794  | 96883  | 4.00E-65  | 179 | 199 | 89 -  | 163 | 348  | 66985  | 67183  |
| UN48582 | Rsa1.0_00139.1 | 751  | 357786 | 1.00E-166 | 299 | 300 | 99 -  | 1   | 300  | 292094 | 292393 |
| UN48583 | Rsa1.0_00015.1 | 1035 | 561803 | 0         | 431 | 438 | 98 -  | 602 | 1035 | 291515 | 291952 |
| UN48584 | Rsa1.0_04198.1 | 793  | 18504  | 0         | 570 | 593 | 96 -  | 2   | 587  | 13939  | 14526  |
| UN48585 | Rsa1.0_00269.1 | 1000 | 341668 | 1.00E-110 | 266 | 286 | 93 -  | 11  | 287  | 289954 | 290237 |
| UN48586 | Rsa1.0_20183.1 | 887  | 1330   | 0         | 432 | 432 | 100 + | 455 | 886  | 157    | 588    |
| UN48587 | Rsa1.0_02053.1 | 709  | 35554  | 1.00E-180 | 368 | 382 | 96 +  | 333 | 709  | 32532  | 32910  |
| UN48588 | Rsa1.0_00067.1 | 682  | 415055 | 1.00E-147 | 279 | 284 | 98 -  | 1   | 284  | 244191 | 244474 |
| UN48589 | Rsa1.0_00153.1 | 1080 | 192931 | 1.00E-178 | 484 | 539 | 89 +  | 543 | 1080 | 26879  | 27395  |
| UN48590 | Rsa1.0_07182.1 | 1127 | 9777   | 1.00E-166 | 354 | 371 | 95 -  | 771 | 1127 | 7010   | 7380   |
| UN48591 | Rsa1.0_03588.1 | 778  | 21908  | 0         | 532 | 570 | 93 -  | 156 | 714  | 2928   | 3494   |
| UN48592 | Rsa1.0_00207.1 | 651  | 248736 | 0         | 555 | 579 | 95 +  | 1   | 573  | 194259 | 194836 |



|         |                |      |        |           |      |      |       |     |      |        |        |
|---------|----------------|------|--------|-----------|------|------|-------|-----|------|--------|--------|
| UN48593 | Rsa1.0.00081.1 | 1127 | 143261 | 0         | 621  | 623  | 99 -  | 503 | 1125 | 138638 | 139260 |
| UN48594 | Rsa1.0.00001.1 | 671  | 363028 | 0         | 652  | 677  | 96 +  | 3   | 671  | 287292 | 287966 |
| UN48595 | Rsa1.0.03344.1 | 689  | 23593  | 0         | 684  | 689  | 99 +  | 1   | 689  | 15103  | 15790  |
| UN48596 | Rsa1.0.14634.1 | 873  | 3205   | 0         | 336  | 340  | 98 -  | 357 | 696  | 1139   | 1478   |
| UN48597 | Rsa1.0.00082.1 | 659  | 237584 | 1.00E-100 | 188  | 189  | 99 +  | 447 | 635  | 133006 | 133194 |
| UN48598 | Rsa1.0.07309.1 | 794  | 9572   | 0         | 515  | 517  | 99 -  | 1   | 517  | 4292   | 4808   |
| UN48599 | Rsa1.0.01705.1 | 998  | 40710  | 2.00E-58  | 200  | 231  | 86 -  | 59  | 270  | 38585  | 38815  |
| UN48600 | Rsa1.0.03568.1 | 975  | 22048  | 0         | 734  | 751  | 97 +  | 217 | 966  | 18572  | 19318  |
| UN48601 | Rsa1.0.00037.1 | 910  | 307838 | 0         | 408  | 419  | 97 -  | 3   | 419  | 46810  | 47226  |
| UN48602 | Rsa1.0.00013.1 | 654  | 292129 | 0         | 640  | 651  | 98 -  | 2   | 652  | 114309 | 114959 |
| UN48603 | Rsa1.0.01174.1 | 729  | 51696  | 0         | 630  | 647  | 97 -  | 1   | 643  | 12826  | 13471  |
| UN48604 | Rsa1.0.44971.1 | 999  | 501    | 0         | 377  | 379  | 99 -  | 1   | 379  | 15     | 393    |
| UN48605 | Rsa1.0.00048.1 | 896  | 167185 | 0         | 813  | 889  | 91 +  | 7   | 881  | 146175 | 147043 |
| UN48606 | Rsa1.0.02735.1 | 685  | 28344  | 0         | 533  | 551  | 96 +  | 3   | 551  | 2741   | 3290   |
| UN48607 | Rsa1.0.00124.1 | 442  | 262503 | 0         | 438  | 442  | 99 +  | 3   | 441  | 56826  | 57267  |
| UN48608 | Rsa1.0.00119.1 | 837  | 467509 | 1.00E-89  | 217  | 232  | 93 +  | 330 | 561  | 247334 | 247559 |
| UN48609 | Rsa1.0.00589.1 | 802  | 209965 | 1.00E-153 | 277  | 278  | 99 +  | 463 | 740  | 193381 | 193658 |
| UN48610 | Rsa1.0.00519.1 | 960  | 197864 | 0         | 357  | 368  | 97 -  | 2   | 369  | 192606 | 192973 |
| UN48611 | Rsa1.0.05669.1 | 1118 | 12993  | 0         | 587  | 596  | 98 +  | 1   | 596  | 9645   | 10240  |
| UN48612 | Rsa1.0.00205.1 | 769  | 193401 | 1.00E-137 | 298  | 311  | 95 -  | 1   | 309  | 92527  | 92831  |
| UN48613 | Rsa1.0.07727.1 | 432  | 8700   | 1.00E-131 | 238  | 238  | 100 - | 3   | 240  | 4431   | 4668   |
| UN48614 | Rsa1.0.08018.1 | 1110 | 8075   | 1.00E-155 | 326  | 342  | 95 -  | 602 | 943  | 5142   | 5477   |
| UN48615 | Rsa1.0.01561.1 | 776  | 43227  | 1.00E-129 | 234  | 234  | 100 - | 543 | 776  | 32097  | 32330  |
| UN48616 | Rsa1.0.01313.1 | 953  | 48387  | 1.00E-151 | 317  | 331  | 95 -  | 624 | 953  | 647    | 977    |
| UN48617 | Rsa1.0.07813.1 | 596  | 8493   | 0         | 578  | 602  | 96 -  | 2   | 596  | 975    | 1571   |
| UN48618 | Rsa1.0.01749.1 | 628  | 39822  | 1.00E-123 | 332  | 361  | 91 +  | 271 | 628  | 34005  | 34349  |
| UN48619 | Rsa1.0.02698.1 | 726  | 28593  | 1.00E-106 | 214  | 220  | 97 -  | 461 | 680  | 9035   | 9254   |
| UN48620 | Rsa1.0.00476.1 | 597  | 280966 | 0         | 584  | 587  | 99 -  | 12  | 597  | 222922 | 223508 |
| UN48621 | Rsa1.0.01529.1 | 447  | 43871  | 0         | 441  | 445  | 99 -  | 1   | 445  | 31834  | 32278  |
| UN48622 | Rsa1.0.00322.1 | 780  | 212233 | 1.00E-148 | 284  | 290  | 97 +  | 295 | 584  | 206966 | 207255 |
| UN48623 | Rsa1.0.01306.1 | 884  | 48720  | 0         | 350  | 350  | 100 - | 1   | 350  | 755    | 1104   |
| UN48624 | Rsa1.0.00761.1 | 1183 | 65133  | 0         | 1041 | 1076 | 96 +  | 114 | 1183 | 37793  | 38860  |
| UN48625 | Rsa1.0.00049.1 | 615  | 167018 | 1.00E-178 | 342  | 349  | 97 -  | 56  | 404  | 128791 | 129138 |
| UN48626 | Rsa1.0.00407.1 | 746  | 191544 | 0         | 380  | 396  | 95 -  | 6   | 399  | 182904 | 183289 |
| UN48627 | Rsa1.0.03843.1 | 1206 | 20496  | 1.00E-141 | 275  | 282  | 97 +  | 583 | 864  | 11162  | 11443  |
| UN48628 | Rsa1.0.00050.1 | 792  | 237174 | 1.00E-175 | 397  | 430  | 92 +  | 1   | 430  | 31115  | 31520  |
| UN48629 | Rsa1.0.00247.1 | 1293 | 103408 | 7.00E-80  | 197  | 207  | 95 -  | 20  | 225  | 74920  | 75122  |
| UN48630 | Rsa1.0.00205.1 | 825  | 193401 | 1.00E-98  | 263  | 291  | 90 +  | 460 | 750  | 77712  | 77988  |
| UN48631 | Rsa1.0.15516.1 | 629  | 2563   | 1.00E-135 | 268  | 275  | 97 +  | 356 | 628  | 1144   | 1418   |

|         |                |      |        |           |     |     |       |     |      |        |        |
|---------|----------------|------|--------|-----------|-----|-----|-------|-----|------|--------|--------|
| UN48632 | Rsa1.0.36971.1 | 1491 | 610    | 0         | 585 | 588 | 99 -  | 2   | 589  | 20     | 607    |
| UN48633 | Rsa1.0.00500.1 | 487  | 272308 | 0         | 396 | 415 | 95 +  | 73  | 487  | 102394 | 102795 |
| UN48634 | Rsa1.0.02420.1 | 672  | 31580  | 0         | 428 | 454 | 94 -  | 4   | 453  | 15051  | 15503  |
| UN48635 | Rsa1.0.02282.1 | 958  | 163951 | 1.00E-180 | 342 | 348 | 98 +  | 611 | 958  | 156496 | 156842 |
| UN48636 | Rsa1.0.02253.1 | 508  | 33356  | 0         | 368 | 370 | 99 -  | 140 | 508  | 10470  | 10839  |
| UN48637 | Rsa1.0.04794.1 | 765  | 15960  | 1.00E-177 | 366 | 383 | 95 +  | 80  | 462  | 6544   | 6926   |
| UN48638 | Rsa1.0.00632.1 | 968  | 183777 | 0         | 635 | 669 | 94 -  | 1   | 659  | 37099  | 37765  |
| UN48639 | Rsa1.0.00124.1 | 668  | 262503 | 1.00E-120 | 277 | 294 | 94 -  | 375 | 667  | 14154  | 14444  |
| UN48640 | Rsa1.0.00679.1 | 897  | 68971  | 3.00E-78  | 164 | 169 | 97 -  | 563 | 731  | 65932  | 66100  |
| UN48641 | Rsa1.0.00166.1 | 655  | 240912 | 0         | 533 | 549 | 97 +  | 3   | 548  | 131051 | 131598 |
| UN48642 | Rsa1.0.05748.1 | 553  | 12749  | 1.00E-130 | 244 | 247 | 98 +  | 1   | 247  | 8285   | 8531   |
| UN48643 | Rsa1.0.00294.1 | 702  | 144860 | 0         | 427 | 428 | 99 -  | 190 | 617  | 43286  | 43713  |
| UN48644 | Rsa1.0.00340.1 | 1419 | 305782 | 1.00E-130 | 405 | 464 | 87 -  | 1   | 453  | 190468 | 190893 |
| UN48645 | Rsa1.0.00178.1 | 818  | 114861 | 0         | 804 | 820 | 98 +  | 2   | 818  | 5902   | 6720   |
| UN48646 | Rsa1.0.01611.1 | 1045 | 42269  | 1.00E-119 | 292 | 310 | 94 -  | 740 | 1043 | 15232  | 15537  |
| UN48647 | Rsa1.0.00482.1 | 684  | 81162  | 4.00E-46  | 101 | 103 | 98 -  | 222 | 324  | 5789   | 5891   |
| UN48648 | Rsa1.0.00757.1 | 577  | 65559  | 0         | 481 | 507 | 94 +  | 70  | 576  | 41627  | 42124  |
| UN48649 | Rsa1.0.02605.1 | 138  | 29637  | 3.00E-46  | 121 | 130 | 93 -  | 5   | 134  | 26078  | 26207  |
| UN48650 | Rsa1.0.00037.1 | 755  | 307838 | 5.00E-98  | 210 | 218 | 96 -  | 465 | 682  | 267093 | 267309 |
| UN48651 | Rsa1.0.05573.1 | 658  | 13290  | 0         | 457 | 489 | 93 +  | 175 | 654  | 4157   | 4642   |
| UN48652 | Rsa1.0.19555.1 | 681  | 1415   | 0         | 364 | 366 | 99 -  | 60  | 425  | 1050   | 1415   |
| UN48653 | Rsa1.0.00113.1 | 647  | 131574 | 0         | 501 | 513 | 97 -  | 135 | 647  | 31770  | 32282  |
| UN48654 | Rsa1.0.03813.1 | 1033 | 20708  | 1.00E-136 | 247 | 247 | 100 + | 785 | 1031 | 2017   | 2263   |
| UN48655 | Rsa1.0.01050.1 | 804  | 55651  | 1.00E-142 | 266 | 269 | 98 +  | 533 | 801  | 27609  | 27877  |
| UN48656 | Rsa1.0.00037.1 | 807  | 307838 | 0         | 521 | 540 | 96 -  | 283 | 807  | 198117 | 198655 |
| UN48657 | Rsa1.0.02730.1 | 1538 | 28385  | 0         | 711 | 715 | 99 -  | 824 | 1538 | 2166   | 2880   |
| UN48658 | Rsa1.0.00016.1 | 1209 | 831256 | 1.00E-179 | 354 | 366 | 96 +  | 274 | 639  | 428653 | 429018 |
| UN48659 | Rsa1.0.00697.1 | 922  | 67913  | 0         | 892 | 925 | 96 -  | 3   | 922  | 47733  | 48652  |
| UN48660 | Rsa1.0.21831.1 | 819  | 1169   | 1.00E-68  | 212 | 234 | 90 +  | 148 | 377  | 791    | 1021   |
| UN48661 | Rsa1.0.00108.1 | 798  | 478491 | 1.00E-150 | 284 | 288 | 98 +  | 513 | 797  | 467691 | 467978 |
| UN48662 | Rsa1.0.00505.1 | 526  | 79323  | 9.00E-62  | 142 | 149 | 95 +  | 123 | 271  | 13080  | 13228  |
| UN48663 | Rsa1.0.05569.1 | 1090 | 13311  | 0         | 413 | 431 | 95 -  | 666 | 1090 | 4150   | 4579   |
| UN48664 | Rsa1.0.00234.1 | 814  | 197060 | 4.00E-65  | 180 | 195 | 92 -  | 616 | 808  | 15884  | 16073  |
| UN48665 | Rsa1.0.14283.1 | 619  | 3580   | 0         | 403 | 413 | 97 +  | 207 | 619  | 409    | 819    |
| UN48666 | Rsa1.0.00081.1 | 897  | 143261 | 1.00E-135 | 271 | 277 | 97 +  | 625 | 897  | 134326 | 134600 |
| UN48667 | Rsa1.0.06671.1 | 746  | 10563  | 0         | 696 | 729 | 95 -  | 19  | 746  | 3132   | 3850   |
| UN48668 | Rsa1.0.00457.1 | 1005 | 337301 | 1.00E-122 | 225 | 226 | 99 -  | 398 | 623  | 161069 | 161294 |
| UN48669 | Rsa1.0.01650.1 | 578  | 41589  | 1.00E-135 | 347 | 378 | 91 -  | 195 | 572  | 27296  | 27662  |
| UN48670 | Rsa1.0.00859.1 | 732  | 61795  | 0         | 370 | 381 | 97 -  | 79  | 459  | 61329  | 61709  |

|         |                |      |        |           |     |     |      |     |      |        |        |
|---------|----------------|------|--------|-----------|-----|-----|------|-----|------|--------|--------|
| UN48671 | Rsa1.0.00480.1 | 655  | 81325  | 1.00E-116 | 238 | 246 | 96 + | 258 | 500  | 4323   | 4568   |
| UN48672 | Rsa1.0.01783.1 | 928  | 39383  | 1.00E-119 | 235 | 241 | 97 - | 667 | 907  | 9454   | 9694   |
| UN48673 | Rsa1.0.00758.1 | 594  | 65477  | 1.00E-145 | 264 | 265 | 99 - | 326 | 590  | 11258  | 11522  |
| UN48674 | Rsa1.0.00556.1 | 733  | 207212 | 0         | 695 | 735 | 94 + | 6   | 732  | 43743  | 44474  |
| UN48675 | Rsa1.0.00030.1 | 1087 | 250988 | 1.00E-71  | 156 | 162 | 96 + | 548 | 709  | 123971 | 124132 |
| UN48676 | Rsa1.0.00026.1 | 856  | 327835 | 0         | 746 | 790 | 94 - | 8   | 796  | 25771  | 26558  |
| UN48677 | Rsa1.0.00076.1 | 573  | 146021 | 0         | 543 | 570 | 95 + | 7   | 571  | 100578 | 101146 |
| UN48678 | Rsa1.0.01719.1 | 686  | 40388  | 1.00E-105 | 265 | 284 | 93 - | 2   | 282  | 28024  | 28299  |
| UN48679 | Rsa1.0.02863.1 | 882  | 27160  | 1.00E-147 | 307 | 319 | 96 + | 534 | 848  | 14504  | 14822  |
| UN48680 | Rsa1.0.00028.1 | 1196 | 293984 | 0         | 472 | 486 | 97 - | 4   | 489  | 281443 | 281927 |
| UN48681 | Rsa1.0.00108.1 | 727  | 478491 | 1.00E-134 | 273 | 283 | 96 + | 444 | 726  | 459452 | 459734 |
| UN48682 | Rsa1.0.05822.1 | 658  | 12521  | 1.00E-156 | 334 | 352 | 94 - | 35  | 382  | 7677   | 8028   |
| UN48683 | Rsa1.0.04340.1 | 785  | 17831  | 1.00E-153 | 337 | 354 | 95 + | 429 | 781  | 16410  | 16756  |
| UN48684 | Rsa1.0.00792.1 | 483  | 64163  | 1.00E-79  | 178 | 185 | 96 + | 300 | 483  | 7358   | 7539   |
| UN48685 | Rsa1.0.58948.1 | 739  | 388    | 0         | 377 | 381 | 98 + | 360 | 739  | 7      | 387    |
| UN48686 | Rsa1.0.15262.1 | 1017 | 2722   | 1.00E-144 | 288 | 296 | 97 + | 723 | 1017 | 1912   | 2207   |
| UN48687 | Rsa1.0.00275.1 | 656  | 210104 | 1.00E-136 | 307 | 324 | 94 - | 1   | 323  | 178612 | 178931 |
| UN48688 | Rsa1.0.04123.1 | 763  | 18947  | 1.00E-148 | 297 | 305 | 97 + | 447 | 751  | 15564  | 15865  |
| UN48689 | Rsa1.0.02170.1 | 654  | 34352  | 0         | 588 | 625 | 94 - | 27  | 651  | 30232  | 30835  |
| UN48690 | Rsa1.0.00500.1 | 804  | 272308 | 0         | 571 | 605 | 94 - | 1   | 592  | 157120 | 157724 |
| UN48691 | Rsa1.0.00007.1 | 476  | 239325 | 6.00E-81  | 275 | 318 | 86 + | 165 | 460  | 42229  | 42536  |
| UN48692 | Rsa1.0.44085.1 | 1014 | 510    | 1.00E-160 | 322 | 334 | 96 - | 73  | 406  | 70     | 403    |
| UN48693 | Rsa1.0.00277.1 | 1351 | 100132 | 1.00E-134 | 352 | 381 | 92 - | 971 | 1345 | 76575  | 76948  |
| UN48694 | Rsa1.0.01201.1 | 1067 | 50856  | 1.00E-169 | 325 | 333 | 97 + | 624 | 956  | 46496  | 46828  |
| UN48695 | Rsa1.0.14737.1 | 706  | 3115   | 1.00E-147 | 307 | 321 | 95 - | 306 | 626  | 2055   | 2375   |
| UN48696 | Rsa1.0.00145.1 | 806  | 261008 | 1.00E-151 | 322 | 338 | 95 - | 471 | 806  | 96005  | 96342  |
| UN48697 | Rsa1.0.06978.1 | 696  | 10073  | 1.00E-159 | 306 | 313 | 97 - | 146 | 458  | 2434   | 2746   |
| UN48698 | Rsa1.0.00214.1 | 982  | 107508 | 0         | 557 | 623 | 89 + | 368 | 950  | 67224  | 67845  |
| UN48699 | Rsa1.0.03352.1 | 986  | 23506  | 0         | 934 | 996 | 93 - | 2   | 984  | 4671   | 5647   |
| UN48700 | Rsa1.0.00083.1 | 837  | 442773 | 0         | 804 | 840 | 95 - | 2   | 830  | 359574 | 360410 |
| UN48701 | Rsa1.0.02777.1 | 792  | 27986  | 1.00E-141 | 281 | 290 | 96 - | 501 | 790  | 23977  | 24266  |
| UN48702 | Rsa1.0.02907.1 | 1159 | 26861  | 0         | 526 | 561 | 93 + | 1   | 555  | 15237  | 15794  |
| UN48703 | Rsa1.0.00420.1 | 625  | 86496  | 3.00E-96  | 197 | 202 | 97 + | 391 | 592  | 11931  | 12130  |
| UN48704 | Rsa1.0.05477.1 | 800  | 13613  | 1.00E-100 | 189 | 190 | 99 - | 388 | 577  | 4693   | 4882   |
| UN48705 | Rsa1.0.00307.1 | 874  | 199003 | 1.00E-128 | 390 | 436 | 89 - | 440 | 868  | 183145 | 183556 |
| UN48706 | Rsa1.0.00069.1 | 838  | 403561 | 1.00E-132 | 277 | 290 | 95 + | 1   | 279  | 148021 | 148310 |
| UN48707 | Rsa1.0.00078.1 | 1324 | 175053 | 2.00E-89  | 289 | 330 | 87 + | 1   | 330  | 140360 | 140677 |
| UN48708 | Rsa1.0.00092.1 | 544  | 659932 | 1.00E-144 | 349 | 374 | 93 + | 10  | 381  | 517088 | 517458 |
| UN48709 | Rsa1.0.00101.1 | 724  | 267193 | 1.00E-133 | 274 | 285 | 96 - | 123 | 407  | 258416 | 258700 |

|         |                |      |        |           |     |     |      |     |      |        |        |
|---------|----------------|------|--------|-----------|-----|-----|------|-----|------|--------|--------|
| UN48710 | Rsa1.0_39807.1 | 936  | 564    | 1.00E-103 | 271 | 292 | 92 + | 649 | 936  | 1      | 288    |
| UN48711 | Rsa1.0_02871.1 | 745  | 27085  | 0         | 392 | 408 | 96 - | 3   | 410  | 24021  | 24427  |
| UN48712 | Rsa1.0_01146.1 | 1009 | 163455 | 1.00E-157 | 328 | 341 | 96 - | 1   | 341  | 18082  | 18420  |
| UN48713 | Rsa1.0_00394.1 | 652  | 148426 | 1.00E-108 | 290 | 320 | 90 - | 325 | 638  | 120719 | 121030 |
| UN48714 | Rsa1.0_03201.1 | 689  | 157656 | 0         | 390 | 407 | 95 + | 3   | 399  | 18916  | 19322  |
| UN48715 | Rsa1.0_00390.1 | 534  | 88681  | 0         | 458 | 466 | 98 - | 69  | 534  | 10794  | 11259  |
| UN48716 | Rsa1.0_01581.1 | 658  | 42833  | 1.00E-153 | 295 | 302 | 97 + | 85  | 386  | 7614   | 7915   |
| UN48717 | Rsa1.0_00503.1 | 1165 | 79468  | 0         | 712 | 715 | 99 + | 451 | 1165 | 68872  | 69586  |
| UN48718 | Rsa1.0_00080.1 | 728  | 190437 | 1.00E-135 | 263 | 269 | 97 - | 15  | 283  | 34258  | 34526  |
| UN48719 | Rsa1.0_00577.1 | 995  | 174827 | 1.00E-166 | 299 | 300 | 99 - | 450 | 749  | 168661 | 168960 |
| UN48720 | Rsa1.0_00913.1 | 885  | 59914  | 0         | 464 | 465 | 99 + | 421 | 885  | 50698  | 51162  |
| UN48721 | Rsa1.0_01168.1 | 495  | 153765 | 6.00E-69  | 223 | 247 | 90 - | 256 | 491  | 23488  | 23728  |
| UN48722 | Rsa1.0_06715.1 | 686  | 10485  | 0         | 553 | 582 | 95 + | 109 | 682  | 2804   | 3385   |
| UN48723 | Rsa1.0_02429.1 | 557  | 31527  | 1.00E-171 | 340 | 352 | 96 + | 201 | 552  | 12869  | 13220  |
| UN48724 | Rsa1.0_02402.1 | 1294 | 31710  | 0         | 435 | 452 | 96 - | 345 | 790  | 25296  | 25747  |
| UN48725 | Rsa1.0_06143.1 | 740  | 11634  | 0         | 725 | 734 | 98 - | 3   | 736  | 4551   | 5282   |
| UN48726 | Rsa1.0_03940.1 | 705  | 19962  | 0         | 440 | 456 | 96 + | 243 | 698  | 7982   | 8436   |
| UN48727 | Rsa1.0_00611.1 | 833  | 72410  | 0         | 439 | 456 | 96 - | 377 | 832  | 15018  | 15467  |
| UN48728 | Rsa1.0_03122.1 | 588  | 25207  | 0         | 396 | 407 | 97 - | 3   | 408  | 14445  | 14851  |
| UN48729 | Rsa1.0_00017.1 | 837  | 752458 | 0         | 439 | 458 | 95 - | 9   | 466  | 354538 | 354992 |
| UN48730 | Rsa1.0_00185.1 | 361  | 248445 | 1.00E-154 | 333 | 351 | 94 - | 6   | 356  | 4395   | 4743   |
| UN48731 | Rsa1.0_05336.1 | 752  | 14117  | 1.00E-101 | 229 | 241 | 95 - | 97  | 332  | 11121  | 11361  |
| UN48732 | Rsa1.0_02245.1 | 704  | 33478  | 1.00E-126 | 235 | 237 | 99 - | 3   | 239  | 6822   | 7058   |
| UN48733 | Rsa1.0_01989.1 | 731  | 36439  | 1.00E-83  | 253 | 278 | 91 + | 457 | 731  | 22890  | 23160  |
| UN48734 | Rsa1.0_00342.1 | 773  | 93695  | 1.00E-110 | 271 | 295 | 91 - | 4   | 298  | 1563   | 1843   |
| UN48735 | Rsa1.0_00181.1 | 784  | 114269 | 0         | 438 | 448 | 97 - | 1   | 445  | 53498  | 53945  |
| UN48736 | Rsa1.0_00048.1 | 931  | 167185 | 0         | 850 | 921 | 92 - | 20  | 929  | 146141 | 147042 |
| UN48737 | Rsa1.0_02222.1 | 629  | 152798 | 0         | 592 | 633 | 93 - | 3   | 629  | 23567  | 24199  |
| UN48738 | Rsa1.0_00027.1 | 760  | 283362 | 1.00E-117 | 226 | 230 | 98 + | 50  | 279  | 136818 | 137047 |
| UN48739 | Rsa1.0_01382.1 | 888  | 46877  | 0         | 704 | 754 | 93 - | 141 | 888  | 37054  | 37801  |
| UN48740 | Rsa1.0_06900.1 | 631  | 131268 | 1.00E-121 | 329 | 357 | 92 - | 279 | 627  | 129900 | 130254 |
| UN48741 | Rsa1.0_00326.1 | 857  | 171955 | 0         | 467 | 501 | 93 + | 357 | 857  | 16263  | 16747  |
| UN48742 | Rsa1.0_01096.1 | 1344 | 54266  | 0         | 628 | 641 | 97 - | 262 | 901  | 9497   | 10135  |
| UN48743 | Rsa1.0_00142.1 | 678  | 121474 | 1.00E-132 | 258 | 264 | 97 + | 343 | 606  | 64267  | 64530  |
| UN48744 | Rsa1.0_36118.1 | 574  | 625    | 1.00E-135 | 269 | 277 | 97 + | 3   | 279  | 20     | 296    |
| UN48745 | Rsa1.0_09314.1 | 1064 | 6461   | 0         | 556 | 562 | 98 + | 5   | 564  | 5553   | 6112   |
| UN48746 | Rsa1.0_03097.1 | 748  | 25434  | 1.00E-168 | 373 | 396 | 94 + | 364 | 748  | 20254  | 20645  |
| UN48747 | Rsa1.0_00007.1 | 902  | 239325 | 0         | 457 | 483 | 94 - | 418 | 900  | 14080  | 14555  |
| UN48748 | Rsa1.0_01159.1 | 893  | 52115  | 1.00E-119 | 238 | 245 | 97 + | 329 | 573  | 32156  | 32400  |

|         |                |      |        |           |     |     |       |     |      |        |        |
|---------|----------------|------|--------|-----------|-----|-----|-------|-----|------|--------|--------|
| UN48749 | Rsa1.0.01604.1 | 922  | 42461  | 1.00E-176 | 357 | 371 | 96 -  | 560 | 922  | 1074   | 1443   |
| UN48750 | Rsa1.0.01408.1 | 862  | 46383  | 1.00E-136 | 312 | 332 | 93 -  | 489 | 813  | 16626  | 16954  |
| UN48751 | Rsa1.0.05354.1 | 795  | 14073  | 0         | 618 | 651 | 94 -  | 147 | 794  | 4710   | 5350   |
| UN48752 | Rsa1.0.07055.1 | 1120 | 9970   | 1.00E-142 | 299 | 313 | 95 +  | 310 | 622  | 1845   | 2157   |
| UN48753 | Rsa1.0.01026.1 | 878  | 171624 | 0         | 573 | 586 | 97 -  | 298 | 878  | 165305 | 165890 |
| UN48754 | Rsa1.0.01958.1 | 740  | 261128 | 8.00E-97  | 195 | 200 | 97 +  | 193 | 392  | 113926 | 114125 |
| UN48755 | Rsa1.0.02231.1 | 729  | 33661  | 0         | 695 | 714 | 97 -  | 2   | 713  | 27200  | 27913  |
| UN48756 | Rsa1.0.00988.1 | 845  | 57525  | 0         | 504 | 505 | 99 -  | 3   | 507  | 50667  | 51171  |
| UN48757 | Rsa1.0.08001.1 | 997  | 8095   | 0         | 389 | 402 | 96 +  | 599 | 996  | 1475   | 1876   |
| UN48758 | Rsa1.0.06900.1 | 613  | 131268 | 1.00E-121 | 314 | 342 | 91 +  | 9   | 335  | 129913 | 130254 |
| UN48759 | Rsa1.0.00333.1 | 797  | 94500  | 1.00E-155 | 339 | 354 | 95 -  | 3   | 353  | 80864  | 81216  |
| UN48760 | Rsa1.0.04934.1 | 551  | 143962 | 0         | 532 | 551 | 96 -  | 3   | 551  | 141886 | 142435 |
| UN48761 | Rsa1.0.01760.1 | 673  | 39730  | 0         | 610 | 650 | 93 -  | 21  | 668  | 27799  | 28439  |
| UN48762 | Rsa1.0.00201.1 | 370  | 232851 | 1.00E-75  | 212 | 230 | 92 -  | 145 | 367  | 109852 | 110072 |
| UN48763 | Rsa1.0.00842.1 | 597  | 62493  | 1.00E-158 | 288 | 290 | 99 -  | 308 | 597  | 38931  | 39220  |
| UN48764 | Rsa1.0.08203.1 | 1037 | 7742   | 1.00E-164 | 306 | 310 | 98 -  | 267 | 576  | 5693   | 6002   |
| UN48765 | Rsa1.0.00212.1 | 745  | 108350 | 1.00E-154 | 318 | 329 | 96 -  | 417 | 743  | 59950  | 60278  |
| UN48766 | Rsa1.0.01159.1 | 979  | 52115  | 1.00E-126 | 238 | 241 | 98 +  | 310 | 550  | 32156  | 32396  |
| UN48767 | Rsa1.0.00030.1 | 543  | 250988 | 3.00E-80  | 167 | 172 | 97 +  | 25  | 196  | 123961 | 124132 |
| UN48768 | Rsa1.0.29217.1 | 682  | 789    | 1.00E-104 | 249 | 267 | 93 +  | 417 | 681  | 335    | 601    |
| UN48769 | Rsa1.0.08223.1 | 824  | 7700   | 0         | 465 | 483 | 96 +  | 274 | 747  | 6338   | 6820   |
| UN48770 | Rsa1.0.02791.1 | 609  | 27832  | 0         | 465 | 500 | 93 -  | 128 | 608  | 8464   | 8959   |
| UN48771 | Rsa1.0.02680.1 | 1029 | 28721  | 0         | 947 | 951 | 99 +  | 63  | 1013 | 18063  | 19013  |
| UN48772 | Rsa1.0.00048.1 | 907  | 167185 | 1.00E-132 | 359 | 393 | 91 +  | 3   | 382  | 147915 | 148303 |
| UN48773 | Rsa1.0.01947.1 | 684  | 36977  | 1.00E-165 | 395 | 417 | 94 +  | 25  | 428  | 23147  | 23560  |
| UN48774 | Rsa1.0.59638.1 | 1004 | 384    | 0         | 384 | 384 | 100 - | 509 | 892  | 1      | 384    |
| UN48775 | Rsa1.0.01412.1 | 617  | 46311  | 0         | 444 | 455 | 97 +  | 163 | 617  | 2332   | 2786   |
| UN48776 | Rsa1.0.01870.1 | 655  | 37919  | 0         | 460 | 461 | 99 +  | 195 | 655  | 17943  | 18403  |
| UN48777 | Rsa1.0.00323.1 | 1036 | 159650 | 0         | 522 | 529 | 98 -  | 4   | 532  | 20463  | 20991  |
| UN48778 | Rsa1.0.00318.1 | 958  | 96094  | 1.00E-147 | 271 | 273 | 99 -  | 444 | 716  | 28524  | 28796  |
| UN48779 | Rsa1.0.05293.1 | 935  | 14237  | 1.00E-130 | 255 | 259 | 98 +  | 678 | 933  | 12377  | 12635  |
| UN48780 | Rsa1.0.44669.1 | 728  | 504    | 0         | 481 | 487 | 98 +  | 1   | 482  | 16     | 502    |
| UN48781 | Rsa1.0.02950.1 | 1108 | 26506  | 0         | 456 | 495 | 92 -  | 1   | 486  | 7276   | 7758   |
| UN48782 | Rsa1.0.01920.1 | 993  | 158533 | 2.00E-92  | 283 | 317 | 89 +  | 2   | 307  | 125936 | 126241 |
| UN48783 | Rsa1.0.07059.1 | 1881 | 9962   | 0         | 456 | 471 | 96 -  | 1   | 471  | 5686   | 6153   |
| UN48784 | Rsa1.0.00414.1 | 1193 | 202190 | 0         | 358 | 362 | 98 +  | 1   | 362  | 195701 | 196062 |
| UN48785 | Rsa1.0.00111.1 | 1054 | 390088 | 0         | 515 | 549 | 93 +  | 510 | 1051 | 334412 | 334954 |
| UN48786 | Rsa1.0.00506.1 | 1167 | 79106  | 1.00E-84  | 207 | 219 | 94 +  | 928 | 1142 | 5680   | 5898   |
| UN48787 | Rsa1.0.00119.1 | 1191 | 467509 | 0         | 405 | 424 | 95 +  | 2   | 421  | 46343  | 46766  |

|         |                |      |        |           |      |      |       |      |      |        |        |
|---------|----------------|------|--------|-----------|------|------|-------|------|------|--------|--------|
| UN48788 | Rsa1.0.01454.1 | 1090 | 45440  | 0         | 435  | 441  | 98 +  | 650  | 1090 | 32801  | 33241  |
| UN48789 | Rsa1.0.04399.1 | 885  | 17543  | 1.00E-133 | 270  | 280  | 96 +  | 3    | 282  | 8810   | 9083   |
| UN48790 | Rsa1.0.01140.1 | 1128 | 52586  | 0         | 518  | 531  | 97 +  | 599  | 1128 | 4637   | 5167   |
| UN48791 | Rsa1.0.00003.1 | 1243 | 340054 | 0         | 430  | 431  | 99 +  | 88   | 518  | 1149   | 1579   |
| UN48792 | Rsa1.0.00064.1 | 1483 | 240927 | 0         | 391  | 391  | 100 - | 1092 | 1482 | 124827 | 125217 |
| UN48793 | Rsa1.0.05878.1 | 1090 | 12344  | 1.00E-173 | 381  | 403  | 94 -  | 688  | 1090 | 8117   | 8501   |
| UN48794 | Rsa1.0.10771.1 | 831  | 5723   | 3.00E-75  | 162  | 168  | 96 -  | 211  | 378  | 1215   | 1382   |
| UN48795 | Rsa1.0.00657.1 | 1315 | 69858  | 3.00E-79  | 169  | 175  | 96 +  | 329  | 503  | 25936  | 26110  |
| UN48796 | Rsa1.0.02343.1 | 1082 | 32374  | 5.00E-99  | 207  | 212  | 97 -  | 717  | 928  | 27963  | 28172  |
| UN48797 | Rsa1.0.02061.1 | 904  | 35487  | 0         | 755  | 756  | 99 +  | 1    | 756  | 31549  | 32304  |
| UN48798 | Rsa1.0.00991.1 | 758  | 143101 | 0         | 462  | 476  | 97 -  | 1    | 475  | 138093 | 138564 |
| UN48799 | Rsa1.0.01185.1 | 1153 | 149842 | 1.00E-132 | 260  | 267  | 97 -  | 404  | 670  | 132558 | 132824 |
| UN48800 | Rsa1.0.06971.1 | 1032 | 10085  | 1.00E-71  | 153  | 158  | 96 -  | 361  | 518  | 5075   | 5232   |
| UN48801 | Rsa1.0.05978.1 | 1095 | 12053  | 3.00E-97  | 206  | 214  | 96 +  | 866  | 1075 | 4482   | 4695   |
| UN48802 | Rsa1.0.15875.1 | 1081 | 2380   | 1.00E-134 | 246  | 247  | 99 +  | 835  | 1081 | 381    | 627    |
| UN48803 | Rsa1.0.07877.1 | 1061 | 8373   | 6.00E-77  | 147  | 147  | 100 + | 214  | 360  | 4515   | 4661   |
| UN48804 | Rsa1.0.00017.1 | 1186 | 752458 | 0         | 360  | 370  | 97 -  | 1    | 370  | 3792   | 4161   |
| UN48805 | Rsa1.0.01359.1 | 1079 | 47271  | 1.00E-128 | 380  | 436  | 87 +  | 2    | 405  | 32410  | 32836  |
| UN48806 | Rsa1.0.03524.1 | 1145 | 22297  | 1.00E-169 | 342  | 355  | 96 -  | 42   | 389  | 17950  | 18303  |
| UN48807 | Rsa1.0.00190.1 | 1222 | 318240 | 0         | 370  | 378  | 97 +  | 22   | 399  | 116690 | 117067 |
| UN48808 | Rsa1.0.06803.1 | 1171 | 10330  | 1.00E-90  | 258  | 276  | 93 -  | 901  | 1171 | 7273   | 7542   |
| UN48809 | Rsa1.0.01696.1 | 1034 | 301850 | 7.00E-61  | 138  | 144  | 95 -  | 702  | 845  | 291899 | 292042 |
| UN48810 | Rsa1.0.01580.1 | 1164 | 42852  | 0         | 414  | 426  | 97 -  | 1    | 424  | 31149  | 31572  |
| UN48811 | Rsa1.0.15024.1 | 932  | 2885   | 1.00E-125 | 266  | 279  | 95 -  | 664  | 932  | 2314   | 2592   |
| UN48812 | Rsa1.0.00772.1 | 1124 | 64856  | 0         | 499  | 520  | 95 -  | 607  | 1124 | 47062  | 47580  |
| UN48813 | Rsa1.0.00470.1 | 1062 | 81968  | 1.00E-119 | 239  | 246  | 97 +  | 1    | 246  | 30132  | 30377  |
| UN48814 | Rsa1.0.03069.1 | 1319 | 25615  | 0         | 509  | 521  | 97 +  | 395  | 915  | 18568  | 19088  |
| UN48815 | Rsa1.0.11046.1 | 1086 | 5635   | 0         | 415  | 424  | 97 -  | 1    | 419  | 331    | 753    |
| UN48816 | Rsa1.0.03244.1 | 876  | 24413  | 0         | 573  | 575  | 99 +  | 302  | 876  | 19633  | 20206  |
| UN48817 | Rsa1.0.00055.1 | 1167 | 520193 | 1.00E-148 | 334  | 353  | 94 +  | 814  | 1166 | 106239 | 106587 |
| UN48818 | Rsa1.0.00033.1 | 1020 | 515811 | 1.00E-125 | 270  | 285  | 94 +  | 2    | 286  | 41403  | 41679  |
| UN48819 | Rsa1.0.02321.1 | 953  | 32572  | 0         | 590  | 604  | 97 +  | 350  | 953  | 5991   | 6593   |
| UN48820 | Rsa1.0.03226.1 | 1408 | 24494  | 0         | 1311 | 1415 | 92 -  | 2    | 1408 | 11457  | 12860  |
| UN48821 | Rsa1.0.00638.1 | 946  | 71037  | 1.00E-131 | 262  | 270  | 97 +  | 331  | 600  | 9037   | 9306   |
| UN48822 | Rsa1.0.00437.1 | 927  | 84879  | 1.00E-145 | 359  | 387  | 92 -  | 513  | 898  | 70229  | 70609  |
| UN48823 | Rsa1.0.00204.1 | 1041 | 109056 | 1.00E-166 | 306  | 309  | 99 +  | 591  | 899  | 48140  | 48448  |
| UN48824 | Rsa1.0.00001.1 | 1181 | 363028 | 0         | 510  | 510  | 100 + | 672  | 1181 | 62099  | 62608  |
| UN48825 | Rsa1.0.00017.1 | 1001 | 752458 | 1.00E-156 | 384  | 412  | 93 +  | 2    | 411  | 138961 | 139369 |
| UN48826 | Rsa1.0.03305.1 | 865  | 147552 | 1.00E-131 | 266  | 274  | 97 +  | 458  | 730  | 141496 | 141769 |

|         |                |      |        |           |     |     |       |      |      |        |        |
|---------|----------------|------|--------|-----------|-----|-----|-------|------|------|--------|--------|
| UN48827 | Rsa1.0_04323.1 | 1074 | 17915  | 1.00E-121 | 237 | 242 | 97 -  | 2    | 243  | 15645  | 15886  |
| UN48828 | Rsa1.0_03122.1 | 873  | 25207  | 1.00E-175 | 324 | 328 | 98 +  | 273  | 600  | 6320   | 6647   |
| UN48829 | Rsa1.0_00033.1 | 1320 | 515811 | 0         | 446 | 458 | 97 -  | 3    | 459  | 11052  | 11509  |
| UN48830 | Rsa1.0_02377.1 | 1177 | 31994  | 0         | 630 | 648 | 97 +  | 86   | 733  | 4733   | 5380   |
| UN48831 | Rsa1.0_13737.1 | 908  | 4403   | 9.00E-94  | 181 | 183 | 98 -  | 39   | 221  | 3954   | 4136   |
| UN48832 | Rsa1.0_00415.1 | 673  | 86795  | 0         | 565 | 606 | 93 -  | 53   | 647  | 8944   | 9548   |
| UN48833 | Rsa1.0_00369.1 | 982  | 266462 | 0         | 407 | 420 | 96 +  | 229  | 648  | 192827 | 193246 |
| UN48834 | Rsa1.0_00076.1 | 1138 | 146021 | 0         | 561 | 580 | 96 +  | 2    | 579  | 75016  | 75583  |
| UN48835 | Rsa1.0_01519.1 | 992  | 44144  | 0         | 529 | 535 | 98 -  | 461  | 992  | 11617  | 12151  |
| UN48836 | Rsa1.0_00515.1 | 599  | 78417  | 0         | 576 | 613 | 93 +  | 1    | 599  | 59716  | 60323  |
| UN48837 | Rsa1.0_05541.1 | 1122 | 139959 | 0         | 356 | 359 | 99 -  | 764  | 1122 | 2749   | 3107   |
| UN48838 | Rsa1.0_00265.1 | 1290 | 220635 | 0         | 330 | 331 | 99 +  | 1    | 330  | 146292 | 146622 |
| UN48839 | Rsa1.0_00501.1 | 499  | 79545  | 0         | 484 | 499 | 96 +  | 3    | 499  | 58705  | 59203  |
| UN48840 | Rsa1.0_03981.1 | 901  | 19724  | 0         | 493 | 542 | 90 -  | 363  | 889  | 18199  | 18729  |
| UN48841 | Rsa1.0_01034.1 | 1150 | 56046  | 0         | 740 | 757 | 97 +  | 152  | 908  | 19416  | 20172  |
| UN48842 | Rsa1.0_01696.1 | 1150 | 301850 | 1.00E-130 | 257 | 263 | 97 -  | 3    | 265  | 32637  | 32896  |
| UN48843 | Rsa1.0_00979.1 | 1308 | 57733  | 1.00E-167 | 328 | 338 | 97 +  | 760  | 1097 | 31552  | 31889  |
| UN48844 | Rsa1.0_23487.1 | 1000 | 1045   | 0         | 745 | 767 | 97 +  | 64   | 830  | 279    | 1045   |
| UN48845 | Rsa1.0_00225.1 | 1190 | 105892 | 1.00E-141 | 296 | 308 | 96 -  | 6    | 304  | 55265  | 55572  |
| UN48846 | Rsa1.0_00648.1 | 1163 | 70351  | 0         | 468 | 468 | 100 - | 695  | 1162 | 12038  | 12505  |
| UN48847 | Rsa1.0_04284.1 | 1111 | 18085  | 0         | 469 | 478 | 98 -  | 1    | 478  | 10452  | 10928  |
| UN48848 | Rsa1.0_01313.1 | 809  | 48387  | 1.00E-132 | 309 | 329 | 93 -  | 10   | 337  | 13937  | 14260  |
| UN48849 | Rsa1.0_00759.1 | 1156 | 65465  | 0         | 837 | 861 | 97 -  | 1    | 858  | 55681  | 56540  |
| UN48850 | Rsa1.0_03170.1 | 843  | 24824  | 1.00E-123 | 264 | 275 | 96 +  | 555  | 827  | 12992  | 13264  |
| UN48851 | Rsa1.0_00009.1 | 1195 | 232558 | 1.00E-149 | 285 | 289 | 98 -  | 907  | 1195 | 32923  | 33210  |
| UN48852 | Rsa1.0_00705.1 | 1032 | 67505  | 1.00E-158 | 283 | 283 | 100 + | 133  | 415  | 53881  | 54163  |
| UN48853 | Rsa1.0_01778.1 | 1192 | 39509  | 1.00E-149 | 298 | 307 | 97 +  | 886  | 1192 | 9400   | 9704   |
| UN48854 | Rsa1.0_00460.1 | 1167 | 206387 | 1.00E-171 | 328 | 335 | 97 +  | 4    | 335  | 200418 | 200752 |
| UN48855 | Rsa1.0_02228.1 | 1276 | 33688  | 0         | 559 | 584 | 95 -  | 52   | 634  | 16770  | 17343  |
| UN48856 | Rsa1.0_00015.1 | 772  | 561803 | 6.00E-73  | 228 | 253 | 90 -  | 1    | 250  | 529332 | 529580 |
| UN48857 | Rsa1.0_00089.1 | 942  | 406142 | 1.00E-134 | 287 | 300 | 95 +  | 5    | 299  | 162037 | 162336 |
| UN48858 | Rsa1.0_00302.1 | 1090 | 97521  | 2.33E-156 | 333 | 355 | 93 +  | 736  | 1081 | 85022  | 85374  |
| UN48859 | Rsa1.0_01559.1 | 1244 | 43262  | 1.00E-173 | 318 | 321 | 99 -  | 924  | 1244 | 20538  | 20858  |
| UN48860 | Rsa1.0_01537.1 | 1648 | 187285 | 1.00E-157 | 292 | 294 | 99 +  | 1356 | 1648 | 21421  | 21714  |
| UN48861 | Rsa1.0_02064.1 | 1123 | 35476  | 1.00E-158 | 320 | 332 | 96 -  | 471  | 802  | 5466   | 5797   |
| UN48862 | Rsa1.0_04126.1 | 530  | 18939  | 0         | 360 | 370 | 97 -  | 4    | 373  | 15519  | 15888  |
| UN48863 | Rsa1.0_03843.1 | 982  | 20496  | 1.00E-160 | 392 | 428 | 91 -  | 565  | 977  | 6097   | 6521   |
| UN48864 | Rsa1.0_00453.1 | 962  | 83031  | 0         | 490 | 503 | 97 -  | 53   | 554  | 68504  | 69006  |
| UN48865 | Rsa1.0_00484.1 | 1300 | 203294 | 0         | 747 | 783 | 95 +  | 516  | 1298 | 56116  | 56892  |

|         |                |      |        |           |      |      |       |      |      |        |        |
|---------|----------------|------|--------|-----------|------|------|-------|------|------|--------|--------|
| UN48866 | Rsa1.0.00336.1 | 1120 | 445051 | 0         | 1084 | 1127 | 96 +  | 3    | 1120 | 308919 | 310041 |
| UN48867 | Rsa1.0.53834.1 | 837  | 423    | 1.00E-100 | 235  | 250  | 94 -  | 7    | 253  | 1      | 248    |
| UN48868 | Rsa1.0.00095.1 | 792  | 283384 | 2.00E-33  | 95   | 102  | 93 -  | 681  | 782  | 123411 | 123512 |
| UN48869 | Rsa1.0.00358.1 | 966  | 91293  | 1.00E-105 | 277  | 300  | 92 -  | 1    | 290  | 1111   | 1409   |
| UN48870 | Rsa1.0.04126.1 | 1050 | 18939  | 0         | 463  | 486  | 95 +  | 566  | 1050 | 17402  | 17884  |
| UN48871 | Rsa1.0.08546.1 | 1152 | 7214   | 2.00E-67  | 214  | 241  | 88 -  | 15   | 251  | 6984   | 7210   |
| UN48872 | Rsa1.0.01401.1 | 970  | 142441 | 0         | 852  | 872  | 97 -  | 1    | 872  | 132155 | 133026 |
| UN48873 | Rsa1.0.00007.1 | 840  | 239325 | 1.00E-102 | 239  | 253  | 94 +  | 9    | 260  | 30267  | 30518  |
| UN48874 | Rsa1.0.02841.1 | 1292 | 27383  | 1.00E-100 | 210  | 219  | 95 +  | 1074 | 1292 | 8321   | 8531   |
| UN48875 | Rsa1.0.01638.1 | 762  | 41857  | 5.00E-92  | 202  | 212  | 95 +  | 198  | 409  | 35702  | 35913  |
| UN48876 | Rsa1.0.15326.1 | 839  | 2683   | 0         | 682  | 700  | 97 +  | 2    | 699  | 632    | 1331   |
| UN48877 | Rsa1.0.00547.1 | 1089 | 76521  | 0         | 430  | 450  | 95 +  | 4    | 453  | 54291  | 54737  |
| UN48878 | Rsa1.0.16164.1 | 1117 | 2261   | 1.00E-145 | 286  | 294  | 97 -  | 182  | 475  | 613    | 906    |
| UN48879 | Rsa1.0.00079.1 | 992  | 606987 | 0         | 605  | 629  | 96 -  | 13   | 641  | 4717   | 5344   |
| UN48880 | Rsa1.0.00070.1 | 940  | 150321 | 0         | 483  | 500  | 96 +  | 3    | 502  | 115490 | 115989 |
| UN48881 | Rsa1.0.00437.1 | 882  | 84879  | 0         | 452  | 454  | 99 +  | 429  | 882  | 50510  | 50962  |
| UN48882 | Rsa1.0.01825.1 | 985  | 38725  | 0         | 596  | 624  | 95 +  | 2    | 625  | 26226  | 26838  |
| UN48883 | Rsa1.0.00016.1 | 1177 | 831256 | 0         | 455  | 477  | 95 -  | 334  | 810  | 253037 | 253513 |
| UN48884 | Rsa1.0.00144.1 | 794  | 120708 | 0         | 427  | 444  | 96 +  | 1    | 442  | 12330  | 12773  |
| UN48885 | Rsa1.0.00374.1 | 1121 | 165738 | 0         | 403  | 415  | 97 -  | 138  | 552  | 140693 | 141107 |
| UN48886 | Rsa1.0.00048.1 | 1231 | 167185 | 1.00E-162 | 384  | 416  | 92 +  | 2    | 407  | 4745   | 5158   |
| UN48887 | Rsa1.0.14775.1 | 763  | 3074   | 1.00E-159 | 285  | 285  | 100 - | 389  | 673  | 2001   | 2285   |
| UN48888 | Rsa1.0.00675.1 | 1068 | 145590 | 0         | 444  | 472  | 94 -  | 596  | 1067 | 45274  | 45726  |
| UN48889 | Rsa1.0.03951.1 | 887  | 19894  | 1.00E-111 | 235  | 245  | 95 +  | 547  | 791  | 3737   | 3981   |
| UN48890 | Rsa1.0.03668.1 | 1103 | 21483  | 0         | 609  | 628  | 96 -  | 1    | 625  | 13255  | 13882  |
| UN48891 | Rsa1.0.01130.1 | 1271 | 52929  | 1.00E-164 | 367  | 391  | 93 -  | 1    | 377  | 44531  | 44917  |
| UN48892 | Rsa1.0.01651.1 | 1041 | 41586  | 1.00E-148 | 289  | 297  | 97 +  | 731  | 1027 | 30453  | 30743  |
| UN48893 | Rsa1.0.01718.1 | 896  | 40389  | 0         | 683  | 696  | 98 +  | 2    | 691  | 16032  | 16727  |
| UN48894 | Rsa1.0.02798.1 | 843  | 27792  | 1.00E-171 | 421  | 455  | 92 +  | 1    | 439  | 5374   | 5823   |
| UN48895 | Rsa1.0.03352.1 | 997  | 23506  | 3.00E-78  | 164  | 169  | 97 -  | 807  | 975  | 16124  | 16292  |
| UN48896 | Rsa1.0.01632.1 | 576  | 181224 | 1.00E-159 | 310  | 319  | 97 -  | 3    | 315  | 27928  | 28246  |
| UN48897 | Rsa1.0.00721.1 | 1267 | 66918  | 0         | 428  | 445  | 96 +  | 313  | 757  | 918    | 1359   |
| UN48898 | Rsa1.0.01126.1 | 802  | 53127  | 1.00E-110 | 235  | 245  | 95 +  | 402  | 646  | 15539  | 15780  |
| UN48899 | Rsa1.0.00222.1 | 1280 | 172263 | 0         | 605  | 639  | 94 -  | 646  | 1278 | 39653  | 40291  |
| UN48900 | Rsa1.0.04085.1 | 850  | 19168  | 1.00E-163 | 461  | 522  | 88 -  | 20   | 517  | 755    | 1267   |
| UN48901 | Rsa1.0.00269.1 | 1138 | 341668 | 0         | 560  | 575  | 97 +  | 535  | 1109 | 18901  | 19475  |
| UN48902 | Rsa1.0.00529.1 | 1243 | 77487  | 1.00E-151 | 334  | 350  | 95 -  | 1    | 348  | 72030  | 72375  |
| UN48903 | Rsa1.0.00375.1 | 1117 | 90207  | 1.00E-134 | 288  | 302  | 95 +  | 722  | 1023 | 34140  | 34439  |
| UN48904 | Rsa1.0.00842.1 | 1114 | 62493  | 1.00E-124 | 229  | 230  | 99 +  | 885  | 1114 | 11085  | 11314  |



|         |                |      |        |           |      |      |      |     |      |        |        |
|---------|----------------|------|--------|-----------|------|------|------|-----|------|--------|--------|
| UN48905 | Rsa1.0.07073.1 | 1230 | 9944   | 1.00E-136 | 296  | 313  | 94 - | 922 | 1228 | 3853   | 4165   |
| UN48906 | Rsa1.0.01806.1 | 1031 | 39021  | 0         | 422  | 435  | 97 - | 592 | 1024 | 21731  | 22163  |
| UN48907 | Rsa1.0.00914.1 | 999  | 59880  | 1.00E-136 | 267  | 274  | 97 - | 374 | 647  | 22117  | 22390  |
| UN48908 | Rsa1.0.00176.1 | 967  | 240984 | 1.00E-101 | 209  | 217  | 96 + | 701 | 917  | 26049  | 26257  |
| UN48909 | Rsa1.0.00034.1 | 1150 | 260119 | 1.00E-157 | 336  | 352  | 95 + | 742 | 1093 | 841    | 1189   |
| UN48910 | Rsa1.0.00155.1 | 1374 | 118465 | 0         | 372  | 382  | 97 + | 993 | 1374 | 53727  | 54105  |
| UN48911 | Rsa1.0.00220.1 | 928  | 192936 | 1.00E-93  | 253  | 278  | 91 + | 655 | 927  | 152562 | 152827 |
| UN48912 | Rsa1.0.01408.1 | 686  | 46383  | 1.00E-154 | 352  | 374  | 94 - | 318 | 684  | 16584  | 16954  |
| UN48913 | Rsa1.0.01512.1 | 1253 | 44234  | 1.00E-170 | 348  | 363  | 95 - | 352 | 714  | 9997   | 10359  |
| UN48914 | Rsa1.0.00948.1 | 1218 | 58620  | 0         | 481  | 534  | 90 - | 5   | 518  | 1582   | 2096   |
| UN48915 | Rsa1.0.00303.1 | 907  | 97468  | 9.00E-94  | 199  | 207  | 96 - | 289 | 495  | 31704  | 31910  |
| UN48916 | Rsa1.0.00388.1 | 934  | 88890  | 0         | 433  | 435  | 99 + | 3   | 437  | 54784  | 55218  |
| UN48917 | Rsa1.0.00152.1 | 643  | 257730 | 4.00E-92  | 249  | 268  | 92 + | 380 | 643  | 214460 | 214726 |
| UN48918 | Rsa1.0.00098.1 | 836  | 349239 | 0         | 431  | 448  | 96 + | 3   | 448  | 292716 | 293162 |
| UN48919 | Rsa1.0.01865.1 | 808  | 37992  | 1.00E-130 | 239  | 240  | 99 + | 567 | 806  | 33427  | 33666  |
| UN48920 | Rsa1.0.00397.1 | 1282 | 88189  | 0         | 681  | 706  | 96 + | 1   | 696  | 64538  | 65242  |
| UN48921 | Rsa1.0.00340.1 | 766  | 305782 | 5.00E-89  | 179  | 183  | 97 - | 308 | 490  | 195108 | 195290 |
| UN48922 | Rsa1.0.02722.1 | 869  | 28417  | 1.00E-114 | 221  | 225  | 98 + | 645 | 869  | 16664  | 16888  |
| UN48923 | Rsa1.0.00010.1 | 981  | 294827 | 0         | 659  | 693  | 95 + | 14  | 694  | 90140  | 90830  |
| UN48924 | Rsa1.0.00131.1 | 918  | 432233 | 0         | 405  | 431  | 93 - | 257 | 687  | 34864  | 35288  |
| UN48925 | Rsa1.0.00237.1 | 1118 | 235974 | 1.00E-151 | 331  | 347  | 95 + | 1   | 346  | 17791  | 18135  |
| UN48926 | Rsa1.0.01081.1 | 681  | 499226 | 0         | 612  | 643  | 95 + | 15  | 654  | 456279 | 456921 |
| UN48927 | Rsa1.0.01042.1 | 928  | 293264 | 0         | 574  | 598  | 95 - | 3   | 598  | 141476 | 142066 |
| UN48928 | Rsa1.0.00655.1 | 1293 | 195840 | 0         | 352  | 355  | 99 + | 934 | 1288 | 23143  | 23496  |
| UN48929 | Rsa1.0.00132.1 | 1370 | 124299 | 0         | 1338 | 1366 | 97 - | 7   | 1370 | 52465  | 53826  |
| UN48930 | Rsa1.0.00065.1 | 657  | 454616 | 4.00E-86  | 232  | 251  | 92 - | 18  | 266  | 116989 | 117234 |
| UN48931 | Rsa1.0.00211.1 | 819  | 228189 | 0         | 399  | 422  | 94 + | 398 | 819  | 201586 | 202000 |
| UN48932 | Rsa1.0.01882.1 | 1226 | 37697  | 0         | 871  | 901  | 96 + | 328 | 1226 | 23907  | 24805  |
| UN48933 | Rsa1.0.00015.1 | 1308 | 561803 | 0         | 398  | 403  | 98 + | 3   | 405  | 370472 | 370874 |
| UN48934 | Rsa1.0.00571.1 | 1205 | 329018 | 0         | 1141 | 1195 | 95 - | 17  | 1204 | 143111 | 144303 |
| UN48935 | Rsa1.0.00013.1 | 723  | 292129 | 2.00E-76  | 167  | 174  | 95 + | 110 | 283  | 72142  | 72315  |
| UN48936 | Rsa1.0.00322.1 | 1259 | 212233 | 1.00E-112 | 210  | 211  | 99 - | 837 | 1047 | 80183  | 80393  |
| UN48937 | Rsa1.0.00038.1 | 483  | 314568 | 0         | 481  | 483  | 99 + | 1   | 483  | 284209 | 284691 |
| UN48938 | Rsa1.0.00821.1 | 1186 | 62891  | 1.00E-107 | 213  | 218  | 97 + | 304 | 521  | 49645  | 49862  |
| UN48939 | Rsa1.0.14816.1 | 960  | 3046   | 0         | 365  | 373  | 97 - | 540 | 912  | 1938   | 2310   |
| UN48940 | Rsa1.0.01259.1 | 747  | 49754  | 1.00E-49  | 113  | 117  | 96 + | 400 | 516  | 34296  | 34412  |
| UN48941 | Rsa1.0.01553.1 | 720  | 43379  | 1.00E-110 | 293  | 317  | 92 + | 409 | 720  | 26455  | 26769  |
| UN48942 | Rsa1.0.00588.1 | 1226 | 73939  | 1.00E-143 | 307  | 318  | 96 + | 871 | 1186 | 19134  | 19448  |
| UN48943 | Rsa1.0.05595.1 | 846  | 13228  | 0         | 394  | 418  | 94 + | 1   | 418  | 3186   | 3599   |

|         |                |      |        |           |     |     |       |     |      |        |        |
|---------|----------------|------|--------|-----------|-----|-----|-------|-----|------|--------|--------|
| UN48944 | Rsa1.0_04116.1 | 975  | 18971  | 1.00E-179 | 318 | 318 | 100 - | 658 | 975  | 1570   | 1887   |
| UN48945 | Rsa1.0_00734.1 | 807  | 66508  | 0         | 539 | 540 | 99 -  | 267 | 806  | 62126  | 62665  |
| UN48946 | Rsa1.0_01453.1 | 1124 | 45449  | 1.00E-131 | 270 | 280 | 96 -  | 388 | 667  | 11450  | 11726  |
| UN48947 | Rsa1.0_01958.1 | 812  | 261128 | 1.00E-100 | 197 | 201 | 98 +  | 182 | 382  | 113925 | 114125 |
| UN48948 | Rsa1.0_01104.1 | 1019 | 285480 | 0         | 478 | 486 | 98 -  | 3   | 488  | 268402 | 268882 |
| UN48949 | Rsa1.0_09255.1 | 1145 | 6525   | 0         | 589 | 606 | 97 +  | 355 | 957  | 1257   | 1859   |
| UN48950 | Rsa1.0_00466.1 | 1003 | 82132  | 0         | 708 | 741 | 95 -  | 263 | 1003 | 23507  | 24246  |
| UN48951 | Rsa1.0_00105.1 | 833  | 134138 | 0         | 402 | 404 | 99 +  | 431 | 833  | 91785  | 92188  |
| UN48952 | Rsa1.0_02144.1 | 1185 | 34630  | 0         | 372 | 377 | 98 +  | 805 | 1181 | 23118  | 23492  |
| UN48953 | Rsa1.0_00161.1 | 893  | 116891 | 0         | 513 | 541 | 94 -  | 291 | 829  | 26063  | 26603  |
| UN48954 | Rsa1.0_00437.1 | 907  | 84879  | 1.00E-133 | 268 | 277 | 96 -  | 630 | 906  | 61992  | 62268  |
| UN48955 | Rsa1.0_02146.1 | 845  | 34625  | 0         | 720 | 758 | 94 -  | 1   | 742  | 17172  | 17929  |
| UN48956 | Rsa1.0_03671.1 | 1061 | 21459  | 1.00E-110 | 340 | 381 | 89 +  | 699 | 1061 | 9838   | 10210  |
| UN48957 | Rsa1.0_00323.1 | 971  | 159650 | 1.00E-153 | 333 | 351 | 94 -  | 622 | 969  | 30599  | 30941  |
| UN48958 | Rsa1.0_01283.1 | 1039 | 49257  | 0         | 417 | 438 | 95 +  | 540 | 972  | 7067   | 7504   |
| UN48959 | Rsa1.0_01758.1 | 799  | 39747  | 0         | 413 | 415 | 99 -  | 369 | 783  | 37154  | 37568  |
| UN48960 | Rsa1.0_00910.1 | 881  | 59975  | 0         | 553 | 553 | 100 + | 2   | 554  | 55799  | 56351  |
| UN48961 | Rsa1.0_06553.1 | 763  | 10795  | 1.00E-157 | 332 | 348 | 95 -  | 111 | 451  | 5503   | 5850   |
| UN48962 | Rsa1.0_00139.1 | 867  | 357786 | 9.00E-57  | 175 | 195 | 89 -  | 180 | 371  | 149456 | 149650 |
| UN48963 | Rsa1.0_00851.1 | 1278 | 62181  | 1.00E-100 | 186 | 186 | 100 - | 1   | 186  | 29745  | 29930  |
| UN48964 | Rsa1.0_11170.1 | 1027 | 5596   | 1.00E-130 | 251 | 256 | 98 -  | 772 | 1027 | 2267   | 2522   |
| UN48965 | Rsa1.0_08255.1 | 1419 | 7652   | 0         | 496 | 499 | 99 +  | 923 | 1419 | 2723   | 3221   |
| UN48966 | Rsa1.0_08018.1 | 1211 | 8075   | 1.00E-171 | 305 | 305 | 100 + | 907 | 1211 | 6273   | 6577   |
| UN48967 | Rsa1.0_00131.1 | 1018 | 432233 | 1.00E-111 | 268 | 292 | 91 -  | 723 | 1014 | 398662 | 398935 |
| UN48968 | Rsa1.0_00067.1 | 1049 | 415055 | 0         | 372 | 381 | 97 -  | 1   | 380  | 301029 | 301405 |
| UN48969 | Rsa1.0_00224.1 | 1253 | 327530 | 3.00E-76  | 161 | 166 | 96 -  | 1   | 166  | 224639 | 224804 |
| UN48970 | Rsa1.0_02870.1 | 884  | 27102  | 0         | 859 | 894 | 96 -  | 8   | 877  | 7659   | 8551   |
| UN48971 | Rsa1.0_00065.1 | 1098 | 454616 | 1.00E-145 | 303 | 317 | 95 -  | 3   | 319  | 191624 | 191940 |
| UN48972 | Rsa1.0_00111.1 | 565  | 390088 | 1.00E-104 | 322 | 364 | 88 -  | 2   | 356  | 7100   | 7451   |
| UN48973 | Rsa1.0_00016.1 | 898  | 831256 | 1.00E-92  | 266 | 292 | 91 -  | 610 | 893  | 225491 | 225775 |
| UN48974 | Rsa1.0_00228.1 | 818  | 105511 | 1.00E-100 | 194 | 197 | 98 -  | 3   | 199  | 41526  | 41722  |
| UN48975 | Rsa1.0_01425.1 | 1000 | 46136  | 0         | 366 | 375 | 97 +  | 9   | 383  | 34224  | 34597  |
| UN48976 | Rsa1.0_00571.1 | 814  | 329018 | 0         | 644 | 655 | 98 +  | 2   | 656  | 143483 | 144137 |
| UN48977 | Rsa1.0_00065.1 | 1136 | 454616 | 0         | 499 | 534 | 93 -  | 621 | 1134 | 26179  | 26712  |
| UN48978 | Rsa1.0_06421.1 | 761  | 11053  | 1.00E-163 | 334 | 346 | 96 -  | 418 | 761  | 3887   | 4231   |
| UN48979 | Rsa1.0_03513.1 | 808  | 22349  | 0         | 393 | 410 | 95 -  | 400 | 808  | 14004  | 14409  |
| UN48980 | Rsa1.0_00037.1 | 962  | 307838 | 0         | 414 | 442 | 93 +  | 530 | 961  | 239665 | 240095 |
| UN48981 | Rsa1.0_01140.1 | 1207 | 52586  | 0         | 731 | 764 | 95 -  | 444 | 1206 | 6334   | 7094   |
| UN48982 | Rsa1.0_02784.1 | 901  | 27881  | 8.00E-85  | 192 | 202 | 95 +  | 697 | 898  | 5126   | 5324   |

|         |                |      |        |           |     |     |       |     |      |        |        |
|---------|----------------|------|--------|-----------|-----|-----|-------|-----|------|--------|--------|
| UN48983 | Rsa1.0_00253.1 | 1975 | 231292 | 1.00E-130 | 250 | 252 | 99 +  | 1   | 251  | 126699 | 126949 |
| UN48984 | Rsa1.0_06969.1 | 910  | 10088  | 3.00E-87  | 200 | 211 | 94 -  | 698 | 908  | 1271   | 1479   |
| UN48985 | Rsa1.0_04872.1 | 1239 | 15659  | 1.00E-121 | 221 | 221 | 100 - | 206 | 426  | 14076  | 14296  |
| UN48986 | Rsa1.0_00980.1 | 1819 | 57729  | 0         | 340 | 340 | 100 + | 656 | 995  | 39477  | 39816  |
| UN48987 | Rsa1.0_00378.1 | 959  | 89892  | 1.00E-148 | 275 | 278 | 98 -  | 1   | 278  | 81481  | 81758  |
| UN48988 | Rsa1.0_02518.1 | 1019 | 30586  | 1.00E-141 | 335 | 362 | 92 -  | 7   | 356  | 29327  | 29685  |
| UN48989 | Rsa1.0_05900.1 | 1442 | 12295  | 0         | 517 | 540 | 95 +  | 222 | 758  | 3618   | 4151   |
| UN48990 | Rsa1.0_17687.1 | 968  | 1765   | 0         | 902 | 933 | 96 -  | 3   | 933  | 1      | 928    |
| UN48991 | Rsa1.0_01440.1 | 850  | 45807  | 0         | 741 | 764 | 96 +  | 1   | 762  | 13708  | 14471  |
| UN48992 | Rsa1.0_18517.1 | 1394 | 1584   | 1.00E-167 | 321 | 327 | 98 +  | 6   | 331  | 1258   | 1584   |
| UN48993 | Rsa1.0_00681.1 | 815  | 68779  | 1.00E-144 | 284 | 292 | 97 -  | 267 | 558  | 44501  | 44792  |
| UN48994 | Rsa1.0_00116.1 | 1066 | 365886 | 1.00E-117 | 233 | 239 | 97 -  | 389 | 627  | 239728 | 239966 |
| UN48995 | Rsa1.0_05653.1 | 809  | 13043  | 0         | 751 | 814 | 92 +  | 4   | 808  | 11420  | 12206  |
| UN48996 | Rsa1.0_00237.1 | 887  | 235974 | 0         | 411 | 429 | 95 +  | 461 | 887  | 225556 | 225981 |
| UN48997 | Rsa1.0_01200.1 | 749  | 50895  | 0         | 394 | 406 | 97 -  | 347 | 749  | 30782  | 31187  |
| UN48998 | Rsa1.0_00789.1 | 1171 | 64233  | 5.00E-93  | 211 | 221 | 95 +  | 3   | 220  | 43027  | 43247  |
| UN48999 | Rsa1.0_00994.1 | 794  | 165189 | 0         | 447 | 447 | 100 + | 1   | 447  | 38190  | 38636  |
| UN49000 | Rsa1.0_00111.1 | 1038 | 390088 | 1.00E-164 | 348 | 364 | 95 +  | 664 | 1023 | 139323 | 139686 |
| UN49001 | Rsa1.0_00021.1 | 1021 | 263655 | 0         | 358 | 367 | 97 +  | 437 | 803  | 238503 | 238869 |
| UN49002 | Rsa1.0_71705.1 | 828  | 320    | 2.00E-97  | 252 | 271 | 92 +  | 3   | 269  | 56     | 319    |
| UN49003 | Rsa1.0_00219.1 | 975  | 106983 | 0         | 527 | 541 | 97 +  | 2   | 542  | 55837  | 56377  |
| UN49004 | Rsa1.0_01388.1 | 728  | 46741  | 1.00E-104 | 257 | 277 | 92 -  | 53  | 320  | 17656  | 17931  |
| UN49005 | Rsa1.0_00473.1 | 1179 | 212204 | 0         | 695 | 741 | 93 -  | 58  | 777  | 76768  | 77508  |
| UN49006 | Rsa1.0_00048.1 | 1224 | 167185 | 0         | 431 | 447 | 96 -  | 673 | 1112 | 5045   | 5491   |
| UN49007 | Rsa1.0_00735.1 | 951  | 66503  | 0         | 489 | 501 | 97 -  | 1   | 501  | 4823   | 5320   |
| UN49008 | Rsa1.0_02319.1 | 805  | 32580  | 1.00E-174 | 313 | 314 | 99 -  | 490 | 803  | 15638  | 15951  |
| UN49009 | Rsa1.0_03618.1 | 1503 | 21744  | 0         | 567 | 595 | 95 -  | 873 | 1465 | 5998   | 6580   |
| UN49010 | Rsa1.0_01660.1 | 1227 | 41400  | 1.00E-101 | 196 | 199 | 98 +  | 308 | 506  | 28567  | 28765  |
| UN49011 | Rsa1.0_00056.1 | 605  | 332604 | 1.00E-140 | 311 | 330 | 94 -  | 279 | 603  | 84534  | 84855  |
| UN49012 | Rsa1.0_18025.1 | 1401 | 1687   | 0         | 524 | 526 | 99 -  | 147 | 672  | 1162   | 1687   |
| UN49013 | Rsa1.0_00707.1 | 539  | 190112 | 1.00E-144 | 291 | 299 | 97 -  | 5   | 303  | 161352 | 161647 |
| UN49014 | Rsa1.0_02045.1 | 1212 | 35650  | 1.00E-108 | 238 | 250 | 95 +  | 823 | 1072 | 22742  | 22989  |
| UN49015 | Rsa1.0_03122.1 | 760  | 25207  | 1.00E-101 | 188 | 188 | 100 + | 573 | 760  | 7659   | 7846   |
| UN49016 | Rsa1.0_00159.1 | 1228 | 431686 | 0         | 521 | 556 | 93 +  | 18  | 562  | 407411 | 407952 |
| UN49017 | Rsa1.0_00453.1 | 1055 | 83031  | 4.00E-78  | 161 | 165 | 97 +  | 615 | 779  | 70878  | 71042  |
| UN49018 | Rsa1.0_00462.1 | 1370 | 82288  | 1.00E-149 | 329 | 350 | 94 +  | 3   | 350  | 36864  | 37202  |
| UN49019 | Rsa1.0_03746.1 | 1013 | 21050  | 0         | 504 | 515 | 97 +  | 126 | 640  | 19828  | 20342  |
| UN49020 | Rsa1.0_00067.1 | 893  | 415055 | 1.00E-114 | 297 | 322 | 92 -  | 581 | 893  | 241240 | 241557 |
| UN49021 | Rsa1.0_00111.1 | 712  | 390088 | 0         | 367 | 381 | 96 -  | 337 | 709  | 32754  | 33134  |

|         |                |      |        |           |      |      |       |     |      |        |        |
|---------|----------------|------|--------|-----------|------|------|-------|-----|------|--------|--------|
| UN49022 | Rsa1.0_17076.1 | 1313 | 1933   | 0         | 363  | 364  | 99 -  | 950 | 1313 | 1570   | 1933   |
| UN49023 | Rsa1.0_08338.1 | 558  | 7511   | 0         | 514  | 553  | 92 -  | 3   | 555  | 490    | 1010   |
| UN49024 | Rsa1.0_00360.1 | 1024 | 91190  | 1.00E-114 | 307  | 332  | 92 -  | 629 | 957  | 49961  | 50287  |
| UN49025 | Rsa1.0_09446.1 | 1287 | 6362   | 1.00E-135 | 292  | 306  | 95 +  | 969 | 1270 | 2600   | 2905   |
| UN49026 | Rsa1.0_01012.1 | 517  | 56836  | 1.00E-100 | 189  | 190  | 99 -  | 278 | 467  | 39690  | 39879  |
| UN49027 | Rsa1.0_03894.1 | 828  | 20207  | 0         | 672  | 698  | 96 -  | 127 | 824  | 2647   | 3337   |
| UN49028 | Rsa1.0_10067.1 | 560  | 6015   | 1.00E-116 | 215  | 216  | 99 -  | 1   | 216  | 24     | 239    |
| UN49029 | Rsa1.0_00616.1 | 1127 | 195713 | 0         | 465  | 469  | 99 -  | 1   | 469  | 181777 | 182245 |
| UN49030 | Rsa1.0_00135.1 | 1208 | 178077 | 0         | 461  | 475  | 97 -  | 2   | 471  | 19427  | 19899  |
| UN49031 | Rsa1.0_00141.1 | 648  | 121494 | 0         | 402  | 421  | 95 -  | 2   | 418  | 83082  | 83501  |
| UN49032 | Rsa1.0_01740.1 | 1205 | 39986  | 0         | 457  | 458  | 99 -  | 357 | 814  | 13886  | 14343  |
| UN49033 | Rsa1.0_01505.1 | 903  | 44382  | 1.00E-106 | 257  | 273  | 94 +  | 638 | 902  | 38967  | 39235  |
| UN49034 | Rsa1.0_03460.1 | 1255 | 22747  | 0         | 628  | 628  | 100 + | 1   | 628  | 12270  | 12897  |
| UN49035 | Rsa1.0_05900.1 | 1258 | 12295  | 0         | 367  | 368  | 99 -  | 3   | 370  | 5008   | 5374   |
| UN49036 | Rsa1.0_00163.1 | 1100 | 116847 | 1.00E-159 | 379  | 406  | 93 -  | 688 | 1084 | 25810  | 26212  |
| UN49037 | Rsa1.0_03413.1 | 1058 | 23137  | 0         | 536  | 565  | 94 +  | 500 | 1056 | 8284   | 8847   |
| UN49038 | Rsa1.0_25520.1 | 826  | 933    | 0         | 346  | 349  | 99 -  | 1   | 349  | 298    | 646    |
| UN49039 | Rsa1.0_00203.1 | 960  | 109129 | 0         | 510  | 539  | 94 +  | 430 | 959  | 38881  | 39419  |
| UN49040 | Rsa1.0_07472.1 | 1328 | 9306   | 0         | 383  | 399  | 95 +  | 861 | 1257 | 6661   | 7059   |
| UN49041 | Rsa1.0_00224.1 | 805  | 327530 | 1.00E-74  | 149  | 151  | 98 -  | 460 | 610  | 205947 | 206097 |
| UN49042 | Rsa1.0_02170.1 | 1042 | 34352  | 0         | 529  | 539  | 98 +  | 510 | 1040 | 28526  | 29064  |
| UN49043 | Rsa1.0_05410.1 | 993  | 13840  | 0         | 484  | 521  | 92 +  | 361 | 875  | 5729   | 6237   |
| UN49044 | Rsa1.0_00179.1 | 1016 | 393324 | 0         | 390  | 399  | 97 +  | 91  | 488  | 1      | 398    |
| UN49045 | Rsa1.0_02402.1 | 1871 | 31710  | 0         | 1342 | 1346 | 99 -  | 1   | 1346 | 25296  | 26640  |
| UN49046 | Rsa1.0_00036.1 | 788  | 176186 | 1.00E-165 | 338  | 351  | 96 -  | 435 | 784  | 102452 | 102802 |
| UN49047 | Rsa1.0_00122.1 | 1440 | 265937 | 0         | 1361 | 1427 | 95 -  | 3   | 1427 | 30186  | 31605  |
| UN49048 | Rsa1.0_01430.1 | 1459 | 46034  | 0         | 1452 | 1452 | 100 - | 8   | 1459 | 39924  | 41375  |
| UN49049 | Rsa1.0_00015.1 | 1214 | 561803 | 0         | 368  | 369  | 99 +  | 846 | 1214 | 264496 | 264864 |
| UN49050 | Rsa1.0_05002.1 | 1022 | 15173  | 1.00E-171 | 338  | 345  | 97 +  | 8   | 350  | 7789   | 8132   |
| UN49051 | Rsa1.0_02048.1 | 986  | 35605  | 0         | 470  | 474  | 99 -  | 235 | 708  | 24818  | 25291  |
| UN49052 | Rsa1.0_04785.1 | 948  | 15993  | 1.00E-164 | 314  | 321  | 97 -  | 327 | 647  | 7584   | 7904   |
| UN49053 | Rsa1.0_00181.1 | 1197 | 114269 | 1.00E-124 | 303  | 327  | 92 -  | 3   | 329  | 103463 | 103779 |
| UN49054 | Rsa1.0_00011.1 | 720  | 225044 | 1.00E-160 | 334  | 348  | 95 -  | 1   | 348  | 207085 | 207428 |
| UN49055 | Rsa1.0_00078.1 | 668  | 175053 | 0         | 644  | 692  | 93 +  | 1   | 667  | 78746  | 79437  |
| UN49056 | Rsa1.0_00413.1 | 717  | 86921  | 1.00E-107 | 197  | 197  | 100 - | 80  | 276  | 55335  | 55531  |
| UN49057 | Rsa1.0_08787.1 | 797  | 6921   | 1.00E-111 | 207  | 208  | 99 -  | 6   | 213  | 1348   | 1555   |
| UN49058 | Rsa1.0_01613.1 | 998  | 182542 | 7.00E-98  | 200  | 205  | 97 +  | 2   | 204  | 148843 | 149047 |
| UN49059 | Rsa1.0_00336.1 | 1097 | 445051 | 1.00E-129 | 345  | 382  | 90 -  | 715 | 1096 | 161993 | 162354 |
| UN49060 | Rsa1.0_01092.1 | 1106 | 54348  | 1.00E-178 | 375  | 392  | 95 +  | 716 | 1106 | 53690  | 54080  |

|         |                |      |        |           |     |     |       |      |      |        |        |
|---------|----------------|------|--------|-----------|-----|-----|-------|------|------|--------|--------|
| UN49061 | Rsa1.0_00656.1 | 1077 | 69968  | 1.00E-132 | 266 | 276 | 96 -  | 804  | 1070 | 49231  | 49506  |
| UN49062 | Rsa1.0_01156.1 | 938  | 52147  | 1.00E-120 | 339 | 378 | 89 +  | 580  | 936  | 29706  | 30072  |
| UN49063 | Rsa1.0_00910.1 | 1465 | 59975  | 1.00E-174 | 385 | 410 | 93 -  | 988  | 1397 | 49291  | 49700  |
| UN49064 | Rsa1.0_02954.1 | 727  | 26485  | 0         | 700 | 734 | 95 -  | 1    | 719  | 16466  | 17197  |
| UN49065 | Rsa1.0_28844.1 | 823  | 801    | 0         | 672 | 693 | 96 -  | 2    | 693  | 1      | 693    |
| UN49066 | Rsa1.0_00042.1 | 696  | 171507 | 0         | 465 | 499 | 93 -  | 202  | 695  | 143923 | 144412 |
| UN49067 | Rsa1.0_00406.1 | 1146 | 87398  | 1.00E-162 | 341 | 358 | 95 -  | 73   | 430  | 53293  | 53650  |
| UN49068 | Rsa1.0_00706.1 | 1402 | 291570 | 0         | 406 | 413 | 98 +  | 1    | 413  | 26835  | 27244  |
| UN49069 | Rsa1.0_00746.1 | 805  | 66044  | 7.00E-76  | 154 | 157 | 98 +  | 364  | 520  | 21826  | 21982  |
| UN49070 | Rsa1.0_00104.1 | 1150 | 368722 | 0         | 754 | 799 | 94 +  | 372  | 1148 | 201064 | 201861 |
| UN49071 | Rsa1.0_03263.1 | 943  | 24268  | 0         | 354 | 363 | 97 +  | 66   | 427  | 1998   | 2360   |
| UN49072 | Rsa1.0_00237.1 | 1118 | 235974 | 0         | 383 | 388 | 98 -  | 729  | 1116 | 60466  | 60853  |
| UN49073 | Rsa1.0_00111.1 | 1308 | 390088 | 0         | 553 | 557 | 99 +  | 752  | 1308 | 27468  | 28024  |
| UN49074 | #              | #    | #      | #         | #   | #   | #     | #    | #    | #      | #      |
| UN49075 | Rsa1.0_05146.1 | 1377 | 14678  | 1.00E-143 | 290 | 301 | 96 +  | 1    | 295  | 995    | 1295   |
| UN49076 | Rsa1.0_00907.1 | 1049 | 60062  | 0         | 522 | 543 | 96 +  | 513  | 1048 | 2211   | 2753   |
| UN49077 | Rsa1.0_11285.1 | 1126 | 5556   | 1.00E-163 | 351 | 368 | 95 +  | 761  | 1126 | 3883   | 4246   |
| UN49078 | Rsa1.0_01200.1 | 841  | 50895  | 0         | 417 | 430 | 96 -  | 331  | 758  | 30758  | 31187  |
| UN49079 | Rsa1.0_01941.1 | 763  | 37069  | 1.00E-125 | 233 | 235 | 99 -  | 528  | 762  | 31013  | 31247  |
| UN49080 | Rsa1.0_04235.1 | 735  | 18373  | 0         | 363 | 368 | 98 -  | 368  | 735  | 16353  | 16720  |
| UN49081 | Rsa1.0_00997.1 | 881  | 57190  | 1.00E-136 | 295 | 308 | 95 +  | 421  | 727  | 52204  | 52506  |
| UN49082 | Rsa1.0_00391.1 | 1138 | 183853 | 0         | 748 | 764 | 97 -  | 86   | 849  | 64185  | 64948  |
| UN49083 | Rsa1.0_00642.1 | 292  | 201230 | 9.00E-76  | 188 | 202 | 93 +  | 94   | 292  | 163117 | 163318 |
| UN49084 | Rsa1.0_00080.1 | 934  | 190437 | 0         | 478 | 495 | 96 +  | 137  | 631  | 68420  | 68914  |
| UN49085 | Rsa1.0_01005.1 | 995  | 56967  | 1.00E-173 | 309 | 309 | 100 + | 1    | 309  | 18895  | 19203  |
| UN49086 | Rsa1.0_01295.1 | 650  | 49040  | 1.00E-172 | 373 | 391 | 95 -  | 253  | 641  | 40227  | 40616  |
| UN49087 | Rsa1.0_00476.1 | 1430 | 280966 | 1.00E-143 | 288 | 298 | 96 -  | 790  | 1087 | 245962 | 246259 |
| UN49088 | Rsa1.0_02874.1 | 653  | 27070  | 0         | 464 | 485 | 95 +  | 2    | 486  | 4876   | 5357   |
| UN49089 | Rsa1.0_01536.1 | 1066 | 43747  | 0         | 426 | 458 | 93 +  | 1    | 447  | 31880  | 32337  |
| UN49090 | Rsa1.0_16915.1 | 1319 | 1991   | 1.00E-102 | 202 | 205 | 98 -  | 1115 | 1319 | 7      | 209    |
| UN49091 | Rsa1.0_18035.1 | 1169 | 1685   | 0         | 611 | 634 | 96 -  | 537  | 1167 | 461    | 1094   |
| UN49092 | Rsa1.0_33317.1 | 720  | 681    | 1.00E-123 | 359 | 403 | 89 +  | 275  | 667  | 1      | 401    |
| UN49093 | Rsa1.0_04402.1 | 808  | 17511  | 1.00E-108 | 239 | 251 | 95 +  | 558  | 807  | 16043  | 16293  |
| UN49094 | Rsa1.0_05262.1 | 1284 | 14334  | 0         | 771 | 786 | 98 +  | 501  | 1284 | 10776  | 11556  |
| UN49095 | Rsa1.0_23719.1 | 634  | 1029   | 0         | 364 | 368 | 98 -  | 1    | 368  | 175    | 542    |
| UN49096 | Rsa1.0_05605.1 | 752  | 13202  | 0         | 642 | 665 | 96 +  | 1    | 665  | 8380   | 9038   |
| UN49097 | Rsa1.0_00130.1 | 620  | 125737 | 0         | 505 | 523 | 96 +  | 108  | 620  | 28245  | 28765  |
| UN49098 | Rsa1.0_01660.1 | 758  | 41400  | 1.00E-150 | 299 | 306 | 97 +  | 453  | 757  | 27246  | 27550  |
| UN49099 | Rsa1.0_01453.1 | 1391 | 45449  | 1.00E-156 | 336 | 350 | 96 -  | 1044 | 1391 | 10576  | 10921  |

|         |                |      |        |           |     |     |       |      |      |        |        |
|---------|----------------|------|--------|-----------|-----|-----|-------|------|------|--------|--------|
| UN49100 | Rsa1.0_00381.1 | 1398 | 89718  | 1.00E-93  | 226 | 238 | 94 +  | 1163 | 1398 | 42028  | 42262  |
| UN49101 | Rsa1.0_00285.1 | 1190 | 149638 | 1.00E-104 | 236 | 250 | 94 +  | 6    | 252  | 95165  | 95414  |
| UN49102 | Rsa1.0_00447.1 | 1025 | 84051  | 4.00E-84  | 200 | 213 | 93 +  | 810  | 1022 | 26801  | 27010  |
| UN49103 | Rsa1.0_08048.1 | 885  | 137630 | 1.00E-163 | 309 | 312 | 99 -  | 573  | 884  | 135358 | 135667 |
| UN49104 | Rsa1.0_04689.1 | 893  | 16376  | 0         | 872 | 900 | 96 +  | 3    | 893  | 15475  | 16371  |
| UN49105 | Rsa1.0_05049.1 | 1078 | 15025  | 1.00E-159 | 368 | 397 | 92 -  | 682  | 1078 | 8827   | 9209   |
| UN49106 | Rsa1.0_00133.1 | 841  | 123768 | 1.00E-128 | 269 | 281 | 95 +  | 400  | 680  | 9256   | 9536   |
| UN49107 | Rsa1.0_00101.1 | 697  | 267193 | 0         | 671 | 719 | 93 -  | 1    | 697  | 89649  | 90367  |
| UN49108 | Rsa1.0_01085.1 | 805  | 54539  | 1.00E-149 | 310 | 324 | 95 -  | 217  | 540  | 13646  | 13969  |
| UN49109 | Rsa1.0_00010.1 | 1097 | 294827 | 0         | 640 | 688 | 93 +  | 7    | 691  | 90164  | 90830  |
| UN49110 | Rsa1.0_01196.1 | 807  | 51097  | 1.00E-107 | 219 | 225 | 97 +  | 129  | 352  | 32613  | 32837  |
| UN49111 | Rsa1.0_00721.1 | 1253 | 66918  | 1.00E-138 | 392 | 442 | 88 -  | 516  | 930  | 918    | 1359   |
| UN49112 | Rsa1.0_00341.1 | 790  | 249309 | 0         | 551 | 569 | 96 -  | 222  | 790  | 207061 | 207626 |
| UN49113 | Rsa1.0_00173.1 | 970  | 288743 | 1.00E-136 | 261 | 266 | 98 +  | 3    | 268  | 109107 | 109372 |
| UN49114 | Rsa1.0_00030.1 | 751  | 250988 | 0         | 728 | 751 | 96 +  | 1    | 750  | 141582 | 142332 |
| UN49115 | Rsa1.0_00059.1 | 1012 | 159650 | 1.00E-175 | 347 | 356 | 97 +  | 659  | 1012 | 24598  | 24953  |
| UN49116 | Rsa1.0_00377.1 | 1006 | 90038  | 0         | 432 | 451 | 95 -  | 554  | 1004 | 79504  | 79953  |
| UN49117 | Rsa1.0_02295.1 | 887  | 149884 | 1.00E-166 | 305 | 308 | 99 -  | 415  | 722  | 138284 | 138591 |
| UN49118 | Rsa1.0_00139.1 | 1046 | 357786 | 1.00E-154 | 341 | 359 | 94 -  | 3    | 353  | 292098 | 292454 |
| UN49119 | Rsa1.0_00081.1 | 770  | 143261 | 2.00E-79  | 157 | 159 | 98 -  | 158  | 316  | 141335 | 141493 |
| UN49120 | Rsa1.0_29830.1 | 1026 | 770    | 1.00E-133 | 265 | 273 | 97 +  | 621  | 893  | 114    | 386    |
| UN49121 | Rsa1.0_03884.1 | 1102 | 20274  | 1.00E-173 | 398 | 431 | 92 +  | 672  | 1102 | 19697  | 20107  |
| UN49122 | Rsa1.0_05161.1 | 1039 | 14631  | 0         | 368 | 379 | 97 -  | 659  | 1037 | 8320   | 8695   |
| UN49123 | Rsa1.0_00097.1 | 938  | 138858 | 0         | 421 | 421 | 100 + | 306  | 726  | 116669 | 117089 |
| UN49124 | Rsa1.0_00048.1 | 1185 | 167185 | 1.00E-165 | 345 | 362 | 95 +  | 3    | 364  | 96417  | 96772  |
| UN49125 | Rsa1.0_02435.1 | 860  | 31454  | 0         | 462 | 468 | 98 +  | 393  | 860  | 17703  | 18169  |
| UN49126 | Rsa1.0_00457.1 | 1059 | 337301 | 1.00E-139 | 254 | 255 | 99 -  | 803  | 1057 | 288157 | 288411 |
| UN49127 | Rsa1.0_07591.1 | 849  | 9060   | 0         | 792 | 833 | 95 -  | 1    | 824  | 1287   | 2110   |
| UN49128 | Rsa1.0_01006.1 | 1168 | 163670 | 0         | 544 | 556 | 97 -  | 1    | 556  | 136690 | 137243 |
| UN49129 | Rsa1.0_14656.1 | 989  | 3183   | 1.00E-154 | 313 | 324 | 96 +  | 3    | 325  | 1318   | 1641   |
| UN49130 | Rsa1.0_23843.1 | 836  | 1022   | 0         | 656 | 683 | 96 +  | 152  | 833  | 1      | 675    |
| UN49131 | Rsa1.0_01958.1 | 1121 | 261128 | 6.00E-80  | 252 | 286 | 88 -  | 843  | 1116 | 111069 | 111349 |
| UN49132 | Rsa1.0_00157.1 | 845  | 245832 | 3.00E-44  | 98  | 100 | 98 -  | 405  | 504  | 136230 | 136329 |
| UN49133 | Rsa1.0_00053.1 | 1326 | 263459 | 1.00E-180 | 396 | 417 | 94 +  | 11   | 425  | 32036  | 32451  |
| UN49134 | Rsa1.0_00747.1 | 777  | 66030  | 0         | 692 | 702 | 98 -  | 3    | 704  | 35999  | 36700  |
| UN49135 | Rsa1.0_00078.1 | 757  | 175053 | 4.00E-71  | 140 | 141 | 99 -  | 61   | 201  | 141561 | 141701 |
| UN49136 | Rsa1.0_00991.1 | 1234 | 143101 | 0         | 717 | 724 | 99 -  | 1    | 724  | 126314 | 127037 |
| UN49137 | Rsa1.0_00008.1 | 706  | 358124 | 1.00E-162 | 336 | 352 | 95 +  | 360  | 705  | 73510  | 73861  |
| UN49138 | Rsa1.0_01679.1 | 1313 | 146876 | 1.00E-123 | 243 | 248 | 97 -  | 1068 | 1313 | 135000 | 135247 |

|         |                |      |        |           |      |      |       |     |      |        |        |
|---------|----------------|------|--------|-----------|------|------|-------|-----|------|--------|--------|
| UN49139 | Rsa1.0.00522.1 | 883  | 78103  | 0         | 697  | 741  | 94 -  | 3   | 740  | 51939  | 52664  |
| UN49140 | Rsa1.0.05449.1 | 798  | 13711  | 3.00E-84  | 162  | 163  | 99 +  | 266 | 428  | 13484  | 13646  |
| UN49141 | Rsa1.0.00059.1 | 726  | 159650 | 2.00E-79  | 207  | 225  | 92 -  | 7   | 231  | 133120 | 133341 |
| UN49142 | Rsa1.0.00960.1 | 975  | 58199  | 1.00E-154 | 315  | 324  | 97 +  | 651 | 973  | 29999  | 30320  |
| UN49143 | Rsa1.0.02841.1 | 1111 | 27383  | 1.00E-169 | 301  | 301  | 100 + | 811 | 1111 | 5500   | 5800   |
| UN49144 | Rsa1.0.02616.1 | 755  | 29542  | 0         | 499  | 515  | 96 +  | 237 | 750  | 23314  | 23828  |
| UN49145 | Rsa1.0.00050.1 | 882  | 237174 | 1.00E-141 | 317  | 333  | 95 +  | 1   | 328  | 133651 | 133982 |
| UN49146 | Rsa1.0.03517.1 | 809  | 22337  | 0         | 793  | 830  | 95 +  | 1   | 809  | 2947   | 3775   |
| UN49147 | Rsa1.0.15089.1 | 830  | 2840   | 1.00E-135 | 307  | 325  | 94 -  | 8   | 330  | 661    | 981    |
| UN49148 | Rsa1.0.08551.1 | 1139 | 7210   | 0         | 1102 | 1137 | 96 -  | 4   | 1139 | 412    | 1548   |
| UN49149 | Rsa1.0.00111.1 | 761  | 390088 | 1.00E-164 | 398  | 431  | 92 +  | 1   | 416  | 32708  | 33134  |
| UN49150 | Rsa1.0.00110.1 | 1120 | 132719 | 1.00E-112 | 257  | 272  | 94 +  | 656 | 924  | 4280   | 4550   |
| UN49151 | Rsa1.0.01709.1 | 1040 | 40587  | 1.00E-172 | 380  | 403  | 94 +  | 2   | 404  | 9642   | 10043  |
| UN49152 | Rsa1.0.00457.1 | 796  | 337301 | 0         | 765  | 796  | 96 +  | 2   | 789  | 176315 | 177110 |
| UN49153 | Rsa1.0.00319.1 | 777  | 167331 | 0         | 432  | 438  | 98 +  | 277 | 714  | 40597  | 41034  |
| UN49154 | Rsa1.0.00017.1 | 705  | 752458 | 2.00E-79  | 154  | 155  | 99 +  | 91  | 245  | 290301 | 290455 |
| UN49155 | Rsa1.0.50018.1 | 999  | 454    | 1.00E-99  | 203  | 209  | 97 -  | 5   | 213  | 99     | 307    |
| UN49156 | Rsa1.0.01505.1 | 730  | 44382  | 1.00E-143 | 257  | 257  | 100 + | 271 | 527  | 6978   | 7234   |
| UN49157 | Rsa1.0.00024.1 | 868  | 188018 | 1.00E-120 | 223  | 224  | 99 -  | 380 | 603  | 77252  | 77475  |
| UN49158 | Rsa1.0.00407.1 | 1305 | 191544 | 0         | 455  | 466  | 97 +  | 483 | 945  | 166770 | 167235 |
| UN49159 | Rsa1.0.00746.1 | 809  | 66044  | 1.00E-172 | 312  | 314  | 99 +  | 1   | 314  | 63301  | 63614  |
| UN49160 | Rsa1.0.03702.1 | 1067 | 21292  | 1.00E-135 | 303  | 323  | 93 -  | 1   | 317  | 13587  | 13909  |
| UN49161 | Rsa1.0.01566.1 | 996  | 43134  | 0         | 367  | 379  | 96 +  | 1   | 378  | 33301  | 33678  |
| UN49162 | Rsa1.0.01170.1 | 1050 | 161131 | 1.00E-120 | 244  | 252  | 96 -  | 3   | 254  | 10604  | 10855  |
| UN49163 | Rsa1.0.05324.1 | 1464 | 14145  | 0         | 463  | 465  | 99 -  | 995 | 1459 | 1128   | 1592   |
| UN49164 | Rsa1.0.02209.1 | 1101 | 33873  | 1.00E-150 | 349  | 377  | 92 +  | 1   | 374  | 26593  | 26957  |
| UN49165 | Rsa1.0.54426.1 | 975  | 419    | 1.00E-142 | 282  | 289  | 97 +  | 688 | 975  | 1      | 289    |
| UN49166 | Rsa1.0.00067.1 | 692  | 415055 | 1.00E-116 | 294  | 317  | 92 +  | 1   | 314  | 78576  | 78877  |
| UN49167 | Rsa1.0.00141.1 | 890  | 121494 | 0         | 459  | 481  | 95 -  | 409 | 889  | 82235  | 82714  |
| UN49168 | Rsa1.0.00439.1 | 1167 | 142776 | 1.00E-170 | 331  | 340  | 97 +  | 399 | 738  | 63119  | 63458  |
| UN49169 | Rsa1.0.00687.1 | 904  | 68494  | 8.00E-85  | 160  | 160  | 100 - | 268 | 427  | 3690   | 3849   |
| UN49170 | Rsa1.0.00119.1 | 1314 | 467509 | 0         | 337  | 338  | 99 +  | 977 | 1314 | 302973 | 303310 |
| UN49171 | Rsa1.0.00011.1 | 789  | 225044 | 6.00E-64  | 138  | 141  | 97 -  | 66  | 206  | 51953  | 52092  |
| UN49172 | Rsa1.0.00033.1 | 1068 | 515811 | 0         | 442  | 443  | 99 -  | 212 | 654  | 146527 | 146969 |
| UN49173 | Rsa1.0.00497.1 | 1186 | 79830  | 0         | 665  | 718  | 92 -  | 3   | 716  | 73170  | 73880  |
| UN49174 | Rsa1.0.25205.1 | 531  | 947    | 0         | 340  | 341  | 99 -  | 1   | 341  | 435    | 775    |
| UN49175 | Rsa1.0.00204.1 | 785  | 109056 | 2.00E-91  | 207  | 219  | 94 -  | 176 | 394  | 52555  | 52773  |
| UN49176 | Rsa1.0.00039.1 | 998  | 296927 | 1.00E-105 | 253  | 269  | 94 -  | 732 | 995  | 210820 | 211088 |
| UN49177 | Rsa1.0.16857.1 | 1192 | 2010   | 1.00E-124 | 232  | 234  | 99 +  | 34  | 267  | 1585   | 1818   |

|         |                |      |        |           |     |      |       |     |      |        |        |
|---------|----------------|------|--------|-----------|-----|------|-------|-----|------|--------|--------|
| UN49178 | Rsa1.0.06492.1 | 1092 | 10913  | 0         | 494 | 518  | 95 +  | 5   | 522  | 6239   | 6745   |
| UN49179 | Rsa1.0.01688.1 | 907  | 40965  | 1.00E-157 | 290 | 293  | 98 +  | 615 | 907  | 36521  | 36813  |
| UN49180 | Rsa1.0.00032.1 | 869  | 306326 | 1.00E-125 | 265 | 274  | 96 +  | 598 | 869  | 279058 | 279329 |
| UN49181 | Rsa1.0.00736.1 | 954  | 66455  | 0         | 846 | 906  | 93 -  | 1   | 903  | 50684  | 51587  |
| UN49182 | Rsa1.0.02955.1 | 1065 | 26484  | 0         | 386 | 394  | 97 -  | 378 | 771  | 8      | 401    |
| UN49183 | Rsa1.0.00048.1 | 1006 | 167185 | 0         | 597 | 605  | 98 -  | 405 | 1006 | 7215   | 7818   |
| UN49184 | Rsa1.0.01968.1 | 820  | 36654  | 1.00E-115 | 255 | 269  | 94 +  | 364 | 629  | 17546  | 17814  |
| UN49185 | Rsa1.0.07908.1 | 588  | 8319   | 3.00E-71  | 153 | 157  | 97 +  | 11  | 166  | 7602   | 7758   |
| UN49186 | Rsa1.0.02375.1 | 1160 | 32026  | 0         | 813 | 835  | 97 +  | 325 | 1159 | 29000  | 29834  |
| UN49187 | Rsa1.0.04123.1 | 702  | 18947  | 0         | 657 | 701  | 93 +  | 4   | 702  | 11871  | 12550  |
| UN49188 | Rsa1.0.00611.1 | 852  | 72410  | 0         | 821 | 853  | 96 -  | 3   | 852  | 15015  | 15859  |
| UN49189 | Rsa1.0.00470.1 | 733  | 81968  | 1.00E-177 | 415 | 447  | 92 +  | 1   | 447  | 27934  | 28369  |
| UN49190 | Rsa1.0.00512.1 | 786  | 200277 | 1.00E-108 | 200 | 200  | 100 - | 3   | 202  | 191224 | 191423 |
| UN49191 | Rsa1.0.00341.1 | 1302 | 249309 | 0         | 523 | 539  | 97 -  | 764 | 1302 | 22888  | 23414  |
| UN49192 | Rsa1.0.00223.1 | 906  | 106231 | 1.00E-165 | 359 | 376  | 95 +  | 3   | 371  | 39783  | 40154  |
| UN49193 | Rsa1.0.00224.1 | 1004 | 327530 | 1.00E-103 | 201 | 203  | 99 -  | 1   | 202  | 38574  | 38776  |
| UN49194 | Rsa1.0.00697.1 | 848  | 67913  | 0         | 823 | 852  | 96 +  | 1   | 846  | 47732  | 48583  |
| UN49195 | Rsa1.0.00442.1 | 1122 | 84596  | 1.00E-103 | 203 | 207  | 98 -  | 631 | 837  | 51424  | 51630  |
| UN49196 | Rsa1.0.05704.1 | 914  | 12883  | 0         | 553 | 577  | 95 -  | 284 | 860  | 2560   | 3136   |
| UN49197 | Rsa1.0.00225.1 | 907  | 105892 | 0         | 329 | 329  | 100 + | 81  | 409  | 53905  | 54233  |
| UN49198 | Rsa1.0.00034.1 | 997  | 260119 | 1.00E-172 | 334 | 343  | 97 -  | 659 | 997  | 238991 | 239333 |
| UN49199 | Rsa1.0.09061.1 | 1042 | 6678   | 1.00E-130 | 294 | 312  | 94 -  | 742 | 1042 | 319    | 630    |
| UN49200 | Rsa1.0.00154.1 | 755  | 189461 | 0         | 542 | 569  | 95 -  | 1   | 566  | 171029 | 171589 |
| UN49201 | Rsa1.0.01340.1 | 718  | 47805  | 1.00E-125 | 236 | 239  | 98 -  | 425 | 663  | 25094  | 25332  |
| UN49202 | Rsa1.0.00340.1 | 1057 | 305782 | 0         | 348 | 348  | 100 - | 710 | 1057 | 194306 | 194653 |
| UN49203 | Rsa1.0.00111.1 | 1096 | 390088 | 0         | 407 | 416  | 97 -  | 680 | 1093 | 197794 | 198208 |
| UN49204 | Rsa1.0.04073.1 | 830  | 19238  | 8.00E-91  | 222 | 238  | 93 -  | 13  | 249  | 13359  | 13596  |
| UN49205 | Rsa1.0.00316.1 | 993  | 96264  | 0         | 502 | 522  | 96 +  | 1   | 519  | 57293  | 57814  |
| UN49206 | Rsa1.0.00094.1 | 1297 | 139042 | 0         | 609 | 634  | 96 +  | 132 | 759  | 90319  | 90949  |
| UN49207 | Rsa1.0.02662.1 | 288  | 28956  | 3.00E-26  | 70  | 73   | 95 +  | 216 | 288  | 10660  | 10732  |
| UN49208 | Rsa1.0.02176.1 | 1045 | 34291  | 0         | 505 | 513  | 98 -  | 1   | 513  | 2195   | 2706   |
| UN49209 | Rsa1.0.00127.1 | 955  | 127446 | 1.00E-118 | 280 | 297  | 94 +  | 665 | 954  | 37712  | 38008  |
| UN49210 | Rsa1.0.05217.1 | 1063 | 142938 | 0         | 433 | 443  | 97 +  | 461 | 900  | 130269 | 130711 |
| UN49211 | Rsa1.0.00288.1 | 900  | 98659  | 1.00E-108 | 206 | 208  | 99 +  | 378 | 585  | 52056  | 52263  |
| UN49212 | Rsa1.0.02513.1 | 1004 | 30643  | 0         | 531 | 553  | 96 +  | 458 | 1002 | 29577  | 30129  |
| UN49213 | Rsa1.0.00015.1 | 952  | 561803 | 0         | 400 | 420  | 95 -  | 1   | 416  | 526505 | 526922 |
| UN49214 | Rsa1.0.03344.1 | 789  | 23593  | 0         | 764 | 787  | 97 +  | 2   | 787  | 15104  | 15887  |
| UN49215 | Rsa1.0.00163.1 | 901  | 116847 | 1.00E-132 | 252 | 256  | 98 +  | 407 | 662  | 11140  | 11395  |
| UN49216 | Rsa1.0.00642.1 | 1017 | 201230 | 0         | 993 | 1017 | 97 +  | 2   | 1017 | 154559 | 155575 |



|         |                |      |        |           |     |     |       |     |      |        |        |
|---------|----------------|------|--------|-----------|-----|-----|-------|-----|------|--------|--------|
| UN49217 | Rsa1.0_10294.1 | 905  | 5901   | 0         | 384 | 384 | 100 - | 1   | 384  | 963    | 1346   |
| UN49218 | Rsa1.0_04368.1 | 985  | 17714  | 1.00E-156 | 311 | 323 | 96 +  | 3   | 316  | 14857  | 15179  |
| UN49219 | Rsa1.0_04670.1 | 1050 | 16453  | 0         | 564 | 566 | 99 -  | 183 | 748  | 5440   | 6005   |
| UN49220 | Rsa1.0_00285.1 | 1110 | 149638 | 1.00E-133 | 244 | 245 | 99 -  | 866 | 1110 | 80883  | 81127  |
| UN49221 | Rsa1.0_00784.1 | 1088 | 64359  | 0         | 432 | 457 | 94 +  | 1   | 455  | 7564   | 8009   |
| UN49222 | Rsa1.0_00251.1 | 463  | 303968 | 6.00E-75  | 197 | 213 | 92 +  | 18  | 222  | 121010 | 121221 |
| UN49223 | Rsa1.0_00193.1 | 1382 | 194198 | 0         | 431 | 441 | 97 +  | 530 | 970  | 98615  | 99055  |
| UN49224 | Rsa1.0_00110.1 | 1064 | 132719 | 1.00E-100 | 207 | 214 | 96 +  | 657 | 870  | 4280   | 4493   |
| UN49225 | Rsa1.0_00115.1 | 671  | 131321 | 3.00E-93  | 307 | 351 | 87 -  | 3   | 341  | 54113  | 54451  |
| UN49226 | Rsa1.0_00217.1 | 921  | 107079 | 1.00E-131 | 286 | 302 | 94 +  | 619 | 920  | 60711  | 61012  |
| UN49227 | Rsa1.0_01249.1 | 479  | 188432 | 2.00E-71  | 152 | 157 | 96 -  | 1   | 157  | 176676 | 176832 |
| UN49228 | Rsa1.0_00638.1 | 985  | 71037  | 1.00E-129 | 265 | 275 | 96 +  | 326 | 600  | 9032   | 9306   |
| UN49229 | Rsa1.0_01541.1 | 836  | 43682  | 1.00E-135 | 248 | 249 | 99 +  | 3   | 251  | 23028  | 23276  |
| UN49230 | Rsa1.0_04282.1 | 628  | 18100  | 0         | 415 | 430 | 96 -  | 1   | 430  | 17329  | 17754  |
| UN49231 | Rsa1.0_01435.1 | 1416 | 45942  | 0         | 554 | 555 | 99 +  | 862 | 1416 | 41020  | 41574  |
| UN49232 | Rsa1.0_00234.1 | 789  | 197060 | 0         | 651 | 651 | 100 - | 1   | 651  | 71549  | 72199  |
| UN49233 | Rsa1.0_00075.1 | 798  | 146680 | 1.00E-113 | 284 | 308 | 92 -  | 3   | 308  | 26868  | 27161  |
| UN49234 | Rsa1.0_00211.1 | 872  | 228189 | 0         | 600 | 600 | 100 - | 84  | 683  | 8747   | 9346   |
| UN49235 | Rsa1.0_00303.1 | 762  | 97468  | 0         | 380 | 380 | 100 + | 1   | 380  | 42805  | 43184  |
| UN49236 | Rsa1.0_00917.1 | 1474 | 182012 | 0         | 629 | 661 | 95 +  | 577 | 1235 | 154788 | 155438 |
| UN49237 | Rsa1.0_00464.1 | 806  | 82253  | 1.00E-103 | 197 | 199 | 98 -  | 226 | 424  | 15401  | 15599  |
| UN49238 | Rsa1.0_00078.1 | 742  | 175053 | 0         | 726 | 760 | 95 +  | 4   | 742  | 3934   | 4693   |
| UN49239 | Rsa1.0_01112.1 | 1035 | 310601 | 9.00E-79  | 243 | 273 | 89 +  | 699 | 969  | 176919 | 177171 |
| UN49240 | Rsa1.0_08401.1 | 797  | 7418   | 0         | 448 | 474 | 94 -  | 40  | 513  | 204    | 677    |
| UN49241 | Rsa1.0_03184.1 | 665  | 24750  | 4.00E-55  | 193 | 219 | 88 +  | 3   | 221  | 19651  | 19859  |
| UN49242 | Rsa1.0_00026.1 | 814  | 327835 | 2.00E-97  | 249 | 271 | 91 -  | 541 | 801  | 191635 | 191902 |
| UN49243 | Rsa1.0_02675.1 | 445  | 28852  | 2.00E-74  | 142 | 142 | 100 + | 179 | 320  | 17929  | 18070  |
| UN49244 | Rsa1.0_00079.1 | 760  | 606987 | 1.00E-116 | 222 | 225 | 98 -  | 133 | 357  | 22253  | 22477  |
| UN49245 | Rsa1.0_00152.1 | 841  | 257730 | 0         | 734 | 784 | 93 -  | 3   | 767  | 202057 | 202828 |
| UN49246 | Rsa1.0_00712.1 | 714  | 67217  | 0         | 423 | 441 | 95 +  | 276 | 714  | 18093  | 18532  |
| UN49247 | Rsa1.0_00596.1 | 938  | 73578  | 1.00E-83  | 168 | 170 | 98 +  | 1   | 169  | 9144   | 9313   |
| UN49248 | Rsa1.0_01101.1 | 625  | 54031  | 7.00E-66  | 173 | 188 | 92 -  | 396 | 583  | 23747  | 23934  |
| UN49249 | Rsa1.0_02196.1 | 918  | 34005  | 0         | 598 | 626 | 95 -  | 275 | 884  | 23551  | 24175  |
| UN49250 | Rsa1.0_00423.1 | 280  | 86138  | 8.00E-73  | 226 | 247 | 91 -  | 37  | 279  | 10876  | 11115  |
| UN49251 | Rsa1.0_02841.1 | 1133 | 27383  | 6.00E-46  | 104 | 107 | 97 +  | 296 | 402  | 3289   | 3395   |
| UN49252 | Rsa1.0_00115.1 | 825  | 131321 | 3.00E-81  | 177 | 184 | 96 +  | 525 | 705  | 36126  | 36309  |
| UN49253 | Rsa1.0_00370.1 | 878  | 90472  | 0         | 399 | 421 | 94 -  | 355 | 770  | 4877   | 5296   |
| UN49254 | Rsa1.0_01461.1 | 728  | 45240  | 0         | 728 | 729 | 99 +  | 1   | 728  | 27346  | 28074  |
| UN49255 | Rsa1.0_00341.1 | 683  | 249309 | 4.00E-80  | 158 | 160 | 98 -  | 478 | 637  | 126668 | 126827 |

|         |                |      |        |           |      |      |      |     |      |        |        |
|---------|----------------|------|--------|-----------|------|------|------|-----|------|--------|--------|
| UN49256 | Rsa1.0.00360.1 | 1103 | 91190  | 0         | 394  | 413  | 95 + | 10  | 416  | 43709  | 44119  |
| UN49257 | Rsa1.0.00748.1 | 983  | 65983  | 0         | 445  | 453  | 98 - | 1   | 451  | 34880  | 35330  |
| UN49258 | Rsa1.0.00251.1 | 1284 | 303968 | 1.00E-150 | 340  | 366  | 92 - | 3   | 350  | 144100 | 144465 |
| UN49259 | Rsa1.0.00002.1 | 1075 | 601661 | 1.00E-135 | 351  | 385  | 91 - | 694 | 1072 | 264132 | 264507 |
| UN49260 | Rsa1.0.07848.1 | 669  | 8429   | 0         | 410  | 426  | 96 - | 251 | 669  | 2381   | 2806   |
| UN49261 | Rsa1.0.03668.1 | 740  | 21483  | 0         | 374  | 385  | 97 + | 2   | 386  | 1621   | 2005   |
| UN49262 | Rsa1.0.00296.1 | 1134 | 97854  | 0         | 506  | 526  | 96 - | 7   | 531  | 17737  | 18260  |
| UN49263 | Rsa1.0.00002.1 | 492  | 601661 | 1.00E-122 | 244  | 251  | 97 + | 242 | 492  | 289356 | 289606 |
| UN49264 | Rsa1.0.05546.1 | 1102 | 13379  | 1.00E-148 | 294  | 303  | 97 - | 428 | 730  | 7592   | 7894   |
| UN49265 | Rsa1.0.14739.1 | 1153 | 3113   | 0         | 749  | 800  | 93 + | 3   | 797  | 2324   | 3113   |
| UN49266 | Rsa1.0.01196.1 | 813  | 51097  | 1.00E-126 | 236  | 238  | 99 + | 414 | 651  | 26455  | 26692  |
| UN49267 | Rsa1.0.01104.1 | 472  | 285480 | 6.00E-69  | 136  | 137  | 99 + | 20  | 156  | 2638   | 2774   |
| UN49268 | Rsa1.0.00059.1 | 707  | 159650 | 1.00E-112 | 235  | 245  | 95 - | 458 | 702  | 147721 | 147965 |
| UN49269 | Rsa1.0.00336.1 | 928  | 445051 | 2.00E-88  | 184  | 190  | 96 - | 90  | 279  | 163125 | 163314 |
| UN49270 | Rsa1.0.00454.1 | 1052 | 216970 | 3.00E-75  | 169  | 176  | 96 - | 876 | 1051 | 21258  | 21432  |
| UN49271 | Rsa1.0.00237.1 | 832  | 235974 | 1.00E-168 | 395  | 426  | 92 - | 14  | 423  | 225556 | 225980 |
| UN49272 | Rsa1.0.07208.1 | 1137 | 9719   | 0         | 611  | 637  | 95 + | 1   | 637  | 7729   | 8364   |
| UN49273 | Rsa1.0.00609.1 | 816  | 72785  | 1.00E-150 | 320  | 335  | 95 + | 406 | 736  | 69756  | 70090  |
| UN49274 | Rsa1.0.00017.1 | 715  | 752458 | 1.00E-125 | 243  | 247  | 98 - | 3   | 249  | 73955  | 74200  |
| UN49275 | Rsa1.0.00078.1 | 793  | 175053 | 0         | 784  | 793  | 98 + | 1   | 793  | 78753  | 79545  |
| UN49276 | Rsa1.0.00855.1 | 789  | 62047  | 1.00E-122 | 295  | 320  | 92 + | 60  | 377  | 15748  | 16051  |
| UN49277 | Rsa1.0.00022.1 | 846  | 200461 | 0         | 464  | 486  | 95 - | 365 | 846  | 86019  | 86504  |
| UN49278 | Rsa1.0.00568.1 | 932  | 75219  | 1.00E-179 | 427  | 460  | 92 - | 454 | 912  | 3692   | 4142   |
| UN49279 | Rsa1.0.01349.1 | 896  | 47513  | 1.00E-176 | 319  | 321  | 99 - | 576 | 896  | 45126  | 45446  |
| UN49280 | Rsa1.0.03728.1 | 776  | 21147  | 1.00E-77  | 163  | 168  | 97 - | 524 | 691  | 1684   | 1851   |
| UN49281 | Rsa1.0.19408.1 | 873  | 1436   | 1.00E-144 | 263  | 264  | 99 + | 610 | 873  | 391    | 654    |
| UN49282 | Rsa1.0.01512.1 | 787  | 44234  | 1.00E-174 | 333  | 341  | 97 - | 2   | 342  | 9997   | 10337  |
| UN49283 | Rsa1.0.00137.1 | 1552 | 122457 | 0         | 1212 | 1227 | 98 + | 133 | 1359 | 25595  | 26821  |
| UN49284 | Rsa1.0.00722.1 | 611  | 66840  | 0         | 591  | 610  | 96 - | 1   | 610  | 51059  | 51668  |
| UN49285 | Rsa1.0.00018.1 | 881  | 410899 | 4.00E-96  | 191  | 195  | 97 + | 80  | 274  | 70314  | 70508  |
| UN49286 | Rsa1.0.00087.1 | 750  | 761073 | 6.00E-67  | 150  | 154  | 97 - | 593 | 744  | 300820 | 300973 |
| UN49287 | Rsa1.0.02753.1 | 623  | 28215  | 0         | 591  | 631  | 93 + | 1   | 621  | 8109   | 8728   |
| UN49288 | Rsa1.0.14624.1 | 908  | 3217   | 1.00E-104 | 282  | 309  | 91 + | 605 | 906  | 1334   | 1632   |
| UN49289 | Rsa1.0.00147.1 | 721  | 249503 | 0         | 689  | 721  | 95 - | 1   | 718  | 241232 | 241947 |
| UN49290 | Rsa1.0.01146.1 | 764  | 163455 | 1.00E-103 | 231  | 242  | 95 + | 2   | 242  | 20553  | 20793  |
| UN49291 | Rsa1.0.00009.1 | 955  | 232558 | 0         | 594  | 628  | 94 - | 1   | 626  | 138504 | 139121 |
| UN49292 | Rsa1.0.00253.1 | 731  | 231292 | 0         | 431  | 455  | 94 + | 3   | 454  | 79532  | 79984  |
| UN49293 | Rsa1.0.00684.1 | 601  | 141701 | 3.00E-77  | 176  | 185  | 95 - | 3   | 187  | 24722  | 24898  |
| UN49294 | Rsa1.0.04355.1 | 930  | 146733 | 0         | 714  | 731  | 97 - | 199 | 929  | 8711   | 9440   |

|         |                |      |        |           |     |     |      |     |      |        |        |
|---------|----------------|------|--------|-----------|-----|-----|------|-----|------|--------|--------|
| UN49295 | Rsa1.0.00087.1 | 727  | 761073 | 2.00E-82  | 189 | 197 | 95 - | 1   | 194  | 314989 | 315182 |
| UN49296 | Rsa1.0.01090.1 | 537  | 54385  | 0         | 522 | 543 | 96 - | 2   | 536  | 45315  | 45856  |
| UN49297 | Rsa1.0.06751.1 | 518  | 10417  | 1.00E-110 | 278 | 297 | 93 - | 2   | 298  | 9247   | 9532   |
| UN49298 | Rsa1.0.01233.1 | 834  | 50184  | 0         | 763 | 810 | 94 + | 1   | 798  | 23564  | 24364  |
| UN49299 | Rsa1.0.02017.1 | 624  | 35999  | 1.00E-134 | 258 | 262 | 98 - | 47  | 308  | 34477  | 34737  |
| UN49300 | Rsa1.0.01172.1 | 777  | 51734  | 1.00E-132 | 292 | 306 | 95 - | 2   | 306  | 9538   | 9839   |
| UN49301 | Rsa1.0.00314.1 | 282  | 96472  | 5.00E-99  | 229 | 245 | 93 - | 1   | 245  | 56253  | 56490  |
| UN49302 | Rsa1.0.00211.1 | 1026 | 228189 | 0         | 561 | 608 | 92 - | 436 | 1024 | 179317 | 179912 |
| UN49303 | Rsa1.0.01389.1 | 722  | 46716  | 1.00E-67  | 155 | 163 | 95 + | 41  | 203  | 15128  | 15290  |
| UN49304 | Rsa1.0.21497.1 | 861  | 1197   | 0         | 734 | 813 | 90 + | 55  | 860  | 162    | 967    |
| UN49305 | Rsa1.0.03594.1 | 521  | 21868  | 0         | 502 | 521 | 96 + | 2   | 521  | 14530  | 15048  |
| UN49306 | Rsa1.0.00179.1 | 634  | 393324 | 1.00E-116 | 223 | 225 | 99 - | 86  | 309  | 248844 | 249068 |
| UN49307 | Rsa1.0.00113.1 | 831  | 131574 | 0         | 517 | 538 | 96 + | 1   | 535  | 13053  | 13590  |
| UN49308 | Rsa1.0.00734.1 | 1022 | 66508  | 8.00E-70  | 192 | 209 | 91 - | 1   | 208  | 15869  | 16069  |
| UN49309 | Rsa1.0.00528.1 | 816  | 164755 | 0         | 527 | 539 | 97 - | 198 | 736  | 109483 | 110021 |
| UN49310 | Rsa1.0.00014.1 | 486  | 348985 | 1.00E-179 | 369 | 385 | 95 - | 3   | 387  | 298418 | 298801 |
| UN49311 | Rsa1.0.01090.1 | 795  | 54385  | 1.00E-179 | 380 | 401 | 94 - | 392 | 792  | 3232   | 3626   |
| UN49312 | Rsa1.0.00339.1 | 894  | 222974 | 2.00E-82  | 159 | 160 | 99 + | 649 | 808  | 63385  | 63544  |
| UN49313 | Rsa1.0.00159.1 | 748  | 431686 | 1.00E-83  | 285 | 323 | 88 - | 13  | 320  | 325900 | 326215 |
| UN49314 | Rsa1.0.00944.1 | 785  | 58733  | 1.00E-151 | 283 | 287 | 98 + | 386 | 672  | 41834  | 42120  |
| UN49315 | Rsa1.0.01895.1 | 910  | 37512  | 1.00E-161 | 359 | 382 | 93 - | 1   | 379  | 10216  | 10597  |
| UN49316 | Rsa1.0.02608.1 | 691  | 29613  | 1.00E-79  | 233 | 257 | 90 + | 1   | 250  | 24663  | 24911  |
| UN49317 | Rsa1.0.00545.1 | 764  | 189649 | 1.00E-140 | 295 | 307 | 96 - | 6   | 310  | 2122   | 2427   |
| UN49318 | Rsa1.0.00273.1 | 675  | 326186 | 1.00E-113 | 277 | 298 | 92 + | 1   | 292  | 307789 | 308084 |
| UN49319 | Rsa1.0.01861.1 | 857  | 38031  | 1.00E-161 | 441 | 489 | 90 - | 146 | 623  | 32206  | 32689  |
| UN49320 | Rsa1.0.06113.1 | 1000 | 11721  | 0         | 864 | 900 | 96 - | 1   | 898  | 277    | 1175   |
| UN49321 | Rsa1.0.03759.1 | 743  | 20987  | 1.00E-178 | 345 | 353 | 97 + | 2   | 353  | 15445  | 15797  |
| UN49322 | Rsa1.0.00105.1 | 1054 | 134138 | 0         | 482 | 510 | 94 - | 1   | 503  | 81215  | 81721  |
| UN49323 | Rsa1.0.00895.1 | 372  | 60615  | 1.00E-114 | 306 | 333 | 91 - | 2   | 332  | 39714  | 40044  |
| UN49324 | Rsa1.0.00115.1 | 830  | 131321 | 2.00E-82  | 162 | 164 | 98 - | 150 | 313  | 36126  | 36289  |
| UN49325 | Rsa1.0.01484.1 | 848  | 44806  | 8.00E-82  | 206 | 223 | 92 + | 1   | 211  | 14353  | 14572  |
| UN49326 | Rsa1.0.02322.1 | 1210 | 32555  | 0         | 381 | 389 | 97 - | 70  | 458  | 6211   | 6598   |
| UN49327 | Rsa1.0.00066.1 | 1290 | 152418 | 0         | 615 | 647 | 95 - | 40  | 684  | 112082 | 112719 |
| UN49328 | Rsa1.0.00608.1 | 700  | 172672 | 1.00E-110 | 245 | 257 | 95 - | 18  | 271  | 118055 | 118311 |
| UN49329 | Rsa1.0.00306.1 | 961  | 146760 | 0         | 440 | 450 | 97 + | 360 | 806  | 133202 | 133651 |
| UN49330 | Rsa1.0.00329.1 | 516  | 222544 | 1.00E-125 | 293 | 308 | 95 + | 9   | 309  | 79575  | 79880  |
| UN49331 | Rsa1.0.02212.1 | 1002 | 33840  | 2.00E-98  | 195 | 199 | 97 - | 360 | 558  | 18942  | 19140  |
| UN49332 | Rsa1.0.00789.1 | 838  | 64233  | 0         | 452 | 454 | 99 - | 1   | 453  | 34606  | 35059  |
| UN49333 | Rsa1.0.05081.1 | 764  | 136103 | 1.00E-144 | 309 | 325 | 95 - | 443 | 764  | 4250   | 4574   |

|         |                |      |        |           |      |      |       |     |      |        |        |
|---------|----------------|------|--------|-----------|------|------|-------|-----|------|--------|--------|
| UN49334 | Rsa1.0.00699.1 | 888  | 184398 | 0         | 492  | 498  | 98 +  | 333 | 829  | 56178  | 56675  |
| UN49335 | Rsa1.0.00568.1 | 736  | 75219  | 1.00E-178 | 325  | 328  | 99 -  | 1   | 328  | 60248  | 60575  |
| UN49336 | Rsa1.0.00674.1 | 760  | 193753 | 1.00E-113 | 220  | 223  | 98 +  | 124 | 345  | 180927 | 181149 |
| UN49337 | Rsa1.0.00772.1 | 644  | 64856  | 0         | 370  | 380  | 97 +  | 3   | 382  | 47066  | 47445  |
| UN49338 | Rsa1.0.00121.1 | 1224 | 278029 | 0         | 426  | 440  | 96 +  | 552 | 991  | 44291  | 44727  |
| UN49339 | Rsa1.0.00188.1 | 715  | 112020 | 1.00E-176 | 313  | 313  | 100 + | 403 | 715  | 47540  | 47852  |
| UN49340 | Rsa1.0.17409.1 | 1233 | 1837   | 0         | 1190 | 1235 | 96 +  | 1   | 1233 | 136    | 1355   |
| UN49341 | Rsa1.0.00409.1 | 1013 | 146788 | 0         | 556  | 559  | 99 -  | 453 | 1011 | 86809  | 87367  |
| UN49342 | Rsa1.0.02663.1 | 992  | 169243 | 0         | 362  | 365  | 99 +  | 3   | 367  | 26583  | 26947  |
| UN49343 | Rsa1.0.00149.1 | 605  | 305196 | 0         | 353  | 356  | 99 -  | 1   | 356  | 102071 | 102426 |
| UN49344 | Rsa1.0.00515.1 | 609  | 78417  | 1.00E-160 | 374  | 401  | 93 -  | 1   | 399  | 59585  | 59969  |
| UN49345 | Rsa1.0.04626.1 | 731  | 16611  | 0         | 404  | 408  | 99 -  | 1   | 406  | 15005  | 15412  |
| UN49346 | Rsa1.0.00185.1 | 1010 | 248445 | 0         | 1003 | 1011 | 99 -  | 1   | 1010 | 204401 | 205411 |
| UN49347 | Rsa1.0.01724.1 | 758  | 40292  | 1.00E-107 | 223  | 230  | 96 +  | 232 | 460  | 614    | 843    |
| UN49348 | Rsa1.0.01349.1 | 815  | 47513  | 0         | 340  | 341  | 99 +  | 2   | 342  | 45106  | 45446  |
| UN49349 | Rsa1.0.01220.1 | 479  | 161775 | 2.00E-99  | 190  | 192  | 98 -  | 288 | 479  | 30848  | 31039  |
| UN49350 | Rsa1.0.03565.1 | 1223 | 22062  | 1.00E-178 | 364  | 381  | 95 +  | 822 | 1193 | 3775   | 4155   |
| UN49351 | Rsa1.0.03971.1 | 688  | 19788  | 1.00E-147 | 316  | 329  | 96 -  | 1   | 329  | 3924   | 4249   |
| UN49352 | Rsa1.0.02478.1 | 1030 | 150183 | 0         | 359  | 368  | 97 -  | 1   | 366  | 136567 | 136934 |
| UN49353 | Rsa1.0.05546.1 | 1055 | 13379  | 1.00E-129 | 305  | 330  | 92 -  | 1   | 330  | 5177   | 5496   |
| UN49354 | Rsa1.0.00196.1 | 869  | 109960 | 0         | 430  | 451  | 95 +  | 431 | 866  | 19288  | 19738  |
| UN49355 | Rsa1.0.00253.1 | 1021 | 231292 | 0         | 433  | 446  | 97 +  | 14  | 458  | 204516 | 204960 |
| UN49356 | Rsa1.0.00012.1 | 950  | 222148 | 0         | 925  | 957  | 96 -  | 3   | 950  | 110337 | 111284 |
| UN49357 | Rsa1.0.01002.1 | 737  | 57063  | 0         | 635  | 655  | 96 +  | 80  | 732  | 17438  | 18092  |
| UN49358 | Rsa1.0.00016.1 | 869  | 831256 | 0         | 459  | 477  | 96 +  | 2   | 478  | 426933 | 427401 |
| UN49359 | Rsa1.0.01313.1 | 1258 | 48387  | 1.00E-104 | 214  | 221  | 96 +  | 945 | 1165 | 19753  | 19973  |
| UN49360 | Rsa1.0.00141.1 | 844  | 121494 | 0         | 414  | 431  | 96 +  | 82  | 512  | 82285  | 82714  |
| UN49361 | Rsa1.0.00608.1 | 934  | 172672 | 0         | 638  | 654  | 97 -  | 205 | 858  | 120841 | 121493 |
| UN49362 | Rsa1.0.16086.1 | 884  | 2289   | 1.00E-104 | 201  | 204  | 98 -  | 1   | 204  | 1078   | 1281   |
| UN49363 | Rsa1.0.00108.1 | 673  | 478491 | 1.00E-129 | 320  | 342  | 93 -  | 1   | 340  | 270627 | 270965 |
| UN49364 | Rsa1.0.00018.1 | 846  | 410899 | 1.00E-138 | 262  | 265  | 98 -  | 1   | 263  | 262610 | 262874 |
| UN49365 | Rsa1.0.00437.1 | 1019 | 84879  | 0         | 433  | 445  | 97 -  | 13  | 456  | 50586  | 51028  |
| UN49366 | Rsa1.0.03422.1 | 811  | 23076  | 1.00E-178 | 319  | 320  | 99 -  | 2   | 321  | 8624   | 8943   |
| UN49367 | Rsa1.0.03216.1 | 795  | 24540  | 1.00E-158 | 316  | 327  | 96 +  | 6   | 332  | 23281  | 23607  |
| UN49368 | Rsa1.0.00131.1 | 915  | 432233 | 1.00E-135 | 248  | 249  | 99 +  | 660 | 908  | 409494 | 409742 |
| UN49369 | Rsa1.0.14203.1 | 1378 | 3670   | 0         | 549  | 579  | 94 -  | 430 | 1008 | 1903   | 2469   |
| UN49370 | Rsa1.0.04242.1 | 704  | 18340  | 0         | 692  | 696  | 99 -  | 9   | 704  | 14723  | 15418  |
| UN49371 | Rsa1.0.02052.1 | 805  | 35555  | 0         | 763  | 775  | 98 +  | 1   | 775  | 440    | 1213   |
| UN49372 | Rsa1.0.05702.1 | 691  | 12884  | 1.00E-46  | 102  | 104  | 98 -  | 87  | 190  | 521    | 624    |

|         |                |      |        |           |      |      |       |     |      |        |        |
|---------|----------------|------|--------|-----------|------|------|-------|-----|------|--------|--------|
| UN49373 | Rsa1.0.00890.1 | 529  | 323870 | 0         | 484  | 526  | 92 +  | 1   | 525  | 176030 | 176550 |
| UN49374 | Rsa1.0.00055.1 | 705  | 520193 | 1.00E-134 | 242  | 242  | 100 + | 1   | 242  | 333970 | 334211 |
| UN49375 | Rsa1.0.00711.1 | 830  | 67223  | 1.00E-105 | 270  | 282  | 95 -  | 542 | 812  | 6640   | 6921   |
| UN49376 | Rsa1.0.00170.1 | 936  | 179538 | 0         | 564  | 582  | 96 +  | 357 | 936  | 22984  | 23564  |
| UN49377 | Rsa1.0.09255.1 | 1091 | 6525   | 0         | 1046 | 1105 | 94 -  | 1   | 1089 | 940    | 2039   |
| UN49378 | Rsa1.0.20105.1 | 1132 | 1340   | 0         | 454  | 468  | 97 -  | 3   | 469  | 457    | 923    |
| UN49379 | Rsa1.0.00040.1 | 561  | 324196 | 0         | 527  | 547  | 96 +  | 4   | 550  | 163975 | 164521 |
| UN49380 | Rsa1.0.19807.1 | 812  | 1380   | 1.00E-134 | 293  | 307  | 95 +  | 1   | 307  | 400    | 700    |
| UN49381 | Rsa1.0.07219.1 | 931  | 9702   | 0         | 445  | 450  | 98 -  | 1   | 448  | 1740   | 2189   |
| UN49382 | Rsa1.0.02820.1 | 411  | 27629  | 1.00E-136 | 386  | 426  | 90 -  | 2   | 403  | 19452  | 19876  |
| UN49383 | Rsa1.0.02040.1 | 1061 | 35684  | 1.00E-114 | 225  | 230  | 97 -  | 298 | 527  | 15056  | 15285  |
| UN49384 | Rsa1.0.02099.1 | 688  | 35030  | 5.00E-98  | 333  | 373  | 89 -  | 280 | 636  | 29839  | 30208  |
| UN49385 | Rsa1.0.00051.1 | 698  | 258225 | 1.00E-149 | 350  | 376  | 93 +  | 62  | 434  | 62989  | 63361  |
| UN49386 | Rsa1.0.04223.1 | 867  | 18407  | 1.00E-162 | 370  | 394  | 93 -  | 1   | 387  | 6198   | 6591   |
| UN49387 | Rsa1.0.31664.1 | 650  | 722    | 1.00E-101 | 200  | 204  | 98 -  | 388 | 591  | 514    | 717    |
| UN49388 | Rsa1.0.01581.1 | 1392 | 42833  | 0         | 562  | 581  | 96 -  | 1   | 578  | 1828   | 2408   |
| UN49389 | Rsa1.0.00519.1 | 869  | 197864 | 0         | 415  | 424  | 97 -  | 450 | 867  | 191658 | 192080 |
| UN49390 | Rsa1.0.02275.1 | 765  | 33107  | 1.00E-172 | 382  | 405  | 94 -  | 23  | 418  | 30103  | 30507  |
| UN49391 | Rsa1.0.00005.1 | 1361 | 353093 | 1.00E-145 | 286  | 294  | 97 -  | 907 | 1200 | 129278 | 129571 |
| UN49392 | Rsa1.0.02645.1 | 1022 | 29158  | 0         | 940  | 977  | 96 +  | 3   | 979  | 17443  | 18408  |
| UN49393 | Rsa1.0.00923.1 | 855  | 153678 | 0         | 668  | 708  | 94 +  | 158 | 855  | 45727  | 46432  |
| UN49394 | Rsa1.0.00761.1 | 1151 | 65133  | 0         | 923  | 948  | 97 -  | 43  | 972  | 12489  | 13435  |
| UN49395 | Rsa1.0.00741.1 | 1161 | 66117  | 1.00E-119 | 234  | 238  | 98 -  | 924 | 1160 | 46373  | 46610  |
| UN49396 | Rsa1.0.01638.1 | 671  | 41857  | 1.00E-113 | 248  | 263  | 94 +  | 3   | 256  | 35227  | 35489  |
| UN49397 | Rsa1.0.00040.1 | 801  | 324196 | 0         | 653  | 701  | 93 -  | 113 | 801  | 296578 | 297259 |
| UN49398 | Rsa1.0.10478.1 | 982  | 5832   | 1.00E-102 | 216  | 222  | 97 +  | 761 | 981  | 5140   | 5360   |
| UN49399 | Rsa1.0.00356.1 | 935  | 91521  | 0         | 483  | 510  | 94 +  | 414 | 918  | 34979  | 35485  |
| UN49400 | Rsa1.0.02110.1 | 892  | 34919  | 0         | 854  | 915  | 93 +  | 2   | 892  | 22650  | 23553  |
| UN49401 | Rsa1.0.02222.1 | 999  | 152798 | 1.00E-136 | 255  | 258  | 98 -  | 1   | 258  | 23940  | 24197  |
| UN49402 | Rsa1.0.01326.1 | 1128 | 48072  | 0         | 517  | 571  | 90 -  | 37  | 570  | 44650  | 45217  |
| UN49403 | Rsa1.0.00108.1 | 690  | 478491 | 1.00E-138 | 318  | 337  | 94 +  | 349 | 683  | 270627 | 270962 |
| UN49404 | Rsa1.0.02358.1 | 1130 | 32213  | 0         | 624  | 655  | 95 -  | 496 | 1130 | 7170   | 7824   |
| UN49405 | Rsa1.0.01457.1 | 1372 | 45337  | 1.00E-132 | 263  | 270  | 97 -  | 923 | 1192 | 6330   | 6596   |
| UN49406 | Rsa1.0.00248.1 | 1177 | 163568 | 3.00E-85  | 196  | 208  | 94 +  | 53  | 254  | 52499  | 52706  |
| UN49407 | Rsa1.0.00013.1 | 978  | 292129 | 0         | 836  | 856  | 97 +  | 61  | 913  | 105190 | 106043 |
| UN49408 | Rsa1.0.00575.1 | 1133 | 74791  | 1.00E-122 | 339  | 377  | 89 +  | 35  | 409  | 58683  | 59033  |
| UN49409 | Rsa1.0.00655.1 | 870  | 195840 | 0         | 327  | 327  | 100 + | 1   | 327  | 166422 | 166748 |
| UN49410 | Rsa1.0.02282.1 | 1058 | 163951 | 1.00E-117 | 381  | 432  | 88 +  | 1   | 430  | 162848 | 163275 |
| UN49411 | Rsa1.0.02858.1 | 806  | 27246  | 9.00E-97  | 183  | 184  | 99 +  | 58  | 241  | 1      | 184    |

|         |                |      |        |           |      |      |      |     |      |        |        |
|---------|----------------|------|--------|-----------|------|------|------|-----|------|--------|--------|
| UN49412 | Rsa1.0.01540.1 | 1158 | 151890 | 7.00E-92  | 208  | 220  | 94 + | 768 | 987  | 129408 | 129627 |
| UN49413 | Rsa1.0.00512.1 | 797  | 200277 | 1.00E-141 | 302  | 316  | 95 + | 3   | 316  | 18491  | 18804  |
| UN49414 | Rsa1.0.02666.1 | 760  | 28915  | 1.00E-128 | 247  | 252  | 98 - | 216 | 467  | 24244  | 24495  |
| UN49415 | Rsa1.0.02023.1 | 797  | 35922  | 0         | 743  | 796  | 93 - | 1   | 796  | 33595  | 34389  |
| UN49416 | Rsa1.0.02020.1 | 874  | 173211 | 0         | 337  | 338  | 99 - | 1   | 338  | 172619 | 172956 |
| UN49417 | Rsa1.0.00034.1 | 1045 | 260119 | 1.00E-158 | 295  | 299  | 98 - | 690 | 988  | 7301   | 7599   |
| UN49418 | Rsa1.0.01440.1 | 473  | 45807  | 0         | 358  | 361  | 99 + | 1   | 359  | 6031   | 6391   |
| UN49419 | Rsa1.0.04943.1 | 678  | 15376  | 0         | 663  | 679  | 97 + | 1   | 676  | 6036   | 6712   |
| UN49420 | Rsa1.0.07811.1 | 1092 | 8496   | 0         | 535  | 574  | 93 - | 3   | 570  | 1308   | 1863   |
| UN49421 | Rsa1.0.04085.1 | 740  | 19168  | 0         | 517  | 548  | 94 - | 5   | 543  | 755    | 1297   |
| UN49422 | Rsa1.0.02076.1 | 869  | 153121 | 0         | 449  | 452  | 99 + | 3   | 454  | 14597  | 15048  |
| UN49423 | Rsa1.0.00497.1 | 837  | 79830  | 0         | 492  | 503  | 97 + | 285 | 787  | 62413  | 62915  |
| UN49424 | Rsa1.0.03608.1 | 1056 | 21804  | 0         | 514  | 558  | 92 + | 2   | 538  | 924    | 1478   |
| UN49425 | Rsa1.0.00205.1 | 1149 | 193401 | 1.00E-170 | 315  | 319  | 98 + | 831 | 1149 | 1291   | 1609   |
| UN49426 | Rsa1.0.02395.1 | 756  | 31785  | 1.00E-165 | 361  | 383  | 94 - | 3   | 370  | 8334   | 8716   |
| UN49427 | Rsa1.0.00111.1 | 1279 | 390088 | 1.00E-108 | 253  | 267  | 94 - | 1   | 265  | 139480 | 139745 |
| UN49428 | Rsa1.0.00089.1 | 977  | 406142 | 1.00E-104 | 220  | 227  | 96 - | 1   | 223  | 342938 | 343164 |
| UN49429 | Rsa1.0.01305.1 | 1213 | 48730  | 0         | 488  | 503  | 97 + | 445 | 947  | 18860  | 19362  |
| UN49430 | Rsa1.0.02343.1 | 491  | 32374  | 1.00E-110 | 234  | 243  | 96 - | 249 | 490  | 1010   | 1252   |
| UN49431 | Rsa1.0.07021.1 | 1076 | 10016  | 1.00E-172 | 328  | 334  | 98 + | 356 | 688  | 7093   | 7426   |
| UN49432 | Rsa1.0.00648.1 | 1074 | 70351  | 1.00E-173 | 349  | 361  | 96 + | 91  | 445  | 12145  | 12505  |
| UN49433 | Rsa1.0.03306.1 | 712  | 23873  | 0         | 404  | 428  | 94 - | 10  | 437  | 12625  | 13045  |
| UN49434 | Rsa1.0.02085.1 | 1101 | 35198  | 1.00E-104 | 237  | 253  | 93 + | 36  | 279  | 15845  | 16097  |
| UN49435 | Rsa1.0.00207.1 | 637  | 248736 | 0         | 560  | 580  | 96 + | 3   | 579  | 194258 | 194836 |
| UN49436 | Rsa1.0.00108.1 | 902  | 478491 | 1.00E-147 | 325  | 341  | 95 + | 1   | 340  | 450999 | 451332 |
| UN49437 | Rsa1.0.00001.1 | 803  | 363028 | 1.00E-178 | 326  | 329  | 99 + | 196 | 524  | 323550 | 323878 |
| UN49438 | Rsa1.0.02600.1 | 707  | 29657  | 0         | 493  | 523  | 94 - | 1   | 513  | 27845  | 28363  |
| UN49439 | Rsa1.0.01355.1 | 727  | 47303  | 0         | 552  | 585  | 94 - | 144 | 722  | 39409  | 39993  |
| UN49440 | Rsa1.0.01701.1 | 919  | 162121 | 0         | 503  | 518  | 97 + | 401 | 918  | 30943  | 31460  |
| UN49441 | Rsa1.0.01283.1 | 1160 | 49257  | 0         | 402  | 412  | 97 + | 747 | 1158 | 7067   | 7478   |
| UN49442 | Rsa1.0.00065.1 | 1086 | 454616 | 0         | 685  | 723  | 94 + | 1   | 708  | 150650 | 151371 |
| UN49443 | Rsa1.0.14302.1 | 650  | 3558   | 1.00E-130 | 290  | 309  | 93 - | 340 | 648  | 843    | 1138   |
| UN49444 | Rsa1.0.08027.1 | 854  | 8058   | 0         | 481  | 504  | 95 - | 6   | 507  | 6887   | 7388   |
| UN49445 | Rsa1.0.00243.1 | 1237 | 103651 | 0         | 1189 | 1244 | 95 - | 1   | 1237 | 85906  | 87136  |
| UN49446 | Rsa1.0.00133.1 | 864  | 123768 | 1.00E-150 | 299  | 309  | 96 + | 437 | 745  | 11639  | 11947  |
| UN49447 | Rsa1.0.02113.1 | 830  | 34890  | 0         | 776  | 817  | 94 - | 11  | 827  | 22694  | 23509  |
| UN49448 | Rsa1.0.01514.1 | 855  | 44222  | 0         | 364  | 365  | 99 + | 1   | 365  | 23179  | 23543  |
| UN49449 | Rsa1.0.01278.1 | 1056 | 49370  | 0         | 373  | 374  | 99 + | 1   | 374  | 19392  | 19765  |
| UN49450 | Rsa1.0.01387.1 | 728  | 46745  | 1.00E-177 | 327  | 330  | 99 + | 253 | 582  | 39359  | 39687  |

|         |                |      |        |           |      |      |      |      |      |        |        |
|---------|----------------|------|--------|-----------|------|------|------|------|------|--------|--------|
| UN49451 | Rsa1.0.01827.1 | 1164 | 143321 | 1.00E-128 | 320  | 345  | 92 + | 16   | 357  | 130946 | 131280 |
| UN49452 | Rsa1.0.01196.1 | 907  | 51097  | 0         | 431  | 435  | 99 + | 3    | 437  | 14165  | 14597  |
| UN49453 | Rsa1.0.04124.1 | 1547 | 18945  | 0         | 374  | 377  | 99 + | 1171 | 1545 | 8363   | 8739   |
| UN49454 | Rsa1.0.30057.1 | 482  | 764    | 0         | 363  | 375  | 96 + | 105  | 479  | 222    | 595    |
| UN49455 | Rsa1.0.09817.1 | 418  | 6137   | 0         | 407  | 417  | 97 - | 2    | 418  | 5606   | 6019   |
| UN49456 | Rsa1.0.09538.1 | 869  | 6301   | 1.00E-114 | 252  | 270  | 93 + | 1    | 254  | 2162   | 2431   |
| UN49457 | Rsa1.0.00336.1 | 1020 | 445051 | 0         | 564  | 628  | 89 - | 347  | 958  | 25324  | 25940  |
| UN49458 | Rsa1.0.01727.1 | 1078 | 40243  | 0         | 391  | 398  | 98 + | 1    | 398  | 11119  | 11516  |
| UN49459 | Rsa1.0.02020.1 | 1061 | 173211 | 0         | 547  | 549  | 99 - | 511  | 1059 | 153367 | 153915 |
| UN49460 | Rsa1.0.13514.1 | 1057 | 4757   | 0         | 703  | 722  | 97 - | 26   | 747  | 836    | 1553   |
| UN49461 | Rsa1.0.10862.1 | 478  | 5698   | 3.00E-55  | 182  | 206  | 88 - | 219  | 424  | 4742   | 4947   |
| UN49462 | Rsa1.0.04377.1 | 945  | 17658  | 0         | 660  | 680  | 97 - | 1    | 679  | 5484   | 6160   |
| UN49463 | Rsa1.0.00710.1 | 986  | 67325  | 1.00E-136 | 256  | 259  | 98 - | 698  | 956  | 27484  | 27742  |
| UN49464 | Rsa1.0.02217.1 | 869  | 33812  | 1.00E-145 | 357  | 386  | 92 - | 3    | 387  | 5429   | 5808   |
| UN49465 | Rsa1.0.01146.1 | 721  | 163455 | 4.00E-71  | 178  | 188  | 94 + | 5    | 189  | 20607  | 20793  |
| UN49466 | Rsa1.0.00913.1 | 938  | 59914  | 1.00E-131 | 292  | 308  | 94 + | 473  | 776  | 55793  | 56100  |
| UN49467 | Rsa1.0.03890.1 | 824  | 20223  | 1.00E-150 | 373  | 404  | 92 - | 11   | 402  | 11314  | 11709  |
| UN49468 | Rsa1.0.07603.1 | 1020 | 9043   | 1.00E-114 | 354  | 399  | 88 + | 160  | 558  | 2808   | 3200   |
| UN49469 | Rsa1.0.00110.1 | 626  | 132719 | 0         | 592  | 634  | 93 + | 1    | 622  | 60667  | 61286  |
| UN49470 | Rsa1.0.00335.1 | 878  | 94371  | 1.00E-106 | 214  | 220  | 97 - | 447  | 666  | 29788  | 30007  |
| UN49471 | Rsa1.0.14744.1 | 855  | 3111   | 1.00E-132 | 248  | 251  | 98 - | 579  | 829  | 724    | 974    |
| UN49472 | Rsa1.0.00777.1 | 252  | 191865 | 4.00E-68  | 155  | 163  | 95 + | 2    | 164  | 128215 | 128377 |
| UN49473 | Rsa1.0.03157.1 | 860  | 24955  | 1.00E-162 | 293  | 294  | 99 - | 137  | 430  | 1625   | 1918   |
| UN49474 | Rsa1.0.02540.1 | 1171 | 30344  | 0         | 881  | 896  | 98 + | 234  | 1129 | 4744   | 5639   |
| UN49475 | Rsa1.0.00058.1 | 1084 | 159921 | 0         | 1081 | 1084 | 99 + | 1    | 1084 | 84888  | 85971  |
| UN49476 | Rsa1.0.11907.1 | 890  | 5374   | 0         | 432  | 455  | 94 - | 1    | 453  | 1101   | 1549   |
| UN49477 | Rsa1.0.00119.1 | 942  | 467509 | 0         | 365  | 369  | 98 + | 4    | 371  | 103045 | 103413 |
| UN49478 | Rsa1.0.03191.1 | 730  | 145762 | 1.00E-109 | 206  | 208  | 99 - | 414  | 621  | 15808  | 16015  |
| UN49479 | Rsa1.0.02043.1 | 570  | 163754 | 1.00E-158 | 285  | 286  | 99 + | 2    | 287  | 146134 | 146419 |
| UN49480 | Rsa1.0.01896.1 | 987  | 37512  | 0         | 945  | 993  | 95 + | 2    | 986  | 8679   | 9661   |
| UN49481 | Rsa1.0.02185.1 | 487  | 34150  | 2.00E-71  | 150  | 153  | 98 - | 1    | 153  | 3237   | 3388   |
| UN49482 | Rsa1.0.00457.1 | 986  | 337301 | 1.00E-122 | 279  | 294  | 94 + | 688  | 978  | 130569 | 130857 |
| UN49483 | Rsa1.0.02020.1 | 880  | 173211 | 1.00E-138 | 320  | 340  | 94 - | 1    | 340  | 172619 | 172954 |
| UN49484 | Rsa1.0.01124.1 | 628  | 53295  | 0         | 600  | 626  | 95 - | 1    | 624  | 25575  | 26199  |
| UN49485 | Rsa1.0.01104.1 | 706  | 285480 | 0         | 666  | 671  | 99 + | 36   | 706  | 33970  | 34640  |
| UN49486 | Rsa1.0.00329.1 | 1289 | 222544 | 0         | 416  | 434  | 95 - | 676  | 1109 | 193299 | 193732 |
| UN49487 | Rsa1.0.00484.1 | 681  | 203294 | 0         | 549  | 578  | 94 + | 104  | 681  | 56324  | 56895  |
| UN49488 | Rsa1.0.02267.1 | 546  | 33194  | 0         | 456  | 486  | 93 - | 8    | 484  | 11925  | 12409  |
| UN49489 | Rsa1.0.04028.1 | 1062 | 19493  | 1.00E-110 | 269  | 291  | 92 - | 778  | 1062 | 2301   | 2588   |

|         |                |      |        |           |      |      |       |     |      |        |        |
|---------|----------------|------|--------|-----------|------|------|-------|-----|------|--------|--------|
| UN49490 | Rsa1.0.02343.1 | 933  | 32374  | 0         | 397  | 410  | 96 -  | 54  | 463  | 9749   | 10158  |
| UN49491 | Rsa1.0.00284.1 | 888  | 323267 | 0         | 684  | 712  | 96 +  | 176 | 887  | 146541 | 147244 |
| UN49492 | Rsa1.0.00092.1 | 1094 | 659932 | 0         | 1039 | 1108 | 93 -  | 3   | 1078 | 175664 | 176766 |
| UN49493 | Rsa1.0.09343.1 | 672  | 6439   | 0         | 420  | 439  | 95 +  | 20  | 448  | 4258   | 4696   |
| UN49494 | Rsa1.0.01105.1 | 639  | 53958  | 0         | 377  | 389  | 96 -  | 6   | 393  | 12551  | 12938  |
| UN49495 | Rsa1.0.08338.1 | 529  | 7511   | 0         | 404  | 431  | 93 -  | 13  | 442  | 560    | 978    |
| UN49496 | Rsa1.0.03521.1 | 1278 | 396204 | 1.00E-139 | 320  | 334  | 95 +  | 951 | 1278 | 139674 | 140004 |
| UN49497 | Rsa1.0.03718.1 | 755  | 21195  | 1.00E-117 | 265  | 282  | 93 +  | 204 | 485  | 654    | 935    |
| UN49498 | Rsa1.0.00427.1 | 202  | 189678 | 1.00E-80  | 177  | 185  | 95 +  | 3   | 183  | 11869  | 12053  |
| UN49499 | Rsa1.0.00050.1 | 830  | 237174 | 0         | 544  | 594  | 91 +  | 251 | 830  | 7595   | 8176   |
| UN49500 | Rsa1.0.00037.1 | 1088 | 307838 | 0         | 451  | 464  | 97 -  | 627 | 1088 | 241191 | 241654 |
| UN49501 | Rsa1.0.00435.1 | 1228 | 317579 | 1.00E-170 | 321  | 327  | 98 -  | 3   | 329  | 68865  | 69191  |
| UN49502 | Rsa1.0.00939.1 | 1027 | 185227 | 1.00E-107 | 228  | 238  | 95 -  | 410 | 647  | 39140  | 39377  |
| UN49503 | Rsa1.0.01091.1 | 1076 | 54383  | 1.00E-180 | 365  | 380  | 96 -  | 647 | 1026 | 11515  | 11894  |
| UN49504 | Rsa1.0.12663.1 | 570  | 5160   | 1.00E-134 | 315  | 339  | 92 -  | 232 | 570  | 936    | 1260   |
| UN49505 | Rsa1.0.07671.1 | 823  | 8860   | 0         | 779  | 847  | 91 +  | 1   | 823  | 3303   | 4128   |
| UN49506 | Rsa1.0.00539.1 | 691  | 76926  | 1.00E-106 | 220  | 228  | 96 +  | 49  | 276  | 27886  | 28113  |
| UN49507 | Rsa1.0.00060.1 | 715  | 502678 | 0         | 674  | 717  | 94 -  | 2   | 715  | 128114 | 128821 |
| UN49508 | Rsa1.0.09899.1 | 974  | 6099   | 0         | 955  | 990  | 96 +  | 2   | 974  | 2975   | 3963   |
| UN49509 | Rsa1.0.02206.1 | 1300 | 33922  | 1.00E-135 | 263  | 268  | 98 -  | 1   | 267  | 19902  | 20169  |
| UN49510 | Rsa1.0.00252.1 | 966  | 102760 | 0         | 538  | 542  | 99 +  | 425 | 966  | 57128  | 57669  |
| UN49511 | Rsa1.0.02575.1 | 938  | 29944  | 0         | 932  | 934  | 99 -  | 3   | 936  | 19878  | 20811  |
| UN49512 | Rsa1.0.00034.1 | 393  | 260119 | 1.00E-149 | 324  | 342  | 94 -  | 2   | 343  | 32894  | 33233  |
| UN49513 | Rsa1.0.00541.1 | 514  | 76863  | 0         | 478  | 493  | 96 -  | 16  | 507  | 61282  | 61773  |
| UN49514 | Rsa1.0.00500.1 | 1076 | 272308 | 1.00E-142 | 264  | 265  | 99 -  | 811 | 1075 | 158682 | 158945 |
| UN49515 | Rsa1.0.00721.1 | 1305 | 66918  | 0         | 420  | 441  | 95 +  | 282 | 722  | 919    | 1359   |
| UN49516 | Rsa1.0.00206.1 | 897  | 109040 | 1.00E-125 | 248  | 254  | 97 -  | 644 | 895  | 45115  | 45368  |
| UN49517 | Rsa1.0.06715.1 | 1263 | 10485  | 0         | 531  | 582  | 91 +  | 705 | 1260 | 2808   | 3385   |
| UN49518 | Rsa1.0.00105.1 | 846  | 134138 | 1.00E-165 | 415  | 453  | 91 +  | 392 | 843  | 91785  | 92214  |
| UN49519 | Rsa1.0.01440.1 | 918  | 45807  | 0         | 753  | 773  | 97 -  | 149 | 918  | 13699  | 14471  |
| UN49520 | Rsa1.0.52876.1 | 1027 | 431    | 0         | 378  | 386  | 97 +  | 285 | 670  | 40     | 425    |
| UN49521 | Rsa1.0.00652.1 | 941  | 70089  | 1.00E-172 | 407  | 441  | 92 +  | 1   | 435  | 46873  | 47303  |
| UN49522 | Rsa1.0.00040.1 | 715  | 324196 | 0         | 499  | 534  | 93 -  | 3   | 532  | 175165 | 175676 |
| UN49523 | Rsa1.0.00664.1 | 796  | 69573  | 0         | 407  | 409  | 99 +  | 1   | 408  | 577    | 984    |
| UN49524 | Rsa1.0.04762.1 | 1060 | 16101  | 0         | 528  | 562  | 93 -  | 11  | 560  | 4256   | 4811   |
| UN49525 | Rsa1.0.45212.1 | 677  | 498    | 1.00E-110 | 214  | 218  | 98 -  | 459 | 676  | 147    | 364    |
| UN49526 | Rsa1.0.02943.1 | 939  | 153598 | 0         | 581  | 596  | 97 -  | 345 | 939  | 128916 | 129510 |
| UN49527 | Rsa1.0.01388.1 | 807  | 46741  | 1.00E-110 | 203  | 203  | 100 - | 1   | 203  | 27619  | 27821  |
| UN49528 | Rsa1.0.01649.1 | 627  | 41624  | 4.00E-92  | 199  | 208  | 95 -  | 190 | 397  | 27386  | 27593  |



|         |                |      |        |           |      |      |       |     |      |        |        |
|---------|----------------|------|--------|-----------|------|------|-------|-----|------|--------|--------|
| UN49529 | Rsa1.0.00293.1 | 1198 | 339294 | 0         | 444  | 448  | 99 -  | 1   | 447  | 254540 | 254987 |
| UN49530 | Rsa1.0.00302.1 | 1203 | 97521  | 0         | 361  | 364  | 99 -  | 2   | 365  | 85022  | 85385  |
| UN49531 | Rsa1.0.01458.1 | 1091 | 175719 | 1.00E-177 | 360  | 372  | 96 +  | 3   | 371  | 33186  | 33554  |
| UN49532 | Rsa1.0.06675.1 | 760  | 10561  | 0         | 494  | 520  | 95 +  | 1   | 516  | 9584   | 10101  |
| UN49533 | Rsa1.0.00118.1 | 1069 | 130637 | 0         | 561  | 598  | 93 +  | 3   | 593  | 28806  | 29403  |
| UN49534 | Rsa1.0.01559.1 | 302  | 43262  | 4.00E-87  | 266  | 299  | 88 -  | 11  | 301  | 17367  | 17652  |
| UN49535 | Rsa1.0.00007.1 | 898  | 239325 | 0         | 824  | 876  | 94 +  | 6   | 877  | 50057  | 50932  |
| UN49536 | Rsa1.0.00013.1 | 1039 | 292129 | 0         | 1032 | 1032 | 100 - | 1   | 1032 | 287828 | 288859 |
| UN49537 | Rsa1.0.00122.1 | 812  | 265937 | 0         | 369  | 383  | 96 -  | 1   | 383  | 82124  | 82506  |
| UN49538 | Rsa1.0.00065.1 | 733  | 454616 | 1.00E-64  | 126  | 126  | 100 + | 473 | 598  | 115656 | 115781 |
| UN49539 | Rsa1.0.04235.1 | 996  | 18373  | 0         | 568  | 597  | 95 +  | 15  | 609  | 11463  | 12055  |
| UN49540 | Rsa1.0.00079.1 | 705  | 606987 | 1.00E-169 | 368  | 386  | 95 -  | 1   | 375  | 22253  | 22636  |
| UN49541 | Rsa1.0.02855.1 | 748  | 27271  | 0         | 510  | 526  | 96 +  | 222 | 745  | 10752  | 11275  |
| UN49542 | Rsa1.0.03241.1 | 900  | 24423  | 0         | 412  | 415  | 99 -  | 484 | 898  | 13644  | 14058  |
| UN49543 | Rsa1.0.00037.1 | 1034 | 307838 | 1.00E-172 | 372  | 398  | 93 +  | 5   | 402  | 257465 | 257840 |
| UN49544 | Rsa1.0.00048.1 | 726  | 167185 | 1.00E-172 | 349  | 358  | 97 -  | 166 | 521  | 2507   | 2862   |
| UN49545 | Rsa1.0.04005.1 | 1553 | 19586  | 0         | 767  | 839  | 91 -  | 691 | 1528 | 2144   | 2955   |
| UN49546 | Rsa1.0.08259.1 | 541  | 7641   | 2.00E-56  | 127  | 132  | 96 +  | 276 | 407  | 2029   | 2160   |
| UN49547 | Rsa1.0.00366.1 | 1031 | 90880  | 0         | 844  | 850  | 99 +  | 4   | 853  | 9231   | 10080  |
| UN49548 | Rsa1.0.08725.1 | 815  | 6997   | 2.00E-51  | 113  | 116  | 97 +  | 247 | 362  | 4214   | 4329   |
| UN49549 | Rsa1.0.02341.1 | 1174 | 32387  | 2.00E-95  | 201  | 206  | 97 -  | 970 | 1174 | 31288  | 31492  |
| UN49550 | Rsa1.0.01502.1 | 731  | 44519  | 0         | 479  | 511  | 93 -  | 5   | 515  | 41343  | 41834  |
| UN49551 | Rsa1.0.02166.1 | 1026 | 34414  | 0         | 342  | 346  | 98 -  | 464 | 809  | 20683  | 21028  |
| UN49552 | Rsa1.0.06615.1 | 755  | 10659  | 0         | 367  | 367  | 100 + | 15  | 381  | 721    | 1087   |
| UN49553 | Rsa1.0.07588.1 | 959  | 9070   | 0         | 636  | 659  | 96 +  | 304 | 959  | 5044   | 5702   |
| UN49554 | Rsa1.0.00096.1 | 568  | 198773 | 0         | 367  | 381  | 96 -  | 184 | 563  | 135997 | 136372 |
| UN49555 | Rsa1.0.01469.1 | 1117 | 45139  | 1.00E-110 | 211  | 214  | 98 -  | 904 | 1117 | 42148  | 42361  |
| UN49556 | Rsa1.0.00576.1 | 716  | 178949 | 4.00E-86  | 180  | 186  | 96 -  | 240 | 425  | 3256   | 3441   |
| UN49557 | Rsa1.0.00131.1 | 831  | 432233 | 1.00E-123 | 243  | 249  | 97 +  | 8   | 256  | 408237 | 408485 |
| UN49558 | Rsa1.0.00656.1 | 724  | 69968  | 1.00E-165 | 425  | 461  | 92 -  | 267 | 723  | 45205  | 45651  |
| UN49559 | Rsa1.0.00807.1 | 887  | 63607  | 6.00E-98  | 185  | 186  | 99 -  | 471 | 656  | 18358  | 18543  |
| UN49560 | Rsa1.0.02694.1 | 1057 | 28610  | 1.00E-165 | 375  | 402  | 93 +  | 238 | 633  | 6542   | 6943   |
| UN49561 | Rsa1.0.01976.1 | 469  | 36570  | 1.00E-111 | 271  | 291  | 93 +  | 3   | 290  | 32507  | 32793  |
| UN49562 | Rsa1.0.01453.1 | 836  | 45449  | 1.00E-145 | 286  | 294  | 97 +  | 4   | 297  | 10628  | 10921  |
| UN49563 | Rsa1.0.05423.1 | 1195 | 13800  | 1.00E-103 | 246  | 262  | 93 -  | 909 | 1167 | 7558   | 7819   |
| UN49564 | Rsa1.0.00152.1 | 959  | 257730 | 1.00E-102 | 215  | 222  | 96 -  | 628 | 849  | 96243  | 96463  |
| UN49565 | Rsa1.0.02622.1 | 1148 | 142402 | 0         | 643  | 661  | 97 -  | 3   | 663  | 9528   | 10188  |
| UN49566 | Rsa1.0.00192.1 | 814  | 278200 | 0         | 609  | 646  | 94 +  | 123 | 767  | 251267 | 251912 |
| UN49567 | Rsa1.0.07809.1 | 944  | 8503   | 0         | 875  | 928  | 94 +  | 28  | 935  | 1020   | 1941   |

|         |                |      |        |           |      |      |       |     |      |        |        |
|---------|----------------|------|--------|-----------|------|------|-------|-----|------|--------|--------|
| UN49568 | Rsa1.0.03352.1 | 1116 | 23506  | 1.00E-105 | 239  | 250  | 95 +  | 868 | 1116 | 4054   | 4301   |
| UN49569 | Rsa1.0.00644.1 | 842  | 136881 | 1.00E-102 | 199  | 202  | 98 +  | 404 | 605  | 63427  | 63628  |
| UN49570 | Rsa1.0.00455.1 | 410  | 224823 | 7.00E-65  | 141  | 146  | 96 -  | 176 | 321  | 183400 | 183545 |
| UN49571 | Rsa1.0.00008.1 | 734  | 358124 | 1.00E-166 | 341  | 356  | 95 -  | 2   | 357  | 73511  | 73866  |
| UN49572 | Rsa1.0.03180.1 | 1203 | 24764  | 1.00E-158 | 341  | 359  | 94 +  | 852 | 1203 | 21745  | 22103  |
| UN49573 | Rsa1.0.01970.1 | 1071 | 36648  | 0         | 1036 | 1075 | 96 +  | 3   | 1071 | 30306  | 31375  |
| UN49574 | Rsa1.0.01938.1 | 307  | 264018 | 1.00E-107 | 203  | 205  | 99 +  | 103 | 307  | 133128 | 133332 |
| UN49575 | Rsa1.0.00134.1 | 1426 | 390219 | 0         | 604  | 646  | 93 +  | 661 | 1306 | 155052 | 155697 |
| UN49576 | Rsa1.0.02122.1 | 1061 | 34797  | 0         | 372  | 381  | 97 -  | 682 | 1061 | 26122  | 26501  |
| UN49577 | Rsa1.0.00115.1 | 756  | 131321 | 1.00E-128 | 301  | 326  | 92 +  | 9   | 334  | 34884  | 35197  |
| UN49578 | Rsa1.0.01085.1 | 855  | 54539  | 1.00E-161 | 315  | 324  | 97 -  | 246 | 569  | 13646  | 13969  |
| UN49579 | Rsa1.0.19459.1 | 1157 | 1429   | 5.00E-99  | 234  | 248  | 94 -  | 890 | 1135 | 827    | 1074   |
| UN49580 | Rsa1.0.05774.1 | 730  | 12667  | 0         | 413  | 430  | 96 +  | 297 | 721  | 3452   | 3881   |
| UN49581 | Rsa1.0.01005.1 | 721  | 56967  | 1.00E-130 | 257  | 264  | 97 -  | 234 | 497  | 19291  | 19554  |
| UN49582 | Rsa1.0.00038.1 | 823  | 314568 | 1.00E-115 | 303  | 328  | 92 +  | 508 | 823  | 16997  | 17323  |
| UN49583 | Rsa1.0.03552.1 | 906  | 22151  | 5.00E-86  | 183  | 190  | 96 +  | 33  | 222  | 13481  | 13670  |
| UN49584 | Rsa1.0.05260.1 | 896  | 14337  | 0         | 638  | 669  | 95 -  | 234 | 896  | 3746   | 4414   |
| UN49585 | Rsa1.0.01786.1 | 748  | 133324 | 2.33E-156 | 359  | 387  | 92 -  | 363 | 747  | 100617 | 100988 |
| UN49586 | Rsa1.0.00912.1 | 684  | 59923  | 1.00E-153 | 332  | 346  | 95 -  | 343 | 683  | 36937  | 37282  |
| UN49587 | Rsa1.0.00328.1 | 1011 | 224661 | 0         | 555  | 574  | 96 +  | 438 | 1011 | 207122 | 207694 |
| UN49588 | Rsa1.0.00137.1 | 811  | 122457 | 1.00E-100 | 185  | 185  | 100 - | 1   | 185  | 5329   | 5513   |
| UN49589 | Rsa1.0.00175.1 | 1026 | 166121 | 1.00E-126 | 278  | 294  | 94 -  | 188 | 475  | 62442  | 62732  |
| UN49590 | Rsa1.0.00121.1 | 1183 | 278029 | 0         | 403  | 414  | 97 +  | 1   | 410  | 120178 | 120590 |
| UN49591 | Rsa1.0.02192.1 | 788  | 171291 | 0         | 360  | 365  | 98 +  | 4   | 368  | 10128  | 10492  |
| UN49592 | Rsa1.0.02188.1 | 1016 | 34104  | 0         | 513  | 532  | 96 +  | 3   | 530  | 2402   | 2933   |
| UN49593 | Rsa1.0.01963.1 | 800  | 36719  | 0         | 418  | 434  | 96 -  | 372 | 800  | 31871  | 32302  |
| UN49594 | Rsa1.0.00145.1 | 780  | 261008 | 0         | 363  | 364  | 99 +  | 306 | 669  | 246600 | 246963 |
| UN49595 | Rsa1.0.00041.1 | 607  | 186197 | 0         | 452  | 466  | 96 -  | 127 | 592  | 54308  | 54773  |
| UN49596 | Rsa1.0.00622.1 | 701  | 71822  | 0         | 411  | 411  | 100 + | 291 | 701  | 11571  | 11981  |
| UN49597 | Rsa1.0.00655.1 | 787  | 195840 | 1.00E-145 | 333  | 355  | 93 -  | 46  | 390  | 17675  | 18029  |
| UN49598 | Rsa1.0.00158.1 | 519  | 117999 | 3.00E-71  | 176  | 187  | 94 +  | 335 | 519  | 40630  | 40814  |
| UN49599 | Rsa1.0.01513.1 | 772  | 44234  | 7.00E-79  | 270  | 307  | 87 -  | 488 | 772  | 17196  | 17498  |
| UN49600 | Rsa1.0.00975.1 | 702  | 57865  | 0         | 625  | 642  | 97 +  | 2   | 643  | 55428  | 56068  |
| UN49601 | Rsa1.0.00541.1 | 854  | 76863  | 1.00E-163 | 316  | 324  | 97 +  | 302 | 625  | 34580  | 34903  |
| UN49602 | Rsa1.0.00568.1 | 682  | 75219  | 1.00E-171 | 350  | 364  | 96 +  | 217 | 574  | 4962   | 5324   |
| UN49603 | Rsa1.0.04121.1 | 720  | 18951  | 0         | 475  | 499  | 95 -  | 7   | 505  | 13882  | 14379  |
| UN49604 | Rsa1.0.16140.1 | 985  | 2268   | 0         | 907  | 932  | 97 +  | 61  | 985  | 1303   | 2234   |
| UN49605 | Rsa1.0.00674.1 | 1103 | 193753 | 1.00E-154 | 323  | 332  | 97 +  | 766 | 1091 | 181840 | 182171 |
| UN49606 | Rsa1.0.02143.1 | 738  | 34632  | 0         | 471  | 480  | 98 -  | 2   | 481  | 13042  | 13521  |

|         |                |      |        |           |      |      |       |     |      |        |        |
|---------|----------------|------|--------|-----------|------|------|-------|-----|------|--------|--------|
| UN49607 | Rsa1.0_00002.1 | 1069 | 601661 | 1.00E-115 | 336  | 375  | 89 +  | 15  | 380  | 264140 | 264511 |
| UN49608 | Rsa1.0_00127.1 | 1298 | 127446 | 1.00E-176 | 320  | 322  | 99 +  | 368 | 689  | 20724  | 21045  |
| UN49609 | Rsa1.0_02157.1 | 805  | 149652 | 1.00E-135 | 254  | 257  | 98 -  | 100 | 356  | 13750  | 14006  |
| UN49610 | Rsa1.0_01422.1 | 888  | 46172  | 1.00E-144 | 269  | 272  | 98 +  | 576 | 847  | 1      | 272    |
| UN49611 | Rsa1.0_08427.1 | 971  | 7371   | 1.00E-177 | 329  | 331  | 99 +  | 642 | 971  | 1      | 330    |
| UN49612 | Rsa1.0_04653.1 | 1109 | 16509  | 1.00E-112 | 212  | 214  | 99 +  | 680 | 893  | 2773   | 2986   |
| UN49613 | Rsa1.0_01448.1 | 262  | 45645  | 1.00E-116 | 255  | 269  | 94 +  | 1   | 261  | 16474  | 16741  |
| UN49614 | Rsa1.0_00323.1 | 1245 | 159650 | 0         | 460  | 468  | 98 -  | 361 | 828  | 11516  | 11983  |
| UN49615 | Rsa1.0_01523.1 | 790  | 43959  | 1.00E-104 | 251  | 267  | 94 +  | 520 | 785  | 23550  | 23807  |
| UN49616 | Rsa1.0_02481.1 | 788  | 31035  | 0         | 413  | 432  | 95 -  | 356 | 786  | 17787  | 18218  |
| UN49617 | Rsa1.0_00127.1 | 1178 | 127446 | 1.00E-138 | 274  | 282  | 97 -  | 168 | 449  | 64243  | 64524  |
| UN49618 | Rsa1.0_18647.1 | 812  | 1560   | 1.00E-155 | 327  | 342  | 95 -  | 468 | 808  | 591    | 932    |
| UN49619 | Rsa1.0_01119.1 | 640  | 53459  | 1.00E-143 | 292  | 303  | 96 +  | 74  | 373  | 42046  | 42348  |
| UN49620 | Rsa1.0_00025.1 | 1276 | 277312 | 1.00E-172 | 312  | 314  | 99 -  | 962 | 1275 | 134683 | 134996 |
| UN49621 | Rsa1.0_00036.1 | 1079 | 176186 | 0         | 1055 | 1079 | 97 +  | 1   | 1079 | 93759  | 94837  |
| UN49622 | Rsa1.0_00594.1 | 914  | 73729  | 0         | 645  | 656  | 98 -  | 258 | 912  | 4135   | 4790   |
| UN49623 | Rsa1.0_00224.1 | 462  | 327530 | 1.00E-162 | 376  | 407  | 92 -  | 73  | 457  | 26167  | 26573  |
| UN49624 | Rsa1.0_22665.1 | 611  | 1104   | 0         | 592  | 606  | 97 -  | 2   | 607  | 101    | 706    |
| UN49625 | Rsa1.0_00595.1 | 917  | 341648 | 0         | 889  | 916  | 97 +  | 3   | 914  | 192510 | 193425 |
| UN49626 | Rsa1.0_50205.1 | 614  | 452    | 1.00E-150 | 405  | 450  | 90 +  | 28  | 477  | 3      | 452    |
| UN49627 | Rsa1.0_00038.1 | 840  | 314568 | 1.00E-159 | 315  | 324  | 97 +  | 517 | 839  | 52376  | 52699  |
| UN49628 | Rsa1.0_00322.1 | 856  | 212233 | 0         | 449  | 474  | 94 +  | 18  | 479  | 4330   | 4800   |
| UN49629 | Rsa1.0_00246.1 | 757  | 103541 | 1.00E-126 | 300  | 320  | 93 +  | 3   | 319  | 89282  | 89594  |
| UN49630 | Rsa1.0_01937.1 | 1101 | 37147  | 0         | 391  | 402  | 97 +  | 700 | 1101 | 21081  | 21480  |
| UN49631 | Rsa1.0_00571.1 | 990  | 329018 | 0         | 873  | 916  | 95 -  | 86  | 986  | 173767 | 174680 |
| UN49632 | Rsa1.0_00527.1 | 1054 | 77733  | 1.00E-104 | 273  | 298  | 91 -  | 294 | 582  | 58084  | 58381  |
| UN49633 | Rsa1.0_00284.1 | 845  | 323267 | 0         | 661  | 687  | 96 +  | 160 | 845  | 146541 | 147225 |
| UN49634 | Rsa1.0_00480.1 | 891  | 81325  | 0         | 430  | 442  | 97 +  | 369 | 807  | 29204  | 29644  |
| UN49635 | Rsa1.0_00748.1 | 816  | 65983  | 1.00E-172 | 423  | 461  | 91 -  | 94  | 546  | 63996  | 64456  |
| UN49636 | Rsa1.0_01070.1 | 339  | 55099  | 4.00E-72  | 190  | 206  | 92 -  | 134 | 339  | 31371  | 31570  |
| UN49637 | Rsa1.0_18035.1 | 1109 | 1685   | 0         | 559  | 578  | 96 +  | 10  | 584  | 467    | 1044   |
| UN49638 | Rsa1.0_01182.1 | 588  | 167304 | 0         | 531  | 553  | 96 +  | 44  | 587  | 26261  | 26813  |
| UN49639 | Rsa1.0_00093.1 | 641  | 214962 | 0         | 329  | 329  | 100 - | 1   | 329  | 134460 | 134788 |
| UN49640 | Rsa1.0_00017.1 | 810  | 752458 | 3.00E-84  | 265  | 298  | 88 -  | 14  | 296  | 30157  | 30441  |
| UN49641 | Rsa1.0_03646.1 | 1165 | 21598  | 1.00E-150 | 273  | 274  | 99 +  | 892 | 1165 | 15617  | 15890  |
| UN49642 | Rsa1.0_00281.1 | 508  | 99908  | 1.00E-158 | 403  | 438  | 92 -  | 94  | 507  | 24103  | 24539  |
| UN49643 | Rsa1.0_00265.1 | 1193 | 220635 | 0         | 481  | 516  | 93 +  | 1   | 513  | 171353 | 171865 |
| UN49644 | Rsa1.0_00015.1 | 1015 | 561803 | 0         | 408  | 414  | 98 +  | 604 | 1013 | 264496 | 264909 |
| UN49645 | Rsa1.0_03634.1 | 797  | 145192 | 0         | 461  | 464  | 99 -  | 334 | 797  | 19071  | 19534  |

|         |                |      |        |           |      |      |       |     |      |        |        |
|---------|----------------|------|--------|-----------|------|------|-------|-----|------|--------|--------|
| UN49646 | Rsa1.0.00734.1 | 824  | 66508  | 6.00E-98  | 243  | 261  | 93 -  | 551 | 805  | 56021  | 56279  |
| UN49647 | Rsa1.0.00004.1 | 1045 | 253996 | 0         | 733  | 756  | 96 -  | 293 | 1045 | 69019  | 69773  |
| UN49648 | Rsa1.0.00414.1 | 1217 | 202190 | 0         | 326  | 326  | 100 + | 892 | 1217 | 197259 | 197584 |
| UN49649 | Rsa1.0.00772.1 | 1120 | 64856  | 0         | 493  | 501  | 98 -  | 354 | 854  | 28581  | 29081  |
| UN49650 | Rsa1.0.00020.1 | 651  | 283099 | 1.00E-166 | 296  | 296  | 100 - | 356 | 651  | 75565  | 75860  |
| UN49651 | Rsa1.0.00027.1 | 1113 | 283362 | 0         | 395  | 404  | 97 +  | 1   | 403  | 160693 | 161096 |
| UN49652 | Rsa1.0.04456.1 | 761  | 17260  | 2.00E-97  | 260  | 284  | 91 +  | 476 | 756  | 7707   | 7985   |
| UN49653 | Rsa1.0.00183.1 | 1304 | 113277 | 1.00E-139 | 285  | 293  | 97 -  | 112 | 402  | 67148  | 67437  |
| UN49654 | Rsa1.0.00234.1 | 1190 | 197060 | 0         | 400  | 415  | 96 -  | 410 | 824  | 144150 | 144564 |
| UN49655 | Rsa1.0.00448.1 | 733  | 84048  | 0         | 724  | 746  | 97 +  | 3   | 733  | 32815  | 33560  |
| UN49656 | Rsa1.0.01895.1 | 1313 | 37512  | 0         | 771  | 799  | 96 +  | 259 | 1057 | 23772  | 24570  |
| UN49657 | Rsa1.0.00755.1 | 1060 | 192559 | 1.00E-116 | 240  | 247  | 97 +  | 2   | 246  | 359    | 603    |
| UN49658 | Rsa1.0.00978.1 | 1156 | 57739  | 1.00E-105 | 253  | 272  | 93 -  | 3   | 265  | 45327  | 45598  |
| UN49659 | Rsa1.0.07344.1 | 1050 | 9528   | 0         | 403  | 418  | 96 -  | 12  | 429  | 523    | 939    |
| UN49660 | Rsa1.0.01896.1 | 807  | 37512  | 0         | 762  | 793  | 96 +  | 5   | 797  | 6185   | 6977   |
| UN49661 | Rsa1.0.01656.1 | 906  | 41494  | 2.00E-98  | 189  | 191  | 98 +  | 390 | 580  | 12318  | 12508  |
| UN49662 | Rsa1.0.04126.1 | 1576 | 18939  | 1.00E-154 | 300  | 308  | 97 -  | 652 | 959  | 12796  | 13103  |
| UN49663 | Rsa1.0.00190.1 | 1246 | 318240 | 0         | 368  | 373  | 98 +  | 68  | 440  | 116695 | 117067 |
| UN49664 | Rsa1.0.00108.1 | 1048 | 478491 | 0         | 419  | 445  | 94 -  | 592 | 1033 | 416456 | 416891 |
| UN49665 | Rsa1.0.00092.1 | 1295 | 659932 | 1.00E-139 | 273  | 279  | 97 -  | 2   | 280  | 154977 | 155254 |
| UN49666 | Rsa1.0.00533.1 | 724  | 77375  | 0         | 711  | 711  | 100 + | 4   | 714  | 49299  | 50009  |
| UN49667 | Rsa1.0.09273.1 | 920  | 6511   | 1.00E-107 | 248  | 261  | 95 -  | 3   | 256  | 1960   | 2219   |
| UN49668 | Rsa1.0.00033.1 | 971  | 515811 | 1.00E-157 | 350  | 373  | 93 -  | 599 | 971  | 8088   | 8460   |
| UN49669 | Rsa1.0.03786.1 | 1041 | 20879  | 0         | 1011 | 1040 | 97 +  | 2   | 1041 | 13900  | 14939  |
| UN49670 | Rsa1.0.00773.1 | 1536 | 64839  | 0         | 628  | 644  | 97 -  | 652 | 1295 | 22427  | 23070  |
| UN49671 | Rsa1.0.02747.1 | 1487 | 28247  | 0         | 413  | 417  | 99 -  | 3   | 419  | 24943  | 25358  |
| UN49672 | Rsa1.0.00793.1 | 928  | 64103  | 9.00E-88  | 196  | 205  | 95 +  | 68  | 271  | 36927  | 37131  |
| UN49673 | Rsa1.0.00417.1 | 1055 | 395068 | 0         | 487  | 519  | 93 +  | 525 | 1043 | 259263 | 259778 |
| UN49674 | Rsa1.0.03524.1 | 967  | 22297  | 1.00E-170 | 319  | 323  | 98 +  | 647 | 967  | 17950  | 18272  |
| UN49675 | Rsa1.0.01660.1 | 1239 | 41400  | 0         | 512  | 547  | 93 +  | 678 | 1221 | 30402  | 30943  |
| UN49676 | Rsa1.0.02117.1 | 1362 | 34843  | 1.00E-143 | 270  | 274  | 98 +  | 855 | 1128 | 15985  | 16258  |
| UN49677 | Rsa1.0.00470.1 | 1124 | 81968  | 2.00E-98  | 208  | 215  | 96 +  | 602 | 816  | 31385  | 31598  |
| UN49678 | Rsa1.0.00331.1 | 1137 | 176754 | 0         | 656  | 672  | 97 -  | 471 | 1137 | 22422  | 23092  |
| UN49679 | Rsa1.0.00552.1 | 793  | 206757 | 1.00E-118 | 225  | 228  | 98 -  | 1   | 228  | 69473  | 69700  |
| UN49680 | Rsa1.0.14140.1 | 1125 | 3748   | 0         | 595  | 600  | 99 +  | 1   | 600  | 1106   | 1705   |
| UN49681 | Rsa1.0.01469.1 | 952  | 45139  | 0         | 661  | 665  | 99 +  | 3   | 667  | 29375  | 30038  |
| UN49682 | Rsa1.0.00335.1 | 1187 | 94371  | 1.00E-155 | 314  | 326  | 96 -  | 817 | 1142 | 42210  | 42535  |
| UN49683 | Rsa1.0.01502.1 | 806  | 44519  | 1.00E-116 | 283  | 304  | 93 -  | 1   | 300  | 39463  | 39762  |
| UN49684 | Rsa1.0.06530.1 | 1086 | 10840  | 1.00E-170 | 464  | 509  | 91 +  | 180 | 684  | 5476   | 5958   |

|         |                |      |        |           |      |      |      |      |      |        |        |
|---------|----------------|------|--------|-----------|------|------|------|------|------|--------|--------|
| UN49685 | Rsa1.0_00648.1 | 798  | 70351  | 1.00E-92  | 198  | 205  | 96 + | 581  | 782  | 13289  | 13490  |
| UN49686 | Rsa1.0_00662.1 | 942  | 192183 | 3.00E-84  | 199  | 211  | 94 - | 729  | 938  | 32222  | 32422  |
| UN49687 | Rsa1.0_01537.1 | 831  | 187285 | 2.00E-97  | 190  | 193  | 98 - | 365  | 557  | 20952  | 21144  |
| UN49688 | Rsa1.0_08285.1 | 1082 | 7606   | 0         | 416  | 438  | 94 - | 3    | 436  | 6676   | 7111   |
| UN49689 | Rsa1.0_00336.1 | 978  | 445051 | 0         | 929  | 986  | 94 + | 3    | 978  | 308919 | 309893 |
| UN49690 | Rsa1.0_00638.1 | 1148 | 71037  | 0         | 426  | 440  | 96 + | 326  | 761  | 9032   | 9471   |
| UN49691 | Rsa1.0_00198.1 | 1100 | 222963 | 1.00E-168 | 374  | 396  | 94 + | 4    | 397  | 135032 | 135427 |
| UN49692 | Rsa1.0_00484.1 | 963  | 203294 | 0         | 537  | 548  | 97 - | 416  | 963  | 49804  | 50347  |
| UN49693 | Rsa1.0_06819.1 | 1064 | 10302  | 0         | 1022 | 1065 | 95 + | 1    | 1064 | 1161   | 2218   |
| UN49694 | Rsa1.0_00079.1 | 1172 | 606987 | 0         | 622  | 646  | 96 - | 7    | 652  | 4648   | 5292   |
| UN49695 | Rsa1.0_00065.1 | 1382 | 454616 | 9.00E-89  | 276  | 304  | 90 - | 1083 | 1382 | 176674 | 176971 |
| UN49696 | Rsa1.0_00069.1 | 733  | 403561 | 1.00E-149 | 276  | 279  | 98 - | 57   | 335  | 179274 | 179552 |
| UN49697 | Rsa1.0_10303.1 | 880  | 5897   | 1.00E-114 | 216  | 218  | 99 + | 238  | 455  | 1614   | 1831   |
| UN49698 | Rsa1.0_39836.1 | 1142 | 564    | 0         | 478  | 511  | 93 - | 3    | 513  | 1      | 498    |
| UN49699 | Rsa1.0_00009.1 | 1101 | 232558 | 1.00E-100 | 228  | 241  | 94 - | 740  | 979  | 33337  | 33571  |
| UN49700 | Rsa1.0_01768.1 | 1164 | 138463 | 0         | 377  | 381  | 98 + | 345  | 725  | 103736 | 104116 |
| UN49701 | Rsa1.0_04890.1 | 1326 | 15591  | 1.00E-152 | 283  | 285  | 99 + | 41   | 324  | 14439  | 14723  |
| UN49702 | Rsa1.0_01814.1 | 923  | 38917  | 3.00E-87  | 198  | 208  | 95 + | 722  | 923  | 7909   | 8116   |
| UN49703 | Rsa1.0_14881.1 | 1141 | 2995   | 0         | 449  | 464  | 96 + | 676  | 1139 | 2323   | 2786   |
| UN49704 | Rsa1.0_00250.1 | 1009 | 273771 | 1.00E-96  | 205  | 212  | 96 - | 797  | 1008 | 60373  | 60583  |
| UN49705 | Rsa1.0_00080.1 | 813  | 190437 | 1.00E-180 | 444  | 480  | 92 + | 2    | 477  | 104347 | 104806 |
| UN49706 | Rsa1.0_00547.1 | 986  | 76521  | 0         | 359  | 367  | 97 - | 259  | 625  | 55109  | 55475  |
| UN49707 | Rsa1.0_00076.1 | 939  | 146021 | 0         | 415  | 433  | 95 + | 506  | 938  | 76300  | 76718  |
| UN49708 | Rsa1.0_17832.1 | 1007 | 1729   | 1.00E-147 | 268  | 269  | 99 + | 739  | 1007 | 123    | 391    |
| UN49709 | Rsa1.0_09583.1 | 1015 | 6270   | 1.00E-160 | 363  | 390  | 93 + | 549  | 929  | 5886   | 6270   |
| UN49710 | Rsa1.0_00407.1 | 1499 | 191544 | 1.00E-109 | 269  | 289  | 93 - | 1217 | 1499 | 7356   | 7642   |
| UN49711 | Rsa1.0_03218.1 | 1029 | 24539  | 1.00E-147 | 339  | 361  | 93 - | 4    | 349  | 5213   | 5572   |
| UN49712 | Rsa1.0_00752.1 | 1329 | 65756  | 1.00E-124 | 367  | 404  | 90 - | 942  | 1327 | 30478  | 30878  |
| UN49713 | Rsa1.0_00257.1 | 1228 | 102407 | 0         | 503  | 513  | 98 + | 716  | 1228 | 71302  | 71814  |
| UN49714 | Rsa1.0_08668.1 | 817  | 7059   | 1.00E-111 | 211  | 213  | 99 + | 469  | 681  | 5662   | 5874   |
| UN49715 | Rsa1.0_00223.1 | 1247 | 106231 | 1.00E-148 | 288  | 295  | 97 - | 329  | 623  | 40630  | 40924  |
| UN49716 | Rsa1.0_03878.1 | 1072 | 20305  | 1.00E-114 | 212  | 213  | 99 + | 519  | 731  | 4375   | 4587   |
| UN49717 | Rsa1.0_08220.1 | 894  | 7701   | 0         | 884  | 891  | 99 + | 3    | 893  | 772    | 1660   |
| UN49718 | Rsa1.0_01359.1 | 1139 | 47271  | 0         | 439  | 441  | 99 + | 3    | 443  | 32397  | 32836  |
| UN49719 | Rsa1.0_02017.1 | 1148 | 35999  | 1.00E-141 | 274  | 279  | 98 - | 3    | 280  | 26848  | 27126  |
| UN49720 | Rsa1.0_00332.1 | 1136 | 94575  | 2.00E-92  | 218  | 232  | 93 + | 131  | 362  | 22760  | 22989  |
| UN49721 | Rsa1.0_03170.1 | 1212 | 24824  | 0         | 707  | 710  | 99 + | 495  | 1203 | 12992  | 13701  |
| UN49722 | Rsa1.0_00529.1 | 920  | 77487  | 1.00E-126 | 259  | 268  | 96 - | 655  | 920  | 21827  | 22094  |
| UN49723 | Rsa1.0_02901.1 | 1181 | 26909  | 1.00E-103 | 272  | 296  | 91 + | 16   | 311  | 13863  | 14152  |

|         |                |      |        |           |     |      |       |     |      |        |        |
|---------|----------------|------|--------|-----------|-----|------|-------|-----|------|--------|--------|
| UN49724 | Rsa1.0.00088.1 | 1688 | 141341 | 0         | 445 | 448  | 99 -  | 324 | 771  | 57975  | 58422  |
| UN49725 | Rsa1.0.06791.1 | 1073 | 10350  | 0         | 832 | 876  | 94 +  | 61  | 936  | 6552   | 7421   |
| UN49726 | Rsa1.0.00759.1 | 922  | 65465  | 0         | 761 | 787  | 96 -  | 1   | 787  | 55681  | 56467  |
| UN49727 | Rsa1.0.02367.1 | 1159 | 32106  | 0         | 573 | 597  | 95 +  | 576 | 1159 | 25289  | 25884  |
| UN49728 | Rsa1.0.05545.1 | 881  | 13379  | 0         | 864 | 886  | 97 -  | 4   | 881  | 11084  | 11969  |
| UN49729 | Rsa1.0.00782.1 | 1028 | 64468  | 1.00E-163 | 303 | 307  | 98 -  | 722 | 1028 | 19372  | 19678  |
| UN49730 | Rsa1.0.02648.1 | 1154 | 29073  | 1.00E-140 | 298 | 311  | 95 +  | 108 | 418  | 5546   | 5852   |
| UN49731 | Rsa1.0.00207.1 | 1026 | 248736 | 0         | 410 | 434  | 94 +  | 595 | 1026 | 246026 | 246453 |
| UN49732 | Rsa1.0.04126.1 | 818  | 18939  | 1.00E-152 | 292 | 297  | 98 +  | 330 | 625  | 17030  | 17326  |
| UN49733 | Rsa1.0.13238.1 | 1245 | 4960   | 0         | 480 | 486  | 98 +  | 754 | 1239 | 2195   | 2680   |
| UN49734 | Rsa1.0.03843.1 | 1033 | 20496  | 1.00E-159 | 391 | 427  | 91 +  | 12  | 423  | 6097   | 6521   |
| UN49735 | Rsa1.0.00577.1 | 1315 | 174827 | 0         | 392 | 409  | 95 -  | 1   | 409  | 151076 | 151481 |
| UN49736 | Rsa1.0.00002.1 | 1072 | 601661 | 0         | 370 | 383  | 96 -  | 686 | 1068 | 264132 | 264511 |
| UN49737 | Rsa1.0.00116.1 | 648  | 365886 | 1.00E-92  | 211 | 223  | 94 -  | 423 | 645  | 314976 | 315195 |
| UN49738 | Rsa1.0.00065.1 | 761  | 454616 | 1.00E-113 | 223 | 228  | 97 -  | 63  | 290  | 116989 | 117216 |
| UN49739 | Rsa1.0.04286.1 | 1016 | 18084  | 1.00E-124 | 230 | 231  | 99 +  | 784 | 1014 | 6107   | 6337   |
| UN49740 | Rsa1.0.01762.1 | 700  | 39682  | 0         | 397 | 410  | 96 +  | 139 | 548  | 1493   | 1902   |
| UN49741 | Rsa1.0.01565.1 | 1205 | 155447 | 0         | 463 | 474  | 97 +  | 5   | 476  | 1778   | 2251   |
| UN49742 | Rsa1.0.01214.1 | 988  | 50599  | 0         | 553 | 579  | 95 -  | 6   | 584  | 49762  | 50340  |
| UN49743 | Rsa1.0.14298.1 | 926  | 3561   | 4.00E-65  | 130 | 131  | 99 -  | 695 | 825  | 145    | 275    |
| UN49744 | Rsa1.0.05189.1 | 1056 | 14545  | 1.00E-159 | 352 | 374  | 94 +  | 23  | 395  | 425    | 785    |
| UN49745 | Rsa1.0.00725.1 | 613  | 66757  | 1.00E-180 | 319 | 319  | 100 + | 2   | 320  | 39812  | 40130  |
| UN49746 | Rsa1.0.00040.1 | 991  | 324196 | 0         | 545 | 561  | 97 +  | 418 | 977  | 246545 | 247105 |
| UN49747 | Rsa1.0.06164.1 | 1186 | 11584  | 1.00E-164 | 293 | 293  | 100 + | 1   | 293  | 1590   | 1882   |
| UN49748 | Rsa1.0.02556.1 | 892  | 30133  | 0         | 679 | 690  | 98 -  | 1   | 687  | 4196   | 4882   |
| UN49749 | Rsa1.0.00490.1 | 1268 | 186713 | 0         | 945 | 1045 | 90 +  | 9   | 1053 | 23898  | 24942  |
| UN49750 | Rsa1.0.00104.1 | 917  | 368722 | 6.00E-92  | 238 | 260  | 91 +  | 501 | 760  | 201374 | 201633 |
| UN49751 | Rsa1.0.01955.1 | 1197 | 36850  | 0         | 942 | 998  | 94 +  | 214 | 1191 | 13035  | 14027  |
| UN49752 | Rsa1.0.50581.1 | 980  | 449    | 1.00E-172 | 349 | 363  | 96 -  | 217 | 579  | 87     | 449    |
| UN49753 | Rsa1.0.03817.1 | 1122 | 20669  | 1.00E-144 | 268 | 271  | 98 +  | 852 | 1122 | 15724  | 15994  |
| UN49754 | Rsa1.0.00051.1 | 1110 | 258225 | 0         | 603 | 627  | 96 -  | 487 | 1110 | 47441  | 48059  |
| UN49755 | Rsa1.0.00655.1 | 1055 | 195840 | 1.00E-173 | 371 | 384  | 96 +  | 674 | 1054 | 23143  | 23522  |
| UN49756 | Rsa1.0.00277.1 | 1017 | 100132 | 1.00E-122 | 328 | 362  | 90 -  | 651 | 1000 | 88368  | 88725  |
| UN49757 | Rsa1.0.02411.1 | 1079 | 31655  | 0         | 789 | 826  | 95 -  | 268 | 1075 | 27414  | 28235  |
| UN49758 | Rsa1.0.00557.1 | 803  | 75865  | 1.00E-129 | 310 | 336  | 92 +  | 2   | 323  | 74480  | 74807  |
| UN49759 | Rsa1.0.00033.1 | 1000 | 515811 | 0         | 396 | 397  | 99 +  | 604 | 1000 | 42902  | 43297  |
| UN49760 | Rsa1.0.00644.1 | 1437 | 136881 | 1.00E-109 | 201 | 201  | 100 + | 19  | 219  | 42114  | 42314  |
| UN49761 | Rsa1.0.00354.1 | 1267 | 232005 | 0         | 379 | 393  | 96 +  | 78  | 470  | 13148  | 13540  |
| UN49762 | Rsa1.0.00301.1 | 1119 | 365315 | 0         | 417 | 421  | 99 -  | 204 | 624  | 195261 | 195679 |

|         |                |      |        |           |      |      |       |     |      |        |        |
|---------|----------------|------|--------|-----------|------|------|-------|-----|------|--------|--------|
| UN49763 | Rsa1.0.00068.1 | 846  | 151813 | 1.00E-144 | 293  | 304  | 96 -  | 543 | 846  | 97516  | 97819  |
| UN49764 | Rsa1.0.02000.1 | 1320 | 36210  | 1.00E-144 | 293  | 302  | 97 -  | 3   | 300  | 4950   | 5251   |
| UN49765 | Rsa1.0.01772.1 | 1432 | 39557  | 0         | 652  | 659  | 98 -  | 763 | 1421 | 4407   | 5062   |
| UN49766 | Rsa1.0.01696.1 | 891  | 301850 | 1.00E-100 | 218  | 230  | 94 -  | 6   | 226  | 32637  | 32866  |
| UN49767 | Rsa1.0.02494.1 | 758  | 132923 | 0         | 594  | 611  | 97 -  | 85  | 695  | 6436   | 7046   |
| UN49768 | Rsa1.0.00657.1 | 832  | 69858  | 8.00E-51  | 121  | 127  | 95 -  | 513 | 639  | 26517  | 26643  |
| UN49769 | Rsa1.0.00486.1 | 745  | 80875  | 0         | 428  | 449  | 95 -  | 298 | 745  | 32581  | 33022  |
| UN49770 | Rsa1.0.00015.1 | 1109 | 561803 | 1.00E-118 | 237  | 244  | 97 +  | 73  | 316  | 527851 | 528094 |
| UN49771 | Rsa1.0.10771.1 | 1094 | 5723   | 0         | 394  | 413  | 95 +  | 660 | 1071 | 1882   | 2290   |
| UN49772 | Rsa1.0.00033.1 | 980  | 515811 | 0         | 376  | 394  | 95 +  | 598 | 979  | 42902  | 43295  |
| UN49773 | Rsa1.0.00977.1 | 1153 | 198001 | 1.00E-126 | 246  | 251  | 98 -  | 1   | 248  | 29296  | 29546  |
| UN49774 | Rsa1.0.00324.1 | 787  | 218805 | 2.00E-85  | 211  | 224  | 94 +  | 12  | 232  | 188059 | 188281 |
| UN49775 | Rsa1.0.01978.1 | 845  | 36546  | 2.33E-156 | 308  | 319  | 96 +  | 527 | 845  | 12510  | 12825  |
| UN49776 | Rsa1.0.00328.1 | 773  | 224661 | 6.00E-70  | 150  | 155  | 96 -  | 154 | 308  | 218734 | 218888 |
| UN49777 | Rsa1.0.00287.1 | 1038 | 98687  | 1.00E-129 | 264  | 274  | 96 -  | 3   | 276  | 46610  | 46883  |
| UN49778 | Rsa1.0.00910.1 | 1468 | 59975  | 1.00E-118 | 322  | 352  | 91 +  | 1   | 352  | 30940  | 31276  |
| UN49779 | Rsa1.0.00131.1 | 1128 | 432233 | 0         | 580  | 598  | 96 +  | 531 | 1126 | 34864  | 35461  |
| UN49780 | Rsa1.0.00048.1 | 821  | 167185 | 5.00E-86  | 180  | 186  | 96 -  | 205 | 390  | 6266   | 6451   |
| UN49781 | Rsa1.0.00007.1 | 831  | 239325 | 7.00E-79  | 159  | 162  | 98 +  | 574 | 735  | 15014  | 15175  |
| UN49782 | Rsa1.0.00433.1 | 762  | 85381  | 1.00E-101 | 261  | 279  | 93 -  | 456 | 732  | 65203  | 65477  |
| UN49783 | Rsa1.0.01196.1 | 1239 | 51097  | 1.00E-131 | 238  | 238  | 100 + | 831 | 1068 | 26455  | 26692  |
| UN49784 | Rsa1.0.00409.1 | 799  | 146788 | 0         | 755  | 778  | 97 -  | 26  | 799  | 145938 | 146715 |
| UN49785 | Rsa1.0.04568.1 | 868  | 16805  | 0         | 852  | 854  | 99 +  | 13  | 866  | 4827   | 5680   |
| UN49786 | Rsa1.0.01595.1 | 892  | 175383 | 6.00E-92  | 188  | 192  | 97 -  | 701 | 892  | 5888   | 6078   |
| UN49787 | Rsa1.0.00941.1 | 1031 | 58891  | 1.00E-144 | 292  | 301  | 97 +  | 731 | 1030 | 44924  | 45221  |
| UN49788 | Rsa1.0.16460.1 | 1214 | 2148   | 0         | 1155 | 1221 | 94 -  | 1   | 1214 | 357    | 1553   |
| UN49789 | Rsa1.0.02902.1 | 687  | 26907  | 1.00E-136 | 301  | 316  | 95 -  | 1   | 314  | 5590   | 5897   |
| UN49790 | Rsa1.0.00484.1 | 884  | 203294 | 0         | 396  | 416  | 95 -  | 2   | 417  | 56502  | 56910  |
| UN49791 | Rsa1.0.10042.1 | 1094 | 6027   | 1.00E-172 | 315  | 318  | 99 +  | 666 | 983  | 169    | 486    |
| UN49792 | Rsa1.0.07877.1 | 730  | 8373   | 0         | 338  | 341  | 99 -  | 1   | 339  | 5639   | 5979   |
| UN49793 | Rsa1.0.00588.1 | 1279 | 73939  | 1.00E-164 | 377  | 400  | 94 -  | 9   | 404  | 19138  | 19536  |
| UN49794 | Rsa1.0.00213.1 | 726  | 108167 | 1.00E-125 | 248  | 255  | 97 +  | 472 | 726  | 5743   | 5997   |
| UN49795 | Rsa1.0.00003.1 | 827  | 340054 | 2.33E-156 | 354  | 381  | 92 -  | 223 | 601  | 2633   | 3000   |
| UN49796 | Rsa1.0.00073.1 | 967  | 240924 | 1.00E-141 | 272  | 278  | 97 -  | 685 | 962  | 187878 | 188155 |
| UN49797 | Rsa1.0.02139.1 | 1170 | 34686  | 0         | 564  | 576  | 97 +  | 3   | 578  | 24840  | 25414  |
| UN49798 | Rsa1.0.02222.1 | 921  | 152798 | 1.00E-107 | 228  | 238  | 95 +  | 156 | 393  | 14746  | 14983  |
| UN49799 | Rsa1.0.01905.1 | 1407 | 37450  | 0         | 439  | 443  | 99 +  | 1   | 443  | 31757  | 32198  |
| UN49800 | Rsa1.0.03216.1 | 977  | 24540  | 4.00E-96  | 250  | 269  | 92 -  | 713 | 976  | 12063  | 12330  |
| UN49801 | Rsa1.0.00050.1 | 1058 | 237174 | 2.00E-85  | 210  | 225  | 93 -  | 816 | 1040 | 104021 | 104244 |

|         |                |      |        |           |     |     |       |     |      |        |        |
|---------|----------------|------|--------|-----------|-----|-----|-------|-----|------|--------|--------|
| UN49802 | Rsa1.0.00092.1 | 929  | 659932 | 1.00E-169 | 370 | 393 | 94 -  | 3   | 395  | 517900 | 518286 |
| UN49803 | Rsa1.0.00034.1 | 1105 | 260119 | 1.00E-150 | 338 | 354 | 95 +  | 732 | 1081 | 841    | 1189   |
| UN49804 | Rsa1.0.00483.1 | 877  | 81102  | 1.00E-159 | 364 | 386 | 94 -  | 497 | 877  | 46548  | 46932  |
| UN49805 | Rsa1.0.03821.1 | 1117 | 20643  | 1.00E-124 | 272 | 285 | 95 +  | 1   | 285  | 12660  | 12940  |
| UN49806 | Rsa1.0.11375.1 | 682  | 5528   | 1.00E-165 | 372 | 397 | 93 +  | 6   | 402  | 4753   | 5136   |
| UN49807 | Rsa1.0.02916.1 | 941  | 26809  | 0         | 416 | 433 | 96 -  | 5   | 435  | 5584   | 6008   |
| UN49808 | Rsa1.0.04651.1 | 1463 | 16516  | 0         | 581 | 581 | 100 - | 331 | 911  | 13808  | 14388  |
| UN49809 | Rsa1.0.00501.1 | 1013 | 79545  | 1.00E-164 | 316 | 323 | 97 -  | 694 | 1012 | 73166  | 73488  |
| UN49810 | Rsa1.0.11872.1 | 602  | 5384   | 0         | 353 | 353 | 100 - | 244 | 596  | 595    | 947    |
| UN49811 | Rsa1.0.00123.1 | 494  | 325650 | 0         | 330 | 331 | 99 +  | 2   | 332  | 216010 | 216340 |
| UN49812 | Rsa1.0.00016.1 | 557  | 831256 | 0         | 539 | 558 | 96 -  | 2   | 557  | 542844 | 543396 |
| UN49813 | Rsa1.0.00779.1 | 457  | 64568  | 1.00E-140 | 285 | 296 | 96 -  | 1   | 296  | 33078  | 33373  |
| UN49814 | Rsa1.0.02911.1 | 1436 | 142461 | 0         | 664 | 692 | 95 +  | 752 | 1436 | 23423  | 24109  |
| UN49815 | Rsa1.0.03668.1 | 965  | 21483  | 0         | 480 | 489 | 98 +  | 476 | 964  | 13255  | 13743  |
| UN49816 | Rsa1.0.08424.1 | 866  | 7375   | 1.00E-159 | 308 | 316 | 97 +  | 222 | 537  | 4218   | 4533   |
| UN49817 | Rsa1.0.00944.1 | 569  | 58733  | 0         | 442 | 460 | 96 +  | 110 | 569  | 35701  | 36160  |
| UN49818 | Rsa1.0.00079.1 | 893  | 606987 | 0         | 420 | 443 | 94 -  | 3   | 444  | 66614  | 67043  |
| UN49819 | Rsa1.0.00414.1 | 892  | 202190 | 0         | 504 | 525 | 96 +  | 1   | 524  | 56605  | 57128  |
| UN49820 | Rsa1.0.04384.1 | 1066 | 17629  | 0         | 362 | 371 | 97 -  | 119 | 489  | 4187   | 4557   |
| UN49821 | Rsa1.0.00094.1 | 1254 | 139042 | 0         | 516 | 523 | 98 +  | 3   | 525  | 96088  | 96610  |
| UN49822 | Rsa1.0.00914.1 | 979  | 59880  | 1.00E-131 | 265 | 274 | 96 -  | 352 | 625  | 22117  | 22390  |
| UN49823 | Rsa1.0.00108.1 | 1123 | 478491 | 0         | 447 | 476 | 93 -  | 656 | 1122 | 285727 | 286199 |
| UN49824 | Rsa1.0.01515.1 | 343  | 170864 | 1.00E-158 | 333 | 346 | 96 +  | 2   | 343  | 140654 | 140995 |
| UN49825 | Rsa1.0.01389.1 | 1180 | 46716  | 6.00E-71  | 140 | 141 | 99 +  | 734 | 874  | 17257  | 17397  |
| UN49826 | Rsa1.0.00354.1 | 785  | 232005 | 1.00E-134 | 267 | 275 | 97 +  | 507 | 781  | 230428 | 230702 |
| UN49827 | Rsa1.0.00280.1 | 468  | 99966  | 0         | 441 | 470 | 93 -  | 2   | 464  | 15019  | 15486  |
| UN49828 | Rsa1.0.00644.1 | 741  | 136881 | 1.00E-117 | 240 | 247 | 97 +  | 455 | 700  | 44565  | 44811  |
| UN49829 | Rsa1.0.00541.1 | 862  | 76863  | 1.00E-159 | 314 | 324 | 96 -  | 179 | 502  | 34580  | 34903  |
| UN49830 | Rsa1.0.00009.1 | 1118 | 232558 | 1.00E-157 | 294 | 298 | 98 -  | 3   | 300  | 142538 | 142835 |
| UN49831 | Rsa1.0.00154.1 | 777  | 189461 | 0         | 474 | 485 | 97 -  | 106 | 586  | 171032 | 171515 |
| UN49832 | Rsa1.0.01283.1 | 890  | 49257  | 1.00E-153 | 327 | 344 | 95 +  | 549 | 889  | 7067   | 7410   |
| UN49833 | Rsa1.0.01498.1 | 645  | 44558  | 0         | 639 | 642 | 99 -  | 3   | 644  | 35684  | 36325  |
| UN49834 | Rsa1.0.00087.1 | 1196 | 761073 | 1.00E-166 | 395 | 422 | 93 -  | 780 | 1196 | 615087 | 615505 |
| UN49835 | Rsa1.0.00119.1 | 1119 | 467509 | 0         | 472 | 507 | 93 -  | 263 | 759  | 386218 | 386715 |
| UN49836 | Rsa1.0.00429.1 | 1533 | 85559  | 0         | 806 | 819 | 98 +  | 715 | 1533 | 23587  | 24405  |
| UN49837 | Rsa1.0.00225.1 | 1288 | 105892 | 1.00E-132 | 315 | 341 | 92 +  | 135 | 469  | 53905  | 54233  |
| UN49838 | Rsa1.0.00017.1 | 893  | 752458 | 0         | 558 | 580 | 96 +  | 8   | 575  | 313665 | 314244 |
| UN49839 | Rsa1.0.00340.1 | 771  | 305782 | 1.00E-104 | 237 | 252 | 94 +  | 2   | 253  | 188904 | 189155 |
| UN49840 | Rsa1.0.00055.1 | 814  | 520193 | 0         | 403 | 413 | 97 +  | 379 | 787  | 163773 | 164185 |



|         |                |      |        |           |     |     |       |      |      |        |        |
|---------|----------------|------|--------|-----------|-----|-----|-------|------|------|--------|--------|
| UN49841 | Rsa1.0.02012.1 | 1251 | 36084  | 1.00E-116 | 233 | 239 | 97 +  | 1012 | 1250 | 18461  | 18696  |
| UN49842 | Rsa1.0.00329.1 | 700  | 222544 | 1.00E-138 | 272 | 279 | 97 -  | 3    | 277  | 31335  | 31613  |
| UN49843 | Rsa1.0.00055.1 | 992  | 520193 | 0         | 535 | 565 | 94 +  | 2    | 552  | 169180 | 169744 |
| UN49844 | Rsa1.0.01355.1 | 686  | 47303  | 0         | 628 | 671 | 93 -  | 15   | 680  | 39409  | 40068  |
| UN49845 | Rsa1.0.00107.1 | 644  | 431659 | 2.00E-94  | 182 | 184 | 98 -  | 461  | 644  | 82114  | 82297  |
| UN49846 | Rsa1.0.00883.1 | 781  | 61230  | 1.00E-126 | 254 | 261 | 97 -  | 402  | 661  | 30046  | 30306  |
| UN49847 | Rsa1.0.00094.1 | 677  | 139042 | 0         | 476 | 494 | 96 +  | 21   | 514  | 96117  | 96610  |
| UN49848 | Rsa1.0.00111.1 | 471  | 390088 | 0         | 460 | 462 | 99 -  | 1    | 461  | 334412 | 334872 |
| UN49849 | Rsa1.0.00780.1 | 987  | 147795 | 1.00E-126 | 233 | 234 | 99 +  | 1    | 234  | 23268  | 23501  |
| UN49850 | Rsa1.0.03191.1 | 680  | 145762 | 0         | 650 | 678 | 95 -  | 3    | 680  | 134764 | 135439 |
| UN49851 | Rsa1.0.04111.1 | 858  | 18991  | 1.00E-110 | 250 | 264 | 94 -  | 1    | 264  | 13843  | 14102  |
| UN49852 | Rsa1.0.02043.1 | 715  | 163754 | 1.00E-121 | 236 | 241 | 97 -  | 436  | 676  | 142580 | 142820 |
| UN49853 | Rsa1.0.01370.1 | 1020 | 47093  | 0         | 584 | 590 | 98 -  | 10   | 599  | 6095   | 6684   |
| UN49854 | Rsa1.0.00200.1 | 980  | 162016 | 0         | 620 | 680 | 91 +  | 314  | 978  | 108745 | 109404 |
| UN49855 | Rsa1.0.00669.1 | 681  | 69419  | 4.00E-46  | 98  | 99  | 98 -  | 431  | 529  | 19196  | 19294  |
| UN49856 | Rsa1.0.20228.1 | 947  | 1325   | 0         | 321 | 321 | 100 + | 1    | 321  | 1005   | 1325   |
| UN49857 | Rsa1.0.00863.1 | 876  | 254535 | 0         | 613 | 639 | 95 +  | 2    | 637  | 251935 | 252566 |
| UN49858 | Rsa1.0.00686.1 | 1113 | 68511  | 0         | 486 | 516 | 94 -  | 603  | 1113 | 27887  | 28402  |
| UN49859 | Rsa1.0.05005.1 | 828  | 15169  | 1.00E-139 | 284 | 294 | 96 +  | 538  | 828  | 14659  | 14948  |
| UN49860 | Rsa1.0.00016.1 | 801  | 831256 | 0         | 779 | 795 | 97 -  | 1    | 792  | 542808 | 543601 |
| UN49861 | Rsa1.0.01282.1 | 730  | 49304  | 0         | 547 | 575 | 95 -  | 169  | 730  | 30178  | 30752  |
| UN49862 | Rsa1.0.00376.1 | 757  | 90101  | 0         | 479 | 510 | 93 -  | 11   | 506  | 49557  | 50056  |
| UN49863 | Rsa1.0.03555.1 | 757  | 22129  | 0         | 454 | 454 | 100 - | 2    | 455  | 17793  | 18246  |
| UN49864 | Rsa1.0.01338.1 | 888  | 155644 | 3.00E-69  | 180 | 193 | 93 -  | 697  | 888  | 15485  | 15675  |
| UN49865 | Rsa1.0.00206.1 | 1040 | 109040 | 1.00E-107 | 241 | 253 | 95 +  | 1    | 251  | 50444  | 50695  |
| UN49866 | Rsa1.0.36357.1 | 993  | 620    | 1.00E-137 | 305 | 320 | 95 -  | 676  | 992  | 301    | 620    |
| UN49867 | Rsa1.0.00009.1 | 948  | 232558 | 1.00E-171 | 408 | 437 | 93 -  | 513  | 943  | 117457 | 117890 |
| UN49868 | Rsa1.0.08546.1 | 784  | 7214   | 1.00E-108 | 320 | 362 | 88 -  | 94   | 443  | 6867   | 7210   |
| UN49869 | Rsa1.0.00473.1 | 901  | 212204 | 2.00E-95  | 184 | 186 | 98 -  | 231  | 416  | 48625  | 48810  |
| UN49870 | Rsa1.0.15018.1 | 773  | 2889   | 1.00E-150 | 285 | 290 | 98 +  | 291  | 580  | 2384   | 2673   |
| UN49871 | Rsa1.0.02228.1 | 593  | 33688  | 1.00E-162 | 386 | 415 | 93 -  | 196  | 593  | 16933  | 17343  |
| UN49872 | Rsa1.0.05749.1 | 664  | 12746  | 2.00E-97  | 241 | 259 | 93 +  | 404  | 659  | 1417   | 1669   |
| UN49873 | Rsa1.0.00055.1 | 709  | 520193 | 0         | 394 | 396 | 99 +  | 10   | 405  | 207381 | 207776 |
| UN49874 | Rsa1.0.03781.1 | 947  | 20891  | 0         | 716 | 730 | 98 +  | 218  | 947  | 11400  | 12129  |
| UN49875 | Rsa1.0.02072.1 | 1024 | 35401  | 1.00E-138 | 264 | 269 | 98 +  | 559  | 827  | 6534   | 6802   |
| UN49876 | Rsa1.0.02544.1 | 1240 | 30290  | 1.00E-166 | 366 | 386 | 94 +  | 1    | 385  | 28777  | 29157  |
| UN49877 | Rsa1.0.00821.1 | 1069 | 62891  | 0         | 551 | 553 | 99 -  | 515  | 1067 | 46803  | 47355  |
| UN49878 | Rsa1.0.02555.1 | 1079 | 30146  | 1.00E-129 | 256 | 261 | 98 -  | 1    | 260  | 2219   | 2476   |
| UN49879 | Rsa1.0.17771.1 | 898  | 1744   | 0         | 436 | 436 | 100 - | 463  | 898  | 758    | 1193   |

|         |                |      |        |           |     |     |       |     |     |        |        |
|---------|----------------|------|--------|-----------|-----|-----|-------|-----|-----|--------|--------|
| UN49880 | Rsa1.0.00020.1 | 690  | 283099 | 1.00E-129 | 307 | 326 | 94 +  | 1   | 325 | 75539  | 75860  |
| UN49881 | Rsa1.0.00507.1 | 791  | 79074  | 1.00E-153 | 301 | 310 | 97 +  | 189 | 498 | 42905  | 43214  |
| UN49882 | Rsa1.0.02725.1 | 718  | 28404  | 5.00E-70  | 141 | 143 | 98 +  | 170 | 312 | 7526   | 7668   |
| UN49883 | Rsa1.0.00016.1 | 860  | 831256 | 7.00E-76  | 266 | 297 | 89 +  | 6   | 292 | 225491 | 225775 |
| UN49884 | Rsa1.0.00384.1 | 922  | 89278  | 2.00E-82  | 174 | 180 | 96 -  | 172 | 351 | 81079  | 81258  |
| UN49885 | Rsa1.0.15875.1 | 1140 | 2380   | 1.00E-153 | 278 | 279 | 99 -  | 1   | 279 | 381    | 659    |
| UN49886 | Rsa1.0.00237.1 | 628  | 235974 | 1.00E-127 | 333 | 366 | 90 -  | 210 | 569 | 60494  | 60853  |
| UN49887 | Rsa1.0.00169.1 | 1058 | 274298 | 0         | 788 | 845 | 93 +  | 2   | 825 | 26847  | 27690  |
| UN49888 | Rsa1.0.02252.1 | 707  | 33375  | 0         | 525 | 551 | 95 -  | 26  | 567 | 8074   | 8622   |
| UN49889 | Rsa1.0.04861.1 | 1153 | 15693  | 0         | 405 | 407 | 99 -  | 1   | 407 | 7365   | 7771   |
| UN49890 | Rsa1.0.02516.1 | 828  | 30608  | 2.00E-79  | 178 | 187 | 95 +  | 635 | 821 | 1719   | 1905   |
| UN49891 | Rsa1.0.00023.1 | 1097 | 194764 | 0         | 593 | 629 | 94 +  | 112 | 719 | 83189  | 83805  |
| UN49892 | Rsa1.0.00305.1 | 986  | 97308  | 0         | 442 | 470 | 94 +  | 29  | 493 | 78627  | 79094  |
| UN49893 | Rsa1.0.06175.1 | 973  | 11569  | 1.00E-138 | 268 | 274 | 97 +  | 698 | 971 | 8552   | 8825   |
| UN49894 | Rsa1.0.00424.1 | 746  | 86005  | 1.00E-160 | 308 | 315 | 97 -  | 311 | 625 | 67543  | 67857  |
| UN49895 | Rsa1.0.04399.1 | 845  | 17543  | 1.00E-144 | 303 | 318 | 95 -  | 520 | 837 | 8772   | 9083   |
| UN49896 | Rsa1.0.02101.1 | 973  | 35017  | 0         | 930 | 971 | 95 +  | 1   | 971 | 15803  | 16763  |
| UN49897 | Rsa1.0.00507.1 | 650  | 79074  | 1.00E-152 | 299 | 308 | 97 +  | 137 | 444 | 42907  | 43214  |
| UN49898 | Rsa1.0.00050.1 | 1025 | 237174 | 0         | 350 | 350 | 100 - | 593 | 942 | 35557  | 35906  |
| UN49899 | Rsa1.0.02756.1 | 847  | 28202  | 3.00E-90  | 220 | 239 | 92 -  | 89  | 323 | 15023  | 15249  |
| UN49900 | Rsa1.0.03170.1 | 676  | 24824  | 3.00E-93  | 186 | 190 | 97 -  | 2   | 191 | 12992  | 13181  |
| UN49901 | Rsa1.0.00361.1 | 889  | 91181  | 0         | 438 | 446 | 98 +  | 377 | 822 | 47136  | 47580  |
| UN49902 | Rsa1.0.18517.1 | 817  | 1584   | 1.00E-157 | 281 | 281 | 100 + | 3   | 283 | 1212   | 1492   |
| UN49903 | Rsa1.0.01941.1 | 633  | 37069  | 1.00E-106 | 199 | 200 | 99 +  | 277 | 476 | 31362  | 31561  |
| UN49904 | Rsa1.0.00201.1 | 765  | 232851 | 0         | 402 | 405 | 99 -  | 326 | 730 | 38925  | 39328  |
| UN49905 | Rsa1.0.00047.1 | 942  | 168582 | 1.00E-130 | 272 | 281 | 96 +  | 4   | 284 | 165001 | 165279 |
| UN49906 | Rsa1.0.07499.1 | 661  | 9244   | 1.00E-107 | 321 | 362 | 88 -  | 33  | 394 | 6522   | 6883   |
| UN49907 | Rsa1.0.01134.1 | 795  | 52829  | 1.00E-155 | 281 | 282 | 99 -  | 1   | 282 | 42558  | 42839  |
| UN49908 | Rsa1.0.03666.1 | 899  | 21485  | 0         | 899 | 900 | 99 +  | 1   | 899 | 4078   | 4977   |
| UN49909 | Rsa1.0.03860.1 | 791  | 20407  | 1.00E-166 | 311 | 316 | 98 -  | 213 | 528 | 17073  | 17388  |
| UN49910 | Rsa1.0.08018.1 | 1118 | 8075   | 1.00E-152 | 324 | 340 | 95 -  | 591 | 930 | 5141   | 5477   |
| UN49911 | Rsa1.0.00200.1 | 721  | 162016 | 0         | 588 | 626 | 93 -  | 2   | 627 | 108700 | 109322 |
| UN49912 | Rsa1.0.00116.1 | 982  | 365886 | 1.00E-111 | 229 | 236 | 97 +  | 392 | 626 | 239731 | 239966 |
| UN49913 | Rsa1.0.05217.1 | 1007 | 142938 | 0         | 423 | 443 | 95 +  | 440 | 879 | 130269 | 130711 |
| UN49914 | Rsa1.0.00299.1 | 964  | 97770  | 1.00E-110 | 256 | 273 | 93 -  | 507 | 779 | 26265  | 26534  |
| UN49915 | Rsa1.0.02174.1 | 840  | 34316  | 1.00E-154 | 276 | 276 | 100 + | 3   | 278 | 11691  | 11966  |
| UN49916 | Rsa1.0.00112.1 | 992  | 132199 | 0         | 396 | 413 | 95 +  | 208 | 617 | 116397 | 116809 |
| UN49917 | Rsa1.0.00466.1 | 786  | 82132  | 0         | 559 | 581 | 96 +  | 3   | 582 | 23666  | 24246  |
| UN49918 | Rsa1.0.00017.1 | 1097 | 752458 | 3.00E-66  | 172 | 186 | 92 -  | 674 | 855 | 577876 | 578061 |

|         |                |      |        |           |     |      |      |     |      |        |        |
|---------|----------------|------|--------|-----------|-----|------|------|-----|------|--------|--------|
| UN49919 | Rsa1.0_11285.1 | 1127 | 5556   | 1.00E-84  | 198 | 210  | 94 - | 731 | 937  | 2779   | 2988   |
| UN49920 | Rsa1.0_02009.1 | 862  | 36100  | 0         | 424 | 438  | 96 + | 286 | 723  | 35107  | 35544  |
| UN49921 | Rsa1.0_01242.1 | 866  | 50066  | 2.33E-156 | 328 | 347  | 94 - | 3   | 342  | 17542  | 17888  |
| UN49922 | Rsa1.0_00611.1 | 877  | 72410  | 0         | 478 | 497  | 96 - | 3   | 499  | 60559  | 61054  |
| UN49923 | Rsa1.0_00088.1 | 941  | 141341 | 1.00E-130 | 258 | 265  | 97 + | 647 | 911  | 6655   | 6919   |
| UN49924 | Rsa1.0_00679.1 | 1057 | 68971  | 0         | 974 | 1063 | 91 + | 1   | 1055 | 578    | 1603   |
| UN49925 | Rsa1.0_01655.1 | 1230 | 41508  | 0         | 446 | 475  | 93 - | 1   | 465  | 6342   | 6816   |
| UN49926 | Rsa1.0_04651.1 | 1005 | 16516  | 1.00E-172 | 342 | 354  | 96 + | 316 | 669  | 14035  | 14388  |
| UN49927 | Rsa1.0_07732.1 | 889  | 8695   | 1.00E-133 | 273 | 283  | 96 - | 6   | 285  | 1258   | 1540   |
| UN49928 | Rsa1.0_00001.1 | 806  | 363028 | 0         | 612 | 629  | 97 - | 1   | 629  | 62099  | 62727  |
| UN49929 | Rsa1.0_00080.1 | 899  | 190437 | 1.00E-134 | 267 | 275  | 97 + | 448 | 722  | 34256  | 34530  |
| UN49930 | Rsa1.0_00628.1 | 1430 | 214360 | 0         | 490 | 491  | 99 - | 1   | 491  | 20466  | 20956  |
| UN49931 | Rsa1.0_09304.1 | 992  | 6469   | 1.00E-139 | 293 | 306  | 95 - | 44  | 349  | 4613   | 4915   |
| UN49932 | Rsa1.0_00786.1 | 898  | 64285  | 1.00E-92  | 194 | 201  | 96 + | 340 | 540  | 41596  | 41796  |
| UN49933 | Rsa1.0_00034.1 | 775  | 260119 | 1.00E-95  | 232 | 250  | 92 + | 534 | 773  | 89248  | 89497  |
| UN49934 | Rsa1.0_02186.1 | 840  | 34150  | 1.00E-180 | 368 | 381  | 96 - | 451 | 827  | 13853  | 14231  |
| UN49935 | Rsa1.0_14172.1 | 775  | 3708   | 0         | 531 | 545  | 97 + | 3   | 546  | 1151   | 1695   |
| UN49936 | Rsa1.0_00615.1 | 738  | 72235  | 0         | 437 | 438  | 99 + | 301 | 738  | 26377  | 26814  |
| UN49937 | Rsa1.0_00067.1 | 1121 | 415055 | 0         | 747 | 761  | 98 + | 3   | 763  | 247368 | 248128 |
| UN49938 | Rsa1.0_00092.1 | 1060 | 659932 | 0         | 441 | 442  | 99 - | 2   | 443  | 348844 | 349285 |
| UN49939 | Rsa1.0_00377.1 | 1060 | 90038  | 1.00E-154 | 361 | 385  | 93 - | 49  | 429  | 9787   | 10168  |
| UN49940 | Rsa1.0_05503.1 | 771  | 13510  | 1.00E-160 | 333 | 347  | 95 + | 70  | 411  | 2887   | 3233   |
| UN49941 | Rsa1.0_01006.1 | 1069 | 163670 | 0         | 446 | 461  | 96 - | 1   | 461  | 136690 | 137149 |
| UN49942 | Rsa1.0_02268.1 | 1295 | 33172  | 1.00E-121 | 294 | 315  | 93 - | 1   | 313  | 16898  | 17209  |
| UN49943 | Rsa1.0_03529.1 | 1404 | 22277  | 0         | 973 | 1010 | 96 + | 264 | 1273 | 15606  | 16615  |
| UN49944 | Rsa1.0_00410.1 | 879  | 86957  | 0         | 392 | 400  | 98 - | 478 | 877  | 19646  | 20045  |
| UN49945 | Rsa1.0_02564.1 | 926  | 30047  | 0         | 851 | 859  | 99 + | 70  | 926  | 9027   | 9884   |
| UN49946 | Rsa1.0_00396.1 | 1184 | 88242  | 0         | 386 | 394  | 97 - | 30  | 423  | 19721  | 20114  |
| UN49947 | Rsa1.0_00056.1 | 952  | 332604 | 2.00E-98  | 219 | 231  | 94 - | 355 | 585  | 23852  | 24082  |
| UN49948 | Rsa1.0_00218.1 | 1034 | 201480 | 0         | 639 | 658  | 97 - | 149 | 806  | 177033 | 177689 |
| UN49949 | Rsa1.0_01806.1 | 901  | 39021  | 2.00E-85  | 183 | 188  | 97 - | 707 | 892  | 30191  | 30377  |
| UN49950 | Rsa1.0_05431.1 | 1022 | 13780  | 1.00E-170 | 387 | 410  | 94 + | 580 | 984  | 9312   | 9720   |
| UN49951 | Rsa1.0_03238.1 | 764  | 24432  | 2.00E-63  | 127 | 128  | 99 - | 305 | 432  | 13339  | 13466  |
| UN49952 | Rsa1.0_00178.1 | 1075 | 114861 | 0         | 658 | 688  | 95 - | 302 | 989  | 42445  | 43105  |
| UN49953 | Rsa1.0_01173.1 | 707  | 51727  | 0         | 426 | 440  | 96 - | 126 | 565  | 29674  | 30113  |
| UN49954 | Rsa1.0_00001.1 | 1113 | 363028 | 8.00E-98  | 185 | 186  | 99 - | 487 | 672  | 289127 | 289312 |
| UN49955 | Rsa1.0_12866.1 | 1050 | 5093   | 0         | 995 | 1037 | 95 + | 3   | 1036 | 1104   | 2133   |
| UN49956 | Rsa1.0_00035.1 | 1131 | 176449 | 0         | 377 | 378  | 99 - | 585 | 962  | 48286  | 48663  |
| UN49957 | Rsa1.0_01317.1 | 513  | 48287  | 1.00E-115 | 326 | 361  | 90 - | 9   | 365  | 38419  | 38779  |

|         |                |      |        |           |     |     |       |     |      |        |        |
|---------|----------------|------|--------|-----------|-----|-----|-------|-----|------|--------|--------|
| UN49958 | Rsa1.0_04600.1 | 1018 | 16694  | 1.00E-179 | 346 | 355 | 97 +  | 651 | 1005 | 12273  | 12627  |
| UN49959 | Rsa1.0_14656.1 | 975  | 3183   | 0         | 412 | 418 | 98 -  | 4   | 420  | 2283   | 2700   |
| UN49960 | Rsa1.0_01147.1 | 977  | 52391  | 0         | 591 | 596 | 99 -  | 1   | 596  | 1559   | 2153   |
| UN49961 | Rsa1.0_08338.1 | 570  | 7511   | 0         | 550 | 567 | 97 +  | 2   | 567  | 435    | 989    |
| UN49962 | Rsa1.0_14656.1 | 906  | 3183   | 0         | 328 | 329 | 99 -  | 1   | 329  | 2283   | 2611   |
| UN49963 | Rsa1.0_00336.1 | 1019 | 445051 | 3.00E-97  | 208 | 217 | 95 +  | 297 | 513  | 164727 | 164943 |
| UN49964 | Rsa1.0_01097.1 | 839  | 173349 | 9.00E-94  | 200 | 206 | 97 -  | 3   | 206  | 34536  | 34740  |
| UN49965 | Rsa1.0_71705.1 | 1078 | 320    | 5.00E-96  | 253 | 273 | 92 -  | 810 | 1078 | 54     | 319    |
| UN49966 | Rsa1.0_00948.1 | 1189 | 58620  | 1.00E-124 | 279 | 293 | 95 +  | 702 | 991  | 1582   | 1872   |
| UN49967 | Rsa1.0_00596.1 | 1130 | 73578  | 1.00E-122 | 243 | 249 | 97 +  | 582 | 827  | 10158  | 10406  |
| UN49968 | Rsa1.0_00190.1 | 597  | 318240 | 1.00E-130 | 289 | 306 | 94 -  | 114 | 419  | 314970 | 315272 |
| UN49969 | Rsa1.0_25306.1 | 924  | 942    | 0         | 595 | 618 | 96 -  | 196 | 808  | 329    | 942    |
| UN49970 | Rsa1.0_33731.1 | 670  | 672    | 1.00E-143 | 304 | 323 | 94 +  | 1   | 308  | 345    | 667    |
| UN49971 | Rsa1.0_00522.1 | 536  | 78103  | 1.00E-151 | 319 | 332 | 96 -  | 2   | 329  | 52268  | 52597  |
| UN49972 | Rsa1.0_00067.1 | 1145 | 415055 | 0         | 371 | 378 | 98 -  | 1   | 378  | 301029 | 301405 |
| UN49973 | Rsa1.0_00705.1 | 734  | 67505  | 1.00E-154 | 384 | 412 | 93 -  | 20  | 422  | 30393  | 30801  |
| UN49974 | Rsa1.0_04141.1 | 882  | 18864  | 1.00E-117 | 215 | 215 | 100 + | 372 | 586  | 16507  | 16721  |
| UN49975 | Rsa1.0_01578.1 | 1197 | 42880  | 0         | 539 | 572 | 94 +  | 1   | 559  | 8335   | 8906   |
| UN49976 | Rsa1.0_00614.1 | 642  | 72276  | 1.00E-128 | 278 | 291 | 95 -  | 1   | 288  | 44076  | 44366  |
| UN49977 | Rsa1.0_05122.1 | 871  | 14791  | 7.00E-73  | 149 | 152 | 98 +  | 109 | 260  | 9142   | 9293   |
| UN49978 | Rsa1.0_00813.1 | 773  | 63202  | 1.00E-100 | 201 | 206 | 97 +  | 189 | 394  | 14295  | 14500  |
| UN49979 | Rsa1.0_00487.1 | 832  | 80674  | 1.00E-133 | 301 | 319 | 94 -  | 3   | 317  | 75851  | 76169  |
| UN49980 | Rsa1.0_00137.1 | 761  | 122457 | 1.00E-151 | 275 | 276 | 99 -  | 1   | 276  | 82827  | 83102  |
| UN49981 | Rsa1.0_00132.1 | 818  | 124299 | 0         | 494 | 502 | 98 +  | 1   | 502  | 52465  | 52966  |
| UN49982 | Rsa1.0_00215.1 | 1078 | 201775 | 1.00E-143 | 268 | 270 | 99 +  | 810 | 1078 | 2172   | 2441   |
| UN49983 | Rsa1.0_00133.1 | 807  | 123768 | 0         | 411 | 431 | 95 -  | 2   | 424  | 9867   | 10296  |
| UN49984 | Rsa1.0_14283.1 | 909  | 3580   | 2.00E-61  | 121 | 121 | 100 + | 3   | 123  | 3460   | 3580   |
| UN49985 | Rsa1.0_00102.1 | 376  | 135497 | 1.00E-123 | 241 | 247 | 97 +  | 130 | 376  | 51183  | 51429  |
| UN49986 | Rsa1.0_00119.1 | 819  | 467509 | 0         | 483 | 493 | 97 -  | 327 | 819  | 385630 | 386120 |
| UN49987 | Rsa1.0_03075.1 | 728  | 25560  | 1.00E-168 | 315 | 320 | 98 -  | 289 | 608  | 14646  | 14965  |
| UN49988 | Rsa1.0_05148.1 | 672  | 14675  | 0         | 620 | 660 | 93 +  | 18  | 672  | 9454   | 10110  |
| UN49989 | Rsa1.0_00087.1 | 595  | 761073 | 0         | 563 | 581 | 96 +  | 3   | 583  | 580717 | 581296 |
| UN49990 | Rsa1.0_00058.1 | 622  | 159921 | 1.00E-166 | 359 | 378 | 94 +  | 50  | 424  | 118433 | 118804 |
| UN49991 | Rsa1.0_00066.1 | 1146 | 152418 | 0         | 468 | 505 | 92 +  | 1   | 502  | 15020  | 15504  |
| UN49992 | Rsa1.0_01166.1 | 862  | 51877  | 0         | 451 | 478 | 94 +  | 373 | 837  | 37728  | 38201  |
| UN49993 | Rsa1.0_00561.1 | 1211 | 75653  | 0         | 854 | 923 | 92 -  | 303 | 1211 | 4144   | 5053   |
| UN49994 | Rsa1.0_00484.1 | 697  | 203294 | 1.00E-105 | 228 | 238 | 95 -  | 385 | 621  | 143471 | 143708 |
| UN49995 | Rsa1.0_03991.1 | 883  | 19675  | 0         | 849 | 879 | 96 +  | 3   | 881  | 7573   | 8450   |
| UN49996 | Rsa1.0_00460.1 | 1140 | 206387 | 0         | 381 | 394 | 96 +  | 751 | 1140 | 201840 | 202232 |

|         |                |      |        |           |     |     |       |     |      |        |        |
|---------|----------------|------|--------|-----------|-----|-----|-------|-----|------|--------|--------|
| UN49997 | Rsa1.0_00146.1 | 1164 | 149343 | 0         | 935 | 964 | 96 -  | 3   | 965  | 67449  | 68411  |
| UN49998 | Rsa1.0_13798.1 | 751  | 4320   | 1.00E-129 | 243 | 246 | 98 +  | 282 | 527  | 3764   | 4009   |
| UN49999 | Rsa1.0_04181.1 | 1012 | 18615  | 0         | 337 | 338 | 99 +  | 675 | 1012 | 1739   | 2076   |
| UN50000 | Rsa1.0_01825.1 | 866  | 38725  | 0         | 595 | 613 | 97 -  | 254 | 866  | 26226  | 26838  |
| UN50001 | Rsa1.0_05900.1 | 1252 | 12295  | 1.00E-123 | 270 | 284 | 95 -  | 14  | 294  | 5008   | 5288   |
| UN50002 | Rsa1.0_00093.1 | 744  | 214962 | 4.00E-68  | 168 | 180 | 93 -  | 434 | 613  | 129882 | 130061 |
| UN50003 | Rsa1.0_00096.1 | 408  | 198773 | 2.00E-56  | 198 | 222 | 89 -  | 28  | 246  | 31167  | 31385  |
| UN50004 | Rsa1.0_00006.1 | 1056 | 396176 | 1.00E-133 | 280 | 290 | 96 +  | 3   | 287  | 221726 | 222013 |
| UN50005 | Rsa1.0_50098.1 | 992  | 453    | 0         | 447 | 453 | 98 +  | 141 | 593  | 1      | 453    |
| UN50006 | Rsa1.0_00104.1 | 958  | 368722 | 0         | 370 | 379 | 97 +  | 579 | 957  | 280249 | 280626 |
| UN50007 | Rsa1.0_00863.1 | 1104 | 254535 | 0         | 420 | 435 | 96 +  | 7   | 441  | 126492 | 126926 |
| UN50008 | Rsa1.0_01586.1 | 777  | 42804  | 1.00E-128 | 368 | 403 | 91 +  | 377 | 772  | 27916  | 28305  |
| UN50009 | Rsa1.0_02478.1 | 906  | 150183 | 1.00E-179 | 334 | 339 | 98 -  | 376 | 714  | 136157 | 136495 |
| UN50010 | Rsa1.0_00218.1 | 1032 | 201480 | 1.00E-135 | 287 | 303 | 94 +  | 504 | 795  | 179382 | 179684 |
| UN50011 | Rsa1.0_16090.1 | 575  | 2289   | 0         | 469 | 486 | 96 -  | 5   | 487  | 953    | 1438   |
| UN50012 | Rsa1.0_00720.1 | 1232 | 66931  | 1.00E-152 | 304 | 312 | 97 +  | 287 | 597  | 55601  | 55909  |
| UN50013 | Rsa1.0_02728.1 | 807  | 28400  | 1.00E-123 | 293 | 314 | 93 +  | 505 | 807  | 26857  | 27166  |
| UN50014 | Rsa1.0_07695.1 | 790  | 8770   | 0         | 456 | 477 | 95 +  | 3   | 477  | 1421   | 1897   |
| UN50015 | Rsa1.0_00656.1 | 828  | 69968  | 1.00E-101 | 240 | 258 | 93 -  | 512 | 768  | 49260  | 49506  |
| UN50016 | Rsa1.0_00128.1 | 798  | 228675 | 0         | 660 | 698 | 94 -  | 3   | 699  | 203994 | 204684 |
| UN50017 | Rsa1.0_01166.1 | 1073 | 51877  | 0         | 611 | 615 | 99 -  | 458 | 1072 | 36965  | 37579  |
| UN50018 | Rsa1.0_00828.1 | 1106 | 62744  | 0         | 785 | 786 | 99 -  | 2   | 786  | 15688  | 16473  |
| UN50019 | Rsa1.0_00222.1 | 1343 | 172263 | 0         | 655 | 668 | 98 -  | 674 | 1341 | 39624  | 40291  |
| UN50020 | Rsa1.0_00297.1 | 1046 | 97836  | 0         | 372 | 382 | 97 +  | 1   | 382  | 26353  | 26734  |
| UN50021 | Rsa1.0_00471.1 | 786  | 81897  | 1.00E-156 | 342 | 358 | 95 +  | 427 | 780  | 65986  | 66337  |
| UN50022 | Rsa1.0_00457.1 | 922  | 337301 | 1.00E-119 | 289 | 309 | 93 +  | 620 | 922  | 130569 | 130869 |
| UN50023 | Rsa1.0_00359.1 | 900  | 91256  | 0         | 548 | 573 | 95 -  | 3   | 575  | 47430  | 47998  |
| UN50024 | Rsa1.0_00571.1 | 654  | 329018 | 0         | 488 | 513 | 95 +  | 145 | 654  | 145078 | 145590 |
| UN50025 | Rsa1.0_06101.1 | 563  | 11745  | 5.00E-88  | 165 | 165 | 100 + | 195 | 359  | 1      | 165    |
| UN50026 | Rsa1.0_00040.1 | 1053 | 324196 | 6.00E-83  | 157 | 157 | 100 + | 214 | 370  | 314176 | 314332 |
| UN50027 | Rsa1.0_02286.1 | 919  | 32993  | 0         | 833 | 852 | 97 -  | 70  | 919  | 24152  | 25003  |
| UN50028 | Rsa1.0_00759.1 | 816  | 65465  | 1.00E-161 | 321 | 332 | 96 +  | 190 | 521  | 63940  | 64271  |
| UN50029 | Rsa1.0_00026.1 | 785  | 327835 | 0         | 573 | 593 | 96 -  | 189 | 781  | 27208  | 27800  |
| UN50030 | Rsa1.0_00060.1 | 828  | 502678 | 0         | 401 | 420 | 95 +  | 410 | 827  | 391340 | 391759 |
| UN50031 | Rsa1.0_00067.1 | 730  | 415055 | 1.00E-149 | 318 | 335 | 94 +  | 2   | 336  | 241223 | 241557 |
| UN50032 | Rsa1.0_00016.1 | 564  | 831256 | 1.00E-88  | 175 | 178 | 98 -  | 76  | 253  | 373056 | 373233 |
| UN50033 | Rsa1.0_00227.1 | 1295 | 105849 | 0         | 654 | 682 | 95 +  | 1   | 682  | 102220 | 102892 |
| UN50034 | Rsa1.0_05360.1 | 1071 | 14053  | 1.00E-135 | 254 | 257 | 98 -  | 125 | 381  | 12262  | 12518  |
| UN50035 | Rsa1.0_02950.1 | 804  | 26506  | 1.00E-122 | 267 | 282 | 94 -  | 301 | 582  | 6575   | 6856   |

|         |                |      |        |           |      |      |       |     |      |        |        |
|---------|----------------|------|--------|-----------|------|------|-------|-----|------|--------|--------|
| UN50036 | Rsa1.0.00003.1 | 834  | 340054 | 1.00E-101 | 249  | 271  | 91 -  | 8   | 278  | 190660 | 190921 |
| UN50037 | Rsa1.0.00152.1 | 714  | 257730 | 0         | 694  | 715  | 97 +  | 1   | 712  | 84829  | 85542  |
| UN50038 | Rsa1.0.06160.1 | 740  | 11596  | 0         | 432  | 465  | 92 +  | 274 | 736  | 10936  | 11400  |
| UN50039 | Rsa1.0.01046.1 | 908  | 152989 | 1.00E-177 | 318  | 319  | 99 -  | 425 | 743  | 127932 | 128250 |
| UN50040 | Rsa1.0.01092.1 | 769  | 54348  | 6.00E-67  | 136  | 138  | 98 +  | 394 | 531  | 51202  | 51339  |
| UN50041 | Rsa1.0.00437.1 | 875  | 84879  | 1.00E-115 | 290  | 315  | 92 +  | 562 | 875  | 22576  | 22890  |
| UN50042 | Rsa1.0.00322.1 | 836  | 212233 | 0         | 375  | 376  | 99 +  | 68  | 443  | 4425   | 4800   |
| UN50043 | Rsa1.0.00037.1 | 966  | 307838 | 1.00E-173 | 435  | 480  | 90 +  | 521 | 966  | 239665 | 240144 |
| UN50044 | Rsa1.0.00623.1 | 1257 | 207630 | 0         | 695  | 714  | 97 -  | 331 | 1044 | 152483 | 153196 |
| UN50045 | Rsa1.0.55266.1 | 1075 | 413    | 1.00E-142 | 338  | 365  | 92 -  | 4   | 368  | 21     | 370    |
| UN50046 | Rsa1.0.01092.1 | 1139 | 54348  | 1.00E-106 | 255  | 272  | 93 +  | 867 | 1137 | 53808  | 54078  |
| UN50047 | Rsa1.0.01338.1 | 980  | 155644 | 0         | 409  | 425  | 96 +  | 558 | 980  | 142949 | 143373 |
| UN50048 | Rsa1.0.00092.1 | 1120 | 659932 | 0         | 424  | 450  | 94 +  | 5   | 450  | 504563 | 505012 |
| UN50049 | Rsa1.0.01732.1 | 1052 | 40194  | 0         | 778  | 809  | 96 -  | 245 | 1048 | 24688  | 25496  |
| UN50050 | Rsa1.0.05909.1 | 1095 | 12265  | 1.00E-118 | 223  | 225  | 99 -  | 869 | 1093 | 4644   | 4868   |
| UN50051 | Rsa1.0.01303.1 | 1169 | 48853  | 0         | 409  | 432  | 94 +  | 563 | 994  | 15251  | 15682  |
| UN50052 | Rsa1.0.00339.1 | 1143 | 222974 | 0         | 731  | 845  | 86 -  | 8   | 852  | 28076  | 28920  |
| UN50053 | Rsa1.0.11080.1 | 1154 | 5623   | 1.00E-173 | 362  | 380  | 95 +  | 402 | 781  | 1789   | 2168   |
| UN50054 | Rsa1.0.07464.1 | 1050 | 9328   | 0         | 363  | 373  | 97 -  | 1   | 373  | 1      | 373    |
| UN50055 | Rsa1.0.00075.1 | 1190 | 146680 | 0         | 524  | 547  | 95 -  | 643 | 1189 | 141258 | 141803 |
| UN50056 | Rsa1.0.00183.1 | 1035 | 113277 | 1.00E-121 | 279  | 294  | 94 +  | 590 | 879  | 67148  | 67437  |
| UN50057 | Rsa1.0.00749.1 | 1307 | 65933  | 0         | 1252 | 1320 | 94 -  | 1   | 1307 | 27894  | 29210  |
| UN50058 | Rsa1.0.00011.1 | 1039 | 225044 | 1.00E-107 | 239  | 251  | 95 +  | 793 | 1039 | 137746 | 137996 |
| UN50059 | Rsa1.0.01029.1 | 1060 | 256254 | 1.00E-170 | 318  | 323  | 98 +  | 738 | 1060 | 245893 | 246215 |
| UN50060 | Rsa1.0.00706.1 | 1272 | 291570 | 1.00E-138 | 337  | 366  | 92 -  | 3   | 368  | 231041 | 231391 |
| UN50061 | Rsa1.0.01149.1 | 1355 | 160459 | 1.00E-103 | 214  | 221  | 96 -  | 4   | 221  | 131637 | 131857 |
| UN50062 | Rsa1.0.00104.1 | 999  | 368722 | 0         | 990  | 995  | 99 -  | 3   | 997  | 74318  | 75312  |
| UN50063 | Rsa1.0.00283.1 | 1068 | 183797 | 1.00E-171 | 353  | 367  | 96 +  | 3   | 365  | 10947  | 11313  |
| UN50064 | Rsa1.0.00755.1 | 1156 | 192559 | 1.00E-93  | 205  | 213  | 96 +  | 2   | 212  | 393    | 603    |
| UN50065 | Rsa1.0.02343.1 | 1297 | 32374  | 0         | 425  | 440  | 96 -  | 850 | 1286 | 27735  | 28172  |
| UN50066 | Rsa1.0.00401.1 | 1398 | 244410 | 0         | 1388 | 1409 | 98 +  | 1   | 1398 | 11536  | 12941  |
| UN50067 | Rsa1.0.00502.1 | 1255 | 204180 | 0         | 506  | 517  | 97 +  | 1   | 513  | 60953  | 61469  |
| UN50068 | Rsa1.0.00363.1 | 972  | 90968  | 1.00E-173 | 390  | 419  | 93 -  | 565 | 972  | 75539  | 75957  |
| UN50069 | Rsa1.0.00838.1 | 1242 | 153820 | 0         | 325  | 325  | 100 - | 276 | 600  | 34891  | 35215  |
| UN50070 | Rsa1.0.02848.1 | 574  | 27329  | 1.00E-127 | 349  | 380  | 91 +  | 202 | 574  | 8638   | 9014   |
| UN50071 | Rsa1.0.01185.1 | 1143 | 149842 | 1.00E-139 | 263  | 267  | 98 -  | 397 | 663  | 132558 | 132824 |
| UN50072 | Rsa1.0.02431.1 | 725  | 31504  | 0         | 628  | 660  | 95 -  | 15  | 672  | 12965  | 13622  |
| UN50073 | Rsa1.0.04377.1 | 991  | 17658  | 0         | 899  | 930  | 96 +  | 62  | 991  | 5220   | 6147   |
| UN50074 | Rsa1.0.13708.1 | 830  | 4447   | 1.00E-127 | 274  | 287  | 95 -  | 544 | 830  | 3612   | 3897   |

|         |                |      |        |           |      |      |       |      |      |        |        |
|---------|----------------|------|--------|-----------|------|------|-------|------|------|--------|--------|
| UN50075 | Rsa1.0_12830.1 | 1516 | 5110   | 1.00E-176 | 332  | 336  | 98 -  | 1184 | 1515 | 327    | 662    |
| UN50076 | Rsa1.0_06313.1 | 791  | 11252  | 1.00E-159 | 331  | 347  | 95 +  | 84   | 430  | 6081   | 6421   |
| UN50077 | Rsa1.0_05978.1 | 1140 | 12053  | 1.00E-99  | 207  | 214  | 96 -  | 13   | 222  | 4482   | 4695   |
| UN50078 | Rsa1.0_00689.1 | 980  | 68305  | 1.00E-178 | 353  | 364  | 96 -  | 618  | 980  | 23515  | 23878  |
| UN50079 | Rsa1.0_13888.1 | 1073 | 4146   | 0         | 742  | 804  | 92 -  | 278  | 1073 | 1870   | 2670   |
| UN50080 | Rsa1.0_03044.1 | 652  | 25791  | 0         | 426  | 446  | 95 -  | 59   | 502  | 6288   | 6732   |
| UN50081 | Rsa1.0_16612.1 | 492  | 2091   | 0         | 475  | 506  | 93 -  | 3    | 492  | 128    | 628    |
| UN50082 | Rsa1.0_00114.1 | 1013 | 131330 | 9.00E-82  | 164  | 167  | 98 +  | 706  | 872  | 129182 | 129348 |
| UN50083 | Rsa1.0_02944.1 | 1164 | 26553  | 0         | 421  | 424  | 99 -  | 5    | 428  | 5275   | 5698   |
| UN50084 | Rsa1.0_01382.1 | 791  | 46877  | 0         | 387  | 405  | 95 -  | 20   | 420  | 13890  | 14293  |
| UN50085 | Rsa1.0_02321.1 | 666  | 32572  | 0         | 558  | 572  | 97 -  | 1    | 572  | 6022   | 6592   |
| UN50086 | Rsa1.0_00335.1 | 1116 | 94371  | 1.00E-171 | 356  | 373  | 95 -  | 700  | 1072 | 42163  | 42535  |
| UN50087 | Rsa1.0_01617.1 | 962  | 42127  | 0         | 423  | 423  | 100 - | 2    | 424  | 194    | 616    |
| UN50088 | Rsa1.0_00376.1 | 1071 | 90101  | 0         | 486  | 510  | 95 +  | 553  | 1058 | 49557  | 50056  |
| UN50089 | Rsa1.0_48565.1 | 1352 | 466    | 1.00E-108 | 224  | 231  | 96 +  | 138  | 366  | 209    | 439    |
| UN50090 | Rsa1.0_01670.1 | 903  | 41260  | 0         | 903  | 904  | 99 +  | 1    | 903  | 14398  | 15301  |
| UN50091 | Rsa1.0_00437.1 | 1025 | 84879  | 0         | 428  | 449  | 95 -  | 576  | 1023 | 70166  | 70609  |
| UN50092 | Rsa1.0_01104.1 | 1275 | 285480 | 0         | 364  | 371  | 98 +  | 780  | 1150 | 274158 | 274528 |
| UN50093 | Rsa1.0_02556.1 | 784  | 30133  | 0         | 543  | 562  | 96 +  | 126  | 687  | 2960   | 3521   |
| UN50094 | Rsa1.0_00876.1 | 2358 | 61328  | 0         | 1549 | 1551 | 99 -  | 12   | 1561 | 21209  | 22759  |
| UN50095 | Rsa1.0_06530.1 | 921  | 10840  | 1.00E-108 | 226  | 231  | 97 +  | 39   | 269  | 5731   | 5958   |
| UN50096 | Rsa1.0_00079.1 | 1169 | 606987 | 0         | 625  | 654  | 95 -  | 3    | 653  | 4648   | 5301   |
| UN50097 | Rsa1.0_00608.1 | 936  | 172672 | 0         | 519  | 545  | 95 +  | 392  | 936  | 113755 | 114299 |
| UN50098 | Rsa1.0_00552.1 | 791  | 206757 | 0         | 636  | 658  | 96 +  | 1    | 655  | 68020  | 68677  |
| UN50099 | Rsa1.0_02811.1 | 815  | 27669  | 9.00E-97  | 224  | 235  | 95 +  | 5    | 237  | 1289   | 1521   |
| UN50100 | Rsa1.0_00198.1 | 978  | 222963 | 0         | 386  | 386  | 100 + | 591  | 976  | 136368 | 136753 |
| UN50101 | Rsa1.0_08079.1 | 974  | 7942   | 0         | 759  | 784  | 96 +  | 192  | 972  | 5374   | 6153   |
| UN50102 | Rsa1.0_00383.1 | 833  | 398431 | 8.00E-88  | 276  | 318  | 86 -  | 549  | 833  | 182089 | 182404 |
| UN50103 | Rsa1.0_10486.1 | 1245 | 5830   | 1.00E-149 | 281  | 284  | 98 -  | 8    | 291  | 1743   | 2025   |
| UN50104 | Rsa1.0_00608.1 | 829  | 172672 | 0         | 461  | 481  | 95 +  | 350  | 829  | 113755 | 114233 |
| UN50105 | Rsa1.0_02518.1 | 964  | 30586  | 1.00E-104 | 240  | 255  | 94 -  | 3    | 257  | 29404  | 29655  |
| UN50106 | Rsa1.0_00058.1 | 1002 | 159921 | 0         | 498  | 517  | 96 +  | 1    | 516  | 50907  | 51423  |
| UN50107 | Rsa1.0_00213.1 | 1039 | 108167 | 1.00E-101 | 238  | 255  | 93 +  | 1    | 244  | 93900  | 94154  |
| UN50108 | Rsa1.0_00484.1 | 870  | 203294 | 1.00E-162 | 292  | 293  | 99 -  | 367  | 659  | 50055  | 50347  |
| UN50109 | Rsa1.0_16552.1 | 583  | 2116   | 1.00E-129 | 273  | 286  | 95 -  | 262  | 547  | 1738   | 2023   |
| UN50110 | Rsa1.0_03982.1 | 1864 | 19723  | 0         | 597  | 614  | 97 -  | 450  | 1062 | 3165   | 3774   |
| UN50111 | Rsa1.0_00645.1 | 726  | 189716 | 0         | 417  | 441  | 94 -  | 119  | 559  | 34415  | 34855  |
| UN50112 | Rsa1.0_01829.1 | 740  | 166063 | 0         | 715  | 740  | 96 +  | 2    | 740  | 161042 | 161779 |
| UN50113 | Rsa1.0_04286.1 | 786  | 18084  | 1.00E-132 | 261  | 268  | 97 -  | 328  | 595  | 13076  | 13343  |

|         |                |      |        |           |      |      |       |     |      |        |        |
|---------|----------------|------|--------|-----------|------|------|-------|-----|------|--------|--------|
| UN50114 | Rsa1.0_04455.1 | 1204 | 17266  | 1.00E-175 | 391  | 413  | 94 -  | 3   | 407  | 12968  | 13376  |
| UN50115 | Rsa1.0_01760.1 | 883  | 39730  | 1.00E-178 | 348  | 358  | 97 +  | 58  | 415  | 1442   | 1796   |
| UN50116 | Rsa1.0_00273.1 | 1114 | 326186 | 1.00E-142 | 278  | 285  | 97 -  | 828 | 1112 | 131075 | 131355 |
| UN50117 | Rsa1.0_00336.1 | 1085 | 445051 | 0         | 1038 | 1085 | 95 +  | 1   | 1084 | 308921 | 309990 |
| UN50118 | Rsa1.0_00761.1 | 878  | 65133  | 1.00E-145 | 326  | 344  | 94 +  | 537 | 878  | 62157  | 62498  |
| UN50119 | Rsa1.0_00326.1 | 936  | 171955 | 1.00E-115 | 252  | 265  | 95 +  | 672 | 936  | 69916  | 70177  |
| UN50120 | Rsa1.0_01220.1 | 953  | 161775 | 2.00E-92  | 196  | 201  | 97 -  | 604 | 804  | 122655 | 122853 |
| UN50121 | Rsa1.0_00752.1 | 1434 | 65756  | 0         | 363  | 372  | 97 -  | 1   | 367  | 32301  | 32672  |
| UN50122 | Rsa1.0_00331.1 | 819  | 176754 | 0         | 397  | 410  | 96 +  | 1   | 407  | 22161  | 22570  |
| UN50123 | Rsa1.0_10042.1 | 1092 | 6027   | 1.00E-167 | 310  | 314  | 98 -  | 111 | 424  | 173    | 486    |
| UN50124 | Rsa1.0_00743.1 | 1222 | 177459 | 0         | 413  | 422  | 97 +  | 3   | 424  | 165819 | 166240 |
| UN50125 | Rsa1.0_00786.1 | 860  | 64285  | 1.00E-108 | 270  | 289  | 93 -  | 578 | 860  | 52427  | 52710  |
| UN50126 | Rsa1.0_04194.1 | 1065 | 132734 | 0         | 683  | 708  | 96 +  | 356 | 1063 | 116698 | 117399 |
| UN50127 | Rsa1.0_00017.1 | 875  | 752458 | 1.00E-128 | 232  | 232  | 100 + | 1   | 232  | 1804   | 2035   |
| UN50128 | Rsa1.0_02529.1 | 994  | 30437  | 0         | 435  | 436  | 99 +  | 560 | 994  | 2911   | 3346   |
| UN50129 | Rsa1.0_06073.1 | 1295 | 11807  | 0         | 382  | 388  | 98 -  | 617 | 1001 | 3893   | 4280   |
| UN50130 | Rsa1.0_00002.1 | 917  | 601661 | 1.00E-169 | 364  | 380  | 95 +  | 5   | 381  | 555295 | 555672 |
| UN50131 | Rsa1.0_00332.1 | 1425 | 94575  | 0         | 585  | 591  | 98 +  | 838 | 1425 | 59905  | 60495  |
| UN50132 | Rsa1.0_00332.1 | 584  | 94575  | 0         | 368  | 382  | 96 +  | 3   | 384  | 22610  | 22989  |
| UN50133 | Rsa1.0_00327.1 | 876  | 94892  | 1.00E-123 | 237  | 241  | 98 -  | 217 | 457  | 70836  | 71076  |
| UN50134 | Rsa1.0_02732.1 | 857  | 28372  | 5.00E-15  | 67   | 75   | 89 -  | 617 | 691  | 769    | 843    |
| UN50135 | Rsa1.0_01591.1 | 784  | 42718  | 1.00E-136 | 282  | 292  | 96 +  | 1   | 284  | 22515  | 22805  |
| UN50136 | Rsa1.0_00168.1 | 597  | 115870 | 2.33E-156 | 280  | 286  | 97 -  | 312 | 597  | 88689  | 88974  |
| UN50137 | Rsa1.0_00082.1 | 1080 | 237584 | 1.00E-147 | 307  | 320  | 95 +  | 1   | 319  | 14747  | 15066  |
| UN50138 | Rsa1.0_01344.1 | 949  | 142535 | 1.00E-157 | 427  | 467  | 91 -  | 2   | 454  | 130981 | 131431 |
| UN50139 | Rsa1.0_01359.1 | 1168 | 47271  | 1.00E-169 | 411  | 450  | 91 +  | 2   | 440  | 32391  | 32833  |
| UN50140 | Rsa1.0_04801.1 | 1314 | 15918  | 0         | 365  | 371  | 98 -  | 943 | 1312 | 6869   | 7236   |
| UN50141 | Rsa1.0_01278.1 | 722  | 49370  | 1.00E-83  | 173  | 178  | 97 +  | 294 | 471  | 19977  | 20154  |
| UN50142 | Rsa1.0_22496.1 | 806  | 1116   | 3.00E-53  | 146  | 154  | 94 -  | 658 | 806  | 837    | 990    |
| UN50143 | Rsa1.0_00087.1 | 1118 | 761073 | 0         | 588  | 609  | 96 -  | 122 | 730  | 731650 | 732256 |
| UN50144 | Rsa1.0_00001.1 | 856  | 363028 | 0         | 375  | 377  | 99 -  | 480 | 856  | 314883 | 315259 |
| UN50145 | Rsa1.0_01401.1 | 899  | 142441 | 0         | 537  | 555  | 96 -  | 2   | 554  | 132155 | 132709 |
| UN50146 | Rsa1.0_00011.1 | 809  | 225044 | 1.00E-160 | 395  | 425  | 92 +  | 388 | 808  | 207085 | 207497 |
| UN50147 | Rsa1.0_00058.1 | 710  | 159921 | 1.00E-152 | 326  | 339  | 96 -  | 26  | 362  | 48220  | 48554  |
| UN50148 | Rsa1.0_13979.1 | 824  | 3964   | 0         | 371  | 378  | 98 +  | 442 | 818  | 2932   | 3309   |
| UN50149 | Rsa1.0_00070.1 | 937  | 150321 | 0         | 562  | 586  | 95 -  | 354 | 937  | 59034  | 59616  |
| UN50150 | Rsa1.0_01344.1 | 620  | 142535 | 1.00E-157 | 322  | 335  | 96 +  | 1   | 335  | 129986 | 130312 |
| UN50151 | Rsa1.0_27675.1 | 750  | 844    | 0         | 701  | 737  | 95 +  | 15  | 750  | 2      | 738    |
| UN50152 | Rsa1.0_01119.1 | 1240 | 53459  | 1.00E-112 | 215  | 218  | 98 -  | 350 | 567  | 23345  | 23562  |



|         |                |      |        |           |     |     |       |     |      |        |        |
|---------|----------------|------|--------|-----------|-----|-----|-------|-----|------|--------|--------|
| UN50153 | Rsa1.0.03552.1 | 1169 | 22151  | 1.00E-108 | 227 | 235 | 96 -  | 11  | 244  | 5645   | 5879   |
| UN50154 | Rsa1.0.00277.1 | 1064 | 100132 | 0         | 450 | 468 | 96 -  | 1   | 466  | 84808  | 85274  |
| UN50155 | Rsa1.0.14816.1 | 857  | 3046   | 0         | 413 | 413 | 100 - | 444 | 856  | 1898   | 2310   |
| UN50156 | Rsa1.0.03887.1 | 566  | 20247  | 0         | 562 | 564 | 99 +  | 2   | 565  | 18036  | 18599  |
| UN50157 | Rsa1.0.14436.1 | 897  | 3393   | 0         | 519 | 545 | 95 +  | 10  | 552  | 2258   | 2791   |
| UN50158 | Rsa1.0.00369.1 | 757  | 266462 | 2.00E-88  | 172 | 174 | 98 -  | 2   | 175  | 168231 | 168404 |
| UN50159 | Rsa1.0.00220.1 | 922  | 192936 | 0         | 487 | 487 | 100 - | 227 | 713  | 16394  | 16880  |
| UN50160 | Rsa1.0.02556.1 | 938  | 30133  | 0         | 661 | 698 | 94 -  | 20  | 701  | 4196   | 4883   |
| UN50161 | Rsa1.0.00302.1 | 1075 | 97521  | 1.00E-127 | 327 | 356 | 91 -  | 2   | 343  | 85022  | 85374  |
| UN50162 | Rsa1.0.00997.1 | 956  | 57190  | 1.00E-134 | 293 | 306 | 95 -  | 36  | 340  | 52204  | 52506  |
| UN50163 | Rsa1.0.00398.1 | 606  | 88007  | 0         | 516 | 528 | 97 -  | 1   | 528  | 86445  | 86969  |
| UN50164 | Rsa1.0.03218.1 | 1069 | 24539  | 1.00E-173 | 384 | 407 | 94 +  | 673 | 1067 | 5213   | 5618   |
| UN50165 | Rsa1.0.01042.1 | 926  | 293264 | 0         | 571 | 599 | 95 +  | 327 | 924  | 141476 | 142066 |
| UN50166 | Rsa1.0.01376.1 | 282  | 47004  | 2.00E-98  | 263 | 290 | 90 +  | 2   | 282  | 29511  | 29789  |
| UN50167 | Rsa1.0.23476.1 | 727  | 1046   | 4.00E-89  | 173 | 175 | 98 +  | 553 | 727  | 608    | 782    |
| UN50168 | Rsa1.0.00341.1 | 391  | 249309 | 8.00E-80  | 227 | 248 | 91 -  | 149 | 391  | 114543 | 114788 |
| UN50169 | Rsa1.0.05410.1 | 798  | 13840  | 0         | 365 | 376 | 97 +  | 93  | 468  | 7861   | 8236   |
| UN50170 | Rsa1.0.03170.1 | 584  | 24824  | 4.00E-64  | 216 | 245 | 88 -  | 3   | 244  | 13134  | 13365  |
| UN50171 | Rsa1.0.00378.1 | 995  | 89892  | 0         | 342 | 348 | 98 +  | 550 | 897  | 81481  | 81828  |
| UN50172 | Rsa1.0.04286.1 | 977  | 18084  | 1.00E-117 | 325 | 359 | 90 +  | 1   | 358  | 4044   | 4392   |
| UN50173 | Rsa1.0.03887.1 | 1076 | 20247  | 0         | 783 | 818 | 95 +  | 216 | 1032 | 18202  | 19019  |
| UN50174 | Rsa1.0.05431.1 | 630  | 13780  | 1.00E-165 | 324 | 334 | 97 +  | 297 | 630  | 8836   | 9169   |
| UN50175 | Rsa1.0.01651.1 | 968  | 41586  | 1.00E-133 | 275 | 286 | 96 +  | 670 | 955  | 30453  | 30738  |
| UN50176 | Rsa1.0.01762.1 | 722  | 39682  | 0         | 435 | 456 | 95 -  | 164 | 619  | 1493   | 1937   |
| UN50177 | Rsa1.0.01884.1 | 372  | 37659  | 1.00E-81  | 179 | 186 | 96 -  | 2   | 186  | 17512  | 17697  |
| UN50178 | Rsa1.0.06968.1 | 890  | 10090  | 0         | 857 | 895 | 95 -  | 2   | 890  | 7801   | 8688   |
| UN50179 | Rsa1.0.00355.1 | 1078 | 92038  | 0         | 481 | 499 | 96 +  | 566 | 1060 | 64491  | 64989  |
| UN50180 | Rsa1.0.01591.1 | 1036 | 42718  | 1.00E-136 | 350 | 386 | 90 -  | 35  | 420  | 24117  | 24487  |
| UN50181 | Rsa1.0.00547.1 | 1016 | 76521  | 0         | 415 | 443 | 93 +  | 1   | 443  | 54297  | 54737  |
| UN50182 | Rsa1.0.01278.1 | 1036 | 49370  | 3.00E-88  | 178 | 182 | 97 -  | 93  | 274  | 20617  | 20798  |
| UN50183 | Rsa1.0.14576.1 | 999  | 3250   | 1.00E-169 | 329 | 338 | 97 -  | 488 | 825  | 1681   | 2018   |
| UN50184 | Rsa1.0.00065.1 | 1146 | 454616 | 1.00E-121 | 292 | 313 | 93 -  | 3   | 314  | 191624 | 191930 |
| UN50185 | Rsa1.0.22744.1 | 497  | 1098   | 0         | 356 | 358 | 99 +  | 3   | 360  | 741    | 1098   |
| UN50186 | Rsa1.0.00269.1 | 917  | 341668 | 0         | 465 | 479 | 97 +  | 2   | 476  | 247516 | 247994 |
| UN50187 | Rsa1.0.01048.1 | 1197 | 55684  | 0         | 327 | 327 | 100 - | 1   | 327  | 44113  | 44439  |
| UN50188 | Rsa1.0.09255.1 | 1003 | 6525   | 0         | 627 | 659 | 95 -  | 136 | 790  | 1257   | 1911   |
| UN50189 | Rsa1.0.08355.1 | 351  | 7487   | 1.00E-164 | 339 | 351 | 96 +  | 3   | 351  | 6502   | 6850   |
| UN50190 | Rsa1.0.00001.1 | 802  | 363028 | 1.00E-151 | 301 | 310 | 97 +  | 7   | 316  | 314953 | 315259 |
| UN50191 | Rsa1.0.01745.1 | 1518 | 39905  | 0         | 629 | 629 | 100 - | 3   | 631  | 13001  | 13629  |

|         |                |      |        |           |      |      |       |     |      |        |        |
|---------|----------------|------|--------|-----------|------|------|-------|-----|------|--------|--------|
| UN50192 | Rsa1.0.00547.1 | 1040 | 76521  | 0         | 396  | 416  | 95 -  | 625 | 1040 | 54325  | 54737  |
| UN50193 | Rsa1.0.00015.1 | 1135 | 561803 | 1.00E-130 | 257  | 264  | 97 -  | 1   | 264  | 371807 | 372070 |
| UN50194 | Rsa1.0.00287.1 | 1092 | 98687  | 1.00E-111 | 228  | 236  | 96 +  | 857 | 1092 | 46610  | 46845  |
| UN50195 | Rsa1.0.00176.1 | 932  | 240984 | 2.00E-85  | 200  | 214  | 93 -  | 33  | 246  | 26049  | 26254  |
| UN50196 | Rsa1.0.02415.1 | 717  | 31609  | 1.00E-156 | 305  | 311  | 98 +  | 409 | 717  | 1      | 310    |
| UN50197 | Rsa1.0.00224.1 | 762  | 327530 | 1.00E-128 | 235  | 236  | 99 +  | 1   | 236  | 222173 | 222408 |
| UN50198 | Rsa1.0.01586.1 | 1201 | 42804  | 0         | 427  | 457  | 93 -  | 747 | 1200 | 28047  | 28496  |
| UN50199 | Rsa1.0.02144.1 | 1307 | 34630  | 0         | 388  | 390  | 99 +  | 914 | 1303 | 23103  | 23492  |
| UN50200 | Rsa1.0.00241.1 | 900  | 104000 | 1.00E-149 | 332  | 352  | 94 +  | 557 | 900  | 19355  | 19703  |
| UN50201 | Rsa1.0.19040.1 | 863  | 1491   | 0         | 442  | 446  | 99 -  | 3   | 448  | 953    | 1398   |
| UN50202 | Rsa1.0.01051.1 | 1499 | 55577  | 0         | 831  | 846  | 98 -  | 1   | 846  | 3695   | 4536   |
| UN50203 | Rsa1.0.01540.1 | 1384 | 151890 | 0         | 1309 | 1389 | 94 +  | 5   | 1382 | 142379 | 143756 |
| UN50204 | Rsa1.0.00002.1 | 916  | 601661 | 0         | 767  | 777  | 98 -  | 58  | 833  | 289127 | 289900 |
| UN50205 | Rsa1.0.00184.1 | 1192 | 218748 | 0         | 792  | 879  | 90 -  | 3   | 875  | 43850  | 44722  |
| UN50206 | Rsa1.0.06253.1 | 845  | 11385  | 0         | 501  | 522  | 95 +  | 333 | 843  | 7588   | 8109   |
| UN50207 | Rsa1.0.00067.1 | 714  | 415055 | 1.00E-107 | 210  | 214  | 98 +  | 269 | 482  | 40830  | 41043  |
| UN50208 | Rsa1.0.00419.1 | 669  | 86562  | 1.00E-105 | 315  | 358  | 87 +  | 318 | 667  | 53124  | 53461  |
| UN50209 | Rsa1.0.04126.1 | 802  | 18939  | 1.00E-152 | 291  | 297  | 97 -  | 150 | 446  | 13426  | 13722  |
| UN50210 | Rsa1.0.01552.1 | 787  | 43396  | 0         | 534  | 534  | 100 - | 254 | 787  | 35223  | 35756  |
| UN50211 | Rsa1.0.00529.1 | 844  | 77487  | 1.00E-108 | 241  | 254  | 94 -  | 6   | 259  | 23092  | 23342  |
| UN50212 | Rsa1.0.01119.1 | 1074 | 53459  | 1.00E-128 | 327  | 356  | 91 -  | 726 | 1074 | 43245  | 43594  |
| UN50213 | Rsa1.0.01493.1 | 935  | 44670  | 0         | 484  | 502  | 96 +  | 3   | 504  | 5423   | 5924   |
| UN50214 | Rsa1.0.05382.1 | 547  | 13963  | 1.00E-103 | 287  | 320  | 89 -  | 229 | 547  | 8272   | 8569   |
| UN50215 | Rsa1.0.14298.1 | 934  | 3561   | 1.00E-62  | 129  | 131  | 98 -  | 696 | 826  | 145    | 275    |
| UN50216 | Rsa1.0.05541.1 | 833  | 139959 | 1.00E-68  | 265  | 310  | 85 -  | 417 | 720  | 653    | 950    |
| UN50217 | Rsa1.0.00273.1 | 911  | 326186 | 9.00E-91  | 321  | 362  | 88 -  | 561 | 909  | 160360 | 160717 |
| UN50218 | Rsa1.0.02017.1 | 1153 | 35999  | 1.00E-133 | 277  | 285  | 97 +  | 869 | 1150 | 26848  | 27131  |
| UN50219 | Rsa1.0.00228.1 | 785  | 105511 | 1.00E-74  | 149  | 151  | 98 -  | 497 | 647  | 40568  | 40718  |
| UN50220 | Rsa1.0.00645.1 | 1186 | 189716 | 0         | 1158 | 1185 | 97 +  | 3   | 1186 | 45126  | 46309  |
| UN50221 | Rsa1.0.04199.1 | 625  | 18501  | 0         | 537  | 552  | 97 -  | 71  | 622  | 6410   | 6961   |
| UN50222 | Rsa1.0.02950.1 | 731  | 26506  | 1.00E-126 | 266  | 278  | 95 -  | 215 | 492  | 6575   | 6852   |
| UN50223 | Rsa1.0.00409.1 | 1032 | 146788 | 0         | 974  | 1028 | 94 -  | 18  | 1032 | 145685 | 146712 |
| UN50224 | Rsa1.0.00398.1 | 1240 | 88007  | 0         | 473  | 490  | 96 -  | 749 | 1233 | 41035  | 41523  |
| UN50225 | Rsa1.0.00863.1 | 1059 | 254535 | 0         | 523  | 552  | 94 -  | 507 | 1054 | 252019 | 252566 |
| UN50226 | Rsa1.0.00998.1 | 818  | 57168  | 1.00E-150 | 290  | 297  | 97 +  | 308 | 604  | 9918   | 10214  |
| UN50227 | Rsa1.0.01992.1 | 739  | 36424  | 0         | 704  | 731  | 96 -  | 2   | 732  | 5527   | 6257   |
| UN50228 | Rsa1.0.23312.1 | 856  | 1057   | 1.00E-166 | 337  | 348  | 96 -  | 32  | 377  | 238    | 585    |
| UN50229 | Rsa1.0.03524.1 | 1002 | 22297  | 1.00E-173 | 348  | 360  | 96 +  | 643 | 1000 | 17950  | 18309  |
| UN50230 | Rsa1.0.00017.1 | 1086 | 752458 | 1.00E-93  | 243  | 265  | 91 +  | 774 | 1035 | 3792   | 4056   |

|         |                |      |        |           |      |      |      |     |      |        |        |
|---------|----------------|------|--------|-----------|------|------|------|-----|------|--------|--------|
| UN50231 | Rsa1.0.03267.1 | 731  | 24230  | 0         | 704  | 732  | 96 - | 3   | 731  | 16704  | 17435  |
| UN50232 | Rsa1.0.00105.1 | 1247 | 134138 | 0         | 1088 | 1138 | 95 + | 114 | 1245 | 80589  | 81723  |
| UN50233 | Rsa1.0.08255.1 | 833  | 7652   | 1.00E-179 | 367  | 382  | 96 - | 51  | 431  | 2723   | 3104   |
| UN50234 | Rsa1.0.01062.1 | 871  | 55325  | 0         | 518  | 520  | 99 + | 3   | 522  | 36635  | 37153  |
| UN50235 | Rsa1.0.00484.1 | 771  | 203294 | 1.00E-141 | 367  | 407  | 90 + | 2   | 385  | 135668 | 136074 |
| UN50236 | Rsa1.0.00948.1 | 718  | 58620  | 1.00E-101 | 221  | 232  | 95 + | 362 | 593  | 1011   | 1242   |
| UN50237 | Rsa1.0.00168.1 | 910  | 115870 | 1.00E-133 | 277  | 290  | 95 - | 620 | 909  | 55426  | 55706  |
| UN50238 | Rsa1.0.05410.1 | 1005 | 13840  | 0         | 464  | 490  | 94 + | 430 | 914  | 5739   | 6219   |
| UN50239 | Rsa1.0.01540.1 | 477  | 151890 | 0         | 466  | 495  | 94 - | 1   | 476  | 142470 | 142964 |
| UN50240 | Rsa1.0.00497.1 | 449  | 79830  | 2.00E-77  | 162  | 167  | 97 - | 2   | 168  | 62413  | 62579  |
| UN50241 | Rsa1.0.01090.1 | 697  | 54385  | 0         | 527  | 558  | 94 - | 1   | 552  | 45262  | 45807  |
| UN50242 | Rsa1.0.02043.1 | 692  | 163754 | 7.00E-91  | 195  | 203  | 96 - | 1   | 199  | 145937 | 146139 |
| UN50243 | Rsa1.0.00807.1 | 671  | 63607  | 0         | 646  | 670  | 96 - | 2   | 670  | 16844  | 17509  |
| UN50244 | Rsa1.0.00970.1 | 881  | 57994  | 4.00E-99  | 229  | 244  | 93 + | 67  | 310  | 23555  | 23798  |
| UN50245 | Rsa1.0.01425.1 | 466  | 46136  | 1.00E-179 | 393  | 416  | 94 + | 40  | 452  | 10921  | 11335  |
| UN50246 | Rsa1.0.00075.1 | 970  | 146680 | 0         | 631  | 655  | 96 - | 93  | 747  | 141186 | 141838 |
| UN50247 | Rsa1.0.01516.1 | 1040 | 44196  | 1.00E-164 | 350  | 369  | 94 + | 636 | 1004 | 37004  | 37372  |
| UN50248 | Rsa1.0.00502.1 | 888  | 204180 | 1.00E-158 | 327  | 338  | 96 + | 1   | 334  | 60953  | 61290  |
| UN50249 | Rsa1.0.03400.1 | 989  | 23203  | 0         | 674  | 680  | 99 + | 7   | 685  | 290    | 969    |
| UN50250 | Rsa1.0.00175.1 | 720  | 166121 | 0         | 397  | 406  | 97 + | 313 | 718  | 38721  | 39124  |
| UN50251 | Rsa1.0.03231.1 | 883  | 24456  | 1.00E-120 | 332  | 368  | 90 - | 4   | 352  | 23696  | 24062  |
| UN50252 | Rsa1.0.00124.1 | 1046 | 262503 | 0         | 423  | 443  | 95 + | 604 | 1041 | 29622  | 30064  |
| UN50253 | Rsa1.0.00131.1 | 1152 | 432233 | 0         | 570  | 596  | 95 - | 1   | 594  | 34864  | 35453  |
| UN50254 | Rsa1.0.00404.1 | 403  | 87635  | 0         | 399  | 403  | 99 - | 1   | 403  | 11042  | 11444  |
| UN50255 | Rsa1.0.06209.1 | 1181 | 11484  | 0         | 524  | 573  | 91 - | 633 | 1181 | 2149   | 2719   |
| UN50256 | Rsa1.0.08062.1 | 1155 | 7978   | 0         | 457  | 477  | 95 - | 668 | 1144 | 7468   | 7941   |
| UN50257 | Rsa1.0.01786.1 | 1105 | 133324 | 0         | 810  | 866  | 93 - | 222 | 1074 | 98696  | 99561  |
| UN50258 | Rsa1.0.00308.1 | 715  | 96915  | 1.00E-154 | 345  | 366  | 94 + | 351 | 715  | 81326  | 81682  |
| UN50259 | Rsa1.0.04458.1 | 1222 | 17255  | 1.00E-156 | 304  | 312  | 97 + | 696 | 1007 | 7732   | 8043   |
| UN50260 | Rsa1.0.04399.1 | 784  | 17543  | 1.00E-179 | 336  | 341  | 98 + | 391 | 731  | 9467   | 9805   |
| UN50261 | Rsa1.0.00182.1 | 1574 | 142305 | 0         | 880  | 993  | 88 - | 1   | 962  | 35829  | 36793  |
| UN50262 | Rsa1.0.00706.1 | 1050 | 291570 | 1.00E-138 | 293  | 306  | 95 + | 1   | 306  | 229285 | 229580 |
| UN50263 | Rsa1.0.00104.1 | 1017 | 368722 | 0         | 913  | 930  | 98 - | 88  | 1016 | 71825  | 72754  |
| UN50264 | Rsa1.0.00755.1 | 1121 | 192559 | 5.00E-99  | 206  | 211  | 97 - | 914 | 1121 | 393    | 603    |
| UN50265 | Rsa1.0.02022.1 | 1193 | 35923  | 1.00E-176 | 322  | 325  | 99 + | 869 | 1193 | 14042  | 14366  |
| UN50266 | Rsa1.0.06303.1 | 1000 | 11268  | 0         | 741  | 782  | 94 + | 16  | 795  | 4880   | 5657   |
| UN50267 | Rsa1.0.02947.1 | 945  | 26531  | 1.00E-113 | 245  | 255  | 96 - | 693 | 945  | 12545  | 12799  |
| UN50268 | Rsa1.0.00111.1 | 958  | 390088 | 1.00E-180 | 383  | 399  | 95 + | 526 | 922  | 334412 | 334807 |
| UN50269 | Rsa1.0.00657.1 | 807  | 69858  | 1.00E-114 | 213  | 214  | 99 + | 344 | 557  | 8220   | 8433   |

|         |                |      |        |           |     |      |       |      |      |        |        |
|---------|----------------|------|--------|-----------|-----|------|-------|------|------|--------|--------|
| UN50270 | Rsa1.0_19989.1 | 1094 | 1355   | 3.00E-91  | 188 | 193  | 97 -  | 193  | 385  | 16     | 205    |
| UN50271 | Rsa1.0_03009.1 | 1022 | 26065  | 1.00E-127 | 238 | 240  | 99 +  | 102  | 341  | 15478  | 15717  |
| UN50272 | Rsa1.0_00701.1 | 800  | 67691  | 5.00E-55  | 131 | 138  | 94 +  | 204  | 341  | 21775  | 21912  |
| UN50273 | Rsa1.0_00306.1 | 1117 | 146760 | 0         | 507 | 534  | 94 +  | 584  | 1115 | 126933 | 127451 |
| UN50274 | Rsa1.0_05501.1 | 1290 | 13513  | 0         | 483 | 484  | 99 +  | 363  | 846  | 8336   | 8819   |
| UN50275 | Rsa1.0_01580.1 | 1169 | 42852  | 0         | 481 | 491  | 97 +  | 682  | 1169 | 31149  | 31639  |
| UN50276 | Rsa1.0_05081.1 | 890  | 136103 | 3.00E-84  | 165 | 167  | 98 -  | 603  | 769  | 2423   | 2589   |
| UN50277 | Rsa1.0_00093.1 | 904  | 214962 | 0         | 553 | 554  | 99 +  | 11   | 563  | 128343 | 128896 |
| UN50278 | Rsa1.0_00991.1 | 701  | 143101 | 0         | 636 | 665  | 95 -  | 1    | 655  | 137872 | 138536 |
| UN50279 | Rsa1.0_05687.1 | 838  | 12932  | 1.00E-104 | 214 | 221  | 96 +  | 119  | 339  | 2496   | 2716   |
| UN50280 | Rsa1.0_00379.1 | 907  | 89865  | 3.00E-87  | 167 | 168  | 99 -  | 466  | 633  | 51509  | 51676  |
| UN50281 | Rsa1.0_04808.1 | 954  | 15893  | 0         | 533 | 535  | 99 -  | 420  | 954  | 11930  | 12464  |
| UN50282 | Rsa1.0_03786.1 | 798  | 20879  | 0         | 737 | 741  | 99 +  | 2    | 742  | 13698  | 14438  |
| UN50283 | Rsa1.0_01000.1 | 1192 | 57140  | 1.00E-136 | 317 | 336  | 94 -  | 866  | 1192 | 40430  | 40763  |
| UN50284 | Rsa1.0_72760.1 | 1031 | 315    | 6.00E-80  | 152 | 152  | 100 + | 1    | 152  | 72     | 223    |
| UN50285 | Rsa1.0_02248.1 | 1113 | 33414  | 0         | 993 | 1011 | 98 +  | 107  | 1111 | 31778  | 32788  |
| UN50286 | Rsa1.0_09273.1 | 1073 | 6511   | 4.00E-93  | 222 | 238  | 93 -  | 6    | 238  | 1960   | 2197   |
| UN50287 | Rsa1.0_00083.1 | 1591 | 442773 | 0         | 727 | 757  | 96 +  | 6    | 761  | 359676 | 360429 |
| UN50288 | Rsa1.0_08045.1 | 769  | 8014   | 1.00E-171 | 337 | 344  | 97 -  | 428  | 769  | 4995   | 5336   |
| UN50289 | Rsa1.0_00163.1 | 776  | 116847 | 0         | 454 | 475  | 95 -  | 1    | 472  | 83512  | 83979  |
| UN50290 | Rsa1.0_05320.1 | 783  | 14158  | 1.00E-130 | 245 | 248  | 98 +  | 1    | 248  | 1413   | 1660   |
| UN50291 | Rsa1.0_00978.1 | 1173 | 57739  | 1.00E-103 | 242 | 258  | 93 +  | 917  | 1172 | 45327  | 45584  |
| UN50292 | Rsa1.0_01603.1 | 1146 | 42468  | 0         | 369 | 384  | 96 +  | 2    | 385  | 36933  | 37313  |
| UN50293 | Rsa1.0_00108.1 | 880  | 478491 | 0         | 475 | 494  | 96 +  | 3    | 491  | 416398 | 416891 |
| UN50294 | Rsa1.0_01338.1 | 885  | 155644 | 3.00E-84  | 249 | 282  | 88 +  | 1    | 282  | 142232 | 142494 |
| UN50295 | Rsa1.0_02648.1 | 799  | 29073  | 0         | 395 | 406  | 97 -  | 395  | 798  | 25820  | 26225  |
| UN50296 | Rsa1.0_28272.1 | 1125 | 821    | 0         | 357 | 363  | 98 +  | 10   | 372  | 164    | 525    |
| UN50297 | Rsa1.0_01762.1 | 804  | 39682  | 1.00E-138 | 377 | 416  | 90 -  | 393  | 786  | 6860   | 7267   |
| UN50298 | Rsa1.0_13471.1 | 1566 | 4802   | 0         | 489 | 522  | 93 +  | 1046 | 1562 | 3829   | 4338   |
| UN50299 | Rsa1.0_02550.1 | 1242 | 291051 | 1.00E-133 | 326 | 351  | 92 -  | 10   | 359  | 6190   | 6535   |
| UN50300 | Rsa1.0_05431.1 | 735  | 13780  | 0         | 355 | 363  | 97 +  | 159  | 521  | 8836   | 9198   |
| UN50301 | Rsa1.0_00662.1 | 987  | 192183 | 3.00E-81  | 161 | 162  | 99 -  | 203  | 364  | 33402  | 33562  |
| UN50302 | Rsa1.0_06313.1 | 923  | 11252  | 1.00E-158 | 332 | 347  | 95 -  | 406  | 752  | 6081   | 6421   |
| UN50303 | Rsa1.0_19989.1 | 824  | 1355   | 1.00E-107 | 200 | 201  | 99 -  | 3    | 203  | 645    | 845    |
| UN50304 | Rsa1.0_00168.1 | 1160 | 115870 | 1.00E-135 | 287 | 301  | 95 +  | 690  | 990  | 56550  | 56850  |
| UN50305 | Rsa1.0_00090.1 | 782  | 273859 | 0         | 646 | 662  | 97 +  | 13   | 674  | 171812 | 172471 |
| UN50306 | Rsa1.0_01149.1 | 1313 | 160459 | 1.00E-106 | 225 | 234  | 96 +  | 841  | 1074 | 131081 | 131311 |
| UN50307 | Rsa1.0_02671.1 | 933  | 28887  | 1.00E-136 | 289 | 302  | 95 +  | 632  | 933  | 5055   | 5355   |
| UN50308 | Rsa1.0_00605.1 | 670  | 73199  | 1.00E-144 | 299 | 312  | 95 +  | 1    | 312  | 941    | 1252   |

|         |                |      |        |           |      |      |       |      |      |        |        |
|---------|----------------|------|--------|-----------|------|------|-------|------|------|--------|--------|
| UN50309 | Rsa1.0.00183.1 | 1203 | 113277 | 0         | 410  | 410  | 100 - | 1    | 410  | 67148  | 67557  |
| UN50310 | Rsa1.0.00385.1 | 918  | 89160  | 1.00E-154 | 335  | 350  | 95 -  | 3    | 346  | 45744  | 46092  |
| UN50311 | Rsa1.0.00069.1 | 600  | 403561 | 9.00E-84  | 170  | 174  | 97 +  | 191  | 364  | 178478 | 178651 |
| UN50312 | Rsa1.0.00031.1 | 1327 | 179862 | 0         | 453  | 485  | 93 +  | 101  | 585  | 76042  | 76523  |
| UN50313 | Rsa1.0_15314.1 | 1153 | 2690   | 2.00E-80  | 188  | 199  | 94 -  | 714  | 912  | 2177   | 2372   |
| UN50314 | Rsa1.0_00087.1 | 852  | 761073 | 0         | 503  | 523  | 96 +  | 330  | 852  | 731598 | 732120 |
| UN50315 | Rsa1.0.02420.1 | 640  | 31580  | 0         | 614  | 638  | 96 -  | 3    | 640  | 16072  | 16700  |
| UN50316 | Rsa1.0.01212.1 | 1165 | 50622  | 0         | 860  | 891  | 96 +  | 80   | 970  | 49635  | 50525  |
| UN50317 | Rsa1.0.03695.1 | 999  | 21329  | 2.00E-64  | 220  | 248  | 88 +  | 43   | 285  | 9883   | 10125  |
| UN50318 | Rsa1.0.00336.1 | 1011 | 445051 | 0         | 992  | 1016 | 97 -  | 1    | 1009 | 308919 | 309934 |
| UN50319 | Rsa1.0.00009.1 | 1083 | 232558 | 1.00E-100 | 207  | 214  | 96 +  | 481  | 694  | 34010  | 34223  |
| UN50320 | Rsa1.0.01163.1 | 697  | 51946  | 1.00E-147 | 307  | 319  | 96 +  | 383  | 695  | 16052  | 16368  |
| UN50321 | Rsa1.0.00082.1 | 1176 | 237584 | 0         | 1176 | 1180 | 99 +  | 1    | 1176 | 105731 | 106910 |
| UN50322 | Rsa1.0.00648.1 | 702  | 70351  | 1.00E-169 | 364  | 387  | 94 +  | 119  | 490  | 12120  | 12505  |
| UN50323 | Rsa1.0.00006.1 | 1290 | 396176 | 1.00E-143 | 277  | 283  | 97 +  | 519  | 801  | 93153  | 93435  |
| UN50324 | Rsa1.0.00860.1 | 1272 | 61789  | 1.00E-163 | 324  | 335  | 96 -  | 103  | 437  | 13438  | 13772  |
| UN50325 | Rsa1.0.02362.1 | 792  | 32190  | 1.00E-137 | 255  | 256  | 99 -  | 5    | 259  | 5146   | 5401   |
| UN50326 | Rsa1.0.22496.1 | 966  | 1116   | 1.00E-162 | 346  | 363  | 95 -  | 608  | 966  | 628    | 990    |
| UN50327 | Rsa1.0.03560.1 | 844  | 22092  | 1.00E-173 | 347  | 360  | 96 +  | 381  | 740  | 2543   | 2902   |
| UN50328 | Rsa1.0.62479.1 | 916  | 367    | 0         | 358  | 365  | 98 +  | 27   | 391  | 3      | 367    |
| UN50329 | Rsa1.0_14032.1 | 920  | 3893   | 1.00E-135 | 291  | 310  | 93 +  | 624  | 918  | 3098   | 3407   |
| UN50330 | Rsa1.0.02209.1 | 586  | 33873  | 1.00E-118 | 240  | 248  | 96 +  | 289  | 536  | 27456  | 27703  |
| UN50331 | Rsa1.0.05687.1 | 752  | 12932  | 1.00E-171 | 314  | 317  | 99 +  | 1    | 317  | 3418   | 3734   |
| UN50332 | Rsa1.0.02648.1 | 871  | 29073  | 0         | 406  | 428  | 94 -  | 454  | 871  | 25802  | 26225  |
| UN50333 | Rsa1.0.04139.1 | 1110 | 18883  | 1.00E-158 | 320  | 330  | 96 -  | 1    | 326  | 16416  | 16745  |
| UN50334 | Rsa1.0.00026.1 | 825  | 327835 | 0         | 690  | 728  | 94 -  | 101  | 825  | 2726   | 3453   |
| UN50335 | Rsa1.0.00070.1 | 700  | 150321 | 0         | 402  | 404  | 99 -  | 57   | 460  | 59705  | 60108  |
| UN50336 | Rsa1.0.01896.1 | 827  | 37512  | 1.00E-157 | 287  | 289  | 99 -  | 1    | 289  | 23896  | 24184  |
| UN50337 | Rsa1.0.01340.1 | 891  | 47805  | 7.00E-70  | 264  | 305  | 86 -  | 595  | 891  | 20636  | 20919  |
| UN50338 | Rsa1.0.00722.1 | 1814 | 66840  | 0         | 447  | 448  | 99 -  | 1368 | 1814 | 39506  | 39953  |
| UN50339 | Rsa1.0.00978.1 | 1411 | 57739  | 0         | 1405 | 1409 | 99 +  | 1    | 1409 | 26146  | 27554  |
| UN50340 | Rsa1.0.02365.1 | 1132 | 32118  | 1.00E-120 | 234  | 239  | 97 -  | 50   | 288  | 10500  | 10738  |
| UN50341 | Rsa1.0.01376.1 | 1019 | 47004  | 1.00E-116 | 278  | 299  | 92 -  | 1    | 296  | 29440  | 29728  |
| UN50342 | Rsa1.0.04744.1 | 1222 | 16154  | 1.00E-154 | 339  | 354  | 95 +  | 873  | 1222 | 7259   | 7609   |
| UN50343 | Rsa1.0.00034.1 | 1263 | 260119 | 0         | 736  | 736  | 100 + | 528  | 1263 | 166144 | 166879 |
| UN50344 | Rsa1.0.00369.1 | 1098 | 266462 | 0         | 431  | 447  | 96 -  | 368  | 814  | 169356 | 169802 |
| UN50345 | Rsa1.0.00327.1 | 935  | 94892  | 0         | 507  | 538  | 94 +  | 192  | 727  | 70555  | 71076  |
| UN50346 | Rsa1.0.00277.1 | 1035 | 100132 | 1.00E-127 | 324  | 349  | 92 -  | 691  | 1035 | 83598  | 83938  |
| UN50347 | Rsa1.0_34075.1 | 904  | 665    | 0         | 380  | 389  | 97 -  | 3    | 388  | 9      | 397    |

|         |                |      |        |           |     |     |       |     |      |        |        |
|---------|----------------|------|--------|-----------|-----|-----|-------|-----|------|--------|--------|
| UN50348 | Rsa1.0.00234.1 | 1118 | 197060 | 0         | 398 | 415 | 95 +  | 333 | 747  | 144150 | 144564 |
| UN50349 | Rsa1.0.00706.1 | 922  | 291570 | 1.00E-136 | 289 | 303 | 95 +  | 3   | 305  | 229288 | 229580 |
| UN50350 | Rsa1.0.00437.1 | 776  | 84879  | 4.00E-74  | 202 | 217 | 93 +  | 560 | 772  | 22576  | 22791  |
| UN50351 | Rsa1.0.02803.1 | 831  | 27715  | 1.00E-71  | 177 | 189 | 93 +  | 641 | 829  | 11316  | 11502  |
| UN50352 | Rsa1.0.04399.1 | 1049 | 17543  | 1.00E-121 | 303 | 330 | 91 -  | 188 | 517  | 9928   | 10257  |
| UN50353 | Rsa1.0.01374.1 | 809  | 47047  | 1.00E-144 | 266 | 268 | 99 -  | 542 | 809  | 27515  | 27782  |
| UN50354 | Rsa1.0.01338.1 | 940  | 155644 | 0         | 411 | 425 | 96 -  | 2   | 426  | 142946 | 143370 |
| UN50355 | Rsa1.0.02508.1 | 793  | 30675  | 2.00E-79  | 237 | 264 | 89 -  | 5   | 254  | 3096   | 3353   |
| UN50356 | Rsa1.0.04195.1 | 1068 | 18528  | 1.00E-128 | 239 | 241 | 99 +  | 739 | 979  | 11857  | 12097  |
| UN50357 | Rsa1.0.01012.1 | 1064 | 56836  | 0         | 485 | 524 | 92 -  | 208 | 727  | 30849  | 31372  |
| UN50358 | Rsa1.0.04458.1 | 826  | 17255  | 1.00E-160 | 311 | 319 | 97 -  | 215 | 533  | 7725   | 8043   |
| UN50359 | Rsa1.0.03527.1 | 602  | 22278  | 0         | 357 | 364 | 98 -  | 1   | 363  | 18596  | 18958  |
| UN50360 | Rsa1.0.01997.1 | 1063 | 158416 | 0         | 591 | 610 | 96 +  | 465 | 1063 | 145620 | 146227 |
| UN50361 | Rsa1.0.01732.1 | 624  | 40194  | 0         | 433 | 449 | 96 -  | 176 | 624  | 25065  | 25513  |
| UN50362 | Rsa1.0.00163.1 | 1550 | 116847 | 0         | 464 | 492 | 94 -  | 6   | 496  | 83512  | 83996  |
| UN50363 | Rsa1.0.21327.1 | 825  | 1215   | 1.00E-101 | 191 | 192 | 99 -  | 1   | 192  | 1      | 192    |
| UN50364 | Rsa1.0.01029.1 | 620  | 256254 | 1.00E-114 | 215 | 217 | 99 -  | 403 | 619  | 245143 | 245359 |
| UN50365 | Rsa1.0.01660.1 | 602  | 41400  | 1.00E-174 | 369 | 389 | 94 -  | 95  | 483  | 30402  | 30790  |
| UN50366 | Rsa1.0.02429.1 | 940  | 31527  | 3.00E-60  | 220 | 247 | 89 +  | 1   | 236  | 29078  | 29320  |
| UN50367 | Rsa1.0.06179.1 | 1064 | 11548  | 0         | 419 | 435 | 96 +  | 129 | 563  | 8573   | 9006   |
| UN50368 | Rsa1.0.00039.1 | 1052 | 296927 | 1.00E-139 | 311 | 328 | 94 -  | 1   | 328  | 82015  | 82340  |
| UN50369 | Rsa1.0.04823.1 | 833  | 15840  | 1.00E-142 | 257 | 257 | 100 - | 5   | 261  | 12735  | 12991  |
| UN50370 | Rsa1.0.02648.1 | 782  | 29073  | 1.00E-150 | 299 | 309 | 96 +  | 85  | 393  | 25917  | 26225  |
| UN50371 | Rsa1.0.02593.1 | 932  | 29744  | 1.00E-114 | 246 | 257 | 95 -  | 675 | 929  | 28784  | 29040  |
| UN50372 | Rsa1.0.19036.1 | 1361 | 1492   | 1.00E-115 | 328 | 360 | 91 +  | 1   | 354  | 558    | 909    |
| UN50373 | Rsa1.0.05489.1 | 1076 | 13562  | 0         | 684 | 719 | 95 +  | 1   | 710  | 12190  | 12894  |
| UN50374 | Rsa1.0.02883.1 | 783  | 27035  | 0         | 386 | 393 | 98 -  | 388 | 780  | 3064   | 3456   |
| UN50375 | Rsa1.0.14918.1 | 716  | 2967   | 1.00E-137 | 293 | 305 | 96 +  | 413 | 716  | 1      | 301    |
| UN50376 | Rsa1.0.01344.1 | 893  | 142535 | 1.00E-155 | 330 | 344 | 95 -  | 548 | 891  | 129974 | 130312 |
| UN50377 | Rsa1.0.01012.1 | 950  | 56836  | 0         | 747 | 783 | 95 -  | 169 | 948  | 30597  | 31375  |
| UN50378 | Rsa1.0.02295.1 | 784  | 149884 | 1.00E-135 | 296 | 313 | 94 +  | 472 | 784  | 12460  | 12763  |
| UN50379 | Rsa1.0.01382.1 | 771  | 46877  | 0         | 387 | 405 | 95 +  | 358 | 758  | 13890  | 14293  |
| UN50380 | Rsa1.0.02358.1 | 1624 | 32213  | 0         | 931 | 946 | 98 +  | 491 | 1436 | 7909   | 8854   |
| UN50381 | Rsa1.0.00108.1 | 449  | 478491 | 0         | 402 | 409 | 98 +  | 37  | 445  | 114681 | 115087 |
| UN50382 | Rsa1.0.01012.1 | 758  | 56836  | 1.00E-165 | 417 | 456 | 91 -  | 2   | 452  | 30849  | 31304  |
| UN50383 | Rsa1.0.00710.1 | 1003 | 67325  | 1.00E-111 | 331 | 370 | 89 -  | 1   | 365  | 26519  | 26878  |
| UN50384 | Rsa1.0.03786.1 | 960  | 20879  | 0         | 807 | 811 | 99 -  | 3   | 811  | 14127  | 14937  |
| UN50385 | Rsa1.0.04618.1 | 890  | 16623  | 0         | 553 | 578 | 95 -  | 1   | 569  | 2856   | 3433   |
| UN50386 | Rsa1.0.01489.1 | 1134 | 44764  | 1.00E-176 | 406 | 429 | 94 -  | 714 | 1134 | 49     | 469    |

|         |                |      |        |           |      |      |       |      |      |        |        |
|---------|----------------|------|--------|-----------|------|------|-------|------|------|--------|--------|
| UN50387 | Rsa1.0.01303.1 | 806  | 48853  | 0         | 542  | 563  | 96 +  | 215  | 776  | 15291  | 15847  |
| UN50388 | Rsa1.0.00260.1 | 913  | 102021 | 0         | 418  | 436  | 95 -  | 192  | 627  | 63807  | 64242  |
| UN50389 | Rsa1.0.01493.1 | 1028 | 44670  | 1.00E-178 | 374  | 389  | 96 +  | 639  | 1027 | 7846   | 8227   |
| UN50390 | Rsa1.0.00218.1 | 1093 | 201480 | 0         | 651  | 682  | 95 +  | 250  | 928  | 177033 | 177714 |
| UN50391 | Rsa1.0.00382.1 | 1112 | 251946 | 1.00E-118 | 274  | 289  | 94 -  | 816  | 1103 | 34566  | 34848  |
| UN50392 | Rsa1.0.00490.1 | 1291 | 186713 | 0         | 1246 | 1246 | 100 + | 46   | 1291 | 166594 | 167839 |
| UN50393 | Rsa1.0.00327.1 | 899  | 94892  | 0         | 658  | 698  | 94 -  | 207  | 899  | 70402  | 71076  |
| UN50394 | Rsa1.0.01376.1 | 1046 | 47004  | 1.00E-175 | 315  | 316  | 99 +  | 731  | 1046 | 29432  | 29747  |
| UN50395 | Rsa1.0.08165.1 | 718  | 7806   | 5.00E-67  | 133  | 134  | 99 +  | 128  | 261  | 2273   | 2406   |
| UN50396 | Rsa1.0.04399.1 | 1138 | 17543  | 1.00E-178 | 409  | 437  | 93 +  | 642  | 1076 | 9928   | 10360  |
| UN50397 | Rsa1.0.00119.1 | 1261 | 467509 | 0         | 413  | 432  | 95 +  | 1    | 430  | 46341  | 46766  |
| UN50398 | Rsa1.0.01163.1 | 609  | 51946  | 1.00E-128 | 258  | 265  | 97 +  | 345  | 609  | 16052  | 16315  |
| UN50399 | Rsa1.0.02947.1 | 940  | 26531  | 1.00E-126 | 261  | 270  | 96 +  | 1    | 269  | 12530  | 12799  |
| UN50400 | Rsa1.0.03037.1 | 892  | 25825  | 1.00E-176 | 344  | 353  | 97 +  | 539  | 890  | 5163   | 5515   |
| UN50401 | Rsa1.0.26014.1 | 996  | 910    | 1.00E-111 | 240  | 250  | 96 -  | 741  | 990  | 281    | 525    |
| UN50402 | Rsa1.0.05376.1 | 898  | 13977  | 0         | 631  | 643  | 98 +  | 258  | 898  | 5384   | 6024   |
| UN50403 | Rsa1.0.08194.1 | 1332 | 7757   | 1.00E-107 | 204  | 206  | 99 -  | 840  | 1045 | 5566   | 5771   |
| UN50404 | Rsa1.0.05611.1 | 712  | 13193  | 0         | 473  | 486  | 97 +  | 2    | 487  | 2594   | 3075   |
| UN50405 | Rsa1.0.11462.1 | 854  | 5500   | 0         | 811  | 858  | 94 +  | 1    | 850  | 2312   | 3169   |
| UN50406 | Rsa1.0.00755.1 | 1036 | 192559 | 1.00E-90  | 200  | 208  | 96 -  | 833  | 1036 | 396    | 603    |
| UN50407 | Rsa1.0.00017.1 | 1357 | 752458 | 1.00E-120 | 313  | 340  | 92 -  | 1022 | 1350 | 154938 | 155271 |
| UN50408 | Rsa1.0.00104.1 | 801  | 368722 | 0         | 713  | 727  | 98 +  | 1    | 727  | 74397  | 75123  |
| UN50409 | Rsa1.0.00436.1 | 751  | 85008  | 1.00E-147 | 307  | 322  | 95 -  | 183  | 497  | 78092  | 78413  |
| UN50410 | Rsa1.0.01170.1 | 762  | 161131 | 1.00E-125 | 249  | 256  | 97 +  | 12   | 267  | 130490 | 130745 |
| UN50411 | Rsa1.0.00605.1 | 1167 | 73199  | 1.00E-157 | 324  | 334  | 97 +  | 840  | 1167 | 2322   | 2654   |
| UN50412 | Rsa1.0.08617.1 | 1387 | 7124   | 0         | 1126 | 1176 | 95 -  | 143  | 1301 | 373    | 1548   |
| UN50413 | Rsa1.0.00978.1 | 1466 | 57739  | 0         | 1110 | 1140 | 97 -  | 11   | 1141 | 26362  | 27499  |
| UN50414 | Rsa1.0.00218.1 | 1136 | 201480 | 0         | 778  | 846  | 91 +  | 221  | 1065 | 177033 | 177865 |
| UN50415 | Rsa1.0.01662.1 | 1093 | 41382  | 1.00E-163 | 298  | 300  | 99 +  | 792  | 1091 | 24604  | 24903  |
| UN50416 | Rsa1.0.00382.1 | 1018 | 251946 | 1.00E-148 | 324  | 339  | 95 +  | 1    | 338  | 242909 | 243245 |
| UN50417 | Rsa1.0.00549.1 | 812  | 76473  | 1.00E-122 | 289  | 312  | 92 +  | 5    | 316  | 13029  | 13327  |
| UN50418 | Rsa1.0.00234.1 | 688  | 197060 | 1.00E-143 | 284  | 293  | 96 -  | 285  | 577  | 143774 | 144066 |
| UN50419 | Rsa1.0.00369.1 | 1068 | 266462 | 0         | 409  | 420  | 97 -  | 341  | 760  | 192827 | 193246 |
| UN50420 | Rsa1.0.01376.1 | 708  | 47004  | 1.00E-103 | 272  | 295  | 92 -  | 1    | 290  | 29432  | 29714  |
| UN50421 | Rsa1.0.00422.1 | 601  | 86144  | 0         | 436  | 464  | 93 +  | 149  | 601  | 16094  | 16557  |
| UN50422 | Rsa1.0.02826.1 | 709  | 27560  | 1.00E-168 | 379  | 410  | 92 +  | 1    | 386  | 25783  | 26192  |
| UN50423 | Rsa1.0.00327.1 | 1090 | 94892  | 0         | 1060 | 1092 | 97 -  | 1    | 1086 | 69876  | 70959  |
| UN50424 | Rsa1.0.01338.1 | 957  | 155644 | 0         | 428  | 440  | 97 -  | 1    | 440  | 142949 | 143388 |
| UN50425 | Rsa1.0.00722.1 | 711  | 66840  | 1.00E-161 | 310  | 316  | 98 +  | 71   | 386  | 41419  | 41733  |

|         |                |      |        |           |     |     |      |     |      |        |        |
|---------|----------------|------|--------|-----------|-----|-----|------|-----|------|--------|--------|
| UN50426 | Rsa1.0.00414.1 | 1040 | 202190 | 1.00E-129 | 247 | 251 | 98 + | 1   | 251  | 195812 | 196062 |
| UN50427 | Rsa1.0.00218.1 | 1085 | 201480 | 0         | 784 | 853 | 91 - | 2   | 853  | 174782 | 175609 |
| UN50428 | Rsa1.0.00790.1 | 1164 | 148693 | 1.00E-127 | 237 | 239 | 99 + | 924 | 1162 | 143652 | 143890 |
| UN50429 | Rsa1.0.00180.1 | 857  | 114581 | 1.00E-131 | 301 | 319 | 94 + | 2   | 315  | 34754  | 35066  |
| UN50430 | Rsa1.0.00168.1 | 975  | 115870 | 1.00E-171 | 326 | 333 | 97 + | 263 | 595  | 88498  | 88830  |
| UN50431 | Rsa1.0.00382.1 | 993  | 251946 | 1.00E-135 | 319 | 340 | 93 + | 8   | 343  | 242915 | 243245 |
| UN50432 | Rsa1.0.02173.1 | 885  | 34318  | 0         | 422 | 433 | 97 + | 461 | 885  | 31435  | 31867  |
| UN50433 | Rsa1.0.00075.1 | 883  | 146680 | 1.00E-168 | 341 | 351 | 97 - | 535 | 883  | 141896 | 142244 |
| UN50434 | Rsa1.0.02365.1 | 1025 | 32118  | 1.00E-129 | 250 | 255 | 98 + | 744 | 998  | 10500  | 10754  |
| UN50435 | Rsa1.0.00260.1 | 1077 | 102021 | 0         | 420 | 436 | 96 + | 271 | 706  | 63807  | 64242  |
| UN50436 | Rsa1.0.03769.1 | 504  | 20955  | 1.00E-135 | 268 | 276 | 97 + | 229 | 504  | 9840   | 10115  |
| UN50437 | Rsa1.0.01786.1 | 1053 | 133324 | 0         | 791 | 844 | 93 - | 212 | 1053 | 95992  | 96827  |
| UN50438 | Rsa1.0.00722.1 | 710  | 66840  | 1.00E-153 | 305 | 315 | 96 + | 51  | 365  | 41419  | 41733  |
| UN50439 | Rsa1.0.01144.1 | 385  | 52431  | 0         | 331 | 333 | 99 - | 1   | 333  | 24893  | 25225  |
| UN50440 | Rsa1.0.00414.1 | 1186 | 202190 | 1.00E-121 | 240 | 245 | 97 + | 75  | 318  | 195818 | 196062 |
| UN50441 | Rsa1.0.00218.1 | 1052 | 201480 | 0         | 790 | 848 | 93 + | 208 | 1051 | 174782 | 175609 |
| UN50442 | Rsa1.0.00414.1 | 1212 | 202190 | 2.33E-156 | 362 | 390 | 92 + | 1   | 387  | 195675 | 196062 |
| UN50443 | Rsa1.0.00143.1 | 972  | 121313 | 0         | 566 | 572 | 98 + | 401 | 971  | 9887   | 10458  |
| UN50444 | Rsa1.0.01144.1 | 1009 | 52431  | 1.00E-90  | 248 | 274 | 90 - | 1   | 260  | 24893  | 25165  |
| UN50445 | Rsa1.0.01786.1 | 1104 | 133324 | 0         | 783 | 841 | 93 - | 268 | 1104 | 95997  | 96827  |
| UN50446 | Rsa1.0.00143.1 | 926  | 121313 | 0         | 512 | 532 | 96 - | 1   | 531  | 9887   | 10410  |
| UN50447 | Rsa1.0.00468.1 | 580  | 82095  | 1.00E-172 | 372 | 392 | 94 - | 190 | 579  | 34586  | 34975  |
| UN50448 | Rsa1.0.00260.1 | 949  | 102021 | 0         | 420 | 436 | 96 - | 191 | 626  | 63807  | 64242  |
| UN50449 | Rsa1.0.00092.1 | 1156 | 659932 | 1.00E-107 | 256 | 278 | 92 - | 2   | 279  | 340621 | 340886 |
| UN50450 | Rsa1.0.06209.1 | 944  | 11484  | 1.00E-145 | 277 | 282 | 98 + | 426 | 707  | 3388   | 3669   |
| UN50451 | Rsa1.0.06209.1 | 1108 | 11484  | 0         | 466 | 496 | 93 - | 612 | 1107 | 2233   | 2719   |
| UN50452 | Rsa1.0.00108.1 | 1166 | 478491 | 1.00E-131 | 254 | 258 | 98 - | 3   | 260  | 121672 | 121928 |
| UN50453 | Rsa1.0.00001.1 | 890  | 363028 | 0         | 460 | 496 | 92 - | 1   | 496  | 266567 | 267044 |
| UN50454 | Rsa1.0.02950.1 | 447  | 26506  | 1.00E-115 | 241 | 251 | 96 - | 2   | 252  | 6575   | 6825   |
| UN50455 | Rsa1.0.06209.1 | 1075 | 11484  | 0         | 472 | 487 | 96 + | 3   | 483  | 2233   | 2719   |
| UN50456 | Rsa1.0.06209.1 | 1199 | 11484  | 0         | 529 | 581 | 91 + | 2   | 569  | 2148   | 2719   |
| UN50457 | Rsa1.0.02662.1 | 686  | 28956  | 7.00E-97  | 186 | 188 | 98 + | 199 | 386  | 10660  | 10847  |
| UN50458 | Rsa1.0.01536.1 | 910  | 43747  | 0         | 632 | 651 | 97 - | 1   | 644  | 24193  | 24842  |
| UN50459 | Rsa1.0.00642.1 | 1145 | 201230 | 1.00E-142 | 390 | 431 | 90 + | 738 | 1143 | 161688 | 162114 |
| UN50460 | Rsa1.0.01296.1 | 805  | 49035  | 0         | 395 | 412 | 95 - | 397 | 805  | 35545  | 35953  |
| UN50461 | Rsa1.0.00185.1 | 540  | 248445 | 2.00E-65  | 140 | 143 | 97 + | 272 | 413  | 238605 | 238747 |
| UN50462 | Rsa1.0.04581.1 | 1078 | 16772  | 1.00E-164 | 300 | 301 | 99 + | 779 | 1078 | 6485   | 6785   |
| UN50463 | Rsa1.0.00697.1 | 670  | 67913  | 2.33E-156 | 362 | 395 | 91 + | 1   | 391  | 31775  | 32153  |
| UN50464 | Rsa1.0.00128.1 | 1047 | 228675 | 0         | 751 | 752 | 99 + | 294 | 1045 | 177660 | 178411 |



|         |                |      |        |           |     |     |       |     |      |        |        |
|---------|----------------|------|--------|-----------|-----|-----|-------|-----|------|--------|--------|
| UN50465 | Rsa1.0.00596.1 | 782  | 73578  | 5.00E-92  | 226 | 243 | 93 +  | 541 | 782  | 28854  | 29085  |
| UN50466 | Rsa1.0.07149.1 | 918  | 9824   | 0         | 408 | 418 | 97 +  | 1   | 410  | 828    | 1245   |
| UN50467 | Rsa1.0.13592.1 | 351  | 4685   | 1.00E-140 | 252 | 252 | 100 + | 100 | 351  | 2791   | 3042   |
| UN50468 | Rsa1.0.01951.1 | 1101 | 36941  | 0         | 539 | 601 | 89 -  | 505 | 1095 | 10900  | 11485  |
| UN50469 | Rsa1.0.00120.1 | 697  | 277288 | 0         | 332 | 333 | 99 -  | 1   | 333  | 253442 | 253774 |
| UN50470 | Rsa1.0.01789.1 | 1102 | 39250  | 1.00E-161 | 292 | 293 | 99 -  | 810 | 1102 | 7441   | 7733   |
| UN50471 | Rsa1.0.07591.1 | 638  | 9060   | 1.00E-131 | 282 | 294 | 95 -  | 1   | 293  | 6177   | 6469   |
| UN50472 | Rsa1.0.00163.1 | 858  | 116847 | 0         | 515 | 550 | 93 +  | 309 | 853  | 37083  | 37625  |
| UN50473 | Rsa1.0.00196.1 | 863  | 109960 | 0         | 438 | 453 | 96 +  | 423 | 861  | 19288  | 19740  |
| UN50474 | Rsa1.0.14674.1 | 1229 | 3167   | 0         | 560 | 576 | 97 -  | 656 | 1227 | 2206   | 2779   |
| UN50475 | Rsa1.0.03434.1 | 512  | 22960  | 1.00E-122 | 268 | 280 | 95 -  | 235 | 512  | 12200  | 12476  |
| UN50476 | Rsa1.0.04254.1 | 779  | 18258  | 0         | 425 | 446 | 95 -  | 242 | 687  | 14250  | 14695  |
| UN50477 | Rsa1.0.02076.1 | 738  | 153121 | 0         | 419 | 444 | 94 +  | 27  | 457  | 14605  | 15048  |
| UN50478 | Rsa1.0.09339.1 | 730  | 6444   | 0         | 401 | 402 | 99 -  | 5   | 406  | 4728   | 5129   |
| UN50479 | Rsa1.0.00056.1 | 993  | 332604 | 0         | 877 | 912 | 96 +  | 4   | 913  | 7845   | 8746   |
| UN50480 | Rsa1.0.01796.1 | 518  | 39154  | 2.00E-50  | 204 | 234 | 87 +  | 295 | 515  | 6789   | 7022   |
| UN50481 | Rsa1.0.00715.1 | 494  | 67116  | 0         | 450 | 489 | 92 -  | 1   | 489  | 63717  | 64188  |
| UN50482 | Rsa1.0.06530.1 | 972  | 10840  | 1.00E-110 | 283 | 300 | 94 +  | 1   | 295  | 5665   | 5958   |
| UN50483 | Rsa1.0.02923.1 | 713  | 26736  | 0         | 614 | 665 | 92 -  | 17  | 681  | 14986  | 15645  |
| UN50484 | Rsa1.0.06313.1 | 1291 | 11252  | 1.00E-169 | 337 | 350 | 96 +  | 533 | 882  | 6081   | 6421   |
| UN50485 | Rsa1.0.00611.1 | 763  | 72410  | 0         | 377 | 387 | 97 -  | 377 | 763  | 15083  | 15467  |
| UN50486 | Rsa1.0.01887.1 | 676  | 37564  | 0         | 425 | 428 | 99 +  | 8   | 435  | 14806  | 15233  |
| UN50487 | Rsa1.0.02310.1 | 608  | 32735  | 1.00E-149 | 336 | 359 | 93 +  | 250 | 606  | 30017  | 30366  |
| UN50488 | Rsa1.0.01422.1 | 1164 | 46172  | 0         | 523 | 527 | 99 +  | 3   | 529  | 10137  | 10663  |
| UN50489 | Rsa1.0.00583.1 | 774  | 74309  | 1.00E-166 | 326 | 336 | 97 +  | 323 | 658  | 71950  | 72285  |
| UN50490 | Rsa1.0.06571.1 | 942  | 10750  | 9.00E-91  | 270 | 299 | 90 -  | 3   | 299  | 6156   | 6444   |
| UN50491 | Rsa1.0.01389.1 | 1006 | 46716  | 0         | 387 | 397 | 97 +  | 8   | 404  | 9773   | 10165  |
| UN50492 | Rsa1.0.00245.1 | 1156 | 103569 | 0         | 556 | 563 | 98 +  | 594 | 1156 | 46218  | 46779  |
| UN50493 | Rsa1.0.01371.1 | 740  | 47079  | 0         | 724 | 754 | 96 +  | 2   | 740  | 32289  | 33039  |
| UN50494 | Rsa1.0.00185.1 | 888  | 248445 | 0         | 530 | 533 | 99 -  | 356 | 888  | 246052 | 246584 |
| UN50495 | Rsa1.0.00583.1 | 781  | 74309  | 1.00E-175 | 330 | 336 | 98 -  | 123 | 458  | 71950  | 72285  |
| UN50496 | Rsa1.0.00636.1 | 880  | 71113  | 1.00E-138 | 268 | 273 | 98 +  | 145 | 417  | 56802  | 57072  |
| UN50497 | Rsa1.0.03435.1 | 637  | 22958  | 1.00E-150 | 294 | 302 | 97 -  | 120 | 421  | 21976  | 22277  |
| UN50498 | Rsa1.0.00556.1 | 701  | 207212 | 0         | 630 | 651 | 96 -  | 47  | 697  | 135324 | 135974 |
| UN50499 | Rsa1.0.00251.1 | 571  | 303968 | 2.33E-156 | 295 | 303 | 97 +  | 3   | 303  | 130101 | 130403 |
| UN50500 | Rsa1.0.02655.1 | 788  | 29027  | 1.00E-168 | 343 | 355 | 96 -  | 38  | 390  | 16785  | 17134  |
| UN50501 | Rsa1.0.03107.1 | 1031 | 25349  | 0         | 475 | 498 | 95 +  | 446 | 943  | 13819  | 14315  |
| UN50502 | Rsa1.0.00782.1 | 803  | 64468  | 0         | 732 | 779 | 93 +  | 23  | 800  | 47440  | 48192  |
| UN50503 | Rsa1.0.03593.1 | 1185 | 21869  | 0         | 440 | 446 | 98 -  | 312 | 757  | 2156   | 2601   |

|         |                |      |        |           |     |      |       |      |      |        |        |
|---------|----------------|------|--------|-----------|-----|------|-------|------|------|--------|--------|
| UN50504 | Rsa1.0_01495.1 | 848  | 44613  | 0         | 443 | 467  | 94 -  | 280  | 745  | 19384  | 19847  |
| UN50505 | Rsa1.0_00620.1 | 851  | 71985  | 0         | 424 | 443  | 95 +  | 351  | 792  | 54806  | 55248  |
| UN50506 | Rsa1.0_08285.1 | 1393 | 7606   | 0         | 548 | 563  | 97 +  | 509  | 1071 | 2625   | 3187   |
| UN50507 | Rsa1.0_00033.1 | 863  | 515811 | 0         | 504 | 529  | 95 +  | 1    | 526  | 485085 | 485610 |
| UN50508 | Rsa1.0_00396.1 | 791  | 88242  | 1.00E-174 | 597 | 689  | 86 +  | 61   | 742  | 60777  | 61458  |
| UN50509 | Rsa1.0_00446.1 | 684  | 167829 | 0         | 363 | 374  | 97 -  | 17   | 390  | 129961 | 130333 |
| UN50510 | Rsa1.0_03568.1 | 913  | 22048  | 0         | 690 | 698  | 98 +  | 217  | 913  | 18572  | 19269  |
| UN50511 | Rsa1.0_66827.1 | 1042 | 343    | 1.00E-161 | 303 | 308  | 98 +  | 562  | 869  | 36     | 343    |
| UN50512 | Rsa1.0_00706.1 | 709  | 291570 | 1.00E-162 | 334 | 348  | 95 -  | 3    | 350  | 21539  | 21884  |
| UN50513 | Rsa1.0_00342.1 | 650  | 93695  | 1.00E-106 | 206 | 208  | 99 -  | 14   | 221  | 32256  | 32462  |
| UN50514 | Rsa1.0_01355.1 | 547  | 47303  | 3.00E-92  | 200 | 208  | 96 -  | 203  | 410  | 25986  | 26192  |
| UN50515 | Rsa1.0_02069.1 | 682  | 35425  | 1.00E-149 | 337 | 360  | 93 -  | 270  | 620  | 20713  | 21072  |
| UN50516 | Rsa1.0_02157.1 | 832  | 149652 | 1.00E-106 | 242 | 257  | 94 +  | 1    | 257  | 12871  | 13118  |
| UN50517 | Rsa1.0_00497.1 | 1062 | 79830  | 0         | 360 | 368  | 97 +  | 2    | 369  | 75694  | 76061  |
| UN50518 | Rsa1.0_05878.1 | 1017 | 12344  | 1.00E-145 | 305 | 316  | 96 -  | 701  | 1016 | 8190   | 8501   |
| UN50519 | Rsa1.0_07894.1 | 833  | 8347   | 0         | 392 | 402  | 97 -  | 1    | 401  | 4946   | 5346   |
| UN50520 | Rsa1.0_00124.1 | 698  | 262503 | 1.00E-116 | 302 | 328  | 92 -  | 374  | 697  | 14127  | 14444  |
| UN50521 | Rsa1.0_08910.1 | 1400 | 6798   | 1.00E-93  | 175 | 175  | 100 - | 857  | 1031 | 1064   | 1238   |
| UN50522 | Rsa1.0_00457.1 | 703  | 337301 | 0         | 562 | 594  | 94 +  | 1    | 584  | 334143 | 334731 |
| UN50523 | Rsa1.0_08559.1 | 1001 | 7197   | 0         | 594 | 595  | 99 -  | 1    | 594  | 3619   | 4213   |
| UN50524 | Rsa1.0_00082.1 | 1438 | 237584 | 1.00E-127 | 234 | 235  | 99 -  | 734  | 968  | 137067 | 137301 |
| UN50525 | Rsa1.0_00340.1 | 1274 | 305782 | 1.00E-129 | 258 | 266  | 96 -  | 1001 | 1266 | 188890 | 189155 |
| UN50526 | Rsa1.0_00033.1 | 834  | 515811 | 0         | 670 | 708  | 94 +  | 135  | 833  | 481857 | 482563 |
| UN50527 | Rsa1.0_01414.1 | 990  | 149508 | 7.00E-30  | 138 | 160  | 86 +  | 637  | 796  | 130374 | 130532 |
| UN50528 | Rsa1.0_02456.1 | 782  | 31222  | 0         | 736 | 770  | 95 +  | 11   | 780  | 14625  | 15375  |
| UN50529 | Rsa1.0_08916.1 | 1046 | 6792   | 0         | 990 | 1000 | 99 +  | 47   | 1046 | 5451   | 6450   |
| UN50530 | Rsa1.0_00050.1 | 954  | 237174 | 0         | 526 | 540  | 97 +  | 1    | 531  | 234669 | 235208 |
| UN50531 | Rsa1.0_01896.1 | 838  | 37512  | 0         | 792 | 841  | 94 +  | 3    | 835  | 6314   | 7153   |
| UN50532 | Rsa1.0_00414.1 | 1204 | 202190 | 1.00E-129 | 309 | 332  | 93 +  | 1    | 332  | 77606  | 77933  |
| UN50533 | Rsa1.0_00078.1 | 781  | 175053 | 2.00E-97  | 202 | 209  | 96 -  | 415  | 623  | 141775 | 141983 |
| UN50534 | Rsa1.0_01444.1 | 824  | 169539 | 0         | 453 | 492  | 92 -  | 6    | 471  | 146885 | 147375 |
| UN50535 | Rsa1.0_00123.1 | 887  | 325650 | 0         | 471 | 477  | 98 -  | 412  | 887  | 109845 | 110321 |
| UN50536 | Rsa1.0_04747.1 | 783  | 16147  | 0         | 610 | 662  | 92 +  | 57   | 712  | 2161   | 2815   |
| UN50537 | Rsa1.0_00510.1 | 711  | 78718  | 0         | 506 | 515  | 98 -  | 7    | 519  | 12937  | 13451  |
| UN50538 | Rsa1.0_01104.1 | 1504 | 285480 | 0         | 381 | 399  | 95 -  | 1    | 399  | 10212  | 10610  |
| UN50539 | Rsa1.0_02726.1 | 1044 | 28404  | 0         | 419 | 420  | 99 -  | 1    | 420  | 22727  | 23146  |
| UN50540 | Rsa1.0_00032.1 | 632  | 306326 | 0         | 603 | 626  | 96 -  | 2    | 627  | 270896 | 271516 |
| UN50541 | Rsa1.0_03303.1 | 900  | 23890  | 0         | 646 | 671  | 96 +  | 1    | 668  | 9587   | 10250  |
| UN50542 | Rsa1.0_01829.1 | 820  | 166063 | 0         | 818 | 820  | 99 -  | 1    | 820  | 160961 | 161780 |

|         |                |      |        |           |     |     |       |     |      |        |        |
|---------|----------------|------|--------|-----------|-----|-----|-------|-----|------|--------|--------|
| UN50543 | Rsa1.0.00075.1 | 844  | 146680 | 0         | 354 | 354 | 100 - | 1   | 354  | 26868  | 27221  |
| UN50544 | Rsa1.0.05688.1 | 954  | 12931  | 1.00E-172 | 310 | 311 | 99 +  | 1   | 311  | 364    | 674    |
| UN50545 | Rsa1.0.00926.1 | 1011 | 195072 | 0         | 472 | 495 | 95 +  | 1   | 492  | 41587  | 42072  |
| UN50546 | Rsa1.0.00009.1 | 670  | 232558 | 0         | 549 | 560 | 98 +  | 8   | 567  | 17497  | 18056  |
| UN50547 | Rsa1.0.00109.1 | 868  | 132735 | 1.00E-163 | 292 | 292 | 100 + | 4   | 295  | 85150  | 85441  |
| UN50548 | Rsa1.0.01758.1 | 1093 | 39747  | 0         | 402 | 415 | 96 +  | 338 | 752  | 37154  | 37568  |
| UN50549 | Rsa1.0.15795.1 | 814  | 2418   | 1.00E-106 | 199 | 200 | 99 -  | 2   | 201  | 1881   | 2080   |
| UN50550 | Rsa1.0.00310.1 | 714  | 96852  | 0         | 641 | 664 | 96 -  | 46  | 703  | 3223   | 3884   |
| UN50551 | Rsa1.0.00215.1 | 876  | 201775 | 1.00E-135 | 313 | 333 | 93 -  | 1   | 331  | 2172   | 2495   |
| UN50552 | Rsa1.0.00051.1 | 918  | 258225 | 0         | 716 | 750 | 95 +  | 9   | 749  | 93868  | 94615  |
| UN50553 | Rsa1.0.11409.1 | 1005 | 5515   | 1.00E-147 | 292 | 303 | 96 -  | 1   | 292  | 3734   | 4036   |
| UN50554 | Rsa1.0.00088.1 | 970  | 141341 | 1.00E-151 | 303 | 312 | 97 +  | 1   | 312  | 5598   | 5908   |
| UN50555 | Rsa1.0.00497.1 | 1046 | 79830  | 0         | 812 | 812 | 100 - | 1   | 812  | 48270  | 49081  |
| UN50556 | Rsa1.0.01996.1 | 719  | 36327  | 2.33E-156 | 283 | 290 | 97 -  | 100 | 389  | 28812  | 29101  |
| UN50557 | Rsa1.0.09583.1 | 1100 | 6270   | 0         | 380 | 385 | 98 +  | 576 | 960  | 5886   | 6270   |
| UN50558 | Rsa1.0.00090.1 | 693  | 273859 | 0         | 488 | 508 | 96 +  | 185 | 685  | 148579 | 149084 |
| UN50559 | Rsa1.0.07000.1 | 1408 | 10049  | 0         | 357 | 364 | 98 +  | 720 | 1083 | 3095   | 3458   |
| UN50560 | Rsa1.0.05161.1 | 1132 | 14631  | 1.00E-163 | 336 | 351 | 95 +  | 3   | 353  | 8345   | 8695   |
| UN50561 | Rsa1.0.00083.1 | 1058 | 442773 | 0         | 766 | 801 | 95 +  | 265 | 1058 | 319657 | 320451 |
| UN50562 | Rsa1.0.32336.1 | 865  | 704    | 1.00E-105 | 230 | 238 | 96 -  | 590 | 824  | 427    | 663    |
| UN50563 | Rsa1.0.05822.1 | 669  | 12521  | 0         | 483 | 504 | 95 +  | 171 | 669  | 11655  | 12156  |
| UN50564 | Rsa1.0.01462.1 | 556  | 45231  | 1.00E-157 | 281 | 281 | 100 - | 276 | 556  | 25445  | 25725  |
| UN50565 | Rsa1.0.02456.1 | 609  | 31222  | 1.00E-79  | 212 | 229 | 92 +  | 2   | 224  | 23781  | 24005  |
| UN50566 | Rsa1.0.00812.1 | 752  | 63233  | 1.00E-109 | 204 | 205 | 99 -  | 3   | 207  | 4229   | 4433   |
| UN50567 | Rsa1.0.00185.1 | 600  | 248445 | 1.00E-135 | 297 | 312 | 95 -  | 2   | 311  | 4378   | 4689   |
| UN50568 | Rsa1.0.02152.1 | 682  | 34558  | 0         | 573 | 607 | 94 +  | 22  | 616  | 26461  | 27067  |
| UN50569 | Rsa1.0.03925.1 | 567  | 20025  | 1.00E-115 | 234 | 242 | 96 +  | 1   | 242  | 3495   | 3736   |
| UN50570 | Rsa1.0.08072.1 | 952  | 7955   | 0         | 370 | 371 | 99 -  | 582 | 952  | 5956   | 6326   |
| UN50571 | Rsa1.0.00195.1 | 631  | 251884 | 1.00E-103 | 233 | 249 | 93 +  | 383 | 631  | 83583  | 83820  |
| UN50572 | Rsa1.0.08902.1 | 1049 | 6805   | 0         | 752 | 765 | 98 +  | 286 | 1049 | 4643   | 5407   |
| UN50573 | Rsa1.0.04602.1 | 728  | 16684  | 0         | 358 | 362 | 98 -  | 365 | 726  | 16323  | 16684  |
| UN50574 | Rsa1.0.35485.1 | 804  | 638    | 0         | 395 | 397 | 99 -  | 118 | 514  | 242    | 638    |
| UN50575 | Rsa1.0.03956.1 | 620  | 19872  | 1.00E-147 | 317 | 333 | 95 -  | 25  | 351  | 16858  | 17190  |
| UN50576 | Rsa1.0.16298.1 | 1308 | 2209   | 0         | 628 | 643 | 97 -  | 676 | 1308 | 392    | 1034   |
| UN50577 | Rsa1.0.00213.1 | 519  | 108167 | 6.00E-66  | 253 | 296 | 85 +  | 250 | 518  | 39822  | 40110  |
| UN50578 | Rsa1.0.00476.1 | 881  | 280966 | 1.00E-134 | 288 | 303 | 95 -  | 288 | 590  | 246593 | 246895 |
| UN50579 | Rsa1.0.60174.1 | 524  | 381    | 1.00E-108 | 251 | 268 | 93 -  | 246 | 504  | 1      | 268    |
| UN50580 | Rsa1.0.01126.1 | 837  | 53127  | 0         | 493 | 516 | 95 +  | 322 | 836  | 7555   | 8062   |
| UN50581 | Rsa1.0.07466.1 | 1112 | 9321   | 0         | 565 | 569 | 99 -  | 537 | 1104 | 6150   | 6718   |

|         |                |      |        |           |      |      |       |     |      |        |        |
|---------|----------------|------|--------|-----------|------|------|-------|-----|------|--------|--------|
| UN50582 | Rsa1.0.00045.1 | 955  | 328694 | 0         | 369  | 380  | 97 -  | 581 | 955  | 245028 | 245406 |
| UN50583 | Rsa1.0.00239.1 | 953  | 104332 | 1.00E-159 | 301  | 304  | 99 -  | 652 | 953  | 15170  | 15472  |
| UN50584 | Rsa1.0.01300.1 | 532  | 48942  | 1.00E-111 | 265  | 287  | 92 +  | 11  | 285  | 47253  | 47536  |
| UN50585 | Rsa1.0.02409.1 | 654  | 31663  | 1.00E-163 | 294  | 295  | 99 +  | 356 | 650  | 12015  | 12309  |
| UN50586 | Rsa1.0.00011.1 | 778  | 225044 | 1.00E-103 | 203  | 206  | 98 -  | 575 | 778  | 191859 | 192064 |
| UN50587 | Rsa1.0.00092.1 | 611  | 659932 | 3.00E-99  | 272  | 304  | 89 -  | 1   | 289  | 325333 | 325633 |
| UN50588 | Rsa1.0.01111.1 | 1044 | 53669  | 1.00E-142 | 337  | 359  | 93 -  | 693 | 1043 | 39889  | 40244  |
| UN50589 | Rsa1.0.00379.1 | 1210 | 89865  | 0         | 489  | 508  | 96 -  | 6   | 507  | 52174  | 52681  |
| UN50590 | Rsa1.0.00157.1 | 923  | 245832 | 5.00E-77  | 174  | 183  | 95 -  | 370 | 552  | 183436 | 183618 |
| UN50591 | Rsa1.0.05739.1 | 966  | 12778  | 0         | 371  | 382  | 97 -  | 527 | 908  | 2243   | 2624   |
| UN50592 | Rsa1.0.00589.1 | 972  | 209965 | 0         | 968  | 969  | 99 -  | 4   | 972  | 6241   | 7209   |
| UN50593 | Rsa1.0.00394.1 | 895  | 148426 | 0         | 537  | 550  | 97 -  | 1   | 543  | 67486  | 68035  |
| UN50594 | Rsa1.0.06978.1 | 587  | 10073  | 1.00E-159 | 302  | 308  | 98 -  | 40  | 347  | 2434   | 2741   |
| UN50595 | Rsa1.0.00046.1 | 763  | 320315 | 1.00E-169 | 356  | 371  | 95 -  | 1   | 368  | 29574  | 29942  |
| UN50596 | Rsa1.0.13774.1 | 648  | 4351   | 1.00E-92  | 229  | 245  | 93 -  | 394 | 631  | 1090   | 1334   |
| UN50597 | Rsa1.0.01930.1 | 212  | 37189  | 2.00E-91  | 194  | 202  | 96 +  | 7   | 208  | 1108   | 1309   |
| UN50598 | Rsa1.0.00624.1 | 980  | 71773  | 0         | 358  | 361  | 99 +  | 618 | 978  | 25390  | 25750  |
| UN50599 | Rsa1.0.00482.1 | 200  | 81162  | 5.00E-30  | 70   | 71   | 98 +  | 4   | 74   | 5324   | 5394   |
| UN50600 | Rsa1.0.08725.1 | 1065 | 6997   | 7.00E-98  | 231  | 245  | 94 +  | 634 | 876  | 6362   | 6605   |
| UN50601 | Rsa1.0.00737.1 | 1009 | 66432  | 0         | 479  | 487  | 98 +  | 7   | 493  | 61562  | 62048  |
| UN50602 | Rsa1.0.02719.1 | 598  | 28428  | 0         | 559  | 598  | 93 -  | 1   | 598  | 9909   | 10487  |
| UN50603 | Rsa1.0.00315.1 | 1212 | 96426  | 1.00E-166 | 318  | 325  | 97 -  | 796 | 1120 | 19281  | 19605  |
| UN50604 | Rsa1.0.00087.1 | 875  | 761073 | 3.00E-75  | 150  | 152  | 98 -  | 59  | 210  | 294730 | 294881 |
| UN50605 | Rsa1.0.00252.1 | 738  | 102760 | 1.00E-140 | 274  | 280  | 97 +  | 409 | 687  | 43752  | 44031  |
| UN50606 | Rsa1.0.00875.1 | 1116 | 61371  | 0         | 431  | 431  | 100 + | 1   | 431  | 58201  | 58631  |
| UN50607 | Rsa1.0.00469.1 | 1267 | 82084  | 1.00E-162 | 300  | 302  | 99 -  | 2   | 303  | 69939  | 70239  |
| UN50608 | Rsa1.0.01492.1 | 923  | 44704  | 1.00E-154 | 277  | 277  | 100 + | 1   | 277  | 4583   | 4859   |
| UN50609 | Rsa1.0.00205.1 | 709  | 193401 | 1.00E-119 | 239  | 246  | 97 -  | 251 | 496  | 98206  | 98451  |
| UN50610 | Rsa1.0.00097.1 | 707  | 138858 | 1.00E-167 | 339  | 351  | 96 +  | 294 | 639  | 59426  | 59776  |
| UN50611 | Rsa1.0.01811.1 | 558  | 38977  | 0         | 413  | 426  | 96 -  | 4   | 421  | 26394  | 26819  |
| UN50612 | Rsa1.0.00131.1 | 872  | 432233 | 1.00E-171 | 405  | 436  | 92 +  | 436 | 871  | 96212  | 96630  |
| UN50613 | Rsa1.0.01957.1 | 770  | 36844  | 0         | 716  | 762  | 93 -  | 2   | 763  | 16796  | 17554  |
| UN50614 | Rsa1.0.00001.1 | 781  | 363028 | 1.00E-150 | 315  | 329  | 95 +  | 193 | 515  | 323550 | 323878 |
| UN50615 | Rsa1.0.00124.1 | 1220 | 262503 | 0         | 1106 | 1182 | 93 +  | 30  | 1185 | 59992  | 61173  |
| UN50616 | Rsa1.0.03238.1 | 683  | 24432  | 3.00E-96  | 220  | 231  | 95 -  | 8   | 237  | 18219  | 18448  |
| UN50617 | Rsa1.0.02234.1 | 792  | 33618  | 0         | 508  | 509  | 99 +  | 5   | 513  | 4026   | 4534   |
| UN50618 | Rsa1.0.00029.1 | 633  | 272992 | 1.00E-165 | 300  | 302  | 99 +  | 332 | 633  | 23298  | 23599  |
| UN50619 | Rsa1.0.00065.1 | 927  | 454616 | 0         | 573  | 595  | 96 +  | 306 | 897  | 254496 | 255090 |
| UN50620 | Rsa1.0.00078.1 | 599  | 175053 | 1.00E-179 | 483  | 538  | 89 -  | 1   | 519  | 66466  | 67002  |

|         |                |      |        |           |     |     |       |     |      |        |        |
|---------|----------------|------|--------|-----------|-----|-----|-------|-----|------|--------|--------|
| UN50621 | Rsa1.0.00046.1 | 650  | 320315 | 1.00E-112 | 246 | 257 | 95 -  | 1   | 255  | 29574  | 29829  |
| UN50622 | Rsa1.0.00094.1 | 715  | 139042 | 1.00E-100 | 233 | 248 | 93 +  | 478 | 715  | 119349 | 119594 |
| UN50623 | Rsa1.0.00451.1 | 1216 | 322533 | 1.00E-93  | 216 | 232 | 93 -  | 255 | 486  | 284872 | 285091 |
| UN50624 | Rsa1.0.00007.1 | 640  | 239325 | 0         | 399 | 410 | 97 -  | 231 | 640  | 119532 | 119941 |
| UN50625 | Rsa1.0.00087.1 | 1229 | 761073 | 1.00E-138 | 262 | 266 | 98 +  | 640 | 905  | 274293 | 274558 |
| UN50626 | Rsa1.0.01580.1 | 1172 | 42852  | 0         | 407 | 417 | 97 -  | 1   | 414  | 31149  | 31564  |
| UN50627 | Rsa1.0.00978.1 | 452  | 57739  | 1.00E-155 | 312 | 322 | 96 -  | 3   | 324  | 42690  | 43010  |
| UN50628 | Rsa1.0.00001.1 | 444  | 363028 | 1.00E-57  | 164 | 176 | 93 +  | 2   | 175  | 313391 | 313562 |
| UN50629 | Rsa1.0.02239.1 | 800  | 33534  | 0         | 440 | 452 | 97 +  | 2   | 451  | 14804  | 15252  |
| UN50630 | Rsa1.0.04352.1 | 633  | 17779  | 0         | 528 | 553 | 95 -  | 1   | 547  | 12118  | 12666  |
| UN50631 | Rsa1.0.01730.1 | 751  | 40223  | 0         | 426 | 445 | 95 +  | 305 | 741  | 35176  | 35620  |
| UN50632 | Rsa1.0.33048.1 | 1184 | 687    | 1.00E-121 | 571 | 682 | 83 +  | 233 | 909  | 1      | 668    |
| UN50633 | Rsa1.0.02123.1 | 1513 | 149053 | 0         | 516 | 519 | 99 -  | 453 | 971  | 32143  | 32661  |
| UN50634 | Rsa1.0.08223.1 | 882  | 7700   | 0         | 462 | 463 | 99 +  | 420 | 882  | 6338   | 6800   |
| UN50635 | Rsa1.0.01498.1 | 641  | 44558  | 0         | 613 | 638 | 96 -  | 3   | 640  | 35684  | 36318  |
| UN50636 | Rsa1.0.00077.1 | 1171 | 145005 | 0         | 586 | 588 | 99 +  | 2   | 589  | 89602  | 90189  |
| UN50637 | Rsa1.0.00033.1 | 708  | 515811 | 1.00E-61  | 194 | 219 | 88 +  | 504 | 706  | 35164  | 35381  |
| UN50638 | Rsa1.0.01760.1 | 1545 | 39730  | 1.00E-147 | 320 | 336 | 95 +  | 3   | 338  | 11091  | 11423  |
| UN50639 | Rsa1.0.01126.1 | 945  | 53127  | 0         | 654 | 708 | 92 -  | 3   | 707  | 27997  | 28672  |
| UN50640 | Rsa1.0.00813.1 | 457  | 63202  | 0         | 432 | 458 | 94 +  | 1   | 457  | 18515  | 18969  |
| UN50641 | Rsa1.0.07440.1 | 581  | 9389   | 1.00E-158 | 300 | 306 | 98 -  | 28  | 333  | 6268   | 6573   |
| UN50642 | Rsa1.0.00727.1 | 789  | 66724  | 1.00E-124 | 229 | 230 | 99 +  | 210 | 439  | 30553  | 30782  |
| UN50643 | Rsa1.0.02467.1 | 633  | 31141  | 1.00E-129 | 291 | 308 | 94 -  | 1   | 307  | 3808   | 4106   |
| UN50644 | Rsa1.0.00491.1 | 754  | 80219  | 1.00E-154 | 286 | 289 | 98 -  | 294 | 582  | 68919  | 69207  |
| UN50645 | Rsa1.0.00451.1 | 1040 | 322533 | 1.00E-151 | 319 | 332 | 96 +  | 710 | 1039 | 301659 | 301986 |
| UN50646 | Rsa1.0.25706.1 | 775  | 924    | 1.00E-137 | 256 | 259 | 98 +  | 460 | 718  | 10     | 268    |
| UN50647 | Rsa1.0.00017.1 | 813  | 752458 | 1.00E-103 | 234 | 250 | 93 -  | 463 | 712  | 412804 | 413043 |
| UN50648 | Rsa1.0.02185.1 | 740  | 34150  | 0         | 706 | 748 | 94 -  | 3   | 740  | 27262  | 27997  |
| UN50649 | Rsa1.0.00127.1 | 758  | 127446 | 0         | 641 | 685 | 93 -  | 3   | 686  | 11082  | 11764  |
| UN50650 | Rsa1.0.05972.1 | 688  | 12067  | 3.00E-50  | 105 | 106 | 99 +  | 303 | 408  | 11353  | 11458  |
| UN50651 | Rsa1.0.23487.1 | 1323 | 1045   | 0         | 745 | 764 | 97 -  | 473 | 1236 | 278    | 1041   |
| UN50652 | Rsa1.0.01629.1 | 1043 | 41917  | 1.00E-147 | 329 | 346 | 95 -  | 700 | 1043 | 13342  | 13682  |
| UN50653 | Rsa1.0.02750.1 | 989  | 28239  | 6.00E-92  | 194 | 201 | 96 +  | 88  | 288  | 22928  | 23124  |
| UN50654 | Rsa1.0.00015.1 | 740  | 561803 | 1.00E-169 | 425 | 465 | 91 -  | 285 | 735  | 193333 | 193790 |
| UN50655 | Rsa1.0.00771.1 | 725  | 64870  | 0         | 723 | 723 | 100 + | 3   | 725  | 46884  | 47606  |
| UN50656 | Rsa1.0.00642.1 | 1165 | 201230 | 1.00E-154 | 362 | 388 | 93 -  | 787 | 1163 | 160128 | 160508 |
| UN50657 | Rsa1.0.02358.1 | 1016 | 32213  | 1.00E-172 | 326 | 332 | 98 -  | 487 | 818  | 384    | 712    |
| UN50658 | Rsa1.0.02797.1 | 699  | 27800  | 1.00E-130 | 296 | 314 | 94 +  | 9   | 322  | 652    | 961    |
| UN50659 | Rsa1.0.00684.1 | 983  | 141701 | 0         | 507 | 515 | 98 +  | 469 | 983  | 9100   | 9614   |

|         |                |      |        |           |      |      |       |      |      |        |        |
|---------|----------------|------|--------|-----------|------|------|-------|------|------|--------|--------|
| UN50660 | Rsa1.0.00351.1 | 660  | 413096 | 0         | 508  | 548  | 92 +  | 23   | 558  | 387942 | 388489 |
| UN50661 | Rsa1.0.01115.1 | 1041 | 183545 | 1.00E-173 | 390  | 411  | 94 +  | 633  | 1041 | 6514   | 6919   |
| UN50662 | Rsa1.0.00703.1 | 1048 | 67597  | 1.00E-174 | 369  | 387  | 95 +  | 1    | 382  | 30649  | 31035  |
| UN50663 | Rsa1.0.00104.1 | 549  | 368722 | 1.00E-121 | 229  | 232  | 98 -  | 123  | 354  | 211493 | 211724 |
| UN50664 | Rsa1.0.27736.1 | 279  | 841    | 1.00E-149 | 277  | 279  | 99 -  | 1    | 279  | 283    | 560    |
| UN50665 | Rsa1.0.00014.1 | 1055 | 348985 | 1.00E-144 | 329  | 347  | 94 -  | 1    | 339  | 323900 | 324245 |
| UN50666 | Rsa1.0.03422.1 | 588  | 23076  | 1.00E-143 | 385  | 421  | 91 -  | 2    | 408  | 9864   | 10283  |
| UN50667 | Rsa1.0.00163.1 | 934  | 116847 | 1.00E-111 | 228  | 236  | 96 +  | 527  | 762  | 65088  | 65323  |
| UN50668 | Rsa1.0.00678.1 | 806  | 193163 | 1.00E-155 | 323  | 338  | 95 +  | 452  | 789  | 188844 | 189181 |
| UN50669 | Rsa1.0.01482.1 | 1104 | 44855  | 0         | 454  | 468  | 97 -  | 1    | 468  | 16982  | 17442  |
| UN50670 | Rsa1.0.01867.1 | 1033 | 37960  | 0         | 437  | 437  | 100 - | 64   | 500  | 17660  | 18096  |
| UN50671 | Rsa1.0.03390.1 | 754  | 23270  | 0         | 461  | 465  | 99 -  | 290  | 754  | 6602   | 7066   |
| UN50672 | Rsa1.0.01338.1 | 629  | 155644 | 7.00E-69  | 224  | 249  | 89 +  | 4    | 249  | 13867  | 14109  |
| UN50673 | Rsa1.0.00143.1 | 1532 | 121313 | 0         | 1430 | 1500 | 95 +  | 42   | 1531 | 32720  | 34200  |
| UN50674 | Rsa1.0.03178.1 | 651  | 24798  | 0         | 644  | 648  | 99 -  | 4    | 650  | 9527   | 10174  |
| UN50675 | Rsa1.0.09063.1 | 767  | 6675   | 1.00E-154 | 375  | 406  | 92 +  | 1    | 392  | 1773   | 2178   |
| UN50676 | Rsa1.0.07695.1 | 860  | 8770   | 0         | 422  | 432  | 97 -  | 322  | 753  | 2664   | 3095   |
| UN50677 | Rsa1.0.15287.1 | 1576 | 2708   | 0         | 358  | 359  | 99 -  | 873  | 1231 | 2350   | 2708   |
| UN50678 | Rsa1.0.00017.1 | 758  | 752458 | 0         | 660  | 676  | 97 +  | 2    | 676  | 285740 | 286413 |
| UN50679 | Rsa1.0.02310.1 | 755  | 32735  | 0         | 503  | 515  | 97 -  | 7    | 519  | 30017  | 30531  |
| UN50680 | Rsa1.0.00394.1 | 553  | 148426 | 1.00E-147 | 268  | 269  | 99 +  | 1    | 269  | 98717  | 98985  |
| UN50681 | Rsa1.0.00732.1 | 944  | 66631  | 5.00E-83  | 169  | 173  | 97 +  | 429  | 601  | 1035   | 1207   |
| UN50682 | Rsa1.0.06312.1 | 502  | 11253  | 1.00E-159 | 317  | 327  | 96 -  | 70   | 393  | 6117   | 6443   |
| UN50683 | Rsa1.0.00078.1 | 860  | 175053 | 1.00E-101 | 284  | 314  | 90 +  | 2    | 315  | 140383 | 140677 |
| UN50684 | Rsa1.0.00048.1 | 1678 | 167185 | 5.00E-97  | 200  | 205  | 97 -  | 1286 | 1490 | 148100 | 148303 |
| UN50685 | Rsa1.0.01468.1 | 1086 | 45146  | 0         | 407  | 430  | 94 +  | 656  | 1084 | 16769  | 17198  |
| UN50686 | Rsa1.0.00097.1 | 1395 | 138858 | 0         | 423  | 423  | 100 - | 1    | 423  | 118569 | 118991 |
| UN50687 | Rsa1.0.02275.1 | 1269 | 33107  | 0         | 743  | 745  | 99 -  | 525  | 1269 | 12846  | 13589  |
| UN50688 | Rsa1.0.03646.1 | 1045 | 21598  | 1.00E-169 | 304  | 305  | 99 -  | 182  | 486  | 11504  | 11808  |
| UN50689 | Rsa1.0.01668.1 | 998  | 41299  | 0         | 971  | 1000 | 97 -  | 3    | 998  | 14249  | 15244  |
| UN50690 | Rsa1.0.03869.1 | 759  | 20365  | 0         | 481  | 493  | 97 +  | 213  | 705  | 4022   | 4514   |
| UN50691 | Rsa1.0.00232.1 | 1265 | 104936 | 1.00E-143 | 291  | 302  | 96 -  | 3    | 304  | 48471  | 48772  |
| UN50692 | Rsa1.0.00460.1 | 1053 | 206387 | 0         | 521  | 522  | 99 -  | 529  | 1050 | 27262  | 27783  |
| UN50693 | Rsa1.0.00155.1 | 785  | 118465 | 2.33E-156 | 325  | 347  | 93 -  | 10   | 348  | 96670  | 97010  |
| UN50694 | Rsa1.0.00017.1 | 750  | 752458 | 0         | 481  | 482  | 99 -  | 3    | 484  | 222799 | 223280 |
| UN50695 | Rsa1.0.00273.1 | 568  | 326186 | 1.00E-150 | 328  | 345  | 95 -  | 2    | 345  | 110407 | 110749 |
| UN50696 | Rsa1.0.03074.1 | 1094 | 25568  | 0         | 478  | 478  | 100 - | 617  | 1094 | 19572  | 20049  |
| UN50697 | Rsa1.0.00961.1 | 1006 | 58185  | 1.00E-145 | 270  | 273  | 98 -  | 734  | 1006 | 48803  | 49075  |
| UN50698 | Rsa1.0.00270.1 | 892  | 101236 | 0         | 885  | 892  | 99 +  | 1    | 892  | 37799  | 38690  |

|         |                |      |        |           |     |      |       |     |      |        |        |
|---------|----------------|------|--------|-----------|-----|------|-------|-----|------|--------|--------|
| UN50699 | Rsa1.0.05332.1 | 854  | 14123  | 1.00E-141 | 276 | 283  | 97 +  | 189 | 471  | 8338   | 8620   |
| UN50700 | Rsa1.0.00170.1 | 1259 | 179538 | 0         | 695 | 707  | 98 -  | 534 | 1240 | 161501 | 162205 |
| UN50701 | Rsa1.0.00031.1 | 951  | 179862 | 0         | 929 | 940  | 98 -  | 8   | 947  | 145536 | 146468 |
| UN50702 | Rsa1.0.02955.1 | 784  | 26484  | 1.00E-153 | 299 | 305  | 98 +  | 481 | 784  | 21585  | 21887  |
| UN50703 | Rsa1.0.00157.1 | 1287 | 245832 | 7.00E-77  | 174 | 183  | 95 +  | 584 | 766  | 183436 | 183618 |
| UN50704 | Rsa1.0.01106.1 | 926  | 53916  | 0         | 551 | 557  | 98 +  | 371 | 926  | 2059   | 2615   |
| UN50705 | Rsa1.0.23642.1 | 684  | 1035   | 0         | 522 | 542  | 96 -  | 34  | 572  | 15     | 553    |
| UN50706 | Rsa1.0.00836.1 | 776  | 185968 | 0         | 423 | 447  | 94 +  | 335 | 775  | 182964 | 183403 |
| UN50707 | Rsa1.0.05382.1 | 1019 | 13963  | 0         | 394 | 411  | 95 -  | 177 | 587  | 423    | 833    |
| UN50708 | Rsa1.0.01937.1 | 778  | 37147  | 0         | 520 | 534  | 97 -  | 253 | 774  | 33675  | 34208  |
| UN50709 | Rsa1.0.08265.1 | 640  | 7630   | 0         | 446 | 449  | 99 -  | 190 | 638  | 6610   | 7058   |
| UN50710 | Rsa1.0.03016.1 | 658  | 26000  | 0         | 635 | 661  | 96 -  | 3   | 657  | 4833   | 5489   |
| UN50711 | Rsa1.0.06213.1 | 851  | 11478  | 0         | 462 | 498  | 92 -  | 361 | 850  | 1053   | 1535   |
| UN50712 | Rsa1.0.04387.1 | 1212 | 17625  | 0         | 501 | 501  | 100 - | 1   | 501  | 7587   | 8087   |
| UN50713 | Rsa1.0.06312.1 | 550  | 11253  | 1.00E-148 | 319 | 336  | 94 +  | 117 | 449  | 6117   | 6452   |
| UN50714 | Rsa1.0.00202.1 | 925  | 185895 | 0         | 336 | 340  | 98 +  | 2   | 341  | 116089 | 116428 |
| UN50715 | Rsa1.0.17397.1 | 1004 | 1840   | 0         | 993 | 1003 | 99 +  | 1   | 1003 | 415    | 1415   |
| UN50716 | Rsa1.0.00104.1 | 1147 | 368722 | 0         | 844 | 899  | 93 -  | 3   | 892  | 213055 | 213949 |
| UN50717 | Rsa1.0.01233.1 | 867  | 50184  | 0         | 819 | 873  | 93 +  | 1   | 867  | 23510  | 24365  |
| UN50718 | Rsa1.0.28441.1 | 734  | 815    | 0         | 703 | 735  | 95 +  | 7   | 734  | 1      | 735    |
| UN50719 | Rsa1.0.00190.1 | 1033 | 318240 | 0         | 699 | 727  | 96 +  | 279 | 1002 | 191430 | 192156 |
| UN50720 | Rsa1.0.00866.1 | 553  | 61676  | 2.00E-65  | 127 | 127  | 100 + | 63  | 189  | 56049  | 56175  |
| UN50721 | Rsa1.0.00051.1 | 1429 | 258225 | 1.00E-176 | 421 | 456  | 92 +  | 7   | 460  | 117059 | 117499 |
| UN50722 | Rsa1.0.00209.1 | 1125 | 108531 | 0         | 408 | 415  | 98 +  | 7   | 420  | 61725  | 62139  |
| UN50723 | Rsa1.0.00301.1 | 755  | 365315 | 1.00E-126 | 333 | 367  | 90 -  | 3   | 357  | 346680 | 347040 |
| UN50724 | Rsa1.0.00089.1 | 967  | 406142 | 0         | 613 | 643  | 95 +  | 1   | 633  | 58182  | 58821  |
| UN50725 | Rsa1.0.00589.1 | 727  | 209965 | 0         | 696 | 717  | 97 -  | 11  | 727  | 154858 | 155573 |
| UN50726 | Rsa1.0.00020.1 | 757  | 283099 | 0         | 712 | 756  | 94 +  | 1   | 756  | 197115 | 197849 |
| UN50727 | Rsa1.0.00931.1 | 1047 | 59210  | 1.00E-179 | 356 | 368  | 96 +  | 335 | 702  | 54903  | 55267  |
| UN50728 | Rsa1.0.01009.1 | 649  | 56922  | 1.00E-143 | 286 | 294  | 97 -  | 292 | 584  | 3228   | 3521   |
| UN50729 | Rsa1.0.01462.1 | 506  | 45231  | 3.00E-98  | 232 | 247  | 93 -  | 261 | 506  | 25488  | 25725  |
| UN50730 | Rsa1.0.03418.1 | 916  | 147293 | 2.00E-64  | 126 | 126  | 100 - | 147 | 272  | 11494  | 11619  |
| UN50731 | Rsa1.0.00541.1 | 1239 | 76863  | 0         | 880 | 913  | 96 -  | 192 | 1101 | 11211  | 12123  |
| UN50732 | Rsa1.0.00219.1 | 1046 | 106983 | 0         | 437 | 443  | 98 +  | 604 | 1046 | 56466  | 56908  |
| UN50733 | Rsa1.0.04325.1 | 1445 | 17885  | 1.00E-121 | 256 | 266  | 96 +  | 517 | 781  | 14508  | 14773  |
| UN50734 | Rsa1.0.07327.1 | 675  | 9549   | 1.00E-178 | 385 | 408  | 94 -  | 32  | 439  | 4858   | 5265   |
| UN50735 | Rsa1.0.00533.1 | 715  | 77375  | 0         | 684 | 714  | 95 -  | 1   | 713  | 49300  | 50008  |
| UN50736 | Rsa1.0.00370.1 | 852  | 90472  | 0         | 436 | 437  | 99 +  | 416 | 852  | 42439  | 42875  |
| UN50737 | Rsa1.0.15455.1 | 1337 | 2595   | 0         | 604 | 628  | 96 +  | 4   | 627  | 1692   | 2313   |

|         |                |      |        |           |      |      |       |     |      |        |        |
|---------|----------------|------|--------|-----------|------|------|-------|-----|------|--------|--------|
| UN50738 | Rsa1.0.00258.1 | 1233 | 102381 | 0         | 1036 | 1068 | 97 +  | 3   | 1055 | 83697  | 84764  |
| UN50739 | Rsa1.0.00561.1 | 932  | 75653  | 0         | 914  | 925  | 98 +  | 3   | 927  | 66758  | 67681  |
| UN50740 | Rsa1.0.07921.1 | 724  | 8259   | 0         | 490  | 516  | 94 -  | 8   | 522  | 2634   | 3147   |
| UN50741 | Rsa1.0.01319.1 | 964  | 48273  | 1.00E-167 | 372  | 399  | 93 -  | 565 | 963  | 10899  | 11279  |
| UN50742 | Rsa1.0.00341.1 | 1269 | 249309 | 9.00E-64  | 134  | 137  | 97 +  | 726 | 862  | 1833   | 1969   |
| UN50743 | Rsa1.0.05653.1 | 975  | 13043  | 0         | 920  | 983  | 93 -  | 1   | 972  | 11429  | 12387  |
| UN50744 | Rsa1.0.00180.1 | 536  | 114581 | 1.00E-162 | 289  | 289  | 100 - | 1   | 289  | 24300  | 24588  |
| UN50745 | Rsa1.0.15580.1 | 978  | 2535   | 1.00E-153 | 303  | 311  | 97 +  | 666 | 975  | 1727   | 2037   |
| UN50746 | Rsa1.0.00131.1 | 796  | 432233 | 0         | 528  | 560  | 94 +  | 1   | 554  | 384395 | 384941 |
| UN50747 | Rsa1.0.03853.1 | 726  | 20447  | 1.00E-141 | 313  | 332  | 94 +  | 1   | 332  | 13344  | 13672  |
| UN50748 | Rsa1.0.05874.1 | 710  | 12351  | 0         | 534  | 555  | 96 -  | 2   | 556  | 9389   | 9943   |
| UN50749 | Rsa1.0.01835.1 | 657  | 38542  | 1.00E-136 | 353  | 385  | 91 -  | 255 | 625  | 24254  | 24638  |
| UN50750 | Rsa1.0.00253.1 | 1173 | 231292 | 1.00E-149 | 280  | 284  | 98 -  | 3   | 286  | 125873 | 126156 |
| UN50751 | Rsa1.0.01408.1 | 929  | 46383  | 0         | 513  | 524  | 97 -  | 2   | 525  | 17109  | 17632  |
| UN50752 | Rsa1.0.00071.1 | 693  | 345714 | 1.00E-115 | 250  | 262  | 95 -  | 437 | 692  | 324475 | 324736 |
| UN50753 | Rsa1.0.00714.1 | 797  | 67187  | 1.00E-155 | 281  | 282  | 99 -  | 1   | 282  | 393    | 674    |
| UN50754 | Rsa1.0.03605.1 | 710  | 21827  | 1.00E-141 | 325  | 352  | 92 +  | 339 | 674  | 20342  | 20693  |
| UN50755 | Rsa1.0.00045.1 | 904  | 328694 | 1.00E-123 | 260  | 268  | 97 -  | 122 | 388  | 166098 | 166363 |
| UN50756 | Rsa1.0.01453.1 | 960  | 45449  | 1.00E-117 | 299  | 331  | 90 -  | 614 | 923  | 25120  | 25450  |
| UN50757 | Rsa1.0.00684.1 | 874  | 141701 | 1.00E-175 | 430  | 460  | 93 -  | 420 | 872  | 9756   | 10215  |
| UN50758 | Rsa1.0.00191.1 | 1244 | 316976 | 0         | 665  | 689  | 96 -  | 558 | 1243 | 145006 | 145694 |
| UN50759 | Rsa1.0.02756.1 | 883  | 28202  | 1.00E-166 | 311  | 316  | 98 -  | 371 | 686  | 22631  | 22946  |
| UN50760 | Rsa1.0.00744.1 | 679  | 66084  | 0         | 353  | 354  | 99 +  | 326 | 679  | 32778  | 33131  |
| UN50761 | Rsa1.0.02105.1 | 814  | 156953 | 1.00E-154 | 350  | 375  | 93 +  | 77  | 451  | 150797 | 151165 |
| UN50762 | Rsa1.0.00509.1 | 913  | 78829  | 0         | 332  | 333  | 99 +  | 1   | 333  | 42568  | 42900  |
| UN50763 | Rsa1.0.00184.1 | 629  | 218748 | 1.00E-105 | 275  | 302  | 91 -  | 307 | 592  | 213982 | 214279 |
| UN50764 | Rsa1.0.00675.1 | 465  | 145590 | 1.00E-153 | 364  | 392  | 92 +  | 73  | 463  | 28848  | 29220  |
| UN50765 | Rsa1.0.00627.1 | 821  | 71566  | 0         | 580  | 602  | 96 -  | 15  | 616  | 18405  | 19004  |
| UN50766 | Rsa1.0.01261.1 | 831  | 49744  | 3.00E-78  | 217  | 239  | 90 +  | 135 | 372  | 22737  | 22968  |
| UN50767 | Rsa1.0.00173.1 | 560  | 288743 | 0         | 374  | 382  | 97 +  | 13  | 394  | 39208  | 39589  |
| UN50768 | Rsa1.0.00419.1 | 1392 | 86562  | 0         | 620  | 649  | 95 -  | 746 | 1391 | 15414  | 16061  |
| UN50769 | Rsa1.0.04095.1 | 591  | 19095  | 1.00E-118 | 261  | 276  | 94 -  | 317 | 591  | 6705   | 6971   |
| UN50770 | Rsa1.0.00414.1 | 1240 | 202190 | 0         | 491  | 506  | 97 +  | 734 | 1238 | 201313 | 201813 |
| UN50771 | Rsa1.0.00150.1 | 1552 | 154416 | 0         | 857  | 873  | 98 +  | 683 | 1552 | 63284  | 64156  |
| UN50772 | Rsa1.0.00471.1 | 782  | 81897  | 1.00E-162 | 340  | 353  | 96 -  | 2   | 351  | 65986  | 66337  |
| UN50773 | Rsa1.0.00141.1 | 932  | 121494 | 0         | 498  | 511  | 97 -  | 421 | 930  | 82206  | 82714  |
| UN50774 | Rsa1.0.13824.1 | 1066 | 4259   | 0         | 414  | 434  | 95 -  | 632 | 1063 | 2101   | 2534   |
| UN50775 | Rsa1.0.00486.1 | 734  | 80875  | 1.00E-177 | 379  | 399  | 94 +  | 32  | 422  | 32627  | 33022  |
| UN50776 | Rsa1.0.00917.1 | 790  | 182012 | 0         | 376  | 389  | 96 -  | 402 | 788  | 6144   | 6531   |



|         |                |      |        |           |      |      |       |      |      |        |        |
|---------|----------------|------|--------|-----------|------|------|-------|------|------|--------|--------|
| UN50777 | Rsa1.0.00196.1 | 779  | 109960 | 1.00E-67  | 131  | 131  | 100 + | 75   | 205  | 76664  | 76794  |
| UN50778 | Rsa1.0.62848.1 | 607  | 365    | 0         | 358  | 365  | 98 -  | 13   | 377  | 1      | 365    |
| UN50779 | Rsa1.0.00110.1 | 916  | 132719 | 1.00E-141 | 302  | 318  | 94 -  | 3    | 320  | 92532  | 92849  |
| UN50780 | Rsa1.0.14220.1 | 1075 | 3652   | 4.00E-93  | 216  | 227  | 95 +  | 1    | 221  | 201    | 427    |
| UN50781 | Rsa1.0.04218.1 | 646  | 18423  | 1.00E-115 | 298  | 320  | 93 +  | 327  | 640  | 12805  | 13121  |
| UN50782 | Rsa1.0.01090.1 | 744  | 54385  | 1.00E-172 | 375  | 397  | 94 +  | 4    | 397  | 3230   | 3626   |
| UN50783 | Rsa1.0.00026.1 | 1150 | 327835 | 0         | 432  | 456  | 94 -  | 701  | 1150 | 240934 | 241382 |
| UN50784 | Rsa1.0.00047.1 | 784  | 168582 | 0         | 462  | 471  | 98 +  | 175  | 645  | 93884  | 94354  |
| UN50785 | Rsa1.0.01108.1 | 727  | 53865  | 4.00E-37  | 173  | 204  | 84 +  | 165  | 368  | 44175  | 44378  |
| UN50786 | Rsa1.0.00037.1 | 1028 | 307838 | 0         | 718  | 725  | 99 +  | 304  | 1028 | 186811 | 187534 |
| UN50787 | Rsa1.0.10311.1 | 376  | 5893   | 1.00E-136 | 282  | 294  | 95 -  | 83   | 376  | 3966   | 4254   |
| UN50788 | Rsa1.0.00049.1 | 889  | 167018 | 0         | 530  | 557  | 95 +  | 1    | 553  | 137912 | 138468 |
| UN50789 | Rsa1.0.02001.1 | 795  | 36198  | 0         | 465  | 494  | 94 +  | 306  | 795  | 31940  | 32422  |
| UN50790 | Rsa1.0.03241.1 | 1038 | 24423  | 0         | 461  | 464  | 99 +  | 568  | 1031 | 23915  | 24378  |
| UN50791 | Rsa1.0.00116.1 | 785  | 365886 | 0         | 356  | 356  | 100 - | 287  | 642  | 20143  | 20498  |
| UN50792 | Rsa1.0.00978.1 | 964  | 57739  | 0         | 618  | 621  | 99 +  | 11   | 629  | 41979  | 42599  |
| UN50793 | Rsa1.0.00220.1 | 707  | 192936 | 0         | 583  | 584  | 99 -  | 1    | 584  | 4428   | 5011   |
| UN50794 | Rsa1.0.00729.1 | 1145 | 66690  | 0         | 595  | 628  | 94 +  | 524  | 1145 | 56649  | 57261  |
| UN50795 | Rsa1.0.00135.1 | 804  | 178077 | 1.00E-161 | 412  | 452  | 91 -  | 1    | 431  | 165548 | 165994 |
| UN50796 | Rsa1.0.00363.1 | 551  | 90968  | 3.00E-80  | 191  | 205  | 93 -  | 355  | 551  | 28298  | 28502  |
| UN50797 | Rsa1.0.00114.1 | 869  | 131330 | 1.00E-157 | 340  | 356  | 95 +  | 442  | 792  | 117617 | 117972 |
| UN50798 | Rsa1.0.04512.1 | 619  | 17031  | 1.00E-136 | 277  | 286  | 96 +  | 72   | 357  | 12659  | 12943  |
| UN50799 | Rsa1.0.00007.1 | 1016 | 239325 | 0         | 474  | 484  | 97 -  | 3    | 486  | 210122 | 210605 |
| UN50800 | Rsa1.0.00002.1 | 584  | 601661 | 0         | 516  | 531  | 97 +  | 1    | 531  | 273867 | 274397 |
| UN50801 | Rsa1.0.00014.1 | 491  | 348985 | 0         | 396  | 396  | 100 + | 95   | 490  | 315790 | 316185 |
| UN50802 | Rsa1.0.00888.1 | 549  | 60978  | 0         | 349  | 355  | 98 +  | 2    | 355  | 54500  | 54854  |
| UN50803 | Rsa1.0.13633.1 | 668  | 4605   | 1.00E-131 | 279  | 293  | 95 +  | 3    | 295  | 1066   | 1358   |
| UN50804 | Rsa1.0.19230.1 | 924  | 1460   | 1.00E-144 | 295  | 303  | 97 -  | 624  | 924  | 966    | 1267   |
| UN50805 | Rsa1.0.08706.1 | 349  | 7018   | 1.00E-130 | 274  | 286  | 95 +  | 1    | 284  | 5205   | 5490   |
| UN50806 | Rsa1.0.00715.1 | 458  | 67116  | 1.00E-124 | 225  | 225  | 100 - | 234  | 458  | 40357  | 40581  |
| UN50807 | Rsa1.0.06417.1 | 1046 | 11056  | 2.00E-98  | 214  | 222  | 96 -  | 783  | 1002 | 10673  | 10893  |
| UN50808 | Rsa1.0.01311.1 | 980  | 48456  | 6.00E-46  | 98   | 99   | 98 +  | 529  | 627  | 7784   | 7882   |
| UN50809 | Rsa1.0.01371.1 | 972  | 47079  | 0         | 468  | 477  | 98 +  | 416  | 889  | 25451  | 25925  |
| UN50810 | Rsa1.0.09317.1 | 631  | 6459   | 0         | 437  | 450  | 97 +  | 189  | 629  | 5300   | 5749   |
| UN50811 | Rsa1.0.35376.1 | 1093 | 640    | 0         | 324  | 324  | 100 - | 388  | 711  | 164    | 487    |
| UN50812 | Rsa1.0.03781.1 | 880  | 20891  | 0         | 626  | 649  | 96 +  | 175  | 820  | 11400  | 12047  |
| UN50813 | Rsa1.0.37428.1 | 1164 | 602    | 0         | 533  | 554  | 96 -  | 582  | 1123 | 1      | 554    |
| UN50814 | Rsa1.0.05199.1 | 2788 | 14529  | 0         | 1011 | 1078 | 93 -  | 1709 | 2784 | 6264   | 7324   |
| UN50815 | Rsa1.0.00522.1 | 1115 | 78103  | 1.00E-105 | 209  | 214  | 97 +  | 355  | 568  | 48991  | 49204  |

|         |                |      |        |           |      |      |       |     |      |        |        |
|---------|----------------|------|--------|-----------|------|------|-------|-----|------|--------|--------|
| UN50816 | Rsa1.0.00414.1 | 728  | 202190 | 0         | 611  | 626  | 97 +  | 101 | 726  | 13400  | 14017  |
| UN50817 | Rsa1.0.06373.1 | 927  | 11138  | 1.00E-139 | 293  | 305  | 96 +  | 1   | 300  | 729    | 1033   |
| UN50818 | Rsa1.0.02425.1 | 1369 | 31567  | 0         | 1337 | 1355 | 98 +  | 10  | 1364 | 7409   | 8763   |
| UN50819 | Rsa1.0.00190.1 | 1048 | 318240 | 0         | 680  | 713  | 95 -  | 24  | 735  | 191431 | 192143 |
| UN50820 | Rsa1.0.00375.1 | 1097 | 90207  | 0         | 380  | 387  | 98 +  | 104 | 490  | 56410  | 56796  |
| UN50821 | Rsa1.0.00566.1 | 1171 | 75325  | 0         | 365  | 377  | 96 +  | 459 | 835  | 20189  | 20565  |
| UN50822 | Rsa1.0.01355.1 | 710  | 47303  | 0         | 551  | 582  | 94 +  | 7   | 585  | 39409  | 39990  |
| UN50823 | Rsa1.0.01938.1 | 812  | 264018 | 0         | 628  | 634  | 99 +  | 177 | 810  | 132742 | 133375 |
| UN50824 | Rsa1.0.00863.1 | 1493 | 254535 | 0         | 1150 | 1151 | 99 -  | 4   | 1154 | 112646 | 113796 |
| UN50825 | Rsa1.0.34843.1 | 1432 | 649    | 0         | 648  | 650  | 99 +  | 431 | 1080 | 1      | 649    |
| UN50826 | Rsa1.0.00161.1 | 916  | 116891 | 0         | 881  | 916  | 96 +  | 1   | 916  | 63942  | 64851  |
| UN50827 | Rsa1.0.06275.1 | 701  | 11342  | 0         | 657  | 696  | 94 +  | 1   | 689  | 3890   | 4583   |
| UN50828 | Rsa1.0.01668.1 | 856  | 41299  | 1.00E-139 | 286  | 296  | 96 +  | 562 | 856  | 19391  | 19686  |
| UN50829 | Rsa1.0.00860.1 | 1482 | 61789  | 0         | 519  | 521  | 99 +  | 1   | 519  | 622    | 1142   |
| UN50830 | Rsa1.0.00017.1 | 583  | 752458 | 0         | 410  | 422  | 97 -  | 12  | 432  | 532215 | 532636 |
| UN50831 | Rsa1.0.00566.1 | 661  | 75325  | 1.00E-170 | 303  | 303  | 100 - | 358 | 660  | 37633  | 37935  |
| UN50832 | Rsa1.0.00896.1 | 880  | 60509  | 0         | 676  | 691  | 97 -  | 2   | 692  | 29277  | 29967  |
| UN50833 | Rsa1.0.02605.1 | 1104 | 29637  | 0         | 559  | 559  | 100 + | 546 | 1104 | 25931  | 26489  |
| UN50834 | Rsa1.0.02663.1 | 737  | 169243 | 0         | 728  | 735  | 99 -  | 1   | 735  | 144727 | 145461 |
| UN50835 | Rsa1.0.00008.1 | 663  | 358124 | 6.00E-85  | 184  | 191  | 96 -  | 4   | 194  | 196386 | 196574 |
| UN50836 | Rsa1.0.00215.1 | 780  | 201775 | 0         | 379  | 384  | 98 +  | 1   | 384  | 162470 | 162853 |
| UN50837 | Rsa1.0.02020.1 | 820  | 173211 | 0         | 816  | 819  | 99 -  | 1   | 819  | 148353 | 149171 |
| UN50838 | Rsa1.0.01264.1 | 1452 | 49697  | 0         | 1256 | 1320 | 95 -  | 141 | 1452 | 18998  | 20308  |
| UN50839 | Rsa1.0.02505.1 | 648  | 30703  | 2.00E-94  | 182  | 184  | 98 -  | 142 | 325  | 29797  | 29980  |
| UN50840 | Rsa1.0.07352.1 | 788  | 9518   | 1.00E-132 | 239  | 239  | 100 - | 68  | 306  | 9280   | 9518   |
| UN50841 | Rsa1.0.00886.1 | 952  | 167350 | 0         | 467  | 499  | 93 +  | 1   | 487  | 11221  | 11719  |
| UN50842 | Rsa1.0.00259.1 | 970  | 163204 | 0         | 812  | 822  | 98 +  | 92  | 911  | 154366 | 155186 |
| UN50843 | Rsa1.0.00828.1 | 959  | 62744  | 1.00E-178 | 316  | 316  | 100 + | 644 | 959  | 55356  | 55671  |
| UN50844 | Rsa1.0.00453.1 | 555  | 83031  | 1.00E-159 | 284  | 284  | 100 - | 270 | 553  | 532    | 815    |
| UN50845 | Rsa1.0.03344.1 | 970  | 23593  | 0         | 406  | 409  | 99 +  | 562 | 970  | 12154  | 12562  |
| UN50846 | Rsa1.0.03668.1 | 564  | 21483  | 0         | 407  | 424  | 95 +  | 131 | 553  | 11441  | 11860  |
| UN50847 | Rsa1.0.00723.1 | 775  | 66806  | 0         | 768  | 772  | 99 -  | 4   | 775  | 57950  | 58721  |
| UN50848 | Rsa1.0.00224.1 | 602  | 327530 | 0         | 448  | 449  | 99 +  | 154 | 602  | 221387 | 221835 |
| UN50849 | Rsa1.0.01668.1 | 837  | 41299  | 1.00E-161 | 295  | 296  | 99 -  | 1   | 295  | 19391  | 19686  |
| UN50850 | Rsa1.0.00191.1 | 653  | 316976 | 1.00E-161 | 312  | 320  | 97 +  | 162 | 481  | 140127 | 140446 |
| UN50851 | Rsa1.0.02387.1 | 889  | 31890  | 0         | 501  | 530  | 94 -  | 1   | 515  | 17300  | 17827  |
| UN50852 | Rsa1.0.00387.1 | 920  | 495407 | 1.00E-165 | 377  | 399  | 94 -  | 524 | 918  | 349203 | 349601 |
| UN50853 | Rsa1.0.00132.1 | 724  | 124299 | 0         | 390  | 406  | 96 -  | 1   | 395  | 46291  | 46696  |
| UN50854 | Rsa1.0.00063.1 | 645  | 156150 | 1.00E-111 | 225  | 232  | 96 +  | 151 | 382  | 3494   | 3725   |

|         |                |      |        |           |     |     |       |     |      |        |        |
|---------|----------------|------|--------|-----------|-----|-----|-------|-----|------|--------|--------|
| UN50855 | Rsa1.0.00179.1 | 940  | 393324 | 0         | 931 | 940 | 99 +  | 1   | 940  | 43006  | 43945  |
| UN50856 | Rsa1.0.00087.1 | 1227 | 761073 | 2.33E-156 | 263 | 263 | 100 - | 965 | 1227 | 272947 | 273209 |
| UN50857 | Rsa1.0.00486.1 | 717  | 80875  | 0         | 441 | 445 | 99 -  | 273 | 717  | 32578  | 33022  |
| UN50858 | Rsa1.0.07059.1 | 1162 | 9962   | 0         | 581 | 624 | 93 -  | 50  | 645  | 1685   | 2302   |
| UN50859 | Rsa1.0.04282.1 | 689  | 18100  | 0         | 493 | 522 | 94 -  | 174 | 689  | 12090  | 12609  |
| UN50860 | Rsa1.0.00734.1 | 1015 | 66508  | 3.00E-63  | 180 | 196 | 91 +  | 822 | 1015 | 15869  | 16064  |
| UN50861 | Rsa1.0.01466.1 | 1010 | 45161  | 1.00E-131 | 316 | 338 | 93 +  | 624 | 959  | 25169  | 25505  |
| UN50862 | Rsa1.0.00790.1 | 807  | 148693 | 1.00E-119 | 227 | 230 | 98 -  | 306 | 535  | 135658 | 135887 |
| UN50863 | Rsa1.0.00058.1 | 697  | 159921 | 0         | 512 | 549 | 93 -  | 153 | 691  | 49005  | 49550  |
| UN50864 | Rsa1.0.01121.1 | 793  | 53407  | 0         | 678 | 710 | 95 -  | 8   | 716  | 19076  | 19785  |
| UN50865 | Rsa1.0.00706.1 | 1166 | 291570 | 0         | 645 | 670 | 96 -  | 1   | 669  | 47603  | 48268  |
| UN50866 | Rsa1.0.00056.1 | 904  | 332604 | 0         | 346 | 346 | 100 + | 559 | 904  | 108444 | 108789 |
| UN50867 | Rsa1.0.01077.1 | 727  | 54772  | 0         | 596 | 605 | 98 +  | 121 | 725  | 21078  | 21682  |
| UN50868 | Rsa1.0.00853.1 | 668  | 62101  | 0         | 664 | 666 | 99 -  | 3   | 668  | 41669  | 42334  |
| UN50869 | Rsa1.0.03442.1 | 660  | 22927  | 0         | 335 | 336 | 99 -  | 2   | 337  | 9163   | 9498   |
| UN50870 | Rsa1.0.00835.1 | 863  | 278058 | 0         | 405 | 411 | 98 +  | 1   | 409  | 35207  | 35617  |
| UN50871 | Rsa1.0.02114.1 | 812  | 34873  | 1.00E-162 | 398 | 428 | 92 -  | 391 | 811  | 3166   | 3588   |
| UN50872 | Rsa1.0.05586.1 | 837  | 13263  | 0         | 482 | 498 | 96 +  | 3   | 500  | 9617   | 10111  |
| UN50873 | Rsa1.0.02797.1 | 690  | 27800  | 1.00E-156 | 355 | 379 | 93 -  | 311 | 687  | 583    | 961    |
| UN50874 | Rsa1.0.05884.1 | 685  | 12337  | 0         | 666 | 690 | 96 +  | 2   | 685  | 10020  | 10705  |
| UN50875 | Rsa1.0.00351.1 | 893  | 413096 | 0         | 535 | 571 | 93 +  | 323 | 892  | 376778 | 377346 |
| UN50876 | Rsa1.0.00123.1 | 1451 | 325650 | 1.00E-157 | 282 | 282 | 100 - | 1   | 282  | 235813 | 236094 |
| UN50877 | Rsa1.0.00082.1 | 642  | 237584 | 0         | 464 | 492 | 94 -  | 146 | 637  | 68508  | 68996  |
| UN50878 | Rsa1.0.02544.1 | 544  | 30290  | 0         | 542 | 542 | 100 - | 1   | 542  | 28262  | 28803  |
| UN50879 | Rsa1.0.06034.1 | 691  | 11877  | 1.00E-170 | 303 | 303 | 100 + | 389 | 691  | 6786   | 7088   |
| UN50880 | Rsa1.0.00547.1 | 816  | 76521  | 0         | 420 | 420 | 100 - | 397 | 816  | 988    | 1407   |
| UN50881 | Rsa1.0.08080.1 | 733  | 137363 | 1.00E-128 | 236 | 237 | 99 +  | 101 | 337  | 272    | 508    |
| UN50882 | Rsa1.0.00328.1 | 1775 | 224661 | 0         | 381 | 383 | 99 +  | 3   | 385  | 130929 | 131311 |
| UN50883 | Rsa1.0.00773.1 | 1132 | 64839  | 2.00E-77  | 204 | 224 | 91 +  | 537 | 751  | 58210  | 58433  |
| UN50884 | Rsa1.0.01845.1 | 1008 | 38415  | 1.00E-161 | 337 | 348 | 96 -  | 666 | 1008 | 36037  | 36384  |
| UN50885 | Rsa1.0.00110.1 | 1111 | 132719 | 0         | 464 | 471 | 98 +  | 641 | 1111 | 32257  | 32727  |
| UN50886 | Rsa1.0.00140.1 | 998  | 121541 | 1.00E-163 | 345 | 363 | 95 -  | 78  | 440  | 49081  | 49443  |
| UN50887 | Rsa1.0.00991.1 | 579  | 143101 | 0         | 492 | 512 | 96 +  | 70  | 578  | 137971 | 138478 |
| UN50888 | Rsa1.0.00473.1 | 1142 | 212204 | 1.00E-115 | 244 | 253 | 96 -  | 3   | 253  | 73604  | 73854  |
| UN50889 | Rsa1.0.03831.1 | 1038 | 20579  | 6.00E-80  | 170 | 176 | 96 -  | 1   | 176  | 19839  | 20014  |
| UN50890 | Rsa1.0.01934.1 | 1101 | 37162  | 0         | 400 | 400 | 100 - | 702 | 1101 | 3540   | 3939   |
| UN50891 | Rsa1.0.00372.1 | 723  | 90418  | 1.00E-149 | 324 | 341 | 95 +  | 384 | 723  | 85878  | 86214  |
| UN50892 | Rsa1.0.03237.1 | 980  | 24434  | 1.00E-149 | 315 | 327 | 96 +  | 21  | 346  | 4614   | 4937   |
| UN50893 | Rsa1.0.00016.1 | 1540 | 831256 | 0         | 492 | 494 | 99 -  | 1   | 494  | 524107 | 524599 |

|         |                |      |        |           |     |      |       |     |      |        |        |
|---------|----------------|------|--------|-----------|-----|------|-------|-----|------|--------|--------|
| UN50894 | Rsa1.0_74770.1 | 687  | 307    | 4.00E-89  | 222 | 238  | 93 -  | 1   | 235  | 33     | 260    |
| UN50895 | Rsa1.0_00008.1 | 490  | 358124 | 0         | 487 | 488  | 99 +  | 3   | 490  | 278349 | 278836 |
| UN50896 | Rsa1.0_04181.1 | 1336 | 18615  | 0         | 695 | 723  | 96 +  | 258 | 980  | 936    | 1658   |
| UN50897 | Rsa1.0_02675.1 | 583  | 28852  | 3.00E-74  | 142 | 142  | 100 + | 242 | 383  | 17929  | 18070  |
| UN50898 | Rsa1.0_00204.1 | 1112 | 109056 | 1.00E-164 | 305 | 309  | 98 -  | 136 | 444  | 48140  | 48448  |
| UN50899 | Rsa1.0_01244.1 | 773  | 50061  | 0         | 569 | 569  | 100 + | 205 | 773  | 45952  | 46520  |
| UN50900 | Rsa1.0_00025.1 | 801  | 277312 | 0         | 716 | 756  | 94 -  | 1   | 752  | 141060 | 141813 |
| UN50901 | Rsa1.0_03005.1 | 628  | 26082  | 0         | 504 | 520  | 96 -  | 111 | 628  | 23170  | 23688  |
| UN50902 | Rsa1.0_00122.1 | 1339 | 265937 | 0         | 655 | 694  | 94 +  | 661 | 1339 | 82124  | 82817  |
| UN50903 | Rsa1.0_01270.1 | 959  | 49574  | 0         | 432 | 446  | 96 +  | 513 | 958  | 26998  | 27443  |
| UN50904 | Rsa1.0_00064.1 | 909  | 240927 | 1.00E-131 | 276 | 286  | 96 -  | 1   | 283  | 30039  | 30320  |
| UN50905 | Rsa1.0_00430.1 | 880  | 85453  | 0         | 816 | 859  | 94 +  | 4   | 859  | 44170  | 45025  |
| UN50906 | Rsa1.0_01751.1 | 651  | 39806  | 1.00E-126 | 307 | 328  | 93 -  | 314 | 638  | 30315  | 30634  |
| UN50907 | Rsa1.0_00571.1 | 989  | 329018 | 0         | 546 | 573  | 95 -  | 415 | 986  | 48707  | 49277  |
| UN50908 | Rsa1.0_01016.1 | 752  | 181422 | 0         | 491 | 524  | 93 +  | 229 | 752  | 171865 | 172366 |
| UN50909 | Rsa1.0_00522.1 | 1133 | 78103  | 1.00E-152 | 277 | 278  | 99 +  | 856 | 1133 | 49920  | 50197  |
| UN50910 | Rsa1.0_02032.1 | 1101 | 35830  | 0         | 741 | 755  | 98 -  | 347 | 1100 | 2987   | 3741   |
| UN50911 | Rsa1.0_05938.1 | 1069 | 12173  | 0         | 970 | 1001 | 96 +  | 1   | 999  | 2763   | 3762   |
| UN50912 | Rsa1.0_00055.1 | 634  | 520193 | 0         | 442 | 460  | 96 +  | 2   | 461  | 383494 | 383953 |
| UN50913 | Rsa1.0_01857.1 | 1278 | 38103  | 1.00E-149 | 278 | 281  | 98 +  | 625 | 905  | 22513  | 22793  |
| UN50914 | Rsa1.0_01920.1 | 944  | 158533 | 0         | 937 | 939  | 99 -  | 8   | 944  | 22819  | 23757  |
| UN50915 | Rsa1.0_00487.1 | 1281 | 80674  | 0         | 543 | 551  | 98 -  | 725 | 1275 | 64313  | 64863  |
| UN50916 | Rsa1.0_01855.1 | 877  | 38204  | 0         | 852 | 894  | 95 +  | 1   | 872  | 14776  | 15667  |
| UN50917 | Rsa1.0_00546.1 | 753  | 76523  | 1.00E-122 | 257 | 268  | 95 -  | 8   | 271  | 13319  | 13586  |
| UN50918 | Rsa1.0_01220.1 | 712  | 161775 | 1.00E-155 | 389 | 415  | 93 +  | 1   | 411  | 122447 | 122853 |
| UN50919 | Rsa1.0_04581.1 | 742  | 16772  | 1.00E-147 | 319 | 336  | 94 -  | 29  | 364  | 6485   | 6814   |
| UN50920 | Rsa1.0_00292.1 | 778  | 98141  | 4.00E-71  | 235 | 272  | 86 +  | 495 | 764  | 21932  | 22172  |
| UN50921 | Rsa1.0_02345.1 | 804  | 32337  | 1.00E-121 | 301 | 325  | 92 +  | 470 | 793  | 15392  | 15705  |
| UN50922 | Rsa1.0_02288.1 | 1194 | 32984  | 1.00E-163 | 305 | 309  | 98 +  | 890 | 1194 | 18618  | 18926  |
| UN50923 | Rsa1.0_01578.1 | 943  | 42880  | 1.00E-139 | 261 | 264  | 98 +  | 631 | 894  | 31338  | 31601  |
| UN50924 | Rsa1.0_13369.1 | 592  | 4880   | 1.00E-139 | 282 | 293  | 96 -  | 1   | 286  | 3108   | 3400   |
| UN50925 | Rsa1.0_04121.1 | 689  | 18951  | 0         | 452 | 491  | 92 -  | 53  | 539  | 13838  | 14328  |
| UN50926 | Rsa1.0_01071.1 | 861  | 166914 | 0         | 384 | 398  | 96 +  | 6   | 401  | 14011  | 14407  |
| UN50927 | Rsa1.0_03005.1 | 1171 | 26082  | 0         | 469 | 481  | 97 +  | 71  | 550  | 23208  | 23688  |
| UN50928 | Rsa1.0_01340.1 | 909  | 47805  | 1.00E-158 | 283 | 283  | 100 - | 178 | 460  | 25414  | 25696  |
| UN50929 | Rsa1.0_08421.1 | 1092 | 7380   | 0         | 367 | 372  | 98 +  | 721 | 1092 | 4123   | 4494   |
| UN50930 | Rsa1.0_01236.1 | 752  | 50156  | 2.00E-60  | 134 | 139  | 96 -  | 558 | 696  | 40463  | 40601  |
| UN50931 | Rsa1.0_05221.1 | 970  | 14452  | 1.00E-99  | 200 | 205  | 97 +  | 765 | 969  | 8530   | 8734   |
| UN50932 | Rsa1.0_01292.1 | 822  | 175783 | 1.00E-128 | 238 | 240  | 99 +  | 580 | 819  | 3974   | 4213   |

|         |                |      |        |           |     |     |       |     |      |        |        |
|---------|----------------|------|--------|-----------|-----|-----|-------|-----|------|--------|--------|
| UN50933 | Rsa1.0.00050.1 | 847  | 237174 | 0         | 587 | 621 | 94 +  | 240 | 845  | 7595   | 8208   |
| UN50934 | Rsa1.0.01149.1 | 771  | 160459 | 6.00E-73  | 234 | 261 | 89 +  | 518 | 771  | 43118  | 43368  |
| UN50935 | Rsa1.0.00413.1 | 996  | 86921  | 1.00E-141 | 258 | 259 | 99 +  | 1   | 259  | 9228   | 9486   |
| UN50936 | Rsa1.0.00813.1 | 791  | 63202  | 0         | 537 | 551 | 97 -  | 7   | 556  | 18766  | 19316  |
| UN50937 | Rsa1.0.06303.1 | 1109 | 11268  | 0         | 819 | 852 | 96 +  | 3   | 854  | 4806   | 5657   |
| UN50938 | Rsa1.0.02267.1 | 584  | 33194  | 0         | 583 | 584 | 99 -  | 2   | 584  | 11833  | 12416  |
| UN50939 | Rsa1.0.00706.1 | 690  | 291570 | 1.00E-153 | 307 | 318 | 96 -  | 1   | 318  | 21539  | 21856  |
| UN50940 | Rsa1.0.00326.1 | 950  | 171955 | 1.00E-128 | 239 | 241 | 99 +  | 244 | 484  | 81729  | 81969  |
| UN50941 | Rsa1.0.02753.1 | 648  | 28215  | 0         | 645 | 645 | 100 - | 1   | 645  | 8066   | 8710   |
| UN50942 | Rsa1.0.03956.1 | 628  | 19872  | 1.00E-174 | 327 | 333 | 98 +  | 285 | 617  | 16858  | 17190  |
| UN50943 | Rsa1.0.01126.1 | 838  | 53127  | 0         | 476 | 519 | 91 +  | 321 | 838  | 7555   | 8052   |
| UN50944 | Rsa1.0.02052.1 | 850  | 35555  | 0         | 338 | 338 | 100 - | 1   | 338  | 20165  | 20502  |
| UN50945 | Rsa1.0.01650.1 | 628  | 41589  | 0         | 613 | 626 | 97 -  | 1   | 626  | 27292  | 27916  |
| UN50946 | Rsa1.0.00065.1 | 992  | 454616 | 1.00E-129 | 241 | 243 | 99 +  | 1   | 243  | 190522 | 190764 |
| UN50947 | Rsa1.0.04159.1 | 953  | 18795  | 0         | 834 | 866 | 96 +  | 23  | 886  | 5752   | 6615   |
| UN50948 | Rsa1.0.00252.1 | 697  | 102760 | 1.00E-144 | 276 | 280 | 98 +  | 386 | 664  | 43752  | 44031  |
| UN50949 | Rsa1.0.01195.1 | 724  | 147988 | 0         | 700 | 733 | 95 -  | 4   | 721  | 15401  | 16130  |
| UN50950 | Rsa1.0.00017.1 | 955  | 752458 | 0         | 661 | 712 | 92 -  | 267 | 955  | 68616  | 69315  |
| UN50951 | Rsa1.0.04882.1 | 952  | 15606  | 1.00E-153 | 305 | 315 | 96 +  | 344 | 658  | 7553   | 7867   |
| UN50952 | Rsa1.0.17507.1 | 809  | 1814   | 0         | 456 | 459 | 99 -  | 350 | 808  | 254    | 712    |
| UN50953 | Rsa1.0.02165.1 | 1047 | 34423  | 0         | 554 | 604 | 91 -  | 351 | 939  | 3037   | 3636   |
| UN50954 | Rsa1.0.00928.1 | 1061 | 59293  | 1.00E-111 | 210 | 212 | 99 -  | 3   | 214  | 32258  | 32469  |
| UN50955 | Rsa1.0.00114.1 | 794  | 131330 | 1.00E-105 | 261 | 283 | 92 -  | 427 | 703  | 43115  | 43389  |
| UN50956 | Rsa1.0.00108.1 | 650  | 478491 | 1.00E-112 | 262 | 278 | 94 -  | 7   | 282  | 270625 | 270902 |
| UN50957 | Rsa1.0.02276.1 | 848  | 33098  | 1.00E-95  | 242 | 263 | 92 +  | 7   | 269  | 28482  | 28735  |
| UN50958 | Rsa1.0.00207.1 | 660  | 248736 | 0         | 581 | 603 | 96 -  | 57  | 653  | 194245 | 194847 |
| UN50959 | Rsa1.0.02053.1 | 774  | 35554  | 0         | 388 | 401 | 96 +  | 1   | 399  | 31823  | 32221  |
| UN50960 | Rsa1.0.00123.1 | 1473 | 325650 | 0         | 584 | 608 | 96 +  | 426 | 1030 | 109716 | 110321 |
| UN50961 | Rsa1.0.00651.1 | 530  | 247766 | 1.00E-104 | 222 | 231 | 96 +  | 148 | 378  | 81983  | 82210  |
| UN50962 | Rsa1.0.00413.1 | 806  | 86921  | 2.33E-156 | 357 | 387 | 92 -  | 428 | 800  | 52860  | 53244  |
| UN50963 | Rsa1.0.02070.1 | 837  | 158516 | 3.00E-78  | 171 | 177 | 96 -  | 103 | 278  | 141340 | 141516 |
| UN50964 | Rsa1.0.01534.1 | 425  | 43764  | 0         | 420 | 420 | 100 + | 4   | 423  | 1309   | 1728   |
| UN50965 | Rsa1.0.00604.1 | 594  | 146282 | 0         | 357 | 360 | 99 +  | 163 | 522  | 123280 | 123639 |
| UN50966 | Rsa1.0.00612.1 | 673  | 72376  | 0         | 645 | 666 | 96 +  | 3   | 662  | 18596  | 19260  |
| UN50967 | Rsa1.0.00556.1 | 1307 | 207212 | 0         | 569 | 608 | 93 -  | 1   | 596  | 18791  | 19392  |
| UN50968 | Rsa1.0.01270.1 | 917  | 49574  | 0         | 527 | 554 | 95 +  | 365 | 917  | 18639  | 19191  |
| UN50969 | Rsa1.0.00093.1 | 1317 | 214962 | 0         | 450 | 468 | 96 -  | 799 | 1259 | 95861  | 96328  |
| UN50970 | Rsa1.0.00876.1 | 776  | 61328  | 1.00E-117 | 276 | 297 | 92 +  | 75  | 365  | 49380  | 49676  |
| UN50971 | Rsa1.0.00426.1 | 770  | 85668  | 1.00E-178 | 334 | 340 | 98 +  | 339 | 678  | 22592  | 22931  |

|         |                |      |        |           |     |     |       |      |      |        |        |
|---------|----------------|------|--------|-----------|-----|-----|-------|------|------|--------|--------|
| UN50972 | Rsa1.0.00697.1 | 950  | 67913  | 0         | 949 | 950 | 99 +  | 1    | 950  | 42240  | 43189  |
| UN50973 | Rsa1.0.63077.1 | 899  | 364    | 0         | 349 | 354 | 98 +  | 1    | 354  | 11     | 364    |
| UN50974 | Rsa1.0.00132.1 | 580  | 124299 | 0         | 400 | 417 | 95 +  | 158  | 573  | 46280  | 46693  |
| UN50975 | Rsa1.0.02343.1 | 507  | 32374  | 1.00E-127 | 246 | 250 | 98 -  | 257  | 506  | 1005   | 1252   |
| UN50976 | Rsa1.0.01031.1 | 748  | 56236  | 4.00E-74  | 172 | 181 | 95 -  | 525  | 703  | 40106  | 40286  |
| UN50977 | Rsa1.0.00894.1 | 609  | 269700 | 1.00E-103 | 265 | 290 | 91 -  | 327  | 609  | 126584 | 126855 |
| UN50978 | Rsa1.0.01206.1 | 826  | 50772  | 1.00E-102 | 199 | 202 | 98 -  | 506  | 707  | 39862  | 40063  |
| UN50979 | Rsa1.0.02672.1 | 777  | 28884  | 0         | 643 | 683 | 94 +  | 116  | 777  | 10841  | 11523  |
| UN50980 | Rsa1.0.02456.1 | 708  | 31222  | 4.00E-86  | 225 | 243 | 92 -  | 472  | 708  | 23762  | 24004  |
| UN50981 | Rsa1.0.00522.1 | 1159 | 78103  | 1.00E-135 | 281 | 291 | 96 +  | 873  | 1159 | 49920  | 50210  |
| UN50982 | Rsa1.0.03448.1 | 511  | 22844  | 1.00E-119 | 227 | 229 | 99 +  | 282  | 509  | 1239   | 1467   |
| UN50983 | Rsa1.0.00203.1 | 1030 | 109129 | 0         | 444 | 454 | 97 -  | 1    | 453  | 55688  | 56140  |
| UN50984 | Rsa1.0.02672.1 | 689  | 28884  | 0         | 511 | 536 | 95 +  | 163  | 687  | 27575  | 28110  |
| UN50985 | Rsa1.0.00097.1 | 845  | 138858 | 4.00E-59  | 129 | 133 | 96 -  | 217  | 349  | 136170 | 136302 |
| UN50986 | Rsa1.0.00692.1 | 718  | 68151  | 0         | 639 | 644 | 99 -  | 76   | 718  | 66061  | 66704  |
| UN50987 | Rsa1.0.00350.1 | 1175 | 92346  | 0         | 373 | 378 | 98 +  | 1    | 378  | 79500  | 79877  |
| UN50988 | Rsa1.0.00017.1 | 389  | 752458 | 1.00E-110 | 202 | 202 | 100 - | 1    | 202  | 271555 | 271756 |
| UN50989 | Rsa1.0.01408.1 | 1010 | 46383  | 0         | 477 | 493 | 96 -  | 143  | 635  | 17109  | 17601  |
| UN50990 | Rsa1.0.05943.1 | 1051 | 12158  | 0         | 566 | 578 | 97 +  | 474  | 1051 | 6907   | 7484   |
| UN50991 | Rsa1.0.03491.1 | 747  | 22541  | 0         | 496 | 517 | 95 -  | 46   | 555  | 9058   | 9574   |
| UN50992 | Rsa1.0.01363.1 | 838  | 47195  | 2.00E-97  | 249 | 272 | 91 +  | 5    | 276  | 23115  | 23380  |
| UN50993 | Rsa1.0.05445.1 | 765  | 13718  | 0         | 736 | 759 | 96 +  | 9    | 764  | 12930  | 13687  |
| UN50994 | Rsa1.0.00016.1 | 930  | 831256 | 0         | 473 | 486 | 97 -  | 1    | 484  | 264998 | 265482 |
| UN50995 | Rsa1.0.07444.1 | 718  | 9386   | 1.00E-163 | 295 | 296 | 99 +  | 242  | 537  | 524    | 819    |
| UN50996 | Rsa1.0.05122.1 | 918  | 14791  | 9.00E-88  | 195 | 205 | 95 -  | 451  | 655  | 9372   | 9576   |
| UN50997 | Rsa1.0.02783.1 | 723  | 27927  | 0         | 700 | 716 | 97 +  | 8    | 723  | 13983  | 14696  |
| UN50998 | Rsa1.0.00602.1 | 848  | 73302  | 0         | 666 | 683 | 97 -  | 3    | 682  | 64379  | 65060  |
| UN50999 | Rsa1.0.00002.1 | 764  | 601661 | 1.00E-103 | 319 | 365 | 87 -  | 435  | 764  | 17954  | 18318  |
| UN51000 | Rsa1.0.00396.1 | 719  | 88242  | 0         | 423 | 450 | 94 -  | 3    | 452  | 7161   | 7601   |
| UN51001 | Rsa1.0.00045.1 | 1104 | 328694 | 0         | 531 | 569 | 93 +  | 1    | 558  | 261146 | 261705 |
| UN51002 | Rsa1.0.00144.1 | 668  | 120708 | 9.00E-75  | 152 | 155 | 98 -  | 391  | 545  | 79548  | 79702  |
| UN51003 | Rsa1.0.00593.1 | 522  | 143463 | 3.00E-89  | 186 | 191 | 97 -  | 298  | 487  | 61038  | 61228  |
| UN51004 | Rsa1.0.00522.1 | 928  | 78103  | 1.00E-132 | 257 | 262 | 98 +  | 665  | 926  | 58360  | 58619  |
| UN51005 | Rsa1.0.03436.1 | 521  | 22958  | 1.00E-122 | 247 | 255 | 96 -  | 176  | 430  | 478    | 732    |
| UN51006 | Rsa1.0.00477.1 | 848  | 81556  | 1.00E-103 | 233 | 247 | 94 -  | 472  | 718  | 21683  | 21929  |
| UN51007 | Rsa1.0.02913.1 | 764  | 26816  | 1.00E-103 | 230 | 237 | 97 -  | 528  | 758  | 22355  | 22591  |
| UN51008 | Rsa1.0.00106.1 | 1356 | 133916 | 1.00E-174 | 338 | 343 | 98 +  | 1017 | 1356 | 7524   | 7866   |
| UN51009 | Rsa1.0.02336.1 | 1126 | 32397  | 0         | 420 | 424 | 99 -  | 702  | 1125 | 8973   | 9396   |
| UN51010 | Rsa1.0.01559.1 | 631  | 43262  | 1.00E-159 | 313 | 320 | 97 -  | 314  | 631  | 28829  | 29148  |

|         |                |      |        |           |      |      |       |     |      |        |        |
|---------|----------------|------|--------|-----------|------|------|-------|-----|------|--------|--------|
| UN51011 | Rsa1.0_04200.1 | 906  | 18490  | 1.00E-176 | 353  | 366  | 96 -  | 3   | 368  | 2813   | 3178   |
| UN51012 | Rsa1.0_00442.1 | 1236 | 84596  | 0         | 450  | 450  | 100 - | 785 | 1234 | 78121  | 78570  |
| UN51013 | Rsa1.0_00108.1 | 1029 | 478491 | 1.00E-87  | 183  | 189  | 96 -  | 806 | 994  | 416703 | 416891 |
| UN51014 | Rsa1.0_00239.1 | 871  | 104332 | 0         | 439  | 470  | 93 +  | 2   | 457  | 103566 | 104033 |
| UN51015 | Rsa1.0_00384.1 | 1083 | 89278  | 1.00E-176 | 323  | 326  | 99 +  | 727 | 1052 | 48409  | 48734  |
| UN51016 | Rsa1.0_01414.1 | 995  | 149508 | 1.00E-101 | 365  | 419  | 87 +  | 542 | 960  | 130284 | 130698 |
| UN51017 | Rsa1.0_02859.1 | 530  | 162118 | 1.00E-144 | 327  | 348  | 93 +  | 6   | 353  | 137970 | 138316 |
| UN51018 | Rsa1.0_01352.1 | 675  | 47443  | 0         | 396  | 408  | 97 -  | 7   | 414  | 954    | 1361   |
| UN51019 | Rsa1.0_01077.1 | 1128 | 54772  | 0         | 565  | 604  | 93 +  | 1   | 594  | 10739  | 11340  |
| UN51020 | Rsa1.0_01695.1 | 835  | 40848  | 0         | 787  | 801  | 98 -  | 2   | 794  | 15439  | 16239  |
| UN51021 | Rsa1.0_02672.1 | 755  | 28884  | 0         | 519  | 540  | 96 -  | 3   | 539  | 27575  | 28110  |
| UN51022 | Rsa1.0_00894.1 | 1138 | 269700 | 1.00E-166 | 404  | 436  | 92 -  | 712 | 1137 | 127925 | 128357 |
| UN51023 | Rsa1.0_04205.1 | 716  | 138772 | 1.00E-140 | 358  | 390  | 91 -  | 349 | 716  | 133864 | 134249 |
| UN51024 | Rsa1.0_02020.1 | 754  | 173211 | 0         | 332  | 333  | 99 -  | 419 | 751  | 20254  | 20586  |
| UN51025 | Rsa1.0_10587.1 | 499  | 5794   | 1.00E-110 | 227  | 235  | 96 +  | 265 | 499  | 234    | 468    |
| UN51026 | Rsa1.0_00211.1 | 1121 | 228189 | 0         | 582  | 606  | 96 +  | 3   | 607  | 179313 | 179912 |
| UN51027 | Rsa1.0_00165.1 | 729  | 116466 | 3.00E-93  | 177  | 178  | 99 -  | 242 | 419  | 26990  | 27167  |
| UN51028 | Rsa1.0_06541.1 | 696  | 10806  | 1.00E-105 | 304  | 334  | 91 -  | 364 | 690  | 10047  | 10372  |
| UN51029 | Rsa1.0_00019.1 | 683  | 301669 | 1.00E-131 | 331  | 362  | 91 -  | 316 | 677  | 293157 | 293498 |
| UN51030 | Rsa1.0_00773.1 | 876  | 64839  | 1.00E-102 | 271  | 292  | 92 +  | 11  | 295  | 10153  | 10440  |
| UN51031 | Rsa1.0_00163.1 | 1332 | 116847 | 0         | 1168 | 1243 | 93 +  | 1   | 1223 | 7904   | 9130   |
| UN51032 | Rsa1.0_06939.1 | 795  | 10137  | 1.00E-148 | 333  | 350  | 95 +  | 3   | 347  | 3493   | 3838   |
| UN51033 | Rsa1.0_01146.1 | 664  | 163455 | 1.00E-115 | 281  | 302  | 93 +  | 342 | 635  | 162766 | 163067 |
| UN51034 | Rsa1.0_05782.1 | 937  | 12646  | 1.00E-112 | 212  | 214  | 99 +  | 139 | 352  | 8062   | 8275   |
| UN51035 | Rsa1.0_00043.1 | 744  | 264937 | 1.00E-132 | 302  | 323  | 93 -  | 424 | 743  | 123268 | 123577 |
| UN51036 | Rsa1.0_00152.1 | 797  | 257730 | 1.00E-108 | 205  | 207  | 99 -  | 351 | 557  | 100776 | 100982 |
| UN51037 | Rsa1.0_00253.1 | 1322 | 231292 | 1.00E-102 | 195  | 197  | 98 -  | 878 | 1074 | 90005  | 90201  |
| UN51038 | Rsa1.0_00373.1 | 868  | 90296  | 1.00E-161 | 401  | 432  | 92 +  | 3   | 427  | 67568  | 67986  |
| UN51039 | Rsa1.0_00883.1 | 1232 | 61230  | 1.00E-117 | 326  | 359  | 90 +  | 888 | 1232 | 54394  | 54749  |
| UN51040 | Rsa1.0_23167.1 | 733  | 1067   | 0         | 382  | 389  | 98 +  | 1   | 389  | 510    | 898    |
| UN51041 | Rsa1.0_04511.1 | 882  | 17032  | 1.00E-109 | 230  | 239  | 96 +  | 647 | 882  | 4974   | 5212   |
| UN51042 | Rsa1.0_00197.1 | 624  | 109714 | 1.00E-118 | 245  | 255  | 96 +  | 1   | 255  | 78040  | 78294  |
| UN51043 | Rsa1.0_08744.1 | 781  | 6970   | 0         | 492  | 511  | 96 -  | 97  | 606  | 5426   | 5934   |
| UN51044 | Rsa1.0_00215.1 | 761  | 201775 | 9.00E-69  | 145  | 149  | 97 +  | 464 | 612  | 1920   | 2068   |
| UN51045 | Rsa1.0_01576.1 | 765  | 42923  | 1.00E-110 | 309  | 342  | 90 +  | 388 | 718  | 22319  | 22654  |
| UN51046 | Rsa1.0_00933.1 | 1426 | 59164  | 1.00E-163 | 291  | 291  | 100 + | 729 | 1019 | 2118   | 2408   |
| UN51047 | Rsa1.0_02360.1 | 1020 | 32203  | 0         | 576  | 622  | 92 +  | 1   | 598  | 23957  | 24578  |
| UN51048 | Rsa1.0_02449.1 | 1048 | 31292  | 6.00E-89  | 189  | 195  | 96 -  | 855 | 1048 | 13256  | 13450  |
| UN51049 | Rsa1.0_05354.1 | 905  | 14073  | 0         | 486  | 486  | 100 - | 1   | 486  | 4161   | 4646   |

|         |                |      |        |           |     |     |       |     |      |        |        |
|---------|----------------|------|--------|-----------|-----|-----|-------|-----|------|--------|--------|
| UN51050 | Rsa1.0.02072.1 | 1100 | 35401  | 1.00E-140 | 265 | 269 | 98 -  | 280 | 548  | 6534   | 6802   |
| UN51051 | Rsa1.0.03454.1 | 1311 | 149870 | 0         | 658 | 659 | 99 +  | 2   | 660  | 144059 | 144717 |
| UN51052 | Rsa1.0.02786.1 | 694  | 27880  | 1.00E-180 | 424 | 459 | 92 -  | 233 | 688  | 18744  | 19185  |
| UN51053 | Rsa1.0.01867.1 | 1514 | 37960  | 0         | 482 | 496 | 97 -  | 282 | 777  | 19568  | 20063  |
| UN51054 | Rsa1.0.00218.1 | 727  | 201480 | 0         | 431 | 443 | 97 -  | 285 | 726  | 101445 | 101883 |
| UN51055 | Rsa1.0.00628.1 | 1183 | 214360 | 0         | 444 | 449 | 98 +  | 407 | 855  | 204097 | 204545 |
| UN51056 | Rsa1.0.02383.1 | 972  | 31931  | 0         | 555 | 614 | 90 +  | 33  | 625  | 15273  | 15878  |
| UN51057 | Rsa1.0.02071.1 | 616  | 35409  | 1.00E-137 | 281 | 292 | 96 -  | 325 | 616  | 22586  | 22877  |
| UN51058 | Rsa1.0.01492.1 | 954  | 44704  | 1.00E-120 | 281 | 298 | 94 +  | 1   | 296  | 4570   | 4859   |
| UN51059 | Rsa1.0.02017.1 | 1119 | 35999  | 1.00E-127 | 260 | 268 | 97 +  | 852 | 1119 | 26848  | 27114  |
| UN51060 | Rsa1.0.00275.1 | 550  | 210104 | 1.00E-97  | 205 | 212 | 96 -  | 52  | 261  | 157269 | 157480 |
| UN51061 | Rsa1.0.00660.1 | 694  | 69688  | 1.00E-132 | 305 | 323 | 94 +  | 368 | 681  | 17669  | 17991  |
| UN51062 | Rsa1.0.03037.1 | 1052 | 25825  | 1.00E-178 | 346 | 353 | 98 -  | 3   | 353  | 5163   | 5515   |
| UN51063 | Rsa1.0.00522.1 | 1505 | 78103  | 0         | 655 | 684 | 95 +  | 791 | 1471 | 51939  | 52621  |
| UN51064 | Rsa1.0.00091.1 | 1398 | 139699 | 0         | 469 | 479 | 97 +  | 1   | 478  | 136936 | 137413 |
| UN51065 | Rsa1.0.00120.1 | 693  | 277288 | 1.00E-158 | 322 | 335 | 96 -  | 6   | 340  | 253442 | 253776 |
| UN51066 | Rsa1.0.00586.1 | 871  | 163802 | 0         | 473 | 479 | 98 +  | 394 | 871  | 108888 | 109366 |
| UN51067 | Rsa1.0.00648.1 | 687  | 70351  | 1.00E-116 | 297 | 322 | 92 +  | 6   | 318  | 21672  | 21992  |
| UN51068 | Rsa1.0.00507.1 | 1235 | 79074  | 1.00E-180 | 326 | 328 | 99 -  | 1   | 328  | 44676  | 45003  |
| UN51069 | Rsa1.0.00509.1 | 645  | 78829  | 1.00E-132 | 269 | 276 | 97 +  | 1   | 275  | 6510   | 6784   |
| UN51070 | Rsa1.0.05822.1 | 641  | 12521  | 0         | 484 | 506 | 95 -  | 1   | 494  | 11655  | 12158  |
| UN51071 | Rsa1.0.00017.1 | 820  | 752458 | 2.00E-94  | 253 | 276 | 91 +  | 1   | 270  | 141380 | 141654 |
| UN51072 | Rsa1.0.00938.1 | 576  | 193891 | 0         | 500 | 522 | 95 -  | 1   | 522  | 172122 | 172643 |
| UN51073 | Rsa1.0.15287.1 | 1556 | 2708   | 0         | 357 | 359 | 99 -  | 858 | 1216 | 2350   | 2708   |
| UN51074 | Rsa1.0.00015.1 | 636  | 561803 | 1.00E-149 | 417 | 471 | 88 +  | 60  | 523  | 483083 | 483533 |
| UN51075 | Rsa1.0.02212.1 | 983  | 33840  | 1.00E-93  | 175 | 175 | 100 - | 1   | 175  | 29047  | 29221  |
| UN51076 | Rsa1.0.00011.1 | 812  | 225044 | 0         | 588 | 617 | 95 -  | 203 | 812  | 213237 | 213851 |
| UN51077 | Rsa1.0.00376.1 | 1045 | 90101  | 1.00E-150 | 306 | 318 | 96 +  | 240 | 557  | 49173  | 49490  |
| UN51078 | Rsa1.0.01042.1 | 734  | 293264 | 0         | 479 | 493 | 97 -  | 242 | 734  | 154018 | 154510 |
| UN51079 | Rsa1.0.00012.1 | 703  | 222148 | 1.00E-138 | 322 | 342 | 94 +  | 4   | 342  | 51716  | 52057  |
| UN51080 | Rsa1.0.00271.1 | 734  | 101125 | 1.00E-126 | 236 | 238 | 99 +  | 372 | 609  | 80400  | 80637  |
| UN51081 | Rsa1.0.43953.1 | 1120 | 511    | 0         | 443 | 443 | 100 + | 247 | 689  | 69     | 511    |
| UN51082 | Rsa1.0.17015.1 | 1048 | 1953   | 1.00E-117 | 242 | 250 | 96 -  | 4   | 250  | 874    | 1120   |
| UN51083 | Rsa1.0.00435.1 | 208  | 317579 | 1.00E-74  | 196 | 212 | 92 +  | 1   | 208  | 70741  | 70952  |
| UN51084 | Rsa1.0.14624.1 | 908  | 3217   | 1.00E-112 | 253 | 269 | 94 +  | 628 | 894  | 1334   | 1593   |
| UN51085 | Rsa1.0.01452.1 | 621  | 45459  | 1.00E-110 | 214 | 218 | 98 -  | 222 | 439  | 39322  | 39539  |
| UN51086 | Rsa1.0.00045.1 | 621  | 328694 | 1.00E-139 | 307 | 326 | 94 -  | 286 | 611  | 186950 | 187269 |
| UN51087 | Rsa1.0.03081.1 | 741  | 25523  | 0         | 358 | 360 | 99 -  | 1   | 358  | 22991  | 23350  |
| UN51088 | Rsa1.0.01363.1 | 821  | 47195  | 1.00E-103 | 247 | 266 | 92 +  | 3   | 268  | 23115  | 23380  |



|         |                |      |        |           |      |      |       |      |      |        |        |
|---------|----------------|------|--------|-----------|------|------|-------|------|------|--------|--------|
| UN51089 | Rsa1.0.02043.1 | 1417 | 163754 | 1.00E-122 | 223  | 223  | 100 + | 393  | 615  | 134128 | 134350 |
| UN51090 | Rsa1.0.00471.1 | 771  | 81897  | 0         | 347  | 347  | 100 + | 425  | 771  | 65986  | 66332  |
| UN51091 | Rsa1.0.01539.1 | 1269 | 43698  | 0         | 447  | 458  | 97 -  | 26   | 483  | 23834  | 24291  |
| UN51092 | Rsa1.0.00944.1 | 921  | 58733  | 1.00E-154 | 418  | 465  | 89 -  | 448  | 892  | 41293  | 41743  |
| UN51093 | Rsa1.0.02648.1 | 812  | 29073  | 0         | 391  | 410  | 95 +  | 5    | 404  | 25819  | 26225  |
| UN51094 | Rsa1.0.00579.1 | 1319 | 148308 | 1.00E-148 | 356  | 386  | 92 +  | 1    | 372  | 66636  | 67019  |
| UN51095 | Rsa1.0.00347.1 | 930  | 93048  | 0         | 401  | 412  | 97 -  | 524  | 927  | 68210  | 68621  |
| UN51096 | Rsa1.0.00134.1 | 586  | 390219 | 0         | 531  | 550  | 96 -  | 5    | 554  | 155347 | 155890 |
| UN51097 | Rsa1.0.05653.1 | 580  | 13043  | 0         | 558  | 580  | 96 -  | 1    | 578  | 10824  | 11403  |
| UN51098 | Rsa1.0.00020.1 | 1046 | 283099 | 1.00E-155 | 323  | 336  | 96 -  | 9    | 344  | 140893 | 141224 |
| UN51099 | Rsa1.0.00187.1 | 852  | 393093 | 0         | 464  | 486  | 95 +  | 16   | 498  | 212048 | 212530 |
| UN51100 | Rsa1.0.00105.1 | 436  | 134138 | 0         | 428  | 433  | 98 -  | 2    | 432  | 109975 | 110405 |
| UN51101 | Rsa1.0.01193.1 | 835  | 51147  | 1.00E-61  | 137  | 141  | 97 -  | 35   | 175  | 15855  | 15994  |
| UN51102 | Rsa1.0.00067.1 | 959  | 415055 | 0         | 363  | 367  | 98 +  | 593  | 959  | 7421   | 7784   |
| UN51103 | Rsa1.0.02105.1 | 798  | 156953 | 0         | 346  | 346  | 100 + | 1    | 346  | 33123  | 33468  |
| UN51104 | Rsa1.0.07894.1 | 1181 | 8347   | 0         | 360  | 363  | 99 -  | 820  | 1181 | 5561   | 5922   |
| UN51105 | Rsa1.0.02633.1 | 919  | 29315  | 0         | 417  | 417  | 100 - | 503  | 919  | 355    | 771    |
| UN51106 | Rsa1.0.03991.1 | 1388 | 19675  | 0         | 1370 | 1386 | 98 +  | 1    | 1386 | 7061   | 8446   |
| UN51107 | Rsa1.0.14400.1 | 1000 | 3430   | 0         | 628  | 673  | 93 +  | 330  | 999  | 1      | 667    |
| UN51108 | Rsa1.0.07534.1 | 526  | 9184   | 0         | 347  | 347  | 100 - | 178  | 524  | 7368   | 7714   |
| UN51109 | Rsa1.0.17881.1 | 448  | 1720   | 0         | 390  | 398  | 97 -  | 54   | 446  | 1006   | 1403   |
| UN51110 | Rsa1.0.00425.1 | 906  | 147080 | 0         | 613  | 637  | 96 +  | 104  | 739  | 95758  | 96394  |
| UN51111 | Rsa1.0.01696.1 | 1118 | 301850 | 0         | 676  | 686  | 98 +  | 2    | 680  | 160599 | 161284 |
| UN51112 | Rsa1.0.00087.1 | 638  | 761073 | 9.00E-87  | 187  | 195  | 95 -  | 403  | 597  | 13132  | 13326  |
| UN51113 | Rsa1.0.20261.1 | 771  | 1323   | 0         | 443  | 477  | 92 -  | 298  | 764  | 100    | 575    |
| UN51114 | Rsa1.0.03521.1 | 688  | 396204 | 1.00E-133 | 262  | 269  | 97 +  | 3    | 271  | 133831 | 134099 |
| UN51115 | Rsa1.0.00495.1 | 1641 | 79934  | 4.00E-79  | 151  | 151  | 100 + | 1405 | 1555 | 19840  | 19990  |
| UN51116 | Rsa1.0.00006.1 | 701  | 396176 | 1.00E-163 | 411  | 451  | 91 -  | 266  | 700  | 307656 | 308106 |
| UN51117 | Rsa1.0.01319.1 | 996  | 48273  | 0         | 683  | 711  | 96 +  | 3    | 704  | 10893  | 11594  |
| UN51118 | Rsa1.0.43909.1 | 680  | 512    | 0         | 394  | 397  | 99 +  | 3    | 399  | 77     | 473    |
| UN51119 | Rsa1.0.00105.1 | 807  | 134138 | 0         | 620  | 639  | 97 +  | 168  | 805  | 123747 | 124385 |
| UN51120 | Rsa1.0.01580.1 | 802  | 42852  | 1.00E-107 | 212  | 217  | 97 -  | 279  | 495  | 37225  | 37441  |
| UN51121 | Rsa1.0.00103.1 | 1127 | 135304 | 8.00E-24  | 110  | 126  | 87 +  | 262  | 386  | 30996  | 31121  |
| UN51122 | Rsa1.0.00108.1 | 1173 | 478491 | 8.00E-92  | 249  | 269  | 92 +  | 12   | 276  | 67404  | 67663  |
| UN51123 | Rsa1.0.00611.1 | 948  | 72410  | 0         | 482  | 500  | 96 -  | 1    | 500  | 60559  | 61058  |
| UN51124 | Rsa1.0.00451.1 | 904  | 322533 | 0         | 864  | 924  | 93 +  | 1    | 903  | 249773 | 250693 |
| UN51125 | Rsa1.0.05326.1 | 701  | 14139  | 0         | 356  | 358  | 99 -  | 1    | 358  | 5288   | 5645   |
| UN51126 | Rsa1.0.02626.1 | 916  | 29387  | 0         | 430  | 450  | 95 -  | 471  | 916  | 22846  | 23293  |
| UN51127 | Rsa1.0.00277.1 | 785  | 100132 | 0         | 381  | 395  | 96 -  | 3    | 393  | 63713  | 64106  |

|         |                |      |        |           |      |      |       |      |      |        |        |
|---------|----------------|------|--------|-----------|------|------|-------|------|------|--------|--------|
| UN51128 | Rsa1.0_13672.1 | 799  | 4525   | 0         | 583  | 586  | 99 -  | 3    | 588  | 2836   | 3421   |
| UN51129 | Rsa1.0_00253.1 | 889  | 231292 | 1.00E-129 | 234  | 234  | 100 - | 656  | 889  | 85080  | 85313  |
| UN51130 | Rsa1.0_00454.1 | 758  | 216970 | 0         | 618  | 636  | 97 +  | 116  | 748  | 158280 | 158915 |
| UN51131 | Rsa1.0_01005.1 | 964  | 56967  | 1.00E-139 | 261  | 264  | 98 +  | 282  | 545  | 19291  | 19554  |
| UN51132 | Rsa1.0_00092.1 | 842  | 659932 | 1.00E-165 | 390  | 415  | 93 +  | 2    | 410  | 517048 | 517458 |
| UN51133 | Rsa1.0_07877.1 | 992  | 8373   | 1.00E-74  | 149  | 151  | 98 -  | 436  | 586  | 5171   | 5321   |
| UN51134 | Rsa1.0_05778.1 | 1120 | 12656  | 0         | 886  | 894  | 99 -  | 1    | 893  | 7      | 900    |
| UN51135 | #              | #    | #      | #         | #    | #    | #     | #    | #    | #      | #      |
| UN51136 | Rsa1.0_00482.1 | 1401 | 81162  | 1.00E-179 | 346  | 355  | 97 -  | 11   | 365  | 66121  | 66475  |
| UN51137 | Rsa1.0_05489.1 | 1107 | 13562  | 0         | 538  | 555  | 96 -  | 358  | 911  | 12340  | 12894  |
| UN51138 | Rsa1.0_01806.1 | 963  | 39021  | 0         | 416  | 428  | 97 -  | 536  | 963  | 21744  | 22163  |
| UN51139 | Rsa1.0_01538.1 | 701  | 43733  | 1.00E-132 | 286  | 299  | 95 +  | 1    | 298  | 38527  | 38818  |
| UN51140 | Rsa1.0_01516.1 | 586  | 44196  | 6.00E-91  | 200  | 210  | 95 +  | 74   | 283  | 23664  | 23873  |
| UN51141 | Rsa1.0_00251.1 | 777  | 303968 | 1.00E-171 | 441  | 480  | 91 +  | 1    | 460  | 114403 | 114876 |
| UN51142 | Rsa1.0_00011.1 | 976  | 225044 | 1.00E-164 | 350  | 369  | 94 -  | 608  | 976  | 50515  | 50872  |
| UN51143 | Rsa1.0_01195.1 | 709  | 147988 | 0         | 631  | 663  | 95 -  | 3    | 660  | 15476  | 16127  |
| UN51144 | Rsa1.0_00293.1 | 1074 | 339294 | 0         | 1024 | 1072 | 95 +  | 3    | 1073 | 318351 | 319418 |
| UN51145 | Rsa1.0_00114.1 | 1880 | 131330 | 0         | 346  | 350  | 98 -  | 588  | 937  | 44560  | 44909  |
| UN51146 | Rsa1.0_02150.1 | 777  | 34580  | 0         | 346  | 350  | 98 +  | 426  | 775  | 34063  | 34412  |
| UN51147 | Rsa1.0_00609.1 | 601  | 72785  | 0         | 544  | 572  | 95 -  | 37   | 601  | 17034  | 17589  |
| UN51148 | Rsa1.0_11152.1 | 608  | 5602   | 0         | 346  | 346  | 100 + | 263  | 608  | 5016   | 5361   |
| UN51149 | Rsa1.0_02831.1 | 269  | 27533  | 1.00E-113 | 248  | 262  | 94 -  | 8    | 269  | 14309  | 14570  |
| UN51150 | Rsa1.0_05621.1 | 1371 | 13145  | 0         | 892  | 893  | 99 +  | 1    | 892  | 12253  | 13145  |
| UN51151 | Rsa1.0_00372.1 | 1470 | 90418  | 1.00E-177 | 415  | 443  | 93 -  | 1036 | 1470 | 14626  | 15057  |
| UN51152 | Rsa1.0_00244.1 | 1481 | 103590 | 0         | 1220 | 1236 | 98 -  | 246  | 1481 | 77057  | 78292  |
| UN51153 | Rsa1.0_09186.1 | 1088 | 6572   | 1.00E-173 | 377  | 399  | 94 +  | 701  | 1088 | 5556   | 5953   |
| UN51154 | Rsa1.0_13860.1 | 697  | 4190   | 0         | 685  | 694  | 98 -  | 4    | 696  | 2937   | 3629   |
| UN51155 | Rsa1.0_00043.1 | 1106 | 264937 | 1.00E-179 | 360  | 374  | 96 -  | 2    | 375  | 143187 | 143560 |
| UN51156 | Rsa1.0_02237.1 | 306  | 33544  | 1.00E-148 | 301  | 311  | 96 +  | 1    | 306  | 7482   | 7792   |
| UN51157 | Rsa1.0_00225.1 | 1126 | 105892 | 0         | 503  | 510  | 98 -  | 3    | 512  | 98829  | 99338  |
| UN51158 | Rsa1.0_00324.1 | 1525 | 218805 | 0         | 1150 | 1177 | 97 -  | 3    | 1168 | 144321 | 145496 |
| UN51159 | Rsa1.0_07858.1 | 728  | 8411   | 0         | 359  | 363  | 98 +  | 358  | 719  | 7580   | 7942   |
| UN51160 | Rsa1.0_00128.1 | 688  | 228675 | 1.00E-102 | 229  | 241  | 95 +  | 143  | 380  | 138855 | 139092 |
| UN51161 | Rsa1.0_02361.1 | 1660 | 32190  | 1.00E-119 | 228  | 231  | 98 -  | 2    | 232  | 11102  | 11332  |
| UN51162 | Rsa1.0_00398.1 | 969  | 88007  | 0         | 957  | 967  | 98 -  | 3    | 969  | 4628   | 5594   |
| UN51163 | Rsa1.0_00185.1 | 1451 | 248445 | 1.00E-133 | 256  | 261  | 98 -  | 231  | 491  | 145300 | 145560 |
| UN51164 | Rsa1.0_00251.1 | 1106 | 303968 | 5.00E-99  | 187  | 188  | 99 +  | 713  | 900  | 64674  | 64861  |
| UN51165 | Rsa1.0_01226.1 | 537  | 50316  | 0         | 534  | 534  | 100 - | 4    | 537  | 12341  | 12874  |
| UN51166 | Rsa1.0_11233.1 | 825  | 5574   | 0         | 682  | 708  | 96 -  | 116  | 820  | 124    | 830    |

|         |                |      |        |           |      |      |       |      |      |        |        |
|---------|----------------|------|--------|-----------|------|------|-------|------|------|--------|--------|
| UN51167 | Rsa1.0.03161.1 | 1496 | 24905  | 0         | 433  | 435  | 99 +  | 1    | 435  | 15458  | 15892  |
| UN51168 | Rsa1.0.02449.1 | 782  | 31292  | 1.00E-80  | 222  | 245  | 90 -  | 92   | 336  | 21988  | 22232  |
| UN51169 | Rsa1.0.07131.1 | 971  | 9860   | 0         | 393  | 399  | 98 +  | 1    | 399  | 7950   | 8348   |
| UN51170 | Rsa1.0.01231.1 | 1277 | 50208  | 0         | 396  | 396  | 100 + | 610  | 1005 | 37587  | 37982  |
| UN51171 | Rsa1.0.00563.1 | 1381 | 75491  | 0         | 1359 | 1367 | 99 -  | 3    | 1368 | 25509  | 26873  |
| UN51172 | Rsa1.0.00211.1 | 1345 | 228189 | 0         | 1306 | 1358 | 96 -  | 3    | 1343 | 140053 | 141406 |
| UN51173 | Rsa1.0.01077.1 | 1529 | 54772  | 0         | 1138 | 1170 | 97 -  | 3    | 1172 | 48375  | 49544  |
| UN51174 | Rsa1.0.00190.1 | 1120 | 318240 | 0         | 449  | 477  | 94 -  | 2    | 475  | 45482  | 45957  |
| UN51175 | Rsa1.0.01841.1 | 1535 | 38430  | 0         | 889  | 894  | 99 +  | 2    | 895  | 15814  | 16707  |
| UN51176 | Rsa1.0.00763.1 | 729  | 65121  | 0         | 353  | 354  | 99 +  | 375  | 728  | 32832  | 33185  |
| UN51177 | Rsa1.0.00935.1 | 1292 | 59079  | 0         | 556  | 572  | 97 +  | 1    | 570  | 55806  | 56377  |
| UN51178 | Rsa1.0.04920.1 | 1266 | 15434  | 0         | 739  | 757  | 97 -  | 1    | 757  | 1      | 757    |
| UN51179 | Rsa1.0.00315.1 | 1858 | 96426  | 0         | 702  | 710  | 98 +  | 1148 | 1857 | 85959  | 86668  |
| UN51180 | Rsa1.0.08038.1 | 836  | 8034   | 0         | 331  | 333  | 99 +  | 176  | 508  | 5846   | 6178   |
| UN51181 | Rsa1.0.00056.1 | 854  | 332604 | 0         | 626  | 635  | 98 -  | 1    | 635  | 141016 | 141650 |
| UN51182 | Rsa1.0.00253.1 | 1246 | 231292 | 0         | 600  | 601  | 99 -  | 1    | 601  | 149852 | 150452 |
| UN51183 | Rsa1.0.36775.1 | 741  | 613    | 1.00E-107 | 227  | 237  | 95 +  | 397  | 633  | 184    | 420    |
| UN51184 | Rsa1.0.01642.1 | 1481 | 41772  | 1.00E-152 | 277  | 278  | 99 +  | 1204 | 1481 | 23244  | 23521  |
| UN51185 | #              | #    | #      | #         | #    | #    | #     | #    | #    | #      | #      |
| UN51186 | Rsa1.0.01588.1 | 2070 | 42724  | 0         | 761  | 763  | 99 +  | 2    | 764  | 2093   | 2855   |
| UN51187 | Rsa1.0.00123.1 | 961  | 325650 | 0         | 958  | 959  | 99 +  | 3    | 961  | 213060 | 214017 |
| UN51188 | Rsa1.0.00661.1 | 1018 | 213041 | 0         | 1016 | 1017 | 99 +  | 3    | 1018 | 187784 | 188800 |
| UN51189 | Rsa1.0.01882.1 | 811  | 37697  | 0         | 381  | 381  | 100 - | 431  | 811  | 30227  | 30607  |
| UN51190 | Rsa1.0.00017.1 | 984  | 752458 | 0         | 878  | 920  | 95 -  | 7    | 918  | 32221  | 33139  |
| UN51191 | Rsa1.0.00562.1 | 658  | 75565  | 1.00E-122 | 231  | 234  | 98 +  | 1    | 234  | 21549  | 21782  |
| UN51192 | Rsa1.0.00945.1 | 1509 | 58714  | 0         | 699  | 699  | 100 + | 811  | 1509 | 7499   | 8197   |
| UN51193 | Rsa1.0.01678.1 | 1462 | 162174 | 0         | 918  | 925  | 99 +  | 128  | 1052 | 143403 | 144327 |
| UN51194 | Rsa1.0.00947.1 | 952  | 58664  | 1.00E-159 | 293  | 295  | 99 +  | 1    | 293  | 12120  | 12414  |
| UN51195 | Rsa1.0.12539.1 | 1521 | 5198   | 2.00E-74  | 349  | 413  | 84 +  | 395  | 807  | 15     | 421    |
| UN51196 | Rsa1.0.00829.1 | 1096 | 158305 | 0         | 378  | 391  | 96 +  | 365  | 752  | 123408 | 123798 |
| UN51197 | Rsa1.0.01873.1 | 504  | 37903  | 0         | 495  | 496  | 99 +  | 5    | 500  | 15928  | 16423  |
| UN51198 | Rsa1.0.04082.1 | 1811 | 19180  | 0         | 904  | 904  | 100 + | 908  | 1811 | 17315  | 18218  |
| UN51199 | Rsa1.0.00198.1 | 1445 | 222963 | 0         | 453  | 473  | 95 -  | 975  | 1445 | 65077  | 65546  |
| UN51200 | Rsa1.0.02043.1 | 1166 | 163754 | 1.00E-149 | 279  | 281  | 99 -  | 1    | 280  | 135662 | 135942 |
| UN51201 | Rsa1.0.00622.1 | 1264 | 71822  | 0         | 755  | 755  | 100 + | 505  | 1259 | 37212  | 37966  |
| UN51202 | Rsa1.0.01931.1 | 919  | 37187  | 0         | 912  | 917  | 99 +  | 4    | 919  | 26619  | 27535  |
| UN51203 | Rsa1.0.00301.1 | 626  | 365315 | 1.00E-171 | 331  | 340  | 97 -  | 287  | 626  | 355550 | 355889 |
| UN51204 | Rsa1.0.00188.1 | 1070 | 112020 | 0         | 847  | 854  | 99 +  | 217  | 1070 | 11872  | 12725  |
| UN51205 | Rsa1.0.02911.1 | 1448 | 142461 | 1.00E-150 | 310  | 321  | 96 +  | 1129 | 1447 | 139387 | 139706 |

|         |                |      |        |           |      |      |       |     |      |        |        |
|---------|----------------|------|--------|-----------|------|------|-------|-----|------|--------|--------|
| UN51206 | Rsa1.0.00129.1 | 1322 | 126831 | 0         | 850  | 871  | 97 -  | 197 | 1065 | 30505  | 31365  |
| UN51207 | Rsa1.0.00248.1 | 1086 | 163568 | 0         | 1068 | 1086 | 98 +  | 1   | 1086 | 23383  | 24468  |
| UN51208 | Rsa1.0.00087.1 | 1647 | 761073 | 0         | 1155 | 1177 | 98 +  | 9   | 1184 | 325340 | 326510 |
| UN51209 | Rsa1.0.00920.1 | 855  | 601703 | 0         | 819  | 852  | 96 -  | 3   | 854  | 13747  | 14597  |
| UN51210 | Rsa1.0.00065.1 | 690  | 454616 | 0         | 348  | 356  | 97 -  | 334 | 689  | 452924 | 453279 |
| UN51211 | Rsa1.0.00101.1 | 975  | 267193 | 0         | 676  | 698  | 96 -  | 278 | 975  | 253265 | 253959 |
| UN51212 | Rsa1.0.16046.1 | 1393 | 2307   | 0         | 790  | 892  | 88 +  | 416 | 1306 | 172    | 1063   |
| UN51213 | Rsa1.0.04282.1 | 585  | 18100  | 0         | 411  | 432  | 95 -  | 152 | 583  | 12180  | 12609  |
| UN51214 | Rsa1.0.04862.1 | 760  | 15688  | 0         | 715  | 746  | 95 +  | 23  | 760  | 5056   | 5796   |
| UN51215 | Rsa1.0.00015.1 | 1082 | 561803 | 1.00E-135 | 244  | 244  | 100 + | 49  | 292  | 527851 | 528094 |
| UN51216 | Rsa1.0.05018.1 | 669  | 15118  | 0         | 667  | 667  | 100 + | 1   | 667  | 6743   | 7409   |
| UN51217 | Rsa1.0.00179.1 | 819  | 393324 | 1.00E-123 | 239  | 244  | 97 -  | 455 | 698  | 49376  | 49619  |
| UN51218 | Rsa1.0.01084.1 | 776  | 54605  | 0         | 761  | 777  | 97 -  | 3   | 774  | 44683  | 45455  |
| UN51219 | Rsa1.0.00001.1 | 823  | 363028 | 0         | 551  | 581  | 94 +  | 3   | 579  | 163273 | 163851 |
| UN51220 | Rsa1.0.00690.1 | 1237 | 140527 | 0         | 492  | 526  | 93 +  | 642 | 1163 | 12785  | 13297  |
| UN51221 | Rsa1.0.11621.1 | 739  | 5457   | 0         | 732  | 752  | 97 +  | 1   | 739  | 2607   | 3358   |
| UN51222 | Rsa1.0.00641.1 | 807  | 208241 | 8.00E-51  | 220  | 255  | 86 -  | 264 | 517  | 205238 | 205490 |
| UN51223 | Rsa1.0.00886.1 | 548  | 167350 | 5.00E-82  | 185  | 195  | 94 +  | 3   | 197  | 8161   | 8355   |
| UN51224 | Rsa1.0.01100.1 | 831  | 54113  | 1.00E-148 | 290  | 296  | 97 +  | 63  | 356  | 313    | 606    |
| UN51225 | Rsa1.0.01243.1 | 1257 | 50061  | 0         | 423  | 434  | 97 -  | 155 | 585  | 33434  | 33867  |
| UN51226 | Rsa1.0.00124.1 | 535  | 262503 | 0         | 532  | 533  | 99 -  | 2   | 534  | 159701 | 160233 |
| UN51227 | Rsa1.0.01328.1 | 855  | 48021  | 0         | 853  | 856  | 99 -  | 1   | 855  | 5199   | 6052   |
| UN51228 | Rsa1.0.01242.1 | 1176 | 50066  | 2.00E-64  | 152  | 158  | 96 +  | 1   | 158  | 11914  | 12069  |
| UN51229 | Rsa1.0.00570.1 | 1745 | 75002  | 0         | 995  | 1009 | 98 -  | 2   | 1007 | 72668  | 73675  |
| UN51230 | Rsa1.0.04615.1 | 847  | 16640  | 1.00E-114 | 269  | 293  | 91 +  | 81  | 351  | 5013   | 5305   |
| UN51231 | Rsa1.0.00625.1 | 760  | 71672  | 0         | 756  | 759  | 99 -  | 2   | 760  | 27296  | 28053  |
| UN51232 | Rsa1.0.00290.1 | 1137 | 225096 | 0         | 957  | 1004 | 95 -  | 27  | 1028 | 216567 | 217552 |
| UN51233 | Rsa1.0.37069.1 | 418  | 608    | 1.00E-111 | 267  | 289  | 92 +  | 1   | 277  | 325    | 608    |
| UN51234 | Rsa1.0.03169.1 | 972  | 24826  | 0         | 609  | 642  | 94 +  | 5   | 638  | 2671   | 3292   |
| UN51235 | Rsa1.0.05123.1 | 662  | 14790  | 0         | 647  | 658  | 98 +  | 7   | 662  | 6406   | 7060   |
| UN51236 | Rsa1.0.03785.1 | 892  | 20883  | 1.00E-159 | 360  | 389  | 92 -  | 4   | 380  | 6045   | 6424   |
| UN51237 | Rsa1.0.02131.1 | 1327 | 34754  | 0         | 757  | 758  | 99 +  | 1   | 757  | 6055   | 6812   |
| UN51238 | Rsa1.0.00042.1 | 1205 | 171507 | 0         | 852  | 853  | 99 -  | 6   | 858  | 161589 | 162441 |
| UN51239 | Rsa1.0.03766.1 | 694  | 20970  | 0         | 444  | 469  | 94 +  | 160 | 628  | 13393  | 13849  |
| UN51240 | Rsa1.0.00081.1 | 544  | 143261 | 0         | 493  | 530  | 93 +  | 11  | 532  | 71523  | 72045  |
| UN51241 | Rsa1.0.00067.1 | 1272 | 415055 | 0         | 893  | 927  | 96 +  | 359 | 1272 | 30786  | 31710  |
| UN51242 | Rsa1.0.03037.1 | 1234 | 25825  | 0         | 536  | 546  | 98 +  | 1   | 545  | 24306  | 24846  |
| UN51243 | Rsa1.0.02200.1 | 1049 | 33981  | 1.00E-110 | 227  | 235  | 96 +  | 3   | 237  | 8851   | 9085   |
| UN51244 | Rsa1.0.06952.1 | 800  | 10118  | 1.00E-156 | 313  | 324  | 96 -  | 274 | 597  | 640    | 963    |

|         |                |      |        |           |      |      |       |      |      |        |        |
|---------|----------------|------|--------|-----------|------|------|-------|------|------|--------|--------|
| UN51245 | Rsa1.0_04258.1 | 762  | 18254  | 0         | 414  | 416  | 99 -  | 2    | 417  | 4410   | 4825   |
| UN51246 | Rsa1.0_06247.1 | 941  | 11395  | 1.00E-155 | 403  | 444  | 90 +  | 499  | 941  | 7116   | 7532   |
| UN51247 | Rsa1.0_00162.1 | 1094 | 239935 | 0         | 444  | 476  | 93 -  | 502  | 977  | 63972  | 64443  |
| UN51248 | Rsa1.0_00044.1 | 675  | 271658 | 0         | 665  | 671  | 99 -  | 4    | 674  | 51306  | 51976  |
| UN51249 | Rsa1.0_00009.1 | 902  | 232558 | 0         | 481  | 481  | 100 + | 421  | 901  | 71154  | 71634  |
| UN51250 | Rsa1.0_03878.1 | 1091 | 20305  | 0         | 374  | 376  | 99 -  | 713  | 1088 | 11823  | 12198  |
| UN51251 | Rsa1.0_04625.1 | 1354 | 16613  | 0         | 599  | 615  | 97 -  | 256  | 870  | 14784  | 15398  |
| UN51252 | Rsa1.0_00412.1 | 1142 | 86935  | 1.00E-142 | 320  | 339  | 94 +  | 807  | 1142 | 49294  | 49631  |
| UN51253 | Rsa1.0_00722.1 | 1483 | 66840  | 0         | 1032 | 1048 | 98 +  | 330  | 1374 | 15919  | 16966  |
| UN51254 | Rsa1.0_00355.1 | 992  | 92038  | 1.00E-178 | 411  | 438  | 93 -  | 1    | 431  | 64491  | 64923  |
| UN51255 | Rsa1.0_00067.1 | 763  | 415055 | 0         | 760  | 760  | 100 + | 2    | 761  | 353597 | 354356 |
| UN51256 | Rsa1.0_23641.1 | 1232 | 1035   | 1.00E-160 | 289  | 290  | 99 +  | 812  | 1101 | 746    | 1035   |
| UN51257 | Rsa1.0_00211.1 | 1386 | 228189 | 0         | 711  | 751  | 94 -  | 247  | 997  | 129967 | 130714 |
| UN51258 | Rsa1.0_00260.1 | 3554 | 102021 | 0         | 1485 | 1562 | 95 -  | 1980 | 3526 | 26039  | 27599  |
| UN51259 | Rsa1.0_00283.1 | 1085 | 183797 | 1.00E-148 | 348  | 373  | 93 -  | 714  | 1083 | 10947  | 11313  |
| UN51260 | Rsa1.0_06675.1 | 810  | 10561  | 0         | 533  | 559  | 95 +  | 1    | 557  | 9544   | 10101  |
| UN51261 | Rsa1.0_06070.1 | 1554 | 11813  | 1.00E-145 | 273  | 277  | 98 +  | 1278 | 1554 | 1253   | 1529   |
| UN51262 | Rsa1.0_00153.1 | 1026 | 192931 | 1.00E-138 | 352  | 386  | 91 +  | 641  | 1026 | 87766  | 88136  |
| UN51263 | Rsa1.0_00164.1 | 1094 | 116642 | 0         | 1003 | 1021 | 98 +  | 2    | 1022 | 70421  | 71432  |
| UN51264 | Rsa1.0_00060.1 | 776  | 502678 | 0         | 770  | 774  | 99 +  | 3    | 776  | 120737 | 121510 |
| UN51265 | Rsa1.0_00385.1 | 492  | 89160  | 1.00E-139 | 251  | 251  | 100 - | 241  | 491  | 30396  | 30646  |
| UN51266 | Rsa1.0_00642.1 | 1276 | 201230 | 0         | 398  | 412  | 96 -  | 2    | 410  | 161688 | 162095 |
| UN51267 | Rsa1.0_01704.1 | 645  | 40711  | 1.00E-119 | 232  | 236  | 98 -  | 246  | 478  | 4393   | 4628   |
| UN51268 | Rsa1.0_05523.1 | 903  | 13438  | 0         | 735  | 785  | 93 +  | 1    | 762  | 8986   | 9769   |
| UN51269 | Rsa1.0_00192.1 | 628  | 278200 | 1.00E-130 | 339  | 378  | 89 +  | 274  | 627  | 19564  | 19941  |
| UN51270 | Rsa1.0_02373.1 | 1443 | 32048  | 0         | 537  | 586  | 91 -  | 866  | 1439 | 8540   | 9119   |
| UN51271 | Rsa1.0_01522.1 | 1130 | 157436 | 0         | 803  | 810  | 99 -  | 321  | 1130 | 3042   | 3850   |
| UN51272 | Rsa1.0_01031.1 | 1080 | 56236  | 1.00E-149 | 268  | 268  | 100 + | 670  | 937  | 18106  | 18373  |
| UN51273 | Rsa1.0_01783.1 | 738  | 39383  | 1.00E-162 | 355  | 378  | 93 -  | 145  | 522  | 15244  | 15612  |
| UN51274 | Rsa1.0_01094.1 | 1100 | 167285 | 0         | 763  | 777  | 98 +  | 325  | 1098 | 49165  | 49939  |
| UN51275 | Rsa1.0_00597.1 | 811  | 73445  | 0         | 673  | 694  | 96 -  | 118  | 811  | 10613  | 11306  |
| UN51276 | Rsa1.0_00501.1 | 981  | 79545  | 0         | 568  | 606  | 93 +  | 136  | 720  | 24411  | 25010  |
| UN51277 | Rsa1.0_02584.1 | 853  | 29877  | 0         | 422  | 442  | 95 -  | 4    | 441  | 806    | 1247   |
| UN51278 | Rsa1.0_00944.1 | 1227 | 58733  | 1.00E-111 | 235  | 244  | 96 +  | 1    | 243  | 58241  | 58484  |
| UN51279 | Rsa1.0_02548.1 | 1546 | 30228  | 0         | 901  | 905  | 99 +  | 642  | 1546 | 10107  | 11011  |
| UN51280 | Rsa1.0_01937.1 | 1200 | 37147  | 1.00E-161 | 337  | 351  | 96 +  | 852  | 1200 | 14633  | 14981  |
| UN51281 | Rsa1.0_01487.1 | 1475 | 44784  | 0         | 561  | 564  | 99 -  | 913  | 1475 | 31444  | 32007  |
| UN51282 | Rsa1.0_00224.1 | 464  | 327530 | 1.00E-100 | 263  | 290  | 90 +  | 118  | 405  | 221387 | 221660 |
| UN51283 | Rsa1.0_00099.1 | 961  | 159619 | 0         | 798  | 835  | 95 -  | 1    | 829  | 51342  | 52176  |

|         |                |      |        |           |      |      |       |      |      |        |        |
|---------|----------------|------|--------|-----------|------|------|-------|------|------|--------|--------|
| UN51284 | Rsa1.0.00166.1 | 730  | 240912 | 0         | 494  | 512  | 96 -  | 219  | 730  | 222151 | 222662 |
| UN51285 | Rsa1.0.04625.1 | 627  | 16613  | 0         | 417  | 418  | 99 -  | 208  | 624  | 4603   | 5020   |
| UN51286 | Rsa1.0.00108.1 | 1149 | 478491 | 1.00E-168 | 364  | 384  | 94 -  | 766  | 1146 | 416511 | 416891 |
| UN51287 | Rsa1.0.00484.1 | 958  | 203294 | 0         | 532  | 544  | 97 -  | 415  | 958  | 49804  | 50347  |
| UN51288 | Rsa1.0.01328.1 | 1515 | 48021  | 0         | 341  | 344  | 99 +  | 1171 | 1514 | 17793  | 18134  |
| UN51289 | Rsa1.0.00070.1 | 706  | 150321 | 0         | 419  | 433  | 96 -  | 1    | 432  | 55838  | 56270  |
| UN51290 | Rsa1.0.03309.1 | 670  | 23852  | 1.00E-159 | 312  | 321  | 97 -  | 4    | 324  | 13208  | 13528  |
| UN51291 | Rsa1.0.01026.1 | 1068 | 171624 | 1.00E-136 | 256  | 258  | 99 +  | 1    | 257  | 30330  | 30587  |
| UN51292 | Rsa1.0.00975.1 | 1375 | 57865  | 0         | 590  | 613  | 96 -  | 763  | 1373 | 5667   | 6270   |
| UN51293 | Rsa1.0.00589.1 | 1151 | 209965 | 1.00E-99  | 254  | 277  | 91 +  | 501  | 777  | 189295 | 189571 |
| UN51294 | Rsa1.0.09577.1 | 1257 | 6275   | 0         | 628  | 655  | 95 +  | 413  | 1061 | 1281   | 1935   |
| UN51295 | Rsa1.0.02987.1 | 800  | 26196  | 0         | 359  | 371  | 96 +  | 166  | 536  | 22775  | 23145  |
| UN51296 | Rsa1.0.00092.1 | 804  | 659932 | 0         | 801  | 804  | 99 -  | 1    | 804  | 655777 | 656580 |
| UN51297 | Rsa1.0.05473.1 | 653  | 13628  | 0         | 630  | 660  | 95 -  | 1    | 648  | 11399  | 12058  |
| UN51298 | Rsa1.0.00234.1 | 678  | 197060 | 0         | 630  | 675  | 93 -  | 1    | 675  | 29670  | 30326  |
| UN51299 | Rsa1.0.05596.1 | 671  | 137912 | 1.00E-144 | 317  | 333  | 95 -  | 2    | 326  | 136411 | 136741 |
| UN51300 | Rsa1.0.00088.1 | 762  | 141341 | 1.00E-135 | 303  | 324  | 93 -  | 1    | 306  | 9534   | 9856   |
| UN51301 | Rsa1.0.37310.1 | 1458 | 604    | 1.00E-174 | 322  | 326  | 98 -  | 1133 | 1458 | 215    | 540    |
| UN51302 | Rsa1.0.04846.1 | 966  | 15739  | 0         | 501  | 525  | 95 +  | 440  | 962  | 13280  | 13801  |
| UN51303 | Rsa1.0.02867.1 | 654  | 27121  | 0         | 635  | 656  | 96 +  | 3    | 654  | 8500   | 9155   |
| UN51304 | Rsa1.0.01876.1 | 751  | 37800  | 0         | 561  | 566  | 99 +  | 185  | 750  | 20518  | 21083  |
| UN51305 | Rsa1.0.00092.1 | 721  | 659932 | 0         | 418  | 445  | 93 -  | 263  | 705  | 242851 | 243294 |
| UN51306 | Rsa1.0.01843.1 | 679  | 265131 | 1.00E-168 | 385  | 414  | 92 -  | 3    | 410  | 25363  | 25776  |
| UN51307 | Rsa1.0.01048.1 | 513  | 55684  | 0         | 385  | 386  | 99 +  | 128  | 513  | 31549  | 31934  |
| UN51308 | Rsa1.0.08558.1 | 822  | 7198   | 0         | 511  | 512  | 99 -  | 311  | 822  | 383    | 894    |
| UN51309 | Rsa1.0.00944.1 | 1061 | 58733  | 1.00E-151 | 272  | 272  | 100 - | 790  | 1061 | 58213  | 58484  |
| UN51310 | Rsa1.0.01536.1 | 919  | 43747  | 0         | 417  | 435  | 95 +  | 194  | 628  | 18915  | 19349  |
| UN51311 | Rsa1.0.14001.1 | 895  | 3933   | 0         | 398  | 413  | 96 -  | 450  | 862  | 1399   | 1810   |
| UN51312 | Rsa1.0.02950.1 | 1144 | 26506  | 0         | 481  | 481  | 100 - | 11   | 491  | 7276   | 7756   |
| UN51313 | Rsa1.0.00012.1 | 863  | 222148 | 0         | 325  | 325  | 100 + | 539  | 863  | 69957  | 70281  |
| UN51314 | Rsa1.0.07446.1 | 941  | 9384   | 0         | 368  | 373  | 98 -  | 4    | 376  | 1803   | 2175   |
| UN51315 | Rsa1.0.00056.1 | 967  | 332604 | 0         | 501  | 502  | 99 -  | 1    | 502  | 96611  | 97112  |
| UN51316 | Rsa1.0.00545.1 | 927  | 189649 | 0         | 410  | 414  | 99 +  | 511  | 924  | 32439  | 32852  |
| UN51317 | Rsa1.0.02068.1 | 508  | 35432  | 1.00E-127 | 230  | 230  | 100 + | 1    | 230  | 8747   | 8976   |
| UN51318 | Rsa1.0.01986.1 | 443  | 36489  | 1.00E-179 | 352  | 361  | 97 +  | 85   | 443  | 23647  | 24006  |
| UN51319 | Rsa1.0.01373.1 | 746  | 47052  | 0         | 430  | 430  | 100 + | 316  | 745  | 21559  | 21988  |
| UN51320 | Rsa1.0.00240.1 | 1016 | 104175 | 0         | 589  | 592  | 99 -  | 426  | 1016 | 48201  | 48791  |
| UN51321 | Rsa1.0.11525.1 | 1619 | 5479   | 0         | 1044 | 1046 | 99 +  | 49   | 1094 | 4434   | 5479   |
| UN51322 | Rsa1.0.00886.1 | 695  | 167350 | 1.00E-109 | 231  | 240  | 96 -  | 74   | 311  | 141325 | 141564 |

|         |                |      |        |           |     |     |       |     |      |        |        |
|---------|----------------|------|--------|-----------|-----|-----|-------|-----|------|--------|--------|
| UN51323 | Rsa1.0.07519.1 | 1124 | 9209   | 1.00E-120 | 226 | 228 | 99 +  | 873 | 1100 | 8204   | 8431   |
| UN51324 | Rsa1.0.00033.1 | 888  | 515811 | 5.00E-80  | 257 | 292 | 88 +  | 600 | 883  | 462808 | 463082 |
| UN51325 | Rsa1.0.00566.1 | 1716 | 75325  | 1.00E-180 | 433 | 465 | 93 +  | 828 | 1291 | 24399  | 24860  |
| UN51326 | Rsa1.0.07534.1 | 740  | 9184   | 1.00E-166 | 343 | 357 | 96 -  | 378 | 733  | 7358   | 7714   |
| UN51327 | Rsa1.0_15114.1 | 712  | 2815   | 0         | 436 | 448 | 97 +  | 4   | 451  | 2188   | 2624   |
| UN51328 | Rsa1.0_00744.1 | 663  | 66084  | 1.00E-119 | 274 | 293 | 93 -  | 378 | 660  | 18750  | 19041  |
| UN51329 | Rsa1.0.00663.1 | 318  | 164969 | 1.00E-106 | 286 | 309 | 92 +  | 7   | 301  | 120787 | 121091 |
| UN51330 | Rsa1.0.31664.1 | 538  | 722    | 1.00E-109 | 203 | 204 | 99 +  | 41  | 244  | 514    | 717    |
| UN51331 | Rsa1.0.00086.1 | 536  | 439854 | 1.00E-177 | 346 | 353 | 98 -  | 171 | 521  | 342254 | 342604 |
| UN51332 | Rsa1.0.01410.1 | 688  | 46345  | 1.00E-178 | 331 | 336 | 98 +  | 115 | 450  | 33684  | 34019  |
| UN51333 | Rsa1.0.00270.1 | 356  | 101236 | 1.00E-117 | 330 | 362 | 91 -  | 2   | 355  | 25068  | 25422  |
| UN51334 | Rsa1.0.00374.1 | 1079 | 165738 | 0         | 574 | 574 | 100 - | 3   | 576  | 95095  | 95668  |
| UN51335 | Rsa1.0.01236.1 | 742  | 50156  | 1.00E-141 | 263 | 266 | 98 -  | 477 | 742  | 1237   | 1502   |
| UN51336 | Rsa1.0.01717.1 | 794  | 143162 | 1.00E-137 | 269 | 276 | 97 -  | 140 | 415  | 15704  | 15979  |
| UN51337 | Rsa1.0.02766.1 | 926  | 28128  | 0         | 687 | 706 | 97 -  | 1   | 704  | 17310  | 18009  |
| UN51338 | Rsa1.0.62464.1 | 1262 | 367    | 1.00E-172 | 322 | 327 | 98 +  | 55  | 381  | 1      | 327    |
| UN51339 | Rsa1.0.00301.1 | 704  | 365315 | 1.00E-177 | 342 | 351 | 97 -  | 5   | 355  | 346684 | 347034 |
| UN51340 | Rsa1.0.01762.1 | 623  | 39682  | 0         | 462 | 480 | 96 +  | 137 | 616  | 1493   | 1972   |
| UN51341 | Rsa1.0.00131.1 | 433  | 432233 | 1.00E-94  | 210 | 220 | 95 -  | 18  | 236  | 11596  | 11815  |
| UN51342 | Rsa1.0.01136.1 | 367  | 52724  | 9.00E-52  | 174 | 197 | 88 +  | 185 | 367  | 14179  | 14375  |
| UN51343 | Rsa1.0.00179.1 | 649  | 393324 | 1.00E-86  | 256 | 283 | 90 -  | 3   | 275  | 250660 | 250934 |
| UN51344 | Rsa1.0.01263.1 | 463  | 49703  | 2.00E-80  | 158 | 160 | 98 +  | 67  | 226  | 39811  | 39970  |
| UN51345 | Rsa1.0_14535.1 | 616  | 3289   | 0         | 594 | 613 | 96 -  | 1   | 602  | 477    | 1089   |
| UN51346 | Rsa1.0.00006.1 | 635  | 396176 | 1.00E-168 | 374 | 395 | 94 +  | 3   | 395  | 307719 | 308106 |
| UN51347 | Rsa1.0.00194.1 | 658  | 110851 | 1.00E-142 | 297 | 308 | 96 -  | 2   | 308  | 42338  | 42644  |
| UN51348 | Rsa1.0.02914.1 | 491  | 26815  | 1.00E-172 | 344 | 354 | 97 -  | 139 | 490  | 26114  | 26467  |
| UN51349 | Rsa1.0.05599.1 | 477  | 143653 | 3.00E-83  | 189 | 197 | 95 +  | 283 | 477  | 139259 | 139455 |
| UN51350 | Rsa1.0.03610.1 | 1003 | 21797  | 1.00E-166 | 314 | 320 | 98 -  | 440 | 759  | 15982  | 16301  |
| UN51351 | Rsa1.0.03263.1 | 974  | 24268  | 0         | 468 | 468 | 100 - | 421 | 888  | 3646   | 4113   |
| UN51352 | Rsa1.0.06675.1 | 632  | 10561  | 0         | 465 | 490 | 94 +  | 2   | 489  | 9613   | 10101  |
| UN51353 | Rsa1.0.00608.1 | 1042 | 172672 | 0         | 722 | 801 | 90 -  | 22  | 799  | 3169   | 3956   |
| UN51354 | Rsa1.0.02113.1 | 722  | 34890  | 0         | 586 | 591 | 99 -  | 5   | 595  | 22932  | 23522  |
| UN51355 | Rsa1.0.03100.1 | 868  | 25411  | 0         | 436 | 474 | 91 +  | 196 | 648  | 19710  | 20183  |
| UN51356 | Rsa1.0.00113.1 | 606  | 131574 | 1.00E-126 | 268 | 281 | 95 -  | 325 | 605  | 59767  | 60047  |
| UN51357 | Rsa1.0.05277.1 | 428  | 14284  | 4.00E-85  | 201 | 213 | 94 -  | 26  | 237  | 8545   | 8753   |
| UN51358 | Rsa1.0.00459.1 | 663  | 82580  | 1.00E-137 | 260 | 264 | 98 +  | 255 | 518  | 57149  | 57412  |
| UN51359 | Rsa1.0.00524.1 | 536  | 169613 | 1.00E-135 | 336 | 366 | 91 +  | 18  | 383  | 161744 | 162096 |
| UN51360 | Rsa1.0.05653.1 | 538  | 13043  | 0         | 508 | 532 | 95 -  | 4   | 533  | 10815  | 11346  |
| UN51361 | Rsa1.0.00184.1 | 622  | 218748 | 1.00E-110 | 301 | 332 | 90 +  | 4   | 316  | 213949 | 214279 |

|         |                |      |        |           |     |     |       |     |      |        |        |
|---------|----------------|------|--------|-----------|-----|-----|-------|-----|------|--------|--------|
| UN51362 | Rsa1.0.00558.1 | 882  | 75819  | 0         | 611 | 624 | 97 -  | 259 | 882  | 28200  | 28823  |
| UN51363 | Rsa1.0.00002.1 | 931  | 601661 | 0         | 396 | 398 | 99 +  | 4   | 400  | 140281 | 140677 |
| UN51364 | Rsa1.0.08338.1 | 347  | 7511   | 1.00E-121 | 289 | 315 | 91 +  | 1   | 315  | 493    | 787    |
| UN51365 | Rsa1.0.01296.1 | 647  | 49035  | 3.00E-77  | 213 | 231 | 92 -  | 1   | 218  | 23171  | 23401  |
| UN51366 | Rsa1.0.01843.1 | 666  | 265131 | 1.00E-141 | 295 | 308 | 95 -  | 288 | 595  | 9831   | 10135  |
| UN51367 | Rsa1.0.01516.1 | 400  | 44196  | 1.00E-112 | 257 | 273 | 94 +  | 48  | 319  | 24176  | 24448  |
| UN51368 | Rsa1.0.00380.1 | 470  | 89748  | 1.00E-124 | 328 | 362 | 90 -  | 1   | 359  | 88066  | 88406  |
| UN51369 | Rsa1.0.00008.1 | 475  | 358124 | 1.00E-162 | 357 | 379 | 94 -  | 6   | 381  | 323035 | 323413 |
| UN51370 | Rsa1.0.01936.1 | 514  | 37151  | 0         | 490 | 519 | 94 +  | 1   | 512  | 18253  | 18769  |
| UN51371 | Rsa1.0.03088.1 | 477  | 25476  | 1.00E-176 | 353 | 364 | 96 -  | 1   | 362  | 500    | 863    |
| UN51372 | Rsa1.0.02212.1 | 569  | 33840  | 2.33E-156 | 269 | 271 | 99 -  | 297 | 567  | 27454  | 27724  |
| UN51373 | Rsa1.0.00026.1 | 585  | 327835 | 2.00E-87  | 311 | 351 | 88 -  | 1   | 330  | 174424 | 174772 |
| UN51374 | Rsa1.0.00192.1 | 568  | 278200 | 0         | 361 | 363 | 99 -  | 205 | 567  | 26723  | 27085  |
| UN51375 | Rsa1.0.38122.1 | 721  | 591    | 1.00E-107 | 201 | 202 | 99 +  | 1   | 202  | 41     | 242    |
| UN51376 | Rsa1.0.00066.1 | 598  | 152418 | 0         | 483 | 504 | 95 -  | 2   | 503  | 63479  | 63982  |
| UN51377 | Rsa1.0.00220.1 | 556  | 192936 | 0         | 421 | 442 | 95 -  | 1   | 433  | 4428   | 4868   |
| UN51378 | Rsa1.0.00092.1 | 350  | 659932 | 9.00E-61  | 191 | 210 | 90 +  | 5   | 205  | 190130 | 190338 |
| UN51379 | Rsa1.0.04512.1 | 417  | 17031  | 1.00E-109 | 216 | 221 | 97 +  | 91  | 311  | 12723  | 12943  |
| UN51380 | Rsa1.0.01101.1 | 571  | 54031  | 1.00E-153 | 316 | 330 | 95 -  | 17  | 346  | 14928  | 15257  |
| UN51381 | Rsa1.0.00467.1 | 657  | 156542 | 1.00E-119 | 276 | 293 | 94 -  | 365 | 657  | 10784  | 11068  |
| UN51382 | Rsa1.0.00134.1 | 417  | 390219 | 0         | 354 | 357 | 99 -  | 61  | 417  | 21813  | 22169  |
| UN51383 | Rsa1.0.02456.1 | 701  | 31222  | 1.00E-131 | 245 | 246 | 99 -  | 457 | 701  | 23757  | 24002  |
| UN51384 | Rsa1.0.00344.1 | 581  | 191774 | 1.00E-109 | 213 | 217 | 98 -  | 364 | 580  | 156245 | 156461 |
| UN51385 | Rsa1.0.01215.1 | 1063 | 166813 | 0         | 379 | 392 | 96 +  | 683 | 1063 | 10584  | 10975  |
| UN51386 | Rsa1.0.00040.1 | 1072 | 324196 | 0         | 728 | 778 | 93 +  | 8   | 767  | 296489 | 297259 |
| UN51387 | Rsa1.0.68364.1 | 549  | 335    | 3.00E-92  | 175 | 176 | 99 -  | 1   | 176  | 89     | 264    |
| UN51388 | Rsa1.0.66369.1 | 506  | 345    | 1.00E-116 | 256 | 268 | 95 +  | 233 | 499  | 50     | 315    |
| UN51389 | Rsa1.0.03826.1 | 552  | 20614  | 0         | 510 | 516 | 98 +  | 36  | 551  | 3495   | 4009   |
| UN51390 | Rsa1.0.13633.1 | 579  | 4605   | 1.00E-134 | 243 | 243 | 100 - | 335 | 577  | 1116   | 1358   |
| UN51391 | Rsa1.0.15301.1 | 644  | 2703   | 1.00E-174 | 419 | 450 | 93 +  | 1   | 448  | 787    | 1224   |
| UN51392 | Rsa1.0.27069.1 | 397  | 867    | 1.00E-171 | 338 | 348 | 97 -  | 2   | 342  | 31     | 378    |
| UN51393 | Rsa1.0.05638.1 | 496  | 13098  | 0         | 469 | 494 | 94 +  | 5   | 494  | 4554   | 5047   |
| UN51394 | Rsa1.0.00016.1 | 1182 | 831256 | 1.00E-158 | 310 | 318 | 97 -  | 290 | 604  | 429113 | 429430 |
| UN51395 | Rsa1.0.00119.1 | 626  | 467509 | 0         | 474 | 491 | 96 -  | 1   | 488  | 374988 | 375478 |
| UN51396 | Rsa1.0.00602.1 | 668  | 73302  | 0         | 591 | 605 | 97 -  | 3   | 606  | 29626  | 30229  |
| UN51397 | Rsa1.0.00632.1 | 582  | 183777 | 1.00E-137 | 275 | 283 | 97 +  | 3   | 284  | 149156 | 149438 |
| UN51398 | Rsa1.0.00305.1 | 690  | 97308  | 1.00E-148 | 272 | 274 | 99 +  | 417 | 690  | 22217  | 22490  |
| UN51399 | Rsa1.0.02805.1 | 1280 | 27698  | 0         | 408 | 409 | 99 -  | 3   | 411  | 10386  | 10794  |
| UN51400 | Rsa1.0.03436.1 | 481  | 22958  | 1.00E-137 | 256 | 259 | 98 +  | 93  | 351  | 474    | 732    |



|         |                |      |        |           |     |     |       |     |      |        |        |
|---------|----------------|------|--------|-----------|-----|-----|-------|-----|------|--------|--------|
| UN51401 | Rsa1.0.00967.1 | 808  | 58049  | 0         | 787 | 800 | 98 -  | 3   | 792  | 4820   | 5618   |
| UN51402 | Rsa1.0.00015.1 | 1023 | 561803 | 1.00E-158 | 417 | 458 | 91 -  | 31  | 480  | 526505 | 526940 |
| UN51403 | Rsa1.0.01238.1 | 793  | 50120  | 0         | 615 | 650 | 94 -  | 159 | 793  | 46732  | 47381  |
| UN51404 | Rsa1.0.07428.1 | 365  | 9411   | 1.00E-106 | 196 | 196 | 100 - | 1   | 196  | 4590   | 4785   |
| UN51405 | Rsa1.0.00253.1 | 1213 | 231292 | 0         | 340 | 342 | 99 -  | 871 | 1212 | 89860  | 90201  |
| UN51406 | Rsa1.0.01352.1 | 468  | 47443  | 1.00E-130 | 235 | 235 | 100 - | 1   | 235  | 35006  | 35240  |
| UN51407 | Rsa1.0.05684.1 | 670  | 12943  | 1.00E-158 | 283 | 283 | 100 + | 388 | 670  | 12129  | 12411  |
| UN51408 | Rsa1.0.03605.1 | 935  | 21827  | 1.00E-167 | 341 | 353 | 96 +  | 369 | 718  | 20342  | 20693  |
| UN51409 | Rsa1.0.01190.1 | 592  | 194501 | 1.00E-132 | 309 | 331 | 93 -  | 261 | 590  | 157991 | 158321 |
| UN51410 | Rsa1.0.03563.1 | 1218 | 22070  | 0         | 604 | 604 | 100 - | 614 | 1217 | 15492  | 16095  |
| UN51411 | Rsa1.0.00104.1 | 549  | 368722 | 1.00E-123 | 230 | 232 | 99 +  | 205 | 436  | 211493 | 211724 |
| UN51412 | Rsa1.0.00663.1 | 1010 | 164969 | 1.00E-157 | 282 | 282 | 100 - | 1   | 282  | 146843 | 147124 |
| UN51413 | Rsa1.0.01806.1 | 551  | 39021  | 8.00E-84  | 158 | 158 | 100 - | 1   | 158  | 12836  | 12993  |
| UN51414 | Rsa1.0.00738.1 | 963  | 66322  | 1.00E-126 | 302 | 325 | 92 -  | 642 | 963  | 27044  | 27359  |
| UN51415 | Rsa1.0.00203.1 | 1297 | 109129 | 0         | 864 | 878 | 98 +  | 10  | 887  | 91211  | 92088  |
| UN51416 | Rsa1.0.01185.1 | 665  | 149842 | 1.00E-174 | 309 | 309 | 100 + | 357 | 665  | 11446  | 11754  |
| UN51417 | Rsa1.0.00592.1 | 2152 | 73788  | 0         | 932 | 933 | 99 -  | 3   | 935  | 20791  | 21723  |
| UN51418 | Rsa1.0.13911.1 | 553  | 4104   | 1.00E-169 | 304 | 305 | 99 -  | 248 | 552  | 2589   | 2893   |
| UN51419 | Rsa1.0.00512.1 | 829  | 200277 | 1.00E-153 | 325 | 340 | 95 -  | 480 | 815  | 18465  | 18804  |
| UN51420 | Rsa1.0.01071.1 | 717  | 166914 | 0         | 436 | 449 | 97 -  | 1   | 447  | 24488  | 24933  |
| UN51421 | Rsa1.0.01943.1 | 850  | 37042  | 8.00E-17  | 94  | 110 | 85 +  | 301 | 410  | 5199   | 5308   |
| UN51422 | Rsa1.0.02015.1 | 921  | 36008  | 1.00E-155 | 296 | 301 | 98 +  | 623 | 921  | 24369  | 24669  |
| UN51423 | Rsa1.0.00184.1 | 995  | 218748 | 0         | 666 | 685 | 97 -  | 309 | 992  | 211005 | 211686 |
| UN51424 | Rsa1.0.00473.1 | 933  | 212204 | 0         | 551 | 570 | 96 +  | 367 | 933  | 20772  | 21341  |
| UN51425 | Rsa1.0.00145.1 | 883  | 261008 | 1.00E-148 | 316 | 331 | 95 +  | 4   | 329  | 61405  | 61735  |
| UN51426 | Rsa1.0.03643.1 | 864  | 21607  | 0         | 655 | 670 | 97 -  | 1   | 670  | 5222   | 5890   |
| UN51427 | Rsa1.0.00003.1 | 718  | 340054 | 0         | 704 | 707 | 99 +  | 10  | 716  | 136742 | 137446 |
| UN51428 | Rsa1.0.00608.1 | 973  | 172672 | 0         | 593 | 620 | 95 -  | 73  | 685  | 3338   | 3956   |
| UN51429 | Rsa1.0.01009.1 | 681  | 56922  | 1.00E-147 | 277 | 281 | 98 -  | 7   | 287  | 3612   | 3892   |
| UN51430 | Rsa1.0.01965.1 | 793  | 36698  | 1.00E-126 | 342 | 374 | 91 +  | 435 | 793  | 24177  | 24541  |
| UN51431 | Rsa1.0.00037.1 | 1338 | 307838 | 1.00E-93  | 258 | 288 | 89 -  | 3   | 275  | 150842 | 151127 |
| UN51432 | Rsa1.0.00068.1 | 777  | 151813 | 0         | 495 | 524 | 94 +  | 253 | 769  | 134543 | 135066 |
| UN51433 | Rsa1.0.02121.1 | 1150 | 34813  | 1.00E-34  | 76  | 76  | 100 + | 690 | 765  | 5656   | 5731   |
| UN51434 | Rsa1.0.02429.1 | 750  | 31527  | 0         | 497 | 542 | 91 +  | 40  | 575  | 9754   | 10295  |
| UN51435 | Rsa1.0.00353.1 | 929  | 92242  | 0         | 399 | 411 | 97 -  | 514 | 923  | 82868  | 83278  |
| UN51436 | Rsa1.0.00467.1 | 669  | 156542 | 1.00E-126 | 284 | 300 | 94 +  | 5   | 304  | 10779  | 11070  |
| UN51437 | Rsa1.0.00091.1 | 980  | 139699 | 1.00E-101 | 253 | 271 | 93 -  | 91  | 358  | 80286  | 80555  |
| UN51438 | Rsa1.0.00632.1 | 587  | 183777 | 0         | 545 | 593 | 91 -  | 1   | 587  | 11001  | 11593  |
| UN51439 | Rsa1.0.00796.1 | 611  | 63997  | 0         | 326 | 326 | 100 + | 3   | 328  | 35845  | 36170  |

|         |                |      |        |           |     |     |       |     |      |        |        |
|---------|----------------|------|--------|-----------|-----|-----|-------|-----|------|--------|--------|
| UN51440 | Rsa1.0.00782.1 | 373  | 64468  | 1.00E-158 | 306 | 313 | 97 +  | 63  | 373  | 13384  | 13696  |
| UN51441 | Rsa1.0.01101.1 | 992  | 54031  | 0         | 496 | 496 | 100 + | 497 | 992  | 20468  | 20963  |
| UN51442 | Rsa1.0.00416.1 | 984  | 86772  | 1.00E-149 | 274 | 276 | 99 +  | 707 | 982  | 41330  | 41605  |
| UN51443 | Rsa1.0.00596.1 | 1132 | 73578  | 1.00E-179 | 324 | 326 | 99 -  | 798 | 1123 | 9146   | 9471   |
| UN51444 | Rsa1.0.03099.1 | 1244 | 139424 | 1.00E-105 | 224 | 231 | 96 -  | 57  | 286  | 2121   | 2350   |
| UN51445 | Rsa1.0.02333.1 | 638  | 32431  | 1.00E-123 | 374 | 418 | 89 +  | 221 | 627  | 29979  | 30389  |
| UN51446 | Rsa1.0.00923.1 | 596  | 153678 | 0         | 580 | 590 | 98 +  | 7   | 596  | 23048  | 23636  |
| UN51447 | Rsa1.0.02003.1 | 865  | 36171  | 1.00E-162 | 305 | 309 | 98 -  | 1   | 307  | 15955  | 16263  |
| UN51448 | Rsa1.0.01835.1 | 750  | 38542  | 0         | 373 | 373 | 100 - | 378 | 750  | 21282  | 21654  |
| UN51449 | Rsa1.0.01655.1 | 559  | 41508  | 0         | 430 | 438 | 98 -  | 130 | 559  | 31076  | 31513  |
| UN51450 | Rsa1.0.00017.1 | 870  | 752458 | 0         | 416 | 444 | 93 -  | 353 | 793  | 393326 | 393760 |
| UN51451 | Rsa1.0.01949.1 | 1105 | 36960  | 1.00E-154 | 357 | 380 | 93 -  | 715 | 1090 | 20456  | 20826  |
| UN51452 | Rsa1.0.00473.1 | 1204 | 212204 | 0         | 522 | 524 | 99 +  | 681 | 1204 | 8150   | 8673   |
| UN51453 | Rsa1.0.00202.1 | 620  | 185895 | 1.00E-101 | 217 | 224 | 96 +  | 398 | 620  | 12228  | 12450  |
| UN51454 | Rsa1.0.05391.1 | 1479 | 13936  | 0         | 643 | 658 | 97 -  | 261 | 918  | 3534   | 4191   |
| UN51455 | Rsa1.0.30914.1 | 1621 | 741    | 0         | 357 | 359 | 99 -  | 748 | 1106 | 383    | 741    |
| UN51456 | Rsa1.0.01660.1 | 849  | 41400  | 1.00E-154 | 398 | 436 | 91 -  | 1   | 405  | 27246  | 27680  |
| UN51457 | Rsa1.0.00886.1 | 869  | 167350 | 1.00E-144 | 335 | 355 | 94 +  | 3   | 350  | 33036  | 33388  |
| UN51458 | Rsa1.0.19989.1 | 1050 | 1355   | 4.00E-93  | 186 | 190 | 97 +  | 726 | 915  | 16     | 205    |
| UN51459 | Rsa1.0.00087.1 | 710  | 761073 | 1.00E-134 | 256 | 259 | 98 -  | 452 | 710  | 191414 | 191671 |
| UN51460 | Rsa1.0.00016.1 | 1192 | 831256 | 1.00E-135 | 351 | 382 | 91 +  | 793 | 1169 | 663583 | 663952 |
| UN51461 | Rsa1.0.01440.1 | 1072 | 45807  | 1.00E-126 | 244 | 248 | 98 -  | 1   | 245  | 30644  | 30891  |
| UN51462 | Rsa1.0.00206.1 | 1104 | 109040 | 1.00E-162 | 311 | 317 | 98 -  | 786 | 1102 | 50381  | 50695  |
| UN51463 | Rsa1.0.19248.1 | 910  | 1457   | 0         | 351 | 358 | 98 -  | 356 | 713  | 1      | 358    |
| UN51464 | Rsa1.0.00407.1 | 1025 | 191544 | 0         | 744 | 821 | 90 -  | 201 | 995  | 155557 | 156357 |
| UN51465 | Rsa1.0.02345.1 | 796  | 32337  | 0         | 334 | 335 | 99 -  | 1   | 335  | 15392  | 15726  |
| UN51466 | Rsa1.0.00246.1 | 912  | 103541 | 1.00E-118 | 301 | 326 | 92 +  | 1   | 322  | 89280  | 89594  |
| UN51467 | Rsa1.0.00462.1 | 1230 | 82288  | 0         | 433 | 442 | 97 +  | 791 | 1230 | 68395  | 68834  |
| UN51468 | Rsa1.0.03044.1 | 951  | 25791  | 0         | 460 | 479 | 96 -  | 472 | 950  | 5741   | 6219   |
| UN51469 | Rsa1.0.00506.1 | 993  | 79106  | 1.00E-152 | 279 | 281 | 99 -  | 713 | 993  | 10814  | 11094  |
| UN51470 | Rsa1.0.00486.1 | 1111 | 80875  | 0         | 550 | 579 | 94 +  | 333 | 894  | 15624  | 16200  |
| UN51471 | Rsa1.0.00437.1 | 1136 | 84879  | 0         | 544 | 556 | 97 +  | 582 | 1135 | 50510  | 51064  |
| UN51472 | Rsa1.0.00913.1 | 1385 | 59914  | 0         | 439 | 455 | 96 -  | 940 | 1385 | 54263  | 54717  |
| UN51473 | Rsa1.0.00213.1 | 767  | 108167 | 0         | 518 | 558 | 92 -  | 3   | 548  | 62067  | 62612  |
| UN51474 | Rsa1.0.00273.1 | 573  | 326186 | 0         | 571 | 573 | 99 -  | 1   | 573  | 28142  | 28714  |
| UN51475 | Rsa1.0.00304.1 | 793  | 97429  | 0         | 753 | 777 | 96 -  | 1   | 776  | 19166  | 19938  |
| UN51476 | Rsa1.0.01166.1 | 1148 | 51877  | 0         | 595 | 619 | 96 +  | 1   | 619  | 36970  | 37579  |
| UN51477 | Rsa1.0.00492.1 | 901  | 80178  | 0         | 452 | 475 | 95 +  | 4   | 475  | 64935  | 65409  |
| UN51478 | Rsa1.0.11577.1 | 762  | 5467   | 2.00E-91  | 256 | 280 | 91 +  | 2   | 274  | 738    | 1012   |

|         |                |      |        |           |     |     |       |      |      |        |        |
|---------|----------------|------|--------|-----------|-----|-----|-------|------|------|--------|--------|
| UN51479 | Rsa1.0.00184.1 | 1197 | 218748 | 0         | 515 | 548 | 93 +  | 346  | 888  | 213752 | 214279 |
| UN51480 | Rsa1.0.07606.1 | 639  | 9035   | 0         | 625 | 647 | 96 +  | 1    | 639  | 1955   | 2601   |
| UN51481 | Rsa1.0.01731.1 | 1141 | 40208  | 1.00E-156 | 298 | 304 | 98 -  | 1    | 304  | 16322  | 16625  |
| UN51482 | Rsa1.0.02615.1 | 861  | 29547  | 0         | 581 | 583 | 99 -  | 279  | 861  | 15679  | 16261  |
| UN51483 | Rsa1.0.00017.1 | 843  | 752458 | 0         | 840 | 846 | 99 -  | 3    | 843  | 393303 | 394148 |
| UN51484 | Rsa1.0.00289.1 | 740  | 98620  | 1.00E-158 | 283 | 283 | 100 - | 1    | 283  | 97044  | 97326  |
| UN51485 | Rsa1.0.00678.1 | 596  | 193163 | 8.00E-75  | 165 | 170 | 97 +  | 428  | 594  | 24056  | 24225  |
| UN51486 | Rsa1.0.01476.1 | 802  | 172928 | 0         | 551 | 553 | 99 +  | 1    | 553  | 171075 | 171627 |
| UN51487 | Rsa1.0.03122.1 | 1135 | 25207  | 1.00E-168 | 321 | 328 | 97 +  | 270  | 597  | 6320   | 6647   |
| UN51488 | Rsa1.0.03191.1 | 974  | 145762 | 1.00E-133 | 323 | 346 | 93 +  | 630  | 974  | 16325  | 16658  |
| UN51489 | Rsa1.0.18154.1 | 978  | 1655   | 1.00E-176 | 327 | 330 | 99 -  | 587  | 915  | 1163   | 1492   |
| UN51490 | Rsa1.0.08807.1 | 871  | 6906   | 1.00E-120 | 229 | 232 | 98 -  | 273  | 504  | 4140   | 4371   |
| UN51491 | Rsa1.0.00098.1 | 960  | 349239 | 0         | 433 | 448 | 96 +  | 2    | 449  | 292716 | 293162 |
| UN51492 | Rsa1.0.02198.1 | 1023 | 33989  | 1.00E-154 | 301 | 309 | 97 +  | 126  | 434  | 23969  | 24277  |
| UN51493 | Rsa1.0.00190.1 | 1007 | 318240 | 0         | 688 | 705 | 97 -  | 1    | 705  | 191430 | 192134 |
| UN51494 | Rsa1.0.00116.1 | 831  | 365886 | 1.00E-104 | 228 | 236 | 96 +  | 594  | 829  | 315711 | 315943 |
| UN51495 | Rsa1.0.00060.1 | 1108 | 502678 | 1.00E-137 | 260 | 264 | 98 +  | 203  | 466  | 126419 | 126682 |
| UN51496 | Rsa1.0.19040.1 | 938  | 1491   | 1.00E-170 | 371 | 392 | 94 +  | 422  | 812  | 953    | 1344   |
| UN51497 | Rsa1.0.01570.1 | 1403 | 43015  | 5.00E-87  | 280 | 317 | 88 -  | 1107 | 1403 | 10813  | 11124  |
| UN51498 | Rsa1.0.04224.1 | 1029 | 18402  | 1.00E-180 | 383 | 398 | 96 +  | 602  | 997  | 703    | 1095   |
| UN51499 | Rsa1.0.01029.1 | 596  | 256254 | 1.00E-172 | 327 | 334 | 97 +  | 263  | 596  | 245893 | 246226 |
| UN51500 | Rsa1.0.09126.1 | 1276 | 6625   | 0         | 587 | 610 | 96 +  | 17   | 622  | 5099   | 5707   |
| UN51501 | Rsa1.0.01236.1 | 1330 | 50156  | 1.00E-174 | 325 | 327 | 99 +  | 893  | 1217 | 30684  | 31010  |
| UN51502 | Rsa1.0.14001.1 | 838  | 3933   | 0         | 389 | 393 | 98 -  | 390  | 782  | 1418   | 1810   |
| UN51503 | Rsa1.0.00487.1 | 808  | 80674  | 0         | 409 | 418 | 97 -  | 389  | 806  | 12821  | 13238  |
| UN51504 | Rsa1.0.03005.1 | 1152 | 26082  | 0         | 522 | 561 | 93 +  | 1    | 557  | 23145  | 23688  |
| UN51505 | Rsa1.0.00091.1 | 1326 | 139699 | 0         | 382 | 388 | 98 -  | 115  | 502  | 138092 | 138479 |
| UN51506 | Rsa1.0.00175.1 | 771  | 166121 | 0         | 688 | 709 | 97 +  | 63   | 771  | 85419  | 86124  |
| UN51507 | Rsa1.0.02826.1 | 959  | 27560  | 1.00E-113 | 289 | 310 | 93 +  | 1    | 302  | 14770  | 15075  |
| UN51508 | Rsa1.0.00414.1 | 624  | 202190 | 0         | 611 | 628 | 97 -  | 1    | 624  | 3372   | 3998   |
| UN51509 | Rsa1.0.05708.1 | 865  | 12871  | 0         | 587 | 613 | 95 +  | 257  | 863  | 11144  | 11756  |
| UN51510 | Rsa1.0.00609.1 | 1021 | 72785  | 0         | 467 | 480 | 97 +  | 433  | 912  | 52619  | 53098  |
| UN51511 | Rsa1.0.00055.1 | 890  | 520193 | 0         | 880 | 922 | 95 +  | 2    | 890  | 169278 | 170199 |
| UN51512 | Rsa1.0.00116.1 | 1384 | 365886 | 0         | 512 | 519 | 98 -  | 870  | 1384 | 350760 | 351278 |
| UN51513 | Rsa1.0.02471.1 | 555  | 31104  | 1.00E-154 | 315 | 328 | 96 +  | 1    | 328  | 24411  | 24738  |
| UN51514 | Rsa1.0.00979.1 | 1286 | 57733  | 1.00E-172 | 330 | 338 | 97 -  | 187  | 524  | 31552  | 31889  |
| UN51515 | Rsa1.0.00351.1 | 842  | 413096 | 1.00E-145 | 277 | 281 | 98 +  | 475  | 755  | 242921 | 243200 |
| UN51516 | Rsa1.0.00254.1 | 500  | 102600 | 5.00E-88  | 203 | 213 | 95 +  | 285  | 496  | 84257  | 84468  |
| UN51517 | Rsa1.0.00786.1 | 922  | 64285  | 1.00E-99  | 197 | 201 | 98 -  | 370  | 570  | 41596  | 41796  |

|         |                |      |        |           |     |      |       |     |      |        |        |
|---------|----------------|------|--------|-----------|-----|------|-------|-----|------|--------|--------|
| UN51518 | Rsa1.0.00116.1 | 1290 | 365886 | 0         | 662 | 669  | 98 -  | 270 | 938  | 336690 | 337358 |
| UN51519 | Rsa1.0.00848.1 | 555  | 152362 | 0         | 400 | 408  | 98 -  | 148 | 555  | 47938  | 48343  |
| UN51520 | Rsa1.0.00734.1 | 851  | 66508  | 0         | 556 | 594  | 93 -  | 270 | 851  | 62072  | 62665  |
| UN51521 | Rsa1.0.01154.1 | 1098 | 52249  | 0         | 574 | 578  | 99 -  | 522 | 1097 | 9020   | 9597   |
| UN51522 | Rsa1.0.02254.1 | 677  | 33344  | 2.00E-66  | 273 | 319  | 85 -  | 3   | 295  | 4778   | 5093   |
| UN51523 | Rsa1.0.01955.1 | 995  | 36850  | 0         | 744 | 791  | 94 +  | 223 | 995  | 13035  | 13817  |
| UN51524 | Rsa1.0.01628.1 | 640  | 41932  | 2.00E-53  | 167 | 187  | 89 +  | 350 | 536  | 24850  | 25036  |
| UN51525 | Rsa1.0.09048.1 | 605  | 6683   | 0         | 547 | 577  | 94 -  | 1   | 564  | 5245   | 5820   |
| UN51526 | Rsa1.0.07208.1 | 1029 | 9719   | 1.00E-141 | 292 | 304  | 96 +  | 258 | 561  | 8064   | 8364   |
| UN51527 | Rsa1.0.02963.1 | 1438 | 26407  | 2.33E-156 | 269 | 271  | 99 +  | 271 | 541  | 13077  | 13347  |
| UN51528 | Rsa1.0.01743.1 | 786  | 39926  | 0         | 389 | 406  | 95 -  | 372 | 773  | 6810   | 7212   |
| UN51529 | Rsa1.0.02848.1 | 579  | 27329  | 1.00E-177 | 359 | 372  | 96 -  | 10  | 377  | 8638   | 9008   |
| UN51530 | Rsa1.0.04458.1 | 1035 | 17255  | 1.00E-160 | 311 | 319  | 97 -  | 47  | 365  | 7725   | 8043   |
| UN51531 | Rsa1.0.00480.1 | 856  | 81325  | 0         | 469 | 475  | 98 -  | 381 | 855  | 4328   | 4802   |
| UN51532 | Rsa1.0.01389.1 | 1018 | 46716  | 0         | 385 | 397  | 96 -  | 621 | 1015 | 9773   | 10165  |
| UN51533 | Rsa1.0.01516.1 | 1202 | 44196  | 0         | 958 | 1010 | 94 -  | 172 | 1172 | 24673  | 25680  |
| UN51534 | Rsa1.0.05622.1 | 1317 | 13145  | 1.00E-179 | 529 | 595  | 88 -  | 3   | 571  | 3626   | 4198   |
| UN51535 | Rsa1.0.01418.1 | 1024 | 46237  | 1.00E-173 | 311 | 312  | 99 +  | 712 | 1023 | 7186   | 7497   |
| UN51536 | Rsa1.0.00110.1 | 1610 | 132719 | 0         | 702 | 714  | 98 -  | 1   | 714  | 60665  | 61375  |
| UN51537 | Rsa1.0.00662.1 | 832  | 192183 | 1.00E-119 | 235 | 241  | 97 -  | 293 | 533  | 189853 | 190093 |
| UN51538 | Rsa1.0.01487.1 | 1067 | 44784  | 0         | 521 | 531  | 98 +  | 96  | 625  | 14410  | 14939  |
| UN51539 | Rsa1.0.00552.1 | 869  | 206757 | 1.00E-164 | 368 | 393  | 93 +  | 1   | 378  | 195157 | 195549 |
| UN51540 | Rsa1.0.01650.1 | 549  | 41589  | 1.00E-158 | 488 | 560  | 87 +  | 4   | 549  | 34759  | 35302  |
| UN51541 | Rsa1.0.00056.1 | 607  | 332604 | 4.00E-86  | 180 | 186  | 96 -  | 230 | 415  | 90557  | 90742  |
| UN51542 | Rsa1.0.01414.1 | 1039 | 149508 | 1.00E-161 | 339 | 353  | 96 +  | 684 | 1033 | 115743 | 116091 |
| UN51543 | Rsa1.0.00017.1 | 840  | 752458 | 1.00E-166 | 338 | 351  | 96 -  | 2   | 350  | 41954  | 42304  |
| UN51544 | Rsa1.0.00026.1 | 368  | 327835 | 1.00E-126 | 274 | 288  | 95 +  | 81  | 368  | 306356 | 306642 |
| UN51545 | Rsa1.0.00105.1 | 389  | 134138 | 1.00E-168 | 366 | 387  | 94 +  | 2   | 387  | 123999 | 124385 |
| UN51546 | Rsa1.0.02333.1 | 489  | 32431  | 1.00E-116 | 273 | 289  | 94 +  | 196 | 479  | 29979  | 30265  |
| UN51547 | Rsa1.0.04184.1 | 930  | 18598  | 1.00E-148 | 315 | 331  | 95 -  | 2   | 328  | 9046   | 9376   |
| UN51548 | Rsa1.0.00470.1 | 669  | 81968  | 1.00E-169 | 365 | 385  | 94 +  | 1   | 384  | 27990  | 28369  |
| UN51549 | Rsa1.0.13523.1 | 841  | 4753   | 1.00E-178 | 319 | 320  | 99 -  | 3   | 322  | 470    | 789    |
| UN51550 | Rsa1.0.04325.1 | 1211 | 17885  | 1.00E-115 | 280 | 308  | 90 +  | 2   | 288  | 13735  | 14042  |
| UN51551 | Rsa1.0.04234.1 | 499  | 18378  | 1.00E-85  | 191 | 201  | 95 -  | 162 | 362  | 7914   | 8114   |
| UN51552 | Rsa1.0.00318.1 | 546  | 96094  | 1.00E-109 | 201 | 201  | 100 + | 346 | 546  | 43690  | 43890  |
| UN51553 | Rsa1.0.00243.1 | 1034 | 103651 | 1.00E-142 | 257 | 257  | 100 + | 528 | 784  | 4656   | 4912   |
| UN51554 | Rsa1.0.01948.1 | 903  | 36966  | 0         | 485 | 489  | 99 -  | 413 | 901  | 15160  | 15648  |
| UN51555 | Rsa1.0.01938.1 | 888  | 264018 | 0         | 609 | 644  | 94 -  | 246 | 888  | 159638 | 160265 |
| UN51556 | Rsa1.0.00259.1 | 824  | 163204 | 0         | 787 | 826  | 95 -  | 1   | 824  | 154333 | 155137 |

|         |                |      |        |           |      |      |       |     |      |        |        |
|---------|----------------|------|--------|-----------|------|------|-------|-----|------|--------|--------|
| UN51557 | Rsa1.0.00048.1 | 746  | 167185 | 0         | 360  | 370  | 97 -  | 375 | 744  | 12809  | 13178  |
| UN51558 | Rsa1.0.00697.1 | 917  | 67913  | 0         | 760  | 813  | 93 -  | 103 | 915  | 42295  | 43104  |
| UN51559 | Rsa1.0.00323.1 | 1052 | 159650 | 0         | 836  | 864  | 96 +  | 190 | 1052 | 148966 | 149828 |
| UN51560 | Rsa1.0.01281.1 | 679  | 49313  | 0         | 617  | 643  | 95 +  | 3   | 645  | 26768  | 27403  |
| UN51561 | Rsa1.0.01180.1 | 716  | 51517  | 1.00E-106 | 319  | 357  | 89 +  | 5   | 336  | 33807  | 34163  |
| UN51562 | Rsa1.0.00412.1 | 1176 | 86935  | 1.00E-144 | 323  | 342  | 94 -  | 5   | 343  | 49294  | 49634  |
| UN51563 | Rsa1.0.00108.1 | 1179 | 478491 | 0         | 494  | 496  | 99 -  | 2   | 497  | 91768  | 92263  |
| UN51564 | Rsa1.0.07565.1 | 964  | 9122   | 1.00E-157 | 315  | 325  | 96 -  | 186 | 510  | 4744   | 5067   |
| UN51565 | Rsa1.0.00522.1 | 1141 | 78103  | 1.00E-90  | 203  | 214  | 94 +  | 345 | 558  | 48991  | 49204  |
| UN51566 | Rsa1.0.01249.1 | 913  | 188432 | 0         | 861  | 890  | 96 +  | 2   | 889  | 149504 | 150379 |
| UN51567 | Rsa1.0.00339.1 | 1446 | 222974 | 0         | 779  | 919  | 84 -  | 352 | 1270 | 28078  | 28996  |
| UN51568 | Rsa1.0.00179.1 | 742  | 393324 | 3.00E-84  | 255  | 283  | 90 +  | 468 | 740  | 250660 | 250934 |
| UN51569 | Rsa1.0.02158.1 | 716  | 154841 | 7.00E-85  | 179  | 185  | 96 -  | 161 | 345  | 133307 | 133487 |
| UN51570 | Rsa1.0.01009.1 | 672  | 56922  | 1.00E-170 | 309  | 311  | 99 +  | 360 | 670  | 3612   | 3922   |
| UN51571 | Rsa1.0.05431.1 | 904  | 13780  | 0         | 354  | 363  | 97 +  | 275 | 637  | 8836   | 9198   |
| UN51572 | Rsa1.0.01732.1 | 1319 | 40194  | 0         | 1226 | 1276 | 96 -  | 56  | 1317 | 24250  | 25518  |
| UN51573 | Rsa1.0.04845.1 | 1495 | 15747  | 1.00E-103 | 217  | 225  | 96 +  | 165 | 386  | 4169   | 4393   |
| UN51574 | Rsa1.0.01362.1 | 1111 | 47217  | 0         | 496  | 507  | 97 -  | 2   | 508  | 66     | 572    |
| UN51575 | Rsa1.0.01943.1 | 1064 | 37042  | 1.00E-133 | 304  | 318  | 95 +  | 3   | 317  | 4790   | 5105   |
| UN51576 | Rsa1.0.02085.1 | 1232 | 35198  | 1.00E-107 | 261  | 282  | 92 -  | 2   | 273  | 17654  | 17935  |
| UN51577 | Rsa1.0.00111.1 | 1368 | 390088 | 1.00E-127 | 231  | 231  | 100 + | 261 | 491  | 382034 | 382264 |
| UN51578 | Rsa1.0.02199.1 | 1586 | 33982  | 1.00E-153 | 301  | 307  | 98 +  | 5   | 310  | 10775  | 11080  |
| UN51579 | Rsa1.0.00009.1 | 871  | 232558 | 0         | 709  | 728  | 97 +  | 104 | 827  | 11234  | 11961  |
| UN51580 | Rsa1.0.39426.1 | 1174 | 570    | 0         | 378  | 392  | 96 +  | 732 | 1119 | 46     | 437    |
| UN51581 | Rsa1.0.00649.1 | 890  | 70263  | 0         | 347  | 349  | 99 +  | 541 | 889  | 62855  | 63203  |
| UN51582 | Rsa1.0.00132.1 | 582  | 124299 | 1.00E-130 | 287  | 301  | 95 +  | 284 | 582  | 99696  | 99993  |
| UN51583 | Rsa1.0.02139.1 | 1217 | 34686  | 0         | 521  | 533  | 97 -  | 685 | 1216 | 24882  | 25414  |
| UN51584 | Rsa1.0.02860.1 | 778  | 27207  | 1.00E-143 | 307  | 318  | 96 -  | 3   | 319  | 26162  | 26476  |
| UN51585 | Rsa1.0.01049.1 | 809  | 55655  | 2.00E-94  | 185  | 188  | 98 -  | 265 | 452  | 43175  | 43362  |
| UN51586 | Rsa1.0.00961.1 | 881  | 58185  | 2.33E-156 | 304  | 318  | 95 -  | 1   | 307  | 44233  | 44550  |
| UN51587 | Rsa1.0.00064.1 | 900  | 240927 | 1.00E-106 | 202  | 204  | 99 -  | 46  | 249  | 35983  | 36186  |
| UN51588 | Rsa1.0.01263.1 | 493  | 49703  | 1.00E-66  | 153  | 161  | 95 +  | 79  | 239  | 39810  | 39970  |
| UN51589 | Rsa1.0.00120.1 | 800  | 277288 | 0         | 393  | 398  | 98 +  | 403 | 800  | 121696 | 122093 |
| UN51590 | Rsa1.0.01978.1 | 801  | 36546  | 1.00E-128 | 264  | 273  | 96 -  | 8   | 280  | 12510  | 12781  |
| UN51591 | Rsa1.0.05702.1 | 767  | 12884  | 1.00E-105 | 271  | 291  | 93 -  | 1   | 286  | 712    | 999    |
| UN51592 | Rsa1.0.00289.1 | 1329 | 98620  | 1.00E-113 | 250  | 264  | 94 +  | 17  | 280  | 12905  | 13168  |
| UN51593 | Rsa1.0.00069.1 | 1146 | 403561 | 0         | 458  | 493  | 92 +  | 663 | 1145 | 179274 | 179756 |
| UN51594 | Rsa1.0.00073.1 | 610  | 240924 | 4.00E-98  | 191  | 194  | 98 -  | 67  | 260  | 98132  | 98325  |
| UN51595 | Rsa1.0.08421.1 | 884  | 7380   | 1.00E-131 | 310  | 334  | 92 +  | 367 | 700  | 3635   | 3968   |

|         |                |      |        |           |     |     |       |      |      |        |        |
|---------|----------------|------|--------|-----------|-----|-----|-------|------|------|--------|--------|
| UN51596 | Rsa1.0.01092.1 | 580  | 54348  | 1.00E-167 | 366 | 386 | 94 +  | 194  | 578  | 53690  | 54074  |
| UN51597 | Rsa1.0.03615.1 | 984  | 21766  | 1.00E-153 | 281 | 283 | 99 +  | 272  | 554  | 5270   | 5552   |
| UN51598 | Rsa1.0.00706.1 | 655  | 291570 | 0         | 626 | 660 | 94 +  | 1    | 649  | 23303  | 23961  |
| UN51599 | Rsa1.0.02836.1 | 941  | 27481  | 1.00E-136 | 274 | 282 | 97 +  | 1    | 282  | 12896  | 13176  |
| UN51600 | Rsa1.0.06209.1 | 771  | 11484  | 1.00E-155 | 281 | 282 | 99 -  | 232  | 513  | 3388   | 3669   |
| UN51601 | Rsa1.0.00522.1 | 1742 | 78103  | 5.00E-94  | 197 | 204 | 96 -  | 1243 | 1446 | 35226  | 35429  |
| UN51602 | Rsa1.0.05541.1 | 1070 | 139959 | 1.00E-132 | 294 | 308 | 95 -  | 765  | 1070 | 2801   | 3107   |
| UN51603 | Rsa1.0.00358.1 | 1022 | 91293  | 1.00E-151 | 347 | 364 | 95 -  | 1    | 359  | 1111   | 1473   |
| UN51604 | Rsa1.0.01015.1 | 521  | 56752  | 1.00E-97  | 190 | 193 | 98 -  | 329  | 521  | 2771   | 2963   |
| UN51605 | Rsa1.0.01171.1 | 1104 | 51752  | 1.00E-176 | 393 | 415 | 94 -  | 2    | 408  | 50943  | 51354  |
| UN51606 | Rsa1.0.02959.1 | 1286 | 26441  | 1.00E-161 | 312 | 321 | 97 -  | 966  | 1286 | 1703   | 2015   |
| UN51607 | Rsa1.0.01666.1 | 1228 | 173972 | 1.00E-102 | 224 | 234 | 95 +  | 237  | 470  | 23943  | 24175  |
| UN51608 | Rsa1.0.07894.1 | 784  | 8347   | 1.00E-159 | 303 | 308 | 98 -  | 310  | 617  | 6736   | 7042   |
| UN51609 | Rsa1.0.03075.1 | 1007 | 25560  | 1.00E-159 | 311 | 320 | 97 +  | 407  | 726  | 14646  | 14965  |
| UN51610 | Rsa1.0.03527.1 | 1274 | 22278  | 1.00E-170 | 346 | 358 | 96 -  | 1    | 356  | 18596  | 18952  |
| UN51611 | Rsa1.0.00329.1 | 1265 | 222544 | 0         | 557 | 583 | 95 -  | 684  | 1265 | 193152 | 193732 |
| UN51612 | Rsa1.0.00556.1 | 1308 | 207212 | 0         | 519 | 541 | 95 +  | 139  | 679  | 51917  | 52457  |
| UN51613 | Rsa1.0.02374.1 | 748  | 32043  | 1.00E-129 | 318 | 345 | 92 +  | 3    | 342  | 25664  | 25991  |
| UN51614 | Rsa1.0.00296.1 | 748  | 97854  | 0         | 486 | 515 | 94 -  | 1    | 514  | 17737  | 18250  |
| UN51615 | Rsa1.0.02245.1 | 641  | 33478  | 0         | 395 | 399 | 98 -  | 241  | 639  | 6327   | 6725   |
| UN51616 | Rsa1.0.00029.1 | 1382 | 272992 | 0         | 610 | 613 | 99 -  | 770  | 1382 | 160734 | 161346 |
| UN51617 | Rsa1.0.02836.1 | 935  | 27481  | 1.00E-139 | 269 | 275 | 97 +  | 7    | 281  | 12902  | 13176  |
| UN51618 | Rsa1.0.00451.1 | 911  | 322533 | 1.00E-142 | 316 | 332 | 95 -  | 4    | 331  | 301659 | 301986 |
| UN51619 | Rsa1.0.00007.1 | 922  | 239325 | 1.00E-68  | 158 | 165 | 95 -  | 647  | 810  | 12607  | 12771  |
| UN51620 | Rsa1.0.00816.1 | 1116 | 403350 | 0         | 576 | 586 | 98 -  | 3    | 587  | 133188 | 133773 |
| UN51621 | Rsa1.0.00131.1 | 1225 | 432233 | 1.00E-128 | 289 | 306 | 94 +  | 923  | 1225 | 11596  | 11894  |
| UN51622 | Rsa1.0.00712.1 | 1114 | 67217  | 0         | 415 | 429 | 96 +  | 2    | 426  | 66462  | 66889  |
| UN51623 | Rsa1.0.00006.1 | 929  | 396176 | 0         | 890 | 917 | 97 +  | 13   | 929  | 2889   | 3805   |
| UN51624 | Rsa1.0.00772.1 | 1165 | 64856  | 1.00E-109 | 296 | 330 | 89 +  | 859  | 1165 | 7619   | 7944   |
| UN51625 | Rsa1.0.02836.1 | 928  | 27481  | 1.00E-125 | 261 | 271 | 96 +  | 8    | 272  | 12905  | 13175  |
| UN51626 | Rsa1.0.01633.1 | 964  | 41868  | 1.00E-174 | 378 | 399 | 94 +  | 572  | 964  | 3035   | 3429   |
| UN51627 | Rsa1.0.01458.1 | 1562 | 175719 | 2.00E-65  | 128 | 128 | 100 + | 1200 | 1327 | 38124  | 38251  |
| UN51628 | Rsa1.0.00566.1 | 941  | 75325  | 0         | 374 | 377 | 99 -  | 157  | 533  | 20189  | 20565  |
| UN51629 | Rsa1.0.02041.1 | 957  | 163634 | 6.00E-95  | 186 | 189 | 98 -  | 399  | 587  | 19367  | 19555  |
| UN51630 | Rsa1.0.05812.1 | 982  | 12571  | 0         | 896 | 935 | 95 +  | 4    | 937  | 2611   | 3545   |
| UN51631 | Rsa1.0.02064.1 | 1024 | 35476  | 0         | 484 | 485 | 99 -  | 540  | 1024 | 16539  | 17023  |
| UN51632 | Rsa1.0.00221.1 | 829  | 106972 | 0         | 421 | 436 | 96 +  | 2    | 437  | 37171  | 37606  |
| UN51633 | Rsa1.0.02605.1 | 866  | 29637  | 1.00E-132 | 418 | 471 | 88 +  | 411  | 866  | 12261  | 12730  |
| UN51634 | Rsa1.0.01000.1 | 1059 | 57140  | 1.00E-111 | 266 | 285 | 93 -  | 776  | 1059 | 37897  | 38171  |

|         |                |      |        |           |      |      |       |     |      |        |        |
|---------|----------------|------|--------|-----------|------|------|-------|-----|------|--------|--------|
| UN51635 | Rsa1.0_16553.1 | 475  | 2115   | 2.00E-37  | 92   | 96   | 95 -  | 176 | 271  | 174    | 269    |
| UN51636 | Rsa1.0_01896.1 | 1126 | 37512  | 0         | 892  | 907  | 98 -  | 24  | 922  | 5019   | 5925   |
| UN51637 | Rsa1.0_00078.1 | 825  | 175053 | 1.00E-171 | 332  | 341  | 97 -  | 490 | 825  | 40473  | 40813  |
| UN51638 | Rsa1.0_02608.1 | 1360 | 29613  | 0         | 484  | 484  | 100 + | 742 | 1225 | 25681  | 26164  |
| UN51639 | Rsa1.0_01586.1 | 1074 | 42804  | 1.00E-166 | 332  | 344  | 96 +  | 731 | 1074 | 29493  | 29836  |
| UN51640 | Rsa1.0_00111.1 | 996  | 390088 | 0         | 377  | 394  | 95 -  | 285 | 678  | 381107 | 381500 |
| UN51641 | Rsa1.0_00123.1 | 595  | 325650 | 0         | 564  | 584  | 96 -  | 1   | 584  | 168374 | 168953 |
| UN51642 | Rsa1.0_01005.1 | 1005 | 56967  | 1.00E-137 | 260  | 264  | 98 +  | 324 | 587  | 19291  | 19554  |
| UN51643 | Rsa1.0_06541.1 | 502  | 10806  | 1.00E-73  | 235  | 259  | 90 +  | 1   | 253  | 10121  | 10372  |
| UN51644 | Rsa1.0_00625.1 | 1024 | 71672  | 0         | 587  | 612  | 95 -  | 414 | 1023 | 14866  | 15475  |
| UN51645 | Rsa1.0_00639.1 | 944  | 165873 | 0         | 887  | 938  | 94 +  | 3   | 939  | 126912 | 127849 |
| UN51646 | Rsa1.0_09527.1 | 1129 | 6311   | 1.00E-143 | 297  | 310  | 95 -  | 532 | 841  | 5870   | 6179   |
| UN51647 | Rsa1.0_00639.1 | 1293 | 165873 | 0         | 918  | 943  | 97 +  | 28  | 970  | 128441 | 129381 |
| UN51648 | Rsa1.0_01516.1 | 800  | 44196  | 0         | 398  | 421  | 94 -  | 11  | 431  | 36941  | 37359  |
| UN51649 | Rsa1.0_02060.1 | 863  | 35528  | 0         | 543  | 567  | 95 +  | 302 | 862  | 19474  | 20039  |
| UN51650 | Rsa1.0_00679.1 | 1227 | 68971  | 2.00E-89  | 193  | 200  | 96 +  | 372 | 571  | 33672  | 33870  |
| UN51651 | Rsa1.0_00009.1 | 941  | 232558 | 1.00E-160 | 350  | 367  | 95 +  | 583 | 940  | 53021  | 53383  |
| UN51652 | Rsa1.0_00033.1 | 1309 | 515811 | 1.00E-138 | 262  | 266  | 98 -  | 741 | 1006 | 354853 | 355118 |
| UN51653 | Rsa1.0_03940.1 | 1265 | 19962  | 0         | 895  | 901  | 99 -  | 3   | 900  | 11912  | 12812  |
| UN51654 | Rsa1.0_26014.1 | 1053 | 910    | 1.00E-104 | 241  | 254  | 94 -  | 803 | 1053 | 275    | 525    |
| UN51655 | Rsa1.0_01009.1 | 438  | 56922  | 1.00E-139 | 284  | 294  | 96 +  | 66  | 358  | 3228   | 3521   |
| UN51656 | Rsa1.0_11201.1 | 864  | 5585   | 0         | 365  | 366  | 99 +  | 477 | 842  | 3816   | 4181   |
| UN51657 | Rsa1.0_00817.1 | 822  | 62961  | 0         | 465  | 479  | 97 -  | 344 | 822  | 53855  | 54331  |
| UN51658 | Rsa1.0_00660.1 | 490  | 69688  | 1.00E-176 | 352  | 365  | 96 +  | 3   | 367  | 52586  | 52946  |
| UN51659 | Rsa1.0_00644.1 | 1083 | 136881 | 1.00E-110 | 202  | 202  | 100 - | 425 | 626  | 63427  | 63628  |
| UN51660 | Rsa1.0_13713.1 | 1282 | 4437   | 0         | 344  | 349  | 98 -  | 1   | 348  | 1356   | 1704   |
| UN51661 | Rsa1.0_01135.1 | 1054 | 52799  | 0         | 501  | 506  | 99 +  | 321 | 826  | 24569  | 25074  |
| UN51662 | Rsa1.0_12394.1 | 741  | 5237   | 1.00E-174 | 324  | 329  | 98 -  | 1   | 329  | 4534   | 4862   |
| UN51663 | Rsa1.0_01634.1 | 1057 | 41865  | 0         | 383  | 396  | 96 +  | 1   | 387  | 38708  | 39103  |
| UN51664 | Rsa1.0_00078.1 | 976  | 175053 | 0         | 726  | 787  | 92 -  | 3   | 785  | 66652  | 67432  |
| UN51665 | Rsa1.0_02955.1 | 1265 | 26484  | 1.00E-169 | 323  | 329  | 98 -  | 462 | 790  | 21585  | 21911  |
| UN51666 | Rsa1.0_01651.1 | 941  | 41586  | 0         | 882  | 945  | 93 +  | 2   | 939  | 31329  | 32256  |
| UN51667 | Rsa1.0_09005.1 | 1162 | 6716   | 0         | 1048 | 1060 | 98 +  | 103 | 1162 | 4345   | 5403   |
| UN51668 | Rsa1.0_04581.1 | 1174 | 16772  | 1.00E-124 | 312  | 342  | 91 -  | 16  | 357  | 6485   | 6811   |
| UN51669 | Rsa1.0_03334.1 | 404  | 23659  | 1.00E-123 | 270  | 290  | 93 -  | 3   | 292  | 20257  | 20527  |
| UN51670 | Rsa1.0_01493.1 | 1405 | 44670  | 0         | 503  | 538  | 93 +  | 1   | 534  | 13292  | 13805  |
| UN51671 | Rsa1.0_01418.1 | 1042 | 46237  | 1.00E-163 | 308  | 313  | 98 +  | 733 | 1042 | 7186   | 7498   |
| UN51672 | Rsa1.0_00040.1 | 1186 | 324196 | 1.00E-148 | 346  | 367  | 94 +  | 815 | 1180 | 306929 | 307292 |
| UN51673 | Rsa1.0_02360.1 | 1072 | 32203  | 0         | 611  | 628  | 97 -  | 445 | 1071 | 23954  | 24578  |

|         |                |      |        |           |      |      |       |      |      |        |        |
|---------|----------------|------|--------|-----------|------|------|-------|------|------|--------|--------|
| UN51674 | Rsa1.0.00164.1 | 1185 | 116642 | 0         | 1162 | 1195 | 97 +  | 2    | 1184 | 47977  | 49170  |
| UN51675 | Rsa1.0.00697.1 | 1172 | 67913  | 1.00E-135 | 245  | 245  | 100 - | 2    | 246  | 58748  | 58992  |
| UN51676 | Rsa1.0.00066.1 | 554  | 152418 | 1.00E-116 | 264  | 279  | 94 +  | 28   | 303  | 139775 | 140053 |
| UN51677 | Rsa1.0.00008.1 | 664  | 358124 | 1.00E-132 | 269  | 279  | 96 +  | 1    | 279  | 201309 | 201587 |
| UN51678 | Rsa1.0.00011.1 | 984  | 225044 | 1.00E-155 | 383  | 418  | 91 -  | 585  | 982  | 50465  | 50872  |
| UN51679 | Rsa1.0.00343.1 | 759  | 93570  | 0         | 503  | 503  | 100 + | 250  | 752  | 2493   | 2995   |
| UN51680 | Rsa1.0.01263.1 | 512  | 49703  | 1.00E-82  | 159  | 160  | 99 -  | 263  | 422  | 39811  | 39970  |
| UN51681 | Rsa1.0.02550.1 | 882  | 291051 | 1.00E-160 | 337  | 353  | 95 -  | 527  | 879  | 18197  | 18547  |
| UN51682 | Rsa1.0.00016.1 | 1187 | 831256 | 1.00E-162 | 320  | 326  | 98 +  | 25   | 347  | 370678 | 371003 |
| UN51683 | Rsa1.0.02565.1 | 850  | 30046  | 2.00E-91  | 180  | 183  | 98 -  | 280  | 462  | 26968  | 27150  |
| UN51684 | Rsa1.0.01613.1 | 1496 | 182542 | 0         | 343  | 347  | 98 -  | 345  | 690  | 165612 | 165957 |
| UN51685 | Rsa1.0.00065.1 | 933  | 454616 | 0         | 607  | 621  | 97 -  | 1    | 621  | 254496 | 255116 |
| UN51686 | Rsa1.0.00178.1 | 655  | 114861 | 1.00E-125 | 275  | 289  | 95 +  | 371  | 655  | 12165  | 12453  |
| UN51687 | Rsa1.0.01724.1 | 1057 | 40292  | 0         | 511  | 533  | 95 +  | 524  | 1056 | 19668  | 20191  |
| UN51688 | Rsa1.0.01303.1 | 892  | 48853  | 0         | 552  | 571  | 96 +  | 323  | 892  | 15251  | 15816  |
| UN51689 | Rsa1.0.07021.1 | 1052 | 10016  | 1.00E-123 | 311  | 343  | 90 +  | 350  | 677  | 7093   | 7426   |
| UN51690 | Rsa1.0.06571.1 | 922  | 10750  | 1.00E-93  | 213  | 226  | 94 -  | 70   | 295  | 6156   | 6375   |
| UN51691 | Rsa1.0.00008.1 | 731  | 358124 | 0         | 354  | 363  | 97 -  | 3    | 359  | 73510  | 73872  |
| UN51692 | Rsa1.0.00773.1 | 1117 | 64839  | 3.00E-94  | 200  | 208  | 96 +  | 536  | 743  | 58210  | 58417  |
| UN51693 | Rsa1.0.05753.1 | 1232 | 12732  | 0         | 475  | 480  | 98 +  | 6    | 485  | 11893  | 12372  |
| UN51694 | Rsa1.0.01565.1 | 1352 | 155447 | 0         | 469  | 480  | 97 +  | 196  | 675  | 1771   | 2249   |
| UN51695 | Rsa1.0.00464.1 | 1612 | 82253  | 0         | 489  | 498  | 98 +  | 618  | 1115 | 21695  | 22192  |
| UN51696 | Rsa1.0.01403.1 | 1079 | 46453  | 0         | 409  | 426  | 96 +  | 89   | 507  | 32216  | 32639  |
| UN51697 | Rsa1.0.03579.1 | 1158 | 21969  | 0         | 435  | 465  | 93 -  | 2    | 461  | 18958  | 19419  |
| UN51698 | Rsa1.0.00395.1 | 798  | 214466 | 1.00E-128 | 276  | 290  | 95 +  | 1    | 281  | 4418   | 4707   |
| UN51699 | Rsa1.0.02966.1 | 959  | 135126 | 0         | 478  | 505  | 94 -  | 2    | 493  | 17972  | 18470  |
| UN51700 | Rsa1.0.02001.1 | 804  | 36198  | 0         | 453  | 476  | 95 -  | 1    | 476  | 31940  | 32408  |
| UN51701 | Rsa1.0.00734.1 | 974  | 66508  | 1.00E-159 | 288  | 289  | 99 -  | 1    | 289  | 15771  | 16059  |
| UN51702 | Rsa1.0.04489.1 | 937  | 17145  | 4.00E-99  | 196  | 200  | 98 -  | 460  | 659  | 9319   | 9518   |
| UN51703 | Rsa1.0.00087.1 | 661  | 761073 | 0         | 638  | 661  | 96 -  | 1    | 660  | 25292  | 25949  |
| UN51704 | Rsa1.0.00991.1 | 1637 | 143101 | 1.00E-167 | 449  | 494  | 90 -  | 1174 | 1637 | 47350  | 47839  |
| UN51705 | Rsa1.0.00582.1 | 2504 | 74333  | 0         | 586  | 597  | 98 +  | 1913 | 2503 | 29655  | 30251  |
| UN51706 | Rsa1.0.07171.1 | 707  | 9788   | 2.00E-82  | 210  | 226  | 92 -  | 480  | 705  | 6661   | 6882   |
| UN51707 | Rsa1.0.00564.1 | 749  | 75428  | 1.00E-110 | 228  | 235  | 97 -  | 1    | 235  | 67712  | 67945  |
| UN51708 | Rsa1.0.02226.1 | 1100 | 33726  | 0         | 436  | 440  | 99 -  | 661  | 1099 | 12179  | 12618  |
| UN51709 | Rsa1.0.00510.1 | 1292 | 78718  | 0         | 545  | 568  | 95 +  | 657  | 1223 | 25008  | 25568  |
| UN51710 | Rsa1.0.00806.1 | 1324 | 63674  | 0         | 1301 | 1328 | 97 -  | 2    | 1323 | 42059  | 43386  |
| UN51711 | Rsa1.0.17783.1 | 1471 | 1741   | 6.00E-22  | 97   | 111  | 87 +  | 188  | 298  | 314    | 424    |
| UN51712 | Rsa1.0.01775.1 | 757  | 39519  | 1.00E-120 | 253  | 262  | 96 +  | 499  | 757  | 10927  | 11188  |



|         |                |      |        |           |      |      |       |     |      |        |        |
|---------|----------------|------|--------|-----------|------|------|-------|-----|------|--------|--------|
| UN51713 | Rsa1.0.01692.1 | 1438 | 40894  | 1.00E-101 | 194  | 196  | 98 -  | 657 | 852  | 24599  | 24794  |
| UN51714 | Rsa1.0.01931.1 | 2299 | 37187  | 1.00E-130 | 272  | 282  | 96 +  | 352 | 633  | 3374   | 3650   |
| UN51715 | Rsa1.0.02197.1 | 1351 | 33996  | 0         | 868  | 932  | 93 -  | 42  | 956  | 30823  | 31754  |
| UN51716 | Rsa1.0.06010.1 | 1897 | 11944  | 0         | 931  | 969  | 96 +  | 932 | 1897 | 1551   | 2518   |
| UN51717 | Rsa1.0.02326.1 | 1333 | 32503  | 0         | 437  | 438  | 99 -  | 892 | 1329 | 24523  | 24960  |
| UN51718 | Rsa1.0.02699.1 | 1549 | 28586  | 0         | 399  | 399  | 100 - | 471 | 869  | 6499   | 6897   |
| UN51719 | Rsa1.0.01261.1 | 1351 | 49744  | 1.00E-145 | 268  | 270  | 99 -  | 3   | 272  | 25172  | 25441  |
| UN51720 | Rsa1.0.00001.1 | 795  | 363028 | 1.00E-140 | 311  | 329  | 94 -  | 217 | 539  | 323550 | 323878 |
| UN51721 | Rsa1.0.00566.1 | 582  | 75325  | 0         | 517  | 539  | 95 +  | 43  | 580  | 26279  | 26810  |
| UN51722 | Rsa1.0.05467.1 | 670  | 13649  | 0         | 498  | 512  | 97 -  | 6   | 515  | 11334  | 11844  |
| UN51723 | Rsa1.0.03952.1 | 885  | 19891  | 0         | 554  | 567  | 97 -  | 170 | 736  | 3722   | 4288   |
| UN51724 | Rsa1.0.00059.1 | 756  | 159650 | 1.00E-119 | 386  | 440  | 87 -  | 327 | 756  | 123541 | 123957 |
| UN51725 | Rsa1.0.04224.1 | 972  | 18402  | 0         | 398  | 400  | 99 -  | 3   | 402  | 703    | 1102   |
| UN51726 | Rsa1.0.02222.1 | 453  | 152798 | 0         | 430  | 447  | 96 -  | 13  | 453  | 4671   | 5115   |
| UN51727 | Rsa1.0.00223.1 | 1103 | 106231 | 0         | 1017 | 1067 | 95 +  | 43  | 1101 | 2970   | 4033   |
| UN51728 | Rsa1.0.00256.1 | 875  | 102426 | 0         | 438  | 439  | 99 +  | 437 | 875  | 86245  | 86682  |
| UN51729 | Rsa1.0.00297.1 | 1143 | 97836  | 1.00E-167 | 310  | 314  | 98 -  | 1   | 314  | 34992  | 35305  |
| UN51730 | Rsa1.0.03001.1 | 782  | 26108  | 1.00E-138 | 309  | 326  | 94 +  | 1   | 323  | 5503   | 5824   |
| UN51731 | Rsa1.0.06989.1 | 1009 | 10060  | 1.00E-169 | 361  | 381  | 94 +  | 640 | 1009 | 6765   | 7145   |
| UN51732 | Rsa1.0.02449.1 | 1137 | 31292  | 1.00E-132 | 240  | 240  | 100 - | 702 | 941  | 13545  | 13784  |
| UN51733 | Rsa1.0.00101.1 | 623  | 267193 | 1.00E-137 | 304  | 325  | 93 +  | 316 | 623  | 47238  | 47562  |
| UN51734 | Rsa1.0.00341.1 | 710  | 249309 | 1.00E-114 | 209  | 209  | 100 - | 187 | 395  | 128945 | 129153 |
| UN51735 | Rsa1.0.00349.1 | 776  | 92621  | 1.00E-114 | 213  | 214  | 99 -  | 302 | 515  | 53097  | 53310  |
| UN51736 | Rsa1.0.00086.1 | 537  | 439854 | 0         | 388  | 401  | 96 +  | 1   | 397  | 342204 | 342604 |
| UN51737 | Rsa1.0.00316.1 | 1291 | 96264  | 0         | 483  | 495  | 97 -  | 3   | 497  | 85542  | 86036  |
| UN51738 | Rsa1.0.00258.1 | 1065 | 102381 | 1.00E-154 | 301  | 309  | 97 -  | 141 | 449  | 46518  | 46826  |
| UN51739 | Rsa1.0.00812.1 | 657  | 63233  | 1.00E-150 | 291  | 298  | 97 +  | 5   | 302  | 17154  | 17451  |
| UN51740 | Rsa1.0.01295.1 | 973  | 49040  | 1.00E-144 | 280  | 286  | 97 +  | 575 | 860  | 21320  | 21603  |
| UN51741 | Rsa1.0.07439.1 | 1353 | 9392   | 8.00E-89  | 167  | 167  | 100 + | 10  | 176  | 4682   | 4848   |
| UN51742 | Rsa1.0.02054.1 | 933  | 35548  | 1.00E-133 | 268  | 277  | 96 -  | 492 | 768  | 27078  | 27354  |
| UN51743 | Rsa1.0.00131.1 | 348  | 432233 | 1.00E-123 | 251  | 260  | 96 +  | 89  | 348  | 69127  | 69386  |
| UN51744 | Rsa1.0.00246.1 | 1019 | 103541 | 1.00E-107 | 203  | 205  | 99 -  | 130 | 334  | 6780   | 6984   |
| UN51745 | Rsa1.0.03954.1 | 658  | 19886  | 1.00E-143 | 270  | 273  | 98 +  | 1   | 273  | 831    | 1102   |
| UN51746 | Rsa1.0.01502.1 | 1228 | 44519  | 0         | 482  | 491  | 98 -  | 2   | 486  | 36621  | 37111  |
| UN51747 | Rsa1.0.00409.1 | 549  | 146788 | 1.00E-159 | 345  | 365  | 94 -  | 10  | 374  | 1659   | 2023   |
| UN51748 | Rsa1.0.00804.1 | 902  | 63726  | 1.00E-152 | 288  | 292  | 98 +  | 613 | 902  | 53087  | 53378  |
| UN51749 | Rsa1.0.02103.1 | 867  | 35006  | 0         | 567  | 599  | 94 -  | 225 | 814  | 13499  | 14094  |
| UN51750 | Rsa1.0.00016.1 | 1049 | 831256 | 1.00E-151 | 314  | 322  | 97 +  | 132 | 450  | 353892 | 354210 |
| UN51751 | Rsa1.0.00007.1 | 947  | 239325 | 5.00E-71  | 158  | 165  | 95 -  | 671 | 835  | 12607  | 12771  |



| UN51791 | #              | #   | #      | #         | #   | #   | #     | # | #   | #   | #      | #      | # |
|---------|----------------|-----|--------|-----------|-----|-----|-------|---|-----|-----|--------|--------|---|
| UN51792 | #              | #   | #      | #         | #   | #   | #     | # | #   | #   | #      | #      | # |
| UN51793 | #              | #   | #      | #         | #   | #   | #     | # | #   | #   | #      | #      | # |
| UN51794 | #              | #   | #      | #         | #   | #   | #     | # | #   | #   | #      | #      | # |
| UN51795 | Rsa1.0_00198.1 | 249 | 222963 | 2.00E-39  | 97  | 99  | 97 -  |   | 43  | 139 | 156160 | 156258 |   |
| UN51796 | Rsa1.0_00832.1 | 213 | 62622  | 5.00E-18  | 100 | 111 | 90 -  |   | 11  | 119 | 35176  | 35283  |   |
| UN51797 | Rsa1.0_00016.1 | 254 | 831256 | 3.00E-23  | 87  | 92  | 94 +  |   | 102 | 189 | 785029 | 785120 |   |
| UN51798 | Rsa1.0_00198.1 | 443 | 222963 | 2.00E-68  | 205 | 219 | 93 -  |   | 167 | 380 | 155853 | 156067 |   |
| UN51799 | Rsa1.0_02178.1 | 405 | 156197 | 8.00E-37  | 103 | 107 | 96 -  |   | 1   | 107 | 152755 | 152858 |   |
| UN51800 | Rsa1.0_00506.1 | 329 | 79106  | 2.00E-30  | 68  | 68  | 100 - |   | 31  | 98  | 12395  | 12462  |   |
| UN51801 | Rsa1.0_00170.1 | 419 | 179538 | 6.00E-44  | 101 | 103 | 98 -  |   | 186 | 288 | 91456  | 91557  |   |
| UN51802 | Rsa1.0_00717.1 | 294 | 67051  | 1.00E-56  | 178 | 195 | 91 -  |   | 1   | 192 | 8537   | 8729   |   |
| UN51803 | Rsa1.0_02178.1 | 425 | 156197 | 9.00E-43  | 99  | 101 | 98 -  |   | 1   | 100 | 152755 | 152855 |   |
| UN51804 | Rsa1.0_02178.1 | 284 | 156197 | 9.00E-45  | 102 | 104 | 98 -  |   | 1   | 103 | 152755 | 152858 |   |
| UN51805 | Rsa1.0_01410.1 | 318 | 46345  | 1.00E-123 | 251 | 259 | 96 +  |   | 1   | 258 | 33762  | 34019  |   |
| UN51806 | Rsa1.0_00015.1 | 296 | 561803 | 1.00E-53  | 178 | 198 | 89 +  |   | 59  | 252 | 483083 | 483270 |   |
| UN51807 | Rsa1.0_06364.1 | 440 | 11151  | 2.00E-44  | 110 | 115 | 95 +  |   | 1   | 114 | 11037  | 11151  |   |
| UN51808 | Rsa1.0_00429.1 | 349 | 85559  | 2.00E-77  | 190 | 199 | 95 +  |   | 1   | 195 | 23314  | 23512  |   |
| UN51809 | Rsa1.0_08846.1 | 330 | 6867   | 3.00E-36  | 97  | 102 | 95 +  |   | 99  | 200 | 1961   | 2061   |   |
| UN51810 | Rsa1.0_00628.1 | 394 | 214360 | 3.00E-58  | 126 | 130 | 96 +  |   | 35  | 164 | 24915  | 25044  |   |
| UN51811 | Rsa1.0_08846.1 | 364 | 6867   | 3.00E-42  | 106 | 111 | 95 +  |   | 94  | 204 | 1959   | 2068   |   |
| UN51812 | Rsa1.0_00145.1 | 403 | 261008 | 1.00E-126 | 275 | 289 | 95 -  |   | 7   | 294 | 51003  | 51291  |   |
| UN51813 | Rsa1.0_03521.1 | 436 | 396204 | 1.00E-69  | 148 | 150 | 98 -  |   | 1   | 148 | 15133  | 15282  |   |
| UN51814 | Rsa1.0_03904.1 | 324 | 20162  | 1.00E-53  | 251 | 288 | 87 -  |   | 20  | 281 | 5591   | 5877   |   |
| UN51815 | Rsa1.0_07182.1 | 762 | 9777   | 0         | 699 | 702 | 99 -  |   | 62  | 762 | 5387   | 6088   |   |
| UN51816 | Rsa1.0_04768.1 | 325 | 16066  | 1.00E-104 | 210 | 216 | 97 -  |   | 110 | 325 | 7463   | 7678   |   |
| UN51817 | Rsa1.0_00111.1 | 548 | 390088 | 7.00E-78  | 171 | 179 | 95 -  |   | 44  | 222 | 379950 | 380122 |   |
| UN51818 | Rsa1.0_00875.1 | 602 | 61371  | 0         | 384 | 403 | 95 -  |   | 3   | 405 | 7376   | 7778   |   |
| UN51819 | Rsa1.0_02903.1 | 587 | 26901  | 0         | 559 | 573 | 97 +  |   | 18  | 587 | 4750   | 5319   |   |
| UN51820 | Rsa1.0_04884.1 | 181 | 15599  | 4.00E-58  | 159 | 166 | 95 +  |   | 6   | 165 | 9394   | 9559   |   |
| UN51821 | Rsa1.0_00150.1 | 754 | 154416 | 0         | 735 | 760 | 96 +  |   | 1   | 754 | 151445 | 152197 |   |
| UN51822 | Rsa1.0_01920.1 | 753 | 158533 | 1.00E-119 | 327 | 368 | 88 -  |   | 12  | 353 | 32878  | 33237  |   |
| UN51823 | Rsa1.0_00050.1 | 761 | 237174 | 0         | 511 | 542 | 94 -  |   | 228 | 761 | 96524  | 97062  |   |
| UN51824 | Rsa1.0_00363.1 | 111 | 90968  | 1.00E-13  | 82  | 90  | 91 -  |   | 6   | 93  | 73740  | 73825  |   |
| UN51825 | Rsa1.0_76474.1 | 726 | 300    | 1.00E-117 | 214 | 214 | 100 + |   | 513 | 726 | 36     | 249    |   |
| UN51826 | Rsa1.0_02911.1 | 660 | 142461 | 0         | 396 | 418 | 94 +  |   | 17  | 419 | 25126  | 25542  |   |
| UN51827 | Rsa1.0_02078.1 | 574 | 35308  | 0         | 362 | 372 | 97 -  |   | 3   | 374 | 22831  | 23202  |   |
| UN51828 | Rsa1.0_04797.1 | 666 | 15932  | 1.00E-116 | 222 | 224 | 99 -  |   | 176 | 398 | 10610  | 10833  |   |
| UN51829 | Rsa1.0_00476.1 | 122 | 280966 | 2.00E-12  | 49  | 53  | 92 -  |   | 70  | 122 | 270037 | 270089 |   |

|         |                |     |        |           |     |     |       |     |     |        |        |
|---------|----------------|-----|--------|-----------|-----|-----|-------|-----|-----|--------|--------|
| UN51830 | Rsa1.0.00001.1 | 365 | 363028 | 2.00E-89  | 254 | 284 | 89 +  | 67  | 347 | 190879 | 191142 |
| UN51831 | Rsa1.0.05023.1 | 768 | 15105  | 0         | 380 | 383 | 99 -  | 45  | 427 | 8583   | 8965   |
| UN51832 | Rsa1.0.01053.1 | 760 | 55483  | 0         | 758 | 759 | 99 -  | 3   | 760 | 54255  | 55013  |
| UN51833 | Rsa1.0.01537.1 | 483 | 187285 | 1.00E-103 | 232 | 245 | 94 -  | 131 | 372 | 12649  | 12893  |
| UN51834 | Rsa1.0.00201.1 | 840 | 232851 | 1.00E-134 | 280 | 291 | 96 +  | 8   | 298 | 38233  | 38522  |
| UN51835 | Rsa1.0.00067.1 | 734 | 415055 | 0         | 599 | 636 | 94 -  | 107 | 734 | 68666  | 69301  |
| UN51836 | Rsa1.0.00620.1 | 729 | 71985  | 1.00E-113 | 220 | 223 | 98 +  | 307 | 529 | 5160   | 5381   |
| UN51837 | Rsa1.0.00806.1 | 335 | 63674  | 1.00E-159 | 320 | 332 | 96 -  | 4   | 335 | 46897  | 47228  |
| UN51838 | Rsa1.0.02144.1 | 573 | 34630  | 1.00E-150 | 314 | 326 | 96 -  | 250 | 573 | 8827   | 9152   |
| UN51839 | Rsa1.0.03218.1 | 712 | 24539  | 3.00E-93  | 201 | 208 | 96 -  | 3   | 208 | 9502   | 9707   |
| UN51840 | Rsa1.0.11463.1 | 671 | 5500   | 2.00E-97  | 275 | 301 | 91 +  | 375 | 671 | 213    | 508    |
| UN51841 | Rsa1.0.00206.1 | 839 | 109040 | 0         | 509 | 525 | 96 -  | 271 | 788 | 72614  | 73138  |
| UN51842 | Rsa1.0.00087.1 | 776 | 761073 | 1.00E-137 | 271 | 279 | 97 +  | 295 | 573 | 432699 | 432977 |
| UN51843 | Rsa1.0.00764.1 | 131 | 65056  | 2.00E-31  | 83  | 85  | 97 +  | 1   | 85  | 40416  | 40498  |
| UN51844 | Rsa1.0.01603.1 | 525 | 42468  | 1.00E-142 | 313 | 331 | 94 -  | 198 | 525 | 39915  | 40241  |
| UN51845 | Rsa1.0.05648.1 | 745 | 13049  | 1.00E-180 | 508 | 574 | 88 +  | 193 | 743 | 1990   | 2537   |
| UN51846 | Rsa1.0.00170.1 | 684 | 179538 | 1.00E-76  | 152 | 154 | 98 -  | 270 | 423 | 29057  | 29210  |
| UN51847 | Rsa1.0.00110.1 | 830 | 132719 | 0         | 697 | 731 | 95 +  | 3   | 731 | 34494  | 35208  |
| UN51848 | Rsa1.0.10212.1 | 638 | 5941   | 0         | 396 | 418 | 94 -  | 221 | 638 | 4869   | 5281   |
| UN51849 | Rsa1.0.02683.1 | 820 | 28679  | 1.00E-162 | 289 | 289 | 100 + | 299 | 587 | 19539  | 19827  |
| UN51850 | Rsa1.0.00348.1 | 653 | 92818  | 1.00E-113 | 220 | 224 | 98 +  | 338 | 561 | 10059  | 10282  |
| UN51851 | Rsa1.0.01526.1 | 260 | 43919  | 1.00E-137 | 259 | 262 | 98 -  | 1   | 260 | 40299  | 40560  |
| UN51852 | Rsa1.0.01449.1 | 765 | 45570  | 1.00E-101 | 194 | 196 | 98 +  | 2   | 197 | 42998  | 43193  |
| UN51853 | Rsa1.0.00008.1 | 725 | 358124 | 7.00E-48  | 101 | 102 | 99 -  | 548 | 649 | 247540 | 247641 |
| UN51854 | Rsa1.0.00813.1 | 760 | 63202  | 1.00E-106 | 217 | 224 | 96 +  | 303 | 526 | 43785  | 44008  |
| UN51855 | Rsa1.0.03342.1 | 844 | 23600  | 1.00E-98  | 183 | 183 | 100 - | 336 | 518 | 7690   | 7872   |
| UN51856 | Rsa1.0.00453.1 | 454 | 83031  | 1.00E-139 | 302 | 311 | 97 +  | 141 | 451 | 15490  | 15794  |
| UN51857 | Rsa1.0.00473.1 | 396 | 212204 | 0         | 388 | 399 | 97 +  | 1   | 396 | 195470 | 195867 |
| UN51858 | Rsa1.0.04107.1 | 516 | 19007  | 0         | 453 | 454 | 99 -  | 64  | 516 | 7912   | 8365   |
| UN51859 | Rsa1.0.02949.1 | 559 | 26506  | 1.00E-132 | 295 | 313 | 94 +  | 250 | 559 | 9047   | 9359   |
| UN51860 | Rsa1.0.00686.1 | 692 | 68511  | 0         | 666 | 686 | 97 -  | 10  | 692 | 52372  | 53054  |
| UN51861 | Rsa1.0.02125.1 | 686 | 34775  | 1.00E-58  | 133 | 138 | 96 +  | 552 | 686 | 24931  | 25068  |
| UN51862 | Rsa1.0.04239.1 | 304 | 18345  | 5.00E-90  | 168 | 168 | 100 - | 137 | 304 | 2761   | 2928   |
| UN51863 | Rsa1.0.21115.1 | 577 | 1233   | 1.00E-174 | 410 | 442 | 92 -  | 2   | 443 | 437    | 877    |
| UN51864 | Rsa1.0.00463.1 | 188 | 189177 | 7.00E-97  | 185 | 187 | 98 +  | 2   | 188 | 145118 | 145304 |
| UN51865 | Rsa1.0.01402.1 | 578 | 46509  | 0         | 397 | 417 | 95 -  | 162 | 578 | 19293  | 19709  |
| UN51866 | Rsa1.0.00779.1 | 253 | 64568  | 1.00E-119 | 245 | 253 | 96 -  | 1   | 253 | 50856  | 51107  |
| UN51867 | Rsa1.0.00658.1 | 271 | 69740  | 3.00E-23  | 62  | 64  | 96 +  | 122 | 185 | 25847  | 25910  |
| UN51868 | Rsa1.0.01267.1 | 637 | 49670  | 0         | 600 | 636 | 94 -  | 3   | 637 | 9724   | 10343  |

|         |                |     |        |           |     |     |       |     |     |        |        |
|---------|----------------|-----|--------|-----------|-----|-----|-------|-----|-----|--------|--------|
| UN51869 | Rsa1.0.00978.1 | 797 | 57739  | 0         | 709 | 758 | 93 +  | 1   | 746 | 16117  | 16861  |
| UN51870 | Rsa1.0.03935.1 | 909 | 19983  | 1.00E-28  | 213 | 262 | 81 -  | 184 | 445 | 996    | 1257   |
| UN51871 | Rsa1.0.08691.1 | 775 | 7034   | 1.00E-131 | 322 | 348 | 92 +  | 234 | 573 | 5656   | 6003   |
| UN51872 | Rsa1.0.02548.1 | 614 | 30228  | 1.00E-151 | 298 | 305 | 97 +  | 314 | 614 | 10107  | 10411  |
| UN51873 | Rsa1.0.01456.1 | 792 | 45372  | 1.00E-151 | 328 | 344 | 95 -  | 456 | 792 | 21942  | 22285  |
| UN51874 | Rsa1.0.11893.1 | 309 | 5379   | 1.00E-139 | 294 | 306 | 96 +  | 4   | 309 | 4071   | 4373   |
| UN51875 | Rsa1.0.01657.1 | 769 | 41436  | 0         | 743 | 767 | 96 -  | 3   | 769 | 23477  | 24243  |
| UN51876 | Rsa1.0.04252.1 | 700 | 18262  | 1.00E-126 | 247 | 253 | 97 +  | 205 | 457 | 4528   | 4780   |
| UN51877 | Rsa1.0.03738.1 | 679 | 21071  | 2.00E-82  | 197 | 210 | 93 +  | 155 | 361 | 8042   | 8251   |
| UN51878 | Rsa1.0.29253.1 | 831 | 788    | 0         | 597 | 604 | 98 -  | 228 | 831 | 186    | 788    |
| UN51879 | Rsa1.0.01824.1 | 894 | 38733  | 0         | 519 | 548 | 94 -  | 349 | 888 | 11116  | 11663  |
| UN51880 | Rsa1.0.00081.1 | 566 | 143261 | 0         | 543 | 591 | 91 +  | 3   | 566 | 123521 | 124110 |
| UN51881 | Rsa1.0.00100.1 | 679 | 249232 | 1.00E-139 | 317 | 337 | 94 -  | 80  | 412 | 16262  | 16598  |
| UN51882 | Rsa1.0.04804.1 | 471 | 15902  | 0         | 464 | 470 | 98 -  | 3   | 471 | 6383   | 6852   |
| UN51883 | Rsa1.0.00991.1 | 760 | 143101 | 1.00E-174 | 380 | 404 | 94 -  | 155 | 552 | 142698 | 143101 |
| UN51884 | Rsa1.0.00252.1 | 339 | 102760 | 1.00E-116 | 278 | 291 | 95 +  | 1   | 285 | 63519  | 63807  |
| UN51885 | Rsa1.0.31547.1 | 743 | 725    | 1.00E-155 | 296 | 302 | 98 -  | 1   | 302 | 275    | 576    |
| UN51886 | Rsa1.0.00898.1 | 880 | 202772 | 2.00E-91  | 201 | 211 | 95 +  | 106 | 316 | 171119 | 171329 |
| UN51887 | Rsa1.0.01247.1 | 165 | 49934  | 3.00E-34  | 77  | 78  | 98 -  | 2   | 79  | 12683  | 12760  |
| UN51888 | Rsa1.0.01207.1 | 408 | 141053 | 1.00E-145 | 273 | 277 | 98 +  | 132 | 408 | 91709  | 91985  |
| UN51889 | Rsa1.0.03408.1 | 837 | 23154  | 1.00E-133 | 250 | 253 | 98 -  | 4   | 256 | 6016   | 6268   |
| UN51890 | Rsa1.0.02585.1 | 722 | 29865  | 0         | 547 | 558 | 98 -  | 165 | 722 | 16397  | 16954  |
| UN51891 | Rsa1.0.01015.1 | 753 | 56752  | 2.00E-36  | 206 | 252 | 81 +  | 170 | 405 | 1739   | 1990   |
| UN51892 | Rsa1.0.00806.1 | 658 | 63674  | 1.00E-162 | 342 | 360 | 95 +  | 305 | 658 | 4643   | 5002   |
| UN51893 | Rsa1.0.14175.1 | 740 | 3704   | 1.00E-123 | 234 | 237 | 98 +  | 37  | 273 | 2450   | 2686   |
| UN51894 | Rsa1.0.01974.1 | 759 | 36583  | 1.00E-121 | 242 | 249 | 97 +  | 118 | 366 | 11791  | 12039  |
| UN51895 | Rsa1.0.00855.1 | 303 | 62047  | 1.00E-144 | 299 | 315 | 94 +  | 1   | 303 | 13738  | 14052  |
| UN51896 | Rsa1.0.00349.1 | 839 | 92621  | 3.00E-84  | 159 | 159 | 100 + | 407 | 565 | 37605  | 37763  |
| UN51897 | Rsa1.0.02802.1 | 332 | 27736  | 1.00E-99  | 187 | 188 | 99 -  | 145 | 332 | 12260  | 12447  |
| UN51898 | Rsa1.0.01029.1 | 627 | 256254 | 1.00E-148 | 272 | 274 | 99 +  | 79  | 352 | 22444  | 22717  |
| UN51899 | Rsa1.0.01989.1 | 643 | 36439  | 1.00E-155 | 342 | 357 | 95 +  | 1   | 347 | 10050  | 10405  |
| UN51900 | Rsa1.0.01505.1 | 834 | 44382  | 1.00E-114 | 251 | 261 | 96 +  | 575 | 834 | 37559  | 37817  |
| UN51901 | Rsa1.0.00153.1 | 687 | 192931 | 1.00E-106 | 208 | 212 | 98 +  | 110 | 321 | 76718  | 76929  |
| UN51902 | Rsa1.0.04426.1 | 819 | 17399  | 0         | 632 | 657 | 96 +  | 7   | 660 | 16152  | 16808  |
| UN51903 | Rsa1.0.00251.1 | 576 | 303968 | 0         | 555 | 577 | 96 -  | 1   | 576 | 157858 | 158431 |
| UN51904 | Rsa1.0.01236.1 | 295 | 50156  | 4.00E-47  | 117 | 123 | 95 +  | 41  | 163 | 43426  | 43546  |
| UN51905 | Rsa1.0.35002.1 | 836 | 646    | 2.00E-85  | 170 | 173 | 98 +  | 150 | 322 | 28     | 200    |
| UN51906 | Rsa1.0.00259.1 | 846 | 163204 | 0         | 666 | 690 | 96 +  | 160 | 846 | 90892  | 91572  |
| UN51907 | Rsa1.0.05951.1 | 823 | 12128  | 0         | 805 | 829 | 97 -  | 1   | 823 | 7669   | 8494   |

|         |                |     |        |           |     |     |       |     |     |        |        |
|---------|----------------|-----|--------|-----------|-----|-----|-------|-----|-----|--------|--------|
| UN51908 | Rsa1.0.02105.1 | 174 | 156953 | 6.00E-57  | 157 | 171 | 91 -  | 2   | 172 | 33149  | 33317  |
| UN51909 | Rsa1.0.00533.1 | 843 | 77375  | 6.00E-98  | 193 | 196 | 98 +  | 449 | 641 | 44934  | 45129  |
| UN51910 | Rsa1.0.00486.1 | 781 | 80875  | 0         | 535 | 564 | 94 +  | 3   | 563 | 14977  | 15529  |
| UN51911 | Rsa1.0.00681.1 | 649 | 68779  | 1.00E-157 | 311 | 322 | 96 +  | 3   | 316 | 60758  | 61079  |
| UN51912 | Rsa1.0.00285.1 | 765 | 149638 | 1.00E-67  | 157 | 167 | 94 +  | 121 | 287 | 119945 | 120102 |
| UN51913 | Rsa1.0.02435.1 | 730 | 31454  | 2.00E-94  | 179 | 180 | 99 +  | 203 | 382 | 16559  | 16738  |
| UN51914 | Rsa1.0.04959.1 | 845 | 15323  | 0         | 840 | 846 | 99 +  | 3   | 845 | 2961   | 3806   |
| UN51915 | Rsa1.0.02917.1 | 599 | 159058 | 0         | 387 | 393 | 98 +  | 207 | 599 | 158258 | 158650 |
| UN51916 | Rsa1.0.00448.1 | 552 | 84048  | 0         | 543 | 551 | 98 -  | 1   | 551 | 53069  | 53619  |
| UN51917 | Rsa1.0.00034.1 | 798 | 260119 | 0         | 370 | 380 | 97 +  | 373 | 752 | 129833 | 130211 |
| UN51918 | Rsa1.0.03617.1 | 676 | 21745  | 0         | 661 | 675 | 97 -  | 3   | 676 | 13314  | 13988  |
| UN51919 | Rsa1.0.02247.1 | 658 | 33427  | 4.00E-89  | 384 | 447 | 85 -  | 39  | 468 | 3077   | 3508   |
| UN51920 | Rsa1.0.75906.1 | 524 | 302    | 1.00E-156 | 296 | 300 | 98 +  | 114 | 412 | 3      | 302    |
| UN51921 | Rsa1.0.09895.1 | 662 | 6101   | 0         | 644 | 674 | 95 -  | 2   | 662 | 4946   | 5618   |
| UN51922 | Rsa1.0.00079.1 | 677 | 606987 | 0         | 672 | 675 | 99 -  | 3   | 677 | 93565  | 94239  |
| UN51923 | Rsa1.0.05326.1 | 758 | 14139  | 0         | 356 | 363 | 98 -  | 2   | 364 | 5288   | 5650   |
| UN51924 | Rsa1.0.01285.1 | 555 | 172709 | 0         | 541 | 554 | 97 +  | 2   | 555 | 134717 | 135265 |
| UN51925 | Rsa1.0.00005.1 | 405 | 353093 | 0         | 402 | 403 | 99 -  | 3   | 405 | 9358   | 9760   |
| UN51926 | Rsa1.0.03244.1 | 743 | 24413  | 0         | 439 | 449 | 97 +  | 3   | 442 | 10828  | 11276  |
| UN51927 | Rsa1.0.00017.1 | 622 | 752458 | 2.00E-97  | 193 | 197 | 97 -  | 292 | 488 | 407902 | 408098 |
| UN51928 | Rsa1.0.00032.1 | 632 | 306326 | 0         | 451 | 453 | 99 +  | 1   | 453 | 195646 | 196098 |
| UN51929 | Rsa1.0.09306.1 | 717 | 6468   | 0         | 382 | 383 | 99 -  | 107 | 489 | 971    | 1353   |
| UN51930 | Rsa1.0.00281.1 | 665 | 99908  | 0         | 634 | 681 | 93 -  | 3   | 665 | 17646  | 18325  |
| UN51931 | Rsa1.0.00008.1 | 836 | 358124 | 0         | 729 | 750 | 97 -  | 88  | 836 | 64574  | 65320  |
| UN51932 | Rsa1.0.19257.1 | 786 | 1455   | 1.00E-126 | 312 | 335 | 93 -  | 455 | 786 | 805    | 1131   |
| UN51933 | Rsa1.0.00014.1 | 786 | 348985 | 0         | 350 | 350 | 100 - | 2   | 351 | 332318 | 332667 |
| UN51934 | Rsa1.0.00930.1 | 850 | 59224  | 1.00E-145 | 269 | 270 | 99 +  | 512 | 780 | 48406  | 48675  |
| UN51935 | Rsa1.0.02222.1 | 796 | 152798 | 1.00E-122 | 226 | 227 | 99 -  | 562 | 788 | 14639  | 14865  |
| UN51936 | Rsa1.0.29334.1 | 797 | 785    | 0         | 547 | 564 | 96 +  | 235 | 797 | 1      | 564    |
| UN51937 | Rsa1.0.00017.1 | 516 | 752458 | 0         | 463 | 473 | 97 +  | 50  | 516 | 320343 | 320814 |
| UN51938 | Rsa1.0.00323.1 | 724 | 159650 | 0         | 690 | 731 | 94 -  | 4   | 720 | 82931  | 83650  |
| UN51939 | Rsa1.0.00030.1 | 841 | 250988 | 1.00E-144 | 278 | 283 | 98 -  | 3   | 284 | 46719  | 47001  |
| UN51940 | Rsa1.0.00471.1 | 735 | 81897  | 0         | 429 | 441 | 97 +  | 297 | 735 | 71461  | 71901  |
| UN51941 | Rsa1.0.04235.1 | 833 | 18373  | 0         | 518 | 557 | 92 -  | 275 | 829 | 11502  | 12055  |
| UN51942 | Rsa1.0.06379.1 | 829 | 11131  | 2.00E-73  | 150 | 153 | 98 +  | 392 | 544 | 3938   | 4090   |
| UN51943 | Rsa1.0.00515.1 | 821 | 78417  | 0         | 654 | 690 | 94 +  | 2   | 691 | 16314  | 17002  |
| UN51944 | Rsa1.0.00022.1 | 781 | 200461 | 0         | 555 | 557 | 99 +  | 3   | 559 | 22577  | 23133  |
| UN51945 | Rsa1.0.01009.1 | 488 | 56922  | 1.00E-145 | 290 | 299 | 96 -  | 3   | 299 | 32379  | 32677  |
| UN51946 | Rsa1.0.01565.1 | 761 | 155447 | 0         | 507 | 520 | 97 -  | 2   | 520 | 34665  | 35184  |

|         |                |     |        |           |     |     |       |     |     |        |        |
|---------|----------------|-----|--------|-----------|-----|-----|-------|-----|-----|--------|--------|
| UN51947 | Rsa1.0_01904.1 | 865 | 37450  | 1.00E-176 | 332 | 338 | 98 +  | 353 | 690 | 18865  | 19202  |
| UN51948 | Rsa1.0_01390.1 | 287 | 46695  | 7.00E-92  | 252 | 277 | 90 -  | 10  | 286 | 19097  | 19359  |
| UN51949 | Rsa1.0_00153.1 | 732 | 192931 | 0         | 508 | 521 | 97 +  | 212 | 732 | 148909 | 149428 |
| UN51950 | Rsa1.0_08486.1 | 800 | 7286   | 1.00E-128 | 284 | 300 | 94 -  | 410 | 707 | 4169   | 4468   |
| UN51951 | Rsa1.0_01696.1 | 729 | 301850 | 0         | 552 | 576 | 95 -  | 156 | 729 | 299996 | 300553 |
| UN51952 | Rsa1.0_00049.1 | 825 | 167018 | 0         | 748 | 768 | 97 -  | 58  | 825 | 45536  | 46300  |
| UN51953 | #              | #   | #      | #         | #   | #   | #     | #   | #   | #      | #      |
| UN51954 | Rsa1.0_00300.1 | 274 | 97747  | 1.00E-121 | 257 | 267 | 96 -  | 2   | 268 | 88772  | 89035  |
| UN51955 | Rsa1.0_00600.1 | 178 | 73395  | 1.00E-79  | 168 | 174 | 96 +  | 5   | 178 | 26381  | 26554  |
| UN51956 | Rsa1.0_00635.1 | 733 | 175826 | 1.00E-123 | 265 | 276 | 96 +  | 451 | 724 | 15994  | 16269  |
| UN51957 | Rsa1.0_04018.1 | 467 | 19551  | 1.00E-133 | 305 | 325 | 93 +  | 108 | 421 | 18110  | 18430  |
| UN51958 | Rsa1.0_08461.1 | 736 | 7312   | 0         | 589 | 664 | 88 +  | 26  | 674 | 854    | 1514   |
| UN51959 | Rsa1.0_01373.1 | 855 | 47052  | 1.00E-158 | 289 | 291 | 99 +  | 565 | 855 | 21559  | 21849  |
| UN51960 | Rsa1.0_01950.1 | 463 | 36950  | 1.00E-173 | 331 | 339 | 97 +  | 125 | 463 | 7843   | 8181   |
| UN51961 | Rsa1.0_00470.1 | 662 | 81968  | 1.00E-178 | 358 | 372 | 96 -  | 291 | 662 | 27998  | 28369  |
| UN51962 | Rsa1.0_00472.1 | 560 | 398134 | 1.00E-121 | 230 | 233 | 98 -  | 54  | 286 | 298500 | 298732 |
| UN51963 | Rsa1.0_02214.1 | 776 | 161150 | 1.00E-175 | 318 | 319 | 99 -  | 382 | 699 | 695    | 1013   |
| UN51964 | Rsa1.0_00376.1 | 745 | 90101  | 1.00E-155 | 308 | 318 | 96 +  | 225 | 542 | 49173  | 49490  |
| UN51965 | Rsa1.0_00089.1 | 379 | 406142 | 1.00E-72  | 219 | 242 | 90 -  | 149 | 379 | 210420 | 210658 |
| UN51966 | Rsa1.0_04483.1 | 395 | 17174  | 1.00E-171 | 349 | 362 | 96 -  | 34  | 395 | 7590   | 7947   |
| UN51967 | Rsa1.0_02884.1 | 648 | 27034  | 0         | 418 | 436 | 95 +  | 148 | 581 | 6764   | 7198   |
| UN51968 | Rsa1.0_01753.1 | 709 | 39794  | 0         | 563 | 620 | 90 +  | 2   | 583 | 8597   | 9202   |
| UN51969 | Rsa1.0_02259.1 | 747 | 33299  | 0         | 596 | 606 | 98 -  | 142 | 747 | 30894  | 31499  |
| UN51970 | Rsa1.0_02536.1 | 792 | 30368  | 1.00E-141 | 316 | 333 | 94 -  | 462 | 792 | 21536  | 21861  |
| UN51971 | Rsa1.0_00159.1 | 780 | 431686 | 0         | 574 | 585 | 98 +  | 196 | 780 | 385251 | 385832 |
| UN51972 | Rsa1.0_00108.1 | 495 | 478491 | 1.00E-124 | 329 | 360 | 91 -  | 141 | 495 | 458853 | 459192 |
| UN51973 | Rsa1.0_02634.1 | 852 | 29299  | 1.00E-120 | 226 | 228 | 99 -  | 3   | 230 | 15630  | 15857  |
| UN51974 | Rsa1.0_01650.1 | 709 | 41589  | 1.00E-178 | 377 | 394 | 95 -  | 321 | 709 | 1658   | 2051   |
| UN51975 | Rsa1.0_00701.1 | 853 | 67691  | 1.00E-119 | 316 | 344 | 91 +  | 517 | 853 | 22399  | 22739  |
| UN51976 | Rsa1.0_00571.1 | 607 | 329018 | 0         | 588 | 610 | 96 +  | 3   | 607 | 47284  | 47889  |
| UN51977 | Rsa1.0_00646.1 | 778 | 70473  | 5.00E-58  | 136 | 143 | 95 -  | 3   | 145 | 7599   | 7741   |
| UN51978 | Rsa1.0_00757.1 | 367 | 65559  | 1.00E-168 | 350 | 367 | 95 +  | 1   | 367 | 23490  | 23856  |
| UN51979 | Rsa1.0_02076.1 | 443 | 153121 | 1.00E-136 | 299 | 321 | 93 +  | 123 | 443 | 33602  | 33904  |
| UN51980 | Rsa1.0_05421.1 | 750 | 13806  | 1.00E-150 | 325 | 341 | 95 -  | 5   | 345 | 8859   | 9196   |
| UN51981 | Rsa1.0_00151.1 | 748 | 119541 | 1.00E-168 | 387 | 416 | 93 -  | 13  | 421 | 85430  | 85832  |
| UN51982 | Rsa1.0_00777.1 | 825 | 191865 | 1.00E-171 | 305 | 305 | 100 - | 520 | 824 | 129841 | 130145 |
| UN51983 | Rsa1.0_00650.1 | 747 | 70235  | 0         | 397 | 399 | 99 +  | 258 | 656 | 24284  | 24682  |
| UN51984 | Rsa1.0_01896.1 | 387 | 37512  | 1.00E-145 | 367 | 396 | 92 +  | 2   | 387 | 6778   | 7168   |
| UN51985 | Rsa1.0_00883.1 | 708 | 61230  | 2.00E-35  | 100 | 107 | 93 +  | 159 | 265 | 52523  | 52626  |

|         |                |     |        |           |     |     |       |     |     |        |        |
|---------|----------------|-----|--------|-----------|-----|-----|-------|-----|-----|--------|--------|
| UN51986 | Rsa1.0_01388.1 | 700 | 46741  | 1.00E-129 | 246 | 250 | 98 +  | 207 | 456 | 6365   | 6614   |
| UN51987 | Rsa1.0_03846.1 | 614 | 20481  | 0         | 594 | 614 | 96 +  | 3   | 611 | 19667  | 20280  |
| UN51988 | Rsa1.0_02084.1 | 740 | 35205  | 0         | 715 | 738 | 96 -  | 3   | 740 | 34054  | 34791  |
| UN51989 | Rsa1.0_01806.1 | 811 | 39021  | 1.00E-106 | 199 | 200 | 99 -  | 64  | 263 | 32010  | 32209  |
| UN51990 | Rsa1.0_00666.1 | 824 | 69505  | 0         | 477 | 508 | 93 +  | 305 | 808 | 8565   | 9065   |
| UN51991 | Rsa1.0_06258.1 | 827 | 11371  | 0         | 438 | 454 | 96 -  | 1   | 454 | 9327   | 9780   |
| UN51992 | Rsa1.0_06918.1 | 834 | 10166  | 0         | 484 | 514 | 94 +  | 343 | 834 | 1111   | 1624   |
| UN51993 | Rsa1.0_00089.1 | 709 | 406142 | 0         | 348 | 354 | 98 -  | 3   | 356 | 326317 | 326670 |
| UN51994 | Rsa1.0_01777.1 | 630 | 39511  | 1.00E-131 | 237 | 237 | 100 + | 394 | 630 | 20984  | 21220  |
| UN51995 | Rsa1.0_01513.1 | 765 | 44234  | 4.00E-83  | 249 | 282 | 88 -  | 503 | 765 | 17220  | 17498  |
| UN51996 | Rsa1.0_00053.1 | 767 | 263459 | 4.00E-71  | 146 | 149 | 97 +  | 44  | 192 | 49591  | 49739  |
| UN51997 | Rsa1.0_03995.1 | 726 | 19654  | 0         | 564 | 569 | 99 -  | 160 | 726 | 8195   | 8763   |
| UN51998 | Rsa1.0_05741.1 | 752 | 12773  | 0         | 602 | 675 | 89 -  | 99  | 752 | 3179   | 3817   |
| UN51999 | Rsa1.0_01923.1 | 725 | 37233  | 0         | 369 | 379 | 97 -  | 347 | 725 | 25158  | 25536  |
| UN52000 | Rsa1.0_00428.1 | 652 | 85599  | 0         | 416 | 424 | 98 -  | 32  | 455 | 31030  | 31453  |
| UN52001 | Rsa1.0_01464.1 | 625 | 45193  | 1.00E-112 | 215 | 218 | 98 +  | 12  | 229 | 38317  | 38534  |
| UN52002 | Rsa1.0_00886.1 | 856 | 167350 | 0         | 838 | 850 | 98 +  | 3   | 852 | 8139   | 8988   |
| UN52003 | Rsa1.0_00329.1 | 715 | 222544 | 0         | 389 | 399 | 97 +  | 317 | 715 | 48568  | 48966  |
| UN52004 | Rsa1.0_10904.1 | 754 | 5683   | 0         | 555 | 574 | 96 +  | 181 | 754 | 501    | 1074   |
| UN52005 | Rsa1.0_02383.1 | 761 | 31931  | 0         | 624 | 624 | 100 + | 138 | 761 | 18693  | 19316  |
| UN52006 | Rsa1.0_00179.1 | 815 | 393324 | 0         | 500 | 507 | 98 -  | 3   | 509 | 361927 | 362433 |
| UN52007 | Rsa1.0_00006.1 | 673 | 396176 | 0         | 534 | 588 | 90 +  | 1   | 572 | 368471 | 369045 |
| UN52008 | Rsa1.0_00387.1 | 550 | 495407 | 0         | 545 | 550 | 99 +  | 1   | 550 | 298345 | 298893 |
| UN52009 | Rsa1.0_03279.1 | 191 | 24115  | 8.00E-69  | 146 | 150 | 97 +  | 45  | 191 | 23868  | 24017  |
| UN52010 | Rsa1.0_02565.1 | 698 | 30046  | 0         | 689 | 701 | 98 -  | 3   | 698 | 17702  | 18402  |
| UN52011 | Rsa1.0_06185.1 | 680 | 11540  | 0         | 665 | 690 | 96 -  | 3   | 680 | 5461   | 6149   |
| UN52012 | Rsa1.0_00937.1 | 791 | 59061  | 0         | 422 | 423 | 99 -  | 179 | 601 | 54953  | 55375  |
| UN52013 | Rsa1.0_02670.1 | 210 | 28887  | 1.00E-106 | 204 | 207 | 98 +  | 1   | 207 | 1977   | 2183   |
| UN52014 | Rsa1.0_01578.1 | 860 | 42880  | 0         | 458 | 467 | 98 -  | 397 | 860 | 12144  | 12610  |
| UN52015 | Rsa1.0_01685.1 | 856 | 175033 | 0         | 405 | 412 | 98 -  | 402 | 813 | 7539   | 7950   |
| UN52016 | Rsa1.0_00179.1 | 554 | 393324 | 0         | 517 | 535 | 96 +  | 2   | 533 | 351687 | 352218 |
| UN52017 | Rsa1.0_02965.1 | 709 | 26402  | 0         | 677 | 709 | 95 +  | 5   | 709 | 10534  | 11235  |
| UN52018 | Rsa1.0_09458.1 | 774 | 6353   | 0         | 468 | 476 | 98 -  | 299 | 774 | 5178   | 5653   |
| UN52019 | Rsa1.0_00273.1 | 712 | 326186 | 1.00E-95  | 184 | 186 | 98 +  | 286 | 471 | 316478 | 316663 |
| UN52020 | Rsa1.0_00964.1 | 447 | 316648 | 0         | 425 | 457 | 92 -  | 3   | 447 | 128524 | 128979 |
| UN52021 | Rsa1.0_08988.1 | 448 | 6732   | 0         | 420 | 448 | 93 -  | 2   | 448 | 610    | 1039   |
| UN52022 | Rsa1.0_26461.1 | 155 | 891    | 2.00E-75  | 153 | 155 | 98 -  | 2   | 155 | 490    | 644    |
| UN52023 | Rsa1.0_00357.1 | 777 | 173671 | 0         | 327 | 328 | 99 -  | 2   | 329 | 1433   | 1760   |
| UN52024 | Rsa1.0_19737.1 | 678 | 1390   | 0         | 534 | 539 | 99 -  | 139 | 677 | 385    | 923    |



|         |                |     |        |           |     |     |       |     |     |        |        |
|---------|----------------|-----|--------|-----------|-----|-----|-------|-----|-----|--------|--------|
| UN52025 | Rsa1.0.00349.1 | 664 | 92621  | 0         | 661 | 662 | 99 +  | 3   | 664 | 80680  | 81341  |
| UN52026 | Rsa1.0.03972.1 | 223 | 19787  | 7.00E-76  | 198 | 208 | 95 +  | 18  | 223 | 12229  | 12432  |
| UN52027 | Rsa1.0.09146.1 | 864 | 6610   | 2.00E-73  | 153 | 157 | 97 -  | 156 | 312 | 69     | 225    |
| UN52028 | Rsa1.0.07142.1 | 701 | 9832   | 0         | 445 | 451 | 98 -  | 249 | 698 | 4734   | 5184   |
| UN52029 | #              | #   | #      | #         | #   | #   | #     | #   | #   | #      | #      |
| UN52030 | Rsa1.0.22522.1 | 652 | 1114   | 0         | 375 | 378 | 99 -  | 275 | 652 | 737    | 1114   |
| UN52031 | Rsa1.0.11367.1 | 614 | 5531   | 0         | 583 | 605 | 96 -  | 11  | 614 | 571    | 1175   |
| UN52032 | Rsa1.0.51102.1 | 812 | 445    | 1.00E-124 | 292 | 314 | 92 -  | 32  | 345 | 19     | 332    |
| UN52033 | Rsa1.0.69843.1 | 643 | 328    | 1.00E-173 | 323 | 328 | 98 -  | 61  | 388 | 1      | 328    |
| UN52034 | Rsa1.0.02395.1 | 750 | 31785  | 1.00E-148 | 354 | 377 | 93 +  | 386 | 748 | 8334   | 8708   |
| UN52035 | Rsa1.0.17502.1 | 805 | 1815   | 1.00E-145 | 268 | 270 | 99 +  | 3   | 272 | 416    | 685    |
| UN52036 | Rsa1.0.00636.1 | 822 | 71113  | 1.00E-163 | 338 | 358 | 94 +  | 2   | 341 | 9822   | 10179  |
| UN52037 | Rsa1.0.00035.1 | 833 | 176449 | 2.00E-73  | 153 | 157 | 97 +  | 185 | 341 | 155792 | 155948 |
| UN52038 | Rsa1.0.00039.1 | 549 | 296927 | 0         | 523 | 550 | 95 +  | 2   | 549 | 202278 | 202810 |
| UN52039 | Rsa1.0.00034.1 | 836 | 260119 | 0         | 555 | 567 | 97 -  | 166 | 731 | 123489 | 124055 |
| UN52040 | Rsa1.0.01272.1 | 778 | 49553  | 0         | 726 | 749 | 96 -  | 2   | 748 | 19419  | 20166  |
| UN52041 | Rsa1.0.00240.1 | 454 | 104175 | 0         | 446 | 452 | 98 -  | 3   | 454 | 97271  | 97722  |
| UN52042 | Rsa1.0.00002.1 | 676 | 601661 | 2.00E-88  | 211 | 226 | 93 -  | 2   | 227 | 558227 | 558452 |
| UN52043 | Rsa1.0.02007.1 | 667 | 36130  | 0         | 593 | 660 | 89 +  | 44  | 667 | 21714  | 22364  |
| UN52044 | Rsa1.0.00254.1 | 832 | 102600 | 0         | 449 | 460 | 97 -  | 370 | 825 | 53885  | 54344  |
| UN52045 | Rsa1.0.00033.1 | 271 | 515811 | 1.00E-119 | 254 | 265 | 95 +  | 7   | 270 | 489910 | 490174 |
| UN52046 | Rsa1.0.02550.1 | 737 | 291051 | 1.00E-140 | 301 | 317 | 94 +  | 91  | 404 | 4863   | 5173   |
| UN52047 | Rsa1.0.00307.1 | 718 | 199003 | 1.00E-169 | 334 | 345 | 96 -  | 23  | 367 | 36826  | 37170  |
| UN52048 | Rsa1.0.00165.1 | 773 | 116466 | 0         | 375 | 379 | 98 -  | 3   | 381 | 51074  | 51452  |
| UN52049 | Rsa1.0.12971.1 | 705 | 5060   | 0         | 352 | 354 | 99 +  | 352 | 705 | 4563   | 4916   |
| UN52050 | Rsa1.0.03083.1 | 622 | 25520  | 0         | 577 | 635 | 90 -  | 1   | 619 | 21860  | 22486  |
| UN52051 | Rsa1.0.03080.1 | 786 | 25540  | 0         | 768 | 786 | 97 -  | 1   | 786 | 11018  | 11801  |
| UN52052 | Rsa1.0.06784.1 | 611 | 10359  | 0         | 588 | 609 | 96 -  | 4   | 611 | 2328   | 2936   |
| UN52053 | Rsa1.0.01436.1 | 421 | 45894  | 0         | 410 | 423 | 96 -  | 1   | 421 | 31894  | 32316  |
| UN52054 | Rsa1.0.01031.1 | 113 | 56236  | 1.00E-32  | 106 | 115 | 92 -  | 1   | 113 | 42330  | 42444  |
| UN52055 | Rsa1.0.01947.1 | 805 | 36977  | 0         | 604 | 615 | 98 +  | 1   | 613 | 28823  | 29431  |
| UN52056 | Rsa1.0.26144.1 | 840 | 904    | 0         | 470 | 484 | 97 -  | 358 | 840 | 421    | 904    |
| UN52057 | Rsa1.0.00333.1 | 757 | 94500  | 9.00E-72  | 141 | 142 | 99 +  | 230 | 371 | 31769  | 31910  |
| UN52058 | Rsa1.0.00338.1 | 399 | 94109  | 1.00E-111 | 203 | 203 | 100 + | 1   | 203 | 66562  | 66764  |
| UN52059 | Rsa1.0.01006.1 | 790 | 163670 | 1.00E-109 | 210 | 213 | 98 +  | 280 | 492 | 12937  | 13149  |
| UN52060 | Rsa1.0.06801.1 | 135 | 10332  | 1.00E-39  | 126 | 135 | 93 -  | 1   | 135 | 5876   | 6001   |
| UN52061 | Rsa1.0.00417.1 | 232 | 395068 | 1.00E-49  | 160 | 171 | 93 +  | 3   | 165 | 259387 | 259557 |
| UN52062 | Rsa1.0.00527.1 | 119 | 77733  | 5.00E-29  | 68  | 69  | 98 -  | 1   | 69  | 55478  | 55546  |
| UN52063 | Rsa1.0.00115.1 | 755 | 131321 | 1.00E-138 | 311 | 329 | 94 +  | 428 | 755 | 36136  | 36463  |

|         |                |     |        |           |     |     |       |     |     |        |        |
|---------|----------------|-----|--------|-----------|-----|-----|-------|-----|-----|--------|--------|
| UN52064 | Rsa1.0.01537.1 | 802 | 187285 | 1.00E-175 | 359 | 375 | 95 -  | 339 | 713 | 7907   | 8281   |
| UN52065 | Rsa1.0.03028.1 | 174 | 25872  | 7.00E-63  | 164 | 176 | 93 +  | 2   | 174 | 11243  | 11412  |
| UN52066 | Rsa1.0.00522.1 | 675 | 78103  | 1.00E-112 | 256 | 273 | 93 -  | 189 | 461 | 37558  | 37830  |
| UN52067 | Rsa1.0.00681.1 | 593 | 68779  | 0         | 412 | 417 | 98 -  | 177 | 593 | 42453  | 42866  |
| UN52068 | Rsa1.0.01346.1 | 787 | 47618  | 0         | 434 | 444 | 97 -  | 3   | 446 | 7627   | 8070   |
| UN52069 | Rsa1.0.08223.1 | 633 | 7700   | 1.00E-134 | 273 | 280 | 97 -  | 352 | 626 | 7015   | 7294   |
| UN52070 | Rsa1.0.02453.1 | 747 | 31271  | 1.00E-43  | 213 | 253 | 84 -  | 499 | 747 | 3878   | 4111   |
| UN52071 | Rsa1.0.02418.1 | 776 | 31590  | 0         | 542 | 591 | 91 +  | 171 | 760 | 2828   | 3388   |
| UN52072 | Rsa1.0.01012.1 | 227 | 56836  | 1.00E-101 | 224 | 237 | 94 -  | 1   | 227 | 50951  | 51186  |
| UN52073 | Rsa1.0.01771.1 | 412 | 172709 | 1.00E-103 | 202 | 206 | 98 +  | 207 | 412 | 1196   | 1401   |
| UN52074 | Rsa1.0.01202.1 | 276 | 158825 | 1.00E-128 | 271 | 281 | 96 -  | 2   | 276 | 6810   | 7090   |
| UN52075 | Rsa1.0.00037.1 | 281 | 307838 | 2.00E-76  | 157 | 161 | 97 -  | 2   | 162 | 66868  | 67028  |
| UN52076 | Rsa1.0.03632.1 | 775 | 21645  | 3.00E-78  | 170 | 177 | 96 +  | 599 | 775 | 7166   | 7342   |
| UN52077 | Rsa1.0.07038.1 | 733 | 9999   | 1.00E-136 | 338 | 368 | 91 +  | 3   | 365 | 755    | 1109   |
| UN52078 | Rsa1.0.02028.1 | 775 | 35857  | 1.00E-128 | 245 | 249 | 98 -  | 523 | 771 | 5056   | 5304   |
| UN52079 | Rsa1.0.03284.1 | 511 | 24069  | 1.00E-156 | 304 | 312 | 97 +  | 200 | 511 | 4314   | 4625   |
| UN52080 | Rsa1.0.50778.1 | 126 | 447    | 2.00E-46  | 94  | 94  | 100 - | 33  | 126 | 9      | 102    |
| UN52081 | Rsa1.0.00265.1 | 844 | 220635 | 0         | 616 | 635 | 97 +  | 210 | 844 | 175104 | 175738 |
| UN52082 | Rsa1.0.00091.1 | 628 | 139699 | 1.00E-120 | 282 | 298 | 94 +  | 331 | 627 | 80296  | 80589  |
| UN52083 | #              | #   | #      | #         | #   | #   | #     | #   | #   | #      | #      |
| UN52084 | Rsa1.0.00055.1 | 825 | 520193 | 1.00E-103 | 191 | 191 | 100 - | 3   | 193 | 212366 | 212556 |
| UN52085 | Rsa1.0.01269.1 | 689 | 49622  | 0         | 412 | 412 | 100 - | 3   | 414 | 25891  | 26302  |
| UN52086 | Rsa1.0.00655.1 | 792 | 195840 | 0         | 374 | 377 | 99 +  | 417 | 792 | 31182  | 31558  |
| UN52087 | Rsa1.0.02843.1 | 799 | 27383  | 0         | 782 | 799 | 97 -  | 2   | 799 | 8628   | 9423   |
| UN52088 | Rsa1.0.01352.1 | 785 | 47443  | 2.00E-54  | 112 | 113 | 99 +  | 511 | 623 | 10309  | 10421  |
| UN52089 | Rsa1.0.01115.1 | 811 | 183545 | 1.00E-160 | 295 | 298 | 98 +  | 270 | 567 | 7504   | 7801   |
| UN52090 | Rsa1.0.00354.1 | 288 | 232005 | 1.00E-108 | 211 | 214 | 98 +  | 76  | 288 | 54433  | 54646  |
| UN52091 | Rsa1.0.14436.1 | 529 | 3393   | 0         | 393 | 413 | 95 -  | 122 | 526 | 2240   | 2652   |
| UN52092 | Rsa1.0.01688.1 | 531 | 40965  | 0         | 447 | 463 | 96 -  | 1   | 457 | 24324  | 24784  |
| UN52093 | Rsa1.0.02550.1 | 905 | 291051 | 0         | 901 | 907 | 99 -  | 2   | 905 | 13924  | 14830  |
| UN52094 | Rsa1.0.04573.1 | 741 | 16789  | 1.00E-120 | 253 | 266 | 95 -  | 476 | 741 | 11050  | 11304  |
| UN52095 | Rsa1.0.01791.1 | 849 | 160383 | 0         | 494 | 518 | 95 +  | 314 | 828 | 151288 | 151805 |
| UN52096 | Rsa1.0.01506.1 | 790 | 44370  | 1.00E-129 | 247 | 250 | 98 -  | 3   | 251 | 27020  | 27269  |
| UN52097 | Rsa1.0.00120.1 | 757 | 277288 | 0         | 686 | 716 | 95 +  | 42  | 757 | 223100 | 223811 |
| UN52098 | Rsa1.0.00078.1 | 783 | 175053 | 1.00E-159 | 293 | 296 | 98 -  | 369 | 664 | 18817  | 19112  |
| UN52099 | Rsa1.0.04395.1 | 738 | 17570  | 0         | 695 | 745 | 93 -  | 3   | 738 | 7778   | 8504   |
| UN52100 | Rsa1.0.01949.1 | 679 | 36960  | 1.00E-178 | 361 | 376 | 96 -  | 303 | 678 | 32703  | 33078  |
| UN52101 | Rsa1.0.00437.1 | 525 | 84879  | 1.00E-107 | 216 | 222 | 97 -  | 304 | 525 | 64137  | 64358  |
| UN52102 | Rsa1.0.00048.1 | 663 | 167185 | 1.00E-175 | 358 | 373 | 95 +  | 3   | 375 | 12809  | 13178  |

|         |                |     |        |           |     |     |       |     |     |        |        |
|---------|----------------|-----|--------|-----------|-----|-----|-------|-----|-----|--------|--------|
| UN52103 | Rsa1.0_02180.1 | 730 | 34176  | 1.00E-101 | 190 | 191 | 99 -  | 216 | 406 | 20273  | 20463  |
| UN52104 | Rsa1.0_00984.1 | 785 | 57580  | 4.00E-68  | 147 | 152 | 96 -  | 530 | 681 | 932    | 1083   |
| UN52105 | Rsa1.0_01836.1 | 746 | 38503  | 1.00E-103 | 229 | 242 | 94 -  | 16  | 251 | 6305   | 6546   |
| UN52106 | Rsa1.0_13087.1 | 809 | 5016   | 0         | 658 | 671 | 98 -  | 2   | 672 | 1      | 671    |
| UN52107 | Rsa1.0_05862.1 | 888 | 12390  | 1.00E-120 | 228 | 231 | 98 -  | 439 | 669 | 5233   | 5463   |
| UN52108 | Rsa1.0_01220.1 | 681 | 161775 | 0         | 512 | 516 | 99 -  | 166 | 681 | 11304  | 11819  |
| UN52109 | Rsa1.0_00373.1 | 701 | 90296  | 1.00E-136 | 282 | 294 | 95 -  | 310 | 603 | 66043  | 66336  |
| UN52110 | Rsa1.0_01110.1 | 251 | 195852 | 1.00E-122 | 243 | 250 | 97 -  | 2   | 251 | 17765  | 18014  |
| UN52111 | Rsa1.0_00065.1 | 567 | 454616 | 0         | 355 | 356 | 99 -  | 7   | 362 | 151501 | 151856 |
| UN52112 | Rsa1.0_00469.1 | 229 | 82084  | 4.00E-65  | 212 | 236 | 89 +  | 2   | 227 | 13913  | 14147  |
| UN52113 | Rsa1.0_01160.1 | 773 | 52068  | 0         | 575 | 581 | 98 -  | 3   | 582 | 17076  | 17656  |
| UN52114 | Rsa1.0_00088.1 | 770 | 141341 | 0         | 504 | 512 | 98 +  | 164 | 675 | 121435 | 121944 |
| UN52115 | Rsa1.0_15714.1 | 293 | 2466   | 6.00E-83  | 156 | 156 | 100 - | 1   | 156 | 365    | 520    |
| UN52116 | Rsa1.0_01699.1 | 765 | 40816  | 0         | 438 | 441 | 99 -  | 2   | 442 | 25631  | 26071  |
| UN52117 | Rsa1.0_00045.1 | 668 | 328694 | 1.00E-124 | 292 | 314 | 92 +  | 355 | 668 | 229955 | 230268 |
| UN52118 | Rsa1.0_29195.1 | 688 | 789    | 1.00E-165 | 313 | 318 | 98 -  | 3   | 320 | 1      | 317    |
| UN52119 | Rsa1.0_01029.1 | 827 | 256254 | 0         | 379 | 385 | 98 +  | 277 | 661 | 128525 | 128909 |
| UN52120 | Rsa1.0_01469.1 | 608 | 45139  | 1.00E-143 | 260 | 261 | 99 -  | 320 | 580 | 37902  | 38162  |
| UN52121 | Rsa1.0_01541.1 | 643 | 43682  | 1.00E-112 | 217 | 221 | 98 +  | 373 | 593 | 3094   | 3314   |
| UN52122 | Rsa1.0_01697.1 | 738 | 40837  | 0         | 625 | 642 | 97 +  | 74  | 712 | 16635  | 17275  |
| UN52123 | Rsa1.0_00251.1 | 638 | 303968 | 0         | 403 | 423 | 95 -  | 2   | 418 | 116006 | 116424 |
| UN52124 | Rsa1.0_01958.1 | 504 | 261128 | 2.00E-93  | 278 | 308 | 90 +  | 202 | 504 | 110202 | 110493 |
| UN52125 | Rsa1.0_10681.1 | 639 | 5757   | 0         | 581 | 601 | 96 +  | 12  | 612 | 39     | 639    |
| UN52126 | Rsa1.0_00429.1 | 811 | 85559  | 0         | 359 | 371 | 96 +  | 417 | 787 | 23140  | 23510  |
| UN52127 | Rsa1.0_00366.1 | 655 | 90880  | 1.00E-12  | 78  | 91  | 85 +  | 155 | 245 | 174    | 264    |
| UN52128 | Rsa1.0_34806.1 | 713 | 650    | 1.00E-147 | 310 | 323 | 95 -  | 387 | 705 | 83     | 405    |
| UN52129 | Rsa1.0_04301.1 | 639 | 18022  | 1.00E-118 | 240 | 248 | 96 +  | 384 | 631 | 2827   | 3074   |
| UN52130 | Rsa1.0_00616.1 | 864 | 195713 | 1.00E-113 | 249 | 260 | 95 -  | 3   | 262 | 180142 | 180399 |
| UN52131 | Rsa1.0_00122.1 | 832 | 265937 | 0         | 804 | 837 | 96 -  | 2   | 832 | 41134  | 41967  |
| UN52132 | Rsa1.0_00806.1 | 766 | 63674  | 1.00E-175 | 336 | 344 | 97 +  | 423 | 766 | 20246  | 20589  |
| UN52133 | Rsa1.0_00307.1 | 779 | 199003 | 1.00E-105 | 378 | 437 | 86 -  | 369 | 779 | 87243  | 87662  |
| UN52134 | Rsa1.0_01270.1 | 859 | 49574  | 1.00E-139 | 255 | 256 | 99 +  | 604 | 859 | 46402  | 46657  |
| UN52135 | Rsa1.0_01732.1 | 708 | 40194  | 1.00E-117 | 253 | 266 | 95 +  | 443 | 708 | 35777  | 36042  |
| UN52136 | Rsa1.0_00224.1 | 704 | 327530 | 0         | 375 | 392 | 95 +  | 322 | 704 | 183629 | 184020 |
| UN52137 | Rsa1.0_00060.1 | 622 | 502678 | 0         | 592 | 622 | 95 -  | 4   | 622 | 128509 | 129124 |
| UN52138 | Rsa1.0_46885.1 | 589 | 482    | 1.00E-79  | 154 | 155 | 99 +  | 252 | 406 | 326    | 480    |
| UN52139 | Rsa1.0_12636.1 | 855 | 5168   | 0         | 820 | 824 | 99 -  | 33  | 855 | 3294   | 4117   |
| UN52140 | Rsa1.0_00265.1 | 884 | 220635 | 1.00E-116 | 242 | 249 | 97 -  | 3   | 250 | 190910 | 191157 |
| UN52141 | Rsa1.0_14697.1 | 782 | 3150   | 0         | 441 | 458 | 96 -  | 75  | 532 | 1      | 458    |

|         |                |     |        |           |     |     |       |     |     |        |        |
|---------|----------------|-----|--------|-----------|-----|-----|-------|-----|-----|--------|--------|
| UN52142 | Rsa1.0.00427.1 | 846 | 189678 | 1.00E-110 | 208 | 210 | 99 -  | 354 | 563 | 12894  | 13103  |
| UN52143 | Rsa1.0.01188.1 | 824 | 51362  | 1.00E-125 | 238 | 240 | 99 +  | 586 | 824 | 31071  | 31310  |
| UN52144 | Rsa1.0.00688.1 | 702 | 68396  | 0         | 691 | 700 | 98 +  | 3   | 702 | 3389   | 4088   |
| UN52145 | Rsa1.0.01122.1 | 843 | 53369  | 3.00E-72  | 139 | 139 | 100 + | 316 | 454 | 1886   | 2024   |
| UN52146 | Rsa1.0.00017.1 | 626 | 752458 | 0         | 623 | 625 | 99 +  | 2   | 626 | 105371 | 105995 |
| UN52147 | Rsa1.0.02262.1 | 600 | 33239  | 0         | 384 | 385 | 99 +  | 216 | 600 | 10208  | 10592  |
| UN52148 | Rsa1.0.01803.1 | 178 | 173846 | 4.00E-46  | 165 | 184 | 89 +  | 1   | 178 | 137693 | 137871 |
| UN52149 | Rsa1.0.02907.1 | 181 | 26861  | 3.00E-62  | 161 | 169 | 95 -  | 13  | 181 | 15921  | 16085  |
| UN52150 | Rsa1.0.15978.1 | 459 | 2333   | 0         | 359 | 359 | 100 - | 94  | 452 | 1067   | 1425   |
| UN52151 | Rsa1.0.06038.1 | 136 | 11867  | 2.00E-28  | 99  | 106 | 93 +  | 31  | 136 | 301    | 400    |
| UN52152 | Rsa1.0.00661.1 | 657 | 213041 | 0         | 532 | 572 | 93 -  | 22  | 581 | 6703   | 7264   |
| UN52153 | Rsa1.0.00144.1 | 134 | 120708 | 5.00E-20  | 106 | 117 | 90 +  | 1   | 117 | 86581  | 86690  |
| UN52154 | Rsa1.0.00632.1 | 640 | 183777 | 0         | 542 | 557 | 97 +  | 72  | 628 | 160342 | 160898 |
| UN52155 | Rsa1.0.00343.1 | 166 | 93570  | 1.00E-48  | 116 | 122 | 95 +  | 40  | 161 | 74535  | 74656  |
| UN52156 | Rsa1.0.00636.1 | 398 | 71113  | 1.00E-111 | 204 | 204 | 100 - | 195 | 398 | 41759  | 41962  |
| UN52157 | Rsa1.0.00265.1 | 663 | 220635 | 4.00E-89  | 183 | 187 | 97 -  | 477 | 663 | 172415 | 172600 |
| UN52158 | Rsa1.0.01922.1 | 239 | 37236  | 2.00E-94  | 229 | 239 | 95 -  | 1   | 239 | 12526  | 12758  |
| UN52159 | Rsa1.0.00326.1 | 371 | 171955 | 9.00E-52  | 113 | 116 | 97 -  | 193 | 308 | 28688  | 28803  |
| UN52160 | Rsa1.0.15651.1 | 817 | 2501   | 0         | 372 | 381 | 97 +  | 442 | 817 | 834    | 1214   |
| UN52161 | Rsa1.0.00031.1 | 722 | 179862 | 0         | 451 | 472 | 95 -  | 2   | 473 | 108109 | 108580 |
| UN52162 | Rsa1.0.19408.1 | 216 | 1436   | 5.00E-58  | 196 | 209 | 93 +  | 8   | 216 | 416    | 612    |
| UN52163 | Rsa1.0.03911.1 | 464 | 20133  | 1.00E-139 | 257 | 259 | 99 -  | 183 | 441 | 15131  | 15389  |
| UN52164 | Rsa1.0.00134.1 | 515 | 390219 | 1.00E-120 | 234 | 239 | 97 +  | 3   | 241 | 129374 | 129612 |
| UN52165 | Rsa1.0.00066.1 | 516 | 152418 | 0         | 429 | 445 | 96 +  | 73  | 516 | 63536  | 63979  |
| UN52166 | Rsa1.0.00001.1 | 274 | 363028 | 1.00E-84  | 249 | 271 | 91 -  | 3   | 268 | 287777 | 288046 |
| UN52167 | Rsa1.0.00078.1 | 869 | 175053 | 1.00E-126 | 262 | 273 | 95 +  | 3   | 275 | 75847  | 76119  |
| UN52168 | Rsa1.0.04991.1 | 381 | 15215  | 5.00E-81  | 189 | 196 | 96 -  | 22  | 217 | 1031   | 1221   |
| UN52169 | Rsa1.0.02237.1 | 256 | 33544  | 9.00E-82  | 234 | 250 | 93 +  | 7   | 256 | 2814   | 3055   |
| UN52170 | Rsa1.0.01730.1 | 624 | 40223  | 0         | 574 | 624 | 91 +  | 15  | 624 | 33434  | 34049  |
| UN52171 | Rsa1.0.00116.1 | 834 | 365886 | 1.00E-107 | 221 | 228 | 96 -  | 381 | 606 | 168038 | 168265 |
| UN52172 | Rsa1.0.46627.1 | 780 | 484    | 1.00E-135 | 268 | 276 | 97 +  | 140 | 415 | 1      | 276    |
| UN52173 | #              | #   | #      | #         | #   | #   | #     | #   | #   | #      | #      |
| UN52174 | Rsa1.0.13492.1 | 336 | 4775   | 1.00E-108 | 199 | 199 | 100 + | 138 | 336 | 845    | 1043   |
| UN52175 | Rsa1.0.02309.1 | 740 | 32744  | 1.00E-171 | 386 | 412 | 93 -  | 3   | 414 | 20040  | 20439  |
| UN52176 | Rsa1.0.23487.1 | 792 | 1045   | 0         | 586 | 604 | 97 +  | 184 | 787 | 279    | 881    |
| UN52177 | Rsa1.0.01155.1 | 814 | 52182  | 0         | 465 | 472 | 98 -  | 344 | 814 | 28677  | 29148  |
| UN52178 | Rsa1.0.02692.1 | 726 | 28626  | 0         | 379 | 390 | 97 +  | 337 | 726 | 19918  | 20307  |
| UN52179 | Rsa1.0.00898.1 | 756 | 202772 | 2.00E-54  | 109 | 109 | 100 + | 377 | 485 | 5204   | 5312   |
| UN52180 | Rsa1.0.01602.1 | 387 | 42503  | 1.00E-81  | 263 | 294 | 89 -  | 91  | 375 | 9585   | 9873   |

|         |                |     |        |           |     |     |       |     |     |        |        |
|---------|----------------|-----|--------|-----------|-----|-----|-------|-----|-----|--------|--------|
| UN52181 | Rsa1.0.00478.1 | 854 | 81419  | 0         | 490 | 504 | 97 -  | 4   | 506 | 4192   | 4694   |
| UN52182 | Rsa1.0.00743.1 | 635 | 177459 | 2.00E-97  | 233 | 248 | 93 +  | 388 | 635 | 1203   | 1442   |
| UN52183 | Rsa1.0.00077.1 | 559 | 145005 | 1.00E-159 | 288 | 289 | 99 -  | 2   | 290 | 139752 | 140040 |
| UN52184 | Rsa1.0.01883.1 | 789 | 37661  | 0         | 662 | 695 | 95 +  | 108 | 789 | 9862   | 10556  |
| UN52185 | Rsa1.0.00838.1 | 799 | 153820 | 2.00E-79  | 160 | 163 | 98 +  | 437 | 599 | 131992 | 132154 |
| UN52186 | Rsa1.0.01914.1 | 716 | 37354  | 0         | 614 | 627 | 97 -  | 1   | 625 | 28975  | 29595  |
| UN52187 | Rsa1.0.00145.1 | 876 | 261008 | 0         | 466 | 510 | 91 -  | 186 | 689 | 29294  | 29791  |
| UN52188 | Rsa1.0.00679.1 | 609 | 68971  | 1.00E-132 | 239 | 239 | 100 + | 103 | 341 | 57537  | 57775  |
| UN52189 | Rsa1.0.02613.1 | 638 | 29557  | 1.00E-125 | 257 | 264 | 97 -  | 376 | 638 | 21095  | 21357  |
| UN52190 | Rsa1.0.03448.1 | 612 | 22844  | 1.00E-109 | 267 | 289 | 92 +  | 332 | 612 | 1239   | 1526   |
| UN52191 | Rsa1.0.00170.1 | 501 | 179538 | 3.00E-21  | 131 | 156 | 83 +  | 250 | 398 | 178176 | 178331 |
| UN52192 | #              | #   | #      | #         | #   | #   | #     | #   | #   | #      | #      |
| UN52193 | Rsa1.0.02348.1 | 801 | 32316  | 0         | 556 | 586 | 94 -  | 222 | 801 | 4328   | 4910   |
| UN52194 | Rsa1.0.64483.1 | 416 | 356    | 2.00E-71  | 194 | 212 | 91 -  | 91  | 295 | 23     | 234    |
| UN52195 | Rsa1.0.04258.1 | 440 | 18254  | 1.00E-136 | 251 | 253 | 99 -  | 188 | 440 | 3884   | 4136   |
| UN52196 | Rsa1.0.03890.1 | 703 | 20223  | 0         | 366 | 374 | 97 +  | 331 | 703 | 11314  | 11684  |
| UN52197 | Rsa1.0.00611.1 | 741 | 72410  | 1.00E-143 | 285 | 294 | 96 -  | 448 | 741 | 40655  | 40948  |
| UN52198 | Rsa1.0.06032.1 | 861 | 11886  | 1.00E-140 | 253 | 253 | 100 - | 1   | 253 | 10750  | 11002  |
| UN52199 | Rsa1.0.00988.1 | 728 | 57525  | 1.00E-103 | 202 | 206 | 98 -  | 523 | 728 | 27467  | 27672  |
| UN52200 | Rsa1.0.07775.1 | 458 | 8594   | 0         | 453 | 456 | 99 -  | 3   | 458 | 1795   | 2250   |
| UN52201 | Rsa1.0.00602.1 | 497 | 73302  | 1.00E-128 | 259 | 267 | 97 +  | 2   | 265 | 56680  | 56946  |
| UN52202 | Rsa1.0.03727.1 | 868 | 21158  | 0         | 548 | 557 | 98 -  | 317 | 868 | 2961   | 3516   |
| UN52203 | Rsa1.0.02907.1 | 776 | 26861  | 0         | 546 | 557 | 98 -  | 225 | 776 | 15241  | 15794  |
| UN52204 | Rsa1.0.00055.1 | 687 | 520193 | 5.00E-64  | 140 | 145 | 96 +  | 86  | 230 | 179497 | 179641 |
| UN52205 | Rsa1.0.02043.1 | 830 | 163754 | 1.00E-145 | 282 | 289 | 97 -  | 2   | 290 | 8101   | 8389   |
| UN52206 | Rsa1.0.00045.1 | 772 | 328694 | 1.00E-136 | 300 | 318 | 94 -  | 5   | 322 | 186058 | 186375 |
| UN52207 | Rsa1.0.00042.1 | 712 | 171507 | 2.00E-60  | 343 | 411 | 83 +  | 59  | 462 | 102830 | 103237 |
| UN52208 | Rsa1.0.01396.1 | 696 | 151624 | 1.00E-147 | 286 | 293 | 97 -  | 184 | 476 | 142998 | 143290 |
| UN52209 | Rsa1.0.00679.1 | 783 | 68971  | 1.00E-113 | 301 | 326 | 92 +  | 456 | 780 | 60902  | 61216  |
| UN52210 | Rsa1.0.11639.1 | 770 | 5453   | 8.00E-97  | 195 | 200 | 97 +  | 267 | 466 | 1      | 200    |
| UN52211 | Rsa1.0.00040.1 | 614 | 324196 | 1.00E-153 | 345 | 366 | 94 +  | 249 | 614 | 163645 | 163998 |
| UN52212 | Rsa1.0.00018.1 | 795 | 410899 | 0         | 763 | 786 | 97 +  | 5   | 789 | 13545  | 14330  |
| UN52213 | Rsa1.0.03896.1 | 838 | 20192  | 0         | 812 | 838 | 96 +  | 2   | 838 | 16543  | 17380  |
| UN52214 | Rsa1.0.00024.1 | 589 | 188018 | 0         | 587 | 589 | 99 -  | 1   | 589 | 141029 | 141615 |
| UN52215 | Rsa1.0.00372.1 | 862 | 90418  | 0         | 818 | 850 | 96 +  | 2   | 851 | 78853  | 79699  |
| UN52216 | Rsa1.0.06860.1 | 793 | 10248  | 0         | 746 | 794 | 93 -  | 1   | 793 | 519    | 1312   |
| UN52217 | Rsa1.0.00417.1 | 794 | 395068 | 0         | 574 | 592 | 96 -  | 202 | 790 | 361748 | 362339 |
| UN52218 | Rsa1.0.09900.1 | 718 | 6099   | 0         | 685 | 724 | 94 -  | 1   | 718 | 691    | 1408   |
| UN52219 | Rsa1.0.01777.1 | 563 | 39511  | 1.00E-151 | 271 | 271 | 100 + | 293 | 563 | 20986  | 21256  |

|         |                |     |        |           |     |     |       |     |     |        |        |
|---------|----------------|-----|--------|-----------|-----|-----|-------|-----|-----|--------|--------|
| UN52220 | Rsa1.0.00240.1 | 396 | 104175 | 2.00E-46  | 108 | 111 | 97 -  | 287 | 396 | 52526  | 52636  |
| UN52221 | Rsa1.0.00016.1 | 800 | 831256 | 0         | 766 | 799 | 95 -  | 2   | 800 | 392489 | 393287 |
| UN52222 | Rsa1.0.00263.1 | 741 | 224968 | 0         | 392 | 402 | 97 -  | 3   | 401 | 17314  | 17709  |
| UN52223 | Rsa1.0.00311.1 | 761 | 96847  | 5.00E-98  | 206 | 213 | 96 -  | 290 | 500 | 29360  | 29572  |
| UN52224 | Rsa1.0.06373.1 | 728 | 11138  | 1.00E-143 | 307 | 323 | 95 -  | 2   | 321 | 5656   | 5978   |
| UN52225 | Rsa1.0.02616.1 | 757 | 29542  | 1.00E-169 | 337 | 348 | 96 -  | 3   | 348 | 2287   | 2634   |
| UN52226 | Rsa1.0.00657.1 | 827 | 69858  | 1.00E-61  | 143 | 149 | 95 -  | 680 | 827 | 25962  | 26110  |
| UN52227 | Rsa1.0.18611.1 | 595 | 1565   | 0         | 373 | 381 | 97 +  | 215 | 595 | 957    | 1337   |
| UN52228 | Rsa1.0.37046.1 | 443 | 608    | 1.00E-152 | 302 | 309 | 97 -  | 135 | 442 | 10     | 317    |
| UN52229 | Rsa1.0.02383.1 | 761 | 31931  | 0         | 456 | 497 | 91 -  | 265 | 761 | 16769  | 17250  |
| UN52230 | Rsa1.0.70450.1 | 110 | 325    | 5.00E-47  | 109 | 111 | 98 -  | 1   | 110 | 49     | 158    |
| UN52231 | Rsa1.0.03075.1 | 137 | 25560  | 9.00E-65  | 135 | 137 | 98 +  | 1   | 137 | 7806   | 7941   |
| UN52232 | Rsa1.0.04764.1 | 765 | 16088  | 1.00E-180 | 500 | 559 | 89 +  | 176 | 715 | 1250   | 1795   |
| UN52233 | Rsa1.0.47171.1 | 724 | 479    | 1.00E-140 | 270 | 276 | 97 -  | 7   | 282 | 4      | 279    |
| UN52234 | Rsa1.0.00547.1 | 798 | 76521  | 0         | 778 | 793 | 98 +  | 1   | 793 | 71159  | 71951  |
| UN52235 | Rsa1.0.00140.1 | 815 | 121541 | 1.00E-175 | 312 | 312 | 100 - | 3   | 314 | 119441 | 119752 |
| UN52236 | Rsa1.0.00869.1 | 870 | 61627  | 1.00E-137 | 269 | 276 | 97 +  | 420 | 695 | 56612  | 56887  |
| UN52237 | Rsa1.0.08920.1 | 688 | 6788   | 0         | 641 | 692 | 92 -  | 1   | 688 | 3205   | 3893   |
| UN52238 | Rsa1.0.02515.1 | 590 | 30616  | 2.00E-60  | 171 | 186 | 91 +  | 347 | 529 | 3055   | 3240   |
| UN52239 | Rsa1.0.00218.1 | 758 | 201480 | 0         | 697 | 768 | 90 -  | 8   | 758 | 170920 | 171659 |
| UN52240 | Rsa1.0.01070.1 | 720 | 55099  | 1.00E-92  | 206 | 217 | 94 +  | 374 | 590 | 36569  | 36785  |
| UN52241 | Rsa1.0.03225.1 | 845 | 24500  | 0         | 669 | 723 | 92 -  | 2   | 702 | 20401  | 21108  |
| UN52242 | Rsa1.0.06694.1 | 774 | 10526  | 0         | 521 | 523 | 99 -  | 252 | 774 | 4215   | 4737   |
| UN52243 | Rsa1.0.47610.1 | 769 | 475    | 9.00E-66  | 146 | 152 | 96 -  | 335 | 486 | 1      | 152    |
| UN52244 | Rsa1.0.00290.1 | 814 | 225096 | 0         | 797 | 822 | 96 +  | 2   | 814 | 9470   | 10284  |
| UN52245 | Rsa1.0.00151.1 | 657 | 119541 | 1.00E-82  | 244 | 272 | 89 -  | 141 | 408 | 62972  | 63231  |
| UN52246 | Rsa1.0.00096.1 | 632 | 198773 | 1.00E-100 | 195 | 198 | 98 -  | 1   | 198 | 111490 | 111687 |
| UN52247 | Rsa1.0.01283.1 | 528 | 49257  | 9.00E-25  | 102 | 116 | 87 -  | 409 | 520 | 30587  | 30702  |
| UN52248 | Rsa1.0.00440.1 | 841 | 84723  | 1.00E-58  | 119 | 120 | 99 +  | 3   | 122 | 22754  | 22873  |
| UN52249 | Rsa1.0.01755.1 | 885 | 155581 | 0         | 847 | 878 | 96 +  | 19  | 885 | 11043  | 11920  |
| UN52250 | Rsa1.0.00100.1 | 561 | 249232 | 5.00E-45  | 93  | 93  | 100 - | 469 | 561 | 179430 | 179522 |
| UN52251 | Rsa1.0.00153.1 | 382 | 192931 | 1.00E-134 | 304 | 314 | 96 -  | 70  | 382 | 124589 | 124895 |
| UN52252 | Rsa1.0.00178.1 | 767 | 114861 | 0         | 728 | 778 | 93 +  | 5   | 767 | 69561  | 70338  |
| UN52253 | Rsa1.0.04359.1 | 120 | 17748  | 1.00E-57  | 116 | 117 | 99 -  | 4   | 120 | 12574  | 12690  |
| UN52254 | Rsa1.0.00571.1 | 706 | 329018 | 0         | 681 | 705 | 96 +  | 2   | 706 | 186676 | 187380 |
| UN52255 | Rsa1.0.01410.1 | 696 | 46345  | 1.00E-152 | 300 | 309 | 97 +  | 92  | 400 | 14361  | 14669  |
| UN52256 | Rsa1.0.00378.1 | 826 | 89892  | 0         | 791 | 826 | 95 +  | 2   | 826 | 47146  | 47968  |
| UN52257 | Rsa1.0.01000.1 | 372 | 57140  | 0         | 346 | 351 | 98 -  | 25  | 372 | 23952  | 24302  |
| UN52258 | Rsa1.0.52945.1 | 528 | 430    | 0         | 426 | 430 | 99 -  | 27  | 456 | 1      | 430    |

|         |                |     |        |           |     |     |      |     |     |        |        |
|---------|----------------|-----|--------|-----------|-----|-----|------|-----|-----|--------|--------|
| UN52259 | Rsa1.0.02798.1 | 719 | 27792  | 0         | 449 | 452 | 99 + | 2   | 453 | 23892  | 24343  |
| UN52260 | Rsa1.0.59447.1 | 187 | 385    | 6.00E-85  | 180 | 187 | 96 + | 1   | 187 | 172    | 358    |
| UN52261 | Rsa1.0.06474.1 | 528 | 10949  | 1.00E-136 | 280 | 294 | 95 + | 247 | 528 | 5787   | 6080   |
| UN52262 | Rsa1.0.01007.1 | 174 | 56933  | 8.00E-75  | 163 | 170 | 95 + | 5   | 174 | 48146  | 48315  |
| UN52263 | Rsa1.0.00363.1 | 463 | 90968  | 4.00E-73  | 156 | 160 | 97 + | 1   | 160 | 73791  | 73949  |
| UN52264 | Rsa1.0.01062.1 | 208 | 55325  | 1.00E-33  | 82  | 85  | 96 - | 85  | 169 | 38229  | 38313  |
| UN52265 | Rsa1.0.00043.1 | 191 | 264937 | 4.00E-77  | 176 | 186 | 94 + | 3   | 188 | 259863 | 260048 |
| UN52266 | Rsa1.0.05112.1 | 591 | 14814  | 1.00E-160 | 329 | 342 | 96 + | 23  | 363 | 11193  | 11534  |
| UN52267 | Rsa1.0.00020.1 | 566 | 283099 | 0         | 436 | 455 | 95 + | 1   | 454 | 128245 | 128696 |
| UN52268 | Rsa1.0.11549.1 | 439 | 5473   | 0         | 424 | 438 | 96 + | 1   | 438 | 4464   | 4899   |
| UN52269 | Rsa1.0.18854.1 | 697 | 1523   | 0         | 584 | 627 | 93 + | 75  | 697 | 419    | 1027   |
| UN52270 | Rsa1.0.01085.1 | 227 | 54539  | 8.00E-54  | 125 | 130 | 96 + | 1   | 128 | 13213  | 13342  |
| UN52271 | Rsa1.0.00223.1 | 286 | 106231 | 1.00E-111 | 221 | 227 | 97 + | 1   | 227 | 70785  | 71011  |
| UN52272 | Rsa1.0.03460.1 | 118 | 22747  | 1.00E-23  | 65  | 68  | 95 + | 51  | 118 | 12295  | 12362  |
| UN52273 | Rsa1.0.00806.1 | 362 | 63674  | 1.00E-179 | 351 | 362 | 96 + | 1   | 362 | 45401  | 45762  |
| UN52274 | Rsa1.0.03218.1 | 164 | 24539  | 1.00E-42  | 100 | 104 | 96 + | 1   | 104 | 6709   | 6812   |
| UN52275 | #              | #   | #      | #         | #   | #   | #    | #   | #   | #      | #      |
| UN52276 | Rsa1.0.00762.1 | 395 | 165246 | 3.00E-45  | 96  | 97  | 98 - | 223 | 319 | 26285  | 26381  |
| UN52277 | Rsa1.0.00115.1 | 163 | 131321 | 1.00E-58  | 152 | 163 | 93 - | 1   | 163 | 124920 | 125081 |
| UN52278 | Rsa1.0.00764.1 | 106 | 65056  | 2.00E-34  | 92  | 98  | 93 - | 1   | 98  | 41261  | 41358  |
| UN52279 | Rsa1.0.00170.1 | 102 | 179538 | 7.00E-40  | 95  | 99  | 95 + | 1   | 99  | 29057  | 29155  |
| UN52280 | Rsa1.0.05978.1 | 566 | 12053  | 1.00E-127 | 262 | 272 | 96 - | 1   | 269 | 6833   | 7098   |
| UN52281 | Rsa1.0.00008.1 | 493 | 358124 | 4.00E-85  | 190 | 200 | 95 + | 8   | 207 | 245477 | 245676 |
| UN52282 | Rsa1.0.00813.1 | 854 | 63202  | 1.00E-110 | 273 | 287 | 95 - | 1   | 283 | 45909  | 46192  |
| UN52283 | Rsa1.0.02654.1 | 180 | 29028  | 2.00E-60  | 148 | 158 | 93 + | 20  | 177 | 19627  | 19779  |
| UN52284 | Rsa1.0.00453.1 | 121 | 83031  | 4.00E-48  | 115 | 121 | 95 - | 1   | 121 | 16754  | 16874  |
| UN52285 | Rsa1.0.00856.1 | 136 | 62037  | 5.00E-17  | 54  | 57  | 94 - | 62  | 118 | 17199  | 17255  |
| UN52286 | Rsa1.0.00658.1 | 748 | 69740  | 3.00E-81  | 175 | 182 | 96 + | 84  | 265 | 24174  | 24355  |
| UN52287 | Rsa1.0.03344.1 | 189 | 23593  | 3.00E-68  | 149 | 155 | 96 - | 1   | 155 | 12154  | 12308  |
| UN52288 | Rsa1.0.01763.1 | 875 | 39659  | 5.00E-40  | 139 | 157 | 88 + | 704 | 860 | 34257  | 34413  |
| UN52289 | Rsa1.0.05208.1 | 283 | 14504  | 1.00E-74  | 160 | 166 | 96 - | 7   | 172 | 3908   | 4073   |
| UN52290 | Rsa1.0.10699.1 | 379 | 5752   | 1.00E-176 | 363 | 379 | 95 + | 1   | 379 | 3891   | 4267   |
| UN52291 | Rsa1.0.03738.1 | 119 | 21071  | 7.00E-25  | 82  | 89  | 92 - | 1   | 87  | 11299  | 11387  |
| UN52292 | Rsa1.0.01824.1 | 851 | 38733  | 0         | 409 | 422 | 96 + | 428 | 849 | 10505  | 10926  |
| UN52293 | Rsa1.0.08045.1 | 124 | 8014   | 5.00E-38  | 89  | 92  | 96 + | 1   | 92  | 4995   | 5086   |
| UN52294 | Rsa1.0.00100.1 | 925 | 249232 | 0         | 421 | 427 | 98 + | 404 | 830 | 14515  | 14941  |
| UN52295 | Rsa1.0.02449.1 | 211 | 31292  | 3.00E-19  | 70  | 77  | 90 + | 83  | 159 | 13553  | 13629  |
| UN52296 | Rsa1.0.04689.1 | 307 | 16376  | 1.00E-107 | 282 | 308 | 91 - | 8   | 304 | 1063   | 1369   |
| UN52297 | Rsa1.0.00425.1 | 789 | 147080 | 0         | 535 | 540 | 99 - | 250 | 789 | 13977  | 14516  |

|         |                |     |        |           |     |     |       |     |     |        |        |
|---------|----------------|-----|--------|-----------|-----|-----|-------|-----|-----|--------|--------|
| UN52298 | Rsa1.0_04342.1 | 201 | 17828  | 8.00E-23  | 76  | 83  | 91 +  | 12  | 94  | 8021   | 8103   |
| UN52299 | Rsa1.0_02585.1 | 792 | 29865  | 0         | 545 | 561 | 97 +  | 234 | 792 | 15639  | 16198  |
| UN52300 | Rsa1.0_00453.1 | 253 | 83031  | 1.00E-120 | 242 | 250 | 96 +  | 4   | 253 | 55068  | 55317  |
| UN52301 | Rsa1.0_02303.1 | 811 | 32818  | 0         | 382 | 396 | 96 -  | 1   | 385 | 24842  | 25237  |
| UN52302 | Rsa1.0_00210.1 | 663 | 108424 | 1.00E-117 | 327 | 363 | 90 -  | 4   | 361 | 14800  | 15162  |
| UN52303 | Rsa1.0_01989.1 | 477 | 36439  | 1.00E-177 | 391 | 411 | 95 -  | 2   | 411 | 11211  | 11609  |
| UN52304 | Rsa1.0_00486.1 | 264 | 80875  | 5.00E-77  | 224 | 248 | 90 -  | 20  | 264 | 15648  | 15894  |
| UN52305 | Rsa1.0_03448.1 | 511 | 22844  | 3.00E-74  | 215 | 238 | 90 -  | 2   | 230 | 1239   | 1474   |
| UN52306 | Rsa1.0_00285.1 | 730 | 149638 | 0         | 348 | 351 | 99 -  | 39  | 389 | 122232 | 122582 |
| UN52307 | Rsa1.0_01294.1 | 167 | 49090  | 7.00E-35  | 78  | 79  | 98 -  | 34  | 112 | 40300  | 40378  |
| UN52308 | Rsa1.0_02410.1 | 221 | 31659  | 3.00E-93  | 209 | 221 | 94 -  | 1   | 221 | 21517  | 21737  |
| UN52309 | Rsa1.0_40008.1 | 244 | 562    | 2.00E-82  | 197 | 211 | 93 -  | 30  | 240 | 140    | 350    |
| UN52310 | Rsa1.0_03191.1 | 378 | 145762 | 1.00E-116 | 307 | 336 | 91 -  | 6   | 340 | 16325  | 16649  |
| UN52311 | Rsa1.0_03617.1 | 176 | 21745  | 9.00E-81  | 170 | 176 | 96 +  | 1   | 176 | 12532  | 12707  |
| UN52312 | Rsa1.0_02247.1 | 833 | 33427  | 0         | 394 | 396 | 99 +  | 1   | 396 | 1429   | 1824   |
| UN52313 | Rsa1.0_75906.1 | 524 | 302    | 1.00E-156 | 296 | 300 | 98 -  | 113 | 411 | 3      | 302    |
| UN52314 | Rsa1.0_00152.1 | 315 | 257730 | 1.00E-117 | 261 | 275 | 94 -  | 1   | 275 | 11896  | 12166  |
| UN52315 | Rsa1.0_00224.1 | 828 | 327530 | 0         | 415 | 427 | 97 -  | 2   | 427 | 55808  | 56225  |
| UN52316 | Rsa1.0_00017.1 | 794 | 752458 | 1.00E-135 | 253 | 256 | 98 +  | 1   | 256 | 405225 | 405480 |
| UN52317 | Rsa1.0_00032.1 | 624 | 306326 | 0         | 556 | 571 | 97 -  | 54  | 624 | 196891 | 197461 |
| UN52318 | Rsa1.0_00281.1 | 856 | 99908  | 0         | 576 | 588 | 97 +  | 1   | 588 | 15571  | 16154  |
| UN52319 | Rsa1.0_03958.1 | 448 | 19868  | 4.00E-85  | 211 | 227 | 92 -  | 1   | 227 | 16483  | 16702  |
| UN52320 | Rsa1.0_07131.1 | 765 | 9860   | 0         | 659 | 679 | 97 -  | 1   | 678 | 1      | 676    |
| UN52321 | Rsa1.0_00017.1 | 722 | 752458 | 1.00E-177 | 350 | 362 | 96 -  | 1   | 362 | 321650 | 322011 |
| UN52322 | Rsa1.0_00030.1 | 846 | 250988 | 0         | 549 | 577 | 95 +  | 2   | 574 | 44636  | 45206  |
| UN52323 | Rsa1.0_00471.1 | 321 | 81897  | 1.00E-134 | 297 | 314 | 94 -  | 6   | 319 | 71745  | 72057  |
| UN52324 | Rsa1.0_06379.1 | 317 | 11131  | 3.00E-51  | 103 | 103 | 100 - | 123 | 225 | 4826   | 4928   |
| UN52325 | Rsa1.0_00656.1 | 159 | 69968  | 3.00E-68  | 152 | 159 | 95 -  | 1   | 159 | 39218  | 39376  |
| UN52326 | Rsa1.0_01522.1 | 401 | 157436 | 0         | 386 | 402 | 96 +  | 1   | 401 | 3232   | 3633   |
| UN52327 | Rsa1.0_02116.1 | 818 | 34853  | 0         | 766 | 818 | 93 +  | 1   | 816 | 30559  | 31351  |
| UN52328 | Rsa1.0_01390.1 | 309 | 46695  | 4.00E-81  | 177 | 185 | 95 +  | 1   | 185 | 19234  | 19418  |
| UN52329 | Rsa1.0_00734.1 | 641 | 66508  | 1.00E-138 | 305 | 322 | 94 +  | 1   | 322 | 58283  | 58603  |
| UN52330 | Rsa1.0_00107.1 | 873 | 431659 | 0         | 688 | 726 | 94 -  | 1   | 712 | 146548 | 147270 |
| UN52331 | Rsa1.0_04425.1 | 744 | 17406  | 7.00E-91  | 170 | 170 | 100 - | 171 | 340 | 1667   | 1836   |
| UN52332 | #              | #   | #      | #         | #   | #   | #     | #   | #   | #      | #      |
| UN52333 | Rsa1.0_00120.1 | 136 | 277288 | 1.00E-35  | 116 | 128 | 90 -  | 4   | 131 | 266541 | 266667 |
| UN52334 | Rsa1.0_00121.1 | 548 | 278029 | 1.00E-118 | 249 | 259 | 96 +  | 4   | 261 | 122865 | 123123 |
| UN52335 | Rsa1.0_00020.1 | 704 | 283099 | 0         | 658 | 699 | 94 -  | 7   | 704 | 148660 | 149351 |
| UN52336 | Rsa1.0_01484.1 | 470 | 44806  | 0         | 437 | 462 | 94 +  | 9   | 470 | 28482  | 28936  |



|         |                |     |        |           |     |     |      |     |     |        |        |
|---------|----------------|-----|--------|-----------|-----|-----|------|-----|-----|--------|--------|
| UN52337 | Rsa1.0.02757.1 | 555 | 28187  | 0         | 457 | 467 | 97 - | 1   | 467 | 16196  | 16661  |
| UN52338 | Rsa1.0.06604.1 | 318 | 10681  | 2.00E-95  | 286 | 319 | 89 + | 1   | 318 | 6114   | 6418   |
| UN52339 | Rsa1.0.00055.1 | 834 | 520193 | 0         | 803 | 881 | 91 - | 1   | 834 | 169419 | 170299 |
| UN52340 | Rsa1.0.00310.1 | 787 | 96852  | 0         | 515 | 551 | 93 + | 165 | 715 | 82745  | 83289  |
| UN52341 | Rsa1.0.14939.1 | 148 | 2948   | 1.00E-54  | 132 | 140 | 94 - | 8   | 147 | 902    | 1041   |
| UN52342 | Rsa1.0.04065.1 | 824 | 19275  | 1.00E-159 | 404 | 437 | 92 - | 21  | 448 | 3173   | 3604   |
| UN52343 | Rsa1.0.34428.1 | 108 | 657    | 5.00E-47  | 104 | 107 | 97 + | 2   | 108 | 491    | 597    |
| UN52344 | Rsa1.0.00012.1 | 642 | 222148 | 1.00E-117 | 289 | 306 | 94 + | 9   | 312 | 106072 | 106373 |
| UN52345 | Rsa1.0.00125.1 | 790 | 253043 | 0         | 645 | 687 | 93 + | 108 | 790 | 141297 | 141976 |
| UN52346 | Rsa1.0.00571.1 | 119 | 329018 | 2.00E-25  | 104 | 119 | 87 - | 1   | 119 | 47649  | 47767  |
| UN52347 | Rsa1.0.00151.1 | 861 | 119541 | 0         | 394 | 408 | 96 + | 450 | 853 | 82555  | 82962  |
| UN52348 | Rsa1.0.00650.1 | 614 | 70235  | 0         | 604 | 623 | 96 - | 1   | 614 | 25569  | 26190  |
| UN52349 | Rsa1.0.00157.1 | 130 | 245832 | 3.00E-49  | 117 | 123 | 95 - | 8   | 130 | 163241 | 163363 |
| UN52350 | Rsa1.0.00019.1 | 207 | 301669 | 2.00E-48  | 143 | 157 | 91 + | 11  | 162 | 293080 | 293234 |
| UN52351 | Rsa1.0.01534.1 | 513 | 43764  | 0         | 485 | 508 | 95 - | 8   | 513 | 6841   | 7348   |
| UN52352 | Rsa1.0.01481.1 | 732 | 184562 | 0         | 642 | 658 | 97 + | 76  | 732 | 166822 | 167479 |
| UN52353 | Rsa1.0.06258.1 | 585 | 11371  | 0         | 431 | 444 | 97 + | 4   | 447 | 8030   | 8472   |
| UN52354 | Rsa1.0.71379.1 | 378 | 321    | 1.00E-119 | 232 | 237 | 97 - | 139 | 375 | 85     | 321    |
| UN52355 | Rsa1.0.04957.1 | 398 | 15330  | 2.00E-68  | 202 | 221 | 91 + | 9   | 221 | 1254   | 1470   |
| UN52356 | Rsa1.0.03307.1 | 511 | 23872  | 0         | 492 | 511 | 96 - | 1   | 511 | 17932  | 18442  |
| UN52357 | Rsa1.0.00190.1 | 875 | 318240 | 1.00E-102 | 274 | 296 | 92 + | 29  | 320 | 188085 | 188377 |
| UN52358 | Rsa1.0.33325.1 | 755 | 681    | 0         | 443 | 457 | 96 - | 299 | 755 | 72     | 528    |
| UN52359 | Rsa1.0.02383.1 | 820 | 31931  | 0         | 815 | 817 | 99 - | 4   | 820 | 20338  | 21154  |
| UN52360 | Rsa1.0.01679.1 | 292 | 146876 | 1.00E-145 | 284 | 292 | 97 + | 1   | 292 | 119256 | 119547 |
| UN52361 | Rsa1.0.00206.1 | 350 | 109040 | 5.00E-56  | 171 | 190 | 90 - | 159 | 346 | 96783  | 96972  |
| UN52362 | Rsa1.0.00179.1 | 790 | 393324 | 0         | 481 | 488 | 98 + | 303 | 790 | 360380 | 360866 |
| UN52363 | Rsa1.0.00092.1 | 794 | 659932 | 1.00E-149 | 316 | 332 | 95 + | 226 | 557 | 20551  | 20882  |
| UN52364 | #              | #   | #      | #         | #   | #   | #    | #   | #   | #      | #      |
| UN52365 | Rsa1.0.02565.1 | 861 | 30046  | 0         | 840 | 860 | 97 + | 2   | 861 | 16589  | 17448  |
| UN52366 | Rsa1.0.00937.1 | 526 | 59061  | 0         | 457 | 459 | 99 + | 68  | 526 | 53185  | 53643  |
| UN52367 | Rsa1.0.02965.1 | 123 | 26402  | 3.00E-39  | 110 | 118 | 93 - | 1   | 117 | 11120  | 11237  |
| UN52368 | Rsa1.0.00805.1 | 915 | 63724  | 4.00E-99  | 335 | 385 | 87 - | 54  | 413 | 43181  | 43561  |
| UN52369 | Rsa1.0.00100.1 | 906 | 249232 | 0         | 555 | 569 | 97 + | 338 | 906 | 195789 | 196354 |
| UN52370 | Rsa1.0.08280.1 | 802 | 7610   | 0         | 779 | 805 | 96 + | 1   | 802 | 796    | 1595   |
| UN52371 | Rsa1.0.02946.1 | 667 | 26537  | 0         | 644 | 669 | 96 - | 1   | 667 | 1140   | 1804   |
| UN52372 | Rsa1.0.02609.1 | 752 | 29600  | 0         | 531 | 581 | 91 - | 62  | 638 | 3130   | 3706   |
| UN52373 | Rsa1.0.04286.1 | 180 | 18084  | 3.00E-77  | 167 | 174 | 95 + | 7   | 180 | 13076  | 13249  |
| UN52374 | Rsa1.0.00196.1 | 195 | 109960 | 1.00E-89  | 188 | 195 | 96 - | 1   | 195 | 90374  | 90568  |
| UN52375 | Rsa1.0.00636.1 | 819 | 71113  | 0         | 544 | 549 | 99 - | 1   | 548 | 11206  | 11754  |

|         |                |     |        |           |     |     |       |     |     |        |        |
|---------|----------------|-----|--------|-----------|-----|-----|-------|-----|-----|--------|--------|
| UN52376 | Rsa1.0.02074.1 | 833 | 35370  | 0         | 657 | 672 | 97 +  | 3   | 671 | 33187  | 33857  |
| UN52377 | Rsa1.0.00150.1 | 559 | 154416 | 1.00E-133 | 285 | 300 | 95 -  | 260 | 559 | 151459 | 151758 |
| UN52378 | Rsa1.0.01139.1 | 815 | 52601  | 0         | 384 | 405 | 94 +  | 101 | 499 | 16975  | 17379  |
| UN52379 | Rsa1.0.01419.1 | 113 | 167402 | 4.00E-20  | 50  | 50  | 100 + | 8   | 57  | 133390 | 133439 |
| UN52380 | Rsa1.0.00802.1 | 213 | 63846  | 5.00E-98  | 205 | 213 | 96 +  | 1   | 213 | 49905  | 50117  |
| UN52381 | Rsa1.0.00322.1 | 633 | 212233 | 0         | 507 | 510 | 99 -  | 1   | 510 | 56950  | 57459  |
| UN52382 | Rsa1.0.01953.1 | 189 | 36881  | 1.00E-36  | 111 | 122 | 90 -  | 49  | 170 | 27988  | 28109  |
| UN52383 | Rsa1.0.00307.1 | 755 | 199003 | 0         | 449 | 451 | 99 +  | 2   | 452 | 35353  | 35803  |
| UN52384 | Rsa1.0.03083.1 | 183 | 25520  | 1.00E-58  | 156 | 167 | 93 +  | 17  | 183 | 21578  | 21742  |
| UN52385 | Rsa1.0.00900.1 | 288 | 60367  | 1.00E-131 | 273 | 285 | 95 -  | 3   | 287 | 41486  | 41770  |
| UN52386 | Rsa1.0.26144.1 | 812 | 904    | 1.00E-154 | 298 | 305 | 97 +  | 501 | 805 | 1      | 305    |
| UN52387 | Rsa1.0.00333.1 | 739 | 94500  | 7.00E-88  | 168 | 169 | 99 -  | 487 | 655 | 33891  | 34059  |
| UN52388 | Rsa1.0.01006.1 | 800 | 163670 | 0         | 356 | 359 | 99 -  | 1   | 359 | 15582  | 15940  |
| UN52389 | Rsa1.0.00753.1 | 355 | 65705  | 1.00E-53  | 119 | 123 | 96 +  | 1   | 123 | 748    | 870    |
| UN52390 | Rsa1.0.01537.1 | 909 | 187285 | 0         | 492 | 523 | 94 +  | 1   | 523 | 6465   | 6968   |
| UN52391 | Rsa1.0.00717.1 | 255 | 67051  | 2.00E-33  | 91  | 97  | 93 -  | 39  | 135 | 21683  | 21779  |
| UN52392 | Rsa1.0.02803.1 | 243 | 27715  | 7.00E-36  | 80  | 81  | 98 +  | 1   | 81  | 1684   | 1764   |
| UN52393 | Rsa1.0.00772.1 | 449 | 64856  | 0         | 425 | 449 | 94 +  | 1   | 449 | 47043  | 47488  |
| UN52394 | Rsa1.0.01394.1 | 497 | 46641  | 0         | 478 | 494 | 96 +  | 6   | 497 | 21794  | 22287  |
| UN52395 | Rsa1.0.02604.1 | 802 | 29638  | 0         | 432 | 453 | 95 +  | 1   | 444 | 26159  | 26606  |
| UN52396 | Rsa1.0.03632.1 | 762 | 21645  | 1.00E-144 | 265 | 267 | 99 -  | 1   | 267 | 8415   | 8681   |
| UN52397 | Rsa1.0.00077.1 | 788 | 145005 | 0         | 753 | 785 | 95 -  | 2   | 785 | 134842 | 135623 |
| UN52398 | Rsa1.0.00383.1 | 503 | 398431 | 1.00E-100 | 197 | 200 | 98 -  | 1   | 198 | 127399 | 127598 |
| UN52399 | Rsa1.0.10284.1 | 554 | 5904   | 0         | 472 | 485 | 97 -  | 1   | 485 | 1260   | 1744   |
| UN52400 | Rsa1.0.00205.1 | 139 | 193401 | 3.00E-55  | 131 | 137 | 95 +  | 1   | 137 | 14500  | 14635  |
| UN52401 | Rsa1.0.01540.1 | 154 | 151890 | 7.00E-32  | 89  | 94  | 94 +  | 1   | 94  | 128039 | 128131 |
| UN52402 | Rsa1.0.00098.1 | 819 | 349239 | 0         | 750 | 790 | 94 -  | 36  | 819 | 225073 | 225856 |
| UN52403 | Rsa1.0.00265.1 | 282 | 220635 | 1.00E-122 | 269 | 282 | 95 -  | 1   | 282 | 176395 | 176674 |
| UN52404 | #              | #   | #      | #         | #   | #   | #     | #   | #   | #      | #      |
| UN52405 | #              | #   | #      | #         | #   | #   | #     | #   | #   | #      | #      |
| UN52406 | Rsa1.0.01269.1 | 156 | 49622  | 2.00E-32  | 89  | 95  | 93 +  | 1   | 95  | 25451  | 25545  |
| UN52407 | Rsa1.0.00366.1 | 185 | 90880  | 3.00E-74  | 168 | 177 | 94 -  | 1   | 177 | 25969  | 26145  |
| UN52408 | Rsa1.0.04504.1 | 788 | 17069  | 0         | 544 | 558 | 97 +  | 231 | 788 | 7935   | 8489   |
| UN52409 | Rsa1.0.00105.1 | 154 | 134138 | 2.00E-22  | 75  | 82  | 91 -  | 1   | 82  | 1925   | 2006   |
| UN52410 | #              | #   | #      | #         | #   | #   | #     | #   | #   | #      | #      |
| UN52411 | Rsa1.0.02843.1 | 833 | 27383  | 1.00E-165 | 368 | 396 | 92 +  | 457 | 833 | 8189   | 8583   |
| UN52412 | Rsa1.0.00703.1 | 610 | 67597  | 1.00E-158 | 310 | 318 | 97 -  | 2   | 317 | 10307  | 10624  |
| UN52413 | Rsa1.0.14436.1 | 467 | 3393   | 1.00E-149 | 367 | 401 | 91 +  | 1   | 393 | 2252   | 2652   |
| UN52414 | Rsa1.0.00012.1 | 767 | 222148 | 0         | 723 | 787 | 91 +  | 1   | 767 | 74770  | 75546  |

|         |                |     |        |           |     |     |       |     |     |        |        |
|---------|----------------|-----|--------|-----------|-----|-----|-------|-----|-----|--------|--------|
| UN52415 | Rsa1.0.02550.1 | 173 | 291051 | 4.00E-61  | 155 | 167 | 92 +  | 1   | 167 | 13715  | 13881  |
| UN52416 | Rsa1.0.00048.1 | 120 | 167185 | 3.00E-36  | 112 | 121 | 92 -  | 1   | 120 | 13855  | 13974  |
| UN52417 | Rsa1.0.00984.1 | 149 | 57580  | 1.00E-54  | 138 | 148 | 93 +  | 2   | 149 | 932    | 1079   |
| UN52418 | Rsa1.0.32504.1 | 610 | 700    | 0         | 411 | 427 | 96 +  | 184 | 610 | 1      | 427    |
| UN52419 | Rsa1.0.00065.1 | 185 | 454616 | 4.00E-55  | 160 | 177 | 90 +  | 1   | 177 | 151556 | 151732 |
| UN52420 | Rsa1.0.00777.1 | 883 | 191865 | 1.00E-142 | 266 | 269 | 98 -  | 611 | 879 | 181257 | 181525 |
| UN52421 | Rsa1.0.71453.1 | 135 | 321    | 7.00E-50  | 124 | 132 | 93 -  | 2   | 133 | 43     | 174    |
| UN52422 | Rsa1.0.01376.1 | 297 | 47004  | 1.00E-126 | 253 | 261 | 96 -  | 1   | 261 | 46244  | 46504  |
| UN52423 | Rsa1.0.05782.1 | 143 | 12646  | 4.00E-39  | 109 | 118 | 92 -  | 9   | 126 | 8988   | 9105   |
| UN52424 | Rsa1.0.00688.1 | 876 | 68396  | 4.00E-65  | 191 | 212 | 90 -  | 2   | 199 | 14822  | 15033  |
| UN52425 | Rsa1.0.01699.1 | 207 | 40816  | 1.00E-64  | 139 | 141 | 98 +  | 67  | 207 | 24245  | 24383  |
| UN52426 | Rsa1.0.02754.1 | 640 | 28213  | 1.00E-115 | 350 | 396 | 88 +  | 14  | 409 | 10059  | 10451  |
| UN52427 | Rsa1.0.00539.1 | 388 | 76926  | 3.00E-61  | 165 | 180 | 91 +  | 12  | 191 | 57471  | 57650  |
| UN52428 | Rsa1.0.01958.1 | 823 | 261128 | 1.00E-105 | 201 | 203 | 99 +  | 80  | 282 | 2      | 204    |
| UN52429 | Rsa1.0.00013.1 | 555 | 292129 | 1.00E-108 | 214 | 219 | 97 +  | 271 | 489 | 121565 | 121783 |
| UN52430 | Rsa1.0.01282.1 | 219 | 49304  | 5.00E-55  | 191 | 221 | 86 +  | 1   | 219 | 26627  | 26831  |
| UN52431 | Rsa1.0.03158.1 | 126 | 24950  | 5.00E-23  | 67  | 71  | 94 -  | 54  | 124 | 7686   | 7756   |
| UN52432 | Rsa1.0.04301.1 | 305 | 18022  | 1.00E-44  | 154 | 173 | 89 -  | 109 | 280 | 3410   | 3578   |
| UN52433 | Rsa1.0.00923.1 | 426 | 153678 | 2.33E-156 | 308 | 323 | 95 +  | 1   | 323 | 152664 | 152986 |
| UN52434 | Rsa1.0.00616.1 | 151 | 195713 | 7.00E-78  | 147 | 147 | 100 + | 5   | 151 | 178433 | 178579 |
| UN52435 | Rsa1.0.00122.1 | 693 | 265937 | 0         | 634 | 693 | 91 +  | 10  | 693 | 40356  | 41033  |
| UN52436 | Rsa1.0.12636.1 | 802 | 5168   | 1.00E-122 | 226 | 227 | 99 +  | 1   | 227 | 1832   | 2058   |
| UN52437 | Rsa1.0.00265.1 | 887 | 220635 | 1.00E-131 | 302 | 324 | 93 +  | 3   | 325 | 188935 | 189247 |
| UN52438 | Rsa1.0.00707.1 | 313 | 190112 | 1.00E-155 | 307 | 314 | 97 +  | 1   | 313 | 17615  | 17927  |
| UN52439 | Rsa1.0.00027.1 | 866 | 283362 | 1.00E-119 | 227 | 230 | 98 -  | 492 | 721 | 136818 | 137047 |
| UN52440 | Rsa1.0.00828.1 | 247 | 62744  | 6.00E-89  | 228 | 246 | 92 +  | 3   | 247 | 48068  | 48312  |
| UN52441 | Rsa1.0.02457.1 | 647 | 31208  | 1.00E-117 | 256 | 268 | 95 -  | 1   | 264 | 12121  | 12388  |
| UN52442 | Rsa1.0.00683.1 | 452 | 68638  | 1.00E-114 | 368 | 420 | 87 +  | 46  | 452 | 24142  | 24553  |
| UN52443 | Rsa1.0.03738.1 | 130 | 21071  | 9.00E-40  | 110 | 119 | 92 -  | 4   | 122 | 19902  | 20020  |
| UN52444 | Rsa1.0.06893.1 | 253 | 10194  | 1.00E-37  | 192 | 228 | 84 +  | 27  | 253 | 1057   | 1284   |
| UN52445 | Rsa1.0.00089.1 | 231 | 406142 | 1.00E-68  | 210 | 235 | 89 -  | 1   | 231 | 351970 | 352196 |
| UN52446 | Rsa1.0.01196.1 | 163 | 51097  | 8.00E-44  | 111 | 118 | 94 +  | 1   | 118 | 32720  | 32837  |
| UN52447 | Rsa1.0.00061.1 | 597 | 218685 | 0         | 584 | 597 | 97 -  | 1   | 597 | 185869 | 186464 |
| UN52448 | Rsa1.0.12425.1 | 733 | 5229   | 0         | 394 | 407 | 96 -  | 1   | 406 | 4587   | 4991   |
| UN52449 | Rsa1.0.00134.1 | 140 | 390219 | 3.00E-43  | 125 | 137 | 91 -  | 4   | 140 | 129454 | 129590 |
| UN52450 | Rsa1.0.00078.1 | 694 | 175053 | 5.00E-70  | 159 | 167 | 95 -  | 130 | 296 | 78090  | 78256  |
| UN52451 | Rsa1.0.02237.1 | 937 | 33544  | 0         | 556 | 572 | 97 -  | 361 | 930 | 2848   | 3416   |
| UN52452 | Rsa1.0.00260.1 | 165 | 102021 | 7.00E-72  | 158 | 165 | 95 +  | 1   | 165 | 8972   | 9136   |
| UN52453 | Rsa1.0.01632.1 | 177 | 181224 | 1.00E-30  | 107 | 120 | 89 +  | 23  | 142 | 6520   | 6639   |

|         |                |     |        |           |     |     |       |     |     |        |        |
|---------|----------------|-----|--------|-----------|-----|-----|-------|-----|-----|--------|--------|
| UN52454 | Rsa1.0.00813.1 | 548 | 63202  | 0         | 527 | 546 | 96 -  | 1   | 546 | 22372  | 22917  |
| UN52455 | Rsa1.0.00201.1 | 613 | 232851 | 0         | 584 | 609 | 95 -  | 5   | 613 | 35907  | 36515  |
| UN52456 | Rsa1.0.01611.1 | 166 | 42269  | 3.00E-34  | 83  | 86  | 96 +  | 81  | 166 | 25466  | 25551  |
| UN52457 | Rsa1.0.00478.1 | 206 | 81419  | 6.00E-30  | 109 | 121 | 90 -  | 1   | 118 | 2739   | 2858   |
| UN52458 | Rsa1.0.03031.1 | 665 | 25839  | 1.00E-167 | 325 | 334 | 97 -  | 240 | 573 | 24118  | 24451  |
| UN52459 | Rsa1.0.01883.1 | 382 | 37661  | 8.00E-80  | 166 | 171 | 97 -  | 137 | 307 | 11318  | 11488  |
| UN52460 | Rsa1.0.00924.1 | 313 | 59524  | 6.00E-74  | 166 | 173 | 95 +  | 1   | 172 | 3689   | 3861   |
| UN52461 | Rsa1.0.00838.1 | 913 | 153820 | 1.00E-156 | 321 | 332 | 96 -  | 51  | 380 | 133478 | 133804 |
| UN52462 | Rsa1.0.01914.1 | 861 | 37354  | 0         | 841 | 855 | 98 +  | 10  | 861 | 27128  | 27982  |
| UN52463 | Rsa1.0.00138.1 | 225 | 247040 | 4.00E-96  | 215 | 226 | 95 -  | 1   | 225 | 234440 | 234665 |
| UN52464 | Rsa1.0.07775.1 | 732 | 8594   | 0         | 713 | 727 | 98 +  | 3   | 729 | 954    | 1680   |
| UN52465 | Rsa1.0.25317.1 | 542 | 941    | 0         | 513 | 544 | 94 +  | 1   | 542 | 278    | 819    |
| UN52466 | Rsa1.0.01232.1 | 220 | 155185 | 4.00E-77  | 189 | 202 | 93 +  | 1   | 199 | 132560 | 132758 |
| UN52467 | Rsa1.0.09517.1 | 166 | 6319   | 1.00E-70  | 159 | 166 | 95 +  | 1   | 166 | 1976   | 2139   |
| UN52468 | Rsa1.0.02043.1 | 904 | 163754 | 1.00E-120 | 268 | 283 | 94 +  | 118 | 400 | 5678   | 5958   |
| UN52469 | Rsa1.0.01431.1 | 212 | 167877 | 1.00E-83  | 201 | 213 | 94 -  | 1   | 212 | 157707 | 157918 |
| UN52470 | Rsa1.0.02605.1 | 410 | 29637  | 1.00E-121 | 240 | 245 | 97 -  | 51  | 294 | 8473   | 8717   |
| UN52471 | Rsa1.0.03722.1 | 191 | 21184  | 2.00E-66  | 177 | 192 | 92 -  | 5   | 191 | 9615   | 9805   |
| UN52472 | Rsa1.0.02058.1 | 334 | 35532  | 6.00E-68  | 187 | 206 | 90 +  | 1   | 200 | 14743  | 14948  |
| UN52473 | Rsa1.0.00122.1 | 661 | 265937 | 0         | 540 | 572 | 94 -  | 1   | 561 | 233492 | 234060 |
| UN52474 | Rsa1.0.12731.1 | 735 | 5142   | 1.00E-124 | 269 | 283 | 95 -  | 2   | 280 | 178    | 460    |
| UN52475 | Rsa1.0.00377.1 | 211 | 90038  | 3.00E-87  | 199 | 211 | 94 +  | 1   | 211 | 79677  | 79887  |
| UN52476 | Rsa1.0.00018.1 | 820 | 410899 | 0         | 431 | 453 | 95 -  | 369 | 820 | 14377  | 14828  |
| UN52477 | Rsa1.0.00801.1 | 787 | 63861  | 0         | 356 | 359 | 99 +  | 154 | 512 | 37217  | 37575  |
| UN52478 | Rsa1.0.08870.1 | 736 | 6840   | 0         | 480 | 490 | 97 +  | 2   | 490 | 5766   | 6252   |
| UN52479 | Rsa1.0.04093.1 | 785 | 19106  | 1.00E-144 | 269 | 272 | 98 -  | 310 | 581 | 1581   | 1852   |
| UN52480 | Rsa1.0.01220.1 | 177 | 161775 | 8.00E-69  | 165 | 175 | 94 -  | 3   | 177 | 138841 | 139013 |
| UN52481 | Rsa1.0.02248.1 | 142 | 33414  | 3.00E-61  | 134 | 139 | 96 -  | 1   | 139 | 27097  | 27235  |
| UN52482 | Rsa1.0.00417.1 | 166 | 395068 | 2.00E-69  | 151 | 157 | 96 +  | 10  | 166 | 361441 | 361597 |
| UN52483 | Rsa1.0.00648.1 | 221 | 70351  | 1.00E-83  | 205 | 221 | 92 -  | 1   | 221 | 31514  | 31734  |
| UN52484 | Rsa1.0.00016.1 | 160 | 831256 | 6.00E-26  | 90  | 100 | 90 +  | 54  | 153 | 391928 | 392027 |
| UN52485 | Rsa1.0.00311.1 | 847 | 96847  | 1.00E-129 | 234 | 234 | 100 + | 614 | 847 | 28525  | 28758  |
| UN52486 | Rsa1.0.01373.1 | 199 | 47052  | 1.00E-70  | 183 | 199 | 91 -  | 1   | 199 | 31627  | 31825  |
| UN52487 | Rsa1.0.00295.1 | 473 | 152597 | 1.00E-170 | 342 | 355 | 96 +  | 4   | 358 | 21906  | 22260  |
| UN52488 | Rsa1.0.03352.1 | 169 | 23506  | 3.00E-68  | 163 | 171 | 95 +  | 1   | 169 | 17871  | 18041  |
| UN52489 | Rsa1.0.00547.1 | 534 | 76521  | 0         | 529 | 533 | 99 -  | 3   | 534 | 72013  | 72545  |
| UN52490 | Rsa1.0.01290.1 | 841 | 49179  | 1.00E-108 | 271 | 292 | 92 +  | 430 | 720 | 47098  | 47388  |
| UN52491 | Rsa1.0.00277.1 | 767 | 100132 | 1.00E-122 | 298 | 321 | 92 +  | 1   | 316 | 88408  | 88725  |
| UN52492 | Rsa1.0.00224.1 | 760 | 327530 | 1.00E-140 | 261 | 264 | 98 +  | 1   | 264 | 204876 | 205139 |

|         |                |     |        |           |     |     |      |     |     |        |        |
|---------|----------------|-----|--------|-----------|-----|-----|------|-----|-----|--------|--------|
| UN52493 | Rsa1.0.05573.1 | 890 | 13290  | 0         | 823 | 895 | 91 - | 26  | 890 | 3765   | 4646   |
| UN52494 | Rsa1.0.02515.1 | 330 | 30616  | 2.00E-40  | 106 | 113 | 93 - | 96  | 208 | 2680   | 2792   |
| UN52495 | Rsa1.0.00105.1 | 219 | 134138 | 1.00E-106 | 213 | 219 | 97 - | 1   | 219 | 128360 | 128578 |
| UN52496 | Rsa1.0.00028.1 | 580 | 293984 | 0         | 542 | 585 | 92 + | 2   | 580 | 65888  | 66472  |
| UN52497 | Rsa1.0.27950.1 | 882 | 833    | 0         | 650 | 664 | 97 - | 159 | 822 | 170    | 833    |
| UN52498 | Rsa1.0.03303.1 | 295 | 23890  | 7.00E-95  | 203 | 212 | 95 - | 1   | 212 | 7012   | 7223   |
| UN52499 | Rsa1.0.00290.1 | 782 | 225096 | 0         | 638 | 670 | 95 - | 113 | 782 | 10959  | 11610  |
| UN52500 | Rsa1.0.06160.1 | 706 | 11596  | 0         | 655 | 680 | 96 - | 1   | 679 | 9411   | 10085  |
| UN52501 | Rsa1.0.00096.1 | 839 | 198773 | 0         | 559 | 584 | 95 + | 29  | 605 | 109651 | 110231 |
| UN52502 | Rsa1.0.00087.1 | 228 | 761073 | 2.00E-73  | 211 | 231 | 91 + | 1   | 228 | 730662 | 730891 |
| UN52503 | Rsa1.0.00178.1 | 695 | 114861 | 0         | 621 | 657 | 94 - | 52  | 695 | 71653  | 72301  |
| UN52504 | Rsa1.0.01835.1 | 496 | 38542  | 1.00E-152 | 315 | 329 | 95 - | 1   | 329 | 20859  | 21187  |
| UN52505 | Rsa1.0.00660.1 | 723 | 69688  | 3.00E-87  | 167 | 168 | 99 - | 105 | 272 | 63166  | 63333  |
| UN52506 | Rsa1.0.00213.1 | 647 | 108167 | 7.00E-94  | 199 | 203 | 98 - | 448 | 647 | 90671  | 90873  |
| UN52507 | Rsa1.0.00047.1 | 629 | 168582 | 7.00E-97  | 235 | 248 | 94 - | 371 | 617 | 165035 | 165279 |
| UN52508 | Rsa1.0.05262.1 | 735 | 14334  | 0         | 502 | 547 | 91 - | 2   | 534 | 12878  | 13411  |
| UN52509 | Rsa1.0.01662.1 | 733 | 41382  | 0         | 437 | 440 | 99 - | 240 | 679 | 14174  | 14613  |
| UN52510 | Rsa1.0.00040.1 | 523 | 324196 | 0         | 426 | 431 | 98 + | 93  | 523 | 33482  | 33912  |
| UN52511 | Rsa1.0.05794.1 | 710 | 12610  | 2.00E-85  | 185 | 193 | 95 + | 458 | 650 | 11620  | 11812  |
| UN52512 | Rsa1.0.00029.1 | 151 | 272992 | 2.00E-25  | 74  | 79  | 93 + | 1   | 79  | 252484 | 252562 |
| UN52513 | Rsa1.0.00131.1 | 418 | 432233 | 1.00E-103 | 222 | 231 | 96 - | 138 | 362 | 63262  | 63492  |
| UN52514 | Rsa1.0.02180.1 | 827 | 34176  | 1.00E-151 | 330 | 348 | 94 + | 8   | 351 | 26510  | 26851  |
| UN52515 | Rsa1.0.01838.1 | 557 | 38500  | 0         | 514 | 555 | 92 - | 5   | 557 | 3606   | 4133   |
| UN52516 | Rsa1.0.03465.1 | 720 | 22700  | 4.00E-86  | 173 | 176 | 98 - | 141 | 316 | 21374  | 21546  |
| UN52517 | Rsa1.0.00712.1 | 677 | 67217  | 0         | 502 | 519 | 96 + | 121 | 636 | 47502  | 48017  |
| UN52518 | Rsa1.0.14358.1 | 863 | 3481   | 0         | 725 | 800 | 90 + | 1   | 798 | 2492   | 3274   |
| UN52519 | Rsa1.0.06288.1 | 562 | 11302  | 0         | 435 | 448 | 97 + | 115 | 562 | 10748  | 11190  |
| UN52520 | Rsa1.0.01702.1 | 705 | 40722  | 0         | 445 | 457 | 97 + | 249 | 705 | 13062  | 13518  |
| UN52521 | Rsa1.0.00476.1 | 294 | 280966 | 4.00E-41  | 102 | 106 | 96 + | 116 | 221 | 242497 | 242601 |
| UN52522 | Rsa1.0.01414.1 | 538 | 149508 | 0         | 516 | 536 | 96 + | 4   | 538 | 143154 | 143685 |
| UN52523 | Rsa1.0.05204.1 | 798 | 14516  | 1.00E-160 | 317 | 326 | 97 - | 479 | 798 | 6228   | 6553   |
| UN52524 | Rsa1.0.00195.1 | 474 | 251884 | 0         | 449 | 477 | 94 + | 1   | 474 | 41483  | 41946  |
| UN52525 | Rsa1.0.02686.1 | 162 | 28666  | 4.00E-58  | 129 | 133 | 96 + | 32  | 162 | 19533  | 19665  |
| UN52526 | Rsa1.0.22076.1 | 694 | 1151   | 1.00E-156 | 310 | 321 | 96 - | 382 | 694 | 453    | 773    |
| UN52527 | Rsa1.0.04881.1 | 768 | 15608  | 1.00E-110 | 292 | 317 | 92 - | 454 | 768 | 8994   | 9301   |
| UN52528 | Rsa1.0.00895.1 | 645 | 60615  | 2.33E-156 | 300 | 311 | 96 + | 337 | 643 | 16609  | 16918  |
| UN52529 | Rsa1.0.02092.1 | 564 | 35135  | 1.00E-168 | 342 | 355 | 96 - | 192 | 543 | 30357  | 30708  |
| UN52530 | Rsa1.0.01412.1 | 232 | 46311  | 1.00E-101 | 215 | 223 | 96 - | 5   | 227 | 11239  | 11460  |
| UN52531 | Rsa1.0.00292.1 | 778 | 98141  | 1.00E-133 | 401 | 449 | 89 + | 130 | 572 | 5696   | 6116   |

|         |                |     |        |           |     |     |       |     |     |        |        |
|---------|----------------|-----|--------|-----------|-----|-----|-------|-----|-----|--------|--------|
| UN52532 | Rsa1.0.00127.1 | 800 | 127446 | 1.00E-152 | 306 | 317 | 96 +  | 3   | 319 | 36397  | 36713  |
| UN52533 | Rsa1.0.17583.1 | 819 | 1791   | 0         | 339 | 341 | 99 +  | 463 | 802 | 920    | 1259   |
| UN52534 | Rsa1.0.02657.1 | 516 | 29000  | 0         | 477 | 513 | 92 +  | 3   | 505 | 20688  | 21196  |
| UN52535 | Rsa1.0.00260.1 | 745 | 102021 | 1.00E-111 | 222 | 228 | 97 -  | 514 | 741 | 60735  | 60962  |
| UN52536 | Rsa1.0.01997.1 | 849 | 158416 | 1.00E-102 | 238 | 252 | 94 +  | 3   | 253 | 5394   | 5643   |
| UN52537 | Rsa1.0.01300.1 | 683 | 48942  | 1.00E-139 | 318 | 339 | 93 +  | 236 | 574 | 26044  | 26376  |
| UN52538 | Rsa1.0.00838.1 | 738 | 153820 | 1.00E-89  | 185 | 190 | 97 +  | 165 | 351 | 130890 | 131079 |
| UN52539 | Rsa1.0.00145.1 | 528 | 261008 | 1.00E-85  | 220 | 241 | 91 -  | 94  | 325 | 95121  | 95361  |
| UN52540 | Rsa1.0.00207.1 | 886 | 248736 | 1.00E-144 | 260 | 260 | 100 + | 486 | 745 | 218549 | 218808 |
| UN52541 | Rsa1.0.00144.1 | 509 | 120708 | 0         | 487 | 514 | 94 +  | 2   | 509 | 23836  | 24349  |
| UN52542 | Rsa1.0.00320.1 | 706 | 95784  | 0         | 683 | 709 | 96 -  | 2   | 706 | 58976  | 59683  |
| UN52543 | Rsa1.0.04123.1 | 655 | 18947  | 1.00E-138 | 268 | 274 | 97 -  | 377 | 650 | 7708   | 7981   |
| UN52544 | Rsa1.0.03249.1 | 750 | 146254 | 1.00E-143 | 278 | 285 | 97 -  | 317 | 601 | 143079 | 143363 |
| UN52545 | Rsa1.0.02121.1 | 744 | 34813  | 7.00E-85  | 172 | 176 | 97 +  | 475 | 650 | 14172  | 14347  |
| UN52546 | Rsa1.0.00017.1 | 576 | 752458 | 1.00E-106 | 263 | 283 | 92 +  | 298 | 575 | 314419 | 314693 |
| UN52547 | Rsa1.0.00525.1 | 711 | 78030  | 1.00E-160 | 317 | 327 | 96 -  | 231 | 557 | 5337   | 5663   |
| UN52548 | Rsa1.0.03054.1 | 754 | 25738  | 1.00E-137 | 280 | 291 | 96 +  | 357 | 647 | 14197  | 14487  |
| UN52549 | Rsa1.0.02694.1 | 750 | 28610  | 0         | 660 | 681 | 96 -  | 71  | 750 | 10910  | 11590  |
| UN52550 | Rsa1.0.28709.1 | 631 | 805    | 2.00E-84  | 213 | 227 | 93 -  | 382 | 607 | 162    | 386    |
| UN52551 | Rsa1.0.00010.1 | 555 | 294827 | 2.00E-50  | 126 | 133 | 94 +  | 37  | 169 | 118148 | 118278 |
| UN52552 | Rsa1.0.03218.1 | 823 | 24539  | 1.00E-122 | 273 | 289 | 94 -  | 10  | 289 | 5213   | 5498   |
| UN52553 | Rsa1.0.00163.1 | 772 | 116847 | 1.00E-159 | 470 | 532 | 88 +  | 2   | 533 | 70061  | 70586  |
| UN52554 | Rsa1.0.01388.1 | 727 | 46741  | 1.00E-110 | 326 | 370 | 88 +  | 4   | 370 | 25401  | 25755  |
| UN52555 | Rsa1.0.01825.1 | 157 | 38725  | 5.00E-45  | 145 | 164 | 88 +  | 3   | 157 | 24060  | 24223  |
| UN52556 | Rsa1.0.00065.1 | 781 | 454616 | 1.00E-177 | 395 | 421 | 93 -  | 5   | 415 | 445013 | 445430 |
| UN52557 | Rsa1.0.00100.1 | 696 | 249232 | 1.00E-168 | 338 | 351 | 96 -  | 3   | 353 | 187590 | 187940 |
| UN52558 | Rsa1.0.01779.1 | 552 | 39448  | 0         | 517 | 548 | 94 +  | 3   | 544 | 11186  | 11729  |
| UN52559 | Rsa1.0.05618.1 | 676 | 13165  | 0         | 510 | 544 | 93 +  | 148 | 676 | 4478   | 5018   |
| UN52560 | Rsa1.0.00994.1 | 800 | 165189 | 1.00E-177 | 381 | 403 | 94 -  | 2   | 404 | 38719  | 39121  |
| UN52561 | Rsa1.0.00832.1 | 704 | 62622  | 1.00E-126 | 238 | 241 | 98 +  | 142 | 382 | 32733  | 32973  |
| UN52562 | Rsa1.0.00838.1 | 725 | 153820 | 0         | 361 | 369 | 97 -  | 228 | 596 | 16093  | 16461  |
| UN52563 | Rsa1.0.01875.1 | 588 | 37849  | 1.00E-147 | 299 | 311 | 96 +  | 278 | 588 | 25024  | 25328  |
| UN52564 | Rsa1.0.00457.1 | 596 | 337301 | 1.00E-64  | 126 | 126 | 100 - | 118 | 243 | 161069 | 161194 |
| UN52565 | Rsa1.0.00336.1 | 676 | 445051 | 0         | 497 | 538 | 92 -  | 3   | 527 | 221235 | 221756 |
| UN52566 | Rsa1.0.03711.1 | 614 | 21237  | 4.00E-92  | 286 | 323 | 88 +  | 319 | 614 | 10384  | 10706  |
| UN52567 | Rsa1.0.01117.1 | 225 | 53465  | 6.00E-95  | 216 | 227 | 95 +  | 2   | 225 | 39708  | 39934  |
| UN52568 | Rsa1.0.00877.1 | 580 | 61305  | 0         | 496 | 515 | 96 +  | 3   | 517 | 6888   | 7400   |
| UN52569 | Rsa1.0.01884.1 | 684 | 37659  | 1.00E-106 | 224 | 233 | 96 -  | 2   | 234 | 16553  | 16782  |
| UN52570 | Rsa1.0.04332.1 | 702 | 17869  | 0         | 634 | 656 | 96 -  | 39  | 694 | 11042  | 11691  |

|         |                |     |        |           |     |     |      |     |     |        |        |
|---------|----------------|-----|--------|-----------|-----|-----|------|-----|-----|--------|--------|
| UN52571 | Rsa1.0.03511.1 | 116 | 22373  | 5.00E-44  | 108 | 114 | 94 + | 3   | 116 | 4982   | 5095   |
| UN52572 | Rsa1.0.01953.1 | 774 | 36881  | 2.00E-32  | 124 | 140 | 88 - | 636 | 774 | 24722  | 24861  |
| UN52573 | Rsa1.0.00504.1 | 544 | 79334  | 1.00E-148 | 330 | 352 | 93 + | 192 | 536 | 24076  | 24427  |
| UN52574 | Rsa1.0.00485.1 | 755 | 80937  | 0         | 417 | 432 | 96 + | 3   | 434 | 3511   | 3940   |
| UN52575 | Rsa1.0.00034.1 | 708 | 260119 | 0         | 557 | 586 | 95 + | 119 | 695 | 238118 | 238699 |
| UN52576 | Rsa1.0.04121.1 | 578 | 18951  | 1.00E-113 | 375 | 431 | 87 - | 49  | 479 | 13885  | 14315  |
| UN52577 | Rsa1.0.00719.1 | 838 | 66952  | 0         | 409 | 420 | 97 - | 4   | 423 | 47331  | 47748  |
| UN52578 | Rsa1.0.00817.1 | 751 | 62961  | 0         | 355 | 360 | 98 - | 4   | 363 | 23945  | 24302  |
| UN52579 | Rsa1.0.00427.1 | 477 | 189678 | 6.00E-69  | 136 | 137 | 99 + | 112 | 248 | 162316 | 162452 |
| UN52580 | Rsa1.0.01326.1 | 664 | 48072  | 1.00E-158 | 324 | 334 | 97 - | 290 | 620 | 43834  | 44166  |
| UN52581 | Rsa1.0.01414.1 | 328 | 149508 | 5.00E-99  | 248 | 267 | 92 + | 63  | 328 | 143438 | 143703 |
| UN52582 | Rsa1.0.00480.1 | 794 | 81325  | 0         | 414 | 433 | 95 + | 3   | 434 | 30816  | 31248  |
| UN52583 | Rsa1.0.00223.1 | 679 | 106231 | 1.00E-143 | 284 | 293 | 96 + | 336 | 628 | 40246  | 40538  |
| UN52584 | Rsa1.0.00121.1 | 579 | 278029 | 6.00E-97  | 207 | 215 | 96 - | 267 | 479 | 43521  | 43735  |
| UN52585 | Rsa1.0.00330.1 | 683 | 94666  | 1.00E-152 | 290 | 296 | 97 - | 388 | 683 | 46809  | 47104  |
| UN52586 | Rsa1.0.01814.1 | 759 | 38917  | 1.00E-133 | 268 | 276 | 97 - | 81  | 354 | 868    | 1143   |
| UN52587 | Rsa1.0.20432.1 | 689 | 1306   | 5.00E-70  | 147 | 151 | 97 - | 2   | 152 | 391    | 541    |
| UN52588 | Rsa1.0.00871.1 | 820 | 61539  | 1.00E-80  | 209 | 230 | 90 + | 3   | 222 | 10101  | 10323  |
| UN52589 | Rsa1.0.00294.1 | 746 | 144860 | 0         | 702 | 736 | 95 - | 11  | 746 | 7394   | 8128   |
| UN52590 | Rsa1.0.15067.1 | 776 | 2854   | 1.00E-140 | 298 | 313 | 95 - | 270 | 582 | 2007   | 2319   |
| UN52591 | Rsa1.0.01377.1 | 639 | 46967  | 9.00E-44  | 137 | 151 | 90 + | 339 | 488 | 24827  | 24977  |
| UN52592 | Rsa1.0.03387.1 | 478 | 23278  | 0         | 407 | 432 | 94 + | 50  | 478 | 402    | 833    |
| UN52593 | Rsa1.0.00099.1 | 785 | 159619 | 0         | 432 | 449 | 96 - | 153 | 596 | 7284   | 7729   |
| UN52594 | Rsa1.0.00660.1 | 768 | 69688  | 1.00E-104 | 202 | 205 | 98 - | 29  | 233 | 19305  | 19509  |
| UN52595 | Rsa1.0.00923.1 | 730 | 153678 | 7.00E-85  | 172 | 176 | 97 - | 221 | 396 | 35861  | 36036  |
| UN52596 | Rsa1.0.01549.1 | 684 | 43543  | 0         | 658 | 687 | 95 + | 1   | 684 | 31613  | 32292  |
| UN52597 | Rsa1.0.00113.1 | 797 | 131574 | 1.00E-150 | 292 | 299 | 97 + | 3   | 301 | 51929  | 52224  |
| UN52598 | Rsa1.0.02008.1 | 735 | 36109  | 1.00E-113 | 246 | 256 | 96 - | 480 | 735 | 17395  | 17648  |
| UN52599 | Rsa1.0.02981.1 | 444 | 26285  | 2.00E-68  | 192 | 210 | 91 + | 237 | 444 | 5587   | 5794   |
| UN52600 | Rsa1.0.00777.1 | 778 | 191865 | 0         | 383 | 399 | 95 + | 145 | 543 | 188924 | 189322 |
| UN52601 | Rsa1.0.00829.1 | 514 | 158305 | 1.00E-141 | 306 | 319 | 95 + | 199 | 514 | 109209 | 109527 |
| UN52602 | Rsa1.0.05541.1 | 656 | 139959 | 0         | 435 | 451 | 96 - | 80  | 530 | 128549 | 128990 |
| UN52603 | Rsa1.0.00398.1 | 581 | 88007  | 9.00E-56  | 126 | 131 | 96 - | 428 | 558 | 11503  | 11633  |
| UN52604 | #              | #   | #      | #         | #   | #   | #    | #   | #   | #      | #      |
| UN52605 | Rsa1.0.03380.1 | 679 | 23320  | 1.00E-140 | 320 | 343 | 93 + | 1   | 343 | 4285   | 4615   |
| UN52606 | Rsa1.0.01998.1 | 715 | 36276  | 0         | 608 | 624 | 97 + | 18  | 641 | 669    | 1289   |
| UN52607 | Rsa1.0.00011.1 | 799 | 225044 | 0         | 456 | 492 | 92 - | 223 | 714 | 213364 | 213851 |
| UN52608 | Rsa1.0.00890.1 | 647 | 323870 | 1.00E-79  | 154 | 155 | 99 - | 258 | 412 | 173677 | 173831 |
| UN52609 | Rsa1.0.00539.1 | 758 | 76926  | 0         | 448 | 463 | 96 - | 2   | 461 | 264    | 724    |

|         |                |     |        |           |     |     |       |     |     |        |        |
|---------|----------------|-----|--------|-----------|-----|-----|-------|-----|-----|--------|--------|
| UN52610 | Rsa1.0.00341.1 | 626 | 249309 | 1.00E-112 | 205 | 205 | 100 + | 317 | 521 | 178139 | 178343 |
| UN52611 | Rsa1.0.00080.1 | 674 | 190437 | 1.00E-165 | 359 | 381 | 94 +  | 36  | 416 | 92847  | 93215  |
| UN52612 | Rsa1.0.01280.1 | 641 | 49321  | 0         | 593 | 613 | 96 +  | 32  | 641 | 36579  | 37191  |
| UN52613 | Rsa1.0.01536.1 | 858 | 43747  | 0         | 485 | 510 | 95 +  | 349 | 858 | 28233  | 28732  |
| UN52614 | Rsa1.0.04898.1 | 835 | 15545  | 0         | 813 | 823 | 98 -  | 15  | 835 | 10106  | 10928  |
| UN52615 | Rsa1.0.03640.1 | 848 | 21624  | 1.00E-130 | 269 | 280 | 96 -  | 103 | 382 | 18689  | 18968  |
| UN52616 | Rsa1.0.02404.1 | 529 | 31702  | 1.00E-143 | 273 | 277 | 98 -  | 253 | 529 | 19208  | 19483  |
| UN52617 | Rsa1.0.00351.1 | 684 | 413096 | 1.00E-174 | 376 | 395 | 95 -  | 301 | 684 | 244433 | 244827 |
| UN52618 | Rsa1.0.02802.1 | 701 | 27736  | 0         | 652 | 694 | 93 -  | 5   | 697 | 10962  | 11631  |
| UN52619 | Rsa1.0.00867.1 | 723 | 61635  | 1.00E-124 | 257 | 266 | 96 -  | 451 | 715 | 55412  | 55677  |
| UN52620 | Rsa1.0.01953.1 | 703 | 36881  | 1.00E-135 | 300 | 317 | 94 +  | 382 | 697 | 6698   | 7014   |
| UN52621 | Rsa1.0.00906.1 | 678 | 178966 | 2.00E-82  | 162 | 164 | 98 -  | 66  | 229 | 122095 | 122258 |
| UN52622 | Rsa1.0.01922.1 | 618 | 37236  | 0         | 375 | 388 | 96 -  | 233 | 618 | 12524  | 12910  |
| UN52623 | Rsa1.0.02556.1 | 634 | 30133  | 0         | 520 | 542 | 95 +  | 93  | 634 | 2960   | 3496   |
| UN52624 | Rsa1.0.08430.1 | 605 | 7367   | 0         | 362 | 368 | 98 +  | 64  | 431 | 624    | 991    |
| UN52625 | Rsa1.0.01196.1 | 658 | 51097  | 1.00E-135 | 379 | 424 | 89 +  | 230 | 653 | 1539   | 1962   |
| UN52626 | Rsa1.0.02860.1 | 684 | 27207  | 0         | 663 | 684 | 96 -  | 1   | 684 | 1871   | 2553   |
| UN52627 | Rsa1.0.01641.1 | 747 | 188213 | 0         | 725 | 749 | 96 -  | 3   | 747 | 31670  | 32415  |
| UN52628 | Rsa1.0.00136.1 | 271 | 122464 | 3.00E-69  | 133 | 133 | 100 - | 16  | 148 | 93267  | 93399  |
| UN52629 | Rsa1.0.07014.1 | 750 | 10029  | 0         | 706 | 729 | 96 +  | 30  | 750 | 7694   | 8422   |
| UN52630 | Rsa1.0.00107.1 | 759 | 431659 | 0         | 566 | 590 | 95 -  | 170 | 750 | 300465 | 301052 |
| UN52631 | Rsa1.0.01390.1 | 713 | 46695  | 0         | 659 | 720 | 91 -  | 19  | 713 | 38977  | 39686  |
| UN52632 | Rsa1.0.05969.1 | 772 | 12072  | 0         | 636 | 668 | 95 +  | 1   | 662 | 4252   | 4914   |
| UN52633 | Rsa1.0.00179.1 | 289 | 393324 | 1.00E-120 | 274 | 291 | 94 -  | 5   | 289 | 336513 | 336803 |
| UN52634 | Rsa1.0.14574.1 | 190 | 3252   | 2.00E-91  | 185 | 190 | 97 -  | 1   | 190 | 2912   | 3101   |
| UN52635 | Rsa1.0.21309.1 | 791 | 1216   | 0         | 566 | 583 | 97 +  | 212 | 791 | 257    | 839    |
| UN52636 | Rsa1.0.02719.1 | 877 | 28428  | 0         | 634 | 646 | 98 +  | 230 | 874 | 9837   | 10481  |
| UN52637 | Rsa1.0.00380.1 | 391 | 89748  | 0         | 339 | 342 | 99 -  | 2   | 343 | 25967  | 26308  |
| UN52638 | Rsa1.0.00116.1 | 721 | 365886 | 0         | 474 | 502 | 94 +  | 220 | 721 | 18349  | 18846  |
| UN52639 | Rsa1.0.01043.1 | 775 | 55893  | 0         | 742 | 766 | 96 -  | 2   | 767 | 51342  | 52106  |
| UN52640 | #              | #   | #      | #         | #   | #   | #     | #   | #   | #      | #      |
| UN52641 | Rsa1.0.01266.1 | 787 | 49680  | 0         | 750 | 791 | 94 -  | 1   | 787 | 16024  | 16791  |
| UN52642 | Rsa1.0.00089.1 | 368 | 406142 | 1.00E-124 | 291 | 313 | 92 -  | 36  | 339 | 392576 | 392887 |
| UN52643 | Rsa1.0.00574.1 | 758 | 74797  | 1.00E-130 | 256 | 262 | 97 +  | 174 | 435 | 2996   | 3254   |
| UN52644 | Rsa1.0.00575.1 | 662 | 74791  | 1.00E-106 | 281 | 309 | 90 -  | 358 | 662 | 59483  | 59772  |
| UN52645 | Rsa1.0.00722.1 | 765 | 66840  | 0         | 468 | 508 | 92 -  | 50  | 553 | 38557  | 39058  |
| UN52646 | Rsa1.0.10863.1 | 481 | 5698   | 1.00E-129 | 409 | 461 | 88 +  | 30  | 481 | 4712   | 5170   |
| UN52647 | Rsa1.0.00160.1 | 842 | 346678 | 0         | 402 | 417 | 96 +  | 340 | 756 | 31620  | 32036  |
| UN52648 | Rsa1.0.01881.1 | 675 | 37721  | 0         | 631 | 672 | 93 -  | 3   | 674 | 8434   | 9090   |



|         |                |     |        |           |     |     |      |     |     |        |        |
|---------|----------------|-----|--------|-----------|-----|-----|------|-----|-----|--------|--------|
| UN52649 | Rsa1.0.02710.1 | 650 | 28492  | 1.00E-136 | 302 | 319 | 94 - | 3   | 320 | 25405  | 25719  |
| UN52650 | Rsa1.0.06356.1 | 830 | 11178  | 1.00E-115 | 241 | 251 | 96 - | 433 | 683 | 9177   | 9427   |
| UN52651 | Rsa1.0.00040.1 | 531 | 324196 | 1.00E-159 | 312 | 320 | 97 - | 61  | 379 | 53110  | 53429  |
| UN52652 | Rsa1.0.04004.1 | 456 | 19594  | 0         | 444 | 458 | 96 - | 3   | 456 | 15179  | 15635  |
| UN52653 | Rsa1.0.00865.1 | 641 | 61686  | 0         | 437 | 458 | 95 - | 22  | 478 | 2371   | 2828   |
| UN52654 | Rsa1.0.02267.1 | 492 | 33194  | 0         | 419 | 441 | 95 - | 17  | 451 | 11963  | 12402  |
| UN52655 | Rsa1.0.28104.1 | 719 | 827    | 1.00E-64  | 150 | 158 | 94 + | 466 | 623 | 283    | 440    |
| UN52656 | Rsa1.0.03141.1 | 257 | 25061  | 1.00E-77  | 239 | 266 | 89 - | 1   | 257 | 19289  | 19544  |
| UN52657 | Rsa1.0.00578.1 | 541 | 74581  | 3.00E-31  | 171 | 208 | 82 - | 349 | 541 | 65016  | 65223  |
| UN52658 | Rsa1.0.06714.1 | 189 | 10488  | 1.00E-36  | 112 | 122 | 91 + | 2   | 123 | 9957   | 10077  |
| UN52659 | Rsa1.0.00917.1 | 831 | 182012 | 0         | 707 | 727 | 97 - | 2   | 726 | 130794 | 131520 |
| UN52660 | Rsa1.0.00406.1 | 808 | 87398  | 1.00E-134 | 284 | 297 | 95 + | 129 | 425 | 74471  | 74764  |
| UN52661 | Rsa1.0.04198.1 | 736 | 18504  | 0         | 469 | 493 | 95 + | 250 | 736 | 13939  | 14430  |
| UN52662 | Rsa1.0.01492.1 | 685 | 44704  | 0         | 404 | 430 | 93 + | 5   | 434 | 32824  | 33244  |
| UN52663 | Rsa1.0.01706.1 | 813 | 40694  | 1.00E-125 | 236 | 239 | 98 + | 145 | 383 | 28390  | 28628  |
| UN52664 | Rsa1.0.04527.1 | 528 | 16958  | 0         | 489 | 518 | 94 - | 4   | 521 | 15736  | 16252  |
| UN52665 | Rsa1.0.00055.1 | 820 | 520193 | 1.00E-161 | 316 | 324 | 97 - | 1   | 324 | 336224 | 336546 |
| UN52666 | Rsa1.0.03709.1 | 798 | 21247  | 2.00E-60  | 291 | 345 | 84 - | 149 | 484 | 4128   | 4471   |
| UN52667 | Rsa1.0.22285.1 | 788 | 1134   | 0         | 521 | 537 | 97 - | 75  | 611 | 1      | 537    |
| UN52668 | Rsa1.0.06990.1 | 259 | 10060  | 7.00E-70  | 181 | 197 | 91 + | 63  | 259 | 4389   | 4579   |
| UN52669 | Rsa1.0.16078.1 | 709 | 2294   | 0         | 576 | 593 | 97 - | 119 | 709 | 1698   | 2290   |
| UN52670 | Rsa1.0.02652.1 | 535 | 29038  | 1.00E-63  | 130 | 132 | 98 + | 250 | 381 | 19717  | 19848  |
| UN52671 | Rsa1.0.01790.1 | 692 | 39248  | 1.00E-161 | 315 | 324 | 97 + | 44  | 367 | 14791  | 15114  |
| UN52672 | Rsa1.0.00025.1 | 782 | 277312 | 0         | 469 | 502 | 93 + | 295 | 782 | 224511 | 225010 |
| UN52673 | Rsa1.0.01145.1 | 613 | 149247 | 1.00E-131 | 419 | 477 | 87 - | 7   | 469 | 104474 | 104931 |
| UN52674 | Rsa1.0.03013.1 | 787 | 26026  | 5.00E-61  | 210 | 240 | 87 - | 26  | 265 | 2235   | 2474   |
| UN52675 | Rsa1.0.00627.1 | 819 | 71566  | 8.00E-85  | 163 | 164 | 99 + | 547 | 710 | 62667  | 62830  |
| UN52676 | Rsa1.0.00008.1 | 616 | 358124 | 1.00E-178 | 368 | 385 | 95 + | 232 | 616 | 5892   | 6276   |
| UN52677 | Rsa1.0.00623.1 | 677 | 207630 | 1.00E-143 | 267 | 270 | 98 + | 2   | 271 | 174599 | 174868 |
| UN52678 | Rsa1.0.03946.1 | 554 | 19912  | 1.00E-177 | 333 | 339 | 98 + | 220 | 554 | 383    | 721    |
| UN52679 | Rsa1.0.00296.1 | 814 | 97854  | 1.00E-135 | 263 | 269 | 97 - | 115 | 383 | 46769  | 47037  |
| UN52680 | Rsa1.0.03893.1 | 661 | 20220  | 2.33E-156 | 324 | 343 | 94 + | 319 | 660 | 17243  | 17585  |
| UN52681 | Rsa1.0.01463.1 | 299 | 45213  | 1.00E-158 | 294 | 298 | 98 + | 2   | 299 | 38235  | 38532  |
| UN52682 | Rsa1.0.16253.1 | 757 | 2225   | 1.00E-100 | 195 | 198 | 98 - | 3   | 200 | 1      | 198    |
| UN52683 | Rsa1.0.08622.1 | 757 | 7122   | 8.00E-94  | 219 | 233 | 93 + | 2   | 234 | 3845   | 4074   |
| UN52684 | Rsa1.0.00473.1 | 212 | 212204 | 5.00E-95  | 203 | 212 | 95 + | 1   | 212 | 48598  | 48809  |
| UN52685 | Rsa1.0.04286.1 | 772 | 18084  | 2.00E-79  | 216 | 238 | 90 - | 3   | 237 | 6107   | 6331   |
| UN52686 | Rsa1.0.00483.1 | 750 | 81102  | 1.00E-153 | 313 | 326 | 96 - | 423 | 748 | 46607  | 46932  |
| UN52687 | Rsa1.0.00301.1 | 697 | 365315 | 0         | 409 | 426 | 96 + | 2   | 427 | 83869  | 84294  |

|         |                |     |        |           |     |     |      |     |     |        |        |
|---------|----------------|-----|--------|-----------|-----|-----|------|-----|-----|--------|--------|
| UN52688 | Rsa1.0.03105.1 | 789 | 25373  | 0         | 593 | 606 | 97 - | 25  | 630 | 17355  | 17960  |
| UN52689 | Rsa1.0.00894.1 | 788 | 269700 | 9.00E-69  | 142 | 145 | 97 - | 158 | 302 | 130214 | 130358 |
| UN52690 | Rsa1.0.21467.1 | 752 | 1200   | 0         | 504 | 533 | 94 - | 221 | 751 | 137    | 663    |
| UN52691 | Rsa1.0.01006.1 | 677 | 163670 | 0         | 593 | 616 | 96 + | 52  | 666 | 7899   | 8510   |
| UN52692 | Rsa1.0.00115.1 | 778 | 131321 | 1.00E-139 | 296 | 311 | 95 + | 24  | 334 | 34887  | 35197  |
| UN52693 | Rsa1.0.20731.1 | 294 | 1275   | 3.00E-57  | 122 | 125 | 97 + | 166 | 290 | 9      | 133    |
| UN52694 | Rsa1.0.03506.1 | 742 | 22416  | 1.00E-145 | 400 | 434 | 92 + | 1   | 427 | 7449   | 7871   |
| UN52695 | Rsa1.0.00055.1 | 750 | 520193 | 0         | 735 | 757 | 97 + | 1   | 750 | 188781 | 189537 |
| UN52696 | Rsa1.0.16736.1 | 753 | 2050   | 0         | 597 | 648 | 92 + | 96  | 737 | 749    | 1396   |
| UN52697 | Rsa1.0.00177.1 | 105 | 143394 | 3.00E-45  | 101 | 104 | 97 - | 2   | 105 | 106524 | 106627 |
| UN52698 | Rsa1.0.04768.1 | 742 | 16066  | 1.00E-115 | 244 | 255 | 95 + | 3   | 257 | 352    | 606    |
| UN52699 | #              | #   | #      | #         | #   | #   | #    | #   | #   | #      | #      |
| UN52700 | Rsa1.0.00061.1 | 592 | 218685 | 4.00E-95  | 263 | 291 | 90 - | 307 | 579 | 167065 | 167355 |
| UN52701 | Rsa1.0.00002.1 | 345 | 601661 | 1.00E-105 | 197 | 198 | 99 - | 148 | 345 | 91564  | 91761  |
| UN52702 | Rsa1.0.34820.1 | 772 | 650    | 1.00E-149 | 328 | 344 | 95 - | 237 | 578 | 1      | 343    |
| UN52703 | Rsa1.0.00480.1 | 735 | 81325  | 0         | 668 | 707 | 94 + | 4   | 687 | 3551   | 4254   |
| UN52704 | Rsa1.0.02585.1 | 654 | 29865  | 0         | 630 | 643 | 97 - | 3   | 640 | 25294  | 25936  |
| UN52705 | Rsa1.0.02743.1 | 865 | 28282  | 1.00E-40  | 341 | 426 | 80 + | 304 | 729 | 13739  | 14164  |
| UN52706 | Rsa1.0.00985.1 | 712 | 161950 | 1.00E-109 | 248 | 261 | 95 + | 60  | 320 | 49109  | 49367  |
| UN52707 | Rsa1.0.00563.1 | 785 | 75491  | 2.00E-69  | 137 | 138 | 99 - | 351 | 488 | 73689  | 73826  |
| UN52708 | Rsa1.0.00681.1 | 144 | 68779  | 3.00E-37  | 99  | 105 | 94 - | 40  | 141 | 54809  | 54913  |
| UN52709 | Rsa1.0.01104.1 | 651 | 285480 | 1.00E-121 | 239 | 245 | 97 - | 407 | 651 | 264504 | 264748 |
| UN52710 | Rsa1.0.03218.1 | 701 | 24539  | 5.00E-64  | 155 | 163 | 95 - | 3   | 164 | 9502   | 9661   |
| UN52711 | Rsa1.0.00347.1 | 198 | 93048  | 1.00E-77  | 188 | 201 | 93 + | 1   | 198 | 68247  | 68447  |
| UN52712 | Rsa1.0.05782.1 | 265 | 12646  | 2.00E-52  | 108 | 109 | 99 + | 151 | 259 | 9269   | 9377   |
| UN52713 | Rsa1.0.01015.1 | 683 | 56752  | 1.00E-115 | 216 | 218 | 99 + | 330 | 547 | 2746   | 2963   |
| UN52714 | Rsa1.0.04756.1 | 680 | 16114  | 1.00E-109 | 364 | 418 | 87 + | 1   | 418 | 7833   | 8247   |
| UN52715 | Rsa1.0.00064.1 | 631 | 240927 | 4.00E-12  | 50  | 54  | 92 - | 472 | 525 | 172882 | 172935 |
| UN52716 | Rsa1.0.05496.1 | 604 | 13533  | 6.00E-97  | 204 | 212 | 96 - | 104 | 315 | 1715   | 1926   |
| UN52717 | Rsa1.0.00277.1 | 648 | 100132 | 1.00E-106 | 359 | 415 | 86 - | 25  | 439 | 84808  | 85213  |
| UN52718 | Rsa1.0.01978.1 | 666 | 36546  | 0         | 514 | 545 | 94 - | 122 | 666 | 9700   | 10241  |
| UN52719 | Rsa1.0.02813.1 | 272 | 27656  | 4.00E-99  | 195 | 199 | 97 - | 74  | 272 | 11428  | 11626  |
| UN52720 | Rsa1.0.00383.1 | 810 | 398431 | 0         | 784 | 810 | 96 + | 1   | 810 | 145429 | 146237 |
| UN52721 | Rsa1.0.01519.1 | 675 | 44144  | 0         | 634 | 661 | 95 + | 7   | 664 | 34209  | 34869  |
| UN52722 | Rsa1.0.00367.1 | 804 | 90750  | 0         | 769 | 803 | 95 + | 6   | 804 | 3059   | 3857   |
| UN52723 | Rsa1.0.00428.1 | 678 | 85599  | 0         | 603 | 672 | 89 - | 8   | 678 | 80774  | 81445  |
| UN52724 | Rsa1.0.00385.1 | 390 | 89160  | 3.00E-76  | 184 | 197 | 93 - | 2   | 198 | 54012  | 54208  |
| UN52725 | Rsa1.0.02312.1 | 659 | 32675  | 0         | 393 | 408 | 96 - | 1   | 408 | 16489  | 16893  |
| UN52726 | Rsa1.0.01251.1 | 673 | 49873  | 0         | 629 | 673 | 93 + | 1   | 668 | 34626  | 35274  |

|         |                |     |        |           |     |     |       |     |     |        |        |
|---------|----------------|-----|--------|-----------|-----|-----|-------|-----|-----|--------|--------|
| UN52727 | Rsa1.0.06460.1 | 691 | 10974  | 0         | 573 | 589 | 97 +  | 104 | 691 | 3361   | 3948   |
| UN52728 | Rsa1.0.02114.1 | 414 | 34873  | 1.00E-63  | 134 | 136 | 98 +  | 174 | 309 | 1269   | 1403   |
| UN52729 | Rsa1.0.02521.1 | 710 | 30562  | 1.00E-180 | 385 | 406 | 94 -  | 20  | 420 | 24319  | 24721  |
| UN52730 | Rsa1.0.07441.1 | 733 | 9388   | 0         | 686 | 730 | 93 -  | 3   | 715 | 3859   | 4587   |
| UN52731 | Rsa1.0.00341.1 | 341 | 249309 | 1.00E-128 | 322 | 350 | 92 -  | 1   | 341 | 4049   | 4398   |
| UN52732 | Rsa1.0.02068.1 | 526 | 35432  | 0         | 509 | 534 | 95 -  | 3   | 526 | 15383  | 15910  |
| UN52733 | Rsa1.0.01223.1 | 836 | 50392  | 1.00E-157 | 295 | 298 | 98 +  | 496 | 792 | 46858  | 47155  |
| UN52734 | Rsa1.0.00683.1 | 430 | 68638  | 0         | 413 | 424 | 97 -  | 1   | 424 | 24121  | 24543  |
| UN52735 | Rsa1.0.00278.1 | 809 | 231896 | 0         | 731 | 764 | 95 -  | 2   | 765 | 86343  | 87106  |
| UN52736 | Rsa1.0.08607.1 | 689 | 7132   | 6.00E-76  | 154 | 157 | 98 +  | 446 | 602 | 5203   | 5359   |
| UN52737 | Rsa1.0.00348.1 | 785 | 92818  | 0         | 573 | 597 | 95 -  | 3   | 593 | 45687  | 46274  |
| UN52738 | Rsa1.0.00119.1 | 850 | 467509 | 4.00E-68  | 156 | 164 | 95 +  | 354 | 517 | 403903 | 404066 |
| UN52739 | Rsa1.0.11741.1 | 830 | 5423   | 1.00E-135 | 346 | 376 | 92 -  | 408 | 780 | 4722   | 5096   |
| UN52740 | Rsa1.0.00270.1 | 715 | 101236 | 0         | 710 | 715 | 99 -  | 2   | 715 | 80952  | 81666  |
| UN52741 | Rsa1.0.02532.1 | 194 | 30403  | 3.00E-65  | 181 | 198 | 91 +  | 2   | 194 | 24440  | 24631  |
| UN52742 | Rsa1.0.05282.1 | 614 | 14270  | 1.00E-76  | 173 | 182 | 95 -  | 180 | 361 | 6370   | 6551   |
| UN52743 | Rsa1.0.00231.1 | 822 | 105381 | 1.00E-129 | 278 | 291 | 95 +  | 468 | 757 | 19909  | 20199  |
| UN52744 | Rsa1.0.03131.1 | 861 | 25142  | 0         | 753 | 776 | 97 -  | 34  | 807 | 3668   | 4440   |
| UN52745 | Rsa1.0.02550.1 | 724 | 291051 | 1.00E-104 | 262 | 284 | 92 -  | 343 | 625 | 18624  | 18907  |
| UN52746 | Rsa1.0.04218.1 | 741 | 18423  | 1.00E-150 | 347 | 366 | 94 +  | 339 | 702 | 12805  | 13163  |
| UN52747 | Rsa1.0.00833.1 | 859 | 62621  | 1.00E-151 | 391 | 428 | 91 +  | 439 | 855 | 28121  | 28548  |
| UN52748 | Rsa1.0.01500.1 | 825 | 141844 | 0         | 794 | 831 | 95 +  | 2   | 815 | 139677 | 140502 |
| UN52749 | Rsa1.0.08001.1 | 767 | 8095   | 1.00E-125 | 303 | 325 | 93 +  | 296 | 613 | 5852   | 6172   |
| UN52750 | Rsa1.0.00880.1 | 745 | 61271  | 1.00E-107 | 397 | 467 | 85 +  | 262 | 728 | 46427  | 46878  |
| UN52751 | Rsa1.0.00494.1 | 392 | 79967  | 1.00E-121 | 250 | 260 | 96 +  | 3   | 262 | 20475  | 20734  |
| UN52752 | Rsa1.0.00192.1 | 564 | 278200 | 0         | 369 | 370 | 99 -  | 195 | 564 | 26718  | 27087  |
| UN52753 | Rsa1.0.00428.1 | 738 | 85599  | 0         | 420 | 441 | 95 -  | 42  | 480 | 71148  | 71587  |
| UN52754 | Rsa1.0.00640.1 | 644 | 70979  | 1.00E-134 | 317 | 334 | 94 +  | 316 | 644 | 34993  | 35324  |
| UN52755 | Rsa1.0.00524.1 | 332 | 169613 | 2.00E-64  | 197 | 223 | 88 -  | 1   | 202 | 125155 | 125377 |
| UN52756 | Rsa1.0.00268.1 | 590 | 101470 | 1.00E-138 | 258 | 261 | 98 +  | 251 | 511 | 38557  | 38817  |
| UN52757 | Rsa1.0.00360.1 | 431 | 91190  | 1.00E-123 | 257 | 266 | 96 +  | 3   | 268 | 65987  | 66248  |
| UN52758 | Rsa1.0.02248.1 | 762 | 33414  | 1.00E-166 | 315 | 320 | 98 -  | 166 | 485 | 8599   | 8917   |
| UN52759 | Rsa1.0.01441.1 | 732 | 45790  | 2.00E-88  | 175 | 178 | 98 +  | 126 | 303 | 30012  | 30189  |
| UN52760 | Rsa1.0.00728.1 | 726 | 66704  | 1.00E-119 | 232 | 237 | 97 +  | 266 | 502 | 34243  | 34479  |
| UN52761 | Rsa1.0.31329.1 | 664 | 730    | 1.00E-86  | 163 | 163 | 100 + | 215 | 377 | 86     | 248    |
| UN52762 | Rsa1.0.00341.1 | 652 | 249309 | 1.00E-107 | 206 | 209 | 98 -  | 156 | 364 | 128945 | 129153 |
| UN52763 | Rsa1.0.26233.1 | 759 | 900    | 2.00E-60  | 155 | 167 | 92 +  | 123 | 289 | 730    | 896    |
| UN52764 | Rsa1.0.02027.1 | 166 | 35869  | 4.00E-30  | 73  | 75  | 97 +  | 92  | 166 | 8189   | 8263   |
| UN52765 | Rsa1.0.00080.1 | 842 | 190437 | 1.00E-141 | 282 | 291 | 96 +  | 34  | 324 | 32098  | 32388  |

|         |                |     |        |           |     |     |      |     |     |        |        |
|---------|----------------|-----|--------|-----------|-----|-----|------|-----|-----|--------|--------|
| UN52766 | Rsa1.0.00265.1 | 835 | 220635 | 0         | 656 | 679 | 96 - | 124 | 799 | 208287 | 208965 |
| UN52767 | Rsa1.0.01031.1 | 792 | 56236  | 0         | 374 | 384 | 97 - | 336 | 717 | 21718  | 22101  |
| UN52768 | Rsa1.0.57173.1 | 698 | 400    | 5.00E-61  | 123 | 124 | 99 + | 2   | 125 | 245    | 368    |
| UN52769 | Rsa1.0.02965.1 | 680 | 26402  | 0         | 613 | 632 | 96 + | 53  | 680 | 10615  | 11243  |
| UN52770 | Rsa1.0_18035.1 | 861 | 1685   | 0         | 618 | 647 | 95 + | 4   | 650 | 450    | 1094   |
| UN52771 | Rsa1.0_57826.1 | 442 | 396    | 1.00E-111 | 240 | 252 | 95 + | 142 | 393 | 145    | 396    |
| UN52772 | Rsa1.0.04098.1 | 730 | 19078  | 1.00E-120 | 305 | 326 | 93 - | 408 | 727 | 11234  | 11553  |
| UN52773 | Rsa1.0.00320.1 | 883 | 95784  | 0         | 762 | 847 | 89 - | 60  | 860 | 27698  | 28535  |
| UN52774 | Rsa1.0.01096.1 | 886 | 54266  | 2.00E-97  | 217 | 227 | 95 - | 3   | 227 | 3263   | 3487   |
| UN52775 | Rsa1.0.00637.1 | 873 | 71038  | 0         | 432 | 438 | 98 + | 33  | 470 | 28619  | 29056  |
| UN52776 | Rsa1.0.00399.1 | 792 | 242951 | 1.00E-106 | 211 | 216 | 97 + | 577 | 792 | 71901  | 72116  |
| UN52777 | Rsa1.0.00937.1 | 797 | 59061  | 0         | 448 | 460 | 97 - | 340 | 797 | 48738  | 49196  |
| UN52778 | Rsa1.0.01996.1 | 735 | 36327  | 1.00E-115 | 302 | 327 | 92 - | 413 | 732 | 34985  | 35309  |
| UN52779 | Rsa1.0.23355.1 | 812 | 1055   | 0         | 466 | 476 | 97 + | 332 | 806 | 502    | 977    |
| UN52780 | Rsa1.0_10606.1 | 857 | 5787   | 0         | 668 | 687 | 97 - | 11  | 697 | 3538   | 4224   |
| UN52781 | Rsa1.0.00356.1 | 633 | 91521  | 2.00E-50  | 159 | 175 | 90 + | 275 | 444 | 56449  | 56622  |
| UN52782 | Rsa1.0.00090.1 | 658 | 273859 | 1.00E-112 | 232 | 241 | 96 - | 373 | 613 | 245203 | 245443 |
| UN52783 | Rsa1.0.00589.1 | 663 | 209965 | 1.00E-179 | 327 | 330 | 99 + | 328 | 657 | 152122 | 152451 |
| UN52784 | Rsa1.0.00190.1 | 645 | 318240 | 3.00E-93  | 183 | 186 | 98 - | 428 | 613 | 213578 | 213763 |
| UN52785 | Rsa1.0.01651.1 | 719 | 41586  | 0         | 683 | 716 | 95 - | 6   | 719 | 31545  | 32257  |
| UN52786 | Rsa1.0.43494.1 | 843 | 516    | 0         | 496 | 524 | 94 + | 115 | 634 | 1      | 516    |
| UN52787 | Rsa1.0.08811.1 | 740 | 6904   | 2.00E-78  | 158 | 161 | 98 + | 113 | 273 | 4646   | 4806   |
| UN52788 | Rsa1.0.00415.1 | 733 | 86795  | 1.00E-132 | 245 | 247 | 99 + | 330 | 576 | 72219  | 72465  |
| UN52789 | Rsa1.0.01022.1 | 775 | 56606  | 0         | 715 | 753 | 94 + | 23  | 774 | 22360  | 23103  |
| UN52790 | Rsa1.0.00846.1 | 779 | 62342  | 1.00E-145 | 434 | 490 | 88 + | 292 | 775 | 40524  | 41013  |
| UN52791 | Rsa1.0.02420.1 | 702 | 31580  | 0         | 424 | 449 | 94 + | 256 | 702 | 15051  | 15498  |
| UN52792 | Rsa1.0.01674.1 | 792 | 168300 | 1.00E-139 | 387 | 433 | 89 + | 12  | 418 | 1858   | 2289   |
| UN52793 | Rsa1.0.00135.1 | 276 | 178077 | 3.00E-91  | 255 | 283 | 90 + | 3   | 276 | 102944 | 103226 |
| UN52794 | Rsa1.0.04456.1 | 632 | 17260  | 1.00E-95  | 213 | 222 | 95 + | 413 | 632 | 7706   | 7927   |
| UN52795 | Rsa1.0.05190.1 | 792 | 14544  | 1.00E-107 | 214 | 218 | 98 + | 86  | 302 | 5210   | 5427   |
| UN52796 | Rsa1.0.00030.1 | 719 | 250988 | 2.00E-88  | 172 | 174 | 98 - | 2   | 175 | 46719  | 46892  |
| UN52797 | Rsa1.0.01115.1 | 684 | 183545 | 1.00E-171 | 357 | 374 | 95 + | 3   | 372 | 174027 | 174400 |
| UN52798 | Rsa1.0.06952.1 | 652 | 10118  | 1.00E-161 | 315 | 324 | 97 - | 261 | 584 | 640    | 963    |
| UN52799 | Rsa1.0.09068.1 | 699 | 6671   | 0         | 391 | 404 | 96 - | 290 | 690 | 5506   | 5906   |
| UN52800 | Rsa1.0.02125.1 | 827 | 34775  | 1.00E-117 | 251 | 263 | 95 - | 478 | 740 | 1937   | 2199   |
| UN52801 | Rsa1.0.01215.1 | 628 | 166813 | 3.00E-80  | 204 | 222 | 91 - | 138 | 356 | 43940  | 44152  |
| UN52802 | Rsa1.0.00493.1 | 724 | 80007  | 0         | 392 | 412 | 95 - | 291 | 701 | 77923  | 78332  |
| UN52803 | Rsa1.0.01997.1 | 604 | 158416 | 2.00E-94  | 194 | 200 | 97 + | 322 | 521 | 720    | 919    |
| UN52804 | Rsa1.0.01825.1 | 823 | 38725  | 1.00E-169 | 338 | 350 | 96 + | 19  | 368 | 21300  | 21649  |

|         |                |     |        |           |     |     |      |     |     |        |        |
|---------|----------------|-----|--------|-----------|-----|-----|------|-----|-----|--------|--------|
| UN52805 | Rsa1.0.02185.1 | 719 | 34150  | 0         | 473 | 482 | 98 - | 238 | 719 | 32549  | 33030  |
| UN52806 | Rsa1.0.00512.1 | 657 | 200277 | 0         | 638 | 656 | 97 + | 2   | 657 | 16564  | 17219  |
| UN52807 | Rsa1.0.00275.1 | 689 | 210104 | 0         | 606 | 626 | 96 + | 65  | 689 | 205323 | 205948 |
| UN52808 | Rsa1.0.02514.1 | 829 | 30642  | 2.00E-32  | 103 | 112 | 91 - | 709 | 819 | 17195  | 17306  |
| UN52809 | Rsa1.0_03185.1 | 189 | 24739  | 2.00E-29  | 82  | 85  | 96 + | 1   | 84  | 7269   | 7351   |
| UN52810 | Rsa1.0_03158.1 | 847 | 24950  | 0         | 405 | 426 | 95 + | 1   | 420 | 8138   | 8563   |
| UN52811 | Rsa1.0.00100.1 | 820 | 249232 | 0         | 790 | 818 | 96 - | 4   | 814 | 196447 | 197261 |
| UN52812 | Rsa1.0.06715.1 | 145 | 10485  | 2.00E-38  | 109 | 117 | 93 - | 29  | 145 | 4495   | 4610   |
| UN52813 | Rsa1.0.00099.1 | 838 | 159619 | 0         | 578 | 591 | 97 + | 2   | 592 | 85093  | 85683  |
| UN52814 | Rsa1.0.03376.1 | 680 | 23326  | 7.00E-57  | 125 | 129 | 96 - | 230 | 358 | 22715  | 22843  |
| UN52815 | Rsa1.0.01707.1 | 672 | 40686  | 0         | 346 | 351 | 98 + | 28  | 378 | 33632  | 33982  |
| UN52816 | Rsa1.0.00055.1 | 645 | 520193 | 1.00E-170 | 321 | 327 | 98 + | 287 | 613 | 349414 | 349740 |
| UN52817 | Rsa1.0.03990.1 | 790 | 19676  | 0         | 732 | 801 | 91 - | 4   | 788 | 6867   | 7648   |
| UN52818 | Rsa1.0.00228.1 | 338 | 105511 | 3.00E-57  | 125 | 129 | 96 + | 78  | 206 | 37632  | 37760  |
| UN52819 | Rsa1.0.00877.1 | 273 | 61305  | 1.00E-119 | 261 | 273 | 95 - | 2   | 273 | 488    | 759    |
| UN52820 | Rsa1.0.00144.1 | 371 | 120708 | 1.00E-115 | 328 | 365 | 89 + | 1   | 363 | 68707  | 69050  |
| UN52821 | Rsa1.0.00067.1 | 582 | 415055 | 1.00E-106 | 294 | 325 | 90 + | 4   | 315 | 215551 | 215873 |
| UN52822 | Rsa1.0.02221.1 | 783 | 33796  | 1.00E-164 | 327 | 337 | 97 + | 448 | 783 | 4032   | 4368   |
| UN52823 | Rsa1.0.00382.1 | 753 | 251946 | 2.00E-88  | 228 | 247 | 92 - | 1   | 247 | 244979 | 245215 |
| UN52824 | Rsa1.0.00718.1 | 652 | 279335 | 0         | 592 | 639 | 92 + | 31  | 652 | 234421 | 235057 |
| UN52825 | Rsa1.0.00092.1 | 621 | 659932 | 3.00E-99  | 273 | 306 | 89 - | 4   | 294 | 325333 | 325638 |
| UN52826 | Rsa1.0.04031.1 | 311 | 19489  | 1.00E-136 | 293 | 309 | 94 - | 3   | 311 | 1099   | 1407   |
| UN52827 | Rsa1.0.00235.1 | 757 | 154696 | 1.00E-143 | 269 | 273 | 98 + | 286 | 558 | 98741  | 99013  |
| UN52828 | Rsa1.0.06229.1 | 704 | 11439  | 0         | 667 | 706 | 94 + | 1   | 703 | 8042   | 8740   |
| UN52829 | Rsa1.0_13438.1 | 524 | 4828   | 2.00E-69  | 150 | 155 | 96 - | 3   | 153 | 2804   | 2958   |
| UN52830 | Rsa1.0.00253.1 | 662 | 231292 | 7.00E-54  | 177 | 197 | 89 + | 3   | 193 | 85041  | 85237  |
| UN52831 | #              | #   | #      | #         | #   | #   | #    | #   | #   | #      | #      |
| UN52832 | Rsa1.0.14044.1 | 725 | 3872   | 7.00E-94  | 187 | 191 | 97 - | 531 | 721 | 3179   | 3369   |
| UN52833 | Rsa1.0.00486.1 | 637 | 80875  | 0         | 577 | 626 | 92 + | 26  | 637 | 13173  | 13783  |
| UN52834 | Rsa1.0.00451.1 | 738 | 322533 | 8.00E-94  | 216 | 232 | 93 - | 296 | 527 | 284872 | 285091 |
| UN52835 | Rsa1.0.03133.1 | 261 | 25135  | 1.00E-116 | 235 | 243 | 96 + | 8   | 250 | 19350  | 19592  |
| UN52836 | Rsa1.0.02725.1 | 581 | 28404  | 9.00E-87  | 204 | 215 | 94 + | 363 | 576 | 7763   | 7976   |
| UN52837 | Rsa1.0.01675.1 | 663 | 41155  | 1.00E-118 | 327 | 362 | 90 - | 4   | 347 | 9381   | 9742   |
| UN52838 | Rsa1.0.01271.1 | 606 | 49569  | 1.00E-149 | 289 | 296 | 97 - | 24  | 319 | 21832  | 22127  |
| UN52839 | Rsa1.0.03111.1 | 586 | 25327  | 0         | 355 | 364 | 97 - | 223 | 586 | 4642   | 5005   |
| UN52840 | Rsa1.0.01661.1 | 600 | 41400  | 1.00E-106 | 212 | 216 | 98 + | 4   | 218 | 38566  | 38781  |
| UN52841 | Rsa1.0.26454.1 | 740 | 891    | 1.00E-155 | 284 | 286 | 99 - | 65  | 350 | 521    | 806    |
| UN52842 | Rsa1.0.03225.1 | 825 | 24500  | 0         | 775 | 827 | 93 + | 24  | 825 | 12375  | 13200  |
| UN52843 | Rsa1.0.01887.1 | 763 | 37564  | 0         | 590 | 654 | 90 + | 103 | 756 | 35387  | 36039  |

|         |                |     |        |           |     |     |       |     |     |        |        |
|---------|----------------|-----|--------|-----------|-----|-----|-------|-----|-----|--------|--------|
| UN52844 | Rsa1.0.00342.1 | 758 | 93695  | 0         | 652 | 718 | 90 -  | 70  | 754 | 14762  | 15471  |
| UN52845 | Rsa1.0.00871.1 | 645 | 61539  | 2.00E-50  | 119 | 124 | 95 +  | 2   | 122 | 23106  | 23229  |
| UN52846 | Rsa1.0.00476.1 | 812 | 280966 | 1.00E-119 | 259 | 272 | 95 -  | 530 | 801 | 234226 | 234495 |
| UN52847 | Rsa1.0.03290.1 | 835 | 24011  | 8.00E-91  | 207 | 218 | 94 +  | 492 | 708 | 16102  | 16319  |
| UN52848 | Rsa1.0.04045.1 | 787 | 19403  | 1.00E-115 | 220 | 223 | 98 -  | 207 | 429 | 8280   | 8502   |
| UN52849 | Rsa1.0.00025.1 | 743 | 277312 | 0         | 624 | 638 | 97 +  | 1   | 638 | 110419 | 111056 |
| UN52850 | Rsa1.0.01188.1 | 713 | 51362  | 8.00E-69  | 136 | 137 | 99 -  | 227 | 363 | 34653  | 34789  |
| UN52851 | Rsa1.0.02177.1 | 760 | 34262  | 1.00E-100 | 207 | 214 | 96 -  | 547 | 760 | 20059  | 20272  |
| UN52852 | Rsa1.0.14973.1 | 763 | 2919   | 1.00E-113 | 372 | 427 | 87 -  | 129 | 555 | 1403   | 1829   |
| UN52853 | Rsa1.0.01266.1 | 761 | 49680  | 1.00E-163 | 307 | 312 | 98 +  | 450 | 761 | 11668  | 11979  |
| UN52854 | Rsa1.0.00105.1 | 125 | 134138 | 1.00E-54  | 123 | 127 | 96 +  | 1   | 125 | 61807  | 61933  |
| UN52855 | Rsa1.0.02079.1 | 471 | 35306  | 1.00E-177 | 354 | 366 | 96 -  | 106 | 471 | 16865  | 17229  |
| UN52856 | Rsa1.0.00430.1 | 606 | 85453  | 0         | 536 | 586 | 91 -  | 21  | 606 | 44185  | 44767  |
| UN52857 | Rsa1.0.02150.1 | 171 | 34580  | 5.00E-42  | 96  | 99  | 96 -  | 67  | 165 | 15868  | 15966  |
| UN52858 | Rsa1.0.01850.1 | 126 | 162224 | 4.00E-39  | 88  | 90  | 97 -  | 1   | 90  | 6489   | 6578   |
| UN52859 | Rsa1.0.00995.1 | 532 | 57243  | 1.00E-106 | 211 | 216 | 97 +  | 1   | 216 | 19487  | 19702  |
| UN52860 | Rsa1.0.00978.1 | 262 | 57739  | 2.00E-98  | 213 | 222 | 95 +  | 1   | 221 | 37261  | 37482  |
| UN52861 | Rsa1.0.00176.1 | 489 | 240984 | 1.00E-161 | 324 | 336 | 96 -  | 154 | 489 | 205339 | 205674 |
| UN52862 | Rsa1.0.00179.1 | 693 | 393324 | 4.00E-80  | 152 | 152 | 100 + | 191 | 342 | 40079  | 40230  |
| UN52863 | Rsa1.0.02439.1 | 672 | 31379  | 3.00E-53  | 221 | 258 | 85 -  | 268 | 523 | 13500  | 13757  |
| UN52864 | Rsa1.0.00223.1 | 674 | 106231 | 0         | 633 | 659 | 96 -  | 18  | 674 | 11627  | 12273  |
| UN52865 | Rsa1.0.02032.1 | 774 | 35830  | 0         | 421 | 435 | 96 +  | 338 | 772 | 1810   | 2244   |
| UN52866 | Rsa1.0.00016.1 | 663 | 831256 | 0         | 401 | 417 | 96 -  | 1   | 417 | 828912 | 829328 |
| UN52867 | Rsa1.0.02097.1 | 309 | 35036  | 1.00E-134 | 281 | 290 | 96 +  | 2   | 290 | 16179  | 16466  |
| UN52868 | Rsa1.0.00896.1 | 751 | 60509  | 5.00E-21  | 123 | 145 | 84 +  | 409 | 553 | 3317   | 3460   |
| UN52869 | Rsa1.0.00002.1 | 512 | 601661 | 1.00E-91  | 183 | 187 | 97 +  | 79  | 265 | 255311 | 255497 |
| UN52870 | Rsa1.0.01735.1 | 560 | 40128  | 1.00E-161 | 324 | 336 | 96 +  | 225 | 560 | 33988  | 34323  |
| UN52871 | Rsa1.0.00026.1 | 719 | 327835 | 0         | 595 | 606 | 98 +  | 114 | 719 | 167363 | 167968 |
| UN52872 | Rsa1.0.03355.1 | 458 | 23489  | 0         | 438 | 468 | 93 +  | 1   | 458 | 13557  | 14024  |
| UN52873 | Rsa1.0.01068.1 | 745 | 55208  | 1.00E-104 | 193 | 193 | 100 - | 348 | 540 | 29646  | 29838  |
| UN52874 | Rsa1.0.01031.1 | 254 | 56236  | 1.00E-59  | 189 | 209 | 90 -  | 1   | 202 | 41501  | 41708  |
| UN52875 | Rsa1.0.00440.1 | 210 | 84723  | 5.00E-89  | 199 | 210 | 94 -  | 1   | 210 | 34622  | 34831  |
| UN52876 | Rsa1.0.10679.1 | 442 | 5757   | 0         | 428 | 442 | 96 -  | 1   | 442 | 110    | 551    |
| UN52877 | Rsa1.0.05166.1 | 622 | 14624  | 1.00E-130 | 267 | 277 | 96 +  | 350 | 622 | 14105  | 14381  |
| UN52878 | Rsa1.0.46580.1 | 265 | 485    | 1.00E-117 | 252 | 265 | 95 -  | 1   | 265 | 80     | 344    |
| UN52879 | Rsa1.0.02023.1 | 138 | 35922  | 2.00E-59  | 131 | 136 | 96 +  | 1   | 136 | 27169  | 27304  |
| UN52880 | Rsa1.0.00241.1 | 243 | 104000 | 4.00E-68  | 137 | 139 | 98 -  | 105 | 243 | 60559  | 60697  |
| UN52881 | Rsa1.0.04855.1 | 319 | 15708  | 1.00E-117 | 280 | 300 | 93 +  | 11  | 310 | 5853   | 6144   |
| UN52882 | Rsa1.0.02192.1 | 576 | 171291 | 0         | 432 | 463 | 93 -  | 73  | 517 | 12268  | 12724  |

|         |                |     |        |           |     |     |      |     |     |        |        |
|---------|----------------|-----|--------|-----------|-----|-----|------|-----|-----|--------|--------|
| UN52883 | Rsa1.0_00101.1 | 197 | 267193 | 3.00E-13  | 57  | 63  | 90 - | 134 | 196 | 170445 | 170507 |
| UN52884 | Rsa1.0_00855.1 | 402 | 62047  | 2.00E-74  | 205 | 228 | 89 - | 46  | 273 | 6322   | 6533   |
| UN52885 | Rsa1.0_00060.1 | 266 | 502678 | 1.00E-134 | 260 | 266 | 97 + | 1   | 266 | 31029  | 31294  |
| UN52886 | Rsa1.0_00751.1 | 665 | 65759  | 1.00E-176 | 334 | 341 | 97 + | 325 | 665 | 41458  | 41798  |
| UN52887 | Rsa1.0_00049.1 | 815 | 167018 | 0         | 691 | 732 | 94 - | 2   | 730 | 107759 | 108486 |
| UN52888 | Rsa1.0_00964.1 | 390 | 316648 | 1.00E-57  | 135 | 142 | 95 - | 249 | 390 | 144513 | 144654 |
| UN52889 | Rsa1.0_00080.1 | 637 | 190437 | 1.00E-156 | 306 | 315 | 97 + | 2   | 316 | 68600  | 68914  |
| UN52890 | Rsa1.0_00492.1 | 465 | 80178  | 1.00E-121 | 270 | 285 | 94 + | 3   | 277 | 69378  | 69662  |
| UN52891 | Rsa1.0_00008.1 | 680 | 358124 | 2.00E-81  | 182 | 191 | 95 + | 4   | 194 | 320268 | 320454 |
| UN52892 | Rsa1.0_01205.1 | 351 | 50795  | 8.00E-52  | 113 | 116 | 97 - | 169 | 284 | 24150  | 24265  |
| UN52893 | Rsa1.0_02256.1 | 126 | 33329  | 3.00E-30  | 76  | 79  | 96 + | 2   | 80  | 32663  | 32741  |
| UN52894 | Rsa1.0_01898.1 | 237 | 37491  | 1.00E-110 | 229 | 237 | 96 - | 1   | 237 | 1658   | 1893   |
| UN52895 | Rsa1.0_00838.1 | 246 | 153820 | 4.00E-19  | 65  | 69  | 94 + | 144 | 211 | 33872  | 33940  |
| UN52896 | Rsa1.0_00305.1 | 483 | 97308  | 0         | 449 | 459 | 97 - | 26  | 483 | 43737  | 44195  |
| UN52897 | Rsa1.0_05923.1 | 660 | 12230  | 1.00E-137 | 287 | 300 | 95 - | 3   | 301 | 5290   | 5581   |
| UN52898 | Rsa1.0_00639.1 | 765 | 165873 | 0         | 388 | 404 | 96 + | 163 | 566 | 111239 | 111639 |
| UN52899 | Rsa1.0_04664.1 | 428 | 16471  | 0         | 423 | 428 | 98 - | 1   | 428 | 6775   | 7202   |
| UN52900 | Rsa1.0_01265.1 | 404 | 49686  | 6.00E-84  | 206 | 222 | 92 - | 14  | 235 | 912    | 1133   |
| UN52901 | Rsa1.0_00086.1 | 557 | 439854 | 0         | 392 | 402 | 97 - | 155 | 556 | 342204 | 342604 |
| UN52902 | Rsa1.0_00538.1 | 820 | 77149  | 0         | 365 | 378 | 96 + | 288 | 665 | 65817  | 66194  |
| UN52903 | Rsa1.0_00977.1 | 732 | 198001 | 1.00E-121 | 239 | 244 | 97 - | 1   | 242 | 33827  | 34070  |
| UN52904 | Rsa1.0_00047.1 | 851 | 168582 | 1.00E-175 | 315 | 316 | 99 + | 536 | 851 | 22283  | 22598  |
| UN52905 | Rsa1.0_00339.1 | 771 | 222974 | 1.00E-111 | 223 | 229 | 97 + | 328 | 556 | 88249  | 88477  |
| UN52906 | Rsa1.0_05079.1 | 656 | 14905  | 1.00E-140 | 267 | 272 | 98 + | 1   | 272 | 9509   | 9780   |
| UN52907 | Rsa1.0_00923.1 | 713 | 153678 | 0         | 564 | 582 | 96 - | 133 | 713 | 39898  | 40479  |
| UN52908 | Rsa1.0_04563.1 | 455 | 16837  | 1.00E-57  | 117 | 118 | 99 + | 34  | 151 | 15774  | 15891  |
| UN52909 | Rsa1.0_06524.1 | 763 | 10853  | 1.00E-173 | 311 | 312 | 99 + | 1   | 312 | 7012   | 7323   |
| UN52910 | Rsa1.0_00087.1 | 871 | 761073 | 1.00E-161 | 339 | 356 | 95 + | 311 | 666 | 433300 | 433655 |
| UN52911 | Rsa1.0_30871.1 | 770 | 742    | 0         | 449 | 466 | 96 - | 298 | 763 | 281    | 742    |
| UN52912 | Rsa1.0_13663.1 | 359 | 4540   | 2.00E-62  | 140 | 146 | 95 - | 1   | 146 | 355    | 500    |
| UN52913 | Rsa1.0_01978.1 | 751 | 36546  | 1.00E-116 | 235 | 242 | 97 + | 510 | 751 | 12510  | 12747  |
| UN52914 | Rsa1.0_09563.1 | 529 | 6287   | 0         | 341 | 342 | 99 - | 180 | 521 | 5360   | 5701   |
| UN52915 | Rsa1.0_00006.1 | 799 | 396176 | 4.00E-77  | 169 | 176 | 96 + | 335 | 510 | 326236 | 326407 |
| UN52916 | Rsa1.0_04155.1 | 804 | 134772 | 0         | 544 | 546 | 99 - | 260 | 804 | 125949 | 126493 |
| UN52917 | Rsa1.0_01580.1 | 137 | 42852  | 8.00E-19  | 107 | 119 | 89 + | 2   | 120 | 39774  | 39885  |
| UN52918 | Rsa1.0_05923.1 | 863 | 12230  | 1.00E-141 | 313 | 335 | 93 - | 2   | 336 | 10642  | 10964  |
| UN52919 | Rsa1.0_01396.1 | 755 | 151624 | 1.00E-105 | 212 | 218 | 97 - | 538 | 755 | 143743 | 143960 |
| UN52920 | Rsa1.0_00536.1 | 410 | 77199  | 2.00E-71  | 174 | 184 | 94 + | 9   | 189 | 21405  | 21588  |
| UN52921 | Rsa1.0_01358.1 | 444 | 47278  | 1.00E-156 | 336 | 350 | 96 + | 87  | 436 | 7073   | 7417   |

|         |                |     |        |           |     |     |       |     |     |        |        |
|---------|----------------|-----|--------|-----------|-----|-----|-------|-----|-----|--------|--------|
| UN52922 | Rsa1.0.00343.1 | 733 | 93570  | 0         | 359 | 360 | 99 +  | 374 | 733 | 78541  | 78900  |
| UN52923 | Rsa1.0.00054.1 | 748 | 162053 | 0         | 632 | 688 | 91 -  | 54  | 716 | 122636 | 123311 |
| UN52924 | Rsa1.0.01370.1 | 822 | 47093  | 2.00E-82  | 156 | 156 | 100 + | 2   | 157 | 8444   | 8599   |
| UN52925 | Rsa1.0.00623.1 | 750 | 207630 | 1.00E-115 | 232 | 239 | 97 -  | 244 | 482 | 14542  | 14780  |
| UN52926 | Rsa1.0.00301.1 | 725 | 365315 | 0         | 550 | 563 | 97 -  | 156 | 718 | 285946 | 286508 |
| UN52927 | Rsa1.0.00634.1 | 412 | 71222  | 1.00E-173 | 344 | 356 | 96 +  | 57  | 412 | 68472  | 68827  |
| UN52928 | Rsa1.0.00107.1 | 843 | 431659 | 0         | 747 | 763 | 97 -  | 73  | 830 | 14101  | 14863  |
| UN52929 | Rsa1.0.04556.1 | 729 | 16864  | 0         | 605 | 635 | 95 +  | 101 | 729 | 14910  | 15544  |
| UN52930 | Rsa1.0.00427.1 | 703 | 189678 | 1.00E-177 | 342 | 351 | 97 +  | 101 | 451 | 119995 | 120345 |
| UN52931 | Rsa1.0.00637.1 | 520 | 71038  | 0         | 403 | 416 | 96 -  | 105 | 520 | 2404   | 2817   |
| UN52932 | Rsa1.0.01556.1 | 816 | 163858 | 0         | 442 | 448 | 98 -  | 365 | 811 | 31188  | 31635  |
| UN52933 | Rsa1.0.03261.1 | 726 | 24281  | 5.00E-92  | 243 | 263 | 92 +  | 468 | 726 | 5213   | 5475   |
| UN52934 | Rsa1.0.14674.1 | 631 | 3167   | 0         | 510 | 540 | 94 -  | 69  | 595 | 2243   | 2779   |
| UN52935 | Rsa1.0.00251.1 | 716 | 303968 | 1.00E-140 | 283 | 292 | 96 +  | 423 | 712 | 82182  | 82473  |
| UN52936 | Rsa1.0.00121.1 | 793 | 278029 | 1.00E-137 | 319 | 335 | 95 +  | 5   | 334 | 112247 | 112579 |
| UN52937 | Rsa1.0.00710.1 | 349 | 67325  | 1.00E-167 | 336 | 346 | 97 +  | 2   | 346 | 44125  | 44469  |
| UN52938 | Rsa1.0.27848.1 | 857 | 837    | 1.00E-99  | 545 | 666 | 81 -  | 64  | 717 | 8      | 672    |
| UN52939 | Rsa1.0.00202.1 | 824 | 185895 | 1.00E-172 | 327 | 334 | 97 -  | 3   | 336 | 146141 | 146474 |
| UN52940 | Rsa1.0.00672.1 | 543 | 69358  | 0         | 505 | 556 | 90 -  | 16  | 543 | 38716  | 39271  |
| UN52941 | Rsa1.0.05076.1 | 433 | 14916  | 3.00E-73  | 152 | 156 | 97 -  | 73  | 228 | 13563  | 13718  |
| UN52942 | Rsa1.0.03898.1 | 742 | 20183  | 1.00E-177 | 355 | 368 | 96 +  | 368 | 735 | 5249   | 5613   |
| UN52943 | Rsa1.0.00894.1 | 339 | 269700 | 5.00E-56  | 114 | 115 | 99 -  | 108 | 222 | 132632 | 132746 |
| UN52944 | Rsa1.0.00301.1 | 809 | 365315 | 0         | 373 | 384 | 97 +  | 93  | 476 | 214375 | 214758 |
| UN52945 | Rsa1.0.00693.1 | 810 | 161311 | 0         | 782 | 824 | 94 +  | 2   | 810 | 36580  | 37403  |
| UN52946 | Rsa1.0.00139.1 | 729 | 357786 | 0         | 505 | 519 | 97 +  | 207 | 725 | 128624 | 129142 |
| UN52947 | Rsa1.0.00369.1 | 727 | 266462 | 1.00E-160 | 393 | 426 | 92 -  | 3   | 418 | 5290   | 5713   |
| UN52948 | Rsa1.0.05756.1 | 426 | 12725  | 4.00E-57  | 119 | 121 | 98 -  | 2   | 122 | 5408   | 5528   |
| UN52949 | Rsa1.0.03176.1 | 442 | 24801  | 9.00E-40  | 90  | 92  | 97 +  | 91  | 182 | 14776  | 14867  |
| UN52950 | Rsa1.0.07592.1 | 848 | 9059   | 1.00E-114 | 274 | 292 | 93 -  | 559 | 848 | 7965   | 8253   |
| UN52951 | Rsa1.0.05269.1 | 816 | 14311  | 0         | 774 | 817 | 94 +  | 16  | 816 | 5035   | 5849   |
| UN52952 | Rsa1.0.04500.1 | 256 | 17083  | 5.00E-40  | 116 | 125 | 92 +  | 55  | 175 | 6270   | 6393   |
| UN52953 | Rsa1.0.01845.1 | 652 | 38415  | 7.00E-63  | 144 | 151 | 95 +  | 338 | 488 | 6682   | 6832   |
| UN52954 | Rsa1.0.05204.1 | 230 | 14516  | 1.00E-37  | 102 | 110 | 92 -  | 3   | 105 | 7453   | 7562   |
| UN52955 | Rsa1.0.01727.1 | 779 | 40243  | 0         | 523 | 533 | 98 +  | 61  | 592 | 23645  | 24177  |
| UN52956 | Rsa1.0.01214.1 | 714 | 50599  | 1.00E-122 | 435 | 501 | 86 +  | 3   | 477 | 38506  | 38997  |
| UN52957 | Rsa1.0.00229.1 | 452 | 105471 | 1.00E-134 | 305 | 326 | 93 +  | 127 | 452 | 42642  | 42967  |
| UN52958 | Rsa1.0.00674.1 | 822 | 193753 | 1.00E-121 | 224 | 225 | 99 +  | 251 | 475 | 180927 | 181151 |
| UN52959 | Rsa1.0.03211.1 | 868 | 24591  | 0         | 433 | 475 | 91 +  | 219 | 672 | 7354   | 7828   |
| UN52960 | Rsa1.0.14318.1 | 762 | 3529   | 0         | 645 | 665 | 96 -  | 101 | 762 | 2633   | 3296   |



|         |                |     |        |           |     |     |      |     |     |        |        |
|---------|----------------|-----|--------|-----------|-----|-----|------|-----|-----|--------|--------|
| UN52961 | Rsa1.0.00187.1 | 508 | 393093 | 1.00E-94  | 209 | 216 | 96 - | 295 | 508 | 243460 | 243674 |
| UN52962 | Rsa1.0.01497.1 | 859 | 44559  | 0         | 809 | 838 | 96 + | 1   | 833 | 10979  | 11811  |
| UN52963 | Rsa1.0.02754.1 | 513 | 28213  | 1.00E-153 | 301 | 310 | 97 - | 120 | 429 | 8708   | 9017   |
| UN52964 | Rsa1.0.03450.1 | 781 | 22835  | 0         | 474 | 488 | 97 + | 2   | 488 | 13510  | 13997  |
| UN52965 | Rsa1.0.00287.1 | 316 | 98687  | 4.00E-69  | 182 | 191 | 95 - | 129 | 315 | 12901  | 13087  |
| UN52966 | Rsa1.0.01591.1 | 659 | 42718  | 9.00E-47  | 154 | 170 | 90 + | 494 | 659 | 16746  | 16909  |
| UN52967 | Rsa1.0.01171.1 | 251 | 51752  | 1.00E-15  | 62  | 67  | 92 - | 2   | 68  | 34071  | 34136  |
| UN52968 | Rsa1.0.19230.1 | 890 | 1460   | 1.00E-103 | 220 | 227 | 96 - | 665 | 890 | 1046   | 1271   |
| UN52969 | Rsa1.0.02110.1 | 109 | 34919  | 2.00E-37  | 88  | 91  | 96 - | 1   | 91  | 612    | 702    |
| UN52970 | Rsa1.0.00087.1 | 902 | 761073 | 5.00E-46  | 107 | 111 | 96 - | 585 | 695 | 12141  | 12251  |
| UN52971 | Rsa1.0.07606.1 | 705 | 9035   | 1.00E-153 | 335 | 353 | 94 - | 358 | 705 | 2793   | 3142   |
| UN52972 | Rsa1.0.00208.1 | 844 | 108565 | 0         | 515 | 524 | 98 - | 3   | 525 | 104420 | 104943 |
| UN52973 | Rsa1.0.00787.1 | 787 | 64239  | 0         | 594 | 601 | 98 - | 37  | 637 | 51832  | 52432  |
| UN52974 | Rsa1.0.02072.1 | 708 | 35401  | 1.00E-126 | 270 | 283 | 95 - | 1   | 283 | 28825  | 29104  |
| UN52975 | Rsa1.0.01179.1 | 818 | 51549  | 0         | 754 | 787 | 95 + | 41  | 818 | 21826  | 22609  |
| UN52976 | Rsa1.0.00314.1 | 809 | 96472  | 1.00E-125 | 302 | 325 | 92 + | 1   | 316 | 73961  | 74284  |
| UN52977 | Rsa1.0.00384.1 | 749 | 89278  | 3.00E-87  | 176 | 180 | 97 + | 508 | 687 | 81079  | 81258  |
| UN52978 | Rsa1.0.02681.1 | 639 | 28711  | 1.00E-135 | 262 | 268 | 97 - | 207 | 474 | 6017   | 6284   |
| UN52979 | Rsa1.0.00003.1 | 750 | 340054 | 1.00E-167 | 341 | 353 | 96 + | 401 | 750 | 4541   | 4893   |
| UN52980 | Rsa1.0.00139.1 | 559 | 357786 | 1.00E-153 | 404 | 443 | 91 - | 134 | 559 | 16926  | 17368  |
| UN52981 | Rsa1.0.00858.1 | 141 | 61892  | 5.00E-54  | 126 | 131 | 96 + | 11  | 140 | 16556  | 16686  |
| UN52982 | Rsa1.0.03304.1 | 735 | 23883  | 6.00E-76  | 148 | 149 | 99 + | 280 | 428 | 8987   | 9135   |
| UN52983 | Rsa1.0.02118.1 | 834 | 34839  | 0         | 466 | 497 | 93 + | 5   | 494 | 6126   | 6616   |
| UN52984 | Rsa1.0.00799.1 | 792 | 63918  | 0         | 618 | 652 | 94 - | 160 | 787 | 38799  | 39447  |
| UN52985 | Rsa1.0.00960.1 | 889 | 58199  | 0         | 822 | 867 | 94 + | 1   | 855 | 19109  | 19969  |
| UN52986 | Rsa1.0.01561.1 | 600 | 43227  | 4.00E-95  | 213 | 225 | 94 + | 1   | 225 | 7180   | 7404   |
| UN52987 | Rsa1.0.01126.1 | 332 | 53127  | 1.00E-157 | 307 | 316 | 97 + | 1   | 316 | 24471  | 24786  |
| UN52988 | Rsa1.0.10927.1 | 644 | 5675   | 0         | 587 | 616 | 95 - | 1   | 615 | 285    | 900    |
| UN52989 | Rsa1.0.00823.1 | 749 | 62889  | 0         | 542 | 580 | 93 + | 184 | 748 | 5743   | 6322   |
| UN52990 | Rsa1.0.01300.1 | 343 | 48942  | 1.00E-122 | 244 | 250 | 97 + | 95  | 343 | 33179  | 33428  |
| UN52991 | Rsa1.0.07849.1 | 661 | 8425   | 1.00E-170 | 352 | 370 | 95 + | 3   | 362 | 1255   | 1624   |
| UN52992 | Rsa1.0.02103.1 | 807 | 35006  | 0         | 474 | 500 | 94 - | 23  | 519 | 34046  | 34545  |
| UN52993 | Rsa1.0.00434.1 | 832 | 85171  | 1.00E-100 | 243 | 262 | 92 - | 22  | 279 | 9575   | 9830   |
| UN52994 | Rsa1.0.01724.1 | 890 | 40292  | 1.00E-137 | 311 | 328 | 94 + | 531 | 855 | 19668  | 19995  |
| UN52995 | Rsa1.0.00028.1 | 864 | 293984 | 5.00E-83  | 243 | 270 | 90 - | 3   | 263 | 23439  | 23697  |
| UN52996 | Rsa1.0.03133.1 | 821 | 25135  | 1.00E-162 | 320 | 330 | 96 + | 1   | 330 | 16991  | 17320  |
| UN52997 | Rsa1.0.02671.1 | 766 | 28887  | 1.00E-180 | 348 | 357 | 97 - | 113 | 466 | 13185  | 13541  |
| UN52998 | Rsa1.0.03640.1 | 619 | 21624  | 1.00E-130 | 269 | 280 | 96 - | 118 | 397 | 18689  | 18968  |
| UN52999 | Rsa1.0.00001.1 | 674 | 363028 | 1.00E-142 | 311 | 329 | 94 + | 181 | 500 | 323550 | 323878 |

|         |                |     |        |           |     |     |      |     |     |        |        |
|---------|----------------|-----|--------|-----------|-----|-----|------|-----|-----|--------|--------|
| UN53000 | Rsa1.0_00061.1 | 691 | 218685 | 0         | 478 | 517 | 92 + | 175 | 691 | 169427 | 169927 |
| UN53001 | Rsa1.0_01152.1 | 695 | 52264  | 1.00E-115 | 241 | 250 | 96 - | 445 | 694 | 42726  | 42973  |
| UN53002 | Rsa1.0_00108.1 | 648 | 478491 | 1.00E-148 | 322 | 340 | 94 + | 4   | 343 | 413048 | 413384 |
| UN53003 | Rsa1.0_00226.1 | 807 | 105884 | 0         | 459 | 484 | 94 + | 324 | 807 | 84747  | 85218  |
| UN53004 | Rsa1.0_01434.1 | 755 | 45951  | 0         | 698 | 727 | 96 - | 18  | 744 | 5714   | 6440   |
| UN53005 | Rsa1.0_02811.1 | 784 | 27669  | 9.00E-69  | 151 | 157 | 96 - | 92  | 248 | 2342   | 2498   |
| UN53006 | Rsa1.0_00157.1 | 792 | 245832 | 2.00E-69  | 137 | 138 | 99 - | 655 | 792 | 67696  | 67833  |
| UN53007 | Rsa1.0_23355.1 | 755 | 1055   | 0         | 408 | 418 | 97 + | 5   | 421 | 1      | 416    |
| UN53008 | Rsa1.0_02287.1 | 818 | 32986  | 1.00E-106 | 267 | 283 | 94 + | 538 | 814 | 8162   | 8443   |
| UN53009 | Rsa1.0_00451.1 | 530 | 322533 | 0         | 506 | 530 | 95 - | 1   | 529 | 64918  | 65438  |
| UN53010 | Rsa1.0_00522.1 | 754 | 78103  | 0         | 723 | 753 | 96 + | 2   | 754 | 16584  | 17336  |
| UN53011 | Rsa1.0_03971.1 | 876 | 19788  | 4.00E-74  | 183 | 193 | 94 + | 661 | 849 | 19508  | 19700  |
| UN53012 | Rsa1.0_03377.1 | 737 | 23322  | 1.00E-120 | 244 | 252 | 96 + | 405 | 656 | 16048  | 16299  |
| UN53013 | Rsa1.0_06002.1 | 817 | 11976  | 1.00E-120 | 294 | 321 | 91 - | 198 | 518 | 7167   | 7475   |
| UN53014 | Rsa1.0_00064.1 | 246 | 240927 | 1.00E-65  | 193 | 211 | 91 - | 11  | 220 | 63102  | 63310  |
| UN53015 | Rsa1.0_01549.1 | 212 | 43543  | 1.00E-107 | 212 | 217 | 97 + | 1   | 212 | 14180  | 14396  |
| UN53016 | Rsa1.0_14305.1 | 831 | 3554   | 0         | 566 | 586 | 96 + | 250 | 831 | 1354   | 1939   |
| UN53017 | Rsa1.0_03027.1 | 261 | 25883  | 6.00E-83  | 170 | 172 | 98 - | 4   | 174 | 1628   | 1798   |
| UN53018 | Rsa1.0_02319.1 | 789 | 32580  | 1.00E-123 | 260 | 272 | 95 - | 2   | 273 | 30439  | 30710  |
| UN53019 | Rsa1.0_00596.1 | 874 | 73578  | 4.00E-74  | 157 | 162 | 96 + | 560 | 721 | 22940  | 23101  |
| UN53020 | Rsa1.0_04504.1 | 554 | 17069  | 9.00E-62  | 226 | 261 | 86 + | 294 | 531 | 2573   | 2831   |
| UN53021 | Rsa1.0_00055.1 | 797 | 520193 | 1.00E-100 | 193 | 194 | 99 + | 2   | 195 | 53181  | 53373  |
| UN53022 | Rsa1.0_00042.1 | 731 | 171507 | 0         | 396 | 420 | 94 - | 297 | 704 | 71838  | 72257  |
| UN53023 | Rsa1.0_00501.1 | 753 | 79545  | 2.33E-156 | 295 | 306 | 96 + | 197 | 502 | 67885  | 68190  |
| UN53024 | Rsa1.0_01609.1 | 871 | 42280  | 1.00E-120 | 237 | 243 | 97 + | 72  | 314 | 5394   | 5636   |
| UN53025 | Rsa1.0_01220.1 | 551 | 161775 | 1.00E-82  | 199 | 207 | 96 + | 312 | 514 | 117108 | 117312 |
| UN53026 | Rsa1.0_04307.1 | 794 | 18001  | 0         | 755 | 794 | 95 + | 3   | 794 | 15266  | 16058  |
| UN53027 | Rsa1.0_01727.1 | 477 | 40243  | 1.00E-125 | 292 | 310 | 94 - | 121 | 427 | 11214  | 11516  |
| UN53028 | Rsa1.0_00132.1 | 732 | 124299 | 0         | 678 | 728 | 93 + | 2   | 713 | 45466  | 46186  |
| UN53029 | Rsa1.0_00002.1 | 649 | 601661 | 2.00E-91  | 183 | 187 | 97 + | 217 | 403 | 255311 | 255497 |
| UN53030 | Rsa1.0_00722.1 | 888 | 66840  | 0         | 767 | 807 | 95 + | 5   | 807 | 22140  | 22934  |
| UN53031 | Rsa1.0_00353.1 | 618 | 92242  | 2.00E-81  | 163 | 166 | 98 - | 212 | 377 | 60394  | 60559  |
| UN53032 | Rsa1.0_03923.1 | 820 | 20057  | 1.00E-172 | 330 | 338 | 97 - | 3   | 340 | 15499  | 15836  |
| UN53033 | Rsa1.0_00350.1 | 787 | 92346  | 1.00E-100 | 195 | 198 | 98 + | 579 | 776 | 48364  | 48561  |
| UN53034 | Rsa1.0_00007.1 | 627 | 239325 | 1.00E-144 | 294 | 305 | 96 - | 6   | 307 | 84686  | 84990  |
| UN53035 | Rsa1.0_00027.1 | 573 | 283362 | 0         | 558 | 576 | 96 - | 1   | 573 | 66965  | 67537  |
| UN53036 | Rsa1.0_00067.1 | 637 | 415055 | 3.00E-65  | 142 | 147 | 96 - | 169 | 315 | 39369  | 39515  |
| UN53037 | Rsa1.0_00243.1 | 715 | 103651 | 0         | 493 | 512 | 96 + | 204 | 715 | 85850  | 86361  |
| UN53038 | Rsa1.0_01960.1 | 846 | 36766  | 1.00E-148 | 306 | 318 | 96 - | 1   | 317 | 29700  | 30017  |

|         |                               |     |        |           |     |     |       |     |     |        |        |
|---------|-------------------------------|-----|--------|-----------|-----|-----|-------|-----|-----|--------|--------|
| UN53039 | Rsa1.0.02223.1                | 714 | 152421 | 1.00E-113 | 280 | 299 | 93 +  | 318 | 614 | 129665 | 129961 |
| UN53040 | Rsa1.0.01212.1                | 815 | 50622  | 1.00E-100 | 185 | 185 | 100 - | 231 | 415 | 17488  | 17672  |
| UN53041 | Rsa1.0.05726.1                | 704 | 12809  | 1.00E-136 | 306 | 326 | 93 +  | 362 | 678 | 7169   | 7488   |
| UN53042 | Rsa1.0.00129.1                | 759 | 126831 | 0         | 722 | 733 | 98 +  | 28  | 759 | 122946 | 123678 |
| UN53043 | Rsa1.0.01281.1                | 787 | 49313  | 0         | 419 | 445 | 94 +  | 340 | 781 | 6610   | 7051   |
| UN53044 | Rsa1.0.01833.1                | 724 | 38555  | 1.00E-173 | 329 | 336 | 97 +  | 4   | 339 | 7080   | 7415   |
| UN53045 | Rsa1.0.00754.1                | 678 | 65689  | 0         | 508 | 552 | 92 +  | 131 | 678 | 59897  | 60430  |
| UN53046 | Rsa1.0.00092.1                | 539 | 659932 | 1.00E-114 | 274 | 287 | 95 -  | 256 | 539 | 509786 | 510066 |
| UN53047 | Rsa1.0.00075.1                | 749 | 146680 | 1.00E-163 | 337 | 352 | 95 -  | 103 | 454 | 18710  | 19061  |
| UN53048 | Rsa1.0.02223.1                | 744 | 152421 | 1.00E-158 | 292 | 295 | 98 -  | 118 | 412 | 19316  | 19610  |
| UN53049 | Rsa1.0.01081.1                | 616 | 499226 | 0         | 585 | 618 | 94 -  | 2   | 606 | 456338 | 456955 |
| UN53050 | Rsa1.0.00251.1                | 881 | 303968 | 1.00E-125 | 236 | 239 | 98 -  | 244 | 482 | 290985 | 291223 |
| UN53051 | Rsa1.0.00468.1                | 674 | 82095  | 0         | 475 | 524 | 90 -  | 3   | 502 | 36533  | 37056  |
| UN53052 | Rsa1.0.01896.1                | 392 | 37512  | 1.00E-172 | 377 | 396 | 95 -  | 2   | 392 | 8686   | 9080   |
| UN53053 | Rsa1.0.14748.1                | 872 | 3105   | 2.33E-156 | 272 | 275 | 98 +  | 296 | 570 | 1116   | 1390   |
| UN53054 | # # # # # # # # # # # # # # # |     |        |           |     |     |       |     |     |        |        |
| UN53055 | Rsa1.0.00028.1                | 737 | 293984 | 5.00E-61  | 126 | 128 | 98 -  | 347 | 474 | 21632  | 21759  |
| UN53056 | Rsa1.0.01853.1                | 729 | 147800 | 1.00E-131 | 262 | 270 | 97 +  | 460 | 729 | 128102 | 128371 |
| UN53057 | Rsa1.0.00734.1                | 581 | 66508  | 1.00E-127 | 242 | 246 | 98 +  | 336 | 581 | 13105  | 13350  |
| UN53058 | Rsa1.0.00579.1                | 398 | 148308 | 1.00E-173 | 375 | 394 | 95 -  | 6   | 398 | 66629  | 67019  |
| UN53059 | Rsa1.0.00336.1                | 816 | 445051 | 3.00E-93  | 189 | 194 | 97 +  | 383 | 576 | 217848 | 218041 |
| UN53060 | Rsa1.0.01220.1                | 710 | 161775 | 1.00E-144 | 322 | 342 | 94 -  | 44  | 382 | 128563 | 128895 |
| UN53061 | Rsa1.0.05755.1                | 717 | 12730  | 1.00E-116 | 244 | 256 | 95 +  | 3   | 248 | 5983   | 6238   |
| UN53062 | Rsa1.0.00743.1                | 767 | 177459 | 1.00E-143 | 281 | 289 | 97 +  | 4   | 292 | 165952 | 166240 |
| UN53063 | Rsa1.0.00284.1                | 688 | 323267 | 0         | 519 | 541 | 95 +  | 157 | 688 | 273139 | 273679 |
| UN53064 | Rsa1.0.00352.1                | 845 | 92266  | 1.00E-111 | 366 | 420 | 87 -  | 75  | 494 | 76874  | 77293  |
| UN53065 | Rsa1.0.08995.1                | 822 | 6722   | 1.00E-128 | 245 | 249 | 98 -  | 2   | 250 | 6470   | 6718   |
| UN53066 | Rsa1.0.33770.1                | 652 | 671    | 1.00E-137 | 313 | 336 | 93 -  | 314 | 632 | 148    | 482    |
| UN53067 | Rsa1.0.02224.1                | 723 | 33758  | 0         | 693 | 717 | 96 +  | 1   | 716 | 3838   | 4553   |
| UN53068 | Rsa1.0.06726.1                | 549 | 10460  | 1.00E-162 | 308 | 313 | 98 -  | 238 | 549 | 4344   | 4656   |
| UN53069 | Rsa1.0.00778.1                | 714 | 196751 | 0         | 586 | 606 | 96 -  | 109 | 714 | 180020 | 180624 |
| UN53070 | Rsa1.0.00829.1                | 776 | 158305 | 0         | 367 | 379 | 96 +  | 56  | 434 | 12319  | 12697  |
| UN53071 | Rsa1.0.04279.1                | 693 | 18113  | 1.00E-122 | 253 | 263 | 96 +  | 1   | 263 | 14321  | 14583  |
| UN53072 | Rsa1.0.01151.1                | 642 | 52268  | 8.00E-75  | 149 | 151 | 98 +  | 25  | 175 | 27941  | 28091  |
| UN53073 | Rsa1.0.00387.1                | 806 | 495407 | 0         | 480 | 519 | 92 -  | 12  | 510 | 1952   | 2468   |
| UN53074 | Rsa1.0.00249.1                | 726 | 153740 | 0         | 709 | 723 | 98 +  | 5   | 726 | 82799  | 83520  |
| UN53075 | Rsa1.0.01505.1                | 686 | 44382  | 8.00E-66  | 131 | 132 | 99 +  | 299 | 430 | 36671  | 36802  |
| UN53076 | Rsa1.0.00012.1                | 798 | 222148 | 1.00E-113 | 245 | 255 | 96 +  | 1   | 249 | 69122  | 69375  |
| UN53077 | Rsa1.0.00028.1                | 723 | 293984 | 0         | 632 | 658 | 96 +  | 2   | 659 | 228905 | 229558 |

|         |                |     |        |           |     |     |      |     |     |        |        |
|---------|----------------|-----|--------|-----------|-----|-----|------|-----|-----|--------|--------|
| UN53078 | Rsa1.0.00060.1 | 758 | 502678 | 0         | 721 | 783 | 92 - | 4   | 758 | 43735  | 44508  |
| UN53079 | Rsa1.0.00888.1 | 805 | 60978  | 0         | 773 | 807 | 95 + | 6   | 805 | 16553  | 17338  |
| UN53080 | Rsa1.0.00067.1 | 769 | 415055 | 1.00E-171 | 359 | 376 | 95 + | 394 | 767 | 210904 | 211279 |
| UN53081 | Rsa1.0.01424.1 | 789 | 46139  | 0         | 373 | 389 | 95 + | 3   | 391 | 39544  | 39932  |
| UN53082 | Rsa1.0.06013.1 | 788 | 11931  | 0         | 733 | 789 | 92 + | 1   | 788 | 2223   | 2979   |
| UN53083 | Rsa1.0.01638.1 | 787 | 41857  | 1.00E-168 | 329 | 339 | 97 + | 83  | 421 | 36262  | 36600  |
| UN53084 | Rsa1.0.00012.1 | 541 | 222148 | 1.00E-134 | 301 | 320 | 94 - | 146 | 464 | 10287  | 10599  |
| UN53085 | Rsa1.0.08867.1 | 851 | 6843   | 0         | 819 | 844 | 97 - | 3   | 839 | 352    | 1195   |
| UN53086 | Rsa1.0.07056.1 | 766 | 9969   | 0         | 621 | 645 | 96 - | 122 | 766 | 4133   | 4774   |
| UN53087 | Rsa1.0.00027.1 | 475 | 283362 | 0         | 462 | 474 | 97 + | 2   | 475 | 183412 | 183885 |
| UN53088 | Rsa1.0.18696.1 | 641 | 1550   | 1.00E-113 | 257 | 275 | 93 + | 3   | 277 | 997    | 1262   |
| UN53089 | Rsa1.0.00002.1 | 733 | 601661 | 0         | 706 | 732 | 96 + | 2   | 733 | 415999 | 416730 |
| UN53090 | Rsa1.0.08741.1 | 690 | 6977   | 6.00E-76  | 151 | 153 | 98 + | 129 | 281 | 5982   | 6134   |
| UN53091 | Rsa1.0.00077.1 | 392 | 145005 | 1.00E-173 | 376 | 396 | 94 + | 2   | 391 | 126483 | 126878 |
| UN53092 | Rsa1.0.00085.1 | 646 | 142226 | 1.00E-103 | 313 | 354 | 88 - | 26  | 379 | 132236 | 132589 |
| UN53093 | Rsa1.0.00080.1 | 769 | 190437 | 0         | 590 | 611 | 96 - | 9   | 619 | 188970 | 189580 |
| UN53094 | #              | #   | #      | #         | #   | #   | #    | #   | #   | #      | #      |
| UN53095 | Rsa1.0.00019.1 | 811 | 301669 | 1.00E-172 | 338 | 348 | 97 + | 3   | 350 | 17829  | 18173  |
| UN53096 | Rsa1.0.00002.1 | 658 | 601661 | 1.00E-132 | 281 | 295 | 95 - | 1   | 295 | 558227 | 558521 |
| UN53097 | Rsa1.0.05496.1 | 765 | 13533  | 1.00E-132 | 249 | 252 | 98 + | 193 | 444 | 10675  | 10926  |
| UN53098 | Rsa1.0.00380.1 | 731 | 89748  | 3.00E-68  | 159 | 168 | 94 - | 255 | 422 | 24360  | 24527  |
| UN53099 | Rsa1.0.02651.1 | 748 | 29046  | 1.00E-126 | 266 | 278 | 95 + | 137 | 414 | 27733  | 28010  |
| UN53100 | Rsa1.0.03794.1 | 680 | 20825  | 0         | 663 | 678 | 97 - | 3   | 680 | 2538   | 3215   |
| UN53101 | Rsa1.0.00485.1 | 836 | 80937  | 0         | 566 | 585 | 96 - | 243 | 827 | 16692  | 17276  |
| UN53102 | Rsa1.0.00995.1 | 840 | 57243  | 0         | 454 | 465 | 97 + | 3   | 467 | 19467  | 19931  |
| UN53103 | Rsa1.0.02962.1 | 835 | 26419  | 1.00E-154 | 313 | 325 | 96 - | 300 | 624 | 15344  | 15668  |
| UN53104 | Rsa1.0.02688.1 | 463 | 28644  | 1.00E-131 | 332 | 363 | 91 - | 2   | 347 | 16214  | 16575  |
| UN53105 | Rsa1.0.02159.1 | 694 | 34471  | 1.00E-76  | 210 | 230 | 91 - | 366 | 594 | 29994  | 30223  |
| UN53106 | Rsa1.0.03634.1 | 617 | 145192 | 1.00E-108 | 224 | 233 | 96 + | 19  | 251 | 133676 | 133901 |
| UN53107 | Rsa1.0.03972.1 | 753 | 19787  | 1.00E-153 | 337 | 355 | 94 - | 1   | 354 | 13644  | 13997  |
| UN53108 | Rsa1.0.00213.1 | 335 | 108167 | 3.00E-60  | 130 | 134 | 97 + | 1   | 134 | 89384  | 89517  |
| UN53109 | Rsa1.0.00147.1 | 717 | 249503 | 1.00E-123 | 334 | 372 | 89 - | 346 | 717 | 154707 | 155063 |
| UN53110 | Rsa1.0.01166.1 | 486 | 51877  | 1.00E-160 | 382 | 413 | 92 - | 91  | 486 | 37811  | 38223  |
| UN53111 | Rsa1.0.04857.1 | 530 | 15703  | 0         | 498 | 536 | 92 + | 1   | 530 | 11847  | 12376  |
| UN53112 | Rsa1.0.00701.1 | 489 | 67691  | 1.00E-115 | 307 | 336 | 91 - | 1   | 333 | 23226  | 23558  |
| UN53113 | Rsa1.0.01838.1 | 353 | 38500  | 1.00E-78  | 155 | 157 | 98 + | 197 | 353 | 3196   | 3352   |
| UN53114 | Rsa1.0.06288.1 | 201 | 11302  | 1.00E-52  | 123 | 129 | 95 - | 14  | 142 | 10748  | 10876  |
| UN53115 | Rsa1.0.01326.1 | 106 | 48072  | 2.00E-12  | 80  | 93  | 86 + | 15  | 106 | 43969  | 44061  |
| UN53116 | Rsa1.0.01635.1 | 577 | 41865  | 0         | 407 | 434 | 93 + | 1   | 434 | 7373   | 7797   |

|         |                |     |        |           |     |     |      |     |     |        |        |
|---------|----------------|-----|--------|-----------|-----|-----|------|-----|-----|--------|--------|
| UN53117 | Rsa1.0.02686.1 | 471 | 28666  | 1.00E-102 | 212 | 220 | 96 - | 131 | 350 | 20524  | 20743  |
| UN53118 | Rsa1.0.01248.1 | 361 | 154103 | 1.00E-133 | 317 | 333 | 95 - | 1   | 328 | 42881  | 43211  |
| UN53119 | Rsa1.0.04881.1 | 129 | 15608  | 2.00E-37  | 116 | 127 | 91 + | 1   | 126 | 8322   | 8448   |
| UN53120 | Rsa1.0.17583.1 | 215 | 1791   | 1.00E-86  | 203 | 214 | 94 - | 3   | 215 | 999    | 1211   |
| UN53121 | Rsa1.0.01239.1 | 317 | 50107  | 4.00E-69  | 165 | 175 | 94 - | 1   | 175 | 18949  | 19120  |
| UN53122 | Rsa1.0.10640.1 | 135 | 5772   | 4.00E-36  | 119 | 133 | 89 - | 1   | 133 | 1613   | 1745   |
| UN53123 | Rsa1.0.01997.1 | 293 | 158416 | 2.00E-58  | 165 | 178 | 92 - | 3   | 179 | 7533   | 7707   |
| UN53124 | Rsa1.0.01300.1 | 761 | 48942  | 1.00E-163 | 358 | 377 | 94 - | 3   | 378 | 27539  | 27911  |
| UN53125 | Rsa1.0.08553.1 | 176 | 7210   | 1.00E-36  | 102 | 106 | 96 + | 55  | 160 | 261    | 363    |
| UN53126 | Rsa1.0.00189.1 | 182 | 111830 | 2.00E-84  | 176 | 182 | 96 + | 1   | 182 | 55314  | 55495  |
| UN53127 | Rsa1.0.01903.1 | 150 | 37451  | 7.00E-44  | 108 | 114 | 94 + | 37  | 150 | 14089  | 14202  |
| UN53128 | Rsa1.0.08607.1 | 538 | 7132   | 0         | 456 | 463 | 98 - | 1   | 463 | 1119   | 1580   |
| UN53129 | Rsa1.0.00320.1 | 473 | 95784  | 2.33E-156 | 377 | 414 | 91 + | 71  | 467 | 58590  | 58998  |
| UN53130 | Rsa1.0.04086.1 | 833 | 19166  | 0         | 504 | 535 | 94 + | 2   | 532 | 10468  | 10999  |
| UN53131 | Rsa1.0.08434.1 | 373 | 7362   | 1.00E-41  | 108 | 115 | 93 - | 208 | 322 | 6197   | 6311   |
| UN53132 | Rsa1.0.00964.1 | 719 | 316648 | 0         | 466 | 478 | 97 + | 5   | 481 | 4008   | 4485   |
| UN53133 | Rsa1.0.03249.1 | 122 | 146254 | 2.00E-31  | 105 | 117 | 89 + | 6   | 122 | 143241 | 143357 |
| UN53134 | Rsa1.0.09588.1 | 473 | 6267   | 2.00E-90  | 184 | 189 | 97 - | 57  | 245 | 5926   | 6114   |
| UN53135 | Rsa1.0.08255.1 | 196 | 7652   | 5.00E-61  | 170 | 187 | 90 - | 7   | 193 | 2790   | 2976   |
| UN53136 | Rsa1.0.03184.1 | 149 | 24750  | 9.00E-62  | 141 | 148 | 95 + | 2   | 149 | 6844   | 6991   |
| UN53137 | Rsa1.0.02694.1 | 754 | 28610  | 0         | 502 | 524 | 95 + | 230 | 753 | 9463   | 9986   |
| UN53138 | Rsa1.0.01662.1 | 774 | 41382  | 0         | 452 | 487 | 92 - | 262 | 748 | 26599  | 27070  |
| UN53139 | Rsa1.0.09169.1 | 676 | 6589   | 3.00E-62  | 198 | 218 | 90 + | 269 | 481 | 4958   | 5171   |
| UN53140 | Rsa1.0.00163.1 | 656 | 116847 | 1.00E-179 | 448 | 488 | 91 - | 178 | 656 | 71730  | 72211  |
| UN53141 | Rsa1.0.01388.1 | 361 | 46741  | 1.00E-44  | 104 | 108 | 96 - | 111 | 218 | 27619  | 27726  |
| UN53142 | Rsa1.0.00377.1 | 219 | 90038  | 7.00E-85  | 201 | 215 | 93 - | 5   | 219 | 67079  | 67293  |
| UN53143 | Rsa1.0.05618.1 | 174 | 13165  | 8.00E-35  | 87  | 91  | 95 - | 2   | 92  | 6173   | 6263   |
| UN53144 | Rsa1.0.13830.1 | 789 | 4249   | 1.00E-175 | 326 | 331 | 98 - | 406 | 736 | 761    | 1091   |
| UN53145 | Rsa1.0.00789.1 | 795 | 64233  | 1.00E-114 | 280 | 302 | 92 + | 176 | 468 | 43338  | 43637  |
| UN53146 | Rsa1.0.37242.1 | 736 | 605    | 1.00E-127 | 311 | 340 | 91 + | 16  | 336 | 1      | 337    |
| UN53147 | Rsa1.0.00336.1 | 686 | 445051 | 0         | 520 | 566 | 91 + | 5   | 547 | 219219 | 219780 |
| UN53148 | Rsa1.0.05491.1 | 127 | 13554  | 4.00E-45  | 110 | 116 | 94 + | 8   | 123 | 7113   | 7228   |
| UN53149 | Rsa1.0.01884.1 | 747 | 37659  | 1.00E-178 | 346 | 355 | 97 + | 3   | 357 | 14634  | 14986  |
| UN53150 | Rsa1.0.00485.1 | 639 | 80937  | 1.00E-156 | 326 | 339 | 96 - | 2   | 333 | 5807   | 6145   |
| UN53151 | Rsa1.0.02931.1 | 535 | 26654  | 0         | 512 | 540 | 94 + | 1   | 532 | 7033   | 7568   |
| UN53152 | Rsa1.0.11872.1 | 186 | 5384   | 1.00E-49  | 118 | 124 | 95 + | 2   | 125 | 824    | 947    |
| UN53153 | Rsa1.0.00480.1 | 144 | 81325  | 4.00E-33  | 102 | 112 | 91 - | 8   | 119 | 31679  | 31790  |
| UN53154 | Rsa1.0.00330.1 | 702 | 94666  | 1.00E-156 | 336 | 351 | 95 + | 2   | 349 | 45452  | 45797  |
| UN53155 | Rsa1.0.00131.1 | 266 | 432233 | 3.00E-97  | 246 | 266 | 92 + | 1   | 266 | 387724 | 387980 |

|         |                |     |        |           |     |     |      |     |     |        |        |
|---------|----------------|-----|--------|-----------|-----|-----|------|-----|-----|--------|--------|
| UN53156 | Rsa1.0_15067.1 | 711 | 2854   | 0         | 512 | 531 | 96 + | 6   | 533 | 735    | 1260   |
| UN53157 | Rsa1.0_00644.1 | 763 | 136881 | 1.00E-175 | 348 | 359 | 96 - | 24  | 380 | 41427  | 41785  |
| UN53158 | Rsa1.0_00923.1 | 784 | 153678 | 8.00E-97  | 192 | 196 | 97 + | 209 | 404 | 33743  | 33938  |
| UN53159 | Rsa1.0_04581.1 | 763 | 16772  | 4.00E-83  | 160 | 161 | 99 + | 514 | 674 | 6049   | 6209   |
| UN53160 | Rsa1.0_00418.1 | 197 | 215377 | 2.00E-85  | 187 | 192 | 97 - | 1   | 192 | 4369   | 4557   |
| UN53161 | Rsa1.0_00225.1 | 582 | 105892 | 0         | 496 | 526 | 94 + | 44  | 568 | 97614  | 98133  |
| UN53162 | Rsa1.0_00425.1 | 137 | 147080 | 2.00E-62  | 133 | 137 | 97 - | 1   | 137 | 87313  | 87449  |
| UN53163 | Rsa1.0_02022.1 | 847 | 35923  | 1.00E-147 | 313 | 328 | 95 - | 1   | 328 | 14068  | 14394  |
| UN53164 | Rsa1.0_00398.1 | 346 | 88007  | 3.00E-88  | 191 | 199 | 95 + | 1   | 196 | 10886  | 11084  |
| UN53165 | Rsa1.0_02608.1 | 585 | 29613  | 0         | 546 | 590 | 92 - | 1   | 585 | 24003  | 24587  |
| UN53166 | Rsa1.0_00341.1 | 408 | 249309 | 3.00E-70  | 153 | 159 | 96 - | 250 | 408 | 122736 | 122894 |
| UN53167 | Rsa1.0_01422.1 | 844 | 46172  | 4.00E-96  | 206 | 211 | 97 - | 19  | 227 | 1      | 210    |
| UN53168 | Rsa1.0_00341.1 | 307 | 249309 | 7.00E-55  | 151 | 165 | 91 - | 143 | 307 | 177417 | 177581 |
| UN53169 | Rsa1.0_00080.1 | 783 | 190437 | 5.00E-95  | 192 | 197 | 97 - | 471 | 667 | 95024  | 95220  |
| UN53170 | Rsa1.0_03853.1 | 553 | 20447  | 1.00E-118 | 264 | 278 | 94 - | 1   | 278 | 14042  | 14315  |
| UN53171 | Rsa1.0_00040.1 | 640 | 324196 | 3.00E-59  | 120 | 121 | 99 + | 190 | 310 | 266210 | 266330 |
| UN53172 | Rsa1.0_00111.1 | 139 | 390088 | 2.00E-28  | 122 | 139 | 87 + | 1   | 139 | 383679 | 383809 |
| UN53173 | Rsa1.0_01280.1 | 178 | 49321  | 1.00E-58  | 160 | 175 | 91 - | 4   | 178 | 37170  | 37344  |
| UN53174 | Rsa1.0_03143.1 | 589 | 25024  | 0         | 567 | 594 | 95 - | 3   | 589 | 12656  | 13248  |
| UN53175 | Rsa1.0_01581.1 | 576 | 42833  | 1.00E-151 | 324 | 339 | 95 + | 7   | 344 | 32478  | 32815  |
| UN53176 | Rsa1.0_01101.1 | 524 | 54031  | 1.00E-152 | 276 | 277 | 99 + | 2   | 278 | 25285  | 25561  |
| UN53177 | Rsa1.0_00888.1 | 301 | 60978  | 9.00E-39  | 94  | 98  | 95 - | 1   | 98  | 56069  | 56166  |
| UN53178 | Rsa1.0_02802.1 | 750 | 27736  | 0         | 658 | 680 | 96 + | 1   | 673 | 10030  | 10702  |
| UN53179 | Rsa1.0_00213.1 | 711 | 108167 | 0         | 679 | 712 | 95 + | 1   | 708 | 34830  | 35540  |
| UN53180 | Rsa1.0_00197.1 | 690 | 109714 | 0         | 592 | 618 | 95 + | 6   | 620 | 87941  | 88556  |
| UN53181 | Rsa1.0_00906.1 | 406 | 178966 | 1.00E-106 | 204 | 207 | 98 + | 116 | 322 | 120722 | 120928 |
| UN53182 | Rsa1.0_01146.1 | 842 | 163455 | 0         | 419 | 425 | 98 - | 1   | 425 | 160805 | 161229 |
| UN53183 | Rsa1.0_01397.1 | 144 | 183276 | 7.00E-41  | 117 | 126 | 92 - | 23  | 144 | 17145  | 17269  |
| UN53184 | Rsa1.0_02860.1 | 864 | 27207  | 0         | 399 | 403 | 99 + | 1   | 403 | 868    | 1270   |
| UN53185 | Rsa1.0_01641.1 | 838 | 188213 | 0         | 814 | 837 | 97 + | 2   | 838 | 30770  | 31606  |
| UN53186 | Rsa1.0_07014.1 | 590 | 10029  | 0         | 570 | 590 | 96 - | 1   | 590 | 8439   | 9024   |
| UN53187 | Rsa1.0_01390.1 | 782 | 46695  | 1.00E-151 | 313 | 323 | 96 + | 1   | 322 | 36896  | 37215  |
| UN53188 | Rsa1.0_07753.1 | 832 | 8637   | 0         | 618 | 636 | 97 - | 1   | 636 | 7433   | 8062   |
| UN53189 | Rsa1.0_00116.1 | 617 | 365886 | 1.00E-150 | 337 | 359 | 93 - | 235 | 593 | 20143  | 20498  |
| UN53190 | Rsa1.0_09434.1 | 638 | 6371   | 1.00E-149 | 284 | 288 | 98 - | 1   | 288 | 1878   | 2164   |
| UN53191 | Rsa1.0_00089.1 | 562 | 406142 | 0         | 353 | 361 | 97 + | 1   | 361 | 390293 | 390652 |
| UN53192 | Rsa1.0_14001.1 | 327 | 3933   | 3.00E-63  | 144 | 151 | 95 - | 1   | 151 | 2406   | 2556   |
| UN53193 | Rsa1.0_00722.1 | 694 | 66840  | 1.00E-149 | 303 | 315 | 96 - | 231 | 545 | 41419  | 41733  |
| UN53194 | Rsa1.0_01881.1 | 182 | 37721  | 3.00E-74  | 171 | 181 | 94 + | 1   | 181 | 7936   | 8116   |

|         |                |     |        |           |     |     |      |     |     |        |        |
|---------|----------------|-----|--------|-----------|-----|-----|------|-----|-----|--------|--------|
| UN53195 | Rsa1.0.02710.1 | 778 | 28492  | 1.00E-166 | 354 | 371 | 95 + | 1   | 367 | 23167  | 23533  |
| UN53196 | Rsa1.0.06356.1 | 152 | 11178  | 6.00E-32  | 129 | 145 | 88 + | 7   | 149 | 8813   | 8955   |
| UN53197 | Rsa1.0.00380.1 | 510 | 89748  | 4.00E-82  | 222 | 242 | 91 - | 5   | 241 | 8474   | 8712   |
| UN53198 | Rsa1.0.03550.1 | 305 | 22154  | 1.00E-157 | 299 | 305 | 98 + | 1   | 305 | 7710   | 8014   |
| UN53199 | Rsa1.0.03681.1 | 737 | 21405  | 0         | 715 | 747 | 95 + | 1   | 737 | 721    | 1463   |
| UN53200 | Rsa1.0.04961.1 | 593 | 15316  | 0         | 448 | 465 | 96 + | 131 | 593 | 14236  | 14700  |
| UN53201 | Rsa1.0.00347.1 | 937 | 93048  | 1.00E-179 | 386 | 405 | 95 - | 27  | 425 | 12000  | 12401  |
| UN53202 | Rsa1.0.03781.1 | 850 | 20891  | 1.00E-119 | 287 | 304 | 94 - | 1   | 299 | 4225   | 4526   |
| UN53203 | Rsa1.0.08846.1 | 415 | 6867   | 2.00E-99  | 264 | 285 | 92 + | 4   | 284 | 4030   | 4300   |
| UN53204 | Rsa1.0.02152.1 | 693 | 34558  | 0         | 650 | 699 | 92 - | 2   | 689 | 26485  | 27174  |
| UN53205 | Rsa1.0.02642.1 | 616 | 29181  | 0         | 589 | 617 | 95 - | 1   | 616 | 13621  | 14237  |
| UN53206 | Rsa1.0.00025.1 | 375 | 277312 | 1.00E-137 | 340 | 363 | 93 - | 1   | 361 | 65364  | 65721  |
| UN53207 | Rsa1.0.00917.1 | 830 | 182012 | 0         | 498 | 514 | 96 + | 317 | 830 | 128772 | 129284 |
| UN53208 | Rsa1.0.00194.1 | 779 | 110851 | 0         | 632 | 660 | 95 - | 1   | 647 | 54321  | 54979  |
| UN53209 | Rsa1.0.06772.1 | 205 | 10387  | 5.00E-55  | 183 | 210 | 87 - | 8   | 205 | 5988   | 6197   |
| UN53210 | Rsa1.0.02165.1 | 521 | 34423  | 1.00E-157 | 314 | 325 | 96 + | 8   | 332 | 5018   | 5342   |
| UN53211 | Rsa1.0.04928.1 | 744 | 15420  | 1.00E-148 | 297 | 307 | 96 + | 1   | 307 | 9575   | 9881   |
| UN53212 | Rsa1.0.06990.1 | 731 | 10060  | 0         | 670 | 750 | 89 - | 5   | 731 | 4616   | 5337   |
| UN53213 | Rsa1.0.16078.1 | 788 | 2294   | 0         | 767 | 788 | 97 + | 1   | 788 | 222    | 1003   |
| UN53214 | Rsa1.0.01790.1 | 135 | 39248  | 7.00E-47  | 125 | 135 | 92 - | 1   | 135 | 16301  | 16435  |
| UN53215 | Rsa1.0.01145.1 | 844 | 149247 | 1.00E-127 | 314 | 340 | 92 + | 505 | 844 | 103564 | 103898 |
| UN53216 | Rsa1.0.00623.1 | 769 | 207630 | 1.00E-150 | 279 | 282 | 98 - | 488 | 769 | 175969 | 176250 |
| UN53217 | Rsa1.0.00019.1 | 456 | 301669 | 1.00E-69  | 137 | 138 | 99 - | 198 | 335 | 182425 | 182562 |
| UN53218 | Rsa1.0.00387.1 | 716 | 495407 | 1.00E-124 | 313 | 336 | 93 + | 34  | 361 | 354553 | 354884 |
| UN53219 | Rsa1.0.00645.1 | 703 | 189716 | 2.00E-75  | 159 | 164 | 96 + | 23  | 186 | 20419  | 20582  |
| UN53220 | Rsa1.0.61764.1 | 781 | 371    | 0         | 359 | 371 | 96 - | 387 | 757 | 1      | 371    |
| UN53221 | Rsa1.0.01006.1 | 749 | 163670 | 1.00E-124 | 232 | 234 | 99 - | 1   | 234 | 10409  | 10642  |
| UN53222 | Rsa1.0.00115.1 | 461 | 131321 | 2.00E-68  | 156 | 164 | 95 - | 176 | 339 | 36126  | 36289  |
| UN53223 | Rsa1.0.00415.1 | 309 | 86795  | 6.00E-80  | 207 | 224 | 92 - | 1   | 219 | 6755   | 6978   |
| UN53224 | Rsa1.0.03506.1 | 411 | 22416  | 1.00E-167 | 374 | 395 | 94 - | 20  | 410 | 8475   | 8866   |
| UN53225 | Rsa1.0.01768.1 | 140 | 138463 | 4.00E-45  | 110 | 116 | 94 - | 25  | 140 | 1021   | 1136   |
| UN53226 | Rsa1.0.00367.1 | 106 | 90750  | 1.00E-35  | 79  | 80  | 98 + | 27  | 106 | 43521  | 43600  |
| UN53227 | Rsa1.0.22132.1 | 430 | 1147   | 0         | 411 | 427 | 96 - | 1   | 427 | 452    | 877    |
| UN53228 | Rsa1.0.00177.1 | 725 | 143394 | 1.00E-167 | 347 | 362 | 95 + | 29  | 384 | 104501 | 104862 |
| UN53229 | Rsa1.0.06653.1 | 578 | 10596  | 0         | 549 | 576 | 95 - | 6   | 578 | 2458   | 3030   |
| UN53230 | Rsa1.0.35816.1 | 820 | 631    | 1.00E-130 | 239 | 240 | 99 + | 2   | 241 | 392    | 631    |
| UN53231 | Rsa1.0.01314.1 | 840 | 48365  | 0         | 662 | 708 | 93 + | 131 | 838 | 16748  | 17454  |
| UN53232 | Rsa1.0.08568.1 | 516 | 7186   | 0         | 484 | 508 | 95 - | 9   | 516 | 2374   | 2878   |
| UN53233 | Rsa1.0.02020.1 | 595 | 173211 | 1.00E-98  | 211 | 219 | 96 + | 1   | 219 | 162289 | 162506 |

|         |                |     |        |           |     |     |      |     |     |        |        |
|---------|----------------|-----|--------|-----------|-----|-----|------|-----|-----|--------|--------|
| UN53234 | Rsa1.0.02329.1 | 234 | 32474  | 3.00E-90  | 218 | 233 | 93 - | 4   | 234 | 10586  | 10815  |
| UN53235 | Rsa1.0.01104.1 | 418 | 285480 | 0         | 391 | 406 | 96 + | 8   | 413 | 263889 | 264293 |
| UN53236 | Rsa1.0.47144.1 | 438 | 479    | 1.00E-91  | 192 | 199 | 96 + | 240 | 438 | 179    | 377    |
| UN53237 | Rsa1.0.02252.1 | 664 | 33375  | 1.00E-106 | 219 | 227 | 96 + | 92  | 318 | 27556  | 27782  |
| UN53238 | Rsa1.0.04756.1 | 705 | 16114  | 0         | 670 | 705 | 95 - | 1   | 705 | 8767   | 9471   |
| UN53239 | Rsa1.0.00321.1 | 895 | 95671  | 1.00E-40  | 176 | 206 | 85 - | 528 | 733 | 44677  | 44882  |
| UN53240 | Rsa1.0.00080.1 | 794 | 190437 | 0         | 700 | 749 | 93 + | 49  | 794 | 104336 | 105064 |
| UN53241 | Rsa1.0.01978.1 | 611 | 36546  | 0         | 583 | 609 | 95 + | 6   | 611 | 8480   | 9076   |
| UN53242 | Rsa1.0.02813.1 | 781 | 27656  | 0         | 769 | 794 | 96 + | 1   | 781 | 10549  | 11342  |
| UN53243 | Rsa1.0.00002.1 | 227 | 601661 | 4.00E-77  | 196 | 208 | 94 + | 20  | 227 | 81703  | 81904  |
| UN53244 | Rsa1.0.00428.1 | 751 | 85599  | 0         | 646 | 678 | 95 + | 74  | 751 | 80003  | 80680  |
| UN53245 | Rsa1.0.01251.1 | 783 | 49873  | 0         | 750 | 785 | 95 - | 3   | 783 | 36550  | 37334  |
| UN53246 | Rsa1.0.06460.1 | 474 | 10974  | 0         | 370 | 380 | 97 - | 1   | 380 | 4592   | 4971   |
| UN53247 | Rsa1.0.00008.1 | 375 | 358124 | 1.00E-69  | 170 | 178 | 95 - | 4   | 179 | 39412  | 39588  |
| UN53248 | Rsa1.0.07441.1 | 171 | 9388   | 3.00E-62  | 130 | 133 | 97 + | 39  | 171 | 3381   | 3513   |
| UN53249 | Rsa1.0.00341.1 | 602 | 249309 | 0         | 575 | 603 | 95 + | 3   | 601 | 3237   | 3839   |
| UN53250 | Rsa1.0.02144.1 | 452 | 34630  | 0         | 434 | 450 | 96 - | 4   | 452 | 3060   | 3507   |
| UN53251 | Rsa1.0.08607.1 | 743 | 7132   | 1.00E-156 | 291 | 295 | 98 - | 266 | 560 | 5978   | 6272   |
| UN53252 | Rsa1.0.02928.1 | 784 | 26680  | 1.00E-134 | 287 | 298 | 96 + | 1   | 297 | 7314   | 7608   |
| UN53253 | Rsa1.0.00029.1 | 429 | 272992 | 1.00E-149 | 301 | 312 | 96 + | 1   | 312 | 143322 | 143633 |
| UN53254 | Rsa1.0.08001.1 | 763 | 8095   | 0         | 513 | 531 | 96 - | 237 | 763 | 7528   | 8058   |
| UN53255 | Rsa1.0.00880.1 | 867 | 61271  | 0         | 752 | 794 | 94 - | 77  | 867 | 47373  | 48162  |
| UN53256 | Rsa1.0.00494.1 | 907 | 79967  | 0         | 595 | 616 | 96 - | 295 | 907 | 20942  | 21556  |
| UN53257 | Rsa1.0.00268.1 | 781 | 101470 | 1.00E-127 | 270 | 285 | 94 - | 2   | 286 | 41310  | 41583  |
| UN53258 | Rsa1.0.00080.1 | 133 | 190437 | 4.00E-51  | 127 | 134 | 94 + | 1   | 133 | 19456  | 19589  |
| UN53259 | Rsa1.0.00058.1 | 863 | 159921 | 1.00E-140 | 301 | 313 | 96 - | 12  | 324 | 51767  | 52076  |
| UN53260 | Rsa1.0.02248.1 | 308 | 33414  | 1.00E-154 | 300 | 308 | 97 + | 1   | 308 | 7194   | 7501   |
| UN53261 | Rsa1.0.00728.1 | 827 | 66704  | 0         | 430 | 458 | 93 - | 370 | 827 | 36120  | 36568  |
| UN53262 | Rsa1.0.02734.1 | 100 | 28344  | 3.00E-20  | 53  | 54  | 98 - | 3   | 56  | 2787   | 2840   |
| UN53263 | Rsa1.0.00341.1 | 233 | 249309 | 2.00E-57  | 211 | 236 | 89 + | 1   | 230 | 128458 | 128687 |
| UN53264 | Rsa1.0.02767.1 | 527 | 28111  | 1.00E-180 | 486 | 538 | 90 + | 1   | 526 | 9273   | 9792   |
| UN53265 | Rsa1.0.00124.1 | 280 | 262503 | 1.00E-140 | 273 | 280 | 97 - | 1   | 280 | 86016  | 86295  |
| UN53266 | Rsa1.0.10743.1 | 741 | 5737   | 3.00E-68  | 188 | 206 | 91 + | 180 | 385 | 5219   | 5421   |
| UN53267 | Rsa1.0.00218.1 | 253 | 201480 | 1.00E-105 | 241 | 253 | 95 + | 1   | 249 | 45469  | 45721  |
| UN53268 | Rsa1.0.00398.1 | 266 | 88007  | 1.00E-109 | 249 | 265 | 93 - | 1   | 264 | 86714  | 86970  |
| UN53269 | Rsa1.0.00217.1 | 801 | 107079 | 1.00E-101 | 202 | 207 | 97 - | 153 | 359 | 58697  | 58903  |
| UN53270 | Rsa1.0.14821.1 | 728 | 3044   | 0         | 340 | 345 | 98 - | 297 | 641 | 890    | 1234   |
| UN53271 | Rsa1.0.00321.1 | 416 | 95671  | 1.00E-115 | 277 | 296 | 93 - | 7   | 297 | 40675  | 40969  |
| UN53272 | Rsa1.0.00060.1 | 596 | 502678 | 8.00E-75  | 167 | 175 | 95 - | 159 | 333 | 495990 | 496164 |



|         |                |     |        |           |     |     |      |     |     |        |        |
|---------|----------------|-----|--------|-----------|-----|-----|------|-----|-----|--------|--------|
| UN53273 | Rsa1.0.08888.1 | 673 | 6824   | 1.00E-103 | 221 | 231 | 95 - | 298 | 528 | 975    | 1205   |
| UN53274 | Rsa1.0.01085.1 | 368 | 54539  | 1.00E-159 | 347 | 366 | 94 - | 9   | 368 | 15840  | 16197  |
| UN53275 | Rsa1.0.00399.1 | 822 | 242951 | 0         | 458 | 472 | 97 - | 351 | 822 | 73160  | 73631  |
| UN53276 | Rsa1.0.00047.1 | 360 | 168582 | 1.00E-78  | 240 | 266 | 90 + | 1   | 254 | 56357  | 56622  |
| UN53277 | Rsa1.0.00356.1 | 825 | 91521  | 1.00E-126 | 317 | 342 | 92 - | 1   | 341 | 57383  | 57722  |
| UN53278 | Rsa1.0.31902.1 | 578 | 715    | 1.00E-103 | 227 | 238 | 95 + | 78  | 313 | 3      | 240    |
| UN53279 | Rsa1.0.00192.1 | 118 | 278200 | 3.00E-36  | 104 | 113 | 92 - | 1   | 113 | 19747  | 19859  |
| UN53280 | Rsa1.0.00090.1 | 856 | 273859 | 0         | 396 | 414 | 95 + | 1   | 407 | 241876 | 242289 |
| UN53281 | Rsa1.0.00190.1 | 837 | 318240 | 1.00E-157 | 366 | 390 | 93 + | 1   | 385 | 211867 | 212253 |
| UN53282 | Rsa1.0.04098.1 | 142 | 19078  | 7.00E-41  | 114 | 121 | 94 + | 1   | 119 | 11275  | 11395  |
| UN53283 | Rsa1.0.03149.1 | 199 | 24983  | 7.00E-51  | 108 | 110 | 98 + | 90  | 199 | 19482  | 19591  |
| UN53284 | Rsa1.0.08779.1 | 693 | 6929   | 1.00E-138 | 281 | 290 | 96 - | 23  | 312 | 2977   | 3265   |
| UN53285 | Rsa1.0.00610.1 | 628 | 72740  | 0         | 607 | 628 | 96 + | 1   | 628 | 68427  | 69051  |
| UN53286 | Rsa1.0.09068.1 | 665 | 6671   | 2.33E-156 | 283 | 290 | 97 + | 364 | 653 | 4145   | 4434   |
| UN53287 | Rsa1.0.01049.1 | 740 | 55655  | 1.00E-109 | 225 | 231 | 97 + | 1   | 230 | 33862  | 34090  |
| UN53288 | Rsa1.0.13699.1 | 723 | 4460   | 0         | 446 | 452 | 98 - | 254 | 705 | 3033   | 3484   |
| UN53289 | Rsa1.0.02209.1 | 328 | 33873  | 1.00E-69  | 149 | 154 | 96 + | 175 | 328 | 27048  | 27201  |
| UN53290 | Rsa1.0.00512.1 | 748 | 200277 | 0         | 421 | 431 | 97 - | 318 | 748 | 17188  | 17618  |
| UN53291 | Rsa1.0.00033.1 | 622 | 515811 | 0         | 413 | 433 | 95 + | 1   | 432 | 366405 | 366835 |
| UN53292 | Rsa1.0.00667.1 | 696 | 69460  | 0         | 541 | 557 | 97 + | 13  | 569 | 23995  | 24549  |
| UN53293 | Rsa1.0.00457.1 | 141 | 337301 | 6.00E-29  | 99  | 109 | 90 + | 39  | 141 | 288748 | 288856 |
| UN53294 | Rsa1.0.11948.1 | 700 | 5363   | 1.00E-120 | 258 | 270 | 95 + | 2   | 271 | 3913   | 4180   |
| UN53295 | Rsa1.0.01701.1 | 350 | 162121 | 3.00E-11  | 57  | 64  | 89 - | 271 | 334 | 9316   | 9379   |
| UN53296 | Rsa1.0.00247.1 | 111 | 103408 | 7.00E-31  | 102 | 112 | 91 + | 1   | 111 | 64843  | 64954  |
| UN53297 | Rsa1.0.01036.1 | 508 | 55978  | 1.00E-176 | 387 | 411 | 94 + | 98  | 508 | 48120  | 48527  |
| UN53298 | Rsa1.0.06229.1 | 783 | 11439  | 0         | 386 | 399 | 96 - | 1   | 399 | 9687   | 10083  |
| UN53299 | Rsa1.0.13438.1 | 730 | 4828   | 4.00E-89  | 234 | 256 | 91 + | 52  | 299 | 967    | 1221   |
| UN53300 | Rsa1.0.00708.1 | 523 | 67366  | 0         | 503 | 520 | 96 + | 4   | 523 | 53420  | 53939  |
| UN53301 | Rsa1.0.00374.1 | 554 | 165738 | 0         | 471 | 496 | 94 - | 54  | 544 | 95095  | 95589  |
| UN53302 | Rsa1.0.14044.1 | 863 | 3872   | 0         | 814 | 843 | 96 + | 25  | 863 | 2228   | 3066   |
| UN53303 | Rsa1.0.00486.1 | 514 | 80875  | 1.00E-141 | 319 | 339 | 94 - | 187 | 514 | 13862  | 14200  |
| UN53304 | Rsa1.0.00855.1 | 840 | 62047  | 0         | 460 | 471 | 97 - | 358 | 828 | 13073  | 13543  |
| UN53305 | #              | #   | #      | #         | #   | #   | #    | #   | #   | #      | #      |
| UN53306 | Rsa1.0.02725.1 | 147 | 28404  | 2.00E-38  | 132 | 147 | 89 - | 1   | 144 | 8012   | 8157   |
| UN53307 | #              | #   | #      | #         | #   | #   | #    | #   | #   | #      | #      |
| UN53308 | Rsa1.0.00073.1 | 125 | 240924 | 3.00E-21  | 64  | 68  | 94 + | 4   | 71  | 97764  | 97831  |
| UN53309 | Rsa1.0.03225.1 | 894 | 24500  | 0         | 470 | 497 | 94 - | 1   | 497 | 14578  | 15059  |
| UN53310 | Rsa1.0.04254.1 | 499 | 18258  | 9.00E-99  | 198 | 203 | 97 + | 220 | 422 | 5539   | 5741   |
| UN53311 | Rsa1.0.03290.1 | 425 | 24011  | 1.00E-122 | 266 | 278 | 95 - | 7   | 283 | 18991  | 19267  |

|         |                |     |        |           |     |     |      |     |     |        |        |
|---------|----------------|-----|--------|-----------|-----|-----|------|-----|-----|--------|--------|
| UN53312 | Rsa1.0.01266.1 | 720 | 49680  | 0         | 703 | 736 | 95 - | 2   | 720 | 13042  | 13777  |
| UN53313 | Rsa1.0.00045.1 | 784 | 328694 | 0         | 431 | 451 | 95 + | 5   | 454 | 163335 | 163781 |
| UN53314 | Rsa1.0.06150.1 | 759 | 11614  | 0         | 656 | 699 | 93 - | 32  | 730 | 10766  | 11464  |
| UN53315 | Rsa1.0.00045.1 | 593 | 328694 | 1.00E-103 | 215 | 222 | 96 - | 1   | 222 | 232551 | 232771 |
| UN53316 | Rsa1.0.01675.1 | 742 | 41155  | 3.00E-62  | 140 | 146 | 95 + | 537 | 682 | 9126   | 9271   |
| UN53317 | Rsa1.0.03929.1 | 645 | 19994  | 0         | 354 | 365 | 96 - | 280 | 644 | 15872  | 16236  |
| UN53318 | Rsa1.0.02457.1 | 763 | 31208  | 1.00E-142 | 302 | 315 | 95 - | 3   | 315 | 12120  | 12433  |
| UN53319 | Rsa1.0.14660.1 | 893 | 3181   | 1.00E-135 | 256 | 260 | 98 - | 567 | 826 | 1002   | 1261   |
| UN53320 | Rsa1.0.13580.1 | 558 | 4711   | 4.00E-67  | 160 | 170 | 94 - | 185 | 354 | 4004   | 4173   |
| UN53321 | Rsa1.0.00910.1 | 132 | 59975  | 5.00E-17  | 67  | 73  | 91 + | 19  | 91  | 55827  | 55898  |
| UN53322 | Rsa1.0.01295.1 | 277 | 49040  | 1.00E-121 | 265 | 278 | 95 - | 3   | 277 | 21462  | 21738  |
| UN53323 | Rsa1.0.00978.1 | 771 | 57739  | 0         | 482 | 498 | 96 - | 17  | 511 | 39107  | 39599  |
| UN53324 | Rsa1.0.35884.1 | 636 | 630    | 1.00E-102 | 228 | 240 | 95 - | 53  | 292 | 393    | 630    |
| UN53325 | Rsa1.0.00212.1 | 571 | 108350 | 1.00E-118 | 277 | 297 | 93 + | 12  | 295 | 59983  | 60278  |
| UN53326 | Rsa1.0.00609.1 | 747 | 72785  | 1.00E-153 | 347 | 370 | 93 + | 1   | 364 | 60339  | 60702  |
| UN53327 | Rsa1.0.00176.1 | 544 | 240984 | 1.00E-166 | 362 | 384 | 94 + | 8   | 391 | 205291 | 205674 |
| UN53328 | Rsa1.0.00179.1 | 819 | 393324 | 1.00E-160 | 349 | 368 | 94 - | 17  | 383 | 40210  | 40569  |
| UN53329 | Rsa1.0.00017.1 | 804 | 752458 | 1.00E-163 | 300 | 303 | 99 + | 484 | 786 | 686521 | 686823 |
| UN53330 | Rsa1.0.01957.1 | 692 | 36844  | 1.00E-70  | 188 | 204 | 92 - | 2   | 205 | 23850  | 24042  |
| UN53331 | Rsa1.0.00674.1 | 713 | 193753 | 3.00E-84  | 339 | 393 | 86 - | 3   | 371 | 184230 | 184614 |
| UN53332 | Rsa1.0.01696.1 | 229 | 301850 | 2.00E-88  | 214 | 229 | 93 + | 1   | 229 | 159107 | 159334 |
| UN53333 | Rsa1.0.01068.1 | 764 | 55208  | 1.00E-166 | 341 | 353 | 96 + | 1   | 347 | 28196  | 28548  |
| UN53334 | Rsa1.0.00017.1 | 108 | 752458 | 8.00E-12  | 67  | 76  | 88 - | 33  | 108 | 314170 | 314244 |
| UN53335 | #              | #   | #      | #         | #   | #   | #    | #   | #   | #      | #      |
| UN53336 | Rsa1.0.05467.1 | 700 | 13649  | 1.00E-165 | 327 | 338 | 96 + | 363 | 700 | 8745   | 9082   |
| UN53337 | Rsa1.0.02966.1 | 112 | 135126 | 7.00E-34  | 108 | 121 | 89 - | 1   | 112 | 17972  | 18092  |
| UN53338 | Rsa1.0.00440.1 | 624 | 84723  | 0         | 603 | 622 | 96 - | 3   | 624 | 31911  | 32532  |
| UN53339 | Rsa1.0.01924.1 | 671 | 37226  | 2.00E-94  | 185 | 188 | 98 - | 395 | 582 | 16997  | 17184  |
| UN53340 | Rsa1.0.00363.1 | 666 | 90968  | 1.00E-119 | 245 | 253 | 96 - | 51  | 302 | 31971  | 32223  |
| UN53341 | Rsa1.0.01015.1 | 112 | 56752  | 3.00E-33  | 81  | 84  | 96 - | 29  | 112 | 9327   | 9410   |
| UN53342 | Rsa1.0.07601.1 | 719 | 9051   | 0         | 660 | 688 | 95 - | 29  | 716 | 1486   | 2173   |
| UN53343 | Rsa1.0.03330.1 | 910 | 23671  | 1.00E-159 | 327 | 341 | 95 - | 1   | 341 | 11643  | 11979  |
| UN53344 | Rsa1.0.00059.1 | 928 | 159650 | 0         | 785 | 823 | 95 - | 35  | 844 | 63397  | 64217  |
| UN53345 | Rsa1.0.00108.1 | 655 | 478491 | 0         | 635 | 661 | 96 - | 1   | 654 | 162789 | 163447 |
| UN53346 | Rsa1.0.01146.1 | 533 | 163455 | 1.00E-101 | 202 | 207 | 97 - | 251 | 457 | 24783  | 24989  |
| UN53347 | Rsa1.0.02157.1 | 135 | 149652 | 7.00E-47  | 122 | 130 | 93 - | 6   | 135 | 11836  | 11963  |
| UN53348 | Rsa1.0.09397.1 | 736 | 6396   | 0         | 575 | 622 | 92 + | 118 | 736 | 5580   | 6194   |
| UN53349 | Rsa1.0.00855.1 | 553 | 62047  | 2.00E-87  | 173 | 176 | 98 + | 167 | 342 | 4352   | 4527   |
| UN53350 | Rsa1.0.01814.1 | 203 | 38917  | 2.00E-63  | 159 | 171 | 92 - | 1   | 171 | 21256  | 21426  |

|         |                |     |        |           |     |     |      |     |     |        |        |
|---------|----------------|-----|--------|-----------|-----|-----|------|-----|-----|--------|--------|
| UN53351 | Rsa1.0.00964.1 | 761 | 316648 | 0         | 413 | 436 | 94 + | 6   | 434 | 143591 | 144023 |
| UN53352 | Rsa1.0.01838.1 | 300 | 38500  | 1.00E-121 | 274 | 292 | 93 - | 9   | 300 | 17551  | 17842  |
| UN53353 | Rsa1.0.02315.1 | 776 | 32618  | 1.00E-100 | 240 | 258 | 93 - | 1   | 255 | 6932   | 7183   |
| UN53354 | Rsa1.0.00639.1 | 660 | 165873 | 0         | 621 | 662 | 93 - | 1   | 654 | 112575 | 113235 |
| UN53355 | Rsa1.0.01182.1 | 709 | 167304 | 1.00E-49  | 107 | 109 | 98 - | 441 | 549 | 13263  | 13371  |
| UN53356 | Rsa1.0.00977.1 | 818 | 198001 | 1.00E-138 | 312 | 332 | 93 + | 42  | 372 | 32057  | 32382  |
| UN53357 | Rsa1.0.00002.1 | 758 | 601661 | 0         | 732 | 754 | 97 + | 4   | 755 | 277905 | 278656 |
| UN53358 | Rsa1.0.26360.1 | 463 | 895    | 0         | 446 | 463 | 96 + | 1   | 463 | 17     | 479    |
| UN53359 | Rsa1.0.00339.1 | 207 | 222974 | 5.00E-92  | 198 | 207 | 95 - | 1   | 207 | 90651  | 90857  |
| UN53360 | Rsa1.0.05079.1 | 663 | 14905  | 0         | 570 | 584 | 97 - | 1   | 583 | 10532  | 11115  |
| UN53361 | Rsa1.0.00923.1 | 856 | 153678 | 0         | 448 | 476 | 94 + | 32  | 501 | 38687  | 39160  |
| UN53362 | Rsa1.0.00838.1 | 787 | 153820 | 0         | 608 | 634 | 95 - | 1   | 630 | 14022  | 14651  |
| UN53363 | Rsa1.0.00079.1 | 562 | 606987 | 1.00E-152 | 324 | 340 | 95 - | 2   | 331 | 22253  | 22591  |
| UN53364 | Rsa1.0.13633.1 | 237 | 4605   | 1.00E-28  | 89  | 97  | 91 - | 61  | 157 | 1462   | 1558   |
| UN53365 | Rsa1.0.30387.1 | 857 | 755    | 3.00E-90  | 175 | 177 | 98 + | 499 | 675 | 313    | 489    |
| UN53366 | Rsa1.0.37325.1 | 701 | 604    | 0         | 521 | 547 | 95 + | 169 | 701 | 1      | 547    |
| UN53367 | Rsa1.0.00006.1 | 589 | 396176 | 1.00E-151 | 459 | 519 | 88 - | 101 | 589 | 329226 | 329742 |
| UN53368 | Rsa1.0.11907.1 | 297 | 5374   | 1.00E-141 | 286 | 297 | 96 - | 1   | 297 | 1134   | 1430   |
| UN53369 | Rsa1.0.01580.1 | 740 | 42852  | 1.00E-135 | 352 | 388 | 90 - | 11  | 391 | 40018  | 40392  |
| UN53370 | Rsa1.0.01370.1 | 409 | 47093  | 0         | 388 | 403 | 96 - | 7   | 409 | 6103   | 6505   |
| UN53371 | Rsa1.0.25768.1 | 648 | 921    | 0         | 405 | 413 | 98 - | 1   | 412 | 192    | 604    |
| UN53372 | Rsa1.0.05122.1 | 614 | 14791  | 0         | 578 | 611 | 94 - | 11  | 614 | 1147   | 1757   |
| UN53373 | Rsa1.0.00457.1 | 508 | 337301 | 0         | 418 | 431 | 96 - | 1   | 431 | 142257 | 142686 |
| UN53374 | Rsa1.0.00054.1 | 735 | 162053 | 1.00E-119 | 227 | 230 | 98 + | 1   | 230 | 120000 | 120229 |
| UN53375 | Rsa1.0.16832.1 | 631 | 2019   | 1.00E-156 | 306 | 315 | 97 - | 20  | 334 | 122    | 436    |
| UN53376 | Rsa1.0.00301.1 | 664 | 365315 | 0         | 650 | 664 | 97 + | 1   | 664 | 284261 | 284924 |
| UN53377 | Rsa1.0.01018.1 | 840 | 56685  | 1.00E-123 | 250 | 257 | 97 + | 3   | 259 | 53702  | 53957  |
| UN53378 | Rsa1.0.04556.1 | 459 | 16864  | 1.00E-109 | 222 | 229 | 96 - | 231 | 459 | 16352  | 16580  |
| UN53379 | Rsa1.0.00427.1 | 748 | 189678 | 1.00E-137 | 339 | 365 | 92 - | 2   | 363 | 121623 | 121979 |
| UN53380 | Rsa1.0.00342.1 | 786 | 93695  | 1.00E-125 | 285 | 307 | 92 - | 3   | 309 | 1568   | 1861   |
| UN53381 | Rsa1.0.01556.1 | 812 | 163858 | 0         | 422 | 434 | 97 + | 5   | 438 | 29979  | 30412  |
| UN53382 | Rsa1.0.04563.1 | 692 | 16837  | 4.00E-55  | 125 | 130 | 96 - | 270 | 399 | 15762  | 15891  |
| UN53383 | Rsa1.0.00437.1 | 114 | 84879  | 9.00E-49  | 110 | 114 | 96 - | 1   | 114 | 39675  | 39788  |
| UN53384 | Rsa1.0.00121.1 | 804 | 278029 | 1.00E-120 | 252 | 263 | 95 - | 318 | 580 | 114461 | 114723 |
| UN53385 | Rsa1.0.03048.1 | 791 | 25777  | 0         | 632 | 655 | 96 + | 138 | 791 | 1      | 655    |
| UN53386 | Rsa1.0.03898.1 | 531 | 20183  | 0         | 489 | 515 | 94 - | 3   | 515 | 6005   | 6513   |
| UN53387 | Rsa1.0.02435.1 | 335 | 31454  | 2.00E-92  | 184 | 188 | 97 - | 3   | 190 | 20980  | 21167  |
| UN53388 | Rsa1.0.01434.1 | 347 | 45951  | 9.00E-61  | 239 | 275 | 86 - | 73  | 344 | 8064   | 8323   |
| UN53389 | Rsa1.0.00111.1 | 859 | 390088 | 1.00E-142 | 406 | 449 | 90 - | 17  | 455 | 274816 | 275249 |

|         |                |     |        |           |     |     |      |     |     |        |        |
|---------|----------------|-----|--------|-----------|-----|-----|------|-----|-----|--------|--------|
| UN53390 | Rsa1.0.05161.1 | 442 | 14631  | 1.00E-109 | 234 | 245 | 95 + | 167 | 411 | 12     | 256    |
| UN53391 | Rsa1.0.07592.1 | 764 | 9059   | 0         | 432 | 454 | 95 + | 3   | 453 | 7154   | 7607   |
| UN53392 | Rsa1.0.09661.1 | 131 | 6226   | 9.00E-40  | 120 | 131 | 91 - | 1   | 131 | 103    | 232    |
| UN53393 | Rsa1.0.33032.1 | 182 | 688    | 7.00E-63  | 137 | 142 | 96 + | 41  | 182 | 2      | 143    |
| UN53394 | Rsa1.0.01513.1 | 487 | 44234  | 1.00E-177 | 396 | 422 | 93 - | 15  | 436 | 29142  | 29562  |
| UN53395 | Rsa1.0.00228.1 | 825 | 105511 | 0         | 476 | 484 | 98 - | 1   | 484 | 82494  | 82977  |
| UN53396 | Rsa1.0.01829.1 | 795 | 166063 | 0         | 764 | 798 | 95 - | 1   | 795 | 160988 | 161779 |
| UN53397 | Rsa1.0.01373.1 | 526 | 47052  | 0         | 509 | 526 | 96 - | 1   | 526 | 31526  | 32051  |
| UN53398 | Rsa1.0.00635.1 | 487 | 175826 | 1.00E-114 | 276 | 296 | 93 + | 53  | 345 | 14112  | 14407  |
| UN53399 | Rsa1.0.01497.1 | 733 | 44559  | 0         | 573 | 601 | 95 - | 13  | 605 | 11877  | 12472  |
| UN53400 | #              | #   | #      | #         | #   | #   | #    | #   | #   | #      | #      |
| UN53401 | Rsa1.0.00314.1 | 887 | 96472  | 0         | 552 | 588 | 93 - | 3   | 575 | 74917  | 75504  |
| UN53402 | Rsa1.0.03304.1 | 930 | 23883  | 0         | 511 | 561 | 91 - | 4   | 545 | 10759  | 11306  |
| UN53403 | Rsa1.0.00228.1 | 764 | 105511 | 0         | 743 | 775 | 95 - | 1   | 764 | 98048  | 98822  |
| UN53404 | Rsa1.0.02051.1 | 727 | 35564  | 6.00E-82  | 164 | 167 | 98 - | 159 | 325 | 25313  | 25479  |
| UN53405 | Rsa1.0.00369.1 | 697 | 266462 | 3.00E-93  | 195 | 202 | 96 + | 345 | 546 | 20557  | 20758  |
| UN53406 | Rsa1.0.00799.1 | 769 | 63918  | 0         | 631 | 653 | 96 + | 118 | 769 | 38067  | 38712  |
| UN53407 | Rsa1.0.02633.1 | 796 | 29315  | 1.00E-176 | 387 | 410 | 94 + | 13  | 410 | 365    | 771    |
| UN53408 | Rsa1.0.00331.1 | 400 | 176754 | 2.00E-92  | 214 | 228 | 93 - | 8   | 235 | 159068 | 159295 |
| UN53409 | Rsa1.0.00067.1 | 104 | 415055 | 2.00E-21  | 74  | 80  | 92 - | 7   | 85  | 227361 | 227440 |
| UN53410 | Rsa1.0.02103.1 | 778 | 35006  | 1.00E-140 | 273 | 279 | 97 + | 77  | 353 | 32505  | 32783  |
| UN53411 | Rsa1.0.01151.1 | 418 | 52268  | 1.00E-131 | 295 | 314 | 93 + | 1   | 314 | 26322  | 26635  |
| UN53412 | Rsa1.0.00718.1 | 352 | 279335 | 1.00E-164 | 337 | 352 | 95 - | 1   | 352 | 34472  | 34823  |
| UN53413 | Rsa1.0.01563.1 | 325 | 170823 | 1.00E-143 | 303 | 318 | 95 - | 1   | 318 | 38976  | 39293  |
| UN53414 | Rsa1.0.00906.1 | 756 | 178966 | 0         | 521 | 553 | 94 - | 48  | 599 | 131970 | 132503 |
| UN53415 | Rsa1.0.03640.1 | 655 | 21624  | 1.00E-67  | 143 | 147 | 97 + | 342 | 488 | 17750  | 17896  |
| UN53416 | Rsa1.0.00065.1 | 725 | 454616 | 1.00E-141 | 270 | 275 | 98 + | 381 | 655 | 39827  | 40101  |
| UN53417 | Rsa1.0.01691.1 | 883 | 40921  | 1.00E-127 | 273 | 284 | 96 - | 1   | 281 | 5888   | 6168   |
| UN53418 | Rsa1.0.00964.1 | 161 | 316648 | 2.00E-41  | 141 | 157 | 89 + | 13  | 161 | 167634 | 167790 |
| UN53419 | Rsa1.0.00226.1 | 470 | 105884 | 0         | 442 | 463 | 95 - | 1   | 462 | 85347  | 85805  |
| UN53420 | Rsa1.0.00157.1 | 183 | 245832 | 2.00E-60  | 163 | 175 | 93 + | 4   | 174 | 67514  | 67686  |
| UN53421 | Rsa1.0.00267.1 | 185 | 101509 | 4.00E-46  | 165 | 186 | 88 + | 1   | 185 | 67842  | 68026  |
| UN53422 | Rsa1.0.71908.1 | 175 | 319    | 2.00E-35  | 108 | 116 | 93 + | 54  | 168 | 201    | 315    |
| UN53423 | Rsa1.0.00188.1 | 717 | 112020 | 0         | 698 | 720 | 96 - | 2   | 717 | 22851  | 23570  |
| UN53424 | Rsa1.0.08170.1 | 208 | 7799   | 1.00E-67  | 182 | 198 | 91 + | 11  | 208 | 1720   | 1916   |
| UN53425 | Rsa1.0.14305.1 | 917 | 3554   | 0         | 905 | 916 | 98 - | 1   | 915 | 1853   | 2765   |
| UN53426 | Rsa1.0.00006.1 | 335 | 396176 | 1.00E-114 | 298 | 326 | 91 + | 10  | 335 | 307780 | 308100 |
| UN53427 | Rsa1.0.00042.1 | 568 | 171507 | 1.00E-112 | 290 | 316 | 91 + | 2   | 300 | 70658  | 70972  |
| UN53428 | Rsa1.0.01016.1 | 544 | 181422 | 1.00E-158 | 363 | 395 | 91 - | 171 | 544 | 158361 | 158755 |

|         |                |     |        |           |     |     |      |     |     |        |        |
|---------|----------------|-----|--------|-----------|-----|-----|------|-----|-----|--------|--------|
| UN53429 | Rsa1.0.01609.1 | 752 | 42280  | 0         | 571 | 588 | 97 - | 165 | 752 | 7290   | 7877   |
| UN53430 | Rsa1.0.01611.1 | 119 | 42269  | 1.00E-44  | 113 | 119 | 94 + | 1   | 119 | 4306   | 4423   |
| UN53431 | Rsa1.0.00132.1 | 733 | 124299 | 0         | 496 | 516 | 96 - | 2   | 505 | 46181  | 46696  |
| UN53432 | Rsa1.0.02189.1 | 208 | 34098  | 2.00E-85  | 193 | 204 | 94 - | 1   | 204 | 2131   | 2334   |
| UN53433 | Rsa1.0.00722.1 | 899 | 66840  | 0         | 849 | 925 | 91 - | 2   | 896 | 23696  | 24603  |
| UN53434 | Rsa1.0.00545.1 | 157 | 189649 | 3.00E-37  | 97  | 103 | 94 - | 1   | 103 | 13021  | 13123  |
| UN53435 | Rsa1.0.00642.1 | 848 | 201230 | 0         | 456 | 472 | 96 + | 1   | 472 | 5795   | 6264   |
| UN53436 | Rsa1.0.00243.1 | 520 | 103651 | 0         | 471 | 494 | 95 - | 3   | 493 | 86585  | 87069  |
| UN53437 | Rsa1.0.01960.1 | 822 | 36766  | 0         | 417 | 437 | 95 + | 5   | 437 | 27493  | 27929  |
| UN53438 | Rsa1.0.02152.1 | 703 | 34558  | 0         | 349 | 352 | 99 + | 1   | 352 | 14515  | 14866  |
| UN53439 | Rsa1.0.01833.1 | 680 | 38555  | 1.00E-143 | 339 | 363 | 93 - | 7   | 366 | 11566  | 11926  |
| UN53440 | Rsa1.0.04789.1 | 144 | 15981  | 5.00E-57  | 136 | 144 | 94 + | 1   | 144 | 11139  | 11282  |
| UN53441 | Rsa1.0.00005.1 | 337 | 353093 | 1.00E-133 | 321 | 347 | 92 - | 1   | 337 | 342641 | 342984 |
| UN53442 | Rsa1.0.00497.1 | 135 | 79830  | 1.00E-17  | 105 | 121 | 86 - | 7   | 126 | 54497  | 54614  |
| UN53443 | Rsa1.0.04512.1 | 659 | 17031  | 1.00E-171 | 368 | 389 | 94 + | 4   | 392 | 12559  | 12943  |
| UN53444 | Rsa1.0.03504.1 | 726 | 22443  | 1.00E-169 | 357 | 371 | 96 - | 1   | 369 | 10641  | 11007  |
| UN53445 | Rsa1.0.00429.1 | 166 | 85559  | 5.00E-39  | 121 | 134 | 90 - | 33  | 166 | 61509  | 61642  |
| UN53446 | Rsa1.0.00379.1 | 609 | 89865  | 3.00E-77  | 162 | 167 | 97 + | 222 | 388 | 86615  | 86781  |
| UN53447 | Rsa1.0.02299.1 | 177 | 32857  | 7.00E-26  | 81  | 88  | 92 - | 77  | 164 | 22603  | 22690  |
| UN53448 | Rsa1.0.00630.1 | 785 | 71281  | 1.00E-178 | 352 | 364 | 96 + | 345 | 708 | 61583  | 61946  |
| UN53449 | Rsa1.0.00778.1 | 797 | 196751 | 0         | 768 | 809 | 94 + | 2   | 797 | 179029 | 179837 |
| UN53450 | Rsa1.0.01151.1 | 616 | 52268  | 0         | 589 | 626 | 94 - | 1   | 616 | 29993  | 30609  |
| UN53451 | Rsa1.0.00866.1 | 111 | 61676  | 5.00E-47  | 107 | 111 | 96 - | 1   | 111 | 9702   | 9812   |
| UN53452 | Rsa1.0.00064.1 | 258 | 240927 | 1.00E-37  | 106 | 114 | 92 - | 5   | 115 | 30039  | 30152  |
| UN53453 | Rsa1.0.00034.1 | 530 | 260119 | 1.00E-126 | 257 | 265 | 96 - | 265 | 528 | 54691  | 54955  |
| UN53454 | Rsa1.0.01934.1 | 172 | 37162  | 2.00E-66  | 156 | 162 | 96 + | 15  | 172 | 3579   | 3739   |
| UN53455 | Rsa1.0.00060.1 | 762 | 502678 | 0         | 727 | 750 | 96 + | 14  | 762 | 42866  | 43611  |
| UN53456 | Rsa1.0.00888.1 | 851 | 60978  | 0         | 469 | 484 | 96 - | 2   | 485 | 19314  | 19791  |
| UN53457 | Rsa1.0.01424.1 | 931 | 46139  | 0         | 400 | 424 | 94 - | 3   | 426 | 42149  | 42571  |
| UN53458 | Rsa1.0.03831.1 | 256 | 20579  | 1.00E-93  | 183 | 186 | 98 + | 1   | 186 | 18235  | 18420  |
| UN53459 | Rsa1.0.00002.1 | 737 | 601661 | 0         | 716 | 739 | 96 - | 1   | 737 | 416807 | 417545 |
| UN53460 | Rsa1.0.07598.1 | 629 | 9054   | 1.00E-85  | 182 | 189 | 96 - | 292 | 480 | 1664   | 1852   |
| UN53461 | Rsa1.0.03771.1 | 288 | 20942  | 1.00E-101 | 255 | 275 | 92 + | 1   | 261 | 10940  | 11212  |
| UN53462 | Rsa1.0.00457.1 | 379 | 337301 | 8.00E-40  | 87  | 88  | 98 + | 171 | 258 | 129651 | 129738 |
| UN53463 | Rsa1.0.00002.1 | 924 | 601661 | 1.00E-133 | 269 | 278 | 96 + | 600 | 877 | 556110 | 556387 |
| UN53464 | Rsa1.0.02955.1 | 381 | 26484  | 1.00E-44  | 122 | 132 | 92 - | 240 | 371 | 20929  | 21060  |
| UN53465 | Rsa1.0.00079.1 | 767 | 606987 | 1.00E-89  | 203 | 212 | 95 + | 2   | 212 | 40434  | 40644  |
| UN53466 | Rsa1.0.00380.1 | 794 | 89748  | 0         | 516 | 556 | 92 + | 6   | 557 | 22255  | 22793  |
| UN53467 | Rsa1.0.00341.1 | 186 | 249309 | 2.00E-38  | 139 | 156 | 89 + | 32  | 186 | 221644 | 221792 |

|         |                |     |        |           |     |     |      |     |     |        |        |
|---------|----------------|-----|--------|-----------|-----|-----|------|-----|-----|--------|--------|
| UN53468 | Rsa1.0.05864.1 | 405 | 12387  | 3.00E-36  | 84  | 86  | 97 + | 208 | 293 | 10255  | 10340  |
| UN53469 | Rsa1.0.70998.1 | 423 | 323    | 1.00E-134 | 307 | 325 | 94 + | 2   | 324 | 1      | 323    |
| UN53470 | Rsa1.0.00384.1 | 367 | 89278  | 1.00E-163 | 339 | 354 | 95 - | 15  | 367 | 74009  | 74362  |
| UN53471 | Rsa1.0.03329.1 | 567 | 23676  | 0         | 546 | 564 | 96 - | 4   | 567 | 22529  | 23092  |
| UN53472 | Rsa1.0.05081.1 | 769 | 136103 | 5.00E-86  | 203 | 214 | 94 + | 128 | 338 | 7886   | 8095   |
| UN53473 | Rsa1.0.00168.1 | 206 | 115870 | 5.00E-55  | 133 | 141 | 94 + | 4   | 144 | 114220 | 114360 |
| UN53474 | Rsa1.0.00166.1 | 842 | 240912 | 0         | 440 | 446 | 98 - | 1   | 446 | 219855 | 220300 |
| UN53475 | Rsa1.0.03552.1 | 178 | 22151  | 2.00E-54  | 132 | 140 | 94 - | 28  | 167 | 12975  | 13114  |
| UN53476 | Rsa1.0.00385.1 | 901 | 89160  | 0         | 429 | 459 | 93 + | 1   | 457 | 36391  | 36837  |
| UN53477 | Rsa1.0.01922.1 | 638 | 37236  | 0         | 372 | 382 | 97 + | 1   | 379 | 12529  | 12910  |
| UN53478 | Rsa1.0.06561.1 | 771 | 10772  | 1.00E-137 | 289 | 302 | 95 + | 3   | 301 | 2622   | 2923   |
| UN53479 | Rsa1.0.00876.1 | 742 | 61328  | 0         | 537 | 548 | 97 - | 1   | 547 | 17687  | 18234  |
| UN53480 | Rsa1.0.00407.1 | 586 | 191544 | 0         | 538 | 583 | 92 + | 4   | 586 | 155506 | 156073 |
| UN53481 | Rsa1.0.02874.1 | 261 | 27070  | 1.00E-118 | 252 | 262 | 96 + | 1   | 261 | 26469  | 26728  |
| UN53482 | Rsa1.0.00010.1 | 656 | 294827 | 3.00E-65  | 175 | 190 | 92 + | 1   | 188 | 270947 | 271131 |
| UN53483 | Rsa1.0.00310.1 | 603 | 96852  | 1.00E-139 | 312 | 332 | 93 - | 221 | 539 | 71221  | 71551  |
| UN53484 | Rsa1.0.06508.1 | 336 | 10874  | 1.00E-149 | 319 | 336 | 94 + | 1   | 336 | 4654   | 4989   |
| UN53485 | Rsa1.0.00871.1 | 705 | 61539  | 1.00E-109 | 287 | 311 | 92 - | 4   | 312 | 13835  | 14142  |
| UN53486 | Rsa1.0.05581.1 | 612 | 13272  | 0         | 507 | 527 | 96 - | 1   | 523 | 5476   | 5997   |
| UN53487 | Rsa1.0.02616.1 | 129 | 29542  | 3.00E-33  | 90  | 96  | 93 - | 34  | 129 | 21704  | 21799  |
| UN53488 | Rsa1.0.05743.1 | 101 | 12768  | 6.00E-22  | 89  | 101 | 88 - | 1   | 101 | 319    | 419    |
| UN53489 | Rsa1.0.00181.1 | 171 | 114269 | 8.00E-41  | 106 | 113 | 93 + | 16  | 128 | 102390 | 102502 |
| UN53490 | Rsa1.0.00630.1 | 809 | 71281  | 0         | 789 | 819 | 96 + | 4   | 809 | 66530  | 67344  |
| UN53491 | Rsa1.0.06980.1 | 637 | 10071  | 0         | 343 | 344 | 99 - | 1   | 343 | 4150   | 4493   |
| UN53492 | Rsa1.0.31352.1 | 613 | 729    | 0         | 523 | 570 | 91 - | 46  | 613 | 144    | 710    |
| UN53493 | Rsa1.0.08680.1 | 748 | 7047   | 0         | 529 | 541 | 97 + | 218 | 748 | 5668   | 6208   |
| UN53494 | Rsa1.0.03498.1 | 122 | 22480  | 4.00E-51  | 117 | 122 | 95 + | 1   | 122 | 18517  | 18638  |
| UN53495 | Rsa1.0.03010.1 | 750 | 26054  | 1.00E-106 | 220 | 227 | 96 + | 4   | 230 | 20647  | 20872  |
| UN53496 | Rsa1.0.02961.1 | 158 | 26435  | 1.00E-61  | 147 | 156 | 94 - | 1   | 156 | 15817  | 15972  |
| UN53497 | Rsa1.0.00002.1 | 158 | 601661 | 1.00E-36  | 88  | 90  | 97 - | 1   | 90  | 137235 | 137323 |
| UN53498 | Rsa1.0.00936.1 | 103 | 59078  | 8.00E-15  | 81  | 89  | 91 + | 1   | 89  | 23379  | 23463  |
| UN53499 | Rsa1.0.02644.1 | 385 | 29176  | 0         | 381 | 385 | 98 - | 1   | 385 | 16597  | 16980  |
| UN53500 | Rsa1.0.00997.1 | 684 | 57190  | 0         | 477 | 490 | 97 - | 195 | 684 | 35340  | 35829  |
| UN53501 | Rsa1.0.02478.1 | 266 | 150183 | 1.00E-59  | 135 | 141 | 95 + | 8   | 148 | 7231   | 7371   |
| UN53502 | Rsa1.0.00026.1 | 162 | 327835 | 4.00E-30  | 87  | 91  | 95 + | 1   | 91  | 43799  | 43887  |
| UN53503 | Rsa1.0.00136.1 | 112 | 122464 | 7.00E-34  | 100 | 108 | 92 - | 7   | 112 | 30730  | 30837  |
| UN53504 | Rsa1.0.02124.1 | 597 | 34780  | 0         | 421 | 444 | 94 + | 3   | 436 | 7484   | 7926   |
| UN53505 | Rsa1.0.43137.1 | 122 | 521    | 2.00E-46  | 115 | 122 | 94 + | 1   | 122 | 188    | 309    |
| UN53506 | Rsa1.0.02730.1 | 207 | 28385  | 2.00E-45  | 159 | 172 | 92 + | 4   | 175 | 3380   | 3543   |

|         |                |     |        |           |     |     |       |     |     |        |        |
|---------|----------------|-----|--------|-----------|-----|-----|-------|-----|-----|--------|--------|
| UN53507 | Rsa1.0.05467.1 | 482 | 13649  | 5.00E-94  | 229 | 245 | 93 +  | 1   | 238 | 8197   | 8439   |
| UN53508 | Rsa1.0.03818.1 | 238 | 20668  | 5.00E-43  | 132 | 145 | 91 -  | 1   | 144 | 12386  | 12525  |
| UN53509 | Rsa1.0.00002.1 | 500 | 601661 | 1.00E-147 | 335 | 354 | 94 +  | 5   | 352 | 406224 | 406577 |
| UN53510 | Rsa1.0.00915.1 | 927 | 194446 | 0         | 859 | 908 | 94 +  | 13  | 918 | 180476 | 181375 |
| UN53511 | Rsa1.0.01800.1 | 580 | 39109  | 1.00E-100 | 221 | 232 | 95 -  | 230 | 461 | 7299   | 7527   |
| UN53512 | Rsa1.0.00967.1 | 817 | 58049  | 0         | 785 | 818 | 95 +  | 1   | 817 | 6424   | 7241   |
| UN53513 | Rsa1.0.04397.1 | 863 | 17555  | 0         | 526 | 553 | 95 -  | 1   | 552 | 3221   | 3763   |
| UN53514 | #              | #   | #      | #         | #   | #   | #     | #   | #   | #      | #      |
| UN53515 | Rsa1.0.02589.1 | 774 | 300828 | 0         | 773 | 774 | 99 -  | 1   | 774 | 25138  | 25910  |
| UN53516 | Rsa1.0.00275.1 | 495 | 210104 | 0         | 477 | 493 | 96 +  | 3   | 495 | 14807  | 15299  |
| UN53517 | Rsa1.0.17495.1 | 733 | 1816   | 9.00E-75  | 143 | 143 | 100 - | 585 | 727 | 1508   | 1650   |
| UN53518 | Rsa1.0.01083.1 | 588 | 54617  | 1.00E-112 | 245 | 257 | 95 -  | 1   | 256 | 4951   | 5207   |
| UN53519 | Rsa1.0.00102.1 | 178 | 135497 | 3.00E-40  | 96  | 100 | 96 -  | 79  | 178 | 50865  | 50964  |
| UN53520 | Rsa1.0.00335.1 | 807 | 94371  | 4.00E-68  | 173 | 183 | 94 +  | 3   | 182 | 35203  | 35384  |
| UN53521 | Rsa1.0.00153.1 | 612 | 192931 | 3.00E-71  | 149 | 153 | 97 -  | 217 | 369 | 24233  | 24385  |
| UN53522 | Rsa1.0.00272.1 | 520 | 447836 | 1.00E-115 | 239 | 247 | 96 -  | 12  | 258 | 219273 | 219518 |
| UN53523 | Rsa1.0.00410.1 | 747 | 86957  | 0         | 483 | 498 | 96 +  | 3   | 495 | 65065  | 65561  |
| UN53524 | Rsa1.0.00593.1 | 152 | 143463 | 4.00E-58  | 136 | 142 | 95 +  | 12  | 152 | 14505  | 14646  |
| UN53525 | Rsa1.0.00954.1 | 252 | 189536 | 3.00E-63  | 157 | 167 | 94 +  | 87  | 252 | 155027 | 155193 |
| UN53526 | Rsa1.0.00318.1 | 774 | 96094  | 0         | 650 | 675 | 96 -  | 84  | 756 | 1738   | 2411   |
| UN53527 | Rsa1.0.01922.1 | 509 | 37236  | 0         | 378 | 396 | 95 +  | 1   | 395 | 12521  | 12910  |
| UN53528 | Rsa1.0.03653.1 | 809 | 21564  | 1.00E-80  | 225 | 253 | 88 +  | 1   | 236 | 20360  | 20612  |
| UN53529 | Rsa1.0.05352.1 | 302 | 14079  | 2.33E-156 | 292 | 302 | 96 -  | 1   | 302 | 2387   | 2688   |
| UN53530 | Rsa1.0.04441.1 | 626 | 17341  | 0         | 507 | 543 | 93 -  | 33  | 558 | 7700   | 8242   |
| UN53531 | Rsa1.0.00926.1 | 135 | 195072 | 2.00E-56  | 129 | 135 | 95 +  | 1   | 135 | 176649 | 176783 |
| UN53532 | Rsa1.0.00389.1 | 767 | 88795  | 0         | 546 | 568 | 96 +  | 200 | 767 | 61128  | 61695  |
| UN53533 | Rsa1.0.01672.1 | 845 | 41229  | 1.00E-117 | 233 | 239 | 97 +  | 31  | 269 | 20848  | 21086  |
| UN53534 | Rsa1.0.02020.1 | 352 | 173211 | 2.00E-27  | 69  | 71  | 97 +  | 186 | 256 | 20844  | 20914  |
| UN53535 | Rsa1.0.00179.1 | 312 | 393324 | 1.00E-114 | 217 | 220 | 98 -  | 1   | 220 | 349992 | 350211 |
| UN53536 | Rsa1.0.00721.1 | 168 | 66918  | 2.00E-66  | 158 | 168 | 94 -  | 1   | 168 | 59513  | 59680  |
| UN53537 | Rsa1.0.06226.1 | 248 | 11442  | 5.00E-86  | 222 | 246 | 90 +  | 3   | 248 | 11194  | 11418  |
| UN53538 | Rsa1.0.00472.1 | 619 | 398134 | 1.00E-118 | 225 | 227 | 99 +  | 344 | 569 | 298500 | 298726 |
| UN53539 | Rsa1.0.00130.1 | 380 | 125737 | 1.00E-173 | 360 | 377 | 95 +  | 2   | 378 | 43958  | 44331  |
| UN53540 | Rsa1.0.01007.1 | 108 | 56933  | 1.00E-13  | 52  | 55  | 94 -  | 48  | 101 | 32811  | 32865  |
| UN53541 | Rsa1.0.00269.1 | 815 | 341668 | 0         | 365 | 368 | 99 +  | 408 | 775 | 7746   | 8113   |
| UN53542 | Rsa1.0.36971.1 | 432 | 610    | 0         | 386 | 406 | 95 -  | 4   | 399 | 20     | 425    |
| UN53543 | Rsa1.0.05482.1 | 126 | 13595  | 9.00E-43  | 115 | 123 | 93 +  | 4   | 126 | 4318   | 4438   |
| UN53544 | Rsa1.0.00007.1 | 824 | 239325 | 0         | 423 | 434 | 97 +  | 1   | 434 | 209063 | 209496 |
| UN53545 | Rsa1.0.02413.1 | 369 | 31628  | 4.00E-63  | 144 | 151 | 95 -  | 219 | 369 | 7286   | 7436   |

|         |                |     |        |           |     |     |      |     |     |        |        |
|---------|----------------|-----|--------|-----------|-----|-----|------|-----|-----|--------|--------|
| UN53546 | Rsa1.0.01423.1 | 762 | 46170  | 1.00E-156 | 311 | 320 | 97 - | 51  | 369 | 12666  | 12985  |
| UN53547 | Rsa1.0.02768.1 | 160 | 28110  | 2.00E-59  | 140 | 148 | 94 - | 2   | 149 | 26345  | 26492  |
| UN53548 | Rsa1.0.00122.1 | 245 | 265937 | 1.00E-131 | 243 | 245 | 99 - | 1   | 245 | 35334  | 35578  |
| UN53549 | Rsa1.0.10587.1 | 812 | 5794   | 0         | 572 | 607 | 94 + | 218 | 811 | 3486   | 4090   |
| UN53550 | Rsa1.0.03701.1 | 448 | 21296  | 1.00E-126 | 256 | 265 | 96 + | 1   | 265 | 17365  | 17629  |
| UN53551 | Rsa1.0.00153.1 | 235 | 192931 | 7.00E-73  | 203 | 219 | 92 + | 1   | 215 | 171956 | 172169 |
| UN53552 | Rsa1.0.02138.1 | 362 | 34695  | 1.00E-123 | 250 | 259 | 96 - | 1   | 259 | 7722   | 7980   |
| UN53553 | Rsa1.0.00713.1 | 585 | 158017 | 0         | 468 | 473 | 98 - | 21  | 493 | 66390  | 66862  |
| UN53554 | Rsa1.0.01534.1 | 790 | 43764  | 1.00E-109 | 253 | 269 | 94 - | 1   | 269 | 16191  | 16458  |
| UN53555 | Rsa1.0.00369.1 | 545 | 266462 | 1.00E-149 | 294 | 303 | 97 - | 243 | 545 | 169500 | 169802 |
| UN53556 | Rsa1.0.01134.1 | 868 | 52829  | 0         | 777 | 803 | 96 + | 66  | 868 | 25926  | 26725  |
| UN53557 | Rsa1.0.02990.1 | 124 | 26180  | 1.00E-54  | 120 | 124 | 96 + | 1   | 124 | 18354  | 18477  |
| UN53558 | Rsa1.0.03432.1 | 779 | 22967  | 0         | 715 | 776 | 92 - | 1   | 772 | 9990   | 10751  |
| UN53559 | Rsa1.0.02079.1 | 301 | 35306  | 1.00E-104 | 249 | 265 | 93 - | 1   | 259 | 33954  | 34218  |
| UN53560 | Rsa1.0.02079.1 | 674 | 35306  | 1.00E-95  | 204 | 210 | 97 + | 2   | 209 | 15732  | 15941  |
| UN53561 | Rsa1.0.02105.1 | 554 | 156953 | 1.00E-154 | 340 | 359 | 94 - | 11  | 368 | 151526 | 151882 |
| UN53562 | Rsa1.0.00735.1 | 682 | 66503  | 0         | 571 | 592 | 96 - | 2   | 592 | 4823   | 5410   |
| UN53563 | Rsa1.0.02740.1 | 765 | 28292  | 0         | 591 | 645 | 91 + | 81  | 724 | 10080  | 10723  |
| UN53564 | Rsa1.0.03880.1 | 697 | 20293  | 1.00E-107 | 245 | 262 | 93 - | 75  | 324 | 19678  | 19938  |
| UN53565 | Rsa1.0.03777.1 | 790 | 20922  | 0         | 473 | 524 | 90 - | 49  | 553 | 2336   | 2851   |
| UN53566 | Rsa1.0.01222.1 | 330 | 50398  | 1.00E-62  | 146 | 154 | 94 - | 174 | 327 | 34432  | 34585  |
| UN53567 | Rsa1.0.00618.1 | 137 | 72195  | 1.00E-45  | 126 | 137 | 91 - | 1   | 137 | 2681   | 2817   |
| UN53568 | Rsa1.0.02560.1 | 728 | 30091  | 0         | 723 | 728 | 99 + | 1   | 728 | 17778  | 18505  |
| UN53569 | Rsa1.0.00707.1 | 553 | 190112 | 0         | 536 | 556 | 96 + | 5   | 553 | 38641  | 39193  |
| UN53570 | Rsa1.0.01829.1 | 174 | 166063 | 1.00E-21  | 68  | 73  | 93 + | 68  | 140 | 158118 | 158190 |
| UN53571 | Rsa1.0.05070.1 | 787 | 14933  | 1.00E-137 | 280 | 291 | 96 + | 1   | 291 | 2682   | 2972   |
| UN53572 | Rsa1.0.01472.1 | 705 | 45099  | 0         | 690 | 705 | 97 + | 2   | 705 | 37938  | 38642  |
| UN53573 | Rsa1.0.02606.1 | 565 | 29635  | 1.00E-140 | 310 | 326 | 95 - | 4   | 322 | 7554   | 7875   |
| UN53574 | Rsa1.0.01069.1 | 303 | 55113  | 1.00E-132 | 286 | 302 | 94 + | 1   | 302 | 17701  | 18002  |
| UN53575 | Rsa1.0.04594.1 | 746 | 16713  | 0         | 684 | 735 | 93 + | 1   | 724 | 3804   | 4523   |
| UN53576 | Rsa1.0.00973.1 | 740 | 57913  | 0         | 437 | 443 | 98 + | 1   | 443 | 22820  | 23262  |
| UN53577 | Rsa1.0.06759.1 | 669 | 10402  | 0         | 633 | 647 | 97 + | 2   | 641 | 1105   | 1751   |
| UN53578 | Rsa1.0.00350.1 | 595 | 92346  | 8.00E-78  | 184 | 195 | 94 - | 2   | 196 | 15070  | 15262  |
| UN53579 | Rsa1.0.00019.1 | 235 | 301669 | 1.00E-108 | 226 | 235 | 96 + | 1   | 235 | 73318  | 73552  |
| UN53580 | Rsa1.0.02855.1 | 421 | 27271  | 1.00E-170 | 396 | 423 | 93 - | 1   | 420 | 17898  | 18315  |
| UN53581 | Rsa1.0.00156.1 | 319 | 118383 | 5.00E-90  | 186 | 192 | 96 - | 1   | 192 | 60076  | 60267  |
| UN53582 | Rsa1.0.01328.1 | 789 | 48021  | 1.00E-95  | 209 | 218 | 95 - | 29  | 246 | 17793  | 18009  |
| UN53583 | Rsa1.0.00387.1 | 432 | 495407 | 1.00E-159 | 382 | 415 | 92 - | 18  | 432 | 409998 | 410406 |
| UN53584 | Rsa1.0.00234.1 | 748 | 197060 | 1.00E-125 | 255 | 264 | 96 + | 483 | 746 | 148099 | 148362 |



|         |                |     |        |           |     |     |       |     |     |        |        |
|---------|----------------|-----|--------|-----------|-----|-----|-------|-----|-----|--------|--------|
| UN53585 | Rsa1.0.08102.1 | 368 | 7901   | 1.00E-32  | 87  | 92  | 94 +  | 221 | 312 | 1081   | 1172   |
| UN53586 | Rsa1.0.00108.1 | 325 | 478491 | 1.00E-134 | 301 | 323 | 93 +  | 3   | 325 | 144479 | 144789 |
| UN53587 | Rsa1.0.00066.1 | 799 | 152418 | 0         | 640 | 684 | 93 +  | 38  | 720 | 106028 | 106684 |
| UN53588 | Rsa1.0.00776.1 | 376 | 64637  | 1.00E-158 | 349 | 371 | 94 -  | 6   | 376 | 46441  | 46802  |
| UN53589 | Rsa1.0.00628.1 | 117 | 214360 | 7.00E-22  | 59  | 61  | 96 +  | 3   | 63  | 203940 | 204000 |
| UN53590 | Rsa1.0.00139.1 | 759 | 357786 | 0         | 719 | 760 | 94 -  | 2   | 756 | 1806   | 2550   |
| UN53591 | Rsa1.0.00157.1 | 128 | 245832 | 4.00E-17  | 57  | 61  | 93 -  | 20  | 80  | 183709 | 183769 |
| UN53592 | Rsa1.0.00165.1 | 856 | 116466 | 0         | 503 | 533 | 94 +  | 4   | 525 | 93807  | 94339  |
| UN53593 | Rsa1.0.00046.1 | 168 | 320315 | 4.00E-27  | 101 | 114 | 88 -  | 11  | 124 | 66977  | 67090  |
| UN53594 | Rsa1.0.01740.1 | 151 | 39986  | 1.00E-54  | 139 | 148 | 93 +  | 1   | 147 | 26383  | 26530  |
| UN53595 | Rsa1.0.04358.1 | 126 | 17759  | 1.00E-38  | 111 | 120 | 92 +  | 9   | 126 | 10429  | 10548  |
| UN53596 | Rsa1.0.01137.1 | 797 | 52655  | 0         | 782 | 800 | 97 -  | 1   | 797 | 29963  | 30762  |
| UN53597 | Rsa1.0.01205.1 | 607 | 50795  | 0         | 388 | 397 | 97 +  | 12  | 408 | 23869  | 24265  |
| UN53598 | Rsa1.0.27174.1 | 717 | 863    | 0         | 396 | 416 | 95 -  | 1   | 404 | 132    | 547    |
| UN53599 | Rsa1.0.01388.1 | 483 | 46741  | 1.00E-168 | 419 | 454 | 92 -  | 33  | 483 | 29304  | 29755  |
| UN53600 | Rsa1.0.00407.1 | 835 | 191544 | 1.00E-160 | 350 | 366 | 95 +  | 1   | 364 | 160802 | 161164 |
| UN53601 | Rsa1.0.01938.1 | 151 | 264018 | 3.00E-68  | 146 | 151 | 96 +  | 1   | 151 | 157090 | 157240 |
| UN53602 | Rsa1.0.01226.1 | 741 | 50316  | 1.00E-120 | 273 | 288 | 94 -  | 15  | 301 | 8839   | 9125   |
| UN53603 | Rsa1.0.00068.1 | 757 | 151813 | 0         | 729 | 761 | 95 -  | 3   | 757 | 43566  | 44323  |
| UN53604 | #              | #   | #      | #         | #   | #   | #     | #   | #   | #      | #      |
| UN53605 | Rsa1.0.08079.1 | 701 | 7942   | 0         | 666 | 701 | 95 -  | 1   | 698 | 5438   | 6136   |
| UN53606 | Rsa1.0.03589.1 | 115 | 21893  | 8.00E-34  | 109 | 117 | 93 +  | 1   | 115 | 665    | 780    |
| UN53607 | Rsa1.0.05264.1 | 773 | 14327  | 0         | 650 | 668 | 97 -  | 106 | 773 | 5039   | 5706   |
| UN53608 | Rsa1.0.00959.1 | 501 | 58202  | 1.00E-152 | 324 | 343 | 94 -  | 147 | 489 | 57828  | 58159  |
| UN53609 | Rsa1.0.00402.1 | 891 | 385315 | 0         | 437 | 454 | 96 -  | 443 | 891 | 266886 | 267339 |
| UN53610 | Rsa1.0.00008.1 | 883 | 358124 | 1.00E-173 | 345 | 357 | 96 -  | 209 | 565 | 181921 | 182277 |
| UN53611 | Rsa1.0.00089.1 | 792 | 406142 | 0         | 764 | 802 | 95 +  | 1   | 792 | 390224 | 391014 |
| UN53612 | Rsa1.0.00058.1 | 689 | 159921 | 1.00E-120 | 219 | 219 | 100 - | 467 | 685 | 138384 | 138602 |
| UN53613 | Rsa1.0.03242.1 | 780 | 24415  | 0         | 335 | 338 | 99 +  | 2   | 339 | 3791   | 4128   |
| UN53614 | Rsa1.0.01078.1 | 545 | 316910 | 1.00E-73  | 174 | 185 | 94 +  | 176 | 360 | 125731 | 125915 |
| UN53615 | Rsa1.0.01941.1 | 545 | 37069  | 0         | 533 | 546 | 97 -  | 1   | 545 | 2879   | 3423   |
| UN53616 | Rsa1.0.01026.1 | 460 | 171624 | 0         | 456 | 473 | 96 +  | 1   | 460 | 138812 | 139284 |
| UN53617 | Rsa1.0.02323.1 | 603 | 32534  | 2.00E-87  | 257 | 288 | 89 -  | 194 | 481 | 19769  | 20056  |
| UN53618 | Rsa1.0.00045.1 | 401 | 328694 | 6.00E-84  | 192 | 202 | 95 -  | 1   | 202 | 232551 | 232751 |
| UN53619 | Rsa1.0.08598.1 | 291 | 7143   | 7.00E-89  | 261 | 289 | 90 +  | 1   | 287 | 5360   | 5646   |
| UN53620 | Rsa1.0.54091.1 | 856 | 422    | 1.00E-169 | 406 | 436 | 93 -  | 173 | 606 | 1      | 422    |
| UN53621 | Rsa1.0.00092.1 | 815 | 659932 | 2.00E-94  | 227 | 242 | 93 -  | 4   | 243 | 632612 | 632846 |
| UN53622 | Rsa1.0.08342.1 | 721 | 7502   | 1.00E-120 | 226 | 228 | 99 -  | 203 | 430 | 3606   | 3833   |
| UN53623 | Rsa1.0.00112.1 | 423 | 132199 | 2.00E-84  | 202 | 215 | 93 -  | 99  | 312 | 71853  | 72067  |

|         |                |     |        |           |     |     |      |     |     |        |        |
|---------|----------------|-----|--------|-----------|-----|-----|------|-----|-----|--------|--------|
| UN53624 | Rsa1.0.00301.1 | 451 | 365315 | 0         | 435 | 451 | 96 - | 1   | 451 | 76790  | 77238  |
| UN53625 | Rsa1.0.03740.1 | 639 | 21065  | 0         | 525 | 548 | 95 - | 96  | 639 | 15971  | 16518  |
| UN53626 | Rsa1.0.00045.1 | 806 | 328694 | 4.00E-74  | 154 | 158 | 97 + | 463 | 620 | 179532 | 179689 |
| UN53627 | Rsa1.0.00336.1 | 169 | 445051 | 2.00E-38  | 147 | 169 | 86 + | 1   | 169 | 2437   | 2605   |
| UN53628 | Rsa1.0.04696.1 | 255 | 16339  | 5.00E-46  | 159 | 178 | 89 - | 78  | 255 | 12324  | 12499  |
| UN53629 | Rsa1.0.00647.1 | 423 | 70440  | 9.00E-77  | 155 | 158 | 98 + | 266 | 423 | 56930  | 57087  |
| UN53630 | Rsa1.0.02754.1 | 726 | 28213  | 1.00E-141 | 363 | 396 | 91 + | 8   | 390 | 10059  | 10451  |
| UN53631 | Rsa1.0.00288.1 | 941 | 98659  | 0         | 913 | 948 | 96 - | 7   | 941 | 42711  | 43657  |
| UN53632 | Rsa1.0.00394.1 | 744 | 148426 | 0         | 459 | 460 | 99 + | 1   | 459 | 124766 | 125225 |
| UN53633 | Rsa1.0.07055.1 | 621 | 9970   | 0         | 424 | 433 | 97 - | 1   | 432 | 2701   | 3133   |
| UN53634 | Rsa1.0.05919.1 | 754 | 12240  | 0         | 509 | 514 | 99 + | 241 | 754 | 8865   | 9378   |
| UN53635 | Rsa1.0.00394.1 | 692 | 148426 | 0         | 578 | 596 | 96 + | 1   | 593 | 115480 | 116074 |
| UN53636 | Rsa1.0.00299.1 | 630 | 97770  | 1.00E-169 | 326 | 333 | 97 + | 185 | 517 | 70275  | 70606  |
| UN53637 | Rsa1.0.01559.1 | 170 | 43262  | 7.00E-32  | 120 | 135 | 88 - | 36  | 167 | 17455  | 17587  |
| UN53638 | Rsa1.0.01724.1 | 553 | 40292  | 0         | 354 | 357 | 99 + | 1   | 356 | 6686   | 7042   |
| UN53639 | Rsa1.0.01984.1 | 145 | 36491  | 2.00E-32  | 89  | 95  | 93 + | 38  | 132 | 23783  | 23877  |
| UN53640 | Rsa1.0.00186.1 | 544 | 112669 | 0         | 510 | 553 | 92 - | 1   | 540 | 112017 | 112568 |
| UN53641 | Rsa1.0.00684.1 | 882 | 141701 | 1.00E-134 | 248 | 250 | 99 - | 557 | 806 | 30788  | 31037  |
| UN53642 | Rsa1.0.02076.1 | 504 | 153121 | 1.00E-136 | 312 | 331 | 94 - | 1   | 330 | 33602  | 33928  |
| UN53643 | #              | #   | #      | #         | #   | #   | #    | #   | #   | #      | #      |
| UN53644 | Rsa1.0.00972.1 | 449 | 57937  | 1.00E-29  | 139 | 163 | 85 - | 269 | 431 | 50283  | 50445  |
| UN53645 | Rsa1.0.01836.1 | 493 | 38503  | 0         | 477 | 492 | 96 + | 1   | 492 | 17892  | 18382  |
| UN53646 | Rsa1.0.02225.1 | 221 | 33738  | 4.00E-40  | 90  | 92  | 97 + | 107 | 198 | 29903  | 29994  |
| UN53647 | Rsa1.0.00487.1 | 483 | 80674  | 1.00E-142 | 365 | 398 | 91 + | 1   | 393 | 12841  | 13238  |
| UN53648 | Rsa1.0.00053.1 | 827 | 263459 | 0         | 799 | 839 | 95 + | 1   | 826 | 242825 | 243662 |
| UN53649 | Rsa1.0.02133.1 | 196 | 34726  | 2.00E-69  | 182 | 197 | 92 - | 1   | 196 | 27068  | 27264  |
| UN53650 | Rsa1.0.00687.1 | 746 | 68494  | 1.00E-126 | 241 | 245 | 98 + | 29  | 273 | 10249  | 10493  |
| UN53651 | Rsa1.0.00128.1 | 749 | 228675 | 0         | 443 | 463 | 95 - | 285 | 747 | 80481  | 80931  |
| UN53652 | Rsa1.0.00903.1 | 491 | 60228  | 1.00E-63  | 181 | 200 | 90 + | 46  | 245 | 39406  | 39605  |
| UN53653 | Rsa1.0.09380.1 | 738 | 6409   | 0         | 600 | 614 | 97 - | 1   | 614 | 1      | 614    |
| UN53654 | Rsa1.0.04641.1 | 749 | 268012 | 2.33E-156 | 319 | 336 | 94 - | 57  | 387 | 261467 | 261802 |
| UN53655 | Rsa1.0.01685.1 | 134 | 175033 | 4.00E-42  | 117 | 127 | 92 + | 8   | 134 | 26804  | 26930  |
| UN53656 | Rsa1.0.00602.1 | 293 | 73302  | 1.00E-117 | 275 | 294 | 93 + | 1   | 293 | 30409  | 30702  |
| UN53657 | Rsa1.0.05950.1 | 136 | 12130  | 6.00E-38  | 117 | 128 | 91 + | 5   | 132 | 1277   | 1403   |
| UN53658 | Rsa1.0.01182.1 | 825 | 167304 | 0         | 758 | 795 | 95 + | 1   | 795 | 140440 | 141223 |
| UN53659 | Rsa1.0.00190.1 | 174 | 318240 | 6.00E-54  | 131 | 139 | 94 + | 1   | 139 | 4268   | 4406   |
| UN53660 | Rsa1.0.00054.1 | 773 | 162053 | 1.00E-157 | 333 | 347 | 95 + | 1   | 343 | 14542  | 14886  |
| UN53661 | Rsa1.0.00017.1 | 355 | 752458 | 1.00E-103 | 221 | 231 | 95 + | 104 | 334 | 454127 | 454357 |
| UN53662 | Rsa1.0.03338.1 | 175 | 136346 | 3.00E-56  | 138 | 147 | 93 - | 25  | 171 | 1886   | 2032   |

|         |                |     |        |           |     |     |       |     |     |        |        |
|---------|----------------|-----|--------|-----------|-----|-----|-------|-----|-----|--------|--------|
| UN53663 | Rsa1.0.28855.1 | 910 | 801    | 0         | 468 | 480 | 97 +  | 299 | 777 | 266    | 745    |
| UN53664 | Rsa1.0.01101.1 | 227 | 54031  | 1.00E-40  | 106 | 113 | 93 -  | 75  | 187 | 24178  | 24290  |
| UN53665 | Rsa1.0.00067.1 | 767 | 415055 | 0         | 478 | 512 | 93 +  | 8   | 499 | 251810 | 252321 |
| UN53666 | Rsa1.0.11080.1 | 131 | 5623   | 6.00E-35  | 117 | 127 | 92 +  | 1   | 126 | 1187   | 1311   |
| UN53667 | Rsa1.0.30531.1 | 506 | 751    | 0         | 426 | 443 | 96 -  | 10  | 452 | 1      | 440    |
| UN53668 | Rsa1.0.00653.1 | 185 | 70029  | 2.00E-51  | 154 | 171 | 90 +  | 1   | 171 | 37330  | 37500  |
| UN53669 | Rsa1.0.00467.1 | 894 | 156542 | 0         | 662 | 673 | 98 +  | 3   | 672 | 102961 | 103633 |
| UN53670 | Rsa1.0.00609.1 | 133 | 72785  | 5.00E-26  | 69  | 72  | 95 -  | 62  | 133 | 53052  | 53123  |
| UN53671 | Rsa1.0.62498.1 | 311 | 367    | 2.33E-156 | 283 | 290 | 97 +  | 1   | 290 | 78     | 367    |
| UN53672 | Rsa1.0.08558.1 | 258 | 7198   | 2.00E-48  | 122 | 130 | 93 +  | 1   | 130 | 2581   | 2710   |
| UN53673 | Rsa1.0.00008.1 | 707 | 358124 | 0         | 630 | 650 | 96 +  | 58  | 707 | 63721  | 64368  |
| UN53674 | Rsa1.0.08208.1 | 786 | 7719   | 1.00E-180 | 319 | 319 | 100 - | 307 | 625 | 6170   | 6488   |
| UN53675 | Rsa1.0.00591.1 | 368 | 73789  | 1.00E-121 | 282 | 301 | 93 +  | 5   | 305 | 36032  | 36331  |
| UN53676 | Rsa1.0.04626.1 | 288 | 16611  | 1.00E-120 | 272 | 288 | 94 -  | 1   | 288 | 15125  | 15407  |
| UN53677 | Rsa1.0.00250.1 | 226 | 273771 | 9.00E-60  | 138 | 145 | 95 +  | 10  | 154 | 60850  | 60994  |
| UN53678 | Rsa1.0.00662.1 | 744 | 192183 | 0         | 718 | 743 | 96 -  | 2   | 744 | 55375  | 56117  |
| UN53679 | Rsa1.0.03062.1 | 591 | 25678  | 1.00E-163 | 315 | 323 | 97 +  | 269 | 591 | 6369   | 6691   |
| UN53680 | Rsa1.0.01405.1 | 154 | 46445  | 4.00E-70  | 149 | 154 | 96 +  | 1   | 154 | 20680  | 20833  |
| UN53681 | Rsa1.0.01033.1 | 298 | 56173  | 2.00E-79  | 183 | 194 | 94 -  | 1   | 194 | 27108  | 27301  |
| UN53682 | Rsa1.0.00800.1 | 811 | 63868  | 0         | 377 | 387 | 97 -  | 52  | 438 | 36437  | 36823  |
| UN53683 | Rsa1.0.00087.1 | 795 | 761073 | 0         | 687 | 696 | 98 +  | 101 | 795 | 591779 | 592474 |
| UN53684 | Rsa1.0.15512.1 | 569 | 2565   | 1.00E-144 | 335 | 358 | 93 -  | 2   | 346 | 1609   | 1965   |
| UN53685 | Rsa1.0.02815.1 | 721 | 27650  | 0         | 638 | 689 | 92 +  | 4   | 688 | 26019  | 26697  |
| UN53686 | Rsa1.0.01453.1 | 352 | 45449  | 1.00E-165 | 338 | 352 | 96 -  | 1   | 352 | 5885   | 6233   |
| UN53687 | Rsa1.0.00718.1 | 834 | 279335 | 1.00E-147 | 277 | 281 | 98 +  | 1   | 281 | 17497  | 17777  |
| UN53688 | Rsa1.0.02918.1 | 129 | 26797  | 5.00E-26  | 100 | 111 | 90 +  | 6   | 114 | 13038  | 13147  |
| UN53689 | Rsa1.0.02608.1 | 534 | 29613  | 0         | 512 | 537 | 95 +  | 1   | 534 | 1750   | 2286   |
| UN53690 | Rsa1.0.00384.1 | 124 | 89278  | 2.00E-37  | 103 | 111 | 92 +  | 1   | 111 | 10976  | 11086  |
| UN53691 | Rsa1.0.03467.1 | 327 | 22687  | 1.00E-121 | 299 | 325 | 92 -  | 3   | 327 | 13222  | 13546  |
| UN53692 | Rsa1.0.07974.1 | 865 | 8147   | 0         | 864 | 865 | 99 +  | 1   | 865 | 4970   | 5834   |
| UN53693 | Rsa1.0.04383.1 | 555 | 17631  | 1.00E-163 | 306 | 311 | 98 +  | 104 | 414 | 9497   | 9807   |
| UN53694 | Rsa1.0.00714.1 | 717 | 67187  | 0         | 622 | 625 | 99 -  | 1   | 624 | 6771   | 7395   |
| UN53695 | Rsa1.0.01424.1 | 757 | 46139  | 0         | 625 | 657 | 95 -  | 2   | 658 | 43605  | 44261  |
| UN53696 | Rsa1.0.10267.1 | 414 | 5910   | 4.00E-91  | 326 | 382 | 85 +  | 1   | 369 | 4086   | 4448   |
| UN53697 | Rsa1.0.00107.1 | 798 | 431659 | 1.00E-162 | 305 | 309 | 98 -  | 1   | 308 | 347428 | 347736 |
| UN53698 | Rsa1.0.13229.1 | 893 | 4963   | 1.00E-149 | 268 | 268 | 100 - | 1   | 268 | 4109   | 4376   |
| UN53699 | Rsa1.0.00586.1 | 514 | 163802 | 1.00E-164 | 370 | 394 | 93 -  | 1   | 394 | 153732 | 154121 |
| UN53700 | Rsa1.0.00206.1 | 805 | 109040 | 0         | 560 | 581 | 96 +  | 1   | 576 | 72565  | 73140  |
| UN53701 | Rsa1.0.03790.1 | 721 | 20844  | 1.00E-147 | 291 | 300 | 97 +  | 103 | 402 | 6656   | 6955   |

|         |                |     |        |           |     |     |      |     |     |        |        |
|---------|----------------|-----|--------|-----------|-----|-----|------|-----|-----|--------|--------|
| UN53702 | Rsa1.0_00277.1 | 390 | 100132 | 2.00E-59  | 144 | 153 | 94 + | 1   | 153 | 88573  | 88725  |
| UN53703 | Rsa1.0_00689.1 | 691 | 68305  | 0         | 658 | 685 | 96 + | 7   | 691 | 33668  | 34351  |
| UN53704 | Rsa1.0_00060.1 | 837 | 502678 | 0         | 406 | 435 | 93 + | 8   | 440 | 215439 | 215860 |
| UN53705 | Rsa1.0_00583.1 | 746 | 74309  | 0         | 368 | 377 | 97 + | 38  | 414 | 50093  | 50469  |
| UN53706 | Rsa1.0_16069.1 | 681 | 2298   | 0         | 498 | 526 | 94 - | 159 | 681 | 1753   | 2278   |
| UN53707 | Rsa1.0_00060.1 | 594 | 502678 | 0         | 570 | 592 | 96 + | 5   | 594 | 223272 | 223863 |
| UN53708 | Rsa1.0_00718.1 | 644 | 279335 | 1.00E-130 | 272 | 284 | 95 - | 1   | 284 | 235035 | 235318 |
| UN53709 | Rsa1.0_02873.1 | 815 | 27077  | 0         | 771 | 819 | 94 + | 1   | 815 | 4524   | 5333   |
| UN53710 | Rsa1.0_02407.1 | 792 | 31684  | 0         | 385 | 403 | 95 - | 190 | 591 | 27127  | 27529  |
| UN53711 | Rsa1.0_02962.1 | 636 | 26419  | 1.00E-149 | 327 | 345 | 94 + | 25  | 366 | 13784  | 14127  |
| UN53712 | Rsa1.0_00019.1 | 728 | 301669 | 1.00E-168 | 475 | 529 | 89 - | 37  | 557 | 99010  | 99520  |
| UN53713 | Rsa1.0_00066.1 | 555 | 152418 | 5.00E-91  | 257 | 285 | 90 + | 30  | 302 | 139769 | 140053 |
| UN53714 | Rsa1.0_00124.1 | 230 | 262503 | 3.00E-53  | 145 | 157 | 92 - | 6   | 162 | 246482 | 246636 |
| UN53715 | Rsa1.0_00153.1 | 555 | 192931 | 1.00E-119 | 226 | 229 | 98 - | 327 | 555 | 5535   | 5763   |
| UN53716 | Rsa1.0_04588.1 | 769 | 16739  | 1.00E-104 | 201 | 204 | 98 - | 276 | 479 | 689    | 892    |
| UN53717 | Rsa1.0_00962.1 | 621 | 184909 | 0         | 585 | 620 | 94 - | 4   | 618 | 28097  | 28716  |
| UN53718 | Rsa1.0_05289.1 | 455 | 14259  | 0         | 426 | 453 | 94 + | 3   | 455 | 2293   | 2739   |
| UN53719 | Rsa1.0_01814.1 | 384 | 38917  | 1.00E-163 | 360 | 382 | 94 - | 4   | 384 | 16955  | 17336  |
| UN53720 | Rsa1.0_04140.1 | 805 | 18879  | 1.00E-102 | 232 | 245 | 94 - | 33  | 276 | 68     | 312    |
| UN53721 | Rsa1.0_10447.1 | 782 | 5848   | 0         | 613 | 669 | 91 + | 141 | 778 | 4455   | 5115   |
| UN53722 | Rsa1.0_02856.1 | 529 | 27270  | 0         | 509 | 523 | 97 + | 1   | 521 | 1051   | 1573   |
| UN53723 | Rsa1.0_00138.1 | 818 | 247040 | 0         | 427 | 428 | 99 - | 1   | 428 | 230305 | 230731 |
| UN53724 | Rsa1.0_13994.1 | 903 | 3941   | 0         | 377 | 391 | 96 + | 3   | 385 | 2780   | 3166   |
| UN53725 | Rsa1.0_10699.1 | 479 | 5752   | 0         | 462 | 478 | 96 + | 1   | 478 | 3941   | 4416   |
| UN53726 | Rsa1.0_00017.1 | 105 | 752458 | 9.00E-24  | 74  | 80  | 92 - | 23  | 102 | 515836 | 515915 |
| UN53727 | Rsa1.0_02074.1 | 343 | 35370  | 1.00E-129 | 278 | 292 | 95 - | 1   | 289 | 17902  | 18193  |
| UN53728 | Rsa1.0_02908.1 | 189 | 26859  | 3.00E-25  | 74  | 79  | 93 - | 111 | 189 | 9166   | 9244   |
| UN53729 | #              | #   | #      | #         | #   | #   | #    | #   | #   | #      | #      |
| UN53730 | Rsa1.0_19491.1 | 806 | 1424   | 0         | 399 | 405 | 98 - | 29  | 432 | 857    | 1261   |
| UN53731 | Rsa1.0_00057.1 | 855 | 160473 | 0         | 805 | 847 | 95 - | 9   | 855 | 145776 | 146610 |
| UN53732 | Rsa1.0_03005.1 | 224 | 26082  | 1.00E-80  | 206 | 224 | 91 - | 1   | 224 | 19823  | 20046  |
| UN53733 | Rsa1.0_00273.1 | 592 | 326186 | 1.00E-153 | 351 | 375 | 93 - | 12  | 385 | 307454 | 307824 |
| UN53734 | Rsa1.0_06392.1 | 608 | 11104  | 1.00E-101 | 264 | 286 | 92 + | 328 | 607 | 9537   | 9818   |
| UN53735 | Rsa1.0_00558.1 | 577 | 75819  | 0         | 469 | 494 | 94 + | 1   | 491 | 52647  | 53136  |
| UN53736 | Rsa1.0_00703.1 | 732 | 67597  | 0         | 695 | 736 | 94 - | 13  | 732 | 46013  | 46743  |
| UN53737 | Rsa1.0_00340.1 | 662 | 305782 | 1.00E-139 | 347 | 375 | 92 + | 1   | 358 | 159725 | 160093 |
| UN53738 | Rsa1.0_00389.1 | 823 | 88795  | 1.00E-102 | 207 | 213 | 97 - | 2   | 209 | 68854  | 69066  |
| UN53739 | Rsa1.0_00093.1 | 784 | 214962 | 0         | 712 | 737 | 96 + | 3   | 738 | 22726  | 23461  |
| UN53740 | Rsa1.0_00092.1 | 753 | 659932 | 1.00E-115 | 260 | 273 | 95 + | 15  | 283 | 517187 | 517458 |

|         |                |     |        |           |     |     |       |     |     |        |        |
|---------|----------------|-----|--------|-----------|-----|-----|-------|-----|-----|--------|--------|
| UN53741 | Rsa1.0_04998.1 | 732 | 15180  | 0         | 468 | 485 | 96 -  | 249 | 732 | 14399  | 14879  |
| UN53742 | Rsa1.0_00316.1 | 303 | 96264  | 1.00E-116 | 282 | 304 | 92 +  | 3   | 301 | 57225  | 57527  |
| UN53743 | Rsa1.0_04288.1 | 146 | 18077  | 1.00E-14  | 74  | 85  | 87 -  | 55  | 139 | 13121  | 13205  |
| UN53744 | Rsa1.0_00675.1 | 318 | 145590 | 1.00E-136 | 296 | 313 | 94 +  | 4   | 316 | 143735 | 144047 |
| UN53745 | Rsa1.0_04374.1 | 184 | 17670  | 2.00E-72  | 174 | 184 | 94 -  | 1   | 184 | 8053   | 8232   |
| UN53746 | Rsa1.0_03035.1 | 900 | 25827  | 1.00E-134 | 315 | 333 | 94 +  | 6   | 334 | 1030   | 1359   |
| UN53747 | Rsa1.0_03009.1 | 823 | 26065  | 1.00E-111 | 260 | 273 | 95 +  | 160 | 427 | 22099  | 22368  |
| UN53748 | Rsa1.0_04001.1 | 262 | 19623  | 1.00E-125 | 250 | 258 | 96 -  | 1   | 258 | 6743   | 7000   |
| UN53749 | Rsa1.0_00041.1 | 383 | 186197 | 1.00E-97  | 187 | 189 | 98 +  | 3   | 191 | 26763  | 26951  |
| UN53750 | Rsa1.0_04600.1 | 128 | 16694  | 3.00E-55  | 121 | 125 | 96 -  | 4   | 128 | 12273  | 12397  |
| UN53751 | Rsa1.0_01263.1 | 557 | 49703  | 0         | 543 | 570 | 95 -  | 1   | 557 | 1986   | 2555   |
| UN53752 | Rsa1.0_00001.1 | 798 | 363028 | 0         | 778 | 809 | 96 -  | 1   | 798 | 147883 | 148691 |
| UN53753 | Rsa1.0_02901.1 | 507 | 26909  | 1.00E-131 | 266 | 274 | 97 -  | 4   | 276 | 21290  | 21563  |
| UN53754 | Rsa1.0_00154.1 | 148 | 189461 | 4.00E-30  | 132 | 151 | 87 -  | 2   | 148 | 169411 | 169558 |
| UN53755 | Rsa1.0_05953.1 | 850 | 12120  | 0         | 809 | 850 | 95 -  | 2   | 850 | 1947   | 2796   |
| UN53756 | Rsa1.0_00243.1 | 799 | 103651 | 1.00E-117 | 273 | 295 | 92 -  | 485 | 770 | 56215  | 56501  |
| UN53757 | Rsa1.0_00579.1 | 625 | 148308 | 1.00E-170 | 406 | 439 | 92 -  | 199 | 625 | 63779  | 64208  |
| UN53758 | Rsa1.0_01117.1 | 785 | 53465  | 1.00E-123 | 236 | 240 | 98 +  | 128 | 367 | 38832  | 39071  |
| UN53759 | Rsa1.0_01620.1 | 645 | 42091  | 1.00E-140 | 277 | 285 | 97 -  | 270 | 554 | 19730  | 20014  |
| UN53760 | Rsa1.0_01462.1 | 784 | 45231  | 1.00E-150 | 284 | 289 | 98 +  | 1   | 289 | 14275  | 14563  |
| UN53761 | Rsa1.0_36122.1 | 732 | 625    | 1.00E-24  | 120 | 139 | 86 -  | 345 | 482 | 147    | 285    |
| UN53762 | Rsa1.0_10311.1 | 357 | 5893   | 1.00E-140 | 265 | 269 | 98 -  | 89  | 357 | 3986   | 4254   |
| UN53763 | Rsa1.0_06436.1 | 695 | 11022  | 3.00E-19  | 95  | 110 | 86 -  | 18  | 127 | 600    | 709    |
| UN53764 | Rsa1.0_23907.1 | 745 | 1018   | 0         | 734 | 745 | 98 -  | 1   | 745 | 222    | 966    |
| UN53765 | Rsa1.0_00071.1 | 777 | 345714 | 1.00E-135 | 283 | 294 | 96 +  | 131 | 423 | 10152  | 10442  |
| UN53766 | Rsa1.0_09028.1 | 778 | 6702   | 1.00E-174 | 310 | 310 | 100 + | 109 | 418 | 6393   | 6702   |
| UN53767 | Rsa1.0_07152.1 | 882 | 9815   | 1.00E-108 | 200 | 200 | 100 - | 381 | 580 | 3150   | 3349   |
| UN53768 | Rsa1.0_00385.1 | 779 | 89160  | 1.00E-138 | 326 | 351 | 92 -  | 2   | 339 | 40427  | 40777  |
| UN53769 | Rsa1.0_02851.1 | 593 | 27295  | 2.00E-94  | 176 | 176 | 100 - | 170 | 345 | 17783  | 17958  |
| UN53770 | Rsa1.0_01156.1 | 681 | 52147  | 0         | 667 | 700 | 95 +  | 1   | 681 | 26168  | 26867  |
| UN53771 | Rsa1.0_06561.1 | 674 | 10772  | 0         | 388 | 401 | 96 -  | 2   | 402 | 5342   | 5730   |
| UN53772 | Rsa1.0_00876.1 | 596 | 61328  | 1.00E-180 | 347 | 355 | 97 +  | 242 | 596 | 16801  | 17154  |
| UN53773 | Rsa1.0_00108.1 | 848 | 478491 | 2.00E-66  | 135 | 137 | 98 +  | 156 | 292 | 50411  | 50547  |
| UN53774 | Rsa1.0_00827.1 | 746 | 62790  | 0         | 440 | 447 | 98 +  | 3   | 448 | 29339  | 29784  |
| UN53775 | Rsa1.0_02803.1 | 751 | 27715  | 1.00E-156 | 368 | 395 | 93 +  | 2   | 389 | 18722  | 19115  |
| UN53776 | Rsa1.0_04123.1 | 572 | 18947  | 0         | 526 | 562 | 93 +  | 11  | 572 | 12014  | 12549  |
| UN53777 | Rsa1.0_00010.1 | 157 | 294827 | 1.00E-20  | 61  | 63  | 96 -  | 1   | 63  | 274270 | 274331 |
| UN53778 | Rsa1.0_05581.1 | 869 | 13272  | 0         | 426 | 446 | 95 +  | 189 | 631 | 4253   | 4698   |
| UN53779 | Rsa1.0_00602.1 | 816 | 73302  | 0         | 512 | 532 | 96 -  | 3   | 531 | 1954   | 2482   |

|         |                |     |        |           |     |     |      |     |     |        |        |
|---------|----------------|-----|--------|-----------|-----|-----|------|-----|-----|--------|--------|
| UN53780 | Rsa1.0.03698.1 | 710 | 21302  | 0         | 668 | 681 | 98 + | 30  | 710 | 5321   | 6001   |
| UN53781 | Rsa1.0.00335.1 | 842 | 94371  | 1.00E-172 | 389 | 416 | 93 + | 8   | 415 | 42120  | 42535  |
| UN53782 | Rsa1.0.00722.1 | 705 | 66840  | 0         | 361 | 368 | 98 - | 338 | 702 | 43029  | 43396  |
| UN53783 | Rsa1.0.00630.1 | 730 | 71281  | 0         | 507 | 542 | 93 - | 2   | 540 | 67644  | 68170  |
| UN53784 | Rsa1.0_14092.1 | 714 | 3817   | 1.00E-162 | 293 | 294 | 99 - | 421 | 714 | 411    | 704    |
| UN53785 | Rsa1.0_10640.1 | 691 | 5772   | 1.00E-100 | 192 | 194 | 98 + | 498 | 691 | 1606   | 1799   |
| UN53786 | Rsa1.0.00065.1 | 832 | 454616 | 1.00E-129 | 292 | 310 | 94 + | 3   | 312 | 172359 | 172666 |
| UN53787 | Rsa1.0.00681.1 | 790 | 68779  | 2.00E-94  | 185 | 188 | 98 - | 506 | 693 | 44215  | 44402  |
| UN53788 | Rsa1.0.06376.1 | 699 | 11135  | 1.00E-164 | 313 | 317 | 98 - | 384 | 699 | 10820  | 11135  |
| UN53789 | Rsa1.0.00059.1 | 667 | 159650 | 4.00E-86  | 212 | 229 | 92 - | 2   | 230 | 133120 | 133342 |
| UN53790 | Rsa1.0.44004.1 | 674 | 511    | 0         | 441 | 465 | 94 - | 178 | 629 | 1      | 465    |
| UN53791 | Rsa1.0.00215.1 | 512 | 201775 | 1.00E-124 | 262 | 272 | 96 + | 202 | 472 | 49347  | 49610  |
| UN53792 | Rsa1.0.02644.1 | 182 | 29176  | 5.00E-64  | 130 | 132 | 98 + | 51  | 182 | 16479  | 16610  |
| UN53793 | Rsa1.0.00860.1 | 369 | 61789  | 1.00E-160 | 350 | 369 | 94 - | 2   | 369 | 6517   | 6883   |
| UN53794 | Rsa1.0.01104.1 | 440 | 285480 | 1.00E-122 | 254 | 264 | 96 - | 37  | 300 | 107189 | 107449 |
| UN53795 | Rsa1.0.05217.1 | 694 | 142938 | 0         | 672 | 708 | 94 + | 3   | 694 | 132610 | 133317 |
| UN53796 | Rsa1.0.04397.1 | 739 | 17555  | 1.00E-135 | 256 | 260 | 98 - | 208 | 467 | 6061   | 6320   |
| UN53797 | Rsa1.0.01416.1 | 557 | 46262  | 0         | 497 | 518 | 95 + | 1   | 518 | 39324  | 39837  |
| UN53798 | Rsa1.0.00130.1 | 756 | 125737 | 1.00E-107 | 226 | 233 | 96 - | 522 | 752 | 32158  | 32390  |
| UN53799 | Rsa1.0.04786.1 | 112 | 15988  | 3.00E-36  | 83  | 85  | 97 + | 3   | 87  | 4458   | 4542   |
| UN53800 | #              | #   | #      | #         | #   | #   | #    | #   | #   | #      | #      |
| UN53801 | Rsa1.0.02411.1 | 379 | 31655  | 8.00E-77  | 200 | 209 | 95 + | 28  | 236 | 5191   | 5391   |
| UN53802 | Rsa1.0.02124.1 | 822 | 34780  | 1.00E-122 | 252 | 261 | 96 - | 164 | 422 | 8894   | 9154   |
| UN53803 | Rsa1.0.05467.1 | 828 | 13649  | 2.00E-85  | 176 | 181 | 97 - | 48  | 228 | 10174  | 10354  |
| UN53804 | Rsa1.0.00055.1 | 286 | 520193 | 1.00E-71  | 219 | 246 | 89 + | 62  | 286 | 87536  | 87778  |
| UN53805 | Rsa1.0.00915.1 | 692 | 194446 | 1.00E-175 | 359 | 375 | 95 - | 246 | 620 | 181424 | 181798 |
| UN53806 | Rsa1.0.00124.1 | 687 | 262503 | 1.00E-150 | 342 | 365 | 93 - | 1   | 361 | 153273 | 153635 |
| UN53807 | Rsa1.0.00356.1 | 691 | 91521  | 0         | 419 | 422 | 99 - | 270 | 691 | 44971  | 45391  |
| UN53808 | Rsa1.0.00977.1 | 594 | 198001 | 0         | 580 | 593 | 97 - | 2   | 594 | 169268 | 169860 |
| UN53809 | Rsa1.0.05108.1 | 794 | 14820  | 1.00E-144 | 286 | 294 | 97 + | 3   | 293 | 7628   | 7921   |
| UN53810 | Rsa1.0.01656.1 | 494 | 41494  | 1.00E-110 | 288 | 315 | 91 + | 185 | 494 | 346    | 649    |
| UN53811 | Rsa1.0.04397.1 | 823 | 17555  | 1.00E-130 | 269 | 280 | 96 + | 107 | 386 | 1800   | 2079   |
| UN53812 | Rsa1.0.00077.1 | 763 | 145005 | 1.00E-135 | 350 | 383 | 91 - | 6   | 372 | 43761  | 44136  |
| UN53813 | #              | #   | #      | #         | #   | #   | #    | #   | #   | #      | #      |
| UN53814 | Rsa1.0.00602.1 | 725 | 73302  | 1.00E-120 | 261 | 274 | 95 - | 22  | 292 | 720    | 993    |
| UN53815 | Rsa1.0.02016.1 | 399 | 36003  | 3.00E-61  | 168 | 182 | 92 + | 218 | 399 | 5549   | 5721   |
| UN53816 | Rsa1.0.35953.1 | 690 | 628    | 1.00E-103 | 200 | 203 | 98 - | 1   | 203 | 158    | 360    |
| UN53817 | Rsa1.0.00853.1 | 703 | 62101  | 0         | 651 | 717 | 90 + | 2   | 703 | 51520  | 52221  |
| UN53818 | Rsa1.0_01006.1 | 765 | 163670 | 0         | 760 | 763 | 99 + | 3   | 765 | 147930 | 148692 |

|         |                |     |        |           |     |     |       |     |     |        |        |
|---------|----------------|-----|--------|-----------|-----|-----|-------|-----|-----|--------|--------|
| UN53819 | Rsa1.0.02668.1 | 775 | 28895  | 1.00E-177 | 353 | 364 | 96 +  | 409 | 772 | 5065   | 5424   |
| UN53820 | Rsa1.0.00335.1 | 680 | 94371  | 1.00E-103 | 333 | 382 | 87 -  | 1   | 367 | 37914  | 38286  |
| UN53821 | Rsa1.0.00153.1 | 642 | 192931 | 1.00E-143 | 311 | 325 | 95 +  | 3   | 326 | 20347  | 20668  |
| UN53822 | Rsa1.0.00301.1 | 635 | 365315 | 9.00E-81  | 229 | 257 | 89 -  | 96  | 349 | 363526 | 363767 |
| UN53823 | Rsa1.0.04375.1 | 105 | 141717 | 7.00E-40  | 98  | 103 | 95 -  | 1   | 103 | 15855  | 15957  |
| UN53824 | Rsa1.0.00573.1 | 605 | 74821  | 1.00E-129 | 283 | 299 | 94 -  | 307 | 605 | 45829  | 46127  |
| UN53825 | Rsa1.0.00593.1 | 635 | 143463 | 0         | 616 | 630 | 97 -  | 1   | 630 | 14729  | 15355  |
| UN53826 | Rsa1.0.00164.1 | 815 | 116642 | 0         | 563 | 578 | 97 -  | 235 | 812 | 70654  | 71231  |
| UN53827 | Rsa1.0.00024.1 | 265 | 188018 | 6.00E-83  | 245 | 272 | 90 +  | 1   | 265 | 18145  | 18416  |
| UN53828 | Rsa1.0.01344.1 | 813 | 142535 | 0         | 808 | 812 | 99 -  | 2   | 813 | 111700 | 112509 |
| UN53829 | Rsa1.0.36105.1 | 684 | 625    | 1.00E-79  | 160 | 163 | 98 -  | 37  | 199 | 463    | 625    |
| UN53830 | Rsa1.0.01632.1 | 772 | 181224 | 0         | 761 | 771 | 98 +  | 2   | 772 | 142522 | 143292 |
| UN53831 | Rsa1.0.00471.1 | 781 | 81897  | 0         | 652 | 683 | 95 -  | 15  | 697 | 28627  | 29302  |
| UN53832 | Rsa1.0.22255.1 | 245 | 1137   | 4.00E-53  | 118 | 122 | 96 -  | 8   | 129 | 117    | 238    |
| UN53833 | Rsa1.0.00456.1 | 758 | 82826  | 0         | 385 | 393 | 97 +  | 14  | 404 | 17267  | 17658  |
| UN53834 | Rsa1.0.17744.1 | 661 | 1752   | 0         | 423 | 431 | 98 -  | 1   | 431 | 1      | 428    |
| UN53835 | Rsa1.0.00173.1 | 495 | 288743 | 1.00E-109 | 346 | 396 | 87 +  | 3   | 373 | 88594  | 88979  |
| UN53836 | Rsa1.0.00055.1 | 737 | 520193 | 0         | 417 | 427 | 97 -  | 298 | 724 | 61321  | 61747  |
| UN53837 | Rsa1.0.01262.1 | 699 | 178815 | 0         | 543 | 552 | 98 -  | 148 | 699 | 163216 | 163767 |
| UN53838 | Rsa1.0.00062.1 | 693 | 299291 | 0         | 430 | 432 | 99 +  | 264 | 693 | 291802 | 292233 |
| UN53839 | Rsa1.0.01905.1 | 882 | 37450  | 1.00E-116 | 270 | 287 | 94 -  | 206 | 483 | 34864  | 35150  |
| UN53840 | Rsa1.0.00502.1 | 797 | 204180 | 1.00E-169 | 335 | 346 | 96 -  | 398 | 743 | 61546  | 61891  |
| UN53841 | Rsa1.0.04441.1 | 856 | 17341  | 0         | 535 | 557 | 96 +  | 161 | 717 | 5589   | 6140   |
| UN53842 | Rsa1.0.00093.1 | 731 | 214962 | 0         | 706 | 734 | 96 -  | 3   | 730 | 71207  | 71926  |
| UN53843 | Rsa1.0.00336.1 | 789 | 445051 | 1.00E-119 | 235 | 241 | 97 +  | 549 | 789 | 154837 | 155077 |
| UN53844 | Rsa1.0.06465.1 | 661 | 10962  | 1.00E-120 | 255 | 267 | 95 -  | 9   | 275 | 7871   | 8137   |
| UN53845 | Rsa1.0.01801.1 | 653 | 39094  | 1.00E-150 | 296 | 305 | 97 +  | 136 | 440 | 27622  | 27926  |
| UN53846 | Rsa1.0.00159.1 | 755 | 431686 | 0         | 748 | 755 | 99 +  | 2   | 755 | 228124 | 228878 |
| UN53847 | Rsa1.0.00130.1 | 280 | 125737 | 1.00E-128 | 268 | 280 | 95 -  | 1   | 280 | 45564  | 45843  |
| UN53848 | Rsa1.0.00931.1 | 614 | 59210  | 3.00E-65  | 261 | 303 | 86 +  | 313 | 614 | 46219  | 46520  |
| UN53849 | Rsa1.0.01007.1 | 184 | 56933  | 5.00E-64  | 139 | 143 | 97 +  | 42  | 184 | 30857  | 30997  |
| UN53850 | Rsa1.0.00185.1 | 753 | 248445 | 0         | 443 | 453 | 97 +  | 301 | 753 | 214700 | 215149 |
| UN53851 | Rsa1.0.00269.1 | 790 | 341668 | 1.00E-136 | 267 | 273 | 97 -  | 333 | 603 | 8839   | 9111   |
| UN53852 | Rsa1.0.00583.1 | 708 | 74309  | 1.00E-127 | 283 | 298 | 94 -  | 385 | 682 | 68468  | 68762  |
| UN53853 | Rsa1.0.03263.1 | 577 | 24268  | 2.00E-81  | 171 | 176 | 97 -  | 2   | 177 | 7      | 179    |
| UN53854 | Rsa1.0.03114.1 | 760 | 25318  | 0         | 488 | 511 | 95 +  | 241 | 746 | 6565   | 7070   |
| UN53855 | Rsa1.0.03513.1 | 758 | 22349  | 1.00E-141 | 285 | 295 | 96 +  | 3   | 293 | 9967   | 10261  |
| UN53856 | Rsa1.0.03906.1 | 485 | 20161  | 1.00E-120 | 275 | 295 | 93 -  | 191 | 485 | 15906  | 16186  |
| UN53857 | Rsa1.0.02198.1 | 760 | 33989  | 0         | 662 | 662 | 100 - | 99  | 760 | 929    | 1590   |

|         |                |     |        |           |     |     |      |     |     |        |        |
|---------|----------------|-----|--------|-----------|-----|-----|------|-----|-----|--------|--------|
| UN53858 | Rsa1.0.02163.1 | 848 | 34427  | 0         | 366 | 377 | 97 + | 3   | 379 | 26553  | 26929  |
| UN53859 | Rsa1.0.00015.1 | 444 | 561803 | 1.00E-118 | 234 | 240 | 97 + | 205 | 444 | 447457 | 447696 |
| UN53860 | Rsa1.0.01768.1 | 743 | 138463 | 1.00E-113 | 261 | 278 | 93 + | 1   | 275 | 116870 | 117147 |
| UN53861 | Rsa1.0.00932.1 | 862 | 59185  | 1.00E-136 | 265 | 271 | 97 - | 169 | 439 | 55978  | 56248  |
| UN53862 | Rsa1.0.02457.1 | 641 | 31208  | 2.00E-91  | 174 | 175 | 99 + | 467 | 641 | 10884  | 11058  |
| UN53863 | Rsa1.0.00365.1 | 796 | 90902  | 0         | 339 | 343 | 98 - | 416 | 757 | 3400   | 3742   |
| UN53864 | Rsa1.0.01078.1 | 877 | 316910 | 1.00E-145 | 312 | 325 | 96 + | 556 | 877 | 283926 | 284250 |
| UN53865 | Rsa1.0.05031.1 | 761 | 15083  | 0         | 729 | 757 | 96 - | 6   | 759 | 9703   | 10453  |
| UN53866 | Rsa1.0.03701.1 | 751 | 21296  | 0         | 548 | 565 | 96 - | 190 | 751 | 18315  | 18879  |
| UN53867 | Rsa1.0.00023.1 | 841 | 194764 | 0         | 816 | 842 | 96 - | 3   | 841 | 72090  | 72928  |
| UN53868 | Rsa1.0.01767.1 | 746 | 39615  | 1.00E-180 | 381 | 398 | 95 - | 350 | 746 | 14398  | 14791  |
| UN53869 | Rsa1.0.01175.1 | 802 | 51674  | 0         | 366 | 367 | 99 + | 6   | 372 | 2721   | 3086   |
| UN53870 | Rsa1.0.03513.1 | 362 | 22349  | 1.00E-142 | 319 | 337 | 94 + | 3   | 335 | 13543  | 13878  |
| UN53871 | Rsa1.0.02008.1 | 603 | 36109  | 0         | 591 | 604 | 97 + | 1   | 603 | 8497   | 9100   |
| UN53872 | Rsa1.0.00035.1 | 759 | 176449 | 1.00E-110 | 244 | 258 | 94 + | 165 | 416 | 35232  | 35489  |
| UN53873 | Rsa1.0.00671.1 | 637 | 397884 | 0         | 631 | 635 | 99 - | 3   | 637 | 181520 | 182154 |
| UN53874 | Rsa1.0.01534.1 | 639 | 43764  | 5.00E-79  | 174 | 182 | 95 + | 3   | 184 | 13573  | 13754  |
| UN53875 | Rsa1.0.00378.1 | 481 | 89892  | 1.00E-161 | 355 | 375 | 94 - | 96  | 469 | 36877  | 37250  |
| UN53876 | Rsa1.0.01134.1 | 816 | 52829  | 1.00E-101 | 224 | 235 | 95 - | 583 | 816 | 26762  | 26996  |
| UN53877 | Rsa1.0.08412.1 | 787 | 7404   | 0         | 765 | 788 | 97 - | 1   | 787 | 5491   | 6278   |
| UN53878 | Rsa1.0.00211.1 | 677 | 228189 | 1.00E-129 | 276 | 289 | 95 - | 392 | 677 | 10726  | 11014  |
| UN53879 | Rsa1.0.01214.1 | 574 | 50599  | 0         | 450 | 470 | 95 + | 106 | 571 | 1680   | 2149   |
| UN53880 | Rsa1.0.02707.1 | 639 | 28520  | 1.00E-150 | 276 | 278 | 99 - | 116 | 393 | 2862   | 3139   |
| UN53881 | Rsa1.0.14856.1 | 264 | 3010   | 1.00E-138 | 259 | 261 | 99 + | 2   | 261 | 223    | 483    |
| UN53882 | Rsa1.0.06923.1 | 740 | 10158  | 0         | 406 | 416 | 97 + | 1   | 406 | 7205   | 7620   |
| UN53883 | Rsa1.0.02990.1 | 118 | 26180  | 3.00E-58  | 117 | 118 | 99 - | 1   | 118 | 20599  | 20716  |
| UN53884 | Rsa1.0.00827.1 | 789 | 62790  | 1.00E-100 | 223 | 235 | 94 - | 1   | 235 | 54146  | 54377  |
| UN53885 | Rsa1.0.02772.1 | 492 | 28047  | 0         | 390 | 395 | 98 - | 3   | 397 | 82     | 473    |
| UN53886 | Rsa1.0.02944.1 | 462 | 26553  | 1.00E-137 | 254 | 256 | 99 - | 207 | 462 | 1081   | 1336   |
| UN53887 | Rsa1.0.02650.1 | 753 | 29047  | 1.00E-171 | 311 | 313 | 99 - | 347 | 659 | 11720  | 12032  |
| UN53888 | Rsa1.0.00464.1 | 658 | 82253  | 0         | 580 | 613 | 94 - | 2   | 608 | 49695  | 50306  |
| UN53889 | Rsa1.0.03280.1 | 614 | 145083 | 0         | 409 | 432 | 94 - | 1   | 419 | 141379 | 141810 |
| UN53890 | Rsa1.0.00800.1 | 464 | 63868  | 0         | 397 | 412 | 96 + | 53  | 464 | 56111  | 56522  |
| UN53891 | Rsa1.0.04123.1 | 679 | 18947  | 0         | 637 | 681 | 93 + | 8   | 679 | 11889  | 12548  |
| UN53892 | Rsa1.0.01785.1 | 510 | 39368  | 0         | 468 | 496 | 94 - | 1   | 494 | 28408  | 28890  |
| UN53893 | Rsa1.0.00087.1 | 714 | 761073 | 1.00E-141 | 328 | 353 | 92 - | 156 | 508 | 372682 | 373017 |
| UN53894 | Rsa1.0.02740.1 | 334 | 28292  | 8.00E-89  | 226 | 245 | 92 - | 5   | 249 | 10763  | 11005  |
| UN53895 | Rsa1.0.01435.1 | 335 | 45942  | 1.00E-118 | 311 | 338 | 92 + | 1   | 335 | 41244  | 41573  |
| UN53896 | Rsa1.0.01682.1 | 775 | 41090  | 0         | 677 | 687 | 98 + | 84  | 763 | 25142  | 25828  |



|         |                |     |        |           |     |     |       |     |     |        |        |
|---------|----------------|-----|--------|-----------|-----|-----|-------|-----|-----|--------|--------|
| UN53897 | Rsa1.0.01519.1 | 496 | 44144  | 0         | 480 | 498 | 96 -  | 1   | 494 | 11636  | 12127  |
| UN53898 | Rsa1.0.03777.1 | 737 | 20922  | 1.00E-154 | 373 | 404 | 92 +  | 1   | 386 | 471    | 865    |
| UN53899 | Rsa1.0.02723.1 | 627 | 28408  | 1.00E-165 | 317 | 323 | 98 -  | 3   | 324 | 8852   | 9174   |
| UN53900 | Rsa1.0.01199.1 | 523 | 163576 | 1.00E-107 | 210 | 214 | 98 +  | 270 | 483 | 17832  | 18045  |
| UN53901 | Rsa1.0.00991.1 | 594 | 143101 | 0         | 565 | 618 | 91 -  | 1   | 594 | 46088  | 46705  |
| UN53902 | Rsa1.0.11595.1 | 611 | 5463   | 1.00E-117 | 341 | 377 | 90 -  | 46  | 398 | 933    | 1307   |
| UN53903 | Rsa1.0.00382.1 | 748 | 251946 | 1.00E-151 | 328 | 346 | 94 +  | 186 | 528 | 33538  | 33883  |
| UN53904 | Rsa1.0.00329.1 | 484 | 222544 | 0         | 399 | 415 | 96 +  | 78  | 484 | 192494 | 192908 |
| UN53905 | Rsa1.0.00251.1 | 448 | 303968 | 7.00E-53  | 109 | 110 | 99 -  | 13  | 122 | 59688  | 59797  |
| UN53906 | Rsa1.0.01222.1 | 692 | 50398  | 1.00E-104 | 199 | 201 | 99 +  | 394 | 594 | 34383  | 34583  |
| UN53907 | Rsa1.0.06247.1 | 659 | 11395  | 0         | 635 | 660 | 96 +  | 1   | 659 | 6108   | 6765   |
| UN53908 | Rsa1.0.00190.1 | 372 | 318240 | 4.00E-54  | 146 | 156 | 93 +  | 1   | 156 | 11018  | 11171  |
| UN53909 | Rsa1.0.01648.1 | 321 | 41635  | 1.00E-164 | 313 | 320 | 97 -  | 2   | 321 | 31258  | 31577  |
| UN53910 | Rsa1.0.00276.1 | 790 | 100160 | 0         | 596 | 608 | 98 +  | 183 | 790 | 62615  | 63218  |
| UN53911 | Rsa1.0.00175.1 | 675 | 166121 | 0         | 386 | 395 | 97 +  | 266 | 659 | 154618 | 155009 |
| UN53912 | Rsa1.0.01693.1 | 717 | 40876  | 1.00E-113 | 255 | 269 | 94 -  | 447 | 711 | 40073  | 40340  |
| UN53913 | Rsa1.0.02200.1 | 351 | 33981  | 1.00E-170 | 340 | 351 | 96 +  | 2   | 351 | 10447  | 10797  |
| UN53914 | Rsa1.0.02560.1 | 690 | 30091  | 0         | 650 | 655 | 99 -  | 37  | 690 | 18589  | 19243  |
| UN53915 | Rsa1.0.00323.1 | 685 | 159650 | 1.00E-122 | 255 | 265 | 96 -  | 2   | 263 | 48893  | 49157  |
| UN53916 | Rsa1.0.02210.1 | 759 | 33857  | 1.00E-143 | 275 | 281 | 97 -  | 356 | 636 | 23354  | 23634  |
| UN53917 | Rsa1.0.00128.1 | 826 | 228675 | 0         | 544 | 554 | 98 +  | 1   | 554 | 92502  | 93055  |
| UN53918 | Rsa1.0.00194.1 | 592 | 110851 | 0         | 590 | 592 | 99 +  | 1   | 592 | 86636  | 87227  |
| UN53919 | Rsa1.0.02026.1 | 769 | 35896  | 0         | 609 | 628 | 96 -  | 3   | 630 | 17714  | 18332  |
| UN53920 | Rsa1.0.01472.1 | 729 | 45099  | 0         | 634 | 647 | 97 -  | 83  | 729 | 38832  | 39478  |
| UN53921 | Rsa1.0.04415.1 | 782 | 147889 | 1.00E-132 | 299 | 318 | 94 -  | 3   | 317 | 144332 | 144649 |
| UN53922 | Rsa1.0.00451.1 | 698 | 322533 | 1.00E-89  | 243 | 267 | 91 -  | 429 | 692 | 283432 | 283684 |
| UN53923 | Rsa1.0.07809.1 | 465 | 8503   | 0         | 441 | 447 | 98 +  | 19  | 465 | 1545   | 1991   |
| UN53924 | Rsa1.0.02606.1 | 710 | 29635  | 1.00E-128 | 311 | 339 | 91 +  | 4   | 321 | 5888   | 6226   |
| UN53925 | Rsa1.0.00457.1 | 788 | 337301 | 0         | 520 | 521 | 99 +  | 268 | 788 | 197358 | 197878 |
| UN53926 | Rsa1.0.00270.1 | 653 | 101236 | 0         | 390 | 398 | 97 -  | 2   | 398 | 65199  | 65596  |
| UN53927 | Rsa1.0.01053.1 | 706 | 55483  | 1.00E-152 | 272 | 272 | 100 - | 2   | 273 | 42394  | 42665  |
| UN53928 | Rsa1.0.03795.1 | 430 | 20818  | 0         | 416 | 431 | 96 -  | 3   | 430 | 15685  | 16113  |
| UN53929 | Rsa1.0.06759.1 | 734 | 10402  | 0         | 612 | 637 | 96 -  | 114 | 734 | 1767   | 2403   |
| UN53930 | Rsa1.0.01072.1 | 660 | 55068  | 0         | 416 | 437 | 95 -  | 4   | 440 | 36761  | 37187  |
| UN53931 | Rsa1.0.01237.1 | 780 | 50124  | 0         | 395 | 412 | 95 +  | 4   | 415 | 2883   | 3285   |
| UN53932 | Rsa1.0.14220.1 | 716 | 3652   | 3.00E-65  | 145 | 151 | 96 -  | 394 | 544 | 2829   | 2979   |
| UN53933 | Rsa1.0.00222.1 | 611 | 172263 | 0         | 593 | 611 | 97 -  | 1   | 611 | 73439  | 74049  |
| UN53934 | Rsa1.0.03323.1 | 705 | 23751  | 1.00E-113 | 243 | 255 | 95 -  | 5   | 259 | 12306  | 12560  |
| UN53935 | Rsa1.0.00501.1 | 287 | 79545  | 3.00E-54  | 111 | 112 | 99 +  | 176 | 287 | 20921  | 21032  |

|         |                |     |        |           |     |     |       |     |     |        |        |
|---------|----------------|-----|--------|-----------|-----|-----|-------|-----|-----|--------|--------|
| UN53936 | Rsa1.0.00421.1 | 749 | 86365  | 1.00E-103 | 254 | 271 | 93 -  | 486 | 749 | 82663  | 82933  |
| UN53937 | Rsa1.0.00776.1 | 831 | 64637  | 0         | 463 | 479 | 96 +  | 203 | 680 | 10547  | 11022  |
| UN53938 | Rsa1.0.01580.1 | 776 | 42852  | 1.00E-104 | 211 | 217 | 97 +  | 558 | 774 | 31149  | 31365  |
| UN53939 | Rsa1.0.74800.1 | 815 | 307    | 1.00E-170 | 306 | 307 | 99 +  | 166 | 472 | 1      | 307    |
| UN53940 | Rsa1.0.02467.1 | 574 | 31141  | 5.00E-73  | 146 | 148 | 98 -  | 135 | 282 | 9764   | 9911   |
| UN53941 | Rsa1.0.01062.1 | 723 | 55325  | 0         | 604 | 617 | 97 -  | 94  | 710 | 52194  | 52807  |
| UN53942 | Rsa1.0.01730.1 | 642 | 40223  | 1.00E-156 | 310 | 320 | 96 +  | 318 | 637 | 35176  | 35495  |
| UN53943 | Rsa1.0.00022.1 | 810 | 200461 | 1.00E-121 | 251 | 261 | 96 -  | 342 | 602 | 72068  | 72328  |
| UN53944 | Rsa1.0.01516.1 | 831 | 44196  | 0         | 481 | 509 | 94 -  | 2   | 510 | 36804  | 37310  |
| UN53945 | Rsa1.0.01685.1 | 823 | 175033 | 1.00E-133 | 268 | 277 | 96 -  | 3   | 279 | 9566   | 9842   |
| UN53946 | Rsa1.0.00950.1 | 727 | 58547  | 0         | 493 | 534 | 92 +  | 7   | 540 | 42430  | 42942  |
| UN53947 | Rsa1.0.00066.1 | 722 | 152418 | 0         | 681 | 726 | 93 -  | 9   | 722 | 106868 | 107593 |
| UN53948 | Rsa1.0.00457.1 | 687 | 337301 | 1.00E-109 | 258 | 277 | 93 -  | 303 | 569 | 290956 | 291232 |
| UN53949 | Rsa1.0.08661.1 | 743 | 7068   | 0         | 504 | 521 | 96 -  | 2   | 522 | 2244   | 2764   |
| UN53950 | Rsa1.0.00139.1 | 541 | 357786 | 0         | 349 | 356 | 98 +  | 50  | 404 | 570    | 925    |
| UN53951 | Rsa1.0.00244.1 | 693 | 103590 | 0         | 525 | 542 | 96 -  | 152 | 693 | 77749  | 78290  |
| UN53952 | Rsa1.0.00179.1 | 613 | 393324 | 1.00E-145 | 274 | 277 | 98 +  | 333 | 609 | 199770 | 200045 |
| UN53953 | Rsa1.0.01559.1 | 874 | 43262  | 0         | 849 | 879 | 96 -  | 1   | 874 | 33336  | 34210  |
| UN53954 | Rsa1.0.00625.1 | 887 | 71672  | 2.00E-67  | 164 | 175 | 93 +  | 155 | 328 | 53567  | 53732  |
| UN53955 | Rsa1.0.01091.1 | 683 | 54383  | 1.00E-171 | 391 | 415 | 94 -  | 261 | 672 | 3315   | 3726   |
| UN53956 | Rsa1.0.00165.1 | 886 | 116466 | 1.00E-113 | 241 | 251 | 96 -  | 420 | 669 | 95256  | 95506  |
| UN53957 | Rsa1.0.00014.1 | 146 | 348985 | 6.00E-72  | 143 | 145 | 98 +  | 2   | 146 | 339671 | 339815 |
| UN53958 | Rsa1.0.00056.1 | 482 | 332604 | 1.00E-172 | 439 | 482 | 91 +  | 1   | 481 | 108326 | 108787 |
| UN53959 | Rsa1.0.01137.1 | 841 | 52655  | 0         | 425 | 441 | 96 +  | 386 | 826 | 29605  | 30045  |
| UN53960 | Rsa1.0.02099.1 | 267 | 35030  | 1.00E-149 | 267 | 267 | 100 - | 1   | 267 | 24857  | 25123  |
| UN53961 | Rsa1.0.02470.1 | 622 | 31108  | 1.00E-137 | 307 | 326 | 94 -  | 298 | 622 | 18656  | 18974  |
| UN53962 | Rsa1.0.03681.1 | 754 | 21405  | 0         | 520 | 532 | 97 -  | 226 | 754 | 1412   | 1943   |
| UN53963 | Rsa1.0.00097.1 | 724 | 138858 | 1.00E-73  | 169 | 177 | 95 +  | 447 | 617 | 42576  | 42752  |
| UN53964 | Rsa1.0.01226.1 | 766 | 50316  | 1.00E-151 | 314 | 324 | 96 +  | 10  | 332 | 6389   | 6710   |
| UN53965 | Rsa1.0.00632.1 | 653 | 183777 | 0         | 488 | 512 | 95 +  | 143 | 653 | 10510  | 11021  |
| UN53966 | Rsa1.0.00019.1 | 649 | 301669 | 0         | 647 | 648 | 99 +  | 2   | 649 | 268291 | 268938 |
| UN53967 | Rsa1.0.00105.1 | 659 | 134138 | 1.00E-164 | 299 | 301 | 99 -  | 359 | 659 | 10992  | 11292  |
| UN53968 | Rsa1.0.05264.1 | 847 | 14327  | 0         | 829 | 847 | 97 +  | 6   | 847 | 3397   | 4243   |
| UN53969 | Rsa1.0.01186.1 | 754 | 51418  | 0         | 742 | 754 | 98 -  | 2   | 754 | 46854  | 47607  |
| UN53970 | Rsa1.0.17922.1 | 493 | 1708   | 0         | 364 | 370 | 98 +  | 126 | 493 | 315    | 684    |
| UN53971 | Rsa1.0.00959.1 | 697 | 58202  | 0         | 685 | 720 | 95 +  | 3   | 697 | 56760  | 57478  |
| UN53972 | Rsa1.0.00427.1 | 271 | 189678 | 5.00E-74  | 144 | 145 | 99 -  | 2   | 146 | 185811 | 185955 |
| UN53973 | Rsa1.0.01177.1 | 857 | 51572  | 0         | 414 | 420 | 98 -  | 439 | 857 | 6892   | 7311   |
| UN53974 | Rsa1.0.00402.1 | 649 | 385315 | 0         | 648 | 649 | 99 +  | 1   | 649 | 265385 | 266033 |

|         |                |     |        |           |     |     |       |     |     |        |        |
|---------|----------------|-----|--------|-----------|-----|-----|-------|-----|-----|--------|--------|
| UN53975 | Rsa1.0.00008.1 | 763 | 358124 | 0         | 625 | 649 | 96 +  | 116 | 763 | 180648 | 181293 |
| UN53976 | Rsa1.0.00089.1 | 211 | 406142 | 1.00E-71  | 178 | 189 | 94 -  | 3   | 190 | 392613 | 392800 |
| UN53977 | Rsa1.0.01539.1 | 555 | 43698  | 1.00E-174 | 515 | 582 | 88 +  | 1   | 555 | 4700   | 5273   |
| UN53978 | Rsa1.0.03242.1 | 669 | 24415  | 1.00E-169 | 322 | 329 | 97 -  | 2   | 330 | 6081   | 6409   |
| UN53979 | Rsa1.0.00984.1 | 718 | 57580  | 0         | 357 | 362 | 98 -  | 360 | 718 | 44893  | 45254  |
| UN53980 | Rsa1.0.00015.1 | 860 | 561803 | 1.00E-120 | 235 | 240 | 97 +  | 58  | 297 | 527855 | 528094 |
| UN53981 | Rsa1.0.02124.1 | 694 | 34780  | 0         | 669 | 694 | 96 +  | 2   | 694 | 29113  | 29806  |
| UN53982 | Rsa1.0.01078.1 | 636 | 316910 | 3.00E-74  | 152 | 154 | 98 -  | 476 | 628 | 127605 | 127758 |
| UN53983 | Rsa1.0.00107.1 | 783 | 431659 | 1.00E-156 | 356 | 378 | 94 +  | 1   | 365 | 298725 | 299101 |
| UN53984 | Rsa1.0.01941.1 | 671 | 37069  | 0         | 641 | 668 | 95 +  | 3   | 669 | 1877   | 2544   |
| UN53985 | Rsa1.0.00250.1 | 718 | 273771 | 1.00E-109 | 224 | 232 | 96 +  | 37  | 268 | 242170 | 242401 |
| UN53986 | Rsa1.0.02323.1 | 725 | 32534  | 1.00E-177 | 576 | 663 | 86 +  | 63  | 725 | 17309  | 17971  |
| UN53987 | Rsa1.0.00108.1 | 679 | 478491 | 0         | 579 | 605 | 95 +  | 78  | 676 | 381869 | 382467 |
| UN53988 | Rsa1.0.00057.1 | 716 | 160473 | 1.00E-109 | 210 | 212 | 99 +  | 504 | 714 | 71857  | 72068  |
| UN53989 | Rsa1.0.01100.1 | 749 | 54113  | 1.00E-80  | 153 | 153 | 100 + | 241 | 393 | 32145  | 32297  |
| UN53990 | Rsa1.0.21652.1 | 511 | 1184   | 1.00E-140 | 284 | 294 | 96 -  | 167 | 457 | 891    | 1184   |
| UN53991 | Rsa1.0.00092.1 | 796 | 659932 | 1.00E-103 | 191 | 191 | 100 + | 3   | 193 | 629595 | 629785 |
| UN53992 | Rsa1.0.08342.1 | 655 | 7502   | 1.00E-153 | 289 | 291 | 99 +  | 367 | 655 | 1042   | 1332   |
| UN53993 | Rsa1.0.02097.1 | 184 | 35036  | 2.00E-57  | 130 | 135 | 96 +  | 1   | 135 | 17274  | 17405  |
| UN53994 | Rsa1.0.08575.1 | 717 | 7180   | 0         | 674 | 680 | 99 +  | 38  | 717 | 5643   | 6322   |
| UN53995 | Rsa1.0.08756.1 | 695 | 6955   | 0         | 378 | 391 | 96 -  | 305 | 695 | 307    | 697    |
| UN53996 | Rsa1.0.01742.1 | 374 | 39962  | 2.00E-83  | 198 | 209 | 94 -  | 162 | 369 | 25945  | 26152  |
| UN53997 | Rsa1.0.00045.1 | 740 | 328694 | 2.33E-156 | 316 | 331 | 95 -  | 4   | 333 | 181708 | 182033 |
| UN53998 | Rsa1.0.00033.1 | 883 | 515811 | 1.00E-162 | 299 | 301 | 99 -  | 563 | 862 | 335259 | 335559 |
| UN53999 | Rsa1.0.01540.1 | 676 | 151890 | 0         | 324 | 324 | 100 + | 73  | 396 | 149399 | 149722 |
| UN54000 | Rsa1.0.00265.1 | 747 | 220635 | 1.00E-155 | 323 | 338 | 95 +  | 3   | 340 | 136518 | 136855 |
| UN54001 | Rsa1.0.02754.1 | 777 | 28213  | 0         | 470 | 491 | 95 -  | 3   | 493 | 11981  | 12471  |
| UN54002 | Rsa1.0.00737.1 | 763 | 66432  | 0         | 400 | 425 | 94 +  | 135 | 556 | 2349   | 2773   |
| UN54003 | Rsa1.0.02803.1 | 669 | 27715  | 0         | 498 | 523 | 95 -  | 147 | 669 | 17494  | 18013  |
| UN54004 | Rsa1.0.02158.1 | 717 | 154841 | 0         | 433 | 450 | 96 +  | 199 | 648 | 131925 | 132374 |
| UN54005 | Rsa1.0.00288.1 | 709 | 98659  | 0         | 520 | 541 | 96 +  | 160 | 700 | 42129  | 42669  |
| UN54006 | Rsa1.0.01233.1 | 752 | 50184  | 1.00E-119 | 286 | 305 | 93 -  | 448 | 750 | 29100  | 29402  |
| UN54007 | Rsa1.0.00323.1 | 696 | 159650 | 1.00E-104 | 199 | 201 | 99 +  | 7   | 207 | 42271  | 42471  |
| UN54008 | Rsa1.0.01937.1 | 259 | 37147  | 6.00E-83  | 217 | 236 | 91 -  | 26  | 259 | 27245  | 27471  |
| UN54009 | Rsa1.0.05919.1 | 772 | 12240  | 0         | 506 | 510 | 99 -  | 263 | 772 | 9889   | 10398  |
| UN54010 | Rsa1.0.00394.1 | 470 | 148426 | 0         | 465 | 472 | 98 -  | 2   | 470 | 116414 | 116885 |
| UN54011 | Rsa1.0.00671.1 | 788 | 397884 | 1.00E-155 | 350 | 374 | 93 +  | 421 | 788 | 176112 | 176476 |
| UN54012 | Rsa1.0.00299.1 | 791 | 97770  | 1.00E-107 | 227 | 237 | 95 -  | 264 | 500 | 71809  | 72045  |
| UN54013 | Rsa1.0.00807.1 | 469 | 63607  | 4.00E-88  | 231 | 250 | 92 -  | 225 | 469 | 40784  | 41027  |

|         |                |     |        |           |     |     |       |     |     |        |        |
|---------|----------------|-----|--------|-----------|-----|-----|-------|-----|-----|--------|--------|
| UN54014 | Rsa1.0_01104.1 | 645 | 285480 | 1.00E-110 | 265 | 285 | 92 +  | 372 | 645 | 263481 | 263764 |
| UN54015 | Rsa1.0_00920.1 | 220 | 601703 | 1.00E-117 | 217 | 218 | 99 -  | 3   | 220 | 585891 | 586108 |
| UN54016 | Rsa1.0_04454.1 | 730 | 17268  | 0         | 701 | 735 | 95 -  | 2   | 730 | 12711  | 13442  |
| UN54017 | Rsa1.0_00512.1 | 781 | 200277 | 1.00E-111 | 234 | 244 | 95 +  | 314 | 557 | 63228  | 63471  |
| UN54018 | Rsa1.0_04031.1 | 240 | 19489  | 9.00E-57  | 121 | 124 | 97 -  | 113 | 236 | 1211   | 1334   |
| UN54019 | Rsa1.0_00627.1 | 831 | 71566  | 4.00E-96  | 182 | 183 | 99 +  | 484 | 666 | 21740  | 21922  |
| UN54020 | Rsa1.0_01264.1 | 774 | 49697  | 0         | 732 | 773 | 94 +  | 5   | 774 | 15333  | 16102  |
| UN54021 | Rsa1.0_00350.1 | 622 | 92346  | 2.00E-54  | 146 | 157 | 92 +  | 466 | 622 | 10293  | 10448  |
| UN54022 | Rsa1.0_00140.1 | 677 | 121541 | 0         | 653 | 672 | 97 -  | 2   | 673 | 65162  | 65832  |
| UN54023 | Rsa1.0_00622.1 | 467 | 71822  | 0         | 451 | 468 | 96 -  | 1   | 467 | 2278   | 2745   |
| UN54024 | Rsa1.0_00684.1 | 834 | 141701 | 1.00E-129 | 245 | 248 | 98 +  | 2   | 249 | 26822  | 27066  |
| UN54025 | Rsa1.0_02076.1 | 838 | 153121 | 1.00E-175 | 359 | 371 | 96 +  | 470 | 838 | 32925  | 33294  |
| UN54026 | Rsa1.0_00116.1 | 786 | 365886 | 1.00E-178 | 541 | 604 | 89 +  | 193 | 786 | 69604  | 70193  |
| UN54027 | Rsa1.0_00972.1 | 869 | 57937  | 1.00E-125 | 538 | 635 | 84 +  | 13  | 641 | 49815  | 50445  |
| UN54028 | Rsa1.0_02560.1 | 756 | 30091  | 0         | 339 | 343 | 98 -  | 201 | 541 | 7721   | 8063   |
| UN54029 | Rsa1.0_00722.1 | 482 | 66840  | 1.00E-105 | 206 | 210 | 98 -  | 134 | 343 | 59641  | 59850  |
| UN54030 | Rsa1.0_18158.1 | 737 | 1655   | 0         | 548 | 562 | 97 -  | 176 | 737 | 1095   | 1655   |
| UN54031 | Rsa1.0_00218.1 | 687 | 201480 | 1.00E-159 | 293 | 296 | 98 +  | 392 | 687 | 36942  | 37237  |
| UN54032 | Rsa1.0_05677.1 | 640 | 12968  | 0         | 590 | 620 | 95 -  | 29  | 640 | 6731   | 7349   |
| UN54033 | Rsa1.0_02273.1 | 752 | 140964 | 1.00E-157 | 288 | 290 | 99 -  | 2   | 291 | 10349  | 10638  |
| UN54034 | Rsa1.0_02765.1 | 660 | 28141  | 1.00E-105 | 422 | 498 | 84 -  | 3   | 500 | 27538  | 28035  |
| UN54035 | Rsa1.0_00060.1 | 888 | 502678 | 1.00E-123 | 254 | 264 | 96 +  | 221 | 484 | 126419 | 126682 |
| UN54036 | Rsa1.0_00123.1 | 705 | 325650 | 0         | 387 | 406 | 95 +  | 286 | 691 | 248527 | 248932 |
| UN54037 | Rsa1.0_02133.1 | 231 | 34726  | 8.00E-48  | 97  | 97  | 100 + | 101 | 197 | 26643  | 26739  |
| UN54038 | Rsa1.0_00687.1 | 813 | 68494  | 2.00E-73  | 166 | 174 | 95 -  | 3   | 176 | 17367  | 17536  |
| UN54039 | Rsa1.0_00903.1 | 842 | 60228  | 0         | 396 | 410 | 96 -  | 4   | 405 | 41519  | 41928  |
| UN54040 | Rsa1.0_00198.1 | 747 | 222963 | 1.00E-158 | 295 | 299 | 98 -  | 337 | 635 | 36849  | 37147  |
| UN54041 | Rsa1.0_00478.1 | 659 | 81419  | 1.00E-144 | 265 | 267 | 99 -  | 393 | 659 | 28157  | 28423  |
| UN54042 | Rsa1.0_03281.1 | 731 | 143349 | 0         | 709 | 729 | 97 -  | 1   | 729 | 296    | 1021   |
| UN54043 | Rsa1.0_01009.1 | 521 | 56922  | 2.33E-156 | 291 | 299 | 97 -  | 6   | 303 | 32384  | 32682  |
| UN54044 | Rsa1.0_00706.1 | 811 | 291570 | 0         | 546 | 567 | 96 +  | 134 | 700 | 181304 | 181868 |
| UN54045 | Rsa1.0_01182.1 | 770 | 167304 | 0         | 636 | 670 | 94 -  | 101 | 770 | 141247 | 141910 |
| UN54046 | Rsa1.0_64336.1 | 215 | 356    | 2.00E-39  | 92  | 95  | 96 -  | 1   | 95  | 21     | 115    |
| UN54047 | Rsa1.0_00402.1 | 679 | 385315 | 0         | 671 | 677 | 99 -  | 3   | 679 | 87930  | 88603  |
| UN54048 | Rsa1.0_40049.1 | 727 | 561    | 2.00E-85  | 167 | 169 | 98 -  | 240 | 408 | 244    | 412    |
| UN54049 | Rsa1.0_03054.1 | 891 | 25738  | 1.00E-178 | 346 | 353 | 98 +  | 3   | 353 | 13554  | 13906  |
| UN54050 | Rsa1.0_04123.1 | 376 | 18947  | 1.00E-176 | 337 | 345 | 97 -  | 32  | 376 | 8719   | 9063   |
| UN54051 | Rsa1.0_20065.1 | 803 | 1346   | 0         | 720 | 746 | 96 -  | 58  | 803 | 402    | 1144   |
| UN54052 | Rsa1.0_10158.1 | 775 | 5971   | 1.00E-102 | 207 | 213 | 97 -  | 555 | 767 | 604    | 816    |

|         |                |     |        |           |     |     |       |     |     |        |        |
|---------|----------------|-----|--------|-----------|-----|-----|-------|-----|-----|--------|--------|
| UN54053 | Rsa1.0.05893.1 | 800 | 12306  | 0         | 420 | 422 | 99 -  | 4   | 424 | 8742   | 9163   |
| UN54054 | Rsa1.0.03263.1 | 557 | 24268  | 1.00E-158 | 388 | 421 | 92 -  | 150 | 557 | 15002  | 15411  |
| UN54055 | Rsa1.0.08015.1 | 901 | 8078   | 0         | 491 | 497 | 98 -  | 408 | 901 | 6597   | 7093   |
| UN54056 | Rsa1.0.00038.1 | 474 | 314568 | 0         | 459 | 490 | 93 -  | 3   | 474 | 201952 | 202439 |
| UN54057 | Rsa1.0.00011.1 | 813 | 225044 | 0         | 796 | 809 | 98 -  | 1   | 809 | 211561 | 212369 |
| UN54058 | Rsa1.0.00130.1 | 745 | 125737 | 3.00E-90  | 185 | 189 | 97 +  | 3   | 190 | 34130  | 34318  |
| UN54059 | Rsa1.0.00031.1 | 855 | 179862 | 3.00E-35  | 153 | 176 | 86 +  | 580 | 752 | 86371  | 86546  |
| UN54060 | Rsa1.0.04398.1 | 804 | 17550  | 1.00E-140 | 286 | 297 | 96 +  | 343 | 639 | 3111   | 3407   |
| UN54061 | Rsa1.0.00467.1 | 784 | 156542 | 0         | 422 | 438 | 96 -  | 344 | 781 | 104396 | 104833 |
| UN54062 | Rsa1.0.00991.1 | 780 | 143101 | 0         | 514 | 523 | 98 +  | 66  | 588 | 54800  | 55322  |
| UN54063 | Rsa1.0.00515.1 | 801 | 78417  | 0         | 655 | 694 | 94 +  | 85  | 778 | 16013  | 16706  |
| UN54064 | Rsa1.0.08208.1 | 660 | 7719   | 0         | 537 | 575 | 93 +  | 8   | 582 | 4140   | 4702   |
| UN54065 | Rsa1.0.01454.1 | 575 | 45440  | 0         | 530 | 579 | 91 +  | 2   | 575 | 2844   | 3400   |
| UN54066 | Rsa1.0.00107.1 | 727 | 431659 | 0         | 678 | 723 | 93 -  | 4   | 721 | 425781 | 426493 |
| UN54067 | Rsa1.0.01219.1 | 760 | 50527  | 1.00E-167 | 337 | 349 | 96 -  | 395 | 743 | 4820   | 5166   |
| UN54068 | Rsa1.0.00800.1 | 875 | 63868  | 0         | 636 | 661 | 96 +  | 220 | 874 | 35259  | 35919  |
| UN54069 | Rsa1.0.00087.1 | 711 | 761073 | 0         | 662 | 707 | 93 -  | 5   | 711 | 593147 | 593853 |
| UN54070 | Rsa1.0.00555.1 | 765 | 75920  | 0         | 441 | 465 | 94 -  | 286 | 750 | 2572   | 3036   |
| UN54071 | #              | #   | #      | #         | #   | #   | #     | #   | #   | #      | #      |
| UN54072 | Rsa1.0.02084.1 | 725 | 35205  | 0         | 686 | 730 | 93 -  | 1   | 725 | 30241  | 30969  |
| UN54073 | Rsa1.0.05562.1 | 729 | 13323  | 1.00E-126 | 517 | 608 | 85 -  | 131 | 729 | 411    | 1011   |
| UN54074 | Rsa1.0.00017.1 | 780 | 752458 | 6.00E-73  | 146 | 148 | 98 +  | 220 | 367 | 603348 | 603495 |
| UN54075 | Rsa1.0.00076.1 | 775 | 146021 | 1.00E-141 | 255 | 255 | 100 - | 2   | 256 | 47378  | 47632  |
| UN54076 | Rsa1.0.00718.1 | 829 | 279335 | 1.00E-98  | 192 | 195 | 98 -  | 75  | 269 | 20484  | 20678  |
| UN54077 | Rsa1.0.01405.1 | 746 | 46445  | 0         | 491 | 511 | 96 +  | 2   | 512 | 29710  | 30220  |
| UN54078 | Rsa1.0.07535.1 | 857 | 9183   | 0         | 591 | 620 | 95 +  | 3   | 618 | 8568   | 9183   |
| UN54079 | Rsa1.0.00265.1 | 749 | 220635 | 1.00E-122 | 240 | 246 | 97 +  | 215 | 460 | 10527  | 10772  |
| UN54080 | Rsa1.0.24631.1 | 739 | 976    | 1.00E-138 | 268 | 274 | 97 +  | 3   | 276 | 241    | 514    |
| UN54081 | #              | #   | #      | #         | #   | #   | #     | #   | #   | #      | #      |
| UN54082 | Rsa1.0.01768.1 | 439 | 138463 | 5.00E-32  | 83  | 86  | 96 +  | 1   | 84  | 136965 | 137050 |
| UN54083 | Rsa1.0.02608.1 | 807 | 29613  | 0         | 660 | 666 | 99 -  | 1   | 665 | 3034   | 3699   |
| UN54084 | Rsa1.0.00384.1 | 399 | 89278  | 1.00E-112 | 276 | 295 | 93 -  | 87  | 375 | 10799  | 11093  |
| UN54085 | Rsa1.0.00059.1 | 728 | 159650 | 0         | 510 | 528 | 96 +  | 2   | 526 | 121104 | 121628 |
| UN54086 | Rsa1.0.33878.1 | 784 | 669    | 1.00E-154 | 306 | 313 | 97 +  | 473 | 784 | 161    | 472    |
| UN54087 | Rsa1.0.01126.1 | 549 | 53127  | 0         | 513 | 551 | 93 +  | 1   | 545 | 14471  | 15014  |
| UN54088 | Rsa1.0.00714.1 | 779 | 67187  | 0         | 768 | 776 | 98 +  | 4   | 779 | 5364   | 6138   |
| UN54089 | Rsa1.0.01082.1 | 654 | 54640  | 0         | 422 | 422 | 100 - | 1   | 422 | 15720  | 16141  |
| UN54090 | Rsa1.0.01857.1 | 616 | 38103  | 6.00E-94  | 207 | 217 | 95 +  | 136 | 349 | 18550  | 18766  |
| UN54091 | Rsa1.0.00088.1 | 801 | 141341 | 0         | 433 | 466 | 92 +  | 43  | 499 | 10088  | 10550  |

|         |                |     |        |           |     |     |      |     |     |        |        |
|---------|----------------|-----|--------|-----------|-----|-----|------|-----|-----|--------|--------|
| UN54092 | Rsa1.0_00926.1 | 883 | 195072 | 2.00E-88  | 184 | 190 | 96 + | 464 | 653 | 194883 | 195072 |
| UN54093 | Rsa1.0_00525.1 | 677 | 78030  | 0         | 547 | 566 | 96 + | 114 | 677 | 47428  | 47993  |
| UN54094 | Rsa1.0_00195.1 | 329 | 251884 | 2.33E-156 | 307 | 322 | 95 - | 8   | 329 | 248426 | 248747 |
| UN54095 | Rsa1.0_00858.1 | 807 | 61892  | 1.00E-140 | 256 | 257 | 99 + | 115 | 371 | 32640  | 32896  |
| UN54096 | Rsa1.0_00636.1 | 657 | 71113  | 1.00E-76  | 229 | 256 | 89 - | 100 | 355 | 12431  | 12668  |
| UN54097 | Rsa1.0_01321.1 | 825 | 48248  | 0         | 395 | 422 | 93 + | 158 | 562 | 6404   | 6825   |
| UN54098 | Rsa1.0_10267.1 | 755 | 5910   | 0         | 384 | 403 | 95 - | 3   | 405 | 4974   | 5375   |
| UN54099 | Rsa1.0_01835.1 | 759 | 38542  | 0         | 730 | 758 | 96 - | 3   | 759 | 24261  | 25015  |
| UN54100 | Rsa1.0_00020.1 | 787 | 283099 | 1.00E-169 | 318 | 321 | 99 - | 470 | 787 | 42665  | 42985  |
| UN54101 | Rsa1.0_01042.1 | 548 | 293264 | 0         | 509 | 527 | 96 + | 1   | 527 | 137376 | 137895 |
| UN54102 | Rsa1.0_00024.1 | 739 | 188018 | 1.00E-101 | 237 | 251 | 94 - | 1   | 250 | 155159 | 155408 |
| UN54103 | Rsa1.0_00586.1 | 697 | 163802 | 1.00E-168 | 386 | 405 | 95 + | 297 | 695 | 153732 | 154132 |
| UN54104 | Rsa1.0_02457.1 | 291 | 31208  | 1.00E-59  | 151 | 157 | 96 - | 34  | 190 | 13222  | 13374  |
| UN54105 | Rsa1.0_00206.1 | 278 | 109040 | 1.00E-93  | 261 | 278 | 93 - | 2   | 278 | 73527  | 73796  |
| UN54106 | Rsa1.0_00293.1 | 317 | 339294 | 1.00E-172 | 315 | 317 | 99 + | 1   | 317 | 177486 | 177801 |
| UN54107 | Rsa1.0_01067.1 | 197 | 55230  | 4.00E-80  | 187 | 194 | 96 - | 2   | 195 | 4573   | 4761   |
| UN54108 | Rsa1.0_00586.1 | 722 | 163802 | 0         | 704 | 731 | 96 + | 1   | 721 | 145644 | 146367 |
| UN54109 | Rsa1.0_02707.1 | 325 | 28520  | 1.00E-127 | 301 | 311 | 96 + | 8   | 318 | 12735  | 13035  |
| UN54110 | Rsa1.0_00187.1 | 657 | 393093 | 0         | 428 | 443 | 96 + | 211 | 653 | 214572 | 215014 |
| UN54111 | Rsa1.0_23092.1 | 399 | 1071   | 6.00E-50  | 107 | 109 | 98 + | 56  | 164 | 963    | 1071   |
| UN54112 | Rsa1.0_00689.1 | 801 | 68305  | 0         | 754 | 783 | 96 - | 20  | 799 | 34431  | 35210  |
| UN54113 | Rsa1.0_00060.1 | 458 | 502678 | 5.00E-97  | 283 | 304 | 93 - | 155 | 458 | 216954 | 217247 |
| UN54114 | Rsa1.0_01476.1 | 672 | 172928 | 0         | 528 | 545 | 96 - | 17  | 561 | 12607  | 13151  |
| UN54115 | Rsa1.0_00047.1 | 694 | 168582 | 1.00E-168 | 310 | 312 | 99 - | 381 | 692 | 70278  | 70588  |
| UN54116 | Rsa1.0_00258.1 | 385 | 102381 | 1.00E-60  | 136 | 139 | 97 - | 248 | 385 | 45903  | 46040  |
| UN54117 | Rsa1.0_04696.1 | 270 | 16339  | 5.00E-71  | 237 | 259 | 91 + | 4   | 262 | 11046  | 11294  |
| UN54118 | Rsa1.0_00161.1 | 275 | 116891 | 8.00E-73  | 181 | 187 | 96 - | 95  | 275 | 86755  | 86941  |
| UN54119 | Rsa1.0_02411.1 | 181 | 31655  | 5.00E-39  | 119 | 126 | 94 - | 56  | 181 | 28347  | 28468  |
| UN54120 | Rsa1.0_04022.1 | 266 | 19534  | 8.00E-73  | 166 | 171 | 97 + | 98  | 266 | 6268   | 6437   |
| UN54121 | Rsa1.0_03355.1 | 890 | 23489  | 0         | 489 | 510 | 95 + | 108 | 617 | 1467   | 1973   |
| UN54122 | Rsa1.0_00304.1 | 685 | 97429  | 0         | 440 | 454 | 96 + | 225 | 677 | 13857  | 14309  |
| UN54123 | Rsa1.0_00026.1 | 192 | 327835 | 4.00E-74  | 182 | 192 | 94 - | 1   | 192 | 9717   | 9904   |
| UN54124 | Rsa1.0_00394.1 | 865 | 148426 | 0         | 471 | 491 | 95 - | 37  | 518 | 67486  | 67976  |
| UN54125 | Rsa1.0_02135.1 | 806 | 34713  | 0         | 668 | 723 | 92 + | 108 | 800 | 7000   | 7709   |
| UN54126 | Rsa1.0_00008.1 | 563 | 358124 | 0         | 546 | 567 | 96 - | 2   | 563 | 76762  | 77327  |
| UN54127 | Rsa1.0_03843.1 | 732 | 20496  | 0         | 372 | 382 | 97 + | 1   | 382 | 4037   | 4418   |
| UN54128 | Rsa1.0_00718.1 | 850 | 279335 | 0         | 520 | 522 | 99 + | 3   | 524 | 231667 | 232188 |
| UN54129 | Rsa1.0_08388.1 | 274 | 7436   | 1.00E-110 | 251 | 258 | 97 - | 9   | 265 | 3300   | 3551   |
| UN54130 | Rsa1.0_00183.1 | 645 | 113277 | 2.00E-35  | 105 | 112 | 93 + | 511 | 621 | 48905  | 49014  |

|         |                |     |        |           |     |     |       |     |     |        |        |
|---------|----------------|-----|--------|-----------|-----|-----|-------|-----|-----|--------|--------|
| UN54131 | Rsa1.0.01264.1 | 760 | 49697  | 1.00E-159 | 313 | 321 | 97 -  | 438 | 758 | 17491  | 17810  |
| UN54132 | Rsa1.0.02873.1 | 205 | 27077  | 1.00E-27  | 99  | 106 | 93 -  | 11  | 116 | 5979   | 6079   |
| UN54133 | Rsa1.0.03303.1 | 386 | 23890  | 1.00E-102 | 313 | 336 | 93 +  | 51  | 386 | 4111   | 4431   |
| UN54134 | Rsa1.0.03099.1 | 734 | 139424 | 1.00E-55  | 121 | 123 | 98 -  | 555 | 676 | 475    | 597    |
| UN54135 | Rsa1.0.00360.1 | 553 | 91190  | 5.00E-82  | 167 | 171 | 97 +  | 83  | 253 | 46323  | 46493  |
| UN54136 | Rsa1.0.02407.1 | 774 | 31684  | 1.00E-104 | 228 | 240 | 95 +  | 46  | 285 | 24015  | 24254  |
| UN54137 | Rsa1.0.00991.1 | 859 | 143101 | 2.00E-97  | 215 | 225 | 95 -  | 419 | 642 | 18734  | 18958  |
| UN54138 | Rsa1.0.00124.1 | 749 | 262503 | 1.00E-120 | 286 | 301 | 95 +  | 446 | 743 | 246482 | 246776 |
| UN54139 | Rsa1.0.04584.1 | 731 | 16756  | 0         | 445 | 461 | 96 -  | 250 | 706 | 12408  | 12866  |
| UN54140 | Rsa1.0.00153.1 | 812 | 192931 | 0         | 765 | 809 | 94 +  | 4   | 812 | 4398   | 5184   |
| UN54141 | Rsa1.0.00192.1 | 433 | 278200 | 1.00E-174 | 329 | 333 | 98 +  | 99  | 431 | 13714  | 14044  |
| UN54142 | Rsa1.0.00064.1 | 675 | 240927 | 1.00E-157 | 310 | 319 | 97 +  | 65  | 380 | 231755 | 232073 |
| UN54143 | Rsa1.0.00876.1 | 794 | 61328  | 1.00E-130 | 267 | 275 | 97 -  | 483 | 754 | 36515  | 36789  |
| UN54144 | Rsa1.0.03890.1 | 617 | 20223  | 1.00E-161 | 348 | 370 | 94 -  | 24  | 393 | 8045   | 8399   |
| UN54145 | Rsa1.0.02103.1 | 491 | 35006  | 1.00E-163 | 304 | 307 | 99 -  | 1   | 307 | 14618  | 14923  |
| UN54146 | Rsa1.0.01207.1 | 814 | 141053 | 1.00E-152 | 330 | 349 | 94 -  | 350 | 698 | 109018 | 109366 |
| UN54147 | Rsa1.0.00962.1 | 388 | 184909 | 1.00E-150 | 368 | 389 | 94 +  | 1   | 388 | 28084  | 28464  |
| UN54148 | Rsa1.0.04290.1 | 615 | 18063  | 7.00E-26  | 82  | 88  | 93 -  | 460 | 547 | 14274  | 14359  |
| UN54149 | Rsa1.0.05289.1 | 778 | 14259  | 0         | 540 | 564 | 95 -  | 215 | 778 | 2718   | 3281   |
| UN54150 | Rsa1.0.01228.1 | 607 | 50238  | 1.00E-107 | 223 | 230 | 96 -  | 3   | 231 | 22365  | 22594  |
| UN54151 | Rsa1.0.00010.1 | 841 | 294827 | 1.00E-131 | 296 | 314 | 94 -  | 4   | 317 | 82110  | 82417  |
| UN54152 | Rsa1.0.00813.1 | 697 | 63202  | 1.00E-89  | 175 | 176 | 99 -  | 523 | 697 | 11826  | 12001  |
| UN54153 | Rsa1.0.00066.1 | 436 | 152418 | 0         | 380 | 389 | 97 +  | 1   | 389 | 134965 | 135353 |
| UN54154 | Rsa1.0.17549.1 | 810 | 1799   | 0         | 646 | 702 | 92 -  | 3   | 684 | 441    | 1130   |
| UN54155 | Rsa1.0.19447.1 | 685 | 1430   | 0         | 510 | 531 | 96 +  | 3   | 533 | 902    | 1430   |
| UN54156 | Rsa1.0.07748.1 | 625 | 8654   | 1.00E-129 | 365 | 415 | 87 -  | 4   | 400 | 7090   | 7483   |
| UN54157 | Rsa1.0.00191.1 | 832 | 316976 | 1.00E-155 | 309 | 318 | 97 -  | 23  | 340 | 125627 | 125938 |
| UN54158 | Rsa1.0.00087.1 | 886 | 761073 | 0         | 879 | 885 | 99 +  | 1   | 883 | 601440 | 602324 |
| UN54159 | Rsa1.0.03781.1 | 838 | 20891  | 1.00E-119 | 245 | 254 | 96 +  | 39  | 292 | 3060   | 3313   |
| UN54160 | Rsa1.0.00383.1 | 809 | 398431 | 1.00E-95  | 202 | 210 | 96 -  | 365 | 574 | 188964 | 189173 |
| UN54161 | Rsa1.0.00198.1 | 664 | 222963 | 1.00E-106 | 195 | 195 | 100 + | 352 | 546 | 142806 | 143000 |
| UN54162 | Rsa1.0.09459.1 | 684 | 6353   | 1.00E-131 | 322 | 345 | 93 +  | 3   | 345 | 4891   | 5228   |
| UN54163 | Rsa1.0.03709.1 | 806 | 21247  | 0         | 467 | 483 | 96 +  | 324 | 806 | 8142   | 8624   |
| UN54164 | Rsa1.0.00057.1 | 804 | 160473 | 0         | 761 | 808 | 94 +  | 1   | 804 | 144762 | 145566 |
| UN54165 | Rsa1.0.00425.1 | 817 | 147080 | 2.00E-63  | 127 | 128 | 99 +  | 374 | 501 | 146145 | 146272 |
| UN54166 | Rsa1.0.00584.1 | 811 | 74295  | 1.00E-114 | 219 | 222 | 98 +  | 426 | 647 | 1227   | 1448   |
| UN54167 | Rsa1.0.00641.1 | 750 | 208241 | 0         | 507 | 520 | 97 +  | 231 | 750 | 146277 | 146795 |
| UN54168 | Rsa1.0.06392.1 | 865 | 11104  | 0         | 535 | 565 | 94 -  | 6   | 566 | 9813   | 10373  |
| UN54169 | Rsa1.0.01576.1 | 654 | 42923  | 1.00E-114 | 231 | 237 | 97 +  | 419 | 654 | 22319  | 22555  |

|         |                |     |        |           |     |     |       |     |     |        |        |
|---------|----------------|-----|--------|-----------|-----|-----|-------|-----|-----|--------|--------|
| UN54170 | Rsa1.0_00703.1 | 685 | 67597  | 0         | 666 | 683 | 97 +  | 4   | 684 | 45315  | 45997  |
| UN54171 | Rsa1.0_00044.1 | 748 | 271658 | 6.00E-79  | 156 | 158 | 98 +  | 287 | 444 | 155493 | 155650 |
| UN54172 | Rsa1.0_03165.1 | 675 | 24866  | 1.00E-132 | 249 | 252 | 98 +  | 3   | 254 | 8608   | 8859   |
| UN54173 | Rsa1.0_07538.1 | 829 | 9176   | 3.00E-72  | 176 | 187 | 94 -  | 643 | 829 | 2552   | 2737   |
| UN54174 | Rsa1.0_05208.1 | 547 | 14504  | 1.00E-131 | 273 | 284 | 96 +  | 267 | 547 | 3908   | 4191   |
| UN54175 | Rsa1.0_00335.1 | 426 | 94371  | 1.00E-154 | 338 | 354 | 95 +  | 71  | 422 | 50290  | 50639  |
| UN54176 | Rsa1.0_00119.1 | 461 | 467509 | 2.00E-47  | 109 | 113 | 96 +  | 176 | 288 | 283866 | 283978 |
| UN54177 | Rsa1.0_05739.1 | 133 | 12778  | 4.00E-48  | 126 | 133 | 94 -  | 1   | 133 | 2699   | 2829   |
| UN54178 | Rsa1.0_52092.1 | 118 | 437    | 2.00E-31  | 95  | 101 | 94 +  | 4   | 104 | 119    | 217    |
| UN54179 | Rsa1.0_00190.1 | 792 | 318240 | 0         | 402 | 402 | 100 - | 2   | 403 | 283349 | 283750 |
| UN54180 | Rsa1.0_00622.1 | 809 | 71822  | 0         | 721 | 748 | 96 -  | 40  | 787 | 2002   | 2749   |
| UN54181 | Rsa1.0_00048.1 | 354 | 167185 | 2.00E-89  | 187 | 193 | 96 +  | 1   | 193 | 99109  | 99298  |
| UN54182 | Rsa1.0_00179.1 | 734 | 393324 | 2.00E-54  | 252 | 296 | 85 +  | 322 | 615 | 19880  | 20173  |
| UN54183 | #              | #   | #      | #         | #   | #   | #     | #   | #   | #      | #      |
| UN54184 | Rsa1.0_00383.1 | 725 | 398431 | 7.00E-17  | 61  | 66  | 92 -  | 251 | 316 | 369834 | 369899 |
| UN54185 | Rsa1.0_00593.1 | 692 | 143463 | 0         | 587 | 602 | 97 +  | 3   | 602 | 49761  | 50355  |
| UN54186 | Rsa1.0_00160.1 | 426 | 346678 | 0         | 406 | 425 | 95 -  | 2   | 426 | 192085 | 192509 |
| UN54187 | Rsa1.0_00069.1 | 699 | 403561 | 7.00E-94  | 217 | 230 | 94 +  | 474 | 696 | 200655 | 200884 |
| UN54188 | Rsa1.0_00017.1 | 391 | 752458 | 1.00E-117 | 223 | 225 | 99 +  | 1   | 225 | 715547 | 715770 |
| UN54189 | Rsa1.0_00426.1 | 155 | 85668  | 1.00E-45  | 120 | 129 | 93 -  | 1   | 129 | 31825  | 31953  |
| UN54190 | Rsa1.0_01786.1 | 592 | 133324 | 6.00E-97  | 229 | 241 | 95 +  | 353 | 592 | 125811 | 126045 |
| UN54191 | Rsa1.0_00201.1 | 668 | 232851 | 0         | 485 | 515 | 94 -  | 157 | 668 | 143084 | 143585 |
| UN54192 | Rsa1.0_00001.1 | 533 | 363028 | 0         | 517 | 534 | 96 +  | 3   | 533 | 210984 | 211514 |
| UN54193 | Rsa1.0_00921.1 | 823 | 59599  | 0         | 447 | 462 | 96 +  | 25  | 482 | 8792   | 9253   |
| UN54194 | Rsa1.0_02916.1 | 278 | 26809  | 1.00E-56  | 115 | 116 | 99 -  | 2   | 117 | 8909   | 9024   |
| UN54195 | Rsa1.0_04915.1 | 798 | 15461  | 1.00E-12  | 77  | 89  | 86 +  | 490 | 575 | 1767   | 1855   |
| UN54196 | Rsa1.0_00254.1 | 705 | 102600 | 1.00E-128 | 290 | 306 | 94 -  | 396 | 699 | 74067  | 74363  |
| UN54197 | Rsa1.0_01037.1 | 750 | 55969  | 1.00E-95  | 184 | 186 | 98 +  | 257 | 442 | 35452  | 35637  |
| UN54198 | Rsa1.0_17872.1 | 288 | 1722   | 1.00E-123 | 271 | 287 | 94 +  | 2   | 288 | 234    | 520    |
| UN54199 | Rsa1.0_00064.1 | 544 | 240927 | 0         | 427 | 434 | 98 -  | 111 | 544 | 116731 | 117164 |
| UN54200 | Rsa1.0_00719.1 | 740 | 66952  | 1.00E-123 | 296 | 318 | 93 -  | 3   | 320 | 47399  | 47711  |
| UN54201 | Rsa1.0_02901.1 | 345 | 26909  | 1.00E-133 | 247 | 249 | 99 +  | 97  | 345 | 21318  | 21566  |
| UN54202 | Rsa1.0_00265.1 | 810 | 220635 | 2.00E-97  | 203 | 209 | 97 -  | 601 | 809 | 189339 | 189546 |
| UN54203 | Rsa1.0_02510.1 | 472 | 30662  | 0         | 403 | 417 | 96 -  | 56  | 472 | 24169  | 24582  |
| UN54204 | Rsa1.0_01178.1 | 105 | 51571  | 6.00E-19  | 69  | 72  | 95 +  | 34  | 105 | 19050  | 19118  |
| UN54205 | Rsa1.0_21524.1 | 153 | 1195   | 1.00E-17  | 103 | 113 | 91 -  | 41  | 153 | 1038   | 1142   |
| UN54206 | Rsa1.0_13229.1 | 219 | 4963   | 6.00E-67  | 154 | 160 | 96 +  | 1   | 160 | 2910   | 3066   |
| UN54207 | Rsa1.0_00476.1 | 386 | 280966 | 1.00E-137 | 332 | 356 | 93 -  | 2   | 357 | 220853 | 221190 |
| UN54208 | Rsa1.0_00002.1 | 710 | 601661 | 2.00E-54  | 121 | 125 | 96 -  | 275 | 399 | 140755 | 140879 |



|         |                |     |        |           |     |     |      |     |     |        |        |
|---------|----------------|-----|--------|-----------|-----|-----|------|-----|-----|--------|--------|
| UN54209 | Rsa1.0.00090.1 | 433 | 273859 | 1.00E-162 | 415 | 437 | 94 - | 1   | 433 | 259731 | 260155 |
| UN54210 | Rsa1.0.03302.1 | 639 | 23898  | 1.00E-76  | 164 | 170 | 96 - | 194 | 363 | 15093  | 15262  |
| UN54211 | Rsa1.0.02079.1 | 674 | 35306  | 1.00E-156 | 375 | 400 | 93 - | 3   | 396 | 10004  | 10395  |
| UN54212 | Rsa1.0.10416.1 | 186 | 5856   | 4.00E-52  | 171 | 186 | 91 + | 1   | 186 | 760    | 937    |
| UN54213 | Rsa1.0.00485.1 | 792 | 80937  | 9.00E-63  | 141 | 147 | 95 - | 121 | 267 | 9891   | 10037  |
| UN54214 | Rsa1.0.02678.1 | 670 | 135053 | 0         | 434 | 444 | 97 - | 227 | 670 | 133644 | 134087 |
| UN54215 | Rsa1.0.00056.1 | 126 | 332604 | 3.00E-12  | 60  | 64  | 93 + | 20  | 83  | 108318 | 108377 |
| UN54216 | Rsa1.0.01731.1 | 745 | 40208  | 3.00E-53  | 116 | 119 | 97 + | 3   | 121 | 34860  | 34978  |
| UN54217 | Rsa1.0.01578.1 | 417 | 42880  | 3.00E-64  | 176 | 189 | 93 + | 178 | 364 | 41438  | 41625  |
| UN54218 | Rsa1.0.00127.1 | 592 | 127446 | 1.00E-98  | 386 | 432 | 89 + | 1   | 427 | 66888  | 67299  |
| UN54219 | Rsa1.0.00127.1 | 749 | 127446 | 0         | 472 | 497 | 94 + | 123 | 613 | 66808  | 67304  |
| UN54220 | Rsa1.0.04853.1 | 706 | 15712  | 0         | 584 | 614 | 95 - | 2   | 615 | 9833   | 10445  |
| UN54221 | Rsa1.0.08371.1 | 692 | 7458   | 0         | 497 | 511 | 97 - | 5   | 515 | 1192   | 1702   |
| UN54222 | Rsa1.0.04403.1 | 709 | 17511  | 0         | 517 | 523 | 98 - | 1   | 523 | 11200  | 11722  |
| UN54223 | Rsa1.0.00010.1 | 567 | 294827 | 8.00E-50  | 107 | 109 | 98 - | 23  | 131 | 214330 | 214438 |
| UN54224 | Rsa1.0.00528.1 | 248 | 164755 | 2.00E-33  | 99  | 106 | 93 - | 34  | 137 | 141222 | 141324 |
| UN54225 | Rsa1.0.02834.1 | 833 | 27493  | 0         | 347 | 353 | 98 - | 181 | 533 | 21613  | 21965  |
| UN54226 | Rsa1.0.00053.1 | 310 | 263459 | 1.00E-165 | 306 | 310 | 98 - | 1   | 310 | 230470 | 230779 |
| UN54227 | Rsa1.0.01073.1 | 104 | 55030  | 6.00E-28  | 91  | 98  | 92 - | 1   | 98  | 7323   | 7417   |
| UN54228 | Rsa1.0.01073.1 | 858 | 55030  | 0         | 805 | 823 | 97 - | 2   | 824 | 7030   | 7852   |
| UN54229 | Rsa1.0.01506.1 | 126 | 44370  | 3.00E-15  | 63  | 69  | 91 - | 1   | 67  | 32641  | 32709  |
| UN54230 | Rsa1.0.00119.1 | 354 | 467509 | 1.00E-100 | 236 | 245 | 96 + | 101 | 341 | 335390 | 335632 |
| UN54231 | Rsa1.0.09695.1 | 880 | 6206   | 1.00E-131 | 309 | 323 | 95 + | 563 | 878 | 577    | 895    |
| UN54232 | Rsa1.0.00039.1 | 409 | 296927 | 5.00E-38  | 135 | 145 | 93 + | 31  | 175 | 10918  | 11056  |
| UN54233 | Rsa1.0.08351.1 | 413 | 7492   | 6.00E-13  | 73  | 81  | 90 - | 8   | 88  | 1628   | 1703   |
| UN54234 | Rsa1.0.01077.1 | 485 | 54772  | 1.00E-57  | 183 | 200 | 91 + | 292 | 485 | 18951  | 19149  |
| UN54235 | Rsa1.0.02094.1 | 674 | 35116  | 0         | 664 | 674 | 98 - | 3   | 674 | 4171   | 4844   |
| UN54236 | Rsa1.0.09211.1 | 746 | 6556   | 5.00E-55  | 127 | 132 | 96 - | 618 | 746 | 2702   | 2833   |
| UN54237 | Rsa1.0.04876.1 | 785 | 15631  | 1.00E-107 | 233 | 245 | 95 - | 213 | 451 | 3072   | 3316   |
| UN54238 | Rsa1.0.00055.1 | 394 | 520193 | 1.00E-179 | 348 | 358 | 97 - | 35  | 392 | 394677 | 395034 |
| UN54239 | Rsa1.0.00876.1 | 771 | 61328  | 1.00E-160 | 304 | 310 | 98 + | 296 | 605 | 52376  | 52685  |
| UN54240 | Rsa1.0.01674.1 | 905 | 168300 | 0         | 437 | 442 | 98 + | 3   | 441 | 1848   | 2289   |
| UN54241 | Rsa1.0.04795.1 | 780 | 15950  | 0         | 422 | 437 | 96 - | 347 | 780 | 10839  | 11275  |
| UN54242 | Rsa1.0.06918.1 | 801 | 10166  | 1.00E-126 | 246 | 251 | 98 + | 1   | 248 | 537    | 787    |
| UN54243 | Rsa1.0.00284.1 | 826 | 323267 | 1.00E-134 | 252 | 255 | 98 - | 6   | 260 | 134554 | 134808 |
| UN54244 | Rsa1.0.02157.1 | 601 | 149652 | 0         | 598 | 599 | 99 + | 3   | 601 | 7214   | 7812   |
| UN54245 | Rsa1.0.00176.1 | 876 | 240984 | 0         | 477 | 498 | 95 + | 1   | 498 | 17769  | 18263  |
| UN54246 | Rsa1.0.00369.1 | 659 | 266462 | 1.00E-117 | 226 | 230 | 98 - | 54  | 283 | 20854  | 21083  |
| UN54247 | Rsa1.0.14550.1 | 297 | 3278   | 2.00E-92  | 210 | 223 | 94 + | 75  | 297 | 632    | 843    |

|         |                |     |        |           |     |     |      |     |     |        |        |
|---------|----------------|-----|--------|-----------|-----|-----|------|-----|-----|--------|--------|
| UN54248 | Rsa1.0.09385.1 | 845 | 6405   | 1.00E-163 | 323 | 331 | 97 + | 3   | 332 | 874    | 1203   |
| UN54249 | Rsa1.0.01022.1 | 731 | 56606  | 1.00E-144 | 342 | 369 | 92 + | 367 | 731 | 27956  | 28315  |
| UN54250 | Rsa1.0.00482.1 | 835 | 81162  | 0         | 507 | 527 | 96 - | 310 | 835 | 68326  | 68851  |
| UN54251 | Rsa1.0.01866.1 | 630 | 37961  | 0         | 408 | 415 | 98 - | 3   | 415 | 36635  | 37049  |
| UN54252 | Rsa1.0.03511.1 | 820 | 22373  | 1.00E-132 | 266 | 275 | 96 + | 361 | 635 | 2676   | 2950   |
| UN54253 | Rsa1.0.00377.1 | 888 | 90038  | 1.00E-116 | 229 | 233 | 98 - | 377 | 608 | 28480  | 28712  |
| UN54254 | Rsa1.0.08068.1 | 336 | 7960   | 1.00E-126 | 242 | 245 | 98 - | 1   | 244 | 7580   | 7824   |
| UN54255 | Rsa1.0.00796.1 | 719 | 63997  | 1.00E-136 | 270 | 278 | 97 - | 279 | 556 | 54326  | 54603  |
| UN54256 | Rsa1.0.12636.1 | 580 | 5168   | 7.00E-69  | 169 | 181 | 93 - | 71  | 251 | 4237   | 4417   |
| UN54257 | Rsa1.0.29878.1 | 841 | 769    | 4.00E-99  | 240 | 259 | 92 + | 209 | 456 | 324    | 582    |
| UN54258 | Rsa1.0.01352.1 | 248 | 47443  | 1.00E-103 | 203 | 206 | 98 - | 1   | 205 | 8629   | 8834   |
| UN54259 | Rsa1.0.00327.1 | 830 | 94892  | 1.00E-112 | 218 | 222 | 98 - | 489 | 710 | 63026  | 63247  |
| UN54260 | Rsa1.0.02082.1 | 678 | 35228  | 1.00E-164 | 530 | 604 | 87 + | 89  | 678 | 15298  | 15900  |
| UN54261 | Rsa1.0.01552.1 | 816 | 43396  | 0         | 371 | 384 | 96 + | 433 | 816 | 14249  | 14631  |
| UN54262 | Rsa1.0.01549.1 | 763 | 43543  | 1.00E-111 | 207 | 208 | 99 - | 545 | 752 | 7754   | 7961   |
| UN54263 | Rsa1.0.01029.1 | 790 | 256254 | 1.00E-120 | 244 | 252 | 96 + | 261 | 512 | 130650 | 130901 |
| UN54264 | Rsa1.0.17320.1 | 526 | 1861   | 1.00E-180 | 332 | 336 | 98 - | 191 | 526 | 265    | 600    |
| UN54265 | Rsa1.0.45828.1 | 808 | 492    | 1.00E-74  | 297 | 341 | 87 - | 13  | 334 | 1      | 337    |
| UN54266 | Rsa1.0.00399.1 | 582 | 242951 | 1.00E-109 | 212 | 216 | 98 - | 367 | 582 | 53012  | 53227  |
| UN54267 | Rsa1.0.07515.1 | 833 | 9221   | 0         | 798 | 837 | 95 + | 3   | 833 | 5653   | 6489   |
| UN54268 | Rsa1.0.00356.1 | 706 | 91521  | 0         | 631 | 668 | 94 - | 51  | 706 | 46622  | 47286  |
| UN54269 | Rsa1.0.00389.1 | 742 | 88795  | 1.00E-163 | 325 | 335 | 97 - | 409 | 742 | 62373  | 62707  |
| UN54270 | Rsa1.0.02647.1 | 620 | 29120  | 1.00E-168 | 302 | 303 | 99 + | 318 | 620 | 7003   | 7305   |
| UN54271 | Rsa1.0.00761.1 | 503 | 65133  | 0         | 475 | 498 | 95 - | 9   | 503 | 12877  | 13358  |
| UN54272 | Rsa1.0.00121.1 | 161 | 278029 | 2.00E-53  | 146 | 156 | 93 + | 9   | 161 | 6707   | 6860   |
| UN54273 | Rsa1.0.00476.1 | 677 | 280966 | 1.00E-92  | 182 | 185 | 98 + | 243 | 427 | 26167  | 26351  |
| UN54274 | Rsa1.0.00342.1 | 426 | 93695  | 2.00E-53  | 135 | 139 | 97 + | 130 | 268 | 200    | 334    |
| UN54275 | Rsa1.0.00051.1 | 258 | 258225 | 2.00E-54  | 111 | 112 | 99 + | 147 | 258 | 86662  | 86773  |
| UN54276 | Rsa1.0.29491.1 | 796 | 781    | 0         | 529 | 535 | 98 - | 3   | 533 | 7      | 541    |
| UN54277 | Rsa1.0.00119.1 | 814 | 467509 | 0         | 774 | 834 | 92 + | 2   | 814 | 48995  | 49807  |
| UN54278 | Rsa1.0.19102.1 | 338 | 1479   | 1.00E-103 | 208 | 211 | 98 - | 128 | 338 | 766    | 974    |
| UN54279 | Rsa1.0.01287.1 | 343 | 49195  | 2.00E-24  | 83  | 90  | 92 + | 184 | 273 | 19516  | 19604  |
| UN54280 | Rsa1.0.00387.1 | 835 | 495407 | 0         | 512 | 535 | 95 - | 317 | 835 | 161744 | 162278 |
| UN54281 | Rsa1.0.01281.1 | 569 | 49313  | 1.00E-155 | 316 | 328 | 96 + | 5   | 330 | 26766  | 27093  |
| UN54282 | Rsa1.0.05279.1 | 172 | 14277  | 3.00E-56  | 163 | 173 | 94 + | 1   | 172 | 13826  | 13991  |
| UN54283 | Rsa1.0.00017.1 | 240 | 752458 | 8.00E-79  | 230 | 244 | 94 - | 8   | 240 | 236122 | 236365 |
| UN54284 | Rsa1.0.00039.1 | 542 | 296927 | 8.00E-47  | 99  | 100 | 99 + | 180 | 279 | 18624  | 18723  |
| UN54285 | Rsa1.0.00027.1 | 288 | 283362 | 1.00E-127 | 276 | 289 | 95 - | 1   | 285 | 39076  | 39364  |
| UN54286 | Rsa1.0.00261.1 | 702 | 151157 | 0         | 359 | 363 | 98 + | 340 | 702 | 105363 | 105725 |

|         |                |     |        |           |     |     |       |     |     |        |        |
|---------|----------------|-----|--------|-----------|-----|-----|-------|-----|-----|--------|--------|
| UN54287 | Rsa1.0.00598.1 | 808 | 73425  | 0         | 409 | 410 | 99 +  | 336 | 745 | 16629  | 17038  |
| UN54288 | Rsa1.0.01673.1 | 822 | 41197  | 0         | 385 | 393 | 97 +  | 431 | 822 | 7236   | 7628   |
| UN54289 | Rsa1.0.00327.1 | 670 | 94892  | 0         | 510 | 547 | 93 -  | 133 | 670 | 36193  | 36730  |
| UN54290 | Rsa1.0.00437.1 | 786 | 84879  | 1.00E-151 | 315 | 332 | 94 +  | 460 | 779 | 37704  | 38035  |
| UN54291 | Rsa1.0.05784.1 | 110 | 12643  | 6.00E-16  | 64  | 67  | 95 +  | 42  | 105 | 1645   | 1711   |
| UN54292 | Rsa1.0.00641.1 | 718 | 208241 | 1.00E-159 | 297 | 301 | 98 +  | 418 | 718 | 146449 | 146749 |
| UN54293 | Rsa1.0.05878.1 | 654 | 12344  | 1.00E-128 | 305 | 327 | 93 -  | 328 | 654 | 8193   | 8501   |
| UN54294 | Rsa1.0.00017.1 | 586 | 752458 | 0         | 577 | 585 | 98 +  | 2   | 586 | 71778  | 72362  |
| UN54295 | Rsa1.0.00535.1 | 791 | 77239  | 0         | 767 | 790 | 97 -  | 2   | 791 | 8086   | 8866   |
| UN54296 | Rsa1.0.64525.1 | 262 | 355    | 1.00E-114 | 255 | 266 | 95 -  | 1   | 262 | 27     | 290    |
| UN54297 | Rsa1.0.10443.1 | 748 | 5849   | 0         | 688 | 700 | 98 +  | 5   | 702 | 471    | 1170   |
| UN54298 | Rsa1.0.05208.1 | 533 | 14504  | 1.00E-117 | 266 | 282 | 94 +  | 252 | 533 | 3955   | 4230   |
| UN54299 | Rsa1.0.03726.1 | 718 | 21160  | 0         | 412 | 424 | 97 -  | 294 | 716 | 7736   | 8157   |
| UN54300 | Rsa1.0.01811.1 | 418 | 38977  | 1.00E-113 | 248 | 258 | 96 +  | 164 | 418 | 18627  | 18883  |
| UN54301 | Rsa1.0.00021.1 | 418 | 263655 | 7.00E-62  | 127 | 129 | 98 +  | 153 | 281 | 177921 | 178049 |
| UN54302 | Rsa1.0.03427.1 | 703 | 22992  | 9.00E-75  | 155 | 159 | 97 +  | 117 | 275 | 9515   | 9673   |
| UN54303 | Rsa1.0.00212.1 | 293 | 108350 | 1.00E-124 | 281 | 296 | 94 +  | 2   | 293 | 39779  | 40073  |
| UN54304 | Rsa1.0.05691.1 | 852 | 12918  | 0         | 801 | 851 | 94 -  | 3   | 852 | 548    | 1378   |
| UN54305 | Rsa1.0.00434.1 | 744 | 85171  | 0         | 627 | 645 | 97 -  | 3   | 647 | 55693  | 56337  |
| UN54306 | Rsa1.0.00067.1 | 448 | 415055 | 1.00E-161 | 287 | 287 | 100 + | 162 | 448 | 314010 | 314296 |
| UN54307 | Rsa1.0.00287.1 | 792 | 98687  | 0         | 770 | 789 | 97 -  | 3   | 791 | 30523  | 31310  |
| UN54308 | Rsa1.0.00940.1 | 671 | 179946 | 0         | 635 | 670 | 94 -  | 4   | 671 | 5445   | 6107   |
| UN54309 | Rsa1.0.00030.1 | 684 | 250988 | 1.00E-112 | 218 | 222 | 98 -  | 26  | 247 | 166284 | 166505 |
| UN54310 | Rsa1.0.05832.1 | 790 | 12491  | 1.00E-128 | 241 | 244 | 98 -  | 3   | 246 | 10411  | 10654  |
| UN54311 | Rsa1.0.00971.1 | 504 | 57973  | 1.00E-131 | 290 | 309 | 93 -  | 3   | 311 | 20158  | 20457  |
| UN54312 | Rsa1.0.02165.1 | 446 | 34423  | 1.00E-128 | 312 | 336 | 92 +  | 63  | 388 | 11169  | 11502  |
| UN54313 | Rsa1.0.00449.1 | 735 | 83863  | 0         | 330 | 330 | 100 + | 406 | 735 | 12219  | 12548  |
| UN54314 | Rsa1.0.04786.1 | 155 | 15988  | 2.00E-50  | 113 | 117 | 96 +  | 29  | 145 | 3306   | 3422   |
| UN54315 | Rsa1.0.03496.1 | 875 | 22492  | 0         | 414 | 419 | 98 -  | 6   | 422 | 12074  | 12492  |
| UN54316 | Rsa1.0.00427.1 | 643 | 189678 | 1.00E-82  | 168 | 172 | 97 +  | 271 | 442 | 162553 | 162724 |
| UN54317 | Rsa1.0.00116.1 | 488 | 365886 | 1.00E-122 | 316 | 340 | 92 -  | 157 | 488 | 53063  | 53396  |
| UN54318 | Rsa1.0.02478.1 | 682 | 150183 | 0         | 647 | 671 | 96 -  | 3   | 668 | 133527 | 134194 |
| UN54319 | Rsa1.0.02942.1 | 853 | 26577  | 8.00E-82  | 155 | 155 | 100 - | 3   | 157 | 8098   | 8252   |
| UN54320 | Rsa1.0.03825.1 | 760 | 20623  | 1.00E-126 | 242 | 246 | 98 +  | 155 | 400 | 2922   | 3167   |
| UN54321 | Rsa1.0.10156.1 | 778 | 5972   | 1.00E-77  | 160 | 164 | 97 +  | 500 | 663 | 790    | 953    |
| UN54322 | Rsa1.0.00375.1 | 731 | 90207  | 4.00E-89  | 188 | 194 | 96 +  | 470 | 661 | 63770  | 63963  |
| UN54323 | Rsa1.0.02116.1 | 918 | 34853  | 1.00E-102 | 217 | 222 | 97 -  | 699 | 918 | 28350  | 28570  |
| UN54324 | Rsa1.0.01926.1 | 114 | 37206  | 2.00E-37  | 110 | 115 | 95 +  | 1   | 111 | 17848  | 17962  |
| UN54325 | Rsa1.0.00372.1 | 501 | 90418  | 0         | 486 | 506 | 96 -  | 2   | 501 | 3765   | 4270   |

|         |                |     |        |           |     |     |      |     |     |        |        |
|---------|----------------|-----|--------|-----------|-----|-----|------|-----|-----|--------|--------|
| UN54326 | Rsa1.0.00773.1 | 760 | 64839  | 2.00E-94  | 200 | 208 | 96 - | 239 | 446 | 58210  | 58417  |
| UN54327 | Rsa1.0.00608.1 | 681 | 172672 | 1.00E-176 | 420 | 460 | 91 + | 243 | 681 | 3169   | 3616   |
| UN54328 | Rsa1.0.03408.1 | 387 | 23154  | 1.00E-107 | 217 | 221 | 98 + | 167 | 386 | 3084   | 3303   |
| UN54329 | Rsa1.0.00343.1 | 863 | 93570  | 0         | 453 | 457 | 99 + | 3   | 459 | 14245  | 14701  |
| UN54330 | Rsa1.0.01783.1 | 655 | 39383  | 1.00E-121 | 233 | 237 | 98 - | 419 | 655 | 9629   | 9865   |
| UN54331 | Rsa1.0.22343.1 | 692 | 1129   | 1.00E-134 | 258 | 263 | 98 + | 48  | 310 | 867    | 1129   |
| UN54332 | Rsa1.0.06803.1 | 673 | 10330  | 0         | 646 | 662 | 97 + | 5   | 666 | 5466   | 6127   |
| UN54333 | Rsa1.0.00310.1 | 905 | 96852  | 1.00E-153 | 293 | 299 | 97 + | 192 | 490 | 18297  | 18595  |
| UN54334 | Rsa1.0.00211.1 | 745 | 228189 | 1.00E-132 | 258 | 264 | 97 - | 384 | 647 | 213211 | 213474 |
| UN54335 | Rsa1.0.03034.1 | 761 | 157864 | 0         | 342 | 343 | 99 + | 419 | 761 | 145516 | 145858 |
| UN54336 | Rsa1.0.07475.1 | 808 | 9292   | 0         | 759 | 771 | 98 - | 6   | 772 | 6503   | 7273   |
| UN54337 | Rsa1.0.10147.1 | 801 | 5976   | 0         | 351 | 356 | 98 + | 3   | 357 | 748    | 1103   |
| UN54338 | Rsa1.0.00033.1 | 680 | 515811 | 5.00E-67  | 155 | 162 | 95 - | 519 | 679 | 36833  | 36994  |
| UN54339 | Rsa1.0.00054.1 | 799 | 162053 | 0         | 474 | 486 | 97 + | 3   | 482 | 134328 | 134812 |
| UN54340 | Rsa1.0.15602.1 | 906 | 2523   | 0         | 469 | 476 | 98 + | 436 | 906 | 1648   | 2122   |
| UN54341 | Rsa1.0.00004.1 | 143 | 253996 | 1.00E-39  | 134 | 143 | 93 - | 1   | 143 | 69512  | 69648  |
| UN54342 | Rsa1.0.00651.1 | 787 | 247766 | 0         | 417 | 430 | 96 + | 315 | 744 | 226222 | 226651 |
| UN54343 | Rsa1.0.00036.1 | 799 | 176186 | 1.00E-120 | 228 | 231 | 98 + | 301 | 531 | 28061  | 28291  |
| UN54344 | Rsa1.0.05792.1 | 697 | 12612  | 1.00E-172 | 324 | 330 | 98 + | 368 | 697 | 1150   | 1479   |
| UN54345 | Rsa1.0.00012.1 | 417 | 222148 | 1.00E-60  | 150 | 155 | 96 - | 12  | 166 | 10988  | 11138  |
| UN54346 | Rsa1.0.00088.1 | 542 | 141341 | 1.00E-149 | 388 | 424 | 91 - | 85  | 500 | 66452  | 66870  |
| UN54347 | Rsa1.0.04292.1 | 809 | 18050  | 1.00E-154 | 286 | 289 | 98 + | 244 | 532 | 5306   | 5594   |
| UN54348 | Rsa1.0.00602.1 | 497 | 73302  | 1.00E-161 | 324 | 335 | 96 - | 2   | 335 | 31694  | 32028  |
| UN54349 | Rsa1.0.09986.1 | 792 | 6049   | 1.00E-108 | 324 | 361 | 89 - | 85  | 444 | 5215   | 5570   |
| UN54350 | Rsa1.0.00127.1 | 418 | 127446 | 0         | 402 | 416 | 96 - | 3   | 417 | 23439  | 23850  |
| UN54351 | Rsa1.0.03086.1 | 838 | 25495  | 5.00E-49  | 109 | 112 | 97 + | 448 | 559 | 2350   | 2461   |
| UN54352 | Rsa1.0.00051.1 | 798 | 258225 | 1.00E-154 | 339 | 359 | 94 + | 3   | 361 | 113688 | 114039 |
| UN54353 | Rsa1.0.00048.1 | 822 | 167185 | 3.00E-84  | 177 | 183 | 96 + | 473 | 655 | 158599 | 158781 |
| UN54354 | Rsa1.0.04250.1 | 532 | 18264  | 2.33E-156 | 275 | 278 | 98 + | 256 | 532 | 14217  | 14494  |
| UN54355 | Rsa1.0.04654.1 | 600 | 16496  | 1.00E-154 | 321 | 334 | 96 - | 58  | 391 | 6418   | 6747   |
| UN54356 | Rsa1.0.09450.1 | 801 | 6360   | 0         | 559 | 575 | 97 - | 141 | 715 | 4608   | 5182   |
| UN54357 | Rsa1.0.00330.1 | 744 | 94666  | 0         | 598 | 623 | 95 + | 2   | 615 | 84330  | 84951  |
| UN54358 | Rsa1.0.00701.1 | 749 | 67691  | 0         | 635 | 646 | 98 - | 13  | 657 | 17250  | 17894  |
| UN54359 | Rsa1.0.00251.1 | 647 | 303968 | 1.00E-147 | 324 | 339 | 95 - | 9   | 342 | 148513 | 148850 |
| UN54360 | Rsa1.0.03921.1 | 724 | 20080  | 0         | 390 | 408 | 95 - | 317 | 724 | 8030   | 8437   |
| UN54361 | Rsa1.0.01147.1 | 858 | 52391  | 0         | 838 | 850 | 98 - | 6   | 855 | 8287   | 9136   |
| UN54362 | Rsa1.0.07645.1 | 868 | 8949   | 1.00E-165 | 322 | 330 | 97 + | 540 | 868 | 451    | 780    |
| UN54363 | Rsa1.0.00713.1 | 769 | 158017 | 0         | 419 | 428 | 97 - | 343 | 769 | 25955  | 26381  |
| UN54364 | Rsa1.0.03564.1 | 748 | 22068  | 0         | 509 | 526 | 96 - | 183 | 707 | 14015  | 14535  |

|         |                |     |        |           |     |     |       |     |     |        |        |
|---------|----------------|-----|--------|-----------|-----|-----|-------|-----|-----|--------|--------|
| UN54365 | Rsa1.0.03327.1 | 460 | 23707  | 1.00E-177 | 432 | 461 | 93 +  | 1   | 458 | 17674  | 18128  |
| UN54366 | Rsa1.0.00730.1 | 516 | 66673  | 0         | 500 | 516 | 96 -  | 1   | 516 | 26386  | 26899  |
| UN54367 | Rsa1.0.00438.1 | 782 | 84861  | 1.00E-102 | 195 | 197 | 98 +  | 71  | 267 | 65780  | 65976  |
| UN54368 | Rsa1.0.01182.1 | 827 | 167304 | 0         | 749 | 793 | 94 -  | 37  | 827 | 131397 | 132187 |
| UN54369 | Rsa1.0.00163.1 | 853 | 116847 | 6.00E-61  | 123 | 124 | 99 +  | 252 | 375 | 57621  | 57744  |
| UN54370 | Rsa1.0.00860.1 | 810 | 61789  | 1.00E-174 | 331 | 338 | 97 -  | 17  | 354 | 13435  | 13772  |
| UN54371 | Rsa1.0.04036.1 | 468 | 19473  | 1.00E-107 | 209 | 213 | 98 +  | 2   | 214 | 1132   | 1344   |
| UN54372 | Rsa1.0.63857.1 | 800 | 359    | 1.00E-159 | 322 | 329 | 97 -  | 476 | 800 | 31     | 359    |
| UN54373 | Rsa1.0.00016.1 | 120 | 831256 | 2.00E-28  | 99  | 108 | 91 +  | 1   | 108 | 576680 | 576785 |
| UN54374 | Rsa1.0.00133.1 | 541 | 123768 | 1.00E-109 | 201 | 201 | 100 - | 341 | 541 | 52102  | 52302  |
| UN54375 | Rsa1.0.00096.1 | 509 | 198773 | 1.00E-151 | 372 | 407 | 91 -  | 1   | 384 | 34990  | 35395  |
| UN54376 | Rsa1.0.23985.1 | 757 | 1013   | 0         | 515 | 523 | 98 -  | 1   | 519 | 1      | 523    |
| UN54377 | Rsa1.0.04591.1 | 768 | 16717  | 4.00E-37  | 116 | 128 | 90 +  | 441 | 568 | 7075   | 7202   |
| UN54378 | Rsa1.0.19075.1 | 774 | 1483   | 0         | 535 | 554 | 96 +  | 227 | 774 | 2      | 549    |
| UN54379 | Rsa1.0.00066.1 | 611 | 152418 | 1.00E-173 | 311 | 312 | 99 +  | 300 | 611 | 83634  | 83945  |
| UN54380 | Rsa1.0.00339.1 | 751 | 222974 | 0         | 436 | 456 | 95 -  | 300 | 751 | 92508  | 92960  |
| UN54381 | Rsa1.0.00114.1 | 716 | 131330 | 2.00E-42  | 92  | 93  | 98 -  | 533 | 625 | 9043   | 9135   |
| UN54382 | Rsa1.0.74241.1 | 799 | 309    | 1.00E-159 | 302 | 307 | 98 +  | 139 | 443 | 3      | 309    |
| UN54383 | Rsa1.0.14032.1 | 667 | 3893   | 0         | 585 | 629 | 93 -  | 3   | 613 | 367    | 988    |
| UN54384 | Rsa1.0.10576.1 | 630 | 5797   | 1.00E-118 | 255 | 266 | 95 +  | 365 | 630 | 3248   | 3510   |
| UN54385 | Rsa1.0.00236.1 | 741 | 104771 | 0         | 448 | 449 | 99 +  | 293 | 741 | 58482  | 58930  |
| UN54386 | Rsa1.0.01767.1 | 672 | 39615  | 1.00E-120 | 228 | 231 | 98 +  | 3   | 233 | 29109  | 29339  |
| UN54387 | Rsa1.0.24531.1 | 649 | 982    | 0         | 580 | 605 | 95 -  | 45  | 649 | 113    | 717    |
| UN54388 | Rsa1.0.00636.1 | 719 | 71113  | 0         | 397 | 400 | 99 +  | 320 | 719 | 10262  | 10660  |
| UN54389 | Rsa1.0.05044.1 | 684 | 15041  | 0         | 430 | 443 | 97 -  | 3   | 445 | 11257  | 11698  |
| UN54390 | Rsa1.0.22545.1 | 729 | 1111   | 0         | 490 | 499 | 98 +  | 231 | 729 | 1      | 499    |
| UN54391 | Rsa1.0.08780.1 | 687 | 6928   | 1.00E-109 | 247 | 259 | 95 +  | 426 | 681 | 4415   | 4672   |
| UN54392 | Rsa1.0.03816.1 | 705 | 20701  | 0         | 636 | 678 | 93 -  | 5   | 681 | 4539   | 5213   |
| UN54393 | Rsa1.0.01421.1 | 750 | 46197  | 1.00E-125 | 248 | 255 | 97 -  | 122 | 376 | 30027  | 30281  |
| UN54394 | Rsa1.0.05680.1 | 808 | 12958  | 1.00E-138 | 271 | 278 | 97 -  | 412 | 689 | 4947   | 5224   |
| UN54395 | Rsa1.0.00561.1 | 833 | 75653  | 0         | 429 | 433 | 99 -  | 401 | 833 | 4621   | 5053   |
| UN54396 | Rsa1.0.01669.1 | 723 | 41286  | 1.00E-126 | 247 | 253 | 97 -  | 145 | 397 | 12514  | 12766  |
| UN54397 | Rsa1.0.01857.1 | 356 | 38103  | 3.00E-67  | 137 | 138 | 99 +  | 157 | 294 | 4693   | 4829   |
| UN54398 | Rsa1.0.00917.1 | 652 | 182012 | 0         | 606 | 621 | 97 +  | 3   | 623 | 153742 | 154362 |
| UN54399 | Rsa1.0.00929.1 | 873 | 137796 | 0         | 428 | 429 | 99 +  | 3   | 431 | 132011 | 132439 |
| UN54400 | Rsa1.0.06131.1 | 756 | 11665  | 0         | 700 | 752 | 93 -  | 5   | 755 | 8405   | 9155   |
| UN54401 | Rsa1.0.01733.1 | 473 | 40186  | 1.00E-82  | 165 | 168 | 98 -  | 306 | 473 | 17703  | 17870  |
| UN54402 | Rsa1.0.02420.1 | 689 | 31580  | 0         | 580 | 629 | 92 -  | 64  | 678 | 28219  | 28846  |
| UN54403 | Rsa1.0.00653.1 | 370 | 70029  | 5.00E-41  | 125 | 133 | 93 +  | 132 | 264 | 40673  | 40800  |

|         |                |     |        |           |     |     |      |     |     |        |        |
|---------|----------------|-----|--------|-----------|-----|-----|------|-----|-----|--------|--------|
| UN54404 | Rsa1.0.00089.1 | 491 | 406142 | 3.00E-92  | 214 | 225 | 95 + | 269 | 491 | 345785 | 346005 |
| UN54405 | Rsa1.0.00548.1 | 783 | 76518  | 1.00E-156 | 293 | 296 | 98 - | 488 | 782 | 36236  | 36531  |
| UN54406 | Rsa1.0.00833.1 | 677 | 62621  | 0         | 408 | 419 | 97 + | 260 | 677 | 39627  | 40045  |
| UN54407 | Rsa1.0.00385.1 | 298 | 89160  | 6.00E-46  | 122 | 126 | 96 + | 173 | 298 | 47991  | 48112  |
| UN54408 | Rsa1.0.00346.1 | 871 | 93130  | 1.00E-157 | 296 | 301 | 98 - | 3   | 303 | 59225  | 59525  |
| UN54409 | Rsa1.0.02616.1 | 700 | 29542  | 0         | 672 | 693 | 96 - | 8   | 700 | 23527  | 24219  |
| UN54410 | Rsa1.0.00205.1 | 850 | 193401 | 1.00E-160 | 344 | 361 | 95 + | 493 | 850 | 77712  | 78062  |
| UN54411 | Rsa1.0.02253.1 | 799 | 33356  | 0         | 544 | 570 | 95 - | 3   | 567 | 11611  | 12176  |
| UN54412 | Rsa1.0.00200.1 | 739 | 162016 | 0         | 734 | 740 | 99 + | 3   | 739 | 22163  | 22902  |
| UN54413 | Rsa1.0.09695.1 | 673 | 6206   | 0         | 419 | 422 | 99 - | 252 | 673 | 1250   | 1671   |
| UN54414 | Rsa1.0.01536.1 | 830 | 43747  | 0         | 429 | 445 | 96 - | 387 | 829 | 32240  | 32683  |
| UN54415 | Rsa1.0.00114.1 | 596 | 131330 | 1.00E-180 | 399 | 424 | 94 + | 168 | 586 | 120091 | 120514 |
| UN54416 | Rsa1.0.00473.1 | 681 | 212204 | 0         | 490 | 509 | 96 + | 26  | 534 | 76191  | 76699  |
| UN54417 | Rsa1.0.05648.1 | 748 | 13049  | 0         | 646 | 668 | 96 - | 82  | 748 | 12382  | 13049  |
| UN54418 | Rsa1.0.00096.1 | 734 | 198773 | 0         | 618 | 650 | 95 + | 90  | 734 | 117624 | 118255 |
| UN54419 | Rsa1.0.00451.1 | 845 | 322533 | 0         | 572 | 604 | 94 - | 10  | 609 | 248604 | 249205 |
| UN54420 | Rsa1.0.02456.1 | 766 | 31222  | 1.00E-119 | 242 | 250 | 96 - | 516 | 765 | 23759  | 24004  |
| UN54421 | Rsa1.0.00436.1 | 409 | 85008  | 1.00E-103 | 243 | 262 | 92 - | 159 | 409 | 64204  | 64461  |
| UN54422 | Rsa1.0.02787.1 | 590 | 27872  | 6.00E-20  | 93  | 107 | 86 - | 6   | 112 | 17463  | 17569  |
| UN54423 | Rsa1.0.03069.1 | 360 | 25615  | 0         | 355 | 358 | 99 - | 3   | 360 | 22444  | 22801  |
| UN54424 | Rsa1.0.55409.1 | 384 | 412    | 5.00E-35  | 94  | 100 | 94 - | 1   | 100 | 96     | 195    |
| UN54425 | Rsa1.0.00802.1 | 851 | 63846  | 1.00E-117 | 254 | 265 | 95 - | 587 | 847 | 29689  | 29953  |
| UN54426 | Rsa1.0.01531.1 | 753 | 43778  | 0         | 484 | 505 | 95 + | 2   | 506 | 14945  | 15449  |
| UN54427 | Rsa1.0.45068.1 | 670 | 500    | 0         | 379 | 391 | 96 - | 1   | 391 | 1      | 391    |
| UN54428 | Rsa1.0.34128.1 | 583 | 664    | 2.00E-75  | 182 | 192 | 94 - | 346 | 532 | 2      | 191    |
| UN54429 | Rsa1.0.01220.1 | 373 | 161775 | 1.00E-124 | 334 | 374 | 89 + | 2   | 373 | 121551 | 121895 |
| UN54430 | Rsa1.0.00055.1 | 822 | 520193 | 0         | 486 | 508 | 95 - | 126 | 633 | 276693 | 277200 |
| UN54431 | Rsa1.0.00339.1 | 516 | 222974 | 0         | 507 | 515 | 98 + | 2   | 516 | 36185  | 36699  |
| UN54432 | Rsa1.0.00016.1 | 837 | 831256 | 9.00E-63  | 162 | 175 | 92 + | 405 | 579 | 663018 | 663192 |
| UN54433 | Rsa1.0.03646.1 | 526 | 21598  | 1.00E-131 | 261 | 269 | 97 - | 2   | 270 | 11101  | 11369  |
| UN54434 | Rsa1.0.02858.1 | 762 | 27246  | 0         | 649 | 704 | 92 + | 2   | 684 | 20058  | 20761  |
| UN54435 | Rsa1.0.02762.1 | 785 | 28146  | 1.00E-132 | 248 | 251 | 98 + | 3   | 253 | 19730  | 19980  |
| UN54436 | Rsa1.0.00386.1 | 376 | 89134  | 0         | 343 | 349 | 98 - | 29  | 376 | 57896  | 58244  |
| UN54437 | Rsa1.0.04586.1 | 870 | 16748  | 2.00E-17  | 136 | 167 | 81 - | 343 | 500 | 10998  | 11164  |
| UN54438 | Rsa1.0.16139.1 | 674 | 2268   | 1.00E-116 | 218 | 220 | 99 - | 117 | 336 | 686    | 905    |
| UN54439 | Rsa1.0.00066.1 | 585 | 152418 | 1.00E-156 | 329 | 345 | 95 + | 107 | 451 | 66553  | 66888  |
| UN54440 | Rsa1.0.30821.1 | 577 | 744    | 0         | 421 | 440 | 95 - | 140 | 577 | 315    | 744    |
| UN54441 | Rsa1.0.00675.1 | 752 | 145590 | 1.00E-127 | 258 | 267 | 96 - | 163 | 429 | 45811  | 46077  |
| UN54442 | Rsa1.0.07965.1 | 786 | 8166   | 1.00E-149 | 338 | 360 | 93 - | 326 | 682 | 4405   | 4756   |

|         |                |     |        |           |     |     |       |     |     |        |        |
|---------|----------------|-----|--------|-----------|-----|-----|-------|-----|-----|--------|--------|
| UN54443 | Rsa1.0.07193.1 | 825 | 9752   | 4.00E-99  | 219 | 228 | 96 +  | 3   | 228 | 1447   | 1674   |
| UN54444 | Rsa1.0.00079.1 | 794 | 606987 | 1.00E-156 | 359 | 383 | 93 -  | 45  | 421 | 66614  | 66995  |
| UN54445 | Rsa1.0.00438.1 | 269 | 84861  | 2.00E-21  | 92  | 100 | 92 +  | 171 | 268 | 77250  | 77346  |
| UN54446 | Rsa1.0.05179.1 | 443 | 14576  | 4.00E-79  | 181 | 190 | 95 -  | 255 | 443 | 13053  | 13242  |
| UN54447 | Rsa1.0.00123.1 | 840 | 325650 | 1.00E-154 | 396 | 432 | 91 +  | 5   | 433 | 122275 | 122685 |
| UN54448 | Rsa1.0.00078.1 | 249 | 175053 | 1.00E-112 | 240 | 248 | 96 +  | 2   | 245 | 53191  | 53438  |
| UN54449 | Rsa1.0.01451.1 | 306 | 45459  | 1.00E-158 | 299 | 304 | 98 +  | 3   | 306 | 35228  | 35528  |
| UN54450 | Rsa1.0.00599.1 | 783 | 73418  | 0         | 757 | 784 | 96 +  | 2   | 783 | 53830  | 54613  |
| UN54451 | Rsa1.0.02299.1 | 702 | 32857  | 3.00E-47  | 103 | 105 | 98 +  | 506 | 610 | 23010  | 23114  |
| UN54452 | Rsa1.0.00926.1 | 719 | 195072 | 0         | 699 | 718 | 97 -  | 2   | 719 | 44642  | 45353  |
| UN54453 | Rsa1.0.00378.1 | 812 | 89892  | 0         | 378 | 379 | 99 +  | 188 | 566 | 42190  | 42568  |
| UN54454 | Rsa1.0.00543.1 | 863 | 76788  | 1.00E-123 | 264 | 277 | 95 -  | 143 | 419 | 44960  | 45236  |
| UN54455 | Rsa1.0.00451.1 | 229 | 322533 | 2.00E-94  | 213 | 221 | 96 -  | 1   | 221 | 262015 | 262229 |
| UN54456 | #              | #   | #      | #         | #   | #   | #     | #   | #   | #      | #      |
| UN54457 | Rsa1.0.08388.1 | 583 | 7436   | 0         | 511 | 518 | 98 -  | 55  | 571 | 3041   | 3558   |
| UN54458 | Rsa1.0.22307.1 | 674 | 1132   | 1.00E-143 | 324 | 344 | 94 -  | 2   | 342 | 26     | 363    |
| UN54459 | Rsa1.0.01099.1 | 745 | 158481 | 1.00E-138 | 326 | 352 | 92 -  | 394 | 745 | 15639  | 15984  |
| UN54460 | Rsa1.0.02866.1 | 819 | 27122  | 0         | 443 | 444 | 99 -  | 376 | 819 | 9726   | 10169  |
| UN54461 | Rsa1.0.00113.1 | 333 | 131574 | 3.00E-76  | 158 | 161 | 98 +  | 173 | 333 | 60574  | 60733  |
| UN54462 | Rsa1.0.44085.1 | 798 | 510    | 1.00E-137 | 277 | 287 | 96 -  | 221 | 507 | 120    | 406    |
| UN54463 | Rsa1.0.00364.1 | 314 | 90951  | 1.00E-129 | 301 | 313 | 96 +  | 1   | 313 | 63339  | 63642  |
| UN54464 | Rsa1.0.00135.1 | 247 | 178077 | 3.00E-75  | 213 | 227 | 93 +  | 1   | 223 | 64073  | 64296  |
| UN54465 | Rsa1.0.00586.1 | 270 | 163802 | 8.00E-76  | 234 | 250 | 93 +  | 8   | 256 | 108981 | 109218 |
| UN54466 | Rsa1.0.50581.1 | 336 | 449    | 5.00E-90  | 201 | 207 | 97 -  | 2   | 208 | 87     | 288    |
| UN54467 | Rsa1.0.00090.1 | 240 | 273859 | 6.00E-55  | 176 | 188 | 93 -  | 32  | 219 | 171812 | 171990 |
| UN54468 | Rsa1.0.00662.1 | 795 | 192183 | 0         | 575 | 577 | 99 +  | 8   | 584 | 67039  | 67615  |
| UN54469 | Rsa1.0.07813.1 | 632 | 8493   | 0         | 430 | 430 | 100 - | 203 | 632 | 1044   | 1473   |
| UN54470 | Rsa1.0.01825.1 | 632 | 38725  | 0         | 479 | 480 | 99 -  | 154 | 632 | 27130  | 27609  |
| UN54471 | Rsa1.0.01779.1 | 116 | 39448  | 1.00E-35  | 86  | 88  | 97 -  | 6   | 92  | 33732  | 33819  |
| UN54472 | Rsa1.0.07584.1 | 131 | 9081   | 3.00E-49  | 127 | 134 | 94 +  | 1   | 131 | 2794   | 2927   |
| UN54473 | Rsa1.0.01456.1 | 224 | 45372  | 5.00E-43  | 205 | 224 | 91 -  | 1   | 224 | 3613   | 3820   |
| UN54474 | Rsa1.0.02185.1 | 313 | 34150  | 3.00E-17  | 99  | 109 | 90 -  | 3   | 111 | 21353  | 21454  |
| UN54475 | Rsa1.0.00281.1 | 357 | 99908  | 1.00E-152 | 341 | 352 | 96 -  | 8   | 357 | 65770  | 66113  |
| UN54476 | Rsa1.0.00141.1 | 422 | 121494 | 8.00E-68  | 228 | 249 | 91 -  | 1   | 249 | 32100  | 32337  |
| UN54477 | Rsa1.0.03764.1 | 635 | 20971  | 0         | 629 | 631 | 99 +  | 5   | 635 | 13045  | 13675  |
| UN54478 | Rsa1.0.00348.1 | 830 | 92818  | 0         | 391 | 406 | 96 -  | 426 | 830 | 49632  | 50033  |
| UN54479 | Rsa1.0.10714.1 | 639 | 5748   | 0         | 373 | 384 | 97 +  | 260 | 639 | 4278   | 4660   |
| UN54480 | Rsa1.0.00127.1 | 222 | 127446 | 1.00E-46  | 116 | 119 | 97 +  | 36  | 154 | 15124  | 15239  |
| UN54481 | Rsa1.0.00067.1 | 773 | 415055 | 3.00E-50  | 128 | 136 | 94 -  | 76  | 211 | 389887 | 390019 |

|         |                |     |        |           |     |     |       |     |     |        |        |
|---------|----------------|-----|--------|-----------|-----|-----|-------|-----|-----|--------|--------|
| UN54482 | Rsa1.0.32857.1 | 107 | 692    | 1.00E-16  | 86  | 96  | 89 -  | 5   | 100 | 163    | 255    |
| UN54483 | Rsa1.0.01604.1 | 608 | 42461  | 0         | 598 | 607 | 98 +  | 2   | 608 | 28427  | 29033  |
| UN54484 | Rsa1.0.01567.1 | 785 | 43090  | 1.00E-165 | 339 | 351 | 96 -  | 191 | 540 | 11163  | 11512  |
| UN54485 | Rsa1.0.03937.1 | 469 | 19969  | 1.00E-107 | 251 | 270 | 92 -  | 218 | 469 | 3032   | 3301   |
| UN54486 | Rsa1.0.00307.1 | 784 | 199003 | 0         | 451 | 471 | 95 -  | 7   | 476 | 56392  | 56853  |
| UN54487 | Rsa1.0.55271.1 | 596 | 413    | 1.00E-168 | 306 | 308 | 99 -  | 2   | 309 | 1      | 308    |
| UN54488 | Rsa1.0.00533.1 | 136 | 77375  | 8.00E-19  | 121 | 134 | 90 +  | 3   | 136 | 45493  | 45615  |
| UN54489 | Rsa1.0.00466.1 | 322 | 82132  | 1.00E-138 | 310 | 324 | 95 -  | 2   | 322 | 23693  | 24014  |
| UN54490 | Rsa1.0.03031.1 | 172 | 25839  | 5.00E-39  | 142 | 154 | 92 +  | 17  | 170 | 24691  | 24838  |
| UN54491 | Rsa1.0.00059.1 | 465 | 159650 | 1.00E-29  | 73  | 75  | 97 -  | 391 | 465 | 132036 | 132110 |
| UN54492 | Rsa1.0.02022.1 | 770 | 35923  | 1.00E-105 | 200 | 202 | 99 +  | 59  | 260 | 12645  | 12846  |
| UN54493 | Rsa1.0.00420.1 | 750 | 86496  | 1.00E-142 | 282 | 288 | 97 +  | 459 | 745 | 6921   | 7207   |
| UN54494 | #              | #   | #      | #         | #   | #   | #     | #   | #   | #      | #      |
| UN54495 | Rsa1.0.01649.1 | 737 | 41624  | 1.00E-140 | 277 | 285 | 97 +  | 3   | 287 | 34425  | 34709  |
| UN54496 | Rsa1.0.00408.1 | 726 | 176752 | 0         | 683 | 693 | 98 +  | 35  | 726 | 158973 | 159665 |
| UN54497 | Rsa1.0.00937.1 | 704 | 59061  | 0         | 332 | 333 | 99 +  | 372 | 704 | 30120  | 30452  |
| UN54498 | Rsa1.0.01351.1 | 753 | 47498  | 0         | 502 | 511 | 98 -  | 245 | 753 | 18722  | 19232  |
| UN54499 | Rsa1.0.06179.1 | 789 | 11548  | 2.00E-70  | 136 | 136 | 100 + | 480 | 615 | 7112   | 7247   |
| UN54500 | Rsa1.0.02711.1 | 701 | 28475  | 0         | 661 | 683 | 96 -  | 2   | 684 | 8786   | 9468   |
| UN54501 | Rsa1.0.02588.1 | 788 | 29840  | 0         | 378 | 388 | 97 -  | 2   | 389 | 28844  | 29226  |
| UN54502 | Rsa1.0.00965.1 | 451 | 58139  | 1.00E-107 | 197 | 197 | 100 + | 255 | 451 | 2060   | 2256   |
| UN54503 | Rsa1.0.00078.1 | 680 | 175053 | 1.00E-103 | 247 | 262 | 94 -  | 423 | 680 | 42644  | 42905  |
| UN54504 | Rsa1.0.01606.1 | 855 | 42432  | 0         | 645 | 664 | 97 -  | 200 | 855 | 9169   | 9832   |
| UN54505 | Rsa1.0.01540.1 | 841 | 151890 | 1.00E-123 | 236 | 240 | 98 -  | 441 | 680 | 144792 | 145031 |
| UN54506 | Rsa1.0.00104.1 | 853 | 368722 | 1.00E-122 | 290 | 311 | 93 +  | 25  | 332 | 167025 | 167332 |
| UN54507 | Rsa1.0.04340.1 | 540 | 17831  | 0         | 534 | 538 | 99 +  | 3   | 540 | 4040   | 4576   |
| UN54508 | Rsa1.0.00548.1 | 828 | 76518  | 3.00E-87  | 167 | 168 | 99 -  | 401 | 568 | 37246  | 37413  |
| UN54509 | Rsa1.0.04260.1 | 809 | 18238  | 0         | 702 | 776 | 90 +  | 37  | 809 | 11207  | 11946  |
| UN54510 | Rsa1.0.00071.1 | 808 | 345714 | 1.00E-148 | 286 | 290 | 98 -  | 521 | 808 | 336644 | 336933 |
| UN54511 | Rsa1.0.07850.1 | 739 | 8423   | 3.00E-99  | 295 | 329 | 89 +  | 194 | 496 | 5806   | 6134   |
| UN54512 | Rsa1.0.01444.1 | 807 | 169539 | 1.00E-160 | 321 | 333 | 96 -  | 482 | 807 | 132459 | 132791 |
| UN54513 | Rsa1.0.02871.1 | 635 | 27085  | 0         | 368 | 376 | 97 -  | 260 | 635 | 1640   | 2014   |
| UN54514 | Rsa1.0.00806.1 | 730 | 63674  | 0         | 401 | 413 | 97 +  | 2   | 414 | 4163   | 4575   |
| UN54515 | Rsa1.0.31836.1 | 780 | 717    | 1.00E-113 | 226 | 232 | 97 +  | 358 | 589 | 1      | 232    |
| UN54516 | Rsa1.0.00077.1 | 776 | 145005 | 2.00E-85  | 173 | 177 | 97 -  | 4   | 180 | 70040  | 70216  |
| UN54517 | Rsa1.0.00156.1 | 462 | 118383 | 1.00E-136 | 254 | 257 | 98 +  | 206 | 462 | 39658  | 39914  |
| UN54518 | Rsa1.0.04387.1 | 835 | 17625  | 1.00E-140 | 300 | 312 | 96 +  | 526 | 834 | 7389   | 7699   |
| UN54519 | Rsa1.0.00391.1 | 705 | 183853 | 1.00E-108 | 202 | 203 | 99 -  | 324 | 526 | 33142  | 33344  |
| UN54520 | Rsa1.0.00868.1 | 520 | 61630  | 3.00E-92  | 232 | 252 | 92 -  | 166 | 417 | 28178  | 28429  |



|         |                |     |        |           |     |     |       |     |     |        |        |
|---------|----------------|-----|--------|-----------|-----|-----|-------|-----|-----|--------|--------|
| UN54521 | Rsa1.0.01476.1 | 566 | 172928 | 0         | 536 | 566 | 94 +  | 1   | 566 | 10887  | 11439  |
| UN54522 | Rsa1.0.00104.1 | 757 | 368722 | 7.00E-48  | 203 | 238 | 85 -  | 19  | 256 | 175033 | 175270 |
| UN54523 | Rsa1.0.01436.1 | 847 | 45894  | 1.00E-95  | 190 | 194 | 97 +  | 414 | 607 | 14569  | 14762  |
| UN54524 | Rsa1.0.04646.1 | 638 | 16541  | 0         | 614 | 635 | 96 -  | 4   | 637 | 4233   | 4866   |
| UN54525 | Rsa1.0.00010.1 | 859 | 294827 | 1.00E-171 | 347 | 361 | 96 -  | 5   | 365 | 124003 | 124363 |
| UN54526 | Rsa1.0.00192.1 | 769 | 278200 | 1.00E-168 | 445 | 489 | 91 +  | 26  | 510 | 90290  | 90775  |
| UN54527 | Rsa1.0.00451.1 | 117 | 322533 | 7.00E-28  | 93  | 99  | 93 -  | 1   | 99  | 997    | 1092   |
| UN54528 | Rsa1.0.03764.1 | 611 | 20971  | 1.00E-132 | 448 | 516 | 86 +  | 36  | 550 | 14256  | 14767  |
| UN54529 | Rsa1.0.00038.1 | 645 | 314568 | 0         | 609 | 656 | 92 +  | 3   | 645 | 272230 | 272885 |
| UN54530 | Rsa1.0.01364.1 | 769 | 47172  | 0         | 492 | 503 | 97 -  | 239 | 741 | 35257  | 35759  |
| UN54531 | Rsa1.0.00208.1 | 786 | 108565 | 0         | 479 | 525 | 91 -  | 144 | 664 | 24737  | 25234  |
| UN54532 | Rsa1.0.00069.1 | 305 | 403561 | 2.33E-156 | 297 | 306 | 97 +  | 2   | 305 | 14838  | 15143  |
| UN54533 | Rsa1.0.03646.1 | 111 | 21598  | 4.00E-23  | 83  | 87  | 95 -  | 12  | 98  | 7637   | 7719   |
| UN54534 | Rsa1.0.00864.1 | 742 | 61702  | 0         | 402 | 409 | 98 +  | 334 | 742 | 23698  | 24106  |
| UN54535 | Rsa1.0.00418.1 | 851 | 215377 | 1.00E-102 | 190 | 190 | 100 + | 482 | 671 | 14667  | 14856  |
| UN54536 | Rsa1.0.01704.1 | 702 | 40711  | 1.00E-117 | 231 | 236 | 97 +  | 160 | 392 | 4393   | 4628   |
| UN54537 | Rsa1.0.03774.1 | 545 | 20932  | 1.00E-150 | 305 | 314 | 97 +  | 4   | 317 | 6510   | 6821   |
| UN54538 | Rsa1.0.00978.1 | 142 | 57739  | 5.00E-54  | 142 | 147 | 96 +  | 1   | 142 | 42782  | 42928  |
| UN54539 | Rsa1.0.06168.1 | 747 | 11580  | 7.00E-54  | 150 | 161 | 93 +  | 381 | 536 | 7866   | 8025   |
| UN54540 | Rsa1.0.03949.1 | 858 | 19899  | 1.00E-123 | 237 | 240 | 98 +  | 3   | 241 | 7428   | 7667   |
| UN54541 | Rsa1.0.00356.1 | 652 | 91521  | 0         | 609 | 676 | 90 +  | 1   | 652 | 37926  | 38583  |
| UN54542 | Rsa1.0.00225.1 | 883 | 105892 | 0         | 851 | 881 | 96 -  | 3   | 881 | 71406  | 72283  |
| UN54543 | Rsa1.0.01625.1 | 707 | 42019  | 1.00E-140 | 268 | 273 | 98 -  | 435 | 707 | 20460  | 20732  |
| UN54544 | #              | #   | #      | #         | #   | #   | #     | #   | #   | #      | #      |
| UN54545 | Rsa1.0.08955.1 | 323 | 6754   | 5.00E-93  | 188 | 193 | 97 +  | 1   | 193 | 6451   | 6643   |
| UN54546 | Rsa1.0.05748.1 | 779 | 12749  | 0         | 772 | 779 | 99 -  | 1   | 779 | 11377  | 12155  |
| UN54547 | Rsa1.0.00067.1 | 765 | 415055 | 0         | 557 | 585 | 95 -  | 168 | 744 | 227602 | 228184 |
| UN54548 | Rsa1.0.02430.1 | 352 | 31506  | 1.00E-93  | 259 | 273 | 94 -  | 5   | 277 | 12980  | 13240  |
| UN54549 | Rsa1.0.01484.1 | 100 | 44806  | 2.00E-15  | 77  | 82  | 93 -  | 1   | 82  | 14433  | 14509  |
| UN54550 | Rsa1.0.00108.1 | 747 | 478491 | 1.00E-126 | 304 | 329 | 92 +  | 62  | 375 | 7746   | 8074   |
| UN54551 | Rsa1.0.00113.1 | 787 | 131574 | 0         | 576 | 589 | 97 +  | 144 | 732 | 7814   | 8402   |
| UN54552 | Rsa1.0.00805.1 | 310 | 63724  | 1.00E-149 | 275 | 276 | 99 +  | 33  | 308 | 5626   | 5900   |
| UN54553 | Rsa1.0.00008.1 | 283 | 358124 | 1.00E-132 | 271 | 282 | 96 +  | 2   | 283 | 62302  | 62583  |
| UN54554 | Rsa1.0.00374.1 | 666 | 165738 | 1.00E-177 | 327 | 331 | 98 +  | 1   | 331 | 128276 | 128606 |
| UN54555 | Rsa1.0.00065.1 | 840 | 454616 | 6.00E-70  | 138 | 139 | 99 +  | 239 | 377 | 23814  | 23952  |
| UN54556 | Rsa1.0.02220.1 | 818 | 176031 | 0         | 739 | 800 | 92 -  | 35  | 818 | 168893 | 169668 |
| UN54557 | Rsa1.0.00566.1 | 790 | 75325  | 1.00E-124 | 309 | 332 | 93 -  | 451 | 782 | 24535  | 24860  |
| UN54558 | Rsa1.0.00258.1 | 532 | 102381 | 0         | 527 | 531 | 99 -  | 2   | 532 | 47601  | 48131  |
| UN54559 | Rsa1.0.00453.1 | 843 | 83031  | 0         | 413 | 424 | 97 +  | 425 | 843 | 75551  | 75974  |

|         |                |     |        |           |     |     |       |     |     |        |        |
|---------|----------------|-----|--------|-----------|-----|-----|-------|-----|-----|--------|--------|
| UN54560 | Rsa1.0.00065.1 | 847 | 454616 | 1.00E-135 | 265 | 272 | 97 -  | 102 | 373 | 40865  | 41136  |
| UN54561 | Rsa1.0.02121.1 | 585 | 34813  | 0         | 533 | 581 | 91 -  | 1   | 581 | 15415  | 15995  |
| UN54562 | Rsa1.0.01583.1 | 599 | 156297 | 7.00E-63  | 123 | 123 | 100 - | 183 | 305 | 129792 | 129914 |
| UN54563 | Rsa1.0.00169.1 | 780 | 274298 | 0         | 532 | 555 | 95 -  | 235 | 780 | 27329  | 27880  |
| UN54564 | Rsa1.0.05479.1 | 844 | 13603  | 5.00E-80  | 161 | 164 | 98 +  | 426 | 589 | 4476   | 4639   |
| UN54565 | Rsa1.0.00358.1 | 884 | 91293  | 1.00E-125 | 243 | 247 | 98 +  | 260 | 505 | 32622  | 32868  |
| UN54566 | Rsa1.0.00636.1 | 778 | 71113  | 0         | 741 | 803 | 92 -  | 2   | 778 | 39143  | 39924  |
| UN54567 | Rsa1.0.07657.1 | 828 | 8896   | 0         | 515 | 518 | 99 +  | 3   | 520 | 7402   | 7919   |
| UN54568 | Rsa1.0.14876.1 | 599 | 2997   | 3.00E-40  | 115 | 125 | 92 -  | 178 | 302 | 2248   | 2372   |
| UN54569 | Rsa1.0.02678.1 | 792 | 135053 | 1.00E-150 | 343 | 367 | 93 -  | 3   | 363 | 130452 | 130810 |
| UN54570 | Rsa1.0.05153.1 | 790 | 14663  | 1.00E-140 | 274 | 281 | 97 -  | 1   | 281 | 2220   | 2500   |
| UN54571 | Rsa1.0.03088.1 | 471 | 25476  | 0         | 353 | 359 | 98 +  | 114 | 471 | 500    | 858    |
| UN54572 | Rsa1.0.05743.1 | 629 | 12768  | 1.00E-137 | 281 | 290 | 96 +  | 342 | 629 | 222    | 510    |
| UN54573 | Rsa1.0.02751.1 | 561 | 28238  | 0         | 531 | 565 | 93 -  | 2   | 561 | 15955  | 16517  |
| UN54574 | Rsa1.0.02070.1 | 860 | 158516 | 1.00E-138 | 255 | 257 | 99 -  | 313 | 569 | 1816   | 2072   |
| UN54575 | Rsa1.0.00350.1 | 593 | 92346  | 1.00E-134 | 248 | 250 | 99 +  | 3   | 252 | 50551  | 50800  |
| UN54576 | Rsa1.0.01925.1 | 834 | 37220  | 1.00E-144 | 299 | 309 | 96 +  | 3   | 308 | 5430   | 5736   |
| UN54577 | Rsa1.0.00145.1 | 777 | 261008 | 1.00E-103 | 325 | 371 | 87 -  | 422 | 773 | 95967  | 96323  |
| UN54578 | Rsa1.0.00050.1 | 252 | 237174 | 3.00E-63  | 219 | 247 | 88 +  | 6   | 252 | 4987   | 5220   |
| UN54579 | Rsa1.0.02884.1 | 677 | 27034  | 0         | 480 | 496 | 96 -  | 182 | 677 | 8131   | 8626   |
| UN54580 | Rsa1.0.01145.1 | 730 | 149247 | 1.00E-98  | 198 | 203 | 97 +  | 424 | 626 | 108241 | 108443 |
| UN54581 | Rsa1.0.04601.1 | 530 | 16686  | 0         | 341 | 344 | 99 -  | 3   | 344 | 13360  | 13703  |
| UN54582 | Rsa1.0.02218.1 | 740 | 33809  | 0         | 702 | 733 | 95 +  | 8   | 740 | 24480  | 25209  |
| UN54583 | Rsa1.0.06571.1 | 674 | 10750  | 6.00E-48  | 98  | 98  | 100 - | 322 | 419 | 8062   | 8159   |
| UN54584 | Rsa1.0.04698.1 | 359 | 16335  | 1.00E-151 | 313 | 327 | 95 -  | 2   | 328 | 7896   | 8222   |
| UN54585 | Rsa1.0.00769.1 | 557 | 64911  | 0         | 554 | 558 | 99 -  | 1   | 557 | 35772  | 36329  |
| UN54586 | Rsa1.0.03576.1 | 656 | 21986  | 1.00E-111 | 204 | 204 | 100 + | 453 | 656 | 2933   | 3136   |
| UN54587 | Rsa1.0.04211.1 | 709 | 18440  | 0         | 569 | 616 | 92 -  | 1   | 602 | 1578   | 2188   |
| UN54588 | Rsa1.0.00066.1 | 157 | 152418 | 3.00E-74  | 153 | 157 | 97 -  | 1   | 157 | 94568  | 94724  |
| UN54589 | Rsa1.0.00250.1 | 127 | 273771 | 8.00E-28  | 104 | 116 | 89 -  | 1   | 116 | 243541 | 243651 |
| UN54590 | Rsa1.0.08961.1 | 398 | 6750   | 1.00E-105 | 306 | 338 | 90 +  | 1   | 336 | 4417   | 4752   |
| UN54591 | Rsa1.0.05293.1 | 207 | 14237  | 2.00E-17  | 52  | 54  | 96 +  | 30  | 83  | 9874   | 9927   |
| UN54592 | Rsa1.0.00743.1 | 846 | 177459 | 0         | 616 | 620 | 99 +  | 173 | 792 | 111928 | 112547 |
| UN54593 | Rsa1.0.04223.1 | 434 | 18407  | 1.00E-125 | 312 | 338 | 92 +  | 27  | 364 | 9488   | 9816   |
| UN54594 | Rsa1.0.20706.1 | 107 | 1277   | 2.00E-37  | 104 | 110 | 94 +  | 1   | 107 | 1019   | 1128   |
| UN54595 | Rsa1.0.16597.1 | 451 | 2098   | 1.00E-108 | 253 | 271 | 93 -  | 184 | 450 | 1485   | 1755   |
| UN54596 | Rsa1.0.06978.1 | 120 | 10073  | 4.00E-11  | 53  | 59  | 89 +  | 8   | 66  | 1842   | 1900   |
| UN54597 | Rsa1.0.04085.1 | 147 | 19168  | 3.00E-49  | 126 | 135 | 93 +  | 3   | 137 | 1989   | 2123   |
| UN54598 | Rsa1.0.00321.1 | 179 | 95671  | 1.00E-49  | 135 | 140 | 96 +  | 31  | 170 | 27452  | 27586  |

| UN54599 | #              | #   | #      | #         | #   | #   | #     | #   | #   | #      | #      | # |
|---------|----------------|-----|--------|-----------|-----|-----|-------|-----|-----|--------|--------|---|
| UN54600 | Rsa1.0_00417.1 | 156 | 395068 | 2.00E-59  | 148 | 156 | 94 +  | 1   | 156 | 13671  | 13824  |   |
| UN54601 | Rsa1.0_00190.1 | 549 | 318240 | 1.00E-148 | 371 | 396 | 93 +  | 4   | 390 | 300531 | 300925 |   |
| UN54602 | Rsa1.0_00284.1 | 216 | 323267 | 8.00E-88  | 203 | 216 | 93 +  | 1   | 216 | 132183 | 132398 |   |
| UN54603 | Rsa1.0_09385.1 | 538 | 6405   | 1.00E-178 | 400 | 428 | 93 -  | 4   | 431 | 3450   | 3877   |   |
| UN54604 | Rsa1.0_00294.1 | 816 | 144860 | 0         | 724 | 749 | 96 +  | 68  | 816 | 115613 | 116360 |   |
| UN54605 | Rsa1.0_00026.1 | 188 | 327835 | 4.00E-83  | 180 | 188 | 95 -  | 1   | 188 | 152538 | 152725 |   |
| UN54606 | Rsa1.0_44971.1 | 779 | 501    | 0         | 354 | 358 | 98 -  | 2   | 359 | 15     | 372    |   |
| UN54607 | Rsa1.0_00228.1 | 734 | 105511 | 1.00E-110 | 211 | 214 | 98 +  | 521 | 734 | 39328  | 39541  |   |
| UN54608 | Rsa1.0_04819.1 | 517 | 140505 | 1.00E-103 | 238 | 250 | 95 -  | 1   | 247 | 5268   | 5512   |   |
| UN54609 | Rsa1.0_02082.1 | 126 | 35228  | 2.00E-37  | 113 | 123 | 91 -  | 5   | 126 | 15720  | 15842  |   |
| UN54610 | Rsa1.0_01058.1 | 331 | 55430  | 1.00E-180 | 328 | 331 | 99 +  | 1   | 331 | 32159  | 32489  |   |
| UN54611 | Rsa1.0_07835.1 | 131 | 8453   | 3.00E-49  | 120 | 127 | 94 -  | 1   | 127 | 6385   | 6511   |   |
| UN54612 | Rsa1.0_03072.1 | 682 | 25577  | 0         | 369 | 373 | 98 -  | 1   | 373 | 14936  | 15308  |   |
| UN54613 | Rsa1.0_01549.1 | 711 | 43543  | 0         | 704 | 711 | 99 +  | 3   | 711 | 6285   | 6995   |   |
| UN54614 | Rsa1.0_01448.1 | 496 | 45645  | 1.00E-54  | 139 | 149 | 93 +  | 1   | 149 | 39465  | 39613  |   |
| UN54615 | Rsa1.0_01029.1 | 150 | 256254 | 6.00E-63  | 131 | 134 | 97 -  | 8   | 141 | 131721 | 131854 |   |
| UN54616 | Rsa1.0_00399.1 | 827 | 242951 | 1.00E-140 | 307 | 321 | 95 +  | 1   | 320 | 51523  | 51841  |   |
| UN54617 | Rsa1.0_00356.1 | 790 | 91521  | 1.00E-106 | 237 | 248 | 95 +  | 12  | 259 | 45150  | 45391  |   |
| UN54618 | Rsa1.0_00351.1 | 140 | 413096 | 2.00E-28  | 73  | 76  | 96 -  | 65  | 140 | 242134 | 242209 |   |
| UN54619 | Rsa1.0_05043.1 | 432 | 15044  | 1.00E-151 | 324 | 339 | 95 -  | 3   | 340 | 332    | 664    |   |
| UN54620 | Rsa1.0_03069.1 | 809 | 25615  | 0         | 364 | 370 | 98 +  | 440 | 809 | 18568  | 18937  |   |
| UN54621 | Rsa1.0_00025.1 | 733 | 277312 | 0         | 380 | 383 | 99 -  | 1   | 383 | 226605 | 226987 |   |
| UN54622 | Rsa1.0_00719.1 | 508 | 66952  | 1.00E-125 | 259 | 267 | 97 -  | 1   | 266 | 44599  | 44863  |   |
| UN54623 | Rsa1.0_00158.1 | 141 | 117999 | 4.00E-67  | 138 | 141 | 97 -  | 1   | 141 | 100445 | 100585 |   |
| UN54624 | Rsa1.0_00991.1 | 643 | 143101 | 0         | 404 | 415 | 97 -  | 229 | 643 | 133543 | 133957 |   |
| UN54625 | Rsa1.0_00327.1 | 801 | 94892  | 0         | 552 | 586 | 94 +  | 217 | 801 | 35603  | 36183  |   |
| UN54626 | Rsa1.0_00535.1 | 609 | 77239  | 0         | 474 | 515 | 92 +  | 109 | 609 | 6987   | 7499   |   |
| UN54627 | Rsa1.0_00054.1 | 694 | 162053 | 1.00E-165 | 298 | 299 | 99 +  | 1   | 299 | 151824 | 152122 |   |
| UN54628 | Rsa1.0_02096.1 | 691 | 35041  | 0         | 465 | 469 | 99 -  | 1   | 468 | 4771   | 5239   |   |
| UN54629 | Rsa1.0_08133.1 | 107 | 7852   | 7.00E-40  | 98  | 103 | 95 -  | 5   | 107 | 2038   | 2140   |   |
| UN54630 | Rsa1.0_01811.1 | 541 | 38977  | 0         | 539 | 541 | 99 -  | 1   | 541 | 19046  | 19585  |   |
| UN54631 | Rsa1.0_00369.1 | 142 | 266462 | 1.00E-29  | 69  | 70  | 98 +  | 73  | 142 | 5136   | 5205   |   |
| UN54632 | Rsa1.0_02565.1 | 247 | 30046  | 2.00E-39  | 83  | 83  | 100 - | 113 | 195 | 27406  | 27488  |   |
| UN54633 | Rsa1.0_00434.1 | 786 | 85171  | 0         | 755 | 768 | 98 +  | 3   | 770 | 54016  | 54783  |   |
| UN54634 | Rsa1.0_00853.1 | 156 | 62101  | 2.00E-53  | 139 | 150 | 92 +  | 7   | 156 | 41721  | 41870  |   |
| UN54635 | Rsa1.0_00434.1 | 413 | 85171  | 1.00E-97  | 199 | 205 | 97 -  | 1   | 205 | 36365  | 36569  |   |
| UN54636 | Rsa1.0_00449.1 | 726 | 83863  | 0         | 617 | 622 | 99 -  | 8   | 629 | 13044  | 13665  |   |
| UN54637 | Rsa1.0_00195.1 | 674 | 251884 | 0         | 453 | 483 | 93 -  | 1   | 469 | 208307 | 208786 |   |

|         |                |     |        |           |     |     |       |     |     |        |        |
|---------|----------------|-----|--------|-----------|-----|-----|-------|-----|-----|--------|--------|
| UN54638 | Rsa1.0.02450.1 | 813 | 31288  | 1.00E-166 | 396 | 430 | 92 +  | 1   | 430 | 17961  | 18367  |
| UN54639 | Rsa1.0.06883.1 | 844 | 10210  | 0         | 478 | 501 | 95 +  | 2   | 494 | 5349   | 5845   |
| UN54640 | Rsa1.0.08583.1 | 612 | 7161   | 1.00E-160 | 349 | 370 | 94 +  | 5   | 374 | 960    | 1329   |
| UN54641 | Rsa1.0.02116.1 | 891 | 34853  | 2.00E-76  | 161 | 166 | 96 +  | 527 | 692 | 27429  | 27594  |
| UN54642 | Rsa1.0.00034.1 | 299 | 260119 | 4.00E-35  | 88  | 92  | 95 -  | 116 | 207 | 89035  | 89126  |
| UN54643 | Rsa1.0.01578.1 | 291 | 42880  | 7.00E-92  | 261 | 291 | 89 -  | 1   | 291 | 31376  | 31666  |
| UN54644 | Rsa1.0.00127.1 | 324 | 127446 | 4.00E-84  | 279 | 317 | 88 -  | 11  | 316 | 114976 | 115290 |
| UN54645 | Rsa1.0.36288.1 | 305 | 621    | 5.00E-28  | 67  | 68  | 98 +  | 226 | 293 | 1      | 68     |
| UN54646 | Rsa1.0.01119.1 | 200 | 53459  | 1.00E-77  | 175 | 183 | 95 -  | 11  | 192 | 23902  | 24084  |
| UN54647 | Rsa1.0.02994.1 | 230 | 26168  | 1.00E-107 | 218 | 225 | 96 +  | 6   | 230 | 2351   | 2575   |
| UN54648 | Rsa1.0.01827.1 | 736 | 143321 | 0         | 342 | 343 | 99 -  | 1   | 343 | 135719 | 136061 |
| UN54649 | Rsa1.0.03565.1 | 953 | 22062  | 1.00E-112 | 276 | 301 | 91 +  | 57  | 347 | 1974   | 2274   |
| UN54650 | Rsa1.0.00047.1 | 643 | 168582 | 1.00E-160 | 305 | 309 | 98 -  | 1   | 309 | 5017   | 5322   |
| UN54651 | Rsa1.0.00033.1 | 628 | 515811 | 0         | 590 | 618 | 95 +  | 1   | 618 | 36139  | 36748  |
| UN54652 | Rsa1.0.05293.1 | 494 | 14237  | 1.00E-143 | 351 | 382 | 91 +  | 109 | 490 | 6325   | 6706   |
| UN54653 | Rsa1.0.03295.1 | 191 | 23970  | 1.00E-64  | 167 | 181 | 92 -  | 9   | 189 | 6866   | 7046   |
| UN54654 | Rsa1.0.00805.1 | 251 | 63724  | 1.00E-106 | 237 | 251 | 94 +  | 1   | 251 | 13674  | 13924  |
| UN54655 | Rsa1.0.01208.1 | 705 | 50718  | 4.00E-80  | 170 | 176 | 96 -  | 28  | 203 | 27949  | 28124  |
| UN54656 | Rsa1.0.00123.1 | 220 | 325650 | 2.00E-32  | 95  | 103 | 92 +  | 59  | 161 | 60409  | 60511  |
| UN54657 | Rsa1.0.04071.1 | 140 | 19243  | 5.00E-48  | 109 | 113 | 96 +  | 25  | 137 | 11237  | 11349  |
| UN54658 | Rsa1.0.48795.1 | 752 | 464    | 1.00E-142 | 313 | 328 | 95 +  | 426 | 752 | 1      | 326    |
| UN54659 | Rsa1.0.00053.1 | 828 | 263459 | 0         | 602 | 667 | 90 -  | 165 | 828 | 192627 | 193292 |
| UN54660 | Rsa1.0.15978.1 | 706 | 2333   | 0         | 362 | 372 | 97 -  | 9   | 375 | 1      | 370    |
| UN54661 | Rsa1.0.03921.1 | 694 | 20080  | 1.00E-177 | 355 | 366 | 96 +  | 2   | 365 | 7139   | 7504   |
| UN54662 | Rsa1.0.00707.1 | 854 | 190112 | 1.00E-157 | 305 | 312 | 97 +  | 1   | 310 | 155116 | 155427 |
| UN54663 | Rsa1.0.00101.1 | 601 | 267193 | 0         | 478 | 498 | 95 -  | 3   | 499 | 161020 | 161511 |
| UN54664 | Rsa1.0.00438.1 | 686 | 84861  | 0         | 352 | 352 | 100 - | 278 | 629 | 67511  | 67862  |
| UN54665 | Rsa1.0.01762.1 | 129 | 39682  | 1.00E-35  | 88  | 92  | 95 +  | 3   | 94  | 7176   | 7267   |
| UN54666 | Rsa1.0.01182.1 | 334 | 167304 | 1.00E-129 | 309 | 332 | 93 +  | 6   | 334 | 131327 | 131658 |
| UN54667 | Rsa1.0.02429.1 | 171 | 31527  | 6.00E-57  | 153 | 166 | 92 -  | 9   | 171 | 17279  | 17444  |
| UN54668 | Rsa1.0.00001.1 | 331 | 363028 | 2.00E-83  | 199 | 213 | 93 +  | 1   | 213 | 315047 | 315259 |
| UN54669 | Rsa1.0.02438.1 | 196 | 31392  | 2.00E-66  | 186 | 202 | 92 -  | 1   | 196 | 4159   | 4356   |
| UN54670 | Rsa1.0.00096.1 | 287 | 198773 | 1.00E-114 | 271 | 290 | 93 +  | 1   | 287 | 32958  | 33246  |
| UN54671 | Rsa1.0.04573.1 | 465 | 16789  | 1.00E-119 | 217 | 217 | 100 - | 5   | 221 | 2938   | 3154   |
| UN54672 | #              | #   | #      | #         | #   | #   | #     | #   | #   | #      | #      |
| UN54673 | Rsa1.0.00948.1 | 184 | 58620  | 3.00E-56  | 129 | 135 | 95 -  | 45  | 179 | 50456  | 50590  |
| UN54674 | Rsa1.0.00875.1 | 596 | 61371  | 0         | 575 | 596 | 96 +  | 1   | 596 | 6987   | 7582   |
| UN54675 | Rsa1.0.02935.1 | 117 | 26621  | 9.00E-43  | 106 | 112 | 94 +  | 6   | 117 | 24481  | 24592  |
| UN54676 | Rsa1.0.03605.1 | 128 | 21827  | 1.00E-45  | 111 | 117 | 94 -  | 1   | 117 | 20346  | 20462  |

| UN54677 | #              | #   | #      | #         | #   | #   | #     | #   | #   | #      | #      | # |
|---------|----------------|-----|--------|-----------|-----|-----|-------|-----|-----|--------|--------|---|
| UN54678 | Rsa1.0_01969.1 | 811 | 153351 | 0         | 369 | 385 | 95 +  | 2   | 385 | 15024  | 15399  |   |
| UN54679 | Rsa1.0_00300.1 | 296 | 97747  | 1.00E-123 | 273 | 289 | 94 -  | 1   | 289 | 82807  | 83091  |   |
| UN54680 | Rsa1.0_00051.1 | 322 | 258225 | 1.00E-139 | 304 | 322 | 94 +  | 1   | 322 | 119617 | 119938 |   |
| UN54681 | Rsa1.0_01869.1 | 598 | 37928  | 0         | 580 | 593 | 97 +  | 6   | 598 | 6776   | 7368   |   |
| UN54682 | Rsa1.0_01421.1 | 773 | 46197  | 0         | 353 | 361 | 97 +  | 1   | 361 | 27422  | 27781  |   |
| UN54683 | Rsa1.0_00077.1 | 812 | 145005 | 0         | 474 | 485 | 97 -  | 3   | 487 | 18639  | 19123  |   |
| UN54684 | Rsa1.0_13238.1 | 747 | 4960   | 1.00E-123 | 290 | 310 | 93 -  | 3   | 305 | 2473   | 2780   |   |
| UN54685 | Rsa1.0_01669.1 | 296 | 41286  | 1.00E-93  | 237 | 258 | 91 +  | 1   | 258 | 11734  | 11991  |   |
| UN54686 | Rsa1.0_00374.1 | 181 | 165738 | 1.00E-76  | 172 | 181 | 95 -  | 1   | 181 | 95181  | 95361  |   |
| UN54687 | Rsa1.0_01148.1 | 142 | 52375  | 1.00E-48  | 131 | 142 | 92 +  | 1   | 142 | 31732  | 31873  |   |
| UN54688 | Rsa1.0_00890.1 | 680 | 323870 | 0         | 518 | 531 | 97 +  | 11  | 541 | 16738  | 17268  |   |
| UN54689 | #              | #   | #      | #         | #   | #   | #     | #   | #   | #      | #      |   |
| UN54690 | Rsa1.0_00929.1 | 783 | 137796 | 0         | 652 | 656 | 99 -  | 1   | 656 | 134676 | 135331 |   |
| UN54691 | Rsa1.0_23114.1 | 134 | 1070   | 2.00E-41  | 113 | 122 | 92 +  | 13  | 134 | 381    | 502    |   |
| UN54692 | Rsa1.0_03062.1 | 233 | 25678  | 9.00E-57  | 139 | 148 | 93 +  | 1   | 148 | 6127   | 6274   |   |
| UN54693 | Rsa1.0_01955.1 | 438 | 36850  | 3.00E-24  | 121 | 140 | 86 -  | 190 | 325 | 13739  | 13878  |   |
| UN54694 | Rsa1.0_01151.1 | 360 | 52268  | 1.00E-150 | 335 | 357 | 93 -  | 1   | 357 | 30069  | 30425  |   |
| UN54695 | Rsa1.0_05136.1 | 775 | 14729  | 0         | 756 | 781 | 96 +  | 1   | 775 | 13599  | 14367  |   |
| UN54696 | Rsa1.0_07959.1 | 102 | 8173   | 2.00E-12  | 58  | 65  | 89 -  | 27  | 91  | 5855   | 5919   |   |
| UN54697 | Rsa1.0_01223.1 | 115 | 50392  | 1.00E-38  | 108 | 117 | 92 -  | 1   | 112 | 48354  | 48470  |   |
| UN54698 | Rsa1.0_00018.1 | 330 | 410899 | 1.00E-139 | 313 | 330 | 94 +  | 1   | 330 | 79127  | 79452  |   |
| UN54699 | Rsa1.0_05445.1 | 270 | 13718  | 1.00E-123 | 256 | 267 | 95 +  | 1   | 267 | 13232  | 13498  |   |
| UN54700 | Rsa1.0_00346.1 | 780 | 93130  | 0         | 359 | 360 | 99 +  | 3   | 362 | 53929  | 54287  |   |
| UN54701 | Rsa1.0_00121.1 | 106 | 278029 | 6.00E-22  | 71  | 77  | 92 +  | 30  | 106 | 123394 | 123470 |   |
| UN54702 | Rsa1.0_02626.1 | 422 | 29387  | 1.00E-165 | 371 | 397 | 93 +  | 1   | 388 | 22899  | 23293  |   |
| UN54703 | Rsa1.0_15450.1 | 585 | 2598   | 2.00E-69  | 140 | 142 | 98 +  | 242 | 383 | 520    | 661    |   |
| UN54704 | Rsa1.0_01330.1 | 752 | 47960  | 0         | 750 | 751 | 99 +  | 1   | 751 | 15903  | 16653  |   |
| UN54705 | Rsa1.0_05782.1 | 169 | 12646  | 6.00E-51  | 120 | 126 | 95 -  | 8   | 133 | 8980   | 9105   |   |
| UN54706 | Rsa1.0_02194.1 | 153 | 34029  | 1.00E-64  | 143 | 149 | 95 -  | 1   | 149 | 33565  | 33713  |   |
| UN54707 | Rsa1.0_05648.1 | 829 | 13049  | 1.00E-169 | 324 | 330 | 98 +  | 1   | 329 | 11096  | 11425  |   |
| UN54708 | Rsa1.0_00451.1 | 109 | 322533 | 7.00E-37  | 78  | 78  | 100 + | 1   | 78  | 247820 | 247897 |   |
| UN54709 | Rsa1.0_06021.1 | 124 | 11911  | 2.00E-13  | 45  | 47  | 95 +  | 78  | 124 | 5328   | 5374   |   |
| UN54710 | Rsa1.0_00436.1 | 498 | 85008  | 1.00E-66  | 135 | 137 | 98 +  | 361 | 497 | 63846  | 63982  |   |
| UN54711 | Rsa1.0_01531.1 | 169 | 43778  | 3.00E-74  | 162 | 169 | 95 -  | 1   | 169 | 17306  | 17474  |   |
| UN54712 | Rsa1.0_02900.1 | 870 | 26928  | 0         | 586 | 605 | 96 +  | 81  | 685 | 384    | 988    |   |
| UN54713 | Rsa1.0_00170.1 | 181 | 179538 | 1.00E-73  | 171 | 181 | 94 +  | 1   | 181 | 57852  | 58028  |   |
| UN54714 | Rsa1.0_16822.1 | 789 | 2022   | 0         | 666 | 709 | 93 -  | 94  | 789 | 1324   | 2022   |   |
| UN54715 | Rsa1.0_00055.1 | 696 | 520193 | 0         | 687 | 695 | 98 +  | 2   | 696 | 275704 | 276398 |   |

| UN54716 | #              | #   | #      | #         | #   | #   | #    | #   | #   | #      | #      | # |
|---------|----------------|-----|--------|-----------|-----|-----|------|-----|-----|--------|--------|---|
| UN54717 | Rsa1.0.39477.1 | 698 | 570    | 3.00E-53  | 110 | 111 | 99 + | 452 | 562 | 156    | 266    |   |
| UN54718 | Rsa1.0.06647.1 | 128 | 10604  | 4.00E-45  | 102 | 104 | 98 - | 1   | 104 | 6455   | 6557   |   |
| UN54719 | Rsa1.0.07831.1 | 173 | 8461   | 5.00E-67  | 159 | 169 | 94 - | 2   | 170 | 5195   | 5363   |   |
| UN54720 | Rsa1.0.00382.1 | 104 | 251946 | 9.00E-24  | 86  | 96  | 89 + | 9   | 104 | 173226 | 173321 |   |
| UN54721 | Rsa1.0.00360.1 | 105 | 91190  | 1.00E-50  | 104 | 105 | 99 - | 1   | 105 | 77056  | 77160  |   |
| UN54722 | Rsa1.0.00123.1 | 833 | 325650 | 1.00E-153 | 424 | 467 | 90 - | 1   | 465 | 123234 | 123687 |   |
| UN54723 | Rsa1.0.04483.1 | 486 | 17174  | 1.00E-100 | 251 | 271 | 92 + | 1   | 269 | 7616   | 7879   |   |
| UN54724 | Rsa1.0.02124.1 | 474 | 34780  | 0         | 445 | 475 | 93 + | 1   | 474 | 4369   | 4841   |   |
| UN54725 | #              | #   | #      | #         | #   | #   | #    | #   | #   | #      | #      | # |
| UN54726 | Rsa1.0.00301.1 | 451 | 365315 | 4.00E-82  | 196 | 209 | 93 + | 129 | 334 | 327848 | 328056 |   |
| UN54727 | Rsa1.0.00599.1 | 819 | 73418  | 0         | 801 | 830 | 96 - | 1   | 819 | 54809  | 55635  |   |
| UN54728 | Rsa1.0.01294.1 | 623 | 49090  | 1.00E-158 | 318 | 327 | 97 + | 2   | 327 | 35082  | 35407  |   |
| UN54729 | Rsa1.0.02747.1 | 505 | 28247  | 1.00E-168 | 375 | 402 | 93 - | 5   | 387 | 24943  | 25342  |   |
| UN54730 | Rsa1.0.05489.1 | 633 | 13562  | 0         | 619 | 634 | 97 + | 2   | 633 | 12147  | 12779  |   |
| UN54731 | Rsa1.0.00154.1 | 559 | 189461 | 2.00E-72  | 151 | 155 | 97 + | 369 | 523 | 130658 | 130812 |   |
| UN54732 | Rsa1.0.00457.1 | 149 | 337301 | 1.00E-36  | 96  | 102 | 94 + | 2   | 103 | 317277 | 317378 |   |
| UN54733 | Rsa1.0.01099.1 | 683 | 158481 | 1.00E-123 | 277 | 293 | 94 + | 64  | 356 | 14074  | 14365  |   |
| UN54734 | Rsa1.0.15297.1 | 725 | 2704   | 1.00E-117 | 273 | 290 | 94 + | 7   | 294 | 2112   | 2400   |   |
| UN54735 | Rsa1.0.00428.1 | 794 | 85599  | 0         | 614 | 635 | 96 + | 163 | 794 | 31030  | 31664  |   |
| UN54736 | Rsa1.0.01565.1 | 848 | 155447 | 1.00E-169 | 336 | 347 | 96 - | 488 | 834 | 9135   | 9478   |   |
| UN54737 | Rsa1.0.00028.1 | 785 | 293984 | 0         | 763 | 784 | 97 + | 1   | 783 | 137173 | 137941 |   |
| UN54738 | Rsa1.0.02281.1 | 824 | 292576 | 0         | 467 | 473 | 98 - | 4   | 476 | 276717 | 277189 |   |
| UN54739 | Rsa1.0.04095.1 | 323 | 19095  | 1.00E-136 | 264 | 270 | 97 + | 1   | 270 | 10615  | 10884  |   |
| UN54740 | Rsa1.0.01456.1 | 847 | 45372  | 0         | 824 | 847 | 97 + | 1   | 847 | 3180   | 4022   |   |
| UN54741 | Rsa1.0.04542.1 | 832 | 16930  | 1.00E-149 | 350 | 377 | 92 - | 1   | 374 | 13253  | 13618  |   |
| UN54742 | Rsa1.0.02860.1 | 823 | 27207  | 1.00E-154 | 289 | 292 | 98 + | 1   | 292 | 9009   | 9299   |   |
| UN54743 | Rsa1.0.01280.1 | 793 | 49321  | 3.00E-87  | 182 | 187 | 97 + | 458 | 642 | 7894   | 8080   |   |
| UN54744 | Rsa1.0.09250.1 | 920 | 6528   | 0         | 395 | 406 | 97 - | 5   | 408 | 4449   | 4854   |   |
| UN54745 | Rsa1.0.15220.1 | 842 | 2748   | 0         | 549 | 567 | 96 + | 1   | 563 | 2182   | 2748   |   |
| UN54746 | Rsa1.0.01604.1 | 655 | 42461  | 0         | 417 | 421 | 99 - | 1   | 420 | 29368  | 29786  |   |
| UN54747 | Rsa1.0.01209.1 | 111 | 50668  | 2.00E-25  | 83  | 91  | 91 - | 6   | 96  | 40308  | 40398  |   |
| UN54748 | Rsa1.0.00602.1 | 911 | 73302  | 4.00E-99  | 190 | 192 | 98 - | 188 | 379 | 46825  | 47016  |   |
| UN54749 | Rsa1.0.23505.1 | 599 | 1044   | 0         | 412 | 419 | 98 - | 1   | 419 | 248    | 666    |   |
| UN54750 | Rsa1.0.05056.1 | 370 | 14981  | 1.00E-75  | 182 | 195 | 93 + | 1   | 189 | 7333   | 7522   |   |
| UN54751 | Rsa1.0.02588.1 | 391 | 29840  | 1.00E-166 | 362 | 384 | 94 + | 4   | 387 | 28227  | 28610  |   |
| UN54752 | Rsa1.0.00965.1 | 276 | 58139  | 1.00E-145 | 274 | 277 | 98 - | 1   | 276 | 2267   | 2543   |   |
| UN54753 | Rsa1.0.01606.1 | 106 | 42432  | 2.00E-34  | 102 | 106 | 96 + | 1   | 106 | 9085   | 9186   |   |
| UN54754 | Rsa1.0.00463.1 | 173 | 189177 | 5.00E-42  | 108 | 111 | 97 - | 1   | 111 | 180605 | 180712 |   |

|         |                |     |        |           |     |     |       |     |     |        |        |
|---------|----------------|-----|--------|-----------|-----|-----|-------|-----|-----|--------|--------|
| UN54755 | Rsa1.0.00548.1 | 750 | 76518  | 0         | 729 | 747 | 97 +  | 2   | 748 | 35500  | 36246  |
| UN54756 | Rsa1.0.03613.1 | 194 | 21773  | 1.00E-33  | 82  | 85  | 96 +  | 1   | 85  | 17242  | 17326  |
| UN54757 | Rsa1.0.04260.1 | 350 | 18238  | 0         | 341 | 344 | 99 -  | 1   | 344 | 12560  | 12902  |
| UN54758 | Rsa1.0.02871.1 | 175 | 27085  | 6.00E-48  | 118 | 125 | 94 +  | 3   | 127 | 1890   | 2014   |
| UN54759 | Rsa1.0.00513.1 | 323 | 78579  | 7.00E-49  | 121 | 127 | 95 +  | 1   | 126 | 57540  | 57666  |
| UN54760 | Rsa1.0.00651.1 | 223 | 247766 | 2.00E-48  | 183 | 217 | 84 +  | 1   | 217 | 92840  | 93034  |
| UN54761 | Rsa1.0.31836.1 | 550 | 717    | 1.00E-67  | 146 | 151 | 96 -  | 366 | 516 | 567    | 717    |
| UN54762 | Rsa1.0.03125.1 | 586 | 147978 | 1.00E-121 | 239 | 245 | 97 +  | 339 | 583 | 131175 | 131419 |
| UN54763 | Rsa1.0.00192.1 | 759 | 278200 | 0         | 730 | 778 | 93 -  | 3   | 759 | 91951  | 92727  |
| UN54764 | Rsa1.0.00402.1 | 643 | 385315 | 0         | 622 | 643 | 96 +  | 1   | 643 | 87895  | 88534  |
| UN54765 | Rsa1.0.02503.1 | 620 | 30709  | 1.00E-121 | 266 | 277 | 96 +  | 5   | 278 | 27246  | 27522  |
| UN54766 | Rsa1.0.00622.1 | 153 | 71822  | 2.00E-62  | 145 | 153 | 94 +  | 1   | 153 | 26358  | 26510  |
| UN54767 | Rsa1.0.00017.1 | 915 | 752458 | 0         | 867 | 920 | 94 -  | 1   | 915 | 416066 | 416985 |
| UN54768 | Rsa1.0.00273.1 | 784 | 326186 | 1.00E-154 | 295 | 301 | 98 +  | 1   | 301 | 46035  | 46335  |
| UN54769 | Rsa1.0.04045.1 | 571 | 19403  | 0         | 327 | 328 | 99 -  | 126 | 453 | 5362   | 5689   |
| UN54770 | Rsa1.0.00064.1 | 130 | 240927 | 4.00E-42  | 117 | 127 | 92 -  | 1   | 127 | 73671  | 73797  |
| UN54771 | Rsa1.0.00418.1 | 802 | 215377 | 0         | 793 | 803 | 98 -  | 1   | 802 | 15448  | 16250  |
| UN54772 | Rsa1.0.03949.1 | 797 | 19899  | 0         | 396 | 397 | 99 -  | 5   | 401 | 9280   | 9676   |
| UN54773 | Rsa1.0.00376.1 | 211 | 90101  | 1.00E-43  | 111 | 118 | 94 +  | 94  | 211 | 978    | 1095   |
| UN54774 | Rsa1.0.03123.1 | 735 | 25207  | 1.00E-118 | 278 | 295 | 94 -  | 3   | 297 | 22588  | 22878  |
| UN54775 | Rsa1.0.05441.1 | 615 | 13742  | 1.00E-121 | 446 | 514 | 86 +  | 32  | 536 | 2128   | 2622   |
| UN54776 | Rsa1.0.00788.1 | 238 | 64237  | 8.00E-51  | 123 | 130 | 94 -  | 109 | 238 | 34451  | 34580  |
| UN54777 | Rsa1.0.00698.1 | 287 | 67816  | 5.00E-62  | 133 | 137 | 97 -  | 4   | 140 | 12376  | 12512  |
| UN54778 | Rsa1.0.00064.1 | 277 | 240927 | 6.00E-77  | 227 | 253 | 89 +  | 31  | 277 | 124964 | 125215 |
| UN54779 | Rsa1.0.00772.1 | 847 | 64856  | 1.00E-148 | 330 | 352 | 93 -  | 5   | 348 | 52504  | 52846  |
| UN54780 | Rsa1.0.00113.1 | 511 | 131574 | 1.00E-79  | 215 | 233 | 92 -  | 1   | 229 | 8888   | 9119   |
| UN54781 | Rsa1.0.00065.1 | 782 | 454616 | 1.00E-95  | 178 | 178 | 100 - | 498 | 675 | 25196  | 25373  |
| UN54782 | Rsa1.0.02220.1 | 670 | 176031 | 0         | 662 | 671 | 98 +  | 1   | 670 | 167398 | 168068 |
| UN54783 | Rsa1.0.00418.1 | 813 | 215377 | 0         | 488 | 498 | 97 -  | 292 | 789 | 4220   | 4717   |
| UN54784 | Rsa1.0.00058.1 | 271 | 159921 | 1.00E-130 | 262 | 271 | 96 +  | 1   | 271 | 153622 | 153892 |
| UN54785 | Rsa1.0.04267.1 | 250 | 18193  | 1.00E-105 | 240 | 254 | 94 +  | 1   | 250 | 10667  | 10918  |
| UN54786 | Rsa1.0.01126.1 | 283 | 53127  | 2.00E-67  | 145 | 150 | 96 +  | 129 | 278 | 15323  | 15472  |
| UN54787 | Rsa1.0.65705.1 | 542 | 349    | 1.00E-124 | 293 | 313 | 93 -  | 11  | 321 | 38     | 349    |
| UN54788 | Rsa1.0.00139.1 | 223 | 357786 | 9.00E-97  | 212 | 223 | 95 -  | 1   | 223 | 68438  | 68660  |
| UN54789 | Rsa1.0.02913.1 | 870 | 26816  | 0         | 501 | 526 | 95 +  | 1   | 522 | 24391  | 24912  |
| UN54790 | Rsa1.0.00044.1 | 717 | 271658 | 0         | 469 | 481 | 97 -  | 237 | 717 | 261627 | 262107 |
| UN54791 | Rsa1.0.02218.1 | 765 | 33809  | 5.00E-92  | 199 | 208 | 95 -  | 558 | 765 | 25711  | 25918  |
| UN54792 | Rsa1.0.00062.1 | 131 | 299291 | 3.00E-15  | 42  | 42  | 100 - | 77  | 118 | 81110  | 81151  |
| UN54793 | Rsa1.0.00104.1 | 365 | 368722 | 1.00E-164 | 353 | 368 | 95 +  | 1   | 365 | 239110 | 239475 |

|         |                |     |        |           |     |     |       |     |     |        |        |
|---------|----------------|-----|--------|-----------|-----|-----|-------|-----|-----|--------|--------|
| UN54794 | Rsa1.0_04034.1 | 611 | 19481  | 0         | 594 | 611 | 97 +  | 4   | 611 | 6252   | 6850   |
| UN54795 | Rsa1.0_02692.1 | 582 | 28626  | 0         | 472 | 498 | 94 -  | 85  | 582 | 1067   | 1561   |
| UN54796 | Rsa1.0_02358.1 | 988 | 32213  | 0         | 404 | 407 | 99 +  | 387 | 793 | 7418   | 7824   |
| UN54797 | Rsa1.0_00999.1 | 292 | 57162  | 4.00E-44  | 91  | 91  | 100 + | 139 | 229 | 16212  | 16302  |
| UN54798 | Rsa1.0_01952.1 | 134 | 36940  | 7.00E-13  | 50  | 54  | 92 -  | 81  | 134 | 29784  | 29837  |
| UN54799 | #              | #   | #      | #         | #   | #   | #     | #   | #   | #      | #      |
| UN54800 | Rsa1.0_32803.1 | 845 | 693    | 0         | 581 | 607 | 95 -  | 240 | 845 | 97     | 689    |
| UN54801 | Rsa1.0_02615.1 | 334 | 29547  | 1.00E-135 | 320 | 334 | 95 -  | 1   | 334 | 15777  | 16100  |
| UN54802 | Rsa1.0_00207.1 | 371 | 248736 | 1.00E-115 | 293 | 306 | 95 +  | 1   | 306 | 3453   | 3747   |
| UN54803 | Rsa1.0_00031.1 | 190 | 179862 | 2.00E-38  | 90  | 93  | 96 -  | 76  | 168 | 82267  | 82359  |
| UN54804 | Rsa1.0_01341.1 | 865 | 47764  | 0         | 365 | 378 | 96 +  | 3   | 380 | 10453  | 10829  |
| UN54805 | Rsa1.0_01415.1 | 792 | 46263  | 1.00E-137 | 276 | 287 | 96 -  | 310 | 596 | 18143  | 18420  |
| UN54806 | Rsa1.0_00722.1 | 720 | 66840  | 0         | 493 | 493 | 100 - | 228 | 720 | 42904  | 43396  |
| UN54807 | Rsa1.0_03854.1 | 793 | 20429  | 1.00E-177 | 323 | 326 | 99 -  | 374 | 699 | 10010  | 10335  |
| UN54808 | Rsa1.0_00041.1 | 595 | 186197 | 1.00E-112 | 221 | 225 | 98 -  | 144 | 368 | 153061 | 153284 |
| UN54809 | Rsa1.0_02222.1 | 479 | 152798 | 0         | 437 | 441 | 99 -  | 39  | 479 | 23502  | 23941  |
| UN54810 | Rsa1.0_00315.1 | 744 | 96426  | 0         | 578 | 595 | 97 +  | 150 | 744 | 89773  | 90367  |
| UN54811 | Rsa1.0_00974.1 | 733 | 57893  | 7.00E-85  | 167 | 168 | 99 -  | 565 | 732 | 50586  | 50752  |
| UN54812 | Rsa1.0_04270.1 | 764 | 18174  | 0         | 749 | 765 | 97 +  | 2   | 764 | 7648   | 8412   |
| UN54813 | Rsa1.0_00780.1 | 712 | 147795 | 1.00E-168 | 314 | 318 | 98 -  | 1   | 316 | 63618  | 63935  |
| UN54814 | Rsa1.0_00335.1 | 737 | 94371  | 0         | 402 | 415 | 96 -  | 11  | 425 | 37914  | 38328  |
| UN54815 | Rsa1.0_03100.1 | 275 | 25411  | 1.00E-106 | 232 | 239 | 97 +  | 37  | 275 | 1878   | 2112   |
| UN54816 | Rsa1.0_02087.1 | 508 | 35198  | 1.00E-165 | 448 | 499 | 89 +  | 4   | 502 | 8573   | 9071   |
| UN54817 | Rsa1.0_01257.1 | 476 | 49766  | 0         | 454 | 482 | 94 -  | 1   | 474 | 389    | 866    |
| UN54818 | Rsa1.0_00035.1 | 313 | 176449 | 1.00E-134 | 302 | 313 | 96 -  | 1   | 313 | 125864 | 126168 |
| UN54819 | Rsa1.0_06213.1 | 213 | 11478  | 1.00E-27  | 182 | 218 | 83 -  | 1   | 213 | 7490   | 7688   |
| UN54820 | Rsa1.0_01838.1 | 866 | 38500  | 1.00E-142 | 319 | 341 | 93 -  | 3   | 343 | 25420  | 25751  |
| UN54821 | Rsa1.0_00119.1 | 603 | 467509 | 0         | 324 | 325 | 99 +  | 279 | 603 | 447147 | 447471 |
| UN54822 | Rsa1.0_01646.1 | 673 | 41735  | 0         | 472 | 483 | 97 -  | 5   | 487 | 28186  | 28668  |
| UN54823 | Rsa1.0_00017.1 | 768 | 752458 | 1.00E-168 | 490 | 547 | 89 +  | 4   | 537 | 1770   | 2299   |
| UN54824 | Rsa1.0_00301.1 | 134 | 365315 | 9.00E-37  | 123 | 130 | 94 -  | 5   | 134 | 225260 | 225383 |
| UN54825 | #              | #   | #      | #         | #   | #   | #     | #   | #   | #      | #      |
| UN54826 | Rsa1.0_02235.1 | 724 | 33615  | 1.00E-125 | 366 | 410 | 89 -  | 2   | 405 | 16046  | 16433  |
| UN54827 | Rsa1.0_00111.1 | 634 | 390088 | 8.00E-75  | 143 | 143 | 100 + | 160 | 302 | 370686 | 370828 |
| UN54828 | Rsa1.0_00447.1 | 294 | 84051  | 1.00E-121 | 283 | 292 | 96 +  | 1   | 292 | 14598  | 14880  |
| UN54829 | Rsa1.0_00097.1 | 468 | 138858 | 0         | 463 | 465 | 99 -  | 1   | 463 | 5538   | 6002   |
| UN54830 | Rsa1.0_00873.1 | 516 | 61459  | 1.00E-128 | 265 | 273 | 97 +  | 246 | 516 | 46323  | 46595  |
| UN54831 | Rsa1.0_00130.1 | 487 | 125737 | 9.00E-68  | 143 | 147 | 97 +  | 229 | 375 | 11342  | 11488  |
| UN54832 | Rsa1.0_01411.1 | 132 | 46326  | 7.00E-50  | 117 | 120 | 97 +  | 13  | 132 | 2426   | 2543   |



|         |                |     |        |           |     |     |       |     |     |        |        |
|---------|----------------|-----|--------|-----------|-----|-----|-------|-----|-----|--------|--------|
| UN54833 | Rsa1.0.00868.1 | 556 | 61630  | 3.00E-92  | 232 | 252 | 92 -  | 191 | 442 | 28178  | 28429  |
| UN54834 | Rsa1.0.00708.1 | 326 | 67366  | 5.00E-93  | 179 | 181 | 98 -  | 1   | 181 | 65149  | 65329  |
| UN54835 | Rsa1.0.00852.1 | 733 | 62179  | 0         | 486 | 491 | 98 +  | 245 | 733 | 42742  | 43232  |
| UN54836 | Rsa1.0.00525.1 | 821 | 78030  | 0         | 767 | 813 | 94 +  | 24  | 821 | 6407   | 7210   |
| UN54837 | Rsa1.0.00014.1 | 737 | 348985 | 0         | 718 | 736 | 97 -  | 3   | 737 | 174346 | 175078 |
| UN54838 | Rsa1.0.00270.1 | 127 | 101236 | 4.00E-45  | 123 | 128 | 96 +  | 1   | 127 | 18752  | 18876  |
| UN54839 | Rsa1.0.00030.1 | 714 | 250988 | 0         | 667 | 726 | 91 -  | 5   | 714 | 184680 | 185381 |
| UN54840 | Rsa1.0.06196.1 | 239 | 11515  | 1.00E-121 | 237 | 242 | 97 -  | 1   | 239 | 754    | 995    |
| UN54841 | Rsa1.0.06151.1 | 597 | 11612  | 1.00E-76  | 149 | 150 | 99 +  | 102 | 251 | 8372   | 8521   |
| UN54842 | Rsa1.0.01919.1 | 460 | 37272  | 1.00E-162 | 296 | 297 | 99 +  | 150 | 446 | 22526  | 22821  |
| UN54843 | Rsa1.0.00069.1 | 706 | 403561 | 0         | 342 | 344 | 99 -  | 363 | 706 | 394897 | 395240 |
| UN54844 | Rsa1.0.01151.1 | 605 | 52268  | 0         | 352 | 360 | 97 -  | 214 | 570 | 26282  | 26641  |
| UN54845 | Rsa1.0.02179.1 | 688 | 34188  | 1.00E-150 | 309 | 319 | 96 -  | 150 | 467 | 23724  | 24037  |
| UN54846 | Rsa1.0.03426.1 | 816 | 23010  | 3.00E-81  | 170 | 174 | 97 +  | 280 | 452 | 4207   | 4380   |
| UN54847 | Rsa1.0.00995.1 | 668 | 57243  | 0         | 665 | 667 | 99 -  | 1   | 666 | 48127  | 48793  |
| UN54848 | Rsa1.0.02463.1 | 872 | 31157  | 0         | 839 | 879 | 95 -  | 3   | 872 | 6309   | 7186   |
| UN54849 | Rsa1.0.02299.1 | 845 | 32857  | 1.00E-118 | 254 | 268 | 94 -  | 58  | 325 | 20632  | 20890  |
| UN54850 | Rsa1.0.00422.1 | 639 | 86144  | 0         | 616 | 650 | 94 +  | 1   | 634 | 31998  | 32647  |
| UN54851 | Rsa1.0.00056.1 | 854 | 332604 | 0         | 543 | 545 | 99 -  | 293 | 835 | 214927 | 215471 |
| UN54852 | Rsa1.0.00014.1 | 563 | 348985 | 1.00E-175 | 498 | 561 | 88 -  | 2   | 559 | 331501 | 332036 |
| UN54853 | Rsa1.0.00734.1 | 687 | 66508  | 0         | 489 | 516 | 94 +  | 177 | 687 | 48749  | 49263  |
| UN54854 | Rsa1.0.03634.1 | 646 | 145192 | 1.00E-122 | 251 | 262 | 95 -  | 210 | 471 | 128818 | 129070 |
| UN54855 | Rsa1.0.00035.1 | 652 | 176449 | 0         | 557 | 570 | 97 +  | 22  | 590 | 155393 | 155959 |
| UN54856 | Rsa1.0.00757.1 | 400 | 65559  | 2.00E-68  | 132 | 132 | 100 - | 38  | 169 | 13259  | 13390  |
| UN54857 | Rsa1.0.00340.1 | 763 | 305782 | 0         | 370 | 376 | 98 -  | 388 | 763 | 284030 | 284404 |
| UN54858 | Rsa1.0.00705.1 | 692 | 67505  | 0         | 410 | 426 | 96 +  | 1   | 426 | 16432  | 16855  |
| UN54859 | Rsa1.0.02935.1 | 111 | 26621  | 7.00E-34  | 90  | 93  | 96 +  | 19  | 111 | 7722   | 7812   |
| UN54860 | Rsa1.0.02750.1 | 227 | 28239  | 3.00E-78  | 165 | 168 | 98 +  | 62  | 227 | 16123  | 16290  |
| UN54861 | Rsa1.0.02089.1 | 820 | 35163  | 0         | 762 | 781 | 97 -  | 2   | 782 | 24245  | 25024  |
| UN54862 | Rsa1.0.02020.1 | 451 | 173211 | 5.00E-60  | 124 | 126 | 98 +  | 289 | 414 | 7785   | 7910   |
| UN54863 | Rsa1.0.01468.1 | 846 | 45146  | 1.00E-151 | 284 | 288 | 98 +  | 481 | 768 | 39086  | 39373  |
| UN54864 | Rsa1.0.01184.1 | 534 | 51452  | 1.00E-108 | 199 | 199 | 100 + | 1   | 199 | 46862  | 47060  |
| UN54865 | Rsa1.0.01769.1 | 839 | 39568  | 1.00E-107 | 229 | 234 | 97 +  | 610 | 839 | 8728   | 8961   |
| UN54866 | Rsa1.0.01726.1 | 320 | 40263  | 1.00E-160 | 310 | 318 | 97 +  | 3   | 320 | 6024   | 6341   |
| UN54867 | Rsa1.0.01637.1 | 397 | 41862  | 1.00E-118 | 326 | 347 | 93 -  | 1   | 347 | 774    | 1108   |
| UN54868 | Rsa1.0.32056.1 | 552 | 711    | 7.00E-78  | 154 | 156 | 98 -  | 105 | 260 | 38     | 193    |
| UN54869 | Rsa1.0.00308.1 | 754 | 96915  | 0         | 419 | 435 | 96 +  | 90  | 524 | 32093  | 32527  |
| UN54870 | Rsa1.0.08631.1 | 853 | 7103   | 1.00E-114 | 242 | 253 | 95 -  | 399 | 651 | 3461   | 3713   |
| UN54871 | Rsa1.0.00573.1 | 654 | 74821  | 1.00E-175 | 349 | 361 | 96 -  | 1   | 357 | 46209  | 46569  |

|         |                |     |        |           |     |     |      |     |     |        |        |
|---------|----------------|-----|--------|-----------|-----|-----|------|-----|-----|--------|--------|
| UN54872 | Rsa1.0.02185.1 | 783 | 34150  | 0         | 351 | 353 | 99 - | 431 | 783 | 16720  | 17072  |
| UN54873 | Rsa1.0.00351.1 | 832 | 413096 | 0         | 544 | 554 | 98 - | 280 | 832 | 14012  | 14561  |
| UN54874 | Rsa1.0.01665.1 | 459 | 41364  | 4.00E-39  | 163 | 187 | 87 - | 196 | 381 | 2464   | 2649   |
| UN54875 | Rsa1.0.03550.1 | 728 | 22154  | 1.00E-157 | 330 | 346 | 95 + | 2   | 346 | 1714   | 2051   |
| UN54876 | Rsa1.0_17297.1 | 783 | 1867   | 0         | 478 | 506 | 94 - | 1   | 506 | 1344   | 1849   |
| UN54877 | Rsa1.0_00705.1 | 601 | 67505  | 0         | 534 | 541 | 98 - | 61  | 601 | 45541  | 46077  |
| UN54878 | Rsa1.0.00778.1 | 156 | 196751 | 3.00E-52  | 143 | 154 | 92 + | 1   | 150 | 165559 | 165712 |
| UN54879 | Rsa1.0.02710.1 | 838 | 28492  | 1.00E-117 | 246 | 256 | 96 - | 1   | 256 | 25405  | 25657  |
| UN54880 | Rsa1.0.00107.1 | 817 | 431659 | 1.00E-104 | 209 | 214 | 97 + | 1   | 210 | 5116   | 5329   |
| UN54881 | #              | #   | #      | #         | #   | #   | #    | #   | #   | #      | #      |
| UN54882 | Rsa1.0.00417.1 | 613 | 395068 | 0         | 599 | 613 | 97 - | 1   | 613 | 377948 | 378560 |
| UN54883 | Rsa1.0.04593.1 | 747 | 16713  | 0         | 646 | 647 | 99 - | 101 | 747 | 3006   | 3652   |
| UN54884 | Rsa1.0.07537.1 | 707 | 9176   | 1.00E-161 | 321 | 332 | 96 - | 375 | 706 | 4280   | 4611   |
| UN54885 | Rsa1.0_11107.1 | 703 | 5613   | 5.00E-95  | 194 | 197 | 98 + | 505 | 700 | 3868   | 4063   |
| UN54886 | Rsa1.0.00644.1 | 296 | 136881 | 1.00E-137 | 280 | 291 | 96 + | 2   | 292 | 27191  | 27481  |
| UN54887 | Rsa1.0.04784.1 | 193 | 15995  | 2.00E-79  | 172 | 177 | 97 - | 17  | 193 | 9198   | 9371   |
| UN54888 | Rsa1.0.00177.1 | 788 | 143394 | 0         | 783 | 786 | 99 - | 3   | 788 | 133168 | 133951 |
| UN54889 | Rsa1.0.45828.1 | 851 | 492    | 1.00E-157 | 326 | 337 | 96 - | 21  | 353 | 1      | 337    |
| UN54890 | Rsa1.0.00473.1 | 468 | 212204 | 0         | 447 | 466 | 95 + | 3   | 468 | 6953   | 7418   |
| UN54891 | Rsa1.0.02601.1 | 150 | 29654  | 2.00E-41  | 140 | 150 | 93 + | 1   | 150 | 26861  | 27004  |
| UN54892 | Rsa1.0.02928.1 | 699 | 26680  | 1.00E-132 | 328 | 354 | 92 + | 364 | 699 | 16552  | 16903  |
| UN54893 | Rsa1.0.00017.1 | 774 | 752458 | 5.00E-86  | 225 | 238 | 94 + | 539 | 772 | 154565 | 154800 |
| UN54894 | Rsa1.0.00004.1 | 644 | 253996 | 1.00E-132 | 249 | 251 | 99 + | 59  | 308 | 8986   | 9236   |
| UN54895 | Rsa1.0.00008.1 | 698 | 358124 | 0         | 660 | 690 | 95 + | 1   | 689 | 180664 | 181349 |
| UN54896 | Rsa1.0.36484.1 | 729 | 618    | 0         | 445 | 460 | 96 - | 4   | 457 | 1      | 460    |
| UN54897 | Rsa1.0.00520.1 | 784 | 78226  | 0         | 752 | 796 | 94 - | 3   | 783 | 2605   | 3397   |
| UN54898 | Rsa1.0.00466.1 | 136 | 82132  | 2.00E-13  | 72  | 83  | 86 + | 3   | 82  | 78840  | 78915  |
| UN54899 | Rsa1.0.02099.1 | 436 | 35030  | 7.00E-90  | 171 | 172 | 99 - | 2   | 173 | 33693  | 33864  |
| UN54900 | Rsa1.0.00213.1 | 304 | 108167 | 1.00E-136 | 281 | 293 | 95 - | 12  | 304 | 35081  | 35373  |
| UN54901 | Rsa1.0.01963.1 | 658 | 36719  | 1.00E-135 | 263 | 268 | 98 - | 391 | 658 | 22226  | 22492  |
| UN54902 | Rsa1.0.06258.1 | 609 | 11371  | 0         | 604 | 609 | 99 + | 2   | 609 | 10349  | 10956  |
| UN54903 | Rsa1.0.02431.1 | 825 | 31504  | 1.00E-111 | 340 | 389 | 87 - | 2   | 360 | 4629   | 5005   |
| UN54904 | Rsa1.0.00549.1 | 780 | 76473  | 0         | 767 | 774 | 99 + | 9   | 780 | 6270   | 7043   |
| UN54905 | Rsa1.0.00540.1 | 454 | 76895  | 1.00E-147 | 280 | 284 | 98 + | 165 | 448 | 69441  | 69723  |
| UN54906 | Rsa1.0.00034.1 | 797 | 260119 | 0         | 715 | 732 | 97 + | 58  | 788 | 66394  | 67125  |
| UN54907 | Rsa1.0.00077.1 | 530 | 145005 | 2.00E-65  | 214 | 239 | 89 - | 305 | 530 | 89951  | 90189  |
| UN54908 | Rsa1.0.00124.1 | 224 | 262503 | 8.00E-48  | 128 | 133 | 96 - | 54  | 186 | 92273  | 92401  |
| UN54909 | Rsa1.0.00473.1 | 657 | 212204 | 1.00E-116 | 262 | 272 | 96 + | 388 | 657 | 198113 | 198381 |
| UN54910 | Rsa1.0.03107.1 | 573 | 25349  | 1.00E-132 | 248 | 251 | 98 - | 323 | 573 | 20317  | 20567  |

|         |                |     |        |           |     |     |       |     |     |        |        |
|---------|----------------|-----|--------|-----------|-----|-----|-------|-----|-----|--------|--------|
| UN54911 | Rsa1.0.03932.1 | 147 | 19991  | 2.00E-28  | 71  | 72  | 98 -  | 76  | 147 | 14403  | 14473  |
| UN54912 | Rsa1.0.00385.1 | 824 | 89160  | 0         | 704 | 817 | 86 +  | 17  | 824 | 67016  | 67828  |
| UN54913 | Rsa1.0.08180.1 | 780 | 7778   | 1.00E-86  | 169 | 171 | 98 +  | 389 | 559 | 5759   | 5929   |
| UN54914 | Rsa1.0.00065.1 | 311 | 454616 | 3.00E-48  | 111 | 114 | 97 -  | 198 | 311 | 39989  | 40101  |
| UN54915 | Rsa1.0.02386.1 | 397 | 31895  | 1.00E-127 | 234 | 235 | 99 -  | 163 | 397 | 11060  | 11294  |
| UN54916 | Rsa1.0.06329.1 | 761 | 11225  | 0         | 682 | 697 | 97 +  | 2   | 698 | 10530  | 11225  |
| UN54917 | Rsa1.0.01292.1 | 770 | 175783 | 0         | 637 | 654 | 97 -  | 113 | 765 | 146003 | 146655 |
| UN54918 | Rsa1.0.01176.1 | 717 | 51638  | 1.00E-147 | 288 | 296 | 97 -  | 422 | 717 | 5795   | 6090   |
| UN54919 | Rsa1.0.00218.1 | 683 | 201480 | 0         | 548 | 553 | 99 -  | 133 | 683 | 25605  | 26157  |
| UN54920 | Rsa1.0.00164.1 | 644 | 116642 | 5.00E-67  | 133 | 134 | 99 -  | 306 | 439 | 111968 | 112101 |
| UN54921 | Rsa1.0.02529.1 | 249 | 30437  | 1.00E-115 | 235 | 241 | 97 +  | 12  | 249 | 8491   | 8731   |
| UN54922 | Rsa1.0.00128.1 | 684 | 228675 | 1.00E-79  | 328 | 379 | 86 -  | 59  | 430 | 202406 | 202760 |
| UN54923 | Rsa1.0.00028.1 | 843 | 293984 | 0         | 770 | 815 | 94 -  | 1   | 811 | 143254 | 144066 |
| UN54924 | Rsa1.0.02442.1 | 742 | 31355  | 1.00E-118 | 264 | 275 | 96 -  | 467 | 739 | 24588  | 24859  |
| UN54925 | Rsa1.0.01097.1 | 459 | 173349 | 1.00E-107 | 249 | 265 | 93 -  | 201 | 459 | 17805  | 18064  |
| UN54926 | Rsa1.0.01072.1 | 773 | 55068  | 0         | 360 | 364 | 98 -  | 302 | 665 | 43267  | 43630  |
| UN54927 | Rsa1.0.08753.1 | 164 | 6957   | 2.00E-16  | 47  | 48  | 97 -  | 117 | 164 | 1359   | 1406   |
| UN54928 | Rsa1.0.00039.1 | 715 | 296927 | 3.00E-90  | 187 | 193 | 96 -  | 140 | 332 | 78033  | 78225  |
| UN54929 | Rsa1.0.01110.1 | 605 | 195852 | 0         | 446 | 473 | 94 -  | 7   | 473 | 29395  | 29864  |
| UN54930 | Rsa1.0.01957.1 | 849 | 36844  | 0         | 539 | 556 | 96 -  | 3   | 557 | 17873  | 18428  |
| UN54931 | Rsa1.0.00023.1 | 822 | 194764 | 1.00E-129 | 310 | 339 | 91 +  | 1   | 339 | 83441  | 83758  |
| UN54932 | Rsa1.0.05008.1 | 692 | 15154  | 0         | 532 | 543 | 97 +  | 156 | 692 | 10705  | 11247  |
| UN54933 | Rsa1.0.00858.1 | 764 | 61892  | 0         | 328 | 329 | 99 +  | 436 | 764 | 19996  | 20324  |
| UN54934 | Rsa1.0.01574.1 | 769 | 42930  | 0         | 763 | 766 | 99 -  | 2   | 767 | 4769   | 5534   |
| UN54935 | Rsa1.0.00546.1 | 417 | 76523  | 7.00E-96  | 193 | 198 | 97 -  | 99  | 296 | 13319  | 13516  |
| UN54936 | Rsa1.0.00812.1 | 792 | 63233  | 0         | 765 | 766 | 99 +  | 4   | 769 | 17148  | 17913  |
| UN54937 | Rsa1.0.21086.1 | 746 | 1237   | 0         | 370 | 377 | 98 -  | 225 | 599 | 1      | 377    |
| UN54938 | Rsa1.0.00001.1 | 785 | 363028 | 1.00E-119 | 263 | 278 | 94 -  | 348 | 625 | 51426  | 51703  |
| UN54939 | Rsa1.0.00496.1 | 792 | 79834  | 0         | 398 | 408 | 97 -  | 223 | 630 | 27282  | 27686  |
| UN54940 | Rsa1.0.00807.1 | 780 | 63607  | 0         | 521 | 548 | 95 -  | 228 | 763 | 13460  | 14005  |
| UN54941 | Rsa1.0.00632.1 | 589 | 183777 | 1.00E-107 | 198 | 198 | 100 + | 392 | 589 | 168864 | 169061 |
| UN54942 | Rsa1.0.02164.1 | 798 | 34426  | 4.00E-68  | 172 | 184 | 93 +  | 621 | 798 | 6410   | 6593   |
| UN54943 | Rsa1.0.00166.1 | 675 | 240912 | 0         | 448 | 456 | 98 -  | 217 | 672 | 222207 | 222662 |
| UN54944 | Rsa1.0.02599.1 | 723 | 29660  | 1.00E-152 | 335 | 355 | 94 +  | 358 | 712 | 4089   | 4440   |
| UN54945 | Rsa1.0.02267.1 | 685 | 33194  | 1.00E-107 | 252 | 270 | 93 +  | 176 | 445 | 26825  | 27094  |
| UN54946 | Rsa1.0.00660.1 | 603 | 69688  | 1.00E-144 | 260 | 260 | 100 - | 344 | 603 | 15734  | 15993  |
| UN54947 | #              | #   | #      | #         | #   | #   | #     | #   | #   | #      | #      |
| UN54948 | Rsa1.0.01944.1 | 491 | 37037  | 1.00E-156 | 314 | 325 | 96 +  | 104 | 425 | 35449  | 35773  |
| UN54949 | Rsa1.0.04787.1 | 534 | 15987  | 1.00E-143 | 257 | 257 | 100 - | 3   | 259 | 3619   | 3875   |

|         |                |     |        |           |     |     |       |     |     |        |        |
|---------|----------------|-----|--------|-----------|-----|-----|-------|-----|-----|--------|--------|
| UN54950 | Rsa1.0.00846.1 | 838 | 62342  | 0         | 344 | 346 | 99 -  | 482 | 826 | 45407  | 45752  |
| UN54951 | Rsa1.0.00133.1 | 729 | 123768 | 0         | 717 | 730 | 98 -  | 1   | 727 | 79187  | 79916  |
| UN54952 | Rsa1.0.00473.1 | 777 | 212204 | 0         | 738 | 781 | 94 +  | 1   | 777 | 15509  | 16277  |
| UN54953 | Rsa1.0.03029.1 | 501 | 25858  | 1.00E-176 | 366 | 384 | 95 -  | 2   | 385 | 19497  | 19880  |
| UN54954 | Rsa1.0.01606.1 | 251 | 42432  | 1.00E-116 | 243 | 251 | 96 -  | 1   | 251 | 9300   | 9548   |
| UN54955 | Rsa1.0.03884.1 | 795 | 20274  | 1.00E-147 | 306 | 319 | 95 +  | 185 | 500 | 18988  | 19306  |
| UN54956 | Rsa1.0.00040.1 | 800 | 324196 | 4.00E-65  | 130 | 131 | 99 +  | 459 | 589 | 313381 | 313511 |
| UN54957 | Rsa1.0.00074.1 | 468 | 147591 | 0         | 464 | 474 | 97 -  | 1   | 468 | 105887 | 106360 |
| UN54958 | Rsa1.0.00105.1 | 707 | 134138 | 1.00E-165 | 310 | 313 | 99 +  | 3   | 312 | 105118 | 105430 |
| UN54959 | Rsa1.0.14926.1 | 242 | 2960   | 4.00E-31  | 69  | 69  | 100 + | 164 | 232 | 1007   | 1075   |
| UN54960 | Rsa1.0.00044.1 | 814 | 271658 | 1.00E-171 | 367 | 385 | 95 -  | 407 | 789 | 270081 | 270465 |
| UN54961 | Rsa1.0.00272.1 | 621 | 447836 | 0         | 495 | 496 | 99 +  | 126 | 621 | 32889  | 33384  |
| UN54962 | Rsa1.0.17143.1 | 390 | 1910   | 0         | 383 | 393 | 97 -  | 2   | 390 | 949    | 1339   |
| UN54963 | Rsa1.0.00417.1 | 686 | 395068 | 0         | 614 | 649 | 94 -  | 1   | 643 | 235826 | 236465 |
| UN54964 | Rsa1.0.00078.1 | 706 | 175053 | 0         | 684 | 706 | 96 +  | 1   | 706 | 70048  | 70753  |
| UN54965 | Rsa1.0.01453.1 | 642 | 45449  | 4.00E-86  | 226 | 243 | 93 +  | 398 | 637 | 2212   | 2450   |
| UN54966 | Rsa1.0.00237.1 | 823 | 235974 | 4.00E-99  | 187 | 188 | 99 +  | 132 | 319 | 209565 | 209752 |
| UN54967 | Rsa1.0.05393.1 | 863 | 13919  | 0         | 723 | 761 | 95 -  | 104 | 863 | 5213   | 5973   |
| UN54968 | Rsa1.0.08867.1 | 866 | 6843   | 0         | 852 | 869 | 98 -  | 3   | 866 | 303    | 1170   |
| UN54969 | Rsa1.0.00645.1 | 705 | 189716 | 0         | 646 | 647 | 99 +  | 3   | 649 | 2212   | 2858   |
| UN54970 | Rsa1.0.15554.1 | 844 | 2545   | 0         | 352 | 354 | 99 -  | 90  | 443 | 804    | 1157   |
| UN54971 | Rsa1.0.00807.1 | 644 | 63607  | 1.00E-137 | 293 | 308 | 95 +  | 53  | 360 | 48409  | 48716  |
| UN54972 | Rsa1.0.03774.1 | 810 | 20932  | 0         | 506 | 553 | 91 +  | 3   | 543 | 16205  | 16736  |
| UN54973 | Rsa1.0.01060.1 | 246 | 55368  | 1.00E-129 | 242 | 245 | 98 +  | 2   | 246 | 42366  | 42610  |
| UN54974 | Rsa1.0.00491.1 | 767 | 80219  | 1.00E-120 | 244 | 252 | 96 +  | 3   | 254 | 30182  | 30429  |
| UN54975 | Rsa1.0.03269.1 | 169 | 24196  | 3.00E-71  | 161 | 168 | 95 +  | 2   | 169 | 1541   | 1707   |
| UN54976 | Rsa1.0.06671.1 | 870 | 10563  | 0         | 861 | 864 | 99 -  | 1   | 863 | 5757   | 6620   |
| UN54977 | Rsa1.0.00164.1 | 352 | 116642 | 1.00E-164 | 334 | 344 | 97 +  | 1   | 344 | 48214  | 48554  |
| UN54978 | Rsa1.0.00495.1 | 790 | 79934  | 1.00E-167 | 312 | 316 | 98 +  | 3   | 318 | 9084   | 9396   |
| UN54979 | Rsa1.0.00356.1 | 698 | 91521  | 0         | 379 | 382 | 99 +  | 318 | 698 | 34979  | 35360  |
| UN54980 | Rsa1.0.00003.1 | 804 | 340054 | 1.00E-101 | 200 | 203 | 98 +  | 590 | 792 | 85507  | 85708  |
| UN54981 | Rsa1.0.18522.1 | 707 | 1582   | 6.00E-82  | 158 | 159 | 99 -  | 2   | 160 | 147    | 305    |
| UN54982 | Rsa1.0.00040.1 | 807 | 324196 | 1.00E-132 | 249 | 252 | 98 -  | 394 | 645 | 286546 | 286797 |
| UN54983 | Rsa1.0.13593.1 | 663 | 4685   | 0         | 655 | 665 | 98 +  | 1   | 663 | 106    | 769    |
| UN54984 | Rsa1.0.02859.1 | 580 | 162118 | 0         | 560 | 579 | 96 -  | 2   | 580 | 156732 | 157310 |
| UN54985 | Rsa1.0.04622.1 | 639 | 16618  | 1.00E-155 | 287 | 290 | 98 +  | 1   | 290 | 12681  | 12970  |
| UN54986 | Rsa1.0.04098.1 | 658 | 19078  | 0         | 646 | 656 | 98 -  | 3   | 658 | 781    | 1431   |
| UN54987 | Rsa1.0.01798.1 | 792 | 173909 | 1.00E-129 | 252 | 258 | 97 -  | 265 | 522 | 162725 | 162982 |
| UN54988 | Rsa1.0.00374.1 | 408 | 165738 | 1.00E-123 | 237 | 240 | 98 +  | 168 | 406 | 156178 | 156417 |

|         |                |     |        |           |     |     |       |     |     |        |        |
|---------|----------------|-----|--------|-----------|-----|-----|-------|-----|-----|--------|--------|
| UN54989 | Rsa1.0.03356.1 | 718 | 23487  | 0         | 524 | 539 | 97 +  | 180 | 718 | 3614   | 4149   |
| UN54990 | Rsa1.0.00811.1 | 699 | 63242  | 1.00E-169 | 354 | 369 | 95 +  | 3   | 371 | 40733  | 41099  |
| UN54991 | Rsa1.0.05050.1 | 648 | 15022  | 6.00E-91  | 179 | 182 | 98 -  | 466 | 647 | 4647   | 4828   |
| UN54992 | Rsa1.0.00363.1 | 731 | 90968  | 0         | 408 | 419 | 97 +  | 2   | 420 | 71838  | 72250  |
| UN54993 | Rsa1.0.00019.1 | 649 | 301669 | 0         | 625 | 646 | 96 +  | 4   | 649 | 268265 | 268910 |
| UN54994 | Rsa1.0.08645.1 | 479 | 7087   | 1.00E-140 | 357 | 383 | 93 +  | 89  | 471 | 3324   | 3698   |
| UN54995 | #              | #   | #      | #         | #   | #   | #     | #   | #   | #      | #      |
| UN54996 | Rsa1.0.00308.1 | 797 | 96915  | 0         | 539 | 542 | 99 -  | 256 | 797 | 85826  | 86367  |
| UN54997 | Rsa1.0.00867.1 | 831 | 61635  | 1.00E-116 | 225 | 229 | 98 +  | 3   | 231 | 21968  | 22196  |
| UN54998 | Rsa1.0.01703.1 | 101 | 40713  | 4.00E-41  | 97  | 101 | 96 +  | 1   | 101 | 20876  | 20976  |
| UN54999 | Rsa1.0.00205.1 | 605 | 193401 | 4.00E-64  | 178 | 193 | 92 -  | 414 | 605 | 79338  | 79529  |
| UN55000 | Rsa1.0.00419.1 | 791 | 86562  | 1.00E-134 | 245 | 246 | 99 +  | 70  | 315 | 65643  | 65888  |
| UN55001 | Rsa1.0.17847.1 | 529 | 1727   | 1.00E-139 | 280 | 289 | 96 +  | 167 | 455 | 739    | 1024   |
| UN55002 | Rsa1.0.00952.1 | 804 | 58450  | 0         | 781 | 817 | 95 +  | 4   | 804 | 54230  | 55036  |
| UN55003 | Rsa1.0.00387.1 | 658 | 495407 | 1.00E-156 | 314 | 324 | 96 +  | 3   | 325 | 30058  | 30381  |
| UN55004 | Rsa1.0.00118.1 | 824 | 130637 | 0         | 567 | 599 | 94 +  | 3   | 595 | 28805  | 29403  |
| UN55005 | Rsa1.0.03434.1 | 754 | 22960  | 0         | 514 | 514 | 100 - | 2   | 515 | 19582  | 20095  |
| UN55006 | Rsa1.0.00275.1 | 748 | 210104 | 4.00E-86  | 185 | 192 | 96 -  | 9   | 197 | 163741 | 163932 |
| UN55007 | Rsa1.0.00062.1 | 846 | 299291 | 0         | 574 | 607 | 94 -  | 220 | 824 | 293689 | 294282 |
| UN55008 | Rsa1.0.00472.1 | 559 | 398134 | 1.00E-121 | 302 | 326 | 92 +  | 6   | 324 | 166242 | 166564 |
| UN55009 | Rsa1.0.02825.1 | 720 | 27568  | 1.00E-137 | 267 | 271 | 98 +  | 446 | 715 | 26950  | 27219  |
| UN55010 | Rsa1.0.01505.1 | 723 | 44382  | 3.00E-22  | 73  | 79  | 92 +  | 261 | 339 | 27416  | 27494  |
| UN55011 | Rsa1.0.00027.1 | 523 | 283362 | 1.00E-155 | 296 | 301 | 98 -  | 223 | 523 | 48211  | 48510  |
| UN55012 | Rsa1.0.03029.1 | 775 | 25858  | 1.00E-174 | 369 | 387 | 95 +  | 4   | 389 | 11943  | 12326  |
| UN55013 | Rsa1.0.00168.1 | 575 | 115870 | 1.00E-141 | 254 | 254 | 100 + | 322 | 575 | 7170   | 7423   |
| UN55014 | Rsa1.0.01635.1 | 664 | 41865  | 1.00E-124 | 226 | 226 | 100 - | 439 | 664 | 21149  | 21374  |
| UN55015 | Rsa1.0.00152.1 | 555 | 257730 | 1.00E-101 | 187 | 187 | 100 - | 120 | 306 | 251492 | 251678 |
| UN55016 | Rsa1.0.01855.1 | 699 | 38204  | 0         | 412 | 422 | 97 -  | 278 | 699 | 15681  | 16102  |
| UN55017 | Rsa1.0.00341.1 | 732 | 249309 | 0         | 688 | 734 | 93 -  | 2   | 729 | 3120   | 3837   |
| UN55018 | Rsa1.0.00667.1 | 505 | 69460  | 1.00E-179 | 362 | 377 | 96 +  | 140 | 505 | 35323  | 35699  |
| UN55019 | Rsa1.0.00469.1 | 827 | 82084  | 0         | 818 | 829 | 98 -  | 3   | 827 | 15885  | 16713  |
| UN55020 | Rsa1.0.20270.1 | 658 | 1322   | 0         | 636 | 649 | 97 -  | 12  | 658 | 369    | 1014   |
| UN55021 | Rsa1.0.00413.1 | 634 | 86921  | 0         | 523 | 554 | 94 +  | 2   | 551 | 3794   | 4345   |
| UN55022 | Rsa1.0.00019.1 | 830 | 301669 | 0         | 382 | 387 | 98 +  | 358 | 744 | 132036 | 132422 |
| UN55023 | Rsa1.0.00045.1 | 609 | 328694 | 2.33E-156 | 310 | 325 | 95 +  | 9   | 333 | 186948 | 187269 |
| UN55024 | Rsa1.0.06329.1 | 417 | 11225  | 9.00E-49  | 135 | 148 | 91 +  | 160 | 307 | 462    | 596    |
| UN55025 | Rsa1.0.04076.1 | 660 | 19209  | 1.00E-172 | 379 | 406 | 93 -  | 271 | 658 | 6881   | 7286   |
| UN55026 | Rsa1.0.03401.1 | 796 | 23191  | 1.00E-137 | 256 | 259 | 98 -  | 353 | 611 | 22479  | 22737  |
| UN55027 | Rsa1.0.04632.1 | 792 | 16589  | 0         | 786 | 791 | 99 +  | 2   | 792 | 10408  | 11197  |

|         |                |     |        |           |     |     |       |     |     |        |        |
|---------|----------------|-----|--------|-----------|-----|-----|-------|-----|-----|--------|--------|
| UN55028 | Rsa1.0_10922.1 | 345 | 5677   | 1.00E-50  | 114 | 118 | 96 +  | 29  | 146 | 1657   | 1774   |
| UN55029 | Rsa1.0_03764.1 | 681 | 20971  | 1.00E-133 | 250 | 253 | 98 +  | 360 | 612 | 9126   | 9378   |
| UN55030 | Rsa1.0_00085.1 | 825 | 142226 | 0         | 669 | 739 | 90 -  | 3   | 725 | 65292  | 66014  |
| UN55031 | Rsa1.0_01990.1 | 553 | 36431  | 1.00E-177 | 320 | 322 | 99 +  | 232 | 553 | 3649   | 3970   |
| UN55032 | Rsa1.0_02860.1 | 616 | 27207  | 1.00E-180 | 330 | 332 | 99 -  | 3   | 333 | 26162  | 26493  |
| UN55033 | Rsa1.0_22177.1 | 221 | 1144   | 1.00E-113 | 207 | 207 | 100 + | 2   | 208 | 263    | 469    |
| UN55034 | Rsa1.0_02588.1 | 831 | 29840  | 0         | 824 | 832 | 99 +  | 1   | 831 | 3530   | 4361   |
| UN55035 | Rsa1.0_00124.1 | 865 | 262503 | 0         | 709 | 753 | 94 -  | 5   | 747 | 29195  | 29946  |
| UN55036 | Rsa1.0_00387.1 | 869 | 495407 | 1.00E-117 | 256 | 265 | 96 +  | 610 | 869 | 396750 | 397014 |
| UN55037 | Rsa1.0_00197.1 | 855 | 109714 | 0         | 445 | 459 | 96 +  | 403 | 852 | 46101  | 46559  |
| UN55038 | Rsa1.0_01674.1 | 699 | 168300 | 0         | 695 | 697 | 99 -  | 3   | 699 | 159774 | 160470 |
| UN55039 | Rsa1.0_02663.1 | 662 | 169243 | 0         | 524 | 552 | 94 +  | 102 | 653 | 20800  | 21347  |
| UN55040 | Rsa1.0_00408.1 | 650 | 176752 | 0         | 649 | 650 | 99 +  | 1   | 650 | 32599  | 33248  |
| UN55041 | Rsa1.0_00238.1 | 606 | 193193 | 1.00E-132 | 334 | 364 | 91 -  | 249 | 606 | 80577  | 80930  |
| UN55042 | Rsa1.0_02303.1 | 838 | 32818  | 2.00E-97  | 187 | 189 | 98 +  | 125 | 313 | 833    | 1021   |
| UN55043 | Rsa1.0_00219.1 | 747 | 106983 | 0         | 394 | 406 | 97 +  | 342 | 747 | 55600  | 56005  |
| UN55044 | Rsa1.0_00484.1 | 488 | 203294 | 1.00E-143 | 260 | 261 | 99 -  | 214 | 474 | 143448 | 143708 |
| UN55045 | Rsa1.0_00727.1 | 739 | 66724  | 1.00E-154 | 283 | 285 | 99 -  | 136 | 420 | 48293  | 48577  |
| UN55046 | Rsa1.0_05914.1 | 349 | 12253  | 0         | 349 | 350 | 99 -  | 1   | 349 | 2479   | 2828   |
| UN55047 | Rsa1.0_00083.1 | 723 | 442773 | 0         | 720 | 722 | 99 +  | 3   | 723 | 370989 | 371710 |
| UN55048 | Rsa1.0_08675.1 | 423 | 7054   | 0         | 422 | 423 | 99 +  | 1   | 423 | 1699   | 2121   |
| UN55049 | Rsa1.0_66564.1 | 396 | 344    | 1.00E-149 | 300 | 308 | 97 -  | 95  | 396 | 37     | 344    |
| UN55050 | Rsa1.0_03482.1 | 725 | 22625  | 7.00E-94  | 184 | 187 | 98 +  | 300 | 486 | 6018   | 6204   |
| UN55051 | Rsa1.0_00065.1 | 745 | 454616 | 0         | 497 | 498 | 99 -  | 249 | 745 | 453115 | 453612 |
| UN55052 | Rsa1.0_14656.1 | 717 | 3183   | 1.00E-148 | 296 | 306 | 96 +  | 3   | 308 | 1337   | 1642   |
| UN55053 | Rsa1.0_00005.1 | 678 | 353093 | 1.00E-137 | 247 | 247 | 100 - | 3   | 249 | 201906 | 202152 |
| UN55054 | Rsa1.0_04160.1 | 774 | 18795  | 0         | 742 | 776 | 95 +  | 2   | 773 | 316    | 1090   |
| UN55055 | Rsa1.0_00055.1 | 599 | 520193 | 0         | 480 | 499 | 96 +  | 103 | 599 | 405822 | 406318 |
| UN55056 | Rsa1.0_01983.1 | 756 | 36509  | 0         | 365 | 371 | 98 +  | 1   | 371 | 30037  | 30407  |
| UN55057 | Rsa1.0_01102.1 | 751 | 53987  | 1.00E-40  | 219 | 267 | 82 -  | 140 | 404 | 43702  | 43944  |
| UN55058 | Rsa1.0_00081.1 | 477 | 143261 | 1.00E-137 | 254 | 256 | 99 +  | 3   | 258 | 123487 | 123742 |
| UN55059 | Rsa1.0_00104.1 | 782 | 368722 | 1.00E-92  | 226 | 242 | 93 -  | 108 | 349 | 36876  | 37112  |
| UN55060 | Rsa1.0_00104.1 | 808 | 368722 | 1.00E-168 | 300 | 300 | 100 + | 3   | 302 | 255737 | 256036 |
| UN55061 | Rsa1.0_03877.1 | 488 | 20318  | 4.00E-85  | 198 | 214 | 92 -  | 86  | 284 | 1268   | 1481   |
| UN55062 | Rsa1.0_01372.1 | 728 | 47068  | 0         | 715 | 719 | 99 -  | 3   | 717 | 4883   | 5601   |
| UN55063 | Rsa1.0_00181.1 | 192 | 114269 | 1.00E-80  | 182 | 192 | 94 -  | 1   | 192 | 94218  | 94409  |
| UN55064 | Rsa1.0_00039.1 | 733 | 296927 | 0         | 621 | 670 | 92 -  | 67  | 731 | 21961  | 22615  |
| UN55065 | Rsa1.0_03798.1 | 642 | 20800  | 0         | 358 | 364 | 98 +  | 266 | 625 | 4677   | 5039   |
| UN55066 | Rsa1.0_00861.1 | 846 | 61759  | 1.00E-133 | 262 | 269 | 97 +  | 414 | 682 | 44124  | 44392  |

|         |                |     |        |           |     |     |       |     |     |        |        |
|---------|----------------|-----|--------|-----------|-----|-----|-------|-----|-----|--------|--------|
| UN55067 | Rsa1.0.00577.1 | 784 | 174827 | 1.00E-145 | 304 | 312 | 97 +  | 459 | 764 | 132266 | 132577 |
| UN55068 | Rsa1.0.03922.1 | 779 | 20060  | 1.00E-153 | 326 | 335 | 97 +  | 451 | 779 | 2801   | 3135   |
| UN55069 | Rsa1.0.02315.1 | 370 | 32618  | 1.00E-112 | 208 | 209 | 99 -  | 4   | 212 | 27097  | 27305  |
| UN55070 | Rsa1.0.00002.1 | 281 | 601661 | 1.00E-115 | 262 | 281 | 93 -  | 2   | 281 | 422842 | 423108 |
| UN55071 | Rsa1.0.08656.1 | 689 | 7077   | 7.00E-14  | 41  | 41  | 100 - | 182 | 222 | 518    | 558    |
| UN55072 | Rsa1.0.02387.1 | 685 | 31890  | 2.00E-45  | 97  | 98  | 98 +  | 350 | 447 | 24684  | 24781  |
| UN55073 | Rsa1.0.00017.1 | 798 | 752458 | 1.00E-161 | 348 | 363 | 95 +  | 1   | 359 | 60289  | 60650  |
| UN55074 | Rsa1.0.02170.1 | 702 | 34352  | 1.00E-163 | 316 | 325 | 97 -  | 3   | 327 | 28748  | 29064  |
| UN55075 | Rsa1.0.00736.1 | 755 | 66455  | 0         | 645 | 649 | 99 +  | 108 | 753 | 50684  | 51332  |
| UN55076 | Rsa1.0.00837.1 | 820 | 62568  | 0         | 430 | 448 | 95 +  | 367 | 801 | 3086   | 3533   |
| UN55077 | Rsa1.0.02204.1 | 762 | 33930  | 0         | 466 | 489 | 95 +  | 5   | 485 | 20641  | 21123  |
| UN55078 | Rsa1.0.00095.1 | 596 | 283384 | 0         | 588 | 594 | 98 +  | 3   | 596 | 96419  | 97012  |
| UN55079 | Rsa1.0.00016.1 | 518 | 831256 | 0         | 491 | 536 | 91 -  | 3   | 518 | 499607 | 500136 |
| UN55080 | Rsa1.0.00159.1 | 778 | 431686 | 1.00E-178 | 319 | 320 | 99 -  | 222 | 541 | 268820 | 269139 |
| UN55081 | Rsa1.0.01095.1 | 699 | 54276  | 1.00E-171 | 342 | 352 | 97 -  | 4   | 354 | 8052   | 8402   |
| UN55082 | Rsa1.0.00132.1 | 350 | 124299 | 1.00E-155 | 335 | 350 | 95 +  | 4   | 350 | 105876 | 106220 |
| UN55083 | Rsa1.0.01170.1 | 718 | 161131 | 0         | 524 | 543 | 96 +  | 19  | 558 | 10385  | 10927  |
| UN55084 | Rsa1.0.66339.1 | 688 | 345    | 2.00E-94  | 185 | 188 | 98 -  | 183 | 370 | 98     | 285    |
| UN55085 | Rsa1.0.01603.1 | 758 | 42468  | 1.00E-121 | 292 | 316 | 92 -  | 3   | 317 | 1835   | 2140   |
| UN55086 | Rsa1.0.59051.1 | 769 | 387    | 2.00E-82  | 194 | 206 | 94 +  | 1   | 206 | 184    | 386    |
| UN55087 | Rsa1.0.02707.1 | 591 | 28520  | 3.00E-77  | 160 | 163 | 98 -  | 292 | 453 | 491    | 653    |
| UN55088 | Rsa1.0.00252.1 | 644 | 102760 | 0         | 560 | 577 | 97 +  | 71  | 644 | 86703  | 87278  |
| UN55089 | Rsa1.0.00018.1 | 760 | 410899 | 1.00E-129 | 293 | 311 | 94 +  | 171 | 472 | 53224  | 53533  |
| UN55090 | Rsa1.0.02118.1 | 696 | 34839  | 1.00E-178 | 384 | 404 | 95 +  | 1   | 399 | 26459  | 26860  |
| UN55091 | Rsa1.0.02278.1 | 578 | 33085  | 9.00E-19  | 74  | 81  | 91 -  | 315 | 394 | 9638   | 9718   |
| UN55092 | Rsa1.0.14454.1 | 722 | 3372   | 0         | 417 | 432 | 96 -  | 287 | 714 | 669    | 1100   |
| UN55093 | Rsa1.0.00632.1 | 777 | 183777 | 1.00E-107 | 200 | 201 | 99 -  | 3   | 203 | 5048   | 5248   |
| UN55094 | Rsa1.0.00128.1 | 623 | 228675 | 0         | 580 | 612 | 94 +  | 8   | 618 | 64044  | 64646  |
| UN55095 | Rsa1.0.06469.1 | 774 | 10957  | 0         | 435 | 444 | 97 +  | 45  | 485 | 5277   | 5720   |
| UN55096 | Rsa1.0.01758.1 | 413 | 39747  | 1.00E-112 | 242 | 252 | 96 -  | 166 | 413 | 35052  | 35303  |
| UN55097 | Rsa1.0.00065.1 | 780 | 454616 | 1.00E-107 | 209 | 213 | 98 +  | 153 | 365 | 159767 | 159979 |
| UN55098 | Rsa1.0.01976.1 | 752 | 36570  | 3.00E-87  | 225 | 241 | 93 +  | 171 | 410 | 741    | 975    |
| UN55099 | Rsa1.0.09273.1 | 796 | 6511   | 0         | 792 | 801 | 98 +  | 2   | 794 | 645    | 1445   |
| UN55100 | Rsa1.0.00686.1 | 786 | 68511  | 0         | 426 | 427 | 99 +  | 3   | 429 | 39329  | 39755  |
| UN55101 | Rsa1.0.37121.1 | 777 | 607    | 1.00E-122 | 334 | 371 | 90 +  | 42  | 412 | 237    | 607    |
| UN55102 | Rsa1.0.11519.1 | 698 | 5480   | 1.00E-159 | 293 | 296 | 98 -  | 201 | 496 | 4461   | 4756   |
| UN55103 | Rsa1.0.01724.1 | 768 | 40292  | 6.00E-67  | 170 | 177 | 96 +  | 575 | 746 | 19668  | 19843  |
| UN55104 | Rsa1.0.04280.1 | 738 | 18110  | 0         | 645 | 705 | 91 -  | 3   | 700 | 6121   | 6813   |
| UN55105 | Rsa1.0.01846.1 | 764 | 38367  | 5.00E-98  | 249 | 270 | 92 -  | 3   | 271 | 2847   | 3116   |

|         |                |     |        |           |     |     |       |     |     |        |        |
|---------|----------------|-----|--------|-----------|-----|-----|-------|-----|-----|--------|--------|
| UN55106 | Rsa1.0.00092.1 | 712 | 659932 | 0         | 441 | 442 | 99 +  | 265 | 706 | 222759 | 223200 |
| UN55107 | Rsa1.0.01832.1 | 664 | 38581  | 0         | 527 | 551 | 95 -  | 114 | 658 | 32084  | 32625  |
| UN55108 | Rsa1.0.04251.1 | 517 | 18263  | 1.00E-119 | 279 | 297 | 93 +  | 222 | 517 | 14811  | 15100  |
| UN55109 | Rsa1.0.00224.1 | 714 | 327530 | 0         | 358 | 361 | 99 -  | 354 | 713 | 26213  | 26573  |
| UN55110 | Rsa1.0.02911.1 | 744 | 142461 | 1.00E-108 | 259 | 277 | 93 +  | 3   | 277 | 137286 | 137550 |
| UN55111 | Rsa1.0.02989.1 | 736 | 26187  | 1.00E-18  | 187 | 233 | 80 +  | 414 | 646 | 18285  | 18517  |
| UN55112 | Rsa1.0.04109.1 | 726 | 19000  | 3.00E-81  | 160 | 162 | 98 +  | 97  | 258 | 15402  | 15563  |
| UN55113 | Rsa1.0.00653.1 | 800 | 70029  | 1.00E-154 | 392 | 428 | 91 -  | 3   | 426 | 18742  | 19166  |
| UN55114 | Rsa1.0.08102.1 | 588 | 7901   | 1.00E-102 | 200 | 203 | 98 -  | 373 | 575 | 699    | 898    |
| UN55115 | Rsa1.0.03846.1 | 755 | 20481  | 1.00E-133 | 244 | 245 | 99 +  | 1   | 245 | 12113  | 12357  |
| UN55116 | Rsa1.0.00979.1 | 626 | 57733  | 1.00E-171 | 304 | 304 | 100 - | 323 | 626 | 1409   | 1712   |
| UN55117 | Rsa1.0.00190.1 | 769 | 318240 | 0         | 556 | 614 | 90 -  | 3   | 596 | 45482  | 46088  |
| UN55118 | Rsa1.0.02269.1 | 772 | 33168  | 0         | 562 | 574 | 97 -  | 2   | 575 | 20259  | 20832  |
| UN55119 | Rsa1.0.01869.1 | 733 | 37928  | 0         | 728 | 734 | 99 -  | 3   | 733 | 27296  | 28028  |
| UN55120 | Rsa1.0.01666.1 | 655 | 173972 | 0         | 379 | 380 | 99 +  | 3   | 382 | 133869 | 134248 |
| UN55121 | Rsa1.0.00089.1 | 664 | 406142 | 0         | 648 | 663 | 97 -  | 2   | 663 | 87245  | 87907  |
| UN55122 | Rsa1.0.02601.1 | 682 | 29654  | 0         | 589 | 597 | 98 +  | 3   | 597 | 3192   | 3788   |
| UN55123 | Rsa1.0.00029.1 | 728 | 272992 | 1.00E-170 | 411 | 445 | 92 -  | 1   | 442 | 251743 | 252176 |
| UN55124 | Rsa1.0.06281.1 | 376 | 11317  | 0         | 375 | 375 | 100 - | 2   | 376 | 10133  | 10507  |
| UN55125 | Rsa1.0.10226.1 | 629 | 5932   | 1.00E-131 | 270 | 277 | 97 +  | 355 | 628 | 319    | 594    |
| UN55126 | Rsa1.0.02472.1 | 776 | 31085  | 1.00E-125 | 390 | 441 | 88 +  | 274 | 711 | 3353   | 3781   |
| UN55127 | Rsa1.0.00158.1 | 681 | 117999 | 0         | 510 | 512 | 99 +  | 144 | 654 | 23079  | 23590  |
| UN55128 | Rsa1.0.00191.1 | 563 | 316976 | 0         | 344 | 344 | 100 - | 220 | 563 | 46209  | 46552  |
| UN55129 | Rsa1.0.00251.1 | 239 | 303968 | 2.00E-39  | 86  | 87  | 98 -  | 153 | 239 | 291137 | 291223 |
| UN55130 | Rsa1.0.00991.1 | 713 | 143101 | 0         | 687 | 712 | 96 +  | 6   | 713 | 33679  | 34389  |
| UN55131 | Rsa1.0.01116.1 | 687 | 142088 | 1.00E-159 | 301 | 305 | 98 -  | 383 | 687 | 119152 | 119455 |
| UN55132 | Rsa1.0.00985.1 | 548 | 161950 | 1.00E-172 | 324 | 330 | 98 +  | 219 | 548 | 47336  | 47665  |
| UN55133 | Rsa1.0.00243.1 | 680 | 103651 | 1.00E-170 | 354 | 369 | 95 -  | 3   | 370 | 36972  | 37337  |
| UN55134 | Rsa1.0.01112.1 | 698 | 310601 | 1.00E-113 | 248 | 261 | 95 +  | 438 | 698 | 31685  | 31942  |
| UN55135 | Rsa1.0.01359.1 | 667 | 47271  | 1.00E-179 | 348 | 358 | 97 -  | 3   | 360 | 33556  | 33913  |
| UN55136 | Rsa1.0.04446.1 | 601 | 17317  | 1.00E-131 | 261 | 269 | 97 -  | 224 | 492 | 845    | 1113   |
| UN55137 | Rsa1.0.00194.1 | 689 | 110851 | 0         | 371 | 384 | 96 -  | 161 | 540 | 70858  | 71241  |
| UN55138 | Rsa1.0.02400.1 | 690 | 31750  | 0         | 456 | 481 | 94 +  | 216 | 690 | 14794  | 15271  |
| UN55139 | Rsa1.0.00118.1 | 676 | 130637 | 0         | 440 | 442 | 99 +  | 236 | 676 | 58549  | 58990  |
| UN55140 | Rsa1.0.00022.1 | 756 | 200461 | 1.00E-114 | 218 | 221 | 98 -  | 286 | 506 | 18695  | 18915  |
| UN55141 | Rsa1.0.00162.1 | 618 | 239935 | 0         | 368 | 381 | 96 -  | 242 | 618 | 19230  | 19610  |
| UN55142 | Rsa1.0.00015.1 | 273 | 561803 | 1.00E-107 | 255 | 275 | 92 -  | 2   | 273 | 293269 | 293534 |
| UN55143 | Rsa1.0.01272.1 | 726 | 49553  | 1.00E-129 | 277 | 291 | 95 +  | 2   | 292 | 17978  | 18268  |
| UN55144 | Rsa1.0.00657.1 | 284 | 69858  | 1.00E-152 | 282 | 284 | 99 -  | 2   | 284 | 46480  | 46763  |



|         |                |     |        |           |     |     |       |     |     |        |        |
|---------|----------------|-----|--------|-----------|-----|-----|-------|-----|-----|--------|--------|
| UN55145 | Rsa1.0_30129.1 | 634 | 762    | 1.00E-172 | 324 | 330 | 98 +  | 37  | 366 | 1      | 330    |
| UN55146 | Rsa1.0_13870.1 | 419 | 4179   | 0         | 417 | 419 | 99 +  | 1   | 419 | 691    | 1108   |
| UN55147 | Rsa1.0_15615.1 | 732 | 2518   | 1.00E-180 | 362 | 373 | 97 -  | 364 | 732 | 690    | 1061   |
| UN55148 | Rsa1.0_00720.1 | 719 | 66931  | 1.00E-168 | 330 | 335 | 98 +  | 390 | 719 | 20651  | 20985  |
| UN55149 | Rsa1.0_00609.1 | 791 | 72785  | 0         | 411 | 425 | 96 +  | 273 | 697 | 52129  | 52553  |
| UN55150 | Rsa1.0_00005.1 | 638 | 353093 | 0         | 551 | 555 | 99 -  | 87  | 638 | 208626 | 209180 |
| UN55151 | Rsa1.0_00260.1 | 589 | 102021 | 0         | 482 | 518 | 93 +  | 3   | 516 | 68504  | 69018  |
| UN55152 | Rsa1.0_00099.1 | 763 | 159619 | 0         | 755 | 769 | 98 +  | 3   | 763 | 51279  | 52047  |
| UN55153 | Rsa1.0_00008.1 | 783 | 358124 | 0         | 728 | 752 | 96 +  | 4   | 752 | 6349   | 7100   |
| UN55154 | Rsa1.0_02391.1 | 665 | 31836  | 0         | 645 | 668 | 96 -  | 3   | 665 | 4660   | 5327   |
| UN55155 | Rsa1.0_00105.1 | 489 | 134138 | 0         | 461 | 484 | 95 +  | 16  | 489 | 60014  | 60497  |
| UN55156 | Rsa1.0_00038.1 | 809 | 314568 | 0         | 771 | 818 | 94 -  | 2   | 809 | 47739  | 48530  |
| UN55157 | Rsa1.0_01156.1 | 677 | 52147  | 0         | 662 | 681 | 97 +  | 1   | 675 | 31799  | 32477  |
| UN55158 | Rsa1.0_13019.1 | 661 | 5042   | 0         | 398 | 411 | 96 +  | 251 | 661 | 1377   | 1787   |
| UN55159 | Rsa1.0_02431.1 | 734 | 31504  | 1.00E-125 | 262 | 268 | 97 -  | 468 | 731 | 3762   | 4029   |
| UN55160 | Rsa1.0_00110.1 | 725 | 132719 | 0         | 338 | 339 | 99 +  | 307 | 645 | 101876 | 102214 |
| UN55161 | Rsa1.0_01180.1 | 335 | 51517  | 1.00E-134 | 316 | 335 | 94 -  | 8   | 335 | 32292  | 32625  |
| UN55162 | Rsa1.0_02941.1 | 769 | 26583  | 5.00E-98  | 216 | 222 | 97 +  | 514 | 732 | 6324   | 6544   |
| UN55163 | Rsa1.0_00991.1 | 767 | 143101 | 0         | 709 | 741 | 95 +  | 29  | 767 | 125219 | 125959 |
| UN55164 | Rsa1.0_01634.1 | 525 | 41865  | 1.00E-63  | 130 | 132 | 98 +  | 1   | 132 | 36027  | 36158  |
| UN55165 | Rsa1.0_13238.1 | 721 | 4960   | 0         | 340 | 343 | 99 +  | 374 | 715 | 2195   | 2537   |
| UN55166 | Rsa1.0_01789.1 | 746 | 39250  | 1.00E-123 | 262 | 272 | 96 +  | 1   | 265 | 18810  | 19080  |
| UN55167 | Rsa1.0_02456.1 | 656 | 31222  | 0         | 364 | 365 | 99 +  | 292 | 656 | 25869  | 26233  |
| UN55168 | Rsa1.0_00525.1 | 516 | 78030  | 0         | 493 | 512 | 96 -  | 2   | 513 | 37523  | 38034  |
| UN55169 | Rsa1.0_00527.1 | 663 | 77733  | 1.00E-156 | 290 | 292 | 99 -  | 373 | 663 | 30118  | 30409  |
| UN55170 | Rsa1.0_17534.1 | 515 | 1803   | 0         | 456 | 457 | 99 -  | 59  | 515 | 591    | 1047   |
| UN55171 | Rsa1.0_00017.1 | 763 | 752458 | 2.00E-73  | 147 | 149 | 98 +  | 226 | 374 | 648478 | 648626 |
| UN55172 | Rsa1.0_35031.1 | 647 | 646    | 0         | 584 | 605 | 96 -  | 49  | 647 | 42     | 646    |
| UN55173 | Rsa1.0_08332.1 | 748 | 7528   | 1.00E-122 | 257 | 268 | 95 -  | 145 | 409 | 6599   | 6866   |
| UN55174 | Rsa1.0_68898.1 | 268 | 333    | 1.00E-141 | 254 | 254 | 100 + | 2   | 255 | 80     | 333    |
| UN55175 | Rsa1.0_00463.1 | 242 | 189177 | 3.00E-26  | 87  | 96  | 90 +  | 153 | 242 | 114448 | 114543 |
| UN55176 | Rsa1.0_00131.1 | 690 | 432233 | 2.00E-81  | 154 | 154 | 100 - | 309 | 462 | 424975 | 425128 |
| UN55177 | Rsa1.0_03408.1 | 806 | 23154  | 8.00E-88  | 180 | 184 | 97 +  | 3   | 184 | 14388  | 14571  |
| UN55178 | Rsa1.0_00130.1 | 700 | 125737 | 1.00E-145 | 264 | 265 | 99 +  | 3   | 267 | 6688   | 6952   |
| UN55179 | Rsa1.0_00016.1 | 668 | 831256 | 7.00E-60  | 118 | 118 | 100 + | 428 | 545 | 362963 | 363080 |
| UN55180 | Rsa1.0_00179.1 | 426 | 393324 | 1.00E-166 | 322 | 331 | 97 -  | 96  | 426 | 299684 | 300008 |
| UN55181 | Rsa1.0_06582.1 | 745 | 10722  | 1.00E-105 | 200 | 202 | 99 +  | 23  | 224 | 4951   | 5152   |
| UN55182 | Rsa1.0_00067.1 | 667 | 415055 | 0         | 633 | 664 | 95 -  | 4   | 667 | 83714  | 84375  |
| UN55183 | Rsa1.0_01900.1 | 654 | 37473  | 0         | 647 | 648 | 99 +  | 2   | 649 | 8720   | 9367   |

|         |                |     |        |           |     |     |       |     |     |        |        |
|---------|----------------|-----|--------|-----------|-----|-----|-------|-----|-----|--------|--------|
| UN55184 | Rsa1.0.00032.1 | 700 | 306326 | 0         | 687 | 701 | 98 -  | 2   | 700 | 274465 | 275165 |
| UN55185 | Rsa1.0.00021.1 | 750 | 263655 | 1.00E-177 | 392 | 410 | 95 +  | 347 | 750 | 226811 | 227220 |
| UN55186 | Rsa1.0.04419.1 | 588 | 17430  | 1.00E-137 | 250 | 251 | 99 +  | 88  | 338 | 2669   | 2919   |
| UN55187 | Rsa1.0.00118.1 | 794 | 130637 | 1.00E-139 | 284 | 295 | 96 +  | 412 | 706 | 35795  | 36089  |
| UN55188 | Rsa1.0.00033.1 | 586 | 515811 | 8.00E-84  | 164 | 166 | 98 +  | 421 | 586 | 354853 | 355018 |
| UN55189 | Rsa1.0.03916.1 | 662 | 20117  | 0         | 333 | 334 | 99 -  | 3   | 336 | 17349  | 17682  |
| UN55190 | Rsa1.0.01033.1 | 751 | 56173  | 1.00E-77  | 148 | 148 | 100 + | 3   | 150 | 14419  | 14566  |
| UN55191 | Rsa1.0.02471.1 | 725 | 31104  | 0         | 479 | 495 | 96 -  | 234 | 725 | 29870  | 30364  |
| UN55192 | Rsa1.0.14087.1 | 730 | 3821   | 0         | 629 | 635 | 99 -  | 98  | 728 | 1519   | 2153   |
| UN55193 | Rsa1.0.00694.1 | 758 | 68074  | 0         | 723 | 725 | 99 -  | 2   | 725 | 6662   | 7386   |
| UN55194 | Rsa1.0.06520.1 | 554 | 10857  | 0         | 549 | 551 | 99 -  | 3   | 552 | 5720   | 6270   |
| UN55195 | Rsa1.0.00579.1 | 614 | 148308 | 1.00E-137 | 254 | 256 | 99 -  | 3   | 258 | 16093  | 16348  |
| UN55196 | Rsa1.0.10724.1 | 673 | 5745   | 0         | 324 | 325 | 99 -  | 3   | 327 | 5214   | 5538   |
| UN55197 | Rsa1.0.04194.1 | 707 | 132734 | 2.00E-35  | 92  | 97  | 94 -  | 220 | 316 | 119693 | 119789 |
| UN55198 | Rsa1.0.02110.1 | 645 | 34919  | 1.00E-109 | 200 | 200 | 100 + | 91  | 290 | 20604  | 20803  |
| UN55199 | Rsa1.0.03794.1 | 694 | 20825  | 1.00E-177 | 366 | 383 | 95 -  | 310 | 692 | 7697   | 8079   |
| UN55200 | Rsa1.0.00272.1 | 497 | 447836 | 0         | 330 | 330 | 100 + | 168 | 497 | 83840  | 84169  |
| UN55201 | Rsa1.0.00618.1 | 744 | 72195  | 0         | 740 | 749 | 98 +  | 2   | 744 | 32655  | 33403  |
| UN55202 | Rsa1.0.00269.1 | 679 | 341668 | 5.00E-67  | 130 | 130 | 100 + | 108 | 237 | 45001  | 45130  |
| UN55203 | Rsa1.0.00204.1 | 724 | 109056 | 0         | 416 | 419 | 99 +  | 2   | 417 | 44191  | 44609  |
| UN55204 | Rsa1.0.02377.1 | 325 | 31994  | 1.00E-111 | 307 | 346 | 88 +  | 2   | 323 | 18818  | 19158  |
| UN55205 | Rsa1.0.02711.1 | 760 | 28475  | 0         | 635 | 687 | 92 -  | 2   | 675 | 26982  | 27668  |
| UN55206 | Rsa1.0.01174.1 | 693 | 51696  | 1.00E-167 | 330 | 338 | 97 -  | 357 | 693 | 35530  | 35866  |
| UN55207 | Rsa1.0.01273.1 | 673 | 49464  | 1.00E-175 | 320 | 323 | 99 -  | 351 | 673 | 40102  | 40424  |
| UN55208 | Rsa1.0.00017.1 | 322 | 752458 | 1.00E-108 | 218 | 223 | 97 -  | 89  | 310 | 138929 | 139151 |
| UN55209 | Rsa1.0.00385.1 | 777 | 89160  | 0         | 455 | 466 | 97 -  | 3   | 468 | 12113  | 12578  |
| UN55210 | Rsa1.0.00497.1 | 254 | 79830  | 1.00E-131 | 252 | 256 | 98 -  | 1   | 254 | 29627  | 29882  |
| UN55211 | Rsa1.0.01256.1 | 719 | 49770  | 1.00E-103 | 204 | 207 | 98 +  | 514 | 719 | 29387  | 29593  |
| UN55212 | Rsa1.0.01007.1 | 515 | 56933  | 0         | 509 | 514 | 99 +  | 2   | 515 | 22143  | 22656  |
| UN55213 | Rsa1.0.04214.1 | 559 | 18437  | 1.00E-116 | 230 | 236 | 97 -  | 3   | 238 | 7889   | 8124   |
| UN55214 | Rsa1.0.06092.1 | 303 | 11756  | 6.00E-77  | 224 | 249 | 89 +  | 57  | 303 | 369    | 612    |
| UN55215 | Rsa1.0.05287.1 | 748 | 14264  | 0         | 654 | 704 | 92 +  | 1   | 701 | 4668   | 5363   |
| UN55216 | Rsa1.0.00306.1 | 658 | 146760 | 1.00E-105 | 200 | 202 | 99 -  | 3   | 204 | 134121 | 134322 |
| UN55217 | Rsa1.0.00170.1 | 765 | 179538 | 1.00E-123 | 251 | 260 | 96 -  | 294 | 553 | 28952  | 29211  |
| UN55218 | Rsa1.0.59256.1 | 428 | 386    | 0         | 343 | 343 | 100 - | 2   | 344 | 1      | 343    |
| UN55219 | Rsa1.0.00268.1 | 762 | 101470 | 0         | 508 | 512 | 99 +  | 10  | 521 | 36936  | 37447  |
| UN55220 | Rsa1.0.01719.1 | 779 | 40388  | 0         | 490 | 511 | 95 -  | 268 | 772 | 1130   | 1640   |
| UN55221 | Rsa1.0.00058.1 | 819 | 159921 | 0         | 343 | 349 | 98 +  | 2   | 350 | 50783  | 51131  |
| UN55222 | Rsa1.0.00016.1 | 797 | 831256 | 0         | 773 | 794 | 97 -  | 1   | 785 | 440954 | 441747 |

|         |                |     |        |           |     |     |       |     |     |        |        |
|---------|----------------|-----|--------|-----------|-----|-----|-------|-----|-----|--------|--------|
| UN55223 | Rsa1.0_14378.1 | 691 | 3455   | 0         | 374 | 382 | 97 +  | 1   | 376 | 3005   | 3386   |
| UN55224 | Rsa1.0_03565.1 | 420 | 22062  | 0         | 400 | 416 | 96 -  | 5   | 420 | 17829  | 18244  |
| UN55225 | Rsa1.0_00046.1 | 783 | 320315 | 0         | 620 | 678 | 91 -  | 114 | 780 | 68808  | 69455  |
| UN55226 | Rsa1.0_00620.1 | 409 | 71985  | 1.00E-112 | 260 | 275 | 94 -  | 89  | 359 | 54443  | 54715  |
| UN55227 | Rsa1.0_07056.1 | 626 | 9969   | 0         | 365 | 366 | 99 -  | 261 | 626 | 1841   | 2206   |
| UN55228 | Rsa1.0_00380.1 | 333 | 89748  | 1.00E-160 | 286 | 286 | 100 + | 48  | 333 | 52464  | 52749  |
| UN55229 | Rsa1.0_05336.1 | 817 | 14117  | 0         | 733 | 766 | 95 -  | 2   | 763 | 5819   | 6581   |
| UN55230 | Rsa1.0_00342.1 | 808 | 93695  | 0         | 544 | 547 | 99 -  | 165 | 709 | 14752  | 15298  |
| UN55231 | Rsa1.0_00104.1 | 590 | 368722 | 0         | 588 | 588 | 100 + | 3   | 590 | 273683 | 274270 |
| UN55232 | Rsa1.0_00168.1 | 767 | 115870 | 1.00E-141 | 324 | 337 | 96 +  | 399 | 728 | 40116  | 40449  |
| UN55233 | Rsa1.0_00420.1 | 810 | 86496  | 0         | 686 | 724 | 94 -  | 24  | 741 | 40222  | 40939  |
| UN55234 | Rsa1.0_01740.1 | 716 | 39986  | 0         | 456 | 479 | 95 +  | 224 | 696 | 11211  | 11687  |
| UN55235 | Rsa1.0_01065.1 | 625 | 55264  | 0         | 508 | 516 | 98 +  | 113 | 625 | 28205  | 28720  |
| UN55236 | Rsa1.0_00439.1 | 761 | 142776 | 1.00E-162 | 327 | 338 | 96 +  | 353 | 689 | 63119  | 63456  |
| UN55237 | Rsa1.0_02493.1 | 659 | 30854  | 1.00E-109 | 210 | 213 | 98 -  | 447 | 659 | 24534  | 24746  |
| UN55238 | Rsa1.0_02429.1 | 472 | 31527  | 1.00E-109 | 216 | 221 | 97 +  | 73  | 293 | 16509  | 16729  |
| UN55239 | Rsa1.0_21460.1 | 622 | 1202   | 0         | 366 | 368 | 99 +  | 1   | 368 | 583    | 950    |
| UN55240 | Rsa1.0_00009.1 | 780 | 232558 | 2.00E-85  | 173 | 177 | 97 -  | 391 | 567 | 62630  | 62806  |
| UN55241 | Rsa1.0_00097.1 | 593 | 138858 | 0         | 413 | 416 | 99 -  | 3   | 418 | 35955  | 36370  |
| UN55242 | Rsa1.0_00301.1 | 712 | 365315 | 0         | 689 | 708 | 97 -  | 3   | 708 | 228435 | 229136 |
| UN55243 | Rsa1.0_00190.1 | 783 | 318240 | 0         | 730 | 745 | 97 +  | 18  | 757 | 84353  | 85096  |
| UN55244 | Rsa1.0_00192.1 | 660 | 278200 | 0         | 340 | 343 | 99 +  | 3   | 345 | 11747  | 12088  |
| UN55245 | Rsa1.0_03213.1 | 641 | 24568  | 3.00E-71  | 214 | 237 | 90 -  | 375 | 604 | 11505  | 11741  |
| UN55246 | Rsa1.0_03304.1 | 765 | 23883  | 0         | 543 | 580 | 93 -  | 147 | 717 | 20917  | 21484  |
| UN55247 | Rsa1.0_00773.1 | 175 | 64839  | 2.00E-16  | 53  | 56  | 94 +  | 105 | 160 | 18598  | 18653  |
| UN55248 | Rsa1.0_06631.1 | 777 | 10632  | 0         | 399 | 415 | 96 -  | 3   | 411 | 369    | 783    |
| UN55249 | Rsa1.0_00611.1 | 685 | 72410  | 0         | 599 | 610 | 98 +  | 66  | 672 | 43471  | 44080  |
| UN55250 | Rsa1.0_00128.1 | 609 | 228675 | 0         | 468 | 491 | 95 -  | 71  | 560 | 190235 | 190722 |
| UN55251 | Rsa1.0_09317.1 | 593 | 6459   | 1.00E-141 | 274 | 279 | 98 +  | 316 | 593 | 5467   | 5745   |
| UN55252 | Rsa1.0_00449.1 | 790 | 83863  | 1.00E-163 | 347 | 366 | 94 -  | 3   | 368 | 56110  | 56468  |
| UN55253 | Rsa1.0_03276.1 | 635 | 24152  | 1.00E-152 | 335 | 355 | 94 +  | 3   | 357 | 13382  | 13733  |
| UN55254 | Rsa1.0_00321.1 | 650 | 95671  | 1.00E-159 | 294 | 297 | 98 -  | 1   | 297 | 77384  | 77680  |
| UN55255 | Rsa1.0_00623.1 | 705 | 207630 | 0         | 691 | 695 | 99 +  | 1   | 692 | 191283 | 191977 |
| UN55256 | Rsa1.0_00414.1 | 661 | 202190 | 0         | 634 | 663 | 95 -  | 3   | 661 | 66384  | 67041  |
| UN55257 | Rsa1.0_00008.1 | 692 | 358124 | 0         | 605 | 619 | 97 -  | 4   | 622 | 24044  | 24656  |
| UN55258 | Rsa1.0_04259.1 | 670 | 18253  | 0         | 553 | 569 | 97 -  | 103 | 666 | 10815  | 11381  |
| UN55259 | Rsa1.0_03087.1 | 735 | 25478  | 2.00E-11  | 101 | 121 | 83 +  | 21  | 140 | 15405  | 15525  |
| UN55260 | Rsa1.0_33532.1 | 798 | 676    | 1.00E-135 | 309 | 330 | 93 +  | 64  | 390 | 2      | 325    |
| UN55261 | Rsa1.0_05762.1 | 713 | 12715  | 0         | 416 | 435 | 95 +  | 281 | 711 | 11648  | 12082  |

|         |                |     |        |           |     |     |       |     |     |        |        |
|---------|----------------|-----|--------|-----------|-----|-----|-------|-----|-----|--------|--------|
| UN55262 | Rsa1.0.68049.1 | 116 | 337    | 2.00E-37  | 79  | 79  | 100 - | 38  | 116 | 259    | 337    |
| UN55263 | Rsa1.0.02045.1 | 398 | 35650  | 0         | 390 | 396 | 98 +  | 3   | 398 | 3519   | 3911   |
| UN55264 | Rsa1.0.05870.1 | 776 | 146055 | 0         | 443 | 459 | 96 +  | 3   | 459 | 10604  | 11062  |
| UN55265 | Rsa1.0.01529.1 | 737 | 43871  | 0         | 677 | 738 | 91 +  | 9   | 737 | 42526  | 43242  |
| UN55266 | Rsa1.0.00437.1 | 819 | 84879  | 3.00E-90  | 186 | 191 | 97 +  | 102 | 289 | 54317  | 54507  |
| UN55267 | Rsa1.0.02879.1 | 777 | 27047  | 5.00E-92  | 175 | 176 | 99 -  | 3   | 178 | 26523  | 26698  |
| UN55268 | Rsa1.0.00135.1 | 299 | 178077 | 1.00E-163 | 296 | 298 | 99 +  | 2   | 299 | 38823  | 39120  |
| UN55269 | Rsa1.0.02080.1 | 174 | 35297  | 8.00E-78  | 160 | 163 | 98 +  | 10  | 171 | 21305  | 21467  |
| UN55270 | Rsa1.0.00088.1 | 655 | 141341 | 0         | 449 | 450 | 99 +  | 206 | 655 | 79307  | 79756  |
| UN55271 | Rsa1.0.00890.1 | 742 | 323870 | 0         | 377 | 380 | 99 -  | 366 | 742 | 292188 | 292567 |
| UN55272 | Rsa1.0.02020.1 | 823 | 173211 | 0         | 466 | 492 | 94 -  | 341 | 823 | 137952 | 138443 |
| UN55273 | Rsa1.0.06566.1 | 803 | 10764  | 1.00E-159 | 318 | 324 | 98 -  | 405 | 724 | 4725   | 5048   |
| UN55274 | Rsa1.0.00525.1 | 665 | 78030  | 0         | 663 | 664 | 99 +  | 3   | 665 | 52034  | 52697  |
| UN55275 | Rsa1.0.01388.1 | 794 | 46741  | 1.00E-132 | 255 | 260 | 98 +  | 62  | 321 | 28320  | 28579  |
| UN55276 | Rsa1.0.02035.1 | 426 | 35776  | 1.00E-149 | 282 | 287 | 98 +  | 140 | 426 | 8211   | 8497   |
| UN55277 | Rsa1.0.00250.1 | 823 | 273771 | 1.00E-127 | 257 | 264 | 97 -  | 3   | 262 | 62424  | 62686  |
| UN55278 | Rsa1.0.04006.1 | 569 | 19585  | 0         | 566 | 568 | 99 -  | 3   | 569 | 18983  | 19550  |
| UN55279 | Rsa1.0.15552.1 | 772 | 2546   | 1.00E-80  | 170 | 173 | 98 -  | 554 | 724 | 2374   | 2546   |
| UN55280 | Rsa1.0.00001.1 | 613 | 363028 | 1.00E-118 | 278 | 298 | 93 +  | 2   | 299 | 128467 | 128761 |
| UN55281 | Rsa1.0.18639.1 | 806 | 1561   | 4.00E-65  | 142 | 147 | 96 +  | 62  | 208 | 20     | 166    |
| UN55282 | Rsa1.0.02352.1 | 737 | 32301  | 0         | 685 | 742 | 92 -  | 1   | 737 | 900    | 1641   |
| UN55283 | Rsa1.0.00917.1 | 802 | 182012 | 0         | 604 | 621 | 97 +  | 2   | 622 | 153742 | 154362 |
| UN55284 | Rsa1.0.00030.1 | 746 | 250988 | 0         | 648 | 674 | 96 -  | 1   | 670 | 217135 | 217805 |
| UN55285 | Rsa1.0.00642.1 | 789 | 201230 | 4.00E-65  | 136 | 139 | 97 -  | 40  | 178 | 64647  | 64785  |
| UN55286 | Rsa1.0.00422.1 | 723 | 86144  | 0         | 631 | 671 | 94 +  | 15  | 661 | 34737  | 35403  |
| UN55287 | Rsa1.0.00707.1 | 566 | 190112 | 1.00E-159 | 317 | 323 | 98 -  | 3   | 320 | 53610  | 53932  |
| UN55288 | Rsa1.0.15602.1 | 751 | 2523   | 1.00E-124 | 226 | 226 | 100 + | 117 | 342 | 1      | 226    |
| UN55289 | Rsa1.0.00123.1 | 564 | 325650 | 0         | 472 | 479 | 98 -  | 86  | 564 | 292862 | 293340 |
| UN55290 | Rsa1.0.43239.1 | 610 | 519    | 1.00E-61  | 130 | 133 | 97 -  | 392 | 524 | 240    | 372    |
| UN55291 | Rsa1.0.00838.1 | 683 | 153820 | 0         | 443 | 453 | 97 +  | 230 | 680 | 27431  | 27883  |
| UN55292 | Rsa1.0.01645.1 | 499 | 41748  | 1.00E-112 | 424 | 493 | 86 -  | 1   | 485 | 17911  | 18388  |
| UN55293 | Rsa1.0.00482.1 | 758 | 81162  | 1.00E-149 | 314 | 323 | 97 -  | 442 | 758 | 53875  | 54197  |
| UN55294 | Rsa1.0.03158.1 | 791 | 24950  | 2.00E-70  | 157 | 164 | 95 -  | 436 | 599 | 16970  | 17133  |
| UN55295 | Rsa1.0.00136.1 | 764 | 122464 | 0         | 576 | 592 | 97 -  | 48  | 639 | 115445 | 116036 |
| UN55296 | Rsa1.0.02722.1 | 558 | 28417  | 1.00E-160 | 304 | 310 | 98 +  | 20  | 329 | 959    | 1268   |
| UN55297 | Rsa1.0.01865.1 | 725 | 37992  | 6.00E-70  | 185 | 199 | 92 +  | 458 | 654 | 32692  | 32890  |
| UN55298 | Rsa1.0.05596.1 | 628 | 137912 | 1.00E-150 | 295 | 302 | 97 +  | 333 | 628 | 131715 | 132016 |
| UN55299 | Rsa1.0.00440.1 | 729 | 84723  | 3.00E-81  | 175 | 182 | 96 -  | 548 | 729 | 25217  | 25398  |
| UN55300 | Rsa1.0.01877.1 | 743 | 37789  | 0         | 732 | 744 | 98 +  | 2   | 743 | 24747  | 25490  |

|         |                |     |        |           |     |     |       |     |     |        |        |
|---------|----------------|-----|--------|-----------|-----|-----|-------|-----|-----|--------|--------|
| UN55301 | Rsa1.0.01650.1 | 721 | 41589  | 1.00E-175 | 370 | 389 | 95 +  | 3   | 391 | 27320  | 27705  |
| UN55302 | Rsa1.0.24027.1 | 689 | 1011   | 1.00E-110 | 214 | 217 | 98 -  | 473 | 689 | 788    | 1002   |
| UN55303 | Rsa1.0.01868.1 | 754 | 150904 | 0         | 505 | 508 | 99 +  | 3   | 510 | 1829   | 2336   |
| UN55304 | Rsa1.0.01222.1 | 723 | 50398  | 1.00E-174 | 351 | 361 | 97 -  | 361 | 717 | 9559   | 9919   |
| UN55305 | Rsa1.0.04025.1 | 756 | 19511  | 1.00E-138 | 252 | 253 | 99 +  | 449 | 701 | 1506   | 1758   |
| UN55306 | Rsa1.0.02808.1 | 677 | 27677  | 1.00E-125 | 348 | 386 | 90 -  | 296 | 677 | 17239  | 17614  |
| UN55307 | Rsa1.0.01964.1 | 797 | 36702  | 3.00E-90  | 172 | 173 | 99 -  | 397 | 569 | 9859   | 10031  |
| UN55308 | Rsa1.0.09270.1 | 747 | 6513   | 0         | 668 | 727 | 91 -  | 15  | 731 | 5485   | 6181   |
| UN55309 | Rsa1.0.07051.1 | 738 | 9980   | 1.00E-73  | 183 | 197 | 92 -  | 42  | 238 | 9243   | 9439   |
| UN55310 | Rsa1.0.04576.1 | 798 | 16783  | 0         | 644 | 670 | 96 +  | 2   | 668 | 13500  | 14167  |
| UN55311 | Rsa1.0.00211.1 | 127 | 228189 | 6.00E-41  | 115 | 125 | 92 +  | 2   | 126 | 209237 | 209361 |
| UN55312 | Rsa1.0.00457.1 | 660 | 337301 | 0         | 380 | 399 | 95 +  | 247 | 645 | 190464 | 190862 |
| UN55313 | Rsa1.0.00912.1 | 745 | 59923  | 0         | 693 | 693 | 100 + | 1   | 693 | 27785  | 28477  |
| UN55314 | Rsa1.0.00788.1 | 755 | 64237  | 1.00E-98  | 203 | 210 | 96 +  | 4   | 213 | 32094  | 32297  |
| UN55315 | Rsa1.0.07617.1 | 663 | 9015   | 0         | 401 | 402 | 99 -  | 262 | 663 | 8339   | 8740   |
| UN55316 | Rsa1.0.00596.1 | 789 | 73578  | 0         | 518 | 518 | 100 + | 2   | 519 | 9141   | 9658   |
| UN55317 | Rsa1.0.02431.1 | 566 | 31504  | 2.00E-38  | 100 | 106 | 94 +  | 231 | 336 | 27641  | 27746  |
| UN55318 | Rsa1.0.00879.1 | 668 | 61297  | 1.00E-24  | 89  | 99  | 89 -  | 184 | 282 | 34636  | 34734  |
| UN55319 | Rsa1.0.00201.1 | 779 | 232851 | 0         | 739 | 769 | 96 +  | 3   | 767 | 45027  | 45790  |
| UN55320 | Rsa1.0.01106.1 | 712 | 53916  | 0         | 370 | 375 | 98 +  | 3   | 377 | 784    | 1158   |
| UN55321 | Rsa1.0.00284.1 | 715 | 323267 | 0         | 348 | 348 | 100 + | 368 | 715 | 275018 | 275365 |
| UN55322 | Rsa1.0.00015.1 | 649 | 561803 | 1.00E-175 | 373 | 391 | 95 +  | 42  | 432 | 370491 | 370874 |
| UN55323 | Rsa1.0.02308.1 | 797 | 32768  | 0         | 734 | 762 | 96 +  | 8   | 755 | 23143  | 23903  |
| UN55324 | Rsa1.0.00138.1 | 117 | 247040 | 6.00E-44  | 105 | 110 | 95 -  | 4   | 113 | 5329   | 5438   |
| UN55325 | Rsa1.0.06876.1 | 712 | 10223  | 0         | 448 | 448 | 100 + | 1   | 448 | 2025   | 2472   |
| UN55326 | Rsa1.0.01423.1 | 126 | 46170  | 7.00E-22  | 64  | 67  | 95 -  | 62  | 125 | 11668  | 11734  |
| UN55327 | Rsa1.0.01344.1 | 119 | 142535 | 2.00E-34  | 104 | 114 | 91 +  | 1   | 114 | 117640 | 117753 |
| UN55328 | Rsa1.0.06166.1 | 172 | 11583  | 7.00E-63  | 152 | 162 | 93 -  | 11  | 172 | 6269   | 6430   |
| UN55329 | Rsa1.0.00942.1 | 281 | 58873  | 1.00E-137 | 271 | 279 | 97 -  | 3   | 281 | 3209   | 3487   |
| UN55330 | Rsa1.0.00484.1 | 167 | 203294 | 4.00E-55  | 149 | 161 | 92 +  | 7   | 167 | 49937  | 50096  |
| UN55331 | Rsa1.0.00407.1 | 190 | 191544 | 1.00E-67  | 175 | 190 | 92 -  | 1   | 190 | 176938 | 177127 |
| UN55332 | Rsa1.0.02048.1 | 339 | 35605  | 5.00E-87  | 196 | 207 | 94 +  | 5   | 211 | 24322  | 24528  |
| UN55333 | Rsa1.0.00480.1 | 795 | 81325  | 0         | 345 | 346 | 99 +  | 2   | 347 | 41824  | 42169  |
| UN55334 | Rsa1.0.03854.1 | 569 | 20429  | 1.00E-110 | 205 | 206 | 99 +  | 5   | 210 | 6162   | 6367   |
| UN55335 | Rsa1.0.03477.1 | 755 | 22635  | 1.00E-165 | 347 | 363 | 95 +  | 1   | 361 | 8510   | 8869   |
| UN55336 | Rsa1.0.03560.1 | 466 | 22092  | 0         | 436 | 463 | 94 -  | 1   | 463 | 379    | 840    |
| UN55337 | Rsa1.0.02658.1 | 837 | 28978  | 0         | 368 | 370 | 99 +  | 2   | 371 | 18332  | 18701  |
| UN55338 | Rsa1.0.00780.1 | 816 | 147795 | 1.00E-151 | 312 | 325 | 96 +  | 165 | 486 | 59359  | 59683  |
| UN55339 | Rsa1.0.00807.1 | 743 | 63607  | 0         | 706 | 722 | 97 +  | 11  | 732 | 16903  | 17624  |

|         |                |     |        |           |     |     |       |     |     |        |        |
|---------|----------------|-----|--------|-----------|-----|-----|-------|-----|-----|--------|--------|
| UN55340 | Rsa1.0_00417.1 | 334 | 395068 | 1.00E-139 | 317 | 334 | 94 +  | 1   | 334 | 376590 | 376919 |
| UN55341 | Rsa1.0_11170.1 | 281 | 5596   | 2.00E-42  | 118 | 128 | 92 +  | 71  | 198 | 2625   | 2752   |
| UN55342 | Rsa1.0_00387.1 | 236 | 495407 | 6.00E-95  | 222 | 236 | 94 -  | 1   | 236 | 377675 | 377909 |
| UN55343 | Rsa1.0_06213.1 | 685 | 11478  | 5.00E-73  | 258 | 294 | 87 +  | 396 | 685 | 7283   | 7560   |
| UN55344 | Rsa1.0_01206.1 | 729 | 50772  | 0         | 704 | 730 | 96 -  | 7   | 729 | 25709  | 26438  |
| UN55345 | Rsa1.0_00301.1 | 263 | 365315 | 1.00E-99  | 241 | 260 | 92 +  | 4   | 263 | 224585 | 224844 |
| UN55346 | Rsa1.0_00991.1 | 898 | 143101 | 1.00E-175 | 320 | 323 | 99 -  | 350 | 672 | 126314 | 126636 |
| UN55347 | Rsa1.0_00255.1 | 714 | 204967 | 0         | 690 | 716 | 96 -  | 1   | 709 | 70989  | 71702  |
| UN55348 | Rsa1.0_00004.1 | 587 | 253996 | 0         | 577 | 587 | 98 -  | 1   | 587 | 10089  | 10670  |
| UN55349 | Rsa1.0_00097.1 | 846 | 138858 | 0         | 554 | 556 | 99 +  | 291 | 846 | 4891   | 5446   |
| UN55350 | Rsa1.0_00630.1 | 951 | 71281  | 1.00E-178 | 352 | 364 | 96 +  | 346 | 709 | 61583  | 61946  |
| UN55351 | Rsa1.0_00865.1 | 229 | 61686  | 4.00E-40  | 133 | 148 | 89 +  | 1   | 147 | 967    | 1114   |
| UN55352 | Rsa1.0_02750.1 | 213 | 28239  | 7.00E-79  | 199 | 215 | 92 +  | 1   | 212 | 25620  | 25834  |
| UN55353 | Rsa1.0_00097.1 | 558 | 138858 | 1.00E-140 | 276 | 284 | 97 +  | 5   | 288 | 14069  | 14352  |
| UN55354 | Rsa1.0_01606.1 | 766 | 42432  | 1.00E-176 | 400 | 424 | 94 +  | 1   | 423 | 16031  | 16440  |
| UN55355 | Rsa1.0_00525.1 | 772 | 78030  | 1.00E-172 | 334 | 343 | 97 -  | 426 | 768 | 7279   | 7621   |
| UN55356 | Rsa1.0_00481.1 | 233 | 81316  | 9.00E-54  | 188 | 218 | 86 +  | 9   | 226 | 71997  | 72200  |
| UN55357 | Rsa1.0_00014.1 | 856 | 348985 | 1.00E-158 | 354 | 374 | 94 +  | 468 | 829 | 173701 | 174072 |
| UN55358 | Rsa1.0_00041.1 | 118 | 186197 | 2.00E-46  | 112 | 118 | 94 +  | 1   | 118 | 183313 | 183430 |
| UN55359 | Rsa1.0_05008.1 | 114 | 15154  | 2.00E-15  | 70  | 77  | 90 -  | 1   | 75  | 11964  | 12039  |
| UN55360 | Rsa1.0_01116.1 | 372 | 142088 | 1.00E-152 | 342 | 359 | 95 +  | 1   | 359 | 130103 | 130455 |
| UN55361 | Rsa1.0_00858.1 | 123 | 61892  | 4.00E-42  | 114 | 123 | 92 -  | 1   | 123 | 20267  | 20389  |
| UN55362 | Rsa1.0_00333.1 | 101 | 94500  | 1.00E-50  | 101 | 101 | 100 - | 1   | 101 | 46834  | 46934  |
| UN55363 | Rsa1.0_00001.1 | 464 | 363028 | 1.00E-128 | 253 | 259 | 97 +  | 1   | 259 | 47817  | 48073  |
| UN55364 | Rsa1.0_00030.1 | 625 | 250988 | 2.00E-60  | 122 | 123 | 99 +  | 442 | 564 | 183836 | 183958 |
| UN55365 | Rsa1.0_00034.1 | 456 | 260119 | 6.00E-47  | 124 | 133 | 93 -  | 6   | 134 | 89248  | 89380  |
| UN55366 | Rsa1.0_00964.1 | 433 | 316648 | 1.00E-124 | 250 | 258 | 96 -  | 1   | 258 | 165354 | 165611 |
| UN55367 | Rsa1.0_03426.1 | 359 | 23010  | 1.00E-156 | 309 | 319 | 96 -  | 41  | 359 | 4859   | 5177   |
| UN55368 | Rsa1.0_03714.1 | 768 | 21217  | 0         | 402 | 405 | 99 -  | 3   | 407 | 15909  | 16313  |
| UN55369 | Rsa1.0_00811.1 | 802 | 63242  | 0         | 790 | 802 | 98 -  | 1   | 802 | 45873  | 46672  |
| UN55370 | Rsa1.0_04876.1 | 131 | 15631  | 2.00E-31  | 81  | 85  | 95 +  | 1   | 85  | 4422   | 4506   |
| UN55371 | Rsa1.0_00363.1 | 183 | 90968  | 3.00E-68  | 167 | 179 | 93 -  | 1   | 179 | 73572  | 73745  |
| UN55372 | Rsa1.0_02089.1 | 337 | 35163  | 1.00E-172 | 326 | 333 | 97 +  | 1   | 333 | 22953  | 23285  |
| UN55373 | Rsa1.0_02020.1 | 103 | 173211 | 1.00E-35  | 94  | 100 | 94 -  | 4   | 103 | 9121   | 9220   |
| UN55374 | Rsa1.0_02260.1 | 122 | 33260  | 1.00E-26  | 64  | 65  | 98 -  | 58  | 122 | 25874  | 25938  |
| UN55375 | Rsa1.0_01468.1 | 219 | 45146  | 2.00E-91  | 176 | 178 | 98 -  | 42  | 219 | 40452  | 40629  |
| UN55376 | Rsa1.0_01769.1 | 315 | 39568  | 1.00E-164 | 293 | 293 | 100 - | 7   | 299 | 9087   | 9379   |
| UN55377 | Rsa1.0_01637.1 | 148 | 41862  | 1.00E-33  | 82  | 85  | 96 +  | 56  | 140 | 774    | 858    |
| UN55378 | Rsa1.0_43429.1 | 481 | 517    | 1.00E-111 | 222 | 228 | 97 -  | 110 | 337 | 290    | 517    |

|         |                |     |        |           |     |     |       |     |     |        |        |
|---------|----------------|-----|--------|-----------|-----|-----|-------|-----|-----|--------|--------|
| UN55379 | Rsa1.0.00842.1 | 146 | 62493  | 3.00E-18  | 50  | 51  | 98 -  | 96  | 146 | 660    | 710    |
| UN55380 | Rsa1.0.00573.1 | 360 | 74821  | 1.00E-157 | 345 | 363 | 95 +  | 1   | 360 | 45049  | 45409  |
| UN55381 | Rsa1.0.01701.1 | 321 | 162121 | 1.00E-102 | 219 | 228 | 96 +  | 15  | 242 | 27427  | 27652  |
| UN55382 | Rsa1.0.00371.1 | 264 | 90463  | 1.00E-118 | 248 | 259 | 95 +  | 6   | 264 | 73493  | 73751  |
| UN55383 | Rsa1.0.00133.1 | 192 | 123768 | 2.00E-85  | 184 | 192 | 95 -  | 1   | 192 | 9914   | 10105  |
| UN55384 | Rsa1.0.03259.1 | 155 | 24290  | 7.00E-78  | 153 | 155 | 98 -  | 1   | 155 | 2191   | 2345   |
| UN55385 | Rsa1.0.00135.1 | 502 | 178077 | 0         | 499 | 502 | 99 +  | 1   | 502 | 94614  | 95114  |
| UN55386 | Rsa1.0.01423.1 | 248 | 46170  | 1.00E-109 | 237 | 247 | 95 -  | 3   | 248 | 12754  | 12998  |
| UN55387 | Rsa1.0.02463.1 | 351 | 31157  | 1.00E-142 | 267 | 271 | 98 +  | 1   | 271 | 5693   | 5963   |
| UN55388 | Rsa1.0.02299.1 | 631 | 32857  | 1.00E-124 | 234 | 237 | 98 +  | 216 | 452 | 18267  | 18503  |
| UN55389 | Rsa1.0.00422.1 | 159 | 86144  | 1.00E-70  | 156 | 159 | 98 -  | 1   | 159 | 33961  | 34116  |
| UN55390 | Rsa1.0.05045.1 | 560 | 15035  | 0         | 552 | 560 | 98 +  | 1   | 560 | 11627  | 12186  |
| UN55391 | Rsa1.0.00056.1 | 207 | 332604 | 5.00E-86  | 189 | 197 | 95 +  | 11  | 207 | 214697 | 214892 |
| UN55392 | #              | #   | #      | #         | #   | #   | #     | #   | #   | #      | #      |
| UN55393 | Rsa1.0.00207.1 | 311 | 248736 | 1.00E-142 | 291 | 303 | 96 -  | 9   | 311 | 15107  | 15409  |
| UN55394 | Rsa1.0.00004.1 | 267 | 253996 | 2.00E-30  | 71  | 72  | 98 -  | 196 | 267 | 234442 | 234513 |
| UN55395 | Rsa1.0.01527.1 | 236 | 43905  | 3.00E-29  | 88  | 94  | 93 +  | 144 | 236 | 36094  | 36187  |
| UN55396 | Rsa1.0.00635.1 | 806 | 175826 | 0         | 370 | 371 | 99 +  | 1   | 371 | 123351 | 123721 |
| UN55397 | Rsa1.0.08180.1 | 772 | 7778   | 3.00E-62  | 122 | 122 | 100 - | 269 | 390 | 7646   | 7767   |
| UN55398 | Rsa1.0.05599.1 | 788 | 143653 | 0         | 788 | 789 | 99 +  | 1   | 788 | 12241  | 13029  |
| UN55399 | Rsa1.0.00026.1 | 359 | 327835 | 1.00E-136 | 261 | 266 | 98 -  | 1   | 266 | 174424 | 174689 |
| UN55400 | Rsa1.0.00466.1 | 356 | 82132  | 1.00E-173 | 344 | 356 | 96 -  | 1   | 356 | 80711  | 81066  |
| UN55401 | Rsa1.0.00213.1 | 246 | 108167 | 2.00E-76  | 226 | 248 | 91 +  | 1   | 246 | 34719  | 34953  |
| UN55402 | Rsa1.0.03368.1 | 574 | 23382  | 0         | 562 | 574 | 97 -  | 1   | 574 | 3638   | 4211   |
| UN55403 | Rsa1.0.06258.1 | 395 | 11371  | 7.00E-71  | 152 | 156 | 97 -  | 1   | 155 | 11013  | 11168  |
| UN55404 | Rsa1.0.02431.1 | 133 | 31504  | 4.00E-42  | 108 | 115 | 93 +  | 19  | 133 | 4161   | 4275   |
| UN55405 | Rsa1.0.09273.1 | 614 | 6511   | 0         | 344 | 344 | 100 + | 14  | 357 | 1      | 344    |
| UN55406 | Rsa1.0.35727.1 | 293 | 633    | 1.00E-101 | 187 | 187 | 100 + | 107 | 293 | 1      | 187    |
| UN55407 | Rsa1.0.05749.1 | 292 | 12746  | 9.00E-73  | 242 | 276 | 87 -  | 18  | 292 | 1577   | 1829   |
| UN55408 | #              | #   | #      | #         | #   | #   | #     | #   | #   | #      | #      |
| UN55409 | Rsa1.0.01176.1 | 743 | 51638  | 0         | 593 | 626 | 94 +  | 118 | 743 | 3883   | 4508   |
| UN55410 | Rsa1.0.00422.1 | 498 | 86144  | 0         | 409 | 431 | 94 -  | 8   | 436 | 16094  | 16523  |
| UN55411 | Rsa1.0.00218.1 | 118 | 201480 | 1.00E-47  | 111 | 116 | 95 +  | 1   | 116 | 25604  | 25719  |
| UN55412 | Rsa1.0.06839.1 | 553 | 10286  | 1.00E-101 | 289 | 325 | 88 +  | 3   | 312 | 6327   | 6640   |
| UN55413 | #              | #   | #      | #         | #   | #   | #     | #   | #   | #      | #      |
| UN55414 | Rsa1.0.00085.1 | 374 | 142226 | 1.00E-172 | 355 | 370 | 95 +  | 1   | 370 | 64508  | 64876  |
| UN55415 | Rsa1.0.02588.1 | 695 | 29840  | 0         | 627 | 629 | 99 -  | 67  | 695 | 4451   | 5079   |
| UN55416 | Rsa1.0.02707.1 | 518 | 28520  | 3.00E-77  | 153 | 155 | 98 -  | 258 | 412 | 13182  | 13336  |
| UN55417 | Rsa1.0.00339.1 | 202 | 222974 | 3.00E-53  | 112 | 114 | 98 -  | 78  | 191 | 211475 | 211588 |

|         |                |     |        |           |     |     |       |     |     |        |        |
|---------|----------------|-----|--------|-----------|-----|-----|-------|-----|-----|--------|--------|
| UN55418 | Rsa1.0_04245.1 | 366 | 18299  | 2.33E-156 | 343 | 363 | 94 +  | 5   | 366 | 8079   | 8437   |
| UN55419 | Rsa1.0_01007.1 | 185 | 56933  | 2.00E-63  | 175 | 189 | 92 -  | 1   | 185 | 32707  | 32894  |
| UN55420 | Rsa1.0_00992.1 | 764 | 57419  | 0         | 373 | 380 | 98 +  | 82  | 461 | 40504  | 40883  |
| UN55421 | Rsa1.0_26178.1 | 782 | 903    | 0         | 590 | 614 | 96 +  | 1   | 610 | 92     | 699    |
| UN55422 | Rsa1.0_00105.1 | 791 | 134138 | 0         | 591 | 609 | 97 -  | 1   | 605 | 107748 | 108348 |
| UN55423 | Rsa1.0_04888.1 | 234 | 15595  | 1.00E-122 | 231 | 234 | 98 -  | 1   | 234 | 2086   | 2319   |
| UN55424 | Rsa1.0_04108.1 | 139 | 19001  | 2.00E-44  | 121 | 131 | 92 +  | 1   | 131 | 9824   | 9954   |
| UN55425 | Rsa1.0_00273.1 | 894 | 326186 | 0         | 578 | 599 | 96 -  | 6   | 602 | 37563  | 38157  |
| UN55426 | Rsa1.0_00044.1 | 249 | 271658 | 7.00E-36  | 101 | 109 | 92 +  | 70  | 178 | 269820 | 269928 |
| UN55427 | Rsa1.0_17143.1 | 283 | 1910   | 7.00E-95  | 198 | 204 | 97 +  | 80  | 283 | 612    | 814    |
| UN55428 | Rsa1.0_03035.1 | 690 | 25827  | 3.00E-74  | 142 | 142 | 100 + | 543 | 684 | 4594   | 4735   |
| UN55429 | Rsa1.0_00027.1 | 708 | 283362 | 7.00E-88  | 174 | 177 | 98 -  | 532 | 708 | 136871 | 137047 |
| UN55430 | Rsa1.0_00645.1 | 722 | 189716 | 0         | 485 | 488 | 99 -  | 4   | 490 | 3390   | 3877   |
| UN55431 | Rsa1.0_00491.1 | 550 | 80219  | 1.00E-151 | 329 | 349 | 94 -  | 3   | 340 | 33681  | 34028  |
| UN55432 | Rsa1.0_00238.1 | 471 | 193193 | 1.00E-158 | 426 | 470 | 90 +  | 12  | 470 | 79870  | 80337  |
| UN55433 | Rsa1.0_00040.1 | 451 | 324196 | 1.00E-118 | 258 | 270 | 95 -  | 39  | 306 | 308714 | 308982 |
| UN55434 | Rsa1.0_01703.1 | 289 | 40713  | 1.00E-123 | 275 | 290 | 94 -  | 1   | 289 | 22184  | 22470  |
| UN55435 | Rsa1.0_00419.1 | 558 | 86562  | 0         | 460 | 496 | 92 -  | 49  | 544 | 69061  | 69552  |
| UN55436 | Rsa1.0_00890.1 | 861 | 323870 | 1.00E-144 | 279 | 283 | 98 -  | 4   | 285 | 213739 | 214020 |
| UN55437 | Rsa1.0_06757.1 | 107 | 10411  | 3.00E-42  | 102 | 107 | 95 +  | 1   | 107 | 3438   | 3544   |
| UN55438 | Rsa1.0_00640.1 | 719 | 70979  | 0         | 494 | 505 | 97 -  | 1   | 505 | 49450  | 49953  |
| UN55439 | Rsa1.0_00913.1 | 798 | 59914  | 0         | 575 | 615 | 93 -  | 205 | 798 | 10636  | 11250  |
| UN55440 | Rsa1.0_19297.1 | 307 | 1450   | 1.00E-161 | 301 | 305 | 98 -  | 3   | 307 | 391    | 692    |
| UN55441 | Rsa1.0_06671.1 | 723 | 10563  | 0         | 701 | 704 | 99 +  | 20  | 723 | 4986   | 5689   |
| UN55442 | Rsa1.0_00495.1 | 732 | 79934  | 0         | 579 | 583 | 99 -  | 2   | 581 | 11988  | 12570  |
| UN55443 | Rsa1.0_02859.1 | 697 | 162118 | 0         | 679 | 696 | 97 +  | 2   | 697 | 156024 | 156719 |
| UN55444 | Rsa1.0_00008.1 | 450 | 358124 | 1.00E-125 | 249 | 256 | 97 -  | 1   | 256 | 30632  | 30887  |
| UN55445 | Rsa1.0_00081.1 | 814 | 143261 | 0         | 428 | 441 | 97 -  | 3   | 441 | 129500 | 129940 |
| UN55446 | Rsa1.0_00351.1 | 246 | 413096 | 1.00E-34  | 109 | 119 | 91 +  | 65  | 182 | 244930 | 245048 |
| UN55447 | Rsa1.0_00275.1 | 782 | 210104 | 1.00E-131 | 252 | 257 | 98 +  | 2   | 258 | 161321 | 161577 |
| UN55448 | Rsa1.0_00062.1 | 569 | 299291 | 0         | 385 | 400 | 96 +  | 170 | 569 | 293440 | 293838 |
| UN55449 | Rsa1.0_29377.1 | 451 | 784    | 4.00E-88  | 183 | 189 | 96 +  | 263 | 451 | 576    | 764    |
| UN55450 | Rsa1.0_03029.1 | 850 | 25858  | 1.00E-145 | 273 | 277 | 98 -  | 451 | 727 | 15109  | 15385  |
| UN55451 | Rsa1.0_00698.1 | 404 | 67816  | 1.00E-91  | 195 | 203 | 96 -  | 68  | 270 | 21219  | 21421  |
| UN55452 | Rsa1.0_00498.1 | 675 | 79746  | 0         | 659 | 676 | 97 -  | 1   | 675 | 44914  | 45589  |
| UN55453 | Rsa1.0_00826.1 | 388 | 166736 | 1.00E-114 | 247 | 260 | 95 -  | 1   | 260 | 130040 | 130299 |
| UN55454 | Rsa1.0_02663.1 | 645 | 169243 | 1.00E-177 | 329 | 334 | 98 -  | 297 | 630 | 21780  | 22113  |
| UN55455 | Rsa1.0_00268.1 | 775 | 101470 | 1.00E-153 | 280 | 282 | 99 -  | 2   | 283 | 41310  | 41591  |
| UN55456 | Rsa1.0_00016.1 | 408 | 831256 | 1.00E-131 | 284 | 300 | 94 +  | 115 | 408 | 440582 | 440881 |



|         |                |     |        |           |     |     |      |     |     |        |        |
|---------|----------------|-----|--------|-----------|-----|-----|------|-----|-----|--------|--------|
| UN55457 | Rsa1.0.01065.1 | 665 | 55264  | 0         | 576 | 585 | 98 - | 81  | 665 | 29647  | 30231  |
| UN55458 | Rsa1.0.03303.1 | 146 | 23890  | 3.00E-58  | 138 | 146 | 94 - | 1   | 146 | 4269   | 4414   |
| UN55459 | Rsa1.0.02493.1 | 502 | 30854  | 0         | 499 | 500 | 99 + | 3   | 502 | 23573  | 24072  |
| UN55460 | Rsa1.0.00040.1 | 692 | 324196 | 0         | 690 | 693 | 99 - | 1   | 692 | 90586  | 91278  |
| UN55461 | Rsa1.0_40811.1 | 797 | 550    | 1.00E-139 | 277 | 283 | 97 - | 517 | 797 | 268    | 550    |
| UN55462 | Rsa1.0_00467.1 | 564 | 156542 | 1.00E-104 | 291 | 322 | 90 + | 9   | 324 | 80195  | 80512  |
| UN55463 | Rsa1.0.14177.1 | 809 | 3699   | 1.00E-159 | 297 | 301 | 98 + | 378 | 678 | 3242   | 3542   |
| UN55464 | Rsa1.0.00190.1 | 504 | 318240 | 0         | 503 | 504 | 99 - | 1   | 504 | 85309  | 85812  |
| UN55465 | Rsa1.0.00335.1 | 832 | 94371  | 0         | 811 | 840 | 96 + | 1   | 832 | 10703  | 11539  |
| UN55466 | Rsa1.0.00158.1 | 465 | 117999 | 0         | 464 | 465 | 99 - | 1   | 465 | 24064  | 24528  |
| UN55467 | Rsa1.0.00916.1 | 560 | 59789  | 1.00E-115 | 247 | 258 | 95 - | 3   | 259 | 35590  | 35847  |
| UN55468 | Rsa1.0.00347.1 | 872 | 93048  | 1.00E-165 | 318 | 325 | 97 - | 147 | 471 | 12000  | 12322  |
| UN55469 | Rsa1.0.03307.1 | 565 | 23872  | 0         | 452 | 484 | 93 - | 67  | 542 | 17877  | 18358  |
| UN55470 | Rsa1.0.00985.1 | 751 | 161950 | 0         | 748 | 750 | 99 - | 2   | 751 | 48200  | 48949  |
| UN55471 | #              | #   | #      | #         | #   | #   | #    | #   | #   | #      | #      |
| UN55472 | Rsa1.0.00243.1 | 775 | 103651 | 1.00E-177 | 453 | 490 | 92 + | 288 | 773 | 36016  | 36497  |
| UN55473 | Rsa1.0.01056.1 | 797 | 55449  | 0         | 782 | 796 | 98 - | 2   | 797 | 48485  | 49280  |
| UN55474 | Rsa1.0_15455.1 | 165 | 2595   | 1.00E-76  | 161 | 165 | 97 + | 1   | 165 | 1893   | 2056   |
| UN55475 | Rsa1.0.00332.1 | 212 | 94575  | 2.00E-33  | 91  | 97  | 93 + | 115 | 211 | 39580  | 39676  |
| UN55476 | Rsa1.0.00623.1 | 671 | 207630 | 0         | 668 | 673 | 99 - | 1   | 671 | 191854 | 192526 |
| UN55477 | Rsa1.0.00377.1 | 685 | 90038  | 1.00E-145 | 287 | 295 | 97 + | 7   | 298 | 489    | 783    |
| UN55478 | Rsa1.0.00003.1 | 554 | 340054 | 0         | 398 | 412 | 96 + | 1   | 409 | 276986 | 277397 |
| UN55479 | Rsa1.0.00008.1 | 698 | 358124 | 0         | 428 | 433 | 98 + | 266 | 698 | 23216  | 23648  |
| UN55480 | Rsa1.0.01143.1 | 645 | 52456  | 0         | 634 | 646 | 98 + | 1   | 645 | 218    | 862    |
| UN55481 | Rsa1.0.03486.1 | 668 | 22573  | 1.00E-164 | 355 | 373 | 95 + | 1   | 372 | 13178  | 13549  |
| UN55482 | Rsa1.0.18634.1 | 739 | 1562   | 0         | 449 | 485 | 92 + | 261 | 739 | 1016   | 1497   |
| UN55483 | Rsa1.0.09273.1 | 549 | 6511   | 0         | 545 | 549 | 99 - | 2   | 549 | 1364   | 1912   |
| UN55484 | Rsa1.0.00731.1 | 564 | 66638  | 0         | 456 | 468 | 97 - | 2   | 461 | 2946   | 3413   |
| UN55485 | Rsa1.0.00082.1 | 528 | 237584 | 1.00E-115 | 235 | 243 | 96 - | 92  | 334 | 138563 | 138805 |
| UN55486 | Rsa1.0.01231.1 | 470 | 50208  | 1.00E-159 | 307 | 313 | 98 - | 84  | 396 | 41437  | 41748  |
| UN55487 | Rsa1.0.00609.1 | 763 | 72785  | 0         | 470 | 483 | 97 - | 84  | 566 | 52616  | 53098  |
| UN55488 | Rsa1.0.00131.1 | 713 | 432233 | 1.00E-174 | 324 | 328 | 98 - | 1   | 328 | 96212  | 96536  |
| UN55489 | #              | #   | #      | #         | #   | #   | #    | #   | #   | #      | #      |
| UN55490 | Rsa1.0.00099.1 | 429 | 159619 | 0         | 420 | 429 | 97 - | 1   | 429 | 51803  | 52231  |
| UN55491 | Rsa1.0.00105.1 | 807 | 134138 | 0         | 586 | 619 | 94 - | 1   | 604 | 61301  | 61914  |
| UN55492 | Rsa1.0.00373.1 | 456 | 90296  | 7.00E-56  | 117 | 119 | 98 + | 229 | 347 | 60491  | 60609  |
| UN55493 | Rsa1.0.05762.1 | 268 | 12715  | 1.00E-114 | 246 | 257 | 95 - | 1   | 256 | 11976  | 12232  |
| UN55494 | Rsa1.0.03465.1 | 651 | 22700  | 1.00E-115 | 225 | 229 | 98 - | 3   | 228 | 11011  | 11239  |
| UN55495 | Rsa1.0.00051.1 | 499 | 258225 | 0         | 476 | 508 | 93 + | 3   | 499 | 119327 | 119832 |

|         |                |     |        |           |     |     |       |     |     |        |        |
|---------|----------------|-----|--------|-----------|-----|-----|-------|-----|-----|--------|--------|
| UN55496 | Rsa1.0.01949.1 | 716 | 36960  | 0         | 479 | 486 | 98 +  | 192 | 677 | 32593  | 33078  |
| UN55497 | Rsa1.0.00271.1 | 428 | 101125 | 1.00E-112 | 269 | 291 | 92 -  | 1   | 278 | 97740  | 98030  |
| UN55498 | Rsa1.0.00135.1 | 718 | 178077 | 0         | 702 | 714 | 98 -  | 5   | 718 | 39121  | 39834  |
| UN55499 | Rsa1.0.04280.1 | 788 | 18110  | 0         | 670 | 734 | 91 +  | 59  | 788 | 5383   | 6087   |
| UN55500 | Rsa1.0.02320.1 | 787 | 32575  | 0         | 332 | 333 | 99 +  | 2   | 334 | 6256   | 6588   |
| UN55501 | Rsa1.0.01846.1 | 813 | 38367  | 0         | 496 | 511 | 97 +  | 1   | 511 | 945    | 1455   |
| UN55502 | Rsa1.0.01236.1 | 100 | 50156  | 9.00E-27  | 88  | 97  | 90 +  | 4   | 100 | 44011  | 44107  |
| UN55503 | Rsa1.0.04396.1 | 827 | 17561  | 1.00E-117 | 248 | 255 | 97 -  | 4   | 257 | 2712   | 2964   |
| UN55504 | Rsa1.0.00017.1 | 727 | 752458 | 1.00E-113 | 214 | 216 | 99 +  | 1   | 216 | 290240 | 290455 |
| UN55505 | Rsa1.0.16572.1 | 187 | 2108   | 2.00E-91  | 186 | 191 | 97 -  | 1   | 187 | 699    | 889    |
| UN55506 | Rsa1.0.01409.1 | 609 | 151595 | 0         | 419 | 447 | 93 +  | 2   | 448 | 118291 | 118731 |
| UN55507 | Rsa1.0.00128.1 | 527 | 228675 | 1.00E-102 | 207 | 213 | 97 +  | 1   | 213 | 180439 | 180651 |
| UN55508 | Rsa1.0.08717.1 | 510 | 7008   | 0         | 487 | 510 | 95 -  | 1   | 510 | 2922   | 3428   |
| UN55509 | Rsa1.0.01215.1 | 549 | 166813 | 0         | 363 | 373 | 97 +  | 1   | 373 | 9634   | 10006  |
| UN55510 | Rsa1.0.00130.1 | 840 | 125737 | 0         | 662 | 724 | 91 -  | 9   | 721 | 8316   | 9012   |
| UN55511 | Rsa1.0.00067.1 | 187 | 415055 | 5.00E-33  | 111 | 123 | 90 +  | 32  | 147 | 69791  | 69913  |
| UN55512 | Rsa1.0.00067.1 | 727 | 415055 | 0         | 392 | 406 | 96 +  | 322 | 727 | 82824  | 83229  |
| UN55513 | Rsa1.0.00032.1 | 766 | 306326 | 0         | 760 | 763 | 99 +  | 1   | 763 | 273680 | 274442 |
| UN55514 | Rsa1.0.00351.1 | 849 | 413096 | 1.00E-116 | 273 | 288 | 94 -  | 549 | 832 | 393418 | 393705 |
| UN55515 | Rsa1.0.00022.1 | 208 | 200461 | 1.00E-80  | 179 | 188 | 95 +  | 21  | 208 | 18423  | 18610  |
| UN55516 | Rsa1.0.00955.1 | 613 | 58358  | 0         | 612 | 613 | 99 +  | 1   | 613 | 40899  | 41511  |
| UN55517 | Rsa1.0.00531.1 | 146 | 77387  | 4.00E-70  | 143 | 146 | 97 +  | 1   | 146 | 10527  | 10672  |
| UN55518 | Rsa1.0.01778.1 | 217 | 39509  | 3.00E-44  | 109 | 115 | 94 +  | 1   | 115 | 16610  | 16724  |
| UN55519 | Rsa1.0.00905.1 | 233 | 60110  | 1.00E-129 | 233 | 233 | 100 + | 1   | 233 | 19129  | 19361  |
| UN55520 | Rsa1.0.08165.1 | 208 | 7806   | 4.00E-43  | 92  | 93  | 98 -  | 23  | 115 | 2694   | 2786   |
| UN55521 | Rsa1.0.06476.1 | 533 | 10946  | 5.00E-11  | 42  | 44  | 95 +  | 292 | 335 | 5859   | 5902   |
| UN55522 | Rsa1.0.09550.1 | 571 | 6295   | 1.00E-164 | 320 | 329 | 97 -  | 1   | 329 | 150    | 478    |
| UN55523 | Rsa1.0.02583.1 | 188 | 29887  | 8.00E-69  | 138 | 140 | 98 -  | 7   | 146 | 6571   | 6710   |
| UN55524 | Rsa1.0.01773.1 | 106 | 39546  | 4.00E-32  | 88  | 94  | 93 +  | 5   | 98  | 27497  | 27590  |
| UN55525 | Rsa1.0.00528.1 | 186 | 164755 | 6.00E-51  | 162 | 182 | 89 +  | 1   | 182 | 109641 | 109822 |
| UN55526 | Rsa1.0.03794.1 | 875 | 20825  | 0         | 805 | 855 | 94 +  | 11  | 860 | 6959   | 7799   |
| UN55527 | Rsa1.0.61533.1 | 386 | 372    | 1.00E-162 | 331 | 345 | 95 +  | 1   | 345 | 28     | 372    |
| UN55528 | Rsa1.0.00460.1 | 784 | 206387 | 0         | 750 | 777 | 96 -  | 1   | 768 | 492    | 1268   |
| UN55529 | Rsa1.0.00618.1 | 855 | 72195  | 0         | 845 | 852 | 99 -  | 1   | 847 | 33093  | 33944  |
| UN55530 | Rsa1.0.17021.1 | 726 | 1951   | 0         | 719 | 725 | 99 +  | 2   | 726 | 669    | 1393   |
| UN55531 | Rsa1.0.00110.1 | 116 | 132719 | 3.00E-39  | 103 | 110 | 93 -  | 7   | 116 | 103050 | 103159 |
| UN55532 | Rsa1.0.02589.1 | 154 | 300828 | 9.00E-59  | 142 | 151 | 94 -  | 1   | 151 | 16441  | 16591  |
| UN55533 | Rsa1.0.00165.1 | 771 | 116466 | 0         | 686 | 720 | 95 -  | 1   | 720 | 31495  | 32206  |
| UN55534 | Rsa1.0.00006.1 | 112 | 396176 | 5.00E-38  | 104 | 112 | 92 +  | 1   | 112 | 313840 | 313951 |

|         |                |     |        |           |     |     |       |     |     |        |        |
|---------|----------------|-----|--------|-----------|-----|-----|-------|-----|-----|--------|--------|
| UN55535 | Rsa1.0.00026.1 | 784 | 327835 | 0         | 780 | 785 | 99 +  | 1   | 784 | 174931 | 175715 |
| UN55536 | Rsa1.0.03572.1 | 671 | 146346 | 0         | 634 | 673 | 94 +  | 2   | 671 | 129365 | 130019 |
| UN55537 | Rsa1.0.02269.1 | 463 | 33168  | 0         | 403 | 427 | 94 +  | 2   | 423 | 18600  | 19023  |
| UN55538 | Rsa1.0.01869.1 | 562 | 37928  | 0         | 557 | 560 | 99 +  | 3   | 562 | 26780  | 27339  |
| UN55539 | Rsa1.0.00089.1 | 659 | 406142 | 0         | 642 | 655 | 98 +  | 1   | 655 | 86551  | 87204  |
| UN55540 | Rsa1.0.00029.1 | 451 | 272992 | 3.00E-98  | 206 | 214 | 96 +  | 1   | 214 | 250944 | 251157 |
| UN55541 | Rsa1.0.00614.1 | 707 | 72276  | 2.33E-156 | 568 | 660 | 86 -  | 23  | 679 | 31385  | 32037  |
| UN55542 | Rsa1.0.00021.1 | 757 | 263655 | 0         | 736 | 751 | 98 -  | 2   | 752 | 227779 | 228526 |
| UN55543 | Rsa1.0.03916.1 | 238 | 20117  | 2.00E-98  | 224 | 238 | 94 +  | 1   | 238 | 15645  | 15882  |
| UN55544 | Rsa1.0.00217.1 | 833 | 107079 | 0         | 394 | 403 | 97 -  | 1   | 403 | 100460 | 100862 |
| UN55545 | #              | #   | #      | #         | #   | #   | #     | #   | #   | #      | #      |
| UN55546 | Rsa1.0.01146.1 | 561 | 163455 | 1.00E-122 | 247 | 254 | 97 -  | 1   | 253 | 15434  | 15687  |
| UN55547 | Rsa1.0.00063.1 | 672 | 156150 | 1.00E-166 | 336 | 349 | 96 -  | 1   | 349 | 138349 | 138697 |
| UN55548 | Rsa1.0.03282.1 | 391 | 24107  | 4.00E-94  | 193 | 199 | 96 +  | 1   | 199 | 9576   | 9774   |
| UN55549 | Rsa1.0.00959.1 | 798 | 58202  | 0         | 356 | 357 | 99 -  | 213 | 569 | 57806  | 58162  |
| UN55550 | Rsa1.0.07555.1 | 794 | 9139   | 1.00E-109 | 226 | 233 | 96 +  | 1   | 232 | 3211   | 3443   |
| UN55551 | Rsa1.0.00198.1 | 202 | 222963 | 4.00E-83  | 184 | 192 | 95 +  | 12  | 202 | 176257 | 176448 |
| UN55552 | Rsa1.0.00676.1 | 182 | 69166  | 1.00E-33  | 157 | 181 | 86 -  | 3   | 180 | 53567  | 53737  |
| UN55553 | Rsa1.0.05367.1 | 864 | 14010  | 0         | 338 | 338 | 100 - | 2   | 339 | 4072   | 4409   |
| UN55554 | Rsa1.0.22403.1 | 474 | 1124   | 1.00E-124 | 249 | 257 | 96 -  | 218 | 474 | 642    | 898    |
| UN55555 | Rsa1.0.01957.1 | 760 | 36844  | 0         | 514 | 563 | 91 +  | 16  | 563 | 22660  | 23219  |
| UN55556 | Rsa1.0.04623.1 | 719 | 16617  | 0         | 684 | 719 | 95 -  | 1   | 719 | 15575  | 16288  |
| UN55557 | Rsa1.0.02987.1 | 718 | 26196  | 1.00E-147 | 440 | 504 | 87 +  | 9   | 482 | 24981  | 25473  |
| UN55558 | Rsa1.0.04090.1 | 753 | 19145  | 0         | 486 | 489 | 99 -  | 1   | 488 | 6324   | 6812   |
| UN55559 | Rsa1.0.00104.1 | 404 | 368722 | 1.00E-143 | 314 | 332 | 94 -  | 8   | 337 | 257459 | 257790 |
| UN55560 | Rsa1.0.00039.1 | 725 | 296927 | 0         | 678 | 718 | 94 +  | 8   | 725 | 21042  | 21758  |
| UN55561 | Rsa1.0.00088.1 | 784 | 141341 | 0         | 779 | 785 | 99 -  | 1   | 784 | 79719  | 80503  |
| UN55562 | Rsa1.0.04116.1 | 154 | 18971  | 2.00E-32  | 118 | 133 | 88 -  | 27  | 152 | 1425   | 1556   |
| UN55563 | Rsa1.0.00589.1 | 653 | 209965 | 0         | 514 | 546 | 94 +  | 26  | 567 | 9764   | 10294  |
| UN55564 | Rsa1.0.03309.1 | 386 | 23852  | 6.00E-93  | 216 | 229 | 94 +  | 3   | 231 | 12278  | 12505  |
| UN55565 | Rsa1.0.67890.1 | 537 | 338    | 6.00E-23  | 123 | 144 | 85 +  | 33  | 176 | 80     | 222    |
| UN55566 | Rsa1.0.06566.1 | 747 | 10764  | 0         | 548 | 550 | 99 +  | 1   | 550 | 4499   | 5048   |
| UN55567 | Rsa1.0.00525.1 | 781 | 78030  | 0         | 735 | 786 | 93 -  | 4   | 781 | 53131  | 53916  |
| UN55568 | Rsa1.0.06392.1 | 288 | 11104  | 1.00E-138 | 278 | 288 | 96 -  | 1   | 288 | 10531  | 10818  |
| UN55569 | Rsa1.0.15552.1 | 787 | 2546   | 0         | 326 | 327 | 99 +  | 1   | 327 | 2220   | 2546   |
| UN55570 | Rsa1.0.18295.1 | 566 | 1629   | 0         | 536 | 566 | 94 -  | 1   | 566 | 85     | 650    |
| UN55571 | Rsa1.0.00805.1 | 123 | 63724  | 4.00E-42  | 111 | 119 | 93 -  | 1   | 119 | 9082   | 9200   |
| UN55572 | Rsa1.0.03290.1 | 219 | 24011  | 4.00E-74  | 189 | 205 | 92 +  | 12  | 216 | 3352   | 3556   |
| UN55573 | Rsa1.0.00213.1 | 734 | 108167 | 0         | 549 | 596 | 92 -  | 5   | 579 | 62067  | 62651  |

|         |                |     |        |           |     |     |       |     |     |        |        |
|---------|----------------|-----|--------|-----------|-----|-----|-------|-----|-----|--------|--------|
| UN55574 | Rsa1.0.03922.1 | 870 | 20060  | 0         | 529 | 539 | 98 -  | 1   | 537 | 2801   | 3339   |
| UN55575 | Rsa1.0.00151.1 | 729 | 119541 | 1.00E-180 | 337 | 343 | 98 -  | 387 | 729 | 36793  | 37135  |
| UN55576 | Rsa1.0.00422.1 | 465 | 86144  | 1.00E-136 | 249 | 250 | 99 -  | 3   | 252 | 36192  | 36441  |
| UN55577 | Rsa1.0.00838.1 | 771 | 153820 | 0         | 751 | 773 | 97 -  | 1   | 771 | 29668  | 30439  |
| UN55578 | Rsa1.0.05054.1 | 372 | 14983  | 1.00E-133 | 273 | 284 | 96 +  | 1   | 284 | 382    | 665    |
| UN55579 | Rsa1.0.01762.1 | 827 | 39682  | 1.00E-153 | 382 | 416 | 91 +  | 25  | 423 | 6860   | 7267   |
| UN55580 | Rsa1.0.00016.1 | 537 | 831256 | 0         | 514 | 538 | 95 +  | 2   | 537 | 499030 | 499562 |
| UN55581 | Rsa1.0.00159.1 | 731 | 431686 | 0         | 723 | 731 | 98 +  | 1   | 730 | 267202 | 267932 |
| UN55582 | Rsa1.0.00504.1 | 662 | 79334  | 1.00E-135 | 306 | 325 | 94 +  | 338 | 662 | 23369  | 23692  |
| UN55583 | Rsa1.0.05878.1 | 240 | 12344  | 1.00E-107 | 229 | 240 | 95 +  | 1   | 240 | 1488   | 1727   |
| UN55584 | Rsa1.0.00097.1 | 596 | 138858 | 1.00E-138 | 253 | 254 | 99 -  | 343 | 596 | 79901  | 80154  |
| UN55585 | Rsa1.0.05596.1 | 632 | 137912 | 0         | 626 | 632 | 99 -  | 2   | 632 | 132139 | 132770 |
| UN55586 | Rsa1.0.08611.1 | 875 | 7130   | 0         | 571 | 573 | 99 -  | 281 | 853 | 1922   | 2493   |
| UN55587 | Rsa1.0.01182.1 | 333 | 167304 | 1.00E-117 | 243 | 253 | 96 -  | 1   | 253 | 133142 | 133394 |
| UN55588 | Rsa1.0.00985.1 | 843 | 161950 | 0         | 549 | 567 | 96 -  | 12  | 578 | 36103  | 36669  |
| UN55589 | Rsa1.0.00221.1 | 214 | 106972 | 9.00E-69  | 184 | 199 | 92 +  | 16  | 214 | 17479  | 17674  |
| UN55590 | Rsa1.0.02808.1 | 245 | 27677  | 7.00E-67  | 197 | 219 | 89 +  | 30  | 245 | 17348  | 17566  |
| UN55591 | Rsa1.0.02545.1 | 796 | 30286  | 0         | 750 | 755 | 99 +  | 33  | 785 | 23850  | 24604  |
| UN55592 | Rsa1.0.00211.1 | 154 | 228189 | 1.00E-60  | 145 | 154 | 94 -  | 1   | 154 | 210072 | 210225 |
| UN55593 | Rsa1.0.05051.1 | 886 | 15018  | 0         | 465 | 471 | 98 +  | 1   | 470 | 13846  | 14315  |
| UN55594 | Rsa1.0.00252.1 | 729 | 102760 | 0         | 706 | 736 | 95 -  | 1   | 729 | 87463  | 88198  |
| UN55595 | Rsa1.0.03015.1 | 217 | 26006  | 1.00E-107 | 208 | 212 | 98 -  | 1   | 212 | 12458  | 12669  |
| UN55596 | Rsa1.0.02118.1 | 815 | 34839  | 0         | 793 | 817 | 97 -  | 1   | 815 | 29145  | 29955  |
| UN55597 | Rsa1.0.01287.1 | 666 | 49195  | 0         | 659 | 666 | 98 -  | 1   | 666 | 47940  | 48605  |
| UN55598 | Rsa1.0.02202.1 | 694 | 33961  | 9.00E-78  | 148 | 148 | 100 - | 346 | 493 | 22482  | 22629  |
| UN55599 | Rsa1.0.00128.1 | 566 | 228675 | 1.00E-144 | 305 | 320 | 95 -  | 247 | 566 | 66195  | 66514  |
| UN55600 | Rsa1.0.01100.1 | 694 | 54113  | 0         | 647 | 710 | 91 -  | 6   | 694 | 24125  | 24816  |
| UN55601 | Rsa1.0.01481.1 | 224 | 184562 | 1.00E-107 | 217 | 224 | 96 +  | 1   | 224 | 180916 | 181139 |
| UN55602 | Rsa1.0.00125.1 | 668 | 253043 | 9.00E-38  | 132 | 149 | 88 +  | 520 | 668 | 4230   | 4378   |
| UN55603 | Rsa1.0.07361.1 | 747 | 9514   | 1.00E-156 | 286 | 288 | 99 +  | 227 | 514 | 8046   | 8333   |
| UN55604 | Rsa1.0.00201.1 | 866 | 232851 | 0         | 808 | 854 | 94 -  | 2   | 852 | 45801  | 46639  |
| UN55605 | Rsa1.0.01188.1 | 642 | 51362  | 1.00E-123 | 255 | 264 | 96 +  | 1   | 263 | 31595  | 31858  |
| UN55606 | Rsa1.0.00015.1 | 499 | 561803 | 0         | 405 | 418 | 96 -  | 1   | 418 | 371807 | 372220 |
| UN55607 | Rsa1.0.02308.1 | 805 | 32768  | 0         | 683 | 717 | 95 -  | 90  | 803 | 23513  | 24225  |
| UN55608 | Rsa1.0.00027.1 | 742 | 283362 | 1.00E-101 | 235 | 246 | 95 -  | 499 | 742 | 105131 | 105373 |
| UN55609 | Rsa1.0.05354.1 | 295 | 14073  | 6.00E-40  | 108 | 112 | 96 +  | 149 | 258 | 3206   | 3316   |
| UN55610 | Rsa1.0.00657.1 | 238 | 69858  | 1.00E-28  | 95  | 101 | 94 -  | 138 | 238 | 26546  | 26643  |
| UN55611 | Rsa1.0.00208.1 | 287 | 108565 | 2.00E-82  | 212 | 223 | 95 -  | 65  | 287 | 21465  | 21681  |
| UN55612 | Rsa1.0.17244.1 | 267 | 1882   | 5.00E-43  | 208 | 240 | 86 -  | 21  | 257 | 1626   | 1851   |

|         |                |     |        |           |     |     |       |     |     |        |        |
|---------|----------------|-----|--------|-----------|-----|-----|-------|-----|-----|--------|--------|
| UN55613 | Rsa1.0.00329.1 | 423 | 222544 | 8.00E-31  | 83  | 85  | 97 -  | 173 | 257 | 735    | 817    |
| UN55614 | Rsa1.0.01559.1 | 311 | 43262  | 1.00E-38  | 82  | 82  | 100 + | 230 | 311 | 4366   | 4447   |
| UN55615 | Rsa1.0.03093.1 | 768 | 25445  | 0         | 690 | 717 | 96 +  | 3   | 717 | 13143  | 13853  |
| UN55616 | Rsa1.0.06303.1 | 356 | 11268  | 7.00E-40  | 87  | 88  | 98 -  | 204 | 291 | 9531   | 9618   |
| UN55617 | Rsa1.0.00421.1 | 101 | 86365  | 9.00E-27  | 89  | 93  | 95 -  | 1   | 93  | 82654  | 82742  |
| UN55618 | Rsa1.0.15037.1 | 671 | 2878   | 0         | 502 | 525 | 95 +  | 33  | 557 | 997    | 1505   |
| UN55619 | Rsa1.0.01082.1 | 463 | 54640  | 0         | 436 | 465 | 93 +  | 2   | 463 | 14087  | 14551  |
| UN55620 | Rsa1.0.00004.1 | 683 | 253996 | 0         | 682 | 683 | 99 +  | 1   | 683 | 208325 | 209007 |
| UN55621 | Rsa1.0.02379.1 | 647 | 150705 | 0         | 512 | 532 | 96 -  | 120 | 647 | 141626 | 142156 |
| UN55622 | Rsa1.0.01016.1 | 679 | 181422 | 1.00E-129 | 240 | 242 | 99 +  | 236 | 477 | 3575   | 3816   |
| UN55623 | Rsa1.0.03606.1 | 591 | 21818  | 7.00E-66  | 143 | 148 | 96 -  | 138 | 285 | 2456   | 2603   |
| UN55624 | Rsa1.0.04415.1 | 704 | 147889 | 0         | 529 | 531 | 99 -  | 175 | 704 | 5501   | 6031   |
| UN55625 | Rsa1.0.01134.1 | 505 | 52829  | 1.00E-106 | 196 | 196 | 100 - | 1   | 196 | 43276  | 43471  |
| UN55626 | Rsa1.0.01893.1 | 609 | 37520  | 4.00E-92  | 182 | 184 | 98 +  | 1   | 184 | 26377  | 26559  |
| UN55627 | Rsa1.0.04355.1 | 574 | 146733 | 1.00E-168 | 336 | 347 | 96 -  | 229 | 573 | 14325  | 14671  |
| UN55628 | Rsa1.0.00780.1 | 566 | 147795 | 0         | 532 | 545 | 97 +  | 23  | 566 | 724    | 1268   |
| UN55629 | Rsa1.0.00005.1 | 625 | 353093 | 0         | 602 | 625 | 96 +  | 1   | 625 | 69451  | 70072  |
| UN55630 | Rsa1.0.02881.1 | 566 | 27041  | 0         | 464 | 508 | 91 +  | 1   | 486 | 3857   | 4363   |
| UN55631 | Rsa1.0.00556.1 | 306 | 207212 | 1.00E-135 | 294 | 306 | 96 -  | 1   | 305 | 198657 | 198957 |
| UN55632 | Rsa1.0.03769.1 | 153 | 20955  | 3.00E-18  | 105 | 115 | 91 +  | 19  | 133 | 10026  | 10133  |
| UN55633 | Rsa1.0.02400.1 | 646 | 31750  | 1.00E-135 | 267 | 276 | 96 -  | 3   | 269 | 21153  | 21428  |
| UN55634 | Rsa1.0.01618.1 | 210 | 42118  | 3.00E-41  | 182 | 204 | 89 -  | 7   | 209 | 17371  | 17565  |
| UN55635 | Rsa1.0.02253.1 | 140 | 33356  | 9.00E-25  | 61  | 62  | 98 +  | 79  | 140 | 24833  | 24894  |
| UN55636 | Rsa1.0.01060.1 | 459 | 55368  | 1.00E-114 | 280 | 293 | 95 -  | 1   | 293 | 43672  | 43956  |
| UN55637 | Rsa1.0.01170.1 | 192 | 161131 | 7.00E-17  | 48  | 49  | 97 +  | 144 | 192 | 132516 | 132564 |
| UN55638 | Rsa1.0.00490.1 | 344 | 186713 | 3.00E-51  | 103 | 103 | 100 + | 165 | 267 | 71626  | 71728  |
| UN55639 | Rsa1.0.09269.1 | 194 | 6514   | 2.00E-41  | 93  | 94  | 98 +  | 97  | 190 | 491    | 583    |
| UN55640 | Rsa1.0.00112.1 | 668 | 132199 | 0         | 608 | 631 | 96 +  | 39  | 668 | 98396  | 99026  |
| UN55641 | Rsa1.0.00238.1 | 421 | 193193 | 0         | 417 | 423 | 98 +  | 1   | 421 | 190078 | 190499 |
| UN55642 | #              | #   | #      | #         | #   | #   | #     | #   | #   | #      | #      |
| UN55643 | Rsa1.0.04191.1 | 211 | 18578  | 7.00E-48  | 114 | 117 | 97 -  | 95  | 211 | 6691   | 6805   |
| UN55644 | Rsa1.0.00287.1 | 482 | 98687  | 1.00E-112 | 257 | 270 | 95 -  | 1   | 270 | 57224  | 57490  |
| UN55645 | Rsa1.0.07877.1 | 462 | 8373   | 3.00E-83  | 239 | 252 | 94 +  | 27  | 278 | 1077   | 1316   |
| UN55646 | Rsa1.0.02629.1 | 207 | 29350  | 1.00E-80  | 196 | 203 | 96 +  | 1   | 196 | 5649   | 5851   |
| UN55647 | Rsa1.0.00121.1 | 237 | 278029 | 5.00E-89  | 180 | 182 | 98 -  | 1   | 180 | 9797   | 9978   |
| UN55648 | Rsa1.0.02096.1 | 708 | 35041  | 0         | 703 | 710 | 99 +  | 1   | 708 | 3615   | 4322   |
| UN55649 | Rsa1.0.06624.1 | 603 | 10645  | 1.00E-116 | 234 | 241 | 97 +  | 212 | 452 | 4772   | 5012   |
| UN55650 | Rsa1.0.00711.1 | 559 | 67223  | 0         | 438 | 438 | 100 - | 122 | 559 | 35196  | 35633  |
| UN55651 | Rsa1.0.00940.1 | 165 | 179946 | 3.00E-59  | 153 | 163 | 93 +  | 1   | 160 | 176145 | 176307 |

|         |                |     |        |           |     |     |       |     |     |        |        |
|---------|----------------|-----|--------|-----------|-----|-----|-------|-----|-----|--------|--------|
| UN55652 | Rsa1.0_04426.1 | 121 | 17399  | 2.00E-16  | 58  | 60  | 96 -  | 62  | 121 | 13231  | 13288  |
| UN55653 | Rsa1.0_00959.1 | 405 | 58202  | 0         | 386 | 405 | 95 +  | 4   | 404 | 11358  | 11761  |
| UN55654 | Rsa1.0_00093.1 | 495 | 214962 | 0         | 494 | 494 | 100 + | 2   | 495 | 88411  | 88904  |
| UN55655 | Rsa1.0_00216.1 | 692 | 197563 | 0         | 676 | 697 | 96 +  | 1   | 692 | 91270  | 91965  |
| UN55656 | Rsa1.0_01445.1 | 556 | 45671  | 1.00E-138 | 250 | 250 | 100 + | 307 | 556 | 27093  | 27342  |
| UN55657 | Rsa1.0_00525.1 | 436 | 78030  | 1.00E-121 | 248 | 252 | 98 -  | 148 | 395 | 4976   | 5227   |
| UN55658 | Rsa1.0_00636.1 | 267 | 71113  | 1.00E-40  | 88  | 89  | 98 -  | 93  | 181 | 15009  | 15097  |
| UN55659 | Rsa1.0_00067.1 | 487 | 415055 | 1.00E-142 | 268 | 271 | 98 -  | 217 | 487 | 242619 | 242888 |
| UN55660 | Rsa1.0_04422.1 | 442 | 17423  | 2.00E-84  | 201 | 210 | 95 -  | 9   | 216 | 11588  | 11794  |
| UN55661 | Rsa1.0_00194.1 | 163 | 110851 | 2.00E-60  | 149 | 154 | 96 +  | 10  | 163 | 50613  | 50762  |
| UN55662 | Rsa1.0_02496.1 | 309 | 30814  | 1.00E-101 | 208 | 211 | 98 +  | 1   | 211 | 1379   | 1586   |
| UN55663 | Rsa1.0_00463.1 | 724 | 189177 | 0         | 681 | 712 | 95 -  | 7   | 718 | 10658  | 11364  |
| UN55664 | Rsa1.0_00213.1 | 270 | 108167 | 9.00E-79  | 247 | 263 | 93 -  | 8   | 270 | 14641  | 14888  |
| UN55665 | Rsa1.0_01421.1 | 152 | 46197  | 3.00E-52  | 139 | 144 | 96 -  | 10  | 151 | 18235  | 18375  |
| UN55666 | Rsa1.0_02116.1 | 202 | 34853  | 2.00E-54  | 176 | 188 | 93 -  | 15  | 202 | 31255  | 31434  |
| UN55667 | Rsa1.0_08471.1 | 176 | 7302   | 1.00E-55  | 122 | 126 | 96 +  | 1   | 126 | 6438   | 6563   |
| UN55668 | Rsa1.0_00295.1 | 122 | 152597 | 3.00E-15  | 66  | 70  | 94 +  | 50  | 119 | 87220  | 87286  |
| UN55669 | Rsa1.0_01997.1 | 712 | 158416 | 1.00E-174 | 408 | 438 | 93 -  | 1   | 425 | 3183   | 3611   |
| UN55670 | Rsa1.0_01838.1 | 183 | 38500  | 6.00E-45  | 128 | 135 | 94 +  | 9   | 143 | 21490  | 21619  |
| UN55671 | Rsa1.0_00301.1 | 823 | 365315 | 0         | 557 | 583 | 95 +  | 259 | 819 | 194651 | 195232 |
| UN55672 | #              | #   | #      | #         | #   | #   | #     | #   | #   | #      | #      |
| UN55673 | Rsa1.0_02229.1 | 285 | 33672  | 4.00E-81  | 245 | 263 | 93 -  | 1   | 263 | 17849  | 18099  |
| UN55674 | Rsa1.0_00078.1 | 373 | 175053 | 1.00E-118 | 251 | 262 | 95 -  | 115 | 373 | 30587  | 30848  |
| UN55675 | Rsa1.0_00017.1 | 265 | 752458 | 1.00E-148 | 265 | 265 | 100 + | 1   | 265 | 303853 | 304117 |
| UN55676 | Rsa1.0_00143.1 | 700 | 121313 | 0         | 670 | 699 | 95 +  | 2   | 700 | 46296  | 46988  |
| UN55677 | Rsa1.0_03237.1 | 836 | 24434  | 0         | 398 | 419 | 94 +  | 216 | 631 | 751    | 1165   |
| UN55678 | Rsa1.0_06035.1 | 280 | 11874  | 4.00E-13  | 52  | 55  | 94 -  | 226 | 280 | 8516   | 8569   |
| UN55679 | Rsa1.0_48139.1 | 794 | 470    | 0         | 388 | 395 | 98 -  | 64  | 458 | 76     | 470    |
| UN55680 | Rsa1.0_01080.1 | 507 | 54752  | 2.00E-96  | 228 | 235 | 97 -  | 160 | 394 | 8900   | 9127   |
| UN55681 | Rsa1.0_00931.1 | 121 | 59210  | 8.00E-31  | 68  | 68  | 100 - | 54  | 121 | 6192   | 6259   |
| UN55682 | Rsa1.0_01211.1 | 205 | 50646  | 2.00E-32  | 153 | 176 | 86 +  | 25  | 199 | 42058  | 42222  |
| UN55683 | Rsa1.0_00805.1 | 142 | 63724  | 1.00E-33  | 104 | 109 | 95 +  | 25  | 133 | 4847   | 4951   |
| UN55684 | Rsa1.0_00329.1 | 161 | 222544 | 7.00E-38  | 93  | 96  | 96 -  | 1   | 96  | 73392  | 73486  |
| UN55685 | Rsa1.0_00245.1 | 354 | 103569 | 9.00E-98  | 241 | 252 | 95 -  | 103 | 354 | 55260  | 55503  |
| UN55686 | Rsa1.0_00473.1 | 409 | 212204 | 1.00E-69  | 229 | 246 | 93 +  | 165 | 409 | 20772  | 21007  |
| UN55687 | Rsa1.0_00055.1 | 138 | 520193 | 6.00E-35  | 122 | 133 | 91 +  | 1   | 133 | 164271 | 164397 |
| UN55688 | Rsa1.0_00751.1 | 165 | 65759  | 8.00E-41  | 147 | 159 | 92 +  | 1   | 159 | 3401   | 3550   |
| UN55689 | Rsa1.0_27604.1 | 460 | 846    | 9.00E-40  | 96  | 100 | 96 -  | 11  | 110 | 390    | 489    |
| UN55690 | Rsa1.0_01768.1 | 815 | 138463 | 1.00E-111 | 223 | 229 | 97 -  | 8   | 236 | 121794 | 122022 |

|         |                |     |        |           |     |     |       |     |     |        |        |
|---------|----------------|-----|--------|-----------|-----|-----|-------|-----|-----|--------|--------|
| UN55691 | Rsa1.0.01937.1 | 280 | 37147  | 7.00E-24  | 87  | 93  | 93 +  | 173 | 265 | 20704  | 20793  |
| UN55692 | Rsa1.0.06468.1 | 108 | 10958  | 6.00E-16  | 97  | 106 | 91 -  | 3   | 108 | 6858   | 6955   |
| UN55693 | Rsa1.0.65387.1 | 167 | 351    | 8.00E-41  | 125 | 132 | 94 +  | 36  | 167 | 8      | 133    |
| UN55694 | Rsa1.0.00247.1 | 294 | 103408 | 2.00E-39  | 86  | 87  | 98 +  | 60  | 146 | 72664  | 72750  |
| UN55695 | Rsa1.0.00222.1 | 240 | 172263 | 2.00E-54  | 127 | 131 | 96 -  | 113 | 240 | 17763  | 17893  |
| UN55696 | Rsa1.0.09343.1 | 123 | 6439   | 1.00E-26  | 79  | 84  | 94 -  | 40  | 123 | 4615   | 4696   |
| UN55697 | Rsa1.0.00179.1 | 434 | 393324 | 0         | 390 | 396 | 98 +  | 36  | 431 | 230406 | 230800 |
| UN55698 | Rsa1.0.15639.1 | 130 | 2510   | 3.00E-30  | 114 | 122 | 93 -  | 1   | 122 | 169    | 283    |
| UN55699 | Rsa1.0.03009.1 | 469 | 26065  | 1.00E-160 | 307 | 315 | 97 -  | 163 | 469 | 21362  | 21676  |
| UN55700 | Rsa1.0.71785.1 | 676 | 319    | 1.00E-58  | 116 | 116 | 100 + | 480 | 595 | 37     | 152    |
| UN55701 | Rsa1.0.00078.1 | 638 | 175053 | 1.00E-132 | 242 | 243 | 99 -  | 107 | 349 | 41372  | 41614  |
| UN55702 | Rsa1.0.00060.1 | 449 | 502678 | 1.00E-155 | 281 | 282 | 99 -  | 1   | 282 | 74917  | 75198  |
| UN55703 | Rsa1.0.00071.1 | 282 | 345714 | 2.00E-49  | 117 | 120 | 97 -  | 111 | 229 | 206610 | 206728 |
| UN55704 | Rsa1.0.02248.1 | 259 | 33414  | 2.00E-39  | 118 | 123 | 95 -  | 1   | 123 | 13037  | 13154  |
| UN55705 | Rsa1.0.01315.1 | 599 | 48361  | 9.00E-90  | 196 | 204 | 96 +  | 383 | 586 | 29531  | 29733  |
| UN55706 | Rsa1.0.04364.1 | 709 | 17734  | 0         | 397 | 401 | 99 -  | 229 | 629 | 5652   | 6052   |
| UN55707 | Rsa1.0.00378.1 | 465 | 89892  | 1.00E-123 | 273 | 286 | 95 -  | 1   | 282 | 38675  | 38959  |
| UN55708 | Rsa1.0.01710.1 | 135 | 40586  | 1.00E-42  | 122 | 128 | 95 -  | 8   | 135 | 19405  | 19528  |
| UN55709 | Rsa1.0.02098.1 | 249 | 35032  | 3.00E-38  | 198 | 237 | 83 -  | 1   | 237 | 27401  | 27637  |
| UN55710 | Rsa1.0.01707.1 | 531 | 40686  | 6.00E-60  | 121 | 122 | 99 +  | 195 | 316 | 16726  | 16847  |
| UN55711 | Rsa1.0.05208.1 | 206 | 14504  | 2.00E-82  | 194 | 203 | 95 +  | 4   | 206 | 4067   | 4266   |
| UN55712 | Rsa1.0.02557.1 | 193 | 30127  | 1.00E-15  | 89  | 98  | 90 +  | 2   | 99  | 4747   | 4838   |
| UN55713 | Rsa1.0.04463.1 | 844 | 17247  | 1.00E-101 | 209 | 216 | 96 +  | 379 | 594 | 14698  | 14913  |
| UN55714 | Rsa1.0.00399.1 | 557 | 242951 | 0         | 517 | 539 | 95 -  | 1   | 538 | 65430  | 65958  |
| UN55715 | Rsa1.0.00877.1 | 311 | 61305  | 1.00E-142 | 303 | 311 | 97 +  | 1   | 311 | 15318  | 15621  |
| UN55716 | Rsa1.0.05194.1 | 796 | 14536  | 0         | 467 | 508 | 91 +  | 288 | 773 | 11824  | 12331  |
| UN55717 | Rsa1.0.09709.1 | 138 | 6198   | 1.00E-36  | 106 | 110 | 96 +  | 1   | 110 | 1877   | 1982   |
| UN55718 | Rsa1.0.00055.1 | 214 | 520193 | 6.00E-64  | 124 | 124 | 100 - | 1   | 124 | 7080   | 7203   |
| UN55719 | Rsa1.0.04594.1 | 444 | 16713  | 2.00E-71  | 150 | 153 | 98 +  | 164 | 316 | 11361  | 11512  |
| UN55720 | Rsa1.0.00515.1 | 128 | 78417  | 4.00E-45  | 116 | 120 | 96 -  | 9   | 128 | 59952  | 60068  |
| UN55721 | Rsa1.0.00176.1 | 235 | 240984 | 1.00E-21  | 99  | 109 | 90 +  | 127 | 235 | 186323 | 186427 |
| UN55722 | Rsa1.0.00143.1 | 437 | 121313 | 0         | 401 | 414 | 96 +  | 9   | 416 | 9887   | 10298  |
| UN55723 | Rsa1.0.01139.1 | 232 | 52601  | 1.00E-58  | 202 | 217 | 93 -  | 9   | 225 | 17570  | 17773  |
| UN55724 | Rsa1.0.05878.1 | 231 | 12344  | 4.00E-25  | 123 | 141 | 87 -  | 96  | 231 | 1338   | 1478   |
| UN55725 | Rsa1.0.01199.1 | 770 | 163576 | 1.00E-89  | 168 | 168 | 100 - | 1   | 168 | 3292   | 3459   |
| UN55726 | Rsa1.0.11285.1 | 282 | 5556   | 1.00E-56  | 160 | 168 | 95 +  | 103 | 264 | 3883   | 4050   |
| UN55727 | Rsa1.0.47118.1 | 563 | 480    | 1.00E-142 | 275 | 280 | 98 -  | 13  | 292 | 85     | 363    |
| UN55728 | Rsa1.0.02283.1 | 490 | 33024  | 3.00E-52  | 111 | 113 | 98 -  | 336 | 448 | 15118  | 15230  |
| UN55729 | Rsa1.0.01466.1 | 148 | 45161  | 5.00E-51  | 123 | 130 | 94 -  | 2   | 131 | 39082  | 39211  |

|         |                |     |        |           |     |     |       |     |     |        |        |
|---------|----------------|-----|--------|-----------|-----|-----|-------|-----|-----|--------|--------|
| UN55730 | Rsa1.0.09406.1 | 504 | 6391   | 3.00E-37  | 144 | 155 | 92 +  | 168 | 322 | 5674   | 5819   |
| UN55731 | Rsa1.0.00253.1 | 115 | 231292 | 3.00E-24  | 95  | 101 | 94 -  | 1   | 101 | 205385 | 205480 |
| UN55732 | Rsa1.0.00115.1 | 207 | 131321 | 2.00E-88  | 201 | 209 | 96 -  | 1   | 207 | 63428  | 63635  |
| UN55733 | Rsa1.0.00950.1 | 231 | 58547  | 2.00E-48  | 122 | 126 | 96 -  | 4   | 129 | 39149  | 39271  |
| UN55734 | Rsa1.0.00020.1 | 426 | 283099 | 0         | 411 | 426 | 96 -  | 1   | 426 | 101430 | 101845 |
| UN55735 | Rsa1.0.06170.1 | 261 | 11575  | 2.00E-98  | 233 | 243 | 95 -  | 1   | 242 | 6802   | 7036   |
| UN55736 | Rsa1.0.00428.1 | 679 | 85599  | 0         | 601 | 677 | 88 -  | 2   | 678 | 80384  | 81059  |
| UN55737 | Rsa1.0.00722.1 | 207 | 66840  | 3.00E-78  | 190 | 196 | 96 +  | 1   | 196 | 20744  | 20933  |
| UN55738 | Rsa1.0.00384.1 | 726 | 89278  | 1.00E-148 | 294 | 302 | 97 +  | 1   | 296 | 32439  | 32740  |
| UN55739 | Rsa1.0.04034.1 | 237 | 19481  | 5.00E-77  | 224 | 237 | 94 +  | 1   | 237 | 712    | 937    |
| UN55740 | Rsa1.0.03925.1 | 476 | 20025  | 0         | 456 | 474 | 96 -  | 3   | 476 | 13154  | 13620  |
| UN55741 | Rsa1.0.00722.1 | 714 | 66840  | 0         | 424 | 432 | 98 +  | 283 | 714 | 23022  | 23453  |
| UN55742 | Rsa1.0.00041.1 | 738 | 186197 | 1.00E-112 | 238 | 248 | 95 -  | 491 | 738 | 133923 | 134167 |
| UN55743 | Rsa1.0.01394.1 | 303 | 46641  | 2.00E-58  | 129 | 131 | 98 -  | 127 | 257 | 6167   | 6295   |
| UN55744 | Rsa1.0.00381.1 | 290 | 89718  | 8.00E-70  | 214 | 230 | 93 -  | 60  | 288 | 74644  | 74861  |
| UN55745 | Rsa1.0.00066.1 | 202 | 152418 | 4.00E-40  | 115 | 120 | 95 -  | 1   | 119 | 107601 | 107717 |
| UN55746 | Rsa1.0.00763.1 | 265 | 65121  | 5.00E-34  | 114 | 122 | 93 -  | 1   | 122 | 60149  | 60266  |
| UN55747 | Rsa1.0.03662.1 | 607 | 21492  | 2.00E-69  | 177 | 190 | 93 -  | 3   | 186 | 2930   | 3119   |
| UN55748 | Rsa1.0.00964.1 | 804 | 316648 | 0         | 795 | 804 | 98 +  | 1   | 804 | 291119 | 291922 |
| UN55749 | Rsa1.0.01571.1 | 704 | 43000  | 0         | 592 | 595 | 99 +  | 2   | 593 | 12195  | 12789  |
| UN55750 | Rsa1.0.01233.1 | 790 | 50184  | 1.00E-140 | 355 | 381 | 93 -  | 420 | 790 | 45580  | 45959  |
| UN55751 | Rsa1.0.00699.1 | 828 | 184398 | 0         | 780 | 790 | 98 -  | 1   | 790 | 146382 | 147170 |
| UN55752 | Rsa1.0.04003.1 | 744 | 19607  | 0         | 586 | 611 | 95 +  | 3   | 608 | 9061   | 9663   |
| UN55753 | Rsa1.0.10890.1 | 164 | 5688   | 7.00E-63  | 152 | 161 | 94 +  | 6   | 164 | 72     | 232    |
| UN55754 | Rsa1.0.00262.1 | 253 | 101906 | 9.00E-88  | 238 | 251 | 94 +  | 3   | 253 | 53434  | 53674  |
| UN55755 | Rsa1.0.07441.1 | 671 | 9388   | 1.00E-138 | 250 | 250 | 100 - | 269 | 518 | 8156   | 8405   |
| UN55756 | Rsa1.0.02910.1 | 890 | 26843  | 2.00E-64  | 126 | 126 | 100 + | 3   | 128 | 20245  | 20370  |
| UN55757 | Rsa1.0.00486.1 | 570 | 80875  | 0         | 515 | 525 | 98 +  | 1   | 525 | 4560   | 5083   |
| UN55758 | Rsa1.0.00112.1 | 694 | 132199 | 0         | 488 | 489 | 99 -  | 1   | 489 | 89607  | 90095  |
| UN55759 | Rsa1.0.00105.1 | 798 | 134138 | 1.00E-140 | 273 | 279 | 97 +  | 67  | 343 | 105152 | 105430 |
| UN55760 | Rsa1.0.00542.1 | 266 | 76831  | 1.00E-145 | 264 | 265 | 99 +  | 2   | 266 | 35769  | 36033  |
| UN55761 | Rsa1.0.01588.1 | 649 | 42724  | 1.00E-171 | 352 | 361 | 97 +  | 288 | 645 | 10555  | 10913  |
| UN55762 | Rsa1.0.02641.1 | 266 | 29191  | 2.00E-45  | 126 | 132 | 95 +  | 3   | 134 | 15399  | 15525  |
| UN55763 | Rsa1.0.09530.1 | 729 | 6308   | 8.00E-63  | 140 | 145 | 96 -  | 6   | 150 | 3      | 144    |
| UN55764 | Rsa1.0.00369.1 | 187 | 266462 | 5.00E-58  | 131 | 134 | 97 +  | 2   | 135 | 193109 | 193240 |
| UN55765 | Rsa1.0.04918.1 | 438 | 15441  | 0         | 436 | 437 | 99 +  | 2   | 438 | 3601   | 4037   |
| UN55766 | Rsa1.0.00026.1 | 218 | 327835 | 2.00E-91  | 208 | 218 | 95 +  | 2   | 218 | 209001 | 209217 |
| UN55767 | Rsa1.0.00147.1 | 560 | 249503 | 2.00E-59  | 129 | 132 | 97 -  | 244 | 373 | 219259 | 219390 |
| UN55768 | Rsa1.0.03460.1 | 409 | 22747  | 1.00E-128 | 321 | 337 | 95 +  | 77  | 409 | 5713   | 6039   |



|         |                |     |        |           |     |     |       |     |     |        |        |
|---------|----------------|-----|--------|-----------|-----|-----|-------|-----|-----|--------|--------|
| UN55769 | Rsa1.0.00181.1 | 388 | 114269 | 1.00E-124 | 303 | 321 | 94 +  | 66  | 386 | 44415  | 44729  |
| UN55770 | Rsa1.0.00321.1 | 166 | 95671  | 2.00E-26  | 84  | 89  | 94 +  | 52  | 140 | 19782  | 19868  |
| UN55771 | Rsa1.0_11694.1 | 456 | 131228 | 1.00E-102 | 189 | 189 | 100 + | 70  | 258 | 369    | 557    |
| UN55772 | Rsa1.0_02252.1 | 135 | 33375  | 4.00E-11  | 49  | 51  | 96 -  | 85  | 135 | 27943  | 27991  |
| UN55773 | Rsa1.0_00019.1 | 288 | 301669 | 5.00E-96  | 226 | 238 | 94 +  | 1   | 230 | 113021 | 113258 |
| UN55774 | Rsa1.0_00052.1 | 196 | 162771 | 6.00E-70  | 146 | 150 | 97 +  | 47  | 196 | 122215 | 122364 |
| UN55775 | Rsa1.0_02930.1 | 143 | 26668  | 1.00E-39  | 118 | 123 | 95 -  | 20  | 142 | 1699   | 1816   |
| UN55776 | Rsa1.0_00097.1 | 140 | 138858 | 2.00E-44  | 127 | 134 | 94 +  | 1   | 134 | 91538  | 91666  |
| UN55777 | Rsa1.0_02224.1 | 169 | 33758  | 2.00E-16  | 73  | 79  | 92 -  | 91  | 169 | 27362  | 27436  |
| UN55778 | Rsa1.0_02061.1 | 793 | 35487  | 0         | 675 | 680 | 99 +  | 76  | 753 | 31626  | 32304  |
| UN55779 | Rsa1.0_00803.1 | 347 | 144228 | 1.00E-120 | 330 | 351 | 94 +  | 1   | 347 | 51922  | 52260  |
| UN55780 | Rsa1.0_02734.1 | 245 | 28344  | 1.00E-108 | 230 | 238 | 96 +  | 3   | 238 | 2436   | 2673   |
| UN55781 | #              | #   | #      | #         | #   | #   | #     | #   | #   | #      | #      |
| UN55782 | Rsa1.0_01046.1 | 577 | 152989 | 1.00E-100 | 186 | 186 | 100 + | 171 | 356 | 136697 | 136882 |
| UN55783 | Rsa1.0_02925.1 | 247 | 26720  | 2.00E-61  | 170 | 180 | 94 -  | 1   | 180 | 21120  | 21294  |
| UN55784 | Rsa1.0_00409.1 | 486 | 146788 | 1.00E-112 | 217 | 221 | 98 -  | 2   | 222 | 97202  | 97422  |
| UN55785 | Rsa1.0_00178.1 | 263 | 114861 | 1.00E-109 | 253 | 263 | 96 +  | 1   | 263 | 5938   | 6193   |
| UN55786 | Rsa1.0_04286.1 | 675 | 18084  | 1.00E-175 | 345 | 351 | 98 +  | 330 | 675 | 2131   | 2481   |
| UN55787 | Rsa1.0_04141.1 | 748 | 18864  | 1.00E-154 | 277 | 277 | 100 + | 3   | 279 | 14147  | 14423  |
| UN55788 | #              | #   | #      | #         | #   | #   | #     | #   | #   | #      | #      |
| UN55789 | Rsa1.0_00767.1 | 588 | 64980  | 0         | 398 | 399 | 99 -  | 114 | 512 | 17852  | 18250  |
| UN55790 | Rsa1.0_30762.1 | 229 | 745    | 6.00E-67  | 212 | 229 | 92 +  | 1   | 229 | 367    | 587    |
| UN55791 | Rsa1.0_00381.1 | 124 | 89718  | 8.00E-28  | 84  | 87  | 96 +  | 37  | 123 | 64358  | 64441  |
| UN55792 | Rsa1.0_04507.1 | 791 | 17045  | 0         | 599 | 611 | 98 +  | 3   | 613 | 7801   | 8407   |
| UN55793 | Rsa1.0_07904.1 | 667 | 8321   | 0         | 541 | 541 | 100 - | 3   | 543 | 1684   | 2224   |
| UN55794 | Rsa1.0_03759.1 | 718 | 20987  | 3.00E-81  | 157 | 158 | 99 +  | 94  | 251 | 10029  | 10186  |
| UN55795 | Rsa1.0_07263.1 | 731 | 9644   | 1.00E-174 | 475 | 530 | 89 +  | 68  | 597 | 4440   | 4969   |
| UN55796 | Rsa1.0_01625.1 | 728 | 42019  | 0         | 428 | 442 | 96 -  | 287 | 728 | 29680  | 30114  |
| UN55797 | Rsa1.0_02223.1 | 347 | 152421 | 2.00E-18  | 81  | 92  | 88 -  | 4   | 95  | 24121  | 24212  |
| UN55798 | Rsa1.0_00040.1 | 458 | 324196 | 2.33E-156 | 265 | 266 | 99 -  | 193 | 458 | 163977 | 164242 |
| UN55799 | Rsa1.0_04238.1 | 169 | 18352  | 1.00E-11  | 83  | 91  | 91 +  | 63  | 153 | 1914   | 1997   |
| UN55800 | Rsa1.0_00040.1 | 741 | 324196 | 1.00E-98  | 183 | 183 | 100 - | 79  | 261 | 283649 | 283831 |
| UN55801 | Rsa1.0_01053.1 | 607 | 55483  | 0         | 585 | 607 | 96 -  | 1   | 607 | 39458  | 40049  |
| UN55802 | Rsa1.0_00543.1 | 169 | 76788  | 1.00E-18  | 60  | 64  | 93 +  | 106 | 169 | 8313   | 8376   |
| UN55803 | Rsa1.0_02266.1 | 809 | 33195  | 1.00E-158 | 309 | 314 | 98 +  | 500 | 809 | 4279   | 4592   |
| UN55804 | Rsa1.0_05785.1 | 136 | 12639  | 9.00E-34  | 87  | 91  | 95 -  | 4   | 91  | 2991   | 3081   |
| UN55805 | Rsa1.0_15639.1 | 716 | 2510   | 0         | 713 | 714 | 99 -  | 3   | 716 | 239    | 952    |
| UN55806 | Rsa1.0_01538.1 | 659 | 43733  | 1.00E-108 | 287 | 317 | 90 -  | 151 | 456 | 29189  | 29504  |
| UN55807 | Rsa1.0_21659.1 | 372 | 1184   | 2.00E-49  | 114 | 116 | 98 +  | 243 | 357 | 621    | 735    |

|         |                |     |        |           |     |     |      |     |     |        |        |
|---------|----------------|-----|--------|-----------|-----|-----|------|-----|-----|--------|--------|
| UN55808 | Rsa1.0_00037.1 | 707 | 307838 | 0         | 686 | 720 | 95 + | 1   | 707 | 186263 | 186977 |
| UN55809 | #              | #   | #      | #         | #   | #   | #    | #   | #   | #      |        |
| UN55810 | Rsa1.0_43521.1 | 274 | 516    | 7.00E-58  | 160 | 169 | 94 - | 3   | 171 | 119    | 281    |
| UN55811 | Rsa1.0_67579.1 | 177 | 339    | 2.00E-85  | 163 | 164 | 99 - | 8   | 171 | 151    | 314    |
| UN55812 | Rsa1.0_01292.1 | 119 | 175783 | 6.00E-13  | 52  | 54  | 96 - | 62  | 115 | 148843 | 148894 |
| UN55813 | Rsa1.0_01457.1 | 291 | 45337  | 3.00E-60  | 172 | 184 | 93 - | 112 | 291 | 6416   | 6596   |
| UN55814 | Rsa1.0_02400.1 | 373 | 31750  | 1.00E-143 | 359 | 377 | 95 + | 1   | 373 | 9828   | 10191  |
| UN55815 | Rsa1.0_42967.1 | 184 | 523    | 8.00E-29  | 135 | 149 | 90 - | 16  | 164 | 108    | 249    |
| UN55816 | Rsa1.0_02358.1 | 155 | 32213  | 3.00E-49  | 125 | 130 | 96 - | 26  | 155 | 7433   | 7558   |
| UN55817 | Rsa1.0_01947.1 | 668 | 36977  | 1.00E-164 | 321 | 325 | 98 + | 342 | 662 | 11580  | 11904  |
| UN55818 | Rsa1.0_01196.1 | 511 | 51097  | 3.00E-92  | 192 | 196 | 97 - | 170 | 365 | 11006  | 11199  |
| UN55819 | Rsa1.0_05748.1 | 103 | 12749  | 3.00E-30  | 88  | 91  | 96 + | 13  | 103 | 10843  | 10930  |
| UN55820 | Rsa1.0_01985.1 | 118 | 36491  | 9.00E-43  | 107 | 111 | 96 - | 1   | 111 | 1827   | 1934   |
| UN55821 | Rsa1.0_03193.1 | 455 | 24690  | 1.00E-131 | 260 | 266 | 97 + | 5   | 270 | 17972  | 18236  |
| UN55822 | Rsa1.0_04288.1 | 300 | 18077  | 2.00E-70  | 163 | 167 | 97 - | 82  | 248 | 9680   | 9842   |
| UN55823 | Rsa1.0_10890.1 | 514 | 5688   | 0         | 508 | 514 | 98 + | 1   | 514 | 2581   | 3091   |
| UN55824 | Rsa1.0_48591.1 | 748 | 466    | 1.00E-121 | 230 | 233 | 98 + | 2   | 234 | 93     | 325    |
| UN55825 | Rsa1.0_02255.1 | 820 | 148935 | 0         | 444 | 451 | 98 - | 315 | 765 | 25911  | 26360  |
| UN55826 | Rsa1.0_00032.1 | 814 | 306326 | 0         | 446 | 463 | 96 - | 79  | 541 | 266644 | 267106 |
| UN55827 | Rsa1.0_00533.1 | 219 | 77375  | 6.00E-30  | 87  | 91  | 95 - | 129 | 219 | 36954  | 37042  |
| UN55828 | Rsa1.0_00308.1 | 680 | 96915  | 1.00E-172 | 331 | 337 | 98 + | 331 | 664 | 81326  | 81662  |
| UN55829 | Rsa1.0_00750.1 | 879 | 190548 | 0         | 861 | 863 | 99 + | 1   | 861 | 16405  | 17267  |
| UN55830 | Rsa1.0_00245.1 | 142 | 103569 | 4.00E-33  | 130 | 139 | 93 - | 4   | 142 | 55250  | 55379  |
| UN55831 | Rsa1.0_00062.1 | 819 | 299291 | 0         | 405 | 427 | 94 + | 2   | 426 | 268196 | 268622 |
| UN55832 | Rsa1.0_08532.1 | 160 | 7228   | 8.00E-81  | 158 | 160 | 98 + | 1   | 160 | 2204   | 2363   |
| UN55833 | Rsa1.0_00709.1 | 833 | 67329  | 0         | 714 | 741 | 96 - | 3   | 740 | 65873  | 66608  |
| UN55834 | Rsa1.0_01758.1 | 128 | 39747  | 1.00E-54  | 125 | 128 | 97 + | 1   | 128 | 4712   | 4837   |
| UN55835 | Rsa1.0_04925.1 | 796 | 15424  | 0         | 593 | 610 | 97 - | 189 | 796 | 1234   | 1843   |
| UN55836 | Rsa1.0_00486.1 | 476 | 80875  | 0         | 467 | 477 | 97 + | 1   | 476 | 7445   | 7920   |
| UN55837 | Rsa1.0_00429.1 | 249 | 85559  | 3.00E-41  | 209 | 244 | 85 - | 5   | 248 | 44092  | 44328  |
| UN55838 | Rsa1.0_04103.1 | 203 | 19048  | 1.00E-77  | 193 | 203 | 95 + | 1   | 203 | 9954   | 10152  |
| UN55839 | Rsa1.0_02548.1 | 296 | 30228  | 2.00E-43  | 100 | 102 | 98 + | 195 | 296 | 9298   | 9398   |
| UN55840 | Rsa1.0_02742.1 | 139 | 28284  | 1.00E-42  | 121 | 131 | 92 + | 6   | 136 | 9740   | 9863   |
| UN55841 | Rsa1.0_01036.1 | 366 | 55978  | 4.00E-57  | 173 | 185 | 93 - | 101 | 285 | 12738  | 12916  |
| UN55842 | Rsa1.0_03278.1 | 358 | 24125  | 1.00E-35  | 101 | 105 | 96 - | 149 | 253 | 2860   | 2961   |
| UN55843 | Rsa1.0_01580.1 | 231 | 42852  | 5.00E-52  | 131 | 136 | 96 + | 92  | 227 | 30603  | 30735  |
| UN55844 | Rsa1.0_01997.1 | 182 | 158416 | 8.00E-32  | 82  | 86  | 95 - | 1   | 86  | 9636   | 9721   |
| UN55845 | Rsa1.0_00698.1 | 150 | 67816  | 1.00E-11  | 46  | 48  | 95 + | 100 | 146 | 48448  | 48495  |
| UN55846 | Rsa1.0_03728.1 | 685 | 21147  | 6.00E-85  | 167 | 168 | 99 + | 489 | 655 | 13590  | 13757  |

|         |                |     |        |           |     |     |       |     |     |        |        |
|---------|----------------|-----|--------|-----------|-----|-----|-------|-----|-----|--------|--------|
| UN55847 | Rsa1.0.00569.1 | 311 | 75060  | 1.00E-132 | 285 | 298 | 95 -  | 1   | 298 | 42726  | 43021  |
| UN55848 | Rsa1.0.01286.1 | 164 | 49209  | 7.00E-26  | 95  | 100 | 95 -  | 1   | 100 | 40864  | 40958  |
| UN55849 | Rsa1.0.00253.1 | 795 | 231292 | 0         | 386 | 395 | 97 -  | 104 | 498 | 13488  | 13881  |
| UN55850 | Rsa1.0.00179.1 | 596 | 393324 | 2.00E-26  | 65  | 66  | 98 -  | 267 | 332 | 297879 | 297944 |
| UN55851 | Rsa1.0.02105.1 | 751 | 156953 | 0         | 408 | 430 | 94 +  | 4   | 433 | 150746 | 151167 |
| UN55852 | Rsa1.0.00644.1 | 440 | 136881 | 1.00E-128 | 270 | 284 | 95 +  | 171 | 440 | 31373  | 31656  |
| UN55853 | Rsa1.0.44890.1 | 846 | 502    | 2.00E-88  | 181 | 185 | 97 -  | 223 | 405 | 317    | 501    |
| UN55854 | Rsa1.0.00297.1 | 344 | 97836  | 1.00E-169 | 332 | 342 | 97 -  | 1   | 339 | 86158  | 86499  |
| UN55855 | Rsa1.0.18748.1 | 323 | 1541   | 1.00E-96  | 179 | 179 | 100 - | 4   | 182 | 731    | 909    |
| UN55856 | Rsa1.0.07865.1 | 607 | 8400   | 1.00E-116 | 221 | 224 | 98 -  | 167 | 390 | 6448   | 6671   |
| UN55857 | Rsa1.0.00094.1 | 781 | 139042 | 2.00E-97  | 199 | 205 | 97 +  | 126 | 330 | 118743 | 118947 |
| UN55858 | #              | #   | #      | #         | #   | #   | #     | #   | #   | #      | #      |
| UN55859 | Rsa1.0.00326.1 | 677 | 171955 | 0         | 441 | 456 | 96 -  | 3   | 455 | 22464  | 22915  |
| UN55860 | Rsa1.0.05491.1 | 882 | 13554  | 0         | 367 | 369 | 99 -  | 60  | 428 | 9307   | 9675   |
| UN55861 | Rsa1.0.00082.1 | 680 | 237584 | 0         | 445 | 466 | 95 +  | 221 | 677 | 105997 | 106461 |
| UN55862 | Rsa1.0.00047.1 | 609 | 168582 | 4.00E-21  | 89  | 101 | 88 +  | 155 | 255 | 49609  | 49709  |
| UN55863 | Rsa1.0.00923.1 | 671 | 153678 | 0         | 626 | 657 | 95 +  | 1   | 651 | 45804  | 46459  |
| UN55864 | Rsa1.0.04515.1 | 581 | 17021  | 0         | 570 | 580 | 98 +  | 2   | 581 | 1423   | 2002   |
| UN55865 | Rsa1.0.00286.1 | 344 | 98709  | 5.00E-47  | 99  | 100 | 99 -  | 239 | 338 | 27808  | 27907  |
| UN55866 | Rsa1.0.00116.1 | 639 | 365886 | 2.00E-87  | 193 | 204 | 94 -  | 95  | 298 | 191190 | 191384 |
| UN55867 | Rsa1.0.00293.1 | 639 | 339294 | 0         | 340 | 341 | 99 +  | 2   | 342 | 88061  | 88401  |
| UN55868 | Rsa1.0.01545.1 | 547 | 43599  | 0         | 534 | 554 | 96 -  | 3   | 547 | 32617  | 33170  |
| UN55869 | Rsa1.0.01092.1 | 724 | 54348  | 0         | 701 | 723 | 96 +  | 3   | 724 | 11929  | 12651  |
| UN55870 | Rsa1.0.13987.1 | 377 | 3954   | 0         | 334 | 334 | 100 - | 44  | 377 | 1702   | 2035   |
| UN55871 | Rsa1.0.04282.1 | 733 | 18100  | 0         | 413 | 424 | 97 +  | 315 | 733 | 7541   | 7964   |
| UN55872 | Rsa1.0.00214.1 | 673 | 107508 | 1.00E-132 | 273 | 284 | 96 -  | 6   | 289 | 31884  | 32167  |
| UN55873 | Rsa1.0.00152.1 | 596 | 257730 | 3.00E-86  | 200 | 212 | 94 +  | 109 | 320 | 200315 | 200523 |
| UN55874 | Rsa1.0.03005.1 | 590 | 26082  | 1.00E-102 | 233 | 250 | 93 +  | 2   | 251 | 15071  | 15308  |
| UN55875 | Rsa1.0.05790.1 | 608 | 12618  | 2.33E-156 | 327 | 347 | 94 +  | 111 | 456 | 3671   | 4017   |
| UN55876 | Rsa1.0.00881.1 | 739 | 61260  | 0         | 427 | 454 | 94 +  | 285 | 738 | 18614  | 19067  |
| UN55877 | Rsa1.0.01009.1 | 612 | 56922  | 1.00E-156 | 279 | 279 | 100 - | 334 | 612 | 29245  | 29523  |
| UN55878 | Rsa1.0.00621.1 | 849 | 71840  | 0         | 464 | 467 | 99 +  | 3   | 469 | 24855  | 25321  |
| UN55879 | Rsa1.0.53123.1 | 468 | 429    | 1.00E-97  | 203 | 209 | 97 +  | 260 | 468 | 1      | 208    |
| UN55880 | Rsa1.0.74354.1 | 615 | 308    | 3.00E-68  | 145 | 148 | 97 -  | 398 | 545 | 6      | 152    |
| UN55881 | Rsa1.0.02915.1 | 850 | 26813  | 0         | 742 | 754 | 98 -  | 102 | 850 | 8631   | 9383   |
| UN55882 | Rsa1.0.00100.1 | 677 | 249232 | 0         | 490 | 495 | 98 -  | 183 | 677 | 181636 | 182130 |
| UN55883 | Rsa1.0.06673.1 | 640 | 10562  | 7.00E-94  | 182 | 183 | 99 +  | 3   | 184 | 502    | 684    |
| UN55884 | Rsa1.0.07542.1 | 609 | 9160   | 1.00E-101 | 200 | 204 | 98 -  | 113 | 316 | 8375   | 8578   |
| UN55885 | Rsa1.0.07930.1 | 318 | 8239   | 2.00E-55  | 216 | 246 | 87 +  | 56  | 290 | 79     | 321    |

|         |                |     |        |           |     |     |       |     |     |        |        |
|---------|----------------|-----|--------|-----------|-----|-----|-------|-----|-----|--------|--------|
| UN55886 | Rsa1.0_00290.1 | 748 | 225096 | 0         | 626 | 629 | 99 -  | 121 | 748 | 14793  | 15421  |
| UN55887 | Rsa1.0_03839.1 | 427 | 20525  | 2.33E-156 | 286 | 291 | 98 +  | 139 | 427 | 60     | 350    |
| UN55888 | Rsa1.0_00007.1 | 729 | 239325 | 1.00E-135 | 278 | 288 | 96 -  | 1   | 287 | 16013  | 16300  |
| UN55889 | Rsa1.0_01565.1 | 745 | 155447 | 1.00E-129 | 501 | 580 | 86 -  | 3   | 566 | 35927  | 36487  |
| UN55890 | Rsa1.0_02969.1 | 635 | 26390  | 0         | 459 | 462 | 99 -  | 7   | 468 | 8912   | 9373   |
| UN55891 | Rsa1.0_00277.1 | 298 | 100132 | 1.00E-165 | 297 | 298 | 99 -  | 1   | 298 | 10546  | 10843  |
| UN55892 | Rsa1.0_00789.1 | 694 | 64233  | 1.00E-98  | 227 | 239 | 94 -  | 4   | 242 | 44999  | 45230  |
| UN55893 | Rsa1.0_00733.1 | 147 | 66583  | 2.00E-35  | 97  | 100 | 97 +  | 12  | 108 | 58923  | 59022  |
| UN55894 | Rsa1.0_06931.1 | 714 | 10145  | 1.00E-137 | 353 | 387 | 91 +  | 3   | 386 | 9569   | 9936   |
| UN55895 | Rsa1.0_01442.1 | 753 | 45776  | 1.00E-114 | 268 | 286 | 93 +  | 54  | 333 | 20988  | 21273  |
| UN55896 | Rsa1.0_00218.1 | 599 | 201480 | 0         | 527 | 553 | 95 -  | 47  | 599 | 46599  | 47145  |
| UN55897 | Rsa1.0_00052.1 | 736 | 162771 | 0         | 611 | 621 | 98 +  | 112 | 729 | 81968  | 82588  |
| UN55898 | Rsa1.0_00358.1 | 404 | 91293  | 1.00E-109 | 232 | 244 | 95 +  | 161 | 404 | 74541  | 74774  |
| UN55899 | Rsa1.0_02247.1 | 608 | 33427  | 1.00E-126 | 298 | 317 | 94 -  | 298 | 608 | 8493   | 8807   |
| UN55900 | Rsa1.0_02248.1 | 780 | 33414  | 0         | 415 | 417 | 99 +  | 126 | 542 | 22949  | 23365  |
| UN55901 | Rsa1.0_00381.1 | 761 | 89718  | 1.00E-158 | 317 | 323 | 98 -  | 429 | 747 | 56276  | 56598  |
| UN55902 | Rsa1.0_00047.1 | 673 | 168582 | 1.00E-178 | 369 | 383 | 96 +  | 4   | 383 | 29444  | 29824  |
| UN55903 | Rsa1.0_02043.1 | 664 | 163754 | 1.00E-113 | 231 | 238 | 97 +  | 3   | 237 | 144972 | 145209 |
| UN55904 | Rsa1.0_01104.1 | 735 | 285480 | 1.00E-166 | 299 | 300 | 99 -  | 1   | 300 | 158743 | 159042 |
| UN55905 | Rsa1.0_00539.1 | 538 | 76926  | 1.00E-106 | 220 | 228 | 96 +  | 147 | 374 | 27886  | 28113  |
| UN55906 | Rsa1.0_03855.1 | 681 | 20429  | 1.00E-107 | 207 | 209 | 99 +  | 246 | 454 | 13620  | 13827  |
| UN55907 | Rsa1.0_01170.1 | 637 | 161131 | 1.00E-152 | 293 | 299 | 97 -  | 339 | 637 | 114490 | 114785 |
| UN55908 | Rsa1.0_01115.1 | 685 | 183545 | 0         | 461 | 483 | 95 +  | 3   | 479 | 1262   | 1743   |
| UN55909 | Rsa1.0_00093.1 | 540 | 214962 | 2.00E-99  | 228 | 240 | 95 +  | 14  | 253 | 12721  | 12958  |
| UN55910 | Rsa1.0_00360.1 | 703 | 91190  | 3.00E-84  | 168 | 171 | 98 +  | 272 | 442 | 46323  | 46493  |
| UN55911 | Rsa1.0_00025.1 | 706 | 277312 | 0         | 700 | 713 | 98 +  | 2   | 706 | 129703 | 130415 |
| UN55912 | Rsa1.0_00481.1 | 805 | 81316  | 0         | 434 | 436 | 99 +  | 2   | 437 | 41170  | 41605  |
| UN55913 | Rsa1.0_00398.1 | 404 | 88007  | 1.00E-124 | 253 | 260 | 97 -  | 148 | 404 | 1666   | 1925   |
| UN55914 | Rsa1.0_01016.1 | 580 | 181422 | 2.00E-90  | 282 | 322 | 87 -  | 52  | 373 | 44377  | 44671  |
| UN55915 | Rsa1.0_03244.1 | 553 | 24413  | 1.00E-100 | 238 | 255 | 93 -  | 6   | 252 | 23790  | 24044  |
| UN55916 | Rsa1.0_00368.1 | 681 | 90669  | 1.00E-119 | 257 | 269 | 95 -  | 152 | 417 | 6728   | 6993   |
| UN55917 | Rsa1.0_00609.1 | 778 | 72785  | 1.00E-137 | 263 | 268 | 98 +  | 3   | 270 | 51762  | 52029  |
| UN55918 | Rsa1.0_01472.1 | 683 | 45099  | 1.00E-131 | 238 | 238 | 100 - | 210 | 447 | 24438  | 24675  |
| UN55919 | Rsa1.0_00639.1 | 634 | 165873 | 0         | 616 | 633 | 97 +  | 3   | 634 | 106131 | 106758 |
| UN55920 | Rsa1.0_00001.1 | 710 | 363028 | 0         | 688 | 700 | 98 -  | 3   | 697 | 37752  | 38451  |
| UN55921 | Rsa1.0_01747.1 | 793 | 39881  | 1.00E-170 | 348 | 355 | 98 -  | 445 | 793 | 23589  | 23943  |
| UN55922 | Rsa1.0_00501.1 | 752 | 79545  | 1.00E-162 | 302 | 306 | 98 +  | 197 | 502 | 67885  | 68190  |
| UN55923 | Rsa1.0_01857.1 | 159 | 38103  | 5.00E-76  | 153 | 156 | 98 -  | 3   | 158 | 12994  | 13149  |
| UN55924 | Rsa1.0_01701.1 | 795 | 162121 | 0         | 572 | 584 | 97 +  | 4   | 587 | 19379  | 19962  |

|         |                |     |        |           |     |     |       |     |     |        |        |
|---------|----------------|-----|--------|-----------|-----|-----|-------|-----|-----|--------|--------|
| UN55925 | Rsa1.0.00394.1 | 642 | 148426 | 2.00E-94  | 209 | 220 | 95 -  | 3   | 222 | 107239 | 107458 |
| UN55926 | Rsa1.0.48315.1 | 585 | 469    | 1.00E-179 | 351 | 362 | 96 -  | 2   | 363 | 61     | 422    |
| UN55927 | Rsa1.0.07468.1 | 412 | 9316   | 1.00E-163 | 342 | 359 | 95 +  | 55  | 403 | 8494   | 8852   |
| UN55928 | Rsa1.0.27283.1 | 740 | 859    | 3.00E-81  | 157 | 158 | 99 -  | 195 | 352 | 148    | 305    |
| UN55929 | Rsa1.0.00152.1 | 776 | 257730 | 1.00E-169 | 447 | 499 | 89 -  | 196 | 681 | 76288  | 76774  |
| UN55930 | Rsa1.0.00017.1 | 721 | 752458 | 0         | 566 | 569 | 99 +  | 87  | 655 | 33515  | 34083  |
| UN55931 | Rsa1.0.00380.1 | 393 | 89748  | 1.00E-112 | 225 | 231 | 97 +  | 163 | 393 | 84350  | 84576  |
| UN55932 | Rsa1.0.00016.1 | 769 | 831256 | 3.00E-65  | 160 | 171 | 93 +  | 424 | 594 | 663022 | 663192 |
| UN55933 | Rsa1.0.00105.1 | 422 | 134138 | 3.00E-70  | 153 | 159 | 96 +  | 260 | 418 | 69332  | 69490  |
| UN55934 | Rsa1.0.00579.1 | 425 | 148308 | 1.00E-165 | 360 | 381 | 94 -  | 53  | 425 | 66639  | 67019  |
| UN55935 | Rsa1.0.06035.1 | 660 | 11874  | 4.00E-12  | 47  | 50  | 94 -  | 147 | 196 | 7218   | 7267   |
| UN55936 | Rsa1.0.01242.1 | 590 | 50066  | 1.00E-116 | 216 | 217 | 99 +  | 279 | 495 | 17101  | 17317  |
| UN55937 | Rsa1.0.00157.1 | 729 | 245832 | 0         | 705 | 725 | 97 +  | 3   | 722 | 215899 | 216623 |
| UN55938 | Rsa1.0.04352.1 | 489 | 17779  | 1.00E-139 | 254 | 255 | 99 +  | 87  | 341 | 12118  | 12372  |
| UN55939 | Rsa1.0.09302.1 | 646 | 6470   | 1.00E-136 | 246 | 246 | 100 + | 3   | 248 | 374    | 619    |
| UN55940 | Rsa1.0.00632.1 | 693 | 183777 | 0         | 680 | 693 | 98 -  | 2   | 693 | 41031  | 41721  |
| UN55941 | Rsa1.0.00408.1 | 645 | 176752 | 1.00E-173 | 314 | 316 | 99 +  | 289 | 604 | 30985  | 31300  |
| UN55942 | Rsa1.0.00002.1 | 772 | 601661 | 9.00E-69  | 133 | 133 | 100 - | 115 | 247 | 95714  | 95846  |
| UN55943 | Rsa1.0.00608.1 | 470 | 172672 | 3.00E-89  | 232 | 248 | 93 +  | 192 | 431 | 3709   | 3956   |
| UN55944 | Rsa1.0.03809.1 | 665 | 20731  | 0         | 589 | 606 | 97 +  | 2   | 606 | 2014   | 2619   |
| UN55945 | Rsa1.0.28445.1 | 747 | 815    | 1.00E-180 | 344 | 351 | 98 +  | 383 | 732 | 389    | 739    |
| UN55946 | Rsa1.0.04911.1 | 697 | 15483  | 1.00E-144 | 273 | 276 | 98 -  | 394 | 668 | 8462   | 8737   |
| UN55947 | Rsa1.0.00871.1 | 746 | 61539  | 0         | 678 | 702 | 96 +  | 13  | 708 | 8146   | 8838   |
| UN55948 | Rsa1.0.00386.1 | 170 | 89134  | 6.00E-91  | 169 | 169 | 100 + | 2   | 170 | 26450  | 26618  |
| UN55949 | Rsa1.0.50795.1 | 622 | 447    | 1.00E-106 | 196 | 196 | 100 - | 427 | 622 | 252    | 447    |
| UN55950 | Rsa1.0.00419.1 | 797 | 86562  | 2.00E-88  | 199 | 206 | 96 -  | 533 | 735 | 20811  | 21016  |
| UN55951 | Rsa1.0.59920.1 | 729 | 382    | 1.00E-176 | 332 | 336 | 98 -  | 316 | 649 | 48     | 382    |
| UN55952 | Rsa1.0.02861.1 | 791 | 27188  | 1.00E-125 | 374 | 422 | 88 +  | 3   | 422 | 18988  | 19398  |
| UN55953 | Rsa1.0.00983.1 | 673 | 57586  | 0         | 659 | 672 | 98 +  | 2   | 673 | 10700  | 11371  |
| UN55954 | Rsa1.0.00363.1 | 458 | 90968  | 1.00E-119 | 225 | 226 | 99 -  | 233 | 458 | 73725  | 73949  |
| UN55955 | Rsa1.0.00782.1 | 684 | 64468  | 1.00E-100 | 207 | 214 | 96 -  | 334 | 547 | 20391  | 20604  |
| UN55956 | Rsa1.0.06647.1 | 722 | 10604  | 0         | 527 | 557 | 94 +  | 2   | 542 | 5668   | 6224   |
| UN55957 | Rsa1.0.04967.1 | 565 | 15303  | 6.00E-23  | 103 | 118 | 87 -  | 382 | 499 | 11537  | 11651  |
| UN55958 | Rsa1.0.00310.1 | 684 | 96852  | 3.00E-16  | 75  | 85  | 88 +  | 399 | 483 | 80765  | 80849  |
| UN55959 | Rsa1.0.00078.1 | 780 | 175053 | 0         | 672 | 678 | 99 +  | 37  | 713 | 111911 | 112588 |
| UN55960 | Rsa1.0.17489.1 | 720 | 1816   | 0         | 437 | 446 | 97 +  | 264 | 705 | 630    | 1075   |
| UN55961 | Rsa1.0.42837.1 | 770 | 524    | 2.00E-51  | 144 | 156 | 92 -  | 394 | 548 | 357    | 512    |
| UN55962 | Rsa1.0.00928.1 | 625 | 59293  | 0         | 518 | 542 | 95 -  | 85  | 625 | 24272  | 24813  |
| UN55963 | Rsa1.0.01021.1 | 617 | 56610  | 0         | 610 | 617 | 98 -  | 1   | 617 | 39798  | 40413  |

|         |                |     |        |           |     |     |       |     |     |        |        |
|---------|----------------|-----|--------|-----------|-----|-----|-------|-----|-----|--------|--------|
| UN55964 | Rsa1.0.00876.1 | 783 | 61328  | 1.00E-179 | 330 | 334 | 98 +  | 249 | 582 | 40232  | 40565  |
| UN55965 | Rsa1.0.01220.1 | 727 | 161775 | 1.00E-153 | 286 | 290 | 98 +  | 2   | 291 | 22560  | 22849  |
| UN55966 | Rsa1.0.03100.1 | 577 | 25411  | 1.00E-134 | 267 | 275 | 97 -  | 231 | 505 | 3045   | 3319   |
| UN55967 | Rsa1.0.00790.1 | 806 | 148693 | 1.00E-144 | 307 | 321 | 95 +  | 3   | 319 | 19377  | 19691  |
| UN55968 | Rsa1.0.01260.1 | 595 | 49750  | 1.00E-149 | 307 | 320 | 95 +  | 276 | 595 | 28228  | 28547  |
| UN55969 | Rsa1.0.16978.1 | 539 | 1964   | 1.00E-122 | 232 | 235 | 98 +  | 299 | 533 | 1215   | 1449   |
| UN55970 | Rsa1.0.02266.1 | 792 | 33195  | 1.00E-114 | 235 | 242 | 97 +  | 263 | 503 | 13176  | 13417  |
| UN55971 | Rsa1.0.35196.1 | 737 | 643    | 6.00E-42  | 181 | 210 | 86 +  | 272 | 481 | 215    | 420    |
| UN55972 | Rsa1.0.06653.1 | 729 | 10596  | 1.00E-138 | 289 | 300 | 96 +  | 350 | 648 | 1659   | 1955   |
| UN55973 | Rsa1.0.00477.1 | 508 | 81556  | 1.00E-118 | 310 | 340 | 91 -  | 172 | 508 | 52650  | 52976  |
| UN55974 | Rsa1.0.01069.1 | 472 | 55113  | 0         | 436 | 438 | 99 -  | 35  | 472 | 12909  | 13346  |
| UN55975 | Rsa1.0.00478.1 | 627 | 81419  | 0         | 512 | 523 | 97 -  | 2   | 522 | 56378  | 56896  |
| UN55976 | Rsa1.0.01650.1 | 644 | 41589  | 0         | 546 | 601 | 90 +  | 3   | 601 | 27288  | 27881  |
| UN55977 | Rsa1.0.00902.1 | 617 | 60241  | 0         | 603 | 617 | 97 +  | 1   | 617 | 26406  | 27022  |
| UN55978 | Rsa1.0.02452.1 | 151 | 31280  | 9.00E-59  | 121 | 123 | 98 +  | 1   | 123 | 10761  | 10883  |
| UN55979 | Rsa1.0.01299.1 | 780 | 162028 | 1.00E-77  | 161 | 164 | 98 +  | 2   | 164 | 157184 | 157347 |
| UN55980 | Rsa1.0.05410.1 | 678 | 13840  | 4.00E-15  | 64  | 71  | 90 -  | 193 | 263 | 1209   | 1279   |
| UN55981 | Rsa1.0.00515.1 | 687 | 78417  | 0         | 361 | 368 | 98 +  | 320 | 687 | 54657  | 55024  |
| UN55982 | Rsa1.0.07999.1 | 816 | 8102   | 0         | 552 | 564 | 97 +  | 3   | 566 | 7419   | 7982   |
| UN55983 | Rsa1.0.00028.1 | 677 | 293984 | 0         | 652 | 687 | 94 +  | 4   | 677 | 257639 | 258319 |
| UN55984 | Rsa1.0.01005.1 | 656 | 56967  | 1.00E-121 | 247 | 256 | 96 -  | 353 | 608 | 19299  | 19554  |
| UN55985 | Rsa1.0.10939.1 | 694 | 5670   | 0         | 371 | 371 | 100 - | 3   | 373 | 1902   | 2272   |
| UN55986 | Rsa1.0.04571.1 | 736 | 16792  | 0         | 496 | 515 | 96 -  | 224 | 730 | 10545  | 11054  |
| UN55987 | Rsa1.0.02162.1 | 780 | 34431  | 0         | 775 | 787 | 98 -  | 1   | 776 | 28721  | 29507  |
| UN55988 | Rsa1.0.00131.1 | 769 | 432233 | 4.00E-80  | 164 | 168 | 97 +  | 280 | 447 | 10362  | 10529  |
| UN55989 | Rsa1.0.03122.1 | 682 | 25207  | 1.00E-133 | 289 | 305 | 94 -  | 270 | 574 | 11322  | 11626  |
| UN55990 | Rsa1.0.06190.1 | 806 | 11525  | 1.00E-174 | 335 | 340 | 98 +  | 376 | 713 | 9474   | 9810   |
| UN55991 | Rsa1.0.02365.1 | 768 | 32118  | 0         | 697 | 776 | 89 -  | 3   | 768 | 30153  | 30883  |
| UN55992 | Rsa1.0.00022.1 | 794 | 200461 | 0         | 530 | 553 | 95 -  | 1   | 553 | 80130  | 80682  |
| UN55993 | Rsa1.0.07440.1 | 767 | 9389   | 0         | 674 | 700 | 96 +  | 5   | 701 | 4396   | 5095   |
| UN55994 | Rsa1.0.01550.1 | 719 | 43443  | 2.00E-94  | 176 | 176 | 100 - | 2   | 177 | 17415  | 17590  |
| UN55995 | Rsa1.0.00168.1 | 625 | 115870 | 0         | 592 | 625 | 94 +  | 1   | 625 | 93395  | 94001  |
| UN55996 | Rsa1.0.04189.1 | 750 | 18584  | 0         | 408 | 420 | 97 +  | 336 | 747 | 10771  | 11190  |
| UN55997 | Rsa1.0.00108.1 | 733 | 478491 | 0         | 482 | 494 | 97 +  | 3   | 487 | 416398 | 416891 |
| UN55998 | Rsa1.0.19426.1 | 754 | 1434   | 0         | 612 | 686 | 89 +  | 8   | 691 | 381    | 1058   |
| UN55999 | Rsa1.0.00524.1 | 738 | 169613 | 1.00E-106 | 205 | 208 | 98 -  | 352 | 559 | 133897 | 134104 |
| UN56000 | Rsa1.0.00163.1 | 317 | 116847 | 2.00E-80  | 179 | 188 | 95 +  | 2   | 189 | 70399  | 70586  |
| UN56001 | Rsa1.0.32085.1 | 739 | 710    | 0         | 544 | 554 | 98 -  | 83  | 635 | 156    | 707    |
| UN56002 | Rsa1.0.00799.1 | 789 | 63918  | 1.00E-149 | 268 | 268 | 100 + | 3   | 270 | 18668  | 18935  |

|         |                |     |        |           |     |     |       |     |     |        |        |
|---------|----------------|-----|--------|-----------|-----|-----|-------|-----|-----|--------|--------|
| UN56003 | Rsa1.0.01112.1 | 586 | 310601 | 1.00E-159 | 302 | 308 | 98 +  | 279 | 586 | 45495  | 45802  |
| UN56004 | Rsa1.0.03826.1 | 743 | 20614  | 1.00E-116 | 247 | 256 | 96 +  | 3   | 257 | 13359  | 13607  |
| UN56005 | Rsa1.0.00151.1 | 803 | 119541 | 0         | 535 | 541 | 98 -  | 183 | 719 | 47530  | 48070  |
| UN56006 | Rsa1.0.03100.1 | 687 | 25411  | 0         | 400 | 412 | 97 +  | 50  | 460 | 17252  | 17663  |
| UN56007 | Rsa1.0.00123.1 | 757 | 325650 | 1.00E-134 | 242 | 242 | 100 - | 332 | 573 | 91636  | 91877  |
| UN56008 | Rsa1.0.00138.1 | 639 | 247040 | 1.00E-155 | 310 | 321 | 96 -  | 62  | 382 | 64744  | 65064  |
| UN56009 | Rsa1.0.00015.1 | 750 | 561803 | 1.00E-161 | 311 | 318 | 97 +  | 272 | 589 | 445991 | 446305 |
| UN56010 | Rsa1.0.00471.1 | 267 | 81897  | 1.00E-124 | 229 | 230 | 99 +  | 38  | 267 | 26770  | 26999  |
| UN56011 | Rsa1.0.00583.1 | 768 | 74309  | 0         | 431 | 457 | 94 +  | 293 | 730 | 2732   | 3187   |
| UN56012 | Rsa1.0.00967.1 | 585 | 58049  | 0         | 504 | 506 | 99 -  | 75  | 580 | 7714   | 8217   |
| UN56013 | Rsa1.0.00292.1 | 756 | 98141  | 2.00E-79  | 227 | 245 | 92 +  | 487 | 727 | 6664   | 6904   |
| UN56014 | Rsa1.0.22290.1 | 682 | 1133   | 0         | 535 | 549 | 97 -  | 135 | 682 | 239    | 786    |
| UN56015 | Rsa1.0.02601.1 | 743 | 29654  | 0         | 427 | 441 | 96 +  | 32  | 472 | 3968   | 4408   |
| UN56016 | Rsa1.0.00720.1 | 686 | 66931  | 0         | 324 | 325 | 99 +  | 3   | 327 | 31878  | 32202  |
| UN56017 | Rsa1.0.00092.1 | 645 | 659932 | 0         | 595 | 636 | 93 +  | 10  | 645 | 334744 | 335370 |
| UN56018 | Rsa1.0.01070.1 | 758 | 55099  | 1.00E-43  | 91  | 91  | 100 - | 518 | 608 | 32444  | 32534  |
| UN56019 | Rsa1.0.02675.1 | 480 | 28852  | 0         | 357 | 369 | 96 +  | 1   | 369 | 11021  | 11389  |
| UN56020 | Rsa1.0.00417.1 | 485 | 395068 | 1.00E-149 | 332 | 355 | 93 -  | 134 | 485 | 387292 | 387634 |
| UN56021 | Rsa1.0.02681.1 | 806 | 28711  | 1.00E-37  | 250 | 305 | 81 +  | 403 | 706 | 3147   | 3451   |
| UN56022 | Rsa1.0.00469.1 | 271 | 82084  | 6.00E-55  | 118 | 121 | 97 -  | 96  | 216 | 46066  | 46186  |
| UN56023 | Rsa1.0.00846.1 | 220 | 62342  | 1.00E-111 | 216 | 220 | 98 -  | 1   | 220 | 32968  | 33187  |
| UN56024 | Rsa1.0.10663.1 | 543 | 5765   | 0         | 530 | 542 | 97 -  | 4   | 543 | 4958   | 5499   |
| UN56025 | Rsa1.0.00058.1 | 497 | 159921 | 4.00E-79  | 156 | 158 | 98 +  | 3   | 160 | 91209  | 91366  |
| UN56026 | Rsa1.0.01061.1 | 633 | 55349  | 5.00E-73  | 212 | 236 | 89 -  | 233 | 468 | 22509  | 22744  |
| UN56027 | Rsa1.0.05278.1 | 580 | 14282  | 0         | 403 | 420 | 95 -  | 174 | 580 | 9061   | 9480   |
| UN56028 | Rsa1.0.00006.1 | 691 | 396176 | 5.00E-64  | 143 | 149 | 95 -  | 178 | 326 | 305430 | 305578 |
| UN56029 | Rsa1.0.02068.1 | 666 | 35432  | 1.00E-177 | 360 | 373 | 96 +  | 156 | 525 | 7159   | 7530   |
| UN56030 | Rsa1.0.01146.1 | 542 | 163455 | 0         | 522 | 535 | 97 -  | 1   | 535 | 143229 | 143763 |
| UN56031 | Rsa1.0.01327.1 | 641 | 48033  | 0         | 608 | 638 | 95 +  | 5   | 641 | 12111  | 12748  |
| UN56032 | Rsa1.0.00050.1 | 428 | 237174 | 6.00E-78  | 148 | 148 | 100 - | 97  | 244 | 97298  | 97445  |
| UN56033 | Rsa1.0.29040.1 | 639 | 794    | 0         | 448 | 448 | 100 + | 2   | 449 | 198    | 645    |
| UN56034 | Rsa1.0.00048.1 | 647 | 167185 | 1.00E-131 | 353 | 387 | 91 +  | 3   | 377 | 147921 | 148303 |
| UN56035 | Rsa1.0.00213.1 | 691 | 108167 | 0         | 631 | 665 | 94 +  | 30  | 691 | 6711   | 7367   |
| UN56036 | Rsa1.0.03178.1 | 615 | 24798  | 1.00E-95  | 199 | 205 | 97 +  | 255 | 457 | 7251   | 7455   |
| UN56037 | Rsa1.0.01719.1 | 668 | 40388  | 0         | 391 | 395 | 98 +  | 3   | 393 | 20724  | 21118  |
| UN56038 | Rsa1.0.03524.1 | 623 | 22297  | 1.00E-128 | 245 | 249 | 98 +  | 210 | 458 | 17219  | 17467  |
| UN56039 | Rsa1.0.01723.1 | 733 | 40318  | 0         | 480 | 485 | 98 +  | 4   | 488 | 26832  | 27315  |
| UN56040 | Rsa1.0.00033.1 | 639 | 515811 | 0         | 611 | 641 | 95 -  | 2   | 639 | 393481 | 394120 |
| UN56041 | Rsa1.0.01867.1 | 719 | 37960  | 0         | 431 | 448 | 96 -  | 271 | 715 | 19616  | 20063  |

|         |                |     |        |           |     |     |       |     |     |        |        |
|---------|----------------|-----|--------|-----------|-----|-----|-------|-----|-----|--------|--------|
| UN56042 | Rsa1.0.02634.1 | 575 | 29299  | 0         | 362 | 363 | 99 -  | 1   | 363 | 18717  | 19079  |
| UN56043 | Rsa1.0.05160.1 | 673 | 14637  | 0         | 538 | 562 | 95 +  | 125 | 673 | 10046  | 10607  |
| UN56044 | Rsa1.0.01151.1 | 524 | 52268  | 0         | 341 | 347 | 98 -  | 178 | 524 | 26295  | 26641  |
| UN56045 | Rsa1.0.00759.1 | 610 | 65465  | 9.00E-87  | 214 | 231 | 92 -  | 3   | 233 | 47411  | 47641  |
| UN56046 | Rsa1.0.01004.1 | 751 | 56975  | 1.00E-151 | 296 | 304 | 97 -  | 323 | 626 | 20064  | 20367  |
| UN56047 | Rsa1.0.00325.1 | 715 | 95371  | 1.00E-100 | 254 | 276 | 92 +  | 341 | 616 | 79215  | 79487  |
| UN56048 | Rsa1.0.05482.1 | 666 | 13595  | 1.00E-147 | 268 | 269 | 99 -  | 350 | 618 | 4648   | 4916   |
| UN56049 | Rsa1.0.12385.1 | 731 | 5240   | 1.00E-113 | 216 | 219 | 98 +  | 167 | 385 | 4649   | 4867   |
| UN56050 | Rsa1.0.03898.1 | 637 | 20183  | 1.00E-137 | 366 | 406 | 90 +  | 2   | 392 | 6971   | 7375   |
| UN56051 | Rsa1.0.03324.1 | 738 | 23732  | 0         | 378 | 382 | 98 +  | 360 | 738 | 474    | 855    |
| UN56052 | Rsa1.0.55343.1 | 729 | 413    | 8.00E-63  | 123 | 123 | 100 - | 258 | 380 | 124    | 246    |
| UN56053 | Rsa1.0.02686.1 | 719 | 28666  | 0         | 392 | 405 | 96 +  | 311 | 712 | 6729   | 7133   |
| UN56054 | Rsa1.0.00170.1 | 681 | 179538 | 0         | 575 | 578 | 99 -  | 3   | 580 | 142903 | 143480 |
| UN56055 | Rsa1.0.05865.1 | 726 | 12377  | 0         | 721 | 725 | 99 -  | 2   | 725 | 9637   | 10360  |
| UN56056 | Rsa1.0.00827.1 | 581 | 62790  | 0         | 414 | 435 | 95 +  | 4   | 438 | 21834  | 22268  |
| UN56057 | Rsa1.0.00024.1 | 144 | 188018 | 8.00E-16  | 79  | 91  | 86 -  | 54  | 144 | 108565 | 108655 |
| UN56058 | Rsa1.0.00688.1 | 833 | 68396  | 0         | 556 | 598 | 92 -  | 19  | 616 | 37596  | 38179  |
| UN56059 | Rsa1.0.01679.1 | 302 | 146876 | 4.00E-41  | 104 | 110 | 94 +  | 23  | 132 | 135351 | 135460 |
| UN56060 | Rsa1.0.00008.1 | 103 | 358124 | 2.00E-12  | 52  | 57  | 91 -  | 44  | 100 | 225969 | 226025 |
| UN56061 | Rsa1.0.01319.1 | 465 | 48273  | 0         | 449 | 468 | 95 +  | 1   | 465 | 16311  | 16778  |
| UN56062 | Rsa1.0.00004.1 | 686 | 253996 | 0         | 680 | 686 | 99 -  | 1   | 686 | 209153 | 209838 |
| UN56063 | Rsa1.0.04991.1 | 202 | 15215  | 3.00E-53  | 130 | 134 | 97 -  | 72  | 202 | 9425   | 9558   |
| UN56064 | Rsa1.0.00005.1 | 844 | 353093 | 1.00E-126 | 242 | 246 | 98 -  | 374 | 619 | 70408  | 70653  |
| UN56065 | Rsa1.0.00224.1 | 501 | 327530 | 1.00E-88  | 215 | 227 | 94 +  | 54  | 277 | 178415 | 178637 |
| UN56066 | Rsa1.0.03769.1 | 538 | 20955  | 1.00E-127 | 280 | 295 | 94 -  | 20  | 314 | 9840   | 10133  |
| UN56067 | Rsa1.0.00143.1 | 881 | 121313 | 0         | 868 | 879 | 98 -  | 1   | 878 | 47007  | 47885  |
| UN56068 | Rsa1.0.00055.1 | 514 | 520193 | 0         | 500 | 516 | 96 -  | 1   | 514 | 164016 | 164531 |
| UN56069 | Rsa1.0.01420.1 | 628 | 46210  | 1.00E-126 | 229 | 229 | 100 - | 384 | 612 | 8012   | 8240   |
| UN56070 | Rsa1.0.01170.1 | 541 | 161131 | 2.00E-35  | 98  | 105 | 93 -  | 309 | 413 | 131666 | 131770 |
| UN56071 | Rsa1.0.08498.1 | 197 | 7270   | 1.00E-86  | 189 | 196 | 96 +  | 4   | 197 | 5546   | 5739   |
| UN56072 | Rsa1.0.00964.1 | 438 | 316648 | 1.00E-131 | 312 | 337 | 92 +  | 1   | 337 | 161994 | 162320 |
| UN56073 | Rsa1.0.00329.1 | 711 | 222544 | 0         | 596 | 618 | 96 -  | 1   | 614 | 20375  | 20990  |
| UN56074 | Rsa1.0.00656.1 | 223 | 69968  | 7.00E-45  | 113 | 120 | 94 +  | 86  | 205 | 45749  | 45868  |
| UN56075 | Rsa1.0.02557.1 | 315 | 30127  | 5.00E-90  | 272 | 306 | 88 -  | 4   | 305 | 6193   | 6484   |
| UN56076 | Rsa1.0.00228.1 | 229 | 105511 | 1.00E-86  | 180 | 186 | 96 +  | 1   | 186 | 13360  | 13545  |
| UN56077 | #              | #   | #      | #         | #   | #   | #     | #   | #   | #      | #      |
| UN56078 | Rsa1.0.05194.1 | 770 | 14536  | 0         | 387 | 399 | 96 -  | 372 | 770 | 12451  | 12849  |
| UN56079 | Rsa1.0.00275.1 | 352 | 210104 | 1.00E-38  | 85  | 86  | 98 -  | 84  | 169 | 157078 | 157163 |
| UN56080 | Rsa1.0.07877.1 | 847 | 8373   | 1.00E-168 | 316 | 320 | 98 -  | 3   | 322 | 1997   | 2315   |



|         |                |     |        |           |     |     |       |     |     |        |        |
|---------|----------------|-----|--------|-----------|-----|-----|-------|-----|-----|--------|--------|
| UN56081 | Rsa1.0.00280.1 | 443 | 99966  | 0         | 425 | 443 | 95 +  | 1   | 443 | 15027  | 15469  |
| UN56082 | Rsa1.0.02096.1 | 285 | 35041  | 1.00E-124 | 270 | 285 | 94 -  | 1   | 285 | 4854   | 5138   |
| UN56083 | Rsa1.0.00959.1 | 569 | 58202  | 0         | 521 | 533 | 97 -  | 2   | 533 | 11839  | 12370  |
| UN56084 | Rsa1.0.00964.1 | 788 | 316648 | 0         | 776 | 789 | 98 -  | 1   | 788 | 292633 | 293418 |
| UN56085 | Rsa1.0.00068.1 | 519 | 151813 | 0         | 429 | 461 | 93 +  | 59  | 519 | 97289  | 97749  |
| UN56086 | Rsa1.0.13906.1 | 837 | 4114   | 1.00E-120 | 294 | 321 | 91 +  | 223 | 543 | 1559   | 1858   |
| UN56087 | Rsa1.0.01778.1 | 494 | 39509  | 1.00E-132 | 296 | 311 | 95 -  | 3   | 308 | 9400   | 9707   |
| UN56088 | #              | #   | #      | #         | #   | #   | #     | #   | #   | #      | #      |
| UN56089 | Rsa1.0.04142.1 | 203 | 18861  | 1.00E-109 | 202 | 203 | 99 +  | 1   | 203 | 9838   | 10040  |
| UN56090 | Rsa1.0.03759.1 | 928 | 20987  | 0         | 720 | 731 | 98 -  | 2   | 732 | 13856  | 14583  |
| UN56091 | Rsa1.0.01586.1 | 522 | 42804  | 1.00E-155 | 442 | 496 | 89 +  | 1   | 494 | 36683  | 37178  |
| UN56092 | Rsa1.0.02034.1 | 854 | 35823  | 2.00E-23  | 96  | 109 | 88 +  | 723 | 831 | 33957  | 34065  |
| UN56093 | Rsa1.0.03302.1 | 512 | 23898  | 1.00E-124 | 249 | 257 | 96 +  | 1   | 257 | 11743  | 11999  |
| UN56094 | Rsa1.0.00055.1 | 737 | 520193 | 0         | 492 | 509 | 96 -  | 229 | 737 | 198670 | 199178 |
| UN56095 | Rsa1.0.00539.1 | 548 | 76926  | 1.00E-175 | 353 | 367 | 96 +  | 1   | 367 | 57284  | 57650  |
| UN56096 | Rsa1.0.13604.1 | 644 | 4657   | 1.00E-109 | 213 | 217 | 98 +  | 1   | 217 | 2043   | 2259   |
| UN56097 | Rsa1.0.16384.1 | 526 | 2170   | 2.00E-87  | 167 | 168 | 99 -  | 3   | 170 | 507    | 674    |
| UN56098 | Rsa1.0.01606.1 | 609 | 42432  | 0         | 364 | 368 | 98 +  | 1   | 368 | 21903  | 22270  |
| UN56099 | Rsa1.0.03547.1 | 809 | 22167  | 0         | 688 | 690 | 99 +  | 1   | 690 | 10269  | 10958  |
| UN56100 | Rsa1.0.01606.1 | 637 | 42432  | 6.00E-17  | 105 | 120 | 87 -  | 53  | 167 | 35817  | 35935  |
| UN56101 | Rsa1.0.00722.1 | 629 | 66840  | 1.00E-157 | 301 | 307 | 98 +  | 326 | 629 | 15919  | 16225  |
| UN56102 | Rsa1.0.00205.1 | 409 | 193401 | 4.00E-88  | 177 | 181 | 97 +  | 208 | 388 | 14110  | 14290  |
| UN56103 | Rsa1.0.00213.1 | 113 | 108167 | 5.00E-35  | 84  | 87  | 96 +  | 1   | 87  | 15070  | 15156  |
| UN56104 | Rsa1.0.16978.1 | 537 | 1964   | 1.00E-70  | 207 | 228 | 90 -  | 4   | 229 | 1215   | 1442   |
| UN56105 | Rsa1.0.01691.1 | 290 | 40921  | 4.00E-81  | 227 | 249 | 91 +  | 1   | 247 | 15358  | 15606  |
| UN56106 | Rsa1.0.00006.1 | 441 | 396176 | 1.00E-159 | 312 | 321 | 97 +  | 1   | 321 | 303043 | 303363 |
| UN56107 | Rsa1.0.08007.1 | 338 | 8087   | 4.00E-72  | 138 | 138 | 100 + | 201 | 338 | 6977   | 7114   |
| UN56108 | Rsa1.0.00239.1 | 361 | 104332 | 3.00E-88  | 171 | 173 | 98 +  | 1   | 173 | 103861 | 104033 |
| UN56109 | Rsa1.0.00737.1 | 535 | 66432  | 2.00E-99  | 247 | 266 | 92 -  | 7   | 270 | 25538  | 25801  |
| UN56110 | Rsa1.0.00923.1 | 272 | 153678 | 2.00E-88  | 248 | 275 | 90 -  | 1   | 272 | 45995  | 46269  |
| UN56111 | Rsa1.0.00286.1 | 203 | 98709  | 3.00E-56  | 139 | 147 | 94 +  | 58  | 203 | 27156  | 27302  |
| UN56112 | Rsa1.0.00116.1 | 264 | 365886 | 2.00E-30  | 74  | 76  | 97 +  | 93  | 168 | 189697 | 189772 |
| UN56113 | Rsa1.0.00224.1 | 108 | 327530 | 3.00E-42  | 102 | 107 | 95 -  | 2   | 108 | 195813 | 195919 |
| UN56114 | Rsa1.0.00752.1 | 181 | 65756  | 3.00E-56  | 126 | 131 | 96 -  | 7   | 137 | 32618  | 32748  |
| UN56115 | Rsa1.0.15243.1 | 533 | 2733   | 0         | 502 | 531 | 94 -  | 1   | 531 | 2092   | 2620   |
| UN56116 | Rsa1.0.09343.1 | 863 | 6439   | 1.00E-141 | 371 | 409 | 90 +  | 1   | 387 | 4288   | 4696   |
| UN56117 | #              | #   | #      | #         | #   | #   | #     | #   | #   | #      | #      |
| UN56118 | Rsa1.0.00502.1 | 821 | 204180 | 1.00E-126 | 259 | 269 | 96 -  | 348 | 616 | 71543  | 71811  |
| UN56119 | Rsa1.0.00920.1 | 627 | 601703 | 1.00E-117 | 214 | 214 | 100 + | 1   | 214 | 447582 | 447795 |

|         |                |     |        |           |     |     |       |     |     |        |        |
|---------|----------------|-----|--------|-----------|-----|-----|-------|-----|-----|--------|--------|
| UN56120 | Rsa1.0_15639.1 | 490 | 2510   | 0         | 365 | 374 | 97 +  | 1   | 374 | 184    | 557    |
| UN56121 | Rsa1.0_03460.1 | 633 | 22747  | 1.00E-136 | 270 | 276 | 97 -  | 1   | 273 | 5713   | 5987   |
| UN56122 | Rsa1.0_46715.1 | 656 | 483    | 1.00E-125 | 228 | 228 | 100 + | 362 | 589 | 184    | 411    |
| UN56123 | Rsa1.0_00019.1 | 550 | 301669 | 1.00E-135 | 361 | 398 | 90 -  | 167 | 550 | 114023 | 114420 |
| UN56124 | Rsa1.0_01859.1 | 634 | 38073  | 0         | 622 | 631 | 98 -  | 4   | 634 | 11140  | 11769  |
| UN56125 | Rsa1.0_00052.1 | 765 | 162771 | 0         | 651 | 708 | 91 -  | 70  | 765 | 122698 | 123393 |
| UN56126 | Rsa1.0_02930.1 | 528 | 26668  | 0         | 449 | 454 | 98 +  | 2   | 454 | 1699   | 2152   |
| UN56127 | Rsa1.0_00097.1 | 125 | 138858 | 3.00E-33  | 112 | 124 | 90 -  | 1   | 124 | 92534  | 92656  |
| UN56128 | Rsa1.0_02224.1 | 776 | 33758  | 1.00E-123 | 252 | 259 | 97 +  | 3   | 259 | 26765  | 27022  |
| UN56129 | Rsa1.0_01000.1 | 746 | 57140  | 0         | 745 | 746 | 99 +  | 1   | 746 | 53347  | 54092  |
| UN56130 | Rsa1.0_01388.1 | 799 | 46741  | 3.00E-78  | 152 | 153 | 99 -  | 361 | 513 | 22025  | 22177  |
| UN56131 | Rsa1.0_01053.1 | 648 | 55483  | 0         | 644 | 648 | 99 +  | 1   | 648 | 39245  | 39892  |
| UN56132 | Rsa1.0_01638.1 | 943 | 41857  | 1.00E-170 | 331 | 339 | 97 -  | 406 | 743 | 36262  | 36600  |
| UN56133 | Rsa1.0_17382.1 | 477 | 1845   | 2.00E-81  | 169 | 174 | 97 +  | 7   | 180 | 1593   | 1766   |
| UN56134 | Rsa1.0_02213.1 | 789 | 33824  | 0         | 475 | 476 | 99 +  | 1   | 476 | 28386  | 28861  |
| UN56135 | Rsa1.0_03469.1 | 347 | 22681  | 1.00E-129 | 310 | 335 | 92 -  | 1   | 335 | 11412  | 11743  |
| UN56136 | Rsa1.0_05805.1 | 843 | 12585  | 0         | 834 | 836 | 99 +  | 1   | 836 | 181    | 1016   |
| UN56137 | Rsa1.0_01092.1 | 668 | 54348  | 0         | 648 | 668 | 97 -  | 1   | 668 | 13223  | 13889  |
| UN56138 | Rsa1.0_03005.1 | 792 | 26082  | 2.33E-156 | 269 | 271 | 99 -  | 1   | 271 | 19087  | 19357  |
| UN56139 | Rsa1.0_00130.1 | 176 | 125737 | 3.00E-34  | 83  | 86  | 96 +  | 91  | 176 | 38687  | 38772  |
| UN56140 | Rsa1.0_01110.1 | 842 | 195852 | 1.00E-127 | 260 | 267 | 97 +  | 10  | 276 | 173590 | 173854 |
| UN56141 | Rsa1.0_01252.1 | 769 | 49847  | 0         | 340 | 344 | 98 +  | 1   | 344 | 38178  | 38521  |
| UN56142 | Rsa1.0_04630.1 | 531 | 16595  | 1.00E-173 | 357 | 371 | 96 +  | 1   | 369 | 14525  | 14895  |
| UN56143 | Rsa1.0_04288.1 | 862 | 18077  | 0         | 507 | 511 | 99 +  | 3   | 513 | 6604   | 7114   |
| UN56144 | Rsa1.0_31312.1 | 203 | 730    | 2.00E-60  | 136 | 141 | 96 -  | 1   | 141 | 151    | 289    |
| UN56145 | Rsa1.0_00288.1 | 897 | 98659  | 0         | 348 | 351 | 99 -  | 1   | 350 | 52520  | 52869  |
| UN56146 | Rsa1.0_00213.1 | 602 | 108167 | 0         | 451 | 480 | 93 -  | 8   | 478 | 11292  | 11769  |
| UN56147 | Rsa1.0_01456.1 | 188 | 45372  | 2.00E-48  | 113 | 118 | 95 +  | 71  | 188 | 27459  | 27576  |
| UN56148 | Rsa1.0_00066.1 | 784 | 152418 | 1.00E-128 | 247 | 252 | 98 +  | 369 | 620 | 106778 | 107029 |
| UN56149 | Rsa1.0_00750.1 | 787 | 190548 | 0         | 774 | 789 | 98 -  | 1   | 787 | 18058  | 18844  |
| UN56150 | Rsa1.0_00062.1 | 477 | 299291 | 0         | 464 | 472 | 98 -  | 3   | 474 | 269117 | 269588 |
| UN56151 | Rsa1.0_00709.1 | 548 | 67329  | 0         | 525 | 540 | 97 +  | 9   | 548 | 64594  | 65133  |
| UN56152 | Rsa1.0_00207.1 | 540 | 248736 | 0         | 520 | 537 | 96 +  | 1   | 537 | 194311 | 194847 |
| UN56153 | Rsa1.0_00287.1 | 567 | 98687  | 1.00E-70  | 222 | 253 | 87 +  | 1   | 237 | 12837  | 13088  |
| UN56154 | Rsa1.0_01337.1 | 185 | 47829  | 9.00E-75  | 176 | 186 | 94 +  | 1   | 185 | 40145  | 40330  |
| UN56155 | Rsa1.0_04925.1 | 764 | 15424  | 0         | 579 | 598 | 96 +  | 168 | 764 | 456    | 1053   |
| UN56156 | Rsa1.0_03263.1 | 921 | 24268  | 0         | 889 | 926 | 96 +  | 1   | 921 | 21907  | 22829  |
| UN56157 | Rsa1.0_00881.1 | 530 | 61260  | 1.00E-103 | 275 | 299 | 91 -  | 1   | 287 | 20053  | 20350  |
| UN56158 | Rsa1.0_03178.1 | 160 | 24798  | 2.00E-60  | 133 | 138 | 96 -  | 19  | 156 | 16509  | 16646  |

|         |                |     |        |           |     |     |       |     |     |        |        |
|---------|----------------|-----|--------|-----------|-----|-----|-------|-----|-----|--------|--------|
| UN56159 | Rsa1.0.00078.1 | 451 | 175053 | 0         | 409 | 413 | 99 -  | 1   | 413 | 52479  | 52890  |
| UN56160 | Rsa1.0.01219.1 | 624 | 50527  | 1.00E-148 | 305 | 318 | 95 -  | 166 | 483 | 25973  | 26290  |
| UN56161 | Rsa1.0.22803.1 | 411 | 1093   | 1.00E-108 | 208 | 211 | 98 +  | 1   | 211 | 258    | 468    |
| UN56162 | Rsa1.0.69052.1 | 170 | 332    | 4.00E-64  | 154 | 164 | 93 +  | 7   | 170 | 16     | 179    |
| UN56163 | Rsa1.0.02915.1 | 600 | 26813  | 0         | 597 | 607 | 98 +  | 1   | 600 | 7821   | 8427   |
| UN56164 | Rsa1.0.01280.1 | 126 | 49321  | 2.00E-53  | 121 | 126 | 96 -  | 1   | 126 | 29724  | 29849  |
| UN56165 | Rsa1.0.05595.1 | 457 | 13228  | 1.00E-154 | 328 | 343 | 95 +  | 1   | 343 | 3249   | 3588   |
| UN56166 | Rsa1.0.00387.1 | 655 | 495407 | 0         | 582 | 590 | 98 -  | 2   | 588 | 17196  | 17785  |
| UN56167 | Rsa1.0.00065.1 | 679 | 454616 | 1.00E-155 | 296 | 302 | 98 +  | 300 | 601 | 231797 | 232098 |
| UN56168 | Rsa1.0.00966.1 | 891 | 58136  | 0         | 430 | 440 | 97 +  | 1   | 440 | 7779   | 8218   |
| UN56169 | Rsa1.0.03618.1 | 753 | 21744  | 1.00E-165 | 345 | 362 | 95 -  | 1   | 362 | 967    | 1328   |
| UN56170 | Rsa1.0.01046.1 | 654 | 152989 | 0         | 412 | 416 | 99 -  | 1   | 415 | 139680 | 140095 |
| UN56171 | Rsa1.0.04286.1 | 145 | 18084  | 1.00E-48  | 139 | 149 | 93 -  | 1   | 145 | 2253   | 2401   |
| UN56172 | Rsa1.0.00352.1 | 802 | 92266  | 0         | 728 | 737 | 98 +  | 66  | 802 | 31653  | 32389  |
| UN56173 | Rsa1.0.00381.1 | 563 | 89718  | 1.00E-148 | 278 | 282 | 98 -  | 280 | 561 | 63833  | 64114  |
| UN56174 | Rsa1.0.03728.1 | 688 | 21147  | 1.00E-111 | 213 | 216 | 98 -  | 338 | 553 | 14130  | 14345  |
| UN56175 | Rsa1.0.00554.1 | 781 | 150953 | 0         | 615 | 672 | 91 -  | 120 | 780 | 148059 | 148726 |
| UN56176 | Rsa1.0.02096.1 | 278 | 35041  | 1.00E-147 | 273 | 276 | 98 +  | 1   | 276 | 16496  | 16771  |
| UN56177 | Rsa1.0.00297.1 | 741 | 97836  | 0         | 738 | 741 | 99 +  | 1   | 741 | 84698  | 85438  |
| UN56178 | Rsa1.0.00202.1 | 394 | 185895 | 4.00E-97  | 207 | 216 | 95 -  | 179 | 394 | 11698  | 11913  |
| UN56179 | Rsa1.0.06253.1 | 844 | 11385  | 2.00E-64  | 126 | 126 | 100 + | 262 | 387 | 10879  | 11004  |
| UN56180 | Rsa1.0.07542.1 | 715 | 9160   | 0         | 396 | 402 | 98 +  | 314 | 715 | 6682   | 7082   |
| UN56181 | Rsa1.0.01041.1 | 217 | 55910  | 5.00E-58  | 134 | 138 | 97 +  | 31  | 168 | 26870  | 27005  |
| UN56182 | Rsa1.0.04396.1 | 141 | 17561  | 2.00E-44  | 124 | 135 | 91 -  | 4   | 138 | 17424  | 17558  |
| UN56183 | Rsa1.0.01327.1 | 822 | 48033  | 0         | 788 | 820 | 96 -  | 4   | 822 | 13205  | 14022  |
| UN56184 | Rsa1.0.75322.1 | 124 | 304    | 6.00E-50  | 118 | 124 | 95 +  | 1   | 124 | 96     | 219    |
| UN56185 | Rsa1.0.00823.1 | 502 | 62889  | 1.00E-162 | 305 | 310 | 98 +  | 193 | 502 | 45308  | 45617  |
| UN56186 | Rsa1.0.00048.1 | 677 | 167185 | 7.00E-54  | 120 | 124 | 96 -  | 554 | 677 | 149947 | 150070 |
| UN56187 | Rsa1.0.02144.1 | 747 | 34630  | 1.00E-128 | 251 | 257 | 97 +  | 253 | 509 | 20521  | 20777  |
| UN56188 | Rsa1.0.55032.1 | 748 | 415    | 1.00E-171 | 347 | 360 | 96 +  | 1   | 359 | 56     | 415    |
| UN56189 | Rsa1.0.05823.1 | 129 | 12521  | 1.00E-51  | 121 | 127 | 95 +  | 3   | 129 | 7220   | 7346   |
| UN56190 | Rsa1.0.06168.1 | 742 | 11580  | 1.00E-129 | 259 | 266 | 97 -  | 209 | 474 | 8500   | 8764   |
| UN56191 | Rsa1.0.00234.1 | 603 | 197060 | 0         | 583 | 605 | 96 -  | 1   | 603 | 56750  | 57354  |
| UN56192 | Rsa1.0.01867.1 | 170 | 37960  | 2.00E-26  | 70  | 73  | 95 +  | 64  | 136 | 18769  | 18841  |
| UN56193 | Rsa1.0.05160.1 | 316 | 14637  | 1.00E-90  | 191 | 197 | 96 -  | 6   | 201 | 11614  | 11810  |
| UN56194 | Rsa1.0.00090.1 | 742 | 273859 | 0         | 682 | 715 | 95 -  | 10  | 721 | 232436 | 233136 |
| UN56195 | Rsa1.0.01004.1 | 660 | 56975  | 0         | 538 | 590 | 91 +  | 20  | 599 | 18969  | 19547  |
| UN56196 | Rsa1.0.03898.1 | 654 | 20183  | 0         | 596 | 631 | 94 -  | 3   | 633 | 8350   | 8978   |
| UN56197 | Rsa1.0.00653.1 | 652 | 70029  | 1.00E-137 | 297 | 312 | 95 -  | 1   | 311 | 41467  | 41774  |

|         |                |     |        |           |     |     |       |     |     |        |        |
|---------|----------------|-----|--------|-----------|-----|-----|-------|-----|-----|--------|--------|
| UN56198 | Rsa1.0.00769.1 | 149 | 64911  | 1.00E-17  | 97  | 112 | 86 -  | 42  | 149 | 12349  | 12460  |
| UN56199 | Rsa1.0.76581.1 | 798 | 300    | 1.00E-160 | 295 | 298 | 98 -  | 16  | 313 | 3      | 300    |
| UN56200 | Rsa1.0.00290.1 | 565 | 225096 | 1.00E-135 | 297 | 312 | 95 -  | 34  | 342 | 190482 | 190793 |
| UN56201 | Rsa1.0.04571.1 | 161 | 16792  | 4.00E-55  | 145 | 157 | 92 +  | 1   | 157 | 10598  | 10754  |
| UN56202 | Rsa1.0.03721.1 | 821 | 21185  | 1.00E-123 | 224 | 224 | 100 + | 1   | 224 | 20923  | 21146  |
| UN56203 | Rsa1.0.02239.1 | 520 | 33534  | 5.00E-85  | 208 | 222 | 93 -  | 40  | 257 | 28204  | 28425  |
| UN56204 | Rsa1.0.05865.1 | 633 | 12377  | 0         | 630 | 633 | 99 +  | 1   | 633 | 8490   | 9122   |
| UN56205 | Rsa1.0.00292.1 | 399 | 98141  | 3.00E-70  | 239 | 269 | 88 -  | 1   | 267 | 6664   | 6928   |
| UN56206 | Rsa1.0.00066.1 | 313 | 152418 | 1.00E-96  | 276 | 307 | 89 -  | 8   | 313 | 112364 | 112670 |
| UN56207 | Rsa1.0.00022.1 | 795 | 200461 | 0         | 508 | 523 | 97 +  | 267 | 788 | 79511  | 80033  |
| UN56208 | Rsa1.0.00539.1 | 740 | 76926  | 1.00E-134 | 285 | 297 | 95 -  | 4   | 300 | 28381  | 28673  |
| UN56209 | Rsa1.0.07440.1 | 360 | 9389   | 1.00E-148 | 320 | 334 | 95 -  | 29  | 360 | 5007   | 5339   |
| UN56210 | Rsa1.0.00025.1 | 887 | 277312 | 0         | 601 | 622 | 96 +  | 97  | 716 | 17843  | 18461  |
| UN56211 | Rsa1.0.00168.1 | 795 | 115870 | 0         | 753 | 807 | 93 -  | 2   | 786 | 94341  | 95137  |
| UN56212 | Rsa1.0.04189.1 | 830 | 18584  | 0         | 438 | 446 | 98 -  | 1   | 446 | 11571  | 12016  |
| UN56213 | Rsa1.0.01958.1 | 459 | 261128 | 1.00E-174 | 435 | 475 | 91 +  | 2   | 459 | 119242 | 119713 |
| UN56214 | Rsa1.0.04418.1 | 745 | 17434  | 1.00E-74  | 146 | 147 | 99 -  | 228 | 374 | 13307  | 13453  |
| UN56215 | Rsa1.0.01596.1 | 858 | 42595  | 1.00E-121 | 227 | 229 | 99 -  | 1   | 229 | 40410  | 40638  |
| UN56216 | Rsa1.0.00557.1 | 461 | 75865  | 1.00E-124 | 313 | 342 | 91 -  | 10  | 351 | 69508  | 69849  |
| UN56217 | Rsa1.0.03244.1 | 562 | 24413  | 1.00E-103 | 202 | 206 | 98 +  | 319 | 524 | 22141  | 22346  |
| UN56218 | Rsa1.0.03100.1 | 857 | 25411  | 0         | 404 | 411 | 98 -  | 1   | 410 | 19134  | 19544  |
| UN56219 | Rsa1.0.00547.1 | 780 | 76521  | 1.00E-141 | 312 | 326 | 95 -  | 1   | 321 | 60981  | 61301  |
| UN56220 | Rsa1.0.00097.1 | 854 | 138858 | 4.00E-59  | 129 | 133 | 96 -  | 240 | 372 | 136170 | 136302 |
| UN56221 | Rsa1.0.07846.1 | 709 | 8433   | 0         | 556 | 573 | 97 -  | 8   | 577 | 4180   | 4751   |
| UN56222 | #              | #   | #      | #         | #   | #   | #     | #   | #   | #      | #      |
| UN56223 | Rsa1.0.01857.1 | 343 | 38103  | 1.00E-161 | 329 | 343 | 95 +  | 1   | 343 | 12686  | 13028  |
| UN56224 | Rsa1.0.00843.1 | 626 | 62411  | 0         | 373 | 386 | 96 +  | 1   | 381 | 54124  | 54507  |
| UN56225 | Rsa1.0.02473.1 | 784 | 31083  | 2.00E-76  | 186 | 198 | 93 +  | 1   | 197 | 20469  | 20666  |
| UN56226 | Rsa1.0.00017.1 | 714 | 752458 | 0         | 574 | 576 | 99 -  | 1   | 576 | 34731  | 35306  |
| UN56227 | Rsa1.0.00002.1 | 484 | 601661 | 3.00E-83  | 181 | 189 | 95 +  | 171 | 359 | 94315  | 94503  |
| UN56228 | Rsa1.0.00419.1 | 735 | 86562  | 0         | 400 | 406 | 98 +  | 218 | 623 | 20613  | 21016  |
| UN56229 | Rsa1.0.05926.1 | 696 | 12220  | 0         | 687 | 696 | 98 +  | 1   | 696 | 9662   | 10357  |
| UN56230 | Rsa1.0.00055.1 | 813 | 520193 | 1.00E-95  | 289 | 324 | 89 +  | 214 | 533 | 5811   | 6134   |
| UN56231 | Rsa1.0.00876.1 | 813 | 61328  | 0         | 475 | 509 | 93 -  | 93  | 593 | 41244  | 41750  |
| UN56232 | Rsa1.0.00194.1 | 167 | 110851 | 1.00E-51  | 148 | 161 | 91 +  | 4   | 164 | 100117 | 100273 |
| UN56233 | Rsa1.0.01220.1 | 781 | 161775 | 0         | 434 | 440 | 98 -  | 338 | 777 | 24868  | 25307  |
| UN56234 | Rsa1.0.00163.1 | 238 | 116847 | 1.00E-123 | 232 | 235 | 98 +  | 1   | 235 | 49942  | 50176  |
| UN56235 | Rsa1.0.02372.1 | 130 | 32053  | 3.00E-58  | 126 | 130 | 96 +  | 1   | 130 | 28782  | 28911  |
| UN56236 | Rsa1.0.01221.1 | 602 | 50421  | 6.00E-97  | 297 | 338 | 87 -  | 12  | 328 | 49364  | 49696  |

|         |                |     |        |           |     |     |       |     |     |        |        |
|---------|----------------|-----|--------|-----------|-----|-----|-------|-----|-----|--------|--------|
| UN56237 | Rsa1.0.00676.1 | 737 | 69166  | 0         | 449 | 450 | 99 +  | 2   | 451 | 64510  | 64959  |
| UN56238 | Rsa1.0.01206.1 | 813 | 50772  | 0         | 358 | 358 | 100 + | 352 | 709 | 12349  | 12706  |
| UN56239 | Rsa1.0.05494.1 | 531 | 13547  | 1.00E-165 | 389 | 418 | 93 +  | 1   | 411 | 7684   | 8101   |
| UN56240 | Rsa1.0.00019.1 | 161 | 301669 | 1.00E-82  | 158 | 159 | 99 -  | 3   | 161 | 245809 | 245967 |
| UN56241 | Rsa1.0.15241.1 | 402 | 2734   | 1.00E-123 | 236 | 240 | 98 +  | 117 | 356 | 897    | 1136   |
| UN56242 | Rsa1.0.01934.1 | 520 | 37162  | 1.00E-134 | 350 | 382 | 91 +  | 6   | 385 | 3564   | 3939   |
| UN56243 | Rsa1.0.00273.1 | 170 | 326186 | 1.00E-42  | 152 | 170 | 89 -  | 3   | 167 | 45700  | 45869  |
| UN56244 | Rsa1.0.14100.1 | 717 | 3809   | 1.00E-173 | 414 | 446 | 92 +  | 3   | 443 | 617    | 1057   |
| UN56245 | Rsa1.0.01766.1 | 835 | 39617  | 0         | 351 | 356 | 98 +  | 201 | 555 | 30500  | 30852  |
| UN56246 | Rsa1.0.01377.1 | 814 | 46967  | 3.00E-78  | 158 | 161 | 98 +  | 302 | 462 | 176    | 336    |
| UN56247 | Rsa1.0.05847.1 | 828 | 12433  | 0         | 685 | 736 | 93 +  | 18  | 746 | 4469   | 5192   |
| UN56248 | Rsa1.0.05192.1 | 858 | 136195 | 0         | 496 | 499 | 99 -  | 1   | 499 | 124985 | 125483 |
| UN56249 | Rsa1.0.08630.1 | 101 | 7104   | 1.00E-32  | 86  | 91  | 94 -  | 1   | 91  | 6267   | 6357   |
| UN56250 | Rsa1.0.01600.1 | 137 | 42537  | 2.00E-38  | 123 | 137 | 89 +  | 1   | 137 | 8838   | 8974   |
| UN56251 | Rsa1.0.28106.1 | 249 | 827    | 3.00E-47  | 166 | 188 | 88 -  | 26  | 207 | 619    | 806    |
| UN56252 | Rsa1.0.00710.1 | 263 | 67325  | 4.00E-90  | 227 | 244 | 93 -  | 13  | 255 | 1773   | 2015   |
| UN56253 | Rsa1.0.01104.1 | 158 | 285480 | 2.00E-63  | 151 | 159 | 94 +  | 1   | 158 | 157734 | 157892 |
| UN56254 | Rsa1.0.03855.1 | 788 | 20429  | 1.00E-154 | 295 | 301 | 98 -  | 42  | 338 | 15602  | 15902  |
| UN56255 | Rsa1.0.00954.1 | 495 | 189536 | 1.00E-79  | 185 | 195 | 94 -  | 9   | 202 | 40588  | 40782  |
| UN56256 | Rsa1.0.03037.1 | 270 | 25825  | 1.00E-113 | 254 | 270 | 94 -  | 1   | 270 | 9682   | 9951   |
| UN56257 | Rsa1.0.00093.1 | 264 | 214962 | 7.00E-98  | 252 | 275 | 91 -  | 2   | 259 | 14083  | 14356  |
| UN56258 | Rsa1.0.01997.1 | 750 | 158416 | 2.33E-156 | 289 | 297 | 97 +  | 2   | 296 | 151801 | 152097 |
| UN56259 | Rsa1.0.00025.1 | 582 | 277312 | 0         | 406 | 414 | 98 -  | 1   | 413 | 131335 | 131748 |
| UN56260 | Rsa1.0.00056.1 | 721 | 332604 | 1.00E-120 | 295 | 318 | 92 -  | 1   | 314 | 94692  | 95009  |
| UN56261 | Rsa1.0.08909.1 | 403 | 6799   | 1.00E-63  | 229 | 258 | 88 -  | 1   | 250 | 5387   | 5640   |
| UN56262 | Rsa1.0.10407.1 | 697 | 5858   | 0         | 346 | 347 | 99 -  | 2   | 348 | 769    | 1115   |
| UN56263 | Rsa1.0.00163.1 | 819 | 116847 | 1.00E-138 | 510 | 591 | 86 -  | 1   | 566 | 71817  | 72394  |
| UN56264 | Rsa1.0.00425.1 | 536 | 147080 | 1.00E-147 | 301 | 313 | 96 +  | 1   | 313 | 120225 | 120537 |
| UN56265 | Rsa1.0.00586.1 | 822 | 163802 | 0         | 484 | 489 | 98 -  | 1   | 489 | 146294 | 146782 |
| UN56266 | Rsa1.0.00630.1 | 190 | 71281  | 2.00E-44  | 103 | 107 | 96 -  | 84  | 190 | 60115  | 60221  |
| UN56267 | Rsa1.0.14087.1 | 789 | 3821   | 0         | 679 | 688 | 98 +  | 1   | 688 | 1466   | 2153   |
| UN56268 | Rsa1.0.05271.1 | 542 | 14306  | 0         | 362 | 366 | 98 +  | 1   | 365 | 12107  | 12472  |
| UN56269 | Rsa1.0.02944.1 | 657 | 26553  | 1.00E-175 | 321 | 324 | 99 -  | 1   | 324 | 5275   | 5598   |
| UN56270 | Rsa1.0.03451.1 | 781 | 22828  | 0         | 727 | 790 | 92 -  | 1   | 781 | 8936   | 9703   |
| UN56271 | Rsa1.0.02675.1 | 258 | 28852  | 1.00E-120 | 248 | 258 | 96 -  | 1   | 258 | 12944  | 13201  |
| UN56272 | Rsa1.0.00008.1 | 771 | 358124 | 0         | 474 | 513 | 92 +  | 181 | 692 | 3365   | 3875   |
| UN56273 | Rsa1.0.00959.1 | 522 | 58202  | 0         | 355 | 364 | 97 +  | 1   | 359 | 3594   | 3957   |
| UN56274 | Rsa1.0.00022.1 | 719 | 200461 | 3.00E-31  | 184 | 222 | 82 -  | 286 | 507 | 148113 | 148334 |
| UN56275 | Rsa1.0.00846.1 | 587 | 62342  | 0         | 575 | 591 | 97 +  | 1   | 587 | 31222  | 31812  |

|         |                |     |        |           |     |     |       |     |     |        |        |
|---------|----------------|-----|--------|-----------|-----|-----|-------|-----|-----|--------|--------|
| UN56276 | Rsa1.0.01468.1 | 134 | 45146  | 4.00E-51  | 126 | 134 | 94 +  | 1   | 134 | 33924  | 34057  |
| UN56277 | Rsa1.0.01146.1 | 668 | 163455 | 0         | 617 | 666 | 92 +  | 5   | 662 | 141519 | 142179 |
| UN56278 | Rsa1.0.01801.1 | 663 | 39094  | 1.00E-147 | 274 | 276 | 99 +  | 2   | 276 | 20069  | 20344  |
| UN56279 | Rsa1.0.04061.1 | 738 | 19310  | 0         | 526 | 560 | 93 +  | 1   | 547 | 13117  | 13675  |
| UN56280 | Rsa1.0.00825.1 | 442 | 62855  | 1.00E-106 | 277 | 299 | 92 -  | 5   | 299 | 55424  | 55717  |
| UN56281 | Rsa1.0.00221.1 | 458 | 106972 | 0         | 439 | 448 | 97 -  | 1   | 448 | 23856  | 24302  |
| UN56282 | Rsa1.0.00632.1 | 758 | 183777 | 0         | 743 | 760 | 97 +  | 1   | 758 | 40244  | 40999  |
| UN56283 | Rsa1.0.04295.1 | 782 | 18040  | 9.00E-29  | 120 | 136 | 88 +  | 365 | 499 | 12540  | 12672  |
| UN56284 | Rsa1.0.00078.1 | 751 | 175053 | 0         | 745 | 751 | 99 -  | 1   | 751 | 112966 | 113716 |
| UN56285 | Rsa1.0.01573.1 | 484 | 42964  | 3.00E-92  | 237 | 256 | 92 -  | 16  | 269 | 7912   | 8167   |
| UN56286 | Rsa1.0.00453.1 | 629 | 83031  | 0         | 402 | 412 | 97 -  | 1   | 412 | 19304  | 19715  |
| UN56287 | Rsa1.0.00207.1 | 754 | 248736 | 1.00E-131 | 381 | 438 | 86 -  | 1   | 415 | 89809  | 90226  |
| UN56288 | #              | #   | #      | #         | #   | #   | #     | #   | #   | #      | #      |
| UN56289 | Rsa1.0.73802.1 | 616 | 310    | 1.00E-135 | 275 | 284 | 96 -  | 1   | 283 | 1      | 284    |
| UN56290 | Rsa1.0.00478.1 | 666 | 81419  | 0         | 657 | 672 | 97 +  | 1   | 666 | 55515  | 56185  |
| UN56291 | Rsa1.0.08419.1 | 221 | 7381   | 3.00E-87  | 207 | 219 | 94 +  | 3   | 221 | 6910   | 7126   |
| UN56292 | Rsa1.0.08080.1 | 139 | 137363 | 4.00E-33  | 81  | 84  | 96 -  | 13  | 96  | 1006   | 1089   |
| UN56293 | Rsa1.0.01081.1 | 352 | 499226 | 5.00E-93  | 239 | 261 | 91 +  | 1   | 252 | 5735   | 5994   |
| UN56294 | Rsa1.0.01146.1 | 557 | 163455 | 5.00E-88  | 189 | 196 | 96 +  | 132 | 327 | 16616  | 16809  |
| UN56295 | Rsa1.0.00013.1 | 166 | 292129 | 1.00E-67  | 154 | 162 | 95 -  | 5   | 166 | 73072  | 73233  |
| UN56296 | Rsa1.0.00044.1 | 489 | 271658 | 5.00E-60  | 150 | 158 | 94 +  | 2   | 158 | 176704 | 176860 |
| UN56297 | Rsa1.0.01625.1 | 252 | 42019  | 4.00E-93  | 233 | 252 | 92 +  | 1   | 252 | 29675  | 29919  |
| UN56298 | Rsa1.0.00036.1 | 816 | 176186 | 1.00E-111 | 306 | 334 | 91 -  | 13  | 338 | 100327 | 100656 |
| UN56299 | Rsa1.0.00492.1 | 490 | 80178  | 1.00E-164 | 418 | 459 | 91 +  | 6   | 442 | 69214  | 69662  |
| UN56300 | Rsa1.0.00194.1 | 681 | 110851 | 0         | 461 | 485 | 95 +  | 198 | 681 | 13143  | 13619  |
| UN56301 | Rsa1.0.02061.1 | 814 | 35487  | 1.00E-135 | 277 | 287 | 96 -  | 528 | 814 | 23370  | 23648  |
| UN56302 | Rsa1.0.02003.1 | 827 | 36171  | 0         | 489 | 491 | 99 +  | 4   | 494 | 27935  | 28425  |
| UN56303 | Rsa1.0.01543.1 | 548 | 43645  | 0         | 419 | 425 | 98 +  | 126 | 548 | 6110   | 6534   |
| UN56304 | Rsa1.0.00347.1 | 739 | 93048  | 0         | 690 | 740 | 93 -  | 3   | 739 | 44901  | 45610  |
| UN56305 | Rsa1.0.05389.1 | 753 | 13943  | 0         | 725 | 751 | 96 +  | 3   | 753 | 7213   | 7955   |
| UN56306 | Rsa1.0.03125.1 | 655 | 147978 | 0         | 403 | 423 | 95 +  | 242 | 655 | 130250 | 130672 |
| UN56307 | Rsa1.0.01053.1 | 763 | 55483  | 1.00E-113 | 252 | 265 | 95 +  | 202 | 461 | 13048  | 13312  |
| UN56308 | Rsa1.0.11802.1 | 868 | 5404   | 1.00E-141 | 296 | 309 | 95 +  | 276 | 582 | 1482   | 1790   |
| UN56309 | Rsa1.0.00594.1 | 800 | 73729  | 0         | 386 | 389 | 99 +  | 3   | 391 | 34509  | 34896  |
| UN56310 | Rsa1.0.00465.1 | 656 | 82138  | 0         | 548 | 576 | 95 +  | 84  | 656 | 21482  | 22054  |
| UN56311 | Rsa1.0.01590.1 | 504 | 42719  | 0         | 333 | 334 | 99 +  | 171 | 504 | 37627  | 37960  |
| UN56312 | Rsa1.0.04407.1 | 665 | 17504  | 1.00E-137 | 263 | 268 | 98 -  | 1   | 264 | 7540   | 7807   |
| UN56313 | Rsa1.0.01898.1 | 550 | 37491  | 0         | 538 | 549 | 97 +  | 2   | 550 | 6257   | 6805   |
| UN56314 | Rsa1.0.04381.1 | 837 | 17639  | 0         | 455 | 455 | 100 - | 375 | 829 | 12835  | 13289  |

|         |                |     |        |           |     |     |       |     |     |        |        |
|---------|----------------|-----|--------|-----------|-----|-----|-------|-----|-----|--------|--------|
| UN56315 | Rsa1.0.00314.1 | 835 | 96472  | 0         | 571 | 609 | 93 +  | 212 | 817 | 28551  | 29159  |
| UN56316 | Rsa1.0.00211.1 | 783 | 228189 | 1.00E-174 | 324 | 326 | 99 -  | 368 | 693 | 10691  | 11014  |
| UN56317 | Rsa1.0.01003.1 | 736 | 56976  | 3.00E-90  | 184 | 189 | 97 -  | 147 | 335 | 26217  | 26405  |
| UN56318 | Rsa1.0.01382.1 | 566 | 46877  | 1.00E-176 | 347 | 360 | 96 -  | 217 | 566 | 16726  | 17085  |
| UN56319 | Rsa1.0.00048.1 | 833 | 167185 | 1.00E-154 | 327 | 343 | 95 -  | 491 | 833 | 7219   | 7559   |
| UN56320 | Rsa1.0.03238.1 | 717 | 24432  | 0         | 684 | 723 | 94 +  | 1   | 717 | 4471   | 5186   |
| UN56321 | Rsa1.0.00082.1 | 698 | 237584 | 0         | 664 | 697 | 95 +  | 3   | 698 | 461    | 1157   |
| UN56322 | Rsa1.0.00487.1 | 792 | 80674  | 1.00E-156 | 282 | 283 | 99 -  | 510 | 792 | 74654  | 74936  |
| UN56323 | Rsa1.0.01201.1 | 815 | 50856  | 1.00E-168 | 320 | 327 | 97 -  | 3   | 329 | 1      | 327    |
| UN56324 | #              | #   | #      | #         | #   | #   | #     | #   | #   | #      | #      |
| UN56325 | Rsa1.0.01039.1 | 873 | 55946  | 1.00E-117 | 245 | 254 | 96 +  | 566 | 818 | 49675  | 49928  |
| UN56326 | Rsa1.0.45780.1 | 831 | 493    | 0         | 371 | 379 | 97 +  | 455 | 831 | 1      | 378    |
| UN56327 | Rsa1.0.01016.1 | 678 | 181422 | 0         | 447 | 465 | 96 +  | 94  | 558 | 53528  | 53991  |
| UN56328 | Rsa1.0.00759.1 | 707 | 65465  | 1.00E-100 | 194 | 197 | 98 -  | 167 | 363 | 20709  | 20905  |
| UN56329 | Rsa1.0.15479.1 | 770 | 2584   | 5.00E-95  | 184 | 185 | 99 +  | 583 | 766 | 2400   | 2584   |
| UN56330 | Rsa1.0.00019.1 | 787 | 301669 | 0         | 540 | 550 | 98 -  | 2   | 551 | 110059 | 110608 |
| UN56331 | Rsa1.0.00755.1 | 869 | 192559 | 1.00E-154 | 323 | 333 | 96 +  | 486 | 815 | 168170 | 168501 |
| UN56332 | Rsa1.0.07974.1 | 701 | 8147   | 4.00E-77  | 147 | 147 | 100 - | 2   | 148 | 7498   | 7644   |
| UN56333 | Rsa1.0.01400.1 | 859 | 46560  | 0         | 427 | 429 | 99 -  | 3   | 431 | 4494   | 4922   |
| UN56334 | Rsa1.0.02559.1 | 743 | 30096  | 5.00E-95  | 198 | 205 | 96 -  | 123 | 327 | 14994  | 15198  |
| UN56335 | Rsa1.0.09168.1 | 413 | 6590   | 1.00E-148 | 266 | 266 | 100 + | 148 | 413 | 5395   | 5660   |
| UN56336 | Rsa1.0.05665.1 | 766 | 13003  | 0         | 523 | 551 | 94 +  | 3   | 553 | 9456   | 9991   |
| UN56337 | Rsa1.0.01759.1 | 756 | 39745  | 1.00E-111 | 215 | 217 | 99 -  | 3   | 218 | 12411  | 12627  |
| UN56338 | Rsa1.0.00055.1 | 725 | 520193 | 1.00E-168 | 309 | 311 | 99 +  | 1   | 310 | 155384 | 155694 |
| UN56339 | Rsa1.0.00548.1 | 833 | 76518  | 1.00E-120 | 229 | 232 | 98 -  | 3   | 234 | 62227  | 62458  |
| UN56340 | Rsa1.0.00139.1 | 507 | 357786 | 0         | 356 | 358 | 99 -  | 150 | 507 | 129481 | 129838 |
| UN56341 | Rsa1.0.03312.1 | 431 | 23841  | 1.00E-111 | 236 | 244 | 96 +  | 129 | 372 | 1714   | 1955   |
| UN56342 | Rsa1.0.00265.1 | 568 | 220635 | 0         | 415 | 430 | 96 -  | 141 | 568 | 152179 | 152607 |
| UN56343 | Rsa1.0.01196.1 | 625 | 51097  | 1.00E-95  | 197 | 202 | 97 -  | 424 | 624 | 29480  | 29681  |
| UN56344 | Rsa1.0.00221.1 | 176 | 106972 | 1.00E-64  | 165 | 172 | 95 +  | 1   | 172 | 37970  | 38135  |
| UN56345 | Rsa1.0.01452.1 | 495 | 45459  | 0         | 365 | 365 | 100 - | 1   | 365 | 31900  | 32264  |
| UN56346 | Rsa1.0.04575.1 | 456 | 16783  | 6.00E-44  | 125 | 131 | 95 -  | 161 | 291 | 7343   | 7469   |
| UN56347 | #              | #   | #      | #         | #   | #   | #     | #   | #   | #      | #      |
| UN56348 | Rsa1.0.04911.1 | 585 | 15483  | 1.00E-125 | 271 | 279 | 97 -  | 240 | 516 | 8462   | 8737   |
| UN56349 | Rsa1.0.01031.1 | 112 | 56236  | 1.00E-20  | 51  | 51  | 100 - | 4   | 54  | 5786   | 5836   |
| UN56350 | Rsa1.0.01034.1 | 550 | 56046  | 0         | 526 | 547 | 96 +  | 1   | 547 | 19627  | 20170  |
| UN56351 | Rsa1.0.00130.1 | 670 | 125737 | 1.00E-124 | 259 | 270 | 95 -  | 20  | 289 | 113633 | 113902 |
| UN56352 | Rsa1.0.03010.1 | 535 | 26054  | 1.00E-114 | 244 | 253 | 96 -  | 284 | 535 | 20626  | 20877  |
| UN56353 | Rsa1.0.63049.1 | 693 | 364    | 1.00E-95  | 205 | 210 | 97 -  | 486 | 693 | 134    | 342    |

|         |                |     |        |           |     |     |       |     |     |        |        |
|---------|----------------|-----|--------|-----------|-----|-----|-------|-----|-----|--------|--------|
| UN56354 | Rsa1.0_10978.1 | 415 | 5657   | 1.00E-107 | 258 | 269 | 95 -  | 147 | 414 | 812    | 1074   |
| UN56355 | Rsa1.0_00224.1 | 854 | 327530 | 0         | 811 | 836 | 97 +  | 2   | 825 | 227152 | 227983 |
| UN56356 | Rsa1.0_02071.1 | 870 | 35409  | 0         | 447 | 452 | 98 -  | 2   | 453 | 28275  | 28726  |
| UN56357 | Rsa1.0_00867.1 | 773 | 61635  | 0         | 595 | 600 | 99 -  | 1   | 599 | 945    | 1544   |
| UN56358 | Rsa1.0_03521.1 | 489 | 396204 | 1.00E-170 | 361 | 378 | 95 +  | 115 | 489 | 269243 | 269620 |
| UN56359 | Rsa1.0_01597.1 | 342 | 42555  | 0         | 337 | 340 | 99 -  | 2   | 341 | 9511   | 9849   |
| UN56360 | Rsa1.0_15608.1 | 852 | 2522   | 0         | 803 | 821 | 97 -  | 3   | 822 | 562    | 1382   |
| UN56361 | Rsa1.0_01054.1 | 314 | 55470  | 1.00E-128 | 298 | 316 | 94 +  | 2   | 314 | 26100  | 26410  |
| UN56362 | Rsa1.0_00861.1 | 563 | 61759  | 1.00E-133 | 241 | 241 | 100 - | 323 | 563 | 30359  | 30599  |
| UN56363 | Rsa1.0_03451.1 | 792 | 22828  | 1.00E-128 | 241 | 244 | 98 +  | 456 | 699 | 7997   | 8240   |
| UN56364 | Rsa1.0_03996.1 | 454 | 19654  | 0         | 453 | 454 | 99 -  | 1   | 454 | 8219   | 8672   |
| UN56365 | Rsa1.0_04224.1 | 866 | 18402  | 1.00E-179 | 322 | 323 | 99 +  | 262 | 584 | 303    | 625    |
| UN56366 | Rsa1.0_00543.1 | 762 | 76788  | 1.00E-95  | 260 | 283 | 91 -  | 2   | 283 | 54425  | 54701  |
| UN56367 | Rsa1.0_00188.1 | 446 | 112020 | 3.00E-86  | 248 | 277 | 89 -  | 38  | 304 | 102610 | 102885 |
| UN56368 | Rsa1.0_00097.1 | 505 | 138858 | 0         | 387 | 402 | 96 +  | 106 | 505 | 46836  | 47231  |
| UN56369 | Rsa1.0_01814.1 | 877 | 38917  | 1.00E-162 | 293 | 294 | 99 -  | 105 | 398 | 2673   | 2966   |
| UN56370 | Rsa1.0_01504.1 | 819 | 189978 | 0         | 781 | 811 | 96 +  | 18  | 819 | 149404 | 150214 |
| UN56371 | Rsa1.0_00194.1 | 668 | 110851 | 0         | 448 | 471 | 95 +  | 198 | 667 | 13143  | 13605  |
| UN56372 | Rsa1.0_01220.1 | 831 | 161775 | 6.00E-64  | 128 | 129 | 99 -  | 524 | 652 | 124240 | 124368 |
| UN56373 | Rsa1.0_01494.1 | 374 | 44641  | 1.00E-158 | 289 | 290 | 99 +  | 85  | 374 | 4752   | 5040   |
| UN56374 | Rsa1.0_00015.1 | 764 | 561803 | 0         | 617 | 630 | 97 +  | 136 | 764 | 443074 | 443698 |
| UN56375 | Rsa1.0_00389.1 | 857 | 88795  | 1.00E-160 | 287 | 287 | 100 + | 184 | 470 | 68066  | 68352  |
| UN56376 | Rsa1.0_00198.1 | 321 | 222963 | 1.00E-114 | 296 | 320 | 92 -  | 1   | 309 | 23609  | 23924  |
| UN56377 | Rsa1.0_06543.1 | 735 | 10805  | 0         | 671 | 699 | 95 +  | 37  | 735 | 2806   | 3492   |
| UN56378 | Rsa1.0_02400.1 | 764 | 31750  | 0         | 724 | 759 | 95 +  | 6   | 764 | 14960  | 15718  |
| UN56379 | Rsa1.0_07705.1 | 839 | 8754   | 0         | 742 | 759 | 97 +  | 3   | 761 | 113    | 870    |
| UN56380 | Rsa1.0_00092.1 | 755 | 659932 | 0         | 365 | 368 | 99 +  | 1   | 368 | 197189 | 197556 |
| UN56381 | Rsa1.0_01591.1 | 793 | 42718  | 1.00E-142 | 294 | 306 | 96 +  | 192 | 494 | 8046   | 8351   |
| UN56382 | Rsa1.0_01048.1 | 723 | 55684  | 0         | 389 | 391 | 99 +  | 36  | 426 | 26121  | 26511  |
| UN56383 | Rsa1.0_00236.1 | 687 | 104771 | 1.00E-143 | 263 | 265 | 99 -  | 3   | 267 | 90025  | 90289  |
| UN56384 | Rsa1.0_17099.1 | 829 | 1924   | 1.00E-132 | 246 | 248 | 99 +  | 305 | 552 | 1237   | 1484   |
| UN56385 | Rsa1.0_01149.1 | 452 | 160459 | 1.00E-134 | 314 | 335 | 93 -  | 127 | 450 | 128172 | 128505 |
| UN56386 | Rsa1.0_01863.1 | 699 | 38010  | 1.00E-127 | 247 | 252 | 98 +  | 10  | 257 | 24856  | 25107  |
| UN56387 | Rsa1.0_00017.1 | 711 | 752458 | 1.00E-178 | 326 | 328 | 99 +  | 3   | 330 | 204590 | 204915 |
| UN56388 | Rsa1.0_00066.1 | 775 | 152418 | 1.00E-154 | 279 | 280 | 99 -  | 209 | 488 | 16275  | 16554  |
| UN56389 | Rsa1.0_00059.1 | 807 | 159650 | 1.00E-159 | 288 | 289 | 99 -  | 365 | 653 | 115576 | 115864 |
| UN56390 | Rsa1.0_04209.1 | 887 | 18442  | 1.00E-164 | 293 | 293 | 100 + | 2   | 294 | 4797   | 5089   |
| UN56391 | Rsa1.0_02310.1 | 662 | 32735  | 0         | 659 | 661 | 99 -  | 3   | 662 | 29711  | 30371  |
| UN56392 | Rsa1.0_00409.1 | 827 | 146788 | 1.00E-143 | 326 | 346 | 94 +  | 14  | 352 | 112393 | 112733 |



|         |                |     |        |           |     |     |       |     |     |        |        |
|---------|----------------|-----|--------|-----------|-----|-----|-------|-----|-----|--------|--------|
| UN56393 | Rsa1.0.00835.1 | 708 | 278058 | 1.00E-161 | 297 | 300 | 99 +  | 96  | 395 | 49347  | 49646  |
| UN56394 | Rsa1.0.00903.1 | 673 | 60228  | 1.00E-166 | 359 | 377 | 95 -  | 301 | 673 | 52756  | 53129  |
| UN56395 | Rsa1.0.01923.1 | 250 | 37233  | 2.00E-64  | 202 | 216 | 93 -  | 35  | 250 | 18104  | 18309  |
| UN56396 | Rsa1.0.00153.1 | 858 | 192931 | 0         | 375 | 381 | 98 +  | 478 | 853 | 190517 | 190897 |
| UN56397 | Rsa1.0.01083.1 | 330 | 54617  | 1.00E-78  | 248 | 269 | 92 +  | 63  | 330 | 4951   | 5211   |
| UN56398 | Rsa1.0.01453.1 | 529 | 45449  | 1.00E-112 | 273 | 292 | 93 -  | 197 | 488 | 11444  | 11726  |
| UN56399 | Rsa1.0.42389.1 | 685 | 529    | 6.00E-14  | 62  | 69  | 89 -  | 449 | 517 | 196    | 264    |
| UN56400 | Rsa1.0.02680.1 | 715 | 28721  | 0         | 503 | 512 | 98 +  | 206 | 715 | 17767  | 18276  |
| UN56401 | Rsa1.0.12001.1 | 415 | 5345   | 1.00E-135 | 316 | 335 | 94 -  | 77  | 408 | 679    | 1011   |
| UN56402 | Rsa1.0.00205.1 | 247 | 193401 | 5.00E-40  | 192 | 213 | 90 -  | 35  | 247 | 137637 | 137834 |
| UN56403 | Rsa1.0.01537.1 | 674 | 187285 | 0         | 408 | 425 | 96 +  | 252 | 674 | 841    | 1262   |
| UN56404 | Rsa1.0.02360.1 | 658 | 32203  | 0         | 529 | 538 | 98 +  | 121 | 658 | 28271  | 28807  |
| UN56405 | Rsa1.0.01960.1 | 847 | 36766  | 0         | 325 | 325 | 100 - | 6   | 330 | 29700  | 30024  |
| UN56406 | Rsa1.0.00435.1 | 285 | 317579 | 1.00E-160 | 285 | 285 | 100 - | 1   | 285 | 74298  | 74582  |
| UN56407 | Rsa1.0.00099.1 | 833 | 159619 | 1.00E-129 | 244 | 247 | 98 +  | 365 | 611 | 2549   | 2795   |
| UN56408 | Rsa1.0.01837.1 | 426 | 38502  | 2.00E-96  | 234 | 249 | 93 +  | 8   | 252 | 32971  | 33213  |
| UN56409 | Rsa1.0.03334.1 | 729 | 23659  | 2.00E-94  | 182 | 184 | 98 +  | 8   | 191 | 18868  | 19051  |
| UN56410 | Rsa1.0.25124.1 | 658 | 950    | 0         | 390 | 392 | 99 +  | 267 | 658 | 434    | 825    |
| UN56411 | Rsa1.0.00026.1 | 581 | 327835 | 1.00E-115 | 296 | 318 | 93 +  | 269 | 581 | 174428 | 174739 |
| UN56412 | Rsa1.0.00614.1 | 656 | 72276  | 8.00E-69  | 161 | 169 | 95 -  | 229 | 396 | 44076  | 44244  |
| UN56413 | Rsa1.0.02431.1 | 377 | 31504  | 0         | 374 | 375 | 99 +  | 3   | 377 | 16424  | 16798  |
| UN56414 | Rsa1.0.01285.1 | 699 | 172709 | 0         | 476 | 492 | 96 +  | 1   | 492 | 138304 | 138795 |
| UN56415 | Rsa1.0.00008.1 | 715 | 358124 | 0         | 649 | 653 | 99 -  | 63  | 715 | 64671  | 65323  |
| UN56416 | Rsa1.0.00656.1 | 771 | 69968  | 0         | 444 | 445 | 99 -  | 327 | 771 | 54329  | 54773  |
| UN56417 | Rsa1.0.00120.1 | 113 | 277288 | 6.00E-53  | 111 | 113 | 98 +  | 1   | 113 | 222361 | 222473 |
| UN56418 | Rsa1.0.00926.1 | 836 | 195072 | 0         | 374 | 374 | 100 - | 3   | 376 | 43023  | 43396  |
| UN56419 | Rsa1.0.02447.1 | 657 | 31325  | 1.00E-129 | 240 | 242 | 99 -  | 188 | 429 | 20564  | 20805  |
| UN56420 | Rsa1.0.02810.1 | 816 | 27671  | 1.00E-160 | 287 | 287 | 100 + | 66  | 352 | 17019  | 17305  |
| UN56421 | Rsa1.0.00113.1 | 434 | 131574 | 0         | 433 | 434 | 99 +  | 1   | 434 | 87636  | 88069  |
| UN56422 | Rsa1.0.00375.1 | 736 | 90207  | 1.00E-116 | 221 | 224 | 98 -  | 357 | 580 | 56870  | 57093  |
| UN56423 | Rsa1.0.00190.1 | 259 | 318240 | 1.00E-107 | 246 | 255 | 96 -  | 11  | 258 | 140962 | 141216 |
| UN56424 | Rsa1.0.03503.1 | 806 | 22445  | 0         | 411 | 432 | 95 +  | 128 | 549 | 14651  | 15082  |
| UN56425 | Rsa1.0.16231.1 | 466 | 131890 | 0         | 376 | 376 | 100 - | 1   | 376 | 130789 | 131164 |
| UN56426 | Rsa1.0.00017.1 | 808 | 752458 | 0         | 518 | 568 | 91 +  | 51  | 597 | 367673 | 368240 |
| UN56427 | Rsa1.0.01682.1 | 553 | 41090  | 1.00E-135 | 256 | 260 | 98 -  | 1   | 260 | 30089  | 30348  |
| UN56428 | Rsa1.0.03960.1 | 469 | 19864  | 1.00E-148 | 424 | 474 | 89 -  | 8   | 455 | 14717  | 15189  |
| UN56429 | Rsa1.0.00735.1 | 825 | 66503  | 0         | 381 | 382 | 99 -  | 3   | 384 | 18081  | 18462  |
| UN56430 | Rsa1.0.04099.1 | 813 | 19060  | 0         | 524 | 528 | 99 +  | 287 | 813 | 12466  | 12991  |
| UN56431 | Rsa1.0.00491.1 | 559 | 80219  | 0         | 427 | 454 | 94 -  | 110 | 555 | 46404  | 46855  |

|         |                |     |        |           |     |     |       |     |     |        |        |
|---------|----------------|-----|--------|-----------|-----|-----|-------|-----|-----|--------|--------|
| UN56432 | Rsa1.0.00071.1 | 851 | 345714 | 1.00E-159 | 308 | 316 | 97 -  | 3   | 318 | 56561  | 56876  |
| UN56433 | Rsa1.0.00425.1 | 813 | 147080 | 0         | 444 | 444 | 100 - | 370 | 813 | 75246  | 75689  |
| UN56434 | Rsa1.0.02967.1 | 636 | 26395  | 3.00E-65  | 160 | 171 | 93 -  | 304 | 474 | 14615  | 14785  |
| UN56435 | Rsa1.0.02978.1 | 756 | 26304  | 2.00E-94  | 229 | 246 | 93 -  | 3   | 235 | 15416  | 15661  |
| UN56436 | Rsa1.0.00211.1 | 288 | 228189 | 7.00E-95  | 225 | 232 | 96 -  | 4   | 231 | 130208 | 130436 |
| UN56437 | Rsa1.0.01096.1 | 685 | 54266  | 1.00E-157 | 287 | 289 | 99 +  | 137 | 425 | 4808   | 5096   |
| UN56438 | Rsa1.0.00812.1 | 791 | 63233  | 0         | 405 | 415 | 97 +  | 240 | 654 | 12713  | 13127  |
| UN56439 | Rsa1.0.00595.1 | 784 | 341648 | 0         | 764 | 790 | 96 +  | 3   | 784 | 192510 | 193299 |
| UN56440 | Rsa1.0.01982.1 | 765 | 36530  | 1.00E-168 | 312 | 315 | 99 -  | 452 | 765 | 26520  | 26834  |
| UN56441 | Rsa1.0.01881.1 | 650 | 37721  | 1.00E-169 | 321 | 325 | 98 -  | 326 | 650 | 22791  | 23113  |
| UN56442 | Rsa1.0.00057.1 | 381 | 160473 | 6.00E-62  | 167 | 177 | 94 +  | 7   | 183 | 49338  | 49510  |
| UN56443 | Rsa1.0.13434.1 | 594 | 4831   | 3.00E-83  | 169 | 173 | 97 +  | 422 | 594 | 389    | 561    |
| UN56444 | Rsa1.0.01196.1 | 402 | 51097  | 4.00E-94  | 217 | 226 | 96 -  | 178 | 402 | 32610  | 32831  |
| UN56445 | Rsa1.0.01575.1 | 133 | 42924  | 5.00E-26  | 116 | 126 | 92 -  | 7   | 132 | 41948  | 42064  |
| UN56446 | Rsa1.0.00390.1 | 775 | 88681  | 0         | 648 | 711 | 91 +  | 63  | 772 | 16737  | 17445  |
| UN56447 | Rsa1.0.13708.1 | 670 | 4447   | 0         | 557 | 561 | 99 -  | 3   | 563 | 2527   | 3087   |
| UN56448 | Rsa1.0.19040.1 | 365 | 1491   | 1.00E-105 | 335 | 358 | 93 +  | 1   | 348 | 981    | 1330   |
| UN56449 | Rsa1.0.03401.1 | 296 | 23191  | 1.00E-115 | 272 | 285 | 95 +  | 13  | 296 | 22620  | 22897  |
| UN56450 | Rsa1.0.00159.1 | 859 | 431686 | 1.00E-104 | 216 | 224 | 96 +  | 217 | 440 | 349193 | 349416 |
| UN56451 | Rsa1.0.00294.1 | 755 | 144860 | 0         | 391 | 393 | 99 -  | 2   | 394 | 118527 | 118919 |
| UN56452 | Rsa1.0.00871.1 | 644 | 61539  | 0         | 426 | 426 | 100 + | 219 | 644 | 4048   | 4473   |
| UN56453 | Rsa1.0.01993.1 | 467 | 36384  | 1.00E-180 | 325 | 327 | 99 -  | 141 | 467 | 11363  | 11689  |
| UN56454 | Rsa1.0.00817.1 | 118 | 62961  | 3.00E-27  | 111 | 118 | 94 -  | 1   | 118 | 53949  | 54059  |
| UN56455 | Rsa1.0.02078.1 | 749 | 35308  | 0         | 483 | 484 | 99 -  | 266 | 749 | 11893  | 12376  |
| UN56456 | Rsa1.0.04808.1 | 486 | 15893  | 1.00E-167 | 298 | 298 | 100 - | 1   | 298 | 13072  | 13369  |
| UN56457 | Rsa1.0.01775.1 | 572 | 39519  | 1.00E-101 | 211 | 217 | 97 +  | 354 | 570 | 6860   | 7072   |
| UN56458 | Rsa1.0.11107.1 | 810 | 5613   | 1.00E-179 | 340 | 343 | 99 +  | 470 | 810 | 3865   | 4206   |
| UN56459 | Rsa1.0.16876.1 | 478 | 2005   | 7.00E-50  | 113 | 117 | 96 +  | 153 | 269 | 910    | 1026   |
| UN56460 | Rsa1.0.00660.1 | 289 | 69688  | 1.00E-154 | 288 | 292 | 98 -  | 2   | 289 | 3447   | 3738   |
| UN56461 | Rsa1.0.02205.1 | 136 | 33923  | 8.00E-62  | 132 | 136 | 97 -  | 1   | 136 | 5855   | 5990   |
| UN56462 | Rsa1.0.03141.1 | 815 | 25061  | 1.00E-168 | 376 | 405 | 92 +  | 426 | 815 | 12076  | 12480  |
| UN56463 | Rsa1.0.01221.1 | 777 | 50421  | 0         | 768 | 775 | 99 +  | 3   | 777 | 11859  | 12632  |
| UN56464 | Rsa1.0.01316.1 | 617 | 48325  | 0         | 472 | 473 | 99 -  | 145 | 617 | 17456  | 17927  |
| UN56465 | Rsa1.0.05544.1 | 306 | 13381  | 3.00E-60  | 118 | 118 | 100 - | 1   | 118 | 8507   | 8624   |
| UN56466 | Rsa1.0.01668.1 | 767 | 41299  | 1.00E-110 | 269 | 291 | 92 -  | 79  | 369 | 40399  | 40689  |
| UN56467 | Rsa1.0.00728.1 | 487 | 66704  | 1.00E-106 | 245 | 261 | 93 -  | 4   | 261 | 16817  | 17077  |
| UN56468 | Rsa1.0.00253.1 | 106 | 231292 | 2.00E-46  | 104 | 106 | 98 -  | 2   | 106 | 8881   | 8986   |
| UN56469 | Rsa1.0.00671.1 | 297 | 397884 | 1.00E-160 | 296 | 298 | 99 +  | 1   | 297 | 192158 | 192455 |
| UN56470 | Rsa1.0.03524.1 | 440 | 22297  | 1.00E-121 | 238 | 244 | 97 -  | 193 | 436 | 14286  | 14529  |

|         |                |     |        |           |     |     |       |     |     |        |        |
|---------|----------------|-----|--------|-----------|-----|-----|-------|-----|-----|--------|--------|
| UN56471 | Rsa1.0_00930.1 | 372 | 59224  | 1.00E-177 | 329 | 334 | 98 -  | 39  | 372 | 38997  | 39330  |
| UN56472 | Rsa1.0_00336.1 | 848 | 445051 | 1.00E-132 | 248 | 251 | 98 +  | 598 | 848 | 281490 | 281740 |
| UN56473 | Rsa1.0_02040.1 | 383 | 35684  | 4.00E-63  | 123 | 123 | 100 + | 92  | 214 | 12407  | 12529  |
| UN56474 | Rsa1.0_02858.1 | 674 | 27246  | 1.00E-168 | 381 | 407 | 93 -  | 284 | 674 | 2273   | 2679   |
| UN56475 | Rsa1.0_00092.1 | 876 | 659932 | 0         | 518 | 547 | 94 +  | 16  | 557 | 455345 | 455884 |
| UN56476 | Rsa1.0_02029.1 | 482 | 35857  | 1.00E-143 | 298 | 306 | 97 -  | 1   | 306 | 16302  | 16603  |
| UN56477 | Rsa1.0_01976.1 | 639 | 36570  | 4.00E-92  | 172 | 172 | 100 - | 266 | 437 | 26045  | 26216  |
| UN56478 | Rsa1.0_00067.1 | 582 | 415055 | 1.00E-161 | 287 | 287 | 100 + | 296 | 582 | 314010 | 314296 |
| UN56479 | Rsa1.0_00576.1 | 659 | 178949 | 0         | 360 | 363 | 99 -  | 1   | 363 | 142181 | 142543 |
| UN56480 | Rsa1.0_05727.1 | 781 | 12808  | 1.00E-144 | 262 | 263 | 99 -  | 3   | 265 | 3515   | 3777   |
| UN56481 | Rsa1.0_03168.1 | 490 | 24827  | 1.00E-143 | 263 | 265 | 99 -  | 2   | 266 | 22104  | 22368  |
| UN56482 | Rsa1.0_00526.1 | 664 | 169279 | 0         | 530 | 587 | 90 -  | 43  | 614 | 119383 | 119945 |
| UN56483 | Rsa1.0_03668.1 | 575 | 21483  | 2.00E-93  | 174 | 174 | 100 + | 357 | 530 | 9647   | 9820   |
| UN56484 | Rsa1.0_00744.1 | 200 | 66084  | 5.00E-89  | 191 | 198 | 96 -  | 2   | 198 | 57848  | 58045  |
| UN56485 | Rsa1.0_00112.1 | 661 | 132199 | 1.00E-128 | 277 | 291 | 95 -  | 168 | 458 | 103093 | 103380 |
| UN56486 | Rsa1.0_00911.1 | 623 | 59943  | 0         | 494 | 508 | 97 +  | 1   | 507 | 14929  | 15436  |
| UN56487 | Rsa1.0_08979.1 | 733 | 6739   | 0         | 485 | 503 | 96 -  | 232 | 733 | 5218   | 5720   |
| UN56488 | #              | #   | #      | #         | #   | #   | #     | #   | #   | #      | #      |
| UN56489 | Rsa1.0_23881.1 | 680 | 1020   | 2.00E-41  | 143 | 163 | 87 -  | 174 | 336 | 168    | 321    |
| UN56490 | Rsa1.0_02191.1 | 812 | 34078  | 1.00E-166 | 359 | 378 | 94 -  | 2   | 372 | 23641  | 24015  |
| UN56491 | Rsa1.0_03009.1 | 618 | 26065  | 1.00E-114 | 230 | 237 | 97 +  | 76  | 312 | 15481  | 15717  |
| UN56492 | Rsa1.0_01513.1 | 773 | 44234  | 2.00E-85  | 351 | 410 | 85 -  | 387 | 767 | 16199  | 16595  |
| UN56493 | Rsa1.0_00164.1 | 767 | 116642 | 0         | 765 | 773 | 98 -  | 1   | 767 | 75063  | 75835  |
| UN56494 | Rsa1.0_06078.1 | 517 | 11794  | 1.00E-76  | 189 | 202 | 93 -  | 1   | 201 | 2318   | 2519   |
| UN56495 | Rsa1.0_01054.1 | 753 | 55470  | 0         | 413 | 421 | 98 -  | 333 | 746 | 9067   | 9487   |
| UN56496 | Rsa1.0_05319.1 | 739 | 14158  | 1.00E-122 | 263 | 275 | 95 +  | 21  | 294 | 428    | 702    |
| UN56497 | Rsa1.0_04915.1 | 608 | 15461  | 0         | 599 | 603 | 99 +  | 1   | 603 | 4883   | 5485   |
| UN56498 | Rsa1.0_00286.1 | 702 | 98709  | 2.00E-54  | 115 | 117 | 98 +  | 318 | 434 | 21127  | 21243  |
| UN56499 | Rsa1.0_01833.1 | 804 | 38555  | 1.00E-71  | 147 | 150 | 98 +  | 481 | 630 | 15971  | 16120  |
| UN56500 | Rsa1.0_02858.1 | 198 | 27246  | 3.00E-31  | 76  | 77  | 98 -  | 17  | 93  | 552    | 627    |
| UN56501 | Rsa1.0_27525.1 | 729 | 849    | 3.00E-96  | 191 | 195 | 97 +  | 210 | 404 | 218    | 412    |
| UN56502 | Rsa1.0_00016.1 | 754 | 831256 | 0         | 426 | 454 | 93 +  | 187 | 640 | 650571 | 651024 |
| UN56503 | Rsa1.0_00303.1 | 148 | 97468  | 7.00E-44  | 96  | 98  | 97 -  | 51  | 148 | 40265  | 40362  |
| UN56504 | Rsa1.0_00145.1 | 621 | 261008 | 1.00E-177 | 327 | 331 | 98 -  | 278 | 608 | 246629 | 246959 |
| UN56505 | Rsa1.0_01678.1 | 629 | 162174 | 0         | 385 | 392 | 98 -  | 35  | 426 | 144329 | 144720 |
| UN56506 | Rsa1.0_00040.1 | 720 | 324196 | 1.00E-169 | 378 | 396 | 95 +  | 328 | 717 | 223524 | 223918 |
| UN56507 | Rsa1.0_01054.1 | 657 | 55470  | 3.00E-22  | 79  | 87  | 90 +  | 4   | 90  | 52088  | 52174  |
| UN56508 | Rsa1.0_00005.1 | 821 | 353093 | 0         | 767 | 823 | 93 +  | 5   | 821 | 64754  | 65556  |
| UN56509 | Rsa1.0_00661.1 | 740 | 213041 | 1.00E-132 | 285 | 299 | 95 -  | 437 | 733 | 46267  | 46565  |

|         |                |     |        |           |     |     |       |     |     |        |        |
|---------|----------------|-----|--------|-----------|-----|-----|-------|-----|-----|--------|--------|
| UN56510 | Rsa1.0.00577.1 | 655 | 174827 | 4.00E-83  | 166 | 169 | 98 -  | 487 | 655 | 160601 | 160769 |
| UN56511 | Rsa1.0.01884.1 | 788 | 37659  | 1.00E-101 | 339 | 390 | 86 +  | 228 | 605 | 28844  | 29233  |
| UN56512 | Rsa1.0.02003.1 | 701 | 36171  | 1.00E-102 | 303 | 340 | 89 -  | 1   | 334 | 33665  | 33998  |
| UN56513 | Rsa1.0.00905.1 | 786 | 60110  | 1.00E-109 | 229 | 237 | 96 +  | 535 | 770 | 24895  | 25131  |
| UN56514 | Rsa1.0_10378.1 | 520 | 5866   | 1.00E-120 | 297 | 320 | 92 +  | 201 | 519 | 5556   | 5860   |
| UN56515 | Rsa1.0_02873.1 | 438 | 27077  | 1.00E-170 | 328 | 335 | 97 +  | 64  | 398 | 15590  | 15923  |
| UN56516 | Rsa1.0.02859.1 | 609 | 162118 | 1.00E-144 | 275 | 280 | 98 -  | 1   | 280 | 138640 | 138919 |
| UN56517 | Rsa1.0.01701.1 | 146 | 162121 | 4.00E-36  | 83  | 85  | 97 +  | 1   | 85  | 149885 | 149969 |
| UN56518 | Rsa1.0_16837.1 | 748 | 2018   | 0         | 385 | 398 | 96 +  | 353 | 746 | 470    | 867    |
| UN56519 | Rsa1.0.00525.1 | 709 | 78030  | 0         | 460 | 471 | 97 +  | 190 | 660 | 60682  | 61152  |
| UN56520 | Rsa1.0.07692.1 | 602 | 132338 | 1.00E-120 | 298 | 321 | 92 -  | 249 | 569 | 6752   | 7067   |
| UN56521 | Rsa1.0.01454.1 | 804 | 45440  | 1.00E-147 | 319 | 334 | 95 +  | 473 | 796 | 12955  | 13288  |
| UN56522 | Rsa1.0.00025.1 | 558 | 277312 | 0         | 498 | 506 | 98 -  | 1   | 506 | 99683  | 100188 |
| UN56523 | Rsa1.0.00005.1 | 769 | 353093 | 1.00E-156 | 317 | 326 | 97 -  | 447 | 769 | 256222 | 256546 |
| UN56524 | Rsa1.0.01731.1 | 751 | 40208  | 5.00E-95  | 206 | 213 | 96 +  | 483 | 693 | 29671  | 29883  |
| UN56525 | Rsa1.0.00589.1 | 565 | 209965 | 0         | 560 | 561 | 99 -  | 5   | 565 | 167852 | 168412 |
| UN56526 | Rsa1.0.01363.1 | 655 | 47195  | 1.00E-108 | 217 | 223 | 97 +  | 2   | 224 | 20298  | 20520  |
| UN56527 | Rsa1.0.03567.1 | 703 | 22049  | 0         | 512 | 512 | 100 + | 107 | 618 | 11451  | 11962  |
| UN56528 | Rsa1.0.02754.1 | 667 | 28213  | 0         | 654 | 663 | 98 +  | 1   | 660 | 7904   | 8566   |
| UN56529 | Rsa1.0.03024.1 | 713 | 25931  | 0         | 710 | 715 | 99 +  | 2   | 713 | 23629  | 24343  |
| UN56530 | Rsa1.0.00269.1 | 631 | 341668 | 0         | 485 | 510 | 95 +  | 4   | 498 | 306295 | 306800 |
| UN56531 | Rsa1.0.01549.1 | 740 | 43543  | 0         | 714 | 745 | 95 +  | 3   | 740 | 31477  | 32220  |
| UN56532 | Rsa1.0.04126.1 | 755 | 18939  | 1.00E-100 | 266 | 293 | 90 +  | 270 | 562 | 17030  | 17322  |
| UN56533 | Rsa1.0.01329.1 | 663 | 47982  | 0         | 536 | 547 | 97 +  | 1   | 543 | 20901  | 21447  |
| UN56534 | Rsa1.0.01506.1 | 549 | 44370  | 0         | 374 | 389 | 96 -  | 3   | 387 | 14269  | 14656  |
| UN56535 | Rsa1.0.00049.1 | 538 | 167018 | 0         | 514 | 517 | 99 +  | 5   | 521 | 98719  | 99235  |
| UN56536 | Rsa1.0.00104.1 | 641 | 368722 | 0         | 478 | 499 | 95 +  | 133 | 631 | 29781  | 30274  |
| UN56537 | Rsa1.0.00176.1 | 654 | 240984 | 0         | 437 | 455 | 96 +  | 11  | 465 | 17769  | 18220  |
| UN56538 | Rsa1.0.03341.1 | 651 | 23604  | 0         | 367 | 382 | 96 -  | 211 | 592 | 2950   | 3319   |
| UN56539 | Rsa1.0.00422.1 | 758 | 86144  | 0         | 562 | 604 | 93 -  | 1   | 586 | 83575  | 84178  |
| UN56540 | Rsa1.0.00316.1 | 726 | 96264  | 0         | 462 | 487 | 94 -  | 11  | 495 | 85542  | 86028  |
| UN56541 | Rsa1.0.02851.1 | 678 | 27295  | 1.00E-112 | 208 | 209 | 99 +  | 470 | 678 | 6834   | 7042   |
| UN56542 | Rsa1.0.00204.1 | 163 | 109056 | 3.00E-80  | 160 | 163 | 98 +  | 1   | 163 | 105957 | 106119 |
| UN56543 | Rsa1.0.01669.1 | 784 | 41286  | 0         | 572 | 598 | 95 -  | 3   | 592 | 10431  | 11023  |
| UN56544 | Rsa1.0.00675.1 | 739 | 145590 | 0         | 624 | 659 | 94 -  | 2   | 654 | 49098  | 49753  |
| UN56545 | Rsa1.0.01175.1 | 382 | 51674  | 4.00E-97  | 232 | 250 | 92 -  | 1   | 247 | 41128  | 41363  |
| UN56546 | Rsa1.0.00131.1 | 692 | 432233 | 1.00E-176 | 387 | 409 | 94 -  | 282 | 685 | 188419 | 188825 |
| UN56547 | Rsa1.0.07846.1 | 430 | 8433   | 0         | 402 | 408 | 98 +  | 2   | 408 | 4353   | 4760   |
| UN56548 | Rsa1.0.00931.1 | 685 | 59210  | 1.00E-154 | 286 | 289 | 98 -  | 268 | 556 | 23892  | 24180  |

|         |                |     |        |           |     |     |       |     |     |        |        |
|---------|----------------|-----|--------|-----------|-----|-----|-------|-----|-----|--------|--------|
| UN56549 | Rsa1.0.00017.1 | 708 | 752458 | 0         | 676 | 699 | 96 +  | 13  | 707 | 285257 | 285954 |
| UN56550 | Rsa1.0.24099.1 | 598 | 1007   | 1.00E-114 | 215 | 217 | 99 -  | 269 | 485 | 442    | 658    |
| UN56551 | Rsa1.0.01990.1 | 690 | 36431  | 1.00E-171 | 307 | 308 | 99 -  | 2   | 309 | 34873  | 35180  |
| UN56552 | Rsa1.0.05217.1 | 619 | 142938 | 0         | 424 | 446 | 95 -  | 152 | 593 | 130269 | 130711 |
| UN56553 | Rsa1.0.01786.1 | 753 | 133324 | 1.00E-110 | 217 | 221 | 98 +  | 287 | 504 | 1720   | 1940   |
| UN56554 | Rsa1.0.00596.1 | 664 | 73578  | 0         | 449 | 470 | 95 -  | 2   | 471 | 36703  | 37172  |
| UN56555 | Rsa1.0.00114.1 | 682 | 131330 | 2.33E-156 | 305 | 319 | 95 -  | 265 | 583 | 45013  | 45331  |
| UN56556 | Rsa1.0.00115.1 | 120 | 131321 | 9.00E-43  | 106 | 112 | 94 +  | 7   | 118 | 68401  | 68512  |
| UN56557 | Rsa1.0.01618.1 | 340 | 42118  | 5.00E-87  | 221 | 239 | 92 +  | 107 | 339 | 295    | 533    |
| UN56558 | Rsa1.0.29880.1 | 427 | 769    | 0         | 415 | 425 | 97 -  | 3   | 427 | 129    | 553    |
| UN56559 | Rsa1.0.05612.1 | 692 | 13193  | 9.00E-72  | 138 | 138 | 100 - | 20  | 157 | 12049  | 12186  |
| UN56560 | Rsa1.0.00024.1 | 733 | 188018 | 0         | 673 | 741 | 90 -  | 4   | 733 | 61217  | 61933  |
| UN56561 | Rsa1.0.00204.1 | 741 | 109056 | 0         | 694 | 734 | 94 +  | 13  | 735 | 42658  | 43391  |
| UN56562 | Rsa1.0.00529.1 | 781 | 77487  | 0         | 744 | 776 | 95 +  | 3   | 775 | 4526   | 5301   |
| UN56563 | Rsa1.0.01092.1 | 720 | 54348  | 1.00E-126 | 307 | 331 | 92 -  | 114 | 436 | 44476  | 44800  |
| UN56564 | Rsa1.0.59643.1 | 726 | 384    | 1.00E-119 | 239 | 246 | 97 +  | 314 | 559 | 1      | 246    |
| UN56565 | Rsa1.0.04835.1 | 740 | 15766  | 1.00E-128 | 260 | 269 | 96 -  | 414 | 682 | 13933  | 14201  |
| UN56566 | Rsa1.0.00645.1 | 729 | 189716 | 0         | 684 | 717 | 95 +  | 14  | 729 | 29437  | 30153  |
| UN56567 | Rsa1.0.00438.1 | 752 | 84861  | 0         | 716 | 734 | 97 +  | 3   | 732 | 39880  | 40612  |
| UN56568 | Rsa1.0.06903.1 | 750 | 10186  | 1.00E-122 | 228 | 230 | 99 +  | 144 | 373 | 179    | 408    |
| UN56569 | Rsa1.0.38173.1 | 266 | 590    | 1.00E-46  | 101 | 103 | 98 -  | 2   | 104 | 183    | 285    |
| UN56570 | Rsa1.0.02803.1 | 675 | 27715  | 1.00E-163 | 333 | 347 | 95 +  | 35  | 381 | 18769  | 19115  |
| UN56571 | Rsa1.0.00751.1 | 709 | 65759  | 0         | 444 | 466 | 95 +  | 4   | 469 | 45208  | 45672  |
| UN56572 | Rsa1.0.03552.1 | 750 | 22151  | 2.00E-91  | 200 | 209 | 95 +  | 42  | 250 | 11229  | 11434  |
| UN56573 | Rsa1.0.00184.1 | 715 | 218748 | 0         | 442 | 458 | 96 -  | 259 | 715 | 2713   | 3170   |
| UN56574 | Rsa1.0.06160.1 | 730 | 11596  | 1.00E-140 | 313 | 333 | 93 +  | 235 | 567 | 11089  | 11421  |
| UN56575 | Rsa1.0.03294.1 | 673 | 23971  | 0         | 463 | 495 | 93 -  | 183 | 663 | 17160  | 17653  |
| UN56576 | Rsa1.0.00632.1 | 679 | 183777 | 1.00E-127 | 237 | 239 | 99 +  | 441 | 679 | 158959 | 159197 |
| UN56577 | Rsa1.0.00059.1 | 671 | 159650 | 0         | 641 | 671 | 95 +  | 1   | 671 | 65845  | 66515  |
| UN56578 | Rsa1.0.00959.1 | 644 | 58202  | 1.00E-121 | 248 | 256 | 96 +  | 390 | 644 | 1503   | 1758   |
| UN56579 | Rsa1.0.00105.1 | 679 | 134138 | 3.00E-87  | 179 | 184 | 97 -  | 171 | 354 | 86940  | 87123  |
| UN56580 | Rsa1.0.37045.1 | 712 | 608    | 0         | 498 | 523 | 95 -  | 1   | 522 | 1      | 523    |
| UN56581 | Rsa1.0.06047.1 | 462 | 11854  | 2.00E-59  | 120 | 121 | 99 -  | 3   | 123 | 10287  | 10407  |
| UN56582 | Rsa1.0.01396.1 | 497 | 151624 | 1.00E-159 | 348 | 366 | 95 -  | 128 | 489 | 128767 | 129131 |
| UN56583 | Rsa1.0.00140.1 | 711 | 121541 | 0         | 328 | 329 | 99 +  | 4   | 332 | 9821   | 10149  |
| UN56584 | Rsa1.0.00247.1 | 686 | 103408 | 1.00E-127 | 331 | 364 | 90 -  | 3   | 350 | 66969  | 67329  |
| UN56585 | Rsa1.0.05505.1 | 758 | 13500  | 1.00E-105 | 214 | 220 | 97 +  | 3   | 219 | 581    | 800    |
| UN56586 | Rsa1.0.00899.1 | 735 | 60404  | 1.00E-109 | 207 | 209 | 99 -  | 2   | 210 | 23796  | 24004  |
| UN56587 | Rsa1.0.01310.1 | 753 | 164719 | 0         | 677 | 732 | 92 +  | 20  | 738 | 8595   | 9317   |

|         |                |     |        |           |     |     |       |     |     |        |        |
|---------|----------------|-----|--------|-----------|-----|-----|-------|-----|-----|--------|--------|
| UN56588 | Rsa1.0.02548.1 | 812 | 30228  | 1.00E-162 | 377 | 390 | 96 +  | 435 | 812 | 8737   | 9126   |
| UN56589 | Rsa1.0.00076.1 | 645 | 146021 | 2.00E-88  | 181 | 186 | 97 +  | 201 | 386 | 43256  | 43441  |
| UN56590 | Rsa1.0.02008.1 | 353 | 36109  | 0         | 353 | 353 | 100 + | 1   | 353 | 19046  | 19398  |
| UN56591 | Rsa1.0.00749.1 | 631 | 65933  | 1.00E-151 | 295 | 303 | 97 -  | 329 | 631 | 36471  | 36773  |
| UN56592 | Rsa1.0.02142.1 | 737 | 34633  | 1.00E-165 | 297 | 298 | 99 -  | 2   | 299 | 30341  | 30638  |
| UN56593 | Rsa1.0.02605.1 | 597 | 29637  | 1.00E-131 | 274 | 285 | 96 +  | 3   | 286 | 12918  | 13202  |
| UN56594 | Rsa1.0.01546.1 | 472 | 43586  | 1.00E-177 | 353 | 366 | 96 +  | 102 | 467 | 21013  | 21373  |
| UN56595 | Rsa1.0.02411.1 | 788 | 31655  | 1.00E-168 | 299 | 299 | 100 + | 3   | 301 | 4522   | 4820   |
| UN56596 | Rsa1.0.05976.1 | 621 | 12061  | 1.00E-177 | 327 | 331 | 98 -  | 3   | 333 | 11221  | 11551  |
| UN56597 | Rsa1.0.01792.1 | 680 | 39227  | 0         | 494 | 509 | 97 -  | 172 | 680 | 35226  | 35733  |
| UN56598 | Rsa1.0.00707.1 | 649 | 190112 | 0         | 563 | 582 | 96 -  | 71  | 640 | 16052  | 16633  |
| UN56599 | Rsa1.0.01258.1 | 812 | 49755  | 0         | 367 | 367 | 100 + | 242 | 608 | 45501  | 45867  |
| UN56600 | Rsa1.0.02673.1 | 767 | 28877  | 1.00E-100 | 200 | 205 | 97 +  | 2   | 206 | 10467  | 10671  |
| UN56601 | Rsa1.0.09853.1 | 559 | 6118   | 6.00E-57  | 131 | 137 | 95 +  | 423 | 559 | 1888   | 2024   |
| UN56602 | Rsa1.0.01303.1 | 482 | 48853  | 1.00E-108 | 228 | 237 | 96 -  | 246 | 482 | 42903  | 43136  |
| UN56603 | Rsa1.0.11907.1 | 740 | 5374   | 1.00E-120 | 281 | 297 | 94 -  | 450 | 740 | 2948   | 3244   |
| UN56604 | Rsa1.0.01349.1 | 658 | 47513  | 0         | 556 | 559 | 99 +  | 3   | 561 | 9230   | 9788   |
| UN56605 | Rsa1.0.07693.1 | 785 | 8776   | 1.00E-163 | 352 | 372 | 94 -  | 286 | 657 | 7066   | 7437   |
| UN56606 | Rsa1.0.00361.1 | 775 | 91181  | 0         | 455 | 463 | 98 +  | 314 | 774 | 47138  | 47600  |
| UN56607 | Rsa1.0.01193.1 | 664 | 51147  | 9.00E-78  | 164 | 168 | 97 +  | 192 | 358 | 13320  | 13487  |
| UN56608 | Rsa1.0.13471.1 | 770 | 4802   | 1.00E-120 | 235 | 240 | 97 +  | 286 | 525 | 2722   | 2961   |
| UN56609 | Rsa1.0.02183.1 | 588 | 34170  | 0         | 401 | 407 | 98 +  | 55  | 457 | 19134  | 19540  |
| UN56610 | Rsa1.0.00555.1 | 656 | 75920  | 0         | 637 | 645 | 98 +  | 3   | 647 | 33413  | 34056  |
| UN56611 | Rsa1.0.03820.1 | 800 | 20664  | 2.00E-69  | 171 | 178 | 96 -  | 618 | 791 | 6782   | 6959   |
| UN56612 | Rsa1.0.01166.1 | 715 | 51877  | 1.00E-128 | 263 | 273 | 96 +  | 285 | 557 | 6459   | 6731   |
| UN56613 | Rsa1.0.00706.1 | 637 | 291570 | 1.00E-153 | 303 | 310 | 97 +  | 175 | 481 | 47218  | 47527  |
| UN56614 | Rsa1.0.00073.1 | 787 | 240924 | 1.00E-165 | 338 | 346 | 97 -  | 3   | 345 | 227516 | 227859 |
| UN56615 | Rsa1.0.01696.1 | 276 | 301850 | 1.00E-111 | 261 | 278 | 93 -  | 1   | 276 | 160666 | 160942 |
| UN56616 | Rsa1.0.04448.1 | 682 | 17309  | 0         | 496 | 520 | 95 +  | 164 | 682 | 10372  | 10891  |
| UN56617 | Rsa1.0.00690.1 | 683 | 140527 | 0         | 333 | 335 | 99 +  | 3   | 336 | 4939   | 5273   |
| UN56618 | Rsa1.0.01507.1 | 280 | 44361  | 3.00E-91  | 217 | 233 | 93 -  | 9   | 241 | 28340  | 28566  |
| UN56619 | Rsa1.0.00476.1 | 646 | 280966 | 1.00E-158 | 327 | 338 | 96 -  | 286 | 621 | 218738 | 219074 |
| UN56620 | Rsa1.0.00272.1 | 147 | 447836 | 6.00E-35  | 81  | 83  | 97 -  | 1   | 83  | 67489  | 67571  |
| UN56621 | Rsa1.0.00040.1 | 658 | 324196 | 2.00E-94  | 194 | 200 | 97 -  | 10  | 209 | 91484  | 91683  |
| UN56622 | Rsa1.0.04027.1 | 678 | 19501  | 0         | 621 | 670 | 92 -  | 17  | 670 | 4285   | 4954   |
| UN56623 | Rsa1.0.02273.1 | 645 | 140964 | 1.00E-107 | 200 | 201 | 99 -  | 27  | 227 | 9674   | 9874   |
| UN56624 | Rsa1.0.03264.1 | 706 | 145959 | 1.00E-70  | 142 | 144 | 98 +  | 164 | 307 | 139203 | 139346 |
| UN56625 | Rsa1.0.00617.1 | 765 | 72199  | 0         | 680 | 717 | 94 -  | 42  | 757 | 32206  | 32919  |
| UN56626 | Rsa1.0.02726.1 | 778 | 28404  | 1.00E-122 | 252 | 262 | 96 +  | 211 | 472 | 21630  | 21891  |

|         |                |     |        |           |     |     |      |     |     |        |        |
|---------|----------------|-----|--------|-----------|-----|-----|------|-----|-----|--------|--------|
| UN56627 | Rsa1.0.03401.1 | 766 | 23191  | 0         | 503 | 524 | 95 - | 240 | 759 | 5999   | 6522   |
| UN56628 | Rsa1.0.00274.1 | 705 | 210119 | 0         | 486 | 503 | 96 + | 205 | 705 | 188576 | 189078 |
| UN56629 | Rsa1.0.01562.1 | 621 | 43196  | 0         | 610 | 618 | 98 + | 2   | 619 | 8920   | 9536   |
| UN56630 | Rsa1.0.00974.1 | 583 | 57893  | 4.00E-67  | 154 | 162 | 95 - | 121 | 282 | 53560  | 53721  |
| UN56631 | Rsa1.0.01115.1 | 707 | 183545 | 2.00E-94  | 294 | 325 | 90 + | 3   | 317 | 4959   | 5278   |
| UN56632 | Rsa1.0.01356.1 | 802 | 47287  | 4.00E-71  | 140 | 141 | 99 + | 134 | 274 | 33746  | 33886  |
| UN56633 | Rsa1.0.00120.1 | 743 | 277288 | 0         | 364 | 366 | 99 + | 362 | 726 | 266327 | 266691 |
| UN56634 | Rsa1.0.00061.1 | 739 | 218685 | 0         | 657 | 676 | 97 + | 59  | 730 | 200631 | 201306 |
| UN56635 | Rsa1.0.01923.1 | 672 | 37233  | 1.00E-134 | 263 | 267 | 98 + | 403 | 667 | 36457  | 36723  |
| UN56636 | Rsa1.0.00181.1 | 391 | 114269 | 1.00E-180 | 373 | 391 | 95 - | 1   | 391 | 79710  | 80100  |
| UN56637 | Rsa1.0.08518.1 | 740 | 7244   | 0         | 664 | 730 | 90 + | 2   | 727 | 5114   | 5809   |
| UN56638 | Rsa1.0.00418.1 | 431 | 215377 | 1.00E-154 | 321 | 335 | 95 - | 93  | 421 | 45570  | 45904  |
| UN56639 | Rsa1.0.00540.1 | 143 | 76895  | 2.00E-50  | 129 | 137 | 94 - | 7   | 143 | 16008  | 16143  |
| UN56640 | Rsa1.0.00387.1 | 682 | 495407 | 1.00E-131 | 243 | 245 | 99 - | 1   | 245 | 400491 | 400735 |
| UN56641 | Rsa1.0.00586.1 | 424 | 163802 | 1.00E-137 | 256 | 259 | 98 + | 54  | 312 | 108341 | 108599 |
| UN56642 | Rsa1.0.00087.1 | 672 | 761073 | 0         | 605 | 642 | 94 - | 3   | 638 | 213348 | 213979 |
| UN56643 | Rsa1.0.00292.1 | 678 | 98141  | 9.00E-81  | 202 | 216 | 93 - | 1   | 214 | 64971  | 65185  |
| UN56644 | Rsa1.0.08100.1 | 815 | 7912   | 0         | 554 | 603 | 91 + | 2   | 595 | 5894   | 6493   |
| UN56645 | Rsa1.0.07250.1 | 613 | 9663   | 1.00E-98  | 299 | 344 | 86 - | 3   | 336 | 9079   | 9403   |
| UN56646 | Rsa1.0.01046.1 | 691 | 152989 | 0         | 391 | 392 | 99 + | 223 | 614 | 136697 | 137088 |
| UN56647 | Rsa1.0.00218.1 | 777 | 201480 | 0         | 627 | 655 | 95 + | 88  | 740 | 21366  | 22014  |
| UN56648 | Rsa1.0.00047.1 | 586 | 168582 | 1.00E-166 | 425 | 463 | 91 + | 124 | 586 | 29921  | 30368  |
| UN56649 | Rsa1.0.00254.1 | 547 | 102600 | 0         | 460 | 469 | 98 + | 1   | 468 | 20696  | 21163  |
| UN56650 | Rsa1.0.02345.1 | 612 | 32337  | 0         | 577 | 606 | 95 - | 2   | 596 | 1800   | 2397   |
| UN56651 | Rsa1.0.02269.1 | 664 | 33168  | 0         | 616 | 677 | 90 - | 3   | 662 | 10697  | 11348  |
| UN56652 | Rsa1.0.00100.1 | 543 | 249232 | 1.00E-144 | 289 | 299 | 96 + | 1   | 299 | 11218  | 11516  |
| UN56653 | Rsa1.0.03567.1 | 770 | 22049  | 1.00E-89  | 242 | 262 | 92 + | 3   | 256 | 18353  | 18611  |
| UN56654 | Rsa1.0.00732.1 | 840 | 66631  | 3.00E-72  | 175 | 183 | 95 + | 572 | 751 | 43798  | 43980  |
| UN56655 | Rsa1.0.17623.1 | 761 | 1781   | 0         | 564 | 593 | 95 - | 165 | 753 | 1189   | 1781   |
| UN56656 | Rsa1.0.00722.1 | 653 | 66840  | 0         | 445 | 478 | 93 - | 9   | 486 | 38556  | 39033  |
| UN56657 | Rsa1.0.02616.1 | 139 | 29542  | 8.00E-59  | 133 | 139 | 95 - | 1   | 139 | 24024  | 24162  |
| UN56658 | Rsa1.0.02086.1 | 808 | 35198  | 0         | 735 | 751 | 97 - | 6   | 752 | 19926  | 20675  |
| UN56659 | Rsa1.0.00214.1 | 668 | 107508 | 1.00E-131 | 275 | 285 | 96 + | 3   | 284 | 71858  | 72142  |
| UN56660 | Rsa1.0.02020.1 | 715 | 173211 | 0         | 386 | 397 | 97 + | 3   | 399 | 143722 | 144118 |
| UN56661 | Rsa1.0.01101.1 | 707 | 54031  | 0         | 696 | 706 | 98 - | 2   | 707 | 15123  | 15826  |
| UN56662 | #              | #   | #      | #         | #   | #   | #    | #   | #   | #      | #      |
| UN56663 | Rsa1.0.00415.1 | 616 | 86795  | 1.00E-105 | 218 | 226 | 96 - | 45  | 270 | 75383  | 75608  |
| UN56664 | Rsa1.0.03264.1 | 787 | 145959 | 4.00E-80  | 164 | 168 | 97 + | 185 | 352 | 129573 | 129740 |
| UN56665 | Rsa1.0.02648.1 | 606 | 29073  | 1.00E-132 | 294 | 310 | 94 + | 107 | 415 | 5546   | 5852   |

|         |                |     |        |           |     |     |       |     |     |        |        |
|---------|----------------|-----|--------|-----------|-----|-----|-------|-----|-----|--------|--------|
| UN56666 | Rsa1.0_00301.1 | 729 | 365315 | 0         | 464 | 487 | 95 -  | 231 | 712 | 167097 | 167574 |
| UN56667 | Rsa1.0_06841.1 | 638 | 10286  | 1.00E-118 | 224 | 227 | 98 -  | 164 | 390 | 8514   | 8740   |
| UN56668 | Rsa1.0_00383.1 | 662 | 398431 | 0         | 417 | 429 | 97 +  | 2   | 427 | 20225  | 20653  |
| UN56669 | Rsa1.0_07879.1 | 456 | 8370   | 1.00E-175 | 390 | 414 | 94 -  | 1   | 404 | 900    | 1310   |
| UN56670 | Rsa1.0_07638.1 | 670 | 8967   | 1.00E-142 | 368 | 406 | 90 +  | 10  | 394 | 4151   | 4555   |
| UN56671 | Rsa1.0_00918.1 | 750 | 59720  | 1.00E-113 | 233 | 239 | 97 -  | 451 | 687 | 3329   | 3567   |
| UN56672 | Rsa1.0_00152.1 | 770 | 257730 | 1.00E-158 | 321 | 331 | 96 +  | 414 | 742 | 59089  | 59419  |
| UN56673 | Rsa1.0_00796.1 | 699 | 63997  | 0         | 383 | 394 | 97 -  | 3   | 396 | 41983  | 42376  |
| UN56674 | Rsa1.0_01971.1 | 768 | 36641  | 0         | 568 | 606 | 93 +  | 81  | 684 | 19087  | 19692  |
| UN56675 | Rsa1.0_02692.1 | 715 | 28626  | 0         | 682 | 716 | 95 +  | 2   | 709 | 20112  | 20826  |
| UN56676 | Rsa1.0_03985.1 | 656 | 19704  | 2.00E-75  | 378 | 454 | 83 +  | 57  | 504 | 10687  | 11137  |
| UN56677 | Rsa1.0_05239.1 | 735 | 14410  | 0         | 388 | 404 | 96 -  | 343 | 735 | 11729  | 12132  |
| UN56678 | Rsa1.0_00291.1 | 752 | 172129 | 1.00E-153 | 277 | 278 | 99 -  | 256 | 533 | 64816  | 65093  |
| UN56679 | Rsa1.0_01697.1 | 728 | 40837  | 1.00E-149 | 288 | 294 | 97 +  | 2   | 295 | 17997  | 18288  |
| UN56680 | Rsa1.0_00002.1 | 713 | 601661 | 1.00E-178 | 361 | 371 | 97 -  | 347 | 713 | 550540 | 550909 |
| UN56681 | Rsa1.0_00902.1 | 651 | 60241  | 1.00E-164 | 320 | 329 | 97 -  | 323 | 651 | 51801  | 52129  |
| UN56682 | Rsa1.0_00642.1 | 629 | 201230 | 1.00E-119 | 242 | 250 | 96 -  | 174 | 423 | 4076   | 4325   |
| UN56683 | Rsa1.0_00964.1 | 233 | 316648 | 5.00E-83  | 226 | 253 | 89 +  | 1   | 232 | 302250 | 302502 |
| UN56684 | Rsa1.0_02625.1 | 647 | 139104 | 0         | 519 | 521 | 99 +  | 5   | 525 | 12716  | 13236  |
| UN56685 | Rsa1.0_06784.1 | 536 | 10359  | 0         | 410 | 410 | 100 + | 2   | 411 | 5973   | 6382   |
| UN56686 | Rsa1.0_00073.1 | 596 | 240924 | 0         | 346 | 348 | 99 +  | 2   | 349 | 188736 | 189083 |
| UN56687 | Rsa1.0_02117.1 | 684 | 34843  | 0         | 345 | 352 | 98 +  | 2   | 353 | 8941   | 9292   |
| UN56688 | Rsa1.0_02926.1 | 655 | 26716  | 1.00E-100 | 206 | 213 | 96 -  | 443 | 655 | 2672   | 2884   |
| UN56689 | Rsa1.0_40963.1 | 669 | 548    | 3.00E-93  | 226 | 248 | 91 +  | 3   | 231 | 270    | 517    |
| UN56690 | Rsa1.0_05610.1 | 218 | 13194  | 1.00E-103 | 208 | 213 | 97 -  | 3   | 213 | 735    | 947    |
| UN56691 | Rsa1.0_11060.1 | 715 | 5629   | 0         | 663 | 690 | 96 -  | 10  | 698 | 2      | 691    |
| UN56692 | Rsa1.0_05461.1 | 727 | 13674  | 1.00E-73  | 144 | 145 | 99 +  | 490 | 634 | 7770   | 7914   |
| UN56693 | Rsa1.0_00009.1 | 750 | 232558 | 6.00E-70  | 144 | 147 | 97 +  | 439 | 585 | 149796 | 149942 |
| UN56694 | Rsa1.0_00308.1 | 712 | 96915  | 0         | 484 | 512 | 94 -  | 202 | 710 | 85859  | 86367  |
| UN56695 | Rsa1.0_01341.1 | 702 | 47764  | 0         | 476 | 501 | 95 +  | 206 | 702 | 39690  | 40188  |
| UN56696 | Rsa1.0_00092.1 | 724 | 659932 | 1.00E-153 | 286 | 290 | 98 +  | 168 | 457 | 311430 | 311719 |
| UN56697 | Rsa1.0_03381.1 | 757 | 23306  | 1.00E-116 | 243 | 251 | 96 -  | 120 | 370 | 19673  | 19919  |
| UN56698 | Rsa1.0_00786.1 | 694 | 64285  | 0         | 458 | 476 | 96 +  | 1   | 476 | 32122  | 32597  |
| UN56699 | Rsa1.0_00408.1 | 512 | 176752 | 1.00E-136 | 266 | 273 | 97 -  | 2   | 274 | 134345 | 134617 |
| UN56700 | Rsa1.0_00050.1 | 167 | 237174 | 8.00E-75  | 160 | 166 | 96 -  | 2   | 167 | 236090 | 236255 |
| UN56701 | Rsa1.0_00275.1 | 712 | 210104 | 3.00E-87  | 194 | 204 | 95 -  | 4   | 207 | 163741 | 163944 |
| UN56702 | Rsa1.0_03607.1 | 721 | 21817  | 4.00E-52  | 108 | 109 | 99 +  | 139 | 247 | 1914   | 2022   |
| UN56703 | Rsa1.0_00267.1 | 719 | 101509 | 1.00E-151 | 312 | 323 | 96 +  | 399 | 719 | 27250  | 27572  |
| UN56704 | Rsa1.0_02129.1 | 742 | 34757  | 0         | 713 | 742 | 96 +  | 1   | 737 | 12177  | 12918  |



|         |                |     |        |           |     |     |       |     |     |        |        |
|---------|----------------|-----|--------|-----------|-----|-----|-------|-----|-----|--------|--------|
| UN56705 | Rsa1.0.00470.1 | 553 | 81968  | 1.00E-120 | 267 | 283 | 94 +  | 238 | 520 | 48972  | 49254  |
| UN56706 | Rsa1.0.05293.1 | 727 | 14237  | 1.00E-136 | 301 | 317 | 94 -  | 3   | 317 | 2267   | 2582   |
| UN56707 | Rsa1.0.01519.1 | 687 | 44144  | 1.00E-86  | 268 | 300 | 89 -  | 8   | 282 | 26283  | 26581  |
| UN56708 | Rsa1.0.02905.1 | 692 | 26873  | 1.00E-175 | 345 | 356 | 96 +  | 2   | 357 | 23541  | 23896  |
| UN56709 | Rsa1.0.00317.1 | 722 | 218290 | 6.00E-79  | 171 | 177 | 96 -  | 4   | 180 | 73990  | 74164  |
| UN56710 | Rsa1.0.04563.1 | 658 | 16837  | 2.00E-78  | 155 | 157 | 98 +  | 4   | 160 | 12914  | 13070  |
| UN56711 | Rsa1.0.00425.1 | 707 | 147080 | 1.00E-175 | 355 | 368 | 96 -  | 35  | 400 | 116284 | 116648 |
| UN56712 | Rsa1.0.00604.1 | 757 | 146282 | 7.00E-54  | 123 | 128 | 96 +  | 226 | 353 | 79022  | 79149  |
| UN56713 | Rsa1.0.00090.1 | 433 | 273859 | 3.00E-76  | 197 | 212 | 92 +  | 228 | 433 | 148882 | 149091 |
| UN56714 | Rsa1.0.02840.1 | 385 | 27386  | 2.00E-18  | 84  | 96  | 87 +  | 36  | 131 | 7593   | 7688   |
| UN56715 | Rsa1.0.00017.1 | 780 | 752458 | 0         | 670 | 685 | 97 -  | 107 | 780 | 238236 | 238920 |
| UN56716 | Rsa1.0.00179.1 | 368 | 393324 | 1.00E-134 | 249 | 251 | 99 -  | 1   | 251 | 61345  | 61595  |
| UN56717 | Rsa1.0.00060.1 | 633 | 502678 | 0         | 608 | 636 | 95 -  | 1   | 630 | 336364 | 336999 |
| UN56718 | Rsa1.0.13978.1 | 631 | 3965   | 0         | 492 | 496 | 99 -  | 3   | 495 | 2609   | 3104   |
| UN56719 | Rsa1.0.00069.1 | 668 | 403561 | 0         | 642 | 662 | 96 +  | 2   | 662 | 11487  | 12148  |
| UN56720 | Rsa1.0.00273.1 | 649 | 326186 | 6.00E-79  | 209 | 226 | 92 -  | 430 | 649 | 136557 | 136781 |
| UN56721 | Rsa1.0.01282.1 | 628 | 49304  | 0         | 590 | 619 | 95 -  | 10  | 628 | 15345  | 15955  |
| UN56722 | Rsa1.0.00372.1 | 710 | 90418  | 3.00E-71  | 167 | 177 | 94 -  | 8   | 184 | 5806   | 5982   |
| UN56723 | Rsa1.0.01925.1 | 670 | 37220  | 3.00E-22  | 90  | 102 | 88 +  | 322 | 417 | 5477   | 5578   |
| UN56724 | Rsa1.0.12280.1 | 691 | 5266   | 1.00E-131 | 246 | 249 | 98 +  | 3   | 251 | 456    | 704    |
| UN56725 | Rsa1.0.00464.1 | 607 | 82253  | 1.00E-144 | 286 | 294 | 97 +  | 1   | 291 | 18382  | 18675  |
| UN56726 | Rsa1.0.00838.1 | 649 | 153820 | 0         | 616 | 635 | 97 +  | 18  | 649 | 7812   | 8443   |
| UN56727 | Rsa1.0.01356.1 | 734 | 47287  | 1.00E-140 | 259 | 261 | 99 +  | 270 | 530 | 8186   | 8446   |
| UN56728 | Rsa1.0.00035.1 | 724 | 176449 | 2.00E-76  | 152 | 154 | 98 +  | 185 | 338 | 155795 | 155948 |
| UN56729 | Rsa1.0.00721.1 | 734 | 66918  | 0         | 410 | 428 | 95 +  | 293 | 715 | 723    | 1148   |
| UN56730 | Rsa1.0.00655.1 | 706 | 195840 | 1.00E-123 | 273 | 288 | 94 +  | 176 | 463 | 15353  | 15639  |
| UN56731 | Rsa1.0.03031.1 | 732 | 25839  | 3.00E-87  | 182 | 188 | 96 -  | 328 | 515 | 1755   | 1942   |
| UN56732 | Rsa1.0.00861.1 | 679 | 61759  | 0         | 655 | 684 | 95 -  | 2   | 679 | 59770  | 60452  |
| UN56733 | Rsa1.0.00048.1 | 516 | 167185 | 0         | 481 | 517 | 93 +  | 1   | 516 | 107343 | 107856 |
| UN56734 | Rsa1.0.00153.1 | 746 | 192931 | 1.00E-134 | 353 | 387 | 91 -  | 2   | 379 | 170695 | 171069 |
| UN56735 | Rsa1.0.00374.1 | 642 | 165738 | 1.00E-163 | 309 | 315 | 98 -  | 128 | 442 | 133506 | 133820 |
| UN56736 | Rsa1.0.00040.1 | 711 | 324196 | 1.00E-137 | 355 | 383 | 92 -  | 337 | 707 | 296834 | 297216 |
| UN56737 | Rsa1.0.05683.1 | 653 | 12944  | 0         | 400 | 400 | 100 - | 79  | 478 | 4060   | 4459   |
| UN56738 | Rsa1.0.00055.1 | 596 | 520193 | 1.00E-173 | 317 | 320 | 99 -  | 275 | 594 | 352664 | 352983 |
| UN56739 | Rsa1.0.00269.1 | 706 | 341668 | 1.00E-168 | 355 | 372 | 95 +  | 3   | 364 | 47583  | 47954  |
| UN56740 | Rsa1.0.00450.1 | 706 | 139397 | 0         | 521 | 532 | 97 +  | 2   | 533 | 40520  | 41051  |
| UN56741 | Rsa1.0.62848.1 | 638 | 365    | 1.00E-163 | 337 | 352 | 95 -  | 58  | 409 | 1      | 352    |
| UN56742 | Rsa1.0.05937.1 | 629 | 12175  | 0         | 622 | 628 | 99 -  | 2   | 629 | 2730   | 3357   |
| UN56743 | Rsa1.0.01645.1 | 158 | 41748  | 2.00E-59  | 134 | 140 | 95 -  | 1   | 140 | 17279  | 17418  |

|         |                |     |        |           |     |     |      |     |     |        |        |
|---------|----------------|-----|--------|-----------|-----|-----|------|-----|-----|--------|--------|
| UN56744 | Rsa1.0.00017.1 | 210 | 752458 | 3.00E-75  | 169 | 175 | 96 + | 36  | 210 | 286414 | 286586 |
| UN56745 | Rsa1.0.03883.1 | 694 | 20282  | 0         | 449 | 459 | 97 + | 233 | 689 | 9509   | 9967   |
| UN56746 | Rsa1.0.00112.1 | 712 | 132199 | 5.00E-98  | 185 | 186 | 99 + | 354 | 539 | 11274  | 11459  |
| UN56747 | Rsa1.0.02903.1 | 751 | 26901  | 0         | 360 | 372 | 96 + | 2   | 373 | 7147   | 7518   |
| UN56748 | Rsa1.0.00071.1 | 644 | 345714 | 1.00E-133 | 253 | 257 | 98 - | 388 | 644 | 43275  | 43531  |
| UN56749 | Rsa1.0.00009.1 | 712 | 232558 | 0         | 483 | 505 | 95 + | 183 | 685 | 37176  | 37680  |
| UN56750 | Rsa1.0.00571.1 | 621 | 329018 | 1.00E-159 | 332 | 345 | 96 - | 3   | 341 | 43395  | 43739  |
| UN56751 | Rsa1.0.00307.1 | 777 | 199003 | 3.00E-78  | 209 | 225 | 92 + | 16  | 234 | 68019  | 68236  |
| UN56752 | Rsa1.0.00625.1 | 698 | 71672  | 1.00E-117 | 229 | 234 | 97 - | 77  | 310 | 46786  | 47019  |
| UN56753 | Rsa1.0.00338.1 | 666 | 94109  | 2.00E-97  | 197 | 201 | 98 - | 80  | 279 | 84890  | 85090  |
| UN56754 | Rsa1.0.03870.1 | 613 | 20362  | 0         | 431 | 447 | 96 + | 170 | 613 | 654    | 1099   |
| UN56755 | Rsa1.0.00108.1 | 636 | 478491 | 9.00E-87  | 184 | 190 | 96 + | 202 | 389 | 419082 | 419271 |
| UN56756 | Rsa1.0.00667.1 | 614 | 69460  | 0         | 592 | 612 | 96 - | 5   | 614 | 52551  | 53161  |
| UN56757 | Rsa1.0.06541.1 | 111 | 10806  | 3.00E-36  | 101 | 109 | 92 + | 3   | 111 | 10697  | 10805  |
| UN56758 | Rsa1.0.03306.1 | 560 | 23873  | 0         | 367 | 371 | 98 - | 4   | 374 | 12625  | 12994  |
| UN56759 | Rsa1.0.00817.1 | 491 | 62961  | 0         | 464 | 487 | 95 + | 5   | 491 | 23229  | 23713  |
| UN56760 | Rsa1.0.00254.1 | 656 | 102600 | 1.00E-137 | 294 | 307 | 95 + | 5   | 309 | 74057  | 74363  |
| UN56761 | Rsa1.0.03325.1 | 109 | 23720  | 2.00E-21  | 61  | 64  | 95 + | 12  | 75  | 15132  | 15195  |
| UN56762 | Rsa1.0.71872.1 | 128 | 319    | 1.00E-42  | 118 | 128 | 92 - | 1   | 128 | 188    | 315    |
| UN56763 | Rsa1.0.03306.1 | 506 | 23873  | 1.00E-168 | 316 | 320 | 98 - | 1   | 320 | 12625  | 12943  |
| UN56764 | Rsa1.0.03738.1 | 175 | 21071  | 3.00E-80  | 169 | 175 | 96 - | 1   | 175 | 10917  | 11091  |
| UN56765 | Rsa1.0.03325.1 | 271 | 23720  | 1.00E-46  | 119 | 127 | 93 + | 13  | 139 | 15069  | 15195  |
| UN56766 | Rsa1.0.01053.1 | 858 | 55483  | 0         | 588 | 609 | 96 - | 1   | 609 | 14055  | 14659  |
| UN56767 | Rsa1.0.71872.1 | 137 | 319    | 2.00E-56  | 129 | 135 | 95 - | 3   | 137 | 185    | 319    |
| UN56768 | Rsa1.0.00936.1 | 438 | 59078  | 1.00E-158 | 308 | 315 | 97 + | 1   | 314 | 27800  | 28114  |
| UN56769 | Rsa1.0.03400.1 | 233 | 23203  | 1.00E-122 | 230 | 233 | 98 - | 1   | 233 | 22566  | 22798  |
| UN56770 | Rsa1.0.00049.1 | 799 | 167018 | 0         | 394 | 400 | 98 + | 54  | 453 | 95382  | 95779  |
| UN56771 | Rsa1.0.05122.1 | 625 | 14791  | 6.00E-17  | 55  | 58  | 94 - | 350 | 407 | 8554   | 8611   |
| UN56772 | Rsa1.0.01648.1 | 121 | 41635  | 4.00E-60  | 120 | 121 | 99 + | 1   | 121 | 6043   | 6163   |
| UN56773 | Rsa1.0.00130.1 | 770 | 125737 | 1.00E-149 | 392 | 434 | 90 + | 1   | 419 | 110793 | 111214 |
| UN56774 | Rsa1.0.00051.1 | 440 | 258225 | 1.00E-142 | 386 | 423 | 91 + | 11  | 433 | 119616 | 120028 |
| UN56775 | Rsa1.0.00867.1 | 263 | 61635  | 3.00E-57  | 134 | 141 | 95 + | 1   | 141 | 345    | 485    |
| UN56776 | Rsa1.0.00391.1 | 160 | 183853 | 4.00E-70  | 157 | 162 | 96 + | 1   | 160 | 63686  | 63847  |
| UN56777 | Rsa1.0.01814.1 | 767 | 38917  | 0         | 467 | 469 | 99 + | 1   | 467 | 300    | 768    |
| UN56778 | Rsa1.0.01504.1 | 843 | 189978 | 0         | 613 | 632 | 96 - | 212 | 843 | 150171 | 150802 |
| UN56779 | Rsa1.0.01156.1 | 800 | 52147  | 1.00E-176 | 325 | 328 | 99 + | 1   | 328 | 24006  | 24331  |
| UN56780 | Rsa1.0.00194.1 | 668 | 110851 | 0         | 448 | 471 | 95 - | 2   | 471 | 13143  | 13605  |
| UN56781 | Rsa1.0.06716.1 | 647 | 10482  | 0         | 546 | 553 | 98 + | 1   | 553 | 4551   | 5102   |
| UN56782 | Rsa1.0.00688.1 | 616 | 68396  | 0         | 408 | 434 | 94 + | 3   | 433 | 15240  | 15664  |

|         |                |     |        |           |     |     |       |     |     |        |        |
|---------|----------------|-----|--------|-----------|-----|-----|-------|-----|-----|--------|--------|
| UN56783 | Rsa1.0.01167.1 | 623 | 51859  | 0         | 474 | 492 | 96 +  | 1   | 488 | 27148  | 27639  |
| UN56784 | Rsa1.0.04342.1 | 808 | 17828  | 0         | 371 | 382 | 97 +  | 427 | 808 | 355    | 736    |
| UN56785 | Rsa1.0.04651.1 | 873 | 16516  | 1.00E-160 | 286 | 286 | 100 + | 3   | 288 | 9251   | 9536   |
| UN56786 | Rsa1.0.00104.1 | 619 | 368722 | 1.00E-126 | 242 | 245 | 98 +  | 1   | 245 | 264137 | 264380 |
| UN56787 | Rsa1.0.00398.1 | 106 | 88007  | 1.00E-41  | 101 | 106 | 95 -  | 1   | 106 | 29228  | 29333  |
| UN56788 | Rsa1.0.00281.1 | 889 | 99908  | 1.00E-148 | 285 | 291 | 97 +  | 3   | 293 | 82503  | 82793  |
| UN56789 | Rsa1.0.01012.1 | 507 | 56836  | 1.00E-165 | 295 | 295 | 100 + | 213 | 507 | 26347  | 26641  |
| UN56790 | Rsa1.0.01426.1 | 115 | 46112  | 6.00E-47  | 110 | 115 | 95 +  | 1   | 115 | 44190  | 44304  |
| UN56791 | Rsa1.0.00011.1 | 280 | 225044 | 3.00E-63  | 159 | 171 | 92 -  | 106 | 276 | 4900   | 5070   |
| UN56792 | Rsa1.0.03471.1 | 172 | 22678  | 1.00E-52  | 114 | 117 | 97 -  | 4   | 120 | 14018  | 14134  |
| UN56793 | Rsa1.0.01097.1 | 731 | 173349 | 0         | 379 | 388 | 97 +  | 33  | 419 | 32276  | 32663  |
| UN56794 | Rsa1.0.04209.1 | 690 | 18442  | 0         | 361 | 362 | 99 -  | 1   | 362 | 6321   | 6682   |
| UN56795 | Rsa1.0.00409.1 | 817 | 146788 | 0         | 361 | 363 | 99 -  | 2   | 364 | 115450 | 115812 |
| UN56796 | Rsa1.0.00964.1 | 481 | 316648 | 1.00E-121 | 223 | 224 | 99 -  | 1   | 224 | 261452 | 261675 |
| UN56797 | Rsa1.0.00903.1 | 575 | 60228  | 1.00E-137 | 349 | 380 | 91 +  | 1   | 376 | 52753  | 53129  |
| UN56798 | Rsa1.0.04428.1 | 685 | 17399  | 0         | 527 | 531 | 99 -  | 155 | 685 | 7484   | 8014   |
| UN56799 | Rsa1.0.00143.1 | 203 | 121313 | 2.00E-82  | 192 | 203 | 94 +  | 1   | 203 | 90463  | 90664  |
| UN56800 | Rsa1.0.01609.1 | 239 | 42280  | 1.00E-107 | 224 | 233 | 96 +  | 1   | 233 | 35024  | 35256  |
| UN56801 | Rsa1.0.00158.1 | 471 | 117999 | 1.00E-129 | 234 | 234 | 100 - | 3   | 236 | 40584  | 40817  |
| UN56802 | Rsa1.0.12001.1 | 803 | 5345   | 0         | 784 | 803 | 97 +  | 1   | 803 | 28     | 830    |
| UN56803 | Rsa1.0.00435.1 | 103 | 317579 | 3.00E-42  | 99  | 103 | 96 +  | 1   | 103 | 74200  | 74302  |
| UN56804 | Rsa1.0.01837.1 | 788 | 38502  | 1.00E-158 | 295 | 299 | 98 -  | 1   | 299 | 37610  | 37908  |
| UN56805 | Rsa1.0.00290.1 | 718 | 225096 | 0         | 558 | 560 | 99 -  | 2   | 561 | 4455   | 5014   |
| UN56806 | Rsa1.0.00055.1 | 441 | 520193 | 0         | 417 | 440 | 94 -  | 5   | 441 | 340328 | 340766 |
| UN56807 | Rsa1.0.02206.1 | 810 | 33922  | 0         | 770 | 814 | 94 -  | 3   | 810 | 6656   | 7461   |
| UN56808 | Rsa1.0.01265.1 | 194 | 49686  | 1.00E-18  | 105 | 124 | 84 +  | 67  | 190 | 36418  | 36541  |
| UN56809 | Rsa1.0.00069.1 | 326 | 403561 | 1.00E-101 | 211 | 218 | 96 +  | 1   | 218 | 395422 | 395638 |
| UN56810 | Rsa1.0.03410.1 | 238 | 23147  | 6.00E-95  | 223 | 238 | 93 -  | 1   | 238 | 10396  | 10630  |
| UN56811 | Rsa1.0.02796.1 | 927 | 27805  | 1.00E-136 | 300 | 313 | 95 -  | 1   | 310 | 16192  | 16501  |
| UN56812 | #              | #   | #      | #         | #   | #   | #     | #   | #   | #      | #      |
| UN56813 | Rsa1.0.00190.1 | 894 | 318240 | 0         | 614 | 617 | 99 +  | 1   | 617 | 140914 | 141530 |
| UN56814 | Rsa1.0.03503.1 | 794 | 22445  | 0         | 556 | 568 | 97 -  | 1   | 568 | 15755  | 16321  |
| UN56815 | Rsa1.0.16231.1 | 819 | 131890 | 1.00E-128 | 235 | 236 | 99 +  | 452 | 687 | 130090 | 130325 |
| UN56816 | Rsa1.0.00017.1 | 163 | 752458 | 4.00E-67  | 153 | 161 | 95 -  | 1   | 161 | 368952 | 369112 |
| UN56817 | Rsa1.0.00491.1 | 138 | 80219  | 2.00E-50  | 132 | 142 | 92 +  | 1   | 138 | 46680  | 46821  |
| UN56818 | Rsa1.0.02079.1 | 492 | 35306  | 0         | 415 | 431 | 96 +  | 3   | 433 | 3681   | 4111   |
| UN56819 | Rsa1.0.00246.1 | 780 | 103541 | 0         | 611 | 612 | 99 +  | 169 | 780 | 10961  | 11572  |
| UN56820 | Rsa1.0.00644.1 | 433 | 136881 | 1.00E-154 | 349 | 378 | 92 -  | 1   | 378 | 41427  | 41786  |
| UN56821 | Rsa1.0.00236.1 | 923 | 104771 | 0         | 406 | 409 | 99 +  | 1   | 409 | 20455  | 20863  |

|         |                |     |        |           |     |     |       |     |     |        |        |
|---------|----------------|-----|--------|-----------|-----|-----|-------|-----|-----|--------|--------|
| UN56822 | Rsa1.0.00423.1 | 833 | 86138  | 0         | 677 | 680 | 99 -  | 1   | 680 | 48394  | 49073  |
| UN56823 | Rsa1.0.00061.1 | 662 | 218685 | 1.00E-49  | 123 | 129 | 95 +  | 138 | 265 | 166357 | 166485 |
| UN56824 | Rsa1.0.21279.1 | 425 | 1219   | 0         | 423 | 427 | 99 -  | 1   | 425 | 144    | 570    |
| UN56825 | Rsa1.0.00018.1 | 746 | 410899 | 0         | 416 | 434 | 95 -  | 1   | 432 | 51112  | 51544  |
| UN56826 | Rsa1.0.05665.1 | 716 | 13003  | 1.00E-116 | 216 | 217 | 99 -  | 1   | 217 | 12268  | 12484  |
| UN56827 | Rsa1.0.00963.1 | 845 | 58176  | 7.00E-45  | 99  | 101 | 98 +  | 231 | 331 | 36340  | 36440  |
| UN56828 | Rsa1.0.02064.1 | 278 | 35476  | 1.00E-119 | 265 | 280 | 94 -  | 1   | 278 | 15849  | 16128  |
| UN56829 | Rsa1.0.16170.1 | 738 | 2258   | 1.00E-156 | 279 | 279 | 100 + | 2   | 280 | 1264   | 1542   |
| UN56830 | Rsa1.0.01982.1 | 553 | 36530  | 0         | 541 | 553 | 97 +  | 1   | 553 | 25906  | 26458  |
| UN56831 | Rsa1.0.14746.1 | 180 | 3110   | 1.00E-36  | 96  | 102 | 94 -  | 36  | 137 | 2928   | 3029   |
| UN56832 | Rsa1.0.01575.1 | 468 | 42924  | 5.00E-69  | 136 | 137 | 99 +  | 2   | 138 | 41948  | 42084  |
| UN56833 | Rsa1.0.03401.1 | 873 | 23191  | 0         | 830 | 863 | 96 -  | 1   | 848 | 22235  | 23097  |
| UN56834 | Rsa1.0.02097.1 | 195 | 35036  | 3.00E-56  | 138 | 147 | 93 -  | 44  | 190 | 18920  | 19066  |
| UN56835 | Rsa1.0.01221.1 | 785 | 50421  | 0         | 782 | 785 | 99 -  | 1   | 785 | 13309  | 14093  |
| UN56836 | Rsa1.0.00185.1 | 187 | 248445 | 4.00E-55  | 177 | 196 | 90 -  | 1   | 184 | 10380  | 10573  |
| UN56837 | Rsa1.0.01656.1 | 597 | 41494  | 4.00E-89  | 185 | 191 | 96 +  | 355 | 545 | 12318  | 12508  |
| UN56838 | Rsa1.0.00045.1 | 276 | 328694 | 1.00E-120 | 260 | 274 | 94 +  | 3   | 276 | 184436 | 184709 |
| UN56839 | Rsa1.0.00129.1 | 886 | 126831 | 0         | 386 | 393 | 98 +  | 116 | 508 | 29136  | 29527  |
| UN56840 | Rsa1.0.01359.1 | 510 | 47271  | 5.00E-85  | 278 | 322 | 86 +  | 2   | 301 | 32519  | 32833  |
| UN56841 | Rsa1.0.00092.1 | 821 | 659932 | 0         | 537 | 601 | 89 -  | 1   | 567 | 456551 | 457150 |
| UN56842 | Rsa1.0.03436.1 | 145 | 22958  | 2.00E-62  | 136 | 141 | 96 +  | 5   | 145 | 544    | 684    |
| UN56843 | Rsa1.0.00025.1 | 758 | 277312 | 0         | 540 | 552 | 97 +  | 1   | 552 | 97681  | 98230  |
| UN56844 | #              | #   | #      | #         | #   | #   | #     | #   | #   | #      | #      |
| UN56845 | Rsa1.0.00595.1 | 508 | 341648 | 0         | 480 | 508 | 94 -  | 7   | 508 | 192891 | 193398 |
| UN56846 | Rsa1.0.00812.1 | 615 | 63233  | 0         | 372 | 384 | 96 +  | 1   | 384 | 1589   | 1972   |
| UN56847 | Rsa1.0.01775.1 | 568 | 39519  | 8.00E-81  | 183 | 192 | 95 -  | 24  | 215 | 6860   | 7049   |
| UN56848 | Rsa1.0.00604.1 | 385 | 146282 | 1.00E-134 | 297 | 315 | 94 -  | 4   | 318 | 111511 | 111825 |
| UN56849 | Rsa1.0.03165.1 | 665 | 24866  | 0         | 409 | 413 | 99 -  | 252 | 663 | 18882  | 19294  |
| UN56850 | Rsa1.0.02430.1 | 444 | 31506  | 1.00E-78  | 194 | 209 | 92 +  | 233 | 441 | 13146  | 13354  |
| UN56851 | Rsa1.0.00089.1 | 227 | 406142 | 5.00E-86  | 210 | 224 | 93 -  | 7   | 227 | 231283 | 231506 |
| UN56852 | Rsa1.0.02944.1 | 802 | 26553  | 1.00E-138 | 297 | 312 | 95 -  | 8   | 314 | 15937  | 16245  |
| UN56853 | Rsa1.0.00546.1 | 503 | 76523  | 0         | 475 | 495 | 95 -  | 2   | 496 | 25215  | 25708  |
| UN56854 | Rsa1.0.00793.1 | 178 | 64103  | 5.00E-30  | 154 | 181 | 85 +  | 1   | 175 | 52053  | 52230  |
| UN56855 | Rsa1.0.01406.1 | 246 | 46439  | 2.00E-85  | 169 | 172 | 98 +  | 1   | 172 | 40452  | 40623  |
| UN56856 | Rsa1.0.45094.1 | 102 | 500    | 1.00E-41  | 98  | 102 | 96 -  | 1   | 102 | 150    | 251    |
| UN56857 | Rsa1.0.00796.1 | 487 | 63997  | 0         | 452 | 485 | 93 +  | 7   | 484 | 40348  | 40826  |
| UN56858 | Rsa1.0.01096.1 | 775 | 54266  | 1.00E-134 | 301 | 317 | 94 +  | 3   | 315 | 8879   | 9194   |
| UN56859 | Rsa1.0.07577.1 | 811 | 9092   | 0         | 569 | 598 | 95 -  | 7   | 603 | 7519   | 8113   |
| UN56860 | Rsa1.0.07219.1 | 178 | 9702   | 7.00E-63  | 165 | 178 | 92 +  | 1   | 178 | 336    | 512    |

|         |                |     |        |           |     |     |       |     |     |        |        |
|---------|----------------|-----|--------|-----------|-----|-----|-------|-----|-----|--------|--------|
| UN56861 | Rsa1.0.02548.1 | 719 | 30228  | 0         | 705 | 717 | 98 -  | 3   | 719 | 1073   | 1785   |
| UN56862 | Rsa1.0.00550.1 | 606 | 210790 | 1.00E-112 | 262 | 279 | 93 +  | 1   | 279 | 54906  | 55175  |
| UN56863 | Rsa1.0.00262.1 | 126 | 101906 | 3.00E-61  | 122 | 123 | 99 -  | 4   | 126 | 45595  | 45717  |
| UN56864 | Rsa1.0.06784.1 | 662 | 10359  | 0         | 658 | 665 | 98 -  | 1   | 662 | 6497   | 7160   |
| UN56865 | Rsa1.0.02117.1 | 735 | 34843  | 0         | 377 | 383 | 98 -  | 1   | 383 | 10862  | 11244  |
| UN56866 | Rsa1.0.00079.1 | 547 | 606987 | 1.00E-85  | 208 | 221 | 94 +  | 1   | 221 | 40426  | 40644  |
| UN56867 | Rsa1.0.00030.1 | 269 | 250988 | 1.00E-65  | 139 | 143 | 97 -  | 63  | 205 | 174954 | 175096 |
| UN56868 | Rsa1.0.14271.1 | 384 | 3591   | 1.00E-112 | 223 | 229 | 97 -  | 156 | 384 | 3363   | 3591   |
| UN56869 | Rsa1.0.04434.1 | 774 | 17377  | 0         | 735 | 776 | 94 +  | 4   | 774 | 7289   | 8057   |
| UN56870 | Rsa1.0.05461.1 | 609 | 13674  | 1.00E-132 | 263 | 271 | 97 -  | 1   | 271 | 9168   | 9438   |
| UN56871 | Rsa1.0.02700.1 | 763 | 28584  | 0         | 459 | 471 | 97 +  | 1   | 469 | 2884   | 3354   |
| UN56872 | Rsa1.0.00092.1 | 718 | 659932 | 0         | 698 | 731 | 95 -  | 1   | 718 | 312114 | 312841 |
| UN56873 | Rsa1.0.04440.1 | 811 | 17347  | 0         | 706 | 769 | 91 -  | 3   | 748 | 14024  | 14775  |
| UN56874 | Rsa1.0.00786.1 | 711 | 64285  | 0         | 673 | 711 | 94 -  | 17  | 711 | 33343  | 34053  |
| UN56875 | Rsa1.0.00408.1 | 818 | 176752 | 0         | 395 | 410 | 96 +  | 411 | 818 | 133299 | 133708 |
| UN56876 | Rsa1.0.00001.1 | 699 | 363028 | 1.00E-168 | 338 | 349 | 96 +  | 1   | 346 | 242274 | 242620 |
| UN56877 | Rsa1.0.02129.1 | 756 | 34757  | 0         | 735 | 765 | 96 -  | 4   | 756 | 12765  | 13529  |
| UN56878 | Rsa1.0.00188.1 | 629 | 112020 | 1.00E-180 | 319 | 319 | 100 + | 311 | 629 | 3989   | 4307   |
| UN56879 | Rsa1.0.01519.1 | 822 | 44144  | 0         | 665 | 696 | 95 +  | 1   | 680 | 24156  | 24851  |
| UN56880 | Rsa1.0.04005.1 | 585 | 19586  | 0         | 559 | 585 | 95 -  | 1   | 585 | 15412  | 15988  |
| UN56881 | Rsa1.0.00425.1 | 571 | 147080 | 0         | 553 | 572 | 96 +  | 2   | 571 | 113873 | 114441 |
| UN56882 | Rsa1.0.00604.1 | 742 | 146282 | 4.00E-80  | 182 | 192 | 94 -  | 486 | 677 | 80064  | 80255  |
| UN56883 | Rsa1.0.02929.1 | 801 | 26673  | 0         | 759 | 804 | 94 +  | 1   | 796 | 13882  | 14685  |
| UN56884 | Rsa1.0.00841.1 | 132 | 183065 | 2.00E-31  | 82  | 85  | 96 +  | 49  | 132 | 159158 | 159242 |
| UN56885 | Rsa1.0.05505.1 | 704 | 13500  | 1.00E-115 | 333 | 369 | 90 -  | 174 | 535 | 2698   | 3052   |
| UN56886 | Rsa1.0.00899.1 | 760 | 60404  | 1.00E-83  | 173 | 178 | 97 +  | 201 | 378 | 17485  | 17662  |
| UN56887 | Rsa1.0.02548.1 | 786 | 30228  | 0         | 349 | 352 | 99 -  | 437 | 786 | 8792   | 9143   |
| UN56888 | Rsa1.0.00749.1 | 700 | 65933  | 0         | 490 | 509 | 96 +  | 1   | 507 | 34591  | 35098  |
| UN56889 | Rsa1.0.15011.1 | 859 | 2893   | 1.00E-148 | 329 | 347 | 94 -  | 3   | 348 | 807    | 1147   |
| UN56890 | Rsa1.0.04802.1 | 702 | 15914  | 0         | 394 | 401 | 98 +  | 1   | 401 | 15152  | 15551  |
| UN56891 | Rsa1.0.01792.1 | 812 | 39227  | 0         | 414 | 420 | 98 +  | 1   | 420 | 34160  | 34579  |
| UN56892 | Rsa1.0.00707.1 | 572 | 190112 | 0         | 562 | 587 | 95 +  | 1   | 572 | 15510  | 16096  |
| UN56893 | Rsa1.0.01258.1 | 681 | 49755  | 0         | 477 | 479 | 99 -  | 1   | 479 | 46488  | 46966  |
| UN56894 | Rsa1.0.00457.1 | 380 | 337301 | 7.00E-65  | 141 | 146 | 96 +  | 17  | 162 | 129417 | 129562 |
| UN56895 | Rsa1.0.05326.1 | 813 | 14139  | 0         | 345 | 350 | 98 -  | 465 | 813 | 2944   | 3293   |
| UN56896 | Rsa1.0.00040.1 | 704 | 324196 | 9.00E-72  | 144 | 146 | 98 +  | 550 | 695 | 89657  | 89802  |
| UN56897 | Rsa1.0.02309.1 | 154 | 32744  | 4.00E-70  | 149 | 154 | 96 -  | 1   | 154 | 31146  | 31299  |
| UN56898 | Rsa1.0.71724.1 | 376 | 319    | 1.00E-78  | 185 | 193 | 95 -  | 1   | 190 | 1      | 193    |
| UN56899 | Rsa1.0.01046.1 | 298 | 152989 | 3.00E-91  | 194 | 202 | 96 -  | 1   | 202 | 139680 | 139881 |

|         |                |     |        |           |     |     |       |     |     |        |        |
|---------|----------------|-----|--------|-----------|-----|-----|-------|-----|-----|--------|--------|
| UN56900 | Rsa1.0.00471.1 | 184 | 81897  | 8.00E-72  | 170 | 181 | 93 +  | 4   | 184 | 72229  | 72409  |
| UN56901 | Rsa1.0.00040.1 | 119 | 324196 | 2.00E-28  | 103 | 116 | 88 -  | 1   | 116 | 110673 | 110788 |
| UN56902 | Rsa1.0.02269.1 | 580 | 33168  | 0         | 551 | 581 | 94 +  | 1   | 580 | 9017   | 9585   |
| UN56903 | Rsa1.0.03853.1 | 545 | 20447  | 1.00E-128 | 270 | 281 | 96 -  | 83  | 362 | 14042  | 14322  |
| UN56904 | Rsa1.0.01101.1 | 711 | 54031  | 1.00E-168 | 369 | 389 | 94 +  | 1   | 385 | 14275  | 14662  |
| UN56905 | Rsa1.0.00002.1 | 485 | 601661 | 5.00E-57  | 122 | 125 | 97 +  | 322 | 446 | 140755 | 140879 |
| UN56906 | Rsa1.0.01081.1 | 399 | 499226 | 1.00E-102 | 227 | 240 | 94 -  | 160 | 399 | 19381  | 19620  |
| UN56907 | Rsa1.0.02648.1 | 112 | 29073  | 2.00E-15  | 51  | 54  | 94 -  | 2   | 55  | 7574   | 7627   |
| UN56908 | Rsa1.0.00383.1 | 884 | 398431 | 0         | 691 | 723 | 95 -  | 126 | 835 | 21577  | 22299  |
| UN56909 | Rsa1.0.00589.1 | 265 | 209965 | 3.00E-75  | 239 | 265 | 90 +  | 5   | 265 | 179934 | 180195 |
| UN56910 | Rsa1.0.00362.1 | 295 | 299497 | 1.00E-111 | 249 | 263 | 94 -  | 35  | 295 | 292807 | 293069 |
| UN56911 | Rsa1.0.01414.1 | 414 | 149508 | 1.00E-151 | 343 | 365 | 93 -  | 1   | 365 | 115743 | 116103 |
| UN56912 | Rsa1.0.03216.1 | 134 | 24540  | 1.00E-51  | 124 | 131 | 94 -  | 4   | 134 | 21017  | 21147  |
| UN56913 | Rsa1.0.03668.1 | 464 | 21483  | 0         | 453 | 464 | 97 -  | 1   | 464 | 10000  | 10463  |
| UN56914 | Rsa1.0.11131.1 | 575 | 5607   | 5.00E-88  | 237 | 262 | 90 -  | 6   | 254 | 4542   | 4798   |
| UN56915 | Rsa1.0.00112.1 | 556 | 132199 | 1.00E-105 | 209 | 214 | 97 +  | 336 | 549 | 101023 | 101236 |
| UN56916 | Rsa1.0.04799.1 | 315 | 15926  | 8.00E-21  | 52  | 52  | 100 - | 1   | 52  | 6821   | 6872   |
| UN56917 | Rsa1.0.00529.1 | 744 | 77487  | 1.00E-180 | 459 | 509 | 90 -  | 200 | 708 | 6144   | 6637   |
| UN56918 | Rsa1.0.00178.1 | 744 | 114861 | 0         | 508 | 523 | 97 -  | 1   | 520 | 6211   | 6733   |
| UN56919 | Rsa1.0.04048.1 | 892 | 19394  | 1.00E-147 | 326 | 342 | 95 -  | 482 | 817 | 13538  | 13879  |
| UN56920 | Rsa1.0.00438.1 | 702 | 84861  | 0         | 664 | 671 | 98 -  | 6   | 675 | 45042  | 45712  |
| UN56921 | Rsa1.0.00480.1 | 666 | 81325  | 0         | 579 | 593 | 97 -  | 1   | 591 | 7836   | 8428   |
| UN56922 | Rsa1.0.02803.1 | 684 | 27715  | 1.00E-101 | 228 | 239 | 95 -  | 1   | 238 | 26242  | 26479  |
| UN56923 | Rsa1.0.00869.1 | 832 | 61627  | 1.00E-148 | 314 | 332 | 94 +  | 1   | 315 | 13415  | 13746  |
| UN56924 | Rsa1.0.05501.1 | 560 | 13513  | 2.00E-75  | 168 | 176 | 95 -  | 199 | 374 | 9065   | 9240   |
| UN56925 | Rsa1.0.02923.1 | 623 | 26736  | 0         | 612 | 622 | 98 +  | 3   | 623 | 11625  | 12243  |
| UN56926 | Rsa1.0.00460.1 | 627 | 206387 | 0         | 575 | 601 | 95 +  | 1   | 599 | 17666  | 18261  |
| UN56927 | Rsa1.0.00164.1 | 740 | 116642 | 0         | 728 | 760 | 95 +  | 1   | 740 | 74504  | 75261  |
| UN56928 | Rsa1.0.11907.1 | 845 | 5374   | 0         | 475 | 496 | 95 +  | 355 | 845 | 2121   | 2613   |
| UN56929 | Rsa1.0.00351.1 | 407 | 413096 | 4.00E-91  | 179 | 182 | 98 +  | 226 | 407 | 14258  | 14439  |
| UN56930 | Rsa1.0.15121.1 | 754 | 2812   | 1.00E-169 | 369 | 388 | 95 -  | 279 | 664 | 233    | 618    |
| UN56931 | Rsa1.0.03843.1 | 891 | 20496  | 2.00E-85  | 266 | 294 | 90 -  | 578 | 862 | 6228   | 6521   |
| UN56932 | Rsa1.0.01349.1 | 821 | 47513  | 0         | 797 | 823 | 96 -  | 1   | 821 | 10750  | 11563  |
| UN56933 | Rsa1.0.13471.1 | 226 | 4802   | 4.00E-68  | 209 | 229 | 91 -  | 4   | 226 | 4151   | 4373   |
| UN56934 | Rsa1.0.00543.1 | 271 | 76788  | 3.00E-66  | 152 | 160 | 95 -  | 109 | 268 | 43029  | 43188  |
| UN56935 | Rsa1.0.01617.1 | 687 | 42127  | 0         | 379 | 396 | 95 +  | 90  | 479 | 24907  | 25302  |
| UN56936 | Rsa1.0.00068.1 | 345 | 151813 | 1.00E-132 | 316 | 338 | 93 -  | 13  | 345 | 104632 | 104965 |
| UN56937 | Rsa1.0.20965.1 | 745 | 1249   | 1.00E-148 | 273 | 275 | 99 -  | 3   | 277 | 218    | 492    |
| UN56938 | Rsa1.0.03820.1 | 790 | 20664  | 2.00E-79  | 151 | 151 | 100 + | 233 | 383 | 5678   | 5828   |

|         |                |     |        |           |     |     |       |     |     |        |        |
|---------|----------------|-----|--------|-----------|-----|-----|-------|-----|-----|--------|--------|
| UN56939 | Rsa1.0.00225.1 | 756 | 105892 | 0         | 573 | 582 | 98 +  | 175 | 756 | 78843  | 79423  |
| UN56940 | Rsa1.0.00007.1 | 847 | 239325 | 1.00E-162 | 321 | 330 | 97 -  | 473 | 801 | 21271  | 21600  |
| UN56941 | Rsa1.0.00016.1 | 714 | 831256 | 0         | 570 | 602 | 94 -  | 114 | 713 | 651388 | 651989 |
| UN56942 | Rsa1.0.00219.1 | 721 | 106983 | 3.00E-81  | 179 | 185 | 96 -  | 3   | 184 | 45753  | 45937  |
| UN56943 | Rsa1.0.09762.1 | 110 | 6164   | 1.00E-44  | 103 | 107 | 96 +  | 4   | 110 | 6056   | 6162   |
| UN56944 | Rsa1.0.02228.1 | 533 | 33688  | 1.00E-149 | 346 | 366 | 94 +  | 5   | 368 | 10194  | 10554  |
| UN56945 | Rsa1.0.00577.1 | 732 | 174827 | 0         | 720 | 734 | 98 +  | 1   | 732 | 159619 | 160352 |
| UN56946 | Rsa1.0.00974.1 | 887 | 57893  | 1.00E-95  | 187 | 190 | 98 +  | 294 | 483 | 52461  | 52650  |
| UN56947 | Rsa1.0.01356.1 | 783 | 47287  | 8.00E-94  | 254 | 278 | 91 -  | 1   | 265 | 36339  | 36611  |
| UN56948 | Rsa1.0.00061.1 | 723 | 218685 | 1.00E-139 | 300 | 314 | 95 -  | 2   | 314 | 202138 | 202449 |
| UN56949 | Rsa1.0.00387.1 | 875 | 495407 | 1.00E-179 | 373 | 389 | 95 +  | 34  | 419 | 398897 | 399285 |
| UN56950 | Rsa1.0.00087.1 | 838 | 761073 | 0         | 438 | 463 | 94 +  | 380 | 838 | 212971 | 213430 |
| UN56951 | Rsa1.0.01884.1 | 810 | 37659  | 0         | 460 | 479 | 96 -  | 333 | 809 | 30547  | 31021  |
| UN56952 | Rsa1.0.01083.1 | 180 | 54617  | 2.00E-29  | 81  | 86  | 94 -  | 62  | 147 | 4741   | 4826   |
| UN56953 | #              | #   | #      | #         | #   | #   | #     | #   | #   | #      | #      |
| UN56954 | Rsa1.0.37507.1 | 783 | 601    | 1.00E-175 | 368 | 386 | 95 +  | 1   | 384 | 216    | 601    |
| UN56955 | Rsa1.0.02274.1 | 740 | 33109  | 0         | 451 | 459 | 98 -  | 282 | 740 | 8259   | 8714   |
| UN56956 | Rsa1.0.00525.1 | 729 | 78030  | 0         | 705 | 720 | 97 -  | 12  | 729 | 61518  | 62236  |
| UN56957 | Rsa1.0.09451.1 | 132 | 6359   | 9.00E-34  | 108 | 117 | 92 +  | 1   | 116 | 5878   | 5993   |
| UN56958 | Rsa1.0.01860.1 | 800 | 38057  | 1.00E-144 | 319 | 339 | 94 +  | 3   | 335 | 21434  | 21772  |
| UN56959 | Rsa1.0.01618.1 | 732 | 42118  | 0         | 717 | 736 | 97 +  | 1   | 732 | 16236  | 16965  |
| UN56960 | Rsa1.0.00078.1 | 313 | 175053 | 1.00E-136 | 299 | 316 | 94 +  | 1   | 313 | 130330 | 130645 |
| UN56961 | Rsa1.0.00732.1 | 875 | 66631  | 1.00E-132 | 264 | 271 | 97 -  | 85  | 355 | 44927  | 45196  |
| UN56962 | Rsa1.0.01013.1 | 783 | 56822  | 0         | 666 | 737 | 90 -  | 44  | 780 | 7240   | 7976   |
| UN56963 | Rsa1.0.01739.1 | 516 | 40068  | 1.00E-134 | 269 | 278 | 96 -  | 239 | 516 | 6449   | 6726   |
| UN56964 | Rsa1.0.01965.1 | 120 | 36698  | 6.00E-13  | 61  | 66  | 92 -  | 4   | 69  | 26235  | 26298  |
| UN56965 | Rsa1.0.01731.1 | 758 | 40208  | 1.00E-123 | 243 | 249 | 97 -  | 461 | 709 | 29671  | 29919  |
| UN56966 | Rsa1.0.01743.1 | 218 | 39926  | 2.00E-73  | 188 | 204 | 92 +  | 15  | 218 | 6914   | 7117   |
| UN56967 | Rsa1.0.00589.1 | 722 | 209965 | 0         | 659 | 692 | 95 +  | 40  | 722 | 166952 | 167642 |
| UN56968 | Rsa1.0.03567.1 | 480 | 22049  | 0         | 394 | 394 | 100 - | 1   | 394 | 13158  | 13551  |
| UN56969 | Rsa1.0.00269.1 | 115 | 341668 | 5.00E-35  | 105 | 115 | 91 -  | 1   | 115 | 306839 | 306953 |
| UN56970 | Rsa1.0.00627.1 | 173 | 71566  | 7.00E-63  | 159 | 170 | 93 -  | 5   | 173 | 5813   | 5982   |
| UN56971 | Rsa1.0.11811.1 | 515 | 5401   | 3.00E-86  | 177 | 182 | 97 -  | 304 | 485 | 2094   | 2275   |
| UN56972 | Rsa1.0.01824.1 | 452 | 38733  | 1.00E-109 | 222 | 229 | 96 +  | 1   | 229 | 7795   | 8023   |
| UN56973 | Rsa1.0.04463.1 | 779 | 17247  | 0         | 549 | 572 | 95 -  | 1   | 568 | 15847  | 16415  |
| UN56974 | Rsa1.0.00776.1 | 775 | 64637  | 0         | 416 | 444 | 93 +  | 1   | 440 | 1666   | 2109   |
| UN56975 | Rsa1.0.00699.1 | 135 | 184398 | 2.00E-47  | 123 | 132 | 93 +  | 1   | 132 | 121717 | 121848 |
| UN56976 | Rsa1.0.02851.1 | 722 | 27295  | 0         | 450 | 451 | 99 -  | 1   | 451 | 8083   | 8533   |
| UN56977 | Rsa1.0.00168.1 | 540 | 115870 | 1.00E-128 | 256 | 263 | 97 -  | 280 | 540 | 88712  | 88974  |

|         |                |     |        |           |     |     |      |     |     |        |        |
|---------|----------------|-----|--------|-----------|-----|-----|------|-----|-----|--------|--------|
| UN56978 | Rsa1.0.01669.1 | 724 | 41286  | 1.00E-171 | 324 | 328 | 98 + | 98  | 424 | 9237   | 9563   |
| UN56979 | Rsa1.0.00675.1 | 707 | 145590 | 6.00E-48  | 101 | 102 | 99 + | 231 | 332 | 47534  | 47635  |
| UN56980 | Rsa1.0.01175.1 | 522 | 51674  | 0         | 516 | 522 | 98 + | 1   | 522 | 38861  | 39382  |
| UN56981 | Rsa1.0.00333.1 | 291 | 94500  | 2.00E-39  | 86  | 87  | 98 - | 140 | 226 | 80154  | 80240  |
| UN56982 | Rsa1.0.00931.1 | 701 | 59210  | 1.00E-125 | 261 | 269 | 97 + | 1   | 265 | 21715  | 21982  |
| UN56983 | Rsa1.0.00017.1 | 484 | 752458 | 0         | 467 | 483 | 96 - | 1   | 483 | 286107 | 286586 |
| UN56984 | Rsa1.0.01990.1 | 765 | 36431  | 0         | 761 | 766 | 99 + | 2   | 765 | 32544  | 33308  |
| UN56985 | Rsa1.0.05217.1 | 599 | 142938 | 1.00E-171 | 307 | 308 | 99 + | 2   | 309 | 129137 | 129444 |
| UN56986 | Rsa1.0.00115.1 | 561 | 131321 | 1.00E-147 | 359 | 383 | 93 - | 2   | 378 | 68836  | 69211  |
| UN56987 | Rsa1.0.00427.1 | 561 | 189678 | 1.00E-101 | 202 | 207 | 97 - | 248 | 454 | 10947  | 11153  |
| UN56988 | Rsa1.0.00020.1 | 231 | 283099 | 7.00E-76  | 174 | 184 | 94 - | 1   | 184 | 92156  | 92339  |
| UN56989 | Rsa1.0.00059.1 | 722 | 159650 | 0         | 405 | 414 | 97 - | 309 | 722 | 66822  | 67235  |
| UN56990 | Rsa1.0.00105.1 | 716 | 134138 | 1.00E-135 | 274 | 281 | 97 + | 314 | 592 | 85009  | 85289  |
| UN56991 | Rsa1.0.00040.1 | 708 | 324196 | 0         | 568 | 609 | 93 - | 101 | 706 | 240167 | 240758 |
| UN56992 | Rsa1.0.00078.1 | 164 | 175053 | 2.00E-59  | 152 | 164 | 92 + | 1   | 164 | 130159 | 130322 |
| UN56993 | Rsa1.0.02682.1 | 690 | 28711  | 0         | 615 | 635 | 96 + | 57  | 690 | 16904  | 17538  |
| UN56994 | Rsa1.0.03860.1 | 761 | 20407  | 0         | 684 | 728 | 93 - | 42  | 761 | 13177  | 13904  |
| UN56995 | Rsa1.0.47030.1 | 759 | 481    | 3.00E-96  | 299 | 335 | 89 - | 410 | 741 | 1      | 335    |
| UN56996 | Rsa1.0.03723.1 | 192 | 21173  | 1.00E-24  | 157 | 188 | 83 - | 4   | 188 | 8420   | 8596   |
| UN56997 | Rsa1.0.00141.1 | 252 | 121494 | 1.00E-77  | 224 | 247 | 90 - | 1   | 246 | 20836  | 21081  |
| UN56998 | Rsa1.0.02429.1 | 314 | 31527  | 1.00E-115 | 288 | 314 | 91 - | 1   | 314 | 9981   | 10294  |
| UN56999 | Rsa1.0.00069.1 | 757 | 403561 | 0         | 477 | 502 | 95 - | 1   | 494 | 13176  | 13676  |
| UN57000 | Rsa1.0.00293.1 | 784 | 339294 | 0         | 725 | 756 | 95 + | 33  | 784 | 318457 | 319212 |
| UN57001 | Rsa1.0.00224.1 | 165 | 327530 | 6.00E-51  | 114 | 118 | 96 + | 33  | 150 | 178520 | 178637 |
| UN57002 | Rsa1.0.00721.1 | 703 | 66918  | 1.00E-125 | 314 | 340 | 92 - | 270 | 602 | 4442   | 4781   |
| UN57003 | Rsa1.0.00370.1 | 174 | 90472  | 6.00E-17  | 60  | 65  | 92 + | 110 | 174 | 23323  | 23387  |
| UN57004 | Rsa1.0.00473.1 | 701 | 212204 | 3.00E-96  | 185 | 187 | 98 + | 1   | 187 | 71451  | 71637  |
| UN57005 | Rsa1.0.00009.1 | 735 | 232558 | 8.00E-94  | 190 | 195 | 97 + | 169 | 363 | 53747  | 53941  |
| UN57006 | Rsa1.0.00092.1 | 669 | 659932 | 1.00E-155 | 296 | 302 | 98 - | 6   | 307 | 154977 | 155278 |
| UN57007 | Rsa1.0.00040.1 | 517 | 324196 | 0         | 493 | 525 | 93 + | 2   | 517 | 296474 | 296993 |
| UN57008 | Rsa1.0.01364.1 | 203 | 47172  | 1.00E-67  | 192 | 215 | 89 + | 1   | 203 | 43463  | 43677  |
| UN57009 | Rsa1.0.00055.1 | 565 | 520193 | 0         | 519 | 564 | 92 + | 1   | 563 | 350348 | 350896 |
| UN57010 | Rsa1.0.00269.1 | 692 | 341668 | 0         | 649 | 687 | 94 - | 6   | 692 | 48577  | 49249  |
| UN57011 | Rsa1.0.03926.1 | 559 | 20024  | 1.00E-24  | 161 | 195 | 82 + | 181 | 375 | 18798  | 18992  |
| UN57012 | Rsa1.0.05937.1 | 746 | 12175  | 0         | 687 | 707 | 97 + | 40  | 746 | 1616   | 2322   |
| UN57013 | Rsa1.0.00883.1 | 195 | 61230  | 1.00E-49  | 155 | 172 | 90 - | 1   | 171 | 54391  | 54562  |
| UN57014 | Rsa1.0.01540.1 | 193 | 151890 | 4.00E-77  | 177 | 187 | 94 + | 1   | 183 | 128012 | 128198 |
| UN57015 | Rsa1.0.01645.1 | 300 | 41748  | 1.00E-101 | 286 | 314 | 91 + | 1   | 300 | 16600  | 16907  |
| UN57016 | Rsa1.0.01010.1 | 400 | 56906  | 3.00E-67  | 151 | 158 | 95 + | 1   | 158 | 15754  | 15911  |



|         |                |     |        |           |     |     |       |     |     |        |        |
|---------|----------------|-----|--------|-----------|-----|-----|-------|-----|-----|--------|--------|
| UN57017 | Rsa1.0.03883.1 | 426 | 20282  | 0         | 413 | 432 | 95 -  | 1   | 426 | 10111  | 10542  |
| UN57018 | Rsa1.0.00627.1 | 477 | 71566  | 5.00E-91  | 198 | 207 | 95 -  | 1   | 207 | 63670  | 63872  |
| UN57019 | Rsa1.0.00008.1 | 552 | 358124 | 1.00E-101 | 247 | 264 | 93 +  | 10  | 268 | 245396 | 245658 |
| UN57020 | Rsa1.0.00150.1 | 142 | 154416 | 1.00E-33  | 97  | 105 | 92 -  | 38  | 142 | 151654 | 151758 |
| UN57021 | Rsa1.0.00571.1 | 707 | 329018 | 3.00E-84  | 165 | 167 | 98 +  | 310 | 476 | 41922  | 42088  |
| UN57022 | Rsa1.0.00667.1 | 767 | 69460  | 1.00E-135 | 321 | 346 | 92 +  | 409 | 753 | 51311  | 51649  |
| UN57023 | Rsa1.0.01843.1 | 711 | 265131 | 0         | 693 | 707 | 98 +  | 3   | 704 | 25016  | 25722  |
| UN57024 | Rsa1.0.04131.1 | 682 | 18923  | 0         | 358 | 361 | 99 +  | 324 | 682 | 1385   | 1745   |
| UN57025 | Rsa1.0.03304.1 | 709 | 23883  | 0         | 377 | 390 | 96 +  | 2   | 391 | 18298  | 18687  |
| UN57026 | Rsa1.0.00038.1 | 268 | 314568 | 1.00E-112 | 214 | 217 | 98 +  | 1   | 217 | 8423   | 8639   |
| UN57027 | Rsa1.0.19044.1 | 820 | 1490   | 0         | 795 | 833 | 95 +  | 2   | 815 | 233    | 1063   |
| UN57028 | Rsa1.0.05818.1 | 661 | 12544  | 0         | 347 | 354 | 98 -  | 219 | 572 | 9428   | 9781   |
| UN57029 | Rsa1.0.08325.1 | 602 | 7536   | 0         | 591 | 599 | 98 -  | 3   | 601 | 4654   | 5248   |
| UN57030 | Rsa1.0.00002.1 | 696 | 601661 | 0         | 372 | 379 | 98 +  | 3   | 381 | 281960 | 282338 |
| UN57031 | Rsa1.0.02680.1 | 799 | 28721  | 0         | 751 | 784 | 95 +  | 1   | 782 | 18117  | 18899  |
| UN57032 | Rsa1.0.01259.1 | 758 | 49754  | 0         | 488 | 496 | 98 -  | 1   | 494 | 41601  | 42096  |
| UN57033 | Rsa1.0.00012.1 | 502 | 222148 | 1.00E-178 | 339 | 344 | 98 -  | 161 | 502 | 51714  | 52057  |
| UN57034 | Rsa1.0.00055.1 | 788 | 520193 | 0         | 623 | 652 | 95 +  | 82  | 729 | 64727  | 65377  |
| UN57035 | Rsa1.0.14347.1 | 618 | 3490   | 1.00E-155 | 319 | 333 | 95 +  | 25  | 357 | 520    | 852    |
| UN57036 | Rsa1.0.00152.1 | 718 | 257730 | 0         | 484 | 511 | 94 -  | 216 | 718 | 251174 | 251678 |
| UN57037 | Rsa1.0.01538.1 | 439 | 43733  | 1.00E-104 | 192 | 192 | 100 - | 248 | 439 | 7705   | 7896   |
| UN57038 | Rsa1.0.02923.1 | 435 | 26736  | 0         | 378 | 395 | 95 +  | 5   | 385 | 7945   | 8337   |
| UN57039 | Rsa1.0.00079.1 | 631 | 606987 | 0         | 599 | 627 | 95 +  | 1   | 627 | 540409 | 541035 |
| UN57040 | Rsa1.0.00418.1 | 689 | 215377 | 0         | 676 | 696 | 97 -  | 1   | 689 | 68253  | 68948  |
| UN57041 | Rsa1.0.00066.1 | 803 | 152418 | 1.00E-180 | 342 | 348 | 98 -  | 25  | 371 | 73601  | 73948  |
| UN57042 | Rsa1.0.25445.1 | 583 | 935    | 1.00E-140 | 252 | 252 | 100 + | 332 | 583 | 1      | 252    |
| UN57043 | Rsa1.0.63101.1 | 584 | 364    | 4.00E-55  | 146 | 156 | 93 -  | 387 | 539 | 21     | 175    |
| UN57044 | Rsa1.0.00131.1 | 643 | 432233 | 1.00E-140 | 274 | 281 | 97 -  | 363 | 643 | 188545 | 188825 |
| UN57045 | Rsa1.0.02415.1 | 645 | 31609  | 0         | 545 | 562 | 96 -  | 9   | 570 | 27010  | 27565  |
| UN57046 | Rsa1.0.01449.1 | 772 | 45570  | 0         | 581 | 592 | 98 +  | 2   | 593 | 12568  | 13159  |
| UN57047 | Rsa1.0.00576.1 | 763 | 178949 | 0         | 418 | 439 | 95 +  | 162 | 600 | 63282  | 63720  |
| UN57048 | Rsa1.0.06555.1 | 743 | 10794  | 0         | 700 | 750 | 93 -  | 2   | 743 | 6619   | 7360   |
| UN57049 | Rsa1.0.00720.1 | 733 | 66931  | 0         | 370 | 377 | 98 +  | 361 | 733 | 2953   | 3329   |
| UN57050 | Rsa1.0.00467.1 | 803 | 156542 | 0         | 443 | 445 | 99 +  | 56  | 500 | 143234 | 143678 |
| UN57051 | Rsa1.0.00990.1 | 485 | 57445  | 0         | 445 | 470 | 94 -  | 4   | 461 | 47470  | 47936  |
| UN57052 | Rsa1.0.00305.1 | 179 | 97308  | 5.00E-33  | 91  | 97  | 93 -  | 1   | 93  | 17531  | 17627  |
| UN57053 | Rsa1.0.00095.1 | 721 | 283384 | 1.00E-156 | 327 | 340 | 96 -  | 20  | 358 | 41813  | 42151  |
| UN57054 | Rsa1.0.00188.1 | 478 | 112020 | 0         | 445 | 480 | 92 -  | 3   | 478 | 96268  | 96735  |
| UN57055 | Rsa1.0.00001.1 | 415 | 363028 | 1.00E-167 | 315 | 321 | 98 +  | 94  | 414 | 35996  | 36316  |

|         |                |     |        |           |     |     |       |     |     |        |        |
|---------|----------------|-----|--------|-----------|-----|-----|-------|-----|-----|--------|--------|
| UN57056 | Rsa1.0.00025.1 | 725 | 277312 | 0         | 568 | 583 | 97 +  | 124 | 702 | 264675 | 265257 |
| UN57057 | Rsa1.0.00423.1 | 712 | 86138  | 0         | 694 | 709 | 97 -  | 2   | 708 | 67006  | 67713  |
| UN57058 | Rsa1.0.00015.1 | 636 | 561803 | 1.00E-122 | 271 | 287 | 94 -  | 350 | 636 | 332514 | 332800 |
| UN57059 | Rsa1.0.08986.1 | 834 | 6733   | 1.00E-142 | 281 | 288 | 97 +  | 181 | 468 | 5027   | 5313   |
| UN57060 | Rsa1.0.00690.1 | 746 | 140527 | 6.00E-79  | 168 | 174 | 96 -  | 483 | 656 | 26603  | 26776  |
| UN57061 | Rsa1.0.00042.1 | 704 | 171507 | 1.00E-163 | 371 | 398 | 93 -  | 273 | 658 | 102644 | 103041 |
| UN57062 | Rsa1.0.23843.1 | 668 | 1022   | 1.00E-160 | 359 | 382 | 93 +  | 290 | 661 | 338    | 717    |
| UN57063 | Rsa1.0.03269.1 | 735 | 24196  | 1.00E-120 | 302 | 332 | 90 +  | 416 | 735 | 11786  | 12117  |
| UN57064 | Rsa1.0.04460.1 | 775 | 17250  | 0         | 712 | 728 | 97 -  | 47  | 773 | 16359  | 17086  |
| UN57065 | Rsa1.0.66921.1 | 152 | 343    | 4.00E-61  | 119 | 119 | 100 + | 34  | 152 | 1      | 119    |
| UN57066 | Rsa1.0.00892.1 | 642 | 60703  | 0         | 633 | 641 | 98 +  | 3   | 642 | 52458  | 53097  |
| UN57067 | Rsa1.0.00585.1 | 677 | 74164  | 1.00E-172 | 307 | 307 | 100 - | 367 | 673 | 12743  | 13049  |
| UN57068 | Rsa1.0.03325.1 | 666 | 23720  | 3.00E-62  | 122 | 122 | 100 - | 438 | 559 | 15074  | 15195  |
| UN57069 | Rsa1.0.34899.1 | 741 | 648    | 0         | 415 | 434 | 95 -  | 295 | 726 | 1      | 434    |
| UN57070 | Rsa1.0.09084.1 | 165 | 6660   | 9.00E-84  | 164 | 165 | 99 -  | 1   | 165 | 1034   | 1197   |
| UN57071 | Rsa1.0.01649.1 | 526 | 41624  | 5.00E-51  | 115 | 119 | 96 +  | 7   | 125 | 40865  | 40983  |
| UN57072 | Rsa1.0.00942.1 | 701 | 58873  | 0         | 392 | 401 | 97 -  | 301 | 701 | 5088   | 5488   |
| UN57073 | Rsa1.0.00434.1 | 678 | 85171  | 1.00E-119 | 226 | 229 | 98 +  | 450 | 678 | 13937  | 14165  |
| UN57074 | Rsa1.0.03625.1 | 307 | 21692  | 1.00E-147 | 292 | 299 | 97 -  | 10  | 307 | 19580  | 19877  |
| UN57075 | Rsa1.0.00911.1 | 648 | 59943  | 0         | 621 | 654 | 94 +  | 1   | 648 | 54755  | 55408  |
| UN57076 | Rsa1.0.00016.1 | 739 | 831256 | 0         | 619 | 629 | 98 -  | 113 | 739 | 543296 | 543924 |
| UN57077 | Rsa1.0.03664.1 | 694 | 21487  | 1.00E-148 | 331 | 352 | 94 -  | 90  | 438 | 4808   | 5159   |
| UN57078 | Rsa1.0.00241.1 | 688 | 104000 | 0         | 671 | 688 | 97 +  | 2   | 688 | 89026  | 89713  |
| UN57079 | Rsa1.0.00034.1 | 722 | 260119 | 0         | 565 | 576 | 98 +  | 2   | 571 | 8445   | 9020   |
| UN57080 | Rsa1.0.00678.1 | 704 | 193163 | 0         | 508 | 518 | 98 -  | 3   | 518 | 177259 | 177774 |
| UN57081 | Rsa1.0.01704.1 | 714 | 40711  | 1.00E-153 | 344 | 366 | 93 +  | 343 | 707 | 38291  | 38656  |
| UN57082 | Rsa1.0.00243.1 | 727 | 103651 | 1.00E-111 | 242 | 254 | 95 -  | 418 | 668 | 88205  | 88458  |
| UN57083 | Rsa1.0.09164.1 | 705 | 6595   | 0         | 401 | 410 | 97 +  | 4   | 413 | 6186   | 6595   |
| UN57084 | Rsa1.0.18603.1 | 381 | 1566   | 1.00E-158 | 346 | 363 | 95 +  | 19  | 381 | 766    | 1125   |
| UN57085 | Rsa1.0.03283.1 | 527 | 24089  | 1.00E-149 | 267 | 267 | 100 + | 3   | 269 | 23691  | 23957  |
| UN57086 | Rsa1.0.00016.1 | 648 | 831256 | 0         | 430 | 456 | 94 +  | 187 | 639 | 650571 | 651026 |
| UN57087 | Rsa1.0.01953.1 | 657 | 36881  | 7.00E-63  | 153 | 163 | 93 +  | 352 | 514 | 28181  | 28343  |
| UN57088 | Rsa1.0.00838.1 | 651 | 153820 | 0         | 496 | 513 | 96 +  | 137 | 649 | 49065  | 49577  |
| UN57089 | Rsa1.0.09152.1 | 738 | 6607   | 7.00E-48  | 143 | 158 | 90 -  | 258 | 415 | 1438   | 1595   |
| UN57090 | Rsa1.0.01137.1 | 734 | 52655  | 0         | 371 | 384 | 96 -  | 1   | 380 | 7111   | 7494   |
| UN57091 | Rsa1.0.01140.1 | 251 | 52586  | 1.00E-89  | 174 | 175 | 99 -  | 9   | 183 | 33597  | 33770  |
| UN57092 | Rsa1.0.00296.1 | 213 | 97854  | 8.00E-51  | 124 | 130 | 95 -  | 1   | 129 | 71472  | 71601  |
| UN57093 | Rsa1.0.04516.1 | 467 | 17018  | 1.00E-140 | 286 | 297 | 96 -  | 171 | 467 | 16637  | 16933  |
| UN57094 | Rsa1.0.01296.1 | 685 | 49035  | 9.00E-78  | 154 | 156 | 98 -  | 339 | 494 | 10542  | 10697  |

|         |                |     |        |           |     |     |       |     |     |        |        |
|---------|----------------|-----|--------|-----------|-----|-----|-------|-----|-----|--------|--------|
| UN57095 | Rsa1.0.00221.1 | 372 | 106972 | 1.00E-129 | 294 | 315 | 93 -  | 60  | 372 | 51633  | 51937  |
| UN57096 | Rsa1.0.00920.1 | 640 | 601703 | 0         | 335 | 338 | 99 -  | 184 | 521 | 12300  | 12637  |
| UN57097 | Rsa1.0.01573.1 | 597 | 42964  | 0         | 559 | 579 | 96 -  | 20  | 597 | 13617  | 14194  |
| UN57098 | Rsa1.0.03662.1 | 696 | 21492  | 1.00E-110 | 346 | 394 | 87 +  | 111 | 503 | 1411   | 1780   |
| UN57099 | Rsa1.0.04981.1 | 107 | 15250  | 7.00E-34  | 97  | 101 | 96 +  | 7   | 107 | 1555   | 1652   |
| UN57100 | Rsa1.0.02016.1 | 723 | 36003  | 5.00E-95  | 199 | 205 | 97 -  | 106 | 309 | 7714   | 7918   |
| UN57101 | Rsa1.0.01600.1 | 335 | 42537  | 1.00E-102 | 234 | 245 | 95 -  | 89  | 333 | 8753   | 8994   |
| UN57102 | Rsa1.0.32300.1 | 700 | 705    | 3.00E-96  | 179 | 179 | 100 - | 195 | 373 | 1      | 179    |
| UN57103 | Rsa1.0.00336.1 | 733 | 445051 | 3.00E-93  | 189 | 194 | 97 +  | 341 | 534 | 217848 | 218041 |
| UN57104 | Rsa1.0.00821.1 | 476 | 62891  | 0         | 418 | 421 | 99 +  | 56  | 476 | 53196  | 53614  |
| UN57105 | Rsa1.0.02505.1 | 699 | 30703  | 1.00E-160 | 403 | 442 | 91 -  | 172 | 613 | 3915   | 4356   |
| UN57106 | Rsa1.0.04651.1 | 632 | 16516  | 6.00E-48  | 110 | 114 | 96 -  | 413 | 526 | 10962  | 11075  |
| UN57107 | Rsa1.0.01036.1 | 518 | 55978  | 1.00E-119 | 258 | 266 | 96 -  | 257 | 518 | 26492  | 26757  |
| UN57108 | Rsa1.0.00114.1 | 183 | 131330 | 2.00E-47  | 105 | 108 | 97 +  | 49  | 156 | 21268  | 21375  |
| UN57109 | Rsa1.0.00421.1 | 374 | 86365  | 1.00E-81  | 218 | 236 | 92 +  | 4   | 229 | 47993  | 48228  |
| UN57110 | Rsa1.0.01182.1 | 662 | 167304 | 0         | 628 | 665 | 94 +  | 2   | 648 | 3359   | 4014   |
| UN57111 | Rsa1.0.00269.1 | 712 | 341668 | 0         | 664 | 699 | 94 -  | 13  | 710 | 1551   | 2240   |
| UN57112 | Rsa1.0.04910.1 | 564 | 15484  | 1.00E-162 | 326 | 337 | 96 +  | 3   | 339 | 9169   | 9504   |
| UN57113 | Rsa1.0.02124.1 | 201 | 34780  | 2.00E-41  | 89  | 90  | 98 -  | 3   | 92  | 18632  | 18721  |
| UN57114 | Rsa1.0.13820.1 | 773 | 4264   | 2.00E-76  | 335 | 396 | 84 -  | 28  | 420 | 1501   | 1895   |
| UN57115 | Rsa1.0.02402.1 | 798 | 31710  | 0         | 456 | 477 | 95 -  | 3   | 474 | 30606  | 31079  |
| UN57116 | Rsa1.0.00039.1 | 675 | 296927 | 0         | 567 | 596 | 95 -  | 78  | 669 | 11857  | 12448  |
| UN57117 | Rsa1.0.00017.1 | 397 | 752458 | 3.00E-95  | 199 | 205 | 97 +  | 191 | 395 | 331105 | 331303 |
| UN57118 | Rsa1.0.29871.1 | 710 | 769    | 1.00E-107 | 221 | 226 | 97 +  | 422 | 645 | 1      | 226    |
| UN57119 | Rsa1.0.00398.1 | 630 | 88007  | 4.00E-98  | 234 | 250 | 93 +  | 378 | 626 | 63012  | 63261  |
| UN57120 | Rsa1.0.03122.1 | 721 | 25207  | 0         | 701 | 726 | 96 +  | 3   | 721 | 21603  | 22326  |
| UN57121 | Rsa1.0.03387.1 | 487 | 23278  | 0         | 442 | 473 | 93 +  | 18  | 487 | 358    | 830    |
| UN57122 | Rsa1.0.00414.1 | 675 | 202190 | 1.00E-175 | 352 | 365 | 96 -  | 1   | 365 | 197259 | 197620 |
| UN57123 | Rsa1.0.01064.1 | 729 | 55295  | 0         | 506 | 548 | 92 -  | 1   | 547 | 1      | 530    |
| UN57124 | Rsa1.0.00387.1 | 685 | 495407 | 0         | 506 | 525 | 96 +  | 166 | 685 | 17196  | 17720  |
| UN57125 | Rsa1.0.00043.1 | 663 | 264937 | 0         | 548 | 570 | 96 +  | 98  | 659 | 7016   | 7579   |
| UN57126 | Rsa1.0.01176.1 | 528 | 51638  | 1.00E-129 | 279 | 290 | 96 +  | 215 | 503 | 27291  | 27578  |
| UN57127 | Rsa1.0.06395.1 | 680 | 11096  | 0         | 674 | 679 | 99 +  | 2   | 680 | 9499   | 10177  |
| UN57128 | Rsa1.0.03569.1 | 730 | 22041  | 1.00E-126 | 239 | 242 | 98 -  | 79  | 320 | 14787  | 15028  |
| UN57129 | Rsa1.0.02118.1 | 573 | 34839  | 1.00E-113 | 245 | 256 | 95 -  | 4   | 258 | 10008  | 10263  |
| UN57130 | Rsa1.0.00322.1 | 734 | 212233 | 6.00E-79  | 150 | 150 | 100 - | 157 | 306 | 85025  | 85174  |
| UN57131 | Rsa1.0.02557.1 | 791 | 30127  | 0         | 760 | 799 | 95 +  | 2   | 791 | 5242   | 6040   |
| UN57132 | Rsa1.0.01420.1 | 769 | 46210  | 4.00E-68  | 180 | 192 | 93 -  | 3   | 193 | 37756  | 37945  |
| UN57133 | Rsa1.0.01208.1 | 765 | 50718  | 0         | 521 | 573 | 90 -  | 15  | 587 | 9393   | 9958   |

|         |                |     |        |           |     |     |       |     |     |        |        |
|---------|----------------|-----|--------|-----------|-----|-----|-------|-----|-----|--------|--------|
| UN57134 | Rsa1.0.00725.1 | 780 | 66757  | 0         | 544 | 591 | 92 +  | 78  | 668 | 43146  | 43718  |
| UN57135 | Rsa1.0.00670.1 | 702 | 69371  | 1.00E-115 | 228 | 234 | 97 +  | 2   | 235 | 7600   | 7833   |
| UN57136 | Rsa1.0.00079.1 | 761 | 606987 | 0         | 506 | 515 | 98 -  | 2   | 514 | 24821  | 25335  |
| UN57137 | Rsa1.0.01140.1 | 355 | 52586  | 1.00E-93  | 174 | 174 | 100 + | 181 | 354 | 46500  | 46673  |
| UN57138 | Rsa1.0.04816.1 | 772 | 15872  | 1.00E-132 | 256 | 259 | 98 +  | 512 | 768 | 7702   | 7960   |
| UN57139 | Rsa1.0.00679.1 | 691 | 68971  | 0         | 592 | 610 | 97 -  | 2   | 608 | 27104  | 27713  |
| UN57140 | Rsa1.0.00123.1 | 811 | 325650 | 1.00E-119 | 226 | 229 | 98 +  | 265 | 493 | 234211 | 234439 |
| UN57141 | Rsa1.0.02950.1 | 776 | 26506  | 1.00E-126 | 266 | 278 | 95 -  | 430 | 707 | 6575   | 6852   |
| UN57142 | Rsa1.0.05366.1 | 802 | 14036  | 1.00E-125 | 266 | 280 | 95 +  | 2   | 268 | 1113   | 1392   |
| UN57143 | Rsa1.0.00145.1 | 770 | 261008 | 0         | 753 | 765 | 98 +  | 2   | 759 | 55591  | 56355  |
| UN57144 | Rsa1.0.00873.1 | 687 | 61459  | 1.00E-157 | 290 | 293 | 98 -  | 3   | 295 | 60916  | 61208  |
| UN57145 | Rsa1.0.00063.1 | 521 | 156150 | 0         | 507 | 521 | 97 -  | 4   | 521 | 6422   | 6942   |
| UN57146 | Rsa1.0.00678.1 | 703 | 193163 | 0         | 697 | 702 | 99 -  | 3   | 703 | 155429 | 156130 |
| UN57147 | Rsa1.0.01409.1 | 846 | 151595 | 3.00E-75  | 150 | 152 | 98 -  | 2   | 153 | 127542 | 127693 |
| UN57148 | Rsa1.0.07201.1 | 597 | 9732   | 0         | 390 | 391 | 99 -  | 1   | 391 | 159    | 549    |
| UN57149 | Rsa1.0.01889.1 | 740 | 37562  | 0         | 417 | 417 | 100 + | 3   | 419 | 8160   | 8576   |
| UN57150 | #              | #   | #      | #         | #   | #   | #     | #   | #   | #      | #      |
| UN57151 | Rsa1.0.03688.1 | 735 | 143676 | 1.00E-86  | 163 | 163 | 100 - | 17  | 179 | 16485  | 16647  |
| UN57152 | Rsa1.0.00101.1 | 735 | 267193 | 0         | 653 | 707 | 92 -  | 32  | 733 | 103766 | 104469 |
| UN57153 | Rsa1.0.10407.1 | 556 | 5858   | 0         | 540 | 544 | 99 +  | 3   | 546 | 1443   | 1986   |
| UN57154 | Rsa1.0.00136.1 | 413 | 122464 | 1.00E-114 | 268 | 284 | 94 -  | 132 | 413 | 112163 | 112445 |
| UN57155 | Rsa1.0.01041.1 | 467 | 55910  | 0         | 365 | 371 | 98 -  | 97  | 467 | 32065  | 32434  |
| UN57156 | Rsa1.0.01408.1 | 695 | 46383  | 0         | 524 | 544 | 96 -  | 153 | 695 | 17115  | 17658  |
| UN57157 | Rsa1.0.02221.1 | 654 | 33796  | 1.00E-140 | 279 | 288 | 96 -  | 205 | 492 | 18658  | 18945  |
| UN57158 | Rsa1.0.00140.1 | 731 | 121541 | 0         | 604 | 626 | 96 -  | 106 | 731 | 89583  | 90195  |
| UN57159 | Rsa1.0.01416.1 | 774 | 46262  | 4.00E-83  | 166 | 169 | 98 +  | 348 | 516 | 15129  | 15297  |
| UN57160 | Rsa1.0.01331.1 | 284 | 47944  | 2.00E-55  | 236 | 278 | 84 +  | 7   | 284 | 38794  | 39066  |
| UN57161 | Rsa1.0.23487.1 | 702 | 1045   | 1.00E-150 | 297 | 305 | 97 +  | 399 | 702 | 263    | 567    |
| UN57162 | Rsa1.0.00120.1 | 699 | 277288 | 0         | 597 | 625 | 95 +  | 1   | 622 | 85286  | 85910  |
| UN57163 | Rsa1.0.00159.1 | 767 | 431686 | 1.00E-100 | 204 | 210 | 97 -  | 214 | 423 | 353539 | 353748 |
| UN57164 | Rsa1.0.00205.1 | 614 | 193401 | 6.00E-14  | 53  | 57  | 92 +  | 28  | 84  | 151310 | 151366 |
| UN57165 | Rsa1.0.35641.1 | 782 | 635    | 2.00E-97  | 187 | 189 | 98 -  | 565 | 753 | 351    | 539    |
| UN57166 | Rsa1.0.00529.1 | 746 | 77487  | 1.00E-133 | 288 | 304 | 94 -  | 1   | 297 | 54541  | 54840  |
| UN57167 | Rsa1.0.01965.1 | 743 | 36698  | 0         | 401 | 410 | 97 +  | 11  | 420 | 3518   | 3927   |
| UN57168 | Rsa1.0.01274.1 | 356 | 49419  | 2.00E-77  | 200 | 215 | 93 +  | 144 | 356 | 21348  | 21557  |
| UN57169 | Rsa1.0.00111.1 | 707 | 390088 | 0         | 679 | 727 | 93 +  | 2   | 707 | 60499  | 61213  |
| UN57170 | Rsa1.0.02282.1 | 645 | 163951 | 0         | 629 | 648 | 97 +  | 2   | 645 | 143838 | 144484 |
| UN57171 | Rsa1.0.00601.1 | 700 | 177045 | 2.00E-72  | 165 | 173 | 95 -  | 44  | 213 | 143839 | 144011 |
| UN57172 | Rsa1.0.05812.1 | 683 | 12571  | 0         | 440 | 441 | 99 +  | 3   | 443 | 3959   | 4399   |

|         |                |     |        |           |     |     |       |     |     |        |        |
|---------|----------------|-----|--------|-----------|-----|-----|-------|-----|-----|--------|--------|
| UN57173 | Rsa1.0_00659.1 | 713 | 69733  | 1.00E-124 | 320 | 350 | 91 +  | 364 | 710 | 55176  | 55502  |
| UN57174 | Rsa1.0_00456.1 | 787 | 82826  | 0         | 486 | 521 | 93 +  | 276 | 781 | 18300  | 18812  |
| UN57175 | Rsa1.0_09994.1 | 515 | 6046   | 0         | 486 | 496 | 97 +  | 20  | 513 | 3049   | 3541   |
| UN57176 | #              | #   | #      | #         | #   | #   | #     | #   | #   | #      | #      |
| UN57177 | Rsa1.0_00559.1 | 774 | 190486 | 2.00E-94  | 474 | 563 | 84 -  | 95  | 654 | 182166 | 182722 |
| UN57178 | Rsa1.0_00196.1 | 592 | 109960 | 1.00E-147 | 305 | 318 | 95 +  | 38  | 355 | 68435  | 68749  |
| UN57179 | Rsa1.0_05036.1 | 800 | 15058  | 0         | 727 | 751 | 96 +  | 46  | 786 | 13189  | 13936  |
| UN57180 | Rsa1.0_00363.1 | 802 | 90968  | 0         | 353 | 353 | 100 + | 178 | 530 | 21396  | 21748  |
| UN57181 | Rsa1.0_00108.1 | 663 | 478491 | 1.00E-152 | 272 | 272 | 100 + | 22  | 293 | 142976 | 143247 |
| UN57182 | Rsa1.0_00064.1 | 509 | 240927 | 0         | 390 | 407 | 95 +  | 104 | 508 | 215957 | 216359 |
| UN57183 | Rsa1.0_00876.1 | 709 | 61328  | 0         | 682 | 714 | 95 -  | 2   | 709 | 21947  | 22660  |
| UN57184 | Rsa1.0_00001.1 | 129 | 363028 | 1.00E-60  | 121 | 122 | 99 +  | 1   | 122 | 40847  | 40968  |
| UN57185 | Rsa1.0_00529.1 | 807 | 77487  | 1.00E-92  | 211 | 223 | 94 +  | 5   | 227 | 1856   | 2075   |
| UN57186 | Rsa1.0_02643.1 | 581 | 29176  | 1.00E-180 | 359 | 371 | 96 -  | 211 | 581 | 25802  | 26171  |
| UN57187 | Rsa1.0_09383.1 | 685 | 6407   | 1.00E-160 | 308 | 314 | 98 -  | 373 | 685 | 5246   | 5559   |
| UN57188 | Rsa1.0_00464.1 | 832 | 82253  | 0         | 408 | 420 | 97 +  | 411 | 828 | 46862  | 47281  |
| UN57189 | Rsa1.0_03452.1 | 799 | 22817  | 0         | 616 | 633 | 97 +  | 175 | 799 | 2139   | 2771   |
| UN57190 | Rsa1.0_03706.1 | 751 | 21255  | 1.00E-117 | 224 | 227 | 98 +  | 525 | 751 | 12268  | 12494  |
| UN57191 | Rsa1.0_01078.1 | 137 | 316910 | 4.00E-39  | 91  | 94  | 96 +  | 1   | 94  | 131736 | 131829 |
| UN57192 | Rsa1.0_00188.1 | 542 | 112020 | 0         | 383 | 388 | 98 -  | 156 | 542 | 86745  | 87132  |
| UN57193 | Rsa1.0_19019.1 | 673 | 1494   | 0         | 507 | 517 | 98 +  | 3   | 519 | 739    | 1251   |
| UN57194 | Rsa1.0_00001.1 | 644 | 363028 | 0         | 607 | 651 | 93 -  | 10  | 644 | 77999  | 78646  |
| UN57195 | Rsa1.0_01235.1 | 818 | 50180  | 1.00E-114 | 209 | 209 | 100 - | 430 | 638 | 23613  | 23821  |
| UN57196 | Rsa1.0_01667.1 | 764 | 41315  | 0         | 358 | 365 | 98 +  | 401 | 764 | 32932  | 33296  |
| UN57197 | Rsa1.0_03810.1 | 655 | 20727  | 1.00E-137 | 364 | 398 | 91 +  | 11  | 393 | 19855  | 20247  |
| UN57198 | Rsa1.0_00999.1 | 720 | 57162  | 0         | 352 | 356 | 98 +  | 366 | 720 | 24328  | 24683  |
| UN57199 | Rsa1.0_01212.1 | 720 | 50622  | 1.00E-116 | 215 | 216 | 99 -  | 502 | 717 | 604    | 819    |
| UN57200 | Rsa1.0_02429.1 | 562 | 31527  | 1.00E-128 | 287 | 305 | 94 +  | 264 | 562 | 12869  | 13170  |
| UN57201 | Rsa1.0_02915.1 | 488 | 26813  | 1.00E-139 | 263 | 267 | 98 -  | 222 | 488 | 24984  | 25250  |
| UN57202 | #              | #   | #      | #         | #   | #   | #     | #   | #   | #      | #      |
| UN57203 | Rsa1.0_03077.1 | 201 | 25558  | 1.00E-101 | 199 | 202 | 98 -  | 1   | 201 | 17629  | 17830  |
| UN57204 | Rsa1.0_03400.1 | 655 | 23203  | 0         | 499 | 515 | 96 +  | 141 | 655 | 14669  | 15181  |
| UN57205 | Rsa1.0_02707.1 | 675 | 28520  | 1.00E-132 | 272 | 281 | 96 +  | 396 | 675 | 11082  | 11359  |
| UN57206 | Rsa1.0_11762.1 | 346 | 5416   | 0         | 346 | 346 | 100 + | 1   | 346 | 3556   | 3901   |
| UN57207 | Rsa1.0_00552.1 | 209 | 206757 | 2.00E-60  | 150 | 157 | 95 +  | 2   | 155 | 45274  | 45429  |
| UN57208 | Rsa1.0_08434.1 | 625 | 7362   | 1.00E-100 | 222 | 233 | 95 +  | 308 | 539 | 3497   | 3729   |
| UN57209 | Rsa1.0_02003.1 | 620 | 36171  | 1.00E-110 | 206 | 207 | 99 +  | 183 | 389 | 15191  | 15397  |
| UN57210 | Rsa1.0_00163.1 | 732 | 116847 | 1.00E-107 | 217 | 222 | 97 +  | 72  | 292 | 82070  | 82291  |
| UN57211 | Rsa1.0_00513.1 | 710 | 78579  | 1.00E-61  | 164 | 177 | 92 -  | 520 | 695 | 8194   | 8370   |

|         |                |     |        |           |     |     |       |     |     |        |        |
|---------|----------------|-----|--------|-----------|-----|-----|-------|-----|-----|--------|--------|
| UN57212 | Rsa1.0.00740.1 | 729 | 215972 | 0         | 455 | 469 | 97 +  | 146 | 611 | 34237  | 34705  |
| UN57213 | Rsa1.0.00251.1 | 651 | 303968 | 1.00E-39  | 90  | 92  | 97 -  | 504 | 595 | 56705  | 56796  |
| UN57214 | Rsa1.0.01965.1 | 680 | 36698  | 3.00E-68  | 139 | 140 | 99 +  | 453 | 592 | 7918   | 8056   |
| UN57215 | Rsa1.0.02345.1 | 704 | 32337  | 1.00E-107 | 249 | 261 | 95 +  | 284 | 541 | 11558  | 11816  |
| UN57216 | Rsa1.0.02036.1 | 455 | 35731  | 0         | 448 | 457 | 98 -  | 1   | 455 | 12369  | 12825  |
| UN57217 | Rsa1.0.00772.1 | 743 | 64856  | 1.00E-73  | 219 | 245 | 89 -  | 437 | 681 | 36472  | 36716  |
| UN57218 | Rsa1.0.01075.1 | 569 | 156953 | 0         | 568 | 568 | 100 - | 2   | 569 | 143579 | 144146 |
| UN57219 | Rsa1.0.00679.1 | 745 | 68971  | 1.00E-98  | 195 | 199 | 97 +  | 161 | 359 | 33672  | 33870  |
| UN57220 | Rsa1.0.00796.1 | 654 | 63997  | 0         | 633 | 651 | 97 -  | 3   | 650 | 21606  | 22253  |
| UN57221 | Rsa1.0.13433.1 | 655 | 4832   | 1.00E-119 | 275 | 294 | 93 +  | 3   | 296 | 2067   | 2360   |
| UN57222 | Rsa1.0.05999.1 | 766 | 11984  | 0         | 732 | 759 | 96 -  | 4   | 762 | 2658   | 3416   |
| UN57223 | Rsa1.0.08114.1 | 695 | 7883   | 0         | 390 | 404 | 96 +  | 289 | 687 | 6163   | 6566   |
| UN57224 | Rsa1.0.00757.1 | 633 | 65559  | 0         | 448 | 457 | 98 -  | 177 | 633 | 12680  | 13134  |
| UN57225 | Rsa1.0.00389.1 | 726 | 88795  | 1.00E-177 | 329 | 334 | 98 -  | 3   | 336 | 66337  | 66670  |
| UN57226 | Rsa1.0.00207.1 | 751 | 248736 | 1.00E-159 | 354 | 377 | 93 -  | 9   | 385 | 53823  | 54199  |
| UN57227 | Rsa1.0.00417.1 | 765 | 395068 | 1.00E-178 | 343 | 352 | 97 -  | 3   | 354 | 14475  | 14826  |
| UN57228 | Rsa1.0.01481.1 | 671 | 184562 | 1.00E-123 | 225 | 225 | 100 - | 1   | 225 | 182559 | 182783 |
| UN57229 | Rsa1.0.00012.1 | 711 | 222148 | 3.00E-90  | 273 | 308 | 88 +  | 208 | 509 | 86930  | 87222  |
| UN57230 | Rsa1.0.00732.1 | 583 | 66631  | 1.00E-73  | 151 | 153 | 98 +  | 333 | 484 | 43832  | 43984  |
| UN57231 | Rsa1.0.00798.1 | 594 | 63945  | 1.00E-103 | 237 | 249 | 95 -  | 44  | 287 | 40993  | 41241  |
| UN57232 | Rsa1.0.02269.1 | 705 | 33168  | 0         | 665 | 692 | 96 +  | 1   | 690 | 29892  | 30581  |
| UN57233 | Rsa1.0.02855.1 | 674 | 27271  | 0         | 373 | 387 | 96 +  | 288 | 674 | 10684  | 11070  |
| UN57234 | Rsa1.0.02881.1 | 820 | 27041  | 0         | 786 | 820 | 95 +  | 6   | 820 | 20816  | 21633  |
| UN57235 | Rsa1.0.12420.1 | 794 | 5230   | 0         | 423 | 443 | 95 +  | 347 | 786 | 1647   | 2087   |
| UN57236 | Rsa1.0.03074.1 | 768 | 25568  | 0         | 768 | 769 | 99 -  | 1   | 768 | 19717  | 20485  |
| UN57237 | Rsa1.0.01232.1 | 550 | 155185 | 1.00E-135 | 297 | 311 | 95 -  | 242 | 550 | 153425 | 153733 |
| UN57238 | Rsa1.0.01112.1 | 672 | 310601 | 1.00E-101 | 235 | 250 | 94 -  | 234 | 480 | 156216 | 156465 |
| UN57239 | Rsa1.0.08265.1 | 707 | 7630   | 1.00E-43  | 114 | 118 | 96 -  | 594 | 707 | 6941   | 7058   |
| UN57240 | Rsa1.0.03044.1 | 655 | 25791  | 1.00E-103 | 269 | 295 | 91 -  | 206 | 497 | 15710  | 15992  |
| UN57241 | Rsa1.0.02668.1 | 646 | 28895  | 0         | 365 | 373 | 97 +  | 269 | 641 | 3600   | 3968   |
| UN57242 | Rsa1.0.03297.1 | 767 | 23969  | 1.00E-92  | 283 | 319 | 88 +  | 454 | 767 | 3924   | 4224   |
| UN57243 | Rsa1.0.00594.1 | 637 | 73729  | 4.00E-95  | 195 | 201 | 97 -  | 420 | 620 | 23932  | 24132  |
| UN57244 | Rsa1.0.00080.1 | 307 | 190437 | 1.00E-99  | 187 | 188 | 99 -  | 120 | 307 | 96018  | 96205  |
| UN57245 | Rsa1.0.05340.1 | 788 | 14110  | 0         | 768 | 782 | 98 -  | 1   | 780 | 4251   | 5031   |
| UN57246 | Rsa1.0.40929.1 | 476 | 549    | 1.00E-113 | 226 | 232 | 97 +  | 2   | 233 | 318    | 549    |
| UN57247 | Rsa1.0.33701.1 | 626 | 673    | 0         | 388 | 393 | 98 -  | 1   | 392 | 5      | 397    |
| UN57248 | Rsa1.0.00816.1 | 464 | 403350 | 1.00E-143 | 266 | 269 | 98 -  | 1   | 269 | 363549 | 363817 |
| UN57249 | Rsa1.0.45676.1 | 656 | 494    | 2.00E-97  | 184 | 185 | 99 -  | 34  | 218 | 310    | 494    |
| UN57250 | Rsa1.0.02931.1 | 448 | 26654  | 7.00E-90  | 187 | 193 | 96 -  | 256 | 448 | 1080   | 1268   |

|         |                |     |        |           |     |     |       |     |     |        |        |
|---------|----------------|-----|--------|-----------|-----|-----|-------|-----|-----|--------|--------|
| UN57251 | Rsa1.0.00017.1 | 670 | 752458 | 2.00E-84  | 195 | 207 | 94 -  | 113 | 319 | 644525 | 644731 |
| UN57252 | Rsa1.0.08259.1 | 778 | 7641   | 4.00E-68  | 138 | 140 | 98 +  | 507 | 646 | 6229   | 6368   |
| UN57253 | Rsa1.0.00602.1 | 157 | 73302  | 3.00E-65  | 151 | 159 | 94 +  | 3   | 157 | 46776  | 46934  |
| UN57254 | Rsa1.0.04039.1 | 712 | 19467  | 0         | 664 | 702 | 94 -  | 10  | 710 | 9329   | 10029  |
| UN57255 | Rsa1.0.00048.1 | 613 | 167185 | 1.00E-127 | 267 | 279 | 95 +  | 292 | 570 | 35395  | 35673  |
| UN57256 | Rsa1.0.05559.1 | 694 | 13329  | 6.00E-48  | 208 | 244 | 85 +  | 279 | 519 | 7415   | 7658   |
| UN57257 | Rsa1.0.02406.1 | 622 | 145276 | 1.00E-111 | 207 | 208 | 99 -  | 415 | 622 | 7595   | 7802   |
| UN57258 | Rsa1.0.03215.1 | 398 | 24551  | 8.00E-77  | 152 | 154 | 98 -  | 140 | 293 | 8512   | 8665   |
| UN57259 | Rsa1.0.00577.1 | 629 | 174827 | 4.00E-89  | 191 | 199 | 95 +  | 399 | 597 | 117952 | 118150 |
| UN57260 | Rsa1.0.08192.1 | 734 | 7762   | 8.00E-97  | 219 | 231 | 94 +  | 494 | 717 | 6351   | 6581   |
| UN57261 | Rsa1.0.00207.1 | 669 | 248736 | 1.00E-114 | 248 | 260 | 95 -  | 2   | 259 | 241562 | 241821 |
| UN57262 | Rsa1.0.05611.1 | 673 | 13193  | 0         | 420 | 431 | 97 -  | 1   | 431 | 10175  | 10602  |
| UN57263 | Rsa1.0.02385.1 | 749 | 31907  | 0         | 610 | 624 | 97 -  | 1   | 624 | 11441  | 12064  |
| UN57264 | Rsa1.0.01411.1 | 736 | 46326  | 0         | 581 | 593 | 97 +  | 3   | 592 | 10107  | 10698  |
| UN57265 | Rsa1.0.00369.1 | 321 | 266462 | 1.00E-108 | 228 | 238 | 95 -  | 89  | 321 | 146305 | 146542 |
| UN57266 | Rsa1.0.05002.1 | 783 | 15173  | 1.00E-86  | 181 | 187 | 96 -  | 385 | 571 | 8410   | 8596   |
| UN57267 | Rsa1.0.07651.1 | 750 | 8929   | 0         | 731 | 739 | 98 -  | 4   | 741 | 7661   | 8399   |
| UN57268 | Rsa1.0.00278.1 | 724 | 231896 | 0         | 459 | 460 | 99 -  | 2   | 461 | 84030  | 84489  |
| UN57269 | Rsa1.0.00349.1 | 747 | 92621  | 1.00E-120 | 226 | 227 | 99 -  | 3   | 228 | 53759  | 53985  |
| UN57270 | Rsa1.0.05076.1 | 620 | 14916  | 0         | 361 | 365 | 98 -  | 1   | 365 | 4033   | 4397   |
| UN57271 | Rsa1.0.02258.1 | 655 | 33307  | 1.00E-139 | 251 | 251 | 100 - | 3   | 253 | 26139  | 26389  |
| UN57272 | Rsa1.0.00528.1 | 723 | 164755 | 2.00E-76  | 185 | 198 | 93 +  | 6   | 203 | 142460 | 142657 |
| UN57273 | Rsa1.0.49559.1 | 531 | 457    | 1.00E-14  | 69  | 78  | 88 +  | 92  | 169 | 297    | 374    |
| UN57274 | Rsa1.0.04504.1 | 627 | 17069  | 0         | 597 | 634 | 94 -  | 3   | 627 | 9980   | 10593  |
| UN57275 | Rsa1.0.00593.1 | 360 | 143463 | 1.00E-107 | 213 | 217 | 98 -  | 2   | 218 | 44942  | 45157  |
| UN57276 | Rsa1.0.01629.1 | 723 | 41917  | 1.00E-148 | 272 | 274 | 99 -  | 260 | 533 | 17966  | 18239  |
| UN57277 | Rsa1.0.00248.1 | 771 | 163568 | 7.00E-88  | 180 | 185 | 97 +  | 332 | 516 | 70838  | 71022  |
| UN57278 | Rsa1.0.01731.1 | 711 | 40208  | 3.00E-87  | 170 | 172 | 98 +  | 53  | 224 | 27535  | 27706  |
| UN57279 | Rsa1.0.15420.1 | 719 | 2614   | 0         | 370 | 381 | 97 +  | 2   | 382 | 1520   | 1900   |
| UN57280 | Rsa1.0.00053.1 | 727 | 263459 | 1.00E-89  | 238 | 262 | 90 +  | 2   | 263 | 82951  | 83200  |
| UN57281 | Rsa1.0.00078.1 | 259 | 175053 | 5.00E-34  | 122 | 139 | 87 -  | 66  | 196 | 39124  | 39262  |
| UN57282 | Rsa1.0.00562.1 | 678 | 75565  | 0         | 511 | 541 | 94 +  | 131 | 670 | 18141  | 18681  |
| UN57283 | Rsa1.0.00004.1 | 695 | 253996 | 1.00E-166 | 490 | 556 | 88 -  | 10  | 556 | 205841 | 206391 |
| UN57284 | Rsa1.0.00464.1 | 401 | 82253  | 1.00E-131 | 260 | 265 | 98 -  | 139 | 401 | 28863  | 29127  |
| UN57285 | Rsa1.0.00522.1 | 762 | 78103  | 0         | 467 | 488 | 95 -  | 278 | 762 | 46043  | 46530  |
| UN57286 | Rsa1.0.00701.1 | 805 | 67691  | 2.00E-76  | 190 | 207 | 91 +  | 3   | 209 | 21346  | 21540  |
| UN57287 | Rsa1.0.09269.1 | 700 | 6514   | 1.00E-116 | 250 | 256 | 97 +  | 447 | 698 | 1082   | 1336   |
| UN57288 | Rsa1.0.03381.1 | 623 | 23306  | 0         | 353 | 353 | 100 - | 200 | 552 | 17096  | 17448  |
| UN57289 | Rsa1.0.24517.1 | 700 | 984    | 2.00E-91  | 180 | 183 | 98 +  | 491 | 673 | 799    | 981    |

|         |                |     |        |           |     |     |       |     |     |        |        |
|---------|----------------|-----|--------|-----------|-----|-----|-------|-----|-----|--------|--------|
| UN57290 | Rsa1.0.00542.1 | 698 | 76831  | 1.00E-137 | 262 | 267 | 98 -  | 33  | 299 | 27325  | 27591  |
| UN57291 | Rsa1.0.00171.1 | 696 | 115622 | 1.00E-104 | 226 | 235 | 96 -  | 465 | 696 | 92586  | 92820  |
| UN57292 | Rsa1.0.00713.1 | 794 | 158017 | 1.00E-173 | 338 | 346 | 97 +  | 3   | 344 | 5913   | 6258   |
| UN57293 | Rsa1.0.00085.1 | 840 | 142226 | 1.00E-133 | 256 | 261 | 98 +  | 1   | 261 | 22138  | 22398  |
| UN57294 | Rsa1.0.00065.1 | 758 | 454616 | 1.00E-98  | 186 | 187 | 99 -  | 353 | 539 | 224997 | 225183 |
| UN57295 | Rsa1.0.00027.1 | 757 | 283362 | 1.00E-158 | 334 | 351 | 95 +  | 6   | 356 | 151068 | 151418 |
| UN57296 | Rsa1.0.01955.1 | 720 | 36850  | 0         | 553 | 566 | 97 -  | 103 | 666 | 19109  | 19671  |
| UN57297 | Rsa1.0.15140.1 | 262 | 2804   | 2.00E-45  | 105 | 109 | 96 +  | 101 | 209 | 1097   | 1205   |
| UN57298 | Rsa1.0.00705.1 | 710 | 67505  | 2.00E-60  | 125 | 127 | 98 -  | 458 | 584 | 18096  | 18222  |
| UN57299 | Rsa1.0.00101.1 | 719 | 267193 | 0         | 656 | 713 | 92 -  | 20  | 715 | 195685 | 196393 |
| UN57300 | Rsa1.0.02521.1 | 783 | 30562  | 0         | 733 | 750 | 97 -  | 2   | 748 | 21904  | 22647  |
| UN57301 | Rsa1.0.00391.1 | 609 | 183853 | 5.00E-73  | 163 | 170 | 95 -  | 192 | 361 | 48165  | 48331  |
| UN57302 | Rsa1.0.00759.1 | 711 | 65465  | 1.00E-164 | 376 | 405 | 92 -  | 291 | 691 | 25337  | 25726  |
| UN57303 | Rsa1.0.00092.1 | 735 | 659932 | 1.00E-160 | 298 | 302 | 98 +  | 246 | 547 | 13028  | 13329  |
| UN57304 | Rsa1.0.03842.1 | 799 | 20503  | 0         | 703 | 738 | 95 +  | 3   | 737 | 7417   | 8139   |
| UN57305 | Rsa1.0.10240.1 | 692 | 5927   | 0         | 531 | 559 | 94 -  | 2   | 554 | 5152   | 5696   |
| UN57306 | Rsa1.0.00160.1 | 731 | 346678 | 0         | 384 | 395 | 97 +  | 116 | 510 | 2224   | 2618   |
| UN57307 | Rsa1.0.01882.1 | 718 | 37697  | 0         | 403 | 414 | 97 -  | 10  | 422 | 9325   | 9738   |
| UN57308 | Rsa1.0.01058.1 | 718 | 55430  | 1.00E-125 | 228 | 228 | 100 + | 491 | 718 | 17805  | 18032  |
| UN57309 | Rsa1.0.00696.1 | 586 | 68010  | 0         | 529 | 550 | 96 +  | 28  | 576 | 10928  | 11477  |
| UN57310 | Rsa1.0.03778.1 | 569 | 20908  | 1.00E-79  | 243 | 275 | 88 +  | 14  | 279 | 8253   | 8527   |
| UN57311 | Rsa1.0.00399.1 | 741 | 242951 | 0         | 700 | 720 | 97 +  | 3   | 716 | 16378  | 17094  |
| UN57312 | Rsa1.0.00101.1 | 727 | 267193 | 5.00E-67  | 412 | 506 | 81 +  | 141 | 646 | 25131  | 25636  |
| UN57313 | Rsa1.0.00457.1 | 678 | 337301 | 1.00E-134 | 294 | 311 | 94 +  | 6   | 316 | 294101 | 294411 |
| UN57314 | Rsa1.0.07805.1 | 743 | 8510   | 0         | 420 | 424 | 99 +  | 3   | 426 | 5179   | 5602   |
| UN57315 | Rsa1.0.00141.1 | 692 | 121494 | 1.00E-166 | 348 | 365 | 95 -  | 96  | 460 | 32098  | 32462  |
| UN57316 | Rsa1.0.01186.1 | 734 | 51418  | 1.00E-135 | 251 | 252 | 99 +  | 479 | 729 | 3230   | 3481   |
| UN57317 | Rsa1.0.00050.1 | 766 | 237174 | 0         | 553 | 560 | 98 -  | 210 | 763 | 235650 | 236209 |
| UN57318 | Rsa1.0.00018.1 | 771 | 410899 | 1.00E-127 | 255 | 263 | 96 -  | 3   | 265 | 106206 | 106468 |
| UN57319 | Rsa1.0.00439.1 | 768 | 142776 | 0         | 421 | 424 | 99 +  | 148 | 571 | 20475  | 20898  |
| UN57320 | Rsa1.0.00107.1 | 813 | 431659 | 0         | 343 | 345 | 99 -  | 115 | 459 | 149213 | 149557 |
| UN57321 | Rsa1.0.04482.1 | 665 | 17175  | 1.00E-89  | 212 | 224 | 94 -  | 25  | 246 | 10704  | 10922  |
| UN57322 | Rsa1.0.08564.1 | 682 | 7193   | 0         | 570 | 576 | 98 +  | 107 | 682 | 3581   | 4156   |
| UN57323 | Rsa1.0.00340.1 | 728 | 305782 | 1.00E-80  | 165 | 169 | 97 -  | 303 | 471 | 137455 | 137623 |
| UN57324 | Rsa1.0.00507.1 | 692 | 79074  | 0         | 606 | 616 | 98 +  | 77  | 692 | 69841  | 70454  |
| UN57325 | Rsa1.0.00006.1 | 751 | 396176 | 1.00E-143 | 288 | 298 | 96 +  | 68  | 365 | 92561  | 92858  |
| UN57326 | Rsa1.0.00039.1 | 464 | 296927 | 0         | 452 | 467 | 96 -  | 1   | 464 | 21881  | 22347  |
| UN57327 | Rsa1.0.03543.1 | 778 | 22185  | 1.00E-106 | 271 | 296 | 91 -  | 2   | 295 | 19953  | 20231  |
| UN57328 | Rsa1.0.02397.1 | 671 | 31778  | 1.00E-163 | 310 | 316 | 98 -  | 344 | 659 | 7758   | 8073   |



|         |                |     |        |           |     |     |       |     |     |        |        |
|---------|----------------|-----|--------|-----------|-----|-----|-------|-----|-----|--------|--------|
| UN57329 | Rsa1.0.02026.1 | 653 | 35896  | 1.00E-119 | 218 | 218 | 100 - | 17  | 234 | 9114   | 9331   |
| UN57330 | Rsa1.0.00278.1 | 737 | 231896 | 0         | 373 | 376 | 99 +  | 249 | 624 | 58615  | 58990  |
| UN57331 | Rsa1.0.04249.1 | 779 | 18269  | 5.00E-58  | 127 | 131 | 96 +  | 501 | 631 | 3581   | 3711   |
| UN57332 | Rsa1.0.34246.1 | 171 | 661    | 1.00E-51  | 103 | 103 | 100 + | 6   | 108 | 390    | 492    |
| UN57333 | Rsa1.0.01707.1 | 783 | 40686  | 1.00E-144 | 345 | 363 | 95 -  | 401 | 755 | 25856  | 26218  |
| UN57334 | Rsa1.0.02071.1 | 700 | 35409  | 0         | 577 | 631 | 91 -  | 39  | 660 | 5185   | 5794   |
| UN57335 | Rsa1.0.00214.1 | 457 | 107508 | 1.00E-114 | 231 | 237 | 97 +  | 193 | 428 | 64898  | 65134  |
| UN57336 | Rsa1.0.34449.1 | 707 | 657    | 6.00E-85  | 169 | 172 | 98 +  | 372 | 543 | 1      | 172    |
| UN57337 | Rsa1.0.01299.1 | 709 | 162028 | 1.00E-172 | 427 | 466 | 91 -  | 4   | 469 | 140777 | 141241 |
| UN57338 | Rsa1.0.00398.1 | 417 | 88007  | 0         | 394 | 416 | 94 -  | 2   | 417 | 70692  | 71107  |
| UN57339 | Rsa1.0.01149.1 | 715 | 160459 | 1.00E-120 | 241 | 247 | 97 +  | 470 | 715 | 43118  | 43364  |
| UN57340 | Rsa1.0.00119.1 | 174 | 467509 | 2.00E-53  | 116 | 118 | 98 -  | 58  | 174 | 229267 | 229384 |
| UN57341 | Rsa1.0.65870.1 | 655 | 348    | 1.00E-132 | 245 | 247 | 99 +  | 148 | 394 | 1      | 247    |
| UN57342 | Rsa1.0.00140.1 | 691 | 121541 | 1.00E-113 | 278 | 297 | 93 -  | 394 | 684 | 31126  | 31421  |
| UN57343 | Rsa1.0.04209.1 | 579 | 18442  | 0         | 503 | 510 | 98 -  | 31  | 540 | 17933  | 18442  |
| UN57344 | Rsa1.0.00030.1 | 753 | 250988 | 0         | 431 | 436 | 98 +  | 169 | 604 | 1646   | 2081   |
| UN57345 | Rsa1.0.60013.1 | 394 | 381    | 1.00E-176 | 330 | 336 | 98 +  | 59  | 394 | 1      | 336    |
| UN57346 | Rsa1.0.05616.1 | 683 | 13188  | 0         | 673 | 692 | 97 +  | 1   | 678 | 4287   | 4978   |
| UN57347 | Rsa1.0.02756.1 | 236 | 28202  | 3.00E-69  | 143 | 145 | 98 +  | 93  | 236 | 18849  | 18993  |
| UN57348 | Rsa1.0.05688.1 | 712 | 12931  | 0         | 704 | 716 | 98 +  | 2   | 712 | 11095  | 11810  |
| UN57349 | Rsa1.0.01216.1 | 719 | 50580  | 0         | 387 | 399 | 96 +  | 5   | 400 | 39305  | 39703  |
| UN57350 | Rsa1.0.53768.1 | 150 | 424    | 1.00E-76  | 145 | 145 | 100 + | 3   | 147 | 43     | 187    |
| UN57351 | Rsa1.0.00472.1 | 658 | 398134 | 0         | 452 | 455 | 99 +  | 204 | 658 | 292065 | 292519 |
| UN57352 | Rsa1.0.01881.1 | 706 | 37721  | 0         | 457 | 469 | 97 -  | 240 | 706 | 8184   | 8652   |
| UN57353 | Rsa1.0.00785.1 | 739 | 64356  | 0         | 456 | 469 | 97 -  | 4   | 472 | 27723  | 28185  |
| UN57354 | Rsa1.0.07877.1 | 162 | 8373   | 1.00E-24  | 98  | 110 | 89 +  | 3   | 107 | 5667   | 5775   |
| UN57355 | Rsa1.0.03009.1 | 605 | 26065  | 1.00E-135 | 347 | 376 | 92 +  | 3   | 368 | 6154   | 6524   |
| UN57356 | Rsa1.0.01111.1 | 732 | 53669  | 1.00E-135 | 272 | 281 | 96 -  | 171 | 451 | 11408  | 11688  |
| UN57357 | Rsa1.0.00625.1 | 723 | 71672  | 0         | 686 | 724 | 94 +  | 4   | 723 | 26547  | 27264  |
| UN57358 | Rsa1.0.05784.1 | 748 | 12643  | 1.00E-109 | 200 | 200 | 100 + | 14  | 213 | 7152   | 7351   |
| UN57359 | Rsa1.0.11048.1 | 636 | 5634   | 1.00E-107 | 364 | 421 | 86 +  | 235 | 636 | 28     | 448    |
| UN57360 | Rsa1.0.00208.1 | 760 | 108565 | 0         | 753 | 760 | 99 -  | 1   | 756 | 86339  | 87098  |
| UN57361 | Rsa1.0.02891.1 | 661 | 27010  | 3.00E-74  | 142 | 142 | 100 + | 14  | 155 | 1346   | 1487   |
| UN57362 | Rsa1.0.16217.1 | 729 | 130903 | 0         | 381 | 384 | 99 -  | 2   | 385 | 129922 | 130304 |
| UN57363 | Rsa1.0.01434.1 | 733 | 45951  | 0         | 689 | 728 | 94 +  | 1   | 722 | 21193  | 21919  |
| UN57364 | Rsa1.0.00272.1 | 647 | 447836 | 1.00E-151 | 302 | 309 | 97 +  | 340 | 647 | 83797  | 84101  |
| UN57365 | Rsa1.0.08147.1 | 549 | 7835   | 0         | 539 | 555 | 97 +  | 4   | 549 | 6883   | 7437   |
| UN57366 | Rsa1.0.00123.1 | 659 | 325650 | 1.00E-82  | 217 | 238 | 91 +  | 6   | 231 | 173031 | 173268 |
| UN57367 | Rsa1.0.01438.1 | 424 | 45882  | 1.00E-41  | 90  | 91  | 98 +  | 128 | 218 | 30280  | 30370  |

|         |                |     |        |           |     |     |       |     |     |        |        |
|---------|----------------|-----|--------|-----------|-----|-----|-------|-----|-----|--------|--------|
| UN57368 | Rsa1.0.41965.1 | 357 | 535    | 1.00E-129 | 325 | 353 | 92 -  | 4   | 354 | 98     | 450    |
| UN57369 | Rsa1.0.01223.1 | 514 | 50392  | 1.00E-123 | 254 | 264 | 96 +  | 1   | 264 | 32563  | 32826  |
| UN57370 | Rsa1.0.00213.1 | 395 | 108167 | 1.00E-113 | 207 | 207 | 100 + | 120 | 326 | 3190   | 3396   |
| UN57371 | Rsa1.0.00055.1 | 542 | 520193 | 0         | 541 | 541 | 100 + | 2   | 542 | 287985 | 288525 |
| UN57372 | Rsa1.0.01536.1 | 602 | 43747  | 1.00E-127 | 242 | 246 | 98 -  | 357 | 602 | 23678  | 23923  |
| UN57373 | Rsa1.0.01591.1 | 729 | 42718  | 0         | 386 | 402 | 96 -  | 331 | 729 | 32110  | 32511  |
| UN57374 | Rsa1.0.07738.1 | 353 | 8686   | 0         | 344 | 350 | 98 +  | 1   | 350 | 2589   | 2938   |
| UN57375 | Rsa1.0.00030.1 | 220 | 250988 | 1.00E-71  | 168 | 175 | 96 -  | 44  | 213 | 211568 | 211742 |
| UN57376 | Rsa1.0.06604.1 | 678 | 10681  | 1.00E-126 | 238 | 241 | 98 +  | 253 | 493 | 9818   | 10058  |
| UN57377 | Rsa1.0.01951.1 | 668 | 36941  | 0         | 432 | 443 | 97 -  | 12  | 452 | 4662   | 5102   |
| UN57378 | Rsa1.0.00834.1 | 662 | 62600  | 2.00E-75  | 144 | 144 | 100 + | 294 | 437 | 49393  | 49536  |
| UN57379 | Rsa1.0.05668.1 | 727 | 12994  | 1.00E-122 | 223 | 223 | 100 + | 161 | 383 | 10719  | 10941  |
| UN57380 | Rsa1.0.03467.1 | 756 | 22687  | 1.00E-154 | 291 | 296 | 98 +  | 2   | 297 | 11903  | 12198  |
| UN57381 | Rsa1.0.00002.1 | 633 | 601661 | 1.00E-171 | 410 | 444 | 92 +  | 2   | 428 | 97426  | 97869  |
| UN57382 | Rsa1.0.03252.1 | 640 | 24338  | 0         | 580 | 598 | 96 +  | 44  | 640 | 16318  | 16913  |
| UN57383 | Rsa1.0.00017.1 | 558 | 752458 | 3.00E-89  | 170 | 171 | 99 +  | 201 | 371 | 661278 | 661448 |
| UN57384 | Rsa1.0.00661.1 | 696 | 213041 | 0         | 382 | 384 | 99 -  | 314 | 696 | 212658 | 213041 |
| UN57385 | Rsa1.0.01310.1 | 218 | 164719 | 2.00E-91  | 208 | 219 | 94 -  | 1   | 214 | 6999   | 7217   |
| UN57386 | Rsa1.0.00778.1 | 427 | 196751 | 0         | 419 | 427 | 98 -  | 2   | 427 | 155182 | 155608 |
| UN57387 | Rsa1.0.02524.1 | 336 | 30496  | 8.00E-52  | 107 | 108 | 99 -  | 47  | 154 | 16107  | 16214  |
| UN57388 | Rsa1.0.09834.1 | 423 | 6128   | 0         | 421 | 423 | 99 +  | 1   | 423 | 574    | 996    |
| UN57389 | Rsa1.0.04384.1 | 605 | 17629  | 1.00E-172 | 433 | 477 | 90 -  | 138 | 605 | 2116   | 2581   |
| UN57390 | Rsa1.0.00162.1 | 216 | 239935 | 1.00E-111 | 214 | 216 | 99 +  | 1   | 216 | 25264  | 25478  |
| UN57391 | Rsa1.0.00425.1 | 739 | 147080 | 0         | 718 | 742 | 96 +  | 1   | 739 | 112517 | 113258 |
| UN57392 | Rsa1.0.02550.1 | 644 | 291051 | 0         | 607 | 624 | 97 +  | 2   | 624 | 2819   | 3442   |
| UN57393 | Rsa1.0.03842.1 | 492 | 20503  | 0         | 382 | 400 | 95 -  | 83  | 482 | 15597  | 15995  |
| UN57394 | Rsa1.0.00162.1 | 388 | 239935 | 1.00E-130 | 308 | 334 | 92 -  | 1   | 322 | 39573  | 39903  |
| UN57395 | Rsa1.0.46690.1 | 636 | 484    | 0         | 349 | 352 | 99 -  | 149 | 500 | 1      | 352    |
| UN57396 | Rsa1.0.00715.1 | 604 | 67116  | 0         | 574 | 587 | 97 +  | 18  | 604 | 58558  | 59144  |
| UN57397 | Rsa1.0.00497.1 | 321 | 79830  | 1.00E-150 | 275 | 277 | 99 +  | 2   | 278 | 22282  | 22558  |
| UN57398 | Rsa1.0.03037.1 | 695 | 25825  | 0         | 637 | 658 | 96 +  | 1   | 653 | 17748  | 18404  |
| UN57399 | Rsa1.0.00190.1 | 669 | 318240 | 1.00E-132 | 286 | 297 | 96 +  | 5   | 299 | 51862  | 52154  |
| UN57400 | Rsa1.0.03927.1 | 671 | 19997  | 1.00E-128 | 247 | 252 | 98 +  | 321 | 572 | 16914  | 17165  |
| UN57401 | Rsa1.0.01031.1 | 730 | 56236  | 1.00E-112 | 252 | 267 | 94 -  | 141 | 404 | 18106  | 18372  |
| UN57402 | Rsa1.0.00793.1 | 697 | 64103  | 9.00E-75  | 187 | 198 | 94 -  | 3   | 197 | 6999   | 7195   |
| UN57403 | Rsa1.0.01817.1 | 640 | 38849  | 0         | 507 | 508 | 99 -  | 1   | 508 | 3387   | 3894   |
| UN57404 | Rsa1.0.03860.1 | 672 | 20407  | 1.00E-153 | 306 | 316 | 96 -  | 146 | 458 | 17073  | 17388  |
| UN57405 | Rsa1.0.00582.1 | 735 | 74333  | 0         | 723 | 739 | 97 +  | 1   | 735 | 13209  | 13947  |
| UN57406 | Rsa1.0.03673.1 | 667 | 21448  | 1.00E-168 | 302 | 303 | 99 +  | 94  | 396 | 14545  | 14847  |

|         |                |     |        |           |     |     |       |     |     |        |        |
|---------|----------------|-----|--------|-----------|-----|-----|-------|-----|-----|--------|--------|
| UN57407 | Rsa1.0.02163.1 | 689 | 34427  | 0         | 402 | 411 | 97 +  | 14  | 424 | 28174  | 28584  |
| UN57408 | Rsa1.0.00022.1 | 476 | 200461 | 1.00E-85  | 161 | 161 | 100 + | 316 | 476 | 151207 | 151367 |
| UN57409 | Rsa1.0.02608.1 | 496 | 29613  | 0         | 455 | 460 | 98 -  | 1   | 460 | 28533  | 28991  |
| UN57410 | Rsa1.0.00851.1 | 228 | 62181  | 2.00E-42  | 109 | 116 | 93 +  | 82  | 197 | 27863  | 27978  |
| UN57411 | Rsa1.0.00379.1 | 657 | 89865  | 4.00E-46  | 101 | 103 | 98 -  | 94  | 196 | 88673  | 88775  |
| UN57412 | Rsa1.0.00021.1 | 684 | 263655 | 1.00E-111 | 213 | 216 | 98 +  | 61  | 276 | 60975  | 61190  |
| UN57413 | Rsa1.0.01892.1 | 426 | 37526  | 8.00E-71  | 171 | 182 | 93 +  | 1   | 179 | 25014  | 25195  |
| UN57414 | Rsa1.0.35228.1 | 706 | 642    | 2.00E-45  | 118 | 126 | 93 -  | 1   | 126 | 4      | 129    |
| UN57415 | Rsa1.0.03422.1 | 563 | 23076  | 0         | 554 | 568 | 97 +  | 1   | 560 | 18592  | 19158  |
| UN57416 | Rsa1.0.00004.1 | 641 | 253996 | 1.00E-162 | 296 | 297 | 99 +  | 346 | 641 | 37761  | 38057  |
| UN57417 | Rsa1.0.02730.1 | 469 | 28385  | 1.00E-137 | 257 | 260 | 98 -  | 105 | 364 | 13862  | 14121  |
| UN57418 | Rsa1.0.04029.1 | 665 | 19491  | 0         | 474 | 489 | 96 -  | 179 | 665 | 8476   | 8963   |
| UN57419 | Rsa1.0.00225.1 | 725 | 105892 | 1.00E-133 | 251 | 253 | 99 +  | 474 | 725 | 42928  | 43180  |
| UN57420 | Rsa1.0.00330.1 | 608 | 94666  | 1.00E-144 | 309 | 324 | 95 +  | 2   | 324 | 84642  | 84965  |
| UN57421 | Rsa1.0.00389.1 | 605 | 88795  | 2.00E-63  | 136 | 140 | 97 -  | 223 | 362 | 65177  | 65316  |
| UN57422 | Rsa1.0.36792.1 | 760 | 613    | 1.00E-100 | 219 | 230 | 95 -  | 269 | 498 | 239    | 468    |
| UN57423 | Rsa1.0.00577.1 | 475 | 174827 | 1.00E-85  | 253 | 276 | 91 +  | 139 | 411 | 148897 | 149163 |
| UN57424 | Rsa1.0.01285.1 | 157 | 172709 | 1.00E-45  | 145 | 157 | 92 -  | 5   | 157 | 156762 | 156913 |
| UN57425 | Rsa1.0.00044.1 | 230 | 271658 | 2.00E-73  | 204 | 222 | 91 +  | 9   | 225 | 9878   | 10099  |
| UN57426 | Rsa1.0.01749.1 | 727 | 39822  | 1.00E-12  | 66  | 75  | 88 -  | 463 | 537 | 20898  | 20972  |
| UN57427 | Rsa1.0.02347.1 | 614 | 32332  | 0         | 352 | 356 | 98 -  | 261 | 614 | 28471  | 28826  |
| UN57428 | Rsa1.0.01505.1 | 730 | 44382  | 0         | 621 | 640 | 97 -  | 52  | 690 | 42124  | 42763  |
| UN57429 | Rsa1.0.00031.1 | 727 | 179862 | 1.00E-163 | 335 | 349 | 95 -  | 1   | 340 | 316    | 664    |
| UN57430 | Rsa1.0.02678.1 | 719 | 135053 | 0         | 408 | 427 | 95 -  | 1   | 427 | 130452 | 130863 |
| UN57431 | Rsa1.0.00265.1 | 736 | 220635 | 2.00E-72  | 191 | 207 | 92 -  | 1   | 201 | 148914 | 149120 |
| UN57432 | Rsa1.0.00387.1 | 666 | 495407 | 0         | 580 | 598 | 96 +  | 73  | 666 | 93939  | 94535  |
| UN57433 | Rsa1.0.01175.1 | 497 | 51674  | 1.00E-177 | 324 | 327 | 99 +  | 1   | 327 | 26051  | 26377  |
| UN57434 | Rsa1.0.05633.1 | 599 | 13118  | 0         | 571 | 597 | 95 -  | 5   | 599 | 4581   | 5169   |
| UN57435 | Rsa1.0.00366.1 | 712 | 90880  | 2.00E-97  | 184 | 185 | 99 +  | 322 | 506 | 13590  | 13774  |
| UN57436 | Rsa1.0.00251.1 | 729 | 303968 | 1.00E-125 | 236 | 239 | 98 -  | 121 | 359 | 290985 | 291223 |
| UN57437 | Rsa1.0.05818.1 | 647 | 12544  | 0         | 633 | 645 | 98 +  | 3   | 647 | 8328   | 8972   |
| UN57438 | Rsa1.0.03997.1 | 764 | 19652  | 3.00E-84  | 197 | 213 | 92 -  | 1   | 198 | 4171   | 4383   |
| UN57439 | Rsa1.0.00370.1 | 777 | 90472  | 1.00E-169 | 432 | 479 | 90 +  | 302 | 777 | 42439  | 42899  |
| UN57440 | Rsa1.0.00248.1 | 736 | 163568 | 1.00E-160 | 343 | 359 | 95 +  | 11  | 365 | 99363  | 99719  |
| UN57441 | Rsa1.0.10828.1 | 701 | 5709   | 0         | 408 | 412 | 99 +  | 2   | 413 | 5218   | 5629   |
| UN57442 | Rsa1.0.01380.1 | 123 | 155003 | 4.00E-51  | 114 | 118 | 96 +  | 6   | 123 | 9083   | 9200   |
| UN57443 | Rsa1.0.00002.1 | 549 | 601661 | 0         | 337 | 341 | 98 -  | 26  | 366 | 283406 | 283746 |
| UN57444 | Rsa1.0.01487.1 | 478 | 44784  | 1.00E-136 | 326 | 348 | 93 -  | 1   | 342 | 2584   | 2931   |
| UN57445 | Rsa1.0.00279.1 | 794 | 100039 | 7.00E-48  | 135 | 146 | 92 -  | 62  | 204 | 7038   | 7180   |

|         |                |     |        |           |     |     |      |     |     |        |        |
|---------|----------------|-----|--------|-----------|-----|-----|------|-----|-----|--------|--------|
| UN57446 | Rsa1.0.02680.1 | 130 | 28721  | 1.00E-48  | 122 | 130 | 93 - | 1   | 130 | 18729  | 18858  |
| UN57447 | Rsa1.0.01259.1 | 756 | 49754  | 0         | 736 | 739 | 99 + | 1   | 739 | 38560  | 39298  |
| UN57448 | Rsa1.0.01082.1 | 239 | 54640  | 1.00E-108 | 229 | 239 | 95 - | 1   | 239 | 10679  | 10917  |
| UN57449 | Rsa1.0.00079.1 | 117 | 606987 | 7.00E-22  | 56  | 57  | 98 - | 6   | 62  | 541187 | 541243 |
| UN57450 | Rsa1.0.00418.1 | 707 | 215377 | 0         | 705 | 712 | 99 + | 1   | 707 | 67040  | 67751  |
| UN57451 | Rsa1.0.00457.1 | 477 | 337301 | 1.00E-131 | 277 | 290 | 95 + | 159 | 448 | 9577   | 9866   |
| UN57452 | Rsa1.0.14943.1 | 420 | 2944   | 0         | 406 | 413 | 98 + | 3   | 415 | 1862   | 2272   |
| UN57453 | Rsa1.0.30871.1 | 772 | 742    | 1.00E-119 | 260 | 270 | 96 + | 114 | 382 | 86     | 353    |
| UN57454 | Rsa1.0.05847.1 | 733 | 12433  | 1.00E-167 | 330 | 341 | 96 + | 399 | 733 | 2039   | 2379   |
| UN57455 | Rsa1.0.00044.1 | 122 | 271658 | 7.00E-56  | 119 | 122 | 97 - | 1   | 122 | 139720 | 139841 |
| UN57456 | Rsa1.0.00025.1 | 723 | 277312 | 0         | 697 | 725 | 96 - | 1   | 723 | 265573 | 266288 |
| UN57457 | Rsa1.0.04166.1 | 155 | 18757  | 4.00E-58  | 141 | 150 | 94 - | 1   | 150 | 4679   | 4828   |
| UN57458 | Rsa1.0.02226.1 | 817 | 33726  | 1.00E-166 | 343 | 354 | 96 + | 106 | 456 | 12269  | 12618  |
| UN57459 | Rsa1.0.01783.1 | 107 | 39383  | 3.00E-42  | 102 | 107 | 95 + | 1   | 107 | 20052  | 20158  |
| UN57460 | Rsa1.0.00123.1 | 710 | 325650 | 0         | 681 | 711 | 95 + | 2   | 710 | 173800 | 174500 |
| UN57461 | Rsa1.0.00780.1 | 820 | 147795 | 1.00E-141 | 314 | 332 | 94 - | 1   | 330 | 16309  | 16637  |
| UN57462 | Rsa1.0.00046.1 | 773 | 320315 | 0         | 641 | 646 | 99 - | 125 | 769 | 20385  | 21030  |
| UN57463 | Rsa1.0.00194.1 | 454 | 110851 | 1.00E-156 | 324 | 339 | 95 - | 1   | 339 | 42338  | 42676  |
| UN57464 | Rsa1.0.00292.1 | 852 | 98141  | 1.00E-147 | 304 | 316 | 96 + | 1   | 316 | 63941  | 64254  |
| UN57465 | Rsa1.0.00005.1 | 404 | 353093 | 1.00E-117 | 238 | 246 | 96 + | 1   | 246 | 169084 | 169329 |
| UN57466 | Rsa1.0.05494.1 | 137 | 13547  | 1.00E-60  | 134 | 138 | 97 + | 1   | 137 | 7713   | 7850   |
| UN57467 | Rsa1.0.01635.1 | 527 | 41865  | 0         | 433 | 466 | 92 + | 1   | 466 | 7345   | 7801   |
| UN57468 | Rsa1.0.24053.1 | 754 | 1009   | 0         | 393 | 402 | 97 + | 269 | 669 | 267    | 668    |
| UN57469 | Rsa1.0.00412.1 | 629 | 86935  | 0         | 621 | 629 | 98 + | 1   | 628 | 51606  | 52234  |
| UN57470 | Rsa1.0.00155.1 | 585 | 118465 | 1.00E-160 | 337 | 350 | 96 - | 34  | 383 | 53727  | 54073  |
| UN57471 | Rsa1.0.03867.1 | 114 | 20369  | 3.00E-36  | 98  | 105 | 93 - | 1   | 105 | 15555  | 15659  |
| UN57472 | Rsa1.0.05066.1 | 160 | 14943  | 3.00E-71  | 154 | 160 | 96 - | 1   | 160 | 424    | 583    |
| UN57473 | Rsa1.0.00759.1 | 706 | 65465  | 1.00E-76  | 176 | 186 | 94 - | 289 | 474 | 44072  | 44257  |
| UN57474 | Rsa1.0.00108.1 | 342 | 478491 | 1.00E-115 | 282 | 302 | 93 - | 20  | 319 | 270625 | 270925 |
| UN57475 | Rsa1.0.01292.1 | 725 | 175783 | 0         | 424 | 428 | 99 + | 1   | 428 | 152612 | 153039 |
| UN57476 | Rsa1.0.00678.1 | 711 | 193163 | 0         | 683 | 711 | 96 + | 1   | 711 | 174442 | 175145 |
| UN57477 | Rsa1.0.04806.1 | 130 | 15898  | 7.00E-56  | 125 | 130 | 96 - | 1   | 130 | 7356   | 7485   |
| UN57478 | Rsa1.0.00453.1 | 798 | 83031  | 0         | 674 | 722 | 93 - | 17  | 738 | 75551  | 76245  |
| UN57479 | Rsa1.0.01274.1 | 498 | 49419  | 4.00E-76  | 175 | 185 | 94 + | 71  | 255 | 37771  | 37955  |
| UN57480 | Rsa1.0.00008.1 | 238 | 358124 | 1.00E-86  | 207 | 222 | 93 - | 17  | 238 | 282640 | 282861 |
| UN57481 | Rsa1.0.00056.1 | 862 | 332604 | 2.00E-94  | 185 | 188 | 98 + | 637 | 824 | 233929 | 234116 |
| UN57482 | Rsa1.0.30600.1 | 787 | 750    | 0         | 465 | 491 | 94 - | 4   | 490 | 197    | 686    |
| UN57483 | Rsa1.0.04713.1 | 550 | 16270  | 1.00E-168 | 406 | 440 | 92 + | 109 | 548 | 10218  | 10656  |
| UN57484 | Rsa1.0.00029.1 | 163 | 272992 | 2.00E-19  | 61  | 65  | 93 - | 2   | 66  | 249519 | 249583 |

|         |                |     |        |           |     |     |       |     |     |        |        |
|---------|----------------|-----|--------|-----------|-----|-----|-------|-----|-----|--------|--------|
| UN57485 | Rsa1.0.00107.1 | 260 | 431659 | 9.00E-88  | 232 | 252 | 92 +  | 1   | 248 | 180757 | 181005 |
| UN57486 | Rsa1.0.04980.1 | 364 | 15251  | 0         | 360 | 363 | 99 -  | 2   | 364 | 7051   | 7413   |
| UN57487 | Rsa1.0.14003.1 | 646 | 3930   | 1.00E-169 | 339 | 352 | 96 -  | 1   | 346 | 2895   | 3246   |
| UN57488 | Rsa1.0.00417.1 | 495 | 395068 | 4.00E-82  | 179 | 187 | 95 +  | 1   | 187 | 13697  | 13883  |
| UN57489 | Rsa1.0.01137.1 | 821 | 52655  | 0         | 559 | 579 | 96 +  | 3   | 574 | 4783   | 5354   |
| UN57490 | Rsa1.0.03267.1 | 151 | 24230  | 5.00E-51  | 139 | 150 | 92 -  | 1   | 150 | 12645  | 12793  |
| UN57491 | Rsa1.0.00414.1 | 372 | 202190 | 1.00E-149 | 350 | 376 | 93 +  | 1   | 372 | 3393   | 3767   |
| UN57492 | Rsa1.0.01140.1 | 184 | 52586  | 2.00E-51  | 133 | 143 | 93 +  | 3   | 145 | 32543  | 32685  |
| UN57493 | Rsa1.0.04043.1 | 712 | 19416  | 0         | 667 | 712 | 93 +  | 4   | 712 | 4417   | 5110   |
| UN57494 | Rsa1.0.00296.1 | 827 | 97854  | 0         | 547 | 568 | 96 +  | 1   | 562 | 70192  | 70757  |
| UN57495 | Rsa1.0.01296.1 | 591 | 49035  | 1.00E-153 | 437 | 495 | 88 +  | 3   | 472 | 8860   | 9337   |
| UN57496 | Rsa1.0.00116.1 | 291 | 365886 | 1.00E-133 | 277 | 288 | 96 -  | 1   | 288 | 137267 | 137553 |
| UN57497 | Rsa1.0.00221.1 | 291 | 106972 | 3.00E-91  | 258 | 288 | 89 +  | 1   | 286 | 51633  | 51910  |
| UN57498 | Rsa1.0.00058.1 | 313 | 159921 | 7.00E-80  | 175 | 183 | 95 +  | 1   | 183 | 46682  | 46864  |
| UN57499 | Rsa1.0.01308.1 | 461 | 48596  | 8.00E-62  | 133 | 137 | 97 -  | 325 | 461 | 45851  | 45987  |
| UN57500 | Rsa1.0.02373.1 | 723 | 32048  | 0         | 564 | 587 | 96 +  | 1   | 587 | 8541   | 9119   |
| UN57501 | Rsa1.0.01126.1 | 670 | 53127  | 1.00E-157 | 320 | 333 | 96 -  | 270 | 602 | 1257   | 1589   |
| UN57502 | Rsa1.0.04154.1 | 663 | 18802  | 1.00E-165 | 366 | 392 | 93 -  | 272 | 663 | 14985  | 15365  |
| UN57503 | Rsa1.0.00138.1 | 753 | 247040 | 2.00E-69  | 253 | 288 | 87 +  | 26  | 312 | 8649   | 8931   |
| UN57504 | Rsa1.0.00720.1 | 662 | 66931  | 1.00E-122 | 280 | 304 | 92 +  | 1   | 285 | 55150  | 55453  |
| UN57505 | Rsa1.0.04910.1 | 378 | 15484  | 6.00E-93  | 194 | 201 | 96 -  | 178 | 378 | 9304   | 9504   |
| UN57506 | Rsa1.0.00021.1 | 740 | 263655 | 0         | 466 | 485 | 96 -  | 2   | 482 | 199080 | 199563 |
| UN57507 | Rsa1.0.00603.1 | 189 | 73299  | 3.00E-50  | 116 | 121 | 95 +  | 2   | 122 | 42617  | 42737  |
| UN57508 | Rsa1.0.03569.1 | 794 | 22041  | 1.00E-144 | 379 | 414 | 91 +  | 1   | 408 | 12518  | 12922  |
| UN57509 | Rsa1.0.00429.1 | 146 | 85559  | 2.00E-44  | 130 | 143 | 90 -  | 1   | 143 | 24249  | 24391  |
| UN57510 | Rsa1.0.00323.1 | 558 | 159650 | 1.00E-142 | 256 | 256 | 100 + | 1   | 256 | 113413 | 113668 |
| UN57511 | Rsa1.0.01322.1 | 662 | 48166  | 1.00E-135 | 308 | 330 | 93 +  | 51  | 367 | 9729   | 10058  |
| UN57512 | Rsa1.0.00322.1 | 715 | 212233 | 6.00E-76  | 162 | 167 | 97 +  | 408 | 571 | 83613  | 83779  |
| UN57513 | Rsa1.0.02557.1 | 706 | 30127  | 0         | 678 | 702 | 96 -  | 1   | 702 | 5991   | 6683   |
| UN57514 | Rsa1.0.15145.1 | 623 | 2800   | 1.00E-139 | 304 | 321 | 94 +  | 1   | 321 | 235    | 552    |
| UN57515 | Rsa1.0.00863.1 | 143 | 254535 | 5.00E-48  | 131 | 141 | 92 -  | 4   | 143 | 213576 | 213716 |
| UN57516 | Rsa1.0.07246.1 | 637 | 9665   | 0         | 405 | 410 | 98 -  | 228 | 637 | 4608   | 5017   |
| UN57517 | Rsa1.0.00227.1 | 711 | 105849 | 0         | 358 | 368 | 97 +  | 269 | 636 | 31232  | 31599  |
| UN57518 | Rsa1.0.00679.1 | 756 | 68971  | 1.00E-180 | 408 | 431 | 94 +  | 28  | 447 | 25620  | 26045  |
| UN57519 | Rsa1.0.00757.1 | 529 | 65559  | 1.00E-100 | 250 | 268 | 93 +  | 8   | 273 | 58117  | 58372  |
| UN57520 | Rsa1.0.02170.1 | 170 | 34352  | 3.00E-31  | 138 | 161 | 85 -  | 10  | 170 | 1798   | 1958   |
| UN57521 | Rsa1.0.00063.1 | 734 | 156150 | 1.00E-136 | 296 | 312 | 94 +  | 423 | 734 | 5800   | 6108   |
| UN57522 | Rsa1.0.01409.1 | 656 | 151595 | 1.00E-133 | 250 | 253 | 98 +  | 11  | 263 | 124572 | 124824 |
| UN57523 | Rsa1.0.00273.1 | 274 | 326186 | 1.00E-129 | 264 | 274 | 96 +  | 1   | 274 | 237665 | 237938 |

|         |                |     |        |           |     |     |      |   |     |     |        |        |
|---------|----------------|-----|--------|-----------|-----|-----|------|---|-----|-----|--------|--------|
| UN57524 | Rsa1.0_01889.1 | 649 | 37562  | 0         | 647 | 650 | 99 - |   | 1   | 649 | 10314  | 10963  |
| UN57525 | #              | #   | #      | #         | #   | #   | #    | # | #   | #   | #      | #      |
| UN57526 | Rsa1.0_00009.1 | 475 | 232558 | 1.00E-116 | 222 | 225 | 98 + |   | 3   | 227 | 296    | 520    |
| UN57527 | Rsa1.0_00085.1 | 746 | 142226 | 1.00E-140 | 310 | 326 | 95 + |   | 31  | 356 | 28413  | 28732  |
| UN57528 | Rsa1.0_00497.1 | 393 | 79830  | 3.00E-67  | 176 | 190 | 92 - |   | 12  | 201 | 52219  | 52407  |
| UN57529 | Rsa1.0_08838.1 | 677 | 6873   | 0         | 508 | 524 | 96 - |   | 1   | 524 | 2943   | 3465   |
| UN57530 | Rsa1.0_00140.1 | 747 | 121541 | 0         | 731 | 745 | 98 + |   | 3   | 747 | 88742  | 89486  |
| UN57531 | Rsa1.0_00159.1 | 807 | 431686 | 0         | 465 | 479 | 97 + |   | 4   | 479 | 350442 | 350920 |
| UN57532 | Rsa1.0_00263.1 | 794 | 224968 | 2.00E-70  | 247 | 287 | 86 + |   | 1   | 258 | 141435 | 141721 |
| UN57533 | Rsa1.0_00104.1 | 827 | 368722 | 0         | 793 | 829 | 95 - |   | 1   | 827 | 68774  | 69602  |
| UN57534 | Rsa1.0_57571.1 | 761 | 397    | 0         | 392 | 395 | 99 + |   | 111 | 505 | 1      | 395    |
| UN57535 | Rsa1.0_00111.1 | 167 | 390088 | 2.00E-66  | 155 | 164 | 94 - |   | 1   | 164 | 60906  | 61069  |
| UN57536 | Rsa1.0_00370.1 | 383 | 90472  | 1.00E-149 | 326 | 344 | 94 + |   | 1   | 343 | 73419  | 73762  |
| UN57537 | Rsa1.0_01036.1 | 890 | 55978  | 0         | 837 | 850 | 98 + |   | 1   | 845 | 47382  | 48231  |
| UN57538 | Rsa1.0_00196.1 | 576 | 109960 | 5.00E-51  | 127 | 135 | 94 - |   | 404 | 538 | 70876  | 71010  |
| UN57539 | Rsa1.0_16906.1 | 836 | 1993   | 1.00E-144 | 277 | 283 | 97 - |   | 1   | 283 | 4      | 286    |
| UN57540 | Rsa1.0_02862.1 | 697 | 27163  | 0         | 524 | 539 | 97 + |   | 84  | 622 | 21827  | 22365  |
| UN57541 | Rsa1.0_05326.1 | 108 | 14139  | 1.00E-38  | 103 | 108 | 95 - |   | 1   | 108 | 4069   | 4173   |
| UN57542 | Rsa1.0_09383.1 | 760 | 6407   | 0         | 751 | 760 | 98 + |   | 1   | 760 | 4496   | 5255   |
| UN57543 | Rsa1.0_00464.1 | 778 | 82253  | 0         | 451 | 458 | 98 - |   | 170 | 624 | 48375  | 48832  |
| UN57544 | Rsa1.0_01593.1 | 543 | 150996 | 0         | 390 | 402 | 97 + |   | 4   | 405 | 149449 | 149850 |
| UN57545 | Rsa1.0_01235.1 | 103 | 50180  | 3.00E-45  | 98  | 100 | 98 + |   | 1   | 100 | 22330  | 22429  |
| UN57546 | Rsa1.0_01667.1 | 220 | 41315  | 1.00E-92  | 208 | 220 | 94 - |   | 1   | 220 | 33943  | 34162  |
| UN57547 | Rsa1.0_04196.1 | 708 | 18515  | 0         | 498 | 516 | 96 + |   | 21  | 534 | 16842  | 17354  |
| UN57548 | Rsa1.0_01628.1 | 522 | 41932  | 1.00E-143 | 275 | 281 | 97 + |   | 1   | 281 | 5724   | 6004   |
| UN57549 | Rsa1.0_02819.1 | 822 | 27629  | 0         | 782 | 828 | 94 + |   | 1   | 822 | 26168  | 26991  |
| UN57550 | Rsa1.0_00163.1 | 731 | 116847 | 1.00E-158 | 414 | 452 | 91 - |   | 13  | 452 | 83512  | 83962  |
| UN57551 | Rsa1.0_00130.1 | 182 | 125737 | 1.00E-33  | 85  | 89  | 95 + |   | 92  | 180 | 38687  | 38775  |
| UN57552 | Rsa1.0_03367.1 | 241 | 23387  | 2.00E-42  | 127 | 140 | 90 + |   | 102 | 241 | 1583   | 1722   |
| UN57553 | Rsa1.0_01965.1 | 217 | 36698  | 1.00E-46  | 110 | 115 | 95 - |   | 1   | 115 | 15438  | 15552  |
| UN57554 | Rsa1.0_04411.1 | 740 | 142979 | 0         | 719 | 745 | 96 + |   | 4   | 740 | 137868 | 138609 |
| UN57555 | Rsa1.0_00657.1 | 104 | 69858  | 1.00E-22  | 92  | 104 | 88 + |   | 1   | 104 | 69074  | 69174  |
| UN57556 | #              | #   | #      | #         | #   | #   | #    | # | #   | #   | #      | #      |
| UN57557 | Rsa1.0_02867.1 | 717 | 27121  | 3.00E-71  | 259 | 304 | 85 - |   | 1   | 292 | 3466   | 3753   |
| UN57558 | Rsa1.0_00900.1 | 557 | 60367  | 1.00E-140 | 307 | 325 | 94 + |   | 1   | 325 | 25855  | 26170  |
| UN57559 | Rsa1.0_03736.1 | 103 | 21081  | 1.00E-16  | 89  | 100 | 89 + |   | 2   | 101 | 10552  | 10648  |
| UN57560 | Rsa1.0_00389.1 | 701 | 88795  | 3.00E-84  | 180 | 187 | 96 + |   | 416 | 602 | 64594  | 64780  |
| UN57561 | Rsa1.0_05311.1 | 134 | 14181  | 2.00E-53  | 127 | 134 | 94 - |   | 1   | 134 | 6842   | 6975   |
| UN57562 | Rsa1.0_00012.1 | 714 | 222148 | 1.00E-144 | 319 | 337 | 94 - |   | 12  | 343 | 88471  | 88798  |

|         |                |     |        |           |     |     |      |     |     |        |        |
|---------|----------------|-----|--------|-----------|-----|-----|------|-----|-----|--------|--------|
| UN57563 | Rsa1.0.02070.1 | 407 | 158516 | 1.00E-150 | 376 | 410 | 91 + | 4   | 407 | 13204  | 13604  |
| UN57564 | Rsa1.0.00425.1 | 177 | 147080 | 1.00E-52  | 159 | 177 | 89 + | 1   | 177 | 75311  | 75487  |
| UN57565 | Rsa1.0.03074.1 | 621 | 25568  | 0         | 620 | 624 | 99 + | 1   | 621 | 18873  | 19496  |
| UN57566 | Rsa1.0.00074.1 | 717 | 147591 | 0         | 532 | 543 | 97 - | 1   | 543 | 128419 | 128958 |
| UN57567 | Rsa1.0.00475.1 | 121 | 81678  | 2.00E-34  | 95  | 102 | 93 + | 1   | 102 | 27097  | 27198  |
| UN57568 | Rsa1.0.01112.1 | 651 | 310601 | 0         | 599 | 622 | 96 + | 25  | 645 | 154642 | 155261 |
| UN57569 | Rsa1.0.08074.1 | 729 | 7952   | 0         | 511 | 518 | 98 - | 3   | 519 | 6406   | 6923   |
| UN57570 | Rsa1.0.00101.1 | 569 | 267193 | 0         | 560 | 570 | 98 - | 1   | 569 | 141787 | 142355 |
| UN57571 | Rsa1.0.16915.1 | 703 | 1991   | 2.00E-63  | 134 | 136 | 98 + | 2   | 137 | 5      | 139    |
| UN57572 | Rsa1.0.00201.1 | 693 | 232851 | 0         | 654 | 704 | 92 + | 2   | 693 | 225593 | 226294 |
| UN57573 | Rsa1.0.13268.1 | 741 | 4949   | 1.00E-166 | 317 | 324 | 97 - | 315 | 638 | 381    | 704    |
| UN57574 | Rsa1.0.00602.1 | 633 | 73302  | 0         | 617 | 633 | 97 - | 1   | 633 | 47236  | 47867  |
| UN57575 | Rsa1.0.04039.1 | 693 | 19467  | 0         | 668 | 693 | 96 + | 1   | 693 | 8349   | 9039   |
| UN57576 | Rsa1.0.02387.1 | 526 | 31890  | 0         | 504 | 529 | 95 - | 1   | 526 | 14201  | 14729  |
| UN57577 | Rsa1.0.03215.1 | 711 | 24551  | 1.00E-161 | 335 | 347 | 96 + | 66  | 410 | 5040   | 5384   |
| UN57578 | Rsa1.0.00398.1 | 602 | 88007  | 0         | 519 | 538 | 96 + | 2   | 534 | 40987  | 41523  |
| UN57579 | Rsa1.0.00207.1 | 760 | 248736 | 0         | 557 | 577 | 96 + | 184 | 760 | 240373 | 240949 |
| UN57580 | Rsa1.0.02954.1 | 715 | 26485  | 0         | 691 | 727 | 95 + | 11  | 715 | 16501  | 17227  |
| UN57581 | Rsa1.0.01013.1 | 167 | 56822  | 2.00E-75  | 161 | 167 | 96 + | 1   | 167 | 23120  | 23286  |
| UN57582 | Rsa1.0.05076.1 | 446 | 14916  | 1.00E-82  | 240 | 272 | 88 + | 1   | 264 | 3306   | 3563   |
| UN57583 | Rsa1.0.00049.1 | 579 | 167018 | 1.00E-144 | 325 | 349 | 93 - | 18  | 351 | 128791 | 129138 |
| UN57584 | Rsa1.0.04998.1 | 719 | 15180  | 0         | 718 | 728 | 98 - | 1   | 719 | 7014   | 7741   |
| UN57585 | Rsa1.0.09929.1 | 205 | 6087   | 7.00E-45  | 122 | 131 | 93 + | 1   | 129 | 248    | 378    |
| UN57586 | Rsa1.0.00821.1 | 767 | 62891  | 0         | 445 | 450 | 98 - | 226 | 673 | 50163  | 50612  |
| UN57587 | Rsa1.0.38764.1 | 100 | 580    | 1.00E-35  | 91  | 96  | 94 + | 1   | 96  | 253    | 348    |
| UN57588 | Rsa1.0.37762.1 | 720 | 597    | 1.00E-175 | 388 | 412 | 94 + | 41  | 443 | 163    | 568    |
| UN57589 | Rsa1.0.00562.1 | 668 | 75565  | 0         | 651 | 668 | 97 - | 1   | 668 | 19440  | 20107  |
| UN57590 | Rsa1.0.03245.1 | 549 | 24385  | 1.00E-176 | 353 | 365 | 96 - | 178 | 541 | 23943  | 24307  |
| UN57591 | Rsa1.0.00522.1 | 779 | 78103  | 0         | 496 | 510 | 97 + | 271 | 779 | 45218  | 45727  |
| UN57592 | Rsa1.0.03045.1 | 792 | 25787  | 0         | 494 | 496 | 99 + | 1   | 496 | 5909   | 6403   |
| UN57593 | Rsa1.0.00085.1 | 526 | 142226 | 2.00E-59  | 132 | 137 | 96 - | 253 | 389 | 22769  | 22905  |
| UN57594 | Rsa1.0.00101.1 | 807 | 267193 | 1.00E-154 | 300 | 308 | 97 + | 1   | 308 | 194783 | 195090 |
| UN57595 | Rsa1.0.02521.1 | 504 | 30562  | 0         | 446 | 461 | 96 + | 15  | 466 | 21039  | 21499  |
| UN57596 | Rsa1.0.01525.1 | 323 | 43925  | 1.00E-135 | 306 | 324 | 94 - | 1   | 323 | 32544  | 32866  |
| UN57597 | Rsa1.0.00292.1 | 721 | 98141  | 0         | 715 | 721 | 99 + | 1   | 721 | 18782  | 19501  |
| UN57598 | Rsa1.0.02865.1 | 323 | 27133  | 1.00E-151 | 310 | 323 | 95 - | 1   | 323 | 1863   | 2185   |
| UN57599 | Rsa1.0.01882.1 | 491 | 37697  | 0         | 471 | 487 | 96 + | 2   | 488 | 4757   | 5243   |
| UN57600 | Rsa1.0.01369.1 | 121 | 47127  | 1.00E-35  | 109 | 120 | 90 + | 2   | 121 | 8462   | 8581   |
| UN57601 | Rsa1.0.00696.1 | 776 | 68010  | 0         | 523 | 528 | 99 - | 249 | 776 | 11473  | 12000  |

|         |                |     |        |           |     |     |      |     |     |        |        |
|---------|----------------|-----|--------|-----------|-----|-----|------|-----|-----|--------|--------|
| UN57602 | Rsa1.0_12809.1 | 580 | 5119   | 2.00E-78  | 204 | 220 | 92 + | 1   | 220 | 3368   | 3584   |
| UN57603 | Rsa1.0_03301.1 | 771 | 23932  | 3.00E-81  | 473 | 578 | 81 + | 189 | 766 | 17763  | 18339  |
| UN57604 | Rsa1.0_00457.1 | 752 | 337301 | 0         | 371 | 382 | 97 - | 374 | 752 | 296420 | 296801 |
| UN57605 | Rsa1.0_00107.1 | 123 | 431659 | 1.00E-23  | 99  | 111 | 89 + | 16  | 123 | 148770 | 148880 |
| UN57606 | #              | #   | #      | #         | #   | #   | #    | #   | #   | #      | #      |
| UN57607 | Rsa1.0_13824.1 | 707 | 4259   | 0         | 432 | 455 | 94 + | 3   | 457 | 2081   | 2534   |
| UN57608 | Rsa1.0_00507.1 | 616 | 79074  | 0         | 514 | 540 | 95 - | 1   | 540 | 71107  | 71646  |
| UN57609 | Rsa1.0_02397.1 | 772 | 31778  | 1.00E-150 | 288 | 294 | 97 + | 393 | 686 | 6138   | 6431   |
| UN57610 | Rsa1.0_02026.1 | 785 | 35896  | 1.00E-176 | 316 | 317 | 99 + | 1   | 317 | 6567   | 6883   |
| UN57611 | Rsa1.0_00278.1 | 500 | 231896 | 1.00E-149 | 352 | 376 | 93 - | 1   | 370 | 60144  | 60513  |
| UN57612 | Rsa1.0_19740.1 | 750 | 1390   | 0         | 727 | 743 | 97 + | 5   | 745 | 654    | 1390   |
| UN57613 | Rsa1.0_00196.1 | 319 | 109960 | 1.00E-127 | 301 | 321 | 93 - | 4   | 319 | 102346 | 102666 |
| UN57614 | Rsa1.0_08427.1 | 751 | 7371   | 1.00E-67  | 300 | 351 | 85 + | 29  | 378 | 4547   | 4894   |
| UN57615 | Rsa1.0_00234.1 | 136 | 197060 | 2.00E-37  | 109 | 119 | 91 + | 4   | 122 | 15418  | 15536  |
| UN57616 | Rsa1.0_00810.1 | 604 | 63289  | 0         | 438 | 469 | 93 - | 8   | 460 | 57632  | 58096  |
| UN57617 | Rsa1.0_03581.1 | 129 | 21965  | 6.00E-41  | 104 | 109 | 95 - | 18  | 126 | 2013   | 2120   |
| UN57618 | Rsa1.0_04209.1 | 444 | 18442  | 1.00E-159 | 348 | 370 | 94 + | 17  | 386 | 15716  | 16078  |
| UN57619 | Rsa1.0_04064.1 | 286 | 19297  | 1.00E-112 | 247 | 261 | 94 - | 1   | 261 | 18501  | 18761  |
| UN57620 | Rsa1.0_02071.1 | 278 | 35409  | 1.00E-117 | 253 | 266 | 95 - | 8   | 269 | 7713   | 7978   |
| UN57621 | Rsa1.0_00472.1 | 248 | 398134 | 1.00E-135 | 247 | 248 | 99 - | 1   | 248 | 293762 | 294009 |
| UN57622 | Rsa1.0_00900.1 | 181 | 60367  | 2.00E-60  | 142 | 150 | 94 - | 1   | 150 | 29648  | 29797  |
| UN57623 | Rsa1.0_04786.1 | 368 | 15988  | 2.00E-98  | 311 | 349 | 89 - | 1   | 343 | 1623   | 1962   |
| UN57624 | Rsa1.0_05190.1 | 346 | 14544  | 8.00E-55  | 175 | 193 | 90 - | 27  | 216 | 7027   | 7219   |
| UN57625 | Rsa1.0_00208.1 | 659 | 108565 | 0         | 655 | 660 | 99 + | 1   | 659 | 85726  | 86385  |
| UN57626 | Rsa1.0_01434.1 | 483 | 45951  | 1.00E-140 | 342 | 370 | 92 - | 115 | 479 | 22588  | 22952  |
| UN57627 | #              | #   | #      | #         | #   | #   | #    | #   | #   | #      | #      |
| UN57628 | Rsa1.0_01501.1 | 379 | 44532  | 3.00E-73  | 152 | 156 | 97 - | 224 | 379 | 100    | 255    |
| UN57629 | Rsa1.0_00055.1 | 702 | 520193 | 0         | 697 | 702 | 99 - | 1   | 702 | 288575 | 289274 |
| UN57630 | Rsa1.0_00302.1 | 756 | 97521  | 0         | 366 | 369 | 99 - | 1   | 369 | 85022  | 85390  |
| UN57631 | Rsa1.0_06452.1 | 652 | 10994  | 1.00E-155 | 281 | 282 | 99 + | 272 | 553 | 2469   | 2750   |
| UN57632 | Rsa1.0_01951.1 | 756 | 36941  | 1.00E-160 | 348 | 369 | 94 + | 4   | 368 | 2057   | 2418   |
| UN57633 | Rsa1.0_00834.1 | 135 | 62600  | 3.00E-58  | 123 | 126 | 97 - | 9   | 134 | 51195  | 51320  |
| UN57634 | Rsa1.0_05668.1 | 132 | 12994  | 2.00E-47  | 123 | 132 | 93 - | 1   | 132 | 12070  | 12201  |
| UN57635 | Rsa1.0_01333.1 | 787 | 47929  | 0         | 491 | 515 | 95 - | 274 | 787 | 44773  | 45287  |
| UN57636 | Rsa1.0_00328.1 | 642 | 224661 | 0         | 447 | 451 | 99 - | 74  | 524 | 207122 | 207572 |
| UN57637 | Rsa1.0_01889.1 | 167 | 37562  | 2.00E-54  | 129 | 136 | 94 - | 21  | 156 | 23055  | 23190  |
| UN57638 | Rsa1.0_00661.1 | 660 | 213041 | 0         | 655 | 659 | 99 + | 3   | 660 | 211241 | 211899 |
| UN57639 | Rsa1.0_00778.1 | 345 | 196751 | 1.00E-119 | 280 | 298 | 93 + | 2   | 293 | 153468 | 153765 |
| UN57640 | Rsa1.0_00053.1 | 469 | 263459 | 3.00E-95  | 235 | 252 | 93 - | 5   | 254 | 34020  | 34270  |



|         |                |     |        |           |     |     |       |     |     |        |        |
|---------|----------------|-----|--------|-----------|-----|-----|-------|-----|-----|--------|--------|
| UN57641 | Rsa1.0.04384.1 | 548 | 17629  | 0         | 527 | 550 | 95 +  | 4   | 548 | 1011   | 1557   |
| UN57642 | Rsa1.0.01758.1 | 155 | 39747  | 1.00E-64  | 146 | 153 | 95 +  | 1   | 153 | 36703  | 36855  |
| UN57643 | Rsa1.0.00620.1 | 683 | 71985  | 0         | 349 | 355 | 98 +  | 329 | 683 | 54806  | 55160  |
| UN57644 | Rsa1.0.03134.1 | 465 | 145023 | 1.00E-171 | 363 | 381 | 95 -  | 2   | 375 | 4339   | 4716   |
| UN57645 | Rsa1.0.00124.1 | 330 | 262503 | 1.00E-119 | 265 | 280 | 94 +  | 20  | 297 | 28441  | 28720  |
| UN57646 | Rsa1.0.00215.1 | 647 | 201775 | 0         | 408 | 436 | 93 -  | 1   | 435 | 50928  | 51346  |
| UN57647 | Rsa1.0.01817.1 | 798 | 38849  | 1.00E-173 | 362 | 378 | 95 +  | 2   | 377 | 1432   | 1807   |
| UN57648 | Rsa1.0.00582.1 | 732 | 74333  | 0         | 709 | 720 | 98 -  | 1   | 720 | 14169  | 14888  |
| UN57649 | Rsa1.0.03673.1 | 723 | 21448  | 0         | 357 | 363 | 98 -  | 3   | 364 | 16097  | 16457  |
| UN57650 | Rsa1.0.00648.1 | 119 | 70351  | 2.00E-56  | 118 | 119 | 99 +  | 1   | 119 | 46483  | 46600  |
| UN57651 | Rsa1.0.02608.1 | 580 | 29613  | 1.00E-104 | 207 | 212 | 97 +  | 1   | 212 | 26820  | 27031  |
| UN57652 | Rsa1.0.04367.1 | 257 | 17728  | 8.00E-42  | 102 | 107 | 95 -  | 1   | 107 | 13016  | 13122  |
| UN57653 | Rsa1.0.13010.1 | 307 | 5047   | 1.00E-121 | 287 | 309 | 92 +  | 3   | 307 | 2441   | 2749   |
| UN57654 | Rsa1.0.04029.1 | 105 | 19491  | 1.00E-38  | 99  | 105 | 94 +  | 1   | 105 | 8522   | 8626   |
| UN57655 | Rsa1.0.00222.1 | 334 | 172263 | 1.00E-139 | 308 | 327 | 94 -  | 1   | 327 | 69472  | 69798  |
| UN57656 | Rsa1.0.02903.1 | 611 | 26901  | 1.00E-169 | 552 | 633 | 87 -  | 1   | 607 | 23874  | 24494  |
| UN57657 | Rsa1.0.09303.1 | 177 | 6469   | 3.00E-71  | 167 | 176 | 94 +  | 1   | 175 | 6294   | 6469   |
| UN57658 | Rsa1.0.01313.1 | 155 | 48387  | 6.00E-60  | 132 | 137 | 96 +  | 19  | 155 | 1056   | 1192   |
| UN57659 | Rsa1.0.02536.1 | 440 | 30368  | 0         | 416 | 444 | 93 +  | 1   | 440 | 19446  | 19879  |
| UN57660 | Rsa1.0.00963.1 | 142 | 58176  | 9.00E-25  | 82  | 90  | 91 +  | 18  | 107 | 26927  | 27016  |
| UN57661 | Rsa1.0.01175.1 | 287 | 51674  | 1.00E-50  | 159 | 175 | 90 -  | 3   | 171 | 27867  | 28036  |
| UN57662 | Rsa1.0.03319.1 | 164 | 23767  | 1.00E-17  | 124 | 141 | 87 +  | 1   | 141 | 17213  | 17345  |
| UN57663 | #              | #   | #      | #         | #   | #   | #     | #   | #   | #      | #      |
| UN57664 | Rsa1.0.00262.1 | 729 | 101906 | 3.00E-62  | 128 | 130 | 98 -  | 317 | 446 | 83483  | 83612  |
| UN57665 | Rsa1.0.00615.1 | 701 | 72235  | 0         | 675 | 703 | 96 -  | 2   | 701 | 61747  | 62449  |
| UN57666 | Rsa1.0.00133.1 | 633 | 123768 | 0         | 412 | 414 | 99 -  | 220 | 633 | 78222  | 78635  |
| UN57667 | Rsa1.0.00144.1 | 794 | 120708 | 0         | 423 | 436 | 97 +  | 2   | 434 | 45132  | 45567  |
| UN57668 | Rsa1.0.00668.1 | 653 | 69421  | 0         | 567 | 581 | 97 +  | 53  | 633 | 11049  | 11629  |
| UN57669 | Rsa1.0.00111.1 | 656 | 390088 | 0         | 637 | 657 | 96 -  | 2   | 656 | 189893 | 190549 |
| UN57670 | Rsa1.0.13154.1 | 473 | 4990   | 1.00E-115 | 245 | 255 | 96 +  | 10  | 263 | 3136   | 3390   |
| UN57671 | Rsa1.0.03513.1 | 666 | 22349  | 1.00E-131 | 256 | 262 | 97 -  | 3   | 264 | 17749  | 18010  |
| UN57672 | Rsa1.0.03769.1 | 583 | 20955  | 3.00E-77  | 293 | 344 | 85 +  | 205 | 548 | 5729   | 6040   |
| UN57673 | Rsa1.0.00070.1 | 408 | 150321 | 1.00E-161 | 299 | 303 | 98 +  | 106 | 408 | 37747  | 38049  |
| UN57674 | Rsa1.0.14550.1 | 654 | 3278   | 3.00E-59  | 192 | 217 | 88 +  | 218 | 434 | 330    | 546    |
| UN57675 | Rsa1.0.00895.1 | 685 | 60615  | 1.00E-150 | 269 | 269 | 100 - | 104 | 372 | 41036  | 41304  |
| UN57676 | Rsa1.0.01301.1 | 568 | 169072 | 1.00E-109 | 251 | 266 | 94 +  | 2   | 264 | 41959  | 42218  |
| UN57677 | Rsa1.0.01172.1 | 641 | 51734  | 3.00E-65  | 167 | 179 | 93 +  | 319 | 496 | 49064  | 49242  |
| UN57678 | Rsa1.0.02149.1 | 662 | 148330 | 2.00E-57  | 187 | 210 | 89 +  | 229 | 422 | 30883  | 31092  |
| UN57679 | Rsa1.0.00484.1 | 717 | 203294 | 1.00E-129 | 282 | 293 | 96 -  | 414 | 701 | 127681 | 127973 |

|         |                |     |        |           |     |     |      |     |     |        |        |
|---------|----------------|-----|--------|-----------|-----|-----|------|-----|-----|--------|--------|
| UN57680 | Rsa1.0_00069.1 | 638 | 403561 | 1.00E-101 | 247 | 264 | 93 + | 356 | 615 | 200655 | 200916 |
| UN57681 | Rsa1.0_00005.1 | 748 | 353093 | 0         | 734 | 747 | 98 + | 3   | 748 | 295955 | 296701 |
| UN57682 | Rsa1.0_02769.1 | 626 | 28107  | 1.00E-135 | 372 | 416 | 89 + | 1   | 403 | 17125  | 17534  |
| UN57683 | Rsa1.0_00179.1 | 656 | 393324 | 7.00E-66  | 146 | 152 | 96 - | 167 | 318 | 65790  | 65941  |
| UN57684 | Rsa1.0_11827.1 | 431 | 5395   | 1.00E-151 | 368 | 398 | 92 + | 1   | 395 | 409    | 806    |
| UN57685 | Rsa1.0_00288.1 | 454 | 98659  | 1.00E-180 | 417 | 451 | 92 - | 2   | 452 | 84503  | 84938  |
| UN57686 | Rsa1.0_03319.1 | 627 | 23767  | 8.00E-78  | 193 | 207 | 93 - | 236 | 440 | 12677  | 12883  |
| UN57687 | Rsa1.0_00160.1 | 687 | 346678 | 1.00E-76  | 167 | 174 | 95 - | 206 | 379 | 245125 | 245298 |
| UN57688 | Rsa1.0_08728.1 | 699 | 6995   | 1.00E-158 | 347 | 366 | 94 - | 287 | 652 | 3891   | 4253   |
| UN57689 | Rsa1.0_00838.1 | 435 | 153820 | 4.00E-45  | 111 | 117 | 94 - | 206 | 322 | 56542  | 56658  |
| UN57690 | Rsa1.0_08285.1 | 777 | 7606   | 0         | 754 | 798 | 94 - | 1   | 775 | 2800   | 3591   |
| UN57691 | Rsa1.0_00093.1 | 709 | 214962 | 5.00E-70  | 144 | 147 | 97 - | 492 | 638 | 98063  | 98209  |
| UN57692 | Rsa1.0_00008.1 | 724 | 358124 | 0         | 354 | 358 | 98 - | 189 | 546 | 78544  | 78901  |
| UN57693 | Rsa1.0_03491.1 | 659 | 22541  | 1.00E-101 | 400 | 471 | 84 - | 48  | 518 | 9065   | 9535   |
| UN57694 | Rsa1.0_05570.1 | 673 | 13301  | 0         | 643 | 670 | 95 + | 5   | 673 | 10577  | 11233  |
| UN57695 | Rsa1.0_00067.1 | 641 | 415055 | 0         | 568 | 643 | 88 - | 2   | 641 | 140940 | 141543 |
| UN57696 | Rsa1.0_00494.1 | 687 | 79967  | 0         | 567 | 608 | 93 - | 3   | 582 | 34423  | 35030  |
| UN57697 | Rsa1.0_00017.1 | 790 | 752458 | 3.00E-84  | 177 | 183 | 96 + | 236 | 418 | 62005  | 62187  |
| UN57698 | Rsa1.0_03019.1 | 627 | 25987  | 1.00E-160 | 325 | 338 | 96 + | 290 | 627 | 575    | 912    |
| UN57699 | Rsa1.0_00419.1 | 514 | 86562  | 0         | 490 | 511 | 95 - | 3   | 504 | 76097  | 76606  |
| UN57700 | Rsa1.0_00253.1 | 795 | 231292 | 0         | 555 | 581 | 95 - | 211 | 788 | 25462  | 26042  |
| UN57701 | Rsa1.0_01123.1 | 617 | 53359  | 1.00E-145 | 335 | 356 | 94 + | 3   | 349 | 20615  | 20960  |
| UN57702 | Rsa1.0_03944.1 | 661 | 19926  | 1.00E-138 | 344 | 372 | 92 + | 3   | 367 | 9310   | 9679   |
| UN57703 | Rsa1.0_00190.1 | 666 | 318240 | 1.00E-120 | 231 | 235 | 98 - | 6   | 240 | 142188 | 142422 |
| UN57704 | Rsa1.0_00173.1 | 329 | 288743 | 5.00E-19  | 71  | 77  | 92 - | 252 | 328 | 42369  | 42444  |
| UN57705 | Rsa1.0_00054.1 | 633 | 162053 | 1.00E-108 | 331 | 375 | 88 - | 228 | 602 | 41547  | 41921  |
| UN57706 | Rsa1.0_01876.1 | 302 | 37800  | 8.00E-61  | 217 | 248 | 87 + | 44  | 284 | 12724  | 12968  |
| UN57707 | Rsa1.0_00142.1 | 704 | 121474 | 1.00E-174 | 342 | 352 | 97 - | 3   | 351 | 90981  | 91332  |
| UN57708 | Rsa1.0_00198.1 | 693 | 222963 | 0         | 432 | 459 | 94 + | 3   | 452 | 128659 | 129114 |
| UN57709 | Rsa1.0_03448.1 | 510 | 22844  | 1.00E-76  | 222 | 245 | 90 + | 277 | 510 | 1239   | 1481   |
| UN57710 | Rsa1.0_01270.1 | 679 | 49574  | 0         | 654 | 681 | 96 - | 2   | 679 | 27008  | 27688  |
| UN57711 | Rsa1.0_00341.1 | 665 | 249309 | 1.00E-107 | 206 | 209 | 98 - | 187 | 395 | 128945 | 129153 |
| UN57712 | Rsa1.0_02901.1 | 642 | 26909  | 0         | 516 | 546 | 94 - | 4   | 548 | 21040  | 21581  |
| UN57713 | Rsa1.0_00782.1 | 510 | 64468  | 1.00E-115 | 223 | 226 | 98 + | 285 | 510 | 23070  | 23293  |
| UN57714 | Rsa1.0_14348.1 | 695 | 3490   | 1.00E-106 | 210 | 215 | 97 + | 31  | 245 | 1006   | 1220   |
| UN57715 | Rsa1.0_00879.1 | 456 | 61297  | 2.00E-96  | 232 | 247 | 93 - | 212 | 456 | 30396  | 30642  |
| UN57716 | Rsa1.0_00802.1 | 727 | 63846  | 1.00E-67  | 195 | 212 | 91 + | 519 | 727 | 15856  | 16063  |
| UN57717 | Rsa1.0_03305.1 | 677 | 147552 | 1.00E-134 | 286 | 299 | 95 + | 3   | 300 | 144437 | 144735 |
| UN57718 | Rsa1.0_00166.1 | 627 | 240912 | 1.00E-134 | 322 | 351 | 91 + | 17  | 355 | 134247 | 134597 |

|         |                |     |        |           |     |     |      |     |     |        |        |
|---------|----------------|-----|--------|-----------|-----|-----|------|-----|-----|--------|--------|
| UN57719 | Rsa1.0_19913.1 | 645 | 1366   | 0         | 639 | 644 | 99 - | 2   | 645 | 78     | 721    |
| UN57720 | Rsa1.0_00118.1 | 736 | 130637 | 1.00E-118 | 266 | 284 | 93 + | 3   | 272 | 32045  | 32328  |
| UN57721 | Rsa1.0_00124.1 | 661 | 262503 | 0         | 633 | 661 | 95 - | 2   | 661 | 40217  | 40871  |
| UN57722 | Rsa1.0_00944.1 | 661 | 58733  | 3.00E-93  | 226 | 244 | 92 - | 3   | 245 | 5223   | 5455   |
| UN57723 | Rsa1.0_00120.1 | 638 | 277288 | 0         | 601 | 638 | 94 + | 2   | 638 | 85124  | 85761  |
| UN57724 | Rsa1.0_00253.1 | 644 | 231292 | 0         | 535 | 545 | 98 - | 7   | 551 | 196879 | 197423 |
| UN57725 | Rsa1.0_03290.1 | 375 | 24011  | 1.00E-168 | 349 | 363 | 96 + | 11  | 372 | 13470  | 13831  |
| UN57726 | Rsa1.0_08634.1 | 780 | 7101   | 0         | 756 | 781 | 96 - | 3   | 779 | 5542   | 6322   |
| UN57727 | Rsa1.0_01810.1 | 572 | 38991  | 9.00E-90  | 305 | 348 | 87 + | 22  | 368 | 16650  | 16996  |
| UN57728 | Rsa1.0_00237.1 | 684 | 235974 | 0         | 543 | 591 | 91 - | 110 | 684 | 45871  | 46461  |
| UN57729 | Rsa1.0_00842.1 | 648 | 62493  | 1.00E-104 | 214 | 220 | 97 + | 2   | 221 | 27703  | 27921  |
| UN57730 | Rsa1.0_00152.1 | 670 | 257730 | 0         | 667 | 668 | 99 + | 3   | 670 | 244035 | 244702 |
| UN57731 | Rsa1.0_00136.1 | 437 | 122464 | 3.00E-86  | 225 | 242 | 92 + | 190 | 423 | 30698  | 30939  |
| UN57732 | Rsa1.0_06247.1 | 509 | 11395  | 1.00E-131 | 279 | 293 | 95 + | 2   | 294 | 5131   | 5423   |
| UN57733 | Rsa1.0_05161.1 | 678 | 14631  | 1.00E-126 | 322 | 351 | 91 + | 7   | 354 | 8351   | 8695   |
| UN57734 | Rsa1.0_04281.1 | 247 | 18107  | 1.00E-118 | 242 | 247 | 97 - | 2   | 247 | 5713   | 5957   |
| UN57735 | Rsa1.0_00104.1 | 573 | 368722 | 1.00E-162 | 363 | 385 | 94 - | 165 | 544 | 60384  | 60760  |
| UN57736 | Rsa1.0_02695.1 | 707 | 28605  | 1.00E-170 | 334 | 343 | 97 - | 82  | 423 | 13524  | 13866  |
| UN57737 | Rsa1.0_08186.1 | 549 | 7770   | 2.00E-59  | 123 | 125 | 98 - | 152 | 276 | 7540   | 7664   |
| UN57738 | Rsa1.0_06561.1 | 117 | 10772  | 2.00E-46  | 111 | 116 | 95 + | 2   | 117 | 1325   | 1437   |
| UN57739 | Rsa1.0_03944.1 | 720 | 19926  | 1.00E-139 | 269 | 275 | 97 - | 23  | 297 | 11811  | 12085  |
| UN57740 | Rsa1.0_00211.1 | 745 | 228189 | 0         | 460 | 484 | 95 - | 268 | 745 | 189417 | 189900 |
| UN57741 | Rsa1.0_00055.1 | 605 | 520193 | 1.00E-27  | 105 | 118 | 88 - | 50  | 164 | 94677  | 94794  |
| UN57742 | Rsa1.0_00022.1 | 684 | 200461 | 0         | 590 | 625 | 94 + | 1   | 621 | 43557  | 44178  |
| UN57743 | Rsa1.0_04298.1 | 612 | 147466 | 2.00E-97  | 245 | 262 | 93 - | 1   | 256 | 10409  | 10669  |
| UN57744 | Rsa1.0_01997.1 | 667 | 158416 | 0         | 505 | 548 | 92 + | 141 | 667 | 3354   | 3898   |
| UN57745 | Rsa1.0_00496.1 | 313 | 79834  | 1.00E-132 | 296 | 312 | 94 - | 1   | 310 | 31001  | 31309  |
| UN57746 | Rsa1.0_01099.1 | 660 | 158481 | 1.00E-126 | 280 | 296 | 94 - | 366 | 660 | 15695  | 15984  |
| UN57747 | Rsa1.0_00867.1 | 683 | 61635  | 1.00E-129 | 312 | 336 | 92 + | 349 | 680 | 60106  | 60441  |
| UN57748 | Rsa1.0_02855.1 | 680 | 27271  | 1.00E-176 | 409 | 434 | 94 + | 256 | 677 | 10823  | 11254  |
| UN57749 | Rsa1.0_03679.1 | 680 | 21409  | 2.00E-29  | 224 | 275 | 81 + | 237 | 508 | 13353  | 13624  |
| UN57750 | Rsa1.0_00102.1 | 681 | 135497 | 1.00E-120 | 303 | 332 | 91 + | 352 | 671 | 51183  | 51503  |
| UN57751 | Rsa1.0_00203.1 | 744 | 109129 | 4.00E-37  | 102 | 108 | 94 - | 579 | 685 | 92176  | 92283  |
| UN57752 | Rsa1.0_01669.1 | 781 | 41286  | 1.00E-128 | 248 | 253 | 98 - | 159 | 411 | 12514  | 12766  |
| UN57753 | Rsa1.0_00336.1 | 672 | 445051 | 0         | 634 | 670 | 94 - | 4   | 672 | 202618 | 203287 |
| UN57754 | Rsa1.0_01228.1 | 721 | 50238  | 1.00E-119 | 271 | 283 | 95 - | 443 | 719 | 1771   | 2051   |
| UN57755 | Rsa1.0_00832.1 | 688 | 62622  | 0         | 408 | 424 | 96 + | 267 | 688 | 21143  | 21566  |
| UN57756 | Rsa1.0_00160.1 | 672 | 346678 | 1.00E-79  | 181 | 191 | 94 + | 11  | 201 | 230782 | 230972 |
| UN57757 | Rsa1.0_00336.1 | 601 | 445051 | 0         | 543 | 590 | 92 - | 39  | 601 | 174762 | 175351 |

|         |                |     |        |           |     |     |       |     |     |        |        |
|---------|----------------|-----|--------|-----------|-----|-----|-------|-----|-----|--------|--------|
| UN57758 | Rsa1.0.08931.1 | 776 | 6775   | 0         | 570 | 601 | 94 -  | 144 | 743 | 618    | 1217   |
| UN57759 | Rsa1.0.00047.1 | 687 | 168582 | 1.00E-136 | 313 | 334 | 93 +  | 87  | 417 | 15661  | 15991  |
| UN57760 | Rsa1.0.07240.1 | 552 | 9676   | 1.00E-143 | 287 | 297 | 96 -  | 256 | 552 | 2889   | 3185   |
| UN57761 | Rsa1.0.00152.1 | 664 | 257730 | 0         | 631 | 663 | 95 +  | 4   | 661 | 210117 | 210779 |
| UN57762 | Rsa1.0.03727.1 | 636 | 21158  | 0         | 607 | 626 | 96 -  | 1   | 623 | 11124  | 11749  |
| UN57763 | Rsa1.0.00301.1 | 587 | 365315 | 1.00E-104 | 205 | 209 | 98 -  | 234 | 442 | 327848 | 328056 |
| UN57764 | Rsa1.0.00208.1 | 253 | 108565 | 1.00E-86  | 238 | 266 | 89 -  | 2   | 249 | 20226  | 20491  |
| UN57765 | Rsa1.0.01168.1 | 455 | 153765 | 1.00E-60  | 165 | 178 | 92 -  | 268 | 437 | 23551  | 23728  |
| UN57766 | Rsa1.0.07638.1 | 689 | 8967   | 1.00E-157 | 371 | 397 | 93 +  | 60  | 449 | 4161   | 4555   |
| UN57767 | Rsa1.0.01561.1 | 789 | 43227  | 7.00E-79  | 153 | 154 | 99 +  | 183 | 336 | 25195  | 25348  |
| UN57768 | Rsa1.0.00128.1 | 637 | 228675 | 1.00E-125 | 301 | 324 | 92 -  | 3   | 310 | 202406 | 202725 |
| UN57769 | Rsa1.0.00553.1 | 521 | 75983  | 8.00E-53  | 115 | 118 | 97 +  | 23  | 140 | 28935  | 29052  |
| UN57770 | Rsa1.0.00044.1 | 704 | 271658 | 1.00E-142 | 349 | 371 | 94 -  | 3   | 364 | 267896 | 268262 |
| UN57771 | Rsa1.0.01458.1 | 778 | 175719 | 6.00E-64  | 167 | 179 | 93 -  | 7   | 183 | 415    | 591    |
| UN57772 | Rsa1.0.00293.1 | 464 | 339294 | 1.00E-130 | 241 | 243 | 99 -  | 222 | 464 | 4726   | 4968   |
| UN57773 | Rsa1.0.00351.1 | 655 | 413096 | 1.00E-109 | 217 | 221 | 98 +  | 436 | 655 | 267204 | 267424 |
| UN57774 | Rsa1.0.00196.1 | 671 | 109960 | 0         | 496 | 511 | 97 +  | 3   | 513 | 17195  | 17705  |
| UN57775 | Rsa1.0.02871.1 | 759 | 27085  | 1.00E-174 | 345 | 357 | 96 +  | 323 | 679 | 13077  | 13433  |
| UN57776 | Rsa1.0.00483.1 | 804 | 81102  | 5.00E-89  | 188 | 195 | 96 +  | 301 | 495 | 50572  | 50766  |
| UN57777 | Rsa1.0.00198.1 | 623 | 222963 | 0         | 380 | 392 | 96 -  | 2   | 393 | 24525  | 24916  |
| UN57778 | Rsa1.0.00415.1 | 688 | 86795  | 0         | 379 | 385 | 98 -  | 1   | 383 | 86209  | 86592  |
| UN57779 | Rsa1.0.01610.1 | 708 | 42274  | 0         | 584 | 621 | 94 -  | 78  | 697 | 19040  | 19660  |
| UN57780 | Rsa1.0.01507.1 | 763 | 44361  | 1.00E-116 | 212 | 212 | 100 - | 436 | 647 | 23147  | 23358  |
| UN57781 | Rsa1.0.00026.1 | 658 | 327835 | 3.00E-62  | 202 | 234 | 86 -  | 310 | 543 | 55459  | 55671  |
| UN57782 | Rsa1.0.04786.1 | 729 | 15988  | 0         | 602 | 636 | 94 -  | 97  | 729 | 14389  | 15014  |
| UN57783 | Rsa1.0.00131.1 | 636 | 432233 | 2.00E-91  | 204 | 215 | 94 +  | 214 | 428 | 410706 | 410920 |
| UN57784 | Rsa1.0.02386.1 | 731 | 31895  | 0         | 467 | 494 | 94 -  | 239 | 731 | 11378  | 11871  |
| UN57785 | Rsa1.0.04478.1 | 713 | 17183  | 1.00E-116 | 233 | 240 | 97 +  | 346 | 585 | 2935   | 3174   |
| UN57786 | Rsa1.0.04588.1 | 769 | 16739  | 4.00E-77  | 159 | 162 | 98 +  | 114 | 273 | 14590  | 14751  |
| UN57787 | Rsa1.0.00194.1 | 710 | 110851 | 1.00E-76  | 168 | 173 | 97 -  | 541 | 710 | 17713  | 17885  |
| UN57788 | Rsa1.0.00873.1 | 749 | 61459  | 1.00E-174 | 421 | 457 | 92 -  | 290 | 745 | 19489  | 19945  |
| UN57789 | Rsa1.0.01360.1 | 626 | 47246  | 5.00E-76  | 145 | 145 | 100 + | 140 | 284 | 36689  | 36833  |
| UN57790 | Rsa1.0.01144.1 | 723 | 52431  | 0         | 618 | 648 | 95 +  | 72  | 710 | 35460  | 36104  |
| UN57791 | Rsa1.0.01016.1 | 681 | 181422 | 1.00E-153 | 357 | 386 | 92 +  | 116 | 492 | 162631 | 163016 |
| UN57792 | Rsa1.0.00095.1 | 510 | 283384 | 0         | 413 | 420 | 98 +  | 91  | 510 | 96593  | 97012  |
| UN57793 | Rsa1.0.02185.1 | 560 | 34150  | 1.00E-106 | 235 | 248 | 94 -  | 3   | 250 | 5058   | 5296   |
| UN57794 | Rsa1.0.03581.1 | 679 | 21965  | 0         | 632 | 675 | 93 -  | 1   | 674 | 15953  | 16619  |
| UN57795 | Rsa1.0.00414.1 | 735 | 202190 | 0         | 376 | 386 | 97 -  | 5   | 388 | 173712 | 174097 |
| UN57796 | Rsa1.0.00280.1 | 291 | 99966  | 4.00E-84  | 171 | 174 | 98 +  | 5   | 177 | 27739  | 27912  |

|         |                |     |        |           |     |     |      |     |     |        |        |
|---------|----------------|-----|--------|-----------|-----|-----|------|-----|-----|--------|--------|
| UN57797 | Rsa1.0.01445.1 | 675 | 45671  | 1.00E-134 | 258 | 263 | 98 - | 413 | 675 | 7290   | 7552   |
| UN57798 | Rsa1.0.06041.1 | 715 | 11861  | 1.00E-153 | 334 | 347 | 96 - | 361 | 702 | 10205  | 10551  |
| UN57799 | Rsa1.0.01977.1 | 379 | 36559  | 1.00E-160 | 314 | 322 | 97 + | 52  | 373 | 23096  | 23416  |
| UN57800 | Rsa1.0.00037.1 | 799 | 307838 | 1.00E-111 | 213 | 216 | 98 - | 185 | 400 | 199239 | 199454 |
| UN57801 | Rsa1.0.15089.1 | 736 | 2840   | 0         | 669 | 702 | 95 - | 3   | 702 | 308    | 1001   |
| UN57802 | Rsa1.0.02684.1 | 722 | 28676  | 0         | 429 | 440 | 97 + | 274 | 713 | 19137  | 19570  |
| UN57803 | Rsa1.0.01719.1 | 156 | 40388  | 3.00E-49  | 132 | 143 | 92 + | 5   | 147 | 22537  | 22679  |
| UN57804 | Rsa1.0.00913.1 | 747 | 59914  | 1.00E-143 | 361 | 393 | 91 + | 220 | 606 | 10123  | 10509  |
| UN57805 | Rsa1.0.00214.1 | 663 | 107508 | 1.00E-125 | 297 | 318 | 93 + | 355 | 663 | 102294 | 102611 |
| UN57806 | Rsa1.0.00778.1 | 596 | 196751 | 3.00E-25  | 152 | 180 | 84 + | 10  | 189 | 139095 | 139272 |
| UN57807 | Rsa1.0.01212.1 | 783 | 50622  | 0         | 732 | 754 | 97 - | 3   | 748 | 47156  | 47909  |
| UN57808 | Rsa1.0.01729.1 | 800 | 304246 | 1.00E-109 | 210 | 213 | 98 - | 412 | 624 | 656    | 868    |
| UN57809 | Rsa1.0.00618.1 | 547 | 72195  | 0         | 533 | 548 | 97 + | 3   | 547 | 18686  | 19233  |
| UN57810 | Rsa1.0.00183.1 | 687 | 113277 | 8.00E-72  | 150 | 154 | 97 + | 442 | 595 | 66521  | 66674  |
| UN57811 | Rsa1.0.00394.1 | 720 | 148426 | 2.00E-97  | 208 | 217 | 95 - | 3   | 219 | 107239 | 107455 |
| UN57812 | Rsa1.0.00107.1 | 673 | 431659 | 0         | 592 | 631 | 93 + | 15  | 632 | 313218 | 313840 |
| UN57813 | Rsa1.0.09716.1 | 660 | 6195   | 1.00E-126 | 275 | 290 | 94 + | 363 | 652 | 613    | 902    |
| UN57814 | Rsa1.0.00253.1 | 729 | 231292 | 3.00E-96  | 198 | 203 | 97 - | 5   | 207 | 206344 | 206545 |
| UN57815 | Rsa1.0.01690.1 | 563 | 40939  | 0         | 538 | 575 | 93 - | 3   | 563 | 25629  | 26203  |
| UN57816 | Rsa1.0.03191.1 | 673 | 145762 | 7.00E-91  | 176 | 178 | 98 - | 376 | 553 | 9036   | 9213   |
| UN57817 | Rsa1.0.08902.1 | 666 | 6805   | 0         | 629 | 663 | 94 - | 5   | 665 | 5294   | 5956   |
| UN57818 | Rsa1.0.01803.1 | 739 | 173846 | 2.00E-54  | 118 | 121 | 97 + | 296 | 416 | 17730  | 17850  |
| UN57819 | Rsa1.0.02644.1 | 729 | 29176  | 0         | 451 | 492 | 91 + | 3   | 494 | 5143   | 5626   |
| UN57820 | Rsa1.0.00369.1 | 309 | 266462 | 1.00E-50  | 146 | 160 | 91 + | 71  | 227 | 168942 | 169101 |
| UN57821 | Rsa1.0.00202.1 | 757 | 185895 | 1.00E-117 | 310 | 336 | 92 - | 3   | 324 | 149570 | 149896 |
| UN57822 | Rsa1.0.01349.1 | 832 | 47513  | 1.00E-137 | 250 | 251 | 99 - | 103 | 353 | 46078  | 46328  |
| UN57823 | Rsa1.0.00252.1 | 747 | 102760 | 1.00E-135 | 268 | 276 | 97 + | 394 | 669 | 43752  | 44027  |
| UN57824 | Rsa1.0.00208.1 | 484 | 108565 | 1.00E-57  | 128 | 132 | 96 - | 38  | 169 | 8534   | 8662   |
| UN57825 | Rsa1.0.02314.1 | 210 | 32642  | 1.00E-103 | 204 | 209 | 97 - | 2   | 210 | 9637   | 9845   |
| UN57826 | Rsa1.0.01543.1 | 765 | 43645  | 1.00E-122 | 379 | 425 | 89 - | 242 | 662 | 39698  | 40119  |
| UN57827 | Rsa1.0.00497.1 | 808 | 79830  | 1.00E-110 | 224 | 231 | 96 + | 270 | 500 | 40861  | 41091  |
| UN57828 | Rsa1.0.04664.1 | 625 | 16471  | 0         | 614 | 623 | 98 + | 3   | 625 | 11326  | 11947  |
| UN57829 | Rsa1.0.00576.1 | 660 | 178949 | 0         | 420 | 439 | 95 + | 159 | 597 | 63282  | 63720  |
| UN57830 | Rsa1.0.00344.1 | 646 | 191774 | 1.00E-104 | 246 | 260 | 94 - | 391 | 646 | 24189  | 24448  |
| UN57831 | Rsa1.0.00487.1 | 815 | 80674  | 0         | 553 | 583 | 94 - | 211 | 778 | 70726  | 71306  |
| UN57832 | Rsa1.0.00152.1 | 587 | 257730 | 1.00E-161 | 333 | 348 | 95 - | 244 | 587 | 203808 | 204155 |
| UN57833 | Rsa1.0.02605.1 | 776 | 29637  | 0         | 717 | 792 | 90 + | 1   | 772 | 14621  | 15397  |
| UN57834 | Rsa1.0.00289.1 | 609 | 98620  | 0         | 456 | 463 | 98 - | 67  | 529 | 10849  | 11311  |
| UN57835 | Rsa1.0.03425.1 | 781 | 23043  | 0         | 445 | 473 | 94 - | 303 | 770 | 6691   | 7159   |

|         |                |     |        |           |     |     |      |     |     |        |        |
|---------|----------------|-----|--------|-----------|-----|-----|------|-----|-----|--------|--------|
| UN57836 | Rsa1.0.00804.1 | 398 | 63726  | 0         | 378 | 392 | 96 + | 1   | 392 | 36831  | 37222  |
| UN57837 | Rsa1.0.00076.1 | 737 | 146021 | 1.00E-105 | 258 | 281 | 91 + | 442 | 719 | 66993  | 67261  |
| UN57838 | Rsa1.0.01726.1 | 572 | 40263  | 0         | 556 | 575 | 96 + | 2   | 572 | 432    | 1002   |
| UN57839 | Rsa1.0.00575.1 | 764 | 74791  | 0         | 691 | 768 | 89 - | 2   | 743 | 63323  | 64064  |
| UN57840 | Rsa1.0.01126.1 | 576 | 53127  | 1.00E-113 | 226 | 230 | 98 - | 348 | 576 | 15026  | 15253  |
| UN57841 | Rsa1.0.00620.1 | 715 | 71985  | 1.00E-103 | 194 | 195 | 99 - | 358 | 552 | 48196  | 48390  |
| UN57842 | Rsa1.0.00130.1 | 610 | 125737 | 1.00E-18  | 64  | 69  | 92 + | 36  | 104 | 76263  | 76331  |
| UN57843 | Rsa1.0.00354.1 | 776 | 232005 | 2.00E-72  | 145 | 147 | 98 + | 412 | 558 | 170294 | 170440 |
| UN57844 | Rsa1.0.01881.1 | 563 | 37721  | 1.00E-169 | 328 | 337 | 97 - | 8   | 344 | 34544  | 34880  |
| UN57845 | Rsa1.0.05004.1 | 308 | 15172  | 2.00E-61  | 138 | 144 | 95 - | 165 | 308 | 2588   | 2731   |
| UN57846 | Rsa1.0.14856.1 | 745 | 3010   | 0         | 339 | 344 | 98 + | 402 | 745 | 1812   | 2155   |
| UN57847 | Rsa1.0.00198.1 | 696 | 222963 | 1.00E-172 | 338 | 347 | 97 + | 351 | 696 | 152016 | 152362 |
| UN57848 | Rsa1.0.02642.1 | 772 | 29181  | 0         | 459 | 478 | 96 + | 267 | 739 | 13097  | 13574  |
| UN57849 | Rsa1.0.00367.1 | 667 | 90750  | 1.00E-125 | 242 | 247 | 97 + | 2   | 248 | 16708  | 16954  |
| UN57850 | Rsa1.0.02223.1 | 679 | 152421 | 0         | 506 | 519 | 97 - | 33  | 551 | 19095  | 19610  |
| UN57851 | Rsa1.0.22778.1 | 210 | 1095   | 1.00E-18  | 51  | 52  | 98 - | 159 | 210 | 860    | 911    |
| UN57852 | Rsa1.0.00017.1 | 475 | 752458 | 1.00E-111 | 304 | 339 | 89 - | 155 | 473 | 719238 | 719576 |
| UN57853 | Rsa1.0.01053.1 | 648 | 55483  | 1.00E-131 | 252 | 257 | 98 - | 23  | 279 | 42397  | 42653  |
| UN57854 | Rsa1.0.00540.1 | 670 | 76895  | 1.00E-101 | 203 | 207 | 98 + | 432 | 638 | 69438  | 69643  |
| UN57855 | Rsa1.0.01101.1 | 638 | 54031  | 2.00E-72  | 157 | 163 | 96 - | 321 | 483 | 38522  | 38684  |
| UN57856 | Rsa1.0.22283.1 | 767 | 1134   | 1.00E-175 | 330 | 336 | 98 + | 134 | 469 | 799    | 1134   |
| UN57857 | Rsa1.0.03183.1 | 678 | 24755  | 0         | 397 | 408 | 97 - | 3   | 409 | 17720  | 18127  |
| UN57858 | Rsa1.0.00487.1 | 753 | 80674  | 1.00E-89  | 191 | 196 | 97 - | 556 | 749 | 38678  | 38873  |
| UN57859 | Rsa1.0.14459.1 | 781 | 3367   | 3.00E-81  | 157 | 158 | 99 - | 171 | 328 | 267    | 424    |
| UN57860 | Rsa1.0.04218.1 | 624 | 18423  | 0         | 602 | 625 | 96 + | 3   | 624 | 15018  | 15639  |
| UN57861 | Rsa1.0.00105.1 | 678 | 134138 | 1.00E-39  | 131 | 145 | 90 + | 174 | 313 | 1001   | 1145   |
| UN57862 | Rsa1.0.00067.1 | 763 | 415055 | 1.00E-127 | 318 | 338 | 94 - | 417 | 746 | 38748  | 39085  |
| UN57863 | Rsa1.0.00048.1 | 642 | 167185 | 1.00E-116 | 228 | 232 | 98 + | 212 | 443 | 148073 | 148303 |
| UN57864 | Rsa1.0.00366.1 | 731 | 90880  | 0         | 724 | 732 | 98 + | 3   | 731 | 156    | 887    |
| UN57865 | Rsa1.0.00153.1 | 817 | 192931 | 6.00E-67  | 172 | 181 | 95 + | 587 | 762 | 168694 | 168874 |
| UN57866 | Rsa1.0.00139.1 | 737 | 357786 | 1.00E-77  | 185 | 197 | 93 + | 3   | 199 | 15592  | 15779  |
| UN57867 | Rsa1.0.07236.1 | 620 | 9680   | 0         | 591 | 621 | 95 + | 3   | 619 | 1108   | 1725   |
| UN57868 | Rsa1.0.01151.1 | 722 | 52268  | 5.00E-21  | 113 | 133 | 84 + | 37  | 169 | 33920  | 34052  |
| UN57869 | Rsa1.0.15067.1 | 736 | 2854   | 5.00E-98  | 242 | 261 | 92 - | 18  | 274 | 2469   | 2726   |
| UN57870 | Rsa1.0.00829.1 | 514 | 158305 | 1.00E-133 | 262 | 269 | 97 + | 121 | 389 | 101844 | 102112 |
| UN57871 | Rsa1.0.01453.1 | 746 | 45449  | 1.00E-147 | 322 | 341 | 94 + | 48  | 378 | 25110  | 25450  |
| UN57872 | Rsa1.0.02719.1 | 782 | 28428  | 1.00E-120 | 284 | 304 | 93 + | 3   | 295 | 6539   | 6842   |
| UN57873 | Rsa1.0.02079.1 | 266 | 35306  | 1.00E-68  | 174 | 184 | 94 - | 50  | 227 | 10163  | 10344  |
| UN57874 | Rsa1.0.02034.1 | 740 | 35823  | 1.00E-158 | 329 | 341 | 96 - | 17  | 353 | 11733  | 12072  |

|         |                |     |        |           |     |     |      |     |     |        |        |
|---------|----------------|-----|--------|-----------|-----|-----|------|-----|-----|--------|--------|
| UN57875 | Rsa1.0.01112.1 | 735 | 310601 | 6.00E-76  | 202 | 217 | 93 + | 3   | 216 | 290260 | 290476 |
| UN57876 | Rsa1.0.03514.1 | 688 | 22346  | 1.00E-119 | 233 | 238 | 97 - | 32  | 269 | 19509  | 19746  |
| UN57877 | Rsa1.0.00654.1 | 445 | 70012  | 0         | 425 | 456 | 93 - | 3   | 445 | 24909  | 25361  |
| UN57878 | Rsa1.0.04356.1 | 448 | 17764  | 0         | 444 | 449 | 98 + | 1   | 448 | 10676  | 11123  |
| UN57879 | Rsa1.0.00782.1 | 660 | 64468  | 1.00E-128 | 248 | 253 | 98 + | 5   | 257 | 17719  | 17971  |
| UN57880 | Rsa1.0.01945.1 | 641 | 36989  | 0         | 602 | 635 | 94 + | 3   | 636 | 10725  | 11354  |
| UN57881 | Rsa1.0.01540.1 | 735 | 151890 | 1.00E-168 | 388 | 416 | 93 - | 60  | 472 | 143152 | 143564 |
| UN57882 | Rsa1.0.04396.1 | 729 | 17561  | 1.00E-132 | 249 | 252 | 98 - | 279 | 530 | 12761  | 13012  |
| UN57883 | Rsa1.0.00006.1 | 720 | 396176 | 1.00E-166 | 418 | 449 | 93 + | 277 | 720 | 328636 | 329082 |
| UN57884 | Rsa1.0.00501.1 | 710 | 79545  | 0         | 549 | 564 | 97 - | 151 | 710 | 58707  | 59270  |
| UN57885 | Rsa1.0.01356.1 | 667 | 47287  | 0         | 645 | 666 | 96 - | 1   | 666 | 36980  | 37644  |
| UN57886 | Rsa1.0.00716.1 | 144 | 67078  | 2.00E-22  | 85  | 90  | 94 - | 6   | 91  | 692    | 781    |
| UN57887 | Rsa1.0.00092.1 | 787 | 659932 | 1.00E-145 | 315 | 333 | 94 + | 271 | 603 | 191762 | 192094 |
| UN57888 | Rsa1.0.09978.1 | 635 | 6055   | 0         | 457 | 479 | 95 - | 152 | 625 | 138    | 613    |
| UN57889 | Rsa1.0.01298.1 | 787 | 48999  | 0         | 770 | 812 | 94 - | 2   | 787 | 7314   | 8124   |
| UN57890 | Rsa1.0.00145.1 | 646 | 261008 | 5.00E-79  | 159 | 162 | 98 - | 299 | 460 | 21092  | 21253  |
| UN57891 | Rsa1.0.00628.1 | 673 | 214360 | 1.00E-79  | 169 | 175 | 96 + | 226 | 400 | 45588  | 45762  |
| UN57892 | Rsa1.0.03668.1 | 521 | 21483  | 1.00E-178 | 363 | 378 | 96 + | 144 | 521 | 11438  | 11812  |
| UN57893 | Rsa1.0.01134.1 | 797 | 52829  | 1.00E-154 | 314 | 326 | 96 + | 311 | 633 | 37381  | 37706  |
| UN57894 | Rsa1.0.37923.1 | 761 | 594    | 1.00E-177 | 356 | 367 | 97 - | 155 | 521 | 1      | 365    |
| UN57895 | Rsa1.0.01245.1 | 313 | 149868 | 1.00E-132 | 296 | 314 | 94 - | 1   | 313 | 37650  | 37963  |
| UN57896 | Rsa1.0.04418.1 | 644 | 17434  | 3.00E-65  | 133 | 135 | 98 + | 61  | 195 | 12170  | 12304  |
| UN57897 | Rsa1.0.00816.1 | 402 | 403350 | 3.00E-61  | 157 | 168 | 93 + | 1   | 168 | 110022 | 110183 |
| UN57898 | Rsa1.0.73721.1 | 722 | 311    | 3.00E-90  | 188 | 193 | 97 + | 531 | 722 | 88     | 280    |
| UN57899 | Rsa1.0.50795.1 | 453 | 447    | 4.00E-85  | 187 | 195 | 95 - | 265 | 453 | 254    | 447    |
| UN57900 | Rsa1.0.00070.1 | 635 | 150321 | 0         | 427 | 437 | 97 + | 3   | 439 | 28272  | 28705  |
| UN57901 | Rsa1.0.01964.1 | 709 | 36702  | 0         | 587 | 629 | 93 - | 86  | 709 | 11363  | 11973  |
| UN57902 | Rsa1.0.02515.1 | 739 | 30616  | 2.00E-97  | 203 | 209 | 97 - | 177 | 384 | 5977   | 6185   |
| UN57903 | Rsa1.0.00094.1 | 375 | 139042 | 1.00E-94  | 206 | 216 | 95 + | 1   | 216 | 96395  | 96610  |
| UN57904 | Rsa1.0.00190.1 | 543 | 318240 | 0         | 528 | 546 | 96 + | 1   | 543 | 93274  | 93819  |
| UN57905 | Rsa1.0.19861.1 | 717 | 1373   | 3.00E-87  | 182 | 187 | 97 + | 339 | 523 | 173    | 359    |
| UN57906 | Rsa1.0.14034.1 | 602 | 3890   | 1.00E-104 | 214 | 221 | 96 - | 116 | 336 | 133    | 353    |
| UN57907 | Rsa1.0.00297.1 | 658 | 97836  | 1.00E-171 | 361 | 380 | 95 - | 171 | 549 | 33828  | 34198  |
| UN57908 | Rsa1.0.02411.1 | 630 | 31655  | 1.00E-170 | 405 | 440 | 92 - | 3   | 437 | 29046  | 29467  |
| UN57909 | Rsa1.0.04026.1 | 630 | 19508  | 0         | 566 | 612 | 92 - | 36  | 630 | 5149   | 5752   |
| UN57910 | Rsa1.0.00287.1 | 544 | 98687  | 3.00E-89  | 278 | 315 | 88 + | 35  | 349 | 53406  | 53720  |
| UN57911 | Rsa1.0.03393.1 | 630 | 23247  | 1.00E-82  | 159 | 160 | 99 + | 108 | 267 | 17253  | 17412  |
| UN57912 | Rsa1.0.03623.1 | 480 | 21714  | 1.00E-106 | 222 | 230 | 96 - | 71  | 300 | 3887   | 4113   |
| UN57913 | Rsa1.0.00489.1 | 568 | 80434  | 1.00E-167 | 309 | 313 | 98 - | 255 | 567 | 7663   | 7975   |

|         |                |     |        |           |     |     |       |     |     |        |        |
|---------|----------------|-----|--------|-----------|-----|-----|-------|-----|-----|--------|--------|
| UN57914 | Rsa1.0.08133.1 | 766 | 7852   | 0         | 365 | 369 | 98 +  | 4   | 372 | 100    | 467    |
| UN57915 | Rsa1.0.01373.1 | 730 | 47052  | 1.00E-151 | 359 | 388 | 92 +  | 3   | 388 | 3549   | 3924   |
| UN57916 | Rsa1.0.00004.1 | 727 | 253996 | 4.00E-77  | 197 | 214 | 92 +  | 166 | 379 | 20103  | 20305  |
| UN57917 | Rsa1.0.02248.1 | 763 | 33414  | 1.00E-141 | 312 | 332 | 93 +  | 11  | 333 | 26078  | 26406  |
| UN57918 | Rsa1.0.01135.1 | 691 | 52799  | 0         | 379 | 382 | 99 +  | 1   | 382 | 24283  | 24664  |
| UN57919 | Rsa1.0.01364.1 | 742 | 47172  | 0         | 683 | 745 | 91 +  | 3   | 733 | 12009  | 12741  |
| UN57920 | Rsa1.0.00144.1 | 692 | 120708 | 1.00E-136 | 287 | 303 | 94 -  | 388 | 690 | 79412  | 79702  |
| UN57921 | Rsa1.0.00019.1 | 593 | 301669 | 0         | 376 | 385 | 97 -  | 209 | 593 | 186101 | 186485 |
| UN57922 | Rsa1.0.00321.1 | 226 | 95671  | 7.00E-36  | 93  | 97  | 95 +  | 9   | 104 | 19098  | 19194  |
| UN57923 | Rsa1.0.02004.1 | 777 | 169138 | 0         | 751 | 777 | 96 -  | 6   | 777 | 149446 | 150220 |
| UN57924 | Rsa1.0.00835.1 | 720 | 278058 | 1.00E-157 | 332 | 348 | 95 +  | 5   | 352 | 48760  | 49104  |
| UN57925 | Rsa1.0.04989.1 | 413 | 15217  | 1.00E-145 | 315 | 331 | 95 -  | 2   | 331 | 249    | 572    |
| UN57926 | Rsa1.0.02300.1 | 633 | 32847  | 2.00E-81  | 214 | 235 | 91 +  | 11  | 232 | 21458  | 21692  |
| UN57927 | Rsa1.0.52681.1 | 708 | 432    | 1.00E-178 | 328 | 332 | 98 -  | 91  | 422 | 101    | 432    |
| UN57928 | Rsa1.0.00898.1 | 381 | 202772 | 2.00E-96  | 239 | 254 | 94 +  | 129 | 379 | 8777   | 9028   |
| UN57929 | Rsa1.0.17223.1 | 797 | 1888   | 0         | 479 | 509 | 94 +  | 293 | 797 | 1217   | 1725   |
| UN57930 | Rsa1.0.00596.1 | 566 | 73578  | 1.00E-64  | 170 | 185 | 91 -  | 392 | 566 | 30915  | 31098  |
| UN57931 | #              | #   | #      | #         | #   | #   | #     | #   | #   | #      | #      |
| UN57932 | Rsa1.0.00288.1 | 783 | 98659  | 1.00E-177 | 375 | 394 | 95 +  | 4   | 396 | 13395  | 13788  |
| UN57933 | Rsa1.0.27339.1 | 654 | 857    | 1.00E-161 | 309 | 316 | 97 +  | 174 | 489 | 58     | 373    |
| UN57934 | Rsa1.0.02139.1 | 649 | 34686  | 0         | 510 | 522 | 97 -  | 128 | 649 | 28347  | 28868  |
| UN57935 | Rsa1.0.00389.1 | 725 | 88795  | 6.00E-70  | 171 | 185 | 92 -  | 3   | 176 | 33691  | 33875  |
| UN57936 | Rsa1.0.00025.1 | 260 | 277312 | 1.00E-46  | 104 | 107 | 97 -  | 78  | 184 | 117292 | 117398 |
| UN57937 | Rsa1.0.00816.1 | 685 | 403350 | 0         | 425 | 461 | 92 -  | 3   | 436 | 265674 | 266131 |
| UN57938 | Rsa1.0.00925.1 | 676 | 59481  | 1.00E-92  | 191 | 197 | 96 -  | 417 | 613 | 50311  | 50507  |
| UN57939 | Rsa1.0.00703.1 | 653 | 67597  | 1.00E-76  | 179 | 190 | 94 -  | 9   | 198 | 32491  | 32680  |
| UN57940 | Rsa1.0.16459.1 | 684 | 2148   | 1.00E-149 | 417 | 467 | 89 +  | 9   | 475 | 1639   | 2105   |
| UN57941 | Rsa1.0.03016.1 | 342 | 26000  | 4.00E-66  | 138 | 140 | 98 -  | 101 | 240 | 2871   | 3009   |
| UN57942 | Rsa1.0.01198.1 | 607 | 51029  | 1.00E-113 | 226 | 231 | 97 -  | 377 | 607 | 32064  | 32293  |
| UN57943 | Rsa1.0.16152.1 | 268 | 2264   | 1.00E-110 | 202 | 202 | 100 - | 1   | 202 | 248    | 449    |
| UN57944 | Rsa1.0.00279.1 | 718 | 100039 | 1.00E-117 | 253 | 265 | 95 -  | 457 | 718 | 83441  | 83705  |
| UN57945 | Rsa1.0.00079.1 | 744 | 606987 | 1.00E-132 | 270 | 279 | 96 -  | 107 | 384 | 43203  | 43481  |
| UN57946 | Rsa1.0.01101.1 | 311 | 54031  | 6.00E-74  | 153 | 157 | 97 +  | 3   | 159 | 22032  | 22188  |
| UN57947 | Rsa1.0.09339.1 | 637 | 6444   | 1.00E-153 | 335 | 359 | 93 +  | 254 | 612 | 4728   | 5064   |
| UN57948 | Rsa1.0.01145.1 | 140 | 149247 | 2.00E-50  | 116 | 121 | 95 +  | 20  | 140 | 109706 | 109826 |
| UN57949 | Rsa1.0.00012.1 | 709 | 222148 | 1.00E-113 | 243 | 252 | 96 +  | 1   | 246 | 69125  | 69375  |
| UN57950 | Rsa1.0.00128.1 | 765 | 228675 | 1.00E-141 | 303 | 316 | 95 +  | 3   | 317 | 216103 | 216414 |
| UN57951 | Rsa1.0.00341.1 | 543 | 249309 | 2.00E-69  | 222 | 246 | 90 -  | 302 | 543 | 123994 | 124239 |
| UN57952 | Rsa1.0.00119.1 | 265 | 467509 | 2.00E-89  | 224 | 237 | 94 -  | 33  | 265 | 32100  | 32333  |



| UN57953 | #              | #   | #      | #         | #   | #   | #     | #   | #   | #      | #      | # |
|---------|----------------|-----|--------|-----------|-----|-----|-------|-----|-----|--------|--------|---|
| UN57954 | Rsa1.0.00017.1 | 732 | 752458 | 1.00E-136 | 259 | 262 | 98 +  | 14  | 275 | 204655 | 204915 |   |
| UN57955 | Rsa1.0.01232.1 | 648 | 155185 | 3.00E-65  | 153 | 159 | 96 +  | 491 | 647 | 131378 | 131536 |   |
| UN57956 | Rsa1.0.00069.1 | 305 | 403561 | 1.00E-141 | 292 | 305 | 95 -  | 1   | 305 | 353544 | 353848 |   |
| UN57957 | Rsa1.0.02235.1 | 710 | 33615  | 0         | 367 | 370 | 99 -  | 1   | 370 | 19943  | 20312  |   |
| UN57958 | Rsa1.0.01005.1 | 730 | 56967  | 8.00E-94  | 263 | 292 | 90 +  | 438 | 728 | 39743  | 40026  |   |
| UN57959 | Rsa1.0.01294.1 | 780 | 49090  | 0         | 726 | 763 | 95 +  | 3   | 758 | 6067   | 6829   |   |
| UN57960 | Rsa1.0.01206.1 | 649 | 50772  | 1.00E-130 | 320 | 348 | 91 -  | 311 | 648 | 27581  | 27928  |   |
| UN57961 | Rsa1.0.02543.1 | 307 | 30302  | 1.00E-139 | 288 | 297 | 96 +  | 1   | 297 | 3813   | 4105   |   |
| UN57962 | Rsa1.0.01328.1 | 192 | 48021  | 2.00E-88  | 183 | 189 | 96 +  | 1   | 189 | 11814  | 12002  |   |
| UN57963 | Rsa1.0.00416.1 | 697 | 86772  | 0         | 497 | 516 | 96 +  | 166 | 679 | 74497  | 75006  |   |
| UN57964 | Rsa1.0.02928.1 | 558 | 26680  | 1.00E-148 | 293 | 302 | 97 +  | 253 | 554 | 15618  | 15919  |   |
| UN57965 | Rsa1.0.06952.1 | 680 | 10118  | 1.00E-166 | 317 | 324 | 97 -  | 295 | 618 | 640    | 963    |   |
| UN57966 | Rsa1.0.02111.1 | 477 | 34913  | 1.00E-91  | 189 | 194 | 97 +  | 200 | 391 | 34579  | 34772  |   |
| UN57967 | Rsa1.0.00105.1 | 706 | 134138 | 1.00E-141 | 287 | 297 | 96 +  | 41  | 337 | 105136 | 105430 |   |
| UN57968 | Rsa1.0.00187.1 | 760 | 393093 | 1.00E-142 | 256 | 256 | 100 - | 456 | 711 | 207308 | 207563 |   |
| UN57969 | Rsa1.0.02219.1 | 751 | 33798  | 0         | 518 | 540 | 95 +  | 2   | 541 | 12104  | 12631  |   |
| UN57970 | Rsa1.0.00048.1 | 414 | 167185 | 1.00E-177 | 383 | 400 | 95 -  | 21  | 414 | 81391  | 81784  |   |
| UN57971 | Rsa1.0.01149.1 | 630 | 160459 | 3.00E-93  | 198 | 206 | 96 -  | 381 | 586 | 15999  | 16204  |   |
| UN57972 | Rsa1.0.02658.1 | 772 | 28978  | 1.00E-110 | 215 | 219 | 98 -  | 353 | 571 | 6505   | 6723   |   |
| UN57973 | Rsa1.0.00585.1 | 679 | 74164  | 1.00E-123 | 255 | 265 | 96 -  | 325 | 589 | 61931  | 62195  |   |
| UN57974 | Rsa1.0.02366.1 | 808 | 32110  | 1.00E-136 | 290 | 298 | 97 -  | 478 | 770 | 9070   | 9367   |   |
| UN57975 | Rsa1.0.02135.1 | 760 | 34713  | 0         | 676 | 717 | 94 +  | 52  | 747 | 7000   | 7709   |   |
| UN57976 | Rsa1.0.03408.1 | 719 | 23154  | 1.00E-131 | 384 | 434 | 88 +  | 98  | 514 | 14533  | 14954  |   |
| UN57977 | Rsa1.0.00657.1 | 708 | 69858  | 1.00E-112 | 243 | 255 | 95 +  | 15  | 269 | 661    | 906    |   |
| UN57978 | Rsa1.0.00493.1 | 661 | 80007  | 0         | 629 | 663 | 94 +  | 3   | 661 | 3742   | 4401   |   |
| UN57979 | Rsa1.0.00284.1 | 501 | 323267 | 0         | 471 | 504 | 93 -  | 2   | 501 | 232420 | 232921 |   |
| UN57980 | Rsa1.0.00425.1 | 697 | 147080 | 3.00E-84  | 245 | 269 | 91 -  | 409 | 673 | 120276 | 120537 |   |
| UN57981 | Rsa1.0.01509.1 | 697 | 44258  | 1.00E-169 | 418 | 456 | 91 +  | 1   | 447 | 330    | 776    |   |
| UN57982 | Rsa1.0.03253.1 | 629 | 24321  | 1.00E-140 | 301 | 317 | 94 +  | 4   | 320 | 12367  | 12683  |   |
| UN57983 | Rsa1.0.01358.1 | 643 | 47278  | 1.00E-27  | 270 | 336 | 80 -  | 32  | 366 | 23562  | 23896  |   |
| UN57984 | Rsa1.0.09024.1 | 785 | 6703   | 0         | 504 | 525 | 96 +  | 8   | 532 | 5348   | 5872   |   |
| UN57985 | Rsa1.0.02406.1 | 686 | 145276 | 5.00E-61  | 168 | 184 | 91 +  | 49  | 232 | 143166 | 143349 |   |
| UN57986 | Rsa1.0.02575.1 | 696 | 29944  | 1.00E-147 | 282 | 288 | 97 +  | 21  | 308 | 2100   | 2387   |   |
| UN57987 | Rsa1.0.00061.1 | 673 | 218685 | 1.00E-64  | 262 | 307 | 85 -  | 9   | 306 | 167440 | 167731 |   |
| UN57988 | Rsa1.0.00173.1 | 649 | 288743 | 0         | 566 | 603 | 93 -  | 53  | 649 | 214591 | 215193 |   |
| UN57989 | Rsa1.0.03804.1 | 671 | 20746  | 0         | 400 | 415 | 96 -  | 196 | 610 | 8031   | 8440   |   |
| UN57990 | Rsa1.0.02786.1 | 648 | 27880  | 1.00E-177 | 372 | 388 | 95 -  | 262 | 648 | 18803  | 19185  |   |
| UN57991 | Rsa1.0.00644.1 | 608 | 136881 | 2.33E-156 | 300 | 311 | 96 +  | 301 | 608 | 31373  | 31681  |   |

|         |                |     |        |           |     |     |       |     |     |        |        |
|---------|----------------|-----|--------|-----------|-----|-----|-------|-----|-----|--------|--------|
| UN57992 | Rsa1.0.00509.1 | 761 | 78829  | 0         | 393 | 399 | 98 -  | 83  | 481 | 10013  | 10411  |
| UN57993 | Rsa1.0.05326.1 | 683 | 14139  | 1.00E-119 | 280 | 299 | 93 -  | 385 | 683 | 4920   | 5214   |
| UN57994 | Rsa1.0.03221.1 | 638 | 24535  | 1.00E-149 | 286 | 292 | 97 +  | 136 | 427 | 18543  | 18834  |
| UN57995 | Rsa1.0.02817.1 | 660 | 27644  | 0         | 635 | 659 | 96 -  | 2   | 660 | 10322  | 10977  |
| UN57996 | Rsa1.0.00537.1 | 718 | 186980 | 1.00E-177 | 412 | 443 | 93 +  | 279 | 714 | 163783 | 164222 |
| UN57997 | Rsa1.0.03309.1 | 366 | 23852  | 1.00E-137 | 277 | 287 | 96 -  | 2   | 288 | 18943  | 19229  |
| UN57998 | Rsa1.0.07650.1 | 111 | 8929   | 2.00E-56  | 111 | 111 | 100 + | 1   | 111 | 5146   | 5256   |
| UN57999 | Rsa1.0.01943.1 | 263 | 37042  | 1.00E-83  | 199 | 214 | 92 +  | 1   | 208 | 30688  | 30894  |
| UN58000 | Rsa1.0.06859.1 | 653 | 10248  | 1.00E-125 | 295 | 319 | 92 -  | 100 | 418 | 6019   | 6328   |
| UN58001 | Rsa1.0.05673.1 | 572 | 12980  | 1.00E-150 | 296 | 304 | 97 -  | 268 | 571 | 10008  | 10308  |
| UN58002 | Rsa1.0.00086.1 | 718 | 439854 | 0         | 694 | 720 | 96 -  | 1   | 718 | 369920 | 370631 |
| UN58003 | Rsa1.0.00092.1 | 655 | 659932 | 1.00E-123 | 253 | 261 | 96 +  | 1   | 260 | 113906 | 114166 |
| UN58004 | Rsa1.0.16170.1 | 423 | 2258   | 1.00E-103 | 288 | 315 | 91 -  | 117 | 421 | 1231   | 1542   |
| UN58005 | Rsa1.0.19324.1 | 734 | 1447   | 1.00E-135 | 268 | 276 | 97 -  | 453 | 728 | 1029   | 1304   |
| UN58006 | Rsa1.0.07236.1 | 503 | 9680   | 1.00E-110 | 271 | 292 | 92 +  | 1   | 286 | 1168   | 1456   |
| UN58007 | Rsa1.0.00030.1 | 698 | 250988 | 1.00E-101 | 214 | 223 | 95 -  | 246 | 468 | 29830  | 30052  |
| UN58008 | Rsa1.0.04159.1 | 504 | 18795  | 9.00E-99  | 201 | 207 | 97 +  | 112 | 318 | 10338  | 10544  |
| UN58009 | Rsa1.0.03302.1 | 718 | 23898  | 0         | 686 | 718 | 95 +  | 2   | 718 | 10354  | 11071  |
| UN58010 | Rsa1.0.01147.1 | 738 | 52391  | 0         | 427 | 445 | 95 -  | 294 | 738 | 42361  | 42805  |
| UN58011 | Rsa1.0.02062.1 | 562 | 35485  | 0         | 543 | 565 | 96 -  | 1   | 562 | 7628   | 8192   |
| UN58012 | Rsa1.0.00608.1 | 620 | 172672 | 0         | 598 | 619 | 96 -  | 1   | 619 | 163235 | 163845 |
| UN58013 | Rsa1.0.03075.1 | 699 | 25560  | 1.00E-102 | 216 | 224 | 96 +  | 478 | 699 | 14646  | 14869  |
| UN58014 | Rsa1.0.00632.1 | 644 | 183777 | 1.00E-129 | 310 | 334 | 92 +  | 323 | 644 | 14434  | 14767  |
| UN58015 | Rsa1.0.15613.1 | 496 | 2519   | 3.00E-61  | 129 | 132 | 97 +  | 156 | 287 | 249    | 380    |
| UN58016 | Rsa1.0.00340.1 | 677 | 305782 | 0         | 434 | 443 | 97 -  | 235 | 677 | 6867   | 7308   |
| UN58017 | Rsa1.0.01769.1 | 486 | 39568  | 0         | 418 | 442 | 94 -  | 48  | 486 | 32132  | 32571  |
| UN58018 | Rsa1.0.00129.1 | 208 | 126831 | 1.00E-100 | 185 | 185 | 100 - | 24  | 208 | 39529  | 39713  |
| UN58019 | Rsa1.0.00139.1 | 554 | 357786 | 1.00E-155 | 287 | 290 | 98 +  | 1   | 290 | 149017 | 149306 |
| UN58020 | Rsa1.0.00985.1 | 609 | 161950 | 1.00E-100 | 201 | 206 | 97 +  | 231 | 436 | 49457  | 49662  |
| UN58021 | Rsa1.0.00052.1 | 608 | 162771 | 1.00E-142 | 371 | 405 | 91 +  | 183 | 585 | 80480  | 80879  |
| UN58022 | Rsa1.0.01348.1 | 697 | 47569  | 2.00E-81  | 277 | 318 | 87 +  | 380 | 697 | 4461   | 4778   |
| UN58023 | Rsa1.0.00701.1 | 155 | 67691  | 2.00E-44  | 129 | 143 | 90 +  | 3   | 145 | 21407  | 21540  |
| UN58024 | Rsa1.0.00366.1 | 510 | 90880  | 1.00E-164 | 312 | 318 | 98 -  | 196 | 510 | 9239   | 9556   |
| UN58025 | Rsa1.0.00161.1 | 504 | 116891 | 1.00E-70  | 154 | 160 | 96 +  | 84  | 243 | 56381  | 56540  |
| UN58026 | Rsa1.0.00190.1 | 695 | 318240 | 1.00E-122 | 296 | 321 | 92 -  | 320 | 632 | 91484  | 91801  |
| UN58027 | Rsa1.0.20140.1 | 585 | 1335   | 1.00E-103 | 211 | 218 | 96 -  | 59  | 276 | 242    | 459    |
| UN58028 | Rsa1.0.06336.1 | 701 | 11215  | 1.00E-166 | 430 | 476 | 90 +  | 40  | 491 | 8160   | 8624   |
| UN58029 | Rsa1.0.06590.1 | 742 | 10706  | 0         | 501 | 530 | 94 -  | 148 | 660 | 2959   | 3488   |
| UN58030 | Rsa1.0.09579.1 | 387 | 6274   | 2.00E-62  | 171 | 190 | 90 +  | 161 | 350 | 5329   | 5505   |

|         |                |     |        |           |     |     |      |     |     |        |        |
|---------|----------------|-----|--------|-----------|-----|-----|------|-----|-----|--------|--------|
| UN58031 | Rsa1.0.07818.1 | 584 | 8477   | 0         | 556 | 582 | 95 + | 2   | 579 | 163    | 741    |
| UN58032 | Rsa1.0.01659.1 | 144 | 164577 | 2.00E-22  | 66  | 70  | 94 + | 73  | 142 | 17728  | 17797  |
| UN58033 | Rsa1.0.00389.1 | 305 | 88795  | 3.00E-66  | 155 | 162 | 95 - | 1   | 159 | 33691  | 33851  |
| UN58034 | Rsa1.0.01527.1 | 645 | 43905  | 1.00E-129 | 322 | 353 | 91 + | 180 | 532 | 3571   | 3908   |
| UN58035 | Rsa1.0.59786.1 | 637 | 383    | 1.00E-177 | 355 | 365 | 97 + | 272 | 634 | 1      | 363    |
| UN58036 | Rsa1.0.08182.1 | 382 | 7776   | 3.00E-76  | 152 | 153 | 99 - | 1   | 152 | 5212   | 5364   |
| UN58037 | Rsa1.0.01513.1 | 282 | 44234  | 2.00E-67  | 145 | 150 | 96 - | 125 | 274 | 38141  | 38290  |
| UN58038 | Rsa1.0.28770.1 | 697 | 803    | 1.00E-120 | 246 | 255 | 96 - | 2   | 256 | 221    | 475    |
| UN58039 | Rsa1.0.07331.1 | 453 | 9548   | 1.00E-127 | 249 | 255 | 97 - | 3   | 257 | 3629   | 3883   |
| UN58040 | Rsa1.0.01122.1 | 746 | 53369  | 0         | 356 | 366 | 97 + | 3   | 368 | 38952  | 39309  |
| UN58041 | Rsa1.0.00001.1 | 533 | 363028 | 1.00E-136 | 323 | 344 | 93 - | 193 | 533 | 290716 | 291052 |
| UN58042 | Rsa1.0.00100.1 | 714 | 249232 | 1.00E-156 | 285 | 287 | 99 - | 127 | 413 | 117508 | 117794 |
| UN58043 | Rsa1.0.00001.1 | 635 | 363028 | 1.00E-137 | 253 | 255 | 99 + | 238 | 492 | 239851 | 240105 |
| UN58044 | Rsa1.0.34142.1 | 780 | 663    | 1.00E-159 | 308 | 316 | 97 + | 220 | 535 | 347    | 662    |
| UN58045 | Rsa1.0.07663.1 | 688 | 8879   | 4.00E-77  | 162 | 167 | 97 - | 304 | 470 | 5723   | 5889   |
| UN58046 | Rsa1.0.01685.1 | 650 | 175033 | 0         | 506 | 531 | 95 + | 115 | 644 | 6310   | 6839   |
| UN58047 | Rsa1.0.76149.1 | 778 | 301    | 1.00E-126 | 242 | 246 | 98 + | 63  | 308 | 1      | 246    |
| UN58048 | Rsa1.0.06647.1 | 675 | 10604  | 0         | 654 | 692 | 94 + | 2   | 675 | 5394   | 6085   |
| UN58049 | Rsa1.0.00826.1 | 697 | 166736 | 1.00E-112 | 235 | 245 | 95 - | 115 | 359 | 154378 | 154622 |
| UN58050 | Rsa1.0.00737.1 | 632 | 66432  | 0         | 574 | 586 | 97 - | 2   | 585 | 51879  | 52464  |
| UN58051 | Rsa1.0.00332.1 | 568 | 94575  | 1.00E-157 | 379 | 405 | 93 + | 176 | 568 | 74767  | 75168  |
| UN58052 | Rsa1.0.00064.1 | 116 | 240927 | 1.00E-20  | 105 | 118 | 88 + | 1   | 116 | 218212 | 218326 |
| UN58053 | Rsa1.0.02652.1 | 713 | 29038  | 0         | 681 | 729 | 93 + | 4   | 713 | 398    | 1125   |
| UN58054 | Rsa1.0.02104.1 | 454 | 34985  | 1.00E-122 | 291 | 307 | 94 + | 153 | 454 | 23511  | 23812  |
| UN58055 | Rsa1.0.02648.1 | 552 | 29073  | 2.00E-87  | 234 | 255 | 91 + | 293 | 544 | 28376  | 28620  |
| UN58056 | Rsa1.0.32526.1 | 333 | 700    | 6.00E-99  | 276 | 299 | 92 + | 2   | 291 | 34     | 330    |
| UN58057 | Rsa1.0.00070.1 | 682 | 150321 | 1.00E-144 | 319 | 339 | 94 - | 344 | 682 | 59770  | 60108  |
| UN58058 | Rsa1.0.00949.1 | 728 | 58549  | 0         | 706 | 729 | 96 + | 3   | 728 | 53194  | 53922  |
| UN58059 | Rsa1.0.00648.1 | 613 | 70351  | 5.00E-73  | 191 | 209 | 91 + | 406 | 613 | 9530   | 9726   |
| UN58060 | Rsa1.0.00725.1 | 636 | 66757  | 0         | 382 | 401 | 95 + | 196 | 596 | 43137  | 43537  |
| UN58061 | Rsa1.0.15499.1 | 649 | 2570   | 1.00E-101 | 246 | 266 | 92 - | 113 | 366 | 1132   | 1397   |
| UN58062 | Rsa1.0.00130.1 | 674 | 125737 | 1.00E-155 | 304 | 312 | 97 + | 295 | 603 | 76637  | 76948  |
| UN58063 | Rsa1.0.00087.1 | 638 | 761073 | 2.00E-84  | 171 | 175 | 97 - | 218 | 392 | 278974 | 279148 |
| UN58064 | Rsa1.0.01844.1 | 639 | 38421  | 0         | 436 | 461 | 94 + | 119 | 576 | 8408   | 8868   |
| UN58065 | Rsa1.0.00524.1 | 627 | 169613 | 0         | 386 | 396 | 97 + | 232 | 627 | 141781 | 142176 |
| UN58066 | Rsa1.0.00051.1 | 676 | 258225 | 0         | 351 | 357 | 98 - | 2   | 358 | 23407  | 23763  |
| UN58067 | Rsa1.0.04444.1 | 652 | 17320  | 1.00E-155 | 354 | 378 | 93 - | 3   | 365 | 11592  | 11969  |
| UN58068 | Rsa1.0.09174.1 | 724 | 6580   | 1.00E-101 | 232 | 244 | 95 + | 1   | 242 | 5726   | 5969   |
| UN58069 | Rsa1.0.00748.1 | 709 | 65983  | 6.00E-73  | 155 | 160 | 96 - | 348 | 507 | 16394  | 16553  |

|         |                |     |        |           |     |     |      |     |     |        |        |
|---------|----------------|-----|--------|-----------|-----|-----|------|-----|-----|--------|--------|
| UN58070 | Rsa1.0.00323.1 | 705 | 159650 | 0         | 405 | 429 | 94 - | 245 | 667 | 13045  | 13473  |
| UN58071 | Rsa1.0.00092.1 | 737 | 659932 | 4.00E-74  | 160 | 166 | 96 + | 79  | 244 | 439077 | 439242 |
| UN58072 | Rsa1.0.16521.1 | 669 | 2125   | 1.00E-160 | 296 | 299 | 98 - | 3   | 301 | 1431   | 1729   |
| UN58073 | Rsa1.0.00813.1 | 634 | 63202  | 7.00E-97  | 248 | 266 | 93 + | 371 | 634 | 51291  | 51552  |
| UN58074 | Rsa1.0.00666.1 | 675 | 69505  | 1.00E-162 | 355 | 373 | 95 + | 305 | 675 | 8565   | 8935   |
| UN58075 | Rsa1.0.00709.1 | 596 | 67329  | 0         | 570 | 595 | 95 + | 2   | 591 | 30576  | 31168  |
| UN58076 | Rsa1.0.01970.1 | 615 | 36648  | 0         | 599 | 615 | 97 + | 1   | 615 | 1887   | 2501   |
| UN58077 | Rsa1.0.00718.1 | 467 | 279335 | 0         | 382 | 400 | 95 + | 57  | 450 | 235035 | 235434 |
| UN58078 | Rsa1.0.06513.1 | 241 | 10869  | 2.00E-98  | 213 | 224 | 95 - | 2   | 218 | 1      | 224    |
| UN58079 | Rsa1.0.00376.1 | 747 | 90101  | 0         | 403 | 423 | 95 - | 328 | 747 | 35114  | 35535  |
| UN58080 | Rsa1.0.04960.1 | 765 | 15321  | 0         | 505 | 519 | 97 - | 251 | 761 | 9728   | 10246  |
| UN58081 | Rsa1.0.00159.1 | 724 | 431686 | 1.00E-180 | 338 | 344 | 98 - | 2   | 345 | 409473 | 409816 |
| UN58082 | Rsa1.0.03631.1 | 702 | 21647  | 0         | 688 | 700 | 98 + | 3   | 702 | 7902   | 8598   |
| UN58083 | Rsa1.0.00873.1 | 621 | 61459  | 1.00E-70  | 160 | 168 | 95 - | 178 | 345 | 14109  | 14276  |
| UN58084 | Rsa1.0.02319.1 | 720 | 32580  | 1.00E-113 | 292 | 320 | 91 + | 3   | 309 | 15638  | 15951  |
| UN58085 | Rsa1.0.00009.1 | 736 | 232558 | 0         | 557 | 577 | 96 - | 2   | 578 | 71154  | 71730  |
| UN58086 | Rsa1.0.00050.1 | 734 | 237174 | 0         | 461 | 481 | 95 + | 237 | 716 | 7595   | 8075   |
| UN58087 | Rsa1.0.02072.1 | 655 | 35401  | 1.00E-126 | 259 | 269 | 96 - | 234 | 502 | 6534   | 6802   |
| UN58088 | Rsa1.0.00512.1 | 598 | 200277 | 1.00E-124 | 238 | 242 | 98 + | 325 | 566 | 63228  | 63469  |
| UN58089 | Rsa1.0.00123.1 | 625 | 325650 | 0         | 478 | 488 | 97 - | 2   | 489 | 35241  | 35728  |
| UN58090 | Rsa1.0.07914.1 | 769 | 8294   | 1.00E-153 | 306 | 315 | 97 + | 456 | 769 | 1883   | 2197   |
| UN58091 | Rsa1.0.02745.1 | 752 | 28263  | 9.00E-72  | 264 | 305 | 86 - | 3   | 295 | 10794  | 11098  |
| UN58092 | Rsa1.0.00485.1 | 581 | 80937  | 0         | 564 | 592 | 95 - | 3   | 581 | 32430  | 33021  |
| UN58093 | Rsa1.0.07555.1 | 631 | 9139   | 1.00E-102 | 204 | 209 | 97 - | 168 | 376 | 2123   | 2331   |
| UN58094 | Rsa1.0.08430.1 | 743 | 7367   | 0         | 361 | 368 | 98 + | 52  | 419 | 624    | 991    |
| UN58095 | Rsa1.0.00171.1 | 675 | 115622 | 0         | 480 | 493 | 97 - | 107 | 599 | 113872 | 114364 |
| UN58096 | Rsa1.0.00105.1 | 741 | 134138 | 1.00E-128 | 285 | 302 | 94 + | 89  | 387 | 40537  | 40838  |
| UN58097 | Rsa1.0.04243.1 | 663 | 18321  | 0         | 382 | 397 | 96 - | 71  | 467 | 5629   | 6025   |
| UN58098 | Rsa1.0.00273.1 | 632 | 326186 | 5.00E-76  | 186 | 199 | 93 - | 107 | 302 | 40601  | 40799  |
| UN58099 | Rsa1.0.04584.1 | 725 | 16756  | 0         | 461 | 479 | 96 - | 251 | 725 | 12390  | 12866  |
| UN58100 | Rsa1.0.00222.1 | 702 | 172263 | 0         | 512 | 536 | 95 - | 170 | 702 | 23213  | 23745  |
| UN58101 | Rsa1.0.01815.1 | 751 | 38897  | 0         | 532 | 535 | 99 - | 200 | 734 | 14408  | 14942  |
| UN58102 | Rsa1.0.00178.1 | 702 | 114861 | 0         | 497 | 531 | 93 - | 1   | 529 | 28587  | 29113  |
| UN58103 | Rsa1.0.00130.1 | 767 | 125737 | 7.00E-88  | 174 | 177 | 98 + | 454 | 630 | 4175   | 4351   |
| UN58104 | Rsa1.0.08532.1 | 555 | 7228   | 0         | 540 | 569 | 94 + | 2   | 555 | 5325   | 5891   |
| UN58105 | Rsa1.0.00566.1 | 608 | 75325  | 9.00E-84  | 161 | 162 | 99 - | 195 | 356 | 38088  | 38249  |
| UN58106 | Rsa1.0.03101.1 | 665 | 25410  | 1.00E-118 | 227 | 231 | 98 + | 23  | 253 | 5690   | 5920   |
| UN58107 | Rsa1.0.00078.1 | 695 | 175053 | 0         | 367 | 379 | 96 - | 8   | 386 | 131869 | 132247 |
| UN58108 | Rsa1.0.02099.1 | 735 | 35030  | 1.00E-117 | 232 | 238 | 97 - | 2   | 239 | 27260  | 27497  |

|         |                |     |        |           |     |     |      |     |     |        |        |
|---------|----------------|-----|--------|-----------|-----|-----|------|-----|-----|--------|--------|
| UN58109 | Rsa1.0.00576.1 | 756 | 178949 | 0         | 687 | 725 | 94 + | 1   | 715 | 24192  | 24902  |
| UN58110 | Rsa1.0.01905.1 | 771 | 37450  | 8.00E-91  | 255 | 287 | 88 - | 231 | 496 | 34864  | 35150  |
| UN58111 | Rsa1.0.00329.1 | 714 | 222544 | 0         | 411 | 423 | 97 - | 293 | 712 | 41417  | 41839  |
| UN58112 | Rsa1.0.00894.1 | 764 | 269700 | 0         | 396 | 425 | 93 - | 9   | 414 | 25792  | 26216  |
| UN58113 | Rsa1.0.01730.1 | 658 | 40223  | 1.00E-161 | 330 | 344 | 95 + | 315 | 658 | 35176  | 35519  |
| UN58114 | Rsa1.0.00308.1 | 709 | 96915  | 1.00E-157 | 347 | 368 | 94 + | 337 | 704 | 81326  | 81685  |
| UN58115 | Rsa1.0.00145.1 | 582 | 261008 | 1.00E-122 | 406 | 467 | 86 + | 122 | 557 | 75205  | 75662  |
| UN58116 | Rsa1.0.00876.1 | 613 | 61328  | 2.00E-93  | 258 | 284 | 90 - | 1   | 280 | 37103  | 37386  |
| UN58117 | Rsa1.0.04215.1 | 654 | 18437  | 0         | 612 | 659 | 92 + | 6   | 649 | 7587   | 8237   |
| UN58118 | Rsa1.0.01198.1 | 695 | 51029  | 0         | 451 | 467 | 96 - | 225 | 691 | 25799  | 26258  |
| UN58119 | #              | #   | #      | #         | #   | #   | #    | #   | #   | #      | #      |
| UN58120 | Rsa1.0.21578.1 | 453 | 1190   | 2.00E-71  | 155 | 161 | 96 - | 162 | 322 | 684    | 844    |
| UN58121 | Rsa1.0.01344.1 | 741 | 142535 | 1.00E-103 | 264 | 289 | 91 + | 32  | 307 | 15328  | 15613  |
| UN58122 | Rsa1.0.01740.1 | 737 | 39986  | 0         | 548 | 563 | 97 - | 176 | 737 | 4872   | 5434   |
| UN58123 | Rsa1.0.04882.1 | 540 | 15606  | 1.00E-138 | 320 | 342 | 93 - | 201 | 539 | 7133   | 7472   |
| UN58124 | Rsa1.0.00621.1 | 669 | 71840  | 1.00E-147 | 317 | 334 | 94 + | 3   | 332 | 37651  | 37984  |
| UN58125 | Rsa1.0.00028.1 | 687 | 293984 | 0         | 343 | 349 | 98 - | 166 | 514 | 66786  | 67134  |
| UN58126 | Rsa1.0.02400.1 | 177 | 31750  | 2.00E-51  | 164 | 183 | 89 - | 1   | 177 | 18269  | 18451  |
| UN58127 | Rsa1.0.00963.1 | 780 | 58176  | 0         | 744 | 788 | 94 - | 2   | 775 | 32498  | 33275  |
| UN58128 | Rsa1.0.00569.1 | 633 | 75060  | 1.00E-164 | 372 | 397 | 93 + | 3   | 397 | 64241  | 64628  |
| UN58129 | Rsa1.0.01937.1 | 714 | 37147  | 0         | 400 | 421 | 95 - | 296 | 714 | 23947  | 24367  |
| UN58130 | Rsa1.0.00471.1 | 692 | 81897  | 1.00E-156 | 308 | 316 | 97 - | 3   | 318 | 11867  | 12181  |
| UN58131 | Rsa1.0.00098.1 | 743 | 349239 | 1.00E-140 | 331 | 352 | 94 - | 400 | 743 | 238578 | 238928 |
| UN58132 | Rsa1.0.00503.1 | 720 | 79468  | 1.00E-95  | 199 | 206 | 96 + | 33  | 238 | 67251  | 67456  |
| UN58133 | Rsa1.0.02496.1 | 642 | 30814  | 1.00E-115 | 255 | 267 | 95 + | 378 | 642 | 9253   | 9519   |
| UN58134 | Rsa1.0.01310.1 | 592 | 164719 | 1.00E-132 | 295 | 311 | 94 + | 2   | 307 | 11649  | 11957  |
| UN58135 | Rsa1.0.00745.1 | 694 | 66067  | 0         | 541 | 563 | 96 + | 133 | 694 | 42176  | 42735  |
| UN58136 | Rsa1.0.04450.1 | 624 | 17297  | 0         | 576 | 600 | 96 + | 29  | 624 | 11966  | 12562  |
| UN58137 | Rsa1.0.00868.1 | 658 | 61630  | 1.00E-130 | 239 | 240 | 99 + | 198 | 437 | 46860  | 47099  |
| UN58138 | Rsa1.0.04890.1 | 223 | 15591  | 1.00E-77  | 175 | 181 | 96 + | 46  | 223 | 9190   | 9368   |
| UN58139 | Rsa1.0.07861.1 | 666 | 8406   | 0         | 654 | 668 | 97 + | 3   | 666 | 6144   | 6811   |
| UN58140 | Rsa1.0.01818.1 | 687 | 38837  | 1.00E-120 | 253 | 264 | 95 + | 8   | 271 | 29977  | 30240  |
| UN58141 | Rsa1.0.07482.1 | 764 | 9278   | 1.00E-159 | 310 | 316 | 98 - | 449 | 764 | 2180   | 2493   |
| UN58142 | Rsa1.0.01539.1 | 768 | 43698  | 1.00E-95  | 196 | 202 | 97 - | 451 | 652 | 38016  | 38217  |
| UN58143 | Rsa1.0.00071.1 | 586 | 345714 | 1.00E-157 | 321 | 333 | 96 - | 242 | 573 | 311999 | 312331 |
| UN58144 | Rsa1.0.00620.1 | 424 | 71985  | 1.00E-140 | 301 | 317 | 94 + | 108 | 424 | 8178   | 8494   |
| UN58145 | Rsa1.0.00044.1 | 749 | 271658 | 1.00E-171 | 344 | 356 | 96 + | 3   | 356 | 185706 | 186061 |
| UN58146 | Rsa1.0.02777.1 | 634 | 27986  | 1.00E-125 | 259 | 268 | 96 - | 240 | 506 | 6968   | 7235   |
| UN58147 | Rsa1.0.00972.1 | 403 | 57937  | 2.00E-93  | 195 | 202 | 96 - | 1   | 202 | 53820  | 54021  |

|         |                |     |        |           |     |     |       |     |     |        |        |
|---------|----------------|-----|--------|-----------|-----|-----|-------|-----|-----|--------|--------|
| UN58148 | Rsa1.0.01326.1 | 685 | 48072  | 0         | 397 | 422 | 94 +  | 254 | 672 | 38864  | 39279  |
| UN58149 | Rsa1.0.01258.1 | 385 | 49755  | 4.00E-63  | 132 | 135 | 97 -  | 63  | 197 | 22587  | 22721  |
| UN58150 | Rsa1.0.00077.1 | 834 | 145005 | 2.00E-88  | 187 | 194 | 96 -  | 273 | 466 | 47502  | 47695  |
| UN58151 | Rsa1.0.04808.1 | 643 | 15893  | 1.00E-171 | 396 | 426 | 92 -  | 3   | 423 | 13072  | 13488  |
| UN58152 | Rsa1.0.19466.1 | 760 | 1427   | 1.00E-137 | 323 | 349 | 92 -  | 174 | 516 | 1091   | 1427   |
| UN58153 | Rsa1.0.01583.1 | 631 | 156297 | 2.00E-63  | 145 | 152 | 95 -  | 94  | 245 | 130377 | 130528 |
| UN58154 | Rsa1.0.02129.1 | 659 | 34757  | 7.00E-57  | 139 | 147 | 94 -  | 70  | 216 | 3428   | 3571   |
| UN58155 | Rsa1.0.00887.1 | 775 | 61048  | 3.00E-90  | 191 | 197 | 96 +  | 236 | 431 | 49405  | 49601  |
| UN58156 | Rsa1.0.04310.1 | 492 | 17994  | 3.00E-86  | 224 | 242 | 92 -  | 227 | 466 | 1790   | 2031   |
| UN58157 | Rsa1.0.00374.1 | 687 | 165738 | 1.00E-173 | 374 | 396 | 94 -  | 288 | 673 | 133014 | 133409 |
| UN58158 | Rsa1.0.01534.1 | 782 | 43764  | 0         | 369 | 378 | 97 -  | 406 | 779 | 21467  | 21844  |
| UN58159 | Rsa1.0.21881.1 | 768 | 1167   | 5.00E-61  | 120 | 120 | 100 + | 147 | 266 | 1048   | 1167   |
| UN58160 | Rsa1.0.03356.1 | 772 | 23487  | 0         | 606 | 625 | 96 -  | 21  | 645 | 7096   | 7717   |
| UN58161 | Rsa1.0.06278.1 | 744 | 11333  | 1.00E-151 | 304 | 315 | 96 +  | 3   | 317 | 4832   | 5146   |
| UN58162 | Rsa1.0.11052.1 | 796 | 5632   | 0         | 781 | 832 | 93 +  | 2   | 796 | 3729   | 4560   |
| UN58163 | Rsa1.0.00697.1 | 691 | 67913  | 1.00E-138 | 326 | 351 | 92 -  | 349 | 690 | 38301  | 38651  |
| UN58164 | Rsa1.0.01573.1 | 640 | 42964  | 1.00E-180 | 378 | 398 | 94 -  | 143 | 540 | 17377  | 17768  |
| UN58165 | Rsa1.0.00551.1 | 749 | 76227  | 1.00E-100 | 234 | 245 | 95 -  | 444 | 684 | 55677  | 55920  |
| UN58166 | Rsa1.0.00051.1 | 655 | 258225 | 0         | 465 | 482 | 96 -  | 165 | 646 | 2685   | 3162   |
| UN58167 | Rsa1.0.06643.1 | 526 | 10615  | 2.00E-59  | 304 | 365 | 83 -  | 43  | 404 | 9683   | 10044  |
| UN58168 | Rsa1.0.00233.1 | 612 | 104918 | 1.00E-170 | 370 | 391 | 94 -  | 49  | 438 | 79217  | 79607  |
| UN58169 | Rsa1.0.00301.1 | 594 | 365315 | 0         | 373 | 387 | 96 +  | 209 | 594 | 84625  | 85011  |
| UN58170 | Rsa1.0.01104.1 | 685 | 285480 | 1.00E-118 | 254 | 265 | 95 -  | 405 | 668 | 107189 | 107450 |
| UN58171 | Rsa1.0.00781.1 | 671 | 64480  | 1.00E-148 | 286 | 290 | 98 +  | 374 | 662 | 1199   | 1487   |
| UN58172 | Rsa1.0.02826.1 | 546 | 27560  | 0         | 496 | 524 | 94 +  | 23  | 546 | 18166  | 18689  |
| UN58173 | Rsa1.0.02097.1 | 385 | 35036  | 2.00E-96  | 245 | 263 | 93 +  | 125 | 385 | 19172  | 19433  |
| UN58174 | Rsa1.0.00092.1 | 627 | 659932 | 1.00E-116 | 240 | 248 | 96 -  | 338 | 583 | 127591 | 127838 |
| UN58175 | Rsa1.0.01121.1 | 620 | 53407  | 1.00E-149 | 345 | 371 | 92 -  | 1   | 371 | 27465  | 27829  |
| UN58176 | Rsa1.0.00423.1 | 643 | 86138  | 0         | 430 | 456 | 94 -  | 75  | 530 | 8117   | 8569   |
| UN58177 | Rsa1.0.00762.1 | 703 | 165246 | 1.00E-139 | 257 | 259 | 99 +  | 3   | 261 | 25959  | 26217  |
| UN58178 | Rsa1.0.14532.1 | 629 | 3293   | 1.00E-101 | 228 | 242 | 94 -  | 15  | 250 | 111    | 352    |
| UN58179 | Rsa1.0.00119.1 | 744 | 467509 | 4.00E-68  | 153 | 160 | 95 +  | 349 | 508 | 389081 | 389240 |
| UN58180 | Rsa1.0.00185.1 | 812 | 248445 | 0         | 552 | 576 | 95 +  | 242 | 812 | 214700 | 215275 |
| UN58181 | Rsa1.0.00033.1 | 754 | 515811 | 1.00E-173 | 343 | 354 | 96 -  | 15  | 368 | 131617 | 131967 |
| UN58182 | Rsa1.0.03640.1 | 763 | 21624  | 1.00E-138 | 267 | 273 | 97 -  | 184 | 456 | 16093  | 16365  |
| UN58183 | Rsa1.0.00505.1 | 697 | 79323  | 1.00E-139 | 302 | 319 | 94 +  | 165 | 483 | 10759  | 11077  |
| UN58184 | Rsa1.0.01272.1 | 415 | 49553  | 1.00E-115 | 376 | 435 | 86 -  | 1   | 415 | 37260  | 37668  |
| UN58185 | Rsa1.0.00201.1 | 656 | 232851 | 0         | 608 | 628 | 96 -  | 32  | 656 | 209388 | 210015 |
| UN58186 | Rsa1.0.00482.1 | 645 | 81162  | 1.00E-147 | 277 | 281 | 98 -  | 296 | 576 | 69356  | 69636  |

|         |                |     |        |           |     |     |       |     |     |        |        |
|---------|----------------|-----|--------|-----------|-----|-----|-------|-----|-----|--------|--------|
| UN58187 | Rsa1.0.45557.1 | 400 | 495    | 1.00E-131 | 290 | 313 | 92 +  | 88  | 400 | 77     | 367    |
| UN58188 | Rsa1.0.02991.1 | 804 | 26178  | 2.00E-63  | 180 | 193 | 93 -  | 619 | 804 | 7033   | 7224   |
| UN58189 | Rsa1.0.00805.1 | 262 | 63724  | 1.00E-111 | 251 | 264 | 95 +  | 1   | 262 | 5628   | 5886   |
| UN58190 | Rsa1.0.01515.1 | 702 | 170864 | 0         | 526 | 560 | 93 -  | 80  | 633 | 158805 | 159364 |
| UN58191 | Rsa1.0.00728.1 | 179 | 66704  | 5.00E-70  | 170 | 178 | 95 -  | 2   | 179 | 15828  | 16002  |
| UN58192 | Rsa1.0.00220.1 | 643 | 192936 | 1.00E-79  | 194 | 207 | 93 -  | 2   | 207 | 144276 | 144482 |
| UN58193 | Rsa1.0.00552.1 | 279 | 206757 | 1.00E-128 | 269 | 280 | 96 +  | 3   | 279 | 195146 | 195422 |
| UN58194 | Rsa1.0.00512.1 | 702 | 200277 | 1.00E-104 | 235 | 249 | 94 +  | 79  | 327 | 61460  | 61708  |
| UN58195 | Rsa1.0.01317.1 | 651 | 48287  | 0         | 552 | 579 | 95 +  | 3   | 581 | 34096  | 34673  |
| UN58196 | Rsa1.0.00325.1 | 610 | 95371  | 1.00E-131 | 264 | 273 | 96 +  | 237 | 509 | 79215  | 79487  |
| UN58197 | Rsa1.0.00136.1 | 710 | 122464 | 0         | 554 | 569 | 97 +  | 145 | 710 | 77555  | 78120  |
| UN58198 | Rsa1.0.00905.1 | 323 | 60110  | 1.00E-142 | 280 | 288 | 97 -  | 1   | 288 | 7811   | 8098   |
| UN58199 | Rsa1.0.00015.1 | 690 | 561803 | 0         | 672 | 692 | 97 +  | 2   | 690 | 374345 | 375031 |
| UN58200 | Rsa1.0.56626.1 | 671 | 404    | 1.00E-174 | 368 | 385 | 95 +  | 250 | 633 | 21     | 404    |
| UN58201 | Rsa1.0.00198.1 | 774 | 222963 | 0         | 581 | 624 | 93 +  | 159 | 774 | 138000 | 138620 |
| UN58202 | Rsa1.0.00652.1 | 612 | 70089  | 0         | 519 | 569 | 91 +  | 1   | 550 | 46938  | 47497  |
| UN58203 | Rsa1.0.00112.1 | 658 | 132199 | 1.00E-111 | 246 | 258 | 95 +  | 3   | 257 | 55435  | 55691  |
| UN58204 | Rsa1.0.00372.1 | 670 | 90418  | 0         | 633 | 671 | 94 +  | 3   | 670 | 18170  | 18837  |
| UN58205 | Rsa1.0.00307.1 | 614 | 199003 | 0         | 335 | 337 | 99 -  | 1   | 337 | 172427 | 172763 |
| UN58206 | Rsa1.0.01997.1 | 513 | 158416 | 1.00E-124 | 234 | 237 | 98 +  | 17  | 253 | 15015  | 15251  |
| UN58207 | Rsa1.0.00892.1 | 701 | 60703  | 0         | 676 | 701 | 96 -  | 2   | 699 | 48190  | 48889  |
| UN58208 | Rsa1.0.07444.1 | 663 | 9386   | 1.00E-108 | 205 | 207 | 99 -  | 94  | 300 | 2001   | 2207   |
| UN58209 | Rsa1.0.00586.1 | 647 | 163802 | 1.00E-130 | 260 | 268 | 97 +  | 225 | 492 | 153732 | 153999 |
| UN58210 | Rsa1.0.00107.1 | 729 | 431659 | 0         | 589 | 645 | 91 +  | 61  | 703 | 280664 | 281296 |
| UN58211 | Rsa1.0.02574.1 | 716 | 29954  | 1.00E-176 | 337 | 345 | 97 +  | 147 | 491 | 26290  | 26634  |
| UN58212 | Rsa1.0.06887.1 | 663 | 10208  | 0         | 436 | 448 | 97 +  | 5   | 452 | 2592   | 3039   |
| UN58213 | Rsa1.0.00275.1 | 705 | 210104 | 1.00E-103 | 205 | 210 | 97 +  | 64  | 273 | 164586 | 164795 |
| UN58214 | Rsa1.0.00045.1 | 735 | 328694 | 1.00E-110 | 248 | 263 | 94 +  | 3   | 265 | 11924  | 12186  |
| UN58215 | Rsa1.0.02673.1 | 654 | 28877  | 0         | 548 | 577 | 94 +  | 78  | 654 | 9279   | 9847   |
| UN58216 | Rsa1.0.01394.1 | 751 | 46641  | 0         | 712 | 751 | 94 +  | 3   | 751 | 36713  | 37459  |
| UN58217 | Rsa1.0.02735.1 | 639 | 28344  | 3.00E-93  | 207 | 218 | 94 +  | 12  | 229 | 25440  | 25657  |
| UN58218 | Rsa1.0.02248.1 | 732 | 33414  | 3.00E-84  | 165 | 167 | 98 -  | 383 | 549 | 13032  | 13198  |
| UN58219 | Rsa1.0.05051.1 | 746 | 15018  | 2.00E-48  | 99  | 99  | 100 - | 440 | 538 | 14722  | 14820  |
| UN58220 | Rsa1.0.01161.1 | 451 | 52029  | 1.00E-32  | 90  | 96  | 93 +  | 289 | 384 | 37047  | 37142  |
| UN58221 | Rsa1.0.03257.1 | 742 | 24305  | 0         | 495 | 498 | 99 -  | 246 | 742 | 7497   | 7994   |
| UN58222 | Rsa1.0.01420.1 | 742 | 46210  | 1.00E-95  | 184 | 186 | 98 +  | 281 | 466 | 7399   | 7584   |
| UN58223 | Rsa1.0.00744.1 | 696 | 66084  | 6.00E-79  | 153 | 154 | 99 +  | 392 | 545 | 52957  | 53110  |
| UN58224 | Rsa1.0.62130.1 | 779 | 369    | 0         | 363 | 369 | 98 -  | 93  | 461 | 1      | 369    |
| UN58225 | Rsa1.0.07756.1 | 695 | 8634   | 0         | 605 | 625 | 96 -  | 75  | 695 | 6913   | 7533   |

|         |                |     |        |           |     |     |      |     |     |        |        |
|---------|----------------|-----|--------|-----------|-----|-----|------|-----|-----|--------|--------|
| UN58226 | Rsa1.0.00107.1 | 686 | 431659 | 0         | 538 | 562 | 95 - | 1   | 556 | 87540  | 88089  |
| UN58227 | Rsa1.0.00254.1 | 509 | 102600 | 2.00E-65  | 166 | 178 | 93 + | 11  | 188 | 17820  | 17995  |
| UN58228 | Rsa1.0.00237.1 | 712 | 235974 | 0         | 394 | 403 | 97 - | 3   | 404 | 70772  | 71174  |
| UN58229 | Rsa1.0.00876.1 | 752 | 61328  | 1.00E-130 | 266 | 275 | 96 - | 447 | 719 | 36515  | 36789  |
| UN58230 | Rsa1.0.00289.1 | 191 | 98620  | 2.00E-79  | 180 | 190 | 94 - | 2   | 191 | 85925  | 86114  |
| UN58231 | Rsa1.0.04033.1 | 437 | 19481  | 2.00E-96  | 191 | 195 | 97 - | 2   | 196 | 9206   | 9400   |
| UN58232 | Rsa1.0.04510.1 | 653 | 17033  | 4.00E-55  | 116 | 118 | 98 + | 375 | 492 | 9821   | 9938   |
| UN58233 | Rsa1.0.00798.1 | 714 | 63945  | 1.00E-163 | 330 | 341 | 96 - | 5   | 341 | 41969  | 42309  |
| UN58234 | Rsa1.0.02946.1 | 596 | 26537  | 2.00E-97  | 289 | 324 | 89 + | 230 | 553 | 463    | 774    |
| UN58235 | Rsa1.0.01971.1 | 401 | 36641  | 1.00E-153 | 318 | 330 | 96 + | 75  | 401 | 10966  | 11291  |
| UN58236 | #              | #   | #      | #         | #   | #   | #    | #   | #   | #      | #      |
| UN58237 | Rsa1.0.02729.1 | 185 | 28394  | 9.00E-78  | 153 | 155 | 98 + | 1   | 155 | 19152  | 19306  |
| UN58238 | Rsa1.0.01185.1 | 672 | 149842 | 3.00E-37  | 105 | 112 | 93 - | 511 | 621 | 119345 | 119456 |
| UN58239 | Rsa1.0.00111.1 | 708 | 390088 | 0         | 484 | 509 | 95 + | 202 | 703 | 177208 | 177714 |
| UN58240 | Rsa1.0.28998.1 | 645 | 796    | 0         | 344 | 346 | 99 + | 244 | 589 | 435    | 780    |
| UN58241 | Rsa1.0.00041.1 | 663 | 186197 | 1.00E-110 | 217 | 222 | 97 - | 317 | 538 | 134294 | 134515 |
| UN58242 | Rsa1.0.00171.1 | 733 | 115622 | 1.00E-131 | 288 | 302 | 95 - | 7   | 304 | 52232  | 52530  |
| UN58243 | Rsa1.0.12592.1 | 696 | 5180   | 0         | 668 | 694 | 96 - | 3   | 696 | 384    | 1075   |
| UN58244 | Rsa1.0.12857.1 | 445 | 5096   | 1.00E-141 | 296 | 308 | 96 + | 133 | 440 | 2329   | 2632   |
| UN58245 | Rsa1.0.00612.1 | 712 | 72376  | 1.00E-162 | 314 | 321 | 97 - | 391 | 710 | 63306  | 63626  |
| UN58246 | Rsa1.0.01634.1 | 710 | 41865  | 1.00E-100 | 203 | 209 | 97 - | 386 | 594 | 39398  | 39606  |
| UN58247 | Rsa1.0.03713.1 | 729 | 21221  | 1.00E-107 | 212 | 217 | 97 + | 455 | 671 | 17371  | 17587  |
| UN58248 | Rsa1.0.03744.1 | 777 | 21053  | 0         | 410 | 423 | 96 - | 354 | 774 | 1716   | 2138   |
| UN58249 | Rsa1.0.03406.1 | 420 | 23159  | 1.00E-101 | 202 | 207 | 97 + | 1   | 207 | 15796  | 16002  |
| UN58250 | Rsa1.0.00128.1 | 713 | 228675 | 1.00E-100 | 254 | 279 | 91 - | 41  | 307 | 120447 | 120725 |
| UN58251 | Rsa1.0.00467.1 | 783 | 156542 | 1.00E-114 | 272 | 287 | 94 + | 501 | 779 | 77638  | 77924  |
| UN58252 | Rsa1.0.00924.1 | 616 | 59524  | 1.00E-179 | 343 | 350 | 98 + | 268 | 616 | 30403  | 30752  |
| UN58253 | Rsa1.0.09117.1 | 727 | 6637   | 1.00E-154 | 327 | 346 | 94 - | 3   | 336 | 2458   | 2803   |
| UN58254 | Rsa1.0.17727.1 | 659 | 1755   | 2.00E-57  | 132 | 138 | 95 + | 178 | 315 | 832    | 969    |
| UN58255 | Rsa1.0.00048.1 | 631 | 167185 | 2.00E-78  | 195 | 207 | 94 - | 3   | 204 | 157461 | 157667 |
| UN58256 | Rsa1.0.00048.1 | 606 | 167185 | 1.00E-101 | 211 | 219 | 96 - | 388 | 606 | 75878  | 76096  |
| UN58257 | Rsa1.0.01053.1 | 721 | 55483  | 1.00E-109 | 228 | 237 | 96 - | 136 | 372 | 39611  | 39847  |
| UN58258 | Rsa1.0.04063.1 | 781 | 19300  | 1.00E-109 | 219 | 225 | 97 + | 1   | 225 | 9805   | 10029  |
| UN58259 | Rsa1.0.02195.1 | 633 | 34024  | 0         | 468 | 481 | 97 + | 148 | 628 | 23726  | 24205  |
| UN58260 | Rsa1.0.03169.1 | 708 | 24826  | 1.00E-165 | 319 | 327 | 97 - | 82  | 408 | 21963  | 22289  |
| UN58261 | Rsa1.0.01183.1 | 725 | 51465  | 0         | 439 | 459 | 95 - | 3   | 460 | 44480  | 44929  |
| UN58262 | Rsa1.0.03204.1 | 740 | 24622  | 1.00E-163 | 322 | 331 | 97 - | 70  | 394 | 6070   | 6400   |
| UN58263 | Rsa1.0.07263.1 | 696 | 9644   | 0         | 584 | 633 | 92 + | 64  | 696 | 4439   | 5071   |
| UN58264 | Rsa1.0.00426.1 | 799 | 85668  | 0         | 417 | 435 | 95 - | 223 | 657 | 31242  | 31676  |



|         |                |     |        |           |     |     |      |     |     |        |        |
|---------|----------------|-----|--------|-----------|-----|-----|------|-----|-----|--------|--------|
| UN58265 | Rsa1.0.00697.1 | 473 | 67913  | 7.00E-87  | 224 | 240 | 93 + | 3   | 236 | 54368  | 54606  |
| UN58266 | Rsa1.0.00116.1 | 687 | 365886 | 1.00E-110 | 217 | 222 | 97 + | 2   | 223 | 128380 | 128601 |
| UN58267 | Rsa1.0.00017.1 | 464 | 752458 | 5.00E-63  | 132 | 135 | 97 + | 194 | 328 | 359032 | 359166 |
| UN58268 | Rsa1.0.04002.1 | 160 | 19608  | 2.00E-60  | 130 | 134 | 97 + | 1   | 134 | 16883  | 17016  |
| UN58269 | Rsa1.0.00039.1 | 727 | 296927 | 0         | 716 | 727 | 98 + | 2   | 727 | 58364  | 59090  |
| UN58270 | Rsa1.0.00017.1 | 743 | 752458 | 0         | 406 | 424 | 95 + | 214 | 637 | 517153 | 517573 |
| UN58271 | Rsa1.0.00703.1 | 698 | 67597  | 0         | 609 | 634 | 96 + | 62  | 694 | 25184  | 25817  |
| UN58272 | Rsa1.0.00189.1 | 637 | 111830 | 0         | 606 | 634 | 95 + | 1   | 633 | 61123  | 61755  |
| UN58273 | Rsa1.0.00938.1 | 715 | 193891 | 0         | 623 | 645 | 96 + | 77  | 715 | 179936 | 180580 |
| UN58274 | Rsa1.0.00326.1 | 598 | 171955 | 1.00E-122 | 254 | 263 | 96 - | 298 | 554 | 67413  | 67675  |
| UN58275 | Rsa1.0.00009.1 | 198 | 232558 | 2.00E-88  | 172 | 173 | 99 + | 3   | 174 | 128132 | 128304 |
| UN58276 | Rsa1.0.00652.1 | 419 | 70089  | 6.00E-87  | 196 | 207 | 94 - | 4   | 210 | 61355  | 61561  |
| UN58277 | Rsa1.0.01634.1 | 713 | 41865  | 1.00E-166 | 393 | 427 | 92 + | 1   | 406 | 32895  | 33321  |
| UN58278 | Rsa1.0.00003.1 | 669 | 340054 | 2.00E-97  | 214 | 225 | 95 - | 84  | 308 | 278263 | 278487 |
| UN58279 | Rsa1.0.00203.1 | 684 | 109129 | 9.00E-81  | 198 | 213 | 92 + | 123 | 335 | 22484  | 22696  |
| UN58280 | Rsa1.0.00002.1 | 462 | 601661 | 1.00E-155 | 320 | 333 | 96 + | 125 | 457 | 557976 | 558306 |
| UN58281 | Rsa1.0.00034.1 | 340 | 260119 | 7.00E-40  | 87  | 88  | 98 - | 253 | 340 | 239826 | 239913 |
| UN58282 | Rsa1.0.00476.1 | 717 | 280966 | 0         | 594 | 612 | 97 + | 3   | 612 | 158312 | 158922 |
| UN58283 | Rsa1.0.01020.1 | 697 | 56619  | 2.00E-72  | 172 | 183 | 93 + | 509 | 691 | 33443  | 33625  |
| UN58284 | Rsa1.0.01604.1 | 745 | 42461  | 1.00E-161 | 357 | 376 | 94 - | 375 | 745 | 40254  | 40626  |
| UN58285 | Rsa1.0.00916.1 | 465 | 59789  | 5.00E-91  | 179 | 182 | 98 + | 45  | 226 | 35105  | 35286  |
| UN58286 | Rsa1.0.03107.1 | 700 | 25349  | 0         | 369 | 375 | 98 - | 328 | 700 | 18572  | 18945  |
| UN58287 | Rsa1.0.07757.1 | 637 | 8633   | 1.00E-123 | 233 | 236 | 98 - | 12  | 247 | 1773   | 2008   |
| UN58288 | Rsa1.0.00300.1 | 644 | 97747  | 1.00E-100 | 221 | 229 | 96 + | 131 | 356 | 29635  | 29862  |
| UN58289 | Rsa1.0.00026.1 | 794 | 327835 | 0         | 588 | 644 | 91 - | 107 | 747 | 304393 | 304999 |
| UN58290 | Rsa1.0.00420.1 | 622 | 86496  | 1.00E-115 | 263 | 284 | 92 - | 2   | 270 | 41205  | 41488  |
| UN58291 | Rsa1.0.00020.1 | 632 | 283099 | 1.00E-177 | 348 | 359 | 96 - | 153 | 511 | 20914  | 21272  |
| UN58292 | Rsa1.0.00306.1 | 645 | 146760 | 4.00E-98  | 375 | 445 | 84 - | 6   | 426 | 92285  | 92711  |
| UN58293 | Rsa1.0.04478.1 | 221 | 17183  | 1.00E-40  | 132 | 144 | 91 + | 1   | 137 | 2245   | 2386   |
| UN58294 | Rsa1.0.01731.1 | 649 | 40208  | 0         | 482 | 503 | 95 + | 149 | 649 | 19840  | 20337  |
| UN58295 | Rsa1.0.00100.1 | 729 | 249232 | 1.00E-86  | 181 | 187 | 96 - | 264 | 450 | 15510  | 15696  |
| UN58296 | Rsa1.0.01153.1 | 658 | 52264  | 1.00E-103 | 282 | 308 | 91 + | 3   | 302 | 34412  | 34716  |
| UN58297 | Rsa1.0.00959.1 | 435 | 58202  | 1.00E-161 | 349 | 367 | 95 + | 1   | 365 | 968    | 1323   |
| UN58298 | Rsa1.0.00208.1 | 700 | 108565 | 1.00E-170 | 339 | 351 | 96 - | 2   | 352 | 61499  | 61849  |
| UN58299 | Rsa1.0.00262.1 | 822 | 101906 | 1.00E-122 | 270 | 284 | 95 + | 10  | 289 | 81287  | 81570  |
| UN58300 | Rsa1.0.00663.1 | 143 | 164969 | 1.00E-54  | 127 | 132 | 96 - | 8   | 139 | 101090 | 101220 |
| UN58301 | Rsa1.0.06151.1 | 514 | 11612  | 1.00E-167 | 372 | 393 | 94 - | 122 | 514 | 9793   | 10181  |
| UN58302 | Rsa1.0.01874.1 | 152 | 37853  | 6.00E-63  | 140 | 146 | 95 + | 3   | 148 | 23898  | 24043  |
| UN58303 | Rsa1.0.02149.1 | 740 | 148330 | 0         | 347 | 353 | 98 - | 382 | 733 | 31722  | 32074  |

|         |                |     |        |           |     |     |      |     |     |        |        |
|---------|----------------|-----|--------|-----------|-----|-----|------|-----|-----|--------|--------|
| UN58304 | Rsa1.0.00327.1 | 780 | 94892  | 8.00E-97  | 215 | 225 | 95 - | 2   | 223 | 18711  | 18933  |
| UN58305 | Rsa1.0.00018.1 | 827 | 410899 | 0         | 776 | 813 | 95 + | 18  | 821 | 173316 | 174128 |
| UN58306 | Rsa1.0.04415.1 | 715 | 147889 | 0         | 525 | 567 | 92 + | 2   | 567 | 132357 | 132905 |
| UN58307 | Rsa1.0.00003.1 | 809 | 340054 | 8.00E-91  | 242 | 261 | 92 - | 1   | 258 | 190660 | 190918 |
| UN58308 | Rsa1.0.02478.1 | 173 | 150183 | 1.00E-73  | 167 | 172 | 97 - | 1   | 170 | 137010 | 137180 |
| UN58309 | Rsa1.0.00005.1 | 769 | 353093 | 0         | 681 | 701 | 97 - | 72  | 769 | 296909 | 297609 |
| UN58310 | Rsa1.0.02769.1 | 656 | 28107  | 1.00E-161 | 303 | 308 | 98 - | 182 | 489 | 20934  | 21241  |
| UN58311 | Rsa1.0.02373.1 | 108 | 32048  | 2.00E-40  | 102 | 108 | 94 + | 1   | 108 | 8906   | 9013   |
| UN58312 | Rsa1.0.00288.1 | 605 | 98659  | 1.00E-177 | 379 | 398 | 95 + | 134 | 531 | 82911  | 83305  |
| UN58313 | Rsa1.0.03319.1 | 587 | 23767  | 2.00E-87  | 179 | 184 | 97 + | 324 | 507 | 11651  | 11834  |
| UN58314 | Rsa1.0.03543.1 | 791 | 22185  | 1.00E-176 | 353 | 365 | 96 + | 7   | 371 | 1847   | 2205   |
| UN58315 | Rsa1.0.08728.1 | 725 | 6995   | 1.00E-125 | 343 | 383 | 89 + | 6   | 372 | 1866   | 2235   |
| UN58316 | Rsa1.0.08285.1 | 607 | 7606   | 4.00E-98  | 208 | 216 | 96 + | 212 | 427 | 2320   | 2532   |
| UN58317 | Rsa1.0.00093.1 | 530 | 214962 | 3.00E-89  | 191 | 198 | 96 + | 7   | 202 | 97777  | 97974  |
| UN58318 | Rsa1.0.05134.1 | 670 | 143181 | 0         | 621 | 645 | 96 + | 26  | 668 | 137769 | 138410 |
| UN58319 | Rsa1.0.05570.1 | 104 | 13301  | 7.00E-37  | 96  | 102 | 94 - | 1   | 102 | 11236  | 11337  |
| UN58320 | Rsa1.0.00419.1 | 733 | 86562  | 1.00E-172 | 339 | 350 | 96 + | 378 | 727 | 73557  | 73906  |
| UN58321 | Rsa1.0.00045.1 | 745 | 328694 | 1.00E-138 | 298 | 313 | 95 - | 1   | 310 | 14422  | 14731  |
| UN58322 | Rsa1.0.00657.1 | 859 | 69858  | 1.00E-126 | 318 | 345 | 92 + | 8   | 346 | 3223   | 3556   |
| UN58323 | Rsa1.0.00017.1 | 778 | 752458 | 1.00E-131 | 290 | 306 | 94 + | 1   | 305 | 604946 | 605251 |
| UN58324 | Rsa1.0.00841.1 | 110 | 183065 | 2.00E-34  | 98  | 106 | 92 + | 1   | 106 | 6346   | 6451   |
| UN58325 | Rsa1.0.00273.1 | 598 | 326186 | 1.00E-88  | 268 | 300 | 89 + | 1   | 283 | 2506   | 2803   |
| UN58326 | Rsa1.0.01512.1 | 174 | 44234  | 4.00E-55  | 158 | 173 | 91 + | 3   | 174 | 33125  | 33297  |
| UN58327 | Rsa1.0.00013.1 | 768 | 292129 | 9.00E-66  | 167 | 180 | 92 - | 334 | 513 | 27966  | 28145  |
| UN58328 | Rsa1.0.00265.1 | 661 | 220635 | 1.00E-172 | 436 | 472 | 92 + | 1   | 458 | 159691 | 160158 |
| UN58329 | Rsa1.0.01261.1 | 189 | 49744  | 1.00E-36  | 99  | 106 | 93 + | 81  | 186 | 22860  | 22965  |
| UN58330 | Rsa1.0.00058.1 | 647 | 159921 | 1.00E-133 | 333 | 364 | 91 + | 7   | 359 | 54210  | 54573  |
| UN58331 | Rsa1.0.02901.1 | 715 | 26909  | 0         | 660 | 750 | 88 + | 1   | 715 | 19348  | 20067  |
| UN58332 | Rsa1.0.01581.1 | 148 | 42833  | 6.00E-60  | 138 | 145 | 95 - | 1   | 145 | 29046  | 29190  |
| UN58333 | Rsa1.0.01812.1 | 225 | 38956  | 2.00E-91  | 209 | 222 | 94 - | 4   | 225 | 25049  | 25270  |
| UN58334 | Rsa1.0.00166.1 | 183 | 240912 | 2.00E-44  | 106 | 111 | 95 - | 2   | 112 | 135472 | 135582 |
| UN58335 | Rsa1.0.00247.1 | 529 | 103408 | 1.00E-124 | 293 | 314 | 93 + | 3   | 309 | 64844  | 65154  |
| UN58336 | Rsa1.0.03618.1 | 120 | 21744  | 2.00E-28  | 106 | 120 | 88 + | 1   | 120 | 11053  | 11172  |
| UN58337 | Rsa1.0.02646.1 | 757 | 29123  | 1.00E-145 | 302 | 317 | 95 - | 15  | 331 | 14950  | 15257  |
| UN58338 | Rsa1.0.01507.1 | 111 | 44361  | 2.00E-12  | 43  | 45  | 95 - | 12  | 56  | 21372  | 21416  |
| UN58339 | Rsa1.0.01765.1 | 730 | 39640  | 1.00E-18  | 55  | 57  | 96 + | 561 | 617 | 31988  | 32044  |
| UN58340 | Rsa1.0.03612.1 | 767 | 21784  | 0         | 730 | 770 | 94 - | 1   | 764 | 9674   | 10439  |
| UN58341 | Rsa1.0.00136.1 | 111 | 122464 | 1.00E-13  | 51  | 55  | 92 - | 1   | 55  | 28451  | 28505  |
| UN58342 | Rsa1.0.06247.1 | 654 | 11395  | 1.00E-155 | 359 | 384 | 93 - | 18  | 394 | 7116   | 7498   |

|         |                |     |        |           |     |     |      |     |     |        |        |
|---------|----------------|-----|--------|-----------|-----|-----|------|-----|-----|--------|--------|
| UN58343 | Rsa1.0.00116.1 | 362 | 365886 | 1.00E-166 | 346 | 362 | 95 - | 1   | 362 | 83451  | 83810  |
| UN58344 | Rsa1.0.01278.1 | 605 | 49370  | 1.00E-160 | 435 | 482 | 90 - | 112 | 592 | 9756   | 10236  |
| UN58345 | Rsa1.0.02695.1 | 766 | 28605  | 0         | 666 | 691 | 96 + | 3   | 685 | 12256  | 12943  |
| UN58346 | Rsa1.0.03944.1 | 139 | 19926  | 2.00E-44  | 127 | 139 | 91 + | 1   | 139 | 10427  | 10565  |
| UN58347 | Rsa1.0.03656.1 | 872 | 21552  | 0         | 493 | 536 | 91 + | 1   | 526 | 11893  | 12421  |
| UN58348 | Rsa1.0.02939.1 | 742 | 26595  | 0         | 469 | 497 | 94 + | 3   | 490 | 16786  | 17273  |
| UN58349 | Rsa1.0.05423.1 | 730 | 13800  | 0         | 423 | 451 | 93 + | 7   | 452 | 7558   | 8000   |
| UN58350 | Rsa1.0.01934.1 | 130 | 37162  | 9.00E-37  | 110 | 119 | 92 + | 5   | 118 | 1902   | 2020   |
| UN58351 | Rsa1.0.02301.1 | 575 | 32835  | 0         | 533 | 565 | 94 - | 12  | 575 | 20505  | 21067  |
| UN58352 | Rsa1.0.01997.1 | 702 | 158416 | 0         | 677 | 713 | 94 - | 2   | 702 | 3907   | 4617   |
| UN58353 | Rsa1.0.01099.1 | 359 | 158481 | 1.00E-122 | 271 | 285 | 95 + | 1   | 283 | 14082  | 14365  |
| UN58354 | Rsa1.0.00203.1 | 761 | 109129 | 0         | 691 | 707 | 97 + | 2   | 708 | 91283  | 91989  |
| UN58355 | Rsa1.0.04428.1 | 756 | 17399  | 0         | 520 | 538 | 96 - | 219 | 756 | 7477   | 8014   |
| UN58356 | Rsa1.0.01669.1 | 362 | 41286  | 1.00E-133 | 333 | 361 | 92 + | 1   | 359 | 11528  | 11879  |
| UN58357 | Rsa1.0.00336.1 | 805 | 445051 | 1.00E-156 | 433 | 474 | 91 + | 18  | 475 | 200806 | 201275 |
| UN58358 | Rsa1.0.01355.1 | 177 | 47303  | 3.00E-62  | 160 | 173 | 92 - | 5   | 177 | 39685  | 39857  |
| UN58359 | Rsa1.0.00484.1 | 554 | 203294 | 0         | 500 | 521 | 95 + | 3   | 521 | 126952 | 127468 |
| UN58360 | Rsa1.0.00591.1 | 613 | 73789  | 1.00E-162 | 313 | 321 | 97 + | 1   | 321 | 36011  | 36331  |
| UN58361 | Rsa1.0.74365.1 | 502 | 308    | 1.00E-118 | 240 | 248 | 96 + | 1   | 248 | 61     | 308    |
| UN58362 | Rsa1.0.00327.1 | 620 | 94892  | 0         | 558 | 592 | 94 + | 15  | 606 | 68955  | 69534  |
| UN58363 | Rsa1.0.00351.1 | 163 | 413096 | 2.00E-41  | 150 | 169 | 88 + | 1   | 163 | 244523 | 244689 |
| UN58364 | Rsa1.0.04868.1 | 222 | 15670  | 8.00E-85  | 204 | 219 | 93 + | 1   | 219 | 6794   | 7012   |
| UN58365 | Rsa1.0.00047.1 | 371 | 168582 | 1.00E-123 | 336 | 370 | 90 - | 10  | 371 | 16759  | 17126  |
| UN58366 | Rsa1.0.00152.1 | 407 | 257730 | 1.00E-126 | 328 | 360 | 91 - | 6   | 363 | 210420 | 210779 |
| UN58367 | Rsa1.0.00034.1 | 654 | 260119 | 2.00E-75  | 159 | 164 | 96 + | 338 | 501 | 158357 | 158520 |
| UN58368 | Rsa1.0.00553.1 | 750 | 75983  | 8.00E-97  | 227 | 241 | 94 - | 44  | 279 | 31383  | 31623  |
| UN58369 | Rsa1.0.19592.1 | 543 | 1410   | 1.00E-156 | 336 | 355 | 94 + | 189 | 543 | 121    | 475    |
| UN58370 | Rsa1.0.00483.1 | 448 | 81102  | 1.00E-160 | 383 | 408 | 93 - | 1   | 403 | 51013  | 51417  |
| UN58371 | Rsa1.0.00092.1 | 156 | 659932 | 8.00E-50  | 142 | 156 | 91 + | 1   | 156 | 175851 | 176006 |
| UN58372 | Rsa1.0.00026.1 | 626 | 327835 | 6.00E-94  | 328 | 376 | 87 + | 55  | 407 | 53001  | 53368  |
| UN58373 | Rsa1.0.04786.1 | 731 | 15988  | 1.00E-134 | 321 | 347 | 92 + | 1   | 333 | 13450  | 13796  |
| UN58374 | Rsa1.0.14856.1 | 743 | 3010   | 1.00E-137 | 323 | 342 | 94 - | 1   | 339 | 2281   | 2619   |
| UN58375 | Rsa1.0.00457.1 | 810 | 337301 | 0         | 784 | 809 | 96 - | 1   | 809 | 176899 | 177706 |
| UN58376 | Rsa1.0.00194.1 | 594 | 110851 | 1.00E-122 | 383 | 433 | 88 + | 1   | 414 | 17464  | 17885  |
| UN58377 | Rsa1.0.01847.1 | 679 | 38346  | 0         | 512 | 544 | 94 - | 4   | 531 | 3801   | 4344   |
| UN58378 | Rsa1.0.15691.1 | 844 | 2479   | 1.00E-71  | 197 | 212 | 92 + | 2   | 209 | 1463   | 1672   |
| UN58379 | Rsa1.0.00093.1 | 361 | 214962 | 1.00E-170 | 346 | 359 | 96 + | 4   | 361 | 83930  | 84288  |
| UN58380 | Rsa1.0.00752.1 | 223 | 65756  | 1.00E-77  | 189 | 203 | 93 - | 13  | 215 | 14309  | 14511  |
| UN58381 | Rsa1.0.06124.1 | 526 | 11681  | 2.00E-87  | 200 | 212 | 94 - | 14  | 225 | 1043   | 1254   |

|         |                |     |        |           |     |     |      |     |     |        |        |
|---------|----------------|-----|--------|-----------|-----|-----|------|-----|-----|--------|--------|
| UN58382 | Rsa1.0.06041.1 | 691 | 11861  | 0         | 426 | 434 | 98 + | 28  | 458 | 9352   | 9785   |
| UN58383 | Rsa1.0.41178.1 | 592 | 545    | 3.00E-68  | 135 | 136 | 99 + | 175 | 310 | 205    | 340    |
| UN58384 | Rsa1.0.03352.1 | 565 | 23506  | 1.00E-82  | 180 | 188 | 95 + | 188 | 375 | 18148  | 18335  |
| UN58385 | Rsa1.0.01060.1 | 692 | 55368  | 0         | 419 | 432 | 96 - | 1   | 432 | 42156  | 42587  |
| UN58386 | Rsa1.0.00913.1 | 745 | 59914  | 0         | 415 | 429 | 96 - | 311 | 739 | 10822  | 11250  |
| UN58387 | Rsa1.0.00214.1 | 787 | 107508 | 0         | 414 | 437 | 94 - | 3   | 431 | 103190 | 103626 |
| UN58388 | Rsa1.0.00618.1 | 366 | 72195  | 1.00E-173 | 352 | 364 | 96 - | 2   | 365 | 19701  | 20058  |
| UN58389 | Rsa1.0.00183.1 | 314 | 113277 | 1.00E-118 | 267 | 283 | 94 - | 2   | 283 | 67155  | 67437  |
| UN58390 | Rsa1.0.01690.1 | 289 | 40939  | 1.00E-114 | 269 | 289 | 93 + | 1   | 289 | 25720  | 26008  |
| UN58391 | Rsa1.0.00707.1 | 182 | 190112 | 4.00E-77  | 173 | 182 | 95 + | 1   | 182 | 7571   | 7752   |
| UN58392 | Rsa1.0.02644.1 | 766 | 29176  | 0         | 725 | 751 | 96 - | 18  | 766 | 10163  | 10913  |
| UN58393 | Rsa1.0.00369.1 | 184 | 266462 | 2.00E-69  | 170 | 181 | 93 - | 5   | 184 | 169934 | 170114 |
| UN58394 | Rsa1.0.00252.1 | 367 | 102760 | 1.00E-118 | 333 | 369 | 90 - | 2   | 367 | 44817  | 45172  |
| UN58395 | Rsa1.0.00208.1 | 354 | 108565 | 1.00E-135 | 273 | 282 | 96 + | 33  | 314 | 7689   | 7968   |
| UN58396 | Rsa1.0.01543.1 | 662 | 43645  | 1.00E-115 | 223 | 227 | 98 + | 5   | 231 | 37960  | 38186  |
| UN58397 | Rsa1.0.02605.1 | 756 | 29637  | 0         | 620 | 669 | 92 - | 114 | 756 | 16318  | 16981  |
| UN58398 | #              | #   | #      | #         | #   | #   | #    | #   | #   | #      | #      |
| UN58399 | Rsa1.0.00804.1 | 186 | 63726  | 6.00E-11  | 92  | 108 | 85 - | 61  | 168 | 46483  | 46584  |
| UN58400 | Rsa1.0.00076.1 | 587 | 146021 | 0         | 567 | 585 | 96 - | 7   | 587 | 67195  | 67778  |
| UN58401 | Rsa1.0.03944.1 | 359 | 19926  | 9.00E-61  | 155 | 166 | 93 - | 16  | 181 | 9994   | 10157  |
| UN58402 | Rsa1.0.00575.1 | 718 | 74791  | 0         | 676 | 739 | 91 + | 1   | 716 | 62743  | 63479  |
| UN58403 | Rsa1.0.01016.1 | 186 | 181422 | 1.00E-70  | 156 | 163 | 95 - | 20  | 182 | 3640   | 3802   |
| UN58404 | Rsa1.0.04536.1 | 741 | 16947  | 1.00E-122 | 243 | 250 | 97 + | 1   | 250 | 8800   | 9049   |
| UN58405 | Rsa1.0.01632.1 | 104 | 181224 | 3.00E-36  | 95  | 101 | 94 + | 3   | 103 | 168376 | 168476 |
| UN58406 | Rsa1.0.00071.1 | 222 | 345714 | 1.00E-103 | 214 | 222 | 96 - | 1   | 222 | 4165   | 4386   |
| UN58407 | Rsa1.0.00504.1 | 718 | 79334  | 1.00E-131 | 251 | 255 | 98 + | 2   | 253 | 30118  | 30372  |
| UN58408 | Rsa1.0.02642.1 | 701 | 29181  | 0         | 678 | 702 | 96 - | 1   | 701 | 13536  | 14237  |
| UN58409 | Rsa1.0.01053.1 | 730 | 55483  | 1.00E-123 | 240 | 245 | 97 + | 374 | 618 | 41035  | 41279  |
| UN58410 | Rsa1.0.03794.1 | 628 | 20825  | 0         | 607 | 627 | 96 + | 2   | 628 | 2052   | 2675   |
| UN58411 | Rsa1.0.03183.1 | 730 | 24755  | 0         | 422 | 446 | 94 + | 1   | 446 | 15415  | 15852  |
| UN58412 | Rsa1.0.00145.1 | 671 | 261008 | 1.00E-100 | 251 | 269 | 93 + | 2   | 259 | 38596  | 38861  |
| UN58413 | Rsa1.0.00133.1 | 614 | 123768 | 1.00E-169 | 378 | 398 | 94 - | 8   | 401 | 9867   | 10259  |
| UN58414 | Rsa1.0.00278.1 | 133 | 231896 | 1.00E-32  | 113 | 127 | 88 - | 7   | 133 | 150576 | 150702 |
| UN58415 | Rsa1.0.01713.1 | 383 | 40564  | 1.00E-81  | 224 | 248 | 90 + | 1   | 236 | 30448  | 30695  |
| UN58416 | Rsa1.0.02457.1 | 700 | 31208  | 1.00E-133 | 297 | 314 | 94 - | 3   | 311 | 12120  | 12433  |
| UN58417 | Rsa1.0.00048.1 | 720 | 167185 | 1.00E-73  | 147 | 149 | 98 - | 534 | 682 | 149922 | 150070 |
| UN58418 | Rsa1.0.00359.1 | 452 | 91256  | 6.00E-84  | 210 | 224 | 93 - | 1   | 219 | 90578  | 90801  |
| UN58419 | Rsa1.0.02144.1 | 511 | 34630  | 0         | 482 | 504 | 95 - | 9   | 511 | 3032   | 3530   |
| UN58420 | Rsa1.0.00689.1 | 145 | 68305  | 1.00E-63  | 138 | 143 | 96 + | 3   | 145 | 12907  | 13049  |



|         |                |     |        |           |     |     |      |     |     |        |        |
|---------|----------------|-----|--------|-----------|-----|-----|------|-----|-----|--------|--------|
| UN58460 | Rsa1.0.00288.1 | 787 | 98659  | 1.00E-109 | 270 | 291 | 92 - | 16  | 306 | 16369  | 16655  |
| UN58461 | Rsa1.0.29038.1 | 242 | 794    | 6.00E-95  | 224 | 238 | 94 - | 9   | 242 | 170    | 407    |
| UN58462 | Rsa1.0.01146.1 | 778 | 163455 | 1.00E-103 | 203 | 207 | 98 - | 240 | 446 | 24783  | 24989  |
| UN58463 | Rsa1.0.02139.1 | 693 | 34686  | 0         | 672 | 695 | 96 + | 1   | 693 | 27692  | 28382  |
| UN58464 | Rsa1.0.00925.1 | 219 | 59481  | 6.00E-64  | 139 | 144 | 96 + | 71  | 214 | 49474  | 49617  |
| UN58465 | Rsa1.0.01561.1 | 110 | 43227  | 3.00E-39  | 91  | 94  | 96 - | 14  | 107 | 28627  | 28720  |
| UN58466 | Rsa1.0.01198.1 | 181 | 51029  | 7.00E-63  | 165 | 178 | 92 + | 4   | 181 | 32056  | 32232  |
| UN58467 | Rsa1.0.74161.1 | 702 | 309    | 1.00E-154 | 283 | 284 | 99 + | 75  | 357 | 1      | 284    |
| UN58468 | Rsa1.0.02658.1 | 197 | 28978  | 3.00E-65  | 153 | 162 | 94 + | 1   | 162 | 17922  | 18083  |
| UN58469 | Rsa1.0.03404.1 | 525 | 23177  | 1.00E-144 | 305 | 320 | 95 - | 162 | 481 | 11583  | 11902  |
| UN58470 | Rsa1.0.01232.1 | 427 | 155185 | 2.00E-96  | 212 | 223 | 95 - | 199 | 421 | 131817 | 132039 |
| UN58471 | Rsa1.0.02028.1 | 118 | 35857  | 4.00E-23  | 61  | 63  | 96 + | 1   | 63  | 4143   | 4205   |
| UN58472 | Rsa1.0.00318.1 | 585 | 96094  | 1.00E-98  | 227 | 239 | 94 - | 3   | 240 | 79852  | 80089  |
| UN58473 | Rsa1.0.01978.1 | 727 | 36546  | 0         | 703 | 715 | 98 + | 1   | 715 | 4335   | 5047   |
| UN58474 | Rsa1.0.00635.1 | 136 | 175826 | 4.00E-42  | 125 | 137 | 91 + | 3   | 136 | 14173  | 14309  |
| UN58475 | Rsa1.0.00162.1 | 471 | 239935 | 1.00E-170 | 331 | 341 | 97 - | 7   | 347 | 12315  | 12648  |
| UN58476 | Rsa1.0.04395.1 | 201 | 17570  | 3.00E-53  | 121 | 126 | 96 + | 1   | 126 | 10159  | 10284  |
| UN58477 | Rsa1.0.02991.1 | 501 | 26178  | 1.00E-109 | 288 | 317 | 90 + | 2   | 304 | 20729  | 21039  |
| UN58478 | Rsa1.0.00105.1 | 832 | 134138 | 0         | 474 | 493 | 96 - | 313 | 799 | 106820 | 107306 |
| UN58479 | Rsa1.0.01978.1 | 175 | 36546  | 6.00E-85  | 171 | 175 | 97 - | 1   | 175 | 28725  | 28899  |
| UN58480 | Rsa1.0.01196.1 | 804 | 51097  | 0         | 380 | 386 | 98 - | 419 | 804 | 6756   | 7140   |
| UN58481 | Rsa1.0.00045.1 | 303 | 328694 | 1.00E-105 | 202 | 205 | 98 - | 1   | 205 | 16514  | 16718  |
| UN58482 | Rsa1.0.03408.1 | 781 | 23154  | 5.00E-92  | 245 | 268 | 91 - | 1   | 267 | 16946  | 17213  |
| UN58483 | Rsa1.0.00657.1 | 539 | 69858  | 0         | 518 | 546 | 94 - | 1   | 537 | 1889   | 2434   |
| UN58484 | Rsa1.0.00916.1 | 139 | 59789  | 3.00E-61  | 134 | 139 | 96 - | 1   | 139 | 30464  | 30602  |
| UN58485 | Rsa1.0.01042.1 | 735 | 293264 | 1.00E-126 | 370 | 415 | 89 + | 97  | 504 | 161694 | 162095 |
| UN58486 | Rsa1.0.00409.1 | 112 | 146788 | 2.00E-28  | 97  | 108 | 89 - | 1   | 108 | 119522 | 119629 |
| UN58487 | Rsa1.0.00173.1 | 435 | 288743 | 1.00E-138 | 356 | 391 | 91 + | 14  | 388 | 213837 | 214225 |
| UN58488 | Rsa1.0.00920.1 | 453 | 601703 | 1.00E-110 | 256 | 274 | 93 + | 180 | 453 | 442210 | 442483 |
| UN58489 | Rsa1.0.19598.1 | 804 | 1409   | 0         | 609 | 662 | 91 - | 22  | 681 | 253    | 893    |
| UN58490 | Rsa1.0.00537.1 | 871 | 186980 | 0         | 831 | 859 | 96 - | 2   | 859 | 165296 | 166148 |
| UN58491 | Rsa1.0.05043.1 | 527 | 15044  | 1.00E-102 | 236 | 251 | 94 + | 1   | 249 | 13772  | 14022  |
| UN58492 | Rsa1.0.00128.1 | 465 | 228675 | 5.00E-54  | 111 | 112 | 99 + | 354 | 465 | 158832 | 158943 |
| UN58493 | Rsa1.0.00470.1 | 343 | 81968  | 4.00E-72  | 181 | 192 | 94 + | 1   | 188 | 51416  | 51606  |
| UN58494 | Rsa1.0.00369.1 | 307 | 266462 | 1.00E-101 | 240 | 258 | 93 - | 46  | 303 | 169545 | 169802 |
| UN58495 | Rsa1.0.00949.1 | 346 | 58549  | 1.00E-47  | 112 | 117 | 95 + | 185 | 301 | 9898   | 10014  |
| UN58496 | Rsa1.0.00086.1 | 669 | 439854 | 0         | 653 | 669 | 97 + | 1   | 669 | 369041 | 369708 |
| UN58497 | Rsa1.0.00610.1 | 622 | 72740  | 0         | 515 | 547 | 94 + | 3   | 549 | 44561  | 45104  |
| UN58498 | Rsa1.0.00025.1 | 700 | 277312 | 0         | 614 | 641 | 95 - | 63  | 700 | 68115  | 68750  |

|         |                |     |        |           |     |     |      |     |     |        |        |
|---------|----------------|-----|--------|-----------|-----|-----|------|-----|-----|--------|--------|
| UN58499 | Rsa1.0.00092.1 | 796 | 659932 | 0         | 741 | 776 | 95 - | 1   | 761 | 114955 | 115730 |
| UN58500 | Rsa1.0.07695.1 | 406 | 8770   | 1.00E-143 | 311 | 329 | 94 - | 11  | 339 | 3190   | 3518   |
| UN58501 | Rsa1.0.00030.1 | 741 | 250988 | 2.00E-75  | 147 | 148 | 99 + | 414 | 561 | 28259  | 28406  |
| UN58502 | Rsa1.0.04159.1 | 571 | 18795  | 0         | 423 | 441 | 95 - | 1   | 437 | 11135  | 11571  |
| UN58503 | Rsa1.0.01094.1 | 155 | 167285 | 3.00E-74  | 150 | 153 | 98 + | 1   | 153 | 17472  | 17624  |
| UN58504 | Rsa1.0.01147.1 | 656 | 52391  | 0         | 645 | 656 | 98 + | 1   | 656 | 41471  | 42126  |
| UN58505 | Rsa1.0.00369.1 | 129 | 266462 | 4.00E-36  | 115 | 127 | 90 - | 3   | 129 | 169982 | 170105 |
| UN58506 | Rsa1.0.07673.1 | 341 | 8850   | 1.00E-130 | 313 | 337 | 92 + | 5   | 341 | 8224   | 8556   |
| UN58507 | Rsa1.0.00699.1 | 803 | 184398 | 1.00E-149 | 319 | 333 | 95 + | 7   | 334 | 55752  | 56083  |
| UN58508 | Rsa1.0.00701.1 | 440 | 67691  | 0         | 422 | 439 | 96 - | 1   | 439 | 39780  | 40214  |
| UN58509 | Rsa1.0.00182.1 | 725 | 142305 | 7.00E-20  | 72  | 79  | 91 + | 339 | 417 | 83978  | 84056  |
| UN58510 | Rsa1.0.00128.1 | 331 | 228675 | 1.00E-142 | 279 | 287 | 97 + | 45  | 331 | 116359 | 116645 |
| UN58511 | Rsa1.0.16218.1 | 646 | 2240   | 1.00E-76  | 263 | 300 | 87 + | 16  | 311 | 80     | 374    |
| UN58512 | Rsa1.0.01348.1 | 239 | 47569  | 1.00E-21  | 80  | 89  | 89 - | 1   | 89  | 5151   | 5239   |
| UN58513 | Rsa1.0.00170.1 | 482 | 179538 | 7.00E-84  | 186 | 193 | 96 + | 3   | 193 | 141334 | 141525 |
| UN58514 | Rsa1.0.01179.1 | 613 | 51549  | 0         | 589 | 625 | 94 - | 1   | 613 | 17412  | 18036  |
| UN58515 | Rsa1.0.07426.1 | 247 | 9413   | 1.00E-117 | 235 | 242 | 97 + | 1   | 242 | 1224   | 1465   |
| UN58516 | Rsa1.0.00673.1 | 710 | 69325  | 6.00E-48  | 107 | 110 | 97 + | 601 | 710 | 54368  | 54477  |
| UN58517 | Rsa1.0.06590.1 | 795 | 10706  | 0         | 412 | 429 | 96 + | 344 | 769 | 2006   | 2428   |
| UN58518 | Rsa1.0.00907.1 | 171 | 60062  | 1.00E-82  | 167 | 171 | 97 + | 1   | 171 | 48869  | 49039  |
| UN58519 | Rsa1.0.02949.1 | 663 | 26506  | 1.00E-150 | 302 | 312 | 96 - | 318 | 626 | 4000   | 4311   |
| UN58520 | Rsa1.0.00482.1 | 476 | 81162  | 3.00E-98  | 234 | 249 | 93 + | 1   | 248 | 60475  | 60721  |
| UN58521 | Rsa1.0.00639.1 | 327 | 165873 | 9.00E-61  | 146 | 154 | 94 + | 1   | 152 | 142914 | 143067 |
| UN58522 | Rsa1.0.01513.1 | 130 | 44234  | 7.00E-50  | 127 | 134 | 94 + | 1   | 130 | 36921  | 37054  |
| UN58523 | Rsa1.0.03799.1 | 117 | 20775  | 1.00E-29  | 78  | 82  | 95 + | 1   | 82  | 17416  | 17497  |
| UN58524 | Rsa1.0.00162.1 | 786 | 239935 | 1.00E-126 | 259 | 265 | 97 - | 1   | 263 | 25199  | 25461  |
| UN58525 | Rsa1.0.03700.1 | 211 | 21299  | 4.00E-34  | 83  | 86  | 96 - | 1   | 86  | 954    | 1039   |
| UN58526 | Rsa1.0.01168.1 | 482 | 153765 | 1.00E-134 | 303 | 322 | 94 + | 158 | 478 | 44255  | 44576  |
| UN58527 | Rsa1.0.59476.1 | 750 | 385    | 1.00E-150 | 290 | 297 | 97 + | 454 | 750 | 1      | 297    |
| UN58528 | Rsa1.0.01569.1 | 694 | 43029  | 7.00E-88  | 270 | 303 | 89 - | 3   | 292 | 38883  | 39184  |
| UN58529 | Rsa1.0.01685.1 | 729 | 175033 | 1.00E-178 | 370 | 388 | 95 - | 353 | 729 | 7645   | 8032   |
| UN58530 | Rsa1.0.00974.1 | 382 | 57893  | 9.00E-86  | 170 | 173 | 98 + | 55  | 227 | 4877   | 5049   |
| UN58531 | Rsa1.0.00737.1 | 706 | 66432  | 1.00E-153 | 341 | 358 | 95 + | 1   | 347 | 51264  | 51618  |
| UN58532 | Rsa1.0.02652.1 | 758 | 29038  | 0         | 453 | 468 | 96 - | 292 | 758 | 3032   | 3499   |
| UN58533 | Rsa1.0.04139.1 | 123 | 18883  | 5.00E-38  | 107 | 116 | 92 + | 1   | 116 | 13367  | 13482  |
| UN58534 | Rsa1.0.04333.1 | 734 | 17865  | 1.00E-177 | 401 | 428 | 93 + | 5   | 419 | 10700  | 11121  |
| UN58535 | Rsa1.0.04332.1 | 313 | 17869  | 1.00E-123 | 291 | 311 | 93 + | 5   | 313 | 16113  | 16423  |
| UN58536 | Rsa1.0.03294.1 | 782 | 23971  | 3.00E-99  | 208 | 216 | 96 - | 292 | 507 | 4277   | 4492   |
| UN58537 | Rsa1.0.15967.1 | 265 | 2337   | 8.00E-33  | 129 | 145 | 88 - | 5   | 147 | 538    | 678    |

|         |                |     |        |           |     |     |      |     |     |        |        |
|---------|----------------|-----|--------|-----------|-----|-----|------|-----|-----|--------|--------|
| UN58538 | Rsa1.0.00130.1 | 118 | 125737 | 2.00E-19  | 76  | 85  | 89 - | 3   | 87  | 77692  | 77776  |
| UN58539 | Rsa1.0.01844.1 | 577 | 38421  | 1.00E-174 | 491 | 549 | 89 - | 38  | 577 | 10248  | 10793  |
| UN58540 | Rsa1.0.00381.1 | 488 | 89718  | 1.00E-60  | 185 | 207 | 89 + | 282 | 488 | 75168  | 75374  |
| UN58541 | Rsa1.0.14336.1 | 837 | 3503   | 0         | 798 | 803 | 99 + | 3   | 805 | 930    | 1732   |
| UN58542 | Rsa1.0.00051.1 | 266 | 258225 | 2.00E-92  | 178 | 180 | 98 + | 85  | 264 | 22179  | 22358  |
| UN58543 | Rsa1.0.01134.1 | 132 | 52829  | 1.00E-26  | 85  | 93  | 91 + | 38  | 130 | 41979  | 42071  |
| UN58544 | Rsa1.0.02210.1 | 226 | 33857  | 4.00E-96  | 219 | 231 | 94 - | 1   | 226 | 29331  | 29561  |
| UN58545 | Rsa1.0.00092.1 | 848 | 659932 | 3.00E-93  | 190 | 194 | 97 - | 17  | 210 | 443401 | 443593 |
| UN58546 | Rsa1.0.16521.1 | 178 | 2125   | 1.00E-79  | 171 | 178 | 96 + | 1   | 178 | 7      | 184    |
| UN58547 | Rsa1.0.02101.1 | 482 | 35017  | 0         | 457 | 482 | 94 - | 1   | 482 | 14502  | 14974  |
| UN58548 | Rsa1.0.00666.1 | 578 | 69505  | 0         | 547 | 575 | 95 - | 8   | 576 | 9321   | 9890   |
| UN58549 | Rsa1.0.00154.1 | 275 | 189461 | 3.00E-69  | 254 | 285 | 89 + | 1   | 275 | 79485  | 79767  |
| UN58550 | Rsa1.0.03631.1 | 768 | 21647  | 0         | 577 | 605 | 95 - | 69  | 673 | 9052   | 9638   |
| UN58551 | Rsa1.0.00050.1 | 241 | 237174 | 3.00E-72  | 195 | 214 | 91 - | 28  | 241 | 7862   | 8075   |
| UN58552 | Rsa1.0.04415.1 | 242 | 147889 | 2.00E-45  | 105 | 109 | 96 + | 32  | 140 | 141474 | 141582 |
| UN58553 | Rsa1.0.01674.1 | 540 | 168300 | 1.00E-156 | 298 | 304 | 98 + | 5   | 308 | 7681   | 7984   |
| UN58554 | Rsa1.0.00123.1 | 230 | 325650 | 1.00E-119 | 225 | 228 | 98 + | 3   | 230 | 34019  | 34246  |
| UN58555 | Rsa1.0.00017.1 | 642 | 752458 | 1.00E-103 | 240 | 254 | 94 + | 4   | 256 | 290309 | 290560 |
| UN58556 | Rsa1.0.01201.1 | 745 | 50856  | 0         | 681 | 705 | 96 - | 1   | 702 | 6024   | 6728   |
| UN58557 | Rsa1.0.01283.1 | 328 | 49257  | 9.00E-98  | 222 | 233 | 95 - | 1   | 233 | 16633  | 16863  |
| UN58558 | Rsa1.0.00502.1 | 750 | 204180 | 0         | 723 | 752 | 96 + | 4   | 750 | 32130  | 32874  |
| UN58559 | Rsa1.0.03101.1 | 494 | 25410  | 0         | 374 | 387 | 96 - | 56  | 442 | 7075   | 7461   |
| UN58560 | Rsa1.0.02099.1 | 726 | 35030  | 0         | 677 | 710 | 95 + | 1   | 710 | 24861  | 25570  |
| UN58561 | Rsa1.0.00576.1 | 810 | 178949 | 0         | 754 | 826 | 91 - | 9   | 810 | 25869  | 26671  |
| UN58562 | Rsa1.0.08994.1 | 796 | 6724   | 1.00E-160 | 322 | 332 | 96 - | 64  | 392 | 3405   | 3735   |
| UN58563 | Rsa1.0.00813.1 | 728 | 63202  | 0         | 465 | 486 | 95 - | 2   | 485 | 51191  | 51665  |
| UN58564 | Rsa1.0.00656.1 | 159 | 69968  | 5.00E-73  | 154 | 159 | 96 - | 1   | 159 | 39279  | 39437  |
| UN58565 | Rsa1.0.00065.1 | 513 | 454616 | 0         | 442 | 462 | 95 + | 17  | 465 | 125181 | 125642 |
| UN58566 | Rsa1.0.01135.1 | 611 | 52799  | 0         | 530 | 550 | 96 + | 11  | 558 | 44886  | 45435  |
| UN58567 | Rsa1.0.00789.1 | 511 | 64233  | 1.00E-110 | 286 | 309 | 92 - | 1   | 305 | 24999  | 25306  |
| UN58568 | Rsa1.0.01110.1 | 361 | 195852 | 1.00E-114 | 265 | 281 | 94 + | 3   | 278 | 173575 | 173854 |
| UN58569 | Rsa1.0.01200.1 | 229 | 50895  | 1.00E-105 | 220 | 229 | 96 + | 1   | 229 | 30219  | 30447  |
| UN58570 | Rsa1.0.00552.1 | 154 | 206757 | 7.00E-38  | 95  | 100 | 95 + | 14  | 113 | 73003  | 73102  |
| UN58571 | Rsa1.0.00621.1 | 418 | 71840  | 2.00E-68  | 253 | 289 | 87 - | 5   | 281 | 40569  | 40857  |
| UN58572 | Rsa1.0.02688.1 | 112 | 28644  | 3.00E-39  | 104 | 110 | 94 + | 1   | 109 | 9675   | 9784   |
| UN58573 | Rsa1.0.00028.1 | 705 | 293984 | 0         | 672 | 726 | 92 + | 3   | 705 | 65856  | 66579  |
| UN58574 | Rsa1.0.02400.1 | 156 | 31750  | 3.00E-74  | 150 | 153 | 98 + | 1   | 153 | 17369  | 17521  |
| UN58575 | Rsa1.0.00963.1 | 549 | 58176  | 2.00E-44  | 138 | 151 | 91 + | 226 | 375 | 30596  | 30744  |
| UN58576 | Rsa1.0.04651.1 | 262 | 16516  | 5.00E-40  | 90  | 92  | 97 + | 144 | 235 | 9618   | 9709   |



|         |                |     |        |           |     |     |      |     |     |        |        |
|---------|----------------|-----|--------|-----------|-----|-----|------|-----|-----|--------|--------|
| UN58577 | Rsa1.0.02655.1 | 490 | 29027  | 1.00E-148 | 300 | 310 | 96 - | 9   | 317 | 16785  | 17094  |
| UN58578 | Rsa1.0.00620.1 | 208 | 71985  | 1.00E-92  | 199 | 208 | 95 - | 1   | 208 | 8551   | 8758   |
| UN58579 | Rsa1.0.00077.1 | 825 | 145005 | 0         | 356 | 366 | 97 + | 1   | 365 | 44613  | 44978  |
| UN58580 | Rsa1.0.04808.1 | 792 | 15893  | 0         | 753 | 811 | 92 + | 3   | 792 | 11477  | 12286  |
| UN58581 | Rsa1.0.00017.1 | 492 | 752458 | 2.00E-62  | 188 | 209 | 89 - | 44  | 238 | 30157  | 30362  |
| UN58582 | Rsa1.0.04310.1 | 683 | 17994  | 3.00E-99  | 202 | 208 | 97 + | 263 | 470 | 957    | 1164   |
| UN58583 | Rsa1.0.00374.1 | 680 | 165738 | 0         | 456 | 470 | 97 + | 11  | 480 | 131823 | 132291 |
| UN58584 | Rsa1.0.00238.1 | 101 | 193193 | 7.00E-43  | 97  | 100 | 97 - | 1   | 100 | 190372 | 190471 |
| UN58585 | Rsa1.0.05383.1 | 257 | 13962  | 3.00E-38  | 108 | 117 | 92 + | 40  | 156 | 5947   | 6063   |
| UN58586 | Rsa1.0.07818.1 | 150 | 8477   | 9.00E-56  | 128 | 134 | 95 - | 17  | 150 | 610    | 743    |
| UN58587 | Rsa1.0.04612.1 | 797 | 16647  | 1.00E-145 | 313 | 326 | 96 - | 1   | 322 | 15528  | 15850  |
| UN58588 | Rsa1.0.00477.1 | 626 | 81556  | 0         | 418 | 443 | 94 + | 9   | 444 | 23852  | 24283  |
| UN58589 | Rsa1.0.01857.1 | 727 | 38103  | 1.00E-110 | 206 | 207 | 99 + | 518 | 724 | 9697   | 9903   |
| UN58590 | Rsa1.0.01573.1 | 775 | 42964  | 0         | 401 | 418 | 95 + | 4   | 411 | 15021  | 15436  |
| UN58591 | Rsa1.0.02210.1 | 678 | 33857  | 0         | 473 | 476 | 99 - | 203 | 678 | 5881   | 6356   |
| UN58592 | Rsa1.0.14913.1 | 316 | 2969   | 1.00E-136 | 301 | 318 | 94 - | 1   | 313 | 649    | 966    |
| UN58593 | Rsa1.0.02826.1 | 550 | 27560  | 0         | 518 | 573 | 90 - | 3   | 548 | 19982  | 20551  |
| UN58594 | Rsa1.0.02097.1 | 385 | 35036  | 3.00E-82  | 239 | 263 | 90 - | 1   | 261 | 19172  | 19433  |
| UN58595 | Rsa1.0.04282.1 | 870 | 18100  | 1.00E-111 | 207 | 208 | 99 - | 491 | 698 | 8337   | 8544   |
| UN58596 | #              | #   | #      | #         | #   | #   | #    | #   | #   | #      | #      |
| UN58597 | Rsa1.0.00092.1 | 875 | 659932 | 0         | 782 | 818 | 95 + | 1   | 812 | 125890 | 126699 |
| UN58598 | Rsa1.0.00423.1 | 763 | 86138  | 0         | 609 | 636 | 95 + | 1   | 633 | 6077   | 6708   |
| UN58599 | Rsa1.0.01328.1 | 610 | 48021  | 1.00E-88  | 200 | 210 | 95 - | 1   | 210 | 17797  | 18005  |
| UN58600 | Rsa1.0.00822.1 | 675 | 62891  | 1.00E-158 | 295 | 299 | 98 - | 348 | 646 | 46963  | 47261  |
| UN58601 | Rsa1.0.00119.1 | 746 | 467509 | 1.00E-139 | 288 | 299 | 96 - | 1   | 299 | 390249 | 390546 |
| UN58602 | Rsa1.0.00505.1 | 718 | 79323  | 0         | 681 | 718 | 94 - | 1   | 718 | 11072  | 11777  |
| UN58603 | Rsa1.0.01553.1 | 158 | 43379  | 2.00E-41  | 101 | 106 | 95 - | 53  | 158 | 26255  | 26360  |
| UN58604 | Rsa1.0.00253.1 | 191 | 231292 | 5.00E-70  | 173 | 186 | 93 + | 1   | 186 | 204739 | 204924 |
| UN58605 | Rsa1.0.03471.1 | 483 | 22678  | 0         | 465 | 485 | 95 - | 1   | 483 | 1116   | 1599   |
| UN58606 | Rsa1.0.01515.1 | 733 | 170864 | 0         | 439 | 463 | 94 + | 271 | 733 | 157969 | 158431 |
| UN58607 | Rsa1.0.00087.1 | 194 | 761073 | 1.00E-61  | 176 | 194 | 90 - | 1   | 194 | 433318 | 433508 |
| UN58608 | Rsa1.0.01252.1 | 369 | 49847  | 1.00E-102 | 235 | 248 | 94 + | 4   | 248 | 35552  | 35799  |
| UN58609 | Rsa1.0.00472.1 | 773 | 398134 | 0         | 587 | 611 | 96 + | 22  | 625 | 178757 | 179360 |
| UN58610 | Rsa1.0.00325.1 | 613 | 95371  | 1.00E-114 | 333 | 378 | 88 - | 1   | 361 | 80478  | 80841  |
| UN58611 | Rsa1.0.01405.1 | 366 | 46445  | 1.00E-139 | 338 | 366 | 92 + | 1   | 366 | 12858  | 13217  |
| UN58612 | Rsa1.0.00556.1 | 316 | 207212 | 1.00E-101 | 210 | 218 | 96 + | 1   | 218 | 137557 | 137774 |
| UN58613 | Rsa1.0.00198.1 | 498 | 222963 | 0         | 456 | 489 | 93 - | 10  | 498 | 138606 | 139089 |
| UN58614 | Rsa1.0.03043.1 | 716 | 130531 | 1.00E-143 | 344 | 366 | 93 + | 2   | 364 | 128240 | 128603 |
| UN58615 | Rsa1.0.00112.1 | 138 | 132199 | 5.00E-54  | 128 | 135 | 94 - | 1   | 135 | 55783  | 55917  |

|         |                |     |        |           |     |     |      |     |     |        |        |
|---------|----------------|-----|--------|-----------|-----|-----|------|-----|-----|--------|--------|
| UN58616 | Rsa1.0.01768.1 | 407 | 138463 | 2.00E-56  | 127 | 132 | 96 - | 17  | 148 | 110165 | 110296 |
| UN58617 | Rsa1.0.04200.1 | 631 | 18490  | 1.00E-98  | 233 | 249 | 93 + | 386 | 631 | 12934  | 13182  |
| UN58618 | Rsa1.0.00111.1 | 241 | 390088 | 3.00E-47  | 211 | 243 | 86 - | 3   | 238 | 334659 | 334897 |
| UN58619 | Rsa1.0.00178.1 | 239 | 114861 | 9.00E-88  | 182 | 188 | 96 + | 5   | 192 | 98555  | 98742  |
| UN58620 | Rsa1.0.04124.1 | 588 | 18945  | 6.00E-94  | 184 | 187 | 98 + | 363 | 549 | 6999   | 7185   |
| UN58621 | Rsa1.0.00057.1 | 547 | 160473 | 0         | 499 | 542 | 92 - | 1   | 536 | 39501  | 40042  |
| UN58622 | Rsa1.0.02735.1 | 391 | 28344  | 2.00E-52  | 114 | 117 | 97 - | 143 | 259 | 27551  | 27667  |
| UN58623 | Rsa1.0.00805.1 | 480 | 63724  | 1.00E-161 | 334 | 348 | 95 - | 1   | 348 | 5509   | 5851   |
| UN58624 | Rsa1.0.02207.1 | 489 | 33914  | 0         | 469 | 493 | 95 + | 5   | 486 | 33321  | 33811  |
| UN58625 | Rsa1.0.00159.1 | 576 | 431686 | 0         | 557 | 598 | 93 + | 1   | 576 | 270398 | 270992 |
| UN58626 | Rsa1.0.00301.1 | 734 | 365315 | 0         | 706 | 733 | 96 - | 4   | 734 | 48215  | 48940  |
| UN58627 | Rsa1.0.07808.1 | 729 | 8504   | 0         | 499 | 517 | 96 + | 22  | 537 | 212    | 727    |
| UN58628 | Rsa1.0.00632.1 | 133 | 183777 | 2.00E-41  | 119 | 130 | 91 + | 1   | 130 | 149183 | 149312 |
| UN58629 | Rsa1.0.00045.1 | 521 | 328694 | 1.00E-173 | 381 | 405 | 94 - | 9   | 404 | 314632 | 315036 |
| UN58630 | Rsa1.0.00222.1 | 745 | 172263 | 4.00E-86  | 203 | 213 | 95 + | 15  | 223 | 57631  | 57843  |
| UN58631 | Rsa1.0.00915.1 | 510 | 194446 | 3.00E-92  | 304 | 346 | 87 - | 178 | 510 | 18149  | 18493  |
| UN58632 | Rsa1.0.17174.1 | 734 | 1901   | 1.00E-126 | 257 | 265 | 96 + | 10  | 274 | 782    | 1045   |
| UN58633 | Rsa1.0.00111.1 | 806 | 390088 | 0         | 757 | 789 | 95 - | 1   | 788 | 178097 | 178884 |
| UN58634 | Rsa1.0.00017.1 | 101 | 752458 | 5.00E-16  | 46  | 47  | 97 + | 11  | 57  | 141944 | 141990 |
| UN58635 | Rsa1.0.63231.1 | 428 | 363    | 3.00E-70  | 150 | 155 | 96 - | 23  | 177 | 89     | 243    |
| UN58636 | Rsa1.0.00041.1 | 542 | 186197 | 1.00E-97  | 205 | 213 | 96 + | 265 | 477 | 133364 | 133576 |
| UN58637 | Rsa1.0.01537.1 | 765 | 187285 | 1.00E-80  | 274 | 305 | 89 + | 1   | 301 | 9543   | 9829   |
| UN58638 | Rsa1.0.01659.1 | 625 | 164577 | 0         | 589 | 626 | 94 - | 6   | 625 | 179    | 797    |
| UN58639 | Rsa1.0.00682.1 | 101 | 68680  | 3.00E-17  | 89  | 101 | 88 - | 1   | 101 | 3280   | 3378   |
| UN58640 | Rsa1.0.00018.1 | 187 | 410899 | 5.00E-33  | 158 | 185 | 85 - | 5   | 184 | 262699 | 262883 |
| UN58641 | Rsa1.0.00612.1 | 712 | 72376  | 1.00E-151 | 290 | 295 | 98 + | 410 | 702 | 62988  | 63282  |
| UN58642 | Rsa1.0.00224.1 | 679 | 327530 | 3.00E-65  | 169 | 184 | 91 + | 38  | 221 | 204806 | 204981 |
| UN58643 | Rsa1.0.00128.1 | 682 | 228675 | 1.00E-106 | 213 | 219 | 97 + | 237 | 455 | 118114 | 118332 |
| UN58644 | Rsa1.0.01272.1 | 726 | 49553  | 0         | 478 | 523 | 91 - | 23  | 527 | 18808  | 19319  |
| UN58645 | Rsa1.0.06258.1 | 154 | 11371  | 1.00E-48  | 141 | 154 | 91 - | 3   | 154 | 4334   | 4483   |
| UN58646 | Rsa1.0.03853.1 | 666 | 20447  | 1.00E-135 | 272 | 281 | 96 - | 84  | 364 | 14042  | 14322  |
| UN58647 | Rsa1.0.01131.1 | 610 | 52928  | 2.00E-23  | 116 | 133 | 87 - | 428 | 558 | 804    | 936    |
| UN58648 | Rsa1.0.00991.1 | 474 | 143101 | 0         | 451 | 481 | 93 - | 1   | 474 | 134501 | 134976 |
| UN58649 | #              | #   | #      | #         | #   | #   | #    | #   | #   | #      | #      |
| UN58650 | Rsa1.0.01183.1 | 810 | 51465  | 1.00E-113 | 232 | 239 | 97 + | 2   | 239 | 42662  | 42900  |
| UN58651 | Rsa1.0.00937.1 | 567 | 59061  | 0         | 541 | 568 | 95 - | 1   | 566 | 22804  | 23369  |
| UN58652 | Rsa1.0.01586.1 | 748 | 42804  | 0         | 688 | 743 | 92 + | 6   | 747 | 36665  | 37401  |
| UN58653 | Rsa1.0.01611.1 | 723 | 42269  | 0         | 365 | 368 | 99 + | 3   | 369 | 38051  | 38418  |
| UN58654 | Rsa1.0.00190.1 | 804 | 318240 | 1.00E-142 | 386 | 429 | 89 + | 1   | 427 | 196708 | 197113 |

|         |                |     |        |           |     |     |      |     |     |        |        |
|---------|----------------|-----|--------|-----------|-----|-----|------|-----|-----|--------|--------|
| UN58655 | Rsa1.0_01375.1 | 542 | 47038  | 6.00E-94  | 199 | 207 | 96 - | 1   | 207 | 38063  | 38269  |
| UN58656 | Rsa1.0_00344.1 | 107 | 191774 | 2.00E-37  | 100 | 107 | 93 + | 1   | 107 | 156610 | 156716 |
| UN58657 | Rsa1.0_11160.1 | 324 | 5600   | 1.00E-100 | 236 | 251 | 94 - | 1   | 249 | 1870   | 2118   |
| UN58658 | Rsa1.0_03781.1 | 349 | 20891  | 1.00E-131 | 304 | 323 | 94 + | 13  | 331 | 5241   | 5562   |
| UN58659 | Rsa1.0_00017.1 | 732 | 752458 | 0         | 701 | 729 | 96 - | 4   | 732 | 361020 | 361736 |
| UN58660 | Rsa1.0_00017.1 | 777 | 752458 | 0         | 447 | 461 | 96 - | 313 | 773 | 518035 | 518495 |
| UN58661 | Rsa1.0_00703.1 | 718 | 67597  | 0         | 446 | 491 | 90 - | 1   | 483 | 26906  | 27374  |
| UN58662 | Rsa1.0_00189.1 | 582 | 111830 | 0         | 549 | 597 | 91 - | 1   | 579 | 62540  | 63134  |
| UN58663 | Rsa1.0_00101.1 | 689 | 267193 | 1.00E-168 | 418 | 451 | 92 - | 1   | 444 | 182115 | 182556 |
| UN58664 | Rsa1.0_01005.1 | 755 | 56967  | 0         | 331 | 333 | 99 + | 312 | 644 | 8492   | 8824   |
| UN58665 | Rsa1.0_00017.1 | 721 | 752458 | 1.00E-123 | 295 | 316 | 93 - | 27  | 337 | 160917 | 161230 |
| UN58666 | Rsa1.0_00858.1 | 182 | 61892  | 2.00E-48  | 116 | 122 | 95 - | 1   | 122 | 32973  | 33094  |
| UN58667 | Rsa1.0_00003.1 | 590 | 340054 | 1.00E-127 | 376 | 421 | 89 + | 1   | 416 | 276991 | 277397 |
| UN58668 | Rsa1.0_00203.1 | 113 | 109129 | 2.00E-18  | 62  | 67  | 92 - | 43  | 109 | 22935  | 23001  |
| UN58669 | Rsa1.0_00002.1 | 401 | 601661 | 1.00E-125 | 350 | 387 | 90 - | 15  | 401 | 558292 | 558674 |
| UN58670 | Rsa1.0_04192.1 | 585 | 18572  | 1.00E-156 | 343 | 364 | 94 + | 155 | 518 | 12500  | 12863  |
| UN58671 | Rsa1.0_00777.1 | 128 | 191865 | 5.00E-57  | 124 | 128 | 96 + | 1   | 128 | 142789 | 142916 |
| UN58672 | Rsa1.0_00490.1 | 762 | 186713 | 0         | 498 | 509 | 97 + | 1   | 508 | 52339  | 52847  |
| UN58673 | Rsa1.0_00435.1 | 745 | 317579 | 3.00E-96  | 241 | 263 | 91 + | 1   | 259 | 67389  | 67641  |
| UN58674 | Rsa1.0_00026.1 | 693 | 327835 | 0         | 524 | 561 | 93 + | 127 | 685 | 300610 | 301167 |
| UN58675 | Rsa1.0_00020.1 | 640 | 283099 | 0         | 618 | 647 | 95 + | 1   | 640 | 19842  | 20484  |
| UN58676 | Rsa1.0_00306.1 | 304 | 146760 | 1.00E-44  | 119 | 128 | 92 + | 85  | 212 | 89633  | 89760  |
| UN58677 | Rsa1.0_00239.1 | 269 | 104332 | 2.00E-86  | 195 | 206 | 94 + | 1   | 206 | 97378  | 97583  |
| UN58678 | Rsa1.0_00100.1 | 682 | 249232 | 0         | 388 | 399 | 97 + | 1   | 399 | 14029  | 14423  |
| UN58679 | Rsa1.0_00037.1 | 691 | 307838 | 1.00E-154 | 309 | 319 | 96 - | 324 | 642 | 261462 | 261777 |
| UN58680 | Rsa1.0_03019.1 | 364 | 25987  | 5.00E-84  | 195 | 205 | 95 + | 4   | 208 | 17431  | 17632  |
| UN58681 | Rsa1.0_00344.1 | 773 | 191774 | 0         | 458 | 483 | 94 - | 19  | 498 | 108987 | 109465 |
| UN58682 | Rsa1.0_00208.1 | 674 | 108565 | 0         | 407 | 429 | 94 + | 9   | 434 | 59720  | 60138  |
| UN58683 | Rsa1.0_06258.1 | 154 | 11371  | 6.00E-66  | 145 | 151 | 96 - | 1   | 151 | 5781   | 5931   |
| UN58684 | Rsa1.0_00804.1 | 332 | 63726  | 1.00E-75  | 277 | 315 | 87 + | 1   | 310 | 26928  | 27226  |
| UN58685 | Rsa1.0_00088.1 | 325 | 141341 | 2.00E-55  | 270 | 316 | 85 - | 3   | 318 | 18961  | 19253  |
| UN58686 | Rsa1.0_00013.1 | 782 | 292129 | 1.00E-138 | 320 | 341 | 93 + | 3   | 332 | 74112  | 74450  |
| UN58687 | Rsa1.0_00324.1 | 373 | 218805 | 1.00E-161 | 345 | 364 | 94 + | 10  | 373 | 3853   | 4207   |
| UN58688 | Rsa1.0_01704.1 | 788 | 40711  | 1.00E-95  | 222 | 236 | 94 + | 170 | 402 | 4393   | 4628   |
| UN58689 | Rsa1.0_00500.1 | 752 | 272308 | 4.00E-71  | 149 | 153 | 97 + | 330 | 482 | 30604  | 30756  |
| UN58690 | Rsa1.0_00069.1 | 792 | 403561 | 1.00E-142 | 271 | 276 | 98 - | 139 | 414 | 179274 | 179549 |
| UN58691 | Rsa1.0_02969.1 | 636 | 26390  | 4.00E-86  | 243 | 261 | 93 + | 389 | 636 | 17574  | 17834  |
| UN58692 | Rsa1.0_01844.1 | 785 | 38421  | 6.00E-67  | 145 | 150 | 96 - | 351 | 500 | 5996   | 6145   |
| UN58693 | Rsa1.0_31685.1 | 677 | 721    | 1.00E-103 | 193 | 194 | 99 - | 195 | 388 | 515    | 708    |

|         |                |     |        |           |     |     |       |     |     |        |        |
|---------|----------------|-----|--------|-----------|-----|-----|-------|-----|-----|--------|--------|
| UN58694 | Rsa1.0.00827.1 | 676 | 62790  | 0         | 420 | 424 | 99 +  | 253 | 676 | 31023  | 31446  |
| UN58695 | Rsa1.0.00964.1 | 672 | 316648 | 4.00E-80  | 231 | 256 | 90 +  | 408 | 660 | 261452 | 261694 |
| UN58696 | Rsa1.0.05217.1 | 655 | 142938 | 1.00E-169 | 368 | 381 | 96 -  | 279 | 653 | 129744 | 130122 |
| UN58697 | Rsa1.0.14734.1 | 759 | 3116   | 0         | 488 | 504 | 96 -  | 57  | 558 | 139    | 642    |
| UN58698 | Rsa1.0.01828.1 | 488 | 38681  | 0         | 478 | 488 | 97 +  | 1   | 483 | 35701  | 36188  |
| UN58699 | Rsa1.0.01060.1 | 756 | 55368  | 1.00E-138 | 313 | 335 | 93 +  | 199 | 530 | 21378  | 21703  |
| UN58700 | Rsa1.0.01649.1 | 631 | 41624  | 0         | 389 | 392 | 99 +  | 241 | 631 | 36122  | 36513  |
| UN58701 | Rsa1.0.01102.1 | 487 | 53987  | 4.00E-85  | 256 | 284 | 90 +  | 3   | 283 | 7967   | 8250   |
| UN58702 | Rsa1.0.00806.1 | 151 | 63674  | 3.00E-52  | 132 | 136 | 97 +  | 1   | 132 | 2474   | 2609   |
| UN58703 | Rsa1.0.00376.1 | 558 | 90101  | 5.00E-76  | 145 | 145 | 100 + | 140 | 284 | 21069  | 21213  |
| UN58704 | Rsa1.0.05611.1 | 818 | 13193  | 0         | 656 | 697 | 94 +  | 95  | 778 | 1      | 694    |
| UN58705 | Rsa1.0.00224.1 | 793 | 327530 | 2.00E-63  | 133 | 136 | 97 -  | 453 | 588 | 205575 | 205710 |
| UN58706 | Rsa1.0.01955.1 | 781 | 36850  | 8.00E-60  | 203 | 229 | 88 +  | 3   | 230 | 12725  | 12946  |
| UN58707 | Rsa1.0.03271.1 | 798 | 24187  | 1.00E-165 | 309 | 314 | 98 +  | 15  | 328 | 14673  | 14986  |
| UN58708 | Rsa1.0.12606.1 | 640 | 5176   | 0         | 356 | 357 | 99 +  | 3   | 359 | 475    | 831    |
| UN58709 | Rsa1.0.00860.1 | 776 | 61789  | 1.00E-156 | 320 | 331 | 96 -  | 381 | 708 | 13442  | 13772  |
| UN58710 | Rsa1.0.02728.1 | 773 | 28400  | 1.00E-114 | 242 | 252 | 96 +  | 525 | 769 | 26853  | 27104  |
| UN58711 | Rsa1.0.00961.1 | 665 | 58185  | 0         | 643 | 663 | 96 +  | 3   | 665 | 16681  | 17337  |
| UN58712 | Rsa1.0.09200.1 | 801 | 6562   | 1.00E-144 | 310 | 322 | 96 -  | 431 | 748 | 5993   | 6313   |
| UN58713 | Rsa1.0.00038.1 | 326 | 314568 | 1.00E-155 | 318 | 326 | 97 +  | 1   | 326 | 283909 | 284230 |
| UN58714 | Rsa1.0.02179.1 | 780 | 34188  | 0         | 618 | 635 | 97 -  | 2   | 636 | 24265  | 24899  |
| UN58715 | Rsa1.0.02374.1 | 321 | 32043  | 7.00E-43  | 98  | 101 | 97 -  | 221 | 321 | 26877  | 26977  |
| UN58716 | Rsa1.0.00962.1 | 691 | 184909 | 1.00E-171 | 315 | 317 | 99 +  | 376 | 691 | 13117  | 13433  |
| UN58717 | Rsa1.0.06681.1 | 718 | 135746 | 0         | 645 | 658 | 98 -  | 61  | 718 | 2353   | 3010   |
| UN58718 | Rsa1.0.00973.1 | 715 | 57913  | 1.00E-116 | 263 | 279 | 94 +  | 235 | 512 | 5428   | 5700   |
| UN58719 | Rsa1.0.00214.1 | 720 | 107508 | 1.00E-111 | 237 | 246 | 96 -  | 11  | 255 | 32701  | 32943  |
| UN58720 | Rsa1.0.06819.1 | 548 | 10302  | 0         | 530 | 549 | 96 +  | 1   | 548 | 1601   | 2149   |
| UN58721 | Rsa1.0.08471.1 | 664 | 7302   | 0         | 439 | 446 | 98 +  | 121 | 563 | 6330   | 6775   |
| UN58722 | Rsa1.0.00111.1 | 738 | 390088 | 0         | 727 | 735 | 98 -  | 2   | 733 | 321817 | 322551 |
| UN58723 | Rsa1.0.00262.1 | 632 | 101906 | 4.00E-95  | 189 | 193 | 97 +  | 4   | 196 | 46471  | 46663  |
| UN58724 | Rsa1.0.01196.1 | 714 | 51097  | 1.00E-117 | 226 | 230 | 98 +  | 365 | 594 | 25278  | 25507  |
| UN58725 | Rsa1.0.16475.1 | 599 | 2143   | 2.00E-90  | 184 | 189 | 97 +  | 410 | 598 | 689    | 877    |
| UN58726 | Rsa1.0.00370.1 | 735 | 90472  | 0         | 598 | 625 | 95 -  | 112 | 735 | 41175  | 41794  |
| UN58727 | Rsa1.0.13713.1 | 775 | 4437   | 0         | 723 | 766 | 94 -  | 3   | 768 | 3488   | 4244   |
| UN58728 | Rsa1.0.03552.1 | 792 | 22151  | 7.00E-82  | 167 | 171 | 97 +  | 453 | 623 | 14663  | 14833  |
| UN58729 | Rsa1.0.01311.1 | 710 | 48456  | 0         | 635 | 687 | 92 -  | 1   | 677 | 27878  | 28557  |
| UN58730 | Rsa1.0.00201.1 | 722 | 232851 | 0         | 572 | 611 | 93 -  | 119 | 721 | 72661  | 73247  |
| UN58731 | Rsa1.0.02685.1 | 774 | 28669  | 0         | 385 | 402 | 95 -  | 4   | 405 | 2494   | 2889   |
| UN58732 | Rsa1.0.04181.1 | 720 | 18615  | 1.00E-118 | 254 | 266 | 95 +  | 10  | 272 | 367    | 632    |

|         |                |     |        |           |     |     |       |     |     |        |        |
|---------|----------------|-----|--------|-----------|-----|-----|-------|-----|-----|--------|--------|
| UN58733 | Rsa1.0.00778.1 | 182 | 196751 | 1.00E-98  | 182 | 182 | 100 + | 1   | 182 | 38126  | 38307  |
| UN58734 | Rsa1.0.01172.1 | 686 | 51734  | 1.00E-167 | 316 | 322 | 98 -  | 67  | 388 | 6286   | 6607   |
| UN58735 | Rsa1.0.00108.1 | 761 | 478491 | 0         | 487 | 491 | 99 -  | 3   | 493 | 311324 | 311814 |
| UN58736 | Rsa1.0.01049.1 | 690 | 55655  | 1.00E-147 | 317 | 332 | 95 +  | 292 | 623 | 33200  | 33529  |
| UN58737 | Rsa1.0.01567.1 | 805 | 43090  | 0         | 762 | 802 | 95 +  | 9   | 795 | 3639   | 4440   |
| UN58738 | Rsa1.0.00037.1 | 662 | 307838 | 1.00E-155 | 277 | 277 | 100 - | 3   | 279 | 195549 | 195825 |
| UN58739 | Rsa1.0.00340.1 | 801 | 305782 | 0         | 420 | 432 | 97 +  | 41  | 472 | 191831 | 192262 |
| UN58740 | Rsa1.0.21652.1 | 399 | 1184   | 1.00E-81  | 160 | 162 | 98 -  | 238 | 399 | 1023   | 1184   |
| UN58741 | Rsa1.0.06865.1 | 774 | 10240  | 0         | 760 | 770 | 98 -  | 3   | 768 | 9018   | 9787   |
| UN58742 | Rsa1.0.60174.1 | 789 | 381    | 1.00E-132 | 264 | 268 | 98 -  | 511 | 775 | 1      | 268    |
| UN58743 | Rsa1.0.06113.1 | 795 | 11721  | 0         | 502 | 534 | 94 +  | 243 | 770 | 11131  | 11664  |
| UN58744 | Rsa1.0.01308.1 | 720 | 48596  | 0         | 409 | 431 | 94 +  | 89  | 516 | 24987  | 25408  |
| UN58745 | Rsa1.0.01104.1 | 753 | 285480 | 0         | 440 | 443 | 99 +  | 195 | 636 | 34309  | 34751  |
| UN58746 | Rsa1.0.02514.1 | 807 | 30642  | 0         | 742 | 786 | 94 -  | 2   | 782 | 5382   | 6167   |
| UN58747 | Rsa1.0.00017.1 | 246 | 752458 | 1.00E-104 | 233 | 245 | 95 -  | 3   | 246 | 684871 | 685111 |
| UN58748 | Rsa1.0.02634.1 | 722 | 29299  | 0         | 458 | 470 | 97 +  | 3   | 472 | 1428   | 1897   |
| UN58749 | Rsa1.0.05004.1 | 748 | 15172  | 1.00E-121 | 271 | 287 | 94 -  | 333 | 616 | 3432   | 3718   |
| UN58750 | Rsa1.0.12420.1 | 774 | 5230   | 0         | 430 | 442 | 97 +  | 328 | 766 | 1647   | 2087   |
| UN58751 | Rsa1.0.03676.1 | 228 | 21437  | 1.00E-104 | 223 | 234 | 95 +  | 1   | 228 | 15587  | 15820  |
| UN58752 | Rsa1.0.06673.1 | 790 | 10562  | 1.00E-80  | 156 | 157 | 99 -  | 114 | 270 | 4441   | 4597   |
| UN58753 | Rsa1.0.00856.1 | 659 | 62037  | 1.00E-12  | 63  | 71  | 88 +  | 306 | 376 | 41733  | 41803  |
| UN58754 | Rsa1.0.02144.1 | 769 | 34630  | 2.00E-91  | 186 | 191 | 97 +  | 140 | 330 | 1304   | 1494   |
| UN58755 | Rsa1.0.02964.1 | 779 | 26407  | 1.00E-55  | 114 | 115 | 99 +  | 246 | 360 | 13665  | 13779  |
| UN58756 | Rsa1.0.00398.1 | 672 | 88007  | 1.00E-171 | 307 | 308 | 99 +  | 365 | 672 | 86642  | 86949  |
| UN58757 | Rsa1.0.00522.1 | 171 | 78103  | 4.00E-21  | 52  | 52  | 100 - | 86  | 137 | 38028  | 38079  |
| UN58758 | Rsa1.0.00816.1 | 767 | 403350 | 2.00E-72  | 195 | 212 | 91 +  | 3   | 211 | 109979 | 110183 |
| UN58759 | Rsa1.0.00204.1 | 105 | 109056 | 1.00E-29  | 87  | 93  | 93 -  | 15  | 105 | 21274  | 21366  |
| UN58760 | Rsa1.0.06491.1 | 741 | 10914  | 1.00E-104 | 246 | 262 | 93 -  | 3   | 263 | 6243   | 6501   |
| UN58761 | Rsa1.0.01182.1 | 786 | 167304 | 0         | 501 | 523 | 95 -  | 177 | 698 | 118231 | 118753 |
| UN58762 | Rsa1.0.00141.1 | 222 | 121494 | 2.00E-57  | 125 | 129 | 96 +  | 2   | 130 | 98408  | 98536  |
| UN58763 | Rsa1.0.00706.1 | 701 | 291570 | 1.00E-162 | 331 | 344 | 96 -  | 2   | 345 | 21539  | 21880  |
| UN58764 | Rsa1.0.00997.1 | 745 | 57190  | 2.00E-63  | 136 | 140 | 97 +  | 3   | 142 | 22902  | 23041  |
| UN58765 | Rsa1.0.00887.1 | 651 | 61048  | 1.00E-180 | 366 | 381 | 96 -  | 2   | 379 | 48056  | 48436  |
| UN58766 | Rsa1.0.00347.1 | 657 | 93048  | 0         | 384 | 403 | 95 -  | 262 | 657 | 14559  | 14958  |
| UN58767 | Rsa1.0.08020.1 | 714 | 8075   | 1.00E-147 | 330 | 353 | 93 +  | 28  | 380 | 137    | 471    |
| UN58768 | Rsa1.0.01554.1 | 811 | 43379  | 0         | 378 | 386 | 97 -  | 374 | 755 | 41062  | 41447  |
| UN58769 | Rsa1.0.00008.1 | 815 | 358124 | 0         | 357 | 366 | 97 -  | 3   | 368 | 56542  | 56907  |
| UN58770 | Rsa1.0.09895.1 | 711 | 6101   | 0         | 675 | 730 | 92 -  | 3   | 711 | 4875   | 5598   |
| UN58771 | Rsa1.0.01687.1 | 691 | 40979  | 0         | 661 | 692 | 95 -  | 2   | 691 | 2474   | 3165   |

|         |                |     |        |           |     |     |       |     |     |        |        |
|---------|----------------|-----|--------|-----------|-----|-----|-------|-----|-----|--------|--------|
| UN58772 | Rsa1.0.03338.1 | 768 | 136346 | 0         | 609 | 633 | 96 -  | 1   | 627 | 7781   | 8413   |
| UN58773 | Rsa1.0.00526.1 | 641 | 169279 | 4.00E-95  | 273 | 302 | 90 +  | 343 | 641 | 167348 | 167646 |
| UN58774 | Rsa1.0.06800.1 | 775 | 10335  | 0         | 737 | 755 | 97 -  | 3   | 751 | 2966   | 3718   |
| UN58775 | Rsa1.0.04626.1 | 634 | 16611  | 1.00E-104 | 210 | 216 | 97 +  | 195 | 410 | 14230  | 14445  |
| UN58776 | Rsa1.0.00123.1 | 749 | 325650 | 0         | 637 | 658 | 96 -  | 94  | 749 | 230628 | 231285 |
| UN58777 | Rsa1.0.00228.1 | 759 | 105511 | 0         | 693 | 718 | 96 -  | 44  | 756 | 28445  | 29159  |
| UN58778 | Rsa1.0.08494.1 | 714 | 7274   | 1.00E-144 | 269 | 272 | 98 -  | 342 | 613 | 194    | 465    |
| UN58779 | Rsa1.0.00970.1 | 740 | 57994  | 0         | 647 | 658 | 98 +  | 5   | 661 | 10175  | 10828  |
| UN58780 | Rsa1.0.02041.1 | 687 | 163634 | 5.00E-67  | 133 | 134 | 99 +  | 2   | 135 | 147988 | 148121 |
| UN58781 | Rsa1.0.01126.1 | 767 | 53127  | 0         | 682 | 707 | 96 +  | 73  | 767 | 35534  | 36240  |
| UN58782 | Rsa1.0.01117.1 | 537 | 53465  | 1.00E-178 | 334 | 339 | 98 -  | 199 | 537 | 10919  | 11254  |
| UN58783 | Rsa1.0.05175.1 | 620 | 14603  | 1.00E-156 | 323 | 334 | 96 +  | 263 | 595 | 9884   | 10213  |
| UN58784 | Rsa1.0.02949.1 | 490 | 26506  | 1.00E-177 | 436 | 477 | 91 -  | 3   | 473 | 19628  | 20104  |
| UN58785 | Rsa1.0.00651.1 | 748 | 247766 | 1.00E-150 | 272 | 273 | 99 -  | 48  | 320 | 184294 | 184566 |
| UN58786 | Rsa1.0.00387.1 | 554 | 495407 | 0         | 405 | 408 | 99 -  | 147 | 554 | 352825 | 353232 |
| UN58787 | Rsa1.0.34234.1 | 723 | 661    | 1.00E-162 | 341 | 356 | 95 +  | 2   | 354 | 306    | 661    |
| UN58788 | Rsa1.0.00573.1 | 724 | 74821  | 0         | 616 | 629 | 97 +  | 2   | 630 | 40537  | 41165  |
| UN58789 | Rsa1.0.00147.1 | 632 | 249503 | 0         | 618 | 632 | 97 +  | 1   | 632 | 240539 | 241170 |
| UN58790 | Rsa1.0.00043.1 | 279 | 264937 | 1.00E-53  | 110 | 111 | 99 -  | 169 | 279 | 124658 | 124768 |
| UN58791 | Rsa1.0.00169.1 | 403 | 274298 | 4.00E-63  | 143 | 149 | 95 -  | 241 | 386 | 27920  | 28068  |
| UN58792 | Rsa1.0.00407.1 | 467 | 191544 | 1.00E-176 | 403 | 426 | 94 -  | 45  | 466 | 160816 | 161237 |
| UN58793 | Rsa1.0.00071.1 | 752 | 345714 | 0         | 409 | 423 | 96 +  | 9   | 430 | 133690 | 134112 |
| UN58794 | Rsa1.0.00008.1 | 738 | 358124 | 1.00E-168 | 350 | 369 | 94 -  | 166 | 534 | 78544  | 78901  |
| UN58795 | Rsa1.0.01456.1 | 787 | 45372  | 1.00E-172 | 306 | 306 | 100 + | 279 | 584 | 7527   | 7832   |
| UN58796 | Rsa1.0.02429.1 | 683 | 31527  | 1.00E-138 | 278 | 286 | 97 +  | 376 | 660 | 12481  | 12766  |
| UN58797 | Rsa1.0.01989.1 | 627 | 36439  | 3.00E-80  | 173 | 180 | 96 +  | 172 | 351 | 9804   | 9983   |
| UN58798 | Rsa1.0.00985.1 | 712 | 161950 | 0         | 411 | 424 | 96 +  | 55  | 475 | 43673  | 44096  |
| UN58799 | Rsa1.0.01857.1 | 780 | 38103  | 0         | 521 | 532 | 97 -  | 3   | 534 | 22856  | 23382  |
| UN58800 | Rsa1.0.00146.1 | 705 | 149343 | 1.00E-156 | 316 | 328 | 96 +  | 349 | 676 | 41915  | 42242  |
| UN58801 | Rsa1.0.00359.1 | 613 | 91256  | 9.00E-47  | 102 | 104 | 98 +  | 34  | 137 | 21151  | 21254  |
| UN58802 | Rsa1.0.00345.1 | 758 | 93226  | 0         | 340 | 345 | 98 -  | 400 | 743 | 16934  | 17278  |
| UN58803 | Rsa1.0.13883.1 | 756 | 4153   | 1.00E-103 | 197 | 199 | 98 +  | 292 | 490 | 1777   | 1975   |
| UN58804 | Rsa1.0.00104.1 | 778 | 368722 | 4.00E-28  | 104 | 116 | 89 +  | 276 | 389 | 349075 | 349190 |
| UN58805 | Rsa1.0.00017.1 | 512 | 752458 | 4.00E-45  | 120 | 129 | 93 -  | 205 | 333 | 156688 | 156816 |
| UN58806 | Rsa1.0.00291.1 | 799 | 172129 | 0         | 784 | 799 | 98 -  | 4   | 799 | 72442  | 73240  |
| UN58807 | Rsa1.0.12830.1 | 727 | 5110   | 0         | 682 | 707 | 96 +  | 3   | 707 | 376    | 1075   |
| UN58808 | Rsa1.0.02335.1 | 344 | 32400  | 2.00E-92  | 194 | 200 | 97 -  | 146 | 344 | 21192  | 21391  |
| UN58809 | Rsa1.0.00253.1 | 662 | 231292 | 3.00E-71  | 152 | 157 | 96 -  | 285 | 441 | 212149 | 212305 |
| UN58810 | Rsa1.0.17889.1 | 714 | 1717   | 0         | 450 | 463 | 97 +  | 2   | 460 | 1255   | 1717   |

|         |                |     |        |           |     |     |       |     |     |        |        |
|---------|----------------|-----|--------|-----------|-----|-----|-------|-----|-----|--------|--------|
| UN58811 | Rsa1.0.06034.1 | 786 | 11877  | 0         | 762 | 790 | 96 +  | 1   | 786 | 1252   | 2041   |
| UN58812 | Rsa1.0.00132.1 | 701 | 124299 | 1.00E-148 | 329 | 344 | 95 -  | 365 | 698 | 111199 | 111540 |
| UN58813 | Rsa1.0.06311.1 | 638 | 11254  | 1.00E-144 | 266 | 267 | 99 +  | 3   | 268 | 1291   | 1557   |
| UN58814 | Rsa1.0.00797.1 | 380 | 63959  | 1.00E-167 | 364 | 382 | 95 +  | 1   | 380 | 60464  | 60839  |
| UN58815 | Rsa1.0.01845.1 | 687 | 38415  | 1.00E-168 | 300 | 300 | 100 + | 50  | 349 | 31559  | 31858  |
| UN58816 | Rsa1.0.09634.1 | 700 | 6242   | 1.00E-126 | 260 | 268 | 97 +  | 6   | 269 | 5520   | 5787   |
| UN58817 | Rsa1.0.00134.1 | 283 | 390219 | 9.00E-82  | 160 | 162 | 98 -  | 2   | 163 | 232067 | 232228 |
| UN58818 | Rsa1.0.00294.1 | 714 | 144860 | 1.00E-102 | 213 | 221 | 96 +  | 21  | 241 | 79395  | 79615  |
| UN58819 | Rsa1.0.04488.1 | 606 | 17155  | 1.00E-160 | 316 | 326 | 96 +  | 2   | 327 | 13152  | 13477  |
| UN58820 | Rsa1.0.11222.1 | 484 | 5577   | 3.00E-27  | 213 | 263 | 80 -  | 144 | 406 | 3716   | 3978   |
| UN58821 | Rsa1.0.02593.1 | 758 | 29744  | 1.00E-89  | 191 | 198 | 96 -  | 274 | 468 | 5683   | 5880   |
| UN58822 | Rsa1.0.08562.1 | 536 | 7193   | 6.00E-97  | 183 | 184 | 99 +  | 36  | 219 | 3771   | 3954   |
| UN58823 | Rsa1.0.00789.1 | 653 | 64233  | 1.00E-147 | 313 | 330 | 94 +  | 2   | 328 | 21834  | 22154  |
| UN58824 | Rsa1.0.00180.1 | 731 | 114581 | 2.00E-75  | 159 | 164 | 96 -  | 340 | 503 | 19225  | 19388  |
| UN58825 | Rsa1.0.00111.1 | 264 | 390088 | 1.00E-100 | 241 | 256 | 94 +  | 2   | 254 | 334552 | 334806 |
| UN58826 | Rsa1.0.00975.1 | 394 | 57865  | 1.00E-124 | 229 | 230 | 99 +  | 165 | 394 | 34416  | 34645  |
| UN58827 | Rsa1.0.02163.1 | 690 | 34427  | 6.00E-82  | 326 | 381 | 85 +  | 304 | 684 | 3114   | 3490   |
| UN58828 | Rsa1.0.40296.1 | 456 | 557    | 1.00E-153 | 309 | 318 | 97 +  | 124 | 440 | 241    | 557    |
| UN58829 | Rsa1.0.00236.1 | 755 | 104771 | 6.00E-67  | 270 | 310 | 87 -  | 463 | 748 | 20975  | 21283  |
| UN58830 | Rsa1.0.00287.1 | 662 | 98687  | 0         | 406 | 416 | 97 -  | 119 | 534 | 51455  | 51870  |
| UN58831 | Rsa1.0.01119.1 | 684 | 53459  | 1.00E-79  | 157 | 159 | 98 +  | 437 | 595 | 22828  | 22986  |
| UN58832 | Rsa1.0.03062.1 | 714 | 25678  | 0         | 512 | 521 | 98 -  | 3   | 520 | 8175   | 8695   |
| UN58833 | Rsa1.0.00308.1 | 751 | 96915  | 1.00E-92  | 245 | 264 | 92 -  | 3   | 257 | 95252  | 95514  |
| UN58834 | Rsa1.0.00037.1 | 747 | 307838 | 1.00E-118 | 294 | 316 | 93 -  | 3   | 312 | 201318 | 201631 |
| UN58835 | Rsa1.0.04394.1 | 686 | 17571  | 1.00E-162 | 296 | 297 | 99 -  | 391 | 686 | 5035   | 5331   |
| UN58836 | Rsa1.0.00307.1 | 642 | 199003 | 1.00E-119 | 263 | 278 | 94 -  | 104 | 381 | 61363  | 61640  |
| UN58837 | Rsa1.0.00584.1 | 785 | 74295  | 0         | 712 | 744 | 95 +  | 2   | 744 | 43772  | 44515  |
| UN58838 | Rsa1.0.17444.1 | 409 | 1828   | 6.00E-81  | 201 | 219 | 91 +  | 6   | 213 | 1575   | 1793   |
| UN58839 | Rsa1.0.01438.1 | 725 | 45882  | 0         | 423 | 438 | 96 +  | 289 | 725 | 31311  | 31748  |
| UN58840 | Rsa1.0.04377.1 | 800 | 17658  | 1.00E-157 | 356 | 381 | 93 -  | 389 | 769 | 6145   | 6525   |
| UN58841 | Rsa1.0.00720.1 | 510 | 66931  | 2.00E-78  | 183 | 193 | 94 -  | 262 | 452 | 18555  | 18743  |
| UN58842 | Rsa1.0.00347.1 | 713 | 93048  | 1.00E-114 | 253 | 269 | 94 -  | 126 | 394 | 83814  | 84073  |
| UN58843 | Rsa1.0.00103.1 | 769 | 135304 | 4.00E-71  | 184 | 198 | 92 -  | 533 | 725 | 128590 | 128787 |
| UN58844 | Rsa1.0.00269.1 | 680 | 341668 | 0         | 454 | 475 | 95 -  | 2   | 464 | 316281 | 316755 |
| UN58845 | Rsa1.0.00833.1 | 660 | 62621  | 1.00E-110 | 250 | 262 | 95 +  | 1   | 255 | 27119  | 27378  |
| UN58846 | Rsa1.0.32129.1 | 678 | 709    | 0         | 598 | 617 | 96 -  | 5   | 621 | 1      | 617    |
| UN58847 | Rsa1.0.00285.1 | 463 | 149638 | 2.00E-68  | 153 | 159 | 96 -  | 90  | 246 | 145757 | 145915 |
| UN58848 | Rsa1.0.00942.1 | 715 | 58873  | 1.00E-137 | 287 | 298 | 96 +  | 419 | 715 | 3175   | 3470   |
| UN58849 | Rsa1.0.06065.1 | 722 | 11828  | 0         | 638 | 667 | 95 -  | 3   | 666 | 2050   | 2716   |

|         |                |     |        |           |     |     |       |     |     |        |        |
|---------|----------------|-----|--------|-----------|-----|-----|-------|-----|-----|--------|--------|
| UN58850 | Rsa1.0.09170.1 | 708 | 6588   | 1.00E-143 | 336 | 367 | 91 +  | 250 | 595 | 5779   | 6142   |
| UN58851 | Rsa1.0.01701.1 | 638 | 162121 | 1.00E-121 | 249 | 258 | 96 -  | 187 | 444 | 140313 | 140567 |
| UN58852 | Rsa1.0.00198.1 | 855 | 222963 | 1.00E-125 | 263 | 271 | 97 -  | 1   | 269 | 52563  | 52831  |
| UN58853 | Rsa1.0.00176.1 | 587 | 240984 | 0         | 560 | 580 | 96 -  | 2   | 581 | 205291 | 205870 |
| UN58854 | Rsa1.0.01232.1 | 757 | 155185 | 1.00E-137 | 305 | 323 | 94 -  | 3   | 325 | 134026 | 134347 |
| UN58855 | Rsa1.0.00087.1 | 451 | 761073 | 0         | 447 | 450 | 99 +  | 2   | 451 | 167359 | 167808 |
| UN58856 | Rsa1.0.00585.1 | 724 | 74164  | 1.00E-92  | 173 | 173 | 100 - | 379 | 551 | 63523  | 63695  |
| UN58857 | Rsa1.0.05343.1 | 718 | 14103  | 0         | 709 | 718 | 98 -  | 2   | 718 | 12877  | 13594  |
| UN58858 | Rsa1.0.01786.1 | 682 | 133324 | 1.00E-135 | 286 | 299 | 95 +  | 273 | 568 | 117074 | 117372 |
| UN58859 | Rsa1.0.04262.1 | 708 | 18220  | 0         | 488 | 493 | 98 +  | 64  | 556 | 2821   | 3313   |
| UN58860 | Rsa1.0.00068.1 | 129 | 151813 | 3.00E-49  | 117 | 122 | 95 -  | 1   | 122 | 123266 | 123385 |
| UN58861 | Rsa1.0.04238.1 | 616 | 18352  | 3.00E-68  | 132 | 132 | 100 + | 312 | 443 | 6619   | 6750   |
| UN58862 | Rsa1.0.02282.1 | 714 | 163951 | 1.00E-113 | 210 | 211 | 99 +  | 79  | 289 | 149562 | 149772 |
| UN58863 | Rsa1.0.00158.1 | 681 | 117999 | 1.00E-100 | 310 | 347 | 89 -  | 1   | 344 | 33119  | 33461  |
| UN58864 | Rsa1.0.02365.1 | 749 | 32118  | 1.00E-119 | 311 | 338 | 92 +  | 3   | 337 | 13255  | 13592  |
| UN58865 | Rsa1.0.00605.1 | 708 | 73199  | 0         | 447 | 448 | 99 +  | 75  | 522 | 67241  | 67688  |
| UN58866 | Rsa1.0.00088.1 | 619 | 141341 | 0         | 375 | 385 | 97 +  | 1   | 385 | 3839   | 4223   |
| UN58867 | Rsa1.0.01919.1 | 690 | 37272  | 1.00E-116 | 239 | 248 | 96 -  | 116 | 363 | 7905   | 8152   |
| UN58868 | Rsa1.0.03782.1 | 823 | 20891  | 1.00E-116 | 219 | 221 | 99 +  | 108 | 328 | 12838  | 13058  |
| UN58869 | Rsa1.0.15301.1 | 638 | 2703   | 1.00E-175 | 381 | 401 | 95 -  | 239 | 638 | 833    | 1224   |
| UN58870 | Rsa1.0.00556.1 | 667 | 207212 | 2.00E-66  | 337 | 399 | 84 -  | 30  | 412 | 40589  | 40965  |
| UN58871 | Rsa1.0.00344.1 | 752 | 191774 | 1.00E-108 | 237 | 249 | 95 +  | 273 | 521 | 179315 | 179560 |
| UN58872 | Rsa1.0.00817.1 | 721 | 62961  | 0         | 383 | 398 | 96 +  | 208 | 602 | 29379  | 29775  |
| UN58873 | Rsa1.0.03455.1 | 556 | 22804  | 0         | 533 | 557 | 95 +  | 1   | 556 | 2465   | 3017   |
| UN58874 | Rsa1.0.00107.1 | 753 | 431659 | 0         | 400 | 420 | 95 +  | 31  | 444 | 314543 | 314962 |
| UN58875 | Rsa1.0.03785.1 | 637 | 20883  | 0         | 353 | 353 | 100 + | 4   | 356 | 12644  | 12996  |
| UN58876 | Rsa1.0.00352.1 | 633 | 92266  | 0         | 615 | 644 | 95 +  | 1   | 633 | 22028  | 22671  |
| UN58877 | #              | #   | #      | #         | #   | #   | #     | #   | #   | #      | #      |
| UN58878 | Rsa1.0.07440.1 | 670 | 9389   | 0         | 642 | 672 | 95 +  | 2   | 670 | 4133   | 4804   |
| UN58879 | Rsa1.0.07814.1 | 689 | 8487   | 4.00E-43  | 105 | 110 | 95 -  | 292 | 401 | 744    | 853    |
| UN58880 | Rsa1.0.00069.1 | 781 | 403561 | 0         | 623 | 644 | 96 -  | 139 | 781 | 354155 | 354794 |
| UN58881 | Rsa1.0.00773.1 | 736 | 64839  | 0         | 481 | 500 | 96 +  | 129 | 628 | 12568  | 13067  |
| UN58882 | Rsa1.0.02027.1 | 782 | 35869  | 1.00E-157 | 303 | 309 | 98 -  | 346 | 652 | 28879  | 29187  |
| UN58883 | Rsa1.0.00525.1 | 720 | 78030  | 0         | 487 | 507 | 96 +  | 1   | 507 | 30615  | 31121  |
| UN58884 | Rsa1.0.00476.1 | 737 | 280966 | 0         | 495 | 512 | 96 +  | 232 | 737 | 159214 | 159721 |
| UN58885 | Rsa1.0.00097.1 | 675 | 138858 | 1.00E-131 | 247 | 249 | 99 +  | 1   | 249 | 79907  | 80154  |
| UN58886 | Rsa1.0.03280.1 | 781 | 145083 | 1.00E-140 | 267 | 272 | 98 -  | 185 | 456 | 121982 | 122253 |
| UN58887 | Rsa1.0.00037.1 | 794 | 307838 | 1.00E-123 | 245 | 252 | 97 -  | 3   | 254 | 242549 | 242800 |
| UN58888 | Rsa1.0.11536.1 | 105 | 5476   | 3.00E-42  | 99  | 103 | 96 -  | 3   | 105 | 5292   | 5394   |



|         |                |     |        |           |     |     |       |     |     |        |        |
|---------|----------------|-----|--------|-----------|-----|-----|-------|-----|-----|--------|--------|
| UN58889 | Rsa1.0.03640.1 | 675 | 21624  | 1.00E-115 | 255 | 269 | 94 -  | 128 | 393 | 18689  | 18957  |
| UN58890 | Rsa1.0.08916.1 | 605 | 6792   | 0         | 577 | 601 | 96 +  | 6   | 605 | 5379   | 5979   |
| UN58891 | Rsa1.0.03304.1 | 742 | 23883  | 1.00E-159 | 321 | 333 | 96 +  | 4   | 329 | 16048  | 16378  |
| UN58892 | Rsa1.0.02949.1 | 791 | 26506  | 1.00E-168 | 341 | 355 | 96 +  | 153 | 507 | 9047   | 9401   |
| UN58893 | Rsa1.0.00075.1 | 742 | 146680 | 0         | 623 | 698 | 89 -  | 10  | 704 | 128091 | 128785 |
| UN58894 | Rsa1.0.15506.1 | 718 | 2567   | 0         | 414 | 425 | 97 +  | 188 | 611 | 1575   | 1999   |
| UN58895 | Rsa1.0.00018.1 | 803 | 410899 | 9.00E-66  | 128 | 128 | 100 - | 3   | 130 | 409267 | 409394 |
| UN58896 | Rsa1.0.00833.1 | 735 | 62621  | 1.00E-122 | 271 | 287 | 94 +  | 445 | 731 | 28121  | 28407  |
| UN58897 | Rsa1.0.00040.1 | 503 | 324196 | 1.00E-122 | 276 | 294 | 93 +  | 2   | 289 | 152206 | 152499 |
| UN58898 | Rsa1.0.00026.1 | 770 | 327835 | 0         | 419 | 426 | 98 -  | 339 | 758 | 53867  | 54292  |
| UN58899 | Rsa1.0.07845.1 | 778 | 8434   | 0         | 563 | 615 | 91 -  | 169 | 770 | 1339   | 1935   |
| UN58900 | Rsa1.0.00123.1 | 573 | 325650 | 0         | 553 | 575 | 96 -  | 2   | 573 | 165220 | 165794 |
| UN58901 | Rsa1.0.01982.1 | 750 | 36530  | 1.00E-117 | 280 | 298 | 93 -  | 456 | 750 | 26537  | 26834  |
| UN58902 | Rsa1.0.08045.1 | 367 | 8014   | 1.00E-66  | 149 | 155 | 96 -  | 65  | 216 | 7857   | 8011   |
| UN58903 | Rsa1.0.03733.1 | 669 | 21108  | 0         | 524 | 544 | 96 +  | 132 | 669 | 13781  | 14324  |
| UN58904 | Rsa1.0.00141.1 | 750 | 121494 | 5.00E-52  | 111 | 113 | 98 +  | 66  | 178 | 7963   | 8075   |
| UN58905 | Rsa1.0.00476.1 | 310 | 280966 | 3.00E-45  | 93  | 93  | 100 + | 65  | 157 | 157534 | 157626 |
| UN58906 | Rsa1.0.00803.1 | 708 | 144228 | 1.00E-168 | 336 | 347 | 96 -  | 63  | 408 | 53408  | 53754  |
| UN58907 | Rsa1.0.03125.1 | 741 | 147978 | 1.00E-137 | 253 | 255 | 99 -  | 249 | 503 | 138288 | 138542 |
| UN58908 | Rsa1.0.01953.1 | 653 | 36881  | 0         | 641 | 652 | 98 +  | 2   | 653 | 32476  | 33127  |
| UN58909 | Rsa1.0.00850.1 | 366 | 62193  | 0         | 356 | 365 | 97 -  | 2   | 366 | 26421  | 26785  |
| UN58910 | Rsa1.0.10456.1 | 679 | 5845   | 4.00E-83  | 166 | 169 | 98 -  | 283 | 451 | 5457   | 5625   |
| UN58911 | Rsa1.0.00130.1 | 642 | 125737 | 1.00E-149 | 304 | 315 | 96 +  | 295 | 608 | 7588   | 7902   |
| UN58912 | Rsa1.0.02316.1 | 731 | 32608  | 0         | 417 | 417 | 100 + | 3   | 419 | 16501  | 16917  |
| UN58913 | Rsa1.0.16648.1 | 679 | 2079   | 7.00E-60  | 203 | 228 | 89 -  | 460 | 679 | 318    | 543    |
| UN58914 | Rsa1.0.00273.1 | 716 | 326186 | 1.00E-107 | 248 | 265 | 93 +  | 157 | 421 | 41820  | 42084  |
| UN58915 | Rsa1.0.03187.1 | 808 | 24726  | 7.00E-85  | 299 | 346 | 86 +  | 2   | 327 | 19150  | 19488  |
| UN58916 | Rsa1.0.00453.1 | 144 | 83031  | 2.00E-47  | 105 | 108 | 97 -  | 37  | 144 | 71149  | 71256  |
| UN58917 | Rsa1.0.02740.1 | 755 | 28292  | 2.00E-17  | 113 | 135 | 83 -  | 315 | 449 | 23648  | 23782  |
| UN58918 | Rsa1.0.04073.1 | 308 | 19238  | 3.00E-48  | 152 | 174 | 87 -  | 152 | 308 | 10575  | 10748  |
| UN58919 | Rsa1.0.00180.1 | 119 | 114581 | 3.00E-36  | 96  | 101 | 95 +  | 1   | 101 | 38907  | 39006  |
| UN58920 | Rsa1.0.09399.1 | 772 | 6394   | 0         | 683 | 738 | 92 -  | 8   | 741 | 777    | 1513   |
| UN58921 | Rsa1.0.01054.1 | 753 | 55470  | 1.00E-172 | 325 | 331 | 98 +  | 2   | 332 | 52074  | 52404  |
| UN58922 | Rsa1.0.00758.1 | 188 | 65477  | 1.00E-100 | 187 | 188 | 99 -  | 1   | 188 | 56941  | 57128  |
| UN58923 | Rsa1.0.05074.1 | 626 | 14925  | 1.00E-168 | 305 | 307 | 99 -  | 1   | 307 | 14252  | 14558  |
| UN58924 | Rsa1.0.00150.1 | 748 | 154416 | 0         | 699 | 764 | 91 -  | 1   | 748 | 63472  | 64208  |
| UN58925 | Rsa1.0.00465.1 | 697 | 82138  | 7.00E-91  | 187 | 190 | 98 +  | 510 | 697 | 67916  | 68105  |
| UN58926 | Rsa1.0.02855.1 | 628 | 27271  | 0         | 626 | 628 | 99 +  | 1   | 628 | 17461  | 18088  |
| UN58927 | Rsa1.0.00111.1 | 322 | 390088 | 1.00E-53  | 139 | 147 | 94 -  | 145 | 291 | 35825  | 35969  |

|         |                |     |        |           |     |     |       |     |     |        |        |
|---------|----------------|-----|--------|-----------|-----|-----|-------|-----|-----|--------|--------|
| UN58928 | Rsa1.0.03159.1 | 696 | 24946  | 0         | 670 | 721 | 92 -  | 1   | 696 | 12158  | 12861  |
| UN58929 | Rsa1.0.01926.1 | 208 | 37206  | 2.00E-76  | 196 | 212 | 92 +  | 3   | 208 | 6559   | 6764   |
| UN58930 | Rsa1.0.06038.1 | 671 | 11867  | 1.00E-104 | 195 | 196 | 99 +  | 1   | 196 | 6391   | 6586   |
| UN58931 | Rsa1.0.00391.1 | 415 | 183853 | 1.00E-140 | 288 | 296 | 97 -  | 117 | 411 | 60239  | 60532  |
| UN58932 | Rsa1.0.00767.1 | 214 | 64980  | 1.00E-80  | 184 | 193 | 95 -  | 23  | 214 | 18639  | 18827  |
| UN58933 | Rsa1.0.04245.1 | 789 | 18299  | 0         | 351 | 357 | 98 -  | 434 | 789 | 9385   | 9741   |
| UN58934 | Rsa1.0.00759.1 | 783 | 65465  | 0         | 671 | 709 | 94 +  | 88  | 783 | 8202   | 8904   |
| UN58935 | Rsa1.0.08929.1 | 640 | 6777   | 1.00E-109 | 230 | 240 | 95 -  | 315 | 554 | 914    | 1153   |
| UN58936 | Rsa1.0.00002.1 | 504 | 601661 | 4.00E-33  | 104 | 113 | 92 -  | 68  | 180 | 140996 | 141107 |
| UN58937 | Rsa1.0.00968.1 | 235 | 58020  | 3.00E-78  | 219 | 238 | 92 -  | 3   | 235 | 52396  | 52627  |
| UN58938 | Rsa1.0.00001.1 | 450 | 363028 | 8.00E-99  | 247 | 269 | 91 +  | 2   | 258 | 323610 | 323878 |
| UN58939 | Rsa1.0.01301.1 | 116 | 169072 | 1.00E-47  | 109 | 112 | 97 +  | 3   | 113 | 15721  | 15832  |
| UN58940 | Rsa1.0.01015.1 | 734 | 56752  | 2.00E-82  | 198 | 211 | 93 +  | 371 | 581 | 5890   | 6098   |
| UN58941 | Rsa1.0.00279.1 | 737 | 100039 | 1.00E-136 | 284 | 296 | 95 -  | 3   | 295 | 37942  | 38237  |
| UN58942 | Rsa1.0.00047.1 | 487 | 168582 | 1.00E-111 | 327 | 368 | 88 -  | 106 | 447 | 149282 | 149645 |
| UN58943 | Rsa1.0.00020.1 | 518 | 283099 | 1.00E-108 | 272 | 297 | 91 -  | 222 | 518 | 151644 | 151928 |
| UN58944 | Rsa1.0.01119.1 | 652 | 53459  | 1.00E-114 | 282 | 306 | 92 +  | 85  | 381 | 42043  | 42348  |
| UN58945 | Rsa1.0.04806.1 | 703 | 15898  | 0         | 569 | 573 | 99 +  | 132 | 703 | 7069   | 7641   |
| UN58946 | Rsa1.0.02116.1 | 753 | 34853  | 0         | 712 | 757 | 94 -  | 2   | 753 | 30563  | 31297  |
| UN58947 | Rsa1.0.03780.1 | 792 | 20899  | 1.00E-114 | 351 | 400 | 87 -  | 334 | 728 | 11180  | 11558  |
| UN58948 | Rsa1.0.00108.1 | 634 | 478491 | 2.00E-87  | 188 | 196 | 95 +  | 205 | 400 | 273140 | 273335 |
| UN58949 | Rsa1.0.00050.1 | 153 | 237174 | 2.00E-44  | 106 | 111 | 95 +  | 43  | 153 | 168566 | 168676 |
| UN58950 | Rsa1.0.00033.1 | 223 | 515811 | 2.00E-30  | 186 | 206 | 90 -  | 18  | 223 | 146566 | 146754 |
| UN58951 | Rsa1.0.05665.1 | 543 | 13003  | 1.00E-110 | 220 | 226 | 97 +  | 2   | 227 | 11141  | 11366  |
| UN58952 | Rsa1.0.00551.1 | 309 | 76227  | 7.00E-52  | 104 | 104 | 100 - | 200 | 303 | 55445  | 55548  |
| UN58953 | Rsa1.0.04646.1 | 699 | 16541  | 1.00E-110 | 309 | 340 | 90 +  | 366 | 695 | 2437   | 2775   |
| UN58954 | Rsa1.0.00254.1 | 797 | 102600 | 1.00E-103 | 190 | 190 | 100 - | 383 | 572 | 74957  | 75146  |
| UN58955 | Rsa1.0.01565.1 | 744 | 155447 | 0         | 407 | 423 | 96 +  | 2   | 418 | 8200   | 8622   |
| UN58956 | Rsa1.0.01750.1 | 649 | 39816  | 7.00E-97  | 226 | 240 | 94 +  | 413 | 649 | 22530  | 22766  |
| UN58957 | Rsa1.0.33108.1 | 839 | 686    | 0         | 668 | 683 | 97 -  | 104 | 785 | 4      | 686    |
| UN58958 | Rsa1.0.00122.1 | 695 | 265937 | 0         | 620 | 624 | 99 +  | 72  | 695 | 237311 | 237934 |
| UN58959 | Rsa1.0.01776.1 | 640 | 39511  | 0         | 535 | 580 | 92 +  | 18  | 594 | 26754  | 27327  |
| UN58960 | Rsa1.0.01302.1 | 340 | 48907  | 1.00E-120 | 310 | 340 | 91 +  | 2   | 340 | 1976   | 2303   |
| UN58961 | Rsa1.0.03472.1 | 648 | 22669  | 0         | 634 | 648 | 97 +  | 1   | 648 | 12681  | 13328  |
| UN58962 | Rsa1.0.00022.1 | 512 | 200461 | 1.00E-85  | 182 | 189 | 96 -  | 318 | 506 | 126768 | 126956 |
| UN58963 | Rsa1.0.33468.1 | 737 | 677    | 0         | 603 | 615 | 98 -  | 124 | 737 | 63     | 677    |
| UN58964 | Rsa1.0.00196.1 | 690 | 109960 | 1.00E-171 | 350 | 364 | 96 +  | 2   | 365 | 10167  | 10529  |
| UN58965 | Rsa1.0.13615.1 | 759 | 4632   | 4.00E-43  | 252 | 306 | 82 -  | 13  | 318 | 661    | 966    |
| UN58966 | Rsa1.0.00409.1 | 824 | 146788 | 0         | 509 | 512 | 99 +  | 310 | 818 | 87558  | 88069  |

|         |                |     |        |           |     |     |      |     |     |        |        |
|---------|----------------|-----|--------|-----------|-----|-----|------|-----|-----|--------|--------|
| UN58967 | Rsa1.0.00333.1 | 799 | 94500  | 1.00E-166 | 378 | 402 | 94 + | 200 | 592 | 79840  | 80240  |
| UN58968 | Rsa1.0.02421.1 | 639 | 31579  | 1.00E-162 | 314 | 322 | 97 + | 81  | 402 | 9918   | 10239  |
| UN58969 | Rsa1.0.02505.1 | 232 | 30703  | 6.00E-98  | 218 | 228 | 95 - | 1   | 227 | 23111  | 23336  |
| UN58970 | Rsa1.0.00119.1 | 213 | 467509 | 2.00E-79  | 193 | 202 | 95 + | 1   | 199 | 62413  | 62613  |
| UN58971 | Rsa1.0.05874.1 | 795 | 12351  | 0         | 450 | 457 | 98 + | 3   | 455 | 5844   | 6299   |
| UN58972 | Rsa1.0.00076.1 | 497 | 146021 | 0         | 448 | 479 | 93 - | 25  | 497 | 76853  | 77317  |
| UN58973 | Rsa1.0.05570.1 | 770 | 13301  | 1.00E-143 | 306 | 316 | 96 + | 448 | 759 | 12647  | 12960  |
| UN58974 | Rsa1.0.02952.1 | 844 | 26492  | 0         | 418 | 424 | 98 - | 3   | 426 | 3855   | 4278   |
| UN58975 | Rsa1.0.00248.1 | 773 | 163568 | 0         | 536 | 561 | 95 - | 3   | 563 | 24042  | 24602  |
| UN58976 | Rsa1.0.01537.1 | 845 | 187285 | 1.00E-122 | 274 | 291 | 94 + | 226 | 516 | 19498  | 19788  |
| UN58977 | Rsa1.0.00321.1 | 379 | 95671  | 3.00E-45  | 120 | 129 | 93 - | 91  | 219 | 28300  | 28428  |
| UN58978 | Rsa1.0.00848.1 | 578 | 152362 | 1.00E-110 | 209 | 211 | 99 - | 53  | 263 | 40824  | 41034  |
| UN58979 | Rsa1.0.00784.1 | 787 | 64359  | 0         | 596 | 606 | 98 - | 2   | 607 | 14509  | 15114  |
| UN58980 | Rsa1.0.00764.1 | 825 | 65056  | 1.00E-124 | 284 | 304 | 93 + | 26  | 326 | 19998  | 20292  |
| UN58981 | Rsa1.0.03553.1 | 848 | 22150  | 0         | 537 | 556 | 96 - | 6   | 561 | 16579  | 17134  |
| UN58982 | Rsa1.0.09006.1 | 679 | 6715   | 0         | 653 | 687 | 95 + | 2   | 679 | 4723   | 5403   |
| UN58983 | Rsa1.0.01220.1 | 750 | 161775 | 1.00E-109 | 243 | 257 | 94 + | 164 | 420 | 26564  | 26820  |
| UN58984 | Rsa1.0.01600.1 | 720 | 42537  | 0         | 674 | 724 | 93 + | 2   | 720 | 5088   | 5797   |
| UN58985 | Rsa1.0.00305.1 | 766 | 97308  | 3.00E-93  | 177 | 178 | 99 - | 454 | 631 | 72382  | 72559  |
| UN58986 | Rsa1.0.01576.1 | 620 | 42923  | 0         | 578 | 626 | 92 - | 4   | 616 | 22925  | 23547  |
| UN58987 | Rsa1.0.00605.1 | 762 | 73199  | 0         | 362 | 368 | 98 - | 314 | 681 | 27650  | 28017  |
| UN58988 | Rsa1.0.70008.1 | 491 | 327    | 1.00E-110 | 209 | 211 | 99 - | 281 | 491 | 117    | 327    |
| UN58989 | Rsa1.0.00307.1 | 574 | 199003 | 0         | 460 | 498 | 92 - | 7   | 502 | 10972  | 11461  |
| UN58990 | Rsa1.0.00150.1 | 808 | 154416 | 1.00E-177 | 335 | 342 | 97 - | 63  | 404 | 60307  | 60648  |
| UN58991 | Rsa1.0.00227.1 | 645 | 105849 | 6.00E-85  | 272 | 305 | 89 - | 280 | 581 | 91244  | 91544  |
| UN58992 | Rsa1.0.15363.1 | 445 | 2655   | 1.00E-154 | 361 | 387 | 93 + | 63  | 442 | 1088   | 1473   |
| UN58993 | Rsa1.0.00012.1 | 667 | 222148 | 1.00E-113 | 308 | 343 | 89 + | 317 | 652 | 110785 | 111109 |
| UN58994 | Rsa1.0.08133.1 | 765 | 7852   | 0         | 411 | 421 | 97 + | 1   | 419 | 48     | 467    |
| UN58995 | Rsa1.0.00757.1 | 706 | 65559  | 7.00E-57  | 116 | 117 | 99 - | 222 | 338 | 60113  | 60229  |
| UN58996 | Rsa1.0.00857.1 | 718 | 61904  | 0         | 416 | 422 | 98 - | 3   | 420 | 24043  | 24464  |
| UN58997 | Rsa1.0.02722.1 | 695 | 28417  | 1.00E-116 | 216 | 217 | 99 + | 467 | 683 | 7208   | 7424   |
| UN58998 | Rsa1.0.01289.1 | 784 | 49181  | 1.00E-138 | 259 | 262 | 98 - | 173 | 434 | 7660   | 7921   |
| UN58999 | Rsa1.0.00549.1 | 742 | 76473  | 0         | 437 | 455 | 96 - | 74  | 528 | 10847  | 11298  |
| UN59000 | Rsa1.0.01565.1 | 775 | 155447 | 1.00E-157 | 325 | 338 | 96 + | 2   | 338 | 1914   | 2251   |
| UN59001 | Rsa1.0.00424.1 | 727 | 86005  | 0         | 721 | 729 | 98 - | 1   | 727 | 33519  | 34247  |
| UN59002 | Rsa1.0.00577.1 | 731 | 174827 | 0         | 438 | 460 | 95 - | 272 | 731 | 10934  | 11381  |
| UN59003 | Rsa1.0.00178.1 | 653 | 114861 | 1.00E-126 | 251 | 258 | 97 - | 149 | 406 | 8783   | 9040   |
| UN59004 | Rsa1.0.06468.1 | 110 | 10958  | 2.00E-49  | 105 | 107 | 98 - | 4   | 110 | 2456   | 2562   |
| UN59005 | Rsa1.0.04876.1 | 712 | 15631  | 1.00E-113 | 237 | 246 | 96 - | 209 | 451 | 3072   | 3317   |

|         |                |     |        |           |     |     |       |     |     |        |        |
|---------|----------------|-----|--------|-----------|-----|-----|-------|-----|-----|--------|--------|
| UN59006 | Rsa1.0.03201.1 | 783 | 157656 | 0         | 398 | 415 | 95 +  | 4   | 408 | 18908  | 19322  |
| UN59007 | Rsa1.0.00017.1 | 564 | 752458 | 1.00E-127 | 303 | 326 | 92 -  | 37  | 361 | 304817 | 305142 |
| UN59008 | Rsa1.0.02054.1 | 790 | 35548  | 8.00E-97  | 244 | 256 | 95 -  | 484 | 732 | 27099  | 27354  |
| UN59009 | Rsa1.0.02561.1 | 424 | 30080  | 0         | 368 | 375 | 98 +  | 44  | 418 | 19449  | 19823  |
| UN59010 | Rsa1.0.01960.1 | 690 | 36766  | 1.00E-116 | 234 | 241 | 97 +  | 90  | 330 | 7984   | 8224   |
| UN59011 | Rsa1.0.01168.1 | 654 | 153765 | 1.00E-168 | 342 | 355 | 96 -  | 3   | 355 | 24169  | 24514  |
| UN59012 | Rsa1.0.00216.1 | 762 | 197563 | 1.00E-129 | 235 | 235 | 100 + | 3   | 237 | 54437  | 54671  |
| UN59013 | Rsa1.0.00688.1 | 783 | 68396  | 0         | 613 | 657 | 93 +  | 67  | 717 | 30972  | 31606  |
| UN59014 | Rsa1.0.03483.1 | 741 | 22621  | 1.00E-77  | 184 | 196 | 93 +  | 1   | 196 | 16953  | 17148  |
| UN59015 | Rsa1.0.04890.1 | 562 | 15591  | 1.00E-67  | 260 | 297 | 87 -  | 3   | 292 | 11260  | 11546  |
| UN59016 | Rsa1.0.00080.1 | 741 | 190437 | 1.00E-133 | 262 | 269 | 97 -  | 188 | 456 | 34258  | 34526  |
| UN59017 | Rsa1.0.17187.1 | 420 | 1897   | 0         | 399 | 412 | 96 +  | 11  | 419 | 1101   | 1507   |
| UN59018 | Rsa1.0.24279.1 | 802 | 996    | 0         | 413 | 415 | 99 +  | 1   | 414 | 340    | 754    |
| UN59019 | Rsa1.0.00218.1 | 806 | 201480 | 1.00E-129 | 247 | 251 | 98 +  | 312 | 562 | 110483 | 110733 |
| UN59020 | Rsa1.0.14918.1 | 581 | 2967   | 3.00E-34  | 115 | 127 | 90 -  | 3   | 129 | 1616   | 1736   |
| UN59021 | Rsa1.0.03652.1 | 477 | 21565  | 1.00E-127 | 279 | 295 | 94 +  | 8   | 302 | 1      | 290    |
| UN59022 | Rsa1.0.01281.1 | 757 | 49313  | 1.00E-134 | 243 | 243 | 100 + | 143 | 385 | 11168  | 11410  |
| UN59023 | Rsa1.0.01355.1 | 685 | 47303  | 3.00E-93  | 224 | 237 | 94 +  | 444 | 676 | 7405   | 7641   |
| UN59024 | Rsa1.0.00198.1 | 309 | 222963 | 8.00E-61  | 145 | 151 | 96 -  | 154 | 302 | 155030 | 155180 |
| UN59025 | Rsa1.0.05569.1 | 630 | 13311  | 1.00E-180 | 354 | 368 | 96 +  | 275 | 630 | 3528   | 3895   |
| UN59026 | Rsa1.0.01771.1 | 794 | 172709 | 1.00E-138 | 268 | 274 | 97 -  | 154 | 427 | 29605  | 29878  |
| UN59027 | Rsa1.0.02634.1 | 813 | 29299  | 0         | 744 | 750 | 99 -  | 1   | 746 | 17450  | 18199  |
| UN59028 | Rsa1.0.00035.1 | 819 | 176449 | 7.00E-76  | 154 | 157 | 98 +  | 232 | 388 | 155792 | 155948 |
| UN59029 | Rsa1.0.00788.1 | 775 | 64237  | 3.00E-99  | 228 | 240 | 95 +  | 538 | 775 | 33152  | 33391  |
| UN59030 | Rsa1.0.00016.1 | 695 | 831256 | 2.00E-78  | 174 | 181 | 96 -  | 3   | 183 | 227401 | 227580 |
| UN59031 | Rsa1.0.01920.1 | 736 | 158533 | 0         | 715 | 734 | 97 -  | 5   | 735 | 4413   | 5146   |
| UN59032 | Rsa1.0.01196.1 | 680 | 51097  | 1.00E-157 | 335 | 350 | 95 +  | 331 | 680 | 40985  | 41328  |
| UN59033 | Rsa1.0.00545.1 | 803 | 189649 | 1.00E-115 | 260 | 272 | 95 +  | 501 | 768 | 2122   | 2390   |
| UN59034 | Rsa1.0.06273.1 | 658 | 11346  | 0         | 587 | 622 | 94 -  | 37  | 658 | 3014   | 3618   |
| UN59035 | Rsa1.0.00045.1 | 576 | 328694 | 0         | 485 | 487 | 99 +  | 3   | 489 | 280898 | 281384 |
| UN59036 | Rsa1.0.02456.1 | 716 | 31222  | 1.00E-104 | 222 | 229 | 96 -  | 485 | 712 | 23777  | 24004  |
| UN59037 | Rsa1.0.00370.1 | 693 | 90472  | 0         | 404 | 422 | 95 -  | 281 | 693 | 45979  | 46400  |
| UN59038 | Rsa1.0.08258.1 | 759 | 7649   | 3.00E-65  | 148 | 155 | 95 +  | 516 | 670 | 4864   | 5018   |
| UN59039 | Rsa1.0.00491.1 | 760 | 80219  | 0         | 719 | 740 | 97 -  | 1   | 736 | 73833  | 74571  |
| UN59040 | Rsa1.0.00305.1 | 819 | 97308  | 1.00E-114 | 250 | 264 | 94 -  | 245 | 499 | 39688  | 39948  |
| UN59041 | Rsa1.0.01153.1 | 647 | 52264  | 1.00E-126 | 243 | 246 | 98 +  | 403 | 647 | 37100  | 37345  |
| UN59042 | Rsa1.0.00253.1 | 760 | 231292 | 2.00E-76  | 169 | 176 | 96 +  | 433 | 608 | 141842 | 142014 |
| UN59043 | Rsa1.0.00586.1 | 686 | 163802 | 0         | 644 | 687 | 93 +  | 12  | 685 | 4255   | 4929   |
| UN59044 | Rsa1.0.08760.1 | 541 | 6948   | 2.00E-84  | 171 | 175 | 97 -  | 367 | 541 | 3706   | 3880   |

|         |                |     |        |           |     |     |       |     |     |        |        |
|---------|----------------|-----|--------|-----------|-----|-----|-------|-----|-----|--------|--------|
| UN59045 | Rsa1.0.01844.1 | 683 | 38421  | 1.00E-121 | 233 | 237 | 98 -  | 29  | 265 | 13775  | 14011  |
| UN59046 | Rsa1.0.00172.1 | 736 | 115476 | 0         | 400 | 405 | 98 -  | 7   | 411 | 58969  | 59373  |
| UN59047 | Rsa1.0_13019.1 | 641 | 5042   | 0         | 402 | 410 | 98 +  | 232 | 641 | 1377   | 1786   |
| UN59048 | Rsa1.0_03945.1 | 579 | 19924  | 3.00E-83  | 169 | 173 | 97 +  | 327 | 499 | 14735  | 14907  |
| UN59049 | Rsa1.0_11690.1 | 805 | 5440   | 1.00E-101 | 334 | 379 | 88 +  | 33  | 411 | 5016   | 5380   |
| UN59050 | Rsa1.0_00016.1 | 710 | 831256 | 1.00E-89  | 225 | 243 | 92 -  | 130 | 361 | 205984 | 206225 |
| UN59051 | Rsa1.0_00075.1 | 756 | 146680 | 1.00E-118 | 251 | 260 | 96 -  | 3   | 261 | 144164 | 144422 |
| UN59052 | Rsa1.0_00491.1 | 676 | 80219  | 0         | 645 | 691 | 93 -  | 8   | 675 | 64676  | 65363  |
| UN59053 | #              | #   | #      | #         | #   | #   | #     | #   | #   | #      | #      |
| UN59054 | Rsa1.0_03231.1 | 245 | 24456  | 1.00E-105 | 220 | 229 | 96 +  | 10  | 238 | 22443  | 22671  |
| UN59055 | Rsa1.0_00329.1 | 800 | 222544 | 1.00E-147 | 267 | 268 | 99 -  | 268 | 535 | 161039 | 161306 |
| UN59056 | Rsa1.0_00243.1 | 784 | 103651 | 0         | 433 | 454 | 95 -  | 318 | 762 | 87689  | 88142  |
| UN59057 | Rsa1.0_02798.1 | 718 | 27792  | 1.00E-137 | 273 | 280 | 97 -  | 389 | 667 | 6600   | 6879   |
| UN59058 | Rsa1.0_09409.1 | 775 | 6390   | 1.00E-117 | 248 | 258 | 96 +  | 3   | 259 | 1184   | 1441   |
| UN59059 | Rsa1.0_00112.1 | 665 | 132199 | 0         | 469 | 500 | 93 -  | 164 | 663 | 84822  | 85321  |
| UN59060 | Rsa1.0_00978.1 | 273 | 57739  | 1.00E-108 | 259 | 274 | 94 +  | 3   | 273 | 27487  | 27758  |
| UN59061 | Rsa1.0_08048.1 | 493 | 137630 | 1.00E-170 | 357 | 373 | 95 -  | 2   | 373 | 130328 | 130698 |
| UN59062 | Rsa1.0_00127.1 | 738 | 127446 | 1.00E-141 | 344 | 376 | 91 +  | 37  | 403 | 113042 | 113405 |
| UN59063 | Rsa1.0_00804.1 | 698 | 63726  | 0         | 364 | 369 | 98 -  | 3   | 371 | 23232  | 23597  |
| UN59064 | Rsa1.0_00633.1 | 778 | 71250  | 0         | 394 | 403 | 97 +  | 89  | 491 | 4702   | 5104   |
| UN59065 | Rsa1.0_00477.1 | 503 | 81556  | 1.00E-177 | 451 | 489 | 92 -  | 27  | 503 | 53818  | 54300  |
| UN59066 | Rsa1.0_00394.1 | 693 | 148426 | 1.00E-134 | 243 | 243 | 100 - | 2   | 244 | 83772  | 84014  |
| UN59067 | Rsa1.0_00755.1 | 717 | 192559 | 0         | 492 | 497 | 98 +  | 223 | 717 | 138989 | 139485 |
| UN59068 | Rsa1.0_00944.1 | 736 | 58733  | 0         | 541 | 589 | 91 +  | 152 | 736 | 45223  | 45799  |
| UN59069 | Rsa1.0_00070.1 | 268 | 150321 | 3.00E-72  | 163 | 170 | 95 -  | 1   | 169 | 62088  | 62252  |
| UN59070 | Rsa1.0_00015.1 | 782 | 561803 | 0         | 774 | 782 | 98 -  | 2   | 780 | 23100  | 23881  |
| UN59071 | Rsa1.0_20293.1 | 281 | 1320   | 2.00E-64  | 154 | 162 | 95 +  | 4   | 162 | 706    | 865    |
| UN59072 | Rsa1.0_00829.1 | 256 | 158305 | 1.00E-56  | 125 | 128 | 97 +  | 100 | 226 | 107663 | 107790 |
| UN59073 | Rsa1.0_00856.1 | 282 | 62037  | 3.00E-60  | 153 | 164 | 93 +  | 4   | 167 | 14559  | 14719  |
| UN59074 | Rsa1.0_00493.1 | 554 | 80007  | 1.00E-130 | 265 | 272 | 97 +  | 284 | 554 | 6252   | 6522   |
| UN59075 | Rsa1.0_00505.1 | 804 | 79323  | 1.00E-106 | 235 | 249 | 94 +  | 3   | 251 | 4292   | 4532   |
| UN59076 | Rsa1.0_01504.1 | 666 | 189978 | 1.00E-166 | 355 | 371 | 95 +  | 304 | 666 | 41496  | 41865  |
| UN59077 | Rsa1.0_00484.1 | 752 | 203294 | 2.00E-97  | 199 | 205 | 97 -  | 148 | 352 | 52037  | 52241  |
| UN59078 | Rsa1.0_03937.1 | 775 | 19969  | 1.00E-70  | 161 | 168 | 95 -  | 2   | 168 | 5147   | 5314   |
| UN59079 | Rsa1.0_07001.1 | 740 | 10048  | 2.00E-63  | 130 | 132 | 98 -  | 413 | 544 | 6595   | 6726   |
| UN59080 | Rsa1.0_01656.1 | 189 | 41494  | 3.00E-31  | 145 | 173 | 83 -  | 1   | 150 | 13867  | 14039  |
| UN59081 | Rsa1.0_01727.1 | 547 | 40243  | 0         | 524 | 546 | 95 +  | 2   | 547 | 385    | 929    |
| UN59082 | Rsa1.0_01005.1 | 804 | 56967  | 1.00E-135 | 259 | 264 | 98 -  | 395 | 658 | 16479  | 16742  |
| UN59083 | Rsa1.0_02259.1 | 328 | 33299  | 9.00E-30  | 261 | 321 | 81 +  | 1   | 315 | 29457  | 29777  |

|         |                |     |        |           |     |     |       |     |     |        |        |
|---------|----------------|-----|--------|-----------|-----|-----|-------|-----|-----|--------|--------|
| UN59084 | Rsa1.0_06892.1 | 623 | 10197  | 1.00E-164 | 339 | 353 | 96 +  | 237 | 589 | 9775   | 10126  |
| UN59085 | Rsa1.0_18276.1 | 732 | 1631   | 1.00E-148 | 384 | 420 | 91 -  | 34  | 448 | 1      | 410    |
| UN59086 | Rsa1.0_08388.1 | 163 | 7436   | 1.00E-54  | 126 | 132 | 95 -  | 32  | 163 | 3860   | 3991   |
| UN59087 | Rsa1.0_07333.1 | 777 | 9547   | 6.00E-36  | 78  | 78  | 100 + | 27  | 104 | 8134   | 8211   |
| UN59088 | Rsa1.0_01032.1 | 549 | 56189  | 0         | 414 | 418 | 99 +  | 134 | 549 | 24607  | 25023  |
| UN59089 | Rsa1.0_07379.1 | 604 | 9492   | 1.00E-61  | 127 | 129 | 98 +  | 4   | 132 | 1936   | 2064   |
| UN59090 | Rsa1.0_08353.1 | 615 | 7492   | 1.00E-165 | 508 | 577 | 88 -  | 62  | 615 | 773    | 1328   |
| UN59091 | Rsa1.0_00053.1 | 634 | 263459 | 0         | 585 | 637 | 91 +  | 1   | 634 | 192009 | 192639 |
| UN59092 | Rsa1.0_02643.1 | 772 | 29176  | 0         | 362 | 370 | 97 -  | 125 | 491 | 6109   | 6478   |
| UN59093 | Rsa1.0_00284.1 | 351 | 323267 | 3.00E-70  | 138 | 139 | 99 -  | 90  | 228 | 234814 | 234952 |
| UN59094 | Rsa1.0_00038.1 | 376 | 314568 | 1.00E-172 | 363 | 381 | 95 +  | 3   | 376 | 175980 | 176360 |
| UN59095 | Rsa1.0_04243.1 | 769 | 18321  | 0         | 381 | 393 | 96 -  | 90  | 482 | 5629   | 6021   |
| UN59096 | Rsa1.0_02514.1 | 761 | 30642  | 0         | 561 | 591 | 94 -  | 163 | 741 | 9964   | 10545  |
| UN59097 | Rsa1.0_00367.1 | 780 | 90750  | 0         | 672 | 686 | 97 +  | 100 | 780 | 11354  | 12039  |
| UN59098 | Rsa1.0_00029.1 | 645 | 272992 | 0         | 480 | 502 | 95 +  | 101 | 599 | 260779 | 261279 |
| UN59099 | Rsa1.0_16427.1 | 504 | 2159   | 1.00E-138 | 264 | 269 | 98 -  | 108 | 376 | 1      | 269    |
| UN59100 | Rsa1.0_07419.1 | 784 | 9424   | 3.00E-41  | 126 | 138 | 91 +  | 341 | 476 | 433    | 570    |
| UN59101 | Rsa1.0_02496.1 | 775 | 30814  | 0         | 405 | 420 | 96 +  | 2   | 421 | 12912  | 13328  |
| UN59102 | Rsa1.0_00160.1 | 712 | 346678 | 0         | 483 | 496 | 97 +  | 9   | 503 | 143548 | 144043 |
| UN59103 | Rsa1.0_00191.1 | 803 | 316976 | 0         | 362 | 373 | 97 +  | 372 | 737 | 34469  | 34841  |
| UN59104 | Rsa1.0_00116.1 | 769 | 365886 | 1.00E-106 | 225 | 235 | 95 +  | 115 | 349 | 222135 | 222369 |
| UN59105 | Rsa1.0_00652.1 | 826 | 70089  | 1.00E-139 | 351 | 389 | 90 +  | 25  | 398 | 46924  | 47303  |
| UN59106 | Rsa1.0_01783.1 | 664 | 39383  | 0         | 519 | 543 | 95 +  | 122 | 659 | 33733  | 34272  |
| UN59107 | Rsa1.0_00204.1 | 735 | 109056 | 1.00E-117 | 223 | 226 | 98 -  | 371 | 596 | 20868  | 21093  |
| UN59108 | Rsa1.0_18145.1 | 786 | 1657   | 0         | 414 | 440 | 94 -  | 345 | 783 | 290    | 729    |
| UN59109 | Rsa1.0_00269.1 | 618 | 341668 | 0         | 414 | 420 | 98 -  | 199 | 618 | 309793 | 310210 |
| UN59110 | Rsa1.0_01910.1 | 656 | 37405  | 1.00E-130 | 242 | 244 | 99 +  | 182 | 425 | 26990  | 27233  |
| UN59111 | Rsa1.0_00048.1 | 594 | 167185 | 1.00E-123 | 248 | 256 | 96 -  | 3   | 258 | 31363  | 31618  |
| UN59112 | Rsa1.0_00387.1 | 620 | 495407 | 0         | 601 | 623 | 96 -  | 3   | 620 | 402140 | 402760 |
| UN59113 | Rsa1.0_00107.1 | 791 | 431659 | 0         | 494 | 507 | 97 +  | 174 | 679 | 145075 | 145581 |
| UN59114 | Rsa1.0_00135.1 | 779 | 178077 | 1.00E-175 | 380 | 402 | 94 +  | 4   | 404 | 17827  | 18221  |
| UN59115 | Rsa1.0_00505.1 | 742 | 79323  | 1.00E-140 | 279 | 288 | 96 +  | 2   | 289 | 4321   | 4608   |
| UN59116 | Rsa1.0_00002.1 | 566 | 601661 | 1.00E-152 | 300 | 307 | 97 +  | 260 | 566 | 544239 | 544542 |
| UN59117 | Rsa1.0_02526.1 | 283 | 30479  | 5.00E-68  | 134 | 135 | 99 -  | 1   | 135 | 15200  | 15334  |
| UN59118 | Rsa1.0_04651.1 | 751 | 16516  | 2.33E-156 | 288 | 294 | 97 -  | 431 | 721 | 14095  | 14388  |
| UN59119 | Rsa1.0_01875.1 | 764 | 37849  | 0         | 633 | 668 | 94 +  | 3   | 664 | 17219  | 17872  |
| UN59120 | Rsa1.0_01838.1 | 494 | 38500  | 1.00E-73  | 150 | 153 | 98 +  | 263 | 415 | 16843  | 16995  |
| UN59121 | Rsa1.0_26455.1 | 628 | 891    | 2.00E-91  | 171 | 171 | 100 - | 3   | 173 | 24     | 194    |
| UN59122 | Rsa1.0_28998.1 | 765 | 796    | 0         | 343 | 346 | 99 +  | 350 | 694 | 435    | 780    |

|         |                |     |        |           |     |     |       |     |     |        |        |
|---------|----------------|-----|--------|-----------|-----|-----|-------|-----|-----|--------|--------|
| UN59123 | Rsa1.0.39063.1 | 396 | 576    | 1.00E-84  | 184 | 191 | 96 +  | 3   | 193 | 204    | 393    |
| UN59124 | Rsa1.0.01326.1 | 712 | 48072  | 0         | 351 | 355 | 98 -  | 360 | 712 | 34677  | 35031  |
| UN59125 | Rsa1.0.11519.1 | 706 | 5480   | 1.00E-153 | 304 | 313 | 97 -  | 1   | 310 | 4924   | 5236   |
| UN59126 | Rsa1.0.00479.1 | 299 | 81377  | 8.00E-61  | 171 | 183 | 93 +  | 1   | 183 | 79715  | 79893  |
| UN59127 | Rsa1.0.18107.1 | 748 | 1664   | 0         | 635 | 664 | 95 +  | 88  | 748 | 745    | 1399   |
| UN59128 | Rsa1.0.15357.1 | 625 | 2660   | 0         | 476 | 485 | 98 +  | 3   | 484 | 1529   | 2013   |
| UN59129 | Rsa1.0.00104.1 | 155 | 368722 | 4.00E-61  | 149 | 155 | 96 -  | 2   | 153 | 347113 | 347267 |
| UN59130 | Rsa1.0.01144.1 | 715 | 52431  | 1.00E-141 | 268 | 271 | 98 +  | 330 | 599 | 40617  | 40887  |
| UN59131 | Rsa1.0.02479.1 | 532 | 31038  | 8.00E-47  | 96  | 96  | 100 + | 427 | 522 | 15064  | 15159  |
| UN59132 | Rsa1.0.14629.1 | 678 | 3210   | 0         | 673 | 678 | 99 -  | 1   | 678 | 835    | 1512   |
| UN59133 | Rsa1.0.00451.1 | 690 | 322533 | 0         | 621 | 648 | 95 +  | 35  | 672 | 64925  | 65570  |
| UN59134 | Rsa1.0.08338.1 | 150 | 7511   | 2.00E-22  | 86  | 94  | 91 +  | 38  | 131 | 2005   | 2096   |
| UN59135 | Rsa1.0.00332.1 | 711 | 94575  | 0         | 708 | 709 | 99 -  | 3   | 711 | 57047  | 57754  |
| UN59136 | Rsa1.0.00190.1 | 689 | 318240 | 1.00E-144 | 286 | 295 | 96 -  | 392 | 686 | 298754 | 299048 |
| UN59137 | Rsa1.0.01699.1 | 650 | 40816  | 0         | 339 | 342 | 99 -  | 1   | 342 | 19400  | 19741  |
| UN59138 | Rsa1.0.00566.1 | 567 | 75325  | 2.00E-81  | 160 | 162 | 98 -  | 155 | 316 | 38088  | 38249  |
| UN59139 | Rsa1.0.00129.1 | 146 | 126831 | 1.00E-39  | 89  | 91  | 97 -  | 1   | 91  | 101517 | 101607 |
| UN59140 | Rsa1.0.01869.1 | 194 | 37928  | 1.00E-86  | 186 | 194 | 95 -  | 1   | 194 | 27751  | 27944  |
| UN59141 | Rsa1.0.12857.1 | 483 | 5096   | 1.00E-105 | 247 | 264 | 93 +  | 197 | 453 | 2330   | 2593   |
| UN59142 | Rsa1.0.01220.1 | 553 | 161775 | 0         | 518 | 554 | 93 +  | 3   | 553 | 112948 | 113498 |
| UN59143 | Rsa1.0.00422.1 | 710 | 86144  | 0         | 679 | 725 | 93 +  | 1   | 710 | 32011  | 32735  |
| UN59144 | Rsa1.0.00427.1 | 588 | 189678 | 0         | 530 | 543 | 97 -  | 3   | 545 | 57292  | 57834  |
| UN59145 | Rsa1.0.07826.1 | 694 | 8466   | 1.00E-167 | 447 | 493 | 90 +  | 188 | 680 | 4587   | 5075   |
| UN59146 | Rsa1.0.01648.1 | 685 | 41635  | 4.00E-77  | 153 | 155 | 98 -  | 312 | 466 | 32601  | 32755  |
| UN59147 | Rsa1.0.00818.1 | 754 | 62939  | 1.00E-104 | 198 | 200 | 99 +  | 223 | 422 | 42020  | 42219  |
| UN59148 | Rsa1.0.14084.1 | 674 | 3822   | 1.00E-135 | 260 | 265 | 98 -  | 2   | 266 | 281    | 545    |
| UN59149 | Rsa1.0.00010.1 | 744 | 294827 | 2.00E-88  | 187 | 194 | 96 -  | 147 | 340 | 215674 | 215867 |
| UN59150 | Rsa1.0.01376.1 | 664 | 47004  | 1.00E-143 | 285 | 294 | 96 +  | 64  | 357 | 2      | 295    |
| UN59151 | Rsa1.0.01543.1 | 197 | 43645  | 2.00E-88  | 189 | 197 | 95 -  | 1   | 197 | 7799   | 7995   |
| UN59152 | Rsa1.0.00043.1 | 737 | 264937 | 1.00E-178 | 381 | 396 | 96 -  | 346 | 737 | 143212 | 143606 |
| UN59153 | Rsa1.0.04407.1 | 706 | 17504  | 1.00E-174 | 327 | 333 | 98 -  | 374 | 706 | 4291   | 4623   |
| UN59154 | Rsa1.0.16565.1 | 646 | 2110   | 0         | 496 | 522 | 95 -  | 121 | 640 | 493    | 1014   |
| UN59155 | Rsa1.0.00173.1 | 732 | 288743 | 1.00E-135 | 274 | 282 | 97 +  | 3   | 281 | 42961  | 43241  |
| UN59156 | Rsa1.0.00163.1 | 526 | 116847 | 4.00E-42  | 100 | 104 | 96 +  | 85  | 188 | 63366  | 63469  |
| UN59157 | Rsa1.0.01065.1 | 779 | 55264  | 1.00E-141 | 311 | 330 | 94 +  | 3   | 326 | 798    | 1127   |
| UN59158 | Rsa1.0.01785.1 | 811 | 39368  | 6.00E-98  | 185 | 186 | 99 +  | 1   | 186 | 16605  | 16790  |
| UN59159 | Rsa1.0.00277.1 | 356 | 100132 | 1.00E-35  | 87  | 89  | 97 +  | 268 | 356 | 49296  | 49383  |
| UN59160 | Rsa1.0.13686.1 | 528 | 4480   | 0         | 446 | 458 | 97 +  | 71  | 528 | 381    | 837    |
| UN59161 | Rsa1.0.00088.1 | 604 | 141341 | 1.00E-167 | 315 | 318 | 99 -  | 288 | 604 | 55146  | 55462  |

|         |                |     |        |           |     |     |       |     |     |        |        |
|---------|----------------|-----|--------|-----------|-----|-----|-------|-----|-----|--------|--------|
| UN59162 | Rsa1.0.02914.1 | 752 | 26815  | 1.00E-101 | 204 | 208 | 98 +  | 1   | 207 | 22976  | 23183  |
| UN59163 | Rsa1.0.00635.1 | 444 | 175826 | 0         | 403 | 428 | 94 -  | 3   | 429 | 107077 | 107492 |
| UN59164 | Rsa1.0.02507.1 | 701 | 30696  | 1.00E-143 | 303 | 317 | 95 +  | 4   | 320 | 10183  | 10498  |
| UN59165 | Rsa1.0.01670.1 | 718 | 41260  | 0         | 694 | 701 | 99 -  | 18  | 718 | 3811   | 4508   |
| UN59166 | Rsa1.0.00999.1 | 641 | 57162  | 0         | 602 | 654 | 92 +  | 1   | 641 | 38044  | 38688  |
| UN59167 | Rsa1.0.00205.1 | 761 | 193401 | 0         | 725 | 764 | 94 -  | 1   | 761 | 186509 | 187272 |
| UN59168 | Rsa1.0.03541.1 | 754 | 22194  | 1.00E-125 | 244 | 247 | 98 -  | 506 | 750 | 18039  | 18285  |
| UN59169 | Rsa1.0.00670.1 | 238 | 69371  | 1.00E-126 | 234 | 236 | 99 +  | 2   | 237 | 9368   | 9603   |
| UN59170 | Rsa1.0.17534.1 | 669 | 1803   | 1.00E-160 | 295 | 298 | 98 -  | 1   | 298 | 1368   | 1665   |
| UN59171 | Rsa1.0.05522.1 | 665 | 13441  | 0         | 632 | 641 | 98 -  | 20  | 660 | 5389   | 6029   |
| UN59172 | Rsa1.0.09112.1 | 668 | 6641   | 1.00E-149 | 338 | 361 | 93 +  | 11  | 371 | 5670   | 6022   |
| UN59173 | Rsa1.0.01015.1 | 701 | 56752  | 1.00E-24  | 195 | 244 | 79 +  | 278 | 505 | 1747   | 1990   |
| UN59174 | Rsa1.0.02662.1 | 798 | 28956  | 1.00E-140 | 277 | 285 | 97 +  | 162 | 446 | 7819   | 8103   |
| UN59175 | Rsa1.0.00112.1 | 644 | 132199 | 0         | 605 | 633 | 95 +  | 1   | 625 | 115082 | 115714 |
| UN59176 | Rsa1.0.00064.1 | 702 | 240927 | 1.00E-101 | 191 | 192 | 99 +  | 139 | 330 | 182799 | 182990 |
| UN59177 | Rsa1.0.17597.1 | 765 | 1788   | 3.00E-87  | 185 | 192 | 96 +  | 141 | 332 | 1057   | 1248   |
| UN59178 | Rsa1.0.01008.1 | 622 | 56924  | 0         | 592 | 595 | 99 -  | 28  | 622 | 9557   | 10151  |
| UN59179 | Rsa1.0.69907.1 | 539 | 328    | 1.00E-156 | 285 | 287 | 99 -  | 187 | 473 | 1      | 287    |
| UN59180 | Rsa1.0.00026.1 | 728 | 327835 | 0         | 693 | 736 | 94 -  | 1   | 728 | 230593 | 231317 |
| UN59181 | Rsa1.0.01081.1 | 663 | 499226 | 1.00E-137 | 248 | 248 | 100 - | 416 | 663 | 170966 | 171213 |
| UN59182 | Rsa1.0.07639.1 | 715 | 8966   | 0         | 704 | 711 | 99 -  | 2   | 710 | 7060   | 7770   |
| UN59183 | Rsa1.0.02858.1 | 406 | 27246  | 1.00E-57  | 127 | 130 | 97 -  | 103 | 232 | 5128   | 5256   |
| UN59184 | Rsa1.0.00253.1 | 693 | 231292 | 0         | 438 | 454 | 96 -  | 240 | 692 | 25589  | 26042  |
| UN59185 | Rsa1.0.00420.1 | 373 | 86496  | 1.00E-106 | 225 | 234 | 96 -  | 3   | 233 | 45120  | 45353  |
| UN59186 | Rsa1.0.00806.1 | 692 | 63674  | 1.00E-169 | 339 | 350 | 96 +  | 186 | 534 | 20246  | 20595  |
| UN59187 | Rsa1.0.10321.1 | 786 | 5887   | 0         | 641 | 685 | 93 -  | 108 | 776 | 198    | 879    |
| UN59188 | Rsa1.0.00703.1 | 721 | 67597  | 1.00E-77  | 169 | 176 | 96 -  | 3   | 178 | 32491  | 32666  |
| UN59189 | Rsa1.0.02996.1 | 790 | 26152  | 1.00E-83  | 161 | 162 | 99 +  | 305 | 466 | 20002  | 20163  |
| UN59190 | Rsa1.0.00710.1 | 733 | 67325  | 2.00E-94  | 230 | 246 | 93 -  | 486 | 722 | 12245  | 12490  |
| UN59191 | Rsa1.0.00333.1 | 642 | 94500  | 3.00E-59  | 123 | 125 | 98 +  | 4   | 128 | 31107  | 31231  |
| UN59192 | Rsa1.0.00813.1 | 754 | 63202  | 1.00E-86  | 209 | 224 | 93 +  | 299 | 513 | 43785  | 44008  |
| UN59193 | Rsa1.0.04689.1 | 785 | 16376  | 0         | 421 | 423 | 99 +  | 107 | 529 | 539    | 961    |
| UN59194 | Rsa1.0.00488.1 | 517 | 80490  | 1.00E-147 | 278 | 281 | 98 +  | 3   | 283 | 5217   | 5496   |
| UN59195 | Rsa1.0.00356.1 | 669 | 91521  | 1.00E-122 | 252 | 261 | 96 +  | 114 | 372 | 47880  | 48140  |
| UN59196 | Rsa1.0.00433.1 | 692 | 85381  | 0         | 690 | 691 | 99 -  | 2   | 692 | 63131  | 63821  |
| UN59197 | Rsa1.0.02568.1 | 756 | 30015  | 1.00E-133 | 253 | 257 | 98 -  | 3   | 259 | 11243  | 11499  |
| UN59198 | Rsa1.0.04935.1 | 734 | 15403  | 2.00E-38  | 124 | 138 | 89 +  | 5   | 142 | 4320   | 4457   |
| UN59199 | Rsa1.0.03160.1 | 756 | 24916  | 0         | 474 | 487 | 97 +  | 278 | 756 | 1010   | 1496   |
| UN59200 | Rsa1.0.00640.1 | 610 | 70979  | 0         | 575 | 612 | 93 -  | 3   | 608 | 34862  | 35469  |



|         |                |     |        |           |     |     |       |     |     |        |        |
|---------|----------------|-----|--------|-----------|-----|-----|-------|-----|-----|--------|--------|
| UN59201 | Rsa1.0.00087.1 | 783 | 761073 | 1.00E-98  | 239 | 257 | 92 +  | 262 | 518 | 233697 | 233950 |
| UN59202 | Rsa1.0.00769.1 | 706 | 64911  | 1.00E-174 | 337 | 346 | 97 +  | 4   | 349 | 12927  | 13272  |
| UN59203 | Rsa1.0.01389.1 | 777 | 46716  | 1.00E-137 | 293 | 302 | 97 +  | 460 | 757 | 10431  | 10729  |
| UN59204 | Rsa1.0.03626.1 | 794 | 160993 | 0         | 341 | 344 | 99 +  | 2   | 345 | 2302   | 2645   |
| UN59205 | Rsa1.0.00649.1 | 709 | 70263  | 1.00E-174 | 408 | 436 | 93 +  | 178 | 609 | 24617  | 25050  |
| UN59206 | Rsa1.0.00187.1 | 583 | 393093 | 1.00E-125 | 227 | 227 | 100 + | 1   | 227 | 372011 | 372237 |
| UN59207 | Rsa1.0.00365.1 | 718 | 90902  | 0         | 696 | 719 | 96 -  | 4   | 718 | 64913  | 65631  |
| UN59208 | Rsa1.0.00006.1 | 593 | 396176 | 0         | 477 | 517 | 92 -  | 1   | 517 | 271218 | 271713 |
| UN59209 | Rsa1.0.02101.1 | 706 | 35017  | 1.00E-169 | 326 | 334 | 97 +  | 2   | 335 | 28937  | 29270  |
| UN59210 | Rsa1.0.01638.1 | 677 | 41857  | 3.00E-99  | 208 | 216 | 96 +  | 384 | 599 | 35980  | 36195  |
| UN59211 | Rsa1.0.39041.1 | 557 | 576    | 1.00E-135 | 254 | 257 | 98 -  | 211 | 467 | 1      | 257    |
| UN59212 | Rsa1.0.00038.1 | 627 | 314568 | 1.00E-162 | 331 | 343 | 96 -  | 146 | 487 | 253317 | 253656 |
| UN59213 | Rsa1.0.00611.1 | 727 | 72410  | 0         | 602 | 613 | 98 +  | 112 | 724 | 43471  | 44083  |
| UN59214 | Rsa1.0.02392.1 | 747 | 152517 | 2.00E-88  | 184 | 190 | 96 -  | 451 | 640 | 22042  | 22231  |
| UN59215 | Rsa1.0.10432.1 | 508 | 5853   | 0         | 480 | 508 | 94 +  | 1   | 508 | 4601   | 5106   |
| UN59216 | Rsa1.0.02471.1 | 745 | 31104  | 3.00E-90  | 184 | 189 | 97 +  | 144 | 332 | 18663  | 18851  |
| UN59217 | Rsa1.0.01475.1 | 726 | 45044  | 1.00E-173 | 379 | 400 | 94 -  | 334 | 726 | 37384  | 37783  |
| UN59218 | Rsa1.0.07634.1 | 738 | 8979   | 1.00E-178 | 330 | 333 | 99 -  | 390 | 721 | 8463   | 8795   |
| UN59219 | Rsa1.0.00911.1 | 605 | 59943  | 1.00E-147 | 295 | 304 | 97 +  | 303 | 605 | 34004  | 34307  |
| UN59220 | Rsa1.0.17297.1 | 753 | 1867   | 0         | 495 | 527 | 93 -  | 38  | 564 | 1344   | 1867   |
| UN59221 | Rsa1.0.01683.1 | 813 | 41059  | 0         | 472 | 509 | 92 +  | 282 | 782 | 23925  | 24417  |
| UN59222 | Rsa1.0.04057.1 | 634 | 19333  | 1.00E-138 | 249 | 249 | 100 + | 222 | 470 | 15501  | 15749  |
| UN59223 | Rsa1.0.05713.1 | 712 | 12855  | 1.00E-106 | 196 | 196 | 100 + | 1   | 196 | 616    | 811    |
| UN59224 | Rsa1.0.01286.1 | 820 | 49209  | 8.00E-94  | 217 | 227 | 95 -  | 591 | 815 | 40552  | 40777  |
| UN59225 | Rsa1.0.01175.1 | 583 | 51674  | 0         | 398 | 412 | 96 -  | 173 | 582 | 13967  | 14375  |
| UN59226 | Rsa1.0.01283.1 | 847 | 49257  | 2.00E-79  | 157 | 159 | 98 +  | 104 | 262 | 15344  | 15502  |
| UN59227 | Rsa1.0.01361.1 | 155 | 47226  | 5.00E-42  | 138 | 149 | 92 -  | 9   | 152 | 20162  | 20308  |
| UN59228 | Rsa1.0.06124.1 | 832 | 11681  | 0         | 792 | 842 | 94 +  | 7   | 832 | 6234   | 7072   |
| UN59229 | Rsa1.0.00422.1 | 796 | 86144  | 0         | 679 | 692 | 98 -  | 3   | 691 | 45223  | 45914  |
| UN59230 | Rsa1.0.02500.1 | 719 | 30768  | 0         | 458 | 487 | 94 +  | 151 | 634 | 8542   | 9025   |
| UN59231 | Rsa1.0.04646.1 | 814 | 16541  | 0         | 390 | 412 | 94 +  | 97  | 505 | 443    | 854    |
| UN59232 | Rsa1.0.00634.1 | 710 | 71222  | 1.00E-120 | 252 | 261 | 96 +  | 375 | 631 | 44913  | 45173  |
| UN59233 | Rsa1.0.00047.1 | 187 | 168582 | 3.00E-74  | 176 | 187 | 94 +  | 1   | 187 | 30104  | 30287  |
| UN59234 | Rsa1.0.00632.1 | 773 | 183777 | 1.00E-169 | 327 | 333 | 98 -  | 413 | 743 | 6130   | 6462   |
| UN59235 | Rsa1.0.00028.1 | 636 | 293984 | 0         | 613 | 635 | 96 -  | 2   | 636 | 66861  | 67495  |
| UN59236 | Rsa1.0.05233.1 | 628 | 14422  | 1.00E-158 | 312 | 322 | 96 +  | 1   | 322 | 6331   | 6652   |
| UN59237 | Rsa1.0.00134.1 | 796 | 390219 | 1.00E-105 | 201 | 203 | 99 -  | 174 | 376 | 46370  | 46572  |
| UN59238 | Rsa1.0.01412.1 | 693 | 46311  | 1.00E-147 | 296 | 306 | 96 +  | 3   | 299 | 14305  | 14610  |
| UN59239 | Rsa1.0.00257.1 | 745 | 102407 | 0         | 501 | 515 | 97 -  | 1   | 515 | 79985  | 80499  |

|         |                |     |        |           |     |     |      |     |     |        |        |
|---------|----------------|-----|--------|-----------|-----|-----|------|-----|-----|--------|--------|
| UN59240 | Rsa1.0.00236.1 | 240 | 104771 | 3.00E-50  | 144 | 157 | 91 - | 73  | 228 | 96721  | 96877  |
| UN59241 | Rsa1.0.00792.1 | 693 | 64163  | 0         | 539 | 570 | 94 + | 3   | 572 | 2510   | 3079   |
| UN59242 | Rsa1.0.12117.1 | 172 | 5311   | 5.00E-70  | 158 | 166 | 95 - | 1   | 166 | 4222   | 4387   |
| UN59243 | Rsa1.0.00028.1 | 774 | 293984 | 0         | 624 | 672 | 92 + | 4   | 673 | 265245 | 265898 |
| UN59244 | Rsa1.0.01846.1 | 720 | 38367  | 0         | 695 | 719 | 96 - | 3   | 720 | 16276  | 16994  |
| UN59245 | Rsa1.0.00369.1 | 796 | 266462 | 7.00E-82  | 167 | 171 | 97 - | 263 | 433 | 147360 | 147530 |
| UN59246 | Rsa1.0.00412.1 | 713 | 86935  | 0         | 482 | 496 | 97 - | 27  | 518 | 2899   | 3393   |
| UN59247 | Rsa1.0.01248.1 | 551 | 154103 | 1.00E-107 | 263 | 282 | 93 + | 270 | 551 | 11758  | 12032  |
| UN59248 | Rsa1.0.00552.1 | 653 | 206757 | 5.00E-76  | 183 | 195 | 93 - | 7   | 201 | 20128  | 20319  |
| UN59249 | Rsa1.0.04266.1 | 714 | 18195  | 1.00E-148 | 311 | 325 | 95 + | 397 | 714 | 5607   | 5931   |
| UN59250 | Rsa1.0.00150.1 | 720 | 154416 | 1.00E-171 | 328 | 336 | 97 - | 24  | 359 | 60307  | 60642  |
| UN59251 | Rsa1.0.03843.1 | 198 | 20496  | 1.00E-80  | 179 | 188 | 95 + | 11  | 198 | 16773  | 16960  |
| UN59252 | Rsa1.0.00047.1 | 681 | 168582 | 0         | 564 | 582 | 96 + | 74  | 655 | 122835 | 123416 |
| UN59253 | Rsa1.0.01305.1 | 659 | 48730  | 0         | 646 | 658 | 98 - | 2   | 659 | 6217   | 6874   |
| UN59254 | Rsa1.0.00500.1 | 836 | 272308 | 0         | 540 | 556 | 97 - | 246 | 801 | 31785  | 32340  |
| UN59255 | Rsa1.0.00120.1 | 790 | 277288 | 3.00E-16  | 63  | 69  | 91 + | 304 | 372 | 232781 | 232849 |
| UN59256 | Rsa1.0.02928.1 | 649 | 26680  | 0         | 522 | 555 | 94 + | 1   | 537 | 20010  | 20560  |
| UN59257 | Rsa1.0.11375.1 | 745 | 5528   | 1.00E-153 | 372 | 407 | 91 + | 1   | 407 | 4748   | 5136   |
| UN59258 | Rsa1.0.03860.1 | 266 | 20407  | 1.00E-74  | 252 | 288 | 87 + | 1   | 266 | 15814  | 16100  |
| UN59259 | Rsa1.0.01060.1 | 782 | 55368  | 1.00E-104 | 255 | 275 | 92 - | 1   | 272 | 22827  | 23096  |
| UN59260 | Rsa1.0.00686.1 | 727 | 68511  | 1.00E-119 | 263 | 277 | 94 + | 142 | 418 | 57551  | 57821  |
| UN59261 | Rsa1.0.00806.1 | 897 | 63674  | 0         | 535 | 568 | 94 - | 1   | 554 | 4643   | 5210   |
| UN59262 | Rsa1.0.00376.1 | 710 | 90101  | 3.00E-99  | 187 | 188 | 99 - | 490 | 677 | 23097  | 23284  |
| UN59263 | Rsa1.0.00224.1 | 786 | 327530 | 2.00E-63  | 133 | 136 | 97 + | 469 | 604 | 205575 | 205710 |
| UN59264 | Rsa1.0.00518.1 | 799 | 78360  | 2.00E-97  | 193 | 197 | 97 + | 215 | 411 | 19614  | 19810  |
| UN59265 | Rsa1.0.02748.1 | 638 | 28242  | 0         | 521 | 554 | 94 + | 43  | 590 | 14277  | 14825  |
| UN59266 | Rsa1.0.00356.1 | 491 | 91521  | 2.00E-99  | 208 | 216 | 96 + | 1   | 216 | 80190  | 80405  |
| UN59267 | Rsa1.0.03302.1 | 602 | 23898  | 1.00E-172 | 348 | 361 | 96 + | 1   | 358 | 17712  | 18072  |
| UN59268 | Rsa1.0.00961.1 | 294 | 58185  | 1.00E-105 | 211 | 217 | 97 - | 1   | 217 | 17672  | 17888  |
| UN59269 | Rsa1.0.03860.1 | 282 | 20407  | 4.00E-56  | 150 | 163 | 92 + | 67  | 229 | 14428  | 14590  |
| UN59270 | Rsa1.0.06800.1 | 328 | 10335  | 1.00E-141 | 268 | 273 | 98 + | 1   | 273 | 196    | 468    |
| UN59271 | #              | #   | #      | #         | #   | #   | #    | #   | #   | #      | #      |
| UN59272 | Rsa1.0.06045.1 | 550 | 11858  | 0         | 422 | 427 | 98 - | 1   | 427 | 3948   | 4374   |
| UN59273 | Rsa1.0.06259.1 | 578 | 11370  | 0         | 565 | 585 | 96 - | 1   | 578 | 685    | 1269   |
| UN59274 | Rsa1.0.02264.1 | 767 | 33233  | 1.00E-177 | 365 | 381 | 95 + | 167 | 547 | 8307   | 8684   |
| UN59275 | Rsa1.0.02626.1 | 369 | 29387  | 1.00E-124 | 246 | 253 | 97 + | 1   | 253 | 23041  | 23293  |
| UN59276 | Rsa1.0.00817.1 | 222 | 62961  | 5.00E-86  | 207 | 221 | 93 + | 3   | 222 | 53964  | 54184  |
| UN59277 | Rsa1.0.02991.1 | 745 | 26178  | 0         | 440 | 460 | 95 - | 15  | 471 | 2153   | 2610   |
| UN59278 | Rsa1.0.01567.1 | 819 | 43090  | 0         | 779 | 826 | 94 - | 1   | 819 | 4297   | 5122   |

|         |                |     |        |           |     |     |       |     |     |        |        |
|---------|----------------|-----|--------|-----------|-----|-----|-------|-----|-----|--------|--------|
| UN59279 | Rsa1.0.00002.1 | 112 | 601661 | 1.00E-41  | 101 | 106 | 95 +  | 7   | 112 | 82023  | 82128  |
| UN59280 | Rsa1.0.01308.1 | 677 | 48596  | 1.00E-169 | 364 | 381 | 95 -  | 299 | 674 | 26029  | 26406  |
| UN59281 | Rsa1.0.00092.1 | 506 | 659932 | 1.00E-125 | 287 | 307 | 93 +  | 94  | 400 | 518004 | 518304 |
| UN59282 | Rsa1.0.05004.1 | 360 | 15172  | 1.00E-135 | 262 | 268 | 97 +  | 1   | 268 | 1481   | 1748   |
| UN59283 | Rsa1.0.12420.1 | 504 | 5230   | 1.00E-138 | 400 | 453 | 88 -  | 1   | 431 | 2344   | 2785   |
| UN59284 | Rsa1.0.00065.1 | 264 | 454616 | 1.00E-103 | 245 | 264 | 92 +  | 3   | 259 | 4680   | 4943   |
| UN59285 | #              | #   | #      | #         | #   | #   | #     | #   | #   | #      | #      |
| UN59286 | Rsa1.0.02283.1 | 779 | 33024  | 0         | 511 | 527 | 96 -  | 2   | 528 | 18511  | 19029  |
| UN59287 | Rsa1.0.00301.1 | 518 | 365315 | 1.00E-133 | 353 | 390 | 90 +  | 98  | 474 | 194144 | 194528 |
| UN59288 | Rsa1.0.01182.1 | 733 | 167304 | 1.00E-127 | 290 | 309 | 93 +  | 350 | 655 | 117900 | 118208 |
| UN59289 | Rsa1.0.02812.1 | 748 | 27660  | 0         | 446 | 468 | 95 +  | 1   | 461 | 3688   | 4155   |
| UN59290 | Rsa1.0.01239.1 | 292 | 50107  | 5.00E-99  | 207 | 215 | 96 -  | 78  | 292 | 5307   | 5521   |
| UN59291 | Rsa1.0.00725.1 | 758 | 66757  | 0         | 466 | 489 | 95 -  | 44  | 532 | 10669  | 11155  |
| UN59292 | Rsa1.0.29217.1 | 782 | 789    | 1.00E-132 | 357 | 396 | 90 +  | 390 | 771 | 286    | 681    |
| UN59293 | Rsa1.0.00447.1 | 353 | 84051  | 1.00E-105 | 228 | 238 | 95 -  | 7   | 244 | 33914  | 34150  |
| UN59294 | Rsa1.0.00151.1 | 687 | 119541 | 1.00E-157 | 303 | 310 | 97 +  | 1   | 310 | 12291  | 12600  |
| UN59295 | Rsa1.0.00117.1 | 103 | 213118 | 5.00E-41  | 97  | 101 | 96 +  | 3   | 103 | 202654 | 202754 |
| UN59296 | Rsa1.0.03001.1 | 271 | 26108  | 6.00E-49  | 156 | 175 | 89 +  | 4   | 173 | 9533   | 9707   |
| UN59297 | Rsa1.0.04200.1 | 732 | 18490  | 0         | 666 | 688 | 96 +  | 1   | 687 | 8543   | 9224   |
| UN59298 | Rsa1.0.00651.1 | 754 | 247766 | 1.00E-177 | 323 | 326 | 99 +  | 1   | 326 | 181040 | 181365 |
| UN59299 | Rsa1.0.00387.1 | 678 | 495407 | 0         | 452 | 457 | 98 +  | 1   | 457 | 352064 | 352520 |
| UN59300 | Rsa1.0.03413.1 | 697 | 23137  | 0         | 475 | 508 | 93 -  | 27  | 534 | 8284   | 8788   |
| UN59301 | Rsa1.0.01261.1 | 146 | 49744  | 3.00E-49  | 137 | 149 | 91 -  | 1   | 146 | 9702   | 9850   |
| UN59302 | Rsa1.0.00671.1 | 559 | 397884 | 0         | 479 | 503 | 95 +  | 4   | 506 | 267942 | 268443 |
| UN59303 | Rsa1.0.00083.1 | 848 | 442773 | 0         | 792 | 823 | 96 +  | 32  | 848 | 359544 | 360362 |
| UN59304 | Rsa1.0.00071.1 | 718 | 345714 | 1.00E-152 | 298 | 304 | 98 -  | 1   | 302 | 135274 | 135576 |
| UN59305 | Rsa1.0.00407.1 | 791 | 191544 | 0         | 760 | 797 | 95 +  | 1   | 791 | 155495 | 156273 |
| UN59306 | Rsa1.0.21531.1 | 813 | 1195   | 1.00E-120 | 227 | 228 | 99 +  | 587 | 813 | 664    | 891    |
| UN59307 | Rsa1.0.26615.1 | 695 | 884    | 1.00E-117 | 233 | 239 | 97 -  | 3   | 241 | 273    | 511    |
| UN59308 | Rsa1.0.00359.1 | 798 | 91256  | 0         | 756 | 780 | 96 -  | 19  | 798 | 21954  | 22733  |
| UN59309 | Rsa1.0.13883.1 | 448 | 4153   | 2.00E-80  | 155 | 156 | 99 -  | 111 | 266 | 2949   | 3104   |
| UN59310 | Rsa1.0.00182.1 | 879 | 142305 | 0         | 690 | 721 | 95 -  | 1   | 718 | 94201  | 94916  |
| UN59311 | Rsa1.0.00291.1 | 637 | 172129 | 0         | 343 | 347 | 98 +  | 1   | 347 | 71499  | 71845  |
| UN59312 | Rsa1.0.00330.1 | 410 | 94666  | 1.00E-172 | 384 | 410 | 93 -  | 1   | 410 | 17156  | 17565  |
| UN59313 | Rsa1.0.15385.1 | 742 | 2644   | 0         | 438 | 444 | 98 -  | 299 | 742 | 331    | 774    |
| UN59314 | Rsa1.0.52707.1 | 772 | 432    | 0         | 351 | 351 | 100 - | 1   | 351 | 1      | 351    |
| UN59315 | Rsa1.0.02715.1 | 664 | 28466  | 0         | 650 | 666 | 97 +  | 5   | 664 | 6885   | 7550   |
| UN59316 | Rsa1.0.00003.1 | 735 | 340054 | 1.00E-64  | 264 | 310 | 85 -  | 18  | 327 | 159464 | 159773 |
| UN59317 | Rsa1.0.00293.1 | 734 | 339294 | 0         | 734 | 734 | 100 - | 1   | 734 | 177646 | 178379 |

|         |                |     |        |           |     |     |       |     |     |        |        |
|---------|----------------|-----|--------|-----------|-----|-----|-------|-----|-----|--------|--------|
| UN59318 | Rsa1.0.00161.1 | 225 | 116891 | 1.00E-105 | 217 | 225 | 96 -  | 1   | 225 | 24903  | 25127  |
| UN59319 | Rsa1.0.00229.1 | 128 | 105471 | 2.00E-47  | 117 | 124 | 94 -  | 5   | 128 | 43089  | 43212  |
| UN59320 | Rsa1.0.00630.1 | 778 | 71281  | 0         | 752 | 810 | 92 -  | 1   | 778 | 23932  | 24739  |
| UN59321 | Rsa1.0.00287.1 | 779 | 98687  | 1.00E-136 | 294 | 310 | 94 +  | 270 | 579 | 50187  | 50496  |
| UN59322 | Rsa1.0.00308.1 | 712 | 96915  | 1.00E-89  | 183 | 188 | 97 +  | 525 | 712 | 94163  | 94350  |
| UN59323 | Rsa1.0.00307.1 | 319 | 199003 | 5.00E-93  | 221 | 233 | 94 +  | 56  | 284 | 60726  | 60954  |
| UN59324 | Rsa1.0.00179.1 | 786 | 393324 | 1.00E-112 | 206 | 206 | 100 + | 4   | 209 | 51835  | 52040  |
| UN59325 | Rsa1.0.00065.1 | 131 | 454616 | 2.00E-40  | 112 | 120 | 93 -  | 1   | 120 | 448348 | 448466 |
| UN59326 | Rsa1.0.01438.1 | 161 | 45882  | 3.00E-40  | 105 | 112 | 93 -  | 5   | 116 | 32161  | 32272  |
| UN59327 | Rsa1.0.00053.1 | 678 | 263459 | 0         | 645 | 659 | 97 +  | 22  | 678 | 243012 | 243670 |
| UN59328 | Rsa1.0.00347.1 | 768 | 93048  | 0         | 649 | 721 | 90 +  | 1   | 694 | 82533  | 83234  |
| UN59329 | Rsa1.0.00143.1 | 235 | 121313 | 3.00E-84  | 192 | 201 | 95 +  | 36  | 235 | 32817  | 33015  |
| UN59330 | Rsa1.0.00103.1 | 754 | 135304 | 1.00E-116 | 233 | 240 | 97 +  | 1   | 240 | 126538 | 126777 |
| UN59331 | Rsa1.0.00198.1 | 829 | 222963 | 1.00E-166 | 303 | 305 | 99 +  | 1   | 305 | 51087  | 51391  |
| UN59332 | Rsa1.0.05343.1 | 650 | 14103  | 0         | 634 | 641 | 98 +  | 10  | 650 | 11684  | 12324  |
| UN59333 | Rsa1.0.00158.1 | 728 | 117999 | 0         | 673 | 696 | 96 +  | 1   | 685 | 23829  | 24524  |
| UN59334 | Rsa1.0.08586.1 | 639 | 7157   | 1.00E-162 | 334 | 350 | 95 +  | 290 | 639 | 1944   | 2284   |
| UN59335 | Rsa1.0.00088.1 | 412 | 141341 | 6.00E-87  | 193 | 203 | 95 -  | 210 | 412 | 4827   | 5029   |
| UN59336 | Rsa1.0.00979.1 | 710 | 57733  | 0         | 656 | 697 | 94 -  | 2   | 698 | 44924  | 45600  |
| UN59337 | Rsa1.0.00817.1 | 709 | 62961  | 0         | 416 | 429 | 96 -  | 1   | 424 | 30881  | 31305  |
| UN59338 | Rsa1.0.01436.1 | 414 | 45894  | 1.00E-108 | 298 | 327 | 91 -  | 14  | 334 | 16901  | 17220  |
| UN59339 | Rsa1.0.00706.1 | 136 | 291570 | 8.00E-22  | 74  | 81  | 91 +  | 1   | 81  | 25929  | 26009  |
| UN59340 | Rsa1.0.01453.1 | 581 | 45449  | 9.00E-56  | 123 | 127 | 96 -  | 323 | 449 | 1808   | 1934   |
| UN59341 | Rsa1.0.03612.1 | 386 | 21784  | 1.00E-178 | 374 | 392 | 95 -  | 1   | 386 | 9886   | 10277  |
| UN59342 | Rsa1.0.00359.1 | 776 | 91256  | 0         | 479 | 511 | 93 -  | 3   | 494 | 13631  | 14141  |
| UN59343 | Rsa1.0.00773.1 | 612 | 64839  | 0         | 459 | 494 | 92 -  | 1   | 491 | 13672  | 14164  |
| UN59344 | Rsa1.0.00215.1 | 195 | 201775 | 2.00E-63  | 156 | 167 | 93 -  | 8   | 174 | 163836 | 164002 |
| UN59345 | Rsa1.0.01570.1 | 712 | 43015  | 3.00E-93  | 281 | 315 | 89 +  | 1   | 299 | 10814  | 11124  |
| UN59346 | Rsa1.0.00220.1 | 543 | 192936 | 2.00E-75  | 252 | 285 | 88 +  | 3   | 274 | 143179 | 143460 |
| UN59347 | Rsa1.0.00026.1 | 495 | 327835 | 1.00E-110 | 203 | 203 | 100 + | 219 | 421 | 290986 | 291188 |
| UN59348 | Rsa1.0.02962.1 | 408 | 26419  | 1.00E-135 | 368 | 409 | 89 +  | 5   | 405 | 11390  | 11777  |
| UN59349 | Rsa1.0.00113.1 | 758 | 131574 | 0         | 727 | 756 | 96 +  | 5   | 758 | 123275 | 124025 |
| UN59350 | Rsa1.0.03640.1 | 581 | 21624  | 2.00E-69  | 140 | 142 | 98 +  | 163 | 304 | 17532  | 17673  |
| UN59351 | Rsa1.0.03304.1 | 708 | 23883  | 0         | 484 | 513 | 94 -  | 5   | 514 | 18843  | 19347  |
| UN59352 | Rsa1.0.17888.1 | 471 | 1717   | 1.00E-128 | 249 | 253 | 98 +  | 14  | 266 | 1109   | 1360   |
| UN59353 | Rsa1.0.01145.1 | 794 | 149247 | 0         | 489 | 509 | 96 +  | 1   | 506 | 123244 | 123750 |
| UN59354 | Rsa1.0.00195.1 | 831 | 251884 | 0         | 377 | 391 | 96 +  | 37  | 423 | 217405 | 217795 |
| UN59355 | Rsa1.0.00026.1 | 783 | 327835 | 0         | 407 | 409 | 99 +  | 2   | 410 | 52965  | 53372  |
| UN59356 | Rsa1.0.08927.1 | 654 | 6782   | 1.00E-130 | 273 | 284 | 96 -  | 5   | 287 | 87     | 370    |

|         |                |     |        |           |     |     |       |     |     |        |        |
|---------|----------------|-----|--------|-----------|-----|-----|-------|-----|-----|--------|--------|
| UN59357 | Rsa1.0.00123.1 | 664 | 325650 | 0         | 537 | 558 | 96 +  | 105 | 653 | 164267 | 164823 |
| UN59358 | Rsa1.0.01149.1 | 600 | 160459 | 3.00E-80  | 195 | 204 | 95 +  | 1   | 201 | 129794 | 129996 |
| UN59359 | Rsa1.0.00512.1 | 713 | 200277 | 0         | 426 | 447 | 95 -  | 1   | 443 | 71437  | 71883  |
| UN59360 | Rsa1.0.18254.1 | 721 | 1636   | 1.00E-141 | 326 | 348 | 93 +  | 2   | 335 | 682    | 1024   |
| UN59361 | Rsa1.0.01170.1 | 192 | 161131 | 4.00E-46  | 120 | 128 | 93 +  | 65  | 192 | 115176 | 115300 |
| UN59362 | Rsa1.0.14157.1 | 830 | 3726   | 1.00E-112 | 231 | 238 | 97 -  | 17  | 254 | 134    | 370    |
| UN59363 | Rsa1.0.00243.1 | 675 | 103651 | 0         | 613 | 639 | 95 +  | 38  | 675 | 87334  | 87972  |
| UN59364 | Rsa1.0.04386.1 | 703 | 17627  | 0         | 466 | 484 | 96 -  | 1   | 481 | 15113  | 15595  |
| UN59365 | Rsa1.0.12479.1 | 382 | 5214   | 2.00E-21  | 74  | 81  | 91 +  | 261 | 341 | 15     | 95     |
| UN59366 | Rsa1.0.01094.1 | 780 | 167285 | 0         | 532 | 564 | 94 -  | 39  | 591 | 49222  | 49779  |
| UN59367 | Rsa1.0.00311.1 | 559 | 96847  | 1.00E-110 | 225 | 232 | 96 +  | 101 | 332 | 33665  | 33892  |
| UN59368 | Rsa1.0.00483.1 | 641 | 81102  | 1.00E-164 | 293 | 293 | 100 - | 1   | 293 | 76625  | 76917  |
| UN59369 | Rsa1.0.02485.1 | 763 | 30968  | 0         | 505 | 527 | 95 +  | 1   | 525 | 21489  | 22014  |
| UN59370 | Rsa1.0.06038.1 | 584 | 11867  | 1.00E-163 | 382 | 409 | 93 -  | 2   | 409 | 8497   | 8901   |
| UN59371 | Rsa1.0.02214.1 | 198 | 161150 | 3.00E-31  | 78  | 81  | 96 +  | 60  | 140 | 527    | 607    |
| UN59372 | Rsa1.0.03365.1 | 460 | 23410  | 0         | 442 | 460 | 96 -  | 3   | 459 | 13261  | 13715  |
| UN59373 | Rsa1.0.00968.1 | 676 | 58020  | 1.00E-165 | 319 | 327 | 97 +  | 341 | 667 | 50504  | 50830  |
| UN59374 | Rsa1.0.00104.1 | 753 | 368722 | 0         | 699 | 741 | 94 -  | 14  | 753 | 213178 | 213918 |
| UN59375 | Rsa1.0.05517.1 | 673 | 13460  | 1.00E-101 | 225 | 236 | 95 -  | 11  | 245 | 7139   | 7374   |
| UN59376 | Rsa1.0.03780.1 | 445 | 20899  | 1.00E-109 | 218 | 224 | 97 +  | 1   | 224 | 10879  | 11102  |
| UN59377 | Rsa1.0.00050.1 | 779 | 237174 | 0         | 669 | 693 | 96 -  | 31  | 717 | 169290 | 169978 |
| UN59378 | Rsa1.0.00072.1 | 643 | 148743 | 0         | 376 | 383 | 98 -  | 151 | 532 | 10439  | 10821  |
| UN59379 | Rsa1.0.00336.1 | 690 | 445051 | 1.00E-61  | 130 | 133 | 97 -  | 353 | 485 | 305579 | 305711 |
| UN59380 | Rsa1.0.01565.1 | 791 | 155447 | 1.00E-147 | 286 | 293 | 97 -  | 499 | 791 | 9186   | 9478   |
| UN59381 | Rsa1.0.29430.1 | 725 | 783    | 0         | 536 | 560 | 95 -  | 168 | 725 | 225    | 783    |
| UN59382 | Rsa1.0.04279.1 | 888 | 18113  | 1.00E-159 | 317 | 325 | 97 -  | 1   | 325 | 16443  | 16765  |
| UN59383 | #              | #   | #      | #         | #   | #   | #     | #   | #   | #      | #      |
| UN59384 | Rsa1.0.03579.1 | 770 | 21969  | 1.00E-145 | 337 | 358 | 94 +  | 1   | 350 | 19418  | 19775  |
| UN59385 | Rsa1.0.02505.1 | 639 | 30703  | 0         | 530 | 580 | 91 +  | 1   | 563 | 22035  | 22609  |
| UN59386 | Rsa1.0.00420.1 | 829 | 86496  | 0         | 454 | 464 | 97 -  | 356 | 819 | 6924   | 7387   |
| UN59387 | Rsa1.0.00339.1 | 859 | 222974 | 1.00E-154 | 276 | 276 | 100 - | 1   | 276 | 5454   | 5729   |
| UN59388 | Rsa1.0.02076.1 | 708 | 153121 | 1.00E-162 | 325 | 337 | 96 -  | 370 | 706 | 30100  | 30430  |
| UN59389 | Rsa1.0.00081.1 | 644 | 143261 | 0         | 609 | 634 | 96 -  | 10  | 642 | 123487 | 124115 |
| UN59390 | Rsa1.0.05570.1 | 214 | 13301  | 1.00E-101 | 207 | 214 | 96 -  | 1   | 214 | 12968  | 13181  |
| UN59391 | Rsa1.0.01153.1 | 741 | 52264  | 0         | 357 | 361 | 98 -  | 3   | 362 | 37100  | 37460  |
| UN59392 | Rsa1.0.00194.1 | 294 | 110851 | 1.00E-137 | 285 | 297 | 95 +  | 1   | 294 | 68741  | 69037  |
| UN59393 | Rsa1.0.03682.1 | 737 | 21396  | 1.00E-137 | 285 | 297 | 95 -  | 3   | 290 | 13413  | 13709  |
| UN59394 | Rsa1.0.08078.1 | 118 | 7944   | 5.00E-38  | 114 | 122 | 93 +  | 1   | 118 | 3127   | 3247   |
| UN59395 | Rsa1.0.02810.1 | 735 | 27671  | 0         | 735 | 735 | 100 - | 1   | 735 | 21489  | 22223  |

|         |                |     |        |           |     |     |      |     |     |        |        |
|---------|----------------|-----|--------|-----------|-----|-----|------|-----|-----|--------|--------|
| UN59396 | Rsa1.0.00482.1 | 719 | 81162  | 1.00E-127 | 253 | 259 | 97 + | 2   | 259 | 60459  | 60717  |
| UN59397 | Rsa1.0.04653.1 | 664 | 16509  | 0         | 381 | 384 | 99 - | 1   | 384 | 2773   | 3156   |
| UN59398 | Rsa1.0.03553.1 | 809 | 22150  | 1.00E-169 | 347 | 359 | 96 + | 2   | 354 | 14869  | 15227  |
| UN59399 | Rsa1.0.00101.1 | 205 | 267193 | 7.00E-54  | 182 | 208 | 87 + | 1   | 205 | 4444   | 4641   |
| UN59400 | Rsa1.0.09006.1 | 880 | 6715   | 0         | 844 | 855 | 98 - | 1   | 846 | 5391   | 6245   |
| UN59401 | Rsa1.0.07021.1 | 299 | 10016  | 3.00E-48  | 146 | 162 | 90 - | 138 | 299 | 7265   | 7426   |
| UN59402 | Rsa1.0.00227.1 | 749 | 105849 | 0         | 541 | 547 | 98 + | 1   | 547 | 90203  | 90746  |
| UN59403 | Rsa1.0.08133.1 | 728 | 7852   | 0         | 433 | 444 | 97 - | 285 | 728 | 1359   | 1802   |
| UN59404 | Rsa1.0.00857.1 | 676 | 61904  | 0         | 373 | 376 | 99 + | 301 | 676 | 23316  | 23690  |
| UN59405 | Rsa1.0.08074.1 | 743 | 7952   | 0         | 464 | 479 | 96 - | 69  | 547 | 6387   | 6865   |
| UN59406 | Rsa1.0.04489.1 | 771 | 17145  | 2.00E-94  | 194 | 200 | 97 - | 357 | 556 | 9319   | 9518   |
| UN59407 | Rsa1.0.00094.1 | 235 | 139042 | 6.00E-98  | 202 | 209 | 96 + | 1   | 209 | 130535 | 130743 |
| UN59408 | Rsa1.0.01289.1 | 700 | 49181  | 0         | 339 | 344 | 98 + | 1   | 344 | 6130   | 6473   |
| UN59409 | Rsa1.0.00197.1 | 122 | 109714 | 1.00E-23  | 101 | 116 | 87 - | 7   | 122 | 65137  | 65252  |
| UN59410 | Rsa1.0.06468.1 | 197 | 10958  | 7.00E-91  | 188 | 193 | 97 + | 1   | 193 | 583    | 774    |
| UN59411 | Rsa1.0.00218.1 | 775 | 201480 | 1.00E-130 | 282 | 297 | 94 - | 169 | 465 | 111393 | 111680 |
| UN59412 | Rsa1.0.00604.1 | 118 | 146282 | 8.00E-37  | 105 | 114 | 92 - | 5   | 118 | 123431 | 123544 |
| UN59413 | #              | #   | #      | #         | #   | #   | #    | #   | #   | #      | #      |
| UN59414 | Rsa1.0.00016.1 | 202 | 831256 | 9.00E-66  | 185 | 200 | 92 + | 9   | 202 | 225491 | 225689 |
| UN59415 | Rsa1.0.02550.1 | 866 | 291051 | 0         | 466 | 478 | 97 + | 383 | 855 | 274287 | 274764 |
| UN59416 | Rsa1.0.03257.1 | 210 | 24305  | 6.00E-76  | 197 | 212 | 92 + | 1   | 210 | 13758  | 13969  |
| UN59417 | Rsa1.0.00413.1 | 549 | 86921  | 0         | 518 | 561 | 92 - | 1   | 549 | 4698   | 5258   |
| UN59418 | Rsa1.0.00545.1 | 750 | 189649 | 1.00E-166 | 319 | 326 | 97 - | 1   | 326 | 2122   | 2444   |
| UN59419 | Rsa1.0.06814.1 | 736 | 10309  | 0         | 624 | 657 | 94 + | 2   | 649 | 6150   | 6806   |
| UN59420 | Rsa1.0.00045.1 | 384 | 328694 | 1.00E-174 | 343 | 354 | 96 - | 31  | 384 | 289403 | 289756 |
| UN59421 | Rsa1.0.00491.1 | 780 | 80219  | 0         | 750 | 782 | 95 + | 1   | 778 | 72404  | 73182  |
| UN59422 | Rsa1.0.02196.1 | 793 | 34005  | 1.00E-106 | 211 | 216 | 97 - | 388 | 603 | 2308   | 2523   |
| UN59423 | Rsa1.0.00402.1 | 198 | 385315 | 3.00E-84  | 188 | 198 | 94 + | 1   | 198 | 228529 | 228726 |
| UN59424 | Rsa1.0.03263.1 | 645 | 24268  | 0         | 614 | 650 | 94 - | 1   | 645 | 21004  | 21645  |
| UN59425 | Rsa1.0.00491.1 | 163 | 80219  | 4.00E-24  | 135 | 156 | 86 + | 13  | 163 | 64271  | 64426  |
| UN59426 | Rsa1.0.03231.1 | 714 | 24456  | 1.00E-144 | 333 | 355 | 93 - | 6   | 355 | 23696  | 24048  |
| UN59427 | Rsa1.0.09409.1 | 151 | 6390   | 2.00E-56  | 141 | 151 | 93 - | 1   | 151 | 2226   | 2376   |
| UN59428 | Rsa1.0.00944.1 | 308 | 58733  | 1.00E-110 | 292 | 317 | 92 - | 1   | 308 | 45934  | 46245  |
| UN59429 | Rsa1.0.01134.1 | 190 | 52829  | 2.00E-42  | 112 | 120 | 93 + | 70  | 189 | 41897  | 42016  |
| UN59430 | Rsa1.0.00015.1 | 673 | 561803 | 1.00E-166 | 300 | 301 | 99 + | 1   | 301 | 22195  | 22495  |
| UN59431 | Rsa1.0.07821.1 | 111 | 8471   | 4.00E-17  | 72  | 81  | 88 + | 1   | 81  | 7629   | 7709   |
| UN59432 | Rsa1.0.01097.1 | 692 | 173349 | 0         | 664 | 683 | 97 + | 11  | 692 | 28924  | 29603  |
| UN59433 | Rsa1.0.01656.1 | 868 | 41494  | 2.00E-98  | 189 | 191 | 98 + | 385 | 575 | 12318  | 12508  |
| UN59434 | Rsa1.0.00033.1 | 127 | 515811 | 3.00E-27  | 114 | 131 | 87 + | 1   | 127 | 431500 | 431630 |

|         |                |     |        |           |     |     |      |     |     |        |        |
|---------|----------------|-----|--------|-----------|-----|-----|------|-----|-----|--------|--------|
| UN59435 | Rsa1.0.07014.1 | 780 | 10029  | 0         | 476 | 495 | 96 - | 5   | 499 | 6650   | 7144   |
| UN59436 | Rsa1.0.03136.1 | 804 | 25113  | 0         | 619 | 638 | 97 - | 2   | 624 | 15270  | 15907  |
| UN59437 | Rsa1.0.01536.1 | 251 | 43747  | 4.00E-90  | 216 | 232 | 93 + | 20  | 251 | 18980  | 19211  |
| UN59438 | Rsa1.0.01005.1 | 759 | 56967  | 1.00E-147 | 357 | 385 | 92 + | 2   | 383 | 16017  | 16393  |
| UN59439 | Rsa1.0.04286.1 | 141 | 18084  | 9.00E-28  | 106 | 119 | 89 + | 23  | 141 | 4207   | 4324   |
| UN59440 | Rsa1.0.00018.1 | 641 | 410899 | 1.00E-162 | 343 | 357 | 96 - | 4   | 357 | 189085 | 189440 |
| UN59441 | Rsa1.0.00069.1 | 103 | 403561 | 1.00E-16  | 71  | 80  | 88 - | 24  | 103 | 200738 | 200817 |
| UN59442 | Rsa1.0.02962.1 | 256 | 26419  | 2.00E-48  | 113 | 118 | 95 - | 1   | 118 | 21023  | 21140  |
| UN59443 | Rsa1.0.01081.1 | 638 | 499226 | 1.00E-131 | 302 | 319 | 94 + | 1   | 316 | 188832 | 189146 |
| UN59444 | Rsa1.0.00224.1 | 565 | 327530 | 0         | 542 | 555 | 97 - | 13  | 565 | 185624 | 186177 |
| UN59445 | Rsa1.0.00367.1 | 459 | 90750  | 0         | 443 | 461 | 96 - | 2   | 459 | 12560  | 13020  |
| UN59446 | Rsa1.0.00029.1 | 162 | 272992 | 2.00E-50  | 128 | 136 | 94 - | 29  | 162 | 261994 | 262129 |
| UN59447 | Rsa1.0.02642.1 | 783 | 29181  | 0         | 767 | 792 | 96 - | 1   | 783 | 13446  | 14237  |
| UN59448 | Rsa1.0.00067.1 | 750 | 415055 | 1.00E-136 | 273 | 282 | 96 - | 434 | 715 | 226623 | 226904 |
| UN59449 | Rsa1.0.07910.1 | 810 | 8314   | 1.00E-49  | 140 | 151 | 92 + | 595 | 741 | 7822   | 7972   |
| UN59450 | Rsa1.0.33729.1 | 672 | 672    | 1.00E-83  | 174 | 178 | 97 - | 1   | 177 | 1      | 178    |
| UN59451 | Rsa1.0.08994.1 | 182 | 6724   | 1.00E-70  | 170 | 181 | 93 - | 5   | 182 | 3572   | 3752   |
| UN59452 | Rsa1.0.12731.1 | 829 | 5142   | 1.00E-173 | 357 | 373 | 95 - | 3   | 366 | 130    | 502    |
| UN59453 | Rsa1.0.03479.1 | 472 | 22631  | 1.00E-121 | 357 | 402 | 88 - | 74  | 472 | 21816  | 22217  |
| UN59454 | Rsa1.0.00204.1 | 805 | 109056 | 0         | 413 | 426 | 96 + | 38  | 459 | 19482  | 19907  |
| UN59455 | Rsa1.0.03898.1 | 727 | 20183  | 0         | 369 | 381 | 96 - | 2   | 382 | 2513   | 2888   |
| UN59456 | Rsa1.0.00147.1 | 143 | 249503 | 1.00E-33  | 116 | 130 | 89 + | 14  | 139 | 217856 | 217985 |
| UN59457 | Rsa1.0.00016.1 | 569 | 831256 | 0         | 375 | 390 | 96 - | 3   | 392 | 785585 | 785969 |
| UN59458 | Rsa1.0.02499.1 | 828 | 30774  | 0         | 611 | 651 | 93 + | 185 | 822 | 4725   | 5368   |
| UN59459 | Rsa1.0.11429.1 | 417 | 5511   | 1.00E-139 | 254 | 255 | 99 - | 37  | 291 | 4743   | 4997   |
| UN59460 | Rsa1.0.00198.1 | 735 | 222963 | 0         | 390 | 409 | 95 + | 1   | 407 | 135019 | 135427 |
| UN59461 | Rsa1.0.00563.1 | 768 | 75491  | 1.00E-108 | 242 | 256 | 94 - | 400 | 655 | 7880   | 8135   |
| UN59462 | Rsa1.0.00071.1 | 857 | 345714 | 0         | 821 | 860 | 95 + | 1   | 857 | 318130 | 318988 |
| UN59463 | Rsa1.0.01474.1 | 766 | 45070  | 0         | 677 | 719 | 94 - | 1   | 704 | 40171  | 40881  |
| UN59464 | Rsa1.0.02386.1 | 711 | 31895  | 0         | 511 | 533 | 95 + | 179 | 711 | 10729  | 11261  |
| UN59465 | Rsa1.0.01857.1 | 713 | 38103  | 0         | 688 | 712 | 96 + | 2   | 713 | 12556  | 13267  |
| UN59466 | Rsa1.0.00111.1 | 156 | 390088 | 5.00E-14  | 55  | 60  | 91 - | 52  | 111 | 152187 | 152246 |
| UN59467 | Rsa1.0.00920.1 | 322 | 601703 | 1.00E-87  | 188 | 196 | 95 + | 127 | 322 | 17460  | 17655  |
| UN59468 | Rsa1.0.00321.1 | 782 | 95671  | 1.00E-148 | 321 | 335 | 95 - | 16  | 344 | 40671  | 41004  |
| UN59469 | Rsa1.0.00511.1 | 783 | 78616  | 0         | 769 | 795 | 96 - | 2   | 783 | 55634  | 56426  |
| UN59470 | Rsa1.0.00899.1 | 236 | 60404  | 4.00E-56  | 205 | 235 | 87 + | 3   | 236 | 12597  | 12831  |
| UN59471 | Rsa1.0.00522.1 | 724 | 78103  | 0         | 676 | 701 | 96 - | 9   | 708 | 51939  | 52632  |
| UN59472 | Rsa1.0.02064.1 | 808 | 35476  | 0         | 456 | 484 | 94 + | 8   | 475 | 16544  | 17023  |
| UN59473 | Rsa1.0.19147.1 | 110 | 1473   | 3.00E-45  | 104 | 108 | 96 + | 1   | 108 | 1129   | 1236   |

|         |                |     |        |           |     |     |       |     |     |        |        |
|---------|----------------|-----|--------|-----------|-----|-----|-------|-----|-----|--------|--------|
| UN59474 | Rsa1.0.58366.1 | 701 | 392    | 1.00E-153 | 318 | 335 | 94 -  | 122 | 456 | 70     | 391    |
| UN59475 | Rsa1.0.00104.1 | 663 | 368722 | 0         | 646 | 665 | 97 +  | 3   | 663 | 346419 | 347083 |
| UN59476 | Rsa1.0.00017.1 | 758 | 752458 | 0         | 656 | 658 | 99 -  | 16  | 673 | 335525 | 336182 |
| UN59477 | Rsa1.0.02479.1 | 621 | 31038  | 1.00E-112 | 223 | 228 | 97 -  | 385 | 609 | 15298  | 15525  |
| UN59478 | Rsa1.0.25041.1 | 233 | 954    | 2.00E-98  | 216 | 226 | 95 -  | 2   | 226 | 257    | 482    |
| UN59479 | Rsa1.0.08779.1 | 334 | 6929   | 1.00E-137 | 315 | 335 | 94 +  | 1   | 334 | 5811   | 6144   |
| UN59480 | Rsa1.0.00111.1 | 401 | 390088 | 1.00E-163 | 350 | 368 | 95 -  | 32  | 399 | 174815 | 175177 |
| UN59481 | Rsa1.0.01699.1 | 743 | 40816  | 0         | 380 | 387 | 98 +  | 1   | 387 | 17182  | 17567  |
| UN59482 | Rsa1.0.04234.1 | 565 | 18378  | 9.00E-93  | 194 | 201 | 96 -  | 171 | 371 | 7914   | 8114   |
| UN59483 | Rsa1.0.00991.1 | 545 | 143101 | 1.00E-159 | 381 | 407 | 93 -  | 1   | 406 | 29555  | 29951  |
| UN59484 | Rsa1.0.02846.1 | 744 | 27338  | 1.00E-109 | 246 | 260 | 94 +  | 3   | 258 | 16561  | 16818  |
| UN59485 | Rsa1.0.00129.1 | 813 | 126831 | 0         | 777 | 842 | 92 +  | 1   | 813 | 100442 | 101271 |
| UN59486 | Rsa1.0.01869.1 | 782 | 37928  | 0         | 487 | 494 | 98 +  | 284 | 776 | 26818  | 27311  |
| UN59487 | Rsa1.0.01220.1 | 697 | 161775 | 0         | 667 | 705 | 94 -  | 2   | 697 | 113837 | 114535 |
| UN59488 | Rsa1.0.21221.1 | 690 | 1224   | 0         | 375 | 384 | 97 +  | 307 | 690 | 80     | 462    |
| UN59489 | Rsa1.0.01721.1 | 257 | 40345  | 1.00E-117 | 247 | 257 | 96 +  | 1   | 257 | 5756   | 6011   |
| UN59490 | Rsa1.0.00094.1 | 120 | 139042 | 2.00E-13  | 39  | 39  | 100 - | 1   | 39  | 2138   | 2176   |
| UN59491 | Rsa1.0.00006.1 | 225 | 396176 | 1.00E-34  | 117 | 131 | 89 +  | 25  | 155 | 371237 | 371367 |
| UN59492 | Rsa1.0.04576.1 | 152 | 16783  | 6.00E-32  | 86  | 89  | 96 +  | 58  | 146 | 1267   | 1352   |
| UN59493 | Rsa1.0.00531.1 | 615 | 77387  | 0         | 612 | 615 | 99 +  | 3   | 615 | 26743  | 27357  |
| UN59494 | Rsa1.0.15707.1 | 809 | 2469   | 0         | 414 | 416 | 99 +  | 3   | 418 | 2054   | 2469   |
| UN59495 | Rsa1.0.02157.1 | 721 | 149652 | 1.00E-77  | 166 | 172 | 96 +  | 1   | 172 | 139742 | 139913 |
| UN59496 | Rsa1.0.04483.1 | 662 | 17174  | 1.00E-150 | 299 | 308 | 97 -  | 1   | 308 | 15244  | 15548  |
| UN59497 | Rsa1.0.03656.1 | 153 | 21552  | 2.00E-22  | 63  | 66  | 95 -  | 4   | 69  | 3479   | 3544   |
| UN59498 | Rsa1.0.00456.1 | 764 | 82826  | 0         | 348 | 351 | 99 +  | 1   | 351 | 7495   | 7845   |
| UN59499 | Rsa1.0.01361.1 | 729 | 47226  | 1.00E-119 | 292 | 312 | 93 +  | 420 | 729 | 19202  | 19509  |
| UN59500 | Rsa1.0.06124.1 | 633 | 11681  | 0         | 602 | 634 | 94 -  | 1   | 628 | 6891   | 7518   |
| UN59501 | Rsa1.0.02500.1 | 809 | 30768  | 1.00E-118 | 283 | 303 | 93 -  | 3   | 303 | 10187  | 10488  |
| UN59502 | Rsa1.0.00632.1 | 769 | 183777 | 0         | 736 | 769 | 95 +  | 2   | 769 | 5422   | 6180   |
| UN59503 | Rsa1.0.00194.1 | 133 | 110851 | 3.00E-18  | 112 | 130 | 86 -  | 1   | 129 | 13404  | 13530  |
| UN59504 | Rsa1.0.01819.1 | 548 | 38834  | 1.00E-54  | 133 | 140 | 95 +  | 297 | 436 | 27161  | 27298  |
| UN59505 | Rsa1.0.54167.1 | 143 | 421    | 9.00E-25  | 97  | 110 | 88 +  | 34  | 143 | 176    | 285    |
| UN59506 | Rsa1.0.04608.1 | 545 | 16661  | 1.00E-153 | 334 | 354 | 94 -  | 198 | 545 | 8176   | 8529   |
| UN59507 | Rsa1.0.06376.1 | 154 | 11135  | 1.00E-57  | 143 | 153 | 93 +  | 1   | 153 | 10252  | 10404  |
| UN59508 | Rsa1.0.06740.1 | 541 | 10439  | 1.00E-168 | 376 | 399 | 94 +  | 1   | 396 | 7401   | 7795   |
| UN59509 | Rsa1.0.00030.1 | 734 | 250988 | 0         | 366 | 377 | 97 -  | 1   | 376 | 103386 | 103761 |
| UN59510 | Rsa1.0.01412.1 | 726 | 46311  | 0         | 393 | 411 | 95 -  | 2   | 400 | 15912  | 16322  |
| UN59511 | Rsa1.0.00257.1 | 484 | 102407 | 0         | 446 | 473 | 94 +  | 12  | 484 | 78840  | 79312  |
| UN59512 | Rsa1.0.01147.1 | 518 | 52391  | 3.00E-61  | 276 | 334 | 82 +  | 1   | 330 | 46073  | 46362  |



|         |                |     |        |           |     |     |       |     |     |        |        |
|---------|----------------|-----|--------|-----------|-----|-----|-------|-----|-----|--------|--------|
| UN59513 | Rsa1.0_13227.1 | 713 | 4963   | 0         | 342 | 348 | 98 +  | 366 | 713 | 1      | 348    |
| UN59514 | Rsa1.0_00028.1 | 668 | 293984 | 0         | 651 | 666 | 97 -  | 4   | 668 | 266302 | 266967 |
| UN59515 | Rsa1.0_01846.1 | 122 | 38367  | 3.00E-39  | 112 | 122 | 91 +  | 1   | 122 | 16024  | 16145  |
| UN59516 | Rsa1.0_00369.1 | 164 | 266462 | 7.00E-26  | 101 | 115 | 87 +  | 52  | 160 | 146745 | 146859 |
| UN59517 | Rsa1.0_00133.1 | 577 | 123768 | 1.00E-155 | 280 | 281 | 99 -  | 46  | 326 | 28001  | 28281  |
| UN59518 | Rsa1.0_00006.1 | 602 | 396176 | 1.00E-127 | 295 | 315 | 93 -  | 121 | 434 | 201166 | 201480 |
| UN59519 | Rsa1.0_01121.1 | 773 | 53407  | 0         | 750 | 774 | 96 -  | 2   | 773 | 7884   | 8655   |
| UN59520 | Rsa1.0_02884.1 | 627 | 27034  | 0         | 419 | 433 | 96 -  | 51  | 478 | 6764   | 7195   |
| UN59521 | Rsa1.0_01412.1 | 288 | 46311  | 7.00E-55  | 235 | 274 | 85 +  | 17  | 288 | 10334  | 10603  |
| UN59522 | Rsa1.0_07263.1 | 146 | 9644   | 3.00E-34  | 125 | 142 | 88 -  | 1   | 142 | 5437   | 5578   |
| UN59523 | Rsa1.0_01561.1 | 722 | 43227  | 1.00E-95  | 178 | 178 | 100 - | 154 | 331 | 19302  | 19479  |
| UN59524 | Rsa1.0_00090.1 | 339 | 273859 | 1.00E-59  | 129 | 133 | 96 +  | 144 | 276 | 77912  | 78044  |
| UN59525 | Rsa1.0_02792.1 | 159 | 27829  | 3.00E-74  | 156 | 160 | 97 +  | 2   | 159 | 19485  | 19644  |
| UN59526 | Rsa1.0_16574.1 | 526 | 2106   | 0         | 378 | 386 | 97 +  | 46  | 431 | 1717   | 2102   |
| UN59527 | Rsa1.0_00098.1 | 277 | 349239 | 1.00E-90  | 169 | 169 | 100 + | 3   | 171 | 293303 | 293471 |
| UN59528 | Rsa1.0_13815.1 | 134 | 4270   | 1.00E-23  | 56  | 56  | 100 - | 79  | 134 | 1094   | 1149   |
| UN59529 | Rsa1.0_07219.1 | 232 | 9702   | 7.00E-33  | 88  | 92  | 95 -  | 75  | 166 | 1086   | 1176   |
| UN59530 | Rsa1.0_01803.1 | 608 | 173846 | 0         | 593 | 609 | 97 -  | 1   | 608 | 148853 | 149461 |
| UN59531 | Rsa1.0_00029.1 | 119 | 272992 | 2.00E-25  | 68  | 71  | 95 -  | 1   | 71  | 24583  | 24653  |
| UN59532 | Rsa1.0_09029.1 | 436 | 6700   | 0         | 428 | 437 | 97 -  | 3   | 436 | 5806   | 6241   |
| UN59533 | Rsa1.0_04581.1 | 121 | 16772  | 8.00E-31  | 92  | 100 | 92 +  | 13  | 112 | 16673  | 16772  |
| UN59534 | Rsa1.0_01478.1 | 656 | 44991  | 0         | 446 | 452 | 98 +  | 2   | 450 | 30821  | 31272  |
| UN59535 | Rsa1.0_00011.1 | 206 | 225044 | 6.00E-36  | 121 | 129 | 93 -  | 74  | 202 | 206033 | 206156 |
| UN59536 | Rsa1.0_00006.1 | 508 | 396176 | 2.00E-62  | 189 | 206 | 91 -  | 254 | 452 | 303349 | 303552 |
| UN59537 | Rsa1.0_00894.1 | 246 | 269700 | 5.00E-40  | 84  | 84  | 100 - | 163 | 246 | 128467 | 128550 |
| UN59538 | Rsa1.0_05495.1 | 188 | 13534  | 3.00E-53  | 120 | 122 | 98 -  | 57  | 178 | 2628   | 2747   |
| UN59539 | Rsa1.0_00661.1 | 783 | 213041 | 8.00E-57  | 199 | 229 | 86 +  | 208 | 422 | 62944  | 63172  |
| UN59540 | Rsa1.0_03448.1 | 757 | 22844  | 1.00E-148 | 270 | 271 | 99 -  | 487 | 757 | 19662  | 19932  |
| UN59541 | Rsa1.0_01323.1 | 663 | 48152  | 1.00E-174 | 316 | 318 | 99 -  | 274 | 591 | 45463  | 45780  |
| UN59542 | Rsa1.0_00236.1 | 264 | 104771 | 2.00E-51  | 120 | 125 | 96 -  | 1   | 125 | 20717  | 20838  |
| UN59543 | Rsa1.0_00396.1 | 291 | 88242  | 4.00E-90  | 174 | 176 | 98 +  | 94  | 269 | 18478  | 18653  |
| UN59544 | Rsa1.0_02010.1 | 806 | 36096  | 0         | 369 | 379 | 97 +  | 3   | 381 | 7547   | 7922   |
| UN59545 | Rsa1.0_02178.1 | 649 | 156197 | 0         | 641 | 650 | 98 +  | 2   | 649 | 15151  | 15798  |
| UN59546 | Rsa1.0_02065.1 | 206 | 35467  | 2.00E-97  | 198 | 204 | 97 -  | 3   | 206 | 131    | 334    |
| UN59547 | Rsa1.0_02378.1 | 194 | 31991  | 2.00E-38  | 115 | 121 | 95 +  | 1   | 121 | 13982  | 14098  |
| UN59548 | Rsa1.0_02605.1 | 745 | 29637  | 0         | 720 | 743 | 96 +  | 3   | 745 | 27473  | 28203  |
| UN59549 | Rsa1.0_00063.1 | 652 | 156150 | 0         | 359 | 368 | 97 +  | 279 | 646 | 141619 | 141986 |
| UN59550 | Rsa1.0_00246.1 | 661 | 103541 | 1.00E-134 | 286 | 299 | 95 -  | 365 | 661 | 42143  | 42438  |
| UN59551 | Rsa1.0_01453.1 | 804 | 45449  | 1.00E-109 | 227 | 233 | 97 -  | 545 | 775 | 14884  | 15116  |

|         |                |     |        |           |     |     |       |     |     |        |        |
|---------|----------------|-----|--------|-----------|-----|-----|-------|-----|-----|--------|--------|
| UN59552 | Rsa1.0.00026.1 | 673 | 327835 | 1.00E-149 | 319 | 334 | 95 -  | 3   | 336 | 48784  | 49114  |
| UN59553 | Rsa1.0.00690.1 | 669 | 140527 | 3.00E-90  | 181 | 185 | 97 -  | 472 | 656 | 26592  | 26776  |
| UN59554 | Rsa1.0.02975.1 | 823 | 26322  | 0         | 644 | 689 | 93 -  | 4   | 673 | 7477   | 8160   |
| UN59555 | Rsa1.0.01078.1 | 741 | 316910 | 0         | 374 | 385 | 97 +  | 31  | 415 | 283224 | 283605 |
| UN59556 | Rsa1.0.01509.1 | 795 | 44258  | 0         | 713 | 744 | 95 -  | 52  | 787 | 19793  | 20536  |
| UN59557 | Rsa1.0.01937.1 | 690 | 37147  | 2.00E-72  | 139 | 139 | 100 - | 211 | 349 | 32017  | 32155  |
| UN59558 | Rsa1.0.02792.1 | 764 | 27829  | 0         | 507 | 507 | 100 - | 3   | 509 | 27101  | 27607  |
| UN59559 | Rsa1.0.01018.1 | 707 | 56685  | 1.00E-152 | 312 | 323 | 96 -  | 378 | 698 | 12050  | 12366  |
| UN59560 | Rsa1.0.04379.1 | 764 | 17646  | 1.00E-114 | 231 | 238 | 97 +  | 3   | 240 | 15248  | 15485  |
| UN59561 | Rsa1.0.00040.1 | 564 | 324196 | 0         | 541 | 568 | 95 +  | 1   | 564 | 39238  | 39798  |
| UN59562 | Rsa1.0.01048.1 | 515 | 55684  | 1.00E-118 | 224 | 227 | 98 +  | 1   | 227 | 42148  | 42374  |
| UN59563 | Rsa1.0.00898.1 | 796 | 202772 | 5.00E-58  | 118 | 119 | 99 +  | 92  | 210 | 6844   | 6962   |
| UN59564 | Rsa1.0.05909.1 | 509 | 12265  | 1.00E-172 | 324 | 330 | 98 +  | 66  | 395 | 9036   | 9365   |
| UN59565 | Rsa1.0.06594.1 | 606 | 10700  | 0         | 549 | 618 | 88 -  | 4   | 606 | 4832   | 5424   |
| UN59566 | Rsa1.0.00270.1 | 741 | 101236 | 4.00E-86  | 162 | 162 | 100 - | 1   | 162 | 64245  | 64406  |
| UN59567 | Rsa1.0.00858.1 | 783 | 61892  | 0         | 560 | 570 | 98 +  | 2   | 571 | 18792  | 19361  |
| UN59568 | Rsa1.0.01527.1 | 765 | 43905  | 1.00E-140 | 291 | 305 | 95 -  | 7   | 311 | 37951  | 38246  |
| UN59569 | Rsa1.0.01000.1 | 786 | 57140  | 1.00E-132 | 277 | 291 | 95 -  | 2   | 292 | 18873  | 19153  |
| UN59570 | Rsa1.0.02840.1 | 778 | 27386  | 1.00E-129 | 359 | 393 | 91 -  | 406 | 777 | 16975  | 17365  |
| UN59571 | Rsa1.0.00447.1 | 682 | 84051  | 4.00E-95  | 222 | 237 | 93 +  | 3   | 229 | 23712  | 23948  |
| UN59572 | Rsa1.0.00020.1 | 675 | 283099 | 0         | 648 | 677 | 95 +  | 3   | 675 | 197116 | 197792 |
| UN59573 | Rsa1.0.00084.1 | 480 | 142338 | 0         | 384 | 386 | 99 +  | 2   | 387 | 28362  | 28747  |
| UN59574 | Rsa1.0.01149.1 | 746 | 160459 | 2.00E-85  | 167 | 169 | 98 -  | 578 | 746 | 24804  | 24972  |
| UN59575 | Rsa1.0.00009.1 | 780 | 232558 | 5.00E-58  | 154 | 167 | 92 -  | 482 | 648 | 72177  | 72343  |
| UN59576 | Rsa1.0.00577.1 | 595 | 174827 | 0         | 547 | 567 | 96 +  | 27  | 593 | 490    | 1056   |
| UN59577 | Rsa1.0.19461.1 | 254 | 1428   | 1.00E-126 | 247 | 253 | 97 +  | 2   | 254 | 74     | 326    |
| UN59578 | Rsa1.0.01804.1 | 551 | 39038  | 1.00E-131 | 238 | 238 | 100 + | 314 | 551 | 34250  | 34487  |
| UN59579 | Rsa1.0.07344.1 | 756 | 9528   | 1.00E-129 | 259 | 267 | 97 +  | 1   | 267 | 5021   | 5287   |
| UN59580 | Rsa1.0.00007.1 | 613 | 239325 | 1.00E-165 | 303 | 306 | 99 -  | 307 | 612 | 126978 | 127283 |
| UN59581 | Rsa1.0.00931.1 | 667 | 59210  | 1.00E-125 | 243 | 248 | 97 -  | 71  | 318 | 49295  | 49542  |
| UN59582 | Rsa1.0.00226.1 | 752 | 105884 | 0         | 672 | 701 | 95 +  | 53  | 748 | 31502  | 32195  |
| UN59583 | Rsa1.0.03743.1 | 315 | 21062  | 1.00E-102 | 294 | 325 | 90 -  | 1   | 315 | 16650  | 16962  |
| UN59584 | Rsa1.0.00028.1 | 701 | 293984 | 1.00E-124 | 256 | 266 | 96 -  | 399 | 664 | 66521  | 66786  |
| UN59585 | Rsa1.0.00022.1 | 664 | 200461 | 3.00E-90  | 184 | 189 | 97 -  | 350 | 538 | 126768 | 126956 |
| UN59586 | Rsa1.0.00107.1 | 716 | 431659 | 0         | 702 | 717 | 97 +  | 3   | 716 | 101586 | 102299 |
| UN59587 | Rsa1.0.01968.1 | 625 | 36654  | 0         | 573 | 601 | 95 +  | 32  | 625 | 10040  | 10636  |
| UN59588 | Rsa1.0.06169.1 | 640 | 11578  | 0         | 370 | 385 | 96 +  | 3   | 386 | 6654   | 7031   |
| UN59589 | Rsa1.0.00784.1 | 737 | 64359  | 0         | 708 | 739 | 95 +  | 3   | 730 | 36021  | 36752  |
| UN59590 | Rsa1.0.00067.1 | 786 | 415055 | 1.00E-177 | 492 | 540 | 91 -  | 281 | 786 | 58856  | 59393  |

|         |                |     |        |           |     |     |      |     |     |        |        |
|---------|----------------|-----|--------|-----------|-----|-----|------|-----|-----|--------|--------|
| UN59591 | Rsa1.0.02673.1 | 726 | 28877  | 0         | 669 | 701 | 95 - | 3   | 697 | 15009  | 15706  |
| UN59592 | Rsa1.0.16090.1 | 795 | 2289   | 0         | 715 | 747 | 95 - | 61  | 794 | 932    | 1678   |
| UN59593 | Rsa1.0.00300.1 | 769 | 97747  | 1.00E-159 | 293 | 296 | 98 + | 315 | 610 | 81779  | 82074  |
| UN59594 | Rsa1.0.03614.1 | 777 | 21773  | 1.00E-167 | 340 | 350 | 97 + | 415 | 761 | 20041  | 20390  |
| UN59595 | Rsa1.0.00940.1 | 617 | 179946 | 0         | 558 | 616 | 90 - | 2   | 617 | 178028 | 178640 |
| UN59596 | Rsa1.0.03081.1 | 754 | 25523  | 0         | 536 | 559 | 95 - | 4   | 562 | 23809  | 24367  |
| UN59597 | Rsa1.0.00785.1 | 697 | 64356  | 1.00E-143 | 319 | 341 | 93 + | 2   | 340 | 31585  | 31907  |
| UN59598 | Rsa1.0.00092.1 | 768 | 659932 | 2.00E-35  | 398 | 494 | 80 + | 76  | 552 | 163122 | 163605 |
| UN59599 | Rsa1.0.01188.1 | 822 | 51362  | 2.00E-67  | 149 | 155 | 96 - | 444 | 598 | 47432  | 47586  |
| UN59600 | Rsa1.0.04873.1 | 739 | 15657  | 1.00E-136 | 277 | 286 | 96 - | 53  | 337 | 8146   | 8431   |
| UN59601 | Rsa1.0.01625.1 | 741 | 42019  | 1.00E-128 | 262 | 268 | 97 - | 462 | 726 | 20465  | 20732  |
| UN59602 | Rsa1.0.00022.1 | 161 | 200461 | 5.00E-79  | 158 | 161 | 98 - | 1   | 161 | 114069 | 114229 |
| UN59603 | Rsa1.0.00649.1 | 776 | 70263  | 0         | 409 | 420 | 97 + | 124 | 543 | 24456  | 24875  |
| UN59604 | Rsa1.0.00143.1 | 720 | 121313 | 0         | 642 | 711 | 90 + | 17  | 704 | 8935   | 9619   |
| UN59605 | Rsa1.0.33527.1 | 179 | 676    | 2.00E-32  | 97  | 104 | 93 - | 28  | 131 | 486    | 584    |
| UN59606 | Rsa1.0.00171.1 | 809 | 115622 | 2.00E-67  | 137 | 139 | 98 - | 561 | 699 | 91557  | 91695  |
| UN59607 | Rsa1.0.00412.1 | 760 | 86935  | 0         | 468 | 497 | 94 + | 29  | 522 | 18332  | 18822  |
| UN59608 | Rsa1.0.00056.1 | 458 | 332604 | 1.00E-107 | 215 | 221 | 97 - | 207 | 427 | 61763  | 61983  |
| UN59609 | Rsa1.0.02170.1 | 786 | 34352  | 0         | 474 | 502 | 94 - | 278 | 773 | 30924  | 31425  |
| UN59610 | Rsa1.0.18381.1 | 774 | 1611   | 1.00E-133 | 276 | 287 | 96 + | 42  | 328 | 1113   | 1396   |
| UN59611 | Rsa1.0.01022.1 | 685 | 56606  | 0         | 408 | 427 | 95 + | 209 | 635 | 28582  | 28998  |
| UN59612 | Rsa1.0.01339.1 | 680 | 47813  | 1.00E-177 | 349 | 358 | 97 - | 314 | 670 | 46398  | 46754  |
| UN59613 | Rsa1.0.00028.1 | 757 | 293984 | 1.00E-77  | 182 | 191 | 95 - | 15  | 204 | 23439  | 23627  |
| UN59614 | Rsa1.0.28848.1 | 307 | 801    | 1.00E-107 | 232 | 242 | 95 - | 2   | 241 | 385    | 624    |
| UN59615 | Rsa1.0.00407.1 | 752 | 191544 | 0         | 687 | 728 | 94 - | 1   | 713 | 155936 | 156661 |
| UN59616 | Rsa1.0.06872.1 | 788 | 10231  | 1.00E-104 | 218 | 226 | 96 - | 152 | 374 | 1961   | 2186   |
| UN59617 | Rsa1.0.01725.1 | 737 | 40290  | 1.00E-113 | 244 | 257 | 94 + | 1   | 250 | 32298  | 32554  |
| UN59618 | Rsa1.0.00418.1 | 352 | 215377 | 1.00E-155 | 297 | 301 | 98 - | 53  | 352 | 16462  | 16761  |
| UN59619 | Rsa1.0.02383.1 | 702 | 31931  | 1.00E-133 | 277 | 289 | 95 - | 321 | 609 | 16962  | 17250  |
| UN59620 | Rsa1.0.00089.1 | 793 | 406142 | 1.00E-162 | 301 | 305 | 98 - | 98  | 402 | 323800 | 324104 |
| UN59621 | Rsa1.0.00827.1 | 674 | 62790  | 1.00E-172 | 310 | 311 | 99 - | 1   | 311 | 18296  | 18606  |
| UN59622 | Rsa1.0.00216.1 | 324 | 197563 | 1.00E-147 | 276 | 280 | 98 + | 1   | 280 | 99119  | 99398  |
| UN59623 | Rsa1.0.00679.1 | 542 | 68971  | 0         | 533 | 542 | 98 + | 1   | 542 | 21081  | 21622  |
| UN59624 | Rsa1.0.01143.1 | 712 | 52456  | 0         | 696 | 714 | 97 - | 1   | 707 | 20951  | 21658  |
| UN59625 | Rsa1.0.01104.1 | 215 | 285480 | 2.00E-14  | 127 | 145 | 87 - | 1   | 141 | 135402 | 135537 |
| UN59626 | Rsa1.0.03487.1 | 727 | 22564  | 0         | 664 | 668 | 99 - | 1   | 666 | 4242   | 4909   |
| UN59627 | Rsa1.0.06004.1 | 734 | 11961  | 1.00E-170 | 306 | 307 | 99 - | 172 | 478 | 5996   | 6302   |
| UN59628 | Rsa1.0.01046.1 | 725 | 152989 | 1.00E-135 | 259 | 264 | 98 + | 195 | 458 | 147674 | 147937 |
| UN59629 | Rsa1.0.00160.1 | 759 | 346678 | 1.00E-120 | 264 | 277 | 95 - | 65  | 334 | 193005 | 193278 |

|         |                |     |        |           |     |     |       |     |     |        |        |
|---------|----------------|-----|--------|-----------|-----|-----|-------|-----|-----|--------|--------|
| UN59630 | Rsa1.0_02723.1 | 640 | 28408  | 0         | 525 | 540 | 97 -  | 102 | 640 | 7698   | 8237   |
| UN59631 | Rsa1.0_03521.1 | 710 | 396204 | 0         | 530 | 552 | 96 +  | 1   | 549 | 4888   | 5436   |
| UN59632 | Rsa1.0_00351.1 | 412 | 413096 | 1.00E-151 | 282 | 286 | 98 +  | 127 | 412 | 197574 | 197859 |
| UN59633 | Rsa1.0_00287.1 | 278 | 98687  | 5.00E-62  | 168 | 177 | 94 -  | 94  | 265 | 56896  | 57072  |
| UN59634 | Rsa1.0_03354.1 | 693 | 23491  | 0         | 581 | 608 | 95 +  | 4   | 608 | 17199  | 17806  |
| UN59635 | Rsa1.0_02347.1 | 641 | 32332  | 1.00E-118 | 243 | 248 | 97 -  | 396 | 641 | 28508  | 28754  |
| UN59636 | Rsa1.0_10267.1 | 652 | 5910   | 0         | 632 | 661 | 95 +  | 1   | 652 | 2869   | 3527   |
| UN59637 | Rsa1.0_01168.1 | 396 | 153765 | 0         | 389 | 397 | 97 -  | 1   | 396 | 26268  | 26663  |
| UN59638 | Rsa1.0_00593.1 | 627 | 143463 | 0         | 601 | 639 | 94 -  | 1   | 627 | 14726  | 15364  |
| UN59639 | Rsa1.0_00630.1 | 734 | 71281  | 0         | 518 | 552 | 93 +  | 7   | 534 | 3790   | 4341   |
| UN59640 | Rsa1.0_00108.1 | 724 | 478491 | 1.00E-108 | 212 | 215 | 98 +  | 511 | 724 | 440719 | 440933 |
| UN59641 | Rsa1.0_00108.1 | 724 | 478491 | 1.00E-174 | 330 | 337 | 97 -  | 75  | 411 | 72265  | 72601  |
| UN59642 | Rsa1.0_55799.1 | 606 | 409    | 0         | 393 | 409 | 96 -  | 3   | 405 | 1      | 408    |
| UN59643 | #              | #   | #      | #         | #   | #   | #     | #   | #   | #      | #      |
| UN59644 | Rsa1.0_01014.1 | 718 | 56762  | 0         | 491 | 526 | 93 -  | 1   | 516 | 30878  | 31392  |
| UN59645 | Rsa1.0_03937.1 | 693 | 19969  | 1.00E-163 | 301 | 304 | 99 -  | 1   | 304 | 8023   | 8326   |
| UN59646 | Rsa1.0_00523.1 | 765 | 178770 | 1.00E-125 | 236 | 239 | 98 -  | 252 | 490 | 37472  | 37710  |
| UN59647 | Rsa1.0_01898.1 | 306 | 37491  | 1.00E-16  | 51  | 53  | 96 -  | 141 | 193 | 3834   | 3886   |
| UN59648 | Rsa1.0_02957.1 | 706 | 26479  | 8.00E-29  | 100 | 110 | 90 -  | 72  | 180 | 14400  | 14509  |
| UN59649 | Rsa1.0_01010.1 | 693 | 56906  | 0         | 382 | 387 | 98 -  | 1   | 387 | 56262  | 56645  |
| UN59650 | Rsa1.0_24710.1 | 697 | 971    | 1.00E-154 | 306 | 316 | 96 -  | 156 | 471 | 517    | 832    |
| UN59651 | Rsa1.0_00026.1 | 642 | 327835 | 4.00E-61  | 120 | 120 | 100 - | 2   | 121 | 55459  | 55578  |
| UN59652 | Rsa1.0_18598.1 | 246 | 1567   | 1.00E-49  | 118 | 124 | 95 +  | 8   | 131 | 1      | 124    |
| UN59653 | Rsa1.0_09171.1 | 565 | 6586   | 1.00E-159 | 340 | 361 | 94 -  | 144 | 491 | 5749   | 6109   |
| UN59654 | Rsa1.0_00152.1 | 609 | 257730 | 1.00E-104 | 211 | 217 | 97 -  | 3   | 219 | 251779 | 251995 |
| UN59655 | Rsa1.0_03661.1 | 285 | 21513  | 1.00E-104 | 233 | 246 | 94 +  | 40  | 285 | 8500   | 8742   |
| UN59656 | Rsa1.0_00078.1 | 778 | 175053 | 1.00E-177 | 370 | 388 | 95 -  | 393 | 778 | 67535  | 67910  |
| UN59657 | Rsa1.0_04045.1 | 688 | 19403  | 0         | 649 | 660 | 98 +  | 2   | 661 | 4334   | 4993   |
| UN59658 | Rsa1.0_10336.1 | 701 | 5882   | 0         | 394 | 397 | 99 +  | 293 | 687 | 4863   | 5259   |
| UN59659 | Rsa1.0_02800.1 | 703 | 27760  | 3.00E-65  | 160 | 169 | 94 -  | 7   | 171 | 9547   | 9715   |
| UN59660 | Rsa1.0_02236.1 | 822 | 33558  | 0         | 421 | 441 | 95 +  | 11  | 450 | 11475  | 11913  |
| UN59661 | Rsa1.0_02371.1 | 746 | 32069  | 0         | 403 | 413 | 97 +  | 3   | 415 | 24498  | 24909  |
| UN59662 | Rsa1.0_07290.1 | 619 | 9608   | 1.00E-135 | 263 | 268 | 98 -  | 2   | 267 | 8599   | 8866   |
| UN59663 | Rsa1.0_00122.1 | 756 | 265937 | 1.00E-128 | 275 | 284 | 96 -  | 437 | 717 | 107858 | 108140 |
| UN59664 | Rsa1.0_01835.1 | 721 | 38542  | 0         | 687 | 732 | 93 +  | 2   | 721 | 15833  | 16560  |
| UN59665 | Rsa1.0_00928.1 | 526 | 59293  | 2.00E-99  | 196 | 200 | 98 -  | 1   | 200 | 30313  | 30512  |
| UN59666 | Rsa1.0_01396.1 | 704 | 151624 | 1.00E-117 | 232 | 238 | 97 +  | 365 | 602 | 3757   | 3994   |
| UN59667 | Rsa1.0_03204.1 | 583 | 24622  | 1.00E-143 | 269 | 272 | 98 -  | 223 | 491 | 6290   | 6561   |
| UN59668 | Rsa1.0_00483.1 | 457 | 81102  | 1.00E-91  | 189 | 195 | 96 +  | 41  | 235 | 50572  | 50766  |

|         |                |     |        |           |     |     |      |     |     |        |        |
|---------|----------------|-----|--------|-----------|-----|-----|------|-----|-----|--------|--------|
| UN59669 | Rsa1.0.00179.1 | 285 | 393324 | 3.00E-35  | 82  | 84  | 97 + | 186 | 269 | 216408 | 216491 |
| UN59670 | Rsa1.0.00196.1 | 657 | 109960 | 6.00E-79  | 183 | 194 | 94 + | 165 | 358 | 51018  | 51211  |
| UN59671 | Rsa1.0.01648.1 | 282 | 41635  | 1.00E-138 | 273 | 281 | 97 - | 2   | 282 | 18279  | 18559  |
| UN59672 | Rsa1.0.00557.1 | 642 | 75865  | 1.00E-135 | 307 | 326 | 94 + | 7   | 324 | 74483  | 74807  |
| UN59673 | Rsa1.0.01768.1 | 568 | 138463 | 0         | 457 | 461 | 99 - | 2   | 462 | 126411 | 126871 |
| UN59674 | Rsa1.0.01408.1 | 281 | 46383  | 1.00E-126 | 266 | 276 | 96 - | 3   | 277 | 30148  | 30421  |
| UN59675 | Rsa1.0.09638.1 | 702 | 6240   | 1.00E-106 | 223 | 232 | 96 - | 50  | 281 | 456    | 687    |
| UN59676 | Rsa1.0.00577.1 | 644 | 174827 | 1.00E-134 | 317 | 342 | 92 + | 11  | 337 | 134487 | 134828 |
| UN59677 | Rsa1.0.00307.1 | 787 | 199003 | 0         | 724 | 766 | 94 - | 3   | 762 | 27622  | 28381  |
| UN59678 | Rsa1.0.01197.1 | 747 | 51071  | 6.00E-70  | 405 | 487 | 83 - | 154 | 628 | 7648   | 8130   |
| UN59679 | Rsa1.0.00048.1 | 753 | 167185 | 1.00E-107 | 204 | 206 | 99 - | 335 | 540 | 156001 | 156206 |
| UN59680 | Rsa1.0.18507.1 | 729 | 1586   | 0         | 703 | 734 | 95 - | 2   | 729 | 235    | 966    |
| UN59681 | Rsa1.0.03561.1 | 705 | 22089  | 4.00E-86  | 255 | 280 | 91 + | 434 | 703 | 21299  | 21576  |
| UN59682 | Rsa1.0.00857.1 | 664 | 61904  | 0         | 486 | 505 | 96 + | 108 | 610 | 13090  | 13594  |
| UN59683 | Rsa1.0.02846.1 | 732 | 27338  | 0         | 400 | 421 | 95 - | 313 | 732 | 11784  | 12202  |
| UN59684 | Rsa1.0.04025.1 | 798 | 19511  | 1.00E-135 | 251 | 253 | 99 + | 400 | 652 | 1506   | 1758   |
| UN59685 | Rsa1.0.03108.1 | 614 | 25340  | 0         | 569 | 603 | 94 - | 14  | 614 | 12572  | 13173  |
| UN59686 | Rsa1.0.03278.1 | 749 | 24125  | 1.00E-55  | 114 | 115 | 99 - | 146 | 260 | 3055   | 3169   |
| UN59687 | Rsa1.0.02841.1 | 693 | 27383  | 0         | 436 | 446 | 97 + | 1   | 446 | 24135  | 24580  |
| UN59688 | Rsa1.0.03873.1 | 678 | 20360  | 0         | 670 | 689 | 97 - | 1   | 678 | 9673   | 10361  |
| UN59689 | Rsa1.0.31476.1 | 786 | 726    | 1.00E-130 | 254 | 260 | 97 - | 13  | 272 | 467    | 726    |
| UN59690 | Rsa1.0.00552.1 | 256 | 206757 | 4.00E-65  | 135 | 138 | 97 - | 119 | 256 | 75289  | 75426  |
| UN59691 | Rsa1.0.00373.1 | 283 | 90296  | 2.00E-79  | 231 | 256 | 90 - | 31  | 283 | 81026  | 81275  |
| UN59692 | Rsa1.0.00384.1 | 286 | 89278  | 1.00E-102 | 261 | 288 | 90 + | 3   | 286 | 47246  | 47518  |
| UN59693 | Rsa1.0.12638.1 | 727 | 5167   | 0         | 339 | 341 | 99 + | 372 | 710 | 4621   | 4961   |
| UN59694 | Rsa1.0.02176.1 | 250 | 34291  | 1.00E-113 | 241 | 247 | 97 + | 1   | 245 | 15919  | 16163  |
| UN59695 | Rsa1.0.00596.1 | 698 | 73578  | 9.00E-41  | 116 | 126 | 92 + | 481 | 606 | 66462  | 66587  |
| UN59696 | Rsa1.0.00546.1 | 198 | 76523  | 4.00E-43  | 95  | 97  | 97 + | 50  | 146 | 38216  | 38312  |
| UN59697 | Rsa1.0.02727.1 | 705 | 28404  | 0         | 472 | 500 | 94 - | 69  | 561 | 2100   | 2593   |
| UN59698 | Rsa1.0.09450.1 | 564 | 6360   | 1.00E-160 | 313 | 322 | 97 + | 109 | 430 | 765    | 1086   |
| UN59699 | Rsa1.0.00237.1 | 281 | 235974 | 1.00E-118 | 266 | 283 | 93 - | 3   | 280 | 99122  | 99404  |
| UN59700 | Rsa1.0.00160.1 | 585 | 346678 | 0         | 557 | 578 | 96 + | 9   | 585 | 143548 | 144125 |
| UN59701 | #              | #   | #      | #         | #   | #   | #    | #   | #   | #      | #      |
| UN59702 | Rsa1.0.01685.1 | 692 | 175033 | 1.00E-126 | 259 | 268 | 96 - | 8   | 273 | 9566   | 9833   |
| UN59703 | Rsa1.0.19895.1 | 407 | 1369   | 1.00E-122 | 231 | 234 | 98 - | 174 | 407 | 1109   | 1342   |
| UN59704 | Rsa1.0.02990.1 | 753 | 26180  | 1.00E-142 | 370 | 410 | 90 - | 294 | 683 | 20367  | 20770  |
| UN59705 | Rsa1.0.03554.1 | 589 | 22137  | 1.00E-150 | 287 | 293 | 97 + | 1   | 293 | 18777  | 19069  |
| UN59706 | Rsa1.0.02977.1 | 699 | 26313  | 1.00E-128 | 251 | 256 | 98 - | 3   | 256 | 5518   | 5773   |
| UN59707 | Rsa1.0.07130.1 | 688 | 9861   | 1.00E-106 | 250 | 266 | 93 + | 1   | 261 | 2672   | 2929   |



|         |                |     |        |           |     |     |       |     |     |        |        |
|---------|----------------|-----|--------|-----------|-----|-----|-------|-----|-----|--------|--------|
| UN59747 | Rsa1.0.43433.1 | 794 | 517    | 1.00E-172 | 384 | 410 | 93 +  | 1   | 410 | 100    | 509    |
| UN59748 | Rsa1.0.01862.1 | 715 | 38030  | 0         | 710 | 712 | 99 -  | 3   | 712 | 35829  | 36540  |
| UN59749 | Rsa1.0.00187.1 | 814 | 393093 | 1.00E-103 | 304 | 341 | 89 -  | 1   | 332 | 51304  | 51641  |
| UN59750 | Rsa1.0.11701.1 | 761 | 5437   | 0         | 494 | 497 | 99 -  | 2   | 498 | 1      | 497    |
| UN59751 | Rsa1.0.02215.1 | 797 | 33822  | 0         | 583 | 620 | 94 -  | 21  | 636 | 9505   | 10108  |
| UN59752 | Rsa1.0.09128.1 | 801 | 6624   | 3.00E-22  | 154 | 187 | 82 +  | 21  | 207 | 178    | 364    |
| UN59753 | Rsa1.0.06708.1 | 716 | 10502  | 0         | 622 | 658 | 94 +  | 2   | 659 | 6177   | 6834   |
| UN59754 | Rsa1.0.01004.1 | 735 | 56975  | 0         | 707 | 734 | 96 +  | 5   | 735 | 49741  | 50474  |
| UN59755 | Rsa1.0.22780.1 | 745 | 1095   | 0         | 472 | 477 | 98 +  | 269 | 745 | 175    | 651    |
| UN59756 | Rsa1.0.27096.1 | 695 | 866    | 1.00E-168 | 308 | 311 | 99 +  | 385 | 695 | 335    | 645    |
| UN59757 | #              | #   | #      | #         | #   | #   | #     | #   | #   | #      | #      |
| UN59758 | Rsa1.0.00271.1 | 766 | 101125 | 0         | 714 | 765 | 93 +  | 3   | 760 | 67550  | 68302  |
| UN59759 | Rsa1.0.02727.1 | 797 | 28404  | 0         | 776 | 791 | 98 -  | 2   | 784 | 4557   | 5347   |
| UN59760 | Rsa1.0.27793.1 | 633 | 839    | 1.00E-153 | 297 | 302 | 98 -  | 329 | 629 | 246    | 546    |
| UN59761 | Rsa1.0.00002.1 | 809 | 601661 | 0         | 405 | 420 | 96 +  | 273 | 691 | 68497  | 68916  |
| UN59762 | Rsa1.0.01320.1 | 410 | 48271  | 0         | 392 | 409 | 95 -  | 3   | 410 | 21439  | 21845  |
| UN59763 | Rsa1.0.00108.1 | 712 | 478491 | 1.00E-173 | 344 | 354 | 97 -  | 356 | 708 | 458996 | 459346 |
| UN59764 | Rsa1.0.00741.1 | 674 | 66117  | 0         | 660 | 671 | 98 +  | 2   | 672 | 43956  | 44626  |
| UN59765 | Rsa1.0.00094.1 | 417 | 139042 | 1.00E-161 | 394 | 422 | 93 -  | 3   | 417 | 60615  | 61035  |
| UN59766 | Rsa1.0.00365.1 | 767 | 90902  | 1.00E-163 | 323 | 331 | 97 -  | 410 | 738 | 4583   | 4913   |
| UN59767 | Rsa1.0.00033.1 | 730 | 515811 | 1.00E-168 | 302 | 303 | 99 -  | 20  | 322 | 131652 | 131954 |
| UN59768 | Rsa1.0.01704.1 | 541 | 40711  | 0         | 480 | 491 | 97 +  | 54  | 541 | 31412  | 31902  |
| UN59769 | Rsa1.0.00398.1 | 601 | 88007  | 0         | 412 | 433 | 95 +  | 6   | 430 | 66794  | 67223  |
| UN59770 | Rsa1.0.00518.1 | 254 | 78360  | 2.00E-33  | 76  | 77  | 98 -  | 2   | 78  | 16015  | 16091  |
| UN59771 | Rsa1.0.05367.1 | 537 | 14010  | 0         | 447 | 478 | 93 +  | 2   | 477 | 2691   | 3156   |
| UN59772 | Rsa1.0.00571.1 | 737 | 329018 | 0         | 640 | 668 | 95 +  | 1   | 664 | 1026   | 1693   |
| UN59773 | Rsa1.0.08039.1 | 482 | 8030   | 1.00E-169 | 355 | 373 | 95 -  | 1   | 373 | 1      | 373    |
| UN59774 | Rsa1.0.02082.1 | 379 | 35228  | 0         | 375 | 379 | 98 -  | 2   | 379 | 1485   | 1863   |
| UN59775 | Rsa1.0.01585.1 | 172 | 42806  | 1.00E-58  | 160 | 174 | 91 -  | 1   | 172 | 20125  | 20298  |
| UN59776 | Rsa1.0.00803.1 | 644 | 144228 | 0         | 642 | 644 | 99 -  | 2   | 644 | 6928   | 7571   |
| UN59777 | Rsa1.0.00652.1 | 734 | 70089  | 2.00E-88  | 208 | 222 | 93 -  | 35  | 256 | 61355  | 61576  |
| UN59778 | Rsa1.0.06590.1 | 745 | 10706  | 0         | 523 | 544 | 96 -  | 148 | 688 | 2959   | 3502   |
| UN59779 | Rsa1.0.02947.1 | 696 | 26531  | 5.00E-70  | 150 | 155 | 96 -  | 165 | 319 | 13913  | 14067  |
| UN59780 | Rsa1.0.04775.1 | 590 | 16025  | 0         | 562 | 592 | 94 -  | 1   | 590 | 4510   | 5100   |
| UN59781 | Rsa1.0.00416.1 | 453 | 86772  | 1.00E-116 | 283 | 306 | 92 +  | 33  | 335 | 64292  | 64597  |
| UN59782 | Rsa1.0.00116.1 | 763 | 365886 | 1.00E-134 | 243 | 243 | 100 - | 404 | 646 | 239724 | 239966 |
| UN59783 | Rsa1.0.00016.1 | 733 | 831256 | 1.00E-134 | 269 | 278 | 96 +  | 327 | 604 | 785216 | 785493 |
| UN59784 | Rsa1.0.02363.1 | 631 | 32189  | 0         | 407 | 411 | 99 +  | 1   | 411 | 15661  | 16071  |
| UN59785 | Rsa1.0.00632.1 | 281 | 183777 | 1.00E-109 | 227 | 236 | 96 -  | 1   | 236 | 37301  | 37536  |

|         |                |     |        |           |     |     |       |     |     |        |        |
|---------|----------------|-----|--------|-----------|-----|-----|-------|-----|-----|--------|--------|
| UN59786 | Rsa1.0.02560.1 | 637 | 30091  | 1.00E-164 | 311 | 317 | 98 -  | 317 | 633 | 3643   | 3959   |
| UN59787 | Rsa1.0.03036.1 | 343 | 25826  | 5.00E-93  | 176 | 177 | 99 +  | 167 | 343 | 14373  | 14549  |
| UN59788 | Rsa1.0.02160.1 | 190 | 34468  | 1.00E-100 | 187 | 188 | 99 +  | 3   | 190 | 6292   | 6479   |
| UN59789 | Rsa1.0.00172.1 | 708 | 115476 | 1.00E-178 | 508 | 573 | 88 +  | 83  | 655 | 20915  | 21478  |
| UN59790 | Rsa1.0.09594.1 | 620 | 6263   | 4.00E-64  | 134 | 136 | 98 -  | 3   | 136 | 3976   | 4111   |
| UN59791 | Rsa1.0.00637.1 | 627 | 71038  | 1.00E-112 | 222 | 226 | 98 -  | 403 | 627 | 3287   | 3512   |
| UN59792 | Rsa1.0.02396.1 | 336 | 31783  | 1.00E-111 | 209 | 211 | 99 +  | 122 | 332 | 9408   | 9618   |
| UN59793 | Rsa1.0.04106.1 | 689 | 19018  | 0         | 394 | 401 | 98 +  | 3   | 403 | 9033   | 9433   |
| UN59794 | Rsa1.0.00996.1 | 680 | 57222  | 1.00E-173 | 335 | 344 | 97 -  | 9   | 352 | 53540  | 53883  |
| UN59795 | Rsa1.0.05687.1 | 794 | 12932  | 1.00E-102 | 213 | 221 | 96 +  | 192 | 412 | 2496   | 2716   |
| UN59796 | Rsa1.0.00041.1 | 672 | 186197 | 3.00E-99  | 190 | 192 | 98 +  | 276 | 467 | 147920 | 148111 |
| UN59797 | Rsa1.0.00165.1 | 657 | 116466 | 1.00E-149 | 300 | 310 | 96 -  | 345 | 651 | 94030  | 94339  |
| UN59798 | Rsa1.0.00683.1 | 507 | 68638  | 0         | 460 | 482 | 95 -  | 3   | 484 | 4602   | 5081   |
| UN59799 | Rsa1.0.00840.1 | 535 | 62514  | 1.00E-141 | 317 | 336 | 94 -  | 12  | 345 | 25725  | 26052  |
| UN59800 | Rsa1.0.00920.1 | 562 | 601703 | 1.00E-103 | 209 | 215 | 97 -  | 3   | 217 | 12726  | 12940  |
| UN59801 | Rsa1.0.00826.1 | 474 | 166736 | 0         | 382 | 391 | 97 -  | 26  | 415 | 131985 | 132375 |
| UN59802 | Rsa1.0.01914.1 | 537 | 37354  | 1.00E-101 | 196 | 199 | 98 -  | 19  | 217 | 10995  | 11193  |
| UN59803 | Rsa1.0.00221.1 | 646 | 106972 | 1.00E-153 | 391 | 432 | 90 -  | 3   | 413 | 50983  | 51403  |
| UN59804 | Rsa1.0.02643.1 | 686 | 29176  | 2.00E-72  | 161 | 167 | 96 -  | 521 | 686 | 6309   | 6475   |
| UN59805 | Rsa1.0.03682.1 | 656 | 21396  | 0         | 535 | 594 | 90 +  | 64  | 653 | 9871   | 10455  |
| UN59806 | Rsa1.0.00325.1 | 283 | 95371  | 1.00E-124 | 268 | 281 | 95 -  | 3   | 283 | 37741  | 38020  |
| UN59807 | Rsa1.0.00514.1 | 708 | 78421  | 1.00E-180 | 363 | 375 | 96 +  | 203 | 575 | 26259  | 26633  |
| UN59808 | Rsa1.0.00001.1 | 486 | 363028 | 0         | 481 | 503 | 95 +  | 2   | 486 | 53829  | 54330  |
| UN59809 | Rsa1.0.05811.1 | 523 | 12572  | 0         | 392 | 397 | 98 +  | 127 | 523 | 11594  | 11990  |
| UN59810 | Rsa1.0.00648.1 | 670 | 70351  | 1.00E-151 | 307 | 316 | 97 +  | 3   | 316 | 21681  | 21992  |
| UN59811 | Rsa1.0.00009.1 | 660 | 232558 | 6.00E-42  | 88  | 88  | 100 - | 516 | 603 | 42292  | 42379  |
| UN59812 | Rsa1.0.01593.1 | 707 | 150996 | 1.00E-163 | 477 | 534 | 89 -  | 24  | 551 | 132545 | 133053 |
| UN59813 | Rsa1.0.00240.1 | 753 | 104175 | 0         | 502 | 548 | 91 +  | 5   | 544 | 44060  | 44592  |
| UN59814 | Rsa1.0.08162.1 | 188 | 7813   | 2.00E-81  | 178 | 185 | 96 +  | 4   | 187 | 6693   | 6877   |
| UN59815 | Rsa1.0.05026.1 | 565 | 15095  | 1.00E-126 | 337 | 371 | 90 +  | 3   | 364 | 8039   | 8399   |
| UN59816 | Rsa1.0.06968.1 | 673 | 10090  | 0         | 575 | 626 | 91 -  | 14  | 621 | 8752   | 9362   |
| UN59817 | Rsa1.0.01022.1 | 731 | 56606  | 1.00E-152 | 346 | 369 | 93 +  | 351 | 717 | 28582  | 28941  |
| UN59818 | #              | #   | #      | #         | #   | #   | #     | #   | #   | #      | #      |
| UN59819 | Rsa1.0.00579.1 | 590 | 148308 | 1.00E-79  | 194 | 208 | 93 +  | 3   | 204 | 69451  | 69655  |
| UN59820 | Rsa1.0.01506.1 | 281 | 44370  | 2.00E-52  | 111 | 113 | 98 -  | 3   | 115 | 18512  | 18624  |
| UN59821 | Rsa1.0.00134.1 | 643 | 390219 | 1.00E-137 | 302 | 316 | 95 +  | 331 | 641 | 13216  | 13528  |
| UN59822 | Rsa1.0.02139.1 | 113 | 34686  | 1.00E-57  | 113 | 113 | 100 - | 1   | 113 | 11807  | 11919  |
| UN59823 | Rsa1.0.00108.1 | 616 | 478491 | 1.00E-152 | 374 | 407 | 91 -  | 189 | 592 | 134964 | 135351 |
| UN59824 | Rsa1.0.00082.1 | 571 | 237584 | 4.00E-64  | 131 | 133 | 98 -  | 439 | 571 | 47945  | 48077  |



|         |                |     |        |           |     |     |       |     |     |        |        |
|---------|----------------|-----|--------|-----------|-----|-----|-------|-----|-----|--------|--------|
| UN59825 | Rsa1.0.00715.1 | 226 | 67116  | 1.00E-98  | 214 | 222 | 96 -  | 7   | 226 | 28041  | 28262  |
| UN59826 | Rsa1.0.06459.1 | 689 | 10979  | 0         | 683 | 690 | 98 +  | 2   | 689 | 3777   | 4465   |
| UN59827 | Rsa1.0.02700.1 | 645 | 28584  | 3.00E-62  | 122 | 122 | 100 + | 375 | 496 | 13178  | 13299  |
| UN59828 | Rsa1.0.00418.1 | 692 | 215377 | 2.00E-88  | 169 | 170 | 99 +  | 109 | 278 | 43786  | 43955  |
| UN59829 | Rsa1.0.01717.1 | 751 | 143162 | 1.00E-102 | 211 | 217 | 97 -  | 14  | 229 | 32116  | 32332  |
| UN59830 | Rsa1.0.00047.1 | 264 | 168582 | 1.00E-136 | 257 | 261 | 98 +  | 4   | 264 | 66684  | 66944  |
| UN59831 | Rsa1.0.00869.1 | 510 | 61627  | 0         | 422 | 432 | 97 +  | 10  | 441 | 60448  | 60876  |
| UN59832 | Rsa1.0.00123.1 | 160 | 325650 | 3.00E-49  | 112 | 115 | 97 +  | 47  | 160 | 246545 | 246659 |
| UN59833 | Rsa1.0.04783.1 | 772 | 15995  | 1.00E-141 | 297 | 311 | 95 -  | 2   | 312 | 11259  | 11569  |
| UN59834 | Rsa1.0.08001.1 | 282 | 8095   | 8.00E-73  | 240 | 276 | 86 +  | 2   | 274 | 7040   | 7291   |
| UN59835 | Rsa1.0.01803.1 | 514 | 173846 | 8.00E-53  | 112 | 114 | 98 +  | 87  | 200 | 32570  | 32683  |
| UN59836 | Rsa1.0.23487.1 | 704 | 1045   | 0         | 545 | 557 | 97 +  | 103 | 658 | 279    | 835    |
| UN59837 | Rsa1.0.02657.1 | 676 | 29000  | 0         | 659 | 674 | 97 +  | 6   | 676 | 19323  | 19996  |
| UN59838 | Rsa1.0.03070.1 | 640 | 25578  | 1.00E-179 | 494 | 552 | 89 +  | 99  | 638 | 13284  | 13829  |
| UN59839 | Rsa1.0.01078.1 | 761 | 316910 | 0         | 617 | 634 | 97 -  | 1   | 624 | 137271 | 137904 |
| UN59840 | Rsa1.0.03290.1 | 793 | 24011  | 1.00E-174 | 350 | 363 | 96 +  | 3   | 362 | 7193   | 7555   |
| UN59841 | Rsa1.0.00099.1 | 748 | 159619 | 0         | 535 | 545 | 98 +  | 2   | 546 | 39245  | 39789  |
| UN59842 | Rsa1.0.00265.1 | 719 | 220635 | 1.00E-143 | 306 | 317 | 96 +  | 399 | 710 | 197596 | 197912 |
| UN59843 | Rsa1.0.03407.1 | 560 | 23154  | 1.00E-152 | 351 | 373 | 94 +  | 5   | 377 | 6535   | 6899   |
| UN59844 | Rsa1.0.00065.1 | 624 | 454616 | 1.00E-167 | 310 | 314 | 98 +  | 119 | 432 | 210339 | 210652 |
| UN59845 | Rsa1.0.08984.1 | 283 | 6734   | 4.00E-53  | 121 | 126 | 96 +  | 158 | 283 | 2090   | 2215   |
| UN59846 | Rsa1.0.00025.1 | 562 | 277312 | 1.00E-116 | 236 | 241 | 97 +  | 5   | 244 | 57855  | 58094  |
| UN59847 | Rsa1.0.00698.1 | 327 | 67816  | 1.00E-167 | 319 | 326 | 97 +  | 2   | 327 | 43444  | 43769  |
| UN59848 | Rsa1.0.05700.1 | 191 | 12886  | 6.00E-79  | 155 | 157 | 98 -  | 29  | 185 | 7820   | 7976   |
| UN59849 | Rsa1.0.09720.1 | 584 | 6190   | 0         | 582 | 592 | 98 -  | 1   | 584 | 967    | 1558   |
| UN59850 | Rsa1.0.00033.1 | 677 | 515811 | 6.00E-48  | 180 | 204 | 88 -  | 456 | 656 | 33667  | 33858  |
| UN59851 | Rsa1.0.00363.1 | 639 | 90968  | 2.00E-87  | 182 | 188 | 96 +  | 371 | 558 | 31971  | 32158  |
| UN59852 | Rsa1.0.01333.1 | 430 | 47929  | 0         | 414 | 425 | 97 -  | 3   | 425 | 31325  | 31749  |
| UN59853 | Rsa1.0.02896.1 | 737 | 26970  | 0         | 701 | 740 | 94 -  | 3   | 733 | 23928  | 24666  |
| UN59854 | Rsa1.0.02386.1 | 704 | 31895  | 0         | 428 | 452 | 94 -  | 253 | 704 | 11414  | 11865  |
| UN59855 | Rsa1.0.00664.1 | 661 | 69573  | 1.00E-134 | 248 | 250 | 99 +  | 3   | 252 | 68789  | 69038  |
| UN59856 | Rsa1.0.01867.1 | 379 | 37960  | 6.00E-56  | 210 | 246 | 85 -  | 19  | 262 | 18618  | 18841  |
| UN59857 | Rsa1.0.05890.1 | 429 | 12317  | 1.00E-151 | 349 | 374 | 93 -  | 15  | 382 | 2122   | 2489   |
| UN59858 | Rsa1.0.03128.1 | 295 | 25180  | 1.00E-40  | 144 | 164 | 87 -  | 3   | 166 | 4517   | 4664   |
| UN59859 | Rsa1.0.01607.1 | 767 | 42328  | 7.00E-51  | 106 | 107 | 99 -  | 192 | 298 | 30702  | 30808  |
| UN59860 | Rsa1.0.00055.1 | 794 | 520193 | 0         | 510 | 535 | 95 -  | 211 | 743 | 276667 | 277200 |
| UN59861 | Rsa1.0.03055.1 | 258 | 25730  | 1.00E-124 | 253 | 261 | 96 +  | 2   | 258 | 736    | 994    |
| UN59862 | Rsa1.0.04446.1 | 626 | 17317  | 0         | 503 | 513 | 98 -  | 114 | 626 | 7758   | 8270   |
| UN59863 | Rsa1.0.00377.1 | 723 | 90038  | 0         | 561 | 597 | 93 +  | 141 | 723 | 33637  | 34230  |

|         |                |     |        |           |     |     |       |     |     |        |        |
|---------|----------------|-----|--------|-----------|-----|-----|-------|-----|-----|--------|--------|
| UN59864 | Rsa1.0.00190.1 | 767 | 318240 | 0         | 459 | 481 | 95 +  | 12  | 486 | 201676 | 202156 |
| UN59865 | Rsa1.0.00448.1 | 794 | 84048  | 1.00E-154 | 288 | 292 | 98 -  | 161 | 452 | 63770  | 64061  |
| UN59866 | Rsa1.0.01004.1 | 684 | 56975  | 0         | 625 | 686 | 91 -  | 6   | 684 | 21939  | 22594  |
| UN59867 | Rsa1.0.08845.1 | 676 | 6867   | 0         | 557 | 590 | 94 -  | 92  | 671 | 4102   | 4691   |
| UN59868 | Rsa1.0.01104.1 | 745 | 285480 | 0         | 737 | 744 | 99 -  | 3   | 745 | 145878 | 146621 |
| UN59869 | Rsa1.0.03323.1 | 144 | 23751  | 4.00E-39  | 122 | 134 | 91 -  | 5   | 138 | 15323  | 15450  |
| UN59870 | Rsa1.0.07528.1 | 551 | 9195   | 1.00E-54  | 109 | 109 | 100 + | 121 | 229 | 220    | 328    |
| UN59871 | Rsa1.0.18032.1 | 299 | 1686   | 6.00E-83  | 183 | 192 | 95 +  | 106 | 297 | 1302   | 1493   |
| UN59872 | Rsa1.0.00962.1 | 223 | 184909 | 2.00E-70  | 202 | 223 | 90 -  | 1   | 223 | 52416  | 52632  |
| UN59873 | Rsa1.0.15266.1 | 762 | 2720   | 0         | 577 | 606 | 95 -  | 20  | 625 | 1475   | 2071   |
| UN59874 | Rsa1.0.30444.1 | 385 | 753    | 1.00E-178 | 370 | 384 | 96 +  | 1   | 381 | 42     | 420    |
| UN59875 | Rsa1.0.00148.1 | 791 | 120234 | 0         | 679 | 708 | 95 +  | 27  | 728 | 36558  | 37262  |
| UN59876 | Rsa1.0.04603.1 | 684 | 16682  | 0         | 338 | 338 | 100 + | 2   | 339 | 6745   | 7082   |
| UN59877 | Rsa1.0.00243.1 | 500 | 103651 | 0         | 456 | 472 | 96 +  | 20  | 490 | 86585  | 87053  |
| UN59878 | Rsa1.0.00726.1 | 559 | 66734  | 1.00E-106 | 223 | 232 | 96 +  | 305 | 536 | 27110  | 27341  |
| UN59879 | #              | #   | #      | #         | #   | #   | #     | #   | #   | #      | #      |
| UN59880 | Rsa1.0.07000.1 | 353 | 10049  | 1.00E-104 | 267 | 291 | 91 +  | 60  | 350 | 5507   | 5785   |
| UN59881 | Rsa1.0.03543.1 | 715 | 22185  | 0         | 579 | 603 | 96 -  | 108 | 708 | 6005   | 6607   |
| UN59882 | Rsa1.0.00537.1 | 395 | 186980 | 0         | 384 | 395 | 97 +  | 1   | 395 | 15265  | 15656  |
| UN59883 | Rsa1.0.04288.1 | 626 | 18077  | 1.00E-100 | 266 | 287 | 92 +  | 346 | 626 | 13754  | 14038  |
| UN59884 | Rsa1.0.01951.1 | 833 | 36941  | 2.33E-156 | 269 | 271 | 99 -  | 237 | 507 | 11628  | 11898  |
| UN59885 | Rsa1.0.01740.1 | 774 | 39986  | 1.00E-159 | 287 | 288 | 99 -  | 65  | 352 | 27598  | 27885  |
| UN59886 | Rsa1.0.00069.1 | 318 | 403561 | 1.00E-130 | 262 | 271 | 96 +  | 1   | 271 | 161611 | 161881 |
| UN59887 | Rsa1.0.00890.1 | 263 | 323870 | 1.00E-108 | 255 | 265 | 96 -  | 1   | 263 | 160765 | 161022 |
| UN59888 | Rsa1.0.00253.1 | 702 | 231292 | 0         | 488 | 521 | 93 -  | 194 | 702 | 200099 | 200615 |
| UN59889 | Rsa1.0.00413.1 | 679 | 86921  | 0         | 534 | 537 | 99 -  | 143 | 679 | 6183   | 6719   |
| UN59890 | Rsa1.0.22759.1 | 698 | 1097   | 0         | 596 | 621 | 95 -  | 3   | 623 | 80     | 697    |
| UN59891 | Rsa1.0.02089.1 | 766 | 35163  | 1.00E-138 | 293 | 305 | 96 -  | 4   | 307 | 10642  | 10945  |
| UN59892 | Rsa1.0.02036.1 | 616 | 35731  | 0         | 563 | 571 | 98 +  | 46  | 616 | 24889  | 25457  |
| UN59893 | Rsa1.0.01008.1 | 624 | 56924  | 0         | 376 | 390 | 96 +  | 8   | 393 | 3656   | 4041   |
| UN59894 | Rsa1.0.04212.1 | 797 | 18439  | 1.00E-145 | 270 | 273 | 98 -  | 3   | 275 | 5390   | 5662   |
| UN59895 | Rsa1.0.07921.1 | 733 | 8259   | 0         | 463 | 478 | 96 +  | 253 | 724 | 2634   | 3111   |
| UN59896 | Rsa1.0.00793.1 | 675 | 64103  | 0         | 537 | 540 | 99 -  | 138 | 675 | 24468  | 25007  |
| UN59897 | Rsa1.0.00025.1 | 618 | 277312 | 0         | 406 | 415 | 97 -  | 1   | 412 | 99683  | 100096 |
| UN59898 | Rsa1.0.02504.1 | 685 | 30706  | 0         | 448 | 454 | 98 +  | 234 | 685 | 4800   | 5252   |
| UN59899 | Rsa1.0.05531.1 | 506 | 13405  | 0         | 467 | 502 | 93 +  | 1   | 496 | 1006   | 1498   |
| UN59900 | Rsa1.0.00625.1 | 618 | 71672  | 0         | 442 | 452 | 97 +  | 3   | 454 | 54788  | 55237  |
| UN59901 | Rsa1.0.02085.1 | 596 | 35198  | 1.00E-134 | 258 | 263 | 98 +  | 33  | 295 | 15839  | 16097  |
| UN59902 | Rsa1.0.01964.1 | 745 | 36702  | 0         | 617 | 660 | 93 -  | 88  | 742 | 11336  | 11973  |

|         |                |     |        |           |     |     |       |     |     |        |        |
|---------|----------------|-----|--------|-----------|-----|-----|-------|-----|-----|--------|--------|
| UN59903 | Rsa1.0.02397.1 | 685 | 31778  | 1.00E-110 | 206 | 207 | 99 +  | 399 | 605 | 20840  | 21046  |
| UN59904 | Rsa1.0.00083.1 | 202 | 442773 | 2.00E-63  | 129 | 131 | 98 +  | 1   | 131 | 132776 | 132906 |
| UN59905 | Rsa1.0.14833.1 | 349 | 3034   | 1.00E-121 | 325 | 357 | 91 -  | 2   | 346 | 432    | 788    |
| UN59906 | Rsa1.0.07260.1 | 744 | 9650   | 0         | 569 | 578 | 98 +  | 168 | 742 | 3869   | 4446   |
| UN59907 | Rsa1.0.01566.1 | 703 | 43134  | 0         | 569 | 599 | 94 -  | 54  | 643 | 34068  | 34665  |
| UN59908 | Rsa1.0.00279.1 | 736 | 100039 | 1.00E-107 | 349 | 399 | 87 -  | 78  | 476 | 44227  | 44601  |
| UN59909 | Rsa1.0.00321.1 | 750 | 95671  | 0         | 614 | 625 | 98 -  | 2   | 626 | 58384  | 59002  |
| UN59910 | Rsa1.0.00198.1 | 719 | 222963 | 1.00E-116 | 213 | 213 | 100 - | 2   | 214 | 39759  | 39971  |
| UN59911 | Rsa1.0.00199.1 | 697 | 249604 | 0         | 478 | 495 | 96 +  | 194 | 684 | 184508 | 185000 |
| UN59912 | Rsa1.0.03246.1 | 364 | 24379  | 1.00E-159 | 349 | 366 | 95 -  | 1   | 364 | 14686  | 15047  |
| UN59913 | Rsa1.0.00341.1 | 657 | 249309 | 1.00E-151 | 330 | 351 | 94 -  | 132 | 482 | 208697 | 209038 |
| UN59914 | Rsa1.0.01442.1 | 342 | 45776  | 1.00E-140 | 255 | 256 | 99 +  | 1   | 256 | 23761  | 24016  |
| UN59915 | Rsa1.0.01159.1 | 210 | 52115  | 8.00E-91  | 205 | 213 | 96 -  | 1   | 210 | 35255  | 35467  |
| UN59916 | Rsa1.0.11694.1 | 496 | 131228 | 1.00E-152 | 284 | 288 | 98 -  | 116 | 403 | 129046 | 129333 |
| UN59917 | Rsa1.0.06138.1 | 655 | 11651  | 0         | 619 | 628 | 98 -  | 28  | 655 | 265    | 885    |
| UN59918 | Rsa1.0.02298.1 | 826 | 32872  | 1.00E-122 | 229 | 231 | 99 +  | 197 | 427 | 5799   | 6029   |
| UN59919 | Rsa1.0.01982.1 | 742 | 36530  | 0         | 480 | 494 | 97 +  | 6   | 499 | 24753  | 25246  |
| UN59920 | Rsa1.0.00360.1 | 442 | 91190  | 0         | 436 | 440 | 99 -  | 2   | 441 | 40853  | 41292  |
| UN59921 | Rsa1.0.00335.1 | 442 | 94371  | 1.00E-143 | 346 | 373 | 92 +  | 70  | 441 | 50290  | 50650  |
| UN59922 | Rsa1.0.03200.1 | 595 | 24634  | 1.00E-152 | 272 | 272 | 100 + | 89  | 360 | 17813  | 18084  |
| UN59923 | Rsa1.0.09146.1 | 694 | 6610   | 1.00E-106 | 222 | 231 | 96 -  | 155 | 385 | 1      | 225    |
| UN59924 | Rsa1.0.00006.1 | 336 | 396176 | 2.00E-95  | 183 | 185 | 98 +  | 70  | 254 | 61690  | 61874  |
| UN59925 | Rsa1.0.10166.1 | 800 | 5966   | 0         | 382 | 392 | 97 -  | 289 | 680 | 5176   | 5567   |
| UN59926 | Rsa1.0.00021.1 | 722 | 263655 | 1.00E-148 | 284 | 289 | 98 +  | 1   | 287 | 14037  | 14325  |
| UN59927 | Rsa1.0.00019.1 | 795 | 301669 | 0         | 380 | 387 | 98 +  | 356 | 740 | 132036 | 132422 |
| UN59928 | Rsa1.0.13754.1 | 590 | 4380   | 1.00E-113 | 269 | 291 | 92 +  | 300 | 590 | 2956   | 3226   |
| UN59929 | Rsa1.0.01522.1 | 184 | 157436 | 3.00E-65  | 174 | 182 | 95 +  | 1   | 182 | 145332 | 145507 |
| UN59930 | Rsa1.0.02404.1 | 775 | 31702  | 0         | 677 | 737 | 91 -  | 20  | 743 | 13194  | 13928  |
| UN59931 | Rsa1.0.06258.1 | 247 | 11371  | 8.00E-82  | 231 | 245 | 94 +  | 1   | 245 | 4250   | 4484   |
| UN59932 | Rsa1.0.00296.1 | 643 | 97854  | 2.00E-97  | 196 | 201 | 97 -  | 187 | 387 | 77294  | 77494  |
| UN59933 | Rsa1.0.00168.1 | 501 | 115870 | 4.00E-73  | 160 | 166 | 96 -  | 52  | 214 | 54317  | 54482  |
| UN59934 | Rsa1.0.00244.1 | 714 | 103590 | 1.00E-118 | 250 | 256 | 97 -  | 463 | 714 | 34225  | 34480  |
| UN59935 | Rsa1.0.00757.1 | 131 | 65559  | 8.00E-28  | 93  | 99  | 93 +  | 33  | 131 | 62110  | 62205  |
| UN59936 | Rsa1.0.00140.1 | 796 | 121541 | 1.00E-126 | 308 | 324 | 95 +  | 478 | 793 | 22655  | 22976  |
| UN59937 | Rsa1.0.00254.1 | 712 | 102600 | 1.00E-111 | 268 | 289 | 92 +  | 1   | 289 | 87873  | 88147  |
| UN59938 | Rsa1.0.00204.1 | 706 | 109056 | 1.00E-154 | 304 | 311 | 97 -  | 153 | 460 | 34777  | 35086  |
| UN59939 | Rsa1.0.06136.1 | 785 | 11659  | 0         | 482 | 495 | 97 +  | 1   | 493 | 11171  | 11659  |
| UN59940 | Rsa1.0.00277.1 | 718 | 100132 | 1.00E-143 | 272 | 277 | 98 +  | 1   | 277 | 75546  | 75822  |
| UN59941 | Rsa1.0.18716.1 | 776 | 1547   | 0         | 421 | 427 | 98 -  | 331 | 755 | 57     | 482    |

|         |                |     |        |           |     |     |      |     |     |        |        |
|---------|----------------|-----|--------|-----------|-----|-----|------|-----|-----|--------|--------|
| UN59942 | Rsa1.0.00476.1 | 607 | 280966 | 0         | 539 | 565 | 95 + | 41  | 605 | 151096 | 151652 |
| UN59943 | Rsa1.0.00994.1 | 706 | 165189 | 1.00E-164 | 390 | 421 | 92 - | 249 | 668 | 38216  | 38636  |
| UN59944 | Rsa1.0.02157.1 | 424 | 149652 | 1.00E-167 | 337 | 350 | 96 + | 73  | 422 | 7480   | 7829   |
| UN59945 | Rsa1.0.00200.1 | 664 | 162016 | 0         | 646 | 648 | 99 - | 18  | 664 | 12747  | 13394  |
| UN59946 | Rsa1.0.05160.1 | 810 | 14637  | 0         | 526 | 577 | 91 - | 185 | 754 | 13496  | 14051  |
| UN59947 | Rsa1.0.38619.1 | 471 | 583    | 1.00E-113 | 226 | 232 | 97 + | 4   | 235 | 348    | 579    |
| UN59948 | Rsa1.0.00482.1 | 752 | 81162  | 0         | 498 | 499 | 99 - | 1   | 499 | 55139  | 55637  |
| UN59949 | Rsa1.0.00451.1 | 644 | 322533 | 1.00E-117 | 229 | 234 | 97 - | 56  | 289 | 22115  | 22348  |
| UN59950 | Rsa1.0.01413.1 | 768 | 46275  | 0         | 532 | 540 | 98 + | 2   | 541 | 20297  | 20836  |
| UN59951 | #              | #   | #      | #         | #   | #   | #    | #   | #   | #      | #      |
| UN59952 | Rsa1.0.00157.1 | 603 | 245832 | 1.00E-79  | 226 | 249 | 90 - | 67  | 312 | 66738  | 66980  |
| UN59953 | Rsa1.0.00002.1 | 166 | 601661 | 3.00E-25  | 88  | 95  | 92 - | 66  | 158 | 19295  | 19389  |
| UN59954 | Rsa1.0.03434.1 | 788 | 22960  | 0         | 426 | 432 | 98 + | 3   | 433 | 1216   | 1646   |
| UN59955 | Rsa1.0.00672.1 | 708 | 69358  | 1.00E-138 | 296 | 311 | 95 - | 219 | 526 | 40414  | 40724  |
| UN59956 | Rsa1.0.00904.1 | 789 | 180594 | 0         | 752 | 772 | 97 + | 2   | 770 | 151312 | 152080 |
| UN59957 | Rsa1.0.02479.1 | 740 | 31038  | 0         | 360 | 368 | 97 + | 121 | 488 | 9274   | 9641   |
| UN59958 | Rsa1.0.01507.1 | 761 | 44361  | 1.00E-150 | 293 | 300 | 97 - | 21  | 318 | 28340  | 28639  |
| UN59959 | Rsa1.0.02382.1 | 697 | 31969  | 0         | 676 | 699 | 96 - | 2   | 697 | 18823  | 19521  |
| UN59960 | Rsa1.0.04994.1 | 519 | 15199  | 1.00E-73  | 183 | 197 | 92 + | 148 | 344 | 4534   | 4730   |
| UN59961 | Rsa1.0.02660.1 | 811 | 28969  | 2.33E-156 | 272 | 275 | 98 - | 233 | 507 | 6361   | 6635   |
| UN59962 | Rsa1.0.00288.1 | 719 | 98659  | 0         | 662 | 707 | 93 - | 11  | 717 | 84616  | 85289  |
| UN59963 | Rsa1.0.01540.1 | 763 | 151890 | 8.00E-94  | 205 | 215 | 95 + | 361 | 575 | 127399 | 127613 |
| UN59964 | Rsa1.0.02351.1 | 566 | 32305  | 0         | 551 | 568 | 97 - | 1   | 564 | 5450   | 6017   |
| UN59965 | Rsa1.0.00197.1 | 272 | 109714 | 1.00E-125 | 265 | 276 | 96 - | 1   | 272 | 25112  | 25386  |
| UN59966 | Rsa1.0.01173.1 | 769 | 51727  | 1.00E-107 | 221 | 229 | 96 + | 268 | 496 | 624    | 852    |
| UN59967 | Rsa1.0.03636.1 | 747 | 21638  | 5.00E-95  | 213 | 225 | 94 + | 451 | 675 | 15899  | 16123  |
| UN59968 | Rsa1.0.02528.1 | 641 | 30452  | 1.00E-175 | 342 | 352 | 97 - | 219 | 570 | 29188  | 29539  |
| UN59969 | Rsa1.0.00026.1 | 758 | 327835 | 1.00E-177 | 374 | 392 | 95 - | 3   | 389 | 292894 | 293285 |
| UN59970 | Rsa1.0.02027.1 | 736 | 35869  | 1.00E-130 | 248 | 252 | 98 + | 56  | 307 | 8335   | 8586   |
| UN59971 | Rsa1.0.08871.1 | 543 | 6839   | 1.00E-136 | 270 | 277 | 97 + | 264 | 539 | 6351   | 6627   |
| UN59972 | Rsa1.0.00304.1 | 287 | 97429  | 6.00E-77  | 156 | 158 | 98 + | 61  | 217 | 44427  | 44584  |
| UN59973 | Rsa1.0.03887.1 | 214 | 20247  | 5.00E-58  | 177 | 193 | 91 - | 28  | 214 | 17980  | 18168  |
| UN59974 | Rsa1.0.00391.1 | 739 | 183853 | 1.00E-122 | 292 | 309 | 94 - | 435 | 739 | 47448  | 47753  |
| UN59975 | Rsa1.0.06671.1 | 736 | 10563  | 0         | 376 | 378 | 99 + | 360 | 736 | 8252   | 8629   |
| UN59976 | Rsa1.0.02242.1 | 707 | 33512  | 1.00E-150 | 382 | 419 | 91 - | 1   | 411 | 19514  | 19932  |
| UN59977 | Rsa1.0.13977.1 | 282 | 3965   | 7.00E-89  | 184 | 190 | 96 + | 3   | 192 | 3627   | 3816   |
| UN59978 | Rsa1.0.19647.1 | 740 | 1403   | 1.00E-180 | 410 | 438 | 93 - | 2   | 433 | 710    | 1145   |
| UN59979 | Rsa1.0.00017.1 | 600 | 752458 | 9.00E-53  | 122 | 125 | 97 + | 293 | 414 | 491897 | 492021 |
| UN59980 | Rsa1.0.52522.1 | 737 | 433    | 1.00E-101 | 217 | 226 | 96 - | 426 | 648 | 169    | 394    |

|         |                |     |        |           |     |     |       |     |     |        |        |
|---------|----------------|-----|--------|-----------|-----|-----|-------|-----|-----|--------|--------|
| UN59981 | Rsa1.0.00167.1 | 730 | 116000 | 1.00E-80  | 168 | 173 | 97 +  | 62  | 234 | 12326  | 12498  |
| UN59982 | Rsa1.0.00804.1 | 217 | 63726  | 1.00E-110 | 209 | 210 | 99 -  | 2   | 210 | 8349   | 8558   |
| UN59983 | Rsa1.0.00078.1 | 769 | 175053 | 0         | 488 | 505 | 96 +  | 3   | 507 | 91077  | 91570  |
| UN59984 | Rsa1.0.15965.1 | 298 | 2338   | 3.00E-29  | 105 | 118 | 88 +  | 124 | 241 | 1580   | 1697   |
| UN59985 | Rsa1.0.01794.1 | 546 | 39215  | 0         | 362 | 371 | 97 +  | 3   | 373 | 36713  | 37080  |
| UN59986 | Rsa1.0.02621.1 | 293 | 156120 | 1.00E-133 | 281 | 292 | 96 -  | 3   | 293 | 20421  | 20711  |
| UN59987 | Rsa1.0.00065.1 | 656 | 454616 | 1.00E-105 | 210 | 214 | 98 -  | 409 | 621 | 233698 | 233911 |
| UN59988 | Rsa1.0.00040.1 | 635 | 324196 | 0         | 363 | 371 | 97 +  | 2   | 372 | 92552  | 92922  |
| UN59989 | Rsa1.0.03521.1 | 700 | 396204 | 1.00E-180 | 362 | 376 | 96 +  | 248 | 623 | 10525  | 10900  |
| UN59990 | Rsa1.0.00369.1 | 650 | 266462 | 2.00E-47  | 135 | 145 | 93 +  | 488 | 631 | 10326  | 10469  |
| UN59991 | Rsa1.0.01978.1 | 799 | 36546  | 0         | 742 | 772 | 96 -  | 2   | 768 | 9029   | 9800   |
| UN59992 | Rsa1.0.00294.1 | 646 | 144860 | 1.00E-172 | 369 | 388 | 95 -  | 259 | 646 | 58059  | 58441  |
| UN59993 | Rsa1.0.01561.1 | 523 | 43227  | 0         | 497 | 523 | 95 +  | 1   | 523 | 16839  | 17360  |
| UN59994 | Rsa1.0.07819.1 | 514 | 8476   | 0         | 489 | 514 | 95 +  | 1   | 514 | 7372   | 7885   |
| UN59995 | Rsa1.0.00173.1 | 756 | 288743 | 0         | 543 | 557 | 97 +  | 1   | 557 | 29268  | 29824  |
| UN59996 | Rsa1.0.03188.1 | 803 | 24722  | 0         | 775 | 801 | 96 -  | 3   | 803 | 6485   | 7285   |
| UN59997 | Rsa1.0.00090.1 | 815 | 273859 | 0         | 414 | 426 | 97 -  | 390 | 815 | 78902  | 79327  |
| UN59998 | Rsa1.0.01749.1 | 740 | 39822  | 1.00E-83  | 167 | 170 | 98 -  | 464 | 633 | 1134   | 1303   |
| UN59999 | Rsa1.0.07219.1 | 544 | 9702   | 9.00E-96  | 184 | 186 | 98 +  | 49  | 234 | 395    | 580    |
| UN60000 | Rsa1.0.01803.1 | 679 | 173846 | 0         | 640 | 681 | 93 +  | 1   | 679 | 148152 | 148832 |
| UN60001 | Rsa1.0.00276.1 | 427 | 100160 | 1.00E-152 | 299 | 308 | 97 -  | 119 | 426 | 95501  | 95808  |
| UN60002 | Rsa1.0.01551.1 | 562 | 43411  | 0         | 535 | 558 | 95 -  | 11  | 562 | 2905   | 3460   |
| UN60003 | Rsa1.0.00020.1 | 796 | 283099 | 0         | 738 | 798 | 92 -  | 1   | 791 | 63713  | 64494  |
| UN60004 | Rsa1.0.00025.1 | 696 | 277312 | 0         | 581 | 596 | 97 -  | 1   | 594 | 50309  | 50904  |
| UN60005 | Rsa1.0.00890.1 | 760 | 323870 | 0         | 735 | 767 | 95 -  | 2   | 760 | 216050 | 216806 |
| UN60006 | Rsa1.0.05495.1 | 593 | 13534  | 0         | 550 | 620 | 88 +  | 11  | 584 | 2628   | 3244   |
| UN60007 | Rsa1.0.00249.1 | 792 | 153740 | 0         | 519 | 524 | 99 -  | 1   | 524 | 27176  | 27698  |
| UN60008 | Rsa1.0.01155.1 | 763 | 52182  | 1.00E-109 | 306 | 337 | 90 -  | 3   | 337 | 15259  | 15589  |
| UN60009 | Rsa1.0.00009.1 | 704 | 232558 | 1.00E-125 | 231 | 232 | 99 +  | 41  | 272 | 1      | 232    |
| UN60010 | Rsa1.0.03448.1 | 723 | 22844  | 0         | 466 | 482 | 96 +  | 1   | 480 | 18620  | 19093  |
| UN60011 | Rsa1.0.02350.1 | 755 | 32309  | 0         | 432 | 432 | 100 - | 298 | 729 | 1650   | 2081   |
| UN60012 | Rsa1.0.01323.1 | 729 | 48152  | 0         | 387 | 390 | 99 +  | 2   | 391 | 43499  | 43888  |
| UN60013 | Rsa1.0.00248.1 | 572 | 163568 | 0         | 543 | 578 | 93 +  | 1   | 572 | 40148  | 40719  |
| UN60014 | Rsa1.0.00396.1 | 826 | 88242  | 1.00E-176 | 377 | 396 | 95 -  | 105 | 499 | 19721  | 20114  |
| UN60015 | Rsa1.0.02178.1 | 578 | 156197 | 0         | 567 | 578 | 98 -  | 1   | 578 | 18631  | 19205  |
| UN60016 | Rsa1.0.02703.1 | 223 | 28544  | 4.00E-74  | 206 | 225 | 91 -  | 1   | 223 | 10091  | 10315  |
| UN60017 | Rsa1.0.02058.1 | 398 | 35532  | 1.00E-50  | 138 | 150 | 92 +  | 30  | 179 | 14607  | 14756  |
| UN60018 | Rsa1.0.00207.1 | 661 | 248736 | 1.00E-144 | 467 | 533 | 87 +  | 35  | 539 | 23944  | 24474  |
| UN60019 | Rsa1.0.00395.1 | 301 | 214466 | 6.00E-77  | 273 | 313 | 87 +  | 1   | 295 | 4396   | 4708   |

|         |                |     |        |           |     |     |       |     |     |        |        |
|---------|----------------|-----|--------|-----------|-----|-----|-------|-----|-----|--------|--------|
| UN60020 | Rsa1.0.02605.1 | 760 | 29637  | 0         | 412 | 415 | 99 -  | 1   | 414 | 28967  | 29381  |
| UN60021 | Rsa1.0.00816.1 | 815 | 403350 | 0         | 721 | 759 | 94 -  | 3   | 761 | 359933 | 360680 |
| UN60022 | Rsa1.0.01453.1 | 747 | 45449  | 1.00E-86  | 287 | 325 | 88 +  | 7   | 322 | 13264  | 13582  |
| UN60023 | Rsa1.0.00690.1 | 720 | 140527 | 1.00E-163 | 334 | 347 | 96 +  | 1   | 346 | 25366  | 25712  |
| UN60024 | Rsa1.0.02975.1 | 712 | 26322  | 0         | 467 | 489 | 95 +  | 1   | 480 | 6786   | 7271   |
| UN60025 | Rsa1.0.04379.1 | 531 | 17646  | 1.00E-132 | 386 | 427 | 90 -  | 1   | 423 | 16257  | 16676  |
| UN60026 | Rsa1.0.00838.1 | 496 | 153820 | 0         | 481 | 511 | 94 -  | 1   | 496 | 7920   | 8430   |
| UN60027 | Rsa1.0.01048.1 | 702 | 55684  | 1.00E-174 | 372 | 388 | 95 -  | 1   | 377 | 44113  | 44500  |
| UN60028 | Rsa1.0.00122.1 | 640 | 265937 | 1.00E-174 | 440 | 474 | 92 +  | 31  | 495 | 247401 | 247866 |
| UN60029 | Rsa1.0.00898.1 | 782 | 202772 | 5.00E-92  | 273 | 304 | 89 -  | 16  | 318 | 8777   | 9064   |
| UN60030 | Rsa1.0.06594.1 | 593 | 10700  | 0         | 560 | 590 | 94 +  | 1   | 585 | 3833   | 4420   |
| UN60031 | Rsa1.0.08042.1 | 754 | 8020   | 0         | 415 | 428 | 96 -  | 327 | 754 | 2161   | 2587   |
| UN60032 | Rsa1.0.00029.1 | 732 | 272992 | 1.00E-163 | 333 | 342 | 97 +  | 21  | 359 | 10229  | 10568  |
| UN60033 | Rsa1.0.00722.1 | 619 | 66840  | 1.00E-150 | 297 | 306 | 97 -  | 314 | 619 | 41428  | 41733  |
| UN60034 | Rsa1.0.00009.1 | 674 | 232558 | 2.00E-60  | 155 | 167 | 92 +  | 324 | 490 | 72177  | 72343  |
| UN60035 | Rsa1.0.05823.1 | 523 | 12521  | 1.00E-103 | 268 | 292 | 91 +  | 236 | 523 | 7460   | 7751   |
| UN60036 | Rsa1.0.00970.1 | 771 | 57994  | 0         | 476 | 513 | 92 +  | 4   | 488 | 30956  | 31466  |
| UN60037 | Rsa1.0.09588.1 | 717 | 6267   | 1.00E-92  | 185 | 189 | 97 -  | 493 | 681 | 5926   | 6114   |
| UN60038 | Rsa1.0.05051.1 | 653 | 15018  | 1.00E-171 | 358 | 374 | 95 +  | 4   | 369 | 13943  | 14315  |
| UN60039 | Rsa1.0.01968.1 | 701 | 36654  | 0         | 691 | 701 | 98 -  | 1   | 701 | 10772  | 11470  |
| UN60040 | Rsa1.0.06169.1 | 105 | 11578  | 1.00E-19  | 91  | 105 | 86 -  | 1   | 105 | 8009   | 8113   |
| UN60041 | Rsa1.0.06166.1 | 537 | 11583  | 1.00E-173 | 352 | 363 | 96 +  | 5   | 360 | 6733   | 7094   |
| UN60042 | Rsa1.0.53920.1 | 424 | 423    | 4.00E-97  | 241 | 260 | 92 +  | 171 | 424 | 118    | 377    |
| UN60043 | Rsa1.0.04449.1 | 676 | 17304  | 1.00E-153 | 323 | 337 | 95 +  | 1   | 337 | 16899  | 17226  |
| UN60044 | Rsa1.0.09255.1 | 696 | 6525   | 0         | 573 | 604 | 94 -  | 97  | 696 | 1324   | 1922   |
| UN60045 | Rsa1.0.02928.1 | 221 | 26680  | 1.00E-107 | 212 | 217 | 97 +  | 5   | 221 | 25807  | 26023  |
| UN60046 | Rsa1.0.00453.1 | 681 | 83031  | 0         | 592 | 607 | 97 -  | 77  | 681 | 15570  | 16176  |
| UN60047 | Rsa1.0.00171.1 | 438 | 115622 | 1.00E-111 | 243 | 256 | 94 +  | 1   | 256 | 90883  | 91138  |
| UN60048 | Rsa1.0.00412.1 | 854 | 86935  | 0         | 797 | 854 | 93 -  | 12  | 844 | 19026  | 19874  |
| UN60049 | Rsa1.0.00279.1 | 290 | 100039 | 1.00E-53  | 107 | 107 | 100 + | 150 | 256 | 41806  | 41912  |
| UN60050 | Rsa1.0.02170.1 | 803 | 34352  | 1.00E-163 | 350 | 368 | 95 +  | 200 | 567 | 30474  | 30835  |
| UN60051 | Rsa1.0.00078.1 | 298 | 175053 | 1.00E-117 | 254 | 266 | 95 -  | 1   | 266 | 4712   | 4976   |
| UN60052 | Rsa1.0.05047.1 | 227 | 15032  | 1.00E-40  | 123 | 132 | 93 +  | 67  | 196 | 10375  | 10504  |
| UN60053 | Rsa1.0.09003.1 | 648 | 6717   | 1.00E-105 | 243 | 259 | 93 +  | 1   | 252 | 1118   | 1374   |
| UN60054 | Rsa1.0.00082.1 | 339 | 237584 | 1.00E-177 | 333 | 339 | 98 -  | 1   | 339 | 228722 | 229060 |
| UN60055 | Rsa1.0.01339.1 | 745 | 47813  | 0         | 715 | 736 | 97 +  | 4   | 739 | 44326  | 45061  |
| UN60056 | Rsa1.0.00407.1 | 677 | 191544 | 0         | 638 | 684 | 93 +  | 1   | 670 | 155497 | 156168 |
| UN60057 | Rsa1.0.00921.1 | 125 | 59599  | 7.00E-25  | 67  | 70  | 95 -  | 54  | 123 | 2646   | 2715   |
| UN60058 | Rsa1.0.00438.1 | 438 | 84861  | 2.00E-40  | 91  | 93  | 97 -  | 1   | 93  | 32736  | 32828  |

|         |                |     |        |           |     |     |      |     |     |        |        |
|---------|----------------|-----|--------|-----------|-----|-----|------|-----|-----|--------|--------|
| UN60059 | Rsa1.0_00409.1 | 761 | 146788 | 1.00E-132 | 430 | 494 | 87 + | 110 | 592 | 143334 | 143801 |
| UN60060 | Rsa1.0_06004.1 | 811 | 11961  | 0         | 330 | 331 | 99 + | 2   | 332 | 4818   | 5148   |
| UN60061 | Rsa1.0_01046.1 | 798 | 152989 | 0         | 479 | 511 | 93 - | 1   | 498 | 150335 | 150845 |
| UN60062 | Rsa1.0_03521.1 | 766 | 396204 | 0         | 538 | 542 | 99 - | 1   | 542 | 7355   | 7895   |
| UN60063 | Rsa1.0_14305.1 | 731 | 3554   | 0         | 681 | 735 | 92 - | 1   | 731 | 2041   | 2774   |
| UN60064 | Rsa1.0_00351.1 | 611 | 413096 | 1.00E-121 | 241 | 248 | 97 - | 162 | 409 | 198749 | 198996 |
| UN60065 | Rsa1.0_27862.1 | 623 | 837    | 0         | 515 | 520 | 99 - | 1   | 520 | 1      | 519    |
| UN60066 | Rsa1.0_06939.1 | 341 | 10137  | 8.00E-55  | 158 | 175 | 90 - | 1   | 164 | 4572   | 4745   |
| UN60067 | Rsa1.0_00630.1 | 158 | 71281  | 7.00E-35  | 99  | 107 | 92 - | 19  | 125 | 5802   | 5908   |
| UN60068 | Rsa1.0_05241.1 | 438 | 14405  | 1.00E-167 | 331 | 342 | 96 + | 3   | 344 | 3080   | 3421   |
| UN60069 | Rsa1.0_10001.1 | 574 | 6042   | 1.00E-112 | 227 | 234 | 97 + | 334 | 567 | 71     | 304    |
| UN60070 | Rsa1.0_00108.1 | 256 | 478491 | 1.00E-115 | 245 | 256 | 95 - | 1   | 256 | 441635 | 441887 |
| UN60071 | Rsa1.0_03465.1 | 140 | 22700  | 1.00E-26  | 70  | 73  | 95 - | 3   | 75  | 11014  | 11086  |
| UN60072 | Rsa1.0_00305.1 | 216 | 97308  | 1.00E-55  | 123 | 126 | 97 - | 85  | 209 | 91499  | 91624  |
| UN60073 | Rsa1.0_01660.1 | 795 | 41400  | 0         | 415 | 436 | 95 - | 2   | 432 | 27246  | 27681  |
| UN60074 | Rsa1.0_01898.1 | 302 | 37491  | 1.00E-116 | 281 | 302 | 93 + | 4   | 302 | 1562   | 1862   |
| UN60075 | Rsa1.0_02754.1 | 134 | 28213  | 4.00E-45  | 120 | 128 | 93 + | 4   | 130 | 8656   | 8783   |
| UN60076 | Rsa1.0_00026.1 | 251 | 327835 | 1.00E-101 | 221 | 231 | 95 + | 1   | 230 | 52965  | 53195  |
| UN60077 | Rsa1.0_00694.1 | 602 | 68074  | 0         | 581 | 598 | 97 + | 3   | 599 | 60935  | 61527  |
| UN60078 | Rsa1.0_06383.1 | 140 | 11119  | 1.00E-48  | 128 | 138 | 92 - | 3   | 140 | 378    | 515    |
| UN60079 | Rsa1.0_00053.1 | 221 | 263459 | 3.00E-53  | 201 | 227 | 88 + | 1   | 221 | 242987 | 243211 |
| UN60080 | Rsa1.0_01614.1 | 151 | 42238  | 6.00E-23  | 70  | 75  | 93 - | 77  | 151 | 10949  | 11023  |
| UN60081 | Rsa1.0_00155.1 | 712 | 118465 | 0         | 692 | 713 | 97 - | 3   | 712 | 89794  | 90506  |
| UN60082 | Rsa1.0_02241.1 | 617 | 33520  | 1.00E-156 | 326 | 341 | 95 + | 2   | 342 | 10276  | 10613  |
| UN60083 | Rsa1.0_00654.1 | 715 | 70012  | 0         | 705 | 726 | 97 + | 2   | 715 | 17619  | 18340  |
| UN60084 | Rsa1.0_04045.1 | 771 | 19403  | 0         | 658 | 660 | 99 - | 2   | 661 | 5362   | 6021   |
| UN60085 | Rsa1.0_00265.1 | 265 | 220635 | 1.00E-114 | 250 | 261 | 95 - | 1   | 260 | 139882 | 140137 |
| UN60086 | Rsa1.0_27679.1 | 390 | 843    | 1.00E-169 | 341 | 353 | 96 + | 1   | 352 | 175    | 527    |
| UN60087 | Rsa1.0_02236.1 | 854 | 33558  | 1.00E-121 | 296 | 315 | 93 - | 547 | 854 | 11599  | 11913  |
| UN60088 | Rsa1.0_02127.1 | 764 | 34764  | 1.00E-155 | 321 | 334 | 96 + | 36  | 368 | 4938   | 5271   |
| UN60089 | Rsa1.0_01835.1 | 672 | 38542  | 0         | 650 | 702 | 92 - | 1   | 672 | 16903  | 17593  |
| UN60090 | Rsa1.0_01396.1 | 720 | 151624 | 1.00E-150 | 279 | 282 | 98 - | 381 | 662 | 4313   | 4594   |
| UN60091 | Rsa1.0_00082.1 | 151 | 237584 | 2.00E-66  | 149 | 154 | 96 - | 1   | 151 | 229148 | 229300 |
| UN60092 | Rsa1.0_05955.1 | 189 | 12115  | 1.00E-67  | 174 | 187 | 93 + | 3   | 189 | 647    | 828    |
| UN60093 | Rsa1.0_00002.1 | 163 | 601661 | 1.00E-82  | 161 | 163 | 98 - | 1   | 163 | 232242 | 232404 |
| UN60094 | Rsa1.0_00577.1 | 189 | 174827 | 2.00E-88  | 183 | 189 | 96 - | 1   | 189 | 135417 | 135605 |
| UN60095 | Rsa1.0_00886.1 | 157 | 167350 | 3.00E-43  | 140 | 153 | 91 - | 5   | 154 | 12450  | 12602  |
| UN60096 | Rsa1.0_00307.1 | 196 | 199003 | 1.00E-104 | 195 | 196 | 99 + | 1   | 196 | 27125  | 27320  |
| UN60097 | Rsa1.0_03698.1 | 149 | 21302  | 3.00E-58  | 143 | 150 | 95 + | 1   | 149 | 7594   | 7742   |

|         |                |     |        |           |     |     |       |     |     |        |        |
|---------|----------------|-----|--------|-----------|-----|-----|-------|-----|-----|--------|--------|
| UN60098 | Rsa1.0_00048.1 | 194 | 167185 | 1.00E-67  | 189 | 212 | 89 +  | 2   | 194 | 154781 | 154991 |
| UN60099 | Rsa1.0_05582.1 | 174 | 13271  | 1.00E-30  | 96  | 104 | 92 -  | 5   | 108 | 414    | 516    |
| UN60100 | Rsa1.0_00108.1 | 184 | 478491 | 3.00E-50  | 132 | 140 | 94 +  | 3   | 142 | 134150 | 134286 |
| UN60101 | Rsa1.0_31902.1 | 785 | 715    | 1.00E-126 | 239 | 241 | 99 +  | 86  | 326 | 1      | 240    |
| UN60102 | Rsa1.0_18963.1 | 800 | 1503   | 0         | 347 | 351 | 98 -  | 1   | 350 | 1      | 351    |
| UN60103 | Rsa1.0_00396.1 | 365 | 88242  | 7.00E-77  | 203 | 222 | 91 -  | 18  | 239 | 1132   | 1353   |
| UN60104 | Rsa1.0_03278.1 | 819 | 24125  | 1.00E-154 | 283 | 285 | 99 +  | 1   | 285 | 1987   | 2271   |
| UN60105 | Rsa1.0_01186.1 | 254 | 51418  | 1.00E-86  | 234 | 256 | 91 -  | 1   | 254 | 3133   | 3381   |
| UN60106 | Rsa1.0_01938.1 | 678 | 264018 | 0         | 357 | 360 | 99 -  | 1   | 359 | 132973 | 133332 |
| UN60107 | Rsa1.0_00373.1 | 786 | 90296  | 0         | 726 | 764 | 95 +  | 2   | 756 | 79754  | 80516  |
| UN60108 | Rsa1.0_00608.1 | 785 | 172672 | 0         | 448 | 450 | 99 +  | 61  | 510 | 163174 | 163623 |
| UN60109 | Rsa1.0_00546.1 | 787 | 76523  | 0         | 361 | 370 | 97 -  | 212 | 581 | 39646  | 40015  |
| UN60110 | Rsa1.0_00411.1 | 164 | 86944  | 8.00E-38  | 92  | 96  | 95 -  | 11  | 106 | 6439   | 6534   |
| UN60111 | Rsa1.0_00657.1 | 237 | 69858  | 1.00E-105 | 229 | 238 | 96 -  | 1   | 237 | 43609  | 43845  |
| UN60112 | Rsa1.0_00237.1 | 737 | 235974 | 1.00E-147 | 306 | 320 | 95 +  | 351 | 670 | 98136  | 98455  |
| UN60113 | Rsa1.0_01516.1 | 779 | 44196  | 1.00E-141 | 314 | 334 | 94 +  | 171 | 504 | 37039  | 37372  |
| UN60114 | Rsa1.0_04318.1 | 117 | 17947  | 1.00E-29  | 111 | 128 | 86 +  | 1   | 117 | 4048   | 4175   |
| UN60115 | Rsa1.0_01701.1 | 319 | 162121 | 1.00E-107 | 247 | 265 | 93 +  | 1   | 257 | 20666  | 20930  |
| UN60116 | #              | #   | #      | #         | #   | #   | #     | #   | #   | #      | #      |
| UN60117 | Rsa1.0_10656.1 | 709 | 5768   | 2.33E-156 | 405 | 450 | 90 -  | 245 | 691 | 3424   | 3873   |
| UN60118 | Rsa1.0_00146.1 | 678 | 149343 | 0         | 426 | 444 | 95 -  | 105 | 548 | 51775  | 52218  |
| UN60119 | Rsa1.0_01147.1 | 776 | 52391  | 4.00E-74  | 145 | 146 | 99 +  | 487 | 632 | 46884  | 47029  |
| UN60120 | Rsa1.0_14009.1 | 672 | 3924   | 1.00E-160 | 363 | 386 | 94 +  | 7   | 386 | 2507   | 2886   |
| UN60121 | Rsa1.0_00017.1 | 597 | 752458 | 1.00E-137 | 333 | 360 | 92 +  | 30  | 383 | 661863 | 662218 |
| UN60122 | Rsa1.0_00254.1 | 769 | 102600 | 0         | 720 | 765 | 94 -  | 3   | 766 | 69759  | 70518  |
| UN60123 | Rsa1.0_01586.1 | 831 | 42804  | 3.00E-75  | 181 | 192 | 94 -  | 3   | 193 | 1229   | 1420   |
| UN60124 | Rsa1.0_00112.1 | 754 | 132199 | 0         | 735 | 763 | 96 -  | 1   | 754 | 535    | 1294   |
| UN60125 | Rsa1.0_07130.1 | 749 | 9861   | 0         | 423 | 437 | 96 -  | 2   | 436 | 5298   | 5733   |
| UN60126 | Rsa1.0_00103.1 | 116 | 135304 | 2.00E-46  | 106 | 110 | 96 +  | 4   | 113 | 22157  | 22266  |
| UN60127 | Rsa1.0_01595.1 | 155 | 175383 | 4.00E-64  | 140 | 144 | 97 +  | 1   | 144 | 1957   | 2099   |
| UN60128 | Rsa1.0_04989.1 | 754 | 15217  | 2.00E-75  | 292 | 342 | 85 +  | 303 | 627 | 1387   | 1718   |
| UN60129 | Rsa1.0_02685.1 | 762 | 28669  | 1.00E-109 | 207 | 209 | 99 +  | 3   | 211 | 1288   | 1496   |
| UN60130 | Rsa1.0_00185.1 | 762 | 248445 | 0         | 694 | 767 | 90 +  | 1   | 762 | 241333 | 242070 |
| UN60131 | Rsa1.0_03408.1 | 651 | 23154  | 0         | 615 | 650 | 94 -  | 4   | 651 | 8644   | 9281   |
| UN60132 | Rsa1.0_10263.1 | 774 | 5914   | 0         | 708 | 756 | 93 -  | 25  | 774 | 4693   | 5447   |
| UN60133 | Rsa1.0_01549.1 | 477 | 43543  | 1.00E-167 | 426 | 467 | 91 +  | 6   | 467 | 42744  | 43210  |
| UN60134 | Rsa1.0_00228.1 | 551 | 105511 | 1.00E-136 | 252 | 254 | 99 -  | 1   | 254 | 38272  | 38525  |
| UN60135 | Rsa1.0_00427.1 | 472 | 189678 | 1.00E-119 | 286 | 307 | 93 +  | 4   | 300 | 11853  | 12159  |
| UN60136 | Rsa1.0_00154.1 | 557 | 189461 | 1.00E-116 | 212 | 212 | 100 + | 1   | 212 | 51751  | 51962  |



|         |                |     |        |           |     |     |      |     |     |        |        |
|---------|----------------|-----|--------|-----------|-----|-----|------|-----|-----|--------|--------|
| UN60137 | Rsa1.0_00737.1 | 773 | 66432  | 0         | 376 | 389 | 96 - | 2   | 384 | 11456  | 11844  |
| UN60138 | Rsa1.0_00975.1 | 809 | 57865  | 0         | 800 | 810 | 98 - | 1   | 809 | 33909  | 34718  |
| UN60139 | Rsa1.0_03169.1 | 680 | 24826  | 1.00E-113 | 223 | 228 | 97 + | 389 | 616 | 16469  | 16696  |
| UN60140 | Rsa1.0_00959.1 | 574 | 58202  | 1.00E-113 | 252 | 264 | 95 + | 2   | 264 | 3695   | 3957   |
| UN60141 | Rsa1.0_00605.1 | 676 | 73199  | 0         | 509 | 532 | 95 - | 1   | 532 | 30975  | 31506  |
| UN60142 | Rsa1.0_02219.1 | 358 | 33798  | 1.00E-106 | 248 | 262 | 94 + | 1   | 255 | 14559  | 14818  |
| UN60143 | Rsa1.0_00037.1 | 724 | 307838 | 7.00E-88  | 168 | 169 | 99 - | 124 | 292 | 171711 | 171879 |
| UN60144 | Rsa1.0_01601.1 | 825 | 42519  | 0         | 496 | 512 | 96 + | 14  | 521 | 11077  | 11588  |
| UN60145 | Rsa1.0_00675.1 | 775 | 145590 | 6.00E-76  | 173 | 181 | 95 - | 3   | 182 | 55789  | 55969  |
| UN60146 | Rsa1.0_03354.1 | 412 | 23491  | 0         | 410 | 412 | 99 - | 1   | 412 | 6189   | 6600   |
| UN60147 | Rsa1.0_00067.1 | 723 | 415055 | 0         | 687 | 729 | 94 - | 3   | 723 | 76645  | 77353  |
| UN60148 | Rsa1.0_00819.1 | 785 | 62918  | 0         | 759 | 789 | 96 - | 3   | 785 | 4302   | 5089   |
| UN60149 | Rsa1.0_19187.1 | 153 | 1467   | 1.00E-51  | 146 | 158 | 92 + | 1   | 153 | 1098   | 1252   |
| UN60150 | Rsa1.0_00596.1 | 769 | 73578  | 1.00E-126 | 238 | 241 | 98 - | 225 | 465 | 7964   | 8204   |
| UN60151 | Rsa1.0_00388.1 | 832 | 88890  | 1.00E-133 | 253 | 257 | 98 - | 79  | 335 | 1044   | 1300   |
| UN60152 | Rsa1.0_00283.1 | 834 | 183797 | 0         | 397 | 407 | 97 - | 1   | 407 | 94928  | 95334  |
| UN60153 | Rsa1.0_01680.1 | 783 | 41122  | 0         | 760 | 783 | 97 + | 2   | 783 | 31091  | 31872  |
| UN60154 | Rsa1.0_00421.1 | 716 | 86365  | 1.00E-108 | 285 | 308 | 92 + | 3   | 307 | 70152  | 70449  |
| UN60155 | Rsa1.0_00548.1 | 875 | 76518  | 1.00E-104 | 232 | 243 | 95 + | 20  | 258 | 60519  | 60761  |
| UN60156 | Rsa1.0_04436.1 | 376 | 17364  | 1.00E-177 | 357 | 371 | 96 - | 6   | 376 | 15918  | 16288  |
| UN60157 | Rsa1.0_00620.1 | 796 | 71985  | 0         | 393 | 407 | 96 + | 392 | 796 | 54806  | 55212  |
| UN60158 | Rsa1.0_00439.1 | 597 | 142776 | 0         | 587 | 615 | 95 - | 1   | 595 | 123486 | 124100 |
| UN60159 | Rsa1.0_02901.1 | 518 | 26909  | 1.00E-73  | 248 | 281 | 88 - | 7   | 282 | 21290  | 21563  |
| UN60160 | Rsa1.0_34927.1 | 631 | 648    | 0         | 504 | 542 | 92 - | 1   | 538 | 1      | 539    |
| UN60161 | Rsa1.0_01862.1 | 791 | 38030  | 0         | 491 | 492 | 99 + | 251 | 742 | 35190  | 35681  |
| UN60162 | Rsa1.0_01248.1 | 771 | 154103 | 1.00E-89  | 220 | 236 | 93 - | 4   | 238 | 43313  | 43548  |
| UN60163 | Rsa1.0_02370.1 | 105 | 32071  | 7.00E-37  | 99  | 105 | 94 + | 1   | 105 | 7049   | 7151   |
| UN60164 | Rsa1.0_00228.1 | 270 | 105511 | 1.00E-111 | 257 | 271 | 94 + | 1   | 270 | 86173  | 86440  |
| UN60165 | Rsa1.0_00019.1 | 589 | 301669 | 1.00E-136 | 273 | 280 | 97 + | 1   | 280 | 177015 | 177290 |
| UN60166 | Rsa1.0_01394.1 | 697 | 46641  | 1.00E-135 | 354 | 388 | 91 + | 1   | 368 | 4756   | 5141   |
| UN60167 | Rsa1.0_01412.1 | 331 | 46311  | 9.00E-30  | 228 | 281 | 81 + | 1   | 249 | 10335  | 10614  |
| UN60168 | Rsa1.0_00123.1 | 225 | 325650 | 1.00E-104 | 219 | 228 | 96 - | 2   | 225 | 227132 | 227359 |
| UN60169 | Rsa1.0_27793.1 | 538 | 839    | 1.00E-136 | 290 | 302 | 96 + | 17  | 317 | 246    | 546    |
| UN60170 | Rsa1.0_00741.1 | 520 | 66117  | 1.00E-167 | 358 | 382 | 93 - | 3   | 368 | 45663  | 46044  |
| UN60171 | Rsa1.0_00328.1 | 130 | 224661 | 1.00E-32  | 101 | 111 | 90 + | 1   | 111 | 140860 | 140970 |
| UN60172 | Rsa1.0_00365.1 | 790 | 90902  | 0         | 434 | 443 | 97 + | 348 | 790 | 3993   | 4435   |
| UN60173 | Rsa1.0_00402.1 | 303 | 385315 | 4.00E-72  | 153 | 158 | 96 + | 1   | 158 | 271036 | 271193 |
| UN60174 | Rsa1.0_00398.1 | 798 | 88007  | 0         | 753 | 801 | 94 - | 1   | 798 | 67749  | 68525  |
| UN60175 | Rsa1.0_00571.1 | 667 | 329018 | 0         | 445 | 452 | 98 - | 214 | 664 | 1404   | 1855   |

|         |                |     |        |           |     |     |       |     |     |        |        |
|---------|----------------|-----|--------|-----------|-----|-----|-------|-----|-----|--------|--------|
| UN60176 | Rsa1.0.01865.1 | 445 | 37992  | 1.00E-69  | 134 | 134 | 100 - | 59  | 192 | 33190  | 33323  |
| UN60177 | Rsa1.0.01390.1 | 100 | 46695  | 1.00E-13  | 45  | 47  | 95 -  | 5   | 51  | 24733  | 24779  |
| UN60178 | Rsa1.0.00017.1 | 298 | 752458 | 4.00E-90  | 277 | 305 | 90 +  | 5   | 298 | 661823 | 662123 |
| UN60179 | Rsa1.0.05953.1 | 176 | 12120  | 3.00E-37  | 152 | 174 | 87 -  | 3   | 176 | 754    | 919    |
| UN60180 | Rsa1.0.00468.1 | 470 | 82095  | 0         | 377 | 382 | 98 +  | 6   | 387 | 11720  | 12101  |
| UN60181 | Rsa1.0.01295.1 | 259 | 49040  | 7.00E-98  | 220 | 233 | 94 +  | 6   | 238 | 40384  | 40616  |
| UN60182 | Rsa1.0.00218.1 | 801 | 201480 | 1.00E-177 | 423 | 458 | 92 -  | 5   | 452 | 111393 | 111839 |
| UN60183 | Rsa1.0.00002.1 | 641 | 601661 | 0         | 572 | 640 | 89 -  | 1   | 638 | 576254 | 576893 |
| UN60184 | Rsa1.0.04106.1 | 561 | 19018  | 0         | 483 | 514 | 93 -  | 1   | 496 | 11046  | 11559  |
| UN60185 | Rsa1.0.69949.1 | 110 | 328    | 1.00E-16  | 87  | 100 | 87 -  | 3   | 102 | 62     | 160    |
| UN60186 | Rsa1.0.08779.1 | 611 | 6929   | 0         | 494 | 511 | 96 -  | 1   | 511 | 2825   | 3333   |
| UN60187 | Rsa1.0.00996.1 | 109 | 57222  | 3.00E-33  | 99  | 108 | 91 +  | 1   | 108 | 52876  | 52983  |
| UN60188 | Rsa1.0.00041.1 | 133 | 186197 | 4.00E-42  | 120 | 129 | 93 -  | 1   | 126 | 148315 | 148442 |
| UN60189 | Rsa1.0.02884.1 | 710 | 27034  | 0         | 552 | 583 | 94 -  | 1   | 583 | 12569  | 13145  |
| UN60190 | Rsa1.0.00205.1 | 140 | 193401 | 6.00E-32  | 70  | 70  | 100 + | 9   | 78  | 99369  | 99438  |
| UN60191 | Rsa1.0.00920.1 | 697 | 601703 | 1.00E-165 | 339 | 354 | 95 +  | 1   | 349 | 9524   | 9872   |
| UN60192 | Rsa1.0.00826.1 | 754 | 166736 | 7.00E-88  | 180 | 185 | 97 +  | 259 | 443 | 130768 | 130952 |
| UN60193 | Rsa1.0.02226.1 | 665 | 33726  | 1.00E-49  | 113 | 117 | 96 +  | 433 | 549 | 11062  | 11178  |
| UN60194 | Rsa1.0.01778.1 | 107 | 39509  | 5.00E-44  | 96  | 98  | 97 +  | 7   | 104 | 21970  | 22067  |
| UN60195 | Rsa1.0.05026.1 | 649 | 15095  | 1.00E-101 | 217 | 227 | 95 -  | 252 | 478 | 9795   | 10021  |
| UN60196 | Rsa1.0.02266.1 | 664 | 33195  | 1.00E-177 | 379 | 397 | 95 -  | 8   | 401 | 13845  | 14240  |
| UN60197 | Rsa1.0.00131.1 | 769 | 432233 | 0         | 654 | 685 | 95 +  | 2   | 680 | 153848 | 154531 |
| UN60198 | Rsa1.0.01989.1 | 752 | 36439  | 1.00E-124 | 257 | 265 | 96 -  | 220 | 482 | 10685  | 10948  |
| UN60199 | Rsa1.0.00021.1 | 771 | 263655 | 1.00E-119 | 233 | 238 | 97 +  | 508 | 745 | 18708  | 18945  |
| UN60200 | Rsa1.0.06459.1 | 533 | 10979  | 0         | 516 | 533 | 96 -  | 1   | 533 | 5269   | 5788   |
| UN60201 | Rsa1.0.01000.1 | 459 | 57140  | 7.00E-93  | 194 | 201 | 96 +  | 1   | 201 | 37971  | 38171  |
| UN60202 | Rsa1.0.01717.1 | 497 | 143162 | 0         | 481 | 503 | 95 +  | 1   | 497 | 28776  | 29278  |
| UN60203 | Rsa1.0.00047.1 | 607 | 168582 | 0         | 538 | 544 | 98 +  | 1   | 544 | 167012 | 167555 |
| UN60204 | Rsa1.0.00657.1 | 475 | 69858  | 1.00E-51  | 113 | 116 | 97 +  | 360 | 475 | 35587  | 35702  |
| UN60205 | Rsa1.0.00017.1 | 238 | 752458 | 5.00E-80  | 176 | 183 | 96 -  | 1   | 182 | 450189 | 450371 |
| UN60206 | Rsa1.0.08001.1 | 762 | 8095   | 0         | 527 | 535 | 98 -  | 228 | 762 | 7561   | 8095   |
| UN60207 | Rsa1.0.00329.1 | 185 | 222544 | 3.00E-74  | 174 | 185 | 94 -  | 1   | 185 | 20661  | 20845  |
| UN60208 | Rsa1.0.02657.1 | 482 | 29000  | 0         | 479 | 482 | 99 -  | 1   | 482 | 20685  | 21166  |
| UN60209 | Rsa1.0.03320.1 | 348 | 23765  | 1.00E-124 | 267 | 280 | 95 +  | 1   | 279 | 17178  | 17451  |
| UN60210 | Rsa1.0.00187.1 | 495 | 393093 | 0         | 419 | 445 | 94 +  | 5   | 447 | 155747 | 156191 |
| UN60211 | Rsa1.0.00727.1 | 758 | 66724  | 0         | 673 | 694 | 96 -  | 1   | 692 | 34131  | 34818  |
| UN60212 | Rsa1.0.00301.1 | 685 | 365315 | 4.00E-80  | 185 | 192 | 96 -  | 6   | 196 | 361634 | 361823 |
| UN60213 | Rsa1.0.00108.1 | 786 | 478491 | 0         | 492 | 511 | 96 -  | 1   | 506 | 66756  | 67265  |
| UN60214 | Rsa1.0.05700.1 | 470 | 12886  | 1.00E-161 | 365 | 389 | 93 +  | 27  | 410 | 3841   | 4229   |

|         |                |     |        |           |     |     |       |     |     |        |        |
|---------|----------------|-----|--------|-----------|-----|-----|-------|-----|-----|--------|--------|
| UN60215 | Rsa1.0.01333.1 | 260 | 47929  | 7.00E-64  | 133 | 136 | 97 +  | 125 | 260 | 30715  | 30850  |
| UN60216 | Rsa1.0.67040.1 | 641 | 342    | 0         | 338 | 342 | 98 +  | 268 | 609 | 1      | 342    |
| UN60217 | Rsa1.0.03128.1 | 779 | 25180  | 0         | 401 | 408 | 98 +  | 294 | 701 | 3598   | 4005   |
| UN60218 | Rsa1.0.00448.1 | 641 | 84048  | 1.00E-163 | 325 | 335 | 97 +  | 1   | 335 | 62133  | 62466  |
| UN60219 | Rsa1.0.00352.1 | 280 | 92266  | 1.00E-112 | 257 | 273 | 94 +  | 8   | 280 | 61975  | 62246  |
| UN60220 | Rsa1.0.06288.1 | 127 | 11302  | 1.00E-26  | 120 | 141 | 85 +  | 1   | 127 | 3184   | 3324   |
| UN60221 | Rsa1.0.02668.1 | 862 | 28895  | 1.00E-171 | 311 | 313 | 99 -  | 1   | 313 | 27353  | 27665  |
| UN60222 | Rsa1.0.00454.1 | 168 | 216970 | 1.00E-24  | 106 | 120 | 88 -  | 13  | 128 | 143125 | 143244 |
| UN60223 | Rsa1.0.05823.1 | 133 | 12521  | 2.00E-50  | 124 | 133 | 93 -  | 1   | 133 | 10902  | 11025  |
| UN60224 | Rsa1.0.00782.1 | 425 | 64468  | 1.00E-118 | 390 | 449 | 86 +  | 1   | 424 | 15631  | 16062  |
| UN60225 | Rsa1.0.00017.1 | 901 | 752458 | 0         | 675 | 722 | 93 +  | 1   | 711 | 68616  | 69315  |
| UN60226 | Rsa1.0.06201.1 | 833 | 11506  | 1.00E-138 | 288 | 303 | 95 +  | 23  | 314 | 1      | 303    |
| UN60227 | Rsa1.0.04236.1 | 606 | 18370  | 1.00E-127 | 282 | 297 | 94 -  | 3   | 298 | 16968  | 17256  |
| UN60228 | Rsa1.0.00230.1 | 207 | 105389 | 1.00E-83  | 197 | 208 | 94 +  | 1   | 207 | 2608   | 2813   |
| UN60229 | Rsa1.0.07923.1 | 507 | 8249   | 1.00E-141 | 279 | 286 | 97 +  | 16  | 300 | 2924   | 3209   |
| UN60230 | Rsa1.0.00576.1 | 504 | 178949 | 1.00E-173 | 411 | 444 | 92 -  | 1   | 444 | 6064   | 6506   |
| UN60231 | Rsa1.0.11046.1 | 248 | 5635   | 4.00E-59  | 167 | 180 | 92 -  | 1   | 177 | 589    | 768    |
| UN60232 | Rsa1.0.05336.1 | 132 | 14117  | 5.00E-32  | 116 | 128 | 90 +  | 6   | 132 | 11422  | 11545  |
| UN60233 | Rsa1.0.00030.1 | 882 | 250988 | 0         | 552 | 556 | 99 +  | 66  | 621 | 125043 | 125598 |
| UN60234 | Rsa1.0.00723.1 | 177 | 66806  | 8.00E-75  | 166 | 174 | 95 +  | 4   | 177 | 58081  | 58254  |
| UN60235 | Rsa1.0.00434.1 | 856 | 85171  | 0         | 546 | 591 | 92 +  | 50  | 632 | 66221  | 66802  |
| UN60236 | Rsa1.0.00087.1 | 821 | 761073 | 1.00E-177 | 315 | 315 | 100 + | 1   | 315 | 533452 | 533766 |
| UN60237 | Rsa1.0.00820.1 | 689 | 62911  | 1.00E-111 | 251 | 264 | 95 +  | 146 | 408 | 61866  | 62123  |
| UN60238 | Rsa1.0.00955.1 | 800 | 58358  | 8.00E-57  | 116 | 117 | 99 -  | 572 | 688 | 33191  | 33307  |
| UN60239 | Rsa1.0.00900.1 | 595 | 60367  | 1.00E-138 | 279 | 289 | 96 -  | 5   | 293 | 29910  | 30198  |
| UN60240 | Rsa1.0.00404.1 | 781 | 87635  | 0         | 765 | 781 | 97 -  | 1   | 781 | 67669  | 68449  |
| UN60241 | Rsa1.0.14690.1 | 452 | 3155   | 1.00E-143 | 278 | 284 | 97 -  | 105 | 388 | 137    | 417    |
| UN60242 | Rsa1.0.00173.1 | 784 | 288743 | 1.00E-104 | 294 | 330 | 89 +  | 2   | 328 | 87150  | 87461  |
| UN60243 | Rsa1.0.01536.1 | 401 | 43747  | 1.00E-179 | 380 | 401 | 94 +  | 1   | 401 | 18806  | 19206  |
| UN60244 | Rsa1.0.05846.1 | 333 | 12434  | 2.00E-58  | 124 | 127 | 97 -  | 1   | 127 | 7914   | 8040   |
| UN60245 | Rsa1.0.00017.1 | 344 | 752458 | 1.00E-126 | 317 | 346 | 91 -  | 3   | 344 | 533933 | 534278 |
| UN60246 | Rsa1.0.00537.1 | 858 | 186980 | 1.00E-132 | 267 | 276 | 96 -  | 352 | 627 | 17079  | 17354  |
| UN60247 | Rsa1.0.00925.1 | 791 | 59481  | 0         | 474 | 495 | 95 -  | 3   | 487 | 57760  | 58249  |
| UN60248 | Rsa1.0.00723.1 | 326 | 66806  | 1.00E-136 | 306 | 326 | 93 +  | 1   | 326 | 58078  | 58403  |
| UN60249 | Rsa1.0.00087.1 | 828 | 761073 | 0         | 792 | 826 | 95 -  | 7   | 828 | 87285  | 88107  |
| UN60250 | Rsa1.0.01928.1 | 115 | 37192  | 1.00E-38  | 90  | 93  | 96 -  | 23  | 115 | 3020   | 3112   |
| UN60251 | Rsa1.0.12966.1 | 794 | 5062   | 0         | 746 | 768 | 97 +  | 28  | 789 | 810    | 1573   |
| UN60252 | Rsa1.0.02036.1 | 681 | 35731  | 0         | 637 | 659 | 96 -  | 25  | 681 | 24761  | 25416  |
| UN60253 | Rsa1.0.00491.1 | 759 | 80219  | 0         | 716 | 759 | 94 -  | 1   | 759 | 79043  | 79798  |

|         |                |     |        |           |     |     |       |     |     |        |        |
|---------|----------------|-----|--------|-----------|-----|-----|-------|-----|-----|--------|--------|
| UN60254 | Rsa1.0_00253.1 | 894 | 231292 | 0         | 532 | 574 | 92 +  | 3   | 566 | 198952 | 199505 |
| UN60255 | Rsa1.0_24453.1 | 115 | 987    | 1.00E-23  | 95  | 108 | 87 +  | 1   | 108 | 30     | 137    |
| UN60256 | Rsa1.0_00413.1 | 765 | 86921  | 0         | 759 | 764 | 99 +  | 3   | 765 | 5446   | 6209   |
| UN60257 | Rsa1.0_00399.1 | 227 | 242951 | 1.00E-68  | 189 | 207 | 91 +  | 23  | 227 | 213600 | 213806 |
| UN60258 | Rsa1.0_09577.1 | 360 | 6275   | 1.00E-165 | 344 | 359 | 95 +  | 1   | 357 | 163    | 513    |
| UN60259 | Rsa1.0_26014.1 | 134 | 910    | 4.00E-48  | 115 | 121 | 95 +  | 1   | 121 | 636    | 756    |
| UN60260 | Rsa1.0_03355.1 | 165 | 23489  | 2.00E-38  | 141 | 161 | 87 -  | 4   | 164 | 3195   | 3355   |
| UN60261 | Rsa1.0_02397.1 | 478 | 31778  | 1.00E-76  | 155 | 158 | 98 -  | 1   | 158 | 22344  | 22501  |
| UN60262 | Rsa1.0_00648.1 | 605 | 70351  | 1.00E-151 | 317 | 333 | 95 +  | 1   | 326 | 1649   | 1981   |
| UN60263 | Rsa1.0_00083.1 | 186 | 442773 | 2.00E-85  | 179 | 184 | 97 -  | 1   | 184 | 134875 | 135057 |
| UN60264 | Rsa1.0_02041.1 | 714 | 163634 | 1.00E-165 | 307 | 310 | 99 +  | 189 | 497 | 12492  | 12801  |
| UN60265 | Rsa1.0_40140.1 | 784 | 559    | 1.00E-109 | 210 | 213 | 98 +  | 3   | 215 | 144    | 356    |
| UN60266 | Rsa1.0_00279.1 | 391 | 100039 | 1.00E-139 | 302 | 317 | 95 +  | 42  | 351 | 41034  | 41349  |
| UN60267 | Rsa1.0_00013.1 | 774 | 292129 | 0         | 588 | 640 | 91 -  | 1   | 630 | 168710 | 169340 |
| UN60268 | Rsa1.0_04026.1 | 814 | 19508  | 1.00E-107 | 296 | 321 | 92 -  | 1   | 311 | 11005  | 11323  |
| UN60269 | Rsa1.0_00321.1 | 412 | 95671  | 1.00E-119 | 301 | 327 | 92 +  | 86  | 412 | 57552  | 57874  |
| UN60270 | Rsa1.0_19230.1 | 482 | 1460   | 1.00E-135 | 289 | 304 | 95 +  | 3   | 306 | 968    | 1271   |
| UN60271 | Rsa1.0_04193.1 | 631 | 18571  | 1.00E-147 | 306 | 320 | 95 +  | 312 | 631 | 9100   | 9419   |
| UN60272 | Rsa1.0_01159.1 | 548 | 52115  | 0         | 508 | 546 | 93 +  | 4   | 548 | 34711  | 35256  |
| UN60273 | Rsa1.0_11694.1 | 786 | 131228 | 0         | 748 | 792 | 94 +  | 1   | 786 | 127806 | 128597 |
| UN60274 | Rsa1.0_00798.1 | 778 | 63945  | 0         | 422 | 429 | 98 +  | 1   | 429 | 62666  | 63093  |
| UN60275 | Rsa1.0_02560.1 | 813 | 30091  | 0         | 368 | 369 | 99 +  | 2   | 370 | 6986   | 7354   |
| UN60276 | Rsa1.0_00690.1 | 733 | 140527 | 1.00E-148 | 282 | 286 | 98 -  | 1   | 286 | 61132  | 61416  |
| UN60277 | Rsa1.0_00010.1 | 737 | 294827 | 2.00E-91  | 279 | 311 | 89 +  | 8   | 308 | 135530 | 135837 |
| UN60278 | Rsa1.0_02295.1 | 772 | 149884 | 0         | 432 | 442 | 97 +  | 1   | 438 | 32240  | 32681  |
| UN60279 | Rsa1.0_23460.1 | 675 | 1047   | 0         | 375 | 383 | 97 -  | 59  | 441 | 1      | 383    |
| UN60280 | Rsa1.0_00320.1 | 445 | 95784  | 1.00E-102 | 228 | 240 | 95 +  | 90  | 328 | 8074   | 8313   |
| UN60281 | Rsa1.0_00828.1 | 433 | 62744  | 0         | 421 | 433 | 97 +  | 1   | 433 | 8780   | 9212   |
| UN60282 | Rsa1.0_01148.1 | 794 | 52375  | 0         | 781 | 788 | 99 +  | 3   | 788 | 24314  | 25101  |
| UN60283 | Rsa1.0_05866.1 | 733 | 12376  | 0         | 516 | 516 | 100 - | 136 | 651 | 5437   | 5952   |
| UN60284 | Rsa1.0_00032.1 | 741 | 306326 | 1.00E-127 | 259 | 266 | 97 -  | 1   | 264 | 279058 | 279322 |
| UN60285 | Rsa1.0_00146.1 | 382 | 149343 | 1.00E-149 | 349 | 372 | 93 +  | 13  | 382 | 130727 | 131097 |
| UN60286 | Rsa1.0_00332.1 | 334 | 94575  | 2.00E-67  | 174 | 186 | 93 -  | 4   | 188 | 74767  | 74951  |
| UN60287 | Rsa1.0_00332.1 | 753 | 94575  | 1.00E-129 | 266 | 275 | 96 +  | 303 | 577 | 78288  | 78561  |
| UN60288 | Rsa1.0_04426.1 | 384 | 17399  | 0         | 369 | 382 | 96 -  | 3   | 384 | 5403   | 5784   |
| UN60289 | Rsa1.0_04888.1 | 798 | 15595  | 0         | 737 | 796 | 92 -  | 6   | 795 | 9483   | 10274  |
| UN60290 | Rsa1.0_01363.1 | 736 | 47195  | 1.00E-135 | 254 | 257 | 98 -  | 445 | 701 | 21970  | 22226  |
| UN60291 | Rsa1.0_03107.1 | 841 | 25349  | 1.00E-180 | 383 | 400 | 95 -  | 424 | 820 | 12906  | 13305  |
| UN60292 | Rsa1.0_00166.1 | 260 | 240912 | 1.00E-101 | 239 | 256 | 93 -  | 8   | 260 | 135166 | 135421 |

|         |                |     |        |           |     |     |      |     |     |        |        |
|---------|----------------|-----|--------|-----------|-----|-----|------|-----|-----|--------|--------|
| UN60293 | Rsa1.0.08355.1 | 424 | 7487   | 0         | 403 | 424 | 95 + | 1   | 422 | 6515   | 6931   |
| UN60294 | Rsa1.0.00244.1 | 741 | 103590 | 0         | 422 | 424 | 99 + | 1   | 424 | 32532  | 32955  |
| UN60295 | Rsa1.0.02443.1 | 809 | 31353  | 0         | 452 | 469 | 96 - | 93  | 558 | 7277   | 7742   |
| UN60296 | Rsa1.0.22408.1 | 516 | 1124   | 1.00E-145 | 312 | 328 | 95 + | 1   | 326 | 501    | 823    |
| UN60297 | Rsa1.0.02937.1 | 125 | 26605  | 3.00E-36  | 113 | 125 | 90 - | 1   | 125 | 9906   | 10030  |
| UN60298 | Rsa1.0.00295.1 | 701 | 152597 | 1.00E-168 | 342 | 354 | 96 + | 345 | 695 | 49132  | 49484  |
| UN60299 | Rsa1.0.00016.1 | 263 | 831256 | 3.00E-94  | 211 | 223 | 94 + | 41  | 263 | 403615 | 403837 |
| UN60300 | Rsa1.0.01114.1 | 318 | 53602  | 1.00E-152 | 306 | 316 | 96 - | 1   | 316 | 14682  | 14996  |
| UN60301 | Rsa1.0.01504.1 | 858 | 189978 | 0         | 442 | 478 | 92 + | 1   | 461 | 168485 | 168956 |
| UN60302 | Rsa1.0.01594.1 | 484 | 42612  | 1.00E-79  | 181 | 191 | 94 - | 8   | 198 | 11959  | 12149  |
| UN60303 | Rsa1.0.26227.1 | 756 | 900    | 0         | 515 | 551 | 93 - | 184 | 724 | 351    | 900    |
| UN60304 | Rsa1.0.00684.1 | 751 | 141701 | 0         | 519 | 535 | 97 + | 1   | 535 | 54178  | 54698  |
| UN60305 | Rsa1.0.00451.1 | 794 | 322533 | 2.33E-156 | 320 | 335 | 95 - | 1   | 331 | 301659 | 301989 |
| UN60306 | Rsa1.0.00080.1 | 433 | 190437 | 0         | 412 | 431 | 95 + | 1   | 431 | 104380 | 104810 |
| UN60307 | Rsa1.0.00527.1 | 627 | 77733  | 0         | 515 | 524 | 98 + | 1   | 522 | 26265  | 26788  |
| UN60308 | Rsa1.0.00757.1 | 754 | 65559  | 0         | 719 | 733 | 98 - | 23  | 754 | 44873  | 45605  |
| UN60309 | Rsa1.0.01211.1 | 289 | 50646  | 3.00E-66  | 262 | 306 | 85 - | 1   | 289 | 41955  | 42259  |
| UN60310 | Rsa1.0.09102.1 | 688 | 6646   | 0         | 629 | 681 | 92 - | 14  | 688 | 5729   | 6409   |
| UN60311 | Rsa1.0.04592.1 | 853 | 16716  | 0         | 827 | 852 | 97 + | 5   | 852 | 15516  | 16367  |
| UN60312 | Rsa1.0.02561.1 | 119 | 30080  | 4.00E-48  | 112 | 117 | 95 + | 3   | 119 | 13930  | 14046  |
| UN60313 | Rsa1.0.00327.1 | 791 | 94892  | 0         | 579 | 643 | 90 + | 172 | 790 | 70060  | 70692  |
| UN60314 | Rsa1.0.00992.1 | 803 | 57419  | 1.00E-171 | 365 | 381 | 95 - | 4   | 379 | 25453  | 25830  |
| UN60315 | Rsa1.0.01413.1 | 638 | 46275  | 3.00E-99  | 205 | 212 | 96 - | 401 | 612 | 21142  | 21353  |
| UN60316 | Rsa1.0.00924.1 | 802 | 59524  | 1.00E-172 | 313 | 314 | 99 + | 79  | 392 | 37493  | 37805  |
| UN60317 | Rsa1.0.00515.1 | 713 | 78417  | 1.00E-117 | 332 | 369 | 89 - | 1   | 369 | 19872  | 20232  |
| UN60318 | Rsa1.0.00904.1 | 761 | 180594 | 0         | 748 | 761 | 98 - | 1   | 761 | 152000 | 152760 |
| UN60319 | Rsa1.0.02479.1 | 806 | 31038  | 1.00E-172 | 309 | 310 | 99 - | 497 | 806 | 9967   | 10276  |
| UN60320 | Rsa1.0.07143.1 | 277 | 9832   | 2.00E-67  | 196 | 218 | 89 + | 2   | 219 | 3890   | 4107   |
| UN60321 | Rsa1.0.02382.1 | 658 | 31969  | 0         | 623 | 669 | 93 + | 1   | 658 | 18119  | 18770  |
| UN60322 | Rsa1.0.73415.1 | 138 | 312    | 4.00E-39  | 121 | 134 | 90 - | 1   | 134 | 101    | 234    |
| UN60323 | Rsa1.0.03424.1 | 710 | 23064  | 0         | 584 | 607 | 96 + | 106 | 703 | 79     | 682    |
| UN60324 | Rsa1.0.00090.1 | 609 | 273859 | 1.00E-162 | 317 | 326 | 97 - | 260 | 585 | 144801 | 145126 |
| UN60325 | Rsa1.0.09588.1 | 768 | 6267   | 4.00E-83  | 166 | 169 | 98 - | 493 | 661 | 5926   | 6094   |
| UN60326 | Rsa1.0.03636.1 | 746 | 21638  | 3.00E-87  | 218 | 234 | 93 - | 1   | 232 | 17912  | 18143  |
| UN60327 | Rsa1.0.06671.1 | 394 | 10563  | 0         | 385 | 390 | 98 - | 5   | 394 | 9442   | 9828   |
| UN60328 | Rsa1.0.00734.1 | 608 | 66508  | 0         | 515 | 543 | 94 + | 1   | 543 | 62123  | 62665  |
| UN60329 | #              | #   | #      | #         | #   | #   | #    | #   | #   | #      | #      |
| UN60330 | Rsa1.0.13994.1 | 801 | 3941   | 0         | 374 | 386 | 96 + | 2   | 383 | 2785   | 3166   |
| UN60331 | Rsa1.0.00065.1 | 570 | 454616 | 0         | 553 | 574 | 96 + | 5   | 570 | 4747   | 5320   |

|         |                |     |        |           |     |     |      |     |     |        |        |
|---------|----------------|-----|--------|-----------|-----|-----|------|-----|-----|--------|--------|
| UN60332 | Rsa1.0.00440.1 | 215 | 84723  | 2.00E-88  | 201 | 213 | 94 + | 1   | 213 | 25129  | 25341  |
| UN60333 | Rsa1.0.00804.1 | 738 | 63726  | 0         | 731 | 738 | 99 + | 1   | 738 | 6987   | 7722   |
| UN60334 | Rsa1.0.00501.1 | 527 | 79545  | 0         | 501 | 524 | 95 - | 3   | 526 | 68702  | 69225  |
| UN60335 | Rsa1.0.11599.1 | 606 | 5462   | 1.00E-135 | 282 | 293 | 96 + | 5   | 297 | 4638   | 4929   |
| UN60336 | Rsa1.0.02621.1 | 494 | 156120 | 0         | 484 | 507 | 95 + | 1   | 494 | 18999  | 19501  |
| UN60337 | Rsa1.0.03521.1 | 753 | 396204 | 1.00E-126 | 291 | 311 | 93 - | 33  | 335 | 11752  | 12062  |
| UN60338 | Rsa1.0.00739.1 | 260 | 66155  | 8.00E-79  | 238 | 262 | 90 + | 1   | 260 | 51991  | 52246  |
| UN60339 | Rsa1.0.01646.1 | 449 | 41735  | 1.00E-105 | 231 | 244 | 94 - | 213 | 449 | 29234  | 29477  |
| UN60340 | Rsa1.0.04022.1 | 733 | 19534  | 1.00E-123 | 243 | 249 | 97 - | 312 | 560 | 2133   | 2381   |
| UN60341 | Rsa1.0.04248.1 | 720 | 18287  | 1.00E-153 | 288 | 291 | 98 - | 2   | 291 | 10696  | 10986  |
| UN60342 | Rsa1.0.01575.1 | 550 | 42924  | 8.00E-16  | 95  | 112 | 84 + | 69  | 180 | 37332  | 37443  |
| UN60343 | Rsa1.0.00466.1 | 515 | 82132  | 0         | 362 | 369 | 98 - | 148 | 513 | 13981  | 14349  |
| UN60344 | Rsa1.0.03569.1 | 713 | 22041  | 0         | 685 | 713 | 96 - | 2   | 713 | 5531   | 6243   |
| UN60345 | Rsa1.0.00976.1 | 621 | 57809  | 1.00E-88  | 172 | 174 | 98 + | 152 | 325 | 6518   | 6691   |
| UN60346 | Rsa1.0.01017.1 | 654 | 56714  | 3.00E-90  | 211 | 225 | 93 - | 3   | 225 | 18890  | 19106  |
| UN60347 | Rsa1.0.00848.1 | 745 | 152362 | 1.00E-107 | 209 | 213 | 98 - | 36  | 248 | 40824  | 41036  |
| UN60348 | Rsa1.0.06019.1 | 670 | 11916  | 1.00E-170 | 352 | 367 | 95 + | 7   | 362 | 10984  | 11350  |
| UN60349 | Rsa1.0.00039.1 | 670 | 296927 | 0         | 628 | 658 | 95 - | 1   | 658 | 275205 | 275862 |
| UN60350 | Rsa1.0.03664.1 | 731 | 21487  | 1.00E-110 | 257 | 271 | 94 - | 464 | 731 | 4039   | 4309   |
| UN60351 | Rsa1.0.00089.1 | 761 | 406142 | 0         | 516 | 535 | 96 - | 15  | 544 | 343335 | 343868 |
| UN60352 | Rsa1.0.00284.1 | 755 | 323267 | 0         | 683 | 689 | 99 - | 72  | 755 | 257775 | 258463 |
| UN60353 | Rsa1.0.02707.1 | 657 | 28520  | 3.00E-93  | 189 | 194 | 97 + | 59  | 252 | 10465  | 10658  |
| UN60354 | Rsa1.0.04576.1 | 747 | 16783  | 1.00E-83  | 167 | 170 | 98 + | 532 | 701 | 8671   | 8840   |
| UN60355 | Rsa1.0.01328.1 | 714 | 48021  | 1.00E-101 | 194 | 195 | 99 + | 224 | 417 | 17029  | 17223  |
| UN60356 | Rsa1.0.00554.1 | 668 | 150953 | 0         | 384 | 387 | 99 + | 3   | 387 | 119374 | 119760 |
| UN60357 | Rsa1.0.00838.1 | 578 | 153820 | 1.00E-168 | 418 | 460 | 90 + | 5   | 452 | 59245  | 59689  |
| UN60358 | Rsa1.0.01348.1 | 691 | 47569  | 1.00E-64  | 135 | 138 | 97 - | 3   | 140 | 27790  | 27927  |
| UN60359 | Rsa1.0.00190.1 | 629 | 318240 | 6.00E-85  | 175 | 180 | 97 - | 229 | 408 | 212074 | 212253 |
| UN60360 | Rsa1.0.21003.1 | 752 | 1246   | 0         | 417 | 431 | 96 + | 108 | 537 | 1      | 431    |
| UN60361 | Rsa1.0.00369.1 | 727 | 266462 | 1.00E-148 | 282 | 286 | 98 - | 179 | 463 | 266097 | 266382 |
| UN60362 | Rsa1.0.00190.1 | 596 | 318240 | 0         | 546 | 567 | 96 - | 3   | 566 | 200811 | 201377 |
| UN60363 | Rsa1.0.02104.1 | 597 | 34985  | 0         | 352 | 361 | 97 + | 1   | 361 | 5353   | 5713   |
| UN60364 | Rsa1.0.17009.1 | 697 | 1954   | 1.00E-143 | 265 | 266 | 99 - | 433 | 697 | 1333   | 1598   |
| UN60365 | Rsa1.0.01026.1 | 679 | 171624 | 0         | 381 | 387 | 98 - | 294 | 679 | 165504 | 165890 |
| UN60366 | Rsa1.0.03477.1 | 590 | 22635  | 0         | 397 | 398 | 99 + | 126 | 523 | 2550   | 2947   |
| UN60367 | Rsa1.0.04434.1 | 641 | 17377  | 0         | 606 | 653 | 92 - | 2   | 641 | 7296   | 7941   |
| UN60368 | Rsa1.0.07731.1 | 488 | 8696   | 0         | 382 | 386 | 98 - | 99  | 484 | 5682   | 6063   |
| UN60369 | Rsa1.0.13728.1 | 457 | 4415   | 3.00E-33  | 118 | 133 | 88 + | 43  | 175 | 2195   | 2327   |
| UN60370 | Rsa1.0.00124.1 | 758 | 262503 | 0         | 367 | 379 | 96 - | 142 | 520 | 21414  | 21790  |

|         |                |     |        |           |     |     |       |     |     |        |        |
|---------|----------------|-----|--------|-----------|-----|-----|-------|-----|-----|--------|--------|
| UN60371 | Rsa1.0.02537.1 | 697 | 30367  | 7.00E-54  | 242 | 284 | 85 -  | 20  | 302 | 24113  | 24395  |
| UN60372 | Rsa1.0.00399.1 | 440 | 242951 | 2.00E-56  | 112 | 112 | 100 - | 148 | 259 | 221421 | 221532 |
| UN60373 | Rsa1.0.00026.1 | 533 | 327835 | 2.00E-35  | 110 | 121 | 90 +  | 413 | 533 | 100989 | 101109 |
| UN60374 | Rsa1.0.01146.1 | 749 | 163455 | 1.00E-141 | 260 | 262 | 99 +  | 1   | 262 | 38461  | 38722  |
| UN60375 | Rsa1.0.00740.1 | 568 | 215972 | 0         | 557 | 575 | 96 -  | 1   | 568 | 212734 | 213308 |
| UN60376 | Rsa1.0.00367.1 | 587 | 90750  | 1.00E-167 | 307 | 310 | 99 -  | 278 | 587 | 54063  | 54372  |
| UN60377 | Rsa1.0.01566.1 | 649 | 43134  | 0         | 541 | 566 | 95 -  | 93  | 649 | 34097  | 34658  |
| UN60378 | Rsa1.0.01048.1 | 735 | 55684  | 0         | 731 | 733 | 99 +  | 2   | 734 | 43917  | 44649  |
| UN60379 | Rsa1.0.00016.1 | 628 | 831256 | 6.00E-94  | 231 | 245 | 94 +  | 386 | 628 | 673832 | 674072 |
| UN60380 | Rsa1.0.16043.1 | 377 | 2309   | 1.00E-125 | 227 | 227 | 100 + | 3   | 229 | 787    | 1013   |
| UN60381 | Rsa1.0.00192.1 | 665 | 278200 | 9.00E-41  | 140 | 156 | 89 -  | 71  | 225 | 93714  | 93866  |
| UN60382 | Rsa1.0.02663.1 | 330 | 169243 | 1.00E-143 | 313 | 330 | 94 +  | 1   | 330 | 6118   | 6442   |
| UN60383 | Rsa1.0.00419.1 | 818 | 86562  | 9.00E-63  | 123 | 123 | 100 - | 602 | 724 | 41455  | 41577  |
| UN60384 | Rsa1.0.01484.1 | 557 | 44806  | 0         | 359 | 361 | 99 +  | 197 | 557 | 28137  | 28496  |
| UN60385 | Rsa1.0.14849.1 | 658 | 3014   | 0         | 644 | 659 | 97 -  | 1   | 658 | 1424   | 2071   |
| UN60386 | Rsa1.0.09380.1 | 569 | 6409   | 0         | 552 | 575 | 96 +  | 3   | 569 | 5796   | 6370   |
| UN60387 | Rsa1.0.00605.1 | 687 | 73199  | 0         | 442 | 460 | 96 -  | 3   | 462 | 4479   | 4932   |
| UN60388 | Rsa1.0.01126.1 | 735 | 53127  | 1.00E-150 | 273 | 274 | 99 -  | 462 | 735 | 29878  | 30151  |
| UN60389 | Rsa1.0.08984.1 | 719 | 6734   | 0         | 504 | 535 | 94 +  | 77  | 610 | 2077   | 2605   |
| UN60390 | Rsa1.0.04660.1 | 405 | 16478  | 3.00E-92  | 203 | 212 | 95 +  | 195 | 405 | 12709  | 12920  |
| UN60391 | Rsa1.0.01058.1 | 738 | 55430  | 2.00E-88  | 181 | 186 | 97 -  | 285 | 470 | 22337  | 22522  |
| UN60392 | Rsa1.0.01316.1 | 649 | 48325  | 0         | 647 | 649 | 99 -  | 1   | 649 | 35360  | 36008  |
| UN60393 | Rsa1.0.03125.1 | 647 | 147978 | 1.00E-164 | 329 | 341 | 96 -  | 194 | 534 | 139075 | 139415 |
| UN60394 | Rsa1.0.00829.1 | 476 | 158305 | 2.00E-37  | 98  | 104 | 94 +  | 13  | 116 | 40278  | 40381  |
| UN60395 | Rsa1.0.05199.1 | 790 | 14529  | 3.00E-75  | 204 | 226 | 90 +  | 72  | 297 | 7773   | 7987   |
| UN60396 | Rsa1.0.22714.1 | 757 | 1101   | 0         | 702 | 731 | 96 +  | 29  | 757 | 1      | 729    |
| UN60397 | Rsa1.0.00014.1 | 428 | 348985 | 1.00E-126 | 249 | 253 | 98 +  | 178 | 428 | 164648 | 164900 |
| UN60398 | Rsa1.0.02281.1 | 684 | 292576 | 0         | 673 | 688 | 97 -  | 3   | 684 | 290300 | 290987 |
| UN60399 | Rsa1.0.07394.1 | 268 | 9466   | 1.00E-150 | 268 | 268 | 100 + | 1   | 268 | 1217   | 1484   |
| UN60400 | Rsa1.0.01094.1 | 685 | 167285 | 0         | 451 | 471 | 95 -  | 216 | 685 | 17503  | 17973  |
| UN60401 | Rsa1.0.00328.1 | 285 | 224661 | 1.00E-148 | 280 | 284 | 98 -  | 2   | 285 | 191658 | 191938 |
| UN60402 | Rsa1.0.00381.1 | 778 | 89718  | 5.00E-55  | 110 | 110 | 100 - | 318 | 427 | 85169  | 85278  |
| UN60403 | Rsa1.0.00368.1 | 660 | 90669  | 0         | 610 | 680 | 89 +  | 2   | 660 | 84987  | 85652  |
| UN60404 | Rsa1.0.00464.1 | 152 | 82253  | 3.00E-18  | 106 | 117 | 90 -  | 25  | 141 | 37491  | 37598  |
| UN60405 | Rsa1.0.00706.1 | 760 | 291570 | 0         | 414 | 422 | 98 -  | 335 | 756 | 170675 | 171096 |
| UN60406 | Rsa1.0.00768.1 | 199 | 64969  | 1.00E-109 | 199 | 199 | 100 - | 1   | 199 | 45879  | 46077  |
| UN60407 | Rsa1.0.01934.1 | 723 | 37162  | 0         | 597 | 617 | 96 +  | 1   | 610 | 13761  | 14377  |
| UN60408 | Rsa1.0.00016.1 | 191 | 831256 | 6.00E-79  | 183 | 191 | 95 +  | 1   | 191 | 785786 | 785971 |
| UN60409 | Rsa1.0.00284.1 | 739 | 323267 | 0         | 431 | 444 | 97 -  | 296 | 739 | 262813 | 263256 |

|         |                |     |        |           |     |     |       |     |     |        |        |
|---------|----------------|-----|--------|-----------|-----|-----|-------|-----|-----|--------|--------|
| UN60410 | Rsa1.0_24864.1 | 460 | 963    | 1.00E-161 | 424 | 467 | 90 -  | 1   | 460 | 325    | 790    |
| UN60411 | Rsa1.0_02060.1 | 801 | 35528  | 0         | 370 | 376 | 98 +  | 427 | 801 | 19474  | 19849  |
| UN60412 | Rsa1.0_00369.1 | 399 | 266462 | 1.00E-131 | 279 | 294 | 94 -  | 115 | 399 | 2037   | 2330   |
| UN60413 | Rsa1.0_48917.1 | 734 | 463    | 1.00E-100 | 188 | 189 | 99 +  | 206 | 394 | 45     | 233    |
| UN60414 | Rsa1.0_03367.1 | 780 | 23387  | 4.00E-71  | 140 | 141 | 99 -  | 475 | 615 | 2690   | 2830   |
| UN60415 | Rsa1.0_00484.1 | 189 | 203294 | 6.00E-42  | 87  | 87  | 100 - | 1   | 87  | 136825 | 136911 |
| UN60416 | Rsa1.0_00510.1 | 640 | 78718  | 0         | 356 | 367 | 97 -  | 74  | 440 | 53847  | 54213  |
| UN60417 | Rsa1.0_00017.1 | 759 | 752458 | 0         | 538 | 579 | 92 +  | 65  | 628 | 367663 | 368240 |
| UN60418 | Rsa1.0_02218.1 | 853 | 33809  | 0         | 806 | 843 | 95 -  | 20  | 853 | 18232  | 19072  |
| UN60419 | Rsa1.0_00529.1 | 727 | 77487  | 0         | 512 | 529 | 96 -  | 5   | 531 | 25360  | 25885  |
| UN60420 | Rsa1.0_02114.1 | 670 | 34873  | 0         | 660 | 672 | 98 +  | 1   | 670 | 15715  | 16385  |
| UN60421 | Rsa1.0_04779.1 | 708 | 16008  | 0         | 684 | 707 | 96 +  | 5   | 708 | 9753   | 10454  |
| UN60422 | Rsa1.0_00682.1 | 743 | 68680  | 0         | 395 | 397 | 99 +  | 2   | 398 | 1953   | 2349   |
| UN60423 | Rsa1.0_00951.1 | 716 | 164588 | 4.00E-86  | 162 | 162 | 100 - | 3   | 164 | 54588  | 54749  |
| UN60424 | Rsa1.0_00040.1 | 717 | 324196 | 1.00E-89  | 171 | 172 | 99 +  | 1   | 172 | 305443 | 305614 |
| UN60425 | Rsa1.0_00067.1 | 564 | 415055 | 0         | 506 | 530 | 95 +  | 3   | 524 | 177432 | 177959 |
| UN60426 | Rsa1.0_00863.1 | 507 | 254535 | 6.00E-75  | 241 | 270 | 89 -  | 243 | 507 | 110407 | 110672 |
| UN60427 | Rsa1.0_00341.1 | 658 | 249309 | 0         | 376 | 376 | 100 - | 166 | 541 | 128778 | 129153 |
| UN60428 | Rsa1.0_00402.1 | 561 | 385315 | 0         | 556 | 559 | 99 +  | 3   | 561 | 128611 | 129169 |
| UN60429 | Rsa1.0_02803.1 | 460 | 27715  | 0         | 440 | 456 | 96 -  | 3   | 457 | 17275  | 17729  |
| UN60430 | Rsa1.0_00078.1 | 538 | 175053 | 0         | 533 | 537 | 99 +  | 2   | 538 | 9551   | 10087  |
| UN60431 | Rsa1.0_02813.1 | 514 | 27656  | 2.00E-87  | 223 | 246 | 90 +  | 108 | 353 | 25679  | 25909  |
| UN60432 | Rsa1.0_23887.1 | 212 | 1019   | 1.00E-109 | 209 | 212 | 98 +  | 1   | 212 | 42     | 253    |
| UN60433 | Rsa1.0_16412.1 | 794 | 2164   | 0         | 793 | 796 | 99 -  | 1   | 794 | 1012   | 1807   |
| UN60434 | Rsa1.0_00674.1 | 771 | 193753 | 0         | 380 | 382 | 99 -  | 1   | 382 | 178035 | 178416 |
| UN60435 | Rsa1.0_00617.1 | 773 | 72199  | 0         | 590 | 595 | 99 +  | 1   | 594 | 60779  | 61373  |
| UN60436 | Rsa1.0_00782.1 | 697 | 64468  | 0         | 428 | 447 | 95 +  | 10  | 452 | 53810  | 54256  |
| UN60437 | Rsa1.0_00221.1 | 313 | 106972 | 1.00E-162 | 307 | 313 | 98 +  | 1   | 313 | 103943 | 104255 |
| UN60438 | Rsa1.0_04098.1 | 292 | 19078  | 1.00E-124 | 282 | 295 | 95 -  | 2   | 292 | 11263  | 11553  |
| UN60439 | Rsa1.0_00502.1 | 759 | 204180 | 0         | 730 | 765 | 95 +  | 2   | 759 | 52177  | 52932  |
| UN60440 | Rsa1.0_01503.1 | 296 | 44467  | 1.00E-129 | 279 | 294 | 94 +  | 3   | 296 | 26666  | 26954  |
| UN60441 | Rsa1.0_00697.1 | 877 | 67913  | 1.00E-135 | 266 | 273 | 97 -  | 320 | 592 | 51878  | 52150  |
| UN60442 | Rsa1.0_00394.1 | 229 | 148426 | 6.00E-58  | 114 | 114 | 100 + | 116 | 229 | 97131  | 97244  |
| UN60443 | Rsa1.0_03309.1 | 765 | 23852  | 0         | 762 | 766 | 99 +  | 1   | 765 | 5419   | 6183   |
| UN60444 | Rsa1.0_16557.1 | 288 | 2113   | 2.00E-64  | 156 | 165 | 94 -  | 130 | 288 | 1058   | 1222   |
| UN60445 | Rsa1.0_06189.1 | 663 | 11525  | 1.00E-118 | 243 | 251 | 96 -  | 111 | 359 | 11271  | 11521  |
| UN60446 | Rsa1.0_01561.1 | 811 | 43227  | 0         | 344 | 346 | 99 -  | 466 | 811 | 37889  | 38234  |
| UN60447 | Rsa1.0_02490.1 | 734 | 30885  | 1.00E-180 | 320 | 320 | 100 - | 415 | 734 | 6010   | 6329   |
| UN60448 | Rsa1.0_01054.1 | 608 | 55470  | 0         | 572 | 590 | 96 +  | 23  | 608 | 25832  | 26418  |



|         |                |     |        |           |     |     |       |     |     |        |        |
|---------|----------------|-----|--------|-----------|-----|-----|-------|-----|-----|--------|--------|
| UN60449 | Rsa1.0.01411.1 | 781 | 46326  | 1.00E-64  | 126 | 126 | 100 + | 656 | 781 | 13108  | 13233  |
| UN60450 | Rsa1.0.01168.1 | 440 | 153765 | 1.00E-69  | 224 | 250 | 89 -  | 193 | 433 | 23488  | 23728  |
| UN60451 | Rsa1.0.00069.1 | 665 | 403561 | 0         | 638 | 662 | 96 +  | 6   | 665 | 370884 | 371544 |
| UN60452 | Rsa1.0.01696.1 | 202 | 301850 | 6.00E-79  | 192 | 200 | 96 -  | 3   | 202 | 159115 | 159308 |
| UN60453 | Rsa1.0.06344.1 | 720 | 11205  | 1.00E-112 | 215 | 217 | 99 +  | 505 | 720 | 7231   | 7447   |
| UN60454 | Rsa1.0.01374.1 | 362 | 47047  | 3.00E-70  | 197 | 215 | 91 -  | 1   | 213 | 28205  | 28414  |
| UN60455 | Rsa1.0.05019.1 | 748 | 15114  | 0         | 428 | 429 | 99 -  | 320 | 748 | 4673   | 5100   |
| UN60456 | Rsa1.0.00025.1 | 189 | 277312 | 2.00E-38  | 149 | 164 | 90 +  | 13  | 175 | 65582  | 65739  |
| UN60457 | Rsa1.0.00078.1 | 321 | 175053 | 1.00E-139 | 306 | 320 | 95 +  | 1   | 318 | 53705  | 54019  |
| UN60458 | Rsa1.0.00753.1 | 500 | 65705  | 0         | 453 | 458 | 98 +  | 43  | 500 | 30158  | 30615  |
| UN60459 | Rsa1.0.00928.1 | 792 | 59293  | 1.00E-159 | 287 | 288 | 99 -  | 505 | 792 | 10585  | 10872  |
| UN60460 | Rsa1.0.00451.1 | 751 | 322533 | 0         | 720 | 762 | 94 -  | 4   | 744 | 250545 | 251305 |
| UN60461 | Rsa1.0.00112.1 | 524 | 132199 | 0         | 323 | 323 | 100 + | 202 | 524 | 118955 | 119277 |
| UN60462 | Rsa1.0.00911.1 | 240 | 59943  | 4.00E-28  | 129 | 153 | 84 +  | 91  | 239 | 51711  | 51845  |
| UN60463 | Rsa1.0.00420.1 | 626 | 86496  | 5.00E-79  | 159 | 162 | 98 -  | 9   | 170 | 72725  | 72886  |
| UN60464 | Rsa1.0.00408.1 | 645 | 176752 | 4.00E-86  | 165 | 166 | 99 +  | 123 | 288 | 103907 | 104072 |
| UN60465 | Rsa1.0.04436.1 | 765 | 17364  | 1.00E-130 | 243 | 244 | 99 +  | 483 | 726 | 15291  | 15533  |
| UN60466 | Rsa1.0.02394.1 | 720 | 31789  | 5.00E-58  | 138 | 143 | 96 -  | 552 | 692 | 334    | 476    |
| UN60467 | Rsa1.0.06821.1 | 787 | 10301  | 1.00E-119 | 238 | 245 | 97 -  | 300 | 544 | 2567   | 2811   |
| UN60468 | Rsa1.0.01877.1 | 735 | 37789  | 2.00E-54  | 115 | 117 | 98 +  | 376 | 492 | 31088  | 31204  |
| UN60469 | Rsa1.0.05440.1 | 314 | 13749  | 1.00E-164 | 307 | 312 | 98 -  | 2   | 313 | 12742  | 13053  |
| UN60470 | Rsa1.0.00002.1 | 656 | 601661 | 6.00E-88  | 183 | 189 | 96 +  | 237 | 425 | 234593 | 234781 |
| UN60471 | Rsa1.0.00386.1 | 715 | 89134  | 1.00E-151 | 290 | 296 | 97 +  | 184 | 479 | 25829  | 26124  |
| UN60472 | Rsa1.0.16519.1 | 773 | 2126   | 3.00E-81  | 182 | 190 | 95 +  | 177 | 365 | 1018   | 1207   |
| UN60473 | Rsa1.0.00071.1 | 749 | 345714 | 0         | 497 | 548 | 90 +  | 2   | 532 | 141340 | 141872 |
| UN60474 | Rsa1.0.06111.1 | 735 | 11723  | 0         | 704 | 734 | 95 +  | 2   | 735 | 3931   | 4664   |
| UN60475 | Rsa1.0.00564.1 | 733 | 75428  | 1.00E-153 | 328 | 346 | 94 -  | 2   | 347 | 12963  | 13308  |
| UN60476 | Rsa1.0.00428.1 | 476 | 85599  | 1.00E-107 | 296 | 329 | 89 -  | 152 | 474 | 32033  | 32352  |
| UN60477 | Rsa1.0.00011.1 | 695 | 225044 | 3.00E-56  | 137 | 144 | 95 -  | 553 | 695 | 191921 | 192064 |
| UN60478 | Rsa1.0.01567.1 | 576 | 43090  | 0         | 477 | 516 | 92 -  | 63  | 574 | 19906  | 20402  |
| UN60479 | Rsa1.0.06194.1 | 256 | 11516  | 2.00E-70  | 138 | 139 | 99 -  | 116 | 254 | 9907   | 10045  |
| UN60480 | Rsa1.0.00676.1 | 716 | 69166  | 0         | 667 | 726 | 91 -  | 5   | 716 | 7904   | 8617   |
| UN60481 | Rsa1.0.00647.1 | 751 | 70440  | 0         | 379 | 390 | 97 -  | 70  | 459 | 5599   | 5988   |
| UN60482 | Rsa1.0.00486.1 | 632 | 80875  | 1.00E-124 | 247 | 253 | 97 +  | 381 | 632 | 15624  | 15876  |
| UN60483 | Rsa1.0.02068.1 | 182 | 35432  | 2.00E-63  | 173 | 182 | 95 -  | 1   | 182 | 15200  | 15374  |
| UN60484 | Rsa1.0.06215.1 | 324 | 11478  | 0         | 323 | 324 | 99 -  | 1   | 324 | 3392   | 3715   |
| UN60485 | Rsa1.0.00398.1 | 832 | 88007  | 0         | 657 | 661 | 99 -  | 1   | 661 | 14478  | 15138  |
| UN60486 | Rsa1.0.01338.1 | 167 | 155644 | 2.00E-41  | 93  | 94  | 98 +  | 1   | 94  | 126647 | 126739 |
| UN60487 | Rsa1.0.00307.1 | 723 | 199003 | 0         | 471 | 479 | 98 -  | 3   | 481 | 10972  | 11450  |

|         |                |     |        |           |     |     |       |     |     |        |        |
|---------|----------------|-----|--------|-----------|-----|-----|-------|-----|-----|--------|--------|
| UN60488 | Rsa1.0_02182.1 | 625 | 34172  | 1.00E-113 | 214 | 216 | 99 -  | 168 | 383 | 23710  | 23925  |
| UN60489 | Rsa1.0_05815.1 | 701 | 12563  | 1.00E-127 | 258 | 267 | 96 +  | 323 | 589 | 8883   | 9149   |
| UN60490 | Rsa1.0_05047.1 | 727 | 15032  | 0         | 635 | 694 | 91 -  | 3   | 677 | 11264  | 11954  |
| UN60491 | Rsa1.0_00281.1 | 625 | 99908  | 0         | 604 | 637 | 94 +  | 2   | 625 | 73367  | 74001  |
| UN60492 | Rsa1.0_02513.1 | 702 | 30643  | 0         | 416 | 419 | 99 +  | 2   | 419 | 9838   | 10256  |
| UN60493 | Rsa1.0_06303.1 | 362 | 11268  | 2.00E-52  | 111 | 113 | 98 -  | 213 | 325 | 9686   | 9798   |
| UN60494 | Rsa1.0_01078.1 | 130 | 316910 | 1.00E-54  | 126 | 131 | 96 +  | 2   | 130 | 136094 | 136224 |
| UN60495 | Rsa1.0_00092.1 | 674 | 659932 | 6.00E-79  | 179 | 189 | 94 -  | 3   | 191 | 134776 | 134958 |
| UN60496 | Rsa1.0_00032.1 | 337 | 306326 | 1.00E-47  | 100 | 101 | 99 +  | 64  | 164 | 201272 | 201372 |
| UN60497 | Rsa1.0_00122.1 | 710 | 265937 | 1.00E-168 | 323 | 327 | 98 +  | 387 | 710 | 58709  | 59035  |
| UN60498 | Rsa1.0_01859.1 | 140 | 38073  | 2.00E-41  | 89  | 90  | 98 -  | 51  | 140 | 16910  | 16999  |
| UN60499 | Rsa1.0_00769.1 | 569 | 64911  | 0         | 481 | 482 | 99 -  | 88  | 569 | 5253   | 5734   |
| UN60500 | Rsa1.0_00275.1 | 637 | 210104 | 0         | 438 | 448 | 97 +  | 2   | 449 | 121602 | 122049 |
| UN60501 | Rsa1.0_26169.1 | 673 | 903    | 3.00E-50  | 112 | 114 | 98 +  | 13  | 125 | 176    | 289    |
| UN60502 | Rsa1.0_09048.1 | 569 | 6683   | 0         | 478 | 493 | 96 +  | 77  | 568 | 5458   | 5950   |
| UN60503 | Rsa1.0_01996.1 | 362 | 36327  | 1.00E-103 | 274 | 297 | 92 -  | 68  | 361 | 28079  | 28368  |
| UN60504 | Rsa1.0_01034.1 | 702 | 56046  | 0         | 680 | 733 | 92 -  | 1   | 702 | 22592  | 23316  |
| UN60505 | Rsa1.0_00911.1 | 688 | 59943  | 0         | 376 | 393 | 95 +  | 297 | 688 | 42158  | 42550  |
| UN60506 | Rsa1.0_42286.1 | 655 | 531    | 0         | 451 | 472 | 95 -  | 5   | 476 | 40     | 511    |
| UN60507 | Rsa1.0_00950.1 | 275 | 58547  | 3.00E-57  | 132 | 136 | 97 +  | 140 | 275 | 37612  | 37744  |
| UN60508 | Rsa1.0_00404.1 | 680 | 87635  | 1.00E-128 | 303 | 325 | 93 -  | 2   | 325 | 1304   | 1628   |
| UN60509 | Rsa1.0_48636.1 | 785 | 466    | 0         | 372 | 376 | 98 -  | 404 | 778 | 91     | 466    |
| UN60510 | Rsa1.0_00454.1 | 351 | 216970 | 1.00E-110 | 223 | 230 | 96 -  | 1   | 230 | 188583 | 188812 |
| UN60511 | Rsa1.0_01434.1 | 593 | 45951  | 0         | 518 | 551 | 94 +  | 7   | 557 | 438    | 977    |
| UN60512 | Rsa1.0_06535.1 | 559 | 10827  | 0         | 519 | 561 | 92 +  | 3   | 559 | 2569   | 3107   |
| UN60513 | Rsa1.0_51812.1 | 702 | 439    | 1.00E-101 | 187 | 187 | 100 - | 3   | 189 | 217    | 403    |
| UN60514 | Rsa1.0_01730.1 | 631 | 40223  | 0         | 351 | 353 | 99 +  | 2   | 354 | 12333  | 12685  |
| UN60515 | Rsa1.0_04211.1 | 559 | 18440  | 0         | 550 | 558 | 98 +  | 2   | 558 | 1446   | 2002   |
| UN60516 | Rsa1.0_02375.1 | 730 | 32026  | 0         | 383 | 390 | 98 +  | 341 | 730 | 29000  | 29389  |
| UN60517 | Rsa1.0_10491.1 | 630 | 5829   | 0         | 478 | 491 | 97 +  | 140 | 630 | 1      | 491    |
| UN60518 | Rsa1.0_02485.1 | 677 | 30968  | 1.00E-134 | 268 | 275 | 97 -  | 233 | 506 | 28448  | 28722  |
| UN60519 | Rsa1.0_00142.1 | 716 | 121474 | 1.00E-171 | 350 | 364 | 96 +  | 265 | 628 | 116830 | 117191 |
| UN60520 | Rsa1.0_02234.1 | 645 | 33618  | 0         | 466 | 501 | 93 -  | 1   | 481 | 11737  | 12237  |
| UN60521 | Rsa1.0_00724.1 | 585 | 66789  | 1.00E-137 | 247 | 247 | 100 + | 339 | 585 | 66377  | 66623  |
| UN60522 | Rsa1.0_02449.1 | 808 | 31292  | 0         | 435 | 448 | 97 +  | 362 | 808 | 21797  | 22244  |
| UN60523 | Rsa1.0_04596.1 | 600 | 16709  | 1.00E-125 | 286 | 311 | 91 +  | 312 | 600 | 1      | 311    |
| UN60524 | Rsa1.0_00176.1 | 141 | 240984 | 2.00E-41  | 133 | 141 | 94 -  | 1   | 141 | 211182 | 211315 |
| UN60525 | Rsa1.0_07676.1 | 243 | 8827   | 2.00E-54  | 111 | 112 | 99 +  | 1   | 112 | 298    | 409    |
| UN60526 | Rsa1.0_01151.1 | 337 | 52268  | 1.00E-138 | 320 | 342 | 93 +  | 1   | 336 | 38049  | 38381  |

|         |                |     |        |           |     |     |       |     |     |        |        |
|---------|----------------|-----|--------|-----------|-----|-----|-------|-----|-----|--------|--------|
| UN60527 | Rsa1.0.00771.1 | 718 | 64870  | 0         | 378 | 382 | 98 +  | 1   | 382 | 47017  | 47397  |
| UN60528 | Rsa1.0.01457.1 | 192 | 45337  | 6.00E-36  | 100 | 105 | 95 -  | 88  | 192 | 7642   | 7744   |
| UN60529 | Rsa1.0.07606.1 | 626 | 9035   | 0         | 355 | 359 | 98 -  | 268 | 626 | 2784   | 3142   |
| UN60530 | Rsa1.0.03878.1 | 218 | 20305  | 4.00E-37  | 100 | 103 | 97 -  | 45  | 147 | 12290  | 12389  |
| UN60531 | Rsa1.0.01805.1 | 127 | 39024  | 3.00E-61  | 125 | 127 | 98 +  | 1   | 127 | 23767  | 23893  |
| UN60532 | Rsa1.0.00369.1 | 679 | 266462 | 1.00E-141 | 366 | 403 | 90 +  | 233 | 635 | 192839 | 193241 |
| UN60533 | Rsa1.0.14950.1 | 765 | 2940   | 0         | 635 | 713 | 89 -  | 3   | 690 | 1674   | 2367   |
| UN60534 | Rsa1.0.02456.1 | 521 | 31222  | 4.00E-64  | 174 | 186 | 93 +  | 335 | 518 | 26022  | 26202  |
| UN60535 | Rsa1.0.02499.1 | 801 | 30774  | 1.00E-127 | 258 | 267 | 96 -  | 442 | 708 | 22868  | 23134  |
| UN60536 | Rsa1.0.01214.1 | 672 | 50599  | 0         | 644 | 664 | 96 +  | 10  | 672 | 33859  | 34511  |
| UN60537 | Rsa1.0.00713.1 | 700 | 158017 | 1.00E-163 | 301 | 303 | 99 -  | 248 | 549 | 31836  | 32138  |
| UN60538 | Rsa1.0.68626.1 | 670 | 334    | 1.00E-39  | 124 | 137 | 90 +  | 474 | 606 | 168    | 304    |
| UN60539 | Rsa1.0.00630.1 | 661 | 71281  | 1.00E-118 | 239 | 247 | 96 +  | 233 | 479 | 16575  | 16821  |
| UN60540 | Rsa1.0.01247.1 | 794 | 49934  | 2.00E-42  | 317 | 393 | 80 +  | 163 | 555 | 19035  | 19427  |
| UN60541 | Rsa1.0.02921.1 | 752 | 26779  | 1.00E-178 | 366 | 382 | 95 -  | 2   | 380 | 24760  | 25141  |
| UN60542 | Rsa1.0.01854.1 | 736 | 38237  | 0         | 734 | 737 | 99 -  | 1   | 736 | 3708   | 4444   |
| UN60543 | Rsa1.0.00016.1 | 655 | 831256 | 5.00E-64  | 180 | 194 | 92 -  | 50  | 241 | 355289 | 355472 |
| UN60544 | Rsa1.0.00092.1 | 734 | 659932 | 0         | 577 | 595 | 96 -  | 135 | 728 | 21612  | 22206  |
| UN60545 | Rsa1.0.00119.1 | 643 | 467509 | 0         | 556 | 581 | 95 -  | 64  | 643 | 347208 | 347782 |
| UN60546 | Rsa1.0.02706.1 | 668 | 28522  | 6.00E-79  | 165 | 170 | 97 +  | 344 | 513 | 13542  | 13711  |
| UN60547 | Rsa1.0.11581.1 | 590 | 5466   | 0         | 472 | 478 | 98 -  | 1   | 478 | 3183   | 3659   |
| UN60548 | Rsa1.0.00576.1 | 688 | 178949 | 1.00E-138 | 262 | 266 | 98 +  | 236 | 501 | 13305  | 13570  |
| UN60549 | Rsa1.0.24271.1 | 753 | 996    | 3.00E-65  | 133 | 135 | 98 -  | 323 | 457 | 175    | 309    |
| UN60550 | Rsa1.0.00497.1 | 748 | 79830  | 1.00E-92  | 226 | 238 | 94 +  | 3   | 234 | 40090  | 40325  |
| UN60551 | Rsa1.0.03476.1 | 580 | 22646  | 0         | 379 | 382 | 99 +  | 201 | 580 | 13003  | 13383  |
| UN60552 | #              | #   | #      | #         | #   | #   | #     | #   | #   | #      | #      |
| UN60553 | Rsa1.0.00905.1 | 687 | 60110  | 2.33E-156 | 269 | 271 | 99 +  | 414 | 684 | 5590   | 5860   |
| UN60554 | Rsa1.0.00306.1 | 650 | 146760 | 4.00E-92  | 256 | 281 | 91 +  | 25  | 301 | 108028 | 108291 |
| UN60555 | Rsa1.0.00058.1 | 575 | 159921 | 0         | 399 | 399 | 100 + | 3   | 401 | 18236  | 18634  |
| UN60556 | Rsa1.0.01612.1 | 705 | 42255  | 0         | 703 | 704 | 99 +  | 3   | 705 | 12479  | 13182  |
| UN60557 | Rsa1.0.01528.1 | 494 | 43882  | 0         | 380 | 393 | 96 +  | 103 | 494 | 20340  | 20730  |
| UN60558 | Rsa1.0.00018.1 | 636 | 410899 | 5.00E-70  | 204 | 227 | 89 -  | 330 | 556 | 127432 | 127658 |
| UN60559 | Rsa1.0.00184.1 | 668 | 218748 | 0         | 650 | 677 | 96 -  | 1   | 668 | 17555  | 18221  |
| UN60560 | Rsa1.0.00797.1 | 718 | 63959  | 0         | 531 | 549 | 96 +  | 155 | 702 | 9991   | 10536  |
| UN60561 | Rsa1.0.00690.1 | 587 | 140527 | 1.00E-51  | 113 | 116 | 97 -  | 472 | 587 | 26854  | 26969  |
| UN60562 | Rsa1.0.02756.1 | 706 | 28202  | 1.00E-161 | 309 | 316 | 97 -  | 316 | 631 | 22631  | 22946  |
| UN60563 | Rsa1.0.00019.1 | 720 | 301669 | 3.00E-87  | 190 | 199 | 95 +  | 52  | 244 | 181302 | 181500 |
| UN60564 | Rsa1.0.14635.1 | 742 | 3204   | 0         | 565 | 598 | 94 +  | 140 | 726 | 2595   | 3177   |
| UN60565 | Rsa1.0.01578.1 | 714 | 42880  | 4.00E-74  | 142 | 142 | 100 + | 139 | 280 | 29757  | 29898  |

|         |                |     |        |           |     |     |       |     |     |        |        |
|---------|----------------|-----|--------|-----------|-----|-----|-------|-----|-----|--------|--------|
| UN60566 | Rsa1.0.02550.1 | 697 | 291051 | 0         | 565 | 576 | 98 +  | 121 | 694 | 2209   | 2784   |
| UN60567 | Rsa1.0.00620.1 | 600 | 71985  | 0         | 510 | 513 | 99 -  | 90  | 600 | 9243   | 9755   |
| UN60568 | Rsa1.0.01468.1 | 736 | 45146  | 0         | 472 | 475 | 99 +  | 239 | 711 | 13817  | 14291  |
| UN60569 | Rsa1.0.00724.1 | 728 | 66789  | 0         | 664 | 696 | 95 -  | 2   | 688 | 17214  | 17906  |
| UN60570 | Rsa1.0.00651.1 | 631 | 247766 | 0         | 385 | 400 | 96 +  | 157 | 556 | 78519  | 78912  |
| UN60571 | Rsa1.0.00008.1 | 727 | 358124 | 1.00E-115 | 295 | 323 | 91 -  | 3   | 319 | 317998 | 318311 |
| UN60572 | Rsa1.0.00725.1 | 636 | 66757  | 0         | 611 | 648 | 94 -  | 3   | 636 | 24561  | 25207  |
| UN60573 | Rsa1.0.00017.1 | 643 | 752458 | 0         | 604 | 656 | 92 +  | 3   | 634 | 312216 | 312871 |
| UN60574 | Rsa1.0.01109.1 | 714 | 53793  | 0         | 698 | 720 | 96 +  | 2   | 714 | 9172   | 9891   |
| UN60575 | Rsa1.0.54025.1 | 713 | 422    | 0         | 414 | 422 | 98 +  | 186 | 604 | 1      | 422    |
| UN60576 | Rsa1.0.00240.1 | 645 | 104175 | 1.00E-136 | 408 | 463 | 88 +  | 204 | 642 | 44006  | 44454  |
| UN60577 | Rsa1.0.01126.1 | 167 | 53127  | 3.00E-62  | 130 | 133 | 97 -  | 16  | 148 | 39906  | 40038  |
| UN60578 | Rsa1.0.01760.1 | 643 | 39730  | 1.00E-143 | 291 | 300 | 97 -  | 7   | 306 | 26012  | 26307  |
| UN60579 | Rsa1.0.00001.1 | 730 | 363028 | 1.00E-119 | 255 | 266 | 95 +  | 34  | 294 | 92829  | 93094  |
| UN60580 | Rsa1.0.00694.1 | 536 | 68074  | 2.00E-84  | 185 | 193 | 95 +  | 3   | 192 | 1462   | 1654   |
| UN60581 | Rsa1.0.02314.1 | 736 | 32642  | 1.00E-179 | 335 | 340 | 98 +  | 2   | 338 | 24769  | 25108  |
| UN60582 | Rsa1.0.00008.1 | 639 | 358124 | 1.00E-178 | 326 | 328 | 99 +  | 139 | 465 | 193479 | 193806 |
| UN60583 | Rsa1.0.00670.1 | 152 | 69371  | 2.00E-41  | 95  | 98  | 96 +  | 55  | 152 | 40264  | 40361  |
| UN60584 | Rsa1.0.00121.1 | 753 | 278029 | 1.00E-136 | 246 | 246 | 100 - | 430 | 675 | 39285  | 39530  |
| UN60585 | Rsa1.0.04016.1 | 720 | 19570  | 1.00E-139 | 266 | 271 | 98 -  | 444 | 714 | 5674   | 5944   |
| UN60586 | Rsa1.0.08530.1 | 744 | 7232   | 1.00E-100 | 192 | 194 | 98 +  | 417 | 610 | 918    | 1111   |
| UN60587 | Rsa1.0.00134.1 | 542 | 390219 | 0         | 424 | 426 | 99 +  | 37  | 460 | 148825 | 149250 |
| UN60588 | Rsa1.0.04483.1 | 682 | 17174  | 1.00E-169 | 305 | 306 | 99 +  | 303 | 608 | 12287  | 12592  |
| UN60589 | Rsa1.0.00030.1 | 794 | 250988 | 1.00E-125 | 251 | 257 | 97 -  | 3   | 257 | 46719  | 46973  |
| UN60590 | Rsa1.0.00224.1 | 755 | 327530 | 4.00E-43  | 108 | 114 | 94 -  | 532 | 645 | 228933 | 229046 |
| UN60591 | Rsa1.0.02750.1 | 668 | 28239  | 1.00E-149 | 587 | 684 | 85 -  | 4   | 668 | 23987  | 24638  |
| UN60592 | Rsa1.0.00329.1 | 661 | 222544 | 7.00E-91  | 185 | 190 | 97 -  | 472 | 661 | 32489  | 32678  |
| UN60593 | Rsa1.0.00990.1 | 714 | 57445  | 1.00E-172 | 337 | 347 | 97 -  | 188 | 534 | 15881  | 16227  |
| UN60594 | Rsa1.0.00383.1 | 708 | 398431 | 0         | 550 | 551 | 99 +  | 3   | 553 | 20101  | 20651  |
| UN60595 | Rsa1.0.04852.1 | 715 | 15712  | 7.00E-88  | 177 | 181 | 97 -  | 4   | 184 | 11746  | 11926  |
| UN60596 | Rsa1.0.02330.1 | 732 | 32452  | 0         | 333 | 334 | 99 -  | 176 | 509 | 1503   | 1836   |
| UN60597 | Rsa1.0.14775.1 | 707 | 3074   | 0         | 391 | 412 | 94 +  | 3   | 399 | 833    | 1243   |
| UN60598 | Rsa1.0.00253.1 | 739 | 231292 | 0         | 486 | 506 | 96 -  | 202 | 706 | 8836   | 9341   |
| UN60599 | Rsa1.0.01153.1 | 562 | 52264  | 0         | 493 | 493 | 100 + | 1   | 493 | 7807   | 8299   |
| UN60600 | Rsa1.0.00020.1 | 150 | 283099 | 2.00E-32  | 77  | 79  | 97 -  | 1   | 79  | 32347  | 32425  |
| UN60601 | Rsa1.0.00045.1 | 452 | 328694 | 1.00E-91  | 174 | 175 | 99 -  | 278 | 452 | 141040 | 141214 |
| UN60602 | Rsa1.0.00905.1 | 698 | 60110  | 0         | 592 | 606 | 97 -  | 89  | 694 | 44738  | 45343  |
| UN60603 | Rsa1.0.04602.1 | 672 | 16684  | 0         | 645 | 678 | 95 -  | 2   | 672 | 2796   | 3473   |
| UN60604 | Rsa1.0.00030.1 | 482 | 250988 | 0         | 409 | 432 | 94 -  | 2   | 419 | 117250 | 117681 |

|         |                |     |        |           |     |     |       |     |     |        |        |
|---------|----------------|-----|--------|-----------|-----|-----|-------|-----|-----|--------|--------|
| UN60605 | Rsa1.0_00676.1 | 675 | 69166  | 1.00E-129 | 262 | 271 | 96 -  | 405 | 675 | 65891  | 66161  |
| UN60606 | Rsa1.0_00992.1 | 528 | 57419  | 0         | 518 | 528 | 98 +  | 1   | 528 | 12696  | 13217  |
| UN60607 | Rsa1.0_01679.1 | 630 | 146876 | 0         | 444 | 464 | 95 +  | 2   | 464 | 144919 | 145382 |
| UN60608 | Rsa1.0_02735.1 | 738 | 28344  | 0         | 466 | 474 | 98 +  | 3   | 475 | 2743   | 3216   |
| UN60609 | Rsa1.0_01602.1 | 582 | 42503  | 1.00E-116 | 212 | 212 | 100 - | 1   | 212 | 21768  | 21979  |
| UN60610 | Rsa1.0_01338.1 | 502 | 155644 | 1.00E-107 | 234 | 244 | 95 +  | 88  | 331 | 126504 | 126743 |
| UN60611 | Rsa1.0_00013.1 | 505 | 292129 | 0         | 458 | 478 | 95 +  | 3   | 480 | 114306 | 114782 |
| UN60612 | Rsa1.0_00930.1 | 472 | 59224  | 6.00E-75  | 214 | 238 | 89 +  | 168 | 405 | 49934  | 50155  |
| UN60613 | Rsa1.0_02085.1 | 731 | 35198  | 1.00E-89  | 238 | 258 | 92 +  | 22  | 277 | 15838  | 16087  |
| UN60614 | Rsa1.0_01336.1 | 674 | 47853  | 6.00E-82  | 175 | 179 | 97 +  | 3   | 179 | 7797   | 7975   |
| UN60615 | Rsa1.0_22064.1 | 569 | 1152   | 1.00E-127 | 260 | 270 | 96 -  | 9   | 278 | 528    | 797    |
| UN60616 | Rsa1.0_01480.1 | 632 | 44926  | 0         | 629 | 633 | 99 -  | 1   | 632 | 27905  | 28537  |
| UN60617 | Rsa1.0_00131.1 | 334 | 432233 | 1.00E-121 | 253 | 262 | 96 +  | 75  | 334 | 69127  | 69386  |
| UN60618 | Rsa1.0_04806.1 | 555 | 15898  | 1.00E-150 | 325 | 344 | 94 +  | 215 | 555 | 7239   | 7574   |
| UN60619 | Rsa1.0_36865.1 | 637 | 612    | 1.00E-129 | 282 | 297 | 94 +  | 39  | 332 | 149    | 445    |
| UN60620 | Rsa1.0_01983.1 | 728 | 36509  | 1.00E-111 | 214 | 216 | 99 +  | 464 | 679 | 31026  | 31240  |
| UN60621 | Rsa1.0_03388.1 | 656 | 23277  | 0         | 649 | 656 | 98 -  | 1   | 656 | 4043   | 4698   |
| UN60622 | Rsa1.0_01196.1 | 777 | 51097  | 1.00E-126 | 279 | 297 | 93 -  | 4   | 300 | 3485   | 3772   |
| UN60623 | Rsa1.0_00128.1 | 739 | 228675 | 1.00E-115 | 264 | 281 | 93 +  | 86  | 363 | 131985 | 132265 |
| UN60624 | Rsa1.0_00082.1 | 650 | 237584 | 0         | 627 | 652 | 96 +  | 2   | 650 | 40703  | 41347  |
| UN60625 | Rsa1.0_02062.1 | 365 | 35485  | 6.00E-19  | 64  | 69  | 92 -  | 297 | 365 | 5627   | 5695   |
| UN60626 | Rsa1.0_00330.1 | 733 | 94666  | 0         | 558 | 558 | 100 + | 82  | 639 | 22896  | 23453  |
| UN60627 | Rsa1.0_01146.1 | 662 | 163455 | 1.00E-108 | 239 | 249 | 95 -  | 418 | 662 | 41238  | 41485  |
| UN60628 | Rsa1.0_08418.1 | 151 | 7391   | 1.00E-54  | 122 | 124 | 98 +  | 28  | 151 | 374    | 495    |
| UN60629 | Rsa1.0_01138.1 | 783 | 190615 | 1.00E-177 | 336 | 343 | 97 +  | 3   | 345 | 16189  | 16531  |
| UN60630 | Rsa1.0_00632.1 | 159 | 183777 | 3.00E-34  | 145 | 159 | 91 +  | 1   | 159 | 166459 | 166606 |
| UN60631 | Rsa1.0_01719.1 | 735 | 40388  | 0         | 502 | 507 | 99 -  | 229 | 735 | 32231  | 32737  |
| UN60632 | Rsa1.0_03852.1 | 748 | 20451  | 0         | 720 | 750 | 96 -  | 2   | 748 | 11491  | 12225  |
| UN60633 | Rsa1.0_03626.1 | 361 | 160993 | 0         | 356 | 358 | 99 +  | 1   | 358 | 4213   | 4570   |
| UN60634 | Rsa1.0_72547.1 | 628 | 316    | 1.00E-85  | 161 | 161 | 100 - | 468 | 628 | 8      | 168    |
| UN60635 | Rsa1.0_05336.1 | 254 | 14117  | 1.00E-121 | 247 | 255 | 96 +  | 2   | 254 | 4289   | 4543   |
| UN60636 | Rsa1.0_00421.1 | 756 | 86365  | 1.00E-61  | 121 | 121 | 100 - | 442 | 562 | 57049  | 57169  |
| UN60637 | Rsa1.0_04898.1 | 499 | 15545  | 3.00E-95  | 243 | 266 | 91 +  | 8   | 273 | 2856   | 3103   |
| UN60638 | Rsa1.0_06944.1 | 647 | 10131  | 1.00E-122 | 222 | 222 | 100 + | 279 | 500 | 9910   | 10131  |
| UN60639 | Rsa1.0_02563.1 | 664 | 30050  | 2.00E-14  | 146 | 180 | 81 +  | 292 | 470 | 16002  | 16174  |
| UN60640 | Rsa1.0_00201.1 | 636 | 232851 | 0         | 633 | 637 | 99 +  | 1   | 636 | 150463 | 151099 |
| UN60641 | Rsa1.0_00514.1 | 342 | 78421  | 8.00E-55  | 112 | 113 | 99 +  | 152 | 264 | 62883  | 62995  |
| UN60642 | Rsa1.0_04179.1 | 664 | 18633  | 1.00E-117 | 233 | 237 | 98 -  | 431 | 664 | 17791  | 18027  |
| UN60643 | Rsa1.0_00855.1 | 678 | 62047  | 0         | 676 | 677 | 99 +  | 2   | 678 | 60244  | 60920  |

|         |                |     |        |           |     |     |       |     |     |        |        |
|---------|----------------|-----|--------|-----------|-----|-----|-------|-----|-----|--------|--------|
| UN60644 | Rsa1.0_01720.1 | 717 | 40358  | 1.00E-100 | 186 | 186 | 100 - | 2   | 187 | 9926   | 10111  |
| UN60645 | Rsa1.0_07998.1 | 810 | 8105   | 1.00E-151 | 302 | 312 | 96 +  | 216 | 527 | 4011   | 4322   |
| UN60646 | Rsa1.0_00502.1 | 558 | 204180 | 1.00E-168 | 305 | 307 | 99 +  | 1   | 307 | 29234  | 29540  |
| UN60647 | Rsa1.0_00181.1 | 654 | 114269 | 1.00E-142 | 311 | 328 | 94 -  | 333 | 654 | 21027  | 21354  |
| UN60648 | Rsa1.0_00016.1 | 123 | 831256 | 4.00E-54  | 119 | 123 | 96 +  | 1   | 123 | 326707 | 326829 |
| UN60649 | Rsa1.0_00911.1 | 460 | 59943  | 1.00E-103 | 218 | 227 | 96 +  | 4   | 230 | 29348  | 29574  |
| UN60650 | Rsa1.0_02105.1 | 497 | 156953 | 0         | 353 | 353 | 100 - | 145 | 497 | 3228   | 3580   |
| UN60651 | Rsa1.0_00128.1 | 636 | 228675 | 2.00E-57  | 140 | 148 | 94 -  | 1   | 145 | 219511 | 219658 |
| UN60652 | Rsa1.0_00140.1 | 722 | 121541 | 1.00E-131 | 269 | 277 | 97 -  | 447 | 722 | 103405 | 103680 |
| UN60653 | Rsa1.0_00017.1 | 448 | 752458 | 1.00E-175 | 408 | 435 | 93 +  | 10  | 435 | 485906 | 486340 |
| UN60654 | Rsa1.0_00594.1 | 668 | 73729  | 1.00E-128 | 232 | 232 | 100 + | 437 | 668 | 30039  | 30270  |
| UN60655 | Rsa1.0_00124.1 | 573 | 262503 | 1.00E-144 | 287 | 295 | 97 -  | 280 | 573 | 83879  | 84167  |
| UN60656 | Rsa1.0_01018.1 | 667 | 56685  | 0         | 663 | 671 | 98 +  | 1   | 667 | 24145  | 24815  |
| UN60657 | Rsa1.0_06113.1 | 206 | 11721  | 1.00E-52  | 139 | 148 | 93 -  | 3   | 149 | 8769   | 8914   |
| UN60658 | Rsa1.0_00017.1 | 323 | 752458 | 1.00E-114 | 301 | 321 | 93 +  | 3   | 323 | 464345 | 464657 |
| UN60659 | Rsa1.0_01516.1 | 264 | 44196  | 7.00E-67  | 132 | 133 | 99 -  | 2   | 134 | 37369  | 37501  |
| UN60660 | Rsa1.0_02034.1 | 655 | 35823  | 1.00E-149 | 328 | 346 | 94 -  | 2   | 338 | 11733  | 12078  |
| UN60661 | Rsa1.0_00474.1 | 639 | 81731  | 1.00E-152 | 316 | 330 | 95 -  | 313 | 639 | 43851  | 44180  |
| UN60662 | Rsa1.0_02397.1 | 507 | 31778  | 1.00E-138 | 294 | 312 | 94 +  | 2   | 299 | 20926  | 21237  |
| UN60663 | Rsa1.0_03297.1 | 588 | 23969  | 1.00E-127 | 317 | 343 | 92 -  | 226 | 567 | 14221  | 14552  |
| UN60664 | Rsa1.0_09116.1 | 769 | 6637   | 0         | 615 | 667 | 92 +  | 2   | 665 | 3281   | 3931   |
| UN60665 | Rsa1.0_00172.1 | 724 | 115476 | 1.00E-176 | 319 | 321 | 99 -  | 5   | 325 | 86942  | 87262  |
| UN60666 | Rsa1.0_05398.1 | 606 | 13885  | 3.00E-96  | 186 | 187 | 99 +  | 421 | 606 | 13003  | 13189  |
| UN60667 | Rsa1.0_00284.1 | 742 | 323267 | 5.00E-95  | 208 | 218 | 95 -  | 528 | 742 | 132324 | 132535 |
| UN60668 | Rsa1.0_00457.1 | 539 | 337301 | 0         | 499 | 522 | 95 -  | 18  | 537 | 179739 | 180256 |
| UN60669 | Rsa1.0_00779.1 | 538 | 64568  | 1.00E-57  | 227 | 267 | 85 +  | 272 | 538 | 25377  | 25631  |
| UN60670 | Rsa1.0_00038.1 | 643 | 314568 | 0         | 551 | 567 | 97 +  | 18  | 584 | 282952 | 283518 |
| UN60671 | Rsa1.0_00053.1 | 710 | 263459 | 4.00E-86  | 162 | 162 | 100 + | 41  | 202 | 32297  | 32458  |
| UN60672 | Rsa1.0_03089.1 | 642 | 25465  | 1.00E-110 | 215 | 218 | 98 +  | 264 | 480 | 8405   | 8622   |
| UN60673 | Rsa1.0_00227.1 | 445 | 105849 | 0         | 445 | 445 | 100 + | 1   | 445 | 9307   | 9751   |
| UN60674 | Rsa1.0_00027.1 | 687 | 283362 | 0         | 676 | 686 | 98 +  | 3   | 687 | 73297  | 73982  |
| UN60675 | Rsa1.0_00170.1 | 735 | 179538 | 4.00E-15  | 120 | 144 | 83 -  | 176 | 318 | 71028  | 71167  |
| UN60676 | Rsa1.0_00015.1 | 764 | 561803 | 8.00E-63  | 168 | 183 | 91 +  | 263 | 445 | 215237 | 215419 |
| UN60677 | Rsa1.0_00065.1 | 723 | 454616 | 1.00E-131 | 267 | 277 | 96 -  | 3   | 279 | 134382 | 134658 |
| UN60678 | Rsa1.0_02377.1 | 745 | 31994  | 1.00E-101 | 215 | 223 | 96 +  | 3   | 225 | 8894   | 9115   |
| UN60679 | Rsa1.0_01466.1 | 677 | 45161  | 0         | 365 | 377 | 96 +  | 2   | 378 | 2068   | 2444   |
| UN60680 | Rsa1.0_00848.1 | 648 | 152362 | 1.00E-112 | 281 | 309 | 90 -  | 172 | 480 | 52795  | 53089  |
| UN60681 | Rsa1.0_04298.1 | 547 | 147466 | 6.00E-66  | 134 | 136 | 98 -  | 3   | 138 | 820    | 955    |
| UN60682 | Rsa1.0_01778.1 | 676 | 39509  | 1.00E-111 | 302 | 338 | 89 +  | 73  | 404 | 10505  | 10823  |

|         |                |     |        |           |     |     |       |     |     |        |        |
|---------|----------------|-----|--------|-----------|-----|-----|-------|-----|-----|--------|--------|
| UN60683 | Rsa1.0.00571.1 | 107 | 329018 | 2.00E-21  | 66  | 68  | 97 -  | 42  | 107 | 49454  | 49521  |
| UN60684 | Rsa1.0.00221.1 | 765 | 106972 | 0         | 749 | 775 | 96 +  | 2   | 765 | 49226  | 49994  |
| UN60685 | Rsa1.0.00001.1 | 797 | 363028 | 0         | 793 | 800 | 99 -  | 2   | 796 | 120733 | 121532 |
| UN60686 | Rsa1.0.02195.1 | 707 | 34024  | 1.00E-135 | 263 | 269 | 97 +  | 110 | 378 | 21552  | 21820  |
| UN60687 | Rsa1.0.00217.1 | 795 | 107079 | 0         | 775 | 801 | 96 +  | 1   | 795 | 77299  | 78099  |
| UN60688 | Rsa1.0.03634.1 | 656 | 145192 | 0         | 369 | 370 | 99 -  | 287 | 656 | 133532 | 133901 |
| UN60689 | Rsa1.0.05820.1 | 455 | 12540  | 0         | 354 | 355 | 99 +  | 1   | 355 | 8152   | 8506   |
| UN60690 | Rsa1.0.00920.1 | 704 | 601703 | 0         | 604 | 617 | 97 +  | 91  | 704 | 295676 | 296292 |
| UN60691 | Rsa1.0.00554.1 | 667 | 150953 | 1.00E-106 | 336 | 386 | 87 +  | 6   | 376 | 119394 | 119760 |
| UN60692 | Rsa1.0.04422.1 | 732 | 17423  | 1.00E-101 | 187 | 187 | 100 - | 546 | 732 | 10826  | 11012  |
| UN60693 | Rsa1.0.03781.1 | 686 | 20891  | 1.00E-171 | 399 | 423 | 94 -  | 269 | 686 | 5148   | 5562   |
| UN60694 | Rsa1.0.00480.1 | 746 | 81325  | 0         | 740 | 752 | 98 +  | 2   | 746 | 35699  | 36450  |
| UN60695 | Rsa1.0.28434.1 | 768 | 815    | 1.00E-120 | 235 | 238 | 98 +  | 534 | 768 | 48     | 285    |
| UN60696 | Rsa1.0.03166.1 | 726 | 24863  | 0         | 422 | 447 | 94 +  | 282 | 726 | 16687  | 17130  |
| UN60697 | Rsa1.0.06165.1 | 688 | 11584  | 0         | 674 | 687 | 98 -  | 2   | 688 | 10061  | 10747  |
| UN60698 | Rsa1.0.00537.1 | 703 | 186980 | 0         | 376 | 391 | 96 +  | 199 | 589 | 163711 | 164092 |
| UN60699 | Rsa1.0.00205.1 | 146 | 193401 | 3.00E-52  | 135 | 143 | 94 -  | 1   | 142 | 99212  | 99352  |
| UN60700 | Rsa1.0.05153.1 | 760 | 14663  | 8.00E-97  | 233 | 252 | 92 +  | 94  | 345 | 1685   | 1927   |
| UN60701 | Rsa1.0.00404.1 | 536 | 87635  | 5.00E-79  | 202 | 217 | 93 +  | 295 | 510 | 86855  | 87069  |
| UN60702 | Rsa1.0.01475.1 | 664 | 45044  | 0         | 645 | 663 | 97 -  | 2   | 664 | 26420  | 27082  |
| UN60703 | Rsa1.0.02713.1 | 641 | 28470  | 0         | 639 | 641 | 99 -  | 1   | 641 | 9376   | 10016  |
| UN60704 | Rsa1.0.00847.1 | 296 | 62270  | 2.00E-70  | 169 | 179 | 94 +  | 85  | 262 | 54053  | 54231  |
| UN60705 | Rsa1.0.00206.1 | 426 | 109040 | 1.00E-171 | 406 | 438 | 92 -  | 4   | 426 | 18772  | 19209  |
| UN60706 | Rsa1.0.00030.1 | 786 | 250988 | 3.00E-90  | 283 | 311 | 90 -  | 19  | 315 | 107603 | 107912 |
| UN60707 | Rsa1.0.03951.1 | 786 | 19894  | 1.00E-137 | 342 | 373 | 91 +  | 276 | 646 | 18554  | 18920  |
| UN60708 | Rsa1.0.04857.1 | 781 | 15703  | 0         | 752 | 761 | 98 +  | 1   | 755 | 10481  | 11241  |
| UN60709 | Rsa1.0.07250.1 | 742 | 9663   | 2.00E-75  | 269 | 319 | 84 -  | 3   | 299 | 9079   | 9379   |
| UN60710 | Rsa1.0.15165.1 | 517 | 2785   | 0         | 481 | 515 | 93 +  | 3   | 517 | 672    | 1186   |
| UN60711 | Rsa1.0.00178.1 | 720 | 114861 | 1.00E-177 | 333 | 339 | 98 +  | 45  | 383 | 66267  | 66605  |
| UN60712 | Rsa1.0.00574.1 | 418 | 74797  | 0         | 413 | 418 | 98 +  | 1   | 418 | 4166   | 4583   |
| UN60713 | Rsa1.0.01059.1 | 751 | 55410  | 1.00E-141 | 279 | 287 | 97 -  | 465 | 751 | 12572  | 12858  |
| UN60714 | Rsa1.0.02125.1 | 162 | 34775  | 5.00E-82  | 160 | 162 | 98 -  | 1   | 162 | 1267   | 1428   |
| UN60715 | Rsa1.0.08532.1 | 804 | 7228   | 1.00E-150 | 282 | 285 | 98 -  | 3   | 286 | 1      | 285    |
| UN60716 | Rsa1.0.05897.1 | 751 | 12302  | 0         | 672 | 706 | 95 -  | 2   | 703 | 4954   | 5659   |
| UN60717 | Rsa1.0.04611.1 | 785 | 16647  | 1.00E-165 | 397 | 427 | 92 +  | 2   | 426 | 9458   | 9883   |
| UN60718 | Rsa1.0.01051.1 | 741 | 55577  | 3.00E-84  | 199 | 209 | 95 +  | 524 | 730 | 3695   | 3900   |
| UN60719 | Rsa1.0.01204.1 | 818 | 50843  | 8.00E-85  | 175 | 180 | 97 +  | 242 | 421 | 25142  | 25321  |
| UN60720 | Rsa1.0.00589.1 | 638 | 209965 | 3.00E-80  | 196 | 210 | 93 +  | 155 | 361 | 152245 | 152454 |
| UN60721 | Rsa1.0.00883.1 | 638 | 61230  | 0         | 596 | 615 | 96 -  | 2   | 608 | 40280  | 40893  |

|         |                |     |        |           |     |     |      |     |     |        |        |
|---------|----------------|-----|--------|-----------|-----|-----|------|-----|-----|--------|--------|
| UN60722 | Rsa1.0_00090.1 | 709 | 273859 | 0         | 704 | 711 | 99 - | 2   | 708 | 8982   | 9692   |
| UN60723 | Rsa1.0_00702.1 | 723 | 67600  | 0         | 710 | 727 | 97 - | 2   | 723 | 41215  | 41940  |
| UN60724 | Rsa1.0_03393.1 | 795 | 23247  | 0         | 532 | 572 | 93 - | 240 | 789 | 13187  | 13758  |
| UN60725 | Rsa1.0_01332.1 | 822 | 47936  | 6.00E-98  | 185 | 186 | 99 - | 461 | 646 | 29636  | 29821  |
| UN60726 | Rsa1.0_01815.1 | 576 | 38897  | 0         | 506 | 508 | 99 - | 69  | 576 | 14405  | 14912  |
| UN60727 | Rsa1.0_00097.1 | 735 | 138858 | 0         | 408 | 417 | 97 - | 3   | 418 | 100340 | 100756 |
| UN60728 | Rsa1.0_00089.1 | 783 | 406142 | 0         | 387 | 399 | 96 - | 3   | 401 | 58902  | 59300  |
| UN60729 | Rsa1.0_02338.1 | 747 | 32390  | 0         | 437 | 455 | 96 + | 96  | 550 | 1599   | 2044   |
| UN60730 | Rsa1.0_01769.1 | 625 | 39568  | 1.00E-119 | 227 | 230 | 98 - | 187 | 416 | 35470  | 35699  |
| UN60731 | Rsa1.0_00385.1 | 764 | 89160  | 7.00E-79  | 168 | 174 | 96 + | 256 | 429 | 50842  | 51015  |
| UN60732 | Rsa1.0_00642.1 | 675 | 201230 | 0         | 486 | 507 | 95 - | 1   | 501 | 30064  | 30570  |
| UN60733 | Rsa1.0_00351.1 | 743 | 413096 | 0         | 697 | 721 | 96 - | 9   | 726 | 377996 | 378715 |
| UN60734 | Rsa1.0_03669.1 | 808 | 147114 | 0         | 642 | 663 | 96 + | 99  | 759 | 20525  | 21181  |
| UN60735 | Rsa1.0_01027.1 | 730 | 56402  | 0         | 590 | 606 | 97 - | 2   | 604 | 40281  | 40886  |
| UN60736 | Rsa1.0_02443.1 | 605 | 31353  | 3.00E-77  | 169 | 175 | 96 - | 4   | 178 | 20091  | 20264  |
| UN60737 | Rsa1.0_03573.1 | 535 | 22013  | 2.00E-13  | 133 | 159 | 83 - | 340 | 493 | 12225  | 12383  |
| UN60738 | Rsa1.0_01358.1 | 746 | 47278  | 1.00E-166 | 303 | 305 | 99 + | 258 | 562 | 6113   | 6417   |
| UN60739 | Rsa1.0_04086.1 | 688 | 19166  | 1.00E-143 | 261 | 262 | 99 - | 177 | 438 | 14810  | 15071  |
| UN60740 | Rsa1.0_16356.1 | 821 | 2182   | 0         | 740 | 757 | 97 + | 77  | 821 | 1421   | 2177   |
| UN60741 | Rsa1.0_00165.1 | 764 | 116466 | 0         | 379 | 389 | 97 + | 376 | 764 | 2055   | 2443   |
| UN60742 | Rsa1.0_01274.1 | 758 | 49419  | 0         | 370 | 379 | 97 - | 178 | 556 | 28183  | 28561  |
| UN60743 | Rsa1.0_01354.1 | 667 | 47342  | 1.00E-127 | 254 | 259 | 98 - | 406 | 662 | 9371   | 9629   |
| UN60744 | Rsa1.0_01668.1 | 703 | 41299  | 0         | 684 | 705 | 97 + | 2   | 703 | 5834   | 6538   |
| UN60745 | Rsa1.0_16932.1 | 351 | 1984   | 1.00E-139 | 277 | 285 | 97 + | 2   | 286 | 1022   | 1304   |
| UN60746 | Rsa1.0_02655.1 | 734 | 29027  | 1.00E-36  | 130 | 143 | 90 - | 595 | 734 | 11146  | 11288  |
| UN60747 | Rsa1.0_00008.1 | 707 | 358124 | 1.00E-108 | 248 | 265 | 93 + | 1   | 265 | 10803  | 11055  |
| UN60748 | Rsa1.0_02004.1 | 753 | 169138 | 0         | 392 | 406 | 96 + | 252 | 657 | 153253 | 153652 |
| UN60749 | Rsa1.0_00959.1 | 812 | 58202  | 0         | 357 | 361 | 98 + | 3   | 363 | 16175  | 16535  |
| UN60750 | Rsa1.0_17175.1 | 762 | 1901   | 1.00E-148 | 331 | 355 | 93 - | 4   | 340 | 421    | 775    |
| UN60751 | Rsa1.0_01405.1 | 701 | 46445  | 0         | 466 | 506 | 92 - | 218 | 701 | 32966  | 33471  |
| UN60752 | Rsa1.0_04558.1 | 697 | 16860  | 0         | 571 | 574 | 99 - | 2   | 573 | 223    | 796    |
| UN60753 | Rsa1.0_00025.1 | 742 | 277312 | 1.00E-172 | 358 | 372 | 96 + | 372 | 741 | 265656 | 266024 |
| UN60754 | Rsa1.0_04275.1 | 644 | 18136  | 0         | 411 | 426 | 96 - | 3   | 427 | 3255   | 3680   |
| UN60755 | Rsa1.0_02924.1 | 641 | 26736  | 1.00E-163 | 299 | 300 | 99 + | 343 | 641 | 7926   | 8225   |
| UN60756 | Rsa1.0_00130.1 | 712 | 125737 | 0         | 503 | 520 | 96 + | 73  | 591 | 121432 | 121946 |
| UN60757 | Rsa1.0_03276.1 | 762 | 24152  | 1.00E-176 | 331 | 337 | 98 + | 3   | 339 | 13397  | 13733  |
| UN60758 | Rsa1.0_04021.1 | 668 | 19536  | 0         | 365 | 376 | 97 - | 292 | 667 | 4252   | 4622   |
| UN60759 | #              | #   | #      | #         | #   | #   | #    | #   | #   | #      | #      |
| UN60760 | Rsa1.0_00873.1 | 749 | 61459  | 0         | 708 | 743 | 95 + | 3   | 743 | 45245  | 45973  |



|         |                |     |        |           |     |     |       |     |     |        |        |
|---------|----------------|-----|--------|-----------|-----|-----|-------|-----|-----|--------|--------|
| UN60761 | Rsa1.0_13066.1 | 692 | 5025   | 0         | 682 | 690 | 98 +  | 4   | 692 | 3683   | 4369   |
| UN60762 | Rsa1.0_00105.1 | 698 | 134138 | 1.00E-131 | 267 | 276 | 96 +  | 1   | 273 | 507    | 782    |
| UN60763 | Rsa1.0_00998.1 | 647 | 57168  | 7.00E-97  | 192 | 196 | 97 -  | 81  | 276 | 53088  | 53283  |
| UN60764 | Rsa1.0_00725.1 | 183 | 66757  | 4.00E-43  | 162 | 185 | 87 +  | 3   | 183 | 43015  | 43187  |
| UN60765 | Rsa1.0_01338.1 | 738 | 155644 | 0         | 406 | 416 | 97 -  | 79  | 494 | 150627 | 151042 |
| UN60766 | Rsa1.0_07001.1 | 731 | 10048  | 6.00E-70  | 135 | 135 | 100 - | 515 | 649 | 6595   | 6729   |
| UN60767 | Rsa1.0_00185.1 | 612 | 248445 | 0         | 612 | 612 | 100 - | 1   | 612 | 241409 | 242020 |
| UN60768 | Rsa1.0_00181.1 | 638 | 114269 | 0         | 637 | 637 | 100 + | 2   | 638 | 15853  | 16489  |
| UN60769 | Rsa1.0_03410.1 | 773 | 23147  | 1.00E-137 | 268 | 275 | 97 +  | 90  | 364 | 7051   | 7325   |
| UN60770 | Rsa1.0_00692.1 | 687 | 68151  | 1.00E-36  | 204 | 244 | 83 +  | 165 | 398 | 61262  | 61505  |
| UN60771 | Rsa1.0_12649.1 | 637 | 5164   | 1.00E-122 | 247 | 255 | 96 +  | 5   | 259 | 198    | 452    |
| UN60772 | Rsa1.0_05027.1 | 789 | 15094  | 9.00E-29  | 72  | 74  | 97 -  | 37  | 110 | 7925   | 7998   |
| UN60773 | #              | #   | #      | #         | #   | #   | #     | #   | #   | #      | #      |
| UN60774 | Rsa1.0_00136.1 | 733 | 122464 | 0         | 570 | 596 | 95 -  | 45  | 640 | 115441 | 116036 |
| UN60775 | Rsa1.0_00182.1 | 784 | 142305 | 1.00E-166 | 376 | 403 | 93 +  | 1   | 391 | 35043  | 35445  |
| UN60776 | Rsa1.0_00105.1 | 150 | 134138 | 2.00E-28  | 90  | 95  | 94 -  | 33  | 127 | 123747 | 123837 |
| UN60777 | Rsa1.0_01317.1 | 851 | 48287  | 5.00E-92  | 274 | 304 | 90 +  | 476 | 777 | 41346  | 41643  |
| UN60778 | Rsa1.0_74770.1 | 472 | 307    | 1.00E-105 | 200 | 202 | 99 +  | 271 | 472 | 33     | 234    |
| UN60779 | Rsa1.0_00065.1 | 769 | 454616 | 1.00E-74  | 170 | 179 | 94 -  | 462 | 640 | 178100 | 178278 |
| UN60780 | Rsa1.0_01166.1 | 708 | 51877  | 0         | 698 | 707 | 98 -  | 2   | 708 | 7427   | 8131   |
| UN60781 | Rsa1.0_05092.1 | 723 | 14878  | 1.00E-169 | 349 | 365 | 95 -  | 359 | 723 | 14366  | 14730  |
| UN60782 | Rsa1.0_04894.1 | 811 | 15569  | 1.00E-156 | 331 | 348 | 95 -  | 1   | 348 | 12849  | 13196  |
| UN60783 | Rsa1.0_10394.1 | 778 | 5861   | 0         | 464 | 470 | 98 -  | 1   | 469 | 1      | 470    |
| UN60784 | Rsa1.0_01480.1 | 625 | 44926  | 0         | 355 | 355 | 100 - | 1   | 355 | 26422  | 26776  |
| UN60785 | Rsa1.0_03572.1 | 341 | 146346 | 1.00E-179 | 335 | 341 | 98 +  | 1   | 341 | 20122  | 20462  |
| UN60786 | Rsa1.0_04831.1 | 772 | 15799  | 1.00E-162 | 312 | 317 | 98 +  | 449 | 763 | 4919   | 5235   |
| UN60787 | Rsa1.0_00487.1 | 742 | 80674  | 1.00E-131 | 373 | 418 | 89 +  | 219 | 636 | 23759  | 24176  |
| UN60788 | Rsa1.0_00964.1 | 399 | 316648 | 1.00E-139 | 272 | 279 | 97 -  | 34  | 312 | 29015  | 29293  |
| UN60789 | Rsa1.0_00722.1 | 502 | 66840  | 0         | 498 | 500 | 99 -  | 3   | 502 | 38564  | 39063  |
| UN60790 | Rsa1.0_00506.1 | 705 | 79106  | 0         | 375 | 388 | 96 -  | 320 | 703 | 21140  | 21526  |
| UN60791 | Rsa1.0_00068.1 | 622 | 151813 | 1.00E-145 | 267 | 269 | 99 -  | 1   | 269 | 55974  | 56242  |
| UN60792 | Rsa1.0_00874.1 | 727 | 179723 | 0         | 571 | 582 | 98 +  | 81  | 659 | 54576  | 55157  |
| UN60793 | Rsa1.0_03754.1 | 848 | 21005  | 0         | 832 | 837 | 99 -  | 3   | 837 | 9364   | 10199  |
| UN60794 | Rsa1.0_01096.1 | 768 | 54266  | 1.00E-107 | 222 | 230 | 96 +  | 2   | 231 | 5768   | 5997   |
| UN60795 | Rsa1.0_00190.1 | 290 | 318240 | 4.00E-75  | 143 | 143 | 100 + | 47  | 189 | 203733 | 203875 |
| UN60796 | Rsa1.0_00293.1 | 787 | 339294 | 0         | 769 | 777 | 98 +  | 2   | 775 | 177419 | 178195 |
| UN60797 | Rsa1.0_03550.1 | 658 | 22154  | 6.00E-48  | 104 | 106 | 98 +  | 253 | 358 | 3928   | 4033   |
| UN60798 | Rsa1.0_06793.1 | 155 | 10347  | 1.00E-79  | 153 | 154 | 99 -  | 2   | 155 | 1141   | 1294   |
| UN60799 | Rsa1.0_00089.1 | 334 | 406142 | 1.00E-126 | 237 | 239 | 99 -  | 98  | 334 | 210420 | 210658 |

|         |                |     |        |           |     |     |       |     |     |        |        |
|---------|----------------|-----|--------|-----------|-----|-----|-------|-----|-----|--------|--------|
| UN60800 | Rsa1.0.02032.1 | 733 | 35830  | 0         | 423 | 433 | 97 +  | 304 | 733 | 1810   | 2242   |
| UN60801 | Rsa1.0.00556.1 | 806 | 207212 | 0         | 639 | 665 | 96 -  | 148 | 806 | 15159  | 15820  |
| UN60802 | Rsa1.0.02568.1 | 766 | 30015  | 5.00E-95  | 192 | 197 | 97 -  | 196 | 392 | 10825  | 11021  |
| UN60803 | Rsa1.0.00311.1 | 511 | 96847  | 0         | 489 | 494 | 98 -  | 18  | 511 | 43673  | 44164  |
| UN60804 | Rsa1.0.04450.1 | 670 | 17297  | 3.00E-19  | 107 | 126 | 84 +  | 462 | 587 | 6733   | 6858   |
| UN60805 | Rsa1.0.00002.1 | 800 | 601661 | 2.00E-57  | 232 | 268 | 86 -  | 485 | 747 | 539650 | 539917 |
| UN60806 | Rsa1.0.00482.1 | 684 | 81162  | 1.00E-122 | 223 | 223 | 100 + | 274 | 496 | 18970  | 19192  |
| UN60807 | Rsa1.0.00311.1 | 754 | 96847  | 1.00E-150 | 351 | 371 | 94 -  | 345 | 713 | 4209   | 4572   |
| UN60808 | Rsa1.0.00561.1 | 653 | 75653  | 0         | 466 | 473 | 98 +  | 181 | 653 | 36775  | 37244  |
| UN60809 | Rsa1.0.00916.1 | 648 | 59789  | 1.00E-140 | 306 | 320 | 95 +  | 179 | 496 | 12226  | 12544  |
| UN60810 | Rsa1.0.06013.1 | 456 | 11931  | 0         | 452 | 455 | 99 +  | 3   | 456 | 10532  | 10986  |
| UN60811 | Rsa1.0.00556.1 | 197 | 207212 | 2.00E-79  | 179 | 186 | 96 -  | 5   | 190 | 135270 | 135453 |
| UN60812 | Rsa1.0.00218.1 | 709 | 201480 | 1.00E-165 | 294 | 294 | 100 - | 2   | 295 | 38039  | 38332  |
| UN60813 | Rsa1.0.05533.1 | 736 | 13402  | 0         | 385 | 391 | 98 +  | 1   | 391 | 10851  | 11241  |
| UN60814 | Rsa1.0.17526.1 | 712 | 1808   | 1.00E-129 | 247 | 251 | 98 +  | 40  | 290 | 915    | 1165   |
| UN60815 | Rsa1.0.00002.1 | 663 | 601661 | 0         | 634 | 659 | 96 +  | 2   | 657 | 105607 | 106261 |
| UN60816 | Rsa1.0.03209.1 | 782 | 24592  | 3.00E-90  | 203 | 213 | 95 +  | 46  | 257 | 12187  | 12399  |
| UN60817 | Rsa1.0.29381.1 | 601 | 784    | 9.00E-90  | 189 | 196 | 96 +  | 285 | 480 | 230    | 425    |
| UN60818 | Rsa1.0.00178.1 | 289 | 114861 | 1.00E-138 | 275 | 283 | 97 +  | 7   | 289 | 100195 | 100474 |
| UN60819 | Rsa1.0.02884.1 | 701 | 27034  | 1.00E-119 | 311 | 338 | 92 +  | 369 | 701 | 12825  | 13159  |
| UN60820 | Rsa1.0.01466.1 | 732 | 45161  | 0         | 716 | 723 | 99 -  | 1   | 718 | 38861  | 39583  |
| UN60821 | Rsa1.0.01341.1 | 477 | 47764  | 0         | 410 | 410 | 100 - | 3   | 412 | 29068  | 29477  |
| UN60822 | Rsa1.0.00007.1 | 254 | 239325 | 1.00E-114 | 241 | 252 | 95 -  | 3   | 254 | 16321  | 16572  |
| UN60823 | Rsa1.0.02792.1 | 602 | 27829  | 0         | 600 | 601 | 99 +  | 2   | 602 | 6819   | 7419   |
| UN60824 | Rsa1.0.01803.1 | 699 | 173846 | 2.00E-75  | 184 | 196 | 93 -  | 501 | 695 | 21965  | 22160  |
| UN60825 | Rsa1.0.00586.1 | 683 | 163802 | 0         | 399 | 403 | 99 +  | 282 | 683 | 153732 | 154134 |
| UN60826 | Rsa1.0.69707.1 | 223 | 329    | 2.00E-60  | 156 | 165 | 94 +  | 62  | 217 | 30     | 194    |
| UN60827 | Rsa1.0.00964.1 | 394 | 316648 | 0         | 356 | 362 | 98 +  | 33  | 394 | 304161 | 304522 |
| UN60828 | Rsa1.0.00195.1 | 493 | 251884 | 3.00E-64  | 131 | 133 | 98 +  | 210 | 342 | 239819 | 239951 |
| UN60829 | Rsa1.0.00725.1 | 751 | 66757  | 0         | 551 | 603 | 91 +  | 23  | 622 | 43131  | 43718  |
| UN60830 | Rsa1.0.02613.1 | 744 | 29557  | 4.00E-43  | 341 | 422 | 80 -  | 324 | 743 | 24015  | 24436  |
| UN60831 | Rsa1.0.03762.1 | 659 | 20976  | 0         | 365 | 366 | 99 +  | 15  | 380 | 9030   | 9395   |
| UN60832 | Rsa1.0.00429.1 | 643 | 85559  | 0         | 607 | 641 | 94 +  | 3   | 643 | 19617  | 20248  |
| UN60833 | Rsa1.0.00087.1 | 724 | 761073 | 1.00E-98  | 229 | 241 | 95 -  | 9   | 248 | 103404 | 103640 |
| UN60834 | Rsa1.0.01730.1 | 730 | 40223  | 0         | 563 | 568 | 99 -  | 2   | 568 | 14693  | 15260  |
| UN60835 | Rsa1.0.00176.1 | 230 | 240984 | 4.00E-59  | 127 | 130 | 97 +  | 1   | 127 | 210475 | 210604 |
| UN60836 | Rsa1.0.14950.1 | 365 | 2940   | 1.00E-148 | 337 | 357 | 94 +  | 8   | 364 | 1444   | 1796   |
| UN60837 | Rsa1.0.00914.1 | 233 | 59880  | 6.00E-67  | 168 | 179 | 93 -  | 1   | 179 | 41852  | 42026  |
| UN60838 | Rsa1.0.00119.1 | 346 | 467509 | 1.00E-160 | 332 | 346 | 95 +  | 1   | 346 | 346461 | 346805 |

|         |                |     |        |           |     |     |       |     |     |        |        |
|---------|----------------|-----|--------|-----------|-----|-----|-------|-----|-----|--------|--------|
| UN60839 | Rsa1.0.00381.1 | 517 | 89718  | 3.00E-83  | 224 | 244 | 91 +  | 9   | 245 | 72020  | 72262  |
| UN60840 | Rsa1.0.00196.1 | 675 | 109960 | 0         | 620 | 646 | 95 +  | 34  | 675 | 88822  | 89455  |
| UN60841 | Rsa1.0.02180.1 | 743 | 34176  | 1.00E-101 | 190 | 191 | 99 -  | 218 | 408 | 20273  | 20463  |
| UN60842 | Rsa1.0.10134.1 | 723 | 5984   | 0         | 698 | 720 | 96 +  | 7   | 723 | 2492   | 3211   |
| UN60843 | Rsa1.0.01829.1 | 639 | 166063 | 1.00E-79  | 166 | 171 | 97 -  | 440 | 610 | 157854 | 158024 |
| UN60844 | Rsa1.0.00254.1 | 664 | 102600 | 2.00E-75  | 210 | 232 | 90 +  | 46  | 276 | 87924  | 88146  |
| UN60845 | Rsa1.0.01895.1 | 674 | 37512  | 5.00E-98  | 439 | 528 | 83 -  | 1   | 497 | 11928  | 12431  |
| UN60846 | Rsa1.0.71176.1 | 712 | 322    | 1.00E-173 | 311 | 312 | 99 +  | 3   | 314 | 11     | 322    |
| UN60847 | Rsa1.0.00708.1 | 433 | 67366  | 1.00E-179 | 352 | 363 | 96 +  | 3   | 365 | 60719  | 61078  |
| UN60848 | Rsa1.0.01696.1 | 704 | 301850 | 0         | 413 | 419 | 98 +  | 286 | 704 | 143709 | 144127 |
| UN60849 | Rsa1.0.03387.1 | 646 | 23278  | 0         | 468 | 485 | 96 +  | 162 | 646 | 7461   | 7945   |
| UN60850 | Rsa1.0.03237.1 | 633 | 24434  | 0         | 541 | 558 | 96 -  | 77  | 633 | 7458   | 8015   |
| UN60851 | Rsa1.0.00401.1 | 640 | 244410 | 0         | 460 | 470 | 97 +  | 1   | 467 | 234410 | 234879 |
| UN60852 | Rsa1.0.00122.1 | 682 | 265937 | 0         | 675 | 700 | 96 -  | 4   | 682 | 92455  | 93154  |
| UN60853 | Rsa1.0.00197.1 | 666 | 109714 | 0         | 538 | 558 | 96 +  | 2   | 559 | 80573  | 81130  |
| UN60854 | Rsa1.0.00457.1 | 511 | 337301 | 6.00E-75  | 166 | 173 | 95 -  | 19  | 188 | 130685 | 130857 |
| UN60855 | Rsa1.0.00116.1 | 745 | 365886 | 1.00E-110 | 224 | 231 | 96 +  | 163 | 393 | 128371 | 128601 |
| UN60856 | Rsa1.0.00152.1 | 710 | 257730 | 1.00E-143 | 413 | 460 | 89 +  | 3   | 459 | 230075 | 230527 |
| UN60857 | Rsa1.0.03569.1 | 585 | 22041  | 0         | 579 | 587 | 98 +  | 1   | 585 | 4851   | 5436   |
| UN60858 | Rsa1.0.01017.1 | 799 | 56714  | 1.00E-103 | 203 | 207 | 98 +  | 1   | 207 | 16022  | 16228  |
| UN60859 | Rsa1.0.00386.1 | 625 | 89134  | 1.00E-170 | 312 | 315 | 99 -  | 1   | 315 | 57440  | 57754  |
| UN60860 | Rsa1.0.00001.1 | 114 | 363028 | 3.00E-36  | 99  | 105 | 94 -  | 11  | 114 | 211258 | 211362 |
| UN60861 | Rsa1.0.00189.1 | 120 | 111830 | 2.00E-40  | 108 | 116 | 93 -  | 1   | 116 | 46412  | 46527  |
| UN60862 | Rsa1.0.14836.1 | 718 | 3030   | 1.00E-138 | 250 | 250 | 100 + | 3   | 252 | 2246   | 2495   |
| UN60863 | Rsa1.0.03057.1 | 103 | 25724  | 5.00E-13  | 44  | 46  | 95 +  | 58  | 103 | 7136   | 7181   |
| UN60864 | Rsa1.0.00471.1 | 105 | 81897  | 6.00E-28  | 88  | 95  | 92 -  | 1   | 94  | 66147  | 66241  |
| UN60865 | Rsa1.0.00461.1 | 722 | 82509  | 1.00E-165 | 377 | 410 | 91 -  | 1   | 410 | 20464  | 20851  |
| UN60866 | Rsa1.0.08225.1 | 731 | 7695   | 0         | 705 | 728 | 96 +  | 1   | 728 | 4144   | 4868   |
| UN60867 | Rsa1.0.01862.1 | 713 | 38030  | 1.00E-150 | 269 | 269 | 100 - | 445 | 713 | 16415  | 16683  |
| UN60868 | Rsa1.0.00145.1 | 125 | 261008 | 3.00E-49  | 117 | 123 | 95 -  | 1   | 123 | 8829   | 8951   |
| UN60869 | Rsa1.0.02513.1 | 573 | 30643  | 0         | 557 | 574 | 97 -  | 1   | 573 | 11205  | 11777  |
| UN60870 | Rsa1.0.01752.1 | 552 | 39805  | 0         | 536 | 553 | 96 +  | 1   | 552 | 23269  | 23821  |
| UN60871 | Rsa1.0.00911.1 | 622 | 59943  | 0         | 616 | 624 | 98 -  | 1   | 622 | 20858  | 21481  |
| UN60872 | Rsa1.0.01478.1 | 592 | 44991  | 0         | 588 | 597 | 98 +  | 1   | 592 | 7236   | 7832   |
| UN60873 | Rsa1.0.00674.1 | 635 | 193753 | 0         | 346 | 349 | 99 +  | 280 | 628 | 129454 | 129802 |
| UN60874 | Rsa1.0.00911.1 | 158 | 59943  | 2.00E-53  | 142 | 154 | 92 -  | 1   | 154 | 42295  | 42448  |
| UN60875 | Rsa1.0.00046.1 | 673 | 320315 | 0         | 510 | 534 | 95 -  | 1   | 534 | 22369  | 22902  |
| UN60876 | Rsa1.0.01434.1 | 144 | 45951  | 3.00E-52  | 110 | 112 | 98 -  | 1   | 112 | 1046   | 1157   |
| UN60877 | Rsa1.0.06535.1 | 760 | 10827  | 0         | 737 | 761 | 96 -  | 1   | 760 | 3214   | 3974   |

|         |                |     |        |           |     |     |       |     |     |        |        |
|---------|----------------|-----|--------|-----------|-----|-----|-------|-----|-----|--------|--------|
| UN60878 | Rsa1.0.00089.1 | 698 | 406142 | 0         | 639 | 677 | 94 +  | 27  | 698 | 342179 | 342850 |
| UN60879 | Rsa1.0.04576.1 | 529 | 16783  | 1.00E-168 | 463 | 512 | 90 -  | 5   | 495 | 9598   | 10102  |
| UN60880 | Rsa1.0.00115.1 | 232 | 131321 | 5.00E-86  | 216 | 233 | 92 -  | 1   | 232 | 48923  | 49155  |
| UN60881 | Rsa1.0.00554.1 | 714 | 150953 | 1.00E-128 | 238 | 240 | 99 -  | 1   | 240 | 121603 | 121842 |
| UN60882 | Rsa1.0.00369.1 | 511 | 266462 | 0         | 474 | 494 | 95 +  | 18  | 511 | 264496 | 264989 |
| UN60883 | Rsa1.0.02104.1 | 671 | 34985  | 0         | 372 | 373 | 99 -  | 1   | 373 | 7644   | 8016   |
| UN60884 | Rsa1.0.04876.1 | 183 | 15631  | 2.00E-75  | 158 | 163 | 96 +  | 4   | 166 | 4226   | 4388   |
| UN60885 | #              | #   | #      | #         | #   | #   | #     | #   | #   | #      | #      |
| UN60886 | Rsa1.0.04779.1 | 612 | 16008  | 0         | 575 | 616 | 93 -  | 6   | 612 | 10456  | 11063  |
| UN60887 | Rsa1.0.00951.1 | 100 | 164588 | 6.00E-34  | 79  | 81  | 97 +  | 16  | 96  | 52175  | 52255  |
| UN60888 | Rsa1.0.72071.1 | 318 | 318    | 1.00E-129 | 270 | 282 | 95 -  | 1   | 282 | 1      | 282    |
| UN60889 | Rsa1.0.02207.1 | 539 | 33914  | 1.00E-124 | 226 | 226 | 100 - | 1   | 226 | 33104  | 33329  |
| UN60890 | Rsa1.0.00191.1 | 542 | 316976 | 1.00E-134 | 270 | 279 | 96 -  | 211 | 489 | 145775 | 146053 |
| UN60891 | Rsa1.0.51431.1 | 738 | 442    | 1.00E-169 | 325 | 333 | 97 -  | 188 | 520 | 109    | 441    |
| UN60892 | Rsa1.0.00071.1 | 802 | 345714 | 0         | 359 | 363 | 98 -  | 76  | 437 | 142422 | 142783 |
| UN60893 | Rsa1.0.03541.1 | 128 | 22194  | 2.00E-22  | 82  | 90  | 91 +  | 1   | 89  | 1881   | 1970   |
| UN60894 | Rsa1.0.06580.1 | 116 | 10723  | 4.00E-45  | 111 | 116 | 95 -  | 1   | 116 | 762    | 876    |
| UN60895 | Rsa1.0.00676.1 | 128 | 69166  | 7.00E-50  | 109 | 112 | 97 +  | 10  | 121 | 7617   | 7728   |
| UN60896 | Rsa1.0.06215.1 | 163 | 11478  | 2.00E-50  | 115 | 117 | 98 +  | 47  | 163 | 3274   | 3388   |
| UN60897 | Rsa1.0.02234.1 | 461 | 33618  | 1.00E-180 | 338 | 343 | 98 +  | 1   | 343 | 10239  | 10580  |
| UN60898 | Rsa1.0.03019.1 | 725 | 25987  | 0         | 586 | 588 | 99 -  | 1   | 588 | 1534   | 2121   |
| UN60899 | Rsa1.0.00221.1 | 684 | 106972 | 0         | 405 | 427 | 94 -  | 4   | 429 | 23888  | 24304  |
| UN60900 | Rsa1.0.05871.1 | 601 | 12356  | 1.00E-105 | 225 | 234 | 96 -  | 3   | 235 | 6586   | 6819   |
| UN60901 | Rsa1.0.03609.1 | 666 | 21798  | 0         | 615 | 665 | 92 +  | 7   | 666 | 275    | 916    |
| UN60902 | Rsa1.0.01800.1 | 119 | 39109  | 3.00E-30  | 104 | 115 | 90 -  | 1   | 114 | 7817   | 7931   |
| UN60903 | Rsa1.0.00015.1 | 723 | 561803 | 1.00E-137 | 273 | 281 | 97 +  | 2   | 279 | 215139 | 215419 |
| UN60904 | Rsa1.0.00325.1 | 841 | 95371  | 1.00E-152 | 273 | 273 | 100 + | 236 | 508 | 79215  | 79487  |
| UN60905 | Rsa1.0.00645.1 | 659 | 189716 | 1.00E-144 | 280 | 287 | 97 +  | 136 | 422 | 33786  | 34072  |
| UN60906 | Rsa1.0.04236.1 | 713 | 18370  | 0         | 707 | 710 | 99 +  | 4   | 713 | 4999   | 5708   |
| UN60907 | Rsa1.0.00038.1 | 715 | 314568 | 2.33E-156 | 293 | 303 | 96 +  | 2   | 300 | 196263 | 196565 |
| UN60908 | Rsa1.0.00275.1 | 698 | 210104 | 0         | 670 | 686 | 97 +  | 23  | 698 | 16268  | 16953  |
| UN60909 | Rsa1.0.00033.1 | 636 | 515811 | 0         | 555 | 593 | 93 -  | 36  | 619 | 352668 | 353258 |
| UN60910 | Rsa1.0.01602.1 | 657 | 42503  | 0         | 372 | 374 | 99 -  | 241 | 614 | 11562  | 11935  |
| UN60911 | Rsa1.0.00034.1 | 547 | 260119 | 1.00E-60  | 161 | 175 | 92 +  | 173 | 347 | 95307  | 95481  |
| UN60912 | Rsa1.0.03367.1 | 575 | 23387  | 1.00E-110 | 206 | 207 | 99 +  | 193 | 399 | 1583   | 1789   |
| UN60913 | Rsa1.0.09478.1 | 736 | 6341   | 0         | 427 | 450 | 94 -  | 9   | 458 | 5663   | 6109   |
| UN60914 | Rsa1.0.02218.1 | 765 | 33809  | 0         | 670 | 726 | 92 +  | 52  | 765 | 17466  | 18187  |
| UN60915 | Rsa1.0.00483.1 | 735 | 81102  | 8.00E-57  | 246 | 292 | 84 +  | 1   | 273 | 32616  | 32906  |
| UN60916 | Rsa1.0.03385.1 | 409 | 23280  | 1.00E-158 | 292 | 295 | 98 -  | 1   | 295 | 18397  | 18691  |

|         |                |     |        |           |     |     |       |     |     |        |        |
|---------|----------------|-----|--------|-----------|-----|-----|-------|-----|-----|--------|--------|
| UN60917 | Rsa1.0_00069.1 | 796 | 403561 | 0         | 511 | 540 | 94 -  | 264 | 796 | 371715 | 372249 |
| UN60918 | Rsa1.0_04583.1 | 703 | 16756  | 0         | 402 | 405 | 99 -  | 299 | 703 | 6486   | 6890   |
| UN60919 | Rsa1.0_00078.1 | 470 | 175053 | 0         | 431 | 451 | 95 -  | 2   | 450 | 54022  | 54466  |
| UN60920 | Rsa1.0_00301.1 | 807 | 365315 | 1.00E-86  | 219 | 236 | 92 -  | 118 | 348 | 318013 | 318248 |
| UN60921 | Rsa1.0_00928.1 | 553 | 59293  | 0         | 549 | 555 | 98 +  | 1   | 553 | 8657   | 9211   |
| UN60922 | Rsa1.0_00451.1 | 759 | 322533 | 0         | 686 | 745 | 92 +  | 37  | 759 | 249778 | 250518 |
| UN60923 | Rsa1.0_66644.1 | 677 | 344    | 5.00E-70  | 158 | 167 | 94 +  | 4   | 161 | 178    | 344    |
| UN60924 | Rsa1.0_00186.1 | 191 | 112669 | 2.00E-91  | 185 | 190 | 97 +  | 2   | 191 | 106671 | 106860 |
| UN60925 | Rsa1.0_00382.1 | 549 | 251946 | 1.00E-73  | 195 | 205 | 95 +  | 350 | 548 | 38232  | 38436  |
| UN60926 | Rsa1.0_00065.1 | 669 | 454616 | 0         | 526 | 565 | 93 +  | 3   | 547 | 192928 | 193492 |
| UN60927 | Rsa1.0_00128.1 | 706 | 228675 | 1.00E-123 | 236 | 240 | 98 +  | 190 | 429 | 89116  | 89355  |
| UN60928 | Rsa1.0_20339.1 | 474 | 1315   | 1.00E-108 | 199 | 199 | 100 - | 276 | 474 | 931    | 1129   |
| UN60929 | Rsa1.0_08861.1 | 100 | 6847   | 6.00E-22  | 83  | 93  | 89 -  | 1   | 93  | 3774   | 3866   |
| UN60930 | Rsa1.0_02916.1 | 523 | 26809  | 0         | 392 | 410 | 95 -  | 7   | 416 | 5584   | 5991   |
| UN60931 | Rsa1.0_14285.1 | 683 | 3579   | 0         | 597 | 620 | 96 +  | 1   | 619 | 41     | 658    |
| UN60932 | #              | #   | #      | #         | #   | #   | #     | #   | #   | #      | #      |
| UN60933 | Rsa1.0_08144.1 | 244 | 7835   | 1.00E-122 | 237 | 242 | 97 -  | 1   | 242 | 594    | 835    |
| UN60934 | Rsa1.0_05440.1 | 228 | 13749  | 9.00E-97  | 215 | 227 | 94 +  | 1   | 227 | 12827  | 13053  |
| UN60935 | Rsa1.0_01771.1 | 628 | 172709 | 0         | 506 | 506 | 100 + | 1   | 506 | 10021  | 10526  |
| UN60936 | Rsa1.0_01857.1 | 575 | 38103  | 0         | 401 | 424 | 94 +  | 4   | 422 | 1234   | 1653   |
| UN60937 | Rsa1.0_00002.1 | 197 | 601661 | 1.00E-100 | 194 | 197 | 98 -  | 1   | 197 | 235775 | 235971 |
| UN60938 | Rsa1.0_00129.1 | 812 | 126831 | 0         | 805 | 818 | 98 +  | 3   | 812 | 97287  | 98104  |
| UN60939 | Rsa1.0_00131.1 | 676 | 432233 | 1.00E-126 | 235 | 237 | 99 -  | 1   | 237 | 409550 | 409786 |
| UN60940 | Rsa1.0_01017.1 | 608 | 56714  | 0         | 431 | 448 | 96 -  | 163 | 608 | 18263  | 18698  |
| UN60941 | Rsa1.0_04146.1 | 663 | 18833  | 0         | 620 | 666 | 93 +  | 2   | 663 | 3809   | 4459   |
| UN60942 | Rsa1.0_00205.1 | 643 | 193401 | 9.00E-81  | 156 | 157 | 99 +  | 338 | 494 | 31914  | 32070  |
| UN60943 | Rsa1.0_05166.1 | 566 | 14624  | 1.00E-141 | 271 | 276 | 98 +  | 294 | 566 | 14105  | 14380  |
| UN60944 | Rsa1.0_06138.1 | 571 | 11651  | 0         | 389 | 397 | 97 -  | 168 | 559 | 10355  | 10751  |
| UN60945 | Rsa1.0_00799.1 | 696 | 63918  | 0         | 692 | 692 | 100 + | 5   | 696 | 14165  | 14856  |
| UN60946 | Rsa1.0_01876.1 | 668 | 37800  | 1.00E-138 | 279 | 288 | 96 -  | 2   | 289 | 9471   | 9755   |
| UN60947 | Rsa1.0_00887.1 | 484 | 61048  | 1.00E-136 | 304 | 322 | 94 +  | 1   | 321 | 29157  | 29478  |
| UN60948 | #              | #   | #      | #         | #   | #   | #     | #   | #   | #      | #      |
| UN60949 | Rsa1.0_00092.1 | 569 | 659932 | 0         | 418 | 429 | 97 -  | 1   | 428 | 449088 | 449516 |
| UN60950 | Rsa1.0_01286.1 | 684 | 49209  | 0         | 677 | 684 | 98 +  | 1   | 684 | 35996  | 36679  |
| UN60951 | Rsa1.0_00205.1 | 379 | 193401 | 1.00E-180 | 363 | 377 | 96 +  | 3   | 379 | 111974 | 112347 |
| UN60952 | Rsa1.0_00661.1 | 637 | 213041 | 1.00E-165 | 322 | 331 | 97 -  | 6   | 336 | 6034   | 6364   |
| UN60953 | Rsa1.0_00010.1 | 713 | 294827 | 1.00E-171 | 353 | 368 | 95 -  | 312 | 676 | 119770 | 120134 |
| UN60954 | Rsa1.0_00557.1 | 652 | 75865  | 0         | 538 | 542 | 99 -  | 3   | 544 | 53235  | 53776  |
| UN60955 | Rsa1.0_00944.1 | 637 | 58733  | 0         | 391 | 404 | 96 +  | 13  | 414 | 45541  | 45944  |

|         |                |     |        |           |     |     |       |     |     |        |        |
|---------|----------------|-----|--------|-----------|-----|-----|-------|-----|-----|--------|--------|
| UN60956 | Rsa1.0.02652.1 | 359 | 29038  | 1.00E-127 | 244 | 248 | 98 +  | 115 | 359 | 21715  | 21962  |
| UN60957 | Rsa1.0.00131.1 | 681 | 432233 | 0         | 613 | 677 | 90 -  | 3   | 663 | 90115  | 90769  |
| UN60958 | Rsa1.0.01971.1 | 101 | 36641  | 2.00E-15  | 57  | 61  | 93 +  | 41  | 101 | 19087  | 19145  |
| UN60959 | Rsa1.0.01517.1 | 610 | 44170  | 1.00E-156 | 299 | 304 | 98 -  | 3   | 305 | 18101  | 18404  |
| UN60960 | Rsa1.0.14560.1 | 640 | 3267   | 1.00E-131 | 238 | 238 | 100 - | 224 | 461 | 1839   | 2076   |
| UN60961 | Rsa1.0.00192.1 | 608 | 278200 | 0         | 426 | 439 | 97 +  | 1   | 438 | 37941  | 38378  |
| UN60962 | Rsa1.0.02608.1 | 290 | 29613  | 3.00E-63  | 126 | 127 | 99 -  | 1   | 127 | 8438   | 8564   |
| UN60963 | Rsa1.0.01230.1 | 643 | 50221  | 0         | 625 | 640 | 97 +  | 2   | 640 | 40795  | 41433  |
| UN60964 | Rsa1.0.00628.1 | 704 | 214360 | 1.00E-168 | 312 | 316 | 98 -  | 212 | 527 | 186222 | 186537 |
| UN60965 | Rsa1.0.00331.1 | 671 | 176754 | 1.00E-132 | 247 | 248 | 99 -  | 226 | 472 | 109645 | 109892 |
| UN60966 | Rsa1.0.01151.1 | 631 | 52268  | 0         | 400 | 403 | 99 +  | 229 | 631 | 43970  | 44372  |
| UN60967 | Rsa1.0.01080.1 | 746 | 54752  | 1.00E-74  | 158 | 163 | 96 +  | 582 | 744 | 52128  | 52290  |
| UN60968 | Rsa1.0.12096.1 | 711 | 5315   | 0         | 472 | 492 | 95 -  | 11  | 502 | 2161   | 2640   |
| UN60969 | Rsa1.0.00473.1 | 114 | 212204 | 1.00E-41  | 104 | 110 | 94 -  | 5   | 114 | 44323  | 44432  |
| UN60970 | Rsa1.0.01827.1 | 734 | 143321 | 0         | 514 | 515 | 99 -  | 8   | 522 | 114721 | 115235 |
| UN60971 | Rsa1.0.04462.1 | 322 | 17250  | 5.00E-93  | 266 | 293 | 90 +  | 36  | 321 | 4739   | 5030   |
| UN60972 | Rsa1.0.00008.1 | 741 | 358124 | 0         | 728 | 730 | 99 -  | 1   | 730 | 194203 | 194932 |
| UN60973 | Rsa1.0.05081.1 | 660 | 136103 | 1.00E-110 | 251 | 262 | 95 +  | 1   | 258 | 7835   | 8095   |
| UN60974 | Rsa1.0.61631.1 | 182 | 372    | 9.00E-75  | 172 | 182 | 94 +  | 1   | 182 | 61     | 242    |
| UN60975 | Rsa1.0.00604.1 | 603 | 146282 | 1.00E-164 | 299 | 301 | 99 -  | 3   | 303 | 20840  | 21140  |
| UN60976 | Rsa1.0.00423.1 | 270 | 86138  | 2.00E-61  | 209 | 233 | 89 +  | 3   | 234 | 10890  | 11115  |
| UN60977 | Rsa1.0.65917.1 | 117 | 348    | 7.00E-25  | 64  | 66  | 96 -  | 1   | 66  | 224    | 289    |
| UN60978 | Rsa1.0.00006.1 | 416 | 396176 | 0         | 357 | 363 | 98 -  | 1   | 363 | 223817 | 224175 |
| UN60979 | Rsa1.0.00253.1 | 710 | 231292 | 0         | 456 | 465 | 98 +  | 4   | 468 | 6305   | 6768   |
| UN60980 | Rsa1.0.02506.1 | 765 | 30700  | 0         | 358 | 359 | 99 +  | 407 | 765 | 6452   | 6810   |
| UN60981 | Rsa1.0.00090.1 | 570 | 273859 | 1.00E-170 | 355 | 370 | 95 -  | 3   | 370 | 141630 | 141998 |
| UN60982 | Rsa1.0.03781.1 | 483 | 20891  | 0         | 433 | 456 | 94 +  | 1   | 451 | 5114   | 5562   |
| UN60983 | Rsa1.0.02389.1 | 129 | 146428 | 1.00E-45  | 120 | 129 | 93 -  | 1   | 129 | 139090 | 139218 |
| UN60984 | Rsa1.0.00751.1 | 426 | 65759  | 3.00E-70  | 315 | 371 | 84 -  | 1   | 360 | 40309  | 40647  |
| UN60985 | Rsa1.0.05384.1 | 837 | 13960  | 0         | 566 | 581 | 97 +  | 9   | 587 | 1089   | 1669   |
| UN60986 | Rsa1.0.02458.1 | 129 | 31197  | 6.00E-44  | 102 | 106 | 96 +  | 8   | 113 | 8746   | 8851   |
| UN60987 | Rsa1.0.00922.1 | 805 | 59588  | 0         | 664 | 671 | 98 +  | 1   | 666 | 51069  | 51739  |
| UN60988 | Rsa1.0.00001.1 | 190 | 363028 | 2.00E-42  | 161 | 187 | 86 -  | 5   | 190 | 93928  | 94100  |
| UN60989 | Rsa1.0.02411.1 | 221 | 31655  | 4.00E-77  | 200 | 219 | 91 -  | 3   | 221 | 6231   | 6441   |
| UN60990 | Rsa1.0.04483.1 | 703 | 17174  | 0         | 446 | 450 | 99 -  | 1   | 450 | 15244  | 15693  |
| UN60991 | Rsa1.0.05573.1 | 745 | 13290  | 0         | 547 | 568 | 96 -  | 6   | 567 | 4031   | 4593   |
| UN60992 | Rsa1.0.01540.1 | 592 | 151890 | 0         | 465 | 494 | 94 -  | 6   | 486 | 111905 | 112397 |
| UN60993 | Rsa1.0.00383.1 | 805 | 398431 | 0         | 784 | 802 | 97 -  | 1   | 799 | 21742  | 22541  |
| UN60994 | Rsa1.0.00889.1 | 414 | 60978  | 1.00E-54  | 142 | 153 | 92 +  | 179 | 331 | 16428  | 16580  |

|         |                |     |        |           |     |     |       |     |     |        |        |
|---------|----------------|-----|--------|-----------|-----|-----|-------|-----|-----|--------|--------|
| UN60995 | Rsa1.0_00905.1 | 849 | 60110  | 0         | 652 | 675 | 96 +  | 161 | 829 | 44042  | 44713  |
| UN60996 | Rsa1.0_03072.1 | 249 | 25577  | 5.00E-86  | 164 | 165 | 99 -  | 2   | 166 | 15119  | 15283  |
| UN60997 | Rsa1.0_01642.1 | 382 | 41772  | 0         | 374 | 384 | 97 -  | 1   | 382 | 15067  | 15450  |
| UN60998 | Rsa1.0_00992.1 | 774 | 57419  | 0         | 743 | 780 | 95 -  | 3   | 774 | 13277  | 14042  |
| UN60999 | Rsa1.0_00722.1 | 645 | 66840  | 1.00E-166 | 348 | 365 | 95 +  | 1   | 361 | 58800  | 59164  |
| UN61000 | Rsa1.0_01480.1 | 598 | 44926  | 1.00E-82  | 259 | 282 | 91 +  | 1   | 277 | 25819  | 26094  |
| UN61001 | Rsa1.0_00028.1 | 460 | 293984 | 0         | 445 | 465 | 95 +  | 1   | 460 | 149867 | 150331 |
| UN61002 | Rsa1.0_01895.1 | 267 | 37512  | 6.00E-46  | 97  | 98  | 98 -  | 158 | 255 | 34125  | 34222  |
| UN61003 | Rsa1.0_00025.1 | 520 | 277312 | 0         | 516 | 519 | 99 -  | 3   | 520 | 45087  | 45605  |
| UN61004 | Rsa1.0_00625.1 | 752 | 71672  | 1.00E-149 | 312 | 323 | 96 +  | 1   | 323 | 30706  | 31024  |
| UN61005 | Rsa1.0_03166.1 | 745 | 24863  | 2.33E-156 | 341 | 366 | 93 -  | 1   | 355 | 19446  | 19810  |
| UN61006 | Rsa1.0_00002.1 | 688 | 601661 | 0         | 439 | 457 | 96 +  | 12  | 468 | 124235 | 124691 |
| UN61007 | Rsa1.0_10640.1 | 131 | 5772   | 1.00E-32  | 71  | 71  | 100 - | 1   | 71  | 1844   | 1914   |
| UN61008 | Rsa1.0_13353.1 | 568 | 4894   | 1.00E-143 | 321 | 343 | 93 -  | 98  | 440 | 2419   | 2753   |
| UN61009 | Rsa1.0_12539.1 | 762 | 5198   | 0         | 388 | 389 | 99 +  | 374 | 762 | 1      | 389    |
| UN61010 | Rsa1.0_02478.1 | 666 | 150183 | 9.00E-81  | 159 | 161 | 98 +  | 1   | 161 | 148355 | 148515 |
| UN61011 | Rsa1.0_00104.1 | 718 | 368722 | 0         | 586 | 619 | 94 -  | 2   | 619 | 201224 | 201824 |
| UN61012 | Rsa1.0_00001.1 | 421 | 363028 | 1.00E-124 | 238 | 242 | 98 -  | 1   | 242 | 93769  | 94010  |
| UN61013 | Rsa1.0_01565.1 | 613 | 155447 | 1.00E-134 | 328 | 351 | 93 +  | 1   | 346 | 10737  | 11083  |
| UN61014 | Rsa1.0_11581.1 | 689 | 5466   | 0         | 452 | 454 | 99 +  | 143 | 595 | 557    | 1010   |
| UN61015 | Rsa1.0_00882.1 | 641 | 61249  | 1.00E-143 | 335 | 358 | 93 -  | 1   | 352 | 56311  | 56667  |
| UN61016 | #              | #   | #      | #         | #   | #   | #     | #   | #   | #      | #      |
| UN61017 | Rsa1.0_00095.1 | 152 | 283384 | 1.00E-33  | 94  | 100 | 94 +  | 53  | 152 | 74541  | 74638  |
| UN61018 | Rsa1.0_07925.1 | 482 | 8245   | 1.00E-150 | 338 | 355 | 95 -  | 1   | 351 | 79     | 424    |
| UN61019 | Rsa1.0_02222.1 | 160 | 152798 | 5.00E-45  | 134 | 148 | 90 +  | 1   | 148 | 4969   | 5116   |
| UN61020 | Rsa1.0_04085.1 | 513 | 19168  | 1.00E-174 | 333 | 341 | 97 +  | 9   | 349 | 300    | 640    |
| UN61021 | Rsa1.0_31244.1 | 553 | 732    | 6.00E-94  | 175 | 175 | 100 - | 379 | 553 | 558    | 732    |
| UN61022 | Rsa1.0_00041.1 | 766 | 186197 | 1.00E-129 | 423 | 484 | 87 -  | 1   | 454 | 148191 | 148665 |
| UN61023 | Rsa1.0_00514.1 | 476 | 78421  | 1.00E-145 | 309 | 323 | 95 -  | 3   | 318 | 64028  | 64349  |
| UN61024 | Rsa1.0_00855.1 | 775 | 62047  | 0         | 706 | 706 | 100 - | 70  | 775 | 61342  | 62047  |
| UN61025 | Rsa1.0_01344.1 | 732 | 142535 | 0         | 429 | 442 | 97 +  | 18  | 454 | 109904 | 110344 |
| UN61026 | Rsa1.0_02084.1 | 753 | 35205  | 0         | 374 | 376 | 99 -  | 4   | 379 | 3988   | 4363   |
| UN61027 | Rsa1.0_00056.1 | 414 | 332604 | 1.00E-170 | 375 | 399 | 93 +  | 16  | 414 | 84753  | 85151  |
| UN61028 | Rsa1.0_08811.1 | 631 | 6904   | 1.00E-121 | 260 | 272 | 95 -  | 1   | 272 | 5210   | 5479   |
| UN61029 | Rsa1.0_01018.1 | 747 | 56685  | 0         | 735 | 747 | 98 -  | 3   | 747 | 24840  | 25585  |
| UN61030 | Rsa1.0_03484.1 | 654 | 22618  | 1.00E-112 | 212 | 214 | 99 +  | 195 | 408 | 5281   | 5494   |
| UN61031 | Rsa1.0_02397.1 | 761 | 31778  | 0         | 532 | 535 | 99 -  | 2   | 536 | 22096  | 22630  |
| UN61032 | Rsa1.0_02688.1 | 346 | 28644  | 1.00E-152 | 299 | 308 | 97 +  | 1   | 308 | 9643   | 9950   |
| UN61033 | Rsa1.0_00384.1 | 840 | 89278  | 1.00E-133 | 352 | 384 | 91 -  | 97  | 473 | 49264  | 49644  |

|         |                |     |        |           |     |     |       |     |     |        |        |
|---------|----------------|-----|--------|-----------|-----|-----|-------|-----|-----|--------|--------|
| UN61034 | Rsa1.0.03452.1 | 626 | 22817  | 0         | 626 | 627 | 99 -  | 1   | 626 | 18465  | 19091  |
| UN61035 | Rsa1.0.00293.1 | 808 | 339294 | 0         | 781 | 789 | 98 -  | 1   | 785 | 177591 | 178379 |
| UN61036 | Rsa1.0.00206.1 | 649 | 109040 | 0         | 643 | 649 | 99 +  | 1   | 649 | 17860  | 18508  |
| UN61037 | Rsa1.0.02859.1 | 444 | 162118 | 3.00E-67  | 194 | 214 | 90 -  | 21  | 225 | 144252 | 144463 |
| UN61038 | Rsa1.0.00281.1 | 655 | 99908  | 0         | 512 | 531 | 96 -  | 46  | 572 | 49992  | 50522  |
| UN61039 | Rsa1.0.03521.1 | 531 | 396204 | 1.00E-125 | 305 | 324 | 94 -  | 152 | 469 | 136464 | 136784 |
| UN61040 | Rsa1.0.03249.1 | 706 | 146254 | 0         | 452 | 464 | 97 +  | 1   | 462 | 141663 | 142124 |
| UN61041 | Rsa1.0.01204.1 | 750 | 50843  | 1.00E-131 | 257 | 261 | 98 -  | 1   | 259 | 27061  | 27321  |
| UN61042 | Rsa1.0.00203.1 | 677 | 109129 | 0         | 545 | 564 | 96 -  | 114 | 677 | 36863  | 37423  |
| UN61043 | Rsa1.0.02241.1 | 847 | 33520  | 0         | 490 | 500 | 98 +  | 342 | 838 | 20022  | 20521  |
| UN61044 | Rsa1.0.00090.1 | 831 | 273859 | 0         | 538 | 540 | 99 +  | 294 | 831 | 8070   | 8609   |
| UN61045 | Rsa1.0.01332.1 | 695 | 47936  | 0         | 491 | 494 | 99 +  | 1   | 493 | 28130  | 28623  |
| UN61046 | Rsa1.0.15161.1 | 658 | 2788   | 1.00E-110 | 220 | 226 | 97 -  | 2   | 227 | 1342   | 1567   |
| UN61047 | Rsa1.0.02316.1 | 458 | 32608  | 0         | 439 | 455 | 96 +  | 1   | 455 | 6004   | 6458   |
| UN61048 | Rsa1.0.00363.1 | 475 | 90968  | 0         | 472 | 475 | 99 +  | 1   | 475 | 67264  | 67738  |
| UN61049 | Rsa1.0.00401.1 | 136 | 244410 | 2.00E-47  | 124 | 132 | 93 -  | 2   | 133 | 243141 | 243271 |
| UN61050 | Rsa1.0.00847.1 | 130 | 62270  | 2.00E-41  | 119 | 130 | 91 -  | 1   | 130 | 55297  | 55426  |
| UN61051 | Rsa1.0.00622.1 | 758 | 71822  | 0         | 658 | 696 | 94 +  | 65  | 758 | 12077  | 12755  |
| UN61052 | #              | #   | #      | #         | #   | #   | #     | #   | #   | #      | #      |
| UN61053 | Rsa1.0.01336.1 | 781 | 47853  | 0         | 449 | 463 | 96 -  | 1   | 463 | 10463  | 10925  |
| UN61054 | Rsa1.0.16249.1 | 423 | 2227   | 4.00E-54  | 117 | 120 | 97 +  | 256 | 375 | 481    | 600    |
| UN61055 | Rsa1.0.01865.1 | 511 | 37992  | 4.00E-67  | 133 | 134 | 99 -  | 182 | 315 | 33190  | 33323  |
| UN61056 | Rsa1.0.01491.1 | 109 | 44718  | 2.00E-21  | 94  | 108 | 87 +  | 2   | 109 | 33557  | 33664  |
| UN61057 | Rsa1.0.01634.1 | 730 | 41865  | 1.00E-128 | 236 | 237 | 99 -  | 1   | 237 | 25008  | 25244  |
| UN61058 | Rsa1.0.01027.1 | 461 | 56402  | 1.00E-123 | 263 | 276 | 95 +  | 121 | 396 | 39744  | 40019  |
| UN61059 | Rsa1.0.01536.1 | 162 | 43747  | 2.00E-72  | 156 | 162 | 96 -  | 1   | 162 | 28610  | 28771  |
| UN61060 | Rsa1.0.04333.1 | 391 | 17865  | 1.00E-78  | 178 | 185 | 96 +  | 4   | 187 | 6723   | 6906   |
| UN61061 | Rsa1.0.00306.1 | 714 | 146760 | 2.00E-79  | 157 | 159 | 98 -  | 1   | 159 | 116154 | 116312 |
| UN61062 | Rsa1.0.00049.1 | 736 | 167018 | 0         | 491 | 523 | 93 -  | 1   | 523 | 134071 | 134579 |
| UN61063 | Rsa1.0.00184.1 | 765 | 218748 | 0         | 750 | 767 | 97 +  | 1   | 765 | 16544  | 17306  |
| UN61064 | Rsa1.0.00797.1 | 127 | 63959  | 9.00E-34  | 118 | 130 | 90 -  | 1   | 127 | 11925  | 12051  |
| UN61065 | Rsa1.0.00005.1 | 634 | 353093 | 1.00E-129 | 273 | 286 | 95 -  | 1   | 286 | 334794 | 335068 |
| UN61066 | Rsa1.0.04043.1 | 763 | 19416  | 1.00E-160 | 329 | 340 | 96 +  | 7   | 345 | 4203   | 4537   |
| UN61067 | Rsa1.0.00617.1 | 784 | 72199  | 0         | 754 | 759 | 99 -  | 1   | 759 | 64040  | 64798  |
| UN61068 | Rsa1.0.09730.1 | 411 | 6184   | 0         | 411 | 411 | 100 + | 1   | 411 | 1489   | 1899   |
| UN61069 | Rsa1.0.00782.1 | 551 | 64468  | 1.00E-122 | 305 | 330 | 92 -  | 2   | 330 | 55933  | 56261  |
| UN61070 | Rsa1.0.01439.1 | 770 | 45841  | 1.00E-168 | 358 | 380 | 94 +  | 1   | 378 | 42587  | 42951  |
| UN61071 | Rsa1.0.00959.1 | 705 | 58202  | 0         | 422 | 423 | 99 +  | 1   | 423 | 11099  | 11521  |
| UN61072 | Rsa1.0.00502.1 | 739 | 204180 | 1.00E-144 | 314 | 329 | 95 -  | 2   | 324 | 54694  | 55022  |



|         |                |     |        |           |     |     |       |     |     |        |        |
|---------|----------------|-----|--------|-----------|-----|-----|-------|-----|-----|--------|--------|
| UN61073 | Rsa1.0_00394.1 | 746 | 148426 | 1.00E-161 | 361 | 383 | 94 -  | 5   | 383 | 97923  | 98296  |
| UN61074 | Rsa1.0_02411.1 | 122 | 31655  | 2.00E-25  | 71  | 75  | 94 -  | 1   | 75  | 5948   | 6022   |
| UN61075 | Rsa1.0_03388.1 | 303 | 23277  | 1.00E-154 | 293 | 296 | 98 +  | 1   | 296 | 3675   | 3968   |
| UN61076 | Rsa1.0_28381.1 | 747 | 817    | 1.00E-46  | 129 | 140 | 92 +  | 413 | 552 | 141    | 280    |
| UN61077 | Rsa1.0_00172.1 | 761 | 115476 | 0         | 761 | 761 | 100 + | 1   | 761 | 85232  | 85992  |
| UN61078 | Rsa1.0_00720.1 | 557 | 66931  | 1.00E-129 | 249 | 254 | 98 -  | 1   | 254 | 35589  | 35842  |
| UN61079 | Rsa1.0_00544.1 | 127 | 76787  | 3.00E-58  | 126 | 129 | 97 +  | 1   | 127 | 8476   | 8604   |
| UN61080 | Rsa1.0_00975.1 | 134 | 57865  | 2.00E-47  | 114 | 120 | 95 -  | 2   | 121 | 55909  | 56028  |
| UN61081 | Rsa1.0_00779.1 | 733 | 64568  | 0         | 697 | 736 | 94 -  | 1   | 733 | 26259  | 26987  |
| UN61082 | Rsa1.0_16435.1 | 467 | 2156   | 1.00E-103 | 199 | 202 | 98 -  | 1   | 202 | 1198   | 1399   |
| UN61083 | Rsa1.0_01592.1 | 123 | 42685  | 1.00E-23  | 59  | 60  | 98 -  | 28  | 87  | 26748  | 26807  |
| UN61084 | Rsa1.0_07055.1 | 671 | 9970   | 0         | 390 | 400 | 97 -  | 1   | 397 | 2701   | 3100   |
| UN61085 | Rsa1.0_00015.1 | 723 | 561803 | 7.00E-94  | 232 | 251 | 92 -  | 132 | 382 | 217939 | 218189 |
| UN61086 | Rsa1.0_00065.1 | 781 | 454616 | 0         | 760 | 776 | 97 +  | 5   | 780 | 132991 | 133765 |
| UN61087 | Rsa1.0_00223.1 | 809 | 106231 | 0         | 777 | 814 | 95 +  | 1   | 806 | 78186  | 78991  |
| UN61088 | Rsa1.0_01316.1 | 782 | 48325  | 0         | 775 | 777 | 99 +  | 2   | 777 | 34271  | 35047  |
| UN61089 | Rsa1.0_07604.1 | 344 | 9041   | 1.00E-176 | 336 | 344 | 97 +  | 1   | 344 | 3101   | 3444   |
| UN61090 | Rsa1.0_00342.1 | 808 | 93695  | 0         | 394 | 405 | 97 -  | 401 | 805 | 16637  | 17038  |
| UN61091 | Rsa1.0_01091.1 | 115 | 54383  | 2.00E-43  | 104 | 109 | 95 -  | 4   | 112 | 21708  | 21816  |
| UN61092 | Rsa1.0_17349.1 | 526 | 1853   | 1.00E-105 | 276 | 299 | 92 +  | 2   | 289 | 1556   | 1853   |
| UN61093 | Rsa1.0_04194.1 | 628 | 132734 | 1.00E-147 | 285 | 292 | 97 +  | 277 | 568 | 131500 | 131791 |
| UN61094 | Rsa1.0_00381.1 | 728 | 89718  | 0         | 351 | 351 | 100 + | 1   | 351 | 82899  | 83249  |
| UN61095 | Rsa1.0_04124.1 | 793 | 18945  | 1.00E-159 | 309 | 315 | 98 +  | 2   | 312 | 6592   | 6906   |
| UN61096 | Rsa1.0_00551.1 | 569 | 76227  | 0         | 539 | 539 | 100 - | 3   | 541 | 29432  | 29970  |
| UN61097 | Rsa1.0_00512.1 | 718 | 200277 | 0         | 536 | 576 | 93 -  | 130 | 692 | 193063 | 193637 |
| UN61098 | Rsa1.0_03997.1 | 483 | 19652  | 5.00E-66  | 211 | 235 | 89 -  | 6   | 236 | 4171   | 4405   |
| UN61099 | Rsa1.0_01165.1 | 797 | 51898  | 0         | 794 | 795 | 99 +  | 3   | 797 | 50388  | 51181  |
| UN61100 | Rsa1.0_00890.1 | 526 | 323870 | 1.00E-100 | 191 | 193 | 98 -  | 1   | 193 | 306236 | 306428 |
| UN61101 | Rsa1.0_01576.1 | 289 | 42923  | 1.00E-116 | 232 | 239 | 97 -  | 1   | 239 | 22319  | 22557  |
| UN61102 | Rsa1.0_00632.1 | 690 | 183777 | 0         | 686 | 690 | 99 -  | 1   | 690 | 166877 | 167566 |
| UN61103 | Rsa1.0_03074.1 | 802 | 25568  | 1.00E-147 | 285 | 292 | 97 -  | 1   | 292 | 11533  | 11824  |
| UN61104 | Rsa1.0_04065.1 | 766 | 19275  | 1.00E-154 | 361 | 384 | 94 -  | 9   | 384 | 3173   | 3555   |
| UN61105 | Rsa1.0_00087.1 | 722 | 761073 | 1.00E-168 | 343 | 354 | 96 -  | 3   | 352 | 360585 | 360937 |
| UN61106 | Rsa1.0_03132.1 | 272 | 25142  | 1.00E-74  | 160 | 166 | 96 +  | 1   | 166 | 8368   | 8533   |
| UN61107 | Rsa1.0_00221.1 | 825 | 106972 | 1.00E-169 | 418 | 451 | 92 -  | 1   | 437 | 50385  | 50832  |
| UN61108 | Rsa1.0_00217.1 | 787 | 107079 | 1.00E-103 | 197 | 199 | 98 -  | 354 | 552 | 80990  | 81188  |
| UN61109 | Rsa1.0_08717.1 | 315 | 7008   | 1.00E-166 | 310 | 315 | 98 +  | 1   | 315 | 3493   | 3807   |
| UN61110 | Rsa1.0_00920.1 | 645 | 601703 | 0         | 630 | 657 | 95 -  | 1   | 645 | 296732 | 297388 |
| UN61111 | Rsa1.0_00097.1 | 739 | 138858 | 5.00E-95  | 177 | 177 | 100 + | 1   | 177 | 96995  | 97171  |

|         |                |     |        |           |     |     |       |     |     |        |        |
|---------|----------------|-----|--------|-----------|-----|-----|-------|-----|-----|--------|--------|
| UN61112 | Rsa1.0_00102.1 | 694 | 135497 | 1.00E-123 | 242 | 248 | 97 -  | 1   | 248 | 51183  | 51430  |
| UN61113 | Rsa1.0_00212.1 | 286 | 108350 | 1.00E-102 | 249 | 269 | 92 -  | 18  | 286 | 46958  | 47226  |
| UN61114 | Rsa1.0_02079.1 | 787 | 35306  | 0         | 464 | 492 | 94 -  | 3   | 494 | 24546  | 25025  |
| UN61115 | Rsa1.0_02357.1 | 618 | 32220  | 1.00E-122 | 289 | 309 | 93 +  | 3   | 305 | 11474  | 11779  |
| UN61116 | Rsa1.0_00782.1 | 457 | 64468  | 1.00E-156 | 311 | 321 | 96 -  | 140 | 457 | 28281  | 28601  |
| UN61117 | Rsa1.0_01166.1 | 729 | 51877  | 0         | 722 | 730 | 98 +  | 1   | 729 | 6144   | 6872   |
| UN61118 | Rsa1.0_00461.1 | 377 | 82509  | 0         | 366 | 378 | 96 -  | 1   | 377 | 55061  | 55437  |
| UN61119 | Rsa1.0_05849.1 | 123 | 12425  | 2.00E-49  | 111 | 115 | 96 +  | 5   | 119 | 9517   | 9631   |
| UN61120 | Rsa1.0_03781.1 | 382 | 20891  | 1.00E-119 | 313 | 335 | 93 -  | 2   | 329 | 4225   | 4551   |
| UN61121 | Rsa1.0_01790.1 | 374 | 39248  | 1.00E-174 | 352 | 366 | 96 +  | 1   | 366 | 17157  | 17522  |
| UN61122 | Rsa1.0_04880.1 | 867 | 15612  | 0         | 699 | 734 | 95 +  | 2   | 728 | 534    | 1258   |
| UN61123 | Rsa1.0_04857.1 | 832 | 15703  | 0         | 832 | 834 | 99 -  | 1   | 832 | 10955  | 11788  |
| UN61124 | Rsa1.0_01207.1 | 384 | 141053 | 1.00E-153 | 319 | 334 | 95 +  | 3   | 331 | 131253 | 131586 |
| UN61125 | Rsa1.0_00025.1 | 686 | 277312 | 0         | 510 | 515 | 99 +  | 1   | 515 | 252435 | 252948 |
| UN61126 | Rsa1.0_00088.1 | 783 | 141341 | 1.00E-141 | 254 | 254 | 100 + | 1   | 254 | 96279  | 96532  |
| UN61127 | Rsa1.0_00017.1 | 844 | 752458 | 0         | 602 | 616 | 97 -  | 230 | 844 | 361144 | 361750 |
| UN61128 | #              | #   | #      | #         | #   | #   | #     | #   | #   | #      | #      |
| UN61129 | Rsa1.0_00589.1 | 507 | 209965 | 0         | 412 | 433 | 95 -  | 51  | 483 | 152952 | 153380 |
| UN61130 | Rsa1.0_02200.1 | 535 | 33981  | 1.00E-144 | 311 | 328 | 94 -  | 1   | 323 | 10438  | 10765  |
| UN61131 | Rsa1.0_00271.1 | 217 | 101125 | 5.00E-49  | 118 | 123 | 95 +  | 8   | 129 | 36543  | 36665  |
| UN61132 | Rsa1.0_02392.1 | 101 | 152517 | 1.00E-29  | 91  | 98  | 92 -  | 5   | 101 | 30307  | 30404  |
| UN61133 | Rsa1.0_01480.1 | 300 | 44926  | 7.00E-92  | 192 | 199 | 96 +  | 5   | 203 | 25898  | 26096  |
| UN61134 | Rsa1.0_01719.1 | 231 | 40388  | 3.00E-69  | 180 | 192 | 93 +  | 1   | 190 | 27275  | 27464  |
| UN61135 | Rsa1.0_00007.1 | 494 | 239325 | 2.00E-72  | 291 | 341 | 85 +  | 38  | 375 | 113866 | 114206 |
| UN61136 | Rsa1.0_00915.1 | 779 | 194446 | 0         | 673 | 681 | 98 -  | 35  | 714 | 25647  | 26327  |
| UN61137 | Rsa1.0_01732.1 | 808 | 40194  | 0         | 487 | 492 | 98 -  | 2   | 493 | 31382  | 31873  |
| UN61138 | Rsa1.0_00116.1 | 511 | 365886 | 1.00E-107 | 235 | 245 | 95 -  | 1   | 244 | 36206  | 36449  |
| UN61139 | Rsa1.0_00072.1 | 758 | 148743 | 0         | 633 | 650 | 97 -  | 62  | 710 | 65398  | 66047  |
| UN61140 | Rsa1.0_45149.1 | 792 | 499    | 0         | 499 | 499 | 100 - | 54  | 552 | 1      | 499    |
| UN61141 | Rsa1.0_03754.1 | 768 | 21005  | 0         | 346 | 347 | 99 +  | 1   | 347 | 6399   | 6745   |
| UN61142 | Rsa1.0_05473.1 | 272 | 13628  | 3.00E-72  | 171 | 182 | 93 -  | 1   | 182 | 11693  | 11874  |
| UN61143 | Rsa1.0_00052.1 | 583 | 162771 | 1.00E-107 | 249 | 265 | 93 +  | 13  | 275 | 52254  | 52518  |
| UN61144 | Rsa1.0_00323.1 | 780 | 159650 | 1.00E-113 | 357 | 406 | 87 -  | 26  | 409 | 43841  | 44246  |
| UN61145 | Rsa1.0_02057.1 | 395 | 35540  | 1.00E-121 | 356 | 402 | 88 -  | 12  | 395 | 22962  | 23358  |
| UN61146 | #              | #   | #      | #         | #   | #   | #     | #   | #   | #      | #      |
| UN61147 | Rsa1.0_00198.1 | 107 | 222963 | 2.00E-37  | 100 | 107 | 93 +  | 1   | 107 | 171485 | 171591 |
| UN61148 | Rsa1.0_41755.1 | 890 | 538    | 3.00E-72  | 171 | 179 | 95 -  | 190 | 366 | 360    | 538    |
| UN61149 | Rsa1.0_00065.1 | 527 | 454616 | 1.00E-45  | 94  | 94  | 100 - | 170 | 263 | 194572 | 194665 |
| UN61150 | Rsa1.0_05956.1 | 749 | 12111  | 2.00E-97  | 203 | 208 | 97 -  | 545 | 749 | 3273   | 3480   |

|         |                |     |        |           |     |     |      |     |     |        |        |
|---------|----------------|-----|--------|-----------|-----|-----|------|-----|-----|--------|--------|
| UN61151 | Rsa1.0_09069.1 | 319 | 6671   | 1.00E-156 | 311 | 319 | 97 + | 1   | 319 | 2868   | 3184   |
| UN61152 | Rsa1.0_02953.1 | 228 | 26487  | 2.00E-27  | 121 | 139 | 87 + | 10  | 147 | 18665  | 18803  |
| UN61153 | Rsa1.0_00080.1 | 479 | 190437 | 0         | 458 | 475 | 96 - | 5   | 479 | 81448  | 81919  |
| UN61154 | Rsa1.0_00802.1 | 516 | 63846  | 0         | 513 | 516 | 99 + | 1   | 516 | 40789  | 41302  |
| UN61155 | Rsa1.0_01857.1 | 429 | 38103  | 0         | 408 | 435 | 93 - | 4   | 429 | 2912   | 3346   |
| UN61156 | Rsa1.0_05622.1 | 580 | 13145  | 1.00E-169 | 311 | 314 | 99 - | 1   | 314 | 8790   | 9103   |
| UN61157 | Rsa1.0_00165.1 | 257 | 116466 | 2.00E-76  | 166 | 173 | 95 + | 84  | 256 | 26984  | 27156  |
| UN61158 | Rsa1.0_00205.1 | 139 | 193401 | 3.00E-61  | 134 | 139 | 96 - | 1   | 139 | 112462 | 112600 |
| UN61159 | Rsa1.0_01567.1 | 362 | 43090  | 0         | 353 | 362 | 97 + | 1   | 362 | 19941  | 20302  |
| UN61160 | Rsa1.0_00092.1 | 142 | 659932 | 8.00E-56  | 134 | 142 | 94 + | 1   | 142 | 175751 | 175892 |
| UN61161 | Rsa1.0_01971.1 | 848 | 36641  | 0         | 504 | 525 | 96 - | 326 | 846 | 19990  | 20514  |
| UN61162 | Rsa1.0_03185.1 | 210 | 24739  | 5.00E-27  | 77  | 82  | 93 + | 129 | 210 | 3733   | 3814   |
| UN61163 | Rsa1.0_00165.1 | 726 | 116466 | 0         | 543 | 566 | 95 - | 163 | 726 | 2487   | 3049   |
| UN61164 | Rsa1.0_01274.1 | 770 | 49419  | 1.00E-101 | 204 | 210 | 97 + | 1   | 204 | 26518  | 26727  |
| UN61165 | Rsa1.0_01920.1 | 555 | 158533 | 9.00E-96  | 269 | 297 | 90 - | 243 | 539 | 151926 | 152219 |
| UN61166 | Rsa1.0_00008.1 | 679 | 358124 | 0         | 634 | 679 | 93 - | 1   | 676 | 12064  | 12717  |
| UN61167 | Rsa1.0_00153.1 | 221 | 192931 | 3.00E-35  | 94  | 100 | 94 - | 14  | 113 | 168501 | 168600 |
| UN61168 | Rsa1.0_00005.1 | 827 | 353093 | 1.00E-123 | 299 | 328 | 91 + | 4   | 313 | 122040 | 122367 |
| UN61169 | Rsa1.0_00049.1 | 586 | 167018 | 0         | 570 | 593 | 96 + | 1   | 586 | 7069   | 7660   |
| UN61170 | Rsa1.0_02695.1 | 623 | 28605  | 0         | 439 | 459 | 95 + | 165 | 623 | 7947   | 8402   |
| UN61171 | Rsa1.0_05429.1 | 719 | 13781  | 1.00E-174 | 332 | 337 | 98 - | 34  | 368 | 12232  | 12568  |
| UN61172 | Rsa1.0_00632.1 | 723 | 183777 | 0         | 526 | 530 | 99 - | 1   | 528 | 161405 | 161934 |
| UN61173 | Rsa1.0_23784.1 | 558 | 1025   | 0         | 555 | 558 | 99 - | 1   | 558 | 333    | 890    |
| UN61174 | Rsa1.0_02924.1 | 328 | 26736  | 1.00E-178 | 325 | 328 | 99 - | 1   | 328 | 9089   | 9416   |
| UN61175 | Rsa1.0_00464.1 | 692 | 82253  | 1.00E-52  | 133 | 142 | 93 - | 153 | 294 | 60279  | 60420  |
| UN61176 | Rsa1.0_00873.1 | 614 | 61459  | 0         | 458 | 485 | 94 - | 23  | 507 | 46323  | 46802  |
| UN61177 | Rsa1.0_00725.1 | 698 | 66757  | 5.00E-58  | 124 | 127 | 97 - | 422 | 548 | 44602  | 44728  |
| UN61178 | Rsa1.0_00485.1 | 761 | 80937  | 1.00E-159 | 316 | 324 | 97 + | 2   | 324 | 71021  | 71343  |
| UN61179 | Rsa1.0_00003.1 | 708 | 340054 | 0         | 707 | 708 | 99 + | 1   | 708 | 53832  | 54539  |
| UN61180 | Rsa1.0_03346.1 | 217 | 23589  | 1.00E-104 | 210 | 215 | 97 - | 1   | 214 | 10818  | 11032  |
| UN61181 | Rsa1.0_01340.1 | 518 | 47805  | 0         | 505 | 518 | 97 + | 1   | 518 | 24173  | 24687  |
| UN61182 | Rsa1.0_07973.1 | 654 | 8149   | 0         | 582 | 614 | 94 - | 1   | 609 | 7285   | 7889   |
| UN61183 | Rsa1.0_00812.1 | 674 | 63233  | 1.00E-165 | 341 | 358 | 95 - | 293 | 641 | 13929  | 14286  |
| UN61184 | Rsa1.0_02381.1 | 798 | 31972  | 6.00E-73  | 247 | 282 | 87 + | 392 | 661 | 17365  | 17645  |
| UN61185 | Rsa1.0_00002.1 | 745 | 601661 | 2.00E-57  | 293 | 352 | 83 + | 394 | 745 | 538878 | 539226 |
| UN61186 | Rsa1.0_02200.1 | 571 | 33981  | 1.00E-177 | 338 | 345 | 97 - | 2   | 344 | 15144  | 15488  |
| UN61187 | Rsa1.0_01519.1 | 561 | 44144  | 0         | 552 | 561 | 98 - | 1   | 561 | 37613  | 38173  |
| UN61188 | Rsa1.0_00628.1 | 674 | 214360 | 1.00E-165 | 303 | 306 | 99 + | 369 | 674 | 185087 | 185392 |
| UN61189 | Rsa1.0_04557.1 | 785 | 145048 | 0         | 432 | 457 | 94 + | 1   | 455 | 135292 | 135731 |

|         |                |     |        |           |     |     |       |     |     |        |        |
|---------|----------------|-----|--------|-----------|-----|-----|-------|-----|-----|--------|--------|
| UN61190 | Rsa1.0.00991.1 | 770 | 143101 | 0         | 577 | 623 | 92 -  | 4   | 599 | 29619  | 30240  |
| UN61191 | Rsa1.0.00708.1 | 603 | 67366  | 0         | 441 | 465 | 94 -  | 12  | 473 | 63092  | 63551  |
| UN61192 | Rsa1.0.01696.1 | 761 | 301850 | 0         | 735 | 744 | 98 -  | 18  | 761 | 144528 | 145271 |
| UN61193 | Rsa1.0.11955.1 | 464 | 5361   | 1.00E-106 | 207 | 211 | 98 -  | 223 | 433 | 1069   | 1279   |
| UN61194 | Rsa1.0.00482.1 | 758 | 81162  | 0         | 758 | 759 | 99 -  | 1   | 758 | 20069  | 20827  |
| UN61195 | Rsa1.0.00601.1 | 717 | 177045 | 0         | 414 | 416 | 99 +  | 302 | 717 | 135013 | 135428 |
| UN61196 | Rsa1.0.01015.1 | 330 | 56752  | 3.00E-76  | 184 | 194 | 94 +  | 1   | 193 | 10119  | 10307  |
| UN61197 | Rsa1.0.05533.1 | 684 | 13402  | 0         | 501 | 520 | 96 -  | 1   | 514 | 11345  | 11863  |
| UN61198 | Rsa1.0.00719.1 | 168 | 66952  | 1.00E-73  | 161 | 168 | 95 -  | 1   | 168 | 25736  | 25903  |
| UN61199 | Rsa1.0.06900.1 | 294 | 131268 | 1.00E-62  | 146 | 154 | 94 +  | 1   | 154 | 130101 | 130254 |
| UN61200 | Rsa1.0.11946.1 | 758 | 5364   | 1.00E-162 | 352 | 367 | 95 -  | 1   | 364 | 6      | 368    |
| UN61201 | Rsa1.0.01803.1 | 818 | 173846 | 1.00E-55  | 142 | 152 | 93 +  | 209 | 356 | 19794  | 19945  |
| UN61202 | Rsa1.0.02414.1 | 570 | 31625  | 0         | 481 | 493 | 97 +  | 1   | 492 | 29334  | 29824  |
| UN61203 | Rsa1.0.05636.1 | 744 | 13111  | 0         | 437 | 446 | 97 -  | 59  | 498 | 1103   | 1548   |
| UN61204 | Rsa1.0.06604.1 | 718 | 10681  | 1.00E-174 | 338 | 345 | 97 +  | 1   | 344 | 8388   | 8730   |
| UN61205 | Rsa1.0.00015.1 | 465 | 561803 | 0         | 428 | 450 | 95 +  | 1   | 448 | 171291 | 171737 |
| UN61206 | Rsa1.0.03185.1 | 693 | 24739  | 1.00E-151 | 315 | 327 | 96 -  | 1   | 326 | 3304   | 3629   |
| UN61207 | Rsa1.0.20735.1 | 132 | 1275   | 1.00E-32  | 81  | 83  | 97 +  | 50  | 132 | 142    | 223    |
| UN61208 | Rsa1.0.05159.1 | 737 | 14642  | 0         | 453 | 463 | 97 -  | 3   | 465 | 8745   | 9202   |
| UN61209 | Rsa1.0.00008.1 | 228 | 358124 | 3.00E-35  | 174 | 202 | 86 +  | 30  | 228 | 66022  | 66220  |
| UN61210 | Rsa1.0.01805.1 | 217 | 39024  | 1.00E-43  | 193 | 221 | 87 -  | 1   | 217 | 28933  | 29146  |
| UN61211 | Rsa1.0.00250.1 | 319 | 273771 | 1.00E-179 | 317 | 317 | 100 - | 3   | 319 | 212384 | 212700 |
| UN61212 | Rsa1.0.13786.1 | 321 | 4339   | 8.00E-98  | 193 | 197 | 97 -  | 2   | 198 | 1      | 197    |
| UN61213 | Rsa1.0.01081.1 | 710 | 499226 | 1.00E-178 | 374 | 390 | 95 +  | 3   | 386 | 318641 | 319030 |
| UN61214 | Rsa1.0.00019.1 | 670 | 301669 | 0         | 669 | 671 | 99 -  | 1   | 670 | 173622 | 174292 |
| UN61215 | Rsa1.0.00417.1 | 776 | 395068 | 1.00E-120 | 271 | 285 | 95 -  | 4   | 282 | 223890 | 224174 |
| UN61216 | Rsa1.0.01529.1 | 392 | 43871  | 2.00E-74  | 142 | 142 | 100 - | 170 | 311 | 34058  | 34199  |
| UN61217 | Rsa1.0.00083.1 | 658 | 442773 | 1.00E-155 | 314 | 325 | 96 +  | 335 | 658 | 382574 | 382898 |
| UN61218 | Rsa1.0.02901.1 | 671 | 26909  | 1.00E-118 | 230 | 235 | 97 -  | 437 | 671 | 12403  | 12637  |
| UN61219 | Rsa1.0.00196.1 | 665 | 109960 | 1.00E-92  | 193 | 199 | 96 +  | 155 | 353 | 72042  | 72237  |
| UN61220 | Rsa1.0.00018.1 | 719 | 410899 | 1.00E-106 | 217 | 224 | 96 +  | 91  | 310 | 70285  | 70508  |
| UN61221 | Rsa1.0.00099.1 | 798 | 159619 | 0         | 762 | 781 | 97 +  | 2   | 775 | 127202 | 127981 |
| UN61222 | Rsa1.0.00064.1 | 185 | 240927 | 3.00E-74  | 179 | 185 | 96 +  | 6   | 185 | 28838  | 29022  |
| UN61223 | Rsa1.0.09261.1 | 684 | 6521   | 0         | 639 | 683 | 93 -  | 1   | 675 | 63     | 744    |
| UN61224 | Rsa1.0.00696.1 | 595 | 68010  | 0         | 587 | 595 | 98 +  | 1   | 595 | 9414   | 10008  |
| UN61225 | Rsa1.0.00277.1 | 716 | 100132 | 1.00E-117 | 258 | 271 | 95 -  | 445 | 714 | 88459  | 88725  |
| UN61226 | Rsa1.0.18738.1 | 503 | 1544   | 1.00E-153 | 305 | 315 | 96 -  | 128 | 442 | 1      | 315    |
| UN61227 | Rsa1.0.00709.1 | 751 | 67329  | 0         | 719 | 751 | 95 -  | 2   | 751 | 31970  | 32720  |
| UN61228 | Rsa1.0.01329.1 | 723 | 47982  | 0         | 715 | 720 | 99 -  | 5   | 723 | 30554  | 31271  |

|         |                |     |        |           |     |     |       |     |     |        |        |
|---------|----------------|-----|--------|-----------|-----|-----|-------|-----|-----|--------|--------|
| UN61229 | Rsa1.0.00533.1 | 628 | 77375  | 1.00E-113 | 208 | 208 | 100 - | 3   | 210 | 55493  | 55700  |
| UN61230 | Rsa1.0.02237.1 | 779 | 33544  | 0         | 582 | 590 | 98 -  | 2   | 591 | 21052  | 21641  |
| UN61231 | Rsa1.0.00515.1 | 741 | 78417  | 0         | 553 | 617 | 89 +  | 125 | 741 | 16118  | 16734  |
| UN61232 | Rsa1.0.00758.1 | 429 | 65477  | 0         | 354 | 355 | 99 -  | 75  | 429 | 36596  | 36950  |
| UN61233 | Rsa1.0.02675.1 | 526 | 28852  | 2.00E-72  | 142 | 143 | 99 -  | 148 | 290 | 17929  | 18071  |
| UN61234 | Rsa1.0.00101.1 | 753 | 267193 | 1.00E-131 | 252 | 257 | 98 -  | 108 | 364 | 121172 | 121428 |
| UN61235 | Rsa1.0.02360.1 | 692 | 32203  | 0         | 335 | 338 | 99 -  | 190 | 527 | 14177  | 14514  |
| UN61236 | Rsa1.0.08927.1 | 473 | 6782   | 2.33E-156 | 327 | 342 | 95 +  | 132 | 473 | 77     | 413    |
| UN61237 | Rsa1.0.08242.1 | 702 | 7667   | 0         | 572 | 633 | 90 +  | 35  | 650 | 1061   | 1684   |
| UN61238 | Rsa1.0.00737.1 | 696 | 66432  | 0         | 362 | 370 | 97 +  | 328 | 696 | 2636   | 3005   |
| UN61239 | Rsa1.0.01078.1 | 733 | 316910 | 0         | 570 | 603 | 94 +  | 3   | 598 | 131615 | 132217 |
| UN61240 | Rsa1.0.75906.1 | 428 | 302    | 1.00E-161 | 297 | 300 | 99 +  | 118 | 417 | 3      | 302    |
| UN61241 | Rsa1.0.01208.1 | 652 | 50718  | 0         | 497 | 547 | 90 -  | 1   | 538 | 9393   | 9935   |
| UN61242 | Rsa1.0.04415.1 | 739 | 147889 | 0         | 605 | 632 | 95 -  | 3   | 625 | 138725 | 139353 |
| UN61243 | Rsa1.0.00241.1 | 501 | 104000 | 1.00E-63  | 124 | 124 | 100 + | 165 | 288 | 34619  | 34742  |
| UN61244 | Rsa1.0.04103.1 | 283 | 19048  | 1.00E-126 | 275 | 287 | 95 +  | 1   | 283 | 14018  | 14304  |
| UN61245 | Rsa1.0.00576.1 | 672 | 178949 | 2.33E-156 | 268 | 270 | 99 +  | 403 | 672 | 160143 | 160412 |
| UN61246 | Rsa1.0.06010.1 | 740 | 11944  | 0         | 591 | 669 | 88 +  | 4   | 672 | 4866   | 5534   |
| UN61247 | Rsa1.0.00114.1 | 685 | 131330 | 0         | 374 | 375 | 99 +  | 169 | 543 | 117141 | 117515 |
| UN61248 | Rsa1.0.02969.1 | 701 | 26390  | 0         | 354 | 356 | 99 -  | 4   | 359 | 7245   | 7600   |
| UN61249 | Rsa1.0.49549.1 | 366 | 458    | 9.00E-55  | 109 | 109 | 100 + | 258 | 366 | 75     | 183    |
| UN61250 | Rsa1.0.01864.1 | 524 | 37998  | 0         | 415 | 416 | 99 -  | 91  | 506 | 36817  | 37232  |
| UN61251 | Rsa1.0.03325.1 | 396 | 23720  | 1.00E-149 | 312 | 324 | 96 -  | 74  | 395 | 14655  | 14978  |
| UN61252 | Rsa1.0.03260.1 | 792 | 24284  | 0         | 775 | 789 | 98 -  | 2   | 783 | 16915  | 17703  |
| UN61253 | Rsa1.0.00977.1 | 630 | 198001 | 5.00E-73  | 140 | 140 | 100 - | 304 | 443 | 2552   | 2691   |
| UN61254 | Rsa1.0.05574.1 | 694 | 13290  | 1.00E-21  | 84  | 93  | 90 -  | 530 | 620 | 3818   | 3910   |
| UN61255 | Rsa1.0.00081.1 | 656 | 143261 | 1.00E-108 | 233 | 243 | 95 -  | 395 | 637 | 130155 | 130396 |
| UN61256 | Rsa1.0.00185.1 | 673 | 248445 | 1.00E-113 | 210 | 211 | 99 -  | 125 | 335 | 171501 | 171711 |
| UN61257 | Rsa1.0.00250.1 | 734 | 273771 | 1.00E-172 | 390 | 414 | 94 -  | 2   | 412 | 257782 | 258184 |
| UN61258 | Rsa1.0.03826.1 | 708 | 20614  | 1.00E-120 | 250 | 259 | 96 +  | 1   | 259 | 13356  | 13607  |
| UN61259 | Rsa1.0.02097.1 | 385 | 35036  | 1.00E-112 | 239 | 250 | 95 +  | 73  | 322 | 7689   | 7938   |
| UN61260 | Rsa1.0.25909.1 | 718 | 914    | 8.00E-66  | 128 | 128 | 100 + | 76  | 203 | 485    | 612    |
| UN61261 | Rsa1.0.00539.1 | 750 | 76926  | 0         | 503 | 507 | 99 -  | 2   | 507 | 57741  | 58246  |
| UN61262 | Rsa1.0.00418.1 | 615 | 215377 | 1.00E-173 | 323 | 328 | 98 +  | 10  | 337 | 215050 | 215377 |
| UN61263 | Rsa1.0.06071.1 | 544 | 11813  | 0         | 540 | 541 | 99 +  | 4   | 544 | 6536   | 7076   |
| UN61264 | Rsa1.0.06047.1 | 350 | 11854  | 1.00E-149 | 297 | 307 | 96 -  | 10  | 316 | 6559   | 6865   |
| UN61265 | Rsa1.0.02125.1 | 398 | 34775  | 1.00E-111 | 235 | 243 | 96 +  | 157 | 398 | 22292  | 22532  |
| UN61266 | Rsa1.0.00907.1 | 710 | 60062  | 0         | 616 | 635 | 97 +  | 3   | 633 | 54598  | 55232  |
| UN61267 | Rsa1.0.01439.1 | 270 | 45841  | 1.00E-144 | 267 | 270 | 98 +  | 1   | 270 | 40523  | 40792  |

|         |                |     |        |           |     |     |       |     |     |        |        |
|---------|----------------|-----|--------|-----------|-----|-----|-------|-----|-----|--------|--------|
| UN61268 | Rsa1.0.03602.1 | 809 | 21847  | 1.00E-170 | 303 | 303 | 100 - | 313 | 615 | 9409   | 9711   |
| UN61269 | Rsa1.0.00722.1 | 624 | 66840  | 0         | 486 | 504 | 96 -  | 9   | 512 | 51177  | 51680  |
| UN61270 | Rsa1.0.13896.1 | 651 | 4134   | 0         | 613 | 631 | 97 +  | 21  | 651 | 1      | 630    |
| UN61271 | Rsa1.0.05544.1 | 817 | 13381  | 1.00E-140 | 287 | 296 | 96 -  | 376 | 669 | 7514   | 7809   |
| UN61272 | Rsa1.0.00280.1 | 777 | 99966  | 7.00E-79  | 160 | 162 | 98 -  | 3   | 163 | 14592  | 14753  |
| UN61273 | Rsa1.0.00243.1 | 795 | 103651 | 1.00E-139 | 260 | 263 | 98 +  | 355 | 617 | 24613  | 24875  |
| UN61274 | Rsa1.0.00833.1 | 404 | 62621  | 0         | 378 | 393 | 96 -  | 1   | 393 | 33090  | 33481  |
| UN61275 | Rsa1.0.00476.1 | 602 | 280966 | 1.00E-126 | 252 | 259 | 97 +  | 3   | 258 | 21243  | 21501  |
| UN61276 | Rsa1.0.00438.1 | 766 | 84861  | 1.00E-147 | 289 | 297 | 97 -  | 245 | 541 | 16571  | 16867  |
| UN61277 | Rsa1.0.09211.1 | 529 | 6556   | 8.00E-87  | 166 | 167 | 99 -  | 172 | 338 | 4351   | 4517   |
| UN61278 | Rsa1.0.00488.1 | 681 | 80490  | 2.00E-81  | 154 | 154 | 100 - | 413 | 566 | 77670  | 77823  |
| UN61279 | Rsa1.0.00025.1 | 754 | 277312 | 1.00E-175 | 315 | 316 | 99 +  | 219 | 534 | 225933 | 226248 |
| UN61280 | Rsa1.0.00448.1 | 696 | 84048  | 0         | 648 | 668 | 97 -  | 5   | 666 | 492    | 1151   |
| UN61281 | Rsa1.0.00028.1 | 713 | 293984 | 2.00E-66  | 129 | 129 | 100 - | 402 | 530 | 22905  | 23033  |
| UN61282 | Rsa1.0.01456.1 | 769 | 45372  | 0         | 744 | 749 | 99 -  | 2   | 750 | 21422  | 22169  |
| UN61283 | Rsa1.0.04445.1 | 137 | 17319  | 8.00E-22  | 100 | 113 | 88 +  | 8   | 118 | 506    | 618    |
| UN61284 | Rsa1.0.00100.1 | 657 | 249232 | 0         | 633 | 654 | 96 -  | 4   | 657 | 31430  | 32083  |
| UN61285 | Rsa1.0.07413.1 | 752 | 9438   | 0         | 377 | 380 | 99 -  | 374 | 752 | 988    | 1367   |
| UN61286 | Rsa1.0.00355.1 | 684 | 92038  | 0         | 516 | 564 | 91 -  | 128 | 682 | 77886  | 78429  |
| UN61287 | Rsa1.0.02962.1 | 702 | 26419  | 0         | 424 | 429 | 98 +  | 272 | 700 | 9363   | 9791   |
| UN61288 | Rsa1.0.00864.1 | 690 | 61702  | 1.00E-104 | 208 | 213 | 97 -  | 61  | 273 | 9748   | 9960   |
| UN61289 | Rsa1.0.00958.1 | 724 | 58243  | 0         | 358 | 361 | 99 -  | 140 | 500 | 29100  | 29460  |
| UN61290 | Rsa1.0.00421.1 | 691 | 86365  | 1.00E-100 | 209 | 217 | 96 +  | 260 | 476 | 67757  | 67973  |
| UN61291 | Rsa1.0.05559.1 | 608 | 13329  | 0         | 385 | 387 | 99 +  | 222 | 608 | 1716   | 2102   |
| UN61292 | Rsa1.0.00033.1 | 680 | 515811 | 0         | 529 | 589 | 89 -  | 1   | 583 | 18285  | 18844  |
| UN61293 | Rsa1.0.00341.1 | 698 | 249309 | 1.00E-137 | 356 | 394 | 90 +  | 317 | 689 | 68303  | 68696  |
| UN61294 | Rsa1.0.00423.1 | 555 | 86138  | 0         | 465 | 466 | 99 -  | 90  | 555 | 23288  | 23753  |
| UN61295 | Rsa1.0.00131.1 | 807 | 432233 | 1.00E-156 | 351 | 368 | 95 +  | 444 | 806 | 96212  | 96575  |
| UN61296 | Rsa1.0.01217.1 | 761 | 50554  | 2.33E-156 | 286 | 290 | 98 -  | 470 | 757 | 21170  | 21458  |
| UN61297 | Rsa1.0.02991.1 | 664 | 26178  | 0         | 638 | 674 | 94 -  | 2   | 664 | 20730  | 21390  |
| UN61298 | Rsa1.0.00062.1 | 775 | 299291 | 2.00E-72  | 500 | 608 | 82 +  | 46  | 647 | 37611  | 38211  |
| UN61299 | Rsa1.0.04260.1 | 683 | 18238  | 1.00E-100 | 196 | 198 | 98 +  | 383 | 579 | 1357   | 1554   |
| UN61300 | Rsa1.0.00657.1 | 391 | 69858  | 1.00E-173 | 310 | 311 | 99 +  | 81  | 391 | 9477   | 9787   |
| UN61301 | Rsa1.0.01440.1 | 788 | 45807  | 1.00E-89  | 168 | 168 | 100 - | 370 | 537 | 1444   | 1611   |
| UN61302 | Rsa1.0.01216.1 | 580 | 50580  | 0         | 439 | 445 | 98 -  | 2   | 445 | 46257  | 46701  |
| UN61303 | Rsa1.0.18414.1 | 815 | 1603   | 0         | 683 | 742 | 92 +  | 5   | 745 | 464    | 1203   |
| UN61304 | Rsa1.0.02872.1 | 721 | 27080  | 0         | 493 | 498 | 98 -  | 226 | 721 | 23276  | 23773  |
| UN61305 | #              | #   | #      | #         | #   | #   | #     | #   | #   | #      | #      |
| UN61306 | Rsa1.0.00026.1 | 698 | 327835 | 6.00E-85  | 181 | 188 | 96 -  | 2   | 189 | 284442 | 284629 |

|         |                |     |        |           |     |     |       |     |     |        |        |
|---------|----------------|-----|--------|-----------|-----|-----|-------|-----|-----|--------|--------|
| UN61307 | Rsa1.0.05977.1 | 641 | 12056  | 0         | 366 | 367 | 99 -  | 3   | 369 | 5863   | 6229   |
| UN61308 | Rsa1.0.01026.1 | 666 | 171624 | 0         | 661 | 664 | 99 -  | 3   | 666 | 14383  | 15046  |
| UN61309 | Rsa1.0.00255.1 | 774 | 204967 | 0         | 409 | 427 | 95 -  | 3   | 428 | 178444 | 178870 |
| UN61310 | Rsa1.0.00903.1 | 830 | 60228  | 0         | 452 | 461 | 98 +  | 5   | 465 | 37466  | 37926  |
| UN61311 | Rsa1.0.00872.1 | 609 | 61495  | 0         | 367 | 376 | 97 +  | 234 | 609 | 18906  | 19276  |
| UN61312 | Rsa1.0.01400.1 | 671 | 46560  | 1.00E-162 | 317 | 326 | 97 +  | 198 | 523 | 24689  | 25014  |
| UN61313 | Rsa1.0.09006.1 | 820 | 6715   | 0         | 388 | 393 | 98 +  | 355 | 745 | 3234   | 3626   |
| UN61314 | Rsa1.0.05549.1 | 675 | 13366  | 1.00E-143 | 277 | 282 | 98 -  | 395 | 675 | 12796  | 13077  |
| UN61315 | Rsa1.0.00411.1 | 531 | 86944  | 6.00E-97  | 182 | 183 | 99 +  | 300 | 482 | 61796  | 61978  |
| UN61316 | Rsa1.0.00015.1 | 494 | 561803 | 0         | 493 | 494 | 99 -  | 1   | 494 | 40344  | 40837  |
| UN61317 | Rsa1.0.05574.1 | 780 | 13290  | 7.00E-48  | 185 | 214 | 86 -  | 328 | 541 | 3509   | 3722   |
| UN61318 | Rsa1.0.00743.1 | 448 | 177459 | 0         | 437 | 448 | 97 +  | 1   | 448 | 14732  | 15177  |
| UN61319 | Rsa1.0.00790.1 | 262 | 148693 | 5.00E-80  | 151 | 151 | 100 + | 112 | 262 | 141939 | 142089 |
| UN61320 | Rsa1.0.06220.1 | 679 | 11459  | 0         | 638 | 642 | 99 -  | 2   | 643 | 1      | 642    |
| UN61321 | Rsa1.0.00486.1 | 677 | 80875  | 0         | 565 | 569 | 99 +  | 109 | 677 | 13777  | 14345  |
| UN61322 | Rsa1.0.00951.1 | 697 | 164588 | 1.00E-131 | 285 | 298 | 95 +  | 397 | 693 | 114506 | 114802 |
| UN61323 | Rsa1.0.05063.1 | 597 | 14951  | 0         | 478 | 483 | 98 -  | 104 | 586 | 13507  | 13989  |
| UN61324 | Rsa1.0.01848.1 | 619 | 38312  | 1.00E-134 | 242 | 242 | 100 + | 378 | 619 | 2393   | 2634   |
| UN61325 | Rsa1.0.02346.1 | 583 | 32337  | 0         | 334 | 337 | 99 -  | 248 | 583 | 6774   | 7110   |
| UN61326 | Rsa1.0.00426.1 | 729 | 85668  | 1.00E-109 | 231 | 241 | 95 -  | 64  | 304 | 30922  | 31162  |
| UN61327 | Rsa1.0.10042.1 | 350 | 6027   | 1.00E-128 | 232 | 232 | 100 - | 119 | 350 | 255    | 486    |
| UN61328 | Rsa1.0.02544.1 | 674 | 30290  | 0         | 673 | 675 | 99 -  | 1   | 674 | 4217   | 4891   |
| UN61329 | Rsa1.0.00180.1 | 530 | 114581 | 1.00E-102 | 192 | 193 | 99 -  | 338 | 530 | 20941  | 21133  |
| UN61330 | Rsa1.0.06976.1 | 604 | 10073  | 0         | 570 | 605 | 94 -  | 1   | 604 | 3018   | 3621   |
| UN61331 | Rsa1.0.01947.1 | 770 | 36977  | 0         | 554 | 558 | 99 +  | 214 | 770 | 11800  | 12357  |
| UN61332 | Rsa1.0.03694.1 | 677 | 21336  | 0         | 331 | 331 | 100 + | 347 | 677 | 358    | 688    |
| UN61333 | Rsa1.0.03055.1 | 734 | 25730  | 0         | 409 | 418 | 97 +  | 315 | 726 | 1162   | 1579   |
| UN61334 | Rsa1.0.00191.1 | 817 | 316976 | 0         | 409 | 423 | 96 -  | 271 | 685 | 259269 | 259691 |
| UN61335 | Rsa1.0.00067.1 | 662 | 415055 | 2.00E-87  | 170 | 172 | 98 -  | 18  | 189 | 255703 | 255874 |
| UN61336 | Rsa1.0.17307.1 | 484 | 1864   | 0         | 481 | 483 | 99 -  | 2   | 484 | 1298   | 1779   |
| UN61337 | Rsa1.0.00214.1 | 769 | 107508 | 1.00E-175 | 447 | 492 | 90 +  | 274 | 765 | 55299  | 55790  |
| UN61338 | Rsa1.0.00318.1 | 638 | 96094  | 1.00E-174 | 312 | 313 | 99 +  | 256 | 568 | 85764  | 86076  |
| UN61339 | Rsa1.0.00018.1 | 797 | 410899 | 0         | 398 | 399 | 99 +  | 196 | 594 | 194358 | 194756 |
| UN61340 | Rsa1.0.00798.1 | 722 | 63945  | 1.00E-120 | 242 | 247 | 97 +  | 476 | 720 | 43753  | 43999  |
| UN61341 | Rsa1.0.00803.1 | 756 | 144228 | 0         | 519 | 537 | 96 +  | 209 | 737 | 51745  | 52281  |
| UN61342 | Rsa1.0.01338.1 | 253 | 155644 | 4.00E-65  | 154 | 164 | 93 -  | 3   | 166 | 154523 | 154679 |
| UN61343 | Rsa1.0.01182.1 | 763 | 167304 | 3.00E-81  | 163 | 166 | 98 -  | 62  | 227 | 157803 | 157968 |
| UN61344 | Rsa1.0.03279.1 | 798 | 24115  | 1.00E-159 | 334 | 341 | 97 -  | 458 | 791 | 14893  | 15233  |
| UN61345 | Rsa1.0.39408.1 | 762 | 571    | 0         | 457 | 463 | 98 -  | 2   | 459 | 87     | 549    |

|         |                |     |        |           |     |     |       |     |     |        |        |
|---------|----------------|-----|--------|-----------|-----|-----|-------|-----|-----|--------|--------|
| UN61346 | Rsa1.0.00018.1 | 758 | 410899 | 0         | 410 | 413 | 99 +  | 338 | 748 | 56058  | 56470  |
| UN61347 | Rsa1.0.02365.1 | 731 | 32118  | 1.00E-153 | 277 | 278 | 99 +  | 1   | 278 | 11143  | 11420  |
| UN61348 | Rsa1.0.00917.1 | 437 | 182012 | 1.00E-149 | 268 | 268 | 100 - | 2   | 269 | 5819   | 6086   |
| UN61349 | Rsa1.0.00719.1 | 735 | 66952  | 1.00E-125 | 239 | 243 | 98 +  | 264 | 506 | 62444  | 62686  |
| UN61350 | Rsa1.0.00935.1 | 371 | 59079  | 1.00E-78  | 167 | 173 | 96 -  | 46  | 218 | 57646  | 57818  |
| UN61351 | Rsa1.0.06248.1 | 664 | 11394  | 0         | 338 | 339 | 99 -  | 11  | 349 | 5811   | 6149   |
| UN61352 | Rsa1.0.01721.1 | 725 | 40345  | 0         | 331 | 331 | 100 + | 385 | 715 | 24212  | 24542  |
| UN61353 | Rsa1.0.03292.1 | 520 | 23977  | 0         | 405 | 422 | 95 +  | 2   | 421 | 11789  | 12208  |
| UN61354 | Rsa1.0.00699.1 | 496 | 184398 | 2.00E-72  | 151 | 155 | 97 +  | 157 | 311 | 10559  | 10713  |
| UN61355 | Rsa1.0.00661.1 | 736 | 213041 | 8.00E-60  | 121 | 122 | 99 -  | 13  | 134 | 56382  | 56503  |
| UN61356 | Rsa1.0.02667.1 | 695 | 28910  | 0         | 678 | 695 | 97 +  | 1   | 695 | 10155  | 10848  |
| UN61357 | Rsa1.0.01945.1 | 665 | 36989  | 0         | 488 | 513 | 95 +  | 156 | 665 | 4104   | 4607   |
| UN61358 | Rsa1.0.01184.1 | 800 | 51452  | 0         | 380 | 383 | 99 +  | 231 | 613 | 26949  | 27331  |
| UN61359 | Rsa1.0.10792.1 | 115 | 5719   | 3.00E-36  | 101 | 108 | 93 +  | 1   | 102 | 623    | 729    |
| UN61360 | Rsa1.0.00456.1 | 298 | 82826  | 1.00E-132 | 238 | 238 | 100 + | 61  | 298 | 76458  | 76695  |
| UN61361 | Rsa1.0.05599.1 | 621 | 143653 | 1.00E-162 | 290 | 290 | 100 + | 332 | 621 | 139259 | 139548 |
| UN61362 | Rsa1.0.16460.1 | 727 | 2148   | 0         | 621 | 637 | 97 -  | 92  | 727 | 1142   | 1778   |
| UN61363 | Rsa1.0.01662.1 | 372 | 41382  | 0         | 371 | 371 | 100 - | 2   | 372 | 13143  | 13513  |
| UN61364 | Rsa1.0.00017.1 | 805 | 752458 | 6.00E-73  | 140 | 140 | 100 - | 349 | 488 | 607111 | 607250 |
| UN61365 | Rsa1.0.00017.1 | 826 | 752458 | 0         | 379 | 381 | 99 -  | 5   | 385 | 237977 | 238357 |
| UN61366 | Rsa1.0.00653.1 | 741 | 70029  | 0         | 678 | 698 | 97 -  | 1   | 696 | 34651  | 35348  |
| UN61367 | Rsa1.0.00301.1 | 795 | 365315 | 1.00E-110 | 205 | 206 | 99 -  | 254 | 459 | 350507 | 350712 |
| UN61368 | Rsa1.0.02343.1 | 790 | 32374  | 1.00E-134 | 276 | 286 | 96 +  | 4   | 289 | 1020   | 1304   |
| UN61369 | Rsa1.0.00172.1 | 666 | 115476 | 1.00E-161 | 304 | 308 | 98 -  | 360 | 666 | 79     | 386    |
| UN61370 | Rsa1.0.00385.1 | 560 | 89160  | 0         | 541 | 559 | 96 -  | 2   | 560 | 21262  | 21814  |
| UN61371 | Rsa1.0.01613.1 | 816 | 182542 | 0         | 782 | 788 | 99 +  | 3   | 786 | 26138  | 26925  |
| UN61372 | Rsa1.0.02058.1 | 659 | 35532  | 2.33E-156 | 263 | 263 | 100 - | 1   | 263 | 15951  | 16213  |
| UN61373 | Rsa1.0.00361.1 | 680 | 91181  | 0         | 470 | 478 | 98 +  | 204 | 680 | 47141  | 47618  |
| UN61374 | Rsa1.0.00971.1 | 803 | 57973  | 0         | 524 | 545 | 96 -  | 8   | 549 | 51430  | 51968  |
| UN61375 | Rsa1.0.00026.1 | 713 | 327835 | 0         | 499 | 522 | 95 -  | 192 | 713 | 27279  | 27800  |
| UN61376 | Rsa1.0.00182.1 | 286 | 142305 | 1.00E-141 | 277 | 285 | 97 -  | 2   | 286 | 113520 | 113804 |
| UN61377 | Rsa1.0.02428.1 | 681 | 31542  | 1.00E-141 | 354 | 387 | 91 -  | 2   | 371 | 15665  | 16049  |
| UN61378 | Rsa1.0.08312.1 | 347 | 7564   | 0         | 342 | 345 | 99 -  | 3   | 347 | 2690   | 3034   |
| UN61379 | Rsa1.0.11107.1 | 622 | 5613   | 4.00E-61  | 141 | 148 | 95 +  | 346 | 493 | 3024   | 3171   |
| UN61380 | Rsa1.0.00372.1 | 649 | 90418  | 0         | 636 | 654 | 97 +  | 4   | 649 | 18167  | 18820  |
| UN61381 | Rsa1.0.03976.1 | 475 | 19759  | 0         | 428 | 434 | 98 +  | 26  | 457 | 12217  | 12649  |
| UN61382 | Rsa1.0.02654.1 | 786 | 29028  | 0         | 404 | 407 | 99 +  | 3   | 409 | 20846  | 21250  |
| UN61383 | Rsa1.0.00568.1 | 709 | 75219  | 1.00E-141 | 261 | 262 | 99 +  | 209 | 469 | 24583  | 24844  |
| UN61384 | Rsa1.0.04426.1 | 722 | 17399  | 1.00E-98  | 189 | 191 | 98 +  | 45  | 235 | 4354   | 4544   |



|         |                |     |        |           |     |     |       |     |     |        |        |
|---------|----------------|-----|--------|-----------|-----|-----|-------|-----|-----|--------|--------|
| UN61385 | Rsa1.0_01256.1 | 648 | 49770  | 1.00E-141 | 261 | 263 | 99 -  | 50  | 312 | 6290   | 6552   |
| UN61386 | Rsa1.0_00121.1 | 746 | 278029 | 9.00E-66  | 134 | 136 | 98 +  | 43  | 178 | 84874  | 85009  |
| UN61387 | Rsa1.0_01130.1 | 776 | 52929  | 0         | 564 | 574 | 98 +  | 125 | 696 | 33329  | 33902  |
| UN61388 | Rsa1.0_00024.1 | 145 | 188018 | 6.00E-63  | 140 | 145 | 96 +  | 3   | 145 | 172275 | 172419 |
| UN61389 | Rsa1.0_00058.1 | 597 | 159921 | 0         | 499 | 509 | 98 -  | 88  | 596 | 49040  | 49546  |
| UN61390 | Rsa1.0_01759.1 | 655 | 39745  | 1.00E-104 | 202 | 205 | 98 -  | 12  | 216 | 12408  | 12612  |
| UN61391 | Rsa1.0_00002.1 | 745 | 601661 | 1.00E-165 | 324 | 334 | 97 -  | 3   | 336 | 558227 | 558560 |
| UN61392 | Rsa1.0_01210.1 | 712 | 50663  | 0         | 702 | 707 | 99 -  | 3   | 708 | 27782  | 28488  |
| UN61393 | Rsa1.0_00632.1 | 571 | 183777 | 1.00E-113 | 210 | 211 | 99 +  | 202 | 412 | 2417   | 2627   |
| UN61394 | Rsa1.0_00779.1 | 714 | 64568  | 1.00E-179 | 321 | 322 | 99 +  | 1   | 322 | 29029  | 29350  |
| UN61395 | Rsa1.0_00158.1 | 496 | 117999 | 4.00E-76  | 176 | 184 | 95 +  | 3   | 186 | 39942  | 40122  |
| UN61396 | Rsa1.0_06955.1 | 813 | 10111  | 1.00E-113 | 287 | 304 | 94 -  | 507 | 803 | 7927   | 8230   |
| UN61397 | Rsa1.0_01870.1 | 735 | 37919  | 2.00E-39  | 93  | 96  | 96 +  | 309 | 404 | 15662  | 15757  |
| UN61398 | Rsa1.0_00131.1 | 654 | 432233 | 1.00E-152 | 365 | 396 | 92 -  | 38  | 433 | 194264 | 194659 |
| UN61399 | Rsa1.0_01591.1 | 353 | 42718  | 1.00E-123 | 322 | 351 | 91 +  | 1   | 349 | 15026  | 15360  |
| UN61400 | Rsa1.0_04519.1 | 726 | 17004  | 0         | 724 | 728 | 99 +  | 1   | 726 | 4092   | 4819   |
| UN61401 | Rsa1.0_12206.1 | 659 | 5289   | 0         | 500 | 504 | 99 -  | 1   | 502 | 4768   | 5271   |
| UN61402 | Rsa1.0_07732.1 | 757 | 8695   | 0         | 545 | 545 | 100 + | 197 | 741 | 663    | 1207   |
| UN61403 | Rsa1.0_00858.1 | 627 | 61892  | 0         | 594 | 627 | 94 +  | 2   | 623 | 20044  | 20657  |
| UN61404 | Rsa1.0_00285.1 | 636 | 149638 | 1.00E-113 | 229 | 236 | 97 -  | 280 | 515 | 148538 | 148773 |
| UN61405 | Rsa1.0_00123.1 | 762 | 325650 | 1.00E-83  | 276 | 317 | 87 -  | 5   | 318 | 220450 | 220754 |
| UN61406 | Rsa1.0_04812.1 | 732 | 15883  | 2.00E-91  | 177 | 179 | 98 +  | 35  | 213 | 10428  | 10606  |
| UN61407 | Rsa1.0_33663.1 | 636 | 673    | 0         | 531 | 547 | 97 -  | 2   | 548 | 1      | 547    |
| UN61408 | Rsa1.0_04067.1 | 811 | 19256  | 0         | 401 | 409 | 98 -  | 391 | 793 | 8026   | 8434   |
| UN61409 | Rsa1.0_00065.1 | 725 | 454616 | 1.00E-77  | 175 | 184 | 95 +  | 304 | 487 | 446607 | 446790 |
| UN61410 | Rsa1.0_03249.1 | 669 | 146254 | 0         | 432 | 440 | 98 -  | 232 | 669 | 22698  | 23137  |
| UN61411 | Rsa1.0_00017.1 | 598 | 752458 | 1.00E-119 | 241 | 248 | 97 +  | 81  | 328 | 715526 | 715770 |
| UN61412 | Rsa1.0_01975.1 | 390 | 36578  | 1.00E-103 | 236 | 251 | 94 -  | 140 | 390 | 21413  | 21663  |
| UN61413 | Rsa1.0_00028.1 | 706 | 293984 | 1.00E-109 | 259 | 273 | 94 -  | 434 | 697 | 282965 | 283237 |
| UN61414 | Rsa1.0_03156.1 | 733 | 24956  | 2.00E-85  | 164 | 165 | 99 -  | 54  | 218 | 4809   | 4973   |
| UN61415 | Rsa1.0_03304.1 | 682 | 23883  | 1.00E-177 | 336 | 343 | 97 -  | 2   | 344 | 9975   | 10317  |
| UN61416 | Rsa1.0_00026.1 | 694 | 327835 | 4.00E-92  | 197 | 204 | 96 -  | 492 | 694 | 242410 | 242613 |
| UN61417 | Rsa1.0_03352.1 | 756 | 23506  | 0         | 625 | 654 | 95 -  | 114 | 756 | 5515   | 6159   |
| UN61418 | Rsa1.0_00257.1 | 185 | 102407 | 8.00E-72  | 175 | 185 | 94 -  | 1   | 185 | 14727  | 14909  |
| UN61419 | Rsa1.0_05984.1 | 389 | 12031  | 1.00E-53  | 122 | 127 | 96 -  | 202 | 328 | 5720   | 5846   |
| UN61420 | Rsa1.0_00384.1 | 637 | 89278  | 1.00E-107 | 313 | 356 | 87 +  | 3   | 358 | 47250  | 47581  |
| UN61421 | Rsa1.0_01118.1 | 686 | 53460  | 1.00E-109 | 233 | 244 | 95 -  | 63  | 306 | 13629  | 13872  |
| UN61422 | Rsa1.0_18241.1 | 319 | 1639   | 1.00E-163 | 313 | 319 | 98 -  | 1   | 319 | 1033   | 1350   |
| UN61423 | Rsa1.0_03042.1 | 604 | 25803  | 1.00E-179 | 349 | 358 | 97 -  | 248 | 604 | 24892  | 25249  |

|         |                |     |        |           |     |     |       |     |     |        |        |
|---------|----------------|-----|--------|-----------|-----|-----|-------|-----|-----|--------|--------|
| UN61424 | Rsa1.0.06441.1 | 709 | 11009  | 0         | 653 | 659 | 99 +  | 50  | 705 | 2840   | 3498   |
| UN61425 | Rsa1.0.00417.1 | 721 | 395068 | 1.00E-156 | 279 | 279 | 100 + | 2   | 280 | 246387 | 246665 |
| UN61426 | Rsa1.0.03073.1 | 637 | 25574  | 0         | 517 | 524 | 98 +  | 1   | 524 | 19307  | 19830  |
| UN61427 | Rsa1.0.00075.1 | 742 | 146680 | 1.00E-122 | 254 | 265 | 95 -  | 7   | 265 | 69234  | 69498  |
| UN61428 | Rsa1.0.02070.1 | 492 | 158516 | 0         | 468 | 497 | 94 -  | 2   | 490 | 13203  | 13698  |
| UN61429 | Rsa1.0.00087.1 | 645 | 761073 | 0         | 550 | 605 | 90 +  | 14  | 600 | 180807 | 181405 |
| UN61430 | Rsa1.0.00254.1 | 693 | 102600 | 1.00E-95  | 187 | 190 | 98 -  | 378 | 567 | 74957  | 75146  |
| UN61431 | Rsa1.0.12202.1 | 694 | 5290   | 0         | 664 | 706 | 94 +  | 2   | 694 | 214    | 917    |
| UN61432 | Rsa1.0.00041.1 | 611 | 186197 | 1.00E-110 | 217 | 222 | 97 -  | 210 | 431 | 134294 | 134515 |
| UN61433 | Rsa1.0.01339.1 | 768 | 47813  | 0         | 398 | 407 | 97 -  | 315 | 717 | 46352  | 46757  |
| UN61434 | Rsa1.0.02283.1 | 787 | 33024  | 1.00E-154 | 311 | 320 | 97 +  | 469 | 786 | 29757  | 30076  |
| UN61435 | Rsa1.0.06136.1 | 777 | 11659  | 0         | 685 | 739 | 92 -  | 3   | 722 | 3826   | 4556   |
| UN61436 | Rsa1.0.00088.1 | 605 | 141341 | 0         | 578 | 604 | 95 +  | 2   | 605 | 4700   | 5300   |
| UN61437 | Rsa1.0.00222.1 | 733 | 172263 | 1.00E-113 | 217 | 220 | 98 +  | 1   | 220 | 14273  | 14492  |
| UN61438 | Rsa1.0.08595.1 | 640 | 7147   | 0         | 612 | 639 | 95 -  | 3   | 640 | 4735   | 5372   |
| UN61439 | Rsa1.0.00122.1 | 427 | 265937 | 1.00E-131 | 267 | 277 | 96 -  | 148 | 424 | 252850 | 253126 |
| UN61440 | Rsa1.0.03168.1 | 648 | 24827  | 1.00E-155 | 351 | 368 | 95 +  | 116 | 478 | 18089  | 18454  |
| UN61441 | Rsa1.0.01148.1 | 657 | 52375  | 1.00E-112 | 221 | 226 | 97 +  | 224 | 449 | 32962  | 33187  |
| UN61442 | Rsa1.0.00994.1 | 585 | 165189 | 1.00E-155 | 284 | 285 | 99 -  | 302 | 585 | 39824  | 40108  |
| UN61443 | Rsa1.0.00466.1 | 711 | 82132  | 0         | 710 | 713 | 99 +  | 2   | 711 | 80146  | 80858  |
| UN61444 | Rsa1.0.00031.1 | 589 | 179862 | 0         | 588 | 589 | 99 -  | 1   | 589 | 127954 | 128542 |
| UN61445 | Rsa1.0.02173.1 | 618 | 34318  | 0         | 345 | 346 | 99 -  | 1   | 346 | 25807  | 26152  |
| UN61446 | Rsa1.0.02367.1 | 689 | 32106  | 0         | 468 | 489 | 95 -  | 201 | 689 | 11509  | 11995  |
| UN61447 | Rsa1.0.00778.1 | 711 | 196751 | 0         | 333 | 333 | 100 + | 4   | 336 | 161709 | 162041 |
| UN61448 | Rsa1.0.01236.1 | 736 | 50156  | 2.00E-88  | 166 | 166 | 100 + | 3   | 168 | 42382  | 42547  |
| UN61449 | Rsa1.0.08162.1 | 678 | 7813   | 0         | 676 | 678 | 99 +  | 2   | 678 | 6935   | 7612   |
| UN61450 | Rsa1.0.01971.1 | 684 | 36641  | 1.00E-101 | 234 | 250 | 93 -  | 17  | 255 | 29023  | 29272  |
| UN61451 | Rsa1.0.00980.1 | 730 | 57729  | 1.00E-106 | 232 | 244 | 95 +  | 79  | 322 | 44240  | 44483  |
| UN61452 | Rsa1.0.01112.1 | 508 | 310601 | 1.00E-179 | 373 | 390 | 95 -  | 1   | 388 | 7022   | 7402   |
| UN61453 | Rsa1.0.00196.1 | 758 | 109960 | 1.00E-176 | 400 | 428 | 93 +  | 4   | 425 | 10103  | 10529  |
| UN61454 | Rsa1.0.03224.1 | 692 | 24501  | 0         | 341 | 341 | 100 - | 3   | 343 | 2512   | 2852   |
| UN61455 | Rsa1.0.01460.1 | 710 | 45255  | 0         | 694 | 712 | 97 -  | 2   | 704 | 33286  | 33995  |
| UN61456 | Rsa1.0.00069.1 | 667 | 403561 | 0         | 379 | 387 | 97 +  | 1   | 387 | 11906  | 12292  |
| UN61457 | Rsa1.0.00740.1 | 232 | 215972 | 6.00E-58  | 153 | 162 | 94 +  | 70  | 230 | 1797   | 1956   |
| UN61458 | Rsa1.0.01061.1 | 740 | 55349  | 1.00E-110 | 214 | 218 | 98 -  | 501 | 718 | 32804  | 33021  |
| UN61459 | Rsa1.0.00333.1 | 677 | 94500  | 0         | 420 | 421 | 99 +  | 258 | 677 | 34140  | 34560  |
| UN61460 | Rsa1.0.02325.1 | 618 | 160025 | 0         | 368 | 369 | 99 +  | 251 | 618 | 152161 | 152529 |
| UN61461 | Rsa1.0.01234.1 | 144 | 50183  | 4.00E-64  | 139 | 144 | 96 -  | 1   | 144 | 32409  | 32552  |
| UN61462 | Rsa1.0.01026.1 | 607 | 171624 | 0         | 498 | 528 | 94 -  | 83  | 589 | 160039 | 160566 |

|         |                |     |        |           |     |     |       |     |     |        |        |
|---------|----------------|-----|--------|-----------|-----|-----|-------|-----|-----|--------|--------|
| UN61463 | Rsa1.0.00002.1 | 679 | 601661 | 0         | 676 | 682 | 99 -  | 2   | 679 | 539559 | 540240 |
| UN61464 | Rsa1.0.01076.1 | 638 | 54835  | 0         | 351 | 352 | 99 -  | 88  | 439 | 2108   | 2459   |
| UN61465 | Rsa1.0.00066.1 | 688 | 152418 | 1.00E-121 | 262 | 272 | 96 -  | 209 | 477 | 16275  | 16545  |
| UN61466 | Rsa1.0.00673.1 | 710 | 69325  | 1.00E-98  | 273 | 298 | 91 -  | 416 | 710 | 57077  | 57372  |
| UN61467 | Rsa1.0.00926.1 | 641 | 195072 | 1.00E-156 | 285 | 287 | 99 +  | 355 | 641 | 32516  | 32802  |
| UN61468 | Rsa1.0.02020.1 | 602 | 173211 | 1.00E-120 | 222 | 223 | 99 +  | 3   | 225 | 142219 | 142441 |
| UN61469 | Rsa1.0.00025.1 | 679 | 277312 | 3.00E-74  | 151 | 154 | 98 +  | 148 | 301 | 58559  | 58712  |
| UN61470 | Rsa1.0.00949.1 | 695 | 58549  | 0         | 435 | 442 | 98 -  | 1   | 440 | 15936  | 16376  |
| UN61471 | Rsa1.0.00354.1 | 679 | 232005 | 0         | 630 | 631 | 99 -  | 2   | 631 | 27539  | 28169  |
| UN61472 | Rsa1.0.00485.1 | 657 | 80937  | 0         | 594 | 623 | 95 -  | 35  | 657 | 72945  | 73567  |
| UN61473 | Rsa1.0.08837.1 | 541 | 6874   | 3.00E-92  | 181 | 184 | 98 -  | 167 | 350 | 1685   | 1868   |
| UN61474 | Rsa1.0.00954.1 | 652 | 189536 | 0         | 630 | 651 | 96 -  | 3   | 652 | 170686 | 171336 |
| UN61475 | Rsa1.0.02246.1 | 809 | 33435  | 1.00E-105 | 194 | 194 | 100 + | 267 | 460 | 23284  | 23477  |
| UN61476 | Rsa1.0.00221.1 | 780 | 106972 | 0         | 369 | 376 | 98 -  | 407 | 777 | 42134  | 42509  |
| UN61477 | Rsa1.0.06590.1 | 741 | 10706  | 0         | 526 | 548 | 95 -  | 82  | 625 | 2959   | 3506   |
| UN61478 | Rsa1.0.01247.1 | 743 | 49934  | 0         | 448 | 449 | 99 +  | 296 | 743 | 45105  | 45553  |
| UN61479 | Rsa1.0.01492.1 | 617 | 44704  | 1.00E-163 | 338 | 352 | 96 +  | 3   | 354 | 1053   | 1403   |
| UN61480 | Rsa1.0.00734.1 | 743 | 66508  | 1.00E-134 | 317 | 337 | 94 -  | 1   | 332 | 60946  | 61277  |
| UN61481 | Rsa1.0.00916.1 | 622 | 59789  | 1.00E-110 | 202 | 202 | 100 + | 1   | 202 | 27586  | 27787  |
| UN61482 | Rsa1.0.01683.1 | 723 | 41059  | 0         | 347 | 353 | 98 +  | 155 | 507 | 23260  | 23612  |
| UN61483 | Rsa1.0.36482.1 | 644 | 618    | 0         | 405 | 408 | 99 -  | 1   | 408 | 93     | 500    |
| UN61484 | Rsa1.0.03356.1 | 770 | 23487  | 0         | 327 | 327 | 100 - | 2   | 328 | 7373   | 7699   |
| UN61485 | Rsa1.0.05920.1 | 707 | 12239  | 2.00E-44  | 116 | 124 | 93 +  | 286 | 409 | 6934   | 7057   |
| UN61486 | Rsa1.0.05654.1 | 641 | 13042  | 0         | 611 | 639 | 95 -  | 3   | 641 | 8424   | 9044   |
| UN61487 | Rsa1.0.00485.1 | 793 | 80937  | 0         | 538 | 555 | 96 -  | 241 | 792 | 16722  | 17276  |
| UN61488 | Rsa1.0.00593.1 | 410 | 143463 | 0         | 405 | 410 | 98 -  | 1   | 410 | 41096  | 41505  |
| UN61489 | Rsa1.0.00101.1 | 579 | 267193 | 3.00E-80  | 258 | 292 | 88 -  | 275 | 566 | 4438   | 4708   |
| UN61490 | Rsa1.0.00145.1 | 684 | 261008 | 1.00E-110 | 246 | 258 | 95 +  | 53  | 308 | 54360  | 54617  |
| UN61491 | Rsa1.0.01777.1 | 535 | 39511  | 3.00E-71  | 236 | 267 | 88 +  | 284 | 531 | 20986  | 21252  |
| UN61492 | Rsa1.0.00402.1 | 653 | 385315 | 0         | 443 | 458 | 96 +  | 197 | 653 | 232161 | 232613 |
| UN61493 | Rsa1.0.03354.1 | 640 | 23491  | 0         | 508 | 520 | 97 +  | 6   | 525 | 11869  | 12388  |
| UN61494 | Rsa1.0.00743.1 | 776 | 177459 | 0         | 415 | 424 | 97 +  | 3   | 423 | 173907 | 174330 |
| UN61495 | Rsa1.0.00492.1 | 768 | 80178  | 0         | 752 | 771 | 97 -  | 2   | 768 | 59110  | 59880  |
| UN61496 | Rsa1.0.00015.1 | 449 | 561803 | 1.00E-135 | 257 | 260 | 98 +  | 190 | 449 | 463749 | 464007 |
| UN61497 | Rsa1.0.12292.1 | 680 | 5263   | 0         | 459 | 462 | 99 +  | 221 | 680 | 179    | 640    |
| UN61498 | Rsa1.0.00418.1 | 277 | 215377 | 5.00E-68  | 163 | 170 | 95 +  | 41  | 206 | 43786  | 43955  |
| UN61499 | Rsa1.0.00832.1 | 530 | 62622  | 0         | 527 | 533 | 98 +  | 1   | 529 | 17587  | 18119  |
| UN61500 | Rsa1.0.08961.1 | 708 | 6750   | 1.00E-161 | 330 | 343 | 96 +  | 297 | 635 | 6295   | 6634   |
| UN61501 | Rsa1.0.01595.1 | 733 | 175383 | 0         | 361 | 365 | 98 -  | 2   | 364 | 27602  | 27966  |





|         |                |     |        |           |     |     |       |     |     |        |        |
|---------|----------------|-----|--------|-----------|-----|-----|-------|-----|-----|--------|--------|
| UN61580 | Rsa1.0.02780.1 | 706 | 27965  | 1.00E-110 | 262 | 282 | 92 -  | 186 | 465 | 11367  | 11639  |
| UN61581 | Rsa1.0.02026.1 | 481 | 35896  | 1.00E-124 | 231 | 233 | 99 -  | 171 | 403 | 13982  | 14214  |
| UN61582 | Rsa1.0.00802.1 | 668 | 63846  | 1.00E-73  | 144 | 145 | 99 +  | 151 | 295 | 27435  | 27579  |
| UN61583 | Rsa1.0.00001.1 | 491 | 363028 | 0         | 445 | 446 | 99 -  | 46  | 491 | 174220 | 174665 |
| UN61584 | Rsa1.0.00586.1 | 506 | 163802 | 8.00E-90  | 168 | 168 | 100 + | 18  | 185 | 151119 | 151286 |
| UN61585 | Rsa1.0.00404.1 | 725 | 87635  | 1.00E-171 | 370 | 392 | 94 +  | 4   | 384 | 9764   | 10155  |
| UN61586 | Rsa1.0.01510.1 | 648 | 44237  | 1.00E-141 | 402 | 460 | 87 +  | 207 | 645 | 18824  | 19262  |
| UN61587 | Rsa1.0.16177.1 | 647 | 2255   | 2.00E-75  | 157 | 160 | 98 -  | 150 | 308 | 151    | 310    |
| UN61588 | Rsa1.0.00344.1 | 682 | 191774 | 0         | 567 | 591 | 95 +  | 95  | 682 | 102407 | 102994 |
| UN61589 | Rsa1.0.03128.1 | 682 | 25180  | 0         | 653 | 676 | 96 -  | 7   | 682 | 22811  | 23486  |
| UN61590 | Rsa1.0.22264.1 | 243 | 1136   | 1.00E-116 | 218 | 220 | 99 -  | 3   | 222 | 265    | 484    |
| UN61591 | Rsa1.0.01440.1 | 702 | 45807  | 1.00E-67  | 134 | 135 | 99 -  | 35  | 169 | 9207   | 9341   |
| UN61592 | Rsa1.0.00123.1 | 790 | 325650 | 1.00E-109 | 213 | 217 | 98 -  | 3   | 219 | 225789 | 226005 |
| UN61593 | Rsa1.0.00146.1 | 393 | 149343 | 0         | 390 | 407 | 95 -  | 1   | 393 | 99571  | 99977  |
| UN61594 | Rsa1.0.01234.1 | 301 | 50183  | 1.00E-150 | 293 | 301 | 97 +  | 1   | 301 | 19967  | 20267  |
| UN61595 | Rsa1.0.00145.1 | 669 | 261008 | 5.00E-70  | 153 | 159 | 96 +  | 211 | 369 | 31350  | 31508  |
| UN61596 | Rsa1.0.47586.1 | 655 | 475    | 0         | 438 | 438 | 100 - | 161 | 598 | 1      | 438    |
| UN61597 | Rsa1.0.00341.1 | 769 | 249309 | 0         | 511 | 525 | 97 -  | 3   | 520 | 2130   | 2650   |
| UN61598 | Rsa1.0.00632.1 | 661 | 183777 | 1.00E-109 | 203 | 204 | 99 +  | 229 | 432 | 2424   | 2627   |
| UN61599 | Rsa1.0.00684.1 | 558 | 141701 | 0         | 453 | 470 | 96 +  | 2   | 468 | 41782  | 42251  |
| UN61600 | Rsa1.0.02710.1 | 780 | 28492  | 1.00E-138 | 278 | 287 | 96 -  | 2   | 285 | 20922  | 21208  |
| UN61601 | Rsa1.0.21362.1 | 757 | 1212   | 0         | 717 | 746 | 96 +  | 2   | 745 | 410    | 1154   |
| UN61602 | Rsa1.0.01814.1 | 649 | 38917  | 1.00E-165 | 396 | 424 | 93 +  | 1   | 413 | 14978  | 15394  |
| UN61603 | Rsa1.0.24121.1 | 602 | 1005   | 0         | 561 | 581 | 96 -  | 23  | 602 | 258    | 838    |
| UN61604 | Rsa1.0.00041.1 | 674 | 186197 | 1.00E-128 | 259 | 268 | 96 -  | 261 | 528 | 129816 | 130083 |
| UN61605 | Rsa1.0.00739.1 | 655 | 66155  | 0         | 417 | 422 | 98 -  | 235 | 655 | 40495  | 40916  |
| UN61606 | Rsa1.0.02958.1 | 130 | 26443  | 2.00E-65  | 129 | 130 | 99 +  | 1   | 130 | 8676   | 8805   |
| UN61607 | Rsa1.0.01419.1 | 700 | 167402 | 0         | 396 | 403 | 98 +  | 298 | 699 | 132120 | 132520 |
| UN61608 | Rsa1.0.05347.1 | 631 | 14096  | 1.00E-143 | 261 | 262 | 99 +  | 235 | 496 | 7956   | 8217   |
| UN61609 | Rsa1.0.03642.1 | 668 | 21609  | 1.00E-134 | 266 | 273 | 97 -  | 251 | 523 | 5889   | 6158   |
| UN61610 | Rsa1.0.02987.1 | 109 | 26196  | 9.00E-49  | 101 | 102 | 99 -  | 1   | 102 | 24017  | 24118  |
| UN61611 | Rsa1.0.01919.1 | 136 | 37272  | 2.00E-71  | 136 | 136 | 100 - | 1   | 136 | 3675   | 3810   |
| UN61612 | Rsa1.0.01397.1 | 681 | 183276 | 1.00E-178 | 339 | 345 | 98 -  | 85  | 428 | 145744 | 146088 |
| UN61613 | Rsa1.0.40652.1 | 736 | 552    | 3.00E-44  | 92  | 92  | 100 - | 232 | 323 | 248    | 339    |
| UN61614 | Rsa1.0.00876.1 | 709 | 61328  | 0         | 703 | 711 | 98 -  | 2   | 709 | 54843  | 55553  |
| UN61615 | Rsa1.0.00080.1 | 634 | 190437 | 1.00E-145 | 267 | 269 | 99 -  | 255 | 523 | 27027  | 27295  |
| UN61616 | Rsa1.0.00025.1 | 704 | 277312 | 1.00E-147 | 290 | 296 | 97 +  | 2   | 294 | 57853  | 58148  |
| UN61617 | Rsa1.0.10422.1 | 719 | 5854   | 1.00E-120 | 333 | 370 | 90 +  | 372 | 719 | 1678   | 2046   |
| UN61618 | Rsa1.0.00888.1 | 618 | 60978  | 0         | 542 | 559 | 96 +  | 59  | 617 | 53612  | 54167  |

|         |                |     |        |           |     |     |       |     |     |        |        |
|---------|----------------|-----|--------|-----------|-----|-----|-------|-----|-----|--------|--------|
| UN61619 | Rsa1.0.00491.1 | 756 | 80219  | 1.00E-142 | 488 | 565 | 86 -  | 200 | 755 | 24188  | 24752  |
| UN61620 | Rsa1.0.00018.1 | 483 | 410899 | 0         | 482 | 483 | 99 -  | 1   | 483 | 56496  | 56978  |
| UN61621 | Rsa1.0.00369.1 | 802 | 266462 | 4.00E-71  | 168 | 177 | 94 -  | 1   | 177 | 168224 | 168399 |
| UN61622 | Rsa1.0.00017.1 | 103 | 752458 | 2.00E-34  | 95  | 102 | 93 +  | 1   | 102 | 236055 | 236156 |
| UN61623 | Rsa1.0.00121.1 | 568 | 278029 | 9.00E-90  | 180 | 184 | 97 +  | 1   | 184 | 59556  | 59739  |
| UN61624 | Rsa1.0.00011.1 | 773 | 225044 | 3.00E-99  | 184 | 184 | 100 - | 1   | 184 | 200725 | 200908 |
| UN61625 | Rsa1.0.00856.1 | 221 | 62037  | 8.00E-57  | 112 | 112 | 100 - | 25  | 136 | 9186   | 9297   |
| UN61626 | Rsa1.0.04651.1 | 679 | 16516  | 1.00E-122 | 258 | 270 | 95 +  | 2   | 271 | 9267   | 9536   |
| UN61627 | Rsa1.0.04991.1 | 634 | 15215  | 0         | 464 | 473 | 98 +  | 164 | 634 | 9337   | 9806   |
| UN61628 | Rsa1.0.02944.1 | 793 | 26553  | 1.00E-138 | 250 | 250 | 100 + | 3   | 252 | 3609   | 3858   |
| UN61629 | Rsa1.0.13896.1 | 790 | 4134   | 0         | 771 | 784 | 98 -  | 7   | 790 | 677    | 1453   |
| UN61630 | Rsa1.0.01561.1 | 258 | 43227  | 1.00E-127 | 251 | 258 | 97 -  | 1   | 258 | 21650  | 21907  |
| UN61631 | Rsa1.0.02911.1 | 769 | 142461 | 1.00E-159 | 327 | 338 | 96 +  | 6   | 340 | 22435  | 22770  |
| UN61632 | Rsa1.0.03360.1 | 348 | 23459  | 1.00E-114 | 219 | 221 | 99 -  | 1   | 221 | 18357  | 18576  |
| UN61633 | Rsa1.0.01015.1 | 728 | 56752  | 0         | 384 | 388 | 98 +  | 337 | 724 | 8794   | 9181   |
| UN61634 | Rsa1.0.00184.1 | 663 | 218748 | 0         | 478 | 479 | 99 -  | 185 | 663 | 211728 | 212206 |
| UN61635 | Rsa1.0.00487.1 | 715 | 80674  | 3.00E-90  | 172 | 173 | 99 -  | 413 | 585 | 38941  | 39113  |
| UN61636 | Rsa1.0.00227.1 | 715 | 105849 | 1.00E-117 | 215 | 215 | 100 + | 2   | 216 | 27745  | 27959  |
| UN61637 | Rsa1.0.00239.1 | 210 | 104332 | 3.00E-50  | 188 | 216 | 87 -  | 2   | 210 | 28884  | 29099  |
| UN61638 | Rsa1.0.01261.1 | 205 | 49744  | 6.00E-79  | 188 | 201 | 93 +  | 5   | 205 | 22751  | 22951  |
| UN61639 | Rsa1.0.00438.1 | 580 | 84861  | 1.00E-168 | 328 | 337 | 97 +  | 44  | 380 | 15680  | 16012  |
| UN61640 | Rsa1.0.03352.1 | 336 | 23506  | 1.00E-47  | 112 | 117 | 95 +  | 1   | 117 | 16176  | 16292  |
| UN61641 | Rsa1.0.00190.1 | 730 | 318240 | 0         | 359 | 360 | 99 +  | 283 | 642 | 203951 | 204310 |
| UN61642 | Rsa1.0.16521.1 | 708 | 2125   | 0         | 468 | 492 | 95 -  | 3   | 494 | 1174   | 1653   |
| UN61643 | Rsa1.0.01433.1 | 799 | 45976  | 0         | 425 | 449 | 94 -  | 2   | 443 | 7083   | 7526   |
| UN61644 | Rsa1.0.02247.1 | 710 | 33427  | 1.00E-124 | 229 | 230 | 99 -  | 481 | 710 | 7389   | 7618   |
| UN61645 | Rsa1.0.00169.1 | 615 | 274298 | 1.00E-24  | 87  | 95  | 91 +  | 522 | 615 | 109726 | 109820 |
| UN61646 | Rsa1.0.01824.1 | 687 | 38733  | 0         | 451 | 463 | 97 +  | 227 | 687 | 5376   | 5838   |
| UN61647 | Rsa1.0.03142.1 | 461 | 25043  | 0         | 458 | 461 | 99 -  | 1   | 461 | 20353  | 20813  |
| UN61648 | Rsa1.0.06849.1 | 710 | 10271  | 1.00E-124 | 266 | 277 | 96 -  | 5   | 280 | 9692   | 9966   |
| UN61649 | Rsa1.0.01155.1 | 136 | 52182  | 1.00E-32  | 74  | 75  | 98 -  | 59  | 133 | 13030  | 13104  |
| UN61650 | Rsa1.0.03926.1 | 123 | 20024  | 6.00E-47  | 113 | 119 | 94 +  | 1   | 119 | 5384   | 5502   |
| UN61651 | Rsa1.0.02949.1 | 132 | 26506  | 8.00E-22  | 62  | 65  | 95 -  | 39  | 103 | 4401   | 4465   |
| UN61652 | #              | #   | #      | #         | #   | #   | #     | #   | #   | #      | #      |
| UN61653 | Rsa1.0.02234.1 | 728 | 33618  | 4.00E-74  | 157 | 162 | 96 -  | 306 | 467 | 2559   | 2720   |
| UN61654 | Rsa1.0.03842.1 | 693 | 20503  | 0         | 444 | 460 | 96 -  | 4   | 459 | 17620  | 18079  |
| UN61655 | Rsa1.0.00550.1 | 841 | 210790 | 1.00E-179 | 421 | 454 | 92 -  | 254 | 706 | 183114 | 183567 |
| UN61656 | Rsa1.0.00087.1 | 773 | 761073 | 1.00E-101 | 190 | 191 | 99 -  | 1   | 191 | 441788 | 441978 |
| UN61657 | Rsa1.0.00341.1 | 368 | 249309 | 1.00E-123 | 338 | 369 | 91 -  | 1   | 368 | 243081 | 243442 |

|         |                |     |        |           |     |     |       |     |     |        |        |
|---------|----------------|-----|--------|-----------|-----|-----|-------|-----|-----|--------|--------|
| UN61658 | Rsa1.0_02195.1 | 186 | 34024  | 1.00E-79  | 177 | 186 | 95 -  | 1   | 186 | 30849  | 31034  |
| UN61659 | Rsa1.0_02667.1 | 845 | 28910  | 0         | 821 | 845 | 97 -  | 2   | 845 | 11387  | 12231  |
| UN61660 | Rsa1.0_00730.1 | 744 | 66673  | 0         | 735 | 746 | 98 -  | 4   | 744 | 39669  | 40414  |
| UN61661 | Rsa1.0_00414.1 | 667 | 202190 | 0         | 533 | 577 | 92 +  | 105 | 667 | 45473  | 46047  |
| UN61662 | Rsa1.0_06952.1 | 704 | 10118  | 0         | 701 | 707 | 99 +  | 2   | 704 | 5297   | 6003   |
| UN61663 | Rsa1.0_00139.1 | 636 | 357786 | 1.00E-137 | 257 | 259 | 99 -  | 25  | 282 | 139050 | 139308 |
| UN61664 | Rsa1.0_00324.1 | 746 | 218805 | 3.00E-87  | 179 | 184 | 97 +  | 355 | 538 | 186385 | 186568 |
| UN61665 | Rsa1.0_02750.1 | 542 | 28239  | 0         | 525 | 540 | 97 -  | 6   | 542 | 4477   | 5016   |
| UN61666 | Rsa1.0_01007.1 | 430 | 56933  | 1.00E-135 | 257 | 260 | 98 -  | 172 | 430 | 2061   | 2320   |
| UN61667 | Rsa1.0_00880.1 | 636 | 61271  | 1.00E-144 | 263 | 264 | 99 -  | 45  | 308 | 9371   | 9634   |
| UN61668 | Rsa1.0_02201.1 | 633 | 33981  | 1.00E-153 | 305 | 315 | 96 +  | 11  | 325 | 21956  | 22270  |
| UN61669 | Rsa1.0_00818.1 | 305 | 62939  | 1.00E-99  | 216 | 226 | 95 -  | 83  | 305 | 40684  | 40909  |
| UN61670 | Rsa1.0_00365.1 | 441 | 90902  | 7.00E-90  | 382 | 441 | 86 +  | 7   | 441 | 29577  | 29990  |
| UN61671 | Rsa1.0_00734.1 | 233 | 66508  | 1.00E-95  | 198 | 205 | 96 +  | 8   | 212 | 25097  | 25301  |
| UN61672 | Rsa1.0_00089.1 | 813 | 406142 | 0         | 456 | 456 | 100 + | 1   | 456 | 322207 | 322662 |
| UN61673 | Rsa1.0_00571.1 | 130 | 329018 | 3.00E-15  | 81  | 94  | 86 -  | 1   | 93  | 40670  | 40754  |
| UN61674 | Rsa1.0_03963.1 | 816 | 19855  | 0         | 552 | 552 | 100 - | 3   | 554 | 127    | 678    |
| UN61675 | Rsa1.0_04845.1 | 104 | 15747  | 1.00E-35  | 91  | 96  | 94 -  | 1   | 96  | 5903   | 5998   |
| UN61676 | Rsa1.0_00023.1 | 752 | 194764 | 0         | 736 | 757 | 97 +  | 1   | 752 | 111846 | 112597 |
| UN61677 | Rsa1.0_04877.1 | 593 | 15631  | 0         | 570 | 593 | 96 +  | 2   | 593 | 2104   | 2688   |
| UN61678 | Rsa1.0_10792.1 | 722 | 5719   | 0         | 715 | 725 | 98 -  | 1   | 722 | 1536   | 2259   |
| UN61679 | Rsa1.0_00456.1 | 201 | 82826  | 9.00E-72  | 180 | 193 | 93 -  | 9   | 201 | 78275  | 78466  |
| UN61680 | Rsa1.0_00019.1 | 771 | 301669 | 0         | 614 | 630 | 97 +  | 144 | 771 | 172733 | 173359 |
| UN61681 | Rsa1.0_00018.1 | 165 | 410899 | 9.00E-13  | 78  | 87  | 89 -  | 27  | 112 | 71551  | 71631  |
| UN61682 | Rsa1.0_03090.1 | 494 | 25464  | 0         | 401 | 407 | 98 +  | 4   | 410 | 21799  | 22205  |
| UN61683 | Rsa1.0_00069.1 | 567 | 403561 | 0         | 480 | 483 | 99 -  | 1   | 482 | 13176  | 13658  |
| UN61684 | Rsa1.0_00708.1 | 705 | 67366  | 0         | 649 | 674 | 96 -  | 1   | 674 | 38712  | 39384  |
| UN61685 | Rsa1.0_05547.1 | 676 | 13369  | 1.00E-166 | 315 | 321 | 98 +  | 356 | 676 | 5450   | 5770   |
| UN61686 | Rsa1.0_00025.1 | 722 | 277312 | 1.00E-158 | 365 | 385 | 94 -  | 1   | 373 | 14017  | 14400  |
| UN61687 | Rsa1.0_02360.1 | 780 | 32203  | 2.00E-79  | 157 | 159 | 98 +  | 14  | 172 | 11222  | 11380  |
| UN61688 | Rsa1.0_00139.1 | 218 | 357786 | 1.00E-31  | 119 | 134 | 88 -  | 12  | 144 | 149456 | 149589 |
| UN61689 | Rsa1.0_00003.1 | 784 | 340054 | 2.33E-156 | 354 | 381 | 92 -  | 189 | 567 | 2633   | 3000   |
| UN61690 | Rsa1.0_10188.1 | 636 | 5953   | 1.00E-160 | 306 | 311 | 98 +  | 139 | 448 | 1      | 311    |
| UN61691 | Rsa1.0_07130.1 | 702 | 9861   | 0         | 470 | 476 | 98 -  | 3   | 478 | 952    | 1427   |
| UN61692 | Rsa1.0_16766.1 | 220 | 2041   | 5.00E-86  | 200 | 213 | 93 +  | 5   | 217 | 1152   | 1364   |
| UN61693 | Rsa1.0_00221.1 | 715 | 106972 | 0         | 400 | 402 | 99 +  | 1   | 402 | 41490  | 41891  |
| UN61694 | Rsa1.0_00192.1 | 790 | 278200 | 0         | 367 | 380 | 96 -  | 373 | 752 | 75232  | 75611  |
| UN61695 | Rsa1.0_01208.1 | 507 | 50718  | 1.00E-79  | 259 | 295 | 87 +  | 116 | 410 | 8969   | 9263   |
| UN61696 | Rsa1.0_00339.1 | 869 | 222974 | 3.00E-69  | 194 | 209 | 92 +  | 125 | 329 | 178049 | 178256 |



|         |                |     |        |           |     |     |      |     |     |        |        |
|---------|----------------|-----|--------|-----------|-----|-----|------|-----|-----|--------|--------|
| UN61697 | Rsa1.0.00007.1 | 305 | 239325 | 1.00E-68  | 135 | 136 | 99 + | 101 | 236 | 108080 | 108215 |
| UN61698 | Rsa1.0.00782.1 | 780 | 64468  | 0         | 431 | 456 | 94 - | 226 | 681 | 28205  | 28648  |
| UN61699 | Rsa1.0.00977.1 | 537 | 198001 | 0         | 376 | 385 | 97 + | 3   | 383 | 1146   | 1529   |
| UN61700 | Rsa1.0.02754.1 | 310 | 28213  | 3.00E-14  | 50  | 53  | 94 + | 152 | 204 | 10399  | 10451  |
| UN61701 | Rsa1.0.00185.1 | 831 | 248445 | 0         | 831 | 832 | 99 + | 1   | 831 | 169745 | 170576 |
| UN61702 | Rsa1.0.09766.1 | 355 | 6162   | 1.00E-112 | 273 | 292 | 93 - | 1   | 288 | 1825   | 2115   |
| UN61703 | Rsa1.0.00701.1 | 632 | 67691  | 0         | 476 | 498 | 95 + | 34  | 531 | 40965  | 41457  |
| UN61704 | Rsa1.0.00228.1 | 800 | 105511 | 0         | 738 | 771 | 95 + | 3   | 756 | 46175  | 46942  |
| UN61705 | Rsa1.0.01632.1 | 143 | 181224 | 6.00E-35  | 108 | 119 | 90 + | 25  | 143 | 6520   | 6638   |
| UN61706 | #              | #   | #      | #         | #   | #   | #    | #   | #   | #      | #      |
| UN61707 | Rsa1.0.14871.1 | 565 | 2999   | 4.00E-64  | 192 | 216 | 88 - | 1   | 202 | 2735   | 2949   |
| UN61708 | Rsa1.0.00214.1 | 696 | 107508 | 0         | 689 | 691 | 99 + | 3   | 693 | 58540  | 59230  |
| UN61709 | Rsa1.0.02215.1 | 295 | 33822  | 1.00E-135 | 276 | 287 | 96 - | 1   | 287 | 27836  | 28122  |
| UN61710 | Rsa1.0.00246.1 | 718 | 103541 | 0         | 514 | 560 | 91 + | 184 | 718 | 25136  | 25692  |
| UN61711 | Rsa1.0.00869.1 | 389 | 61627  | 2.00E-46  | 102 | 103 | 99 + | 288 | 389 | 39625  | 39727  |
| UN61712 | Rsa1.0.00848.1 | 294 | 152362 | 1.00E-101 | 234 | 250 | 93 + | 1   | 250 | 48094  | 48343  |
| UN61713 | Rsa1.0.00387.1 | 259 | 495407 | 1.00E-123 | 245 | 252 | 97 + | 8   | 259 | 163254 | 163505 |
| UN61714 | Rsa1.0.02548.1 | 495 | 30228  | 1.00E-153 | 313 | 324 | 96 - | 7   | 330 | 9298   | 9616   |
| UN61715 | Rsa1.0.30957.1 | 582 | 740    | 1.00E-163 | 354 | 374 | 94 + | 5   | 376 | 127    | 500    |
| UN61716 | Rsa1.0.18141.1 | 136 | 1658   | 1.00E-54  | 126 | 132 | 95 + | 5   | 136 | 1128   | 1259   |
| UN61717 | Rsa1.0.00713.1 | 346 | 158017 | 1.00E-99  | 240 | 258 | 93 + | 4   | 261 | 668    | 922    |
| UN61718 | Rsa1.0.04260.1 | 860 | 18238  | 1.00E-179 | 364 | 374 | 97 - | 1   | 371 | 3017   | 3389   |
| UN61719 | Rsa1.0.00696.1 | 772 | 68010  | 0         | 531 | 535 | 99 - | 238 | 772 | 11466  | 12000  |
| UN61720 | Rsa1.0.05293.1 | 292 | 14237  | 4.00E-90  | 269 | 296 | 90 + | 1   | 292 | 9630   | 9919   |
| UN61721 | Rsa1.0.15907.1 | 824 | 2365   | 0         | 448 | 450 | 99 + | 2   | 451 | 678    | 1127   |
| UN61722 | Rsa1.0.00709.1 | 729 | 67329  | 0         | 711 | 729 | 97 + | 2   | 729 | 31148  | 31876  |
| UN61723 | Rsa1.0.00727.1 | 421 | 66724  | 1.00E-88  | 193 | 202 | 95 + | 176 | 377 | 15710  | 15911  |
| UN61724 | Rsa1.0.00890.1 | 144 | 323870 | 3.00E-49  | 129 | 139 | 92 - | 1   | 139 | 162685 | 162823 |
| UN61725 | Rsa1.0.00515.1 | 746 | 78417  | 0         | 588 | 611 | 96 - | 3   | 613 | 17343  | 17952  |
| UN61726 | Rsa1.0.01302.1 | 202 | 48907  | 1.00E-52  | 124 | 129 | 96 - | 50  | 177 | 2733   | 2861   |
| UN61727 | Rsa1.0.00626.1 | 750 | 71582  | 1.00E-131 | 355 | 390 | 91 - | 5   | 383 | 53387  | 53769  |
| UN61728 | Rsa1.0.07413.1 | 855 | 9438   | 0         | 698 | 710 | 98 + | 154 | 855 | 80     | 789    |
| UN61729 | Rsa1.0.00355.1 | 684 | 92038  | 0         | 516 | 564 | 91 + | 3   | 557 | 77886  | 78429  |
| UN61730 | Rsa1.0.03178.1 | 198 | 24798  | 1.00E-86  | 189 | 198 | 95 - | 1   | 198 | 16292  | 16489  |
| UN61731 | Rsa1.0.00017.1 | 820 | 752458 | 0         | 770 | 815 | 94 - | 1   | 815 | 416175 | 416989 |
| UN61732 | Rsa1.0.10233.1 | 407 | 5928   | 1.00E-158 | 372 | 406 | 91 - | 2   | 407 | 2479   | 2861   |
| UN61733 | Rsa1.0.00790.1 | 799 | 148693 | 1.00E-126 | 239 | 242 | 98 - | 1   | 242 | 143652 | 143893 |
| UN61734 | Rsa1.0.02228.1 | 420 | 33688  | 1.00E-165 | 336 | 350 | 96 + | 4   | 353 | 10205  | 10554  |
| UN61735 | Rsa1.0.01220.1 | 491 | 161775 | 1.00E-133 | 262 | 268 | 97 - | 1   | 267 | 117108 | 117375 |

|         |                |     |        |           |     |     |       |     |     |        |        |
|---------|----------------|-----|--------|-----------|-----|-----|-------|-----|-----|--------|--------|
| UN61736 | Rsa1.0.02544.1 | 683 | 30290  | 0         | 679 | 683 | 99 +  | 1   | 683 | 3520   | 4202   |
| UN61737 | Rsa1.0.01595.1 | 117 | 175383 | 3.00E-39  | 103 | 110 | 93 +  | 4   | 113 | 41145  | 41254  |
| UN61738 | Rsa1.0.00180.1 | 101 | 114581 | 4.00E-29  | 92  | 101 | 91 +  | 1   | 101 | 21022  | 21122  |
| UN61739 | Rsa1.0.00719.1 | 525 | 66952  | 2.33E-156 | 292 | 300 | 97 -  | 2   | 297 | 63686  | 63985  |
| UN61740 | Rsa1.0.00790.1 | 138 | 148693 | 6.00E-35  | 120 | 131 | 91 -  | 9   | 138 | 22020  | 22148  |
| UN61741 | Rsa1.0.07516.1 | 110 | 9218   | 2.00E-34  | 101 | 110 | 91 +  | 1   | 110 | 6496   | 6605   |
| UN61742 | Rsa1.0.06248.1 | 598 | 11394  | 0         | 413 | 430 | 96 +  | 3   | 423 | 4449   | 4878   |
| UN61743 | Rsa1.0.03543.1 | 316 | 22185  | 1.00E-121 | 278 | 297 | 93 +  | 20  | 316 | 15906  | 16198  |
| UN61744 | Rsa1.0.00661.1 | 490 | 213041 | 9.00E-71  | 145 | 148 | 97 +  | 198 | 345 | 54678  | 54825  |
| UN61745 | Rsa1.0.04563.1 | 800 | 16837  | 1.00E-164 | 345 | 360 | 95 +  | 9   | 366 | 16342  | 16700  |
| UN61746 | Rsa1.0.01431.1 | 113 | 167877 | 2.00E-31  | 96  | 105 | 91 -  | 1   | 105 | 157766 | 157870 |
| UN61747 | Rsa1.0.00907.1 | 478 | 60062  | 1.00E-116 | 218 | 220 | 99 -  | 37  | 256 | 56065  | 56284  |
| UN61748 | Rsa1.0.00923.1 | 557 | 153678 | 0         | 422 | 430 | 98 +  | 1   | 430 | 23047  | 23476  |
| UN61749 | Rsa1.0.01006.1 | 506 | 163670 | 3.00E-74  | 163 | 170 | 95 +  | 134 | 303 | 24121  | 24290  |
| UN61750 | Rsa1.0.00648.1 | 637 | 70351  | 0         | 349 | 353 | 98 +  | 1   | 353 | 12066  | 12415  |
| UN61751 | Rsa1.0.01229.1 | 427 | 50235  | 0         | 414 | 427 | 96 -  | 1   | 427 | 3917   | 4343   |
| UN61752 | Rsa1.0.00628.1 | 732 | 214360 | 0         | 406 | 406 | 100 - | 1   | 406 | 20549  | 20954  |
| UN61753 | Rsa1.0.00568.1 | 527 | 75219  | 0         | 353 | 353 | 100 - | 2   | 354 | 26080  | 26432  |
| UN61754 | Rsa1.0.01151.1 | 428 | 52268  | 1.00E-133 | 297 | 316 | 93 +  | 1   | 316 | 26326  | 26641  |
| UN61755 | Rsa1.0.00421.1 | 721 | 86365  | 1.00E-112 | 288 | 306 | 94 +  | 3   | 304 | 70152  | 70449  |
| UN61756 | Rsa1.0.00193.1 | 532 | 194198 | 1.00E-141 | 291 | 303 | 96 +  | 202 | 504 | 103331 | 103633 |
| UN61757 | Rsa1.0.01130.1 | 118 | 52929  | 1.00E-26  | 104 | 117 | 88 -  | 4   | 114 | 34970  | 35086  |
| UN61758 | Rsa1.0.00159.1 | 751 | 431686 | 0         | 466 | 482 | 96 -  | 162 | 643 | 261878 | 262359 |
| UN61759 | Rsa1.0.06864.1 | 370 | 10240  | 1.00E-129 | 338 | 376 | 89 -  | 2   | 370 | 5871   | 6233   |
| UN61760 | Rsa1.0.01536.1 | 723 | 43747  | 0         | 634 | 641 | 98 -  | 74  | 712 | 12120  | 12760  |
| UN61761 | Rsa1.0.00183.1 | 840 | 113277 | 0         | 814 | 837 | 97 +  | 10  | 840 | 96770  | 97606  |
| UN61762 | Rsa1.0.00502.1 | 359 | 204180 | 1.00E-135 | 329 | 356 | 92 +  | 1   | 356 | 181151 | 181505 |
| UN61763 | Rsa1.0.00651.1 | 237 | 247766 | 3.00E-87  | 214 | 228 | 93 -  | 12  | 237 | 178724 | 178947 |
| UN61764 | Rsa1.0.04542.1 | 564 | 16930  | 1.00E-118 | 268 | 286 | 93 -  | 1   | 279 | 13253  | 13538  |
| UN61765 | Rsa1.0.59867.1 | 567 | 382    | 5.00E-82  | 214 | 229 | 93 +  | 238 | 461 | 144    | 371    |
| UN61766 | Rsa1.0.00533.1 | 678 | 77375  | 5.00E-98  | 250 | 270 | 92 +  | 15  | 278 | 63814  | 64082  |
| UN61767 | Rsa1.0.00026.1 | 834 | 327835 | 0         | 768 | 799 | 96 -  | 3   | 798 | 2795   | 3592   |
| UN61768 | Rsa1.0.00182.1 | 675 | 142305 | 0         | 538 | 552 | 97 +  | 3   | 554 | 112672 | 113223 |
| UN61769 | Rsa1.0.08312.1 | 850 | 7564   | 0         | 808 | 814 | 99 +  | 1   | 811 | 837    | 1650   |
| UN61770 | Rsa1.0.00628.1 | 641 | 214360 | 0         | 641 | 642 | 99 -  | 1   | 641 | 23828  | 24469  |
| UN61771 | Rsa1.0.04032.1 | 728 | 19489  | 0         | 430 | 443 | 97 +  | 1   | 443 | 6334   | 6776   |
| UN61772 | Rsa1.0.00017.1 | 781 | 752458 | 0         | 384 | 406 | 94 -  | 1   | 390 | 718544 | 718948 |
| UN61773 | Rsa1.0.01566.1 | 755 | 43134  | 0         | 488 | 503 | 97 +  | 1   | 500 | 14168  | 14668  |
| UN61774 | Rsa1.0.00383.1 | 251 | 398431 | 3.00E-97  | 213 | 219 | 97 -  | 6   | 219 | 5837   | 6055   |

|         |                |     |        |           |     |     |       |     |     |        |        |
|---------|----------------|-----|--------|-----------|-----|-----|-------|-----|-----|--------|--------|
| UN61775 | Rsa1.0.03168.1 | 757 | 24827  | 0         | 722 | 747 | 96 -  | 14  | 757 | 19654  | 20400  |
| UN61776 | Rsa1.0.00107.1 | 434 | 431659 | 1.00E-170 | 409 | 442 | 92 -  | 1   | 434 | 337123 | 337564 |
| UN61777 | Rsa1.0.00008.1 | 426 | 358124 | 1.00E-139 | 265 | 270 | 98 -  | 2   | 271 | 54525  | 54794  |
| UN61778 | Rsa1.0.00466.1 | 113 | 82132  | 6.00E-50  | 112 | 115 | 97 -  | 1   | 113 | 81440  | 81554  |
| UN61779 | Rsa1.0.02173.1 | 651 | 34318  | 0         | 398 | 404 | 98 +  | 101 | 503 | 22151  | 22554  |
| UN61780 | Rsa1.0.00946.1 | 761 | 58666  | 1.00E-174 | 323 | 326 | 99 -  | 1   | 326 | 52830  | 53154  |
| UN61781 | Rsa1.0.00196.1 | 763 | 109960 | 0         | 732 | 778 | 94 -  | 1   | 763 | 11224  | 12001  |
| UN61782 | Rsa1.0.01234.1 | 724 | 50183  | 0         | 511 | 514 | 99 +  | 1   | 512 | 30951  | 31464  |
| UN61783 | Rsa1.0.00185.1 | 491 | 248445 | 0         | 471 | 491 | 95 +  | 1   | 491 | 246052 | 246532 |
| UN61784 | Rsa1.0.00391.1 | 759 | 183853 | 0         | 458 | 472 | 97 +  | 288 | 759 | 64185  | 64656  |
| UN61785 | Rsa1.0.00932.1 | 732 | 59185  | 1.00E-149 | 313 | 326 | 96 -  | 1   | 324 | 36975  | 37299  |
| UN61786 | Rsa1.0.05679.1 | 379 | 12958  | 1.00E-144 | 280 | 287 | 97 +  | 3   | 289 | 830    | 1116   |
| UN61787 | Rsa1.0.15765.1 | 197 | 2437   | 6.00E-45  | 113 | 120 | 94 -  | 78  | 197 | 1313   | 1432   |
| UN61788 | Rsa1.0.04522.1 | 579 | 16988  | 0         | 573 | 579 | 98 -  | 3   | 577 | 1107   | 1685   |
| UN61789 | Rsa1.0.00028.1 | 280 | 293984 | 1.00E-105 | 257 | 278 | 92 +  | 3   | 280 | 282596 | 282864 |
| UN61790 | Rsa1.0.03074.1 | 347 | 25568  | 1.00E-152 | 308 | 320 | 96 -  | 1   | 320 | 11533  | 11852  |
| UN61791 | Rsa1.0.04538.1 | 782 | 16940  | 0         | 541 | 567 | 95 -  | 219 | 782 | 6883   | 7444   |
| UN61792 | Rsa1.0.04812.1 | 223 | 15883  | 7.00E-79  | 149 | 149 | 100 - | 75  | 223 | 12062  | 12210  |
| UN61793 | Rsa1.0.02745.1 | 785 | 28263  | 0         | 420 | 434 | 96 -  | 94  | 527 | 766    | 1199   |
| UN61794 | Rsa1.0.03029.1 | 122 | 25858  | 5.00E-32  | 91  | 98  | 92 -  | 25  | 122 | 15800  | 15897  |
| UN61795 | Rsa1.0.03304.1 | 774 | 23883  | 0         | 684 | 708 | 96 +  | 71  | 774 | 8615   | 9315   |
| UN61796 | Rsa1.0.00305.1 | 197 | 97308  | 2.00E-88  | 190 | 197 | 96 +  | 1   | 197 | 71707  | 71902  |
| UN61797 | Rsa1.0.00926.1 | 801 | 195072 | 0         | 774 | 786 | 98 -  | 1   | 786 | 30126  | 30911  |
| UN61798 | Rsa1.0.00053.1 | 552 | 263459 | 1.00E-109 | 260 | 278 | 93 -  | 2   | 277 | 194175 | 194444 |
| UN61799 | Rsa1.0.18241.1 | 751 | 1639   | 0         | 707 | 710 | 99 +  | 1   | 709 | 197    | 906    |
| UN61800 | Rsa1.0.00160.1 | 444 | 346678 | 0         | 434 | 449 | 96 +  | 1   | 444 | 137826 | 138274 |
| UN61801 | Rsa1.0.00507.1 | 258 | 79074  | 4.00E-90  | 189 | 196 | 96 +  | 40  | 235 | 18947  | 19142  |
| UN61802 | Rsa1.0.02916.1 | 588 | 26809  | 1.00E-134 | 272 | 282 | 96 -  | 1   | 282 | 1634   | 1915   |
| UN61803 | Rsa1.0.00741.1 | 687 | 66117  | 0         | 566 | 581 | 97 -  | 103 | 683 | 35925  | 36505  |
| UN61804 | Rsa1.0.00356.1 | 606 | 91521  | 0         | 488 | 501 | 97 -  | 7   | 507 | 5213   | 5709   |
| UN61805 | Rsa1.0.06136.1 | 478 | 11659  | 0         | 460 | 480 | 95 +  | 1   | 478 | 3232   | 3700   |
| UN61806 | Rsa1.0.01007.1 | 421 | 56933  | 1.00E-123 | 252 | 260 | 96 +  | 1   | 259 | 2061   | 2320   |
| UN61807 | Rsa1.0.29386.1 | 490 | 784    | 0         | 438 | 447 | 97 +  | 44  | 490 | 1      | 447    |
| UN61808 | Rsa1.0.01789.1 | 203 | 39250  | 4.00E-80  | 190 | 203 | 93 -  | 1   | 203 | 10066  | 10268  |
| UN61809 | Rsa1.0.00001.1 | 257 | 363028 | 1.00E-123 | 248 | 255 | 97 +  | 3   | 257 | 1368   | 1621   |
| UN61810 | Rsa1.0.04977.1 | 220 | 15260  | 6.00E-70  | 164 | 173 | 94 -  | 48  | 218 | 9375   | 9547   |
| UN61811 | Rsa1.0.01595.1 | 719 | 175383 | 0         | 492 | 496 | 99 +  | 2   | 497 | 25699  | 26193  |
| UN61812 | Rsa1.0.07321.1 | 621 | 9559   | 1.00E-109 | 277 | 304 | 91 -  | 115 | 398 | 4293   | 4596   |
| UN61813 | Rsa1.0.00712.1 | 757 | 67217  | 0         | 446 | 466 | 95 -  | 1   | 464 | 18090  | 18551  |

|         |                |     |        |           |     |     |      |     |     |        |        |
|---------|----------------|-----|--------|-----------|-----|-----|------|-----|-----|--------|--------|
| UN61814 | Rsa1.0.00301.1 | 504 | 365315 | 0         | 482 | 498 | 96 - | 4   | 501 | 26445  | 26942  |
| UN61815 | Rsa1.0.01945.1 | 754 | 36989  | 0         | 753 | 754 | 99 - | 1   | 754 | 15310  | 16063  |
| UN61816 | Rsa1.0.01414.1 | 569 | 149508 | 0         | 529 | 560 | 94 - | 1   | 558 | 143147 | 143697 |
| UN61817 | Rsa1.0.00635.1 | 780 | 175826 | 1.00E-126 | 328 | 363 | 90 + | 1   | 344 | 107037 | 107397 |
| UN61818 | Rsa1.0.02016.1 | 758 | 36003  | 1.00E-165 | 316 | 323 | 97 + | 299 | 621 | 6525   | 6847   |
| UN61819 | Rsa1.0.01101.1 | 503 | 54031  | 9.00E-68  | 146 | 150 | 97 - | 1   | 148 | 24383  | 24532  |
| UN61820 | Rsa1.0.04483.1 | 337 | 17174  | 2.00E-89  | 188 | 195 | 96 + | 1   | 195 | 9895   | 10089  |
| UN61821 | Rsa1.0.00458.1 | 841 | 82717  | 0         | 415 | 436 | 95 + | 1   | 436 | 75544  | 75964  |
| UN61822 | Rsa1.0.02378.1 | 273 | 31991  | 1.00E-106 | 258 | 277 | 93 + | 1   | 273 | 14237  | 14513  |
| UN61823 | Rsa1.0.00306.1 | 782 | 146760 | 0         | 758 | 782 | 96 + | 1   | 782 | 84419  | 85198  |
| UN61824 | Rsa1.0.00631.1 | 143 | 71277  | 1.00E-48  | 129 | 138 | 93 + | 1   | 138 | 59029  | 59165  |
| UN61825 | Rsa1.0.00301.1 | 505 | 365315 | 0         | 486 | 505 | 96 + | 1   | 505 | 224478 | 224982 |
| UN61826 | Rsa1.0.01001.1 | 531 | 57077  | 8.00E-84  | 245 | 271 | 90 - | 8   | 274 | 22938  | 23206  |
| UN61827 | Rsa1.0.00116.1 | 683 | 365886 | 1.00E-155 | 301 | 309 | 97 + | 374 | 682 | 344197 | 344505 |
| UN61828 | Rsa1.0.00278.1 | 703 | 231896 | 0         | 660 | 696 | 94 + | 13  | 703 | 25594  | 26275  |
| UN61829 | Rsa1.0.05679.1 | 903 | 12958  | 1.00E-111 | 208 | 209 | 99 + | 1   | 209 | 601    | 809    |
| UN61830 | Rsa1.0.13238.1 | 601 | 4960   | 0         | 532 | 552 | 96 - | 27  | 571 | 2195   | 2746   |
| UN61831 | Rsa1.0.02780.1 | 577 | 27965  | 0         | 451 | 467 | 96 + | 6   | 471 | 8346   | 8809   |
| UN61832 | Rsa1.0.00802.1 | 814 | 63846  | 1.00E-137 | 277 | 287 | 96 - | 1   | 287 | 29300  | 29586  |
| UN61833 | Rsa1.0.00020.1 | 874 | 283099 | 1.00E-143 | 326 | 347 | 93 + | 3   | 348 | 158295 | 158632 |
| UN61834 | Rsa1.0.00734.1 | 595 | 66508  | 2.00E-94  | 247 | 271 | 91 + | 1   | 257 | 58335  | 58603  |
| UN61835 | Rsa1.0.01740.1 | 451 | 39986  | 3.00E-89  | 225 | 242 | 92 + | 1   | 239 | 26331  | 26572  |
| UN61836 | Rsa1.0.01683.1 | 413 | 41059  | 5.00E-66  | 146 | 152 | 96 - | 152 | 303 | 23704  | 23855  |
| UN61837 | Rsa1.0.11439.1 | 459 | 5507   | 5.00E-32  | 77  | 79  | 97 + | 123 | 201 | 93     | 171    |
| UN61838 | Rsa1.0.00797.1 | 702 | 63959  | 0         | 574 | 617 | 93 + | 3   | 597 | 51678  | 52289  |
| UN61839 | Rsa1.0.01263.1 | 655 | 49703  | 0         | 650 | 658 | 98 - | 1   | 655 | 46908  | 47565  |
| UN61840 | Rsa1.0.00028.1 | 785 | 293984 | 0         | 775 | 787 | 98 + | 3   | 784 | 230168 | 230954 |
| UN61841 | Rsa1.0.00813.1 | 591 | 63202  | 1.00E-116 | 222 | 225 | 98 + | 316 | 540 | 11625  | 11849  |
| UN61842 | Rsa1.0.07736.1 | 813 | 8687   | 0         | 688 | 706 | 97 - | 3   | 706 | 83     | 788    |
| UN61843 | Rsa1.0.00403.1 | 133 | 87701  | 8.00E-22  | 62  | 65  | 95 - | 69  | 133 | 45257  | 45321  |
| UN61844 | Rsa1.0.01731.1 | 695 | 40208  | 1.00E-175 | 339 | 347 | 97 + | 189 | 535 | 31180  | 31525  |
| UN61845 | Rsa1.0.00381.1 | 143 | 89718  | 1.00E-42  | 124 | 136 | 91 - | 4   | 139 | 47518  | 47653  |
| UN61846 | Rsa1.0.01364.1 | 510 | 47172  | 1.00E-170 | 339 | 351 | 96 + | 6   | 356 | 43593  | 43943  |
| UN61847 | Rsa1.0.00866.1 | 747 | 61676  | 0         | 553 | 611 | 90 + | 1   | 611 | 56741  | 57327  |
| UN61848 | Rsa1.0.00094.1 | 542 | 139042 | 7.00E-75  | 192 | 206 | 93 - | 291 | 495 | 135609 | 135812 |
| UN61849 | Rsa1.0.03306.1 | 206 | 23873  | 3.00E-78  | 188 | 199 | 94 - | 5   | 203 | 12850  | 13045  |
| UN61850 | Rsa1.0.00344.1 | 793 | 191774 | 0         | 380 | 395 | 96 - | 1   | 393 | 104082 | 104474 |
| UN61851 | Rsa1.0.03128.1 | 710 | 25180  | 0         | 647 | 708 | 91 + | 3   | 710 | 20696  | 21403  |
| UN61852 | Rsa1.0.01440.1 | 837 | 45807  | 0         | 407 | 412 | 98 + | 2   | 411 | 6983   | 7394   |

|         |                |     |        |           |     |     |       |     |     |        |        |
|---------|----------------|-----|--------|-----------|-----|-----|-------|-----|-----|--------|--------|
| UN61853 | Rsa1.0.00145.1 | 784 | 261008 | 5.00E-89  | 210 | 223 | 94 -  | 29  | 250 | 34764  | 34986  |
| UN61854 | Rsa1.0.00341.1 | 726 | 249309 | 0         | 663 | 726 | 91 +  | 5   | 723 | 717    | 1426   |
| UN61855 | Rsa1.0.08027.1 | 351 | 8058   | 1.00E-180 | 343 | 351 | 97 -  | 1   | 351 | 6991   | 7341   |
| UN61856 | Rsa1.0.39586.1 | 750 | 568    | 5.00E-92  | 181 | 184 | 98 -  | 391 | 574 | 26     | 209    |
| UN61857 | Rsa1.0.00041.1 | 739 | 186197 | 1.00E-104 | 208 | 213 | 97 +  | 249 | 461 | 127713 | 127925 |
| UN61858 | Rsa1.0.00651.1 | 638 | 247766 | 0         | 373 | 382 | 97 -  | 259 | 638 | 80365  | 80746  |
| UN61859 | Rsa1.0.01217.1 | 740 | 50554  | 0         | 375 | 382 | 98 -  | 359 | 740 | 13613  | 13994  |
| UN61860 | Rsa1.0.05347.1 | 399 | 14096  | 0         | 396 | 402 | 98 -  | 1   | 399 | 9360   | 9761   |
| UN61861 | Rsa1.0.03642.1 | 800 | 21609  | 1.00E-156 | 555 | 646 | 85 +  | 205 | 800 | 4850   | 5478   |
| UN61862 | Rsa1.0.03898.1 | 698 | 20183  | 1.00E-76  | 209 | 228 | 91 +  | 1   | 222 | 12151  | 12375  |
| UN61863 | Rsa1.0.01620.1 | 599 | 42091  | 0         | 397 | 399 | 99 -  | 1   | 399 | 13430  | 13828  |
| UN61864 | Rsa1.0.00415.1 | 708 | 86795  | 0         | 443 | 458 | 96 -  | 251 | 708 | 73272  | 73729  |
| UN61865 | Rsa1.0.10422.1 | 830 | 5854   | 0         | 728 | 805 | 90 -  | 1   | 780 | 2065   | 2853   |
| UN61866 | Rsa1.0.02222.1 | 298 | 152798 | 1.00E-124 | 281 | 297 | 94 +  | 1   | 296 | 4841   | 5136   |
| UN61867 | Rsa1.0.01055.1 | 796 | 55466  | 0         | 625 | 688 | 90 -  | 1   | 664 | 12305  | 12986  |
| UN61868 | Rsa1.0.03132.1 | 651 | 25142  | 0         | 593 | 600 | 98 +  | 1   | 598 | 7931   | 8530   |
| UN61869 | Rsa1.0.00080.1 | 786 | 190437 | 0         | 666 | 690 | 96 -  | 66  | 755 | 81407  | 82096  |
| UN61870 | Rsa1.0.00034.1 | 716 | 260119 | 0         | 688 | 722 | 95 +  | 1   | 716 | 249027 | 249747 |
| UN61871 | Rsa1.0.33251.1 | 146 | 683    | 7.00E-75  | 145 | 146 | 99 -  | 1   | 146 | 75     | 220    |
| UN61872 | Rsa1.0.00842.1 | 276 | 62493  | 2.00E-85  | 196 | 208 | 94 -  | 69  | 276 | 3221   | 3428   |
| UN61873 | Rsa1.0.00571.1 | 193 | 329018 | 2.00E-82  | 184 | 193 | 95 +  | 1   | 190 | 165735 | 165927 |
| UN61874 | Rsa1.0.00710.1 | 738 | 67325  | 0         | 709 | 765 | 92 +  | 1   | 733 | 3547   | 4307   |
| UN61875 | Rsa1.0.01063.1 | 655 | 55301  | 0         | 623 | 659 | 94 +  | 1   | 655 | 16256  | 16900  |
| UN61876 | Rsa1.0.01728.1 | 533 | 40239  | 1.00E-113 | 275 | 295 | 93 -  | 1   | 294 | 3678   | 3971   |
| UN61877 | Rsa1.0.06162.1 | 452 | 11590  | 1.00E-143 | 261 | 262 | 99 -  | 1   | 262 | 4572   | 4833   |
| UN61878 | Rsa1.0.03191.1 | 311 | 145762 | 1.00E-112 | 244 | 256 | 95 +  | 56  | 311 | 16091  | 16344  |
| UN61879 | Rsa1.0.02817.1 | 438 | 27644  | 0         | 425 | 435 | 97 +  | 2   | 436 | 13997  | 14431  |
| UN61880 | Rsa1.0.02404.1 | 137 | 31702  | 5.00E-23  | 61  | 63  | 96 -  | 72  | 134 | 23132  | 23194  |
| UN61881 | Rsa1.0.00890.1 | 748 | 323870 | 0         | 401 | 402 | 99 +  | 1   | 402 | 160758 | 161158 |
| UN61882 | Rsa1.0.00739.1 | 859 | 66155  | 1.00E-138 | 281 | 289 | 97 -  | 573 | 859 | 24537  | 24825  |
| UN61883 | Rsa1.0.20054.1 | 814 | 1347   | 1.00E-109 | 204 | 205 | 99 -  | 558 | 762 | 1083   | 1287   |
| UN61884 | Rsa1.0.00336.1 | 264 | 445051 | 1.00E-101 | 240 | 256 | 93 -  | 9   | 260 | 156364 | 156619 |
| UN61885 | Rsa1.0.00302.1 | 642 | 97521  | 0         | 617 | 641 | 96 +  | 2   | 642 | 61951  | 62579  |
| UN61886 | Rsa1.0.00148.1 | 338 | 120234 | 1.00E-160 | 325 | 338 | 96 -  | 1   | 338 | 37104  | 37441  |
| UN61887 | Rsa1.0.05547.1 | 364 | 13369  | 1.00E-148 | 297 | 306 | 97 -  | 3   | 307 | 6351   | 6656   |
| UN61888 | Rsa1.0.00101.1 | 686 | 267193 | 1.00E-135 | 306 | 324 | 94 -  | 27  | 344 | 47238  | 47560  |
| UN61889 | Rsa1.0.00131.1 | 589 | 432233 | 0         | 322 | 322 | 100 + | 3   | 324 | 414598 | 414919 |
| UN61890 | Rsa1.0.03344.1 | 638 | 23593  | 0         | 423 | 450 | 94 -  | 1   | 450 | 12168  | 12615  |
| UN61891 | Rsa1.0.73518.1 | 364 | 312    | 1.00E-162 | 308 | 313 | 98 +  | 35  | 347 | 1      | 312    |

|         |                |     |        |           |     |     |       |     |     |        |        |
|---------|----------------|-----|--------|-----------|-----|-----|-------|-----|-----|--------|--------|
| UN61892 | Rsa1.0_01893.1 | 116 | 37520  | 7.00E-59  | 115 | 115 | 100 - | 2   | 116 | 21323  | 21437  |
| UN61893 | #              | #   | #      | #         | #   | #   | #     | #   | #   | #      | #      |
| UN61894 | Rsa1.0_00857.1 | 699 | 61904  | 1.00E-159 | 389 | 423 | 91 -  | 2   | 418 | 15535  | 15951  |
| UN61895 | Rsa1.0_00475.1 | 686 | 81678  | 0         | 341 | 347 | 98 +  | 279 | 625 | 7908   | 8254   |
| UN61896 | Rsa1.0_04616.1 | 663 | 16627  | 2.00E-94  | 256 | 284 | 90 +  | 132 | 406 | 2663   | 2946   |
| UN61897 | Rsa1.0_01376.1 | 612 | 47004  | 3.00E-80  | 158 | 160 | 98 +  | 345 | 504 | 21583  | 21742  |
| UN61898 | Rsa1.0_00012.1 | 566 | 222148 | 0         | 558 | 559 | 99 -  | 1   | 559 | 103711 | 104269 |
| UN61899 | Rsa1.0_07339.1 | 670 | 9534   | 1.00E-155 | 278 | 278 | 100 - | 1   | 278 | 7672   | 7949   |
| UN61900 | Rsa1.0_01004.1 | 733 | 56975  | 0         | 405 | 427 | 94 +  | 39  | 459 | 37959  | 38385  |
| UN61901 | Rsa1.0_00108.1 | 732 | 478491 | 0         | 572 | 576 | 99 +  | 156 | 730 | 114385 | 114959 |
| UN61902 | Rsa1.0_06086.1 | 429 | 11768  | 2.00E-80  | 158 | 160 | 98 +  | 3   | 162 | 10286  | 10445  |
| UN61903 | Rsa1.0_14950.1 | 821 | 2940   | 0         | 737 | 756 | 97 -  | 3   | 750 | 1616   | 2371   |
| UN61904 | Rsa1.0_01376.1 | 534 | 47004  | 0         | 362 | 373 | 97 +  | 153 | 525 | 46244  | 46614  |
| UN61905 | Rsa1.0_01250.1 | 807 | 49874  | 1.00E-129 | 261 | 270 | 96 +  | 9   | 278 | 13938  | 14207  |
| UN61906 | Rsa1.0_01101.1 | 188 | 54031  | 3.00E-99  | 186 | 187 | 99 +  | 2   | 188 | 51958  | 52144  |
| UN61907 | Rsa1.0_00293.1 | 520 | 339294 | 1.00E-110 | 203 | 203 | 100 + | 26  | 228 | 224706 | 224908 |
| UN61908 | Rsa1.0_16079.1 | 622 | 2293   | 0         | 587 | 596 | 98 -  | 1   | 596 | 1      | 596    |
| UN61909 | Rsa1.0_02990.1 | 817 | 26180  | 0         | 804 | 824 | 97 +  | 1   | 815 | 13322  | 14145  |
| UN61910 | Rsa1.0_02559.1 | 573 | 30096  | 1.00E-100 | 258 | 277 | 93 +  | 284 | 559 | 19438  | 19711  |
| UN61911 | Rsa1.0_02944.1 | 228 | 26553  | 2.00E-91  | 215 | 226 | 95 +  | 1   | 225 | 4804   | 5027   |
| UN61912 | Rsa1.0_00247.1 | 572 | 103408 | 0         | 387 | 392 | 98 +  | 34  | 425 | 90052  | 90443  |
| UN61913 | Rsa1.0_02314.1 | 463 | 32642  | 0         | 441 | 443 | 99 -  | 3   | 445 | 20578  | 21020  |
| UN61914 | Rsa1.0_03093.1 | 807 | 25445  | 0         | 582 | 607 | 95 +  | 203 | 798 | 14489  | 15095  |
| UN61915 | Rsa1.0_18973.1 | 788 | 1502   | 0         | 744 | 774 | 96 -  | 2   | 761 | 363    | 1131   |
| UN61916 | Rsa1.0_04867.1 | 669 | 15670  | 0         | 667 | 668 | 99 +  | 3   | 669 | 1878   | 2545   |
| UN61917 | Rsa1.0_60568.1 | 453 | 378    | 3.00E-89  | 182 | 187 | 97 +  | 115 | 301 | 192    | 378    |
| UN61918 | Rsa1.0_00721.1 | 662 | 66918  | 0         | 433 | 434 | 99 +  | 229 | 662 | 27433  | 27866  |
| UN61919 | Rsa1.0_00223.1 | 575 | 106231 | 0         | 572 | 574 | 99 +  | 2   | 575 | 5950   | 6521   |
| UN61920 | Rsa1.0_02310.1 | 693 | 32735  | 0         | 383 | 399 | 95 +  | 1   | 391 | 27771  | 28169  |
| UN61921 | Rsa1.0_00616.1 | 658 | 195713 | 0         | 461 | 466 | 98 +  | 193 | 658 | 181777 | 182239 |
| UN61922 | Rsa1.0_00321.1 | 807 | 95671  | 1.00E-144 | 260 | 260 | 100 - | 231 | 490 | 11633  | 11892  |
| UN61923 | Rsa1.0_00287.1 | 827 | 98687  | 0         | 635 | 718 | 88 +  | 47  | 758 | 53355  | 54072  |
| UN61924 | Rsa1.0_00604.1 | 656 | 146282 | 0         | 355 | 360 | 98 +  | 163 | 521 | 123280 | 123639 |
| UN61925 | Rsa1.0_14084.1 | 821 | 3822   | 0         | 686 | 707 | 97 -  | 88  | 781 | 2089   | 2795   |
| UN61926 | Rsa1.0_00301.1 | 706 | 365315 | 1.00E-132 | 240 | 240 | 100 + | 1   | 240 | 359042 | 359281 |
| UN61927 | Rsa1.0_56381.1 | 549 | 406    | 0         | 369 | 373 | 98 -  | 177 | 549 | 34     | 406    |
| UN61928 | Rsa1.0_41047.1 | 647 | 547    | 0         | 378 | 386 | 97 +  | 206 | 591 | 1      | 384    |
| UN61929 | Rsa1.0_02378.1 | 789 | 31991  | 0         | 362 | 375 | 96 +  | 1   | 375 | 12974  | 13336  |
| UN61930 | Rsa1.0_00356.1 | 750 | 91521  | 2.00E-54  | 109 | 109 | 100 - | 130 | 238 | 62421  | 62529  |

|         |                |     |        |           |     |     |       |     |     |        |        |
|---------|----------------|-----|--------|-----------|-----|-----|-------|-----|-----|--------|--------|
| UN61931 | Rsa1.0.03985.1 | 772 | 19704  | 0         | 745 | 761 | 97 +  | 4   | 763 | 14421  | 15181  |
| UN61932 | Rsa1.0.07703.1 | 791 | 8756   | 5.00E-98  | 182 | 182 | 100 - | 1   | 182 | 163    | 344    |
| UN61933 | Rsa1.0.04697.1 | 795 | 16336  | 0         | 421 | 439 | 95 +  | 355 | 788 | 11481  | 11919  |
| UN61934 | Rsa1.0.00192.1 | 681 | 278200 | 1.00E-159 | 296 | 300 | 98 -  | 283 | 582 | 43038  | 43337  |
| UN61935 | Rsa1.0.00365.1 | 725 | 90902  | 0         | 367 | 369 | 99 -  | 358 | 725 | 3374   | 3742   |
| UN61936 | Rsa1.0.01796.1 | 741 | 39154  | 1.00E-120 | 230 | 232 | 99 +  | 506 | 736 | 16175  | 16406  |
| UN61937 | Rsa1.0.00784.1 | 638 | 64359  | 0         | 435 | 447 | 97 -  | 4   | 446 | 9051   | 9495   |
| UN61938 | Rsa1.0.04545.1 | 625 | 146799 | 2.00E-84  | 176 | 179 | 98 -  | 447 | 623 | 7537   | 7715   |
| UN61939 | Rsa1.0.04027.1 | 737 | 19501  | 1.00E-49  | 107 | 109 | 98 +  | 553 | 661 | 5877   | 5985   |
| UN61940 | Rsa1.0.00852.1 | 725 | 62179  | 1.00E-163 | 291 | 291 | 100 + | 3   | 293 | 44250  | 44540  |
| UN61941 | Rsa1.0.01701.1 | 637 | 162121 | 0         | 548 | 573 | 95 -  | 65  | 637 | 34253  | 34804  |
| UN61942 | Rsa1.0.00317.1 | 728 | 218290 | 7.00E-88  | 165 | 165 | 100 - | 3   | 167 | 86842  | 87006  |
| UN61943 | Rsa1.0.02355.1 | 494 | 32260  | 0         | 473 | 492 | 96 -  | 3   | 494 | 25257  | 25736  |
| UN61944 | Rsa1.0.00890.1 | 400 | 323870 | 1.00E-148 | 266 | 266 | 100 - | 48  | 313 | 32241  | 32506  |
| UN61945 | Rsa1.0.00675.1 | 286 | 145590 | 1.00E-122 | 236 | 240 | 98 +  | 50  | 286 | 28808  | 29047  |
| UN61946 | #              | #   | #      | #         | #   | #   | #     | #   | #   | #      | #      |
| UN61947 | Rsa1.0.00649.1 | 598 | 70263  | 0         | 394 | 412 | 95 +  | 3   | 412 | 24103  | 24511  |
| UN61948 | Rsa1.0.00563.1 | 770 | 75491  | 0         | 611 | 645 | 94 +  | 80  | 721 | 69489  | 70126  |
| UN61949 | Rsa1.0.00216.1 | 809 | 197563 | 1.00E-143 | 279 | 286 | 97 -  | 323 | 608 | 17305  | 17590  |
| UN61950 | Rsa1.0.02320.1 | 668 | 32575  | 1.00E-159 | 353 | 377 | 93 +  | 10  | 377 | 22068  | 22444  |
| UN61951 | Rsa1.0.00398.1 | 679 | 88007  | 0         | 366 | 372 | 98 +  | 29  | 400 | 68924  | 69295  |
| UN61952 | Rsa1.0.03073.1 | 632 | 25574  | 0         | 604 | 628 | 96 +  | 5   | 632 | 14376  | 15000  |
| UN61953 | Rsa1.0.00029.1 | 640 | 272992 | 0         | 401 | 406 | 98 +  | 140 | 542 | 205832 | 206237 |
| UN61954 | Rsa1.0.01423.1 | 639 | 46170  | 1.00E-175 | 312 | 312 | 100 + | 328 | 639 | 12665  | 12976  |
| UN61955 | Rsa1.0.00028.1 | 706 | 293984 | 0         | 663 | 667 | 99 -  | 2   | 666 | 284062 | 284728 |
| UN61956 | Rsa1.0.00105.1 | 778 | 134138 | 1.00E-154 | 277 | 277 | 100 - | 3   | 279 | 101285 | 101561 |
| UN61957 | Rsa1.0.00006.1 | 201 | 396176 | 4.00E-86  | 167 | 169 | 98 +  | 33  | 201 | 99064  | 99232  |
| UN61958 | Rsa1.0.00939.1 | 796 | 185227 | 0         | 449 | 466 | 96 +  | 1   | 466 | 161132 | 161593 |
| UN61959 | Rsa1.0.19288.1 | 554 | 1451   | 9.00E-93  | 196 | 201 | 97 -  | 337 | 537 | 1245   | 1443   |
| UN61960 | Rsa1.0.03016.1 | 660 | 26000  | 1.00E-156 | 348 | 365 | 95 -  | 26  | 384 | 3315   | 3678   |
| UN61961 | Rsa1.0.00136.1 | 710 | 122464 | 1.00E-122 | 312 | 342 | 91 -  | 9   | 347 | 57274  | 57597  |
| UN61962 | Rsa1.0.08223.1 | 758 | 7700   | 1.00E-162 | 289 | 289 | 100 + | 5   | 293 | 1773   | 2061   |
| UN61963 | Rsa1.0.00546.1 | 777 | 76523  | 0         | 395 | 398 | 99 +  | 219 | 616 | 38928  | 39325  |
| UN61964 | Rsa1.0.01306.1 | 738 | 48720  | 0         | 370 | 371 | 99 -  | 3   | 373 | 33628  | 33998  |
| UN61965 | Rsa1.0.00069.1 | 294 | 403561 | 1.00E-138 | 249 | 249 | 100 - | 3   | 251 | 187194 | 187442 |
| UN61966 | Rsa1.0.00414.1 | 648 | 202190 | 1.00E-116 | 216 | 217 | 99 -  | 208 | 424 | 197259 | 197475 |
| UN61967 | Rsa1.0.00045.1 | 743 | 328694 | 0         | 740 | 743 | 99 +  | 3   | 743 | 226322 | 227064 |
| UN61968 | Rsa1.0.00387.1 | 745 | 495407 | 1.00E-173 | 339 | 348 | 97 +  | 3   | 349 | 30034  | 30381  |
| UN61969 | Rsa1.0.03762.1 | 638 | 20976  | 4.00E-12  | 44  | 46  | 95 -  | 305 | 350 | 3306   | 3351   |

|         |                |     |        |           |     |     |       |     |     |        |        |
|---------|----------------|-----|--------|-----------|-----|-----|-------|-----|-----|--------|--------|
| UN61970 | Rsa1.0_11534.1 | 724 | 5477   | 0         | 619 | 635 | 97 +  | 1   | 635 | 1087   | 1721   |
| UN61971 | Rsa1.0_00112.1 | 655 | 132199 | 0         | 360 | 360 | 100 - | 119 | 478 | 45829  | 46188  |
| UN61972 | Rsa1.0_02923.1 | 705 | 26736  | 1.00E-107 | 296 | 323 | 91 -  | 384 | 702 | 15783  | 16101  |
| UN61973 | Rsa1.0_00243.1 | 816 | 103651 | 0         | 573 | 574 | 99 -  | 3   | 576 | 94197  | 94770  |
| UN61974 | Rsa1.0_13751.1 | 612 | 4383   | 0         | 608 | 611 | 99 +  | 3   | 612 | 2630   | 3240   |
| UN61975 | Rsa1.0_00715.1 | 756 | 67116  | 0         | 563 | 566 | 99 -  | 2   | 567 | 22526  | 23091  |
| UN61976 | Rsa1.0_00413.1 | 664 | 86921  | 1.00E-160 | 293 | 295 | 99 +  | 3   | 297 | 56057  | 56351  |
| UN61977 | Rsa1.0_08258.1 | 674 | 7649   | 6.00E-82  | 155 | 155 | 100 + | 207 | 361 | 4864   | 5018   |
| UN61978 | Rsa1.0_01515.1 | 703 | 170864 | 0         | 653 | 709 | 92 -  | 2   | 702 | 127392 | 128091 |
| UN61979 | Rsa1.0_01330.1 | 671 | 47960  | 1.00E-118 | 314 | 350 | 89 +  | 1   | 329 | 43091  | 43431  |
| UN61980 | Rsa1.0_00237.1 | 784 | 235974 | 1.00E-92  | 176 | 177 | 99 -  | 121 | 297 | 185827 | 186003 |
| UN61981 | Rsa1.0_01571.1 | 666 | 43000  | 1.00E-178 | 410 | 439 | 93 +  | 132 | 569 | 12344  | 12769  |
| UN61982 | Rsa1.0_01162.1 | 664 | 169104 | 1.00E-170 | 337 | 348 | 96 -  | 32  | 375 | 154463 | 154810 |
| UN61983 | Rsa1.0_00366.1 | 359 | 90880  | 1.00E-133 | 266 | 273 | 97 -  | 88  | 359 | 9194   | 9466   |
| UN61984 | Rsa1.0_00543.1 | 810 | 76788  | 7.00E-82  | 217 | 227 | 95 +  | 568 | 786 | 8642   | 8868   |
| UN61985 | Rsa1.0_00167.1 | 707 | 116000 | 0         | 697 | 713 | 97 +  | 3   | 707 | 107324 | 108033 |
| UN61986 | Rsa1.0_13128.1 | 768 | 4999   | 2.00E-91  | 195 | 203 | 96 -  | 311 | 513 | 3729   | 3931   |
| UN61987 | Rsa1.0_00015.1 | 633 | 561803 | 0         | 367 | 369 | 99 +  | 3   | 369 | 215235 | 215603 |
| UN61988 | Rsa1.0_00939.1 | 738 | 185227 | 1.00E-102 | 207 | 213 | 97 -  | 343 | 555 | 52657  | 52869  |
| UN61989 | Rsa1.0_03767.1 | 769 | 20969  | 0         | 751 | 776 | 96 +  | 2   | 769 | 9549   | 10324  |
| UN61990 | Rsa1.0_03391.1 | 745 | 23251  | 1.00E-150 | 273 | 274 | 99 -  | 3   | 276 | 9305   | 9578   |
| UN61991 | Rsa1.0_00840.1 | 453 | 62514  | 1.00E-166 | 309 | 312 | 99 -  | 143 | 453 | 5234   | 5545   |
| UN61992 | Rsa1.0_01263.1 | 716 | 49703  | 1.00E-98  | 227 | 239 | 94 +  | 413 | 649 | 42751  | 42989  |
| UN61993 | Rsa1.0_00302.1 | 632 | 97521  | 0         | 359 | 360 | 99 -  | 273 | 632 | 55682  | 56041  |
| UN61994 | Rsa1.0_08961.1 | 747 | 6750   | 0         | 670 | 694 | 96 +  | 1   | 686 | 5951   | 6638   |
| UN61995 | Rsa1.0_01632.1 | 727 | 181224 | 1.00E-123 | 280 | 296 | 94 -  | 19  | 314 | 3094   | 3387   |
| UN61996 | Rsa1.0_05336.1 | 707 | 14117  | 0         | 343 | 344 | 99 -  | 323 | 666 | 5512   | 5855   |
| UN61997 | Rsa1.0_04450.1 | 738 | 17297  | 0         | 592 | 609 | 97 +  | 88  | 695 | 13877  | 14485  |
| UN61998 | Rsa1.0_00448.1 | 632 | 84048  | 0         | 619 | 630 | 98 -  | 3   | 632 | 15888  | 16517  |
| UN61999 | Rsa1.0_00454.1 | 802 | 216970 | 1.00E-180 | 390 | 414 | 94 -  | 4   | 417 | 188572 | 188973 |
| UN62000 | Rsa1.0_00527.1 | 685 | 77733  | 0         | 678 | 679 | 99 -  | 3   | 681 | 9265   | 9943   |
| UN62001 | Rsa1.0_12336.1 | 690 | 5251   | 0         | 537 | 539 | 99 -  | 2   | 540 | 182    | 720    |
| UN62002 | Rsa1.0_00244.1 | 630 | 103590 | 0         | 629 | 630 | 99 -  | 1   | 630 | 10699  | 11328  |
| UN62003 | Rsa1.0_00355.1 | 763 | 92038  | 2.00E-94  | 209 | 216 | 96 +  | 551 | 763 | 64491  | 64706  |
| UN62004 | Rsa1.0_03956.1 | 786 | 19872  | 1.00E-58  | 125 | 128 | 97 -  | 542 | 669 | 18419  | 18546  |
| UN62005 | Rsa1.0_01179.1 | 646 | 51549  | 0         | 545 | 552 | 98 +  | 95  | 646 | 21802  | 22353  |
| UN62006 | Rsa1.0_01117.1 | 610 | 53465  | 1.00E-127 | 244 | 247 | 98 +  | 1   | 247 | 22602  | 22847  |
| UN62007 | Rsa1.0_03384.1 | 830 | 23291  | 0         | 538 | 562 | 95 +  | 273 | 830 | 10618  | 11179  |
| UN62008 | Rsa1.0_00556.1 | 569 | 207212 | 0         | 564 | 569 | 99 +  | 1   | 569 | 163365 | 163933 |



|         |                |     |        |           |     |     |       |     |     |        |        |
|---------|----------------|-----|--------|-----------|-----|-----|-------|-----|-----|--------|--------|
| UN62009 | Rsa1.0_04651.1 | 778 | 16516  | 1.00E-140 | 256 | 257 | 99 -  | 330 | 586 | 13808  | 14064  |
| UN62010 | Rsa1.0_00092.1 | 782 | 659932 | 9.00E-66  | 140 | 144 | 97 -  | 158 | 301 | 127962 | 128105 |
| UN62011 | Rsa1.0_01729.1 | 716 | 304246 | 0         | 705 | 721 | 97 -  | 1   | 716 | 302561 | 303279 |
| UN62012 | Rsa1.0_00160.1 | 779 | 346678 | 0         | 424 | 426 | 99 +  | 3   | 428 | 30965  | 31390  |
| UN62013 | Rsa1.0_00451.1 | 601 | 322533 | 1.00E-119 | 290 | 316 | 91 +  | 9   | 309 | 300615 | 300930 |
| UN62014 | Rsa1.0_00417.1 | 614 | 395068 | 0         | 466 | 480 | 97 +  | 15  | 491 | 219053 | 219532 |
| UN62015 | Rsa1.0_01414.1 | 475 | 149508 | 0         | 429 | 446 | 96 +  | 32  | 475 | 142256 | 142700 |
| UN62016 | Rsa1.0_01485.1 | 715 | 44797  | 0         | 711 | 713 | 99 -  | 1   | 712 | 16610  | 17322  |
| UN62017 | Rsa1.0_02502.1 | 766 | 30740  | 1.00E-143 | 270 | 273 | 98 +  | 495 | 766 | 9700   | 9972   |
| UN62018 | Rsa1.0_00262.1 | 796 | 101906 | 0         | 766 | 796 | 96 -  | 3   | 794 | 87499  | 88294  |
| UN62019 | Rsa1.0_03553.1 | 667 | 22150  | 1.00E-106 | 199 | 200 | 99 -  | 1   | 200 | 18338  | 18537  |
| UN62020 | Rsa1.0_02067.1 | 681 | 35451  | 0         | 422 | 439 | 96 -  | 223 | 661 | 2133   | 2571   |
| UN62021 | Rsa1.0_01994.1 | 682 | 36374  | 1.00E-144 | 278 | 284 | 97 -  | 5   | 288 | 33951  | 34234  |
| UN62022 | Rsa1.0_14494.1 | 622 | 3331   | 2.00E-81  | 154 | 154 | 100 + | 151 | 304 | 3085   | 3238   |
| UN62023 | Rsa1.0_01422.1 | 766 | 46172  | 2.00E-60  | 207 | 238 | 86 +  | 151 | 373 | 12740  | 12977  |
| UN62024 | Rsa1.0_00928.1 | 762 | 59293  | 1.00E-140 | 310 | 320 | 96 -  | 448 | 759 | 21410  | 21729  |
| UN62025 | Rsa1.0_02215.1 | 643 | 33822  | 0         | 643 | 643 | 100 - | 1   | 643 | 16908  | 17550  |
| UN62026 | Rsa1.0_01747.1 | 114 | 39881  | 2.00E-43  | 104 | 109 | 95 -  | 3   | 111 | 24745  | 24853  |
| UN62027 | Rsa1.0_00589.1 | 697 | 209965 | 1.00E-159 | 323 | 334 | 96 +  | 364 | 693 | 152119 | 152452 |
| UN62028 | Rsa1.0_14050.1 | 775 | 3867   | 1.00E-180 | 395 | 412 | 95 +  | 347 | 752 | 3166   | 3577   |
| UN62029 | Rsa1.0_00207.1 | 632 | 248736 | 1.00E-106 | 203 | 204 | 99 +  | 1   | 204 | 63250  | 63452  |
| UN62030 | Rsa1.0_00906.1 | 775 | 178966 | 2.00E-32  | 85  | 88  | 96 -  | 684 | 770 | 166    | 253    |
| UN62031 | Rsa1.0_01482.1 | 787 | 44855  | 7.00E-82  | 161 | 163 | 98 +  | 203 | 365 | 15882  | 16044  |
| UN62032 | Rsa1.0_01955.1 | 795 | 36850  | 0         | 496 | 508 | 97 +  | 220 | 724 | 13035  | 13536  |
| UN62033 | Rsa1.0_07263.1 | 764 | 9644   | 0         | 614 | 689 | 89 +  | 77  | 758 | 4448   | 5136   |
| UN62034 | Rsa1.0_00916.1 | 722 | 59789  | 1.00E-109 | 225 | 232 | 96 +  | 493 | 722 | 15473  | 15704  |
| UN62035 | Rsa1.0_00604.1 | 662 | 146282 | 0         | 433 | 448 | 96 -  | 2   | 443 | 95818  | 96265  |
| UN62036 | Rsa1.0_04415.1 | 160 | 147889 | 5.00E-48  | 128 | 137 | 93 +  | 5   | 138 | 136717 | 136850 |
| UN62037 | Rsa1.0_03393.1 | 715 | 23247  | 0         | 606 | 607 | 99 +  | 3   | 609 | 15164  | 15770  |
| UN62038 | Rsa1.0_00041.1 | 748 | 186197 | 2.00E-94  | 207 | 216 | 95 -  | 15  | 229 | 160986 | 161201 |
| UN62039 | Rsa1.0_00404.1 | 759 | 87635  | 1.00E-109 | 231 | 236 | 97 -  | 528 | 759 | 44479  | 44714  |
| UN62040 | Rsa1.0_01651.1 | 819 | 41586  | 1.00E-83  | 161 | 162 | 99 -  | 1   | 162 | 37370  | 37531  |
| UN62041 | Rsa1.0_16685.1 | 583 | 2065   | 0         | 570 | 584 | 97 +  | 2   | 583 | 428    | 1011   |
| UN62042 | Rsa1.0_02523.1 | 817 | 30527  | 1.00E-117 | 217 | 218 | 99 -  | 314 | 531 | 10082  | 10299  |
| UN62043 | Rsa1.0_01016.1 | 666 | 181422 | 0         | 579 | 613 | 94 +  | 66  | 666 | 43416  | 44028  |
| UN62044 | Rsa1.0_00891.1 | 726 | 60724  | 3.00E-90  | 175 | 177 | 98 -  | 262 | 438 | 35838  | 36014  |
| UN62045 | Rsa1.0_02032.1 | 671 | 35830  | 0         | 480 | 487 | 98 -  | 185 | 671 | 24090  | 24572  |
| UN62046 | Rsa1.0_01112.1 | 649 | 310601 | 4.00E-52  | 145 | 157 | 92 +  | 72  | 227 | 290320 | 290476 |
| UN62047 | Rsa1.0_05262.1 | 727 | 14334  | 0         | 385 | 386 | 99 +  | 3   | 388 | 10064  | 10449  |

|         |                |     |        |           |     |     |       |     |     |        |        |
|---------|----------------|-----|--------|-----------|-----|-----|-------|-----|-----|--------|--------|
| UN62048 | Rsa1.0_00106.1 | 685 | 133916 | 0         | 606 | 607 | 99 +  | 1   | 607 | 91979  | 92585  |
| UN62049 | Rsa1.0_00611.1 | 655 | 72410  | 0         | 556 | 557 | 99 -  | 24  | 580 | 22831  | 23386  |
| UN62050 | #              | #   | #      | #         | #   | #   | #     | #   | #   | #      | #      |
| UN62051 | Rsa1.0_00826.1 | 696 | 166736 | 1.00E-115 | 217 | 219 | 99 +  | 478 | 696 | 8796   | 9014   |
| UN62052 | Rsa1.0_01308.1 | 734 | 48596  | 4.00E-34  | 108 | 117 | 92 +  | 619 | 734 | 4790   | 4903   |
| UN62053 | Rsa1.0_02282.1 | 792 | 163951 | 0         | 782 | 798 | 97 -  | 3   | 792 | 146550 | 147347 |
| UN62054 | Rsa1.0_03719.1 | 721 | 21194  | 0         | 627 | 634 | 98 -  | 82  | 714 | 5277   | 5909   |
| UN62055 | Rsa1.0_07535.1 | 779 | 9183   | 0         | 615 | 636 | 96 +  | 9   | 641 | 8549   | 9183   |
| UN62056 | Rsa1.0_00017.1 | 777 | 752458 | 1.00E-107 | 206 | 209 | 98 +  | 115 | 323 | 51737  | 51945  |
| UN62057 | Rsa1.0_05781.1 | 610 | 12654  | 1.00E-143 | 272 | 277 | 98 +  | 3   | 279 | 11760  | 12036  |
| UN62058 | Rsa1.0_33901.1 | 735 | 668    | 1.00E-129 | 242 | 243 | 99 +  | 494 | 735 | 139    | 381    |
| UN62059 | Rsa1.0_09048.1 | 649 | 6683   | 0         | 590 | 606 | 97 +  | 45  | 649 | 5298   | 5897   |
| UN62060 | Rsa1.0_01517.1 | 746 | 44170  | 0         | 693 | 712 | 97 +  | 37  | 746 | 15894  | 16604  |
| UN62061 | Rsa1.0_04637.1 | 774 | 16551  | 1.00E-153 | 315 | 333 | 94 -  | 5   | 337 | 11789  | 12103  |
| UN62062 | Rsa1.0_00679.1 | 680 | 68971  | 0         | 667 | 680 | 98 -  | 4   | 680 | 9116   | 9795   |
| UN62063 | Rsa1.0_41382.1 | 659 | 543    | 1.00E-175 | 358 | 372 | 96 +  | 153 | 521 | 1      | 369    |
| UN62064 | Rsa1.0_00025.1 | 666 | 277312 | 0         | 621 | 665 | 93 +  | 2   | 666 | 44626  | 45280  |
| UN62065 | Rsa1.0_05474.1 | 232 | 13620  | 1.00E-95  | 184 | 185 | 99 +  | 1   | 184 | 11077  | 11261  |
| UN62066 | Rsa1.0_00387.1 | 823 | 495407 | 0         | 428 | 446 | 95 -  | 365 | 797 | 161836 | 162278 |
| UN62067 | Rsa1.0_04373.1 | 638 | 17673  | 0         | 634 | 636 | 99 -  | 3   | 638 | 6962   | 7597   |
| UN62068 | Rsa1.0_02964.1 | 796 | 26407  | 5.00E-58  | 115 | 115 | 100 + | 267 | 381 | 13665  | 13779  |
| UN62069 | Rsa1.0_03846.1 | 683 | 20481  | 1.00E-134 | 242 | 242 | 100 + | 3   | 244 | 16273  | 16514  |
| UN62070 | Rsa1.0_20285.1 | 681 | 1321   | 1.00E-70  | 142 | 144 | 98 +  | 236 | 379 | 229    | 372    |
| UN62071 | Rsa1.0_01148.1 | 814 | 52375  | 1.00E-113 | 231 | 238 | 97 +  | 3   | 237 | 21353  | 21590  |
| UN62072 | Rsa1.0_01413.1 | 741 | 46275  | 0         | 433 | 440 | 98 +  | 306 | 741 | 8524   | 8963   |
| UN62073 | Rsa1.0_00949.1 | 800 | 58549  | 0         | 788 | 801 | 98 -  | 2   | 793 | 45720  | 46520  |
| UN62074 | Rsa1.0_00110.1 | 461 | 132719 | 1.00E-110 | 305 | 342 | 89 +  | 140 | 461 | 112314 | 112652 |
| UN62075 | Rsa1.0_00464.1 | 763 | 82253  | 1.00E-124 | 244 | 250 | 97 -  | 271 | 520 | 55490  | 55739  |
| UN62076 | Rsa1.0_00028.1 | 736 | 293984 | 1.00E-162 | 317 | 324 | 97 +  | 15  | 335 | 41557  | 41880  |
| UN62077 | Rsa1.0_63356.1 | 801 | 362    | 0         | 360 | 362 | 99 -  | 312 | 673 | 1      | 362    |
| UN62078 | Rsa1.0_00374.1 | 710 | 165738 | 1.00E-163 | 305 | 307 | 99 +  | 406 | 710 | 129967 | 130273 |
| UN62079 | Rsa1.0_01887.1 | 755 | 37564  | 1.00E-109 | 242 | 256 | 94 +  | 5   | 260 | 23994  | 24249  |
| UN62080 | Rsa1.0_00228.1 | 801 | 105511 | 1.00E-122 | 226 | 227 | 99 -  | 211 | 437 | 93732  | 93958  |
| UN62081 | Rsa1.0_05570.1 | 816 | 13301  | 0         | 767 | 791 | 96 +  | 2   | 779 | 332    | 1122   |
| UN62082 | Rsa1.0_00055.1 | 791 | 520193 | 0         | 408 | 424 | 96 -  | 369 | 791 | 335271 | 335691 |
| UN62083 | Rsa1.0_03427.1 | 678 | 22992  | 0         | 409 | 413 | 99 +  | 13  | 425 | 11971  | 12383  |
| UN62084 | Rsa1.0_07464.1 | 739 | 9328   | 0         | 672 | 709 | 94 -  | 11  | 715 | 4712   | 5415   |
| UN62085 | Rsa1.0_06002.1 | 709 | 11976  | 0         | 490 | 506 | 96 -  | 196 | 699 | 5816   | 6321   |
| UN62086 | Rsa1.0_12327.1 | 777 | 5255   | 0         | 531 | 534 | 99 -  | 2   | 535 | 958    | 1491   |

|         |                |     |        |           |     |     |       |     |     |        |        |
|---------|----------------|-----|--------|-----------|-----|-----|-------|-----|-----|--------|--------|
| UN62087 | Rsa1.0.01729.1 | 663 | 304246 | 0         | 661 | 661 | 100 + | 3   | 663 | 116512 | 117172 |
| UN62088 | Rsa1.0.00890.1 | 579 | 323870 | 1.00E-159 | 368 | 399 | 92 -  | 191 | 574 | 166570 | 166964 |
| UN62089 | Rsa1.0.00858.1 | 610 | 61892  | 0         | 606 | 608 | 99 +  | 3   | 610 | 4852   | 5459   |
| UN62090 | Rsa1.0.00770.1 | 259 | 64900  | 1.00E-137 | 257 | 259 | 99 +  | 2   | 259 | 25532  | 25790  |
| UN62091 | Rsa1.0.00434.1 | 215 | 85171  | 4.00E-65  | 126 | 126 | 100 - | 90  | 215 | 65162  | 65287  |
| UN62092 | Rsa1.0.19354.1 | 729 | 1444   | 1.00E-166 | 303 | 305 | 99 -  | 134 | 438 | 1140   | 1444   |
| UN62093 | Rsa1.0.00984.1 | 719 | 57580  | 0         | 519 | 520 | 99 -  | 3   | 522 | 5923   | 6442   |
| UN62094 | Rsa1.0.00217.1 | 773 | 107079 | 1.00E-180 | 326 | 328 | 99 -  | 4   | 331 | 66911  | 67238  |
| UN62095 | Rsa1.0.02412.1 | 745 | 31643  | 5.00E-64  | 134 | 137 | 97 -  | 262 | 398 | 18159  | 18295  |
| UN62096 | Rsa1.0.01091.1 | 677 | 54383  | 0         | 421 | 421 | 100 - | 1   | 421 | 28856  | 29276  |
| UN62097 | Rsa1.0.00087.1 | 658 | 761073 | 1.00E-107 | 259 | 282 | 91 -  | 389 | 658 | 729355 | 729636 |
| UN62098 | Rsa1.0.00298.1 | 794 | 349131 | 1.00E-155 | 293 | 298 | 98 -  | 3   | 300 | 318911 | 319208 |
| UN62099 | Rsa1.0.00213.1 | 679 | 108167 | 3.00E-99  | 274 | 301 | 91 -  | 376 | 671 | 14655  | 14954  |
| UN62100 | Rsa1.0.00089.1 | 755 | 406142 | 0         | 369 | 371 | 99 -  | 3   | 373 | 233659 | 234029 |
| UN62101 | Rsa1.0.32596.1 | 633 | 698    | 5.00E-76  | 148 | 149 | 99 -  | 485 | 633 | 377    | 525    |
| UN62102 | Rsa1.0.05880.1 | 585 | 12343  | 0         | 566 | 584 | 96 +  | 2   | 585 | 4318   | 4901   |
| UN62103 | Rsa1.0.00471.1 | 754 | 81897  | 0         | 421 | 443 | 95 -  | 321 | 754 | 67054  | 67496  |
| UN62104 | Rsa1.0.02783.1 | 599 | 27927  | 1.00E-129 | 254 | 260 | 97 -  | 343 | 599 | 8614   | 8873   |
| UN62105 | Rsa1.0.00276.1 | 684 | 100160 | 1.00E-147 | 265 | 265 | 100 - | 420 | 684 | 9724   | 9988   |
| UN62106 | Rsa1.0.01251.1 | 797 | 49873  | 0         | 796 | 800 | 99 -  | 1   | 797 | 5105   | 5904   |
| UN62107 | Rsa1.0.00642.1 | 582 | 201230 | 2.00E-75  | 171 | 180 | 95 +  | 12  | 186 | 160139 | 160318 |
| UN62108 | Rsa1.0.08779.1 | 746 | 6929   | 0         | 660 | 675 | 97 +  | 73  | 743 | 2430   | 3104   |
| UN62109 | Rsa1.0.33219.1 | 575 | 684    | 1.00E-149 | 321 | 338 | 94 +  | 90  | 424 | 1      | 333    |
| UN62110 | Rsa1.0.00314.1 | 673 | 96472  | 1.00E-172 | 313 | 314 | 99 -  | 269 | 581 | 39939  | 40252  |
| UN62111 | #              | #   | #      | #         | #   | #   | #     | #   | #   | #      | #      |
| UN62112 | Rsa1.0.02207.1 | 666 | 33914  | 0         | 547 | 547 | 100 + | 69  | 615 | 1      | 547    |
| UN62113 | Rsa1.0.14192.1 | 101 | 3681   | 5.00E-16  | 43  | 43  | 100 + | 1   | 43  | 3286   | 3328   |
| UN62114 | Rsa1.0.02573.1 | 459 | 29955  | 1.00E-174 | 310 | 310 | 100 - | 1   | 310 | 19071  | 19380  |
| UN62115 | Rsa1.0.00577.1 | 773 | 174827 | 0         | 746 | 775 | 96 +  | 3   | 773 | 492    | 1266   |
| UN62116 | Rsa1.0.00612.1 | 846 | 72376  | 1.00E-152 | 273 | 273 | 100 - | 483 | 755 | 63354  | 63626  |
| UN62117 | Rsa1.0.00180.1 | 441 | 114581 | 1.00E-118 | 218 | 219 | 99 +  | 166 | 384 | 110422 | 110640 |
| UN62118 | Rsa1.0.08361.1 | 716 | 7477   | 1.00E-163 | 298 | 299 | 99 -  | 419 | 716 | 5204   | 5502   |
| UN62119 | Rsa1.0.01364.1 | 641 | 47172  | 0         | 601 | 635 | 94 +  | 3   | 637 | 12009  | 12625  |
| UN62120 | Rsa1.0.03964.1 | 512 | 19835  | 0         | 454 | 477 | 95 +  | 37  | 512 | 6295   | 6770   |
| UN62121 | Rsa1.0.00127.1 | 780 | 127446 | 1.00E-149 | 271 | 272 | 99 -  | 3   | 274 | 100543 | 100814 |
| UN62122 | Rsa1.0.02451.1 | 392 | 31283  | 1.00E-145 | 338 | 361 | 93 +  | 2   | 359 | 2266   | 2623   |
| UN62123 | Rsa1.0.00577.1 | 618 | 174827 | 1.00E-154 | 279 | 280 | 99 +  | 187 | 466 | 165762 | 166041 |
| UN62124 | Rsa1.0.08811.1 | 489 | 6904   | 0         | 465 | 483 | 96 +  | 2   | 476 | 1972   | 2451   |
| UN62125 | Rsa1.0.00536.1 | 467 | 77199  | 1.00E-131 | 260 | 266 | 97 -  | 4   | 268 | 43767  | 44032  |

|         |                |     |        |           |     |     |       |     |     |        |        |
|---------|----------------|-----|--------|-----------|-----|-----|-------|-----|-----|--------|--------|
| UN62126 | Rsa1.0_14249.1 | 220 | 3618   | 1.00E-116 | 218 | 220 | 99 +  | 1   | 220 | 1181   | 1400   |
| UN62127 | Rsa1.0_00623.1 | 268 | 207630 | 1.00E-142 | 265 | 268 | 98 +  | 1   | 268 | 180523 | 180790 |
| UN62128 | Rsa1.0_00065.1 | 739 | 454616 | 1.00E-110 | 227 | 235 | 96 +  | 7   | 241 | 8975   | 9209   |
| UN62129 | Rsa1.0_03365.1 | 819 | 23410  | 1.00E-102 | 204 | 209 | 97 -  | 210 | 418 | 6621   | 6829   |
| UN62130 | Rsa1.0_00865.1 | 445 | 61686  | 3.00E-61  | 123 | 124 | 99 -  | 141 | 264 | 29095  | 29218  |
| UN62131 | Rsa1.0_00064.1 | 748 | 240927 | 0         | 453 | 472 | 95 -  | 117 | 586 | 126299 | 126767 |
| UN62132 | Rsa1.0_01171.1 | 697 | 51752  | 3.00E-93  | 177 | 178 | 99 -  | 3   | 180 | 19820  | 19997  |
| UN62133 | Rsa1.0_00512.1 | 350 | 200277 | 0         | 350 | 353 | 99 -  | 1   | 350 | 56849  | 57201  |
| UN62134 | Rsa1.0_00630.1 | 606 | 71281  | 0         | 455 | 461 | 98 +  | 17  | 477 | 3790   | 4250   |
| UN62135 | Rsa1.0_00036.1 | 671 | 176186 | 3.00E-50  | 182 | 206 | 88 -  | 464 | 668 | 152697 | 152901 |
| UN62136 | Rsa1.0_04153.1 | 407 | 18807  | 1.00E-127 | 264 | 275 | 96 +  | 131 | 405 | 16137  | 16411  |
| UN62137 | Rsa1.0_00131.1 | 629 | 432233 | 1.00E-121 | 223 | 224 | 99 +  | 2   | 225 | 107509 | 107732 |
| UN62138 | Rsa1.0_00251.1 | 691 | 303968 | 6.00E-11  | 69  | 80  | 86 +  | 413 | 492 | 146599 | 146678 |
| UN62139 | Rsa1.0_02368.1 | 728 | 32096  | 3.00E-50  | 255 | 300 | 85 -  | 97  | 391 | 26556  | 26853  |
| UN62140 | Rsa1.0_02583.1 | 726 | 29887  | 0         | 384 | 388 | 98 +  | 3   | 390 | 16794  | 17181  |
| UN62141 | Rsa1.0_09810.1 | 735 | 6140   | 0         | 372 | 376 | 98 +  | 3   | 377 | 5765   | 6140   |
| UN62142 | Rsa1.0_00695.1 | 356 | 68019  | 1.00E-110 | 247 | 262 | 94 -  | 84  | 345 | 2022   | 2283   |
| UN62143 | Rsa1.0_01828.1 | 758 | 38681  | 0         | 730 | 735 | 99 -  | 11  | 741 | 13143  | 13877  |
| UN62144 | Rsa1.0_00635.1 | 674 | 175826 | 1.00E-118 | 236 | 243 | 97 +  | 296 | 538 | 104827 | 105069 |
| UN62145 | Rsa1.0_00600.1 | 763 | 73395  | 1.00E-112 | 285 | 307 | 92 +  | 426 | 728 | 68561  | 68864  |
| UN62146 | Rsa1.0_01377.1 | 717 | 46967  | 0         | 524 | 538 | 97 -  | 179 | 715 | 11167  | 11702  |
| UN62147 | Rsa1.0_01644.1 | 649 | 41754  | 2.00E-75  | 205 | 226 | 90 +  | 53  | 264 | 36457  | 36679  |
| UN62148 | Rsa1.0_00883.1 | 677 | 61230  | 4.00E-83  | 185 | 193 | 95 -  | 201 | 392 | 48842  | 49034  |
| UN62149 | Rsa1.0_00306.1 | 787 | 146760 | 1.00E-131 | 302 | 322 | 93 -  | 466 | 786 | 98359  | 98680  |
| UN62150 | Rsa1.0_03387.1 | 750 | 23278  | 4.00E-74  | 157 | 162 | 96 +  | 152 | 313 | 1409   | 1570   |
| UN62151 | Rsa1.0_00263.1 | 811 | 224968 | 6.00E-64  | 125 | 125 | 100 + | 168 | 292 | 149941 | 150065 |
| UN62152 | Rsa1.0_02567.1 | 689 | 30016  | 0         | 633 | 636 | 99 +  | 54  | 689 | 22224  | 22859  |
| UN62153 | Rsa1.0_01462.1 | 637 | 45231  | 1.00E-103 | 194 | 195 | 99 +  | 440 | 634 | 27589  | 27783  |
| UN62154 | Rsa1.0_00387.1 | 512 | 495407 | 1.00E-111 | 222 | 228 | 97 +  | 249 | 476 | 471842 | 472069 |
| UN62155 | Rsa1.0_04446.1 | 283 | 17317  | 1.00E-124 | 271 | 284 | 95 -  | 1   | 283 | 697    | 977    |
| UN62156 | Rsa1.0_00120.1 | 750 | 277288 | 0         | 525 | 529 | 99 +  | 1   | 529 | 252738 | 253266 |
| UN62157 | Rsa1.0_01809.1 | 536 | 39004  | 0         | 523 | 530 | 98 -  | 1   | 527 | 30598  | 31127  |
| UN62158 | Rsa1.0_01615.1 | 809 | 42145  | 0         | 765 | 809 | 94 +  | 2   | 809 | 6379   | 7185   |
| UN62159 | Rsa1.0_02316.1 | 773 | 32608  | 0         | 757 | 765 | 98 -  | 3   | 762 | 6053   | 6817   |
| UN62160 | Rsa1.0_15913.1 | 696 | 2362   | 2.00E-17  | 158 | 190 | 83 -  | 508 | 689 | 960    | 1147   |
| UN62161 | Rsa1.0_01531.1 | 741 | 43778  | 0         | 464 | 483 | 96 +  | 3   | 485 | 14967  | 15449  |
| UN62162 | Rsa1.0_06619.1 | 696 | 10650  | 1.00E-117 | 214 | 214 | 100 - | 117 | 330 | 3537   | 3750   |
| UN62163 | Rsa1.0_00133.1 | 837 | 123768 | 0         | 808 | 831 | 97 +  | 3   | 830 | 23124  | 23951  |
| UN62164 | Rsa1.0_01036.1 | 797 | 55978  | 0         | 731 | 759 | 96 -  | 3   | 756 | 40985  | 41737  |

|         |                |     |        |           |     |     |       |     |     |        |        |
|---------|----------------|-----|--------|-----------|-----|-----|-------|-----|-----|--------|--------|
| UN62165 | Rsa1.0.01300.1 | 659 | 48942  | 2.00E-72  | 190 | 207 | 91 +  | 205 | 411 | 27015  | 27221  |
| UN62166 | Rsa1.0.32888.1 | 661 | 691    | 0         | 584 | 622 | 93 +  | 6   | 617 | 71     | 691    |
| UN62167 | Rsa1.0.02173.1 | 537 | 34318  | 0         | 471 | 484 | 97 +  | 60  | 537 | 14926  | 15406  |
| UN62168 | Rsa1.0.11516.1 | 381 | 5481   | 1.00E-118 | 221 | 223 | 99 -  | 3   | 225 | 1682   | 1904   |
| UN62169 | Rsa1.0.03327.1 | 770 | 23707  | 0         | 765 | 770 | 99 +  | 3   | 769 | 6262   | 7031   |
| UN62170 | Rsa1.0.02992.1 | 769 | 26176  | 1.00E-116 | 219 | 221 | 99 +  | 444 | 664 | 237    | 457    |
| UN62171 | Rsa1.0.01248.1 | 762 | 154103 | 0         | 728 | 758 | 96 +  | 6   | 762 | 7034   | 7791   |
| UN62172 | Rsa1.0.01100.1 | 679 | 54113  | 2.00E-91  | 171 | 171 | 100 - | 261 | 431 | 35688  | 35858  |
| UN62173 | Rsa1.0.02993.1 | 542 | 26170  | 0         | 537 | 541 | 99 +  | 2   | 542 | 10852  | 11390  |
| UN62174 | Rsa1.0.07311.1 | 430 | 9567   | 0         | 428 | 429 | 99 +  | 2   | 430 | 8329   | 8757   |
| UN62175 | Rsa1.0.00910.1 | 710 | 59975  | 0         | 705 | 709 | 99 -  | 4   | 710 | 24051  | 24759  |
| UN62176 | Rsa1.0.03895.1 | 717 | 20206  | 1.00E-178 | 335 | 341 | 98 -  | 280 | 620 | 15359  | 15699  |
| UN62177 | Rsa1.0.00980.1 | 737 | 57729  | 1.00E-143 | 258 | 258 | 100 + | 480 | 737 | 49031  | 49288  |
| UN62178 | Rsa1.0.06673.1 | 448 | 10562  | 6.00E-84  | 179 | 186 | 96 +  | 3   | 188 | 492    | 677    |
| UN62179 | Rsa1.0.01814.1 | 746 | 38917  | 0         | 649 | 657 | 98 -  | 2   | 657 | 25714  | 26370  |
| UN62180 | Rsa1.0.05140.1 | 768 | 14710  | 3.00E-96  | 239 | 256 | 93 -  | 3   | 258 | 12012  | 12261  |
| UN62181 | Rsa1.0.00101.1 | 733 | 267193 | 0         | 421 | 442 | 95 -  | 279 | 715 | 105441 | 105880 |
| UN62182 | Rsa1.0.01740.1 | 729 | 39986  | 0         | 408 | 419 | 97 -  | 2   | 420 | 24972  | 25390  |
| UN62183 | Rsa1.0.31792.1 | 768 | 718    | 0         | 568 | 617 | 92 -  | 1   | 617 | 1      | 617    |
| UN62184 | Rsa1.0.00218.1 | 315 | 201480 | 1.00E-130 | 279 | 295 | 94 +  | 1   | 295 | 178413 | 178698 |
| UN62185 | Rsa1.0.01388.1 | 690 | 46741  | 1.00E-108 | 219 | 223 | 98 +  | 470 | 690 | 19510  | 19732  |
| UN62186 | Rsa1.0.00028.1 | 714 | 293984 | 1.00E-174 | 322 | 325 | 99 +  | 391 | 714 | 123194 | 123518 |
| UN62187 | Rsa1.0.00737.1 | 373 | 66432  | 1.00E-115 | 220 | 223 | 98 -  | 67  | 289 | 62534  | 62756  |
| UN62188 | Rsa1.0.00715.1 | 482 | 67116  | 6.00E-75  | 233 | 257 | 90 -  | 222 | 474 | 40328  | 40581  |
| UN62189 | Rsa1.0.00293.1 | 760 | 339294 | 0         | 754 | 759 | 99 +  | 2   | 755 | 177495 | 178253 |
| UN62190 | Rsa1.0.00104.1 | 570 | 368722 | 2.00E-93  | 187 | 190 | 98 +  | 382 | 570 | 66139  | 66328  |
| UN62191 | Rsa1.0.00008.1 | 607 | 358124 | 0         | 403 | 411 | 98 +  | 199 | 607 | 5892   | 6302   |
| UN62192 | Rsa1.0.03366.1 | 266 | 23401  | 2.00E-36  | 109 | 114 | 95 +  | 153 | 262 | 9413   | 9526   |
| UN62193 | Rsa1.0.09071.1 | 331 | 6671   | 0         | 331 | 331 | 100 - | 1   | 331 | 1045   | 1375   |
| UN62194 | Rsa1.0.00001.1 | 250 | 363028 | 1.00E-123 | 246 | 253 | 97 +  | 1   | 250 | 35738  | 35990  |
| UN62195 | Rsa1.0.04714.1 | 634 | 146738 | 0         | 631 | 632 | 99 -  | 3   | 634 | 143599 | 144230 |
| UN62196 | Rsa1.0.06169.1 | 753 | 11578  | 1.00E-136 | 306 | 327 | 93 +  | 1   | 326 | 6717   | 7031   |
| UN62197 | Rsa1.0.01054.1 | 599 | 55470  | 0         | 465 | 491 | 94 -  | 117 | 599 | 42655  | 43145  |
| UN62198 | Rsa1.0.01458.1 | 779 | 175719 | 0         | 737 | 772 | 95 +  | 7   | 775 | 12019  | 12790  |
| UN62199 | Rsa1.0.00652.1 | 761 | 70089  | 0         | 420 | 438 | 95 +  | 325 | 761 | 26027  | 26464  |
| UN62200 | Rsa1.0.01012.1 | 455 | 56836  | 3.00E-98  | 188 | 190 | 98 +  | 42  | 231 | 39690  | 39879  |
| UN62201 | Rsa1.0.01989.1 | 609 | 36439  | 1.00E-85  | 170 | 173 | 98 +  | 103 | 275 | 22104  | 22276  |
| UN62202 | Rsa1.0.02900.1 | 679 | 26928  | 3.00E-96  | 243 | 262 | 92 +  | 412 | 673 | 16858  | 17116  |
| UN62203 | Rsa1.0.08274.1 | 782 | 7616   | 1.00E-159 | 285 | 285 | 100 - | 3   | 287 | 2731   | 3015   |

|         |                |     |        |           |     |     |       |     |     |        |        |
|---------|----------------|-----|--------|-----------|-----|-----|-------|-----|-----|--------|--------|
| UN62204 | Rsa1.0.05306.1 | 524 | 14205  | 0         | 354 | 355 | 99 +  | 170 | 524 | 5410   | 5764   |
| UN62205 | Rsa1.0.00225.1 | 631 | 105892 | 4.00E-92  | 215 | 227 | 94 -  | 1   | 226 | 70755  | 70979  |
| UN62206 | Rsa1.0.02599.1 | 643 | 29660  | 6.00E-54  | 138 | 145 | 95 +  | 416 | 557 | 3839   | 3980   |
| UN62207 | Rsa1.0.00172.1 | 667 | 115476 | 0         | 347 | 353 | 98 -  | 315 | 667 | 34     | 386    |
| UN62208 | Rsa1.0.00962.1 | 702 | 184909 | 1.00E-112 | 215 | 217 | 99 +  | 410 | 624 | 22393  | 22609  |
| UN62209 | Rsa1.0.00370.1 | 679 | 90472  | 0         | 646 | 679 | 95 -  | 4   | 679 | 38385  | 39048  |
| UN62210 | #              | #   | #      | #         | #   | #   | #     | #   | #   | #      | #      |
| UN62211 | Rsa1.0.17503.1 | 576 | 1814   | 2.00E-96  | 182 | 183 | 99 -  | 394 | 576 | 643    | 825    |
| UN62212 | Rsa1.0.00116.1 | 653 | 365886 | 0         | 649 | 652 | 99 -  | 2   | 653 | 139111 | 139762 |
| UN62213 | Rsa1.0.00725.1 | 699 | 66757  | 0         | 585 | 588 | 99 +  | 76  | 663 | 43131  | 43718  |
| UN62214 | Rsa1.0.00203.1 | 706 | 109129 | 1.00E-130 | 260 | 268 | 97 -  | 43  | 310 | 83780  | 84047  |
| UN62215 | Rsa1.0.00367.1 | 483 | 90750  | 0         | 348 | 349 | 99 +  | 1   | 349 | 84932  | 85280  |
| UN62216 | Rsa1.0.00018.1 | 729 | 410899 | 0         | 369 | 369 | 100 - | 126 | 494 | 96206  | 96574  |
| UN62217 | Rsa1.0.00002.1 | 331 | 601661 | 3.00E-79  | 150 | 150 | 100 + | 3   | 152 | 242443 | 242592 |
| UN62218 | Rsa1.0.00153.1 | 590 | 192931 | 0         | 587 | 588 | 99 +  | 3   | 590 | 141593 | 142180 |
| UN62219 | Rsa1.0.00454.1 | 599 | 216970 | 2.00E-94  | 200 | 204 | 98 +  | 365 | 565 | 166009 | 166212 |
| UN62220 | Rsa1.0.02713.1 | 657 | 28470  | 1.00E-148 | 269 | 270 | 99 -  | 4   | 273 | 9741   | 10010  |
| UN62221 | Rsa1.0.03119.1 | 662 | 25270  | 1.00E-103 | 191 | 191 | 100 + | 14  | 204 | 21891  | 22081  |
| UN62222 | Rsa1.0.00663.1 | 828 | 164969 | 0         | 711 | 714 | 99 +  | 3   | 716 | 147509 | 148222 |
| UN62223 | Rsa1.0.01236.1 | 751 | 50156  | 1.00E-140 | 351 | 378 | 92 +  | 376 | 740 | 1951   | 2324   |
| UN62224 | Rsa1.0.07352.1 | 670 | 9518   | 1.00E-149 | 274 | 275 | 99 -  | 397 | 670 | 4827   | 5101   |
| UN62225 | Rsa1.0.01720.1 | 541 | 40358  | 1.00E-133 | 317 | 344 | 92 +  | 2   | 325 | 31031  | 31374  |
| UN62226 | Rsa1.0.00064.1 | 352 | 240927 | 2.00E-55  | 190 | 211 | 90 +  | 3   | 212 | 31058  | 31261  |
| UN62227 | Rsa1.0.03100.1 | 693 | 25411  | 1.00E-135 | 248 | 249 | 99 -  | 161 | 409 | 3588   | 3836   |
| UN62228 | Rsa1.0.00119.1 | 613 | 467509 | 0         | 604 | 613 | 98 +  | 1   | 613 | 235222 | 235834 |
| UN62229 | Rsa1.0.00245.1 | 808 | 103569 | 0         | 470 | 487 | 96 +  | 103 | 588 | 1543   | 2028   |
| UN62230 | Rsa1.0.00302.1 | 755 | 97521  | 1.00E-156 | 344 | 364 | 94 +  | 3   | 355 | 33883  | 34246  |
| UN62231 | Rsa1.0.00010.1 | 565 | 294827 | 0         | 440 | 454 | 96 +  | 103 | 554 | 176812 | 177264 |
| UN62232 | Rsa1.0.02192.1 | 583 | 171291 | 1.00E-124 | 232 | 234 | 99 -  | 1   | 234 | 12268  | 12501  |
| UN62233 | Rsa1.0.05273.1 | 697 | 14304  | 1.00E-143 | 294 | 305 | 96 +  | 3   | 301 | 13687  | 13991  |
| UN62234 | Rsa1.0.01434.1 | 768 | 45951  | 0         | 332 | 335 | 99 +  | 321 | 655 | 2951   | 3285   |
| UN62235 | Rsa1.0.06278.1 | 501 | 11333  | 1.00E-160 | 323 | 334 | 96 +  | 2   | 334 | 4816   | 5149   |
| UN62236 | Rsa1.0.01435.1 | 775 | 45942  | 1.00E-80  | 191 | 201 | 95 +  | 526 | 724 | 42964  | 43164  |
| UN62237 | Rsa1.0.03454.1 | 543 | 149870 | 1.00E-144 | 262 | 263 | 99 -  | 3   | 265 | 145511 | 145773 |
| UN62238 | Rsa1.0.00250.1 | 646 | 273771 | 0         | 538 | 556 | 96 +  | 4   | 553 | 262118 | 262667 |
| UN62239 | Rsa1.0.02223.1 | 742 | 152421 | 0         | 657 | 676 | 97 +  | 72  | 740 | 14168  | 14840  |
| UN62240 | Rsa1.0.14703.1 | 724 | 3143   | 0         | 515 | 542 | 95 +  | 185 | 724 | 1      | 542    |
| UN62241 | Rsa1.0.04116.1 | 705 | 18971  | 0         | 485 | 488 | 99 +  | 207 | 694 | 9867   | 10354  |
| UN62242 | Rsa1.0.00194.1 | 734 | 110851 | 0         | 383 | 385 | 99 -  | 235 | 618 | 70858  | 71241  |

|         |                |     |        |           |     |     |       |     |     |        |        |
|---------|----------------|-----|--------|-----------|-----|-----|-------|-----|-----|--------|--------|
| UN62243 | Rsa1.0_10941.1 | 615 | 5670   | 6.00E-88  | 295 | 337 | 87 -  | 269 | 604 | 4379   | 4715   |
| UN62244 | Rsa1.0_05465.1 | 796 | 13657  | 0         | 752 | 755 | 99 +  | 2   | 753 | 4819   | 5573   |
| UN62245 | Rsa1.0_00034.1 | 793 | 260119 | 3.00E-75  | 151 | 152 | 99 -  | 2   | 153 | 58507  | 58657  |
| UN62246 | Rsa1.0_00293.1 | 803 | 339294 | 1.00E-167 | 338 | 349 | 96 -  | 3   | 351 | 32826  | 33171  |
| UN62247 | Rsa1.0_09901.1 | 665 | 6099   | 0         | 475 | 501 | 94 -  | 2   | 498 | 5233   | 5730   |
| UN62248 | Rsa1.0_02394.1 | 576 | 31789  | 3.00E-31  | 82  | 86  | 95 -  | 491 | 576 | 5760   | 5845   |
| UN62249 | Rsa1.0_04243.1 | 714 | 18321  | 1.00E-138 | 268 | 274 | 97 -  | 70  | 343 | 8697   | 8970   |
| UN62250 | Rsa1.0_04399.1 | 578 | 17543  | 1.00E-164 | 310 | 316 | 98 +  | 203 | 518 | 11746  | 12061  |
| UN62251 | Rsa1.0_01581.1 | 803 | 42833  | 0         | 780 | 790 | 98 -  | 3   | 785 | 20002  | 20791  |
| UN62252 | Rsa1.0_00083.1 | 606 | 442773 | 1.00E-152 | 276 | 277 | 99 +  | 230 | 506 | 408068 | 408344 |
| UN62253 | Rsa1.0_39388.1 | 575 | 571    | 1.00E-153 | 278 | 279 | 99 -  | 257 | 535 | 1      | 279    |
| UN62254 | Rsa1.0_08558.1 | 741 | 7198   | 4.00E-74  | 207 | 227 | 91 -  | 483 | 695 | 3285   | 3510   |
| UN62255 | Rsa1.0_00240.1 | 679 | 104175 | 0         | 502 | 506 | 99 -  | 175 | 679 | 102462 | 102967 |
| UN62256 | Rsa1.0_00027.1 | 709 | 283362 | 2.00E-72  | 151 | 155 | 97 -  | 538 | 692 | 168867 | 169021 |
| UN62257 | Rsa1.0_02409.1 | 767 | 31663  | 0         | 575 | 624 | 92 -  | 132 | 749 | 24343  | 24948  |
| UN62258 | Rsa1.0_00152.1 | 648 | 257730 | 9.00E-78  | 201 | 218 | 92 +  | 174 | 391 | 200309 | 200523 |
| UN62259 | Rsa1.0_03982.1 | 752 | 19723  | 0         | 469 | 480 | 97 -  | 117 | 596 | 4841   | 5320   |
| UN62260 | Rsa1.0_06102.1 | 806 | 11740  | 1.00E-116 | 252 | 264 | 95 -  | 3   | 260 | 6539   | 6801   |
| UN62261 | Rsa1.0_00026.1 | 111 | 327835 | 9.00E-18  | 55  | 58  | 94 -  | 51  | 108 | 182364 | 182421 |
| UN62262 | Rsa1.0_00089.1 | 548 | 406142 | 1.00E-101 | 188 | 188 | 100 - | 301 | 488 | 165182 | 165369 |
| UN62263 | Rsa1.0_27096.1 | 592 | 866    | 1.00E-140 | 256 | 257 | 99 +  | 336 | 592 | 335    | 591    |
| UN62264 | Rsa1.0_00681.1 | 376 | 68779  | 0         | 368 | 379 | 97 +  | 1   | 376 | 36592  | 36970  |
| UN62265 | Rsa1.0_00026.1 | 766 | 327835 | 1.00E-101 | 214 | 223 | 95 -  | 134 | 356 | 47923  | 48145  |
| UN62266 | Rsa1.0_21040.1 | 693 | 1242   | 1.00E-92  | 191 | 197 | 96 +  | 475 | 671 | 1      | 197    |
| UN62267 | Rsa1.0_11626.1 | 828 | 5456   | 7.00E-39  | 86  | 87  | 98 -  | 525 | 611 | 308    | 394    |
| UN62268 | Rsa1.0_01844.1 | 704 | 38421  | 1.00E-160 | 287 | 287 | 100 + | 357 | 643 | 21524  | 21810  |
| UN62269 | Rsa1.0_15997.1 | 635 | 2328   | 0         | 386 | 387 | 99 +  | 3   | 389 | 1942   | 2328   |
| UN62270 | Rsa1.0_00683.1 | 522 | 68638  | 0         | 488 | 523 | 93 -  | 3   | 522 | 958    | 1472   |
| UN62271 | Rsa1.0_00426.1 | 746 | 85668  | 0         | 696 | 759 | 91 +  | 1   | 744 | 67038  | 67787  |
| UN62272 | Rsa1.0_02030.1 | 736 | 179909 | 1.00E-95  | 178 | 178 | 100 - | 257 | 434 | 14365  | 14542  |
| UN62273 | Rsa1.0_00926.1 | 716 | 195072 | 0         | 539 | 555 | 97 +  | 2   | 556 | 40462  | 41016  |
| UN62274 | Rsa1.0_00638.1 | 710 | 71037  | 1.00E-174 | 336 | 345 | 97 +  | 364 | 708 | 37998  | 38342  |
| UN62275 | Rsa1.0_00554.1 | 605 | 150953 | 4.00E-95  | 264 | 287 | 91 +  | 324 | 605 | 141702 | 141986 |
| UN62276 | Rsa1.0_15510.1 | 489 | 2565   | 0         | 440 | 442 | 99 -  | 48  | 489 | 1622   | 2063   |
| UN62277 | Rsa1.0_06336.1 | 739 | 11215  | 1.00E-177 | 343 | 352 | 97 +  | 1   | 349 | 8279   | 8624   |
| UN62278 | Rsa1.0_01960.1 | 758 | 36766  | 1.00E-80  | 207 | 223 | 92 -  | 3   | 221 | 34918  | 35140  |
| UN62279 | Rsa1.0_00040.1 | 735 | 324196 | 3.00E-81  | 157 | 158 | 99 -  | 3   | 160 | 284540 | 284697 |
| UN62280 | Rsa1.0_05496.1 | 738 | 13533  | 1.00E-160 | 301 | 306 | 98 -  | 158 | 463 | 2002   | 2307   |
| UN62281 | Rsa1.0_00765.1 | 708 | 65029  | 1.00E-125 | 331 | 365 | 90 -  | 234 | 586 | 35782  | 36140  |

|         |                |     |        |           |     |     |       |     |     |        |        |
|---------|----------------|-----|--------|-----------|-----|-----|-------|-----|-----|--------|--------|
| UN62282 | Rsa1.0_20130.1 | 764 | 1337   | 3.00E-25  | 138 | 156 | 88 +  | 608 | 758 | 321    | 475    |
| UN62283 | Rsa1.0_18011.1 | 790 | 1690   | 1.00E-147 | 268 | 269 | 99 -  | 3   | 271 | 1      | 269    |
| UN62284 | Rsa1.0_01925.1 | 744 | 37220  | 1.00E-151 | 300 | 308 | 97 +  | 3   | 310 | 5430   | 5736   |
| UN62285 | Rsa1.0_18008.1 | 742 | 1691   | 1.00E-143 | 266 | 269 | 98 -  | 391 | 659 | 1423   | 1691   |
| UN62286 | Rsa1.0_00178.1 | 624 | 114861 | 1.00E-158 | 313 | 323 | 96 -  | 10  | 332 | 95456  | 95778  |
| UN62287 | Rsa1.0_01171.1 | 813 | 51752  | 1.00E-117 | 217 | 218 | 99 +  | 135 | 352 | 49854  | 50071  |
| UN62288 | Rsa1.0_00001.1 | 826 | 363028 | 1.00E-149 | 268 | 268 | 100 + | 337 | 604 | 357259 | 357526 |
| UN62289 | Rsa1.0_00211.1 | 799 | 228189 | 0         | 587 | 600 | 97 -  | 191 | 782 | 171169 | 171768 |
| UN62290 | Rsa1.0_00129.1 | 612 | 126831 | 1.00E-135 | 253 | 256 | 98 -  | 130 | 385 | 68294  | 68549  |
| UN62291 | Rsa1.0_04497.1 | 737 | 17103  | 1.00E-134 | 243 | 243 | 100 + | 123 | 365 | 3083   | 3325   |
| UN62292 | Rsa1.0_00382.1 | 717 | 251946 | 1.00E-167 | 334 | 346 | 96 +  | 193 | 538 | 33538  | 33883  |
| UN62293 | Rsa1.0_02039.1 | 678 | 35699  | 1.00E-155 | 341 | 358 | 95 -  | 1   | 355 | 4243   | 4600   |
| UN62294 | Rsa1.0_00999.1 | 758 | 57162  | 4.00E-80  | 155 | 156 | 99 +  | 231 | 386 | 31117  | 31272  |
| UN62295 | Rsa1.0_00460.1 | 475 | 206387 | 1.00E-100 | 245 | 263 | 93 +  | 110 | 367 | 187529 | 187786 |
| UN62296 | Rsa1.0_01980.1 | 621 | 36544  | 1.00E-161 | 287 | 287 | 100 - | 1   | 287 | 35601  | 35887  |
| UN62297 | Rsa1.0_11229.1 | 812 | 5576   | 0         | 668 | 687 | 97 +  | 133 | 805 | 4418   | 5104   |
| UN62298 | Rsa1.0_00087.1 | 565 | 761073 | 0         | 519 | 574 | 90 +  | 10  | 565 | 180723 | 181290 |
| UN62299 | Rsa1.0_75837.1 | 448 | 302    | 1.00E-166 | 296 | 296 | 100 + | 91  | 386 | 1      | 296    |
| UN62300 | Rsa1.0_00549.1 | 737 | 76473  | 1.00E-113 | 327 | 362 | 90 -  | 190 | 546 | 21577  | 21917  |
| UN62301 | Rsa1.0_01895.1 | 770 | 37512  | 0         | 454 | 455 | 99 +  | 3   | 457 | 22555  | 23009  |
| UN62302 | Rsa1.0_14175.1 | 257 | 3704   | 4.00E-99  | 203 | 207 | 98 +  | 6   | 210 | 2461   | 2667   |
| UN62303 | Rsa1.0_00580.1 | 759 | 74515  | 0         | 752 | 764 | 98 -  | 1   | 757 | 18370  | 19133  |
| UN62304 | Rsa1.0_00211.1 | 778 | 228189 | 1.00E-114 | 226 | 230 | 98 -  | 184 | 412 | 16550  | 16779  |
| UN62305 | Rsa1.0_01182.1 | 449 | 167304 | 1.00E-125 | 228 | 228 | 100 - | 38  | 265 | 165655 | 165882 |
| UN62306 | Rsa1.0_00053.1 | 755 | 263459 | 1.00E-168 | 341 | 355 | 96 +  | 15  | 369 | 158935 | 159289 |
| UN62307 | Rsa1.0_00459.1 | 544 | 82580  | 0         | 520 | 535 | 97 +  | 12  | 544 | 10571  | 11103  |
| UN62308 | Rsa1.0_00363.1 | 159 | 90968  | 8.00E-78  | 153 | 155 | 98 +  | 2   | 156 | 24474  | 24628  |
| UN62309 | Rsa1.0_02580.1 | 608 | 29909  | 1.00E-116 | 215 | 216 | 99 -  | 1   | 216 | 25652  | 25867  |
| UN62310 | Rsa1.0_05495.1 | 794 | 13534  | 1.00E-179 | 383 | 394 | 97 -  | 366 | 750 | 548    | 941    |
| UN62311 | Rsa1.0_00455.1 | 772 | 224823 | 1.00E-171 | 312 | 313 | 99 -  | 441 | 752 | 188127 | 188439 |
| UN62312 | Rsa1.0_01287.1 | 639 | 49195  | 0         | 638 | 640 | 99 +  | 1   | 639 | 24265  | 24904  |
| UN62313 | Rsa1.0_00678.1 | 770 | 193163 | 0         | 766 | 773 | 99 -  | 1   | 769 | 178665 | 179437 |
| UN62314 | Rsa1.0_06047.1 | 697 | 11854  | 0         | 524 | 529 | 99 -  | 170 | 697 | 6840   | 7368   |
| UN62315 | Rsa1.0_02414.1 | 802 | 31625  | 1.00E-137 | 256 | 258 | 99 -  | 3   | 258 | 21576  | 21833  |
| UN62316 | Rsa1.0_00026.1 | 794 | 327835 | 1.00E-159 | 308 | 315 | 97 -  | 4   | 316 | 253028 | 253342 |
| UN62317 | Rsa1.0_24144.1 | 595 | 1005   | 1.00E-118 | 223 | 224 | 99 -  | 372 | 595 | 736    | 958    |
| UN62318 | Rsa1.0_01338.1 | 657 | 155644 | 0         | 652 | 657 | 99 -  | 1   | 657 | 110290 | 110946 |
| UN62319 | Rsa1.0_00442.1 | 817 | 84596  | 0         | 809 | 821 | 98 +  | 2   | 817 | 45590  | 46410  |
| UN62320 | Rsa1.0_00372.1 | 683 | 90418  | 1.00E-109 | 204 | 205 | 99 -  | 328 | 532 | 4922   | 5126   |



|         |                |     |        |           |     |     |       |     |     |        |        |
|---------|----------------|-----|--------|-----------|-----|-----|-------|-----|-----|--------|--------|
| UN62321 | Rsa1.0.55096.1 | 551 | 415    | 1.00E-152 | 273 | 273 | 100 + | 97  | 369 | 102    | 374    |
| UN62322 | Rsa1.0.02314.1 | 801 | 32642  | 0         | 361 | 363 | 99 -  | 132 | 494 | 5396   | 5758   |
| UN62323 | Rsa1.0.09314.1 | 811 | 6461   | 0         | 775 | 805 | 96 +  | 31  | 811 | 3997   | 4801   |
| UN62324 | Rsa1.0.38396.1 | 762 | 586    | 1.00E-113 | 214 | 215 | 99 +  | 481 | 694 | 309    | 523    |
| UN62325 | Rsa1.0.01016.1 | 751 | 181422 | 8.00E-97  | 186 | 188 | 98 -  | 2   | 189 | 36095  | 36282  |
| UN62326 | Rsa1.0.09594.1 | 756 | 6263   | 4.00E-68  | 135 | 136 | 99 -  | 3   | 138 | 3976   | 4111   |
| UN62327 | Rsa1.0.01976.1 | 693 | 36570  | 1.00E-135 | 322 | 351 | 91 -  | 332 | 682 | 22609  | 22940  |
| UN62328 | Rsa1.0.00202.1 | 435 | 185895 | 1.00E-118 | 216 | 216 | 100 + | 1   | 216 | 11698  | 11913  |
| UN62329 | Rsa1.0.00009.1 | 595 | 232558 | 1.00E-159 | 314 | 323 | 97 +  | 206 | 526 | 128366 | 128688 |
| UN62330 | Rsa1.0.00387.1 | 677 | 495407 | 0         | 377 | 384 | 98 +  | 296 | 677 | 30529  | 30912  |
| UN62331 | Rsa1.0.01083.1 | 681 | 54617  | 0         | 612 | 628 | 97 +  | 48  | 674 | 8204   | 8828   |
| UN62332 | Rsa1.0.04655.1 | 777 | 16495  | 0         | 343 | 348 | 98 +  | 3   | 350 | 7168   | 7515   |
| UN62333 | Rsa1.0.00269.1 | 592 | 341668 | 0         | 585 | 610 | 95 -  | 1   | 592 | 316211 | 316818 |
| UN62334 | Rsa1.0.00817.1 | 598 | 62961  | 2.00E-66  | 159 | 169 | 94 +  | 2   | 170 | 20046  | 20214  |
| UN62335 | Rsa1.0.00006.1 | 805 | 396176 | 3.00E-93  | 189 | 194 | 97 -  | 337 | 530 | 371649 | 371842 |
| UN62336 | Rsa1.0.01544.1 | 796 | 185602 | 0         | 699 | 720 | 97 +  | 3   | 721 | 182817 | 183530 |
| UN62337 | Rsa1.0.01059.1 | 825 | 55410  | 0         | 331 | 331 | 100 - | 2   | 332 | 13423  | 13753  |
| UN62338 | Rsa1.0.00549.1 | 703 | 76473  | 5.00E-98  | 182 | 182 | 100 - | 345 | 526 | 8328   | 8509   |
| UN62339 | Rsa1.0.02686.1 | 408 | 28666  | 2.00E-68  | 135 | 136 | 99 +  | 273 | 408 | 5916   | 6051   |
| UN62340 | Rsa1.0.08837.1 | 791 | 6874   | 0         | 347 | 348 | 99 -  | 232 | 579 | 1521   | 1868   |
| UN62341 | Rsa1.0.01737.1 | 508 | 40101  | 0         | 493 | 506 | 97 +  | 3   | 508 | 1727   | 2226   |
| UN62342 | Rsa1.0.00857.1 | 766 | 61904  | 0         | 598 | 616 | 97 +  | 89  | 704 | 11594  | 12209  |
| UN62343 | Rsa1.0.00608.1 | 718 | 172672 | 1.00E-169 | 324 | 329 | 98 +  | 393 | 718 | 100163 | 100491 |
| UN62344 | Rsa1.0.00686.1 | 606 | 68511  | 2.00E-93  | 177 | 178 | 99 -  | 184 | 361 | 55858  | 56035  |
| UN62345 | Rsa1.0.31200.1 | 778 | 733    | 0         | 350 | 355 | 98 -  | 394 | 748 | 49     | 403    |
| UN62346 | Rsa1.0.00156.1 | 795 | 118383 | 1.00E-167 | 366 | 385 | 95 -  | 290 | 665 | 54651  | 55035  |
| UN62347 | Rsa1.0.00483.1 | 606 | 81102  | 9.00E-90  | 189 | 196 | 96 -  | 3   | 198 | 39282  | 39477  |
| UN62348 | Rsa1.0.00244.1 | 792 | 103590 | 0         | 708 | 740 | 95 -  | 3   | 733 | 21927  | 22660  |
| UN62349 | Rsa1.0.00469.1 | 786 | 82084  | 1.00E-159 | 291 | 293 | 99 -  | 3   | 295 | 58757  | 59049  |
| UN62350 | Rsa1.0.01758.1 | 771 | 39747  | 1.00E-174 | 366 | 381 | 96 -  | 394 | 771 | 37188  | 37568  |
| UN62351 | Rsa1.0.04961.1 | 653 | 15316  | 0         | 627 | 653 | 96 +  | 3   | 653 | 1452   | 2095   |
| UN62352 | Rsa1.0.00023.1 | 635 | 194764 | 1.00E-105 | 222 | 230 | 96 -  | 341 | 569 | 123646 | 123875 |
| UN62353 | Rsa1.0.01185.1 | 636 | 149842 | 1.00E-169 | 305 | 306 | 99 +  | 331 | 636 | 11446  | 11751  |
| UN62354 | Rsa1.0.00545.1 | 693 | 189649 | 0         | 507 | 511 | 99 +  | 7   | 517 | 29596  | 30105  |
| UN62355 | Rsa1.0.00380.1 | 761 | 89748  | 0         | 431 | 462 | 93 -  | 217 | 672 | 57690  | 58139  |
| UN62356 | Rsa1.0.02256.1 | 575 | 33329  | 1.00E-161 | 320 | 331 | 96 -  | 3   | 333 | 26782  | 27112  |
| UN62357 | Rsa1.0.00194.1 | 283 | 110851 | 1.00E-114 | 215 | 217 | 99 -  | 3   | 219 | 19390  | 19606  |
| UN62358 | Rsa1.0.00602.1 | 669 | 73302  | 0         | 467 | 478 | 97 -  | 129 | 606 | 64379  | 64855  |
| UN62359 | Rsa1.0.02422.1 | 283 | 161122 | 1.00E-148 | 277 | 281 | 98 +  | 3   | 283 | 11205  | 11485  |

|         |                |     |        |           |     |     |       |     |     |        |        |
|---------|----------------|-----|--------|-----------|-----|-----|-------|-----|-----|--------|--------|
| UN62360 | Rsa1.0.06603.1 | 725 | 10682  | 1.00E-109 | 224 | 232 | 96 +  | 206 | 437 | 6948   | 7179   |
| UN62361 | Rsa1.0.00218.1 | 777 | 201480 | 1.00E-119 | 233 | 237 | 98 +  | 3   | 239 | 108698 | 108933 |
| UN62362 | Rsa1.0.00641.1 | 287 | 208241 | 1.00E-114 | 208 | 208 | 100 + | 62  | 269 | 168484 | 168691 |
| UN62363 | Rsa1.0.00611.1 | 696 | 72410  | 0         | 521 | 530 | 98 +  | 165 | 692 | 43472  | 44001  |
| UN62364 | Rsa1.0.01400.1 | 653 | 46560  | 0         | 343 | 345 | 99 +  | 3   | 347 | 152    | 496    |
| UN62365 | Rsa1.0.00940.1 | 642 | 179946 | 0         | 522 | 545 | 95 +  | 94  | 638 | 56107  | 56639  |
| UN62366 | Rsa1.0.00107.1 | 581 | 431659 | 0         | 580 | 580 | 100 + | 2   | 581 | 286274 | 286853 |
| UN62367 | Rsa1.0.00442.1 | 775 | 84596  | 1.00E-173 | 345 | 354 | 97 -  | 424 | 775 | 51055  | 51405  |
| UN62368 | Rsa1.0.02120.1 | 802 | 34819  | 0         | 459 | 461 | 99 +  | 3   | 463 | 29370  | 29830  |
| UN62369 | Rsa1.0.02694.1 | 723 | 28610  | 0         | 417 | 418 | 99 +  | 43  | 460 | 4461   | 4878   |
| UN62370 | Rsa1.0.02146.1 | 704 | 34625  | 1.00E-108 | 233 | 243 | 95 +  | 457 | 698 | 28384  | 28626  |
| UN62371 | Rsa1.0.00066.1 | 682 | 152418 | 1.00E-178 | 320 | 321 | 99 -  | 247 | 567 | 101686 | 102006 |
| UN62372 | Rsa1.0.00087.1 | 808 | 761073 | 1.00E-151 | 314 | 328 | 95 -  | 3   | 330 | 57105  | 57432  |
| UN62373 | Rsa1.0.02320.1 | 759 | 32575  | 0         | 696 | 699 | 99 +  | 60  | 755 | 13413  | 14111  |
| UN62374 | Rsa1.0.00269.1 | 761 | 341668 | 0         | 433 | 449 | 96 -  | 125 | 572 | 293910 | 294358 |
| UN62375 | Rsa1.0.01937.1 | 710 | 37147  | 0         | 623 | 670 | 92 -  | 3   | 671 | 32247  | 32892  |
| UN62376 | Rsa1.0.03441.1 | 805 | 22927  | 0         | 705 | 711 | 99 +  | 1   | 711 | 16725  | 17435  |
| UN62377 | Rsa1.0.00233.1 | 680 | 104918 | 1.00E-58  | 116 | 116 | 100 + | 2   | 117 | 7845   | 7960   |
| UN62378 | Rsa1.0.00780.1 | 503 | 147795 | 0         | 465 | 502 | 92 -  | 2   | 503 | 25646  | 26118  |
| UN62379 | Rsa1.0.00044.1 | 750 | 271658 | 0         | 747 | 753 | 99 +  | 1   | 750 | 169988 | 170740 |
| UN62380 | Rsa1.0.00427.1 | 795 | 189678 | 0         | 348 | 350 | 99 -  | 92  | 441 | 124873 | 125222 |
| UN62381 | Rsa1.0.01400.1 | 743 | 46560  | 1.00E-151 | 340 | 361 | 94 -  | 398 | 743 | 41142  | 41502  |
| UN62382 | Rsa1.0.03639.1 | 351 | 21629  | 2.00E-65  | 133 | 135 | 98 -  | 217 | 351 | 351    | 485    |
| UN62383 | Rsa1.0.00002.1 | 613 | 601661 | 0         | 507 | 531 | 95 +  | 85  | 613 | 180215 | 180745 |
| UN62384 | Rsa1.0.09321.1 | 274 | 6456   | 2.00E-61  | 129 | 132 | 97 -  | 138 | 269 | 1681   | 1812   |
| UN62385 | Rsa1.0.01747.1 | 840 | 39881  | 0         | 664 | 688 | 96 +  | 123 | 803 | 10093  | 10780  |
| UN62386 | Rsa1.0.05911.1 | 647 | 12261  | 1.00E-160 | 325 | 337 | 96 +  | 314 | 647 | 991    | 1327   |
| UN62387 | Rsa1.0.00542.1 | 708 | 76831  | 1.00E-155 | 287 | 290 | 98 -  | 3   | 292 | 24034  | 24323  |
| UN62388 | Rsa1.0.04911.1 | 837 | 15483  | 1.00E-135 | 271 | 277 | 97 -  | 423 | 697 | 8461   | 8737   |
| UN62389 | Rsa1.0.00816.1 | 606 | 403350 | 0         | 376 | 377 | 99 +  | 3   | 379 | 267869 | 268245 |
| UN62390 | Rsa1.0.15250.1 | 747 | 2727   | 0         | 741 | 747 | 99 +  | 2   | 745 | 656    | 1402   |
| UN62391 | Rsa1.0.00574.1 | 807 | 74797  | 0         | 458 | 464 | 98 +  | 3   | 462 | 68122  | 68584  |
| UN62392 | Rsa1.0.00409.1 | 758 | 146788 | 0         | 397 | 405 | 98 -  | 2   | 402 | 68281  | 68685  |
| UN62393 | Rsa1.0.45210.1 | 690 | 498    | 6.00E-79  | 156 | 158 | 98 +  | 78  | 235 | 141    | 298    |
| UN62394 | Rsa1.0.01529.1 | 791 | 43871  | 1.00E-131 | 332 | 359 | 92 -  | 3   | 356 | 25491  | 25832  |
| UN62395 | Rsa1.0.02198.1 | 758 | 33989  | 1.00E-125 | 252 | 260 | 96 -  | 3   | 262 | 12702  | 12961  |
| UN62396 | Rsa1.0.04670.1 | 754 | 16453  | 0         | 402 | 418 | 96 +  | 341 | 754 | 5440   | 5857   |
| UN62397 | Rsa1.0.19009.1 | 703 | 1495   | 0         | 426 | 438 | 97 +  | 171 | 608 | 770    | 1207   |
| UN62398 | Rsa1.0.00154.1 | 144 | 189461 | 1.00E-70  | 138 | 139 | 99 +  | 3   | 141 | 86468  | 86606  |

|         |                |     |        |           |     |     |       |     |     |        |        |
|---------|----------------|-----|--------|-----------|-----|-----|-------|-----|-----|--------|--------|
| UN62399 | Rsa1.0_30444.1 | 800 | 753    | 0         | 466 | 467 | 99 +  | 170 | 636 | 287    | 753    |
| UN62400 | Rsa1.0_02119.1 | 815 | 34833  | 0         | 777 | 813 | 95 +  | 3   | 807 | 5615   | 6415   |
| UN62401 | Rsa1.0_05122.1 | 772 | 14791  | 0         | 720 | 730 | 98 +  | 2   | 724 | 6707   | 7436   |
| UN62402 | Rsa1.0_02287.1 | 634 | 32986  | 1.00E-140 | 319 | 340 | 93 +  | 222 | 560 | 7100   | 7439   |
| UN62403 | Rsa1.0_00926.1 | 205 | 195072 | 1.00E-111 | 204 | 204 | 100 - | 2   | 205 | 176310 | 176513 |
| UN62404 | Rsa1.0_00220.1 | 527 | 192936 | 1.00E-166 | 299 | 300 | 99 +  | 41  | 340 | 19048  | 19347  |
| UN62405 | Rsa1.0_04153.1 | 784 | 18807  | 1.00E-168 | 350 | 365 | 95 -  | 3   | 363 | 6301   | 6665   |
| UN62406 | Rsa1.0_00695.1 | 684 | 68019  | 0         | 397 | 400 | 99 -  | 287 | 684 | 1401   | 1800   |
| UN62407 | Rsa1.0_57544.1 | 796 | 398    | 0         | 390 | 398 | 97 +  | 387 | 781 | 1      | 398    |
| UN62408 | Rsa1.0_08143.1 | 787 | 7836   | 1.00E-169 | 304 | 305 | 99 +  | 74  | 378 | 3153   | 3457   |
| UN62409 | Rsa1.0_01101.1 | 783 | 54031  | 0         | 621 | 633 | 98 +  | 2   | 633 | 31207  | 31839  |
| UN62410 | Rsa1.0_00528.1 | 726 | 164755 | 9.00E-32  | 144 | 167 | 86 -  | 139 | 305 | 93704  | 93859  |
| UN62411 | Rsa1.0_00490.1 | 393 | 186713 | 0         | 386 | 392 | 98 +  | 2   | 393 | 49573  | 49964  |
| UN62412 | Rsa1.0_01416.1 | 684 | 46262  | 0         | 612 | 615 | 99 -  | 73  | 684 | 22989  | 23603  |
| UN62413 | Rsa1.0_13791.1 | 749 | 4330   | 1.00E-143 | 260 | 261 | 99 +  | 136 | 396 | 2597   | 2857   |
| UN62414 | Rsa1.0_00182.1 | 681 | 142305 | 0         | 342 | 347 | 98 +  | 265 | 611 | 51644  | 51990  |
| UN62415 | Rsa1.0_01258.1 | 460 | 49755  | 1.00E-105 | 219 | 226 | 96 -  | 236 | 460 | 22263  | 22488  |
| UN62416 | Rsa1.0_00131.1 | 750 | 432233 | 2.00E-82  | 196 | 209 | 93 +  | 63  | 271 | 161995 | 162199 |
| UN62417 | Rsa1.0_00761.1 | 799 | 65133  | 1.00E-105 | 268 | 281 | 95 +  | 530 | 799 | 62157  | 62437  |
| UN62418 | Rsa1.0_06455.1 | 685 | 10983  | 0         | 680 | 689 | 98 -  | 3   | 685 | 6804   | 7492   |
| UN62419 | Rsa1.0_00527.1 | 766 | 77733  | 1.00E-148 | 348 | 375 | 92 -  | 291 | 665 | 54819  | 55189  |
| UN62420 | Rsa1.0_05758.1 | 725 | 12721  | 1.00E-166 | 332 | 343 | 96 -  | 27  | 366 | 3474   | 3816   |
| UN62421 | Rsa1.0_62130.1 | 441 | 369    | 1.00E-180 | 348 | 357 | 97 -  | 85  | 438 | 13     | 369    |
| UN62422 | Rsa1.0_00166.1 | 705 | 240912 | 0         | 683 | 686 | 99 +  | 13  | 696 | 134253 | 134938 |
| UN62423 | Rsa1.0_00661.1 | 701 | 213041 | 1.00E-98  | 265 | 297 | 89 +  | 228 | 524 | 24663  | 24935  |
| UN62424 | Rsa1.0_00002.1 | 251 | 601661 | 1.00E-114 | 239 | 249 | 95 -  | 3   | 251 | 20760  | 21008  |
| UN62425 | Rsa1.0_08916.1 | 179 | 6792   | 7.00E-60  | 127 | 129 | 98 +  | 5   | 133 | 4248   | 4375   |
| UN62426 | Rsa1.0_11060.1 | 721 | 5629   | 1.00E-127 | 231 | 231 | 100 - | 350 | 580 | 1009   | 1239   |
| UN62427 | Rsa1.0_00335.1 | 772 | 94371  | 1.00E-117 | 220 | 222 | 99 -  | 3   | 224 | 17542  | 17763  |
| UN62428 | Rsa1.0_00085.1 | 816 | 142226 | 0         | 487 | 508 | 95 +  | 243 | 745 | 20681  | 21188  |
| UN62429 | Rsa1.0_00050.1 | 700 | 237174 | 0         | 352 | 357 | 98 +  | 344 | 700 | 14027  | 14383  |
| UN62430 | Rsa1.0_03912.1 | 661 | 135266 | 1.00E-152 | 321 | 334 | 96 -  | 248 | 576 | 2247   | 2580   |
| UN62431 | Rsa1.0_00139.1 | 759 | 357786 | 0         | 387 | 402 | 96 -  | 172 | 570 | 138526 | 138927 |
| UN62432 | Rsa1.0_02123.1 | 779 | 149053 | 0         | 626 | 634 | 98 +  | 23  | 656 | 17326  | 17958  |
| UN62433 | Rsa1.0_05382.1 | 589 | 13963  | 0         | 478 | 526 | 90 -  | 15  | 515 | 9762   | 10281  |
| UN62434 | Rsa1.0_00284.1 | 420 | 323267 | 1.00E-145 | 387 | 419 | 92 +  | 2   | 413 | 297201 | 297612 |
| UN62435 | Rsa1.0_00009.1 | 799 | 232558 | 1.00E-140 | 305 | 320 | 95 -  | 92  | 410 | 13153  | 13465  |
| UN62436 | Rsa1.0_04141.1 | 652 | 18864  | 1.00E-108 | 209 | 211 | 99 +  | 1   | 210 | 14213  | 14423  |
| UN62437 | Rsa1.0_00315.1 | 731 | 96426  | 0         | 348 | 351 | 99 +  | 353 | 702 | 19802  | 20152  |

|         |                |     |        |           |     |     |       |     |     |        |        |
|---------|----------------|-----|--------|-----------|-----|-----|-------|-----|-----|--------|--------|
| UN62438 | Rsa1.0.01143.1 | 769 | 52456  | 0         | 549 | 573 | 95 -  | 196 | 762 | 20773  | 21345  |
| UN62439 | Rsa1.0.00038.1 | 726 | 314568 | 1.00E-166 | 297 | 297 | 100 + | 1   | 297 | 196269 | 196565 |
| UN62440 | Rsa1.0.00080.1 | 780 | 190437 | 3.00E-81  | 163 | 166 | 98 +  | 134 | 299 | 65281  | 65446  |
| UN62441 | Rsa1.0.07056.1 | 807 | 9969   | 0         | 550 | 574 | 95 +  | 207 | 766 | 6091   | 6661   |
| UN62442 | Rsa1.0.47137.1 | 774 | 479    | 0         | 475 | 480 | 98 -  | 64  | 542 | 1      | 479    |
| UN62443 | Rsa1.0.04867.1 | 640 | 15670  | 0         | 637 | 640 | 99 -  | 1   | 640 | 2585   | 3224   |
| UN62444 | Rsa1.0.01506.1 | 662 | 44370  | 4.00E-46  | 143 | 159 | 89 -  | 1   | 159 | 44120  | 44278  |
| UN62445 | Rsa1.0.00417.1 | 266 | 395068 | 1.00E-107 | 242 | 257 | 94 -  | 1   | 257 | 259251 | 259507 |
| UN62446 | Rsa1.0.14084.1 | 704 | 3822   | 1.00E-150 | 285 | 290 | 98 +  | 239 | 528 | 459    | 748    |
| UN62447 | Rsa1.0.16116.1 | 762 | 2278   | 1.00E-161 | 294 | 296 | 99 -  | 285 | 580 | 388    | 683    |
| UN62448 | Rsa1.0.03134.1 | 550 | 145023 | 1.00E-164 | 292 | 292 | 100 + | 1   | 292 | 4876   | 5167   |
| UN62449 | Rsa1.0.03029.1 | 650 | 25858  | 0         | 437 | 459 | 95 -  | 1   | 459 | 18553  | 19009  |
| UN62450 | Rsa1.0.08961.1 | 773 | 6750   | 0         | 357 | 364 | 98 +  | 2   | 365 | 4389   | 4752   |
| UN62451 | Rsa1.0.00721.1 | 619 | 66918  | 0         | 619 | 619 | 100 - | 1   | 619 | 28867  | 29485  |
| UN62452 | Rsa1.0.01796.1 | 701 | 39154  | 1.00E-171 | 307 | 308 | 99 -  | 1   | 308 | 16683  | 16990  |
| UN62453 | Rsa1.0.02430.1 | 131 | 31506  | 1.00E-23  | 65  | 68  | 95 +  | 60  | 127 | 13146  | 13213  |
| UN62454 | Rsa1.0.00792.1 | 242 | 64163  | 7.00E-67  | 150 | 157 | 95 -  | 62  | 218 | 6424   | 6580   |
| UN62455 | Rsa1.0.00190.1 | 643 | 318240 | 0         | 457 | 465 | 98 -  | 2   | 464 | 20540  | 21001  |
| UN62456 | Rsa1.0.01094.1 | 395 | 167285 | 1.00E-107 | 226 | 235 | 96 -  | 7   | 238 | 12558  | 12792  |
| UN62457 | Rsa1.0.00852.1 | 277 | 62179  | 2.00E-76  | 148 | 149 | 99 -  | 52  | 200 | 46196  | 46344  |
| UN62458 | Rsa1.0.04787.1 | 821 | 15987  | 0         | 536 | 556 | 96 -  | 99  | 654 | 1961   | 2516   |
| UN62459 | Rsa1.0.00216.1 | 733 | 197563 | 0         | 633 | 666 | 95 +  | 5   | 662 | 16553  | 17212  |
| UN62460 | Rsa1.0.01485.1 | 718 | 44797  | 0         | 717 | 717 | 100 + | 2   | 718 | 15815  | 16531  |
| UN62461 | Rsa1.0.02502.1 | 770 | 30740  | 0         | 757 | 771 | 98 -  | 1   | 770 | 10251  | 11021  |
| UN62462 | Rsa1.0.04431.1 | 704 | 17389  | 0         | 550 | 588 | 93 +  | 117 | 703 | 16716  | 17303  |
| UN62463 | Rsa1.0.03553.1 | 793 | 22150  | 1.00E-177 | 341 | 348 | 97 +  | 1   | 343 | 14880  | 15227  |
| UN62464 | Rsa1.0.00651.1 | 459 | 247766 | 0         | 455 | 459 | 99 +  | 1   | 459 | 105382 | 105840 |
| UN62465 | Rsa1.0.02963.1 | 194 | 26407  | 5.00E-33  | 87  | 92  | 94 +  | 25  | 116 | 4498   | 4589   |
| UN62466 | Rsa1.0.00811.1 | 710 | 63242  | 0         | 342 | 343 | 99 -  | 1   | 342 | 19065  | 19407  |
| UN62467 | Rsa1.0.00928.1 | 101 | 59293  | 3.00E-17  | 57  | 61  | 93 +  | 6   | 66  | 21665  | 21725  |
| UN62468 | Rsa1.0.00335.1 | 722 | 94371  | 0         | 426 | 451 | 94 +  | 270 | 720 | 80250  | 80693  |
| UN62469 | Rsa1.0.02215.1 | 443 | 33822  | 1.00E-170 | 302 | 302 | 100 + | 1   | 302 | 16169  | 16470  |
| UN62470 | Rsa1.0.09661.1 | 244 | 6226   | 1.00E-102 | 225 | 237 | 94 -  | 8   | 244 | 3      | 239    |
| UN62471 | Rsa1.0.02015.1 | 792 | 36008  | 1.00E-125 | 237 | 240 | 98 +  | 300 | 539 | 2837   | 3076   |
| UN62472 | Rsa1.0.01292.1 | 723 | 175783 | 0         | 668 | 693 | 96 +  | 3   | 692 | 145968 | 146660 |
| UN62473 | Rsa1.0.01311.1 | 807 | 48456  | 0         | 401 | 402 | 99 -  | 1   | 402 | 16788  | 17189  |
| UN62474 | Rsa1.0.00628.1 | 804 | 214360 | 1.00E-156 | 440 | 489 | 89 +  | 126 | 611 | 67098  | 67583  |
| UN62475 | Rsa1.0.00305.1 | 781 | 97308  | 0         | 770 | 781 | 98 +  | 1   | 780 | 15771  | 16551  |
| UN62476 | Rsa1.0.02523.1 | 750 | 30527  | 0         | 531 | 538 | 98 +  | 5   | 542 | 8821   | 9358   |

|         |                |     |        |           |     |     |       |     |     |        |        |
|---------|----------------|-----|--------|-----------|-----|-----|-------|-----|-----|--------|--------|
| UN62477 | Rsa1.0_15387.1 | 465 | 2642   | 1.00E-171 | 326 | 333 | 97 +  | 3   | 335 | 2073   | 2405   |
| UN62478 | Rsa1.0_00106.1 | 809 | 133916 | 0         | 653 | 677 | 96 -  | 1   | 676 | 93075  | 93744  |
| UN62479 | Rsa1.0_00029.1 | 804 | 272992 | 0         | 600 | 663 | 90 +  | 142 | 804 | 196804 | 197460 |
| UN62480 | Rsa1.0_00611.1 | 199 | 72410  | 2.00E-94  | 194 | 199 | 97 +  | 1   | 199 | 22119  | 22316  |
| UN62481 | Rsa1.0_00645.1 | 573 | 189716 | 2.00E-66  | 444 | 545 | 81 -  | 36  | 569 | 161984 | 162491 |
| UN62482 | Rsa1.0_06978.1 | 680 | 10073  | 0         | 644 | 682 | 94 +  | 2   | 680 | 1832   | 2489   |
| UN62483 | Rsa1.0_00105.1 | 120 | 134138 | 1.00E-41  | 107 | 114 | 93 +  | 7   | 120 | 122257 | 122370 |
| UN62484 | Rsa1.0_33901.1 | 265 | 668    | 3.00E-75  | 161 | 167 | 96 -  | 1   | 167 | 139    | 305    |
| UN62485 | Rsa1.0_08223.1 | 750 | 7700   | 0         | 490 | 491 | 99 -  | 1   | 491 | 4843   | 5333   |
| UN62486 | Rsa1.0_06143.1 | 288 | 11634  | 1.00E-102 | 231 | 245 | 94 +  | 43  | 287 | 4551   | 4795   |
| UN62487 | Rsa1.0_00679.1 | 730 | 68971  | 1.00E-137 | 283 | 294 | 96 +  | 1   | 287 | 6832   | 7125   |
| UN62488 | Rsa1.0_00013.1 | 224 | 292129 | 2.00E-66  | 147 | 152 | 96 -  | 73  | 224 | 73072  | 73222  |
| UN62489 | Rsa1.0_25230.1 | 765 | 946    | 2.00E-66  | 163 | 172 | 94 +  | 225 | 396 | 757    | 925    |
| UN62490 | Rsa1.0_01148.1 | 855 | 52375  | 0         | 682 | 695 | 98 -  | 1   | 695 | 23102  | 23789  |
| UN62491 | Rsa1.0_41102.1 | 844 | 546    | 1.00E-172 | 357 | 372 | 95 -  | 171 | 541 | 1      | 369    |
| UN62492 | Rsa1.0_00110.1 | 561 | 132719 | 1.00E-156 | 285 | 287 | 99 -  | 3   | 289 | 114800 | 115086 |
| UN62493 | Rsa1.0_00464.1 | 696 | 82253  | 1.00E-130 | 251 | 256 | 98 +  | 311 | 566 | 53169  | 53424  |
| UN62494 | Rsa1.0_00471.1 | 166 | 81897  | 4.00E-30  | 67  | 67  | 100 + | 69  | 135 | 46928  | 46994  |
| UN62495 | Rsa1.0_03427.1 | 173 | 22992  | 9.00E-47  | 114 | 119 | 95 -  | 1   | 119 | 13924  | 14041  |
| UN62496 | Rsa1.0_00198.1 | 830 | 222963 | 0         | 785 | 833 | 94 -  | 2   | 830 | 138226 | 139047 |
| UN62497 | Rsa1.0_07464.1 | 858 | 9328   | 0         | 579 | 606 | 95 +  | 1   | 600 | 3763   | 4368   |
| UN62498 | Rsa1.0_06002.1 | 650 | 11976  | 2.33E-156 | 288 | 296 | 97 +  | 198 | 490 | 5386   | 5681   |
| UN62499 | Rsa1.0_12327.1 | 192 | 5255   | 2.00E-38  | 90  | 93  | 96 +  | 94  | 186 | 961    | 1053   |
| UN62500 | Rsa1.0_00858.1 | 469 | 61892  | 0         | 467 | 469 | 99 -  | 1   | 469 | 5426   | 5894   |
| UN62501 | Rsa1.0_16344.1 | 752 | 2187   | 1.00E-119 | 227 | 230 | 98 +  | 409 | 638 | 874    | 1103   |
| UN62502 | Rsa1.0_01883.1 | 712 | 37661  | 3.00E-68  | 202 | 225 | 89 +  | 1   | 223 | 29778  | 29990  |
| UN62503 | Rsa1.0_00022.1 | 295 | 200461 | 1.00E-131 | 287 | 298 | 96 -  | 4   | 293 | 190493 | 190790 |
| UN62504 | Rsa1.0_00018.1 | 345 | 410899 | 6.00E-34  | 95  | 98  | 96 +  | 164 | 258 | 124353 | 124450 |
| UN62505 | Rsa1.0_00556.1 | 643 | 207212 | 0         | 604 | 648 | 93 -  | 5   | 643 | 37933  | 38575  |
| UN62506 | Rsa1.0_00206.1 | 628 | 109040 | 0         | 339 | 342 | 99 +  | 287 | 628 | 12094  | 12435  |
| UN62507 | Rsa1.0_00451.1 | 762 | 322533 | 0         | 469 | 487 | 96 -  | 1   | 484 | 49244  | 49725  |
| UN62508 | Rsa1.0_00265.1 | 698 | 220635 | 0         | 571 | 577 | 98 -  | 123 | 698 | 208388 | 208964 |
| UN62509 | Rsa1.0_00153.1 | 679 | 192931 | 1.00E-126 | 305 | 328 | 92 +  | 2   | 319 | 143094 | 143418 |
| UN62510 | Rsa1.0_08258.1 | 748 | 7649   | 1.00E-153 | 274 | 274 | 100 - | 1   | 274 | 6849   | 7122   |
| UN62511 | Rsa1.0_38780.1 | 659 | 580    | 2.00E-50  | 123 | 130 | 94 +  | 330 | 459 | 96     | 225    |
| UN62512 | Rsa1.0_00243.1 | 834 | 103651 | 1.00E-178 | 392 | 414 | 94 +  | 413 | 824 | 92979  | 93389  |
| UN62513 | Rsa1.0_00152.1 | 495 | 257730 | 3.00E-95  | 259 | 283 | 91 +  | 1   | 278 | 250252 | 250529 |
| UN62514 | Rsa1.0_00759.1 | 375 | 65465  | 1.00E-179 | 359 | 373 | 96 -  | 1   | 373 | 56065  | 56437  |
| UN62515 | Rsa1.0_00087.1 | 113 | 761073 | 1.00E-23  | 83  | 88  | 94 +  | 3   | 90  | 192239 | 192323 |

|         |                |     |        |           |     |     |       |     |     |        |        |
|---------|----------------|-----|--------|-----------|-----|-----|-------|-----|-----|--------|--------|
| UN62516 | Rsa1.0.01222.1 | 591 | 50398  | 1.00E-151 | 271 | 271 | 100 + | 319 | 589 | 35651  | 35921  |
| UN62517 | Rsa1.0.00167.1 | 751 | 116000 | 0         | 750 | 751 | 99 -  | 1   | 751 | 108149 | 108898 |
| UN62518 | Rsa1.0.00358.1 | 156 | 91293  | 4.00E-67  | 144 | 149 | 96 -  | 8   | 156 | 49095  | 49243  |
| UN62519 | Rsa1.0.00087.1 | 758 | 761073 | 1.00E-147 | 296 | 307 | 96 +  | 209 | 515 | 210545 | 210845 |
| UN62520 | Rsa1.0.00123.1 | 746 | 325650 | 0         | 466 | 469 | 99 -  | 216 | 682 | 220372 | 220840 |
| UN62521 | Rsa1.0.06170.1 | 663 | 11575  | 0         | 658 | 661 | 99 +  | 3   | 663 | 1854   | 2514   |
| UN62522 | Rsa1.0.01405.1 | 354 | 46445  | 1.00E-123 | 299 | 325 | 92 +  | 2   | 326 | 34096  | 34408  |
| UN62523 | Rsa1.0.00531.1 | 230 | 77387  | 1.00E-95  | 226 | 233 | 96 -  | 1   | 226 | 27125  | 27357  |
| UN62524 | Rsa1.0.00136.1 | 562 | 122464 | 4.00E-67  | 177 | 191 | 92 +  | 209 | 398 | 28826  | 29012  |
| UN62525 | Rsa1.0.01957.1 | 704 | 36844  | 0         | 434 | 456 | 95 -  | 242 | 695 | 25694  | 26148  |
| UN62526 | Rsa1.0.34500.1 | 709 | 656    | 1.00E-106 | 195 | 195 | 100 - | 431 | 625 | 200    | 394    |
| UN62527 | Rsa1.0.01796.1 | 708 | 39154  | 0         | 699 | 708 | 98 -  | 3   | 708 | 21002  | 21709  |
| UN62528 | Rsa1.0.06151.1 | 783 | 11612  | 7.00E-79  | 159 | 162 | 98 +  | 2   | 163 | 8149   | 8310   |
| UN62529 | Rsa1.0.00826.1 | 288 | 166736 | 4.00E-56  | 125 | 129 | 96 +  | 163 | 288 | 155658 | 155786 |
| UN62530 | Rsa1.0.00104.1 | 583 | 368722 | 4.00E-15  | 190 | 239 | 79 -  | 116 | 354 | 351975 | 352213 |
| UN62531 | Rsa1.0.00145.1 | 623 | 261008 | 3.00E-80  | 194 | 208 | 93 -  | 396 | 603 | 73740  | 73947  |
| UN62532 | Rsa1.0.00857.1 | 330 | 61904  | 1.00E-158 | 317 | 328 | 96 +  | 1   | 328 | 14300  | 14624  |
| UN62533 | Rsa1.0.03605.1 | 135 | 21827  | 7.00E-50  | 112 | 116 | 96 -  | 1   | 116 | 20346  | 20461  |
| UN62534 | Rsa1.0.01663.1 | 187 | 168589 | 6.00E-82  | 172 | 178 | 96 +  | 10  | 187 | 138829 | 139006 |
| UN62535 | Rsa1.0.10474.1 | 470 | 5835   | 1.00E-131 | 265 | 274 | 96 -  | 1   | 274 | 5300   | 5573   |
| UN62536 | Rsa1.0.00087.1 | 462 | 761073 | 0         | 404 | 423 | 95 +  | 49  | 462 | 5463   | 5885   |
| UN62537 | Rsa1.0.01632.1 | 758 | 181224 | 1.00E-157 | 401 | 431 | 93 +  | 134 | 559 | 884    | 1304   |
| UN62538 | Rsa1.0.00441.1 | 800 | 84607  | 0         | 453 | 476 | 95 -  | 96  | 571 | 29577  | 30052  |
| UN62539 | Rsa1.0.03162.1 | 274 | 24895  | 1.00E-132 | 265 | 274 | 96 -  | 1   | 274 | 22632  | 22905  |
| UN62540 | Rsa1.0.01572.1 | 682 | 42995  | 0         | 666 | 701 | 95 +  | 1   | 682 | 6114   | 6806   |
| UN62541 | Rsa1.0.01004.1 | 837 | 56975  | 0         | 743 | 799 | 92 -  | 9   | 791 | 39474  | 40258  |
| UN62542 | Rsa1.0.00448.1 | 805 | 84048  | 0         | 797 | 805 | 99 +  | 3   | 805 | 15056  | 15860  |
| UN62543 | Rsa1.0.01393.1 | 684 | 46661  | 1.00E-118 | 243 | 251 | 96 +  | 1   | 251 | 41180  | 41429  |
| UN62544 | Rsa1.0.00293.1 | 222 | 339294 | 1.00E-105 | 215 | 222 | 96 +  | 1   | 222 | 4276   | 4497   |
| UN62545 | Rsa1.0.01106.1 | 539 | 53916  | 0         | 530 | 533 | 99 -  | 2   | 534 | 29717  | 30249  |
| UN62546 | Rsa1.0.02283.1 | 717 | 33024  | 9.00E-72  | 148 | 150 | 98 -  | 135 | 283 | 1250   | 1399   |
| UN62547 | Rsa1.0.01860.1 | 769 | 38057  | 0         | 344 | 345 | 99 +  | 2   | 346 | 21428  | 21772  |
| UN62548 | Rsa1.0.01172.1 | 325 | 51734  | 1.00E-127 | 305 | 330 | 92 -  | 1   | 325 | 27506  | 27835  |
| UN62549 | Rsa1.0.02990.1 | 588 | 26180  | 0         | 571 | 588 | 97 -  | 1   | 588 | 13680  | 14266  |
| UN62550 | Rsa1.0.00139.1 | 121 | 357786 | 5.00E-35  | 108 | 119 | 90 -  | 3   | 121 | 141851 | 141969 |
| UN62551 | Rsa1.0.03384.1 | 822 | 23291  | 0         | 502 | 509 | 98 -  | 1   | 505 | 12050  | 12558  |
| UN62552 | Rsa1.0.17419.1 | 118 | 1834   | 1.00E-47  | 108 | 112 | 96 +  | 1   | 112 | 1498   | 1609   |
| UN62553 | Rsa1.0.02559.1 | 763 | 30096  | 1.00E-109 | 368 | 416 | 88 -  | 357 | 763 | 19887  | 20289  |
| UN62554 | Rsa1.0.12152.1 | 647 | 5300   | 6.00E-17  | 71  | 78  | 91 +  | 67  | 143 | 621    | 698    |

|         |                |     |        |           |     |     |       |     |     |        |        |
|---------|----------------|-----|--------|-----------|-----|-----|-------|-----|-----|--------|--------|
| UN62555 | Rsa1.0.00247.1 | 720 | 103408 | 0         | 510 | 546 | 93 -  | 10  | 554 | 91993  | 92520  |
| UN62556 | Rsa1.0.01625.1 | 780 | 42019  | 1.00E-147 | 280 | 284 | 98 +  | 1   | 284 | 20450  | 20732  |
| UN62557 | Rsa1.0.00964.1 | 755 | 316648 | 0         | 547 | 558 | 98 +  | 1   | 555 | 3939   | 4496   |
| UN62558 | Rsa1.0.00844.1 | 498 | 62403  | 8.00E-62  | 124 | 125 | 99 -  | 333 | 457 | 55759  | 55883  |
| UN62559 | Rsa1.0.00417.1 | 752 | 395068 | 0         | 710 | 738 | 96 -  | 7   | 744 | 220606 | 221334 |
| UN62560 | Rsa1.0.03387.1 | 136 | 23278  | 9.00E-31  | 113 | 128 | 88 -  | 9   | 136 | 1832   | 1959   |
| UN62561 | Rsa1.0.03290.1 | 668 | 24011  | 0         | 584 | 625 | 93 -  | 70  | 668 | 6219   | 6842   |
| UN62562 | Rsa1.0.00522.1 | 710 | 78103  | 0         | 661 | 693 | 95 -  | 1   | 687 | 51939  | 52631  |
| UN62563 | Rsa1.0.03365.1 | 797 | 23410  | 0         | 389 | 395 | 98 -  | 406 | 797 | 12373  | 12767  |
| UN62564 | Rsa1.0.01809.1 | 332 | 39004  | 0         | 332 | 332 | 100 + | 1   | 332 | 29902  | 30233  |
| UN62565 | Rsa1.0.00257.1 | 755 | 102407 | 0         | 429 | 430 | 99 +  | 1   | 430 | 80958  | 81387  |
| UN62566 | Rsa1.0.00928.1 | 219 | 59293  | 4.00E-37  | 88  | 91  | 96 +  | 74  | 164 | 29996  | 30086  |
| UN62567 | Rsa1.0.04153.1 | 167 | 18807  | 2.00E-56  | 147 | 159 | 92 +  | 4   | 162 | 5596   | 5754   |
| UN62568 | Rsa1.0.05499.1 | 909 | 13520  | 1.00E-114 | 225 | 229 | 98 -  | 4   | 231 | 12343  | 12571  |
| UN62569 | Rsa1.0.00755.1 | 285 | 192559 | 1.00E-125 | 269 | 283 | 95 -  | 3   | 285 | 139040 | 139322 |
| UN62570 | Rsa1.0.00211.1 | 465 | 228189 | 2.00E-87  | 215 | 231 | 93 +  | 1   | 231 | 170127 | 170355 |
| UN62571 | Rsa1.0.00479.1 | 250 | 81377  | 4.00E-62  | 124 | 125 | 99 -  | 123 | 247 | 28801  | 28925  |
| UN62572 | Rsa1.0.02356.1 | 704 | 141500 | 3.00E-99  | 246 | 266 | 92 -  | 270 | 532 | 138543 | 138808 |
| UN62573 | Rsa1.0.09671.1 | 433 | 6221   | 1.00E-159 | 326 | 340 | 95 +  | 90  | 429 | 3      | 342    |
| UN62574 | Rsa1.0.01036.1 | 713 | 55978  | 0         | 692 | 718 | 96 +  | 1   | 713 | 40237  | 40954  |
| UN62575 | Rsa1.0.03642.1 | 156 | 21609  | 7.00E-38  | 127 | 139 | 91 +  | 16  | 151 | 5391   | 5528   |
| UN62576 | Rsa1.0.00701.1 | 193 | 67691  | 1.00E-83  | 181 | 189 | 95 +  | 5   | 193 | 5418   | 5606   |
| UN62577 | Rsa1.0.00218.1 | 182 | 201480 | 3.00E-34  | 83  | 86  | 96 -  | 52  | 137 | 36625  | 36710  |
| UN62578 | Rsa1.0.00178.1 | 732 | 114861 | 0         | 663 | 705 | 94 +  | 30  | 732 | 93360  | 94053  |
| UN62579 | Rsa1.0.00005.1 | 300 | 353093 | 1.00E-124 | 284 | 303 | 93 +  | 1   | 300 | 122044 | 122346 |
| UN62580 | Rsa1.0.02992.1 | 528 | 26176  | 0         | 500 | 513 | 97 -  | 1   | 510 | 999    | 1508   |
| UN62581 | Rsa1.0.00016.1 | 421 | 831256 | 0         | 404 | 424 | 95 +  | 1   | 418 | 52528  | 52951  |
| UN62582 | Rsa1.0.02282.1 | 111 | 163951 | 9.00E-12  | 55  | 60  | 91 -  | 5   | 63  | 155088 | 155147 |
| UN62583 | Rsa1.0.03959.1 | 706 | 19866  | 0         | 670 | 714 | 93 -  | 2   | 706 | 9104   | 9805   |
| UN62584 | Rsa1.0.00777.1 | 719 | 191865 | 1.00E-154 | 303 | 310 | 97 -  | 1   | 306 | 182499 | 182807 |
| UN62585 | Rsa1.0.03119.1 | 155 | 25270  | 2.00E-75  | 152 | 155 | 98 -  | 1   | 155 | 24189  | 24343  |
| UN62586 | Rsa1.0.00910.1 | 762 | 59975  | 0         | 702 | 702 | 100 + | 61  | 762 | 23345  | 24046  |
| UN62587 | Rsa1.0.02692.1 | 798 | 28626  | 1.00E-158 | 393 | 427 | 92 +  | 374 | 798 | 21962  | 22388  |
| UN62588 | Rsa1.0.01188.1 | 674 | 51362  | 0         | 672 | 674 | 99 -  | 1   | 674 | 35511  | 36184  |
| UN62589 | Rsa1.0.00119.1 | 715 | 467509 | 0         | 709 | 716 | 99 -  | 1   | 715 | 236487 | 237202 |
| UN62590 | Rsa1.0.01076.1 | 663 | 54835  | 0         | 381 | 400 | 95 +  | 264 | 663 | 4497   | 4896   |
| UN62591 | Rsa1.0.00628.1 | 505 | 214360 | 1.00E-113 | 288 | 314 | 91 -  | 1   | 312 | 184065 | 184378 |
| UN62592 | Rsa1.0.13895.1 | 704 | 4135   | 2.00E-79  | 172 | 179 | 96 +  | 399 | 577 | 2861   | 3039   |
| UN62593 | Rsa1.0.03005.1 | 687 | 26082  | 0         | 537 | 538 | 99 +  | 1   | 538 | 3547   | 4084   |

|         |                |     |        |           |     |     |       |     |     |        |        |
|---------|----------------|-----|--------|-----------|-----|-----|-------|-----|-----|--------|--------|
| UN62594 | Rsa1.0_00387.1 | 740 | 495407 | 1.00E-180 | 326 | 328 | 99 -  | 1   | 328 | 398452 | 398779 |
| UN62595 | Rsa1.0_09695.1 | 425 | 6206   | 0         | 385 | 402 | 95 +  | 1   | 402 | 1270   | 1671   |
| UN62596 | Rsa1.0_05465.1 | 750 | 13657  | 0         | 745 | 750 | 99 -  | 1   | 750 | 5873   | 6622   |
| UN62597 | Rsa1.0_00879.1 | 154 | 61297  | 1.00E-51  | 140 | 151 | 92 -  | 5   | 154 | 11184  | 11334  |
| UN62598 | Rsa1.0_00016.1 | 820 | 831256 | 1.00E-155 | 278 | 278 | 100 + | 1   | 278 | 447830 | 448107 |
| UN62599 | Rsa1.0_02068.1 | 139 | 35432  | 8.00E-56  | 125 | 130 | 96 -  | 1   | 130 | 8081   | 8210   |
| UN62600 | Rsa1.0_03327.1 | 755 | 23707  | 0         | 460 | 472 | 97 -  | 3   | 473 | 8091   | 8562   |
| UN62601 | Rsa1.0_00101.1 | 145 | 267193 | 1.00E-39  | 133 | 147 | 90 +  | 1   | 145 | 105590 | 105736 |
| UN62602 | Rsa1.0_00229.1 | 781 | 105471 | 1.00E-153 | 293 | 297 | 98 +  | 1   | 294 | 6376   | 6672   |
| UN62603 | Rsa1.0_00028.1 | 745 | 293984 | 0         | 394 | 396 | 99 -  | 1   | 396 | 125589 | 125984 |
| UN62604 | Rsa1.0_02295.1 | 445 | 149884 | 1.00E-164 | 333 | 345 | 96 +  | 101 | 445 | 127178 | 127521 |
| UN62605 | Rsa1.0_00293.1 | 758 | 339294 | 0         | 756 | 756 | 100 - | 1   | 756 | 177624 | 178379 |
| UN62606 | Rsa1.0_03366.1 | 735 | 23401  | 0         | 457 | 463 | 98 -  | 1   | 463 | 10224  | 10686  |
| UN62607 | Rsa1.0_04033.1 | 759 | 19481  | 1.00E-101 | 227 | 238 | 95 +  | 256 | 489 | 5297   | 5534   |
| UN62608 | Rsa1.0_00089.1 | 720 | 406142 | 0         | 699 | 721 | 96 +  | 1   | 720 | 403915 | 404630 |
| UN62609 | Rsa1.0_04243.1 | 793 | 18321  | 0         | 782 | 803 | 97 +  | 1   | 793 | 7283   | 8085   |
| UN62610 | Rsa1.0_01581.1 | 725 | 42833  | 0         | 725 | 725 | 100 + | 1   | 725 | 19451  | 20175  |
| UN62611 | Rsa1.0_00083.1 | 652 | 442773 | 0         | 529 | 536 | 98 -  | 2   | 537 | 409132 | 409667 |
| UN62612 | Rsa1.0_00777.1 | 539 | 191865 | 0         | 511 | 539 | 94 -  | 1   | 539 | 13601  | 14120  |
| UN62613 | Rsa1.0_00019.1 | 542 | 301669 | 0         | 461 | 479 | 96 -  | 34  | 511 | 99010  | 99487  |
| UN62614 | #              | #   | #      | #         | #   | #   | #     | #   | #   | #      | #      |
| UN62615 | Rsa1.0_04831.1 | 612 | 15799  | 1.00E-147 | 273 | 276 | 98 +  | 1   | 276 | 663    | 938    |
| UN62616 | Rsa1.0_01384.1 | 537 | 46803  | 1.00E-54  | 172 | 193 | 89 +  | 319 | 511 | 33810  | 34002  |
| UN62617 | Rsa1.0_00984.1 | 685 | 57580  | 0         | 440 | 442 | 99 +  | 244 | 685 | 4416   | 4857   |
| UN62618 | Rsa1.0_00089.1 | 750 | 406142 | 0         | 746 | 750 | 99 +  | 1   | 750 | 163827 | 164576 |
| UN62619 | Rsa1.0_01099.1 | 158 | 158481 | 2.00E-72  | 150 | 154 | 97 -  | 5   | 158 | 132435 | 132588 |
| UN62620 | Rsa1.0_08365.1 | 572 | 7468   | 0         | 434 | 459 | 94 -  | 81  | 518 | 146    | 604    |
| UN62621 | Rsa1.0_00784.1 | 446 | 64359  | 1.00E-177 | 333 | 339 | 98 +  | 1   | 339 | 7628   | 7966   |
| UN62622 | Rsa1.0_00438.1 | 396 | 84861  | 1.00E-154 | 354 | 377 | 93 -  | 1   | 372 | 75306  | 75681  |
| UN62623 | Rsa1.0_00049.1 | 756 | 167018 | 0         | 500 | 525 | 95 -  | 1   | 525 | 134071 | 134580 |
| UN62624 | Rsa1.0_01458.1 | 789 | 175719 | 0         | 768 | 782 | 98 -  | 8   | 789 | 14526  | 15307  |
| UN62625 | Rsa1.0_00071.1 | 536 | 345714 | 0         | 519 | 538 | 96 -  | 1   | 536 | 105412 | 105943 |
| UN62626 | Rsa1.0_01976.1 | 138 | 36570  | 3.00E-27  | 62  | 62  | 100 - | 1   | 62  | 747    | 808    |
| UN62627 | Rsa1.0_00123.1 | 805 | 325650 | 1.00E-152 | 288 | 293 | 98 -  | 1   | 293 | 227015 | 227307 |
| UN62628 | Rsa1.0_01844.1 | 803 | 38421  | 0         | 402 | 404 | 99 -  | 1   | 404 | 24175  | 24578  |
| UN62629 | Rsa1.0_01091.1 | 292 | 54383  | 2.00E-76  | 172 | 181 | 95 +  | 4   | 184 | 26746  | 26926  |
| UN62630 | Rsa1.0_12036.1 | 582 | 5335   | 0         | 377 | 380 | 99 -  | 2   | 381 | 1      | 380    |
| UN62631 | Rsa1.0_02030.1 | 813 | 179909 | 1.00E-128 | 238 | 240 | 99 +  | 268 | 507 | 12236  | 12475  |
| UN62632 | Rsa1.0_00712.1 | 673 | 67217  | 0         | 372 | 379 | 98 +  | 10  | 388 | 20254  | 20631  |



|         |                |     |        |           |     |     |       |     |     |        |        |
|---------|----------------|-----|--------|-----------|-----|-----|-------|-----|-----|--------|--------|
| UN62633 | Rsa1.0.00831.1 | 512 | 62673  | 0         | 377 | 395 | 95 +  | 1   | 391 | 22716  | 23110  |
| UN62634 | Rsa1.0.00638.1 | 694 | 71037  | 0         | 669 | 709 | 94 -  | 7   | 694 | 38403  | 39110  |
| UN62635 | Rsa1.0.00006.1 | 188 | 396176 | 3.00E-71  | 169 | 180 | 93 -  | 3   | 182 | 312603 | 312782 |
| UN62636 | Rsa1.0.00046.1 | 786 | 320315 | 0         | 330 | 331 | 99 +  | 2   | 332 | 90578  | 90908  |
| UN62637 | Rsa1.0.01506.1 | 319 | 44370  | 4.00E-47  | 217 | 256 | 84 +  | 1   | 248 | 31472  | 31714  |
| UN62638 | Rsa1.0.00562.1 | 495 | 75565  | 0         | 481 | 502 | 95 +  | 1   | 495 | 23891  | 24392  |
| UN62639 | Rsa1.0.00156.1 | 748 | 118383 | 0         | 685 | 714 | 95 +  | 2   | 706 | 54322  | 55035  |
| UN62640 | Rsa1.0.00471.1 | 309 | 81897  | 1.00E-137 | 293 | 307 | 95 +  | 3   | 308 | 66781  | 67087  |
| UN62641 | Rsa1.0.00178.1 | 732 | 114861 | 3.00E-87  | 236 | 261 | 90 +  | 2   | 261 | 30337  | 30580  |
| UN62642 | Rsa1.0.14279.1 | 786 | 3582   | 0         | 343 | 344 | 99 +  | 1   | 344 | 3239   | 3582   |
| UN62643 | Rsa1.0.08274.1 | 723 | 7616   | 0         | 675 | 686 | 98 +  | 2   | 687 | 74     | 756    |
| UN62644 | Rsa1.0.02711.1 | 850 | 28475  | 0         | 806 | 831 | 96 +  | 9   | 837 | 8774   | 9596   |
| UN62645 | Rsa1.0.02433.1 | 118 | 158318 | 2.00E-31  | 108 | 119 | 90 +  | 4   | 118 | 141350 | 141468 |
| UN62646 | Rsa1.0.01742.1 | 366 | 39962  | 1.00E-78  | 192 | 205 | 93 +  | 3   | 207 | 25946  | 26149  |
| UN62647 | Rsa1.0.02783.1 | 716 | 27927  | 1.00E-142 | 282 | 288 | 97 +  | 23  | 309 | 7399   | 7685   |
| UN62648 | Rsa1.0.00554.1 | 788 | 150953 | 0         | 722 | 739 | 97 +  | 42  | 780 | 51526  | 52264  |
| UN62649 | Rsa1.0.01311.1 | 816 | 48456  | 0         | 419 | 430 | 97 +  | 2   | 430 | 42972  | 43401  |
| UN62650 | Rsa1.0.00116.1 | 465 | 365886 | 0         | 461 | 465 | 99 +  | 2   | 465 | 137791 | 138255 |
| UN62651 | Rsa1.0.00725.1 | 786 | 66757  | 1.00E-114 | 210 | 210 | 100 - | 1   | 210 | 45052  | 45261  |
| UN62652 | Rsa1.0.01400.1 | 864 | 46560  | 0         | 389 | 397 | 97 -  | 4   | 398 | 13162  | 13555  |
| UN62653 | Rsa1.0.03870.1 | 393 | 20362  | 1.00E-112 | 245 | 258 | 94 +  | 21  | 278 | 19547  | 19794  |
| UN62654 | Rsa1.0.01537.1 | 707 | 187285 | 0         | 698 | 707 | 98 +  | 1   | 707 | 167173 | 167879 |
| UN62655 | Rsa1.0.01099.1 | 774 | 158481 | 1.00E-143 | 261 | 262 | 99 +  | 274 | 535 | 4085   | 4346   |
| UN62656 | Rsa1.0.04198.1 | 197 | 18504  | 7.00E-91  | 190 | 197 | 96 -  | 1   | 197 | 15953  | 16149  |
| UN62657 | Rsa1.0.00817.1 | 449 | 62961  | 0         | 433 | 451 | 96 +  | 1   | 449 | 23198  | 23645  |
| UN62658 | Rsa1.0.05978.1 | 190 | 12053  | 9.00E-78  | 177 | 187 | 94 -  | 1   | 187 | 6833   | 7019   |
| UN62659 | Rsa1.0.01990.1 | 728 | 36431  | 0         | 540 | 605 | 89 +  | 126 | 728 | 32552  | 33143  |
| UN62660 | Rsa1.0.00483.1 | 709 | 81102  | 1.00E-151 | 316 | 330 | 95 +  | 1   | 327 | 37228  | 37553  |
| UN62661 | Rsa1.0.00373.1 | 792 | 90296  | 1.00E-118 | 222 | 224 | 99 +  | 330 | 553 | 73915  | 74138  |
| UN62662 | Rsa1.0.03213.1 | 513 | 24568  | 0         | 367 | 368 | 99 +  | 1   | 368 | 7407   | 7774   |
| UN62663 | Rsa1.0.00273.1 | 595 | 326186 | 1.00E-160 | 295 | 298 | 98 +  | 1   | 298 | 150580 | 150877 |
| UN62664 | Rsa1.0.18421.1 | 820 | 1602   | 0         | 718 | 721 | 99 +  | 1   | 719 | 662    | 1382   |
| UN62665 | Rsa1.0.00542.1 | 820 | 76831  | 0         | 665 | 697 | 95 +  | 1   | 697 | 22054  | 22735  |
| UN62666 | Rsa1.0.02198.1 | 802 | 33989  | 0         | 384 | 396 | 96 +  | 1   | 396 | 9320   | 9715   |
| UN62667 | Rsa1.0.01251.1 | 701 | 49873  | 0         | 699 | 701 | 99 +  | 1   | 701 | 3838   | 4538   |
| UN62668 | Rsa1.0.04383.1 | 178 | 17631  | 1.00E-70  | 166 | 178 | 93 +  | 1   | 178 | 9328   | 9495   |
| UN62669 | Rsa1.0.00974.1 | 807 | 57893  | 1.00E-138 | 257 | 258 | 99 -  | 2   | 259 | 36896  | 37152  |
| UN62670 | Rsa1.0.01573.1 | 456 | 42964  | 1.00E-135 | 321 | 344 | 93 -  | 89  | 427 | 4044   | 4385   |
| UN62671 | Rsa1.0.02240.1 | 165 | 153768 | 7.00E-72  | 158 | 165 | 95 +  | 1   | 165 | 145335 | 145499 |

|         |                |     |        |           |     |     |       |     |     |        |        |
|---------|----------------|-----|--------|-----------|-----|-----|-------|-----|-----|--------|--------|
| UN62672 | Rsa1.0_18634.1 | 693 | 1562   | 0         | 669 | 702 | 95 +  | 1   | 693 | 619    | 1317   |
| UN62673 | Rsa1.0_02872.1 | 835 | 27080  | 5.00E-92  | 268 | 301 | 89 +  | 82  | 369 | 22244  | 22544  |
| UN62674 | Rsa1.0_00110.1 | 765 | 132719 | 0         | 681 | 735 | 92 +  | 2   | 733 | 49711  | 50444  |
| UN62675 | Rsa1.0_01364.1 | 748 | 47172  | 1.00E-156 | 285 | 287 | 99 -  | 45  | 331 | 14811  | 15097  |
| UN62676 | Rsa1.0_03471.1 | 500 | 22678  | 1.00E-117 | 229 | 234 | 97 +  | 163 | 396 | 14969  | 15202  |
| UN62677 | Rsa1.0_00159.1 | 580 | 431686 | 0         | 400 | 404 | 99 -  | 1   | 401 | 9476   | 9879   |
| UN62678 | Rsa1.0_00108.1 | 762 | 478491 | 0         | 420 | 437 | 96 -  | 2   | 438 | 279966 | 280401 |
| UN62679 | Rsa1.0_14220.1 | 515 | 3652   | 1.00E-118 | 224 | 227 | 98 +  | 1   | 227 | 201    | 427    |
| UN62680 | Rsa1.0_00623.1 | 634 | 207630 | 0         | 626 | 634 | 98 -  | 1   | 634 | 180918 | 181551 |
| UN62681 | Rsa1.0_00865.1 | 796 | 61686  | 0         | 636 | 639 | 99 +  | 1   | 639 | 26294  | 26932  |
| UN62682 | Rsa1.0_01976.1 | 510 | 36570  | 1.00E-149 | 310 | 323 | 95 +  | 9   | 326 | 7788   | 8109   |
| UN62683 | Rsa1.0_02143.1 | 253 | 34632  | 1.00E-117 | 243 | 253 | 96 -  | 1   | 253 | 9383   | 9635   |
| UN62684 | Rsa1.0_13843.1 | 760 | 4225   | 0         | 566 | 568 | 99 +  | 1   | 568 | 3658   | 4225   |
| UN62685 | Rsa1.0_00890.1 | 509 | 323870 | 1.00E-141 | 279 | 286 | 97 -  | 1   | 286 | 162613 | 162897 |
| UN62686 | Rsa1.0_00306.1 | 748 | 146760 | 0         | 609 | 639 | 95 +  | 110 | 748 | 97623  | 98261  |
| UN62687 | Rsa1.0_01720.1 | 457 | 40358  | 1.00E-114 | 208 | 208 | 100 - | 1   | 208 | 19488  | 19695  |
| UN62688 | Rsa1.0_06715.1 | 124 | 10485  | 4.00E-45  | 113 | 120 | 94 +  | 5   | 124 | 3649   | 3768   |
| UN62689 | Rsa1.0_00512.1 | 754 | 200277 | 0         | 493 | 493 | 100 - | 1   | 493 | 71437  | 71929  |
| UN62690 | Rsa1.0_01559.1 | 166 | 43262  | 1.00E-48  | 128 | 137 | 93 +  | 18  | 154 | 29014  | 29148  |
| UN62691 | Rsa1.0_00272.1 | 197 | 447836 | 2.00E-88  | 189 | 197 | 95 +  | 1   | 197 | 56653  | 56849  |
| UN62692 | Rsa1.0_00038.1 | 815 | 314568 | 0         | 361 | 363 | 99 -  | 1   | 362 | 45790  | 46152  |
| UN62693 | Rsa1.0_24144.1 | 290 | 1005   | 1.00E-131 | 258 | 265 | 97 +  | 1   | 265 | 167    | 431    |
| UN62694 | Rsa1.0_01338.1 | 788 | 155644 | 0         | 775 | 789 | 98 +  | 1   | 788 | 109255 | 110043 |
| UN62695 | Rsa1.0_00730.1 | 155 | 66673  | 6.00E-57  | 140 | 148 | 94 -  | 1   | 147 | 49262  | 49409  |
| UN62696 | Rsa1.0_08582.1 | 826 | 7162   | 0         | 817 | 822 | 99 -  | 1   | 821 | 278    | 1098   |
| UN62697 | Rsa1.0_02180.1 | 244 | 34176  | 1.00E-103 | 229 | 242 | 94 +  | 3   | 244 | 18123  | 18364  |
| UN62698 | Rsa1.0_00178.1 | 716 | 114861 | 0         | 460 | 482 | 95 +  | 235 | 716 | 26943  | 27424  |
| UN62699 | Rsa1.0_00031.1 | 146 | 179862 | 6.00E-66  | 139 | 143 | 97 -  | 4   | 146 | 146019 | 146161 |
| UN62700 | Rsa1.0_61153.1 | 512 | 375    | 3.00E-95  | 192 | 197 | 97 +  | 75  | 271 | 1      | 197    |
| UN62701 | Rsa1.0_01701.1 | 532 | 162121 | 0         | 509 | 533 | 95 -  | 1   | 532 | 20055  | 20585  |
| UN62702 | Rsa1.0_01016.1 | 626 | 181422 | 1.00E-122 | 239 | 243 | 98 +  | 1   | 243 | 34101  | 34342  |
| UN62703 | Rsa1.0_04576.1 | 259 | 16783  | 1.00E-101 | 235 | 249 | 94 +  | 1   | 241 | 379    | 627    |
| UN62704 | Rsa1.0_05758.1 | 610 | 12721  | 0         | 545 | 573 | 95 +  | 1   | 567 | 2053   | 2621   |
| UN62705 | Rsa1.0_00661.1 | 625 | 213041 | 0         | 625 | 625 | 100 - | 1   | 625 | 25947  | 26571  |
| UN62706 | Rsa1.0_00088.1 | 524 | 141341 | 0         | 434 | 442 | 98 -  | 1   | 440 | 62412  | 62853  |
| UN62707 | Rsa1.0_01674.1 | 675 | 168300 | 1.00E-138 | 253 | 254 | 99 +  | 1   | 254 | 13327  | 13580  |
| UN62708 | Rsa1.0_00050.1 | 720 | 237174 | 1.00E-100 | 197 | 201 | 98 -  | 520 | 720 | 14470  | 14670  |
| UN62709 | Rsa1.0_00042.1 | 760 | 171507 | 1.00E-174 | 321 | 325 | 98 -  | 1   | 325 | 3359   | 3683   |
| UN62710 | Rsa1.0_00825.1 | 707 | 62855  | 0         | 463 | 463 | 100 - | 2   | 464 | 2203   | 2665   |

|         |                |     |        |           |     |     |      |     |     |        |        |
|---------|----------------|-----|--------|-----------|-----|-----|------|-----|-----|--------|--------|
| UN62711 | Rsa1.0.06288.1 | 903 | 11302  | 0         | 678 | 703 | 96 - | 182 | 868 | 972    | 1674   |
| UN62712 | Rsa1.0.05382.1 | 770 | 13963  | 1.00E-124 | 244 | 250 | 97 + | 402 | 651 | 8823   | 9072   |
| UN62713 | Rsa1.0.00009.1 | 756 | 232558 | 0         | 602 | 619 | 97 + | 133 | 748 | 12410  | 13028  |
| UN62714 | Rsa1.0.39408.1 | 678 | 571    | 1.00E-175 | 360 | 376 | 95 + | 299 | 674 | 87     | 462    |
| UN62715 | Rsa1.0.04415.1 | 257 | 147889 | 2.00E-98  | 240 | 258 | 93 + | 1   | 257 | 132528 | 132785 |
| UN62716 | Rsa1.0.06073.1 | 738 | 11807  | 0         | 637 | 664 | 95 - | 1   | 656 | 4362   | 5022   |
| UN62717 | Rsa1.0.00019.1 | 582 | 301669 | 0         | 564 | 566 | 99 + | 1   | 565 | 73085  | 73650  |
| UN62718 | Rsa1.0.00387.1 | 183 | 495407 | 6.00E-85  | 174 | 179 | 97 - | 5   | 183 | 32279  | 32457  |
| UN62719 | Rsa1.0.00269.1 | 828 | 341668 | 0         | 810 | 831 | 97 + | 5   | 828 | 314925 | 315752 |
| UN62720 | Rsa1.0.01544.1 | 775 | 185602 | 0         | 484 | 499 | 96 - | 114 | 607 | 184353 | 184851 |
| UN62721 | Rsa1.0.02686.1 | 716 | 28666  | 1.00E-103 | 202 | 206 | 98 - | 114 | 319 | 6932   | 7137   |
| UN62722 | Rsa1.0.00457.1 | 263 | 337301 | 8.00E-73  | 233 | 261 | 89 - | 1   | 260 | 142411 | 142667 |
| UN62723 | Rsa1.0.01737.1 | 586 | 40101  | 1.00E-179 | 327 | 330 | 99 - | 257 | 586 | 2646   | 2975   |
| UN62724 | Rsa1.0.01514.1 | 780 | 44222  | 0         | 382 | 387 | 98 + | 2   | 386 | 23157  | 23543  |
| UN62725 | Rsa1.0.05760.1 | 433 | 12720  | 1.00E-108 | 238 | 251 | 94 - | 14  | 264 | 4627   | 4877   |
| UN62726 | Rsa1.0.02018.1 | 750 | 35994  | 8.00E-23  | 114 | 132 | 86 - | 48  | 179 | 3167   | 3297   |
| UN62727 | Rsa1.0.02120.1 | 728 | 34819  | 0         | 562 | 565 | 99 - | 164 | 728 | 30805  | 31369  |
| UN62728 | Rsa1.0.02146.1 | 851 | 34625  | 0         | 825 | 853 | 96 - | 1   | 851 | 29140  | 29988  |
| UN62729 | Rsa1.0.02797.1 | 599 | 27800  | 0         | 590 | 597 | 98 + | 3   | 599 | 13758  | 14354  |
| UN62730 | Rsa1.0.00507.1 | 599 | 79074  | 0         | 529 | 532 | 99 - | 1   | 532 | 59842  | 60373  |
| UN62731 | Rsa1.0.00269.1 | 859 | 341668 | 0         | 629 | 659 | 95 + | 4   | 657 | 292796 | 293452 |
| UN62732 | Rsa1.0.03441.1 | 495 | 22927  | 1.00E-131 | 255 | 260 | 98 - | 1   | 258 | 17561  | 17820  |
| UN62733 | Rsa1.0.00044.1 | 135 | 271658 | 3.00E-49  | 126 | 135 | 93 - | 1   | 135 | 170606 | 170740 |
| UN62734 | Rsa1.0.00427.1 | 780 | 189678 | 0         | 348 | 352 | 98 + | 277 | 628 | 122870 | 123221 |
| UN62735 | Rsa1.0.00279.1 | 436 | 100039 | 1.00E-103 | 247 | 265 | 93 + | 136 | 397 | 83441  | 83705  |
| UN62736 | Rsa1.0.05081.1 | 860 | 136103 | 1.00E-133 | 346 | 384 | 90 - | 33  | 397 | 5006   | 5389   |
| UN62737 | Rsa1.0.03005.1 | 250 | 26082  | 2.00E-94  | 229 | 247 | 92 - | 1   | 247 | 20067  | 20313  |
| UN62738 | Rsa1.0.05708.1 | 606 | 12871  | 1.00E-152 | 324 | 341 | 95 + | 266 | 606 | 11144  | 11484  |
| UN62739 | Rsa1.0.01747.1 | 578 | 39881  | 0         | 538 | 565 | 95 - | 15  | 578 | 10753  | 11317  |
| UN62740 | Rsa1.0.00300.1 | 362 | 97747  | 1.00E-160 | 343 | 360 | 95 - | 1   | 358 | 82830  | 83182  |
| UN62741 | Rsa1.0.02529.1 | 784 | 30437  | 0         | 781 | 784 | 99 + | 1   | 784 | 13002  | 13785  |
| UN62742 | Rsa1.0.00695.1 | 800 | 68019  | 0         | 422 | 426 | 99 + | 5   | 430 | 383    | 808    |
| UN62743 | Rsa1.0.01867.1 | 266 | 37960  | 1.00E-111 | 224 | 231 | 96 + | 1   | 231 | 18611  | 18841  |
| UN62744 | Rsa1.0.48111.1 | 767 | 470    | 0         | 344 | 350 | 98 + | 169 | 517 | 4      | 353    |
| UN62745 | Rsa1.0.03689.1 | 190 | 21354  | 3.00E-13  | 142 | 175 | 81 + | 1   | 174 | 16905  | 17074  |
| UN62746 | Rsa1.0.00253.1 | 845 | 231292 | 0         | 455 | 458 | 99 - | 1   | 458 | 188517 | 188974 |
| UN62747 | Rsa1.0.00142.1 | 743 | 121474 | 1.00E-143 | 304 | 322 | 94 + | 434 | 743 | 90981  | 91302  |
| UN62748 | Rsa1.0.05428.1 | 684 | 13789  | 1.00E-143 | 283 | 290 | 97 + | 16  | 305 | 6198   | 6486   |
| UN62749 | Rsa1.0.00085.1 | 203 | 142226 | 1.00E-101 | 199 | 203 | 98 - | 1   | 203 | 21288  | 21490  |

|         |                |     |        |           |     |     |       |     |     |        |        |
|---------|----------------|-----|--------|-----------|-----|-----|-------|-----|-----|--------|--------|
| UN62750 | Rsa1.0_00368.1 | 618 | 90669  | 1.00E-122 | 308 | 338 | 91 +  | 281 | 618 | 11927  | 12255  |
| UN62751 | Rsa1.0_00558.1 | 673 | 75819  | 0         | 406 | 409 | 99 -  | 265 | 673 | 28414  | 28822  |
| UN62752 | Rsa1.0_00060.1 | 731 | 502678 | 2.00E-72  | 166 | 175 | 94 -  | 224 | 398 | 495990 | 496164 |
| UN62753 | Rsa1.0_00454.1 | 693 | 216970 | 0         | 409 | 431 | 94 -  | 2   | 421 | 157070 | 157498 |
| UN62754 | Rsa1.0_00133.1 | 458 | 123768 | 2.00E-78  | 155 | 157 | 98 +  | 143 | 299 | 52521  | 52677  |
| UN62755 | Rsa1.0_00020.1 | 730 | 283099 | 1.00E-109 | 225 | 232 | 96 -  | 490 | 719 | 91309  | 91540  |
| UN62756 | Rsa1.0_00131.1 | 692 | 432233 | 1.00E-170 | 321 | 327 | 98 -  | 1   | 327 | 165749 | 166075 |
| UN62757 | Rsa1.0_02178.1 | 162 | 156197 | 1.00E-79  | 159 | 162 | 98 +  | 1   | 162 | 898    | 1059   |
| UN62758 | Rsa1.0_06455.1 | 641 | 10983  | 0         | 636 | 641 | 99 +  | 1   | 641 | 6155   | 6795   |
| UN62759 | Rsa1.0_08957.1 | 711 | 6754   | 0         | 420 | 435 | 96 -  | 4   | 438 | 5913   | 6342   |
| UN62760 | Rsa1.0_03785.1 | 152 | 20883  | 7.00E-44  | 123 | 134 | 91 +  | 1   | 134 | 5686   | 5819   |
| UN62761 | Rsa1.0_01591.1 | 652 | 42718  | 0         | 643 | 652 | 98 -  | 1   | 652 | 18338  | 18989  |
| UN62762 | Rsa1.0_17349.1 | 402 | 1853   | 1.00E-121 | 284 | 303 | 93 +  | 1   | 296 | 1553   | 1853   |
| UN62763 | Rsa1.0_00278.1 | 135 | 231896 | 2.00E-44  | 124 | 135 | 91 -  | 1   | 135 | 49950  | 50084  |
| UN62764 | Rsa1.0_00071.1 | 224 | 345714 | 2.00E-85  | 208 | 224 | 92 +  | 1   | 224 | 71304  | 71527  |
| UN62765 | Rsa1.0_01701.1 | 150 | 162121 | 4.00E-21  | 91  | 104 | 87 -  | 45  | 148 | 9023   | 9126   |
| UN62766 | Rsa1.0_01203.1 | 446 | 50848  | 1.00E-168 | 321 | 327 | 98 -  | 1   | 325 | 42403  | 42729  |
| UN62767 | Rsa1.0_00197.1 | 873 | 109714 | 1.00E-118 | 216 | 216 | 100 - | 447 | 662 | 76920  | 77135  |
| UN62768 | Rsa1.0_10540.1 | 153 | 5811   | 1.00E-57  | 140 | 149 | 93 -  | 1   | 149 | 4190   | 4338   |
| UN62769 | Rsa1.0_08419.1 | 302 | 7381   | 1.00E-105 | 205 | 209 | 98 +  | 1   | 209 | 7173   | 7381   |
| UN62770 | Rsa1.0_00759.1 | 442 | 65465  | 1.00E-104 | 198 | 200 | 99 -  | 1   | 200 | 9402   | 9601   |
| UN62771 | Rsa1.0_02419.1 | 685 | 31583  | 1.00E-170 | 377 | 399 | 94 -  | 3   | 401 | 8438   | 8834   |
| UN62772 | Rsa1.0_13077.1 | 830 | 5021   | 3.00E-90  | 187 | 193 | 96 -  | 565 | 757 | 4405   | 4597   |
| UN62773 | Rsa1.0_00173.1 | 138 | 288743 | 1.00E-20  | 75  | 83  | 90 +  | 7   | 89  | 283802 | 283884 |
| UN62774 | #              | #   | #      | #         | #   | #   | #     | #   | #   | #      | #      |
| UN62775 | Rsa1.0_01004.1 | 850 | 56975  | 0         | 500 | 538 | 92 +  | 315 | 850 | 11833  | 12353  |
| UN62776 | Rsa1.0_00676.1 | 639 | 69166  | 0         | 625 | 651 | 96 +  | 1   | 639 | 45725  | 46375  |
| UN62777 | Rsa1.0_00055.1 | 195 | 520193 | 2.00E-82  | 185 | 195 | 94 -  | 1   | 195 | 180056 | 180250 |
| UN62778 | Rsa1.0_00213.1 | 684 | 108167 | 0         | 494 | 512 | 96 +  | 8   | 514 | 22199  | 22707  |
| UN62779 | Rsa1.0_05049.1 | 308 | 15025  | 4.00E-69  | 258 | 298 | 86 +  | 4   | 298 | 8919   | 9209   |
| UN62780 | Rsa1.0_00011.1 | 857 | 225044 | 0         | 439 | 453 | 96 +  | 1   | 451 | 103662 | 104111 |
| UN62781 | Rsa1.0_01390.1 | 755 | 46695  | 0         | 716 | 757 | 94 +  | 1   | 755 | 30269  | 31007  |
| UN62782 | Rsa1.0_00300.1 | 386 | 97747  | 0         | 375 | 386 | 97 -  | 1   | 386 | 28470  | 28855  |
| UN62783 | Rsa1.0_00260.1 | 578 | 102021 | 0         | 473 | 480 | 98 +  | 1   | 480 | 36120  | 36599  |
| UN62784 | Rsa1.0_08486.1 | 790 | 7286   | 0         | 627 | 670 | 93 +  | 1   | 667 | 4976   | 5636   |
| UN62785 | Rsa1.0_00166.1 | 117 | 240912 | 3.00E-18  | 53  | 55  | 96 +  | 1   | 55  | 171551 | 171605 |
| UN62786 | Rsa1.0_00300.1 | 295 | 97747  | 1.00E-123 | 281 | 296 | 94 +  | 3   | 295 | 88803  | 89094  |
| UN62787 | Rsa1.0_00076.1 | 866 | 146021 | 0         | 753 | 756 | 99 +  | 1   | 755 | 68829  | 69584  |
| UN62788 | Rsa1.0_01311.1 | 656 | 48456  | 5.00E-70  | 151 | 155 | 97 -  | 189 | 342 | 20157  | 20311  |

|         |                |     |        |           |     |     |      |     |     |        |        |
|---------|----------------|-----|--------|-----------|-----|-----|------|-----|-----|--------|--------|
| UN62789 | Rsa1.0.02782.1 | 187 | 27929  | 6.00E-76  | 171 | 180 | 95 - | 5   | 184 | 15760  | 15939  |
| UN62790 | Rsa1.0.07390.1 | 431 | 9477   | 1.00E-140 | 335 | 365 | 91 - | 62  | 408 | 4360   | 4724   |
| UN62791 | Rsa1.0.00458.1 | 220 | 82717  | 1.00E-100 | 209 | 217 | 96 + | 1   | 217 | 75606  | 75822  |
| UN62792 | Rsa1.0.00025.1 | 238 | 277312 | 7.00E-76  | 191 | 202 | 94 - | 1   | 199 | 157594 | 157792 |
| UN62793 | Rsa1.0.01045.1 | 209 | 55853  | 2.00E-66  | 190 | 206 | 92 + | 3   | 204 | 24299  | 24497  |
| UN62794 | Rsa1.0.04292.1 | 713 | 18050  | 8.00E-66  | 137 | 140 | 97 - | 391 | 530 | 8746   | 8885   |
| UN62795 | Rsa1.0.00190.1 | 572 | 318240 | 1.00E-159 | 353 | 374 | 94 - | 1   | 374 | 12061  | 12429  |
| UN62796 | Rsa1.0.00111.1 | 159 | 390088 | 4.00E-58  | 141 | 150 | 94 - | 5   | 154 | 75688  | 75837  |
| UN62797 | Rsa1.0.01727.1 | 729 | 40243  | 1.00E-132 | 276 | 287 | 96 - | 74  | 359 | 7333   | 7619   |
| UN62798 | Rsa1.0.02159.1 | 632 | 34471  | 1.00E-172 | 375 | 395 | 94 + | 1   | 388 | 29829  | 30223  |
| UN62799 | Rsa1.0.00855.1 | 712 | 62047  | 0         | 455 | 474 | 95 + | 239 | 712 | 4343   | 4816   |
| UN62800 | Rsa1.0.02149.1 | 275 | 148330 | 1.00E-125 | 265 | 275 | 96 - | 1   | 275 | 29076  | 29348  |
| UN62801 | Rsa1.0.00329.1 | 730 | 222544 | 0         | 700 | 725 | 96 + | 1   | 724 | 159771 | 160490 |
| UN62802 | Rsa1.0.00542.1 | 824 | 76831  | 1.00E-119 | 248 | 258 | 96 + | 505 | 762 | 37068  | 37325  |
| UN62803 | Rsa1.0.00166.1 | 708 | 240912 | 0         | 656 | 673 | 97 - | 1   | 668 | 134910 | 135582 |
| UN62804 | Rsa1.0.00156.1 | 252 | 118383 | 1.00E-96  | 233 | 248 | 93 + | 6   | 252 | 62798  | 63040  |
| UN62805 | Rsa1.0.01924.1 | 104 | 37226  | 3.00E-30  | 91  | 99  | 91 - | 2   | 100 | 26459  | 26557  |
| UN62806 | Rsa1.0.00630.1 | 818 | 71281  | 0         | 806 | 820 | 98 + | 1   | 818 | 9915   | 10734  |
| UN62807 | Rsa1.0.06578.1 | 783 | 10726  | 0         | 606 | 626 | 96 + | 3   | 628 | 926    | 1544   |
| UN62808 | Rsa1.0.00016.1 | 344 | 831256 | 1.00E-53  | 125 | 131 | 95 + | 214 | 344 | 523013 | 523143 |
| UN62809 | Rsa1.0.04010.1 | 649 | 19576  | 2.00E-81  | 267 | 302 | 88 - | 82  | 382 | 14509  | 14804  |
| UN62810 | Rsa1.0.00331.1 | 489 | 176754 | 0         | 476 | 499 | 95 + | 2   | 485 | 22301  | 22799  |
| UN62811 | Rsa1.0.00525.1 | 679 | 78030  | 0         | 625 | 646 | 96 + | 3   | 639 | 33923  | 34568  |
| UN62812 | Rsa1.0.06271.1 | 687 | 11351  | 1.00E-112 | 249 | 263 | 94 - | 152 | 413 | 3374   | 3628   |
| UN62813 | Rsa1.0.00446.1 | 763 | 167829 | 0         | 758 | 763 | 99 - | 1   | 763 | 134946 | 135708 |
| UN62814 | Rsa1.0.00714.1 | 490 | 67187  | 2.00E-35  | 110 | 121 | 90 - | 238 | 358 | 40399  | 40519  |
| UN62815 | Rsa1.0.04250.1 | 684 | 18264  | 0         | 433 | 462 | 93 - | 1   | 462 | 8455   | 8897   |
| UN62816 | Rsa1.0.00728.1 | 275 | 66704  | 1.00E-139 | 270 | 275 | 98 - | 1   | 275 | 5146   | 5419   |
| UN62817 | Rsa1.0.03183.1 | 662 | 24755  | 1.00E-161 | 373 | 396 | 94 + | 1   | 394 | 6733   | 7126   |
| UN62818 | Rsa1.0.00706.1 | 546 | 291570 | 1.00E-110 | 247 | 262 | 94 + | 260 | 521 | 1      | 262    |
| UN62819 | Rsa1.0.00128.1 | 762 | 228675 | 1.00E-118 | 234 | 240 | 97 - | 302 | 541 | 89116  | 89355  |
| UN62820 | Rsa1.0.00250.1 | 117 | 273771 | 2.00E-40  | 96  | 100 | 96 - | 18  | 117 | 186762 | 186861 |
| UN62821 | Rsa1.0.06901.1 | 674 | 10186  | 0         | 483 | 489 | 98 - | 8   | 496 | 9698   | 10186  |
| UN62822 | Rsa1.0.00663.1 | 112 | 164969 | 3.00E-33  | 102 | 112 | 91 - | 1   | 112 | 124165 | 124276 |
| UN62823 | Rsa1.0.02110.1 | 355 | 34919  | 1.00E-102 | 209 | 215 | 97 + | 1   | 213 | 26304  | 26518  |
| UN62824 | Rsa1.0.00314.1 | 344 | 96472  | 5.00E-53  | 109 | 110 | 99 - | 36  | 145 | 75356  | 75465  |
| UN62825 | Rsa1.0.00642.1 | 587 | 201230 | 0         | 447 | 449 | 99 - | 139 | 587 | 69024  | 69472  |
| UN62826 | Rsa1.0.02606.1 | 142 | 29635  | 2.00E-56  | 133 | 140 | 95 - | 3   | 142 | 4734   | 4869   |
| UN62827 | Rsa1.0.02750.1 | 442 | 28239  | 0         | 432 | 442 | 97 + | 1   | 442 | 4456   | 4897   |

|         |                |     |        |           |     |     |      |     |     |        |        |
|---------|----------------|-----|--------|-----------|-----|-----|------|-----|-----|--------|--------|
| UN62828 | Rsa1.0.00838.1 | 676 | 153820 | 0         | 632 | 693 | 91 - | 4   | 676 | 59213  | 59889  |
| UN62829 | Rsa1.0.02274.1 | 608 | 33109  | 0         | 586 | 613 | 95 + | 1   | 608 | 21519  | 22123  |
| UN62830 | Rsa1.0.00223.1 | 482 | 106231 | 0         | 436 | 460 | 94 - | 24  | 482 | 6084   | 6541   |
| UN62831 | Rsa1.0.02089.1 | 679 | 35163  | 1.00E-147 | 280 | 285 | 98 + | 1   | 285 | 8879   | 9163   |
| UN62832 | Rsa1.0.00041.1 | 696 | 186197 | 1.00E-140 | 284 | 294 | 96 + | 1   | 294 | 132787 | 133072 |
| UN62833 | Rsa1.0.01121.1 | 692 | 53407  | 0         | 438 | 447 | 97 - | 5   | 451 | 14431  | 14876  |
| UN62834 | Rsa1.0.00094.1 | 562 | 139042 | 1.00E-125 | 245 | 251 | 97 + | 1   | 251 | 75214  | 75464  |
| UN62835 | Rsa1.0.00822.1 | 646 | 62891  | 0         | 604 | 642 | 94 - | 2   | 642 | 5200   | 5840   |
| UN62836 | Rsa1.0.03709.1 | 462 | 21247  | 1.00E-147 | 291 | 300 | 97 + | 1   | 300 | 18601  | 18900  |
| UN62837 | Rsa1.0.00697.1 | 479 | 67913  | 1.00E-137 | 284 | 296 | 95 + | 30  | 325 | 36884  | 37179  |
| UN62838 | Rsa1.0.01073.1 | 527 | 55030  | 1.00E-128 | 302 | 320 | 94 - | 1   | 314 | 5736   | 6052   |
| UN62839 | Rsa1.0.01190.1 | 677 | 194501 | 0         | 356 | 367 | 97 - | 1   | 367 | 13189  | 13555  |
| UN62840 | Rsa1.0.02012.1 | 334 | 36084  | 1.00E-166 | 325 | 334 | 97 + | 1   | 334 | 19785  | 20115  |
| UN62841 | Rsa1.0.00097.1 | 286 | 138858 | 1.00E-117 | 240 | 249 | 96 - | 3   | 251 | 118569 | 118817 |
| UN62842 | Rsa1.0.00017.1 | 668 | 752458 | 1.00E-147 | 327 | 347 | 94 + | 322 | 668 | 123177 | 123520 |
| UN62843 | Rsa1.0.00107.1 | 162 | 431659 | 2.00E-72  | 156 | 162 | 96 + | 1   | 162 | 425814 | 425975 |
| UN62844 | Rsa1.0.03735.1 | 493 | 21087  | 0         | 427 | 440 | 97 - | 48  | 483 | 5153   | 5592   |
| UN62845 | Rsa1.0.08810.1 | 688 | 6904   | 1.00E-110 | 205 | 206 | 99 - | 205 | 410 | 6556   | 6761   |
| UN62846 | Rsa1.0.01668.1 | 103 | 41299  | 1.00E-35  | 98  | 104 | 94 - | 1   | 103 | 19571  | 19674  |
| UN62847 | Rsa1.0.01151.1 | 618 | 52268  | 0         | 589 | 620 | 95 + | 1   | 618 | 2037   | 2656   |
| UN62848 | Rsa1.0.00890.1 | 130 | 323870 | 4.00E-39  | 120 | 130 | 92 - | 1   | 126 | 185163 | 185289 |
| UN62849 | Rsa1.0.00291.1 | 196 | 172129 | 3.00E-47  | 123 | 132 | 93 + | 56  | 187 | 95286  | 95417  |
| UN62850 | Rsa1.0.01031.1 | 186 | 56236  | 2.00E-51  | 145 | 158 | 91 + | 1   | 151 | 4942   | 5099   |
| UN62851 | Rsa1.0.00100.1 | 469 | 249232 | 1.00E-173 | 388 | 408 | 95 - | 5   | 410 | 179062 | 179466 |
| UN62852 | Rsa1.0.02418.1 | 611 | 31590  | 1.00E-138 | 253 | 254 | 99 - | 284 | 537 | 18899  | 19152  |
| UN62853 | Rsa1.0.00218.1 | 690 | 201480 | 0         | 657 | 688 | 95 + | 3   | 689 | 137997 | 138670 |
| UN62854 | Rsa1.0.62301.1 | 639 | 368    | 0         | 366 | 368 | 99 + | 262 | 629 | 1      | 368    |
| UN62855 | Rsa1.0.02369.1 | 678 | 32075  | 0         | 502 | 504 | 99 - | 1   | 504 | 5009   | 5511   |
| UN62856 | Rsa1.0.05819.1 | 714 | 12543  | 0         | 355 | 357 | 99 + | 3   | 359 | 4262   | 4616   |
| UN62857 | Rsa1.0.02500.1 | 501 | 30768  | 0         | 470 | 495 | 94 + | 7   | 500 | 26874  | 27368  |
| UN62858 | Rsa1.0.00619.1 | 386 | 71985  | 1.00E-161 | 350 | 371 | 94 + | 21  | 386 | 14096  | 14460  |
| UN62859 | Rsa1.0.01431.1 | 333 | 167877 | 1.00E-145 | 301 | 311 | 96 - | 1   | 309 | 17548  | 17856  |
| UN62860 | Rsa1.0.00307.1 | 681 | 199003 | 3.00E-87  | 268 | 302 | 88 + | 72  | 369 | 80099  | 80391  |
| UN62861 | Rsa1.0.00414.1 | 322 | 202190 | 8.00E-98  | 300 | 330 | 90 + | 1   | 322 | 195597 | 195913 |
| UN62862 | Rsa1.0.00630.1 | 584 | 71281  | 1.00E-159 | 326 | 336 | 97 + | 15  | 349 | 61075  | 61408  |
| UN62863 | Rsa1.0.01389.1 | 658 | 46716  | 0         | 567 | 598 | 94 - | 3   | 598 | 45590  | 46180  |
| UN62864 | Rsa1.0.01104.1 | 283 | 285480 | 1.00E-59  | 129 | 133 | 96 - | 151 | 283 | 268484 | 268616 |
| UN62865 | Rsa1.0.00457.1 | 130 | 337301 | 7.00E-56  | 125 | 130 | 96 - | 1   | 130 | 142432 | 142561 |
| UN62866 | Rsa1.0.00968.1 | 668 | 58020  | 0         | 346 | 353 | 98 + | 316 | 668 | 50504  | 50856  |

|         |                |     |        |           |     |     |      |     |     |        |        |
|---------|----------------|-----|--------|-----------|-----|-----|------|-----|-----|--------|--------|
| UN62867 | Rsa1.0_01321.1 | 643 | 48248  | 0         | 613 | 639 | 95 - | 14  | 643 | 8189   | 8825   |
| UN62868 | Rsa1.0_17275.1 | 316 | 1874   | 1.00E-121 | 296 | 316 | 93 + | 1   | 311 | 1453   | 1764   |
| UN62869 | Rsa1.0_05015.1 | 500 | 15125  | 2.00E-93  | 231 | 246 | 93 + | 1   | 246 | 7070   | 7307   |
| UN62870 | Rsa1.0_02336.1 | 345 | 32397  | 0         | 342 | 345 | 99 - | 1   | 345 | 28870  | 29214  |
| UN62871 | Rsa1.0_63418.1 | 223 | 362    | 1.00E-103 | 215 | 222 | 96 - | 3   | 223 | 127    | 348    |
| UN62872 | Rsa1.0_00589.1 | 393 | 209965 | 3.00E-82  | 179 | 187 | 95 + | 200 | 386 | 188963 | 189149 |
| UN62873 | Rsa1.0_00078.1 | 604 | 175053 | 1.00E-159 | 323 | 336 | 96 + | 1   | 336 | 37480  | 37815  |
| UN62874 | Rsa1.0_02267.1 | 251 | 33194  | 9.00E-91  | 239 | 257 | 92 + | 1   | 251 | 28519  | 28772  |
| UN62875 | Rsa1.0_00961.1 | 765 | 58185  | 0         | 647 | 656 | 98 + | 1   | 656 | 1000   | 1655   |
| UN62876 | Rsa1.0_02513.1 | 718 | 30643  | 0         | 715 | 718 | 99 - | 1   | 718 | 11041  | 11758  |
| UN62877 | Rsa1.0_01629.1 | 530 | 41917  | 1.00E-140 | 255 | 256 | 99 + | 1   | 256 | 15406  | 15661  |
| UN62878 | Rsa1.0_76411.1 | 630 | 300    | 1.00E-125 | 233 | 235 | 99 + | 396 | 630 | 43     | 277    |
| UN62879 | Rsa1.0_10442.1 | 279 | 5849   | 1.00E-120 | 245 | 254 | 96 - | 1   | 254 | 2696   | 2949   |
| UN62880 | Rsa1.0_01282.1 | 652 | 49304  | 2.00E-81  | 213 | 228 | 93 + | 86  | 311 | 32054  | 32277  |
| UN62881 | Rsa1.0_00104.1 | 402 | 368722 | 2.00E-89  | 202 | 213 | 94 + | 189 | 401 | 164791 | 165000 |
| UN62882 | Rsa1.0_01018.1 | 636 | 56685  | 0         | 592 | 619 | 95 - | 37  | 636 | 31171  | 31786  |
| UN62883 | Rsa1.0_00045.1 | 635 | 328694 | 0         | 614 | 636 | 96 + | 1   | 634 | 267001 | 267634 |
| UN62884 | Rsa1.0_00344.1 | 294 | 191774 | 7.00E-92  | 186 | 191 | 97 + | 101 | 291 | 156563 | 156753 |
| UN62885 | Rsa1.0_00628.1 | 694 | 214360 | 1.00E-173 | 387 | 411 | 94 - | 1   | 410 | 203096 | 203494 |
| UN62886 | Rsa1.0_27471.1 | 197 | 851    | 1.00E-86  | 191 | 198 | 96 + | 1   | 197 | 265    | 461    |
| UN62887 | Rsa1.0_01719.1 | 263 | 40388  | 1.00E-104 | 222 | 232 | 95 - | 4   | 235 | 30549  | 30780  |
| UN62888 | Rsa1.0_04512.1 | 561 | 17031  | 1.00E-137 | 290 | 304 | 95 + | 1   | 304 | 12640  | 12943  |
| UN62889 | Rsa1.0_00010.1 | 277 | 294827 | 1.00E-152 | 275 | 276 | 99 - | 2   | 277 | 117434 | 117709 |
| UN62890 | Rsa1.0_00249.1 | 573 | 153740 | 0         | 567 | 573 | 98 - | 1   | 573 | 94232  | 94804  |
| UN62891 | Rsa1.0_01682.1 | 439 | 41090  | 2.33E-156 | 268 | 270 | 99 - | 170 | 439 | 25702  | 25971  |
| UN62892 | Rsa1.0_09707.1 | 289 | 6199   | 1.00E-124 | 274 | 289 | 94 - | 1   | 289 | 5279   | 5566   |
| UN62893 | Rsa1.0_73693.1 | 702 | 311    | 1.00E-168 | 310 | 312 | 99 + | 136 | 447 | 1      | 311    |
| UN62894 | Rsa1.0_00320.1 | 616 | 95784  | 1.00E-156 | 348 | 366 | 95 + | 5   | 369 | 61044  | 61399  |
| UN62895 | Rsa1.0_01476.1 | 542 | 172928 | 0         | 513 | 556 | 92 - | 1   | 542 | 10896  | 11441  |
| UN62896 | Rsa1.0_00038.1 | 777 | 314568 | 1.00E-135 | 299 | 315 | 94 - | 1   | 315 | 310046 | 310356 |
| UN62897 | Rsa1.0_26211.1 | 131 | 901    | 6.00E-41  | 97  | 101 | 96 - | 31  | 131 | 498    | 598    |
| UN62898 | #              | #   | #      | #         | #   | #   | #    | #   | #   | #      | #      |
| UN62899 | Rsa1.0_01926.1 | 571 | 37206  | 0         | 551 | 608 | 90 - | 1   | 571 | 13666  | 14271  |
| UN62900 | Rsa1.0_00009.1 | 106 | 232558 | 4.00E-32  | 97  | 106 | 91 + | 1   | 106 | 117380 | 117485 |
| UN62901 | Rsa1.0_01153.1 | 249 | 52264  | 2.00E-98  | 236 | 249 | 94 + | 3   | 249 | 47592  | 47837  |
| UN62902 | Rsa1.0_00484.1 | 318 | 203294 | 1.00E-127 | 293 | 314 | 93 - | 4   | 317 | 56429  | 56742  |
| UN62903 | Rsa1.0_09943.1 | 647 | 6076   | 1.00E-125 | 535 | 621 | 86 + | 3   | 612 | 1464   | 2074   |
| UN62904 | Rsa1.0_00339.1 | 431 | 222974 | 0         | 393 | 407 | 96 - | 1   | 403 | 211966 | 212372 |
| UN62905 | Rsa1.0_00836.1 | 405 | 185968 | 1.00E-161 | 351 | 369 | 95 + | 16  | 379 | 17849  | 18217  |

|         |                |     |        |           |     |     |       |     |     |        |        |
|---------|----------------|-----|--------|-----------|-----|-----|-------|-----|-----|--------|--------|
| UN62906 | Rsa1.0.00404.1 | 463 | 87635  | 1.00E-175 | 370 | 389 | 95 -  | 1   | 386 | 11886  | 12274  |
| UN62907 | Rsa1.0.03718.1 | 726 | 21195  | 0         | 449 | 485 | 92 +  | 3   | 462 | 451    | 935    |
| UN62908 | Rsa1.0.00427.1 | 697 | 189678 | 0         | 504 | 528 | 95 -  | 3   | 521 | 181898 | 182424 |
| UN62909 | Rsa1.0.42609.1 | 701 | 527    | 0         | 509 | 529 | 96 -  | 128 | 656 | 1      | 527    |
| UN62910 | Rsa1.0_00759.1 | 589 | 65465  | 0         | 569 | 601 | 94 -  | 1   | 573 | 64598  | 65198  |
| UN62911 | Rsa1.0_00200.1 | 404 | 162016 | 1.00E-66  | 170 | 182 | 93 +  | 20  | 201 | 95848  | 96024  |
| UN62912 | Rsa1.0.01313.1 | 639 | 48387  | 8.00E-41  | 95  | 98  | 96 +  | 3   | 100 | 16633  | 16730  |
| UN62913 | Rsa1.0.00125.1 | 636 | 253043 | 1.00E-103 | 190 | 190 | 100 - | 261 | 450 | 216231 | 216420 |
| UN62914 | Rsa1.0.02470.1 | 622 | 31108  | 0         | 357 | 361 | 98 -  | 102 | 462 | 7071   | 7429   |
| UN62915 | Rsa1.0.10084.1 | 689 | 6005   | 0         | 519 | 523 | 99 +  | 1   | 522 | 1414   | 1936   |
| UN62916 | Rsa1.0.03527.1 | 745 | 22278  | 1.00E-157 | 353 | 375 | 94 -  | 1   | 373 | 18596  | 18958  |
| UN62917 | Rsa1.0.07606.1 | 140 | 9035   | 3.00E-27  | 89  | 98  | 90 +  | 42  | 139 | 2101   | 2198   |
| UN62918 | Rsa1.0.11282.1 | 676 | 5558   | 0         | 654 | 692 | 94 +  | 3   | 676 | 4756   | 5447   |
| UN62919 | Rsa1.0.41595.1 | 640 | 540    | 4.00E-55  | 238 | 282 | 84 +  | 316 | 583 | 1      | 282    |
| UN62920 | Rsa1.0.01356.1 | 665 | 47287  | 0         | 411 | 413 | 99 -  | 3   | 415 | 6134   | 6546   |
| UN62921 | Rsa1.0.01249.1 | 492 | 188432 | 2.00E-44  | 107 | 112 | 95 -  | 168 | 279 | 176489 | 176600 |
| UN62922 | Rsa1.0.02888.1 | 698 | 27020  | 0         | 370 | 372 | 99 -  | 1   | 372 | 21048  | 21419  |
| UN62923 | Rsa1.0.01674.1 | 597 | 168300 | 1.00E-167 | 352 | 368 | 95 -  | 3   | 369 | 4084   | 4448   |
| UN62924 | Rsa1.0.45734.1 | 533 | 493    | 7.00E-72  | 141 | 142 | 99 +  | 350 | 491 | 153    | 294    |
| UN62925 | Rsa1.0.01251.1 | 693 | 49873  | 0         | 633 | 689 | 91 +  | 5   | 691 | 942    | 1619   |
| UN62926 | Rsa1.0.02846.1 | 682 | 27338  | 1.00E-166 | 333 | 345 | 96 +  | 12  | 352 | 16491  | 16835  |
| UN62927 | Rsa1.0.02102.1 | 332 | 35009  | 8.00E-55  | 161 | 177 | 90 +  | 143 | 318 | 21429  | 21605  |
| UN62928 | Rsa1.0.03303.1 | 442 | 23890  | 0         | 426 | 447 | 95 +  | 1   | 442 | 9656   | 10099  |
| UN62929 | Rsa1.0.00510.1 | 459 | 78718  | 3.00E-98  | 194 | 198 | 97 +  | 262 | 459 | 53847  | 54044  |
| UN62930 | Rsa1.0.03631.1 | 793 | 21647  | 0         | 436 | 452 | 96 -  | 60  | 508 | 2780   | 3228   |
| UN62931 | Rsa1.0.02214.1 | 295 | 161150 | 1.00E-135 | 281 | 292 | 96 +  | 3   | 294 | 13148  | 13438  |
| UN62932 | Rsa1.0.04463.1 | 553 | 17247  | 0         | 548 | 556 | 98 -  | 1   | 553 | 4623   | 5176   |
| UN62933 | Rsa1.0.00233.1 | 644 | 104918 | 4.00E-12  | 47  | 50  | 94 -  | 480 | 529 | 8152   | 8201   |
| UN62934 | Rsa1.0.01382.1 | 667 | 46877  | 0         | 577 | 582 | 99 +  | 1   | 582 | 27432  | 28010  |
| UN62935 | Rsa1.0.00176.1 | 370 | 240984 | 1.00E-147 | 276 | 280 | 98 -  | 91  | 370 | 234899 | 235178 |
| UN62936 | Rsa1.0.03511.1 | 458 | 22373  | 1.00E-167 | 420 | 459 | 91 -  | 3   | 458 | 17091  | 17548  |
| UN62937 | Rsa1.0.00260.1 | 255 | 102021 | 1.00E-105 | 220 | 229 | 96 +  | 6   | 234 | 56472  | 56700  |
| UN62938 | Rsa1.0.75003.1 | 190 | 306    | 1.00E-52  | 111 | 113 | 98 +  | 23  | 135 | 2      | 114    |
| UN62939 | Rsa1.0.05741.1 | 275 | 12773  | 1.00E-99  | 252 | 271 | 92 +  | 1   | 271 | 3089   | 3355   |
| UN62940 | Rsa1.0.10093.1 | 294 | 6001   | 1.00E-126 | 268 | 281 | 95 -  | 11  | 291 | 4708   | 4988   |
| UN62941 | Rsa1.0.12971.1 | 154 | 5060   | 9.00E-22  | 62  | 65  | 95 -  | 1   | 65  | 4865   | 4929   |
| UN62942 | Rsa1.0.00079.1 | 699 | 606987 | 0         | 475 | 481 | 98 +  | 219 | 699 | 592457 | 592937 |
| UN62943 | Rsa1.0.00041.1 | 672 | 186197 | 0         | 649 | 674 | 96 +  | 1   | 671 | 106154 | 106825 |
| UN62944 | Rsa1.0.01867.1 | 683 | 37960  | 1.00E-73  | 160 | 166 | 96 +  | 3   | 168 | 33736  | 33897  |



|         |                |     |        |           |     |     |       |     |     |        |        |
|---------|----------------|-----|--------|-----------|-----|-----|-------|-----|-----|--------|--------|
| UN62945 | Rsa1.0_00172.1 | 409 | 115476 | 1.00E-168 | 384 | 410 | 93 +  | 3   | 409 | 88982  | 89390  |
| UN62946 | Rsa1.0_00018.1 | 101 | 410899 | 2.00E-34  | 92  | 98  | 93 -  | 4   | 101 | 78521  | 78618  |
| UN62947 | Rsa1.0_03762.1 | 831 | 20976  | 0         | 444 | 457 | 97 -  | 1   | 457 | 12667  | 13118  |
| UN62948 | Rsa1.0_00558.1 | 644 | 75819  | 0         | 632 | 647 | 97 +  | 1   | 644 | 11844  | 12490  |
| UN62949 | Rsa1.0_07717.1 | 722 | 8720   | 0         | 498 | 532 | 93 +  | 70  | 601 | 1      | 520    |
| UN62950 | Rsa1.0_00423.1 | 732 | 86138  | 0         | 696 | 721 | 96 +  | 12  | 732 | 78024  | 78742  |
| UN62951 | Rsa1.0_00949.1 | 103 | 58549  | 5.00E-44  | 99  | 101 | 98 -  | 3   | 103 | 52501  | 52599  |
| UN62952 | #              | #   | #      | #         | #   | #   | #     | #   | #   | #      | #      |
| UN62953 | Rsa1.0_01710.1 | 140 | 40586  | 2.00E-44  | 130 | 142 | 91 +  | 1   | 140 | 19401  | 19542  |
| UN62954 | Rsa1.0_00524.1 | 529 | 169613 | 1.00E-94  | 208 | 216 | 96 -  | 1   | 216 | 155579 | 155792 |
| UN62955 | Rsa1.0_02043.1 | 728 | 163754 | 0         | 475 | 495 | 95 +  | 1   | 487 | 146137 | 146631 |
| UN62956 | Rsa1.0_01081.1 | 790 | 499226 | 3.00E-87  | 205 | 218 | 94 +  | 48  | 262 | 16604  | 16821  |
| UN62957 | Rsa1.0_02222.1 | 731 | 152798 | 1.00E-167 | 307 | 310 | 99 +  | 4   | 313 | 10246  | 10555  |
| UN62958 | Rsa1.0_00108.1 | 522 | 478491 | 1.00E-126 | 288 | 310 | 92 -  | 1   | 298 | 306148 | 306457 |
| UN62959 | Rsa1.0_02003.1 | 465 | 36171  | 1.00E-66  | 135 | 137 | 98 +  | 85  | 221 | 31714  | 31850  |
| UN62960 | Rsa1.0_00009.1 | 808 | 232558 | 0         | 499 | 508 | 98 +  | 2   | 509 | 22844  | 23349  |
| UN62961 | Rsa1.0_00131.1 | 254 | 432233 | 2.00E-42  | 100 | 104 | 96 -  | 22  | 125 | 261769 | 261872 |
| UN62962 | Rsa1.0_01102.1 | 201 | 53987  | 1.00E-83  | 190 | 201 | 94 +  | 1   | 201 | 41419  | 41619  |
| UN62963 | Rsa1.0_00326.1 | 825 | 171955 | 1.00E-108 | 326 | 364 | 89 +  | 449 | 808 | 64894  | 65243  |
| UN62964 | Rsa1.0_07657.1 | 145 | 8896   | 2.00E-41  | 108 | 114 | 94 -  | 30  | 142 | 3696   | 3809   |
| UN62965 | Rsa1.0_01430.1 | 809 | 46034  | 0         | 351 | 354 | 99 +  | 346 | 699 | 4467   | 4819   |
| UN62966 | Rsa1.0_01153.1 | 642 | 52264  | 0         | 418 | 429 | 97 -  | 93  | 521 | 25847  | 26275  |
| UN62967 | Rsa1.0_00049.1 | 203 | 167018 | 1.00E-77  | 190 | 204 | 93 +  | 1   | 200 | 7089   | 7292   |
| UN62968 | Rsa1.0_01972.1 | 624 | 36634  | 0         | 429 | 441 | 97 -  | 1   | 435 | 4014   | 4454   |
| UN62969 | Rsa1.0_00011.1 | 221 | 225044 | 9.00E-63  | 199 | 222 | 89 +  | 1   | 221 | 177410 | 177630 |
| UN62970 | Rsa1.0_01387.1 | 525 | 46745  | 0         | 485 | 532 | 91 -  | 1   | 525 | 41699  | 42216  |
| UN62971 | Rsa1.0_00019.1 | 685 | 301669 | 0         | 684 | 684 | 100 - | 2   | 685 | 252120 | 252803 |
| UN62972 | Rsa1.0_01778.1 | 311 | 39509  | 2.00E-36  | 228 | 273 | 83 +  | 41  | 311 | 16235  | 16494  |
| UN62973 | Rsa1.0_02200.1 | 665 | 33981  | 0         | 358 | 369 | 97 -  | 5   | 373 | 10438  | 10796  |
| UN62974 | Rsa1.0_00087.1 | 700 | 761073 | 1.00E-117 | 254 | 265 | 95 +  | 4   | 268 | 298390 | 298651 |
| UN62975 | Rsa1.0_11956.1 | 174 | 5361   | 4.00E-12  | 46  | 49  | 93 +  | 1   | 49  | 5313   | 5361   |
| UN62976 | Rsa1.0_00092.1 | 748 | 659932 | 1.00E-67  | 178 | 191 | 93 +  | 3   | 193 | 23707  | 23890  |
| UN62977 | Rsa1.0_00124.1 | 723 | 262503 | 1.00E-110 | 239 | 250 | 95 -  | 160 | 407 | 19648  | 19897  |
| UN62978 | Rsa1.0_01056.1 | 751 | 55449  | 0         | 509 | 522 | 97 +  | 86  | 607 | 11988  | 12507  |
| UN62979 | Rsa1.0_07756.1 | 108 | 8634   | 6.00E-25  | 73  | 78  | 93 -  | 7   | 84  | 5992   | 6069   |
| UN62980 | Rsa1.0_01170.1 | 600 | 161131 | 0         | 584 | 606 | 96 -  | 4   | 600 | 116512 | 117115 |
| UN62981 | Rsa1.0_00182.1 | 762 | 142305 | 0         | 429 | 458 | 93 -  | 1   | 458 | 128304 | 128757 |
| UN62982 | Rsa1.0_01474.1 | 745 | 45070  | 0         | 412 | 425 | 96 +  | 1   | 425 | 30850  | 31273  |
| UN62983 | Rsa1.0_00966.1 | 660 | 58136  | 0         | 638 | 662 | 96 +  | 1   | 660 | 41753  | 42411  |

|         |                |     |        |           |     |     |       |     |     |        |        |
|---------|----------------|-----|--------|-----------|-----|-----|-------|-----|-----|--------|--------|
| UN62984 | Rsa1.0.00066.1 | 577 | 152418 | 0         | 480 | 487 | 98 +  | 1   | 483 | 37136  | 37622  |
| UN62985 | Rsa1.0.01565.1 | 476 | 155447 | 0         | 468 | 477 | 98 -  | 1   | 476 | 154708 | 155184 |
| UN62986 | Rsa1.0.16476.1 | 729 | 2143   | 4.00E-46  | 98  | 99  | 98 -  | 322 | 420 | 1473   | 1571   |
| UN62987 | Rsa1.0.00055.1 | 780 | 520193 | 8.00E-54  | 132 | 140 | 94 -  | 319 | 458 | 5110   | 5249   |
| UN62988 | Rsa1.0.00105.1 | 495 | 134138 | 0         | 467 | 505 | 92 -  | 3   | 495 | 99133  | 99635  |
| UN62989 | Rsa1.0.00212.1 | 787 | 108350 | 0         | 762 | 777 | 98 +  | 11  | 787 | 1175   | 1944   |
| UN62990 | Rsa1.0.02273.1 | 787 | 140964 | 0         | 439 | 460 | 95 -  | 1   | 456 | 138057 | 138516 |
| UN62991 | Rsa1.0.00003.1 | 716 | 340054 | 1.00E-18  | 151 | 185 | 81 -  | 462 | 646 | 163218 | 163402 |
| UN62992 | Rsa1.0.01949.1 | 444 | 36960  | 8.00E-99  | 231 | 247 | 93 +  | 3   | 249 | 23209  | 23455  |
| UN62993 | Rsa1.0.00047.1 | 819 | 168582 | 1.00E-119 | 253 | 263 | 96 +  | 1   | 261 | 79098  | 79358  |
| UN62994 | Rsa1.0.00619.1 | 639 | 71985  | 0         | 632 | 642 | 98 -  | 1   | 639 | 24893  | 25534  |
| UN62995 | Rsa1.0.05578.1 | 579 | 13284  | 0         | 474 | 490 | 96 +  | 57  | 545 | 2676   | 3163   |
| UN62996 | Rsa1.0.01348.1 | 749 | 47569  | 0         | 743 | 745 | 99 -  | 1   | 745 | 44368  | 45112  |
| UN62997 | Rsa1.0.00399.1 | 704 | 242951 | 0         | 682 | 705 | 96 +  | 1   | 704 | 227398 | 228095 |
| UN62998 | Rsa1.0.04378.1 | 233 | 17651  | 4.00E-96  | 218 | 230 | 94 -  | 1   | 229 | 4666   | 4895   |
| UN62999 | Rsa1.0.00031.1 | 196 | 179862 | 5.00E-55  | 124 | 129 | 96 +  | 1   | 129 | 82026  | 82154  |
| UN63000 | Rsa1.0.07772.1 | 745 | 8601   | 0         | 491 | 508 | 96 -  | 2   | 508 | 554    | 1058   |
| UN63001 | Rsa1.0.02299.1 | 129 | 32857  | 9.00E-37  | 87  | 90  | 96 -  | 1   | 90  | 23201  | 23290  |
| UN63002 | Rsa1.0.02599.1 | 779 | 29660  | 1.00E-129 | 243 | 246 | 98 -  | 170 | 415 | 4089   | 4334   |
| UN63003 | Rsa1.0.00211.1 | 673 | 228189 | 1.00E-122 | 299 | 321 | 93 +  | 1   | 315 | 146517 | 146834 |
| UN63004 | Rsa1.0.00017.1 | 105 | 752458 | 3.00E-45  | 101 | 104 | 97 -  | 1   | 104 | 154686 | 154789 |
| UN63005 | Rsa1.0.00856.1 | 631 | 62037  | 0         | 604 | 630 | 95 +  | 1   | 630 | 55622  | 56247  |
| UN63006 | Rsa1.0.02975.1 | 105 | 26322  | 2.00E-24  | 69  | 73  | 94 -  | 33  | 105 | 22412  | 22484  |
| UN63007 | Rsa1.0.49744.1 | 307 | 456    | 7.00E-89  | 253 | 278 | 91 +  | 1   | 274 | 52     | 325    |
| UN63008 | Rsa1.0.03403.1 | 811 | 23179  | 0         | 805 | 815 | 98 -  | 1   | 811 | 1164   | 1978   |
| UN63009 | Rsa1.0.00351.1 | 585 | 413096 | 1.00E-177 | 322 | 323 | 99 -  | 263 | 585 | 228936 | 229257 |
| UN63010 | Rsa1.0.03684.1 | 629 | 21392  | 1.00E-174 | 329 | 334 | 98 +  | 296 | 629 | 14749  | 15081  |
| UN63011 | Rsa1.0.01580.1 | 715 | 42852  | 1.00E-147 | 283 | 288 | 98 +  | 367 | 654 | 30603  | 30889  |
| UN63012 | Rsa1.0.00759.1 | 741 | 65465  | 0         | 674 | 709 | 95 +  | 44  | 741 | 8202   | 8903   |
| UN63013 | Rsa1.0.01904.1 | 788 | 37450  | 0         | 721 | 741 | 97 +  | 49  | 788 | 10687  | 11427  |
| UN63014 | Rsa1.0.02419.1 | 694 | 31583  | 0         | 562 | 602 | 93 +  | 64  | 662 | 6802   | 7389   |
| UN63015 | Rsa1.0.03949.1 | 831 | 19899  | 9.00E-63  | 245 | 287 | 85 -  | 440 | 703 | 18509  | 18794  |
| UN63016 | Rsa1.0.00028.1 | 791 | 293984 | 0         | 482 | 495 | 97 -  | 2   | 494 | 153891 | 154385 |
| UN63017 | Rsa1.0.12809.1 | 728 | 5119   | 1.00E-154 | 357 | 382 | 93 -  | 5   | 386 | 4445   | 4817   |
| UN63018 | Rsa1.0.01004.1 | 807 | 56975  | 0         | 622 | 628 | 99 -  | 4   | 630 | 13438  | 14065  |
| UN63019 | Rsa1.0.00457.1 | 795 | 337301 | 1.00E-176 | 362 | 376 | 96 -  | 3   | 366 | 128787 | 129161 |
| UN63020 | Rsa1.0.01022.1 | 616 | 56606  | 2.00E-84  | 208 | 222 | 93 +  | 3   | 222 | 27350  | 27570  |
| UN63021 | Rsa1.0.00025.1 | 760 | 277312 | 0         | 658 | 684 | 96 -  | 4   | 687 | 228101 | 228772 |
| UN63022 | Rsa1.0.00190.1 | 693 | 318240 | 0         | 362 | 362 | 100 - | 332 | 693 | 179339 | 179700 |

|         |                |     |        |           |     |     |       |     |     |        |        |
|---------|----------------|-----|--------|-----------|-----|-----|-------|-----|-----|--------|--------|
| UN63023 | Rsa1.0.01168.1 | 667 | 153765 | 0         | 474 | 498 | 95 -  | 171 | 667 | 28202  | 28699  |
| UN63024 | Rsa1.0.00107.1 | 638 | 431659 | 1.00E-169 | 374 | 395 | 94 -  | 3   | 390 | 255374 | 255760 |
| UN63025 | Rsa1.0.00178.1 | 459 | 114861 | 2.00E-44  | 209 | 243 | 86 +  | 166 | 403 | 14125  | 14367  |
| UN63026 | Rsa1.0.05080.1 | 272 | 14905  | 1.00E-119 | 256 | 265 | 96 +  | 1   | 264 | 11851  | 12113  |
| UN63027 | Rsa1.0.00087.1 | 605 | 761073 | 0         | 604 | 608 | 99 -  | 1   | 605 | 104344 | 104951 |
| UN63028 | Rsa1.0.00213.1 | 766 | 108167 | 1.00E-170 | 342 | 354 | 96 -  | 4   | 351 | 24551  | 24903  |
| UN63029 | Rsa1.0.00523.1 | 723 | 178770 | 1.00E-178 | 323 | 325 | 99 +  | 399 | 723 | 161188 | 161512 |
| UN63030 | Rsa1.0.03550.1 | 649 | 22154  | 1.00E-124 | 235 | 238 | 98 -  | 3   | 240 | 6701   | 6938   |
| UN63031 | Rsa1.0.00675.1 | 780 | 145590 | 0         | 646 | 682 | 94 -  | 2   | 668 | 49098  | 49776  |
| UN63032 | Rsa1.0.26227.1 | 565 | 900    | 0         | 427 | 437 | 97 +  | 60  | 493 | 464    | 900    |
| UN63033 | Rsa1.0.00451.1 | 413 | 322533 | 0         | 401 | 412 | 97 -  | 2   | 413 | 64946  | 65356  |
| UN63034 | Rsa1.0.01348.1 | 686 | 47569  | 1.00E-117 | 224 | 227 | 98 -  | 157 | 383 | 24704  | 24930  |
| UN63035 | Rsa1.0.01712.1 | 341 | 154210 | 2.00E-77  | 157 | 159 | 98 -  | 117 | 274 | 30014  | 30172  |
| UN63036 | Rsa1.0.01390.1 | 677 | 46695  | 0         | 616 | 673 | 91 -  | 1   | 665 | 31872  | 32525  |
| UN63037 | Rsa1.0.00260.1 | 764 | 102021 | 0         | 400 | 404 | 99 -  | 5   | 406 | 38230  | 38633  |
| UN63038 | Rsa1.0.00812.1 | 769 | 63233  | 1.00E-173 | 408 | 440 | 92 +  | 3   | 439 | 12020  | 12441  |
| UN63039 | Rsa1.0.00136.1 | 775 | 122464 | 1.00E-149 | 331 | 353 | 93 -  | 243 | 587 | 56801  | 57153  |
| UN63040 | Rsa1.0.02369.1 | 650 | 32075  | 1.00E-64  | 251 | 289 | 86 -  | 103 | 379 | 1207   | 1493   |
| UN63041 | Rsa1.0.00166.1 | 108 | 240912 | 3.00E-42  | 99  | 103 | 96 -  | 6   | 108 | 172650 | 172752 |
| UN63042 | Rsa1.0.03184.1 | 537 | 24750  | 1.00E-115 | 237 | 246 | 96 +  | 61  | 306 | 15432  | 15677  |
| UN63043 | Rsa1.0.00707.1 | 654 | 190112 | 0         | 367 | 373 | 98 +  | 282 | 654 | 139464 | 139836 |
| UN63044 | Rsa1.0.00008.1 | 588 | 358124 | 0         | 407 | 424 | 95 -  | 3   | 426 | 56542  | 56964  |
| UN63045 | Rsa1.0.00076.1 | 811 | 146021 | 1.00E-126 | 229 | 229 | 100 - | 3   | 231 | 74227  | 74455  |
| UN63046 | Rsa1.0.04411.1 | 723 | 142979 | 0         | 420 | 420 | 100 - | 3   | 422 | 8384   | 8803   |
| UN63047 | Rsa1.0.07390.1 | 701 | 9477   | 0         | 406 | 417 | 97 +  | 285 | 700 | 3948   | 4364   |
| UN63048 | Rsa1.0.00351.1 | 608 | 413096 | 1.00E-165 | 297 | 298 | 99 +  | 3   | 300 | 146261 | 146558 |
| UN63049 | Rsa1.0.01846.1 | 687 | 38367  | 1.00E-163 | 303 | 307 | 98 -  | 140 | 446 | 36153  | 36459  |
| UN63050 | Rsa1.0.00314.1 | 617 | 96472  | 1.00E-138 | 350 | 384 | 91 +  | 206 | 587 | 30151  | 30525  |
| UN63051 | Rsa1.0.00060.1 | 610 | 502678 | 1.00E-180 | 366 | 380 | 96 -  | 129 | 507 | 387116 | 387495 |
| UN63052 | Rsa1.0.01045.1 | 563 | 55853  | 1.00E-148 | 303 | 314 | 96 -  | 251 | 563 | 25110  | 25423  |
| UN63053 | Rsa1.0.00208.1 | 608 | 108565 | 7.00E-66  | 140 | 144 | 97 -  | 1   | 144 | 20790  | 20933  |
| UN63054 | Rsa1.0.00190.1 | 786 | 318240 | 1.00E-104 | 241 | 257 | 93 +  | 3   | 259 | 10038  | 10294  |
| UN63055 | Rsa1.0.01171.1 | 272 | 51752  | 1.00E-141 | 262 | 265 | 98 -  | 8   | 272 | 31454  | 31718  |
| UN63056 | Rsa1.0.00855.1 | 456 | 62047  | 3.00E-89  | 208 | 223 | 93 -  | 31  | 253 | 6321   | 6534   |
| UN63057 | Rsa1.0.00002.1 | 603 | 601661 | 1.00E-137 | 282 | 293 | 96 +  | 5   | 297 | 264132 | 264421 |
| UN63058 | Rsa1.0.07795.1 | 460 | 8543   | 0         | 440 | 454 | 96 +  | 7   | 460 | 579    | 1032   |
| UN63059 | Rsa1.0.11081.1 | 591 | 5623   | 1.00E-110 | 211 | 214 | 98 +  | 86  | 299 | 5130   | 5343   |
| UN63060 | Rsa1.0.00352.1 | 640 | 92266  | 0         | 544 | 558 | 97 -  | 3   | 559 | 26243  | 26800  |
| UN63061 | Rsa1.0.00015.1 | 605 | 561803 | 0         | 476 | 515 | 92 +  | 94  | 595 | 525788 | 526297 |

|         |                |     |        |           |     |     |       |     |     |        |        |
|---------|----------------|-----|--------|-----------|-----|-----|-------|-----|-----|--------|--------|
| UN63062 | Rsa1.0.07882.1 | 729 | 8363   | 6.00E-73  | 166 | 175 | 94 -  | 2   | 170 | 1473   | 1647   |
| UN63063 | Rsa1.0.00017.1 | 738 | 752458 | 0         | 471 | 507 | 92 -  | 169 | 672 | 124431 | 124925 |
| UN63064 | Rsa1.0.00018.1 | 441 | 410899 | 1.00E-63  | 145 | 152 | 95 +  | 77  | 228 | 186717 | 186868 |
| UN63065 | Rsa1.0.03735.1 | 616 | 21087  | 0         | 441 | 454 | 97 +  | 164 | 616 | 3647   | 4100   |
| UN63066 | Rsa1.0.03956.1 | 566 | 19872  | 3.00E-83  | 195 | 207 | 94 -  | 124 | 330 | 19590  | 19793  |
| UN63067 | Rsa1.0.00324.1 | 672 | 218805 | 0         | 413 | 418 | 98 +  | 2   | 419 | 17432  | 17849  |
| UN63068 | Rsa1.0.00143.1 | 738 | 121313 | 0         | 718 | 739 | 97 +  | 2   | 738 | 64628  | 65366  |
| UN63069 | Rsa1.0.03681.1 | 568 | 21405  | 2.00E-75  | 153 | 156 | 98 -  | 413 | 568 | 1810   | 1965   |
| UN63070 | #              | #   | #      | #         | #   | #   | #     | #   | #   | #      | #      |
| UN63071 | Rsa1.0.00543.1 | 631 | 76788  | 0         | 593 | 598 | 99 +  | 32  | 629 | 62318  | 62913  |
| UN63072 | Rsa1.0.01864.1 | 375 | 37998  | 1.00E-136 | 255 | 257 | 99 +  | 119 | 375 | 11783  | 12038  |
| UN63073 | Rsa1.0.00166.1 | 623 | 240912 | 0         | 518 | 553 | 93 +  | 83  | 623 | 134247 | 134799 |
| UN63074 | Rsa1.0.02346.1 | 205 | 32337  | 4.00E-71  | 175 | 187 | 93 -  | 1   | 187 | 8469   | 8653   |
| UN63075 | Rsa1.0.00458.1 | 603 | 82717  | 0         | 364 | 367 | 99 +  | 3   | 368 | 49595  | 49961  |
| UN63076 | Rsa1.0.05380.1 | 475 | 13968  | 2.00E-99  | 205 | 211 | 97 -  | 3   | 211 | 5039   | 5249   |
| UN63077 | Rsa1.0.01560.1 | 651 | 43256  | 1.00E-107 | 270 | 291 | 92 +  | 366 | 651 | 41496  | 41785  |
| UN63078 | Rsa1.0.01287.1 | 706 | 49195  | 0         | 351 | 360 | 97 -  | 1   | 360 | 4086   | 4445   |
| UN63079 | Rsa1.0.00036.1 | 242 | 176186 | 2.00E-98  | 226 | 241 | 93 +  | 2   | 242 | 54796  | 55025  |
| UN63080 | Rsa1.0.35587.1 | 785 | 636    | 1.00E-71  | 255 | 294 | 86 -  | 208 | 501 | 174    | 467    |
| UN63081 | Rsa1.0.72337.1 | 643 | 317    | 1.00E-166 | 313 | 317 | 98 -  | 235 | 550 | 1      | 317    |
| UN63082 | Rsa1.0.05942.1 | 572 | 12158  | 0         | 549 | 571 | 96 -  | 2   | 568 | 11545  | 12105  |
| UN63083 | Rsa1.0.02561.1 | 700 | 30080  | 0         | 364 | 375 | 97 +  | 3   | 377 | 18408  | 18782  |
| UN63084 | Rsa1.0.00310.1 | 643 | 96852  | 0         | 619 | 643 | 96 -  | 2   | 643 | 4283   | 4925   |
| UN63085 | Rsa1.0.01442.1 | 501 | 45776  | 1.00E-130 | 242 | 244 | 99 +  | 3   | 246 | 41778  | 42021  |
| UN63086 | Rsa1.0.00738.1 | 494 | 66322  | 2.33E-156 | 299 | 308 | 97 +  | 14  | 319 | 27056  | 27359  |
| UN63087 | Rsa1.0.00041.1 | 651 | 186197 | 2.33E-156 | 311 | 327 | 95 +  | 3   | 329 | 32025  | 32351  |
| UN63088 | Rsa1.0.00114.1 | 570 | 131330 | 2.00E-23  | 72  | 77  | 93 +  | 309 | 385 | 112622 | 112698 |
| UN63089 | Rsa1.0.00123.1 | 744 | 325650 | 1.00E-131 | 268 | 274 | 97 +  | 463 | 734 | 180639 | 180911 |
| UN63090 | Rsa1.0.00411.1 | 648 | 86944  | 0         | 636 | 666 | 95 +  | 2   | 648 | 62152  | 62814  |
| UN63091 | Rsa1.0.00961.1 | 716 | 58185  | 0         | 688 | 707 | 97 +  | 1   | 705 | 22484  | 23189  |
| UN63092 | Rsa1.0.00112.1 | 683 | 132199 | 1.00E-150 | 279 | 282 | 98 -  | 3   | 284 | 73976  | 74257  |
| UN63093 | Rsa1.0.00525.1 | 745 | 78030  | 1.00E-157 | 330 | 342 | 96 -  | 10  | 349 | 35908  | 36248  |
| UN63094 | Rsa1.0.51346.1 | 489 | 443    | 1.00E-134 | 273 | 282 | 96 +  | 3   | 282 | 127    | 408    |
| UN63095 | Rsa1.0.06271.1 | 781 | 11351  | 1.00E-61  | 121 | 121 | 100 + | 380 | 500 | 2843   | 2963   |
| UN63096 | Rsa1.0.00446.1 | 777 | 167829 | 0         | 335 | 335 | 100 + | 2   | 336 | 133701 | 134035 |
| UN63097 | Rsa1.0.00459.1 | 630 | 82580  | 3.00E-68  | 153 | 160 | 95 -  | 186 | 345 | 63936  | 64095  |
| UN63098 | Rsa1.0.00304.1 | 696 | 97429  | 0         | 390 | 398 | 97 +  | 2   | 399 | 21998  | 22395  |
| UN63099 | Rsa1.0.04250.1 | 682 | 18264  | 1.00E-113 | 208 | 208 | 100 + | 2   | 209 | 5978   | 6185   |
| UN63100 | Rsa1.0.02420.1 | 708 | 31580  | 0         | 686 | 708 | 96 -  | 4   | 708 | 15953  | 16660  |

|         |                |     |        |           |     |     |       |     |     |        |        |
|---------|----------------|-----|--------|-----------|-----|-----|-------|-----|-----|--------|--------|
| UN63101 | Rsa1.0_03183.1 | 602 | 24755  | 0         | 422 | 453 | 93 -  | 2   | 454 | 8389   | 8841   |
| UN63102 | Rsa1.0_04466.1 | 767 | 17236  | 0         | 663 | 677 | 97 +  | 70  | 744 | 7948   | 8624   |
| UN63103 | Rsa1.0_01453.1 | 679 | 45449  | 1.00E-153 | 295 | 298 | 98 +  | 383 | 677 | 5772   | 6069   |
| UN63104 | Rsa1.0_00148.1 | 647 | 120234 | 1.00E-157 | 290 | 293 | 98 +  | 256 | 548 | 61369  | 61661  |
| UN63105 | Rsa1.0_00349.1 | 592 | 92621  | 0         | 411 | 413 | 99 +  | 180 | 592 | 60612  | 61024  |
| UN63106 | Rsa1.0_00198.1 | 671 | 222963 | 0         | 423 | 456 | 92 +  | 3   | 440 | 128659 | 129114 |
| UN63107 | Rsa1.0_00128.1 | 659 | 228675 | 3.00E-56  | 130 | 136 | 95 +  | 274 | 409 | 87011  | 87146  |
| UN63108 | Rsa1.0_00089.1 | 573 | 406142 | 0         | 472 | 481 | 98 -  | 93  | 573 | 239642 | 240122 |
| UN63109 | Rsa1.0_01039.1 | 702 | 55946  | 0         | 642 | 665 | 96 +  | 1   | 664 | 54254  | 54918  |
| UN63110 | Rsa1.0_09169.1 | 665 | 6589   | 0         | 649 | 649 | 100 - | 3   | 651 | 5414   | 6062   |
| UN63111 | Rsa1.0_01080.1 | 555 | 54752  | 0         | 495 | 521 | 95 -  | 37  | 555 | 34053  | 34573  |
| UN63112 | Rsa1.0_04504.1 | 123 | 17069  | 6.00E-41  | 101 | 105 | 96 +  | 1   | 105 | 2728   | 2831   |
| UN63113 | Rsa1.0_00185.1 | 459 | 248445 | 0         | 441 | 456 | 96 +  | 1   | 456 | 6894   | 7349   |
| UN63114 | Rsa1.0_01864.1 | 662 | 37998  | 0         | 561 | 588 | 95 +  | 90  | 662 | 29145  | 29729  |
| UN63115 | Rsa1.0_14302.1 | 720 | 3558   | 1.00E-140 | 327 | 355 | 92 +  | 3   | 357 | 799    | 1138   |
| UN63116 | Rsa1.0_01523.1 | 724 | 43959  | 1.00E-67  | 131 | 131 | 100 + | 286 | 416 | 23028  | 23158  |
| UN63117 | Rsa1.0_00012.1 | 627 | 222148 | 1.00E-142 | 256 | 256 | 100 - | 3   | 258 | 13799  | 14054  |
| UN63118 | Rsa1.0_42411.1 | 202 | 529    | 4.00E-71  | 163 | 168 | 97 +  | 37  | 202 | 59     | 225    |
| UN63119 | Rsa1.0_19234.1 | 470 | 1460   | 1.00E-119 | 230 | 234 | 98 -  | 1   | 234 | 494    | 727    |
| UN63120 | Rsa1.0_01616.1 | 789 | 42137  | 1.00E-169 | 378 | 396 | 95 +  | 354 | 742 | 21496  | 21891  |
| UN63121 | Rsa1.0_01073.1 | 699 | 55030  | 0         | 354 | 361 | 98 +  | 339 | 699 | 4648   | 5008   |
| UN63122 | Rsa1.0_05579.1 | 812 | 13275  | 1.00E-131 | 240 | 241 | 99 +  | 2   | 242 | 11629  | 11869  |
| UN63123 | Rsa1.0_02820.1 | 809 | 27629  | 1.00E-145 | 286 | 293 | 97 +  | 4   | 296 | 2290   | 2581   |
| UN63124 | Rsa1.0_00950.1 | 631 | 58547  | 1.00E-114 | 209 | 209 | 100 + | 3   | 211 | 24481  | 24689  |
| UN63125 | Rsa1.0_00089.1 | 549 | 406142 | 0         | 535 | 543 | 98 -  | 2   | 544 | 322213 | 322755 |
| UN63126 | Rsa1.0_05632.1 | 441 | 13120  | 1.00E-152 | 379 | 413 | 91 -  | 26  | 429 | 8206   | 8612   |
| UN63127 | Rsa1.0_00339.1 | 759 | 222974 | 1.00E-95  | 218 | 228 | 95 +  | 537 | 759 | 177448 | 177675 |
| UN63128 | Rsa1.0_02820.1 | 547 | 27629  | 1.00E-139 | 276 | 283 | 97 +  | 2   | 284 | 2300   | 2581   |
| UN63129 | Rsa1.0_01151.1 | 677 | 52268  | 0         | 616 | 626 | 98 -  | 2   | 627 | 3960   | 4585   |
| UN63130 | Rsa1.0_00890.1 | 744 | 323870 | 0         | 491 | 504 | 97 +  | 25  | 519 | 182319 | 182822 |
| UN63131 | Rsa1.0_00291.1 | 569 | 172129 | 1.00E-109 | 222 | 229 | 96 -  | 68  | 296 | 96215  | 96443  |
| UN63132 | Rsa1.0_02418.1 | 601 | 31590  | 1.00E-103 | 194 | 195 | 99 +  | 119 | 313 | 17724  | 17918  |
| UN63133 | Rsa1.0_00218.1 | 738 | 201480 | 0         | 718 | 740 | 97 -  | 1   | 738 | 138888 | 139627 |
| UN63134 | Rsa1.0_00023.1 | 548 | 194764 | 0         | 520 | 555 | 93 +  | 2   | 548 | 118191 | 118727 |
| UN63135 | Rsa1.0_02735.1 | 652 | 28344  | 0         | 540 | 601 | 89 +  | 7   | 594 | 2745   | 3325   |
| UN63136 | Rsa1.0_00069.1 | 690 | 403561 | 0         | 672 | 703 | 95 -  | 3   | 690 | 361810 | 362512 |
| UN63137 | Rsa1.0_01022.1 | 669 | 56606  | 0         | 639 | 662 | 96 +  | 11  | 669 | 21475  | 22136  |
| UN63138 | Rsa1.0_02110.1 | 576 | 34919  | 1.00E-114 | 239 | 249 | 95 -  | 68  | 316 | 28480  | 28728  |
| UN63139 | Rsa1.0_01565.1 | 567 | 155447 | 0         | 564 | 566 | 99 -  | 2   | 567 | 35961  | 36525  |

|         |                |     |        |           |     |     |       |     |     |        |        |
|---------|----------------|-----|--------|-----------|-----|-----|-------|-----|-----|--------|--------|
| UN63140 | Rsa1.0.00546.1 | 722 | 76523  | 1.00E-126 | 447 | 513 | 87 -  | 3   | 500 | 62118  | 62605  |
| UN63141 | Rsa1.0.08023.1 | 535 | 8071   | 1.00E-124 | 397 | 453 | 87 -  | 8   | 452 | 6044   | 6463   |
| UN63142 | Rsa1.0.03929.1 | 169 | 19994  | 3.00E-83  | 156 | 156 | 100 + | 14  | 169 | 15319  | 15474  |
| UN63143 | Rsa1.0.12992.1 | 491 | 130538 | 0         | 421 | 424 | 99 -  | 68  | 491 | 130115 | 130538 |
| UN63144 | Rsa1.0.08575.1 | 563 | 7180   | 0         | 559 | 561 | 99 +  | 3   | 563 | 4943   | 5503   |
| UN63145 | Rsa1.0.00642.1 | 604 | 201230 | 0         | 346 | 347 | 99 +  | 258 | 604 | 68602  | 68948  |
| UN63146 | Rsa1.0.01039.1 | 647 | 55946  | 2.00E-88  | 181 | 186 | 97 +  | 153 | 338 | 27773  | 27958  |
| UN63147 | Rsa1.0.02606.1 | 574 | 29635  | 1.00E-122 | 483 | 564 | 85 +  | 29  | 574 | 3825   | 4359   |
| UN63148 | Rsa1.0.05124.1 | 545 | 14790  | 0         | 365 | 379 | 96 +  | 167 | 545 | 717    | 1095   |
| UN63149 | Rsa1.0.02750.1 | 128 | 28239  | 8.00E-62  | 126 | 128 | 98 -  | 1   | 128 | 5269   | 5396   |
| UN63150 | Rsa1.0.00838.1 | 609 | 153820 | 0         | 586 | 607 | 96 +  | 3   | 609 | 58605  | 59205  |
| UN63151 | Rsa1.0.00715.1 | 386 | 67116  | 1.00E-72  | 160 | 167 | 95 -  | 4   | 165 | 41043  | 41209  |
| UN63152 | Rsa1.0.00550.1 | 634 | 210790 | 0         | 613 | 634 | 96 -  | 2   | 634 | 201994 | 202627 |
| UN63153 | Rsa1.0.02506.1 | 202 | 30700  | 8.00E-94  | 180 | 182 | 98 +  | 1   | 182 | 5023   | 5204   |
| UN63154 | Rsa1.0.05643.1 | 784 | 13065  | 0         | 699 | 718 | 97 -  | 71  | 784 | 3242   | 3959   |
| UN63155 | Rsa1.0.08215.1 | 564 | 7711   | 0         | 445 | 465 | 95 -  | 3   | 455 | 2325   | 2789   |
| UN63156 | Rsa1.0.00021.1 | 328 | 263655 | 1.00E-173 | 322 | 326 | 98 -  | 3   | 328 | 131524 | 131847 |
| UN63157 | Rsa1.0.05047.1 | 584 | 15032  | 0         | 479 | 498 | 96 -  | 2   | 493 | 11264  | 11761  |
| UN63158 | Rsa1.0.00041.1 | 783 | 186197 | 1.00E-123 | 281 | 293 | 95 -  | 496 | 783 | 133875 | 134167 |
| UN63159 | Rsa1.0.00398.1 | 381 | 88007  | 1.00E-100 | 230 | 242 | 95 -  | 2   | 242 | 44704  | 44944  |
| UN63160 | #              | #   | #      | #         | #   | #   | #     | #   | #   | #      | #      |
| UN63161 | Rsa1.0.04051.1 | 764 | 19375  | 6.00E-67  | 136 | 138 | 98 -  | 223 | 360 | 13070  | 13207  |
| UN63162 | Rsa1.0.01121.1 | 647 | 53407  | 0         | 639 | 645 | 99 +  | 3   | 647 | 12246  | 12890  |
| UN63163 | Rsa1.0.03488.1 | 742 | 22556  | 0         | 575 | 578 | 99 +  | 2   | 579 | 13060  | 13637  |
| UN63164 | Rsa1.0.00822.1 | 675 | 62891  | 1.00E-116 | 254 | 267 | 95 +  | 3   | 267 | 2679   | 2945   |
| UN63165 | Rsa1.0.07671.1 | 671 | 8860   | 0         | 671 | 671 | 100 + | 1   | 671 | 3303   | 3973   |
| UN63166 | Rsa1.0.01634.1 | 594 | 41865  | 1.00E-112 | 206 | 206 | 100 - | 2   | 207 | 40498  | 40703  |
| UN63167 | Rsa1.0.19075.1 | 664 | 1483   | 0         | 523 | 554 | 94 +  | 2   | 549 | 192    | 742    |
| UN63168 | Rsa1.0.00148.1 | 773 | 120234 | 0         | 573 | 587 | 97 +  | 3   | 580 | 11759  | 12345  |
| UN63169 | Rsa1.0.03552.1 | 425 | 22151  | 0         | 420 | 429 | 97 -  | 3   | 425 | 8470   | 8897   |
| UN63170 | Rsa1.0.00013.1 | 743 | 292129 | 1.00E-37  | 84  | 85  | 98 +  | 134 | 218 | 158323 | 158407 |
| UN63171 | Rsa1.0.00151.1 | 325 | 119541 | 1.00E-119 | 263 | 276 | 95 +  | 50  | 325 | 43485  | 43752  |
| UN63172 | Rsa1.0.04018.1 | 661 | 19551  | 1.00E-167 | 301 | 302 | 99 +  | 250 | 551 | 1897   | 2198   |
| UN63173 | Rsa1.0.00878.1 | 587 | 330303 | 1.00E-144 | 325 | 346 | 93 -  | 129 | 474 | 148561 | 148903 |
| UN63174 | Rsa1.0.05819.1 | 771 | 12543  | 1.00E-148 | 269 | 270 | 99 -  | 2   | 271 | 6432   | 6701   |
| UN63175 | Rsa1.0.14734.1 | 615 | 3116   | 0         | 488 | 511 | 95 -  | 48  | 558 | 139    | 643    |
| UN63176 | Rsa1.0.01160.1 | 538 | 52068  | 5.00E-14  | 71  | 81  | 87 -  | 51  | 131 | 19207  | 19287  |
| UN63177 | Rsa1.0.02948.1 | 453 | 26526  | 3.00E-61  | 139 | 144 | 96 +  | 30  | 172 | 5602   | 5745   |
| UN63178 | Rsa1.0.02884.1 | 651 | 27034  | 1.00E-168 | 429 | 483 | 88 -  | 213 | 648 | 20559  | 21041  |

|         |                |     |        |           |     |     |       |     |     |        |        |
|---------|----------------|-----|--------|-----------|-----|-----|-------|-----|-----|--------|--------|
| UN63179 | Rsa1.0.01516.1 | 457 | 44196  | 1.00E-91  | 198 | 206 | 96 -  | 2   | 205 | 24091  | 24296  |
| UN63180 | Rsa1.0.03650.1 | 768 | 21583  | 3.00E-25  | 87  | 96  | 90 -  | 514 | 609 | 8999   | 9094   |
| UN63181 | Rsa1.0.01431.1 | 700 | 167877 | 0         | 429 | 461 | 93 +  | 66  | 514 | 14362  | 14817  |
| UN63182 | Rsa1.0.00583.1 | 227 | 74309  | 1.00E-61  | 151 | 158 | 95 -  | 4   | 159 | 69775  | 69929  |
| UN63183 | Rsa1.0.01344.1 | 656 | 142535 | 0         | 645 | 658 | 98 -  | 2   | 656 | 133044 | 133700 |
| UN63184 | Rsa1.0.00701.1 | 590 | 67691  | 0         | 427 | 433 | 98 -  | 3   | 435 | 6019   | 6451   |
| UN63185 | Rsa1.0.00139.1 | 749 | 357786 | 1.00E-74  | 274 | 314 | 87 -  | 5   | 311 | 32194  | 32505  |
| UN63186 | Rsa1.0.01124.1 | 635 | 53295  | 2.00E-41  | 162 | 187 | 86 -  | 1   | 187 | 39677  | 39863  |
| UN63187 | Rsa1.0.00307.1 | 708 | 199003 | 9.00E-72  | 141 | 142 | 99 -  | 96  | 237 | 82038  | 82179  |
| UN63188 | Rsa1.0.00414.1 | 736 | 202190 | 5.00E-98  | 208 | 216 | 96 -  | 64  | 279 | 197259 | 197471 |
| UN63189 | Rsa1.0.02359.1 | 657 | 32211  | 0         | 528 | 542 | 97 -  | 119 | 657 | 21898  | 22439  |
| UN63190 | Rsa1.0.00971.1 | 617 | 57973  | 0         | 412 | 430 | 95 +  | 1   | 426 | 55688  | 56112  |
| UN63191 | Rsa1.0.03831.1 | 585 | 20579  | 0         | 583 | 584 | 99 -  | 2   | 585 | 7181   | 7764   |
| UN63192 | Rsa1.0.00713.1 | 121 | 158017 | 7.00E-59  | 115 | 115 | 100 - | 2   | 116 | 49753  | 49867  |
| UN63193 | Rsa1.0.01000.1 | 406 | 57140  | 1.00E-149 | 365 | 399 | 91 -  | 2   | 399 | 53385  | 53755  |
| UN63194 | Rsa1.0.01389.1 | 634 | 46716  | 1.00E-102 | 210 | 217 | 96 +  | 418 | 634 | 44422  | 44638  |
| UN63195 | Rsa1.0.01321.1 | 614 | 48248  | 0         | 399 | 409 | 97 +  | 204 | 608 | 6404   | 6812   |
| UN63196 | Rsa1.0.21540.1 | 746 | 1194   | 0         | 603 | 638 | 94 -  | 2   | 638 | 1      | 632    |
| UN63197 | Rsa1.0.02336.1 | 490 | 32397  | 0         | 358 | 360 | 99 +  | 2   | 361 | 28179  | 28538  |
| UN63198 | Rsa1.0.00262.1 | 712 | 101906 | 1.00E-107 | 206 | 209 | 98 -  | 504 | 712 | 96021  | 96229  |
| UN63199 | Rsa1.0.00243.1 | 567 | 103651 | 0         | 373 | 375 | 99 -  | 1   | 373 | 92979  | 93353  |
| UN63200 | Rsa1.0.00012.1 | 417 | 222148 | 1.00E-155 | 387 | 418 | 92 +  | 3   | 415 | 131062 | 131471 |
| UN63201 | Rsa1.0.00407.1 | 243 | 191544 | 4.00E-99  | 227 | 238 | 95 -  | 1   | 236 | 160804 | 161039 |
| UN63202 | Rsa1.0.00340.1 | 413 | 305782 | 1.00E-115 | 246 | 258 | 95 -  | 36  | 293 | 102126 | 102383 |
| UN63203 | Rsa1.0.02194.1 | 552 | 34029  | 1.00E-172 | 338 | 347 | 97 +  | 141 | 486 | 11929  | 12271  |
| UN63204 | Rsa1.0.16163.1 | 768 | 2261   | 0         | 562 | 588 | 95 -  | 113 | 700 | 759    | 1346   |
| UN63205 | Rsa1.0.00589.1 | 779 | 209965 | 2.00E-97  | 255 | 277 | 92 -  | 404 | 678 | 189295 | 189571 |
| UN63206 | Rsa1.0.00340.1 | 697 | 305782 | 0         | 494 | 513 | 96 -  | 176 | 682 | 32448  | 32954  |
| UN63207 | Rsa1.0.10831.1 | 622 | 5708   | 1.00E-33  | 216 | 257 | 84 +  | 14  | 264 | 934    | 1185   |
| UN63208 | Rsa1.0.00066.1 | 444 | 152418 | 4.00E-79  | 190 | 201 | 94 -  | 49  | 247 | 52686  | 52885  |
| UN63209 | Rsa1.0.01635.1 | 682 | 41865  | 2.00E-75  | 144 | 144 | 100 - | 502 | 645 | 21446  | 21589  |
| UN63210 | Rsa1.0.00911.1 | 729 | 59943  | 0         | 620 | 639 | 97 +  | 95  | 729 | 13349  | 13987  |
| UN63211 | Rsa1.0.02187.1 | 225 | 34113  | 1.00E-119 | 224 | 225 | 99 -  | 2   | 225 | 22220  | 22444  |
| UN63212 | Rsa1.0.13907.1 | 515 | 4113   | 1.00E-111 | 262 | 280 | 93 +  | 159 | 437 | 1509   | 1783   |
| UN63213 | Rsa1.0.00127.1 | 522 | 127446 | 0         | 496 | 510 | 97 +  | 13  | 522 | 121671 | 122180 |
| UN63214 | Rsa1.0.64378.1 | 245 | 356    | 1.00E-133 | 243 | 244 | 99 -  | 2   | 245 | 14     | 257    |
| UN63215 | Rsa1.0.02811.1 | 162 | 27669  | 1.00E-67  | 156 | 161 | 96 -  | 2   | 162 | 13318  | 13474  |
| UN63216 | Rsa1.0.01891.1 | 650 | 37530  | 0         | 368 | 382 | 96 +  | 269 | 650 | 36036  | 36416  |
| UN63217 | Rsa1.0.00959.1 | 679 | 58202  | 0         | 656 | 682 | 96 +  | 1   | 676 | 56856  | 57526  |

|         |                |     |        |           |     |     |       |     |     |        |        |
|---------|----------------|-----|--------|-----------|-----|-----|-------|-----|-----|--------|--------|
| UN63218 | Rsa1.0.03057.1 | 579 | 25724  | 0         | 473 | 481 | 98 -  | 99  | 579 | 11923  | 12403  |
| UN63219 | Rsa1.0.00073.1 | 647 | 240924 | 0         | 469 | 483 | 97 +  | 92  | 569 | 209256 | 209738 |
| UN63220 | Rsa1.0.05199.1 | 622 | 14529  | 1.00E-156 | 355 | 380 | 93 -  | 2   | 381 | 5237   | 5616   |
| UN63221 | Rsa1.0.01046.1 | 654 | 152989 | 0         | 377 | 392 | 96 +  | 222 | 613 | 136697 | 137088 |
| UN63222 | Rsa1.0.02950.1 | 784 | 26506  | 3.00E-96  | 194 | 199 | 97 -  | 251 | 449 | 20132  | 20330  |
| UN63223 | Rsa1.0.03865.1 | 606 | 20373  | 1.00E-79  | 157 | 159 | 98 +  | 105 | 263 | 9267   | 9425   |
| UN63224 | Rsa1.0.10094.1 | 495 | 6000   | 0         | 399 | 401 | 99 -  | 89  | 489 | 472    | 872    |
| UN63225 | Rsa1.0.02872.1 | 764 | 27080  | 5.00E-92  | 225 | 235 | 95 -  | 528 | 758 | 9238   | 9469   |
| UN63226 | Rsa1.0.00249.1 | 569 | 153740 | 0         | 566 | 569 | 99 +  | 1   | 569 | 93251  | 93819  |
| UN63227 | Rsa1.0.02246.1 | 654 | 33435  | 1.00E-144 | 304 | 319 | 95 +  | 159 | 477 | 7137   | 7455   |
| UN63228 | Rsa1.0.00060.1 | 755 | 502678 | 0         | 743 | 754 | 98 -  | 3   | 755 | 111785 | 112538 |
| UN63229 | Rsa1.0.01682.1 | 608 | 41090  | 1.00E-180 | 326 | 328 | 99 +  | 280 | 607 | 25344  | 25671  |
| UN63230 | Rsa1.0.00327.1 | 396 | 94892  | 6.00E-90  | 168 | 168 | 100 + | 180 | 347 | 19710  | 19877  |
| UN63231 | Rsa1.0.01817.1 | 681 | 38849  | 1.00E-167 | 323 | 330 | 97 +  | 302 | 631 | 31779  | 32107  |
| UN63232 | Rsa1.0.05600.1 | 498 | 13222  | 1.00E-139 | 257 | 259 | 99 -  | 155 | 413 | 5917   | 6175   |
| UN63233 | Rsa1.0.04849.1 | 773 | 15726  | 0         | 427 | 429 | 99 +  | 4   | 432 | 3565   | 3993   |
| UN63234 | Rsa1.0.05317.1 | 712 | 14160  | 3.00E-87  | 164 | 164 | 100 - | 307 | 470 | 9125   | 9288   |
| UN63235 | Rsa1.0.03476.1 | 791 | 22646  | 0         | 613 | 630 | 97 -  | 2   | 631 | 10297  | 10923  |
| UN63236 | Rsa1.0.00094.1 | 787 | 139042 | 1.00E-165 | 306 | 310 | 98 -  | 2   | 311 | 76389  | 76698  |
| UN63237 | Rsa1.0.00294.1 | 698 | 144860 | 3.00E-84  | 171 | 175 | 97 +  | 418 | 592 | 22556  | 22730  |
| UN63238 | Rsa1.0.04602.1 | 794 | 16684  | 1.00E-179 | 503 | 558 | 90 -  | 137 | 675 | 13966  | 14511  |
| UN63239 | Rsa1.0.08700.1 | 715 | 7028   | 0         | 432 | 437 | 98 +  | 272 | 706 | 4920   | 5356   |
| UN63240 | Rsa1.0.04448.1 | 421 | 17309  | 1.00E-164 | 390 | 420 | 92 +  | 4   | 421 | 9976   | 10394  |
| UN63241 | Rsa1.0.09211.1 | 662 | 6556   | 4.00E-52  | 118 | 121 | 97 -  | 533 | 652 | 3110   | 3230   |
| UN63242 | Rsa1.0.00018.1 | 618 | 410899 | 0         | 340 | 345 | 98 -  | 3   | 347 | 375439 | 375783 |
| UN63243 | Rsa1.0.00802.1 | 762 | 63846  | 0         | 375 | 382 | 98 +  | 361 | 739 | 26567  | 26948  |
| UN63244 | Rsa1.0.00876.1 | 784 | 61328  | 0         | 592 | 615 | 96 -  | 167 | 781 | 8718   | 9332   |
| UN63245 | Rsa1.0.21613.1 | 764 | 1187   | 1.00E-163 | 312 | 318 | 98 -  | 3   | 318 | 714    | 1031   |
| UN63246 | Rsa1.0.01516.1 | 731 | 44196  | 1.00E-125 | 286 | 304 | 94 -  | 222 | 524 | 37069  | 37372  |
| UN63247 | Rsa1.0.00685.1 | 629 | 68515  | 0         | 615 | 624 | 98 +  | 1   | 624 | 12791  | 13414  |
| UN63248 | Rsa1.0.00831.1 | 711 | 62673  | 0         | 690 | 715 | 96 -  | 2   | 711 | 57344  | 58055  |
| UN63249 | Rsa1.0.00321.1 | 657 | 95671  | 1.00E-137 | 265 | 270 | 98 +  | 329 | 595 | 67633  | 67902  |
| UN63250 | Rsa1.0.15357.1 | 691 | 2660   | 0         | 630 | 667 | 94 +  | 36  | 690 | 1350   | 2013   |
| UN63251 | Rsa1.0.03005.1 | 609 | 26082  | 1.00E-117 | 243 | 252 | 96 +  | 232 | 480 | 571    | 822    |
| UN63252 | Rsa1.0.00476.1 | 786 | 280966 | 1.00E-106 | 213 | 216 | 98 +  | 508 | 721 | 6730   | 6945   |
| UN63253 | Rsa1.0.00320.1 | 792 | 95784  | 1.00E-174 | 360 | 377 | 95 -  | 318 | 694 | 62271  | 62647  |
| UN63254 | Rsa1.0.00016.1 | 530 | 831256 | 1.00E-125 | 283 | 299 | 94 -  | 119 | 416 | 205928 | 206225 |
| UN63255 | Rsa1.0.02186.1 | 815 | 34150  | 1.00E-125 | 240 | 244 | 98 -  | 44  | 287 | 15168  | 15411  |
| UN63256 | Rsa1.0.13762.1 | 460 | 4370   | 1.00E-140 | 283 | 293 | 96 -  | 168 | 460 | 3741   | 4033   |



|         |                |     |        |           |     |     |       |     |     |        |        |
|---------|----------------|-----|--------|-----------|-----|-----|-------|-----|-----|--------|--------|
| UN63257 | Rsa1.0.06524.1 | 739 | 10853  | 0         | 477 | 515 | 92 -  | 31  | 540 | 9714   | 10220  |
| UN63258 | Rsa1.0.01476.1 | 579 | 172928 | 0         | 553 | 573 | 96 +  | 2   | 574 | 10166  | 10738  |
| UN63259 | Rsa1.0.02768.1 | 803 | 28110  | 1.00E-115 | 226 | 231 | 97 +  | 3   | 233 | 4387   | 4617   |
| UN63260 | Rsa1.0.03903.1 | 766 | 20166  | 0         | 658 | 664 | 99 -  | 3   | 665 | 18810  | 19473  |
| UN63261 | Rsa1.0.00154.1 | 203 | 189461 | 1.00E-101 | 200 | 203 | 98 -  | 2   | 203 | 28091  | 28293  |
| UN63262 | Rsa1.0.01942.1 | 705 | 37048  | 0         | 518 | 529 | 97 +  | 181 | 705 | 3758   | 4286   |
| UN63263 | Rsa1.0.13349.1 | 542 | 4897   | 0         | 380 | 380 | 100 - | 161 | 540 | 4518   | 4897   |
| UN63264 | Rsa1.0.00049.1 | 395 | 167018 | 1.00E-116 | 233 | 239 | 97 +  | 155 | 393 | 82583  | 82819  |
| UN63265 | Rsa1.0.04303.1 | 827 | 18007  | 0         | 467 | 500 | 93 -  | 3   | 496 | 11053  | 11537  |
| UN63266 | Rsa1.0.01583.1 | 610 | 156297 | 4.00E-58  | 121 | 123 | 98 -  | 247 | 369 | 129994 | 130116 |
| UN63267 | Rsa1.0.01121.1 | 577 | 53407  | 1.00E-102 | 201 | 205 | 98 -  | 3   | 207 | 52331  | 52535  |
| UN63268 | Rsa1.0.00106.1 | 718 | 133916 | 0         | 700 | 719 | 97 -  | 2   | 718 | 97112  | 97830  |
| UN63269 | Rsa1.0.01722.1 | 465 | 40320  | 0         | 430 | 437 | 98 -  | 30  | 465 | 556    | 989    |
| UN63270 | Rsa1.0.00898.1 | 505 | 202772 | 1.00E-51  | 107 | 108 | 99 +  | 211 | 318 | 3148   | 3255   |
| UN63271 | Rsa1.0.37242.1 | 790 | 605    | 3.00E-96  | 259 | 279 | 92 -  | 496 | 764 | 59     | 337    |
| UN63272 | Rsa1.0.00040.1 | 765 | 324196 | 1.00E-166 | 433 | 475 | 91 +  | 307 | 765 | 223524 | 223994 |
| UN63273 | Rsa1.0.00674.1 | 788 | 193753 | 0         | 738 | 775 | 95 +  | 1   | 747 | 179813 | 180585 |
| UN63274 | Rsa1.0.00161.1 | 610 | 116891 | 0         | 506 | 526 | 96 +  | 85  | 610 | 93522  | 94037  |
| UN63275 | Rsa1.0.00458.1 | 753 | 82717  | 1.00E-117 | 246 | 254 | 96 -  | 5   | 254 | 70453  | 70702  |
| UN63276 | Rsa1.0.00729.1 | 457 | 66690  | 0         | 451 | 455 | 99 -  | 4   | 457 | 42268  | 42722  |
| UN63277 | Rsa1.0.00556.1 | 754 | 207212 | 0         | 514 | 544 | 94 +  | 164 | 704 | 51917  | 52456  |
| UN63278 | Rsa1.0.00120.1 | 673 | 277288 | 1.00E-42  | 149 | 169 | 88 -  | 133 | 301 | 229170 | 229338 |
| UN63279 | Rsa1.0.13800.1 | 348 | 4315   | 6.00E-96  | 236 | 254 | 92 +  | 96  | 348 | 915    | 1168   |
| UN63280 | Rsa1.0.01629.1 | 243 | 41917  | 2.00E-33  | 104 | 109 | 95 -  | 133 | 237 | 16008  | 16116  |
| UN63281 | Rsa1.0.00033.1 | 716 | 515811 | 0         | 441 | 448 | 98 -  | 177 | 624 | 146527 | 146971 |
| UN63282 | Rsa1.0.03158.1 | 475 | 24950  | 1.00E-172 | 345 | 359 | 96 -  | 2   | 352 | 1      | 359    |
| UN63283 | Rsa1.0.00886.1 | 199 | 167350 | 1.00E-89  | 173 | 175 | 98 -  | 21  | 195 | 41715  | 41889  |
| UN63284 | Rsa1.0.01243.1 | 636 | 50061  | 0         | 631 | 634 | 99 +  | 3   | 636 | 48901  | 49534  |
| UN63285 | Rsa1.0.10442.1 | 510 | 5849   | 1.00E-82  | 159 | 160 | 99 +  | 164 | 323 | 2226   | 2385   |
| UN63286 | Rsa1.0.02309.1 | 540 | 32744  | 0         | 379 | 398 | 95 +  | 150 | 540 | 31125  | 31520  |
| UN63287 | Rsa1.0.00104.1 | 807 | 368722 | 0         | 764 | 814 | 93 -  | 3   | 807 | 165286 | 166099 |
| UN63288 | Rsa1.0.01018.1 | 813 | 56685  | 0         | 420 | 453 | 92 +  | 3   | 455 | 29548  | 29972  |
| UN63289 | Rsa1.0.04153.1 | 414 | 18807  | 1.00E-111 | 240 | 252 | 95 +  | 161 | 412 | 16104  | 16355  |
| UN63290 | Rsa1.0.02008.1 | 654 | 36109  | 4.00E-18  | 90  | 104 | 86 -  | 223 | 326 | 35397  | 35500  |
| UN63291 | Rsa1.0.02037.1 | 806 | 35717  | 1.00E-178 | 353 | 361 | 97 +  | 373 | 730 | 24954  | 25314  |
| UN63292 | Rsa1.0.01729.1 | 198 | 304246 | 7.00E-91  | 193 | 200 | 96 -  | 1   | 198 | 141152 | 141351 |
| UN63293 | Rsa1.0.00873.1 | 549 | 61459  | 1.00E-152 | 299 | 308 | 97 +  | 242 | 549 | 7862   | 8169   |
| UN63294 | Rsa1.0.02221.1 | 648 | 33796  | 1.00E-179 | 367 | 382 | 96 -  | 268 | 648 | 17945  | 18326  |
| UN63295 | Rsa1.0.02505.1 | 721 | 30703  | 1.00E-160 | 426 | 467 | 91 -  | 258 | 711 | 22127  | 22592  |

|         |                |     |        |           |     |     |       |     |     |        |        |
|---------|----------------|-----|--------|-----------|-----|-----|-------|-----|-----|--------|--------|
| UN63296 | Rsa1.0.32718.1 | 783 | 695    | 0         | 556 | 572 | 97 +  | 2   | 573 | 124    | 695    |
| UN63297 | Rsa1.0.00088.1 | 748 | 141341 | 0         | 646 | 708 | 91 -  | 17  | 711 | 64423  | 65109  |
| UN63298 | Rsa1.0.01613.1 | 786 | 182542 | 1.00E-135 | 260 | 264 | 98 +  | 1   | 264 | 164122 | 164384 |
| UN63299 | Rsa1.0.04393.1 | 376 | 17573  | 0         | 375 | 375 | 100 + | 2   | 376 | 12402  | 12776  |
| UN63300 | Rsa1.0.00928.1 | 756 | 59293  | 1.00E-106 | 209 | 212 | 98 -  | 3   | 213 | 32258  | 32469  |
| UN63301 | Rsa1.0.01611.1 | 533 | 42269  | 1.00E-179 | 318 | 318 | 100 - | 3   | 320 | 6192   | 6509   |
| UN63302 | Rsa1.0.00039.1 | 751 | 296927 | 1.00E-154 | 341 | 365 | 93 +  | 399 | 751 | 39321  | 39685  |
| UN63303 | Rsa1.0.06294.1 | 807 | 11291  | 0         | 802 | 810 | 99 +  | 3   | 807 | 704    | 1513   |
| UN63304 | Rsa1.0.02586.1 | 787 | 29856  | 1.00E-127 | 278 | 296 | 93 -  | 345 | 628 | 7362   | 7657   |
| UN63305 | Rsa1.0.05289.1 | 402 | 14259  | 1.00E-84  | 240 | 265 | 90 -  | 131 | 395 | 4143   | 4393   |
| UN63306 | Rsa1.0.00970.1 | 734 | 57994  | 0         | 365 | 367 | 99 -  | 370 | 734 | 40602  | 40968  |
| UN63307 | Rsa1.0.00148.1 | 813 | 120234 | 0         | 790 | 832 | 94 +  | 3   | 806 | 30662  | 31493  |
| UN63308 | Rsa1.0.00205.1 | 672 | 193401 | 2.00E-94  | 221 | 233 | 94 -  | 405 | 633 | 130115 | 130345 |
| UN63309 | Rsa1.0.00127.1 | 583 | 127446 | 7.00E-69  | 467 | 576 | 81 +  | 2   | 561 | 66245  | 66793  |
| UN63310 | Rsa1.0.00453.1 | 652 | 83031  | 1.00E-163 | 371 | 398 | 93 -  | 269 | 646 | 38182  | 38578  |
| UN63311 | Rsa1.0.04497.1 | 439 | 17103  | 0         | 397 | 412 | 96 -  | 1   | 410 | 10987  | 11398  |
| UN63312 | Rsa1.0.39668.1 | 776 | 567    | 0         | 438 | 454 | 96 +  | 3   | 455 | 116    | 567    |
| UN63313 | Rsa1.0.07208.1 | 741 | 9719   | 0         | 717 | 743 | 96 +  | 2   | 741 | 6559   | 7301   |
| UN63314 | Rsa1.0.00181.1 | 593 | 114269 | 0         | 568 | 590 | 96 -  | 5   | 593 | 60593  | 61178  |
| UN63315 | Rsa1.0.01228.1 | 471 | 50238  | 1.00E-122 | 268 | 281 | 95 +  | 191 | 471 | 733    | 1010   |
| UN63316 | Rsa1.0.00068.1 | 664 | 151813 | 6.00E-85  | 229 | 254 | 90 -  | 275 | 525 | 107211 | 107446 |
| UN63317 | Rsa1.0.00427.1 | 785 | 189678 | 1.00E-166 | 382 | 403 | 94 +  | 349 | 745 | 181241 | 181642 |
| UN63318 | Rsa1.0.16000.1 | 314 | 2327   | 1.00E-68  | 155 | 163 | 95 +  | 58  | 214 | 2074   | 2236   |
| UN63319 | Rsa1.0.00193.1 | 768 | 194198 | 0         | 559 | 564 | 99 +  | 1   | 560 | 9838   | 10401  |
| UN63320 | Rsa1.0.00201.1 | 580 | 232851 | 0         | 389 | 403 | 96 +  | 186 | 580 | 55560  | 55961  |
| UN63321 | Rsa1.0.21923.1 | 528 | 1163   | 1.00E-171 | 352 | 368 | 95 -  | 155 | 521 | 806    | 1163   |
| UN63322 | Rsa1.0.00189.1 | 616 | 111830 | 0         | 380 | 381 | 99 +  | 3   | 383 | 42061  | 42441  |
| UN63323 | Rsa1.0.00149.1 | 387 | 305196 | 8.00E-74  | 147 | 149 | 98 +  | 122 | 270 | 8266   | 8414   |
| UN63324 | Rsa1.0.00221.1 | 638 | 106972 | 0         | 444 | 456 | 97 +  | 141 | 596 | 28891  | 29346  |
| UN63325 | Rsa1.0.00167.1 | 522 | 116000 | 2.00E-78  | 164 | 169 | 97 +  | 178 | 346 | 15680  | 15848  |
| UN63326 | Rsa1.0.01286.1 | 457 | 49209  | 0         | 435 | 456 | 95 -  | 2   | 457 | 7370   | 7825   |
| UN63327 | Rsa1.0.07462.1 | 525 | 9332   | 1.00E-82  | 159 | 160 | 99 -  | 350 | 509 | 9173   | 9332   |
| UN63328 | Rsa1.0.01313.1 | 192 | 48387  | 2.00E-38  | 90  | 93  | 96 -  | 7   | 99  | 20057  | 20149  |
| UN63329 | Rsa1.0.00816.1 | 107 | 403350 | 7.00E-34  | 93  | 97  | 95 -  | 13  | 107 | 391700 | 391796 |
| UN63330 | Rsa1.0.01360.1 | 435 | 47246  | 1.00E-169 | 339 | 352 | 96 +  | 2   | 353 | 45126  | 45471  |
| UN63331 | Rsa1.0.00107.1 | 463 | 431659 | 0         | 439 | 451 | 97 -  | 2   | 451 | 153492 | 153942 |
| UN63332 | Rsa1.0.00454.1 | 522 | 216970 | 1.00E-119 | 241 | 248 | 97 +  | 3   | 250 | 142064 | 142308 |
| UN63333 | Rsa1.0.00125.1 | 552 | 253043 | 0         | 329 | 329 | 100 + | 204 | 532 | 214464 | 214792 |
| UN63334 | Rsa1.0.03184.1 | 588 | 24750  | 0         | 489 | 512 | 95 +  | 4   | 515 | 15432  | 15930  |

|         |                |     |        |           |     |     |       |     |     |        |        |
|---------|----------------|-----|--------|-----------|-----|-----|-------|-----|-----|--------|--------|
| UN63335 | Rsa1.0.00038.1 | 610 | 314568 | 0         | 591 | 610 | 96 +  | 3   | 610 | 191666 | 192271 |
| UN63336 | Rsa1.0.08144.1 | 660 | 7835   | 1.00E-149 | 332 | 353 | 94 -  | 25  | 372 | 6964   | 7313   |
| UN63337 | Rsa1.0.02490.1 | 634 | 30885  | 1.00E-157 | 284 | 285 | 99 -  | 214 | 498 | 6530   | 6814   |
| UN63338 | Rsa1.0.00975.1 | 646 | 57865  | 0         | 501 | 505 | 99 +  | 142 | 646 | 34239  | 34742  |
| UN63339 | Rsa1.0.00100.1 | 505 | 249232 | 1.00E-143 | 307 | 321 | 95 +  | 1   | 321 | 11198  | 11516  |
| UN63340 | Rsa1.0.02888.1 | 135 | 27020  | 1.00E-54  | 111 | 112 | 99 +  | 24  | 135 | 19157  | 19268  |
| UN63341 | Rsa1.0.02848.1 | 305 | 27329  | 3.00E-45  | 115 | 121 | 95 +  | 179 | 298 | 23348  | 23468  |
| UN63342 | Rsa1.0.00236.1 | 406 | 104771 | 1.00E-151 | 381 | 414 | 92 -  | 1   | 406 | 74773  | 75180  |
| UN63343 | Rsa1.0.03609.1 | 614 | 21798  | 1.00E-118 | 242 | 251 | 96 -  | 128 | 378 | 19650  | 19900  |
| UN63344 | Rsa1.0.04463.1 | 794 | 17247  | 0         | 791 | 794 | 99 +  | 2   | 794 | 3299   | 4092   |
| UN63345 | Rsa1.0.04594.1 | 642 | 16713  | 0         | 624 | 641 | 97 -  | 3   | 642 | 15432  | 16072  |
| UN63346 | Rsa1.0.00562.1 | 639 | 75565  | 0         | 619 | 640 | 96 -  | 2   | 639 | 24387  | 25023  |
| UN63347 | Rsa1.0.01921.1 | 579 | 168088 | 1.00E-149 | 285 | 291 | 97 -  | 264 | 554 | 154135 | 154425 |
| UN63348 | Rsa1.0.01591.1 | 460 | 42718  | 1.00E-103 | 257 | 275 | 93 -  | 172 | 441 | 8961   | 9233   |
| UN63349 | Rsa1.0.00010.1 | 317 | 294827 | 5.00E-93  | 214 | 225 | 95 +  | 98  | 317 | 120230 | 120452 |
| UN63350 | Rsa1.0.00363.1 | 322 | 90968  | 5.00E-87  | 257 | 285 | 90 +  | 37  | 318 | 42303  | 42575  |
| UN63351 | Rsa1.0.00218.1 | 340 | 201480 | 3.00E-79  | 175 | 182 | 96 +  | 3   | 183 | 32200  | 32381  |
| UN63352 | Rsa1.0.06990.1 | 261 | 10060  | 2.00E-55  | 197 | 225 | 87 +  | 41  | 261 | 4389   | 4595   |
| UN63353 | #              | #   | #      | #         | #   | #   | #     | #   | #   | #      | #      |
| UN63354 | Rsa1.0.01605.1 | 509 | 42442  | 1.00E-109 | 216 | 221 | 97 +  | 164 | 384 | 42110  | 42330  |
| UN63355 | Rsa1.0.02057.1 | 478 | 35540  | 1.00E-119 | 218 | 218 | 100 + | 92  | 309 | 8154   | 8371   |
| UN63356 | Rsa1.0.00176.1 | 416 | 240984 | 0         | 402 | 413 | 97 +  | 1   | 409 | 234198 | 234610 |
| UN63357 | Rsa1.0.03511.1 | 290 | 22373  | 1.00E-105 | 263 | 285 | 92 +  | 7   | 290 | 4989   | 5273   |
| UN63358 | Rsa1.0.00097.1 | 225 | 138858 | 5.00E-83  | 156 | 156 | 100 + | 70  | 225 | 119398 | 119553 |
| UN63359 | Rsa1.0.00194.1 | 432 | 110851 | 1.00E-134 | 246 | 247 | 99 -  | 3   | 249 | 8652   | 8898   |
| UN63360 | Rsa1.0.16934.1 | 725 | 1983   | 0         | 684 | 718 | 95 +  | 3   | 720 | 1111   | 1827   |
| UN63361 | Rsa1.0.00726.1 | 670 | 66734  | 1.00E-138 | 266 | 270 | 98 -  | 296 | 564 | 50406  | 50675  |
| UN63362 | Rsa1.0.00663.1 | 436 | 164969 | 1.00E-112 | 209 | 210 | 99 +  | 227 | 436 | 8372   | 8581   |
| UN63363 | Rsa1.0.05865.1 | 573 | 12377  | 1.00E-116 | 216 | 217 | 99 +  | 80  | 296 | 11793  | 12009  |
| UN63364 | Rsa1.0.01018.1 | 276 | 56685  | 1.00E-126 | 269 | 281 | 95 +  | 2   | 276 | 25337  | 25617  |
| UN63365 | Rsa1.0.00214.1 | 693 | 107508 | 0         | 405 | 415 | 97 +  | 209 | 623 | 102294 | 102708 |
| UN63366 | Rsa1.0.00374.1 | 359 | 165738 | 4.00E-57  | 122 | 125 | 97 +  | 176 | 300 | 130742 | 130866 |
| UN63367 | Rsa1.0.00371.1 | 288 | 90463  | 1.00E-130 | 280 | 294 | 95 +  | 1   | 288 | 85570  | 85862  |
| UN63368 | Rsa1.0.00720.1 | 104 | 66931  | 8.00E-52  | 103 | 103 | 100 + | 2   | 104 | 34621  | 34723  |
| UN63369 | Rsa1.0.00886.1 | 659 | 167350 | 0         | 407 | 424 | 95 +  | 240 | 659 | 765    | 1185   |
| UN63370 | Rsa1.0.00731.1 | 656 | 66638  | 0         | 639 | 655 | 97 -  | 2   | 656 | 13715  | 14369  |
| UN63371 | Rsa1.0.00278.1 | 298 | 231896 | 3.00E-63  | 238 | 276 | 86 +  | 42  | 298 | 16694  | 16964  |
| UN63372 | Rsa1.0.00576.1 | 606 | 178949 | 0         | 487 | 494 | 98 -  | 113 | 606 | 163441 | 163934 |
| UN63373 | Rsa1.0.00059.1 | 739 | 159650 | 0         | 369 | 378 | 97 +  | 3   | 379 | 68247  | 68624  |

|         |                |     |        |           |     |     |       |     |     |        |        |
|---------|----------------|-----|--------|-----------|-----|-----|-------|-----|-----|--------|--------|
| UN63374 | Rsa1.0.00694.1 | 674 | 68074  | 1.00E-15  | 81  | 92  | 88 -  | 535 | 625 | 52450  | 52541  |
| UN63375 | Rsa1.0.05909.1 | 734 | 12265  | 1.00E-126 | 265 | 276 | 96 +  | 439 | 711 | 5440   | 5715   |
| UN63376 | Rsa1.0.00373.1 | 692 | 90296  | 0         | 634 | 690 | 91 -  | 7   | 692 | 64311  | 64991  |
| UN63377 | Rsa1.0.00079.1 | 721 | 606987 | 0         | 706 | 710 | 99 -  | 2   | 711 | 594033 | 594741 |
| UN63378 | Rsa1.0.01760.1 | 178 | 39730  | 2.00E-48  | 164 | 183 | 89 -  | 4   | 175 | 7795   | 7977   |
| UN63379 | Rsa1.0.55725.1 | 729 | 410    | 2.00E-88  | 203 | 214 | 94 +  | 511 | 723 | 4      | 217    |
| UN63380 | Rsa1.0.61787.1 | 582 | 371    | 0         | 362 | 374 | 96 -  | 160 | 533 | 1      | 371    |
| UN63381 | Rsa1.0.00705.1 | 703 | 67505  | 1.00E-100 | 198 | 201 | 98 +  | 504 | 703 | 53349  | 53549  |
| UN63382 | Rsa1.0.00577.1 | 764 | 174827 | 0         | 412 | 444 | 92 +  | 90  | 514 | 149759 | 150199 |
| UN63383 | Rsa1.0.00520.1 | 780 | 78226  | 0         | 770 | 793 | 97 -  | 2   | 780 | 20010  | 20802  |
| UN63384 | Rsa1.0.00033.1 | 632 | 515811 | 0         | 565 | 621 | 90 -  | 18  | 632 | 356579 | 357196 |
| UN63385 | Rsa1.0.01867.1 | 771 | 37960  | 1.00E-150 | 269 | 269 | 100 + | 28  | 296 | 5797   | 6065   |
| UN63386 | Rsa1.0.00172.1 | 714 | 115476 | 0         | 676 | 732 | 92 -  | 3   | 714 | 89682  | 90410  |
| UN63387 | Rsa1.0.00018.1 | 651 | 410899 | 0         | 646 | 651 | 99 +  | 1   | 651 | 75983  | 76631  |
| UN63388 | Rsa1.0.03133.1 | 601 | 25135  | 1.00E-139 | 366 | 409 | 89 +  | 201 | 601 | 15886  | 16278  |
| UN63389 | Rsa1.0.00055.1 | 623 | 520193 | 0         | 604 | 623 | 96 +  | 1   | 623 | 348148 | 348770 |
| UN63390 | Rsa1.0.00305.1 | 625 | 97308  | 1.00E-174 | 330 | 337 | 97 -  | 289 | 625 | 16567  | 16903  |
| UN63391 | Rsa1.0.01251.1 | 642 | 49873  | 0         | 377 | 384 | 98 -  | 5   | 388 | 2655   | 3038   |
| UN63392 | Rsa1.0.05431.1 | 651 | 13780  | 1.00E-177 | 352 | 363 | 96 -  | 271 | 632 | 8836   | 9198   |
| UN63393 | Rsa1.0.00090.1 | 662 | 273859 | 1.00E-129 | 340 | 376 | 90 +  | 277 | 642 | 232766 | 233128 |
| UN63394 | Rsa1.0.00053.1 | 776 | 263459 | 2.00E-82  | 168 | 172 | 97 +  | 51  | 222 | 49568  | 49739  |
| UN63395 | Rsa1.0.01943.1 | 665 | 37042  | 0         | 661 | 663 | 99 -  | 3   | 665 | 14564  | 15226  |
| UN63396 | Rsa1.0.01677.1 | 767 | 41140  | 1.00E-144 | 278 | 284 | 97 +  | 332 | 615 | 7463   | 7746   |
| UN63397 | Rsa1.0.00168.1 | 702 | 115870 | 0         | 681 | 700 | 97 +  | 3   | 702 | 72267  | 72966  |
| UN63398 | Rsa1.0.01907.1 | 725 | 37431  | 1.00E-125 | 266 | 279 | 95 +  | 131 | 403 | 27801  | 28079  |
| UN63399 | Rsa1.0.03762.1 | 800 | 20976  | 0         | 759 | 792 | 95 +  | 5   | 795 | 10909  | 11700  |
| UN63400 | Rsa1.0.00558.1 | 202 | 75819  | 2.00E-97  | 197 | 200 | 98 -  | 3   | 202 | 12552  | 12749  |
| UN63401 | Rsa1.0.00550.1 | 458 | 210790 | 0         | 367 | 368 | 99 +  | 91  | 458 | 196865 | 197232 |
| UN63402 | Rsa1.0.01769.1 | 178 | 39568  | 3.00E-74  | 141 | 141 | 100 - | 38  | 178 | 35556  | 35696  |
| UN63403 | Rsa1.0.00026.1 | 329 | 327835 | 1.00E-131 | 264 | 272 | 97 +  | 2   | 271 | 106731 | 107002 |
| UN63404 | Rsa1.0.05477.1 | 685 | 13613  | 4.00E-92  | 175 | 176 | 99 -  | 131 | 306 | 5200   | 5375   |
| UN63405 | Rsa1.0.04399.1 | 685 | 17543  | 1.00E-147 | 303 | 316 | 95 +  | 152 | 467 | 11746  | 12061  |
| UN63406 | Rsa1.0.00009.1 | 650 | 232558 | 1.00E-180 | 356 | 370 | 96 +  | 1   | 359 | 148198 | 148567 |
| UN63407 | Rsa1.0.01231.1 | 605 | 50208  | 6.00E-14  | 104 | 125 | 83 +  | 464 | 588 | 46500  | 46624  |
| UN63408 | Rsa1.0.00423.1 | 789 | 86138  | 0         | 755 | 793 | 95 -  | 3   | 787 | 78577  | 79360  |
| UN63409 | Rsa1.0.00484.1 | 740 | 203294 | 0         | 464 | 480 | 96 -  | 215 | 691 | 126991 | 127469 |
| UN63410 | #              | #   | #      | #         | #   | #   | #     | #   | #   | #      | #      |
| UN63411 | Rsa1.0.00478.1 | 800 | 81419  | 1.00E-153 | 307 | 319 | 96 -  | 3   | 321 | 62811  | 63121  |
| UN63412 | Rsa1.0.00135.1 | 478 | 178077 | 0         | 350 | 351 | 99 -  | 3   | 353 | 176750 | 177100 |

|         |                |     |        |           |     |     |       |     |     |        |        |
|---------|----------------|-----|--------|-----------|-----|-----|-------|-----|-----|--------|--------|
| UN63413 | Rsa1.0_00326.1 | 350 | 171955 | 1.00E-133 | 304 | 322 | 94 -  | 6   | 327 | 67899  | 68215  |
| UN63414 | Rsa1.0_22317.1 | 348 | 1131   | 1.00E-149 | 303 | 314 | 96 +  | 4   | 314 | 818    | 1131   |
| UN63415 | Rsa1.0_00046.1 | 606 | 320315 | 1.00E-127 | 295 | 316 | 93 +  | 3   | 318 | 124662 | 124974 |
| UN63416 | Rsa1.0_05910.1 | 272 | 12264  | 1.00E-123 | 258 | 268 | 96 -  | 1   | 266 | 10224  | 10487  |
| UN63417 | Rsa1.0_43978.1 | 638 | 511    | 0         | 362 | 364 | 99 -  | 1   | 364 | 1      | 364    |
| UN63418 | Rsa1.0_01009.1 | 161 | 56922  | 3.00E-65  | 144 | 150 | 96 -  | 12  | 161 | 2471   | 2620   |
| UN63419 | Rsa1.0_00396.1 | 734 | 88242  | 0         | 721 | 736 | 97 +  | 3   | 733 | 85315  | 86050  |
| UN63420 | Rsa1.0_00867.1 | 672 | 61635  | 3.00E-71  | 163 | 171 | 95 +  | 386 | 553 | 17901  | 18071  |
| UN63421 | Rsa1.0_02003.1 | 761 | 36171  | 1.00E-179 | 333 | 338 | 98 -  | 3   | 340 | 33665  | 34002  |
| UN63422 | Rsa1.0_00339.1 | 474 | 222974 | 2.00E-96  | 182 | 183 | 99 +  | 264 | 446 | 203113 | 203295 |
| UN63423 | Rsa1.0_08309.1 | 566 | 7565   | 0         | 477 | 493 | 96 +  | 3   | 495 | 5547   | 6039   |
| UN63424 | Rsa1.0_00016.1 | 586 | 831256 | 1.00E-103 | 257 | 274 | 93 +  | 315 | 586 | 578847 | 579117 |
| UN63425 | Rsa1.0_00183.1 | 375 | 113277 | 1.00E-139 | 355 | 390 | 91 -  | 2   | 375 | 19191  | 19580  |
| UN63426 | Rsa1.0_00326.1 | 781 | 171955 | 0         | 703 | 774 | 90 -  | 16  | 763 | 65194  | 65943  |
| UN63427 | Rsa1.0_01092.1 | 617 | 54348  | 1.00E-33  | 92  | 98  | 93 -  | 520 | 617 | 16763  | 16860  |
| UN63428 | Rsa1.0_00259.1 | 452 | 163204 | 0         | 419 | 430 | 97 +  | 23  | 452 | 149420 | 149844 |
| UN63429 | Rsa1.0_04919.1 | 636 | 15440  | 1.00E-166 | 324 | 333 | 97 -  | 4   | 336 | 10487  | 10819  |
| UN63430 | Rsa1.0_16012.1 | 570 | 2324   | 1.00E-17  | 80  | 91  | 87 -  | 6   | 96  | 2004   | 2094   |
| UN63431 | Rsa1.0_05278.1 | 747 | 14282  | 2.00E-60  | 145 | 154 | 94 -  | 1   | 148 | 11809  | 11962  |
| UN63432 | Rsa1.0_01147.1 | 664 | 52391  | 1.00E-98  | 204 | 211 | 96 +  | 454 | 664 | 3547   | 3757   |
| UN63433 | Rsa1.0_00011.1 | 749 | 225044 | 1.00E-121 | 273 | 288 | 94 -  | 464 | 749 | 177400 | 177686 |
| UN63434 | Rsa1.0_01170.1 | 804 | 161131 | 0         | 766 | 797 | 96 +  | 10  | 803 | 115796 | 116583 |
| UN63435 | Rsa1.0_00182.1 | 772 | 142305 | 3.00E-84  | 159 | 159 | 100 + | 192 | 350 | 125433 | 125591 |
| UN63436 | Rsa1.0_01474.1 | 564 | 45070  | 5.00E-85  | 178 | 184 | 96 -  | 356 | 539 | 32182  | 32365  |
| UN63437 | Rsa1.0_00966.1 | 734 | 58136  | 1.00E-119 | 221 | 222 | 99 -  | 448 | 669 | 45708  | 45929  |
| UN63438 | Rsa1.0_00017.1 | 797 | 752458 | 1.00E-134 | 245 | 246 | 99 -  | 2   | 247 | 723475 | 723720 |
| UN63439 | Rsa1.0_03692.1 | 415 | 21338  | 3.00E-67  | 136 | 138 | 98 -  | 141 | 278 | 7088   | 7225   |
| UN63440 | Rsa1.0_00025.1 | 544 | 277312 | 3.00E-92  | 275 | 308 | 89 +  | 4   | 302 | 57848  | 58148  |
| UN63441 | Rsa1.0_00292.1 | 785 | 98141  | 4.00E-46  | 101 | 103 | 98 +  | 141 | 243 | 21062  | 21164  |
| UN63442 | Rsa1.0_00206.1 | 780 | 109040 | 1.00E-132 | 256 | 260 | 98 +  | 197 | 455 | 26697  | 26956  |
| UN63443 | Rsa1.0_02822.1 | 593 | 27598  | 0         | 350 | 350 | 100 + | 244 | 593 | 530    | 879    |
| UN63444 | Rsa1.0_00066.1 | 520 | 152418 | 1.00E-134 | 258 | 263 | 98 -  | 2   | 264 | 39938  | 40200  |
| UN63445 | Rsa1.0_01565.1 | 623 | 155447 | 0         | 546 | 575 | 94 +  | 55  | 623 | 153709 | 154283 |
| UN63446 | Rsa1.0_00108.1 | 392 | 478491 | 2.00E-80  | 176 | 184 | 95 +  | 132 | 315 | 466270 | 466453 |
| UN63447 | Rsa1.0_05542.1 | 754 | 13384  | 1.00E-110 | 254 | 270 | 94 +  | 95  | 364 | 11360  | 11623  |
| UN63448 | Rsa1.0_00055.1 | 750 | 520193 | 1.00E-117 | 241 | 250 | 96 +  | 395 | 644 | 3529   | 3778   |
| UN63449 | Rsa1.0_00105.1 | 326 | 134138 | 1.00E-145 | 311 | 326 | 95 +  | 4   | 326 | 97960  | 98284  |
| UN63450 | Rsa1.0_00047.1 | 657 | 168582 | 1.00E-98  | 192 | 195 | 98 +  | 128 | 322 | 31612  | 31806  |
| UN63451 | Rsa1.0_00212.1 | 768 | 108350 | 0         | 765 | 774 | 98 -  | 1   | 768 | 1821   | 2594   |

|         |                |     |        |           |     |     |       |     |     |        |        |
|---------|----------------|-----|--------|-----------|-----|-----|-------|-----|-----|--------|--------|
| UN63452 | Rsa1.0.00324.1 | 601 | 218805 | 4.00E-95  | 177 | 177 | 100 - | 2   | 178 | 172511 | 172687 |
| UN63453 | Rsa1.0.02273.1 | 614 | 140964 | 1.00E-165 | 425 | 468 | 90 +  | 150 | 614 | 136881 | 137348 |
| UN63454 | Rsa1.0.26893.1 | 739 | 874    | 1.00E-154 | 302 | 310 | 97 +  | 329 | 635 | 565    | 874    |
| UN63455 | #              | #   | #      | #         | #   | #   | #     | #   | #   | #      | #      |
| UN63456 | Rsa1.0.00793.1 | 718 | 64103  | 3.00E-87  | 204 | 215 | 94 -  | 2   | 216 | 42366  | 42577  |
| UN63457 | Rsa1.0.01179.1 | 619 | 51549  | 1.00E-131 | 265 | 274 | 96 +  | 112 | 385 | 16245  | 16518  |
| UN63458 | Rsa1.0.00619.1 | 391 | 71985  | 1.00E-121 | 226 | 228 | 99 +  | 7   | 234 | 23974  | 24201  |
| UN63459 | Rsa1.0.01348.1 | 701 | 47569  | 0         | 560 | 562 | 99 +  | 140 | 701 | 43811  | 44372  |
| UN63460 | Rsa1.0.00038.1 | 498 | 314568 | 1.00E-142 | 267 | 271 | 98 -  | 228 | 498 | 238023 | 238293 |
| UN63461 | Rsa1.0.00399.1 | 669 | 242951 | 0         | 545 | 570 | 95 -  | 107 | 669 | 228320 | 228889 |
| UN63462 | Rsa1.0.00110.1 | 777 | 132719 | 1.00E-107 | 218 | 225 | 96 +  | 284 | 508 | 5698   | 5922   |
| UN63463 | Rsa1.0.00218.1 | 526 | 201480 | 1.00E-167 | 319 | 326 | 97 -  | 201 | 526 | 126688 | 127013 |
| UN63464 | Rsa1.0.01370.1 | 600 | 47093  | 2.00E-56  | 124 | 128 | 96 +  | 375 | 502 | 4775   | 4902   |
| UN63465 | Rsa1.0.07516.1 | 115 | 9218   | 3.00E-45  | 108 | 112 | 96 +  | 5   | 115 | 6987   | 7098   |
| UN63466 | Rsa1.0.00668.1 | 723 | 69421  | 1.00E-92  | 250 | 272 | 91 +  | 465 | 723 | 1      | 266    |
| UN63467 | Rsa1.0.00739.1 | 699 | 66155  | 0         | 492 | 504 | 97 +  | 195 | 697 | 21620  | 22123  |
| UN63468 | Rsa1.0.25026.1 | 680 | 955    | 0         | 578 | 610 | 94 +  | 86  | 680 | 1      | 606    |
| UN63469 | Rsa1.0.00923.1 | 761 | 153678 | 2.00E-97  | 197 | 202 | 97 +  | 512 | 709 | 21101  | 21302  |
| UN63470 | Rsa1.0.00373.1 | 712 | 90296  | 0         | 362 | 373 | 97 +  | 3   | 375 | 25722  | 26087  |
| UN63471 | Rsa1.0.01544.1 | 287 | 185602 | 1.00E-126 | 273 | 284 | 96 -  | 7   | 287 | 21710  | 21993  |
| UN63472 | Rsa1.0.00016.1 | 501 | 831256 | 1.00E-103 | 214 | 222 | 96 +  | 15  | 236 | 4750   | 4971   |
| UN63473 | Rsa1.0.04026.1 | 686 | 19508  | 0         | 652 | 680 | 95 +  | 11  | 684 | 12194  | 12873  |
| UN63474 | Rsa1.0.03402.1 | 251 | 23188  | 1.00E-118 | 243 | 250 | 97 -  | 3   | 251 | 12940  | 13187  |
| UN63475 | Rsa1.0.01686.1 | 744 | 40991  | 0         | 410 | 417 | 98 +  | 330 | 744 | 39546  | 39959  |
| UN63476 | Rsa1.0.24315.1 | 507 | 993    | 0         | 375 | 377 | 99 +  | 131 | 507 | 77     | 452    |
| UN63477 | Rsa1.0.00038.1 | 771 | 314568 | 5.00E-64  | 131 | 133 | 98 +  | 176 | 308 | 254723 | 254855 |
| UN63478 | Rsa1.0.00157.1 | 505 | 245832 | 0         | 439 | 467 | 94 +  | 34  | 499 | 239149 | 239601 |
| UN63479 | Rsa1.0.02634.1 | 733 | 29299  | 1.00E-143 | 311 | 327 | 95 -  | 370 | 687 | 26049  | 26375  |
| UN63480 | Rsa1.0.04863.1 | 646 | 15687  | 3.00E-59  | 120 | 121 | 99 -  | 319 | 439 | 8086   | 8206   |
| UN63481 | Rsa1.0.00020.1 | 788 | 283099 | 0         | 761 | 791 | 96 +  | 2   | 787 | 53484  | 54274  |
| UN63482 | Rsa1.0.00262.1 | 720 | 101906 | 0         | 531 | 534 | 99 -  | 186 | 719 | 8363   | 8896   |
| UN63483 | Rsa1.0.00275.1 | 762 | 210104 | 1.00E-144 | 296 | 307 | 96 -  | 437 | 743 | 172124 | 172429 |
| UN63484 | Rsa1.0.01558.1 | 594 | 43287  | 4.00E-64  | 208 | 232 | 89 -  | 366 | 594 | 32830  | 33060  |
| UN63485 | Rsa1.0.02943.1 | 553 | 153598 | 1.00E-82  | 186 | 196 | 94 -  | 197 | 392 | 130372 | 130567 |
| UN63486 | Rsa1.0.28859.1 | 637 | 801    | 0         | 594 | 622 | 95 -  | 19  | 637 | 121    | 742    |
| UN63487 | Rsa1.0.03673.1 | 741 | 21448  | 1.00E-112 | 273 | 288 | 94 -  | 458 | 737 | 4302   | 4589   |
| UN63488 | Rsa1.0.16572.1 | 295 | 2108   | 4.00E-72  | 195 | 208 | 93 +  | 91  | 295 | 43     | 246    |
| UN63489 | Rsa1.0.01197.1 | 458 | 51071  | 5.00E-60  | 150 | 157 | 95 +  | 292 | 447 | 3486   | 3639   |
| UN63490 | Rsa1.0.00016.1 | 746 | 831256 | 0         | 713 | 758 | 94 +  | 1   | 746 | 18025  | 18766  |

|         |                |     |        |           |     |     |       |     |     |        |        |
|---------|----------------|-----|--------|-----------|-----|-----|-------|-----|-----|--------|--------|
| UN63491 | Rsa1.0.01044.1 | 490 | 55861  | 1.00E-134 | 255 | 259 | 98 -  | 81  | 339 | 5029   | 5287   |
| UN63492 | Rsa1.0.01340.1 | 656 | 47805  | 1.00E-130 | 274 | 286 | 95 -  | 236 | 521 | 25414  | 25696  |
| UN63493 | Rsa1.0.01387.1 | 784 | 46745  | 0         | 607 | 656 | 92 +  | 3   | 649 | 40826  | 41477  |
| UN63494 | Rsa1.0.00646.1 | 655 | 70473  | 0         | 635 | 655 | 96 -  | 1   | 655 | 18090  | 18741  |
| UN63495 | Rsa1.0.00370.1 | 475 | 90472  | 3.00E-83  | 193 | 204 | 94 -  | 274 | 475 | 23223  | 23426  |
| UN63496 | Rsa1.0.00147.1 | 744 | 249503 | 0         | 543 | 567 | 95 +  | 174 | 737 | 240399 | 240965 |
| UN63497 | Rsa1.0.00339.1 | 362 | 222974 | 1.00E-160 | 340 | 357 | 95 +  | 3   | 358 | 202304 | 202660 |
| UN63498 | Rsa1.0.02098.1 | 780 | 35032  | 2.00E-45  | 119 | 126 | 94 -  | 571 | 695 | 19848  | 19973  |
| UN63499 | Rsa1.0.00336.1 | 748 | 445051 | 2.00E-72  | 139 | 139 | 100 - | 610 | 748 | 168239 | 168377 |
| UN63500 | Rsa1.0.00963.1 | 334 | 58176  | 2.33E-156 | 315 | 330 | 95 -  | 2   | 330 | 40170  | 40498  |
| UN63501 | Rsa1.0.02946.1 | 771 | 26537  | 0         | 389 | 405 | 96 +  | 369 | 771 | 1368   | 1768   |
| UN63502 | Rsa1.0.00647.1 | 763 | 70440  | 0         | 491 | 492 | 99 +  | 128 | 619 | 20180  | 20671  |
| UN63503 | Rsa1.0.00170.1 | 744 | 179538 | 1.00E-110 | 228 | 235 | 97 -  | 45  | 278 | 23253  | 23487  |
| UN63504 | Rsa1.0.00124.1 | 731 | 262503 | 2.00E-69  | 143 | 146 | 97 +  | 462 | 607 | 18800  | 18945  |
| UN63505 | Rsa1.0.00154.1 | 631 | 189461 | 1.00E-64  | 153 | 162 | 94 -  | 308 | 469 | 135334 | 135495 |
| UN63506 | Rsa1.0.00018.1 | 531 | 410899 | 1.00E-88  | 175 | 178 | 98 +  | 3   | 180 | 76705  | 76882  |
| UN63507 | Rsa1.0.00453.1 | 131 | 83031  | 3.00E-33  | 124 | 140 | 88 -  | 1   | 129 | 16956  | 17095  |
| UN63508 | Rsa1.0.00322.1 | 458 | 212233 | 1.00E-106 | 233 | 244 | 95 +  | 1   | 243 | 92343  | 92586  |
| UN63509 | Rsa1.0.00473.1 | 395 | 212204 | 1.00E-156 | 366 | 393 | 93 -  | 3   | 391 | 20892  | 21284  |
| UN63510 | Rsa1.0.00033.1 | 483 | 515811 | 1.00E-124 | 260 | 270 | 96 +  | 3   | 272 | 130066 | 130334 |
| UN63511 | Rsa1.0.41277.1 | 601 | 544    | 1.00E-166 | 314 | 320 | 98 +  | 282 | 601 | 6      | 325    |
| UN63512 | Rsa1.0.11977.1 | 789 | 5355   | 2.33E-156 | 278 | 283 | 98 +  | 204 | 486 | 1629   | 1911   |
| UN63513 | #              | #   | #      | #         | #   | #   | #     | #   | #   | #      | #      |
| UN63514 | Rsa1.0.01819.1 | 725 | 38834  | 1.00E-112 | 264 | 280 | 94 +  | 1   | 278 | 26405  | 26681  |
| UN63515 | Rsa1.0.00657.1 | 468 | 69858  | 1.00E-143 | 320 | 334 | 95 -  | 1   | 332 | 9457   | 9787   |
| UN63516 | Rsa1.0.04646.1 | 673 | 16541  | 1.00E-123 | 323 | 356 | 90 -  | 12  | 362 | 2437   | 2777   |
| UN63517 | Rsa1.0.00527.1 | 648 | 77733  | 1.00E-135 | 288 | 301 | 95 +  | 3   | 302 | 29544  | 29844  |
| UN63518 | Rsa1.0.00255.1 | 369 | 204967 | 1.00E-155 | 354 | 376 | 94 +  | 2   | 369 | 22448  | 22821  |
| UN63519 | Rsa1.0.00387.1 | 125 | 495407 | 3.00E-55  | 121 | 125 | 96 -  | 1   | 125 | 410075 | 410199 |
| UN63520 | Rsa1.0.00863.1 | 728 | 254535 | 1.00E-70  | 243 | 275 | 88 -  | 437 | 704 | 110384 | 110656 |
| UN63521 | Rsa1.0.00211.1 | 261 | 228189 | 1.00E-49  | 159 | 177 | 89 +  | 1   | 174 | 144696 | 144865 |
| UN63522 | Rsa1.0.00067.1 | 446 | 415055 | 0         | 417 | 445 | 93 -  | 1   | 443 | 76906  | 77336  |
| UN63523 | Rsa1.0.00097.1 | 623 | 138858 | 1.00E-106 | 230 | 240 | 95 -  | 385 | 623 | 26354  | 26593  |
| UN63524 | Rsa1.0.00659.1 | 130 | 69733  | 3.00E-49  | 120 | 127 | 94 -  | 1   | 127 | 20753  | 20879  |
| UN63525 | Rsa1.0.01666.1 | 504 | 173972 | 1.00E-179 | 397 | 419 | 94 -  | 42  | 457 | 4179   | 4594   |
| UN63526 | Rsa1.0.00457.1 | 794 | 337301 | 0         | 549 | 594 | 92 +  | 7   | 585 | 317288 | 317875 |
| UN63527 | Rsa1.0.01228.1 | 532 | 50238  | 1.00E-129 | 319 | 343 | 93 +  | 3   | 337 | 1718   | 2051   |
| UN63528 | Rsa1.0.00635.1 | 505 | 175826 | 0         | 477 | 499 | 95 +  | 3   | 501 | 19400  | 19890  |
| UN63529 | Rsa1.0.00033.1 | 126 | 515811 | 7.00E-56  | 122 | 126 | 96 +  | 1   | 126 | 371704 | 371829 |

|         |                |     |        |           |     |     |      |     |     |        |        |
|---------|----------------|-----|--------|-----------|-----|-----|------|-----|-----|--------|--------|
| UN63530 | Rsa1.0_03166.1 | 754 | 24863  | 1.00E-176 | 323 | 325 | 99 - | 1   | 324 | 19446  | 19770  |
| UN63531 | Rsa1.0_04564.1 | 859 | 16837  | 1.00E-155 | 314 | 326 | 96 - | 1   | 326 | 6054   | 6379   |
| UN63532 | Rsa1.0_03541.1 | 762 | 22194  | 0         | 616 | 630 | 97 - | 1   | 627 | 10205  | 10832  |
| UN63533 | Rsa1.0_00059.1 | 636 | 159650 | 1.00E-112 | 271 | 290 | 93 + | 5   | 288 | 123674 | 123957 |
| UN63534 | Rsa1.0_00108.1 | 675 | 478491 | 0         | 617 | 649 | 95 + | 34  | 675 | 81003  | 81646  |
| UN63535 | Rsa1.0_32811.1 | 628 | 693    | 1.00E-165 | 362 | 381 | 95 - | 3   | 381 | 3      | 370    |
| UN63536 | Rsa1.0_03188.1 | 526 | 24722  | 1.00E-132 | 282 | 295 | 95 - | 1   | 294 | 6901   | 7195   |
| UN63537 | Rsa1.0_04751.1 | 767 | 16132  | 0         | 738 | 778 | 94 + | 1   | 767 | 11440  | 12208  |
| UN63538 | Rsa1.0_05541.1 | 532 | 139959 | 1.00E-152 | 316 | 329 | 96 + | 8   | 335 | 2779   | 3107   |
| UN63539 | Rsa1.0_02222.1 | 546 | 152798 | 0         | 489 | 516 | 94 + | 1   | 513 | 121290 | 121802 |
| UN63540 | Rsa1.0_00152.1 | 482 | 257730 | 1.00E-117 | 343 | 386 | 88 - | 108 | 482 | 118071 | 118447 |
| UN63541 | Rsa1.0_00069.1 | 559 | 403561 | 1.00E-110 | 231 | 241 | 95 + | 1   | 235 | 148070 | 148310 |
| UN63542 | Rsa1.0_01435.1 | 528 | 45942  | 1.00E-107 | 248 | 265 | 93 - | 74  | 338 | 28028  | 28292  |
| UN63543 | Rsa1.0_00270.1 | 252 | 101236 | 1.00E-117 | 244 | 253 | 96 - | 1   | 252 | 40538  | 40790  |
| UN63544 | Rsa1.0_00484.1 | 712 | 203294 | 1.00E-138 | 329 | 354 | 92 + | 11  | 350 | 135723 | 136074 |
| UN63545 | Rsa1.0_17851.1 | 555 | 1726   | 1.00E-174 | 440 | 483 | 91 - | 1   | 465 | 1      | 482    |
| UN63546 | Rsa1.0_00517.1 | 517 | 142790 | 1.00E-167 | 348 | 365 | 95 - | 3   | 367 | 113059 | 113423 |
| UN63547 | Rsa1.0_04747.1 | 593 | 16147  | 1.00E-103 | 355 | 403 | 88 + | 74  | 461 | 8088   | 8480   |
| UN63548 | Rsa1.0_00098.1 | 751 | 349239 | 0         | 412 | 433 | 95 - | 320 | 751 | 276261 | 276683 |
| UN63549 | Rsa1.0_02246.1 | 684 | 33435  | 0         | 468 | 482 | 97 - | 26  | 504 | 24290  | 24771  |
| UN63550 | Rsa1.0_00409.1 | 189 | 146788 | 3.00E-87  | 178 | 183 | 97 - | 7   | 189 | 12131  | 12313  |
| UN63551 | Rsa1.0_01137.1 | 337 | 52655  | 5.00E-59  | 135 | 140 | 96 - | 2   | 141 | 4150   | 4288   |
| UN63552 | Rsa1.0_00965.1 | 760 | 58139  | 1.00E-103 | 226 | 237 | 95 - | 3   | 238 | 9265   | 9494   |
| UN63553 | Rsa1.0_00978.1 | 700 | 57739  | 5.00E-98  | 227 | 238 | 95 - | 2   | 237 | 36456  | 36692  |
| UN63554 | Rsa1.0_00054.1 | 810 | 162053 | 1.00E-122 | 235 | 238 | 98 + | 574 | 810 | 121313 | 121550 |
| UN63555 | Rsa1.0_02407.1 | 646 | 31684  | 1.00E-79  | 163 | 167 | 97 - | 178 | 344 | 27363  | 27529  |
| UN63556 | Rsa1.0_01663.1 | 726 | 168589 | 1.00E-169 | 337 | 346 | 97 + | 1   | 346 | 145039 | 145382 |
| UN63557 | Rsa1.0_00226.1 | 650 | 105884 | 0         | 590 | 618 | 95 + | 35  | 650 | 63959  | 64575  |
| UN63558 | Rsa1.0_00611.1 | 375 | 72410  | 9.00E-86  | 206 | 221 | 93 - | 5   | 225 | 60760  | 60980  |
| UN63559 | Rsa1.0_00139.1 | 479 | 357786 | 2.00E-90  | 193 | 201 | 96 + | 218 | 418 | 264610 | 264810 |
| UN63560 | Rsa1.0_02180.1 | 687 | 34176  | 0         | 550 | 560 | 98 - | 128 | 687 | 9376   | 9935   |
| UN63561 | Rsa1.0_06911.1 | 462 | 10178  | 2.00E-68  | 174 | 188 | 92 + | 15  | 202 | 1023   | 1205   |
| UN63562 | Rsa1.0_02672.1 | 464 | 28884  | 1.00E-161 | 425 | 464 | 91 - | 5   | 464 | 26565  | 27013  |
| UN63563 | Rsa1.0_01046.1 | 842 | 152989 | 0         | 405 | 416 | 97 + | 1   | 413 | 111378 | 111793 |
| UN63564 | Rsa1.0_27932.1 | 514 | 834    | 0         | 493 | 516 | 95 + | 4   | 514 | 107    | 622    |
| UN63565 | Rsa1.0_04652.1 | 762 | 16515  | 1.00E-114 | 263 | 281 | 93 - | 482 | 762 | 6873   | 7153   |
| UN63566 | Rsa1.0_02976.1 | 379 | 26315  | 1.00E-81  | 190 | 202 | 94 + | 168 | 369 | 18615  | 18816  |
| UN63567 | Rsa1.0_05573.1 | 200 | 13290  | 4.00E-83  | 189 | 200 | 94 - | 1   | 200 | 4205   | 4404   |
| UN63568 | Rsa1.0_01363.1 | 167 | 47195  | 4.00E-27  | 73  | 76  | 96 + | 93  | 165 | 12     | 87     |



|         |                |     |        |           |     |     |      |     |     |        |        |
|---------|----------------|-----|--------|-----------|-----|-----|------|-----|-----|--------|--------|
| UN63569 | Rsa1.0.00457.1 | 110 | 337301 | 8.00E-43  | 103 | 108 | 95 - | 1   | 108 | 177424 | 177531 |
| UN63570 | Rsa1.0.02471.1 | 528 | 31104  | 1.00E-173 | 395 | 420 | 94 + | 114 | 528 | 17537  | 17949  |
| UN63571 | Rsa1.0.00100.1 | 413 | 249232 | 1.00E-136 | 261 | 265 | 98 - | 1   | 264 | 200843 | 201107 |
| UN63572 | Rsa1.0.05784.1 | 436 | 12643  | 1.00E-157 | 370 | 397 | 93 - | 12  | 407 | 1645   | 2040   |
| UN63573 | Rsa1.0.03813.1 | 304 | 20708  | 6.00E-40  | 111 | 120 | 92 - | 185 | 304 | 1315   | 1434   |
| UN63574 | Rsa1.0.01603.1 | 696 | 42468  | 0         | 651 | 692 | 94 - | 19  | 696 | 8935   | 9622   |
| UN63575 | Rsa1.0.03762.1 | 824 | 20976  | 0         | 456 | 475 | 96 - | 3   | 477 | 12667  | 13133  |
| UN63576 | Rsa1.0.01889.1 | 507 | 37562  | 2.00E-41  | 93  | 95  | 97 + | 177 | 271 | 20763  | 20857  |
| UN63577 | Rsa1.0.00579.1 | 652 | 148308 | 4.00E-46  | 144 | 159 | 90 + | 43  | 201 | 13902  | 14054  |
| UN63578 | Rsa1.0.03448.1 | 716 | 22844  | 0         | 422 | 434 | 97 + | 1   | 432 | 18665  | 19093  |
| UN63579 | Rsa1.0.03860.1 | 701 | 20407  | 0         | 493 | 514 | 95 + | 1   | 507 | 15804  | 16316  |
| UN63580 | Rsa1.0.04172.1 | 528 | 18679  | 1.00E-141 | 342 | 372 | 91 - | 1   | 372 | 4778   | 5136   |
| UN63581 | Rsa1.0.00789.1 | 644 | 64233  | 1.00E-175 | 442 | 483 | 91 - | 2   | 484 | 7946   | 8426   |
| UN63582 | Rsa1.0.19224.1 | 325 | 1461   | 1.00E-105 | 292 | 325 | 89 + | 1   | 325 | 759    | 1083   |
| UN63583 | Rsa1.0.02105.1 | 180 | 156953 | 7.00E-57  | 155 | 168 | 92 + | 1   | 168 | 149098 | 149264 |
| UN63584 | Rsa1.0.00863.1 | 582 | 254535 | 1.00E-165 | 361 | 383 | 94 - | 1   | 383 | 213547 | 213929 |
| UN63585 | Rsa1.0.01154.1 | 538 | 52249  | 1.00E-115 | 232 | 239 | 97 - | 246 | 484 | 2298   | 2536   |
| UN63586 | Rsa1.0.58370.1 | 258 | 392    | 8.00E-79  | 215 | 234 | 91 - | 1   | 228 | 98     | 331    |
| UN63587 | Rsa1.0.00018.1 | 610 | 410899 | 1.00E-122 | 279 | 294 | 94 + | 1   | 294 | 102832 | 103121 |
| UN63588 | Rsa1.0.00373.1 | 755 | 90296  | 0         | 660 | 684 | 96 - | 3   | 685 | 28081  | 28763  |
| UN63589 | Rsa1.0.07315.1 | 786 | 9562   | 0         | 743 | 753 | 98 - | 1   | 753 | 7008   | 7760   |
| UN63590 | Rsa1.0.00941.1 | 563 | 58891  | 8.00E-87  | 181 | 187 | 96 + | 371 | 557 | 58119  | 58305  |
| UN63591 | Rsa1.0.00273.1 | 103 | 326186 | 5.00E-16  | 46  | 47  | 97 + | 28  | 74  | 150985 | 151031 |
| UN63592 | Rsa1.0.00034.1 | 756 | 260119 | 7.00E-85  | 181 | 188 | 96 - | 337 | 524 | 234874 | 235061 |
| UN63593 | Rsa1.0.00284.1 | 622 | 323267 | 0         | 585 | 625 | 93 + | 1   | 622 | 143388 | 143998 |
| UN63594 | Rsa1.0.03175.1 | 814 | 24802  | 1.00E-140 | 360 | 400 | 90 - | 3   | 401 | 22371  | 22748  |
| UN63595 | Rsa1.0.00001.1 | 185 | 363028 | 3.00E-93  | 182 | 185 | 98 - | 1   | 185 | 40552  | 40736  |
| UN63596 | Rsa1.0.03027.1 | 749 | 25883  | 1.00E-105 | 214 | 220 | 97 + | 121 | 337 | 22289  | 22508  |
| UN63597 | Rsa1.0.02872.1 | 362 | 27080  | 1.00E-166 | 349 | 365 | 95 + | 2   | 362 | 11209  | 11573  |
| UN63598 | Rsa1.0.49554.1 | 533 | 458    | 0         | 382 | 396 | 96 + | 1   | 394 | 57     | 450    |
| UN63599 | Rsa1.0.00575.1 | 278 | 74791  | 4.00E-90  | 246 | 271 | 90 + | 15  | 278 | 69882  | 70152  |
| UN63600 | Rsa1.0.00773.1 | 689 | 64839  | 0         | 576 | 627 | 91 - | 81  | 689 | 51289  | 51912  |
| UN63601 | Rsa1.0.01504.1 | 681 | 189978 | 0         | 417 | 443 | 94 + | 5   | 442 | 168519 | 168956 |
| UN63602 | Rsa1.0.00937.1 | 453 | 59061  | 1.00E-180 | 374 | 391 | 95 + | 63  | 452 | 53185  | 53575  |
| UN63603 | Rsa1.0.03650.1 | 629 | 21583  | 0         | 491 | 512 | 95 - | 1   | 509 | 1368   | 1875   |
| UN63604 | Rsa1.0.00014.1 | 170 | 348985 | 2.00E-56  | 152 | 165 | 92 + | 1   | 165 | 331568 | 331729 |
| UN63605 | Rsa1.0.02994.1 | 156 | 26168  | 4.00E-64  | 148 | 156 | 94 + | 1   | 156 | 2160   | 2315   |
| UN63606 | Rsa1.0.03698.1 | 179 | 21302  | 2.00E-63  | 150 | 159 | 94 + | 7   | 165 | 8098   | 8256   |
| UN63607 | Rsa1.0.00008.1 | 175 | 358124 | 1.00E-39  | 137 | 155 | 88 + | 21  | 175 | 14855  | 15009  |

|         |                |     |        |           |     |     |      |     |     |        |        |
|---------|----------------|-----|--------|-----------|-----|-----|------|-----|-----|--------|--------|
| UN63608 | Rsa1.0.06018.1 | 703 | 11923  | 8.00E-63  | 211 | 237 | 89 + | 1   | 223 | 11028  | 11263  |
| UN63609 | Rsa1.0.02622.1 | 743 | 142402 | 1.00E-142 | 284 | 293 | 96 + | 1   | 293 | 336    | 624    |
| UN63610 | Rsa1.0.22416.1 | 502 | 1123   | 1.00E-109 | 234 | 243 | 96 + | 3   | 244 | 883    | 1123   |
| UN63611 | Rsa1.0.02105.1 | 255 | 156953 | 7.00E-61  | 219 | 250 | 87 - | 1   | 250 | 151657 | 151898 |
| UN63612 | Rsa1.0.00124.1 | 802 | 262503 | 1.00E-110 | 308 | 336 | 91 + | 1   | 323 | 170755 | 171085 |
| UN63613 | Rsa1.0.06092.1 | 486 | 11756  | 0         | 461 | 497 | 92 + | 7   | 481 | 6208   | 6704   |
| UN63614 | Rsa1.0.13872.1 | 740 | 4176   | 3.00E-81  | 163 | 166 | 98 - | 556 | 721 | 1574   | 1739   |
| UN63615 | Rsa1.0.05624.1 | 142 | 13140  | 4.00E-27  | 111 | 128 | 86 + | 2   | 128 | 3802   | 3918   |
| UN63616 | Rsa1.0.00344.1 | 296 | 191774 | 1.00E-62  | 205 | 232 | 88 - | 5   | 235 | 136306 | 136525 |
| UN63617 | Rsa1.0.18460.1 | 752 | 1595   | 3.00E-65  | 139 | 143 | 97 - | 565 | 707 | 1263   | 1405   |
| UN63618 | Rsa1.0.00885.1 | 268 | 61088  | 1.00E-120 | 256 | 268 | 95 + | 4   | 268 | 5900   | 6167   |
| UN63619 | Rsa1.0.01897.1 | 568 | 37499  | 0         | 367 | 372 | 98 + | 2   | 370 | 4844   | 5215   |
| UN63620 | Rsa1.0.00224.1 | 207 | 327530 | 6.00E-73  | 186 | 201 | 92 - | 6   | 203 | 86980  | 87180  |
| UN63621 | Rsa1.0.02682.1 | 416 | 28711  | 1.00E-164 | 390 | 419 | 93 + | 1   | 416 | 9634   | 10051  |
| UN63622 | Rsa1.0.01864.1 | 469 | 37998  | 0         | 460 | 468 | 98 + | 4   | 469 | 36857  | 37324  |
| UN63623 | Rsa1.0.03927.1 | 350 | 19997  | 1.00E-138 | 319 | 341 | 93 - | 7   | 347 | 18527  | 18866  |
| UN63624 | Rsa1.0.02358.1 | 685 | 32213  | 1.00E-178 | 564 | 647 | 87 + | 19  | 656 | 19749  | 20357  |
| UN63625 | Rsa1.0.04883.1 | 735 | 15603  | 0         | 615 | 654 | 94 + | 1   | 650 | 10467  | 11109  |
| UN63626 | Rsa1.0.03122.1 | 823 | 25207  | 1.00E-155 | 331 | 344 | 96 + | 7   | 344 | 16091  | 16434  |
| UN63627 | Rsa1.0.00216.1 | 836 | 197563 | 1.00E-111 | 318 | 350 | 90 + | 8   | 349 | 11102  | 11441  |
| UN63628 | Rsa1.0.00459.1 | 450 | 82580  | 0         | 367 | 379 | 96 + | 5   | 383 | 41122  | 41500  |
| UN63629 | Rsa1.0.01073.1 | 724 | 55030  | 0         | 709 | 740 | 95 + | 1   | 724 | 33341  | 34080  |
| UN63630 | Rsa1.0.00112.1 | 377 | 132199 | 1.00E-110 | 247 | 262 | 94 + | 116 | 377 | 84391  | 84652  |
| UN63631 | Rsa1.0.06713.1 | 356 | 10488  | 3.00E-67  | 145 | 150 | 96 - | 74  | 223 | 1686   | 1835   |
| UN63632 | Rsa1.0.00598.1 | 105 | 73425  | 5.00E-41  | 100 | 105 | 95 + | 1   | 105 | 67258  | 67362  |
| UN63633 | Rsa1.0.03304.1 | 709 | 23883  | 0         | 444 | 477 | 93 - | 1   | 474 | 18857  | 19326  |
| UN63634 | Rsa1.0.01469.1 | 758 | 45139  | 3.00E-96  | 182 | 183 | 99 - | 346 | 528 | 21454  | 21636  |
| UN63635 | Rsa1.0.03015.1 | 576 | 26006  | 1.00E-85  | 195 | 204 | 95 + | 133 | 336 | 534    | 734    |
| UN63636 | Rsa1.0.03305.1 | 545 | 147552 | 1.00E-145 | 433 | 489 | 88 + | 61  | 545 | 139222 | 139688 |
| UN63637 | Rsa1.0.26323.1 | 292 | 896    | 1.00E-93  | 268 | 295 | 90 - | 1   | 292 | 392    | 682    |
| UN63638 | Rsa1.0.00218.1 | 852 | 201480 | 0         | 408 | 427 | 95 - | 1   | 427 | 180348 | 180772 |
| UN63639 | Rsa1.0.00289.1 | 722 | 98620  | 1.00E-132 | 320 | 345 | 92 + | 1   | 345 | 25668  | 26003  |
| UN63640 | Rsa1.0.01382.1 | 358 | 46877  | 1.00E-143 | 327 | 350 | 93 - | 13  | 358 | 13944  | 14293  |
| UN63641 | Rsa1.0.00721.1 | 120 | 66918  | 2.00E-34  | 112 | 122 | 91 - | 1   | 120 | 59552  | 59673  |
| UN63642 | Rsa1.0.00044.1 | 303 | 271658 | 1.00E-133 | 296 | 311 | 95 + | 2   | 303 | 68747  | 69056  |
| UN63643 | Rsa1.0.00332.1 | 762 | 94575  | 0         | 533 | 562 | 94 - | 2   | 560 | 37309  | 37864  |
| UN63644 | Rsa1.0.00002.1 | 351 | 601661 | 1.00E-154 | 335 | 351 | 95 + | 2   | 351 | 436582 | 436929 |
| UN63645 | Rsa1.0.00255.1 | 471 | 204967 | 1.00E-158 | 380 | 411 | 92 + | 68  | 471 | 22419  | 22821  |
| UN63646 | Rsa1.0.01536.1 | 339 | 43747  | 6.00E-71  | 209 | 232 | 90 + | 108 | 339 | 18915  | 19145  |

|         |                |     |        |           |     |     |       |     |     |        |        |
|---------|----------------|-----|--------|-----------|-----|-----|-------|-----|-----|--------|--------|
| UN63647 | Rsa1.0_42756.1 | 261 | 525    | 1.00E-104 | 237 | 249 | 95 +  | 6   | 248 | 257    | 505    |
| UN63648 | Rsa1.0_02085.1 | 797 | 35198  | 0         | 726 | 766 | 94 -  | 1   | 759 | 28444  | 29206  |
| UN63649 | Rsa1.0_17020.1 | 380 | 1951   | 1.00E-125 | 299 | 323 | 92 +  | 11  | 333 | 1550   | 1872   |
| UN63650 | Rsa1.0_00251.1 | 515 | 303968 | 5.00E-57  | 239 | 279 | 85 -  | 9   | 259 | 127337 | 127614 |
| UN63651 | Rsa1.0_00017.1 | 269 | 752458 | 1.00E-116 | 258 | 271 | 95 +  | 1   | 269 | 398428 | 398697 |
| UN63652 | Rsa1.0_00329.1 | 868 | 222544 | 1.00E-134 | 577 | 688 | 83 +  | 166 | 851 | 10954  | 11629  |
| UN63653 | Rsa1.0_00543.1 | 135 | 76788  | 1.00E-45  | 126 | 133 | 94 -  | 1   | 132 | 15694  | 15824  |
| UN63654 | Rsa1.0_00067.1 | 685 | 415055 | 1.00E-149 | 342 | 364 | 93 +  | 322 | 685 | 151957 | 152313 |
| UN63655 | Rsa1.0_00108.1 | 388 | 478491 | 1.00E-152 | 344 | 365 | 94 -  | 1   | 363 | 12518  | 12873  |
| UN63656 | Rsa1.0_00176.1 | 321 | 240984 | 1.00E-115 | 244 | 255 | 95 +  | 43  | 297 | 9869   | 10123  |
| UN63657 | Rsa1.0_00316.1 | 142 | 96264  | 1.00E-36  | 96  | 102 | 94 +  | 41  | 142 | 85735  | 85836  |
| UN63658 | Rsa1.0_00681.1 | 199 | 68779  | 4.00E-74  | 183 | 196 | 93 +  | 1   | 194 | 42498  | 42693  |
| UN63659 | Rsa1.0_03041.1 | 580 | 25804  | 0         | 552 | 560 | 98 -  | 2   | 559 | 5441   | 6000   |
| UN63660 | Rsa1.0_03668.1 | 501 | 21483  | 0         | 416 | 432 | 96 -  | 1   | 429 | 11438  | 11869  |
| UN63661 | Rsa1.0_04374.1 | 472 | 17670  | 0         | 444 | 472 | 94 -  | 1   | 472 | 16677  | 17133  |
| UN63662 | Rsa1.0_47151.1 | 534 | 479    | 0         | 470 | 486 | 96 +  | 12  | 496 | 1      | 479    |
| UN63663 | Rsa1.0_00932.1 | 453 | 59185  | 1.00E-160 | 320 | 330 | 96 +  | 1   | 330 | 1234   | 1562   |
| UN63664 | Rsa1.0_01901.1 | 458 | 37472  | 1.00E-180 | 423 | 460 | 91 -  | 1   | 458 | 20269  | 20707  |
| UN63665 | Rsa1.0_21904.1 | 752 | 1164   | 2.00E-63  | 127 | 128 | 99 +  | 544 | 671 | 11     | 138    |
| UN63666 | Rsa1.0_09211.1 | 695 | 6556   | 1.00E-166 | 297 | 297 | 100 + | 202 | 498 | 2282   | 2578   |
| UN63667 | Rsa1.0_00662.1 | 172 | 192183 | 2.00E-54  | 156 | 172 | 90 -  | 1   | 172 | 2245   | 2416   |
| UN63668 | Rsa1.0_52728.1 | 663 | 432    | 1.00E-150 | 306 | 318 | 96 +  | 195 | 512 | 6      | 323    |
| UN63669 | Rsa1.0_12103.1 | 285 | 5314   | 3.00E-32  | 193 | 231 | 83 +  | 71  | 285 | 29     | 253    |
| UN63670 | Rsa1.0_00093.1 | 131 | 214962 | 4.00E-48  | 127 | 135 | 94 -  | 1   | 131 | 81533  | 81667  |
| UN63671 | Rsa1.0_74778.1 | 542 | 307    | 1.00E-151 | 298 | 307 | 97 +  | 99  | 405 | 1      | 307    |
| UN63672 | Rsa1.0_00320.1 | 497 | 95784  | 1.00E-105 | 267 | 289 | 92 -  | 1   | 271 | 60213  | 60501  |
| UN63673 | Rsa1.0_03935.1 | 495 | 19983  | 1.00E-128 | 256 | 264 | 96 +  | 71  | 334 | 7878   | 8141   |
| UN63674 | Rsa1.0_00722.1 | 606 | 66840  | 1.00E-141 | 299 | 312 | 95 -  | 1   | 312 | 41773  | 42081  |
| UN63675 | Rsa1.0_09169.1 | 464 | 6589   | 2.00E-87  | 207 | 218 | 94 +  | 241 | 457 | 4958   | 5171   |
| UN63676 | Rsa1.0_01818.1 | 665 | 38837  | 0         | 442 | 449 | 98 +  | 16  | 462 | 7177   | 7625   |
| UN63677 | Rsa1.0_04395.1 | 667 | 17570  | 0         | 644 | 679 | 94 +  | 1   | 667 | 6933   | 7610   |
| UN63678 | Rsa1.0_00414.1 | 398 | 202190 | 0         | 382 | 403 | 94 +  | 9   | 398 | 180870 | 181271 |
| UN63679 | Rsa1.0_00516.1 | 745 | 78417  | 8.00E-97  | 186 | 188 | 98 +  | 1   | 188 | 11598  | 11785  |
| UN63680 | Rsa1.0_00068.1 | 731 | 151813 | 0         | 702 | 730 | 96 +  | 5   | 731 | 37005  | 37732  |
| UN63681 | Rsa1.0_03001.1 | 602 | 26108  | 0         | 594 | 602 | 98 -  | 1   | 602 | 13150  | 13751  |
| UN63682 | Rsa1.0_00827.1 | 110 | 62790  | 2.00E-46  | 106 | 110 | 96 +  | 1   | 110 | 21627  | 21736  |
| UN63683 | Rsa1.0_01394.1 | 413 | 46641  | 1.00E-161 | 383 | 412 | 92 +  | 2   | 413 | 21720  | 22129  |
| UN63684 | Rsa1.0_00251.1 | 583 | 303968 | 1.00E-162 | 444 | 494 | 89 +  | 1   | 469 | 114389 | 114876 |
| UN63685 | Rsa1.0_01806.1 | 199 | 39021  | 5.00E-67  | 156 | 165 | 94 -  | 31  | 195 | 35582  | 35746  |

|         |                |     |        |           |     |     |       |     |     |        |        |
|---------|----------------|-----|--------|-----------|-----|-----|-------|-----|-----|--------|--------|
| UN63686 | Rsa1.0.00051.1 | 847 | 258225 | 0         | 820 | 852 | 96 +  | 3   | 847 | 119344 | 120190 |
| UN63687 | Rsa1.0.00440.1 | 700 | 84723  | 1.00E-125 | 264 | 273 | 96 -  | 4   | 276 | 68557  | 68824  |
| UN63688 | Rsa1.0.01158.1 | 757 | 52121  | 1.00E-154 | 634 | 749 | 84 -  | 1   | 749 | 7194   | 7935   |
| UN63689 | Rsa1.0.00218.1 | 736 | 201480 | 1.00E-149 | 405 | 443 | 91 +  | 4   | 434 | 25525  | 25957  |
| UN63690 | Rsa1.0.38361.1 | 729 | 587    | 0         | 424 | 437 | 97 +  | 42  | 478 | 1      | 437    |
| UN63691 | Rsa1.0.03875.1 | 702 | 20355  | 0         | 415 | 427 | 97 -  | 3   | 427 | 18863  | 19289  |
| UN63692 | Rsa1.0.00556.1 | 798 | 207212 | 0         | 591 | 611 | 96 +  | 3   | 612 | 27003  | 27609  |
| UN63693 | Rsa1.0.20682.1 | 206 | 1280   | 5.00E-89  | 198 | 206 | 96 -  | 1   | 206 | 874    | 1077   |
| UN63694 | Rsa1.0.04166.1 | 158 | 18757  | 9.00E-22  | 68  | 73  | 93 -  | 86  | 158 | 13069  | 13141  |
| UN63695 | Rsa1.0.00658.1 | 770 | 69740  | 0         | 754 | 757 | 99 -  | 14  | 770 | 58763  | 59519  |
| UN63696 | Rsa1.0.00333.1 | 728 | 94500  | 0         | 491 | 518 | 94 -  | 1   | 517 | 69149  | 69665  |
| UN63697 | Rsa1.0.00490.1 | 671 | 186713 | 1.00E-138 | 279 | 289 | 96 -  | 207 | 495 | 39542  | 39830  |
| UN63698 | Rsa1.0.00172.1 | 833 | 115476 | 0         | 735 | 778 | 94 -  | 57  | 833 | 24255  | 25028  |
| UN63699 | Rsa1.0.05239.1 | 360 | 14410  | 5.00E-87  | 251 | 278 | 90 +  | 1   | 269 | 11859  | 12132  |
| UN63700 | Rsa1.0.01228.1 | 468 | 50238  | 1.00E-109 | 247 | 260 | 95 -  | 64  | 321 | 733    | 992    |
| UN63701 | Rsa1.0.14663.1 | 707 | 3175   | 1.00E-76  | 363 | 432 | 84 -  | 28  | 457 | 1859   | 2282   |
| UN63702 | Rsa1.0.10792.1 | 671 | 5719   | 4.00E-95  | 180 | 181 | 99 +  | 314 | 494 | 1786   | 1966   |
| UN63703 | Rsa1.0.02690.1 | 540 | 28629  | 1.00E-104 | 238 | 252 | 94 -  | 1   | 251 | 17941  | 18192  |
| UN63704 | Rsa1.0.01111.1 | 577 | 53669  | 1.00E-154 | 342 | 360 | 95 +  | 1   | 356 | 39889  | 40244  |
| UN63705 | Rsa1.0.00207.1 | 690 | 248736 | 1.00E-115 | 282 | 301 | 93 -  | 1   | 299 | 204456 | 204753 |
| UN63706 | Rsa1.0.00012.1 | 697 | 222148 | 1.00E-149 | 368 | 395 | 93 +  | 2   | 390 | 51663  | 52057  |
| UN63707 | Rsa1.0.00700.1 | 693 | 67699  | 0         | 682 | 694 | 98 -  | 1   | 693 | 48345  | 49038  |
| UN63708 | Rsa1.0.01453.1 | 773 | 45449  | 4.00E-74  | 259 | 291 | 89 +  | 6   | 286 | 13301  | 13582  |
| UN63709 | Rsa1.0.02917.1 | 275 | 159058 | 1.00E-127 | 264 | 275 | 96 +  | 1   | 275 | 144210 | 144484 |
| UN63710 | Rsa1.0.00065.1 | 718 | 454616 | 0         | 454 | 463 | 98 +  | 120 | 579 | 125181 | 125642 |
| UN63711 | Rsa1.0.11375.1 | 514 | 5528   | 1.00E-148 | 366 | 402 | 91 +  | 6   | 407 | 4753   | 5136   |
| UN63712 | Rsa1.0.00716.1 | 421 | 67078  | 1.00E-157 | 336 | 354 | 94 -  | 68  | 421 | 36406  | 36751  |
| UN63713 | Rsa1.0.00577.1 | 602 | 174827 | 0         | 576 | 601 | 95 +  | 2   | 602 | 29494  | 30087  |
| UN63714 | Rsa1.0.00183.1 | 491 | 113277 | 0         | 476 | 503 | 94 +  | 1   | 491 | 96718  | 97215  |
| UN63715 | Rsa1.0.00272.1 | 120 | 447836 | 1.00E-26  | 70  | 73  | 95 -  | 48  | 120 | 218967 | 219039 |
| UN63716 | Rsa1.0.04438.1 | 582 | 17361  | 1.00E-109 | 284 | 309 | 91 +  | 2   | 306 | 14917  | 15213  |
| UN63717 | Rsa1.0.04426.1 | 486 | 17399  | 3.00E-58  | 127 | 131 | 96 +  | 8   | 138 | 13150  | 13280  |
| UN63718 | Rsa1.0.00104.1 | 609 | 368722 | 0         | 577 | 631 | 91 -  | 1   | 609 | 201234 | 201854 |
| UN63719 | Rsa1.0.04181.1 | 128 | 18615  | 8.00E-31  | 86  | 92  | 93 -  | 1   | 92  | 1739   | 1830   |
| UN63720 | Rsa1.0.01173.1 | 426 | 51727  | 1.00E-140 | 314 | 332 | 94 -  | 2   | 333 | 1555   | 1884   |
| UN63721 | Rsa1.0.01578.1 | 758 | 42880  | 4.00E-74  | 142 | 142 | 100 - | 615 | 756 | 29757  | 29898  |
| UN63722 | Rsa1.0.00055.1 | 526 | 520193 | 0         | 493 | 512 | 96 +  | 15  | 526 | 289812 | 290323 |
| UN63723 | Rsa1.0.01546.1 | 101 | 43586  | 2.00E-43  | 98  | 101 | 97 +  | 1   | 101 | 34011  | 34111  |
| UN63724 | Rsa1.0.00660.1 | 663 | 69688  | 1.00E-122 | 306 | 331 | 92 +  | 15  | 344 | 3599   | 3928   |

|         |                |     |        |           |     |     |       |     |     |        |        |
|---------|----------------|-----|--------|-----------|-----|-----|-------|-----|-----|--------|--------|
| UN63725 | Rsa1.0.26999.1 | 647 | 870    | 1.00E-124 | 236 | 238 | 99 -  | 101 | 338 | 154    | 390    |
| UN63726 | Rsa1.0.07983.1 | 659 | 8131   | 0         | 582 | 657 | 88 +  | 7   | 657 | 3732   | 4374   |
| UN63727 | Rsa1.0.00860.1 | 171 | 61789  | 2.00E-75  | 161 | 167 | 96 +  | 3   | 169 | 6690   | 6856   |
| UN63728 | Rsa1.0.00793.1 | 604 | 64103  | 1.00E-73  | 203 | 222 | 91 +  | 1   | 217 | 13051  | 13272  |
| UN63729 | Rsa1.0.00198.1 | 654 | 222963 | 0         | 620 | 654 | 94 -  | 1   | 651 | 164631 | 165271 |
| UN63730 | Rsa1.0.03997.1 | 706 | 19652  | 0         | 665 | 712 | 93 +  | 1   | 705 | 10404  | 11092  |
| UN63731 | Rsa1.0.00226.1 | 202 | 105884 | 9.00E-72  | 179 | 193 | 92 +  | 6   | 198 | 97478  | 97670  |
| UN63732 | Rsa1.0.01322.1 | 711 | 48166  | 5.00E-98  | 342 | 394 | 86 +  | 33  | 412 | 9692   | 10058  |
| UN63733 | Rsa1.0.00083.1 | 701 | 442773 | 1.00E-135 | 308 | 329 | 93 +  | 208 | 536 | 137729 | 138057 |
| UN63734 | Rsa1.0.02228.1 | 116 | 33688  | 1.00E-38  | 90  | 93  | 96 +  | 1   | 93  | 10462  | 10554  |
| UN63735 | Rsa1.0.03985.1 | 333 | 19704  | 1.00E-159 | 327 | 342 | 95 -  | 1   | 333 | 15806  | 16144  |
| UN63736 | Rsa1.0.00048.1 | 491 | 167185 | 1.00E-111 | 252 | 268 | 94 +  | 141 | 408 | 77879  | 78146  |
| UN63737 | Rsa1.0.00091.1 | 186 | 139699 | 4.00E-58  | 172 | 189 | 91 -  | 1   | 183 | 80410  | 80596  |
| UN63738 | Rsa1.0.00933.1 | 650 | 59164  | 1.00E-125 | 273 | 285 | 95 -  | 1   | 281 | 2856   | 3139   |
| UN63739 | #              | #   | #      | #         | #   | #   | #     | #   | #   | #      | #      |
| UN63740 | Rsa1.0.00059.1 | 593 | 159650 | 0         | 576 | 596 | 96 +  | 1   | 593 | 38597  | 39192  |
| UN63741 | Rsa1.0.00180.1 | 312 | 114581 | 1.00E-134 | 295 | 312 | 94 -  | 1   | 312 | 111416 | 111724 |
| UN63742 | Rsa1.0.00964.1 | 431 | 316648 | 1.00E-180 | 410 | 438 | 93 +  | 1   | 431 | 304617 | 305052 |
| UN63743 | Rsa1.0.00790.1 | 727 | 148693 | 1.00E-145 | 282 | 289 | 97 +  | 435 | 723 | 57272  | 57560  |
| UN63744 | Rsa1.0.00001.1 | 301 | 363028 | 1.00E-101 | 262 | 287 | 91 -  | 3   | 286 | 241164 | 241444 |
| UN63745 | Rsa1.0.03133.1 | 649 | 25135  | 1.00E-175 | 351 | 364 | 96 -  | 286 | 649 | 11868  | 12231  |
| UN63746 | Rsa1.0.02126.1 | 681 | 34765  | 0         | 647 | 689 | 93 +  | 5   | 677 | 10088  | 10765  |
| UN63747 | Rsa1.0.00044.1 | 528 | 271658 | 1.00E-137 | 332 | 361 | 91 -  | 3   | 358 | 6694   | 7047   |
| UN63748 | Rsa1.0.00190.1 | 579 | 318240 | 0         | 381 | 389 | 97 -  | 3   | 391 | 20540  | 20928  |
| UN63749 | Rsa1.0.00017.1 | 683 | 752458 | 0         | 620 | 663 | 93 -  | 33  | 677 | 335525 | 336177 |
| UN63750 | Rsa1.0.04470.1 | 598 | 17204  | 1.00E-132 | 308 | 327 | 94 -  | 3   | 327 | 4465   | 4785   |
| UN63751 | Rsa1.0.15623.1 | 461 | 2515   | 1.00E-174 | 327 | 333 | 98 -  | 129 | 461 | 307    | 639    |
| UN63752 | Rsa1.0.00029.1 | 625 | 272992 | 4.00E-83  | 281 | 320 | 87 -  | 303 | 621 | 209176 | 209483 |
| UN63753 | Rsa1.0.04470.1 | 629 | 17204  | 0         | 598 | 625 | 95 -  | 2   | 626 | 11977  | 12601  |
| UN63754 | Rsa1.0.00145.1 | 649 | 261008 | 5.00E-36  | 182 | 220 | 82 -  | 4   | 195 | 34764  | 34981  |
| UN63755 | Rsa1.0.00153.1 | 506 | 192931 | 0         | 482 | 507 | 95 -  | 3   | 506 | 140209 | 140708 |
| UN63756 | Rsa1.0.08706.1 | 368 | 7018   | 2.00E-98  | 203 | 210 | 96 +  | 1   | 210 | 5281   | 5490   |
| UN63757 | Rsa1.0.00507.1 | 578 | 79074  | 9.00E-90  | 189 | 196 | 96 +  | 211 | 406 | 18947  | 19142  |
| UN63758 | Rsa1.0.00145.1 | 317 | 261008 | 1.00E-145 | 303 | 317 | 95 -  | 1   | 317 | 244542 | 244858 |
| UN63759 | Rsa1.0.73885.1 | 180 | 310    | 2.00E-57  | 173 | 195 | 88 +  | 1   | 179 | 42     | 236    |
| UN63760 | Rsa1.0.01198.1 | 423 | 51029  | 0         | 396 | 420 | 94 +  | 1   | 420 | 43904  | 44312  |
| UN63761 | Rsa1.0.02651.1 | 552 | 29046  | 5.00E-82  | 155 | 155 | 100 - | 3   | 157 | 22784  | 22938  |
| UN63762 | Rsa1.0.02257.1 | 629 | 33318  | 1.00E-73  | 147 | 149 | 98 +  | 129 | 277 | 20288  | 20436  |
| UN63763 | Rsa1.0.00962.1 | 438 | 184909 | 0         | 419 | 442 | 94 -  | 1   | 438 | 41562  | 42002  |

|         |                |     |        |           |     |     |       |     |     |        |        |
|---------|----------------|-----|--------|-----------|-----|-----|-------|-----|-----|--------|--------|
| UN63764 | Rsa1.0.00690.1 | 161 | 140527 | 2.00E-60  | 153 | 162 | 94 -  | 1   | 161 | 11255  | 11415  |
| UN63765 | Rsa1.0.02749.1 | 567 | 28241  | 1.00E-129 | 285 | 302 | 94 -  | 231 | 532 | 3067   | 3368   |
| UN63766 | Rsa1.0.00571.1 | 542 | 329018 | 1.00E-164 | 328 | 337 | 97 -  | 1   | 337 | 145933 | 146267 |
| UN63767 | Rsa1.0.05441.1 | 643 | 13742  | 1.00E-110 | 202 | 202 | 100 - | 304 | 505 | 10714  | 10915  |
| UN63768 | Rsa1.0.00484.1 | 712 | 203294 | 0         | 523 | 531 | 98 +  | 2   | 532 | 199236 | 199766 |
| UN63769 | Rsa1.0.00083.1 | 372 | 442773 | 1.00E-129 | 339 | 373 | 90 -  | 1   | 372 | 320140 | 320501 |
| UN63770 | Rsa1.0.06088.1 | 465 | 11767  | 1.00E-147 | 289 | 296 | 97 +  | 1   | 296 | 11087  | 11381  |
| UN63771 | Rsa1.0.01877.1 | 374 | 37789  | 1.00E-106 | 213 | 219 | 97 -  | 1   | 219 | 34868  | 35086  |
| UN63772 | Rsa1.0.01183.1 | 191 | 51465  | 4.00E-43  | 162 | 188 | 86 -  | 5   | 188 | 46711  | 46887  |
| UN63773 | Rsa1.0.00871.1 | 369 | 61539  | 1.00E-163 | 334 | 347 | 96 +  | 12  | 357 | 14139  | 14485  |
| UN63774 | Rsa1.0.07596.1 | 642 | 9056   | 0         | 528 | 557 | 94 -  | 11  | 566 | 4498   | 5046   |
| UN63775 | Rsa1.0.01679.1 | 260 | 146876 | 1.00E-104 | 248 | 267 | 92 +  | 1   | 260 | 119034 | 119296 |
| UN63776 | Rsa1.0.01663.1 | 612 | 168589 | 0         | 595 | 614 | 96 +  | 1   | 612 | 167613 | 168226 |
| UN63777 | Rsa1.0.00122.1 | 651 | 265937 | 0         | 588 | 641 | 91 +  | 17  | 651 | 107105 | 107730 |
| UN63778 | Rsa1.0.00067.1 | 509 | 415055 | 1.00E-42  | 112 | 117 | 95 +  | 113 | 228 | 69802  | 69917  |
| UN63779 | Rsa1.0.05622.1 | 208 | 13145  | 4.00E-77  | 196 | 209 | 93 -  | 1   | 208 | 3804   | 4009   |
| UN63780 | Rsa1.0.00088.1 | 457 | 141341 | 1.00E-165 | 370 | 393 | 94 -  | 32  | 421 | 62412  | 62799  |
| UN63781 | Rsa1.0.00851.1 | 625 | 62181  | 1.00E-109 | 289 | 316 | 91 -  | 15  | 327 | 12047  | 12362  |
| UN63782 | Rsa1.0.09349.1 | 305 | 6433   | 1.00E-130 | 273 | 285 | 95 -  | 24  | 305 | 5152   | 5436   |
| UN63783 | Rsa1.0.08532.1 | 572 | 7228   | 2.00E-84  | 207 | 222 | 93 -  | 1   | 220 | 4225   | 4446   |
| UN63784 | Rsa1.0.01371.1 | 669 | 47079  | 0         | 451 | 458 | 98 +  | 212 | 669 | 42892  | 43349  |
| UN63785 | Rsa1.0.00644.1 | 603 | 136881 | 6.00E-97  | 195 | 199 | 97 +  | 217 | 413 | 62879  | 63077  |
| UN63786 | Rsa1.0.02820.1 | 441 | 27629  | 0         | 427 | 445 | 95 +  | 1   | 441 | 19433  | 19875  |
| UN63787 | Rsa1.0.05352.1 | 385 | 14079  | 1.00E-158 | 354 | 377 | 93 -  | 15  | 383 | 2395   | 2771   |
| UN63788 | #              | #   | #      | #         | #   | #   | #     | #   | #   | #      | #      |
| UN63789 | Rsa1.0.00451.1 | 415 | 322533 | 1.00E-75  | 200 | 219 | 91 +  | 5   | 223 | 21659  | 21866  |
| UN63790 | Rsa1.0.05271.1 | 323 | 14306  | 1.00E-114 | 300 | 325 | 92 -  | 1   | 323 | 10335  | 10653  |
| UN63791 | Rsa1.0.01926.1 | 510 | 37206  | 1.00E-136 | 302 | 319 | 94 -  | 2   | 317 | 6451   | 6763   |
| UN63792 | Rsa1.0.14660.1 | 367 | 3181   | 9.00E-89  | 213 | 224 | 95 -  | 1   | 222 | 2019   | 2238   |
| UN63793 | Rsa1.0.00205.1 | 394 | 193401 | 4.00E-91  | 189 | 194 | 97 +  | 12  | 204 | 130152 | 130345 |
| UN63794 | Rsa1.0.13775.1 | 708 | 4349   | 0         | 683 | 718 | 95 +  | 3   | 708 | 1532   | 2249   |
| UN63795 | Rsa1.0.00313.1 | 420 | 96745  | 1.00E-137 | 317 | 336 | 94 -  | 1   | 336 | 79688  | 80020  |
| UN63796 | Rsa1.0.02606.1 | 505 | 29635  | 1.00E-180 | 418 | 448 | 93 +  | 1   | 442 | 17605  | 18052  |
| UN63797 | Rsa1.0.00044.1 | 748 | 271658 | 0         | 481 | 506 | 95 +  | 3   | 505 | 157760 | 158261 |
| UN63798 | Rsa1.0.05595.1 | 190 | 13228  | 4.00E-55  | 170 | 190 | 89 +  | 1   | 190 | 3250   | 3435   |
| UN63799 | Rsa1.0.01570.1 | 685 | 43015  | 1.00E-102 | 295 | 331 | 89 +  | 3   | 315 | 10798  | 11124  |
| UN63800 | Rsa1.0.00391.1 | 675 | 183853 | 0         | 634 | 657 | 96 +  | 25  | 675 | 60038  | 60693  |
| UN63801 | Rsa1.0.00363.1 | 606 | 90968  | 0         | 384 | 398 | 96 +  | 2   | 396 | 75560  | 75957  |
| UN63802 | Rsa1.0.07190.1 | 111 | 9757   | 6.00E-25  | 95  | 106 | 89 +  | 7   | 111 | 2864   | 2969   |

|         |                |     |        |           |     |     |      |     |     |        |        |
|---------|----------------|-----|--------|-----------|-----|-----|------|-----|-----|--------|--------|
| UN63803 | Rsa1.0.00978.1 | 142 | 57739  | 1.00E-54  | 117 | 120 | 97 - | 1   | 120 | 42694  | 42813  |
| UN63804 | Rsa1.0.07848.1 | 645 | 8429   | 0         | 416 | 426 | 97 + | 1   | 426 | 2381   | 2806   |
| UN63805 | Rsa1.0.08311.1 | 104 | 7564   | 6.00E-25  | 82  | 89  | 92 + | 16  | 104 | 7163   | 7249   |
| UN63806 | Rsa1.0.00050.1 | 279 | 237174 | 3.00E-69  | 175 | 189 | 92 + | 91  | 279 | 188957 | 189140 |
| UN63807 | Rsa1.0.00861.1 | 484 | 61759  | 1.00E-26  | 154 | 178 | 86 - | 1   | 174 | 52330  | 52506  |
| UN63808 | Rsa1.0.02969.1 | 368 | 26390  | 1.00E-78  | 183 | 193 | 94 - | 160 | 351 | 13425  | 13617  |
| UN63809 | Rsa1.0.00058.1 | 536 | 159921 | 1.00E-109 | 281 | 305 | 92 - | 1   | 291 | 93528  | 93830  |
| UN63810 | Rsa1.0.05510.1 | 412 | 13470  | 1.00E-157 | 329 | 343 | 95 + | 5   | 347 | 1556   | 1895   |
| UN63811 | Rsa1.0.02889.1 | 286 | 27019  | 1.00E-138 | 272 | 280 | 97 + | 7   | 286 | 7808   | 8087   |
| UN63812 | Rsa1.0.04538.1 | 146 | 16940  | 8.00E-50  | 135 | 144 | 93 - | 1   | 144 | 7099   | 7240   |
| UN63813 | Rsa1.0.38116.1 | 546 | 591    | 1.00E-153 | 356 | 387 | 91 + | 176 | 546 | 121    | 502    |
| UN63814 | Rsa1.0.04991.1 | 598 | 15215  | 1.00E-132 | 360 | 406 | 88 + | 7   | 393 | 1      | 398    |
| UN63815 | Rsa1.0.02373.1 | 554 | 32048  | 0         | 429 | 444 | 96 - | 3   | 442 | 18304  | 18747  |
| UN63816 | Rsa1.0.53223.1 | 371 | 428    | 1.00E-140 | 316 | 334 | 94 - | 2   | 331 | 1      | 333    |
| UN63817 | Rsa1.0.00114.1 | 160 | 131330 | 5.00E-39  | 134 | 150 | 89 + | 5   | 153 | 29610  | 29759  |
| UN63818 | Rsa1.0.03940.1 | 236 | 19962  | 8.00E-45  | 155 | 179 | 86 - | 8   | 172 | 1607   | 1785   |
| UN63819 | Rsa1.0.05162.1 | 536 | 14631  | 7.00E-81  | 210 | 226 | 92 - | 3   | 222 | 4187   | 4412   |
| UN63820 | Rsa1.0.02872.1 | 145 | 27080  | 5.00E-11  | 56  | 63  | 88 + | 77  | 139 | 9263   | 9325   |
| UN63821 | Rsa1.0.00476.1 | 520 | 280966 | 0         | 492 | 507 | 97 - | 3   | 509 | 145911 | 146414 |
| UN63822 | Rsa1.0.00501.1 | 617 | 79545  | 1.00E-178 | 395 | 420 | 94 - | 22  | 438 | 20925  | 21341  |
| UN63823 | Rsa1.0.00093.1 | 400 | 214962 | 4.00E-57  | 119 | 121 | 98 - | 280 | 400 | 134249 | 134369 |
| UN63824 | Rsa1.0.03422.1 | 576 | 23076  | 1.00E-169 | 501 | 566 | 88 - | 3   | 552 | 6783   | 7324   |
| UN63825 | Rsa1.0.00006.1 | 599 | 396176 | 1.00E-156 | 334 | 353 | 94 + | 2   | 354 | 100738 | 101082 |
| UN63826 | Rsa1.0.00017.1 | 356 | 752458 | 1.00E-84  | 308 | 356 | 86 - | 1   | 352 | 416672 | 417021 |
| UN63827 | Rsa1.0.01491.1 | 631 | 44718  | 1.00E-175 | 329 | 334 | 98 + | 1   | 334 | 18422  | 18752  |
| UN63828 | Rsa1.0.02896.1 | 569 | 26970  | 1.00E-134 | 292 | 307 | 95 - | 265 | 569 | 12708  | 13011  |
| UN63829 | Rsa1.0.02396.1 | 513 | 31783  | 1.00E-113 | 249 | 262 | 95 - | 1   | 260 | 27111  | 27372  |
| UN63830 | Rsa1.0.00779.1 | 609 | 64568  | 0         | 566 | 598 | 94 + | 13  | 609 | 50957  | 51554  |
| UN63831 | Rsa1.0.01270.1 | 409 | 49574  | 5.00E-78  | 168 | 174 | 96 + | 62  | 235 | 15673  | 15843  |
| UN63832 | Rsa1.0.00441.1 | 485 | 84607  | 0         | 428 | 447 | 95 + | 1   | 444 | 9463   | 9908   |
| UN63833 | Rsa1.0.07766.1 | 122 | 8612   | 2.00E-47  | 114 | 120 | 95 - | 1   | 120 | 8117   | 8236   |
| UN63834 | Rsa1.0.00938.1 | 330 | 193891 | 1.00E-125 | 307 | 331 | 92 - | 2   | 326 | 188390 | 188719 |
| UN63835 | Rsa1.0.02719.1 | 751 | 28428  | 0         | 663 | 673 | 98 - | 3   | 675 | 9837   | 10509  |
| UN63836 | Rsa1.0.13888.1 | 512 | 4146   | 0         | 462 | 500 | 92 + | 16  | 512 | 1773   | 2266   |
| UN63837 | Rsa1.0.00579.1 | 442 | 148308 | 1.00E-154 | 349 | 374 | 93 + | 46  | 406 | 63839  | 64208  |
| UN63838 | Rsa1.0.02406.1 | 429 | 145276 | 1.00E-167 | 370 | 394 | 93 + | 36  | 429 | 15094  | 15478  |
| UN63839 | Rsa1.0.00882.1 | 634 | 61249  | 1.00E-153 | 411 | 460 | 89 - | 1   | 431 | 15542  | 15999  |
| UN63840 | Rsa1.0.02113.1 | 337 | 34890  | 1.00E-157 | 323 | 337 | 95 - | 1   | 337 | 23174  | 23510  |
| UN63841 | Rsa1.0.04022.1 | 757 | 19534  | 1.00E-114 | 240 | 249 | 96 - | 3   | 251 | 6267   | 6514   |

|         |                |     |        |           |     |     |      |     |     |        |        |
|---------|----------------|-----|--------|-----------|-----|-----|------|-----|-----|--------|--------|
| UN63842 | Rsa1.0_00224.1 | 167 | 327530 | 1.00E-39  | 126 | 139 | 90 + | 26  | 163 | 222206 | 222344 |
| UN63843 | Rsa1.0_05874.1 | 503 | 12351  | 0         | 484 | 507 | 95 + | 1   | 499 | 9255   | 9759   |
| UN63844 | Rsa1.0_01011.1 | 372 | 56883  | 1.00E-179 | 357 | 370 | 96 - | 1   | 370 | 22446  | 22815  |
| UN63845 | Rsa1.0_00079.1 | 350 | 606987 | 1.00E-84  | 172 | 175 | 98 + | 5   | 178 | 40470  | 40644  |
| UN63846 | Rsa1.0_00269.1 | 580 | 341668 | 1.00E-167 | 328 | 339 | 96 - | 1   | 339 | 190625 | 190956 |
| UN63847 | Rsa1.0_01104.1 | 640 | 285480 | 0         | 608 | 644 | 94 + | 1   | 640 | 263893 | 264536 |
| UN63848 | Rsa1.0_00990.1 | 646 | 57445  | 1.00E-101 | 196 | 199 | 98 + | 448 | 646 | 42432  | 42630  |
| UN63849 | Rsa1.0_01370.1 | 601 | 47093  | 1.00E-140 | 504 | 584 | 86 - | 15  | 598 | 32764  | 33344  |
| UN63850 | Rsa1.0_20750.1 | 139 | 1273   | 7.00E-41  | 120 | 129 | 93 - | 4   | 131 | 931    | 1058   |
| UN63851 | Rsa1.0_00140.1 | 192 | 121541 | 1.00E-30  | 104 | 116 | 89 - | 73  | 188 | 22180  | 22295  |
| UN63852 | #              | #   | #      | #         | #   | #   | #    | #   | #   | #      | #      |
| UN63853 | Rsa1.0_00105.1 | 382 | 134138 | 1.00E-129 | 360 | 393 | 91 - | 3   | 382 | 61527  | 61914  |
| UN63854 | Rsa1.0_14746.1 | 329 | 3110   | 1.00E-72  | 221 | 251 | 88 - | 1   | 247 | 1379   | 1610   |
| UN63855 | Rsa1.0_00558.1 | 322 | 75819  | 1.00E-135 | 304 | 322 | 94 + | 1   | 322 | 52735  | 53052  |
| UN63856 | Rsa1.0_00171.1 | 241 | 115622 | 6.00E-55  | 136 | 145 | 93 - | 93  | 237 | 41948  | 42092  |
| UN63857 | Rsa1.0_00471.1 | 241 | 81897  | 1.00E-80  | 176 | 183 | 96 + | 59  | 241 | 106    | 286    |
| UN63858 | Rsa1.0_02319.1 | 512 | 32580  | 2.00E-62  | 177 | 196 | 90 - | 41  | 225 | 17290  | 17484  |
| UN63859 | Rsa1.0_00180.1 | 499 | 114581 | 0         | 476 | 505 | 94 + | 2   | 499 | 8164   | 8663   |
| UN63860 | Rsa1.0_00339.1 | 563 | 222974 | 1.00E-152 | 293 | 300 | 97 - | 264 | 563 | 4836   | 5135   |
| UN63861 | Rsa1.0_01077.1 | 350 | 54772  | 1.00E-161 | 319 | 331 | 96 + | 1   | 331 | 27219  | 27540  |
| UN63862 | Rsa1.0_02924.1 | 149 | 26736  | 6.00E-60  | 141 | 149 | 94 - | 1   | 149 | 8992   | 9140   |
| UN63863 | Rsa1.0_00299.1 | 716 | 97770  | 0         | 697 | 719 | 96 + | 1   | 716 | 43280  | 43995  |
| UN63864 | Rsa1.0_02124.1 | 432 | 34780  | 0         | 415 | 432 | 96 + | 2   | 432 | 4385   | 4816   |
| UN63865 | Rsa1.0_00417.1 | 774 | 395068 | 0         | 487 | 515 | 94 - | 12  | 526 | 235258 | 235769 |
| UN63866 | Rsa1.0_01749.1 | 343 | 39822  | 1.00E-179 | 339 | 345 | 98 - | 1   | 343 | 34028  | 34372  |
| UN63867 | Rsa1.0_00351.1 | 620 | 413096 | 1.00E-131 | 318 | 342 | 92 + | 1   | 330 | 244486 | 244827 |
| UN63868 | Rsa1.0_00970.1 | 789 | 57994  | 1.00E-125 | 258 | 268 | 96 + | 13  | 280 | 23531  | 23798  |
| UN63869 | Rsa1.0_00382.1 | 354 | 251946 | 1.00E-129 | 324 | 354 | 91 + | 1   | 354 | 108638 | 108991 |
| UN63870 | Rsa1.0_07005.1 | 268 | 10044  | 1.00E-107 | 200 | 201 | 99 + | 1   | 201 | 4144   | 4344   |
| UN63871 | Rsa1.0_00733.1 | 276 | 66583  | 1.00E-126 | 269 | 279 | 96 - | 1   | 276 | 47739  | 48015  |
| UN63872 | Rsa1.0_00645.1 | 454 | 189716 | 0         | 372 | 385 | 96 - | 70  | 454 | 34471  | 34855  |
| UN63873 | Rsa1.0_00980.1 | 517 | 57729  | 4.00E-27  | 72  | 75  | 96 + | 317 | 391 | 27094  | 27168  |
| UN63874 | Rsa1.0_00008.1 | 438 | 358124 | 0         | 409 | 433 | 94 - | 4   | 435 | 278349 | 278780 |
| UN63875 | Rsa1.0_00053.1 | 666 | 263459 | 1.00E-101 | 240 | 255 | 94 - | 4   | 258 | 34020  | 34271  |
| UN63876 | Rsa1.0_00229.1 | 308 | 105471 | 1.00E-131 | 288 | 305 | 94 - | 1   | 305 | 43413  | 43717  |
| UN63877 | Rsa1.0_02811.1 | 717 | 27669  | 0         | 479 | 496 | 96 - | 3   | 498 | 26244  | 26733  |
| UN63878 | Rsa1.0_00021.1 | 671 | 263655 | 0         | 641 | 683 | 93 - | 3   | 671 | 186321 | 186999 |
| UN63879 | Rsa1.0_00351.1 | 351 | 413096 | 1.00E-139 | 327 | 350 | 93 - | 17  | 351 | 267285 | 267632 |
| UN63880 | Rsa1.0_00284.1 | 705 | 323267 | 0         | 663 | 711 | 93 - | 1   | 702 | 296860 | 297558 |



|         |                |     |        |           |     |     |       |     |     |        |        |
|---------|----------------|-----|--------|-----------|-----|-----|-------|-----|-----|--------|--------|
| UN63881 | Rsa1.0_00235.1 | 815 | 154696 | 1.00E-111 | 216 | 220 | 98 -  | 121 | 340 | 143455 | 143674 |
| UN63882 | Rsa1.0_00278.1 | 752 | 231896 | 0         | 742 | 755 | 98 +  | 1   | 752 | 17109  | 17862  |
| UN63883 | Rsa1.0_02346.1 | 561 | 32337  | 1.00E-178 | 429 | 463 | 92 -  | 2   | 461 | 3519   | 3970   |
| UN63884 | Rsa1.0_00064.1 | 608 | 240927 | 0         | 528 | 550 | 96 -  | 2   | 551 | 2395   | 2934   |
| UN63885 | Rsa1.0_01973.1 | 476 | 36598  | 0         | 448 | 475 | 94 +  | 3   | 476 | 29322  | 29786  |
| UN63886 | Rsa1.0_00203.1 | 525 | 109129 | 2.00E-84  | 202 | 211 | 95 -  | 47  | 253 | 23222  | 23432  |
| UN63887 | Rsa1.0_00272.1 | 141 | 447836 | 1.00E-57  | 128 | 132 | 96 -  | 7   | 138 | 84036  | 84165  |
| UN63888 | Rsa1.0_00185.1 | 576 | 248445 | 1.00E-159 | 336 | 352 | 95 -  | 1   | 350 | 4407   | 4758   |
| UN63889 | Rsa1.0_00237.1 | 764 | 235974 | 3.00E-87  | 245 | 263 | 93 +  | 1   | 259 | 545    | 803    |
| UN63890 | Rsa1.0_01140.1 | 536 | 52586  | 1.00E-168 | 336 | 347 | 96 -  | 191 | 536 | 4780   | 5126   |
| UN63891 | Rsa1.0_18670.1 | 209 | 1555   | 1.00E-71  | 176 | 187 | 94 -  | 26  | 209 | 872    | 1057   |
| UN63892 | Rsa1.0_00176.1 | 773 | 240984 | 0         | 479 | 507 | 94 +  | 3   | 499 | 150879 | 151385 |
| UN63893 | Rsa1.0_00707.1 | 733 | 190112 | 0         | 687 | 735 | 93 +  | 4   | 733 | 52225  | 52941  |
| UN63894 | Rsa1.0_00960.1 | 200 | 58199  | 6.00E-79  | 180 | 189 | 95 -  | 9   | 196 | 14271  | 14459  |
| UN63895 | Rsa1.0_00059.1 | 724 | 159650 | 0         | 521 | 550 | 94 +  | 6   | 550 | 136197 | 136741 |
| UN63896 | Rsa1.0_06030.1 | 386 | 11889  | 0         | 373 | 386 | 96 -  | 1   | 386 | 10952  | 11334  |
| UN63897 | Rsa1.0_00911.1 | 672 | 59943  | 1.00E-171 | 352 | 368 | 95 -  | 140 | 507 | 42158  | 42525  |
| UN63898 | Rsa1.0_00745.1 | 736 | 66067  | 0         | 472 | 504 | 93 -  | 11  | 512 | 52944  | 53435  |
| UN63899 | Rsa1.0_00219.1 | 712 | 106983 | 2.00E-82  | 175 | 180 | 97 -  | 1   | 179 | 45690  | 45869  |
| UN63900 | Rsa1.0_01945.1 | 669 | 36989  | 0         | 637 | 672 | 94 -  | 4   | 669 | 26472  | 27132  |
| UN63901 | Rsa1.0_00191.1 | 778 | 316976 | 1.00E-160 | 334 | 346 | 96 +  | 45  | 386 | 258038 | 258383 |
| UN63902 | Rsa1.0_00739.1 | 223 | 66155  | 1.00E-77  | 204 | 219 | 93 +  | 5   | 223 | 52032  | 52247  |
| UN63903 | Rsa1.0_26197.1 | 796 | 902    | 1.00E-144 | 259 | 259 | 100 + | 452 | 710 | 216    | 474    |
| UN63904 | Rsa1.0_02428.1 | 740 | 31542  | 6.00E-79  | 251 | 285 | 88 +  | 1   | 275 | 15732  | 16005  |
| UN63905 | Rsa1.0_39229.1 | 726 | 573    | 1.00E-136 | 273 | 278 | 98 -  | 23  | 298 | 57     | 333    |
| UN63906 | Rsa1.0_04223.1 | 726 | 18407  | 0         | 686 | 730 | 93 +  | 2   | 726 | 6564   | 7286   |
| UN63907 | Rsa1.0_00806.1 | 780 | 63674  | 1.00E-177 | 341 | 350 | 97 -  | 398 | 747 | 20246  | 20595  |
| UN63908 | Rsa1.0_02694.1 | 791 | 28610  | 3.00E-47  | 186 | 213 | 87 +  | 194 | 404 | 19381  | 19593  |
| UN63909 | Rsa1.0_02503.1 | 746 | 30709  | 0         | 378 | 383 | 98 -  | 3   | 385 | 10335  | 10717  |
| UN63910 | Rsa1.0_01248.1 | 572 | 154103 | 4.00E-95  | 222 | 237 | 93 -  | 3   | 239 | 43313  | 43549  |
| UN63911 | Rsa1.0_61380.1 | 772 | 373    | 1.00E-128 | 249 | 253 | 98 -  | 68  | 320 | 122    | 373    |
| UN63912 | Rsa1.0_01526.1 | 860 | 43919  | 0         | 345 | 352 | 98 +  | 1   | 352 | 22336  | 22685  |
| UN63913 | Rsa1.0_00326.1 | 173 | 171955 | 8.00E-38  | 96  | 100 | 96 +  | 1   | 99  | 61827  | 61926  |
| UN63914 | Rsa1.0_00951.1 | 781 | 164588 | 0         | 732 | 761 | 96 -  | 3   | 763 | 7896   | 8650   |
| UN63915 | Rsa1.0_04026.1 | 290 | 19508  | 2.00E-73  | 255 | 289 | 88 -  | 5   | 287 | 11005  | 11292  |
| UN63916 | Rsa1.0_00141.1 | 779 | 121494 | 1.00E-125 | 230 | 231 | 99 +  | 4   | 234 | 29593  | 29823  |
| UN63917 | Rsa1.0_00837.1 | 883 | 62568  | 1.00E-113 | 258 | 273 | 94 +  | 102 | 371 | 54585  | 54856  |
| UN63918 | Rsa1.0_01869.1 | 278 | 37928  | 1.00E-114 | 265 | 282 | 93 +  | 1   | 278 | 329    | 609    |
| UN63919 | Rsa1.0_00456.1 | 649 | 82826  | 0         | 511 | 545 | 93 -  | 27  | 556 | 18300  | 18840  |

|         |                |     |        |           |     |     |      |     |     |        |        |
|---------|----------------|-----|--------|-----------|-----|-----|------|-----|-----|--------|--------|
| UN63920 | Rsa1.0.00111.1 | 544 | 390088 | 0         | 509 | 532 | 95 + | 17  | 544 | 383660 | 384188 |
| UN63921 | Rsa1.0.02343.1 | 909 | 32374  | 1.00E-65  | 149 | 156 | 95 - | 1   | 156 | 20323  | 20478  |
| UN63922 | Rsa1.0.01090.1 | 736 | 54385  | 0         | 695 | 729 | 95 - | 3   | 722 | 28191  | 28918  |
| UN63923 | Rsa1.0.01266.1 | 705 | 49680  | 1.00E-89  | 192 | 200 | 96 + | 461 | 660 | 1534   | 1733   |
| UN63924 | Rsa1.0.01598.1 | 759 | 42553  | 1.00E-110 | 273 | 296 | 92 - | 446 | 737 | 40499  | 40794  |
| UN63925 | Rsa1.0.05701.1 | 723 | 12884  | 0         | 661 | 729 | 90 + | 2   | 723 | 9929   | 10644  |
| UN63926 | Rsa1.0.02280.1 | 183 | 33063  | 4.00E-80  | 169 | 175 | 96 - | 9   | 183 | 765    | 939    |
| UN63927 | Rsa1.0.01792.1 | 144 | 39227  | 2.00E-56  | 135 | 143 | 94 + | 2   | 144 | 25569  | 25711  |
| UN63928 | Rsa1.0.01005.1 | 583 | 56967  | 0         | 551 | 586 | 94 + | 1   | 583 | 5010   | 5588   |
| UN63929 | Rsa1.0.01244.1 | 300 | 50061  | 7.00E-92  | 274 | 303 | 90 + | 4   | 300 | 4618   | 4917   |
| UN63930 | Rsa1.0.00352.1 | 705 | 92266  | 3.00E-34  | 126 | 143 | 88 + | 168 | 310 | 75970  | 76112  |
| UN63931 | Rsa1.0.00653.1 | 781 | 70029  | 0         | 453 | 465 | 97 + | 2   | 466 | 37063  | 37527  |
| UN63932 | Rsa1.0.01419.1 | 280 | 167402 | 1.00E-101 | 260 | 282 | 92 - | 1   | 280 | 132049 | 132329 |
| UN63933 | Rsa1.0.00239.1 | 526 | 104332 | 1.00E-122 | 243 | 250 | 97 - | 277 | 526 | 28477  | 28726  |
| UN63934 | Rsa1.0.00113.1 | 628 | 131574 | 1.00E-164 | 364 | 384 | 94 - | 1   | 381 | 72534  | 72916  |
| UN63935 | Rsa1.0.00044.1 | 704 | 271658 | 0         | 476 | 490 | 97 - | 215 | 704 | 261621 | 262107 |
| UN63936 | Rsa1.0.00153.1 | 574 | 192931 | 0         | 507 | 525 | 96 + | 3   | 523 | 124381 | 124905 |
| UN63937 | Rsa1.0.00413.1 | 663 | 86921  | 0         | 645 | 670 | 96 - | 1   | 663 | 4637   | 5306   |
| UN63938 | Rsa1.0.04375.1 | 664 | 141717 | 0         | 364 | 377 | 96 + | 44  | 420 | 15761  | 16134  |
| UN63939 | Rsa1.0.00729.1 | 659 | 66690  | 0         | 512 | 529 | 96 - | 1   | 529 | 56649  | 57177  |
| UN63940 | Rsa1.0.14532.1 | 649 | 3293   | 3.00E-59  | 210 | 244 | 86 + | 413 | 647 | 30     | 258    |
| UN63941 | Rsa1.0.02348.1 | 629 | 32316  | 0         | 581 | 633 | 91 - | 1   | 629 | 23424  | 24051  |
| UN63942 | Rsa1.0.01721.1 | 465 | 40345  | 1.00E-121 | 243 | 249 | 97 + | 1   | 249 | 5778   | 6025   |
| UN63943 | Rsa1.0.00695.1 | 706 | 68019  | 1.00E-100 | 268 | 295 | 90 + | 412 | 706 | 894    | 1185   |
| UN63944 | Rsa1.0.00028.1 | 728 | 293984 | 0         | 639 | 680 | 93 + | 22  | 685 | 71204  | 71878  |
| UN63945 | Rsa1.0.01110.1 | 661 | 195852 | 0         | 501 | 517 | 96 + | 1   | 509 | 36509  | 37025  |
| UN63946 | Rsa1.0.04493.1 | 773 | 17137  | 6.00E-67  | 179 | 194 | 92 - | 1   | 190 | 4233   | 4419   |
| UN63947 | Rsa1.0.00301.1 | 807 | 365315 | 0         | 442 | 446 | 99 + | 1   | 446 | 297547 | 297992 |
| UN63948 | Rsa1.0.00041.1 | 597 | 186197 | 0         | 401 | 424 | 94 + | 1   | 423 | 151557 | 151979 |
| UN63949 | Rsa1.0.00664.1 | 726 | 69573  | 0         | 372 | 381 | 97 + | 1   | 380 | 41355  | 41735  |
| UN63950 | Rsa1.0.02374.1 | 715 | 32043  | 1.00E-92  | 257 | 281 | 91 + | 35  | 311 | 25715  | 25991  |
| UN63951 | Rsa1.0.00585.1 | 560 | 74164  | 0         | 502 | 558 | 89 - | 3   | 539 | 40197  | 40754  |
| UN63952 | Rsa1.0.00177.1 | 478 | 143394 | 3.00E-80  | 381 | 450 | 84 + | 29  | 474 | 86910  | 87355  |
| UN63953 | Rsa1.0.00670.1 | 506 | 69371  | 1.00E-167 | 347 | 361 | 96 + | 5   | 363 | 35186  | 35545  |
| UN63954 | Rsa1.0.00081.1 | 189 | 143261 | 3.00E-84  | 180 | 186 | 96 + | 1   | 186 | 140622 | 140806 |
| UN63955 | Rsa1.0.02313.1 | 694 | 32653  | 1.00E-144 | 409 | 462 | 88 - | 3   | 440 | 6788   | 7234   |
| UN63956 | Rsa1.0.11462.1 | 612 | 5500   | 0         | 581 | 623 | 93 - | 2   | 612 | 2631   | 3253   |
| UN63957 | Rsa1.0.00287.1 | 541 | 98687  | 0         | 436 | 446 | 97 - | 1   | 445 | 30929  | 31374  |
| UN63958 | Rsa1.0.11977.1 | 559 | 5355   | 2.00E-75  | 147 | 148 | 99 - | 171 | 318 | 3438   | 3585   |

|         |                |     |        |           |     |     |      |     |     |        |        |
|---------|----------------|-----|--------|-----------|-----|-----|------|-----|-----|--------|--------|
| UN63959 | Rsa1.0.01659.1 | 325 | 164577 | 1.00E-127 | 281 | 294 | 95 - | 25  | 314 | 154596 | 154889 |
| UN63960 | Rsa1.0.01521.1 | 583 | 142147 | 0         | 520 | 539 | 96 + | 3   | 540 | 99001  | 99533  |
| UN63961 | Rsa1.0.00032.1 | 471 | 306326 | 0         | 450 | 479 | 93 - | 7   | 471 | 146698 | 147171 |
| UN63962 | Rsa1.0.13629.1 | 370 | 4609   | 1.00E-41  | 94  | 95  | 98 - | 179 | 272 | 145    | 239    |
| UN63963 | Rsa1.0.18008.1 | 596 | 1691   | 1.00E-109 | 228 | 236 | 96 - | 362 | 596 | 1453   | 1688   |
| UN63964 | Rsa1.0.01376.1 | 777 | 47004  | 0         | 434 | 443 | 97 + | 3   | 445 | 40123  | 40565  |
| UN63965 | Rsa1.0.02654.1 | 340 | 29028  | 1.00E-121 | 261 | 272 | 95 - | 68  | 338 | 19630  | 19899  |
| UN63966 | Rsa1.0.03610.1 | 548 | 21797  | 1.00E-125 | 243 | 247 | 98 + | 3   | 248 | 15424  | 15670  |
| UN63967 | Rsa1.0.00040.1 | 489 | 324196 | 2.00E-47  | 100 | 101 | 99 + | 389 | 489 | 243476 | 243576 |
| UN63968 | Rsa1.0.00222.1 | 604 | 172263 | 5.00E-73  | 167 | 176 | 94 + | 8   | 183 | 136705 | 136880 |
| UN63969 | Rsa1.0.01214.1 | 575 | 50599  | 0         | 545 | 585 | 93 - | 3   | 575 | 2278   | 2852   |
| UN63970 | Rsa1.0.00016.1 | 556 | 831256 | 1.00E-133 | 250 | 253 | 98 + | 1   | 253 | 14643  | 14895  |
| UN63971 | Rsa1.0.03452.1 | 647 | 22817  | 0         | 620 | 637 | 97 + | 14  | 647 | 2264   | 2900   |
| UN63972 | Rsa1.0.00130.1 | 380 | 125737 | 1.00E-168 | 371 | 393 | 94 - | 3   | 380 | 117768 | 118160 |
| UN63973 | Rsa1.0.03130.1 | 216 | 25145  | 4.00E-68  | 150 | 156 | 96 + | 1   | 152 | 870    | 1025   |
| UN63974 | Rsa1.0.01692.1 | 587 | 40894  | 1.00E-79  | 195 | 209 | 93 + | 177 | 382 | 23854  | 24062  |
| UN63975 | Rsa1.0.01986.1 | 645 | 36489  | 1.00E-172 | 322 | 327 | 98 - | 2   | 328 | 15835  | 16161  |
| UN63976 | Rsa1.0.04399.1 | 793 | 17543  | 1.00E-101 | 239 | 255 | 93 + | 18  | 265 | 8829   | 9083   |
| UN63977 | Rsa1.0.00207.1 | 717 | 248736 | 2.00E-45  | 133 | 142 | 93 + | 575 | 713 | 244784 | 244925 |
| UN63978 | Rsa1.0.02671.1 | 308 | 28887  | 7.00E-55  | 133 | 141 | 94 - | 137 | 277 | 10710  | 10850  |
| UN63979 | Rsa1.0.00745.1 | 568 | 66067  | 1.00E-162 | 323 | 334 | 96 - | 2   | 335 | 25762  | 26095  |
| UN63980 | Rsa1.0.00105.1 | 639 | 134138 | 0         | 504 | 524 | 96 + | 116 | 639 | 80589  | 81111  |
| UN63981 | Rsa1.0.00033.1 | 426 | 515811 | 2.00E-50  | 176 | 200 | 88 - | 77  | 276 | 372750 | 372946 |
| UN63982 | Rsa1.0.00487.1 | 598 | 80674  | 9.00E-53  | 109 | 110 | 99 - | 428 | 537 | 18372  | 18481  |
| UN63983 | Rsa1.0.03166.1 | 645 | 24863  | 1.00E-171 | 510 | 574 | 88 + | 95  | 645 | 17900  | 18470  |
| UN63984 | Rsa1.0.01321.1 | 295 | 48248  | 1.00E-126 | 247 | 253 | 97 + | 43  | 295 | 47545  | 47797  |
| UN63985 | Rsa1.0.00581.1 | 727 | 163575 | 5.00E-64  | 131 | 133 | 98 - | 487 | 619 | 28441  | 28573  |
| UN63986 | Rsa1.0.00607.1 | 681 | 73146  | 1.00E-176 | 358 | 373 | 95 + | 6   | 378 | 14229  | 14601  |
| UN63987 | Rsa1.0.01523.1 | 751 | 43959  | 1.00E-115 | 259 | 275 | 94 + | 272 | 536 | 23028  | 23302  |
| UN63988 | Rsa1.0.00954.1 | 694 | 189536 | 6.00E-76  | 154 | 157 | 98 + | 485 | 641 | 37783  | 37939  |
| UN63989 | Rsa1.0.00347.1 | 470 | 93048  | 1.00E-57  | 195 | 222 | 87 - | 225 | 444 | 81469  | 81672  |
| UN63990 | Rsa1.0.00112.1 | 388 | 132199 | 1.00E-66  | 164 | 173 | 94 + | 223 | 388 | 118993 | 119165 |
| UN63991 | Rsa1.0.00237.1 | 642 | 235974 | 7.00E-94  | 233 | 251 | 92 + | 43  | 292 | 4721   | 4971   |
| UN63992 | Rsa1.0.00059.1 | 242 | 159650 | 6.00E-64  | 177 | 193 | 91 - | 12  | 197 | 124440 | 124629 |
| UN63993 | Rsa1.0.00965.1 | 649 | 58139  | 8.00E-69  | 142 | 145 | 97 + | 485 | 629 | 8169   | 8313   |
| UN63994 | Rsa1.0.00054.1 | 638 | 162053 | 1.00E-103 | 216 | 222 | 97 - | 30  | 251 | 123064 | 123282 |
| UN63995 | Rsa1.0.03211.1 | 824 | 24591  | 1.00E-145 | 292 | 302 | 96 + | 3   | 304 | 7527   | 7828   |
| UN63996 | Rsa1.0.02407.1 | 772 | 31684  | 1.00E-118 | 282 | 304 | 92 + | 3   | 306 | 23951  | 24254  |
| UN63997 | Rsa1.0.01663.1 | 810 | 168589 | 1.00E-128 | 248 | 253 | 98 - | 240 | 492 | 148222 | 148474 |

|         |                |     |        |           |     |     |       |     |     |        |        |
|---------|----------------|-----|--------|-----------|-----|-----|-------|-----|-----|--------|--------|
| UN63998 | Rsa1.0_00296.1 | 707 | 97854  | 1.00E-148 | 363 | 392 | 92 +  | 3   | 382 | 51437  | 51825  |
| UN63999 | Rsa1.0_13633.1 | 499 | 4605   | 1.00E-42  | 98  | 101 | 97 +  | 165 | 265 | 1458   | 1558   |
| UN64000 | Rsa1.0_00544.1 | 227 | 76787  | 3.00E-44  | 130 | 142 | 91 +  | 63  | 203 | 586    | 721    |
| UN64001 | Rsa1.0_03271.1 | 633 | 24187  | 3.00E-93  | 206 | 216 | 95 -  | 280 | 495 | 2314   | 2526   |
| UN64002 | Rsa1.0_00045.1 | 677 | 328694 | 0         | 437 | 456 | 95 +  | 9   | 463 | 224837 | 225292 |
| UN64003 | Rsa1.0_01525.1 | 706 | 43925  | 0         | 492 | 498 | 98 -  | 197 | 694 | 17139  | 17636  |
| UN64004 | Rsa1.0_08505.1 | 730 | 7258   | 5.00E-95  | 432 | 506 | 85 -  | 215 | 713 | 6341   | 6841   |
| UN64005 | Rsa1.0_02442.1 | 495 | 31355  | 1.00E-112 | 240 | 249 | 96 -  | 247 | 495 | 12548  | 12794  |
| UN64006 | Rsa1.0_00009.1 | 774 | 232558 | 1.00E-178 | 350 | 361 | 96 -  | 318 | 678 | 9736   | 10096  |
| UN64007 | Rsa1.0_02180.1 | 669 | 34176  | 0         | 347 | 349 | 99 +  | 3   | 351 | 8375   | 8723   |
| UN64008 | Rsa1.0_00476.1 | 676 | 280966 | 0         | 669 | 689 | 97 -  | 4   | 676 | 31904  | 32592  |
| UN64009 | Rsa1.0_02672.1 | 678 | 28884  | 0         | 622 | 699 | 88 +  | 1   | 678 | 24743  | 25426  |
| UN64010 | Rsa1.0_01046.1 | 778 | 152989 | 8.00E-57  | 150 | 157 | 95 -  | 623 | 775 | 112969 | 113125 |
| UN64011 | Rsa1.0_02187.1 | 273 | 34113  | 1.00E-130 | 263 | 272 | 96 +  | 1   | 272 | 25368  | 25639  |
| UN64012 | Rsa1.0_02365.1 | 724 | 32118  | 0         | 660 | 734 | 89 -  | 3   | 724 | 30178  | 30883  |
| UN64013 | Rsa1.0_04751.1 | 273 | 16132  | 1.00E-103 | 220 | 229 | 96 -  | 45  | 273 | 13066  | 13292  |
| UN64014 | Rsa1.0_01031.1 | 754 | 56236  | 1.00E-98  | 209 | 215 | 97 -  | 527 | 739 | 40072  | 40286  |
| UN64015 | Rsa1.0_18696.1 | 627 | 1550   | 1.00E-106 | 246 | 263 | 93 +  | 3   | 265 | 1000   | 1262   |
| UN64016 | Rsa1.0_00867.1 | 571 | 61635  | 5.00E-82  | 266 | 298 | 89 -  | 3   | 294 | 27352  | 27640  |
| UN64017 | Rsa1.0_00121.1 | 729 | 278029 | 1.00E-177 | 353 | 366 | 96 -  | 2   | 367 | 11572  | 11937  |
| UN64018 | Rsa1.0_01511.1 | 654 | 44235  | 1.00E-145 | 267 | 269 | 99 +  | 386 | 654 | 30186  | 30454  |
| UN64019 | Rsa1.0_05938.1 | 759 | 12173  | 0         | 732 | 767 | 95 +  | 2   | 759 | 2276   | 3033   |
| UN64020 | Rsa1.0_00817.1 | 764 | 62961  | 2.00E-97  | 181 | 181 | 100 + | 349 | 529 | 36251  | 36431  |
| UN64021 | Rsa1.0_01804.1 | 579 | 39038  | 9.00E-19  | 97  | 112 | 86 +  | 297 | 408 | 26289  | 26393  |
| UN64022 | Rsa1.0_12457.1 | 208 | 5222   | 4.00E-68  | 140 | 143 | 97 -  | 3   | 145 | 4922   | 5064   |
| UN64023 | Rsa1.0_00005.1 | 668 | 353093 | 0         | 634 | 666 | 95 +  | 1   | 663 | 193903 | 194568 |
| UN64024 | Rsa1.0_10841.1 | 718 | 5705   | 0         | 648 | 706 | 91 +  | 5   | 709 | 135    | 834    |
| UN64025 | Rsa1.0_01076.1 | 663 | 54835  | 0         | 614 | 647 | 94 -  | 9   | 653 | 4096   | 4739   |
| UN64026 | Rsa1.0_03284.1 | 703 | 24069  | 1.00E-127 | 288 | 304 | 94 -  | 343 | 644 | 18434  | 18733  |
| UN64027 | Rsa1.0_04538.1 | 776 | 16940  | 7.00E-79  | 198 | 209 | 94 +  | 570 | 774 | 7026   | 7233   |
| UN64028 | Rsa1.0_01534.1 | 786 | 43764  | 0         | 761 | 791 | 96 +  | 1   | 786 | 9362   | 10152  |
| UN64029 | Rsa1.0_00484.1 | 687 | 203294 | 1.00E-132 | 340 | 375 | 90 -  | 7   | 378 | 137471 | 137829 |
| UN64030 | Rsa1.0_11048.1 | 648 | 5634   | 1.00E-64  | 184 | 202 | 91 +  | 447 | 648 | 262    | 462    |
| UN64031 | Rsa1.0_00878.1 | 802 | 330303 | 8.00E-88  | 168 | 169 | 99 -  | 241 | 409 | 327224 | 327392 |
| UN64032 | Rsa1.0_00154.1 | 596 | 189461 | 1.00E-119 | 247 | 257 | 96 -  | 314 | 565 | 79526  | 79782  |
| UN64033 | Rsa1.0_00453.1 | 720 | 83031  | 0         | 651 | 676 | 96 +  | 55  | 714 | 16425  | 17100  |
| UN64034 | Rsa1.0_00053.1 | 380 | 263459 | 1.00E-148 | 351 | 378 | 92 +  | 3   | 380 | 72510  | 72886  |
| UN64035 | Rsa1.0_01569.1 | 788 | 43029  | 0         | 545 | 570 | 95 -  | 220 | 786 | 24245  | 24814  |
| UN64036 | Rsa1.0_03506.1 | 556 | 22416  | 1.00E-121 | 247 | 256 | 96 -  | 243 | 492 | 11977  | 12232  |

|         |                |     |        |           |     |     |      |     |     |        |        |
|---------|----------------|-----|--------|-----------|-----|-----|------|-----|-----|--------|--------|
| UN64037 | Rsa1.0_04243.1 | 812 | 18321  | 0         | 773 | 812 | 95 + | 8   | 808 | 12640  | 13451  |
| UN64038 | Rsa1.0_00047.1 | 766 | 168582 | 1.00E-102 | 201 | 205 | 98 + | 68  | 272 | 97858  | 98062  |
| UN64039 | Rsa1.0_52986.1 | 698 | 430    | 1.00E-102 | 233 | 248 | 93 - | 241 | 488 | 74     | 315    |
| UN64040 | #              | #   | #      | #         | #   | #   | #    | #   | #   | #      | #      |
| UN64041 | Rsa1.0_00897.1 | 749 | 60498  | 0         | 699 | 738 | 94 - | 15  | 749 | 46718  | 47452  |
| UN64042 | Rsa1.0_00429.1 | 392 | 85559  | 1.00E-123 | 244 | 251 | 97 - | 3   | 253 | 26197  | 26447  |
| UN64043 | Rsa1.0_09091.1 | 741 | 6656   | 1.00E-101 | 209 | 216 | 96 - | 1   | 216 | 5070   | 5285   |
| UN64044 | Rsa1.0_04179.1 | 706 | 18633  | 0         | 686 | 708 | 96 - | 2   | 706 | 1440   | 2143   |
| UN64045 | Rsa1.0_00098.1 | 723 | 349239 | 0         | 543 | 586 | 92 + | 160 | 723 | 275444 | 276027 |
| UN64046 | Rsa1.0_01321.1 | 657 | 48248  | 0         | 611 | 620 | 98 - | 2   | 621 | 19587  | 20206  |
| UN64047 | Rsa1.0_06032.1 | 785 | 11886  | 6.00E-64  | 243 | 284 | 85 - | 7   | 281 | 10750  | 11012  |
| UN64048 | Rsa1.0_05766.1 | 644 | 12708  | 1.00E-143 | 270 | 274 | 98 - | 209 | 482 | 10006  | 10279  |
| UN64049 | Rsa1.0_01537.1 | 640 | 187285 | 1.00E-112 | 235 | 245 | 95 - | 237 | 481 | 12649  | 12893  |
| UN64050 | Rsa1.0_02246.1 | 689 | 33435  | 0         | 465 | 471 | 98 + | 219 | 689 | 23284  | 23754  |
| UN64051 | Rsa1.0_00409.1 | 709 | 146788 | 0         | 673 | 706 | 95 + | 2   | 707 | 11029  | 11734  |
| UN64052 | Rsa1.0_01137.1 | 527 | 52655  | 0         | 338 | 339 | 99 + | 3   | 341 | 2730   | 3068   |
| UN64053 | Rsa1.0_00023.1 | 739 | 194764 | 1.00E-145 | 286 | 293 | 97 + | 440 | 731 | 117583 | 117875 |
| UN64054 | Rsa1.0_04760.1 | 669 | 16105  | 4.00E-86  | 184 | 190 | 96 - | 3   | 191 | 7185   | 7374   |
| UN64055 | Rsa1.0_28058.1 | 756 | 829    | 0         | 688 | 708 | 97 - | 2   | 709 | 1      | 707    |
| UN64056 | Rsa1.0_00351.1 | 693 | 413096 | 2.00E-23  | 103 | 116 | 88 + | 351 | 464 | 184381 | 184495 |
| UN64057 | Rsa1.0_05573.1 | 797 | 13290  | 1.00E-109 | 225 | 233 | 96 + | 125 | 357 | 2830   | 3062   |
| UN64058 | Rsa1.0_01905.1 | 661 | 37450  | 1.00E-141 | 359 | 393 | 91 + | 277 | 652 | 21816  | 22197  |
| UN64059 | Rsa1.0_05336.1 | 813 | 14117  | 4.00E-74  | 151 | 154 | 98 + | 3   | 156 | 8645   | 8798   |
| UN64060 | Rsa1.0_00570.1 | 674 | 75002  | 0         | 649 | 671 | 96 - | 3   | 668 | 31760  | 32424  |
| UN64061 | Rsa1.0_06209.1 | 813 | 11484  | 0         | 474 | 513 | 92 + | 5   | 505 | 2213   | 2719   |
| UN64062 | Rsa1.0_00178.1 | 591 | 114861 | 0         | 575 | 594 | 96 - | 1   | 591 | 13753  | 14345  |
| UN64063 | Rsa1.0_02723.1 | 746 | 28408  | 1.00E-160 | 318 | 326 | 97 - | 423 | 746 | 7978   | 8303   |
| UN64064 | Rsa1.0_00402.1 | 816 | 385315 | 0         | 434 | 445 | 97 - | 377 | 816 | 89253  | 89697  |
| UN64065 | Rsa1.0_00487.1 | 701 | 80674  | 1.00E-168 | 350 | 366 | 95 - | 3   | 365 | 75851  | 76216  |
| UN64066 | Rsa1.0_00100.1 | 625 | 249232 | 0         | 468 | 498 | 93 + | 3   | 500 | 199418 | 199909 |
| UN64067 | Rsa1.0_05391.1 | 619 | 13936  | 0         | 435 | 448 | 97 - | 168 | 615 | 2766   | 3209   |
| UN64068 | Rsa1.0_00025.1 | 693 | 277312 | 2.33E-156 | 271 | 274 | 98 - | 170 | 443 | 271079 | 271352 |
| UN64069 | Rsa1.0_00070.1 | 769 | 150321 | 0         | 510 | 527 | 96 + | 49  | 575 | 36981  | 37507  |
| UN64070 | Rsa1.0_01786.1 | 578 | 133324 | 0         | 402 | 426 | 94 - | 140 | 563 | 118325 | 118750 |
| UN64071 | Rsa1.0_00645.1 | 619 | 189716 | 1.00E-118 | 234 | 240 | 97 - | 199 | 438 | 151484 | 151723 |
| UN64072 | Rsa1.0_00655.1 | 819 | 195840 | 1.00E-95  | 221 | 234 | 94 + | 3   | 233 | 14920  | 15150  |
| UN64073 | Rsa1.0_00985.1 | 577 | 161950 | 1.00E-150 | 313 | 327 | 95 - | 3   | 326 | 32823  | 33149  |
| UN64074 | Rsa1.0_02477.1 | 721 | 31058  | 0         | 490 | 509 | 96 - | 46  | 545 | 15085  | 15593  |
| UN64075 | Rsa1.0_45629.1 | 648 | 494    | 0         | 471 | 491 | 95 - | 68  | 547 | 1      | 491    |

|         |                |     |        |           |     |     |       |     |     |        |        |
|---------|----------------|-----|--------|-----------|-----|-----|-------|-----|-----|--------|--------|
| UN64076 | Rsa1.0_00397.1 | 680 | 88189  | 1.00E-73  | 159 | 165 | 96 -  | 277 | 441 | 65711  | 65875  |
| UN64077 | Rsa1.0_02267.1 | 763 | 33194  | 6.00E-70  | 138 | 139 | 99 -  | 471 | 609 | 9697   | 9835   |
| UN64078 | Rsa1.0_00038.1 | 388 | 314568 | 1.00E-94  | 243 | 263 | 92 -  | 132 | 387 | 304014 | 304275 |
| UN64079 | Rsa1.0_01126.1 | 211 | 53127  | 3.00E-44  | 182 | 211 | 86 +  | 2   | 211 | 7840   | 8030   |
| UN64080 | Rsa1.0_00088.1 | 598 | 141341 | 1.00E-85  | 167 | 169 | 98 +  | 87  | 255 | 106711 | 106879 |
| UN64081 | Rsa1.0_01889.1 | 793 | 37562  | 9.00E-66  | 143 | 148 | 96 -  | 7   | 154 | 22630  | 22777  |
| UN64082 | Rsa1.0_00579.1 | 819 | 148308 | 1.00E-165 | 347 | 364 | 95 -  | 213 | 573 | 15752  | 16115  |
| UN64083 | Rsa1.0_16449.1 | 399 | 2152   | 3.00E-76  | 160 | 165 | 96 +  | 183 | 347 | 1831   | 1995   |
| UN64084 | Rsa1.0_03860.1 | 810 | 20407  | 1.00E-144 | 305 | 319 | 95 -  | 217 | 532 | 17073  | 17388  |
| UN64085 | Rsa1.0_00504.1 | 801 | 79334  | 0         | 739 | 774 | 95 +  | 32  | 801 | 60685  | 61458  |
| UN64086 | Rsa1.0_00251.1 | 801 | 303968 | 0         | 404 | 410 | 98 -  | 1   | 410 | 159357 | 159766 |
| UN64087 | Rsa1.0_02349.1 | 749 | 32312  | 5.00E-18  | 154 | 188 | 81 -  | 504 | 691 | 2023   | 2204   |
| UN64088 | Rsa1.0_00124.1 | 669 | 262503 | 4.00E-83  | 175 | 181 | 96 -  | 316 | 496 | 29199  | 29379  |
| UN64089 | Rsa1.0_00682.1 | 624 | 68680  | 0         | 493 | 519 | 94 -  | 5   | 521 | 37867  | 38385  |
| UN64090 | Rsa1.0_00961.1 | 706 | 58185  | 3.00E-65  | 127 | 127 | 100 - | 438 | 564 | 24900  | 25026  |
| UN64091 | Rsa1.0_00399.1 | 693 | 242951 | 0         | 533 | 545 | 97 +  | 3   | 544 | 75602  | 76146  |
| UN64092 | Rsa1.0_01366.1 | 630 | 47139  | 3.00E-31  | 104 | 114 | 91 +  | 518 | 630 | 5696   | 5809   |
| UN64093 | Rsa1.0_00502.1 | 369 | 204180 | 4.00E-57  | 204 | 240 | 85 -  | 11  | 245 | 182232 | 182449 |
| UN64094 | Rsa1.0_01154.1 | 705 | 52249  | 1.00E-144 | 286 | 295 | 96 +  | 41  | 335 | 1014   | 1308   |
| UN64095 | Rsa1.0_16666.1 | 609 | 2071   | 1.00E-174 | 465 | 505 | 92 +  | 3   | 499 | 1069   | 1556   |
| UN64096 | Rsa1.0_00030.1 | 611 | 250988 | 1.00E-128 | 256 | 264 | 96 -  | 348 | 611 | 213961 | 214224 |
| UN64097 | Rsa1.0_07315.1 | 699 | 9562   | 0         | 691 | 698 | 98 +  | 2   | 699 | 5744   | 6441   |
| UN64098 | Rsa1.0_35270.1 | 816 | 641    | 1.00E-163 | 309 | 315 | 98 +  | 358 | 672 | 19     | 333    |
| UN64099 | Rsa1.0_00093.1 | 327 | 214962 | 3.00E-94  | 292 | 328 | 89 -  | 2   | 325 | 104541 | 104851 |
| UN64100 | Rsa1.0_00067.1 | 527 | 415055 | 0         | 426 | 449 | 94 -  | 83  | 527 | 46414  | 46853  |
| UN64101 | Rsa1.0_00131.1 | 675 | 432233 | 4.00E-80  | 164 | 168 | 97 +  | 277 | 444 | 10362  | 10529  |
| UN64102 | Rsa1.0_00284.1 | 612 | 323267 | 0         | 590 | 608 | 97 -  | 3   | 610 | 144311 | 144918 |
| UN64103 | Rsa1.0_03175.1 | 650 | 24802  | 0         | 581 | 651 | 89 +  | 1   | 637 | 20837  | 21457  |
| UN64104 | Rsa1.0_00958.1 | 722 | 58243  | 0         | 365 | 376 | 97 -  | 344 | 719 | 2989   | 3364   |
| UN64105 | Rsa1.0_00001.1 | 754 | 363028 | 0         | 715 | 769 | 92 +  | 1   | 754 | 39152  | 39907  |
| UN64106 | Rsa1.0_02023.1 | 780 | 35922  | 0         | 483 | 525 | 92 +  | 259 | 780 | 26294  | 26818  |
| UN64107 | Rsa1.0_01545.1 | 661 | 43599  | 0         | 465 | 491 | 94 -  | 4   | 479 | 27015  | 27501  |
| UN64108 | Rsa1.0_00745.1 | 520 | 66067  | 1.00E-133 | 331 | 355 | 93 -  | 149 | 500 | 46607  | 46958  |
| UN64109 | Rsa1.0_00196.1 | 587 | 109960 | 1.00E-152 | 319 | 335 | 95 +  | 1   | 323 | 101293 | 101627 |
| UN64110 | Rsa1.0_00967.1 | 597 | 58049  | 0         | 577 | 596 | 96 -  | 2   | 597 | 7514   | 8109   |
| UN64111 | Rsa1.0_00033.1 | 248 | 515811 | 5.00E-40  | 91  | 92  | 98 -  | 148 | 238 | 146880 | 146971 |
| UN64112 | Rsa1.0_00098.1 | 579 | 349239 | 1.00E-143 | 302 | 317 | 95 +  | 273 | 579 | 343978 | 344294 |
| UN64113 | Rsa1.0_01325.1 | 375 | 48131  | 1.00E-140 | 342 | 366 | 93 +  | 23  | 375 | 16479  | 16844  |
| UN64114 | Rsa1.0_00703.1 | 745 | 67597  | 1.00E-160 | 310 | 318 | 97 +  | 273 | 590 | 7592   | 7909   |

|         |                |     |        |           |     |     |       |     |     |        |        |
|---------|----------------|-----|--------|-----------|-----|-----|-------|-----|-----|--------|--------|
| UN64115 | Rsa1.0.03027.1 | 666 | 25883  | 7.00E-97  | 264 | 291 | 90 -  | 3   | 277 | 24444  | 24733  |
| UN64116 | Rsa1.0.03800.1 | 570 | 20768  | 0         | 551 | 569 | 96 -  | 2   | 570 | 1792   | 2359   |
| UN64117 | Rsa1.0.00575.1 | 583 | 74791  | 1.00E-112 | 224 | 230 | 97 -  | 2   | 231 | 71722  | 71951  |
| UN64118 | Rsa1.0.00487.1 | 559 | 80674  | 2.00E-38  | 91  | 94  | 96 -  | 226 | 319 | 15521  | 15614  |
| UN64119 | Rsa1.0.18628.1 | 686 | 1562   | 0         | 662 | 689 | 96 -  | 1   | 686 | 624    | 1309   |
| UN64120 | Rsa1.0.00937.1 | 762 | 59061  | 0         | 413 | 423 | 97 -  | 94  | 516 | 54953  | 55375  |
| UN64121 | Rsa1.0.00707.1 | 557 | 190112 | 0         | 534 | 553 | 96 -  | 5   | 557 | 14120  | 14671  |
| UN64122 | Rsa1.0.01963.1 | 749 | 36719  | 0         | 498 | 529 | 94 -  | 13  | 540 | 25344  | 25849  |
| UN64123 | Rsa1.0.01047.1 | 226 | 55705  | 1.00E-110 | 205 | 206 | 99 +  | 3   | 208 | 39244  | 39449  |
| UN64124 | Rsa1.0.00483.1 | 696 | 81102  | 3.00E-47  | 109 | 113 | 96 -  | 245 | 357 | 49082  | 49194  |
| UN64125 | Rsa1.0.22496.1 | 588 | 1116   | 2.00E-78  | 179 | 187 | 95 -  | 3   | 185 | 22     | 208    |
| UN64126 | Rsa1.0.00856.1 | 653 | 62037  | 1.00E-73  | 150 | 153 | 98 -  | 377 | 529 | 13140  | 13292  |
| UN64127 | Rsa1.0.03297.1 | 626 | 23969  | 2.00E-78  | 182 | 192 | 94 +  | 435 | 626 | 21026  | 21215  |
| UN64128 | Rsa1.0.04794.1 | 773 | 15960  | 0         | 368 | 383 | 96 +  | 80  | 462 | 6544   | 6926   |
| UN64129 | Rsa1.0.02079.1 | 651 | 35306  | 1.00E-154 | 310 | 320 | 96 -  | 3   | 321 | 4592   | 4911   |
| UN64130 | Rsa1.0.01335.1 | 628 | 47894  | 1.00E-133 | 315 | 341 | 92 -  | 2   | 333 | 3912   | 4252   |
| UN64131 | Rsa1.0.01000.1 | 691 | 57140  | 1.00E-86  | 175 | 179 | 97 -  | 1   | 179 | 19064  | 19242  |
| UN64132 | Rsa1.0.00467.1 | 765 | 156542 | 1.00E-110 | 245 | 259 | 94 +  | 42  | 300 | 91014  | 91272  |
| UN64133 | Rsa1.0.00457.1 | 630 | 337301 | 1.00E-134 | 326 | 353 | 92 +  | 281 | 630 | 334386 | 334734 |
| UN64134 | Rsa1.0.12250.1 | 460 | 5276   | 1.00E-164 | 301 | 304 | 99 -  | 123 | 426 | 674    | 977    |
| UN64135 | Rsa1.0.00253.1 | 724 | 231292 | 7.00E-94  | 196 | 203 | 96 -  | 372 | 574 | 205358 | 205560 |
| UN64136 | Rsa1.0.00131.1 | 446 | 432233 | 1.00E-149 | 327 | 348 | 93 -  | 86  | 425 | 285283 | 285630 |
| UN64137 | Rsa1.0.02026.1 | 796 | 35896  | 1.00E-119 | 229 | 233 | 98 -  | 166 | 398 | 13982  | 14214  |
| UN64138 | Rsa1.0.24394.1 | 515 | 989    | 4.00E-64  | 125 | 125 | 100 - | 185 | 309 | 545    | 669    |
| UN64139 | Rsa1.0.00484.1 | 793 | 203294 | 1.00E-179 | 356 | 363 | 98 -  | 369 | 727 | 49985  | 50347  |
| UN64140 | Rsa1.0.00713.1 | 114 | 158017 | 2.00E-40  | 112 | 118 | 94 -  | 2   | 114 | 49848  | 49965  |
| UN64141 | Rsa1.0.01739.1 | 652 | 40068  | 0         | 600 | 665 | 90 -  | 4   | 652 | 15085  | 15726  |
| UN64142 | Rsa1.0.00017.1 | 564 | 752458 | 1.00E-134 | 320 | 345 | 92 -  | 227 | 564 | 277058 | 277402 |
| UN64143 | Rsa1.0.02312.1 | 595 | 32675  | 0         | 501 | 508 | 98 -  | 89  | 595 | 20044  | 20551  |
| UN64144 | Rsa1.0.08388.1 | 504 | 7436   | 0         | 359 | 364 | 98 -  | 38  | 401 | 3639   | 4002   |
| UN64145 | Rsa1.0.02593.1 | 465 | 29744  | 1.00E-118 | 258 | 271 | 95 -  | 196 | 465 | 4392   | 4656   |
| UN64146 | Rsa1.0.00212.1 | 511 | 108350 | 0         | 464 | 476 | 97 -  | 36  | 511 | 23849  | 24318  |
| UN64147 | Rsa1.0.08779.1 | 788 | 6929   | 0         | 748 | 781 | 95 +  | 4   | 772 | 2477   | 3253   |
| UN64148 | Rsa1.0.00626.1 | 706 | 71582  | 4.00E-49  | 109 | 111 | 98 -  | 285 | 393 | 56024  | 56134  |
| UN64149 | Rsa1.0.00124.1 | 701 | 262503 | 0         | 442 | 458 | 96 -  | 159 | 613 | 172735 | 173192 |
| UN64150 | Rsa1.0.04422.1 | 629 | 17423  | 0         | 602 | 630 | 95 -  | 3   | 629 | 2241   | 2863   |
| UN64151 | Rsa1.0.62453.1 | 604 | 367    | 1.00E-118 | 255 | 268 | 95 -  | 184 | 451 | 1      | 268    |
| UN64152 | Rsa1.0.00101.1 | 350 | 267193 | 5.00E-81  | 187 | 193 | 96 -  | 162 | 350 | 121236 | 121428 |
| UN64153 | Rsa1.0.13872.1 | 697 | 4176   | 3.00E-96  | 200 | 207 | 96 +  | 85  | 291 | 1      | 207    |

|         |                |     |        |           |     |     |      |     |     |        |        |
|---------|----------------|-----|--------|-----------|-----|-----|------|-----|-----|--------|--------|
| UN64154 | Rsa1.0.00050.1 | 740 | 237174 | 0         | 460 | 482 | 95 + | 216 | 697 | 7595   | 8076   |
| UN64155 | Rsa1.0.01754.1 | 587 | 39792  | 1.00E-125 | 267 | 280 | 95 + | 308 | 587 | 13547  | 13826  |
| UN64156 | Rsa1.0.03278.1 | 439 | 24125  | 4.00E-51  | 109 | 111 | 98 - | 278 | 388 | 3059   | 3169   |
| UN64157 | Rsa1.0.01139.1 | 716 | 52601  | 0         | 426 | 449 | 94 + | 119 | 567 | 48423  | 48864  |
| UN64158 | Rsa1.0.00093.1 | 744 | 214962 | 0         | 675 | 706 | 95 + | 2   | 705 | 103728 | 104433 |
| UN64159 | Rsa1.0.55266.1 | 220 | 413    | 1.00E-74  | 201 | 217 | 92 - | 7   | 220 | 82     | 292    |
| UN64160 | Rsa1.0.00885.1 | 622 | 61088  | 0         | 366 | 373 | 98 - | 5   | 377 | 6698   | 7070   |
| UN64161 | Rsa1.0.03191.1 | 730 | 145762 | 1.00E-86  | 292 | 333 | 87 - | 341 | 663 | 22149  | 22472  |
| UN64162 | Rsa1.0.02682.1 | 416 | 28711  | 1.00E-128 | 277 | 291 | 95 - | 129 | 416 | 10469  | 10759  |
| UN64163 | Rsa1.0.01827.1 | 639 | 143321 | 1.00E-140 | 317 | 336 | 94 - | 293 | 627 | 130946 | 131280 |
| UN64164 | Rsa1.0.01424.1 | 790 | 46139  | 0         | 549 | 577 | 95 + | 217 | 788 | 43607  | 44183  |
| UN64165 | Rsa1.0.02358.1 | 560 | 32213  | 0         | 525 | 571 | 91 - | 12  | 560 | 21251  | 21811  |
| UN64166 | Rsa1.0.01454.1 | 367 | 45440  | 1.00E-81  | 161 | 162 | 99 + | 168 | 328 | 12564  | 12725  |
| UN64167 | Rsa1.0.15221.1 | 731 | 2744   | 1.00E-125 | 246 | 251 | 98 - | 462 | 711 | 376    | 626    |
| UN64168 | Rsa1.0.03122.1 | 630 | 25207  | 1.00E-109 | 225 | 233 | 96 - | 388 | 620 | 17669  | 17901  |
| UN64169 | Rsa1.0.00216.1 | 664 | 197563 | 1.00E-82  | 165 | 168 | 98 - | 163 | 330 | 13885  | 14052  |
| UN64170 | Rsa1.0.07701.1 | 724 | 8758   | 0         | 711 | 727 | 97 + | 1   | 724 | 4606   | 5331   |
| UN64171 | Rsa1.0.04584.1 | 438 | 16756  | 1.00E-140 | 273 | 279 | 97 + | 143 | 421 | 4436   | 4712   |
| UN64172 | Rsa1.0.00529.1 | 125 | 77487  | 6.00E-38  | 119 | 132 | 90 + | 1   | 122 | 1920   | 2051   |
| UN64173 | Rsa1.0.00459.1 | 108 | 82580  | 3.00E-39  | 97  | 102 | 95 - | 3   | 104 | 42245  | 42346  |
| UN64174 | Rsa1.0.01073.1 | 275 | 55030  | 1.00E-116 | 258 | 273 | 94 - | 3   | 275 | 34259  | 34528  |
| UN64175 | Rsa1.0.00134.1 | 503 | 390219 | 8.00E-93  | 200 | 209 | 95 + | 1   | 209 | 129404 | 129612 |
| UN64176 | Rsa1.0.00026.1 | 764 | 327835 | 1.00E-147 | 278 | 281 | 98 - | 478 | 758 | 46305  | 46584  |
| UN64177 | Rsa1.0.00500.1 | 670 | 272308 | 1.00E-76  | 216 | 238 | 90 - | 150 | 380 | 160574 | 160802 |
| UN64178 | Rsa1.0.03425.1 | 683 | 23043  | 1.00E-126 | 281 | 300 | 93 - | 3   | 302 | 7749   | 8033   |
| UN64179 | Rsa1.0.19594.1 | 602 | 1410   | 1.00E-143 | 333 | 360 | 92 + | 259 | 602 | 356    | 715    |
| UN64180 | Rsa1.0.09468.1 | 584 | 6346   | 1.00E-134 | 328 | 358 | 91 + | 4   | 341 | 5954   | 6307   |
| UN64181 | Rsa1.0.00037.1 | 820 | 307838 | 0         | 490 | 504 | 97 - | 2   | 503 | 66234  | 66737  |
| UN64182 | Rsa1.0.18647.1 | 692 | 1560   | 1.00E-157 | 328 | 342 | 95 - | 341 | 681 | 591    | 932    |
| UN64183 | Rsa1.0.01039.1 | 766 | 55946  | 1.00E-129 | 249 | 254 | 98 - | 513 | 766 | 38104  | 38357  |
| UN64184 | Rsa1.0.03304.1 | 535 | 23883  | 0         | 517 | 534 | 96 + | 2   | 535 | 17600  | 18132  |
| UN64185 | Rsa1.0.01064.1 | 799 | 55295  | 4.00E-74  | 470 | 577 | 81 - | 76  | 649 | 1      | 557    |
| UN64186 | Rsa1.0.00440.1 | 319 | 84723  | 7.00E-43  | 101 | 105 | 96 + | 98  | 202 | 47675  | 47779  |
| UN64187 | Rsa1.0.00459.1 | 359 | 82580  | 1.00E-112 | 221 | 226 | 97 + | 134 | 359 | 69485  | 69710  |
| UN64188 | Rsa1.0.02392.1 | 808 | 152517 | 1.00E-108 | 216 | 221 | 97 - | 449 | 669 | 26268  | 26485  |
| UN64189 | Rsa1.0.01701.1 | 768 | 162121 | 8.00E-94  | 187 | 191 | 97 - | 144 | 334 | 26072  | 26262  |
| UN64190 | Rsa1.0.00054.1 | 691 | 162053 | 0         | 363 | 368 | 98 + | 1   | 368 | 137459 | 137826 |
| UN64191 | Rsa1.0.02922.1 | 666 | 26753  | 2.00E-48  | 144 | 159 | 90 + | 166 | 324 | 10034  | 10192  |
| UN64192 | Rsa1.0.00296.1 | 741 | 97854  | 1.00E-143 | 347 | 376 | 92 + | 34  | 400 | 51453  | 51825  |



|         |                |     |        |           |     |     |      |     |     |        |        |
|---------|----------------|-----|--------|-----------|-----|-----|------|-----|-----|--------|--------|
| UN64193 | Rsa1.0.00777.1 | 815 | 191865 | 1.00E-168 | 369 | 387 | 95 + | 430 | 807 | 182381 | 182767 |
| UN64194 | Rsa1.0.03015.1 | 556 | 26006  | 7.00E-41  | 95  | 98  | 96 - | 3   | 100 | 3192   | 3289   |
| UN64195 | Rsa1.0.02347.1 | 362 | 32332  | 8.00E-46  | 106 | 110 | 96 - | 185 | 294 | 24104  | 24213  |
| UN64196 | Rsa1.0.00042.1 | 463 | 171507 | 1.00E-122 | 255 | 266 | 95 + | 196 | 461 | 157980 | 158245 |
| UN64197 | Rsa1.0.02969.1 | 633 | 26390  | 1.00E-125 | 270 | 283 | 95 - | 1   | 283 | 21656  | 21937  |
| UN64198 | Rsa1.0.03305.1 | 619 | 147552 | 0         | 591 | 621 | 95 - | 2   | 619 | 139656 | 140271 |
| UN64199 | Rsa1.0.09005.1 | 507 | 6716   | 0         | 473 | 507 | 93 + | 1   | 507 | 3915   | 4420   |
| UN64200 | Rsa1.0.00224.1 | 522 | 327530 | 1.00E-106 | 205 | 208 | 98 + | 194 | 401 | 42951  | 43158  |
| UN64201 | Rsa1.0.03007.1 | 574 | 26070  | 1.00E-140 | 283 | 293 | 96 - | 57  | 349 | 3370   | 3662   |
| UN64202 | Rsa1.0.02133.1 | 667 | 34726  | 1.00E-101 | 231 | 245 | 94 + | 158 | 399 | 31515  | 31759  |
| UN64203 | Rsa1.0.00158.1 | 526 | 117999 | 8.00E-90  | 219 | 232 | 94 + | 299 | 525 | 40584  | 40812  |
| UN64204 | Rsa1.0.05273.1 | 257 | 14304  | 1.00E-68  | 135 | 136 | 99 + | 60  | 195 | 140    | 275    |
| UN64205 | Rsa1.0.00413.1 | 312 | 86921  | 3.00E-88  | 203 | 213 | 95 + | 91  | 303 | 47313  | 47523  |
| UN64206 | Rsa1.0.03664.1 | 625 | 21487  | 1.00E-142 | 329 | 352 | 93 - | 92  | 437 | 4808   | 5159   |
| UN64207 | Rsa1.0.00002.1 | 815 | 601661 | 0         | 784 | 814 | 96 - | 2   | 813 | 437088 | 437901 |
| UN64208 | Rsa1.0.01364.1 | 549 | 47172  | 1.00E-168 | 324 | 331 | 97 - | 3   | 331 | 45707  | 46033  |
| UN64209 | Rsa1.0.66339.1 | 829 | 345    | 9.00E-97  | 186 | 188 | 98 - | 192 | 379 | 98     | 285    |
| UN64210 | Rsa1.0.01938.1 | 747 | 264018 | 0         | 561 | 584 | 96 - | 170 | 747 | 156784 | 157365 |
| UN64211 | Rsa1.0.02085.1 | 690 | 35198  | 0         | 653 | 689 | 94 + | 3   | 690 | 27918  | 28604  |
| UN64212 | Rsa1.0.01444.1 | 582 | 169539 | 1.00E-118 | 258 | 268 | 96 - | 317 | 582 | 14822  | 15088  |
| UN64213 | Rsa1.0.03753.1 | 733 | 21010  | 1.00E-114 | 314 | 343 | 91 - | 3   | 341 | 3208   | 3532   |
| UN64214 | Rsa1.0.29854.1 | 840 | 770    | 0         | 418 | 431 | 96 - | 3   | 433 | 1      | 429    |
| UN64215 | Rsa1.0.00309.1 | 693 | 96883  | 3.00E-68  | 150 | 156 | 96 - | 159 | 314 | 66985  | 67140  |
| UN64216 | Rsa1.0.00662.1 | 661 | 192183 | 1.00E-129 | 255 | 262 | 97 + | 110 | 371 | 1595   | 1856   |
| UN64217 | Rsa1.0.04022.1 | 633 | 19534  | 1.00E-82  | 186 | 196 | 94 + | 438 | 633 | 6268   | 6463   |
| UN64218 | Rsa1.0.02114.1 | 765 | 34873  | 0         | 492 | 546 | 90 + | 191 | 734 | 14430  | 14945  |
| UN64219 | Rsa1.0.00024.1 | 674 | 188018 | 2.00E-94  | 208 | 218 | 95 - | 374 | 588 | 53498  | 53715  |
| UN64220 | Rsa1.0.01292.1 | 630 | 175783 | 1.00E-112 | 215 | 218 | 98 + | 410 | 627 | 3978   | 4195   |
| UN64221 | Rsa1.0.03009.1 | 624 | 26065  | 1.00E-149 | 318 | 333 | 95 + | 3   | 330 | 2674   | 3006   |
| UN64222 | Rsa1.0.00329.1 | 394 | 222544 | 3.00E-70  | 211 | 235 | 89 - | 157 | 391 | 16347  | 16580  |
| UN64223 | Rsa1.0.00128.1 | 632 | 228675 | 0         | 610 | 633 | 96 - | 2   | 632 | 207544 | 208176 |
| UN64224 | Rsa1.0.00001.1 | 650 | 363028 | 0         | 614 | 639 | 96 + | 4   | 642 | 33766  | 34404  |
| UN64225 | Rsa1.0.00108.1 | 708 | 478491 | 0         | 688 | 711 | 96 + | 1   | 708 | 10872  | 11575  |
| UN64226 | Rsa1.0.00243.1 | 733 | 103651 | 1.00E-160 | 316 | 326 | 96 - | 408 | 733 | 20991  | 21316  |
| UN64227 | Rsa1.0.54377.1 | 104 | 419    | 2.00E-40  | 99  | 104 | 95 + | 1   | 104 | 314    | 417    |
| UN64228 | Rsa1.0.14734.1 | 750 | 3116   | 0         | 465 | 505 | 92 - | 45  | 528 | 139    | 643    |
| UN64229 | Rsa1.0.08166.1 | 526 | 7803   | 2.00E-59  | 126 | 129 | 97 - | 191 | 319 | 1      | 129    |
| UN64230 | Rsa1.0.00221.1 | 761 | 106972 | 1.00E-102 | 281 | 311 | 90 - | 37  | 343 | 50983  | 51274  |
| UN64231 | Rsa1.0.00316.1 | 576 | 96264  | 1.00E-136 | 282 | 294 | 95 - | 11  | 304 | 85735  | 86028  |

|         |                |     |        |           |     |     |      |     |     |        |        |
|---------|----------------|-----|--------|-----------|-----|-----|------|-----|-----|--------|--------|
| UN64232 | Rsa1.0.03070.1 | 671 | 25578  | 0         | 530 | 593 | 89 + | 88  | 668 | 13284  | 13866  |
| UN64233 | Rsa1.0.00115.1 | 110 | 131321 | 2.00E-18  | 50  | 51  | 98 + | 60  | 110 | 21048  | 21098  |
| UN64234 | Rsa1.0.00207.1 | 510 | 248736 | 0         | 467 | 494 | 94 + | 3   | 495 | 196517 | 197000 |
| UN64235 | Rsa1.0.00034.1 | 732 | 260119 | 1.00E-114 | 268 | 285 | 94 + | 450 | 732 | 67803  | 68081  |
| UN64236 | Rsa1.0.00286.1 | 479 | 98709  | 2.00E-84  | 263 | 294 | 89 - | 147 | 433 | 92105  | 92391  |
| UN64237 | Rsa1.0.02737.1 | 536 | 28325  | 1.00E-108 | 256 | 271 | 94 + | 2   | 272 | 6905   | 7167   |
| UN64238 | Rsa1.0.04374.1 | 323 | 17670  | 1.00E-138 | 294 | 309 | 95 + | 25  | 323 | 16320  | 16628  |
| UN64239 | Rsa1.0.44526.1 | 152 | 505    | 1.00E-33  | 76  | 77  | 98 - | 5   | 81  | 159    | 235    |
| UN64240 | Rsa1.0.00338.1 | 722 | 94109  | 1.00E-129 | 261 | 267 | 97 + | 451 | 715 | 65588  | 65854  |
| UN64241 | Rsa1.0.00773.1 | 808 | 64839  | 0         | 442 | 474 | 93 + | 162 | 628 | 60360  | 60831  |
| UN64242 | Rsa1.0.00932.1 | 730 | 59185  | 1.00E-162 | 342 | 360 | 95 - | 7   | 366 | 3645   | 3992   |
| UN64243 | Rsa1.0.00222.1 | 700 | 172263 | 0         | 591 | 640 | 92 + | 25  | 643 | 39652  | 40291  |
| UN64244 | Rsa1.0.00006.1 | 674 | 396176 | 0         | 627 | 662 | 94 - | 9   | 663 | 385972 | 386624 |
| UN64245 | Rsa1.0.05754.1 | 698 | 12731  | 2.00E-82  | 162 | 164 | 98 - | 459 | 622 | 7374   | 7537   |
| UN64246 | Rsa1.0.10284.1 | 606 | 5904   | 1.00E-140 | 272 | 277 | 98 - | 331 | 606 | 1827   | 2103   |
| UN64247 | Rsa1.0.00526.1 | 400 | 169279 | 0         | 395 | 398 | 99 - | 3   | 400 | 127460 | 127857 |
| UN64248 | Rsa1.0.02831.1 | 521 | 27533  | 0         | 415 | 442 | 93 + | 80  | 521 | 13241  | 13682  |
| UN64249 | Rsa1.0.00605.1 | 668 | 73199  | 0         | 427 | 454 | 94 - | 3   | 442 | 4479   | 4932   |
| UN64250 | Rsa1.0.00048.1 | 274 | 167185 | 5.00E-68  | 149 | 155 | 96 - | 10  | 164 | 106387 | 106541 |
| UN64251 | Rsa1.0.01606.1 | 768 | 42432  | 1.00E-160 | 341 | 359 | 94 + | 161 | 519 | 6320   | 6673   |
| UN64252 | Rsa1.0.00320.1 | 296 | 95784  | 1.00E-138 | 283 | 294 | 96 + | 3   | 296 | 57782  | 58072  |
| UN64253 | Rsa1.0.00175.1 | 344 | 166121 | 1.00E-87  | 189 | 195 | 96 - | 117 | 310 | 141898 | 142090 |
| UN64254 | Rsa1.0.00648.1 | 578 | 70351  | 1.00E-125 | 303 | 325 | 93 + | 9   | 327 | 21672  | 21992  |
| UN64255 | Rsa1.0.00815.1 | 599 | 63031  | 5.00E-39  | 148 | 167 | 88 + | 177 | 342 | 33400  | 33565  |
| UN64256 | Rsa1.0.08459.1 | 747 | 7315   | 1.00E-103 | 228 | 238 | 95 - | 3   | 233 | 4884   | 5121   |
| UN64257 | Rsa1.0.00085.1 | 768 | 142226 | 0         | 642 | 678 | 94 - | 4   | 671 | 7383   | 8060   |
| UN64258 | Rsa1.0.00099.1 | 474 | 159619 | 3.00E-55  | 113 | 114 | 99 - | 2   | 115 | 5681   | 5794   |
| UN64259 | Rsa1.0.01818.1 | 802 | 38837  | 0         | 379 | 388 | 97 - | 2   | 386 | 10616  | 11000  |
| UN64260 | Rsa1.0.00082.1 | 756 | 237584 | 1.00E-116 | 311 | 344 | 90 - | 194 | 537 | 26890  | 27233  |
| UN64261 | Rsa1.0.12198.1 | 668 | 5291   | 0         | 508 | 531 | 95 + | 31  | 561 | 4412   | 4942   |
| UN64262 | Rsa1.0.00447.1 | 513 | 84051  | 1.00E-126 | 272 | 284 | 95 + | 228 | 508 | 14586  | 14869  |
| UN64263 | Rsa1.0.04395.1 | 631 | 17570  | 0         | 591 | 629 | 93 - | 3   | 622 | 7918   | 8545   |
| UN64264 | Rsa1.0.26598.1 | 820 | 884    | 0         | 770 | 816 | 94 + | 5   | 802 | 53     | 864    |
| UN64265 | Rsa1.0.00516.1 | 770 | 78417  | 6.00E-73  | 146 | 148 | 98 - | 137 | 284 | 14950  | 15097  |
| UN64266 | Rsa1.0.00068.1 | 723 | 151813 | 0         | 688 | 721 | 95 - | 4   | 723 | 38254  | 38974  |
| UN64267 | Rsa1.0.00163.1 | 364 | 116847 | 1.00E-158 | 338 | 350 | 96 - | 2   | 346 | 51457  | 51806  |
| UN64268 | Rsa1.0.03001.1 | 694 | 26108  | 0         | 669 | 706 | 94 + | 2   | 694 | 11580  | 12282  |
| UN64269 | Rsa1.0.04455.1 | 512 | 17266  | 0         | 398 | 412 | 96 - | 1   | 409 | 12968  | 13378  |
| UN64270 | Rsa1.0.00734.1 | 348 | 66508  | 1.00E-121 | 253 | 260 | 97 + | 2   | 258 | 53633  | 53891  |

|         |                |     |        |           |     |     |      |     |     |        |        |
|---------|----------------|-----|--------|-----------|-----|-----|------|-----|-----|--------|--------|
| UN64271 | Rsa1.0.00111.1 | 810 | 390088 | 0         | 495 | 521 | 95 - | 59  | 579 | 338919 | 339427 |
| UN64272 | Rsa1.0.00699.1 | 659 | 184398 | 1.00E-180 | 349 | 358 | 97 - | 306 | 659 | 183965 | 184319 |
| UN64273 | Rsa1.0.00340.1 | 396 | 305782 | 2.00E-74  | 186 | 199 | 93 + | 113 | 310 | 193443 | 193637 |
| UN64274 | Rsa1.0.00060.1 | 627 | 502678 | 0         | 417 | 428 | 97 + | 1   | 428 | 396604 | 397031 |
| UN64275 | Rsa1.0.00720.1 | 619 | 66931  | 1.00E-116 | 242 | 251 | 96 + | 369 | 619 | 37937  | 38185  |
| UN64276 | Rsa1.0.05162.1 | 530 | 14631  | 1.00E-104 | 252 | 269 | 93 - | 153 | 412 | 9833   | 10099  |
| UN64277 | Rsa1.0.02811.1 | 452 | 27669  | 1.00E-133 | 264 | 272 | 97 - | 144 | 415 | 14402  | 14673  |
| UN64278 | Rsa1.0.00157.1 | 440 | 245832 | 0         | 394 | 406 | 97 - | 36  | 439 | 156456 | 156861 |
| UN64279 | Rsa1.0.00879.1 | 580 | 61297  | 1.00E-175 | 317 | 319 | 99 - | 262 | 580 | 12606  | 12924  |
| UN64280 | Rsa1.0.00051.1 | 733 | 258225 | 0         | 710 | 734 | 96 - | 1   | 733 | 120655 | 121388 |
| UN64281 | Rsa1.0.00092.1 | 278 | 659932 | 1.00E-132 | 271 | 279 | 97 + | 2   | 278 | 655744 | 656022 |
| UN64282 | Rsa1.0.00190.1 | 648 | 318240 | 4.00E-98  | 209 | 218 | 95 + | 1   | 218 | 201939 | 202156 |
| UN64283 | Rsa1.0.04489.1 | 651 | 17145  | 1.00E-114 | 241 | 251 | 96 + | 363 | 613 | 9271   | 9518   |
| UN64284 | Rsa1.0.00440.1 | 604 | 84723  | 9.00E-53  | 112 | 114 | 98 + | 127 | 240 | 66302  | 66415  |
| UN64285 | Rsa1.0.17744.1 | 716 | 1752   | 0         | 439 | 461 | 95 - | 233 | 693 | 747    | 1204   |
| UN64286 | Rsa1.0.00887.1 | 634 | 61048  | 4.00E-52  | 199 | 229 | 86 + | 317 | 545 | 37729  | 37956  |
| UN64287 | Rsa1.0.00218.1 | 616 | 201480 | 0         | 593 | 612 | 96 - | 2   | 613 | 26804  | 27415  |
| UN64288 | Rsa1.0.02098.1 | 811 | 35032  | 3.00E-53  | 122 | 127 | 96 - | 576 | 702 | 19847  | 19973  |
| UN64289 | Rsa1.0.03875.1 | 568 | 20355  | 1.00E-130 | 245 | 248 | 98 + | 2   | 249 | 15229  | 15476  |
| UN64290 | Rsa1.0.00556.1 | 615 | 207212 | 0         | 555 | 586 | 94 - | 40  | 615 | 28491  | 29074  |
| UN64291 | Rsa1.0.65172.1 | 701 | 352    | 1.00E-132 | 252 | 256 | 98 + | 121 | 376 | 97     | 352    |
| UN64292 | Rsa1.0.05699.1 | 519 | 12889  | 0         | 512 | 526 | 97 - | 2   | 519 | 10198  | 10723  |
| UN64293 | Rsa1.0.00131.1 | 632 | 432233 | 1.00E-141 | 286 | 295 | 96 + | 3   | 291 | 6338   | 6632   |
| UN64294 | Rsa1.0.04166.1 | 604 | 18757  | 1.00E-147 | 298 | 309 | 96 + | 3   | 311 | 12587  | 12895  |
| UN64295 | #              | #   | #      | #         | #   | #   | #    | #   | #   | #      | #      |
| UN64296 | Rsa1.0.05004.1 | 714 | 15172  | 1.00E-114 | 275 | 299 | 91 - | 149 | 447 | 3432   | 3718   |
| UN64297 | Rsa1.0.00658.1 | 683 | 69740  | 0         | 678 | 682 | 99 + | 3   | 683 | 56796  | 57477  |
| UN64298 | Rsa1.0.17354.1 | 478 | 1851   | 1.00E-116 | 307 | 338 | 90 - | 141 | 478 | 367    | 701    |
| UN64299 | Rsa1.0.00377.1 | 469 | 90038  | 1.00E-145 | 282 | 289 | 97 - | 2   | 290 | 46603  | 46891  |
| UN64300 | Rsa1.0.05260.1 | 629 | 14337  | 1.00E-120 | 267 | 282 | 94 - | 3   | 284 | 4819   | 5098   |
| UN64301 | Rsa1.0.00333.1 | 749 | 94500  | 1.00E-127 | 258 | 267 | 96 + | 148 | 414 | 68164  | 68430  |
| UN64302 | Rsa1.0.00172.1 | 649 | 115476 | 0         | 615 | 652 | 94 + | 3   | 649 | 23558  | 24207  |
| UN64303 | Rsa1.0.00056.1 | 573 | 332604 | 2.00E-56  | 118 | 120 | 98 - | 407 | 526 | 293483 | 293602 |
| UN64304 | Rsa1.0.05239.1 | 590 | 14410  | 3.00E-99  | 244 | 262 | 93 - | 339 | 590 | 11875  | 12132  |
| UN64305 | Rsa1.0.02700.1 | 556 | 28584  | 6.00E-94  | 234 | 251 | 93 + | 310 | 555 | 27509  | 27757  |
| UN64306 | Rsa1.0.00640.1 | 583 | 70979  | 3.00E-74  | 160 | 166 | 96 + | 222 | 387 | 47923  | 48088  |
| UN64307 | Rsa1.0.01811.1 | 478 | 38977  | 1.00E-115 | 217 | 219 | 99 + | 256 | 474 | 1187   | 1405   |
| UN64308 | Rsa1.0.03304.1 | 713 | 23883  | 0         | 468 | 494 | 94 + | 222 | 713 | 18843  | 19328  |
| UN64309 | Rsa1.0.03880.1 | 404 | 20293  | 2.00E-96  | 210 | 219 | 95 + | 155 | 372 | 18521  | 18739  |

|         |                |     |        |           |     |     |      |     |     |        |        |
|---------|----------------|-----|--------|-----------|-----|-----|------|-----|-----|--------|--------|
| UN64310 | Rsa1.0.01111.1 | 486 | 53669  | 1.00E-107 | 245 | 261 | 93 - | 47  | 298 | 41591  | 41850  |
| UN64311 | Rsa1.0.00207.1 | 553 | 248736 | 2.00E-41  | 96  | 99  | 96 + | 205 | 303 | 202510 | 202608 |
| UN64312 | Rsa1.0.01242.1 | 326 | 50066  | 1.00E-106 | 228 | 239 | 95 + | 57  | 295 | 16507  | 16745  |
| UN64313 | Rsa1.0.00182.1 | 543 | 142305 | 0         | 530 | 541 | 97 + | 3   | 543 | 122612 | 123152 |
| UN64314 | Rsa1.0.03681.1 | 303 | 21405  | 2.00E-80  | 159 | 160 | 99 - | 3   | 161 | 18854  | 19013  |
| UN64315 | Rsa1.0.02336.1 | 356 | 32397  | 4.00E-72  | 189 | 202 | 93 - | 144 | 340 | 3336   | 3534   |
| UN64316 | Rsa1.0.01263.1 | 461 | 49703  | 7.00E-84  | 182 | 190 | 95 + | 170 | 359 | 42329  | 42518  |
| UN64317 | Rsa1.0.00898.1 | 707 | 202772 | 0         | 559 | 569 | 98 - | 139 | 707 | 176557 | 177125 |
| UN64318 | Rsa1.0.01453.1 | 426 | 45449  | 2.00E-71  | 176 | 188 | 93 - | 5   | 190 | 15930  | 16117  |
| UN64319 | Rsa1.0.00065.1 | 133 | 454616 | 5.00E-60  | 129 | 133 | 96 - | 1   | 133 | 127238 | 127370 |
| UN64320 | Rsa1.0.00043.1 | 614 | 264937 | 9.00E-90  | 255 | 283 | 90 + | 3   | 269 | 99184  | 99465  |
| UN64321 | Rsa1.0.01334.1 | 321 | 47904  | 2.00E-46  | 101 | 103 | 98 - | 146 | 248 | 8674   | 8776   |
| UN64322 | Rsa1.0.00517.1 | 666 | 142790 | 1.00E-76  | 152 | 154 | 98 + | 142 | 295 | 69570  | 69723  |
| UN64323 | Rsa1.0.00104.1 | 563 | 368722 | 1.00E-79  | 163 | 167 | 97 + | 397 | 563 | 201064 | 201230 |
| UN64324 | Rsa1.0.00168.1 | 563 | 115870 | 1.00E-164 | 374 | 403 | 92 - | 64  | 454 | 111590 | 111989 |
| UN64325 | Rsa1.0.03177.1 | 555 | 24799  | 2.00E-90  | 201 | 211 | 95 + | 1   | 208 | 2349   | 2559   |
| UN64326 | Rsa1.0.01546.1 | 414 | 43586  | 1.00E-179 | 389 | 411 | 94 + | 3   | 412 | 30255  | 30661  |
| UN64327 | Rsa1.0.00179.1 | 533 | 393324 | 1.00E-175 | 417 | 451 | 92 + | 63  | 507 | 25123  | 25573  |
| UN64328 | Rsa1.0.00093.1 | 127 | 214962 | 3.00E-24  | 110 | 125 | 88 - | 2   | 126 | 11283  | 11400  |
| UN64329 | Rsa1.0.01173.1 | 635 | 51727  | 1.00E-116 | 254 | 267 | 95 + | 9   | 272 | 111    | 377    |
| UN64330 | Rsa1.0.00055.1 | 289 | 520193 | 1.00E-100 | 197 | 201 | 98 - | 89  | 289 | 291330 | 291530 |
| UN64331 | Rsa1.0.00660.1 | 558 | 69688  | 4.00E-95  | 192 | 197 | 97 - | 41  | 237 | 5394   | 5590   |
| UN64332 | Rsa1.0.00376.1 | 537 | 90101  | 1.00E-110 | 217 | 222 | 97 - | 316 | 537 | 35314  | 35535  |
| UN64333 | Rsa1.0.00006.1 | 427 | 396176 | 1.00E-128 | 362 | 408 | 88 - | 26  | 427 | 24662  | 25051  |
| UN64334 | Rsa1.0.00418.1 | 771 | 215377 | 1.00E-115 | 238 | 247 | 96 + | 9   | 255 | 55275  | 55521  |
| UN64335 | Rsa1.0.00561.1 | 738 | 75653  | 0         | 705 | 745 | 94 - | 2   | 738 | 62871  | 63591  |
| UN64336 | Rsa1.0.14107.1 | 158 | 3802   | 1.00E-14  | 53  | 57  | 92 + | 102 | 158 | 1      | 57     |
| UN64337 | Rsa1.0.00546.1 | 722 | 76523  | 0         | 687 | 726 | 94 - | 6   | 722 | 68412  | 69134  |
| UN64338 | Rsa1.0.00724.1 | 437 | 66789  | 0         | 421 | 442 | 95 + | 2   | 437 | 38921  | 39361  |
| UN64339 | Rsa1.0.01518.1 | 590 | 141402 | 0         | 558 | 588 | 94 + | 7   | 590 | 117722 | 118303 |
| UN64340 | Rsa1.0.00019.1 | 626 | 301669 | 0         | 618 | 634 | 97 - | 2   | 626 | 103385 | 104018 |
| UN64341 | Rsa1.0.00001.1 | 694 | 363028 | 1.00E-117 | 250 | 258 | 96 + | 439 | 693 | 239197 | 239454 |
| UN64342 | Rsa1.0.02016.1 | 650 | 36003  | 0         | 369 | 379 | 97 + | 270 | 648 | 23397  | 23773  |
| UN64343 | Rsa1.0.01251.1 | 607 | 49873  | 0         | 389 | 406 | 95 - | 202 | 607 | 27304  | 27707  |
| UN64344 | Rsa1.0.03133.1 | 732 | 25135  | 1.00E-152 | 333 | 349 | 95 + | 385 | 730 | 11553  | 11901  |
| UN64345 | Rsa1.0.04141.1 | 233 | 18864  | 2.00E-54  | 147 | 156 | 94 - | 3   | 155 | 17273  | 17428  |
| UN64346 | Rsa1.0.09314.1 | 773 | 6461   | 0         | 511 | 542 | 94 + | 155 | 689 | 3997   | 4527   |
| UN64347 | Rsa1.0.04155.1 | 452 | 134772 | 0         | 381 | 398 | 95 + | 9   | 405 | 130474 | 130870 |
| UN64348 | Rsa1.0.02126.1 | 752 | 34765  | 0         | 420 | 429 | 97 - | 2   | 430 | 12167  | 12595  |

|         |                |     |        |           |     |     |       |     |     |        |        |
|---------|----------------|-----|--------|-----------|-----|-----|-------|-----|-----|--------|--------|
| UN64349 | Rsa1.0.01077.1 | 595 | 54772  | 8.00E-75  | 152 | 155 | 98 -  | 61  | 215 | 20022  | 20176  |
| UN64350 | Rsa1.0.00016.1 | 686 | 831256 | 3.00E-93  | 382 | 451 | 84 +  | 177 | 618 | 650571 | 651021 |
| UN64351 | Rsa1.0.16156.1 | 742 | 2263   | 0         | 725 | 733 | 98 +  | 3   | 732 | 1176   | 1908   |
| UN64352 | Rsa1.0.00044.1 | 770 | 271658 | 1.00E-95  | 197 | 201 | 98 +  | 3   | 202 | 3256   | 3454   |
| UN64353 | Rsa1.0.00190.1 | 544 | 318240 | 0         | 423 | 447 | 94 +  | 9   | 444 | 17883  | 18324  |
| UN64354 | Rsa1.0.02907.1 | 682 | 26861  | 1.00E-106 | 216 | 223 | 96 -  | 388 | 610 | 15863  | 16085  |
| UN64355 | Rsa1.0.33333.1 | 606 | 681    | 0         | 551 | 585 | 94 +  | 24  | 606 | 76     | 653    |
| UN64356 | Rsa1.0.00029.1 | 703 | 272992 | 7.00E-91  | 214 | 225 | 95 +  | 481 | 703 | 208940 | 209162 |
| UN64357 | Rsa1.0.04470.1 | 754 | 17204  | 0         | 725 | 755 | 96 +  | 3   | 754 | 10813  | 11560  |
| UN64358 | Rsa1.0.00008.1 | 503 | 358124 | 1.00E-115 | 284 | 307 | 92 +  | 200 | 503 | 30632  | 30926  |
| UN64359 | Rsa1.0.00145.1 | 763 | 261008 | 2.00E-51  | 145 | 159 | 91 +  | 218 | 370 | 31350  | 31508  |
| UN64360 | Rsa1.0.00153.1 | 717 | 192931 | 1.00E-101 | 209 | 215 | 97 +  | 480 | 693 | 139608 | 139822 |
| UN64361 | Rsa1.0.00507.1 | 685 | 79074  | 0         | 351 | 359 | 97 -  | 327 | 685 | 16346  | 16701  |
| UN64362 | Rsa1.0.00214.1 | 487 | 107508 | 1.00E-94  | 182 | 184 | 98 -  | 5   | 188 | 7050   | 7233   |
| UN64363 | Rsa1.0.08558.1 | 700 | 7198   | 3.00E-93  | 227 | 244 | 93 -  | 6   | 246 | 6434   | 6677   |
| UN64364 | Rsa1.0.00793.1 | 632 | 64103  | 1.00E-108 | 257 | 272 | 94 -  | 361 | 632 | 13008  | 13272  |
| UN64365 | Rsa1.0.02685.1 | 534 | 28669  | 2.00E-75  | 162 | 168 | 96 -  | 367 | 534 | 10151  | 10318  |
| UN64366 | Rsa1.0.02257.1 | 534 | 33318  | 0         | 487 | 534 | 91 -  | 5   | 534 | 21574  | 22093  |
| UN64367 | Rsa1.0.00962.1 | 562 | 184909 | 0         | 493 | 512 | 96 +  | 50  | 561 | 40755  | 41263  |
| UN64368 | Rsa1.0.04438.1 | 225 | 17361  | 1.00E-43  | 117 | 125 | 93 +  | 3   | 127 | 12879  | 13001  |
| UN64369 | Rsa1.0.00690.1 | 710 | 140527 | 0         | 463 | 494 | 93 +  | 207 | 696 | 10481  | 10962  |
| UN64370 | Rsa1.0.00642.1 | 167 | 201230 | 9.00E-47  | 118 | 123 | 95 +  | 46  | 167 | 174584 | 174705 |
| UN64371 | Rsa1.0.03884.1 | 452 | 20274  | 0         | 333 | 336 | 99 -  | 117 | 452 | 13881  | 14216  |
| UN64372 | Rsa1.0.02749.1 | 648 | 28241  | 5.00E-73  | 174 | 184 | 94 +  | 208 | 390 | 2047   | 2230   |
| UN64373 | Rsa1.0.03565.1 | 690 | 22062  | 0         | 529 | 554 | 95 -  | 137 | 690 | 18037  | 18590  |
| UN64374 | Rsa1.0.05653.1 | 556 | 13043  | 0         | 446 | 474 | 94 +  | 93  | 556 | 10006  | 10476  |
| UN64375 | Rsa1.0.02388.1 | 497 | 31881  | 8.00E-99  | 201 | 206 | 97 +  | 292 | 497 | 4132   | 4335   |
| UN64376 | Rsa1.0.00571.1 | 635 | 329018 | 0         | 452 | 485 | 93 +  | 154 | 635 | 145041 | 145519 |
| UN64377 | Rsa1.0.05441.1 | 284 | 13742  | 6.00E-80  | 192 | 205 | 93 +  | 80  | 284 | 8798   | 8999   |
| UN64378 | Rsa1.0.00069.1 | 636 | 403561 | 1.00E-135 | 274 | 284 | 96 +  | 1   | 284 | 161598 | 161881 |
| UN64379 | Rsa1.0.02820.1 | 622 | 27629  | 1.00E-106 | 204 | 207 | 98 -  | 206 | 412 | 20354  | 20560  |
| UN64380 | Rsa1.0.21552.1 | 459 | 1192   | 1.00E-42  | 101 | 105 | 96 -  | 2   | 106 | 772    | 876    |
| UN64381 | Rsa1.0.00143.1 | 627 | 121313 | 1.00E-162 | 344 | 361 | 95 +  | 3   | 360 | 97993  | 98349  |
| UN64382 | #              | #   | #      | #         | #   | #   | #     | #   | #   | #      | #      |
| UN64383 | Rsa1.0.15215.1 | 824 | 2752   | 1.00E-118 | 311 | 331 | 93 +  | 509 | 824 | 1684   | 2014   |
| UN64384 | Rsa1.0.00823.1 | 614 | 62889  | 0         | 575 | 607 | 94 -  | 12  | 614 | 17555  | 18161  |
| UN64385 | Rsa1.0.03280.1 | 566 | 145083 | 1.00E-156 | 322 | 335 | 96 -  | 40  | 373 | 2559   | 2893   |
| UN64386 | Rsa1.0.01104.1 | 754 | 285480 | 1.00E-140 | 315 | 329 | 95 +  | 420 | 743 | 10212  | 10540  |
| UN64387 | Rsa1.0.00301.1 | 762 | 365315 | 1.00E-86  | 163 | 163 | 100 + | 514 | 676 | 159534 | 159696 |

|         |                |     |        |           |     |     |      |     |     |        |        |
|---------|----------------|-----|--------|-----------|-----|-----|------|-----|-----|--------|--------|
| UN64388 | Rsa1.0.00773.1 | 802 | 64839  | 0         | 766 | 809 | 94 - | 2   | 802 | 8493   | 9298   |
| UN64389 | Rsa1.0.01597.1 | 558 | 42555  | 1.00E-147 | 283 | 289 | 97 - | 2   | 290 | 18920  | 19208  |
| UN64390 | Rsa1.0.12160.1 | 592 | 5298   | 4.00E-70  | 147 | 151 | 97 + | 423 | 573 | 530    | 680    |
| UN64391 | Rsa1.0.13775.1 | 554 | 4349   | 1.00E-128 | 253 | 260 | 97 - | 295 | 554 | 2807   | 3066   |
| UN64392 | Rsa1.0.02226.1 | 393 | 33726  | 1.00E-60  | 173 | 186 | 93 - | 3   | 187 | 11844  | 12025  |
| UN64393 | Rsa1.0.01953.1 | 252 | 36881  | 1.00E-59  | 183 | 203 | 90 + | 1   | 200 | 26325  | 26521  |
| UN64394 | Rsa1.0.03471.1 | 548 | 22678  | 1.00E-111 | 227 | 234 | 97 - | 167 | 397 | 14969  | 15202  |
| UN64395 | Rsa1.0.03688.1 | 389 | 143676 | 3.00E-73  | 147 | 148 | 99 - | 55  | 201 | 16253  | 16400  |
| UN64396 | Rsa1.0.02606.1 | 484 | 29635  | 0         | 476 | 484 | 98 - | 3   | 484 | 20337  | 20820  |
| UN64397 | Rsa1.0.00075.1 | 404 | 146680 | 1.00E-102 | 253 | 275 | 92 + | 84  | 342 | 88317  | 88591  |
| UN64398 | Rsa1.0.03099.1 | 478 | 139424 | 1.00E-82  | 210 | 228 | 92 + | 2   | 226 | 4396   | 4611   |
| UN64399 | Rsa1.0.08015.1 | 563 | 8078   | 0         | 369 | 376 | 98 - | 3   | 375 | 2144   | 2519   |
| UN64400 | Rsa1.0.03044.1 | 576 | 25791  | 1.00E-102 | 267 | 294 | 90 - | 116 | 406 | 15714  | 15992  |
| UN64401 | Rsa1.0.00281.1 | 715 | 99908  | 0         | 633 | 660 | 95 - | 56  | 715 | 83530  | 84189  |
| UN64402 | Rsa1.0.00016.1 | 579 | 831256 | 0         | 479 | 503 | 95 + | 6   | 508 | 294575 | 295077 |
| UN64403 | Rsa1.0.02375.1 | 565 | 32026  | 1.00E-129 | 310 | 334 | 92 + | 3   | 334 | 28545  | 28869  |
| UN64404 | Rsa1.0.09091.1 | 264 | 6656   | 1.00E-126 | 255 | 264 | 96 + | 1   | 264 | 2339   | 2602   |
| UN64405 | Rsa1.0.00497.1 | 604 | 79830  | 0         | 398 | 419 | 94 - | 145 | 560 | 3429   | 3847   |
| UN64406 | Rsa1.0.00490.1 | 239 | 186713 | 4.00E-56  | 129 | 135 | 95 + | 3   | 137 | 20800  | 20934  |
| UN64407 | Rsa1.0.02266.1 | 127 | 33195  | 5.00E-20  | 57  | 58  | 98 + | 58  | 114 | 13497  | 13554  |
| UN64408 | Rsa1.0.00196.1 | 193 | 109960 | 2.00E-85  | 185 | 192 | 96 - | 3   | 193 | 19463  | 19654  |
| UN64409 | Rsa1.0.03185.1 | 496 | 24739  | 5.00E-97  | 186 | 188 | 98 - | 238 | 425 | 9033   | 9220   |
| UN64410 | Rsa1.0.01783.1 | 491 | 39383  | 2.00E-28  | 83  | 89  | 93 - | 57  | 145 | 20355  | 20443  |
| UN64411 | Rsa1.0.01877.1 | 469 | 37789  | 1.00E-97  | 196 | 201 | 97 + | 1   | 201 | 33298  | 33498  |
| UN64412 | Rsa1.0.00116.1 | 315 | 365886 | 8.00E-24  | 69  | 73  | 94 - | 83  | 155 | 157266 | 157338 |
| UN64413 | Rsa1.0.00179.1 | 341 | 393324 | 2.00E-71  | 161 | 169 | 95 + | 77  | 245 | 349023 | 349191 |
| UN64414 | Rsa1.0.03431.1 | 281 | 22974  | 1.00E-102 | 223 | 233 | 95 - | 3   | 234 | 5524   | 5756   |
| UN64415 | Rsa1.0.01306.1 | 282 | 48720  | 1.00E-109 | 260 | 279 | 93 + | 3   | 281 | 33645  | 33921  |
| UN64416 | Rsa1.0.00871.1 | 200 | 61539  | 9.00E-69  | 144 | 148 | 97 - | 53  | 200 | 15405  | 15552  |
| UN64417 | Rsa1.0.07596.1 | 731 | 9056   | 1.00E-175 | 358 | 372 | 96 + | 274 | 644 | 4029   | 4400   |
| UN64418 | Rsa1.0.01476.1 | 284 | 172928 | 6.00E-40  | 126 | 140 | 90 - | 145 | 284 | 9557   | 9691   |
| UN64419 | Rsa1.0.00330.1 | 526 | 94666  | 1.00E-60  | 122 | 123 | 99 - | 225 | 347 | 43212  | 43334  |
| UN64420 | Rsa1.0.04462.1 | 475 | 17250  | 2.00E-84  | 197 | 207 | 95 + | 165 | 371 | 5837   | 6041   |
| UN64421 | Rsa1.0.00019.1 | 283 | 301669 | 1.00E-133 | 273 | 283 | 96 + | 4   | 283 | 17859  | 18141  |
| UN64422 | Rsa1.0.00285.1 | 613 | 149638 | 1.00E-156 | 361 | 386 | 93 - | 3   | 387 | 1797   | 2180   |
| UN64423 | Rsa1.0.00122.1 | 588 | 265937 | 1.00E-141 | 278 | 285 | 97 - | 278 | 562 | 107859 | 108140 |
| UN64424 | Rsa1.0.05218.1 | 613 | 14457  | 3.00E-74  | 148 | 150 | 98 + | 92  | 241 | 4482   | 4631   |
| UN64425 | Rsa1.0.00088.1 | 706 | 141341 | 1.00E-150 | 302 | 313 | 96 + | 2   | 314 | 61081  | 61393  |
| UN64426 | Rsa1.0.03264.1 | 286 | 145959 | 2.00E-58  | 121 | 123 | 98 + | 164 | 286 | 129573 | 129695 |

|         |                |     |        |           |     |     |      |     |     |        |        |
|---------|----------------|-----|--------|-----------|-----|-----|------|-----|-----|--------|--------|
| UN64427 | Rsa1.0.02018.1 | 581 | 35994  | 0         | 536 | 555 | 96 + | 27  | 581 | 29181  | 29730  |
| UN64428 | Rsa1.0.02377.1 | 286 | 31994  | 1.00E-116 | 266 | 283 | 93 + | 2   | 277 | 5616   | 5898   |
| UN64429 | Rsa1.0.00050.1 | 667 | 237174 | 7.00E-57  | 119 | 121 | 98 + | 156 | 276 | 78766  | 78886  |
| UN64430 | Rsa1.0.09063.1 | 714 | 6675   | 0         | 367 | 379 | 96 - | 337 | 714 | 1800   | 2178   |
| UN64431 | Rsa1.0.00008.1 | 638 | 358124 | 1.00E-122 | 288 | 313 | 92 + | 57  | 354 | 162320 | 162632 |
| UN64432 | Rsa1.0.09349.1 | 610 | 6433   | 0         | 404 | 421 | 95 + | 1   | 421 | 4147   | 4567   |
| UN64433 | Rsa1.0.00194.1 | 339 | 110851 | 2.00E-95  | 189 | 193 | 97 + | 3   | 195 | 11775  | 11967  |
| UN64434 | Rsa1.0.00825.1 | 393 | 62855  | 2.00E-56  | 115 | 116 | 99 - | 124 | 239 | 29883  | 29998  |
| UN64435 | Rsa1.0.08532.1 | 188 | 7228   | 2.00E-44  | 114 | 121 | 94 + | 1   | 121 | 1587   | 1704   |
| UN64436 | Rsa1.0.04318.1 | 533 | 17947  | 1.00E-116 | 254 | 265 | 95 - | 2   | 264 | 5968   | 6232   |
| UN64437 | Rsa1.0.00644.1 | 282 | 136881 | 2.00E-48  | 104 | 106 | 98 - | 116 | 221 | 64056  | 64161  |
| UN64438 | Rsa1.0.02900.1 | 612 | 26928  | 3.00E-62  | 211 | 236 | 89 + | 363 | 593 | 16858  | 17087  |
| UN64439 | Rsa1.0.33919.1 | 540 | 668    | 1.00E-133 | 264 | 272 | 97 - | 269 | 540 | 397    | 668    |
| UN64440 | Rsa1.0.07983.1 | 341 | 8131   | 1.00E-119 | 311 | 339 | 91 - | 5   | 341 | 4459   | 4794   |
| UN64441 | Rsa1.0.00185.1 | 752 | 248445 | 3.00E-62  | 125 | 126 | 99 + | 340 | 465 | 8954   | 9079   |
| UN64442 | Rsa1.0.00422.1 | 722 | 86144  | 0         | 690 | 736 | 93 + | 3   | 722 | 32004  | 32736  |
| UN64443 | Rsa1.0.00198.1 | 522 | 222963 | 1.00E-152 | 302 | 312 | 96 + | 211 | 522 | 163806 | 164117 |
| UN64444 | Rsa1.0.03997.1 | 553 | 19652  | 1.00E-171 | 393 | 421 | 93 - | 126 | 544 | 11047  | 11458  |
| UN64445 | Rsa1.0.01322.1 | 587 | 48166  | 1.00E-108 | 224 | 231 | 96 - | 358 | 587 | 11033  | 11263  |
| UN64446 | Rsa1.0.02939.1 | 479 | 26595  | 1.00E-118 | 291 | 316 | 92 - | 11  | 326 | 20553  | 20868  |
| UN64447 | Rsa1.0.01000.1 | 358 | 57140  | 2.00E-71  | 192 | 205 | 93 - | 141 | 342 | 16897  | 17100  |
| UN64448 | Rsa1.0.00065.1 | 743 | 454616 | 0         | 479 | 514 | 93 + | 4   | 506 | 411687 | 412195 |
| UN64449 | Rsa1.0.03244.1 | 280 | 24413  | 1.00E-103 | 253 | 272 | 93 + | 15  | 280 | 10841  | 11109  |
| UN64450 | Rsa1.0.00394.1 | 731 | 148426 | 0         | 570 | 610 | 93 - | 131 | 731 | 125736 | 126342 |
| UN64451 | Rsa1.0.08315.1 | 165 | 7556   | 1.00E-76  | 151 | 153 | 98 - | 8   | 160 | 828    | 980    |
| UN64452 | Rsa1.0.00114.1 | 545 | 131330 | 0         | 523 | 544 | 96 + | 3   | 545 | 53524  | 54063  |
| UN64453 | Rsa1.0.00897.1 | 605 | 60498  | 1.00E-111 | 237 | 246 | 96 - | 195 | 439 | 22614  | 22856  |
| UN64454 | Rsa1.0.02228.1 | 186 | 33688  | 6.00E-45  | 101 | 104 | 97 - | 1   | 104 | 12574  | 12677  |
| UN64455 | Rsa1.0.04040.1 | 591 | 19439  | 1.00E-180 | 353 | 364 | 96 - | 228 | 591 | 9917   | 10280  |
| UN64456 | Rsa1.0.00407.1 | 802 | 191544 | 6.00E-73  | 149 | 152 | 98 + | 398 | 549 | 29701  | 29852  |
| UN64457 | Rsa1.0.00744.1 | 630 | 66084  | 6.00E-88  | 180 | 185 | 97 - | 388 | 572 | 58549  | 58733  |
| UN64458 | Rsa1.0.00006.1 | 827 | 396176 | 1.00E-125 | 278 | 295 | 94 - | 3   | 297 | 102352 | 102641 |
| UN64459 | Rsa1.0.00023.1 | 802 | 194764 | 0         | 372 | 384 | 96 + | 3   | 384 | 179578 | 179961 |
| UN64460 | Rsa1.0.08140.1 | 560 | 7845   | 1.00E-178 | 345 | 352 | 98 + | 63  | 412 | 5824   | 6174   |
| UN64461 | Rsa1.0.01491.1 | 818 | 44718  | 0         | 797 | 819 | 97 - | 2   | 815 | 20062  | 20880  |
| UN64462 | Rsa1.0.00383.1 | 823 | 398431 | 1.00E-136 | 261 | 266 | 98 + | 155 | 420 | 1568   | 1833   |
| UN64463 | Rsa1.0.02178.1 | 791 | 156197 | 0         | 488 | 503 | 97 - | 64  | 566 | 1510   | 2012   |
| UN64464 | Rsa1.0.00779.1 | 759 | 64568  | 0         | 483 | 507 | 95 - | 245 | 748 | 51428  | 51934  |
| UN64465 | Rsa1.0.00131.1 | 747 | 432233 | 0         | 457 | 482 | 94 - | 261 | 732 | 250691 | 251170 |

|         |                |     |        |           |     |     |      |     |     |        |        |
|---------|----------------|-----|--------|-----------|-----|-----|------|-----|-----|--------|--------|
| UN64466 | Rsa1.0.01539.1 | 615 | 43698  | 2.00E-94  | 185 | 188 | 98 - | 3   | 190 | 6459   | 6646   |
| UN64467 | Rsa1.0.00496.1 | 667 | 79834  | 0         | 336 | 340 | 98 + | 324 | 663 | 39325  | 39664  |
| UN64468 | Rsa1.0.00034.1 | 807 | 260119 | 0         | 408 | 419 | 97 + | 2   | 419 | 66754  | 67172  |
| UN64469 | Rsa1.0.00195.1 | 658 | 251884 | 1.00E-109 | 245 | 262 | 93 + | 391 | 652 | 83583  | 83833  |
| UN64470 | Rsa1.0.00047.1 | 710 | 168582 | 1.00E-128 | 302 | 322 | 93 + | 4   | 314 | 118640 | 118961 |
| UN64471 | Rsa1.0.00075.1 | 606 | 146680 | 0         | 596 | 609 | 97 + | 3   | 606 | 117258 | 117865 |
| UN64472 | Rsa1.0.00211.1 | 503 | 228189 | 5.00E-85  | 181 | 188 | 96 - | 42  | 229 | 143762 | 143949 |
| UN64473 | Rsa1.0.04989.1 | 603 | 15217  | 1.00E-128 | 284 | 303 | 93 + | 301 | 603 | 2481   | 2767   |
| UN64474 | Rsa1.0.75375.1 | 769 | 304    | 1.00E-120 | 223 | 224 | 99 + | 1   | 224 | 81     | 304    |
| UN64475 | Rsa1.0.09470.1 | 662 | 6345   | 0         | 488 | 490 | 99 + | 2   | 491 | 5268   | 5757   |
| UN64476 | Rsa1.0.05141.1 | 403 | 14710  | 1.00E-109 | 208 | 209 | 99 - | 196 | 403 | 5515   | 5723   |
| UN64477 | Rsa1.0.14845.1 | 481 | 3019   | 0         | 445 | 470 | 94 - | 6   | 475 | 2052   | 2520   |
| UN64478 | Rsa1.0.00881.1 | 800 | 61260  | 0         | 370 | 381 | 97 - | 100 | 477 | 2549   | 2929   |
| UN64479 | Rsa1.0.00991.1 | 806 | 143101 | 0         | 455 | 471 | 96 + | 2   | 468 | 133487 | 133957 |
| UN64480 | Rsa1.0.00337.1 | 521 | 143174 | 1.00E-100 | 204 | 209 | 97 - | 217 | 425 | 141486 | 141693 |
| UN64481 | Rsa1.0.00615.1 | 607 | 72235  | 1.00E-149 | 310 | 324 | 95 + | 142 | 465 | 25401  | 25724  |
| UN64482 | Rsa1.0.28117.1 | 284 | 827    | 1.00E-128 | 274 | 286 | 95 + | 3   | 284 | 474    | 759    |
| UN64483 | Rsa1.0.00071.1 | 536 | 345714 | 1.00E-140 | 265 | 269 | 98 + | 2   | 270 | 101619 | 101887 |
| UN64484 | Rsa1.0.01410.1 | 204 | 46345  | 2.00E-75  | 199 | 222 | 89 + | 1   | 204 | 31376  | 31597  |
| UN64485 | Rsa1.0.00095.1 | 284 | 283384 | 2.00E-70  | 173 | 185 | 93 - | 81  | 265 | 29791  | 29972  |
| UN64486 | Rsa1.0.00172.1 | 619 | 115476 | 1.00E-179 | 345 | 354 | 97 - | 264 | 617 | 33     | 386    |
| UN64487 | Rsa1.0.00078.1 | 621 | 175053 | 2.00E-87  | 198 | 206 | 96 - | 418 | 619 | 40609  | 40813  |
| UN64488 | Rsa1.0.02969.1 | 416 | 26390  | 3.00E-33  | 76  | 77  | 98 + | 335 | 411 | 12164  | 12240  |
| UN64489 | Rsa1.0.00473.1 | 316 | 212204 | 3.00E-85  | 210 | 220 | 95 + | 1   | 215 | 76480  | 76699  |
| UN64490 | Rsa1.0.14011.1 | 269 | 3920   | 3.00E-35  | 85  | 88  | 96 - | 180 | 267 | 3833   | 3920   |
| UN64491 | Rsa1.0.00048.1 | 395 | 167185 | 1.00E-114 | 305 | 334 | 91 - | 7   | 335 | 76604  | 76927  |
| UN64492 | Rsa1.0.03162.1 | 290 | 24895  | 3.00E-57  | 134 | 141 | 95 + | 3   | 143 | 21649  | 21789  |
| UN64493 | Rsa1.0.71734.1 | 287 | 319    | 1.00E-56  | 124 | 128 | 96 + | 157 | 284 | 105    | 232    |
| UN64494 | Rsa1.0.04139.1 | 686 | 18883  | 1.00E-64  | 165 | 176 | 93 + | 3   | 177 | 14158  | 14330  |
| UN64495 | Rsa1.0.00545.1 | 515 | 189649 | 0         | 498 | 514 | 96 - | 2   | 515 | 44711  | 45223  |
| UN64496 | Rsa1.0.00017.1 | 470 | 752458 | 7.00E-93  | 209 | 220 | 95 + | 256 | 470 | 314371 | 314588 |
| UN64497 | Rsa1.0.05878.1 | 287 | 12344  | 3.00E-94  | 205 | 214 | 95 - | 24  | 235 | 2128   | 2341   |
| UN64498 | Rsa1.0.00742.1 | 483 | 66106  | 1.00E-173 | 401 | 427 | 93 + | 63  | 483 | 15643  | 16066  |
| UN64499 | Rsa1.0.00419.1 | 597 | 86562  | 2.00E-93  | 224 | 243 | 92 - | 319 | 561 | 46390  | 46620  |
| UN64500 | Rsa1.0.00139.1 | 535 | 357786 | 1.00E-101 | 205 | 211 | 97 + | 129 | 339 | 38121  | 38331  |
| UN64501 | Rsa1.0.02375.1 | 101 | 32026  | 4.00E-23  | 89  | 99  | 89 + | 3   | 101 | 28547  | 28644  |
| UN64502 | Rsa1.0.00097.1 | 815 | 138858 | 3.00E-90  | 172 | 173 | 99 - | 313 | 485 | 74797  | 74969  |
| UN64503 | Rsa1.0.10000.1 | 750 | 6043   | 2.00E-91  | 236 | 255 | 92 + | 491 | 743 | 3678   | 3932   |
| UN64504 | Rsa1.0.00378.1 | 663 | 89892  | 1.00E-163 | 341 | 357 | 95 - | 159 | 512 | 64565  | 64921  |



|         |                |     |        |           |     |     |       |     |     |        |        |
|---------|----------------|-----|--------|-----------|-----|-----|-------|-----|-----|--------|--------|
| UN64505 | Rsa1.0.00069.1 | 781 | 403561 | 0         | 610 | 641 | 95 +  | 2   | 630 | 78939  | 79579  |
| UN64506 | Rsa1.0.00894.1 | 794 | 269700 | 1.00E-108 | 215 | 219 | 98 -  | 545 | 762 | 24277  | 24495  |
| UN64507 | Rsa1.0.00205.1 | 788 | 193401 | 1.00E-102 | 231 | 242 | 95 -  | 531 | 769 | 14481  | 14714  |
| UN64508 | Rsa1.0.00235.1 | 762 | 154696 | 0         | 426 | 456 | 93 +  | 213 | 668 | 139087 | 139542 |
| UN64509 | Rsa1.0.46690.1 | 532 | 484    | 3.00E-89  | 278 | 317 | 87 -  | 78  | 383 | 4      | 320    |
| UN64510 | Rsa1.0.02254.1 | 749 | 33344  | 1.00E-102 | 281 | 309 | 90 +  | 453 | 749 | 4758   | 5066   |
| UN64511 | Rsa1.0.01335.1 | 638 | 47894  | 4.00E-61  | 139 | 145 | 95 -  | 3   | 147 | 4212   | 4352   |
| UN64512 | Rsa1.0.00114.1 | 793 | 131330 | 1.00E-125 | 271 | 283 | 95 -  | 5   | 287 | 31129  | 31404  |
| UN64513 | Rsa1.0.03940.1 | 708 | 19962  | 0         | 409 | 435 | 94 +  | 25  | 452 | 13     | 447    |
| UN64514 | Rsa1.0.00136.1 | 774 | 122464 | 0         | 576 | 596 | 96 -  | 49  | 644 | 115441 | 116036 |
| UN64515 | Rsa1.0.02872.1 | 685 | 27080  | 6.00E-79  | 153 | 154 | 99 -  | 532 | 685 | 9316   | 9469   |
| UN64516 | Rsa1.0.04970.1 | 777 | 15277  | 1.00E-113 | 237 | 243 | 97 +  | 512 | 751 | 662    | 904    |
| UN64517 | Rsa1.0.00476.1 | 719 | 280966 | 0         | 675 | 724 | 93 +  | 3   | 719 | 144705 | 145403 |
| UN64518 | Rsa1.0.02918.1 | 824 | 26797  | 0         | 665 | 696 | 95 -  | 20  | 697 | 13930  | 14621  |
| UN64519 | Rsa1.0.08327.1 | 746 | 7534   | 0         | 475 | 516 | 92 +  | 7   | 520 | 6589   | 7095   |
| UN64520 | Rsa1.0.02394.1 | 694 | 31789  | 9.00E-38  | 111 | 120 | 92 -  | 340 | 459 | 5749   | 5866   |
| UN64521 | Rsa1.0.03550.1 | 753 | 22154  | 1.00E-128 | 281 | 295 | 95 -  | 3   | 294 | 6701   | 6995   |
| UN64522 | Rsa1.0.00501.1 | 687 | 79545  | 0         | 431 | 445 | 96 +  | 73  | 517 | 18563  | 19004  |
| UN64523 | Rsa1.0.00557.1 | 738 | 75865  | 1.00E-138 | 304 | 321 | 94 +  | 25  | 339 | 74489  | 74809  |
| UN64524 | Rsa1.0.01405.1 | 629 | 46445  | 1.00E-175 | 350 | 363 | 96 +  | 121 | 483 | 7776   | 8138   |
| UN64525 | Rsa1.0.17699.1 | 801 | 1763   | 1.00E-111 | 248 | 261 | 95 +  | 3   | 258 | 1238   | 1498   |
| UN64526 | Rsa1.0.00070.1 | 793 | 150321 | 0         | 708 | 749 | 94 +  | 24  | 754 | 53681  | 54423  |
| UN64527 | Rsa1.0.03422.1 | 665 | 23076  | 3.00E-65  | 142 | 147 | 96 +  | 235 | 381 | 5908   | 6054   |
| UN64528 | Rsa1.0.00978.1 | 467 | 57739  | 7.00E-56  | 120 | 122 | 98 -  | 3   | 124 | 4434   | 4553   |
| UN64529 | Rsa1.0.01279.1 | 779 | 180330 | 0         | 738 | 760 | 97 +  | 8   | 763 | 27086  | 27838  |
| UN64530 | Rsa1.0.00295.1 | 627 | 152597 | 1.00E-128 | 283 | 295 | 95 +  | 300 | 591 | 84040  | 84332  |
| UN64531 | Rsa1.0.00473.1 | 791 | 212204 | 3.00E-75  | 159 | 164 | 96 -  | 456 | 619 | 72475  | 72638  |
| UN64532 | Rsa1.0.00484.1 | 612 | 203294 | 2.00E-91  | 186 | 191 | 97 -  | 22  | 212 | 144609 | 144799 |
| UN64533 | Rsa1.0.00772.1 | 771 | 64856  | 2.00E-85  | 173 | 177 | 97 -  | 145 | 321 | 48223  | 48399  |
| UN64534 | Rsa1.0.00292.1 | 660 | 98141  | 5.00E-33  | 100 | 109 | 91 +  | 552 | 660 | 8775   | 8883   |
| UN64535 | Rsa1.0.02564.1 | 782 | 30047  | 1.00E-122 | 285 | 297 | 95 -  | 495 | 782 | 5643   | 5939   |
| UN64536 | Rsa1.0.01524.1 | 463 | 43949  | 5.00E-20  | 126 | 151 | 83 -  | 90  | 240 | 43289  | 43439  |
| UN64537 | Rsa1.0.00882.1 | 792 | 61249  | 0         | 437 | 449 | 97 +  | 315 | 760 | 14747  | 15192  |
| UN64538 | Rsa1.0.00926.1 | 657 | 195072 | 1.00E-174 | 354 | 367 | 96 +  | 134 | 500 | 35123  | 35485  |
| UN64539 | Rsa1.0.02113.1 | 735 | 34890  | 0         | 576 | 582 | 98 +  | 156 | 735 | 22921  | 23502  |
| UN64540 | Rsa1.0.00476.1 | 797 | 280966 | 5.00E-92  | 198 | 204 | 97 -  | 3   | 206 | 239317 | 239518 |
| UN64541 | Rsa1.0.04022.1 | 811 | 19534  | 1.00E-64  | 126 | 126 | 100 + | 346 | 471 | 5694   | 5819   |
| UN64542 | Rsa1.0.00224.1 | 818 | 327530 | 6.00E-73  | 155 | 160 | 96 -  | 3   | 162 | 224639 | 224798 |
| UN64543 | Rsa1.0.00079.1 | 805 | 606987 | 0         | 662 | 722 | 91 -  | 2   | 700 | 41618  | 42331  |

|         |                |     |        |           |     |     |      |     |     |        |        |
|---------|----------------|-----|--------|-----------|-----|-----|------|-----|-----|--------|--------|
| UN64544 | Rsa1.0.00088.1 | 727 | 141341 | 2.00E-76  | 155 | 158 | 98 + | 51  | 208 | 11582  | 11739  |
| UN64545 | Rsa1.0.00382.1 | 759 | 251946 | 0         | 727 | 756 | 96 - | 4   | 757 | 108843 | 109598 |
| UN64546 | Rsa1.0.01104.1 | 803 | 285480 | 1.00E-137 | 314 | 331 | 94 - | 443 | 769 | 264418 | 264748 |
| UN64547 | Rsa1.0.01318.1 | 741 | 48275  | 0         | 662 | 750 | 88 + | 10  | 741 | 29740  | 30476  |
| UN64548 | Rsa1.0.02360.1 | 624 | 32203  | 1.00E-121 | 238 | 244 | 97 - | 374 | 617 | 24288  | 24531  |
| UN64549 | Rsa1.0.20750.1 | 656 | 1273   | 0         | 590 | 615 | 95 + | 5   | 618 | 512    | 1119   |
| UN64550 | Rsa1.0.02289.1 | 273 | 32981  | 7.00E-61  | 125 | 127 | 98 - | 109 | 235 | 27244  | 27370  |
| UN64551 | Rsa1.0.04231.1 | 597 | 18380  | 2.00E-19  | 66  | 70  | 94 - | 24  | 93  | 9311   | 9379   |
| UN64552 | Rsa1.0.06748.1 | 750 | 10423  | 4.00E-77  | 165 | 171 | 96 - | 158 | 328 | 1155   | 1325   |
| UN64553 | Rsa1.0.03277.1 | 240 | 24138  | 7.00E-67  | 141 | 145 | 97 + | 90  | 234 | 13187  | 13331  |
| UN64554 | Rsa1.0.00100.1 | 664 | 249232 | 0         | 481 | 505 | 95 + | 38  | 542 | 229324 | 229828 |
| UN64555 | Rsa1.0.00128.1 | 632 | 228675 | 1.00E-174 | 380 | 404 | 94 + | 12  | 415 | 9277   | 9674   |
| UN64556 | Rsa1.0.02061.1 | 608 | 35487  | 0         | 470 | 487 | 96 - | 2   | 483 | 3514   | 4000   |
| UN64557 | Rsa1.0.01092.1 | 584 | 54348  | 5.00E-82  | 174 | 179 | 97 + | 155 | 332 | 52547  | 52725  |
| UN64558 | Rsa1.0.00425.1 | 741 | 147080 | 0         | 363 | 374 | 97 - | 53  | 426 | 116284 | 116654 |
| UN64559 | Rsa1.0.02319.1 | 267 | 32580  | 2.00E-67  | 181 | 192 | 94 + | 79  | 267 | 15721  | 15908  |
| UN64560 | Rsa1.0.00178.1 | 672 | 114861 | 1.00E-110 | 285 | 312 | 91 + | 242 | 538 | 4955   | 5263   |
| UN64561 | Rsa1.0.00180.1 | 688 | 114581 | 1.00E-83  | 223 | 249 | 89 - | 230 | 460 | 9528   | 9776   |
| UN64562 | Rsa1.0.01205.1 | 645 | 50795  | 1.00E-145 | 271 | 273 | 99 - | 155 | 427 | 25499  | 25770  |
| UN64563 | Rsa1.0.00381.1 | 257 | 89718  | 1.00E-68  | 145 | 148 | 97 + | 33  | 180 | 45306  | 45452  |
| UN64564 | Rsa1.0.00339.1 | 473 | 222974 | 0         | 457 | 472 | 96 + | 2   | 473 | 4343   | 4814   |
| UN64565 | Rsa1.0.01046.1 | 452 | 152989 | 3.00E-49  | 125 | 132 | 94 - | 1   | 132 | 129093 | 129223 |
| UN64566 | Rsa1.0.00237.1 | 578 | 235974 | 0         | 568 | 578 | 98 + | 2   | 578 | 69872  | 70449  |
| UN64567 | Rsa1.0.01679.1 | 262 | 146876 | 6.00E-52  | 116 | 120 | 96 - | 4   | 123 | 137496 | 137615 |
| UN64568 | Rsa1.0.01081.1 | 348 | 499226 | 7.00E-71  | 175 | 188 | 93 + | 2   | 189 | 457883 | 458070 |
| UN64569 | Rsa1.0.00149.1 | 378 | 305196 | 1.00E-106 | 208 | 212 | 98 - | 10  | 221 | 27276  | 27487  |
| UN64570 | Rsa1.0.00299.1 | 591 | 97770  | 1.00E-131 | 240 | 241 | 99 - | 240 | 480 | 44164  | 44404  |
| UN64571 | Rsa1.0.01749.1 | 349 | 39822  | 1.00E-127 | 280 | 291 | 96 + | 54  | 340 | 32662  | 32952  |
| UN64572 | Rsa1.0.00749.1 | 585 | 65933  | 0         | 540 | 563 | 95 - | 30  | 585 | 44873  | 45434  |
| UN64573 | Rsa1.0.00556.1 | 696 | 207212 | 1.00E-157 | 342 | 363 | 94 - | 346 | 696 | 30691  | 31053  |
| UN64574 | Rsa1.0.09336.1 | 699 | 6447   | 1.00E-128 | 235 | 236 | 99 + | 308 | 543 | 288    | 523    |
| UN64575 | Rsa1.0.03303.1 | 294 | 23890  | 1.00E-50  | 118 | 122 | 96 + | 100 | 220 | 3537   | 3658   |
| UN64576 | Rsa1.0.08776.1 | 768 | 6932   | 1.00E-131 | 244 | 246 | 99 + | 106 | 351 | 1747   | 1992   |
| UN64577 | Rsa1.0.00980.1 | 488 | 57729  | 1.00E-100 | 204 | 210 | 97 - | 250 | 459 | 27619  | 27828  |
| UN64578 | Rsa1.0.00124.1 | 669 | 262503 | 1.00E-110 | 224 | 231 | 96 + | 390 | 620 | 89705  | 89935  |
| UN64579 | Rsa1.0.01788.1 | 246 | 39296  | 6.00E-95  | 192 | 196 | 97 - | 4   | 198 | 26403  | 26598  |
| UN64580 | Rsa1.0.00848.1 | 136 | 152362 | 2.00E-25  | 79  | 83  | 95 - | 56  | 136 | 40927  | 41009  |
| UN64581 | Rsa1.0.03009.1 | 172 | 26065  | 2.00E-41  | 95  | 98  | 96 + | 75  | 172 | 6299   | 6396   |
| UN64582 | Rsa1.0.00235.1 | 583 | 154696 | 1.00E-109 | 231 | 241 | 95 + | 3   | 243 | 141278 | 141518 |

|         |                |     |        |           |     |     |      |     |     |        |        |
|---------|----------------|-----|--------|-----------|-----|-----|------|-----|-----|--------|--------|
| UN64583 | Rsa1.0.00182.1 | 490 | 142305 | 1.00E-176 | 382 | 401 | 95 + | 90  | 490 | 94512  | 94904  |
| UN64584 | Rsa1.0.00278.1 | 308 | 231896 | 1.00E-158 | 303 | 307 | 98 - | 2   | 306 | 18063  | 18369  |
| UN64585 | Rsa1.0.46474.1 | 726 | 486    | 2.00E-78  | 155 | 157 | 98 + | 230 | 386 | 330    | 486    |
| UN64586 | Rsa1.0.02346.1 | 680 | 32337  | 1.00E-138 | 271 | 278 | 97 + | 2   | 279 | 1725   | 2002   |
| UN64587 | Rsa1.0.00064.1 | 161 | 240927 | 2.00E-66  | 159 | 164 | 96 + | 1   | 161 | 1033   | 1195   |
| UN64588 | Rsa1.0.00316.1 | 257 | 96264  | 1.00E-101 | 224 | 235 | 95 - | 20  | 253 | 85794  | 86028  |
| UN64589 | Rsa1.0.01973.1 | 657 | 36598  | 1.00E-98  | 192 | 195 | 98 - | 357 | 551 | 31386  | 31580  |
| UN64590 | Rsa1.0.00203.1 | 301 | 109129 | 2.00E-55  | 131 | 138 | 94 + | 164 | 301 | 21777  | 21914  |
| UN64591 | Rsa1.0.03237.1 | 435 | 24434  | 1.00E-81  | 178 | 186 | 95 - | 1   | 186 | 6501   | 6686   |
| UN64592 | Rsa1.0.00923.1 | 283 | 153678 | 1.00E-149 | 279 | 283 | 98 - | 1   | 283 | 23790  | 24072  |
| UN64593 | Rsa1.0.01266.1 | 516 | 49680  | 0         | 493 | 518 | 95 + | 2   | 516 | 5555   | 6072   |
| UN64594 | Rsa1.0.00037.1 | 631 | 307838 | 1.00E-134 | 292 | 308 | 94 + | 2   | 309 | 22466  | 22770  |
| UN64595 | Rsa1.0.05570.1 | 634 | 13301  | 1.00E-155 | 369 | 392 | 94 - | 247 | 634 | 6878   | 7266   |
| UN64596 | Rsa1.0.22459.1 | 760 | 1119   | 8.00E-97  | 189 | 191 | 98 + | 3   | 193 | 44     | 232    |
| UN64597 | Rsa1.0.01453.1 | 678 | 45449  | 1.00E-168 | 352 | 369 | 95 + | 9   | 373 | 25082  | 25450  |
| UN64598 | Rsa1.0.01042.1 | 260 | 293264 | 3.00E-97  | 207 | 216 | 95 - | 43  | 258 | 141786 | 142001 |
| UN64599 | Rsa1.0.00146.1 | 617 | 149343 | 0         | 515 | 550 | 93 - | 51  | 595 | 54001  | 54543  |
| UN64600 | Rsa1.0.00002.1 | 633 | 601661 | 1.00E-170 | 350 | 365 | 95 + | 242 | 606 | 289594 | 289955 |
| UN64601 | Rsa1.0.00738.1 | 333 | 66322  | 1.00E-22  | 82  | 90  | 91 - | 147 | 234 | 6583   | 6672   |
| UN64602 | Rsa1.0.00566.1 | 418 | 75325  | 1.00E-151 | 382 | 421 | 90 + | 2   | 418 | 26366  | 26770  |
| UN64603 | Rsa1.0.00059.1 | 522 | 159650 | 0         | 501 | 521 | 96 - | 2   | 522 | 137816 | 138336 |
| UN64604 | Rsa1.0.03257.1 | 417 | 24305  | 5.00E-63  | 145 | 151 | 96 - | 3   | 152 | 15760  | 15910  |
| UN64605 | Rsa1.0.01203.1 | 200 | 50848  | 2.00E-38  | 97  | 101 | 96 - | 44  | 143 | 50748  | 50848  |
| UN64606 | Rsa1.0.03465.1 | 574 | 22700  | 0         | 432 | 466 | 92 - | 110 | 574 | 17092  | 17545  |
| UN64607 | Rsa1.0.05015.1 | 145 | 15125  | 2.00E-62  | 139 | 145 | 95 - | 1   | 145 | 9728   | 9872   |
| UN64608 | Rsa1.0.08170.1 | 665 | 7799   | 0         | 634 | 659 | 96 - | 1   | 659 | 1846   | 2504   |
| UN64609 | Rsa1.0.00020.1 | 630 | 283099 | 0         | 504 | 524 | 96 - | 110 | 630 | 95757  | 96280  |
| UN64610 | Rsa1.0.20346.1 | 606 | 1314   | 2.00E-97  | 239 | 254 | 94 - | 3   | 250 | 202    | 454    |
| UN64611 | Rsa1.0.00545.1 | 612 | 189649 | 1.00E-110 | 225 | 230 | 97 - | 12  | 240 | 61983  | 62211  |
| UN64612 | Rsa1.0.00254.1 | 560 | 102600 | 1.00E-105 | 227 | 236 | 96 - | 65  | 296 | 85303  | 85538  |
| UN64613 | Rsa1.0.00134.1 | 672 | 390219 | 1.00E-134 | 327 | 355 | 92 - | 261 | 609 | 374726 | 375071 |
| UN64614 | Rsa1.0.00120.1 | 455 | 277288 | 0         | 377 | 393 | 95 - | 19  | 411 | 96123  | 96513  |
| UN64615 | Rsa1.0.04223.1 | 249 | 18407  | 1.00E-114 | 238 | 248 | 95 - | 2   | 249 | 7795   | 8042   |
| UN64616 | Rsa1.0.00806.1 | 378 | 63674  | 4.00E-69  | 151 | 157 | 96 + | 139 | 295 | 19736  | 19892  |
| UN64617 | Rsa1.0.05818.1 | 129 | 12544  | 2.00E-44  | 124 | 130 | 95 + | 4   | 129 | 6713   | 6841   |
| UN64618 | Rsa1.0.00414.1 | 611 | 202190 | 0         | 441 | 462 | 95 - | 4   | 465 | 201313 | 201774 |
| UN64619 | Rsa1.0.02503.1 | 372 | 30709  | 6.00E-99  | 256 | 272 | 94 + | 111 | 372 | 9307   | 9578   |
| UN64620 | Rsa1.0.01526.1 | 593 | 43919  | 0         | 573 | 591 | 96 - | 3   | 593 | 23871  | 24461  |
| UN64621 | Rsa1.0.02528.1 | 662 | 30452  | 1.00E-171 | 366 | 387 | 94 + | 2   | 379 | 18557  | 18940  |

|         |                |     |        |           |     |     |       |     |     |        |        |
|---------|----------------|-----|--------|-----------|-----|-----|-------|-----|-----|--------|--------|
| UN64622 | Rsa1.0_14089.1 | 582 | 3820   | 0         | 556 | 579 | 96 -  | 6   | 582 | 1920   | 2493   |
| UN64623 | Rsa1.0_00951.1 | 697 | 164588 | 0         | 665 | 694 | 95 +  | 4   | 697 | 7080   | 7773   |
| UN64624 | Rsa1.0_00141.1 | 647 | 121494 | 1.00E-174 | 351 | 365 | 96 -  | 113 | 477 | 32098  | 32462  |
| UN64625 | Rsa1.0_00456.1 | 679 | 82826  | 0         | 493 | 518 | 95 +  | 3   | 510 | 17146  | 17658  |
| UN64626 | Rsa1.0_00197.1 | 722 | 109714 | 0         | 560 | 574 | 97 +  | 3   | 576 | 22536  | 23109  |
| UN64627 | Rsa1.0_08045.1 | 775 | 8014   | 9.00E-66  | 145 | 148 | 97 -  | 571 | 716 | 5973   | 6120   |
| UN64628 | Rsa1.0_01167.1 | 681 | 51859  | 0         | 647 | 691 | 93 -  | 2   | 681 | 48998  | 49671  |
| UN64629 | Rsa1.0_02343.1 | 803 | 32374  | 4.00E-68  | 259 | 296 | 87 +  | 6   | 291 | 17189  | 17480  |
| UN64630 | Rsa1.0_01806.1 | 599 | 39021  | 0         | 580 | 602 | 96 -  | 1   | 599 | 32649  | 33250  |
| UN64631 | Rsa1.0_00568.1 | 756 | 75219  | 1.00E-159 | 308 | 316 | 97 +  | 256 | 571 | 4251   | 4566   |
| UN64632 | Rsa1.0_01090.1 | 724 | 54385  | 1.00E-92  | 313 | 362 | 86 +  | 253 | 583 | 27546  | 27901  |
| UN64633 | Rsa1.0_00313.1 | 672 | 96745  | 1.00E-155 | 340 | 357 | 95 -  | 3   | 357 | 82318  | 82673  |
| UN64634 | Rsa1.0_00737.1 | 769 | 66432  | 3.00E-96  | 206 | 215 | 95 -  | 19  | 233 | 16216  | 16430  |
| UN64635 | Rsa1.0_02178.1 | 729 | 156197 | 0         | 448 | 458 | 97 -  | 104 | 561 | 12724  | 13181  |
| UN64636 | Rsa1.0_00626.1 | 538 | 71582  | 1.00E-169 | 351 | 366 | 95 +  | 176 | 538 | 53383  | 53746  |
| UN64637 | Rsa1.0_03215.1 | 654 | 24551  | 1.00E-70  | 136 | 136 | 100 - | 304 | 439 | 6426   | 6561   |
| UN64638 | Rsa1.0_00108.1 | 702 | 478491 | 0         | 420 | 436 | 96 -  | 36  | 471 | 460361 | 460796 |
| UN64639 | Rsa1.0_00352.1 | 767 | 92266  | 1.00E-120 | 369 | 419 | 88 -  | 5   | 423 | 76865  | 77283  |
| UN64640 | Rsa1.0_00054.1 | 631 | 162053 | 1.00E-110 | 215 | 218 | 98 -  | 410 | 626 | 86607  | 86824  |
| UN64641 | Rsa1.0_00848.1 | 781 | 152362 | 9.00E-66  | 149 | 156 | 95 +  | 65  | 220 | 36481  | 36636  |
| UN64642 | Rsa1.0_00145.1 | 559 | 261008 | 1.00E-116 | 234 | 241 | 97 -  | 234 | 474 | 96824  | 97064  |
| UN64643 | Rsa1.0_00384.1 | 596 | 89278  | 0         | 545 | 577 | 94 -  | 1   | 571 | 27384  | 27955  |
| UN64644 | Rsa1.0_02550.1 | 778 | 291051 | 1.00E-129 | 303 | 322 | 94 +  | 101 | 415 | 4853   | 5173   |
| UN64645 | Rsa1.0_07408.1 | 670 | 9445   | 0         | 377 | 379 | 99 -  | 3   | 381 | 4561   | 4939   |
| UN64646 | Rsa1.0_02922.1 | 514 | 26753  | 0         | 403 | 419 | 96 +  | 96  | 514 | 1658   | 2070   |
| UN64647 | Rsa1.0_00827.1 | 586 | 62790  | 9.00E-93  | 206 | 217 | 94 -  | 172 | 388 | 59904  | 60120  |
| UN64648 | Rsa1.0_02811.1 | 212 | 27669  | 1.00E-67  | 130 | 130 | 100 + | 50  | 179 | 25031  | 25160  |
| UN64649 | Rsa1.0_06206.1 | 226 | 11494  | 1.00E-65  | 139 | 143 | 97 -  | 4   | 146 | 10065  | 10207  |
| UN64650 | Rsa1.0_02158.1 | 748 | 154841 | 0         | 510 | 526 | 96 +  | 145 | 670 | 131891 | 132416 |
| UN64651 | Rsa1.0_04670.1 | 796 | 16453  | 1.00E-134 | 272 | 282 | 96 +  | 3   | 284 | 3403   | 3684   |
| UN64652 | Rsa1.0_06362.1 | 669 | 11154  | 2.00E-51  | 107 | 108 | 99 -  | 212 | 319 | 7399   | 7506   |
| UN64653 | Rsa1.0_00284.1 | 713 | 323267 | 6.00E-76  | 193 | 205 | 94 +  | 514 | 713 | 294163 | 294364 |
| UN64654 | Rsa1.0_00896.1 | 652 | 60509  | 1.00E-147 | 279 | 284 | 98 +  | 107 | 390 | 16503  | 16786  |
| UN64655 | Rsa1.0_00051.1 | 446 | 258225 | 0         | 387 | 395 | 97 +  | 2   | 395 | 53855  | 54248  |
| UN64656 | Rsa1.0_00734.1 | 706 | 66508  | 1.00E-111 | 247 | 259 | 95 +  | 3   | 260 | 53635  | 53891  |
| UN64657 | Rsa1.0_05701.1 | 809 | 12884  | 0         | 514 | 548 | 93 -  | 199 | 738 | 12329  | 12871  |
| UN64658 | Rsa1.0_05708.1 | 781 | 12871  | 0         | 639 | 662 | 96 -  | 3   | 655 | 11146  | 11807  |
| UN64659 | Rsa1.0_07601.1 | 200 | 9051   | 5.00E-95  | 194 | 200 | 97 +  | 1   | 200 | 767    | 966    |
| UN64660 | Rsa1.0_00100.1 | 581 | 249232 | 0         | 577 | 579 | 99 -  | 3   | 581 | 40973  | 41551  |

|         |                |     |        |           |     |     |       |     |     |        |        |
|---------|----------------|-----|--------|-----------|-----|-----|-------|-----|-----|--------|--------|
| UN64661 | Rsa1.0.00121.1 | 132 | 278029 | 2.00E-34  | 87  | 90  | 96 -  | 36  | 124 | 60381  | 60470  |
| UN64662 | Rsa1.0.01955.1 | 719 | 36850  | 1.00E-114 | 225 | 230 | 97 -  | 8   | 237 | 17248  | 17477  |
| UN64663 | Rsa1.0.01005.1 | 755 | 56967  | 1.00E-125 | 259 | 268 | 96 -  | 445 | 711 | 5859   | 6126   |
| UN64664 | Rsa1.0.04179.1 | 389 | 18633  | 5.00E-78  | 230 | 255 | 90 +  | 97  | 350 | 17069  | 17316  |
| UN64665 | Rsa1.0.04355.1 | 621 | 146733 | 0         | 335 | 337 | 99 +  | 3   | 339 | 9104   | 9440   |
| UN64666 | Rsa1.0.00134.1 | 777 | 390219 | 0         | 420 | 439 | 95 -  | 231 | 666 | 45256  | 45694  |
| UN64667 | Rsa1.0.03808.1 | 641 | 20732  | 6.00E-54  | 184 | 208 | 88 -  | 210 | 416 | 5623   | 5830   |
| UN64668 | Rsa1.0.02070.1 | 759 | 158516 | 1.00E-101 | 203 | 208 | 97 -  | 8   | 215 | 10398  | 10605  |
| UN64669 | Rsa1.0.00087.1 | 765 | 761073 | 1.00E-106 | 239 | 250 | 95 +  | 519 | 764 | 182243 | 182492 |
| UN64670 | Rsa1.0.00123.1 | 689 | 325650 | 0         | 662 | 689 | 96 -  | 2   | 688 | 306633 | 307321 |
| UN64671 | Rsa1.0.00413.1 | 803 | 86921  | 0         | 719 | 752 | 95 +  | 1   | 742 | 4446   | 5197   |
| UN64672 | Rsa1.0.00009.1 | 125 | 232558 | 1.00E-41  | 110 | 118 | 93 +  | 8   | 125 | 10696  | 10813  |
| UN64673 | Rsa1.0.00396.1 | 168 | 88242  | 6.00E-14  | 40  | 40  | 100 + | 93  | 132 | 20063  | 20102  |
| UN64674 | Rsa1.0.03439.1 | 602 | 22930  | 1.00E-131 | 264 | 271 | 97 +  | 337 | 602 | 21322  | 21592  |
| UN64675 | Rsa1.0.00180.1 | 715 | 114581 | 1.00E-116 | 237 | 245 | 96 +  | 3   | 247 | 38000  | 38244  |
| UN64676 | Rsa1.0.01580.1 | 633 | 42852  | 1.00E-116 | 231 | 237 | 97 +  | 397 | 633 | 30603  | 30839  |
| UN64677 | Rsa1.0.00743.1 | 647 | 177459 | 5.00E-70  | 170 | 181 | 93 -  | 272 | 452 | 159628 | 159805 |
| UN64678 | Rsa1.0.03860.1 | 669 | 20407  | 1.00E-159 | 311 | 319 | 97 -  | 230 | 548 | 17073  | 17388  |
| UN64679 | Rsa1.0.00369.1 | 677 | 266462 | 5.00E-36  | 255 | 314 | 81 -  | 272 | 585 | 132689 | 133002 |
| UN64680 | Rsa1.0.13143.1 | 703 | 4993   | 1.00E-147 | 273 | 276 | 98 -  | 218 | 493 | 3060   | 3335   |
| UN64681 | Rsa1.0.02348.1 | 127 | 32316  | 7.00E-50  | 120 | 126 | 95 +  | 2   | 127 | 18750  | 18872  |
| UN64682 | Rsa1.0.00695.1 | 722 | 68019  | 0         | 479 | 504 | 95 -  | 32  | 535 | 1892   | 2389   |
| UN64683 | Rsa1.0.00010.1 | 790 | 294827 | 1.00E-114 | 222 | 226 | 98 -  | 135 | 360 | 248372 | 248597 |
| UN64684 | Rsa1.0.02118.1 | 684 | 34839  | 1.00E-147 | 291 | 300 | 97 +  | 385 | 684 | 3249   | 3548   |
| UN64685 | Rsa1.0.00028.1 | 804 | 293984 | 0         | 648 | 692 | 93 -  | 15  | 701 | 72169  | 72843  |
| UN64686 | Rsa1.0.05421.1 | 772 | 13806  | 1.00E-113 | 238 | 248 | 95 -  | 271 | 518 | 8527   | 8774   |
| UN64687 | Rsa1.0.02377.1 | 776 | 31994  | 0         | 522 | 532 | 98 +  | 1   | 532 | 3656   | 4187   |
| UN64688 | Rsa1.0.03483.1 | 688 | 22621  | 1.00E-129 | 273 | 285 | 95 +  | 7   | 289 | 16864  | 17148  |
| UN64689 | Rsa1.0.14083.1 | 802 | 3824   | 0         | 525 | 540 | 97 +  | 198 | 735 | 3277   | 3816   |
| UN64690 | Rsa1.0.02282.1 | 714 | 163951 | 2.00E-94  | 200 | 208 | 96 +  | 503 | 710 | 150366 | 150573 |
| UN64691 | Rsa1.0.06887.1 | 682 | 10208  | 1.00E-115 | 238 | 247 | 96 +  | 219 | 465 | 4618   | 4864   |
| UN64692 | Rsa1.0.08744.1 | 684 | 6970   | 0         | 583 | 598 | 97 -  | 85  | 682 | 5340   | 5934   |
| UN64693 | Rsa1.0.04493.1 | 285 | 17137  | 4.00E-78  | 151 | 152 | 99 +  | 113 | 264 | 859    | 1010   |
| UN64694 | Rsa1.0.00301.1 | 681 | 365315 | 0         | 403 | 406 | 99 -  | 3   | 408 | 299676 | 300079 |
| UN64695 | Rsa1.0.00930.1 | 659 | 59224  | 2.00E-97  | 324 | 368 | 88 -  | 315 | 651 | 45093  | 45457  |
| UN64696 | Rsa1.0.00068.1 | 776 | 151813 | 0         | 649 | 696 | 93 +  | 1   | 681 | 42912  | 43603  |
| UN64697 | Rsa1.0.02142.1 | 755 | 34633  | 1.00E-163 | 346 | 364 | 95 -  | 261 | 621 | 27753  | 28110  |
| UN64698 | Rsa1.0.00035.1 | 451 | 176449 | 1.00E-145 | 316 | 332 | 95 -  | 127 | 451 | 111375 | 111706 |
| UN64699 | Rsa1.0.00664.1 | 629 | 69573  | 0         | 462 | 478 | 96 -  | 3   | 476 | 43166  | 43643  |

|         |                |     |        |           |     |     |      |     |     |        |        |
|---------|----------------|-----|--------|-----------|-----|-----|------|-----|-----|--------|--------|
| UN64700 | Rsa1.0.00409.1 | 767 | 146788 | 1.00E-101 | 205 | 211 | 97 + | 501 | 711 | 95483  | 95693  |
| UN64701 | Rsa1.0.00585.1 | 772 | 74164  | 0         | 735 | 772 | 95 + | 3   | 771 | 39240  | 40008  |
| UN64702 | Rsa1.0.00177.1 | 781 | 143394 | 6.00E-70  | 416 | 506 | 82 - | 249 | 741 | 87483  | 87977  |
| UN64703 | Rsa1.0.03148.1 | 191 | 24989  | 3.00E-47  | 105 | 108 | 97 + | 2   | 109 | 8364   | 8471   |
| UN64704 | Rsa1.0_12060.1 | 749 | 5328   | 1.00E-103 | 235 | 250 | 94 - | 5   | 254 | 97     | 346    |
| UN64705 | Rsa1.0_02030.1 | 633 | 179909 | 0         | 609 | 633 | 96 + | 1   | 633 | 163135 | 163765 |
| UN64706 | Rsa1.0.00175.1 | 415 | 166121 | 0         | 393 | 410 | 95 + | 7   | 415 | 42145  | 42554  |
| UN64707 | Rsa1.0.02197.1 | 659 | 33996  | 1.00E-100 | 198 | 202 | 98 - | 194 | 395 | 4507   | 4708   |
| UN64708 | Rsa1.0.00090.1 | 151 | 273859 | 3.00E-68  | 143 | 147 | 97 - | 2   | 148 | 187644 | 187790 |
| UN64709 | Rsa1.0.00065.1 | 657 | 454616 | 1.00E-176 | 371 | 388 | 95 + | 5   | 388 | 417289 | 417667 |
| UN64710 | Rsa1.0.00816.1 | 200 | 403350 | 2.00E-75  | 164 | 171 | 95 + | 1   | 171 | 390262 | 390432 |
| UN64711 | Rsa1.0.01043.1 | 153 | 55893  | 1.00E-76  | 151 | 153 | 98 + | 1   | 153 | 55521  | 55673  |
| UN64712 | Rsa1.0.04181.1 | 665 | 18615  | 0         | 386 | 394 | 97 - | 162 | 555 | 936    | 1329   |
| UN64713 | Rsa1.0.01660.1 | 553 | 41400  | 0         | 513 | 514 | 99 - | 1   | 514 | 30402  | 30915  |
| UN64714 | Rsa1.0.02694.1 | 805 | 28610  | 0         | 498 | 518 | 96 - | 282 | 798 | 11189  | 11701  |
| UN64715 | Rsa1.0.00197.1 | 405 | 109714 | 1.00E-103 | 217 | 225 | 96 + | 4   | 228 | 2488   | 2709   |
| UN64716 | Rsa1.0.01145.1 | 101 | 149247 | 1.00E-32  | 80  | 83  | 96 + | 6   | 88  | 123249 | 123331 |
| UN64717 | Rsa1.0.02036.1 | 617 | 35731  | 1.00E-30  | 99  | 109 | 90 + | 62  | 170 | 5128   | 5236   |
| UN64718 | Rsa1.0.00825.1 | 699 | 62855  | 0         | 496 | 519 | 95 - | 48  | 566 | 10756  | 11272  |
| UN64719 | Rsa1.0.03639.1 | 329 | 21629  | 5.00E-96  | 240 | 256 | 93 + | 2   | 248 | 2035   | 2288   |
| UN64720 | Rsa1.0.00954.1 | 659 | 189536 | 1.00E-103 | 226 | 239 | 94 - | 1   | 239 | 7992   | 8222   |
| UN64721 | Rsa1.0.10890.1 | 597 | 5688   | 0         | 569 | 595 | 95 - | 5   | 597 | 260    | 852    |
| UN64722 | Rsa1.0.03627.1 | 549 | 21658  | 0         | 415 | 419 | 99 - | 1   | 418 | 8013   | 8431   |
| UN64723 | Rsa1.0.07829.1 | 194 | 8462   | 1.00E-24  | 151 | 184 | 82 - | 12  | 190 | 4794   | 4961   |
| UN64724 | Rsa1.0.08326.1 | 673 | 7534   | 0         | 642 | 672 | 95 + | 5   | 673 | 2477   | 3146   |
| UN64725 | Rsa1.0.00301.1 | 856 | 365315 | 1.00E-101 | 245 | 260 | 94 - | 8   | 265 | 361634 | 361883 |
| UN64726 | Rsa1.0.04520.1 | 652 | 16995  | 0         | 470 | 505 | 93 - | 2   | 494 | 9371   | 9869   |
| UN64727 | Rsa1.0.10875.1 | 457 | 5693   | 0         | 437 | 456 | 95 - | 1   | 455 | 1476   | 1931   |
| UN64728 | Rsa1.0.05004.1 | 561 | 15172  | 1.00E-98  | 201 | 207 | 97 - | 201 | 407 | 13090  | 13296  |
| UN64729 | Rsa1.0.04271.1 | 372 | 18148  | 2.33E-156 | 358 | 397 | 90 - | 8   | 372 | 15370  | 15766  |
| UN64730 | Rsa1.0.20024.1 | 622 | 1351   | 2.00E-38  | 155 | 178 | 87 - | 2   | 179 | 56     | 232    |
| UN64731 | Rsa1.0.00732.1 | 532 | 66631  | 1.00E-144 | 309 | 324 | 95 + | 4   | 327 | 1801   | 2123   |
| UN64732 | Rsa1.0.01838.1 | 686 | 38500  | 1.00E-67  | 213 | 241 | 88 - | 158 | 395 | 27397  | 27628  |
| UN64733 | Rsa1.0.01031.1 | 151 | 56236  | 1.00E-27  | 72  | 75  | 96 + | 30  | 104 | 5392   | 5466   |
| UN64734 | Rsa1.0.01917.1 | 548 | 37303  | 0         | 397 | 410 | 96 + | 1   | 410 | 10142  | 10547  |
| UN64735 | Rsa1.0.04838.1 | 609 | 15762  | 1.00E-125 | 266 | 278 | 95 - | 1   | 276 | 4578   | 4855   |
| UN64736 | Rsa1.0.00502.1 | 318 | 204180 | 8.00E-95  | 212 | 224 | 94 - | 93  | 316 | 71580  | 71803  |
| UN64737 | Rsa1.0.05428.1 | 861 | 13789  | 0         | 660 | 664 | 99 + | 2   | 665 | 415    | 1078   |
| UN64738 | Rsa1.0.09637.1 | 805 | 6240   | 0         | 691 | 770 | 89 + | 3   | 768 | 4952   | 5719   |

|         |                |     |        |           |     |     |      |     |     |        |        |
|---------|----------------|-----|--------|-----------|-----|-----|------|-----|-----|--------|--------|
| UN64739 | Rsa1.0.00558.1 | 856 | 75819  | 0         | 588 | 600 | 98 - | 258 | 856 | 28223  | 28822  |
| UN64740 | Rsa1.0.00047.1 | 107 | 168582 | 1.00E-32  | 89  | 95  | 93 - | 13  | 107 | 99539  | 99633  |
| UN64741 | Rsa1.0.00069.1 | 473 | 403561 | 1.00E-150 | 370 | 401 | 92 + | 1   | 400 | 187716 | 188105 |
| UN64742 | Rsa1.0.01006.1 | 739 | 163670 | 0         | 460 | 474 | 97 + | 95  | 566 | 25655  | 26128  |
| UN64743 | Rsa1.0.01015.1 | 698 | 56752  | 0         | 436 | 444 | 98 - | 2   | 445 | 36966  | 37409  |
| UN64744 | Rsa1.0.02570.1 | 695 | 30000  | 3.00E-90  | 203 | 213 | 95 + | 12  | 224 | 2286   | 2497   |
| UN64745 | Rsa1.0.02772.1 | 657 | 28047  | 1.00E-153 | 281 | 283 | 99 + | 3   | 285 | 22681  | 22963  |
| UN64746 | Rsa1.0.00482.1 | 321 | 81162  | 1.00E-140 | 301 | 318 | 94 - | 4   | 321 | 20317  | 20627  |
| UN64747 | Rsa1.0.05643.1 | 554 | 13065  | 1.00E-175 | 398 | 421 | 94 + | 29  | 443 | 2375   | 2793   |
| UN64748 | Rsa1.0.00131.1 | 647 | 432233 | 1.00E-128 | 291 | 309 | 94 - | 1   | 307 | 11596  | 11896  |
| UN64749 | Rsa1.0.00066.1 | 485 | 152418 | 1.00E-111 | 247 | 260 | 95 - | 17  | 273 | 66544  | 66800  |
| UN64750 | Rsa1.0.00668.1 | 699 | 69421  | 0         | 452 | 468 | 96 + | 5   | 472 | 23971  | 24437  |
| UN64751 | Rsa1.0.05221.1 | 356 | 14452  | 4.00E-60  | 136 | 142 | 95 - | 133 | 274 | 8282   | 8423   |
| UN64752 | Rsa1.0.01965.1 | 710 | 36698  | 1.00E-175 | 333 | 340 | 97 - | 371 | 710 | 17208  | 17547  |
| UN64753 | Rsa1.0.08039.1 | 757 | 8030   | 0         | 427 | 434 | 98 - | 324 | 757 | 3238   | 3671   |
| UN64754 | Rsa1.0.10873.1 | 837 | 5694   | 1.00E-74  | 155 | 159 | 97 - | 247 | 405 | 515    | 673    |
| UN64755 | Rsa1.0.49874.1 | 815 | 455    | 0         | 363 | 370 | 98 + | 441 | 809 | 1      | 370    |
| UN64756 | Rsa1.0.01658.1 | 790 | 41414  | 1.00E-165 | 566 | 654 | 86 + | 109 | 762 | 19535  | 20185  |
| UN64757 | Rsa1.0.02777.1 | 456 | 27986  | 1.00E-125 | 272 | 285 | 95 + | 4   | 284 | 23982  | 24266  |
| UN64758 | Rsa1.0.01104.1 | 697 | 285480 | 1.00E-112 | 214 | 217 | 98 - | 170 | 386 | 268402 | 268618 |
| UN64759 | Rsa1.0.05271.1 | 130 | 14306  | 1.00E-42  | 113 | 120 | 94 - | 11  | 130 | 10538  | 10656  |
| UN64760 | Rsa1.0.00621.1 | 583 | 71840  | 1.00E-122 | 266 | 281 | 94 - | 218 | 498 | 50769  | 51043  |
| UN64761 | Rsa1.0.00201.1 | 180 | 232851 | 5.00E-73  | 163 | 171 | 95 + | 10  | 180 | 129834 | 130004 |
| UN64762 | Rsa1.0.00306.1 | 634 | 146760 | 0         | 455 | 472 | 96 - | 1   | 470 | 126933 | 127397 |
| UN64763 | Rsa1.0.07152.1 | 362 | 9815   | 0         | 357 | 363 | 98 - | 1   | 362 | 1937   | 2299   |
| UN64764 | Rsa1.0.00204.1 | 632 | 109056 | 0         | 604 | 644 | 93 - | 3   | 632 | 97209  | 97847  |
| UN64765 | Rsa1.0.01505.1 | 197 | 44382  | 4.00E-86  | 189 | 196 | 96 - | 3   | 197 | 38989  | 39182  |
| UN64766 | Rsa1.0.10212.1 | 487 | 5941   | 0         | 461 | 487 | 94 + | 3   | 487 | 4815   | 5295   |
| UN64767 | Rsa1.0.00628.1 | 129 | 214360 | 1.00E-38  | 117 | 128 | 91 - | 1   | 126 | 184229 | 184356 |
| UN64768 | Rsa1.0.03201.1 | 625 | 157656 | 0         | 612 | 625 | 97 - | 1   | 625 | 17445  | 18069  |
| UN64769 | Rsa1.0.02975.1 | 152 | 26322  | 1.00E-17  | 55  | 58  | 94 - | 87  | 144 | 22582  | 22639  |
| UN64770 | Rsa1.0.00254.1 | 466 | 102600 | 3.00E-58  | 193 | 219 | 88 - | 72  | 276 | 26720  | 26932  |
| UN64771 | Rsa1.0.00141.1 | 231 | 121494 | 3.00E-66  | 208 | 238 | 87 + | 1   | 228 | 29528  | 29750  |
| UN64772 | Rsa1.0.07397.1 | 605 | 9464   | 1.00E-111 | 240 | 252 | 95 - | 1   | 252 | 3341   | 3587   |
| UN64773 | Rsa1.0.00623.1 | 660 | 207630 | 0         | 328 | 329 | 99 - | 1   | 329 | 140372 | 140700 |
| UN64774 | Rsa1.0.00668.1 | 874 | 69421  | 1.00E-157 | 296 | 301 | 98 - | 254 | 554 | 30663  | 30963  |
| UN64775 | Rsa1.0.15241.1 | 716 | 2734   | 1.00E-171 | 419 | 458 | 91 - | 41  | 480 | 1      | 458    |
| UN64776 | Rsa1.0.00092.1 | 804 | 659932 | 4.00E-74  | 192 | 208 | 92 + | 469 | 676 | 170161 | 170365 |
| UN64777 | Rsa1.0.00194.1 | 250 | 110851 | 6.00E-58  | 220 | 250 | 88 - | 2   | 250 | 13369  | 13610  |

|         |                |     |        |           |     |     |      |     |     |        |        |
|---------|----------------|-----|--------|-----------|-----|-----|------|-----|-----|--------|--------|
| UN64778 | Rsa1.0.01695.1 | 591 | 40848  | 1.00E-170 | 355 | 371 | 95 - | 3   | 373 | 8401   | 8770   |
| UN64779 | Rsa1.0.00023.1 | 753 | 194764 | 0         | 374 | 387 | 96 - | 369 | 743 | 96929  | 97315  |
| UN64780 | Rsa1.0.62560.1 | 805 | 367    | 1.00E-161 | 326 | 339 | 96 - | 1   | 328 | 1      | 339    |
| UN64781 | Rsa1.0.00844.1 | 429 | 62403  | 1.00E-108 | 201 | 202 | 99 - | 1   | 202 | 55968  | 56169  |
| UN64782 | Rsa1.0.01039.1 | 651 | 55946  | 1.00E-122 | 241 | 246 | 97 - | 5   | 249 | 15892  | 16137  |
| UN64783 | Rsa1.0.01532.1 | 717 | 43767  | 0         | 687 | 717 | 95 + | 1   | 717 | 6615   | 7330   |
| UN64784 | Rsa1.0.00543.1 | 339 | 76788  | 2.00E-89  | 255 | 281 | 90 - | 3   | 268 | 15651  | 15931  |
| UN64785 | Rsa1.0.01148.1 | 731 | 52375  | 0         | 554 | 574 | 96 + | 20  | 583 | 46407  | 46978  |
| UN64786 | Rsa1.0.00296.1 | 224 | 97854  | 7.00E-76  | 200 | 216 | 92 + | 11  | 224 | 44681  | 44896  |
| UN64787 | Rsa1.0.01745.1 | 730 | 39905  | 1.00E-127 | 300 | 321 | 93 - | 1   | 320 | 552    | 864    |
| UN64788 | Rsa1.0.04223.1 | 486 | 18407  | 0         | 390 | 399 | 97 - | 1   | 398 | 6198   | 6596   |
| UN64789 | Rsa1.0.01540.1 | 341 | 151890 | 9.00E-64  | 291 | 344 | 84 - | 3   | 332 | 125801 | 126136 |
| UN64790 | Rsa1.0.00101.1 | 450 | 267193 | 3.00E-64  | 131 | 133 | 98 + | 226 | 358 | 258205 | 258337 |
| UN64791 | Rsa1.0.02401.1 | 780 | 138425 | 5.00E-98  | 191 | 194 | 98 - | 513 | 706 | 20633  | 20826  |
| UN64792 | Rsa1.0.02688.1 | 423 | 28644  | 0         | 399 | 414 | 96 + | 6   | 417 | 16133  | 16546  |
| UN64793 | Rsa1.0.02358.1 | 754 | 32213  | 0         | 733 | 755 | 97 - | 1   | 754 | 5427   | 6181   |
| UN64794 | Rsa1.0.15775.1 | 827 | 2429   | 9.00E-97  | 199 | 204 | 97 - | 14  | 216 | 1520   | 1723   |
| UN64795 | Rsa1.0.00303.1 | 629 | 97468  | 0         | 588 | 632 | 93 - | 1   | 629 | 6912   | 7533   |
| UN64796 | Rsa1.0.00517.1 | 694 | 142790 | 1.00E-172 | 345 | 354 | 97 - | 1   | 353 | 126290 | 126640 |
| UN64797 | Rsa1.0.17012.1 | 806 | 1953   | 0         | 677 | 704 | 96 + | 103 | 806 | 966    | 1666   |
| UN64798 | Rsa1.0.01357.1 | 733 | 47280  | 1.00E-104 | 229 | 237 | 96 + | 1   | 236 | 697    | 931    |
| UN64799 | Rsa1.0.00387.1 | 579 | 495407 | 1.00E-117 | 289 | 308 | 93 - | 11  | 314 | 385962 | 386266 |
| UN64800 | Rsa1.0.19308.1 | 717 | 1449   | 0         | 688 | 719 | 95 + | 3   | 717 | 515    | 1227   |
| UN64801 | Rsa1.0.00959.1 | 718 | 58202  | 1.00E-173 | 405 | 435 | 93 + | 9   | 441 | 47003  | 47436  |
| UN64802 | Rsa1.0.12370.1 | 589 | 5243   | 0         | 519 | 540 | 96 - | 2   | 537 | 878    | 1417   |
| UN64803 | Rsa1.0.00281.1 | 731 | 99908  | 1.00E-124 | 276 | 292 | 94 + | 1   | 289 | 82502  | 82793  |
| UN64804 | Rsa1.0.01789.1 | 260 | 39250  | 2.00E-92  | 238 | 259 | 91 - | 4   | 260 | 19919  | 20177  |
| UN64805 | Rsa1.0.00070.1 | 781 | 150321 | 0         | 491 | 517 | 94 - | 1   | 514 | 35896  | 36412  |
| UN64806 | Rsa1.0.00111.1 | 161 | 390088 | 7.00E-72  | 155 | 161 | 96 - | 1   | 161 | 75789  | 75949  |
| UN64807 | Rsa1.0.00050.1 | 565 | 237174 | 0         | 516 | 521 | 99 - | 5   | 525 | 195082 | 195601 |
| UN64808 | Rsa1.0.01115.1 | 681 | 183545 | 1.00E-121 | 307 | 330 | 93 - | 3   | 327 | 4207   | 4533   |
| UN64809 | Rsa1.0.00279.1 | 306 | 100039 | 2.00E-89  | 274 | 310 | 88 - | 8   | 306 | 5530   | 5829   |
| UN64810 | Rsa1.0.00412.1 | 777 | 86935  | 1.00E-125 | 269 | 283 | 95 - | 1   | 283 | 49294  | 49576  |
| UN64811 | Rsa1.0.00382.1 | 748 | 251946 | 0         | 438 | 453 | 96 - | 13  | 458 | 107858 | 108310 |
| UN64812 | Rsa1.0.01434.1 | 796 | 45951  | 1.00E-133 | 259 | 264 | 98 + | 1   | 262 | 45525  | 45788  |
| UN64813 | Rsa1.0.05660.1 | 439 | 13012  | 1.00E-125 | 251 | 259 | 96 + | 181 | 439 | 4121   | 4379   |
| UN64814 | Rsa1.0.00630.1 | 602 | 71281  | 1.00E-162 | 324 | 334 | 97 + | 15  | 347 | 61075  | 61408  |
| UN64815 | Rsa1.0.00844.1 | 445 | 62403  | 1.00E-137 | 275 | 284 | 96 + | 1   | 284 | 19644  | 19922  |
| UN64816 | Rsa1.0.05073.1 | 154 | 14925  | 2.00E-28  | 79  | 84  | 94 - | 1   | 84  | 5489   | 5572   |



|         |                |     |        |           |     |     |       |     |     |        |        |
|---------|----------------|-----|--------|-----------|-----|-----|-------|-----|-----|--------|--------|
| UN64817 | Rsa1.0.02506.1 | 663 | 30700  | 1.00E-132 | 287 | 304 | 94 +  | 1   | 304 | 5829   | 6119   |
| UN64818 | Rsa1.0.00134.1 | 240 | 390219 | 4.00E-68  | 158 | 167 | 94 +  | 1   | 167 | 22003  | 22169  |
| UN64819 | Rsa1.0.06287.1 | 695 | 11303  | 1.00E-174 | 355 | 370 | 95 +  | 82  | 451 | 6397   | 6766   |
| UN64820 | Rsa1.0.00094.1 | 665 | 139042 | 0         | 458 | 483 | 94 +  | 1   | 481 | 60601  | 61075  |
| UN64821 | Rsa1.0.00022.1 | 538 | 200461 | 1.00E-143 | 300 | 314 | 95 -  | 221 | 534 | 23737  | 24050  |
| UN64822 | Rsa1.0.00923.1 | 105 | 153678 | 4.00E-26  | 90  | 100 | 90 +  | 6   | 105 | 152610 | 152709 |
| UN64823 | Rsa1.0.00455.1 | 700 | 224823 | 0         | 435 | 444 | 97 +  | 1   | 444 | 145715 | 146156 |
| UN64824 | Rsa1.0.02528.1 | 328 | 30452  | 1.00E-110 | 226 | 234 | 96 -  | 1   | 234 | 5297   | 5530   |
| UN64825 | Rsa1.0.05119.1 | 816 | 14795  | 1.00E-156 | 366 | 395 | 92 -  | 104 | 498 | 9237   | 9631   |
| UN64826 | Rsa1.0.00341.1 | 460 | 249309 | 1.00E-104 | 246 | 261 | 94 +  | 1   | 258 | 109980 | 110237 |
| UN64827 | Rsa1.0.10460.1 | 533 | 5842   | 0         | 436 | 451 | 96 +  | 1   | 451 | 3653   | 4103   |
| UN64828 | Rsa1.0.03673.1 | 874 | 21448  | 0         | 478 | 492 | 97 +  | 19  | 507 | 4101   | 4589   |
| UN64829 | Rsa1.0.02377.1 | 103 | 31994  | 9.00E-21  | 90  | 103 | 87 -  | 1   | 103 | 10357  | 10459  |
| UN64830 | Rsa1.0.01310.1 | 716 | 164719 | 0         | 673 | 721 | 93 +  | 1   | 716 | 6026   | 6724   |
| UN64831 | Rsa1.0.00709.1 | 319 | 67329  | 1.00E-114 | 292 | 319 | 91 -  | 1   | 319 | 13849  | 14165  |
| UN64832 | Rsa1.0.04760.1 | 230 | 16105  | 7.00E-39  | 94  | 98  | 95 +  | 83  | 180 | 6389   | 6486   |
| UN64833 | Rsa1.0.01586.1 | 804 | 42804  | 2.00E-94  | 200 | 208 | 96 +  | 251 | 458 | 1769   | 1976   |
| UN64834 | Rsa1.0.13854.1 | 173 | 4197   | 1.00E-58  | 154 | 167 | 92 +  | 1   | 167 | 3760   | 3926   |
| UN64835 | Rsa1.0.00647.1 | 467 | 70440  | 1.00E-165 | 331 | 342 | 96 +  | 6   | 347 | 41513  | 41852  |
| UN64836 | Rsa1.0.00202.1 | 643 | 185895 | 0         | 494 | 520 | 95 +  | 127 | 643 | 145062 | 145571 |
| UN64837 | Rsa1.0.00128.1 | 673 | 228675 | 5.00E-61  | 120 | 120 | 100 + | 355 | 474 | 151246 | 151365 |
| UN64838 | Rsa1.0.03394.1 | 402 | 23247  | 3.00E-67  | 142 | 146 | 97 +  | 187 | 332 | 1120   | 1265   |
| UN64839 | Rsa1.0.00332.1 | 584 | 94575  | 0         | 447 | 466 | 95 +  | 11  | 469 | 62061  | 62524  |
| UN64840 | Rsa1.0.00362.1 | 599 | 299497 | 0         | 584 | 600 | 97 -  | 1   | 599 | 296091 | 296690 |
| UN64841 | Rsa1.0.11007.1 | 248 | 5650   | 1.00E-113 | 237 | 247 | 95 -  | 2   | 248 | 538    | 784    |
| UN64842 | Rsa1.0.00417.1 | 635 | 395068 | 0         | 374 | 381 | 98 +  | 255 | 635 | 376217 | 376597 |
| UN64843 | Rsa1.0.01731.1 | 522 | 40208  | 0         | 460 | 481 | 95 -  | 3   | 483 | 19840  | 20312  |
| UN64844 | Rsa1.0.00063.1 | 240 | 156150 | 3.00E-41  | 114 | 122 | 93 +  | 1   | 121 | 68400  | 68521  |
| UN64845 | Rsa1.0.00407.1 | 448 | 191544 | 2.00E-68  | 147 | 152 | 96 -  | 218 | 369 | 29701  | 29852  |
| UN64846 | Rsa1.0.04862.1 | 665 | 15688  | 1.00E-161 | 303 | 308 | 98 +  | 1   | 308 | 2301   | 2608   |
| UN64847 | Rsa1.0.15566.1 | 725 | 2538   | 0         | 504 | 542 | 92 -  | 182 | 722 | 1349   | 1890   |
| UN64848 | Rsa1.0.05056.1 | 222 | 14981  | 3.00E-41  | 101 | 106 | 95 +  | 89  | 194 | 7499   | 7604   |
| UN64849 | Rsa1.0.03846.1 | 606 | 20481  | 1.00E-110 | 248 | 261 | 95 -  | 7   | 266 | 14496  | 14753  |
| UN64850 | Rsa1.0.04288.1 | 639 | 18077  | 0         | 413 | 415 | 99 +  | 1   | 415 | 6587   | 7001   |
| UN64851 | Rsa1.0.00205.1 | 569 | 193401 | 0         | 553 | 587 | 94 +  | 2   | 569 | 174524 | 175110 |
| UN64852 | Rsa1.0.00404.1 | 733 | 87635  | 0         | 729 | 733 | 99 -  | 1   | 733 | 61430  | 62162  |
| UN64853 | Rsa1.0.00676.1 | 730 | 69166  | 1.00E-140 | 364 | 399 | 91 +  | 4   | 383 | 53741  | 54139  |
| UN64854 | Rsa1.0.00811.1 | 729 | 63242  | 0         | 548 | 554 | 98 -  | 175 | 728 | 25226  | 25779  |
| UN64855 | Rsa1.0.00218.1 | 518 | 201480 | 1.00E-152 | 359 | 388 | 92 -  | 131 | 518 | 177302 | 177689 |

|         |                |     |        |           |     |     |       |     |     |        |        |
|---------|----------------|-----|--------|-----------|-----|-----|-------|-----|-----|--------|--------|
| UN64856 | Rsa1.0.00447.1 | 722 | 84051  | 1.00E-140 | 261 | 264 | 98 +  | 3   | 266 | 14972  | 15235  |
| UN64857 | Rsa1.0.07909.1 | 744 | 8315   | 0         | 441 | 454 | 97 -  | 237 | 690 | 5908   | 6361   |
| UN64858 | Rsa1.0.00398.1 | 705 | 88007  | 0         | 472 | 489 | 96 +  | 1   | 485 | 73680  | 74165  |
| UN64859 | Rsa1.0.00915.1 | 215 | 194446 | 1.00E-15  | 58  | 63  | 92 -  | 37  | 99  | 179114 | 179176 |
| UN64860 | Rsa1.0.00939.1 | 256 | 185227 | 4.00E-96  | 235 | 253 | 92 -  | 4   | 256 | 38037  | 38287  |
| UN64861 | Rsa1.0.00016.1 | 802 | 831256 | 4.00E-68  | 169 | 184 | 91 -  | 170 | 353 | 789687 | 789857 |
| UN64862 | Rsa1.0.00284.1 | 126 | 323267 | 1.00E-51  | 112 | 115 | 97 +  | 3   | 117 | 135300 | 135414 |
| UN64863 | Rsa1.0.00149.1 | 781 | 305196 | 0         | 398 | 414 | 96 +  | 2   | 410 | 26586  | 26998  |
| UN64864 | Rsa1.0.00130.1 | 713 | 125737 | 0         | 485 | 517 | 93 +  | 48  | 549 | 102324 | 102833 |
| UN64865 | Rsa1.0.03615.1 | 101 | 21766  | 3.00E-39  | 91  | 94  | 96 -  | 1   | 94  | 18024  | 18117  |
| UN64866 | Rsa1.0.01605.1 | 688 | 42442  | 0         | 651 | 651 | 100 - | 3   | 653 | 33016  | 33666  |
| UN64867 | Rsa1.0.05179.1 | 542 | 14576  | 1.00E-145 | 296 | 307 | 96 -  | 236 | 542 | 2252   | 2555   |
| UN64868 | Rsa1.0.03090.1 | 385 | 25464  | 1.00E-97  | 232 | 247 | 93 +  | 15  | 261 | 17092  | 17334  |
| UN64869 | Rsa1.0.04725.1 | 655 | 16221  | 1.00E-171 | 353 | 367 | 96 -  | 33  | 395 | 761    | 1127   |
| UN64870 | Rsa1.0.33920.1 | 638 | 668    | 0         | 443 | 461 | 96 +  | 3   | 463 | 208    | 668    |
| UN64871 | Rsa1.0.00706.1 | 767 | 291570 | 1.00E-131 | 362 | 397 | 91 +  | 3   | 391 | 26855  | 27244  |
| UN64872 | Rsa1.0.00928.1 | 322 | 59293  | 7.00E-43  | 122 | 130 | 93 +  | 1   | 125 | 5893   | 6021   |
| UN64873 | Rsa1.0.00915.1 | 742 | 194446 | 0         | 622 | 653 | 95 +  | 89  | 741 | 18721  | 19373  |
| UN64874 | Rsa1.0.00251.1 | 162 | 303968 | 7.00E-72  | 152 | 157 | 96 +  | 1   | 157 | 55618  | 55774  |
| UN64875 | Rsa1.0.00821.1 | 527 | 62891  | 0         | 485 | 515 | 94 -  | 1   | 511 | 46032  | 46532  |
| UN64876 | Rsa1.0.01473.1 | 816 | 45094  | 0         | 495 | 499 | 99 -  | 1   | 498 | 15535  | 16033  |
| UN64877 | Rsa1.0.03287.1 | 690 | 24025  | 0         | 384 | 386 | 99 -  | 174 | 559 | 21583  | 21968  |
| UN64878 | Rsa1.0.11534.1 | 407 | 5477   | 0         | 394 | 410 | 96 -  | 1   | 407 | 1830   | 2236   |
| UN64879 | Rsa1.0.01339.1 | 768 | 47813  | 0         | 499 | 505 | 98 -  | 1   | 505 | 5850   | 6354   |
| UN64880 | Rsa1.0.00024.1 | 657 | 188018 | 1.00E-130 | 276 | 287 | 96 -  | 4   | 290 | 17045  | 17328  |
| UN64881 | Rsa1.0.08740.1 | 683 | 6980   | 1.00E-141 | 290 | 302 | 96 +  | 366 | 667 | 1988   | 2289   |
| UN64882 | Rsa1.0.02200.1 | 889 | 33981  | 0         | 510 | 526 | 96 -  | 343 | 864 | 14345  | 14870  |
| UN64883 | Rsa1.0.14764.1 | 733 | 3084   | 0         | 659 | 693 | 95 +  | 2   | 694 | 1942   | 2634   |
| UN64884 | Rsa1.0.00224.1 | 280 | 327530 | 3.00E-57  | 140 | 149 | 93 -  | 3   | 151 | 210516 | 210664 |
| UN64885 | Rsa1.0.00262.1 | 835 | 101906 | 0         | 761 | 801 | 95 +  | 37  | 835 | 86590  | 87382  |
| UN64886 | Rsa1.0.03163.1 | 812 | 24894  | 0         | 479 | 494 | 96 -  | 1   | 492 | 22793  | 23286  |
| UN64887 | Rsa1.0.00493.1 | 688 | 80007  | 0         | 634 | 681 | 93 +  | 22  | 688 | 18998  | 19671  |
| UN64888 | Rsa1.0.00751.1 | 118 | 65759  | 4.00E-45  | 110 | 116 | 94 -  | 3   | 118 | 41920  | 42035  |
| UN64889 | Rsa1.0.13382.1 | 681 | 4874   | 0         | 571 | 628 | 90 -  | 51  | 675 | 717    | 1337   |
| UN64890 | Rsa1.0.04568.1 | 396 | 16805  | 1.00E-161 | 368 | 393 | 93 -  | 4   | 396 | 5152   | 5535   |
| UN64891 | Rsa1.0.01026.1 | 832 | 171624 | 0         | 762 | 775 | 98 +  | 33  | 807 | 4625   | 5398   |
| UN64892 | Rsa1.0.06771.1 | 188 | 10388  | 4.00E-83  | 180 | 188 | 95 -  | 1   | 188 | 2728   | 2915   |
| UN64893 | Rsa1.0.00042.1 | 782 | 171507 | 2.00E-73  | 153 | 157 | 97 +  | 269 | 425 | 88765  | 88921  |
| UN64894 | Rsa1.0.13545.1 | 704 | 4741   | 3.00E-65  | 127 | 127 | 100 + | 236 | 362 | 1542   | 1668   |

|         |                |     |        |           |     |     |      |     |     |        |        |
|---------|----------------|-----|--------|-----------|-----|-----|------|-----|-----|--------|--------|
| UN64895 | Rsa1.0_00989.1 | 680 | 57494  | 1.00E-105 | 448 | 526 | 85 + | 81  | 604 | 53638  | 54160  |
| UN64896 | Rsa1.0_02425.1 | 663 | 31567  | 4.00E-89  | 176 | 179 | 98 + | 246 | 424 | 14010  | 14188  |
| UN64897 | Rsa1.0_00350.1 | 759 | 92346  | 1.00E-129 | 261 | 269 | 97 - | 2   | 270 | 48362  | 48628  |
| UN64898 | Rsa1.0_06603.1 | 623 | 10682  | 1.00E-174 | 342 | 353 | 96 - | 4   | 356 | 7727   | 8079   |
| UN64899 | Rsa1.0_00005.1 | 783 | 353093 | 0         | 471 | 492 | 95 + | 1   | 491 | 138082 | 138562 |
| UN64900 | Rsa1.0_00581.1 | 739 | 163575 | 0         | 737 | 739 | 99 - | 1   | 739 | 27307  | 28045  |
| UN64901 | Rsa1.0_00336.1 | 275 | 445051 | 1.00E-115 | 219 | 222 | 98 - | 1   | 222 | 211685 | 211906 |
| UN64902 | Rsa1.0_00440.1 | 768 | 84723  | 1.00E-175 | 360 | 376 | 95 - | 321 | 696 | 57581  | 57956  |
| UN64903 | Rsa1.0_00720.1 | 636 | 66931  | 7.00E-97  | 224 | 240 | 93 - | 160 | 390 | 62325  | 62564  |
| UN64904 | Rsa1.0_00352.1 | 715 | 92266  | 0         | 668 | 719 | 92 + | 2   | 715 | 24886  | 25591  |
| UN64905 | Rsa1.0_00079.1 | 339 | 606987 | 2.00E-46  | 107 | 111 | 96 - | 57  | 167 | 132914 | 133024 |
| UN64906 | Rsa1.0_00159.1 | 847 | 431686 | 0         | 656 | 671 | 97 + | 175 | 845 | 326918 | 327587 |
| UN64907 | Rsa1.0_33019.1 | 329 | 688    | 2.33E-156 | 315 | 330 | 95 - | 1   | 329 | 110    | 438    |
| UN64908 | Rsa1.0_08922.1 | 570 | 6788   | 0         | 552 | 571 | 96 - | 1   | 570 | 2346   | 2916   |
| UN64909 | Rsa1.0_00171.1 | 411 | 115622 | 0         | 399 | 411 | 97 + | 1   | 411 | 101167 | 101577 |
| UN64910 | Rsa1.0_07056.1 | 472 | 9969   | 1.00E-170 | 434 | 475 | 91 - | 3   | 472 | 6397   | 6864   |
| UN64911 | Rsa1.0_00441.1 | 725 | 84607  | 0         | 480 | 524 | 91 - | 51  | 571 | 29577  | 30099  |
| UN64912 | Rsa1.0_01440.1 | 711 | 45807  | 0         | 403 | 407 | 99 + | 1   | 406 | 30991  | 31397  |
| UN64913 | Rsa1.0_02454.1 | 777 | 31263  | 0         | 718 | 736 | 97 - | 1   | 735 | 25933  | 26661  |
| UN64914 | Rsa1.0_30825.1 | 438 | 743    | 0         | 416 | 438 | 94 - | 1   | 438 | 12     | 448    |
| UN64915 | Rsa1.0_02717.1 | 740 | 28458  | 1.00E-166 | 348 | 363 | 95 - | 332 | 691 | 23793  | 24149  |
| UN64916 | Rsa1.0_02362.1 | 647 | 32190  | 1.00E-112 | 264 | 283 | 93 - | 7   | 289 | 21332  | 21611  |
| UN64917 | Rsa1.0_01475.1 | 288 | 45044  | 8.00E-64  | 127 | 128 | 99 + | 161 | 288 | 4438   | 4565   |
| UN64918 | Rsa1.0_00047.1 | 677 | 168582 | 0         | 425 | 426 | 99 - | 1   | 426 | 140112 | 140537 |
| UN64919 | Rsa1.0_00201.1 | 551 | 232851 | 8.00E-81  | 209 | 227 | 92 - | 1   | 227 | 72009  | 72227  |
| UN64920 | Rsa1.0_00235.1 | 183 | 154696 | 2.00E-82  | 176 | 183 | 96 - | 1   | 183 | 147416 | 147598 |
| UN64921 | Rsa1.0_02018.1 | 183 | 35994  | 2.00E-75  | 173 | 183 | 94 - | 1   | 183 | 5191   | 5373   |
| UN64922 | Rsa1.0_00605.1 | 735 | 73199  | 1.00E-119 | 269 | 285 | 94 + | 3   | 283 | 68979  | 69261  |
| UN64923 | Rsa1.0_00889.1 | 540 | 60978  | 0         | 534 | 541 | 98 + | 1   | 540 | 4612   | 5152   |
| UN64924 | Rsa1.0_00637.1 | 660 | 71038  | 0         | 358 | 369 | 97 + | 292 | 660 | 2761   | 3129   |
| UN64925 | Rsa1.0_02707.1 | 192 | 28520  | 4.00E-83  | 183 | 192 | 95 - | 1   | 192 | 11209  | 11400  |
| UN64926 | Rsa1.0_28586.1 | 769 | 809    | 0         | 537 | 539 | 99 - | 231 | 769 | 272    | 809    |
| UN64927 | Rsa1.0_06689.1 | 798 | 10535  | 0         | 744 | 784 | 94 + | 16  | 798 | 5333   | 6114   |
| UN64928 | Rsa1.0_03805.1 | 581 | 20746  | 0         | 556 | 581 | 95 - | 1   | 581 | 14387  | 14962  |
| UN64929 | Rsa1.0_00008.1 | 856 | 358124 | 0         | 641 | 661 | 96 - | 201 | 856 | 172311 | 172971 |
| UN64930 | Rsa1.0_02900.1 | 603 | 26928  | 0         | 584 | 600 | 97 + | 4   | 603 | 294    | 892    |
| UN64931 | Rsa1.0_00705.1 | 740 | 67505  | 1.00E-121 | 254 | 265 | 95 - | 476 | 740 | 44556  | 44820  |
| UN64932 | Rsa1.0_01376.1 | 394 | 47004  | 1.00E-123 | 241 | 247 | 97 + | 1   | 247 | 37711  | 37957  |
| UN64933 | Rsa1.0_02157.1 | 621 | 149652 | 0         | 613 | 620 | 98 - | 1   | 619 | 11431  | 12050  |

|         |                |     |        |           |     |     |      |     |     |        |        |
|---------|----------------|-----|--------|-----------|-----|-----|------|-----|-----|--------|--------|
| UN64934 | Rsa1.0.07466.1 | 689 | 9321   | 3.00E-31  | 210 | 256 | 82 - | 361 | 609 | 4853   | 5107   |
| UN64935 | Rsa1.0.00294.1 | 748 | 144860 | 0         | 507 | 521 | 97 - | 226 | 746 | 57925  | 58442  |
| UN64936 | Rsa1.0.00734.1 | 714 | 66508  | 0         | 521 | 544 | 95 + | 1   | 542 | 62123  | 62665  |
| UN64937 | Rsa1.0.00033.1 | 160 | 515811 | 3.00E-31  | 140 | 163 | 85 + | 1   | 160 | 366412 | 366574 |
| UN64938 | Rsa1.0.04220.1 | 792 | 18421  | 0         | 366 | 379 | 96 + | 204 | 582 | 11673  | 12048  |
| UN64939 | Rsa1.0.00223.1 | 153 | 106231 | 1.00E-60  | 148 | 156 | 94 - | 1   | 153 | 70318  | 70472  |
| UN64940 | Rsa1.0.00224.1 | 754 | 327530 | 0         | 737 | 756 | 97 - | 1   | 754 | 86698  | 87453  |
| UN64941 | Rsa1.0.05911.1 | 147 | 12261  | 2.00E-53  | 139 | 148 | 93 + | 4   | 147 | 8823   | 8970   |
| UN64942 | Rsa1.0.14855.1 | 697 | 3011   | 0         | 509 | 526 | 96 - | 172 | 694 | 1807   | 2327   |
| UN64943 | Rsa1.0.02794.1 | 538 | 27820  | 1.00E-110 | 255 | 271 | 94 + | 25  | 284 | 26686  | 26956  |
| UN64944 | Rsa1.0.08072.1 | 562 | 7955   | 9.00E-90  | 197 | 204 | 96 - | 1   | 204 | 520    | 721    |
| UN64945 | Rsa1.0.00030.1 | 389 | 250988 | 2.00E-83  | 323 | 377 | 85 - | 3   | 363 | 27132  | 27488  |
| UN64946 | Rsa1.0.00093.1 | 512 | 214962 | 1.00E-116 | 325 | 356 | 91 - | 1   | 352 | 127696 | 128045 |
| UN64947 | Rsa1.0.00655.1 | 511 | 195840 | 1.00E-177 | 418 | 451 | 92 - | 1   | 451 | 17675  | 18105  |
| UN64948 | Rsa1.0.05456.1 | 102 | 13688  | 3.00E-42  | 100 | 103 | 97 + | 1   | 102 | 8575   | 8677   |
| UN64949 | Rsa1.0.01768.1 | 651 | 138463 | 0         | 366 | 368 | 99 - | 55  | 422 | 769    | 1136   |
| UN64950 | Rsa1.0.00910.1 | 474 | 59975  | 1.00E-174 | 433 | 467 | 92 - | 14  | 474 | 29227  | 29686  |
| UN64951 | Rsa1.0.14046.1 | 503 | 3872   | 3.00E-83  | 219 | 235 | 93 - | 1   | 231 | 1796   | 2028   |
| UN64952 | Rsa1.0.00059.1 | 149 | 159650 | 6.00E-69  | 144 | 148 | 97 - | 1   | 148 | 24742  | 24889  |
| UN64953 | Rsa1.0.01588.1 | 581 | 42724  | 4.00E-89  | 179 | 182 | 98 + | 285 | 464 | 13419  | 13600  |
| UN64954 | Rsa1.0.00218.1 | 697 | 201480 | 1.00E-172 | 362 | 378 | 95 - | 70  | 445 | 153355 | 153731 |
| UN64955 | Rsa1.0.00365.1 | 631 | 90902  | 0         | 437 | 464 | 94 - | 2   | 464 | 44104  | 44556  |
| UN64956 | Rsa1.0.00900.1 | 727 | 60367  | 4.00E-86  | 180 | 186 | 96 - | 59  | 244 | 41432  | 41617  |
| UN64957 | Rsa1.0.03223.1 | 555 | 24512  | 0         | 528 | 559 | 94 + | 1   | 555 | 9206   | 9763   |
| UN64958 | Rsa1.0.04437.1 | 658 | 17362  | 0         | 636 | 659 | 96 + | 1   | 653 | 1626   | 2282   |
| UN64959 | Rsa1.0.02774.1 | 448 | 28038  | 0         | 438 | 448 | 97 - | 1   | 448 | 214    | 656    |
| UN64960 | Rsa1.0.00522.1 | 756 | 78103  | 1.00E-135 | 329 | 355 | 92 - | 403 | 753 | 22739  | 23093  |
| UN64961 | Rsa1.0.01923.1 | 523 | 37233  | 0         | 485 | 531 | 91 - | 19  | 523 | 32234  | 32758  |
| UN64962 | Rsa1.0.00083.1 | 730 | 442773 | 0         | 536 | 551 | 97 + | 1   | 549 | 310473 | 311021 |
| UN64963 | Rsa1.0.00051.1 | 639 | 258225 | 1.00E-152 | 348 | 373 | 93 + | 37  | 409 | 62989  | 63361  |
| UN64964 | Rsa1.0.00163.1 | 727 | 116847 | 0         | 683 | 739 | 92 - | 1   | 727 | 85465  | 86199  |
| UN64965 | Rsa1.0.00118.1 | 698 | 130637 | 0         | 645 | 670 | 96 - | 1   | 666 | 29905  | 30571  |
| UN64966 | Rsa1.0.02593.1 | 288 | 29744  | 1.00E-101 | 233 | 247 | 94 + | 1   | 247 | 2919   | 3164   |
| UN64967 | Rsa1.0.00502.1 | 611 | 204180 | 1.00E-149 | 323 | 344 | 93 + | 1   | 332 | 11681  | 12024  |
| UN64968 | Rsa1.0.00262.1 | 232 | 101906 | 4.00E-96  | 221 | 233 | 94 - | 1   | 232 | 53428  | 53658  |
| UN64969 | Rsa1.0.00144.1 | 771 | 120708 | 0         | 769 | 771 | 99 + | 1   | 771 | 97823  | 98593  |
| UN64970 | #              | #   | #      | #         | #   | #   | #    | #   | #   | #      | #      |
| UN64971 | Rsa1.0.00045.1 | 665 | 328694 | 0         | 403 | 419 | 96 + | 2   | 420 | 94114  | 94525  |
| UN64972 | Rsa1.0.02023.1 | 749 | 35922  | 0         | 736 | 747 | 98 + | 3   | 749 | 9109   | 9855   |

|         |                |     |        |           |     |     |       |     |     |        |        |
|---------|----------------|-----|--------|-----------|-----|-----|-------|-----|-----|--------|--------|
| UN64973 | Rsa1.0.08230.1 | 137 | 7688   | 5.00E-54  | 129 | 135 | 95 -  | 4   | 137 | 5473   | 5607   |
| UN64974 | Rsa1.0.19010.1 | 683 | 1495   | 0         | 588 | 647 | 90 -  | 24  | 647 | 1      | 646    |
| UN64975 | Rsa1.0.33466.1 | 660 | 677    | 1.00E-102 | 224 | 235 | 95 +  | 1   | 232 | 220    | 454    |
| UN64976 | Rsa1.0.06825.1 | 725 | 10297  | 1.00E-130 | 266 | 276 | 96 +  | 1   | 276 | 7691   | 7966   |
| UN64977 | Rsa1.0.00184.1 | 185 | 218748 | 4.00E-49  | 139 | 151 | 92 +  | 33  | 182 | 213982 | 214132 |
| UN64978 | Rsa1.0.04470.1 | 721 | 17204  | 0         | 693 | 721 | 96 -  | 1   | 721 | 14663  | 15379  |
| UN64979 | Rsa1.0.08838.1 | 581 | 6873   | 0         | 443 | 460 | 96 -  | 95  | 554 | 2943   | 3401   |
| UN64980 | Rsa1.0.00457.1 | 777 | 337301 | 0         | 765 | 778 | 98 +  | 1   | 777 | 329771 | 330548 |
| UN64981 | Rsa1.0.00277.1 | 186 | 100132 | 7.00E-54  | 168 | 185 | 90 +  | 5   | 186 | 16035  | 16217  |
| UN64982 | Rsa1.0.04188.1 | 656 | 18586  | 0         | 637 | 658 | 96 +  | 1   | 655 | 6480   | 7133   |
| UN64983 | Rsa1.0.00002.1 | 313 | 601661 | 1.00E-115 | 250 | 263 | 95 +  | 17  | 279 | 124429 | 124691 |
| UN64984 | Rsa1.0.36780.1 | 702 | 613    | 2.00E-32  | 120 | 136 | 88 -  | 567 | 702 | 153    | 288    |
| UN64985 | Rsa1.0.16541.1 | 814 | 2119   | 0         | 786 | 824 | 95 -  | 1   | 806 | 92     | 914    |
| UN64986 | Rsa1.0.01811.1 | 185 | 38977  | 1.00E-61  | 159 | 172 | 92 +  | 1   | 172 | 1753   | 1924   |
| UN64987 | Rsa1.0.00280.1 | 664 | 99966  | 0         | 614 | 672 | 91 +  | 6   | 664 | 30067  | 30730  |
| UN64988 | Rsa1.0.00553.1 | 653 | 75983  | 1.00E-61  | 136 | 141 | 96 +  | 4   | 144 | 25896  | 26036  |
| UN64989 | Rsa1.0.00208.1 | 609 | 108565 | 1.00E-128 | 244 | 247 | 98 +  | 1   | 245 | 30193  | 30439  |
| UN64990 | Rsa1.0.06057.1 | 223 | 11842  | 1.00E-108 | 217 | 223 | 97 -  | 1   | 223 | 3263   | 3485   |
| UN64991 | Rsa1.0.01184.1 | 392 | 51452  | 1.00E-124 | 340 | 375 | 90 -  | 1   | 370 | 27411  | 27784  |
| UN64992 | Rsa1.0.05947.1 | 430 | 12142  | 1.00E-121 | 270 | 286 | 94 +  | 1   | 283 | 5633   | 5918   |
| UN64993 | Rsa1.0.00026.1 | 270 | 327835 | 1.00E-134 | 261 | 265 | 98 -  | 6   | 270 | 171791 | 172052 |
| UN64994 | Rsa1.0.00108.1 | 502 | 478491 | 1.00E-127 | 274 | 287 | 95 -  | 29  | 315 | 302540 | 302825 |
| UN64995 | Rsa1.0.01149.1 | 536 | 160459 | 4.00E-70  | 200 | 221 | 90 -  | 286 | 503 | 152944 | 153164 |
| UN64996 | #              | #   | #      | #         | #   | #   | #     | #   | #   | #      | #      |
| UN64997 | Rsa1.0.01199.1 | 749 | 163576 | 1.00E-118 | 243 | 252 | 96 -  | 162 | 413 | 9697   | 9948   |
| UN64998 | Rsa1.0.09169.1 | 689 | 6589   | 4.00E-80  | 155 | 156 | 99 +  | 289 | 444 | 5016   | 5171   |
| UN64999 | Rsa1.0.03599.1 | 769 | 21857  | 0         | 419 | 449 | 93 +  | 321 | 769 | 2346   | 2794   |
| UN65000 | Rsa1.0.00184.1 | 533 | 218748 | 0         | 410 | 429 | 95 -  | 2   | 422 | 81581  | 82009  |
| UN65001 | Rsa1.0.00650.1 | 552 | 70235  | 1.00E-159 | 354 | 372 | 95 -  | 1   | 360 | 67840  | 68209  |
| UN65002 | Rsa1.0.00070.1 | 847 | 150321 | 1.00E-145 | 445 | 504 | 88 -  | 347 | 847 | 89067  | 89539  |
| UN65003 | Rsa1.0.00523.1 | 712 | 178770 | 0         | 692 | 734 | 94 -  | 1   | 712 | 114420 | 115151 |
| UN65004 | Rsa1.0.00552.1 | 249 | 206757 | 2.00E-58  | 177 | 195 | 90 -  | 1   | 194 | 187345 | 187538 |
| UN65005 | Rsa1.0.00830.1 | 744 | 62685  | 0         | 526 | 542 | 97 +  | 30  | 571 | 49095  | 49636  |
| UN65006 | Rsa1.0.00033.1 | 734 | 515811 | 0         | 575 | 585 | 98 -  | 80  | 664 | 481863 | 482446 |
| UN65007 | Rsa1.0.03765.1 | 766 | 20971  | 0         | 391 | 391 | 100 + | 376 | 766 | 16880  | 17270  |
| UN65008 | Rsa1.0.03191.1 | 777 | 145762 | 1.00E-95  | 356 | 417 | 85 +  | 205 | 618 | 22098  | 22472  |
| UN65009 | Rsa1.0.01884.1 | 569 | 37659  | 0         | 400 | 417 | 95 +  | 153 | 569 | 17512  | 17928  |
| UN65010 | Rsa1.0.00398.1 | 716 | 88007  | 5.00E-98  | 218 | 229 | 95 +  | 217 | 445 | 43749  | 43975  |
| UN65011 | Rsa1.0.03821.1 | 803 | 20643  | 1.00E-110 | 237 | 245 | 96 -  | 3   | 244 | 6054   | 6297   |

|         |                |     |        |           |     |     |       |     |     |        |        |
|---------|----------------|-----|--------|-----------|-----|-----|-------|-----|-----|--------|--------|
| UN65012 | Rsa1.0_00220.1 | 873 | 192936 | 1.00E-179 | 367 | 382 | 96 +  | 1   | 381 | 143079 | 143460 |
| UN65013 | Rsa1.0_02085.1 | 680 | 35198  | 4.00E-49  | 192 | 226 | 84 +  | 229 | 439 | 28439  | 28664  |
| UN65014 | Rsa1.0_05940.1 | 610 | 12169  | 0         | 599 | 603 | 99 +  | 2   | 604 | 9231   | 9833   |
| UN65015 | Rsa1.0_00062.1 | 723 | 299291 | 8.00E-66  | 140 | 144 | 97 -  | 190 | 333 | 283617 | 283760 |
| UN65016 | Rsa1.0_00603.1 | 703 | 73299  | 0         | 484 | 510 | 94 +  | 194 | 703 | 62516  | 63022  |
| UN65017 | Rsa1.0_00476.1 | 682 | 280966 | 0         | 651 | 688 | 94 -  | 1   | 682 | 232273 | 232960 |
| UN65018 | Rsa1.0_01376.1 | 726 | 47004  | 1.00E-138 | 340 | 371 | 91 -  | 3   | 355 | 21956  | 22326  |
| UN65019 | Rsa1.0_01185.1 | 774 | 149842 | 1.00E-117 | 255 | 267 | 95 +  | 467 | 732 | 132558 | 132824 |
| UN65020 | Rsa1.0_01030.1 | 624 | 56290  | 1.00E-128 | 251 | 256 | 98 -  | 1   | 254 | 40732  | 40987  |
| UN65021 | Rsa1.0_04355.1 | 497 | 146733 | 1.00E-142 | 289 | 300 | 96 -  | 1   | 300 | 133389 | 133688 |
| UN65022 | Rsa1.0_01355.1 | 178 | 47303  | 3.00E-65  | 165 | 178 | 92 -  | 1   | 178 | 39734  | 39911  |
| UN65023 | Rsa1.0_00016.1 | 563 | 831256 | 3.00E-89  | 186 | 191 | 97 +  | 294 | 483 | 238927 | 239117 |
| UN65024 | Rsa1.0_01540.1 | 650 | 151890 | 1.00E-64  | 292 | 341 | 85 -  | 1   | 327 | 125765 | 126098 |
| UN65025 | Rsa1.0_02619.1 | 644 | 29444  | 0         | 609 | 644 | 94 +  | 1   | 644 | 5307   | 5943   |
| UN65026 | Rsa1.0_00842.1 | 610 | 62493  | 1.00E-168 | 452 | 493 | 91 +  | 9   | 493 | 14579  | 15054  |
| UN65027 | Rsa1.0_00003.1 | 663 | 340054 | 0         | 562 | 587 | 95 -  | 10  | 592 | 168580 | 169161 |
| UN65028 | Rsa1.0_00005.1 | 646 | 353093 | 1.00E-138 | 333 | 360 | 92 -  | 3   | 360 | 121587 | 121946 |
| UN65029 | Rsa1.0_19592.1 | 438 | 1410   | 0         | 409 | 423 | 96 +  | 18  | 438 | 1      | 423    |
| UN65030 | Rsa1.0_00825.1 | 734 | 62855  | 0         | 595 | 609 | 97 +  | 118 | 726 | 9205   | 9813   |
| UN65031 | Rsa1.0_15119.1 | 270 | 2814   | 2.00E-49  | 116 | 120 | 96 +  | 103 | 221 | 1424   | 1543   |
| UN65032 | Rsa1.0_00190.1 | 161 | 318240 | 8.00E-84  | 157 | 157 | 100 - | 1   | 157 | 295483 | 295639 |
| UN65033 | Rsa1.0_15479.1 | 669 | 2584   | 5.00E-61  | 126 | 128 | 98 +  | 224 | 351 | 1482   | 1609   |
| UN65034 | Rsa1.0_00286.1 | 644 | 98709  | 1.00E-147 | 326 | 344 | 94 -  | 302 | 644 | 27394  | 27736  |
| UN65035 | Rsa1.0_00923.1 | 697 | 153678 | 1.00E-117 | 242 | 251 | 96 +  | 170 | 420 | 31482  | 31732  |
| UN65036 | Rsa1.0_00043.1 | 809 | 264937 | 0         | 344 | 346 | 99 -  | 2   | 347 | 247196 | 247541 |
| UN65037 | Rsa1.0_01729.1 | 694 | 304246 | 0         | 554 | 560 | 98 -  | 136 | 694 | 124267 | 124826 |
| UN65038 | Rsa1.0_00017.1 | 733 | 752458 | 1.00E-137 | 343 | 368 | 93 -  | 4   | 363 | 292601 | 292967 |
| UN65039 | Rsa1.0_01183.1 | 581 | 51465  | 2.00E-78  | 190 | 203 | 93 +  | 380 | 579 | 20241  | 20443  |
| UN65040 | Rsa1.0_04520.1 | 810 | 16995  | 0         | 373 | 389 | 95 +  | 2   | 390 | 7916   | 8301   |
| UN65041 | Rsa1.0_01838.1 | 654 | 38500  | 5.00E-73  | 185 | 200 | 92 +  | 34  | 233 | 26075  | 26274  |
| UN65042 | Rsa1.0_00657.1 | 788 | 69858  | 0         | 391 | 410 | 95 -  | 298 | 706 | 4196   | 4605   |
| UN65043 | Rsa1.0_00989.1 | 762 | 57494  | 8.00E-97  | 213 | 224 | 95 -  | 369 | 592 | 12780  | 13003  |
| UN65044 | Rsa1.0_15895.1 | 706 | 2371   | 1.00E-141 | 329 | 354 | 92 -  | 3   | 356 | 170    | 523    |
| UN65045 | Rsa1.0_00067.1 | 550 | 415055 | 1.00E-129 | 252 | 258 | 97 +  | 14  | 271 | 40052  | 40309  |
| UN65046 | Rsa1.0_02812.1 | 761 | 27660  | 1.00E-152 | 276 | 277 | 99 -  | 2   | 278 | 8925   | 9201   |
| UN65047 | Rsa1.0_01242.1 | 699 | 50066  | 1.00E-177 | 352 | 365 | 96 +  | 138 | 502 | 4509   | 4867   |
| UN65048 | Rsa1.0_00020.1 | 611 | 283099 | 0         | 373 | 380 | 98 +  | 232 | 611 | 73988  | 74367  |
| UN65049 | Rsa1.0_00502.1 | 566 | 204180 | 1.00E-125 | 263 | 275 | 95 +  | 292 | 566 | 70237  | 70511  |
| UN65050 | Rsa1.0_00111.1 | 429 | 390088 | 2.00E-53  | 116 | 119 | 97 -  | 52  | 170 | 384851 | 384969 |

|         |                |     |        |           |     |     |       |     |     |        |        |
|---------|----------------|-----|--------|-----------|-----|-----|-------|-----|-----|--------|--------|
| UN65051 | Rsa1.0.00713.1 | 607 | 158017 | 0         | 587 | 608 | 96 -  | 3   | 607 | 46237  | 46844  |
| UN65052 | Rsa1.0.03047.1 | 697 | 25781  | 3.00E-65  | 145 | 151 | 96 +  | 445 | 595 | 25238  | 25388  |
| UN65053 | Rsa1.0.04165.1 | 686 | 18757  | 0         | 620 | 666 | 93 -  | 2   | 667 | 8380   | 9045   |
| UN65054 | Rsa1.0.00558.1 | 751 | 75819  | 0         | 675 | 697 | 96 -  | 3   | 697 | 56116  | 56809  |
| UN65055 | Rsa1.0.02516.1 | 638 | 30608  | 1.00E-131 | 255 | 261 | 97 +  | 2   | 262 | 25620  | 25880  |
| UN65056 | Rsa1.0.17651.1 | 679 | 1773   | 0         | 570 | 590 | 96 +  | 91  | 679 | 120    | 709    |
| UN65057 | Rsa1.0.00069.1 | 770 | 403561 | 1.00E-141 | 314 | 331 | 94 -  | 3   | 326 | 189991 | 190321 |
| UN65058 | Rsa1.0.02735.1 | 644 | 28344  | 0         | 615 | 647 | 95 +  | 1   | 644 | 2752   | 3397   |
| UN65059 | Rsa1.0.00651.1 | 801 | 247766 | 2.00E-48  | 99  | 99  | 100 - | 372 | 470 | 90937  | 91035  |
| UN65060 | Rsa1.0.01121.1 | 711 | 53407  | 4.00E-80  | 158 | 160 | 98 -  | 203 | 362 | 25326  | 25485  |
| UN65061 | Rsa1.0.03524.1 | 688 | 22297  | 1.00E-155 | 331 | 351 | 94 -  | 343 | 681 | 14602  | 14952  |
| UN65062 | Rsa1.0.01015.1 | 774 | 56752  | 0         | 383 | 392 | 97 +  | 3   | 390 | 33240  | 33631  |
| UN65063 | Rsa1.0.00222.1 | 174 | 172263 | 4.00E-55  | 127 | 133 | 95 +  | 42  | 174 | 139355 | 139487 |
| UN65064 | Rsa1.0.00018.1 | 220 | 410899 | 2.00E-73  | 202 | 220 | 91 +  | 1   | 220 | 102810 | 103027 |
| UN65065 | Rsa1.0.00386.1 | 319 | 89134  | 1.00E-106 | 244 | 258 | 94 -  | 27  | 283 | 44310  | 44565  |
| UN65066 | Rsa1.0.03783.1 | 720 | 20890  | 0         | 475 | 484 | 98 -  | 1   | 482 | 8709   | 9188   |
| UN65067 | Rsa1.0.00134.1 | 496 | 390219 | 0         | 457 | 461 | 99 -  | 1   | 461 | 199872 | 200332 |
| UN65068 | Rsa1.0.00293.1 | 630 | 339294 | 0         | 628 | 630 | 99 -  | 1   | 630 | 177750 | 178379 |
| UN65069 | Rsa1.0.04027.1 | 662 | 19501  | 1.00E-107 | 223 | 229 | 97 +  | 23  | 250 | 3004   | 3230   |
| UN65070 | Rsa1.0.00394.1 | 680 | 148426 | 1.00E-109 | 216 | 221 | 97 +  | 363 | 583 | 99304  | 99524  |
| UN65071 | Rsa1.0.07182.1 | 795 | 9777   | 0         | 772 | 795 | 97 +  | 1   | 795 | 4434   | 5224   |
| UN65072 | Rsa1.0.01400.1 | 877 | 46560  | 0         | 587 | 603 | 97 -  | 5   | 606 | 39590  | 40192  |
| UN65073 | Rsa1.0.00133.1 | 384 | 123768 | 1.00E-174 | 368 | 387 | 95 -  | 1   | 384 | 85217  | 85603  |
| UN65074 | Rsa1.0.00336.1 | 606 | 445051 | 1.00E-171 | 314 | 316 | 99 +  | 1   | 315 | 439520 | 439835 |
| UN65075 | Rsa1.0.00116.1 | 867 | 365886 | 0         | 696 | 715 | 97 +  | 158 | 864 | 139221 | 139935 |
| UN65076 | Rsa1.0.04082.1 | 678 | 19180  | 0         | 520 | 524 | 99 -  | 1   | 524 | 17639  | 18162  |
| UN65077 | Rsa1.0.03956.1 | 364 | 19872  | 2.00E-86  | 248 | 279 | 88 +  | 1   | 262 | 16254  | 16532  |
| UN65078 | Rsa1.0.00172.1 | 199 | 115476 | 2.00E-48  | 167 | 185 | 90 -  | 17  | 199 | 8460   | 8641   |
| UN65079 | Rsa1.0.01977.1 | 478 | 36559  | 2.00E-93  | 213 | 226 | 94 +  | 1   | 226 | 9608   | 9833   |
| UN65080 | #              | #   | #      | #         | #   | #   | #     | #   | #   | #      | #      |
| UN65081 | Rsa1.0.01421.1 | 157 | 46197  | 4.00E-67  | 147 | 152 | 96 +  | 1   | 152 | 18227  | 18376  |
| UN65082 | Rsa1.0.00002.1 | 208 | 601661 | 2.00E-94  | 203 | 210 | 96 -  | 2   | 208 | 574926 | 575135 |
| UN65083 | Rsa1.0.02079.1 | 603 | 35306  | 0         | 562 | 575 | 97 +  | 2   | 576 | 17945  | 18517  |
| UN65084 | Rsa1.0.04279.1 | 653 | 18113  | 1.00E-112 | 227 | 233 | 97 +  | 1   | 233 | 8647   | 8878   |
| UN65085 | Rsa1.0.02777.1 | 541 | 27986  | 0         | 511 | 520 | 98 -  | 1   | 520 | 15700  | 16219  |
| UN65086 | Rsa1.0.00409.1 | 157 | 146788 | 5.00E-39  | 112 | 122 | 91 -  | 36  | 157 | 80880  | 81001  |
| UN65087 | Rsa1.0.00645.1 | 628 | 189716 | 1.00E-103 | 206 | 211 | 97 -  | 317 | 527 | 148236 | 148446 |
| UN65088 | Rsa1.0.00275.1 | 758 | 210104 | 1.00E-138 | 400 | 450 | 88 +  | 1   | 448 | 174983 | 175414 |
| UN65089 | Rsa1.0.00402.1 | 780 | 385315 | 0         | 670 | 714 | 93 +  | 74  | 778 | 129975 | 130686 |

|         |                |     |        |           |     |     |       |     |     |        |        |
|---------|----------------|-----|--------|-----------|-----|-----|-------|-----|-----|--------|--------|
| UN65090 | Rsa1.0_00322.1 | 385 | 212233 | 1.00E-173 | 340 | 350 | 97 -  | 38  | 385 | 207662 | 208011 |
| UN65091 | Rsa1.0_00895.1 | 314 | 60615  | 1.00E-118 | 292 | 314 | 92 +  | 2   | 314 | 39735  | 40045  |
| UN65092 | Rsa1.0_00829.1 | 727 | 158305 | 6.00E-79  | 171 | 178 | 96 +  | 318 | 495 | 110359 | 110536 |
| UN65093 | Rsa1.0_00175.1 | 747 | 166121 | 0         | 722 | 749 | 96 -  | 1   | 747 | 42664  | 43412  |
| UN65094 | Rsa1.0_02197.1 | 584 | 33996  | 0         | 446 | 459 | 97 +  | 76  | 528 | 3408   | 3865   |
| UN65095 | Rsa1.0_00437.1 | 692 | 84879  | 0         | 504 | 513 | 98 -  | 2   | 514 | 4989   | 5501   |
| UN65096 | Rsa1.0_00159.1 | 579 | 431686 | 0         | 571 | 583 | 97 -  | 1   | 577 | 240915 | 241497 |
| UN65097 | Rsa1.0_00285.1 | 721 | 149638 | 0         | 451 | 467 | 96 -  | 3   | 469 | 87711  | 88171  |
| UN65098 | Rsa1.0_00387.1 | 630 | 495407 | 0         | 362 | 374 | 96 +  | 257 | 630 | 471842 | 472215 |
| UN65099 | Rsa1.0_24305.1 | 761 | 994    | 1.00E-139 | 268 | 271 | 98 +  | 384 | 652 | 655    | 925    |
| UN65100 | Rsa1.0_04371.1 | 609 | 17700  | 1.00E-140 | 271 | 277 | 97 +  | 229 | 505 | 13430  | 13706  |
| UN65101 | Rsa1.0_00552.1 | 607 | 206757 | 1.00E-130 | 264 | 272 | 97 -  | 337 | 607 | 181233 | 181504 |
| UN65102 | Rsa1.0_00111.1 | 621 | 390088 | 1.00E-158 | 370 | 399 | 92 -  | 3   | 386 | 263141 | 263529 |
| UN65103 | Rsa1.0_05344.1 | 776 | 14103  | 0         | 577 | 584 | 98 +  | 197 | 776 | 4842   | 5425   |
| UN65104 | Rsa1.0_00281.1 | 604 | 99908  | 1.00E-164 | 349 | 364 | 95 +  | 225 | 585 | 6793   | 7155   |
| UN65105 | Rsa1.0_01768.1 | 625 | 138463 | 0         | 597 | 625 | 95 +  | 1   | 625 | 112997 | 113616 |
| UN65106 | Rsa1.0_03100.1 | 768 | 25411  | 1.00E-150 | 288 | 294 | 97 +  | 3   | 296 | 974    | 1267   |
| UN65107 | Rsa1.0_02503.1 | 731 | 30709  | 1.00E-149 | 337 | 359 | 93 +  | 364 | 721 | 6768   | 7126   |
| UN65108 | Rsa1.0_00092.1 | 782 | 659932 | 1.00E-111 | 226 | 233 | 96 -  | 430 | 662 | 517220 | 517452 |
| UN65109 | Rsa1.0_01238.1 | 690 | 50120  | 1.00E-178 | 362 | 377 | 96 -  | 139 | 515 | 48359  | 48735  |
| UN65110 | Rsa1.0_10460.1 | 676 | 5842   | 0         | 555 | 559 | 99 -  | 118 | 676 | 5284   | 5842   |
| UN65111 | Rsa1.0_03979.1 | 615 | 19728  | 0         | 393 | 395 | 99 -  | 221 | 615 | 12580  | 12974  |
| UN65112 | Rsa1.0_02085.1 | 382 | 35198  | 1.00E-135 | 308 | 331 | 93 +  | 32  | 356 | 33816  | 34137  |
| UN65113 | Rsa1.0_00015.1 | 723 | 561803 | 0         | 446 | 466 | 95 +  | 257 | 720 | 252559 | 253024 |
| UN65114 | Rsa1.0_00009.1 | 438 | 232558 | 6.00E-84  | 187 | 193 | 96 +  | 239 | 430 | 150576 | 150765 |
| UN65115 | Rsa1.0_01991.1 | 617 | 36425  | 4.00E-98  | 228 | 242 | 94 +  | 356 | 596 | 10540  | 10781  |
| UN65116 | Rsa1.0_00632.1 | 618 | 183777 | 0         | 467 | 480 | 97 -  | 142 | 618 | 16467  | 16945  |
| UN65117 | Rsa1.0_00008.1 | 141 | 358124 | 5.00E-48  | 136 | 144 | 94 -  | 3   | 141 | 203197 | 203340 |
| UN65118 | Rsa1.0_02789.1 | 725 | 27850  | 0         | 455 | 455 | 100 + | 3   | 457 | 22846  | 23300  |
| UN65119 | Rsa1.0_01385.1 | 757 | 46782  | 0         | 412 | 418 | 98 -  | 150 | 567 | 6430   | 6847   |
| UN65120 | Rsa1.0_00251.1 | 604 | 303968 | 5.00E-76  | 151 | 153 | 98 -  | 171 | 323 | 298231 | 298383 |
| UN65121 | Rsa1.0_00243.1 | 706 | 103651 | 0         | 516 | 537 | 96 +  | 170 | 706 | 84697  | 85233  |
| UN65122 | Rsa1.0_00200.1 | 591 | 162016 | 1.00E-139 | 272 | 279 | 97 +  | 168 | 446 | 108328 | 108606 |
| UN65123 | Rsa1.0_00015.1 | 732 | 561803 | 0         | 445 | 458 | 97 -  | 274 | 727 | 257386 | 257843 |
| UN65124 | Rsa1.0_02148.1 | 500 | 34610  | 1.00E-176 | 370 | 388 | 95 +  | 113 | 500 | 23706  | 24091  |
| UN65125 | Rsa1.0_00482.1 | 806 | 81162  | 2.33E-156 | 279 | 283 | 98 +  | 193 | 474 | 19602  | 19884  |
| UN65126 | Rsa1.0_14058.1 | 480 | 3860   | 5.00E-97  | 222 | 234 | 94 +  | 171 | 403 | 1      | 231    |
| UN65127 | Rsa1.0_00015.1 | 333 | 561803 | 6.00E-74  | 156 | 161 | 96 -  | 119 | 279 | 375508 | 375668 |
| UN65128 | Rsa1.0_01513.1 | 717 | 44234  | 2.00E-63  | 201 | 217 | 92 -  | 506 | 717 | 17288  | 17498  |



|         |                |     |        |           |     |     |       |     |     |        |        |
|---------|----------------|-----|--------|-----------|-----|-----|-------|-----|-----|--------|--------|
| UN65129 | Rsa1.0.03889.1 | 620 | 20233  | 0         | 505 | 525 | 96 +  | 4   | 528 | 9869   | 10393  |
| UN65130 | Rsa1.0.00041.1 | 777 | 186197 | 1.00E-101 | 215 | 224 | 95 -  | 284 | 507 | 153061 | 153284 |
| UN65131 | Rsa1.0.00025.1 | 612 | 277312 | 1.00E-106 | 204 | 207 | 98 -  | 61  | 267 | 137286 | 137492 |
| UN65132 | Rsa1.0.05643.1 | 769 | 13065  | 0         | 673 | 700 | 96 -  | 75  | 766 | 3260   | 3959   |
| UN65133 | Rsa1.0.06732.1 | 731 | 10449  | 0         | 402 | 424 | 94 +  | 107 | 527 | 8112   | 8529   |
| UN65134 | Rsa1.0.00131.1 | 578 | 432233 | 2.00E-63  | 157 | 168 | 93 +  | 270 | 437 | 10362  | 10529  |
| UN65135 | Rsa1.0.15361.1 | 804 | 2658   | 1.00E-100 | 192 | 194 | 98 -  | 169 | 362 | 171    | 364    |
| UN65136 | Rsa1.0.06893.1 | 736 | 10194  | 0         | 461 | 473 | 97 -  | 266 | 736 | 846    | 1318   |
| UN65137 | Rsa1.0.00668.1 | 760 | 69421  | 1.00E-175 | 311 | 311 | 100 - | 14  | 324 | 27319  | 27629  |
| UN65138 | Rsa1.0.03990.1 | 593 | 19676  | 1.00E-140 | 340 | 367 | 92 +  | 227 | 593 | 3992   | 4335   |
| UN65139 | Rsa1.0.01015.1 | 649 | 56752  | 0         | 548 | 589 | 93 +  | 60  | 645 | 4422   | 5007   |
| UN65140 | Rsa1.0.07618.1 | 637 | 9015   | 4.00E-58  | 139 | 146 | 95 +  | 105 | 248 | 3768   | 3913   |
| UN65141 | Rsa1.0.00200.1 | 631 | 162016 | 3.00E-80  | 152 | 152 | 100 - | 407 | 558 | 134959 | 135110 |
| UN65142 | Rsa1.0.01965.1 | 628 | 36698  | 0         | 590 | 630 | 93 +  | 2   | 628 | 16313  | 16930  |
| UN65143 | Rsa1.0.19440.1 | 778 | 1432   | 0         | 713 | 742 | 96 -  | 2   | 742 | 317    | 1049   |
| UN65144 | Rsa1.0.06247.1 | 779 | 11395  | 5.00E-89  | 185 | 191 | 96 +  | 58  | 248 | 8685   | 8875   |
| UN65145 | Rsa1.0.00202.1 | 777 | 185895 | 0         | 431 | 444 | 97 -  | 3   | 446 | 146141 | 146582 |
| UN65146 | Rsa1.0.03895.1 | 458 | 20206  | 1.00E-145 | 423 | 470 | 90 -  | 2   | 458 | 13677  | 14141  |
| UN65147 | Rsa1.0.00336.1 | 765 | 445051 | 0         | 744 | 758 | 98 -  | 2   | 752 | 263959 | 264716 |
| UN65148 | Rsa1.0.00418.1 | 771 | 215377 | 8.00E-97  | 225 | 236 | 95 +  | 3   | 237 | 78262  | 78495  |
| UN65149 | Rsa1.0.00362.1 | 726 | 299497 | 0         | 708 | 731 | 96 +  | 2   | 726 | 295380 | 296106 |
| UN65150 | Rsa1.0.00324.1 | 690 | 218805 | 0         | 441 | 443 | 99 -  | 197 | 639 | 171647 | 172089 |
| UN65151 | Rsa1.0.00417.1 | 262 | 395068 | 1.00E-133 | 256 | 261 | 98 -  | 2   | 262 | 377182 | 377442 |
| UN65152 | Rsa1.0.00964.1 | 651 | 316648 | 6.00E-85  | 172 | 176 | 97 -  | 2   | 177 | 35552  | 35727  |
| UN65153 | Rsa1.0.00034.1 | 741 | 260119 | 0         | 456 | 469 | 97 +  | 6   | 465 | 7131   | 7599   |
| UN65154 | Rsa1.0.01572.1 | 597 | 42995  | 1.00E-178 | 390 | 413 | 94 -  | 195 | 597 | 6884   | 7295   |
| UN65155 | Rsa1.0.00387.1 | 697 | 495407 | 1.00E-139 | 298 | 309 | 96 +  | 387 | 692 | 396750 | 397055 |
| UN65156 | Rsa1.0.02744.1 | 669 | 28268  | 2.00E-94  | 176 | 176 | 100 - | 3   | 178 | 24978  | 25153  |
| UN65157 | Rsa1.0.06497.1 | 642 | 10890  | 1.00E-159 | 324 | 336 | 96 -  | 14  | 347 | 2384   | 2719   |
| UN65158 | Rsa1.0.00197.1 | 435 | 109714 | 9.00E-43  | 136 | 152 | 89 -  | 85  | 230 | 100879 | 101030 |
| UN65159 | Rsa1.0.00222.1 | 726 | 172263 | 0         | 710 | 735 | 96 +  | 1   | 726 | 168641 | 169374 |
| UN65160 | Rsa1.0.00294.1 | 668 | 144860 | 2.00E-91  | 203 | 215 | 94 -  | 44  | 249 | 62616  | 62830  |
| UN65161 | Rsa1.0.09152.1 | 766 | 6607   | 3.00E-47  | 115 | 121 | 95 -  | 451 | 571 | 1227   | 1347   |
| UN65162 | Rsa1.0.11159.1 | 729 | 5600   | 0         | 686 | 709 | 96 +  | 21  | 727 | 1      | 708    |
| UN65163 | Rsa1.0.01876.1 | 726 | 37800  | 0         | 570 | 596 | 95 +  | 133 | 726 | 36310  | 36905  |
| UN65164 | Rsa1.0.03719.1 | 690 | 21194  | 0         | 623 | 644 | 96 -  | 47  | 690 | 5269   | 5909   |
| UN65165 | Rsa1.0.00753.1 | 673 | 65705  | 0         | 484 | 506 | 95 +  | 172 | 673 | 8299   | 8803   |
| UN65166 | Rsa1.0.08723.1 | 710 | 6998   | 6.00E-76  | 177 | 185 | 95 +  | 528 | 710 | 3154   | 3338   |
| UN65167 | Rsa1.0.02158.1 | 789 | 154841 | 0         | 475 | 492 | 96 +  | 197 | 688 | 131925 | 132416 |

|         |                |     |        |           |     |     |       |     |     |        |        |
|---------|----------------|-----|--------|-----------|-----|-----|-------|-----|-----|--------|--------|
| UN65168 | Rsa1.0.00517.1 | 631 | 142790 | 1.00E-168 | 379 | 405 | 93 +  | 240 | 631 | 125121 | 125525 |
| UN65169 | Rsa1.0.06912.1 | 744 | 10177  | 0         | 699 | 717 | 97 +  | 2   | 712 | 9245   | 9958   |
| UN65170 | Rsa1.0.04231.1 | 758 | 18380  | 1.00E-153 | 376 | 411 | 91 +  | 359 | 758 | 15585  | 15987  |
| UN65171 | Rsa1.0.00281.1 | 787 | 99908  | 0         | 572 | 594 | 96 -  | 5   | 598 | 83414  | 84007  |
| UN65172 | Rsa1.0.08215.1 | 817 | 7711   | 3.00E-84  | 168 | 171 | 98 -  | 305 | 475 | 4681   | 4851   |
| UN65173 | Rsa1.0.02219.1 | 722 | 33798  | 2.00E-94  | 179 | 180 | 99 +  | 213 | 392 | 27259  | 27438  |
| UN65174 | Rsa1.0.00956.1 | 720 | 58304  | 1.00E-171 | 316 | 320 | 98 +  | 399 | 718 | 2176   | 2495   |
| UN65175 | Rsa1.0.06561.1 | 633 | 10772  | 1.00E-171 | 333 | 341 | 97 -  | 1   | 341 | 3005   | 3344   |
| UN65176 | Rsa1.0.00050.1 | 642 | 237174 | 1.00E-85  | 170 | 172 | 98 +  | 3   | 174 | 193199 | 193368 |
| UN65177 | Rsa1.0.01115.1 | 748 | 183545 | 1.00E-154 | 431 | 474 | 90 +  | 12  | 468 | 1272   | 1743   |
| UN65178 | Rsa1.0.00706.1 | 764 | 291570 | 1.00E-114 | 219 | 222 | 98 -  | 3   | 224 | 231041 | 231262 |
| UN65179 | Rsa1.0.00470.1 | 706 | 81968  | 1.00E-175 | 394 | 421 | 93 -  | 287 | 706 | 27956  | 28369  |
| UN65180 | Rsa1.0.00222.1 | 755 | 172263 | 1.00E-106 | 198 | 199 | 99 +  | 3   | 201 | 136676 | 136874 |
| UN65181 | Rsa1.0.00107.1 | 823 | 431659 | 1.00E-168 | 305 | 307 | 99 +  | 3   | 309 | 367203 | 367509 |
| UN65182 | #              | #   | #      | #         | #   | #   | #     | #   | #   | #      | #      |
| UN65183 | Rsa1.0.02506.1 | 800 | 30700  | 1.00E-116 | 320 | 345 | 92 -  | 429 | 763 | 6471   | 6812   |
| UN65184 | Rsa1.0.06287.1 | 643 | 11303  | 1.00E-106 | 221 | 230 | 96 -  | 292 | 521 | 7396   | 7619   |
| UN65185 | Rsa1.0.01234.1 | 629 | 50183  | 1.00E-139 | 254 | 255 | 99 -  | 236 | 490 | 11515  | 11769  |
| UN65186 | #              | #   | #      | #         | #   | #   | #     | #   | #   | #      | #      |
| UN65187 | Rsa1.0.00455.1 | 666 | 224823 | 0         | 630 | 655 | 96 -  | 3   | 642 | 147564 | 148218 |
| UN65188 | Rsa1.0.02201.1 | 795 | 33981  | 1.00E-77  | 196 | 208 | 94 +  | 557 | 761 | 15834  | 16041  |
| UN65189 | Rsa1.0.02338.1 | 593 | 32390  | 0         | 568 | 593 | 95 +  | 1   | 593 | 16530  | 17120  |
| UN65190 | Rsa1.0.04371.1 | 814 | 17700  | 1.00E-160 | 322 | 333 | 96 -  | 11  | 343 | 2476   | 2805   |
| UN65191 | Rsa1.0.09504.1 | 731 | 6328   | 0         | 565 | 568 | 99 -  | 166 | 731 | 3887   | 4454   |
| UN65192 | Rsa1.0.02528.1 | 669 | 30452  | 1.00E-157 | 311 | 321 | 96 +  | 181 | 501 | 4128   | 4448   |
| UN65193 | Rsa1.0.04194.1 | 826 | 132734 | 0         | 397 | 406 | 97 +  | 4   | 402 | 116179 | 116584 |
| UN65194 | Rsa1.0.00126.1 | 415 | 127534 | 1.00E-108 | 211 | 214 | 98 +  | 114 | 326 | 36710  | 36923  |
| UN65195 | Rsa1.0.01026.1 | 568 | 171624 | 1.00E-141 | 293 | 307 | 95 -  | 267 | 564 | 5616   | 5922   |
| UN65196 | Rsa1.0.01102.1 | 674 | 53987  | 9.00E-38  | 136 | 153 | 88 +  | 4   | 156 | 227    | 378    |
| UN65197 | Rsa1.0.00092.1 | 201 | 659932 | 3.00E-65  | 167 | 174 | 95 +  | 33  | 201 | 187657 | 187830 |
| UN65198 | Rsa1.0.01304.1 | 421 | 48790  | 1.00E-170 | 348 | 363 | 95 -  | 59  | 421 | 38015  | 38377  |
| UN65199 | Rsa1.0.02401.1 | 684 | 138425 | 6.00E-39  | 92  | 95  | 96 +  | 372 | 466 | 19391  | 19485  |
| UN65200 | Rsa1.0.00114.1 | 651 | 131330 | 0         | 624 | 652 | 95 +  | 3   | 651 | 60974  | 61612  |
| UN65201 | Rsa1.0.04449.1 | 267 | 17304  | 1.00E-149 | 267 | 267 | 100 - | 1   | 267 | 146    | 412    |
| UN65202 | Rsa1.0.07296.1 | 665 | 9599   | 1.00E-141 | 295 | 307 | 96 -  | 3   | 308 | 8852   | 9158   |
| UN65203 | Rsa1.0.02433.1 | 778 | 158318 | 1.00E-134 | 248 | 250 | 99 -  | 311 | 560 | 129398 | 129647 |
| UN65204 | Rsa1.0.00422.1 | 727 | 86144  | 1.00E-165 | 473 | 526 | 89 +  | 2   | 519 | 33502  | 34009  |
| UN65205 | Rsa1.0.00079.1 | 750 | 606987 | 1.00E-165 | 335 | 352 | 95 +  | 4   | 355 | 70206  | 70542  |
| UN65206 | Rsa1.0.16805.1 | 792 | 2030   | 3.00E-93  | 192 | 197 | 97 -  | 3   | 197 | 284    | 480    |

|         |                |     |        |           |     |     |       |     |     |        |        |
|---------|----------------|-----|--------|-----------|-----|-----|-------|-----|-----|--------|--------|
| UN65207 | Rsa1.0.00484.1 | 767 | 203294 | 0         | 737 | 764 | 96 -  | 14  | 767 | 141055 | 141818 |
| UN65208 | Rsa1.0.05398.1 | 806 | 13885  | 1.00E-49  | 113 | 117 | 96 +  | 2   | 118 | 13703  | 13819  |
| UN65209 | Rsa1.0.00039.1 | 769 | 296927 | 0         | 443 | 455 | 97 -  | 268 | 715 | 134051 | 134505 |
| UN65210 | Rsa1.0.03028.1 | 693 | 25872  | 0         | 664 | 673 | 98 +  | 24  | 693 | 10794  | 11466  |
| UN65211 | Rsa1.0.00990.1 | 784 | 57445  | 0         | 763 | 792 | 96 -  | 3   | 784 | 39770  | 40552  |
| UN65212 | Rsa1.0.00303.1 | 767 | 97468  | 0         | 488 | 490 | 99 +  | 3   | 492 | 5800   | 6289   |
| UN65213 | Rsa1.0.03156.1 | 740 | 24956  | 1.00E-73  | 159 | 165 | 96 -  | 35  | 199 | 4809   | 4973   |
| UN65214 | Rsa1.0.01674.1 | 669 | 168300 | 0         | 635 | 667 | 95 +  | 2   | 668 | 19501  | 20145  |
| UN65215 | Rsa1.0.00201.1 | 732 | 232851 | 0         | 577 | 609 | 94 -  | 2   | 605 | 131887 | 132492 |
| UN65216 | Rsa1.0.00991.1 | 597 | 143101 | 0         | 384 | 401 | 95 -  | 154 | 545 | 142698 | 143098 |
| UN65217 | Rsa1.0.07152.1 | 744 | 9815   | 0         | 739 | 747 | 98 +  | 2   | 744 | 683    | 1429   |
| UN65218 | Rsa1.0.00204.1 | 633 | 109056 | 0         | 520 | 548 | 94 +  | 90  | 633 | 96440  | 96987  |
| UN65219 | Rsa1.0.02097.1 | 667 | 35036  | 2.00E-91  | 195 | 202 | 96 +  | 466 | 667 | 16252  | 16451  |
| UN65220 | Rsa1.0.13716.1 | 719 | 4433   | 0         | 664 | 707 | 93 +  | 16  | 719 | 940    | 1646   |
| UN65221 | Rsa1.0.00300.1 | 755 | 97747  | 0         | 575 | 596 | 96 -  | 61  | 656 | 89745  | 90340  |
| UN65222 | Rsa1.0.03201.1 | 756 | 157656 | 0         | 731 | 752 | 97 +  | 1   | 750 | 16573  | 17324  |
| UN65223 | Rsa1.0.00705.1 | 467 | 67505  | 0         | 348 | 355 | 98 +  | 113 | 467 | 10409  | 10763  |
| UN65224 | Rsa1.0.00350.1 | 119 | 92346  | 4.00E-20  | 101 | 118 | 85 +  | 2   | 119 | 45684  | 45801  |
| UN65225 | Rsa1.0.00226.1 | 705 | 105884 | 6.00E-76  | 164 | 170 | 96 -  | 3   | 168 | 81752  | 81921  |
| UN65226 | Rsa1.0.00254.1 | 685 | 102600 | 9.00E-78  | 178 | 185 | 96 +  | 6   | 185 | 24666  | 24849  |
| UN65227 | Rsa1.0.00415.1 | 614 | 86795  | 0         | 389 | 408 | 95 +  | 205 | 612 | 4549   | 4956   |
| UN65228 | Rsa1.0.02119.1 | 791 | 34833  | 0         | 667 | 695 | 95 +  | 22  | 707 | 5724   | 6415   |
| UN65229 | Rsa1.0.02433.1 | 364 | 158318 | 2.00E-71  | 146 | 149 | 97 -  | 55  | 203 | 131673 | 131821 |
| UN65230 | Rsa1.0.03971.1 | 583 | 19788  | 1.00E-79  | 157 | 159 | 98 +  | 92  | 250 | 18010  | 18168  |
| UN65231 | Rsa1.0.00818.1 | 684 | 62939  | 0         | 651 | 700 | 93 +  | 13  | 683 | 35464  | 36163  |
| UN65232 | Rsa1.0.04379.1 | 749 | 17646  | 0         | 423 | 424 | 99 -  | 62  | 484 | 5536   | 5959   |
| UN65233 | Rsa1.0.00132.1 | 637 | 124299 | 0         | 582 | 607 | 95 +  | 35  | 637 | 52499  | 53102  |
| UN65234 | Rsa1.0.00075.1 | 697 | 146680 | 1.00E-64  | 126 | 126 | 100 - | 125 | 250 | 31518  | 31643  |
| UN65235 | Rsa1.0.16368.1 | 581 | 2175   | 0         | 518 | 530 | 97 +  | 1   | 530 | 311    | 840    |
| UN65236 | Rsa1.0.01205.1 | 753 | 50795  | 0         | 487 | 497 | 97 -  | 212 | 705 | 8626   | 9119   |
| UN65237 | Rsa1.0.01752.1 | 532 | 39805  | 1.00E-104 | 211 | 217 | 97 +  | 232 | 448 | 3243   | 3459   |
| UN65238 | Rsa1.0.00070.1 | 582 | 150321 | 7.00E-69  | 157 | 165 | 95 +  | 128 | 292 | 33797  | 33961  |
| UN65239 | Rsa1.0.00863.1 | 617 | 254535 | 0         | 480 | 512 | 93 +  | 121 | 617 | 109797 | 110307 |
| UN65240 | Rsa1.0.02053.1 | 755 | 35554  | 0         | 359 | 368 | 97 +  | 38  | 404 | 31854  | 32221  |
| UN65241 | Rsa1.0.00930.1 | 429 | 59224  | 3.00E-67  | 139 | 142 | 97 +  | 62  | 203 | 48986  | 49127  |
| UN65242 | Rsa1.0.00272.1 | 637 | 447836 | 1.00E-129 | 256 | 262 | 97 -  | 12  | 272 | 427664 | 427925 |
| UN65243 | Rsa1.0.05073.1 | 577 | 14925  | 1.00E-115 | 240 | 250 | 96 +  | 272 | 521 | 5489   | 5738   |
| UN65244 | Rsa1.0.00672.1 | 754 | 69358  | 0         | 634 | 659 | 96 -  | 2   | 649 | 34475  | 35131  |
| UN65245 | Rsa1.0.00668.1 | 546 | 69421  | 0         | 537 | 552 | 97 +  | 1   | 546 | 29319  | 29869  |

|         |                |     |        |           |     |     |       |     |     |        |        |
|---------|----------------|-----|--------|-----------|-----|-----|-------|-----|-----|--------|--------|
| UN65246 | Rsa1.0.00058.1 | 646 | 159921 | 1.00E-168 | 353 | 371 | 95 -  | 276 | 646 | 52482  | 52852  |
| UN65247 | Rsa1.0.02859.1 | 256 | 162118 | 1.00E-107 | 249 | 259 | 96 -  | 3   | 256 | 15956  | 16212  |
| UN65248 | Rsa1.0.01077.1 | 526 | 54772  | 1.00E-100 | 261 | 281 | 92 -  | 249 | 522 | 15170  | 15448  |
| UN65249 | Rsa1.0.06019.1 | 746 | 11916  | 1.00E-154 | 289 | 293 | 98 +  | 191 | 483 | 2196   | 2488   |
| UN65250 | Rsa1.0.17854.1 | 766 | 1725   | 0         | 562 | 587 | 95 -  | 182 | 766 | 921    | 1504   |
| UN65251 | Rsa1.0.01540.1 | 103 | 151890 | 4.00E-32  | 101 | 106 | 95 -  | 2   | 103 | 142976 | 143081 |
| UN65252 | Rsa1.0.00092.1 | 806 | 659932 | 0         | 544 | 597 | 91 -  | 18  | 593 | 170691 | 171278 |
| UN65253 | Rsa1.0.07528.1 | 580 | 9195   | 0         | 547 | 577 | 94 +  | 5   | 580 | 3310   | 3883   |
| UN65254 | Rsa1.0.09571.1 | 569 | 6280   | 0         | 531 | 569 | 93 +  | 2   | 569 | 835    | 1403   |
| UN65255 | Rsa1.0.02749.1 | 503 | 28241  | 6.00E-75  | 146 | 147 | 99 +  | 24  | 170 | 1631   | 1777   |
| UN65256 | Rsa1.0.20862.1 | 448 | 1261   | 1.00E-144 | 369 | 400 | 92 -  | 3   | 386 | 312    | 709    |
| UN65257 | Rsa1.0.00130.1 | 463 | 125737 | 1.00E-54  | 135 | 142 | 95 -  | 13  | 154 | 23477  | 23613  |
| UN65258 | Rsa1.0.01388.1 | 665 | 46741  | 1.00E-158 | 405 | 443 | 91 +  | 13  | 443 | 16613  | 17050  |
| UN65259 | Rsa1.0.00224.1 | 621 | 327530 | 1.00E-109 | 221 | 228 | 96 +  | 394 | 621 | 208584 | 208811 |
| UN65260 | Rsa1.0.00262.1 | 712 | 101906 | 0         | 684 | 704 | 97 -  | 3   | 702 | 87592  | 88294  |
| UN65261 | Rsa1.0.01412.1 | 525 | 46311  | 0         | 415 | 425 | 97 -  | 9   | 430 | 26018  | 26442  |
| UN65262 | Rsa1.0.01168.1 | 381 | 153765 | 1.00E-148 | 356 | 382 | 93 -  | 1   | 378 | 26387  | 26765  |
| UN65263 | Rsa1.0.00493.1 | 766 | 80007  | 1.00E-175 | 333 | 340 | 97 -  | 370 | 709 | 19650  | 19989  |
| UN65264 | Rsa1.0.00563.1 | 258 | 75491  | 1.00E-120 | 234 | 239 | 97 -  | 12  | 250 | 74314  | 74552  |
| UN65265 | Rsa1.0.01919.1 | 758 | 37272  | 2.00E-73  | 173 | 180 | 96 -  | 4   | 180 | 6410   | 6588   |
| UN65266 | Rsa1.0.01104.1 | 685 | 285480 | 1.00E-159 | 370 | 402 | 92 +  | 2   | 388 | 266582 | 266983 |
| UN65267 | Rsa1.0.02616.1 | 242 | 29542  | 8.00E-82  | 213 | 234 | 91 -  | 2   | 235 | 342    | 566    |
| UN65268 | Rsa1.0.01695.1 | 641 | 40848  | 1.00E-171 | 360 | 380 | 94 +  | 35  | 414 | 5566   | 5936   |
| UN65269 | Rsa1.0.00309.1 | 505 | 96883  | 1.00E-85  | 161 | 161 | 100 - | 3   | 163 | 67342  | 67502  |
| UN65270 | Rsa1.0.00023.1 | 646 | 194764 | 0         | 552 | 604 | 91 +  | 47  | 646 | 94507  | 95086  |
| UN65271 | Rsa1.0.00426.1 | 703 | 85668  | 7.00E-97  | 204 | 212 | 96 -  | 166 | 377 | 34554  | 34765  |
| UN65272 | Rsa1.0.04357.1 | 750 | 17762  | 0         | 518 | 563 | 92 +  | 3   | 553 | 4106   | 4664   |
| UN65273 | Rsa1.0.00844.1 | 672 | 62403  | 0         | 327 | 327 | 100 + | 346 | 672 | 55255  | 55581  |
| UN65274 | Rsa1.0.01039.1 | 725 | 55946  | 0         | 576 | 592 | 97 +  | 2   | 593 | 12608  | 13199  |
| UN65275 | Rsa1.0.02551.1 | 644 | 30196  | 1.00E-89  | 180 | 184 | 97 -  | 14  | 197 | 27835  | 28018  |
| UN65276 | Rsa1.0.04919.1 | 706 | 15440  | 1.00E-132 | 258 | 262 | 98 -  | 409 | 668 | 4628   | 4888   |
| UN65277 | Rsa1.0.01532.1 | 730 | 43767  | 0         | 710 | 733 | 96 -  | 2   | 730 | 7343   | 8074   |
| UN65278 | Rsa1.0.00039.1 | 630 | 296927 | 0         | 605 | 630 | 96 +  | 1   | 630 | 66632  | 67261  |
| UN65279 | Rsa1.0.00228.1 | 788 | 105511 | 0         | 699 | 722 | 96 +  | 39  | 758 | 97676  | 98397  |
| UN65280 | Rsa1.0.00543.1 | 771 | 76788  | 0         | 535 | 563 | 95 +  | 113 | 663 | 13771  | 14330  |
| UN65281 | Rsa1.0.01148.1 | 695 | 52375  | 1.00E-102 | 195 | 197 | 98 -  | 205 | 401 | 47833  | 48029  |
| UN65282 | Rsa1.0.01495.1 | 691 | 44613  | 0         | 556 | 596 | 93 -  | 105 | 691 | 19431  | 20014  |
| UN65283 | Rsa1.0.00230.1 | 690 | 105389 | 1.00E-170 | 363 | 381 | 95 +  | 1   | 378 | 808    | 1187   |
| UN65284 | Rsa1.0.00034.1 | 760 | 260119 | 1.00E-144 | 289 | 299 | 96 -  | 160 | 458 | 15588  | 15886  |

|         |                |     |        |           |     |     |       |     |     |        |        |
|---------|----------------|-----|--------|-----------|-----|-----|-------|-----|-----|--------|--------|
| UN65285 | Rsa1.0.33384.1 | 799 | 679    | 1.00E-172 | 346 | 359 | 96 -  | 99  | 457 | 173    | 531    |
| UN65286 | Rsa1.0.01881.1 | 655 | 37721  | 0         | 559 | 571 | 97 -  | 85  | 655 | 7997   | 8564   |
| UN65287 | Rsa1.0.02849.1 | 274 | 27327  | 3.00E-29  | 72  | 74  | 97 -  | 199 | 272 | 22557  | 22630  |
| UN65288 | Rsa1.0.09468.1 | 224 | 6346   | 2.00E-66  | 165 | 172 | 95 +  | 57  | 224 | 6121   | 6292   |
| UN65289 | Rsa1.0_00201.1 | 352 | 232851 | 4.00E-72  | 206 | 223 | 92 -  | 138 | 351 | 109854 | 110072 |
| UN65290 | Rsa1.0_00447.1 | 679 | 84051  | 0         | 365 | 372 | 98 -  | 309 | 679 | 16757  | 17128  |
| UN65291 | Rsa1.0.00184.1 | 405 | 218748 | 2.00E-71  | 153 | 157 | 97 -  | 185 | 340 | 212050 | 212206 |
| UN65292 | Rsa1.0.02130.1 | 551 | 34755  | 1.00E-179 | 368 | 382 | 96 +  | 169 | 549 | 11852  | 12232  |
| UN65293 | Rsa1.0.02637.1 | 631 | 29244  | 0         | 608 | 617 | 98 -  | 15  | 631 | 24589  | 25205  |
| UN65294 | Rsa1.0.00939.1 | 753 | 185227 | 0         | 490 | 508 | 96 +  | 240 | 747 | 37737  | 38244  |
| UN65295 | Rsa1.0.00149.1 | 749 | 305196 | 0         | 459 | 470 | 97 -  | 234 | 703 | 28569  | 29035  |
| UN65296 | Rsa1.0.00192.1 | 610 | 278200 | 0         | 585 | 608 | 96 +  | 3   | 610 | 273212 | 273813 |
| UN65297 | Rsa1.0.03615.1 | 717 | 21766  | 0         | 689 | 715 | 96 +  | 2   | 716 | 17436  | 18148  |
| UN65298 | Rsa1.0.00087.1 | 416 | 761073 | 2.00E-62  | 125 | 126 | 99 +  | 210 | 335 | 217067 | 217192 |
| UN65299 | Rsa1.0.01256.1 | 694 | 49770  | 0         | 487 | 490 | 99 +  | 205 | 694 | 28746  | 29235  |
| UN65300 | Rsa1.0.01105.1 | 719 | 53958  | 0         | 559 | 581 | 96 -  | 129 | 708 | 40892  | 41472  |
| UN65301 | Rsa1.0.01605.1 | 670 | 42442  | 0         | 398 | 419 | 94 +  | 256 | 670 | 30787  | 31205  |
| UN65302 | Rsa1.0.47147.1 | 623 | 479    | 2.33E-156 | 268 | 270 | 99 -  | 3   | 272 | 36     | 305    |
| UN65303 | Rsa1.0.00318.1 | 622 | 96094  | 1.00E-126 | 266 | 276 | 96 -  | 7   | 279 | 82946  | 83221  |
| UN65304 | Rsa1.0.00001.1 | 642 | 363028 | 1.00E-129 | 238 | 239 | 99 -  | 3   | 241 | 255791 | 256029 |
| UN65305 | Rsa1.0.01844.1 | 561 | 38421  | 1.00E-125 | 279 | 296 | 94 +  | 266 | 561 | 16246  | 16531  |
| UN65306 | Rsa1.0.05204.1 | 217 | 14516  | 7.00E-85  | 172 | 175 | 98 -  | 44  | 217 | 6215   | 6389   |
| UN65307 | Rsa1.0.01382.1 | 721 | 46877  | 0         | 632 | 645 | 97 -  | 81  | 721 | 28297  | 28941  |
| UN65308 | Rsa1.0.15319.1 | 803 | 2689   | 1.00E-113 | 256 | 272 | 94 +  | 43  | 314 | 2418   | 2689   |
| UN65309 | Rsa1.0.29040.1 | 676 | 794    | 1.00E-133 | 265 | 273 | 97 +  | 404 | 676 | 183    | 455    |
| UN65310 | Rsa1.0.00821.1 | 792 | 62891  | 1.00E-114 | 222 | 225 | 98 +  | 159 | 383 | 44817  | 45040  |
| UN65311 | Rsa1.0.00686.1 | 763 | 68511  | 0         | 759 | 766 | 99 +  | 3   | 763 | 26775  | 27540  |
| UN65312 | Rsa1.0.01781.1 | 593 | 39410  | 2.00E-56  | 226 | 264 | 85 +  | 192 | 452 | 28553  | 28794  |
| UN65313 | Rsa1.0.02609.1 | 635 | 29600  | 0         | 503 | 538 | 93 -  | 1   | 532 | 4090   | 4627   |
| UN65314 | Rsa1.0.02613.1 | 738 | 29557  | 1.00E-135 | 283 | 293 | 96 -  | 448 | 738 | 21081  | 21373  |
| UN65315 | Rsa1.0.05257.1 | 806 | 14343  | 0         | 457 | 467 | 97 -  | 341 | 806 | 2282   | 2748   |
| UN65316 | Rsa1.0.00049.1 | 715 | 167018 | 0         | 380 | 398 | 95 +  | 5   | 402 | 80762  | 81159  |
| UN65317 | Rsa1.0.08565.1 | 706 | 7189   | 6.00E-79  | 169 | 174 | 97 -  | 70  | 243 | 3219   | 3391   |
| UN65318 | Rsa1.0.08520.1 | 659 | 7241   | 1.00E-170 | 321 | 326 | 98 +  | 336 | 659 | 6156   | 6481   |
| UN65319 | Rsa1.0.16435.1 | 484 | 2156   | 1.00E-119 | 217 | 217 | 100 + | 268 | 484 | 1198   | 1414   |
| UN65320 | Rsa1.0.02924.1 | 650 | 26736  | 2.00E-41  | 105 | 111 | 94 +  | 334 | 444 | 18355  | 18465  |
| UN65321 | Rsa1.0.00035.1 | 427 | 176449 | 1.00E-137 | 279 | 288 | 96 -  | 135 | 421 | 52629  | 52916  |
| UN65322 | Rsa1.0.11726.1 | 646 | 5427   | 1.00E-55  | 111 | 111 | 100 - | 365 | 475 | 4840   | 4950   |
| UN65323 | Rsa1.0.02422.1 | 566 | 161122 | 0         | 366 | 372 | 98 -  | 1   | 371 | 156025 | 156395 |

|         |                |     |        |           |     |     |      |     |     |        |        |
|---------|----------------|-----|--------|-----------|-----|-----|------|-----|-----|--------|--------|
| UN65324 | Rsa1.0_00250.1 | 666 | 273771 | 4.00E-43  | 162 | 182 | 89 - | 198 | 378 | 3714   | 3893   |
| UN65325 | Rsa1.0_01228.1 | 404 | 50238  | 1.00E-155 | 318 | 329 | 96 - | 67  | 394 | 1725   | 2051   |
| UN65326 | Rsa1.0_00069.1 | 310 | 403561 | 4.00E-69  | 167 | 177 | 94 - | 3   | 179 | 151346 | 151521 |
| UN65327 | Rsa1.0_02435.1 | 213 | 31454  | 1.00E-92  | 206 | 216 | 95 + | 4   | 213 | 19863  | 20078  |
| UN65328 | Rsa1.0_00367.1 | 642 | 90750  | 1.00E-141 | 260 | 262 | 99 + | 1   | 262 | 2084   | 2345   |
| UN65329 | Rsa1.0_01104.1 | 570 | 285480 | 0         | 558 | 569 | 98 + | 3   | 570 | 158631 | 159197 |
| UN65330 | Rsa1.0_00502.1 | 650 | 204180 | 0         | 538 | 589 | 91 - | 74  | 650 | 63795  | 64372  |
| UN65331 | Rsa1.0_00293.1 | 205 | 339294 | 1.00E-106 | 201 | 202 | 99 - | 1   | 201 | 248553 | 248754 |
| UN65332 | Rsa1.0_03668.1 | 280 | 21483  | 4.00E-53  | 118 | 122 | 96 + | 30  | 151 | 10947  | 11068  |
| UN65333 | Rsa1.0_00301.1 | 264 | 365315 | 1.00E-107 | 249 | 261 | 95 + | 8   | 264 | 27313  | 27573  |
| UN65334 | Rsa1.0_14292.1 | 726 | 3569   | 1.00E-166 | 311 | 316 | 98 + | 120 | 435 | 804    | 1119   |
| UN65335 | Rsa1.0_00184.1 | 562 | 218748 | 1.00E-134 | 269 | 277 | 97 - | 286 | 562 | 211932 | 212206 |
| UN65336 | Rsa1.0_08781.1 | 685 | 6927   | 0         | 620 | 666 | 93 - | 2   | 667 | 6217   | 6882   |
| UN65337 | Rsa1.0_03805.1 | 485 | 20746  | 1.00E-148 | 275 | 277 | 99 + | 3   | 277 | 10463  | 10739  |
| UN65338 | Rsa1.0_00599.1 | 614 | 73418  | 0         | 541 | 555 | 97 - | 2   | 556 | 62011  | 62564  |
| UN65339 | Rsa1.0_00126.1 | 798 | 127534 | 1.00E-142 | 301 | 316 | 95 + | 108 | 423 | 37046  | 37361  |
| UN65340 | Rsa1.0_01415.1 | 672 | 46263  | 0         | 415 | 423 | 98 - | 167 | 589 | 21791  | 22213  |
| UN65341 | Rsa1.0_03054.1 | 823 | 25738  | 1.00E-137 | 278 | 287 | 96 + | 363 | 648 | 14197  | 14483  |
| UN65342 | Rsa1.0_01719.1 | 750 | 40388  | 2.00E-85  | 195 | 205 | 95 + | 547 | 750 | 19145  | 19349  |
| UN65343 | Rsa1.0_00116.1 | 595 | 365886 | 9.00E-93  | 213 | 224 | 95 - | 3   | 225 | 244253 | 244474 |
| UN65344 | Rsa1.0_07056.1 | 600 | 9969   | 1.00E-119 | 285 | 308 | 92 + | 299 | 600 | 6091   | 6398   |
| UN65345 | Rsa1.0_00122.1 | 618 | 265937 | 1.00E-119 | 454 | 533 | 85 - | 2   | 534 | 214754 | 215286 |
| UN65346 | Rsa1.0_00489.1 | 257 | 80434  | 1.00E-52  | 114 | 117 | 97 + | 137 | 253 | 47295  | 47411  |
| UN65347 | Rsa1.0_07963.1 | 819 | 8167   | 0         | 397 | 405 | 98 + | 2   | 405 | 7749   | 8153   |
| UN65348 | Rsa1.0_04456.1 | 696 | 17260  | 1.00E-101 | 272 | 299 | 90 + | 190 | 486 | 7155   | 7443   |
| UN65349 | Rsa1.0_01422.1 | 761 | 46172  | 8.00E-94  | 225 | 242 | 92 + | 18  | 253 | 12736  | 12977  |
| UN65350 | Rsa1.0_00047.1 | 678 | 168582 | 1.00E-112 | 215 | 218 | 98 + | 314 | 531 | 136923 | 137140 |
| UN65351 | Rsa1.0_00472.1 | 509 | 398134 | 0         | 477 | 512 | 93 + | 1   | 509 | 269687 | 270191 |
| UN65352 | Rsa1.0_00201.1 | 706 | 232851 | 1.00E-102 | 243 | 255 | 95 + | 1   | 251 | 70109  | 70360  |
| UN65353 | Rsa1.0_01888.1 | 700 | 37563  | 5.00E-58  | 118 | 119 | 99 - | 367 | 485 | 34108  | 34226  |
| UN65354 | Rsa1.0_05056.1 | 402 | 14981  | 1.00E-102 | 272 | 297 | 91 - | 11  | 305 | 9085   | 9376   |
| UN65355 | Rsa1.0_04288.1 | 294 | 18077  | 3.00E-66  | 156 | 160 | 97 - | 139 | 294 | 7831   | 7990   |
| UN65356 | Rsa1.0_08565.1 | 718 | 7189   | 3.00E-47  | 161 | 178 | 90 - | 101 | 276 | 3219   | 3391   |
| UN65357 | Rsa1.0_00205.1 | 631 | 193401 | 0         | 442 | 452 | 97 - | 180 | 631 | 175857 | 176308 |
| UN65358 | Rsa1.0_00404.1 | 752 | 87635  | 0         | 646 | 652 | 99 + | 2   | 651 | 60367  | 61018  |
| UN65359 | Rsa1.0_00111.1 | 736 | 390088 | 0         | 487 | 506 | 96 + | 194 | 696 | 177208 | 177713 |
| UN65360 | Rsa1.0_00229.1 | 709 | 105471 | 0         | 702 | 709 | 99 - | 3   | 709 | 51504  | 52212  |
| UN65361 | Rsa1.0_00104.1 | 581 | 368722 | 1.00E-152 | 295 | 302 | 97 + | 3   | 301 | 255735 | 256036 |
| UN65362 | Rsa1.0_00811.1 | 730 | 63242  | 0         | 711 | 726 | 97 + | 3   | 726 | 24491  | 25216  |

|         |                |     |        |           |     |     |       |     |     |        |        |
|---------|----------------|-----|--------|-----------|-----|-----|-------|-----|-----|--------|--------|
| UN65363 | Rsa1.0.03300.1 | 758 | 23937  | 0         | 355 | 361 | 98 +  | 398 | 758 | 8923   | 9283   |
| UN65364 | Rsa1.0.03344.1 | 740 | 23593  | 1.00E-83  | 289 | 328 | 88 -  | 3   | 324 | 21974  | 22296  |
| UN65365 | Rsa1.0.11595.1 | 735 | 5463   | 1.00E-156 | 314 | 323 | 97 -  | 193 | 514 | 1201   | 1521   |
| UN65366 | Rsa1.0.00605.1 | 843 | 73199  | 1.00E-172 | 330 | 338 | 97 -  | 124 | 461 | 72388  | 72725  |
| UN65367 | Rsa1.0.00889.1 | 846 | 60978  | 1.00E-174 | 330 | 334 | 98 -  | 436 | 767 | 5241   | 5574   |
| UN65368 | Rsa1.0.02234.1 | 664 | 33618  | 1.00E-159 | 309 | 317 | 97 -  | 253 | 569 | 4218   | 4534   |
| UN65369 | Rsa1.0.01678.1 | 805 | 162174 | 0         | 366 | 367 | 99 +  | 85  | 450 | 121487 | 121853 |
| UN65370 | Rsa1.0.03169.1 | 788 | 24826  | 1.00E-177 | 324 | 327 | 99 -  | 47  | 373 | 21963  | 22289  |
| UN65371 | Rsa1.0.06010.1 | 778 | 11944  | 1.00E-177 | 479 | 531 | 90 +  | 204 | 732 | 4866   | 5396   |
| UN65372 | Rsa1.0.00894.1 | 595 | 269700 | 0         | 499 | 499 | 100 + | 97  | 595 | 117605 | 118103 |
| UN65373 | Rsa1.0.01595.1 | 619 | 175383 | 1.00E-121 | 235 | 240 | 97 +  | 164 | 403 | 22598  | 22837  |
| UN65374 | Rsa1.0.03813.1 | 333 | 20708  | 9.00E-64  | 205 | 227 | 90 +  | 105 | 326 | 2017   | 2238   |
| UN65375 | Rsa1.0.00008.1 | 569 | 358124 | 1.00E-144 | 319 | 337 | 94 +  | 3   | 334 | 170488 | 170824 |
| UN65376 | Rsa1.0.02900.1 | 585 | 26928  | 0         | 394 | 404 | 97 -  | 183 | 585 | 1352   | 1755   |
| UN65377 | Rsa1.0.02901.1 | 660 | 26909  | 1.00E-105 | 209 | 214 | 97 -  | 288 | 501 | 12880  | 13093  |
| UN65378 | Rsa1.0.00705.1 | 613 | 67505  | 2.00E-78  | 152 | 153 | 99 +  | 1   | 153 | 42987  | 43139  |
| UN65379 | Rsa1.0.03733.1 | 138 | 21108  | 8.00E-53  | 129 | 137 | 94 -  | 2   | 138 | 4895   | 5031   |
| UN65380 | Rsa1.0.00869.1 | 675 | 61627  | 0         | 459 | 474 | 96 +  | 203 | 675 | 25272  | 25742  |
| UN65381 | Rsa1.0.01199.1 | 652 | 163576 | 1.00E-115 | 219 | 222 | 98 +  | 1   | 222 | 7658   | 7879   |
| UN65382 | Rsa1.0.01078.1 | 646 | 316910 | 1.00E-172 | 376 | 397 | 94 +  | 254 | 646 | 134426 | 134822 |
| UN65383 | Rsa1.0.02409.1 | 254 | 31663  | 8.00E-79  | 152 | 153 | 99 +  | 92  | 244 | 1762   | 1914   |
| UN65384 | Rsa1.0.02494.1 | 283 | 132923 | 1.00E-53  | 113 | 115 | 98 +  | 161 | 275 | 3899   | 4013   |
| UN65385 | #              | #   | #      | #         | #   | #   | #     | #   | #   | #      | #      |
| UN65386 | Rsa1.0.00611.1 | 670 | 72410  | 0         | 401 | 412 | 97 -  | 260 | 670 | 41862  | 42273  |
| UN65387 | Rsa1.0.03191.1 | 630 | 145762 | 1.00E-103 | 205 | 210 | 97 -  | 8   | 217 | 24113  | 24322  |
| UN65388 | Rsa1.0.00526.1 | 164 | 169279 | 5.00E-39  | 82  | 82  | 100 + | 4   | 85  | 147749 | 147830 |
| UN65389 | Rsa1.0.00398.1 | 243 | 88007  | 6.00E-92  | 219 | 231 | 94 -  | 3   | 231 | 44712  | 44941  |
| UN65390 | Rsa1.0.34213.1 | 822 | 662    | 4.00E-68  | 238 | 275 | 86 -  | 143 | 411 | 161    | 426    |
| UN65391 | Rsa1.0.00223.1 | 783 | 106231 | 2.00E-51  | 107 | 108 | 99 -  | 485 | 592 | 37447  | 37554  |
| UN65392 | Rsa1.0.00012.1 | 684 | 222148 | 1.00E-153 | 354 | 384 | 92 +  | 132 | 506 | 110286 | 110657 |
| UN65393 | Rsa1.0.00269.1 | 654 | 341668 | 2.00E-78  | 170 | 177 | 96 +  | 201 | 377 | 289393 | 289569 |
| UN65394 | Rsa1.0.00133.1 | 779 | 123768 | 9.00E-66  | 169 | 185 | 91 +  | 521 | 693 | 861    | 1045   |
| UN65395 | Rsa1.0.02433.1 | 745 | 158318 | 2.00E-72  | 214 | 236 | 90 -  | 28  | 259 | 23130  | 23363  |
| UN65396 | Rsa1.0.00016.1 | 681 | 831256 | 2.00E-69  | 134 | 134 | 100 + | 22  | 155 | 782864 | 782997 |
| UN65397 | Rsa1.0.00284.1 | 688 | 323267 | 8.00E-72  | 144 | 146 | 98 -  | 431 | 576 | 135493 | 135638 |
| UN65398 | Rsa1.0.05179.1 | 646 | 14576  | 0         | 632 | 645 | 97 +  | 2   | 646 | 890    | 1534   |
| UN65399 | Rsa1.0.03090.1 | 578 | 25464  | 0         | 566 | 578 | 97 -  | 2   | 578 | 18568  | 19145  |
| UN65400 | Rsa1.0.27089.1 | 545 | 866    | 1.00E-161 | 434 | 482 | 90 -  | 23  | 504 | 388    | 866    |
| UN65401 | Rsa1.0.00336.1 | 471 | 445051 | 1.00E-119 | 369 | 422 | 87 +  | 63  | 471 | 25324  | 25725  |

|         |                |     |        |           |     |     |       |     |     |        |        |
|---------|----------------|-----|--------|-----------|-----|-----|-------|-----|-----|--------|--------|
| UN65402 | Rsa1.0_00706.1 | 696 | 291570 | 3.00E-62  | 179 | 198 | 90 -  | 339 | 536 | 28510  | 28707  |
| UN65403 | Rsa1.0_01068.1 | 609 | 55208  | 1.00E-166 | 305 | 308 | 99 -  | 3   | 310 | 46500  | 46807  |
| UN65404 | Rsa1.0_00928.1 | 647 | 59293  | 0         | 603 | 667 | 90 -  | 1   | 647 | 6827   | 7486   |
| UN65405 | Rsa1.0_00886.1 | 432 | 167350 | 1.00E-117 | 258 | 268 | 96 -  | 169 | 432 | 42785  | 43050  |
| UN65406 | Rsa1.0_00915.1 | 776 | 194446 | 0         | 603 | 635 | 94 -  | 139 | 771 | 19289  | 19923  |
| UN65407 | Rsa1.0_00251.1 | 695 | 303968 | 2.00E-54  | 163 | 178 | 91 -  | 4   | 173 | 57785  | 57959  |
| UN65408 | Rsa1.0_00721.1 | 601 | 66918  | 1.00E-158 | 335 | 353 | 94 +  | 218 | 570 | 27433  | 27779  |
| UN65409 | Rsa1.0_01473.1 | 372 | 45094  | 2.00E-89  | 183 | 187 | 97 +  | 2   | 187 | 14557  | 14743  |
| UN65410 | Rsa1.0_00523.1 | 622 | 178770 | 0         | 606 | 622 | 97 +  | 2   | 622 | 113828 | 114449 |
| UN65411 | Rsa1.0_05541.1 | 544 | 139959 | 1.00E-132 | 242 | 243 | 99 -  | 173 | 415 | 134310 | 134552 |
| UN65412 | Rsa1.0_04248.1 | 800 | 18287  | 2.00E-69  | 174 | 183 | 95 +  | 563 | 738 | 5494   | 5676   |
| UN65413 | Rsa1.0_00652.1 | 624 | 70089  | 0         | 597 | 623 | 95 +  | 2   | 624 | 13820  | 14442  |
| UN65414 | Rsa1.0_01327.1 | 689 | 48033  | 0         | 455 | 469 | 97 +  | 2   | 468 | 23907  | 24375  |
| UN65415 | Rsa1.0_01553.1 | 609 | 43379  | 0         | 564 | 596 | 94 +  | 3   | 590 | 15810  | 16405  |
| UN65416 | Rsa1.0_01112.1 | 651 | 310601 | 0         | 545 | 557 | 97 -  | 93  | 647 | 163830 | 164386 |
| UN65417 | Rsa1.0_00003.1 | 779 | 340054 | 0         | 717 | 750 | 95 -  | 32  | 779 | 172485 | 173234 |
| UN65418 | Rsa1.0_08427.1 | 765 | 7371   | 0         | 744 | 770 | 96 +  | 4   | 765 | 1270   | 2033   |
| UN65419 | Rsa1.0_00252.1 | 729 | 102760 | 0         | 441 | 454 | 97 -  | 3   | 450 | 78223  | 78676  |
| UN65420 | Rsa1.0_00408.1 | 652 | 176752 | 1.00E-159 | 288 | 289 | 99 -  | 4   | 292 | 108966 | 109254 |
| UN65421 | Rsa1.0_00830.1 | 607 | 62685  | 1.00E-107 | 314 | 352 | 89 -  | 262 | 606 | 50218  | 50569  |
| UN65422 | Rsa1.0_00131.1 | 683 | 432233 | 1.00E-118 | 234 | 240 | 97 -  | 87  | 326 | 67199  | 67438  |
| UN65423 | Rsa1.0_00016.1 | 798 | 831256 | 1.00E-127 | 258 | 267 | 96 -  | 3   | 269 | 239826 | 240092 |
| UN65424 | Rsa1.0_05574.1 | 599 | 13290  | 1.00E-176 | 356 | 369 | 96 -  | 4   | 372 | 4397   | 4764   |
| UN65425 | Rsa1.0_06542.1 | 659 | 10805  | 0         | 620 | 628 | 98 +  | 35  | 659 | 8210   | 8837   |
| UN65426 | Rsa1.0_00582.1 | 798 | 74333  | 1.00E-177 | 377 | 394 | 95 +  | 46  | 434 | 15884  | 16274  |
| UN65427 | Rsa1.0_02497.1 | 744 | 30797  | 3.00E-50  | 160 | 177 | 90 +  | 4   | 180 | 26772  | 26945  |
| UN65428 | Rsa1.0_03821.1 | 712 | 20643  | 2.00E-94  | 176 | 176 | 100 + | 205 | 380 | 4155   | 4330   |
| UN65429 | Rsa1.0_06825.1 | 679 | 10297  | 0         | 564 | 592 | 95 -  | 61  | 652 | 9262   | 9841   |
| UN65430 | Rsa1.0_01000.1 | 653 | 57140  | 2.00E-81  | 208 | 222 | 93 -  | 4   | 218 | 19064  | 19284  |
| UN65431 | Rsa1.0_05448.1 | 733 | 13712  | 1.00E-105 | 197 | 198 | 99 -  | 485 | 682 | 12701  | 12898  |
| UN65432 | Rsa1.0_27329.1 | 623 | 857    | 1.00E-135 | 294 | 309 | 95 -  | 307 | 614 | 549    | 857    |
| UN65433 | Rsa1.0_01039.1 | 516 | 55946  | 0         | 509 | 513 | 99 -  | 2   | 514 | 4368   | 4880   |
| UN65434 | Rsa1.0_02622.1 | 594 | 142402 | 0         | 579 | 592 | 97 -  | 5   | 594 | 7986   | 8577   |
| UN65435 | Rsa1.0_01859.1 | 442 | 38073  | 0         | 432 | 439 | 98 +  | 2   | 439 | 11385  | 11820  |
| UN65436 | Rsa1.0_11534.1 | 618 | 5477   | 0         | 397 | 421 | 94 +  | 199 | 618 | 502    | 922    |
| UN65437 | Rsa1.0_26654.1 | 618 | 883    | 0         | 459 | 484 | 94 +  | 43  | 512 | 197    | 680    |
| UN65438 | Rsa1.0_01339.1 | 489 | 47813  | 0         | 459 | 493 | 93 +  | 2   | 489 | 3808   | 4291   |
| UN65439 | Rsa1.0_08150.1 | 644 | 7832   | 0         | 551 | 593 | 92 -  | 18  | 607 | 7130   | 7717   |
| UN65440 | Rsa1.0_00350.1 | 494 | 92346  | 0         | 460 | 498 | 92 +  | 3   | 492 | 45484  | 45981  |



|         |                |     |        |           |     |     |       |     |     |        |        |
|---------|----------------|-----|--------|-----------|-----|-----|-------|-----|-----|--------|--------|
| UN65441 | Rsa1.0_00501.1 | 765 | 79545  | 0         | 434 | 442 | 98 +  | 76  | 517 | 18563  | 19004  |
| UN65442 | Rsa1.0_00336.1 | 659 | 445051 | 0         | 517 | 527 | 98 +  | 133 | 659 | 209876 | 210402 |
| UN65443 | Rsa1.0_00440.1 | 770 | 84723  | 1.00E-154 | 288 | 292 | 98 +  | 2   | 293 | 55506  | 55797  |
| UN65444 | Rsa1.0_00101.1 | 645 | 267193 | 0         | 595 | 644 | 92 -  | 7   | 645 | 105259 | 105880 |
| UN65445 | Rsa1.0_00352.1 | 737 | 92266  | 0         | 535 | 547 | 97 -  | 13  | 558 | 26244  | 26789  |
| UN65446 | Rsa1.0_00079.1 | 599 | 606987 | 1.00E-159 | 338 | 356 | 94 +  | 244 | 599 | 131777 | 132132 |
| UN65447 | Rsa1.0_00159.1 | 587 | 431686 | 0         | 540 | 585 | 92 -  | 3   | 587 | 329133 | 329700 |
| UN65448 | Rsa1.0_02386.1 | 730 | 31895  | 0         | 434 | 456 | 95 -  | 275 | 730 | 11412  | 11867  |
| UN65449 | Rsa1.0_04808.1 | 758 | 15893  | 0         | 410 | 438 | 93 -  | 3   | 439 | 13072  | 13499  |
| UN65450 | Rsa1.0_04775.1 | 769 | 16025  | 0         | 701 | 732 | 95 +  | 4   | 724 | 4036   | 4767   |
| UN65451 | Rsa1.0_03862.1 | 519 | 20400  | 0         | 427 | 442 | 96 -  | 1   | 442 | 19163  | 19604  |
| UN65452 | Rsa1.0_03741.1 | 640 | 143933 | 0         | 600 | 625 | 96 -  | 2   | 624 | 8538   | 9159   |
| UN65453 | Rsa1.0_00457.1 | 760 | 337301 | 0         | 733 | 768 | 95 -  | 3   | 760 | 330564 | 331331 |
| UN65454 | Rsa1.0_00277.1 | 756 | 100132 | 0         | 500 | 528 | 94 -  | 230 | 747 | 16790  | 17315  |
| UN65455 | #              | #   | #      | #         | #   | #   | #     | #   | #   | #      | #      |
| UN65456 | Rsa1.0_04369.1 | 688 | 17703  | 3.00E-93  | 198 | 206 | 96 -  | 301 | 506 | 498    | 703    |
| UN65457 | #              | #   | #      | #         | #   | #   | #     | #   | #   | #      | #      |
| UN65458 | Rsa1.0_00055.1 | 538 | 520193 | 0         | 518 | 556 | 93 -  | 3   | 538 | 344879 | 345431 |
| UN65459 | Rsa1.0_00891.1 | 810 | 60724  | 1.00E-92  | 176 | 177 | 99 -  | 264 | 440 | 35838  | 36014  |
| UN65460 | Rsa1.0_00280.1 | 688 | 99966  | 0         | 514 | 538 | 95 -  | 151 | 688 | 31328  | 31862  |
| UN65461 | Rsa1.0_03134.1 | 706 | 145023 | 0         | 621 | 658 | 94 +  | 1   | 656 | 134634 | 135288 |
| UN65462 | Rsa1.0_00208.1 | 772 | 108565 | 0         | 619 | 633 | 97 -  | 3   | 634 | 32082  | 32713  |
| UN65463 | Rsa1.0_00092.1 | 706 | 659932 | 1.00E-175 | 346 | 356 | 97 -  | 140 | 494 | 24777  | 25132  |
| UN65464 | Rsa1.0_00010.1 | 650 | 294827 | 0         | 490 | 516 | 94 +  | 2   | 511 | 116714 | 117229 |
| UN65465 | Rsa1.0_05947.1 | 430 | 12142  | 1.00E-147 | 281 | 286 | 98 -  | 148 | 430 | 5633   | 5918   |
| UN65466 | Rsa1.0_01118.1 | 295 | 53460  | 3.00E-85  | 222 | 243 | 91 -  | 3   | 235 | 14781  | 15022  |
| UN65467 | Rsa1.0_01664.1 | 300 | 41364  | 1.00E-152 | 293 | 300 | 97 +  | 1   | 300 | 5370   | 5669   |
| UN65468 | Rsa1.0_00146.1 | 710 | 149343 | 1.00E-124 | 229 | 230 | 99 +  | 106 | 335 | 51216  | 51445  |
| UN65469 | Rsa1.0_01484.1 | 674 | 44806  | 0         | 538 | 579 | 92 +  | 93  | 660 | 24906  | 25478  |
| UN65470 | Rsa1.0_02791.1 | 680 | 27832  | 6.00E-85  | 163 | 164 | 99 +  | 436 | 599 | 6550   | 6713   |
| UN65471 | Rsa1.0_15329.1 | 787 | 2682   | 0         | 742 | 797 | 93 -  | 2   | 781 | 521    | 1315   |
| UN65472 | Rsa1.0_00149.1 | 651 | 305196 | 7.00E-97  | 215 | 226 | 95 +  | 429 | 651 | 104054 | 104279 |
| UN65473 | Rsa1.0_01211.1 | 672 | 50646  | 1.00E-105 | 203 | 206 | 98 +  | 454 | 659 | 18720  | 18925  |
| UN65474 | Rsa1.0_00108.1 | 647 | 478491 | 0         | 493 | 516 | 95 +  | 135 | 647 | 301753 | 302261 |
| UN65475 | Rsa1.0_00198.1 | 699 | 222963 | 0         | 574 | 596 | 96 -  | 2   | 597 | 24525  | 25120  |
| UN65476 | Rsa1.0_00682.1 | 606 | 68680  | 0         | 582 | 606 | 96 -  | 2   | 606 | 12466  | 13069  |
| UN65477 | Rsa1.0_01588.1 | 143 | 42724  | 2.00E-65  | 140 | 144 | 97 -  | 3   | 143 | 16319  | 16462  |
| UN65478 | Rsa1.0_51216.1 | 720 | 444    | 1.00E-121 | 221 | 221 | 100 + | 168 | 388 | 1      | 221    |
| UN65479 | Rsa1.0_00900.1 | 778 | 60367  | 2.33E-156 | 345 | 373 | 92 +  | 307 | 679 | 39918  | 40278  |

|         |                |     |        |           |     |     |      |     |     |        |        |
|---------|----------------|-----|--------|-----------|-----|-----|------|-----|-----|--------|--------|
| UN65480 | Rsa1.0.00429.1 | 509 | 85559  | 0         | 350 | 352 | 99 - | 9   | 360 | 55860  | 56210  |
| UN65481 | Rsa1.0.00917.1 | 779 | 182012 | 1.00E-126 | 233 | 234 | 99 - | 466 | 699 | 130798 | 131031 |
| UN65482 | #              | #   | #      | #         | #   | #   | #    | #   | #   | #      | #      |
| UN65483 | Rsa1.0.03643.1 | 641 | 21607  | 1.00E-137 | 253 | 255 | 99 + | 368 | 622 | 19934  | 20188  |
| UN65484 | Rsa1.0.00045.1 | 211 | 328694 | 4.00E-40  | 93  | 96  | 96 + | 2   | 97  | 13072  | 13167  |
| UN65485 | Rsa1.0.00752.1 | 608 | 65756  | 2.00E-81  | 225 | 244 | 92 + | 109 | 348 | 30640  | 30881  |
| UN65486 | Rsa1.0.00179.1 | 563 | 393324 | 0         | 531 | 536 | 99 - | 28  | 563 | 353556 | 354091 |
| UN65487 | Rsa1.0.03694.1 | 660 | 21336  | 3.00E-77  | 156 | 159 | 98 + | 5   | 163 | 3235   | 3393   |
| UN65488 | Rsa1.0.00188.1 | 342 | 112020 | 1.00E-53  | 194 | 218 | 88 + | 2   | 217 | 23046  | 23260  |
| UN65489 | Rsa1.0.04272.1 | 639 | 18144  | 1.00E-145 | 316 | 333 | 94 + | 3   | 332 | 13001  | 13325  |
| UN65490 | Rsa1.0.00243.1 | 552 | 103651 | 1.00E-164 | 344 | 359 | 95 - | 1   | 357 | 64362  | 64718  |
| UN65491 | Rsa1.0.00253.1 | 624 | 231292 | 1.00E-117 | 235 | 242 | 97 + | 190 | 431 | 123819 | 124060 |
| UN65492 | Rsa1.0.02774.1 | 350 | 28038  | 1.00E-102 | 191 | 192 | 99 + | 81  | 272 | 1      | 192    |
| UN65493 | Rsa1.0.07066.1 | 227 | 9954   | 4.00E-34  | 94  | 98  | 95 - | 132 | 227 | 8161   | 8258   |
| UN65494 | Rsa1.0.00522.1 | 617 | 78103  | 0         | 580 | 618 | 93 + | 2   | 617 | 22078  | 22690  |
| UN65495 | Rsa1.0.00083.1 | 757 | 442773 | 1.00E-148 | 276 | 279 | 98 - | 3   | 281 | 312965 | 313243 |
| UN65496 | Rsa1.0.00133.1 | 428 | 123768 | 2.00E-87  | 173 | 176 | 98 + | 3   | 178 | 66315  | 66490  |
| UN65497 | Rsa1.0.15323.1 | 590 | 2685   | 1.00E-39  | 99  | 103 | 96 + | 102 | 202 | 2507   | 2609   |
| UN65498 | Rsa1.0.01099.1 | 652 | 158481 | 3.00E-71  | 146 | 149 | 97 - | 73  | 221 | 43472  | 43620  |
| UN65499 | Rsa1.0.03487.1 | 513 | 22564  | 0         | 328 | 330 | 99 + | 2   | 331 | 8625   | 8954   |
| UN65500 | Rsa1.0.00684.1 | 533 | 141701 | 1.00E-166 | 356 | 368 | 96 - | 172 | 533 | 54331  | 54698  |
| UN65501 | Rsa1.0.00005.1 | 624 | 353093 | 9.00E-84  | 167 | 170 | 98 + | 316 | 485 | 120151 | 120320 |
| UN65502 | Rsa1.0.15499.1 | 541 | 2570   | 1.00E-117 | 252 | 266 | 94 - | 87  | 343 | 1132   | 1397   |
| UN65503 | Rsa1.0.01571.1 | 680 | 43000  | 2.00E-94  | 193 | 198 | 97 - | 483 | 680 | 22320  | 22514  |
| UN65504 | Rsa1.0.04220.1 | 564 | 18421  | 0         | 368 | 376 | 97 - | 151 | 526 | 11673  | 12048  |
| UN65505 | Rsa1.0.00163.1 | 648 | 116847 | 0         | 414 | 425 | 97 + | 225 | 648 | 84574  | 84998  |
| UN65506 | Rsa1.0.02085.1 | 540 | 35198  | 1.00E-104 | 237 | 253 | 93 + | 26  | 269 | 15845  | 16097  |
| UN65507 | Rsa1.0.00397.1 | 435 | 88189  | 1.00E-91  | 219 | 236 | 92 + | 8   | 235 | 53853  | 54088  |
| UN65508 | Rsa1.0.09146.1 | 346 | 6610   | 1.00E-72  | 176 | 183 | 96 - | 168 | 346 | 43     | 225    |
| UN65509 | Rsa1.0.03043.1 | 772 | 130531 | 1.00E-111 | 226 | 233 | 96 - | 335 | 567 | 129647 | 129879 |
| UN65510 | Rsa1.0.00714.1 | 171 | 67187  | 9.00E-44  | 109 | 114 | 95 + | 45  | 157 | 13249  | 13362  |
| UN65511 | Rsa1.0.06992.1 | 320 | 10059  | 1.00E-119 | 250 | 260 | 96 - | 1   | 256 | 1662   | 1918   |
| UN65512 | Rsa1.0.00294.1 | 132 | 144860 | 7.00E-53  | 128 | 135 | 94 + | 1   | 132 | 57055  | 57189  |
| UN65513 | Rsa1.0.00502.1 | 553 | 204180 | 1.00E-116 | 233 | 240 | 97 - | 2   | 241 | 13044  | 13283  |
| UN65514 | Rsa1.0.01068.1 | 275 | 55208  | 9.00E-79  | 156 | 157 | 99 - | 120 | 275 | 29134  | 29290  |
| UN65515 | Rsa1.0.01556.1 | 282 | 163858 | 8.00E-33  | 84  | 88  | 95 + | 99  | 186 | 24658  | 24745  |
| UN65516 | Rsa1.0.00144.1 | 737 | 120708 | 0         | 719 | 725 | 99 - | 4   | 724 | 98713  | 99437  |
| UN65517 | Rsa1.0.00045.1 | 225 | 328694 | 5.00E-49  | 150 | 165 | 90 - | 3   | 163 | 97992  | 98156  |
| UN65518 | Rsa1.0.00127.1 | 349 | 127446 | 2.00E-71  | 172 | 182 | 94 - | 10  | 186 | 18626  | 18807  |

|         |                |     |        |           |     |     |       |     |     |        |        |
|---------|----------------|-----|--------|-----------|-----|-----|-------|-----|-----|--------|--------|
| UN65519 | Rsa1.0.00071.1 | 606 | 345714 | 1.00E-121 | 256 | 267 | 95 +  | 5   | 269 | 52558  | 52824  |
| UN65520 | Rsa1.0.00804.1 | 751 | 63726  | 0         | 405 | 422 | 95 -  | 143 | 564 | 22813  | 23231  |
| UN65521 | Rsa1.0.03851.1 | 685 | 20451  | 1.00E-117 | 235 | 242 | 97 +  | 322 | 563 | 10944  | 11185  |
| UN65522 | Rsa1.0.00294.1 | 847 | 144860 | 0         | 524 | 546 | 95 +  | 77  | 621 | 57030  | 57575  |
| UN65523 | Rsa1.0.00040.1 | 775 | 324196 | 0         | 446 | 466 | 95 +  | 313 | 775 | 223524 | 223988 |
| UN65524 | Rsa1.0.06281.1 | 645 | 11317  | 0         | 427 | 443 | 96 -  | 206 | 645 | 3722   | 4164   |
| UN65525 | Rsa1.0.00055.1 | 258 | 520193 | 1.00E-117 | 250 | 263 | 95 -  | 4   | 258 | 353094 | 353356 |
| UN65526 | Rsa1.0.00093.1 | 575 | 214962 | 8.00E-81  | 156 | 157 | 99 -  | 419 | 575 | 90431  | 90587  |
| UN65527 | Rsa1.0.03169.1 | 684 | 24826  | 1.00E-125 | 246 | 252 | 97 -  | 36  | 287 | 18033  | 18284  |
| UN65528 | Rsa1.0.04220.1 | 764 | 18421  | 7.00E-82  | 155 | 155 | 100 - | 1   | 155 | 13135  | 13289  |
| UN65529 | Rsa1.0.00223.1 | 584 | 106231 | 4.00E-52  | 120 | 125 | 96 +  | 189 | 313 | 68884  | 69008  |
| UN65530 | Rsa1.0.00865.1 | 600 | 61686  | 0         | 581 | 598 | 97 -  | 3   | 600 | 36037  | 36634  |
| UN65531 | #              | #   | #      | #         | #   | #   | #     | #   | #   | #      | #      |
| UN65532 | Rsa1.0.00048.1 | 708 | 167185 | 1.00E-106 | 221 | 228 | 96 +  | 21  | 248 | 148077 | 148303 |
| UN65533 | Rsa1.0.00125.1 | 615 | 253043 | 1.00E-126 | 331 | 369 | 89 -  | 3   | 368 | 187452 | 187801 |
| UN65534 | Rsa1.0.07341.1 | 784 | 9530   | 0         | 715 | 738 | 96 -  | 1   | 735 | 1331   | 2063   |
| UN65535 | Rsa1.0.00829.1 | 591 | 158305 | 6.00E-97  | 210 | 221 | 95 +  | 3   | 215 | 39868  | 40088  |
| UN65536 | Rsa1.0.00415.1 | 326 | 86795  | 2.00E-89  | 210 | 219 | 95 +  | 92  | 306 | 6405   | 6623   |
| UN65537 | Rsa1.0.02023.1 | 729 | 35922  | 0         | 696 | 711 | 97 -  | 24  | 729 | 9785   | 10494  |
| UN65538 | Rsa1.0.04689.1 | 753 | 16376  | 1.00E-158 | 301 | 307 | 98 +  | 342 | 648 | 3      | 309    |
| UN65539 | Rsa1.0.00163.1 | 757 | 116847 | 0         | 499 | 520 | 95 -  | 143 | 662 | 8611   | 9130   |
| UN65540 | Rsa1.0.01081.1 | 671 | 499226 | 0         | 645 | 669 | 96 -  | 1   | 666 | 43791  | 44459  |
| UN65541 | Rsa1.0.00698.1 | 797 | 67816  | 8.00E-94  | 215 | 223 | 96 +  | 542 | 760 | 43059  | 43281  |
| UN65542 | Rsa1.0.02606.1 | 574 | 29635  | 0         | 363 | 369 | 98 +  | 2   | 370 | 9198   | 9566   |
| UN65543 | Rsa1.0.00065.1 | 677 | 454616 | 1.00E-150 | 290 | 297 | 97 -  | 94  | 390 | 231797 | 232093 |
| UN65544 | Rsa1.0.33449.1 | 188 | 678    | 2.00E-60  | 121 | 122 | 99 -  | 3   | 124 | 110    | 231    |
| UN65545 | Rsa1.0.04383.1 | 199 | 17631  | 3.00E-84  | 170 | 174 | 97 +  | 23  | 196 | 3651   | 3824   |
| UN65546 | Rsa1.0.00063.1 | 607 | 156150 | 1.00E-173 | 317 | 320 | 99 +  | 117 | 436 | 141569 | 141888 |
| UN65547 | Rsa1.0.00990.1 | 780 | 57445  | 0         | 525 | 555 | 94 -  | 98  | 650 | 46214  | 46765  |
| UN65548 | Rsa1.0.24295.1 | 512 | 994    | 0         | 406 | 416 | 97 +  | 98  | 512 | 1      | 416    |
| UN65549 | Rsa1.0.00030.1 | 710 | 250988 | 1.00E-150 | 360 | 390 | 92 +  | 144 | 528 | 25630  | 26010  |
| UN65550 | Rsa1.0.00093.1 | 798 | 214962 | 1.00E-157 | 291 | 294 | 98 +  | 3   | 296 | 126182 | 126475 |
| UN65551 | Rsa1.0.00252.1 | 743 | 102760 | 1.00E-130 | 271 | 280 | 96 +  | 392 | 669 | 43752  | 44031  |
| UN65552 | Rsa1.0.02913.1 | 544 | 26816  | 0         | 534 | 547 | 97 +  | 1   | 544 | 19081  | 19626  |
| UN65553 | Rsa1.0.14046.1 | 350 | 3872   | 5.00E-87  | 166 | 167 | 99 +  | 173 | 339 | 543    | 709    |
| UN65554 | Rsa1.0.01688.1 | 221 | 40965  | 1.00E-98  | 212 | 221 | 95 +  | 1   | 221 | 36602  | 36820  |
| UN65555 | Rsa1.0.06732.1 | 626 | 10449  | 0         | 498 | 529 | 94 +  | 100 | 622 | 8112   | 8637   |
| UN65556 | Rsa1.0.01400.1 | 359 | 46560  | 5.00E-87  | 169 | 171 | 98 +  | 17  | 187 | 38840  | 39010  |
| UN65557 | Rsa1.0.00179.1 | 803 | 393324 | 0         | 402 | 422 | 95 +  | 311 | 721 | 208617 | 209038 |

|         |                |     |        |           |     |     |       |     |     |        |        |
|---------|----------------|-----|--------|-----------|-----|-----|-------|-----|-----|--------|--------|
| UN65558 | Rsa1.0.01466.1 | 240 | 45161  | 3.00E-75  | 157 | 159 | 98 -  | 84  | 240 | 14128  | 14286  |
| UN65559 | Rsa1.0.00198.1 | 376 | 222963 | 1.00E-107 | 293 | 328 | 89 +  | 9   | 315 | 105082 | 105406 |
| UN65560 | Rsa1.0.01371.1 | 272 | 47079  | 2.00E-52  | 108 | 109 | 99 +  | 34  | 142 | 24657  | 24765  |
| UN65561 | Rsa1.0.00596.1 | 264 | 73578  | 1.00E-65  | 133 | 135 | 98 +  | 93  | 227 | 27665  | 27799  |
| UN65562 | Rsa1.0.00116.1 | 167 | 365886 | 3.00E-71  | 147 | 150 | 98 -  | 5   | 151 | 139786 | 139935 |
| UN65563 | Rsa1.0.00332.1 | 663 | 94575  | 0         | 491 | 504 | 97 +  | 74  | 577 | 54514  | 55017  |
| UN65564 | Rsa1.0.00609.1 | 766 | 72785  | 0         | 689 | 731 | 94 -  | 31  | 749 | 17925  | 18639  |
| UN65565 | Rsa1.0.04902.1 | 792 | 15518  | 0         | 427 | 433 | 98 +  | 314 | 742 | 15080  | 15512  |
| UN65566 | Rsa1.0.01112.1 | 357 | 310601 | 1.00E-135 | 298 | 312 | 95 +  | 23  | 329 | 174755 | 175064 |
| UN65567 | Rsa1.0.00172.1 | 629 | 115476 | 0         | 594 | 623 | 95 +  | 3   | 622 | 7808   | 8430   |
| UN65568 | Rsa1.0.01338.1 | 612 | 155644 | 1.00E-141 | 290 | 302 | 96 -  | 162 | 463 | 143772 | 144073 |
| UN65569 | Rsa1.0.00111.1 | 411 | 390088 | 0         | 366 | 374 | 97 -  | 2   | 375 | 339031 | 339404 |
| UN65570 | Rsa1.0.00541.1 | 674 | 76863  | 1.00E-79  | 164 | 167 | 98 -  | 507 | 672 | 9175   | 9341   |
| UN65571 | Rsa1.0.14104.1 | 761 | 3807   | 1.00E-156 | 285 | 287 | 99 +  | 141 | 427 | 2174   | 2460   |
| UN65572 | Rsa1.0.00111.1 | 298 | 390088 | 1.00E-148 | 290 | 296 | 97 +  | 3   | 295 | 59717  | 60012  |
| UN65573 | Rsa1.0.00386.1 | 616 | 89134  | 6.00E-48  | 107 | 110 | 97 +  | 268 | 377 | 28012  | 28121  |
| UN65574 | Rsa1.0.01989.1 | 626 | 36439  | 0         | 479 | 503 | 95 +  | 3   | 497 | 12038  | 12536  |
| UN65575 | Rsa1.0.02313.1 | 804 | 32653  | 0         | 510 | 517 | 98 -  | 2   | 518 | 10333  | 10849  |
| UN65576 | Rsa1.0.37856.1 | 598 | 595    | 0         | 346 | 349 | 99 -  | 4   | 352 | 1      | 348    |
| UN65577 | Rsa1.0.04279.1 | 599 | 18113  | 1.00E-101 | 248 | 265 | 93 -  | 1   | 255 | 11165  | 11429  |
| UN65578 | Rsa1.0.00832.1 | 707 | 62622  | 0         | 411 | 424 | 96 -  | 285 | 707 | 43948  | 44371  |
| UN65579 | Rsa1.0.06038.1 | 822 | 11867  | 1.00E-141 | 260 | 262 | 99 +  | 364 | 625 | 6325   | 6586   |
| UN65580 | Rsa1.0.03783.1 | 755 | 20890  | 0         | 500 | 515 | 97 +  | 9   | 523 | 7271   | 7785   |
| UN65581 | Rsa1.0.00134.1 | 775 | 390219 | 0         | 746 | 776 | 96 +  | 2   | 773 | 198665 | 199440 |
| UN65582 | Rsa1.0.00122.1 | 711 | 265937 | 1.00E-113 | 255 | 270 | 94 -  | 442 | 711 | 222424 | 222691 |
| UN65583 | Rsa1.0.00727.1 | 716 | 66724  | 0         | 659 | 689 | 95 +  | 38  | 716 | 45003  | 45682  |
| UN65584 | Rsa1.0.05867.1 | 647 | 12375  | 0         | 625 | 677 | 92 -  | 3   | 647 | 10878  | 11548  |
| UN65585 | Rsa1.0.00018.1 | 774 | 410899 | 1.00E-154 | 434 | 475 | 91 +  | 30  | 494 | 259635 | 260108 |
| UN65586 | Rsa1.0.03912.1 | 620 | 135266 | 6.00E-85  | 178 | 184 | 96 -  | 184 | 367 | 2397   | 2580   |
| UN65587 | Rsa1.0.15016.1 | 131 | 2892   | 1.00E-42  | 109 | 116 | 93 -  | 16  | 131 | 788    | 903    |
| UN65588 | Rsa1.0.02581.1 | 268 | 29896  | 1.00E-115 | 252 | 265 | 95 -  | 4   | 268 | 11581  | 11843  |
| UN65589 | Rsa1.0.06310.1 | 649 | 11262  | 0         | 426 | 446 | 95 -  | 198 | 642 | 4431   | 4876   |
| UN65590 | Rsa1.0.02505.1 | 249 | 30703  | 6.00E-58  | 214 | 242 | 88 -  | 9   | 249 | 21742  | 21980  |
| UN65591 | Rsa1.0.00240.1 | 209 | 104175 | 2.00E-39  | 86  | 87  | 98 +  | 76  | 162 | 54060  | 54146  |
| UN65592 | Rsa1.0.01186.1 | 456 | 51418  | 0         | 442 | 458 | 96 -  | 1   | 456 | 3066   | 3522   |
| UN65593 | Rsa1.0.00233.1 | 766 | 104918 | 0         | 538 | 572 | 94 +  | 3   | 569 | 11661  | 12228  |
| UN65594 | Rsa1.0.07773.1 | 752 | 8599   | 1.00E-148 | 320 | 338 | 94 -  | 75  | 412 | 7189   | 7526   |
| UN65595 | Rsa1.0.00823.1 | 566 | 62889  | 0         | 564 | 564 | 100 - | 3   | 566 | 5853   | 6416   |
| UN65596 | Rsa1.0.01444.1 | 758 | 169539 | 0         | 717 | 758 | 94 +  | 1   | 758 | 4675   | 5415   |

|         |                |     |        |           |     |     |      |     |     |        |        |
|---------|----------------|-----|--------|-----------|-----|-----|------|-----|-----|--------|--------|
| UN65597 | Rsa1.0.00039.1 | 126 | 296927 | 1.00E-48  | 119 | 126 | 94 + | 1   | 126 | 134015 | 134140 |
| UN65598 | Rsa1.0.00056.1 | 731 | 332604 | 0         | 495 | 513 | 96 - | 222 | 731 | 8067   | 8579   |
| UN65599 | Rsa1.0.00132.1 | 833 | 124299 | 0         | 535 | 598 | 89 - | 226 | 820 | 56418  | 56980  |
| UN65600 | Rsa1.0.00730.1 | 790 | 66673  | 0         | 762 | 791 | 96 + | 1   | 790 | 38910  | 39688  |
| UN65601 | Rsa1.0.04722.1 | 635 | 16236  | 0         | 605 | 635 | 95 - | 1   | 635 | 15071  | 15705  |
| UN65602 | Rsa1.0.01803.1 | 724 | 173846 | 0         | 529 | 556 | 95 - | 3   | 554 | 37306  | 37853  |
| UN65603 | Rsa1.0.01768.1 | 471 | 138463 | 0         | 443 | 472 | 93 - | 4   | 471 | 114058 | 114517 |
| UN65604 | Rsa1.0.07446.1 | 612 | 9384   | 0         | 502 | 512 | 98 + | 87  | 595 | 1207   | 1718   |
| UN65605 | Rsa1.0.00026.1 | 758 | 327835 | 0         | 564 | 577 | 97 - | 182 | 758 | 232934 | 233510 |
| UN65606 | Rsa1.0.00278.1 | 276 | 231896 | 4.00E-93  | 217 | 228 | 95 - | 1   | 227 | 205906 | 206130 |
| UN65607 | Rsa1.0.03646.1 | 172 | 21598  | 4.00E-61  | 164 | 175 | 93 + | 1   | 172 | 18050  | 18224  |
| UN65608 | Rsa1.0.13877.1 | 519 | 4169   | 0         | 469 | 480 | 97 - | 41  | 519 | 1920   | 2399   |
| UN65609 | Rsa1.0.00384.1 | 408 | 89278  | 3.00E-76  | 148 | 149 | 99 - | 260 | 408 | 81110  | 81258  |
| UN65610 | Rsa1.0.01220.1 | 619 | 161775 | 1.00E-132 | 326 | 352 | 92 + | 268 | 619 | 5930   | 6275   |
| UN65611 | Rsa1.0.02411.1 | 518 | 31655  | 1.00E-134 | 267 | 273 | 97 + | 1   | 271 | 27274  | 27545  |
| UN65612 | Rsa1.0.00173.1 | 407 | 288743 | 1.00E-130 | 284 | 300 | 94 + | 1   | 295 | 213926 | 214225 |
| UN65613 | Rsa1.0.00214.1 | 605 | 107508 | 1.00E-152 | 330 | 348 | 94 + | 1   | 342 | 26364  | 26711  |
| UN65614 | Rsa1.0.00213.1 | 160 | 108167 | 2.00E-59  | 155 | 167 | 92 + | 1   | 160 | 93871  | 94037  |
| UN65615 | Rsa1.0.00928.1 | 419 | 59293  | 0         | 403 | 417 | 96 + | 4   | 419 | 29536  | 29951  |
| UN65616 | Rsa1.0.00015.1 | 682 | 561803 | 0         | 676 | 683 | 98 + | 1   | 682 | 430758 | 431440 |
| UN65617 | Rsa1.0.00533.1 | 784 | 77375  | 1.00E-175 | 317 | 319 | 99 + | 1   | 319 | 63764  | 64082  |
| UN65618 | Rsa1.0.00696.1 | 187 | 68010  | 2.00E-54  | 138 | 148 | 93 - | 9   | 156 | 17401  | 17548  |
| UN65619 | Rsa1.0.04786.1 | 123 | 15988  | 5.00E-23  | 70  | 75  | 93 - | 49  | 123 | 3344   | 3418   |
| UN65620 | Rsa1.0.02282.1 | 530 | 163951 | 0         | 384 | 385 | 99 + | 3   | 387 | 135949 | 136333 |
| UN65621 | Rsa1.0.00541.1 | 229 | 76863  | 1.00E-114 | 225 | 229 | 98 - | 1   | 229 | 69024  | 69251  |
| UN65622 | Rsa1.0.00226.1 | 286 | 105884 | 1.00E-126 | 271 | 284 | 95 - | 1   | 283 | 54143  | 54426  |
| UN65623 | Rsa1.0.00020.1 | 844 | 283099 | 0         | 449 | 458 | 98 - | 3   | 456 | 91969  | 92426  |
| UN65624 | Rsa1.0.02196.1 | 637 | 34005  | 1.00E-178 | 360 | 372 | 96 + | 1   | 369 | 9567   | 9934   |
| UN65625 | Rsa1.0.01195.1 | 230 | 147988 | 2.00E-76  | 206 | 226 | 91 + | 5   | 226 | 15561  | 15786  |
| UN65626 | Rsa1.0.03037.1 | 831 | 25825  | 0         | 521 | 543 | 95 + | 39  | 580 | 10624  | 11164  |
| UN65627 | Rsa1.0.26911.1 | 689 | 873    | 1.00E-109 | 203 | 204 | 99 - | 102 | 305 | 670    | 873    |
| UN65628 | Rsa1.0.01310.1 | 342 | 164719 | 1.00E-167 | 332 | 342 | 97 - | 1   | 342 | 153486 | 153826 |
| UN65629 | Rsa1.0.01635.1 | 425 | 41865  | 0         | 401 | 423 | 94 + | 3   | 425 | 15963  | 16381  |
| UN65630 | Rsa1.0.00050.1 | 682 | 237174 | 1.00E-102 | 240 | 256 | 93 + | 20  | 275 | 189043 | 189296 |
| UN65631 | Rsa1.0.02378.1 | 489 | 31991  | 1.00E-148 | 326 | 346 | 94 - | 86  | 431 | 13753  | 14098  |
| UN65632 | Rsa1.0.00912.1 | 511 | 59923  | 1.00E-127 | 287 | 302 | 95 + | 1   | 300 | 36982  | 37282  |
| UN65633 | Rsa1.0.01997.1 | 574 | 158416 | 1.00E-135 | 266 | 273 | 97 + | 281 | 553 | 152195 | 152467 |
| UN65634 | Rsa1.0.03195.1 | 137 | 24673  | 2.00E-38  | 127 | 138 | 92 - | 3   | 137 | 9478   | 9611   |
| UN65635 | Rsa1.0.02177.1 | 280 | 34262  | 4.00E-47  | 99  | 100 | 99 - | 90  | 189 | 18836  | 18935  |

|         |                |     |        |           |     |     |       |     |     |        |        |
|---------|----------------|-----|--------|-----------|-----|-----|-------|-----|-----|--------|--------|
| UN65636 | Rsa1.0_34877.1 | 336 | 649    | 5.00E-90  | 208 | 219 | 94 +  | 7   | 222 | 364    | 577    |
| UN65637 | Rsa1.0_01859.1 | 636 | 38073  | 0         | 627 | 642 | 97 -  | 1   | 636 | 6684   | 7325   |
| UN65638 | Rsa1.0_00657.1 | 577 | 69858  | 1.00E-85  | 170 | 173 | 98 +  | 342 | 514 | 35587  | 35759  |
| UN65639 | Rsa1.0_00251.1 | 128 | 303968 | 4.00E-36  | 115 | 128 | 89 +  | 1   | 128 | 58166  | 58287  |
| UN65640 | Rsa1.0_00088.1 | 411 | 141341 | 3.00E-76  | 166 | 173 | 95 -  | 90  | 262 | 12667  | 12839  |
| UN65641 | Rsa1.0_01965.1 | 310 | 36698  | 5.00E-16  | 112 | 132 | 84 -  | 12  | 143 | 17675  | 17804  |
| UN65642 | Rsa1.0_00127.1 | 130 | 127446 | 2.00E-40  | 117 | 128 | 91 +  | 3   | 130 | 63001  | 63128  |
| UN65643 | Rsa1.0_07998.1 | 224 | 8105   | 1.00E-80  | 213 | 231 | 92 -  | 1   | 224 | 4774   | 5003   |
| UN65644 | Rsa1.0_06732.1 | 596 | 10449  | 0         | 582 | 585 | 99 -  | 12  | 596 | 6408   | 6992   |
| UN65645 | Rsa1.0_00236.1 | 655 | 104771 | 0         | 398 | 401 | 99 -  | 255 | 655 | 50024  | 50424  |
| UN65646 | Rsa1.0_00272.1 | 655 | 447836 | 1.00E-61  | 139 | 145 | 95 +  | 15  | 159 | 330462 | 330606 |
| UN65647 | Rsa1.0_00812.1 | 461 | 63233  | 1.00E-178 | 429 | 461 | 93 +  | 1   | 461 | 31479  | 31931  |
| UN65648 | Rsa1.0_00434.1 | 722 | 85171  | 1.00E-118 | 316 | 348 | 90 +  | 7   | 335 | 8213   | 8558   |
| UN65649 | Rsa1.0_00697.1 | 441 | 67913  | 1.00E-163 | 363 | 386 | 94 +  | 1   | 386 | 31774  | 32157  |
| UN65650 | Rsa1.0_00069.1 | 858 | 403561 | 0         | 403 | 417 | 96 -  | 447 | 858 | 103109 | 103524 |
| UN65651 | Rsa1.0_01073.1 | 172 | 55030  | 1.00E-24  | 135 | 159 | 84 +  | 19  | 172 | 12866  | 13019  |
| UN65652 | Rsa1.0_03972.1 | 623 | 19787  | 1.00E-163 | 339 | 355 | 95 -  | 1   | 355 | 13644  | 13998  |
| UN65653 | Rsa1.0_01467.1 | 369 | 45161  | 1.00E-133 | 282 | 294 | 95 -  | 2   | 291 | 23046  | 23339  |
| UN65654 | Rsa1.0_00995.1 | 143 | 57243  | 5.00E-54  | 134 | 143 | 93 -  | 1   | 143 | 21447  | 21589  |
| UN65655 | Rsa1.0_02871.1 | 373 | 27085  | 0         | 364 | 374 | 97 +  | 3   | 373 | 24821  | 25194  |
| UN65656 | Rsa1.0_00160.1 | 772 | 346678 | 0         | 586 | 603 | 97 +  | 170 | 772 | 156197 | 156799 |
| UN65657 | Rsa1.0_00949.1 | 179 | 58549  | 2.00E-44  | 113 | 119 | 94 +  | 8   | 126 | 9399   | 9516   |
| UN65658 | Rsa1.0_03448.1 | 138 | 22844  | 8.00E-22  | 53  | 53  | 100 - | 75  | 127 | 1095   | 1147   |
| UN65659 | Rsa1.0_00101.1 | 471 | 267193 | 3.00E-92  | 184 | 188 | 97 +  | 257 | 444 | 255534 | 255721 |
| UN65660 | Rsa1.0_32052.1 | 373 | 711    | 1.00E-167 | 327 | 336 | 97 +  | 40  | 373 | 1      | 336    |
| UN65661 | Rsa1.0_04962.1 | 291 | 15312  | 2.00E-36  | 183 | 218 | 83 -  | 1   | 217 | 4851   | 5059   |
| UN65662 | Rsa1.0_03997.1 | 757 | 19652  | 0         | 675 | 703 | 96 +  | 65  | 757 | 10511  | 11208  |
| UN65663 | Rsa1.0_00018.1 | 563 | 410899 | 0         | 560 | 563 | 99 +  | 2   | 562 | 377805 | 378367 |
| UN65664 | Rsa1.0_00021.1 | 537 | 263655 | 3.00E-83  | 194 | 206 | 94 +  | 310 | 511 | 238126 | 238326 |
| UN65665 | Rsa1.0_01524.1 | 649 | 43949  | 0         | 635 | 655 | 96 +  | 1   | 649 | 8469   | 9121   |
| UN65666 | Rsa1.0_25968.1 | 740 | 911    | 0         | 608 | 639 | 95 +  | 107 | 740 | 260    | 898    |
| UN65667 | Rsa1.0_00505.1 | 871 | 79323  | 0         | 488 | 502 | 97 +  | 5   | 504 | 76836  | 77332  |
| UN65668 | Rsa1.0_10478.1 | 194 | 5832   | 1.00E-39  | 98  | 103 | 95 -  | 1   | 103 | 5141   | 5243   |
| UN65669 | Rsa1.0_00609.1 | 462 | 72785  | 1.00E-160 | 298 | 302 | 98 -  | 3   | 304 | 52765  | 53066  |
| UN65670 | Rsa1.0_00066.1 | 494 | 152418 | 6.00E-78  | 228 | 254 | 89 -  | 213 | 453 | 142611 | 142864 |
| UN65671 | Rsa1.0_00329.1 | 171 | 222544 | 3.00E-56  | 154 | 167 | 92 +  | 5   | 171 | 72508  | 72673  |
| UN65672 | Rsa1.0_00033.1 | 728 | 515811 | 0         | 401 | 414 | 96 +  | 1   | 412 | 333960 | 334369 |
| UN65673 | Rsa1.0_00328.1 | 774 | 224661 | 0         | 754 | 759 | 99 -  | 1   | 759 | 165839 | 166597 |
| UN65674 | Rsa1.0_04073.1 | 820 | 19238  | 1.00E-152 | 364 | 398 | 91 +  | 3   | 374 | 10551  | 10948  |

|         |                |     |        |           |     |     |       |     |     |        |        |
|---------|----------------|-----|--------|-----------|-----|-----|-------|-----|-----|--------|--------|
| UN65675 | Rsa1.0.02529.1 | 222 | 30437  | 3.00E-84  | 207 | 222 | 93 +  | 1   | 222 | 27984  | 28204  |
| UN65676 | Rsa1.0.01497.1 | 492 | 44559  | 0         | 457 | 473 | 96 -  | 21  | 491 | 40111  | 40580  |
| UN65677 | Rsa1.0.39538.1 | 771 | 569    | 1.00E-117 | 236 | 241 | 97 +  | 1   | 240 | 189    | 427    |
| UN65678 | Rsa1.0.21540.1 | 865 | 1194   | 1.00E-151 | 381 | 416 | 91 +  | 429 | 833 | 1      | 416    |
| UN65679 | Rsa1.0.01242.1 | 633 | 50066  | 1.00E-118 | 318 | 350 | 90 -  | 2   | 333 | 21407  | 21756  |
| UN65680 | Rsa1.0.00546.1 | 236 | 76523  | 1.00E-71  | 171 | 182 | 93 -  | 17  | 198 | 40096  | 40273  |
| UN65681 | Rsa1.0.01641.1 | 101 | 188213 | 6.00E-31  | 80  | 84  | 95 +  | 18  | 101 | 174787 | 174870 |
| UN65682 | Rsa1.0.00108.1 | 519 | 478491 | 1.00E-100 | 281 | 303 | 92 -  | 1   | 298 | 51602  | 51899  |
| UN65683 | Rsa1.0.00423.1 | 556 | 86138  | 0         | 512 | 519 | 98 +  | 1   | 519 | 6190   | 6708   |
| UN65684 | Rsa1.0.07998.1 | 387 | 8105   | 9.00E-89  | 181 | 186 | 97 -  | 202 | 387 | 4411   | 4596   |
| UN65685 | Rsa1.0.01203.1 | 445 | 50848  | 6.00E-84  | 161 | 162 | 99 -  | 227 | 388 | 42166  | 42327  |
| UN65686 | Rsa1.0.00037.1 | 662 | 307838 | 1.00E-115 | 306 | 331 | 92 -  | 349 | 662 | 306725 | 307052 |
| UN65687 | Rsa1.0.00099.1 | 645 | 159619 | 1.00E-166 | 387 | 416 | 93 -  | 233 | 645 | 46026  | 46427  |
| UN65688 | Rsa1.0.00697.1 | 686 | 67913  | 1.00E-138 | 300 | 318 | 94 +  | 8   | 325 | 50792  | 51101  |
| UN65689 | Rsa1.0.00421.1 | 690 | 86365  | 1.00E-113 | 290 | 310 | 93 -  | 1   | 300 | 18150  | 18456  |
| UN65690 | Rsa1.0.01348.1 | 699 | 47569  | 0         | 363 | 367 | 98 -  | 333 | 699 | 15735  | 16101  |
| UN65691 | Rsa1.0.22254.1 | 165 | 1137   | 1.00E-42  | 97  | 100 | 97 +  | 1   | 100 | 927    | 1026   |
| UN65692 | Rsa1.0.00476.1 | 678 | 280966 | 4.00E-95  | 186 | 189 | 98 -  | 458 | 646 | 5895   | 6083   |
| UN65693 | Rsa1.0.02711.1 | 354 | 28475  | 4.00E-38  | 96  | 101 | 95 -  | 218 | 318 | 24537  | 24637  |
| UN65694 | Rsa1.0.00018.1 | 171 | 410899 | 1.00E-70  | 162 | 170 | 95 +  | 2   | 171 | 228726 | 228888 |
| UN65695 | Rsa1.0.03140.1 | 366 | 25081  | 1.00E-105 | 233 | 243 | 95 -  | 4   | 241 | 12499  | 12741  |
| UN65696 | Rsa1.0.00180.1 | 433 | 114581 | 1.00E-128 | 268 | 281 | 95 -  | 3   | 283 | 61516  | 61788  |
| UN65697 | #              | #   | #      | #         | #   | #   | #     | #   | #   | #      | #      |
| UN65698 | Rsa1.0.07727.1 | 142 | 8700   | 8.00E-56  | 134 | 142 | 94 +  | 1   | 142 | 8392   | 8533   |
| UN65699 | Rsa1.0.00182.1 | 475 | 142305 | 0         | 473 | 474 | 99 +  | 3   | 475 | 66818  | 67291  |
| UN65700 | Rsa1.0.00686.1 | 232 | 68511  | 7.00E-76  | 177 | 188 | 94 +  | 1   | 188 | 61089  | 61276  |
| UN65701 | Rsa1.0.03235.1 | 461 | 24442  | 6.00E-78  | 148 | 148 | 100 + | 178 | 325 | 15987  | 16134  |
| UN65702 | Rsa1.0.15196.1 | 557 | 2766   | 0         | 508 | 518 | 98 +  | 20  | 537 | 1411   | 1928   |
| UN65703 | Rsa1.0.03609.1 | 687 | 21798  | 1.00E-137 | 258 | 260 | 99 +  | 1   | 260 | 20749  | 21007  |
| UN65704 | Rsa1.0.00192.1 | 223 | 278200 | 2.00E-63  | 123 | 123 | 100 - | 1   | 123 | 13989  | 14111  |
| UN65705 | Rsa1.0.01218.1 | 821 | 50536  | 1.00E-109 | 211 | 213 | 99 +  | 1   | 212 | 14245  | 14457  |
| UN65706 | Rsa1.0.00273.1 | 723 | 326186 | 1.00E-101 | 194 | 196 | 98 -  | 53  | 248 | 125342 | 125537 |
| UN65707 | Rsa1.0.13944.1 | 737 | 4039   | 1.00E-24  | 248 | 307 | 80 +  | 227 | 531 | 540    | 845    |
| UN65708 | Rsa1.0.00111.1 | 483 | 390088 | 1.00E-48  | 117 | 123 | 95 -  | 165 | 287 | 347943 | 348065 |
| UN65709 | Rsa1.0.00081.1 | 654 | 143261 | 0         | 516 | 522 | 98 -  | 133 | 654 | 100555 | 101076 |
| UN65710 | Rsa1.0.00804.1 | 885 | 63726  | 0         | 864 | 867 | 99 +  | 1   | 865 | 27351  | 28217  |
| UN65711 | Rsa1.0.02074.1 | 531 | 35370  | 0         | 454 | 490 | 92 +  | 9   | 495 | 12047  | 12525  |
| UN65712 | Rsa1.0.00868.1 | 535 | 61630  | 2.33E-156 | 344 | 367 | 93 -  | 1   | 364 | 15838  | 16199  |
| UN65713 | Rsa1.0.05858.1 | 655 | 12400  | 1.00E-121 | 296 | 322 | 91 -  | 2   | 310 | 9267   | 9584   |

|         |                |     |        |           |     |     |      |     |     |        |        |
|---------|----------------|-----|--------|-----------|-----|-----|------|-----|-----|--------|--------|
| UN65714 | Rsa1.0.01281.1 | 659 | 49313  | 0         | 638 | 673 | 94 + | 3   | 659 | 42579  | 43250  |
| UN65715 | Rsa1.0.00200.1 | 742 | 162016 | 1.00E-165 | 340 | 350 | 97 - | 1   | 348 | 115230 | 115577 |
| UN65716 | Rsa1.0.00161.1 | 523 | 116891 | 1.00E-54  | 191 | 219 | 87 - | 27  | 233 | 116333 | 116541 |
| UN65717 | Rsa1.0.33935.1 | 526 | 667    | 0         | 505 | 527 | 95 - | 1   | 526 | 128    | 654    |
| UN65718 | Rsa1.0.02150.1 | 729 | 34580  | 0         | 690 | 706 | 97 - | 1   | 706 | 27645  | 28350  |
| UN65719 | Rsa1.0.05467.1 | 276 | 13649  | 7.00E-55  | 164 | 183 | 89 - | 1   | 183 | 7816   | 7986   |
| UN65720 | Rsa1.0.43533.1 | 657 | 516    | 1.00E-150 | 285 | 290 | 98 + | 279 | 568 | 145    | 434    |
| UN65721 | Rsa1.0.02606.1 | 124 | 29635  | 6.00E-44  | 114 | 122 | 93 - | 3   | 124 | 15410  | 15531  |
| UN65722 | Rsa1.0.07999.1 | 739 | 8102   | 0         | 729 | 740 | 98 - | 1   | 739 | 5325   | 6061   |
| UN65723 | Rsa1.0.05963.1 | 710 | 12090  | 1.00E-174 | 316 | 318 | 99 - | 2   | 319 | 6976   | 7293   |
| UN65724 | Rsa1.0.02748.1 | 751 | 28242  | 0         | 684 | 743 | 92 - | 8   | 750 | 18400  | 19135  |
| UN65725 | Rsa1.0.01844.1 | 585 | 38421  | 1.00E-117 | 244 | 251 | 97 + | 10  | 254 | 4295   | 4545   |
| UN65726 | Rsa1.0.00015.1 | 810 | 561803 | 0         | 436 | 457 | 95 - | 1   | 447 | 401951 | 402405 |
| UN65727 | Rsa1.0.00484.1 | 498 | 203294 | 0         | 341 | 344 | 99 - | 1   | 344 | 152574 | 152917 |
| UN65728 | Rsa1.0.03718.1 | 643 | 21195  | 1.00E-154 | 295 | 300 | 98 + | 139 | 437 | 636    | 935    |
| UN65729 | Rsa1.0.00575.1 | 565 | 74791  | 1.00E-176 | 358 | 372 | 96 - | 194 | 565 | 62046  | 62415  |
| UN65730 | Rsa1.0.00017.1 | 571 | 752458 | 1.00E-126 | 247 | 252 | 98 + | 1   | 250 | 684880 | 685131 |
| UN65731 | Rsa1.0.08986.1 | 683 | 6733   | 0         | 667 | 683 | 97 - | 1   | 682 | 5477   | 6159   |
| UN65732 | Rsa1.0.00207.1 | 644 | 248736 | 0         | 598 | 646 | 92 + | 5   | 629 | 23834  | 24475  |
| UN65733 | Rsa1.0.00645.1 | 226 | 189716 | 2.00E-79  | 202 | 217 | 93 - | 12  | 226 | 3708   | 3923   |
| UN65734 | Rsa1.0.00589.1 | 487 | 209965 | 8.00E-99  | 228 | 243 | 93 + | 203 | 445 | 193047 | 193289 |
| UN65735 | Rsa1.0.01730.1 | 691 | 40223  | 0         | 640 | 675 | 94 - | 22  | 691 | 35826  | 36488  |
| UN65736 | Rsa1.0.00931.1 | 374 | 59210  | 2.00E-65  | 216 | 242 | 89 + | 2   | 238 | 6022   | 6259   |
| UN65737 | Rsa1.0.03981.1 | 725 | 19724  | 0         | 701 | 723 | 96 + | 3   | 725 | 14326  | 15044  |
| UN65738 | Rsa1.0.07694.1 | 149 | 8776   | 6.00E-60  | 141 | 149 | 94 - | 1   | 149 | 8304   | 8452   |
| UN65739 | Rsa1.0.00038.1 | 347 | 314568 | 3.00E-79  | 156 | 158 | 98 - | 1   | 158 | 59647  | 59804  |
| UN65740 | Rsa1.0.07808.1 | 230 | 8504   | 1.00E-101 | 217 | 227 | 95 + | 1   | 227 | 387    | 613    |
| UN65741 | Rsa1.0.00436.1 | 381 | 85008  | 1.00E-161 | 361 | 382 | 94 + | 1   | 381 | 82017  | 82395  |
| UN65742 | Rsa1.0.01629.1 | 441 | 41917  | 1.00E-179 | 374 | 393 | 95 + | 4   | 396 | 13290  | 13682  |
| UN65743 | Rsa1.0.12897.1 | 255 | 5085   | 5.00E-80  | 210 | 225 | 93 - | 1   | 222 | 1      | 222    |
| UN65744 | Rsa1.0.04205.1 | 684 | 138772 | 0         | 534 | 578 | 92 + | 1   | 560 | 8073   | 8650   |
| UN65745 | Rsa1.0.03774.1 | 544 | 20932  | 1.00E-121 | 256 | 267 | 95 - | 17  | 283 | 17856  | 18120  |
| UN65746 | Rsa1.0.00033.1 | 528 | 515811 | 0         | 407 | 423 | 96 + | 2   | 418 | 431476 | 431898 |
| UN65747 | Rsa1.0.00044.1 | 835 | 271658 | 0         | 765 | 821 | 93 - | 22  | 831 | 61746  | 62563  |
| UN65748 | Rsa1.0.00056.1 | 667 | 332604 | 0         | 635 | 657 | 96 - | 15  | 664 | 24587  | 25242  |
| UN65749 | Rsa1.0.03735.1 | 245 | 21087  | 1.00E-111 | 237 | 247 | 95 + | 1   | 245 | 8019   | 8265   |
| UN65750 | Rsa1.0.03951.1 | 665 | 19894  | 0         | 366 | 380 | 96 - | 1   | 380 | 1966   | 2345   |
| UN65751 | Rsa1.0.02015.1 | 371 | 36008  | 1.00E-102 | 216 | 225 | 96 - | 9   | 233 | 24383  | 24607  |
| UN65752 | Rsa1.0.01115.1 | 554 | 183545 | 0         | 515 | 520 | 99 + | 1   | 520 | 152593 | 153112 |



|         |                |     |        |           |     |     |       |     |     |        |        |
|---------|----------------|-----|--------|-----------|-----|-----|-------|-----|-----|--------|--------|
| UN65753 | Rsa1.0.02592.1 | 567 | 29751  | 0         | 533 | 569 | 93 -  | 1   | 567 | 19330  | 19893  |
| UN65754 | Rsa1.0.03376.1 | 795 | 23326  | 1.00E-142 | 399 | 439 | 90 +  | 1   | 429 | 18789  | 19224  |
| UN65755 | Rsa1.0.00016.1 | 765 | 831256 | 0         | 728 | 749 | 97 -  | 1   | 747 | 300146 | 300894 |
| UN65756 | Rsa1.0.02688.1 | 671 | 28644  | 0         | 540 | 565 | 95 -  | 10  | 572 | 26861  | 27403  |
| UN65757 | Rsa1.0.00059.1 | 747 | 159650 | 0         | 380 | 395 | 96 -  | 1   | 394 | 67322  | 67711  |
| UN65758 | Rsa1.0.01717.1 | 190 | 143162 | 1.00E-61  | 157 | 168 | 93 -  | 24  | 190 | 128737 | 128904 |
| UN65759 | Rsa1.0.01239.1 | 567 | 50107  | 1.00E-168 | 317 | 323 | 98 -  | 241 | 563 | 5199   | 5521   |
| UN65760 | Rsa1.0.01867.1 | 731 | 37960  | 0         | 713 | 727 | 98 -  | 5   | 731 | 25561  | 26287  |
| UN65761 | Rsa1.0.10227.1 | 737 | 5932   | 0         | 532 | 556 | 95 +  | 1   | 556 | 4895   | 5447   |
| UN65762 | Rsa1.0.04155.1 | 782 | 134772 | 0         | 613 | 636 | 96 -  | 126 | 759 | 131001 | 131634 |
| UN65763 | Rsa1.0.00144.1 | 855 | 120708 | 1.00E-108 | 215 | 220 | 97 +  | 539 | 758 | 13724  | 13943  |
| UN65764 | Rsa1.0.03638.1 | 301 | 21634  | 1.00E-84  | 174 | 179 | 97 -  | 123 | 301 | 1467   | 1645   |
| UN65765 | Rsa1.0.00485.1 | 823 | 80937  | 0         | 412 | 427 | 96 +  | 362 | 782 | 30565  | 30991  |
| UN65766 | Rsa1.0.00541.1 | 790 | 76863  | 0         | 723 | 765 | 94 +  | 1   | 762 | 67569  | 68330  |
| UN65767 | Rsa1.0.21189.1 | 827 | 1227   | 5.00E-89  | 185 | 191 | 96 -  | 107 | 297 | 1037   | 1227   |
| UN65768 | Rsa1.0.00226.1 | 816 | 105884 | 1.00E-136 | 258 | 262 | 98 +  | 171 | 432 | 53156  | 53417  |
| UN65769 | Rsa1.0.05003.1 | 795 | 15172  | 1.00E-159 | 285 | 285 | 100 - | 511 | 795 | 9747   | 10031  |
| UN65770 | Rsa1.0.00020.1 | 781 | 283099 | 0         | 365 | 371 | 98 +  | 3   | 373 | 89983  | 90353  |
| UN65771 | Rsa1.0.52605.1 | 650 | 433    | 1.00E-150 | 394 | 439 | 89 -  | 142 | 559 | 4      | 433    |
| UN65772 | Rsa1.0.08919.1 | 824 | 6788   | 0         | 533 | 553 | 96 +  | 250 | 791 | 1      | 553    |
| UN65773 | Rsa1.0.01506.1 | 794 | 44370  | 3.00E-44  | 95  | 96  | 98 -  | 576 | 671 | 34499  | 34594  |
| UN65774 | Rsa1.0.03795.1 | 850 | 20818  | 1.00E-111 | 211 | 213 | 99 +  | 450 | 662 | 14745  | 14957  |
| UN65775 | Rsa1.0.01707.1 | 866 | 40686  | 0         | 391 | 401 | 97 -  | 329 | 729 | 25818  | 26218  |
| UN65776 | Rsa1.0.03990.1 | 801 | 19676  | 7.00E-85  | 209 | 219 | 95 -  | 581 | 795 | 8900   | 9116   |
| UN65777 | Rsa1.0.00354.1 | 443 | 232005 | 8.00E-99  | 207 | 214 | 96 +  | 232 | 443 | 54433  | 54646  |
| UN65778 | Rsa1.0.00096.1 | 835 | 198773 | 1.00E-116 | 243 | 253 | 96 -  | 175 | 427 | 107474 | 107726 |
| UN65779 | Rsa1.0.04415.1 | 661 | 147889 | 0         | 462 | 477 | 96 -  | 2   | 475 | 138725 | 139201 |
| UN65780 | Rsa1.0.00071.1 | 575 | 345714 | 0         | 554 | 584 | 94 +  | 3   | 575 | 70138  | 70709  |
| UN65781 | Rsa1.0.01261.1 | 738 | 49744  | 2.00E-85  | 199 | 213 | 93 -  | 231 | 443 | 38471  | 38674  |
| UN65782 | Rsa1.0.46280.1 | 788 | 488    | 0         | 470 | 488 | 96 +  | 256 | 742 | 1      | 488    |
| UN65783 | Rsa1.0.01675.1 | 320 | 41155  | 1.00E-56  | 170 | 189 | 89 -  | 1   | 180 | 14108  | 14296  |
| UN65784 | Rsa1.0.01169.1 | 563 | 51829  | 0         | 543 | 563 | 96 +  | 1   | 563 | 5735   | 6297   |
| UN65785 | Rsa1.0.00016.1 | 470 | 831256 | 8.00E-62  | 182 | 200 | 91 +  | 23  | 221 | 225588 | 225775 |
| UN65786 | Rsa1.0.00206.1 | 358 | 109040 | 6.00E-65  | 168 | 181 | 92 -  | 180 | 358 | 96792  | 96972  |
| UN65787 | Rsa1.0.02399.1 | 750 | 31763  | 0         | 648 | 686 | 94 -  | 1   | 686 | 12962  | 13640  |
| UN65788 | Rsa1.0.01605.1 | 759 | 42442  | 1.00E-116 | 225 | 229 | 98 -  | 1   | 229 | 33295  | 33523  |
| UN65789 | Rsa1.0.24918.1 | 527 | 961    | 0         | 508 | 538 | 94 +  | 1   | 527 | 297    | 834    |
| UN65790 | Rsa1.0.00005.1 | 647 | 353093 | 3.00E-62  | 177 | 195 | 90 +  | 31  | 224 | 116693 | 116879 |
| UN65791 | Rsa1.0.03218.1 | 182 | 24539  | 2.00E-54  | 159 | 176 | 90 +  | 1   | 176 | 3774   | 3949   |

|         |                |     |        |           |     |     |      |     |     |        |        |
|---------|----------------|-----|--------|-----------|-----|-----|------|-----|-----|--------|--------|
| UN65792 | Rsa1.0.03567.1 | 323 | 22049  | 1.00E-131 | 282 | 297 | 94 + | 1   | 297 | 3567   | 3863   |
| UN65793 | Rsa1.0.01050.1 | 749 | 55651  | 0         | 376 | 378 | 99 + | 113 | 490 | 10908  | 11285  |
| UN65794 | Rsa1.0.00138.1 | 316 | 247040 | 1.00E-138 | 303 | 319 | 94 + | 1   | 316 | 61946  | 62264  |
| UN65795 | Rsa1.0.00126.1 | 810 | 127534 | 1.00E-103 | 226 | 234 | 96 - | 1   | 232 | 38254  | 38486  |
| UN65796 | Rsa1.0.00017.1 | 676 | 752458 | 0         | 669 | 676 | 98 - | 1   | 676 | 296968 | 297642 |
| UN65797 | Rsa1.0.05169.1 | 371 | 14620  | 1.00E-143 | 342 | 365 | 93 + | 5   | 367 | 7420   | 7772   |
| UN65798 | Rsa1.0.08348.1 | 401 | 7495   | 1.00E-94  | 200 | 208 | 96 + | 1   | 208 | 1914   | 2121   |
| UN65799 | Rsa1.0.00661.1 | 822 | 213041 | 0         | 819 | 823 | 99 - | 1   | 822 | 1335   | 2157   |
| UN65800 | Rsa1.0.02992.1 | 271 | 26176  | 4.00E-90  | 244 | 268 | 91 - | 4   | 269 | 1235   | 1493   |
| UN65801 | Rsa1.0.00013.1 | 608 | 292129 | 0         | 403 | 420 | 95 + | 1   | 418 | 160385 | 160802 |
| UN65802 | Rsa1.0.00253.1 | 846 | 231292 | 0         | 672 | 718 | 93 + | 1   | 714 | 207929 | 208633 |
| UN65803 | Rsa1.0.03951.1 | 284 | 19894  | 1.00E-135 | 274 | 284 | 96 - | 1   | 284 | 10116  | 10399  |
| UN65804 | Rsa1.0.00109.1 | 601 | 132735 | 0         | 596 | 605 | 98 - | 3   | 600 | 94634  | 95238  |
| UN65805 | Rsa1.0.03028.1 | 742 | 25872  | 0         | 627 | 642 | 97 - | 83  | 723 | 10794  | 11435  |
| UN65806 | Rsa1.0.00007.1 | 403 | 239325 | 0         | 391 | 403 | 97 + | 1   | 403 | 213681 | 214077 |
| UN65807 | Rsa1.0.04275.1 | 127 | 18136  | 2.00E-40  | 115 | 124 | 92 + | 1   | 124 | 9512   | 9634   |
| UN65808 | Rsa1.0.02852.1 | 268 | 27287  | 9.00E-82  | 220 | 242 | 90 + | 24  | 265 | 4747   | 4988   |
| UN65809 | Rsa1.0.00402.1 | 800 | 385315 | 1.00E-144 | 284 | 291 | 97 + | 511 | 800 | 122176 | 122466 |
| UN65810 | Rsa1.0.00961.1 | 491 | 58185  | 1.00E-173 | 323 | 328 | 98 - | 1   | 328 | 44230  | 44557  |
| UN65811 | Rsa1.0.00480.1 | 768 | 81325  | 1.00E-156 | 295 | 300 | 98 - | 89  | 388 | 38030  | 38329  |
| UN65812 | Rsa1.0.00064.1 | 734 | 240927 | 1.00E-166 | 321 | 325 | 98 + | 412 | 734 | 73776  | 74099  |
| UN65813 | Rsa1.0.09017.1 | 847 | 6706   | 1.00E-180 | 323 | 324 | 99 + | 3   | 326 | 857    | 1180   |
| UN65814 | Rsa1.0.01389.1 | 769 | 46716  | 3.00E-44  | 104 | 108 | 96 - | 234 | 341 | 17542  | 17649  |
| UN65815 | Rsa1.0.02772.1 | 639 | 28047  | 2.00E-94  | 258 | 284 | 90 + | 5   | 280 | 2794   | 3074   |
| UN65816 | Rsa1.0.17886.1 | 768 | 1718   | 0         | 689 | 731 | 94 - | 16  | 743 | 137    | 856    |
| UN65817 | Rsa1.0.00392.1 | 829 | 88523  | 0         | 538 | 555 | 96 + | 88  | 642 | 64004  | 64558  |
| UN65818 | Rsa1.0.00497.1 | 797 | 79830  | 0         | 369 | 382 | 96 + | 417 | 797 | 73170  | 73551  |
| UN65819 | Rsa1.0.03074.1 | 620 | 25568  | 1.00E-180 | 322 | 323 | 99 + | 298 | 620 | 11533  | 11855  |
| UN65820 | Rsa1.0.05706.1 | 614 | 12873  | 0         | 600 | 615 | 97 - | 1   | 614 | 6079   | 6691   |
| UN65821 | Rsa1.0.07058.1 | 551 | 9964   | 0         | 534 | 552 | 96 - | 2   | 551 | 3292   | 3843   |
| UN65822 | Rsa1.0.02244.1 | 749 | 33494  | 0         | 364 | 367 | 99 - | 3   | 369 | 4766   | 5132   |
| UN65823 | Rsa1.0.08790.1 | 680 | 6918   | 1.00E-144 | 302 | 316 | 95 + | 357 | 668 | 5180   | 5495   |
| UN65824 | Rsa1.0.00050.1 | 748 | 237174 | 2.00E-88  | 223 | 242 | 92 - | 32  | 273 | 191578 | 191819 |
| UN65825 | Rsa1.0.00416.1 | 596 | 86772  | 1.00E-171 | 370 | 387 | 95 - | 1   | 382 | 50852  | 51237  |
| UN65826 | Rsa1.0.02085.1 | 548 | 35198  | 0         | 513 | 550 | 93 - | 1   | 545 | 23936  | 24480  |
| UN65827 | Rsa1.0.00016.1 | 818 | 831256 | 1.00E-120 | 264 | 271 | 97 - | 516 | 780 | 353941 | 354210 |
| UN65828 | Rsa1.0.00936.1 | 668 | 59078  | 2.33E-156 | 272 | 275 | 98 + | 230 | 504 | 38796  | 39070  |
| UN65829 | Rsa1.0.02835.1 | 848 | 27491  | 1.00E-154 | 289 | 293 | 98 - | 2   | 294 | 11239  | 11531  |
| UN65830 | Rsa1.0.00877.1 | 858 | 61305  | 1.00E-166 | 299 | 300 | 99 - | 3   | 302 | 19520  | 19819  |

|         |                |     |        |           |     |     |      |     |     |        |        |
|---------|----------------|-----|--------|-----------|-----|-----|------|-----|-----|--------|--------|
| UN65831 | Rsa1.0.07468.1 | 513 | 9316   | 0         | 384 | 399 | 96 + | 49  | 445 | 8454   | 8852   |
| UN65832 | Rsa1.0.00928.1 | 799 | 59293  | 1.00E-104 | 196 | 197 | 99 - | 37  | 233 | 22559  | 22755  |
| UN65833 | Rsa1.0.00685.1 | 571 | 68515  | 0         | 457 | 485 | 94 - | 2   | 481 | 9987   | 10457  |
| UN65834 | Rsa1.0.01838.1 | 542 | 38500  | 1.00E-171 | 352 | 368 | 95 - | 5   | 372 | 21713  | 22080  |
| UN65835 | Rsa1.0.08230.1 | 185 | 7688   | 9.00E-38  | 92  | 96  | 95 - | 1   | 96  | 5325   | 5420   |
| UN65836 | Rsa1.0.02978.1 | 584 | 26304  | 1.00E-138 | 287 | 297 | 96 + | 1   | 297 | 11785  | 12079  |
| UN65837 | Rsa1.0.00187.1 | 753 | 393093 | 0         | 750 | 752 | 99 - | 2   | 753 | 188655 | 189406 |
| UN65838 | Rsa1.0.00363.1 | 299 | 90968  | 6.00E-83  | 192 | 204 | 94 + | 91  | 294 | 67294  | 67497  |
| UN65839 | Rsa1.0.02606.1 | 248 | 29635  | 3.00E-81  | 174 | 181 | 96 - | 1   | 181 | 15277  | 15457  |
| UN65840 | Rsa1.0.00409.1 | 802 | 146788 | 0         | 725 | 750 | 96 + | 1   | 742 | 110500 | 111248 |
| UN65841 | Rsa1.0.01926.1 | 508 | 37206  | 0         | 433 | 449 | 96 - | 1   | 449 | 17508  | 17956  |
| UN65842 | Rsa1.0.21613.1 | 849 | 1187   | 1.00E-108 | 239 | 247 | 96 + | 602 | 844 | 714    | 960    |
| UN65843 | Rsa1.0.00438.1 | 557 | 84861  | 0         | 545 | 557 | 97 + | 1   | 556 | 14382  | 14937  |
| UN65844 | Rsa1.0.00215.1 | 214 | 201775 | 4.00E-68  | 167 | 179 | 93 - | 1   | 179 | 163836 | 164014 |
| UN65845 | Rsa1.0.00392.1 | 592 | 88523  | 0         | 397 | 415 | 95 + | 173 | 584 | 72247  | 72653  |
| UN65846 | Rsa1.0.00482.1 | 657 | 81162  | 1.00E-119 | 238 | 245 | 97 + | 349 | 593 | 473    | 717    |
| UN65847 | Rsa1.0.00796.1 | 372 | 63997  | 2.00E-74  | 157 | 162 | 96 - | 198 | 359 | 57353  | 57514  |
| UN65848 | Rsa1.0.00626.1 | 574 | 71582  | 0         | 523 | 527 | 99 - | 1   | 526 | 9819   | 10345  |
| UN65849 | Rsa1.0.01829.1 | 691 | 166063 | 0         | 460 | 481 | 95 + | 196 | 676 | 158111 | 158586 |
| UN65850 | Rsa1.0.01221.1 | 626 | 50421  | 1.00E-115 | 241 | 251 | 96 - | 3   | 253 | 10412  | 10662  |
| UN65851 | Rsa1.0.00801.1 | 173 | 63861  | 5.00E-70  | 162 | 170 | 95 + | 1   | 170 | 37125  | 37293  |
| UN65852 | Rsa1.0.06259.1 | 666 | 11370  | 0         | 653 | 670 | 97 + | 1   | 666 | 1407   | 2074   |
| UN65853 | Rsa1.0.00251.1 | 548 | 303968 | 1.00E-135 | 287 | 300 | 95 + | 1   | 300 | 58166  | 58459  |
| UN65854 | Rsa1.0.00414.1 | 210 | 202190 | 2.00E-91  | 201 | 210 | 95 + | 1   | 210 | 13326  | 13534  |
| UN65855 | Rsa1.0.00922.1 | 157 | 59588  | 3.00E-65  | 149 | 157 | 94 - | 1   | 157 | 39707  | 39857  |
| UN65856 | Rsa1.0.00415.1 | 591 | 86795  | 1.00E-174 | 337 | 345 | 97 - | 1   | 345 | 6755   | 7093   |
| UN65857 | Rsa1.0.01116.1 | 786 | 142088 | 0         | 414 | 436 | 94 + | 1   | 434 | 138368 | 138803 |
| UN65858 | Rsa1.0.01059.1 | 765 | 55410  | 1.00E-157 | 322 | 333 | 96 + | 20  | 351 | 13903  | 14233  |
| UN65859 | Rsa1.0.02555.1 | 122 | 30146  | 2.00E-34  | 86  | 90  | 95 - | 1   | 90  | 2219   | 2308   |
| UN65860 | Rsa1.0.00219.1 | 201 | 106983 | 1.00E-105 | 199 | 201 | 99 - | 1   | 201 | 34867  | 35067  |
| UN65861 | Rsa1.0.01578.1 | 681 | 42880  | 0         | 590 | 609 | 96 + | 66  | 674 | 11600  | 12208  |
| UN65862 | Rsa1.0.00773.1 | 785 | 64839  | 3.00E-87  | 182 | 188 | 96 - | 366 | 553 | 62344  | 62531  |
| UN65863 | Rsa1.0.01549.1 | 758 | 43543  | 0         | 722 | 762 | 94 - | 1   | 758 | 31538  | 32295  |
| UN65864 | Rsa1.0.02686.1 | 574 | 28666  | 0         | 493 | 519 | 94 - | 57  | 574 | 20228  | 20743  |
| UN65865 | Rsa1.0.00353.1 | 329 | 92242  | 1.00E-117 | 252 | 265 | 95 + | 65  | 329 | 75350  | 75608  |
| UN65866 | Rsa1.0.06323.1 | 736 | 11236  | 0         | 575 | 587 | 97 + | 3   | 588 | 7492   | 8078   |
| UN65867 | Rsa1.0.01159.1 | 728 | 52115  | 1.00E-121 | 239 | 245 | 97 - | 298 | 542 | 32156  | 32400  |
| UN65868 | Rsa1.0.13559.1 | 503 | 4731   | 1.00E-131 | 303 | 317 | 95 + | 186 | 499 | 2676   | 2988   |
| UN65869 | Rsa1.0.00312.1 | 527 | 96765  | 2.00E-81  | 175 | 182 | 96 + | 1   | 182 | 88174  | 88355  |

|         |                |     |        |           |     |     |      |     |     |        |        |
|---------|----------------|-----|--------|-----------|-----|-----|------|-----|-----|--------|--------|
| UN65870 | Rsa1.0_00089.1 | 434 | 406142 | 1.00E-114 | 288 | 309 | 93 - | 1   | 302 | 342938 | 343245 |
| UN65871 | Rsa1.0_04495.1 | 798 | 17123  | 0         | 783 | 799 | 97 + | 1   | 798 | 10919  | 11717  |
| UN65872 | Rsa1.0_00796.1 | 162 | 63997  | 2.00E-44  | 103 | 107 | 96 + | 4   | 110 | 46513  | 46619  |
| UN65873 | Rsa1.0_00190.1 | 641 | 318240 | 1.00E-125 | 254 | 262 | 96 + | 380 | 641 | 126270 | 126528 |
| UN65874 | Rsa1.0_03773.1 | 703 | 20937  | 0         | 485 | 510 | 95 - | 194 | 703 | 7154   | 7663   |
| UN65875 | Rsa1.0_00420.1 | 175 | 86496  | 7.00E-66  | 163 | 175 | 93 + | 1   | 175 | 40137  | 40311  |
| UN65876 | Rsa1.0_00253.1 | 575 | 231292 | 1.00E-168 | 373 | 394 | 94 + | 6   | 396 | 79592  | 79983  |
| UN65877 | Rsa1.0_00243.1 | 132 | 103651 | 1.00E-23  | 111 | 128 | 86 + | 4   | 125 | 95205  | 95332  |
| UN65878 | Rsa1.0_09771.1 | 782 | 6158   | 0         | 445 | 469 | 94 - | 311 | 777 | 214    | 679    |
| UN65879 | Rsa1.0_04562.1 | 787 | 16847  | 0         | 708 | 716 | 98 - | 61  | 775 | 15388  | 16102  |
| UN65880 | Rsa1.0_03656.1 | 679 | 21552  | 1.00E-132 | 250 | 252 | 99 - | 1   | 251 | 3945   | 4196   |
| UN65881 | Rsa1.0_00101.1 | 180 | 267193 | 1.00E-55  | 137 | 146 | 93 - | 1   | 146 | 235547 | 235692 |
| UN65882 | Rsa1.0_03887.1 | 234 | 20247  | 5.00E-43  | 127 | 138 | 92 + | 1   | 133 | 18020  | 18157  |
| UN65883 | Rsa1.0_00111.1 | 763 | 390088 | 0         | 415 | 431 | 96 + | 3   | 433 | 32713  | 33134  |
| UN65884 | Rsa1.0_00285.1 | 318 | 149638 | 4.00E-47  | 137 | 148 | 92 - | 171 | 317 | 54498  | 54644  |
| UN65885 | #              | #   | #      | #         | #   | #   | #    | #   | #   | #      | #      |
| UN65886 | Rsa1.0_05713.1 | 161 | 12855  | 3.00E-43  | 101 | 105 | 96 - | 1   | 105 | 2417   | 2521   |
| UN65887 | Rsa1.0_03148.1 | 477 | 24989  | 1.00E-165 | 375 | 400 | 93 - | 78  | 475 | 21012  | 21408  |
| UN65888 | Rsa1.0_15111.1 | 528 | 2818   | 1.00E-124 | 238 | 242 | 98 + | 222 | 463 | 1768   | 2009   |
| UN65889 | Rsa1.0_00387.1 | 570 | 495407 | 0         | 394 | 401 | 98 - | 94  | 494 | 358755 | 359155 |
| UN65890 | Rsa1.0_03351.1 | 666 | 23514  | 0         | 574 | 620 | 92 - | 53  | 666 | 15344  | 15954  |
| UN65891 | Rsa1.0_13888.1 | 828 | 4146   | 0         | 743 | 814 | 91 + | 18  | 821 | 1773   | 2584   |
| UN65892 | Rsa1.0_01727.1 | 222 | 40243  | 3.00E-38  | 149 | 167 | 89 + | 25  | 188 | 11148  | 11306  |
| UN65893 | Rsa1.0_00426.1 | 271 | 85668  | 7.00E-64  | 133 | 136 | 97 + | 136 | 271 | 32419  | 32554  |
| UN65894 | Rsa1.0_05449.1 | 397 | 13711  | 6.00E-90  | 243 | 266 | 91 + | 1   | 255 | 13219  | 13481  |
| UN65895 | Rsa1.0_00094.1 | 334 | 139042 | 1.00E-117 | 297 | 325 | 91 - | 1   | 320 | 41073  | 41382  |
| UN65896 | Rsa1.0_13593.1 | 146 | 4685   | 1.00E-60  | 139 | 146 | 95 - | 1   | 146 | 621    | 766    |
| UN65897 | Rsa1.0_02648.1 | 325 | 29073  | 8.00E-89  | 205 | 218 | 94 + | 2   | 219 | 26008  | 26225  |
| UN65898 | Rsa1.0_00899.1 | 885 | 60404  | 1.00E-158 | 426 | 462 | 92 - | 432 | 878 | 56690  | 57151  |
| UN65899 | Rsa1.0_00842.1 | 844 | 62493  | 0         | 541 | 544 | 99 - | 1   | 544 | 34973  | 35516  |
| UN65900 | Rsa1.0_02144.1 | 638 | 34630  | 0         | 404 | 411 | 98 + | 5   | 414 | 21186  | 21594  |
| UN65901 | Rsa1.0_01756.1 | 309 | 39779  | 1.00E-153 | 295 | 302 | 97 - | 4   | 305 | 28324  | 28625  |
| UN65902 | Rsa1.0_06444.1 | 615 | 11008  | 0         | 379 | 394 | 96 - | 3   | 396 | 6961   | 7351   |
| UN65903 | Rsa1.0_00507.1 | 795 | 79074  | 1.00E-104 | 202 | 205 | 98 + | 559 | 763 | 15989  | 16193  |
| UN65904 | Rsa1.0_08436.1 | 701 | 7357   | 1.00E-174 | 319 | 322 | 99 + | 1   | 322 | 1724   | 2045   |
| UN65905 | Rsa1.0_00129.1 | 198 | 126831 | 2.00E-60  | 180 | 199 | 90 + | 5   | 198 | 67012  | 67210  |
| UN65906 | Rsa1.0_46975.1 | 740 | 481    | 1.00E-138 | 262 | 266 | 98 - | 93  | 358 | 216    | 481    |
| UN65907 | Rsa1.0_02198.1 | 838 | 33989  | 1.00E-115 | 220 | 223 | 98 + | 2   | 224 | 24055  | 24277  |
| UN65908 | Rsa1.0_03903.1 | 807 | 20166  | 0         | 655 | 665 | 98 - | 3   | 663 | 18810  | 19474  |

|         |                |     |        |           |     |     |       |     |     |        |        |
|---------|----------------|-----|--------|-----------|-----|-----|-------|-----|-----|--------|--------|
| UN65909 | Rsa1.0.00198.1 | 793 | 222963 | 1.00E-132 | 245 | 247 | 99 +  | 171 | 417 | 43886  | 44132  |
| UN65910 | Rsa1.0.06310.1 | 808 | 11262  | 0         | 679 | 752 | 90 +  | 1   | 747 | 3939   | 4681   |
| UN65911 | Rsa1.0.01047.1 | 836 | 55705  | 0         | 775 | 808 | 95 +  | 3   | 795 | 39413  | 40220  |
| UN65912 | Rsa1.0.00480.1 | 846 | 81325  | 0         | 385 | 390 | 98 +  | 3   | 392 | 3543   | 3931   |
| UN65913 | Rsa1.0.01121.1 | 461 | 53407  | 1.00E-171 | 305 | 305 | 100 + | 157 | 461 | 35893  | 36197  |
| UN65914 | Rsa1.0.04029.1 | 682 | 19491  | 0         | 550 | 569 | 96 -  | 114 | 681 | 9830   | 10398  |
| UN65915 | Rsa1.0.00453.1 | 694 | 83031  | 0         | 612 | 645 | 94 -  | 55  | 693 | 37951  | 38578  |
| UN65916 | Rsa1.0.00096.1 | 672 | 198773 | 0         | 419 | 423 | 99 -  | 143 | 563 | 31916  | 32338  |
| UN65917 | Rsa1.0.00293.1 | 127 | 339294 | 6.00E-44  | 113 | 120 | 94 -  | 1   | 117 | 32826  | 32945  |
| UN65918 | Rsa1.0.00187.1 | 784 | 393093 | 1.00E-106 | 208 | 212 | 98 -  | 367 | 578 | 48022  | 48233  |
| UN65919 | Rsa1.0.00111.1 | 554 | 390088 | 1.00E-180 | 326 | 327 | 99 -  | 228 | 554 | 45739  | 46064  |
| UN65920 | Rsa1.0.25516.1 | 698 | 933    | 1.00E-113 | 216 | 219 | 98 -  | 372 | 590 | 431    | 649    |
| UN65921 | Rsa1.0.00666.1 | 640 | 69505  | 0         | 616 | 646 | 95 +  | 3   | 638 | 34049  | 34694  |
| UN65922 | Rsa1.0.03073.1 | 762 | 25574  | 0         | 559 | 578 | 96 -  | 185 | 762 | 322    | 899    |
| UN65923 | Rsa1.0.00437.1 | 701 | 84879  | 4.00E-86  | 183 | 190 | 96 +  | 101 | 290 | 44758  | 44947  |
| UN65924 | Rsa1.0.01191.1 | 730 | 51235  | 0         | 496 | 519 | 95 +  | 16  | 531 | 12090  | 12608  |
| UN65925 | Rsa1.0.02882.1 | 789 | 27039  | 1.00E-166 | 319 | 326 | 97 -  | 2   | 327 | 3754   | 4076   |
| UN65926 | Rsa1.0.02871.1 | 614 | 27085  | 0         | 571 | 615 | 92 -  | 2   | 614 | 25590  | 26188  |
| UN65927 | Rsa1.0.00160.1 | 696 | 346678 | 0         | 651 | 691 | 94 -  | 1   | 690 | 156883 | 157573 |
| UN65928 | Rsa1.0.00015.1 | 824 | 561803 | 0         | 550 | 565 | 97 -  | 232 | 793 | 432081 | 432645 |
| UN65929 | Rsa1.0.00533.1 | 632 | 77375  | 1.00E-134 | 270 | 278 | 97 -  | 244 | 521 | 66092  | 66368  |
| UN65930 | Rsa1.0.00696.1 | 747 | 68010  | 0         | 658 | 687 | 95 +  | 3   | 689 | 16631  | 17316  |
| UN65931 | Rsa1.0.01339.1 | 519 | 47813  | 8.00E-56  | 123 | 127 | 96 +  | 44  | 170 | 29265  | 29391  |
| UN65932 | Rsa1.0.04022.1 | 796 | 19534  | 1.00E-142 | 260 | 261 | 99 +  | 135 | 395 | 5350   | 5610   |
| UN65933 | Rsa1.0.03500.1 | 765 | 22461  | 1.00E-101 | 218 | 225 | 96 -  | 507 | 729 | 10127  | 10348  |
| UN65934 | Rsa1.0.00020.1 | 422 | 283099 | 1.00E-176 | 381 | 402 | 94 +  | 25  | 420 | 140870 | 141268 |
| UN65935 | Rsa1.0.00477.1 | 694 | 81556  | 1.00E-134 | 267 | 274 | 97 -  | 3   | 275 | 25899  | 26172  |
| UN65936 | Rsa1.0.02163.1 | 567 | 34427  | 1.00E-174 | 369 | 384 | 96 -  | 186 | 567 | 12768  | 13148  |
| UN65937 | Rsa1.0.00071.1 | 754 | 345714 | 1.00E-156 | 307 | 316 | 97 -  | 3   | 318 | 56561  | 56876  |
| UN65938 | Rsa1.0.01452.1 | 490 | 45459  | 1.00E-136 | 271 | 279 | 97 +  | 62  | 337 | 17780  | 18058  |
| UN65939 | Rsa1.0.02827.1 | 631 | 27544  | 1.00E-105 | 232 | 245 | 94 +  | 5   | 249 | 13790  | 14028  |
| UN65940 | Rsa1.0.00101.1 | 505 | 267193 | 0         | 495 | 505 | 98 -  | 1   | 505 | 256810 | 257313 |
| UN65941 | Rsa1.0.06728.1 | 815 | 10455  | 9.00E-60  | 118 | 118 | 100 - | 616 | 733 | 6867   | 6984   |
| UN65942 | Rsa1.0.17910.1 | 825 | 1712   | 0         | 552 | 583 | 94 -  | 253 | 821 | 7      | 589    |
| UN65943 | Rsa1.0.01220.1 | 820 | 161775 | 2.00E-88  | 184 | 190 | 96 +  | 109 | 298 | 6369   | 6558   |
| UN65944 | Rsa1.0.07382.1 | 749 | 9487   | 1.00E-168 | 326 | 335 | 97 -  | 329 | 663 | 2      | 336    |
| UN65945 | Rsa1.0.00382.1 | 653 | 251946 | 1.00E-108 | 211 | 215 | 98 -  | 424 | 638 | 114233 | 114447 |
| UN65946 | Rsa1.0.59656.1 | 815 | 384    | 3.00E-38  | 82  | 82  | 100 + | 401 | 482 | 168    | 249    |
| UN65947 | Rsa1.0.00037.1 | 811 | 307838 | 1.00E-153 | 297 | 304 | 97 +  | 151 | 451 | 260315 | 260618 |

|         |                |     |        |           |     |     |       |     |     |        |        |
|---------|----------------|-----|--------|-----------|-----|-----|-------|-----|-----|--------|--------|
| UN65948 | Rsa1.0.00431.1 | 651 | 85391  | 0         | 640 | 649 | 98 -  | 3   | 651 | 80977  | 81623  |
| UN65949 | Rsa1.0.00251.1 | 791 | 303968 | 1.00E-104 | 205 | 209 | 98 -  | 2   | 210 | 59851  | 60059  |
| UN65950 | Rsa1.0.00471.1 | 668 | 81897  | 1.00E-116 | 230 | 235 | 97 +  | 206 | 440 | 23198  | 23429  |
| UN65951 | Rsa1.0.00713.1 | 705 | 158017 | 5.00E-70  | 138 | 139 | 99 -  | 437 | 575 | 32906  | 33044  |
| UN65952 | Rsa1.0.01965.1 | 739 | 36698  | 1.00E-160 | 325 | 338 | 96 +  | 2   | 339 | 17225  | 17562  |
| UN65953 | Rsa1.0.02859.1 | 683 | 162118 | 1.00E-138 | 346 | 375 | 92 -  | 86  | 455 | 26031  | 26390  |
| UN65954 | Rsa1.0.04126.1 | 853 | 18939  | 1.00E-143 | 282 | 290 | 97 +  | 326 | 615 | 17030  | 17319  |
| UN65955 | Rsa1.0.02347.1 | 695 | 32332  | 1.00E-79  | 170 | 175 | 97 -  | 522 | 695 | 23580  | 23754  |
| UN65956 | Rsa1.0.00031.1 | 621 | 179862 | 1.00E-178 | 319 | 320 | 99 -  | 302 | 621 | 73497  | 73816  |
| UN65957 | Rsa1.0.00179.1 | 526 | 393324 | 0         | 400 | 411 | 97 -  | 43  | 452 | 1      | 410    |
| UN65958 | Rsa1.0.14078.1 | 799 | 3830   | 1.00E-105 | 211 | 215 | 98 -  | 7   | 220 | 2969   | 3183   |
| UN65959 | Rsa1.0.00108.1 | 649 | 478491 | 2.00E-66  | 129 | 129 | 100 + | 154 | 282 | 50419  | 50547  |
| UN65960 | Rsa1.0.00067.1 | 756 | 415055 | 1.00E-128 | 269 | 281 | 95 +  | 233 | 513 | 226623 | 226903 |
| UN65961 | Rsa1.0.03238.1 | 796 | 24432  | 3.00E-81  | 201 | 214 | 93 +  | 254 | 466 | 17793  | 18005  |
| UN65962 | Rsa1.0.00332.1 | 776 | 94575  | 0         | 495 | 504 | 98 +  | 76  | 579 | 54514  | 55017  |
| UN65963 | Rsa1.0.08133.1 | 471 | 7852   | 0         | 399 | 410 | 97 +  | 1   | 407 | 59     | 467    |
| UN65964 | Rsa1.0.04378.1 | 677 | 17651  | 0         | 340 | 346 | 98 +  | 332 | 677 | 4630   | 4975   |
| UN65965 | Rsa1.0.00423.1 | 750 | 86138  | 1.00E-143 | 299 | 313 | 95 -  | 240 | 552 | 7169   | 7481   |
| UN65966 | Rsa1.0.00762.1 | 741 | 165246 | 1.00E-162 | 308 | 314 | 98 -  | 2   | 315 | 30573  | 30886  |
| UN65967 | Rsa1.0.00421.1 | 672 | 86365  | 1.00E-161 | 344 | 360 | 95 +  | 56  | 414 | 16296  | 16654  |
| UN65968 | Rsa1.0.01581.1 | 504 | 42833  | 0         | 471 | 484 | 97 -  | 23  | 504 | 21848  | 22330  |
| UN65969 | Rsa1.0.00135.1 | 617 | 178077 | 3.00E-68  | 168 | 180 | 93 -  | 187 | 366 | 167868 | 168047 |
| UN65970 | Rsa1.0.05410.1 | 512 | 13840  | 1.00E-164 | 369 | 391 | 94 -  | 129 | 512 | 5832   | 6219   |
| UN65971 | Rsa1.0.02979.1 | 511 | 26298  | 0         | 495 | 511 | 96 -  | 1   | 511 | 13515  | 14025  |
| UN65972 | Rsa1.0.00064.1 | 741 | 240927 | 1.00E-138 | 255 | 257 | 99 +  | 3   | 259 | 28816  | 29072  |
| UN65973 | Rsa1.0.02980.1 | 283 | 26290  | 1.00E-139 | 280 | 291 | 96 +  | 2   | 283 | 23555  | 23845  |
| UN65974 | Rsa1.0.00592.1 | 499 | 73788  | 0         | 465 | 494 | 94 -  | 2   | 493 | 61603  | 62083  |
| UN65975 | Rsa1.0.01335.1 | 406 | 47894  | 0         | 388 | 405 | 95 +  | 3   | 406 | 29197  | 29597  |
| UN65976 | Rsa1.0.00305.1 | 753 | 97308  | 1.00E-139 | 401 | 450 | 89 -  | 25  | 453 | 39688  | 40131  |
| UN65977 | Rsa1.0.01028.1 | 565 | 56401  | 0         | 349 | 353 | 98 +  | 1   | 353 | 32644  | 32996  |
| UN65978 | Rsa1.0.03646.1 | 836 | 21598  | 1.00E-164 | 302 | 305 | 99 -  | 191 | 495 | 11504  | 11808  |
| UN65979 | Rsa1.0.73767.1 | 852 | 311    | 1.00E-175 | 311 | 311 | 100 + | 363 | 673 | 1      | 311    |
| UN65980 | Rsa1.0.00017.1 | 804 | 752458 | 1.00E-132 | 295 | 313 | 94 +  | 7   | 319 | 326090 | 326399 |
| UN65981 | Rsa1.0.03831.1 | 748 | 20579  | 4.00E-80  | 161 | 164 | 98 -  | 194 | 357 | 17021  | 17184  |
| UN65982 | Rsa1.0.00451.1 | 673 | 322533 | 0         | 614 | 619 | 99 -  | 55  | 673 | 28483  | 29099  |
| UN65983 | Rsa1.0.07894.1 | 652 | 8347   | 1.00E-160 | 310 | 318 | 97 +  | 216 | 533 | 2650   | 2967   |
| UN65984 | Rsa1.0.00816.1 | 625 | 403350 | 1.00E-152 | 291 | 297 | 97 -  | 2   | 298 | 375940 | 376236 |
| UN65985 | Rsa1.0.76417.1 | 774 | 300    | 1.00E-166 | 299 | 300 | 99 -  | 333 | 632 | 1      | 300    |
| UN65986 | Rsa1.0.00060.1 | 802 | 502678 | 1.00E-110 | 228 | 235 | 97 -  | 344 | 577 | 369791 | 370025 |

|         |                |     |        |           |     |     |       |     |     |        |        |
|---------|----------------|-----|--------|-----------|-----|-----|-------|-----|-----|--------|--------|
| UN65987 | Rsa1.0_00236.1 | 804 | 104771 | 0         | 398 | 410 | 97 +  | 299 | 702 | 49095  | 49504  |
| UN65988 | Rsa1.0_00272.1 | 742 | 447836 | 0         | 697 | 754 | 92 -  | 2   | 739 | 331297 | 332043 |
| UN65989 | Rsa1.0_10042.1 | 734 | 6027   | 0         | 689 | 765 | 90 -  | 1   | 723 | 173    | 922    |
| UN65990 | Rsa1.0_00344.1 | 748 | 191774 | 5.00E-58  | 127 | 131 | 96 +  | 166 | 296 | 152974 | 153104 |
| UN65991 | Rsa1.0_11107.1 | 664 | 5613   | 2.00E-75  | 147 | 148 | 99 +  | 339 | 486 | 3024   | 3171   |
| UN65992 | Rsa1.0_00812.1 | 554 | 63233  | 0         | 541 | 558 | 96 -  | 1   | 554 | 32198  | 32755  |
| UN65993 | Rsa1.0_04085.1 | 822 | 19168  | 2.00E-73  | 144 | 145 | 99 -  | 149 | 293 | 12771  | 12915  |
| UN65994 | Rsa1.0_00233.1 | 243 | 104918 | 2.00E-36  | 81  | 82  | 98 -  | 66  | 147 | 13385  | 13466  |
| UN65995 | Rsa1.0_01320.1 | 625 | 48271  | 0         | 544 | 546 | 99 +  | 80  | 625 | 10140  | 10684  |
| UN65996 | Rsa1.0_07773.1 | 705 | 8599   | 0         | 406 | 428 | 94 +  | 277 | 704 | 4867   | 5294   |
| UN65997 | Rsa1.0_01413.1 | 281 | 46275  | 2.00E-73  | 159 | 164 | 96 +  | 3   | 166 | 40686  | 40848  |
| UN65998 | Rsa1.0_03265.1 | 751 | 24258  | 1.00E-170 | 347 | 355 | 97 -  | 389 | 738 | 8139   | 8493   |
| UN65999 | Rsa1.0_04238.1 | 644 | 18352  | 7.00E-60  | 124 | 126 | 98 +  | 344 | 469 | 6625   | 6750   |
| UN66000 | Rsa1.0_00125.1 | 795 | 253043 | 0         | 416 | 428 | 97 +  | 269 | 696 | 201538 | 201965 |
| UN66001 | Rsa1.0_04214.1 | 606 | 18437  | 1.00E-109 | 201 | 201 | 100 - | 3   | 203 | 8080   | 8280   |
| UN66002 | Rsa1.0_08419.1 | 136 | 7381   | 5.00E-66  | 133 | 135 | 98 -  | 2   | 136 | 7167   | 7301   |
| UN66003 | Rsa1.0_03997.1 | 662 | 19652  | 1.00E-107 | 238 | 253 | 94 -  | 410 | 662 | 11208  | 11451  |
| UN66004 | Rsa1.0_00131.1 | 611 | 432233 | 1.00E-138 | 270 | 277 | 97 +  | 2   | 278 | 428458 | 428734 |
| UN66005 | Rsa1.0_00018.1 | 541 | 410899 | 1.00E-114 | 252 | 261 | 96 -  | 3   | 262 | 379887 | 380144 |
| UN66006 | Rsa1.0_06267.1 | 270 | 11356  | 1.00E-109 | 250 | 267 | 93 +  | 1   | 267 | 9921   | 10181  |
| UN66007 | Rsa1.0_01524.1 | 452 | 43949  | 0         | 445 | 451 | 98 -  | 2   | 452 | 9161   | 9611   |
| UN66008 | Rsa1.0_02735.1 | 794 | 28344  | 0         | 357 | 367 | 97 -  | 314 | 680 | 6066   | 6426   |
| UN66009 | Rsa1.0_08744.1 | 767 | 6970   | 0         | 447 | 458 | 97 +  | 233 | 689 | 884    | 1341   |
| UN66010 | Rsa1.0_20945.1 | 713 | 1251   | 0         | 698 | 713 | 97 -  | 1   | 713 | 161    | 873    |
| UN66011 | Rsa1.0_00505.1 | 653 | 79323  | 1.00E-152 | 279 | 281 | 99 -  | 311 | 591 | 78530  | 78810  |
| UN66012 | Rsa1.0_00051.1 | 704 | 258225 | 1.00E-58  | 133 | 138 | 96 -  | 193 | 330 | 253988 | 254122 |
| UN66013 | Rsa1.0_01310.1 | 671 | 164719 | 0         | 500 | 521 | 95 -  | 156 | 671 | 6737   | 7254   |
| UN66014 | Rsa1.0_00369.1 | 793 | 266462 | 0         | 502 | 522 | 96 -  | 271 | 786 | 147016 | 147530 |
| UN66015 | Rsa1.0_13877.1 | 831 | 4169   | 0         | 743 | 757 | 98 +  | 3   | 756 | 1548   | 2304   |
| UN66016 | Rsa1.0_02161.1 | 481 | 34459  | 8.00E-59  | 116 | 116 | 100 + | 344 | 459 | 34332  | 34447  |
| UN66017 | Rsa1.0_00102.1 | 665 | 135497 | 0         | 484 | 504 | 96 -  | 158 | 661 | 40871  | 41374  |
| UN66018 | Rsa1.0_01444.1 | 794 | 169539 | 1.00E-165 | 468 | 519 | 90 -  | 270 | 778 | 5362   | 5861   |
| UN66019 | Rsa1.0_01935.1 | 693 | 37152  | 0         | 445 | 455 | 97 -  | 239 | 693 | 5263   | 5716   |
| UN66020 | Rsa1.0_00652.1 | 505 | 70089  | 0         | 431 | 462 | 93 -  | 3   | 447 | 64886  | 65344  |
| UN66021 | Rsa1.0_01348.1 | 539 | 47569  | 0         | 528 | 542 | 97 +  | 1   | 539 | 14929  | 15470  |
| UN66022 | Rsa1.0_25774.1 | 793 | 920    | 1.00E-147 | 271 | 273 | 99 -  | 219 | 491 | 4      | 276    |
| UN66023 | Rsa1.0_03067.1 | 279 | 25651  | 1.00E-148 | 275 | 278 | 98 -  | 2   | 279 | 5248   | 5525   |
| UN66024 | Rsa1.0_01921.1 | 720 | 168088 | 1.00E-156 | 298 | 304 | 98 -  | 296 | 599 | 144486 | 144789 |
| UN66025 | Rsa1.0_00616.1 | 815 | 195713 | 0         | 347 | 352 | 98 +  | 262 | 613 | 158875 | 159226 |

|         |                |     |        |           |     |     |       |     |     |        |        |
|---------|----------------|-----|--------|-----------|-----|-----|-------|-----|-----|--------|--------|
| UN66026 | Rsa1.0.05719.1 | 789 | 12836  | 1.00E-64  | 126 | 126 | 100 + | 207 | 332 | 7205   | 7330   |
| UN66027 | Rsa1.0.10606.1 | 468 | 5787   | 0         | 465 | 466 | 99 -  | 3   | 468 | 1562   | 2027   |
| UN66028 | Rsa1.0.00233.1 | 683 | 104918 | 2.00E-63  | 155 | 164 | 94 +  | 311 | 474 | 8696   | 8858   |
| UN66029 | Rsa1.0.01467.1 | 612 | 45161  | 1.00E-140 | 305 | 323 | 94 -  | 2   | 312 | 4908   | 5230   |
| UN66030 | Rsa1.0.27096.1 | 747 | 866    | 1.00E-165 | 303 | 306 | 99 +  | 442 | 747 | 335    | 640    |
| UN66031 | Rsa1.0.02203.1 | 594 | 164532 | 1.00E-129 | 243 | 246 | 98 -  | 349 | 594 | 158780 | 159025 |
| UN66032 | Rsa1.0.01220.1 | 816 | 161775 | 0         | 740 | 765 | 96 -  | 2   | 764 | 6251   | 7014   |
| UN66033 | Rsa1.0.01677.1 | 770 | 41140  | 0         | 737 | 768 | 95 +  | 7   | 770 | 25584  | 26349  |
| UN66034 | Rsa1.0.00833.1 | 772 | 62621  | 1.00E-103 | 247 | 261 | 94 +  | 501 | 755 | 28121  | 28381  |
| UN66035 | Rsa1.0.01445.1 | 677 | 45671  | 5.00E-73  | 140 | 140 | 100 - | 12  | 151 | 4959   | 5098   |
| UN66036 | Rsa1.0.01207.1 | 548 | 141053 | 1.00E-131 | 307 | 330 | 93 -  | 218 | 542 | 131261 | 131586 |
| UN66037 | Rsa1.0.01581.1 | 800 | 42833  | 1.00E-172 | 367 | 387 | 94 +  | 3   | 376 | 376    | 761    |
| UN66038 | Rsa1.0.02400.1 | 324 | 31750  | 9.00E-64  | 124 | 124 | 100 + | 201 | 324 | 9129   | 9252   |
| UN66039 | Rsa1.0.02969.1 | 715 | 26390  | 2.00E-82  | 183 | 190 | 96 +  | 41  | 227 | 11202  | 11390  |
| UN66040 | Rsa1.0.12261.1 | 599 | 5272   | 1.00E-113 | 210 | 211 | 99 +  | 389 | 599 | 4848   | 5058   |
| UN66041 | #              | #   | #      | #         | #   | #   | #     | #   | #   | #      | #      |
| UN66042 | Rsa1.0.06817.1 | 778 | 10307  | 7.00E-88  | 402 | 481 | 83 +  | 67  | 547 | 4994   | 5474   |
| UN66043 | Rsa1.0.02614.1 | 494 | 29551  | 0         | 464 | 489 | 94 +  | 6   | 494 | 16779  | 17267  |
| UN66044 | Rsa1.0.00173.1 | 693 | 288743 | 0         | 646 | 661 | 97 -  | 33  | 693 | 214546 | 215204 |
| UN66045 | Rsa1.0.00972.1 | 600 | 57937  | 5.00E-73  | 149 | 152 | 98 -  | 376 | 527 | 11090  | 11241  |
| UN66046 | Rsa1.0.00865.1 | 672 | 61686  | 2.00E-69  | 137 | 138 | 99 +  | 121 | 258 | 42044  | 42181  |
| UN66047 | Rsa1.0.00054.1 | 696 | 162053 | 0         | 684 | 696 | 98 -  | 2   | 696 | 41262  | 41957  |
| UN66048 | Rsa1.0.01803.1 | 786 | 173846 | 1.00E-137 | 332 | 358 | 92 +  | 34  | 391 | 35667  | 36005  |
| UN66049 | Rsa1.0.01808.1 | 702 | 39007  | 0         | 382 | 387 | 98 -  | 207 | 593 | 34333  | 34719  |
| UN66050 | Rsa1.0.00009.1 | 773 | 232558 | 1.00E-125 | 261 | 270 | 96 -  | 132 | 400 | 132659 | 132925 |
| UN66051 | Rsa1.0.01242.1 | 762 | 50066  | 8.00E-97  | 210 | 220 | 95 +  | 385 | 604 | 19654  | 19873  |
| UN66052 | Rsa1.0.00214.1 | 650 | 107508 | 1.00E-150 | 278 | 281 | 98 -  | 307 | 587 | 27706  | 27986  |
| UN66053 | Rsa1.0.07795.1 | 744 | 8543   | 0         | 606 | 628 | 96 +  | 3   | 630 | 596    | 1223   |
| UN66054 | Rsa1.0.00022.1 | 760 | 200461 | 1.00E-152 | 303 | 313 | 96 +  | 4   | 316 | 45415  | 45727  |
| UN66055 | Rsa1.0.01030.1 | 613 | 56290  | 0         | 590 | 608 | 97 -  | 3   | 609 | 43886  | 44493  |
| UN66056 | Rsa1.0.00051.1 | 799 | 258225 | 0         | 525 | 545 | 96 -  | 2   | 546 | 56038  | 56579  |
| UN66057 | Rsa1.0.06781.1 | 561 | 10362  | 0         | 550 | 560 | 98 +  | 2   | 561 | 2113   | 2672   |
| UN66058 | Rsa1.0.01422.1 | 320 | 46172  | 9.00E-70  | 190 | 207 | 91 -  | 119 | 320 | 2054   | 2260   |
| UN66059 | Rsa1.0.00800.1 | 810 | 63868  | 0         | 535 | 541 | 98 +  | 268 | 804 | 43295  | 43835  |
| UN66060 | Rsa1.0.00857.1 | 786 | 61904  | 0         | 611 | 627 | 97 +  | 111 | 731 | 11594  | 12220  |
| UN66061 | Rsa1.0.00413.1 | 731 | 86921  | 1.00E-179 | 357 | 365 | 97 +  | 356 | 715 | 2979   | 3343   |
| UN66062 | Rsa1.0.09837.1 | 260 | 6126   | 9.00E-45  | 98  | 100 | 98 +  | 51  | 150 | 5161   | 5260   |
| UN66063 | Rsa1.0.03782.1 | 834 | 20891  | 1.00E-121 | 245 | 252 | 97 -  | 208 | 457 | 15882  | 16133  |
| UN66064 | Rsa1.0.00066.1 | 645 | 152418 | 1.00E-127 | 257 | 263 | 97 +  | 38  | 299 | 141881 | 142142 |



|         |                |     |        |           |     |     |       |     |     |        |        |
|---------|----------------|-----|--------|-----------|-----|-----|-------|-----|-----|--------|--------|
| UN66065 | Rsa1.0_03025.1 | 765 | 25910  | 0         | 740 | 769 | 96 +  | 1   | 763 | 21126  | 21894  |
| UN66066 | Rsa1.0_01035.1 | 541 | 56019  | 1.00E-106 | 264 | 283 | 93 +  | 268 | 541 | 47064  | 47342  |
| UN66067 | Rsa1.0_00105.1 | 208 | 134138 | 5.00E-86  | 195 | 204 | 95 -  | 1   | 203 | 122061 | 122262 |
| UN66068 | Rsa1.0_01555.1 | 622 | 166456 | 0         | 605 | 622 | 97 -  | 1   | 622 | 7958   | 8579   |
| UN66069 | Rsa1.0_00208.1 | 779 | 108565 | 0         | 513 | 524 | 97 -  | 3   | 525 | 104420 | 104943 |
| UN66070 | Rsa1.0_00647.1 | 783 | 70440  | 0         | 761 | 786 | 96 -  | 2   | 783 | 42312  | 43094  |
| UN66071 | Rsa1.0_02054.1 | 564 | 35548  | 0         | 487 | 513 | 94 -  | 3   | 512 | 5596   | 6096   |
| UN66072 | Rsa1.0_00713.1 | 649 | 158017 | 0         | 626 | 647 | 96 -  | 3   | 649 | 24919  | 25565  |
| UN66073 | Rsa1.0_00521.1 | 811 | 78191  | 0         | 520 | 532 | 97 -  | 3   | 534 | 74362  | 74893  |
| UN66074 | Rsa1.0_00033.1 | 408 | 515811 | 1.00E-115 | 213 | 214 | 99 -  | 110 | 323 | 335808 | 336021 |
| UN66075 | Rsa1.0_01134.1 | 732 | 52829  | 1.00E-165 | 302 | 303 | 99 -  | 423 | 724 | 41896  | 42198  |
| UN66076 | Rsa1.0_19592.1 | 686 | 1410   | 0         | 331 | 333 | 99 -  | 354 | 686 | 156    | 488    |
| UN66077 | Rsa1.0_01058.1 | 665 | 55430  | 0         | 628 | 648 | 96 +  | 21  | 665 | 34206  | 34853  |
| UN66078 | #              | #   | #      | #         | #   | #   | #     | #   | #   | #      | #      |
| UN66079 | Rsa1.0_08151.1 | 556 | 7830   | 0         | 537 | 546 | 98 -  | 4   | 548 | 2328   | 2873   |
| UN66080 | Rsa1.0_00017.1 | 740 | 752458 | 6.00E-73  | 149 | 152 | 98 +  | 475 | 626 | 541792 | 541943 |
| UN66081 | Rsa1.0_03118.1 | 575 | 25288  | 9.00E-87  | 234 | 257 | 91 +  | 164 | 408 | 3130   | 3380   |
| UN66082 | Rsa1.0_00108.1 | 748 | 478491 | 0         | 719 | 748 | 96 +  | 2   | 748 | 161460 | 162201 |
| UN66083 | Rsa1.0_10042.1 | 735 | 6027   | 1.00E-145 | 304 | 317 | 95 -  | 116 | 429 | 173    | 486    |
| UN66084 | Rsa1.0_01182.1 | 741 | 167304 | 1.00E-131 | 265 | 270 | 98 -  | 468 | 734 | 165275 | 165544 |
| UN66085 | Rsa1.0_00101.1 | 595 | 267193 | 1.00E-79  | 151 | 151 | 100 - | 35  | 185 | 5077   | 5227   |
| UN66086 | Rsa1.0_01525.1 | 744 | 43925  | 0         | 429 | 435 | 98 -  | 310 | 744 | 36209  | 36639  |
| UN66087 | Rsa1.0_24335.1 | 819 | 992    | 0         | 700 | 710 | 98 -  | 3   | 712 | 190    | 894    |
| UN66088 | Rsa1.0_03235.1 | 766 | 24442  | 6.00E-73  | 149 | 152 | 98 -  | 461 | 612 | 16804  | 16955  |
| UN66089 | Rsa1.0_00734.1 | 120 | 66508  | 1.00E-51  | 109 | 111 | 98 +  | 3   | 113 | 25894  | 26004  |
| UN66090 | Rsa1.0_03681.1 | 665 | 21405  | 0         | 495 | 504 | 98 -  | 163 | 665 | 1432   | 1935   |
| UN66091 | Rsa1.0_28471.1 | 739 | 814    | 1.00E-49  | 101 | 101 | 100 + | 58  | 158 | 529    | 629    |
| UN66092 | Rsa1.0_01757.1 | 610 | 39771  | 5.00E-73  | 146 | 148 | 98 +  | 463 | 610 | 33413  | 33560  |
| UN66093 | Rsa1.0_00131.1 | 132 | 432233 | 1.00E-48  | 131 | 137 | 95 -  | 1   | 132 | 399708 | 399844 |
| UN66094 | Rsa1.0_00007.1 | 689 | 239325 | 3.00E-74  | 145 | 146 | 99 -  | 214 | 359 | 68631  | 68776  |
| UN66095 | Rsa1.0_00484.1 | 755 | 203294 | 1.00E-124 | 235 | 238 | 98 -  | 279 | 516 | 41096  | 41333  |
| UN66096 | Rsa1.0_00104.1 | 184 | 368722 | 1.00E-36  | 94  | 98  | 95 +  | 83  | 180 | 218004 | 218100 |
| UN66097 | Rsa1.0_01022.1 | 733 | 56606  | 0         | 331 | 333 | 99 -  | 38  | 370 | 42679  | 43011  |
| UN66098 | Rsa1.0_00804.1 | 782 | 63726  | 0         | 602 | 602 | 100 - | 5   | 606 | 28733  | 29334  |
| UN66099 | Rsa1.0_08259.1 | 581 | 7641   | 1.00E-165 | 342 | 356 | 96 -  | 3   | 355 | 3089   | 3443   |
| UN66100 | Rsa1.0_02501.1 | 764 | 30764  | 0         | 420 | 433 | 96 -  | 283 | 709 | 10640  | 11072  |
| UN66101 | Rsa1.0_00071.1 | 765 | 345714 | 1.00E-74  | 156 | 159 | 98 -  | 515 | 672 | 145172 | 145330 |
| UN66102 | Rsa1.0_00435.1 | 697 | 317579 | 1.00E-168 | 302 | 303 | 99 -  | 395 | 697 | 28345  | 28647  |
| UN66103 | Rsa1.0_01000.1 | 628 | 57140  | 3.00E-80  | 155 | 156 | 99 -  | 473 | 628 | 3833   | 3988   |

|         |                |     |        |           |     |     |       |     |     |        |        |
|---------|----------------|-----|--------|-----------|-----|-----|-------|-----|-----|--------|--------|
| UN66104 | Rsa1.0.05858.1 | 813 | 12400  | 3.00E-93  | 187 | 190 | 98 +  | 3   | 191 | 6534   | 6723   |
| UN66105 | Rsa1.0.01281.1 | 622 | 49313  | 2.00E-84  | 180 | 187 | 96 -  | 277 | 463 | 43893  | 44079  |
| UN66106 | Rsa1.0.04797.1 | 467 | 15932  | 1.00E-102 | 213 | 220 | 96 -  | 208 | 426 | 10614  | 10833  |
| UN66107 | Rsa1.0.06253.1 | 651 | 11385  | 2.00E-57  | 120 | 122 | 98 -  | 336 | 457 | 11144  | 11265  |
| UN66108 | Rsa1.0.00869.1 | 493 | 61627  | 1.00E-149 | 316 | 332 | 95 +  | 136 | 467 | 42825  | 43156  |
| UN66109 | Rsa1.0.03137.1 | 726 | 25105  | 1.00E-126 | 232 | 233 | 99 +  | 460 | 692 | 8078   | 8310   |
| UN66110 | Rsa1.0.02073.1 | 699 | 35386  | 0         | 424 | 444 | 95 -  | 257 | 699 | 2189   | 2627   |
| UN66111 | Rsa1.0.00394.1 | 750 | 148426 | 2.00E-48  | 99  | 99  | 100 - | 177 | 275 | 131446 | 131544 |
| UN66112 | Rsa1.0.01018.1 | 796 | 56685  | 0         | 764 | 795 | 96 +  | 3   | 796 | 24064  | 24858  |
| UN66113 | Rsa1.0.00344.1 | 625 | 191774 | 0         | 605 | 630 | 96 +  | 3   | 625 | 102216 | 102844 |
| UN66114 | Rsa1.0.28787.1 | 618 | 803    | 1.00E-136 | 280 | 290 | 96 -  | 317 | 606 | 351    | 639    |
| UN66115 | Rsa1.0.33063.1 | 737 | 687    | 0         | 346 | 347 | 99 +  | 391 | 737 | 87     | 433    |
| UN66116 | Rsa1.0.00523.1 | 543 | 178770 | 1.00E-179 | 390 | 411 | 94 -  | 137 | 543 | 29146  | 29554  |
| UN66117 | Rsa1.0.05963.1 | 650 | 12090  | 1.00E-180 | 334 | 338 | 98 +  | 2   | 336 | 4702   | 5039   |
| UN66118 | Rsa1.0.02748.1 | 621 | 28242  | 0         | 596 | 622 | 95 +  | 1   | 621 | 17536  | 18157  |
| UN66119 | Rsa1.0.05026.1 | 779 | 15095  | 1.00E-131 | 339 | 371 | 91 +  | 3   | 364 | 8039   | 8399   |
| UN66120 | Rsa1.0.07849.1 | 633 | 8425   | 0         | 439 | 455 | 96 -  | 38  | 490 | 4233   | 4687   |
| UN66121 | Rsa1.0.09709.1 | 151 | 6198   | 3.00E-71  | 145 | 148 | 97 -  | 4   | 151 | 3542   | 3689   |
| UN66122 | Rsa1.0.01806.1 | 634 | 39021  | 1.00E-117 | 220 | 222 | 99 -  | 242 | 463 | 29007  | 29228  |
| UN66123 | Rsa1.0.01760.1 | 720 | 39730  | 1.00E-124 | 340 | 370 | 91 +  | 1   | 365 | 11060  | 11423  |
| UN66124 | Rsa1.0.03394.1 | 727 | 23247  | 1.00E-132 | 268 | 275 | 97 +  | 455 | 727 | 5941   | 6215   |
| UN66125 | Rsa1.0.00626.1 | 613 | 71582  | 0         | 595 | 600 | 99 +  | 5   | 604 | 8369   | 8968   |
| UN66126 | Rsa1.0.06138.1 | 610 | 11651  | 1.00E-154 | 364 | 390 | 93 +  | 1   | 382 | 6337   | 6719   |
| UN66127 | Rsa1.0.43266.1 | 639 | 519    | 0         | 485 | 501 | 96 -  | 109 | 603 | 19     | 519    |
| UN66128 | Rsa1.0.03205.1 | 748 | 24614  | 5.00E-27  | 112 | 127 | 88 -  | 503 | 628 | 5744   | 5870   |
| UN66129 | Rsa1.0.17471.1 | 775 | 1821   | 1.00E-100 | 189 | 190 | 99 +  | 188 | 377 | 687    | 876    |
| UN66130 | Rsa1.0.02231.1 | 442 | 33661  | 1.00E-165 | 320 | 327 | 97 -  | 1   | 326 | 27303  | 27629  |
| UN66131 | Rsa1.0.04943.1 | 699 | 15376  | 0         | 693 | 701 | 98 -  | 2   | 699 | 3440   | 4140   |
| UN66132 | Rsa1.0.00324.1 | 536 | 218805 | 0         | 531 | 535 | 99 +  | 3   | 536 | 25672  | 26206  |
| UN66133 | Rsa1.0.00105.1 | 629 | 134138 | 0         | 466 | 487 | 95 +  | 149 | 629 | 60014  | 60500  |
| UN66134 | Rsa1.0.04664.1 | 656 | 16471  | 1.00E-105 | 207 | 210 | 98 -  | 381 | 589 | 14204  | 14413  |
| UN66135 | Rsa1.0.00341.1 | 740 | 249309 | 1.00E-150 | 308 | 320 | 96 -  | 3   | 322 | 25557  | 25874  |
| UN66136 | Rsa1.0.02686.1 | 776 | 28666  | 3.00E-99  | 205 | 211 | 97 -  | 358 | 566 | 1220   | 1430   |
| UN66137 | Rsa1.0.00842.1 | 621 | 62493  | 0         | 571 | 592 | 96 +  | 2   | 593 | 34177  | 34768  |
| UN66138 | Rsa1.0.11912.1 | 551 | 5372   | 0         | 538 | 551 | 97 -  | 2   | 551 | 3619   | 4167   |
| UN66139 | Rsa1.0.00507.1 | 593 | 79074  | 1.00E-161 | 302 | 307 | 98 -  | 2   | 308 | 16816  | 17122  |
| UN66140 | Rsa1.0.00030.1 | 770 | 250988 | 1.00E-134 | 283 | 293 | 96 -  | 4   | 292 | 107603 | 107890 |
| UN66141 | Rsa1.0.01492.1 | 744 | 44704  | 1.00E-141 | 297 | 309 | 96 -  | 4   | 304 | 5964   | 6272   |
| UN66142 | Rsa1.0.00525.1 | 709 | 78030  | 0         | 466 | 490 | 95 +  | 207 | 695 | 47428  | 47917  |

|         |                |     |        |           |     |     |       |     |     |        |        |
|---------|----------------|-----|--------|-----------|-----|-----|-------|-----|-----|--------|--------|
| UN66143 | Rsa1.0.08436.1 | 663 | 7357   | 0         | 357 | 365 | 97 -  | 1   | 363 | 3728   | 4092   |
| UN66144 | Rsa1.0.01969.1 | 709 | 153351 | 3.00E-65  | 130 | 131 | 99 -  | 479 | 609 | 20328  | 20458  |
| UN66145 | Rsa1.0.00863.1 | 428 | 254535 | 0         | 383 | 394 | 97 +  | 1   | 389 | 209439 | 209832 |
| UN66146 | Rsa1.0.00452.1 | 665 | 83201  | 0         | 650 | 671 | 96 +  | 3   | 665 | 62174  | 62842  |
| UN66147 | Rsa1.0.00295.1 | 723 | 152597 | 1.00E-165 | 345 | 363 | 95 +  | 371 | 719 | 23572  | 23934  |
| UN66148 | Rsa1.0.01190.1 | 695 | 194501 | 1.00E-116 | 225 | 229 | 98 -  | 3   | 231 | 7188   | 7416   |
| UN66149 | Rsa1.0.01804.1 | 732 | 39038  | 0         | 445 | 446 | 99 +  | 287 | 732 | 26364  | 26809  |
| UN66150 | Rsa1.0.04224.1 | 615 | 18402  | 0         | 466 | 509 | 91 +  | 111 | 615 | 78     | 572    |
| UN66151 | Rsa1.0.00407.1 | 374 | 191544 | 3.00E-30  | 87  | 92  | 94 -  | 156 | 246 | 177040 | 177131 |
| UN66152 | Rsa1.0.28730.1 | 485 | 805    | 1.00E-133 | 252 | 256 | 98 +  | 230 | 485 | 395    | 650    |
| UN66153 | Rsa1.0.03408.1 | 737 | 23154  | 0         | 502 | 538 | 93 +  | 3   | 529 | 14420  | 14954  |
| UN66154 | Rsa1.0.00161.1 | 703 | 116891 | 1.00E-153 | 278 | 279 | 99 +  | 3   | 281 | 114225 | 114503 |
| UN66155 | Rsa1.0.05259.1 | 707 | 14338  | 0         | 634 | 666 | 95 -  | 15  | 677 | 13674  | 14338  |
| UN66156 | Rsa1.0.00021.1 | 684 | 263655 | 0         | 450 | 469 | 95 +  | 222 | 684 | 30368  | 30836  |
| UN66157 | Rsa1.0.00728.1 | 566 | 66704  | 1.00E-54  | 169 | 185 | 91 -  | 51  | 233 | 47823  | 48006  |
| UN66158 | Rsa1.0.00302.1 | 741 | 97521  | 1.00E-135 | 248 | 249 | 99 +  | 57  | 305 | 65064  | 65312  |
| UN66159 | Rsa1.0.00017.1 | 542 | 752458 | 1.00E-179 | 368 | 385 | 95 +  | 3   | 387 | 51199  | 51577  |
| UN66160 | Rsa1.0.01244.1 | 715 | 50061  | 1.00E-140 | 284 | 293 | 96 +  | 7   | 298 | 28199  | 28491  |
| UN66161 | Rsa1.0.27807.1 | 787 | 838    | 4.00E-83  | 157 | 157 | 100 + | 100 | 256 | 525    | 681    |
| UN66162 | Rsa1.0.00796.1 | 563 | 63997  | 3.00E-68  | 191 | 212 | 90 -  | 180 | 382 | 3604   | 3815   |
| UN66163 | Rsa1.0.01596.1 | 652 | 42595  | 4.00E-89  | 182 | 187 | 97 +  | 54  | 240 | 37808  | 37994  |
| UN66164 | Rsa1.0.00044.1 | 660 | 271658 | 0         | 324 | 325 | 99 +  | 2   | 326 | 13544  | 13868  |
| UN66165 | Rsa1.0.02041.1 | 803 | 163634 | 3.00E-90  | 184 | 189 | 97 -  | 399 | 587 | 19367  | 19555  |
| UN66166 | Rsa1.0.09446.1 | 614 | 6362   | 1.00E-169 | 338 | 349 | 96 -  | 2   | 349 | 1684   | 2032   |
| UN66167 | Rsa1.0.00409.1 | 692 | 146788 | 0         | 585 | 619 | 94 -  | 2   | 619 | 112767 | 113379 |
| UN66168 | #              | #   | #      | #         | #   | #   | #     | #   | #   | #      | #      |
| UN66169 | Rsa1.0.01725.1 | 667 | 40290  | 0         | 660 | 666 | 99 +  | 2   | 667 | 764    | 1427   |
| UN66170 | Rsa1.0.00438.1 | 625 | 84861  | 0         | 537 | 545 | 98 -  | 1   | 545 | 15047  | 15587  |
| UN66171 | Rsa1.0.00205.1 | 495 | 193401 | 1.00E-114 | 225 | 229 | 98 -  | 268 | 495 | 79407  | 79635  |
| UN66172 | Rsa1.0.01752.1 | 608 | 39805  | 1.00E-114 | 215 | 217 | 99 +  | 266 | 482 | 3243   | 3459   |
| UN66173 | Rsa1.0.00919.1 | 565 | 59675  | 8.00E-84  | 158 | 158 | 100 + | 94  | 251 | 8851   | 9008   |
| UN66174 | Rsa1.0.00054.1 | 650 | 162053 | 1.00E-111 | 228 | 236 | 96 -  | 61  | 296 | 144630 | 144865 |
| UN66175 | Rsa1.0.01776.1 | 631 | 39511  | 0         | 382 | 394 | 96 -  | 119 | 509 | 36275  | 36668  |
| UN66176 | Rsa1.0.08550.1 | 827 | 7211   | 1.00E-157 | 285 | 286 | 99 +  | 425 | 710 | 5620   | 5905   |
| UN66177 | Rsa1.0.00419.1 | 792 | 86562  | 0         | 749 | 781 | 95 +  | 3   | 775 | 59722  | 60502  |
| UN66178 | Rsa1.0.00243.1 | 645 | 103651 | 7.00E-66  | 146 | 152 | 96 -  | 489 | 640 | 95579  | 95730  |
| UN66179 | Rsa1.0.00044.1 | 620 | 271658 | 0         | 581 | 608 | 95 +  | 7   | 614 | 60913  | 61520  |
| UN66180 | #              | #   | #      | #         | #   | #   | #     | #   | #   | #      | #      |
| UN66181 | Rsa1.0.07693.1 | 747 | 8776   | 1.00E-151 | 338 | 360 | 93 -  | 286 | 645 | 7078   | 7437   |

|         |                |     |        |           |     |     |       |     |     |        |        |
|---------|----------------|-----|--------|-----------|-----|-----|-------|-----|-----|--------|--------|
| UN66182 | Rsa1.0_08027.1 | 811 | 8058   | 0         | 631 | 656 | 96 +  | 158 | 806 | 6693   | 7348   |
| UN66183 | Rsa1.0_04562.1 | 676 | 16847  | 0         | 666 | 677 | 98 +  | 1   | 676 | 13212  | 13888  |
| UN66184 | Rsa1.0_00014.1 | 583 | 348985 | 1.00E-100 | 185 | 185 | 100 + | 399 | 583 | 222296 | 222480 |
| UN66185 | Rsa1.0_00285.1 | 650 | 149638 | 0         | 602 | 630 | 95 +  | 30  | 649 | 53666  | 54289  |
| UN66186 | Rsa1.0_00312.1 | 524 | 96765  | 0         | 520 | 541 | 96 +  | 2   | 524 | 67923  | 68463  |
| UN66187 | Rsa1.0_04205.1 | 610 | 138772 | 1.00E-103 | 199 | 202 | 98 -  | 256 | 457 | 9258   | 9459   |
| UN66188 | Rsa1.0_00348.1 | 681 | 92818  | 1.00E-178 | 332 | 337 | 98 -  | 344 | 680 | 49697  | 50033  |
| UN66189 | Rsa1.0_12609.1 | 765 | 5175   | 1.00E-107 | 221 | 228 | 96 +  | 1   | 225 | 3773   | 4000   |
| UN66190 | Rsa1.0_01989.1 | 636 | 36439  | 0         | 456 | 466 | 97 +  | 171 | 636 | 24630  | 25095  |
| UN66191 | Rsa1.0_08756.1 | 748 | 6955   | 3.00E-41  | 121 | 131 | 92 +  | 386 | 516 | 5906   | 6035   |
| UN66192 | Rsa1.0_00187.1 | 649 | 393093 | 0         | 645 | 647 | 99 +  | 3   | 649 | 187785 | 188431 |
| UN66193 | Rsa1.0_00017.1 | 785 | 752458 | 1.00E-151 | 328 | 345 | 95 +  | 3   | 341 | 60309  | 60650  |
| UN66194 | Rsa1.0_02357.1 | 672 | 32220  | 1.00E-123 | 234 | 237 | 98 -  | 431 | 667 | 11543  | 11779  |
| UN66195 | Rsa1.0_00067.1 | 780 | 415055 | 1.00E-117 | 218 | 219 | 99 -  | 296 | 514 | 41964  | 42182  |
| UN66196 | Rsa1.0_05932.1 | 770 | 12207  | 1.00E-168 | 314 | 319 | 98 -  | 173 | 491 | 1391   | 1709   |
| UN66197 | Rsa1.0_00392.1 | 560 | 88523  | 0         | 514 | 541 | 95 -  | 2   | 541 | 72788  | 73317  |
| UN66198 | Rsa1.0_02220.1 | 210 | 176031 | 1.00E-106 | 204 | 207 | 98 -  | 4   | 210 | 13524  | 13730  |
| UN66199 | Rsa1.0_00194.1 | 753 | 110851 | 1.00E-134 | 266 | 274 | 97 -  | 394 | 667 | 96995  | 97268  |
| UN66200 | Rsa1.0_04495.1 | 680 | 17123  | 0         | 661 | 681 | 97 -  | 2   | 678 | 12231  | 12907  |
| UN66201 | Rsa1.0_02804.1 | 305 | 27712  | 1.00E-155 | 300 | 305 | 98 +  | 2   | 305 | 14654  | 14956  |
| UN66202 | Rsa1.0_00509.1 | 630 | 78829  | 1.00E-128 | 263 | 273 | 96 -  | 96  | 368 | 57848  | 58120  |
| UN66203 | Rsa1.0_03773.1 | 574 | 20937  | 0         | 556 | 577 | 96 +  | 2   | 574 | 6596   | 7172   |
| UN66204 | Rsa1.0_09986.1 | 645 | 6049   | 8.00E-72  | 185 | 203 | 91 -  | 348 | 538 | 3389   | 3591   |
| UN66205 | Rsa1.0_09525.1 | 505 | 6314   | 0         | 473 | 505 | 93 -  | 1   | 505 | 4605   | 5109   |
| UN66206 | Rsa1.0_00303.1 | 665 | 97468  | 1.00E-143 | 326 | 351 | 92 +  | 78  | 428 | 42846  | 43184  |
| UN66207 | Rsa1.0_03656.1 | 540 | 21552  | 8.00E-90  | 183 | 188 | 97 +  | 172 | 359 | 2123   | 2310   |
| UN66208 | Rsa1.0_00740.1 | 789 | 215972 | 0         | 465 | 487 | 95 +  | 141 | 624 | 34237  | 34723  |
| UN66209 | Rsa1.0_03810.1 | 623 | 20727  | 1.00E-163 | 331 | 344 | 96 +  | 280 | 623 | 20321  | 20664  |
| UN66210 | Rsa1.0_03567.1 | 554 | 22049  | 2.00E-66  | 147 | 153 | 96 +  | 266 | 418 | 20298  | 20450  |
| UN66211 | Rsa1.0_00483.1 | 744 | 81102  | 1.00E-168 | 312 | 316 | 98 -  | 237 | 552 | 56865  | 57180  |
| UN66212 | Rsa1.0_01750.1 | 580 | 39816  | 3.00E-49  | 109 | 112 | 97 -  | 66  | 177 | 18559  | 18670  |
| UN66213 | Rsa1.0_02992.1 | 767 | 26176  | 1.00E-108 | 212 | 216 | 98 +  | 460 | 675 | 237    | 452    |
| UN66214 | Rsa1.0_00924.1 | 556 | 59524  | 3.00E-77  | 154 | 155 | 99 -  | 335 | 488 | 3707   | 3861   |
| UN66215 | Rsa1.0_00518.1 | 702 | 78360  | 0         | 565 | 599 | 94 -  | 8   | 597 | 17626  | 18218  |
| UN66216 | Rsa1.0_00502.1 | 793 | 204180 | 1.00E-148 | 320 | 334 | 95 -  | 409 | 738 | 61558  | 61891  |
| UN66217 | Rsa1.0_21161.1 | 599 | 1229   | 2.00E-35  | 188 | 219 | 85 -  | 27  | 239 | 245    | 462    |
| UN66218 | Rsa1.0_02159.1 | 541 | 34471  | 0         | 325 | 326 | 99 +  | 216 | 541 | 19240  | 19565  |
| UN66219 | Rsa1.0_01717.1 | 551 | 143162 | 0         | 525 | 551 | 95 +  | 2   | 551 | 128394 | 128930 |
| UN66220 | Rsa1.0_03853.1 | 658 | 20447  | 1.00E-165 | 324 | 333 | 97 +  | 17  | 349 | 13343  | 13672  |

|         |                |     |        |           |     |     |      |     |     |        |        |
|---------|----------------|-----|--------|-----------|-----|-----|------|-----|-----|--------|--------|
| UN66221 | Rsa1.0.22095.1 | 538 | 1150   | 3.00E-58  | 201 | 229 | 87 - | 307 | 530 | 467    | 692    |
| UN66222 | Rsa1.0.01867.1 | 721 | 37960  | 0         | 716 | 724 | 98 + | 1   | 719 | 24769  | 25492  |
| UN66223 | Rsa1.0.02406.1 | 653 | 145276 | 1.00E-125 | 246 | 251 | 98 + | 404 | 653 | 1739   | 1989   |
| UN66224 | Rsa1.0.00360.1 | 832 | 91190  | 1.00E-110 | 253 | 267 | 94 + | 3   | 269 | 65991  | 66250  |
| UN66225 | Rsa1.0.02468.1 | 653 | 31122  | 1.00E-100 | 276 | 305 | 90 - | 357 | 650 | 28888  | 29191  |
| UN66226 | Rsa1.0.01292.1 | 621 | 175783 | 3.00E-93  | 186 | 190 | 97 + | 432 | 621 | 3974   | 4163   |
| UN66227 | Rsa1.0.03147.1 | 591 | 25001  | 1.00E-168 | 302 | 303 | 99 + | 289 | 591 | 5429   | 5731   |
| UN66228 | Rsa1.0.01158.1 | 340 | 52121  | 1.00E-115 | 250 | 263 | 95 + | 77  | 334 | 32146  | 32403  |
| UN66229 | Rsa1.0.01931.1 | 608 | 37187  | 1.00E-109 | 226 | 233 | 96 - | 365 | 596 | 32358  | 32590  |
| UN66230 | Rsa1.0.01382.1 | 734 | 46877  | 2.00E-94  | 197 | 204 | 96 - | 134 | 337 | 39405  | 39608  |
| UN66231 | Rsa1.0.00589.1 | 576 | 209965 | 5.00E-82  | 209 | 227 | 92 - | 323 | 549 | 189345 | 189571 |
| UN66232 | Rsa1.0.02852.1 | 598 | 27287  | 1.00E-119 | 327 | 360 | 90 - | 53  | 410 | 5183   | 5530   |
| UN66233 | Rsa1.0.04142.1 | 695 | 18861  | 1.00E-180 | 356 | 367 | 97 - | 256 | 620 | 7362   | 7728   |
| UN66234 | Rsa1.0.01116.1 | 689 | 142088 | 1.00E-176 | 347 | 357 | 97 - | 332 | 688 | 139364 | 139719 |
| UN66235 | Rsa1.0.01147.1 | 219 | 52391  | 2.00E-73  | 163 | 170 | 95 - | 1   | 170 | 8116   | 8282   |
| UN66236 | Rsa1.0.04139.1 | 721 | 18883  | 0         | 593 | 617 | 96 + | 103 | 709 | 17778  | 18391  |
| UN66237 | Rsa1.0.03798.1 | 671 | 20800  | 0         | 407 | 430 | 94 + | 105 | 528 | 11750  | 12179  |
| UN66238 | Rsa1.0.00855.1 | 201 | 62047  | 5.00E-92  | 185 | 187 | 98 + | 15  | 201 | 12698  | 12882  |
| UN66239 | Rsa1.0.02683.1 | 354 | 28679  | 1.00E-140 | 332 | 354 | 93 + | 2   | 354 | 16909  | 17251  |
| UN66240 | Rsa1.0.01373.1 | 732 | 47052  | 1.00E-129 | 266 | 275 | 96 + | 203 | 477 | 1703   | 1976   |
| UN66241 | Rsa1.0.10429.1 | 687 | 5853   | 0         | 658 | 683 | 96 + | 1   | 682 | 3350   | 4027   |
| UN66242 | Rsa1.0.00396.1 | 612 | 88242  | 0         | 603 | 608 | 99 + | 1   | 608 | 68778  | 69384  |
| UN66243 | Rsa1.0.02246.1 | 593 | 33435  | 0         | 406 | 423 | 95 + | 170 | 588 | 4183   | 4604   |
| UN66244 | Rsa1.0.05019.1 | 465 | 15114  | 1.00E-101 | 224 | 235 | 95 - | 232 | 465 | 12120  | 12354  |
| UN66245 | Rsa1.0.00676.1 | 695 | 69166  | 0         | 493 | 519 | 94 - | 132 | 650 | 54623  | 55138  |
| UN66246 | Rsa1.0.12457.1 | 486 | 5222   | 1.00E-162 | 348 | 363 | 95 - | 2   | 358 | 4813   | 5174   |
| UN66247 | Rsa1.0.10941.1 | 543 | 5670   | 0         | 503 | 517 | 97 - | 27  | 543 | 5059   | 5575   |
| UN66248 | Rsa1.0.00645.1 | 670 | 189716 | 2.00E-97  | 203 | 209 | 97 + | 463 | 670 | 3394   | 3602   |
| UN66249 | Rsa1.0.00011.1 | 729 | 225044 | 1.00E-120 | 226 | 227 | 99 - | 1   | 227 | 193043 | 193268 |
| UN66250 | Rsa1.0.03160.1 | 675 | 24916  | 0         | 426 | 433 | 98 + | 243 | 675 | 3384   | 3815   |
| UN66251 | Rsa1.0.01629.1 | 207 | 41917  | 3.00E-93  | 195 | 201 | 97 - | 3   | 202 | 15020  | 15220  |
| UN66252 | Rsa1.0.00280.1 | 663 | 99966  | 0         | 396 | 411 | 96 - | 129 | 539 | 1487   | 1894   |
| UN66253 | Rsa1.0.04458.1 | 679 | 17255  | 1.00E-142 | 298 | 312 | 95 - | 237 | 548 | 7732   | 8043   |
| UN66254 | Rsa1.0.03540.1 | 734 | 22199  | 3.00E-81  | 330 | 389 | 84 + | 71  | 459 | 8025   | 8407   |
| UN66255 | Rsa1.0.00376.1 | 597 | 90101  | 1.00E-135 | 247 | 248 | 99 + | 192 | 439 | 47249  | 47496  |
| UN66256 | Rsa1.0.05412.1 | 600 | 13836  | 3.00E-71  | 155 | 161 | 96 - | 440 | 600 | 953    | 1113   |
| UN66257 | Rsa1.0.00827.1 | 637 | 62790  | 2.00E-97  | 226 | 235 | 96 - | 346 | 576 | 49336  | 49567  |
| UN66258 | Rsa1.0.41502.1 | 793 | 541    | 0         | 488 | 506 | 96 - | 2   | 507 | 1      | 502    |
| UN66259 | Rsa1.0.00083.1 | 681 | 442773 | 0         | 458 | 492 | 93 - | 167 | 645 | 137576 | 138061 |

|         |                |     |        |           |     |     |       |     |     |        |        |
|---------|----------------|-----|--------|-----------|-----|-----|-------|-----|-----|--------|--------|
| UN66260 | Rsa1.0.03554.1 | 608 | 22137  | 0         | 587 | 609 | 96 +  | 1   | 608 | 16455  | 17061  |
| UN66261 | Rsa1.0.01605.1 | 750 | 42442  | 0         | 477 | 504 | 94 +  | 255 | 750 | 30787  | 31290  |
| UN66262 | Rsa1.0.03328.1 | 775 | 23681  | 0         | 538 | 560 | 96 +  | 2   | 561 | 23122  | 23681  |
| UN66263 | Rsa1.0.00796.1 | 718 | 63997  | 0         | 559 | 567 | 98 -  | 144 | 710 | 33356  | 33921  |
| UN66264 | Rsa1.0.03981.1 | 676 | 19724  | 1.00E-163 | 324 | 335 | 96 -  | 333 | 667 | 15130  | 15464  |
| UN66265 | Rsa1.0.07694.1 | 705 | 8776   | 1.00E-110 | 249 | 263 | 94 +  | 268 | 528 | 7803   | 8062   |
| UN66266 | Rsa1.0.02581.1 | 757 | 29896  | 0         | 466 | 478 | 97 +  | 280 | 757 | 9997   | 10473  |
| UN66267 | Rsa1.0.01803.1 | 693 | 173846 | 0         | 646 | 664 | 97 +  | 4   | 667 | 144809 | 145472 |
| UN66268 | Rsa1.0.00305.1 | 721 | 97308  | 1.00E-136 | 249 | 250 | 99 -  | 4   | 253 | 45991  | 46240  |
| UN66269 | Rsa1.0.00038.1 | 558 | 314568 | 1.00E-125 | 243 | 248 | 97 +  | 308 | 555 | 58578  | 58825  |
| UN66270 | Rsa1.0.64946.1 | 753 | 353    | 1.00E-120 | 226 | 228 | 99 +  | 397 | 624 | 38     | 265    |
| UN66271 | Rsa1.0.03679.1 | 776 | 21409  | 0         | 550 | 590 | 93 +  | 197 | 776 | 13347  | 13933  |
| UN66272 | Rsa1.0.00816.1 | 651 | 403350 | 0         | 362 | 369 | 98 +  | 11  | 379 | 267878 | 268245 |
| UN66273 | Rsa1.0.02085.1 | 700 | 35198  | 0         | 660 | 698 | 94 +  | 3   | 700 | 22653  | 23349  |
| UN66274 | Rsa1.0.01027.1 | 573 | 56402  | 0         | 561 | 572 | 98 -  | 2   | 573 | 29999  | 30567  |
| UN66275 | Rsa1.0.00487.1 | 753 | 80674  | 1.00E-46  | 96  | 96  | 100 - | 559 | 654 | 14388  | 14483  |
| UN66276 | Rsa1.0.02204.1 | 573 | 33930  | 1.00E-113 | 221 | 225 | 98 +  | 3   | 227 | 20694  | 20915  |
| UN66277 | Rsa1.0.00002.1 | 740 | 601661 | 0         | 560 | 586 | 95 -  | 156 | 740 | 407203 | 407779 |
| UN66278 | Rsa1.0.02023.1 | 656 | 35922  | 0         | 565 | 597 | 94 +  | 2   | 598 | 27662  | 28258  |
| UN66279 | Rsa1.0.01296.1 | 744 | 49035  | 1.00E-102 | 239 | 254 | 94 +  | 3   | 251 | 5334   | 5587   |
| UN66280 | Rsa1.0.10846.1 | 681 | 5704   | 0         | 643 | 686 | 93 -  | 1   | 681 | 178    | 861    |
| UN66281 | Rsa1.0.01169.1 | 800 | 51829  | 1.00E-171 | 310 | 312 | 99 -  | 3   | 314 | 50144  | 50455  |
| UN66282 | Rsa1.0.02114.1 | 699 | 34873  | 0         | 386 | 398 | 96 +  | 2   | 399 | 14940  | 15337  |
| UN66283 | Rsa1.0.00214.1 | 789 | 107508 | 0         | 464 | 469 | 98 -  | 322 | 789 | 27518  | 27986  |
| UN66284 | Rsa1.0.02772.1 | 660 | 28047  | 0         | 403 | 420 | 95 -  | 3   | 416 | 4728   | 5147   |
| UN66285 | Rsa1.0.04032.1 | 674 | 19489  | 1.00E-116 | 272 | 290 | 93 -  | 14  | 302 | 7468   | 7754   |
| UN66286 | Rsa1.0.00879.1 | 661 | 61297  | 2.00E-75  | 172 | 181 | 95 +  | 3   | 183 | 37267  | 37443  |
| UN66287 | Rsa1.0.13838.1 | 789 | 4236   | 2.00E-70  | 171 | 183 | 93 +  | 454 | 636 | 2303   | 2479   |
| UN66288 | Rsa1.0.02561.1 | 712 | 30080  | 0         | 631 | 646 | 97 -  | 1   | 644 | 14681  | 15325  |
| UN66289 | Rsa1.0.52329.1 | 684 | 435    | 1.00E-162 | 314 | 322 | 97 +  | 3   | 324 | 97     | 418    |
| UN66290 | Rsa1.0.03740.1 | 652 | 21065  | 1.00E-120 | 231 | 235 | 98 -  | 2   | 236 | 9526   | 9760   |
| UN66291 | Rsa1.0.14637.1 | 609 | 3201   | 0         | 491 | 497 | 98 +  | 113 | 609 | 2123   | 2619   |
| UN66292 | Rsa1.0.22298.1 | 680 | 1133   | 0         | 655 | 682 | 96 -  | 3   | 680 | 249    | 928    |
| UN66293 | Rsa1.0.00571.1 | 689 | 329018 | 0         | 446 | 454 | 98 -  | 236 | 687 | 204960 | 205413 |
| UN66294 | Rsa1.0.00511.1 | 740 | 78616  | 0         | 404 | 405 | 99 -  | 336 | 740 | 35023  | 35427  |
| UN66295 | Rsa1.0.00608.1 | 646 | 172672 | 0         | 521 | 540 | 96 +  | 87  | 626 | 111863 | 112399 |
| UN66296 | Rsa1.0.00027.1 | 832 | 283362 | 1.00E-101 | 415 | 491 | 84 -  | 2   | 492 | 22417  | 22907  |
| UN66297 | Rsa1.0.01251.1 | 754 | 49873  | 8.00E-97  | 198 | 204 | 97 -  | 468 | 671 | 48824  | 49027  |
| UN66298 | Rsa1.0.02364.1 | 524 | 32137  | 1.00E-172 | 322 | 326 | 98 +  | 199 | 524 | 31277  | 31601  |

|         |                |     |        |           |     |     |       |     |     |        |        |
|---------|----------------|-----|--------|-----------|-----|-----|-------|-----|-----|--------|--------|
| UN66299 | Rsa1.0.00143.1 | 431 | 121313 | 1.00E-161 | 397 | 430 | 92 +  | 3   | 431 | 97809  | 98229  |
| UN66300 | Rsa1.0.06303.1 | 830 | 11268  | 0         | 536 | 562 | 95 -  | 214 | 769 | 7355   | 7916   |
| UN66301 | Rsa1.0.00306.1 | 636 | 146760 | 2.00E-54  | 109 | 109 | 100 + | 391 | 499 | 112859 | 112967 |
| UN66302 | Rsa1.0.00294.1 | 681 | 144860 | 3.00E-96  | 205 | 215 | 95 -  | 77  | 282 | 62616  | 62830  |
| UN66303 | Rsa1.0.01727.1 | 647 | 40243  | 1.00E-64  | 135 | 138 | 97 -  | 312 | 449 | 12313  | 12450  |
| UN66304 | Rsa1.0.00017.1 | 649 | 752458 | 0         | 354 | 357 | 99 +  | 293 | 649 | 41954  | 42310  |
| UN66305 | Rsa1.0.00798.1 | 799 | 63945  | 0         | 620 | 644 | 96 -  | 123 | 749 | 58426  | 59068  |
| UN66306 | Rsa1.0.02592.1 | 632 | 29751  | 1.00E-143 | 286 | 295 | 96 +  | 57  | 348 | 17131  | 17425  |
| UN66307 | Rsa1.0.09768.1 | 716 | 6159   | 0         | 689 | 718 | 95 -  | 3   | 716 | 3693   | 4408   |
| UN66308 | Rsa1.0.04323.1 | 114 | 17915  | 4.00E-26  | 94  | 104 | 90 +  | 1   | 103 | 13957  | 14060  |
| UN66309 | Rsa1.0.01634.1 | 140 | 41865  | 2.00E-59  | 134 | 140 | 95 +  | 1   | 140 | 25202  | 25341  |
| UN66310 | Rsa1.0.03244.1 | 654 | 24413  | 1.00E-110 | 205 | 206 | 99 +  | 305 | 510 | 22141  | 22346  |
| UN66311 | Rsa1.0.07321.1 | 587 | 9559   | 1.00E-170 | 428 | 471 | 90 -  | 3   | 454 | 4293   | 4753   |
| UN66312 | Rsa1.0.05611.1 | 576 | 13193  | 0         | 499 | 533 | 93 +  | 2   | 530 | 5136   | 5661   |
| UN66313 | Rsa1.0.07463.1 | 637 | 9331   | 0         | 501 | 505 | 99 +  | 1   | 505 | 3197   | 3701   |
| UN66314 | Rsa1.0.00273.1 | 691 | 326186 | 2.33E-156 | 275 | 279 | 98 +  | 60  | 338 | 155330 | 155608 |
| UN66315 | Rsa1.0.01591.1 | 194 | 42718  | 4.00E-80  | 189 | 201 | 94 +  | 1   | 194 | 22506  | 22705  |
| UN66316 | Rsa1.0.00087.1 | 707 | 761073 | 1.00E-106 | 201 | 203 | 99 +  | 474 | 676 | 292656 | 292858 |
| UN66317 | Rsa1.0.02319.1 | 388 | 32580  | 3.00E-76  | 203 | 218 | 93 +  | 142 | 353 | 6518   | 6734   |
| UN66318 | Rsa1.0.00483.1 | 422 | 81102  | 1.00E-110 | 244 | 256 | 95 -  | 26  | 280 | 51013  | 51265  |
| UN66319 | Rsa1.0.00107.1 | 618 | 431659 | 0         | 435 | 463 | 93 -  | 1   | 461 | 146548 | 147008 |
| UN66320 | Rsa1.0.02444.1 | 741 | 31350  | 0         | 717 | 740 | 96 -  | 2   | 741 | 25220  | 25959  |
| UN66321 | Rsa1.0.01701.1 | 731 | 162121 | 0         | 516 | 547 | 94 -  | 21  | 557 | 20038  | 20580  |
| UN66322 | Rsa1.0.03821.1 | 690 | 20643  | 5.00E-98  | 203 | 210 | 96 -  | 481 | 690 | 5290   | 5499   |
| UN66323 | Rsa1.0.00139.1 | 405 | 357786 | 1.00E-155 | 335 | 354 | 94 +  | 52  | 405 | 259723 | 260076 |
| UN66324 | Rsa1.0.00244.1 | 664 | 103590 | 0         | 612 | 657 | 93 +  | 13  | 664 | 77056  | 77711  |
| UN66325 | Rsa1.0.04630.1 | 109 | 16595  | 6.00E-22  | 99  | 109 | 90 +  | 1   | 109 | 14657  | 14761  |
| UN66326 | Rsa1.0.13762.1 | 790 | 4370   | 0         | 640 | 663 | 96 +  | 1   | 660 | 3715   | 4370   |
| UN66327 | Rsa1.0.01737.1 | 468 | 40101  | 0         | 463 | 465 | 99 -  | 1   | 465 | 7536   | 8000   |
| UN66328 | Rsa1.0.00664.1 | 659 | 69573  | 1.00E-100 | 218 | 228 | 95 +  | 3   | 230 | 926    | 1151   |
| UN66329 | Rsa1.0.01099.1 | 270 | 158481 | 2.33E-156 | 268 | 270 | 99 +  | 1   | 270 | 28093  | 28362  |
| UN66330 | Rsa1.0.04005.1 | 677 | 19586  | 0         | 618 | 679 | 91 +  | 1   | 677 | 2168   | 2827   |
| UN66331 | Rsa1.0.00897.1 | 341 | 60498  | 1.00E-119 | 233 | 237 | 98 -  | 8   | 243 | 21543  | 21779  |
| UN66332 | Rsa1.0.00002.1 | 781 | 601661 | 0         | 539 | 555 | 97 -  | 1   | 543 | 595243 | 595797 |
| UN66333 | Rsa1.0.00947.1 | 690 | 58664  | 1.00E-120 | 232 | 236 | 98 +  | 424 | 659 | 12843  | 13078  |
| UN66334 | Rsa1.0.01269.1 | 875 | 49622  | 0         | 749 | 795 | 94 +  | 1   | 782 | 25084  | 25871  |
| UN66335 | Rsa1.0.00033.1 | 191 | 515811 | 2.00E-82  | 182 | 191 | 95 +  | 1   | 191 | 465835 | 466025 |
| UN66336 | Rsa1.0.04626.1 | 282 | 16611  | 1.00E-103 | 252 | 270 | 93 -  | 10  | 278 | 15072  | 15340  |
| UN66337 | Rsa1.0.04296.1 | 820 | 18030  | 1.00E-116 | 238 | 245 | 97 -  | 1   | 245 | 8018   | 8261   |

|         |                |     |        |           |     |     |       |     |     |        |        |
|---------|----------------|-----|--------|-----------|-----|-----|-------|-----|-----|--------|--------|
| UN66338 | Rsa1.0.01924.1 | 845 | 37226  | 0         | 470 | 489 | 96 -  | 1   | 489 | 23204  | 23692  |
| UN66339 | Rsa1.0.02554.1 | 767 | 30187  | 0         | 737 | 755 | 97 -  | 1   | 752 | 6754   | 7508   |
| UN66340 | Rsa1.0.00971.1 | 504 | 57973  | 1.00E-144 | 312 | 328 | 95 +  | 3   | 325 | 49791  | 50118  |
| UN66341 | Rsa1.0.02523.1 | 682 | 30527  | 1.00E-126 | 265 | 277 | 95 +  | 273 | 549 | 5172   | 5448   |
| UN66342 | Rsa1.0.00571.1 | 815 | 329018 | 0         | 564 | 586 | 96 -  | 50  | 635 | 197339 | 197924 |
| UN66343 | Rsa1.0.00350.1 | 665 | 92346  | 0         | 663 | 668 | 99 -  | 1   | 665 | 53039  | 53706  |
| UN66344 | Rsa1.0.00481.1 | 606 | 81316  | 0         | 591 | 606 | 97 -  | 1   | 606 | 20793  | 21398  |
| UN66345 | Rsa1.0.02038.1 | 722 | 35715  | 1.00E-148 | 338 | 361 | 93 -  | 1   | 359 | 9722   | 10072  |
| UN66346 | Rsa1.0.00204.1 | 853 | 109056 | 1.00E-173 | 374 | 395 | 94 +  | 402 | 791 | 51654  | 52040  |
| UN66347 | Rsa1.0.01527.1 | 594 | 43905  | 1.00E-115 | 292 | 319 | 91 -  | 196 | 514 | 30403  | 30721  |
| UN66348 | Rsa1.0.00455.1 | 610 | 224823 | 1.00E-160 | 289 | 290 | 99 +  | 1   | 290 | 183256 | 183545 |
| UN66349 | Rsa1.0.00734.1 | 852 | 66508  | 0         | 547 | 569 | 96 +  | 1   | 564 | 26485  | 27047  |
| UN66350 | Rsa1.0.00077.1 | 628 | 145005 | 0         | 574 | 598 | 95 +  | 1   | 587 | 89600  | 90189  |
| UN66351 | Rsa1.0.00008.1 | 220 | 358124 | 2.00E-67  | 180 | 194 | 92 -  | 23  | 216 | 7490   | 7681   |
| UN66352 | Rsa1.0.00344.1 | 654 | 191774 | 0         | 484 | 501 | 96 +  | 65  | 565 | 128811 | 129311 |
| UN66353 | Rsa1.0.00139.1 | 543 | 357786 | 0         | 536 | 552 | 97 +  | 1   | 543 | 301246 | 301797 |
| UN66354 | Rsa1.0.03656.1 | 874 | 21552  | 0         | 446 | 471 | 94 +  | 4   | 468 | 11954  | 12421  |
| UN66355 | Rsa1.0.01882.1 | 155 | 37697  | 4.00E-61  | 146 | 155 | 94 +  | 1   | 155 | 5029   | 5183   |
| UN66356 | Rsa1.0.13600.1 | 899 | 4672   | 0         | 501 | 502 | 99 +  | 1   | 502 | 1311   | 1812   |
| UN66357 | Rsa1.0.00008.1 | 844 | 358124 | 0         | 522 | 523 | 99 +  | 2   | 524 | 81103  | 81625  |
| UN66358 | Rsa1.0.01137.1 | 659 | 52655  | 0         | 652 | 657 | 99 +  | 3   | 659 | 30628  | 31284  |
| UN66359 | Rsa1.0.00938.1 | 122 | 193891 | 2.00E-43  | 116 | 124 | 93 +  | 1   | 122 | 191608 | 191731 |
| UN66360 | Rsa1.0.10066.1 | 720 | 6016   | 0         | 707 | 720 | 98 +  | 1   | 720 | 1607   | 2326   |
| UN66361 | Rsa1.0.02966.1 | 125 | 135126 | 3.00E-55  | 121 | 125 | 96 -  | 1   | 125 | 17973  | 18097  |
| UN66362 | Rsa1.0.08740.1 | 815 | 6980   | 1.00E-160 | 298 | 302 | 98 +  | 361 | 662 | 1988   | 2289   |
| UN66363 | Rsa1.0.07863.1 | 405 | 8404   | 1.00E-107 | 209 | 213 | 98 +  | 163 | 375 | 3405   | 3617   |
| UN66364 | Rsa1.0.00737.1 | 172 | 66432  | 6.00E-57  | 160 | 172 | 93 -  | 3   | 172 | 30936  | 31106  |
| UN66365 | Rsa1.0.00144.1 | 491 | 120708 | 1.00E-124 | 239 | 241 | 99 +  | 3   | 241 | 110938 | 111178 |
| UN66366 | Rsa1.0.00115.1 | 802 | 131321 | 1.00E-176 | 382 | 399 | 95 -  | 186 | 579 | 68836  | 69232  |
| UN66367 | Rsa1.0.04786.1 | 665 | 15988  | 0         | 483 | 483 | 100 + | 3   | 485 | 13588  | 14070  |
| UN66368 | Rsa1.0.05561.1 | 571 | 13326  | 1.00E-133 | 244 | 245 | 99 -  | 219 | 463 | 3796   | 4040   |
| UN66369 | Rsa1.0.00123.1 | 487 | 325650 | 0         | 483 | 487 | 99 -  | 1   | 487 | 90844  | 91330  |
| UN66370 | Rsa1.0.08389.1 | 697 | 7435   | 0         | 492 | 501 | 98 -  | 193 | 693 | 301    | 794    |
| UN66371 | Rsa1.0.00059.1 | 842 | 159650 | 0         | 836 | 851 | 98 -  | 2   | 842 | 63405  | 64255  |
| UN66372 | Rsa1.0.00275.1 | 528 | 210104 | 1.00E-149 | 315 | 328 | 96 +  | 8   | 334 | 154341 | 154667 |
| UN66373 | Rsa1.0.01740.1 | 745 | 39986  | 0         | 713 | 747 | 95 -  | 3   | 745 | 18128  | 18874  |
| UN66374 | Rsa1.0.01626.1 | 629 | 41989  | 0         | 406 | 406 | 100 + | 1   | 406 | 15831  | 16236  |
| UN66375 | Rsa1.0.07852.1 | 194 | 8421   | 2.00E-63  | 133 | 135 | 98 +  | 1   | 134 | 1768   | 1902   |
| UN66376 | Rsa1.0.00014.1 | 178 | 348985 | 3.00E-37  | 82  | 83  | 98 +  | 15  | 97  | 325768 | 325850 |



|         |                |     |        |           |     |     |       |     |     |        |        |
|---------|----------------|-----|--------|-----------|-----|-----|-------|-----|-----|--------|--------|
| UN66377 | Rsa1.0_04219.1 | 431 | 18421  | 0         | 417 | 431 | 96 +  | 1   | 431 | 547    | 977    |
| UN66378 | Rsa1.0_01758.1 | 474 | 39747  | 3.00E-64  | 149 | 156 | 95 -  | 243 | 396 | 39511  | 39666  |
| UN66379 | Rsa1.0_00371.1 | 266 | 90463  | 1.00E-114 | 248 | 259 | 95 +  | 1   | 259 | 50121  | 50376  |
| UN66380 | Rsa1.0_00188.1 | 729 | 112020 | 3.00E-93  | 218 | 230 | 94 -  | 1   | 226 | 10144  | 10370  |
| UN66381 | Rsa1.0_00200.1 | 116 | 162016 | 2.00E-40  | 105 | 112 | 93 +  | 5   | 116 | 85056  | 85167  |
| UN66382 | Rsa1.0_09011.1 | 195 | 6711   | 2.00E-54  | 173 | 193 | 89 +  | 7   | 194 | 6044   | 6236   |
| UN66383 | Rsa1.0_03867.1 | 220 | 20369  | 1.00E-114 | 214 | 216 | 99 +  | 5   | 220 | 15829  | 16044  |
| UN66384 | Rsa1.0_01060.1 | 722 | 55368  | 6.00E-73  | 196 | 213 | 92 +  | 1   | 213 | 47937  | 48139  |
| UN66385 | Rsa1.0_04969.1 | 121 | 15283  | 2.00E-43  | 113 | 121 | 93 -  | 1   | 121 | 8737   | 8857   |
| UN66386 | Rsa1.0_22070.1 | 144 | 1152   | 9.00E-28  | 75  | 79  | 94 -  | 37  | 115 | 63     | 141    |
| UN66387 | Rsa1.0_01845.1 | 739 | 38415  | 1.00E-102 | 280 | 310 | 90 +  | 448 | 739 | 36592  | 36900  |
| UN66388 | Rsa1.0_00011.1 | 117 | 225044 | 4.00E-48  | 112 | 117 | 95 +  | 1   | 117 | 213458 | 213574 |
| UN66389 | Rsa1.0_00271.1 | 607 | 101125 | 1.00E-125 | 248 | 255 | 97 -  | 289 | 543 | 25866  | 26120  |
| UN66390 | Rsa1.0_00626.1 | 730 | 71582  | 1.00E-125 | 273 | 287 | 95 +  | 1   | 285 | 54748  | 55030  |
| UN66391 | Rsa1.0_00475.1 | 157 | 81678  | 8.00E-50  | 138 | 148 | 93 +  | 12  | 157 | 26934  | 27081  |
| UN66392 | Rsa1.0_04028.1 | 577 | 19493  | 0         | 577 | 577 | 100 - | 1   | 577 | 12494  | 13070  |
| UN66393 | Rsa1.0_00170.1 | 524 | 179538 | 9.00E-99  | 304 | 343 | 88 +  | 181 | 520 | 83462  | 83801  |
| UN66394 | Rsa1.0_08285.1 | 197 | 7606   | 2.00E-78  | 186 | 198 | 93 -  | 3   | 197 | 6691   | 6888   |
| UN66395 | Rsa1.0_00038.1 | 716 | 314568 | 1.00E-141 | 294 | 306 | 96 -  | 2   | 306 | 310046 | 310345 |
| UN66396 | Rsa1.0_00094.1 | 772 | 139042 | 1.00E-171 | 402 | 426 | 94 -  | 2   | 421 | 92426  | 92843  |
| UN66397 | Rsa1.0_00706.1 | 755 | 291570 | 0         | 397 | 407 | 97 -  | 3   | 409 | 56061  | 56466  |
| UN66398 | Rsa1.0_02637.1 | 290 | 29244  | 2.00E-98  | 260 | 284 | 91 -  | 13  | 290 | 6206   | 6486   |
| UN66399 | Rsa1.0_14084.1 | 148 | 3822   | 3.00E-52  | 128 | 136 | 94 +  | 1   | 136 | 554    | 689    |
| UN66400 | Rsa1.0_00016.1 | 598 | 831256 | 1.00E-162 | 340 | 355 | 95 -  | 102 | 454 | 283309 | 283660 |
| UN66401 | Rsa1.0_00827.1 | 629 | 62790  | 1.00E-163 | 316 | 324 | 97 +  | 306 | 629 | 23151  | 23474  |
| UN66402 | Rsa1.0_01649.1 | 312 | 41624  | 1.00E-87  | 197 | 208 | 94 -  | 87  | 294 | 27386  | 27593  |
| UN66403 | Rsa1.0_04088.1 | 131 | 19150  | 4.00E-39  | 88  | 90  | 97 -  | 1   | 90  | 18788  | 18877  |
| UN66404 | Rsa1.0_00939.1 | 124 | 185227 | 1.00E-35  | 76  | 76  | 100 - | 2   | 77  | 34874  | 34949  |
| UN66405 | Rsa1.0_01857.1 | 711 | 38103  | 1.00E-109 | 228 | 236 | 96 -  | 477 | 711 | 7186   | 7421   |
| UN66406 | Rsa1.0_08039.1 | 490 | 8030   | 1.00E-110 | 211 | 214 | 98 +  | 277 | 490 | 4542   | 4755   |
| UN66407 | Rsa1.0_04625.1 | 447 | 16613  | 1.00E-117 | 256 | 270 | 94 -  | 172 | 441 | 9193   | 9462   |
| UN66408 | Rsa1.0_01833.1 | 658 | 38555  | 1.00E-112 | 222 | 227 | 97 -  | 1   | 224 | 16604  | 16830  |
| UN66409 | Rsa1.0_00100.1 | 450 | 249232 | 1.00E-129 | 247 | 250 | 98 +  | 202 | 450 | 194744 | 194993 |
| UN66410 | #              | #   | #      | #         | #   | #   | #     | #   | #   | #      | #      |
| UN66411 | Rsa1.0_20900.1 | 724 | 1257   | 0         | 558 | 583 | 95 +  | 142 | 724 | 7      | 576    |
| UN66412 | Rsa1.0_08165.1 | 807 | 7806   | 0         | 352 | 355 | 99 -  | 1   | 352 | 2878   | 3232   |
| UN66413 | Rsa1.0_39223.1 | 297 | 573    | 3.00E-60  | 136 | 142 | 95 +  | 1   | 142 | 225    | 366    |
| UN66414 | Rsa1.0_02930.1 | 548 | 26668  | 0         | 457 | 460 | 99 -  | 1   | 460 | 23092  | 23551  |
| UN66415 | Rsa1.0_08790.1 | 561 | 6918   | 0         | 474 | 475 | 99 +  | 1   | 475 | 2626   | 3100   |

|         |                |     |        |           |     |     |      |     |     |        |        |
|---------|----------------|-----|--------|-----------|-----|-----|------|-----|-----|--------|--------|
| UN66416 | Rsa1.0.00056.1 | 708 | 332604 | 0         | 374 | 390 | 95 - | 1   | 375 | 206060 | 206449 |
| UN66417 | Rsa1.0.00188.1 | 583 | 112020 | 1.00E-143 | 345 | 374 | 92 - | 2   | 374 | 38799  | 39158  |
| UN66418 | Rsa1.0.01530.1 | 709 | 43820  | 0         | 692 | 704 | 98 + | 1   | 700 | 16613  | 17316  |
| UN66419 | Rsa1.0.00273.1 | 701 | 326186 | 7.00E-97  | 211 | 220 | 95 + | 179 | 397 | 29486  | 29705  |
| UN66420 | Rsa1.0.05631.1 | 735 | 13127  | 1.00E-125 | 287 | 304 | 94 - | 1   | 302 | 4477   | 4780   |
| UN66421 | Rsa1.0.00722.1 | 293 | 66840  | 1.00E-122 | 270 | 282 | 95 + | 17  | 293 | 44125  | 44403  |
| UN66422 | Rsa1.0.01296.1 | 182 | 49035  | 2.00E-72  | 171 | 182 | 93 - | 1   | 182 | 13455  | 13636  |
| UN66423 | Rsa1.0.02101.1 | 737 | 35017  | 0         | 422 | 439 | 96 + | 3   | 437 | 32064  | 32502  |
| UN66424 | Rsa1.0.01732.1 | 734 | 40194  | 1.00E-103 | 212 | 218 | 97 + | 64  | 281 | 16730  | 16946  |
| UN66425 | Rsa1.0.01598.1 | 762 | 42553  | 0         | 731 | 762 | 95 + | 1   | 760 | 8554   | 9309   |
| UN66426 | Rsa1.0.00495.1 | 653 | 79934  | 0         | 561 | 587 | 95 - | 2   | 571 | 11988  | 12570  |
| UN66427 | Rsa1.0.03944.1 | 356 | 19926  | 1.00E-87  | 186 | 192 | 96 - | 161 | 351 | 470    | 661    |
| UN66428 | Rsa1.0.01951.1 | 655 | 36941  | 0         | 637 | 655 | 97 + | 1   | 655 | 35877  | 36528  |
| UN66429 | Rsa1.0.01422.1 | 731 | 46172  | 1.00E-117 | 255 | 269 | 94 + | 18  | 279 | 16357  | 16625  |
| UN66430 | Rsa1.0.00707.1 | 613 | 190112 | 0         | 611 | 613 | 99 + | 1   | 613 | 2745   | 3357   |
| UN66431 | Rsa1.0.00008.1 | 591 | 358124 | 0         | 343 | 345 | 99 - | 1   | 345 | 146200 | 146544 |
| UN66432 | Rsa1.0.02700.1 | 700 | 28584  | 1.00E-130 | 266 | 275 | 96 - | 1   | 273 | 14765  | 15039  |
| UN66433 | Rsa1.0.00376.1 | 759 | 90101  | 1.00E-126 | 242 | 246 | 98 + | 222 | 467 | 6655   | 6900   |
| UN66434 | Rsa1.0.02725.1 | 120 | 28404  | 6.00E-50  | 115 | 120 | 95 - | 1   | 120 | 25422  | 25541  |
| UN66435 | Rsa1.0.01405.1 | 314 | 46445  | 1.00E-117 | 291 | 315 | 92 + | 1   | 311 | 37038  | 37352  |
| UN66436 | Rsa1.0.03581.1 | 699 | 21965  | 1.00E-129 | 281 | 291 | 96 + | 3   | 291 | 14221  | 14509  |
| UN66437 | Rsa1.0.06169.1 | 763 | 11578  | 0         | 496 | 508 | 97 - | 151 | 658 | 7905   | 8412   |
| UN66438 | Rsa1.0.15709.1 | 249 | 2468   | 1.00E-119 | 238 | 245 | 97 + | 5   | 249 | 871    | 1115   |
| UN66439 | Rsa1.0.00948.1 | 870 | 58620  | 0         | 510 | 511 | 99 - | 2   | 512 | 1582   | 2092   |
| UN66440 | Rsa1.0.00454.1 | 822 | 216970 | 1.00E-167 | 345 | 358 | 96 - | 4   | 359 | 183733 | 184090 |
| UN66441 | Rsa1.0.00361.1 | 155 | 91181  | 1.00E-30  | 110 | 123 | 89 - | 33  | 155 | 48118  | 48238  |
| UN66442 | Rsa1.0.01635.1 | 510 | 41865  | 0         | 504 | 510 | 98 + | 1   | 510 | 16980  | 17488  |
| UN66443 | Rsa1.0.00067.1 | 322 | 415055 | 1.00E-121 | 280 | 298 | 93 + | 28  | 322 | 151702 | 151998 |
| UN66444 | Rsa1.0.00458.1 | 817 | 82717  | 1.00E-175 | 323 | 327 | 98 + | 1   | 327 | 21879  | 22205  |
| UN66445 | Rsa1.0.03702.1 | 711 | 21292  | 0         | 517 | 518 | 99 + | 1   | 518 | 10476  | 10993  |
| UN66446 | Rsa1.0.00782.1 | 808 | 64468  | 4.00E-65  | 149 | 155 | 96 - | 1   | 154 | 36493  | 36647  |
| UN66447 | Rsa1.0.00275.1 | 192 | 210104 | 5.00E-70  | 176 | 192 | 91 + | 1   | 192 | 23127  | 23307  |
| UN66448 | Rsa1.0.00273.1 | 764 | 326186 | 0         | 497 | 514 | 96 - | 254 | 764 | 124585 | 125098 |
| UN66449 | Rsa1.0.02686.1 | 704 | 28666  | 0         | 398 | 409 | 97 - | 67  | 474 | 6729   | 7137   |
| UN66450 | Rsa1.0.00293.1 | 764 | 339294 | 0         | 747 | 764 | 97 - | 1   | 764 | 177620 | 178379 |
| UN66451 | Rsa1.0.00018.1 | 205 | 410899 | 4.00E-46  | 97  | 98  | 98 - | 108 | 205 | 185335 | 185432 |
| UN66452 | Rsa1.0.01026.1 | 192 | 171624 | 6.00E-82  | 181 | 190 | 95 + | 3   | 192 | 154269 | 154458 |
| UN66453 | Rsa1.0.01073.1 | 160 | 55030  | 2.00E-56  | 144 | 155 | 92 - | 1   | 155 | 35606  | 35760  |
| UN66454 | Rsa1.0.00028.1 | 765 | 293984 | 1.00E-150 | 320 | 333 | 96 + | 6   | 336 | 260515 | 260846 |

|         |                |     |        |           |     |     |       |     |     |        |        |
|---------|----------------|-----|--------|-----------|-----|-----|-------|-----|-----|--------|--------|
| UN66455 | Rsa1.0.05473.1 | 651 | 13628  | 0         | 633 | 651 | 97 -  | 1   | 651 | 11373  | 12023  |
| UN66456 | Rsa1.0.24004.1 | 750 | 1012   | 0         | 388 | 390 | 99 +  | 1   | 390 | 623    | 1012   |
| UN66457 | Rsa1.0.00506.1 | 813 | 79106  | 1.00E-151 | 306 | 316 | 96 +  | 499 | 813 | 26906  | 27221  |
| UN66458 | Rsa1.0.02092.1 | 792 | 35135  | 0         | 655 | 659 | 99 +  | 2   | 660 | 17655  | 18313  |
| UN66459 | Rsa1.0.02246.1 | 366 | 33435  | 1.00E-114 | 310 | 342 | 90 -  | 1   | 342 | 5814   | 6150   |
| UN66460 | Rsa1.0.00065.1 | 825 | 454616 | 1.00E-116 | 230 | 236 | 97 +  | 194 | 429 | 233321 | 233556 |
| UN66461 | Rsa1.0.00015.1 | 225 | 561803 | 6.00E-24  | 63  | 65  | 96 -  | 114 | 178 | 463090 | 463154 |
| UN66462 | Rsa1.0.00359.1 | 822 | 91256  | 1.00E-155 | 278 | 278 | 100 - | 1   | 278 | 90578  | 90855  |
| UN66463 | Rsa1.0.00268.1 | 790 | 101470 | 1.00E-104 | 226 | 235 | 96 +  | 3   | 236 | 59337  | 59569  |
| UN66464 | Rsa1.0.06155.1 | 449 | 11609  | 0         | 439 | 449 | 97 -  | 1   | 449 | 287    | 735    |
| UN66465 | Rsa1.0.02142.1 | 711 | 34633  | 0         | 335 | 338 | 99 -  | 1   | 338 | 16828  | 17165  |
| UN66466 | Rsa1.0.02084.1 | 848 | 35205  | 0         | 335 | 336 | 99 -  | 176 | 511 | 31289  | 31624  |
| UN66467 | Rsa1.0.00910.1 | 269 | 59975  | 1.00E-102 | 189 | 189 | 100 + | 1   | 189 | 41441  | 41629  |
| UN66468 | Rsa1.0.03133.1 | 793 | 25135  | 0         | 605 | 608 | 99 -  | 184 | 789 | 15882  | 16489  |
| UN66469 | Rsa1.0.00480.1 | 117 | 81325  | 3.00E-24  | 69  | 73  | 94 -  | 42  | 114 | 4894   | 4966   |
| UN66470 | Rsa1.0.13627.1 | 846 | 4613   | 4.00E-25  | 255 | 313 | 81 -  | 2   | 308 | 2059   | 2368   |
| UN66471 | Rsa1.0.04124.1 | 104 | 18945  | 1.00E-22  | 81  | 90  | 90 +  | 1   | 90  | 6754   | 6843   |
| UN66472 | Rsa1.0.05000.1 | 727 | 15178  | 0         | 367 | 386 | 95 -  | 361 | 727 | 1114   | 1499   |
| UN66473 | Rsa1.0.03105.1 | 718 | 25373  | 1.00E-113 | 214 | 216 | 99 +  | 26  | 241 | 15145  | 15360  |
| UN66474 | Rsa1.0.26314.1 | 369 | 897    | 1.00E-111 | 236 | 247 | 95 +  | 3   | 249 | 291    | 537    |
| UN66475 | Rsa1.0.02672.1 | 716 | 28884  | 0         | 681 | 715 | 95 -  | 5   | 716 | 26311  | 27013  |
| UN66476 | Rsa1.0.00552.1 | 637 | 206757 | 1.00E-122 | 297 | 316 | 93 +  | 6   | 315 | 74640  | 74953  |
| UN66477 | Rsa1.0.04113.1 | 682 | 18986  | 1.00E-137 | 332 | 357 | 92 +  | 3   | 354 | 11111  | 11467  |
| UN66478 | Rsa1.0.02455.1 | 725 | 31262  | 0         | 511 | 537 | 95 -  | 1   | 517 | 25412  | 25948  |
| UN66479 | Rsa1.0.03109.1 | 878 | 25336  | 0         | 700 | 722 | 96 -  | 1   | 722 | 3130   | 3842   |
| UN66480 | Rsa1.0.58514.1 | 733 | 391    | 1.00E-180 | 319 | 319 | 100 - | 40  | 358 | 73     | 391    |
| UN66481 | Rsa1.0.00046.1 | 881 | 320315 | 1.00E-113 | 240 | 250 | 96 -  | 7   | 256 | 126782 | 127029 |
| UN66482 | Rsa1.0.00360.1 | 668 | 91190  | 0         | 629 | 682 | 92 -  | 1   | 668 | 80858  | 81530  |
| UN66483 | Rsa1.0.00995.1 | 192 | 57243  | 6.00E-85  | 174 | 179 | 97 -  | 14  | 192 | 21328  | 21506  |
| UN66484 | Rsa1.0.01428.1 | 386 | 46071  | 2.00E-93  | 213 | 226 | 94 +  | 6   | 231 | 16764  | 16989  |
| UN66485 | Rsa1.0.50581.1 | 888 | 449    | 0         | 357 | 363 | 98 +  | 380 | 742 | 87     | 449    |
| UN66486 | Rsa1.0.00583.1 | 645 | 74309  | 0         | 639 | 639 | 100 - | 1   | 639 | 64130  | 64768  |
| UN66487 | Rsa1.0.00069.1 | 877 | 403561 | 0         | 367 | 367 | 100 - | 5   | 371 | 205680 | 206046 |
| UN66488 | Rsa1.0.01125.1 | 565 | 53193  | 1.00E-158 | 334 | 352 | 94 -  | 107 | 458 | 10371  | 10714  |
| UN66489 | Rsa1.0.00067.1 | 836 | 415055 | 0         | 416 | 428 | 97 -  | 1   | 425 | 361586 | 362013 |
| UN66490 | Rsa1.0.00191.1 | 157 | 316976 | 3.00E-74  | 150 | 153 | 98 -  | 5   | 157 | 194638 | 194790 |
| UN66491 | Rsa1.0.00119.1 | 766 | 467509 | 0         | 716 | 756 | 94 +  | 12  | 764 | 217844 | 218584 |
| UN66492 | Rsa1.0.01078.1 | 768 | 316910 | 1.00E-98  | 209 | 215 | 97 +  | 3   | 217 | 125402 | 125614 |
| UN66493 | Rsa1.0.00472.1 | 788 | 398134 | 1.00E-157 | 284 | 285 | 99 +  | 504 | 788 | 298897 | 299181 |

|         |                |     |        |           |     |     |       |     |     |        |        |
|---------|----------------|-----|--------|-----------|-----|-----|-------|-----|-----|--------|--------|
| UN66494 | Rsa1.0.00699.1 | 144 | 184398 | 2.00E-59  | 137 | 144 | 95 +  | 1   | 144 | 14102  | 14245  |
| UN66495 | Rsa1.0.00599.1 | 236 | 73418  | 5.00E-80  | 201 | 216 | 93 -  | 25  | 235 | 40410  | 40625  |
| UN66496 | Rsa1.0.00008.1 | 816 | 358124 | 1.00E-148 | 327 | 346 | 94 +  | 131 | 476 | 3365   | 3709   |
| UN66497 | Rsa1.0.00030.1 | 838 | 250988 | 0         | 826 | 835 | 98 +  | 1   | 835 | 57392  | 58226  |
| UN66498 | Rsa1.0.05925.1 | 713 | 12221  | 1.00E-107 | 231 | 242 | 95 -  | 396 | 637 | 9967   | 10208  |
| UN66499 | Rsa1.0.04772.1 | 820 | 16040  | 0         | 486 | 487 | 99 +  | 1   | 487 | 13593  | 14079  |
| UN66500 | Rsa1.0.00596.1 | 738 | 73578  | 0         | 608 | 624 | 97 +  | 7   | 630 | 54292  | 54915  |
| UN66501 | Rsa1.0.01178.1 | 869 | 51571  | 0         | 398 | 399 | 99 +  | 2   | 400 | 19836  | 20234  |
| UN66502 | Rsa1.0.00006.1 | 728 | 396176 | 0         | 599 | 638 | 93 +  | 1   | 629 | 23038  | 23674  |
| UN66503 | Rsa1.0.02593.1 | 381 | 29744  | 1.00E-132 | 269 | 279 | 96 +  | 1   | 279 | 4382   | 4660   |
| UN66504 | Rsa1.0.03832.1 | 833 | 20577  | 0         | 435 | 459 | 94 -  | 5   | 459 | 2837   | 3293   |
| UN66505 | Rsa1.0.00070.1 | 614 | 150321 | 0         | 611 | 614 | 99 -  | 1   | 614 | 94130  | 94743  |
| UN66506 | Rsa1.0.04134.1 | 340 | 149811 | 1.00E-157 | 324 | 340 | 95 -  | 1   | 340 | 6935   | 7264   |
| UN66507 | Rsa1.0.10868.1 | 615 | 5695   | 1.00E-156 | 297 | 303 | 98 +  | 302 | 604 | 2091   | 2393   |
| UN66508 | Rsa1.0.02229.1 | 777 | 33672  | 1.00E-161 | 344 | 362 | 95 -  | 416 | 777 | 11295  | 11653  |
| UN66509 | Rsa1.0.03876.1 | 386 | 20334  | 1.00E-176 | 370 | 388 | 95 -  | 1   | 386 | 16926  | 17313  |
| UN66510 | Rsa1.0.00259.1 | 630 | 163204 | 0         | 603 | 632 | 95 +  | 1   | 630 | 154330 | 154941 |
| UN66511 | Rsa1.0.00010.1 | 650 | 294827 | 0         | 643 | 653 | 98 -  | 1   | 650 | 227514 | 228166 |
| UN66512 | Rsa1.0.01061.1 | 320 | 55349  | 1.00E-148 | 310 | 322 | 96 +  | 1   | 320 | 29544  | 29860  |
| UN66513 | Rsa1.0.00040.1 | 458 | 324196 | 6.00E-78  | 219 | 237 | 92 +  | 4   | 237 | 172778 | 173009 |
| UN66514 | Rsa1.0.00271.1 | 219 | 101125 | 7.00E-82  | 199 | 214 | 92 -  | 3   | 216 | 88750  | 88963  |
| UN66515 | Rsa1.0.05596.1 | 663 | 137912 | 2.00E-23  | 57  | 57  | 100 - | 1   | 57  | 6636   | 6692   |
| UN66516 | Rsa1.0.02347.1 | 510 | 32332  | 1.00E-177 | 352 | 361 | 97 +  | 1   | 360 | 23577  | 23934  |
| UN66517 | Rsa1.0.00058.1 | 639 | 159921 | 0         | 512 | 540 | 94 -  | 10  | 549 | 71350  | 71867  |
| UN66518 | Rsa1.0.00387.1 | 178 | 495407 | 7.00E-26  | 137 | 161 | 85 +  | 7   | 165 | 401067 | 401224 |
| UN66519 | Rsa1.0.00522.1 | 701 | 78103  | 1.00E-153 | 283 | 285 | 99 -  | 1   | 283 | 44049  | 44333  |
| UN66520 | Rsa1.0.00816.1 | 127 | 403350 | 8.00E-31  | 77  | 80  | 96 -  | 47  | 126 | 111727 | 111806 |
| UN66521 | Rsa1.0.04332.1 | 658 | 17869  | 1.00E-132 | 243 | 244 | 99 +  | 1   | 244 | 4064   | 4307   |
| UN66522 | Rsa1.0.00531.1 | 749 | 77387  | 1.00E-109 | 228 | 236 | 96 -  | 1   | 235 | 39884  | 40114  |
| UN66523 | Rsa1.0.36697.1 | 745 | 614    | 1.00E-169 | 326 | 334 | 97 -  | 1   | 334 | 2      | 335    |
| UN66524 | Rsa1.0.04174.1 | 681 | 18670  | 0         | 674 | 681 | 98 -  | 1   | 681 | 8548   | 9228   |
| UN66525 | Rsa1.0.01605.1 | 713 | 42442  | 0         | 437 | 439 | 99 +  | 2   | 440 | 7037   | 7475   |
| UN66526 | Rsa1.0.04913.1 | 702 | 15464  | 0         | 667 | 683 | 97 -  | 22  | 702 | 14703  | 15384  |
| UN66527 | Rsa1.0.44747.1 | 384 | 503    | 2.00E-71  | 146 | 149 | 97 -  | 161 | 309 | 11     | 159    |
| UN66528 | Rsa1.0.03450.1 | 822 | 22835  | 1.00E-115 | 229 | 234 | 97 +  | 1   | 232 | 9563   | 9796   |
| UN66529 | Rsa1.0.00528.1 | 739 | 164755 | 0         | 698 | 719 | 97 -  | 3   | 719 | 132639 | 133356 |
| UN66530 | Rsa1.0.00782.1 | 880 | 64468  | 1.00E-163 | 313 | 319 | 98 +  | 451 | 767 | 19988  | 20306  |
| UN66531 | Rsa1.0.00037.1 | 302 | 307838 | 1.00E-141 | 282 | 289 | 97 -  | 8   | 295 | 146301 | 146588 |
| UN66532 | Rsa1.0.00341.1 | 166 | 249309 | 4.00E-27  | 146 | 168 | 86 +  | 3   | 166 | 101778 | 101942 |

|         |                |     |        |           |     |     |       |     |     |        |        |
|---------|----------------|-----|--------|-----------|-----|-----|-------|-----|-----|--------|--------|
| UN66533 | Rsa1.0.00517.1 | 510 | 142790 | 0         | 506 | 513 | 98 -  | 1   | 510 | 132823 | 133335 |
| UN66534 | Rsa1.0.00199.1 | 555 | 249604 | 0         | 520 | 555 | 93 -  | 1   | 555 | 36084  | 36618  |
| UN66535 | Rsa1.0.01011.1 | 683 | 56883  | 0         | 630 | 664 | 94 +  | 17  | 679 | 4866   | 5518   |
| UN66536 | Rsa1.0.04254.1 | 561 | 18258  | 0         | 545 | 563 | 96 +  | 4   | 561 | 15188  | 15749  |
| UN66537 | Rsa1.0.00581.1 | 760 | 163575 | 2.33E-156 | 275 | 278 | 98 -  | 2   | 278 | 35997  | 36274  |
| UN66538 | Rsa1.0.03249.1 | 727 | 146254 | 0         | 425 | 432 | 98 +  | 1   | 431 | 6688   | 7119   |
| UN66539 | Rsa1.0.01151.1 | 900 | 52268  | 0         | 822 | 877 | 93 -  | 6   | 868 | 29731  | 30594  |
| UN66540 | Rsa1.0.00314.1 | 745 | 96472  | 1.00E-141 | 279 | 286 | 97 -  | 98  | 383 | 30151  | 30435  |
| UN66541 | Rsa1.0.00643.1 | 791 | 70658  | 7.00E-85  | 386 | 461 | 83 -  | 5   | 455 | 5702   | 6148   |
| UN66542 | Rsa1.0.05376.1 | 117 | 13977  | 4.00E-45  | 101 | 104 | 97 -  | 1   | 104 | 5761   | 5864   |
| UN66543 | Rsa1.0.00169.1 | 767 | 274298 | 0         | 726 | 759 | 95 +  | 3   | 755 | 61965  | 62722  |
| UN66544 | Rsa1.0.10042.1 | 907 | 6027   | 0         | 853 | 858 | 99 +  | 1   | 857 | 5039   | 5896   |
| UN66545 | Rsa1.0.00127.1 | 679 | 127446 | 0         | 360 | 360 | 100 - | 1   | 360 | 21424  | 21783  |
| UN66546 | Rsa1.0.13590.1 | 450 | 4689   | 0         | 389 | 409 | 95 +  | 40  | 447 | 3664   | 4071   |
| UN66547 | Rsa1.0.02146.1 | 540 | 34625  | 1.00E-108 | 262 | 282 | 92 -  | 1   | 270 | 12660  | 12941  |
| UN66548 | Rsa1.0.16992.1 | 664 | 1960   | 0         | 641 | 663 | 96 +  | 2   | 664 | 737    | 1399   |
| UN66549 | Rsa1.0.05265.1 | 623 | 14322  | 0         | 542 | 565 | 95 -  | 1   | 565 | 5197   | 5761   |
| UN66550 | Rsa1.0.03972.1 | 149 | 19787  | 7.00E-35  | 128 | 145 | 88 -  | 1   | 145 | 13651  | 13792  |
| UN66551 | Rsa1.0.00335.1 | 716 | 94371  | 0         | 411 | 430 | 95 +  | 5   | 424 | 45327  | 45756  |
| UN66552 | Rsa1.0.00083.1 | 762 | 442773 | 0         | 351 | 352 | 99 +  | 1   | 352 | 435920 | 436271 |
| UN66553 | Rsa1.0.00303.1 | 786 | 97468  | 0         | 784 | 787 | 99 -  | 1   | 786 | 44008  | 44794  |
| UN66554 | Rsa1.0.06877.1 | 586 | 10223  | 1.00E-120 | 219 | 219 | 100 + | 3   | 221 | 788    | 1006   |
| UN66555 | Rsa1.0.04462.1 | 741 | 17250  | 0         | 523 | 550 | 95 +  | 193 | 741 | 12073  | 12622  |
| UN66556 | Rsa1.0.03261.1 | 797 | 24281  | 0         | 482 | 497 | 96 +  | 106 | 599 | 10621  | 11117  |
| UN66557 | Rsa1.0.00031.1 | 425 | 179862 | 0         | 407 | 426 | 95 -  | 1   | 425 | 23827  | 24251  |
| UN66558 | Rsa1.0.05950.1 | 511 | 12130  | 1.00E-107 | 255 | 271 | 94 +  | 100 | 365 | 1035   | 1304   |
| UN66559 | Rsa1.0.04989.1 | 459 | 15217  | 0         | 439 | 448 | 97 -  | 1   | 448 | 2322   | 2769   |
| UN66560 | Rsa1.0.00507.1 | 648 | 79074  | 0         | 568 | 594 | 95 -  | 60  | 648 | 54348  | 54932  |
| UN66561 | Rsa1.0.01403.1 | 504 | 46453  | 0         | 485 | 505 | 96 +  | 1   | 504 | 18808  | 19304  |
| UN66562 | Rsa1.0.05412.1 | 818 | 13836  | 0         | 544 | 562 | 96 +  | 1   | 561 | 553    | 1113   |
| UN66563 | Rsa1.0.00463.1 | 420 | 189177 | 1.00E-117 | 265 | 281 | 94 +  | 1   | 279 | 169717 | 169997 |
| UN66564 | Rsa1.0.00101.1 | 820 | 267193 | 0         | 810 | 821 | 98 -  | 1   | 820 | 107426 | 108246 |
| UN66565 | Rsa1.0.00111.1 | 709 | 390088 | 1.00E-171 | 313 | 316 | 99 +  | 14  | 329 | 338334 | 338649 |
| UN66566 | Rsa1.0.00870.1 | 552 | 61606  | 0         | 540 | 557 | 96 +  | 1   | 552 | 32892  | 33448  |
| UN66567 | Rsa1.0.22508.1 | 182 | 1115   | 8.00E-69  | 166 | 176 | 94 +  | 1   | 176 | 848    | 1022   |
| UN66568 | Rsa1.0.03233.1 | 112 | 24446  | 1.00E-32  | 102 | 111 | 91 +  | 2   | 112 | 10613  | 10722  |
| UN66569 | Rsa1.0.00011.1 | 419 | 225044 | 0         | 400 | 426 | 93 +  | 1   | 413 | 103649 | 104074 |
| UN66570 | Rsa1.0.00421.1 | 432 | 86365  | 7.00E-96  | 224 | 238 | 94 -  | 196 | 432 | 67157  | 67394  |
| UN66571 | Rsa1.0.01696.1 | 467 | 301850 | 0         | 443 | 463 | 95 +  | 1   | 463 | 159067 | 159529 |

|         |                |     |        |           |     |     |      |     |     |        |        |
|---------|----------------|-----|--------|-----------|-----|-----|------|-----|-----|--------|--------|
| UN66572 | Rsa1.0.02664.1 | 723 | 28917  | 0         | 495 | 511 | 96 - | 10  | 520 | 7481   | 7989   |
| UN66573 | Rsa1.0.00758.1 | 145 | 65477  | 5.00E-60  | 135 | 141 | 95 + | 1   | 141 | 36880  | 37020  |
| UN66574 | Rsa1.0.03235.1 | 446 | 24442  | 0         | 436 | 446 | 97 - | 1   | 446 | 14996  | 15441  |
| UN66575 | Rsa1.0.00002.1 | 446 | 601661 | 1.00E-173 | 414 | 447 | 92 - | 4   | 445 | 232051 | 232495 |
| UN66576 | Rsa1.0_51451.1 | 397 | 442    | 2.00E-68  | 214 | 236 | 90 + | 138 | 371 | 6      | 239    |
| UN66577 | Rsa1.0_07634.1 | 766 | 8979   | 0         | 573 | 594 | 96 - | 174 | 766 | 2907   | 3497   |
| UN66578 | Rsa1.0.41102.1 | 239 | 546    | 4.00E-59  | 146 | 156 | 93 - | 1   | 156 | 1      | 156    |
| UN66579 | Rsa1.0.00040.1 | 211 | 324196 | 2.00E-79  | 186 | 198 | 93 - | 14  | 211 | 195451 | 195648 |
| UN66580 | Rsa1.0.01171.1 | 388 | 51752  | 0         | 383 | 385 | 99 + | 1   | 385 | 24451  | 24835  |
| UN66581 | Rsa1.0.03185.1 | 775 | 24739  | 1.00E-101 | 195 | 196 | 99 + | 533 | 727 | 8398   | 8593   |
| UN66582 | Rsa1.0.00116.1 | 820 | 365886 | 0         | 774 | 833 | 92 - | 2   | 820 | 323792 | 324614 |
| UN66583 | Rsa1.0.00129.1 | 634 | 126831 | 0         | 564 | 598 | 94 - | 49  | 634 | 115550 | 116143 |
| UN66584 | Rsa1.0.04927.1 | 820 | 15422  | 0         | 820 | 823 | 99 + | 1   | 820 | 1684   | 2506   |
| UN66585 | Rsa1.0.03565.1 | 605 | 22062  | 0         | 437 | 460 | 95 + | 1   | 446 | 1815   | 2274   |
| UN66586 | Rsa1.0.00139.1 | 780 | 357786 | 0         | 750 | 785 | 95 - | 1   | 780 | 1865   | 2641   |
| UN66587 | Rsa1.0.00340.1 | 850 | 305782 | 0         | 358 | 367 | 97 + | 3   | 369 | 194262 | 194620 |
| UN66588 | Rsa1.0.05684.1 | 148 | 12943  | 2.00E-31  | 96  | 105 | 91 - | 33  | 137 | 11435  | 11539  |
| UN66589 | Rsa1.0.02535.1 | 744 | 30382  | 0         | 691 | 753 | 91 + | 4   | 744 | 9435   | 10187  |
| UN66590 | Rsa1.0.00019.1 | 855 | 301669 | 0         | 594 | 599 | 99 + | 1   | 598 | 7364   | 7962   |
| UN66591 | Rsa1.0.00108.1 | 224 | 478491 | 1.00E-105 | 218 | 225 | 96 - | 1   | 224 | 47302  | 47526  |
| UN66592 | Rsa1.0.01396.1 | 357 | 151624 | 1.00E-132 | 292 | 309 | 94 + | 52  | 357 | 128767 | 129075 |
| UN66593 | Rsa1.0.00007.1 | 686 | 239325 | 0         | 595 | 632 | 94 - | 3   | 630 | 58424  | 59045  |
| UN66594 | Rsa1.0_45734.1 | 642 | 493    | 7.00E-66  | 137 | 140 | 97 + | 392 | 531 | 153    | 292    |
| UN66595 | Rsa1.0.00341.1 | 568 | 249309 | 2.00E-63  | 203 | 226 | 89 - | 244 | 467 | 211334 | 211546 |
| UN66596 | Rsa1.0.00350.1 | 764 | 92346  | 0         | 587 | 609 | 96 + | 3   | 608 | 52343  | 52951  |
| UN66597 | Rsa1.0_29841.1 | 707 | 770    | 0         | 602 | 617 | 97 + | 1   | 616 | 154    | 770    |
| UN66598 | Rsa1.0.02306.1 | 460 | 32776  | 0         | 457 | 458 | 99 + | 3   | 460 | 6259   | 6716   |
| UN66599 | Rsa1.0.00428.1 | 504 | 85599  | 1.00E-150 | 283 | 287 | 98 - | 3   | 285 | 8593   | 8879   |
| UN66600 | Rsa1.0.08752.1 | 742 | 6959   | 0         | 672 | 712 | 94 - | 2   | 707 | 305    | 1012   |
| UN66601 | Rsa1.0.00708.1 | 150 | 67366  | 5.00E-57  | 137 | 144 | 95 + | 2   | 145 | 16714  | 16856  |
| UN66602 | Rsa1.0.00040.1 | 787 | 324196 | 1.00E-125 | 231 | 232 | 99 + | 201 | 432 | 242141 | 242372 |
| UN66603 | Rsa1.0.00050.1 | 103 | 237174 | 4.00E-32  | 95  | 102 | 93 + | 2   | 103 | 181060 | 181160 |
| UN66604 | Rsa1.0.01099.1 | 648 | 158481 | 1.00E-117 | 223 | 226 | 98 - | 184 | 409 | 28724  | 28949  |
| UN66605 | Rsa1.0.01889.1 | 454 | 37562  | 1.00E-117 | 235 | 242 | 97 + | 186 | 427 | 23057  | 23298  |
| UN66606 | Rsa1.0.00732.1 | 762 | 66631  | 1.00E-133 | 287 | 297 | 96 + | 460 | 752 | 13098  | 13394  |
| UN66607 | Rsa1.0.00060.1 | 785 | 502678 | 1.00E-121 | 231 | 233 | 99 - | 3   | 235 | 384700 | 384931 |
| UN66608 | Rsa1.0.00016.1 | 290 | 831256 | 1.00E-96  | 225 | 235 | 95 + | 60  | 290 | 575573 | 575807 |
| UN66609 | Rsa1.0_01857.1 | 592 | 38103  | 1.00E-177 | 386 | 409 | 94 + | 188 | 584 | 4693   | 5100   |
| UN66610 | Rsa1.0_00391.1 | 755 | 183853 | 0         | 699 | 707 | 98 - | 55  | 755 | 61101  | 61807  |

|         |                |     |        |           |     |     |       |     |     |        |        |
|---------|----------------|-----|--------|-----------|-----|-----|-------|-----|-----|--------|--------|
| UN66611 | Rsa1.0_00707.1 | 738 | 190112 | 0         | 522 | 537 | 97 -  | 83  | 618 | 53138  | 53674  |
| UN66612 | Rsa1.0_05823.1 | 813 | 12521  | 1.00E-139 | 292 | 305 | 95 -  | 5   | 309 | 1      | 302    |
| UN66613 | Rsa1.0_01016.1 | 653 | 181422 | 0         | 396 | 396 | 100 + | 258 | 653 | 155897 | 156292 |
| UN66614 | Rsa1.0_03099.1 | 651 | 139424 | 0         | 512 | 552 | 92 +  | 3   | 550 | 4079   | 4611   |
| UN66615 | Rsa1.0_00273.1 | 778 | 326186 | 1.00E-80  | 156 | 157 | 99 -  | 196 | 352 | 156785 | 156941 |
| UN66616 | Rsa1.0_17800.1 | 730 | 1738   | 0         | 618 | 628 | 98 -  | 1   | 628 | 12     | 639    |
| UN66617 | Rsa1.0_03055.1 | 680 | 25730  | 0         | 375 | 377 | 99 +  | 1   | 377 | 1340   | 1716   |
| UN66618 | Rsa1.0_01696.1 | 636 | 301850 | 5.00E-73  | 143 | 144 | 99 +  | 92  | 235 | 291366 | 291509 |
| UN66619 | Rsa1.0_00963.1 | 677 | 58176  | 4.00E-43  | 90  | 90  | 100 - | 534 | 623 | 26927  | 27016  |
| UN66620 | Rsa1.0_00253.1 | 611 | 231292 | 6.00E-48  | 122 | 130 | 93 +  | 471 | 600 | 105562 | 105691 |
| UN66621 | Rsa1.0_02586.1 | 634 | 29856  | 0         | 474 | 526 | 90 +  | 127 | 634 | 19482  | 19989  |
| UN66622 | Rsa1.0_00913.1 | 679 | 59914  | 1.00E-137 | 248 | 248 | 100 - | 1   | 248 | 3545   | 3792   |
| UN66623 | Rsa1.0_00193.1 | 757 | 194198 | 1.00E-120 | 219 | 219 | 100 + | 3   | 221 | 101079 | 101297 |
| UN66624 | Rsa1.0_14624.1 | 738 | 3217   | 9.00E-75  | 152 | 155 | 98 -  | 21  | 175 | 1334   | 1488   |
| UN66625 | Rsa1.0_03244.1 | 574 | 24413  | 0         | 542 | 551 | 98 -  | 24  | 574 | 17093  | 17643  |
| UN66626 | Rsa1.0_13609.1 | 729 | 4644   | 2.00E-75  | 171 | 180 | 95 +  | 288 | 467 | 2459   | 2638   |
| UN66627 | Rsa1.0_00387.1 | 500 | 495407 | 1.00E-134 | 272 | 282 | 96 +  | 219 | 500 | 406194 | 406475 |
| UN66628 | Rsa1.0_01017.1 | 763 | 56714  | 0         | 356 | 357 | 99 -  | 3   | 359 | 12736  | 13092  |
| UN66629 | Rsa1.0_12132.1 | 798 | 5306   | 0         | 334 | 334 | 100 - | 3   | 336 | 1      | 334    |
| UN66630 | Rsa1.0_00321.1 | 754 | 95671  | 1.00E-138 | 274 | 282 | 97 -  | 473 | 754 | 83037  | 83314  |
| UN66631 | Rsa1.0_07704.1 | 779 | 8754   | 0         | 738 | 768 | 96 +  | 3   | 760 | 1355   | 2122   |
| UN66632 | Rsa1.0_01163.1 | 754 | 51946  | 2.00E-94  | 179 | 180 | 99 +  | 326 | 505 | 15257  | 15436  |
| UN66633 | Rsa1.0_03821.1 | 685 | 20643  | 3.00E-87  | 173 | 176 | 98 +  | 208 | 383 | 4155   | 4330   |
| UN66634 | Rsa1.0_00024.1 | 629 | 188018 | 0         | 625 | 628 | 99 -  | 3   | 629 | 3614   | 4241   |
| UN66635 | Rsa1.0_03884.1 | 702 | 20274  | 1.00E-143 | 324 | 344 | 94 +  | 122 | 460 | 18968  | 19308  |
| UN66636 | Rsa1.0_03776.1 | 731 | 20926  | 1.00E-101 | 206 | 212 | 97 -  | 129 | 340 | 1375   | 1586   |
| UN66637 | Rsa1.0_00600.1 | 776 | 73395  | 0         | 386 | 388 | 99 +  | 13  | 400 | 66182  | 66569  |
| UN66638 | Rsa1.0_00718.1 | 559 | 279335 | 0         | 401 | 406 | 98 +  | 155 | 559 | 252843 | 253248 |
| UN66639 | Rsa1.0_01321.1 | 574 | 48248  | 3.00E-74  | 198 | 215 | 92 -  | 363 | 574 | 35833  | 36040  |
| UN66640 | Rsa1.0_00556.1 | 704 | 207212 | 0         | 651 | 676 | 96 -  | 32  | 700 | 28487  | 29161  |
| UN66641 | Rsa1.0_00224.1 | 443 | 327530 | 2.00E-40  | 106 | 112 | 94 -  | 9   | 120 | 179373 | 179482 |
| UN66642 | Rsa1.0_01349.1 | 769 | 47513  | 0         | 757 | 776 | 97 -  | 2   | 769 | 12390  | 13159  |
| UN66643 | Rsa1.0_00821.1 | 686 | 62891  | 2.00E-78  | 155 | 157 | 98 +  | 439 | 595 | 50456  | 50612  |
| UN66644 | Rsa1.0_05819.1 | 629 | 12543  | 1.00E-117 | 220 | 222 | 99 -  | 408 | 629 | 10985  | 11206  |
| UN66645 | Rsa1.0_01716.1 | 225 | 40483  | 2.00E-30  | 138 | 163 | 84 -  | 21  | 168 | 11946  | 12108  |
| UN66646 | Rsa1.0_00752.1 | 244 | 65756  | 2.00E-48  | 104 | 106 | 98 -  | 136 | 241 | 40992  | 41097  |
| UN66647 | Rsa1.0_13788.1 | 788 | 4338   | 1.00E-145 | 261 | 261 | 100 - | 206 | 466 | 481    | 741    |
| UN66648 | Rsa1.0_07771.1 | 773 | 8603   | 0         | 465 | 475 | 97 +  | 254 | 728 | 2838   | 3312   |
| UN66649 | Rsa1.0_22212.1 | 424 | 1141   | 0         | 398 | 399 | 99 +  | 27  | 424 | 255    | 653    |

|         |                |     |        |           |     |     |       |     |     |        |        |
|---------|----------------|-----|--------|-----------|-----|-----|-------|-----|-----|--------|--------|
| UN66650 | Rsa1.0_04504.1 | 706 | 17069  | 4.00E-89  | 213 | 228 | 93 +  | 491 | 704 | 2582   | 2809   |
| UN66651 | Rsa1.0_00115.1 | 770 | 131321 | 3.00E-87  | 167 | 168 | 99 -  | 218 | 385 | 29078  | 29245  |
| UN66652 | Rsa1.0_07850.1 | 639 | 8423   | 0         | 495 | 496 | 99 +  | 144 | 639 | 3231   | 3726   |
| UN66653 | Rsa1.0_04626.1 | 792 | 16611  | 1.00E-159 | 298 | 300 | 99 +  | 3   | 301 | 11783  | 12081  |
| UN66654 | Rsa1.0_04296.1 | 703 | 18030  | 0         | 348 | 353 | 98 +  | 62  | 414 | 5683   | 6035   |
| UN66655 | Rsa1.0_09126.1 | 656 | 6625   | 1.00E-168 | 316 | 320 | 98 +  | 193 | 511 | 99     | 418    |
| UN66656 | Rsa1.0_00169.1 | 804 | 274298 | 1.00E-128 | 244 | 248 | 98 -  | 352 | 599 | 268750 | 268997 |
| UN66657 | Rsa1.0_01176.1 | 768 | 51638  | 0         | 706 | 710 | 99 -  | 56  | 764 | 4080   | 4789   |
| UN66658 | Rsa1.0_10300.1 | 801 | 5899   | 0         | 577 | 596 | 96 -  | 164 | 756 | 4105   | 4697   |
| UN66659 | Rsa1.0_25955.1 | 357 | 912    | 1.00E-169 | 337 | 349 | 96 +  | 2   | 350 | 171    | 519    |
| UN66660 | Rsa1.0_00737.1 | 772 | 66432  | 0         | 345 | 346 | 99 -  | 3   | 348 | 63192  | 63536  |
| UN66661 | Rsa1.0_02554.1 | 762 | 30187  | 1.00E-166 | 302 | 304 | 99 +  | 57  | 360 | 5639   | 5942   |
| UN66662 | Rsa1.0_00483.1 | 602 | 81102  | 7.00E-63  | 215 | 245 | 87 +  | 1   | 242 | 32662  | 32906  |
| UN66663 | Rsa1.0_00073.1 | 459 | 240924 | 0         | 456 | 459 | 99 -  | 3   | 459 | 82583  | 83041  |
| UN66664 | Rsa1.0_03028.1 | 680 | 25872  | 1.00E-176 | 359 | 373 | 96 +  | 309 | 680 | 2911   | 3283   |
| UN66665 | Rsa1.0_00218.1 | 804 | 201480 | 0         | 466 | 466 | 100 + | 2   | 467 | 12149  | 12614  |
| UN66666 | Rsa1.0_00105.1 | 278 | 134138 | 2.00E-70  | 138 | 139 | 99 -  | 12  | 150 | 70941  | 71079  |
| UN66667 | Rsa1.0_33678.1 | 544 | 673    | 0         | 337 | 341 | 98 -  | 204 | 544 | 90     | 430    |
| UN66668 | Rsa1.0_15018.1 | 595 | 2889   | 1.00E-141 | 281 | 290 | 96 +  | 284 | 573 | 2384   | 2673   |
| UN66669 | Rsa1.0_05932.1 | 742 | 12207  | 1.00E-165 | 313 | 319 | 98 -  | 140 | 458 | 1391   | 1709   |
| UN66670 | Rsa1.0_00083.1 | 791 | 442773 | 0         | 752 | 786 | 95 -  | 5   | 786 | 327107 | 327889 |
| UN66671 | Rsa1.0_01442.1 | 387 | 45776  | 1.00E-163 | 346 | 362 | 95 -  | 1   | 361 | 18025  | 18385  |
| UN66672 | Rsa1.0_00293.1 | 628 | 339294 | 1.00E-180 | 390 | 414 | 94 -  | 224 | 628 | 306767 | 307178 |
| UN66673 | Rsa1.0_00737.1 | 778 | 66432  | 4.00E-71  | 146 | 149 | 97 -  | 524 | 672 | 12060  | 12208  |
| UN66674 | Rsa1.0_00097.1 | 821 | 138858 | 1.00E-100 | 216 | 222 | 97 -  | 585 | 803 | 77258  | 77479  |
| UN66675 | Rsa1.0_00025.1 | 797 | 277312 | 0         | 708 | 729 | 97 +  | 73  | 797 | 141051 | 141779 |
| UN66676 | Rsa1.0_09768.1 | 587 | 6159   | 0         | 489 | 495 | 98 +  | 93  | 587 | 3195   | 3689   |
| UN66677 | Rsa1.0_00104.1 | 599 | 368722 | 0         | 507 | 508 | 99 -  | 92  | 599 | 214133 | 214640 |
| UN66678 | #              | #   | #      | #         | #   | #   | #     | #   | #   | #      | #      |
| UN66679 | Rsa1.0_01146.1 | 433 | 163455 | 1.00E-141 | 271 | 274 | 98 +  | 158 | 431 | 25092  | 25363  |
| UN66680 | Rsa1.0_00748.1 | 753 | 65983  | 5.00E-92  | 184 | 188 | 97 +  | 495 | 682 | 39315  | 39502  |
| UN66681 | Rsa1.0_03244.1 | 703 | 24413  | 1.00E-144 | 269 | 271 | 99 -  | 434 | 703 | 23110  | 23380  |
| UN66682 | Rsa1.0_01156.1 | 809 | 52147  | 1.00E-119 | 256 | 262 | 97 +  | 553 | 809 | 32397  | 32658  |
| UN66683 | Rsa1.0_00014.1 | 647 | 348985 | 0         | 645 | 647 | 99 -  | 1   | 647 | 35223  | 35869  |
| UN66684 | Rsa1.0_00918.1 | 669 | 59720  | 1.00E-140 | 258 | 260 | 99 -  | 106 | 365 | 9592   | 9851   |
| UN66685 | Rsa1.0_02983.1 | 303 | 26268  | 8.00E-98  | 217 | 226 | 96 -  | 77  | 302 | 490    | 709    |
| UN66686 | Rsa1.0_00222.1 | 626 | 172263 | 1.00E-128 | 242 | 245 | 98 -  | 298 | 542 | 19450  | 19694  |
| UN66687 | Rsa1.0_01527.1 | 737 | 43905  | 0         | 364 | 371 | 98 +  | 3   | 373 | 23708  | 24077  |
| UN66688 | Rsa1.0_00223.1 | 733 | 106231 | 1.00E-143 | 293 | 302 | 97 -  | 434 | 733 | 42307  | 42608  |



|         |                |     |        |           |     |     |       |     |     |        |        |
|---------|----------------|-----|--------|-----------|-----|-----|-------|-----|-----|--------|--------|
| UN66689 | Rsa1.0_15045.1 | 169 | 2870   | 3.00E-46  | 104 | 106 | 98 +  | 3   | 107 | 1636   | 1741   |
| UN66690 | Rsa1.0_00821.1 | 644 | 62891  | 2.33E-156 | 303 | 316 | 95 -  | 331 | 638 | 55707  | 56021  |
| UN66691 | Rsa1.0_00387.1 | 669 | 495407 | 1.00E-143 | 273 | 277 | 98 -  | 393 | 669 | 386754 | 387029 |
| UN66692 | Rsa1.0_00139.1 | 712 | 357786 | 0         | 378 | 382 | 98 -  | 51  | 432 | 302296 | 302677 |
| UN66693 | Rsa1.0_01534.1 | 690 | 43764  | 3.00E-74  | 218 | 240 | 90 +  | 452 | 690 | 8925   | 9160   |
| UN66694 | Rsa1.0_00546.1 | 811 | 76523  | 1.00E-144 | 314 | 332 | 94 +  | 172 | 503 | 63470  | 63801  |
| UN66695 | Rsa1.0_04140.1 | 318 | 18879  | 1.00E-87  | 181 | 187 | 96 +  | 1   | 187 | 12147  | 12327  |
| UN66696 | Rsa1.0_00080.1 | 638 | 190437 | 0         | 613 | 637 | 96 -  | 2   | 638 | 104752 | 105388 |
| UN66697 | Rsa1.0_02220.1 | 502 | 176031 | 1.00E-130 | 272 | 284 | 95 -  | 219 | 502 | 647    | 930    |
| UN66698 | Rsa1.0_00971.1 | 638 | 57973  | 0         | 500 | 501 | 99 -  | 102 | 602 | 51938  | 52438  |
| UN66699 | Rsa1.0_00566.1 | 789 | 75325  | 2.00E-97  | 329 | 377 | 87 -  | 210 | 585 | 20189  | 20565  |
| UN66700 | Rsa1.0_01048.1 | 666 | 55684  | 2.00E-97  | 190 | 193 | 98 +  | 115 | 307 | 27541  | 27733  |
| UN66701 | Rsa1.0_01579.1 | 561 | 42860  | 1.00E-166 | 318 | 324 | 98 +  | 239 | 561 | 22671  | 22994  |
| UN66702 | Rsa1.0_00480.1 | 643 | 81325  | 1.00E-156 | 279 | 279 | 100 - | 109 | 387 | 43107  | 43385  |
| UN66703 | Rsa1.0_02138.1 | 572 | 34695  | 1.00E-170 | 312 | 315 | 99 +  | 258 | 572 | 7722   | 8036   |
| UN66704 | Rsa1.0_00014.1 | 689 | 348985 | 1.00E-156 | 336 | 353 | 95 -  | 2   | 354 | 328731 | 329079 |
| UN66705 | Rsa1.0_10309.1 | 653 | 5894   | 0         | 442 | 446 | 99 +  | 152 | 597 | 5450   | 5894   |
| UN66706 | Rsa1.0_09755.1 | 717 | 6166   | 6.00E-73  | 241 | 272 | 88 +  | 444 | 713 | 990    | 1261   |
| UN66707 | Rsa1.0_01121.1 | 543 | 53407  | 0         | 423 | 434 | 97 +  | 112 | 543 | 8220   | 8649   |
| UN66708 | Rsa1.0_02637.1 | 788 | 29244  | 2.00E-63  | 170 | 183 | 92 +  | 1   | 180 | 4614   | 4796   |
| UN66709 | Rsa1.0_00068.1 | 517 | 151813 | 1.00E-100 | 220 | 230 | 95 +  | 38  | 267 | 51650  | 51873  |
| UN66710 | Rsa1.0_00038.1 | 814 | 314568 | 0         | 437 | 448 | 97 -  | 79  | 523 | 236060 | 236503 |
| UN66711 | Rsa1.0_01301.1 | 639 | 169072 | 0         | 610 | 636 | 95 +  | 4   | 639 | 40378  | 41010  |
| UN66712 | Rsa1.0_04181.1 | 389 | 18615  | 0         | 389 | 389 | 100 + | 1   | 389 | 15430  | 15818  |
| UN66713 | Rsa1.0_42389.1 | 778 | 529    | 0         | 525 | 529 | 99 -  | 231 | 756 | 1      | 529    |
| UN66714 | Rsa1.0_00451.1 | 656 | 322533 | 1.00E-121 | 289 | 310 | 93 -  | 3   | 312 | 49439  | 49739  |
| UN66715 | Rsa1.0_00038.1 | 791 | 314568 | 0         | 750 | 801 | 93 +  | 3   | 770 | 175980 | 176780 |
| UN66716 | Rsa1.0_01119.1 | 770 | 53459  | 7.00E-79  | 178 | 186 | 95 +  | 40  | 224 | 21963  | 22148  |
| UN66717 | Rsa1.0_04876.1 | 763 | 15631  | 1.00E-151 | 275 | 276 | 99 -  | 327 | 602 | 6447   | 6722   |
| UN66718 | Rsa1.0_00253.1 | 762 | 231292 | 0         | 699 | 718 | 97 -  | 14  | 726 | 204552 | 205266 |
| UN66719 | Rsa1.0_03965.1 | 461 | 19828  | 0         | 458 | 460 | 99 -  | 2   | 461 | 1286   | 1745   |
| UN66720 | Rsa1.0_00079.1 | 796 | 606987 | 1.00E-171 | 338 | 347 | 97 -  | 422 | 767 | 448242 | 448586 |
| UN66721 | Rsa1.0_08053.1 | 479 | 7999   | 1.00E-123 | 421 | 487 | 86 +  | 1   | 479 | 5457   | 5940   |
| UN66722 | Rsa1.0_00002.1 | 812 | 601661 | 1.00E-144 | 280 | 283 | 98 +  | 476 | 755 | 593692 | 593974 |
| UN66723 | Rsa1.0_01218.1 | 778 | 50536  | 0         | 431 | 461 | 93 -  | 3   | 459 | 49515  | 49974  |
| UN66724 | Rsa1.0_15729.1 | 783 | 2459   | 0         | 723 | 745 | 97 -  | 1   | 742 | 674    | 1418   |
| UN66725 | Rsa1.0_00013.1 | 382 | 292129 | 0         | 368 | 381 | 96 +  | 2   | 382 | 118882 | 119262 |
| UN66726 | Rsa1.0_01029.1 | 700 | 256254 | 1.00E-131 | 247 | 250 | 98 -  | 75  | 324 | 241720 | 241969 |
| UN66727 | Rsa1.0_00034.1 | 721 | 260119 | 3.00E-84  | 197 | 208 | 94 +  | 515 | 721 | 89248  | 89446  |

|         |                |     |        |           |     |     |       |     |     |        |        |
|---------|----------------|-----|--------|-----------|-----|-----|-------|-----|-----|--------|--------|
| UN66728 | Rsa1.0_09978.1 | 611 | 6055   | 0         | 436 | 453 | 96 -  | 159 | 611 | 161    | 610    |
| UN66729 | Rsa1.0_00071.1 | 655 | 345714 | 1.00E-158 | 321 | 335 | 95 +  | 2   | 336 | 13606  | 13931  |
| UN66730 | Rsa1.0_00619.1 | 676 | 71985  | 0         | 654 | 676 | 96 +  | 1   | 676 | 67023  | 67698  |
| UN66731 | Rsa1.0_01221.1 | 707 | 50421  | 8.00E-63  | 126 | 127 | 99 +  | 282 | 408 | 46714  | 46840  |
| UN66732 | Rsa1.0_04079.1 | 463 | 19202  | 1.00E-102 | 200 | 204 | 98 -  | 260 | 463 | 14313  | 14516  |
| UN66733 | Rsa1.0_01023.1 | 697 | 56571  | 1.00E-154 | 306 | 316 | 96 -  | 11  | 326 | 13865  | 14180  |
| UN66734 | Rsa1.0_00837.1 | 680 | 62568  | 0         | 613 | 630 | 97 +  | 2   | 626 | 61797  | 62426  |
| UN66735 | Rsa1.0_00008.1 | 747 | 358124 | 0         | 345 | 345 | 100 - | 2   | 346 | 82962  | 83306  |
| UN66736 | Rsa1.0_01137.1 | 641 | 52655  | 0         | 377 | 383 | 98 -  | 2   | 383 | 32180  | 32562  |
| UN66737 | Rsa1.0_00984.1 | 649 | 57580  | 1.00E-177 | 325 | 327 | 99 -  | 324 | 649 | 273    | 599    |
| UN66738 | Rsa1.0_02527.1 | 720 | 177225 | 0         | 720 | 720 | 100 - | 1   | 720 | 148129 | 148848 |
| UN66739 | Rsa1.0_00065.1 | 718 | 454616 | 1.00E-152 | 350 | 375 | 93 -  | 5   | 379 | 191624 | 191995 |
| UN66740 | Rsa1.0_03070.1 | 650 | 25578  | 1.00E-123 | 324 | 361 | 89 -  | 268 | 607 | 24621  | 24980  |
| UN66741 | Rsa1.0_20469.1 | 328 | 1302   | 0         | 328 | 328 | 100 - | 1   | 328 | 781    | 1108   |
| UN66742 | Rsa1.0_00151.1 | 670 | 119541 | 0         | 591 | 600 | 98 +  | 74  | 670 | 107701 | 108300 |
| UN66743 | Rsa1.0_20862.1 | 664 | 1261   | 0         | 644 | 659 | 97 -  | 10  | 664 | 296    | 954    |
| UN66744 | Rsa1.0_07969.1 | 218 | 8157   | 6.00E-70  | 175 | 182 | 96 -  | 1   | 177 | 5913   | 6094   |
| UN66745 | Rsa1.0_00041.1 | 694 | 186197 | 5.00E-24  | 87  | 96  | 90 +  | 182 | 277 | 113912 | 114004 |
| UN66746 | Rsa1.0_00163.1 | 666 | 116847 | 0         | 439 | 449 | 97 +  | 218 | 666 | 84570  | 85018  |
| UN66747 | Rsa1.0_09054.1 | 259 | 6680   | 4.00E-16  | 109 | 130 | 83 -  | 133 | 259 | 4362   | 4491   |
| UN66748 | Rsa1.0_07863.1 | 722 | 8404   | 5.00E-64  | 137 | 141 | 97 -  | 3   | 143 | 5580   | 5720   |
| UN66749 | Rsa1.0_02561.1 | 776 | 30080  | 5.00E-61  | 120 | 120 | 100 - | 173 | 292 | 16251  | 16370  |
| UN66750 | Rsa1.0_22496.1 | 759 | 1116   | 4.00E-71  | 146 | 149 | 97 -  | 1   | 149 | 22     | 170    |
| UN66751 | Rsa1.0_00482.1 | 577 | 81162  | 1.00E-128 | 232 | 232 | 100 - | 1   | 232 | 9861   | 10092  |
| UN66752 | Rsa1.0_00740.1 | 658 | 215972 | 0         | 457 | 487 | 93 +  | 136 | 619 | 34237  | 34723  |
| UN66753 | Rsa1.0_00144.1 | 579 | 120708 | 1.00E-125 | 252 | 260 | 96 -  | 191 | 450 | 112447 | 112706 |
| UN66754 | Rsa1.0_02032.1 | 669 | 35830  | 0         | 620 | 631 | 98 +  | 37  | 666 | 1810   | 2440   |
| UN66755 | #              | #   | #      | #         | #   | #   | #     | #   | #   | #      | #      |
| UN66756 | Rsa1.0_02433.1 | 646 | 158318 | 0         | 642 | 644 | 99 -  | 3   | 646 | 593    | 1236   |
| UN66757 | Rsa1.0_04786.1 | 620 | 15988  | 0         | 492 | 492 | 100 - | 129 | 620 | 14552  | 15043  |
| UN66758 | Rsa1.0_11080.1 | 801 | 5623   | 8.00E-94  | 235 | 250 | 94 -  | 557 | 801 | 4084   | 4333   |
| UN66759 | #              | #   | #      | #         | #   | #   | #     | #   | #   | #      | #      |
| UN66760 | Rsa1.0_00645.1 | 678 | 189716 | 0         | 424 | 429 | 98 +  | 201 | 627 | 23230  | 23658  |
| UN66761 | Rsa1.0_03272.1 | 716 | 24171  | 0         | 479 | 494 | 96 +  | 1   | 492 | 19327  | 19820  |
| UN66762 | Rsa1.0_04919.1 | 526 | 15440  | 1.00E-165 | 310 | 315 | 98 -  | 4   | 318 | 14560  | 14874  |
| UN66763 | Rsa1.0_00784.1 | 788 | 64359  | 0         | 587 | 607 | 96 +  | 5   | 608 | 29130  | 29732  |
| UN66764 | Rsa1.0_01049.1 | 161 | 55655  | 5.00E-76  | 153 | 156 | 98 +  | 6   | 161 | 39382  | 39537  |
| UN66765 | Rsa1.0_04295.1 | 681 | 18040  | 9.00E-75  | 252 | 289 | 87 +  | 283 | 571 | 10212  | 10493  |
| UN66766 | Rsa1.0_01726.1 | 815 | 40263  | 1.00E-134 | 301 | 319 | 94 -  | 1   | 308 | 9365   | 9683   |

|         |                |     |        |           |     |     |       |     |     |        |        |
|---------|----------------|-----|--------|-----------|-----|-----|-------|-----|-----|--------|--------|
| UN66767 | Rsa1.0.00127.1 | 715 | 127446 | 0         | 472 | 521 | 90 -  | 142 | 645 | 4520   | 5025   |
| UN66768 | Rsa1.0.02823.1 | 586 | 27588  | 0         | 436 | 440 | 99 -  | 1   | 440 | 14422  | 14861  |
| UN66769 | Rsa1.0.00059.1 | 457 | 159650 | 1.00E-116 | 216 | 217 | 99 +  | 208 | 424 | 63089  | 63305  |
| UN66770 | Rsa1.0.07292.1 | 570 | 9605   | 4.00E-73  | 155 | 160 | 96 -  | 1   | 160 | 4987   | 5146   |
| UN66771 | Rsa1.0.04153.1 | 518 | 18807  | 0         | 342 | 343 | 99 +  | 176 | 518 | 16104  | 16446  |
| UN66772 | Rsa1.0.02117.1 | 663 | 34843  | 1.00E-127 | 261 | 271 | 96 +  | 151 | 421 | 15985  | 16255  |
| UN66773 | Rsa1.0.01752.1 | 735 | 39805  | 1.00E-133 | 244 | 245 | 99 +  | 2   | 246 | 3365   | 3609   |
| UN66774 | Rsa1.0.02878.1 | 582 | 27048  | 1.00E-143 | 301 | 316 | 95 +  | 163 | 472 | 19740  | 20055  |
| UN66775 | Rsa1.0.00275.1 | 794 | 210104 | 1.00E-140 | 359 | 381 | 94 -  | 429 | 794 | 155234 | 155614 |
| UN66776 | Rsa1.0.00002.1 | 539 | 601661 | 1.00E-106 | 195 | 195 | 100 - | 295 | 489 | 94309  | 94503  |
| UN66777 | Rsa1.0.01740.1 | 802 | 39986  | 0         | 767 | 807 | 95 +  | 2   | 801 | 17482  | 18288  |
| UN66778 | Rsa1.0.00017.1 | 773 | 752458 | 1.00E-74  | 225 | 251 | 89 +  | 25  | 269 | 1795   | 2035   |
| UN66779 | Rsa1.0.01950.1 | 534 | 36950  | 1.00E-113 | 235 | 244 | 96 -  | 6   | 249 | 20401  | 20644  |
| UN66780 | Rsa1.0.02929.1 | 763 | 26673  | 3.00E-59  | 126 | 129 | 97 +  | 146 | 274 | 23248  | 23376  |
| UN66781 | Rsa1.0.00251.1 | 533 | 303968 | 1.00E-159 | 288 | 289 | 99 +  | 245 | 533 | 140959 | 141247 |
| UN66782 | Rsa1.0.01365.1 | 596 | 47142  | 1.00E-141 | 287 | 297 | 96 -  | 200 | 496 | 26232  | 26526  |
| UN66783 | Rsa1.0.01377.1 | 655 | 46967  | 1.00E-116 | 253 | 266 | 95 -  | 102 | 367 | 1262   | 1524   |
| UN66784 | Rsa1.0.00829.1 | 766 | 158305 | 1.00E-107 | 225 | 232 | 96 -  | 539 | 766 | 131490 | 131721 |
| UN66785 | #              | #   | #      | #         | #   | #   | #     | #   | #   | #      | #      |
| UN66786 | Rsa1.0.04109.1 | 581 | 19000  | 0         | 390 | 394 | 98 +  | 188 | 581 | 7343   | 7736   |
| UN66787 | Rsa1.0.00079.1 | 568 | 606987 | 0         | 425 | 433 | 98 +  | 4   | 436 | 15848  | 16280  |
| UN66788 | Rsa1.0.00200.1 | 817 | 162016 | 1.00E-159 | 358 | 376 | 95 +  | 447 | 817 | 108700 | 109075 |
| UN66789 | Rsa1.0.02930.1 | 725 | 26668  | 1.00E-159 | 291 | 293 | 99 +  | 2   | 294 | 21608  | 21900  |
| UN66790 | Rsa1.0.00625.1 | 358 | 71672  | 3.00E-79  | 171 | 178 | 96 -  | 123 | 300 | 15730  | 15907  |
| UN66791 | Rsa1.0.00188.1 | 641 | 112020 | 1.00E-139 | 278 | 287 | 96 +  | 355 | 641 | 37919  | 38205  |
| UN66792 | Rsa1.0.04219.1 | 539 | 18421  | 0         | 531 | 536 | 99 -  | 4   | 539 | 476    | 1007   |
| UN66793 | Rsa1.0.00394.1 | 674 | 148426 | 0         | 600 | 633 | 94 -  | 6   | 626 | 99719  | 100346 |
| UN66794 | Rsa1.0.04225.1 | 725 | 18400  | 0         | 383 | 383 | 100 + | 3   | 385 | 9168   | 9550   |
| UN66795 | Rsa1.0.04411.1 | 428 | 142979 | 1.00E-133 | 240 | 240 | 100 - | 3   | 242 | 137399 | 137638 |
| UN66796 | Rsa1.0.01758.1 | 745 | 39747  | 1.00E-154 | 461 | 518 | 88 +  | 112 | 618 | 38872  | 39373  |
| UN66797 | Rsa1.0.01287.1 | 757 | 49195  | 0         | 391 | 391 | 100 - | 3   | 393 | 4081   | 4471   |
| UN66798 | Rsa1.0.00968.1 | 640 | 58020  | 0         | 638 | 639 | 99 -  | 2   | 640 | 9846   | 10484  |
| UN66799 | Rsa1.0.00188.1 | 792 | 112020 | 0         | 458 | 479 | 95 +  | 3   | 475 | 8350   | 8828   |
| UN66800 | Rsa1.0.00124.1 | 475 | 262503 | 1.00E-164 | 308 | 312 | 98 +  | 164 | 475 | 255326 | 255635 |
| UN66801 | Rsa1.0.14855.1 | 778 | 3011   | 0         | 495 | 512 | 96 +  | 250 | 758 | 1310   | 1821   |
| UN66802 | Rsa1.0.03280.1 | 598 | 145083 | 0         | 586 | 597 | 98 -  | 2   | 598 | 499    | 1095   |
| UN66803 | Rsa1.0.01145.1 | 592 | 149247 | 1.00E-42  | 89  | 89  | 100 - | 364 | 452 | 125353 | 125441 |
| UN66804 | Rsa1.0.00437.1 | 630 | 84879  | 8.00E-78  | 148 | 148 | 100 + | 351 | 498 | 50281  | 50428  |
| UN66805 | Rsa1.0.03964.1 | 676 | 19835  | 1.00E-139 | 305 | 322 | 94 -  | 3   | 322 | 5670   | 5991   |

|         |                |     |        |           |     |     |       |     |     |        |        |
|---------|----------------|-----|--------|-----------|-----|-----|-------|-----|-----|--------|--------|
| UN66806 | Rsa1.0_16727.1 | 742 | 2052   | 1.00E-105 | 197 | 198 | 99 +  | 3   | 200 | 796    | 993    |
| UN66807 | Rsa1.0_00002.1 | 614 | 601661 | 0         | 610 | 612 | 99 +  | 3   | 614 | 411308 | 411919 |
| UN66808 | Rsa1.0_03123.1 | 641 | 25207  | 0         | 344 | 348 | 98 +  | 294 | 641 | 22210  | 22557  |
| UN66809 | Rsa1.0_00099.1 | 770 | 159619 | 0         | 737 | 772 | 95 +  | 1   | 770 | 119466 | 120234 |
| UN66810 | Rsa1.0_00300.1 | 763 | 97747  | 0         | 569 | 594 | 95 +  | 174 | 763 | 27961  | 28554  |
| UN66811 | Rsa1.0_00092.1 | 793 | 659932 | 0         | 677 | 682 | 99 -  | 3   | 684 | 234216 | 234897 |
| UN66812 | Rsa1.0_00152.1 | 593 | 257730 | 5.00E-76  | 171 | 180 | 95 -  | 3   | 176 | 88376  | 88555  |
| UN66813 | Rsa1.0_01400.1 | 684 | 46560  | 3.00E-59  | 189 | 213 | 88 +  | 24  | 236 | 24802  | 25014  |
| UN66814 | Rsa1.0_01078.1 | 614 | 316910 | 0         | 607 | 612 | 99 +  | 3   | 614 | 314040 | 314650 |
| UN66815 | Rsa1.0_00557.1 | 764 | 75865  | 1.00E-117 | 241 | 249 | 96 -  | 433 | 678 | 17128  | 17376  |
| UN66816 | Rsa1.0_04028.1 | 216 | 19493  | 1.00E-109 | 203 | 204 | 99 +  | 13  | 216 | 12064  | 12267  |
| UN66817 | Rsa1.0_00170.1 | 644 | 179538 | 1.00E-125 | 373 | 420 | 88 -  | 222 | 640 | 83776  | 84195  |
| UN66818 | Rsa1.0_00412.1 | 629 | 86935  | 0         | 432 | 432 | 100 + | 2   | 433 | 17516  | 17947  |
| UN66819 | Rsa1.0_01811.1 | 563 | 38977  | 1.00E-162 | 298 | 301 | 99 +  | 263 | 563 | 25457  | 25757  |
| UN66820 | Rsa1.0_00059.1 | 809 | 159650 | 1.00E-167 | 317 | 322 | 98 +  | 3   | 323 | 19766  | 20087  |
| UN66821 | Rsa1.0_00163.1 | 659 | 116847 | 1.00E-165 | 310 | 315 | 98 +  | 342 | 656 | 45041  | 45355  |
| UN66822 | Rsa1.0_04870.1 | 674 | 135142 | 8.00E-66  | 131 | 132 | 99 -  | 372 | 503 | 2377   | 2508   |
| UN66823 | Rsa1.0_13531.1 | 673 | 4748   | 0         | 432 | 432 | 100 - | 242 | 673 | 545    | 976    |
| UN66824 | Rsa1.0_00123.1 | 740 | 325650 | 0         | 713 | 745 | 95 -  | 2   | 740 | 297233 | 297958 |
| UN66825 | Rsa1.0_00265.1 | 485 | 220635 | 0         | 452 | 485 | 93 -  | 4   | 485 | 171373 | 171853 |
| UN66826 | Rsa1.0_00671.1 | 595 | 397884 | 0         | 588 | 594 | 98 +  | 2   | 595 | 157719 | 158310 |
| UN66827 | Rsa1.0_00706.1 | 589 | 291570 | 0         | 585 | 587 | 99 +  | 3   | 589 | 54835  | 55421  |
| UN66828 | Rsa1.0_04109.1 | 600 | 19000  | 0         | 572 | 606 | 94 -  | 3   | 600 | 523    | 1123   |
| UN66829 | Rsa1.0_14084.1 | 668 | 3822   | 1.00E-141 | 270 | 275 | 98 -  | 319 | 593 | 1302   | 1576   |
| UN66830 | Rsa1.0_01539.1 | 399 | 43698  | 0         | 396 | 397 | 99 +  | 3   | 399 | 40393  | 40789  |
| UN66831 | Rsa1.0_00016.1 | 774 | 831256 | 1.00E-128 | 236 | 237 | 99 +  | 331 | 567 | 281292 | 281528 |
| UN66832 | Rsa1.0_04126.1 | 788 | 18939  | 1.00E-129 | 286 | 295 | 96 +  | 500 | 788 | 17402  | 17696  |
| UN66833 | Rsa1.0_00827.1 | 646 | 62790  | 0         | 411 | 416 | 98 -  | 87  | 502 | 24029  | 24444  |
| UN66834 | Rsa1.0_01649.1 | 589 | 41624  | 1.00E-113 | 208 | 208 | 100 + | 168 | 375 | 27386  | 27593  |
| UN66835 | Rsa1.0_00526.1 | 744 | 169279 | 0         | 421 | 431 | 97 +  | 318 | 744 | 167348 | 167776 |
| UN66836 | Rsa1.0_01857.1 | 763 | 38103  | 1.00E-122 | 243 | 250 | 97 +  | 292 | 541 | 7172   | 7421   |
| UN66837 | Rsa1.0_02233.1 | 443 | 33658  | 0         | 417 | 435 | 95 -  | 10  | 443 | 11321  | 11750  |
| UN66838 | Rsa1.0_00716.1 | 589 | 67078  | 1.00E-180 | 371 | 386 | 96 -  | 139 | 520 | 37528  | 37913  |
| UN66839 | Rsa1.0_08039.1 | 638 | 8030   | 0         | 556 | 568 | 97 -  | 71  | 638 | 5539   | 6106   |
| UN66840 | Rsa1.0_00112.1 | 718 | 132199 | 1.00E-144 | 260 | 260 | 100 + | 332 | 591 | 71227  | 71486  |
| UN66841 | Rsa1.0_01049.1 | 672 | 55655  | 1.00E-89  | 183 | 188 | 97 -  | 206 | 393 | 43175  | 43362  |
| UN66842 | Rsa1.0_00187.1 | 153 | 393093 | 1.00E-39  | 83  | 83  | 100 + | 71  | 153 | 31616  | 31698  |
| UN66843 | Rsa1.0_02648.1 | 330 | 29073  | 1.00E-13  | 61  | 67  | 91 +  | 154 | 218 | 27615  | 27681  |
| UN66844 | Rsa1.0_00017.1 | 773 | 752458 | 0         | 757 | 772 | 98 +  | 2   | 773 | 479926 | 480697 |

|         |                |     |        |           |     |     |       |     |     |        |        |
|---------|----------------|-----|--------|-----------|-----|-----|-------|-----|-----|--------|--------|
| UN66845 | Rsa1.0.00305.1 | 635 | 97308  | 0         | 551 | 560 | 98 -  | 78  | 635 | 81866  | 82425  |
| UN66846 | Rsa1.0.01951.1 | 664 | 36941  | 0         | 413 | 419 | 98 -  | 245 | 658 | 36523  | 36941  |
| UN66847 | Rsa1.0.01515.1 | 619 | 170864 | 0         | 520 | 539 | 96 -  | 81  | 619 | 127862 | 128397 |
| UN66848 | Rsa1.0.07767.1 | 761 | 8609   | 1.00E-129 | 253 | 259 | 97 -  | 446 | 704 | 6842   | 7100   |
| UN66849 | Rsa1.0.00978.1 | 468 | 57739  | 1.00E-63  | 133 | 136 | 97 -  | 333 | 468 | 3918   | 4053   |
| UN66850 | Rsa1.0.00707.1 | 422 | 190112 | 0         | 417 | 421 | 99 -  | 2   | 422 | 3419   | 3839   |
| UN66851 | Rsa1.0.00141.1 | 802 | 121494 | 7.00E-82  | 161 | 163 | 98 -  | 385 | 547 | 113062 | 113224 |
| UN66852 | Rsa1.0.00722.1 | 647 | 66840  | 1.00E-180 | 386 | 408 | 94 -  | 113 | 514 | 46989  | 47393  |
| UN66853 | Rsa1.0.03625.1 | 773 | 21692  | 0         | 389 | 401 | 97 +  | 10  | 410 | 14085  | 14485  |
| UN66854 | Rsa1.0.02101.1 | 781 | 35017  | 1.00E-166 | 406 | 433 | 93 -  | 327 | 751 | 33036  | 33465  |
| UN66855 | Rsa1.0.00135.1 | 716 | 178077 | 1.00E-109 | 204 | 205 | 99 -  | 193 | 397 | 10120  | 10324  |
| UN66856 | Rsa1.0.14084.1 | 752 | 3822   | 1.00E-119 | 342 | 376 | 90 -  | 397 | 752 | 2031   | 2403   |
| UN66857 | Rsa1.0.01732.1 | 650 | 40194  | 0         | 628 | 659 | 95 -  | 6   | 647 | 18279  | 18937  |
| UN66858 | Rsa1.0.08361.1 | 597 | 7477   | 1.00E-165 | 294 | 294 | 100 + | 3   | 296 | 1939   | 2232   |
| UN66859 | Rsa1.0.14545.1 | 772 | 3284   | 1.00E-138 | 391 | 435 | 89 -  | 278 | 707 | 1265   | 1669   |
| UN66860 | Rsa1.0.00630.1 | 688 | 71281  | 0         | 567 | 582 | 97 +  | 3   | 584 | 8427   | 9000   |
| UN66861 | Rsa1.0.01756.1 | 735 | 39779  | 0         | 492 | 511 | 96 +  | 189 | 696 | 39265  | 39774  |
| UN66862 | Rsa1.0.01763.1 | 330 | 39659  | 1.00E-143 | 314 | 337 | 93 +  | 11  | 330 | 3626   | 3962   |
| UN66863 | Rsa1.0.05804.1 | 638 | 12586  | 0         | 630 | 638 | 98 -  | 2   | 638 | 807    | 1442   |
| UN66864 | Rsa1.0.02142.1 | 784 | 34633  | 1.00E-121 | 221 | 221 | 100 + | 3   | 223 | 14207  | 14427  |
| UN66865 | Rsa1.0.02084.1 | 756 | 35205  | 1.00E-116 | 222 | 224 | 99 +  | 534 | 756 | 29930  | 30153  |
| UN66866 | Rsa1.0.03133.1 | 737 | 25135  | 0         | 339 | 340 | 99 +  | 3   | 342 | 12699  | 13038  |
| UN66867 | Rsa1.0.14694.1 | 540 | 3152   | 2.00E-44  | 95  | 96  | 98 -  | 254 | 349 | 880    | 975    |
| UN66868 | Rsa1.0.00997.1 | 703 | 57190  | 1.00E-102 | 219 | 229 | 95 +  | 37  | 265 | 50836  | 51064  |
| UN66869 | Rsa1.0.00710.1 | 553 | 67325  | 3.00E-80  | 166 | 170 | 97 -  | 386 | 552 | 12321  | 12490  |
| UN66870 | Rsa1.0.03070.1 | 638 | 25578  | 0         | 516 | 569 | 90 +  | 82  | 638 | 13276  | 13843  |
| UN66871 | Rsa1.0.00059.1 | 756 | 159650 | 1.00E-122 | 307 | 326 | 94 +  | 428 | 740 | 63397  | 63722  |
| UN66872 | Rsa1.0.00440.1 | 572 | 84723  | 0         | 565 | 572 | 98 +  | 1   | 572 | 78014  | 78580  |
| UN66873 | Rsa1.0.17344.1 | 645 | 1853   | 2.00E-97  | 184 | 185 | 99 +  | 402 | 586 | 1669   | 1853   |
| UN66874 | Rsa1.0.01699.1 | 616 | 40816  | 1.00E-103 | 208 | 214 | 97 -  | 284 | 497 | 17354  | 17567  |
| UN66875 | Rsa1.0.00037.1 | 715 | 307838 | 1.00E-120 | 273 | 287 | 95 +  | 304 | 588 | 306071 | 306356 |
| UN66876 | Rsa1.0.01536.1 | 669 | 43747  | 0         | 428 | 431 | 99 +  | 237 | 667 | 39543  | 39973  |
| UN66877 | Rsa1.0.00178.1 | 754 | 114861 | 1.00E-117 | 284 | 309 | 91 +  | 332 | 625 | 4955   | 5263   |
| UN66878 | Rsa1.0.00458.1 | 683 | 82717  | 1.00E-126 | 235 | 237 | 99 -  | 278 | 514 | 23843  | 24079  |
| UN66879 | Rsa1.0.00721.1 | 599 | 66918  | 0         | 597 | 598 | 99 +  | 2   | 599 | 6340   | 6937   |
| UN66880 | Rsa1.0.00089.1 | 785 | 406142 | 1.00E-126 | 248 | 254 | 97 -  | 532 | 785 | 356970 | 357223 |
| UN66881 | Rsa1.0.00191.1 | 139 | 316976 | 8.00E-53  | 129 | 137 | 94 +  | 2   | 138 | 8224   | 8360   |
| UN66882 | Rsa1.0.00861.1 | 721 | 61759  | 0         | 415 | 417 | 99 -  | 297 | 712 | 1618   | 2034   |
| UN66883 | Rsa1.0.00571.1 | 597 | 329018 | 0         | 433 | 450 | 96 +  | 148 | 597 | 145042 | 145491 |

|         |                |     |        |           |     |     |       |     |     |        |        |
|---------|----------------|-----|--------|-----------|-----|-----|-------|-----|-----|--------|--------|
| UN66884 | Rsa1.0.02309.1 | 675 | 32744  | 1.00E-155 | 383 | 419 | 91 -  | 1   | 402 | 19703  | 20121  |
| UN66885 | Rsa1.0.00108.1 | 708 | 478491 | 0         | 666 | 698 | 95 -  | 14  | 708 | 281383 | 282077 |
| UN66886 | Rsa1.0.01603.1 | 426 | 42468  | 4.00E-85  | 256 | 282 | 90 -  | 147 | 425 | 38995  | 39267  |
| UN66887 | Rsa1.0.03235.1 | 777 | 24442  | 0         | 608 | 616 | 98 +  | 167 | 775 | 14818  | 15433  |
| UN66888 | Rsa1.0.02930.1 | 756 | 26668  | 0         | 716 | 720 | 99 +  | 2   | 719 | 12432  | 13151  |
| UN66889 | Rsa1.0.54779.1 | 732 | 417    | 1.00E-127 | 237 | 239 | 99 -  | 494 | 732 | 14     | 252    |
| UN66890 | Rsa1.0.00250.1 | 607 | 273771 | 0         | 588 | 608 | 96 +  | 1   | 607 | 57212  | 57815  |
| UN66891 | #              | #   | #      | #         | #   | #   | #     | #   | #   | #      | #      |
| UN66892 | Rsa1.0.01661.1 | 687 | 41400  | 0         | 487 | 489 | 99 -  | 183 | 671 | 33858  | 34346  |
| UN66893 | Rsa1.0.05599.1 | 734 | 143653 | 1.00E-145 | 301 | 309 | 97 +  | 429 | 733 | 3542   | 3850   |
| UN66894 | Rsa1.0.02855.1 | 640 | 27271  | 0         | 442 | 484 | 91 +  | 99  | 579 | 10360  | 10831  |
| UN66895 | Rsa1.0.00273.1 | 747 | 326186 | 1.00E-149 | 346 | 373 | 92 +  | 382 | 739 | 124232 | 124601 |
| UN66896 | Rsa1.0.00930.1 | 685 | 59224  | 0         | 660 | 697 | 94 +  | 2   | 685 | 36430  | 37125  |
| UN66897 | Rsa1.0.00427.1 | 694 | 189678 | 0         | 501 | 537 | 93 -  | 14  | 550 | 57292  | 57822  |
| UN66898 | Rsa1.0.15203.1 | 642 | 2763   | 4.00E-98  | 196 | 200 | 98 -  | 295 | 491 | 780    | 979    |
| UN66899 | Rsa1.0.00047.1 | 691 | 168582 | 0         | 676 | 695 | 97 -  | 2   | 691 | 154414 | 155106 |
| UN66900 | Rsa1.0.04155.1 | 613 | 134772 | 0         | 357 | 357 | 100 + | 1   | 357 | 130515 | 130871 |
| UN66901 | Rsa1.0.01829.1 | 597 | 166063 | 0         | 565 | 605 | 93 -  | 1   | 597 | 158065 | 158659 |
| UN66902 | Rsa1.0.03655.1 | 510 | 21557  | 0         | 392 | 399 | 98 +  | 1   | 399 | 1858   | 2254   |
| UN66903 | Rsa1.0.00589.1 | 611 | 209965 | 0         | 605 | 609 | 99 -  | 3   | 611 | 181496 | 182104 |
| UN66904 | Rsa1.0.09006.1 | 749 | 6715   | 0         | 573 | 596 | 96 -  | 172 | 749 | 4252   | 4847   |
| UN66905 | Rsa1.0.00251.1 | 636 | 303968 | 0         | 527 | 552 | 95 -  | 92  | 636 | 114555 | 115096 |
| UN66906 | Rsa1.0.00627.1 | 436 | 71566  | 1.00E-75  | 156 | 160 | 97 +  | 277 | 436 | 29425  | 29584  |
| UN66907 | Rsa1.0.01183.1 | 734 | 51465  | 0         | 707 | 735 | 96 +  | 2   | 734 | 41396  | 42126  |
| UN66908 | Rsa1.0.00341.1 | 728 | 249309 | 1.00E-132 | 253 | 255 | 99 -  | 454 | 706 | 240502 | 240756 |
| UN66909 | Rsa1.0.03241.1 | 795 | 24423  | 1.00E-142 | 274 | 280 | 97 +  | 3   | 282 | 3180   | 3459   |
| UN66910 | Rsa1.0.00028.1 | 780 | 293984 | 2.33E-156 | 278 | 283 | 98 -  | 3   | 285 | 262951 | 263233 |
| UN66911 | Rsa1.0.00016.1 | 600 | 831256 | 1.00E-134 | 282 | 291 | 96 +  | 312 | 600 | 578847 | 579136 |
| UN66912 | Rsa1.0.00506.1 | 347 | 79106  | 1.00E-132 | 308 | 333 | 92 -  | 1   | 331 | 27364  | 27682  |
| UN66913 | Rsa1.0.02092.1 | 631 | 35135  | 0         | 467 | 481 | 97 -  | 2   | 477 | 18888  | 19368  |
| UN66914 | Rsa1.0.02246.1 | 566 | 33435  | 1.00E-122 | 312 | 344 | 90 +  | 30  | 373 | 4796   | 5127   |
| UN66915 | Rsa1.0.00635.1 | 711 | 175826 | 1.00E-118 | 228 | 231 | 98 -  | 483 | 711 | 14177  | 14407  |
| UN66916 | Rsa1.0.00044.1 | 814 | 271658 | 5.00E-58  | 122 | 123 | 99 -  | 436 | 558 | 178856 | 178977 |
| UN66917 | Rsa1.0.00306.1 | 754 | 146760 | 1.00E-162 | 292 | 293 | 99 -  | 76  | 368 | 136226 | 136518 |
| UN66918 | Rsa1.0.12809.1 | 674 | 5119   | 1.00E-139 | 278 | 287 | 96 -  | 2   | 288 | 4503   | 4789   |
| UN66919 | Rsa1.0.00341.1 | 778 | 249309 | 4.00E-80  | 167 | 172 | 97 -  | 229 | 400 | 103263 | 103434 |
| UN66920 | Rsa1.0.00310.1 | 733 | 96852  | 0         | 619 | 696 | 88 +  | 7   | 690 | 5642   | 6322   |
| UN66921 | Rsa1.0.27103.1 | 598 | 865    | 0         | 371 | 380 | 97 -  | 199 | 577 | 38     | 414    |
| UN66922 | Rsa1.0.00420.1 | 572 | 86496  | 0         | 508 | 515 | 98 -  | 60  | 572 | 36866  | 37378  |

|         |                |     |        |           |     |     |       |     |     |        |        |
|---------|----------------|-----|--------|-----------|-----|-----|-------|-----|-----|--------|--------|
| UN66923 | Rsa1.0.01151.1 | 819 | 52268  | 0         | 670 | 696 | 96 +  | 127 | 814 | 29444  | 30139  |
| UN66924 | Rsa1.0.05068.1 | 500 | 14940  | 2.00E-96  | 179 | 179 | 100 - | 322 | 500 | 7043   | 7221   |
| UN66925 | Rsa1.0.02269.1 | 771 | 33168  | 1.00E-137 | 290 | 305 | 95 +  | 3   | 307 | 169    | 460    |
| UN66926 | Rsa1.0.00314.1 | 659 | 96472  | 7.00E-57  | 169 | 187 | 90 +  | 476 | 659 | 28714  | 28900  |
| UN66927 | Rsa1.0.00237.1 | 680 | 235974 | 0         | 400 | 404 | 99 -  | 3   | 406 | 70771  | 71174  |
| UN66928 | Rsa1.0.03232.1 | 642 | 24450  | 0         | 442 | 456 | 96 -  | 3   | 458 | 81     | 535    |
| UN66929 | Rsa1.0.04394.1 | 752 | 17571  | 0         | 349 | 350 | 99 -  | 404 | 752 | 7209   | 7558   |
| UN66930 | Rsa1.0.00048.1 | 196 | 167185 | 2.00E-48  | 107 | 109 | 98 -  | 1   | 107 | 29451  | 29559  |
| UN66931 | Rsa1.0.00006.1 | 737 | 396176 | 1.00E-108 | 202 | 203 | 99 +  | 99  | 301 | 64903  | 65105  |
| UN66932 | Rsa1.0.00699.1 | 755 | 184398 | 1.00E-148 | 314 | 327 | 96 -  | 428 | 752 | 14284  | 14610  |
| UN66933 | Rsa1.0.00104.1 | 666 | 368722 | 0         | 658 | 662 | 99 -  | 5   | 666 | 216072 | 216733 |
| UN66934 | Rsa1.0.00628.1 | 618 | 214360 | 0         | 328 | 328 | 100 + | 291 | 618 | 31426  | 31753  |
| UN66935 | Rsa1.0.00172.1 | 729 | 115476 | 0         | 575 | 625 | 92 -  | 1   | 611 | 84908  | 85532  |
| UN66936 | Rsa1.0.02499.1 | 662 | 30774  | 0         | 637 | 660 | 96 +  | 5   | 662 | 16947  | 17603  |
| UN66937 | Rsa1.0.00303.1 | 786 | 97468  | 4.00E-77  | 193 | 207 | 93 -  | 265 | 470 | 31704  | 31910  |
| UN66938 | Rsa1.0.00030.1 | 744 | 250988 | 1.00E-173 | 456 | 504 | 90 -  | 250 | 744 | 59086  | 59587  |
| UN66939 | Rsa1.0.02036.1 | 739 | 35731  | 5.00E-89  | 182 | 187 | 97 +  | 131 | 317 | 6103   | 6289   |
| UN66940 | Rsa1.0.00217.1 | 781 | 107079 | 4.00E-37  | 380 | 480 | 79 +  | 3   | 482 | 44211  | 44690  |
| UN66941 | Rsa1.0.02911.1 | 721 | 142461 | 1.00E-142 | 259 | 260 | 99 +  | 460 | 719 | 129556 | 129815 |
| UN66942 | Rsa1.0.00006.1 | 796 | 396176 | 0         | 522 | 559 | 93 -  | 4   | 541 | 24582  | 25134  |
| UN66943 | Rsa1.0.02428.1 | 693 | 31542  | 0         | 681 | 691 | 98 -  | 3   | 693 | 12564  | 13254  |
| UN66944 | Rsa1.0.00130.1 | 639 | 125737 | 7.00E-94  | 204 | 211 | 96 +  | 416 | 626 | 123711 | 123919 |
| UN66945 | Rsa1.0.00320.1 | 652 | 95784  | 0         | 631 | 669 | 94 -  | 3   | 652 | 37878  | 38532  |
| UN66946 | Rsa1.0.00711.1 | 780 | 67223  | 0         | 771 | 782 | 98 +  | 1   | 776 | 14609  | 15390  |
| UN66947 | Rsa1.0.20726.1 | 731 | 1275   | 1.00E-174 | 319 | 321 | 99 +  | 411 | 730 | 1      | 321    |
| UN66948 | Rsa1.0.01892.1 | 622 | 37526  | 1.00E-164 | 317 | 325 | 97 +  | 85  | 409 | 35013  | 35337  |
| UN66949 | Rsa1.0.02091.1 | 786 | 35157  | 0         | 741 | 789 | 93 +  | 2   | 785 | 25495  | 26281  |
| UN66950 | Rsa1.0.01419.1 | 752 | 167402 | 1.00E-178 | 316 | 316 | 100 + | 65  | 380 | 41514  | 41829  |
| UN66951 | Rsa1.0.03166.1 | 605 | 24863  | 1.00E-143 | 295 | 307 | 96 -  | 55  | 358 | 935    | 1241   |
| UN66952 | Rsa1.0.11462.1 | 430 | 5500   | 0         | 412 | 434 | 94 -  | 1   | 430 | 2726   | 3158   |
| UN66953 | Rsa1.0.03100.1 | 632 | 25411  | 1.00E-118 | 248 | 261 | 95 +  | 2   | 250 | 962    | 1222   |
| UN66954 | Rsa1.0.02672.1 | 776 | 28884  | 0         | 746 | 808 | 92 +  | 1   | 776 | 25410  | 26215  |
| UN66955 | Rsa1.0.00714.1 | 793 | 67187  | 0         | 790 | 809 | 97 +  | 2   | 793 | 40538  | 41346  |
| UN66956 | Rsa1.0.04113.1 | 832 | 18986  | 3.00E-56  | 112 | 112 | 100 - | 2   | 113 | 13984  | 14095  |
| UN66957 | Rsa1.0.00039.1 | 639 | 296927 | 0         | 488 | 511 | 95 -  | 134 | 639 | 75484  | 75994  |
| UN66958 | Rsa1.0.00058.1 | 539 | 159921 | 1.00E-140 | 253 | 253 | 100 - | 287 | 539 | 96877  | 97129  |
| UN66959 | Rsa1.0.00046.1 | 629 | 320315 | 1.00E-131 | 313 | 336 | 93 +  | 5   | 340 | 124643 | 124974 |
| UN66960 | Rsa1.0.00360.1 | 670 | 91190  | 0         | 667 | 670 | 99 +  | 1   | 670 | 79624  | 80293  |
| UN66961 | Rsa1.0.01110.1 | 814 | 195852 | 0         | 671 | 700 | 95 -  | 115 | 805 | 178602 | 179301 |

|         |                |     |        |           |     |     |       |     |     |        |        |
|---------|----------------|-----|--------|-----------|-----|-----|-------|-----|-----|--------|--------|
| UN66962 | Rsa1.0_00297.1 | 570 | 97836  | 3.00E-71  | 153 | 156 | 98 -  | 112 | 266 | 27462  | 27615  |
| UN66963 | Rsa1.0_00427.1 | 571 | 189678 | 3.00E-46  | 110 | 115 | 95 -  | 251 | 365 | 184689 | 184803 |
| UN66964 | Rsa1.0_05501.1 | 768 | 13513  | 6.00E-73  | 149 | 152 | 98 +  | 531 | 682 | 8665   | 8816   |
| UN66965 | Rsa1.0_15643.1 | 791 | 2505   | 0         | 749 | 783 | 95 +  | 2   | 774 | 504    | 1286   |
| UN66966 | Rsa1.0_16486.1 | 700 | 2139   | 1.00E-114 | 266 | 280 | 95 -  | 421 | 698 | 471    | 747    |
| UN66967 | Rsa1.0_10699.1 | 471 | 5752   | 5.00E-63  | 143 | 149 | 95 -  | 4   | 149 | 4953   | 5101   |
| UN66968 | Rsa1.0_05947.1 | 689 | 12142  | 0         | 649 | 692 | 93 -  | 2   | 689 | 4605   | 5296   |
| UN66969 | Rsa1.0_04025.1 | 640 | 19511  | 1.00E-134 | 252 | 255 | 98 +  | 314 | 568 | 5624   | 5878   |
| UN66970 | Rsa1.0_00190.1 | 669 | 318240 | 4.00E-86  | 169 | 170 | 99 +  | 477 | 646 | 37965  | 38133  |
| UN66971 | Rsa1.0_01963.1 | 679 | 36719  | 1.00E-134 | 252 | 255 | 98 -  | 425 | 679 | 22283  | 22537  |
| UN66972 | Rsa1.0_01311.1 | 792 | 48456  | 2.00E-70  | 136 | 136 | 100 - | 59  | 194 | 45123  | 45258  |
| UN66973 | Rsa1.0_00959.1 | 658 | 58202  | 2.00E-41  | 129 | 143 | 90 -  | 229 | 371 | 18817  | 18959  |
| UN66974 | Rsa1.0_00284.1 | 742 | 323267 | 0         | 713 | 737 | 96 -  | 7   | 742 | 258015 | 258738 |
| UN66975 | Rsa1.0_00352.1 | 821 | 92266  | 0         | 621 | 661 | 93 -  | 163 | 813 | 91609  | 92266  |
| UN66976 | Rsa1.0_32570.1 | 684 | 699    | 0         | 557 | 583 | 95 +  | 58  | 640 | 1      | 572    |
| UN66977 | Rsa1.0_03809.1 | 791 | 20731  | 1.00E-156 | 318 | 331 | 96 +  | 15  | 345 | 18398  | 18728  |
| UN66978 | Rsa1.0_03706.1 | 822 | 21255  | 1.00E-148 | 379 | 405 | 93 +  | 429 | 822 | 1      | 405    |
| UN66979 | Rsa1.0_03450.1 | 790 | 22835  | 0         | 346 | 346 | 100 - | 274 | 619 | 11011  | 11356  |
| UN66980 | Rsa1.0_00383.1 | 623 | 398431 | 1.00E-101 | 225 | 236 | 95 +  | 11  | 243 | 184314 | 184546 |
| UN66981 | Rsa1.0_00138.1 | 816 | 247040 | 0         | 427 | 435 | 98 -  | 181 | 615 | 17106  | 17540  |
| UN66982 | Rsa1.0_01315.1 | 750 | 48361  | 0         | 456 | 475 | 96 -  | 278 | 738 | 47579  | 48053  |
| UN66983 | Rsa1.0_01428.1 | 605 | 46071  | 1.00E-162 | 299 | 301 | 99 -  | 304 | 604 | 16690  | 16989  |
| UN66984 | Rsa1.0_00182.1 | 773 | 142305 | 0         | 380 | 381 | 99 -  | 49  | 429 | 120382 | 120762 |
| UN66985 | Rsa1.0_00689.1 | 324 | 68305  | 1.00E-122 | 294 | 316 | 93 +  | 8   | 322 | 28109  | 28411  |
| UN66986 | Rsa1.0_00583.1 | 749 | 74309  | 0         | 426 | 427 | 99 +  | 3   | 429 | 62938  | 63364  |
| UN66987 | Rsa1.0_02604.1 | 758 | 29638  | 0         | 719 | 768 | 93 -  | 5   | 744 | 27705  | 28472  |
| UN66988 | Rsa1.0_00277.1 | 661 | 100132 | 0         | 466 | 467 | 99 -  | 195 | 661 | 35695  | 36161  |
| UN66989 | Rsa1.0_02286.1 | 785 | 32993  | 0         | 434 | 456 | 95 -  | 325 | 768 | 24548  | 25003  |
| UN66990 | Rsa1.0_00067.1 | 800 | 415055 | 0         | 535 | 563 | 95 +  | 3   | 565 | 360481 | 361034 |
| UN66991 | Rsa1.0_00191.1 | 647 | 316976 | 0         | 583 | 584 | 99 +  | 3   | 586 | 193030 | 193613 |
| UN66992 | Rsa1.0_00119.1 | 746 | 467509 | 0         | 466 | 504 | 92 -  | 2   | 487 | 219233 | 219736 |
| UN66993 | Rsa1.0_01078.1 | 750 | 316910 | 1.00E-83  | 164 | 166 | 98 -  | 490 | 655 | 127092 | 127257 |
| UN66994 | Rsa1.0_03298.1 | 760 | 23956  | 1.00E-116 | 239 | 244 | 97 +  | 521 | 760 | 14942  | 15185  |
| UN66995 | Rsa1.0_00359.1 | 706 | 91256  | 0         | 464 | 474 | 97 +  | 233 | 706 | 8756   | 9229   |
| UN66996 | Rsa1.0_00201.1 | 203 | 232851 | 6.00E-67  | 185 | 202 | 91 -  | 2   | 203 | 222533 | 222719 |
| UN66997 | Rsa1.0_00886.1 | 782 | 167350 | 0         | 544 | 577 | 94 -  | 215 | 779 | 42455  | 43031  |
| UN66998 | Rsa1.0_35321.1 | 598 | 640    | 1.00E-115 | 223 | 227 | 98 -  | 1   | 227 | 281    | 507    |
| UN66999 | Rsa1.0_00099.1 | 821 | 159619 | 0         | 807 | 834 | 96 +  | 2   | 818 | 44479  | 45312  |
| UN67000 | Rsa1.0_02092.1 | 490 | 35135  | 1.00E-145 | 293 | 301 | 97 -  | 194 | 490 | 30410  | 30708  |



|         |                |     |        |           |     |     |       |     |     |        |        |
|---------|----------------|-----|--------|-----------|-----|-----|-------|-----|-----|--------|--------|
| UN67001 | Rsa1.0_50581.1 | 723 | 449    | 0         | 357 | 363 | 98 -  | 153 | 515 | 87     | 449    |
| UN67002 | Rsa1.0_00204.1 | 281 | 109056 | 1.00E-154 | 278 | 279 | 99 -  | 3   | 281 | 81631  | 81909  |
| UN67003 | Rsa1.0_00531.1 | 838 | 77387  | 3.00E-53  | 110 | 111 | 99 +  | 4   | 114 | 38029  | 38139  |
| UN67004 | Rsa1.0_03323.1 | 744 | 23751  | 1.00E-115 | 244 | 255 | 95 -  | 1   | 255 | 12306  | 12560  |
| UN67005 | Rsa1.0_14791.1 | 747 | 3064   | 0         | 528 | 539 | 97 +  | 3   | 539 | 196    | 734    |
| UN67006 | Rsa1.0_00086.1 | 764 | 439854 | 2.00E-97  | 184 | 185 | 99 -  | 165 | 349 | 325954 | 326138 |
| UN67007 | Rsa1.0_01605.1 | 797 | 42442  | 0         | 387 | 387 | 100 - | 3   | 389 | 8318   | 8704   |
| UN67008 | Rsa1.0_00119.1 | 188 | 467509 | 2.00E-81  | 156 | 157 | 99 -  | 32  | 188 | 386560 | 386716 |
| UN67009 | Rsa1.0_04913.1 | 735 | 15464  | 3.00E-90  | 197 | 204 | 96 +  | 535 | 735 | 12290  | 12493  |
| UN67010 | Rsa1.0_01806.1 | 192 | 39021  | 5.00E-67  | 167 | 180 | 92 -  | 11  | 190 | 22984  | 23157  |
| UN67011 | Rsa1.0_00528.1 | 769 | 164755 | 0         | 708 | 766 | 92 +  | 1   | 761 | 131669 | 132413 |
| UN67012 | Rsa1.0_43557.1 | 270 | 516    | 1.00E-113 | 246 | 258 | 95 +  | 2   | 259 | 169    | 425    |
| UN67013 | Rsa1.0_03249.1 | 768 | 146254 | 1.00E-171 | 310 | 312 | 99 -  | 292 | 603 | 7404   | 7715   |
| UN67014 | #              | #   | #      | #         | #   | #   | #     | #   | #   | #      | #      |
| UN67015 | Rsa1.0_00096.1 | 718 | 198773 | 0         | 348 | 358 | 97 +  | 3   | 360 | 155828 | 156175 |
| UN67016 | Rsa1.0_01164.1 | 686 | 51934  | 1.00E-118 | 244 | 252 | 96 +  | 22  | 272 | 41741  | 41992  |
| UN67017 | Rsa1.0_03048.1 | 555 | 25777  | 0         | 489 | 513 | 95 -  | 46  | 555 | 151    | 663    |
| UN67018 | Rsa1.0_00156.1 | 729 | 118383 | 1.00E-143 | 339 | 367 | 92 +  | 175 | 536 | 56991  | 57345  |
| UN67019 | Rsa1.0_03645.1 | 758 | 21599  | 0         | 355 | 364 | 97 -  | 3   | 366 | 18186  | 18549  |
| UN67020 | Rsa1.0_00360.1 | 516 | 91190  | 2.00E-84  | 196 | 206 | 95 -  | 12  | 210 | 53763  | 53967  |
| UN67021 | Rsa1.0_01498.1 | 613 | 44558  | 1.00E-176 | 349 | 361 | 96 -  | 253 | 613 | 35818  | 36178  |
| UN67022 | Rsa1.0_00228.1 | 712 | 105511 | 1.00E-166 | 313 | 317 | 98 -  | 393 | 708 | 47463  | 47779  |
| UN67023 | Rsa1.0_00471.1 | 687 | 81897  | 0         | 685 | 689 | 99 +  | 2   | 687 | 22648  | 23336  |
| UN67024 | Rsa1.0_00067.1 | 676 | 415055 | 1.00E-157 | 377 | 407 | 92 -  | 265 | 667 | 252739 | 253145 |
| UN67025 | Rsa1.0_00020.1 | 795 | 283099 | 5.00E-92  | 188 | 192 | 97 -  | 516 | 707 | 153259 | 153449 |
| UN67026 | Rsa1.0_00278.1 | 627 | 231896 | 2.00E-54  | 171 | 189 | 90 +  | 268 | 454 | 35663  | 35851  |
| UN67027 | Rsa1.0_02146.1 | 663 | 34625  | 1.00E-135 | 329 | 356 | 92 +  | 233 | 567 | 10792  | 11147  |
| UN67028 | Rsa1.0_01220.1 | 617 | 161775 | 1.00E-107 | 250 | 266 | 93 -  | 2   | 261 | 128563 | 128828 |
| UN67029 | Rsa1.0_03832.1 | 289 | 20577  | 1.00E-134 | 281 | 290 | 96 +  | 3   | 289 | 1400   | 1689   |
| UN67030 | Rsa1.0_07875.1 | 663 | 8374   | 1.00E-141 | 281 | 290 | 96 -  | 110 | 399 | 3657   | 3946   |
| UN67031 | Rsa1.0_00070.1 | 791 | 150321 | 0         | 582 | 586 | 99 +  | 137 | 720 | 94017  | 94602  |
| UN67032 | Rsa1.0_00035.1 | 461 | 176449 | 2.00E-74  | 151 | 154 | 98 +  | 161 | 314 | 155795 | 155948 |
| UN67033 | Rsa1.0_04355.1 | 446 | 146733 | 1.00E-159 | 343 | 360 | 95 -  | 3   | 361 | 5338   | 5696   |
| UN67034 | Rsa1.0_01937.1 | 634 | 37147  | 1.00E-131 | 301 | 323 | 93 -  | 3   | 325 | 32247  | 32557  |
| UN67035 | Rsa1.0_43494.1 | 800 | 516    | 1.00E-86  | 220 | 235 | 93 +  | 189 | 423 | 295    | 516    |
| UN67036 | Rsa1.0_01943.1 | 562 | 37042  | 2.00E-59  | 123 | 125 | 98 -  | 47  | 171 | 6309   | 6433   |
| UN67037 | Rsa1.0_01212.1 | 691 | 50622  | 0         | 648 | 681 | 95 -  | 2   | 682 | 45196  | 45876  |
| UN67038 | Rsa1.0_03476.1 | 236 | 22646  | 1.00E-49  | 100 | 100 | 100 + | 137 | 236 | 12828  | 12927  |
| UN67039 | Rsa1.0_11565.1 | 664 | 5470   | 0         | 507 | 528 | 96 -  | 2   | 529 | 4344   | 4869   |

|         |                |     |        |           |     |     |       |     |     |        |        |
|---------|----------------|-----|--------|-----------|-----|-----|-------|-----|-----|--------|--------|
| UN67040 | Rsa1.0_00251.1 | 567 | 303968 | 1.00E-67  | 166 | 174 | 95 +  | 124 | 296 | 128373 | 128543 |
| UN67041 | Rsa1.0_00207.1 | 598 | 248736 | 4.00E-92  | 208 | 220 | 94 -  | 379 | 598 | 53257  | 53476  |
| UN67042 | Rsa1.0_00066.1 | 595 | 152418 | 1.00E-154 | 513 | 581 | 88 +  | 5   | 560 | 65066  | 65629  |
| UN67043 | Rsa1.0_02229.1 | 571 | 33672  | 2.00E-84  | 159 | 159 | 100 + | 413 | 571 | 10502  | 10660  |
| UN67044 | Rsa1.0_04223.1 | 515 | 18407  | 3.00E-61  | 120 | 120 | 100 - | 383 | 502 | 10912  | 11031  |
| UN67045 | Rsa1.0_03981.1 | 788 | 19724  | 0         | 421 | 440 | 95 -  | 323 | 758 | 15025  | 15464  |
| UN67046 | Rsa1.0_06078.1 | 410 | 11794  | 0         | 404 | 406 | 99 -  | 3   | 407 | 2257   | 2662   |
| UN67047 | Rsa1.0_02855.1 | 507 | 27271  | 1.00E-109 | 207 | 208 | 99 +  | 301 | 507 | 11051  | 11258  |
| UN67048 | Rsa1.0_02299.1 | 535 | 32857  | 5.00E-54  | 178 | 203 | 87 +  | 56  | 255 | 21319  | 21509  |
| UN67049 | Rsa1.0_00271.1 | 648 | 101125 | 1.00E-175 | 344 | 355 | 96 +  | 2   | 356 | 88229  | 88583  |
| UN67050 | Rsa1.0_04622.1 | 553 | 16618  | 1.00E-115 | 274 | 296 | 92 +  | 167 | 461 | 12446  | 12729  |
| UN67051 | Rsa1.0_01941.1 | 789 | 37069  | 1.00E-104 | 235 | 244 | 96 -  | 488 | 728 | 32329  | 32571  |
| UN67052 | Rsa1.0_00194.1 | 733 | 110851 | 1.00E-171 | 313 | 316 | 99 +  | 1   | 316 | 53081  | 53396  |
| UN67053 | Rsa1.0_02347.1 | 744 | 32332  | 1.00E-132 | 330 | 359 | 91 -  | 12  | 355 | 25631  | 25988  |
| UN67054 | Rsa1.0_03566.1 | 646 | 22050  | 0         | 642 | 645 | 99 +  | 2   | 646 | 7387   | 8030   |
| UN67055 | Rsa1.0_04422.1 | 703 | 17423  | 0         | 539 | 568 | 94 -  | 25  | 589 | 6262   | 6827   |
| UN67056 | Rsa1.0_00522.1 | 759 | 78103  | 0         | 463 | 469 | 98 +  | 3   | 470 | 40997  | 41465  |
| UN67057 | Rsa1.0_00001.1 | 622 | 363028 | 0         | 464 | 464 | 100 - | 159 | 622 | 95579  | 96042  |
| UN67058 | Rsa1.0_00816.1 | 594 | 403350 | 1.00E-103 | 193 | 194 | 99 +  | 4   | 197 | 1254   | 1447   |
| UN67059 | Rsa1.0_02593.1 | 451 | 29744  | 7.00E-59  | 122 | 124 | 98 -  | 125 | 248 | 1807   | 1930   |
| UN67060 | Rsa1.0_02253.1 | 503 | 33356  | 0         | 425 | 442 | 96 -  | 19  | 457 | 11611  | 12052  |
| UN67061 | Rsa1.0_00491.1 | 309 | 80219  | 1.00E-117 | 285 | 300 | 95 +  | 15  | 305 | 75503  | 75802  |
| UN67062 | Rsa1.0_00190.1 | 597 | 318240 | 2.00E-90  | 254 | 282 | 90 -  | 324 | 587 | 195566 | 195846 |
| UN67063 | Rsa1.0_01697.1 | 679 | 40837  | 0         | 611 | 638 | 95 +  | 52  | 679 | 16641  | 17272  |
| UN67064 | Rsa1.0_00581.1 | 672 | 163575 | 1.00E-170 | 306 | 307 | 99 +  | 3   | 309 | 32718  | 33024  |
| UN67065 | Rsa1.0_01176.1 | 630 | 51638  | 0         | 603 | 630 | 95 -  | 3   | 630 | 27914  | 28534  |
| UN67066 | Rsa1.0_01396.1 | 529 | 151624 | 1.00E-148 | 377 | 408 | 92 -  | 3   | 401 | 132872 | 133266 |
| UN67067 | Rsa1.0_00007.1 | 782 | 239325 | 1.00E-115 | 233 | 239 | 97 +  | 494 | 731 | 58088  | 58326  |
| UN67068 | Rsa1.0_35380.1 | 524 | 640    | 1.00E-151 | 282 | 285 | 98 -  | 243 | 524 | 356    | 640    |
| UN67069 | Rsa1.0_10113.1 | 609 | 5992   | 0         | 517 | 546 | 94 +  | 67  | 609 | 1930   | 2472   |
| UN67070 | Rsa1.0_02812.1 | 353 | 27660  | 6.00E-65  | 148 | 154 | 96 -  | 99  | 251 | 15537  | 15690  |
| UN67071 | Rsa1.0_00041.1 | 758 | 186197 | 1.00E-177 | 317 | 318 | 99 +  | 3   | 320 | 31278  | 31595  |
| UN67072 | Rsa1.0_00008.1 | 628 | 358124 | 0         | 361 | 366 | 98 -  | 264 | 628 | 3878   | 4243   |
| UN67073 | Rsa1.0_00800.1 | 456 | 63868  | 0         | 406 | 409 | 99 +  | 3   | 408 | 3993   | 4401   |
| UN67074 | Rsa1.0_08066.1 | 446 | 7964   | 4.00E-51  | 118 | 123 | 95 +  | 25  | 147 | 7558   | 7680   |
| UN67075 | Rsa1.0_00017.1 | 487 | 752458 | 0         | 429 | 438 | 97 -  | 50  | 487 | 472876 | 473312 |
| UN67076 | Rsa1.0_00190.1 | 623 | 318240 | 0         | 358 | 359 | 99 -  | 264 | 622 | 91443  | 91801  |
| UN67077 | Rsa1.0_00341.1 | 684 | 249309 | 1.00E-139 | 325 | 351 | 92 -  | 124 | 474 | 208697 | 209038 |
| UN67078 | Rsa1.0_01170.1 | 571 | 161131 | 1.00E-161 | 315 | 324 | 97 -  | 163 | 486 | 10604  | 10927  |

|         |                |     |        |           |     |     |       |     |     |        |        |
|---------|----------------|-----|--------|-----------|-----|-----|-------|-----|-----|--------|--------|
| UN67079 | Rsa1.0.00057.1 | 640 | 160473 | 0         | 576 | 576 | 100 - | 3   | 578 | 101205 | 101780 |
| UN67080 | Rsa1.0.63786.1 | 741 | 360    | 1.00E-177 | 335 | 342 | 97 -  | 2   | 343 | 2      | 343    |
| UN67081 | Rsa1.0.00135.1 | 752 | 178077 | 0         | 740 | 753 | 98 +  | 1   | 751 | 32065  | 32817  |
| UN67082 | Rsa1.0.10294.1 | 785 | 5901   | 0         | 412 | 417 | 98 -  | 3   | 416 | 963    | 1379   |
| UN67083 | Rsa1.0.00523.1 | 722 | 178770 | 0         | 699 | 716 | 97 -  | 7   | 722 | 30921  | 31636  |
| UN67084 | Rsa1.0.00064.1 | 261 | 240927 | 5.00E-77  | 178 | 186 | 95 +  | 38  | 221 | 167936 | 168121 |
| UN67085 | Rsa1.0.00108.1 | 790 | 478491 | 2.00E-69  | 134 | 134 | 100 - | 296 | 429 | 121036 | 121169 |
| UN67086 | Rsa1.0.02664.1 | 680 | 28917  | 6.00E-82  | 164 | 167 | 98 +  | 281 | 447 | 5414   | 5580   |
| UN67087 | Rsa1.0.03544.1 | 554 | 22182  | 1.00E-122 | 364 | 411 | 88 -  | 2   | 412 | 3965   | 4375   |
| UN67088 | Rsa1.0.03090.1 | 752 | 25464  | 0         | 552 | 561 | 98 -  | 186 | 745 | 2314   | 2874   |
| UN67089 | Rsa1.0.01558.1 | 758 | 43287  | 0         | 383 | 399 | 95 -  | 355 | 748 | 39242  | 39637  |
| UN67090 | Rsa1.0.03446.1 | 698 | 22876  | 1.00E-117 | 232 | 238 | 97 -  | 250 | 487 | 13141  | 13378  |
| UN67091 | Rsa1.0.00073.1 | 448 | 240924 | 0         | 441 | 447 | 98 -  | 2   | 448 | 111433 | 111879 |
| UN67092 | Rsa1.0.00140.1 | 621 | 121541 | 0         | 595 | 621 | 95 +  | 2   | 621 | 91408  | 92022  |
| UN67093 | Rsa1.0.37136.1 | 636 | 607    | 0         | 464 | 465 | 99 -  | 172 | 636 | 143    | 607    |
| UN67094 | Rsa1.0.00030.1 | 550 | 250988 | 0         | 541 | 545 | 99 +  | 5   | 549 | 32189  | 32731  |
| UN67095 | Rsa1.0.00001.1 | 648 | 363028 | 2.33E-156 | 272 | 274 | 99 +  | 376 | 648 | 281241 | 281514 |
| UN67096 | Rsa1.0.12609.1 | 577 | 5175   | 5.00E-85  | 175 | 180 | 97 +  | 39  | 218 | 3821   | 4000   |
| UN67097 | Rsa1.0.00129.1 | 652 | 126831 | 0         | 618 | 645 | 95 +  | 9   | 652 | 112850 | 113487 |
| UN67098 | Rsa1.0.04927.1 | 763 | 15422  | 0         | 749 | 752 | 99 -  | 1   | 750 | 2438   | 3188   |
| UN67099 | Rsa1.0.03249.1 | 767 | 146254 | 0         | 456 | 476 | 95 -  | 3   | 473 | 8819   | 9294   |
| UN67100 | Rsa1.0.00803.1 | 686 | 144228 | 1.00E-148 | 281 | 286 | 98 +  | 143 | 428 | 12208  | 12493  |
| UN67101 | Rsa1.0.07482.1 | 387 | 9278   | 1.00E-87  | 198 | 204 | 97 +  | 123 | 322 | 81     | 284    |
| UN67102 | Rsa1.0.02190.1 | 405 | 34084  | 0         | 398 | 412 | 96 -  | 1   | 404 | 28763  | 29174  |
| UN67103 | Rsa1.0.01422.1 | 798 | 46172  | 1.00E-131 | 297 | 313 | 94 +  | 407 | 717 | 13653  | 13964  |
| UN67104 | Rsa1.0.13617.1 | 333 | 4630   | 3.00E-17  | 56  | 58  | 96 -  | 200 | 256 | 4355   | 4412   |
| UN67105 | Rsa1.0.00426.1 | 733 | 85668  | 0         | 417 | 435 | 95 -  | 247 | 681 | 31242  | 31676  |
| UN67106 | Rsa1.0.01317.1 | 730 | 48287  | 2.00E-76  | 253 | 284 | 89 +  | 52  | 326 | 34837  | 35118  |
| UN67107 | Rsa1.0.14514.1 | 704 | 3315   | 0         | 341 | 343 | 99 -  | 66  | 408 | 1994   | 2336   |
| UN67108 | Rsa1.0.36744.1 | 662 | 614    | 0         | 474 | 480 | 98 +  | 173 | 652 | 94     | 572    |
| UN67109 | Rsa1.0.25125.1 | 799 | 950    | 0         | 752 | 801 | 93 -  | 15  | 799 | 150    | 950    |
| UN67110 | Rsa1.0.05015.1 | 566 | 15125  | 3.00E-74  | 226 | 252 | 89 -  | 3   | 247 | 6577   | 6821   |
| UN67111 | Rsa1.0.01009.1 | 751 | 56922  | 0         | 742 | 756 | 98 -  | 1   | 751 | 12110  | 12865  |
| UN67112 | Rsa1.0.03452.1 | 711 | 22817  | 0         | 489 | 501 | 97 +  | 217 | 711 | 2147   | 2647   |
| UN67113 | Rsa1.0.04205.1 | 553 | 138772 | 1.00E-104 | 196 | 197 | 99 +  | 99  | 295 | 123685 | 123881 |
| UN67114 | Rsa1.0.00335.1 | 634 | 94371  | 0         | 617 | 636 | 97 -  | 1   | 634 | 48392  | 49026  |
| UN67115 | Rsa1.0.01112.1 | 501 | 310601 | 1.00E-155 | 286 | 288 | 99 -  | 216 | 501 | 7178   | 7465   |
| UN67116 | Rsa1.0.31820.1 | 579 | 717    | 0         | 410 | 414 | 99 +  | 64  | 477 | 304    | 717    |
| UN67117 | Rsa1.0.06149.1 | 689 | 11615  | 0         | 411 | 415 | 99 +  | 58  | 469 | 5349   | 5763   |

|         |                |     |        |           |     |     |       |     |     |        |        |
|---------|----------------|-----|--------|-----------|-----|-----|-------|-----|-----|--------|--------|
| UN67118 | Rsa1.0_00101.1 | 477 | 267193 | 0         | 439 | 467 | 94 +  | 10  | 475 | 106130 | 106585 |
| UN67119 | Rsa1.0_03298.1 | 781 | 23956  | 0         | 519 | 546 | 95 +  | 250 | 781 | 14942  | 15484  |
| UN67120 | Rsa1.0_02935.1 | 370 | 26621  | 2.00E-18  | 63  | 68  | 92 +  | 32  | 99  | 12072  | 12139  |
| UN67121 | Rsa1.0_02252.1 | 763 | 33375  | 0         | 537 | 554 | 96 -  | 214 | 760 | 27964  | 28515  |
| UN67122 | Rsa1.0_00978.1 | 742 | 57739  | 0         | 635 | 675 | 94 +  | 78  | 742 | 1551   | 2221   |
| UN67123 | Rsa1.0_01061.1 | 577 | 55349  | 0         | 408 | 415 | 98 +  | 165 | 577 | 45651  | 46065  |
| UN67124 | Rsa1.0_12609.1 | 643 | 5175   | 1.00E-110 | 222 | 228 | 97 +  | 1   | 225 | 3773   | 4000   |
| UN67125 | Rsa1.0_00139.1 | 626 | 357786 | 1.00E-178 | 359 | 371 | 96 +  | 36  | 406 | 558    | 925    |
| UN67126 | Rsa1.0_08434.1 | 262 | 7362   | 1.00E-59  | 152 | 161 | 94 +  | 3   | 162 | 5953   | 6112   |
| UN67127 | Rsa1.0_01209.1 | 567 | 50668  | 1.00E-141 | 273 | 279 | 97 +  | 3   | 281 | 48165  | 48443  |
| UN67128 | Rsa1.0_00416.1 | 691 | 86772  | 0         | 638 | 676 | 94 -  | 3   | 669 | 57669  | 58339  |
| UN67129 | Rsa1.0_00116.1 | 554 | 365886 | 1.00E-109 | 265 | 284 | 93 +  | 272 | 554 | 33998  | 34275  |
| UN67130 | Rsa1.0_08979.1 | 278 | 6739   | 1.00E-126 | 263 | 275 | 95 -  | 2   | 276 | 4672   | 4940   |
| UN67131 | Rsa1.0_01363.1 | 191 | 47195  | 4.00E-52  | 110 | 112 | 98 +  | 3   | 114 | 40831  | 40942  |
| UN67132 | Rsa1.0_01214.1 | 695 | 50599  | 0         | 361 | 367 | 98 +  | 329 | 692 | 46274  | 46639  |
| UN67133 | Rsa1.0_02535.1 | 608 | 30382  | 0         | 574 | 608 | 94 -  | 1   | 608 | 11279  | 11883  |
| UN67134 | Rsa1.0_00067.1 | 627 | 415055 | 0         | 611 | 625 | 97 -  | 3   | 627 | 19720  | 20337  |
| UN67135 | Rsa1.0_18610.1 | 661 | 1565   | 1.00E-104 | 229 | 239 | 95 -  | 247 | 482 | 1220   | 1457   |
| UN67136 | Rsa1.0_05506.1 | 696 | 13495  | 3.00E-62  | 125 | 126 | 99 +  | 275 | 400 | 3751   | 3876   |
| UN67137 | Rsa1.0_00237.1 | 704 | 235974 | 1.00E-160 | 312 | 319 | 97 -  | 387 | 704 | 217846 | 218164 |
| UN67138 | Rsa1.0_53363.1 | 553 | 427    | 1.00E-138 | 275 | 282 | 97 +  | 133 | 414 | 55     | 335    |
| UN67139 | Rsa1.0_04104.1 | 458 | 19043  | 6.00E-84  | 164 | 166 | 98 -  | 237 | 402 | 18846  | 19011  |
| UN67140 | Rsa1.0_00533.1 | 638 | 77375  | 0         | 452 | 470 | 96 -  | 169 | 638 | 54658  | 55127  |
| UN67141 | Rsa1.0_00083.1 | 717 | 442773 | 0         | 547 | 548 | 99 -  | 2   | 549 | 437134 | 437681 |
| UN67142 | Rsa1.0_00203.1 | 608 | 109129 | 1.00E-180 | 322 | 323 | 99 +  | 286 | 608 | 39000  | 39322  |
| UN67143 | Rsa1.0_00027.1 | 612 | 283362 | 3.00E-43  | 90  | 90  | 100 - | 101 | 190 | 49174  | 49263  |
| UN67144 | Rsa1.0_10835.1 | 428 | 5707   | 1.00E-122 | 222 | 222 | 100 + | 207 | 428 | 3881   | 4102   |
| UN67145 | Rsa1.0_00490.1 | 618 | 186713 | 7.00E-60  | 235 | 267 | 88 -  | 347 | 611 | 79481  | 79735  |
| UN67146 | Rsa1.0_01085.1 | 467 | 54539  | 0         | 326 | 326 | 100 + | 142 | 467 | 8337   | 8662   |
| UN67147 | Rsa1.0_05821.1 | 710 | 12531  | 1.00E-169 | 308 | 310 | 99 -  | 299 | 608 | 9985   | 10294  |
| UN67148 | Rsa1.0_03781.1 | 582 | 20891  | 1.00E-130 | 301 | 318 | 94 -  | 259 | 571 | 5246   | 5562   |
| UN67149 | Rsa1.0_00991.1 | 723 | 143101 | 1.00E-120 | 285 | 301 | 94 +  | 427 | 723 | 34646  | 34943  |
| UN67150 | Rsa1.0_21969.1 | 204 | 1159   | 1.00E-55  | 110 | 110 | 100 - | 7   | 116 | 393    | 502    |
| UN67151 | Rsa1.0_07771.1 | 776 | 8603   | 0         | 761 | 777 | 97 -  | 2   | 776 | 3628   | 4404   |
| UN67152 | Rsa1.0_01303.1 | 617 | 48853  | 1.00E-120 | 276 | 295 | 93 +  | 36  | 330 | 14117  | 14411  |
| UN67153 | Rsa1.0_00556.1 | 681 | 207212 | 1.00E-149 | 283 | 288 | 98 +  | 292 | 579 | 153967 | 154254 |
| UN67154 | Rsa1.0_02103.1 | 519 | 35006  | 0         | 501 | 521 | 96 -  | 1   | 519 | 13492  | 14008  |
| UN67155 | Rsa1.0_00568.1 | 769 | 75219  | 0         | 541 | 560 | 96 -  | 215 | 767 | 2099   | 2658   |
| UN67156 | Rsa1.0_06213.1 | 505 | 11478  | 1.00E-122 | 278 | 294 | 94 -  | 3   | 296 | 1709   | 2000   |

|         |                |     |        |           |     |     |       |     |     |        |        |
|---------|----------------|-----|--------|-----------|-----|-----|-------|-----|-----|--------|--------|
| UN67157 | Rsa1.0.00870.1 | 795 | 61606  | 0         | 563 | 590 | 95 -  | 217 | 795 | 33507  | 34095  |
| UN67158 | Rsa1.0.00427.1 | 639 | 189678 | 1.00E-171 | 370 | 392 | 94 -  | 65  | 450 | 24904  | 25295  |
| UN67159 | Rsa1.0.03233.1 | 733 | 24446  | 0         | 703 | 733 | 95 -  | 1   | 733 | 11086  | 11806  |
| UN67160 | Rsa1.0.00011.1 | 849 | 225044 | 1.00E-171 | 323 | 328 | 98 -  | 2   | 327 | 107194 | 107521 |
| UN67161 | #              | #   | #      | #         | #   | #   | #     | #   | #   | #      | #      |
| UN67162 | Rsa1.0.00083.1 | 783 | 442773 | 0         | 520 | 538 | 96 -  | 254 | 783 | 402072 | 402607 |
| UN67163 | Rsa1.0.00524.1 | 210 | 169613 | 1.00E-100 | 207 | 212 | 97 -  | 1   | 210 | 145143 | 145353 |
| UN67164 | Rsa1.0.00421.1 | 656 | 86365  | 7.00E-63  | 205 | 230 | 89 +  | 247 | 468 | 66305  | 66534  |
| UN67165 | Rsa1.0.00131.1 | 715 | 432233 | 0         | 489 | 498 | 98 +  | 2   | 499 | 259101 | 259598 |
| UN67166 | Rsa1.0.02707.1 | 669 | 28520  | 0         | 554 | 583 | 95 +  | 8   | 590 | 13829  | 14405  |
| UN67167 | Rsa1.0.00078.1 | 726 | 175053 | 1.00E-107 | 237 | 249 | 95 -  | 3   | 251 | 25387  | 25629  |
| UN67168 | Rsa1.0.00002.1 | 749 | 601661 | 0         | 453 | 462 | 98 +  | 53  | 514 | 230785 | 231246 |
| UN67169 | Rsa1.0.00585.1 | 528 | 74164  | 0         | 460 | 474 | 97 +  | 55  | 528 | 36803  | 37276  |
| UN67170 | Rsa1.0.00105.1 | 782 | 134138 | 0         | 611 | 639 | 95 -  | 3   | 622 | 123747 | 124385 |
| UN67171 | Rsa1.0.00410.1 | 740 | 86957  | 0         | 662 | 715 | 92 +  | 2   | 690 | 20799  | 21509  |
| UN67172 | Rsa1.0.00132.1 | 146 | 124299 | 2.00E-50  | 132 | 141 | 93 +  | 2   | 142 | 26264  | 26398  |
| UN67173 | Rsa1.0.00040.1 | 817 | 324196 | 0         | 768 | 799 | 96 +  | 3   | 798 | 194785 | 195583 |
| UN67174 | Rsa1.0.37994.1 | 493 | 593    | 0         | 419 | 422 | 99 +  | 72  | 493 | 1      | 422    |
| UN67175 | Rsa1.0.00627.1 | 701 | 71566  | 0         | 690 | 692 | 99 +  | 2   | 693 | 13359  | 14050  |
| UN67176 | Rsa1.0.16090.1 | 711 | 2289   | 1.00E-168 | 321 | 326 | 98 -  | 389 | 711 | 1217   | 1542   |
| UN67177 | Rsa1.0.01050.1 | 685 | 55651  | 3.00E-93  | 186 | 190 | 97 +  | 106 | 295 | 26568  | 26757  |
| UN67178 | Rsa1.0.03132.1 | 637 | 25142  | 1.00E-145 | 311 | 327 | 95 -  | 34  | 357 | 17814  | 18140  |
| UN67179 | Rsa1.0.00752.1 | 576 | 65756  | 0         | 503 | 551 | 91 +  | 38  | 576 | 39846  | 40379  |
| UN67180 | Rsa1.0.01549.1 | 739 | 43543  | 0         | 737 | 739 | 99 +  | 1   | 739 | 35282  | 36020  |
| UN67181 | Rsa1.0.04444.1 | 591 | 17320  | 1.00E-101 | 253 | 272 | 93 -  | 320 | 590 | 8863   | 9133   |
| UN67182 | Rsa1.0.03681.1 | 194 | 21405  | 4.00E-89  | 187 | 194 | 96 +  | 1   | 194 | 905    | 1098   |
| UN67183 | Rsa1.0.01451.1 | 805 | 45459  | 0         | 586 | 596 | 98 -  | 1   | 596 | 14190  | 14784  |
| UN67184 | Rsa1.0.00711.1 | 177 | 67223  | 8.00E-32  | 151 | 177 | 85 -  | 1   | 177 | 15213  | 15382  |
| UN67185 | Rsa1.0.01659.1 | 807 | 164577 | 1.00E-109 | 210 | 213 | 98 -  | 343 | 555 | 143025 | 143237 |
| UN67186 | Rsa1.0.00716.1 | 163 | 67078  | 4.00E-33  | 123 | 140 | 87 +  | 1   | 135 | 33294  | 33433  |
| UN67187 | Rsa1.0.00494.1 | 635 | 79967  | 0         | 627 | 642 | 97 -  | 1   | 635 | 2552   | 3193   |
| UN67188 | Rsa1.0.02103.1 | 381 | 35006  | 1.00E-138 | 352 | 383 | 91 +  | 1   | 381 | 13490  | 13864  |
| UN67189 | Rsa1.0.00892.1 | 878 | 60703  | 0         | 713 | 763 | 93 +  | 3   | 765 | 19787  | 20526  |
| UN67190 | Rsa1.0.01402.1 | 474 | 46509  | 0         | 375 | 388 | 96 -  | 69  | 456 | 6199   | 6586   |
| UN67191 | Rsa1.0.02404.1 | 278 | 31702  | 1.00E-133 | 269 | 278 | 96 -  | 4   | 278 | 22845  | 23122  |
| UN67192 | Rsa1.0.00378.1 | 257 | 89892  | 3.00E-94  | 242 | 262 | 92 -  | 1   | 257 | 25504  | 25757  |
| UN67193 | Rsa1.0.01359.1 | 716 | 47271  | 3.00E-65  | 127 | 127 | 100 - | 455 | 581 | 30670  | 30796  |
| UN67194 | Rsa1.0.01201.1 | 145 | 50856  | 5.00E-48  | 133 | 145 | 91 -  | 1   | 145 | 6491   | 6635   |
| UN67195 | Rsa1.0.01276.1 | 846 | 49384  | 0         | 715 | 756 | 94 -  | 4   | 757 | 24736  | 25490  |

|         |                |     |        |           |     |     |      |     |     |        |        |
|---------|----------------|-----|--------|-----------|-----|-----|------|-----|-----|--------|--------|
| UN67196 | Rsa1.0_04296.1 | 470 | 18030  | 1.00E-137 | 291 | 303 | 96 - | 1   | 303 | 8022   | 8322   |
| UN67197 | Rsa1.0_00807.1 | 562 | 63607  | 0         | 375 | 377 | 99 + | 1   | 377 | 11794  | 12170  |
| UN67198 | Rsa1.0_00300.1 | 692 | 97747  | 0         | 687 | 694 | 98 - | 1   | 692 | 2491   | 3184   |
| UN67199 | Rsa1.0_00753.1 | 749 | 65705  | 1.00E-160 | 289 | 290 | 99 + | 1   | 290 | 581    | 870    |
| UN67200 | Rsa1.0_03843.1 | 599 | 20496  | 0         | 588 | 599 | 98 - | 3   | 599 | 2080   | 2678   |
| UN67201 | Rsa1.0_01762.1 | 610 | 39682  | 1.00E-168 | 317 | 322 | 98 + | 1   | 320 | 15255  | 15576  |
| UN67202 | Rsa1.0_15775.1 | 725 | 2429   | 1.00E-154 | 398 | 436 | 91 + | 2   | 433 | 317    | 739    |
| UN67203 | Rsa1.0_00452.1 | 799 | 83201  | 1.00E-138 | 285 | 295 | 96 + | 2   | 294 | 938    | 1230   |
| UN67204 | Rsa1.0_00040.1 | 662 | 324196 | 1.00E-147 | 268 | 269 | 99 - | 1   | 269 | 315220 | 315488 |
| UN67205 | Rsa1.0_04193.1 | 400 | 18571  | 1.00E-137 | 260 | 263 | 98 + | 2   | 262 | 6619   | 6881   |
| UN67206 | Rsa1.0_00875.1 | 859 | 61371  | 0         | 447 | 449 | 99 + | 399 | 847 | 58714  | 59162  |
| UN67207 | Rsa1.0_00198.1 | 572 | 222963 | 1.00E-145 | 331 | 350 | 94 - | 10  | 356 | 143087 | 143432 |
| UN67208 | Rsa1.0_00800.1 | 668 | 63868  | 2.00E-66  | 168 | 177 | 94 - | 478 | 651 | 20399  | 20575  |
| UN67209 | Rsa1.0_00773.1 | 636 | 64839  | 1.00E-156 | 295 | 300 | 98 - | 337 | 636 | 25345  | 25644  |
| UN67210 | Rsa1.0_04876.1 | 337 | 15631  | 1.00E-119 | 272 | 284 | 95 + | 7   | 285 | 4224   | 4506   |
| UN67211 | Rsa1.0_02916.1 | 244 | 26809  | 5.00E-86  | 224 | 244 | 91 - | 1   | 244 | 5725   | 5961   |
| UN67212 | Rsa1.0_02389.1 | 364 | 146428 | 1.00E-154 | 320 | 335 | 95 + | 1   | 335 | 132366 | 132700 |
| UN67213 | Rsa1.0_00015.1 | 661 | 561803 | 0         | 633 | 663 | 95 - | 1   | 661 | 443793 | 444452 |
| UN67214 | Rsa1.0_06817.1 | 558 | 10307  | 0         | 555 | 582 | 95 - | 1   | 558 | 5891   | 6472   |
| UN67215 | Rsa1.0_08999.1 | 741 | 6720   | 0         | 541 | 546 | 99 + | 1   | 546 | 3538   | 4083   |
| UN67216 | Rsa1.0_00641.1 | 140 | 208241 | 6.00E-69  | 138 | 140 | 98 - | 1   | 140 | 205279 | 205418 |
| UN67217 | Rsa1.0_00238.1 | 684 | 193193 | 0         | 463 | 469 | 98 + | 1   | 469 | 3548   | 4016   |
| UN67218 | Rsa1.0_00685.1 | 718 | 68515  | 1.00E-52  | 267 | 318 | 83 - | 293 | 608 | 5700   | 6002   |
| UN67219 | Rsa1.0_00511.1 | 675 | 78616  | 0         | 495 | 506 | 97 - | 3   | 508 | 9516   | 10016  |
| UN67220 | Rsa1.0_00198.1 | 505 | 222963 | 1.00E-145 | 300 | 312 | 96 + | 2   | 312 | 17980  | 18285  |
| UN67221 | Rsa1.0_24596.1 | 145 | 978    | 3.00E-40  | 128 | 140 | 91 + | 1   | 140 | 841    | 978    |
| UN67222 | Rsa1.0_53975.1 | 657 | 422    | 1.00E-105 | 286 | 312 | 91 - | 1   | 306 | 1      | 307    |
| UN67223 | Rsa1.0_00286.1 | 514 | 98709  | 1.00E-116 | 246 | 258 | 95 + | 119 | 376 | 54927  | 55177  |
| UN67224 | Rsa1.0_02017.1 | 471 | 35999  | 1.00E-113 | 256 | 270 | 94 - | 2   | 262 | 29901  | 30170  |
| UN67225 | Rsa1.0_00178.1 | 560 | 114861 | 4.00E-95  | 277 | 310 | 89 + | 3   | 300 | 84662  | 84969  |
| UN67226 | Rsa1.0_02955.1 | 427 | 26484  | 2.00E-47  | 231 | 276 | 83 - | 2   | 255 | 21589  | 21860  |
| UN67227 | Rsa1.0_02126.1 | 431 | 34765  | 1.00E-164 | 396 | 433 | 91 - | 1   | 431 | 1899   | 2316   |
| UN67228 | Rsa1.0_03148.1 | 640 | 24989  | 0         | 384 | 385 | 99 - | 1   | 384 | 9948   | 10332  |
| UN67229 | Rsa1.0_01868.1 | 612 | 150904 | 1.00E-142 | 305 | 323 | 94 - | 1   | 313 | 4359   | 4681   |
| UN67230 | Rsa1.0_04388.1 | 368 | 17614  | 1.00E-106 | 261 | 280 | 93 - | 5   | 284 | 12205  | 12482  |
| UN67231 | Rsa1.0_01294.1 | 376 | 49090  | 0         | 359 | 371 | 96 - | 1   | 371 | 6547   | 6917   |
| UN67232 | Rsa1.0_48129.1 | 363 | 470    | 1.00E-150 | 287 | 293 | 97 + | 1   | 293 | 178    | 470    |
| UN67233 | Rsa1.0_06716.1 | 755 | 10482  | 0         | 435 | 440 | 98 + | 1   | 439 | 1389   | 1828   |
| UN67234 | Rsa1.0_00083.1 | 759 | 442773 | 0         | 730 | 763 | 95 + | 2   | 759 | 141368 | 142127 |

|         |                |     |        |           |     |     |       |     |     |        |        |
|---------|----------------|-----|--------|-----------|-----|-----|-------|-----|-----|--------|--------|
| UN67235 | Rsa1.0.00062.1 | 774 | 299291 | 0         | 361 | 363 | 99 +  | 1   | 363 | 22915  | 23277  |
| UN67236 | Rsa1.0.02376.1 | 228 | 32011  | 5.00E-80  | 208 | 227 | 91 -  | 1   | 227 | 14377  | 14603  |
| UN67237 | Rsa1.0.02588.1 | 167 | 29840  | 1.00E-58  | 155 | 167 | 92 +  | 1   | 167 | 14345  | 14510  |
| UN67238 | Rsa1.0.00301.1 | 380 | 365315 | 0         | 370 | 380 | 97 +  | 2   | 380 | 182680 | 183059 |
| UN67239 | Rsa1.0.01396.1 | 689 | 151624 | 0         | 412 | 429 | 96 -  | 1   | 427 | 141509 | 141936 |
| UN67240 | Rsa1.0.00050.1 | 446 | 237174 | 0         | 427 | 460 | 92 -  | 1   | 446 | 7718   | 8170   |
| UN67241 | Rsa1.0.00222.1 | 624 | 172263 | 1.00E-89  | 244 | 266 | 91 +  | 20  | 275 | 57578  | 57843  |
| UN67242 | Rsa1.0.00123.1 | 245 | 325650 | 1.00E-100 | 228 | 241 | 94 -  | 5   | 245 | 112994 | 113233 |
| UN67243 | Rsa1.0.00251.1 | 682 | 303968 | 0         | 465 | 489 | 95 -  | 1   | 487 | 61888  | 62371  |
| UN67244 | Rsa1.0.00019.1 | 174 | 301669 | 1.00E-42  | 109 | 116 | 93 +  | 40  | 155 | 112930 | 113045 |
| UN67245 | Rsa1.0.01758.1 | 622 | 39747  | 0         | 412 | 430 | 95 -  | 1   | 426 | 6469   | 6892   |
| UN67246 | Rsa1.0.02335.1 | 710 | 32400  | 1.00E-131 | 251 | 254 | 98 -  | 1   | 253 | 1      | 254    |
| UN67247 | Rsa1.0.01094.1 | 522 | 167285 | 0         | 347 | 350 | 99 -  | 1   | 348 | 32167  | 32516  |
| UN67248 | Rsa1.0.00888.1 | 707 | 60978  | 0         | 688 | 710 | 96 -  | 1   | 707 | 53617  | 54324  |
| UN67249 | Rsa1.0.03344.1 | 536 | 23593  | 0         | 523 | 544 | 96 +  | 1   | 536 | 16475  | 17016  |
| UN67250 | Rsa1.0.03277.1 | 739 | 24138  | 7.00E-85  | 166 | 168 | 98 -  | 439 | 606 | 14540  | 14707  |
| UN67251 | Rsa1.0.00389.1 | 367 | 88795  | 0         | 363 | 364 | 99 -  | 1   | 364 | 52643  | 53006  |
| UN67252 | Rsa1.0.65121.1 | 344 | 352    | 6.00E-99  | 195 | 199 | 97 +  | 128 | 326 | 154    | 352    |
| UN67253 | Rsa1.0.00201.1 | 168 | 232851 | 7.00E-69  | 159 | 168 | 94 +  | 1   | 168 | 208913 | 209080 |
| UN67254 | Rsa1.0.00674.1 | 422 | 193753 | 0         | 419 | 424 | 98 +  | 2   | 422 | 189883 | 190306 |
| UN67255 | Rsa1.0.03131.1 | 277 | 25142  | 1.00E-110 | 258 | 277 | 93 +  | 1   | 277 | 11451  | 11727  |
| UN67256 | Rsa1.0.00111.1 | 721 | 390088 | 0         | 530 | 568 | 93 -  | 1   | 553 | 60859  | 61422  |
| UN67257 | Rsa1.0.09457.1 | 558 | 6353   | 0         | 515 | 528 | 97 +  | 31  | 558 | 2850   | 3377   |
| UN67258 | Rsa1.0.04369.1 | 594 | 17703  | 0         | 533 | 572 | 93 -  | 1   | 558 | 3934   | 4488   |
| UN67259 | Rsa1.0.04979.1 | 461 | 15257  | 3.00E-92  | 182 | 184 | 98 -  | 116 | 298 | 9966   | 10149  |
| UN67260 | Rsa1.0.11704.1 | 811 | 5437   | 1.00E-150 | 343 | 361 | 95 +  | 43  | 395 | 4913   | 5270   |
| UN67261 | Rsa1.0.01944.1 | 701 | 37037  | 0         | 410 | 426 | 96 +  | 135 | 551 | 30966  | 31391  |
| UN67262 | Rsa1.0.00491.1 | 167 | 80219  | 6.00E-60  | 162 | 175 | 92 -  | 2   | 167 | 76344  | 76518  |
| UN67263 | Rsa1.0.02556.1 | 493 | 30133  | 1.00E-149 | 448 | 502 | 89 -  | 1   | 493 | 4383   | 4866   |
| UN67264 | Rsa1.0.02157.1 | 115 | 149652 | 2.00E-49  | 111 | 115 | 96 -  | 1   | 115 | 11836  | 11950  |
| UN67265 | Rsa1.0.02838.1 | 758 | 27438  | 1.00E-172 | 316 | 319 | 99 +  | 22  | 340 | 7647   | 7965   |
| UN67266 | Rsa1.0.00093.1 | 860 | 214962 | 0         | 584 | 587 | 99 +  | 1   | 586 | 39956  | 40542  |
| UN67267 | Rsa1.0.02286.1 | 329 | 32993  | 1.00E-173 | 308 | 308 | 100 + | 1   | 308 | 6102   | 6409   |
| UN67268 | Rsa1.0.20130.1 | 482 | 1337   | 2.00E-47  | 134 | 145 | 92 -  | 334 | 478 | 332    | 475    |
| UN67269 | Rsa1.0.06701.1 | 489 | 10514  | 0         | 467 | 490 | 95 -  | 1   | 489 | 7206   | 7689   |
| UN67270 | Rsa1.0.07256.1 | 102 | 9655   | 3.00E-39  | 97  | 102 | 95 -  | 1   | 102 | 5991   | 6092   |
| UN67271 | Rsa1.0.03781.1 | 497 | 20891  | 1.00E-105 | 302 | 328 | 92 -  | 1   | 320 | 4225   | 4545   |
| UN67272 | Rsa1.0.00100.1 | 613 | 249232 | 0         | 476 | 504 | 94 -  | 1   | 500 | 13427  | 13930  |
| UN67273 | Rsa1.0.01217.1 | 584 | 50554  | 0         | 480 | 501 | 95 +  | 84  | 584 | 44935  | 45435  |

|         |                |     |        |           |     |     |       |     |     |        |        |
|---------|----------------|-----|--------|-----------|-----|-----|-------|-----|-----|--------|--------|
| UN67274 | Rsa1.0.01806.1 | 498 | 39021  | 0         | 486 | 498 | 97 +  | 1   | 498 | 24193  | 24690  |
| UN67275 | Rsa1.0.09409.1 | 525 | 6390   | 0         | 517 | 523 | 98 +  | 3   | 525 | 2728   | 3249   |
| UN67276 | Rsa1.0.00302.1 | 814 | 97521  | 0         | 807 | 815 | 99 -  | 1   | 814 | 6196   | 7010   |
| UN67277 | Rsa1.0.29038.1 | 254 | 794    | 1.00E-125 | 247 | 254 | 97 -  | 1   | 254 | 170    | 423    |
| UN67278 | Rsa1.0.05510.1 | 676 | 13470  | 1.00E-162 | 305 | 310 | 98 +  | 108 | 417 | 1981   | 2290   |
| UN67279 | Rsa1.0.07382.1 | 445 | 9487   | 0         | 419 | 426 | 98 +  | 12  | 437 | 7323   | 7748   |
| UN67280 | Rsa1.0.00712.1 | 629 | 67217  | 0         | 624 | 628 | 99 -  | 3   | 629 | 47394  | 48021  |
| UN67281 | #              | #   | #      | #         | #   | #   | #     | #   | #   | #      | #      |
| UN67282 | Rsa1.0.00033.1 | 120 | 515811 | 1.00E-35  | 109 | 120 | 90 +  | 1   | 120 | 365442 | 365561 |
| UN67283 | Rsa1.0.33723.1 | 618 | 672    | 1.00E-128 | 239 | 241 | 99 -  | 1   | 241 | 1      | 241    |
| UN67284 | Rsa1.0.02177.1 | 757 | 34262  | 0         | 449 | 449 | 100 - | 309 | 757 | 4093   | 4541   |
| UN67285 | Rsa1.0.05569.1 | 224 | 13311  | 3.00E-90  | 206 | 216 | 95 -  | 9   | 224 | 3767   | 3980   |
| UN67286 | Rsa1.0.05070.1 | 312 | 14933  | 1.00E-131 | 296 | 313 | 94 -  | 1   | 312 | 1856   | 2167   |
| UN67287 | Rsa1.0.00412.1 | 455 | 86935  | 2.00E-93  | 192 | 198 | 96 -  | 204 | 401 | 71396  | 71593  |
| UN67288 | Rsa1.0.06031.1 | 564 | 11889  | 0         | 362 | 364 | 99 -  | 2   | 365 | 3142   | 3505   |
| UN67289 | Rsa1.0.00571.1 | 148 | 329018 | 1.00E-36  | 87  | 90  | 96 -  | 59  | 148 | 144048 | 144137 |
| UN67290 | Rsa1.0.05943.1 | 477 | 12158  | 0         | 371 | 374 | 99 +  | 45  | 418 | 2740   | 3113   |
| UN67291 | Rsa1.0.00246.1 | 585 | 103541 | 0         | 507 | 519 | 97 -  | 12  | 530 | 78385  | 78903  |
| UN67292 | Rsa1.0.00003.1 | 394 | 340054 | 0         | 393 | 394 | 99 -  | 1   | 394 | 235417 | 235810 |
| UN67293 | Rsa1.0.00055.1 | 462 | 520193 | 0         | 446 | 462 | 96 -  | 1   | 462 | 164232 | 164693 |
| UN67294 | Rsa1.0.01696.1 | 778 | 301850 | 0         | 464 | 466 | 99 -  | 2   | 467 | 286367 | 286832 |
| UN67295 | Rsa1.0.00265.1 | 699 | 220635 | 1.00E-167 | 331 | 342 | 96 -  | 1   | 341 | 139882 | 140214 |
| UN67296 | Rsa1.0.00048.1 | 764 | 167185 | 1.00E-165 | 407 | 443 | 91 +  | 1   | 423 | 154778 | 155219 |
| UN67297 | Rsa1.0.02459.1 | 681 | 31185  | 2.00E-29  | 192 | 227 | 84 +  | 458 | 669 | 22313  | 22539  |
| UN67298 | Rsa1.0.04576.1 | 564 | 16783  | 1.00E-113 | 327 | 362 | 90 -  | 207 | 564 | 5679   | 6038   |
| UN67299 | Rsa1.0.01606.1 | 430 | 42432  | 0         | 362 | 362 | 100 + | 3   | 364 | 8250   | 8611   |
| UN67300 | Rsa1.0.00264.1 | 769 | 101674 | 1.00E-165 | 295 | 295 | 100 - | 3   | 297 | 71471  | 71765  |
| UN67301 | Rsa1.0.01487.1 | 798 | 44784  | 0         | 602 | 603 | 99 -  | 4   | 606 | 13754  | 14356  |
| UN67302 | Rsa1.0.01409.1 | 780 | 151595 | 1.00E-129 | 241 | 243 | 99 +  | 373 | 615 | 143167 | 143409 |
| UN67303 | Rsa1.0.00632.1 | 792 | 183777 | 1.00E-156 | 368 | 403 | 91 +  | 1   | 379 | 150808 | 151203 |
| UN67304 | Rsa1.0.00806.1 | 817 | 63674  | 5.00E-83  | 160 | 161 | 99 +  | 308 | 468 | 25849  | 26009  |
| UN67305 | Rsa1.0.00156.1 | 536 | 118383 | 0         | 532 | 536 | 99 +  | 1   | 536 | 620    | 1155   |
| UN67306 | Rsa1.0.00032.1 | 722 | 306326 | 1.00E-134 | 336 | 360 | 93 -  | 5   | 358 | 204411 | 204762 |
| UN67307 | Rsa1.0.01606.1 | 673 | 42432  | 0         | 453 | 457 | 99 +  | 218 | 673 | 40215  | 40671  |
| UN67308 | Rsa1.0.05611.1 | 552 | 13193  | 0         | 540 | 549 | 98 +  | 2   | 548 | 2580   | 3128   |
| UN67309 | Rsa1.0.00437.1 | 199 | 84879  | 2.00E-41  | 92  | 94  | 97 +  | 103 | 196 | 13607  | 13700  |
| UN67310 | Rsa1.0.00492.1 | 607 | 80178  | 1.00E-82  | 180 | 188 | 95 -  | 183 | 370 | 7978   | 8165   |
| UN67311 | #              | #   | #      | #         | #   | #   | #     | #   | #   | #      | #      |
| UN67312 | Rsa1.0.02123.1 | 685 | 149053 | 1.00E-112 | 220 | 225 | 97 -  | 241 | 465 | 31744  | 31968  |



|         |                |     |        |           |     |     |       |     |     |        |        |
|---------|----------------|-----|--------|-----------|-----|-----|-------|-----|-----|--------|--------|
| UN67313 | Rsa1.0.00931.1 | 219 | 59210  | 2.00E-45  | 117 | 125 | 93 +  | 1   | 125 | 8644   | 8768   |
| UN67314 | Rsa1.0.01934.1 | 210 | 37162  | 8.00E-97  | 191 | 195 | 97 +  | 1   | 195 | 1867   | 2061   |
| UN67315 | Rsa1.0.01344.1 | 813 | 142535 | 0         | 419 | 427 | 98 -  | 2   | 427 | 129448 | 129873 |
| UN67316 | Rsa1.0.00261.1 | 667 | 151157 | 0         | 516 | 518 | 99 +  | 1   | 518 | 73053  | 73570  |
| UN67317 | Rsa1.0.07877.1 | 297 | 8373   | 5.00E-28  | 179 | 217 | 82 -  | 91  | 297 | 5656   | 5868   |
| UN67318 | Rsa1.0.01705.1 | 161 | 40710  | 1.00E-48  | 149 | 162 | 91 +  | 1   | 161 | 10496  | 10655  |
| UN67319 | Rsa1.0.00010.1 | 554 | 294827 | 0         | 532 | 558 | 95 -  | 2   | 554 | 116898 | 117453 |
| UN67320 | Rsa1.0.08938.1 | 647 | 6769   | 0         | 502 | 512 | 98 +  | 136 | 647 | 3632   | 4143   |
| UN67321 | Rsa1.0.28530.1 | 684 | 812    | 1.00E-166 | 320 | 328 | 97 -  | 255 | 582 | 199    | 526    |
| UN67322 | Rsa1.0.03960.1 | 684 | 19864  | 1.00E-70  | 154 | 160 | 96 -  | 232 | 391 | 8938   | 9097   |
| UN67323 | Rsa1.0.18513.1 | 507 | 1585   | 0         | 445 | 484 | 91 +  | 24  | 507 | 767    | 1226   |
| UN67324 | Rsa1.0.01483.1 | 602 | 44826  | 0         | 555 | 605 | 91 -  | 2   | 588 | 23699  | 24297  |
| UN67325 | Rsa1.0.09002.1 | 658 | 137863 | 0         | 615 | 632 | 97 -  | 1   | 632 | 135555 | 136186 |
| UN67326 | Rsa1.0.47400.1 | 395 | 477    | 2.33E-156 | 296 | 307 | 96 +  | 89  | 395 | 1      | 307    |
| UN67327 | Rsa1.0.00246.1 | 716 | 103541 | 1.00E-153 | 335 | 353 | 94 +  | 1   | 353 | 32642  | 32991  |
| UN67328 | Rsa1.0.05818.1 | 156 | 12544  | 3.00E-71  | 151 | 156 | 96 -  | 1   | 156 | 7950   | 8105   |
| UN67329 | Rsa1.0.03615.1 | 544 | 21766  | 0         | 540 | 545 | 99 -  | 1   | 544 | 17632  | 18176  |
| UN67330 | Rsa1.0.00130.1 | 602 | 125737 | 1.00E-158 | 297 | 302 | 98 +  | 62  | 363 | 38301  | 38602  |
| UN67331 | Rsa1.0.05741.1 | 134 | 12773  | 4.00E-42  | 124 | 135 | 91 +  | 1   | 134 | 3216   | 3350   |
| UN67332 | Rsa1.0.00556.1 | 843 | 207212 | 0         | 556 | 589 | 94 -  | 2   | 578 | 47334  | 47918  |
| UN67333 | Rsa1.0.00187.1 | 739 | 393093 | 6.00E-79  | 213 | 230 | 92 +  | 16  | 243 | 241359 | 241587 |
| UN67334 | Rsa1.0.00741.1 | 139 | 66117  | 1.00E-39  | 125 | 139 | 89 +  | 1   | 139 | 46384  | 46522  |
| UN67335 | Rsa1.0.00688.1 | 811 | 68396  | 0         | 690 | 714 | 96 -  | 98  | 811 | 41935  | 42644  |
| UN67336 | Rsa1.0.00019.1 | 125 | 301669 | 4.00E-39  | 104 | 110 | 94 -  | 12  | 121 | 233698 | 233806 |
| UN67337 | Rsa1.0.01753.1 | 545 | 39794  | 0         | 537 | 554 | 96 -  | 3   | 545 | 10907  | 11460  |
| UN67338 | Rsa1.0.09566.1 | 150 | 6285   | 1.00E-57  | 138 | 145 | 95 -  | 5   | 149 | 1433   | 1576   |
| UN67339 | Rsa1.0.00254.1 | 461 | 102600 | 1.00E-100 | 229 | 241 | 95 +  | 215 | 452 | 85305  | 85545  |
| UN67340 | Rsa1.0.02439.1 | 113 | 31379  | 5.00E-38  | 105 | 112 | 93 +  | 1   | 107 | 22768  | 22878  |
| UN67341 | Rsa1.0.00178.1 | 183 | 114861 | 2.00E-88  | 177 | 180 | 98 -  | 1   | 180 | 61686  | 61863  |
| UN67342 | Rsa1.0.01032.1 | 165 | 56189  | 6.00E-88  | 164 | 164 | 100 + | 2   | 165 | 44865  | 45028  |
| UN67343 | Rsa1.0.02628.1 | 805 | 29369  | 0         | 771 | 821 | 93 +  | 4   | 805 | 28482  | 29294  |
| UN67344 | Rsa1.0.00131.1 | 269 | 432233 | 1.00E-129 | 257 | 265 | 96 +  | 1   | 265 | 406700 | 406964 |
| UN67345 | Rsa1.0.03851.1 | 773 | 20451  | 0         | 755 | 773 | 97 -  | 1   | 773 | 5815   | 6587   |
| UN67346 | Rsa1.0.00550.1 | 861 | 210790 | 0         | 433 | 445 | 97 +  | 1   | 443 | 177743 | 178187 |
| UN67347 | Rsa1.0.00039.1 | 363 | 296927 | 1.00E-148 | 338 | 363 | 93 -  | 1   | 363 | 131900 | 132254 |
| UN67348 | Rsa1.0.00837.1 | 800 | 62568  | 0         | 704 | 751 | 93 +  | 52  | 800 | 23081  | 23825  |
| UN67349 | Rsa1.0.00177.1 | 329 | 143394 | 1.00E-101 | 232 | 246 | 94 -  | 84  | 329 | 17709  | 17952  |
| UN67350 | Rsa1.0.03280.1 | 501 | 145083 | 0         | 485 | 502 | 96 +  | 2   | 501 | 97     | 595    |
| UN67351 | Rsa1.0.00248.1 | 706 | 163568 | 0         | 548 | 571 | 95 +  | 136 | 706 | 50251  | 50820  |

|         |                |     |        |           |     |     |       |     |     |        |        |
|---------|----------------|-----|--------|-----------|-----|-----|-------|-----|-----|--------|--------|
| UN67352 | Rsa1.0.00127.1 | 515 | 127446 | 0         | 474 | 494 | 95 +  | 25  | 515 | 3419   | 3912   |
| UN67353 | Rsa1.0.00515.1 | 148 | 78417  | 2.00E-59  | 131 | 136 | 96 +  | 1   | 136 | 59867  | 60002  |
| UN67354 | Rsa1.0.01758.1 | 590 | 39747  | 0         | 539 | 560 | 96 +  | 2   | 555 | 35053  | 35612  |
| UN67355 | Rsa1.0.01487.1 | 535 | 44784  | 0         | 525 | 537 | 97 +  | 1   | 535 | 14375  | 14911  |
| UN67356 | Rsa1.0.00167.1 | 576 | 116000 | 0         | 574 | 577 | 99 +  | 1   | 576 | 12133  | 12709  |
| UN67357 | Rsa1.0.00632.1 | 677 | 183777 | 0         | 504 | 519 | 97 +  | 1   | 510 | 44004  | 44522  |
| UN67358 | Rsa1.0.00642.1 | 115 | 201230 | 5.00E-41  | 94  | 97  | 96 +  | 19  | 115 | 62721  | 62817  |
| UN67359 | Rsa1.0.00665.1 | 821 | 69539  | 0         | 772 | 790 | 97 +  | 3   | 788 | 39852  | 40640  |
| UN67360 | Rsa1.0.00958.1 | 460 | 58243  | 0         | 444 | 459 | 96 +  | 5   | 460 | 5951   | 6405   |
| UN67361 | Rsa1.0.01154.1 | 732 | 52249  | 0         | 667 | 667 | 100 + | 4   | 670 | 3332   | 3998   |
| UN67362 | Rsa1.0.00966.1 | 219 | 58136  | 2.00E-97  | 207 | 216 | 95 +  | 4   | 219 | 30800  | 31015  |
| UN67363 | Rsa1.0.05068.1 | 687 | 14940  | 0         | 663 | 694 | 95 +  | 1   | 687 | 4879   | 5568   |
| UN67364 | Rsa1.0.02794.1 | 813 | 27820  | 1.00E-125 | 295 | 312 | 94 -  | 75  | 380 | 18900  | 19208  |
| UN67365 | Rsa1.0.05838.1 | 765 | 12479  | 0         | 730 | 758 | 96 +  | 14  | 765 | 4224   | 4981   |
| UN67366 | Rsa1.0.11276.1 | 256 | 5560   | 1.00E-111 | 237 | 248 | 95 +  | 1   | 248 | 117    | 364    |
| UN67367 | Rsa1.0.04564.1 | 742 | 16837  | 1.00E-172 | 322 | 326 | 98 -  | 396 | 720 | 3753   | 4078   |
| UN67368 | Rsa1.0.00139.1 | 522 | 357786 | 8.00E-13  | 51  | 55  | 92 +  | 145 | 199 | 27973  | 28027  |
| UN67369 | Rsa1.0.00256.1 | 602 | 102426 | 1.00E-106 | 243 | 256 | 94 +  | 1   | 254 | 81199  | 81454  |
| UN67370 | Rsa1.0.03143.1 | 690 | 25024  | 0         | 528 | 558 | 94 -  | 142 | 690 | 12539  | 13090  |
| UN67371 | Rsa1.0.00108.1 | 112 | 478491 | 1.00E-23  | 97  | 111 | 87 -  | 2   | 112 | 77781  | 77885  |
| UN67372 | Rsa1.0.00751.1 | 558 | 65759  | 1.00E-117 | 223 | 226 | 98 +  | 306 | 531 | 12467  | 12692  |
| UN67373 | Rsa1.0.00013.1 | 731 | 292129 | 1.00E-135 | 265 | 272 | 97 +  | 3   | 274 | 120984 | 121255 |
| UN67374 | Rsa1.0.00706.1 | 345 | 291570 | 1.00E-148 | 322 | 341 | 94 +  | 1   | 341 | 278629 | 278969 |
| UN67375 | Rsa1.0.04107.1 | 690 | 19007  | 0         | 643 | 667 | 96 +  | 1   | 662 | 6919   | 7580   |
| UN67376 | Rsa1.0.00271.1 | 717 | 101125 | 1.00E-124 | 235 | 238 | 98 -  | 98  | 335 | 80400  | 80637  |
| UN67377 | Rsa1.0.00294.1 | 729 | 144860 | 0         | 372 | 380 | 97 +  | 252 | 630 | 68064  | 68443  |
| UN67378 | #              | #   | #      | #         | #   | #   | #     | #   | #   | #      | #      |
| UN67379 | Rsa1.0.00204.1 | 612 | 109056 | 0         | 585 | 610 | 95 +  | 1   | 609 | 82932  | 83537  |
| UN67380 | Rsa1.0.02931.1 | 541 | 26654  | 1.00E-104 | 207 | 211 | 98 -  | 223 | 430 | 5953   | 6163   |
| UN67381 | Rsa1.0.32735.1 | 722 | 695    | 1.00E-170 | 303 | 303 | 100 + | 124 | 426 | 1      | 303    |
| UN67382 | Rsa1.0.00627.1 | 379 | 71566  | 8.00E-80  | 169 | 175 | 96 -  | 1   | 175 | 63662  | 63836  |
| UN67383 | Rsa1.0.02263.1 | 524 | 33238  | 0         | 416 | 428 | 97 -  | 4   | 431 | 19170  | 19590  |
| UN67384 | Rsa1.0.00020.1 | 512 | 283099 | 1.00E-133 | 340 | 367 | 92 +  | 10  | 376 | 138823 | 139173 |
| UN67385 | Rsa1.0.00134.1 | 642 | 390219 | 0         | 623 | 649 | 95 +  | 2   | 642 | 133674 | 134322 |
| UN67386 | Rsa1.0.00116.1 | 526 | 365886 | 0         | 509 | 533 | 95 -  | 1   | 526 | 144923 | 145453 |
| UN67387 | Rsa1.0.01534.1 | 282 | 43764  | 1.00E-132 | 271 | 282 | 96 -  | 1   | 282 | 1405   | 1686   |
| UN67388 | Rsa1.0.01857.1 | 547 | 38103  | 6.00E-97  | 238 | 262 | 90 -  | 3   | 264 | 8328   | 8570   |
| UN67389 | Rsa1.0.02688.1 | 192 | 28644  | 2.00E-35  | 166 | 196 | 84 -  | 3   | 188 | 27277  | 27472  |
| UN67390 | Rsa1.0.00789.1 | 629 | 64233  | 0         | 529 | 544 | 97 -  | 2   | 540 | 34406  | 34949  |

|         |                |     |        |           |     |     |       |     |     |        |        |
|---------|----------------|-----|--------|-----------|-----|-----|-------|-----|-----|--------|--------|
| UN67391 | Rsa1.0_54753.1 | 566 | 417    | 1.00E-175 | 396 | 420 | 94 +  | 119 | 538 | 1      | 417    |
| UN67392 | Rsa1.0_00810.1 | 652 | 63289  | 0         | 448 | 452 | 99 -  | 130 | 581 | 51506  | 51957  |
| UN67393 | Rsa1.0_00006.1 | 351 | 396176 | 1.00E-161 | 333 | 348 | 95 -  | 3   | 350 | 60820  | 61163  |
| UN67394 | Rsa1.0_05000.1 | 621 | 15178  | 1.00E-125 | 269 | 280 | 96 +  | 308 | 585 | 10847  | 11126  |
| UN67395 | Rsa1.0_06642.1 | 606 | 10616  | 0         | 386 | 400 | 96 -  | 207 | 606 | 5426   | 5824   |
| UN67396 | Rsa1.0_10673.1 | 354 | 5760   | 1.00E-113 | 222 | 227 | 97 -  | 128 | 354 | 5280   | 5506   |
| UN67397 | Rsa1.0_06111.1 | 421 | 11723  | 1.00E-102 | 251 | 270 | 92 +  | 2   | 263 | 9656   | 9923   |
| UN67398 | Rsa1.0_00348.1 | 529 | 92818  | 1.00E-112 | 253 | 268 | 94 +  | 38  | 303 | 81800  | 82067  |
| UN67399 | Rsa1.0_08272.1 | 239 | 7617   | 1.00E-128 | 234 | 235 | 99 -  | 1   | 235 | 5077   | 5311   |
| UN67400 | Rsa1.0_00048.1 | 693 | 167185 | 0         | 679 | 708 | 95 +  | 1   | 693 | 146192 | 146899 |
| UN67401 | Rsa1.0_02063.1 | 702 | 35484  | 0         | 701 | 702 | 99 -  | 1   | 702 | 29704  | 30405  |
| UN67402 | Rsa1.0_00196.1 | 429 | 109960 | 1.00E-163 | 374 | 398 | 93 +  | 1   | 396 | 18625  | 19020  |
| UN67403 | Rsa1.0_01798.1 | 658 | 173909 | 0         | 636 | 658 | 96 -  | 1   | 658 | 172162 | 172817 |
| UN67404 | Rsa1.0_01090.1 | 165 | 54385  | 2.00E-47  | 142 | 156 | 91 -  | 1   | 156 | 45605  | 45759  |
| UN67405 | Rsa1.0_01121.1 | 484 | 53407  | 0         | 464 | 486 | 95 -  | 3   | 484 | 8168   | 8649   |
| UN67406 | Rsa1.0_01634.1 | 121 | 41865  | 1.00E-48  | 113 | 118 | 95 +  | 1   | 118 | 25350  | 25467  |
| UN67407 | Rsa1.0_01651.1 | 711 | 41586  | 1.00E-160 | 286 | 286 | 100 + | 1   | 286 | 28390  | 28675  |
| UN67408 | Rsa1.0_00227.1 | 201 | 105849 | 1.00E-61  | 181 | 199 | 90 +  | 1   | 197 | 102273 | 102465 |
| UN67409 | Rsa1.0_00013.1 | 457 | 292129 | 3.00E-46  | 173 | 193 | 89 -  | 38  | 226 | 73022  | 73211  |
| UN67410 | Rsa1.0_00968.1 | 683 | 58020  | 0         | 364 | 375 | 97 +  | 309 | 683 | 50504  | 50878  |
| UN67411 | Rsa1.0_00812.1 | 819 | 63233  | 1.00E-153 | 325 | 338 | 96 -  | 2   | 337 | 35328  | 35663  |
| UN67412 | Rsa1.0_01560.1 | 812 | 43256  | 0         | 661 | 663 | 99 -  | 1   | 663 | 24017  | 24679  |
| UN67413 | Rsa1.0_03873.1 | 543 | 20360  | 1.00E-102 | 232 | 245 | 94 -  | 1   | 240 | 9251   | 9494   |
| UN67414 | Rsa1.0_00562.1 | 617 | 75565  | 9.00E-87  | 187 | 195 | 95 +  | 100 | 294 | 52334  | 52528  |
| UN67415 | Rsa1.0_14434.1 | 646 | 3394   | 3.00E-65  | 130 | 131 | 99 +  | 413 | 543 | 1      | 131    |
| UN67416 | Rsa1.0_03735.1 | 623 | 21087  | 0         | 548 | 564 | 97 -  | 1   | 551 | 5153   | 5716   |
| UN67417 | Rsa1.0_00833.1 | 845 | 62621  | 0         | 817 | 843 | 96 +  | 3   | 842 | 41276  | 42117  |
| UN67418 | Rsa1.0_00123.1 | 668 | 325650 | 1.00E-152 | 382 | 414 | 92 +  | 3   | 412 | 59885  | 60285  |
| UN67419 | Rsa1.0_00151.1 | 464 | 119541 | 1.00E-119 | 280 | 296 | 94 +  | 11  | 304 | 46085  | 46376  |
| UN67420 | Rsa1.0_04572.1 | 567 | 16790  | 1.00E-111 | 327 | 368 | 88 +  | 1   | 368 | 10484  | 10831  |
| UN67421 | Rsa1.0_00215.1 | 428 | 201775 | 0         | 428 | 428 | 100 + | 1   | 428 | 150739 | 151166 |
| UN67422 | Rsa1.0_01565.1 | 260 | 155447 | 1.00E-145 | 260 | 260 | 100 - | 1   | 260 | 146121 | 146380 |
| UN67423 | Rsa1.0_04557.1 | 593 | 145048 | 1.00E-124 | 289 | 306 | 94 +  | 128 | 421 | 135419 | 135723 |
| UN67424 | Rsa1.0_00251.1 | 569 | 303968 | 4.00E-64  | 146 | 153 | 95 +  | 279 | 431 | 298231 | 298383 |
| UN67425 | Rsa1.0_00458.1 | 709 | 82717  | 0         | 708 | 712 | 99 -  | 1   | 709 | 79051  | 79762  |
| UN67426 | Rsa1.0_00028.1 | 156 | 293984 | 4.00E-64  | 149 | 156 | 95 -  | 1   | 156 | 277120 | 277274 |
| UN67427 | Rsa1.0_02508.1 | 365 | 30675  | 2.00E-83  | 265 | 302 | 87 +  | 84  | 365 | 1049   | 1342   |
| UN67428 | Rsa1.0_00066.1 | 375 | 152418 | 1.00E-120 | 337 | 378 | 89 +  | 1   | 375 | 15027  | 15383  |
| UN67429 | Rsa1.0_00111.1 | 103 | 390088 | 4.00E-35  | 93  | 99  | 93 +  | 1   | 99  | 76068  | 76166  |

|         |                |     |        |           |     |     |      |     |     |        |        |
|---------|----------------|-----|--------|-----------|-----|-----|------|-----|-----|--------|--------|
| UN67430 | Rsa1.0.00324.1 | 313 | 218805 | 2.00E-73  | 196 | 211 | 92 + | 3   | 208 | 143879 | 144085 |
| UN67431 | Rsa1.0.18185.1 | 327 | 1650   | 2.00E-83  | 223 | 245 | 91 - | 81  | 325 | 1228   | 1472   |
| UN67432 | Rsa1.0.01704.1 | 445 | 40711  | 1.00E-106 | 231 | 243 | 95 + | 1   | 243 | 5648   | 5890   |
| UN67433 | Rsa1.0.00041.1 | 460 | 186197 | 1.00E-124 | 234 | 237 | 98 + | 42  | 278 | 168223 | 168459 |
| UN67434 | Rsa1.0.25440.1 | 316 | 936    | 1.00E-107 | 238 | 250 | 95 + | 2   | 250 | 248    | 494    |
| UN67435 | Rsa1.0.03264.1 | 794 | 145959 | 0         | 790 | 794 | 99 + | 1   | 794 | 129173 | 129965 |
| UN67436 | Rsa1.0.03046.1 | 743 | 25784  | 1.00E-158 | 286 | 287 | 99 - | 1   | 287 | 15386  | 15672  |
| UN67437 | #              | #   | #      | #         | #   | #   | #    | #   | #   | #      | #      |
| UN67438 | Rsa1.0.03761.1 | 837 | 20982  | 0         | 427 | 431 | 99 + | 409 | 837 | 10831  | 11261  |
| UN67439 | Rsa1.0.00693.1 | 318 | 161311 | 4.00E-81  | 159 | 161 | 98 + | 156 | 316 | 60781  | 60941  |
| UN67440 | Rsa1.0.00251.1 | 609 | 303968 | 0         | 432 | 456 | 94 + | 69  | 520 | 83782  | 84232  |
| UN67441 | #              | #   | #      | #         | #   | #   | #    | #   | #   | #      | #      |
| UN67442 | Rsa1.0.07450.1 | 515 | 9373   | 0         | 511 | 515 | 99 - | 1   | 515 | 2348   | 2861   |
| UN67443 | Rsa1.0.00220.1 | 620 | 192936 | 1.00E-133 | 316 | 339 | 93 + | 9   | 341 | 152921 | 153256 |
| UN67444 | Rsa1.0.64376.1 | 609 | 356    | 0         | 352 | 356 | 98 + | 182 | 537 | 1      | 356    |
| UN67445 | Rsa1.0.02212.1 | 643 | 33840  | 1.00E-104 | 206 | 209 | 98 - | 435 | 643 | 29437  | 29644  |
| UN67446 | Rsa1.0.01656.1 | 717 | 41494  | 0         | 415 | 429 | 96 + | 18  | 446 | 6463   | 6886   |
| UN67447 | Rsa1.0.00439.1 | 145 | 142776 | 1.00E-57  | 137 | 145 | 94 - | 1   | 145 | 23108  | 23252  |
| UN67448 | Rsa1.0.00789.1 | 674 | 64233  | 4.00E-52  | 152 | 169 | 89 + | 3   | 171 | 27998  | 28157  |
| UN67449 | Rsa1.0.00056.1 | 854 | 332604 | 0         | 747 | 751 | 99 + | 1   | 749 | 199775 | 200525 |
| UN67450 | Rsa1.0.73621.1 | 164 | 311    | 3.00E-31  | 87  | 93  | 93 + | 72  | 164 | 75     | 167    |
| UN67451 | Rsa1.0.00301.1 | 342 | 365315 | 1.00E-171 | 333 | 340 | 97 + | 1   | 339 | 320808 | 321146 |
| UN67452 | Rsa1.0.00890.1 | 588 | 323870 | 1.00E-176 | 319 | 321 | 99 - | 6   | 326 | 162561 | 162881 |
| UN67453 | Rsa1.0.20936.1 | 772 | 1252   | 1.00E-24  | 95  | 107 | 88 - | 311 | 417 | 921    | 1027   |
| UN67454 | Rsa1.0.01374.1 | 646 | 47047  | 0         | 398 | 413 | 96 + | 23  | 430 | 30852  | 31264  |
| UN67455 | Rsa1.0.00235.1 | 755 | 154696 | 1.00E-101 | 303 | 342 | 88 - | 1   | 321 | 94062  | 94398  |
| UN67456 | Rsa1.0.00418.1 | 468 | 215377 | 1.00E-132 | 255 | 260 | 98 - | 1   | 260 | 45040  | 45295  |
| UN67457 | Rsa1.0.02253.1 | 542 | 33356  | 1.00E-128 | 256 | 264 | 96 - | 1   | 264 | 25657  | 25920  |
| UN67458 | Rsa1.0.03392.1 | 301 | 23248  | 1.00E-138 | 270 | 277 | 97 + | 1   | 277 | 1244   | 1520   |
| UN67459 | Rsa1.0.00017.1 | 398 | 752458 | 1.00E-151 | 306 | 318 | 96 - | 1   | 318 | 41954  | 42271  |
| UN67460 | Rsa1.0.00399.1 | 164 | 242951 | 3.00E-71  | 158 | 164 | 96 - | 1   | 163 | 240360 | 240523 |
| UN67461 | Rsa1.0.01983.1 | 837 | 36509  | 0         | 784 | 801 | 97 - | 37  | 837 | 1059   | 1858   |
| UN67462 | Rsa1.0.02553.1 | 325 | 30190  | 1.00E-160 | 310 | 318 | 97 - | 3   | 320 | 25557  | 25874  |
| UN67463 | Rsa1.0.00144.1 | 396 | 120708 | 1.00E-94  | 320 | 363 | 88 - | 35  | 396 | 74697  | 75050  |
| UN67464 | Rsa1.0.00844.1 | 761 | 62403  | 0         | 705 | 760 | 92 - | 2   | 761 | 7938   | 8694   |
| UN67465 | Rsa1.0.01920.1 | 396 | 158533 | 1.00E-167 | 378 | 403 | 93 - | 1   | 396 | 128161 | 128555 |
| UN67466 | Rsa1.0.00642.1 | 787 | 201230 | 0         | 468 | 488 | 95 - | 6   | 493 | 2588   | 3070   |
| UN67467 | Rsa1.0.16565.1 | 628 | 2110   | 0         | 450 | 465 | 96 + | 164 | 628 | 441    | 905    |
| UN67468 | Rsa1.0.01586.1 | 617 | 42804  | 3.00E-99  | 202 | 208 | 97 + | 253 | 460 | 1769   | 1976   |

|         |                |     |        |           |     |     |       |     |     |        |        |
|---------|----------------|-----|--------|-----------|-----|-----|-------|-----|-----|--------|--------|
| UN67469 | Rsa1.0.00196.1 | 776 | 109960 | 0         | 748 | 778 | 96 -  | 1   | 776 | 11224  | 12001  |
| UN67470 | Rsa1.0.12445.1 | 433 | 5224   | 1.00E-178 | 334 | 340 | 98 -  | 94  | 433 | 3521   | 3860   |
| UN67471 | Rsa1.0.01124.1 | 776 | 53295  | 0         | 385 | 388 | 99 +  | 225 | 612 | 51334  | 51721  |
| UN67472 | Rsa1.0.04626.1 | 431 | 16611  | 0         | 415 | 431 | 96 -  | 1   | 431 | 14923  | 15352  |
| UN67473 | Rsa1.0.00017.1 | 319 | 752458 | 1.00E-180 | 319 | 319 | 100 - | 1   | 319 | 32715  | 33033  |
| UN67474 | #              | #   | #      | #         | #   | #   | #     | #   | #   | #      | #      |
| UN67475 | Rsa1.0.00385.1 | 546 | 89160  | 0         | 389 | 399 | 97 -  | 1   | 395 | 35934  | 36332  |
| UN67476 | Rsa1.0.02735.1 | 620 | 28344  | 0         | 618 | 620 | 99 -  | 1   | 620 | 3625   | 4244   |
| UN67477 | Rsa1.0.01986.1 | 415 | 36489  | 1.00E-103 | 285 | 314 | 90 +  | 2   | 309 | 2655   | 2961   |
| UN67478 | Rsa1.0.02515.1 | 217 | 30616  | 1.00E-30  | 83  | 88  | 94 -  | 130 | 217 | 2703   | 2790   |
| UN67479 | Rsa1.0.00632.1 | 693 | 183777 | 0         | 524 | 535 | 97 -  | 1   | 535 | 157543 | 158077 |
| UN67480 | Rsa1.0.06113.1 | 603 | 11721  | 8.00E-81  | 196 | 209 | 93 +  | 398 | 603 | 6649   | 6854   |
| UN67481 | Rsa1.0.00289.1 | 537 | 98620  | 0         | 496 | 521 | 95 -  | 15  | 535 | 25075  | 25590  |
| UN67482 | Rsa1.0.00472.1 | 645 | 398134 | 1.00E-117 | 214 | 214 | 100 - | 2   | 215 | 178375 | 178588 |
| UN67483 | Rsa1.0.43887.1 | 554 | 512    | 9.00E-19  | 64  | 69  | 92 -  | 486 | 554 | 229    | 297    |
| UN67484 | Rsa1.0.01031.1 | 592 | 56236  | 0         | 575 | 591 | 97 +  | 3   | 592 | 13497  | 14083  |
| UN67485 | Rsa1.0.05418.1 | 205 | 13816  | 1.00E-58  | 130 | 135 | 96 +  | 1   | 135 | 2907   | 3041   |
| UN67486 | Rsa1.0.01947.1 | 451 | 36977  | 0         | 449 | 451 | 99 -  | 1   | 451 | 16514  | 16963  |
| UN67487 | Rsa1.0.00237.1 | 158 | 235974 | 1.00E-67  | 151 | 158 | 95 +  | 1   | 158 | 41714  | 41871  |
| UN67488 | Rsa1.0.00064.1 | 179 | 240927 | 5.00E-73  | 165 | 173 | 95 -  | 1   | 173 | 133195 | 133364 |
| UN67489 | Rsa1.0.00503.1 | 765 | 79468  | 1.00E-142 | 256 | 256 | 100 + | 1   | 256 | 39999  | 40254  |
| UN67490 | Rsa1.0.01100.1 | 758 | 54113  | 0         | 594 | 598 | 99 +  | 159 | 756 | 33803  | 34400  |
| UN67491 | Rsa1.0.02198.1 | 717 | 33989  | 0         | 696 | 721 | 96 +  | 1   | 717 | 6303   | 7023   |
| UN67492 | Rsa1.0.00822.1 | 317 | 62891  | 3.00E-85  | 207 | 221 | 93 -  | 8   | 228 | 32221  | 32436  |
| UN67493 | Rsa1.0.01060.1 | 697 | 55368  | 1.00E-109 | 268 | 285 | 94 -  | 1   | 283 | 40139  | 40416  |
| UN67494 | Rsa1.0.06117.1 | 305 | 11709  | 1.00E-100 | 275 | 305 | 90 +  | 1   | 305 | 1553   | 1847   |
| UN67495 | Rsa1.0.07527.1 | 681 | 9197   | 0         | 394 | 408 | 96 +  | 1   | 396 | 3354   | 3761   |
| UN67496 | Rsa1.0.01933.1 | 453 | 37172  | 7.00E-96  | 268 | 288 | 93 -  | 1   | 284 | 13678  | 13959  |
| UN67497 | Rsa1.0.00017.1 | 729 | 752458 | 0         | 426 | 431 | 98 -  | 299 | 729 | 313815 | 314244 |
| UN67498 | Rsa1.0.01421.1 | 518 | 46197  | 0         | 516 | 518 | 99 +  | 1   | 518 | 17534  | 18051  |
| UN67499 | #              | #   | #      | #         | #   | #   | #     | #   | #   | #      | #      |
| UN67500 | Rsa1.0.49053.1 | 535 | 462    | 1.00E-169 | 307 | 309 | 99 +  | 26  | 334 | 154    | 462    |
| UN67501 | Rsa1.0.00454.1 | 131 | 216970 | 1.00E-38  | 115 | 125 | 92 -  | 8   | 131 | 158679 | 158803 |
| UN67502 | Rsa1.0.00121.1 | 183 | 278029 | 2.00E-48  | 110 | 114 | 96 +  | 53  | 166 | 110932 | 111045 |
| UN67503 | Rsa1.0.00476.1 | 341 | 280966 | 1.00E-96  | 206 | 215 | 95 +  | 123 | 337 | 199384 | 199598 |
| UN67504 | Rsa1.0.02129.1 | 517 | 34757  | 5.00E-97  | 211 | 219 | 96 -  | 4   | 220 | 6494   | 6711   |
| UN67505 | Rsa1.0.00338.1 | 140 | 94109  | 9.00E-62  | 135 | 140 | 96 +  | 1   | 140 | 89845  | 89984  |
| UN67506 | Rsa1.0.02672.1 | 706 | 28884  | 0         | 523 | 526 | 99 +  | 1   | 526 | 11851  | 12376  |
| UN67507 | Rsa1.0.00423.1 | 713 | 86138  | 0         | 356 | 356 | 100 + | 3   | 358 | 27572  | 27927  |

|         |                |     |        |           |     |     |       |     |     |        |        |
|---------|----------------|-----|--------|-----------|-----|-----|-------|-----|-----|--------|--------|
| UN67508 | Rsa1.0.00157.1 | 557 | 245832 | 1.00E-111 | 229 | 236 | 97 +  | 8   | 243 | 19645  | 19879  |
| UN67509 | Rsa1.0.00247.1 | 687 | 103408 | 0         | 594 | 597 | 99 -  | 1   | 597 | 30209  | 30805  |
| UN67510 | Rsa1.0.00363.1 | 171 | 90968  | 4.00E-61  | 160 | 171 | 93 +  | 1   | 171 | 64201  | 64369  |
| UN67511 | Rsa1.0.00779.1 | 339 | 64568  | 0         | 337 | 339 | 99 -  | 3   | 339 | 33097  | 33435  |
| UN67512 | Rsa1.0.00549.1 | 749 | 76473  | 1.00E-140 | 262 | 265 | 98 -  | 426 | 690 | 25005  | 25269  |
| UN67513 | Rsa1.0.00196.1 | 868 | 109960 | 2.00E-70  | 165 | 172 | 95 -  | 695 | 864 | 70383  | 70554  |
| UN67514 | Rsa1.0.01327.1 | 726 | 48033  | 0         | 704 | 726 | 96 +  | 1   | 726 | 42312  | 43037  |
| UN67515 | Rsa1.0.02185.1 | 580 | 34150  | 1.00E-172 | 321 | 326 | 98 -  | 171 | 496 | 21326  | 21651  |
| UN67516 | Rsa1.0.00315.1 | 728 | 96426  | 0         | 717 | 727 | 98 +  | 2   | 721 | 60572  | 61298  |
| UN67517 | Rsa1.0.01489.1 | 146 | 44764  | 4.00E-39  | 91  | 94  | 96 -  | 3   | 96  | 1844   | 1937   |
| UN67518 | Rsa1.0.07058.1 | 486 | 9964   | 0         | 465 | 485 | 95 +  | 3   | 486 | 5542   | 6026   |
| UN67519 | Rsa1.0.00048.1 | 444 | 167185 | 1.00E-141 | 257 | 258 | 99 +  | 1   | 258 | 43746  | 44003  |
| UN67520 | Rsa1.0.00671.1 | 668 | 397884 | 0         | 643 | 681 | 94 -  | 3   | 668 | 246697 | 247375 |
| UN67521 | Rsa1.0.01910.1 | 591 | 37405  | 1.00E-118 | 261 | 277 | 94 +  | 327 | 591 | 12141  | 12417  |
| UN67522 | Rsa1.0.07410.1 | 731 | 9443   | 0         | 383 | 398 | 96 +  | 2   | 393 | 5211   | 5604   |
| UN67523 | Rsa1.0.00494.1 | 633 | 79967  | 0         | 630 | 633 | 99 +  | 1   | 633 | 804    | 1436   |
| UN67524 | Rsa1.0.00421.1 | 632 | 86365  | 1.00E-135 | 251 | 253 | 99 -  | 119 | 371 | 81275  | 81527  |
| UN67525 | Rsa1.0.16521.1 | 595 | 2125   | 1.00E-166 | 501 | 567 | 88 -  | 17  | 555 | 1174   | 1725   |
| UN67526 | Rsa1.0.00289.1 | 595 | 98620  | 1.00E-109 | 291 | 321 | 90 +  | 4   | 311 | 25684  | 26003  |
| UN67527 | Rsa1.0.01424.1 | 717 | 46139  | 0         | 711 | 717 | 99 -  | 2   | 717 | 3508   | 4224   |
| UN67528 | Rsa1.0.01695.1 | 692 | 40848  | 1.00E-105 | 231 | 242 | 95 -  | 63  | 304 | 8401   | 8641   |
| UN67529 | Rsa1.0.00870.1 | 271 | 61606  | 7.00E-30  | 88  | 95  | 92 -  | 131 | 225 | 28207  | 28301  |
| UN67530 | Rsa1.0.00829.1 | 547 | 158305 | 0         | 546 | 547 | 99 +  | 1   | 547 | 146270 | 146816 |
| UN67531 | Rsa1.0.02700.1 | 689 | 28584  | 6.00E-79  | 153 | 154 | 99 -  | 286 | 439 | 14765  | 14918  |
| UN67532 | Rsa1.0.01481.1 | 543 | 184562 | 1.00E-134 | 316 | 343 | 92 +  | 176 | 506 | 15373  | 15715  |
| UN67533 | Rsa1.0.00507.1 | 298 | 79074  | 1.00E-100 | 262 | 285 | 91 +  | 18  | 298 | 9967   | 10248  |
| UN67534 | Rsa1.0.00378.1 | 754 | 89892  | 1.00E-142 | 256 | 256 | 100 + | 3   | 258 | 22569  | 22824  |
| UN67535 | Rsa1.0.00703.1 | 462 | 67597  | 0         | 440 | 470 | 93 +  | 2   | 462 | 8474   | 8936   |
| UN67536 | Rsa1.0.00385.1 | 614 | 89160  | 0         | 365 | 367 | 99 +  | 249 | 614 | 67267  | 67633  |
| UN67537 | Rsa1.0.18485.1 | 546 | 1590   | 0         | 541 | 545 | 99 -  | 1   | 544 | 535    | 1079   |
| UN67538 | Rsa1.0.19019.1 | 697 | 1494   | 0         | 460 | 490 | 93 +  | 3   | 490 | 774    | 1251   |
| UN67539 | Rsa1.0.04282.1 | 651 | 18100  | 1.00E-133 | 253 | 257 | 98 +  | 4   | 260 | 6460   | 6716   |
| UN67540 | Rsa1.0.00153.1 | 769 | 192931 | 1.00E-140 | 259 | 261 | 99 -  | 3   | 263 | 170695 | 170955 |
| UN67541 | Rsa1.0.01768.1 | 619 | 138463 | 1.00E-122 | 272 | 287 | 94 +  | 1   | 287 | 116865 | 117150 |
| UN67542 | Rsa1.0.00300.1 | 792 | 97747  | 0         | 609 | 613 | 99 +  | 31  | 643 | 1555   | 2167   |
| UN67543 | Rsa1.0.00004.1 | 839 | 253996 | 0         | 743 | 745 | 99 +  | 2   | 745 | 36773  | 37517  |
| UN67544 | Rsa1.0.00954.1 | 676 | 189536 | 1.00E-86  | 163 | 163 | 100 + | 264 | 426 | 37320  | 37482  |
| UN67545 | Rsa1.0.03843.1 | 672 | 20496  | 0         | 586 | 590 | 99 +  | 83  | 672 | 556    | 1145   |
| UN67546 | Rsa1.0.00651.1 | 786 | 247766 | 7.00E-48  | 101 | 102 | 99 -  | 298 | 399 | 91328  | 91429  |

|         |                |     |        |           |     |     |       |     |     |        |        |
|---------|----------------|-----|--------|-----------|-----|-----|-------|-----|-----|--------|--------|
| UN67547 | Rsa1.0.00010.1 | 717 | 294827 | 1.00E-165 | 294 | 294 | 100 + | 33  | 326 | 115078 | 115371 |
| UN67548 | Rsa1.0.00359.1 | 704 | 91256  | 0         | 507 | 538 | 94 +  | 166 | 703 | 76188  | 76723  |
| UN67549 | Rsa1.0.01762.1 | 808 | 39682  | 1.00E-126 | 230 | 230 | 100 - | 242 | 471 | 17863  | 18092  |
| UN67550 | Rsa1.0.01460.1 | 778 | 45255  | 0         | 412 | 443 | 93 -  | 3   | 426 | 24259  | 24699  |
| UN67551 | Rsa1.0.00452.1 | 428 | 83201  | 2.00E-53  | 113 | 115 | 98 -  | 238 | 352 | 3196   | 3310   |
| UN67552 | Rsa1.0.01280.1 | 712 | 49321  | 0         | 709 | 712 | 99 -  | 2   | 712 | 2633   | 3344   |
| UN67553 | Rsa1.0.00082.1 | 719 | 237584 | 3.00E-90  | 184 | 189 | 97 -  | 61  | 249 | 133006 | 133194 |
| UN67554 | Rsa1.0.12091.1 | 690 | 5316   | 2.00E-35  | 135 | 153 | 88 +  | 198 | 349 | 456    | 608    |
| UN67555 | Rsa1.0.00253.1 | 603 | 231292 | 0         | 428 | 432 | 99 -  | 172 | 603 | 25611  | 26042  |
| UN67556 | Rsa1.0.02967.1 | 599 | 26395  | 0         | 590 | 600 | 98 -  | 3   | 599 | 2134   | 2732   |
| UN67557 | Rsa1.0.00030.1 | 661 | 250988 | 4.00E-46  | 98  | 99  | 98 -  | 437 | 535 | 145020 | 145118 |
| UN67558 | Rsa1.0.00272.1 | 649 | 447836 | 3.00E-99  | 199 | 204 | 97 -  | 194 | 397 | 58525  | 58728  |
| UN67559 | Rsa1.0.05815.1 | 700 | 12563  | 2.00E-78  | 149 | 149 | 100 + | 287 | 435 | 9001   | 9149   |
| UN67560 | Rsa1.0.01251.1 | 585 | 49873  | 1.00E-79  | 175 | 183 | 95 -  | 86  | 268 | 12229  | 12411  |
| UN67561 | Rsa1.0.00739.1 | 717 | 66155  | 7.00E-94  | 182 | 183 | 99 -  | 529 | 711 | 52049  | 52230  |
| UN67562 | Rsa1.0.01476.1 | 732 | 172928 | 7.00E-91  | 264 | 291 | 90 +  | 191 | 476 | 8190   | 8478   |
| UN67563 | Rsa1.0.01758.1 | 604 | 39747  | 0         | 598 | 602 | 99 +  | 3   | 604 | 3745   | 4346   |
| UN67564 | Rsa1.0.05224.1 | 752 | 14444  | 1.00E-107 | 236 | 248 | 95 +  | 343 | 588 | 13715  | 13962  |
| UN67565 | Rsa1.0.00036.1 | 741 | 176186 | 1.00E-55  | 114 | 115 | 99 +  | 63  | 177 | 33742  | 33856  |
| UN67566 | Rsa1.0.00389.1 | 599 | 88795  | 0         | 519 | 519 | 100 + | 3   | 521 | 51659  | 52177  |
| UN67567 | Rsa1.0.03664.1 | 410 | 21487  | 1.00E-109 | 309 | 338 | 91 -  | 70  | 399 | 6087   | 6423   |
| UN67568 | Rsa1.0.08999.1 | 268 | 6720   | 1.00E-114 | 233 | 240 | 97 -  | 30  | 268 | 5902   | 6141   |
| UN67569 | Rsa1.0.00641.1 | 625 | 208241 | 1.00E-106 | 207 | 211 | 98 +  | 7   | 217 | 203870 | 204080 |
| UN67570 | Rsa1.0.00123.1 | 514 | 325650 | 0         | 494 | 513 | 96 -  | 2   | 514 | 306750 | 307262 |
| UN67571 | Rsa1.0.18356.1 | 726 | 1615   | 0         | 368 | 378 | 97 -  | 3   | 377 | 177    | 551    |
| UN67572 | Rsa1.0.00441.1 | 780 | 84607  | 1.00E-155 | 615 | 726 | 84 -  | 9   | 733 | 46606  | 47331  |
| UN67573 | Rsa1.0.03089.1 | 474 | 25465  | 5.00E-54  | 127 | 132 | 96 +  | 240 | 370 | 8405   | 8536   |
| UN67574 | Rsa1.0.01623.1 | 718 | 42065  | 1.00E-76  | 149 | 150 | 99 -  | 233 | 382 | 38714  | 38863  |
| UN67575 | Rsa1.0.04596.1 | 628 | 16709  | 1.00E-136 | 310 | 337 | 91 +  | 314 | 628 | 2      | 338    |
| UN67576 | Rsa1.0.00340.1 | 686 | 305782 | 1.00E-129 | 282 | 296 | 95 -  | 393 | 686 | 194357 | 194649 |
| UN67577 | Rsa1.0.10038.1 | 242 | 6029   | 8.00E-79  | 228 | 248 | 91 -  | 2   | 242 | 1056   | 1299   |
| UN67578 | Rsa1.0.00286.1 | 692 | 98709  | 1.00E-113 | 248 | 260 | 95 -  | 387 | 645 | 55588  | 55847  |
| UN67579 | Rsa1.0.00623.1 | 447 | 207630 | 0         | 401 | 417 | 96 +  | 38  | 447 | 164996 | 165412 |
| UN67580 | Rsa1.0.05506.1 | 604 | 13495  | 1.00E-161 | 318 | 327 | 97 -  | 279 | 604 | 4933   | 5259   |
| UN67581 | Rsa1.0.00805.1 | 469 | 63724  | 0         | 426 | 457 | 93 -  | 19  | 469 | 57886  | 58342  |
| UN67582 | Rsa1.0.00300.1 | 668 | 97747  | 3.00E-65  | 133 | 135 | 98 -  | 189 | 323 | 34226  | 34360  |
| UN67583 | Rsa1.0.07148.1 | 806 | 9825   | 0         | 695 | 731 | 95 +  | 50  | 767 | 8699   | 9419   |
| UN67584 | Rsa1.0.00049.1 | 725 | 167018 | 1.00E-127 | 282 | 297 | 94 +  | 431 | 723 | 78480  | 78776  |
| UN67585 | Rsa1.0.17273.1 | 567 | 1874   | 1.00E-115 | 220 | 223 | 98 +  | 7   | 229 | 1127   | 1349   |

| UN67586 | #              | #   | #      | #         | #   | #   | #     | #   | #   | #      | #      | # |
|---------|----------------|-----|--------|-----------|-----|-----|-------|-----|-----|--------|--------|---|
| UN67587 | Rsa1.0_03084.1 | 643 | 25506  | 2.00E-91  | 324 | 371 | 87 -  | 275 | 643 | 9795   | 10144  |   |
| UN67588 | Rsa1.0_00318.1 | 733 | 96094  | 0         | 729 | 733 | 99 -  | 2   | 733 | 79782  | 80514  |   |
| UN67589 | Rsa1.0_02976.1 | 727 | 26315  | 0         | 362 | 371 | 97 -  | 3   | 373 | 17585  | 17955  |   |
| UN67590 | Rsa1.0_00496.1 | 649 | 79834  | 0         | 564 | 568 | 99 -  | 2   | 569 | 64988  | 65555  |   |
| UN67591 | Rsa1.0_00198.1 | 153 | 222963 | 2.00E-78  | 151 | 152 | 99 +  | 2   | 153 | 18443  | 18594  |   |
| UN67592 | Rsa1.0_00985.1 | 558 | 161950 | 0         | 364 | 364 | 100 + | 195 | 558 | 47336  | 47699  |   |
| UN67593 | Rsa1.0_01868.1 | 623 | 150904 | 9.00E-87  | 169 | 171 | 98 +  | 387 | 557 | 3130   | 3300   |   |
| UN67594 | Rsa1.0_00002.1 | 613 | 601661 | 1.00E-171 | 339 | 348 | 97 +  | 255 | 600 | 289356 | 289703 |   |
| UN67595 | Rsa1.0_00050.1 | 795 | 237174 | 1.00E-156 | 364 | 386 | 94 +  | 3   | 382 | 8746   | 9126   |   |
| UN67596 | Rsa1.0_00888.1 | 823 | 60978  | 1.00E-116 | 224 | 228 | 98 +  | 321 | 548 | 52249  | 52476  |   |
| UN67597 | Rsa1.0_00040.1 | 695 | 324196 | 0         | 559 | 562 | 99 +  | 132 | 693 | 171219 | 171779 |   |
| UN67598 | Rsa1.0_03344.1 | 723 | 23593  | 0         | 671 | 684 | 98 -  | 31  | 711 | 17430  | 18113  |   |
| UN67599 | Rsa1.0_06225.1 | 484 | 11443  | 0         | 472 | 483 | 97 -  | 6   | 484 | 8420   | 8902   |   |
| UN67600 | Rsa1.0_01105.1 | 604 | 53958  | 0         | 340 | 340 | 100 + | 1   | 340 | 16201  | 16540  |   |
| UN67601 | Rsa1.0_06716.1 | 421 | 10482  | 2.00E-83  | 200 | 208 | 96 -  | 148 | 349 | 3285   | 3492   |   |
| UN67602 | Rsa1.0_00083.1 | 658 | 442773 | 1.00E-136 | 278 | 286 | 97 -  | 365 | 648 | 143273 | 143558 |   |
| UN67603 | Rsa1.0_01669.1 | 700 | 41286  | 1.00E-119 | 244 | 253 | 96 -  | 114 | 366 | 12514  | 12766  |   |
| UN67604 | Rsa1.0_00674.1 | 803 | 193753 | 1.00E-174 | 319 | 322 | 99 -  | 3   | 324 | 190734 | 191055 |   |
| UN67605 | Rsa1.0_01360.1 | 729 | 47246  | 0         | 698 | 717 | 97 -  | 1   | 708 | 12755  | 13471  |   |
| UN67606 | Rsa1.0_02680.1 | 692 | 28721  | 1.00E-76  | 159 | 162 | 98 -  | 7   | 167 | 7882   | 8043   |   |
| UN67607 | Rsa1.0_08807.1 | 821 | 6906   | 0         | 351 | 352 | 99 +  | 213 | 563 | 993    | 1344   |   |
| UN67608 | Rsa1.0_02499.1 | 817 | 30774  | 4.00E-99  | 214 | 224 | 95 -  | 3   | 221 | 2233   | 2456   |   |
| UN67609 | Rsa1.0_03181.1 | 860 | 24763  | 2.00E-76  | 149 | 150 | 99 -  | 2   | 151 | 17156  | 17305  |   |
| UN67610 | Rsa1.0_09457.1 | 685 | 6353   | 1.00E-145 | 301 | 313 | 96 -  | 374 | 685 | 4334   | 4646   |   |
| UN67611 | Rsa1.0_00222.1 | 659 | 172263 | 1.00E-156 | 342 | 361 | 94 -  | 99  | 458 | 87416  | 87763  |   |
| UN67612 | Rsa1.0_04369.1 | 751 | 17703  | 0         | 689 | 700 | 98 +  | 54  | 751 | 3016   | 3715   |   |
| UN67613 | Rsa1.0_00923.1 | 337 | 153678 | 1.00E-69  | 181 | 198 | 91 -  | 140 | 337 | 57062  | 57250  |   |
| UN67614 | Rsa1.0_00179.1 | 828 | 393324 | 1.00E-111 | 204 | 204 | 100 + | 18  | 221 | 203860 | 204063 |   |
| UN67615 | Rsa1.0_00047.1 | 827 | 168582 | 1.00E-115 | 220 | 223 | 98 -  | 67  | 289 | 160764 | 160986 |   |
| UN67616 | Rsa1.0_00061.1 | 612 | 218685 | 1.00E-172 | 317 | 320 | 99 -  | 3   | 319 | 167440 | 167759 |   |
| UN67617 | Rsa1.0_02692.1 | 779 | 28626  | 0         | 425 | 454 | 93 -  | 1   | 454 | 21962  | 22415  |   |
| UN67618 | Rsa1.0_03834.1 | 835 | 20572  | 0         | 740 | 757 | 97 +  | 3   | 757 | 11804  | 12560  |   |
| UN67619 | Rsa1.0_30856.1 | 686 | 743    | 1.00E-117 | 242 | 251 | 96 +  | 210 | 460 | 493    | 743    |   |
| UN67620 | Rsa1.0_00015.1 | 726 | 561803 | 0         | 594 | 625 | 95 +  | 106 | 726 | 443074 | 443698 |   |
| UN67621 | Rsa1.0_00088.1 | 859 | 141341 | 0         | 627 | 629 | 99 -  | 3   | 631 | 87619  | 88247  |   |
| UN67622 | Rsa1.0_00102.1 | 528 | 135497 | 1.00E-115 | 211 | 211 | 100 - | 209 | 419 | 98549  | 98759  |   |
| UN67623 | Rsa1.0_01336.1 | 709 | 47853  | 0         | 559 | 581 | 96 -  | 137 | 709 | 41903  | 42483  |   |
| UN67624 | Rsa1.0_05063.1 | 269 | 14951  | 4.00E-22  | 57  | 58  | 98 -  | 1   | 58  | 10191  | 10248  |   |



|         |                |     |        |           |     |     |       |     |     |        |        |
|---------|----------------|-----|--------|-----------|-----|-----|-------|-----|-----|--------|--------|
| UN67625 | Rsa1.0.00110.1 | 622 | 132719 | 0         | 513 | 535 | 95 -  | 26  | 559 | 52450  | 52984  |
| UN67626 | Rsa1.0.00165.1 | 586 | 116466 | 1.00E-178 | 368 | 382 | 96 -  | 7   | 382 | 27250  | 27631  |
| UN67627 | Rsa1.0.05995.1 | 662 | 11997  | 1.00E-55  | 114 | 115 | 99 +  | 548 | 662 | 3649   | 3763   |
| UN67628 | Rsa1.0.03560.1 | 608 | 22092  | 1.00E-150 | 326 | 345 | 94 -  | 49  | 387 | 5170   | 5514   |
| UN67629 | Rsa1.0.02177.1 | 796 | 34262  | 0         | 612 | 613 | 99 +  | 184 | 796 | 3390   | 4002   |
| UN67630 | Rsa1.0.00428.1 | 651 | 85599  | 4.00E-61  | 138 | 144 | 95 +  | 341 | 484 | 29341  | 29484  |
| UN67631 | Rsa1.0.00487.1 | 789 | 80674  | 1.00E-172 | 309 | 310 | 99 -  | 1   | 310 | 75851  | 76160  |
| UN67632 | Rsa1.0.00187.1 | 624 | 393093 | 1.00E-179 | 350 | 360 | 97 -  | 265 | 624 | 51332  | 51688  |
| UN67633 | Rsa1.0.29967.1 | 588 | 767    | 0         | 504 | 521 | 96 -  | 3   | 522 | 1      | 519    |
| UN67634 | Rsa1.0.00302.1 | 813 | 97521  | 0         | 621 | 636 | 97 +  | 3   | 638 | 36771  | 37406  |
| UN67635 | Rsa1.0.02326.1 | 619 | 32503  | 1.00E-154 | 305 | 314 | 97 +  | 10  | 320 | 4215   | 4528   |
| UN67636 | Rsa1.0.06430.1 | 537 | 11034  | 0         | 521 | 553 | 94 -  | 1   | 537 | 801    | 1353   |
| UN67637 | Rsa1.0.00492.1 | 751 | 80178  | 3.00E-78  | 161 | 165 | 97 +  | 232 | 396 | 6026   | 6190   |
| UN67638 | Rsa1.0.02321.1 | 781 | 32572  | 0         | 722 | 787 | 91 +  | 3   | 770 | 17351  | 18135  |
| UN67639 | Rsa1.0.01209.1 | 347 | 50668  | 0         | 343 | 347 | 98 +  | 1   | 347 | 48244  | 48590  |
| UN67640 | Rsa1.0.01295.1 | 713 | 49040  | 0         | 551 | 561 | 98 -  | 115 | 675 | 8398   | 8958   |
| UN67641 | Rsa1.0.00347.1 | 606 | 93048  | 1.00E-95  | 221 | 234 | 94 -  | 3   | 235 | 82099  | 82332  |
| UN67642 | Rsa1.0.00261.1 | 474 | 151157 | 8.00E-96  | 184 | 186 | 98 +  | 283 | 468 | 3065   | 3250   |
| UN67643 | Rsa1.0.00491.1 | 629 | 80219  | 0         | 442 | 461 | 95 +  | 5   | 461 | 75463  | 75923  |
| UN67644 | Rsa1.0.03420.1 | 768 | 23090  | 3.00E-62  | 122 | 122 | 100 - | 189 | 310 | 10007  | 10128  |
| UN67645 | Rsa1.0.03148.1 | 790 | 24989  | 1.00E-49  | 104 | 105 | 99 +  | 419 | 523 | 15131  | 15235  |
| UN67646 | Rsa1.0.03100.1 | 450 | 25411  | 0         | 336 | 336 | 100 + | 115 | 450 | 1938   | 2273   |
| UN67647 | Rsa1.0.39696.1 | 806 | 566    | 1.00E-95  | 193 | 198 | 97 -  | 46  | 243 | 196    | 393    |
| UN67648 | Rsa1.0.00071.1 | 586 | 345714 | 0         | 362 | 371 | 97 -  | 3   | 372 | 40988  | 41357  |
| UN67649 | Rsa1.0.37576.1 | 724 | 600    | 2.00E-23  | 139 | 168 | 82 +  | 479 | 631 | 379    | 546    |
| UN67650 | Rsa1.0.00331.1 | 687 | 176754 | 1.00E-126 | 259 | 269 | 96 -  | 211 | 479 | 99499  | 99767  |
| UN67651 | Rsa1.0.01487.1 | 568 | 44784  | 1.00E-162 | 293 | 294 | 99 +  | 275 | 568 | 13176  | 13469  |
| UN67652 | Rsa1.0.01409.1 | 752 | 151595 | 0         | 479 | 488 | 98 -  | 264 | 750 | 143875 | 144362 |
| UN67653 | Rsa1.0.01422.1 | 666 | 46172  | 0         | 643 | 665 | 96 +  | 3   | 666 | 39170  | 39831  |
| UN67654 | Rsa1.0.00017.1 | 571 | 752458 | 8.00E-84  | 215 | 234 | 91 -  | 230 | 463 | 746774 | 747007 |
| UN67655 | Rsa1.0.00156.1 | 645 | 118383 | 0         | 468 | 470 | 99 -  | 176 | 645 | 1132   | 1601   |
| UN67656 | Rsa1.0.02952.1 | 803 | 26492  | 0         | 389 | 405 | 96 -  | 1   | 405 | 1633   | 2037   |
| UN67657 | Rsa1.0.06320.1 | 779 | 11242  | 0         | 460 | 464 | 99 -  | 204 | 667 | 6123   | 6586   |
| UN67658 | Rsa1.0.03339.1 | 641 | 23623  | 1.00E-104 | 195 | 196 | 99 +  | 2   | 197 | 18222  | 18417  |
| UN67659 | Rsa1.0.01806.1 | 757 | 39021  | 0         | 727 | 730 | 99 -  | 1   | 730 | 24395  | 25123  |
| UN67660 | Rsa1.0.13686.1 | 810 | 4480   | 1.00E-104 | 210 | 216 | 97 -  | 354 | 569 | 3563   | 3778   |
| UN67661 | Rsa1.0.09409.1 | 642 | 6390   | 1.00E-121 | 220 | 220 | 100 - | 218 | 437 | 4604   | 4823   |
| UN67662 | Rsa1.0.00008.1 | 770 | 358124 | 0         | 460 | 473 | 97 -  | 172 | 644 | 218361 | 218833 |
| UN67663 | Rsa1.0.01715.1 | 618 | 40489  | 5.00E-70  | 145 | 147 | 98 +  | 473 | 618 | 2586   | 2732   |

|         |                |     |        |           |     |     |       |     |     |        |        |
|---------|----------------|-----|--------|-----------|-----|-----|-------|-----|-----|--------|--------|
| UN67664 | Rsa1.0_15314.1 | 795 | 2690   | 2.00E-73  | 185 | 199 | 92 +  | 243 | 441 | 2177   | 2372   |
| UN67665 | Rsa1.0_07382.1 | 781 | 9487   | 0         | 571 | 601 | 95 -  | 175 | 767 | 8072   | 8671   |
| UN67666 | Rsa1.0_02078.1 | 802 | 35308  | 0         | 467 | 481 | 97 -  | 3   | 483 | 22716  | 23196  |
| UN67667 | Rsa1.0_00067.1 | 743 | 415055 | 0         | 638 | 640 | 99 -  | 105 | 743 | 175609 | 176248 |
| UN67668 | Rsa1.0_00712.1 | 697 | 67217  | 0         | 676 | 697 | 96 +  | 2   | 697 | 46499  | 47195  |
| UN67669 | Rsa1.0_01766.1 | 798 | 39617  | 9.00E-32  | 86  | 91  | 94 -  | 689 | 779 | 2968   | 3058   |
| UN67670 | Rsa1.0_12091.1 | 826 | 5316   | 4.00E-74  | 171 | 178 | 96 +  | 575 | 750 | 456    | 633    |
| UN67671 | Rsa1.0_00179.1 | 697 | 393324 | 0         | 402 | 404 | 99 +  | 160 | 563 | 204310 | 204713 |
| UN67672 | Rsa1.0_00671.1 | 774 | 397884 | 0         | 401 | 402 | 99 +  | 2   | 403 | 175624 | 176025 |
| UN67673 | Rsa1.0_02506.1 | 146 | 30700  | 4.00E-42  | 127 | 143 | 88 +  | 4   | 146 | 14164  | 14293  |
| UN67674 | Rsa1.0_04692.1 | 751 | 16357  | 0         | 661 | 669 | 98 +  | 89  | 750 | 12109  | 12777  |
| UN67675 | Rsa1.0_04762.1 | 638 | 16101  | 0         | 588 | 608 | 96 -  | 40  | 638 | 10289  | 10893  |
| UN67676 | Rsa1.0_03113.1 | 519 | 25318  | 1.00E-178 | 331 | 336 | 98 -  | 181 | 516 | 12761  | 13096  |
| UN67677 | Rsa1.0_00202.1 | 637 | 185895 | 1.00E-158 | 282 | 282 | 100 - | 4   | 285 | 149570 | 149851 |
| UN67678 | Rsa1.0_01249.1 | 835 | 188432 | 0         | 648 | 675 | 96 +  | 174 | 833 | 149233 | 149907 |
| UN67679 | Rsa1.0_04576.1 | 749 | 16783  | 0         | 734 | 752 | 97 +  | 1   | 749 | 4557   | 5302   |
| UN67680 | Rsa1.0_01606.1 | 718 | 42432  | 0         | 541 | 559 | 96 -  | 154 | 711 | 9311   | 9869   |
| UN67681 | Rsa1.0_00013.1 | 791 | 292129 | 1.00E-179 | 339 | 343 | 98 +  | 3   | 344 | 74109  | 74450  |
| UN67682 | Rsa1.0_04618.1 | 554 | 16623  | 0         | 553 | 553 | 100 + | 2   | 554 | 2918   | 3470   |
| UN67683 | Rsa1.0_06136.1 | 604 | 11659  | 0         | 430 | 457 | 94 -  | 158 | 602 | 3920   | 4370   |
| UN67684 | Rsa1.0_00949.1 | 658 | 58549  | 0         | 637 | 658 | 96 +  | 2   | 658 | 57228  | 57885  |
| UN67685 | Rsa1.0_01633.1 | 638 | 41868  | 1.00E-132 | 278 | 291 | 95 -  | 59  | 349 | 3901   | 4191   |
| UN67686 | Rsa1.0_00577.1 | 778 | 174827 | 0         | 542 | 569 | 95 +  | 211 | 777 | 18957  | 19525  |
| UN67687 | Rsa1.0_03960.1 | 772 | 19864  | 1.00E-163 | 322 | 332 | 96 +  | 122 | 453 | 6051   | 6382   |
| UN67688 | Rsa1.0_01523.1 | 422 | 43959  | 1.00E-106 | 377 | 434 | 86 -  | 4   | 422 | 28109  | 28522  |
| UN67689 | Rsa1.0_01483.1 | 645 | 44826  | 0         | 635 | 644 | 98 +  | 2   | 645 | 22384  | 23027  |
| UN67690 | Rsa1.0_09002.1 | 558 | 137863 | 1.00E-166 | 299 | 300 | 99 +  | 259 | 558 | 135090 | 135389 |
| UN67691 | Rsa1.0_00190.1 | 636 | 318240 | 0         | 605 | 631 | 95 -  | 6   | 636 | 146797 | 147427 |
| UN67692 | Rsa1.0_02107.1 | 716 | 34940  | 0         | 666 | 680 | 97 -  | 3   | 682 | 32887  | 33566  |
| UN67693 | Rsa1.0_00214.1 | 756 | 107508 | 0         | 396 | 415 | 95 +  | 259 | 658 | 102294 | 102708 |
| UN67694 | Rsa1.0_06580.1 | 643 | 10723  | 1.00E-107 | 204 | 206 | 99 +  | 203 | 408 | 4180   | 4385   |
| UN67695 | Rsa1.0_01606.1 | 779 | 42432  | 0         | 677 | 695 | 97 -  | 88  | 779 | 41231  | 41925  |
| UN67696 | Rsa1.0_00356.1 | 514 | 91521  | 1.00E-133 | 259 | 265 | 97 +  | 122 | 386 | 47880  | 48144  |
| UN67697 | Rsa1.0_00059.1 | 673 | 159650 | 1.00E-100 | 209 | 217 | 96 +  | 217 | 433 | 63089  | 63305  |
| UN67698 | Rsa1.0_00035.1 | 621 | 176449 | 1.00E-116 | 215 | 216 | 99 +  | 3   | 218 | 86564  | 86779  |
| UN67699 | Rsa1.0_03032.1 | 692 | 25836  | 5.00E-64  | 174 | 189 | 92 -  | 4   | 191 | 12511  | 12699  |
| UN67700 | Rsa1.0_03701.1 | 487 | 21296  | 0         | 415 | 429 | 96 +  | 2   | 429 | 10140  | 10568  |
| UN67701 | Rsa1.0_00187.1 | 820 | 393093 | 1.00E-132 | 521 | 621 | 83 -  | 14  | 617 | 242271 | 242849 |
| UN67702 | Rsa1.0_03317.1 | 302 | 23782  | 1.00E-115 | 242 | 252 | 96 -  | 2   | 250 | 7686   | 7937   |

|         |                |     |        |           |     |     |       |     |     |        |        |
|---------|----------------|-----|--------|-----------|-----|-----|-------|-----|-----|--------|--------|
| UN67703 | Rsa1.0_04408.1 | 703 | 17500  | 1.00E-129 | 261 | 270 | 96 +  | 434 | 703 | 15447  | 15716  |
| UN67704 | Rsa1.0_00890.1 | 713 | 323870 | 0         | 423 | 439 | 96 -  | 141 | 570 | 167026 | 167464 |
| UN67705 | Rsa1.0_01064.1 | 386 | 55295  | 1.00E-102 | 350 | 397 | 88 -  | 2   | 385 | 50742  | 51132  |
| UN67706 | Rsa1.0_00638.1 | 765 | 71037  | 0         | 455 | 489 | 93 -  | 4   | 488 | 7718   | 8194   |
| UN67707 | Rsa1.0_00224.1 | 171 | 327530 | 1.00E-70  | 144 | 147 | 97 +  | 25  | 171 | 199796 | 199942 |
| UN67708 | Rsa1.0_25169.1 | 666 | 948    | 1.00E-162 | 289 | 289 | 100 + | 3   | 291 | 300    | 588    |
| UN67709 | Rsa1.0_01944.1 | 730 | 37037  | 1.00E-104 | 206 | 209 | 98 -  | 3   | 211 | 34585  | 34792  |
| UN67710 | Rsa1.0_03178.1 | 606 | 24798  | 1.00E-166 | 515 | 584 | 88 -  | 1   | 571 | 9555   | 10127  |
| UN67711 | Rsa1.0_05462.1 | 490 | 13671  | 0         | 484 | 490 | 98 -  | 1   | 490 | 6069   | 6558   |
| UN67712 | Rsa1.0_12132.1 | 368 | 5306   | 2.00E-86  | 198 | 209 | 94 -  | 3   | 211 | 136    | 342    |
| UN67713 | Rsa1.0_02286.1 | 620 | 32993  | 1.00E-147 | 265 | 265 | 100 - | 1   | 265 | 7743   | 8007   |
| UN67714 | Rsa1.0_01169.1 | 766 | 51829  | 0         | 759 | 777 | 97 -  | 1   | 766 | 37128  | 37904  |
| UN67715 | Rsa1.0_01484.1 | 415 | 44806  | 0         | 366 | 369 | 99 +  | 2   | 367 | 37962  | 38330  |
| UN67716 | Rsa1.0_03292.1 | 743 | 23977  | 0         | 447 | 458 | 97 +  | 289 | 743 | 10302  | 10759  |
| UN67717 | Rsa1.0_02142.1 | 788 | 34633  | 1.00E-103 | 215 | 222 | 96 +  | 3   | 224 | 14207  | 14427  |
| UN67718 | Rsa1.0_00645.1 | 456 | 189716 | 4.00E-85  | 181 | 188 | 96 -  | 64  | 251 | 35226  | 35413  |
| UN67719 | Rsa1.0_00302.1 | 767 | 97521  | 0         | 762 | 767 | 99 +  | 1   | 764 | 4342   | 5108   |
| UN67720 | Rsa1.0_04518.1 | 278 | 17005  | 1.00E-77  | 157 | 159 | 98 -  | 118 | 276 | 12892  | 13049  |
| UN67721 | Rsa1.0_00734.1 | 792 | 66508  | 0         | 484 | 490 | 98 -  | 2   | 490 | 52167  | 52656  |
| UN67722 | Rsa1.0_00838.1 | 668 | 153820 | 0         | 382 | 394 | 96 +  | 3   | 395 | 2111   | 2496   |
| UN67723 | Rsa1.0_01753.1 | 769 | 39794  | 0         | 568 | 610 | 93 +  | 1   | 587 | 8607   | 9202   |
| UN67724 | Rsa1.0_00020.1 | 705 | 283099 | 0         | 630 | 643 | 97 -  | 63  | 704 | 101431 | 102073 |
| UN67725 | Rsa1.0_00079.1 | 764 | 606987 | 0         | 443 | 452 | 98 +  | 293 | 740 | 134304 | 134755 |
| UN67726 | Rsa1.0_00233.1 | 639 | 104918 | 0         | 406 | 431 | 94 -  | 212 | 639 | 54033  | 54459  |
| UN67727 | Rsa1.0_00665.1 | 739 | 69539  | 0         | 435 | 436 | 99 -  | 3   | 438 | 40741  | 41176  |
| UN67728 | Rsa1.0_00069.1 | 611 | 403561 | 2.00E-87  | 164 | 164 | 100 + | 179 | 342 | 199919 | 200082 |
| UN67729 | Rsa1.0_00079.1 | 692 | 606987 | 0         | 681 | 684 | 99 -  | 2   | 685 | 489657 | 490340 |
| UN67730 | Rsa1.0_15714.1 | 414 | 2466   | 8.00E-31  | 122 | 139 | 87 -  | 15  | 153 | 2235   | 2370   |
| UN67731 | Rsa1.0_04029.1 | 609 | 19491  | 1.00E-149 | 319 | 336 | 94 +  | 262 | 597 | 5869   | 6204   |
| UN67732 | Rsa1.0_15871.1 | 689 | 2381   | 1.00E-112 | 205 | 205 | 100 + | 103 | 307 | 272    | 476    |
| UN67733 | Rsa1.0_02728.1 | 546 | 28400  | 1.00E-79  | 154 | 155 | 99 +  | 126 | 280 | 13955  | 14109  |
| UN67734 | Rsa1.0_01956.1 | 741 | 36847  | 0         | 447 | 457 | 97 +  | 289 | 741 | 21617  | 22073  |
| UN67735 | Rsa1.0_01659.1 | 675 | 164577 | 1.00E-110 | 206 | 207 | 99 -  | 104 | 310 | 151289 | 151495 |
| UN67736 | Rsa1.0_02884.1 | 630 | 27034  | 1.00E-114 | 232 | 239 | 97 +  | 61  | 296 | 14486  | 14724  |
| UN67737 | Rsa1.0_04928.1 | 715 | 15420  | 0         | 626 | 629 | 99 -  | 1   | 628 | 10149  | 10777  |
| UN67738 | Rsa1.0_02228.1 | 711 | 33688  | 1.00E-119 | 227 | 229 | 99 -  | 254 | 481 | 29799  | 30027  |
| UN67739 | Rsa1.0_00261.1 | 274 | 151157 | 1.00E-31  | 76  | 78  | 97 -  | 68  | 145 | 74551  | 74628  |
| UN67740 | Rsa1.0_00966.1 | 785 | 58136  | 0         | 675 | 681 | 99 -  | 2   | 681 | 32204  | 32884  |
| UN67741 | Rsa1.0_09635.1 | 745 | 6241   | 0         | 542 | 563 | 96 -  | 186 | 745 | 5692   | 6241   |

|         |                |     |        |           |     |     |       |     |     |        |        |
|---------|----------------|-----|--------|-----------|-----|-----|-------|-----|-----|--------|--------|
| UN67742 | Rsa1.0.00765.1 | 722 | 65029  | 1.00E-134 | 243 | 243 | 100 - | 27  | 269 | 36181  | 36423  |
| UN67743 | Rsa1.0.03366.1 | 720 | 23401  | 0         | 408 | 410 | 99 +  | 198 | 606 | 9183   | 9592   |
| UN67744 | Rsa1.0.10631.1 | 588 | 5776   | 0         | 572 | 587 | 97 -  | 2   | 588 | 4508   | 5092   |
| UN67745 | Rsa1.0.01893.1 | 620 | 37520  | 1.00E-121 | 252 | 263 | 95 -  | 3   | 265 | 7294   | 7545   |
| UN67746 | Rsa1.0.00064.1 | 379 | 240927 | 6.00E-93  | 207 | 217 | 95 +  | 160 | 376 | 7959   | 8174   |
| UN67747 | Rsa1.0.11380.1 | 667 | 5526   | 0         | 534 | 538 | 99 +  | 131 | 667 | 553    | 1090   |
| UN67748 | Rsa1.0.02458.1 | 315 | 31197  | 1.00E-167 | 311 | 313 | 99 -  | 2   | 312 | 9254   | 9566   |
| UN67749 | Rsa1.0.00962.1 | 579 | 184909 | 0         | 533 | 534 | 99 +  | 2   | 535 | 9002   | 9535   |
| UN67750 | Rsa1.0.00006.1 | 356 | 396176 | 1.00E-147 | 332 | 354 | 93 -  | 3   | 356 | 362092 | 362442 |
| UN67751 | Rsa1.0.02532.1 | 292 | 30403  | 7.00E-92  | 229 | 248 | 92 +  | 2   | 239 | 24549  | 24792  |
| UN67752 | Rsa1.0.03615.1 | 760 | 21766  | 7.00E-82  | 158 | 159 | 99 +  | 403 | 561 | 16413  | 16571  |
| UN67753 | Rsa1.0.35634.1 | 605 | 635    | 0         | 372 | 381 | 97 +  | 3   | 383 | 3      | 380    |
| UN67754 | Rsa1.0.00883.1 | 737 | 61230  | 8.00E-63  | 167 | 181 | 92 +  | 182 | 359 | 52523  | 52703  |
| UN67755 | Rsa1.0.00205.1 | 727 | 193401 | 0         | 367 | 380 | 96 +  | 87  | 466 | 180489 | 180862 |
| UN67756 | Rsa1.0.02438.1 | 628 | 31392  | 1.00E-142 | 280 | 287 | 97 -  | 3   | 287 | 25130  | 25416  |
| UN67757 | Rsa1.0.00248.1 | 602 | 163568 | 0         | 581 | 603 | 96 -  | 3   | 602 | 50924  | 51525  |
| UN67758 | Rsa1.0.00987.1 | 763 | 57543  | 0         | 589 | 607 | 97 -  | 2   | 607 | 4713   | 5319   |
| UN67759 | Rsa1.0.00363.1 | 707 | 90968  | 1.00E-165 | 340 | 351 | 96 +  | 320 | 667 | 21396  | 21746  |
| UN67760 | Rsa1.0.02276.1 | 380 | 33098  | 0         | 374 | 383 | 97 +  | 1   | 380 | 22308  | 22690  |
| UN67761 | Rsa1.0.00167.1 | 660 | 116000 | 0         | 657 | 660 | 99 -  | 1   | 660 | 12982  | 13639  |
| UN67762 | Rsa1.0.00168.1 | 564 | 115870 | 0         | 521 | 560 | 93 -  | 2   | 561 | 30842  | 31401  |
| UN67763 | Rsa1.0.00632.1 | 313 | 183777 | 1.00E-158 | 310 | 315 | 98 -  | 1   | 313 | 45519  | 45832  |
| UN67764 | Rsa1.0.00581.1 | 164 | 163575 | 2.00E-60  | 151 | 163 | 92 +  | 2   | 164 | 25288  | 25442  |
| UN67765 | Rsa1.0.00392.1 | 511 | 88523  | 0         | 376 | 383 | 98 -  | 129 | 511 | 9942   | 10324  |
| UN67766 | Rsa1.0.00460.1 | 803 | 206387 | 0         | 725 | 827 | 87 -  | 2   | 803 | 203526 | 204316 |
| UN67767 | Rsa1.0.00178.1 | 498 | 114861 | 0         | 472 | 496 | 95 +  | 5   | 498 | 60649  | 61144  |
| UN67768 | Rsa1.0.03545.1 | 649 | 147543 | 0         | 510 | 519 | 98 +  | 3   | 521 | 7331   | 7849   |
| UN67769 | Rsa1.0.06971.1 | 638 | 10085  | 1.00E-76  | 155 | 158 | 98 -  | 383 | 540 | 5075   | 5232   |
| UN67770 | Rsa1.0.00045.1 | 711 | 328694 | 1.00E-178 | 348 | 357 | 97 +  | 347 | 702 | 229948 | 230304 |
| UN67771 | Rsa1.0.01032.1 | 649 | 56189  | 0         | 422 | 425 | 99 -  | 223 | 644 | 45127  | 45551  |
| UN67772 | Rsa1.0.18947.1 | 721 | 1506   | 0         | 485 | 511 | 94 -  | 99  | 607 | 690    | 1193   |
| UN67773 | Rsa1.0.00350.1 | 559 | 92346  | 0         | 475 | 514 | 92 +  | 8   | 518 | 45516  | 46029  |
| UN67774 | Rsa1.0.20190.1 | 805 | 1330   | 0         | 711 | 760 | 93 -  | 2   | 757 | 108    | 866    |
| UN67775 | Rsa1.0.00839.1 | 741 | 62533  | 0         | 721 | 743 | 97 +  | 3   | 741 | 7762   | 8498   |
| UN67776 | Rsa1.0.07344.1 | 572 | 9528   | 4.00E-92  | 172 | 172 | 100 - | 3   | 174 | 4106   | 4277   |
| UN67777 | Rsa1.0.03851.1 | 117 | 20451  | 4.00E-57  | 112 | 112 | 100 + | 1   | 112 | 5494   | 5605   |
| UN67778 | Rsa1.0.00616.1 | 599 | 195713 | 2.00E-75  | 153 | 156 | 98 +  | 6   | 161 | 142574 | 142729 |
| UN67779 | Rsa1.0.01707.1 | 687 | 40686  | 1.00E-101 | 213 | 220 | 96 +  | 452 | 670 | 16252  | 16471  |
| UN67780 | Rsa1.0.00837.1 | 711 | 62568  | 0         | 696 | 715 | 97 -  | 1   | 711 | 24023  | 24737  |

|         |                |     |        |           |     |     |       |     |     |        |        |
|---------|----------------|-----|--------|-----------|-----|-----|-------|-----|-----|--------|--------|
| UN67781 | Rsa1.0.08548.1 | 748 | 7212   | 0         | 745 | 747 | 99 +  | 2   | 748 | 2332   | 3078   |
| UN67782 | Rsa1.0.00177.1 | 621 | 143394 | 1.00E-176 | 367 | 384 | 95 +  | 1   | 384 | 16959  | 17340  |
| UN67783 | Rsa1.0.05838.1 | 102 | 12479  | 2.00E-46  | 100 | 102 | 98 -  | 1   | 102 | 5495   | 5596   |
| UN67784 | Rsa1.0.01763.1 | 672 | 39659  | 0         | 588 | 625 | 94 +  | 54  | 672 | 868    | 1483   |
| UN67785 | Rsa1.0.04371.1 | 467 | 17700  | 1.00E-148 | 334 | 350 | 95 +  | 120 | 467 | 12630  | 12976  |
| UN67786 | Rsa1.0.01493.1 | 772 | 44670  | 0         | 473 | 499 | 94 +  | 3   | 498 | 5426   | 5924   |
| UN67787 | Rsa1.0.13154.1 | 479 | 4990   | 2.00E-13  | 67  | 76  | 88 +  | 341 | 416 | 4316   | 4391   |
| UN67788 | Rsa1.0.01210.1 | 633 | 50663  | 2.00E-20  | 67  | 72  | 93 +  | 402 | 473 | 5557   | 5628   |
| UN67789 | Rsa1.0.01484.1 | 216 | 44806  | 1.00E-116 | 211 | 211 | 100 + | 3   | 213 | 37088  | 37298  |
| UN67790 | Rsa1.0.08399.1 | 555 | 7424   | 1.00E-147 | 300 | 312 | 96 -  | 2   | 313 | 219    | 530    |
| UN67791 | Rsa1.0.00579.1 | 507 | 148308 | 2.00E-75  | 186 | 198 | 93 +  | 3   | 197 | 69464  | 69655  |
| UN67792 | Rsa1.0.05420.1 | 757 | 13808  | 5.00E-21  | 106 | 121 | 87 +  | 628 | 741 | 3184   | 3304   |
| UN67793 | Rsa1.0.00679.1 | 358 | 68971  | 1.00E-163 | 343 | 357 | 96 -  | 2   | 358 | 49737  | 50088  |
| UN67794 | Rsa1.0.01938.1 | 642 | 264018 | 0         | 630 | 642 | 98 +  | 1   | 642 | 156095 | 156735 |
| UN67795 | Rsa1.0.04027.1 | 155 | 19501  | 2.00E-75  | 143 | 143 | 100 + | 3   | 145 | 13781  | 13923  |
| UN67796 | Rsa1.0.15289.1 | 463 | 2707   | 0         | 452 | 462 | 97 +  | 2   | 463 | 1815   | 2276   |
| UN67797 | Rsa1.0.00116.1 | 612 | 365886 | 1.00E-164 | 426 | 471 | 90 +  | 148 | 612 | 141397 | 141852 |
| UN67798 | Rsa1.0.07321.1 | 710 | 9559   | 1.00E-156 | 361 | 384 | 94 -  | 324 | 705 | 8891   | 9268   |
| UN67799 | Rsa1.0.01857.1 | 772 | 38103  | 1.00E-147 | 335 | 356 | 94 +  | 386 | 734 | 6769   | 7124   |
| UN67800 | Rsa1.0.46459.1 | 604 | 486    | 2.00E-75  | 155 | 158 | 98 -  | 132 | 289 | 1      | 155    |
| UN67801 | Rsa1.0.00810.1 | 620 | 63289  | 1.00E-164 | 308 | 313 | 98 +  | 14  | 326 | 49242  | 49554  |
| UN67802 | Rsa1.0.00179.1 | 560 | 393324 | 5.00E-79  | 195 | 210 | 92 +  | 351 | 560 | 211561 | 211770 |
| UN67803 | Rsa1.0.00593.1 | 706 | 143463 | 1.00E-152 | 293 | 300 | 97 -  | 3   | 302 | 4707   | 5006   |
| UN67804 | Rsa1.0.00006.1 | 787 | 396176 | 1.00E-111 | 226 | 233 | 96 +  | 311 | 543 | 45843  | 46075  |
| UN67805 | Rsa1.0.06837.1 | 610 | 10287  | 1.00E-27  | 82  | 88  | 93 +  | 455 | 542 | 5827   | 5914   |
| UN67806 | Rsa1.0.00175.1 | 637 | 166121 | 1.00E-82  | 162 | 164 | 98 -  | 466 | 629 | 56662  | 56825  |
| UN67807 | Rsa1.0.03795.1 | 643 | 20818  | 1.00E-106 | 195 | 195 | 100 + | 194 | 388 | 14017  | 14211  |
| UN67808 | Rsa1.0.00215.1 | 351 | 201775 | 1.00E-158 | 286 | 287 | 99 -  | 2   | 288 | 152169 | 152455 |
| UN67809 | Rsa1.0.01565.1 | 618 | 155447 | 0         | 617 | 618 | 99 +  | 2   | 618 | 144803 | 145420 |
| UN67810 | Rsa1.0.02807.1 | 650 | 27680  | 1.00E-111 | 216 | 220 | 98 +  | 212 | 431 | 3676   | 3895   |
| UN67811 | Rsa1.0.00458.1 | 750 | 82717  | 0         | 600 | 605 | 99 +  | 126 | 727 | 77971  | 78574  |
| UN67812 | Rsa1.0.00739.1 | 229 | 66155  | 1.00E-74  | 222 | 247 | 89 +  | 1   | 229 | 7284   | 7528   |
| UN67813 | Rsa1.0.35196.1 | 616 | 643    | 0         | 418 | 421 | 99 +  | 153 | 573 | 223    | 643    |
| UN67814 | Rsa1.0.12514.1 | 748 | 5206   | 0         | 523 | 524 | 99 -  | 1   | 524 | 4677   | 5200   |
| UN67815 | Rsa1.0.00562.1 | 609 | 75565  | 0         | 473 | 484 | 97 -  | 129 | 609 | 2758   | 3241   |
| UN67816 | Rsa1.0.02508.1 | 114 | 30675  | 7.00E-34  | 73  | 73  | 100 - | 5   | 77  | 3078   | 3150   |
| UN67817 | Rsa1.0.00502.1 | 660 | 204180 | 0         | 413 | 425 | 97 +  | 8   | 432 | 72597  | 73021  |
| UN67818 | #              | #   | #      | #         | #   | #   | #     | #   | #   | #      | #      |
| UN67819 | Rsa1.0.01081.1 | 699 | 499226 | 4.00E-80  | 166 | 168 | 98 +  | 513 | 678 | 41616  | 41783  |

|         |                |     |        |           |     |     |       |     |     |        |        |
|---------|----------------|-----|--------|-----------|-----|-----|-------|-----|-----|--------|--------|
| UN67820 | Rsa1.0.01544.1 | 315 | 185602 | 1.00E-121 | 296 | 309 | 95 -  | 3   | 302 | 9761   | 10069  |
| UN67821 | Rsa1.0.00041.1 | 643 | 186197 | 4.00E-49  | 106 | 108 | 98 -  | 117 | 224 | 169979 | 170086 |
| UN67822 | Rsa1.0.00065.1 | 510 | 454616 | 1.00E-102 | 204 | 209 | 97 +  | 216 | 424 | 172779 | 172987 |
| UN67823 | Rsa1.0.06642.1 | 629 | 10616  | 1.00E-155 | 283 | 285 | 99 +  | 3   | 287 | 3728   | 4012   |
| UN67824 | Rsa1.0_10673.1 | 575 | 5760   | 1.00E-131 | 252 | 257 | 98 +  | 1   | 257 | 3846   | 4102   |
| UN67825 | Rsa1.0_02499.1 | 651 | 30774  | 0         | 385 | 385 | 100 + | 267 | 651 | 24595  | 24979  |
| UN67826 | #              | #   | #      | #         | #   | #   | #     | #   | #   | #      | #      |
| UN67827 | Rsa1.0.00014.1 | 607 | 348985 | 0         | 382 | 394 | 96 -  | 1   | 388 | 332698 | 333091 |
| UN67828 | Rsa1.0.08272.1 | 590 | 7617   | 0         | 448 | 451 | 99 +  | 141 | 590 | 4572   | 5022   |
| UN67829 | Rsa1.0.20038.1 | 639 | 1349   | 6.00E-91  | 170 | 170 | 100 - | 22  | 191 | 1180   | 1349   |
| UN67830 | Rsa1.0.00751.1 | 675 | 65759  | 1.00E-136 | 258 | 262 | 98 -  | 184 | 445 | 14056  | 14317  |
| UN67831 | Rsa1.0.00222.1 | 571 | 172263 | 0         | 552 | 582 | 94 +  | 3   | 571 | 148583 | 149162 |
| UN67832 | Rsa1.0.00706.1 | 610 | 291570 | 0         | 592 | 603 | 98 -  | 8   | 610 | 279631 | 280233 |
| UN67833 | Rsa1.0_14271.1 | 602 | 3591   | 0         | 433 | 462 | 93 +  | 3   | 443 | 1360   | 1821   |
| UN67834 | Rsa1.0.02045.1 | 381 | 35650  | 4.00E-69  | 157 | 165 | 95 +  | 12  | 176 | 20365  | 20529  |
| UN67835 | Rsa1.0.01280.1 | 627 | 49321  | 1.00E-174 | 338 | 346 | 97 +  | 283 | 627 | 29077  | 29422  |
| UN67836 | Rsa1.0.00294.1 | 780 | 144860 | 7.00E-88  | 180 | 185 | 97 -  | 525 | 709 | 70853  | 71037  |
| UN67837 | #              | #   | #      | #         | #   | #   | #     | #   | #   | #      | #      |
| UN67838 | Rsa1.0.01740.1 | 633 | 39986  | 0         | 447 | 449 | 99 +  | 1   | 449 | 35235  | 35683  |
| UN67839 | Rsa1.0.00368.1 | 585 | 90669  | 0         | 583 | 586 | 99 +  | 1   | 585 | 84200  | 84785  |
| UN67840 | Rsa1.0.00627.1 | 598 | 71566  | 4.00E-95  | 209 | 217 | 96 +  | 382 | 598 | 62449  | 62663  |
| UN67841 | Rsa1.0.04080.1 | 632 | 19198  | 1.00E-115 | 298 | 322 | 92 +  | 310 | 630 | 9679   | 9997   |
| UN67842 | Rsa1.0.00002.1 | 140 | 601661 | 5.00E-20  | 78  | 82  | 95 +  | 51  | 128 | 33357  | 33438  |
| UN67843 | Rsa1.0.00048.1 | 676 | 167185 | 0         | 440 | 450 | 97 +  | 35  | 481 | 108926 | 109374 |
| UN67844 | Rsa1.0.01240.1 | 730 | 50075  | 0         | 540 | 551 | 98 -  | 1   | 551 | 42083  | 42633  |
| UN67845 | Rsa1.0.00020.1 | 740 | 283099 | 1.00E-154 | 399 | 440 | 90 -  | 1   | 436 | 139535 | 139957 |
| UN67846 | Rsa1.0.00134.1 | 660 | 390219 | 0         | 628 | 664 | 94 -  | 3   | 660 | 134445 | 135108 |
| UN67847 | Rsa1.0.01189.1 | 668 | 51358  | 0         | 412 | 425 | 96 +  | 242 | 666 | 17124  | 17547  |
| UN67848 | Rsa1.0.01122.1 | 454 | 53369  | 0         | 445 | 453 | 98 +  | 2   | 454 | 40331  | 40783  |
| UN67849 | Rsa1.0.20026.1 | 801 | 1350   | 0         | 423 | 448 | 94 +  | 3   | 450 | 29     | 460    |
| UN67850 | Rsa1.0.24271.1 | 596 | 996    | 1.00E-67  | 134 | 135 | 99 -  | 459 | 593 | 175    | 309    |
| UN67851 | Rsa1.0.03735.1 | 607 | 21087  | 0         | 452 | 466 | 96 +  | 145 | 607 | 3647   | 4112   |
| UN67852 | Rsa1.0.00540.1 | 812 | 76895  | 1.00E-125 | 230 | 231 | 99 +  | 382 | 612 | 32182  | 32412  |
| UN67853 | Rsa1.0.09897.1 | 619 | 6100   | 0         | 618 | 618 | 100 + | 2   | 619 | 2992   | 3609   |
| UN67854 | Rsa1.0.00833.1 | 667 | 62621  | 1.00E-175 | 426 | 461 | 92 -  | 5   | 460 | 43422  | 43882  |
| UN67855 | Rsa1.0.00345.1 | 587 | 93226  | 0         | 542 | 584 | 92 +  | 7   | 587 | 54506  | 55069  |
| UN67856 | Rsa1.0.00434.1 | 670 | 85171  | 1.00E-171 | 339 | 349 | 97 +  | 37  | 384 | 69109  | 69457  |
| UN67857 | Rsa1.0_17675.1 | 483 | 1767   | 0         | 405 | 405 | 100 + | 79  | 483 | 1130   | 1534   |
| UN67858 | Rsa1.0.03476.1 | 366 | 22646  | 6.00E-90  | 208 | 219 | 94 -  | 1   | 219 | 12105  | 12315  |

|         |                |     |        |           |     |     |       |     |     |        |        |
|---------|----------------|-----|--------|-----------|-----|-----|-------|-----|-----|--------|--------|
| UN67859 | Rsa1.0.00409.1 | 773 | 146788 | 1.00E-105 | 194 | 194 | 100 + | 267 | 460 | 7896   | 8089   |
| UN67860 | Rsa1.0.02017.1 | 599 | 35999  | 1.00E-147 | 278 | 282 | 98 -  | 4   | 282 | 29780  | 30061  |
| UN67861 | Rsa1.0.00727.1 | 747 | 66724  | 0         | 699 | 737 | 94 +  | 3   | 719 | 44976  | 45706  |
| UN67862 | Rsa1.0.00426.1 | 643 | 85668  | 7.00E-97  | 204 | 212 | 96 -  | 167 | 378 | 34554  | 34765  |
| UN67863 | Rsa1.0.02528.1 | 751 | 30452  | 1.00E-106 | 220 | 227 | 96 +  | 4   | 230 | 18720  | 18940  |
| UN67864 | Rsa1.0.15420.1 | 281 | 2614   | 3.00E-69  | 151 | 157 | 96 +  | 2   | 158 | 1083   | 1239   |
| UN67865 | Rsa1.0.03264.1 | 558 | 145959 | 0         | 558 | 558 | 100 - | 1   | 558 | 130176 | 130733 |
| UN67866 | Rsa1.0.15414.1 | 655 | 2620   | 1.00E-98  | 210 | 219 | 95 -  | 318 | 536 | 1712   | 1930   |
| UN67867 | Rsa1.0.00472.1 | 560 | 398134 | 0         | 390 | 390 | 100 + | 171 | 560 | 131111 | 131500 |
| UN67868 | Rsa1.0.00990.1 | 615 | 57445  | 1.00E-153 | 274 | 274 | 100 + | 55  | 328 | 18417  | 18690  |
| UN67869 | Rsa1.0.13805.1 | 631 | 4304   | 0         | 471 | 475 | 99 +  | 158 | 631 | 3466   | 3940   |
| UN67870 | Rsa1.0.00224.1 | 687 | 327530 | 1.00E-157 | 282 | 282 | 100 + | 402 | 683 | 195632 | 195913 |
| UN67871 | Rsa1.0.00121.1 | 169 | 278029 | 9.00E-87  | 165 | 166 | 99 -  | 1   | 166 | 272449 | 272614 |
| UN67872 | Rsa1.0.01414.1 | 737 | 149508 | 3.00E-81  | 166 | 170 | 97 +  | 52  | 221 | 114860 | 115029 |
| UN67873 | Rsa1.0.03093.1 | 613 | 25445  | 5.00E-45  | 96  | 97  | 98 +  | 476 | 572 | 2719   | 2815   |
| UN67874 | Rsa1.0.00601.1 | 424 | 177045 | 6.00E-87  | 210 | 218 | 96 -  | 170 | 380 | 27032  | 27249  |
| UN67875 | Rsa1.0.01796.1 | 147 | 39154  | 6.00E-32  | 88  | 94  | 93 +  | 54  | 147 | 6789   | 6882   |
| UN67876 | Rsa1.0.00097.1 | 281 | 138858 | 1.00E-65  | 155 | 163 | 95 +  | 120 | 281 | 25591  | 25753  |
| UN67877 | Rsa1.0.05162.1 | 161 | 14631  | 2.00E-59  | 140 | 148 | 94 -  | 14  | 161 | 6830   | 6977   |
| UN67878 | Rsa1.0.01063.1 | 664 | 55301  | 0         | 656 | 658 | 99 -  | 1   | 658 | 8240   | 8897   |
| UN67879 | Rsa1.0.01921.1 | 590 | 168088 | 2.00E-94  | 188 | 192 | 97 +  | 1   | 192 | 24409  | 24600  |
| UN67880 | Rsa1.0.00686.1 | 713 | 68511  | 1.00E-140 | 267 | 272 | 98 +  | 2   | 273 | 2292   | 2563   |
| UN67881 | Rsa1.0.02425.1 | 761 | 31567  | 9.00E-69  | 168 | 176 | 95 -  | 581 | 752 | 14013  | 14188  |
| UN67882 | Rsa1.0.09565.1 | 549 | 6285   | 0         | 375 | 389 | 96 +  | 157 | 541 | 5405   | 5789   |
| UN67883 | Rsa1.0.01809.1 | 679 | 39004  | 1.00E-76  | 146 | 146 | 100 - | 143 | 288 | 31082  | 31227  |
| UN67884 | Rsa1.0.00673.1 | 661 | 69325  | 7.00E-91  | 188 | 193 | 97 -  | 143 | 333 | 50970  | 51162  |
| UN67885 | Rsa1.0.01814.1 | 710 | 38917  | 1.00E-123 | 245 | 251 | 97 +  | 339 | 589 | 7063   | 7311   |
| UN67886 | Rsa1.0.00589.1 | 713 | 209965 | 3.00E-96  | 179 | 179 | 100 + | 125 | 303 | 61242  | 61420  |
| UN67887 | Rsa1.0.00009.1 | 751 | 232558 | 1.00E-158 | 300 | 303 | 99 +  | 451 | 751 | 53021  | 53323  |
| UN67888 | Rsa1.0.01986.1 | 722 | 36489  | 0         | 513 | 521 | 98 -  | 1   | 521 | 4049   | 4569   |
| UN67889 | Rsa1.0.03487.1 | 746 | 22564  | 0         | 726 | 750 | 96 -  | 2   | 746 | 2430   | 3167   |
| UN67890 | Rsa1.0.13820.1 | 765 | 4264   | 1.00E-145 | 277 | 282 | 98 -  | 260 | 541 | 1101   | 1382   |
| UN67891 | Rsa1.0.00116.1 | 727 | 365886 | 0         | 486 | 503 | 96 -  | 13  | 515 | 206779 | 207281 |
| UN67892 | Rsa1.0.01659.1 | 537 | 164577 | 1.00E-104 | 232 | 245 | 94 +  | 13  | 257 | 145502 | 145746 |
| UN67893 | Rsa1.0.00663.1 | 741 | 164969 | 1.00E-116 | 225 | 228 | 98 +  | 486 | 712 | 146488 | 146715 |
| UN67894 | Rsa1.0.04518.1 | 700 | 17005  | 1.00E-149 | 289 | 295 | 97 +  | 407 | 700 | 1716   | 2010   |
| UN67895 | Rsa1.0.00473.1 | 439 | 212204 | 2.00E-74  | 178 | 186 | 95 -  | 255 | 437 | 48625  | 48810  |
| UN67896 | #              | #   | #      | #         | #   | #   | #     | #   | #   | #      | #      |
| UN67897 | Rsa1.0.00743.1 | 706 | 177459 | 0         | 495 | 507 | 97 +  | 190 | 691 | 24233  | 24739  |

|         |                |     |        |           |     |     |       |     |     |        |        |
|---------|----------------|-----|--------|-----------|-----|-----|-------|-----|-----|--------|--------|
| UN67898 | Rsa1.0.01732.1 | 627 | 40194  | 0         | 535 | 540 | 99 +  | 88  | 627 | 39609  | 40148  |
| UN67899 | Rsa1.0.07450.1 | 442 | 9373   | 1.00E-100 | 188 | 189 | 99 +  | 146 | 334 | 2002   | 2190   |
| UN67900 | Rsa1.0.00220.1 | 160 | 192936 | 2.00E-41  | 86  | 86  | 100 - | 1   | 86  | 154190 | 154275 |
| UN67901 | Rsa1.0.00756.1 | 549 | 65628  | 2.00E-25  | 87  | 96  | 90 +  | 274 | 369 | 3257   | 3352   |
| UN67902 | Rsa1.0.01249.1 | 698 | 188432 | 0         | 392 | 399 | 98 -  | 10  | 408 | 188034 | 188432 |
| UN67903 | Rsa1.0.06113.1 | 773 | 11721  | 2.00E-97  | 204 | 211 | 96 -  | 391 | 598 | 7816   | 8026   |
| UN67904 | Rsa1.0.00472.1 | 812 | 398134 | 0         | 591 | 594 | 99 +  | 3   | 596 | 177381 | 177974 |
| UN67905 | Rsa1.0.04623.1 | 750 | 16617  | 7.00E-88  | 192 | 201 | 95 +  | 19  | 219 | 1761   | 1961   |
| UN67906 | Rsa1.0.00782.1 | 621 | 64468  | 0         | 573 | 619 | 92 -  | 4   | 621 | 15819  | 16415  |
| UN67907 | Rsa1.0.01031.1 | 701 | 56236  | 0         | 482 | 493 | 97 -  | 2   | 494 | 14349  | 14841  |
| UN67908 | Rsa1.0.01947.1 | 799 | 36977  | 0         | 538 | 547 | 98 +  | 253 | 792 | 16135  | 16681  |
| UN67909 | Rsa1.0.12663.1 | 577 | 5160   | 1.00E-121 | 310 | 335 | 92 -  | 246 | 577 | 938    | 1260   |
| UN67910 | Rsa1.0.01384.1 | 209 | 46803  | 1.00E-108 | 205 | 207 | 99 +  | 3   | 209 | 40943  | 41149  |
| UN67911 | Rsa1.0.08846.1 | 738 | 6867   | 2.00E-48  | 114 | 118 | 96 -  | 3   | 118 | 6654   | 6771   |
| UN67912 | Rsa1.0.00694.1 | 607 | 68074  | 4.00E-95  | 195 | 201 | 97 -  | 2   | 202 | 8297   | 8497   |
| UN67913 | Rsa1.0.02063.1 | 585 | 35484  | 1.00E-118 | 219 | 220 | 99 +  | 2   | 221 | 27000  | 27219  |
| UN67914 | Rsa1.0.01798.1 | 816 | 173909 | 0         | 652 | 700 | 93 +  | 123 | 810 | 171521 | 172214 |
| UN67915 | Rsa1.0.03232.1 | 736 | 24450  | 1.00E-138 | 271 | 274 | 98 -  | 466 | 736 | 22831  | 23104  |
| UN67916 | Rsa1.0.03392.1 | 717 | 23248  | 0         | 408 | 411 | 99 -  | 215 | 625 | 5075   | 5485   |
| UN67917 | Rsa1.0.00964.1 | 591 | 316648 | 2.00E-97  | 202 | 208 | 97 +  | 4   | 211 | 303175 | 303380 |
| UN67918 | Rsa1.0.01983.1 | 747 | 36509  | 0         | 569 | 585 | 97 +  | 161 | 744 | 470    | 1054   |
| UN67919 | Rsa1.0.02097.1 | 575 | 35036  | 0         | 497 | 501 | 99 +  | 3   | 503 | 14285  | 14784  |
| UN67920 | Rsa1.0.02553.1 | 784 | 30190  | 0         | 765 | 785 | 97 +  | 3   | 784 | 24801  | 25585  |
| UN67921 | Rsa1.0.01517.1 | 641 | 44170  | 0         | 625 | 642 | 97 -  | 2   | 641 | 28339  | 28974  |
| UN67922 | Rsa1.0.00779.1 | 674 | 64568  | 1.00E-171 | 304 | 304 | 100 + | 258 | 561 | 32275  | 32578  |
| UN67923 | Rsa1.0.10038.1 | 584 | 6029   | 0         | 452 | 470 | 96 -  | 118 | 584 | 401    | 870    |
| UN67924 | Rsa1.0.00324.1 | 606 | 218805 | 0         | 503 | 518 | 97 -  | 90  | 606 | 216893 | 217410 |
| UN67925 | Rsa1.0.00196.1 | 144 | 109960 | 2.00E-32  | 74  | 75  | 98 +  | 53  | 127 | 69980  | 70054  |
| UN67926 | Rsa1.0.02963.1 | 780 | 26407  | 1.00E-83  | 194 | 208 | 93 -  | 3   | 199 | 14675  | 14882  |
| UN67927 | Rsa1.0.15929.1 | 342 | 2351   | 9.00E-58  | 188 | 210 | 89 -  | 32  | 239 | 163    | 362    |
| UN67928 | Rsa1.0.02248.1 | 381 | 33414  | 1.00E-121 | 221 | 221 | 100 + | 3   | 223 | 26066  | 26286  |
| UN67929 | Rsa1.0.00099.1 | 637 | 159619 | 0         | 453 | 465 | 97 +  | 5   | 469 | 39325  | 39789  |
| UN67930 | Rsa1.0.03876.1 | 194 | 20334  | 2.00E-23  | 59  | 60  | 98 +  | 53  | 112 | 18306  | 18365  |
| UN67931 | Rsa1.0.00496.1 | 563 | 79834  | 0         | 558 | 563 | 99 -  | 3   | 563 | 46600  | 47162  |
| UN67932 | Rsa1.0.04504.1 | 539 | 17069  | 1.00E-173 | 319 | 323 | 98 -  | 3   | 325 | 7932   | 8254   |
| UN67933 | Rsa1.0.00683.1 | 752 | 68638  | 0         | 677 | 700 | 96 -  | 4   | 702 | 39457  | 40156  |
| UN67934 | Rsa1.0.00235.1 | 770 | 154696 | 1.00E-77  | 169 | 175 | 96 +  | 120 | 292 | 92430  | 92604  |
| UN67935 | Rsa1.0.00071.1 | 707 | 345714 | 1.00E-134 | 256 | 259 | 98 -  | 443 | 700 | 324478 | 324736 |
| UN67936 | Rsa1.0.00092.1 | 412 | 659932 | 0         | 412 | 412 | 100 + | 1   | 412 | 623321 | 623732 |



|         |                |     |        |           |     |     |       |     |     |        |        |
|---------|----------------|-----|--------|-----------|-----|-----|-------|-----|-----|--------|--------|
| UN67937 | Rsa1.0_00604.1 | 136 | 146282 | 6.00E-41  | 128 | 141 | 90 +  | 2   | 136 | 111854 | 111994 |
| UN67938 | Rsa1.0_03190.1 | 724 | 24708  | 1.00E-101 | 196 | 199 | 98 +  | 313 | 511 | 12031  | 12229  |
| UN67939 | Rsa1.0_00640.1 | 670 | 70979  | 5.00E-73  | 155 | 160 | 96 +  | 226 | 385 | 47929  | 48088  |
| UN67940 | Rsa1.0_00144.1 | 588 | 120708 | 1.00E-169 | 349 | 364 | 95 +  | 15  | 375 | 73403  | 73766  |
| UN67941 | Rsa1.0_00844.1 | 656 | 62403  | 1.00E-175 | 413 | 447 | 92 +  | 2   | 448 | 6125   | 6571   |
| UN67942 | Rsa1.0_00855.1 | 795 | 62047  | 9.00E-69  | 142 | 145 | 97 +  | 333 | 477 | 55080  | 55224  |
| UN67943 | Rsa1.0_01920.1 | 564 | 158533 | 0         | 463 | 496 | 93 +  | 3   | 496 | 125759 | 126241 |
| UN67944 | Rsa1.0_00284.1 | 698 | 323267 | 0         | 545 | 569 | 95 -  | 91  | 656 | 317106 | 317674 |
| UN67945 | Rsa1.0_00030.1 | 598 | 250988 | 1.00E-165 | 336 | 350 | 96 +  | 124 | 473 | 4766   | 5115   |
| UN67946 | Rsa1.0_01730.1 | 653 | 40223  | 0         | 444 | 456 | 97 +  | 199 | 653 | 35223  | 35678  |
| UN67947 | Rsa1.0_36556.1 | 496 | 617    | 0         | 425 | 434 | 97 -  | 3   | 436 | 1      | 434    |
| UN67948 | Rsa1.0_00416.1 | 633 | 86772  | 1.00E-163 | 360 | 380 | 94 +  | 3   | 381 | 39960  | 40338  |
| UN67949 | Rsa1.0_02494.1 | 704 | 132923 | 1.00E-104 | 234 | 245 | 95 +  | 3   | 246 | 118729 | 118972 |
| UN67950 | Rsa1.0_01259.1 | 344 | 49754  | 1.00E-25  | 75  | 79  | 94 +  | 198 | 274 | 33841  | 33919  |
| UN67951 | Rsa1.0_18616.1 | 794 | 1564   | 0         | 713 | 746 | 95 +  | 5   | 745 | 389    | 1133   |
| UN67952 | Rsa1.0_06581.1 | 770 | 10722  | 2.00E-45  | 103 | 106 | 97 -  | 85  | 190 | 10359  | 10464  |
| UN67953 | Rsa1.0_01586.1 | 784 | 42804  | 3.00E-56  | 138 | 144 | 95 -  | 8   | 149 | 3440   | 3583   |
| UN67954 | Rsa1.0_54779.1 | 489 | 417    | 1.00E-125 | 227 | 227 | 100 - | 263 | 489 | 6      | 232    |
| UN67955 | Rsa1.0_02929.1 | 697 | 26673  | 1.00E-148 | 283 | 286 | 98 -  | 2   | 286 | 22266  | 22550  |
| UN67956 | Rsa1.0_39749.1 | 564 | 565    | 1.00E-119 | 254 | 264 | 96 +  | 1   | 261 | 302    | 565    |
| UN67957 | Rsa1.0_25158.1 | 303 | 949    | 1.00E-140 | 290 | 302 | 96 -  | 3   | 301 | 2      | 303    |
| UN67958 | Rsa1.0_13686.1 | 401 | 4480   | 3.00E-21  | 134 | 161 | 83 -  | 105 | 265 | 4089   | 4249   |
| UN67959 | Rsa1.0_04626.1 | 770 | 16611  | 0         | 545 | 553 | 98 +  | 176 | 721 | 13547  | 14099  |
| UN67960 | Rsa1.0_02070.1 | 104 | 158516 | 3.00E-36  | 97  | 103 | 94 +  | 2   | 104 | 157172 | 157271 |
| UN67961 | Rsa1.0_00009.1 | 257 | 232558 | 2.00E-64  | 155 | 161 | 96 +  | 100 | 257 | 148404 | 148564 |
| UN67962 | Rsa1.0_03010.1 | 738 | 26054  | 0         | 731 | 734 | 99 +  | 1   | 732 | 20917  | 21650  |
| UN67963 | Rsa1.0_01066.1 | 678 | 55235  | 0         | 448 | 450 | 99 +  | 229 | 678 | 41611  | 42060  |
| UN67964 | Rsa1.0_04616.1 | 819 | 16627  | 9.00E-97  | 228 | 240 | 95 +  | 578 | 814 | 4890   | 5129   |
| UN67965 | Rsa1.0_00722.1 | 543 | 66840  | 9.00E-99  | 240 | 255 | 94 -  | 290 | 543 | 3473   | 3725   |
| UN67966 | Rsa1.0_11178.1 | 615 | 5593   | 0         | 489 | 491 | 99 -  | 1   | 491 | 2279   | 2769   |
| UN67967 | Rsa1.0_00120.1 | 610 | 277288 | 5.00E-79  | 184 | 193 | 95 -  | 13  | 203 | 93711  | 93902  |
| UN67968 | Rsa1.0_06382.1 | 500 | 11121  | 1.00E-109 | 201 | 201 | 100 + | 114 | 314 | 9773   | 9973   |
| UN67969 | Rsa1.0_57878.1 | 586 | 395    | 4.00E-92  | 172 | 172 | 100 + | 415 | 586 | 138    | 309    |
| UN67970 | Rsa1.0_01340.1 | 780 | 47805  | 1.00E-117 | 261 | 276 | 94 -  | 247 | 522 | 25414  | 25686  |
| UN67971 | Rsa1.0_05217.1 | 571 | 142938 | 0         | 566 | 569 | 99 -  | 3   | 571 | 130477 | 131045 |
| UN67972 | Rsa1.0_01516.1 | 568 | 44196  | 1.00E-106 | 221 | 228 | 96 -  | 277 | 504 | 27803  | 28029  |
| UN67973 | Rsa1.0_01628.1 | 642 | 41932  | 1.00E-109 | 212 | 216 | 98 +  | 145 | 360 | 36552  | 36767  |
| UN67974 | Rsa1.0_16486.1 | 772 | 2139   | 1.00E-106 | 315 | 355 | 88 -  | 417 | 766 | 413    | 747    |
| UN67975 | Rsa1.0_00260.1 | 744 | 102021 | 1.00E-61  | 124 | 125 | 99 +  | 515 | 639 | 63858  | 63982  |

|         |                |     |        |           |     |     |       |     |     |        |        |
|---------|----------------|-----|--------|-----------|-----|-----|-------|-----|-----|--------|--------|
| UN67976 | Rsa1.0.00185.1 | 595 | 248445 | 0         | 588 | 595 | 98 +  | 1   | 595 | 167117 | 167710 |
| UN67977 | Rsa1.0.00131.1 | 558 | 432233 | 1.00E-160 | 384 | 411 | 93 -  | 76  | 482 | 90218  | 90624  |
| UN67978 | Rsa1.0.00383.1 | 746 | 398431 | 1.00E-169 | 351 | 368 | 95 +  | 4   | 365 | 20284  | 20651  |
| UN67979 | Rsa1.0.00507.1 | 747 | 79074  | 1.00E-154 | 382 | 417 | 91 -  | 1   | 413 | 11403  | 11804  |
| UN67980 | Rsa1.0.00972.1 | 797 | 57937  | 1.00E-119 | 235 | 241 | 97 -  | 315 | 555 | 52953  | 53193  |
| UN67981 | Rsa1.0.04674.1 | 357 | 139859 | 0         | 355 | 355 | 100 + | 3   | 357 | 4923   | 5277   |
| UN67982 | Rsa1.0.00869.1 | 665 | 61627  | 0         | 612 | 671 | 91 -  | 2   | 665 | 39800  | 40444  |
| UN67983 | Rsa1.0.03223.1 | 161 | 24512  | 7.00E-38  | 95  | 99  | 95 -  | 1   | 97  | 10852  | 10950  |
| UN67984 | Rsa1.0.17015.1 | 751 | 1953   | 2.00E-79  | 157 | 159 | 98 -  | 429 | 587 | 1      | 159    |
| UN67985 | Rsa1.0.00363.1 | 686 | 90968  | 0         | 671 | 692 | 96 -  | 2   | 686 | 64395  | 65080  |
| UN67986 | Rsa1.0.00204.1 | 765 | 109056 | 1.00E-122 | 240 | 246 | 97 +  | 1   | 246 | 56779  | 57024  |
| UN67987 | Rsa1.0.00502.1 | 796 | 204180 | 1.00E-18  | 102 | 120 | 85 -  | 377 | 490 | 184041 | 184160 |
| UN67988 | Rsa1.0.02231.1 | 467 | 33661  | 1.00E-125 | 267 | 280 | 95 -  | 2   | 281 | 27387  | 27666  |
| UN67989 | Rsa1.0.00554.1 | 770 | 150953 | 0         | 761 | 768 | 99 +  | 3   | 767 | 9043   | 9809   |
| UN67990 | Rsa1.0.03311.1 | 751 | 23850  | 1.00E-108 | 199 | 199 | 100 - | 175 | 373 | 20177  | 20375  |
| UN67991 | Rsa1.0.00112.1 | 681 | 132199 | 1.00E-92  | 182 | 185 | 98 +  | 323 | 507 | 11275  | 11459  |
| UN67992 | Rsa1.0.00322.1 | 415 | 212233 | 0         | 413 | 414 | 99 +  | 2   | 415 | 207154 | 207567 |
| UN67993 | Rsa1.0.00938.1 | 591 | 193891 | 0         | 584 | 585 | 99 -  | 7   | 591 | 55432  | 56016  |
| UN67994 | Rsa1.0.02121.1 | 767 | 34813  | 1.00E-174 | 324 | 329 | 98 -  | 1   | 329 | 9612   | 9940   |
| UN67995 | Rsa1.0.00187.1 | 311 | 393093 | 1.00E-62  | 169 | 185 | 91 -  | 32  | 205 | 49507  | 49691  |
| UN67996 | Rsa1.0.01656.1 | 714 | 41494  | 0         | 471 | 487 | 96 -  | 114 | 600 | 7421   | 7907   |
| UN67997 | Rsa1.0.00439.1 | 754 | 142776 | 0         | 378 | 395 | 95 +  | 199 | 591 | 22542  | 22934  |
| UN67998 | Rsa1.0.00789.1 | 762 | 64233  | 1.00E-126 | 287 | 306 | 93 -  | 222 | 527 | 29721  | 30026  |
| UN67999 | Rsa1.0.01821.1 | 759 | 38798  | 0         | 746 | 766 | 97 +  | 3   | 754 | 23533  | 24298  |
| UN68000 | Rsa1.0.04478.1 | 637 | 17183  | 1.00E-128 | 241 | 244 | 98 +  | 383 | 626 | 2935   | 3178   |
| UN68001 | Rsa1.0.00289.1 | 646 | 98620  | 1.00E-95  | 202 | 210 | 96 -  | 437 | 646 | 27040  | 27249  |
| UN68002 | Rsa1.0.08001.1 | 729 | 8095   | 1.00E-172 | 553 | 635 | 87 +  | 9   | 636 | 5585   | 6172   |
| UN68003 | Rsa1.0.01695.1 | 689 | 40848  | 1.00E-152 | 356 | 384 | 92 +  | 55  | 435 | 5566   | 5936   |
| UN68004 | Rsa1.0.00092.1 | 507 | 659932 | 5.00E-91  | 191 | 198 | 96 +  | 189 | 386 | 187657 | 187854 |
| UN68005 | Rsa1.0.03169.1 | 647 | 24826  | 1.00E-111 | 216 | 220 | 98 -  | 71  | 290 | 17587  | 17806  |
| UN68006 | Rsa1.0.04281.1 | 699 | 18107  | 0         | 543 | 577 | 94 -  | 2   | 578 | 15672  | 16248  |
| UN68007 | Rsa1.0.02215.1 | 741 | 33822  | 0         | 353 | 355 | 99 +  | 230 | 584 | 26632  | 26986  |
| UN68008 | Rsa1.0.01660.1 | 338 | 41400  | 5.00E-90  | 201 | 208 | 96 -  | 134 | 338 | 35488  | 35695  |
| UN68009 | Rsa1.0.01516.1 | 521 | 44196  | 2.33E-156 | 334 | 356 | 93 -  | 1   | 347 | 25290  | 25644  |
| UN68010 | Rsa1.0.00906.1 | 762 | 178966 | 1.00E-100 | 185 | 185 | 100 - | 60  | 244 | 122049 | 122233 |
| UN68011 | Rsa1.0.00476.1 | 783 | 280966 | 0         | 479 | 483 | 99 +  | 3   | 484 | 147042 | 147522 |
| UN68012 | Rsa1.0.15154.1 | 630 | 2792   | 1.00E-110 | 220 | 226 | 97 +  | 405 | 630 | 1556   | 1781   |
| UN68013 | Rsa1.0.06150.1 | 735 | 11614  | 0         | 687 | 717 | 95 +  | 3   | 714 | 9890   | 10606  |
| UN68014 | Rsa1.0.00511.1 | 606 | 78616  | 1.00E-104 | 242 | 263 | 92 +  | 2   | 246 | 76182  | 76444  |

|         |                |     |        |           |     |     |       |     |     |        |        |
|---------|----------------|-----|--------|-----------|-----|-----|-------|-----|-----|--------|--------|
| UN68015 | Rsa1.0_53620.1 | 662 | 425    | 1.00E-129 | 234 | 234 | 100 + | 3   | 236 | 184    | 417    |
| UN68016 | Rsa1.0_00262.1 | 111 | 101906 | 2.00E-21  | 52  | 52  | 100 - | 1   | 52  | 84576  | 84627  |
| UN68017 | Rsa1.0_03225.1 | 638 | 24500  | 0         | 622 | 639 | 97 +  | 1   | 638 | 17760  | 18398  |
| UN68018 | Rsa1.0_01403.1 | 129 | 46453  | 2.00E-59  | 125 | 128 | 97 +  | 2   | 129 | 24530  | 24657  |
| UN68019 | Rsa1.0_01475.1 | 695 | 45044  | 0         | 528 | 563 | 93 -  | 135 | 695 | 37224  | 37783  |
| UN68020 | Rsa1.0_02893.1 | 623 | 26999  | 1.00E-131 | 321 | 348 | 92 +  | 280 | 618 | 23925  | 24269  |
| UN68021 | Rsa1.0_02672.1 | 726 | 28884  | 0         | 432 | 456 | 94 -  | 17  | 462 | 13963  | 14417  |
| UN68022 | Rsa1.0_00423.1 | 714 | 86138  | 0         | 638 | 641 | 99 -  | 77  | 714 | 28874  | 29514  |
| UN68023 | Rsa1.0_00157.1 | 698 | 245832 | 0         | 657 | 694 | 94 -  | 8   | 698 | 20267  | 20946  |
| UN68024 | Rsa1.0_00069.1 | 120 | 403561 | 8.00E-37  | 99  | 102 | 97 +  | 22  | 120 | 100041 | 100142 |
| UN68025 | Rsa1.0_00045.1 | 697 | 328694 | 2.00E-97  | 190 | 193 | 98 +  | 501 | 693 | 166098 | 166290 |
| UN68026 | Rsa1.0_00136.1 | 566 | 122464 | 1.00E-132 | 242 | 243 | 99 +  | 1   | 243 | 13011  | 13253  |
| UN68027 | Rsa1.0_02780.1 | 290 | 27965  | 1.00E-102 | 216 | 225 | 96 +  | 4   | 228 | 21422  | 21646  |
| UN68028 | Rsa1.0_62288.1 | 590 | 368    | 2.33E-156 | 275 | 279 | 98 -  | 1   | 279 | 1      | 279    |
| UN68029 | Rsa1.0_00108.1 | 216 | 478491 | 2.00E-63  | 186 | 205 | 90 -  | 16  | 216 | 277583 | 277787 |
| UN68030 | Rsa1.0_02895.1 | 705 | 26979  | 0         | 690 | 706 | 97 +  | 1   | 705 | 13717  | 14420  |
| UN68031 | Rsa1.0_01081.1 | 777 | 499226 | 0         | 757 | 778 | 97 -  | 1   | 777 | 154639 | 155415 |
| UN68032 | Rsa1.0_02061.1 | 400 | 35487  | 1.00E-173 | 376 | 400 | 94 +  | 1   | 400 | 10671  | 11061  |
| UN68033 | Rsa1.0_27652.1 | 431 | 844    | 1.00E-110 | 330 | 372 | 88 +  | 7   | 370 | 396    | 767    |
| UN68034 | Rsa1.0_00714.1 | 731 | 67187  | 1.00E-141 | 255 | 255 | 100 + | 1   | 255 | 14803  | 15057  |
| UN68035 | Rsa1.0_00141.1 | 782 | 121494 | 1.00E-116 | 213 | 213 | 100 - | 3   | 215 | 1969   | 2181   |
| UN68036 | Rsa1.0_03065.1 | 386 | 25656  | 1.00E-177 | 370 | 387 | 95 +  | 1   | 386 | 16143  | 16529  |
| UN68037 | Rsa1.0_04611.1 | 414 | 16647  | 0         | 398 | 411 | 96 -  | 1   | 411 | 2646   | 3056   |
| UN68038 | Rsa1.0_00068.1 | 656 | 151813 | 1.00E-149 | 268 | 268 | 100 + | 1   | 268 | 105261 | 105528 |
| UN68039 | Rsa1.0_00308.1 | 203 | 96915  | 2.00E-51  | 136 | 147 | 92 +  | 1   | 147 | 71249  | 71395  |
| UN68040 | Rsa1.0_08067.1 | 747 | 7962   | 1.00E-179 | 318 | 318 | 100 - | 131 | 448 | 7564   | 7881   |
| UN68041 | Rsa1.0_00345.1 | 788 | 93226  | 0         | 560 | 562 | 99 -  | 227 | 788 | 57476  | 58037  |
| UN68042 | Rsa1.0_17122.1 | 591 | 1916   | 0         | 498 | 535 | 93 +  | 49  | 583 | 1383   | 1916   |
| UN68043 | Rsa1.0_07849.1 | 305 | 8425   | 1.00E-113 | 247 | 259 | 95 -  | 48  | 305 | 4508   | 4766   |
| UN68044 | Rsa1.0_46379.1 | 613 | 487    | 1.00E-120 | 234 | 239 | 97 +  | 1   | 239 | 14     | 252    |
| UN68045 | Rsa1.0_00351.1 | 769 | 413096 | 0         | 431 | 435 | 99 -  | 1   | 435 | 144912 | 145346 |
| UN68046 | Rsa1.0_00047.1 | 785 | 168582 | 1.00E-133 | 241 | 241 | 100 + | 1   | 241 | 5976   | 6216   |
| UN68047 | Rsa1.0_00399.1 | 762 | 242951 | 0         | 412 | 434 | 94 +  | 194 | 621 | 79753  | 80180  |
| UN68048 | Rsa1.0_01168.1 | 298 | 153765 | 2.00E-70  | 144 | 147 | 97 +  | 152 | 298 | 44255  | 44401  |
| UN68049 | Rsa1.0_00773.1 | 831 | 64839  | 0         | 650 | 651 | 99 -  | 1   | 650 | 13672  | 14322  |
| UN68050 | Rsa1.0_02950.1 | 730 | 26506  | 6.00E-76  | 154 | 157 | 98 +  | 340 | 496 | 18424  | 18580  |
| UN68051 | Rsa1.0_00760.1 | 662 | 65267  | 2.00E-97  | 222 | 233 | 95 -  | 89  | 321 | 20398  | 20628  |
| UN68052 | Rsa1.0_03627.1 | 148 | 21658  | 3.00E-52  | 134 | 144 | 93 -  | 1   | 144 | 8063   | 8206   |
| UN68053 | Rsa1.0_14100.1 | 693 | 3809   | 0         | 347 | 347 | 100 + | 347 | 693 | 1754   | 2100   |

|         |                |     |        |           |     |     |       |     |     |        |        |
|---------|----------------|-----|--------|-----------|-----|-----|-------|-----|-----|--------|--------|
| UN68054 | Rsa1.0.05162.1 | 660 | 14631  | 1.00E-160 | 356 | 374 | 95 +  | 3   | 376 | 10527  | 10895  |
| UN68055 | Rsa1.0.01263.1 | 684 | 49703  | 0         | 663 | 682 | 97 -  | 3   | 684 | 1842   | 2523   |
| UN68056 | Rsa1.0.00108.1 | 727 | 478491 | 0         | 720 | 732 | 98 +  | 2   | 727 | 80976  | 81707  |
| UN68057 | Rsa1.0.01042.1 | 231 | 293264 | 2.00E-82  | 179 | 187 | 95 +  | 1   | 187 | 141200 | 141386 |
| UN68058 | Rsa1.0.00194.1 | 653 | 110851 | 1.00E-112 | 230 | 236 | 97 +  | 3   | 238 | 100119 | 100351 |
| UN68059 | Rsa1.0.02362.1 | 730 | 32190  | 0         | 636 | 641 | 99 +  | 1   | 641 | 21885  | 22525  |
| UN68060 | Rsa1.0.02666.1 | 800 | 28915  | 0         | 676 | 680 | 99 +  | 1   | 678 | 7026   | 7705   |
| UN68061 | Rsa1.0.24195.1 | 613 | 1001   | 0         | 438 | 438 | 100 - | 176 | 613 | 564    | 1001   |
| UN68062 | Rsa1.0.00644.1 | 662 | 136881 | 1.00E-137 | 265 | 271 | 97 -  | 309 | 579 | 46878  | 47148  |
| UN68063 | Rsa1.0.01511.1 | 176 | 44235  | 1.00E-30  | 89  | 96  | 92 -  | 79  | 174 | 29956  | 30051  |
| UN68064 | Rsa1.0.00059.1 | 554 | 159650 | 1.00E-147 | 296 | 304 | 97 +  | 1   | 303 | 131116 | 131418 |
| UN68065 | Rsa1.0.02384.1 | 763 | 31917  | 0         | 467 | 478 | 97 +  | 3   | 476 | 18046  | 18523  |
| UN68066 | Rsa1.0.14576.1 | 522 | 3250   | 0         | 340 | 345 | 98 +  | 163 | 505 | 1674   | 2018   |
| UN68067 | Rsa1.0.00223.1 | 724 | 106231 | 0         | 710 | 726 | 97 +  | 1   | 720 | 103357 | 104082 |
| UN68068 | Rsa1.0.03247.1 | 730 | 24371  | 1.00E-147 | 264 | 264 | 100 - | 252 | 515 | 10721  | 10984  |
| UN68069 | Rsa1.0.00350.1 | 126 | 92346  | 2.00E-40  | 112 | 120 | 93 +  | 4   | 122 | 33792  | 33911  |
| UN68070 | Rsa1.0.00303.1 | 124 | 97468  | 6.00E-50  | 118 | 124 | 95 +  | 1   | 124 | 53191  | 53314  |
| UN68071 | Rsa1.0.00083.1 | 539 | 442773 | 0         | 521 | 540 | 96 -  | 3   | 537 | 319937 | 320476 |
| UN68072 | Rsa1.0.00017.1 | 456 | 752458 | 3.00E-52  | 178 | 202 | 88 -  | 139 | 334 | 578918 | 579116 |
| UN68073 | Rsa1.0.06715.1 | 132 | 10485  | 2.00E-40  | 114 | 124 | 91 -  | 9   | 132 | 3040   | 3163   |
| UN68074 | Rsa1.0.00630.1 | 206 | 71281  | 3.00E-84  | 188 | 198 | 94 +  | 1   | 198 | 30980  | 31177  |
| UN68075 | Rsa1.0.03594.1 | 666 | 21868  | 0         | 447 | 462 | 96 +  | 128 | 589 | 19676  | 20132  |
| UN68076 | Rsa1.0.32132.1 | 727 | 709    | 0         | 460 | 493 | 93 -  | 185 | 676 | 82     | 572    |
| UN68077 | Rsa1.0.02846.1 | 579 | 27338  | 1.00E-115 | 225 | 230 | 97 +  | 1   | 230 | 16589  | 16818  |
| UN68078 | Rsa1.0.01440.1 | 503 | 45807  | 0         | 485 | 497 | 97 +  | 1   | 496 | 30991  | 31487  |
| UN68079 | Rsa1.0.00612.1 | 661 | 72376  | 1.00E-112 | 221 | 226 | 97 +  | 378 | 603 | 62988  | 63213  |
| UN68080 | Rsa1.0.00387.1 | 498 | 495407 | 0         | 489 | 498 | 98 -  | 1   | 498 | 92507  | 93004  |
| UN68081 | Rsa1.0.06177.1 | 740 | 11561  | 0         | 385 | 388 | 99 -  | 1   | 387 | 10100  | 10487  |
| UN68082 | Rsa1.0.00725.1 | 423 | 66757  | 1.00E-117 | 222 | 225 | 98 +  | 197 | 421 | 24143  | 24367  |
| UN68083 | Rsa1.0.00376.1 | 870 | 90101  | 1.00E-131 | 290 | 307 | 94 +  | 17  | 314 | 33445  | 33747  |
| UN68084 | Rsa1.0.00140.1 | 580 | 121541 | 0         | 575 | 580 | 99 -  | 1   | 580 | 83637  | 84215  |
| UN68085 | Rsa1.0.03443.1 | 809 | 22917  | 0         | 800 | 803 | 99 +  | 1   | 803 | 3005   | 3807   |
| UN68086 | Rsa1.0.01190.1 | 815 | 194501 | 0         | 813 | 815 | 99 +  | 3   | 815 | 44518  | 45332  |
| UN68087 | Rsa1.0.00589.1 | 774 | 209965 | 1.00E-128 | 265 | 272 | 97 +  | 2   | 270 | 188601 | 188872 |
| UN68088 | Rsa1.0.00222.1 | 622 | 172263 | 2.00E-63  | 246 | 281 | 87 +  | 7   | 271 | 57565  | 57843  |
| UN68089 | Rsa1.0.06286.1 | 858 | 11307  | 0         | 783 | 842 | 92 -  | 14  | 843 | 6397   | 7213   |
| UN68090 | Rsa1.0.07834.1 | 704 | 8453   | 0         | 701 | 704 | 99 -  | 1   | 704 | 3134   | 3837   |
| UN68091 | Rsa1.0.00564.1 | 454 | 75428  | 7.00E-50  | 177 | 199 | 88 +  | 255 | 446 | 60824  | 61019  |
| UN68092 | Rsa1.0.03755.1 | 606 | 21000  | 0         | 598 | 606 | 98 +  | 1   | 606 | 9695   | 10300  |

|         |                |     |        |           |     |     |       |     |     |        |        |
|---------|----------------|-----|--------|-----------|-----|-----|-------|-----|-----|--------|--------|
| UN68093 | Rsa1.0_13747.1 | 150 | 4388   | 8.00E-50  | 121 | 128 | 94 +  | 1   | 128 | 1819   | 1946   |
| UN68094 | Rsa1.0_01510.1 | 846 | 44237  | 1.00E-172 | 386 | 408 | 94 -  | 1   | 399 | 21586  | 21990  |
| UN68095 | Rsa1.0_04141.1 | 673 | 18864  | 0         | 672 | 673 | 99 -  | 1   | 673 | 3654   | 4326   |
| UN68096 | Rsa1.0_00451.1 | 148 | 322533 | 1.00E-45  | 129 | 141 | 91 -  | 2   | 142 | 293104 | 293244 |
| UN68097 | Rsa1.0_01786.1 | 675 | 133324 | 1.00E-157 | 282 | 282 | 100 + | 3   | 284 | 106761 | 107042 |
| UN68098 | Rsa1.0_00422.1 | 310 | 86144  | 2.00E-83  | 169 | 173 | 97 +  | 68  | 240 | 82981  | 83153  |
| UN68099 | Rsa1.0_00834.1 | 666 | 62600  | 5.00E-24  | 175 | 210 | 83 +  | 100 | 307 | 32003  | 32206  |
| UN68100 | Rsa1.0_00329.1 | 886 | 222544 | 1.00E-136 | 332 | 358 | 92 -  | 465 | 814 | 129584 | 129936 |
| UN68101 | Rsa1.0_05038.1 | 680 | 15057  | 0         | 674 | 681 | 98 -  | 1   | 680 | 3178   | 3858   |
| UN68102 | Rsa1.0_02446.1 | 746 | 31330  | 0         | 729 | 738 | 98 +  | 2   | 737 | 5053   | 5790   |
| UN68103 | Rsa1.0_00586.1 | 146 | 163802 | 5.00E-57  | 130 | 136 | 95 +  | 1   | 136 | 154598 | 154733 |
| UN68104 | Rsa1.0_00307.1 | 102 | 199003 | 4.00E-38  | 99  | 105 | 94 +  | 2   | 102 | 170971 | 171075 |
| UN68105 | Rsa1.0_08562.1 | 450 | 7193   | 2.00E-65  | 133 | 135 | 98 -  | 316 | 450 | 3820   | 3954   |
| UN68106 | Rsa1.0_00308.1 | 719 | 96915  | 0         | 358 | 363 | 98 +  | 357 | 719 | 46036  | 46398  |
| UN68107 | Rsa1.0_11424.1 | 778 | 5513   | 0         | 409 | 414 | 98 +  | 1   | 414 | 2881   | 3294   |
| UN68108 | Rsa1.0_00476.1 | 713 | 280966 | 0         | 589 | 638 | 92 -  | 1   | 635 | 157513 | 158130 |
| UN68109 | Rsa1.0_00699.1 | 815 | 184398 | 1.00E-153 | 328 | 344 | 95 -  | 1   | 343 | 177778 | 178113 |
| UN68110 | Rsa1.0_00472.1 | 804 | 398134 | 0         | 469 | 471 | 99 +  | 1   | 471 | 132352 | 132822 |
| UN68111 | Rsa1.0_00114.1 | 753 | 131330 | 0         | 331 | 332 | 99 +  | 3   | 334 | 43058  | 43389  |
| UN68112 | Rsa1.0_01827.1 | 733 | 143321 | 0         | 425 | 451 | 94 +  | 283 | 733 | 115693 | 116143 |
| UN68113 | Rsa1.0_03488.1 | 653 | 22556  | 1.00E-175 | 312 | 312 | 100 - | 1   | 312 | 15224  | 15535  |
| UN68114 | Rsa1.0_01772.1 | 732 | 39557  | 1.00E-177 | 412 | 442 | 93 -  | 294 | 732 | 20728  | 21159  |
| UN68115 | Rsa1.0_00065.1 | 420 | 454616 | 5.00E-41  | 127 | 137 | 92 +  | 7   | 142 | 125039 | 125172 |
| UN68116 | Rsa1.0_02149.1 | 824 | 148330 | 3.00E-84  | 176 | 181 | 97 -  | 46  | 226 | 18416  | 18593  |
| UN68117 | Rsa1.0_00032.1 | 784 | 306326 | 1.00E-148 | 267 | 267 | 100 - | 1   | 267 | 293778 | 294044 |
| UN68118 | Rsa1.0_10728.1 | 609 | 5745   | 1.00E-156 | 338 | 355 | 95 -  | 1   | 353 | 3      | 357    |
| UN68119 | Rsa1.0_00857.1 | 772 | 61904  | 1.00E-176 | 398 | 424 | 93 -  | 8   | 414 | 13855  | 14277  |
| UN68120 | Rsa1.0_02221.1 | 778 | 33796  | 0         | 430 | 447 | 96 -  | 332 | 778 | 3512   | 3955   |
| UN68121 | Rsa1.0_00213.1 | 474 | 108167 | 0         | 444 | 467 | 95 -  | 9   | 474 | 11190  | 11653  |
| UN68122 | Rsa1.0_00244.1 | 187 | 103590 | 2.00E-48  | 158 | 177 | 89 +  | 12  | 186 | 77072  | 77248  |
| UN68123 | Rsa1.0_04204.1 | 785 | 18470  | 0         | 612 | 613 | 99 -  | 2   | 614 | 4675   | 5287   |
| UN68124 | Rsa1.0_04397.1 | 485 | 17555  | 0         | 457 | 484 | 94 -  | 4   | 485 | 3257   | 3740   |
| UN68125 | Rsa1.0_00651.1 | 860 | 247766 | 1.00E-117 | 304 | 332 | 91 -  | 4   | 330 | 230335 | 230666 |
| UN68126 | Rsa1.0_04646.1 | 101 | 16541  | 6.00E-22  | 77  | 85  | 90 -  | 3   | 87  | 11467  | 11546  |
| UN68127 | Rsa1.0_01937.1 | 695 | 37147  | 1.00E-153 | 325 | 340 | 95 -  | 1   | 338 | 14633  | 14970  |
| UN68128 | Rsa1.0_02467.1 | 307 | 31141  | 1.00E-156 | 300 | 307 | 97 -  | 1   | 307 | 19002  | 19308  |
| UN68129 | Rsa1.0_53341.1 | 589 | 427    | 6.00E-88  | 168 | 169 | 99 -  | 208 | 376 | 147    | 315    |
| UN68130 | Rsa1.0_05353.1 | 873 | 14078  | 0         | 858 | 866 | 99 -  | 1   | 866 | 9482   | 10346  |
| UN68131 | Rsa1.0_02575.1 | 310 | 29944  | 1.00E-101 | 195 | 198 | 98 -  | 1   | 198 | 19483  | 19680  |

|         |                |     |        |           |     |     |       |     |     |        |        |
|---------|----------------|-----|--------|-----------|-----|-----|-------|-----|-----|--------|--------|
| UN68132 | Rsa1.0.00192.1 | 742 | 278200 | 0         | 493 | 493 | 100 - | 2   | 494 | 238745 | 239237 |
| UN68133 | Rsa1.0.03701.1 | 357 | 21296  | 1.00E-145 | 337 | 360 | 93 -  | 1   | 357 | 10810  | 11169  |
| UN68134 | #              | #   | #      | #         | #   | #   | #     | #   | #   | #      | #      |
| UN68135 | Rsa1.0.00466.1 | 754 | 82132  | 0         | 742 | 771 | 96 +  | 1   | 754 | 63206  | 63975  |
| UN68136 | Rsa1.0.00191.1 | 448 | 316976 | 1.00E-171 | 331 | 340 | 97 +  | 1   | 340 | 197543 | 197882 |
| UN68137 | Rsa1.0.00518.1 | 794 | 78360  | 0         | 357 | 365 | 97 +  | 3   | 367 | 70437  | 70801  |
| UN68138 | Rsa1.0.01338.1 | 138 | 155644 | 2.00E-41  | 125 | 138 | 90 +  | 1   | 138 | 142226 | 142363 |
| UN68139 | Rsa1.0.02688.1 | 712 | 28644  | 1.00E-154 | 421 | 462 | 91 -  | 1   | 445 | 15709  | 16164  |
| UN68140 | Rsa1.0.05282.1 | 279 | 14270  | 1.00E-47  | 147 | 163 | 90 -  | 13  | 172 | 3899   | 4061   |
| UN68141 | Rsa1.0.00157.1 | 803 | 245832 | 0         | 766 | 803 | 95 -  | 1   | 803 | 47265  | 48064  |
| UN68142 | Rsa1.0.00157.1 | 722 | 245832 | 1.00E-164 | 368 | 391 | 94 -  | 1   | 388 | 54796  | 55175  |
| UN68143 | Rsa1.0.10297.1 | 587 | 5900   | 1.00E-168 | 303 | 304 | 99 -  | 284 | 587 | 1199   | 1502   |
| UN68144 | Rsa1.0.02431.1 | 285 | 31504  | 1.00E-143 | 279 | 285 | 97 +  | 1   | 285 | 17484  | 17767  |
| UN68145 | Rsa1.0.03871.1 | 863 | 20362  | 0         | 828 | 863 | 95 +  | 1   | 863 | 9763   | 10625  |
| UN68146 | #              | #   | #      | #         | #   | #   | #     | #   | #   | #      | #      |
| UN68147 | Rsa1.0.01803.1 | 840 | 173846 | 1.00E-150 | 319 | 332 | 96 -  | 513 | 840 | 146978 | 147309 |
| UN68148 | Rsa1.0.07952.1 | 425 | 8190   | 0         | 413 | 425 | 97 +  | 1   | 425 | 1273   | 1697   |
| UN68149 | Rsa1.0.02028.1 | 856 | 35857  | 1.00E-172 | 358 | 373 | 95 -  | 1   | 373 | 35011  | 35380  |
| UN68150 | Rsa1.0.04233.1 | 510 | 18379  | 7.00E-47  | 229 | 268 | 85 +  | 133 | 393 | 5423   | 5683   |
| UN68151 | Rsa1.0.00007.1 | 694 | 239325 | 1.00E-164 | 329 | 341 | 96 +  | 225 | 565 | 209156 | 209496 |
| UN68152 | Rsa1.0.01382.1 | 682 | 46877  | 0         | 330 | 330 | 100 - | 1   | 330 | 6221   | 6550   |
| UN68153 | Rsa1.0.00224.1 | 609 | 327530 | 0         | 606 | 612 | 99 -  | 1   | 609 | 227795 | 228406 |
| UN68154 | Rsa1.0.00045.1 | 749 | 328694 | 1.00E-154 | 313 | 324 | 96 -  | 426 | 749 | 240536 | 240857 |
| UN68155 | Rsa1.0.00133.1 | 636 | 123768 | 1.00E-85  | 253 | 285 | 88 +  | 235 | 500 | 10775  | 11059  |
| UN68156 | Rsa1.0.00806.1 | 778 | 63674  | 0         | 565 | 568 | 99 -  | 1   | 568 | 4643   | 5210   |
| UN68157 | Rsa1.0.00581.1 | 798 | 163575 | 2.00E-97  | 230 | 244 | 94 -  | 93  | 336 | 35997  | 36237  |
| UN68158 | Rsa1.0.00064.1 | 740 | 240927 | 0         | 729 | 740 | 98 +  | 1   | 740 | 136675 | 137412 |
| UN68159 | Rsa1.0.02606.1 | 730 | 29635  | 2.00E-91  | 207 | 219 | 94 -  | 310 | 528 | 12984  | 13202  |
| UN68160 | Rsa1.0.05583.1 | 630 | 13268  | 0         | 625 | 632 | 98 +  | 1   | 630 | 6593   | 7224   |
| UN68161 | Rsa1.0.26227.1 | 250 | 900    | 1.00E-108 | 237 | 250 | 94 -  | 1   | 250 | 622    | 871    |
| UN68162 | Rsa1.0.00847.1 | 560 | 62270  | 0         | 374 | 385 | 97 -  | 96  | 477 | 50627  | 51011  |
| UN68163 | Rsa1.0.00149.1 | 659 | 305196 | 0         | 463 | 477 | 97 -  | 2   | 478 | 104054 | 104524 |
| UN68164 | Rsa1.0.00745.1 | 722 | 66067  | 0         | 721 | 722 | 99 -  | 1   | 722 | 20732  | 21453  |
| UN68165 | Rsa1.0.01457.1 | 721 | 45337  | 1.00E-103 | 249 | 270 | 92 +  | 167 | 424 | 6330   | 6596   |
| UN68166 | Rsa1.0.01824.1 | 572 | 38733  | 0         | 565 | 572 | 98 -  | 1   | 572 | 26423  | 26993  |
| UN68167 | Rsa1.0.06563.1 | 517 | 10765  | 6.00E-63  | 135 | 139 | 97 -  | 103 | 241 | 863    | 1001   |
| UN68168 | Rsa1.0.04649.1 | 526 | 16538  | 1.00E-156 | 334 | 350 | 95 +  | 1   | 350 | 10655  | 11001  |
| UN68169 | Rsa1.0.03036.1 | 724 | 25826  | 0         | 720 | 724 | 99 -  | 1   | 724 | 6163   | 6886   |
| UN68170 | Rsa1.0.00289.1 | 721 | 98620  | 0         | 514 | 516 | 99 +  | 206 | 721 | 86232  | 86747  |

|         |                |     |        |           |     |     |       |     |     |        |        |
|---------|----------------|-----|--------|-----------|-----|-----|-------|-----|-----|--------|--------|
| UN68171 | Rsa1.0.01561.1 | 617 | 43227  | 2.00E-84  | 165 | 167 | 98 -  | 377 | 543 | 26162  | 26328  |
| UN68172 | Rsa1.0.00259.1 | 218 | 163204 | 1.00E-120 | 218 | 218 | 100 - | 1   | 218 | 3109   | 3326   |
| UN68173 | Rsa1.0.00550.1 | 569 | 210790 | 0         | 567 | 567 | 100 - | 3   | 569 | 184310 | 184876 |
| UN68174 | Rsa1.0.00087.1 | 392 | 761073 | 0         | 380 | 393 | 96 -  | 1   | 392 | 568207 | 568599 |
| UN68175 | Rsa1.0.00207.1 | 293 | 248736 | 1.00E-129 | 280 | 294 | 95 -  | 1   | 293 | 4174   | 4467   |
| UN68176 | Rsa1.0.00630.1 | 617 | 71281  | 0         | 393 | 407 | 96 +  | 3   | 408 | 63737  | 64143  |
| UN68177 | Rsa1.0.14508.1 | 577 | 3318   | 0         | 500 | 500 | 100 - | 1   | 500 | 489    | 988    |
| UN68178 | Rsa1.0.01771.1 | 346 | 172709 | 3.00E-54  | 117 | 120 | 97 +  | 227 | 346 | 5283   | 5402   |
| UN68179 | Rsa1.0.00049.1 | 125 | 167018 | 6.00E-41  | 115 | 125 | 92 +  | 1   | 125 | 138040 | 138164 |
| UN68180 | Rsa1.0.05409.1 | 643 | 13844  | 0         | 526 | 568 | 92 -  | 1   | 561 | 11143  | 11700  |
| UN68181 | Rsa1.0.08430.1 | 720 | 7367   | 1.00E-151 | 319 | 331 | 96 -  | 14  | 339 | 5277   | 5603   |
| UN68182 | Rsa1.0.00451.1 | 463 | 322533 | 1.00E-143 | 318 | 334 | 95 -  | 1   | 330 | 301659 | 301988 |
| UN68183 | Rsa1.0.04474.1 | 159 | 17191  | 2.00E-35  | 79  | 80  | 98 +  | 80  | 159 | 15616  | 15695  |
| UN68184 | Rsa1.0.07775.1 | 796 | 8594   | 1.00E-105 | 242 | 258 | 93 -  | 472 | 729 | 53     | 310    |
| UN68185 | Rsa1.0.00991.1 | 656 | 143101 | 0         | 489 | 518 | 94 -  | 4   | 507 | 34643  | 35157  |
| UN68186 | Rsa1.0.00551.1 | 811 | 76227  | 0         | 442 | 465 | 95 -  | 37  | 497 | 20659  | 21118  |
| UN68187 | Rsa1.0.08183.1 | 288 | 7775   | 1.00E-134 | 284 | 298 | 95 +  | 1   | 288 | 155    | 452    |
| UN68188 | Rsa1.0.00362.1 | 445 | 299497 | 0         | 440 | 445 | 98 -  | 1   | 445 | 283052 | 283496 |
| UN68189 | Rsa1.0.02335.1 | 702 | 32400  | 0         | 371 | 379 | 97 +  | 1   | 378 | 2167   | 2543   |
| UN68190 | Rsa1.0.00201.1 | 247 | 232851 | 1.00E-93  | 219 | 234 | 93 -  | 1   | 234 | 151820 | 152053 |
| UN68191 | Rsa1.0.02209.1 | 652 | 33873  | 1.00E-172 | 360 | 377 | 95 +  | 14  | 387 | 26581  | 26957  |
| UN68192 | Rsa1.0.00073.1 | 583 | 240924 | 0         | 580 | 583 | 99 +  | 1   | 583 | 119167 | 119749 |
| UN68193 | Rsa1.0.19994.1 | 567 | 1355   | 1.00E-167 | 304 | 306 | 99 +  | 1   | 306 | 1050   | 1355   |
| UN68194 | Rsa1.0.00940.1 | 411 | 179946 | 0         | 388 | 401 | 96 -  | 1   | 397 | 25552  | 25952  |
| UN68195 | Rsa1.0.00978.1 | 591 | 57739  | 1.00E-70  | 185 | 201 | 92 -  | 1   | 192 | 36456  | 36656  |
| UN68196 | Rsa1.0.00017.1 | 104 | 752458 | 3.00E-45  | 101 | 104 | 97 -  | 1   | 104 | 369232 | 369335 |
| UN68197 | Rsa1.0.02086.1 | 423 | 35198  | 0         | 418 | 425 | 98 -  | 1   | 423 | 14264  | 14688  |
| UN68198 | Rsa1.0.00268.1 | 810 | 101470 | 0         | 808 | 811 | 99 +  | 1   | 810 | 185    | 995    |
| UN68199 | Rsa1.0.00960.1 | 391 | 58199  | 1.00E-124 | 231 | 233 | 99 -  | 1   | 233 | 14176  | 14408  |
| UN68200 | Rsa1.0.03956.1 | 879 | 19872  | 0         | 829 | 832 | 99 -  | 3   | 833 | 6521   | 7352   |
| UN68201 | Rsa1.0.00157.1 | 741 | 245832 | 0         | 738 | 740 | 99 +  | 2   | 741 | 195679 | 196418 |
| UN68202 | Rsa1.0.00010.1 | 689 | 294827 | 1.00E-122 | 223 | 223 | 100 - | 1   | 223 | 249    | 471    |
| UN68203 | Rsa1.0.02995.1 | 780 | 26163  | 0         | 404 | 404 | 100 + | 1   | 404 | 19533  | 19936  |
| UN68204 | Rsa1.0.00255.1 | 246 | 204967 | 3.00E-72  | 211 | 236 | 89 -  | 1   | 229 | 171277 | 171512 |
| UN68205 | Rsa1.0.02947.1 | 123 | 26531  | 6.00E-47  | 101 | 103 | 98 -  | 21  | 123 | 6565   | 6667   |
| UN68206 | Rsa1.0.06455.1 | 122 | 10983  | 2.00E-53  | 118 | 122 | 96 +  | 1   | 122 | 103    | 224    |
| UN68207 | Rsa1.0.00114.1 | 718 | 131330 | 1.00E-142 | 365 | 399 | 91 +  | 4   | 392 | 42998  | 43388  |
| UN68208 | Rsa1.0.00926.1 | 334 | 195072 | 1.00E-139 | 257 | 259 | 99 -  | 1   | 259 | 158012 | 158270 |
| UN68209 | Rsa1.0.00482.1 | 698 | 81162  | 0         | 562 | 594 | 94 +  | 9   | 593 | 67441  | 68021  |

|         |                |     |        |           |     |     |       |     |     |        |        |
|---------|----------------|-----|--------|-----------|-----|-----|-------|-----|-----|--------|--------|
| UN68210 | Rsa1.0.01419.1 | 495 | 167402 | 2.33E-156 | 455 | 518 | 87 -  | 7   | 495 | 131002 | 131516 |
| UN68211 | Rsa1.0.03195.1 | 141 | 24673  | 7.00E-44  | 117 | 126 | 92 -  | 12  | 137 | 9351   | 9476   |
| UN68212 | Rsa1.0.00822.1 | 648 | 62891  | 0         | 438 | 447 | 97 +  | 1   | 447 | 42369  | 42813  |
| UN68213 | Rsa1.0.00640.1 | 212 | 70979  | 1.00E-104 | 207 | 212 | 97 +  | 1   | 212 | 16830  | 17041  |
| UN68214 | Rsa1.0.08115.1 | 236 | 7882   | 7.00E-39  | 97  | 102 | 95 -  | 1   | 102 | 1519   | 1620   |
| UN68215 | Rsa1.0.03624.1 | 377 | 21706  | 0         | 364 | 377 | 96 +  | 1   | 377 | 19731  | 20107  |
| UN68216 | Rsa1.0.16165.1 | 746 | 2260   | 0         | 467 | 504 | 92 -  | 2   | 488 | 593    | 1095   |
| UN68217 | Rsa1.0.00017.1 | 770 | 752458 | 0         | 339 | 341 | 99 -  | 1   | 341 | 711970 | 712310 |
| UN68218 | Rsa1.0.00775.1 | 732 | 64793  | 0         | 494 | 510 | 96 -  | 5   | 512 | 79     | 585    |
| UN68219 | Rsa1.0.00046.1 | 587 | 320315 | 0         | 577 | 587 | 98 -  | 1   | 587 | 47163  | 47746  |
| UN68220 | Rsa1.0.00067.1 | 334 | 415055 | 1.00E-130 | 307 | 329 | 93 -  | 10  | 334 | 170566 | 170894 |
| UN68221 | Rsa1.0.00348.1 | 857 | 92818  | 0         | 852 | 863 | 98 -  | 2   | 857 | 30153  | 31015  |
| UN68222 | Rsa1.0.00173.1 | 754 | 288743 | 1.00E-112 | 209 | 210 | 99 -  | 1   | 210 | 110413 | 110622 |
| UN68223 | Rsa1.0.02377.1 | 241 | 31994  | 1.00E-105 | 229 | 241 | 95 -  | 1   | 241 | 10289  | 10529  |
| UN68224 | Rsa1.0.01838.1 | 744 | 38500  | 1.00E-169 | 363 | 385 | 94 -  | 4   | 378 | 17537  | 17921  |
| UN68225 | Rsa1.0.08721.1 | 652 | 7000   | 1.00E-176 | 316 | 317 | 99 -  | 1   | 317 | 3050   | 3366   |
| UN68226 | Rsa1.0.09173.1 | 225 | 6582   | 5.00E-49  | 135 | 147 | 91 -  | 1   | 147 | 3328   | 3474   |
| UN68227 | Rsa1.0.02185.1 | 150 | 34150  | 7.00E-44  | 140 | 153 | 91 +  | 1   | 150 | 27262  | 27413  |
| UN68228 | Rsa1.0.02935.1 | 500 | 26621  | 2.00E-65  | 177 | 191 | 92 +  | 311 | 500 | 25753  | 25937  |
| UN68229 | Rsa1.0.00200.1 | 679 | 162016 | 6.00E-76  | 178 | 189 | 94 +  | 275 | 463 | 72130  | 72318  |
| UN68230 | Rsa1.0.01081.1 | 646 | 499226 | 0         | 327 | 327 | 100 - | 1   | 327 | 331855 | 332181 |
| UN68231 | Rsa1.0.27037.1 | 392 | 868    | 1.00E-100 | 194 | 197 | 98 +  | 1   | 197 | 120    | 316    |
| UN68232 | Rsa1.0.00539.1 | 693 | 76926  | 1.00E-125 | 260 | 271 | 95 +  | 259 | 529 | 33152  | 33422  |
| UN68233 | Rsa1.0.01055.1 | 683 | 55466  | 0         | 681 | 685 | 99 +  | 1   | 683 | 15714  | 16398  |
| UN68234 | Rsa1.0.01739.1 | 180 | 40068  | 1.00E-64  | 168 | 181 | 92 -  | 1   | 180 | 38131  | 38311  |
| UN68235 | Rsa1.0.01923.1 | 324 | 37233  | 1.00E-132 | 275 | 287 | 95 +  | 9   | 295 | 18025  | 18311  |
| UN68236 | Rsa1.0.00168.1 | 718 | 115870 | 1.00E-156 | 289 | 292 | 98 +  | 13  | 304 | 57889  | 58180  |
| UN68237 | Rsa1.0.01586.1 | 271 | 42804  | 1.00E-121 | 256 | 268 | 95 +  | 1   | 268 | 28197  | 28464  |
| UN68238 | Rsa1.0.01076.1 | 667 | 54835  | 0         | 588 | 596 | 98 -  | 1   | 596 | 34438  | 35030  |
| UN68239 | Rsa1.0.00842.1 | 248 | 62493  | 1.00E-119 | 223 | 224 | 99 -  | 1   | 223 | 29546  | 29769  |
| UN68240 | Rsa1.0.00039.1 | 202 | 296927 | 1.00E-103 | 199 | 201 | 99 +  | 2   | 202 | 15812  | 16011  |
| UN68241 | Rsa1.0.00157.1 | 464 | 245832 | 1.00E-177 | 326 | 329 | 99 +  | 1   | 327 | 64094  | 64422  |
| UN68242 | Rsa1.0.03997.1 | 312 | 19652  | 7.00E-49  | 163 | 182 | 89 -  | 5   | 185 | 4171   | 4350   |
| UN68243 | Rsa1.0.00759.1 | 227 | 65465  | 6.00E-95  | 216 | 228 | 94 +  | 1   | 227 | 10857  | 11084  |
| UN68244 | Rsa1.0.05030.1 | 278 | 15088  | 1.00E-113 | 258 | 275 | 93 +  | 1   | 275 | 11097  | 11371  |
| UN68245 | Rsa1.0.03465.1 | 566 | 22700  | 0         | 455 | 456 | 99 +  | 1   | 456 | 15753  | 16208  |
| UN68246 | Rsa1.0.13143.1 | 169 | 4993   | 5.00E-79  | 149 | 149 | 100 + | 1   | 149 | 728    | 876    |
| UN68247 | #              | #   | #      | #         | #   | #   | #     | #   | #   | #      | #      |
| UN68248 | Rsa1.0.00248.1 | 716 | 163568 | 1.00E-159 | 294 | 297 | 98 -  | 143 | 439 | 71990  | 72286  |



|         |                |     |        |           |     |     |       |     |     |        |        |
|---------|----------------|-----|--------|-----------|-----|-----|-------|-----|-----|--------|--------|
| UN68249 | Rsa1.0.00490.1 | 635 | 186713 | 0         | 524 | 525 | 99 +  | 1   | 525 | 180067 | 180591 |
| UN68250 | Rsa1.0.06412.1 | 740 | 11060  | 0         | 498 | 533 | 93 +  | 3   | 527 | 1003   | 1524   |
| UN68251 | Rsa1.0.00134.1 | 153 | 390219 | 9.00E-62  | 132 | 136 | 97 +  | 3   | 138 | 230406 | 230541 |
| UN68252 | Rsa1.0.00096.1 | 155 | 198773 | 2.00E-66  | 151 | 158 | 95 +  | 1   | 155 | 102199 | 102356 |
| UN68253 | Rsa1.0.05747.1 | 747 | 12749  | 2.33E-156 | 263 | 263 | 100 - | 2   | 264 | 7193   | 7455   |
| UN68254 | Rsa1.0.01388.1 | 672 | 46741  | 0         | 401 | 402 | 99 +  | 1   | 402 | 40975  | 41376  |
| UN68255 | Rsa1.0.00037.1 | 466 | 307838 | 1.00E-128 | 251 | 257 | 97 -  | 1   | 257 | 281781 | 282037 |
| UN68256 | Rsa1.0.00414.1 | 548 | 202190 | 0         | 352 | 352 | 100 + | 197 | 548 | 181977 | 182328 |
| UN68257 | Rsa1.0.00998.1 | 271 | 57168  | 3.00E-32  | 71  | 71  | 100 - | 113 | 183 | 11548  | 11618  |
| UN68258 | Rsa1.0.00222.1 | 527 | 172263 | 0         | 482 | 525 | 91 -  | 3   | 527 | 127726 | 128248 |
| UN68259 | Rsa1.0.00277.1 | 487 | 100132 | 0         | 438 | 438 | 100 - | 1   | 438 | 15157  | 15594  |
| UN68260 | Rsa1.0.00648.1 | 519 | 70351  | 0         | 402 | 407 | 98 -  | 1   | 407 | 31295  | 31701  |
| UN68261 | Rsa1.0.00407.1 | 115 | 191544 | 7.00E-31  | 71  | 72  | 98 +  | 1   | 72  | 166446 | 166517 |
| UN68262 | Rsa1.0.00302.1 | 759 | 97521  | 0         | 738 | 750 | 98 +  | 1   | 750 | 1304   | 2051   |
| UN68263 | Rsa1.0.02476.1 | 762 | 31063  | 0         | 752 | 760 | 98 +  | 3   | 762 | 23711  | 24470  |
| UN68264 | Rsa1.0.00135.1 | 727 | 178077 | 0         | 723 | 723 | 100 + | 5   | 727 | 112559 | 113281 |
| UN68265 | Rsa1.0.00101.1 | 270 | 267193 | 4.00E-90  | 207 | 220 | 94 +  | 47  | 266 | 194777 | 194996 |
| UN68266 | Rsa1.0.00022.1 | 580 | 200461 | 0         | 573 | 580 | 98 -  | 1   | 580 | 104976 | 105552 |
| UN68267 | Rsa1.0.41025.1 | 267 | 547    | 2.00E-58  | 139 | 147 | 94 -  | 1   | 147 | 146    | 292    |
| UN68268 | Rsa1.0.00015.1 | 509 | 561803 | 1.00E-148 | 350 | 378 | 92 +  | 132 | 509 | 222002 | 222379 |
| UN68269 | Rsa1.0.02877.1 | 773 | 27049  | 0         | 769 | 775 | 99 +  | 1   | 773 | 23660  | 24434  |
| UN68270 | Rsa1.0.02663.1 | 279 | 169243 | 1.00E-138 | 269 | 277 | 97 +  | 3   | 279 | 158036 | 158304 |
| UN68271 | Rsa1.0.02433.1 | 618 | 158318 | 1.00E-136 | 249 | 250 | 99 +  | 277 | 526 | 129398 | 129647 |
| UN68272 | Rsa1.0.00079.1 | 708 | 606987 | 1.00E-136 | 246 | 246 | 100 + | 1   | 246 | 40405  | 40650  |
| UN68273 | Rsa1.0.00702.1 | 764 | 67600  | 0         | 756 | 761 | 99 +  | 4   | 764 | 40983  | 41743  |
| UN68274 | Rsa1.0.02111.1 | 734 | 34913  | 1.00E-173 | 315 | 316 | 99 -  | 1   | 316 | 3011   | 3325   |
| UN68275 | Rsa1.0.26270.1 | 747 | 898    | 1.00E-40  | 86  | 86  | 100 + | 624 | 709 | 315    | 400    |
| UN68276 | Rsa1.0.00661.1 | 830 | 213041 | 0         | 811 | 841 | 96 -  | 1   | 830 | 44820  | 45658  |
| UN68277 | Rsa1.0.00554.1 | 806 | 150953 | 0         | 784 | 791 | 99 +  | 9   | 798 | 37445  | 38234  |
| UN68278 | Rsa1.0.05381.1 | 111 | 13966  | 5.00E-47  | 107 | 111 | 96 +  | 1   | 111 | 116    | 226    |
| UN68279 | Rsa1.0.07657.1 | 181 | 8896   | 4.00E-52  | 167 | 184 | 90 -  | 1   | 181 | 3747   | 3930   |
| UN68280 | Rsa1.0.01520.1 | 671 | 44087  | 0         | 534 | 561 | 95 -  | 114 | 671 | 39978  | 40532  |
| UN68281 | Rsa1.0.04626.1 | 671 | 16611  | 1.00E-150 | 350 | 376 | 93 -  | 5   | 377 | 10443  | 10818  |
| UN68282 | Rsa1.0.04028.1 | 846 | 19493  | 0         | 844 | 852 | 99 +  | 1   | 846 | 14968  | 15819  |
| UN68283 | Rsa1.0.01704.1 | 195 | 40711  | 5.00E-92  | 189 | 195 | 96 -  | 1   | 195 | 5264   | 5458   |
| UN68284 | Rsa1.0.01803.1 | 736 | 173846 | 1.00E-117 | 265 | 281 | 94 -  | 151 | 431 | 34629  | 34906  |
| UN68285 | Rsa1.0.00690.1 | 795 | 140527 | 1.00E-178 | 316 | 316 | 100 - | 1   | 316 | 53693  | 54008  |
| UN68286 | Rsa1.0.00139.1 | 642 | 357786 | 0         | 550 | 558 | 98 -  | 4   | 560 | 39167  | 39724  |
| UN68287 | Rsa1.0.00013.1 | 698 | 292129 | 1.00E-163 | 539 | 628 | 85 +  | 30  | 639 | 225214 | 225810 |

|         |                |     |        |           |     |     |       |     |     |        |        |
|---------|----------------|-----|--------|-----------|-----|-----|-------|-----|-----|--------|--------|
| UN68288 | Rsa1.0.05239.1 | 432 | 14410  | 1.00E-176 | 413 | 443 | 93 +  | 1   | 432 | 11688  | 12121  |
| UN68289 | Rsa1.0.00112.1 | 291 | 132199 | 1.00E-142 | 282 | 291 | 96 +  | 1   | 291 | 73015  | 73305  |
| UN68290 | Rsa1.0.01149.1 | 641 | 160459 | 1.00E-85  | 238 | 262 | 90 +  | 1   | 261 | 129745 | 129992 |
| UN68291 | Rsa1.0.05412.1 | 644 | 13836  | 0         | 562 | 562 | 100 + | 1   | 562 | 552    | 1113   |
| UN68292 | Rsa1.0.00662.1 | 183 | 192183 | 6.00E-11  | 90  | 107 | 84 +  | 72  | 177 | 4988   | 5094   |
| UN68293 | Rsa1.0.09000.1 | 314 | 6719   | 1.00E-172 | 312 | 314 | 99 +  | 1   | 314 | 1284   | 1597   |
| UN68294 | Rsa1.0.00469.1 | 491 | 82084  | 1.00E-139 | 310 | 328 | 94 +  | 83  | 410 | 21641  | 21964  |
| UN68295 | Rsa1.0.00962.1 | 730 | 184909 | 1.00E-163 | 334 | 346 | 96 +  | 2   | 345 | 33632  | 33976  |
| UN68296 | Rsa1.0.00028.1 | 435 | 293984 | 0         | 423 | 431 | 98 +  | 5   | 435 | 282596 | 283026 |
| UN68297 | Rsa1.0.00302.1 | 248 | 97521  | 5.00E-46  | 136 | 150 | 90 -  | 7   | 156 | 44281  | 44430  |
| UN68298 | Rsa1.0.00090.1 | 501 | 273859 | 0         | 497 | 501 | 99 -  | 1   | 501 | 218789 | 219289 |
| UN68299 | Rsa1.0.03170.1 | 602 | 24824  | 0         | 600 | 603 | 99 +  | 1   | 602 | 12839  | 13441  |
| UN68300 | Rsa1.0.00048.1 | 604 | 167185 | 1.00E-76  | 183 | 193 | 94 +  | 49  | 241 | 105802 | 105991 |
| UN68301 | Rsa1.0.03425.1 | 852 | 23043  | 0         | 547 | 555 | 98 +  | 180 | 733 | 6605   | 7159   |
| UN68302 | Rsa1.0.00472.1 | 419 | 398134 | 1.00E-145 | 273 | 277 | 98 -  | 1   | 277 | 168065 | 168341 |
| UN68303 | Rsa1.0.04556.1 | 492 | 16864  | 1.00E-179 | 321 | 322 | 99 +  | 1   | 322 | 5620   | 5941   |
| UN68304 | Rsa1.0.03677.1 | 699 | 21430  | 0         | 515 | 516 | 99 -  | 184 | 699 | 14370  | 14885  |
| UN68305 | Rsa1.0.00064.1 | 331 | 240927 | 1.00E-160 | 323 | 336 | 96 -  | 2   | 331 | 43631  | 43966  |
| UN68306 | Rsa1.0.01230.1 | 641 | 50221  | 0         | 433 | 451 | 96 -  | 194 | 641 | 40987  | 41433  |
| UN68307 | Rsa1.0.01289.1 | 689 | 49181  | 2.33E-156 | 274 | 278 | 98 +  | 389 | 666 | 45931  | 46208  |
| UN68308 | Rsa1.0.00804.1 | 182 | 63726  | 4.00E-77  | 170 | 178 | 95 +  | 1   | 178 | 15916  | 16093  |
| UN68309 | Rsa1.0.17486.1 | 698 | 1817   | 0         | 544 | 580 | 93 -  | 111 | 690 | 428    | 1007   |
| UN68310 | Rsa1.0.01814.1 | 375 | 38917  | 1.00E-127 | 245 | 250 | 98 -  | 104 | 353 | 20940  | 21189  |
| UN68311 | Rsa1.0.00727.1 | 157 | 66724  | 2.00E-60  | 145 | 154 | 94 +  | 1   | 154 | 15758  | 15911  |
| UN68312 | Rsa1.0.00147.1 | 749 | 249503 | 0         | 516 | 524 | 98 +  | 1   | 524 | 155736 | 156259 |
| UN68313 | Rsa1.0.00648.1 | 406 | 70351  | 2.33E-156 | 296 | 310 | 95 +  | 1   | 297 | 31756  | 32065  |
| UN68314 | Rsa1.0.00093.1 | 691 | 214962 | 0         | 458 | 476 | 96 +  | 1   | 471 | 128422 | 128896 |
| UN68315 | Rsa1.0.01382.1 | 622 | 46877  | 0         | 617 | 620 | 99 +  | 3   | 622 | 23448  | 24067  |
| UN68316 | Rsa1.0.03598.1 | 246 | 21858  | 6.00E-89  | 225 | 245 | 91 +  | 1   | 239 | 13869  | 14113  |
| UN68317 | Rsa1.0.00100.1 | 701 | 249232 | 0         | 410 | 432 | 94 -  | 53  | 481 | 13427  | 13856  |
| UN68318 | Rsa1.0.07679.1 | 360 | 8811   | 1.00E-156 | 324 | 339 | 95 +  | 22  | 360 | 6087   | 6425   |
| UN68319 | Rsa1.0.00338.1 | 553 | 94109  | 1.00E-102 | 243 | 260 | 93 +  | 4   | 263 | 34865  | 35117  |
| UN68320 | Rsa1.0.00200.1 | 315 | 162016 | 1.00E-127 | 294 | 315 | 93 -  | 1   | 315 | 109112 | 109426 |
| UN68321 | Rsa1.0.05596.1 | 571 | 137912 | 0         | 535 | 547 | 97 +  | 26  | 571 | 127499 | 128045 |
| UN68322 | Rsa1.0.00251.1 | 865 | 303968 | 1.00E-156 | 282 | 283 | 99 -  | 1   | 283 | 127337 | 127619 |
| UN68323 | Rsa1.0.00062.1 | 858 | 299291 | 0         | 796 | 810 | 98 +  | 2   | 811 | 72654  | 73460  |
| UN68324 | Rsa1.0.00085.1 | 133 | 142226 | 1.00E-45  | 120 | 129 | 93 +  | 1   | 129 | 26830  | 26958  |
| UN68325 | Rsa1.0.03191.1 | 202 | 145762 | 5.00E-61  | 149 | 159 | 93 -  | 4   | 162 | 16325  | 16483  |
| UN68326 | Rsa1.0.00229.1 | 408 | 105471 | 1.00E-141 | 290 | 302 | 96 -  | 1   | 302 | 43350  | 43651  |

|         |                |     |        |           |     |     |       |     |     |        |        |
|---------|----------------|-----|--------|-----------|-----|-----|-------|-----|-----|--------|--------|
| UN68327 | Rsa1.0.00283.1 | 871 | 183797 | 0         | 456 | 457 | 99 +  | 1   | 457 | 183341 | 183797 |
| UN68328 | Rsa1.0.00119.1 | 721 | 467509 | 1.00E-125 | 230 | 231 | 99 +  | 1   | 231 | 6605   | 6835   |
| UN68329 | Rsa1.0.01414.1 | 140 | 149508 | 2.00E-50  | 116 | 121 | 95 -  | 1   | 121 | 115743 | 115863 |
| UN68330 | Rsa1.0.00110.1 | 763 | 132719 | 0         | 593 | 618 | 95 +  | 2   | 616 | 115084 | 115686 |
| UN68331 | Rsa1.0.00369.1 | 538 | 266462 | 1.00E-166 | 305 | 308 | 99 -  | 2   | 309 | 202809 | 203116 |
| UN68332 | Rsa1.0.04720.1 | 527 | 16237  | 0         | 342 | 344 | 99 +  | 1   | 344 | 13729  | 14072  |
| UN68333 | Rsa1.0.16367.1 | 728 | 2176   | 0         | 713 | 728 | 97 +  | 1   | 728 | 545    | 1269   |
| UN68334 | Rsa1.0.00368.1 | 580 | 90669  | 0         | 548 | 557 | 98 -  | 1   | 557 | 2637   | 3193   |
| UN68335 | Rsa1.0.00621.1 | 765 | 71840  | 1.00E-169 | 304 | 305 | 99 +  | 440 | 744 | 68110  | 68414  |
| UN68336 | Rsa1.0.00905.1 | 499 | 60110  | 1.00E-178 | 461 | 506 | 91 +  | 1   | 499 | 25166  | 25653  |
| UN68337 | Rsa1.0.02962.1 | 528 | 26419  | 0         | 528 | 528 | 100 + | 1   | 528 | 11226  | 11753  |
| UN68338 | Rsa1.0.01289.1 | 639 | 49181  | 0         | 603 | 608 | 99 +  | 32  | 639 | 980    | 1587   |
| UN68339 | Rsa1.0.01159.1 | 629 | 52115  | 1.00E-141 | 286 | 295 | 96 -  | 1   | 294 | 32609  | 32899  |
| UN68340 | Rsa1.0.16738.1 | 593 | 2050   | 1.00E-169 | 332 | 342 | 97 -  | 252 | 593 | 611    | 952    |
| UN68341 | Rsa1.0.00971.1 | 358 | 57973  | 1.00E-145 | 281 | 287 | 97 -  | 1   | 285 | 48426  | 48712  |
| UN68342 | Rsa1.0.03603.1 | 582 | 21845  | 0         | 432 | 439 | 98 +  | 3   | 441 | 2410   | 2847   |
| UN68343 | Rsa1.0.00497.1 | 136 | 79830  | 9.00E-34  | 91  | 97  | 93 -  | 40  | 136 | 44138  | 44234  |
| UN68344 | Rsa1.0.12843.1 | 295 | 5104   | 3.00E-66  | 137 | 140 | 97 +  | 116 | 255 | 2834   | 2973   |
| UN68345 | Rsa1.0.01015.1 | 660 | 56752  | 0         | 445 | 472 | 94 -  | 31  | 496 | 7528   | 7996   |
| UN68346 | Rsa1.0.01495.1 | 649 | 44613  | 0         | 646 | 649 | 99 -  | 1   | 649 | 16326  | 16973  |
| UN68347 | Rsa1.0.02931.1 | 232 | 26654  | 2.00E-67  | 209 | 229 | 91 -  | 1   | 228 | 6220   | 6443   |
| UN68348 | Rsa1.0.00085.1 | 664 | 142226 | 1.00E-160 | 286 | 286 | 100 + | 1   | 286 | 28447  | 28732  |
| UN68349 | Rsa1.0.01719.1 | 527 | 40388  | 0         | 512 | 527 | 97 +  | 1   | 527 | 16829  | 17355  |
| UN68350 | Rsa1.0.00941.1 | 324 | 58891  | 1.00E-125 | 298 | 320 | 93 -  | 1   | 319 | 44924  | 45234  |
| UN68351 | Rsa1.0.35513.1 | 201 | 637    | 1.00E-98  | 197 | 201 | 98 +  | 1   | 201 | 321    | 519    |
| UN68352 | Rsa1.0.58032.1 | 458 | 394    | 4.00E-91  | 179 | 182 | 98 +  | 71  | 252 | 4      | 185    |
| UN68353 | Rsa1.0.01263.1 | 676 | 49703  | 0         | 427 | 435 | 98 +  | 1   | 429 | 493    | 927    |
| UN68354 | Rsa1.0.00065.1 | 695 | 454616 | 0         | 583 | 591 | 98 -  | 98  | 688 | 235285 | 235875 |
| UN68355 | Rsa1.0.01307.1 | 195 | 48685  | 3.00E-84  | 185 | 194 | 95 +  | 2   | 195 | 47574  | 47767  |
| UN68356 | Rsa1.0.02593.1 | 428 | 29744  | 1.00E-153 | 339 | 360 | 94 -  | 1   | 355 | 12673  | 13024  |
| UN68357 | Rsa1.0.00107.1 | 710 | 431659 | 0         | 402 | 404 | 99 -  | 307 | 710 | 193562 | 193965 |
| UN68358 | Rsa1.0.01340.1 | 802 | 47805  | 3.00E-38  | 93  | 96  | 96 -  | 35  | 130 | 22412  | 22504  |
| UN68359 | Rsa1.0.03981.1 | 617 | 19724  | 0         | 409 | 415 | 98 -  | 203 | 617 | 15050  | 15464  |
| UN68360 | Rsa1.0.01244.1 | 214 | 50061  | 1.00E-115 | 213 | 214 | 99 +  | 1   | 214 | 47348  | 47561  |
| UN68361 | Rsa1.0.03355.1 | 703 | 23489  | 0         | 399 | 401 | 99 +  | 302 | 702 | 13517  | 13917  |
| UN68362 | Rsa1.0.00417.1 | 571 | 395068 | 1.00E-158 | 282 | 282 | 100 - | 3   | 284 | 223890 | 224171 |
| UN68363 | Rsa1.0.01255.1 | 669 | 162921 | 0         | 438 | 442 | 99 +  | 1   | 441 | 157286 | 157727 |
| UN68364 | Rsa1.0.02221.1 | 752 | 33796  | 0         | 471 | 481 | 97 +  | 1   | 481 | 13181  | 13661  |
| UN68365 | Rsa1.0.20977.1 | 232 | 1248   | 1.00E-114 | 226 | 232 | 97 -  | 1   | 232 | 896    | 1127   |

|         |                |     |        |           |     |     |       |     |     |        |        |
|---------|----------------|-----|--------|-----------|-----|-----|-------|-----|-----|--------|--------|
| UN68366 | Rsa1.0.01964.1 | 701 | 36702  | 0         | 640 | 647 | 98 -  | 59  | 701 | 11337  | 11983  |
| UN68367 | Rsa1.0.47800.1 | 616 | 473    | 1.00E-156 | 282 | 283 | 99 -  | 283 | 565 | 1      | 283    |
| UN68368 | Rsa1.0.00662.1 | 630 | 192183 | 4.00E-86  | 209 | 222 | 94 -  | 6   | 227 | 53109  | 53328  |
| UN68369 | Rsa1.0.00706.1 | 382 | 291570 | 1.00E-117 | 266 | 282 | 94 -  | 98  | 379 | 33002  | 33273  |
| UN68370 | Rsa1.0.01662.1 | 301 | 41382  | 1.00E-153 | 296 | 302 | 98 -  | 1   | 301 | 25566  | 25867  |
| UN68371 | Rsa1.0.00354.1 | 592 | 232005 | 0         | 578 | 586 | 98 -  | 1   | 586 | 77297  | 77882  |
| UN68372 | Rsa1.0.07056.1 | 389 | 9969   | 1.00E-168 | 362 | 382 | 94 +  | 8   | 386 | 1782   | 2163   |
| UN68373 | Rsa1.0.03114.1 | 102 | 25318  | 1.00E-38  | 96  | 101 | 95 -  | 1   | 101 | 6778   | 6878   |
| UN68374 | Rsa1.0.02641.1 | 781 | 29191  | 1.00E-178 | 328 | 332 | 98 +  | 3   | 334 | 5567   | 5898   |
| UN68375 | Rsa1.0.00288.1 | 345 | 98659  | 1.00E-123 | 273 | 287 | 95 +  | 2   | 286 | 40832  | 41113  |
| UN68376 | Rsa1.0.02666.1 | 718 | 28915  | 1.00E-161 | 291 | 292 | 99 -  | 1   | 292 | 10002  | 10293  |
| UN68377 | Rsa1.0.00749.1 | 641 | 65933  | 0         | 518 | 537 | 96 -  | 1   | 537 | 29035  | 29571  |
| UN68378 | Rsa1.0.07614.1 | 669 | 9019   | 7.00E-97  | 183 | 184 | 99 +  | 479 | 662 | 6389   | 6572   |
| UN68379 | Rsa1.0.00913.1 | 641 | 59914  | 1.00E-127 | 234 | 235 | 99 -  | 3   | 237 | 12488  | 12722  |
| UN68380 | Rsa1.0.00953.1 | 749 | 145012 | 0         | 537 | 542 | 99 -  | 172 | 713 | 97250  | 97791  |
| UN68381 | Rsa1.0.00037.1 | 688 | 307838 | 9.00E-75  | 424 | 521 | 81 -  | 173 | 678 | 188632 | 189152 |
| UN68382 | Rsa1.0.02780.1 | 744 | 27965  | 1.00E-104 | 193 | 193 | 100 - | 379 | 571 | 23179  | 23371  |
| UN68383 | Rsa1.0.03181.1 | 691 | 24763  | 1.00E-106 | 232 | 242 | 95 -  | 4   | 242 | 20075  | 20315  |
| UN68384 | Rsa1.0.52216.1 | 683 | 436    | 0         | 415 | 417 | 99 -  | 3   | 419 | 1      | 417    |
| UN68385 | Rsa1.0.00729.1 | 643 | 66690  | 0         | 616 | 641 | 96 +  | 3   | 643 | 55930  | 56557  |
| UN68386 | Rsa1.0.00404.1 | 734 | 87635  | 1.00E-113 | 221 | 224 | 98 +  | 385 | 608 | 40790  | 41012  |
| UN68387 | Rsa1.0.11741.1 | 698 | 5423   | 1.00E-143 | 278 | 285 | 97 -  | 414 | 698 | 4812   | 5096   |
| UN68388 | Rsa1.0.01896.1 | 773 | 37512  | 1.00E-137 | 275 | 283 | 97 +  | 3   | 284 | 22615  | 22897  |
| UN68389 | Rsa1.0.00436.1 | 305 | 85008  | 2.00E-49  | 109 | 112 | 97 +  | 47  | 158 | 32250  | 32361  |
| UN68390 | Rsa1.0.61010.1 | 547 | 376    | 2.00E-72  | 139 | 139 | 100 - | 328 | 466 | 238    | 376    |
| UN68391 | Rsa1.0.03826.1 | 730 | 20614  | 0         | 563 | 564 | 99 +  | 6   | 569 | 293    | 855    |
| UN68392 | Rsa1.0.00741.1 | 568 | 66117  | 0         | 432 | 444 | 97 +  | 113 | 555 | 45664  | 46106  |
| UN68393 | Rsa1.0.00119.1 | 516 | 467509 | 1.00E-131 | 290 | 306 | 94 +  | 212 | 516 | 59939  | 60244  |
| UN68394 | Rsa1.0.00714.1 | 767 | 67187  | 8.00E-63  | 126 | 127 | 99 -  | 282 | 408 | 16801  | 16927  |
| UN68395 | Rsa1.0.06168.1 | 618 | 11580  | 1.00E-92  | 173 | 173 | 100 + | 3   | 175 | 11252  | 11424  |
| UN68396 | Rsa1.0.00425.1 | 640 | 147080 | 0         | 639 | 641 | 99 +  | 1   | 640 | 83411  | 84051  |
| UN68397 | Rsa1.0.02895.1 | 762 | 26979  | 1.00E-175 | 318 | 320 | 99 -  | 3   | 322 | 18080  | 18399  |
| UN68398 | Rsa1.0.03884.1 | 729 | 20274  | 1.00E-147 | 306 | 319 | 95 +  | 204 | 519 | 18988  | 19306  |
| UN68399 | Rsa1.0.17937.1 | 767 | 1706   | 0         | 390 | 397 | 98 +  | 3   | 399 | 425    | 821    |
| UN68400 | Rsa1.0.02975.1 | 673 | 26322  | 1.00E-137 | 355 | 388 | 91 +  | 201 | 587 | 15690  | 16061  |
| UN68401 | Rsa1.0.02061.1 | 678 | 35487  | 0         | 663 | 683 | 97 -  | 2   | 678 | 11122  | 11804  |
| UN68402 | Rsa1.0.00821.1 | 376 | 62891  | 0         | 347 | 350 | 99 +  | 1   | 350 | 61416  | 61765  |
| UN68403 | Rsa1.0.03207.1 | 342 | 24604  | 0         | 338 | 338 | 100 - | 3   | 340 | 14834  | 15171  |
| UN68404 | Rsa1.0.00084.1 | 146 | 142338 | 2.00E-65  | 138 | 142 | 97 -  | 1   | 142 | 93023  | 93164  |

|         |                |     |        |           |     |     |       |     |     |        |        |
|---------|----------------|-----|--------|-----------|-----|-----|-------|-----|-----|--------|--------|
| UN68405 | Rsa1.0.01380.1 | 209 | 155003 | 9.00E-32  | 121 | 138 | 87 +  | 7   | 144 | 32293  | 32430  |
| UN68406 | Rsa1.0.01695.1 | 241 | 40848  | 5.00E-49  | 154 | 171 | 90 +  | 70  | 239 | 9182   | 9352   |
| UN68407 | Rsa1.0.04334.1 | 612 | 17852  | 0         | 388 | 393 | 98 -  | 1   | 393 | 10356  | 10748  |
| UN68408 | Rsa1.0.00545.1 | 254 | 189649 | 1.00E-108 | 238 | 251 | 94 +  | 1   | 251 | 44764  | 45014  |
| UN68409 | Rsa1.0.00066.1 | 376 | 152418 | 0         | 366 | 374 | 97 -  | 2   | 375 | 45751  | 46123  |
| UN68410 | Rsa1.0.02040.1 | 485 | 35684  | 0         | 331 | 333 | 99 +  | 1   | 333 | 13744  | 14076  |
| UN68411 | Rsa1.0.05849.1 | 309 | 12425  | 1.00E-122 | 287 | 306 | 93 -  | 1   | 306 | 9139   | 9442   |
| UN68412 | Rsa1.0.02835.1 | 517 | 27491  | 1.00E-180 | 329 | 332 | 99 +  | 1   | 332 | 19068  | 19399  |
| UN68413 | Rsa1.0.00670.1 | 598 | 69371  | 0         | 555 | 573 | 96 +  | 6   | 578 | 33251  | 33823  |
| UN68414 | Rsa1.0.00720.1 | 591 | 66931  | 0         | 337 | 338 | 99 -  | 1   | 338 | 44727  | 45064  |
| UN68415 | Rsa1.0.00075.1 | 543 | 146680 | 0         | 479 | 493 | 97 +  | 54  | 543 | 27951  | 28443  |
| UN68416 | Rsa1.0.03406.1 | 685 | 23159  | 0         | 596 | 603 | 98 +  | 2   | 603 | 10440  | 11040  |
| UN68417 | Rsa1.0.00341.1 | 615 | 249309 | 1.00E-119 | 218 | 218 | 100 - | 124 | 341 | 214488 | 214705 |
| UN68418 | Rsa1.0.00320.1 | 659 | 95784  | 0         | 543 | 577 | 94 -  | 5   | 569 | 9746   | 10315  |
| UN68419 | Rsa1.0.01590.1 | 721 | 42719  | 0         | 622 | 625 | 99 -  | 97  | 721 | 10147  | 10771  |
| UN68420 | Rsa1.0.00534.1 | 708 | 77361  | 0         | 474 | 489 | 96 -  | 143 | 630 | 40852  | 41334  |
| UN68421 | Rsa1.0.04588.1 | 795 | 16739  | 3.00E-75  | 156 | 160 | 97 +  | 112 | 271 | 14592  | 14751  |
| UN68422 | Rsa1.0.07471.1 | 669 | 9307   | 0         | 668 | 670 | 99 +  | 1   | 669 | 2790   | 3459   |
| UN68423 | Rsa1.0.00351.1 | 728 | 413096 | 0         | 569 | 600 | 94 +  | 18  | 607 | 142192 | 142783 |
| UN68424 | Rsa1.0.00047.1 | 640 | 168582 | 1.00E-144 | 262 | 263 | 99 -  | 242 | 504 | 9426   | 9688   |
| UN68425 | Rsa1.0.00399.1 | 768 | 242951 | 1.00E-128 | 232 | 232 | 100 - | 3   | 234 | 82032  | 82263  |
| UN68426 | Rsa1.0.00021.1 | 580 | 263655 | 1.00E-179 | 333 | 338 | 98 +  | 9   | 346 | 80149  | 80486  |
| UN68427 | Rsa1.0.00453.1 | 640 | 83031  | 1.00E-110 | 236 | 246 | 95 +  | 26  | 265 | 79221  | 79466  |
| UN68428 | Rsa1.0.00017.1 | 752 | 752458 | 3.00E-62  | 137 | 142 | 96 +  | 313 | 454 | 578502 | 578643 |
| UN68429 | Rsa1.0.00341.1 | 762 | 249309 | 4.00E-68  | 154 | 160 | 96 -  | 524 | 682 | 126668 | 126827 |
| UN68430 | Rsa1.0.00630.1 | 620 | 71281  | 2.00E-90  | 178 | 181 | 98 -  | 212 | 392 | 32527  | 32707  |
| UN68431 | Rsa1.0.00170.1 | 280 | 179538 | 1.00E-68  | 135 | 136 | 99 -  | 145 | 280 | 23082  | 23217  |
| UN68432 | Rsa1.0.18966.1 | 791 | 1503   | 0         | 519 | 553 | 93 -  | 2   | 550 | 344    | 893    |
| UN68433 | Rsa1.0.13337.1 | 375 | 4908   | 0         | 359 | 368 | 97 +  | 2   | 367 | 4502   | 4869   |
| UN68434 | Rsa1.0.01105.1 | 637 | 53958  | 1.00E-107 | 197 | 197 | 100 + | 80  | 276 | 10349  | 10545  |
| UN68435 | Rsa1.0.05030.1 | 445 | 15088  | 1.00E-161 | 321 | 331 | 96 -  | 115 | 445 | 10979  | 11308  |
| UN68436 | Rsa1.0.01097.1 | 336 | 173349 | 1.00E-90  | 207 | 217 | 95 -  | 126 | 336 | 16375  | 16590  |
| UN68437 | Rsa1.0.00030.1 | 750 | 250988 | 1.00E-104 | 229 | 240 | 95 -  | 9   | 248 | 198811 | 199044 |
| UN68438 | Rsa1.0.04526.1 | 557 | 16962  | 1.00E-120 | 267 | 281 | 95 -  | 273 | 549 | 10755  | 11035  |
| UN68439 | Rsa1.0.00166.1 | 818 | 240912 | 1.00E-174 | 354 | 364 | 97 +  | 431 | 789 | 208749 | 209112 |
| UN68440 | Rsa1.0.05056.1 | 732 | 14981  | 1.00E-132 | 257 | 263 | 97 -  | 356 | 618 | 8495   | 8757   |
| UN68441 | Rsa1.0.13950.1 | 686 | 4028   | 1.00E-135 | 271 | 280 | 96 -  | 407 | 686 | 2507   | 2786   |
| UN68442 | Rsa1.0.00193.1 | 705 | 194198 | 0         | 477 | 478 | 99 -  | 228 | 705 | 142601 | 143078 |
| UN68443 | Rsa1.0.01440.1 | 628 | 45807  | 0         | 330 | 333 | 99 -  | 3   | 335 | 32442  | 32774  |

|         |                |     |        |           |     |     |       |     |     |        |        |
|---------|----------------|-----|--------|-----------|-----|-----|-------|-----|-----|--------|--------|
| UN68444 | Rsa1.0.05316.1 | 798 | 14164  | 0         | 549 | 556 | 98 +  | 3   | 558 | 9311   | 9866   |
| UN68445 | Rsa1.0.00075.1 | 682 | 146680 | 0         | 657 | 691 | 95 +  | 1   | 680 | 140555 | 141245 |
| UN68446 | Rsa1.0.00332.1 | 596 | 94575  | 0         | 592 | 595 | 99 -  | 3   | 596 | 39584  | 40177  |
| UN68447 | Rsa1.0.00310.1 | 715 | 96852  | 0         | 341 | 347 | 98 +  | 232 | 578 | 19570  | 19916  |
| UN68448 | Rsa1.0.03007.1 | 729 | 26070  | 3.00E-87  | 199 | 210 | 94 +  | 3   | 209 | 13281  | 13490  |
| UN68449 | Rsa1.0.01230.1 | 707 | 50221  | 1.00E-92  | 229 | 246 | 93 -  | 1   | 244 | 24733  | 24975  |
| UN68450 | Rsa1.0.00497.1 | 773 | 79830  | 1.00E-119 | 221 | 222 | 99 -  | 400 | 621 | 34787  | 35008  |
| UN68451 | Rsa1.0.05162.1 | 511 | 14631  | 1.00E-171 | 364 | 383 | 95 -  | 1   | 380 | 11545  | 11927  |
| UN68452 | Rsa1.0.04379.1 | 744 | 17646  | 0         | 349 | 350 | 99 -  | 250 | 599 | 6861   | 7210   |
| UN68453 | Rsa1.0.22243.1 | 748 | 1138   | 0         | 484 | 493 | 98 +  | 2   | 493 | 597    | 1089   |
| UN68454 | Rsa1.0.00037.1 | 761 | 307838 | 0         | 371 | 376 | 98 -  | 2   | 374 | 255073 | 255448 |
| UN68455 | Rsa1.0.00828.1 | 777 | 62744  | 0         | 473 | 475 | 99 +  | 298 | 772 | 7600   | 8074   |
| UN68456 | Rsa1.0.00518.1 | 249 | 78360  | 4.00E-96  | 237 | 258 | 91 -  | 1   | 249 | 72002  | 72259  |
| UN68457 | Rsa1.0.00225.1 | 765 | 105892 | 0         | 697 | 705 | 98 +  | 59  | 762 | 53905  | 54609  |
| UN68458 | Rsa1.0.00997.1 | 668 | 57190  | 0         | 461 | 472 | 97 -  | 71  | 542 | 28191  | 28658  |
| UN68459 | Rsa1.0.02688.1 | 613 | 28644  | 0         | 567 | 607 | 93 +  | 2   | 607 | 13343  | 13929  |
| UN68460 | Rsa1.0.00084.1 | 774 | 142338 | 0         | 534 | 540 | 98 +  | 240 | 774 | 92431  | 92970  |
| UN68461 | Rsa1.0.00921.1 | 554 | 59599  | 1.00E-42  | 164 | 187 | 87 -  | 64  | 249 | 55224  | 55407  |
| UN68462 | Rsa1.0.03002.1 | 459 | 26107  | 2.00E-65  | 177 | 194 | 91 +  | 275 | 457 | 16508  | 16701  |
| UN68463 | Rsa1.0.05518.1 | 710 | 13459  | 1.00E-160 | 299 | 303 | 98 +  | 273 | 575 | 5054   | 5356   |
| UN68464 | Rsa1.0.02733.1 | 375 | 28354  | 1.00E-139 | 259 | 262 | 98 -  | 104 | 365 | 15590  | 15851  |
| UN68465 | Rsa1.0.01244.1 | 600 | 50061  | 1.00E-165 | 295 | 295 | 100 - | 1   | 295 | 7137   | 7431   |
| UN68466 | Rsa1.0.00092.1 | 756 | 659932 | 1.00E-137 | 248 | 248 | 100 - | 354 | 601 | 127591 | 127838 |
| UN68467 | Rsa1.0.00190.1 | 731 | 318240 | 0         | 696 | 699 | 99 +  | 36  | 731 | 94238  | 94936  |
| UN68468 | Rsa1.0.00116.1 | 715 | 365886 | 0         | 714 | 716 | 99 +  | 1   | 715 | 33299  | 34014  |
| UN68469 | Rsa1.0.00752.1 | 794 | 65756  | 0         | 400 | 420 | 95 +  | 306 | 720 | 35504  | 35920  |
| UN68470 | Rsa1.0.00974.1 | 730 | 57893  | 0         | 441 | 447 | 98 +  | 1   | 447 | 34943  | 35389  |
| UN68471 | Rsa1.0.05792.1 | 534 | 12612  | 0         | 518 | 534 | 97 -  | 1   | 534 | 8319   | 8852   |
| UN68472 | Rsa1.0.00020.1 | 766 | 283099 | 0         | 701 | 746 | 93 -  | 3   | 734 | 56472  | 57206  |
| UN68473 | Rsa1.0.11424.1 | 798 | 5513   | 1.00E-162 | 382 | 404 | 94 -  | 392 | 786 | 4345   | 4748   |
| UN68474 | Rsa1.0.01772.1 | 790 | 39557  | 0         | 373 | 390 | 95 +  | 99  | 488 | 18250  | 18630  |
| UN68475 | Rsa1.0.05679.1 | 731 | 12958  | 2.00E-88  | 175 | 178 | 98 -  | 266 | 443 | 2663   | 2840   |
| UN68476 | Rsa1.0.00201.1 | 665 | 232851 | 0         | 564 | 590 | 95 -  | 8   | 589 | 140499 | 141087 |
| UN68477 | Rsa1.0.00476.1 | 598 | 280966 | 1.00E-100 | 247 | 265 | 93 +  | 1   | 258 | 157065 | 157328 |
| UN68478 | Rsa1.0.04863.1 | 767 | 15687  | 1.00E-168 | 309 | 312 | 99 -  | 104 | 415 | 9909   | 10220  |
| UN68479 | Rsa1.0.00347.1 | 662 | 93048  | 0         | 600 | 673 | 89 +  | 3   | 658 | 65426  | 66065  |
| UN68480 | Rsa1.0.00423.1 | 696 | 86138  | 1.00E-161 | 312 | 320 | 97 -  | 353 | 672 | 72595  | 72914  |
| UN68481 | Rsa1.0.00204.1 | 714 | 109056 | 1.00E-119 | 277 | 292 | 94 +  | 423 | 704 | 93161  | 93451  |
| UN68482 | Rsa1.0.06306.1 | 762 | 11266  | 0         | 721 | 727 | 99 +  | 38  | 762 | 4238   | 4962   |

|         |                |     |        |           |     |     |       |     |     |        |        |
|---------|----------------|-----|--------|-----------|-----|-----|-------|-----|-----|--------|--------|
| UN68483 | Rsa1.0.00080.1 | 714 | 190437 | 4.00E-83  | 173 | 177 | 97 +  | 539 | 714 | 79633  | 79809  |
| UN68484 | Rsa1.0.02128.1 | 780 | 34758  | 3.00E-84  | 162 | 163 | 99 +  | 1   | 163 | 14455  | 14617  |
| UN68485 | Rsa1.0.02675.1 | 492 | 28852  | 6.00E-78  | 148 | 148 | 100 - | 3   | 150 | 18163  | 18310  |
| UN68486 | Rsa1.0.00145.1 | 749 | 261008 | 0         | 402 | 404 | 99 +  | 346 | 749 | 232353 | 232756 |
| UN68487 | Rsa1.0.00068.1 | 693 | 151813 | 1.00E-120 | 232 | 236 | 98 -  | 287 | 522 | 107211 | 107446 |
| UN68488 | Rsa1.0.03078.1 | 751 | 25548  | 0         | 412 | 412 | 100 + | 1   | 412 | 18318  | 18729  |
| UN68489 | Rsa1.0.00425.1 | 727 | 147080 | 0         | 692 | 697 | 99 +  | 31  | 727 | 927    | 1620   |
| UN68490 | Rsa1.0.02713.1 | 614 | 28470  | 1.00E-143 | 258 | 258 | 100 + | 357 | 614 | 25281  | 25538  |
| UN68491 | Rsa1.0.00345.1 | 161 | 93226  | 3.00E-86  | 161 | 161 | 100 + | 1   | 161 | 56976  | 57136  |
| UN68492 | Rsa1.0.05246.1 | 324 | 14393  | 1.00E-104 | 207 | 212 | 97 +  | 1   | 212 | 1785   | 1996   |
| UN68493 | Rsa1.0.00632.1 | 699 | 183777 | 0         | 687 | 693 | 99 -  | 2   | 693 | 324    | 1015   |
| UN68494 | Rsa1.0.00762.1 | 543 | 165246 | 0         | 504 | 546 | 92 +  | 3   | 543 | 33311  | 33843  |
| UN68495 | Rsa1.0.05689.1 | 727 | 12927  | 0         | 503 | 506 | 99 -  | 219 | 723 | 9800   | 10305  |
| UN68496 | Rsa1.0.00526.1 | 554 | 169279 | 1.00E-152 | 299 | 308 | 97 -  | 19  | 326 | 165759 | 166066 |
| UN68497 | Rsa1.0.00857.1 | 811 | 61904  | 0         | 580 | 600 | 96 +  | 3   | 595 | 11621  | 12220  |
| UN68498 | Rsa1.0.02221.1 | 650 | 33796  | 0         | 393 | 393 | 100 + | 3   | 395 | 1774   | 2166   |
| UN68499 | Rsa1.0.04989.1 | 777 | 15217  | 1.00E-174 | 321 | 324 | 99 -  | 1   | 322 | 249    | 572    |
| UN68500 | Rsa1.0.00213.1 | 387 | 108167 | 1.00E-153 | 375 | 396 | 94 +  | 1   | 387 | 9553   | 9945   |
| UN68501 | Rsa1.0.00369.1 | 745 | 266462 | 2.00E-79  | 157 | 159 | 98 -  | 184 | 342 | 123834 | 123992 |
| UN68502 | Rsa1.0.00344.1 | 827 | 191774 | 1.00E-135 | 248 | 249 | 99 +  | 227 | 475 | 179312 | 179560 |
| UN68503 | Rsa1.0.15005.1 | 765 | 2897   | 1.00E-110 | 203 | 203 | 100 - | 1   | 203 | 1948   | 2150   |
| UN68504 | Rsa1.0.04204.1 | 648 | 18470  | 0         | 460 | 461 | 99 +  | 3   | 463 | 1705   | 2165   |
| UN68505 | Rsa1.0.02015.1 | 762 | 36008  | 0         | 730 | 751 | 97 -  | 3   | 751 | 32059  | 32809  |
| UN68506 | Rsa1.0.00651.1 | 794 | 247766 | 0         | 736 | 760 | 96 +  | 4   | 759 | 229284 | 230028 |
| UN68507 | Rsa1.0.00472.1 | 553 | 398134 | 0         | 410 | 415 | 98 +  | 139 | 553 | 269377 | 269791 |
| UN68508 | Rsa1.0.09538.1 | 650 | 6301   | 1.00E-98  | 189 | 191 | 98 -  | 126 | 316 | 3126   | 3316   |
| UN68509 | Rsa1.0.04482.1 | 651 | 17175  | 0         | 331 | 334 | 99 +  | 311 | 644 | 6014   | 6347   |
| UN68510 | Rsa1.0.44554.1 | 691 | 505    | 1.00E-141 | 280 | 288 | 97 +  | 5   | 284 | 218    | 505    |
| UN68511 | Rsa1.0.00699.1 | 649 | 184398 | 0         | 530 | 538 | 98 +  | 100 | 637 | 176001 | 176538 |
| UN68512 | Rsa1.0.00472.1 | 643 | 398134 | 1.00E-109 | 213 | 216 | 98 -  | 429 | 643 | 133628 | 133843 |
| UN68513 | Rsa1.0.01827.1 | 529 | 143321 | 0         | 362 | 366 | 98 -  | 1   | 366 | 117315 | 117680 |
| UN68514 | Rsa1.0.02457.1 | 183 | 31208  | 6.00E-76  | 162 | 168 | 96 -  | 16  | 183 | 24130  | 24297  |
| UN68515 | Rsa1.0.00092.1 | 588 | 659932 | 1.00E-67  | 134 | 135 | 99 -  | 3   | 137 | 516709 | 516843 |
| UN68516 | Rsa1.0.00516.1 | 687 | 78417  | 0         | 581 | 595 | 97 +  | 98  | 685 | 73599  | 74193  |
| UN68517 | Rsa1.0.05353.1 | 616 | 14078  | 0         | 594 | 594 | 100 + | 1   | 594 | 8632   | 9225   |
| UN68518 | Rsa1.0.00026.1 | 594 | 327835 | 2.33E-156 | 316 | 331 | 95 -  | 3   | 331 | 48784  | 49114  |
| UN68519 | Rsa1.0.01254.1 | 546 | 49801  | 0         | 467 | 489 | 95 -  | 58  | 543 | 13794  | 14282  |
| UN68520 | Rsa1.0.00001.1 | 812 | 363028 | 0         | 436 | 456 | 95 +  | 366 | 811 | 333079 | 333534 |
| UN68521 | Rsa1.0.00192.1 | 726 | 278200 | 1.00E-95  | 178 | 178 | 100 + | 429 | 606 | 236791 | 236968 |

|         |                |     |        |           |     |     |       |     |     |        |        |
|---------|----------------|-----|--------|-----------|-----|-----|-------|-----|-----|--------|--------|
| UN68522 | Rsa1.0.03701.1 | 714 | 21296  | 0         | 578 | 600 | 96 +  | 2   | 601 | 9966   | 10564  |
| UN68523 | Rsa1.0.00472.1 | 748 | 398134 | 1.00E-134 | 264 | 267 | 98 -  | 440 | 703 | 6397   | 6663   |
| UN68524 | Rsa1.0.01447.1 | 674 | 45654  | 0         | 667 | 671 | 99 +  | 4   | 674 | 26233  | 26903  |
| UN68525 | Rsa1.0.07914.1 | 779 | 8294   | 1.00E-156 | 305 | 311 | 98 +  | 454 | 761 | 1896   | 2206   |
| UN68526 | Rsa1.0.03726.1 | 630 | 21160  | 1.00E-168 | 300 | 300 | 100 - | 209 | 508 | 16329  | 16628  |
| UN68527 | Rsa1.0.02384.1 | 760 | 31917  | 0         | 529 | 531 | 99 -  | 4   | 534 | 20184  | 20714  |
| UN68528 | Rsa1.0.01166.1 | 730 | 51877  | 1.00E-157 | 282 | 282 | 100 + | 2   | 283 | 5704   | 5985   |
| UN68529 | Rsa1.0.01331.1 | 736 | 47944  | 0         | 684 | 708 | 96 +  | 30  | 736 | 18448  | 19155  |
| UN68530 | Rsa1.0.02642.1 | 774 | 29181  | 0         | 435 | 445 | 97 +  | 333 | 774 | 13097  | 13541  |
| UN68531 | Rsa1.0.01412.1 | 496 | 46311  | 1.00E-133 | 289 | 304 | 95 +  | 195 | 496 | 2372   | 2666   |
| UN68532 | Rsa1.0.00527.1 | 809 | 77733  | 1.00E-133 | 312 | 327 | 95 -  | 488 | 805 | 36952  | 37278  |
| UN68533 | Rsa1.0.00223.1 | 725 | 106231 | 0         | 377 | 383 | 98 -  | 3   | 385 | 104386 | 104768 |
| UN68534 | Rsa1.0.00170.1 | 657 | 179538 | 0         | 354 | 360 | 98 -  | 295 | 654 | 145605 | 145964 |
| UN68535 | Rsa1.0.03247.1 | 695 | 24371  | 1.00E-126 | 249 | 253 | 98 +  | 224 | 476 | 10010  | 10260  |
| UN68536 | Rsa1.0.00360.1 | 640 | 91190  | 1.00E-144 | 317 | 332 | 95 +  | 2   | 332 | 46329  | 46658  |
| UN68537 | Rsa1.0.00286.1 | 614 | 98709  | 4.00E-49  | 144 | 158 | 91 -  | 296 | 450 | 26937  | 27094  |
| UN68538 | Rsa1.0.00180.1 | 464 | 114581 | 4.00E-88  | 216 | 230 | 93 +  | 238 | 461 | 24300  | 24529  |
| UN68539 | Rsa1.0.02386.1 | 774 | 31895  | 0         | 492 | 494 | 99 -  | 283 | 774 | 17417  | 17910  |
| UN68540 | Rsa1.0.01515.1 | 657 | 170864 | 0         | 640 | 662 | 96 -  | 2   | 657 | 150984 | 151645 |
| UN68541 | Rsa1.0.00873.1 | 401 | 61459  | 2.00E-56  | 115 | 116 | 99 -  | 71  | 186 | 13283  | 13398  |
| UN68542 | Rsa1.0.00201.1 | 636 | 232851 | 0         | 506 | 522 | 96 -  | 115 | 636 | 373    | 894    |
| UN68543 | Rsa1.0.00359.1 | 659 | 91256  | 0         | 453 | 470 | 96 +  | 190 | 659 | 76188  | 76657  |
| UN68544 | Rsa1.0.05641.1 | 705 | 13077  | 1.00E-174 | 327 | 333 | 98 -  | 132 | 464 | 12075  | 12407  |
| UN68545 | Rsa1.0.01883.1 | 642 | 37661  | 1.00E-113 | 231 | 239 | 96 -  | 1   | 239 | 25284  | 25522  |
| UN68546 | Rsa1.0.00231.1 | 613 | 105381 | 1.00E-127 | 271 | 284 | 95 +  | 4   | 287 | 25650  | 25930  |
| UN68547 | Rsa1.0.01359.1 | 692 | 47271  | 3.00E-93  | 174 | 174 | 100 + | 222 | 395 | 17998  | 18171  |
| UN68548 | Rsa1.0.00323.1 | 699 | 159650 | 1.00E-136 | 249 | 250 | 99 -  | 450 | 699 | 58754  | 59003  |
| UN68549 | Rsa1.0.00816.1 | 789 | 403350 | 1.00E-151 | 299 | 308 | 97 +  | 2   | 309 | 250584 | 250891 |
| UN68550 | Rsa1.0.00235.1 | 784 | 154696 | 0         | 387 | 397 | 97 -  | 377 | 765 | 51326  | 51722  |
| UN68551 | Rsa1.0.06286.1 | 758 | 11307  | 0         | 738 | 744 | 99 +  | 3   | 742 | 5418   | 6161   |
| UN68552 | Rsa1.0.00559.1 | 805 | 190486 | 0         | 760 | 785 | 96 -  | 3   | 783 | 182195 | 182979 |
| UN68553 | Rsa1.0.02686.1 | 706 | 28666  | 2.00E-79  | 186 | 196 | 94 -  | 153 | 343 | 1235   | 1430   |
| UN68554 | Rsa1.0.00225.1 | 589 | 105892 | 0         | 324 | 324 | 100 - | 2   | 325 | 62771  | 63094  |
| UN68555 | Rsa1.0.00949.1 | 489 | 58549  | 7.00E-84  | 245 | 270 | 90 -  | 207 | 467 | 15586  | 15851  |
| UN68556 | Rsa1.0.06006.1 | 772 | 11954  | 2.00E-14  | 61  | 66  | 92 -  | 620 | 685 | 2705   | 2769   |
| UN68557 | Rsa1.0.07834.1 | 765 | 8453   | 0         | 629 | 681 | 92 +  | 79  | 743 | 1685   | 2362   |
| UN68558 | Rsa1.0.03741.1 | 634 | 143933 | 1.00E-179 | 379 | 397 | 95 -  | 240 | 634 | 11179  | 11574  |
| UN68559 | Rsa1.0.00541.1 | 550 | 76863  | 0         | 489 | 498 | 98 +  | 49  | 546 | 13931  | 14426  |
| UN68560 | Rsa1.0.04141.1 | 731 | 18864  | 0         | 474 | 477 | 99 +  | 2   | 478 | 2750   | 3226   |



|         |                |     |        |           |     |     |       |     |     |        |        |
|---------|----------------|-----|--------|-----------|-----|-----|-------|-----|-----|--------|--------|
| UN68561 | Rsa1.0.01536.1 | 644 | 43747  | 0         | 329 | 330 | 99 -  | 315 | 644 | 19008  | 19337  |
| UN68562 | Rsa1.0.00564.1 | 634 | 75428  | 0         | 560 | 598 | 93 -  | 2   | 593 | 61870  | 62461  |
| UN68563 | Rsa1.0.00602.1 | 799 | 73302  | 0         | 787 | 802 | 98 +  | 3   | 793 | 35795  | 36596  |
| UN68564 | Rsa1.0.01111.1 | 744 | 53669  | 1.00E-134 | 252 | 255 | 98 -  | 3   | 257 | 35556  | 35810  |
| UN68565 | Rsa1.0.02558.1 | 585 | 30112  | 0         | 577 | 578 | 99 +  | 3   | 580 | 7161   | 7738   |
| UN68566 | Rsa1.0.00001.1 | 590 | 363028 | 1.00E-108 | 202 | 203 | 99 -  | 3   | 205 | 286871 | 287073 |
| UN68567 | Rsa1.0.00832.1 | 728 | 62622  | 1.00E-154 | 293 | 297 | 98 +  | 433 | 728 | 41378  | 41674  |
| UN68568 | Rsa1.0.49048.1 | 224 | 462    | 1.00E-120 | 222 | 223 | 99 +  | 2   | 224 | 199    | 421    |
| UN68569 | Rsa1.0.00282.1 | 124 | 177799 | 4.00E-51  | 105 | 106 | 99 -  | 19  | 124 | 6989   | 7094   |
| UN68570 | Rsa1.0.00303.1 | 842 | 97468  | 8.00E-48  | 101 | 102 | 99 -  | 295 | 396 | 40468  | 40569  |
| UN68571 | Rsa1.0.00385.1 | 630 | 89160  | 1.00E-161 | 381 | 416 | 91 +  | 152 | 567 | 5594   | 5987   |
| UN68572 | #              | #   | #      | #         | #   | #   | #     | #   | #   | #      | #      |
| UN68573 | Rsa1.0.00482.1 | 423 | 81162  | 1.00E-174 | 411 | 440 | 93 -  | 3   | 423 | 28107  | 28545  |
| UN68574 | Rsa1.0.05003.1 | 736 | 15172  | 2.00E-57  | 144 | 153 | 94 +  | 24  | 174 | 6749   | 6901   |
| UN68575 | Rsa1.0.05038.1 | 730 | 15057  | 0         | 717 | 730 | 98 +  | 3   | 730 | 2269   | 2998   |
| UN68576 | Rsa1.0.05282.1 | 684 | 14270  | 1.00E-180 | 541 | 615 | 87 +  | 27  | 641 | 2262   | 2876   |
| UN68577 | Rsa1.0.00157.1 | 711 | 245832 | 0         | 601 | 611 | 98 +  | 98  | 706 | 46172  | 46782  |
| UN68578 | Rsa1.0.00157.1 | 702 | 245832 | 4.00E-89  | 205 | 215 | 95 +  | 1   | 209 | 52109  | 52322  |
| UN68579 | Rsa1.0.07835.1 | 793 | 8453   | 4.00E-77  | 159 | 163 | 97 +  | 213 | 375 | 4944   | 5106   |
| UN68580 | Rsa1.0.10297.1 | 631 | 5900   | 0         | 628 | 629 | 99 +  | 4   | 631 | 266    | 894    |
| UN68581 | Rsa1.0.00381.1 | 721 | 89718  | 0         | 670 | 675 | 99 -  | 2   | 675 | 55578  | 56252  |
| UN68582 | Rsa1.0.00799.1 | 395 | 63918  | 1.00E-165 | 376 | 390 | 96 +  | 8   | 386 | 14240  | 14629  |
| UN68583 | Rsa1.0.03871.1 | 640 | 20362  | 0         | 482 | 503 | 95 -  | 45  | 547 | 10806  | 11306  |
| UN68584 | Rsa1.0.04989.1 | 293 | 15217  | 1.00E-163 | 291 | 291 | 100 + | 3   | 293 | 1914   | 2204   |
| UN68585 | Rsa1.0.00266.1 | 652 | 163932 | 1.00E-111 | 219 | 224 | 97 +  | 426 | 649 | 9927   | 10150  |
| UN68586 | Rsa1.0.01071.1 | 718 | 166914 | 1.00E-135 | 261 | 264 | 98 -  | 457 | 718 | 25539  | 25802  |
| UN68587 | Rsa1.0.49718.1 | 747 | 456    | 1.00E-142 | 283 | 292 | 96 -  | 147 | 438 | 114    | 405    |
| UN68588 | Rsa1.0.02028.1 | 249 | 35857  | 1.00E-122 | 245 | 250 | 98 +  | 2   | 249 | 33845  | 34094  |
| UN68589 | Rsa1.0.00437.1 | 750 | 84879  | 3.00E-84  | 184 | 191 | 96 +  | 8   | 197 | 36681  | 36871  |
| UN68590 | Rsa1.0.00286.1 | 713 | 98709  | 0         | 386 | 399 | 96 +  | 316 | 713 | 37523  | 37920  |
| UN68591 | Rsa1.0.24740.1 | 770 | 969    | 1.00E-137 | 331 | 352 | 94 +  | 424 | 770 | 476    | 827    |
| UN68592 | Rsa1.0.00697.1 | 440 | 67913  | 1.00E-148 | 292 | 300 | 97 -  | 148 | 440 | 50802  | 51101  |
| UN68593 | Rsa1.0.00123.1 | 567 | 325650 | 0         | 555 | 567 | 97 +  | 1   | 567 | 107443 | 108009 |
| UN68594 | Rsa1.0.07902.1 | 382 | 8329   | 1.00E-10  | 59  | 67  | 88 +  | 223 | 289 | 2513   | 2579   |
| UN68595 | Rsa1.0.01183.1 | 738 | 51465  | 0         | 707 | 720 | 98 +  | 2   | 721 | 40934  | 41653  |
| UN68596 | Rsa1.0.00496.1 | 706 | 79834  | 0         | 504 | 506 | 99 -  | 180 | 684 | 30951  | 31456  |
| UN68597 | Rsa1.0.01235.1 | 776 | 50180  | 0         | 361 | 367 | 98 +  | 374 | 739 | 19036  | 19402  |
| UN68598 | Rsa1.0.02203.1 | 640 | 164532 | 1.00E-165 | 306 | 310 | 98 -  | 3   | 312 | 27488  | 27797  |
| UN68599 | Rsa1.0.01755.1 | 735 | 155581 | 0         | 684 | 716 | 95 -  | 1   | 713 | 145906 | 146621 |

|         |                |     |        |           |     |     |       |     |     |        |        |
|---------|----------------|-----|--------|-----------|-----|-----|-------|-----|-----|--------|--------|
| UN68600 | Rsa1.0.00898.1 | 726 | 202772 | 0         | 723 | 726 | 99 -  | 3   | 726 | 36850  | 37575  |
| UN68601 | Rsa1.0.23632.1 | 706 | 1036   | 0         | 484 | 491 | 98 +  | 212 | 701 | 1      | 490    |
| UN68602 | Rsa1.0.00382.1 | 798 | 251946 | 4.00E-74  | 154 | 158 | 97 -  | 421 | 578 | 35108  | 35265  |
| UN68603 | Rsa1.0.00085.1 | 831 | 142226 | 1.00E-128 | 235 | 236 | 99 -  | 387 | 622 | 62912  | 63147  |
| UN68604 | Rsa1.0.08011.1 | 797 | 8082   | 0         | 532 | 543 | 97 -  | 3   | 545 | 214    | 756    |
| UN68605 | Rsa1.0.00770.1 | 622 | 64900  | 1.00E-128 | 236 | 237 | 99 -  | 386 | 622 | 13526  | 13762  |
| UN68606 | Rsa1.0.00046.1 | 767 | 320315 | 0         | 470 | 471 | 99 +  | 3   | 473 | 45130  | 45599  |
| UN68607 | Rsa1.0.00067.1 | 569 | 415055 | 0         | 554 | 568 | 97 +  | 2   | 569 | 169879 | 170446 |
| UN68608 | Rsa1.0.00211.1 | 584 | 228189 | 1.00E-152 | 345 | 369 | 93 +  | 216 | 584 | 210007 | 210375 |
| UN68609 | Rsa1.0.00303.1 | 666 | 97468  | 0         | 609 | 628 | 96 -  | 40  | 666 | 54786  | 55413  |
| UN68610 | Rsa1.0.00083.1 | 175 | 442773 | 3.00E-71  | 168 | 178 | 94 +  | 1   | 175 | 319138 | 319315 |
| UN68611 | Rsa1.0.00416.1 | 722 | 86772  | 1.00E-153 | 274 | 274 | 100 + | 261 | 534 | 79602  | 79875  |
| UN68612 | Rsa1.0.13353.1 | 159 | 4894   | 8.00E-78  | 156 | 159 | 98 +  | 1   | 159 | 4003   | 4161   |
| UN68613 | Rsa1.0.03201.1 | 615 | 157656 | 0         | 382 | 393 | 97 +  | 213 | 605 | 5523   | 5915   |
| UN68614 | Rsa1.0.00403.1 | 550 | 87701  | 0         | 410 | 414 | 99 +  | 133 | 546 | 25246  | 25656  |
| UN68615 | Rsa1.0.00150.1 | 351 | 154416 | 2.33E-156 | 263 | 263 | 100 + | 3   | 265 | 93439  | 93701  |
| UN68616 | Rsa1.0.01382.1 | 524 | 46877  | 0         | 492 | 497 | 98 +  | 2   | 495 | 4782   | 5278   |
| UN68617 | Rsa1.0.00491.1 | 713 | 80219  | 0         | 574 | 604 | 95 +  | 115 | 710 | 60417  | 61017  |
| UN68618 | Rsa1.0.00045.1 | 761 | 328694 | 0         | 693 | 749 | 92 +  | 13  | 747 | 239637 | 240370 |
| UN68619 | Rsa1.0.03616.1 | 508 | 21756  | 1.00E-144 | 260 | 260 | 100 + | 1   | 260 | 8105   | 8364   |
| UN68620 | Rsa1.0.02601.1 | 565 | 29654  | 0         | 558 | 569 | 98 +  | 3   | 565 | 3188   | 3756   |
| UN68621 | Rsa1.0.00056.1 | 731 | 332604 | 1.00E-178 | 344 | 348 | 98 +  | 388 | 731 | 108114 | 108461 |
| UN68622 | Rsa1.0.00195.1 | 212 | 251884 | 7.00E-82  | 154 | 154 | 100 - | 3   | 156 | 249278 | 249431 |
| UN68623 | Rsa1.0.00411.1 | 747 | 86944  | 0         | 725 | 754 | 96 -  | 2   | 745 | 67045  | 67798  |
| UN68624 | Rsa1.0.06177.1 | 533 | 11561  | 1.00E-97  | 193 | 197 | 97 +  | 41  | 237 | 7982   | 8178   |
| UN68625 | Rsa1.0.00725.1 | 636 | 66757  | 0         | 595 | 660 | 90 -  | 2   | 635 | 24552  | 25207  |
| UN68626 | Rsa1.0.00376.1 | 635 | 90101  | 0         | 366 | 367 | 99 -  | 3   | 369 | 35939  | 36305  |
| UN68627 | Rsa1.0.00140.1 | 543 | 121541 | 1.00E-140 | 253 | 253 | 100 + | 291 | 543 | 82594  | 82846  |
| UN68628 | Rsa1.0.02601.1 | 686 | 29654  | 0         | 569 | 601 | 94 +  | 3   | 594 | 3190   | 3790   |
| UN68629 | Rsa1.0.11366.1 | 485 | 5532   | 2.00E-93  | 194 | 200 | 97 -  | 286 | 485 | 2727   | 2923   |
| UN68630 | Rsa1.0.00369.1 | 725 | 266462 | 0         | 410 | 437 | 93 -  | 291 | 725 | 141723 | 142159 |
| UN68631 | Rsa1.0.01190.1 | 652 | 194501 | 0         | 523 | 523 | 100 - | 4   | 526 | 47303  | 47825  |
| UN68632 | Rsa1.0.52522.1 | 640 | 433    | 0         | 386 | 402 | 96 -  | 132 | 533 | 32     | 433    |
| UN68633 | Rsa1.0.02771.1 | 587 | 28079  | 1.00E-17  | 104 | 123 | 84 +  | 459 | 581 | 15015  | 15137  |
| UN68634 | Rsa1.0.01523.1 | 715 | 43959  | 1.00E-125 | 231 | 232 | 99 +  | 3   | 234 | 24156  | 24387  |
| UN68635 | Rsa1.0.02069.1 | 829 | 35425  | 1.00E-98  | 198 | 203 | 97 -  | 78  | 280 | 4465   | 4667   |
| UN68636 | Rsa1.0.07259.1 | 565 | 9650   | 1.00E-125 | 230 | 231 | 99 -  | 240 | 470 | 4691   | 4921   |
| UN68637 | Rsa1.0.01352.1 | 607 | 47443  | 0         | 587 | 621 | 94 +  | 1   | 607 | 45377  | 45997  |
| UN68638 | Rsa1.0.10304.1 | 783 | 5896   | 1.00E-140 | 314 | 324 | 96 -  | 446 | 761 | 5545   | 5868   |

|         |                |     |        |           |     |     |       |     |     |        |        |
|---------|----------------|-----|--------|-----------|-----|-----|-------|-----|-----|--------|--------|
| UN68639 | Rsa1.0.00019.1 | 656 | 301669 | 1.00E-134 | 448 | 515 | 86 +  | 151 | 649 | 276628 | 277138 |
| UN68640 | Rsa1.0.01072.1 | 594 | 55068  | 0         | 337 | 337 | 100 - | 14  | 350 | 36838  | 37174  |
| UN68641 | Rsa1.0.08721.1 | 728 | 7000   | 5.00E-67  | 161 | 170 | 94 +  | 150 | 319 | 558    | 726    |
| UN68642 | Rsa1.0.17498.1 | 703 | 1816   | 0         | 437 | 437 | 100 + | 255 | 691 | 397    | 833    |
| UN68643 | Rsa1.0.00270.1 | 658 | 101236 | 1.00E-119 | 218 | 218 | 100 - | 441 | 658 | 58203  | 58420  |
| UN68644 | Rsa1.0.00218.1 | 736 | 201480 | 0         | 558 | 569 | 98 +  | 159 | 726 | 147139 | 147698 |
| UN68645 | Rsa1.0.44363.1 | 755 | 507    | 1.00E-52  | 112 | 114 | 98 +  | 336 | 449 | 170    | 283    |
| UN68646 | Rsa1.0.01887.1 | 744 | 37564  | 1.00E-148 | 282 | 287 | 98 +  | 230 | 516 | 26172  | 26458  |
| UN68647 | Rsa1.0.11581.1 | 374 | 5466   | 1.00E-152 | 330 | 345 | 95 -  | 5   | 349 | 576    | 913    |
| UN68648 | Rsa1.0.00279.1 | 283 | 100039 | 1.00E-102 | 207 | 212 | 97 +  | 3   | 214 | 65494  | 65703  |
| UN68649 | Rsa1.0.52998.1 | 660 | 430    | 0         | 420 | 430 | 97 +  | 208 | 637 | 1      | 430    |
| UN68650 | Rsa1.0.00875.1 | 795 | 61371  | 1.00E-154 | 276 | 276 | 100 - | 363 | 638 | 58714  | 58989  |
| UN68651 | Rsa1.0.00307.1 | 543 | 199003 | 8.00E-87  | 226 | 244 | 92 +  | 147 | 389 | 86697  | 86935  |
| UN68652 | Rsa1.0.00064.1 | 704 | 240927 | 1.00E-168 | 303 | 304 | 99 -  | 198 | 501 | 138892 | 139195 |
| UN68653 | Rsa1.0.02606.1 | 643 | 29635  | 1.00E-123 | 255 | 264 | 96 +  | 1   | 263 | 9303   | 9566   |
| UN68654 | Rsa1.0.01005.1 | 563 | 56967  | 0         | 448 | 454 | 98 -  | 1   | 454 | 5119   | 5572   |
| UN68655 | Rsa1.0.05583.1 | 798 | 13268  | 0         | 745 | 747 | 99 -  | 4   | 748 | 8351   | 9097   |
| UN68656 | Rsa1.0.01315.1 | 683 | 48361  | 0         | 472 | 504 | 93 +  | 196 | 683 | 29054  | 29557  |
| UN68657 | Rsa1.0.01910.1 | 743 | 37405  | 0         | 381 | 387 | 98 +  | 358 | 743 | 12141  | 12527  |
| UN68658 | Rsa1.0.02642.1 | 641 | 29181  | 0         | 613 | 640 | 95 +  | 2   | 641 | 24863  | 25502  |
| UN68659 | Rsa1.0.04307.1 | 793 | 18001  | 0         | 661 | 678 | 97 +  | 102 | 775 | 15471  | 16148  |
| UN68660 | Rsa1.0.00322.1 | 678 | 212233 | 0         | 429 | 432 | 99 -  | 125 | 554 | 208921 | 209352 |
| UN68661 | Rsa1.0.00122.1 | 745 | 265937 | 0         | 676 | 683 | 98 -  | 3   | 684 | 82121  | 82803  |
| UN68662 | Rsa1.0.01824.1 | 748 | 38733  | 0         | 477 | 478 | 99 +  | 192 | 669 | 25457  | 25934  |
| UN68663 | Rsa1.0.01094.1 | 608 | 167285 | 0         | 602 | 608 | 99 -  | 1   | 607 | 152036 | 152643 |
| UN68664 | Rsa1.0.00153.1 | 618 | 192931 | 0         | 451 | 474 | 95 +  | 145 | 618 | 132506 | 132976 |
| UN68665 | Rsa1.0.01696.1 | 737 | 301850 | 0         | 432 | 432 | 100 + | 3   | 434 | 8674   | 9105   |
| UN68666 | Rsa1.0.03661.1 | 706 | 21513  | 0         | 617 | 630 | 97 +  | 1   | 630 | 19118  | 19747  |
| UN68667 | Rsa1.0.00002.1 | 712 | 601661 | 1.00E-135 | 291 | 305 | 95 -  | 406 | 710 | 398067 | 398360 |
| UN68668 | Rsa1.0.02922.1 | 624 | 26753  | 1.00E-140 | 281 | 289 | 97 -  | 294 | 581 | 12401  | 12689  |
| UN68669 | Rsa1.0.00608.1 | 774 | 172672 | 0         | 576 | 578 | 99 +  | 2   | 578 | 112785 | 113362 |
| UN68670 | Rsa1.0.00999.1 | 615 | 57162  | 0         | 575 | 575 | 100 + | 1   | 575 | 37610  | 38184  |
| UN68671 | Rsa1.0.11525.1 | 626 | 5479   | 1.00E-156 | 483 | 551 | 87 +  | 76  | 626 | 4664   | 5214   |
| UN68672 | Rsa1.0.04641.1 | 622 | 268012 | 0         | 616 | 621 | 99 -  | 2   | 622 | 261849 | 262469 |
| UN68673 | Rsa1.0.04463.1 | 649 | 17247  | 3.00E-99  | 208 | 216 | 96 +  | 364 | 579 | 14698  | 14913  |
| UN68674 | Rsa1.0.00697.1 | 180 | 67913  | 3.00E-59  | 156 | 168 | 92 +  | 2   | 169 | 62632  | 62798  |
| UN68675 | Rsa1.0.00821.1 | 735 | 62891  | 1.00E-159 | 371 | 398 | 93 +  | 3   | 400 | 48931  | 49319  |
| UN68676 | Rsa1.0.00838.1 | 701 | 153820 | 1.00E-137 | 257 | 260 | 98 -  | 400 | 659 | 19805  | 20064  |
| UN68677 | Rsa1.0.14436.1 | 703 | 3393   | 0         | 498 | 506 | 98 -  | 200 | 703 | 2286   | 2791   |

|         |                |     |        |           |     |     |       |     |     |        |        |
|---------|----------------|-----|--------|-----------|-----|-----|-------|-----|-----|--------|--------|
| UN68678 | Rsa1.0.00380.1 | 611 | 89748  | 0         | 396 | 402 | 98 -  | 75  | 476 | 60162  | 60563  |
| UN68679 | Rsa1.0.00016.1 | 330 | 831256 | 1.00E-155 | 318 | 330 | 96 +  | 2   | 330 | 505743 | 506068 |
| UN68680 | Rsa1.0.00944.1 | 761 | 58733  | 2.00E-91  | 217 | 227 | 95 -  | 532 | 754 | 13045  | 13271  |
| UN68681 | Rsa1.0.00836.1 | 610 | 185968 | 0         | 454 | 466 | 97 +  | 6   | 471 | 168530 | 168989 |
| UN68682 | Rsa1.0.05595.1 | 631 | 13228  | 1.00E-108 | 199 | 199 | 100 - | 153 | 351 | 10703  | 10901  |
| UN68683 | Rsa1.0.00089.1 | 402 | 406142 | 0         | 354 | 358 | 98 +  | 3   | 360 | 358374 | 358731 |
| UN68684 | Rsa1.0.04852.1 | 682 | 15712  | 0         | 401 | 407 | 98 +  | 277 | 682 | 7056   | 7460   |
| UN68685 | Rsa1.0.14143.1 | 777 | 3746   | 1.00E-80  | 156 | 157 | 99 +  | 121 | 277 | 221    | 377    |
| UN68686 | Rsa1.0.00067.1 | 663 | 415055 | 3.00E-96  | 220 | 233 | 94 -  | 66  | 295 | 140529 | 140761 |
| UN68687 | Rsa1.0.00521.1 | 641 | 78191  | 1.00E-168 | 299 | 299 | 100 - | 343 | 641 | 71484  | 71782  |
| UN68688 | Rsa1.0.02642.1 | 654 | 29181  | 0         | 516 | 542 | 95 -  | 113 | 653 | 14615  | 15145  |
| UN68689 | Rsa1.0.00482.1 | 744 | 81162  | 0         | 413 | 430 | 96 -  | 316 | 738 | 68422  | 68851  |
| UN68690 | Rsa1.0.01419.1 | 380 | 167402 | 4.00E-97  | 194 | 198 | 97 +  | 183 | 380 | 130447 | 130641 |
| UN68691 | Rsa1.0.02406.1 | 610 | 145276 | 1.00E-168 | 315 | 320 | 98 -  | 3   | 322 | 29142  | 29461  |
| UN68692 | Rsa1.0.00026.1 | 769 | 327835 | 0         | 755 | 767 | 98 +  | 2   | 762 | 131887 | 132653 |
| UN68693 | Rsa1.0.01359.1 | 722 | 47271  | 0         | 488 | 488 | 100 + | 3   | 490 | 5381   | 5868   |
| UN68694 | Rsa1.0.00520.1 | 662 | 78226  | 1.00E-172 | 315 | 318 | 99 +  | 345 | 662 | 31872  | 32189  |
| UN68695 | Rsa1.0.02798.1 | 408 | 27792  | 0         | 383 | 385 | 99 +  | 2   | 386 | 22171  | 22555  |
| UN68696 | Rsa1.0.00577.1 | 395 | 174827 | 6.00E-50  | 110 | 113 | 97 +  | 55  | 167 | 171111 | 171223 |
| UN68697 | Rsa1.0.00822.1 | 655 | 62891  | 0         | 419 | 443 | 94 -  | 85  | 526 | 43734  | 44160  |
| UN68698 | Rsa1.0.00825.1 | 560 | 62855  | 0         | 351 | 353 | 99 -  | 3   | 355 | 30541  | 30893  |
| UN68699 | Rsa1.0.08176.1 | 640 | 7786   | 0         | 628 | 640 | 98 +  | 2   | 640 | 7101   | 7740   |
| UN68700 | Rsa1.0.03624.1 | 630 | 21706  | 0         | 448 | 483 | 92 -  | 158 | 628 | 20438  | 20920  |
| UN68701 | Rsa1.0.03036.1 | 623 | 25826  | 0         | 622 | 622 | 100 + | 2   | 623 | 5464   | 6085   |
| UN68702 | Rsa1.0.62848.1 | 611 | 365    | 0         | 365 | 365 | 100 - | 23  | 387 | 1      | 365    |
| UN68703 | Rsa1.0.01564.1 | 631 | 43169  | 1.00E-112 | 240 | 252 | 95 -  | 21  | 266 | 38448  | 38699  |
| UN68704 | Rsa1.0.13119.1 | 589 | 5003   | 0         | 553 | 590 | 93 +  | 1   | 589 | 109    | 682    |
| UN68705 | Rsa1.0.01701.1 | 430 | 162121 | 1.00E-102 | 210 | 217 | 96 +  | 2   | 218 | 19746  | 19962  |
| UN68706 | Rsa1.0.00527.1 | 578 | 77733  | 1.00E-154 | 279 | 280 | 99 -  | 299 | 578 | 39966  | 40245  |
| UN68707 | Rsa1.0.00990.1 | 469 | 57445  | 1.00E-176 | 404 | 437 | 92 -  | 4   | 423 | 16633  | 17063  |
| UN68708 | Rsa1.0.00761.1 | 609 | 65133  | 1.00E-104 | 193 | 193 | 100 - | 3   | 195 | 15552  | 15744  |
| UN68709 | Rsa1.0.01553.1 | 589 | 43379  | 4.00E-64  | 136 | 139 | 97 +  | 344 | 479 | 7679   | 7817   |
| UN68710 | Rsa1.0.00926.1 | 592 | 195072 | 1.00E-113 | 216 | 219 | 98 +  | 193 | 411 | 157290 | 157508 |
| UN68711 | Rsa1.0.00550.1 | 611 | 210790 | 0         | 466 | 466 | 100 + | 130 | 595 | 183664 | 184129 |
| UN68712 | Rsa1.0.58512.1 | 297 | 391    | 1.00E-154 | 289 | 291 | 99 +  | 2   | 290 | 38     | 328    |
| UN68713 | Rsa1.0.01771.1 | 244 | 172709 | 1.00E-111 | 209 | 211 | 99 -  | 34  | 244 | 5848   | 6058   |
| UN68714 | Rsa1.0.00341.1 | 716 | 249309 | 0         | 680 | 715 | 95 +  | 3   | 716 | 113246 | 113957 |
| UN68715 | Rsa1.0.00289.1 | 316 | 98620  | 1.00E-127 | 238 | 239 | 99 -  | 3   | 240 | 89187  | 89425  |
| UN68716 | Rsa1.0.20352.1 | 550 | 1314   | 7.00E-78  | 151 | 152 | 99 -  | 399 | 550 | 1163   | 1314   |

|         |                |     |        |           |     |     |       |     |     |        |        |
|---------|----------------|-----|--------|-----------|-----|-----|-------|-----|-----|--------|--------|
| UN68717 | Rsa1.0.03896.1 | 666 | 20192  | 0         | 535 | 538 | 99 -  | 3   | 540 | 5161   | 5697   |
| UN68718 | Rsa1.0.00199.1 | 489 | 249604 | 1.00E-142 | 275 | 280 | 98 +  | 210 | 489 | 184536 | 184814 |
| UN68719 | Rsa1.0.06056.1 | 773 | 137271 | 1.00E-113 | 265 | 278 | 95 +  | 497 | 768 | 127496 | 127773 |
| UN68720 | Rsa1.0.00698.1 | 635 | 67816  | 1.00E-21  | 120 | 142 | 84 +  | 284 | 425 | 47009  | 47150  |
| UN68721 | Rsa1.0.00341.1 | 525 | 249309 | 1.00E-153 | 330 | 348 | 94 -  | 181 | 525 | 92237  | 92584  |
| UN68722 | Rsa1.0.00037.1 | 615 | 307838 | 1.00E-128 | 277 | 292 | 94 +  | 258 | 549 | 305125 | 305416 |
| UN68723 | Rsa1.0.04340.1 | 394 | 17831  | 3.00E-79  | 172 | 178 | 96 +  | 212 | 388 | 12977  | 13154  |
| UN68724 | Rsa1.0.02335.1 | 100 | 32400  | 2.00E-43  | 92  | 93  | 98 -  | 3   | 95  | 3772   | 3864   |
| UN68725 | Rsa1.0.00167.1 | 716 | 116000 | 3.00E-68  | 367 | 446 | 82 +  | 5   | 443 | 28365  | 28795  |
| UN68726 | Rsa1.0.07647.1 | 528 | 8942   | 0         | 425 | 426 | 99 -  | 3   | 428 | 726    | 1151   |
| UN68727 | Rsa1.0.08327.1 | 497 | 7534   | 4.00E-76  | 145 | 145 | 100 + | 3   | 147 | 213    | 357    |
| UN68728 | Rsa1.0.00048.1 | 259 | 167185 | 1.00E-96  | 197 | 203 | 97 +  | 3   | 205 | 32179  | 32381  |
| UN68729 | Rsa1.0.02209.1 | 474 | 33873  | 1.00E-118 | 237 | 243 | 97 -  | 233 | 474 | 27461  | 27703  |
| UN68730 | Rsa1.0.09002.1 | 323 | 137863 | 1.00E-166 | 295 | 295 | 100 - | 29  | 323 | 4827   | 5121   |
| UN68731 | Rsa1.0.00194.1 | 549 | 110851 | 1.00E-160 | 330 | 343 | 96 +  | 208 | 549 | 13143  | 13481  |
| UN68732 | Rsa1.0.00185.1 | 597 | 248445 | 1.00E-138 | 289 | 302 | 95 +  | 86  | 387 | 25464  | 25765  |
| UN68733 | Rsa1.0.02086.1 | 763 | 35198  | 0         | 746 | 766 | 97 +  | 2   | 763 | 12686  | 13446  |
| UN68734 | Rsa1.0.00147.1 | 126 | 249503 | 4.00E-54  | 123 | 127 | 96 +  | 1   | 126 | 241051 | 241177 |
| UN68735 | Rsa1.0.01099.1 | 769 | 158481 | 1.00E-152 | 304 | 314 | 96 -  | 336 | 643 | 44494  | 44804  |
| UN68736 | Rsa1.0.04552.1 | 451 | 16878  | 0         | 410 | 431 | 95 +  | 21  | 451 | 1987   | 2414   |
| UN68737 | Rsa1.0.00001.1 | 382 | 363028 | 1.00E-150 | 293 | 300 | 97 -  | 83  | 382 | 47836  | 48133  |
| UN68738 | Rsa1.0.00829.1 | 570 | 158305 | 1.00E-135 | 250 | 252 | 99 +  | 3   | 254 | 109607 | 109858 |
| UN68739 | Rsa1.0.00285.1 | 592 | 149638 | 1.00E-104 | 226 | 237 | 95 -  | 245 | 481 | 148534 | 148770 |
| UN68740 | Rsa1.0.02228.1 | 574 | 33688  | 0         | 382 | 389 | 98 -  | 188 | 574 | 16958  | 17344  |
| UN68741 | Rsa1.0.00310.1 | 552 | 96852  | 0         | 374 | 380 | 98 +  | 3   | 379 | 10897  | 11276  |
| UN68742 | Rsa1.0.00023.1 | 616 | 194764 | 0         | 611 | 615 | 99 -  | 2   | 616 | 39360  | 39974  |
| UN68743 | Rsa1.0.17420.1 | 672 | 1833   | 0         | 417 | 418 | 99 +  | 3   | 420 | 796    | 1213   |
| UN68744 | Rsa1.0.01081.1 | 330 | 499226 | 1.00E-114 | 209 | 209 | 100 + | 3   | 211 | 327275 | 327483 |
| UN68745 | Rsa1.0.00595.1 | 287 | 341648 | 1.00E-154 | 282 | 284 | 99 -  | 4   | 287 | 143280 | 143563 |
| UN68746 | Rsa1.0.02515.1 | 605 | 30616  | 6.00E-88  | 177 | 181 | 97 +  | 90  | 270 | 7915   | 8095   |
| UN68747 | Rsa1.0.17237.1 | 331 | 1885   | 0         | 329 | 330 | 99 -  | 2   | 331 | 1376   | 1705   |
| UN68748 | Rsa1.0.00553.1 | 615 | 75983  | 3.00E-74  | 145 | 146 | 99 +  | 329 | 474 | 12359  | 12504  |
| UN68749 | Rsa1.0.00878.1 | 696 | 330303 | 0         | 659 | 684 | 96 -  | 23  | 693 | 303889 | 304569 |
| UN68750 | Rsa1.0.00085.1 | 489 | 142226 | 1.00E-109 | 210 | 213 | 98 -  | 272 | 484 | 26790  | 27002  |
| UN68751 | Rsa1.0.14705.1 | 724 | 3140   | 0         | 620 | 659 | 94 +  | 4   | 658 | 2492   | 3140   |
| UN68752 | Rsa1.0.03314.1 | 763 | 23804  | 0         | 762 | 767 | 99 -  | 1   | 763 | 1888   | 2654   |
| UN68753 | Rsa1.0.00296.1 | 712 | 97854  | 0         | 700 | 707 | 99 +  | 3   | 709 | 49662  | 50368  |
| UN68754 | Rsa1.0.05429.1 | 304 | 13781  | 1.00E-113 | 252 | 267 | 94 +  | 2   | 268 | 12260  | 12521  |
| UN68755 | Rsa1.0.00252.1 | 621 | 102760 | 0         | 507 | 508 | 99 -  | 114 | 621 | 94699  | 95206  |

|         |                |     |        |           |     |     |       |     |     |        |        |
|---------|----------------|-----|--------|-----------|-----|-----|-------|-----|-----|--------|--------|
| UN68756 | Rsa1.0.01853.1 | 665 | 147800 | 0         | 413 | 415 | 99 -  | 251 | 665 | 32904  | 33318  |
| UN68757 | Rsa1.0.45947.1 | 663 | 491    | 1.00E-112 | 215 | 218 | 98 +  | 232 | 449 | 274    | 491    |
| UN68758 | Rsa1.0.00369.1 | 689 | 266462 | 1.00E-170 | 312 | 315 | 99 +  | 56  | 370 | 201654 | 201968 |
| UN68759 | Rsa1.0.00040.1 | 763 | 324196 | 1.00E-112 | 209 | 210 | 99 -  | 3   | 212 | 289833 | 290042 |
| UN68760 | Rsa1.0.04720.1 | 626 | 16237  | 0         | 624 | 625 | 99 -  | 3   | 626 | 14580  | 15204  |
| UN68761 | Rsa1.0.07379.1 | 702 | 9492   | 1.00E-114 | 222 | 225 | 98 +  | 476 | 700 | 3308   | 3531   |
| UN68762 | Rsa1.0.01668.1 | 805 | 41299  | 1.00E-134 | 275 | 286 | 96 -  | 241 | 526 | 35533  | 35818  |
| UN68763 | Rsa1.0.00621.1 | 550 | 71840  | 0         | 539 | 549 | 98 +  | 2   | 550 | 15027  | 15574  |
| UN68764 | #              | #   | #      | #         | #   | #   | #     | #   | #   | #      | #      |
| UN68765 | Rsa1.0.00451.1 | 701 | 322533 | 0         | 341 | 343 | 99 -  | 357 | 698 | 148158 | 148500 |
| UN68766 | Rsa1.0.01979.1 | 732 | 36545  | 1.00E-159 | 300 | 305 | 98 -  | 300 | 604 | 7891   | 8195   |
| UN68767 | Rsa1.0.03860.1 | 720 | 20407  | 0         | 520 | 521 | 99 -  | 201 | 720 | 14070  | 14590  |
| UN68768 | Rsa1.0.04893.1 | 754 | 15572  | 1.00E-144 | 279 | 284 | 98 -  | 301 | 583 | 15289  | 15572  |
| UN68769 | Rsa1.0.00302.1 | 616 | 97521  | 2.00E-94  | 179 | 180 | 99 -  | 296 | 475 | 2321   | 2500   |
| UN68770 | Rsa1.0.02476.1 | 541 | 31063  | 0         | 514 | 540 | 95 -  | 8   | 541 | 24616  | 25155  |
| UN68771 | Rsa1.0.00116.1 | 724 | 365886 | 0         | 494 | 522 | 94 +  | 126 | 635 | 323627 | 324147 |
| UN68772 | Rsa1.0.04670.1 | 599 | 16453  | 1.00E-153 | 281 | 282 | 99 +  | 3   | 283 | 3403   | 3684   |
| UN68773 | Rsa1.0.00022.1 | 536 | 200461 | 1.00E-164 | 293 | 293 | 100 + | 244 | 536 | 104497 | 104789 |
| UN68774 | Rsa1.0.01015.1 | 367 | 56752  | 1.00E-110 | 323 | 353 | 91 +  | 27  | 360 | 8793   | 9145   |
| UN68775 | Rsa1.0.02877.1 | 481 | 27049  | 0         | 477 | 480 | 99 -  | 2   | 481 | 24552  | 25031  |
| UN68776 | Rsa1.0.00763.1 | 707 | 65121  | 3.00E-84  | 165 | 167 | 98 -  | 284 | 450 | 60458  | 60624  |
| UN68777 | Rsa1.0.02663.1 | 690 | 169243 | 1.00E-122 | 229 | 231 | 99 -  | 195 | 425 | 159934 | 160164 |
| UN68778 | Rsa1.0.00259.1 | 669 | 163204 | 0         | 598 | 611 | 97 +  | 59  | 669 | 13784  | 14394  |
| UN68779 | Rsa1.0.00075.1 | 702 | 146680 | 4.00E-74  | 167 | 173 | 96 -  | 7   | 178 | 144258 | 144428 |
| UN68780 | Rsa1.0.00702.1 | 710 | 67600  | 0         | 438 | 441 | 99 -  | 3   | 440 | 43185  | 43625  |
| UN68781 | Rsa1.0.00051.1 | 261 | 258225 | 4.00E-87  | 246 | 274 | 89 +  | 1   | 261 | 106500 | 106770 |
| UN68782 | Rsa1.0.00661.1 | 624 | 213041 | 0         | 622 | 623 | 99 +  | 2   | 624 | 44151  | 44773  |
| UN68783 | Rsa1.0.00554.1 | 700 | 150953 | 0         | 679 | 699 | 97 -  | 2   | 700 | 39109  | 39803  |
| UN68784 | Rsa1.0.09910.1 | 670 | 6093   | 1.00E-141 | 322 | 344 | 93 +  | 22  | 365 | 258    | 598    |
| UN68785 | Rsa1.0.01236.1 | 467 | 50156  | 0         | 463 | 465 | 99 -  | 3   | 467 | 17782  | 18244  |
| UN68786 | Rsa1.0.05491.1 | 776 | 13554  | 7.00E-79  | 150 | 150 | 100 - | 247 | 396 | 7717   | 7866   |
| UN68787 | Rsa1.0.01819.1 | 792 | 38834  | 1.00E-103 | 197 | 199 | 98 +  | 2   | 200 | 18602  | 18800  |
| UN68788 | Rsa1.0.00048.1 | 707 | 167185 | 0         | 592 | 594 | 99 -  | 115 | 707 | 107536 | 108129 |
| UN68789 | Rsa1.0.00308.1 | 665 | 96915  | 1.00E-131 | 294 | 313 | 93 -  | 50  | 362 | 71892  | 72204  |
| UN68790 | Rsa1.0.00812.1 | 735 | 63233  | 1.00E-105 | 204 | 206 | 99 -  | 127 | 332 | 2586   | 2790   |
| UN68791 | Rsa1.0.03425.1 | 755 | 23043  | 0         | 441 | 459 | 96 -  | 300 | 749 | 6701   | 7159   |
| UN68792 | #              | #   | #      | #         | #   | #   | #     | #   | #   | #      | #      |
| UN68793 | Rsa1.0.00161.1 | 701 | 116891 | 0         | 695 | 699 | 99 -  | 4   | 701 | 32535  | 33231  |
| UN68794 | Rsa1.0.00376.1 | 731 | 90101  | 1.00E-119 | 286 | 309 | 92 +  | 3   | 311 | 66483  | 66780  |

|         |                |     |        |           |     |     |       |     |     |        |        |
|---------|----------------|-----|--------|-----------|-----|-----|-------|-----|-----|--------|--------|
| UN68795 | Rsa1.0_04556.1 | 723 | 16864  | 1.00E-110 | 202 | 202 | 100 - | 479 | 680 | 6805   | 7006   |
| UN68796 | Rsa1.0_14119.1 | 686 | 3785   | 0         | 333 | 333 | 100 - | 353 | 685 | 1382   | 1714   |
| UN68797 | Rsa1.0_03677.1 | 566 | 21430  | 0         | 562 | 565 | 99 +  | 2   | 566 | 13708  | 14272  |
| UN68798 | Rsa1.0_07381.1 | 774 | 9488   | 0         | 768 | 774 | 99 -  | 3   | 774 | 4367   | 5137   |
| UN68799 | Rsa1.0_00064.1 | 602 | 240927 | 0         | 560 | 603 | 92 +  | 2   | 602 | 42407  | 42990  |
| UN68800 | Rsa1.0_01230.1 | 700 | 50221  | 0         | 677 | 696 | 97 +  | 5   | 700 | 40265  | 40957  |
| UN68801 | Rsa1.0_01289.1 | 628 | 49181  | 0         | 348 | 350 | 99 -  | 2   | 351 | 47751  | 48100  |
| UN68802 | Rsa1.0_00974.1 | 593 | 57893  | 2.00E-81  | 166 | 170 | 97 -  | 126 | 295 | 53552  | 53721  |
| UN68803 | Rsa1.0_00804.1 | 690 | 63726  | 0         | 364 | 366 | 99 -  | 326 | 690 | 16002  | 16367  |
| UN68804 | Rsa1.0_05217.1 | 693 | 142938 | 0         | 667 | 693 | 96 +  | 2   | 693 | 132489 | 133181 |
| UN68805 | Rsa1.0_03996.1 | 583 | 19654  | 1.00E-112 | 223 | 229 | 97 -  | 40  | 268 | 5560   | 5788   |
| UN68806 | Rsa1.0_00905.1 | 770 | 60110  | 1.00E-165 | 324 | 334 | 97 +  | 280 | 613 | 26186  | 26519  |
| UN68807 | Rsa1.0_09317.1 | 321 | 6459   | 1.00E-90  | 178 | 181 | 98 +  | 3   | 183 | 5026   | 5206   |
| UN68808 | Rsa1.0_00002.1 | 612 | 601661 | 1.00E-143 | 307 | 322 | 95 -  | 3   | 323 | 558227 | 558548 |
| UN68809 | Rsa1.0_00105.1 | 565 | 134138 | 1.00E-110 | 202 | 202 | 100 + | 204 | 405 | 127152 | 127353 |
| UN68810 | Rsa1.0_00539.1 | 755 | 76926  | 1.00E-166 | 308 | 312 | 98 -  | 107 | 418 | 34343  | 34654  |
| UN68811 | Rsa1.0_01055.1 | 699 | 55466  | 0         | 341 | 343 | 99 -  | 3   | 345 | 17157  | 17499  |
| UN68812 | Rsa1.0_00678.1 | 584 | 193163 | 1.00E-128 | 232 | 232 | 100 + | 353 | 584 | 23909  | 24140  |
| UN68813 | Rsa1.0_00890.1 | 604 | 323870 | 1.00E-133 | 241 | 241 | 100 + | 364 | 604 | 172815 | 173055 |
| UN68814 | Rsa1.0_00195.1 | 733 | 251884 | 1.00E-120 | 253 | 263 | 96 -  | 3   | 261 | 219538 | 219797 |
| UN68815 | Rsa1.0_00119.1 | 695 | 467509 | 0         | 491 | 499 | 98 -  | 56  | 551 | 386218 | 386716 |
| UN68816 | Rsa1.0_00368.1 | 755 | 90669  | 0         | 327 | 329 | 99 +  | 3   | 331 | 756    | 1084   |
| UN68817 | Rsa1.0_01953.1 | 698 | 36881  | 5.00E-27  | 111 | 127 | 87 -  | 544 | 670 | 25166  | 25292  |
| UN68818 | Rsa1.0_01412.1 | 688 | 46311  | 1.00E-49  | 257 | 308 | 83 +  | 86  | 381 | 11273  | 11580  |
| UN68819 | Rsa1.0_00648.1 | 671 | 70351  | 0         | 589 | 598 | 98 -  | 3   | 600 | 32499  | 33095  |
| UN68820 | Rsa1.0_00213.1 | 637 | 108167 | 0         | 583 | 609 | 95 +  | 30  | 637 | 6711   | 7316   |
| UN68821 | Rsa1.0_00093.1 | 726 | 214962 | 0         | 408 | 415 | 98 -  | 3   | 414 | 130159 | 130573 |
| UN68822 | Rsa1.0_00094.1 | 722 | 139042 | 1.00E-113 | 232 | 239 | 97 +  | 5   | 243 | 37898  | 38134  |
| UN68823 | Rsa1.0_02428.1 | 592 | 31542  | 1.00E-140 | 292 | 305 | 95 -  | 167 | 471 | 17805  | 18109  |
| UN68824 | Rsa1.0_00223.1 | 636 | 106231 | 1.00E-178 | 370 | 384 | 96 -  | 256 | 636 | 42158  | 42541  |
| UN68825 | Rsa1.0_03598.1 | 346 | 21858  | 1.00E-169 | 336 | 348 | 96 -  | 1   | 342 | 13778  | 14125  |
| UN68826 | Rsa1.0_01959.1 | 486 | 36798  | 0         | 407 | 431 | 94 -  | 55  | 485 | 15631  | 16060  |
| UN68827 | Rsa1.0_03786.1 | 567 | 20879  | 1.00E-82  | 162 | 164 | 98 +  | 298 | 461 | 332    | 495    |
| UN68828 | Rsa1.0_33645.1 | 611 | 674    | 0         | 435 | 443 | 98 -  | 57  | 499 | 232    | 674    |
| UN68829 | Rsa1.0_00879.1 | 720 | 61297  | 0         | 450 | 454 | 99 -  | 63  | 516 | 30189  | 30642  |
| UN68830 | Rsa1.0_01364.1 | 663 | 47172  | 0         | 399 | 401 | 99 -  | 264 | 663 | 34059  | 34459  |
| UN68831 | Rsa1.0_01314.1 | 639 | 48365  | 0         | 637 | 638 | 99 -  | 2   | 639 | 44370  | 45007  |
| UN68832 | Rsa1.0_05596.1 | 206 | 137912 | 1.00E-108 | 204 | 206 | 99 -  | 1   | 206 | 128944 | 129149 |
| UN68833 | Rsa1.0_00410.1 | 674 | 86957  | 1.00E-160 | 290 | 291 | 99 +  | 384 | 674 | 28659  | 28949  |

|         |                |     |        |           |     |     |       |     |     |        |        |
|---------|----------------|-----|--------|-----------|-----|-----|-------|-----|-----|--------|--------|
| UN68834 | Rsa1.0_02701.1 | 580 | 28582  | 6.00E-60  | 202 | 229 | 88 -  | 60  | 286 | 15156  | 15384  |
| UN68835 | Rsa1.0_00621.1 | 788 | 71840  | 1.00E-114 | 212 | 213 | 99 -  | 48  | 260 | 69792  | 70004  |
| UN68836 | Rsa1.0_01506.1 | 797 | 44370  | 1.00E-107 | 203 | 205 | 99 -  | 80  | 284 | 27668  | 27872  |
| UN68837 | Rsa1.0_00415.1 | 741 | 86795  | 0         | 391 | 395 | 98 +  | 349 | 741 | 4549   | 4943   |
| UN68838 | Rsa1.0_02203.1 | 564 | 164532 | 1.00E-128 | 239 | 241 | 99 -  | 324 | 564 | 23778  | 24018  |
| UN68839 | Rsa1.0_02962.1 | 678 | 26419  | 3.00E-96  | 182 | 183 | 99 -  | 3   | 185 | 13318  | 13500  |
| UN68840 | Rsa1.0_00096.1 | 553 | 198773 | 0         | 461 | 461 | 100 - | 2   | 462 | 103324 | 103784 |
| UN68841 | Rsa1.0_14690.1 | 650 | 3155   | 1.00E-180 | 326 | 328 | 99 -  | 1   | 328 | 1783   | 2110   |
| UN68842 | Rsa1.0_00100.1 | 582 | 249232 | 0         | 549 | 558 | 98 -  | 1   | 555 | 193427 | 193983 |
| UN68843 | Rsa1.0_01838.1 | 659 | 38500  | 0         | 565 | 598 | 94 +  | 60  | 648 | 26060  | 26657  |
| UN68844 | Rsa1.0_00037.1 | 545 | 307838 | 1.00E-144 | 259 | 259 | 100 + | 1   | 259 | 280391 | 280649 |
| UN68845 | Rsa1.0_00414.1 | 634 | 202190 | 0         | 495 | 509 | 97 -  | 3   | 505 | 183769 | 184277 |
| UN68846 | Rsa1.0_01821.1 | 533 | 38798  | 0         | 507 | 518 | 97 +  | 2   | 519 | 23815  | 24332  |
| UN68847 | Rsa1.0_00128.1 | 587 | 228675 | 1.00E-158 | 336 | 353 | 95 +  | 1   | 350 | 68059  | 68411  |
| UN68848 | Rsa1.0_00222.1 | 798 | 172263 | 0         | 449 | 461 | 97 +  | 346 | 798 | 127409 | 127869 |
| UN68849 | Rsa1.0_05754.1 | 696 | 12731  | 3.00E-87  | 173 | 176 | 98 -  | 427 | 602 | 7362   | 7537   |
| UN68850 | Rsa1.0_19288.1 | 636 | 1451   | 0         | 432 | 448 | 96 +  | 189 | 636 | 1      | 448    |
| UN68851 | Rsa1.0_07498.1 | 495 | 9247   | 7.00E-78  | 175 | 184 | 95 +  | 130 | 313 | 1258   | 1441   |
| UN68852 | Rsa1.0_00782.1 | 728 | 64468  | 1.00E-95  | 205 | 214 | 95 -  | 334 | 547 | 20391  | 20604  |
| UN68853 | Rsa1.0_01604.1 | 190 | 42461  | 1.00E-89  | 182 | 187 | 97 +  | 2   | 188 | 39483  | 39669  |
| UN68854 | Rsa1.0_08149.1 | 734 | 7833   | 7.00E-85  | 219 | 239 | 91 -  | 28  | 264 | 6005   | 6229   |
| UN68855 | Rsa1.0_01098.1 | 401 | 54215  | 0         | 398 | 401 | 99 +  | 1   | 400 | 52503  | 52903  |
| UN68856 | Rsa1.0_01424.1 | 739 | 46139  | 0         | 737 | 741 | 99 +  | 1   | 739 | 40584  | 41323  |
| UN68857 | Rsa1.0_01860.1 | 565 | 38057  | 0         | 439 | 456 | 96 -  | 3   | 451 | 27561  | 28016  |
| UN68858 | Rsa1.0_00940.1 | 273 | 179946 | 2.00E-82  | 245 | 271 | 90 -  | 2   | 269 | 172689 | 172959 |
| UN68859 | Rsa1.0_01553.1 | 594 | 43379  | 1.00E-106 | 220 | 228 | 96 +  | 178 | 405 | 1774   | 2001   |
| UN68860 | Rsa1.0_04028.1 | 275 | 19493  | 1.00E-130 | 235 | 235 | 100 - | 1   | 235 | 16717  | 16951  |
| UN68861 | Rsa1.0_00005.1 | 712 | 353093 | 1.00E-165 | 295 | 295 | 100 + | 170 | 464 | 129277 | 129571 |
| UN68862 | Rsa1.0_00529.1 | 687 | 77487  | 1.00E-104 | 193 | 193 | 100 + | 456 | 648 | 61254  | 61446  |
| UN68863 | Rsa1.0_00139.1 | 706 | 357786 | 1.00E-123 | 246 | 253 | 97 +  | 360 | 612 | 37342  | 37594  |
| UN68864 | Rsa1.0_05719.1 | 734 | 12836  | 0         | 413 | 413 | 100 - | 1   | 413 | 11396  | 11808  |
| UN68865 | Rsa1.0_01203.1 | 569 | 50848  | 0         | 434 | 456 | 95 -  | 2   | 445 | 27749  | 28201  |
| UN68866 | Rsa1.0_05239.1 | 382 | 14410  | 1.00E-84  | 174 | 179 | 97 -  | 2   | 180 | 12900  | 13078  |
| UN68867 | Rsa1.0_01149.1 | 576 | 160459 | 1.00E-118 | 228 | 232 | 98 -  | 309 | 540 | 131080 | 131311 |
| UN68868 | Rsa1.0_15922.1 | 670 | 2358   | 0         | 477 | 490 | 97 +  | 1   | 490 | 1401   | 1890   |
| UN68869 | Rsa1.0_02392.1 | 714 | 152517 | 1.00E-161 | 300 | 304 | 98 -  | 286 | 589 | 10522  | 10825  |
| UN68870 | Rsa1.0_04346.1 | 718 | 17813  | 1.00E-157 | 322 | 329 | 97 -  | 394 | 716 | 14205  | 14533  |
| UN68871 | Rsa1.0_02330.1 | 570 | 32452  | 5.00E-51  | 106 | 107 | 99 -  | 359 | 465 | 20984  | 21090  |
| UN68872 | Rsa1.0_09629.1 | 584 | 6244   | 1.00E-167 | 328 | 338 | 97 +  | 3   | 340 | 5824   | 6161   |



|         |                |     |        |           |     |     |       |     |     |        |        |
|---------|----------------|-----|--------|-----------|-----|-----|-------|-----|-----|--------|--------|
| UN68873 | Rsa1.0.02331.1 | 737 | 32449  | 2.00E-85  | 161 | 161 | 100 + | 3   | 163 | 6489   | 6649   |
| UN68874 | Rsa1.0.32339.1 | 652 | 704    | 1.00E-128 | 245 | 249 | 98 +  | 390 | 638 | 269    | 517    |
| UN68875 | Rsa1.0.07756.1 | 750 | 8634   | 1.00E-125 | 248 | 251 | 98 +  | 498 | 745 | 4717   | 4967   |
| UN68876 | Rsa1.0.00621.1 | 558 | 71840  | 0         | 339 | 339 | 100 + | 3   | 341 | 34749  | 35087  |
| UN68877 | Rsa1.0.00556.1 | 316 | 207212 | 1.00E-121 | 270 | 284 | 95 -  | 34  | 316 | 179365 | 179646 |
| UN68878 | Rsa1.0.01013.1 | 702 | 56822  | 1.00E-107 | 245 | 261 | 93 -  | 214 | 474 | 46905  | 47165  |
| UN68879 | Rsa1.0.02429.1 | 268 | 31527  | 2.00E-86  | 177 | 182 | 97 +  | 85  | 266 | 11644  | 11825  |
| UN68880 | Rsa1.0.00085.1 | 163 | 142226 | 1.00E-61  | 144 | 148 | 97 +  | 19  | 163 | 49282  | 49429  |
| UN68881 | Rsa1.0.00088.1 | 632 | 141341 | 1.00E-132 | 245 | 247 | 99 +  | 359 | 605 | 7725   | 7971   |
| UN68882 | Rsa1.0.02698.1 | 505 | 28593  | 5.00E-88  | 171 | 173 | 98 -  | 1   | 173 | 2156   | 2328   |
| UN68883 | Rsa1.0.03415.1 | 287 | 23117  | 1.00E-121 | 275 | 288 | 95 +  | 3   | 287 | 17888  | 18174  |
| UN68884 | Rsa1.0.00049.1 | 589 | 167018 | 1.00E-130 | 299 | 318 | 94 -  | 2   | 319 | 79758  | 80072  |
| UN68885 | Rsa1.0.01193.1 | 782 | 51147  | 1.00E-112 | 206 | 206 | 100 - | 183 | 388 | 31099  | 31304  |
| UN68886 | Rsa1.0.01827.1 | 746 | 143321 | 1.00E-163 | 336 | 350 | 96 -  | 342 | 691 | 131817 | 132163 |
| UN68887 | Rsa1.0.01113.1 | 731 | 53616  | 0         | 388 | 388 | 100 - | 1   | 388 | 22746  | 23133  |
| UN68888 | Rsa1.0.03574.1 | 561 | 22004  | 0         | 542 | 559 | 96 +  | 3   | 561 | 7024   | 7582   |
| UN68889 | Rsa1.0.00224.1 | 602 | 327530 | 0         | 373 | 383 | 97 -  | 222 | 599 | 178814 | 179196 |
| UN68890 | Rsa1.0.01321.1 | 640 | 48248  | 1.00E-139 | 260 | 263 | 98 +  | 372 | 634 | 8206   | 8468   |
| UN68891 | Rsa1.0.15425.1 | 699 | 2612   | 1.00E-131 | 453 | 522 | 86 +  | 178 | 697 | 1419   | 1940   |
| UN68892 | Rsa1.0.00090.1 | 640 | 273859 | 0         | 606 | 634 | 95 +  | 3   | 636 | 217656 | 218286 |
| UN68893 | Rsa1.0.07208.1 | 786 | 9719   | 0         | 396 | 396 | 100 - | 10  | 405 | 8618   | 9013   |
| UN68894 | Rsa1.0.01235.1 | 746 | 50180  | 0         | 417 | 425 | 98 +  | 323 | 746 | 19036  | 19460  |
| UN68895 | Rsa1.0.15242.1 | 686 | 2734   | 1.00E-134 | 271 | 279 | 97 +  | 3   | 281 | 2038   | 2315   |
| UN68896 | Rsa1.0.14371.1 | 708 | 3465   | 0         | 429 | 435 | 98 -  | 3   | 437 | 1336   | 1770   |
| UN68897 | Rsa1.0.01184.1 | 788 | 51452  | 5.00E-98  | 182 | 182 | 100 + | 409 | 590 | 50303  | 50484  |
| UN68898 | Rsa1.0.03207.1 | 621 | 24604  | 0         | 617 | 620 | 99 +  | 2   | 621 | 13898  | 14517  |
| UN68899 | Rsa1.0.03264.1 | 668 | 145959 | 1.00E-73  | 141 | 141 | 100 + | 405 | 545 | 126532 | 126672 |
| UN68900 | Rsa1.0.04126.1 | 808 | 18939  | 1.00E-177 | 347 | 357 | 97 -  | 5   | 361 | 15535  | 15888  |
| UN68901 | Rsa1.0.01380.1 | 777 | 155003 | 2.00E-79  | 323 | 376 | 85 -  | 2   | 362 | 32983  | 33356  |
| UN68902 | Rsa1.0.02792.1 | 580 | 27829  | 0         | 578 | 580 | 99 +  | 3   | 580 | 21278  | 21857  |
| UN68903 | Rsa1.0.01632.1 | 676 | 181224 | 1.00E-123 | 231 | 233 | 99 +  | 162 | 394 | 17769  | 18001  |
| UN68904 | Rsa1.0.01076.1 | 752 | 54835  | 1.00E-132 | 281 | 295 | 95 +  | 458 | 752 | 33834  | 34128  |
| UN68905 | Rsa1.0.01269.1 | 400 | 49622  | 0         | 378 | 391 | 96 -  | 2   | 389 | 32632  | 33022  |
| UN68906 | Rsa1.0.00842.1 | 791 | 62493  | 1.00E-147 | 264 | 264 | 100 + | 3   | 266 | 27679  | 27942  |
| UN68907 | Rsa1.0.46955.1 | 709 | 481    | 1.00E-165 | 300 | 302 | 99 -  | 57  | 358 | 1      | 302    |
| UN68908 | Rsa1.0.00157.1 | 608 | 245832 | 1.00E-157 | 284 | 285 | 99 -  | 232 | 516 | 66380  | 66664  |
| UN68909 | Rsa1.0.02360.1 | 671 | 32203  | 0         | 420 | 441 | 95 -  | 40  | 475 | 24666  | 25100  |
| UN68910 | Rsa1.0.00977.1 | 336 | 198001 | 0         | 335 | 335 | 100 + | 2   | 336 | 181429 | 181763 |
| UN68911 | Rsa1.0.02365.1 | 728 | 32118  | 1.00E-129 | 329 | 358 | 91 +  | 3   | 357 | 11077  | 11420  |

|         |                |     |        |           |     |     |       |     |     |        |        |
|---------|----------------|-----|--------|-----------|-----|-----|-------|-----|-----|--------|--------|
| UN68912 | Rsa1.0_03465.1 | 813 | 22700  | 0         | 794 | 825 | 96 -  | 3   | 813 | 16927  | 17751  |
| UN68913 | Rsa1.0_10764.1 | 743 | 5726   | 1.00E-61  | 124 | 125 | 99 -  | 143 | 267 | 3885   | 4009   |
| UN68914 | Rsa1.0_13143.1 | 760 | 4993   | 1.00E-112 | 224 | 230 | 97 -  | 70  | 299 | 2578   | 2807   |
| UN68915 | Rsa1.0_01566.1 | 687 | 43134  | 0         | 568 | 603 | 94 -  | 51  | 635 | 34060  | 34658  |
| UN68916 | Rsa1.0_26487.1 | 695 | 890    | 1.00E-100 | 186 | 186 | 100 - | 277 | 462 | 363    | 548    |
| UN68917 | Rsa1.0_25169.1 | 649 | 948    | 1.00E-101 | 234 | 248 | 94 +  | 3   | 247 | 305    | 545    |
| UN68918 | Rsa1.0_01270.1 | 219 | 49574  | 4.00E-25  | 170 | 201 | 84 -  | 2   | 189 | 29228  | 29419  |
| UN68919 | Rsa1.0_07458.1 | 566 | 9352   | 1.00E-116 | 212 | 212 | 100 + | 318 | 529 | 2821   | 3032   |
| UN68920 | Rsa1.0_02099.1 | 534 | 35030  | 1.00E-121 | 220 | 220 | 100 + | 3   | 222 | 548    | 767    |
| UN68921 | Rsa1.0_00019.1 | 581 | 301669 | 1.00E-79  | 163 | 167 | 97 -  | 308 | 474 | 113991 | 114157 |
| UN68922 | Rsa1.0_00066.1 | 701 | 152418 | 0         | 687 | 702 | 97 +  | 2   | 701 | 44256  | 44957  |
| UN68923 | Rsa1.0_00105.1 | 125 | 134138 | 2.00E-34  | 110 | 118 | 93 +  | 2   | 117 | 447    | 563    |
| UN68924 | Rsa1.0_00017.1 | 668 | 752458 | 1.00E-138 | 289 | 300 | 96 -  | 3   | 294 | 240609 | 240908 |
| UN68925 | Rsa1.0_19310.1 | 723 | 1449   | 4.00E-83  | 160 | 161 | 99 -  | 286 | 446 | 100    | 260    |
| UN68926 | Rsa1.0_01842.1 | 256 | 38430  | 1.00E-125 | 250 | 255 | 98 -  | 4   | 256 | 7170   | 7424   |
| UN68927 | Rsa1.0_00133.1 | 311 | 123768 | 2.00E-64  | 176 | 185 | 95 -  | 127 | 305 | 11763  | 11947  |
| UN68928 | Rsa1.0_05849.1 | 560 | 12425  | 5.00E-45  | 117 | 125 | 93 +  | 278 | 402 | 7718   | 7842   |
| UN68929 | Rsa1.0_00329.1 | 619 | 222544 | 1.00E-169 | 336 | 347 | 96 +  | 260 | 603 | 186853 | 187199 |
| UN68930 | Rsa1.0_00003.1 | 633 | 340054 | 0         | 565 | 571 | 98 +  | 64  | 633 | 167532 | 168102 |
| UN68931 | Rsa1.0_00169.1 | 777 | 274298 | 1.00E-49  | 107 | 109 | 98 +  | 567 | 675 | 30327  | 30435  |
| UN68932 | Rsa1.0_01289.1 | 116 | 49181  | 1.00E-51  | 113 | 115 | 98 -  | 3   | 116 | 2652   | 2766   |
| UN68933 | Rsa1.0_00855.1 | 656 | 62047  | 0         | 419 | 434 | 96 +  | 2   | 426 | 54390  | 54823  |
| UN68934 | Rsa1.0_01159.1 | 331 | 52115  | 9.00E-67  | 141 | 145 | 97 +  | 23  | 167 | 31460  | 31604  |
| UN68935 | Rsa1.0_01154.1 | 728 | 52249  | 1.00E-123 | 260 | 271 | 95 -  | 3   | 273 | 11404  | 11671  |
| UN68936 | Rsa1.0_09000.1 | 623 | 6719   | 0         | 493 | 493 | 100 - | 131 | 623 | 1638   | 2130   |
| UN68937 | Rsa1.0_00108.1 | 742 | 478491 | 0         | 390 | 404 | 96 -  | 292 | 694 | 73383  | 73786  |
| UN68938 | Rsa1.0_01062.1 | 779 | 55325  | 1.00E-176 | 331 | 337 | 98 -  | 58  | 394 | 52193  | 52529  |
| UN68939 | Rsa1.0_00009.1 | 632 | 232558 | 0         | 455 | 492 | 92 -  | 69  | 548 | 95113  | 95598  |
| UN68940 | Rsa1.0_01866.1 | 229 | 37961  | 1.00E-121 | 226 | 228 | 99 -  | 2   | 229 | 36822  | 37049  |
| UN68941 | Rsa1.0_00104.1 | 606 | 368722 | 1.00E-106 | 218 | 224 | 97 -  | 380 | 603 | 74354  | 74576  |
| UN68942 | Rsa1.0_02396.1 | 460 | 31783  | 0         | 330 | 331 | 99 +  | 4   | 333 | 14406  | 14736  |
| UN68943 | Rsa1.0_04489.1 | 661 | 17145  | 1.00E-64  | 208 | 231 | 90 +  | 3   | 228 | 12676  | 12899  |
| UN68944 | Rsa1.0_00101.1 | 815 | 267193 | 0         | 466 | 475 | 98 +  | 348 | 815 | 3820   | 4294   |
| UN68945 | Rsa1.0_03955.1 | 674 | 19884  | 0         | 413 | 415 | 99 +  | 260 | 674 | 8523   | 8937   |
| UN68946 | Rsa1.0_00042.1 | 301 | 171507 | 1.00E-102 | 259 | 283 | 91 -  | 20  | 286 | 158252 | 158533 |
| UN68947 | Rsa1.0_00726.1 | 676 | 66734  | 0         | 674 | 676 | 99 +  | 2   | 676 | 2956   | 3631   |
| UN68948 | Rsa1.0_06715.1 | 758 | 10485  | 1.00E-111 | 246 | 259 | 94 +  | 357 | 612 | 2461   | 2719   |
| UN68949 | Rsa1.0_16738.1 | 138 | 2050   | 9.00E-68  | 136 | 138 | 98 +  | 1   | 138 | 204    | 341    |
| UN68950 | Rsa1.0_03075.1 | 766 | 25560  | 7.00E-85  | 239 | 255 | 93 +  | 493 | 738 | 14646  | 14900  |

|         |                |     |        |           |     |     |       |     |     |        |        |
|---------|----------------|-----|--------|-----------|-----|-----|-------|-----|-----|--------|--------|
| UN68951 | Rsa1.0_00094.1 | 282 | 139042 | 1.00E-135 | 273 | 279 | 97 +  | 4   | 279 | 4643   | 4921   |
| UN68952 | Rsa1.0_01504.1 | 358 | 189978 | 1.00E-172 | 343 | 352 | 97 +  | 2   | 353 | 31620  | 31966  |
| UN68953 | Rsa1.0_03603.1 | 546 | 21845  | 1.00E-60  | 119 | 119 | 100 - | 205 | 323 | 4018   | 4136   |
| UN68954 | Rsa1.0_00744.1 | 502 | 66084  | 1.00E-113 | 299 | 327 | 91 -  | 38  | 363 | 58901  | 59225  |
| UN68955 | Rsa1.0_00008.1 | 686 | 358124 | 0         | 629 | 638 | 98 +  | 47  | 683 | 180648 | 181285 |
| UN68956 | Rsa1.0_08741.1 | 404 | 6977   | 1.00E-148 | 307 | 317 | 96 +  | 58  | 371 | 5818   | 6134   |
| UN68957 | #              | #   | #      | #         | #   | #   | #     | #   | #   | #      | #      |
| UN68958 | Rsa1.0_00734.1 | 517 | 66508  | 0         | 375 | 376 | 99 +  | 1   | 376 | 14396  | 14771  |
| UN68959 | Rsa1.0_01958.1 | 668 | 261128 | 1.00E-110 | 208 | 210 | 99 -  | 294 | 503 | 258633 | 258842 |
| UN68960 | Rsa1.0_00085.1 | 297 | 142226 | 1.00E-87  | 167 | 168 | 99 -  | 2   | 169 | 31612  | 31779  |
| UN68961 | Rsa1.0_01719.1 | 770 | 40388  | 1.00E-153 | 397 | 431 | 92 -  | 334 | 758 | 17275  | 17702  |
| UN68962 | Rsa1.0_00111.1 | 457 | 390088 | 1.00E-138 | 255 | 257 | 99 +  | 3   | 259 | 75016  | 75272  |
| UN68963 | Rsa1.0_00476.1 | 562 | 280966 | 7.00E-75  | 149 | 151 | 98 -  | 243 | 393 | 34390  | 34540  |
| UN68964 | Rsa1.0_00083.1 | 591 | 442773 | 6.00E-91  | 173 | 174 | 99 +  | 410 | 583 | 392478 | 392651 |
| UN68965 | Rsa1.0_03282.1 | 732 | 24107  | 0         | 494 | 508 | 97 -  | 226 | 728 | 10685  | 11192  |
| UN68966 | Rsa1.0_00342.1 | 714 | 93695  | 1.00E-142 | 268 | 272 | 98 -  | 3   | 274 | 43463  | 43734  |
| UN68967 | Rsa1.0_00107.1 | 281 | 431659 | 1.00E-111 | 218 | 220 | 99 +  | 64  | 281 | 192977 | 193196 |
| UN68968 | Rsa1.0_20346.1 | 536 | 1314   | 1.00E-103 | 230 | 242 | 95 -  | 3   | 240 | 215    | 454    |
| UN68969 | Rsa1.0_02024.1 | 712 | 149168 | 1.00E-111 | 265 | 284 | 93 +  | 3   | 283 | 134273 | 134553 |
| UN68970 | Rsa1.0_20111.1 | 244 | 1340   | 3.00E-75  | 146 | 147 | 99 -  | 2   | 148 | 1136   | 1282   |
| UN68971 | Rsa1.0_00641.1 | 779 | 208241 | 0         | 356 | 365 | 97 +  | 328 | 691 | 5190   | 5554   |
| UN68972 | Rsa1.0_01244.1 | 203 | 50061  | 5.00E-98  | 188 | 189 | 99 -  | 3   | 190 | 48095  | 48283  |
| UN68973 | Rsa1.0_00369.1 | 267 | 266462 | 1.00E-104 | 197 | 199 | 98 +  | 62  | 260 | 136397 | 136595 |
| UN68974 | Rsa1.0_02876.1 | 672 | 27062  | 0         | 540 | 558 | 96 +  | 2   | 559 | 5264   | 5821   |
| UN68975 | Rsa1.0_01255.1 | 608 | 162921 | 0         | 346 | 351 | 98 -  | 111 | 461 | 160797 | 161147 |
| UN68976 | Rsa1.0_02221.1 | 249 | 33796  | 4.00E-68  | 155 | 159 | 97 -  | 94  | 249 | 14783  | 14941  |
| UN68977 | Rsa1.0_02171.1 | 476 | 167557 | 0         | 462 | 478 | 96 +  | 2   | 476 | 10039  | 10516  |
| UN68978 | Rsa1.0_03209.1 | 161 | 24592  | 2.00E-59  | 150 | 156 | 96 -  | 4   | 155 | 20657  | 20812  |
| UN68979 | Rsa1.0_00662.1 | 345 | 192183 | 1.00E-124 | 310 | 334 | 92 +  | 3   | 333 | 51397  | 51720  |
| UN68980 | Rsa1.0_04488.1 | 420 | 17155  | 0         | 380 | 392 | 96 +  | 29  | 420 | 13641  | 14032  |
| UN68981 | Rsa1.0_01662.1 | 295 | 41382  | 1.00E-157 | 294 | 296 | 99 +  | 2   | 295 | 25285  | 25580  |
| UN68982 | Rsa1.0_05648.1 | 571 | 13049  | 0         | 375 | 383 | 97 -  | 191 | 571 | 11506  | 11888  |
| UN68983 | #              | #   | #      | #         | #   | #   | #     | #   | #   | #      | #      |
| UN68984 | Rsa1.0_02139.1 | 541 | 34686  | 2.00E-99  | 202 | 207 | 97 -  | 40  | 246 | 26074  | 26278  |
| UN68985 | Rsa1.0_00524.1 | 373 | 169613 | 3.00E-67  | 267 | 306 | 87 +  | 3   | 297 | 153403 | 153694 |
| UN68986 | Rsa1.0_01388.1 | 673 | 46741  | 1.00E-134 | 248 | 250 | 99 +  | 211 | 460 | 6365   | 6614   |
| UN68987 | Rsa1.0_31408.1 | 748 | 728    | 0         | 711 | 713 | 99 -  | 2   | 713 | 16     | 728    |
| UN68988 | Rsa1.0_00123.1 | 711 | 325650 | 1.00E-117 | 279 | 301 | 92 -  | 2   | 289 | 182368 | 182665 |
| UN68989 | Rsa1.0_01018.1 | 799 | 56685  | 2.00E-66  | 146 | 149 | 97 +  | 653 | 799 | 54766  | 54914  |

|         |                |     |        |           |     |     |       |     |     |        |        |
|---------|----------------|-----|--------|-----------|-----|-----|-------|-----|-----|--------|--------|
| UN68990 | Rsa1.0_00751.1 | 690 | 65759  | 1.00E-70  | 145 | 148 | 97 -  | 502 | 649 | 39663  | 39810  |
| UN68991 | Rsa1.0_01083.1 | 203 | 54617  | 4.00E-37  | 88  | 91  | 96 -  | 56  | 146 | 4739   | 4829   |
| UN68992 | Rsa1.0_00359.1 | 719 | 91256  | 0         | 434 | 455 | 95 -  | 30  | 484 | 84690  | 85135  |
| UN68993 | Rsa1.0_01194.1 | 769 | 51113  | 0         | 742 | 768 | 96 +  | 2   | 769 | 26456  | 27205  |
| UN68994 | Rsa1.0_05680.1 | 818 | 12958  | 1.00E-106 | 347 | 396 | 87 +  | 422 | 814 | 8783   | 9175   |
| UN68995 | Rsa1.0_06213.1 | 147 | 11478  | 9.00E-59  | 139 | 147 | 94 -  | 1   | 147 | 7678   | 7824   |
| UN68996 | Rsa1.0_00558.1 | 514 | 75819  | 1.00E-177 | 380 | 402 | 94 +  | 1   | 396 | 52735  | 53136  |
| UN68997 | Rsa1.0_03247.1 | 468 | 24371  | 0         | 435 | 467 | 93 +  | 3   | 468 | 11683  | 12149  |
| UN68998 | Rsa1.0_14996.1 | 384 | 2904   | 0         | 369 | 384 | 96 +  | 1   | 384 | 2070   | 2450   |
| UN68999 | Rsa1.0_03911.1 | 449 | 20133  | 1.00E-153 | 309 | 318 | 97 +  | 2   | 318 | 15195  | 15506  |
| UN69000 | Rsa1.0_03238.1 | 371 | 24432  | 1.00E-139 | 342 | 368 | 92 -  | 1   | 365 | 4837   | 5200   |
| UN69001 | Rsa1.0_15352.1 | 603 | 2663   | 0         | 580 | 606 | 95 -  | 1   | 603 | 1408   | 2001   |
| UN69002 | Rsa1.0_01679.1 | 197 | 146876 | 2.00E-88  | 189 | 197 | 95 -  | 1   | 197 | 134697 | 134893 |
| UN69003 | Rsa1.0_00253.1 | 569 | 231292 | 1.00E-149 | 268 | 268 | 100 + | 3   | 270 | 113245 | 113512 |
| UN69004 | Rsa1.0_00216.1 | 136 | 197563 | 4.00E-45  | 113 | 120 | 94 -  | 1   | 120 | 25108  | 25227  |
| UN69005 | Rsa1.0_00306.1 | 697 | 146760 | 1.00E-166 | 325 | 335 | 97 +  | 363 | 697 | 133202 | 133530 |
| UN69006 | Rsa1.0_01135.1 | 824 | 52799  | 0         | 393 | 397 | 98 -  | 33  | 429 | 40230  | 40626  |
| UN69007 | Rsa1.0_00425.1 | 559 | 147080 | 0         | 535 | 559 | 95 -  | 1   | 559 | 96401  | 96959  |
| UN69008 | Rsa1.0_02826.1 | 691 | 27560  | 1.00E-141 | 255 | 255 | 100 + | 1   | 255 | 8736   | 8990   |
| UN69009 | Rsa1.0_00875.1 | 679 | 61371  | 0         | 650 | 691 | 94 -  | 3   | 675 | 37837  | 38526  |
| UN69010 | Rsa1.0_00023.1 | 637 | 194764 | 0         | 633 | 637 | 99 +  | 1   | 637 | 5040   | 5676   |
| UN69011 | Rsa1.0_21169.1 | 479 | 1228   | 1.00E-175 | 379 | 399 | 94 +  | 1   | 397 | 668    | 1066   |
| UN69012 | Rsa1.0_02492.1 | 466 | 30859  | 1.00E-108 | 277 | 298 | 92 -  | 1   | 297 | 12178  | 12471  |
| UN69013 | Rsa1.0_15387.1 | 706 | 2642   | 1.00E-144 | 319 | 334 | 95 +  | 1   | 332 | 2077   | 2407   |
| UN69014 | Rsa1.0_00003.1 | 698 | 340054 | 0         | 527 | 549 | 95 -  | 6   | 551 | 168580 | 169128 |
| UN69015 | Rsa1.0_00131.1 | 744 | 432233 | 0         | 499 | 504 | 99 -  | 244 | 744 | 387664 | 388167 |
| UN69016 | Rsa1.0_01510.1 | 789 | 44237  | 0         | 526 | 572 | 91 +  | 118 | 674 | 18824  | 19386  |
| UN69017 | Rsa1.0_00990.1 | 779 | 57445  | 0         | 535 | 563 | 95 -  | 219 | 779 | 6770   | 7330   |
| UN69018 | Rsa1.0_00788.1 | 803 | 64237  | 1.00E-111 | 244 | 253 | 96 +  | 558 | 803 | 33152  | 33404  |
| UN69019 | Rsa1.0_00009.1 | 781 | 232558 | 0         | 409 | 410 | 99 +  | 3   | 412 | 58860  | 59269  |
| UN69020 | Rsa1.0_00511.1 | 576 | 78616  | 0         | 403 | 415 | 97 +  | 162 | 576 | 77066  | 77480  |
| UN69021 | Rsa1.0_00107.1 | 752 | 431659 | 0         | 405 | 420 | 96 +  | 90  | 509 | 314543 | 314962 |
| UN69022 | Rsa1.0_01520.1 | 774 | 44087  | 0         | 757 | 777 | 97 -  | 3   | 774 | 8413   | 9187   |
| UN69023 | Rsa1.0_01066.1 | 654 | 55235  | 1.00E-101 | 200 | 204 | 98 +  | 417 | 620 | 49241  | 49444  |
| UN69024 | Rsa1.0_07466.1 | 671 | 9321   | 1.00E-140 | 337 | 363 | 92 -  | 3   | 362 | 1381   | 1743   |
| UN69025 | Rsa1.0_01360.1 | 597 | 47246  | 0         | 579 | 609 | 95 +  | 1   | 597 | 2473   | 3075   |
| UN69026 | Rsa1.0_00833.1 | 700 | 62621  | 0         | 408 | 429 | 95 -  | 231 | 656 | 24861  | 25282  |
| UN69027 | Rsa1.0_01628.1 | 581 | 41932  | 0         | 575 | 580 | 99 -  | 2   | 581 | 17525  | 18104  |
| UN69028 | Rsa1.0_26100.1 | 736 | 906    | 0         | 418 | 432 | 96 -  | 237 | 664 | 216    | 647    |

|         |                |     |        |           |     |     |       |     |     |        |        |
|---------|----------------|-----|--------|-----------|-----|-----|-------|-----|-----|--------|--------|
| UN69029 | Rsa1.0.00891.1 | 189 | 60724  | 6.00E-48  | 97  | 97  | 100 - | 83  | 179 | 34520  | 34616  |
| UN69030 | Rsa1.0.00017.1 | 568 | 752458 | 1.00E-171 | 406 | 444 | 91 -  | 3   | 426 | 354538 | 354978 |
| UN69031 | Rsa1.0.01855.1 | 800 | 38204  | 0         | 500 | 523 | 95 -  | 278 | 796 | 15580  | 16102  |
| UN69032 | Rsa1.0.00015.1 | 788 | 561803 | 0         | 453 | 464 | 97 -  | 240 | 702 | 254126 | 254586 |
| UN69033 | Rsa1.0.01938.1 | 746 | 264018 | 0         | 438 | 450 | 97 -  | 246 | 693 | 159816 | 160265 |
| UN69034 | Rsa1.0.46943.1 | 609 | 481    | 1.00E-127 | 297 | 318 | 93 -  | 294 | 609 | 162    | 479    |
| UN69035 | Rsa1.0.09304.1 | 648 | 6469   | 0         | 505 | 505 | 100 - | 144 | 648 | 5965   | 6469   |
| UN69036 | Rsa1.0.00009.1 | 728 | 232558 | 0         | 446 | 449 | 99 -  | 280 | 728 | 17452  | 17900  |
| UN69037 | Rsa1.0.01552.1 | 635 | 43396  | 1.00E-98  | 253 | 273 | 92 +  | 372 | 635 | 12725  | 12996  |
| UN69038 | Rsa1.0.01137.1 | 730 | 52655  | 1.00E-177 | 366 | 384 | 95 +  | 3   | 379 | 28812  | 29195  |
| UN69039 | Rsa1.0.02486.1 | 701 | 30965  | 1.00E-168 | 344 | 356 | 96 -  | 295 | 648 | 12167  | 12522  |
| UN69040 | Rsa1.0.08363.1 | 740 | 7474   | 0         | 692 | 716 | 96 +  | 32  | 740 | 2940   | 3655   |
| UN69041 | Rsa1.0.01112.1 | 797 | 310601 | 1.00E-103 | 218 | 226 | 96 +  | 5   | 230 | 174845 | 175064 |
| UN69042 | Rsa1.0.00096.1 | 573 | 198773 | 1.00E-102 | 230 | 244 | 94 +  | 35  | 278 | 171687 | 171924 |
| UN69043 | Rsa1.0.00472.1 | 589 | 398134 | 1.00E-17  | 110 | 131 | 83 -  | 355 | 485 | 309961 | 310091 |
| UN69044 | Rsa1.0.00300.1 | 605 | 97747  | 0         | 529 | 565 | 93 +  | 47  | 605 | 9952   | 10513  |
| UN69045 | Rsa1.0.00123.1 | 677 | 325650 | 1.00E-129 | 250 | 255 | 98 -  | 46  | 300 | 248527 | 248781 |
| UN69046 | Rsa1.0.01044.1 | 105 | 55861  | 2.00E-18  | 80  | 91  | 87 -  | 8   | 98  | 14500  | 14590  |
| UN69047 | Rsa1.0.06209.1 | 530 | 11484  | 5.00E-91  | 214 | 230 | 93 -  | 301 | 530 | 2499   | 2719   |
| UN69048 | Rsa1.0.00190.1 | 359 | 318240 | 1.00E-173 | 346 | 359 | 96 -  | 1   | 359 | 191844 | 192202 |
| UN69049 | Rsa1.0.02481.1 | 581 | 31035  | 5.00E-76  | 182 | 193 | 94 -  | 1   | 193 | 30048  | 30239  |
| UN69050 | Rsa1.0.03325.1 | 151 | 23720  | 2.00E-62  | 143 | 149 | 95 +  | 2   | 149 | 14655  | 14803  |
| UN69051 | Rsa1.0.01570.1 | 283 | 43015  | 4.00E-47  | 203 | 238 | 85 +  | 1   | 220 | 10813  | 11045  |
| UN69052 | Rsa1.0.03813.1 | 316 | 20708  | 5.00E-90  | 168 | 168 | 100 + | 74  | 241 | 10242  | 10409  |
| UN69053 | Rsa1.0.00879.1 | 210 | 61297  | 2.00E-91  | 198 | 206 | 96 -  | 1   | 205 | 11233  | 11438  |
| UN69054 | Rsa1.0.03555.1 | 158 | 22129  | 9.00E-16  | 114 | 135 | 84 -  | 15  | 149 | 18134  | 18261  |
| UN69055 | Rsa1.0.02658.1 | 310 | 28978  | 1.00E-118 | 258 | 272 | 94 +  | 1   | 272 | 18428  | 18699  |
| UN69056 | Rsa1.0.00175.1 | 627 | 166121 | 0         | 597 | 627 | 95 -  | 3   | 627 | 38512  | 39137  |
| UN69057 | Rsa1.0.00095.1 | 467 | 283384 | 0         | 449 | 469 | 95 -  | 1   | 467 | 96723  | 97189  |
| UN69058 | Rsa1.0.01163.1 | 509 | 51946  | 1.00E-179 | 380 | 397 | 95 -  | 9   | 398 | 15934  | 16328  |
| UN69059 | Rsa1.0.00451.1 | 549 | 322533 | 0         | 528 | 544 | 97 +  | 3   | 546 | 49133  | 49675  |
| UN69060 | Rsa1.0.00019.1 | 633 | 301669 | 0         | 441 | 442 | 99 +  | 1   | 442 | 148086 | 148527 |
| UN69061 | Rsa1.0.01246.1 | 719 | 49968  | 0         | 690 | 731 | 94 -  | 1   | 719 | 22110  | 22832  |
| UN69062 | Rsa1.0.02659.1 | 508 | 28971  | 1.00E-144 | 367 | 405 | 90 +  | 1   | 397 | 10817  | 11213  |
| UN69063 | Rsa1.0.00784.1 | 399 | 64359  | 0         | 378 | 393 | 96 -  | 5   | 396 | 30465  | 30857  |
| UN69064 | Rsa1.0.09895.1 | 594 | 6101   | 0         | 572 | 594 | 96 +  | 1   | 594 | 2733   | 3326   |
| UN69065 | Rsa1.0.67091.1 | 725 | 342    | 1.00E-103 | 238 | 251 | 94 -  | 479 | 725 | 94     | 342    |
| UN69066 | Rsa1.0.03469.1 | 317 | 22681  | 1.00E-160 | 309 | 317 | 97 -  | 1   | 317 | 11407  | 11723  |
| UN69067 | Rsa1.0.03995.1 | 129 | 19654  | 2.00E-43  | 119 | 129 | 92 +  | 1   | 129 | 2498   | 2626   |

|         |                |     |        |           |     |     |      |     |     |        |        |
|---------|----------------|-----|--------|-----------|-----|-----|------|-----|-----|--------|--------|
| UN69068 | Rsa1.0_01034.1 | 569 | 56046  | 0         | 547 | 569 | 96 + | 1   | 569 | 21071  | 21639  |
| UN69069 | Rsa1.0_02467.1 | 192 | 31141  | 1.00E-86  | 183 | 190 | 96 - | 3   | 192 | 15554  | 15743  |
| UN69070 | Rsa1.0_00236.1 | 897 | 104771 | 0         | 482 | 502 | 96 - | 5   | 506 | 15770  | 16268  |
| UN69071 | Rsa1.0_00096.1 | 650 | 198773 | 0         | 469 | 475 | 98 + | 1   | 475 | 149839 | 150310 |
| UN69072 | Rsa1.0_04184.1 | 433 | 18598  | 1.00E-113 | 314 | 346 | 90 - | 1   | 339 | 9045   | 9388   |
| UN69073 | Rsa1.0_05523.1 | 713 | 13438  | 1.00E-138 | 307 | 322 | 95 - | 394 | 713 | 9945   | 10265  |
| UN69074 | Rsa1.0_00119.1 | 528 | 467509 | 0         | 520 | 531 | 97 + | 1   | 528 | 280088 | 280616 |
| UN69075 | Rsa1.0_00040.1 | 655 | 324196 | 1.00E-106 | 277 | 303 | 91 + | 360 | 655 | 227656 | 227958 |
| UN69076 | Rsa1.0_00838.1 | 746 | 153820 | 7.00E-91  | 207 | 216 | 95 - | 3   | 215 | 58081  | 58294  |
| UN69077 | Rsa1.0_01318.1 | 739 | 48275  | 0         | 454 | 474 | 95 + | 243 | 716 | 1610   | 2072   |
| UN69078 | Rsa1.0_00792.1 | 774 | 64163  | 0         | 527 | 543 | 97 + | 224 | 763 | 1539   | 2081   |
| UN69079 | Rsa1.0_01867.1 | 793 | 37960  | 1.00E-178 | 329 | 333 | 98 - | 192 | 524 | 23065  | 23397  |
| UN69080 | Rsa1.0_00183.1 | 775 | 113277 | 1.00E-103 | 214 | 222 | 96 + | 55  | 276 | 91870  | 92091  |
| UN69081 | Rsa1.0_00037.1 | 714 | 307838 | 0         | 464 | 483 | 96 + | 1   | 475 | 179583 | 180065 |
| UN69082 | Rsa1.0_01937.1 | 726 | 37147  | 1.00E-153 | 289 | 294 | 98 + | 3   | 296 | 12581  | 12874  |
| UN69083 | Rsa1.0_01955.1 | 658 | 36850  | 0         | 654 | 656 | 99 + | 3   | 658 | 17828  | 18483  |
| UN69084 | Rsa1.0_01460.1 | 729 | 45255  | 0         | 621 | 652 | 95 + | 1   | 650 | 34283  | 34925  |
| UN69085 | Rsa1.0_03879.1 | 535 | 20304  | 1.00E-149 | 328 | 346 | 94 + | 1   | 346 | 3258   | 3600   |
| UN69086 | Rsa1.0_26735.1 | 720 | 880    | 4.00E-86  | 450 | 546 | 82 - | 175 | 720 | 304    | 849    |
| UN69087 | Rsa1.0_00300.1 | 187 | 97747  | 4.00E-40  | 96  | 100 | 96 - | 88  | 187 | 86659  | 86758  |
| UN69088 | Rsa1.0_02637.1 | 151 | 29244  | 3.00E-37  | 130 | 147 | 88 - | 1   | 147 | 9052   | 9198   |
| UN69089 | Rsa1.0_00510.1 | 454 | 78718  | 1.00E-91  | 348 | 405 | 85 + | 1   | 402 | 37813  | 38211  |
| UN69090 | Rsa1.0_03546.1 | 756 | 22172  | 1.00E-121 | 242 | 249 | 97 - | 334 | 582 | 13924  | 14172  |
| UN69091 | Rsa1.0_01786.1 | 648 | 133324 | 1.00E-135 | 269 | 277 | 97 + | 15  | 291 | 18251  | 18527  |
| UN69092 | Rsa1.0_00732.1 | 421 | 66631  | 0         | 388 | 404 | 96 - | 1   | 403 | 13550  | 13953  |
| UN69093 | Rsa1.0_00537.1 | 235 | 186980 | 6.00E-98  | 226 | 237 | 95 - | 1   | 235 | 165833 | 166068 |
| UN69094 | Rsa1.0_02460.1 | 751 | 31169  | 0         | 401 | 422 | 95 - | 1   | 420 | 22604  | 23025  |
| UN69095 | Rsa1.0_02409.1 | 277 | 31663  | 3.00E-72  | 179 | 191 | 93 + | 13  | 203 | 9094   | 9279   |
| UN69096 | Rsa1.0_01296.1 | 750 | 49035  | 0         | 604 | 636 | 94 + | 115 | 750 | 26114  | 26748  |
| UN69097 | Rsa1.0_00599.1 | 576 | 73418  | 1.00E-104 | 270 | 293 | 92 - | 2   | 291 | 47789  | 48073  |
| UN69098 | Rsa1.0_00033.1 | 197 | 515811 | 1.00E-86  | 186 | 194 | 95 + | 1   | 194 | 501924 | 502117 |
| UN69099 | Rsa1.0_06275.1 | 690 | 11342  | 1.00E-135 | 430 | 492 | 87 - | 5   | 496 | 7108   | 7599   |
| UN69100 | Rsa1.0_01026.1 | 609 | 171624 | 1.00E-122 | 229 | 231 | 99 - | 19  | 249 | 35351  | 35581  |
| UN69101 | Rsa1.0_10387.1 | 713 | 5863   | 1.00E-119 | 223 | 225 | 99 - | 347 | 571 | 5639   | 5863   |
| UN69102 | Rsa1.0_00501.1 | 518 | 79545  | 1.00E-160 | 324 | 337 | 96 + | 182 | 518 | 24411  | 24741  |
| UN69103 | Rsa1.0_06614.1 | 786 | 10659  | 1.00E-126 | 277 | 288 | 96 + | 504 | 786 | 4174   | 4461   |
| UN69104 | Rsa1.0_03471.1 | 708 | 22678  | 1.00E-115 | 213 | 214 | 99 - | 3   | 216 | 8482   | 8695   |
| UN69105 | Rsa1.0_00170.1 | 747 | 179538 | 0         | 510 | 512 | 99 - | 118 | 629 | 28952  | 29463  |
| UN69106 | Rsa1.0_00107.1 | 302 | 431659 | 1.00E-128 | 291 | 304 | 95 + | 1   | 299 | 86717  | 87020  |

|         |                |     |        |           |     |     |      |     |     |        |        |
|---------|----------------|-----|--------|-----------|-----|-----|------|-----|-----|--------|--------|
| UN69107 | Rsa1.0.00662.1 | 646 | 192183 | 0         | 541 | 555 | 97 + | 3   | 557 | 62295  | 62849  |
| UN69108 | Rsa1.0.01185.1 | 286 | 149842 | 1.00E-102 | 257 | 279 | 92 + | 2   | 280 | 13513  | 13779  |
| UN69109 | Rsa1.0.07837.1 | 711 | 8449   | 1.00E-161 | 328 | 340 | 96 - | 372 | 711 | 6532   | 6870   |
| UN69110 | Rsa1.0.00542.1 | 724 | 76831  | 1.00E-92  | 188 | 193 | 97 + | 389 | 581 | 37133  | 37325  |
| UN69111 | Rsa1.0.16058.1 | 732 | 2302   | 1.00E-148 | 284 | 289 | 98 + | 171 | 457 | 1139   | 1427   |
| UN69112 | Rsa1.0.00007.1 | 860 | 239325 | 4.00E-74  | 157 | 162 | 96 + | 515 | 676 | 15014  | 15175  |
| UN69113 | Rsa1.0.02829.1 | 226 | 27541  | 1.00E-65  | 139 | 143 | 97 - | 1   | 143 | 4657   | 4799   |
| UN69114 | Rsa1.0.14124.1 | 190 | 3781   | 2.00E-48  | 107 | 110 | 97 - | 1   | 110 | 239    | 348    |
| UN69115 | Rsa1.0.02589.1 | 492 | 300828 | 1.00E-162 | 319 | 329 | 96 - | 1   | 329 | 155784 | 156112 |
| UN69116 | Rsa1.0.00454.1 | 434 | 216970 | 0         | 431 | 434 | 99 + | 1   | 434 | 1592   | 2025   |
| UN69117 | Rsa1.0.00156.1 | 106 | 118383 | 4.00E-32  | 97  | 106 | 91 + | 1   | 106 | 90204  | 90309  |
| UN69118 | Rsa1.0.06274.1 | 787 | 11343  | 1.00E-144 | 266 | 268 | 99 - | 216 | 483 | 1      | 268    |
| UN69119 | Rsa1.0.01115.1 | 667 | 183545 | 0         | 462 | 464 | 99 + | 1   | 464 | 136458 | 136921 |
| UN69120 | Rsa1.0.00128.1 | 885 | 228675 | 0         | 461 | 484 | 95 + | 4   | 482 | 200402 | 200880 |
| UN69121 | Rsa1.0.00002.1 | 436 | 601661 | 1.00E-176 | 410 | 440 | 93 - | 1   | 436 | 33721  | 34146  |
| UN69122 | Rsa1.0.01296.1 | 133 | 49035  | 3.00E-49  | 123 | 131 | 93 - | 1   | 131 | 23190  | 23320  |
| UN69123 | Rsa1.0.03471.1 | 657 | 22678  | 1.00E-174 | 329 | 335 | 98 + | 1   | 332 | 6333   | 6667   |
| UN69124 | Rsa1.0.04845.1 | 212 | 15747  | 9.00E-69  | 191 | 207 | 92 - | 10  | 212 | 6122   | 6328   |
| UN69125 | Rsa1.0.04849.1 | 643 | 15726  | 4.00E-61  | 260 | 302 | 86 - | 132 | 427 | 5720   | 6021   |
| UN69126 | Rsa1.0.00383.1 | 765 | 398431 | 0         | 390 | 405 | 96 - | 1   | 403 | 193214 | 193617 |
| UN69127 | Rsa1.0.00678.1 | 715 | 193163 | 1.00E-131 | 267 | 276 | 96 - | 63  | 335 | 163477 | 163752 |
| UN69128 | Rsa1.0.00079.1 | 213 | 606987 | 4.00E-68  | 152 | 159 | 95 - | 1   | 159 | 82997  | 83155  |
| UN69129 | Rsa1.0.00793.1 | 381 | 64103  | 8.00E-40  | 99  | 104 | 95 + | 220 | 323 | 59524  | 59627  |
| UN69130 | Rsa1.0.00218.1 | 625 | 201480 | 1.00E-119 | 268 | 284 | 94 + | 197 | 480 | 170910 | 171190 |
| UN69131 | Rsa1.0.00645.1 | 166 | 189716 | 3.00E-59  | 152 | 163 | 93 + | 1   | 161 | 23733  | 23895  |
| UN69132 | Rsa1.0.00865.1 | 669 | 61686  | 0         | 663 | 666 | 99 + | 4   | 669 | 33765  | 34430  |
| UN69133 | Rsa1.0.14862.1 | 729 | 3006   | 0         | 597 | 619 | 96 - | 8   | 625 | 1      | 616    |
| UN69134 | Rsa1.0.02929.1 | 650 | 26673  | 0         | 633 | 654 | 96 + | 1   | 650 | 13894  | 14546  |
| UN69135 | Rsa1.0.00009.1 | 434 | 232558 | 1.00E-132 | 290 | 304 | 95 - | 133 | 434 | 185030 | 185329 |
| UN69136 | Rsa1.0.00980.1 | 748 | 57729  | 4.00E-68  | 149 | 154 | 96 - | 1   | 154 | 28226  | 28376  |
| UN69137 | Rsa1.0.00001.1 | 769 | 363028 | 7.00E-88  | 186 | 193 | 96 - | 25  | 217 | 195370 | 195562 |
| UN69138 | Rsa1.0.00589.1 | 722 | 209965 | 0         | 566 | 588 | 96 + | 129 | 714 | 55853  | 56434  |
| UN69139 | Rsa1.0.03201.1 | 808 | 157656 | 0         | 508 | 521 | 97 + | 69  | 588 | 10722  | 11242  |
| UN69140 | Rsa1.0.00336.1 | 749 | 445051 | 1.00E-180 | 370 | 385 | 96 + | 2   | 386 | 25560  | 25940  |
| UN69141 | Rsa1.0.00464.1 | 759 | 82253  | 1.00E-147 | 421 | 472 | 89 - | 3   | 458 | 63616  | 64087  |
| UN69142 | Rsa1.0.00116.1 | 778 | 365886 | 0         | 334 | 335 | 99 + | 59  | 393 | 55076  | 55410  |
| UN69143 | Rsa1.0.01958.1 | 267 | 261128 | 9.00E-48  | 234 | 275 | 85 - | 1   | 267 | 132987 | 133253 |
| UN69144 | #              | #   | #      | #         | #   | #   | #    | #   | #   | #      | #      |
| UN69145 | Rsa1.0.00017.1 | 776 | 752458 | 0         | 390 | 404 | 96 - | 2   | 402 | 319255 | 319657 |

|         |                |     |        |           |     |     |       |     |     |        |        |
|---------|----------------|-----|--------|-----------|-----|-----|-------|-----|-----|--------|--------|
| UN69146 | Rsa1.0.00320.1 | 804 | 95784  | 1.00E-123 | 289 | 306 | 94 -  | 1   | 299 | 60215  | 60516  |
| UN69147 | Rsa1.0.08832.1 | 215 | 6886   | 3.00E-25  | 62  | 63  | 98 +  | 153 | 215 | 2818   | 2880   |
| UN69148 | Rsa1.0.05680.1 | 771 | 12958  | 0         | 732 | 785 | 93 -  | 2   | 767 | 10506  | 11290  |
| UN69149 | Rsa1.0.00697.1 | 690 | 67913  | 0         | 367 | 375 | 97 -  | 316 | 690 | 62104  | 62478  |
| UN69150 | Rsa1.0.00715.1 | 658 | 67116  | 0         | 421 | 432 | 97 +  | 3   | 434 | 16332  | 16756  |
| UN69151 | Rsa1.0.06041.1 | 753 | 11861  | 1.00E-170 | 333 | 343 | 97 -  | 411 | 753 | 6244   | 6586   |
| UN69152 | Rsa1.0.00720.1 | 555 | 66931  | 1.00E-104 | 232 | 240 | 96 -  | 2   | 240 | 26183  | 26418  |
| UN69153 | Rsa1.0.01290.1 | 634 | 49179  | 1.00E-128 | 270 | 280 | 96 +  | 1   | 277 | 4667   | 4946   |
| UN69154 | Rsa1.0.01343.1 | 748 | 47735  | 0         | 573 | 636 | 90 +  | 6   | 616 | 4081   | 4698   |
| UN69155 | Rsa1.0.03642.1 | 395 | 21609  | 7.00E-28  | 119 | 136 | 87 +  | 30  | 165 | 9276   | 9410   |
| UN69156 | Rsa1.0.03638.1 | 673 | 21634  | 1.00E-118 | 290 | 318 | 91 -  | 184 | 481 | 20076  | 20393  |
| UN69157 | Rsa1.0.00964.1 | 726 | 316648 | 2.00E-79  | 151 | 151 | 100 + | 397 | 547 | 164982 | 165132 |
| UN69158 | Rsa1.0.05078.1 | 823 | 14912  | 1.00E-111 | 220 | 225 | 97 -  | 334 | 558 | 3937   | 4161   |
| UN69159 | Rsa1.0.01753.1 | 560 | 39794  | 0         | 403 | 418 | 96 -  | 1   | 417 | 16947  | 17363  |
| UN69160 | Rsa1.0.00302.1 | 709 | 97521  | 0         | 465 | 466 | 99 -  | 1   | 466 | 50717  | 51182  |
| UN69161 | Rsa1.0.00183.1 | 815 | 113277 | 1.00E-175 | 323 | 327 | 98 -  | 364 | 690 | 93138  | 93464  |
| UN69162 | Rsa1.0.00396.1 | 791 | 88242  | 2.33E-156 | 337 | 364 | 92 -  | 2   | 343 | 5961   | 6324   |
| UN69163 | Rsa1.0.00092.1 | 165 | 659932 | 2.00E-26  | 100 | 113 | 88 -  | 53  | 165 | 14645  | 14757  |
| UN69164 | Rsa1.0.00250.1 | 368 | 273771 | 6.00E-99  | 207 | 215 | 96 +  | 1   | 215 | 16303  | 16517  |
| UN69165 | Rsa1.0.00024.1 | 855 | 188018 | 1.00E-125 | 241 | 245 | 98 +  | 55  | 296 | 75368  | 75612  |
| UN69166 | Rsa1.0.01452.1 | 744 | 45459  | 1.00E-144 | 268 | 271 | 98 -  | 1   | 271 | 39627  | 39897  |
| UN69167 | Rsa1.0.00695.1 | 635 | 68019  | 0         | 364 | 370 | 98 +  | 1   | 367 | 27672  | 28041  |
| UN69168 | Rsa1.0.01111.1 | 761 | 53669  | 1.00E-174 | 379 | 398 | 95 +  | 2   | 395 | 31336  | 31730  |
| UN69169 | Rsa1.0.00082.1 | 186 | 237584 | 1.00E-83  | 179 | 185 | 96 -  | 1   | 185 | 138929 | 139112 |
| UN69170 | Rsa1.0.02460.1 | 594 | 31169  | 0         | 567 | 591 | 95 +  | 5   | 594 | 15758  | 16348  |
| UN69171 | Rsa1.0.02281.1 | 697 | 292576 | 0         | 629 | 667 | 94 +  | 4   | 666 | 139802 | 140453 |
| UN69172 | Rsa1.0.00025.1 | 197 | 277312 | 1.00E-40  | 130 | 145 | 89 -  | 3   | 147 | 116389 | 116533 |
| UN69173 | Rsa1.0.00451.1 | 422 | 322533 | 1.00E-134 | 284 | 298 | 95 -  | 6   | 303 | 162816 | 163113 |
| UN69174 | Rsa1.0.06975.1 | 505 | 10074  | 0         | 483 | 508 | 95 +  | 5   | 505 | 8048   | 8552   |
| UN69175 | Rsa1.0.03172.1 | 694 | 24816  | 0         | 650 | 694 | 93 -  | 1   | 694 | 3218   | 3891   |
| UN69176 | Rsa1.0.00324.1 | 174 | 218805 | 4.00E-52  | 143 | 156 | 91 -  | 19  | 174 | 189754 | 189909 |
| UN69177 | Rsa1.0.04709.1 | 184 | 16285  | 6.00E-79  | 164 | 168 | 97 +  | 1   | 168 | 4115   | 4280   |
| UN69178 | Rsa1.0.00092.1 | 697 | 659932 | 1.00E-138 | 268 | 274 | 97 -  | 57  | 330 | 14484  | 14757  |
| UN69179 | Rsa1.0.17040.1 | 110 | 1944   | 1.00E-41  | 104 | 110 | 94 -  | 1   | 110 | 1493   | 1602   |
| UN69180 | Rsa1.0.00816.1 | 547 | 403350 | 1.00E-133 | 303 | 322 | 94 -  | 7   | 325 | 370202 | 370517 |
| UN69181 | Rsa1.0.00383.1 | 654 | 398431 | 0         | 478 | 486 | 98 -  | 169 | 654 | 370787 | 371268 |
| UN69182 | Rsa1.0.00652.1 | 133 | 70089  | 4.00E-51  | 127 | 133 | 95 -  | 1   | 133 | 59346  | 59475  |
| UN69183 | Rsa1.0.01182.1 | 732 | 167304 | 0         | 494 | 519 | 95 -  | 171 | 689 | 118231 | 118749 |
| UN69184 | Rsa1.0.00300.1 | 712 | 97747  | 1.00E-140 | 265 | 269 | 98 -  | 64  | 332 | 11210  | 11478  |



|         |                |     |        |           |     |     |      |     |     |        |        |
|---------|----------------|-----|--------|-----------|-----|-----|------|-----|-----|--------|--------|
| UN69185 | Rsa1.0.02157.1 | 484 | 149652 | 1.00E-175 | 321 | 323 | 99 + | 163 | 484 | 115840 | 116162 |
| UN69186 | Rsa1.0.00213.1 | 751 | 108167 | 0         | 719 | 750 | 95 - | 2   | 749 | 41592  | 42328  |
| UN69187 | Rsa1.0.08766.1 | 648 | 6942   | 1.00E-116 | 311 | 340 | 91 + | 3   | 337 | 6612   | 6938   |
| UN69188 | Rsa1.0.00699.1 | 712 | 184398 | 4.00E-15  | 52  | 55  | 94 - | 300 | 354 | 32597  | 32651  |
| UN69189 | Rsa1.0.00397.1 | 154 | 88189  | 2.00E-59  | 137 | 144 | 95 + | 6   | 149 | 19991  | 20134  |
| UN69190 | Rsa1.0.33878.1 | 509 | 669    | 1.00E-125 | 264 | 272 | 97 - | 92  | 362 | 161    | 430    |
| UN69191 | Rsa1.0.16253.1 | 561 | 2225   | 2.00E-97  | 194 | 197 | 98 - | 3   | 198 | 1      | 197    |
| UN69192 | Rsa1.0.14151.1 | 568 | 3731   | 0         | 563 | 569 | 98 + | 3   | 568 | 909    | 1477   |
| UN69193 | Rsa1.0.03736.1 | 452 | 21081  | 0         | 437 | 452 | 96 - | 3   | 451 | 12463  | 12911  |
| UN69194 | Rsa1.0.00300.1 | 709 | 97747  | 0         | 418 | 422 | 99 + | 3   | 424 | 85358  | 85779  |
| UN69195 | Rsa1.0.01026.1 | 655 | 171624 | 0         | 544 | 573 | 94 - | 85  | 655 | 14048  | 14614  |
| UN69196 | Rsa1.0.01632.1 | 128 | 181224 | 1.00E-23  | 77  | 84  | 91 - | 42  | 125 | 28079  | 28162  |
| UN69197 | Rsa1.0.00017.1 | 566 | 752458 | 0         | 494 | 519 | 95 + | 48  | 566 | 295956 | 296474 |
| UN69198 | Rsa1.0.00975.1 | 627 | 57865  | 1.00E-122 | 257 | 266 | 96 + | 363 | 627 | 49364  | 49628  |
| UN69199 | Rsa1.0.01668.1 | 697 | 41299  | 0         | 370 | 374 | 98 + | 2   | 375 | 339    | 712    |
| UN69200 | Rsa1.0.19195.1 | 101 | 1467   | 6.00E-28  | 81  | 86  | 94 - | 4   | 89  | 531    | 614    |
| UN69201 | Rsa1.0.34294.1 | 759 | 660    | 0         | 477 | 486 | 98 + | 76  | 561 | 1      | 486    |
| UN69202 | Rsa1.0.03766.1 | 208 | 20970  | 7.00E-45  | 153 | 172 | 88 + | 8   | 179 | 15088  | 15258  |
| UN69203 | Rsa1.0.00479.1 | 567 | 81377  | 0         | 491 | 506 | 97 + | 27  | 532 | 27298  | 27794  |
| UN69204 | Rsa1.0.02170.1 | 738 | 34352  | 0         | 705 | 736 | 95 + | 3   | 738 | 4195   | 4919   |
| UN69205 | Rsa1.0.05150.1 | 744 | 14673  | 1.00E-174 | 372 | 392 | 94 - | 292 | 680 | 5984   | 6375   |
| UN69206 | Rsa1.0.01575.1 | 729 | 42924  | 8.00E-26  | 76  | 81  | 93 + | 13  | 93  | 21746  | 21826  |
| UN69207 | Rsa1.0.10380.1 | 362 | 5866   | 0         | 352 | 361 | 97 - | 2   | 362 | 1658   | 2017   |
| UN69208 | Rsa1.0.01016.1 | 162 | 181422 | 6.00E-63  | 152 | 162 | 93 - | 1   | 162 | 3599   | 3760   |
| UN69209 | Rsa1.0.01644.1 | 603 | 41754  | 0         | 401 | 412 | 97 - | 175 | 585 | 40792  | 41199  |
| UN69210 | Rsa1.0.02872.1 | 705 | 27080  | 0         | 425 | 436 | 97 - | 155 | 590 | 9995   | 10430  |
| UN69211 | Rsa1.0.00678.1 | 723 | 193163 | 0         | 458 | 473 | 96 + | 24  | 496 | 23361  | 23824  |
| UN69212 | Rsa1.0.00262.1 | 737 | 101906 | 1.00E-168 | 350 | 367 | 95 - | 3   | 369 | 51801  | 52167  |
| UN69213 | Rsa1.0.00826.1 | 566 | 166736 | 0         | 522 | 523 | 99 - | 44  | 566 | 127446 | 127968 |
| UN69214 | #              | #   | #      | #         | #   | #   | #    | #   | #   | #      | #      |
| UN69215 | Rsa1.0.00049.1 | 484 | 167018 | 0         | 388 | 408 | 95 - | 77  | 484 | 45896  | 46300  |
| UN69216 | Rsa1.0.05196.1 | 514 | 14533  | 0         | 432 | 440 | 98 - | 3   | 436 | 11969  | 12408  |
| UN69217 | Rsa1.0.00016.1 | 283 | 831256 | 7.00E-89  | 244 | 270 | 90 + | 2   | 271 | 744750 | 745004 |
| UN69218 | Rsa1.0.02870.1 | 726 | 27102  | 1.00E-110 | 229 | 238 | 96 + | 416 | 653 | 12375  | 12612  |
| UN69219 | Rsa1.0.00144.1 | 261 | 120708 | 1.00E-104 | 238 | 251 | 94 + | 7   | 257 | 47342  | 47589  |
| UN69220 | Rsa1.0.00070.1 | 535 | 150321 | 1.00E-117 | 262 | 274 | 95 - | 5   | 277 | 32070  | 32341  |
| UN69221 | Rsa1.0.02072.1 | 290 | 35401  | 4.00E-87  | 178 | 183 | 97 + | 1   | 183 | 18171  | 18353  |
| UN69222 | Rsa1.0.03562.1 | 703 | 22084  | 0         | 486 | 491 | 98 + | 1   | 491 | 5971   | 6461   |
| UN69223 | Rsa1.0.01196.1 | 533 | 51097  | 1.00E-120 | 237 | 243 | 97 + | 206 | 448 | 35365  | 35607  |

|         |                |     |        |           |     |     |       |     |     |        |        |
|---------|----------------|-----|--------|-----------|-----|-----|-------|-----|-----|--------|--------|
| UN69224 | Rsa1.0.00427.1 | 188 | 189678 | 2.00E-32  | 147 | 168 | 87 -  | 4   | 165 | 171668 | 171834 |
| UN69225 | Rsa1.0.07145.1 | 352 | 9831   | 5.00E-81  | 156 | 157 | 99 -  | 193 | 349 | 9416   | 9572   |
| UN69226 | Rsa1.0.04368.1 | 229 | 17714  | 2.00E-36  | 93  | 98  | 94 -  | 1   | 98  | 16221  | 16318  |
| UN69227 | Rsa1.0.00705.1 | 835 | 67505  | 0         | 630 | 670 | 94 -  | 1   | 661 | 17127  | 17784  |
| UN69228 | Rsa1.0.00662.1 | 653 | 192183 | 0         | 650 | 652 | 99 -  | 2   | 653 | 65022  | 65673  |
| UN69229 | Rsa1.0.00036.1 | 722 | 176186 | 1.00E-166 | 299 | 300 | 99 -  | 2   | 301 | 64825  | 65124  |
| UN69230 | Rsa1.0.01867.1 | 208 | 37960  | 4.00E-74  | 197 | 213 | 92 +  | 1   | 208 | 16902  | 17112  |
| UN69231 | Rsa1.0.01135.1 | 609 | 52799  | 2.00E-94  | 200 | 208 | 96 -  | 197 | 404 | 24867  | 25074  |
| UN69232 | Rsa1.0.26014.1 | 650 | 910    | 1.00E-105 | 245 | 261 | 93 +  | 1   | 259 | 275    | 525    |
| UN69233 | Rsa1.0.00805.1 | 769 | 63724  | 1.00E-125 | 281 | 298 | 94 +  | 1   | 298 | 43826  | 44115  |
| UN69234 | #              | #   | #      | #         | #   | #   | #     | #   | #   | #      | #      |
| UN69235 | Rsa1.0.00564.1 | 829 | 75428  | 0         | 384 | 403 | 95 +  | 417 | 819 | 65092  | 65494  |
| UN69236 | Rsa1.0.00716.1 | 309 | 67078  | 4.00E-69  | 166 | 177 | 93 -  | 49  | 225 | 36578  | 36754  |
| UN69237 | Rsa1.0.01588.1 | 708 | 42724  | 4.00E-86  | 171 | 174 | 98 +  | 527 | 700 | 39672  | 39845  |
| UN69238 | Rsa1.0.00059.1 | 634 | 159650 | 0         | 525 | 547 | 95 +  | 5   | 548 | 136206 | 136741 |
| UN69239 | Rsa1.0.00975.1 | 273 | 57865  | 1.00E-100 | 237 | 253 | 93 -  | 21  | 273 | 49378  | 49629  |
| UN69240 | Rsa1.0.02170.1 | 552 | 34352  | 0         | 462 | 481 | 96 -  | 70  | 550 | 5263   | 5743   |
| UN69241 | Rsa1.0.07981.1 | 185 | 8132   | 2.00E-69  | 172 | 185 | 92 +  | 1   | 185 | 3411   | 3595   |
| UN69242 | Rsa1.0.00545.1 | 753 | 189649 | 1.00E-154 | 381 | 416 | 91 -  | 15  | 430 | 76179  | 76594  |
| UN69243 | Rsa1.0.00768.1 | 437 | 64969  | 1.00E-66  | 132 | 133 | 99 +  | 299 | 431 | 61506  | 61638  |
| UN69244 | Rsa1.0.03594.1 | 230 | 21868  | 2.00E-76  | 208 | 227 | 91 +  | 7   | 226 | 14533  | 14757  |
| UN69245 | Rsa1.0.02011.1 | 168 | 36088  | 4.00E-49  | 135 | 147 | 91 +  | 22  | 168 | 24827  | 24973  |
| UN69246 | Rsa1.0.06629.1 | 147 | 10633  | 4.00E-61  | 137 | 143 | 95 -  | 1   | 143 | 1563   | 1705   |
| UN69247 | Rsa1.0.00087.1 | 125 | 761073 | 2.00E-25  | 101 | 114 | 88 -  | 1   | 114 | 581237 | 581348 |
| UN69248 | Rsa1.0.04236.1 | 368 | 18370  | 2.00E-96  | 201 | 207 | 97 -  | 3   | 208 | 13887  | 14093  |
| UN69249 | Rsa1.0.01281.1 | 717 | 49313  | 0         | 679 | 728 | 93 +  | 12  | 717 | 28256  | 28980  |
| UN69250 | Rsa1.0.00964.1 | 535 | 316648 | 1.00E-125 | 227 | 227 | 100 - | 309 | 535 | 294720 | 294946 |
| UN69251 | Rsa1.0.03015.1 | 495 | 26006  | 0         | 489 | 492 | 99 +  | 3   | 494 | 10999  | 11490  |
| UN69252 | Rsa1.0.00159.1 | 751 | 431686 | 1.00E-142 | 343 | 373 | 91 -  | 59  | 425 | 210507 | 210867 |
| UN69253 | Rsa1.0.00083.1 | 753 | 442773 | 1.00E-126 | 266 | 278 | 95 +  | 429 | 706 | 252072 | 252349 |
| UN69254 | Rsa1.0.02939.1 | 810 | 26595  | 0         | 515 | 526 | 97 -  | 1   | 522 | 4618   | 5143   |
| UN69255 | Rsa1.0.00416.1 | 763 | 86772  | 1.00E-130 | 282 | 296 | 95 -  | 474 | 763 | 43825  | 44120  |
| UN69256 | Rsa1.0.17691.1 | 750 | 1764   | 5.00E-55  | 224 | 260 | 86 +  | 218 | 476 | 1416   | 1672   |
| UN69257 | Rsa1.0.00645.1 | 560 | 189716 | 3.00E-68  | 195 | 216 | 90 -  | 185 | 400 | 156010 | 156225 |
| UN69258 | Rsa1.0.03319.1 | 193 | 23767  | 4.00E-77  | 161 | 165 | 97 +  | 31  | 193 | 4081   | 4245   |
| UN69259 | Rsa1.0.06692.1 | 687 | 10529  | 0         | 590 | 593 | 99 +  | 95  | 687 | 9750   | 10342  |
| UN69260 | Rsa1.0.00540.1 | 755 | 76895  | 0         | 715 | 759 | 94 +  | 3   | 748 | 61933  | 62674  |
| UN69261 | Rsa1.0.02281.1 | 638 | 292576 | 0         | 621 | 639 | 97 -  | 2   | 638 | 140583 | 141221 |
| UN69262 | Rsa1.0.03267.1 | 616 | 24230  | 1.00E-58  | 123 | 124 | 99 -  | 494 | 616 | 14902  | 15025  |

|         |                |     |        |           |     |     |       |     |     |        |        |
|---------|----------------|-----|--------|-----------|-----|-----|-------|-----|-----|--------|--------|
| UN69263 | Rsa1.0.04095.1 | 301 | 19095  | 2.00E-30  | 95  | 104 | 91 -  | 184 | 287 | 10629  | 10732  |
| UN69264 | Rsa1.0.01389.1 | 723 | 46716  | 1.00E-150 | 329 | 346 | 95 -  | 1   | 346 | 30335  | 30673  |
| UN69265 | Rsa1.0.06148.1 | 674 | 11616  | 1.00E-177 | 372 | 389 | 95 +  | 2   | 384 | 9583   | 9968   |
| UN69266 | Rsa1.0.00273.1 | 558 | 326186 | 1.00E-150 | 305 | 317 | 96 -  | 6   | 322 | 4768   | 5078   |
| UN69267 | Rsa1.0.07627.1 | 542 | 9001   | 0         | 521 | 544 | 95 +  | 3   | 542 | 8330   | 8870   |
| UN69268 | Rsa1.0.00073.1 | 442 | 240924 | 1.00E-180 | 319 | 319 | 100 + | 124 | 442 | 29598  | 29916  |
| UN69269 | Rsa1.0.00105.1 | 741 | 134138 | 1.00E-92  | 304 | 342 | 88 -  | 403 | 741 | 10966  | 11292  |
| UN69270 | Rsa1.0.17771.1 | 112 | 1744   | 2.00E-40  | 99  | 104 | 95 +  | 5   | 108 | 530    | 633    |
| UN69271 | Rsa1.0.02080.1 | 855 | 35297  | 0         | 840 | 877 | 95 -  | 1   | 855 | 12219  | 13093  |
| UN69272 | Rsa1.0.00091.1 | 262 | 139699 | 3.00E-57  | 227 | 260 | 87 -  | 1   | 259 | 80313  | 80568  |
| UN69273 | Rsa1.0.00110.1 | 489 | 132719 | 1.00E-140 | 258 | 260 | 99 -  | 3   | 262 | 111112 | 111371 |
| UN69274 | Rsa1.0.00280.1 | 733 | 99966  | 0         | 564 | 586 | 96 -  | 149 | 733 | 31277  | 31862  |
| UN69275 | Rsa1.0.00921.1 | 399 | 59599  | 0         | 387 | 402 | 96 +  | 1   | 399 | 56098  | 56499  |
| UN69276 | Rsa1.0.04639.1 | 726 | 16550  | 1.00E-102 | 198 | 200 | 99 +  | 3   | 200 | 13272  | 13471  |
| UN69277 | Rsa1.0.00123.1 | 793 | 325650 | 1.00E-141 | 298 | 312 | 95 +  | 3   | 314 | 180035 | 180343 |
| UN69278 | Rsa1.0.03991.1 | 788 | 19675  | 0         | 761 | 793 | 95 +  | 1   | 788 | 7039   | 7831   |
| UN69279 | Rsa1.0.01018.1 | 754 | 56685  | 1.00E-114 | 236 | 245 | 96 -  | 510 | 754 | 55085  | 55329  |
| UN69280 | Rsa1.0.00751.1 | 692 | 65759  | 9.00E-72  | 177 | 186 | 95 +  | 92  | 276 | 37821  | 38004  |
| UN69281 | Rsa1.0.04753.1 | 634 | 16124  | 2.00E-87  | 164 | 164 | 100 - | 283 | 446 | 5458   | 5621   |
| UN69282 | Rsa1.0.01126.1 | 709 | 53127  | 0         | 667 | 689 | 96 -  | 19  | 704 | 52134  | 52822  |
| UN69283 | Rsa1.0.18990.1 | 735 | 1499   | 1.00E-125 | 246 | 252 | 97 -  | 3   | 250 | 486    | 737    |
| UN69284 | Rsa1.0.00220.1 | 718 | 192936 | 0         | 678 | 734 | 92 -  | 5   | 718 | 16525  | 17245  |
| UN69285 | Rsa1.0.00111.1 | 513 | 390088 | 0         | 501 | 514 | 97 +  | 1   | 513 | 338259 | 338770 |
| UN69286 | Rsa1.0.00127.1 | 630 | 127446 | 1.00E-168 | 309 | 312 | 99 +  | 192 | 503 | 46649  | 46960  |
| UN69287 | Rsa1.0.01724.1 | 565 | 40292  | 1.00E-162 | 327 | 337 | 97 +  | 6   | 342 | 9990   | 10323  |
| UN69288 | Rsa1.0.00556.1 | 393 | 207212 | 1.00E-119 | 226 | 229 | 98 -  | 165 | 393 | 179180 | 179408 |
| UN69289 | Rsa1.0.01360.1 | 706 | 47246  | 0         | 695 | 708 | 98 -  | 3   | 706 | 3482   | 4188   |
| UN69290 | Rsa1.0.11581.1 | 772 | 5466   | 5.00E-89  | 198 | 207 | 95 -  | 173 | 373 | 2316   | 2522   |
| UN69291 | Rsa1.0.00632.1 | 575 | 183777 | 7.00E-66  | 177 | 196 | 90 -  | 398 | 575 | 56058  | 56253  |
| UN69292 | Rsa1.0.01855.1 | 762 | 38204  | 0         | 735 | 771 | 95 +  | 3   | 762 | 14814  | 15580  |
| UN69293 | Rsa1.0.11445.1 | 718 | 5505   | 0         | 496 | 513 | 96 +  | 51  | 557 | 4993   | 5505   |
| UN69294 | Rsa1.0.11015.1 | 767 | 5647   | 1.00E-103 | 251 | 267 | 94 -  | 508 | 767 | 5303   | 5569   |
| UN69295 | Rsa1.0.06165.1 | 591 | 11584  | 0         | 545 | 593 | 91 -  | 1   | 582 | 5761   | 6353   |
| UN69296 | Rsa1.0.09304.1 | 427 | 6469   | 0         | 418 | 428 | 97 +  | 1   | 427 | 5521   | 5942   |
| UN69297 | Rsa1.0.01112.1 | 235 | 310601 | 3.00E-50  | 129 | 137 | 94 -  | 95  | 231 | 177036 | 177171 |
| UN69298 | Rsa1.0.06349.1 | 470 | 11199  | 1.00E-177 | 437 | 476 | 91 -  | 1   | 470 | 8998   | 9460   |
| UN69299 | Rsa1.0.05975.1 | 553 | 12062  | 8.00E-90  | 222 | 240 | 92 -  | 324 | 553 | 3841   | 4080   |
| UN69300 | Rsa1.0.01920.1 | 106 | 158533 | 1.00E-41  | 101 | 106 | 95 -  | 1   | 106 | 128313 | 128418 |
| UN69301 | Rsa1.0.04545.1 | 740 | 146799 | 0         | 722 | 747 | 96 -  | 1   | 740 | 6417   | 7163   |

|         |                |     |        |           |     |     |       |     |     |        |        |
|---------|----------------|-----|--------|-----------|-----|-----|-------|-----|-----|--------|--------|
| UN69302 | Rsa1.0.03094.1 | 285 | 25443  | 1.00E-124 | 263 | 274 | 95 -  | 1   | 273 | 11507  | 11780  |
| UN69303 | Rsa1.0.01323.1 | 423 | 48152  | 1.00E-78  | 185 | 195 | 94 +  | 9   | 203 | 25572  | 25762  |
| UN69304 | Rsa1.0.00343.1 | 107 | 93570  | 2.00E-43  | 101 | 105 | 96 -  | 3   | 107 | 33253  | 33357  |
| UN69305 | Rsa1.0.01895.1 | 118 | 37512  | 1.00E-10  | 46  | 50  | 92 -  | 1   | 50  | 24780  | 24829  |
| UN69306 | Rsa1.0.00043.1 | 375 | 264937 | 4.00E-97  | 244 | 264 | 92 +  | 118 | 375 | 7273   | 7536   |
| UN69307 | Rsa1.0.01296.1 | 736 | 49035  | 1.00E-95  | 241 | 260 | 92 +  | 255 | 514 | 9087   | 9337   |
| UN69308 | Rsa1.0.08511.1 | 180 | 7252   | 5.00E-76  | 171 | 180 | 95 +  | 1   | 180 | 1853   | 2032   |
| UN69309 | Rsa1.0.00851.1 | 179 | 62181  | 9.00E-41  | 112 | 121 | 92 -  | 59  | 179 | 11657  | 11777  |
| UN69310 | Rsa1.0.00073.1 | 743 | 240924 | 0         | 457 | 483 | 94 -  | 1   | 482 | 94015  | 94476  |
| UN69311 | Rsa1.0.00275.1 | 807 | 210104 | 0         | 743 | 769 | 96 +  | 2   | 766 | 154259 | 155017 |
| UN69312 | Rsa1.0.04833.1 | 734 | 148235 | 2.00E-11  | 85  | 100 | 85 -  | 258 | 355 | 138232 | 138331 |
| UN69313 | Rsa1.0.00078.1 | 118 | 175053 | 4.00E-17  | 51  | 53  | 96 +  | 66  | 118 | 97164  | 97216  |
| UN69314 | Rsa1.0.02003.1 | 800 | 36171  | 0         | 542 | 547 | 99 -  | 255 | 800 | 19960  | 20506  |
| UN69315 | Rsa1.0.00108.1 | 675 | 478491 | 1.00E-73  | 197 | 213 | 92 +  | 212 | 422 | 440719 | 440931 |
| UN69316 | Rsa1.0.00310.1 | 553 | 96852  | 1.00E-145 | 277 | 281 | 98 +  | 47  | 326 | 10996  | 11276  |
| UN69317 | Rsa1.0.02210.1 | 273 | 33857  | 1.00E-71  | 225 | 253 | 88 -  | 2   | 234 | 22576  | 22827  |
| UN69318 | Rsa1.0.00556.1 | 427 | 207212 | 1.00E-179 | 407 | 430 | 94 +  | 2   | 427 | 169797 | 170220 |
| UN69319 | Rsa1.0.00963.1 | 630 | 58176  | 1.00E-100 | 237 | 253 | 93 -  | 15  | 260 | 30839  | 31091  |
| UN69320 | Rsa1.0.13941.1 | 677 | 4043   | 1.00E-144 | 297 | 310 | 95 -  | 55  | 364 | 3740   | 4043   |
| UN69321 | Rsa1.0.06407.1 | 730 | 11071  | 1.00E-169 | 332 | 342 | 97 -  | 389 | 730 | 5389   | 5730   |
| UN69322 | Rsa1.0.00434.1 | 595 | 85171  | 0         | 384 | 384 | 100 + | 212 | 595 | 48379  | 48762  |
| UN69323 | Rsa1.0.00211.1 | 673 | 228189 | 1.00E-128 | 239 | 240 | 99 -  | 435 | 673 | 169983 | 170222 |
| UN69324 | Rsa1.0.06303.1 | 753 | 11268  | 1.00E-122 | 240 | 246 | 97 -  | 173 | 418 | 9882   | 10127  |
| UN69325 | Rsa1.0.01115.1 | 737 | 183545 | 0         | 734 | 736 | 99 -  | 3   | 737 | 137178 | 137913 |
| UN69326 | Rsa1.0.00451.1 | 405 | 322533 | 1.00E-91  | 180 | 183 | 98 +  | 167 | 349 | 301019 | 301201 |
| UN69327 | Rsa1.0.00088.1 | 611 | 141341 | 0         | 440 | 459 | 95 -  | 164 | 611 | 55236  | 55694  |
| UN69328 | Rsa1.0.03588.1 | 687 | 21908  | 1.00E-174 | 337 | 346 | 97 +  | 1   | 346 | 3149   | 3494   |
| UN69329 | Rsa1.0.00890.1 | 687 | 323870 | 0         | 449 | 475 | 94 +  | 73  | 541 | 215364 | 215838 |
| UN69330 | Rsa1.0.02673.1 | 249 | 28877  | 3.00E-60  | 133 | 138 | 96 +  | 2   | 139 | 10833  | 10970  |
| UN69331 | Rsa1.0.00055.1 | 731 | 520193 | 1.00E-119 | 253 | 265 | 95 -  | 262 | 526 | 6217   | 6481   |
| UN69332 | Rsa1.0.03813.1 | 633 | 20708  | 1.00E-100 | 186 | 186 | 100 - | 229 | 414 | 11798  | 11983  |
| UN69333 | Rsa1.0.02434.1 | 228 | 31464  | 8.00E-51  | 115 | 118 | 97 -  | 111 | 228 | 1782   | 1898   |
| UN69334 | Rsa1.0.00678.1 | 399 | 193163 | 1.00E-116 | 276 | 295 | 93 -  | 1   | 293 | 165986 | 166279 |
| UN69335 | Rsa1.0.14575.1 | 795 | 3251   | 0         | 416 | 442 | 94 -  | 1   | 442 | 2435   | 2862   |
| UN69336 | Rsa1.0.25235.1 | 191 | 945    | 7.00E-88  | 183 | 188 | 97 -  | 5   | 191 | 20     | 207    |
| UN69337 | Rsa1.0.06839.1 | 484 | 10286  | 0         | 457 | 485 | 94 -  | 1   | 479 | 2520   | 3002   |
| UN69338 | Rsa1.0.02513.1 | 601 | 30643  | 0         | 403 | 406 | 99 +  | 196 | 601 | 29577  | 29982  |
| UN69339 | Rsa1.0.03818.1 | 188 | 20668  | 3.00E-62  | 173 | 189 | 91 -  | 1   | 188 | 18283  | 18471  |
| UN69340 | Rsa1.0.00175.1 | 111 | 166121 | 1.00E-44  | 105 | 109 | 96 +  | 3   | 111 | 144770 | 144875 |

|         |                |     |        |           |     |     |       |     |     |        |        |
|---------|----------------|-----|--------|-----------|-----|-----|-------|-----|-----|--------|--------|
| UN69341 | Rsa1.0.09221.1 | 350 | 6549   | 2.00E-65  | 127 | 127 | 100 + | 1   | 127 | 4371   | 4497   |
| UN69342 | Rsa1.0.04786.1 | 486 | 15988  | 1.00E-173 | 380 | 401 | 94 -  | 22  | 421 | 12763  | 13158  |
| UN69343 | Rsa1.0.05325.1 | 724 | 14141  | 0         | 456 | 476 | 95 +  | 252 | 724 | 7616   | 8091   |
| UN69344 | Rsa1.0.01238.1 | 780 | 50120  | 0         | 663 | 700 | 94 +  | 22  | 713 | 46693  | 47381  |
| UN69345 | Rsa1.0.06408.1 | 481 | 11070  | 1.00E-180 | 464 | 521 | 89 +  | 1   | 481 | 7236   | 7755   |
| UN69346 | Rsa1.0.04760.1 | 743 | 16105  | 0         | 616 | 650 | 94 -  | 98  | 743 | 4804   | 5453   |
| UN69347 | Rsa1.0.02794.1 | 653 | 27820  | 1.00E-128 | 251 | 257 | 97 +  | 397 | 653 | 27340  | 27596  |
| UN69348 | #              | #   | #      | #         | #   | #   | #     | #   | #   | #      | #      |
| UN69349 | Rsa1.0.00288.1 | 178 | 98659  | 3.00E-31  | 110 | 123 | 89 -  | 56  | 178 | 16475  | 16594  |
| UN69350 | Rsa1.0.01286.1 | 269 | 49209  | 3.00E-97  | 222 | 236 | 94 +  | 6   | 241 | 4286   | 4521   |
| UN69351 | Rsa1.0.13658.1 | 771 | 4545   | 1.00E-117 | 230 | 235 | 97 -  | 394 | 628 | 20     | 254    |
| UN69352 | Rsa1.0.00123.1 | 718 | 325650 | 0         | 520 | 576 | 90 -  | 102 | 677 | 230667 | 231242 |
| UN69353 | Rsa1.0.05663.1 | 566 | 13005  | 1.00E-135 | 258 | 261 | 98 +  | 303 | 563 | 10219  | 10478  |
| UN69354 | Rsa1.0.00603.1 | 696 | 73299  | 1.00E-148 | 269 | 270 | 99 -  | 427 | 696 | 18985  | 19254  |
| UN69355 | Rsa1.0.00219.1 | 805 | 106983 | 3.00E-59  | 117 | 117 | 100 + | 503 | 619 | 45143  | 45259  |
| UN69356 | Rsa1.0.00568.1 | 638 | 75219  | 0         | 508 | 542 | 93 +  | 3   | 543 | 3623   | 4142   |
| UN69357 | Rsa1.0.03094.1 | 627 | 25443  | 2.00E-75  | 147 | 148 | 99 +  | 49  | 196 | 7887   | 8034   |
| UN69358 | Rsa1.0.00016.1 | 759 | 831256 | 4.00E-71  | 174 | 185 | 94 -  | 78  | 256 | 373056 | 373240 |
| UN69359 | Rsa1.0.00838.1 | 609 | 153820 | 2.00E-23  | 167 | 196 | 85 -  | 419 | 606 | 22474  | 22665  |
| UN69360 | Rsa1.0.00195.1 | 724 | 251884 | 0         | 339 | 342 | 99 +  | 211 | 552 | 213164 | 213505 |
| UN69361 | Rsa1.0.03218.1 | 644 | 24539  | 0         | 434 | 445 | 97 +  | 3   | 447 | 19902  | 20346  |
| UN69362 | Rsa1.0.12668.1 | 685 | 5159   | 0         | 356 | 360 | 98 -  | 168 | 527 | 2816   | 3175   |
| UN69363 | Rsa1.0.00045.1 | 769 | 328694 | 1.00E-120 | 248 | 256 | 96 -  | 3   | 257 | 181708 | 181963 |
| UN69364 | Rsa1.0.00056.1 | 769 | 332604 | 0         | 580 | 641 | 90 -  | 138 | 769 | 84968  | 85600  |
| UN69365 | Rsa1.0.01434.1 | 424 | 45951  | 1.00E-108 | 258 | 271 | 95 +  | 3   | 270 | 7334   | 7597   |
| UN69366 | Rsa1.0.04849.1 | 669 | 15726  | 4.00E-86  | 259 | 288 | 89 +  | 122 | 408 | 4766   | 5049   |
| UN69367 | #              | #   | #      | #         | #   | #   | #     | #   | #   | #      | #      |
| UN69368 | Rsa1.0.01423.1 | 748 | 46170  | 4.00E-40  | 104 | 109 | 95 -  | 3   | 110 | 4788   | 4896   |
| UN69369 | Rsa1.0.02110.1 | 662 | 34919  | 9.00E-47  | 115 | 120 | 95 -  | 38  | 156 | 25598  | 25717  |
| UN69370 | Rsa1.0.00821.1 | 786 | 62891  | 0         | 730 | 745 | 97 +  | 41  | 784 | 11879  | 12623  |
| UN69371 | Rsa1.0.04073.1 | 278 | 19238  | 1.00E-121 | 244 | 252 | 96 -  | 1   | 252 | 16758  | 17009  |
| UN69372 | Rsa1.0.17748.1 | 728 | 1750   | 0         | 719 | 728 | 98 -  | 2   | 728 | 50     | 776    |
| UN69373 | Rsa1.0.00793.1 | 381 | 64103  | 1.00E-44  | 101 | 104 | 97 -  | 59  | 162 | 59524  | 59627  |
| UN69374 | Rsa1.0.44323.1 | 538 | 508    | 0         | 424 | 428 | 99 +  | 19  | 446 | 81     | 508    |
| UN69375 | Rsa1.0.01555.1 | 575 | 166456 | 0         | 566 | 571 | 99 -  | 1   | 571 | 145167 | 145737 |
| UN69376 | Rsa1.0.01590.1 | 690 | 42719  | 0         | 426 | 432 | 98 -  | 257 | 688 | 10004  | 10435  |
| UN69377 | Rsa1.0.00421.1 | 705 | 86365  | 0         | 690 | 703 | 98 -  | 3   | 705 | 18744  | 19445  |
| UN69378 | Rsa1.0.00146.1 | 754 | 149343 | 1.00E-103 | 214 | 222 | 96 -  | 452 | 673 | 87301  | 87522  |
| UN69379 | Rsa1.0.14575.1 | 610 | 3251   | 0         | 374 | 376 | 99 +  | 4   | 379 | 801    | 1176   |

|         |                |     |        |           |     |     |       |     |     |        |        |
|---------|----------------|-----|--------|-----------|-----|-----|-------|-----|-----|--------|--------|
| UN69380 | Rsa1.0.02846.1 | 745 | 27338  | 1.00E-128 | 316 | 344 | 91 -  | 212 | 555 | 13110  | 13437  |
| UN69381 | Rsa1.0.02120.1 | 693 | 34819  | 1.00E-125 | 228 | 228 | 100 + | 111 | 338 | 11139  | 11366  |
| UN69382 | Rsa1.0.13824.1 | 722 | 4259   | 0         | 338 | 342 | 98 -  | 1   | 342 | 2919   | 3260   |
| UN69383 | Rsa1.0.02261.1 | 511 | 33245  | 0         | 500 | 511 | 97 +  | 1   | 510 | 760    | 1270   |
| UN69384 | Rsa1.0.27096.1 | 694 | 866    | 1.00E-140 | 256 | 257 | 99 +  | 438 | 694 | 335    | 591    |
| UN69385 | Rsa1.0.03259.1 | 800 | 24290  | 1.00E-158 | 292 | 295 | 98 +  | 307 | 601 | 969    | 1263   |
| UN69386 | Rsa1.0.52231.1 | 426 | 436    | 3.00E-76  | 272 | 305 | 89 -  | 121 | 423 | 40     | 334    |
| UN69387 | Rsa1.0.00003.1 | 712 | 340054 | 0         | 660 | 686 | 96 +  | 29  | 712 | 167423 | 168106 |
| UN69388 | Rsa1.0.00962.1 | 795 | 184909 | 0         | 732 | 771 | 94 +  | 12  | 774 | 40551  | 41318  |
| UN69389 | Rsa1.0.00524.1 | 751 | 169613 | 1.00E-149 | 338 | 359 | 94 -  | 393 | 751 | 161741 | 162096 |
| UN69390 | Rsa1.0.00261.1 | 730 | 151157 | 0         | 341 | 343 | 99 +  | 281 | 623 | 67145  | 67487  |
| UN69391 | Rsa1.0.01493.1 | 764 | 44670  | 1.00E-173 | 363 | 380 | 95 -  | 385 | 764 | 20837  | 21215  |
| UN69392 | Rsa1.0.22290.1 | 474 | 1133   | 2.00E-65  | 151 | 159 | 94 -  | 167 | 325 | 75     | 233    |
| UN69393 | Rsa1.0.00175.1 | 344 | 166121 | 1.00E-140 | 327 | 347 | 94 +  | 1   | 344 | 152389 | 152732 |
| UN69394 | Rsa1.0.00195.1 | 709 | 251884 | 2.00E-81  | 163 | 166 | 98 +  | 177 | 342 | 239317 | 239482 |
| UN69395 | Rsa1.0.00919.1 | 474 | 59675  | 1.00E-138 | 249 | 249 | 100 + | 225 | 473 | 51714  | 51962  |
| UN69396 | Rsa1.0.00018.1 | 648 | 410899 | 0         | 637 | 646 | 98 +  | 3   | 648 | 140234 | 140879 |
| UN69397 | Rsa1.0.00040.1 | 708 | 324196 | 0         | 694 | 709 | 97 +  | 1   | 704 | 48685  | 49393  |
| UN69398 | Rsa1.0.02929.1 | 372 | 26673  | 1.00E-178 | 358 | 372 | 96 -  | 1   | 372 | 14933  | 15304  |
| UN69399 | Rsa1.0.00222.1 | 711 | 172263 | 0         | 524 | 567 | 92 -  | 156 | 707 | 23182  | 23745  |
| UN69400 | Rsa1.0.10936.1 | 696 | 5671   | 1.00E-116 | 216 | 217 | 99 +  | 97  | 313 | 4804   | 5020   |
| UN69401 | Rsa1.0.17346.1 | 761 | 1853   | 1.00E-125 | 227 | 227 | 100 + | 535 | 761 | 154    | 380    |
| UN69402 | Rsa1.0.06509.1 | 553 | 10873  | 1.00E-107 | 208 | 210 | 99 -  | 1   | 209 | 7705   | 7914   |
| UN69403 | Rsa1.0.00041.1 | 605 | 186197 | 2.00E-87  | 179 | 184 | 97 -  | 62  | 245 | 175346 | 175529 |
| UN69404 | Rsa1.0.00433.1 | 545 | 85381  | 0         | 531 | 543 | 97 +  | 3   | 545 | 57231  | 57771  |
| UN69405 | Rsa1.0.03887.1 | 606 | 20247  | 1.00E-180 | 340 | 347 | 97 -  | 260 | 606 | 18498  | 18844  |
| UN69406 | Rsa1.0.00282.1 | 635 | 177799 | 1.00E-180 | 488 | 544 | 89 -  | 96  | 635 | 103554 | 104097 |
| UN69407 | Rsa1.0.03995.1 | 620 | 19654  | 0         | 619 | 621 | 99 -  | 1   | 620 | 8695   | 9315   |
| UN69408 | Rsa1.0.00498.1 | 714 | 79746  | 1.00E-159 | 304 | 310 | 98 +  | 4   | 310 | 61975  | 62284  |
| UN69409 | Rsa1.0.00920.1 | 754 | 601703 | 0         | 742 | 750 | 98 +  | 2   | 748 | 295986 | 296735 |
| UN69410 | Rsa1.0.00149.1 | 279 | 305196 | 4.00E-47  | 219 | 265 | 82 +  | 45  | 274 | 144915 | 145179 |
| UN69411 | Rsa1.0.01316.1 | 461 | 48325  | 1.00E-140 | 252 | 252 | 100 + | 4   | 255 | 39330  | 39581  |
| UN69412 | Rsa1.0.00796.1 | 755 | 63997  | 0         | 489 | 490 | 99 -  | 1   | 490 | 55870  | 56359  |
| UN69413 | Rsa1.0.00067.1 | 705 | 415055 | 0         | 333 | 334 | 99 +  | 373 | 705 | 314010 | 314343 |
| UN69414 | Rsa1.0.00037.1 | 752 | 307838 | 1.00E-119 | 250 | 260 | 96 -  | 428 | 687 | 218908 | 219165 |
| UN69415 | Rsa1.0.25074.1 | 632 | 952    | 0         | 338 | 341 | 99 -  | 292 | 632 | 613    | 952    |
| UN69416 | Rsa1.0.00033.1 | 645 | 515811 | 0         | 632 | 644 | 98 -  | 2   | 645 | 502521 | 503164 |
| UN69417 | Rsa1.0.20803.1 | 526 | 1268   | 5.00E-14  | 93  | 109 | 85 -  | 418 | 526 | 582    | 689    |
| UN69418 | Rsa1.0.03879.1 | 652 | 20304  | 0         | 414 | 441 | 93 -  | 187 | 626 | 5230   | 5666   |

|         |                |     |        |           |     |     |       |     |     |        |        |
|---------|----------------|-----|--------|-----------|-----|-----|-------|-----|-----|--------|--------|
| UN69419 | Rsa1.0.00149.1 | 191 | 305196 | 3.00E-68  | 177 | 190 | 93 +  | 2   | 191 | 102235 | 102421 |
| UN69420 | Rsa1.0.00302.1 | 698 | 97521  | 0         | 667 | 690 | 96 +  | 12  | 698 | 49206  | 49895  |
| UN69421 | Rsa1.0.00295.1 | 659 | 152597 | 0         | 532 | 555 | 95 +  | 3   | 555 | 21767  | 22321  |
| UN69422 | Rsa1.0.01913.1 | 486 | 37363  | 0         | 469 | 494 | 94 -  | 2   | 486 | 23516  | 24007  |
| UN69423 | Rsa1.0.06170.1 | 774 | 11575  | 6.00E-76  | 333 | 392 | 84 +  | 7   | 386 | 1869   | 2253   |
| UN69424 | Rsa1.0.04527.1 | 614 | 16958  | 0         | 512 | 547 | 93 -  | 22  | 561 | 8468   | 9013   |
| UN69425 | Rsa1.0.25556.1 | 851 | 931    | 0         | 782 | 792 | 98 +  | 67  | 850 | 1      | 792    |
| UN69426 | Rsa1.0.01026.1 | 610 | 171624 | 3.00E-65  | 262 | 308 | 85 -  | 3   | 293 | 31968  | 32269  |
| UN69427 | Rsa1.0.01955.1 | 666 | 36850  | 1.00E-103 | 197 | 199 | 98 -  | 3   | 201 | 17248  | 17446  |
| UN69428 | Rsa1.0.00001.1 | 757 | 363028 | 1.00E-119 | 246 | 253 | 97 +  | 507 | 757 | 280589 | 280841 |
| UN69429 | Rsa1.0.00054.1 | 661 | 162053 | 6.00E-88  | 205 | 217 | 94 -  | 428 | 643 | 86608  | 86824  |
| UN69430 | Rsa1.0.02480.1 | 662 | 31036  | 0         | 633 | 638 | 99 -  | 27  | 662 | 23375  | 24012  |
| UN69431 | Rsa1.0.08693.1 | 765 | 7033   | 1.00E-108 | 200 | 200 | 100 - | 5   | 204 | 903    | 1102   |
| UN69432 | Rsa1.0.01561.1 | 754 | 43227  | 1.00E-169 | 315 | 318 | 99 +  | 434 | 750 | 28427  | 28744  |
| UN69433 | Rsa1.0.00626.1 | 729 | 71582  | 1.00E-138 | 277 | 286 | 96 +  | 164 | 449 | 52857  | 53142  |
| UN69434 | Rsa1.0.01931.1 | 789 | 37187  | 1.00E-165 | 341 | 353 | 96 -  | 231 | 582 | 32868  | 33217  |
| UN69435 | Rsa1.0.05675.1 | 805 | 12970  | 3.00E-44  | 178 | 204 | 87 -  | 1   | 202 | 10125  | 10328  |
| UN69436 | Rsa1.0.03031.1 | 607 | 25839  | 4.00E-49  | 133 | 140 | 95 +  | 3   | 140 | 21801  | 21939  |
| UN69437 | Rsa1.0.07250.1 | 568 | 9663   | 3.00E-77  | 153 | 155 | 98 +  | 391 | 545 | 1850   | 2004   |
| UN69438 | Rsa1.0.00678.1 | 507 | 193163 | 1.00E-150 | 295 | 301 | 98 +  | 209 | 507 | 165986 | 166285 |
| UN69439 | Rsa1.0.00369.1 | 710 | 266462 | 0         | 523 | 530 | 98 -  | 183 | 710 | 184966 | 185495 |
| UN69440 | Rsa1.0.02241.1 | 823 | 33520  | 1.00E-123 | 254 | 263 | 96 -  | 3   | 265 | 11460  | 11719  |
| UN69441 | Rsa1.0.00078.1 | 686 | 175053 | 1.00E-165 | 334 | 346 | 96 -  | 102 | 446 | 99272  | 99617  |
| UN69442 | Rsa1.0.00107.1 | 469 | 431659 | 1.00E-161 | 353 | 375 | 94 +  | 2   | 376 | 184869 | 185232 |
| UN69443 | Rsa1.0.01464.1 | 796 | 45193  | 0         | 717 | 791 | 90 +  | 31  | 796 | 25050  | 25828  |
| UN69444 | Rsa1.0.03246.1 | 699 | 24379  | 0         | 694 | 701 | 99 -  | 2   | 699 | 12261  | 12961  |
| UN69445 | Rsa1.0.01323.1 | 504 | 48152  | 1.00E-85  | 190 | 200 | 95 -  | 1   | 194 | 26371  | 26570  |
| UN69446 | Rsa1.0.01943.1 | 676 | 37042  | 2.00E-81  | 175 | 182 | 96 -  | 389 | 570 | 8480   | 8661   |
| UN69447 | Rsa1.0.00815.1 | 781 | 63031  | 1.00E-114 | 344 | 381 | 90 +  | 394 | 769 | 34436  | 34809  |
| UN69448 | Rsa1.0.00243.1 | 807 | 103651 | 1.00E-119 | 250 | 257 | 97 +  | 503 | 756 | 4656   | 4912   |
| UN69449 | Rsa1.0.01217.1 | 573 | 50554  | 1.00E-128 | 251 | 257 | 97 +  | 71  | 327 | 46456  | 46712  |
| UN69450 | Rsa1.0.36121.1 | 169 | 625    | 3.00E-46  | 94  | 94  | 100 + | 1   | 94  | 431    | 524    |
| UN69451 | Rsa1.0.01786.1 | 528 | 133324 | 0         | 441 | 458 | 96 +  | 74  | 528 | 125586 | 126040 |
| UN69452 | Rsa1.0.00030.1 | 741 | 250988 | 1.00E-132 | 240 | 240 | 100 - | 11  | 250 | 198811 | 199050 |
| UN69453 | Rsa1.0.01890.1 | 751 | 37542  | 2.33E-156 | 272 | 274 | 99 +  | 479 | 751 | 33545  | 33818  |
| UN69454 | Rsa1.0.00031.1 | 751 | 179862 | 0         | 598 | 644 | 92 -  | 114 | 745 | 92697  | 93340  |
| UN69455 | Rsa1.0.00203.1 | 663 | 109129 | 1.00E-101 | 197 | 200 | 98 -  | 328 | 527 | 64704  | 64903  |
| UN69456 | Rsa1.0.00731.1 | 793 | 66638  | 0         | 742 | 770 | 96 +  | 32  | 793 | 38528  | 39294  |
| UN69457 | Rsa1.0.02406.1 | 778 | 145276 | 1.00E-170 | 409 | 441 | 92 +  | 334 | 774 | 14515  | 14945  |

|         |                |     |        |           |     |     |       |     |     |        |        |
|---------|----------------|-----|--------|-----------|-----|-----|-------|-----|-----|--------|--------|
| UN69458 | Rsa1.0.00275.1 | 708 | 210104 | 0         | 425 | 440 | 96 -  | 269 | 708 | 155184 | 155623 |
| UN69459 | Rsa1.0.17009.1 | 770 | 1954   | 0         | 337 | 341 | 98 -  | 419 | 758 | 1258   | 1598   |
| UN69460 | Rsa1.0.01949.1 | 608 | 36960  | 1.00E-138 | 353 | 384 | 91 +  | 3   | 385 | 26043  | 26412  |
| UN69461 | Rsa1.0.04146.1 | 359 | 18833  | 1.00E-143 | 340 | 359 | 94 +  | 1   | 349 | 4329   | 4683   |
| UN69462 | Rsa1.0.00195.1 | 521 | 251884 | 0         | 498 | 521 | 95 +  | 3   | 521 | 12935  | 13452  |
| UN69463 | Rsa1.0.03191.1 | 455 | 145762 | 0         | 436 | 453 | 96 +  | 3   | 455 | 137157 | 137609 |
| UN69464 | Rsa1.0.03259.1 | 761 | 24290  | 1.00E-126 | 229 | 229 | 100 + | 303 | 531 | 1339   | 1567   |
| UN69465 | Rsa1.0.00132.1 | 808 | 124299 | 1.00E-173 | 332 | 340 | 97 -  | 14  | 353 | 92484  | 92823  |
| UN69466 | Rsa1.0.01581.1 | 677 | 42833  | 0         | 428 | 436 | 98 +  | 244 | 677 | 28862  | 29297  |
| UN69467 | Rsa1.0.00009.1 | 680 | 232558 | 1.00E-120 | 246 | 255 | 96 -  | 426 | 680 | 146547 | 146801 |
| UN69468 | Rsa1.0.04870.1 | 783 | 135142 | 0         | 409 | 420 | 97 -  | 254 | 673 | 4854   | 5273   |
| UN69469 | Rsa1.0.14767.1 | 241 | 3079   | 3.00E-69  | 139 | 141 | 98 -  | 101 | 241 | 2623   | 2763   |
| UN69470 | Rsa1.0.01352.1 | 827 | 47443  | 0         | 452 | 474 | 95 -  | 361 | 827 | 8006   | 8479   |
| UN69471 | Rsa1.0.00133.1 | 631 | 123768 | 3.00E-96  | 242 | 263 | 92 +  | 373 | 629 | 36170  | 36423  |
| UN69472 | Rsa1.0.15187.1 | 738 | 2772   | 1.00E-166 | 347 | 359 | 96 +  | 24  | 381 | 1660   | 2013   |
| UN69473 | Rsa1.0.07527.1 | 753 | 9197   | 1.00E-138 | 276 | 284 | 97 -  | 75  | 355 | 4935   | 5218   |
| UN69474 | Rsa1.0.10053.1 | 772 | 6021   | 0         | 618 | 666 | 92 +  | 3   | 666 | 5280   | 5943   |
| UN69475 | Rsa1.0.01701.1 | 219 | 162121 | 2.00E-57  | 116 | 117 | 99 +  | 1   | 117 | 13193  | 13309  |
| UN69476 | Rsa1.0.00143.1 | 683 | 121313 | 1.00E-158 | 400 | 434 | 92 -  | 2   | 414 | 34168  | 34597  |
| UN69477 | Rsa1.0.29707.1 | 664 | 774    | 0         | 412 | 425 | 96 +  | 224 | 648 | 344    | 768    |
| UN69478 | Rsa1.0.02080.1 | 625 | 35297  | 0         | 493 | 495 | 99 +  | 131 | 625 | 10690  | 11184  |
| UN69479 | Rsa1.0.00473.1 | 796 | 212204 | 0         | 493 | 509 | 96 +  | 27  | 535 | 76191  | 76699  |
| UN69480 | Rsa1.0.00425.1 | 422 | 147080 | 1.00E-117 | 225 | 229 | 98 +  | 194 | 422 | 13682  | 13910  |
| UN69481 | Rsa1.0.05714.1 | 430 | 12850  | 3.00E-24  | 67  | 70  | 95 +  | 62  | 131 | 7838   | 7907   |
| UN69482 | Rsa1.0.03546.1 | 598 | 22172  | 1.00E-101 | 273 | 297 | 91 +  | 3   | 293 | 12716  | 13006  |
| UN69483 | Rsa1.0.03588.1 | 703 | 21908  | 0         | 444 | 446 | 99 -  | 3   | 448 | 1840   | 2285   |
| UN69484 | Rsa1.0.01494.1 | 674 | 44641  | 0         | 657 | 678 | 96 +  | 1   | 674 | 34576  | 35252  |
| UN69485 | Rsa1.0.00840.1 | 432 | 62514  | 2.00E-13  | 52  | 56  | 92 -  | 357 | 412 | 14812  | 14867  |
| UN69486 | Rsa1.0.00394.1 | 760 | 148426 | 0         | 451 | 461 | 97 -  | 3   | 458 | 88020  | 88480  |
| UN69487 | Rsa1.0.03513.1 | 751 | 22349  | 1.00E-180 | 337 | 343 | 98 -  | 4   | 346 | 20875  | 21217  |
| UN69488 | Rsa1.0.03614.1 | 754 | 21773  | 0         | 742 | 758 | 97 -  | 2   | 754 | 15168  | 15925  |
| UN69489 | Rsa1.0.00098.1 | 686 | 349239 | 0         | 669 | 682 | 98 -  | 11  | 686 | 295456 | 296136 |
| UN69490 | Rsa1.0.00636.1 | 301 | 71113  | 1.00E-162 | 289 | 289 | 100 - | 3   | 291 | 8642   | 8930   |
| UN69491 | Rsa1.0.03502.1 | 650 | 22446  | 1.00E-92  | 191 | 197 | 96 +  | 145 | 341 | 9041   | 9237   |
| UN69492 | Rsa1.0.00007.1 | 634 | 239325 | 1.00E-107 | 238 | 248 | 95 +  | 74  | 317 | 41905  | 42151  |
| UN69493 | Rsa1.0.05498.1 | 571 | 13523  | 0         | 503 | 515 | 97 +  | 57  | 571 | 508    | 1022   |
| UN69494 | #              | #   | #      | #         | #   | #   | #     | #   | #   | #      | #      |
| UN69495 | Rsa1.0.02179.1 | 719 | 34188  | 8.00E-97  | 186 | 188 | 98 +  | 3   | 190 | 21413  | 21600  |
| UN69496 | Rsa1.0.00336.1 | 807 | 445051 | 8.00E-94  | 175 | 175 | 100 + | 418 | 592 | 12465  | 12639  |



|         |                |     |        |           |     |     |       |     |     |        |        |
|---------|----------------|-----|--------|-----------|-----|-----|-------|-----|-----|--------|--------|
| UN69497 | Rsa1.0.02110.1 | 686 | 34919  | 0         | 380 | 383 | 99 -  | 32  | 414 | 34079  | 34461  |
| UN69498 | Rsa1.0.12152.1 | 623 | 5300   | 1.00E-14  | 70  | 78  | 89 -  | 517 | 593 | 621    | 698    |
| UN69499 | Rsa1.0.07561.1 | 590 | 9129   | 0         | 388 | 404 | 96 -  | 76  | 477 | 848    | 1250   |
| UN69500 | Rsa1.0.18823.1 | 575 | 1527   | 5.00E-88  | 229 | 249 | 91 -  | 28  | 265 | 389    | 637    |
| UN69501 | Rsa1.0.02150.1 | 203 | 34580  | 1.00E-67  | 180 | 197 | 91 +  | 3   | 199 | 16642  | 16832  |
| UN69502 | Rsa1.0.00218.1 | 590 | 201480 | 0         | 564 | 589 | 95 -  | 2   | 590 | 46327  | 46915  |
| UN69503 | #              | #   | #      | #         | #   | #   | #     | #   | #   | #      | #      |
| UN69504 | Rsa1.0.01412.1 | 451 | 46311  | 1.00E-147 | 267 | 268 | 99 +  | 3   | 270 | 1600   | 1867   |
| UN69505 | Rsa1.0.00706.1 | 761 | 291570 | 1.00E-150 | 285 | 290 | 98 +  | 174 | 463 | 47225  | 47514  |
| UN69506 | Rsa1.0.14764.1 | 781 | 3084   | 0         | 321 | 321 | 100 + | 4   | 324 | 216    | 536    |
| UN69507 | Rsa1.0.08344.1 | 733 | 7500   | 0         | 722 | 733 | 98 -  | 3   | 733 | 5179   | 5908   |
| UN69508 | Rsa1.0.00364.1 | 684 | 90951  | 1.00E-161 | 300 | 304 | 98 +  | 362 | 665 | 20603  | 20906  |
| UN69509 | Rsa1.0.04098.1 | 285 | 19078  | 1.00E-113 | 269 | 284 | 94 -  | 6   | 285 | 11237  | 11516  |
| UN69510 | Rsa1.0.03130.1 | 348 | 25145  | 1.00E-162 | 336 | 348 | 96 -  | 2   | 348 | 22202  | 22546  |
| UN69511 | Rsa1.0.01904.1 | 473 | 37450  | 0         | 453 | 469 | 96 -  | 1   | 469 | 3216   | 3683   |
| UN69512 | Rsa1.0.06643.1 | 653 | 10615  | 5.00E-39  | 269 | 331 | 81 -  | 129 | 459 | 10285  | 10615  |
| UN69513 | Rsa1.0.01068.1 | 234 | 55208  | 4.00E-96  | 221 | 234 | 94 +  | 3   | 234 | 34529  | 34753  |
| UN69514 | Rsa1.0.00079.1 | 499 | 606987 | 8.00E-53  | 106 | 106 | 100 - | 112 | 217 | 465312 | 465417 |
| UN69515 | Rsa1.0.00003.1 | 482 | 340054 | 1.00E-91  | 171 | 171 | 100 + | 110 | 280 | 287193 | 287363 |
| UN69516 | Rsa1.0.00014.1 | 552 | 348985 | 0         | 354 | 357 | 99 -  | 196 | 552 | 241634 | 241990 |
| UN69517 | Rsa1.0.00017.1 | 723 | 752458 | 3.00E-96  | 212 | 223 | 95 +  | 221 | 443 | 351280 | 351502 |
| UN69518 | Rsa1.0.00026.1 | 115 | 327835 | 2.00E-49  | 112 | 115 | 97 -  | 1   | 115 | 30619  | 30732  |
| UN69519 | Rsa1.0.02241.1 | 697 | 33520  | 1.00E-131 | 268 | 276 | 97 -  | 2   | 275 | 2796   | 3069   |
| UN69520 | Rsa1.0.00659.1 | 441 | 69733  | 2.00E-90  | 202 | 210 | 96 +  | 233 | 439 | 55265  | 55471  |
| UN69521 | Rsa1.0.00392.1 | 742 | 88523  | 2.00E-72  | 196 | 215 | 91 -  | 289 | 503 | 80711  | 80925  |
| UN69522 | Rsa1.0.03562.1 | 765 | 22084  | 0         | 426 | 430 | 99 -  | 3   | 432 | 8467   | 8896   |
| UN69523 | Rsa1.0.01196.1 | 723 | 51097  | 1.00E-113 | 223 | 226 | 98 -  | 3   | 225 | 36823  | 37048  |
| UN69524 | Rsa1.0.06452.1 | 707 | 10994  | 1.00E-117 | 252 | 267 | 94 -  | 439 | 705 | 3283   | 3537   |
| UN69525 | Rsa1.0.01553.1 | 523 | 43379  | 0         | 355 | 362 | 98 +  | 162 | 523 | 6270   | 6627   |
| UN69526 | Rsa1.0.04833.1 | 838 | 148235 | 1.00E-18  | 118 | 141 | 83 +  | 3   | 143 | 137797 | 137937 |
| UN69527 | Rsa1.0.02421.1 | 753 | 31579  | 1.00E-114 | 289 | 312 | 92 -  | 370 | 679 | 28880  | 29188  |
| UN69528 | Rsa1.0.00265.1 | 793 | 220635 | 1.00E-114 | 241 | 249 | 96 -  | 3   | 250 | 190911 | 191157 |
| UN69529 | Rsa1.0.00985.1 | 799 | 161950 | 0         | 789 | 806 | 97 -  | 3   | 794 | 31104  | 31909  |
| UN69530 | Rsa1.0.23292.1 | 523 | 1059   | 0         | 480 | 512 | 93 +  | 3   | 507 | 554    | 1056   |
| UN69531 | Rsa1.0.72613.1 | 668 | 315    | 2.33E-156 | 306 | 321 | 95 -  | 170 | 490 | 1      | 315    |
| UN69532 | Rsa1.0.02372.1 | 759 | 32053  | 0         | 351 | 353 | 99 -  | 346 | 698 | 29549  | 29901  |
| UN69533 | Rsa1.0.02678.1 | 666 | 135053 | 0         | 395 | 414 | 95 -  | 6   | 419 | 130452 | 130850 |
| UN69534 | Rsa1.0.00175.1 | 744 | 166121 | 2.00E-66  | 183 | 196 | 93 -  | 544 | 729 | 144876 | 145071 |
| UN69535 | Rsa1.0.02659.1 | 576 | 28971  | 1.00E-137 | 250 | 251 | 99 -  | 264 | 514 | 11707  | 11957  |

|         |                |     |        |           |     |     |       |     |     |        |        |
|---------|----------------|-----|--------|-----------|-----|-----|-------|-----|-----|--------|--------|
| UN69536 | Rsa1.0.05605.1 | 725 | 13202  | 0         | 688 | 727 | 94 -  | 2   | 725 | 7497   | 8221   |
| UN69537 | Rsa1.0.00017.1 | 297 | 752458 | 1.00E-105 | 260 | 281 | 92 -  | 1   | 280 | 391673 | 391942 |
| UN69538 | Rsa1.0.32735.1 | 797 | 695    | 1.00E-168 | 299 | 299 | 100 - | 407 | 705 | 5      | 303    |
| UN69539 | Rsa1.0.04786.1 | 621 | 15988  | 0         | 608 | 621 | 97 +  | 1   | 621 | 11349  | 11966  |
| UN69540 | Rsa1.0.09895.1 | 772 | 6101   | 0         | 749 | 780 | 96 -  | 1   | 772 | 3507   | 4286   |
| UN69541 | Rsa1.0.00246.1 | 605 | 103541 | 0         | 558 | 583 | 95 -  | 23  | 605 | 31682  | 32264  |
| UN69542 | Rsa1.0.04248.1 | 636 | 18287  | 1.00E-140 | 287 | 298 | 96 +  | 3   | 300 | 1354   | 1648   |
| UN69543 | Rsa1.0.03133.1 | 523 | 25135  | 1.00E-131 | 238 | 238 | 100 - | 1   | 238 | 22604  | 22841  |
| UN69544 | Rsa1.0.00793.1 | 807 | 64103  | 2.33E-156 | 334 | 356 | 93 +  | 3   | 354 | 59926  | 60280  |
| UN69545 | Rsa1.0.01941.1 | 409 | 37069  | 1.00E-143 | 352 | 383 | 91 -  | 34  | 409 | 30877  | 31247  |
| UN69546 | Rsa1.0.01661.1 | 797 | 41400  | 0         | 445 | 450 | 98 -  | 2   | 451 | 33031  | 33480  |
| UN69547 | Rsa1.0.11276.1 | 482 | 5560   | 1.00E-115 | 237 | 246 | 96 -  | 201 | 446 | 445    | 690    |
| UN69548 | Rsa1.0.06408.1 | 797 | 11070  | 0         | 649 | 702 | 92 -  | 142 | 797 | 7260   | 7960   |
| UN69549 | Rsa1.0.00059.1 | 585 | 159650 | 1.00E-170 | 306 | 307 | 99 -  | 90  | 396 | 96523  | 96829  |
| UN69550 | Rsa1.0.07696.1 | 781 | 8769   | 1.00E-126 | 260 | 270 | 96 +  | 11  | 276 | 6401   | 6670   |
| UN69551 | Rsa1.0.01034.1 | 607 | 56046  | 1.00E-175 | 341 | 351 | 97 -  | 257 | 607 | 21838  | 22188  |
| UN69552 | Rsa1.0.04714.1 | 705 | 146738 | 1.00E-113 | 229 | 235 | 97 +  | 472 | 705 | 139509 | 139743 |
| UN69553 | Rsa1.0.00568.1 | 550 | 75219  | 0         | 472 | 483 | 97 -  | 68  | 550 | 2176   | 2658   |
| UN69554 | Rsa1.0.01111.1 | 792 | 53669  | 1.00E-118 | 248 | 258 | 96 -  | 3   | 260 | 35556  | 35810  |
| UN69555 | Rsa1.0.00472.1 | 470 | 398134 | 1.00E-110 | 312 | 346 | 90 +  | 2   | 341 | 166230 | 166564 |
| UN69556 | Rsa1.0.00745.1 | 749 | 66067  | 0         | 397 | 410 | 96 +  | 2   | 411 | 59172  | 59577  |
| UN69557 | Rsa1.0.00048.1 | 547 | 167185 | 1.00E-121 | 287 | 307 | 93 -  | 1   | 305 | 76604  | 76909  |
| UN69558 | Rsa1.0.08848.1 | 577 | 6865   | 4.00E-92  | 175 | 176 | 99 +  | 391 | 566 | 1      | 176    |
| UN69559 | Rsa1.0.00016.1 | 470 | 831256 | 1.00E-106 | 222 | 231 | 96 -  | 240 | 470 | 572230 | 572460 |
| UN69560 | Rsa1.0.04544.1 | 610 | 16917  | 2.00E-87  | 164 | 164 | 100 + | 2   | 165 | 4564   | 4727   |
| UN69561 | Rsa1.0.01495.1 | 731 | 44613  | 0         | 630 | 638 | 98 -  | 87  | 721 | 35486  | 36123  |
| UN69562 | Rsa1.0.36137.1 | 665 | 625    | 2.00E-17  | 50  | 51  | 98 +  | 287 | 337 | 68     | 118    |
| UN69563 | Rsa1.0.00773.1 | 685 | 64839  | 0         | 656 | 683 | 96 -  | 2   | 682 | 53384  | 54066  |
| UN69564 | Rsa1.0.04850.1 | 757 | 15722  | 0         | 685 | 698 | 98 +  | 1   | 692 | 6546   | 7243   |
| UN69565 | Rsa1.0.00163.1 | 726 | 116847 | 1.00E-130 | 236 | 236 | 100 - | 228 | 463 | 65088  | 65323  |
| UN69566 | Rsa1.0.03111.1 | 773 | 25327  | 0         | 371 | 377 | 98 -  | 280 | 655 | 4629   | 5005   |
| UN69567 | Rsa1.0.05977.1 | 820 | 12056  | 0         | 379 | 385 | 98 -  | 3   | 387 | 10349  | 10733  |
| UN69568 | Rsa1.0.00962.1 | 724 | 184909 | 0         | 718 | 722 | 99 +  | 4   | 724 | 8998   | 9719   |
| UN69569 | Rsa1.0.00921.1 | 734 | 59599  | 0         | 392 | 399 | 98 -  | 55  | 453 | 57356  | 57754  |
| UN69570 | Rsa1.0.01656.1 | 644 | 41494  | 1.00E-121 | 239 | 245 | 97 -  | 400 | 644 | 15380  | 15624  |
| UN69571 | Rsa1.0.01094.1 | 670 | 167285 | 1.00E-168 | 321 | 327 | 98 -  | 345 | 670 | 1917   | 2243   |
| UN69572 | Rsa1.0.00312.1 | 695 | 96765  | 4.00E-55  | 119 | 122 | 97 -  | 373 | 494 | 88582  | 88703  |
| UN69573 | Rsa1.0.00038.1 | 610 | 314568 | 0         | 396 | 403 | 98 -  | 18  | 416 | 241083 | 241485 |
| UN69574 | Rsa1.0.09954.1 | 343 | 6068   | 1.00E-119 | 254 | 266 | 95 -  | 61  | 323 | 4966   | 5225   |

|         |                |     |        |           |     |     |       |     |     |        |        |
|---------|----------------|-----|--------|-----------|-----|-----|-------|-----|-----|--------|--------|
| UN69575 | Rsa1.0.01626.1 | 243 | 41989  | 1.00E-104 | 200 | 203 | 98 -  | 41  | 243 | 16903  | 17105  |
| UN69576 | Rsa1.0.01202.1 | 487 | 158825 | 1.00E-165 | 295 | 295 | 100 - | 1   | 295 | 9300   | 9594   |
| UN69577 | Rsa1.0.10462.1 | 343 | 5842   | 1.00E-149 | 268 | 268 | 100 + | 76  | 343 | 3437   | 3704   |
| UN69578 | Rsa1.0.22514.1 | 618 | 1114   | 0         | 428 | 448 | 95 -  | 171 | 618 | 467    | 913    |
| UN69579 | Rsa1.0.00122.1 | 518 | 265937 | 0         | 493 | 538 | 91 +  | 4   | 518 | 224797 | 225329 |
| UN69580 | Rsa1.0.01180.1 | 340 | 51517  | 1.00E-131 | 279 | 293 | 95 -  | 3   | 295 | 34928  | 35220  |
| UN69581 | Rsa1.0.03728.1 | 794 | 21147  | 2.00E-88  | 184 | 189 | 97 +  | 116 | 302 | 12412  | 12600  |
| UN69582 | Rsa1.0.03937.1 | 523 | 19969  | 1.00E-100 | 224 | 236 | 94 -  | 35  | 270 | 5147   | 5380   |
| UN69583 | Rsa1.0.02276.1 | 303 | 33098  | 5.00E-65  | 158 | 170 | 92 -  | 141 | 301 | 25646  | 25815  |
| UN69584 | Rsa1.0.00913.1 | 475 | 59914  | 3.00E-58  | 165 | 177 | 93 -  | 304 | 475 | 11754  | 11929  |
| UN69585 | Rsa1.0.04139.1 | 769 | 18883  | 0         | 740 | 763 | 96 +  | 3   | 759 | 18036  | 18795  |
| UN69586 | Rsa1.0.00053.1 | 289 | 263459 | 1.00E-77  | 163 | 167 | 97 -  | 1   | 166 | 39454  | 39620  |
| UN69587 | Rsa1.0.03506.1 | 802 | 22416  | 0         | 734 | 791 | 92 +  | 1   | 783 | 7459   | 8239   |
| UN69588 | Rsa1.0.09401.1 | 303 | 6394   | 2.00E-98  | 198 | 202 | 98 -  | 102 | 303 | 2402   | 2602   |
| UN69589 | Rsa1.0.00582.1 | 677 | 74333  | 1.00E-165 | 318 | 326 | 97 -  | 3   | 328 | 60005  | 60330  |
| UN69590 | Rsa1.0.00036.1 | 779 | 176186 | 0         | 657 | 698 | 94 +  | 50  | 740 | 62977  | 63665  |
| UN69591 | Rsa1.0.01867.1 | 781 | 37960  | 1.00E-165 | 333 | 343 | 97 -  | 420 | 760 | 17224  | 17566  |
| UN69592 | Rsa1.0.04124.1 | 714 | 18945  | 0         | 594 | 620 | 95 -  | 94  | 713 | 3961   | 4580   |
| UN69593 | Rsa1.0.00564.1 | 720 | 75428  | 0         | 627 | 654 | 95 -  | 68  | 720 | 65648  | 66294  |
| UN69594 | Rsa1.0.21942.1 | 713 | 1161   | 3.00E-71  | 182 | 197 | 92 -  | 204 | 395 | 404    | 600    |
| UN69595 | Rsa1.0.01588.1 | 711 | 42724  | 6.00E-73  | 165 | 173 | 95 -  | 17  | 185 | 41412  | 41584  |
| UN69596 | Rsa1.0.00097.1 | 666 | 138858 | 1.00E-144 | 280 | 287 | 97 -  | 71  | 357 | 14814  | 15100  |
| UN69597 | Rsa1.0.01646.1 | 746 | 41735  | 2.00E-14  | 103 | 121 | 85 +  | 147 | 264 | 5886   | 6006   |
| UN69598 | Rsa1.0.00026.1 | 486 | 327835 | 2.00E-87  | 176 | 180 | 97 -  | 5   | 184 | 192173 | 192352 |
| UN69599 | Rsa1.0.00027.1 | 621 | 283362 | 1.00E-157 | 337 | 349 | 96 -  | 3   | 351 | 275355 | 275698 |
| UN69600 | Rsa1.0.55812.1 | 510 | 409    | 1.00E-131 | 241 | 242 | 99 -  | 269 | 510 | 42     | 283    |
| UN69601 | Rsa1.0.01555.1 | 701 | 166456 | 0         | 328 | 330 | 99 -  | 11  | 340 | 9770   | 10099  |
| UN69602 | Rsa1.0.01674.1 | 736 | 168300 | 1.00E-180 | 347 | 355 | 97 +  | 4   | 355 | 1846   | 2197   |
| UN69603 | Rsa1.0.00850.1 | 724 | 62193  | 0         | 625 | 721 | 86 +  | 2   | 722 | 41840  | 42559  |
| UN69604 | Rsa1.0.00110.1 | 654 | 132719 | 0         | 443 | 456 | 97 +  | 196 | 646 | 7044   | 7498   |
| UN69605 | Rsa1.0.00668.1 | 442 | 69421  | 0         | 428 | 433 | 98 -  | 3   | 435 | 27187  | 27619  |
| UN69606 | Rsa1.0.07569.1 | 681 | 9106   | 1.00E-151 | 357 | 383 | 93 -  | 120 | 498 | 4562   | 4941   |
| UN69607 | Rsa1.0.01460.1 | 765 | 45255  | 0         | 464 | 474 | 97 -  | 94  | 565 | 33286  | 33757  |
| UN69608 | Rsa1.0.02802.1 | 770 | 27736  | 1.00E-15  | 79  | 88  | 89 -  | 326 | 411 | 11111  | 11198  |
| UN69609 | Rsa1.0.51768.1 | 661 | 439    | 2.00E-69  | 140 | 142 | 98 +  | 344 | 485 | 192    | 333    |
| UN69610 | Rsa1.0.04416.1 | 736 | 17458  | 0         | 486 | 515 | 94 +  | 1   | 513 | 16945  | 17458  |
| UN69611 | Rsa1.0.01857.1 | 479 | 38103  | 0         | 388 | 391 | 99 -  | 91  | 479 | 22869  | 23259  |
| UN69612 | Rsa1.0.00156.1 | 521 | 118383 | 0         | 413 | 424 | 97 -  | 2   | 425 | 90008  | 90428  |
| UN69613 | Rsa1.0.00926.1 | 598 | 195072 | 1.00E-120 | 267 | 283 | 94 -  | 64  | 346 | 43023  | 43305  |

|         |                |     |        |           |     |     |       |     |     |        |        |
|---------|----------------|-----|--------|-----------|-----|-----|-------|-----|-----|--------|--------|
| UN69614 | Rsa1.0_00009.1 | 648 | 232558 | 1.00E-107 | 200 | 201 | 99 -  | 329 | 529 | 180269 | 180469 |
| UN69615 | Rsa1.0_00203.1 | 760 | 109129 | 0         | 713 | 751 | 94 +  | 19  | 760 | 88217  | 88964  |
| UN69616 | Rsa1.0_02294.1 | 740 | 32940  | 1.00E-154 | 320 | 332 | 96 +  | 376 | 705 | 12163  | 12494  |
| UN69617 | Rsa1.0_04236.1 | 702 | 18370  | 0         | 474 | 489 | 96 +  | 89  | 577 | 3343   | 3831   |
| UN69618 | Rsa1.0_00446.1 | 253 | 167829 | 1.00E-96  | 234 | 250 | 93 -  | 3   | 252 | 161282 | 161523 |
| UN69619 | Rsa1.0_00132.1 | 777 | 124299 | 0         | 738 | 784 | 94 +  | 5   | 777 | 65577  | 66360  |
| UN69620 | Rsa1.0_00027.1 | 732 | 283362 | 0         | 392 | 397 | 98 -  | 336 | 732 | 157387 | 157783 |
| UN69621 | Rsa1.0_01344.1 | 732 | 142535 | 0         | 702 | 735 | 95 +  | 4   | 731 | 127511 | 128245 |
| UN69622 | Rsa1.0_03319.1 | 749 | 23767  | 0         | 476 | 496 | 95 -  | 260 | 749 | 18324  | 18819  |
| UN69623 | Rsa1.0_01460.1 | 751 | 45255  | 0         | 490 | 508 | 96 -  | 244 | 751 | 36795  | 37302  |
| UN69624 | Rsa1.0_01625.1 | 181 | 42019  | 9.00E-41  | 120 | 134 | 89 -  | 8   | 141 | 21788  | 21909  |
| UN69625 | Rsa1.0_00642.1 | 122 | 201230 | 1.00E-20  | 60  | 63  | 95 +  | 60  | 122 | 178381 | 178443 |
| UN69626 | Rsa1.0_04973.1 | 726 | 15267  | 0         | 392 | 399 | 98 -  | 3   | 400 | 13811  | 14208  |
| UN69627 | Rsa1.0_09221.1 | 777 | 6549   | 1.00E-106 | 202 | 204 | 99 -  | 206 | 409 | 6346   | 6549   |
| UN69628 | Rsa1.0_01144.1 | 773 | 52431  | 0         | 388 | 401 | 96 +  | 380 | 773 | 23378  | 23777  |
| UN69629 | Rsa1.0_15315.1 | 479 | 2690   | 1.00E-45  | 154 | 171 | 90 -  | 3   | 169 | 2152   | 2320   |
| UN69630 | Rsa1.0_03025.1 | 780 | 25910  | 0         | 552 | 564 | 97 +  | 185 | 745 | 17782  | 18345  |
| UN69631 | Rsa1.0_00578.1 | 550 | 74581  | 0         | 545 | 545 | 100 - | 6   | 550 | 51312  | 51856  |
| UN69632 | Rsa1.0_00416.1 | 646 | 86772  | 0         | 461 | 477 | 96 +  | 176 | 646 | 74497  | 74973  |
| UN69633 | Rsa1.0_04854.1 | 642 | 131560 | 1.00E-173 | 351 | 364 | 96 +  | 280 | 642 | 15144  | 15507  |
| UN69634 | Rsa1.0_00323.1 | 669 | 159650 | 1.00E-155 | 348 | 371 | 93 +  | 3   | 370 | 144840 | 145210 |
| UN69635 | Rsa1.0_01464.1 | 793 | 45193  | 0         | 430 | 442 | 97 +  | 3   | 444 | 38282  | 38721  |
| UN69636 | Rsa1.0_00006.1 | 677 | 396176 | 0         | 648 | 679 | 95 -  | 1   | 677 | 202709 | 203377 |
| UN69637 | Rsa1.0_00068.1 | 476 | 151813 | 1.00E-145 | 297 | 309 | 96 +  | 168 | 476 | 103183 | 103491 |
| UN69638 | Rsa1.0_02239.1 | 789 | 33534  | 0         | 379 | 394 | 96 +  | 3   | 396 | 26114  | 26507  |
| UN69639 | Rsa1.0_00051.1 | 771 | 258225 | 1.00E-141 | 292 | 304 | 96 -  | 472 | 771 | 47759  | 48062  |
| UN69640 | Rsa1.0_00480.1 | 721 | 81325  | 0         | 374 | 383 | 97 +  | 3   | 385 | 3549   | 3931   |
| UN69641 | Rsa1.0_03999.1 | 734 | 19645  | 0         | 403 | 412 | 97 -  | 312 | 722 | 8850   | 9261   |
| UN69642 | Rsa1.0_00236.1 | 679 | 104771 | 1.00E-118 | 446 | 522 | 85 +  | 157 | 675 | 14527  | 15039  |
| UN69643 | Rsa1.0_01633.1 | 736 | 41868  | 1.00E-135 | 251 | 252 | 99 +  | 486 | 736 | 3048   | 3299   |
| UN69644 | Rsa1.0_00320.1 | 554 | 95784  | 0         | 446 | 487 | 91 -  | 2   | 470 | 27691  | 28177  |
| UN69645 | Rsa1.0_00324.1 | 583 | 218805 | 1.00E-168 | 312 | 316 | 98 +  | 268 | 583 | 161100 | 161415 |
| UN69646 | Rsa1.0_03100.1 | 656 | 25411  | 0         | 405 | 412 | 98 +  | 33  | 444 | 17252  | 17663  |
| UN69647 | Rsa1.0_14148.1 | 556 | 3735   | 0         | 511 | 512 | 99 +  | 1   | 512 | 3224   | 3735   |
| UN69648 | Rsa1.0_06471.1 | 727 | 10954  | 0         | 520 | 553 | 94 -  | 121 | 669 | 1444   | 1984   |
| UN69649 | Rsa1.0_00539.1 | 590 | 76926  | 1.00E-151 | 274 | 275 | 99 +  | 3   | 277 | 14379  | 14653  |
| UN69650 | Rsa1.0_00501.1 | 508 | 79545  | 1.00E-155 | 298 | 305 | 97 +  | 179 | 483 | 67885  | 68189  |
| UN69651 | Rsa1.0_03216.1 | 776 | 24540  | 1.00E-100 | 197 | 201 | 98 -  | 5   | 205 | 13385  | 13585  |
| UN69652 | Rsa1.0_00077.1 | 762 | 145005 | 3.00E-90  | 172 | 173 | 99 -  | 2   | 174 | 91242  | 91414  |

|         |                |     |        |           |     |     |       |     |     |        |        |
|---------|----------------|-----|--------|-----------|-----|-----|-------|-----|-----|--------|--------|
| UN69653 | Rsa1.0.00080.1 | 716 | 190437 | 1.00E-125 | 236 | 239 | 98 -  | 1   | 239 | 37681  | 37919  |
| UN69654 | Rsa1.0.00419.1 | 784 | 86562  | 1.00E-124 | 286 | 306 | 93 -  | 200 | 505 | 16660  | 16965  |
| UN69655 | Rsa1.0.00838.1 | 361 | 153820 | 6.00E-96  | 203 | 210 | 96 +  | 3   | 212 | 58597  | 58800  |
| UN69656 | Rsa1.0.04421.1 | 578 | 17430  | 0         | 519 | 576 | 90 -  | 2   | 577 | 15244  | 15819  |
| UN69657 | Rsa1.0.01282.1 | 786 | 49304  | 0         | 765 | 786 | 97 -  | 1   | 783 | 14465  | 15250  |
| UN69658 | Rsa1.0.00122.1 | 745 | 265937 | 1.00E-177 | 378 | 401 | 94 -  | 4   | 389 | 82124  | 82524  |
| UN69659 | Rsa1.0.01668.1 | 643 | 41299  | 0         | 535 | 542 | 98 +  | 99  | 640 | 6326   | 6863   |
| UN69660 | Rsa1.0.00045.1 | 685 | 328694 | 0         | 458 | 481 | 95 +  | 193 | 668 | 314632 | 315112 |
| UN69661 | Rsa1.0.00283.1 | 314 | 183797 | 1.00E-129 | 296 | 317 | 93 +  | 1   | 314 | 66431  | 66735  |
| UN69662 | Rsa1.0.00043.1 | 676 | 264937 | 1.00E-142 | 347 | 379 | 91 -  | 313 | 676 | 7332   | 7710   |
| UN69663 | Rsa1.0.05603.1 | 724 | 13210  | 0         | 377 | 382 | 98 +  | 345 | 724 | 2942   | 3323   |
| UN69664 | Rsa1.0.27953.1 | 759 | 833    | 1.00E-149 | 287 | 292 | 98 -  | 463 | 753 | 21     | 312    |
| UN69665 | Rsa1.0.10110.1 | 544 | 5994   | 1.00E-180 | 492 | 550 | 89 -  | 2   | 544 | 4202   | 4727   |
| UN69666 | Rsa1.0.35884.1 | 194 | 630    | 4.00E-80  | 151 | 151 | 100 + | 1   | 151 | 480    | 630    |
| UN69667 | Rsa1.0.00556.1 | 238 | 207212 | 1.00E-114 | 234 | 241 | 97 -  | 1   | 238 | 184980 | 185218 |
| UN69668 | Rsa1.0.01530.1 | 623 | 43820  | 1.00E-64  | 181 | 197 | 91 -  | 1   | 193 | 5090   | 5282   |
| UN69669 | Rsa1.0.01389.1 | 382 | 46716  | 1.00E-149 | 339 | 359 | 94 -  | 2   | 355 | 30331  | 30686  |
| UN69670 | Rsa1.0.00418.1 | 478 | 215377 | 1.00E-171 | 447 | 493 | 90 +  | 1   | 477 | 24313  | 24796  |
| UN69671 | Rsa1.0.00045.1 | 171 | 328694 | 8.00E-35  | 143 | 163 | 87 -  | 12  | 171 | 16676  | 16829  |
| UN69672 | Rsa1.0.02201.1 | 121 | 33981  | 2.00E-46  | 113 | 118 | 95 +  | 5   | 121 | 26581  | 26698  |
| UN69673 | Rsa1.0.02501.1 | 110 | 30764  | 5.00E-44  | 105 | 110 | 95 +  | 1   | 110 | 10604  | 10713  |
| UN69674 | Rsa1.0.02320.1 | 648 | 32575  | 1.00E-82  | 189 | 200 | 94 -  | 37  | 236 | 24899  | 25098  |
| UN69675 | Rsa1.0.00593.1 | 481 | 143463 | 1.00E-109 | 219 | 225 | 97 +  | 125 | 349 | 55065  | 55289  |
| UN69676 | Rsa1.0.06503.1 | 249 | 10881  | 5.00E-80  | 190 | 202 | 94 +  | 1   | 202 | 6521   | 6720   |
| UN69677 | Rsa1.0.11859.1 | 786 | 5389   | 0         | 545 | 575 | 94 +  | 1   | 565 | 4392   | 4965   |
| UN69678 | Rsa1.0.05428.1 | 638 | 13789  | 1.00E-135 | 291 | 304 | 95 +  | 1   | 304 | 6185   | 6486   |
| UN69679 | Rsa1.0.06940.1 | 721 | 10137  | 1.00E-155 | 323 | 337 | 95 +  | 1   | 335 | 8421   | 8757   |
| UN69680 | Rsa1.0.00156.1 | 631 | 118383 | 1.00E-168 | 372 | 395 | 94 -  | 1   | 395 | 60076  | 60463  |
| UN69681 | Rsa1.0.03612.1 | 718 | 21784  | 0         | 643 | 674 | 95 -  | 20  | 693 | 1189   | 1862   |
| UN69682 | Rsa1.0.36288.1 | 342 | 621    | 2.00E-30  | 68  | 68  | 100 + | 252 | 319 | 1      | 68     |
| UN69683 | Rsa1.0.07512.1 | 513 | 9228   | 0         | 470 | 511 | 91 +  | 2   | 511 | 1256   | 1765   |
| UN69684 | Rsa1.0.00353.1 | 507 | 92242  | 0         | 455 | 477 | 95 +  | 14  | 489 | 59432  | 59906  |
| UN69685 | Rsa1.0.02916.1 | 139 | 26809  | 6.00E-32  | 106 | 117 | 90 -  | 12  | 126 | 5835   | 5951   |
| UN69686 | Rsa1.0.02470.1 | 664 | 31108  | 0         | 355 | 364 | 97 -  | 39  | 402 | 7070   | 7428   |
| UN69687 | Rsa1.0.10563.1 | 361 | 5800   | 1.00E-176 | 347 | 357 | 97 -  | 1   | 357 | 4969   | 5324   |
| UN69688 | Rsa1.0.08846.1 | 663 | 6867   | 1.00E-107 | 245 | 257 | 95 +  | 1   | 257 | 4052   | 4300   |
| UN69689 | Rsa1.0.01655.1 | 520 | 41508  | 0         | 423 | 439 | 96 -  | 1   | 437 | 6342   | 6778   |
| UN69690 | Rsa1.0.00793.1 | 691 | 64103  | 2.00E-81  | 217 | 234 | 92 -  | 23  | 253 | 38449  | 38682  |
| UN69691 | Rsa1.0.00035.1 | 456 | 176449 | 0         | 434 | 456 | 95 -  | 1   | 456 | 50124  | 50579  |

|         |                |     |        |           |     |     |       |     |     |        |        |
|---------|----------------|-----|--------|-----------|-----|-----|-------|-----|-----|--------|--------|
| UN69692 | Rsa1.0.00123.1 | 104 | 325650 | 2.00E-40  | 93  | 96  | 96 -  | 9   | 104 | 227155 | 227250 |
| UN69693 | Rsa1.0.06603.1 | 217 | 10682  | 4.00E-74  | 207 | 229 | 90 -  | 3   | 217 | 5545   | 5772   |
| UN69694 | Rsa1.0.02843.1 | 252 | 27383  | 1.00E-114 | 243 | 252 | 96 -  | 1   | 252 | 23933  | 24181  |
| UN69695 | Rsa1.0.00037.1 | 462 | 307838 | 0         | 438 | 458 | 95 +  | 1   | 456 | 175912 | 176366 |
| UN69696 | Rsa1.0.01724.1 | 250 | 40292  | 4.00E-99  | 214 | 223 | 95 -  | 1   | 222 | 19668  | 19890  |
| UN69697 | Rsa1.0.00342.1 | 673 | 93695  | 1.00E-112 | 228 | 234 | 97 +  | 1   | 234 | 12932  | 13164  |
| UN69698 | Rsa1.0.01435.1 | 557 | 45942  | 1.00E-159 | 336 | 353 | 95 -  | 205 | 557 | 41113  | 41465  |
| UN69699 | Rsa1.0.00320.1 | 535 | 95784  | 2.33E-156 | 293 | 303 | 96 +  | 233 | 535 | 8414   | 8716   |
| UN69700 | Rsa1.0.27770.1 | 460 | 840    | 6.00E-78  | 154 | 156 | 98 +  | 184 | 339 | 27     | 182    |
| UN69701 | Rsa1.0.00482.1 | 287 | 81162  | 1.00E-93  | 209 | 218 | 95 +  | 2   | 219 | 25730  | 25945  |
| UN69702 | Rsa1.0.03499.1 | 508 | 22462  | 0         | 491 | 513 | 95 +  | 1   | 508 | 8400   | 8908   |
| UN69703 | Rsa1.0.01459.1 | 590 | 45277  | 0         | 372 | 385 | 96 +  | 1   | 385 | 22444  | 22828  |
| UN69704 | Rsa1.0.00069.1 | 285 | 403561 | 1.00E-112 | 262 | 280 | 93 -  | 1   | 280 | 170898 | 171175 |
| UN69705 | Rsa1.0.00552.1 | 698 | 206757 | 1.00E-130 | 253 | 256 | 98 -  | 3   | 257 | 187345 | 187599 |
| UN69706 | Rsa1.0.00199.1 | 428 | 249604 | 1.00E-178 | 373 | 392 | 95 -  | 37  | 428 | 164435 | 164826 |
| UN69707 | Rsa1.0.01463.1 | 784 | 45213  | 0         | 764 | 787 | 97 +  | 1   | 784 | 34739  | 35525  |
| UN69708 | Rsa1.0.00361.1 | 255 | 91181  | 1.00E-116 | 244 | 255 | 95 -  | 1   | 255 | 47852  | 48106  |
| UN69709 | Rsa1.0.00329.1 | 334 | 222544 | 1.00E-163 | 308 | 313 | 98 -  | 25  | 334 | 186887 | 187199 |
| UN69710 | Rsa1.0.01919.1 | 666 | 37272  | 0         | 449 | 464 | 96 +  | 20  | 477 | 3530   | 3991   |
| UN69711 | Rsa1.0.04729.1 | 520 | 16201  | 1.00E-115 | 241 | 250 | 96 +  | 4   | 253 | 11807  | 12055  |
| UN69712 | Rsa1.0.04697.1 | 579 | 16336  | 0         | 388 | 409 | 94 -  | 1   | 409 | 7245   | 7653   |
| UN69713 | Rsa1.0.00699.1 | 827 | 184398 | 0         | 395 | 409 | 96 -  | 1   | 408 | 177779 | 178181 |
| UN69714 | Rsa1.0.00490.1 | 437 | 186713 | 0         | 426 | 437 | 97 -  | 1   | 437 | 31277  | 31713  |
| UN69715 | Rsa1.0.00620.1 | 737 | 71985  | 1.00E-162 | 314 | 322 | 97 +  | 408 | 729 | 54806  | 55127  |
| UN69716 | Rsa1.0.00207.1 | 260 | 248736 | 6.00E-83  | 232 | 255 | 90 -  | 1   | 253 | 22760  | 23008  |
| UN69717 | Rsa1.0.01527.1 | 650 | 43905  | 6.00E-54  | 108 | 108 | 100 - | 322 | 429 | 6181   | 6288   |
| UN69718 | Rsa1.0.02668.1 | 796 | 28895  | 0         | 745 | 768 | 97 -  | 2   | 767 | 5065   | 5829   |
| UN69719 | Rsa1.0.04845.1 | 433 | 15747  | 3.00E-64  | 195 | 221 | 88 -  | 1   | 221 | 6110   | 6312   |
| UN69720 | Rsa1.0.01459.1 | 864 | 45277  | 0         | 832 | 870 | 95 +  | 1   | 864 | 35842  | 36703  |
| UN69721 | Rsa1.0.00363.1 | 736 | 90968  | 0         | 685 | 731 | 93 +  | 9   | 736 | 13513  | 14233  |
| UN69722 | Rsa1.0.02092.1 | 786 | 35135  | 0         | 751 | 781 | 96 -  | 1   | 775 | 27152  | 27929  |
| UN69723 | Rsa1.0.00224.1 | 716 | 327530 | 1.00E-120 | 257 | 268 | 95 -  | 7   | 273 | 201452 | 201719 |
| UN69724 | Rsa1.0.00382.1 | 252 | 251946 | 1.00E-71  | 170 | 181 | 93 -  | 1   | 181 | 45789  | 45969  |
| UN69725 | Rsa1.0.03143.1 | 820 | 25024  | 0         | 761 | 796 | 95 -  | 31  | 820 | 12490  | 13270  |
| UN69726 | Rsa1.0.00065.1 | 655 | 454616 | 1.00E-158 | 368 | 393 | 93 +  | 1   | 390 | 417286 | 417667 |
| UN69727 | Rsa1.0.00678.1 | 755 | 193163 | 0         | 686 | 724 | 94 +  | 2   | 725 | 174462 | 175181 |
| UN69728 | Rsa1.0.01907.1 | 693 | 37431  | 0         | 604 | 639 | 94 +  | 5   | 641 | 18386  | 19011  |
| UN69729 | Rsa1.0.05854.1 | 377 | 12415  | 1.00E-179 | 359 | 373 | 96 -  | 1   | 373 | 1682   | 2054   |
| UN69730 | Rsa1.0.00519.1 | 266 | 197864 | 1.00E-104 | 256 | 274 | 93 +  | 1   | 266 | 69737  | 70009  |

|         |                |     |        |           |     |     |      |     |     |        |        |
|---------|----------------|-----|--------|-----------|-----|-----|------|-----|-----|--------|--------|
| UN69731 | Rsa1.0.00469.1 | 579 | 82084  | 4.00E-64  | 137 | 141 | 97 - | 312 | 452 | 69412  | 69552  |
| UN69732 | Rsa1.0.01963.1 | 744 | 36719  | 0         | 502 | 524 | 95 - | 1   | 523 | 35532  | 36055  |
| UN69733 | Rsa1.0.01394.1 | 651 | 46641  | 4.00E-80  | 155 | 156 | 99 + | 214 | 369 | 5219   | 5374   |
| UN69734 | Rsa1.0.07869.1 | 287 | 8386   | 4.00E-47  | 139 | 152 | 91 - | 1   | 152 | 571    | 721    |
| UN69735 | Rsa1.0.01078.1 | 424 | 316910 | 1.00E-105 | 212 | 218 | 97 + | 207 | 424 | 290400 | 290617 |
| UN69736 | Rsa1.0.09775.1 | 390 | 6156   | 1.00E-120 | 242 | 249 | 97 - | 142 | 390 | 4847   | 5092   |
| UN69737 | Rsa1.0.01163.1 | 774 | 51946  | 0         | 599 | 610 | 98 - | 1   | 609 | 22502  | 23109  |
| UN69738 | Rsa1.0.01591.1 | 103 | 42718  | 2.00E-37  | 91  | 95  | 95 + | 6   | 100 | 26845  | 26939  |
| UN69739 | Rsa1.0.04831.1 | 649 | 15799  | 6.00E-14  | 95  | 113 | 84 + | 441 | 553 | 12889  | 13001  |
| UN69740 | Rsa1.0.00069.1 | 790 | 403561 | 0         | 768 | 789 | 97 - | 3   | 790 | 18316  | 19100  |
| UN69741 | Rsa1.0.01875.1 | 446 | 37849  | 1.00E-122 | 259 | 271 | 95 + | 180 | 445 | 25879  | 26149  |
| UN69742 | Rsa1.0.00222.1 | 764 | 172263 | 0         | 760 | 765 | 99 + | 1   | 764 | 152931 | 153695 |
| UN69743 | Rsa1.0.00466.1 | 319 | 82132  | 1.00E-104 | 295 | 325 | 90 + | 1   | 319 | 27048  | 27371  |
| UN69744 | Rsa1.0.00002.1 | 888 | 601661 | 0         | 537 | 565 | 95 - | 297 | 853 | 411347 | 411897 |
| UN69745 | Rsa1.0.06164.1 | 724 | 11584  | 1.00E-110 | 308 | 346 | 89 - | 66  | 388 | 3193   | 3538   |
| UN69746 | Rsa1.0.00107.1 | 350 | 431659 | 1.00E-159 | 334 | 349 | 95 + | 3   | 350 | 346408 | 346752 |
| UN69747 | Rsa1.0.15270.1 | 590 | 2718   | 0         | 570 | 592 | 96 - | 1   | 590 | 1781   | 2371   |
| UN69748 | Rsa1.0.00463.1 | 298 | 189177 | 1.00E-120 | 257 | 270 | 95 - | 1   | 270 | 116365 | 116634 |
| UN69749 | Rsa1.0.00377.1 | 739 | 90038  | 0         | 582 | 603 | 96 - | 20  | 621 | 4691   | 5293   |
| UN69750 | Rsa1.0.04845.1 | 122 | 15747  | 2.00E-53  | 119 | 122 | 97 - | 1   | 122 | 6186   | 6306   |
| UN69751 | Rsa1.0.04892.1 | 673 | 15573  | 1.00E-103 | 251 | 275 | 91 + | 1   | 253 | 6189   | 6463   |
| UN69752 | Rsa1.0.07389.1 | 203 | 9479   | 2.00E-75  | 164 | 171 | 95 + | 33  | 203 | 1124   | 1294   |
| UN69753 | Rsa1.0.53538.1 | 627 | 426    | 4.00E-92  | 322 | 376 | 85 + | 13  | 368 | 2      | 350    |
| UN69754 | Rsa1.0.00271.1 | 433 | 101125 | 1.00E-117 | 270 | 287 | 94 - | 1   | 285 | 97740  | 98024  |
| UN69755 | Rsa1.0.01339.1 | 748 | 47813  | 1.00E-116 | 295 | 320 | 92 - | 1   | 313 | 14806  | 15124  |
| UN69756 | Rsa1.0.00940.1 | 252 | 179946 | 1.00E-118 | 242 | 251 | 96 - | 2   | 252 | 176099 | 176349 |
| UN69757 | Rsa1.0.00226.1 | 584 | 105884 | 6.00E-88  | 215 | 230 | 93 + | 1   | 230 | 79100  | 79324  |
| UN69758 | Rsa1.0.05043.1 | 606 | 15044  | 1.00E-113 | 259 | 273 | 94 - | 1   | 268 | 332    | 603    |
| UN69759 | Rsa1.0.01100.1 | 593 | 54113  | 0         | 550 | 585 | 94 - | 21  | 593 | 24339  | 24923  |
| UN69760 | Rsa1.0.00187.1 | 866 | 393093 | 0         | 452 | 466 | 96 + | 1   | 459 | 155728 | 156191 |
| UN69761 | Rsa1.0.00336.1 | 141 | 445051 | 2.00E-47  | 129 | 141 | 91 + | 1   | 141 | 766    | 898    |
| UN69762 | Rsa1.0.00015.1 | 780 | 561803 | 0         | 414 | 422 | 98 - | 32  | 450 | 217939 | 218359 |
| UN69763 | Rsa1.0.02199.1 | 278 | 33982  | 7.00E-64  | 142 | 148 | 95 - | 98  | 245 | 13612  | 13759  |
| UN69764 | Rsa1.0.00092.1 | 545 | 659932 | 1.00E-173 | 332 | 340 | 97 - | 206 | 545 | 199179 | 199518 |
| UN69765 | Rsa1.0.02791.1 | 659 | 27832  | 0         | 516 | 528 | 97 - | 1   | 528 | 7704   | 8231   |
| UN69766 | Rsa1.0.00033.1 | 553 | 515811 | 0         | 528 | 568 | 92 - | 4   | 553 | 30990  | 31557  |
| UN69767 | Rsa1.0.01534.1 | 283 | 43764  | 1.00E-100 | 265 | 289 | 91 + | 1   | 282 | 10800  | 11088  |
| UN69768 | Rsa1.0.13824.1 | 539 | 4259   | 0         | 442 | 460 | 96 + | 22  | 481 | 2075   | 2534   |
| UN69769 | Rsa1.0.00301.1 | 360 | 365315 | 1.00E-171 | 348 | 361 | 96 - | 1   | 360 | 48575  | 48935  |

|         |                |     |        |           |     |     |      |     |     |        |        |
|---------|----------------|-----|--------|-----------|-----|-----|------|-----|-----|--------|--------|
| UN69770 | Rsa1.0.00016.1 | 413 | 831256 | 0         | 396 | 413 | 95 + | 1   | 413 | 375572 | 375978 |
| UN69771 | Rsa1.0.00699.1 | 457 | 184398 | 0         | 438 | 459 | 95 + | 4   | 457 | 31024  | 31477  |
| UN69772 | Rsa1.0.00065.1 | 177 | 454616 | 3.00E-22  | 125 | 149 | 83 + | 30  | 177 | 444334 | 444472 |
| UN69773 | Rsa1.0.00119.1 | 385 | 467509 | 2.00E-74  | 258 | 286 | 90 + | 5   | 286 | 385633 | 385914 |
| UN69774 | Rsa1.0.02032.1 | 501 | 35830  | 1.00E-127 | 297 | 317 | 93 - | 17  | 332 | 3825   | 4138   |
| UN69775 | Rsa1.0.00377.1 | 669 | 90038  | 1.00E-148 | 351 | 379 | 92 + | 7   | 374 | 51761  | 52136  |
| UN69776 | Rsa1.0.00728.1 | 523 | 66704  | 1.00E-116 | 250 | 261 | 95 - | 1   | 260 | 36897  | 37153  |
| UN69777 | Rsa1.0.00308.1 | 670 | 96915  | 1.00E-142 | 321 | 342 | 93 - | 10  | 350 | 81326  | 81655  |
| UN69778 | Rsa1.0.01667.1 | 793 | 41315  | 0         | 728 | 752 | 96 - | 26  | 765 | 33670  | 34420  |
| UN69779 | Rsa1.0.00369.1 | 713 | 266462 | 0         | 528 | 585 | 90 - | 1   | 581 | 180846 | 181403 |
| UN69780 | Rsa1.0.01937.1 | 638 | 37147  | 0         | 393 | 404 | 97 - | 2   | 405 | 21081  | 21480  |
| UN69781 | Rsa1.0.01937.1 | 715 | 37147  | 0         | 691 | 701 | 98 - | 16  | 715 | 2333   | 3033   |
| UN69782 | Rsa1.0.00730.1 | 119 | 66673  | 1.00E-26  | 103 | 117 | 88 - | 1   | 117 | 53844  | 53955  |
| UN69783 | Rsa1.0.00759.1 | 700 | 65465  | 0         | 397 | 411 | 96 - | 1   | 411 | 9402   | 9811   |
| UN69784 | Rsa1.0.52120.1 | 447 | 436    | 2.00E-84  | 211 | 228 | 92 + | 10  | 233 | 108    | 335    |
| UN69785 | Rsa1.0.00690.1 | 522 | 140527 | 3.00E-52  | 178 | 200 | 89 - | 2   | 190 | 31844  | 32041  |
| UN69786 | Rsa1.0.05569.1 | 194 | 13311  | 2.00E-38  | 106 | 113 | 93 + | 1   | 112 | 4165   | 4277   |
| UN69787 | Rsa1.0.00456.1 | 534 | 82826  | 1.00E-91  | 195 | 203 | 96 + | 206 | 408 | 66344  | 66546  |
| UN69788 | Rsa1.0.05112.1 | 652 | 14814  | 1.00E-157 | 331 | 348 | 95 + | 1   | 342 | 11187  | 11534  |
| UN69789 | #              | #   | #      | #         | #   | #   | #    | #   | #   | #      | #      |
| UN69790 | Rsa1.0.05271.1 | 302 | 14306  | 1.00E-138 | 290 | 302 | 96 - | 1   | 301 | 10319  | 10612  |
| UN69791 | Rsa1.0.00713.1 | 413 | 158017 | 1.00E-173 | 366 | 385 | 95 - | 27  | 409 | 150578 | 150955 |
| UN69792 | Rsa1.0.00706.1 | 536 | 291570 | 1.00E-107 | 268 | 290 | 92 + | 7   | 281 | 232669 | 232957 |
| UN69793 | Rsa1.0.00055.1 | 560 | 520193 | 1.00E-125 | 302 | 329 | 91 - | 244 | 560 | 40388  | 40716  |
| UN69794 | Rsa1.0.01389.1 | 219 | 46716  | 4.00E-68  | 193 | 210 | 91 - | 10  | 216 | 30384  | 30592  |
| UN69795 | Rsa1.0.00358.1 | 145 | 91293  | 3.00E-49  | 134 | 143 | 93 + | 1   | 143 | 35194  | 35334  |
| UN69796 | Rsa1.0.03100.1 | 529 | 25411  | 0         | 511 | 527 | 96 - | 3   | 529 | 6832   | 7358   |
| UN69797 | Rsa1.0.05495.1 | 201 | 13534  | 3.00E-84  | 191 | 201 | 95 + | 1   | 201 | 486    | 684    |
| UN69798 | Rsa1.0.01660.1 | 270 | 41400  | 1.00E-101 | 229 | 243 | 94 - | 1   | 243 | 27246  | 27488  |
| UN69799 | Rsa1.0.00358.1 | 717 | 91293  | 1.00E-174 | 341 | 350 | 97 - | 2   | 351 | 34290  | 34638  |
| UN69800 | Rsa1.0.02097.1 | 473 | 35036  | 1.00E-110 | 276 | 297 | 92 - | 1   | 294 | 19172  | 19467  |
| UN69801 | #              | #   | #      | #         | #   | #   | #    | #   | #   | #      | #      |
| UN69802 | Rsa1.0.23460.1 | 544 | 1047   | 0         | 372 | 383 | 97 - | 144 | 526 | 1      | 383    |
| UN69803 | Rsa1.0.06312.1 | 529 | 11253  | 1.00E-143 | 310 | 327 | 94 - | 50  | 373 | 6117   | 6443   |
| UN69804 | Rsa1.0.10486.1 | 723 | 5830   | 1.00E-177 | 349 | 359 | 97 - | 30  | 387 | 1667   | 2025   |
| UN69805 | Rsa1.0.00951.1 | 430 | 164588 | 1.00E-170 | 356 | 370 | 96 + | 2   | 370 | 48275  | 48641  |
| UN69806 | Rsa1.0.03452.1 | 533 | 22817  | 1.00E-158 | 337 | 354 | 95 - | 2   | 354 | 20027  | 20380  |
| UN69807 | Rsa1.0.00671.1 | 307 | 397884 | 1.00E-138 | 295 | 308 | 95 + | 1   | 307 | 133496 | 133802 |
| UN69808 | Rsa1.0.00003.1 | 807 | 340054 | 0         | 561 | 582 | 96 - | 1   | 577 | 263741 | 264322 |



|         |                |     |        |           |     |     |      |     |     |        |        |
|---------|----------------|-----|--------|-----------|-----|-----|------|-----|-----|--------|--------|
| UN69809 | Rsa1.0.00001.1 | 217 | 363028 | 2.00E-88  | 204 | 217 | 94 + | 1   | 217 | 140039 | 140255 |
| UN69810 | Rsa1.0.02908.1 | 608 | 26859  | 1.00E-126 | 296 | 315 | 93 - | 5   | 316 | 9465   | 9777   |
| UN69811 | Rsa1.0.00054.1 | 744 | 162053 | 1.00E-101 | 280 | 306 | 91 + | 1   | 305 | 14585  | 14886  |
| UN69812 | Rsa1.0.00529.1 | 612 | 77487  | 1.00E-131 | 292 | 310 | 94 + | 162 | 471 | 21063  | 21372  |
| UN69813 | Rsa1.0.00152.1 | 296 | 257730 | 1.00E-132 | 284 | 298 | 95 - | 2   | 296 | 11944  | 12238  |
| UN69814 | Rsa1.0.01153.1 | 652 | 52264  | 0         | 595 | 624 | 95 - | 34  | 652 | 49765  | 50388  |
| UN69815 | Rsa1.0.01338.1 | 764 | 155644 | 1.00E-172 | 462 | 514 | 89 + | 1   | 513 | 142015 | 142494 |
| UN69816 | Rsa1.0.13676.1 | 150 | 4504   | 4.00E-58  | 141 | 150 | 94 - | 1   | 150 | 573    | 722    |
| UN69817 | Rsa1.0.01727.1 | 685 | 40243  | 0         | 593 | 627 | 94 + | 24  | 639 | 29963  | 30588  |
| UN69818 | Rsa1.0.31443.1 | 411 | 727    | 3.00E-67  | 195 | 215 | 90 + | 1   | 210 | 495    | 709    |
| UN69819 | Rsa1.0.00032.1 | 617 | 306326 | 0         | 541 | 568 | 95 + | 2   | 560 | 146606 | 147170 |
| UN69820 | Rsa1.0.00930.1 | 153 | 59224  | 8.00E-44  | 103 | 106 | 97 - | 5   | 109 | 49934  | 50039  |
| UN69821 | Rsa1.0.00094.1 | 595 | 139042 | 1.00E-160 | 344 | 361 | 95 - | 3   | 363 | 97239  | 97596  |
| UN69822 | Rsa1.0.02884.1 | 763 | 27034  | 0         | 732 | 755 | 96 + | 9   | 763 | 22013  | 22761  |
| UN69823 | Rsa1.0.02008.1 | 818 | 36109  | 0         | 804 | 823 | 97 - | 1   | 818 | 13805  | 14627  |
| UN69824 | Rsa1.0.03843.1 | 246 | 20496  | 3.00E-26  | 67  | 69  | 97 - | 68  | 136 | 7306   | 7374   |
| UN69825 | Rsa1.0.00621.1 | 640 | 71840  | 1.00E-120 | 262 | 275 | 95 - | 231 | 504 | 50769  | 51043  |
| UN69826 | Rsa1.0.00055.1 | 854 | 520193 | 2.00E-94  | 182 | 184 | 98 + | 360 | 543 | 157579 | 157762 |
| UN69827 | Rsa1.0.02884.1 | 207 | 27034  | 3.00E-84  | 194 | 206 | 94 - | 2   | 207 | 12830  | 13035  |
| UN69828 | Rsa1.0.02663.1 | 325 | 169243 | 1.00E-133 | 304 | 325 | 93 - | 1   | 325 | 7875   | 8199   |
| UN69829 | Rsa1.0.00531.1 | 588 | 77387  | 1.00E-119 | 223 | 225 | 99 - | 153 | 377 | 25140  | 25364  |
| UN69830 | Rsa1.0.00069.1 | 638 | 403561 | 0         | 555 | 575 | 96 + | 32  | 604 | 130982 | 131556 |
| UN69831 | Rsa1.0.00057.1 | 116 | 160473 | 3.00E-39  | 103 | 110 | 93 - | 3   | 112 | 50015  | 50124  |
| UN69832 | Rsa1.0.04862.1 | 529 | 15688  | 0         | 515 | 529 | 97 - | 1   | 529 | 5186   | 5711   |
| UN69833 | Rsa1.0.00457.1 | 592 | 337301 | 0         | 387 | 401 | 96 - | 48  | 448 | 139977 | 140377 |
| UN69834 | Rsa1.0.01000.1 | 568 | 57140  | 1.00E-134 | 308 | 328 | 93 + | 93  | 420 | 2428   | 2750   |
| UN69835 | Rsa1.0.00503.1 | 462 | 79468  | 1.00E-114 | 325 | 359 | 90 - | 34  | 389 | 69177  | 69532  |
| UN69836 | Rsa1.0.00017.1 | 428 | 752458 | 1.00E-176 | 397 | 424 | 93 + | 1   | 424 | 293359 | 293775 |
| UN69837 | Rsa1.0.01506.1 | 829 | 44370  | 1.00E-110 | 338 | 382 | 88 + | 1   | 374 | 31379  | 31747  |
| UN69838 | Rsa1.0.04880.1 | 811 | 15612  | 0         | 635 | 694 | 91 + | 1   | 675 | 566    | 1258   |
| UN69839 | Rsa1.0.00628.1 | 326 | 214360 | 1.00E-122 | 278 | 292 | 95 + | 1   | 290 | 34471  | 34758  |
| UN69840 | Rsa1.0.01580.1 | 632 | 42852  | 1.00E-100 | 224 | 237 | 94 - | 158 | 394 | 24650  | 24886  |
| UN69841 | Rsa1.0.00071.1 | 237 | 345714 | 1.00E-117 | 231 | 237 | 97 + | 1   | 237 | 66103  | 66339  |
| UN69842 | Rsa1.0.05795.1 | 128 | 12609  | 1.00E-54  | 123 | 128 | 96 + | 1   | 128 | 7701   | 7828   |
| UN69843 | Rsa1.0.03332.1 | 763 | 23665  | 0         | 712 | 738 | 96 - | 29  | 763 | 13107  | 13842  |
| UN69844 | Rsa1.0.00373.1 | 700 | 90296  | 1.00E-137 | 283 | 292 | 96 - | 4   | 294 | 28442  | 28732  |
| UN69845 | Rsa1.0.01679.1 | 748 | 146876 | 1.00E-106 | 282 | 310 | 90 - | 1   | 297 | 142893 | 143202 |
| UN69846 | Rsa1.0.02224.1 | 762 | 33758  | 0         | 725 | 756 | 95 - | 8   | 762 | 3801   | 4554   |
| UN69847 | Rsa1.0.00679.1 | 515 | 68971  | 1.00E-108 | 205 | 207 | 99 - | 294 | 500 | 60439  | 60645  |

|         |                |     |        |           |     |     |       |     |     |        |        |
|---------|----------------|-----|--------|-----------|-----|-----|-------|-----|-----|--------|--------|
| UN69848 | Rsa1.0.00007.1 | 633 | 239325 | 1.00E-122 | 391 | 439 | 89 -  | 220 | 624 | 53028  | 53464  |
| UN69849 | Rsa1.0.00669.1 | 718 | 69419  | 0         | 447 | 463 | 96 +  | 1   | 462 | 34915  | 35374  |
| UN69850 | Rsa1.0.00518.1 | 225 | 78360  | 1.00E-65  | 127 | 127 | 100 + | 1   | 127 | 66810  | 66936  |
| UN69851 | Rsa1.0.02860.1 | 215 | 27207  | 1.00E-89  | 205 | 216 | 94 +  | 1   | 215 | 25035  | 25246  |
| UN69852 | Rsa1.0.00821.1 | 165 | 62891  | 3.00E-68  | 159 | 167 | 95 -  | 1   | 165 | 48020  | 48182  |
| UN69853 | Rsa1.0.56249.1 | 469 | 407    | 2.00E-84  | 165 | 167 | 98 -  | 32  | 198 | 241    | 407    |
| UN69854 | Rsa1.0.00010.1 | 173 | 294827 | 7.00E-23  | 132 | 155 | 85 +  | 15  | 169 | 135526 | 135678 |
| UN69855 | Rsa1.0.04057.1 | 118 | 19333  | 4.00E-51  | 114 | 118 | 96 -  | 1   | 118 | 3579   | 3696   |
| UN69856 | Rsa1.0.00060.1 | 338 | 502678 | 6.00E-99  | 204 | 211 | 96 -  | 128 | 338 | 391355 | 391565 |
| UN69857 | Rsa1.0.04194.1 | 468 | 132734 | 0         | 443 | 452 | 98 +  | 13  | 464 | 125366 | 125817 |
| UN69858 | Rsa1.0.02244.1 | 245 | 33494  | 8.00E-45  | 140 | 155 | 90 +  | 93  | 245 | 12852  | 13006  |
| UN69859 | Rsa1.0.00520.1 | 255 | 78226  | 5.00E-68  | 164 | 175 | 93 +  | 70  | 244 | 1849   | 2023   |
| UN69860 | Rsa1.0.00910.1 | 596 | 59975  | 1.00E-112 | 292 | 319 | 91 +  | 4   | 321 | 30977  | 31276  |
| UN69861 | Rsa1.0.00377.1 | 584 | 90038  | 0         | 552 | 577 | 95 -  | 8   | 584 | 69304  | 69874  |
| UN69862 | Rsa1.0.02494.1 | 315 | 132923 | 5.00E-16  | 110 | 130 | 84 -  | 10  | 135 | 121608 | 121732 |
| UN69863 | Rsa1.0.13593.1 | 387 | 4685   | 1.00E-112 | 320 | 353 | 90 -  | 42  | 386 | 428    | 779    |
| UN69864 | Rsa1.0.03808.1 | 373 | 20732  | 1.00E-179 | 357 | 370 | 96 +  | 4   | 373 | 644    | 1013   |
| UN69865 | Rsa1.0.00301.1 | 688 | 365315 | 0         | 482 | 506 | 95 +  | 3   | 508 | 54314  | 54807  |
| UN69866 | Rsa1.0.05581.1 | 725 | 13272  | 0         | 513 | 541 | 94 -  | 64  | 600 | 5476   | 6010   |
| UN69867 | Rsa1.0.00157.1 | 451 | 245832 | 6.00E-78  | 157 | 159 | 98 +  | 1   | 157 | 76367  | 76525  |
| UN69868 | Rsa1.0.00457.1 | 671 | 337301 | 0         | 556 | 598 | 92 +  | 13  | 610 | 334157 | 334731 |
| UN69869 | Rsa1.0.00193.1 | 848 | 194198 | 2.33E-156 | 293 | 303 | 96 +  | 370 | 672 | 103331 | 103633 |
| UN69870 | Rsa1.0.02550.1 | 773 | 291051 | 0         | 383 | 390 | 98 +  | 385 | 773 | 274287 | 274676 |
| UN69871 | Rsa1.0.00807.1 | 773 | 63607  | 0         | 744 | 772 | 96 +  | 7   | 773 | 16849  | 17617  |
| UN69872 | Rsa1.0.02133.1 | 119 | 34726  | 7.00E-22  | 92  | 104 | 88 -  | 8   | 109 | 33066  | 33169  |
| UN69873 | Rsa1.0.05559.1 | 657 | 13329  | 0         | 426 | 440 | 96 -  | 83  | 522 | 8434   | 8872   |
| UN69874 | Rsa1.0.02215.1 | 382 | 33822  | 1.00E-102 | 249 | 268 | 92 +  | 1   | 267 | 16203  | 16470  |
| UN69875 | Rsa1.0.00437.1 | 329 | 84879  | 2.00E-98  | 265 | 288 | 92 +  | 42  | 329 | 70220  | 70501  |
| UN69876 | Rsa1.0.00589.1 | 772 | 209965 | 0         | 748 | 755 | 99 -  | 1   | 754 | 49587  | 50341  |
| UN69877 | Rsa1.0.01034.1 | 621 | 56046  | 0         | 366 | 378 | 96 -  | 242 | 619 | 19795  | 20172  |
| UN69878 | Rsa1.0.01405.1 | 232 | 46445  | 1.00E-99  | 220 | 232 | 94 -  | 1   | 232 | 16075  | 16306  |
| UN69879 | Rsa1.0.00435.1 | 438 | 317579 | 1.00E-134 | 289 | 301 | 96 -  | 1   | 298 | 66819  | 67117  |
| UN69880 | Rsa1.0.00911.1 | 762 | 59943  | 0         | 572 | 597 | 95 -  | 6   | 598 | 42158  | 42754  |
| UN69881 | Rsa1.0.00123.1 | 699 | 325650 | 1.00E-141 | 264 | 267 | 98 -  | 406 | 672 | 64895  | 65161  |
| UN69882 | Rsa1.0.00583.1 | 668 | 74309  | 1.00E-115 | 303 | 334 | 90 +  | 215 | 548 | 71952  | 72285  |
| UN69883 | Rsa1.0.01146.1 | 633 | 163455 | 1.00E-95  | 267 | 296 | 90 -  | 1   | 289 | 15434  | 15728  |
| UN69884 | Rsa1.0.00096.1 | 701 | 198773 | 1.00E-70  | 151 | 156 | 96 -  | 211 | 366 | 173444 | 173599 |
| UN69885 | Rsa1.0.03391.1 | 643 | 23251  | 0         | 569 | 594 | 95 +  | 55  | 640 | 2370   | 2963   |
| UN69886 | Rsa1.0.14400.1 | 136 | 3430   | 1.00E-35  | 120 | 136 | 88 -  | 1   | 136 | 247    | 373    |

|         |                |     |        |           |     |     |       |     |     |        |        |
|---------|----------------|-----|--------|-----------|-----|-----|-------|-----|-----|--------|--------|
| UN69887 | Rsa1.0.00611.1 | 178 | 72410  | 2.00E-32  | 149 | 170 | 87 +  | 1   | 169 | 5806   | 5971   |
| UN69888 | Rsa1.0.00789.1 | 140 | 64233  | 2.00E-35  | 129 | 146 | 88 +  | 1   | 138 | 49331  | 49476  |
| UN69889 | Rsa1.0.04744.1 | 105 | 16154  | 2.00E-34  | 96  | 102 | 94 -  | 1   | 101 | 7378   | 7479   |
| UN69890 | Rsa1.0.02527.1 | 745 | 177225 | 1.00E-135 | 270 | 276 | 97 -  | 7   | 280 | 19360  | 19635  |
| UN69891 | Rsa1.0.00061.1 | 451 | 218685 | 1.00E-110 | 217 | 222 | 97 +  | 230 | 451 | 67202  | 67423  |
| UN69892 | Rsa1.0.00195.1 | 388 | 251884 | 2.00E-43  | 196 | 229 | 85 -  | 162 | 388 | 228575 | 228802 |
| UN69893 | Rsa1.0.00122.1 | 716 | 265937 | 0         | 691 | 716 | 96 +  | 1   | 716 | 30227  | 30942  |
| UN69894 | #              | #   | #      | #         | #   | #   | #     | #   | #   | #      | #      |
| UN69895 | Rsa1.0.00344.1 | 681 | 191774 | 1.00E-177 | 342 | 350 | 97 -  | 1   | 349 | 104082 | 104431 |
| UN69896 | Rsa1.0.06083.1 | 389 | 11780  | 1.00E-106 | 256 | 275 | 93 +  | 7   | 281 | 7906   | 8179   |
| UN69897 | Rsa1.0.04438.1 | 619 | 17361  | 0         | 424 | 454 | 93 +  | 12  | 455 | 2621   | 3074   |
| UN69898 | Rsa1.0.01220.1 | 680 | 161775 | 1.00E-125 | 262 | 273 | 95 -  | 295 | 564 | 120189 | 120461 |
| UN69899 | Rsa1.0.04670.1 | 294 | 16453  | 1.00E-130 | 266 | 275 | 96 -  | 19  | 292 | 5546   | 5820   |
| UN69900 | Rsa1.0.00184.1 | 619 | 218748 | 0         | 601 | 621 | 96 -  | 1   | 619 | 44106  | 44724  |
| UN69901 | Rsa1.0.00128.1 | 406 | 228675 | 1.00E-121 | 235 | 240 | 97 -  | 166 | 405 | 66275  | 66514  |
| UN69902 | Rsa1.0.00847.1 | 572 | 62270  | 1.00E-127 | 298 | 320 | 93 -  | 127 | 443 | 55145  | 55464  |
| UN69903 | Rsa1.0.02481.1 | 775 | 31035  | 4.00E-28  | 95  | 105 | 90 +  | 665 | 769 | 11396  | 11500  |
| UN69904 | Rsa1.0.01091.1 | 853 | 54383  | 0         | 469 | 496 | 94 +  | 45  | 540 | 11415  | 11893  |
| UN69905 | Rsa1.0.04716.1 | 745 | 16262  | 0         | 707 | 734 | 96 -  | 1   | 731 | 5986   | 6716   |
| UN69906 | Rsa1.0.02525.1 | 338 | 30489  | 1.00E-69  | 134 | 134 | 100 - | 128 | 261 | 15988  | 16121  |
| UN69907 | Rsa1.0.01292.1 | 148 | 175783 | 8.00E-50  | 137 | 147 | 93 +  | 5   | 148 | 156801 | 156942 |
| UN69908 | Rsa1.0.02606.1 | 580 | 29635  | 1.00E-178 | 381 | 398 | 95 -  | 1   | 396 | 7554   | 7947   |
| UN69909 | Rsa1.0.00390.1 | 671 | 88681  | 0         | 565 | 576 | 98 -  | 96  | 671 | 51247  | 51822  |
| UN69910 | Rsa1.0.31858.1 | 439 | 716    | 1.00E-171 | 323 | 329 | 98 -  | 111 | 439 | 382    | 710    |
| UN69911 | Rsa1.0.12933.1 | 279 | 5071   | 1.00E-99  | 262 | 291 | 90 +  | 1   | 279 | 3423   | 3706   |
| UN69912 | Rsa1.0.01182.1 | 179 | 167304 | 3.00E-68  | 168 | 178 | 94 +  | 1   | 175 | 165237 | 165414 |
| UN69913 | Rsa1.0.00196.1 | 776 | 109960 | 0         | 723 | 765 | 94 -  | 1   | 762 | 11238  | 12001  |
| UN69914 | Rsa1.0.00923.1 | 892 | 153678 | 0         | 450 | 475 | 94 +  | 1   | 472 | 38696  | 39160  |
| UN69915 | Rsa1.0.05360.1 | 332 | 14053  | 1.00E-158 | 323 | 331 | 97 -  | 1   | 329 | 9319   | 9647   |
| UN69916 | Rsa1.0.04288.1 | 776 | 18077  | 0         | 709 | 773 | 91 +  | 8   | 776 | 4655   | 5403   |
| UN69917 | Rsa1.0.03494.1 | 610 | 22509  | 0         | 594 | 611 | 97 -  | 2   | 610 | 15250  | 15858  |
| UN69918 | Rsa1.0.08779.1 | 495 | 6929   | 0         | 447 | 468 | 95 -  | 30  | 495 | 2797   | 3263   |
| UN69919 | Rsa1.0.04732.1 | 518 | 16193  | 0         | 516 | 518 | 99 -  | 1   | 518 | 4141   | 4658   |
| UN69920 | Rsa1.0.00116.1 | 674 | 365886 | 1.00E-104 | 307 | 341 | 90 -  | 1   | 325 | 313534 | 313868 |
| UN69921 | Rsa1.0.00910.1 | 607 | 59975  | 1.00E-140 | 314 | 330 | 95 +  | 9   | 338 | 30954  | 31276  |
| UN69922 | Rsa1.0.00353.1 | 356 | 92242  | 3.00E-88  | 211 | 221 | 95 +  | 1   | 219 | 55710  | 55928  |
| UN69923 | Rsa1.0.00060.1 | 723 | 502678 | 1.00E-137 | 292 | 305 | 95 -  | 3   | 303 | 495990 | 496294 |
| UN69924 | Rsa1.0.01578.1 | 265 | 42880  | 1.00E-124 | 258 | 268 | 96 +  | 1   | 265 | 35813  | 36080  |
| UN69925 | Rsa1.0.01234.1 | 365 | 50183  | 1.00E-112 | 331 | 376 | 88 -  | 2   | 365 | 20645  | 20997  |

|         |                |     |        |           |     |     |      |     |     |        |        |
|---------|----------------|-----|--------|-----------|-----|-----|------|-----|-----|--------|--------|
| UN69926 | Rsa1.0_17501.1 | 257 | 1815   | 9.00E-85  | 236 | 258 | 91 + | 1   | 254 | 1160   | 1417   |
| UN69927 | Rsa1.0_00782.1 | 323 | 64468  | 1.00E-109 | 289 | 320 | 90 - | 8   | 323 | 28399  | 28707  |
| UN69928 | Rsa1.0_05943.1 | 614 | 12158  | 1.00E-156 | 391 | 425 | 92 + | 13  | 436 | 6186   | 6605   |
| UN69929 | Rsa1.0_04132.1 | 755 | 18917  | 1.00E-103 | 214 | 222 | 96 - | 372 | 593 | 12904  | 13125  |
| UN69930 | Rsa1.0_04519.1 | 391 | 17004  | 1.00E-122 | 342 | 383 | 89 - | 4   | 378 | 15418  | 15800  |
| UN69931 | Rsa1.0_00360.1 | 651 | 91190  | 0         | 621 | 652 | 95 - | 1   | 651 | 80884  | 81530  |
| UN69932 | Rsa1.0_05884.1 | 847 | 12337  | 0         | 591 | 625 | 94 - | 183 | 807 | 434    | 1054   |
| UN69933 | Rsa1.0_02941.1 | 163 | 26583  | 8.00E-44  | 147 | 165 | 89 - | 1   | 163 | 22686  | 22850  |
| UN69934 | Rsa1.0_03352.1 | 452 | 23506  | 7.00E-96  | 229 | 243 | 94 - | 1   | 239 | 9339   | 9574   |
| UN69935 | Rsa1.0_00307.1 | 734 | 199003 | 1.00E-80  | 162 | 165 | 98 - | 301 | 465 | 79355  | 79519  |
| UN69936 | Rsa1.0_00112.1 | 155 | 132199 | 9.00E-53  | 143 | 155 | 92 + | 1   | 155 | 43245  | 43396  |
| UN69937 | Rsa1.0_01431.1 | 390 | 167877 | 0         | 374 | 390 | 95 - | 1   | 390 | 150058 | 150439 |
| UN69938 | Rsa1.0_00564.1 | 402 | 75428  | 1.00E-144 | 385 | 420 | 91 + | 1   | 398 | 60618  | 61030  |
| UN69939 | Rsa1.0_08744.1 | 545 | 6970   | 0         | 477 | 509 | 93 - | 1   | 505 | 1459   | 1956   |
| UN69940 | Rsa1.0_01183.1 | 601 | 51465  | 0         | 574 | 593 | 96 - | 10  | 601 | 41679  | 42266  |
| UN69941 | Rsa1.0_01618.1 | 602 | 42118  | 5.00E-82  | 233 | 257 | 90 + | 6   | 251 | 17334  | 17587  |
| UN69942 | Rsa1.0_00085.1 | 702 | 142226 | 1.00E-124 | 270 | 281 | 96 + | 3   | 283 | 28456  | 28732  |
| UN69943 | Rsa1.0_00257.1 | 688 | 102407 | 0         | 627 | 654 | 95 + | 35  | 688 | 86125  | 86773  |
| UN69944 | Rsa1.0_03783.1 | 131 | 20890  | 2.00E-50  | 127 | 133 | 95 + | 1   | 131 | 17869  | 18001  |
| UN69945 | Rsa1.0_00848.1 | 195 | 152362 | 1.00E-76  | 190 | 205 | 92 + | 1   | 195 | 901    | 1105   |
| UN69946 | Rsa1.0_00127.1 | 444 | 127446 | 1.00E-140 | 309 | 328 | 94 - | 1   | 328 | 83975  | 84302  |
| UN69947 | Rsa1.0_01595.1 | 511 | 175383 | 3.00E-95  | 214 | 224 | 95 + | 3   | 224 | 5856   | 6078   |
| UN69948 | Rsa1.0_00333.1 | 775 | 94500  | 0         | 744 | 776 | 95 + | 1   | 775 | 35195  | 35961  |
| UN69949 | Rsa1.0_02178.1 | 402 | 156197 | 1.00E-142 | 367 | 403 | 91 - | 1   | 402 | 150529 | 150931 |
| UN69950 | Rsa1.0_00632.1 | 175 | 183777 | 2.00E-38  | 84  | 85  | 98 - | 88  | 172 | 679    | 763    |
| UN69951 | Rsa1.0_00847.1 | 730 | 62270  | 1.00E-107 | 229 | 238 | 96 + | 494 | 730 | 55145  | 55382  |
| UN69952 | Rsa1.0_00293.1 | 575 | 339294 | 1.00E-106 | 310 | 342 | 90 + | 1   | 334 | 312954 | 313281 |
| UN69953 | Rsa1.0_01405.1 | 752 | 46445  | 1.00E-132 | 258 | 264 | 97 + | 3   | 266 | 33993  | 34256  |
| UN69954 | Rsa1.0_01960.1 | 778 | 36766  | 3.00E-84  | 183 | 191 | 95 + | 118 | 308 | 8534   | 8724   |
| UN69955 | Rsa1.0_08437.1 | 686 | 7357   | 0         | 664 | 697 | 95 - | 3   | 686 | 2848   | 3542   |
| UN69956 | Rsa1.0_02750.1 | 807 | 28239  | 1.00E-103 | 502 | 605 | 82 + | 9   | 606 | 3575   | 4179   |
| UN69957 | Rsa1.0_05310.1 | 374 | 14192  | 5.00E-75  | 155 | 159 | 97 + | 41  | 199 | 2314   | 2472   |
| UN69958 | Rsa1.0_00168.1 | 728 | 115870 | 1.00E-114 | 218 | 221 | 98 - | 360 | 580 | 110265 | 110485 |
| UN69959 | Rsa1.0_03471.1 | 480 | 22678  | 1.00E-48  | 111 | 115 | 96 - | 363 | 477 | 14728  | 14842  |
| UN69960 | Rsa1.0_00537.1 | 746 | 186980 | 1.00E-135 | 257 | 261 | 98 + | 30  | 290 | 16128  | 16388  |
| UN69961 | Rsa1.0_28114.1 | 789 | 827    | 8.00E-91  | 185 | 190 | 97 - | 348 | 537 | 638    | 827    |
| UN69962 | Rsa1.0_01527.1 | 726 | 43905  | 1.00E-162 | 326 | 338 | 96 + | 159 | 496 | 3571   | 3908   |
| UN69963 | Rsa1.0_00167.1 | 718 | 116000 | 6.00E-76  | 163 | 169 | 96 + | 145 | 313 | 15680  | 15848  |
| UN69964 | Rsa1.0_02668.1 | 686 | 28895  | 0         | 510 | 527 | 96 + | 152 | 675 | 3600   | 4126   |

|         |                |     |        |           |     |     |      |     |     |        |        |
|---------|----------------|-----|--------|-----------|-----|-----|------|-----|-----|--------|--------|
| UN69965 | Rsa1.0.00025.1 | 661 | 277312 | 1.00E-117 | 289 | 316 | 91 - | 346 | 661 | 275675 | 275974 |
| UN69966 | Rsa1.0.00533.1 | 586 | 77375  | 0         | 508 | 555 | 91 + | 56  | 586 | 930    | 1484   |
| UN69967 | Rsa1.0.05002.1 | 596 | 15173  | 4.00E-92  | 230 | 248 | 92 - | 8   | 246 | 9282   | 9527   |
| UN69968 | Rsa1.0.00503.1 | 585 | 79468  | 1.00E-176 | 353 | 364 | 96 - | 219 | 581 | 61102  | 61463  |
| UN69969 | Rsa1.0.05030.1 | 650 | 15088  | 0         | 600 | 648 | 92 - | 3   | 650 | 10994  | 11620  |
| UN69970 | Rsa1.0.03378.1 | 671 | 23322  | 1.00E-39  | 102 | 108 | 94 - | 161 | 268 | 12836  | 12943  |
| UN69971 | Rsa1.0.00055.1 | 728 | 520193 | 0         | 577 | 597 | 96 + | 3   | 597 | 401250 | 401845 |
| UN69972 | Rsa1.0.00437.1 | 678 | 84879  | 0         | 639 | 669 | 95 + | 7   | 673 | 39360  | 40020  |
| UN69973 | Rsa1.0.05755.1 | 629 | 12730  | 1.00E-170 | 325 | 331 | 98 + | 3   | 332 | 1136   | 1466   |
| UN69974 | Rsa1.0.01763.1 | 665 | 39659  | 0         | 564 | 597 | 94 + | 81  | 665 | 868    | 1452   |
| UN69975 | Rsa1.0.06563.1 | 767 | 10765  | 1.00E-151 | 316 | 331 | 95 - | 152 | 482 | 3523   | 3853   |
| UN69976 | Rsa1.0.17335.1 | 799 | 1857   | 1.00E-114 | 221 | 225 | 98 + | 383 | 607 | 163    | 387    |
| UN69977 | Rsa1.0.01803.1 | 780 | 173846 | 6.00E-70  | 172 | 183 | 93 + | 186 | 362 | 136431 | 136613 |
| UN69978 | Rsa1.0.04845.1 | 790 | 15747  | 1.00E-104 | 219 | 227 | 96 + | 16  | 239 | 4169   | 4395   |
| UN69979 | Rsa1.0.01459.1 | 683 | 45277  | 1.00E-116 | 308 | 335 | 91 - | 183 | 511 | 38022  | 38352  |
| UN69980 | Rsa1.0.05239.1 | 691 | 14410  | 1.00E-159 | 334 | 347 | 96 - | 341 | 682 | 11780  | 12121  |
| UN69981 | Rsa1.0.02244.1 | 764 | 33494  | 1.00E-131 | 291 | 306 | 95 - | 283 | 586 | 13766  | 14071  |
| UN69982 | Rsa1.0.00125.1 | 786 | 253043 | 1.00E-110 | 233 | 243 | 95 + | 5   | 247 | 128820 | 129062 |
| UN69983 | Rsa1.0.00520.1 | 642 | 78226  | 0         | 620 | 654 | 94 - | 4   | 642 | 2748   | 3397   |
| UN69984 | Rsa1.0.01010.1 | 800 | 56906  | 0         | 578 | 613 | 94 + | 6   | 614 | 26060  | 26654  |
| UN69985 | Rsa1.0.03005.1 | 425 | 26082  | 1.00E-118 | 231 | 236 | 97 + | 3   | 238 | 187    | 422    |
| UN69986 | Rsa1.0.00407.1 | 467 | 191544 | 1.00E-171 | 366 | 383 | 95 + | 89  | 466 | 15956  | 16338  |
| UN69987 | Rsa1.0.74050.1 | 780 | 310    | 2.00E-72  | 145 | 147 | 98 - | 524 | 670 | 98     | 244    |
| UN69988 | Rsa1.0.00293.1 | 682 | 339294 | 4.00E-40  | 88  | 89  | 98 - | 94  | 182 | 306545 | 306633 |
| UN69989 | Rsa1.0.00590.1 | 758 | 73835  | 1.00E-156 | 380 | 410 | 92 - | 10  | 417 | 9530   | 9932   |
| UN69990 | Rsa1.0.00110.1 | 399 | 132719 | 1.00E-151 | 372 | 401 | 92 - | 3   | 399 | 7016   | 7404   |
| UN69991 | Rsa1.0.10771.1 | 794 | 5723   | 1.00E-157 | 384 | 416 | 92 - | 3   | 416 | 1882   | 2290   |
| UN69992 | Rsa1.0.00048.1 | 839 | 167185 | 1.00E-116 | 225 | 229 | 98 + | 237 | 465 | 1583   | 1811   |
| UN69993 | Rsa1.0.03309.1 | 442 | 23852  | 1.00E-160 | 347 | 366 | 94 + | 4   | 368 | 17114  | 17479  |
| UN69994 | Rsa1.0.01234.1 | 609 | 50183  | 1.00E-123 | 257 | 268 | 95 + | 342 | 609 | 17937  | 18204  |
| UN69995 | Rsa1.0.05228.1 | 823 | 14437  | 1.00E-118 | 240 | 248 | 96 - | 405 | 652 | 6313   | 6560   |
| UN69996 | Rsa1.0.00493.1 | 533 | 80007  | 1.00E-142 | 311 | 331 | 93 + | 217 | 533 | 60555  | 60884  |
| UN69997 | Rsa1.0.04237.1 | 672 | 18361  | 1.00E-104 | 256 | 277 | 92 - | 178 | 454 | 7441   | 7717   |
| UN69998 | Rsa1.0.02810.1 | 665 | 27671  | 3.00E-87  | 206 | 221 | 93 - | 3   | 215 | 27057  | 27277  |
| UN69999 | Rsa1.0.46280.1 | 713 | 488    | 0         | 469 | 488 | 96 + | 208 | 695 | 1      | 488    |
| UN70000 | Rsa1.0.00795.1 | 533 | 64022  | 0         | 530 | 532 | 99 - | 2   | 533 | 10115  | 10646  |
| UN70001 | Rsa1.0.00489.1 | 723 | 80434  | 0         | 413 | 431 | 95 + | 288 | 718 | 34680  | 35105  |
| UN70002 | Rsa1.0.07925.1 | 739 | 8245   | 0         | 615 | 668 | 92 - | 93  | 739 | 4501   | 5160   |
| UN70003 | Rsa1.0.00586.1 | 601 | 163802 | 1.00E-111 | 238 | 248 | 95 + | 14  | 260 | 154486 | 154733 |

|         |                |     |        |           |     |     |       |     |     |        |        |
|---------|----------------|-----|--------|-----------|-----|-----|-------|-----|-----|--------|--------|
| UN70004 | Rsa1.0.02110.1 | 763 | 34919  | 0         | 737 | 778 | 94 -  | 1   | 763 | 22716  | 23481  |
| UN70005 | Rsa1.0.00782.1 | 809 | 64468  | 2.00E-85  | 170 | 173 | 98 +  | 480 | 652 | 27957  | 28129  |
| UN70006 | Rsa1.0.01211.1 | 816 | 50646  | 0         | 804 | 818 | 98 -  | 1   | 816 | 4329   | 5146   |
| UN70007 | Rsa1.0.02367.1 | 628 | 32106  | 0         | 566 | 606 | 93 +  | 1   | 590 | 11110  | 11712  |
| UN70008 | Rsa1.0.00427.1 | 812 | 189678 | 0         | 599 | 620 | 96 -  | 201 | 812 | 33174  | 33793  |
| UN70009 | Rsa1.0.01168.1 | 436 | 153765 | 6.00E-50  | 173 | 193 | 89 -  | 248 | 433 | 23488  | 23674  |
| UN70010 | Rsa1.0.08334.1 | 114 | 7525   | 1.00E-10  | 34  | 34  | 100 + | 16  | 49  | 2809   | 2842   |
| UN70011 | Rsa1.0.00175.1 | 746 | 166121 | 7.00E-54  | 114 | 116 | 98 +  | 209 | 324 | 26533  | 26648  |
| UN70012 | Rsa1.0.02888.1 | 101 | 27020  | 2.00E-30  | 90  | 95  | 94 -  | 2   | 96  | 7633   | 7725   |
| UN70013 | Rsa1.0.00070.1 | 111 | 150321 | 3.00E-42  | 102 | 107 | 95 +  | 2   | 108 | 146029 | 146135 |
| UN70014 | Rsa1.0.00351.1 | 872 | 413096 | 1.00E-145 | 277 | 282 | 98 -  | 473 | 754 | 133363 | 133644 |
| UN70015 | Rsa1.0.00086.1 | 325 | 439854 | 1.00E-138 | 272 | 280 | 97 +  | 46  | 325 | 241976 | 242255 |
| UN70016 | Rsa1.0.00329.1 | 598 | 222544 | 3.00E-83  | 175 | 181 | 96 -  | 295 | 475 | 178654 | 178834 |
| UN70017 | Rsa1.0.00235.1 | 547 | 154696 | 2.00E-69  | 149 | 154 | 96 -  | 128 | 281 | 144579 | 144732 |
| UN70018 | Rsa1.0.01092.1 | 523 | 54348  | 1.00E-174 | 458 | 502 | 91 +  | 1   | 493 | 22743  | 23240  |
| UN70019 | Rsa1.0.00033.1 | 724 | 515811 | 0         | 687 | 721 | 95 +  | 2   | 719 | 30253  | 30973  |
| UN70020 | Rsa1.0.03646.1 | 843 | 21598  | 1.00E-111 | 254 | 269 | 94 -  | 3   | 271 | 9979   | 10246  |
| UN70021 | Rsa1.0.67554.1 | 816 | 339    | 9.00E-97  | 186 | 188 | 98 +  | 184 | 371 | 1      | 188    |
| UN70022 | Rsa1.0.00120.1 | 134 | 277288 | 1.00E-48  | 125 | 134 | 93 -  | 1   | 134 | 253457 | 253590 |
| UN70023 | #              | #   | #      | #         | #   | #   | #     | #   | #   | #      | #      |
| UN70024 | #              | #   | #      | #         | #   | #   | #     | #   | #   | #      | #      |
| UN70025 | Rsa1.0.00612.1 | 714 | 72376  | 1.00E-133 | 271 | 281 | 96 +  | 434 | 714 | 49165  | 49445  |
| UN70026 | Rsa1.0.00211.1 | 765 | 228189 | 0         | 725 | 765 | 94 +  | 3   | 765 | 140053 | 140815 |
| UN70027 | Rsa1.0.02893.1 | 730 | 26999  | 1.00E-117 | 218 | 219 | 99 +  | 95  | 313 | 21485  | 21703  |
| UN70028 | Rsa1.0.00271.1 | 710 | 101125 | 3.00E-56  | 143 | 152 | 94 +  | 3   | 153 | 24018  | 24169  |
| UN70029 | Rsa1.0.01196.1 | 770 | 51097  | 1.00E-111 | 231 | 236 | 97 +  | 521 | 753 | 26796  | 27031  |
| UN70030 | Rsa1.0.00937.1 | 675 | 59061  | 1.00E-162 | 325 | 337 | 96 -  | 343 | 669 | 6836   | 7172   |
| UN70031 | Rsa1.0.02533.1 | 545 | 30399  | 3.00E-92  | 181 | 184 | 98 -  | 223 | 406 | 25148  | 25331  |
| UN70032 | Rsa1.0.02026.1 | 769 | 35896  | 0         | 383 | 395 | 96 +  | 184 | 577 | 22147  | 22541  |
| UN70033 | Rsa1.0.01326.1 | 611 | 48072  | 1.00E-135 | 250 | 252 | 99 +  | 360 | 611 | 40139  | 40390  |
| UN70034 | Rsa1.0.00423.1 | 780 | 86138  | 1.00E-172 | 322 | 327 | 98 -  | 328 | 654 | 72588  | 72914  |
| UN70035 | Rsa1.0.04223.1 | 773 | 18407  | 5.00E-95  | 207 | 217 | 95 -  | 1   | 217 | 11941  | 12157  |
| UN70036 | Rsa1.0.00953.1 | 639 | 145012 | 0         | 392 | 411 | 95 -  | 3   | 402 | 101674 | 102082 |
| UN70037 | Rsa1.0.00098.1 | 783 | 349239 | 1.00E-171 | 332 | 336 | 98 +  | 390 | 721 | 331917 | 332252 |
| UN70038 | Rsa1.0.00346.1 | 640 | 93130  | 0         | 431 | 441 | 97 +  | 3   | 442 | 44604  | 45044  |
| UN70039 | Rsa1.0.00133.1 | 712 | 123768 | 2.33E-156 | 291 | 298 | 97 -  | 3   | 300 | 56954  | 57248  |
| UN70040 | Rsa1.0.61764.1 | 655 | 371    | 0         | 359 | 371 | 96 +  | 274 | 644 | 1      | 371    |
| UN70041 | Rsa1.0.00548.1 | 693 | 76518  | 1.00E-126 | 379 | 432 | 87 -  | 3   | 412 | 39008  | 39422  |
| UN70042 | Rsa1.0.02295.1 | 736 | 149884 | 1.00E-143 | 399 | 437 | 91 +  | 149 | 580 | 117680 | 118108 |

|         |                |     |        |           |     |     |       |     |     |        |        |
|---------|----------------|-----|--------|-----------|-----|-----|-------|-----|-----|--------|--------|
| UN70043 | Rsa1.0.00802.1 | 713 | 63846  | 0         | 350 | 358 | 97 +  | 1   | 357 | 56846  | 57203  |
| UN70044 | Rsa1.0.00763.1 | 778 | 65121  | 4.00E-80  | 158 | 160 | 98 -  | 432 | 591 | 46818  | 46977  |
| UN70045 | Rsa1.0.00522.1 | 747 | 78103  | 0         | 562 | 581 | 96 +  | 102 | 681 | 51067  | 51647  |
| UN70046 | Rsa1.0.01920.1 | 603 | 158533 | 1.00E-171 | 445 | 489 | 91 +  | 3   | 470 | 125759 | 126241 |
| UN70047 | Rsa1.0.01750.1 | 729 | 39816  | 1.00E-163 | 403 | 442 | 91 +  | 130 | 542 | 14968  | 15402  |
| UN70048 | Rsa1.0.06596.1 | 778 | 10699  | 5.00E-89  | 185 | 190 | 97 +  | 3   | 192 | 1957   | 2144   |
| UN70049 | Rsa1.0.00836.1 | 771 | 185968 | 1.00E-154 | 441 | 484 | 91 +  | 295 | 767 | 141711 | 142191 |
| UN70050 | Rsa1.0.00239.1 | 703 | 104332 | 2.00E-78  | 164 | 169 | 97 -  | 119 | 287 | 16270  | 16438  |
| UN70051 | Rsa1.0.00293.1 | 792 | 339294 | 1.00E-119 | 217 | 217 | 100 - | 297 | 513 | 5234   | 5450   |
| UN70052 | Rsa1.0.02030.1 | 810 | 179909 | 1.00E-152 | 288 | 293 | 98 -  | 113 | 405 | 19457  | 19749  |
| UN70053 | Rsa1.0.00933.1 | 645 | 59164  | 1.00E-170 | 467 | 520 | 89 +  | 133 | 645 | 13258  | 13759  |
| UN70054 | Rsa1.0.00014.1 | 802 | 348985 | 1.00E-139 | 296 | 311 | 95 -  | 2   | 312 | 332154 | 332464 |
| UN70055 | Rsa1.0.01171.1 | 184 | 51752  | 4.00E-83  | 174 | 180 | 96 +  | 1   | 180 | 50225  | 50404  |
| UN70056 | Rsa1.0.00672.1 | 588 | 69358  | 5.00E-79  | 179 | 188 | 95 -  | 368 | 552 | 40537  | 40724  |
| UN70057 | Rsa1.0.01545.1 | 767 | 43599  | 0         | 548 | 564 | 97 -  | 3   | 559 | 32611  | 33174  |
| UN70058 | Rsa1.0.00546.1 | 639 | 76523  | 1.00E-110 | 245 | 258 | 94 -  | 256 | 512 | 12806  | 13063  |
| UN70059 | Rsa1.0.00064.1 | 597 | 240927 | 1.00E-165 | 308 | 311 | 99 +  | 287 | 597 | 73794  | 74103  |
| UN70060 | Rsa1.0.00008.1 | 687 | 358124 | 0         | 421 | 447 | 94 -  | 19  | 465 | 56542  | 56975  |
| UN70061 | Rsa1.0.04182.1 | 529 | 18610  | 0         | 442 | 447 | 98 -  | 2   | 445 | 2083   | 2529   |
| UN70062 | Rsa1.0.03618.1 | 637 | 21744  | 1.00E-156 | 292 | 296 | 98 -  | 148 | 443 | 7557   | 7852   |
| UN70063 | Rsa1.0.00040.1 | 837 | 324196 | 0         | 416 | 433 | 96 -  | 351 | 773 | 51888  | 52320  |
| UN70064 | Rsa1.0.00339.1 | 719 | 222974 | 1.00E-155 | 309 | 319 | 96 +  | 61  | 375 | 210744 | 211062 |
| UN70065 | Rsa1.0.10166.1 | 680 | 5966   | 0         | 376 | 386 | 97 -  | 296 | 680 | 5182   | 5567   |
| UN70066 | Rsa1.0.00490.1 | 815 | 186713 | 0         | 758 | 779 | 97 -  | 3   | 776 | 180969 | 181747 |
| UN70067 | Rsa1.0.00222.1 | 462 | 172263 | 2.00E-90  | 169 | 169 | 100 + | 1   | 169 | 138238 | 138406 |
| UN70068 | #              | #   | #      | #         | #   | #   | #     | #   | #   | #      | #      |
| UN70069 | Rsa1.0.01013.1 | 732 | 56822  | 0         | 574 | 595 | 96 +  | 42  | 624 | 27509  | 28100  |
| UN70070 | Rsa1.0.07534.1 | 461 | 9184   | 1.00E-114 | 260 | 275 | 94 +  | 3   | 276 | 7442   | 7714   |
| UN70071 | Rsa1.0.01394.1 | 658 | 46641  | 2.00E-72  | 157 | 163 | 96 -  | 4   | 166 | 6951   | 7113   |
| UN70072 | Rsa1.0.00327.1 | 569 | 94892  | 0         | 473 | 495 | 95 +  | 86  | 569 | 18499  | 18991  |
| UN70073 | Rsa1.0.00157.1 | 578 | 245832 | 5.00E-79  | 202 | 221 | 91 -  | 353 | 572 | 77102  | 77308  |
| UN70074 | Rsa1.0.01830.1 | 497 | 38641  | 1.00E-133 | 243 | 244 | 99 +  | 250 | 493 | 27334  | 27577  |
| UN70075 | Rsa1.0.00585.1 | 170 | 74164  | 6.00E-51  | 129 | 138 | 93 -  | 33  | 170 | 53970  | 54107  |
| UN70076 | Rsa1.0.01416.1 | 801 | 46262  | 0         | 762 | 792 | 96 +  | 3   | 784 | 39082  | 39873  |
| UN70077 | Rsa1.0.02433.1 | 554 | 158318 | 0         | 530 | 553 | 95 -  | 2   | 554 | 3194   | 3746   |
| UN70078 | Rsa1.0.00012.1 | 791 | 222148 | 1.00E-163 | 309 | 315 | 98 -  | 477 | 791 | 134683 | 134997 |
| UN70079 | Rsa1.0.04142.1 | 751 | 18861  | 0         | 693 | 737 | 94 -  | 19  | 751 | 1933   | 2667   |
| UN70080 | Rsa1.0.00015.1 | 536 | 561803 | 5.00E-91  | 244 | 267 | 91 +  | 1   | 258 | 529587 | 529847 |
| UN70081 | Rsa1.0.00213.1 | 859 | 108167 | 2.00E-82  | 185 | 192 | 96 -  | 576 | 765 | 94735  | 94926  |

|         |                |     |        |           |     |     |      |     |     |        |        |
|---------|----------------|-----|--------|-----------|-----|-----|------|-----|-----|--------|--------|
| UN70082 | Rsa1.0.00671.1 | 592 | 397884 | 1.00E-125 | 236 | 239 | 98 - | 347 | 585 | 133813 | 134051 |
| UN70083 | Rsa1.0.00250.1 | 653 | 273771 | 4.00E-86  | 180 | 186 | 96 - | 60  | 245 | 7537   | 7722   |
| UN70084 | Rsa1.0.08124.1 | 648 | 7869   | 0         | 419 | 438 | 95 - | 211 | 648 | 262    | 699    |
| UN70085 | Rsa1.0.00071.1 | 761 | 345714 | 0         | 665 | 694 | 95 - | 1   | 694 | 105124 | 105814 |
| UN70086 | Rsa1.0.02792.1 | 478 | 27829  | 0         | 456 | 490 | 93 - | 1   | 478 | 19257  | 19738  |
| UN70087 | Rsa1.0.00001.1 | 693 | 363028 | 0         | 363 | 373 | 97 - | 318 | 690 | 141577 | 141949 |
| UN70088 | Rsa1.0.00125.1 | 808 | 253043 | 0         | 606 | 618 | 98 - | 192 | 808 | 234425 | 235042 |
| UN70089 | Rsa1.0.01336.1 | 782 | 47853  | 0         | 435 | 452 | 96 - | 13  | 461 | 41768  | 42219  |
| UN70090 | Rsa1.0.00302.1 | 704 | 97521  | 0         | 687 | 707 | 97 + | 1   | 704 | 87675  | 88381  |
| UN70091 | Rsa1.0.00193.1 | 825 | 194198 | 1.00E-133 | 315 | 338 | 93 - | 6   | 339 | 105606 | 105937 |
| UN70092 | Rsa1.0.25529.1 | 801 | 932    | 1.00E-103 | 193 | 194 | 99 + | 370 | 563 | 720    | 913    |
| UN70093 | Rsa1.0.00162.1 | 791 | 239935 | 0         | 742 | 770 | 96 - | 2   | 770 | 15031  | 15794  |
| UN70094 | Rsa1.0.00993.1 | 607 | 57409  | 1.00E-149 | 326 | 351 | 92 + | 3   | 332 | 56500  | 56850  |
| UN70095 | Rsa1.0.00324.1 | 557 | 218805 | 1.00E-130 | 281 | 295 | 95 - | 3   | 297 | 187362 | 187655 |
| UN70096 | Rsa1.0.00032.1 | 593 | 306326 | 0         | 554 | 580 | 95 + | 10  | 583 | 284822 | 285401 |
| UN70097 | Rsa1.0.02244.1 | 696 | 33494  | 0         | 348 | 349 | 99 - | 1   | 349 | 4766   | 5114   |
| UN70098 | Rsa1.0.01493.1 | 768 | 44670  | 1.00E-139 | 263 | 267 | 98 - | 6   | 272 | 15494  | 15760  |
| UN70099 | Rsa1.0.08359.1 | 768 | 7483   | 1.00E-159 | 306 | 313 | 97 + | 411 | 723 | 818    | 1130   |
| UN70100 | Rsa1.0.04897.1 | 249 | 15545  | 1.00E-101 | 231 | 243 | 95 - | 8   | 249 | 2307   | 2548   |
| UN70101 | Rsa1.0.00437.1 | 131 | 84879  | 3.00E-33  | 91  | 96  | 94 - | 7   | 102 | 71472  | 71566  |
| UN70102 | Rsa1.0.06602.1 | 686 | 10683  | 0         | 661 | 685 | 96 + | 2   | 686 | 9068   | 9746   |
| UN70103 | Rsa1.0.00589.1 | 646 | 209965 | 0         | 543 | 552 | 98 + | 1   | 552 | 48331  | 48879  |
| UN70104 | Rsa1.0.02165.1 | 639 | 34423  | 0         | 553 | 593 | 93 + | 59  | 639 | 3037   | 3629   |
| UN70105 | Rsa1.0.03684.1 | 302 | 21392  | 1.00E-126 | 284 | 301 | 94 - | 1   | 301 | 14760  | 15059  |
| UN70106 | Rsa1.0.04667.1 | 419 | 16460  | 0         | 409 | 418 | 97 + | 3   | 419 | 13382  | 13798  |
| UN70107 | Rsa1.0.00454.1 | 301 | 216970 | 1.00E-56  | 125 | 128 | 97 + | 98  | 224 | 166745 | 166872 |
| UN70108 | Rsa1.0.08553.1 | 811 | 7210   | 1.00E-120 | 223 | 224 | 99 - | 287 | 510 | 588    | 811    |
| UN70109 | Rsa1.0.03610.1 | 563 | 21797  | 1.00E-164 | 298 | 300 | 99 + | 208 | 507 | 17265  | 17564  |
| UN70110 | Rsa1.0.00019.1 | 783 | 301669 | 7.00E-82  | 164 | 167 | 98 - | 317 | 483 | 113991 | 114157 |
| UN70111 | Rsa1.0.00435.1 | 740 | 317579 | 0         | 454 | 482 | 94 + | 157 | 638 | 64809  | 65287  |
| UN70112 | Rsa1.0.04794.1 | 477 | 15960  | 1.00E-100 | 259 | 282 | 91 - | 104 | 385 | 2694   | 2974   |
| UN70113 | Rsa1.0.09074.1 | 541 | 6670   | 1.00E-119 | 272 | 291 | 93 + | 5   | 295 | 2994   | 3277   |
| UN70114 | Rsa1.0.01296.1 | 160 | 49035  | 5.00E-39  | 105 | 112 | 93 + | 52  | 160 | 35777  | 35888  |
| UN70115 | Rsa1.0.00671.1 | 180 | 397884 | 3.00E-53  | 130 | 138 | 94 - | 43  | 180 | 180259 | 180396 |
| UN70116 | Rsa1.0.03056.1 | 611 | 25726  | 0         | 425 | 451 | 94 + | 2   | 451 | 7237   | 7687   |
| UN70117 | Rsa1.0.14624.1 | 313 | 3217   | 5.00E-99  | 284 | 315 | 90 - | 2   | 313 | 1334   | 1634   |
| UN70118 | Rsa1.0.00226.1 | 457 | 105884 | 1.00E-100 | 296 | 332 | 89 + | 43  | 365 | 77864  | 78192  |
| UN70119 | Rsa1.0.00931.1 | 751 | 59210  | 1.00E-121 | 233 | 237 | 98 - | 70  | 306 | 49295  | 49531  |
| UN70120 | Rsa1.0.03818.1 | 780 | 20668  | 1.00E-100 | 200 | 205 | 97 + | 289 | 493 | 10042  | 10246  |



|         |                |     |        |           |     |     |       |     |     |        |        |
|---------|----------------|-----|--------|-----------|-----|-----|-------|-----|-----|--------|--------|
| UN70121 | Rsa1.0_00713.1 | 647 | 158017 | 1.00E-126 | 250 | 256 | 97 -  | 161 | 416 | 2375   | 2627   |
| UN70122 | Rsa1.0_00307.1 | 758 | 199003 | 1.00E-86  | 169 | 171 | 98 +  | 330 | 500 | 75462  | 75632  |
| UN70123 | Rsa1.0_03294.1 | 711 | 23971  | 3.00E-90  | 205 | 216 | 94 +  | 262 | 475 | 4277   | 4492   |
| UN70124 | Rsa1.0_00971.1 | 395 | 57973  | 1.00E-165 | 321 | 328 | 97 +  | 3   | 326 | 47270  | 47597  |
| UN70125 | Rsa1.0_00564.1 | 717 | 75428  | 1.00E-113 | 256 | 270 | 94 -  | 447 | 713 | 61077  | 61346  |
| UN70126 | Rsa1.0_00275.1 | 783 | 210104 | 0         | 730 | 755 | 96 +  | 32  | 783 | 205236 | 205989 |
| UN70127 | Rsa1.0_43084.1 | 625 | 521    | 1.00E-127 | 275 | 286 | 96 -  | 156 | 438 | 1      | 285    |
| UN70128 | Rsa1.0_00173.1 | 748 | 288743 | 5.00E-98  | 203 | 209 | 97 -  | 1   | 209 | 271091 | 271297 |
| UN70129 | Rsa1.0_00893.1 | 703 | 60626  | 0         | 453 | 468 | 96 -  | 236 | 703 | 43330  | 43797  |
| UN70130 | Rsa1.0_00085.1 | 782 | 142226 | 4.00E-68  | 150 | 156 | 96 -  | 593 | 748 | 30273  | 30428  |
| UN70131 | Rsa1.0_00089.1 | 743 | 406142 | 0         | 671 | 743 | 90 +  | 10  | 739 | 349213 | 349934 |
| UN70132 | Rsa1.0_00257.1 | 755 | 102407 | 0         | 391 | 411 | 95 -  | 345 | 755 | 87667  | 88077  |
| UN70133 | Rsa1.0_00425.1 | 616 | 147080 | 0         | 575 | 582 | 98 +  | 3   | 584 | 110531 | 111111 |
| UN70134 | Rsa1.0_02258.1 | 672 | 33307  | 3.00E-68  | 201 | 223 | 90 -  | 3   | 217 | 26139  | 26352  |
| UN70135 | Rsa1.0_00044.1 | 800 | 271658 | 0         | 692 | 758 | 91 +  | 61  | 800 | 21424  | 22178  |
| UN70136 | Rsa1.0_15186.1 | 760 | 2772   | 9.00E-72  | 150 | 154 | 97 -  | 72  | 225 | 1966   | 2119   |
| UN70137 | Rsa1.0_01739.1 | 813 | 40068  | 0         | 790 | 841 | 93 +  | 2   | 811 | 8441   | 9281   |
| UN70138 | Rsa1.0_00790.1 | 476 | 148693 | 4.00E-48  | 98  | 98  | 100 - | 379 | 476 | 353    | 450    |
| UN70139 | Rsa1.0_02203.1 | 765 | 164532 | 1.00E-119 | 232 | 237 | 97 -  | 478 | 714 | 164195 | 164431 |
| UN70140 | Rsa1.0_00329.1 | 639 | 222544 | 1.00E-131 | 259 | 266 | 97 +  | 243 | 508 | 183510 | 183775 |
| UN70141 | Rsa1.0_00472.1 | 712 | 398134 | 0         | 685 | 706 | 97 +  | 2   | 707 | 282523 | 283228 |
| UN70142 | Rsa1.0_01938.1 | 686 | 264018 | 0         | 433 | 446 | 97 -  | 242 | 686 | 159820 | 160265 |
| UN70143 | Rsa1.0_00351.1 | 686 | 413096 | 1.00E-103 | 252 | 265 | 95 +  | 426 | 682 | 3182   | 3446   |
| UN70144 | Rsa1.0_00427.1 | 811 | 189678 | 0         | 725 | 744 | 97 -  | 5   | 746 | 129515 | 130258 |
| UN70145 | Rsa1.0_00369.1 | 772 | 266462 | 1.00E-153 | 324 | 339 | 95 +  | 290 | 627 | 178517 | 178855 |
| UN70146 | Rsa1.0_00440.1 | 197 | 84723  | 6.00E-82  | 187 | 197 | 94 +  | 3   | 197 | 46657  | 46853  |
| UN70147 | Rsa1.0_00970.1 | 738 | 57994  | 0         | 526 | 551 | 95 -  | 3   | 546 | 24535  | 25082  |
| UN70148 | Rsa1.0_26434.1 | 648 | 892    | 1.00E-158 | 302 | 308 | 98 -  | 344 | 648 | 64     | 371    |
| UN70149 | Rsa1.0_00052.1 | 778 | 162771 | 0         | 396 | 411 | 96 +  | 7   | 414 | 81487  | 81896  |
| UN70150 | Rsa1.0_00039.1 | 657 | 296927 | 5.00E-70  | 168 | 179 | 93 -  | 400 | 578 | 49165  | 49343  |
| UN70151 | Rsa1.0_00087.1 | 836 | 761073 | 1.00E-147 | 312 | 321 | 97 -  | 525 | 836 | 528237 | 528557 |
| UN70152 | Rsa1.0_00527.1 | 730 | 77733  | 0         | 358 | 368 | 97 -  | 363 | 730 | 41392  | 41756  |
| UN70153 | Rsa1.0_00182.1 | 704 | 142305 | 0         | 675 | 710 | 95 -  | 2   | 704 | 66928  | 67633  |
| UN70154 | Rsa1.0_05778.1 | 744 | 12656  | 0         | 710 | 736 | 96 -  | 2   | 737 | 148    | 883    |
| UN70155 | Rsa1.0_00040.1 | 792 | 324196 | 0         | 411 | 434 | 94 -  | 1   | 431 | 175165 | 175587 |
| UN70156 | Rsa1.0_02435.1 | 605 | 31454  | 2.00E-90  | 196 | 205 | 95 -  | 392 | 596 | 18376  | 18580  |
| UN70157 | Rsa1.0_00017.1 | 798 | 752458 | 2.00E-70  | 186 | 200 | 93 +  | 14  | 212 | 448326 | 448519 |
| UN70158 | Rsa1.0_07851.1 | 827 | 8423   | 0         | 429 | 439 | 97 +  | 350 | 784 | 4308   | 4746   |
| UN70159 | Rsa1.0_12445.1 | 759 | 5224   | 0         | 364 | 378 | 96 +  | 3   | 380 | 847    | 1224   |

|         |                |     |        |           |     |     |      |     |     |        |        |
|---------|----------------|-----|--------|-----------|-----|-----|------|-----|-----|--------|--------|
| UN70160 | Rsa1.0.00720.1 | 747 | 66931  | 0         | 715 | 744 | 96 + | 1   | 740 | 46883  | 47626  |
| UN70161 | Rsa1.0.00055.1 | 542 | 520193 | 0         | 523 | 543 | 96 - | 5   | 540 | 344870 | 345408 |
| UN70162 | Rsa1.0.05452.1 | 146 | 13697  | 2.00E-65  | 142 | 146 | 97 + | 2   | 146 | 12025  | 12170  |
| UN70163 | Rsa1.0.01119.1 | 639 | 53459  | 1.00E-110 | 228 | 235 | 97 - | 409 | 639 | 11691  | 11924  |
| UN70164 | Rsa1.0.05495.1 | 748 | 13534  | 1.00E-174 | 378 | 396 | 95 - | 356 | 748 | 548    | 941    |
| UN70165 | Rsa1.0.01648.1 | 757 | 41635  | 0         | 599 | 616 | 97 + | 96  | 706 | 10802  | 11417  |
| UN70166 | Rsa1.0.00017.1 | 441 | 752458 | 0         | 422 | 435 | 97 + | 1   | 433 | 286146 | 286575 |
| UN70167 | Rsa1.0.08225.1 | 467 | 7695   | 1.00E-123 | 285 | 304 | 93 - | 165 | 467 | 4156   | 4459   |
| UN70168 | Rsa1.0.01677.1 | 557 | 41140  | 0         | 443 | 452 | 98 + | 108 | 557 | 7512   | 7963   |
| UN70169 | Rsa1.0.14298.1 | 699 | 3561   | 0         | 405 | 416 | 97 - | 215 | 627 | 3050   | 3465   |
| UN70170 | Rsa1.0.01484.1 | 738 | 44806  | 3.00E-81  | 207 | 222 | 93 - | 1   | 220 | 27273  | 27494  |
| UN70171 | Rsa1.0.00302.1 | 350 | 97521  | 1.00E-136 | 323 | 350 | 92 - | 1   | 350 | 76205  | 76545  |
| UN70172 | Rsa1.0.00015.1 | 684 | 561803 | 1.00E-116 | 281 | 302 | 93 + | 111 | 410 | 300978 | 301276 |
| UN70173 | Rsa1.0.00818.1 | 647 | 62939  | 1.00E-79  | 336 | 395 | 85 - | 278 | 641 | 53363  | 53756  |
| UN70174 | Rsa1.0.01825.1 | 117 | 38725  | 1.00E-10  | 102 | 121 | 84 + | 6   | 117 | 14022  | 14142  |
| UN70175 | Rsa1.0.14263.1 | 547 | 3600   | 1.00E-112 | 266 | 284 | 93 + | 1   | 282 | 1234   | 1516   |
| UN70176 | Rsa1.0.11488.1 | 403 | 5487   | 1.00E-170 | 370 | 391 | 94 + | 1   | 381 | 5097   | 5487   |
| UN70177 | Rsa1.0.00759.1 | 506 | 65465  | 1.00E-153 | 307 | 318 | 96 + | 189 | 506 | 63940  | 64257  |
| UN70178 | Rsa1.0.01907.1 | 599 | 37431  | 0         | 437 | 457 | 95 - | 3   | 458 | 19686  | 20141  |
| UN70179 | Rsa1.0.05653.1 | 533 | 13043  | 0         | 427 | 461 | 92 + | 81  | 521 | 9994   | 10449  |
| UN70180 | Rsa1.0.06092.1 | 772 | 11756  | 0         | 392 | 403 | 97 + | 3   | 403 | 238    | 640    |
| UN70181 | Rsa1.0.01696.1 | 173 | 301850 | 4.00E-46  | 162 | 178 | 91 + | 1   | 173 | 298967 | 299139 |
| UN70182 | Rsa1.0.01565.1 | 518 | 155447 | 1.00E-126 | 302 | 321 | 94 + | 2   | 319 | 10764  | 11083  |
| UN70183 | Rsa1.0.00662.1 | 252 | 192183 | 1.00E-86  | 198 | 210 | 94 - | 4   | 213 | 190200 | 190409 |
| UN70184 | Rsa1.0.04649.1 | 481 | 16538  | 1.00E-72  | 151 | 155 | 97 - | 2   | 156 | 5897   | 6051   |
| UN70185 | Rsa1.0.04371.1 | 596 | 17700  | 0         | 564 | 592 | 95 + | 1   | 592 | 14406  | 14990  |
| UN70186 | #              | #   | #      | #         | #   | #   | #    | #   | #   | #      | #      |
| UN70187 | Rsa1.0.01394.1 | 371 | 46641  | 5.00E-75  | 164 | 171 | 95 - | 3   | 173 | 6951   | 7121   |
| UN70188 | Rsa1.0.00879.1 | 747 | 61297  | 1.00E-162 | 333 | 347 | 95 + | 231 | 574 | 37775  | 38121  |
| UN70189 | Rsa1.0.03940.1 | 674 | 19962  | 0         | 386 | 400 | 96 + | 3   | 402 | 11027  | 11426  |
| UN70190 | Rsa1.0.00582.1 | 513 | 74333  | 0         | 492 | 513 | 95 + | 1   | 513 | 11428  | 11938  |
| UN70191 | Rsa1.0.03916.1 | 149 | 20117  | 3.00E-58  | 142 | 150 | 94 + | 1   | 149 | 13542  | 13691  |
| UN70192 | Rsa1.0.00036.1 | 528 | 176186 | 0         | 382 | 392 | 97 + | 1   | 392 | 154322 | 154713 |
| UN70193 | Rsa1.0.00512.1 | 784 | 200277 | 2.00E-70  | 154 | 160 | 96 + | 146 | 305 | 28829  | 28988  |
| UN70194 | Rsa1.0.00003.1 | 280 | 340054 | 1.00E-114 | 242 | 250 | 96 - | 3   | 250 | 12113  | 12359  |
| UN70195 | Rsa1.0.01963.1 | 698 | 36719  | 0         | 409 | 431 | 94 + | 266 | 693 | 34662  | 35092  |
| UN70196 | Rsa1.0.03498.1 | 462 | 22480  | 1.00E-100 | 215 | 223 | 96 - | 4   | 224 | 19020  | 19239  |
| UN70197 | Rsa1.0.01529.1 | 613 | 43871  | 1.00E-116 | 224 | 228 | 98 - | 288 | 515 | 25130  | 25357  |
| UN70198 | Rsa1.0.02312.1 | 759 | 32675  | 1.00E-119 | 275 | 297 | 92 - | 243 | 539 | 21279  | 21557  |

|         |                |     |        |           |     |     |      |     |     |        |        |
|---------|----------------|-----|--------|-----------|-----|-----|------|-----|-----|--------|--------|
| UN70199 | Rsa1.0.03831.1 | 169 | 20579  | 3.00E-80  | 163 | 167 | 97 + | 1   | 167 | 18152  | 18318  |
| UN70200 | Rsa1.0.00344.1 | 613 | 191774 | 0         | 556 | 573 | 97 - | 5   | 577 | 155554 | 156122 |
| UN70201 | Rsa1.0.00066.1 | 119 | 152418 | 1.00E-44  | 109 | 114 | 95 + | 4   | 117 | 73460  | 73571  |
| UN70202 | Rsa1.0.00748.1 | 726 | 65983  | 1.00E-142 | 274 | 280 | 97 + | 376 | 655 | 58948  | 59227  |
| UN70203 | Rsa1.0.00040.1 | 225 | 324196 | 3.00E-41  | 116 | 124 | 93 + | 2   | 124 | 17155  | 17275  |
| UN70204 | Rsa1.0.23297.1 | 530 | 1059   | 2.00E-84  | 202 | 214 | 94 - | 317 | 530 | 537    | 747    |
| UN70205 | Rsa1.0.05326.1 | 430 | 14139  | 1.00E-125 | 256 | 263 | 97 + | 169 | 430 | 3936   | 4197   |
| UN70206 | Rsa1.0.00051.1 | 509 | 258225 | 1.00E-113 | 219 | 223 | 98 - | 98  | 320 | 153374 | 153596 |
| UN70207 | Rsa1.0.00237.1 | 274 | 235974 | 7.00E-55  | 171 | 187 | 91 - | 90  | 273 | 58557  | 58740  |
| UN70208 | Rsa1.0.04778.1 | 399 | 16010  | 1.00E-139 | 362 | 400 | 90 + | 1   | 399 | 10061  | 10444  |
| UN70209 | Rsa1.0.00131.1 | 469 | 432233 | 1.00E-63  | 142 | 148 | 95 - | 40  | 187 | 78027  | 78174  |
| UN70210 | Rsa1.0.00196.1 | 746 | 109960 | 1.00E-177 | 369 | 386 | 95 + | 1   | 386 | 10145  | 10529  |
| UN70211 | Rsa1.0.00923.1 | 486 | 153678 | 1.00E-159 | 347 | 368 | 94 - | 129 | 486 | 40126  | 40493  |
| UN70212 | Rsa1.0.10507.1 | 773 | 5822   | 0         | 468 | 480 | 97 - | 297 | 773 | 2229   | 2708   |
| UN70213 | Rsa1.0.04394.1 | 785 | 17571  | 1.00E-109 | 241 | 257 | 93 - | 3   | 246 | 1756   | 2012   |
| UN70214 | Rsa1.0.00048.1 | 657 | 167185 | 2.00E-91  | 195 | 203 | 96 - | 159 | 361 | 8087   | 8289   |
| UN70215 | Rsa1.0.00784.1 | 751 | 64359  | 0         | 674 | 697 | 96 + | 43  | 739 | 36327  | 37016  |
| UN70216 | Rsa1.0.01163.1 | 787 | 51946  | 1.00E-108 | 214 | 219 | 97 + | 252 | 470 | 21256  | 21474  |
| UN70217 | Rsa1.0.00040.1 | 676 | 324196 | 0         | 642 | 674 | 95 - | 5   | 669 | 2186   | 2856   |
| UN70218 | Rsa1.0.00058.1 | 555 | 159921 | 1.00E-67  | 157 | 163 | 96 + | 3   | 163 | 91204  | 91366  |
| UN70219 | Rsa1.0.00297.1 | 794 | 97836  | 1.00E-147 | 314 | 332 | 94 - | 3   | 322 | 27334  | 27663  |
| UN70220 | Rsa1.0.05569.1 | 790 | 13311  | 0         | 754 | 794 | 94 + | 1   | 790 | 2024   | 2808   |
| UN70221 | Rsa1.0.00707.1 | 634 | 190112 | 0         | 614 | 635 | 96 - | 2   | 633 | 155475 | 156109 |
| UN70222 | Rsa1.0.10201.1 | 564 | 5946   | 0         | 417 | 427 | 97 - | 2   | 428 | 1193   | 1619   |
| UN70223 | Rsa1.0.02753.1 | 460 | 28215  | 0         | 446 | 467 | 95 - | 1   | 460 | 8062   | 8527   |
| UN70224 | Rsa1.0.04279.1 | 597 | 18113  | 1.00E-116 | 236 | 244 | 96 - | 161 | 404 | 5446   | 5689   |
| UN70225 | Rsa1.0.04112.1 | 796 | 18989  | 1.00E-102 | 207 | 213 | 97 - | 350 | 562 | 5520   | 5732   |
| UN70226 | Rsa1.0.00789.1 | 472 | 64233  | 0         | 451 | 473 | 95 - | 3   | 472 | 13089  | 13560  |
| UN70227 | Rsa1.0.00088.1 | 668 | 141341 | 0         | 507 | 529 | 95 + | 3   | 520 | 10027  | 10550  |
| UN70228 | Rsa1.0.00180.1 | 714 | 114581 | 1.00E-106 | 213 | 219 | 97 + | 128 | 346 | 110422 | 110640 |
| UN70229 | Rsa1.0.02792.1 | 753 | 27829  | 1.00E-161 | 327 | 340 | 96 + | 119 | 458 | 17605  | 17944  |
| UN70230 | #              | #   | #      | #         | #   | #   | #    | #   | #   | #      | #      |
| UN70231 | Rsa1.0.00002.1 | 703 | 601661 | 1.00E-110 | 231 | 241 | 95 - | 431 | 664 | 18078  | 18318  |
| UN70232 | Rsa1.0.08342.1 | 648 | 7502   | 1.00E-131 | 335 | 361 | 92 + | 3   | 356 | 599    | 955    |
| UN70233 | Rsa1.0.04356.1 | 638 | 17764  | 1.00E-173 | 471 | 523 | 90 + | 117 | 638 | 10015  | 10525  |
| UN70234 | Rsa1.0.00556.1 | 769 | 207212 | 1.00E-118 | 245 | 252 | 97 + | 488 | 737 | 5867   | 6118   |
| UN70235 | Rsa1.0.00159.1 | 629 | 431686 | 1.00E-103 | 222 | 231 | 96 - | 214 | 443 | 351470 | 351700 |
| UN70236 | Rsa1.0.00324.1 | 104 | 218805 | 1.00E-29  | 94  | 98  | 95 + | 7   | 104 | 187538 | 187631 |
| UN70237 | Rsa1.0.04126.1 | 559 | 18939  | 1.00E-163 | 502 | 568 | 88 - | 1   | 559 | 15347  | 15886  |

|         |                |     |        |           |     |     |       |     |     |        |        |
|---------|----------------|-----|--------|-----------|-----|-----|-------|-----|-----|--------|--------|
| UN70238 | Rsa1.0.02165.1 | 751 | 34423  | 1.00E-137 | 378 | 409 | 92 -  | 348 | 744 | 3228   | 3636   |
| UN70239 | Rsa1.0.00273.1 | 201 | 326186 | 4.00E-49  | 149 | 161 | 92 -  | 3   | 160 | 4994   | 5151   |
| UN70240 | Rsa1.0.09074.1 | 691 | 6670   | 1.00E-179 | 420 | 451 | 93 -  | 252 | 691 | 4240   | 4690   |
| UN70241 | Rsa1.0.00671.1 | 740 | 397884 | 0         | 442 | 446 | 99 +  | 5   | 450 | 179241 | 179686 |
| UN70242 | Rsa1.0.00414.1 | 168 | 202190 | 8.00E-78  | 162 | 167 | 97 -  | 2   | 168 | 68414  | 68580  |
| UN70243 | Rsa1.0.01618.1 | 504 | 42118  | 1.00E-152 | 282 | 284 | 99 +  | 222 | 504 | 31250  | 31533  |
| UN70244 | Rsa1.0.00254.1 | 822 | 102600 | 1.00E-159 | 354 | 373 | 94 -  | 444 | 813 | 53903  | 54275  |
| UN70245 | #              | #   | #      | #         | #   | #   | #     | #   | #   | #      | #      |
| UN70246 | Rsa1.0.03114.1 | 676 | 25318  | 1.00E-86  | 166 | 167 | 99 +  | 206 | 372 | 18545  | 18711  |
| UN70247 | Rsa1.0.00763.1 | 299 | 65121  | 2.00E-49  | 129 | 139 | 92 -  | 45  | 177 | 61251  | 61389  |
| UN70248 | Rsa1.0.00223.1 | 667 | 106231 | 1.00E-139 | 271 | 277 | 97 -  | 294 | 567 | 72236  | 72512  |
| UN70249 | Rsa1.0.05999.1 | 648 | 11984  | 0         | 381 | 392 | 97 +  | 2   | 393 | 1938   | 2329   |
| UN70250 | Rsa1.0.00202.1 | 727 | 185895 | 0         | 699 | 724 | 96 +  | 3   | 724 | 82889  | 83610  |
| UN70251 | Rsa1.0.01524.1 | 796 | 43949  | 0         | 428 | 444 | 96 -  | 347 | 783 | 4229   | 4671   |
| UN70252 | Rsa1.0.00676.1 | 555 | 69166  | 0         | 493 | 535 | 92 -  | 12  | 538 | 23946  | 24471  |
| UN70253 | Rsa1.0.00195.1 | 727 | 251884 | 1.00E-134 | 322 | 346 | 93 +  | 392 | 721 | 208307 | 208651 |
| UN70254 | Rsa1.0.03352.1 | 655 | 23506  | 1.00E-126 | 283 | 300 | 94 +  | 7   | 303 | 6892   | 7191   |
| UN70255 | Rsa1.0.04128.1 | 793 | 18927  | 4.00E-74  | 165 | 170 | 97 +  | 15  | 183 | 11018  | 11186  |
| UN70256 | Rsa1.0.00816.1 | 794 | 403350 | 5.00E-89  | 197 | 203 | 97 -  | 563 | 762 | 115339 | 115541 |
| UN70257 | Rsa1.0.00203.1 | 775 | 109129 | 1.00E-64  | 141 | 146 | 96 -  | 199 | 344 | 3653   | 3798   |
| UN70258 | Rsa1.0.00931.1 | 636 | 59210  | 3.00E-93  | 201 | 210 | 95 -  | 427 | 636 | 9067   | 9276   |
| UN70259 | Rsa1.0.01431.1 | 627 | 167877 | 0         | 391 | 401 | 97 +  | 3   | 403 | 148884 | 149284 |
| UN70260 | Rsa1.0.02170.1 | 228 | 34352  | 3.00E-69  | 200 | 221 | 90 -  | 2   | 222 | 15646  | 15855  |
| UN70261 | Rsa1.0.01923.1 | 727 | 37233  | 4.00E-86  | 184 | 190 | 96 -  | 3   | 192 | 22414  | 22602  |
| UN70262 | Rsa1.0.06101.1 | 759 | 11745  | 1.00E-134 | 275 | 286 | 96 -  | 322 | 607 | 2106   | 2391   |
| UN70263 | Rsa1.0.00054.1 | 713 | 162053 | 0         | 523 | 560 | 93 -  | 161 | 711 | 15483  | 16036  |
| UN70264 | Rsa1.0.00277.1 | 712 | 100132 | 0         | 676 | 701 | 96 -  | 2   | 702 | 36931  | 37628  |
| UN70265 | Rsa1.0.00740.1 | 600 | 215972 | 1.00E-165 | 363 | 382 | 95 -  | 170 | 548 | 11467  | 11848  |
| UN70266 | Rsa1.0.00690.1 | 632 | 140527 | 1.00E-135 | 271 | 277 | 97 -  | 1   | 276 | 34501  | 34776  |
| UN70267 | Rsa1.0.00214.1 | 531 | 107508 | 1.00E-141 | 277 | 283 | 97 -  | 246 | 527 | 36845  | 37127  |
| UN70268 | Rsa1.0.00199.1 | 742 | 249604 | 1.00E-124 | 346 | 386 | 89 +  | 308 | 693 | 60822  | 61207  |
| UN70269 | Rsa1.0.00107.1 | 712 | 431659 | 1.00E-76  | 165 | 170 | 97 -  | 3   | 171 | 376504 | 376673 |
| UN70270 | Rsa1.0.00030.1 | 236 | 250988 | 2.00E-36  | 84  | 86  | 97 -  | 151 | 236 | 212161 | 212246 |
| UN70271 | Rsa1.0.00060.1 | 564 | 502678 | 1.00E-140 | 282 | 292 | 96 +  | 2   | 293 | 396729 | 397020 |
| UN70272 | Rsa1.0.04997.1 | 807 | 15182  | 1.00E-178 | 317 | 317 | 100 - | 2   | 318 | 6185   | 6501   |
| UN70273 | Rsa1.0.00037.1 | 624 | 307838 | 1.00E-129 | 279 | 294 | 94 -  | 69  | 362 | 220272 | 220565 |
| UN70274 | Rsa1.0.03347.1 | 686 | 23588  | 1.00E-112 | 239 | 249 | 95 -  | 439 | 686 | 20340  | 20582  |
| UN70275 | Rsa1.0.01153.1 | 637 | 52264  | 0         | 621 | 637 | 97 +  | 1   | 637 | 48897  | 49533  |
| UN70276 | Rsa1.0.04244.1 | 654 | 18314  | 1.00E-171 | 319 | 324 | 98 -  | 331 | 654 | 3576   | 3899   |

|         |                |     |        |           |     |     |      |     |     |        |        |
|---------|----------------|-----|--------|-----------|-----|-----|------|-----|-----|--------|--------|
| UN70277 | Rsa1.0.03336.1 | 720 | 23648  | 1.00E-151 | 301 | 310 | 97 - | 405 | 711 | 23339  | 23648  |
| UN70278 | Rsa1.0.01727.1 | 813 | 40243  | 1.00E-176 | 319 | 321 | 99 - | 277 | 597 | 30928  | 31248  |
| UN70279 | Rsa1.0.00096.1 | 785 | 198773 | 1.00E-116 | 295 | 322 | 91 - | 36  | 354 | 138020 | 138335 |
| UN70280 | Rsa1.0.00589.1 | 696 | 209965 | 1.00E-125 | 246 | 252 | 97 - | 445 | 696 | 200718 | 200969 |
| UN70281 | Rsa1.0.03664.1 | 737 | 21487  | 3.00E-93  | 201 | 210 | 95 + | 423 | 632 | 9211   | 9420   |
| UN70282 | Rsa1.0.02606.1 | 632 | 29635  | 0         | 373 | 384 | 97 + | 246 | 629 | 14421  | 14804  |
| UN70283 | Rsa1.0.00144.1 | 713 | 120708 | 1.00E-73  | 153 | 157 | 97 + | 353 | 509 | 66013  | 66169  |
| UN70284 | Rsa1.0.00016.1 | 790 | 831256 | 1.00E-64  | 132 | 134 | 98 + | 200 | 333 | 59358  | 59491  |
| UN70285 | Rsa1.0.01638.1 | 787 | 41857  | 0         | 729 | 774 | 94 + | 3   | 769 | 2071   | 2844   |
| UN70286 | Rsa1.0.02888.1 | 666 | 27020  | 1.00E-139 | 281 | 291 | 96 - | 376 | 666 | 11186  | 11476  |
| UN70287 | Rsa1.0.02911.1 | 736 | 142461 | 2.00E-91  | 183 | 187 | 97 + | 3   | 189 | 128046 | 128232 |
| UN70288 | Rsa1.0.00429.1 | 770 | 85559  | 1.00E-124 | 297 | 313 | 94 + | 419 | 724 | 23140  | 23452  |
| UN70289 | Rsa1.0.05332.1 | 536 | 14123  | 1.00E-125 | 270 | 284 | 95 + | 185 | 468 | 8337   | 8620   |
| UN70290 | Rsa1.0.00492.1 | 585 | 80178  | 1.00E-133 | 351 | 387 | 90 + | 9   | 385 | 69289  | 69662  |
| UN70291 | Rsa1.0.04095.1 | 454 | 19095  | 4.00E-51  | 121 | 127 | 95 - | 206 | 332 | 10734  | 10860  |
| UN70292 | Rsa1.0.04267.1 | 575 | 18193  | 0         | 522 | 549 | 95 - | 29  | 575 | 10655  | 11194  |
| UN70293 | Rsa1.0.07001.1 | 794 | 10048  | 2.00E-66  | 138 | 141 | 97 - | 356 | 496 | 5595   | 5735   |
| UN70294 | Rsa1.0.03410.1 | 798 | 23147  | 0         | 720 | 744 | 96 + | 2   | 744 | 19877  | 20620  |
| UN70295 | #              | #   | #      | #         | #   | #   | #    | #   | #   | #      | #      |
| UN70296 | Rsa1.0.00422.1 | 588 | 86144  | 0         | 439 | 457 | 96 + | 134 | 588 | 16094  | 16548  |
| UN70297 | Rsa1.0.01824.1 | 713 | 38733  | 0         | 448 | 466 | 96 + | 252 | 713 | 5376   | 5840   |
| UN70298 | Rsa1.0.10108.1 | 462 | 5996   | 1.00E-75  | 213 | 228 | 93 + | 238 | 462 | 111    | 335    |
| UN70299 | Rsa1.0.00340.1 | 133 | 305782 | 6.00E-32  | 80  | 82  | 97 - | 49  | 129 | 160491 | 160572 |
| UN70300 | Rsa1.0.00954.1 | 506 | 189536 | 2.00E-69  | 153 | 158 | 96 + | 332 | 488 | 38974  | 39131  |
| UN70301 | Rsa1.0.03684.1 | 120 | 21392  | 2.00E-25  | 102 | 115 | 88 - | 6   | 120 | 3174   | 3282   |
| UN70302 | Rsa1.0.01204.1 | 589 | 50843  | 1.00E-112 | 336 | 374 | 89 + | 226 | 583 | 27064  | 27435  |
| UN70303 | Rsa1.0.00415.1 | 659 | 86795  | 1.00E-131 | 261 | 269 | 97 + | 85  | 353 | 6401   | 6669   |
| UN70304 | Rsa1.0.02893.1 | 344 | 26999  | 3.00E-45  | 117 | 125 | 93 - | 3   | 127 | 23925  | 24049  |
| UN70305 | Rsa1.0.00271.1 | 579 | 101125 | 1.00E-114 | 254 | 269 | 94 - | 240 | 508 | 25858  | 26126  |
| UN70306 | Rsa1.0.00205.1 | 782 | 193401 | 5.00E-49  | 124 | 132 | 93 + | 447 | 578 | 12709  | 12840  |
| UN70307 | Rsa1.0.02533.1 | 503 | 30399  | 1.00E-148 | 333 | 351 | 94 + | 1   | 347 | 23996  | 24343  |
| UN70308 | Rsa1.0.00660.1 | 535 | 69688  | 2.00E-75  | 150 | 152 | 98 + | 65  | 216 | 16926  | 17077  |
| UN70309 | Rsa1.0.03774.1 | 733 | 20932  | 0         | 700 | 732 | 95 - | 3   | 733 | 18873  | 19593  |
| UN70310 | Rsa1.0.00470.1 | 718 | 81968  | 1.00E-134 | 274 | 283 | 96 + | 215 | 496 | 48972  | 49254  |
| UN70311 | Rsa1.0.02026.1 | 496 | 35896  | 0         | 470 | 501 | 93 - | 1   | 496 | 22777  | 23265  |
| UN70312 | Rsa1.0.00363.1 | 760 | 90968  | 0         | 729 | 763 | 95 + | 1   | 760 | 13529  | 14279  |
| UN70313 | Rsa1.0.01360.1 | 725 | 47246  | 1.00E-100 | 198 | 201 | 98 + | 4   | 203 | 43133  | 43333  |
| UN70314 | Rsa1.0.00040.1 | 151 | 324196 | 1.00E-42  | 135 | 148 | 91 + | 1   | 147 | 195389 | 195535 |
| UN70315 | Rsa1.0.04223.1 | 798 | 18407  | 0         | 470 | 492 | 95 + | 1   | 491 | 9332   | 9816   |

|         |                |     |        |           |     |     |      |     |     |        |        |
|---------|----------------|-----|--------|-----------|-----|-----|------|-----|-----|--------|--------|
| UN70316 | Rsa1.0.06333.1 | 760 | 11217  | 1.00E-151 | 325 | 342 | 95 + | 1   | 342 | 2113   | 2452   |
| UN70317 | Rsa1.0.23144.1 | 840 | 1068   | 1.00E-137 | 267 | 273 | 97 - | 201 | 473 | 758    | 1027   |
| UN70318 | Rsa1.0.00446.1 | 523 | 167829 | 4.00E-70  | 189 | 209 | 90 + | 1   | 209 | 120052 | 120249 |
| UN70319 | Rsa1.0.00133.1 | 569 | 123768 | 0         | 542 | 547 | 99 + | 25  | 569 | 54799  | 55345  |
| UN70320 | Rsa1.0.01981.1 | 727 | 36537  | 0         | 358 | 369 | 97 - | 283 | 651 | 23844  | 24212  |
| UN70321 | Rsa1.0.00104.1 | 563 | 368722 | 2.33E-156 | 286 | 290 | 98 - | 141 | 427 | 62935  | 63224  |
| UN70322 | Rsa1.0.00016.1 | 775 | 831256 | 0         | 696 | 726 | 95 - | 41  | 763 | 375804 | 376517 |
| UN70323 | Rsa1.0.00064.1 | 688 | 240927 | 0         | 372 | 380 | 97 + | 6   | 385 | 4712   | 5089   |
| UN70324 | Rsa1.0.00332.1 | 195 | 94575  | 1.00E-83  | 189 | 199 | 94 + | 2   | 195 | 55339  | 55534  |
| UN70325 | Rsa1.0.00243.1 | 398 | 103651 | 1.00E-111 | 259 | 272 | 95 + | 129 | 398 | 5006   | 5275   |
| UN70326 | Rsa1.0.00014.1 | 679 | 348985 | 2.00E-91  | 230 | 249 | 92 - | 14  | 249 | 220714 | 220962 |
| UN70327 | Rsa1.0.01156.1 | 656 | 52147  | 0         | 624 | 652 | 95 + | 10  | 652 | 28034  | 28673  |
| UN70328 | Rsa1.0.00119.1 | 795 | 467509 | 1.00E-153 | 451 | 508 | 88 - | 142 | 634 | 386218 | 386716 |
| UN70329 | Rsa1.0.63330.1 | 807 | 362    | 1.00E-128 | 321 | 353 | 90 - | 3   | 351 | 1      | 335    |
| UN70330 | Rsa1.0.00925.1 | 766 | 59481  | 1.00E-176 | 344 | 353 | 97 + | 415 | 766 | 56966  | 57318  |
| UN70331 | Rsa1.0.01553.1 | 718 | 43379  | 1.00E-101 | 254 | 270 | 94 + | 455 | 718 | 26451  | 26719  |
| UN70332 | Rsa1.0.02205.1 | 777 | 33923  | 3.00E-99  | 193 | 196 | 98 - | 187 | 382 | 17153  | 17348  |
| UN70333 | Rsa1.0.00988.1 | 783 | 57525  | 1.00E-138 | 301 | 318 | 94 - | 110 | 421 | 28227  | 28535  |
| UN70334 | Rsa1.0.00087.1 | 681 | 761073 | 1.00E-113 | 243 | 252 | 96 - | 432 | 681 | 102290 | 102541 |
| UN70335 | Rsa1.0.01667.1 | 651 | 41315  | 1.00E-113 | 240 | 248 | 96 + | 406 | 651 | 32932  | 33179  |
| UN70336 | Rsa1.0.00026.1 | 783 | 327835 | 1.00E-103 | 232 | 242 | 95 - | 496 | 734 | 242372 | 242613 |
| UN70337 | Rsa1.0.00621.1 | 743 | 71840  | 5.00E-67  | 146 | 149 | 97 + | 103 | 250 | 49045  | 49191  |
| UN70338 | Rsa1.0.00002.1 | 379 | 601661 | 0         | 330 | 333 | 99 + | 47  | 379 | 182333 | 182665 |
| UN70339 | Rsa1.0.00044.1 | 427 | 271658 | 1.00E-152 | 365 | 394 | 92 - | 34  | 427 | 156047 | 156425 |
| UN70340 | Rsa1.0.00001.1 | 790 | 363028 | 0         | 752 | 794 | 94 + | 4   | 790 | 33675  | 34468  |
| UN70341 | Rsa1.0.01200.1 | 507 | 50895  | 1.00E-135 | 445 | 515 | 86 - | 3   | 507 | 34709  | 35199  |
| UN70342 | Rsa1.0.00104.1 | 273 | 368722 | 1.00E-103 | 248 | 267 | 92 + | 3   | 260 | 213652 | 213918 |
| UN70343 | Rsa1.0.05326.1 | 118 | 14139  | 2.00E-22  | 84  | 92  | 91 - | 3   | 91  | 4077   | 4167   |
| UN70344 | Rsa1.0.00060.1 | 656 | 502678 | 1.00E-100 | 203 | 209 | 97 - | 440 | 648 | 249097 | 249305 |
| UN70345 | Rsa1.0.16367.1 | 236 | 2176   | 2.00E-91  | 214 | 229 | 93 - | 1   | 229 | 1748   | 1970   |
| UN70346 | Rsa1.0.02016.1 | 758 | 36003  | 1.00E-127 | 283 | 298 | 94 - | 75  | 370 | 26200  | 26496  |
| UN70347 | Rsa1.0.00380.1 | 587 | 89748  | 0         | 565 | 592 | 95 + | 1   | 587 | 11467  | 12051  |
| UN70348 | Rsa1.0.00087.1 | 455 | 761073 | 4.00E-91  | 275 | 300 | 91 - | 1   | 295 | 191032 | 191316 |
| UN70349 | Rsa1.0.04991.1 | 193 | 15215  | 2.00E-88  | 186 | 193 | 96 - | 1   | 193 | 9941   | 10133  |
| UN70350 | Rsa1.0.00964.1 | 661 | 316648 | 5.00E-67  | 237 | 277 | 85 + | 1   | 277 | 160133 | 160386 |
| UN70351 | Rsa1.0.02756.1 | 122 | 28202  | 3.00E-24  | 63  | 65  | 96 + | 42  | 106 | 1728   | 1792   |
| UN70352 | Rsa1.0.23375.1 | 748 | 1053   | 0         | 720 | 751 | 95 + | 5   | 748 | 226    | 975    |
| UN70353 | Rsa1.0.00149.1 | 647 | 305196 | 1.00E-158 | 328 | 341 | 96 + | 3   | 339 | 107006 | 107346 |
| UN70354 | Rsa1.0.02340.1 | 491 | 32388  | 1.00E-129 | 306 | 324 | 94 - | 174 | 491 | 16368  | 16690  |

|         |                |     |        |           |     |     |       |     |     |        |        |
|---------|----------------|-----|--------|-----------|-----|-----|-------|-----|-----|--------|--------|
| UN70355 | Rsa1.0.00157.1 | 538 | 245832 | 1.00E-113 | 259 | 278 | 93 +  | 2   | 263 | 29216  | 29493  |
| UN70356 | Rsa1.0.00014.1 | 477 | 348985 | 1.00E-153 | 344 | 362 | 95 -  | 1   | 354 | 323900 | 324260 |
| UN70357 | Rsa1.0.00269.1 | 438 | 341668 | 1.00E-160 | 401 | 438 | 91 -  | 1   | 438 | 17417  | 17848  |
| UN70358 | Rsa1.0.00965.1 | 441 | 58139  | 7.00E-53  | 115 | 118 | 97 -  | 142 | 259 | 9265   | 9382   |
| UN70359 | Rsa1.0.00763.1 | 710 | 65121  | 0         | 504 | 510 | 98 +  | 1   | 510 | 45773  | 46282  |
| UN70360 | Rsa1.0.00295.1 | 293 | 152597 | 2.00E-58  | 169 | 185 | 91 -  | 22  | 206 | 140727 | 140907 |
| UN70361 | Rsa1.0.00522.1 | 690 | 78103  | 0         | 651 | 678 | 96 -  | 1   | 674 | 51939  | 52614  |
| UN70362 | Rsa1.0.37474.1 | 555 | 601    | 5.00E-79  | 168 | 174 | 96 +  | 136 | 309 | 189    | 362    |
| UN70363 | Rsa1.0.41105.1 | 732 | 546    | 1.00E-126 | 303 | 326 | 92 +  | 1   | 317 | 222    | 545    |
| UN70364 | Rsa1.0.00251.1 | 704 | 303968 | 1.00E-95  | 266 | 294 | 90 -  | 3   | 292 | 149091 | 149372 |
| UN70365 | Rsa1.0.03046.1 | 589 | 25784  | 4.00E-58  | 118 | 119 | 99 -  | 2   | 120 | 16806  | 16924  |
| UN70366 | Rsa1.0.01417.1 | 767 | 46252  | 3.00E-44  | 140 | 152 | 92 +  | 8   | 158 | 2265   | 2414   |
| UN70367 | Rsa1.0.00032.1 | 638 | 306326 | 2.00E-41  | 93  | 95  | 97 +  | 471 | 565 | 202300 | 202394 |
| UN70368 | Rsa1.0.33576.1 | 744 | 675    | 0         | 422 | 437 | 96 -  | 68  | 504 | 1      | 434    |
| UN70369 | Rsa1.0.02266.1 | 190 | 33195  | 7.00E-94  | 186 | 190 | 97 -  | 1   | 190 | 17703  | 17892  |
| UN70370 | Rsa1.0.01555.1 | 262 | 166456 | 2.00E-36  | 81  | 82  | 98 +  | 12  | 93  | 18179  | 18260  |
| UN70371 | Rsa1.0.01355.1 | 705 | 47303  | 9.00E-75  | 179 | 191 | 93 +  | 79  | 269 | 6585   | 6770   |
| UN70372 | Rsa1.0.01786.1 | 734 | 133324 | 0         | 408 | 419 | 97 +  | 3   | 421 | 114065 | 114483 |
| UN70373 | Rsa1.0.08846.1 | 683 | 6867   | 3.00E-56  | 139 | 147 | 94 -  | 21  | 165 | 6654   | 6800   |
| UN70374 | Rsa1.0.30636.1 | 791 | 749    | 0         | 569 | 593 | 95 -  | 148 | 735 | 157    | 749    |
| UN70375 | Rsa1.0.00426.1 | 709 | 85668  | 1.00E-110 | 226 | 234 | 96 +  | 147 | 380 | 67962  | 68195  |
| UN70376 | Rsa1.0.00894.1 | 642 | 269700 | 1.00E-107 | 197 | 197 | 100 + | 442 | 638 | 5701   | 5897   |
| UN70377 | Rsa1.0.00198.1 | 611 | 222963 | 0         | 480 | 519 | 92 +  | 102 | 611 | 133941 | 134452 |
| UN70378 | Rsa1.0.00303.1 | 565 | 97468  | 0         | 502 | 529 | 94 +  | 43  | 565 | 30234  | 30754  |
| UN70379 | Rsa1.0.01065.1 | 659 | 55264  | 0         | 504 | 531 | 94 -  | 139 | 659 | 6350   | 6880   |
| UN70380 | Rsa1.0.00037.1 | 807 | 307838 | 0         | 348 | 350 | 99 -  | 3   | 352 | 177014 | 177363 |
| UN70381 | Rsa1.0.01435.1 | 801 | 45942  | 1.00E-120 | 277 | 291 | 95 +  | 478 | 764 | 42964  | 43254  |
| UN70382 | Rsa1.0.00320.1 | 506 | 95784  | 1.00E-136 | 269 | 277 | 97 -  | 3   | 279 | 9936   | 10212  |
| UN70383 | Rsa1.0.14509.1 | 512 | 3318   | 1.00E-155 | 296 | 302 | 98 +  | 113 | 414 | 1766   | 2067   |
| UN70384 | Rsa1.0.00251.1 | 106 | 303968 | 2.00E-37  | 100 | 105 | 95 -  | 3   | 103 | 144379 | 144483 |
| UN70385 | Rsa1.0.00119.1 | 705 | 467509 | 3.00E-68  | 144 | 148 | 97 -  | 436 | 583 | 384234 | 384381 |
| UN70386 | Rsa1.0.00482.1 | 792 | 81162  | 0         | 560 | 621 | 90 -  | 3   | 606 | 28084  | 28689  |
| UN70387 | Rsa1.0.00224.1 | 538 | 327530 | 1.00E-117 | 327 | 369 | 88 +  | 180 | 532 | 221387 | 221738 |
| UN70388 | Rsa1.0.00107.1 | 804 | 431659 | 0         | 769 | 827 | 92 -  | 2   | 804 | 347175 | 347995 |
| UN70389 | Rsa1.0.01146.1 | 601 | 163455 | 3.00E-71  | 166 | 175 | 94 +  | 219 | 390 | 13623  | 13797  |
| UN70390 | Rsa1.0.00004.1 | 723 | 253996 | 1.00E-166 | 320 | 328 | 97 +  | 376 | 703 | 197016 | 197343 |
| UN70391 | Rsa1.0.00856.1 | 687 | 62037  | 0         | 657 | 678 | 96 +  | 3   | 679 | 33903  | 34575  |
| UN70392 | Rsa1.0.04051.1 | 799 | 19375  | 1.00E-180 | 377 | 392 | 96 +  | 358 | 746 | 7220   | 7611   |
| UN70393 | Rsa1.0.00087.1 | 728 | 761073 | 1.00E-113 | 262 | 281 | 93 -  | 369 | 642 | 66847  | 67127  |

|         |                |     |        |           |     |     |      |     |     |        |        |
|---------|----------------|-----|--------|-----------|-----|-----|------|-----|-----|--------|--------|
| UN70394 | Rsa1.0.01704.1 | 803 | 40711  | 0         | 769 | 815 | 94 + | 3   | 793 | 31236  | 32047  |
| UN70395 | Rsa1.0.00096.1 | 724 | 198773 | 0         | 354 | 365 | 96 + | 137 | 501 | 29637  | 30001  |
| UN70396 | Rsa1.0.14400.1 | 742 | 3430   | 1.00E-119 | 371 | 419 | 88 + | 332 | 742 | 2      | 402    |
| UN70397 | Rsa1.0.00496.1 | 795 | 79834  | 1.00E-157 | 344 | 361 | 95 + | 431 | 788 | 34242  | 34602  |
| UN70398 | Rsa1.0.02029.1 | 632 | 35857  | 0         | 605 | 630 | 96 + | 3   | 632 | 25120  | 25749  |
| UN70399 | Rsa1.0.00377.1 | 783 | 90038  | 0         | 755 | 807 | 93 + | 2   | 783 | 3389   | 4189   |
| UN70400 | Rsa1.0.00122.1 | 331 | 265937 | 1.00E-149 | 314 | 330 | 95 + | 2   | 331 | 45221  | 45544  |
| UN70401 | Rsa1.0.00620.1 | 773 | 71985  | 1.00E-106 | 213 | 219 | 97 - | 366 | 584 | 55327  | 55545  |
| UN70402 | Rsa1.0.02527.1 | 702 | 177225 | 0         | 678 | 702 | 96 + | 2   | 702 | 16752  | 17453  |
| UN70403 | Rsa1.0.00061.1 | 726 | 218685 | 1.00E-114 | 225 | 230 | 97 - | 223 | 452 | 70068  | 70297  |
| UN70404 | Rsa1.0.08840.1 | 343 | 6871   | 3.00E-70  | 278 | 320 | 86 + | 3   | 320 | 6306   | 6619   |
| UN70405 | Rsa1.0.00122.1 | 689 | 265937 | 0         | 644 | 680 | 94 - | 3   | 681 | 30927  | 31597  |
| UN70406 | Rsa1.0.03735.1 | 689 | 21087  | 0         | 526 | 541 | 97 + | 2   | 541 | 4542   | 5081   |
| UN70407 | Rsa1.0.04994.1 | 766 | 15199  | 0         | 735 | 763 | 96 + | 3   | 765 | 848    | 1610   |
| UN70408 | Rsa1.0.06083.1 | 680 | 11780  | 3.00E-96  | 194 | 199 | 97 - | 159 | 357 | 5848   | 6046   |
| UN70409 | Rsa1.0.09910.1 | 563 | 6093   | 0         | 452 | 478 | 94 + | 93  | 561 | 3130   | 3607   |
| UN70410 | Rsa1.0.00558.1 | 771 | 75819  | 0         | 560 | 572 | 97 + | 1   | 570 | 28252  | 28823  |
| UN70411 | Rsa1.0.00470.1 | 654 | 81968  | 1.00E-167 | 356 | 374 | 95 - | 282 | 654 | 27996  | 28369  |
| UN70412 | Rsa1.0.02913.1 | 785 | 26816  | 1.00E-103 | 244 | 259 | 94 - | 3   | 256 | 23774  | 24030  |
| UN70413 | Rsa1.0.00644.1 | 760 | 136881 | 3.00E-87  | 278 | 315 | 88 + | 399 | 712 | 39544  | 39842  |
| UN70414 | Rsa1.0.00900.1 | 838 | 60367  | 1.00E-160 | 380 | 407 | 93 - | 3   | 386 | 13294  | 13700  |
| UN70415 | Rsa1.0.06083.1 | 723 | 11780  | 2.00E-88  | 181 | 186 | 97 - | 387 | 572 | 8981   | 9166   |
| UN70416 | Rsa1.0.00582.1 | 574 | 74333  | 9.00E-90  | 215 | 229 | 93 + | 290 | 518 | 73685  | 73908  |
| UN70417 | Rsa1.0.01100.1 | 776 | 54113  | 1.00E-145 | 348 | 368 | 94 + | 418 | 776 | 23894  | 24261  |
| UN70418 | Rsa1.0.00024.1 | 768 | 188018 | 1.00E-131 | 346 | 377 | 91 + | 402 | 768 | 84590  | 84962  |
| UN70419 | Rsa1.0.03209.1 | 812 | 24592  | 0         | 423 | 442 | 95 + | 3   | 443 | 16800  | 17241  |
| UN70420 | Rsa1.0.04438.1 | 647 | 17361  | 1.00E-140 | 409 | 463 | 88 - | 113 | 563 | 5388   | 5841   |
| UN70421 | Rsa1.0.13949.1 | 628 | 4028   | 1.00E-175 | 360 | 376 | 95 + | 3   | 374 | 1093   | 1468   |
| UN70422 | Rsa1.0.00383.1 | 685 | 398431 | 3.00E-96  | 203 | 211 | 96 - | 292 | 502 | 188964 | 189174 |
| UN70423 | Rsa1.0.03779.1 | 643 | 20899  | 2.00E-53  | 163 | 181 | 90 + | 136 | 313 | 349    | 529    |
| UN70424 | Rsa1.0.04873.1 | 288 | 15657  | 2.00E-55  | 123 | 126 | 97 + | 129 | 253 | 13838  | 13963  |
| UN70425 | Rsa1.0.00333.1 | 800 | 94500  | 0         | 611 | 636 | 96 - | 108 | 741 | 36239  | 36874  |
| UN70426 | Rsa1.0.10486.1 | 681 | 5830   | 4.00E-77  | 150 | 151 | 99 + | 402 | 552 | 169    | 319    |
| UN70427 | Rsa1.0.00229.1 | 257 | 105471 | 5.00E-77  | 155 | 158 | 98 - | 43  | 200 | 58466  | 58623  |
| UN70428 | Rsa1.0.04741.1 | 619 | 16164  | 6.00E-91  | 185 | 190 | 97 + | 332 | 521 | 5949   | 6138   |
| UN70429 | Rsa1.0.03385.1 | 678 | 23280  | 0         | 653 | 681 | 95 + | 1   | 676 | 18807  | 19487  |
| UN70430 | Rsa1.0.00632.1 | 472 | 183777 | 1.00E-107 | 271 | 291 | 93 + | 189 | 471 | 168864 | 169151 |
| UN70431 | Rsa1.0.00136.1 | 726 | 122464 | 1.00E-124 | 250 | 258 | 96 - | 268 | 525 | 65625  | 65882  |
| UN70432 | Rsa1.0.00679.1 | 666 | 68971  | 1.00E-155 | 287 | 290 | 98 + | 301 | 590 | 59989  | 60278  |



|         |                |     |        |           |     |     |       |     |     |        |        |
|---------|----------------|-----|--------|-----------|-----|-----|-------|-----|-----|--------|--------|
| UN70433 | Rsa1.0.00060.1 | 774 | 502678 | 0         | 476 | 498 | 95 +  | 272 | 765 | 248130 | 248627 |
| UN70434 | Rsa1.0.00457.1 | 602 | 337301 | 1.00E-135 | 265 | 272 | 97 +  | 303 | 574 | 139230 | 139501 |
| UN70435 | Rsa1.0.00425.1 | 760 | 147080 | 2.00E-88  | 169 | 170 | 99 +  | 420 | 589 | 92485  | 92654  |
| UN70436 | Rsa1.0.00417.1 | 804 | 395068 | 1.00E-115 | 285 | 299 | 95 +  | 513 | 803 | 259259 | 259557 |
| UN70437 | Rsa1.0.00101.1 | 709 | 267193 | 0         | 591 | 644 | 91 +  | 69  | 705 | 89099  | 89733  |
| UN70438 | Rsa1.0.00812.1 | 517 | 63233  | 1.00E-130 | 281 | 294 | 95 +  | 7   | 292 | 17159  | 17452  |
| UN70439 | Rsa1.0.00280.1 | 410 | 99966  | 0         | 393 | 412 | 95 -  | 2   | 410 | 12148  | 12555  |
| UN70440 | Rsa1.0.02016.1 | 793 | 36003  | 1.00E-108 | 209 | 211 | 99 +  | 2   | 211 | 23419  | 23629  |
| UN70441 | Rsa1.0.00380.1 | 701 | 89748  | 1.00E-117 | 224 | 227 | 98 -  | 1   | 227 | 13688  | 13914  |
| UN70442 | Rsa1.0.48683.1 | 402 | 465    | 0         | 381 | 400 | 95 +  | 2   | 401 | 49     | 448    |
| UN70443 | Rsa1.0.02670.1 | 779 | 28887  | 1.00E-108 | 269 | 290 | 92 +  | 6   | 292 | 641    | 924    |
| UN70444 | Rsa1.0.17443.1 | 739 | 1828   | 1.00E-133 | 262 | 269 | 97 +  | 3   | 271 | 982    | 1250   |
| UN70445 | Rsa1.0.01580.1 | 678 | 42852  | 1.00E-86  | 244 | 271 | 90 +  | 246 | 516 | 23407  | 23677  |
| UN70446 | Rsa1.0.01434.1 | 741 | 45951  | 0         | 522 | 545 | 95 +  | 3   | 540 | 21178  | 21722  |
| UN70447 | Rsa1.0.02473.1 | 722 | 31083  | 1.00E-108 | 278 | 297 | 93 -  | 429 | 722 | 13356  | 13647  |
| UN70448 | #              | #   | #      | #         | #   | #   | #     | #   | #   | #      | #      |
| UN70449 | Rsa1.0.00069.1 | 779 | 403561 | 0         | 617 | 653 | 94 +  | 40  | 686 | 17840  | 18485  |
| UN70450 | Rsa1.0.00658.1 | 770 | 69740  | 1.00E-166 | 342 | 354 | 96 -  | 136 | 484 | 18412  | 18765  |
| UN70451 | Rsa1.0.01376.1 | 760 | 47004  | 1.00E-126 | 259 | 269 | 96 +  | 492 | 760 | 41027  | 41295  |
| UN70452 | Rsa1.0.01245.1 | 818 | 149868 | 5.00E-58  | 115 | 115 | 100 + | 371 | 485 | 39634  | 39748  |
| UN70453 | Rsa1.0.01283.1 | 773 | 49257  | 0         | 745 | 777 | 95 -  | 1   | 769 | 16112  | 16880  |
| UN70454 | Rsa1.0.02500.1 | 722 | 30768  | 0         | 456 | 488 | 93 +  | 58  | 542 | 8542   | 9026   |
| UN70455 | Rsa1.0.00121.1 | 454 | 278029 | 1.00E-142 | 289 | 299 | 96 +  | 5   | 301 | 112281 | 112579 |
| UN70456 | Rsa1.0.07327.1 | 777 | 9549   | 1.00E-161 | 330 | 340 | 97 +  | 441 | 777 | 4858   | 5197   |
| UN70457 | Rsa1.0.10036.1 | 617 | 6030   | 1.00E-124 | 341 | 382 | 89 +  | 257 | 612 | 490    | 870    |
| UN70458 | Rsa1.0.00873.1 | 735 | 61459  | 8.00E-94  | 246 | 259 | 94 +  | 485 | 735 | 46323  | 46581  |
| UN70459 | Rsa1.0.00679.1 | 744 | 68971  | 1.00E-143 | 282 | 290 | 97 +  | 311 | 600 | 59989  | 60278  |
| UN70460 | Rsa1.0.00007.1 | 326 | 239325 | 2.00E-55  | 203 | 232 | 87 +  | 3   | 232 | 52635  | 52859  |
| UN70461 | Rsa1.0.00222.1 | 803 | 172263 | 0         | 671 | 677 | 99 -  | 22  | 694 | 153068 | 153744 |
| UN70462 | Rsa1.0.00752.1 | 652 | 65756  | 1.00E-156 | 350 | 370 | 94 +  | 287 | 652 | 35504  | 35867  |
| UN70463 | Rsa1.0.00706.1 | 618 | 291570 | 5.00E-79  | 183 | 194 | 94 -  | 99  | 292 | 28510  | 28703  |
| UN70464 | Rsa1.0.01881.1 | 788 | 37721  | 0         | 558 | 575 | 97 -  | 215 | 782 | 33167  | 33741  |
| UN70465 | Rsa1.0.00337.1 | 655 | 143174 | 1.00E-125 | 257 | 265 | 96 +  | 395 | 655 | 2366   | 2630   |
| UN70466 | Rsa1.0.00466.1 | 672 | 82132  | 0         | 620 | 669 | 92 -  | 21  | 670 | 27217  | 27882  |
| UN70467 | Rsa1.0.05559.1 | 830 | 13329  | 0         | 415 | 425 | 97 +  | 250 | 674 | 7400   | 7824   |
| UN70468 | Rsa1.0.02215.1 | 638 | 33822  | 1.00E-92  | 188 | 193 | 97 -  | 446 | 638 | 16723  | 16915  |
| UN70469 | Rsa1.0.00547.1 | 599 | 76521  | 1.00E-168 | 338 | 351 | 96 -  | 236 | 579 | 1060   | 1407   |
| UN70470 | Rsa1.0.02319.1 | 484 | 32580  | 2.00E-44  | 98  | 100 | 98 -  | 79  | 178 | 29059  | 29158  |
| UN70471 | Rsa1.0.00545.1 | 105 | 189649 | 1.00E-19  | 80  | 85  | 94 +  | 18  | 98  | 836    | 920    |

|         |                |     |        |           |     |     |       |     |     |        |        |
|---------|----------------|-----|--------|-----------|-----|-----|-------|-----|-----|--------|--------|
| UN70472 | Rsa1.0.00964.1 | 798 | 316648 | 1.00E-113 | 240 | 250 | 96 -  | 21  | 267 | 162522 | 162771 |
| UN70473 | Rsa1.0.01591.1 | 482 | 42718  | 1.00E-121 | 292 | 313 | 93 -  | 159 | 467 | 8923   | 9233   |
| UN70474 | Rsa1.0.00714.1 | 696 | 67187  | 7.00E-94  | 244 | 264 | 92 +  | 31  | 286 | 13175  | 13435  |
| UN70475 | Rsa1.0.00007.1 | 182 | 239325 | 1.00E-39  | 147 | 164 | 89 +  | 19  | 181 | 42378  | 42535  |
| UN70476 | Rsa1.0.06164.1 | 704 | 11584  | 1.00E-144 | 322 | 340 | 94 +  | 3   | 341 | 1544   | 1882   |
| UN70477 | Rsa1.0.62848.1 | 290 | 365    | 1.00E-122 | 251 | 260 | 96 -  | 34  | 290 | 93     | 352    |
| UN70478 | Rsa1.0.00744.1 | 736 | 66084  | 0         | 395 | 416 | 94 +  | 1   | 409 | 16992  | 17401  |
| UN70479 | Rsa1.0.01335.1 | 697 | 47894  | 0         | 427 | 460 | 92 -  | 1   | 451 | 3909   | 4359   |
| UN70480 | Rsa1.0.02340.1 | 747 | 32388  | 0         | 714 | 738 | 96 +  | 10  | 743 | 15716  | 16453  |
| UN70481 | Rsa1.0.00369.1 | 622 | 266462 | 1.00E-165 | 334 | 346 | 96 +  | 278 | 622 | 169354 | 169699 |
| UN70482 | Rsa1.0.12805.1 | 548 | 5121   | 9.00E-59  | 143 | 152 | 94 +  | 105 | 256 | 4970   | 5121   |
| UN70483 | Rsa1.0.03477.1 | 532 | 22635  | 0         | 396 | 398 | 99 +  | 98  | 495 | 2550   | 2947   |
| UN70484 | Rsa1.0.15270.1 | 605 | 2718   | 1.00E-149 | 279 | 283 | 98 +  | 323 | 605 | 1267   | 1549   |
| UN70485 | Rsa1.0.01180.1 | 789 | 51517  | 1.00E-147 | 296 | 305 | 97 -  | 16  | 319 | 33362  | 33666  |
| UN70486 | Rsa1.0.01302.1 | 123 | 48907  | 1.00E-26  | 107 | 121 | 88 +  | 3   | 123 | 704    | 818    |
| UN70487 | Rsa1.0.04625.1 | 616 | 16613  | 0         | 413 | 417 | 99 +  | 3   | 416 | 4603   | 5019   |
| UN70488 | Rsa1.0.00453.1 | 396 | 83031  | 1.00E-139 | 284 | 293 | 96 +  | 2   | 290 | 79175  | 79467  |
| UN70489 | Rsa1.0.00964.1 | 668 | 316648 | 3.00E-65  | 145 | 151 | 96 -  | 435 | 585 | 160472 | 160622 |
| UN70490 | Rsa1.0.00269.1 | 747 | 341668 | 0         | 696 | 742 | 93 +  | 17  | 744 | 16422  | 17163  |
| UN70491 | Rsa1.0.00883.1 | 518 | 61230  | 8.00E-87  | 206 | 218 | 94 -  | 3   | 220 | 31185  | 31399  |
| UN70492 | Rsa1.0.02874.1 | 553 | 27070  | 1.00E-138 | 286 | 297 | 96 +  | 42  | 336 | 4410   | 4706   |
| UN70493 | Rsa1.0.01489.1 | 648 | 44764  | 0         | 622 | 637 | 97 +  | 2   | 638 | 25418  | 26054  |
| UN70494 | Rsa1.0.00121.1 | 645 | 278029 | 0         | 337 | 339 | 99 -  | 4   | 342 | 271267 | 271605 |
| UN70495 | Rsa1.0.02098.1 | 709 | 35032  | 1.00E-95  | 238 | 254 | 93 -  | 436 | 687 | 17315  | 17567  |
| UN70496 | Rsa1.0.03191.1 | 812 | 145762 | 1.00E-108 | 333 | 376 | 88 -  | 115 | 481 | 134997 | 135366 |
| UN70497 | Rsa1.0.01518.1 | 673 | 141402 | 1.00E-126 | 263 | 273 | 96 +  | 10  | 282 | 129821 | 130091 |
| UN70498 | Rsa1.0.00965.1 | 779 | 58139  | 2.00E-51  | 110 | 112 | 98 +  | 218 | 329 | 7485   | 7596   |
| UN70499 | Rsa1.0.00436.1 | 662 | 85008  | 1.00E-131 | 279 | 292 | 95 -  | 373 | 662 | 2119   | 2410   |
| UN70500 | Rsa1.0.00628.1 | 582 | 214360 | 0         | 463 | 499 | 92 +  | 68  | 562 | 20466  | 20962  |
| UN70501 | Rsa1.0.01212.1 | 603 | 50622  | 1.00E-109 | 212 | 216 | 98 -  | 173 | 388 | 604    | 819    |
| UN70502 | Rsa1.0.02879.1 | 810 | 27047  | 1.00E-105 | 206 | 209 | 98 -  | 4   | 212 | 26493  | 26698  |
| UN70503 | Rsa1.0.00055.1 | 277 | 520193 | 1.00E-116 | 262 | 274 | 95 -  | 3   | 271 | 161595 | 161867 |
| UN70504 | Rsa1.0.00286.1 | 460 | 98709  | 3.00E-95  | 227 | 241 | 94 +  | 227 | 460 | 11606  | 11846  |
| UN70505 | Rsa1.0.03499.1 | 807 | 22462  | 3.00E-72  | 160 | 167 | 95 +  | 108 | 274 | 18554  | 18720  |
| UN70506 | Rsa1.0.02008.1 | 766 | 36109  | 0         | 723 | 746 | 96 +  | 1   | 738 | 13506  | 14250  |
| UN70507 | Rsa1.0.02369.1 | 414 | 32075  | 0         | 412 | 412 | 100 + | 3   | 414 | 19852  | 20263  |
| UN70508 | Rsa1.0.02735.1 | 582 | 28344  | 1.00E-164 | 310 | 316 | 98 +  | 209 | 524 | 3322   | 3637   |
| UN70509 | Rsa1.0.00181.1 | 541 | 114269 | 1.00E-125 | 252 | 260 | 96 -  | 255 | 514 | 94058  | 94317  |
| UN70510 | Rsa1.0.04288.1 | 646 | 18077  | 1.00E-148 | 298 | 308 | 96 -  | 3   | 307 | 6087   | 6394   |

|         |                |     |        |           |     |     |       |     |     |        |        |
|---------|----------------|-----|--------|-----------|-----|-----|-------|-----|-----|--------|--------|
| UN70511 | Rsa1.0_00246.1 | 604 | 103541 | 0         | 486 | 497 | 97 +  | 17  | 513 | 98108  | 98602  |
| UN70512 | Rsa1.0_16574.1 | 539 | 2106   | 0         | 380 | 389 | 97 +  | 78  | 466 | 1717   | 2105   |
| UN70513 | Rsa1.0_34677.1 | 645 | 653    | 1.00E-143 | 287 | 296 | 96 +  | 41  | 336 | 2      | 294    |
| UN70514 | Rsa1.0_01453.1 | 607 | 45449  | 0         | 576 | 603 | 95 +  | 6   | 607 | 28437  | 29039  |
| UN70515 | Rsa1.0_03494.1 | 683 | 22509  | 0         | 458 | 499 | 91 +  | 180 | 656 | 13667  | 14165  |
| UN70516 | Rsa1.0_00136.1 | 789 | 122464 | 3.00E-99  | 281 | 317 | 88 -  | 40  | 335 | 68244  | 68560  |
| UN70517 | Rsa1.0_00714.1 | 798 | 67187  | 1.00E-104 | 246 | 256 | 96 +  | 536 | 785 | 10569  | 10824  |
| UN70518 | Rsa1.0_01964.1 | 718 | 36702  | 0         | 541 | 582 | 92 -  | 141 | 718 | 11420  | 11983  |
| UN70519 | Rsa1.0_00474.1 | 498 | 81731  | 1.00E-136 | 327 | 351 | 93 +  | 47  | 391 | 33857  | 34207  |
| UN70520 | Rsa1.0_00686.1 | 405 | 68511  | 1.00E-94  | 185 | 188 | 98 -  | 67  | 254 | 61089  | 61276  |
| UN70521 | Rsa1.0_00262.1 | 559 | 101906 | 6.00E-94  | 193 | 199 | 96 -  | 285 | 483 | 69588  | 69786  |
| UN70522 | Rsa1.0_01175.1 | 579 | 51674  | 1.00E-104 | 204 | 208 | 98 +  | 344 | 551 | 493    | 700    |
| UN70523 | Rsa1.0_08779.1 | 754 | 6929   | 0         | 640 | 689 | 92 +  | 63  | 748 | 2033   | 2721   |
| UN70524 | Rsa1.0_09695.1 | 823 | 6206   | 1.00E-98  | 216 | 223 | 96 +  | 561 | 780 | 580    | 802    |
| UN70525 | Rsa1.0_00873.1 | 623 | 61459  | 7.00E-66  | 155 | 164 | 94 -  | 179 | 342 | 14113  | 14276  |
| UN70526 | Rsa1.0_00707.1 | 654 | 190112 | 0         | 382 | 398 | 95 -  | 44  | 440 | 179614 | 180007 |
| UN70527 | Rsa1.0_04732.1 | 585 | 16193  | 0         | 554 | 554 | 100 + | 1   | 554 | 2130   | 2683   |
| UN70528 | Rsa1.0_00116.1 | 793 | 365886 | 1.00E-117 | 274 | 293 | 93 +  | 1   | 290 | 311250 | 311542 |
| UN70529 | Rsa1.0_00910.1 | 840 | 59975  | 3.00E-50  | 114 | 118 | 96 -  | 418 | 535 | 33769  | 33886  |
| UN70530 | Rsa1.0_00076.1 | 498 | 146021 | 0         | 428 | 443 | 96 -  | 59  | 498 | 69145  | 69584  |
| UN70531 | Rsa1.0_00618.1 | 447 | 72195  | 1.00E-103 | 235 | 249 | 94 +  | 14  | 254 | 2625   | 2873   |
| UN70532 | Rsa1.0_00804.1 | 699 | 63726  | 1.00E-156 | 301 | 308 | 97 +  | 2   | 309 | 37251  | 37558  |
| UN70533 | Rsa1.0_00415.1 | 514 | 86795  | 1.00E-130 | 297 | 314 | 94 -  | 3   | 309 | 6755   | 7066   |
| UN70534 | Rsa1.0_00096.1 | 759 | 198773 | 0         | 399 | 422 | 94 -  | 132 | 548 | 110504 | 110922 |
| UN70535 | Rsa1.0_00221.1 | 547 | 106972 | 9.00E-99  | 245 | 262 | 93 -  | 1   | 260 | 37880  | 38139  |
| UN70536 | Rsa1.0_02178.1 | 128 | 156197 | 8.00E-28  | 81  | 87  | 93 +  | 42  | 128 | 151983 | 152069 |
| UN70537 | Rsa1.0_00011.1 | 713 | 225044 | 3.00E-68  | 138 | 140 | 98 -  | 79  | 218 | 51953  | 52092  |
| UN70538 | Rsa1.0_00645.1 | 595 | 189716 | 1.00E-122 | 244 | 250 | 97 -  | 344 | 592 | 124820 | 125069 |
| UN70539 | Rsa1.0_01360.1 | 698 | 47246  | 0         | 400 | 420 | 95 -  | 83  | 502 | 45058  | 45471  |
| UN70540 | Rsa1.0_03643.1 | 160 | 21607  | 2.00E-47  | 144 | 160 | 90 +  | 1   | 160 | 69     | 218    |
| UN70541 | Rsa1.0_00216.1 | 467 | 197563 | 2.00E-78  | 246 | 269 | 91 +  | 6   | 271 | 50431  | 50690  |
| UN70542 | Rsa1.0_00328.1 | 727 | 224661 | 0         | 685 | 695 | 98 -  | 35  | 727 | 141967 | 142660 |
| UN70543 | Rsa1.0_59016.1 | 286 | 388    | 1.00E-50  | 105 | 106 | 99 +  | 1   | 106 | 119    | 224    |
| UN70544 | Rsa1.0_00392.1 | 134 | 88523  | 1.00E-45  | 120 | 129 | 93 -  | 6   | 134 | 31811  | 31939  |
| UN70545 | Rsa1.0_01286.1 | 720 | 49209  | 0         | 351 | 360 | 97 -  | 27  | 386 | 9839   | 10198  |
| UN70546 | Rsa1.0_01919.1 | 754 | 37272  | 2.00E-69  | 167 | 174 | 95 -  | 3   | 174 | 6416   | 6588   |
| UN70547 | Rsa1.0_00056.1 | 793 | 332604 | 1.00E-123 | 268 | 281 | 95 -  | 70  | 350 | 107099 | 107374 |
| UN70548 | Rsa1.0_00359.1 | 713 | 91256  | 0         | 430 | 452 | 95 -  | 1   | 450 | 84690  | 85138  |
| UN70549 | Rsa1.0_07122.1 | 108 | 9866   | 4.00E-20  | 92  | 106 | 86 +  | 1   | 106 | 6839   | 6944   |

|         |                |     |        |           |     |     |      |     |     |        |        |
|---------|----------------|-----|--------|-----------|-----|-----|------|-----|-----|--------|--------|
| UN70550 | Rsa1.0_00699.1 | 764 | 184398 | 1.00E-112 | 242 | 254 | 95 + | 285 | 538 | 176281 | 176534 |
| UN70551 | Rsa1.0_00315.1 | 834 | 96426  | 0         | 345 | 351 | 98 - | 302 | 652 | 19802  | 20152  |
| UN70552 | Rsa1.0_52720.1 | 628 | 432    | 0         | 421 | 432 | 97 + | 67  | 498 | 1      | 432    |
| UN70553 | Rsa1.0_00009.1 | 779 | 232558 | 0         | 745 | 769 | 96 + | 2   | 769 | 27024  | 27792  |
| UN70554 | Rsa1.0_00299.1 | 741 | 97770  | 1.00E-106 | 254 | 273 | 93 + | 154 | 426 | 26265  | 26534  |
| UN70555 | Rsa1.0_00002.1 | 414 | 601661 | 0         | 395 | 412 | 95 + | 1   | 410 | 406129 | 406536 |
| UN70556 | Rsa1.0_00636.1 | 718 | 71113  | 1.00E-128 | 299 | 324 | 92 + | 18  | 340 | 9874   | 10179  |
| UN70557 | Rsa1.0_01778.1 | 326 | 39509  | 1.00E-109 | 268 | 289 | 92 - | 1   | 289 | 9400   | 9682   |
| UN70558 | Rsa1.0_00608.1 | 317 | 172672 | 1.00E-141 | 303 | 318 | 95 - | 1   | 317 | 113784 | 114101 |
| UN70559 | Rsa1.0_00706.1 | 541 | 291570 | 0         | 505 | 539 | 93 + | 8   | 540 | 23308  | 23843  |
| UN70560 | Rsa1.0_01154.1 | 649 | 52249  | 0         | 396 | 400 | 99 + | 3   | 402 | 9019   | 9418   |
| UN70561 | Rsa1.0_02030.1 | 612 | 179909 | 0         | 384 | 395 | 97 + | 3   | 397 | 18410  | 18804  |
| UN70562 | Rsa1.0_00014.1 | 258 | 348985 | 3.00E-66  | 211 | 238 | 88 + | 1   | 238 | 331575 | 331809 |
| UN70563 | Rsa1.0_05287.1 | 642 | 14264  | 1.00E-176 | 414 | 442 | 93 + | 7   | 442 | 12031  | 12470  |
| UN70564 | Rsa1.0_00672.1 | 661 | 69358  | 0         | 606 | 659 | 91 + | 16  | 647 | 38682  | 39339  |
| UN70565 | Rsa1.0_00015.1 | 348 | 561803 | 1.00E-84  | 174 | 179 | 97 + | 169 | 347 | 482098 | 482276 |
| UN70566 | Rsa1.0_00008.1 | 330 | 358124 | 1.00E-104 | 224 | 235 | 95 + | 96  | 330 | 54899  | 55133  |
| UN70567 | Rsa1.0_04182.1 | 103 | 18610  | 1.00E-44  | 100 | 103 | 97 + | 1   | 103 | 1649   | 1751   |
| UN70568 | Rsa1.0_00494.1 | 784 | 79967  | 0         | 559 | 567 | 98 - | 218 | 784 | 49918  | 50483  |
| UN70569 | Rsa1.0_02365.1 | 401 | 32118  | 1.00E-133 | 352 | 386 | 91 + | 13  | 394 | 29260  | 29644  |
| UN70570 | Rsa1.0_03618.1 | 249 | 21744  | 2.00E-51  | 169 | 185 | 91 + | 68  | 249 | 5998   | 6178   |
| UN70571 | Rsa1.0_01261.1 | 119 | 49744  | 3.00E-24  | 106 | 120 | 88 + | 1   | 119 | 22273  | 22390  |
| UN70572 | Rsa1.0_02994.1 | 153 | 26168  | 4.00E-33  | 128 | 148 | 86 + | 6   | 153 | 2351   | 2489   |
| UN70573 | Rsa1.0_00030.1 | 132 | 250988 | 7.00E-16  | 112 | 132 | 84 + | 1   | 132 | 211145 | 211270 |
| UN70574 | Rsa1.0_04098.1 | 635 | 19078  | 1.00E-107 | 278 | 297 | 93 + | 5   | 295 | 11263  | 11553  |
| UN70575 | Rsa1.0_00822.1 | 634 | 62891  | 1.00E-132 | 266 | 275 | 96 - | 360 | 634 | 46987  | 47261  |
| UN70576 | Rsa1.0_00523.1 | 617 | 178770 | 1.00E-131 | 250 | 253 | 98 - | 363 | 615 | 21571  | 21822  |
| UN70577 | Rsa1.0_01431.1 | 349 | 167877 | 1.00E-87  | 188 | 196 | 95 - | 3   | 198 | 157684 | 157879 |
| UN70578 | Rsa1.0_00033.1 | 740 | 515811 | 1.00E-110 | 233 | 239 | 97 + | 505 | 740 | 42902  | 43140  |
| UN70579 | Rsa1.0_00387.1 | 804 | 495407 | 0         | 628 | 652 | 96 - | 161 | 804 | 161630 | 162278 |
| UN70580 | Rsa1.0_03591.1 | 835 | 21888  | 0         | 436 | 455 | 95 + | 387 | 835 | 10478  | 10932  |
| UN70581 | Rsa1.0_00531.1 | 692 | 77387  | 1.00E-135 | 275 | 284 | 96 + | 2   | 279 | 23140  | 23423  |
| UN70582 | Rsa1.0_01211.1 | 648 | 50646  | 0         | 622 | 641 | 97 + | 8   | 648 | 3370   | 4010   |
| UN70583 | Rsa1.0_02524.1 | 674 | 30496  | 0         | 361 | 372 | 97 + | 59  | 430 | 11355  | 11726  |
| UN70584 | Rsa1.0_05595.1 | 689 | 13228  | 1.00E-109 | 248 | 264 | 93 - | 19  | 282 | 5270   | 5527   |
| UN70585 | Rsa1.0_00040.1 | 729 | 324196 | 4.00E-74  | 172 | 182 | 94 + | 548 | 729 | 315227 | 315408 |
| UN70586 | Rsa1.0_02614.1 | 678 | 29551  | 0         | 635 | 682 | 93 + | 2   | 678 | 5275   | 5946   |
| UN70587 | Rsa1.0_00265.1 | 555 | 220635 | 1.00E-51  | 107 | 108 | 99 - | 228 | 335 | 146701 | 146808 |
| UN70588 | Rsa1.0_00741.1 | 681 | 66117  | 1.00E-101 | 261 | 284 | 91 + | 3   | 278 | 49467  | 49747  |

|         |                |     |        |           |     |     |      |     |     |        |        |
|---------|----------------|-----|--------|-----------|-----|-----|------|-----|-----|--------|--------|
| UN70589 | Rsa1.0_17008.1 | 151 | 1955   | 2.00E-32  | 86  | 90  | 95 - | 64  | 151 | 667    | 756    |
| UN70590 | Rsa1.0_02234.1 | 778 | 33618  | 1.00E-165 | 377 | 405 | 93 - | 320 | 723 | 4145   | 4534   |
| UN70591 | Rsa1.0_00415.1 | 676 | 86795  | 0         | 625 | 650 | 96 + | 4   | 652 | 8916   | 9565   |
| UN70592 | Rsa1.0_03107.1 | 745 | 25349  | 0         | 389 | 404 | 96 + | 3   | 406 | 12860  | 13263  |
| UN70593 | Rsa1.0_01506.1 | 706 | 44370  | 7.00E-94  | 184 | 187 | 98 - | 520 | 706 | 32700  | 32886  |
| UN70594 | Rsa1.0_03982.1 | 773 | 19723  | 0         | 457 | 480 | 95 - | 225 | 703 | 4841   | 5320   |
| UN70595 | Rsa1.0_05139.1 | 510 | 14718  | 0         | 491 | 509 | 96 - | 2   | 509 | 6973   | 7475   |
| UN70596 | Rsa1.0_01677.1 | 642 | 41140  | 6.00E-82  | 164 | 167 | 98 + | 291 | 457 | 9523   | 9689   |
| UN70597 | Rsa1.0_02525.1 | 758 | 30489  | 0         | 360 | 366 | 98 + | 2   | 367 | 4824   | 5189   |
| UN70598 | Rsa1.0_00733.1 | 700 | 66583  | 0         | 517 | 548 | 94 + | 163 | 700 | 46236  | 46783  |
| UN70599 | Rsa1.0_03013.1 | 297 | 26026  | 1.00E-132 | 286 | 297 | 96 - | 2   | 297 | 17286  | 17578  |
| UN70600 | Rsa1.0_02722.1 | 645 | 28417  | 0         | 407 | 422 | 96 + | 1   | 416 | 266    | 687    |
| UN70601 | Rsa1.0_01696.1 | 733 | 301850 | 0         | 697 | 740 | 94 - | 3   | 733 | 162097 | 162827 |
| UN70602 | Rsa1.0_05172.1 | 598 | 14608  | 1.00E-152 | 335 | 356 | 94 + | 243 | 598 | 10454  | 10809  |
| UN70603 | Rsa1.0_00821.1 | 739 | 62891  | 0         | 450 | 467 | 96 + | 3   | 469 | 46889  | 47355  |
| UN70604 | Rsa1.0_08462.1 | 731 | 7312   | 0         | 390 | 403 | 96 - | 326 | 725 | 2358   | 2760   |
| UN70605 | Rsa1.0_00645.1 | 698 | 189716 | 0         | 666 | 689 | 96 + | 1   | 686 | 28216  | 28904  |
| UN70606 | Rsa1.0_02582.1 | 780 | 29889  | 0         | 748 | 771 | 97 - | 2   | 770 | 4805   | 5575   |
| UN70607 | Rsa1.0_00360.1 | 740 | 91190  | 0         | 723 | 746 | 96 + | 1   | 740 | 79869  | 80614  |
| UN70608 | Rsa1.0_03145.1 | 762 | 25020  | 1.00E-132 | 266 | 275 | 96 - | 438 | 712 | 5      | 279    |
| UN70609 | Rsa1.0_01679.1 | 559 | 146876 | 6.00E-94  | 207 | 215 | 96 + | 347 | 559 | 134616 | 134830 |
| UN70610 | Rsa1.0_01874.1 | 560 | 37853  | 1.00E-116 | 254 | 268 | 94 - | 28  | 295 | 24318  | 24585  |
| UN70611 | Rsa1.0_00101.1 | 693 | 267193 | 0         | 437 | 462 | 94 + | 232 | 693 | 223001 | 223459 |
| UN70612 | Rsa1.0_00900.1 | 807 | 60367  | 3.00E-93  | 187 | 190 | 98 - | 18  | 206 | 28087  | 28276  |
| UN70613 | Rsa1.0_00057.1 | 710 | 160473 | 1.00E-170 | 368 | 386 | 95 - | 329 | 710 | 33652  | 34037  |
| UN70614 | Rsa1.0_01463.1 | 760 | 45213  | 0         | 728 | 760 | 95 - | 2   | 760 | 36586  | 37345  |
| UN70615 | Rsa1.0_00769.1 | 714 | 64911  | 0         | 689 | 707 | 97 - | 3   | 706 | 27395  | 28090  |
| UN70616 | Rsa1.0_00017.1 | 817 | 752458 | 1.00E-105 | 201 | 203 | 99 - | 485 | 687 | 741109 | 741311 |
| UN70617 | Rsa1.0_02232.1 | 818 | 33659  | 0         | 514 | 539 | 95 + | 5   | 540 | 13117  | 13643  |
| UN70618 | Rsa1.0_00423.1 | 633 | 86138  | 0         | 486 | 517 | 94 - | 8   | 521 | 39552  | 40065  |
| UN70619 | Rsa1.0_15061.1 | 718 | 2858   | 1.00E-122 | 234 | 238 | 98 - | 165 | 402 | 1426   | 1663   |
| UN70620 | Rsa1.0_05932.1 | 835 | 12207  | 1.00E-144 | 295 | 307 | 96 - | 155 | 461 | 1391   | 1697   |
| UN70621 | Rsa1.0_03264.1 | 781 | 145959 | 1.00E-131 | 363 | 405 | 89 + | 3   | 392 | 138261 | 138665 |
| UN70622 | Rsa1.0_00930.1 | 712 | 59224  | 1.00E-134 | 263 | 270 | 97 + | 439 | 708 | 48406  | 48675  |
| UN70623 | Rsa1.0_04526.1 | 757 | 16962  | 1.00E-111 | 250 | 260 | 96 - | 488 | 743 | 14052  | 14310  |
| UN70624 | Rsa1.0_01576.1 | 726 | 42923  | 7.00E-85  | 198 | 211 | 93 + | 4   | 214 | 8364   | 8568   |
| UN70625 | Rsa1.0_03225.1 | 395 | 24500  | 1.00E-171 | 329 | 336 | 97 - | 60  | 395 | 19598  | 19931  |
| UN70626 | Rsa1.0_02267.1 | 770 | 33194  | 1.00E-70  | 176 | 184 | 95 - | 591 | 770 | 24172  | 24355  |
| UN70627 | Rsa1.0_00022.1 | 795 | 200461 | 1.00E-128 | 266 | 277 | 96 - | 150 | 426 | 69611  | 69887  |

|         |                |     |        |           |     |     |      |     |     |        |        |
|---------|----------------|-----|--------|-----------|-----|-----|------|-----|-----|--------|--------|
| UN70628 | Rsa1.0.02117.1 | 693 | 34843  | 1.00E-134 | 273 | 283 | 96 - | 68  | 350 | 4609   | 4891   |
| UN70629 | Rsa1.0.01937.1 | 785 | 37147  | 0         | 778 | 790 | 98 + | 1   | 785 | 896    | 1678   |
| UN70630 | Rsa1.0.00123.1 | 621 | 325650 | 0         | 443 | 462 | 95 - | 160 | 621 | 308541 | 309001 |
| UN70631 | Rsa1.0.05086.1 | 681 | 14886  | 1.00E-100 | 210 | 218 | 96 - | 7   | 224 | 8930   | 9147   |
| UN70632 | Rsa1.0.00727.1 | 691 | 66724  | 0         | 417 | 430 | 96 - | 2   | 422 | 43745  | 44174  |
| UN70633 | Rsa1.0.00333.1 | 806 | 94500  | 9.00E-60  | 136 | 142 | 95 + | 264 | 405 | 31769  | 31910  |
| UN70634 | Rsa1.0.00527.1 | 741 | 77733  | 4.00E-12  | 101 | 122 | 82 + | 612 | 733 | 23504  | 23625  |
| UN70635 | Rsa1.0.00009.1 | 639 | 232558 | 0         | 621 | 648 | 95 + | 1   | 639 | 121394 | 122038 |
| UN70636 | Rsa1.0.05358.1 | 607 | 14060  | 0         | 430 | 439 | 97 + | 2   | 440 | 3021   | 3459   |
| UN70637 | Rsa1.0.05112.1 | 821 | 14814  | 1.00E-163 | 305 | 308 | 99 - | 272 | 578 | 12469  | 12776  |
| UN70638 | Rsa1.0.01635.1 | 736 | 41865  | 1.00E-156 | 332 | 348 | 95 - | 390 | 736 | 38672  | 39019  |
| UN70639 | Rsa1.0.04375.1 | 754 | 141717 | 0         | 731 | 755 | 96 + | 2   | 753 | 6198   | 6952   |
| UN70640 | Rsa1.0.00078.1 | 648 | 175053 | 0         | 609 | 647 | 94 - | 2   | 648 | 79471  | 80117  |
| UN70641 | Rsa1.0.00055.1 | 669 | 520193 | 0         | 393 | 410 | 95 + | 2   | 409 | 39497  | 39906  |
| UN70642 | Rsa1.0.00800.1 | 782 | 63868  | 1.00E-119 | 224 | 226 | 99 + | 117 | 342 | 60809  | 61034  |
| UN70643 | #              | #   | #      | #         | #   | #   | #    | #   | #   | #      | #      |
| UN70644 | Rsa1.0.02247.1 | 652 | 33427  | 3.00E-56  | 127 | 132 | 96 + | 354 | 485 | 28041  | 28172  |
| UN70645 | Rsa1.0.01045.1 | 730 | 55853  | 0         | 690 | 718 | 96 + | 7   | 721 | 32970  | 33678  |
| UN70646 | Rsa1.0.00202.1 | 789 | 185895 | 0         | 744 | 776 | 95 + | 19  | 789 | 82920  | 83691  |
| UN70647 | Rsa1.0.03618.1 | 659 | 21744  | 1.00E-143 | 266 | 268 | 99 - | 342 | 609 | 11054  | 11319  |
| UN70648 | Rsa1.0.02320.1 | 805 | 32575  | 1.00E-161 | 359 | 383 | 93 + | 11  | 393 | 22068  | 22444  |
| UN70649 | Rsa1.0.00686.1 | 801 | 68511  | 1.00E-92  | 202 | 209 | 96 - | 558 | 764 | 28744  | 28952  |
| UN70650 | Rsa1.0.00113.1 | 796 | 131574 | 3.00E-78  | 164 | 169 | 97 - | 1   | 169 | 81089  | 81257  |
| UN70651 | Rsa1.0.04730.1 | 680 | 16199  | 0         | 577 | 591 | 97 + | 93  | 680 | 1      | 591    |
| UN70652 | Rsa1.0.01175.1 | 748 | 51674  | 1.00E-119 | 406 | 470 | 86 + | 246 | 689 | 221    | 677    |
| UN70653 | Rsa1.0.06503.1 | 790 | 10881  | 0         | 662 | 703 | 94 - | 105 | 790 | 6574   | 7274   |
| UN70654 | Rsa1.0.00265.1 | 708 | 220635 | 1.00E-112 | 293 | 320 | 91 + | 392 | 708 | 195831 | 196150 |
| UN70655 | Rsa1.0.03994.1 | 579 | 19659  | 1.00E-144 | 315 | 337 | 93 + | 259 | 579 | 1755   | 2091   |
| UN70656 | Rsa1.0.00187.1 | 808 | 393093 | 1.00E-137 | 323 | 339 | 95 - | 443 | 774 | 156273 | 156611 |
| UN70657 | Rsa1.0.05199.1 | 323 | 14529  | 1.00E-75  | 174 | 184 | 94 - | 2   | 185 | 5433   | 5616   |
| UN70658 | Rsa1.0.00124.1 | 760 | 262503 | 0         | 620 | 643 | 96 - | 5   | 647 | 58430  | 59069  |
| UN70659 | Rsa1.0.57249.1 | 508 | 399    | 1.00E-100 | 315 | 359 | 87 + | 72  | 413 | 42     | 399    |
| UN70660 | Rsa1.0.01075.1 | 787 | 156953 | 0         | 648 | 686 | 94 + | 104 | 787 | 135744 | 136426 |
| UN70661 | Rsa1.0.00978.1 | 684 | 57739  | 1.00E-138 | 462 | 532 | 86 + | 49  | 571 | 42015  | 42543  |
| UN70662 | Rsa1.0.00379.1 | 726 | 89865  | 1.00E-174 | 338 | 347 | 97 - | 249 | 595 | 11967  | 12310  |
| UN70663 | Rsa1.0.00371.1 | 661 | 90463  | 1.00E-112 | 256 | 272 | 94 + | 243 | 511 | 9773   | 10044  |
| UN70664 | Rsa1.0.03612.1 | 738 | 21784  | 1.00E-120 | 559 | 669 | 83 + | 80  | 738 | 1      | 639    |
| UN70665 | Rsa1.0.00194.1 | 640 | 110851 | 0         | 421 | 449 | 93 + | 193 | 640 | 13143  | 13584  |
| UN70666 | Rsa1.0.00377.1 | 513 | 90038  | 0         | 496 | 512 | 96 + | 2   | 513 | 67165  | 67676  |

|         |                |     |        |           |     |     |       |     |     |        |        |
|---------|----------------|-----|--------|-----------|-----|-----|-------|-----|-----|--------|--------|
| UN70667 | Rsa1.0.02235.1 | 633 | 33615  | 0         | 609 | 642 | 94 +  | 1   | 628 | 8461   | 9101   |
| UN70668 | Rsa1.0.00628.1 | 555 | 214360 | 1.00E-117 | 250 | 262 | 95 -  | 68  | 329 | 213000 | 213261 |
| UN70669 | Rsa1.0.01435.1 | 523 | 45942  | 2.00E-87  | 215 | 231 | 93 +  | 194 | 424 | 41237  | 41465  |
| UN70670 | Rsa1.0.02494.1 | 780 | 132923 | 1.00E-86  | 199 | 210 | 94 +  | 3   | 212 | 118765 | 118972 |
| UN70671 | Rsa1.0.02207.1 | 439 | 33914  | 5.00E-69  | 133 | 133 | 100 - | 168 | 300 | 31363  | 31495  |
| UN70672 | Rsa1.0.01412.1 | 772 | 46311  | 1.00E-162 | 318 | 325 | 97 +  | 386 | 708 | 2268   | 2592   |
| UN70673 | Rsa1.0.00224.1 | 713 | 327530 | 1.00E-134 | 298 | 316 | 94 +  | 354 | 666 | 199791 | 200100 |
| UN70674 | Rsa1.0.00037.1 | 613 | 307838 | 0         | 385 | 395 | 97 -  | 3   | 397 | 42175  | 42569  |
| UN70675 | Rsa1.0.01977.1 | 401 | 36559  | 1.00E-126 | 253 | 261 | 96 +  | 86  | 346 | 23094  | 23354  |
| UN70676 | Rsa1.0.03143.1 | 335 | 25024  | 1.00E-109 | 225 | 233 | 96 +  | 103 | 335 | 11910  | 12142  |
| UN70677 | Rsa1.0.00678.1 | 781 | 193163 | 0         | 486 | 514 | 94 -  | 222 | 723 | 177047 | 177554 |
| UN70678 | Rsa1.0.04110.1 | 725 | 18998  | 1.00E-126 | 263 | 273 | 96 +  | 12  | 284 | 4831   | 5102   |
| UN70679 | Rsa1.0.01537.1 | 737 | 187285 | 0         | 450 | 481 | 93 +  | 1   | 479 | 14842  | 15313  |
| UN70680 | Rsa1.0.00669.1 | 697 | 69419  | 1.00E-140 | 265 | 269 | 98 -  | 3   | 271 | 36724  | 36992  |
| UN70681 | Rsa1.0.02601.1 | 812 | 29654  | 1.00E-114 | 278 | 296 | 93 +  | 522 | 812 | 3968   | 4263   |
| UN70682 | Rsa1.0.00789.1 | 633 | 64233  | 1.00E-119 | 261 | 275 | 94 -  | 26  | 300 | 50369  | 50640  |
| UN70683 | Rsa1.0.00180.1 | 739 | 114581 | 1.00E-98  | 210 | 219 | 95 +  | 180 | 398 | 110422 | 110640 |
| UN70684 | Rsa1.0.01915.1 | 141 | 37339  | 2.00E-38  | 81  | 81  | 100 - | 12  | 92  | 12496  | 12576  |
| UN70685 | Rsa1.0.01110.1 | 773 | 195852 | 4.00E-71  | 146 | 149 | 97 -  | 373 | 521 | 20974  | 21122  |
| UN70686 | Rsa1.0.04429.1 | 763 | 17393  | 1.00E-152 | 309 | 321 | 96 -  | 223 | 543 | 13299  | 13619  |
| UN70687 | Rsa1.0.00397.1 | 693 | 88189  | 0         | 678 | 706 | 96 -  | 3   | 693 | 4635   | 5339   |
| UN70688 | Rsa1.0.00318.1 | 476 | 96094  | 0         | 472 | 480 | 98 +  | 1   | 476 | 38819  | 39297  |
| UN70689 | Rsa1.0.00301.1 | 789 | 365315 | 0         | 497 | 517 | 96 +  | 218 | 733 | 26031  | 26547  |
| UN70690 | Rsa1.0.08902.1 | 143 | 6805   | 6.00E-35  | 125 | 139 | 89 -  | 1   | 138 | 4325   | 4462   |
| UN70691 | Rsa1.0.08278.1 | 172 | 7612   | 4.00E-83  | 159 | 160 | 99 +  | 13  | 172 | 7197   | 7356   |
| UN70692 | Rsa1.0.25328.1 | 365 | 941    | 2.00E-58  | 133 | 139 | 95 -  | 57  | 195 | 213    | 351    |
| UN70693 | Rsa1.0.00060.1 | 749 | 502678 | 0         | 700 | 719 | 97 -  | 35  | 749 | 58122  | 58840  |
| UN70694 | Rsa1.0.02275.1 | 827 | 33107  | 0         | 755 | 768 | 98 -  | 4   | 768 | 13537  | 14302  |
| UN70695 | Rsa1.0.04670.1 | 731 | 16453  | 1.00E-136 | 271 | 278 | 97 +  | 3   | 279 | 3407   | 3684   |
| UN70696 | Rsa1.0.01591.1 | 474 | 42718  | 1.00E-115 | 284 | 306 | 92 -  | 176 | 474 | 8928   | 9233   |
| UN70697 | Rsa1.0.00477.1 | 604 | 81556  | 1.00E-137 | 292 | 304 | 96 -  | 297 | 599 | 10546  | 10848  |
| UN70698 | Rsa1.0.08211.1 | 714 | 7714   | 1.00E-166 | 299 | 300 | 99 +  | 4   | 303 | 865    | 1164   |
| UN70699 | Rsa1.0.00087.1 | 722 | 761073 | 1.00E-77  | 184 | 194 | 94 +  | 533 | 722 | 314989 | 315182 |
| UN70700 | Rsa1.0.00262.1 | 211 | 101906 | 7.00E-85  | 205 | 216 | 94 +  | 2   | 211 | 66486  | 66700  |
| UN70701 | Rsa1.0.01459.1 | 758 | 45277  | 3.00E-62  | 128 | 130 | 98 -  | 2   | 131 | 25946  | 26075  |
| UN70702 | Rsa1.0.14644.1 | 723 | 3195   | 0         | 579 | 597 | 96 +  | 1   | 597 | 2238   | 2834   |
| UN70703 | Rsa1.0.11573.1 | 724 | 5468   | 1.00E-137 | 293 | 307 | 95 -  | 419 | 724 | 5136   | 5442   |
| UN70704 | Rsa1.0.01013.1 | 656 | 56822  | 0         | 347 | 350 | 99 -  | 26  | 375 | 29533  | 29882  |
| UN70705 | Rsa1.0.00773.1 | 801 | 64839  | 0         | 606 | 631 | 96 -  | 1   | 628 | 1579   | 2209   |

|         |                |     |        |           |     |     |      |     |     |        |        |
|---------|----------------|-----|--------|-----------|-----|-----|------|-----|-----|--------|--------|
| UN70706 | Rsa1.0_04557.1 | 287 | 145048 | 1.00E-139 | 253 | 254 | 99 + | 34  | 287 | 135868 | 136121 |
| UN70707 | Rsa1.0_00001.1 | 708 | 363028 | 1.00E-118 | 272 | 293 | 92 + | 4   | 296 | 309429 | 309709 |
| UN70708 | Rsa1.0_00422.1 | 540 | 86144  | 0         | 428 | 448 | 95 + | 83  | 525 | 16094  | 16541  |
| UN70709 | Rsa1.0_07859.1 | 406 | 8409   | 0         | 389 | 401 | 97 - | 6   | 406 | 5754   | 6153   |
| UN70710 | Rsa1.0_01190.1 | 778 | 194501 | 1.00E-128 | 293 | 307 | 95 + | 478 | 778 | 13189  | 13495  |
| UN70711 | Rsa1.0_00055.1 | 586 | 520193 | 1.00E-70  | 139 | 140 | 99 + | 2   | 141 | 56969  | 57108  |
| UN70712 | Rsa1.0_00012.1 | 719 | 222148 | 0         | 662 | 746 | 88 + | 1   | 717 | 133876 | 134587 |
| UN70713 | Rsa1.0_01566.1 | 589 | 43134  | 6.00E-91  | 268 | 297 | 90 - | 6   | 289 | 34818  | 35113  |
| UN70714 | Rsa1.0_00582.1 | 706 | 74333  | 0         | 641 | 648 | 98 - | 59  | 706 | 12107  | 12754  |
| UN70715 | Rsa1.0_00036.1 | 759 | 176186 | 3.00E-96  | 203 | 211 | 96 - | 282 | 492 | 155861 | 156071 |
| UN70716 | Rsa1.0_66394.1 | 273 | 345    | 4.00E-59  | 128 | 132 | 96 + | 63  | 194 | 214    | 345    |
| UN70717 | Rsa1.0_02357.1 | 217 | 32220  | 9.00E-66  | 142 | 147 | 96 - | 71  | 217 | 12584  | 12730  |
| UN70718 | Rsa1.0_11048.1 | 668 | 5634   | 2.00E-69  | 189 | 206 | 91 + | 273 | 478 | 262    | 466    |
| UN70719 | Rsa1.0_00197.1 | 116 | 109714 | 4.00E-11  | 48  | 51  | 94 + | 34  | 84  | 91052  | 91101  |
| UN70720 | Rsa1.0_09406.1 | 605 | 6391   | 1.00E-110 | 221 | 227 | 97 + | 179 | 405 | 5073   | 5299   |
| UN70721 | Rsa1.0_00282.1 | 480 | 177799 | 1.00E-110 | 338 | 388 | 87 + | 42  | 411 | 117289 | 117670 |
| UN70722 | Rsa1.0_00344.1 | 592 | 191774 | 2.00E-78  | 161 | 165 | 97 + | 312 | 476 | 154180 | 154344 |
| UN70723 | Rsa1.0_01377.1 | 648 | 46967  | 1.00E-166 | 315 | 321 | 98 - | 328 | 648 | 11331  | 11651  |
| UN70724 | Rsa1.0_01061.1 | 792 | 55349  | 1.00E-136 | 300 | 318 | 94 + | 250 | 567 | 16136  | 16453  |
| UN70725 | Rsa1.0_01101.1 | 557 | 54031  | 5.00E-54  | 157 | 170 | 92 + | 5   | 171 | 40321  | 40488  |
| UN70726 | Rsa1.0_00246.1 | 715 | 103541 | 1.00E-135 | 288 | 302 | 95 - | 3   | 301 | 7484   | 7785   |
| UN70727 | Rsa1.0_00039.1 | 713 | 296927 | 1.00E-80  | 171 | 177 | 96 - | 314 | 490 | 49432  | 49608  |
| UN70728 | Rsa1.0_03385.1 | 632 | 23280  | 0         | 496 | 505 | 98 - | 1   | 505 | 19775  | 20278  |
| UN70729 | Rsa1.0_00281.1 | 345 | 99908  | 5.00E-90  | 180 | 184 | 97 + | 162 | 345 | 2642   | 2825   |
| UN70730 | Rsa1.0_15730.1 | 719 | 2458   | 1.00E-162 | 298 | 301 | 99 + | 3   | 303 | 2158   | 2458   |
| UN70731 | Rsa1.0_00011.1 | 743 | 225044 | 0         | 480 | 503 | 95 - | 75  | 576 | 175775 | 176277 |
| UN70732 | Rsa1.0_00123.1 | 668 | 325650 | 7.00E-60  | 137 | 142 | 96 - | 7   | 147 | 243050 | 243191 |
| UN70733 | Rsa1.0_00042.1 | 787 | 171507 | 1.00E-120 | 268 | 284 | 94 + | 114 | 397 | 155679 | 155962 |
| UN70734 | Rsa1.0_01881.1 | 677 | 37721  | 2.33E-156 | 310 | 324 | 95 + | 363 | 677 | 29442  | 29765  |
| UN70735 | Rsa1.0_00341.1 | 759 | 249309 | 1.00E-116 | 237 | 245 | 96 - | 335 | 579 | 81927  | 82171  |
| UN70736 | Rsa1.0_03321.1 | 675 | 23755  | 0         | 458 | 488 | 93 - | 188 | 675 | 669    | 1150   |
| UN70737 | Rsa1.0_04319.1 | 680 | 17944  | 0         | 398 | 414 | 96 + | 2   | 415 | 6166   | 6579   |
| UN70738 | Rsa1.0_00056.1 | 722 | 332604 | 1.00E-110 | 250 | 269 | 92 + | 3   | 256 | 103797 | 104065 |
| UN70739 | Rsa1.0_00352.1 | 713 | 92266  | 0         | 578 | 590 | 97 + | 124 | 713 | 22072  | 22661  |
| UN70740 | Rsa1.0_02244.1 | 793 | 33494  | 0         | 657 | 680 | 96 - | 105 | 773 | 16893  | 17572  |
| UN70741 | Rsa1.0_54894.1 | 708 | 416    | 1.00E-104 | 288 | 324 | 88 - | 7   | 324 | 33     | 334    |
| UN70742 | Rsa1.0_02500.1 | 735 | 30768  | 6.00E-76  | 187 | 201 | 93 + | 449 | 649 | 7770   | 7970   |
| UN70743 | Rsa1.0_01484.1 | 732 | 44806  | 8.00E-97  | 201 | 208 | 96 + | 353 | 560 | 25250  | 25457  |
| UN70744 | Rsa1.0_00302.1 | 652 | 97521  | 0         | 618 | 657 | 94 + | 1   | 652 | 75707  | 76347  |



|         |                |     |        |           |     |     |       |     |     |        |        |
|---------|----------------|-----|--------|-----------|-----|-----|-------|-----|-----|--------|--------|
| UN70745 | Rsa1.0.01825.1 | 428 | 38725  | 2.00E-87  | 179 | 184 | 97 -  | 152 | 335 | 15884  | 16067  |
| UN70746 | Rsa1.0.00051.1 | 785 | 258225 | 0         | 731 | 777 | 94 +  | 1   | 773 | 134472 | 135248 |
| UN70747 | Rsa1.0.00008.1 | 673 | 358124 | 1.00E-109 | 201 | 201 | 100 - | 6   | 206 | 88834  | 89034  |
| UN70748 | Rsa1.0.01565.1 | 730 | 155447 | 1.00E-119 | 232 | 237 | 97 -  | 172 | 408 | 12086  | 12322  |
| UN70749 | Rsa1.0.00623.1 | 628 | 207630 | 0         | 387 | 394 | 98 -  | 235 | 628 | 152803 | 153196 |
| UN70750 | Rsa1.0.05004.1 | 747 | 15172  | 0         | 710 | 736 | 96 -  | 9   | 734 | 13912  | 14647  |
| UN70751 | Rsa1.0.00083.1 | 503 | 442773 | 0         | 489 | 504 | 97 +  | 1   | 503 | 401839 | 402337 |
| UN70752 | Rsa1.0.00047.1 | 836 | 168582 | 1.00E-102 | 223 | 233 | 95 -  | 1   | 232 | 115948 | 116180 |
| UN70753 | Rsa1.0.04113.1 | 731 | 18986  | 1.00E-135 | 265 | 271 | 97 -  | 261 | 529 | 10364  | 10634  |
| UN70754 | Rsa1.0.00706.1 | 220 | 291570 | 7.00E-42  | 132 | 147 | 89 -  | 5   | 151 | 278051 | 278197 |
| UN70755 | Rsa1.0.00497.1 | 310 | 79830  | 4.00E-87  | 233 | 255 | 91 -  | 57  | 310 | 43604  | 43858  |
| UN70756 | Rsa1.0.02805.1 | 687 | 27698  | 1.00E-138 | 306 | 322 | 95 +  | 1   | 316 | 13652  | 13973  |
| UN70757 | Rsa1.0.00133.1 | 617 | 123768 | 0         | 447 | 454 | 98 +  | 2   | 455 | 59314  | 59765  |
| UN70758 | Rsa1.0.16051.1 | 274 | 2305   | 5.00E-99  | 256 | 278 | 92 +  | 3   | 274 | 1883   | 2158   |
| UN70759 | Rsa1.0.02705.1 | 631 | 28535  | 0         | 403 | 424 | 95 -  | 1   | 424 | 13112  | 13535  |
| UN70760 | Rsa1.0.01441.1 | 839 | 45790  | 0         | 609 | 624 | 97 +  | 11  | 634 | 44619  | 45242  |
| UN70761 | Rsa1.0.10770.1 | 838 | 5723   | 0         | 521 | 535 | 97 +  | 307 | 838 | 431    | 957    |
| UN70762 | Rsa1.0.14634.1 | 789 | 3205   | 1.00E-89  | 232 | 251 | 92 -  | 7   | 254 | 1772   | 2017   |
| UN70763 | Rsa1.0.04396.1 | 721 | 17561  | 1.00E-116 | 233 | 240 | 97 +  | 482 | 721 | 12194  | 12433  |
| UN70764 | Rsa1.0.00289.1 | 773 | 98620  | 1.00E-174 | 309 | 309 | 100 + | 1   | 309 | 70354  | 70662  |
| UN70765 | Rsa1.0.00222.1 | 780 | 172263 | 0         | 465 | 491 | 94 +  | 4   | 493 | 52923  | 53409  |
| UN70766 | Rsa1.0.00382.1 | 810 | 251946 | 0         | 771 | 801 | 96 -  | 8   | 805 | 38501  | 39300  |
| UN70767 | Rsa1.0.00342.1 | 582 | 93695  | 1.00E-110 | 267 | 291 | 91 -  | 3   | 293 | 1568   | 1845   |
| UN70768 | Rsa1.0.00285.1 | 726 | 149638 | 0         | 499 | 527 | 94 -  | 2   | 521 | 142472 | 142994 |
| UN70769 | Rsa1.0.00006.1 | 115 | 396176 | 2.00E-40  | 100 | 104 | 96 +  | 1   | 103 | 368613 | 368716 |
| UN70770 | Rsa1.0.04785.1 | 465 | 15993  | 1.00E-149 | 313 | 324 | 96 +  | 3   | 326 | 7176   | 7496   |
| UN70771 | Rsa1.0.01682.1 | 377 | 41090  | 3.00E-79  | 332 | 393 | 84 -  | 1   | 377 | 26362  | 26739  |
| UN70772 | Rsa1.0.49835.1 | 141 | 455    | 7.00E-50  | 132 | 140 | 94 -  | 4   | 141 | 2      | 141    |
| UN70773 | Rsa1.0.00545.1 | 707 | 189649 | 1.00E-145 | 264 | 265 | 99 -  | 1   | 265 | 5595   | 5859   |
| UN70774 | Rsa1.0.00274.1 | 671 | 210119 | 1.00E-163 | 320 | 329 | 97 -  | 3   | 328 | 46547  | 46875  |
| UN70775 | Rsa1.0.16660.1 | 619 | 2073   | 9.00E-81  | 298 | 348 | 85 -  | 11  | 344 | 645    | 971    |
| UN70776 | Rsa1.0.00018.1 | 748 | 410899 | 0         | 700 | 739 | 94 -  | 16  | 745 | 7547   | 8285   |
| UN70777 | Rsa1.0.01233.1 | 446 | 50184  | 1.00E-133 | 357 | 391 | 91 +  | 60  | 446 | 23511  | 23894  |
| UN70778 | Rsa1.0.15461.1 | 543 | 2591   | 0         | 536 | 543 | 98 -  | 1   | 543 | 1082   | 1624   |
| UN70779 | Rsa1.0.06149.1 | 821 | 11615  | 0         | 756 | 790 | 95 -  | 29  | 817 | 3682   | 4471   |
| UN70780 | Rsa1.0.00398.1 | 741 | 88007  | 0         | 678 | 746 | 90 -  | 3   | 741 | 10695  | 11412  |
| UN70781 | Rsa1.0.00453.1 | 517 | 83031  | 1.00E-144 | 444 | 505 | 87 +  | 39  | 517 | 80226  | 80717  |
| UN70782 | Rsa1.0.03224.1 | 822 | 24501  | 1.00E-175 | 365 | 379 | 96 +  | 442 | 817 | 3731   | 4109   |
| UN70783 | Rsa1.0.03668.1 | 569 | 21483  | 0         | 557 | 572 | 97 -  | 1   | 569 | 2635   | 3206   |

|         |                |     |        |           |     |     |      |     |     |        |        |
|---------|----------------|-----|--------|-----------|-----|-----|------|-----|-----|--------|--------|
| UN70784 | Rsa1.0.02206.1 | 832 | 33922  | 0         | 831 | 835 | 99 + | 2   | 832 | 22564  | 23398  |
| UN70785 | Rsa1.0.05418.1 | 683 | 13816  | 2.00E-69  | 184 | 200 | 92 + | 255 | 452 | 3497   | 3685   |
| UN70786 | Rsa1.0.09646.1 | 559 | 6234   | 0         | 393 | 395 | 99 - | 61  | 455 | 593    | 987    |
| UN70787 | Rsa1.0.04073.1 | 819 | 19238  | 4.00E-99  | 229 | 244 | 93 + | 396 | 639 | 11043  | 11286  |
| UN70788 | Rsa1.0.00448.1 | 805 | 84048  | 0         | 743 | 773 | 96 + | 34  | 799 | 53142  | 53914  |
| UN70789 | Rsa1.0.00977.1 | 657 | 198001 | 0         | 645 | 657 | 98 + | 1   | 657 | 188604 | 189260 |
| UN70790 | Rsa1.0.00492.1 | 749 | 80178  | 0         | 546 | 553 | 98 + | 66  | 618 | 39382  | 39932  |
| UN70791 | Rsa1.0.02057.1 | 151 | 35540  | 1.00E-70  | 147 | 151 | 97 - | 1   | 151 | 10697  | 10847  |
| UN70792 | Rsa1.0.01728.1 | 802 | 40239  | 0         | 738 | 801 | 92 + | 4   | 801 | 3972   | 4757   |
| UN70793 | Rsa1.0.03059.1 | 112 | 25711  | 3.00E-24  | 60  | 61  | 98 + | 52  | 112 | 8614   | 8674   |
| UN70794 | Rsa1.0.03155.1 | 118 | 24958  | 2.00E-25  | 84  | 91  | 92 + | 28  | 118 | 20582  | 20671  |
| UN70795 | Rsa1.0.01828.1 | 725 | 38681  | 0         | 711 | 723 | 98 + | 1   | 722 | 14580  | 15301  |
| UN70796 | Rsa1.0.19481.1 | 602 | 1426   | 0         | 383 | 395 | 96 - | 9   | 400 | 943    | 1337   |
| UN70797 | Rsa1.0.00033.1 | 284 | 515811 | 1.00E-125 | 271 | 285 | 95 + | 1   | 284 | 485116 | 485393 |
| UN70798 | Rsa1.0.00104.1 | 657 | 368722 | 1.00E-138 | 283 | 294 | 96 + | 215 | 508 | 38524  | 38817  |
| UN70799 | Rsa1.0.03391.1 | 794 | 23251  | 0         | 719 | 754 | 95 + | 40  | 787 | 15604  | 16353  |
| UN70800 | Rsa1.0.04846.1 | 585 | 15739  | 1.00E-103 | 207 | 211 | 98 + | 1   | 210 | 5611   | 5821   |
| UN70801 | Rsa1.0.00119.1 | 661 | 467509 | 0         | 640 | 666 | 96 - | 1   | 661 | 3521   | 4185   |
| UN70802 | Rsa1.0.00002.1 | 501 | 601661 | 3.00E-77  | 153 | 155 | 98 - | 1   | 155 | 446043 | 446197 |
| UN70803 | Rsa1.0.00213.1 | 269 | 108167 | 6.00E-52  | 166 | 185 | 89 + | 10  | 193 | 58570  | 58745  |
| UN70804 | Rsa1.0.00623.1 | 576 | 207630 | 1.00E-156 | 317 | 328 | 96 + | 3   | 329 | 195175 | 195502 |
| UN70805 | Rsa1.0.03275.1 | 279 | 24159  | 1.00E-105 | 215 | 222 | 96 + | 58  | 279 | 10668  | 10889  |
| UN70806 | Rsa1.0.02104.1 | 162 | 34985  | 4.00E-55  | 151 | 161 | 93 + | 1   | 159 | 23623  | 23782  |
| UN70807 | Rsa1.0.20661.1 | 361 | 1282   | 1.00E-114 | 315 | 348 | 90 - | 3   | 349 | 732    | 1077   |
| UN70808 | Rsa1.0.01632.1 | 583 | 181224 | 1.00E-103 | 265 | 286 | 92 - | 299 | 583 | 9031   | 9314   |
| UN70809 | Rsa1.0.01321.1 | 401 | 48248  | 1.00E-32  | 98  | 107 | 91 - | 275 | 375 | 36148  | 36254  |
| UN70810 | Rsa1.0.02419.1 | 647 | 31583  | 0         | 642 | 647 | 99 - | 3   | 647 | 563    | 1209   |
| UN70811 | Rsa1.0.00077.1 | 664 | 145005 | 1.00E-178 | 359 | 373 | 96 - | 4   | 376 | 69867  | 70239  |
| UN70812 | Rsa1.0.00133.1 | 603 | 123768 | 2.00E-90  | 185 | 190 | 97 - | 2   | 191 | 52774  | 52959  |
| UN70813 | Rsa1.0.00488.1 | 534 | 80490  | 8.00E-50  | 104 | 105 | 99 - | 272 | 376 | 78814  | 78918  |
| UN70814 | Rsa1.0.01352.1 | 647 | 47443  | 1.00E-102 | 219 | 229 | 95 + | 416 | 644 | 12214  | 12442  |
| UN70815 | Rsa1.0.00616.1 | 563 | 195713 | 1.00E-161 | 291 | 292 | 99 + | 3   | 294 | 193960 | 194251 |
| UN70816 | Rsa1.0.10770.1 | 693 | 5723   | 0         | 657 | 694 | 94 - | 2   | 693 | 892    | 1577   |
| UN70817 | Rsa1.0.15186.1 | 197 | 2772   | 6.00E-42  | 108 | 115 | 93 - | 1   | 115 | 1966   | 2080   |
| UN70818 | Rsa1.0.00290.1 | 623 | 225096 | 0         | 576 | 587 | 98 - | 2   | 585 | 202813 | 203399 |
| UN70819 | Rsa1.0.04422.1 | 750 | 17423  | 0         | 725 | 747 | 97 + | 10  | 750 | 7669   | 8412   |
| UN70820 | Rsa1.0.00290.1 | 631 | 225096 | 4.00E-92  | 205 | 216 | 94 + | 11  | 226 | 188635 | 188850 |
| UN70821 | Rsa1.0.00087.1 | 487 | 761073 | 1.00E-109 | 240 | 248 | 96 - | 1   | 248 | 294730 | 294973 |
| UN70822 | Rsa1.0.04396.1 | 685 | 17561  | 1.00E-120 | 244 | 252 | 96 - | 262 | 513 | 12761  | 13012  |

|         |                |     |        |           |     |     |       |     |     |        |        |
|---------|----------------|-----|--------|-----------|-----|-----|-------|-----|-----|--------|--------|
| UN70823 | Rsa1.0.00136.1 | 579 | 122464 | 0         | 419 | 430 | 97 +  | 153 | 579 | 76241  | 76670  |
| UN70824 | Rsa1.0.70340.1 | 297 | 326    | 1.00E-90  | 181 | 185 | 97 -  | 5   | 189 | 55     | 239    |
| UN70825 | Rsa1.0.00222.1 | 618 | 172263 | 1.00E-145 | 285 | 293 | 97 -  | 1   | 293 | 54390  | 54682  |
| UN70826 | Rsa1.0.01115.1 | 666 | 183545 | 1.00E-174 | 358 | 374 | 95 +  | 3   | 372 | 174027 | 174400 |
| UN70827 | Rsa1.0.00722.1 | 473 | 66840  | 2.00E-96  | 209 | 218 | 95 -  | 173 | 388 | 14010  | 14227  |
| UN70828 | Rsa1.0.00016.1 | 707 | 831256 | 1.00E-110 | 236 | 246 | 95 +  | 458 | 702 | 392173 | 392418 |
| UN70829 | Rsa1.0.00002.1 | 751 | 601661 | 2.00E-76  | 246 | 279 | 88 +  | 34  | 303 | 9269   | 9547   |
| UN70830 | Rsa1.0.00748.1 | 633 | 65983  | 2.00E-81  | 274 | 307 | 89 -  | 1   | 288 | 65464  | 65765  |
| UN70831 | Rsa1.0.01586.1 | 669 | 42804  | 0         | 629 | 673 | 93 -  | 1   | 666 | 28252  | 28920  |
| UN70832 | Rsa1.0.23245.1 | 338 | 1062   | 1.00E-166 | 329 | 341 | 96 -  | 1   | 333 | 217    | 557    |
| UN70833 | Rsa1.0.00463.1 | 687 | 189177 | 1.00E-150 | 288 | 294 | 97 -  | 394 | 687 | 116000 | 116293 |
| UN70834 | Rsa1.0.08846.1 | 542 | 6867   | 3.00E-89  | 222 | 238 | 93 -  | 1   | 237 | 3201   | 3436   |
| UN70835 | Rsa1.0.02803.1 | 698 | 27715  | 8.00E-66  | 150 | 156 | 96 -  | 180 | 334 | 26242  | 26397  |
| UN70836 | Rsa1.0.00071.1 | 468 | 345714 | 1.00E-159 | 314 | 324 | 96 +  | 1   | 324 | 336661 | 336984 |
| UN70837 | Rsa1.0.02477.1 | 826 | 31058  | 0         | 341 | 341 | 100 - | 1   | 341 | 12136  | 12476  |
| UN70838 | Rsa1.0.00001.1 | 488 | 363028 | 0         | 449 | 488 | 92 -  | 1   | 488 | 235810 | 236286 |
| UN70839 | Rsa1.0.00517.1 | 100 | 142790 | 1.00E-35  | 94  | 100 | 94 -  | 1   | 100 | 113212 | 113311 |
| UN70840 | Rsa1.0.06663.1 | 440 | 10576  | 0         | 415 | 434 | 95 +  | 1   | 433 | 6979   | 7407   |
| UN70841 | Rsa1.0.05749.1 | 456 | 12746  | 1.00E-125 | 279 | 291 | 95 -  | 170 | 456 | 1430   | 1715   |
| UN70842 | Rsa1.0.05923.1 | 598 | 12230  | 1.00E-169 | 385 | 414 | 92 +  | 2   | 412 | 4133   | 4531   |
| UN70843 | Rsa1.0.02402.1 | 149 | 31710  | 3.00E-46  | 133 | 146 | 91 +  | 4   | 149 | 23972  | 24112  |
| UN70844 | Rsa1.0.02001.1 | 203 | 36198  | 9.00E-66  | 185 | 203 | 91 -  | 1   | 203 | 32043  | 32239  |
| UN70845 | Rsa1.0.00144.1 | 724 | 120708 | 1.00E-125 | 316 | 341 | 92 -  | 3   | 338 | 10610  | 10948  |
| UN70846 | Rsa1.0.01777.1 | 636 | 39511  | 1.00E-124 | 234 | 237 | 98 +  | 379 | 615 | 18308  | 18544  |
| UN70847 | Rsa1.0.20672.1 | 590 | 1281   | 2.00E-94  | 185 | 188 | 98 +  | 403 | 590 | 1020   | 1207   |
| UN70848 | Rsa1.0.00538.1 | 392 | 77149  | 1.00E-170 | 331 | 339 | 97 -  | 9   | 346 | 18485  | 18823  |
| UN70849 | Rsa1.0.00321.1 | 497 | 95671  | 2.33E-156 | 402 | 443 | 90 +  | 1   | 433 | 26907  | 27341  |
| UN70850 | Rsa1.0.00005.1 | 196 | 353093 | 4.00E-49  | 151 | 168 | 89 +  | 4   | 166 | 50701  | 50864  |
| UN70851 | Rsa1.0.02036.1 | 148 | 35731  | 2.00E-59  | 137 | 144 | 95 +  | 1   | 144 | 9738   | 9881   |
| UN70852 | Rsa1.0.00472.1 | 470 | 398134 | 1.00E-147 | 314 | 328 | 95 +  | 1   | 327 | 306530 | 306856 |
| UN70853 | Rsa1.0.00019.1 | 197 | 301669 | 2.00E-88  | 189 | 197 | 95 -  | 1   | 197 | 274031 | 274227 |
| UN70854 | Rsa1.0.03083.1 | 756 | 25520  | 0         | 716 | 752 | 95 +  | 1   | 748 | 4221   | 4972   |
| UN70855 | Rsa1.0.00065.1 | 689 | 454616 | 0         | 446 | 471 | 94 +  | 13  | 480 | 26243  | 26712  |
| UN70856 | Rsa1.0.04827.1 | 336 | 15815  | 1.00E-157 | 326 | 339 | 96 -  | 1   | 336 | 4273   | 4611   |
| UN70857 | Rsa1.0.03618.1 | 162 | 21744  | 2.00E-66  | 152 | 160 | 95 +  | 3   | 162 | 6191   | 6350   |
| UN70858 | Rsa1.0.00951.1 | 806 | 164588 | 1.00E-118 | 271 | 286 | 94 +  | 2   | 283 | 48357  | 48641  |
| UN70859 | Rsa1.0.00350.1 | 312 | 92346  | 1.00E-150 | 304 | 315 | 96 -  | 1   | 312 | 28751  | 29065  |
| UN70860 | Rsa1.0.01110.1 | 551 | 195852 | 0         | 531 | 552 | 96 +  | 1   | 550 | 16702  | 17246  |
| UN70861 | Rsa1.0.14100.1 | 731 | 3809   | 0         | 363 | 374 | 97 +  | 358 | 731 | 1137   | 1510   |

|         |                |     |        |           |     |     |       |     |     |        |        |
|---------|----------------|-----|--------|-----------|-----|-----|-------|-----|-----|--------|--------|
| UN70862 | Rsa1.0_01012.1 | 190 | 56836  | 2.00E-69  | 154 | 161 | 95 +  | 30  | 190 | 51001  | 51161  |
| UN70863 | Rsa1.0_00199.1 | 660 | 249604 | 1.00E-119 | 269 | 283 | 95 -  | 2   | 284 | 62277  | 62554  |
| UN70864 | Rsa1.0_01695.1 | 395 | 40848  | 0         | 393 | 395 | 99 +  | 1   | 395 | 26870  | 27264  |
| UN70865 | Rsa1.0_01075.1 | 215 | 156953 | 5.00E-49  | 114 | 119 | 95 -  | 87  | 205 | 23635  | 23753  |
| UN70866 | Rsa1.0_00825.1 | 742 | 62855  | 0         | 722 | 771 | 93 -  | 1   | 742 | 35381  | 36147  |
| UN70867 | Rsa1.0_03178.1 | 155 | 24798  | 5.00E-51  | 135 | 146 | 92 +  | 10  | 155 | 9549   | 9694   |
| UN70868 | Rsa1.0_02258.1 | 319 | 33307  | 1.00E-144 | 303 | 315 | 96 +  | 1   | 315 | 30348  | 30660  |
| UN70869 | Rsa1.0_09173.1 | 257 | 6582   | 3.00E-97  | 236 | 252 | 93 -  | 1   | 251 | 3345   | 3595   |
| UN70870 | Rsa1.0_01245.1 | 832 | 149868 | 1.00E-145 | 277 | 282 | 98 -  | 2   | 283 | 40251  | 40528  |
| UN70871 | Rsa1.0_00123.1 | 718 | 325650 | 1.00E-89  | 180 | 184 | 97 -  | 444 | 627 | 181824 | 182007 |
| UN70872 | Rsa1.0_00323.1 | 903 | 159650 | 0         | 407 | 407 | 100 + | 2   | 408 | 11015  | 11421  |
| UN70873 | Rsa1.0_00131.1 | 746 | 432233 | 5.00E-98  | 304 | 335 | 90 -  | 1   | 330 | 412408 | 412731 |
| UN70874 | Rsa1.0_00006.1 | 466 | 396176 | 1.00E-136 | 252 | 254 | 99 -  | 213 | 466 | 198900 | 199153 |
| UN70875 | Rsa1.0_00001.1 | 835 | 363028 | 0         | 806 | 848 | 95 -  | 1   | 835 | 144869 | 145716 |
| UN70876 | Rsa1.0_01186.1 | 836 | 51418  | 0         | 513 | 529 | 96 +  | 310 | 836 | 10845  | 11373  |
| UN70877 | Rsa1.0_01126.1 | 189 | 53127  | 2.00E-35  | 113 | 124 | 91 -  | 3   | 125 | 7935   | 8058   |
| UN70878 | #              | #   | #      | #         | #   | #   | #     | #   | #   | #      | #      |
| UN70879 | Rsa1.0_05589.1 | 658 | 13244  | 0         | 627 | 662 | 94 +  | 1   | 658 | 2420   | 3080   |
| UN70880 | Rsa1.0_03744.1 | 123 | 21053  | 2.00E-47  | 102 | 104 | 98 +  | 1   | 104 | 8772   | 8875   |
| UN70881 | Rsa1.0_02474.1 | 781 | 31076  | 1.00E-166 | 346 | 358 | 96 -  | 23  | 379 | 29475  | 29827  |
| UN70882 | Rsa1.0_08359.1 | 627 | 7483   | 0         | 480 | 495 | 96 -  | 7   | 501 | 3236   | 3727   |
| UN70883 | Rsa1.0_01027.1 | 469 | 56402  | 1.00E-148 | 316 | 331 | 95 +  | 1   | 326 | 20156  | 20486  |
| UN70884 | Rsa1.0_01078.1 | 563 | 316910 | 0         | 550 | 563 | 97 +  | 1   | 563 | 273742 | 274304 |
| UN70885 | Rsa1.0_15363.1 | 505 | 2655   | 1.00E-109 | 231 | 241 | 95 -  | 256 | 496 | 1692   | 1932   |
| UN70886 | Rsa1.0_02648.1 | 745 | 29073  | 5.00E-89  | 219 | 235 | 93 -  | 36  | 267 | 7184   | 7415   |
| UN70887 | Rsa1.0_01115.1 | 442 | 183545 | 1.00E-125 | 391 | 445 | 87 +  | 5   | 442 | 136439 | 136861 |
| UN70888 | Rsa1.0_05418.1 | 196 | 13816  | 8.00E-23  | 78  | 85  | 91 +  | 5   | 86  | 2849   | 2933   |
| UN70889 | Rsa1.0_00399.1 | 713 | 242951 | 1.00E-139 | 267 | 271 | 98 +  | 257 | 526 | 213601 | 213871 |
| UN70890 | Rsa1.0_00388.1 | 142 | 88890  | 2.00E-53  | 133 | 142 | 93 +  | 1   | 142 | 43327  | 43468  |
| UN70891 | Rsa1.0_00230.1 | 783 | 105389 | 1.00E-174 | 309 | 309 | 100 - | 21  | 329 | 5859   | 6167   |
| UN70892 | Rsa1.0_00569.1 | 823 | 75060  | 0         | 581 | 596 | 97 -  | 1   | 595 | 65107  | 65702  |
| UN70893 | Rsa1.0_00013.1 | 282 | 292129 | 5.00E-34  | 94  | 100 | 94 -  | 186 | 282 | 203324 | 203423 |
| UN70894 | Rsa1.0_00087.1 | 786 | 761073 | 0         | 777 | 785 | 98 -  | 2   | 786 | 87369  | 88152  |
| UN70895 | Rsa1.0_00567.1 | 668 | 75260  | 7.00E-97  | 273 | 305 | 89 +  | 32  | 319 | 66994  | 67292  |
| UN70896 | Rsa1.0_00427.1 | 551 | 189678 | 1.00E-177 | 378 | 396 | 95 +  | 6   | 401 | 182558 | 182948 |
| UN70897 | Rsa1.0_00599.1 | 711 | 73418  | 0         | 695 | 713 | 97 -  | 1   | 711 | 54972  | 55684  |
| UN70898 | Rsa1.0_00092.1 | 783 | 659932 | 1.00E-159 | 338 | 357 | 94 -  | 3   | 358 | 238480 | 238824 |
| UN70899 | Rsa1.0_05215.1 | 737 | 14476  | 1.00E-100 | 188 | 189 | 99 +  | 376 | 564 | 9340   | 9528   |
| UN70900 | Rsa1.0_01808.1 | 196 | 39007  | 1.00E-103 | 193 | 194 | 99 -  | 2   | 195 | 37651  | 37844  |

|         |                |     |        |           |     |     |       |     |     |        |        |
|---------|----------------|-----|--------|-----------|-----|-----|-------|-----|-----|--------|--------|
| UN70901 | Rsa1.0.00035.1 | 770 | 176449 | 0         | 388 | 405 | 95 -  | 3   | 407 | 96531  | 96932  |
| UN70902 | Rsa1.0.01743.1 | 261 | 39926  | 1.00E-83  | 193 | 203 | 95 -  | 3   | 201 | 15993  | 16195  |
| UN70903 | Rsa1.0.02286.1 | 582 | 32993  | 0         | 556 | 583 | 95 +  | 4   | 582 | 24151  | 24730  |
| UN70904 | Rsa1.0.00578.1 | 195 | 74581  | 5.00E-67  | 174 | 187 | 93 -  | 5   | 191 | 57542  | 57724  |
| UN70905 | Rsa1.0.00568.1 | 452 | 75219  | 3.00E-89  | 167 | 167 | 100 + | 170 | 336 | 16220  | 16386  |
| UN70906 | Rsa1.0.03342.1 | 525 | 23600  | 0         | 492 | 540 | 91 -  | 3   | 523 | 18609  | 19127  |
| UN70907 | Rsa1.0.02352.1 | 523 | 32301  | 0         | 517 | 520 | 99 +  | 3   | 521 | 7957   | 8476   |
| UN70908 | Rsa1.0.02597.1 | 593 | 29694  | 0         | 581 | 601 | 96 -  | 1   | 593 | 13612  | 14209  |
| UN70909 | Rsa1.0.00130.1 | 770 | 125737 | 1.00E-140 | 341 | 366 | 93 -  | 2   | 360 | 13295  | 13656  |
| UN70910 | Rsa1.0.00344.1 | 828 | 191774 | 0         | 457 | 483 | 94 -  | 6   | 485 | 108987 | 109465 |
| UN70911 | Rsa1.0.11704.1 | 494 | 5437   | 0         | 463 | 492 | 94 +  | 1   | 484 | 3368   | 3848   |
| UN70912 | Rsa1.0.00506.1 | 372 | 79106  | 8.00E-86  | 183 | 189 | 96 -  | 46  | 234 | 10903  | 11090  |
| UN70913 | Rsa1.0.21931.1 | 695 | 1162   | 0         | 532 | 550 | 96 +  | 146 | 695 | 4      | 553    |
| UN70914 | Rsa1.0.00339.1 | 739 | 222974 | 1.00E-141 | 483 | 559 | 86 +  | 181 | 739 | 28076  | 28634  |
| UN70915 | Rsa1.0.00139.1 | 744 | 357786 | 0         | 414 | 427 | 96 -  | 2   | 428 | 347514 | 347939 |
| UN70916 | Rsa1.0.15127.1 | 132 | 2809   | 3.00E-43  | 119 | 128 | 92 +  | 5   | 132 | 1501   | 1626   |
| UN70917 | #              | #   | #      | #         | #   | #   | #     | #   | #   | #      | #      |
| UN70918 | Rsa1.0.10095.1 | 467 | 6000   | 1.00E-108 | 207 | 210 | 98 +  | 2   | 211 | 5601   | 5810   |
| UN70919 | Rsa1.0.02991.1 | 606 | 26178  | 5.00E-73  | 147 | 148 | 99 +  | 283 | 429 | 4144   | 4291   |
| UN70920 | Rsa1.0.03778.1 | 551 | 20908  | 0         | 368 | 368 | 100 + | 3   | 370 | 17573  | 17940  |
| UN70921 | Rsa1.0.00008.1 | 748 | 358124 | 0         | 726 | 753 | 96 +  | 1   | 748 | 217079 | 217830 |
| UN70922 | Rsa1.0.00686.1 | 426 | 68511  | 2.00E-22  | 116 | 131 | 88 -  | 45  | 172 | 10173  | 10302  |
| UN70923 | Rsa1.0.00070.1 | 339 | 150321 | 8.00E-86  | 188 | 197 | 95 -  | 143 | 339 | 116167 | 116363 |
| UN70924 | Rsa1.0.00088.1 | 635 | 141341 | 0         | 541 | 588 | 92 -  | 63  | 635 | 64521  | 65102  |
| UN70925 | Rsa1.0.01958.1 | 434 | 261128 | 6.00E-78  | 257 | 291 | 88 -  | 8   | 293 | 110198 | 110475 |
| UN70926 | Rsa1.0.01563.1 | 461 | 170823 | 1.00E-102 | 222 | 233 | 95 -  | 181 | 409 | 19273  | 19505  |
| UN70927 | Rsa1.0.01148.1 | 225 | 52375  | 2.00E-82  | 207 | 223 | 92 -  | 3   | 225 | 33685  | 33906  |
| UN70928 | Rsa1.0.01610.1 | 558 | 42274  | 1.00E-125 | 245 | 251 | 97 +  | 1   | 246 | 11408  | 11658  |
| UN70929 | Rsa1.0.03399.1 | 485 | 23204  | 0         | 461 | 487 | 94 -  | 1   | 485 | 7512   | 7995   |
| UN70930 | Rsa1.0.00016.1 | 507 | 831256 | 0         | 410 | 430 | 95 -  | 78  | 507 | 392912 | 393341 |
| UN70931 | Rsa1.0.01924.1 | 652 | 37226  | 4.00E-92  | 181 | 184 | 98 -  | 408 | 591 | 17001  | 17184  |
| UN70932 | Rsa1.0.19680.1 | 695 | 1397   | 3.00E-96  | 194 | 199 | 97 -  | 2   | 200 | 913    | 1111   |
| UN70933 | Rsa1.0.00246.1 | 749 | 103541 | 1.00E-154 | 340 | 359 | 94 +  | 16  | 371 | 32634  | 32991  |
| UN70934 | Rsa1.0.09996.1 | 217 | 6045   | 2.00E-91  | 204 | 213 | 95 -  | 1   | 213 | 965    | 1174   |
| UN70935 | Rsa1.0.07090.1 | 622 | 9907   | 1.00E-174 | 355 | 369 | 96 +  | 217 | 584 | 509    | 871    |
| UN70936 | Rsa1.0.01645.1 | 676 | 41748  | 1.00E-105 | 242 | 258 | 93 -  | 7   | 264 | 18211  | 18468  |
| UN70937 | Rsa1.0.01876.1 | 301 | 37800  | 6.00E-46  | 106 | 110 | 96 -  | 27  | 136 | 11381  | 11490  |
| UN70938 | Rsa1.0.00155.1 | 788 | 118465 | 0         | 773 | 795 | 97 +  | 3   | 788 | 29479  | 30271  |
| UN70939 | Rsa1.0.00100.1 | 260 | 249232 | 2.00E-58  | 133 | 139 | 95 +  | 3   | 141 | 174102 | 174240 |

|         |                |     |        |           |     |     |       |     |     |        |        |
|---------|----------------|-----|--------|-----------|-----|-----|-------|-----|-----|--------|--------|
| UN70940 | Rsa1.0.21524.1 | 552 | 1195   | 1.00E-135 | 286 | 300 | 95 +  | 2   | 301 | 857    | 1156   |
| UN70941 | Rsa1.0.04714.1 | 678 | 146738 | 0         | 366 | 368 | 99 +  | 1   | 367 | 991    | 1358   |
| UN70942 | Rsa1.0.00374.1 | 721 | 165738 | 0         | 480 | 499 | 96 -  | 38  | 536 | 95095  | 95586  |
| UN70943 | Rsa1.0.00775.1 | 645 | 64793  | 0         | 337 | 337 | 100 + | 309 | 645 | 9497   | 9833   |
| UN70944 | Rsa1.0.00110.1 | 357 | 132719 | 1.00E-136 | 290 | 303 | 95 +  | 1   | 296 | 91321  | 91621  |
| UN70945 | Rsa1.0.27069.1 | 645 | 867    | 0         | 390 | 408 | 95 -  | 1   | 403 | 5      | 404    |
| UN70946 | Rsa1.0.04789.1 | 267 | 15981  | 1.00E-107 | 257 | 280 | 91 -  | 1   | 267 | 14845  | 15124  |
| UN70947 | Rsa1.0.00087.1 | 770 | 761073 | 0         | 458 | 462 | 99 +  | 1   | 458 | 98789  | 99250  |
| UN70948 | Rsa1.0.00810.1 | 712 | 63289  | 0         | 462 | 503 | 91 -  | 1   | 503 | 26102  | 26571  |
| UN70949 | Rsa1.0.03639.1 | 369 | 21629  | 1.00E-138 | 249 | 249 | 100 + | 1   | 249 | 2040   | 2288   |
| UN70950 | Rsa1.0.14216.1 | 440 | 3655   | 7.00E-16  | 44  | 44  | 100 + | 3   | 46  | 514    | 557    |
| UN70951 | Rsa1.0.00593.1 | 170 | 143463 | 5.00E-42  | 114 | 123 | 92 +  | 48  | 170 | 57111  | 57233  |
| UN70952 | Rsa1.0.05189.1 | 561 | 14545  | 1.00E-162 | 388 | 419 | 92 +  | 1   | 413 | 3110   | 3515   |
| UN70953 | Rsa1.0.03639.1 | 746 | 21629  | 1.00E-130 | 261 | 268 | 97 +  | 476 | 742 | 2692   | 2959   |
| UN70954 | Rsa1.0.02931.1 | 174 | 26654  | 2.00E-32  | 149 | 172 | 86 -  | 5   | 174 | 6255   | 6422   |
| UN70955 | Rsa1.0.00088.1 | 594 | 141341 | 1.00E-100 | 191 | 193 | 98 -  | 370 | 562 | 105308 | 105500 |
| UN70956 | Rsa1.0.04855.1 | 400 | 15708  | 0         | 391 | 398 | 98 +  | 3   | 400 | 9772   | 10169  |
| UN70957 | Rsa1.0.01232.1 | 676 | 155185 | 4.00E-46  | 104 | 107 | 97 +  | 206 | 312 | 130409 | 130515 |
| UN70958 | Rsa1.0.03639.1 | 631 | 21629  | 6.00E-91  | 173 | 174 | 99 -  | 90  | 263 | 4742   | 4915   |
| UN70959 | #              | #   | #      | #         | #   | #   | #     | #   | #   | #      | #      |
| UN70960 | Rsa1.0.00593.1 | 726 | 143463 | 1.00E-113 | 246 | 259 | 94 -  | 8   | 266 | 58122  | 58380  |
| UN70961 | Rsa1.0.02803.1 | 503 | 27715  | 1.00E-148 | 287 | 294 | 97 -  | 210 | 503 | 3180   | 3473   |
| UN70962 | Rsa1.0.00017.1 | 750 | 752458 | 1.00E-125 | 237 | 240 | 98 +  | 163 | 402 | 350937 | 351176 |
| UN70963 | Rsa1.0.03270.1 | 675 | 24193  | 0         | 634 | 709 | 89 -  | 3   | 668 | 2033   | 2741   |
| UN70964 | Rsa1.0.00245.1 | 781 | 103569 | 1.00E-144 | 294 | 303 | 97 +  | 473 | 773 | 58094  | 58396  |
| UN70965 | Rsa1.0.03921.1 | 275 | 20080  | 3.00E-75  | 177 | 188 | 94 +  | 3   | 190 | 4871   | 5054   |
| UN70966 | Rsa1.0.00028.1 | 786 | 293984 | 1.00E-83  | 243 | 270 | 90 +  | 1   | 257 | 51969  | 52235  |
| UN70967 | Rsa1.0.14509.1 | 699 | 3318   | 1.00E-156 | 294 | 299 | 98 +  | 178 | 476 | 1769   | 2067   |
| UN70968 | Rsa1.0.04450.1 | 585 | 17297  | 1.00E-143 | 261 | 262 | 99 +  | 226 | 487 | 12862  | 13123  |
| UN70969 | Rsa1.0.01642.1 | 621 | 41772  | 1.00E-143 | 391 | 431 | 90 +  | 195 | 621 | 36732  | 37160  |
| UN70970 | Rsa1.0.00608.1 | 788 | 172672 | 0         | 530 | 558 | 94 -  | 230 | 787 | 166818 | 167375 |
| UN70971 | Rsa1.0.00453.1 | 633 | 83031  | 0         | 608 | 661 | 91 -  | 1   | 633 | 80797  | 81454  |
| UN70972 | Rsa1.0.00055.1 | 698 | 520193 | 0         | 684 | 702 | 97 +  | 2   | 698 | 323468 | 324169 |
| UN70973 | Rsa1.0.00002.1 | 847 | 601661 | 0         | 597 | 616 | 96 +  | 4   | 619 | 575417 | 576032 |
| UN70974 | Rsa1.0.00027.1 | 673 | 283362 | 1.00E-118 | 254 | 269 | 94 -  | 5   | 273 | 161935 | 162191 |
| UN70975 | Rsa1.0.03503.1 | 666 | 22445  | 0         | 522 | 535 | 97 +  | 132 | 666 | 18564  | 19097  |
| UN70976 | Rsa1.0.00974.1 | 596 | 57893  | 6.00E-91  | 170 | 170 | 100 - | 126 | 295 | 53552  | 53721  |
| UN70977 | Rsa1.0.03224.1 | 630 | 24501  | 0         | 616 | 630 | 97 -  | 3   | 630 | 4233   | 4862   |
| UN70978 | Rsa1.0.01611.1 | 790 | 42269  | 1.00E-106 | 261 | 280 | 93 -  | 91  | 368 | 17493  | 17772  |

|         |                |     |        |           |     |     |       |     |     |        |        |
|---------|----------------|-----|--------|-----------|-----|-----|-------|-----|-----|--------|--------|
| UN70979 | Rsa1.0.01380.1 | 759 | 155003 | 0         | 421 | 443 | 95 +  | 98  | 540 | 45277  | 45710  |
| UN70980 | Rsa1.0.07339.1 | 812 | 9534   | 1.00E-116 | 296 | 314 | 94 -  | 510 | 808 | 6477   | 6790   |
| UN70981 | Rsa1.0.02874.1 | 575 | 27070  | 1.00E-108 | 229 | 239 | 95 -  | 246 | 484 | 462    | 700    |
| UN70982 | Rsa1.0.01390.1 | 676 | 46695  | 0         | 664 | 675 | 98 +  | 2   | 676 | 13970  | 14635  |
| UN70983 | Rsa1.0.00990.1 | 634 | 57445  | 0         | 528 | 545 | 96 -  | 67  | 607 | 42846  | 43389  |
| UN70984 | Rsa1.0.05209.1 | 772 | 14495  | 0         | 576 | 618 | 93 +  | 40  | 651 | 9608   | 10224  |
| UN70985 | Rsa1.0.02878.1 | 541 | 27048  | 0         | 436 | 446 | 97 +  | 2   | 447 | 18011  | 18456  |
| UN70986 | Rsa1.0.00037.1 | 783 | 307838 | 0         | 732 | 751 | 97 -  | 2   | 745 | 17395  | 18145  |
| UN70987 | Rsa1.0.01867.1 | 771 | 37960  | 1.00E-175 | 383 | 399 | 95 -  | 305 | 697 | 19665  | 20063  |
| UN70988 | Rsa1.0.04213.1 | 664 | 18437  | 1.00E-79  | 236 | 265 | 89 +  | 412 | 660 | 17794  | 18057  |
| UN70989 | Rsa1.0.02206.1 | 529 | 33922  | 0         | 526 | 528 | 99 -  | 2   | 529 | 23693  | 24220  |
| UN70990 | Rsa1.0.04827.1 | 701 | 15815  | 0         | 496 | 504 | 98 +  | 202 | 701 | 3893   | 4396   |
| UN70991 | Rsa1.0.00915.1 | 810 | 194446 | 2.00E-76  | 188 | 198 | 94 +  | 297 | 493 | 33274  | 33469  |
| UN70992 | Rsa1.0.01269.1 | 607 | 49622  | 1.00E-107 | 210 | 214 | 98 +  | 394 | 607 | 25889  | 26102  |
| UN70993 | Rsa1.0.01634.1 | 756 | 41865  | 4.00E-86  | 183 | 190 | 96 -  | 442 | 631 | 27428  | 27617  |
| UN70994 | Rsa1.0.01233.1 | 529 | 50184  | 0         | 510 | 536 | 95 -  | 3   | 529 | 23875  | 24407  |
| UN70995 | Rsa1.0.03081.1 | 795 | 25523  | 0         | 759 | 811 | 93 +  | 3   | 795 | 22312  | 23109  |
| UN70996 | Rsa1.0.00211.1 | 648 | 228189 | 1.00E-132 | 282 | 295 | 95 -  | 354 | 648 | 129555 | 129847 |
| UN70997 | Rsa1.0.00350.1 | 606 | 92346  | 0         | 594 | 596 | 99 +  | 3   | 598 | 25600  | 26195  |
| UN70998 | Rsa1.0.00079.1 | 749 | 606987 | 1.00E-145 | 273 | 277 | 98 -  | 20  | 296 | 41615  | 41891  |
| UN70999 | Rsa1.0.00026.1 | 554 | 327835 | 0         | 354 | 365 | 96 +  | 188 | 552 | 1485   | 1849   |
| UN71000 | Rsa1.0.46427.1 | 543 | 486    | 1.00E-162 | 404 | 433 | 93 +  | 24  | 447 | 1      | 430    |
| UN71001 | Rsa1.0.10326.1 | 478 | 5887   | 1.00E-151 | 321 | 335 | 95 +  | 141 | 475 | 75     | 407    |
| UN71002 | Rsa1.0.02984.1 | 686 | 26263  | 0         | 615 | 670 | 91 -  | 41  | 686 | 23915  | 24575  |
| UN71003 | Rsa1.0.01110.1 | 787 | 195852 | 0         | 335 | 335 | 100 - | 453 | 787 | 17955  | 18289  |
| UN71004 | Rsa1.0.00171.1 | 767 | 115622 | 6.00E-73  | 149 | 152 | 98 -  | 497 | 648 | 92525  | 92676  |
| UN71005 | Rsa1.0.00323.1 | 538 | 159650 | 0         | 517 | 537 | 96 -  | 3   | 538 | 102661 | 103197 |
| UN71006 | Rsa1.0.00173.1 | 713 | 288743 | 2.00E-91  | 189 | 195 | 96 -  | 213 | 407 | 284548 | 284742 |
| UN71007 | Rsa1.0.00864.1 | 723 | 61702  | 1.00E-104 | 208 | 213 | 97 -  | 61  | 273 | 9748   | 9960   |
| UN71008 | Rsa1.0.00332.1 | 672 | 94575  | 9.00E-78  | 148 | 148 | 100 + | 262 | 409 | 58943  | 59090  |
| UN71009 | Rsa1.0.00002.1 | 584 | 601661 | 9.00E-50  | 131 | 141 | 92 +  | 441 | 581 | 181390 | 181530 |
| UN71010 | Rsa1.0.01777.1 | 136 | 39511  | 9.00E-65  | 131 | 133 | 98 -  | 1   | 133 | 19530  | 19662  |
| UN71011 | Rsa1.0.03059.1 | 625 | 25711  | 1.00E-107 | 197 | 197 | 100 - | 40  | 236 | 10483  | 10679  |
| UN71012 | Rsa1.0.01828.1 | 588 | 38681  | 0         | 573 | 588 | 97 -  | 3   | 588 | 15740  | 16327  |
| UN71013 | Rsa1.0.04073.1 | 754 | 19238  | 7.00E-82  | 194 | 207 | 93 -  | 17  | 223 | 13359  | 13565  |
| UN71014 | Rsa1.0.00331.1 | 770 | 176754 | 0         | 436 | 458 | 95 -  | 3   | 457 | 23174  | 23631  |
| UN71015 | Rsa1.0.02365.1 | 652 | 32118  | 0         | 578 | 637 | 90 -  | 3   | 637 | 30279  | 30883  |
| UN71016 | Rsa1.0.06535.1 | 672 | 10827  | 0         | 650 | 674 | 96 +  | 1   | 670 | 3140   | 3813   |
| UN71017 | Rsa1.0.05462.1 | 695 | 13671  | 0         | 676 | 696 | 97 +  | 2   | 695 | 8373   | 9065   |

|         |                |     |        |           |     |     |       |     |     |        |        |
|---------|----------------|-----|--------|-----------|-----|-----|-------|-----|-----|--------|--------|
| UN71018 | Rsa1.0.00017.1 | 654 | 752458 | 1.00E-42  | 119 | 129 | 92 -  | 190 | 318 | 156688 | 156816 |
| UN71019 | Rsa1.0.00825.1 | 752 | 62855  | 0         | 466 | 483 | 96 +  | 3   | 485 | 33556  | 34029  |
| UN71020 | Rsa1.0.00123.1 | 709 | 325650 | 3.00E-71  | 379 | 463 | 81 -  | 152 | 590 | 220399 | 220840 |
| UN71021 | Rsa1.0.00593.1 | 547 | 143463 | 1.00E-104 | 214 | 221 | 96 +  | 194 | 414 | 55065  | 55285  |
| UN71022 | Rsa1.0.00018.1 | 484 | 410899 | 0         | 468 | 486 | 96 -  | 1   | 484 | 99142  | 99617  |
| UN71023 | Rsa1.0.01573.1 | 700 | 42964  | 1.00E-126 | 320 | 346 | 92 -  | 69  | 409 | 4044   | 4386   |
| UN71024 | Rsa1.0.00378.1 | 105 | 89892  | 1.00E-32  | 100 | 106 | 94 +  | 2   | 105 | 62141  | 62244  |
| UN71025 | Rsa1.0.05134.1 | 347 | 143181 | 1.00E-93  | 258 | 283 | 91 +  | 1   | 274 | 6140   | 6420   |
| UN71026 | Rsa1.0.00123.1 | 425 | 325650 | 2.00E-80  | 161 | 164 | 98 -  | 213 | 376 | 65405  | 65568  |
| UN71027 | Rsa1.0.00589.1 | 362 | 209965 | 1.00E-158 | 342 | 360 | 95 +  | 3   | 362 | 154857 | 155212 |
| UN71028 | Rsa1.0.00121.1 | 406 | 278029 | 0         | 394 | 407 | 96 +  | 1   | 406 | 55673  | 56079  |
| UN71029 | Rsa1.0.00884.1 | 340 | 61150  | 1.00E-10  | 38  | 39  | 97 -  | 40  | 78  | 39183  | 39221  |
| UN71030 | Rsa1.0.08314.1 | 614 | 7559   | 1.00E-172 | 344 | 355 | 96 +  | 70  | 424 | 3896   | 4249   |
| UN71031 | Rsa1.0.08597.1 | 437 | 7144   | 0         | 434 | 437 | 99 -  | 1   | 437 | 3026   | 3462   |
| UN71032 | Rsa1.0.00343.1 | 722 | 93570  | 0         | 421 | 422 | 99 +  | 2   | 423 | 88629  | 89050  |
| UN71033 | Rsa1.0.05235.1 | 243 | 14421  | 2.00E-97  | 225 | 240 | 93 +  | 1   | 240 | 10673  | 10912  |
| UN71034 | Rsa1.0.00106.1 | 687 | 133916 | 1.00E-138 | 287 | 296 | 96 -  | 3   | 298 | 7524   | 7814   |
| UN71035 | Rsa1.0.00014.1 | 824 | 348985 | 0         | 727 | 809 | 89 +  | 11  | 803 | 169254 | 170016 |
| UN71036 | Rsa1.0.00489.1 | 470 | 80434  | 1.00E-109 | 234 | 244 | 95 -  | 1   | 243 | 48244  | 48487  |
| UN71037 | Rsa1.0.02435.1 | 749 | 31454  | 0         | 701 | 748 | 93 -  | 2   | 749 | 27855  | 28602  |
| UN71038 | Rsa1.0.06581.1 | 709 | 10722  | 1.00E-103 | 202 | 206 | 98 +  | 485 | 690 | 8954   | 9159   |
| UN71039 | Rsa1.0.00253.1 | 705 | 231292 | 1.00E-61  | 121 | 121 | 100 - | 162 | 282 | 86232  | 86352  |
| UN71040 | Rsa1.0.01667.1 | 749 | 41315  | 0         | 358 | 360 | 99 +  | 1   | 360 | 35141  | 35499  |
| UN71041 | Rsa1.0.04337.1 | 348 | 17845  | 1.00E-81  | 202 | 218 | 92 -  | 12  | 229 | 10847  | 11064  |
| UN71042 | Rsa1.0.01978.1 | 725 | 36546  | 0         | 699 | 727 | 96 +  | 3   | 725 | 8458   | 9177   |
| UN71043 | Rsa1.0.00836.1 | 675 | 185968 | 0         | 385 | 396 | 97 -  | 280 | 675 | 161938 | 162333 |
| UN71044 | Rsa1.0.02366.1 | 480 | 32110  | 1.00E-161 | 303 | 307 | 98 -  | 2   | 306 | 18011  | 18317  |
| UN71045 | Rsa1.0.00039.1 | 539 | 296927 | 0         | 520 | 539 | 96 +  | 1   | 539 | 11849  | 12387  |
| UN71046 | Rsa1.0.00394.1 | 380 | 148426 | 0         | 368 | 380 | 96 -  | 1   | 380 | 113941 | 114320 |
| UN71047 | Rsa1.0.12119.1 | 594 | 5311   | 1.00E-112 | 235 | 245 | 95 +  | 1   | 245 | 4612   | 4856   |
| UN71048 | Rsa1.0.12119.1 | 143 | 5311   | 2.00E-47  | 126 | 136 | 92 +  | 1   | 136 | 4621   | 4756   |
| UN71049 | Rsa1.0.00224.1 | 715 | 327530 | 8.00E-63  | 184 | 203 | 90 +  | 42  | 243 | 222206 | 222408 |
| UN71050 | Rsa1.0.00134.1 | 145 | 390219 | 5.00E-57  | 127 | 132 | 96 +  | 8   | 139 | 21800  | 21931  |
| UN71051 | Rsa1.0.01011.1 | 704 | 56883  | 0         | 702 | 704 | 99 -  | 1   | 704 | 13100  | 13803  |
| UN71052 | Rsa1.0.15719.1 | 721 | 2463   | 0         | 597 | 619 | 96 -  | 5   | 622 | 1      | 619    |
| UN71053 | Rsa1.0.01860.1 | 777 | 38057  | 0         | 463 | 490 | 94 +  | 20  | 506 | 25842  | 26331  |
| UN71054 | Rsa1.0.00132.1 | 776 | 124299 | 1.00E-154 | 333 | 348 | 95 +  | 1   | 340 | 111194 | 111540 |
| UN71055 | Rsa1.0.01286.1 | 462 | 49209  | 1.00E-127 | 262 | 272 | 96 -  | 194 | 462 | 23528  | 23799  |
| UN71056 | Rsa1.0.00152.1 | 174 | 257730 | 3.00E-37  | 148 | 169 | 87 +  | 6   | 170 | 41540  | 41708  |



|         |                |     |        |           |     |     |       |     |     |        |        |
|---------|----------------|-----|--------|-----------|-----|-----|-------|-----|-----|--------|--------|
| UN71057 | Rsa1.0.03703.1 | 530 | 21282  | 0         | 506 | 523 | 96 +  | 15  | 530 | 8115   | 8636   |
| UN71058 | Rsa1.0.00502.1 | 265 | 204180 | 1.00E-83  | 230 | 248 | 92 +  | 16  | 261 | 61012  | 61250  |
| UN71059 | Rsa1.0.01000.1 | 501 | 57140  | 1.00E-94  | 222 | 235 | 94 +  | 2   | 234 | 37938  | 38171  |
| UN71060 | Rsa1.0.16163.1 | 389 | 2261   | 4.00E-60  | 130 | 134 | 97 +  | 250 | 383 | 178    | 311    |
| UN71061 | Rsa1.0.00261.1 | 137 | 151157 | 4.00E-48  | 123 | 131 | 93 -  | 8   | 135 | 117252 | 117382 |
| UN71062 | Rsa1.0.00529.1 | 532 | 77487  | 1.00E-162 | 322 | 333 | 96 -  | 1   | 327 | 75987  | 76319  |
| UN71063 | Rsa1.0.01450.1 | 783 | 144251 | 9.00E-32  | 132 | 149 | 88 -  | 61  | 205 | 37119  | 37266  |
| UN71064 | Rsa1.0.00223.1 | 839 | 106231 | 0         | 715 | 756 | 94 +  | 86  | 831 | 41627  | 42369  |
| UN71065 | Rsa1.0.04813.1 | 298 | 15883  | 1.00E-140 | 285 | 296 | 96 -  | 3   | 298 | 1600   | 1895   |
| UN71066 | Rsa1.0.00169.1 | 460 | 274298 | 0         | 448 | 460 | 97 -  | 2   | 460 | 95029  | 95487  |
| UN71067 | Rsa1.0.01220.1 | 217 | 161775 | 2.00E-60  | 124 | 126 | 98 +  | 57  | 182 | 150619 | 150744 |
| UN71068 | Rsa1.0.01637.1 | 747 | 41862  | 0         | 397 | 399 | 99 -  | 1   | 399 | 31463  | 31861  |
| UN71069 | Rsa1.0.00484.1 | 674 | 203294 | 1.00E-101 | 205 | 211 | 97 -  | 1   | 211 | 123381 | 123591 |
| UN71070 | Rsa1.0.01359.1 | 181 | 47271  | 7.00E-20  | 80  | 90  | 88 +  | 1   | 90  | 32341  | 32430  |
| UN71071 | Rsa1.0.00832.1 | 210 | 62622  | 1.00E-98  | 203 | 210 | 96 +  | 1   | 210 | 22110  | 22319  |
| UN71072 | Rsa1.0.00645.1 | 280 | 189716 | 7.00E-58  | 184 | 206 | 89 +  | 17  | 221 | 38175  | 38380  |
| UN71073 | Rsa1.0.02043.1 | 186 | 163754 | 3.00E-68  | 172 | 182 | 94 +  | 1   | 180 | 143820 | 143999 |
| UN71074 | Rsa1.0.00895.1 | 596 | 60615  | 1.00E-145 | 295 | 304 | 97 -  | 2   | 305 | 16603  | 16903  |
| UN71075 | Rsa1.0.01344.1 | 674 | 142535 | 1.00E-144 | 325 | 346 | 93 -  | 1   | 339 | 17745  | 18090  |
| UN71076 | Rsa1.0.00113.1 | 679 | 131574 | 2.00E-97  | 217 | 229 | 94 -  | 451 | 679 | 8176   | 8404   |
| UN71077 | Rsa1.0.00111.1 | 821 | 390088 | 0         | 458 | 474 | 96 +  | 4   | 472 | 197738 | 198208 |
| UN71078 | Rsa1.0.00040.1 | 471 | 324196 | 0         | 440 | 471 | 93 -  | 8   | 471 | 246684 | 247153 |
| UN71079 | Rsa1.0.03921.1 | 677 | 20080  | 3.00E-56  | 112 | 112 | 100 - | 464 | 575 | 5634   | 5745   |
| UN71080 | Rsa1.0.02991.1 | 168 | 26178  | 6.00E-51  | 126 | 134 | 94 +  | 35  | 168 | 20796  | 20924  |
| UN71081 | Rsa1.0.00277.1 | 638 | 100132 | 4.00E-49  | 124 | 132 | 93 -  | 110 | 241 | 10169  | 10300  |
| UN71082 | Rsa1.0.00378.1 | 352 | 89892  | 0         | 345 | 352 | 98 +  | 1   | 352 | 36850  | 37201  |
| UN71083 | Rsa1.0.00128.1 | 790 | 228675 | 0         | 374 | 377 | 99 -  | 4   | 380 | 170963 | 171339 |
| UN71084 | Rsa1.0.00018.1 | 776 | 410899 | 0         | 749 | 785 | 95 +  | 2   | 776 | 79109  | 79890  |
| UN71085 | Rsa1.0.00374.1 | 696 | 165738 | 0         | 491 | 500 | 98 +  | 2   | 501 | 100971 | 101470 |
| UN71086 | Rsa1.0.08437.1 | 755 | 7357   | 0         | 631 | 658 | 95 -  | 3   | 654 | 2928   | 3582   |
| UN71087 | Rsa1.0.00807.1 | 758 | 63607  | 2.00E-91  | 190 | 195 | 97 -  | 565 | 758 | 12796  | 12990  |
| UN71088 | Rsa1.0.00342.1 | 657 | 93695  | 0         | 621 | 663 | 93 +  | 3   | 657 | 37876  | 38523  |
| UN71089 | Rsa1.0.00969.1 | 318 | 58014  | 3.00E-88  | 177 | 181 | 97 -  | 138 | 318 | 22760  | 22940  |
| UN71090 | Rsa1.0.20338.1 | 611 | 1316   | 0         | 595 | 604 | 98 -  | 8   | 611 | 307    | 909    |
| UN71091 | Rsa1.0.00096.1 | 637 | 198773 | 0         | 430 | 448 | 95 -  | 199 | 637 | 108347 | 108794 |
| UN71092 | Rsa1.0.02196.1 | 437 | 34005  | 1.00E-156 | 331 | 346 | 95 +  | 2   | 345 | 9596   | 9934   |
| UN71093 | Rsa1.0.17720.1 | 748 | 1757   | 1.00E-100 | 224 | 236 | 94 +  | 165 | 397 | 134    | 369    |
| UN71094 | Rsa1.0.00208.1 | 473 | 108565 | 1.00E-119 | 277 | 294 | 94 -  | 167 | 458 | 105981 | 106274 |
| UN71095 | Rsa1.0.00463.1 | 364 | 189177 | 1.00E-167 | 335 | 345 | 97 +  | 2   | 345 | 114661 | 115004 |

|         |                |     |        |           |     |     |      |     |     |        |        |
|---------|----------------|-----|--------|-----------|-----|-----|------|-----|-----|--------|--------|
| UN71096 | Rsa1.0_01209.1 | 691 | 50668  | 1.00E-105 | 225 | 234 | 96 - | 458 | 691 | 40611  | 40843  |
| UN71097 | Rsa1.0_01050.1 | 591 | 55651  | 0         | 558 | 595 | 93 - | 3   | 591 | 12300  | 12887  |
| UN71098 | Rsa1.0_01449.1 | 717 | 45570  | 0         | 691 | 711 | 97 - | 1   | 711 | 44761  | 45470  |
| UN71099 | Rsa1.0_03972.1 | 482 | 19787  | 1.00E-179 | 324 | 326 | 99 - | 1   | 326 | 13644  | 13969  |
| UN71100 | Rsa1.0_00878.1 | 672 | 330303 | 0         | 526 | 540 | 97 - | 133 | 672 | 137443 | 137982 |
| UN71101 | Rsa1.0_00897.1 | 698 | 60498  | 0         | 424 | 452 | 93 + | 234 | 673 | 45690  | 46141  |
| UN71102 | Rsa1.0_02372.1 | 805 | 32053  | 0         | 777 | 809 | 96 - | 1   | 805 | 25148  | 25938  |
| UN71103 | Rsa1.0_03083.1 | 694 | 25520  | 0         | 408 | 432 | 94 - | 132 | 560 | 8642   | 9061   |
| UN71104 | Rsa1.0_01256.1 | 669 | 49770  | 0         | 433 | 461 | 93 + | 231 | 669 | 28746  | 29206  |
| UN71105 | Rsa1.0_00645.1 | 348 | 189716 | 1.00E-114 | 249 | 261 | 95 - | 28  | 288 | 154680 | 154939 |
| UN71106 | Rsa1.0_03981.1 | 663 | 19724  | 1.00E-150 | 492 | 564 | 87 + | 26  | 571 | 18201  | 18729  |
| UN71107 | Rsa1.0_00989.1 | 722 | 57494  | 0         | 682 | 725 | 94 - | 1   | 722 | 9409   | 10112  |
| UN71108 | Rsa1.0_00533.1 | 353 | 77375  | 1.00E-103 | 309 | 345 | 89 + | 5   | 341 | 63745  | 64082  |
| UN71109 | Rsa1.0_01953.1 | 739 | 36881  | 0         | 733 | 758 | 96 + | 2   | 739 | 26309  | 27066  |
| UN71110 | Rsa1.0_33723.1 | 679 | 672    | 1.00E-112 | 239 | 250 | 95 - | 1   | 250 | 1      | 241    |
| UN71111 | Rsa1.0_00549.1 | 761 | 76473  | 1.00E-116 | 354 | 401 | 88 + | 1   | 401 | 57884  | 58284  |
| UN71112 | Rsa1.0_08045.1 | 295 | 8014   | 8.00E-61  | 144 | 152 | 94 - | 3   | 150 | 7857   | 8008   |
| UN71113 | Rsa1.0_04744.1 | 592 | 16154  | 0         | 557 | 594 | 93 + | 3   | 586 | 2712   | 3302   |
| UN71114 | Rsa1.0_00040.1 | 630 | 324196 | 1.00E-119 | 253 | 266 | 95 + | 365 | 630 | 70238  | 70494  |
| UN71115 | Rsa1.0_03401.1 | 472 | 23191  | 0         | 398 | 414 | 96 + | 1   | 413 | 4660   | 5070   |
| UN71116 | Rsa1.0_00841.1 | 716 | 183065 | 0         | 651 | 682 | 95 + | 1   | 675 | 158071 | 158745 |
| UN71117 | Rsa1.0_08740.1 | 786 | 6980   | 0         | 449 | 471 | 95 - | 9   | 477 | 706    | 1168   |
| UN71118 | Rsa1.0_01182.1 | 783 | 167304 | 1.00E-130 | 277 | 292 | 94 + | 4   | 295 | 11313  | 11595  |
| UN71119 | Rsa1.0_00832.1 | 616 | 62622  | 7.00E-97  | 210 | 220 | 95 - | 393 | 612 | 22572  | 22791  |
| UN71120 | Rsa1.0_01363.1 | 146 | 47195  | 2.00E-41  | 117 | 126 | 92 - | 9   | 134 | 24316  | 24440  |
| UN71121 | Rsa1.0_04123.1 | 586 | 18947  | 1.00E-138 | 277 | 286 | 96 - | 301 | 586 | 15191  | 15476  |
| UN71122 | Rsa1.0_00116.1 | 558 | 365886 | 0         | 529 | 558 | 94 + | 3   | 558 | 242145 | 242689 |
| UN71123 | Rsa1.0_00693.1 | 130 | 161311 | 1.00E-38  | 122 | 136 | 89 - | 1   | 130 | 37537  | 37672  |
| UN71124 | Rsa1.0_07250.1 | 714 | 9663   | 1.00E-86  | 252 | 279 | 90 + | 76  | 352 | 6954   | 7222   |
| UN71125 | Rsa1.0_13077.1 | 515 | 5021   | 0         | 420 | 442 | 95 + | 1   | 429 | 4549   | 4989   |
| UN71126 | Rsa1.0_02043.1 | 754 | 163754 | 0         | 449 | 464 | 96 - | 281 | 741 | 143862 | 144322 |
| UN71127 | Rsa1.0_01771.1 | 546 | 172709 | 1.00E-134 | 273 | 282 | 96 - | 4   | 285 | 5834   | 6113   |
| UN71128 | Rsa1.0_17721.1 | 676 | 1757   | 0         | 396 | 414 | 95 - | 1   | 414 | 119    | 520    |
| UN71129 | Rsa1.0_02807.1 | 662 | 27680  | 0         | 493 | 523 | 94 + | 2   | 521 | 4945   | 5460   |
| UN71130 | Rsa1.0_00551.1 | 722 | 76227  | 0         | 433 | 453 | 95 - | 1   | 451 | 62352  | 62801  |
| UN71131 | Rsa1.0_02007.1 | 723 | 36130  | 0         | 463 | 477 | 97 + | 4   | 478 | 14911  | 15387  |
| UN71132 | Rsa1.0_49161.1 | 593 | 461    | 1.00E-111 | 242 | 253 | 95 + | 25  | 276 | 14     | 262    |
| UN71133 | Rsa1.0_02812.1 | 721 | 27660  | 0         | 398 | 405 | 98 - | 3   | 406 | 16559  | 16963  |
| UN71134 | Rsa1.0_02453.1 | 483 | 31271  | 1.00E-116 | 243 | 252 | 96 + | 105 | 354 | 14175  | 14426  |

|         |                |     |        |           |     |     |      |     |     |        |        |
|---------|----------------|-----|--------|-----------|-----|-----|------|-----|-----|--------|--------|
| UN71135 | Rsa1.0.02973.1 | 583 | 26348  | 0         | 580 | 582 | 99 - | 2   | 583 | 9190   | 9771   |
| UN71136 | Rsa1.0.00546.1 | 518 | 76523  | 4.00E-64  | 217 | 245 | 88 - | 7   | 248 | 74240  | 74475  |
| UN71137 | Rsa1.0.01106.1 | 563 | 53916  | 0         | 534 | 544 | 98 - | 10  | 553 | 6907   | 7450   |
| UN71138 | Rsa1.0.00773.1 | 620 | 64839  | 0         | 596 | 625 | 95 - | 1   | 620 | 33616  | 34232  |
| UN71139 | Rsa1.0.01742.1 | 175 | 39962  | 3.00E-65  | 147 | 154 | 95 + | 20  | 173 | 2946   | 3099   |
| UN71140 | Rsa1.0.02103.1 | 693 | 35006  | 1.00E-115 | 263 | 277 | 94 - | 1   | 276 | 24076  | 24349  |
| UN71141 | Rsa1.0.00715.1 | 726 | 67116  | 0         | 690 | 730 | 94 + | 1   | 726 | 29359  | 30085  |
| UN71142 | Rsa1.0.02902.1 | 751 | 26907  | 0         | 702 | 705 | 99 - | 3   | 707 | 10317  | 11020  |
| UN71143 | Rsa1.0.00836.1 | 417 | 185968 | 1.00E-129 | 240 | 242 | 99 + | 1   | 242 | 160877 | 161118 |
| UN71144 | Rsa1.0.01049.1 | 343 | 55655  | 1.00E-123 | 247 | 255 | 96 + | 1   | 255 | 39587  | 39841  |
| UN71145 | Rsa1.0.03605.1 | 680 | 21827  | 1.00E-112 | 262 | 277 | 94 - | 371 | 644 | 14489  | 14765  |
| UN71146 | Rsa1.0.00110.1 | 670 | 132719 | 0         | 414 | 438 | 94 + | 1   | 438 | 129270 | 129705 |
| UN71147 | Rsa1.0.01528.1 | 665 | 43882  | 0         | 394 | 407 | 96 + | 35  | 441 | 6553   | 6959   |
| UN71148 | Rsa1.0.17354.1 | 242 | 1851   | 9.00E-91  | 223 | 241 | 92 + | 2   | 242 | 361    | 601    |
| UN71149 | Rsa1.0.04786.1 | 720 | 15988  | 1.00E-131 | 314 | 339 | 92 + | 1   | 325 | 13458  | 13796  |
| UN71150 | Rsa1.0.01346.1 | 788 | 47618  | 0         | 729 | 755 | 96 + | 56  | 788 | 18148  | 18902  |
| UN71151 | Rsa1.0.00936.1 | 795 | 59078  | 0         | 502 | 511 | 98 + | 1   | 510 | 49192  | 49702  |
| UN71152 | Rsa1.0.05382.1 | 199 | 13963  | 2.00E-39  | 98  | 103 | 95 + | 52  | 154 | 230    | 332    |
| UN71153 | Rsa1.0.01861.1 | 169 | 38031  | 7.00E-69  | 164 | 171 | 95 + | 1   | 168 | 14076  | 14245  |
| UN71154 | Rsa1.0.07200.1 | 184 | 9734   | 2.00E-66  | 170 | 184 | 92 - | 1   | 184 | 6531   | 6714   |
| UN71155 | Rsa1.0.03550.1 | 266 | 22154  | 1.00E-53  | 219 | 256 | 85 + | 12  | 266 | 5205   | 5442   |
| UN71156 | Rsa1.0.10218.1 | 699 | 5935   | 0         | 691 | 699 | 98 - | 1   | 699 | 3825   | 4522   |
| UN71157 | #              | #   | #      | #         | #   | #   | #    | #   | #   | #      | #      |
| UN71158 | Rsa1.0.02169.1 | 466 | 34367  | 1.00E-158 | 288 | 290 | 99 + | 1   | 290 | 3203   | 3492   |
| UN71159 | Rsa1.0.00749.1 | 759 | 65933  | 1.00E-163 | 352 | 371 | 94 + | 382 | 751 | 49225  | 49595  |
| UN71160 | Rsa1.0.00054.1 | 386 | 162053 | 7.00E-71  | 168 | 176 | 95 + | 66  | 241 | 92658  | 92831  |
| UN71161 | Rsa1.0.00645.1 | 460 | 189716 | 0         | 448 | 466 | 96 + | 5   | 460 | 163670 | 164135 |
| UN71162 | Rsa1.0.00335.1 | 727 | 94371  | 0         | 684 | 716 | 95 + | 12  | 725 | 38889  | 39600  |
| UN71163 | Rsa1.0.02820.1 | 285 | 27629  | 1.00E-120 | 262 | 273 | 95 + | 15  | 285 | 19605  | 19875  |
| UN71164 | Rsa1.0.00059.1 | 820 | 159650 | 0         | 509 | 531 | 95 + | 6   | 529 | 88644  | 89170  |
| UN71165 | Rsa1.0.03499.1 | 509 | 22462  | 0         | 480 | 518 | 92 + | 1   | 506 | 8399   | 8905   |
| UN71166 | Rsa1.0.00434.1 | 402 | 85171  | 0         | 397 | 402 | 98 - | 2   | 399 | 48641  | 49042  |
| UN71167 | Rsa1.0.00058.1 | 248 | 159921 | 3.00E-72  | 192 | 206 | 93 - | 43  | 243 | 17341  | 17543  |
| UN71168 | Rsa1.0.00016.1 | 651 | 831256 | 0         | 506 | 558 | 90 - | 119 | 651 | 205683 | 206231 |
| UN71169 | Rsa1.0.00763.1 | 682 | 65121  | 1.00E-109 | 213 | 217 | 98 - | 216 | 432 | 60940  | 61156  |
| UN71170 | Rsa1.0.05015.1 | 607 | 15125  | 1.00E-138 | 277 | 285 | 97 + | 1   | 285 | 10498  | 10781  |
| UN71171 | Rsa1.0.00108.1 | 722 | 478491 | 1.00E-92  | 188 | 193 | 97 + | 78  | 270 | 282917 | 283109 |
| UN71172 | Rsa1.0.00107.1 | 599 | 431659 | 0         | 570 | 602 | 94 - | 1   | 599 | 88602  | 89203  |
| UN71173 | Rsa1.0.00018.1 | 691 | 410899 | 0         | 629 | 704 | 89 + | 2   | 691 | 98312  | 98989  |

|         |                |     |        |           |     |     |      |     |     |        |        |
|---------|----------------|-----|--------|-----------|-----|-----|------|-----|-----|--------|--------|
| UN71174 | Rsa1.0.00087.1 | 529 | 761073 | 1.00E-119 | 245 | 253 | 96 - | 34  | 285 | 28872  | 29124  |
| UN71175 | Rsa1.0.00040.1 | 318 | 324196 | 1.00E-157 | 315 | 323 | 97 - | 1   | 318 | 57463  | 57785  |
| UN71176 | Rsa1.0.01147.1 | 559 | 52391  | 0         | 385 | 397 | 96 + | 163 | 559 | 1067   | 1463   |
| UN71177 | Rsa1.0.00222.1 | 424 | 172263 | 2.00E-84  | 178 | 184 | 96 - | 5   | 188 | 42607  | 42786  |
| UN71178 | Rsa1.0.01339.1 | 754 | 47813  | 3.00E-65  | 148 | 155 | 95 + | 191 | 345 | 28483  | 28637  |
| UN71179 | Rsa1.0.00120.1 | 746 | 277288 | 2.00E-60  | 168 | 183 | 91 - | 184 | 366 | 234292 | 234473 |
| UN71180 | Rsa1.0.00003.1 | 724 | 340054 | 1.00E-163 | 315 | 322 | 97 + | 405 | 724 | 4541   | 4862   |
| UN71181 | Rsa1.0.00121.1 | 619 | 278029 | 0         | 557 | 600 | 92 - | 3   | 579 | 57548  | 58140  |
| UN71182 | Rsa1.0.00018.1 | 619 | 410899 | 3.00E-22  | 88  | 99  | 88 + | 435 | 533 | 222647 | 222745 |
| UN71183 | Rsa1.0.14203.1 | 679 | 3670   | 1.00E-137 | 261 | 264 | 98 + | 417 | 679 | 2068   | 2331   |
| UN71184 | Rsa1.0.11229.1 | 701 | 5576   | 0         | 581 | 601 | 96 + | 103 | 701 | 4418   | 5018   |
| UN71185 | Rsa1.0.08597.1 | 777 | 7144   | 1.00E-131 | 263 | 270 | 97 + | 181 | 449 | 771    | 1040   |
| UN71186 | Rsa1.0.05575.1 | 531 | 13288  | 1.00E-116 | 255 | 268 | 95 - | 264 | 531 | 6159   | 6425   |
| UN71187 | Rsa1.0.04985.1 | 687 | 15232  | 0         | 658 | 691 | 95 - | 2   | 687 | 5485   | 6167   |
| UN71188 | Rsa1.0.01449.1 | 296 | 45570  | 1.00E-106 | 215 | 219 | 98 + | 79  | 295 | 44595  | 44813  |
| UN71189 | Rsa1.0.10251.1 | 535 | 5921   | 0         | 520 | 533 | 97 + | 3   | 535 | 1204   | 1736   |
| UN71190 | Rsa1.0.04352.1 | 643 | 17779  | 0         | 524 | 556 | 94 + | 94  | 643 | 12118  | 12665  |
| UN71191 | Rsa1.0.00773.1 | 392 | 64839  | 2.00E-68  | 157 | 163 | 96 - | 4   | 163 | 59075  | 59237  |
| UN71192 | Rsa1.0.00645.1 | 510 | 189716 | 4.00E-67  | 167 | 178 | 93 + | 2   | 178 | 153132 | 153309 |
| UN71193 | Rsa1.0.00246.1 | 785 | 103541 | 1.00E-173 | 387 | 404 | 95 + | 388 | 784 | 29514  | 29917  |
| UN71194 | Rsa1.0.00123.1 | 540 | 325650 | 0         | 516 | 539 | 95 + | 2   | 540 | 270378 | 270910 |
| UN71195 | Rsa1.0.07182.1 | 564 | 9777   | 1.00E-129 | 275 | 288 | 95 - | 45  | 332 | 5784   | 6068   |
| UN71196 | Rsa1.0.01363.1 | 506 | 47195  | 1.00E-130 | 259 | 267 | 97 + | 1   | 267 | 23120  | 23380  |
| UN71197 | Rsa1.0.01048.1 | 161 | 55684  | 2.00E-53  | 150 | 163 | 92 + | 3   | 161 | 42157  | 42313  |
| UN71198 | #              | #   | #      | #         | #   | #   | #    | #   | #   | #      | #      |
| UN71199 | Rsa1.0.14034.1 | 218 | 3890   | 2.00E-32  | 86  | 91  | 94 - | 1   | 91  | 133    | 223    |
| UN71200 | Rsa1.0.00010.1 | 703 | 294827 | 1.00E-101 | 203 | 208 | 97 + | 249 | 456 | 237971 | 238178 |
| UN71201 | Rsa1.0.00116.1 | 678 | 365886 | 3.00E-99  | 280 | 309 | 90 - | 3   | 306 | 244253 | 244550 |
| UN71202 | Rsa1.0.02128.1 | 129 | 34758  | 8.00E-65  | 128 | 129 | 99 + | 1   | 129 | 22114  | 22242  |
| UN71203 | Rsa1.0.02103.1 | 667 | 35006  | 2.00E-94  | 199 | 204 | 97 - | 465 | 667 | 30680  | 30882  |
| UN71204 | Rsa1.0.00773.1 | 734 | 64839  | 0         | 434 | 452 | 96 + | 2   | 452 | 32752  | 33199  |
| UN71205 | Rsa1.0.42651.1 | 523 | 526    | 1.00E-76  | 200 | 218 | 91 - | 43  | 254 | 297    | 510    |
| UN71206 | Rsa1.0.04945.1 | 698 | 15370  | 0         | 566 | 642 | 88 - | 63  | 687 | 4331   | 4962   |
| UN71207 | Rsa1.0.00728.1 | 779 | 66704  | 1.00E-132 | 310 | 333 | 93 - | 5   | 334 | 16740  | 17072  |
| UN71208 | Rsa1.0.00925.1 | 168 | 59481  | 9.00E-50  | 127 | 136 | 93 + | 33  | 168 | 7919   | 8054   |
| UN71209 | Rsa1.0.00891.1 | 676 | 60724  | 1.00E-154 | 300 | 308 | 97 + | 69  | 376 | 27001  | 27308  |
| UN71210 | Rsa1.0.09238.1 | 108 | 6539   | 7.00E-28  | 106 | 119 | 89 - | 1   | 108 | 616    | 734    |
| UN71211 | Rsa1.0.00128.1 | 577 | 228675 | 0         | 427 | 444 | 96 + | 2   | 445 | 65403  | 65846  |
| UN71212 | Rsa1.0.00038.1 | 789 | 314568 | 1.00E-156 | 339 | 358 | 94 - | 3   | 353 | 238902 | 239259 |

|         |                |     |        |           |     |     |       |     |     |        |        |
|---------|----------------|-----|--------|-----------|-----|-----|-------|-----|-----|--------|--------|
| UN71213 | Rsa1.0.00104.1 | 274 | 368722 | 1.00E-65  | 152 | 159 | 95 -  | 119 | 274 | 39241  | 39396  |
| UN71214 | Rsa1.0.00453.1 | 678 | 83031  | 6.00E-82  | 170 | 175 | 97 +  | 277 | 451 | 72257  | 72431  |
| UN71215 | Rsa1.0.00123.1 | 670 | 325650 | 0         | 540 | 561 | 96 -  | 106 | 666 | 294043 | 294600 |
| UN71216 | Rsa1.0.00181.1 | 725 | 114269 | 0         | 669 | 716 | 93 +  | 3   | 707 | 42235  | 42937  |
| UN71217 | Rsa1.0.00425.1 | 644 | 147080 | 1.00E-169 | 347 | 362 | 95 +  | 283 | 644 | 95758  | 96119  |
| UN71218 | Rsa1.0.00135.1 | 724 | 178077 | 0         | 703 | 723 | 97 +  | 3   | 724 | 32069  | 32791  |
| UN71219 | Rsa1.0.04519.1 | 657 | 17004  | 0         | 415 | 427 | 97 +  | 233 | 657 | 4568   | 4994   |
| UN71220 | Rsa1.0.00083.1 | 209 | 442773 | 2.00E-32  | 78  | 79  | 98 -  | 3   | 81  | 404955 | 405032 |
| UN71221 | Rsa1.0.00252.1 | 634 | 102760 | 0         | 555 | 569 | 97 +  | 1   | 568 | 51071  | 51639  |
| UN71222 | Rsa1.0.02518.1 | 700 | 30586  | 0         | 381 | 397 | 95 -  | 260 | 656 | 28413  | 28806  |
| UN71223 | Rsa1.0.00888.1 | 181 | 60978  | 5.00E-39  | 109 | 118 | 92 +  | 1   | 118 | 22615  | 22732  |
| UN71224 | Rsa1.0.05041.1 | 764 | 15053  | 0         | 599 | 611 | 98 +  | 1   | 610 | 11567  | 12176  |
| UN71225 | Rsa1.0.00066.1 | 458 | 152418 | 1.00E-105 | 200 | 202 | 99 +  | 122 | 323 | 91810  | 92011  |
| UN71226 | Rsa1.0.00201.1 | 744 | 232851 | 0         | 363 | 363 | 100 - | 382 | 744 | 124473 | 124835 |
| UN71227 | Rsa1.0.00102.1 | 766 | 135497 | 1.00E-173 | 434 | 467 | 92 +  | 1   | 465 | 42086  | 42536  |
| UN71228 | Rsa1.0.18517.1 | 630 | 1584   | 2.00E-78  | 155 | 157 | 98 +  | 474 | 630 | 180    | 336    |
| UN71229 | Rsa1.0.00376.1 | 558 | 90101  | 1.00E-106 | 201 | 203 | 99 +  | 2   | 204 | 47282  | 47484  |
| UN71230 | Rsa1.0.05642.1 | 171 | 13074  | 9.00E-50  | 121 | 128 | 94 -  | 16  | 143 | 11688  | 11815  |
| UN71231 | Rsa1.0.03362.1 | 606 | 23453  | 1.00E-79  | 196 | 210 | 93 +  | 1   | 210 | 13729  | 13931  |
| UN71232 | Rsa1.0.35057.1 | 379 | 645    | 1.00E-131 | 342 | 378 | 90 +  | 1   | 378 | 281    | 645    |
| UN71233 | Rsa1.0.34677.1 | 645 | 653    | 1.00E-138 | 277 | 286 | 96 +  | 336 | 621 | 368    | 653    |
| UN71234 | Rsa1.0.03477.1 | 716 | 22635  | 1.00E-105 | 299 | 333 | 89 -  | 27  | 350 | 5497   | 5826   |
| UN71235 | Rsa1.0.00033.1 | 722 | 515811 | 1.00E-73  | 173 | 181 | 95 +  | 512 | 691 | 42902  | 43081  |
| UN71236 | Rsa1.0.00495.1 | 603 | 79934  | 1.00E-79  | 151 | 151 | 100 - | 76  | 226 | 19840  | 19990  |
| UN71237 | Rsa1.0.00344.1 | 663 | 191774 | 0         | 346 | 352 | 98 +  | 312 | 663 | 8915   | 9266   |
| UN71238 | Rsa1.0.00355.1 | 557 | 92038  | 0         | 506 | 548 | 92 +  | 1   | 539 | 77899  | 78429  |
| UN71239 | Rsa1.0.01997.1 | 685 | 158416 | 0         | 425 | 455 | 93 +  | 10  | 457 | 143763 | 144206 |
| UN71240 | Rsa1.0.01985.1 | 584 | 36491  | 1.00E-111 | 204 | 204 | 100 + | 3   | 206 | 14306  | 14509  |
| UN71241 | Rsa1.0.09074.1 | 589 | 6670   | 2.00E-90  | 223 | 238 | 93 -  | 357 | 589 | 1170   | 1406   |
| UN71242 | Rsa1.0.00649.1 | 705 | 70263  | 0         | 684 | 704 | 97 +  | 2   | 705 | 10560  | 11263  |
| UN71243 | Rsa1.0.00128.1 | 683 | 228675 | 4.00E-52  | 126 | 133 | 94 -  | 14  | 146 | 219511 | 219643 |
| UN71244 | Rsa1.0.01461.1 | 266 | 45240  | 9.00E-85  | 248 | 279 | 88 -  | 1   | 265 | 2887   | 3165   |
| UN71245 | Rsa1.0.00876.1 | 579 | 61328  | 0         | 516 | 552 | 93 -  | 4   | 548 | 43573  | 44113  |
| UN71246 | Rsa1.0.00601.1 | 651 | 177045 | 1.00E-111 | 281 | 303 | 92 +  | 43  | 339 | 26173  | 26467  |
| UN71247 | Rsa1.0.04450.1 | 806 | 17297  | 0         | 487 | 516 | 94 -  | 291 | 806 | 12614  | 13123  |
| UN71248 | Rsa1.0.00016.1 | 749 | 831256 | 0         | 726 | 750 | 96 +  | 1   | 749 | 542888 | 543633 |
| UN71249 | Rsa1.0.73885.1 | 738 | 310    | 2.00E-91  | 261 | 287 | 90 +  | 1   | 276 | 26     | 310    |
| UN71250 | Rsa1.0.01400.1 | 823 | 46560  | 0         | 391 | 404 | 96 -  | 340 | 743 | 9774   | 10177  |
| UN71251 | Rsa1.0.03019.1 | 262 | 25987  | 4.00E-62  | 150 | 158 | 94 +  | 4   | 158 | 17477  | 17632  |



|         |                |     |        |           |     |     |       |     |     |        |        |
|---------|----------------|-----|--------|-----------|-----|-----|-------|-----|-----|--------|--------|
| UN71291 | Rsa1.0_17067.1 | 147 | 1936   | 9.00E-62  | 138 | 144 | 95 +  | 4   | 147 | 105    | 248    |
| UN71292 | Rsa1.0_01543.1 | 730 | 43645  | 1.00E-145 | 342 | 370 | 92 +  | 2   | 371 | 6984   | 7345   |
| UN71293 | Rsa1.0_02365.1 | 367 | 32118  | 2.00E-58  | 121 | 123 | 98 +  | 94  | 216 | 16072  | 16194  |
| UN71294 | Rsa1.0_00112.1 | 634 | 132199 | 1.00E-152 | 387 | 428 | 90 +  | 156 | 580 | 116397 | 116809 |
| UN71295 | Rsa1.0_00493.1 | 637 | 80007  | 1.00E-119 | 244 | 253 | 96 +  | 189 | 441 | 75604  | 75856  |
| UN71296 | Rsa1.0_00285.1 | 798 | 149638 | 1.00E-148 | 293 | 302 | 97 +  | 3   | 304 | 140377 | 140678 |
| UN71297 | Rsa1.0_20495.1 | 643 | 1299   | 1.00E-140 | 272 | 277 | 98 -  | 359 | 634 | 555    | 831    |
| UN71298 | Rsa1.0_00275.1 | 695 | 210104 | 1.00E-180 | 356 | 364 | 97 +  | 323 | 684 | 119177 | 119539 |
| UN71299 | Rsa1.0_00162.1 | 769 | 239935 | 0         | 699 | 745 | 93 +  | 1   | 727 | 38543  | 39284  |
| UN71300 | Rsa1.0_00006.1 | 587 | 396176 | 2.00E-84  | 198 | 213 | 92 -  | 57  | 258 | 370012 | 370224 |
| UN71301 | Rsa1.0_03057.1 | 695 | 25724  | 1.00E-73  | 156 | 161 | 96 -  | 480 | 640 | 139    | 299    |
| UN71302 | Rsa1.0_00876.1 | 737 | 61328  | 1.00E-80  | 198 | 213 | 92 +  | 1   | 213 | 42181  | 42393  |
| UN71303 | Rsa1.0_00100.1 | 390 | 249232 | 0         | 377 | 389 | 96 -  | 2   | 390 | 30654  | 31037  |
| UN71304 | Rsa1.0_03414.1 | 289 | 23125  | 1.00E-127 | 272 | 287 | 94 +  | 1   | 287 | 12735  | 13012  |
| UN71305 | Rsa1.0_04450.1 | 685 | 17297  | 1.00E-149 | 472 | 539 | 87 +  | 165 | 685 | 11963  | 12477  |
| UN71306 | Rsa1.0_04051.1 | 749 | 19375  | 0         | 442 | 462 | 95 -  | 1   | 456 | 8731   | 9188   |
| UN71307 | Rsa1.0_01850.1 | 785 | 162224 | 1.00E-107 | 210 | 214 | 98 +  | 120 | 333 | 30722  | 30935  |
| UN71308 | Rsa1.0_02903.1 | 716 | 26901  | 0         | 412 | 419 | 98 -  | 20  | 438 | 14022  | 14440  |
| UN71309 | Rsa1.0_02670.1 | 568 | 28887  | 6.00E-97  | 243 | 264 | 92 -  | 5   | 265 | 6101   | 6352   |
| UN71310 | Rsa1.0_00006.1 | 616 | 396176 | 1.00E-112 | 238 | 248 | 95 -  | 3   | 248 | 370016 | 370263 |
| UN71311 | Rsa1.0_01682.1 | 715 | 41090  | 0         | 600 | 634 | 94 +  | 1   | 634 | 25446  | 26079  |
| UN71312 | Rsa1.0_00425.1 | 778 | 147080 | 0         | 647 | 678 | 95 +  | 108 | 778 | 95758  | 96435  |
| UN71313 | Rsa1.0_00652.1 | 571 | 70089  | 1.00E-137 | 312 | 338 | 92 +  | 257 | 571 | 47920  | 48257  |
| UN71314 | Rsa1.0_05326.1 | 390 | 14139  | 1.00E-127 | 239 | 242 | 98 -  | 1   | 242 | 3934   | 4175   |
| UN71315 | Rsa1.0_02071.1 | 373 | 35409  | 1.00E-139 | 293 | 306 | 95 -  | 1   | 305 | 7713   | 8018   |
| UN71316 | Rsa1.0_04854.1 | 325 | 131560 | 1.00E-159 | 319 | 328 | 97 -  | 2   | 322 | 178    | 505    |
| UN71317 | Rsa1.0_00272.1 | 110 | 447836 | 2.00E-37  | 94  | 99  | 94 +  | 8   | 106 | 339574 | 339672 |
| UN71318 | Rsa1.0_00596.1 | 475 | 73578  | 1.00E-128 | 310 | 327 | 94 +  | 4   | 327 | 30927  | 31247  |
| UN71319 | Rsa1.0_02683.1 | 734 | 28679  | 0         | 400 | 400 | 100 - | 1   | 400 | 16865  | 17264  |
| UN71320 | Rsa1.0_03044.1 | 799 | 25791  | 0         | 479 | 515 | 93 -  | 11  | 519 | 6296   | 6806   |
| UN71321 | Rsa1.0_01896.1 | 581 | 37512  | 1.00E-135 | 297 | 311 | 95 +  | 4   | 309 | 35333  | 35643  |
| UN71322 | Rsa1.0_03465.1 | 725 | 22700  | 7.00E-91  | 210 | 224 | 93 -  | 1   | 217 | 11014  | 11237  |
| UN71323 | Rsa1.0_05503.1 | 608 | 13510  | 3.00E-99  | 203 | 208 | 97 +  | 180 | 386 | 3022   | 3229   |
| UN71324 | Rsa1.0_01149.1 | 708 | 160459 | 4.00E-77  | 223 | 245 | 91 +  | 471 | 708 | 43118  | 43354  |
| UN71325 | Rsa1.0_00106.1 | 472 | 133916 | 0         | 413 | 428 | 96 +  | 11  | 438 | 5590   | 6014   |
| UN71326 | Rsa1.0_00014.1 | 293 | 348985 | 2.00E-79  | 243 | 268 | 90 -  | 31  | 293 | 169993 | 170258 |
| UN71327 | Rsa1.0_02493.1 | 339 | 30854  | 1.00E-143 | 303 | 317 | 95 +  | 2   | 318 | 2949   | 3264   |
| UN71328 | Rsa1.0_00310.1 | 132 | 96852  | 6.00E-35  | 90  | 94  | 95 +  | 1   | 92  | 82549  | 82642  |
| UN71329 | Rsa1.0_00215.1 | 674 | 201775 | 0         | 362 | 367 | 98 -  | 308 | 674 | 159005 | 159370 |

|         |                |     |        |           |     |     |      |     |     |        |        |
|---------|----------------|-----|--------|-----------|-----|-----|------|-----|-----|--------|--------|
| UN71330 | Rsa1.0.01642.1 | 670 | 41772  | 0         | 646 | 672 | 96 - | 1   | 670 | 14837  | 15507  |
| UN71331 | Rsa1.0.27955.1 | 770 | 833    | 1.00E-105 | 221 | 230 | 96 - | 97  | 326 | 136    | 365    |
| UN71332 | Rsa1.0.16727.1 | 786 | 2052   | 1.00E-108 | 245 | 260 | 94 + | 2   | 261 | 744    | 993    |
| UN71333 | Rsa1.0.00496.1 | 388 | 79834  | 0         | 373 | 387 | 96 + | 2   | 383 | 4669   | 5052   |
| UN71334 | Rsa1.0.01553.1 | 255 | 43379  | 7.00E-61  | 140 | 147 | 95 + | 109 | 255 | 26451  | 26597  |
| UN71335 | Rsa1.0.01039.1 | 145 | 55946  | 3.00E-24  | 69  | 72  | 95 + | 74  | 145 | 29899  | 29968  |
| UN71336 | Rsa1.0.16565.1 | 828 | 2110   | 0         | 571 | 597 | 95 + | 234 | 828 | 444    | 1040   |
| UN71337 | Rsa1.0.00132.1 | 610 | 124299 | 1.00E-140 | 307 | 322 | 95 - | 15  | 334 | 99696  | 100014 |
| UN71338 | Rsa1.0.00602.1 | 655 | 73302  | 0         | 379 | 394 | 96 - | 237 | 630 | 29563  | 29956  |
| UN71339 | Rsa1.0.01524.1 | 794 | 43949  | 2.00E-70  | 212 | 233 | 90 - | 1   | 228 | 9006   | 9236   |
| UN71340 | Rsa1.0.00240.1 | 105 | 104175 | 2.00E-21  | 55  | 56  | 98 - | 1   | 56  | 69998  | 70053  |
| UN71341 | Rsa1.0.01204.1 | 717 | 50843  | 0         | 490 | 516 | 94 + | 186 | 698 | 9906   | 10418  |
| UN71342 | Rsa1.0.00059.1 | 681 | 159650 | 1.00E-144 | 314 | 335 | 93 - | 1   | 319 | 48535  | 48867  |
| UN71343 | Rsa1.0.00417.1 | 720 | 395068 | 7.00E-91  | 188 | 194 | 96 + | 314 | 507 | 258984 | 259177 |
| UN71344 | Rsa1.0.08072.1 | 781 | 7955   | 0         | 513 | 533 | 96 - | 251 | 777 | 7423   | 7955   |
| UN71345 | Rsa1.0.00918.1 | 740 | 59720  | 0         | 727 | 738 | 98 - | 1   | 738 | 58416  | 59153  |
| UN71346 | Rsa1.0.04427.1 | 647 | 17399  | 1.00E-143 | 312 | 329 | 94 - | 280 | 608 | 16303  | 16630  |
| UN71347 | Rsa1.0.00115.1 | 529 | 131321 | 0         | 388 | 406 | 95 + | 13  | 417 | 49248  | 49653  |
| UN71348 | Rsa1.0.00552.1 | 728 | 206757 | 0         | 383 | 393 | 97 + | 336 | 728 | 75228  | 75620  |
| UN71349 | Rsa1.0.00135.1 | 589 | 178077 | 0         | 351 | 357 | 98 - | 1   | 353 | 97881  | 98237  |
| UN71350 | Rsa1.0.01985.1 | 649 | 36491  | 1.00E-172 | 331 | 338 | 97 - | 312 | 649 | 15892  | 16228  |
| UN71351 | Rsa1.0.02320.1 | 666 | 32575  | 0         | 647 | 665 | 97 + | 2   | 666 | 28793  | 29457  |
| UN71352 | Rsa1.0.06936.1 | 756 | 10143  | 0         | 750 | 756 | 99 - | 1   | 756 | 148    | 903    |
| UN71353 | Rsa1.0.00991.1 | 734 | 143101 | 2.33E-156 | 323 | 342 | 94 - | 381 | 722 | 133622 | 133957 |
| UN71354 | Rsa1.0.00136.1 | 139 | 122464 | 1.00E-48  | 131 | 138 | 94 + | 3   | 139 | 68784  | 68919  |
| UN71355 | Rsa1.0.02500.1 | 666 | 30768  | 1.00E-100 | 200 | 205 | 97 - | 2   | 206 | 10244  | 10448  |
| UN71356 | Rsa1.0.00899.1 | 732 | 60404  | 2.00E-88  | 243 | 268 | 90 - | 54  | 318 | 51380  | 51632  |
| UN71357 | Rsa1.0.02836.1 | 782 | 27481  | 0         | 513 | 535 | 95 - | 169 | 701 | 5025   | 5559   |
| UN71358 | Rsa1.0.01148.1 | 694 | 52375  | 0         | 685 | 694 | 98 - | 2   | 694 | 46657  | 47347  |
| UN71359 | Rsa1.0.00152.1 | 585 | 257730 | 1.00E-100 | 210 | 217 | 96 + | 370 | 585 | 214460 | 214676 |
| UN71360 | Rsa1.0.05642.1 | 606 | 13074  | 4.00E-67  | 153 | 158 | 96 + | 444 | 599 | 10830  | 10987  |
| UN71361 | Rsa1.0.00302.1 | 718 | 97521  | 0         | 703 | 740 | 95 - | 1   | 718 | 38130  | 38866  |
| UN71362 | Rsa1.0.10408.1 | 251 | 5858   | 1.00E-132 | 247 | 250 | 98 - | 1   | 250 | 652    | 901    |
| UN71363 | Rsa1.0.03103.1 | 718 | 25387  | 0         | 546 | 603 | 90 + | 118 | 718 | 6514   | 7112   |
| UN71364 | Rsa1.0.01924.1 | 840 | 37226  | 1.00E-180 | 332 | 335 | 99 - | 1   | 333 | 23355  | 23689  |
| UN71365 | Rsa1.0.21865.1 | 608 | 1168   | 0         | 596 | 611 | 97 - | 2   | 608 | 512    | 1122   |
| UN71366 | Rsa1.0.01104.1 | 623 | 285480 | 1.00E-121 | 230 | 233 | 98 - | 3   | 235 | 263481 | 263713 |
| UN71367 | Rsa1.0.00425.1 | 152 | 147080 | 1.00E-42  | 97  | 100 | 97 + | 11  | 110 | 135471 | 135570 |
| UN71368 | Rsa1.0.01982.1 | 203 | 36530  | 1.00E-43  | 180 | 209 | 86 - | 2   | 203 | 25168  | 25376  |



|         |                |     |        |           |     |     |       |     |     |        |        |
|---------|----------------|-----|--------|-----------|-----|-----|-------|-----|-----|--------|--------|
| UN71369 | Rsa1.0.00805.1 | 417 | 63724  | 0         | 415 | 418 | 99 +  | 1   | 417 | 7112   | 7529   |
| UN71370 | Rsa1.0.02748.1 | 556 | 28242  | 1.00E-102 | 212 | 220 | 96 +  | 317 | 530 | 10699  | 10918  |
| UN71371 | Rsa1.0.02515.1 | 528 | 30616  | 1.00E-173 | 346 | 358 | 96 +  | 1   | 356 | 8954   | 9311   |
| UN71372 | Rsa1.0.00019.1 | 152 | 301669 | 2.00E-53  | 139 | 150 | 92 +  | 3   | 152 | 293342 | 293491 |
| UN71373 | Rsa1.0.00003.1 | 129 | 340054 | 7.00E-50  | 118 | 124 | 95 +  | 4   | 127 | 136838 | 136961 |
| UN71374 | Rsa1.0.01321.1 | 188 | 48248  | 1.00E-73  | 172 | 181 | 95 +  | 6   | 185 | 34873  | 35049  |
| UN71375 | Rsa1.0.58032.1 | 507 | 394    | 4.00E-79  | 174 | 182 | 95 +  | 66  | 247 | 4      | 185    |
| UN71376 | Rsa1.0.00228.1 | 425 | 105511 | 1.00E-167 | 361 | 381 | 94 +  | 29  | 400 | 13167  | 13545  |
| UN71377 | Rsa1.0.05000.1 | 246 | 15178  | 1.00E-40  | 88  | 89  | 98 -  | 158 | 246 | 1411   | 1499   |
| UN71378 | Rsa1.0.00008.1 | 803 | 358124 | 1.00E-125 | 243 | 247 | 98 +  | 558 | 803 | 309080 | 309326 |
| UN71379 | Rsa1.0.00084.1 | 822 | 142338 | 0         | 678 | 696 | 97 +  | 2   | 695 | 132728 | 133423 |
| UN71380 | Rsa1.0.00509.1 | 443 | 78829  | 0         | 406 | 420 | 96 +  | 31  | 443 | 8768   | 9187   |
| UN71381 | Rsa1.0.00628.1 | 455 | 214360 | 1.00E-160 | 328 | 342 | 95 +  | 1   | 342 | 34417  | 34758  |
| UN71382 | Rsa1.0.00474.1 | 385 | 81731  | 1.00E-131 | 343 | 375 | 91 +  | 11  | 385 | 30358  | 30711  |
| UN71383 | Rsa1.0.01168.1 | 710 | 153765 | 1.00E-127 | 315 | 341 | 92 +  | 371 | 710 | 41780  | 42102  |
| UN71384 | Rsa1.0.00893.1 | 572 | 60626  | 0         | 559 | 573 | 97 -  | 1   | 572 | 31578  | 32142  |
| UN71385 | Rsa1.0.00447.1 | 717 | 84051  | 1.00E-100 | 216 | 226 | 95 -  | 3   | 228 | 26801  | 27026  |
| UN71386 | Rsa1.0.00179.1 | 567 | 393324 | 1.00E-155 | 331 | 347 | 95 -  | 4   | 349 | 336511 | 336853 |
| UN71387 | Rsa1.0.13911.1 | 454 | 4104   | 1.00E-88  | 217 | 234 | 92 +  | 1   | 234 | 2660   | 2893   |
| UN71388 | Rsa1.0.00281.1 | 535 | 99908  | 0         | 430 | 457 | 94 +  | 1   | 447 | 24084  | 24539  |
| UN71389 | Rsa1.0.01824.1 | 343 | 38733  | 1.00E-143 | 321 | 341 | 94 -  | 3   | 343 | 7066   | 7405   |
| UN71390 | Rsa1.0.05748.1 | 772 | 12749  | 0         | 400 | 414 | 96 +  | 1   | 413 | 6540   | 6951   |
| UN71391 | Rsa1.0.02374.1 | 729 | 32043  | 0         | 600 | 629 | 95 -  | 35  | 663 | 24874  | 25501  |
| UN71392 | Rsa1.0.18047.1 | 724 | 1682   | 2.00E-78  | 149 | 149 | 100 + | 147 | 295 | 1431   | 1579   |
| UN71393 | Rsa1.0.00694.1 | 595 | 68074  | 0         | 486 | 509 | 95 +  | 89  | 595 | 29258  | 29766  |
| UN71394 | Rsa1.0.01148.1 | 541 | 52375  | 0         | 517 | 540 | 95 -  | 2   | 541 | 24720  | 25250  |
| UN71395 | Rsa1.0.00277.1 | 718 | 100132 | 0         | 698 | 717 | 97 +  | 3   | 713 | 9694   | 10399  |
| UN71396 | Rsa1.0.01346.1 | 335 | 47618  | 1.00E-112 | 219 | 222 | 98 -  | 69  | 290 | 20698  | 20918  |
| UN71397 | Rsa1.0.00038.1 | 732 | 314568 | 0         | 422 | 445 | 94 -  | 83  | 526 | 236060 | 236503 |
| UN71398 | Rsa1.0.01900.1 | 658 | 37473  | 0         | 402 | 404 | 99 +  | 255 | 658 | 9085   | 9487   |
| UN71399 | Rsa1.0.03302.1 | 691 | 23898  | 0         | 663 | 684 | 96 -  | 14  | 688 | 6558   | 7241   |
| UN71400 | Rsa1.0.00179.1 | 737 | 393324 | 1.00E-135 | 309 | 329 | 93 +  | 7   | 329 | 62396  | 62715  |
| UN71401 | Rsa1.0.02119.1 | 756 | 34833  | 0         | 561 | 591 | 94 -  | 13  | 601 | 34172  | 34761  |
| UN71402 | Rsa1.0.12425.1 | 323 | 5229   | 1.00E-135 | 244 | 244 | 100 + | 80  | 323 | 4583   | 4826   |
| UN71403 | Rsa1.0.00020.1 | 755 | 283099 | 0         | 434 | 446 | 97 +  | 3   | 448 | 74046  | 74491  |
| UN71404 | Rsa1.0.01209.1 | 703 | 50668  | 1.00E-140 | 307 | 321 | 95 +  | 389 | 702 | 40043  | 40362  |
| UN71405 | Rsa1.0.00058.1 | 523 | 159921 | 5.00E-20  | 107 | 123 | 86 +  | 323 | 443 | 14619  | 14741  |
| UN71406 | Rsa1.0.02079.1 | 147 | 35306  | 8.00E-16  | 43  | 43  | 100 - | 105 | 147 | 19122  | 19164  |
| UN71407 | Rsa1.0.00972.1 | 540 | 57937  | 1.00E-100 | 204 | 210 | 97 -  | 11  | 220 | 49375  | 49584  |

|         |                |     |        |           |     |     |       |     |     |        |        |
|---------|----------------|-----|--------|-----------|-----|-----|-------|-----|-----|--------|--------|
| UN71408 | Rsa1.0.03727.1 | 707 | 21158  | 0         | 668 | 686 | 97 -  | 1   | 685 | 11043  | 11727  |
| UN71409 | Rsa1.0.00223.1 | 668 | 106231 | 6.00E-82  | 179 | 187 | 95 +  | 197 | 383 | 68819  | 69005  |
| UN71410 | Rsa1.0.00842.1 | 417 | 62493  | 1.00E-163 | 294 | 295 | 99 +  | 10  | 304 | 30056  | 30350  |
| UN71411 | Rsa1.0.00918.1 | 681 | 59720  | 0         | 664 | 681 | 97 +  | 1   | 681 | 57506  | 58186  |
| UN71412 | Rsa1.0.09709.1 | 577 | 6198   | 0         | 401 | 415 | 96 -  | 164 | 577 | 55     | 460    |
| UN71413 | Rsa1.0.01518.1 | 612 | 141402 | 0         | 586 | 606 | 96 +  | 7   | 612 | 117712 | 118312 |
| UN71414 | Rsa1.0.00017.1 | 541 | 752458 | 2.00E-75  | 150 | 152 | 98 +  | 324 | 475 | 444001 | 444152 |
| UN71415 | Rsa1.0.11985.1 | 540 | 5352   | 1.00E-135 | 301 | 320 | 94 +  | 107 | 426 | 4408   | 4727   |
| UN71416 | Rsa1.0.00350.1 | 520 | 92346  | 1.00E-153 | 312 | 325 | 96 -  | 178 | 491 | 61927  | 62250  |
| UN71417 | Rsa1.0.00110.1 | 700 | 132719 | 0         | 666 | 698 | 95 -  | 3   | 700 | 85878  | 86575  |
| UN71418 | Rsa1.0.00556.1 | 537 | 207212 | 0         | 439 | 461 | 95 +  | 87  | 537 | 43969  | 44427  |
| UN71419 | Rsa1.0.01015.1 | 477 | 56752  | 0         | 443 | 465 | 95 +  | 16  | 477 | 7528   | 7988   |
| UN71420 | Rsa1.0.01464.1 | 595 | 45193  | 3.00E-86  | 180 | 185 | 97 +  | 3   | 185 | 10304  | 10488  |
| UN71421 | Rsa1.0.00551.1 | 261 | 76227  | 5.00E-37  | 101 | 107 | 94 +  | 57  | 162 | 61146  | 61252  |
| UN71422 | Rsa1.0.01310.1 | 678 | 164719 | 4.00E-89  | 209 | 226 | 92 -  | 3   | 214 | 1986   | 2211   |
| UN71423 | Rsa1.0.07250.1 | 530 | 9663   | 1.00E-45  | 186 | 218 | 85 -  | 123 | 317 | 9079   | 9295   |
| UN71424 | Rsa1.0.03081.1 | 726 | 25523  | 0         | 368 | 380 | 96 -  | 6   | 385 | 10985  | 11357  |
| UN71425 | Rsa1.0.00585.1 | 624 | 74164  | 0         | 428 | 434 | 98 -  | 191 | 624 | 61422  | 61855  |
| UN71426 | Rsa1.0.01742.1 | 215 | 39962  | 1.00E-103 | 207 | 213 | 97 -  | 3   | 215 | 2947   | 3159   |
| UN71427 | Rsa1.0.01157.1 | 600 | 52121  | 6.00E-91  | 248 | 276 | 89 -  | 3   | 274 | 43708  | 43971  |
| UN71428 | Rsa1.0.01966.1 | 707 | 36681  | 0         | 504 | 508 | 99 -  | 2   | 508 | 23276  | 23783  |
| UN71429 | Rsa1.0.00009.1 | 413 | 232558 | 1.00E-113 | 233 | 241 | 96 +  | 3   | 243 | 44615  | 44852  |
| UN71430 | Rsa1.0.00020.1 | 763 | 283099 | 0         | 744 | 765 | 97 -  | 1   | 761 | 94863  | 95627  |
| UN71431 | Rsa1.0.00026.1 | 773 | 327835 | 0         | 717 | 739 | 97 +  | 2   | 739 | 2165   | 2903   |
| UN71432 | Rsa1.0.02736.1 | 109 | 28329  | 7.00E-37  | 104 | 113 | 92 -  | 3   | 109 | 18072  | 18184  |
| UN71433 | Rsa1.0.00715.1 | 788 | 67116  | 0         | 720 | 782 | 92 -  | 15  | 786 | 29912  | 30686  |
| UN71434 | Rsa1.0.00287.1 | 657 | 98687  | 1.00E-132 | 251 | 255 | 98 -  | 147 | 401 | 68964  | 69218  |
| UN71435 | Rsa1.0.05769.1 | 800 | 12694  | 1.00E-114 | 221 | 225 | 98 +  | 3   | 227 | 7146   | 7370   |
| UN71436 | Rsa1.0.00017.1 | 651 | 752458 | 3.00E-68  | 132 | 132 | 100 - | 304 | 435 | 156685 | 156816 |
| UN71437 | Rsa1.0.01310.1 | 602 | 164719 | 1.00E-121 | 227 | 229 | 99 +  | 374 | 602 | 141043 | 141271 |
| UN71438 | Rsa1.0.03448.1 | 755 | 22844  | 1.00E-131 | 271 | 280 | 96 -  | 476 | 754 | 19656  | 19932  |
| UN71439 | Rsa1.0.00725.1 | 779 | 66757  | 1.00E-178 | 356 | 368 | 96 +  | 218 | 584 | 20904  | 21271  |
| UN71440 | Rsa1.0.00104.1 | 823 | 368722 | 1.00E-107 | 254 | 269 | 94 +  | 405 | 672 | 196710 | 196975 |
| UN71441 | Rsa1.0.02144.1 | 692 | 34630  | 0         | 679 | 691 | 98 -  | 2   | 692 | 24090  | 24780  |
| UN71442 | Rsa1.0.00104.1 | 440 | 368722 | 1.00E-169 | 304 | 305 | 99 +  | 136 | 440 | 32684  | 32988  |
| UN71443 | Rsa1.0.00016.1 | 641 | 831256 | 2.00E-81  | 160 | 162 | 98 -  | 41  | 202 | 355289 | 355450 |
| UN71444 | Rsa1.0.01679.1 | 802 | 146876 | 0         | 443 | 461 | 96 +  | 350 | 801 | 146142 | 146600 |
| UN71445 | Rsa1.0.00414.1 | 222 | 202190 | 2.00E-26  | 88  | 97  | 90 -  | 126 | 222 | 197508 | 197604 |
| UN71446 | Rsa1.0.36326.1 | 717 | 621    | 0         | 384 | 386 | 99 -  | 90  | 475 | 73     | 458    |

|         |                |     |        |           |     |     |       |     |     |        |        |
|---------|----------------|-----|--------|-----------|-----|-----|-------|-----|-----|--------|--------|
| UN71447 | Rsa1.0_00936.1 | 563 | 59078  | 2.00E-96  | 194 | 199 | 97 -  | 168 | 366 | 51051  | 51249  |
| UN71448 | Rsa1.0_10218.1 | 350 | 5935   | 0         | 336 | 336 | 100 + | 15  | 350 | 3419   | 3754   |
| UN71449 | Rsa1.0_06138.1 | 714 | 11651  | 0         | 378 | 392 | 96 -  | 328 | 714 | 10240  | 10630  |
| UN71450 | Rsa1.0_00725.1 | 770 | 66757  | 1.00E-160 | 292 | 294 | 99 +  | 2   | 295 | 5313   | 5606   |
| UN71451 | Rsa1.0_02060.1 | 696 | 35528  | 0         | 419 | 438 | 95 +  | 246 | 677 | 19474  | 19911  |
| UN71452 | Rsa1.0_03601.1 | 691 | 21850  | 1.00E-76  | 146 | 146 | 100 + | 233 | 378 | 11427  | 11572  |
| UN71453 | Rsa1.0_01666.1 | 109 | 173972 | 1.00E-35  | 103 | 110 | 93 -  | 2   | 109 | 6744   | 6851   |
| UN71454 | Rsa1.0_00800.1 | 581 | 63868  | 1.00E-112 | 215 | 218 | 98 -  | 4   | 221 | 19924  | 20141  |
| UN71455 | Rsa1.0_00351.1 | 784 | 413096 | 0         | 495 | 529 | 93 +  | 90  | 612 | 266599 | 267113 |
| UN71456 | Rsa1.0_03044.1 | 666 | 25791  | 1.00E-104 | 226 | 237 | 95 +  | 430 | 666 | 5637   | 5873   |
| UN71457 | Rsa1.0_17985.1 | 730 | 1695   | 2.00E-66  | 141 | 145 | 97 -  | 296 | 440 | 81     | 225    |
| UN71458 | Rsa1.0_02508.1 | 521 | 30675  | 1.00E-134 | 267 | 274 | 97 +  | 1   | 274 | 20110  | 20381  |
| UN71459 | Rsa1.0_00407.1 | 655 | 191544 | 0         | 634 | 656 | 96 -  | 1   | 655 | 167013 | 167661 |
| UN71460 | Rsa1.0_00115.1 | 361 | 131321 | 6.00E-59  | 122 | 124 | 98 -  | 115 | 238 | 50722  | 50845  |
| UN71461 | Rsa1.0_01978.1 | 508 | 36546  | 1.00E-128 | 273 | 286 | 95 -  | 222 | 507 | 9966   | 10248  |
| UN71462 | Rsa1.0_03631.1 | 501 | 21647  | 0         | 477 | 497 | 95 +  | 17  | 501 | 9954   | 10450  |
| UN71463 | Rsa1.0_00224.1 | 274 | 327530 | 1.00E-71  | 162 | 170 | 95 -  | 1   | 170 | 224639 | 224804 |
| UN71464 | Rsa1.0_03185.1 | 670 | 24739  | 4.00E-83  | 175 | 181 | 96 -  | 130 | 310 | 5034   | 5214   |
| UN71465 | Rsa1.0_19075.1 | 637 | 1483   | 0         | 419 | 439 | 95 +  | 199 | 633 | 1      | 436    |
| UN71466 | Rsa1.0_00687.1 | 287 | 68494  | 1.00E-117 | 248 | 257 | 96 -  | 33  | 287 | 50666  | 50922  |
| UN71467 | Rsa1.0_26999.1 | 576 | 870    | 1.00E-144 | 296 | 305 | 97 -  | 276 | 576 | 567    | 870    |
| UN71468 | Rsa1.0_00028.1 | 561 | 293984 | 1.00E-134 | 287 | 295 | 97 -  | 268 | 557 | 627    | 921    |
| UN71469 | Rsa1.0_00737.1 | 697 | 66432  | 0         | 451 | 456 | 98 -  | 245 | 697 | 52056  | 52511  |
| UN71470 | Rsa1.0_00328.1 | 575 | 224661 | 1.00E-137 | 248 | 248 | 100 - | 293 | 540 | 185917 | 186164 |
| UN71471 | Rsa1.0_05812.1 | 681 | 12571  | 1.00E-130 | 254 | 260 | 97 +  | 303 | 562 | 476    | 735    |
| UN71472 | Rsa1.0_00029.1 | 652 | 272992 | 0         | 634 | 659 | 96 -  | 3   | 652 | 10450  | 11107  |
| UN71473 | Rsa1.0_00661.1 | 575 | 213041 | 1.00E-167 | 334 | 345 | 96 +  | 237 | 575 | 192000 | 192344 |
| UN71474 | Rsa1.0_09170.1 | 763 | 6588   | 1.00E-177 | 356 | 370 | 96 +  | 241 | 610 | 5779   | 6142   |
| UN71475 | Rsa1.0_00107.1 | 712 | 431659 | 1.00E-135 | 292 | 306 | 95 +  | 281 | 581 | 9984   | 10289  |
| UN71476 | Rsa1.0_01419.1 | 641 | 167402 | 0         | 511 | 533 | 95 +  | 110 | 641 | 130437 | 130966 |
| UN71477 | Rsa1.0_07475.1 | 758 | 9292   | 1.00E-138 | 310 | 331 | 93 +  | 78  | 408 | 208    | 521    |
| UN71478 | Rsa1.0_02267.1 | 813 | 33194  | 8.00E-91  | 215 | 230 | 93 -  | 185 | 414 | 30984  | 31213  |
| UN71479 | Rsa1.0_01867.1 | 787 | 37960  | 0         | 648 | 684 | 94 -  | 2   | 685 | 976    | 1641   |
| UN71480 | Rsa1.0_05411.1 | 801 | 13838  | 0         | 526 | 542 | 97 -  | 210 | 746 | 9003   | 9544   |
| UN71481 | Rsa1.0_00051.1 | 718 | 258225 | 0         | 696 | 719 | 96 +  | 1   | 718 | 142397 | 143115 |
| UN71482 | Rsa1.0_00605.1 | 631 | 73199  | 1.00E-155 | 325 | 340 | 95 -  | 294 | 631 | 68922  | 69261  |
| UN71483 | Rsa1.0_00107.1 | 709 | 431659 | 0         | 432 | 433 | 99 -  | 2   | 434 | 292597 | 293029 |
| UN71484 | Rsa1.0_06701.1 | 666 | 10514  | 0         | 632 | 668 | 94 +  | 2   | 659 | 7071   | 7732   |
| UN71485 | Rsa1.0_03860.1 | 391 | 20407  | 1.00E-117 | 225 | 229 | 98 -  | 3   | 231 | 6063   | 6291   |

|         |                |     |        |           |     |     |      |     |     |        |        |
|---------|----------------|-----|--------|-----------|-----|-----|------|-----|-----|--------|--------|
| UN71486 | Rsa1.0_10771.1 | 433 | 5723   | 1.00E-108 | 258 | 277 | 93 - | 2   | 278 | 1882   | 2155   |
| UN71487 | Rsa1.0_00123.1 | 741 | 325650 | 1.00E-128 | 264 | 273 | 96 + | 412 | 683 | 180639 | 180911 |
| UN71488 | Rsa1.0_00693.1 | 834 | 161311 | 0         | 762 | 794 | 95 - | 54  | 834 | 41682  | 42475  |
| UN71489 | Rsa1.0_00059.1 | 755 | 159650 | 1.00E-112 | 238 | 246 | 96 - | 505 | 748 | 78389  | 78634  |
| UN71490 | Rsa1.0_01317.1 | 537 | 48287  | 0         | 532 | 537 | 99 + | 1   | 537 | 38110  | 38646  |
| UN71491 | Rsa1.0_01853.1 | 768 | 147800 | 1.00E-123 | 253 | 261 | 96 + | 504 | 763 | 128102 | 128362 |
| UN71492 | Rsa1.0_04531.1 | 603 | 16955  | 0         | 432 | 457 | 94 + | 149 | 600 | 6284   | 6734   |
| UN71493 | Rsa1.0_00067.1 | 653 | 415055 | 1.00E-126 | 275 | 290 | 94 + | 14  | 303 | 312626 | 312915 |
| UN71494 | Rsa1.0_00006.1 | 540 | 396176 | 0         | 522 | 538 | 97 + | 5   | 540 | 198290 | 198826 |
| UN71495 | Rsa1.0_00001.1 | 708 | 363028 | 1.00E-140 | 309 | 328 | 94 + | 95  | 416 | 143880 | 144207 |
| UN71496 | Rsa1.0_00026.1 | 527 | 327835 | 0         | 489 | 498 | 98 + | 31  | 527 | 131842 | 132339 |
| UN71497 | Rsa1.0_00707.1 | 743 | 190112 | 1.00E-140 | 288 | 300 | 96 - | 3   | 302 | 66117  | 66416  |
| UN71498 | Rsa1.0_01656.1 | 732 | 41494  | 0         | 684 | 725 | 94 - | 2   | 716 | 35817  | 36540  |
| UN71499 | Rsa1.0_00329.1 | 608 | 222544 | 2.00E-84  | 174 | 179 | 97 - | 6   | 184 | 2056   | 2234   |
| UN71500 | Rsa1.0_04523.1 | 655 | 16985  | 0         | 600 | 658 | 91 + | 3   | 654 | 12471  | 13119  |
| UN71501 | Rsa1.0_00043.1 | 585 | 264937 | 5.00E-73  | 371 | 444 | 83 - | 56  | 492 | 4349   | 4786   |
| UN71502 | Rsa1.0_02908.1 | 693 | 26859  | 1.00E-134 | 251 | 254 | 98 + | 64  | 317 | 6895   | 7148   |
| UN71503 | Rsa1.0_03746.1 | 525 | 21050  | 1.00E-159 | 348 | 368 | 94 + | 159 | 525 | 19838  | 20199  |
| UN71504 | Rsa1.0_00339.1 | 720 | 222974 | 0         | 415 | 418 | 99 - | 1   | 417 | 81926  | 82343  |
| UN71505 | Rsa1.0_20526.1 | 528 | 1297   | 0         | 342 | 347 | 98 - | 45  | 391 | 1      | 347    |
| UN71506 | Rsa1.0_03319.1 | 682 | 23767  | 1.00E-118 | 246 | 252 | 97 + | 2   | 251 | 22122  | 22372  |
| UN71507 | Rsa1.0_00001.1 | 648 | 363028 | 2.00E-94  | 179 | 180 | 99 - | 469 | 648 | 289133 | 289312 |
| UN71508 | Rsa1.0_01419.1 | 693 | 167402 | 1.00E-133 | 262 | 269 | 97 + | 2   | 270 | 42760  | 43028  |
| UN71509 | Rsa1.0_02458.1 | 800 | 31197  | 1.00E-154 | 312 | 323 | 96 - | 3   | 325 | 9247   | 9566   |
| UN71510 | Rsa1.0_00230.1 | 739 | 105389 | 1.00E-142 | 339 | 364 | 93 + | 9   | 368 | 827    | 1187   |
| UN71511 | Rsa1.0_00682.1 | 345 | 68680  | 2.00E-98  | 194 | 198 | 97 - | 2   | 199 | 45380  | 45577  |
| UN71512 | Rsa1.0_01606.1 | 475 | 42432  | 1.00E-152 | 381 | 410 | 92 - | 64  | 471 | 16048  | 16440  |
| UN71513 | Rsa1.0_00509.1 | 534 | 78829  | 1.00E-162 | 295 | 297 | 99 - | 1   | 297 | 10014  | 10310  |
| UN71514 | Rsa1.0_00920.1 | 743 | 601703 | 1.00E-103 | 202 | 206 | 98 + | 139 | 344 | 439449 | 439654 |
| UN71515 | Rsa1.0_00676.1 | 753 | 69166  | 2.33E-156 | 283 | 290 | 97 + | 46  | 335 | 51227  | 51516  |
| UN71516 | Rsa1.0_00596.1 | 238 | 73578  | 1.00E-58  | 121 | 123 | 98 + | 36  | 158 | 22332  | 22454  |
| UN71517 | Rsa1.0_00168.1 | 591 | 115870 | 1.00E-132 | 262 | 268 | 97 - | 324 | 591 | 57921  | 58187  |
| UN71518 | Rsa1.0_03100.1 | 670 | 25411  | 1.00E-167 | 335 | 346 | 96 + | 325 | 670 | 1871   | 2215   |
| UN71519 | Rsa1.0_02136.1 | 691 | 34707  | 1.00E-156 | 305 | 312 | 97 - | 217 | 527 | 7661   | 7972   |
| UN71520 | Rsa1.0_04557.1 | 720 | 145048 | 0         | 676 | 689 | 98 + | 35  | 720 | 131870 | 132558 |
| UN71521 | Rsa1.0_05257.1 | 712 | 14343  | 0         | 449 | 450 | 99 - | 3   | 452 | 5403   | 5852   |
| UN71522 | Rsa1.0_00149.1 | 705 | 305196 | 0         | 622 | 655 | 94 + | 4   | 656 | 154396 | 155041 |
| UN71523 | Rsa1.0_05784.1 | 446 | 12643  | 1.00E-72  | 157 | 163 | 96 + | 136 | 298 | 828    | 990    |
| UN71524 | Rsa1.0_02470.1 | 772 | 31108  | 3.00E-53  | 122 | 127 | 96 + | 312 | 438 | 24543  | 24669  |

|         |                |     |        |           |     |     |       |     |     |        |        |
|---------|----------------|-----|--------|-----------|-----|-----|-------|-----|-----|--------|--------|
| UN71525 | Rsa1.0.01578.1 | 732 | 42880  | 1.00E-154 | 373 | 403 | 92 -  | 2   | 403 | 37093  | 37483  |
| UN71526 | Rsa1.0.00240.1 | 727 | 104175 | 2.00E-48  | 117 | 123 | 95 +  | 3   | 125 | 82390  | 82512  |
| UN71527 | Rsa1.0.00104.1 | 539 | 368722 | 1.00E-155 | 341 | 361 | 94 +  | 3   | 362 | 212605 | 212965 |
| UN71528 | Rsa1.0.13353.1 | 445 | 4894   | 6.00E-78  | 157 | 160 | 98 +  | 90  | 249 | 4060   | 4219   |
| UN71529 | Rsa1.0.01077.1 | 821 | 54772  | 1.00E-139 | 272 | 279 | 97 -  | 258 | 536 | 11457  | 11735  |
| UN71530 | Rsa1.0.00556.1 | 693 | 207212 | 1.00E-132 | 270 | 279 | 96 -  | 273 | 551 | 39567  | 39844  |
| UN71531 | Rsa1.0.03616.1 | 609 | 21756  | 1.00E-122 | 300 | 326 | 92 +  | 208 | 523 | 8096   | 8421   |
| UN71532 | Rsa1.0.00247.1 | 733 | 103408 | 2.00E-82  | 171 | 176 | 97 -  | 179 | 354 | 12486  | 12661  |
| UN71533 | Rsa1.0.00215.1 | 389 | 201775 | 0         | 380 | 387 | 98 +  | 3   | 389 | 158497 | 158883 |
| UN71534 | Rsa1.0.01642.1 | 722 | 41772  | 0         | 476 | 488 | 97 +  | 236 | 722 | 14167  | 14654  |
| UN71535 | Rsa1.0.02353.1 | 615 | 32300  | 0         | 611 | 613 | 99 -  | 4   | 615 | 7949   | 8561   |
| UN71536 | Rsa1.0.04520.1 | 459 | 16995  | 2.00E-80  | 236 | 257 | 91 +  | 192 | 440 | 11580  | 11835  |
| UN71537 | Rsa1.0.02869.1 | 224 | 27109  | 1.00E-100 | 220 | 234 | 94 +  | 3   | 224 | 3242   | 3475   |
| UN71538 | Rsa1.0.01266.1 | 717 | 49680  | 1.00E-95  | 200 | 207 | 96 -  | 511 | 717 | 1538   | 1740   |
| UN71539 | Rsa1.0.02500.1 | 624 | 30768  | 0         | 454 | 481 | 94 +  | 148 | 624 | 8542   | 9019   |
| UN71540 | Rsa1.0.01531.1 | 709 | 43778  | 0         | 374 | 378 | 98 +  | 3   | 379 | 4619   | 4996   |
| UN71541 | Rsa1.0.04478.1 | 677 | 17183  | 1.00E-102 | 247 | 269 | 91 +  | 178 | 446 | 2601   | 2851   |
| UN71542 | Rsa1.0.00425.1 | 446 | 147080 | 0         | 422 | 432 | 97 -  | 2   | 432 | 135942 | 136372 |
| UN71543 | Rsa1.0.01711.1 | 107 | 40578  | 2.00E-40  | 103 | 108 | 95 +  | 1   | 107 | 19738  | 19845  |
| UN71544 | Rsa1.0.00853.1 | 185 | 62101  | 8.00E-35  | 125 | 144 | 86 +  | 1   | 132 | 54976  | 55119  |
| UN71545 | Rsa1.0.01982.1 | 735 | 36530  | 1.00E-114 | 210 | 210 | 100 + | 249 | 458 | 23719  | 23928  |
| UN71546 | Rsa1.0.00474.1 | 709 | 81731  | 1.00E-125 | 298 | 322 | 92 -  | 3   | 322 | 32476  | 32782  |
| UN71547 | Rsa1.0.00108.1 | 740 | 478491 | 3.00E-68  | 135 | 136 | 99 +  | 152 | 287 | 50419  | 50554  |
| UN71548 | Rsa1.0.00237.1 | 609 | 235974 | 3.00E-77  | 165 | 171 | 96 -  | 98  | 268 | 19068  | 19238  |
| UN71549 | Rsa1.0.00903.1 | 760 | 60228  | 1.00E-100 | 226 | 236 | 95 -  | 6   | 238 | 41702  | 41935  |
| UN71550 | Rsa1.0.00529.1 | 785 | 77487  | 1.00E-152 | 350 | 376 | 93 +  | 8   | 383 | 72632  | 73001  |
| UN71551 | Rsa1.0.01637.1 | 112 | 41862  | 8.00E-43  | 106 | 112 | 94 +  | 1   | 112 | 28275  | 28386  |
| UN71552 | Rsa1.0.00087.1 | 654 | 761073 | 1.00E-92  | 191 | 197 | 96 -  | 446 | 642 | 734798 | 734994 |
| UN71553 | Rsa1.0.01312.1 | 130 | 48401  | 3.00E-46  | 115 | 122 | 94 +  | 7   | 128 | 44619  | 44740  |
| UN71554 | Rsa1.0.00037.1 | 685 | 307838 | 0         | 677 | 699 | 96 +  | 3   | 685 | 198044 | 198740 |
| UN71555 | Rsa1.0.06578.1 | 263 | 10726  | 8.00E-70  | 225 | 252 | 89 -  | 3   | 251 | 9807   | 10046  |
| UN71556 | Rsa1.0.00552.1 | 601 | 206757 | 1.00E-125 | 290 | 307 | 94 -  | 296 | 599 | 70068  | 70374  |
| UN71557 | Rsa1.0.00343.1 | 264 | 93570  | 4.00E-62  | 121 | 121 | 100 + | 1   | 121 | 6129   | 6249   |
| UN71558 | Rsa1.0.00119.1 | 493 | 467509 | 3.00E-52  | 108 | 109 | 99 +  | 309 | 417 | 61229  | 61337  |
| UN71559 | Rsa1.0.01011.1 | 609 | 56883  | 0         | 605 | 608 | 99 +  | 2   | 609 | 11985  | 12592  |
| UN71560 | Rsa1.0.01056.1 | 592 | 55449  | 0         | 496 | 516 | 96 -  | 3   | 509 | 39958  | 40473  |
| UN71561 | Rsa1.0.01860.1 | 663 | 38057  | 0         | 425 | 456 | 93 -  | 3   | 437 | 27561  | 28016  |
| UN71562 | Rsa1.0.00678.1 | 575 | 193163 | 0         | 557 | 592 | 94 -  | 5   | 575 | 155389 | 155979 |
| UN71563 | Rsa1.0.00421.1 | 734 | 86365  | 8.00E-57  | 116 | 117 | 99 -  | 256 | 372 | 57471  | 57587  |

|         |                |     |        |           |     |     |       |     |     |        |        |
|---------|----------------|-----|--------|-----------|-----|-----|-------|-----|-----|--------|--------|
| UN71564 | Rsa1.0.01286.1 | 666 | 49209  | 0         | 626 | 655 | 95 +  | 12  | 666 | 22896  | 23541  |
| UN71565 | Rsa1.0.05036.1 | 573 | 15058  | 0         | 537 | 556 | 96 +  | 18  | 573 | 13193  | 13739  |
| UN71566 | Rsa1.0.00502.1 | 691 | 204180 | 1.00E-152 | 308 | 320 | 96 -  | 372 | 691 | 61572  | 61891  |
| UN71567 | Rsa1.0.01231.1 | 532 | 50208  | 0         | 380 | 385 | 98 -  | 90  | 474 | 38269  | 38653  |
| UN71568 | Rsa1.0.19181.1 | 577 | 1468   | 5.00E-48  | 101 | 102 | 99 +  | 166 | 267 | 787    | 888    |
| UN71569 | Rsa1.0.00223.1 | 484 | 106231 | 1.00E-145 | 287 | 296 | 96 -  | 189 | 484 | 42246  | 42541  |
| UN71570 | Rsa1.0.04813.1 | 447 | 15883  | 0         | 439 | 448 | 97 +  | 3   | 447 | 882    | 1329   |
| UN71571 | Rsa1.0.00169.1 | 524 | 274298 | 0         | 507 | 523 | 96 +  | 3   | 524 | 93190  | 93711  |
| UN71572 | Rsa1.0.00251.1 | 585 | 303968 | 1.00E-130 | 260 | 268 | 97 +  | 33  | 300 | 142568 | 142835 |
| UN71573 | Rsa1.0.00476.1 | 572 | 280966 | 1.00E-114 | 224 | 229 | 97 -  | 39  | 267 | 218202 | 218430 |
| UN71574 | Rsa1.0.02493.1 | 255 | 30854  | 1.00E-83  | 198 | 211 | 93 -  | 3   | 213 | 4179   | 4386   |
| UN71575 | Rsa1.0.00645.1 | 645 | 189716 | 1.00E-180 | 332 | 335 | 99 -  | 312 | 645 | 124735 | 125069 |
| UN71576 | Rsa1.0.03380.1 | 178 | 23320  | 4.00E-61  | 134 | 139 | 96 -  | 5   | 143 | 7459   | 7597   |
| UN71577 | Rsa1.0.01889.1 | 309 | 37562  | 1.00E-112 | 245 | 257 | 95 +  | 5   | 261 | 23043  | 23298  |
| UN71578 | Rsa1.0.00721.1 | 690 | 66918  | 1.00E-166 | 344 | 359 | 95 +  | 332 | 690 | 918    | 1273   |
| UN71579 | Rsa1.0.04639.1 | 690 | 16550  | 1.00E-42  | 181 | 209 | 86 +  | 183 | 390 | 5005   | 5212   |
| UN71580 | Rsa1.0.03636.1 | 561 | 21638  | 2.00E-99  | 184 | 184 | 100 + | 73  | 256 | 15202  | 15385  |
| UN71581 | Rsa1.0.00616.1 | 117 | 195713 | 2.00E-40  | 110 | 116 | 94 -  | 1   | 116 | 183075 | 183188 |
| UN71582 | Rsa1.0.00059.1 | 733 | 159650 | 0         | 728 | 736 | 98 -  | 1   | 733 | 35896  | 36630  |
| UN71583 | Rsa1.0.00796.1 | 767 | 63997  | 9.00E-66  | 140 | 144 | 97 -  | 472 | 615 | 3000   | 3143   |
| UN71584 | Rsa1.0.00239.1 | 269 | 104332 | 8.00E-39  | 104 | 109 | 95 +  | 1   | 106 | 27816  | 27924  |
| UN71585 | Rsa1.0.00138.1 | 734 | 247040 | 0         | 712 | 735 | 96 +  | 1   | 734 | 232687 | 233421 |
| UN71586 | Rsa1.0.01825.1 | 108 | 38725  | 8.00E-43  | 103 | 108 | 95 +  | 1   | 108 | 21301  | 21408  |
| UN71587 | Rsa1.0.01364.1 | 530 | 47172  | 0         | 516 | 532 | 96 -  | 2   | 530 | 33988  | 34518  |
| UN71588 | Rsa1.0.00577.1 | 510 | 174827 | 1.00E-127 | 282 | 299 | 94 +  | 217 | 510 | 158025 | 158323 |
| UN71589 | Rsa1.0.00067.1 | 104 | 415055 | 2.00E-24  | 75  | 81  | 92 -  | 15  | 95  | 255711 | 255791 |
| UN71590 | Rsa1.0.03865.1 | 512 | 20373  | 1.00E-106 | 233 | 245 | 95 +  | 193 | 434 | 1944   | 2182   |
| UN71591 | Rsa1.0.10770.1 | 214 | 5723   | 2.00E-39  | 95  | 99  | 95 -  | 28  | 126 | 3505   | 3603   |
| UN71592 | Rsa1.0.07849.1 | 769 | 8425   | 7.00E-45  | 99  | 101 | 98 -  | 606 | 706 | 6501   | 6601   |
| UN71593 | Rsa1.0.02474.1 | 221 | 31076  | 9.00E-63  | 165 | 175 | 94 +  | 4   | 174 | 28321  | 28492  |
| UN71594 | Rsa1.0.00108.1 | 766 | 478491 | 1.00E-102 | 216 | 225 | 96 +  | 407 | 631 | 45332  | 45556  |
| UN71595 | Rsa1.0.01027.1 | 651 | 56402  | 1.00E-82  | 171 | 176 | 97 -  | 3   | 178 | 21844  | 22019  |
| UN71596 | Rsa1.0.03843.1 | 608 | 20496  | 1.00E-70  | 247 | 283 | 87 +  | 326 | 608 | 4472   | 4742   |
| UN71597 | Rsa1.0.19680.1 | 211 | 1397   | 7.00E-48  | 125 | 131 | 95 +  | 81  | 211 | 949    | 1074   |
| UN71598 | Rsa1.0.00199.1 | 661 | 249604 | 1.00E-157 | 299 | 305 | 98 -  | 20  | 324 | 13561  | 13865  |
| UN71599 | Rsa1.0.02404.1 | 509 | 31702  | 0         | 479 | 497 | 96 -  | 15  | 509 | 5706   | 6198   |
| UN71600 | Rsa1.0.01078.1 | 627 | 316910 | 0         | 607 | 627 | 96 -  | 1   | 627 | 274844 | 275470 |
| UN71601 | Rsa1.0.05739.1 | 424 | 12778  | 1.00E-151 | 383 | 414 | 92 -  | 22  | 424 | 3488   | 3892   |
| UN71602 | Rsa1.0.11211.1 | 750 | 5581   | 0         | 545 | 556 | 98 +  | 2   | 557 | 4725   | 5280   |

|         |                |     |        |           |     |     |      |     |     |        |        |
|---------|----------------|-----|--------|-----------|-----|-----|------|-----|-----|--------|--------|
| UN71603 | Rsa1.0.06313.1 | 698 | 11252  | 1.00E-110 | 206 | 207 | 99 + | 148 | 354 | 6215   | 6421   |
| UN71604 | Rsa1.0.00018.1 | 672 | 410899 | 0         | 642 | 667 | 96 - | 9   | 672 | 80251  | 80914  |
| UN71605 | Rsa1.0.16028.1 | 313 | 2319   | 6.00E-74  | 147 | 149 | 98 - | 165 | 313 | 1189   | 1337   |
| UN71606 | Rsa1.0.07270.1 | 702 | 9634   | 1.00E-155 | 300 | 306 | 98 + | 3   | 308 | 5791   | 6095   |
| UN71607 | Rsa1.0.00528.1 | 736 | 164755 | 5.00E-27  | 276 | 347 | 79 + | 169 | 515 | 148538 | 148884 |
| UN71608 | Rsa1.0.03686.1 | 332 | 21387  | 1.00E-108 | 259 | 271 | 95 - | 27  | 291 | 8466   | 8736   |
| UN71609 | Rsa1.0.05076.1 | 502 | 14916  | 1.00E-118 | 266 | 281 | 94 + | 3   | 280 | 10621  | 10894  |
| UN71610 | Rsa1.0.02372.1 | 709 | 32053  | 0         | 703 | 713 | 98 + | 1   | 709 | 24491  | 25201  |
| UN71611 | Rsa1.0.01806.1 | 800 | 39021  | 0         | 627 | 677 | 92 - | 105 | 755 | 29024  | 29700  |
| UN71612 | Rsa1.0.00664.1 | 542 | 69573  | 1.00E-76  | 158 | 162 | 97 - | 3   | 164 | 26645  | 26806  |
| UN71613 | Rsa1.0.02130.1 | 553 | 34755  | 0         | 541 | 551 | 98 - | 3   | 553 | 5401   | 5951   |
| UN71614 | Rsa1.0.00301.1 | 731 | 365315 | 1.00E-157 | 296 | 301 | 98 - | 273 | 573 | 194651 | 194951 |
| UN71615 | Rsa1.0.05721.1 | 786 | 12821  | 0         | 392 | 405 | 96 + | 388 | 786 | 5611   | 6014   |
| UN71616 | Rsa1.0.02981.1 | 641 | 26285  | 0         | 379 | 392 | 96 - | 3   | 394 | 24880  | 25271  |
| UN71617 | Rsa1.0.07698.1 | 578 | 8763   | 0         | 566 | 577 | 98 - | 2   | 578 | 1283   | 1857   |
| UN71618 | Rsa1.0.00013.1 | 676 | 292129 | 0         | 437 | 450 | 97 + | 230 | 676 | 202488 | 202936 |
| UN71619 | Rsa1.0.00006.1 | 595 | 396176 | 0         | 521 | 532 | 97 - | 64  | 595 | 3276   | 3807   |
| UN71620 | Rsa1.0.00669.1 | 662 | 69419  | 0         | 447 | 461 | 96 + | 204 | 662 | 18999  | 19459  |
| UN71621 | Rsa1.0.00087.1 | 700 | 761073 | 0         | 363 | 370 | 98 + | 182 | 551 | 86718  | 87087  |
| UN71622 | Rsa1.0.02735.1 | 646 | 28344  | 0         | 415 | 425 | 97 - | 222 | 643 | 13174  | 13598  |
| UN71623 | Rsa1.0.04213.1 | 203 | 18437  | 1.00E-43  | 108 | 114 | 94 + | 3   | 116 | 17054  | 17167  |
| UN71624 | Rsa1.0.02987.1 | 641 | 26196  | 0         | 409 | 428 | 95 + | 170 | 597 | 22775  | 23202  |
| UN71625 | Rsa1.0.06583.1 | 679 | 10722  | 0         | 639 | 670 | 95 - | 2   | 669 | 4504   | 5173   |
| UN71626 | Rsa1.0.01536.1 | 778 | 43747  | 1.00E-122 | 247 | 254 | 97 - | 2   | 254 | 8337   | 8590   |
| UN71627 | Rsa1.0.01031.1 | 708 | 56236  | 0         | 419 | 420 | 99 + | 9   | 428 | 46665  | 47084  |
| UN71628 | Rsa1.0.00161.1 | 591 | 116891 | 1.00E-155 | 299 | 306 | 97 - | 286 | 591 | 77573  | 77878  |
| UN71629 | Rsa1.0.08631.1 | 688 | 7103   | 1.00E-151 | 367 | 394 | 93 - | 300 | 688 | 3607   | 3995   |
| UN71630 | Rsa1.0.05864.1 | 742 | 12387  | 1.00E-135 | 361 | 398 | 90 - | 7   | 396 | 11077  | 11453  |
| UN71631 | Rsa1.0.02032.1 | 753 | 35830  | 0         | 389 | 407 | 95 + | 292 | 695 | 1810   | 2216   |
| UN71632 | Rsa1.0.00693.1 | 616 | 161311 | 0         | 587 | 624 | 94 + | 2   | 616 | 36580  | 37203  |
| UN71633 | Rsa1.0.01953.1 | 585 | 36881  | 0         | 583 | 586 | 99 - | 1   | 585 | 27802  | 28386  |
| UN71634 | Rsa1.0.13611.1 | 790 | 4641   | 3.00E-96  | 216 | 227 | 95 + | 170 | 393 | 3194   | 3417   |
| UN71635 | Rsa1.0.00421.1 | 220 | 86365  | 1.00E-83  | 204 | 220 | 92 + | 3   | 220 | 42866  | 43076  |
| UN71636 | Rsa1.0.05878.1 | 480 | 12344  | 8.00E-96  | 236 | 258 | 91 - | 166 | 423 | 9121   | 9360   |
| UN71637 | #              | #   | #      | #         | #   | #   | #    | #   | #   | #      | #      |
| UN71638 | Rsa1.0.05694.1 | 742 | 12903  | 3.00E-87  | 200 | 208 | 96 - | 524 | 728 | 8475   | 8682   |
| UN71639 | Rsa1.0.00104.1 | 143 | 368722 | 1.00E-14  | 61  | 65  | 93 + | 73  | 135 | 13076  | 13140  |
| UN71640 | Rsa1.0.01115.1 | 200 | 183545 | 5.00E-67  | 184 | 196 | 93 - | 3   | 195 | 137721 | 137913 |
| UN71641 | Rsa1.0.00630.1 | 529 | 71281  | 0         | 360 | 366 | 98 - | 2   | 361 | 66667  | 67032  |

|         |                |     |        |           |     |     |       |     |     |        |        |
|---------|----------------|-----|--------|-----------|-----|-----|-------|-----|-----|--------|--------|
| UN71642 | Rsa1.0_00608.1 | 388 | 172672 | 1.00E-138 | 280 | 288 | 97 +  | 103 | 388 | 120841 | 121127 |
| UN71643 | Rsa1.0_00230.1 | 622 | 105389 | 1.00E-156 | 283 | 284 | 99 +  | 339 | 622 | 4736   | 5019   |
| UN71644 | Rsa1.0_00599.1 | 139 | 73418  | 1.00E-60  | 133 | 138 | 96 +  | 2   | 139 | 54473  | 54610  |
| UN71645 | Rsa1.0_00110.1 | 705 | 132719 | 0         | 679 | 701 | 96 -  | 1   | 701 | 130111 | 130805 |
| UN71646 | Rsa1.0_01129.1 | 253 | 52949  | 6.00E-98  | 233 | 251 | 92 +  | 4   | 253 | 8797   | 9036   |
| UN71647 | Rsa1.0_01596.1 | 705 | 42595  | 8.00E-69  | 136 | 137 | 99 +  | 459 | 595 | 39032  | 39168  |
| UN71648 | Rsa1.0_01528.1 | 690 | 43882  | 0         | 668 | 686 | 97 -  | 2   | 686 | 7716   | 8401   |
| UN71649 | Rsa1.0_07499.1 | 561 | 9244   | 0         | 389 | 406 | 95 -  | 11  | 416 | 6510   | 6912   |
| UN71650 | Rsa1.0_01101.1 | 223 | 54031  | 4.00E-37  | 85  | 87  | 97 -  | 72  | 158 | 23747  | 23833  |
| UN71651 | Rsa1.0_00259.1 | 432 | 163204 | 0         | 413 | 432 | 95 +  | 6   | 432 | 154311 | 154741 |
| UN71652 | Rsa1.0_05504.1 | 722 | 13508  | 1.00E-109 | 317 | 349 | 90 +  | 34  | 371 | 4769   | 5114   |
| UN71653 | Rsa1.0_00402.1 | 736 | 385315 | 0         | 413 | 413 | 100 + | 3   | 415 | 270781 | 271193 |
| UN71654 | Rsa1.0_00194.1 | 601 | 110851 | 1.00E-113 | 338 | 377 | 89 -  | 2   | 352 | 56294  | 56670  |
| UN71655 | Rsa1.0_04354.1 | 704 | 17773  | 4.00E-18  | 72  | 80  | 90 -  | 5   | 84  | 2439   | 2518   |
| UN71656 | Rsa1.0_00106.1 | 515 | 133916 | 1.00E-168 | 349 | 366 | 95 +  | 78  | 436 | 59737  | 60102  |
| UN71657 | Rsa1.0_05045.1 | 677 | 15035  | 0         | 660 | 681 | 96 +  | 1   | 677 | 6320   | 7000   |
| UN71658 | Rsa1.0_00706.1 | 265 | 291570 | 1.00E-107 | 251 | 266 | 94 -  | 1   | 265 | 48007  | 48267  |
| UN71659 | Rsa1.0_00128.1 | 524 | 228675 | 1.00E-172 | 379 | 401 | 94 +  | 1   | 400 | 183565 | 183963 |
| UN71660 | Rsa1.0_01365.1 | 544 | 47142  | 0         | 522 | 544 | 95 +  | 3   | 544 | 8122   | 8664   |
| UN71661 | Rsa1.0_01308.1 | 753 | 48596  | 0         | 725 | 751 | 96 +  | 7   | 753 | 26989  | 27736  |
| UN71662 | Rsa1.0_00666.1 | 760 | 69505  | 0         | 732 | 768 | 95 -  | 1   | 760 | 9150   | 9913   |
| UN71663 | Rsa1.0_00051.1 | 648 | 258225 | 1.00E-107 | 215 | 221 | 97 +  | 424 | 644 | 119841 | 120061 |
| UN71664 | Rsa1.0_01081.1 | 193 | 499226 | 1.00E-76  | 181 | 193 | 93 +  | 1   | 193 | 466578 | 466770 |
| UN71665 | Rsa1.0_00029.1 | 759 | 272992 | 0         | 720 | 767 | 93 +  | 14  | 758 | 257520 | 258280 |
| UN71666 | Rsa1.0_00398.1 | 109 | 88007  | 2.00E-43  | 101 | 105 | 96 +  | 5   | 109 | 1727   | 1831   |
| UN71667 | Rsa1.0_07823.1 | 606 | 8468   | 0         | 578 | 606 | 95 -  | 1   | 606 | 5036   | 5637   |
| UN71668 | Rsa1.0_00949.1 | 585 | 58549  | 0         | 507 | 524 | 96 -  | 1   | 520 | 51990  | 52512  |
| UN71669 | Rsa1.0_14069.1 | 430 | 3842   | 0         | 401 | 426 | 94 +  | 1   | 426 | 2061   | 2482   |
| UN71670 | Rsa1.0_00523.1 | 665 | 178770 | 0         | 632 | 639 | 98 -  | 1   | 639 | 130734 | 131371 |
| UN71671 | Rsa1.0_00525.1 | 379 | 78030  | 0         | 364 | 378 | 96 +  | 1   | 378 | 19756  | 20133  |
| UN71672 | Rsa1.0_01170.1 | 592 | 161131 | 1.00E-161 | 325 | 337 | 96 -  | 1   | 328 | 129391 | 129727 |
| UN71673 | Rsa1.0_01331.1 | 130 | 47944  | 1.00E-60  | 127 | 130 | 97 +  | 1   | 130 | 23080  | 23209  |
| UN71674 | Rsa1.0_01696.1 | 706 | 301850 | 1.00E-150 | 308 | 321 | 95 -  | 141 | 461 | 40201  | 40521  |
| UN71675 | Rsa1.0_02367.1 | 243 | 32106  | 2.00E-64  | 125 | 125 | 100 - | 1   | 125 | 7976   | 8100   |
| UN71676 | Rsa1.0_01682.1 | 642 | 41090  | 1.00E-172 | 346 | 358 | 96 -  | 3   | 360 | 10171  | 10527  |
| UN71677 | Rsa1.0_00596.1 | 265 | 73578  | 4.00E-90  | 238 | 260 | 91 +  | 6   | 264 | 42229  | 42488  |
| UN71678 | Rsa1.0_00069.1 | 682 | 403561 | 0         | 403 | 408 | 98 -  | 275 | 682 | 51863  | 52270  |
| UN71679 | Rsa1.0_00740.1 | 310 | 215972 | 1.00E-112 | 284 | 310 | 91 +  | 1   | 310 | 11909  | 12213  |
| UN71680 | Rsa1.0_00306.1 | 129 | 146760 | 8.00E-28  | 86  | 93  | 92 -  | 1   | 90  | 115946 | 116038 |



|         |                |     |        |           |     |     |      |     |     |        |        |
|---------|----------------|-----|--------|-----------|-----|-----|------|-----|-----|--------|--------|
| UN71681 | Rsa1.0_00196.1 | 544 | 109960 | 1.00E-145 | 332 | 353 | 94 - | 1   | 353 | 11656  | 12001  |
| UN71682 | Rsa1.0_00179.1 | 601 | 393324 | 0         | 589 | 616 | 95 + | 1   | 601 | 367793 | 368408 |
| UN71683 | Rsa1.0_02462.1 | 384 | 31158  | 1.00E-102 | 221 | 232 | 95 + | 1   | 232 | 7271   | 7502   |
| UN71684 | Rsa1.0_00017.1 | 136 | 752458 | 2.00E-50  | 116 | 121 | 95 + | 1   | 121 | 141348 | 141468 |
| UN71685 | Rsa1.0_00196.1 | 446 | 109960 | 0         | 419 | 441 | 95 - | 1   | 441 | 11362  | 11802  |
| UN71686 | Rsa1.0_02560.1 | 137 | 30091  | 3.00E-52  | 131 | 139 | 94 + | 1   | 137 | 786    | 924    |
| UN71687 | Rsa1.0_00064.1 | 547 | 240927 | 0         | 512 | 517 | 99 - | 1   | 516 | 132859 | 133372 |
| UN71688 | Rsa1.0_00586.1 | 679 | 163802 | 0         | 547 | 558 | 98 - | 1   | 557 | 108812 | 109366 |
| UN71689 | Rsa1.0_00476.1 | 753 | 280966 | 2.00E-97  | 184 | 185 | 99 - | 273 | 457 | 26167  | 26351  |
| UN71690 | Rsa1.0_00960.1 | 171 | 58199  | 9.00E-44  | 151 | 169 | 89 - | 5   | 171 | 14205  | 14372  |
| UN71691 | Rsa1.0_01338.1 | 837 | 155644 | 2.00E-14  | 66  | 74  | 89 - | 139 | 212 | 128304 | 128377 |
| UN71692 | Rsa1.0_00123.1 | 554 | 325650 | 1.00E-131 | 348 | 384 | 90 - | 3   | 383 | 256008 | 256391 |
| UN71693 | Rsa1.0_02504.1 | 713 | 30706  | 1.00E-106 | 243 | 258 | 94 + | 283 | 540 | 15343  | 15598  |
| UN71694 | Rsa1.0_00123.1 | 363 | 325650 | 0         | 361 | 363 | 99 - | 1   | 363 | 140736 | 141098 |
| UN71695 | Rsa1.0_00017.1 | 150 | 752458 | 1.00E-26  | 76  | 81  | 93 + | 70  | 150 | 272503 | 272583 |
| UN71696 | Rsa1.0_01263.1 | 216 | 49703  | 9.00E-60  | 184 | 205 | 89 - | 5   | 203 | 40157  | 40361  |
| UN71697 | Rsa1.0_01077.1 | 353 | 54772  | 1.00E-129 | 330 | 357 | 92 + | 1   | 353 | 23769  | 24115  |
| UN71698 | Rsa1.0_00041.1 | 469 | 186197 | 0         | 379 | 380 | 99 - | 3   | 382 | 53418  | 53797  |
| UN71699 | Rsa1.0_03447.1 | 233 | 22857  | 5.00E-43  | 101 | 105 | 96 + | 103 | 207 | 19942  | 20046  |
| UN71700 | Rsa1.0_01448.1 | 771 | 45645  | 0         | 606 | 607 | 99 + | 1   | 607 | 20621  | 21227  |
| UN71701 | Rsa1.0_00867.1 | 792 | 61635  | 0         | 377 | 388 | 97 - | 357 | 744 | 19195  | 19582  |
| UN71702 | Rsa1.0_03826.1 | 639 | 20614  | 0         | 619 | 655 | 94 + | 1   | 639 | 3392   | 4046   |
| UN71703 | Rsa1.0_00065.1 | 177 | 454616 | 1.00E-70  | 150 | 155 | 96 + | 20  | 174 | 439710 | 439864 |
| UN71704 | Rsa1.0_00034.1 | 650 | 260119 | 0         | 633 | 656 | 96 - | 1   | 650 | 119558 | 120207 |
| UN71705 | Rsa1.0_01236.1 | 212 | 50156  | 2.00E-88  | 202 | 213 | 94 - | 1   | 212 | 12369  | 12581  |
| UN71706 | Rsa1.0_00321.1 | 625 | 95671  | 0         | 386 | 398 | 96 + | 227 | 624 | 77384  | 77781  |
| UN71707 | Rsa1.0_00038.1 | 661 | 314568 | 0         | 640 | 665 | 96 + | 2   | 661 | 165866 | 166527 |
| UN71708 | Rsa1.0_02231.1 | 568 | 33661  | 0         | 480 | 503 | 95 - | 2   | 501 | 31287  | 31784  |
| UN71709 | Rsa1.0_02680.1 | 523 | 28721  | 5.00E-82  | 158 | 159 | 99 + | 3   | 161 | 13542  | 13700  |
| UN71710 | Rsa1.0_02478.1 | 356 | 150183 | 0         | 350 | 353 | 99 + | 1   | 353 | 130726 | 131078 |
| UN71711 | Rsa1.0_05326.1 | 114 | 14139  | 2.00E-15  | 51  | 54  | 94 + | 2   | 55  | 4864   | 4917   |
| UN71712 | Rsa1.0_01799.1 | 621 | 39127  | 0         | 557 | 588 | 94 + | 10  | 595 | 8405   | 8989   |
| UN71713 | Rsa1.0_02528.1 | 711 | 30452  | 1.00E-134 | 321 | 342 | 93 - | 16  | 347 | 21646  | 21987  |
| UN71714 | Rsa1.0_00008.1 | 531 | 358124 | 0         | 506 | 524 | 96 - | 8   | 531 | 194417 | 194939 |
| UN71715 | Rsa1.0_00224.1 | 460 | 327530 | 4.00E-76  | 186 | 199 | 93 - | 1   | 199 | 201423 | 201618 |
| UN71716 | Rsa1.0_01691.1 | 562 | 40921  | 1.00E-105 | 212 | 218 | 97 + | 1   | 218 | 15390  | 15607  |
| UN71717 | Rsa1.0_02768.1 | 583 | 28110  | 1.00E-129 | 237 | 238 | 99 - | 1   | 238 | 26454  | 26691  |
| UN71718 | Rsa1.0_00123.1 | 609 | 325650 | 0         | 493 | 536 | 91 + | 67  | 602 | 218194 | 218719 |
| UN71719 | Rsa1.0_01610.1 | 723 | 42274  | 0         | 378 | 387 | 97 + | 43  | 426 | 18119  | 18504  |

|         |                |     |        |           |     |     |       |     |     |        |        |
|---------|----------------|-----|--------|-----------|-----|-----|-------|-----|-----|--------|--------|
| UN71720 | Rsa1.0.00990.1 | 417 | 57445  | 1.00E-107 | 212 | 217 | 97 +  | 201 | 417 | 42432  | 42648  |
| UN71721 | Rsa1.0.18670.1 | 281 | 1555   | 1.00E-149 | 276 | 279 | 98 -  | 3   | 281 | 782    | 1060   |
| UN71722 | Rsa1.0.02210.1 | 575 | 33857  | 1.00E-131 | 295 | 313 | 94 +  | 1   | 307 | 12098  | 12405  |
| UN71723 | Rsa1.0.03995.1 | 531 | 19654  | 1.00E-150 | 303 | 314 | 96 +  | 1   | 314 | 2313   | 2626   |
| UN71724 | Rsa1.0.01002.1 | 777 | 57063  | 0         | 561 | 570 | 98 -  | 207 | 776 | 4044   | 4612   |
| UN71725 | Rsa1.0.01613.1 | 434 | 182542 | 0         | 414 | 431 | 96 +  | 2   | 432 | 165938 | 166368 |
| UN71726 | Rsa1.0.00052.1 | 502 | 162771 | 1.00E-112 | 236 | 245 | 96 +  | 1   | 244 | 96965  | 97209  |
| UN71727 | Rsa1.0.00990.1 | 287 | 57445  | 2.00E-98  | 245 | 260 | 94 +  | 3   | 258 | 41250  | 41506  |
| UN71728 | Rsa1.0.01494.1 | 383 | 44641  | 6.00E-53  | 139 | 150 | 92 +  | 140 | 284 | 11175  | 11324  |
| UN71729 | Rsa1.0.00234.1 | 714 | 197060 | 0         | 327 | 329 | 99 +  | 1   | 329 | 147484 | 147812 |
| UN71730 | Rsa1.0.00407.1 | 410 | 191544 | 1.00E-128 | 311 | 335 | 92 +  | 7   | 341 | 24358  | 24688  |
| UN71731 | Rsa1.0.00031.1 | 686 | 179862 | 1.00E-165 | 328 | 339 | 96 +  | 348 | 686 | 82448  | 82786  |
| UN71732 | Rsa1.0.01574.1 | 791 | 42930  | 0         | 381 | 383 | 99 +  | 2   | 384 | 17743  | 18125  |
| UN71733 | Rsa1.0.01533.1 | 875 | 43765  | 1.00E-155 | 413 | 458 | 90 -  | 82  | 534 | 16208  | 16665  |
| UN71734 | Rsa1.0.00002.1 | 660 | 601661 | 0         | 638 | 664 | 96 +  | 3   | 660 | 436517 | 437179 |
| UN71735 | Rsa1.0.00567.1 | 405 | 75260  | 3.00E-79  | 159 | 162 | 98 -  | 138 | 299 | 20836  | 20997  |
| UN71736 | Rsa1.0.00336.1 | 788 | 445051 | 0         | 415 | 420 | 98 -  | 2   | 421 | 14187  | 14606  |
| UN71737 | Rsa1.0.00667.1 | 749 | 69460  | 1.00E-152 | 330 | 351 | 94 +  | 1   | 351 | 37087  | 37426  |
| UN71738 | Rsa1.0.00264.1 | 769 | 101674 | 1.00E-105 | 194 | 194 | 100 - | 576 | 769 | 70534  | 70727  |
| UN71739 | Rsa1.0.05684.1 | 365 | 12943  | 7.00E-68  | 156 | 163 | 95 -  | 1   | 158 | 12129  | 12290  |
| UN71740 | Rsa1.0.00711.1 | 623 | 67223  | 0         | 413 | 432 | 95 -  | 1   | 432 | 27482  | 27913  |
| UN71741 | Rsa1.0.04886.1 | 323 | 15597  | 1.00E-149 | 309 | 323 | 95 +  | 1   | 323 | 1611   | 1933   |
| UN71742 | Rsa1.0.00112.1 | 695 | 132199 | 1.00E-122 | 288 | 306 | 94 -  | 10  | 312 | 56161  | 56460  |
| UN71743 | Rsa1.0.02806.1 | 653 | 27696  | 1.00E-92  | 182 | 185 | 98 +  | 57  | 241 | 5035   | 5219   |
| UN71744 | Rsa1.0.00089.1 | 597 | 406142 | 1.00E-120 | 225 | 227 | 99 +  | 287 | 513 | 322926 | 323152 |
| UN71745 | Rsa1.0.03004.1 | 740 | 26091  | 0         | 414 | 418 | 99 +  | 1   | 418 | 3036   | 3453   |
| UN71746 | Rsa1.0.01442.1 | 510 | 45776  | 0         | 487 | 510 | 95 +  | 1   | 510 | 16800  | 17309  |
| UN71747 | Rsa1.0.00476.1 | 119 | 280966 | 1.00E-57  | 116 | 117 | 99 -  | 3   | 119 | 166266 | 166382 |
| UN71748 | Rsa1.0.00251.1 | 672 | 303968 | 1.00E-113 | 223 | 228 | 97 +  | 405 | 632 | 288115 | 288342 |
| UN71749 | Rsa1.0.00347.1 | 465 | 93048  | 1.00E-153 | 392 | 424 | 92 -  | 4   | 421 | 12008  | 12424  |
| UN71750 | Rsa1.0.00097.1 | 876 | 138858 | 1.00E-162 | 299 | 302 | 99 -  | 232 | 533 | 117419 | 117720 |
| UN71751 | Rsa1.0.04773.1 | 104 | 16037  | 2.00E-40  | 100 | 104 | 96 -  | 1   | 104 | 8753   | 8855   |
| UN71752 | Rsa1.0.00008.1 | 387 | 358124 | 1.00E-127 | 319 | 341 | 93 -  | 3   | 337 | 54525  | 54859  |
| UN71753 | Rsa1.0.04719.1 | 538 | 16239  | 0         | 377 | 388 | 97 -  | 1   | 387 | 260    | 646    |
| UN71754 | Rsa1.0.00380.1 | 256 | 89748  | 7.00E-70  | 226 | 253 | 89 -  | 3   | 253 | 8329   | 8579   |
| UN71755 | Rsa1.0.01489.1 | 564 | 44764  | 0         | 449 | 477 | 94 +  | 29  | 494 | 2      | 469    |
| UN71756 | Rsa1.0.01400.1 | 606 | 46560  | 1.00E-131 | 297 | 317 | 93 -  | 290 | 606 | 9861   | 10177  |
| UN71757 | Rsa1.0.00223.1 | 731 | 106231 | 0         | 448 | 474 | 94 -  | 15  | 480 | 6079   | 6552   |
| UN71758 | Rsa1.0.10465.1 | 192 | 5840   | 1.00E-89  | 185 | 191 | 96 -  | 2   | 192 | 269    | 459    |

| UN71759 | #              | #   | #      | #         | #   | #   | #     | #   | #   | #      | #      | # |
|---------|----------------|-----|--------|-----------|-----|-----|-------|-----|-----|--------|--------|---|
| UN71760 | Rsa1.0.01770.1 | 770 | 39563  | 2.00E-82  | 183 | 192 | 95 -  | 276 | 467 | 13789  | 13980  |   |
| UN71761 | Rsa1.0.06086.1 | 766 | 11768  | 7.00E-51  | 153 | 169 | 90 -  | 9   | 172 | 7613   | 7778   |   |
| UN71762 | Rsa1.0.08172.1 | 726 | 7793   | 1.00E-110 | 203 | 203 | 100 - | 327 | 529 | 6451   | 6653   |   |
| UN71763 | Rsa1.0.00925.1 | 639 | 59481  | 1.00E-172 | 353 | 367 | 96 -  | 1   | 366 | 8960   | 9326   |   |
| UN71764 | Rsa1.0.01182.1 | 106 | 167304 | 9.00E-18  | 58  | 61  | 95 +  | 6   | 64  | 165230 | 165290 |   |
| UN71765 | Rsa1.0.04741.1 | 786 | 16164  | 0         | 505 | 529 | 95 -  | 2   | 526 | 6516   | 7044   |   |
| UN71766 | Rsa1.0.01743.1 | 445 | 39926  | 0         | 426 | 449 | 94 +  | 1   | 442 | 6765   | 7212   |   |
| UN71767 | Rsa1.0.02604.1 | 390 | 29638  | 0         | 381 | 390 | 97 -  | 1   | 390 | 18972  | 19361  |   |
| UN71768 | Rsa1.0.00018.1 | 751 | 410899 | 0         | 690 | 766 | 90 +  | 9   | 746 | 173401 | 174142 |   |
| UN71769 | Rsa1.0.08846.1 | 439 | 6867   | 2.00E-93  | 262 | 283 | 92 +  | 4   | 284 | 4030   | 4299   |   |
| UN71770 | Rsa1.0.08717.1 | 413 | 7008   | 8.00E-68  | 146 | 151 | 96 -  | 2   | 152 | 1261   | 1411   |   |
| UN71771 | Rsa1.0.00755.1 | 643 | 192559 | 1.00E-79  | 224 | 250 | 89 +  | 114 | 346 | 5896   | 6142   |   |
| UN71772 | Rsa1.0.00789.1 | 753 | 64233  | 1.00E-166 | 366 | 386 | 94 -  | 3   | 384 | 53473  | 53851  |   |
| UN71773 | Rsa1.0.00632.1 | 738 | 183777 | 0         | 439 | 459 | 95 -  | 12  | 468 | 157543 | 157998 |   |
| UN71774 | Rsa1.0.01186.1 | 633 | 51418  | 0         | 609 | 636 | 95 +  | 1   | 633 | 46650  | 47278  |   |
| UN71775 | Rsa1.0.04041.1 | 531 | 19430  | 1.00E-139 | 318 | 338 | 94 -  | 173 | 510 | 9307   | 9636   |   |
| UN71776 | Rsa1.0.00381.1 | 754 | 89718  | 0         | 494 | 501 | 98 +  | 7   | 507 | 30336  | 30836  |   |
| UN71777 | Rsa1.0.01249.1 | 401 | 188432 | 0         | 385 | 400 | 96 -  | 3   | 401 | 150010 | 150409 |   |
| UN71778 | Rsa1.0.01244.1 | 351 | 50061  | 1.00E-102 | 232 | 245 | 94 -  | 4   | 248 | 27345  | 27588  |   |
| UN71779 | Rsa1.0.01435.1 | 697 | 45942  | 0         | 549 | 573 | 95 -  | 2   | 572 | 41027  | 41594  |   |
| UN71780 | Rsa1.0.06168.1 | 280 | 11580  | 1.00E-62  | 204 | 233 | 87 -  | 2   | 219 | 8500   | 8732   |   |
| UN71781 | Rsa1.0.00181.1 | 232 | 114269 | 1.00E-101 | 223 | 234 | 95 -  | 1   | 232 | 16258  | 16491  |   |
| UN71782 | Rsa1.0.00170.1 | 694 | 179538 | 1.00E-170 | 332 | 339 | 97 +  | 1   | 338 | 42319  | 42656  |   |
| UN71783 | Rsa1.0.01707.1 | 525 | 40686  | 1.00E-128 | 284 | 299 | 94 +  | 24  | 319 | 29000  | 29298  |   |
| UN71784 | Rsa1.0.04402.1 | 713 | 17511  | 1.00E-142 | 259 | 260 | 99 -  | 1   | 260 | 16036  | 16295  |   |
| UN71785 | Rsa1.0.02046.1 | 121 | 162733 | 6.00E-47  | 113 | 119 | 94 +  | 1   | 119 | 33021  | 33139  |   |
| UN71786 | Rsa1.0.00758.1 | 669 | 65477  | 0         | 665 | 669 | 99 -  | 1   | 667 | 24163  | 24831  |   |
| UN71787 | Rsa1.0.01519.1 | 315 | 44144  | 1.00E-125 | 302 | 321 | 94 +  | 1   | 315 | 11636  | 11955  |   |
| UN71788 | Rsa1.0.05699.1 | 708 | 12889  | 0         | 683 | 698 | 97 +  | 11  | 708 | 10191  | 10880  |   |
| UN71789 | Rsa1.0.02250.1 | 549 | 33409  | 0         | 483 | 497 | 97 +  | 1   | 497 | 32909  | 33405  |   |
| UN71790 | Rsa1.0.00893.1 | 100 | 60626  | 2.00E-34  | 86  | 90  | 95 +  | 6   | 95  | 8177   | 8266   |   |
| UN71791 | Rsa1.0.11786.1 | 280 | 5409   | 1.00E-121 | 262 | 275 | 95 +  | 3   | 277 | 3037   | 3309   |   |
| UN71792 | Rsa1.0.00698.1 | 718 | 67816  | 1.00E-120 | 330 | 361 | 91 +  | 17  | 366 | 21777  | 22136  |   |
| UN71793 | Rsa1.0.00394.1 | 705 | 148426 | 0         | 449 | 478 | 93 +  | 6   | 475 | 124754 | 125225 |   |
| UN71794 | Rsa1.0.00744.1 | 657 | 66084  | 1.00E-95  | 221 | 232 | 95 +  | 106 | 334 | 18800  | 19029  |   |
| UN71795 | Rsa1.0.28569.1 | 689 | 810    | 0         | 437 | 441 | 99 +  | 249 | 689 | 90     | 529    |   |
| UN71796 | Rsa1.0.01287.1 | 675 | 49195  | 0         | 659 | 674 | 97 -  | 6   | 675 | 48008  | 48681  |   |
| UN71797 | Rsa1.0.01765.1 | 624 | 39640  | 0         | 614 | 620 | 99 +  | 6   | 624 | 14191  | 14810  |   |

|         |                |     |        |           |     |     |      |     |     |        |        |
|---------|----------------|-----|--------|-----------|-----|-----|------|-----|-----|--------|--------|
| UN71798 | Rsa1.0.01453.1 | 547 | 45449  | 0         | 437 | 453 | 96 + | 4   | 454 | 6445   | 6896   |
| UN71799 | Rsa1.0.03972.1 | 731 | 19787  | 1.00E-178 | 346 | 356 | 97 - | 1   | 356 | 13644  | 13999  |
| UN71800 | Rsa1.0.00104.1 | 624 | 368722 | 1.00E-161 | 329 | 343 | 95 + | 49  | 391 | 41676  | 42018  |
| UN71801 | Rsa1.0.03862.1 | 699 | 20400  | 0         | 670 | 697 | 96 - | 3   | 699 | 2838   | 3531   |
| UN71802 | Rsa1.0.00460.1 | 776 | 206387 | 0         | 755 | 783 | 96 - | 1   | 776 | 496    | 1275   |
| UN71803 | Rsa1.0.02647.1 | 351 | 29120  | 0         | 341 | 342 | 99 + | 1   | 342 | 26186  | 26527  |
| UN71804 | Rsa1.0.00608.1 | 578 | 172672 | 0         | 422 | 426 | 99 + | 1   | 426 | 163209 | 163634 |
| UN71805 | Rsa1.0.12442.1 | 783 | 5225   | 1.00E-169 | 527 | 599 | 87 - | 183 | 770 | 2036   | 2630   |
| UN71806 | Rsa1.0.09776.1 | 314 | 6155   | 4.00E-84  | 217 | 234 | 92 + | 75  | 307 | 5923   | 6155   |
| UN71807 | Rsa1.0.00951.1 | 744 | 164588 | 0         | 717 | 766 | 93 + | 2   | 744 | 122895 | 123657 |
| UN71808 | Rsa1.0.03645.1 | 519 | 21599  | 0         | 349 | 357 | 97 + | 1   | 357 | 11933  | 12289  |
| UN71809 | Rsa1.0.14655.1 | 626 | 3184   | 0         | 413 | 422 | 97 + | 205 | 626 | 1755   | 2176   |
| UN71810 | Rsa1.0.04118.1 | 676 | 18968  | 1.00E-95  | 193 | 198 | 97 + | 51  | 248 | 1795   | 1992   |
| UN71811 | Rsa1.0.00501.1 | 470 | 79545  | 1.00E-118 | 241 | 248 | 97 - | 1   | 244 | 66810  | 67056  |
| UN71812 | Rsa1.0.03771.1 | 677 | 20942  | 0         | 369 | 377 | 97 + | 301 | 677 | 10745  | 11119  |
| UN71813 | Rsa1.0.03877.1 | 284 | 20318  | 1.00E-110 | 269 | 287 | 93 + | 1   | 284 | 7525   | 7808   |
| UN71814 | Rsa1.0.01580.1 | 638 | 42852  | 1.00E-104 | 211 | 217 | 97 - | 201 | 417 | 37225  | 37441  |
| UN71815 | Rsa1.0.01123.1 | 517 | 53359  | 1.00E-116 | 249 | 261 | 95 - | 54  | 314 | 1531   | 1791   |
| UN71816 | Rsa1.0.00626.1 | 541 | 71582  | 5.00E-79  | 162 | 166 | 97 + | 15  | 180 | 63326  | 63491  |
| UN71817 | Rsa1.0.00671.1 | 767 | 397884 | 0         | 566 | 582 | 97 - | 3   | 583 | 169284 | 169864 |
| UN71818 | Rsa1.0.00543.1 | 476 | 76788  | 2.00E-38  | 100 | 106 | 94 - | 133 | 238 | 66127  | 66232  |
| UN71819 | Rsa1.0.00269.1 | 172 | 341668 | 1.00E-64  | 159 | 169 | 94 - | 5   | 172 | 193384 | 193552 |
| UN71820 | Rsa1.0.00734.1 | 574 | 66508  | 0         | 425 | 427 | 99 + | 1   | 427 | 45756  | 46182  |
| UN71821 | Rsa1.0.04280.1 | 341 | 18110  | 1.00E-143 | 324 | 344 | 94 + | 1   | 341 | 5438   | 5780   |
| UN71822 | Rsa1.0.00940.1 | 595 | 179946 | 0         | 539 | 573 | 94 + | 2   | 574 | 170748 | 171310 |
| UN71823 | Rsa1.0.02729.1 | 534 | 28394  | 0         | 516 | 521 | 99 - | 2   | 520 | 14224  | 14744  |
| UN71824 | Rsa1.0.00423.1 | 822 | 86138  | 1.00E-172 | 376 | 395 | 95 + | 1   | 392 | 38257  | 38646  |
| UN71825 | Rsa1.0.00717.1 | 609 | 67051  | 1.00E-132 | 249 | 252 | 98 + | 358 | 609 | 8491   | 8742   |
| UN71826 | Rsa1.0.02034.1 | 456 | 35823  | 1.00E-166 | 370 | 392 | 94 + | 9   | 399 | 10061  | 10451  |
| UN71827 | Rsa1.0.00570.1 | 633 | 75002  | 0         | 383 | 395 | 96 - | 73  | 467 | 73185  | 73579  |
| UN71828 | Rsa1.0.03843.1 | 434 | 20496  | 5.00E-60  | 140 | 146 | 95 - | 40  | 184 | 7468   | 7613   |
| UN71829 | Rsa1.0.00417.1 | 130 | 395068 | 1.00E-26  | 64  | 65  | 98 + | 66  | 130 | 14145  | 14209  |
| UN71830 | Rsa1.0.00599.1 | 206 | 73418  | 2.00E-29  | 142 | 165 | 86 - | 32  | 188 | 40461  | 40625  |
| UN71831 | Rsa1.0.00899.1 | 805 | 60404  | 1.00E-68  | 401 | 487 | 82 + | 195 | 674 | 21980  | 22443  |
| UN71832 | Rsa1.0.02431.1 | 132 | 31504  | 6.00E-44  | 121 | 130 | 93 + | 1   | 129 | 17564  | 17693  |
| UN71833 | Rsa1.0.00193.1 | 457 | 194198 | 1.00E-180 | 407 | 438 | 92 - | 1   | 418 | 3836   | 4268   |
| UN71834 | Rsa1.0.02599.1 | 528 | 29660  | 1.00E-119 | 249 | 259 | 96 - | 230 | 488 | 4092   | 4347   |
| UN71835 | Rsa1.0.05311.1 | 235 | 14181  | 2.00E-85  | 218 | 232 | 93 - | 5   | 235 | 6777   | 7005   |
| UN71836 | Rsa1.0.01674.1 | 701 | 168300 | 1.00E-172 | 397 | 431 | 92 - | 288 | 701 | 3569   | 3999   |

|         |                |     |        |           |     |     |      |     |     |        |        |
|---------|----------------|-----|--------|-----------|-----|-----|------|-----|-----|--------|--------|
| UN71837 | Rsa1.0_00426.1 | 642 | 85668  | 0         | 620 | 639 | 97 - | 1   | 639 | 10031  | 10669  |
| UN71838 | #              | #   | #      | #         | #   | #   | #    | #   | #   | #      | #      |
| UN71839 | Rsa1.0_02223.1 | 177 | 152421 | 2.00E-84  | 175 | 178 | 98 - | 1   | 177 | 12108  | 12284  |
| UN71840 | Rsa1.0_00278.1 | 738 | 231896 | 1.00E-104 | 214 | 222 | 96 + | 3   | 224 | 152656 | 152870 |
| UN71841 | Rsa1.0_00321.1 | 441 | 95671  | 2.00E-50  | 218 | 258 | 84 - | 12  | 258 | 56950  | 57194  |
| UN71842 | Rsa1.0_05362.1 | 768 | 14049  | 0         | 370 | 384 | 96 + | 171 | 554 | 3472   | 3855   |
| UN71843 | Rsa1.0_01093.1 | 311 | 54312  | 1.00E-135 | 281 | 291 | 96 - | 7   | 295 | 47272  | 47562  |
| UN71844 | Rsa1.0_03218.1 | 751 | 24539  | 0         | 628 | 632 | 99 - | 1   | 632 | 16471  | 17102  |
| UN71845 | Rsa1.0_00118.1 | 171 | 130637 | 2.00E-35  | 85  | 88  | 96 + | 82  | 169 | 90339  | 90426  |
| UN71846 | Rsa1.0_00159.1 | 771 | 431686 | 0         | 460 | 483 | 95 - | 96  | 578 | 261877 | 262359 |
| UN71847 | Rsa1.0_03435.1 | 182 | 22958  | 1.00E-58  | 154 | 167 | 92 + | 12  | 178 | 21599  | 21765  |
| UN71848 | Rsa1.0_00237.1 | 266 | 235974 | 1.00E-117 | 255 | 266 | 95 + | 3   | 266 | 188303 | 188568 |
| UN71849 | #              | #   | #      | #         | #   | #   | #    | #   | #   | #      | #      |
| UN71850 | Rsa1.0_12259.1 | 695 | 5273   | 1.00E-144 | 315 | 333 | 94 + | 124 | 456 | 502    | 831    |
| UN71851 | Rsa1.0_01281.1 | 539 | 49313  | 1.00E-109 | 220 | 225 | 97 + | 3   | 226 | 33529  | 33753  |
| UN71852 | Rsa1.0_09504.1 | 667 | 6328   | 0         | 610 | 669 | 91 + | 3   | 667 | 3697   | 4337   |
| UN71853 | Rsa1.0_00923.1 | 789 | 153678 | 0         | 456 | 479 | 95 + | 1   | 478 | 38692  | 39160  |
| UN71854 | Rsa1.0_00354.1 | 443 | 232005 | 1.00E-75  | 235 | 263 | 89 - | 6   | 262 | 170578 | 170833 |
| UN71855 | Rsa1.0_00208.1 | 669 | 108565 | 0         | 472 | 513 | 92 - | 38  | 541 | 28991  | 29502  |
| UN71856 | Rsa1.0_01482.1 | 556 | 44855  | 1.00E-105 | 318 | 355 | 89 - | 1   | 349 | 30772  | 31105  |
| UN71857 | Rsa1.0_00094.1 | 728 | 139042 | 0         | 702 | 732 | 95 + | 1   | 726 | 7720   | 8444   |
| UN71858 | Rsa1.0_01740.1 | 266 | 39986  | 1.00E-139 | 263 | 266 | 98 - | 2   | 266 | 18609  | 18874  |
| UN71859 | Rsa1.0_01441.1 | 702 | 45790  | 1.00E-176 | 396 | 418 | 94 - | 1   | 415 | 31974  | 32386  |
| UN71860 | Rsa1.0_04511.1 | 771 | 17032  | 0         | 497 | 513 | 96 - | 260 | 771 | 1852   | 2361   |
| UN71861 | Rsa1.0_00506.1 | 710 | 79106  | 4.00E-77  | 179 | 187 | 95 + | 101 | 286 | 10905  | 11090  |
| UN71862 | Rsa1.0_00114.1 | 374 | 131330 | 4.00E-91  | 188 | 194 | 96 - | 180 | 373 | 37732  | 37925  |
| UN71863 | Rsa1.0_13593.1 | 515 | 4685   | 1.00E-153 | 311 | 322 | 96 - | 196 | 515 | 3568   | 3889   |
| UN71864 | Rsa1.0_00253.1 | 525 | 231292 | 0         | 512 | 530 | 96 - | 1   | 525 | 161276 | 161804 |
| UN71865 | Rsa1.0_00050.1 | 449 | 237174 | 1.00E-180 | 355 | 366 | 96 - | 1   | 364 | 33432  | 33797  |
| UN71866 | Rsa1.0_00093.1 | 640 | 214962 | 0         | 492 | 506 | 97 + | 1   | 496 | 11307  | 11812  |
| UN71867 | Rsa1.0_00008.1 | 597 | 358124 | 0         | 343 | 348 | 98 - | 1   | 348 | 273181 | 273528 |
| UN71868 | Rsa1.0_00855.1 | 408 | 62047  | 3.00E-98  | 222 | 234 | 94 - | 13  | 246 | 55971  | 56203  |
| UN71869 | Rsa1.0_01344.1 | 128 | 142535 | 5.00E-35  | 109 | 119 | 91 + | 8   | 125 | 117449 | 117567 |
| UN71870 | Rsa1.0_00472.1 | 662 | 398134 | 1.00E-144 | 278 | 283 | 98 + | 2   | 284 | 295589 | 295870 |
| UN71871 | Rsa1.0_02017.1 | 735 | 35999  | 0         | 625 | 647 | 96 + | 91  | 735 | 9761   | 10407  |
| UN71872 | Rsa1.0_03498.1 | 652 | 22480  | 1.00E-122 | 241 | 245 | 98 - | 80  | 323 | 14642  | 14884  |
| UN71873 | Rsa1.0_00273.1 | 259 | 326186 | 4.00E-62  | 193 | 217 | 88 + | 20  | 236 | 26862  | 27078  |
| UN71874 | Rsa1.0_01076.1 | 563 | 54835  | 0         | 451 | 463 | 97 + | 101 | 563 | 4130   | 4592   |
| UN71875 | Rsa1.0_05938.1 | 685 | 12173  | 0         | 663 | 688 | 96 - | 1   | 685 | 3180   | 3866   |

|         |                |     |        |           |     |     |       |     |     |        |        |
|---------|----------------|-----|--------|-----------|-----|-----|-------|-----|-----|--------|--------|
| UN71876 | Rsa1.0.00630.1 | 456 | 71281  | 1.00E-125 | 257 | 267 | 96 +  | 1   | 267 | 61142  | 61408  |
| UN71877 | Rsa1.0.02748.1 | 185 | 28242  | 2.00E-57  | 125 | 129 | 96 -  | 57  | 185 | 11822  | 11950  |
| UN71878 | Rsa1.0.00003.1 | 734 | 340054 | 1.00E-43  | 181 | 211 | 85 -  | 107 | 317 | 159466 | 159676 |
| UN71879 | Rsa1.0.00529.1 | 601 | 77487  | 1.00E-180 | 337 | 342 | 98 +  | 7   | 348 | 18974  | 19313  |
| UN71880 | Rsa1.0.00954.1 | 676 | 189536 | 0         | 663 | 691 | 95 +  | 1   | 676 | 8410   | 9099   |
| UN71881 | Rsa1.0.01556.1 | 107 | 163858 | 3.00E-48  | 103 | 105 | 98 +  | 1   | 105 | 161533 | 161637 |
| UN71882 | Rsa1.0.06128.1 | 657 | 11671  | 1.00E-178 | 391 | 414 | 94 +  | 1   | 408 | 9704   | 10109  |
| UN71883 | Rsa1.0.02663.1 | 757 | 169243 | 0         | 728 | 757 | 96 -  | 1   | 757 | 24029  | 24777  |
| UN71884 | Rsa1.0.02220.1 | 120 | 176031 | 1.00E-20  | 110 | 132 | 83 +  | 1   | 120 | 156716 | 156847 |
| UN71885 | Rsa1.0.03382.1 | 770 | 23299  | 0         | 739 | 778 | 94 -  | 3   | 770 | 21340  | 22113  |
| UN71886 | Rsa1.0.01641.1 | 728 | 188213 | 1.00E-126 | 344 | 383 | 89 +  | 11  | 390 | 174788 | 175151 |
| UN71887 | Rsa1.0.01180.1 | 260 | 51517  | 1.00E-110 | 247 | 261 | 94 +  | 1   | 260 | 32430  | 32690  |
| UN71888 | Rsa1.0.44332.1 | 765 | 508    | 1.00E-139 | 263 | 267 | 98 +  | 4   | 270 | 28     | 294    |
| UN71889 | Rsa1.0.04264.1 | 166 | 18207  | 2.00E-72  | 153 | 158 | 96 -  | 9   | 166 | 5741   | 5898   |
| UN71890 | Rsa1.0.00067.1 | 448 | 415055 | 1.00E-163 | 322 | 332 | 96 +  | 1   | 328 | 81527  | 81858  |
| UN71891 | Rsa1.0.00023.1 | 600 | 194764 | 0         | 589 | 598 | 98 +  | 3   | 600 | 139435 | 140030 |
| UN71892 | Rsa1.0.00601.1 | 625 | 177045 | 0         | 597 | 625 | 95 +  | 1   | 625 | 134183 | 134805 |
| UN71893 | Rsa1.0.01148.1 | 179 | 52375  | 1.00E-70  | 169 | 179 | 94 +  | 1   | 179 | 27932  | 28109  |
| UN71894 | Rsa1.0.00295.1 | 737 | 152597 | 5.00E-67  | 208 | 236 | 88 +  | 434 | 648 | 140435 | 140670 |
| UN71895 | Rsa1.0.00467.1 | 173 | 156542 | 1.00E-67  | 165 | 174 | 94 -  | 1   | 173 | 129148 | 129320 |
| UN71896 | Rsa1.0.02054.1 | 398 | 35548  | 1.00E-100 | 238 | 252 | 94 -  | 1   | 251 | 34397  | 34644  |
| UN71897 | Rsa1.0.02051.1 | 620 | 35564  | 0         | 385 | 385 | 100 - | 2   | 386 | 25312  | 25696  |
| UN71898 | Rsa1.0.00278.1 | 757 | 231896 | 1.00E-126 | 251 | 258 | 97 -  | 1   | 258 | 150438 | 150695 |
| UN71899 | Rsa1.0.00028.1 | 771 | 293984 | 3.00E-96  | 203 | 211 | 96 -  | 325 | 535 | 276682 | 276892 |
| UN71900 | Rsa1.0.00006.1 | 661 | 396176 | 0         | 478 | 483 | 98 +  | 179 | 661 | 271218 | 271700 |
| UN71901 | Rsa1.0.00067.1 | 294 | 415055 | 4.00E-90  | 232 | 252 | 92 +  | 2   | 252 | 377781 | 378032 |
| UN71902 | Rsa1.0.00456.1 | 165 | 82826  | 1.00E-64  | 149 | 157 | 94 +  | 3   | 159 | 65995  | 66151  |
| UN71903 | Rsa1.0.03835.1 | 485 | 20567  | 0         | 468 | 489 | 95 -  | 1   | 481 | 8226   | 8714   |
| UN71904 | Rsa1.0.04247.1 | 754 | 18295  | 0         | 718 | 758 | 94 +  | 1   | 754 | 406    | 1162   |
| UN71905 | Rsa1.0.00021.1 | 585 | 263655 | 1.00E-103 | 251 | 268 | 93 +  | 2   | 268 | 17635  | 17898  |
| UN71906 | Rsa1.0.00964.1 | 649 | 316648 | 0         | 431 | 455 | 94 +  | 5   | 445 | 3929   | 4381   |
| UN71907 | Rsa1.0.09551.1 | 253 | 6294   | 1.00E-104 | 229 | 240 | 95 -  | 15  | 253 | 5578   | 5817   |
| UN71908 | Rsa1.0.02966.1 | 351 | 135126 | 1.00E-167 | 334 | 346 | 96 -  | 6   | 351 | 18120  | 18465  |
| UN71909 | Rsa1.0.10673.1 | 403 | 5760   | 1.00E-157 | 321 | 333 | 96 -  | 66  | 398 | 5187   | 5518   |
| UN71910 | Rsa1.0.02987.1 | 713 | 26196  | 0         | 542 | 574 | 94 +  | 1   | 563 | 24903  | 25473  |
| UN71911 | Rsa1.0.02896.1 | 654 | 26970  | 1.00E-151 | 283 | 287 | 98 -  | 1   | 287 | 23027  | 23313  |
| UN71912 | Rsa1.0.00092.1 | 427 | 659932 | 6.00E-84  | 186 | 193 | 96 +  | 23  | 212 | 314878 | 315070 |
| UN71913 | Rsa1.0.01666.1 | 696 | 173972 | 2.00E-85  | 313 | 361 | 86 +  | 23  | 364 | 13200  | 13542  |
| UN71914 | Rsa1.0.01094.1 | 114 | 167285 | 2.00E-34  | 104 | 114 | 91 -  | 1   | 114 | 12635  | 12748  |

|         |                |     |        |           |     |     |      |     |     |        |        |
|---------|----------------|-----|--------|-----------|-----|-----|------|-----|-----|--------|--------|
| UN71915 | Rsa1.0.00376.1 | 251 | 90101  | 1.00E-134 | 248 | 250 | 99 - | 2   | 251 | 69745  | 69994  |
| UN71916 | Rsa1.0.08078.1 | 267 | 7944   | 7.00E-98  | 236 | 251 | 94 - | 21  | 267 | 2609   | 2858   |
| UN71917 | Rsa1.0.00020.1 | 280 | 283099 | 9.00E-45  | 125 | 136 | 91 + | 145 | 280 | 76615  | 76750  |
| UN71918 | Rsa1.0.01525.1 | 308 | 43925  | 1.00E-169 | 306 | 308 | 99 + | 1   | 308 | 3914   | 4221   |
| UN71919 | Rsa1.0.00437.1 | 325 | 84879  | 1.00E-150 | 284 | 289 | 98 - | 37  | 325 | 62795  | 63083  |
| UN71920 | Rsa1.0.00010.1 | 661 | 294827 | 0         | 603 | 664 | 90 + | 21  | 661 | 210889 | 211541 |
| UN71921 | Rsa1.0.00480.1 | 330 | 81325  | 1.00E-108 | 296 | 330 | 89 - | 1   | 330 | 37865  | 38170  |
| UN71922 | Rsa1.0.00044.1 | 677 | 271658 | 1.00E-125 | 271 | 280 | 96 + | 3   | 280 | 176770 | 177047 |
| UN71923 | Rsa1.0.02070.1 | 685 | 158516 | 4.00E-49  | 246 | 288 | 85 + | 2   | 285 | 139999 | 140275 |
| UN71924 | Rsa1.0.09813.1 | 734 | 6138   | 1.00E-149 | 302 | 314 | 96 + | 105 | 411 | 188    | 501    |
| UN71925 | Rsa1.0.00187.1 | 473 | 393093 | 1.00E-159 | 378 | 406 | 93 + | 10  | 407 | 32739  | 33141  |
| UN71926 | Rsa1.0.01724.1 | 187 | 40292  | 3.00E-68  | 173 | 187 | 92 - | 1   | 187 | 37521  | 37707  |
| UN71927 | Rsa1.0.00556.1 | 773 | 207212 | 0         | 745 | 777 | 95 - | 2   | 773 | 182018 | 182793 |
| UN71928 | Rsa1.0.01482.1 | 435 | 44855  | 0         | 426 | 434 | 98 + | 1   | 432 | 41491  | 41924  |
| UN71929 | Rsa1.0.02157.1 | 486 | 149652 | 1.00E-111 | 222 | 227 | 97 + | 3   | 227 | 145655 | 145881 |
| UN71930 | Rsa1.0.00562.1 | 239 | 75565  | 1.00E-125 | 234 | 235 | 99 - | 6   | 239 | 14260  | 14494  |
| UN71931 | Rsa1.0.00049.1 | 740 | 167018 | 0         | 715 | 734 | 97 - | 3   | 730 | 25760  | 26491  |
| UN71932 | Rsa1.0.02841.1 | 707 | 27383  | 0         | 396 | 410 | 96 - | 270 | 678 | 18905  | 19314  |
| UN71933 | Rsa1.0.00079.1 | 657 | 606987 | 0         | 636 | 655 | 97 + | 3   | 657 | 551378 | 552032 |
| UN71934 | Rsa1.0.00304.1 | 653 | 97429  | 0         | 367 | 370 | 99 + | 3   | 372 | 92759  | 93128  |
| UN71935 | Rsa1.0.00013.1 | 564 | 292129 | 0         | 477 | 495 | 96 - | 3   | 490 | 143915 | 144406 |
| UN71936 | Rsa1.0.00327.1 | 445 | 94892  | 0         | 416 | 442 | 94 + | 1   | 433 | 61809  | 62248  |
| UN71937 | Rsa1.0.00978.1 | 122 | 57739  | 3.00E-39  | 113 | 122 | 92 - | 2   | 122 | 14338  | 14459  |
| UN71938 | Rsa1.0.09320.1 | 377 | 6457   | 1.00E-155 | 303 | 311 | 97 - | 70  | 377 | 1493   | 1803   |
| UN71939 | Rsa1.0.05000.1 | 727 | 15178  | 1.00E-174 | 369 | 393 | 93 - | 231 | 604 | 1110   | 1499   |
| UN71940 | Rsa1.0.01597.1 | 637 | 42555  | 0         | 598 | 602 | 99 + | 1   | 602 | 18618  | 19219  |
| UN71941 | Rsa1.0.01884.1 | 157 | 37659  | 9.00E-53  | 144 | 157 | 91 + | 1   | 157 | 14679  | 14835  |
| UN71942 | Rsa1.0.04073.1 | 171 | 19238  | 8.00E-41  | 91  | 93  | 97 - | 1   | 93  | 10008  | 10100  |
| UN71943 | Rsa1.0.01674.1 | 468 | 168300 | 1.00E-137 | 286 | 298 | 95 - | 171 | 468 | 3327   | 3621   |
| UN71944 | Rsa1.0.00502.1 | 825 | 204180 | 1.00E-130 | 321 | 345 | 93 - | 485 | 825 | 59513  | 59854  |
| UN71945 | Rsa1.0.00467.1 | 365 | 156542 | 1.00E-114 | 231 | 238 | 97 + | 2   | 236 | 102980 | 103217 |
| UN71946 | Rsa1.0.00190.1 | 671 | 318240 | 1.00E-170 | 409 | 442 | 92 - | 1   | 429 | 210052 | 210488 |
| UN71947 | Rsa1.0.02969.1 | 731 | 26390  | 1.00E-180 | 351 | 359 | 97 - | 2   | 357 | 13425  | 13783  |
| UN71948 | Rsa1.0.00222.1 | 687 | 172263 | 1.00E-106 | 213 | 219 | 97 + | 469 | 687 | 139600 | 139818 |
| UN71949 | Rsa1.0.00065.1 | 356 | 454616 | 1.00E-164 | 348 | 367 | 94 + | 1   | 356 | 194585 | 194951 |
| UN71950 | Rsa1.0.00890.1 | 720 | 323870 | 0         | 699 | 721 | 96 + | 1   | 720 | 199956 | 200676 |
| UN71951 | Rsa1.0.01226.1 | 684 | 50316  | 0         | 648 | 689 | 94 + | 1   | 684 | 8655   | 9333   |
| UN71952 | #              | #   | #      | #         | #   | #   | #    | #   | #   | #      | #      |
| UN71953 | Rsa1.0.01544.1 | 745 | 185602 | 0         | 671 | 682 | 98 + | 2   | 683 | 33022  | 33703  |

|         |                |     |        |           |     |     |       |     |     |        |        |
|---------|----------------|-----|--------|-----------|-----|-----|-------|-----|-----|--------|--------|
| UN71954 | Rsa1.0.07689.1 | 368 | 8790   | 1.00E-177 | 353 | 366 | 96 -  | 1   | 366 | 3416   | 3781   |
| UN71955 | Rsa1.0.00063.1 | 672 | 156150 | 0         | 543 | 556 | 97 +  | 120 | 672 | 63115  | 63669  |
| UN71956 | Rsa1.0.02840.1 | 712 | 27386  | 0         | 708 | 712 | 99 -  | 1   | 712 | 20447  | 21158  |
| UN71957 | Rsa1.0.35857.1 | 555 | 630    | 1.00E-121 | 283 | 301 | 94 -  | 2   | 296 | 1      | 301    |
| UN71958 | Rsa1.0.03156.1 | 658 | 24956  | 0         | 387 | 396 | 97 +  | 264 | 658 | 12121  | 12514  |
| UN71959 | Rsa1.0.00981.1 | 771 | 57700  | 1.00E-132 | 255 | 260 | 98 -  | 3   | 262 | 15605  | 15864  |
| UN71960 | Rsa1.0.00214.1 | 770 | 107508 | 0         | 519 | 533 | 97 -  | 243 | 767 | 58667  | 59199  |
| UN71961 | Rsa1.0.00179.1 | 669 | 393324 | 0         | 534 | 549 | 97 -  | 121 | 669 | 368578 | 369125 |
| UN71962 | Rsa1.0.00179.1 | 813 | 393324 | 6.00E-61  | 132 | 136 | 97 -  | 83  | 218 | 215537 | 215672 |
| UN71963 | Rsa1.0.02462.1 | 738 | 31158  | 0         | 704 | 723 | 97 -  | 2   | 720 | 8749   | 9471   |
| UN71964 | Rsa1.0.05538.1 | 685 | 13393  | 0         | 503 | 516 | 97 -  | 3   | 518 | 5161   | 5675   |
| UN71965 | Rsa1.0.01254.1 | 374 | 49801  | 1.00E-164 | 349 | 367 | 95 -  | 2   | 368 | 13794  | 14153  |
| UN71966 | Rsa1.0.08949.1 | 303 | 6759   | 3.00E-11  | 45  | 48  | 93 -  | 53  | 100 | 6353   | 6400   |
| UN71967 | Rsa1.0.04507.1 | 776 | 17045  | 0         | 590 | 599 | 98 +  | 3   | 601 | 7809   | 8407   |
| UN71968 | Rsa1.0.00295.1 | 784 | 152597 | 0         | 461 | 479 | 96 -  | 2   | 480 | 141018 | 141494 |
| UN71969 | Rsa1.0.00128.1 | 705 | 228675 | 7.00E-60  | 141 | 148 | 95 -  | 2   | 146 | 219511 | 219658 |
| UN71970 | Rsa1.0.01831.1 | 667 | 38628  | 2.00E-84  | 226 | 253 | 89 -  | 285 | 537 | 31185  | 31413  |
| UN71971 | Rsa1.0.00626.1 | 751 | 71582  | 0         | 421 | 441 | 95 -  | 2   | 438 | 65582  | 66020  |
| UN71972 | Rsa1.0.00220.1 | 717 | 192936 | 0         | 570 | 620 | 91 -  | 119 | 716 | 16601  | 17216  |
| UN71973 | Rsa1.0.38227.1 | 797 | 589    | 1.00E-171 | 328 | 335 | 97 +  | 44  | 376 | 1      | 335    |
| UN71974 | Rsa1.0.00469.1 | 286 | 82084  | 3.00E-88  | 197 | 205 | 96 -  | 66  | 268 | 45982  | 46186  |
| UN71975 | Rsa1.0.00123.1 | 706 | 325650 | 0         | 524 | 524 | 100 + | 183 | 706 | 140015 | 140538 |
| UN71976 | Rsa1.0.00467.1 | 619 | 156542 | 0         | 600 | 624 | 96 +  | 2   | 619 | 127897 | 128515 |
| UN71977 | Rsa1.0.08613.1 | 689 | 7128   | 1.00E-125 | 295 | 316 | 93 +  | 379 | 689 | 6772   | 7087   |
| UN71978 | Rsa1.0.01740.1 | 796 | 39986  | 1.00E-147 | 297 | 305 | 97 +  | 381 | 683 | 29745  | 30049  |
| UN71979 | Rsa1.0.00671.1 | 764 | 397884 | 0         | 623 | 637 | 97 +  | 135 | 763 | 168113 | 168749 |
| UN71980 | Rsa1.0.00577.1 | 643 | 174827 | 1.00E-120 | 318 | 345 | 92 -  | 2   | 340 | 159219 | 159552 |
| UN71981 | Rsa1.0.00867.1 | 815 | 61635  | 6.00E-67  | 173 | 186 | 93 +  | 460 | 645 | 17892  | 18071  |
| UN71982 | Rsa1.0.00597.1 | 784 | 73445  | 0         | 675 | 693 | 97 +  | 94  | 784 | 9952   | 10644  |
| UN71983 | Rsa1.0.00662.1 | 670 | 192183 | 0         | 562 | 597 | 94 +  | 3   | 594 | 1272   | 1856   |
| UN71984 | Rsa1.0.00087.1 | 768 | 761073 | 0         | 428 | 439 | 97 +  | 329 | 765 | 213537 | 213975 |
| UN71985 | Rsa1.0.06135.1 | 550 | 11660  | 1.00E-120 | 231 | 235 | 98 -  | 316 | 550 | 2189   | 2423   |
| UN71986 | Rsa1.0.03498.1 | 813 | 22480  | 1.00E-137 | 268 | 275 | 97 +  | 30  | 304 | 13439  | 13713  |
| UN71987 | Rsa1.0.00136.1 | 594 | 122464 | 1.00E-121 | 259 | 271 | 95 -  | 36  | 306 | 62177  | 62439  |
| UN71988 | Rsa1.0.03826.1 | 662 | 20614  | 0         | 471 | 492 | 95 -  | 3   | 488 | 4582   | 5073   |
| UN71989 | Rsa1.0.00005.1 | 624 | 353093 | 1.00E-150 | 278 | 281 | 98 -  | 48  | 328 | 305610 | 305890 |
| UN71990 | Rsa1.0.00010.1 | 765 | 294827 | 1.00E-167 | 456 | 508 | 89 -  | 264 | 764 | 90344  | 90830  |
| UN71991 | Rsa1.0.01026.1 | 632 | 171624 | 0         | 604 | 633 | 95 -  | 3   | 632 | 19811  | 20432  |
| UN71992 | Rsa1.0.01731.1 | 672 | 40208  | 1.00E-155 | 310 | 320 | 96 +  | 3   | 319 | 34820  | 35139  |



|         |                |     |        |           |     |     |       |     |     |        |        |
|---------|----------------|-----|--------|-----------|-----|-----|-------|-----|-----|--------|--------|
| UN71993 | Rsa1.0.37863.1 | 785 | 595    | 0         | 588 | 595 | 98 -  | 90  | 683 | 1      | 595    |
| UN71994 | Rsa1.0.02064.1 | 766 | 35476  | 3.00E-78  | 155 | 157 | 98 +  | 337 | 493 | 15074  | 15230  |
| UN71995 | Rsa1.0.01713.1 | 736 | 40564  | 3.00E-68  | 141 | 144 | 97 -  | 273 | 416 | 31353  | 31496  |
| UN71996 | Rsa1.0.01285.1 | 707 | 172709 | 0         | 377 | 385 | 97 +  | 2   | 386 | 24513  | 24897  |
| UN71997 | Rsa1.0.00589.1 | 645 | 209965 | 1.00E-153 | 321 | 336 | 95 +  | 310 | 642 | 152119 | 152454 |
| UN71998 | Rsa1.0.01029.1 | 617 | 256254 | 1.00E-144 | 265 | 267 | 99 +  | 2   | 268 | 22453  | 22719  |
| UN71999 | Rsa1.0.00663.1 | 274 | 164969 | 1.00E-120 | 236 | 242 | 97 +  | 1   | 242 | 147981 | 148222 |
| UN72000 | Rsa1.0.00220.1 | 709 | 192936 | 1.00E-141 | 281 | 290 | 96 +  | 236 | 525 | 180039 | 180328 |
| UN72001 | Rsa1.0.01110.1 | 743 | 195852 | 0         | 600 | 623 | 96 +  | 121 | 743 | 27303  | 27924  |
| UN72002 | Rsa1.0.05938.1 | 758 | 12173  | 0         | 602 | 609 | 98 +  | 153 | 758 | 2089   | 2697   |
| UN72003 | Rsa1.0.02384.1 | 522 | 31917  | 0         | 476 | 516 | 92 -  | 17  | 522 | 14278  | 14787  |
| UN72004 | Rsa1.0.01656.1 | 606 | 41494  | 1.00E-163 | 311 | 317 | 98 +  | 293 | 606 | 346    | 662    |
| UN72005 | Rsa1.0.00480.1 | 773 | 81325  | 0         | 751 | 773 | 97 +  | 2   | 768 | 36994  | 37765  |
| UN72006 | Rsa1.0.00646.1 | 726 | 70473  | 7.00E-57  | 116 | 117 | 99 -  | 150 | 266 | 7393   | 7509   |
| UN72007 | Rsa1.0.02382.1 | 688 | 31969  | 0         | 366 | 367 | 99 -  | 111 | 477 | 28673  | 29039  |
| UN72008 | Rsa1.0.00604.1 | 778 | 146282 | 4.00E-83  | 169 | 173 | 97 +  | 412 | 584 | 78519  | 78691  |
| UN72009 | Rsa1.0.01163.1 | 795 | 51946  | 1.00E-163 | 438 | 491 | 89 +  | 16  | 490 | 3089   | 3558   |
| UN72010 | Rsa1.0.03125.1 | 578 | 147978 | 1.00E-162 | 331 | 344 | 96 -  | 194 | 537 | 139075 | 139415 |
| UN72011 | Rsa1.0.01413.1 | 607 | 46275  | 9.00E-90  | 305 | 352 | 86 +  | 270 | 607 | 39702  | 40038  |
| UN72012 | Rsa1.0.02157.1 | 666 | 149652 | 0         | 433 | 454 | 95 -  | 80  | 530 | 147090 | 147540 |
| UN72013 | Rsa1.0.00959.1 | 600 | 58202  | 1.00E-114 | 242 | 253 | 95 +  | 118 | 370 | 16283  | 16535  |
| UN72014 | Rsa1.0.00562.1 | 726 | 75565  | 0         | 686 | 749 | 91 +  | 2   | 726 | 12937  | 13685  |
| UN72015 | Rsa1.0.11072.1 | 633 | 5625   | 0         | 591 | 616 | 95 +  | 16  | 630 | 3429   | 4032   |
| UN72016 | Rsa1.0.00218.1 | 774 | 201480 | 1.00E-120 | 239 | 244 | 97 +  | 188 | 430 | 172495 | 172738 |
| UN72017 | Rsa1.0.01682.1 | 672 | 41090  | 1.00E-154 | 320 | 335 | 95 +  | 82  | 410 | 8623   | 8957   |
| UN72018 | Rsa1.0.00265.1 | 724 | 220635 | 1.00E-123 | 301 | 321 | 93 +  | 408 | 724 | 197596 | 197912 |
| UN72019 | Rsa1.0.00044.1 | 269 | 271658 | 4.00E-44  | 106 | 111 | 95 -  | 159 | 269 | 69670  | 69780  |
| UN72020 | Rsa1.0.00379.1 | 280 | 89865  | 1.00E-129 | 267 | 277 | 96 +  | 2   | 276 | 84944  | 85220  |
| UN72021 | Rsa1.0.08018.1 | 757 | 8075   | 1.00E-147 | 325 | 347 | 93 +  | 192 | 538 | 5142   | 5477   |
| UN72022 | Rsa1.0.00167.1 | 771 | 116000 | 0         | 736 | 775 | 94 -  | 2   | 771 | 38301  | 39070  |
| UN72023 | Rsa1.0.16617.1 | 653 | 2088   | 1.00E-42  | 165 | 190 | 86 +  | 113 | 302 | 279    | 464    |
| UN72024 | Rsa1.0.04043.1 | 731 | 19416  | 1.00E-123 | 251 | 260 | 96 -  | 5   | 264 | 10615  | 10868  |
| UN72025 | Rsa1.0.04116.1 | 218 | 18971  | 1.00E-113 | 216 | 218 | 99 +  | 2   | 218 | 10759  | 10976  |
| UN72026 | Rsa1.0.00757.1 | 769 | 65559  | 5.00E-86  | 174 | 178 | 97 +  | 2   | 179 | 33527  | 33704  |
| UN72027 | Rsa1.0.00489.1 | 540 | 80434  | 1.00E-154 | 303 | 310 | 97 +  | 234 | 539 | 45526  | 45835  |
| UN72028 | Rsa1.0.00473.1 | 751 | 212204 | 1.00E-180 | 364 | 379 | 96 +  | 3   | 381 | 14498  | 14876  |
| UN72029 | Rsa1.0.00522.1 | 675 | 78103  | 2.00E-85  | 161 | 161 | 100 + | 153 | 313 | 57517  | 57677  |
| UN72030 | Rsa1.0.00006.1 | 209 | 396176 | 2.00E-94  | 201 | 209 | 96 -  | 1   | 209 | 272479 | 272684 |
| UN72031 | Rsa1.0.00067.1 | 793 | 415055 | 0         | 380 | 394 | 96 -  | 333 | 723 | 378119 | 378512 |

|         |                |     |        |           |     |     |      |     |     |        |        |
|---------|----------------|-----|--------|-----------|-----|-----|------|-----|-----|--------|--------|
| UN72032 | Rsa1.0.03464.1 | 748 | 22715  | 1.00E-134 | 267 | 274 | 97 - | 171 | 441 | 15769  | 16039  |
| UN72033 | Rsa1.0.00551.1 | 643 | 76227  | 2.00E-91  | 209 | 219 | 95 + | 426 | 642 | 28618  | 28836  |
| UN72034 | Rsa1.0.10673.1 | 715 | 5760   | 1.00E-156 | 366 | 395 | 92 + | 3   | 391 | 3717   | 4102   |
| UN72035 | Rsa1.0.01769.1 | 662 | 39568  | 1.00E-175 | 385 | 411 | 93 + | 7   | 407 | 32161  | 32571  |
| UN72036 | Rsa1.0.12259.1 | 735 | 5273   | 1.00E-176 | 337 | 345 | 97 + | 149 | 493 | 487    | 831    |
| UN72037 | Rsa1.0.02449.1 | 745 | 31292  | 0         | 382 | 385 | 99 + | 188 | 572 | 10751  | 11135  |
| UN72038 | Rsa1.0.02896.1 | 734 | 26970  | 1.00E-141 | 285 | 294 | 96 + | 427 | 719 | 22742  | 23035  |
| UN72039 | Rsa1.0.00002.1 | 747 | 601661 | 1.00E-108 | 249 | 265 | 93 - | 3   | 264 | 400637 | 400901 |
| UN72040 | Rsa1.0.00020.1 | 444 | 283099 | 1.00E-124 | 261 | 273 | 95 - | 80  | 352 | 76615  | 76887  |
| UN72041 | Rsa1.0.03375.1 | 260 | 23332  | 2.00E-70  | 141 | 143 | 98 - | 1   | 143 | 7874   | 8016   |
| UN72042 | Rsa1.0.00008.1 | 623 | 358124 | 0         | 439 | 446 | 98 - | 3   | 448 | 251811 | 252256 |
| UN72043 | Rsa1.0.00605.1 | 409 | 73199  | 1.00E-141 | 272 | 278 | 97 + | 132 | 409 | 27650  | 27927  |
| UN72044 | Rsa1.0.08027.1 | 702 | 8058   | 2.33E-156 | 318 | 334 | 95 + | 7   | 339 | 1274   | 1606   |
| UN72045 | Rsa1.0.01436.1 | 120 | 45894  | 7.00E-19  | 57  | 60  | 95 - | 1   | 60  | 27910  | 27969  |
| UN72046 | Rsa1.0.02182.1 | 570 | 34172  | 1.00E-154 | 502 | 582 | 86 - | 3   | 570 | 24515  | 25046  |
| UN72047 | Rsa1.0.00997.1 | 620 | 57190  | 6.00E-85  | 181 | 188 | 96 + | 386 | 573 | 51745  | 51932  |
| UN72048 | Rsa1.0.00472.1 | 555 | 398134 | 1.00E-109 | 231 | 240 | 96 - | 38  | 276 | 297665 | 297904 |
| UN72049 | Rsa1.0.00385.1 | 643 | 89160  | 0         | 410 | 419 | 97 - | 2   | 420 | 15758  | 16176  |
| UN72050 | Rsa1.0.01559.1 | 642 | 43262  | 2.00E-78  | 167 | 173 | 96 + | 389 | 561 | 2268   | 2440   |
| UN72051 | Rsa1.0.00923.1 | 721 | 153678 | 0         | 425 | 433 | 98 - | 187 | 619 | 39894  | 40326  |
| UN72052 | Rsa1.0.00394.1 | 811 | 148426 | 0         | 651 | 680 | 95 - | 126 | 802 | 125670 | 126349 |
| UN72053 | Rsa1.0.02036.1 | 600 | 35731  | 0         | 582 | 605 | 96 + | 2   | 600 | 24515  | 25119  |
| UN72054 | Rsa1.0.00154.1 | 798 | 189461 | 0         | 703 | 741 | 94 - | 1   | 736 | 105874 | 106614 |
| UN72055 | Rsa1.0.02996.1 | 614 | 26152  | 0         | 580 | 622 | 93 - | 2   | 614 | 21988  | 22609  |
| UN72056 | Rsa1.0.00426.1 | 685 | 85668  | 0         | 672 | 685 | 98 + | 1   | 685 | 9149   | 9833   |
| UN72057 | Rsa1.0.00002.1 | 611 | 601661 | 0         | 364 | 374 | 97 + | 238 | 611 | 230786 | 231159 |
| UN72058 | Rsa1.0.00094.1 | 817 | 139042 | 0         | 470 | 503 | 93 - | 332 | 811 | 8431   | 8933   |
| UN72059 | Rsa1.0.03133.1 | 455 | 25135  | 2.00E-74  | 160 | 166 | 96 + | 225 | 390 | 11284  | 11449  |
| UN72060 | Rsa1.0.00099.1 | 754 | 159619 | 0         | 472 | 520 | 90 - | 175 | 673 | 33756  | 34260  |
| UN72061 | Rsa1.0.11500.1 | 662 | 5484   | 1.00E-161 | 303 | 308 | 98 - | 352 | 659 | 335    | 642    |
| UN72062 | Rsa1.0.10315.1 | 559 | 5891   | 4.00E-95  | 189 | 193 | 97 + | 248 | 440 | 5685   | 5877   |
| UN72063 | Rsa1.0.00978.1 | 146 | 57739  | 1.00E-60  | 141 | 146 | 96 + | 3   | 146 | 13380  | 13525  |
| UN72064 | Rsa1.0.01740.1 | 644 | 39986  | 0         | 618 | 643 | 96 + | 2   | 644 | 17739  | 18381  |
| UN72065 | Rsa1.0.00797.1 | 271 | 63959  | 1.00E-120 | 261 | 273 | 95 - | 1   | 271 | 60886  | 61156  |
| UN72066 | Rsa1.0.00321.1 | 426 | 95671  | 2.00E-68  | 221 | 252 | 87 + | 169 | 409 | 56950  | 57188  |
| UN72067 | Rsa1.0.00025.1 | 592 | 277312 | 0         | 571 | 590 | 96 + | 3   | 592 | 52183  | 52772  |
| UN72068 | Rsa1.0.01441.1 | 720 | 45790  | 4.00E-89  | 173 | 175 | 98 + | 131 | 305 | 30012  | 30186  |
| UN72069 | Rsa1.0.07207.1 | 805 | 9720   | 1.00E-151 | 304 | 315 | 96 - | 222 | 536 | 8629   | 8943   |
| UN72070 | Rsa1.0.03697.1 | 756 | 21304  | 1.00E-154 | 294 | 300 | 98 - | 125 | 424 | 17681  | 17980  |

|         |                |     |        |           |     |     |       |     |     |        |        |
|---------|----------------|-----|--------|-----------|-----|-----|-------|-----|-----|--------|--------|
| UN72071 | Rsa1.0.00117.1 | 613 | 213118 | 0         | 496 | 511 | 97 -  | 1   | 508 | 76239  | 76749  |
| UN72072 | Rsa1.0.02663.1 | 805 | 169243 | 0         | 771 | 808 | 95 +  | 3   | 805 | 22877  | 23684  |
| UN72073 | Rsa1.0.00206.1 | 272 | 109040 | 2.00E-70  | 181 | 200 | 90 -  | 2   | 185 | 47088  | 47287  |
| UN72074 | Rsa1.0.03925.1 | 673 | 20025  | 0         | 360 | 367 | 98 +  | 307 | 673 | 3446   | 3812   |
| UN72075 | Rsa1.0.00994.1 | 826 | 165189 | 0         | 409 | 424 | 96 -  | 330 | 747 | 1387   | 1810   |
| UN72076 | Rsa1.0.20801.1 | 749 | 1268   | 0         | 370 | 376 | 98 -  | 378 | 749 | 539    | 914    |
| UN72077 | Rsa1.0.00796.1 | 715 | 63997  | 1.00E-127 | 234 | 235 | 99 -  | 3   | 237 | 56190  | 56424  |
| UN72078 | Rsa1.0.00016.1 | 761 | 831256 | 0         | 501 | 514 | 97 -  | 251 | 761 | 696475 | 696988 |
| UN72079 | Rsa1.0.00196.1 | 748 | 109960 | 1.00E-106 | 210 | 215 | 97 +  | 3   | 217 | 83236  | 83450  |
| UN72080 | Rsa1.0.00059.1 | 244 | 159650 | 1.00E-123 | 239 | 244 | 97 +  | 1   | 244 | 84927  | 85170  |
| UN72081 | Rsa1.0.00336.1 | 830 | 445051 | 1.00E-104 | 199 | 201 | 99 -  | 151 | 351 | 1501   | 1701   |
| UN72082 | Rsa1.0.01855.1 | 794 | 38204  | 1.00E-120 | 259 | 272 | 95 +  | 55  | 326 | 9032   | 9303   |
| UN72083 | Rsa1.0.01431.1 | 785 | 167877 | 0         | 390 | 398 | 97 +  | 389 | 783 | 157522 | 157918 |
| UN72084 | Rsa1.0.14639.1 | 836 | 3198   | 1.00E-108 | 221 | 228 | 96 -  | 210 | 437 | 1011   | 1238   |
| UN72085 | Rsa1.0.02550.1 | 725 | 291051 | 1.00E-158 | 307 | 315 | 97 -  | 107 | 421 | 275718 | 276032 |
| UN72086 | Rsa1.0.00208.1 | 700 | 108565 | 0         | 510 | 547 | 93 +  | 160 | 700 | 27068  | 27611  |
| UN72087 | Rsa1.0.02023.1 | 694 | 35922  | 1.00E-120 | 220 | 220 | 100 - | 3   | 222 | 15898  | 16117  |
| UN72088 | Rsa1.0.00116.1 | 690 | 365886 | 1.00E-109 | 224 | 232 | 96 +  | 192 | 423 | 314964 | 315195 |
| UN72089 | Rsa1.0.05553.1 | 699 | 13344  | 0         | 465 | 475 | 97 -  | 1   | 475 | 11472  | 11946  |
| UN72090 | Rsa1.0.14932.1 | 712 | 2956   | 1.00E-89  | 191 | 196 | 97 +  | 511 | 704 | 633    | 828    |
| UN72091 | Rsa1.0.00423.1 | 645 | 86138  | 1.00E-131 | 472 | 550 | 85 -  | 138 | 645 | 39670  | 40212  |
| UN72092 | Rsa1.0.00247.1 | 362 | 103408 | 1.00E-154 | 316 | 327 | 96 -  | 2   | 327 | 20176  | 20501  |
| UN72093 | Rsa1.0.00979.1 | 811 | 57733  | 4.00E-34  | 140 | 159 | 88 -  | 602 | 758 | 1232   | 1390   |
| UN72094 | Rsa1.0.00718.1 | 768 | 279335 | 1.00E-101 | 215 | 222 | 96 +  | 551 | 768 | 13813  | 14034  |
| UN72095 | Rsa1.0.01360.1 | 692 | 47246  | 0         | 417 | 439 | 94 -  | 261 | 692 | 41356  | 41791  |
| UN72096 | Rsa1.0.00860.1 | 781 | 61789  | 1.00E-135 | 263 | 269 | 97 +  | 194 | 462 | 16955  | 17223  |
| UN72097 | Rsa1.0.27325.1 | 265 | 857    | 1.00E-135 | 259 | 264 | 98 +  | 6   | 265 | 456    | 719    |
| UN72098 | Rsa1.0.01907.1 | 390 | 37431  | 1.00E-112 | 221 | 225 | 98 -  | 166 | 390 | 30198  | 30421  |
| UN72099 | Rsa1.0.00899.1 | 767 | 60404  | 3.00E-28  | 124 | 141 | 87 -  | 595 | 734 | 22304  | 22443  |
| UN72100 | Rsa1.0.01462.1 | 608 | 45231  | 3.00E-83  | 199 | 212 | 93 -  | 3   | 214 | 25946  | 26155  |
| UN72101 | Rsa1.0.00355.1 | 660 | 92038  | 0         | 506 | 547 | 92 -  | 115 | 652 | 77903  | 78429  |
| UN72102 | Rsa1.0.02748.1 | 779 | 28242  | 0         | 599 | 646 | 92 +  | 140 | 776 | 11140  | 11772  |
| UN72103 | Rsa1.0.00012.1 | 288 | 222148 | 4.00E-56  | 117 | 119 | 98 +  | 32  | 150 | 150221 | 150339 |
| UN72104 | Rsa1.0.00387.1 | 674 | 495407 | 2.00E-20  | 70  | 76  | 92 -  | 194 | 269 | 87494  | 87569  |
| UN72105 | Rsa1.0.04646.1 | 748 | 16541  | 1.00E-83  | 164 | 166 | 98 +  | 161 | 326 | 9517   | 9682   |
| UN72106 | Rsa1.0.02820.1 | 634 | 27629  | 0         | 487 | 488 | 99 +  | 147 | 634 | 1548   | 2035   |
| UN72107 | Rsa1.0.00529.1 | 673 | 77487  | 1.00E-147 | 291 | 300 | 97 -  | 203 | 502 | 21073  | 21372  |
| UN72108 | Rsa1.0.06346.1 | 764 | 11203  | 1.00E-180 | 388 | 409 | 94 +  | 347 | 750 | 4198   | 4596   |
| UN72109 | Rsa1.0.18364.1 | 686 | 1614   | 2.00E-85  | 200 | 212 | 94 -  | 475 | 686 | 686    | 895    |

|         |                |     |        |           |     |     |       |     |     |        |        |
|---------|----------------|-----|--------|-----------|-----|-----|-------|-----|-----|--------|--------|
| UN72110 | Rsa1.0.01556.1 | 115 | 163858 | 1.00E-50  | 110 | 113 | 97 -  | 3   | 115 | 162665 | 162777 |
| UN72111 | Rsa1.0.02414.1 | 775 | 31625  | 1.00E-102 | 205 | 209 | 98 -  | 560 | 767 | 20274  | 20482  |
| UN72112 | Rsa1.0.24982.1 | 791 | 957    | 1.00E-116 | 268 | 285 | 94 +  | 296 | 579 | 677    | 957    |
| UN72113 | Rsa1.0.02478.1 | 691 | 150183 | 2.00E-97  | 191 | 193 | 98 -  | 206 | 397 | 132913 | 133105 |
| UN72114 | Rsa1.0.00110.1 | 801 | 132719 | 1.00E-98  | 183 | 183 | 100 + | 255 | 437 | 93859  | 94041  |
| UN72115 | Rsa1.0.01799.1 | 756 | 39127  | 0         | 681 | 708 | 96 -  | 53  | 756 | 9106   | 9813   |
| UN72116 | Rsa1.0.00144.1 | 334 | 120708 | 1.00E-143 | 329 | 342 | 96 -  | 1   | 334 | 111566 | 111907 |
| UN72117 | Rsa1.0.00104.1 | 742 | 368722 | 0         | 474 | 481 | 98 -  | 261 | 738 | 43240  | 43720  |
| UN72118 | Rsa1.0.00008.1 | 525 | 358124 | 1.00E-170 | 309 | 311 | 99 +  | 215 | 525 | 250704 | 251014 |
| UN72119 | Rsa1.0.00223.1 | 572 | 106231 | 1.00E-162 | 295 | 297 | 99 -  | 2   | 298 | 65148  | 65444  |
| UN72120 | Rsa1.0.00248.1 | 707 | 163568 | 1.00E-121 | 239 | 245 | 97 -  | 460 | 704 | 100588 | 100832 |
| UN72121 | Rsa1.0.01068.1 | 711 | 55208  | 1.00E-140 | 261 | 264 | 98 +  | 201 | 464 | 52907  | 53170  |
| UN72122 | Rsa1.0.00015.1 | 658 | 561803 | 1.00E-180 | 323 | 324 | 99 -  | 107 | 430 | 193913 | 194236 |
| UN72123 | Rsa1.0.01077.1 | 601 | 54772  | 1.00E-121 | 234 | 237 | 98 -  | 365 | 601 | 25098  | 25333  |
| UN72124 | Rsa1.0.24194.1 | 690 | 1001   | 1.00E-111 | 237 | 247 | 95 -  | 17  | 261 | 656    | 902    |
| UN72125 | Rsa1.0.00810.1 | 755 | 63289  | 1.00E-117 | 234 | 239 | 97 -  | 518 | 755 | 7706   | 7944   |
| UN72126 | Rsa1.0.00045.1 | 380 | 328694 | 1.00E-153 | 363 | 390 | 93 -  | 2   | 380 | 131813 | 132201 |
| UN72127 | Rsa1.0.02038.1 | 770 | 35715  | 1.00E-126 | 235 | 237 | 99 -  | 2   | 238 | 6640   | 6876   |
| UN72128 | Rsa1.0.00016.1 | 739 | 831256 | 6.00E-70  | 165 | 175 | 94 +  | 397 | 571 | 663018 | 663192 |
| UN72129 | Rsa1.0.01674.1 | 729 | 168300 | 0         | 377 | 390 | 96 +  | 336 | 722 | 2860   | 3249   |
| UN72130 | Rsa1.0.00522.1 | 754 | 78103  | 1.00E-107 | 225 | 232 | 96 +  | 519 | 747 | 49920  | 50151  |
| UN72131 | Rsa1.0.01185.1 | 501 | 149842 | 7.00E-41  | 113 | 122 | 92 -  | 314 | 435 | 110406 | 110527 |
| UN72132 | Rsa1.0.00914.1 | 713 | 59880  | 2.00E-42  | 89  | 89  | 100 + | 524 | 612 | 38192  | 38280  |
| UN72133 | Rsa1.0.03645.1 | 712 | 21599  | 1.00E-101 | 193 | 195 | 98 -  | 418 | 612 | 13810  | 14004  |
| UN72134 | Rsa1.0.38003.1 | 570 | 593    | 3.00E-65  | 130 | 131 | 99 +  | 440 | 570 | 237    | 367    |
| UN72135 | Rsa1.0.00001.1 | 544 | 363028 | 1.00E-136 | 266 | 273 | 97 -  | 78  | 350 | 265418 | 265690 |
| UN72136 | Rsa1.0.00038.1 | 705 | 314568 | 0         | 680 | 704 | 96 -  | 2   | 701 | 166461 | 167155 |
| UN72137 | Rsa1.0.02231.1 | 803 | 33661  | 0         | 770 | 811 | 94 +  | 2   | 800 | 30166  | 30973  |
| UN72138 | Rsa1.0.03241.1 | 760 | 24423  | 0         | 705 | 732 | 96 -  | 2   | 730 | 11093  | 11824  |
| UN72139 | Rsa1.0.03506.1 | 593 | 22416  | 0         | 550 | 571 | 96 +  | 29  | 591 | 8413   | 8980   |
| UN72140 | Rsa1.0.00501.1 | 755 | 79545  | 1.00E-117 | 235 | 242 | 97 +  | 152 | 393 | 65214  | 65455  |
| UN72141 | Rsa1.0.00110.1 | 716 | 132719 | 1.00E-141 | 292 | 303 | 96 +  | 170 | 472 | 3903   | 4204   |
| UN72142 | Rsa1.0.01828.1 | 770 | 38681  | 0         | 763 | 775 | 98 +  | 2   | 770 | 36313  | 37087  |
| UN72143 | Rsa1.0.00078.1 | 539 | 175053 | 1.00E-177 | 348 | 357 | 97 -  | 186 | 539 | 40458  | 40813  |
| UN72144 | Rsa1.0.00278.1 | 789 | 231896 | 0         | 415 | 439 | 94 +  | 3   | 435 | 22583  | 23012  |
| UN72145 | Rsa1.0.03937.1 | 676 | 19969  | 1.00E-92  | 176 | 177 | 99 -  | 3   | 179 | 5147   | 5323   |
| UN72146 | Rsa1.0.17508.1 | 683 | 1813   | 2.00E-78  | 245 | 276 | 88 +  | 34  | 309 | 1191   | 1464   |
| UN72147 | Rsa1.0.02606.1 | 802 | 29635  | 1.00E-92  | 202 | 212 | 95 +  | 56  | 267 | 5992   | 6197   |
| UN72148 | Rsa1.0.03434.1 | 662 | 22960  | 0         | 508 | 509 | 99 -  | 155 | 662 | 17503  | 18011  |

|         |                |     |        |           |     |     |      |     |     |        |        |
|---------|----------------|-----|--------|-----------|-----|-----|------|-----|-----|--------|--------|
| UN72149 | Rsa1.0.01602.1 | 601 | 42503  | 0         | 475 | 485 | 97 - | 3   | 487 | 40981  | 41463  |
| UN72150 | Rsa1.0.00964.1 | 692 | 316648 | 0         | 671 | 691 | 97 - | 2   | 692 | 5005   | 5695   |
| UN72151 | Rsa1.0.01632.1 | 657 | 181224 | 4.00E-12  | 59  | 66  | 89 + | 423 | 488 | 18735  | 18800  |
| UN72152 | Rsa1.0.00331.1 | 760 | 176754 | 1.00E-153 | 284 | 287 | 98 - | 318 | 604 | 99092  | 99378  |
| UN72153 | Rsa1.0.11528.1 | 719 | 5478   | 0         | 415 | 420 | 98 - | 2   | 421 | 164    | 583    |
| UN72154 | Rsa1.0.00476.1 | 750 | 280966 | 1.00E-144 | 292 | 303 | 96 - | 294 | 596 | 246593 | 246895 |
| UN72155 | Rsa1.0.00838.1 | 653 | 153820 | 3.00E-77  | 162 | 167 | 97 - | 487 | 653 | 147907 | 148073 |
| UN72156 | Rsa1.0.01331.1 | 566 | 47944  | 0         | 471 | 492 | 95 - | 75  | 566 | 23249  | 23734  |
| UN72157 | Rsa1.0.18346.1 | 690 | 1617   | 0         | 409 | 414 | 98 - | 9   | 422 | 962    | 1375   |
| UN72158 | Rsa1.0.00437.1 | 611 | 84879  | 0         | 574 | 594 | 96 + | 19  | 611 | 49774  | 50363  |
| UN72159 | Rsa1.0.47369.1 | 736 | 477    | 1.00E-136 | 296 | 309 | 95 - | 417 | 723 | 171    | 477    |
| UN72160 | Rsa1.0.00424.1 | 287 | 86005  | 2.00E-49  | 107 | 108 | 99 - | 3   | 110 | 77825  | 77931  |
| UN72161 | Rsa1.0.00041.1 | 582 | 186197 | 0         | 337 | 339 | 99 - | 244 | 582 | 56660  | 56998  |
| UN72162 | Rsa1.0.00005.1 | 696 | 353093 | 0         | 595 | 634 | 93 + | 60  | 692 | 55339  | 55951  |
| UN72163 | Rsa1.0.07327.1 | 678 | 9549   | 1.00E-167 | 316 | 322 | 98 + | 357 | 678 | 4858   | 5179   |
| UN72164 | Rsa1.0.00327.1 | 701 | 94892  | 0         | 553 | 584 | 94 - | 1   | 582 | 70801  | 71372  |
| UN72165 | Rsa1.0.05410.1 | 753 | 13840  | 0         | 484 | 529 | 91 - | 3   | 510 | 6327   | 6840   |
| UN72166 | Rsa1.0.02136.1 | 659 | 34707  | 1.00E-111 | 235 | 244 | 96 - | 393 | 636 | 9202   | 9444   |
| UN72167 | Rsa1.0.00736.1 | 621 | 66455  | 0         | 605 | 624 | 96 + | 2   | 621 | 56796  | 57419  |
| UN72168 | Rsa1.0.01090.1 | 770 | 54385  | 0         | 518 | 539 | 96 - | 6   | 544 | 28177  | 28715  |
| UN72169 | Rsa1.0.00915.1 | 666 | 194446 | 1.00E-177 | 327 | 330 | 99 - | 338 | 666 | 54112  | 54441  |
| UN72170 | Rsa1.0.00237.1 | 702 | 235974 | 1.00E-118 | 237 | 244 | 97 + | 5   | 248 | 4728   | 4971   |
| UN72171 | Rsa1.0.03820.1 | 300 | 20664  | 5.00E-68  | 148 | 151 | 98 - | 2   | 151 | 5679   | 5828   |
| UN72172 | Rsa1.0.10471.1 | 717 | 5836   | 0         | 690 | 715 | 96 + | 3   | 717 | 101    | 815    |
| UN72173 | Rsa1.0.03818.1 | 687 | 20668  | 1.00E-106 | 202 | 204 | 99 + | 118 | 321 | 10043  | 10246  |
| UN72174 | Rsa1.0.01539.1 | 748 | 43698  | 1.00E-166 | 304 | 305 | 99 + | 3   | 306 | 3617   | 3921   |
| UN72175 | Rsa1.0.38173.1 | 625 | 590    | 1.00E-132 | 286 | 299 | 95 - | 318 | 615 | 9      | 305    |
| UN72176 | Rsa1.0.00421.1 | 511 | 86365  | 1.00E-121 | 247 | 253 | 97 - | 261 | 511 | 81275  | 81527  |
| UN72177 | Rsa1.0.03820.1 | 282 | 20664  | 3.00E-17  | 66  | 70  | 94 - | 105 | 174 | 7385   | 7452   |
| UN72178 | Rsa1.0.00278.1 | 601 | 231896 | 1.00E-125 | 246 | 252 | 97 - | 350 | 601 | 84751  | 85002  |
| UN72179 | Rsa1.0.01112.1 | 623 | 310601 | 1.00E-113 | 232 | 240 | 96 + | 384 | 623 | 31685  | 31924  |
| UN72180 | Rsa1.0.03706.1 | 593 | 21255  | 6.00E-97  | 229 | 246 | 93 + | 3   | 239 | 9964   | 10206  |
| UN72181 | Rsa1.0.00485.1 | 644 | 80937  | 1.00E-126 | 260 | 269 | 96 + | 130 | 398 | 27885  | 28152  |
| UN72182 | Rsa1.0.00015.1 | 638 | 561803 | 1.00E-102 | 195 | 197 | 98 - | 352 | 548 | 207135 | 207331 |
| UN72183 | Rsa1.0.04773.1 | 253 | 16037  | 1.00E-65  | 130 | 131 | 99 + | 2   | 132 | 7829   | 7959   |
| UN72184 | Rsa1.0.02581.1 | 674 | 29896  | 0         | 429 | 440 | 97 + | 74  | 511 | 29274  | 29713  |
| UN72185 | Rsa1.0.00065.1 | 459 | 454616 | 2.00E-93  | 192 | 198 | 96 + | 262 | 459 | 254496 | 254693 |
| UN72186 | Rsa1.0.00380.1 | 652 | 89748  | 0         | 605 | 663 | 91 + | 13  | 652 | 7443   | 8094   |
| UN72187 | Rsa1.0.02754.1 | 664 | 28213  | 4.00E-83  | 184 | 193 | 95 + | 10  | 202 | 12757  | 12949  |

|         |                |     |        |           |     |     |       |     |     |        |        |
|---------|----------------|-----|--------|-----------|-----|-----|-------|-----|-----|--------|--------|
| UN72188 | Rsa1.0.08172.1 | 712 | 7793   | 0         | 424 | 437 | 97 +  | 262 | 695 | 4864   | 5300   |
| UN72189 | Rsa1.0.00041.1 | 359 | 186197 | 1.00E-160 | 343 | 359 | 95 +  | 2   | 359 | 167703 | 168056 |
| UN72190 | Rsa1.0.04741.1 | 806 | 16164  | 1.00E-123 | 303 | 327 | 92 +  | 3   | 320 | 5287   | 5604   |
| UN72191 | Rsa1.0.00108.1 | 787 | 478491 | 1.00E-95  | 187 | 190 | 98 +  | 223 | 412 | 419082 | 419271 |
| UN72192 | Rsa1.0_12636.1 | 748 | 5168   | 1.00E-149 | 434 | 487 | 89 -  | 111 | 584 | 4033   | 4514   |
| UN72193 | Rsa1.0_00018.1 | 789 | 410899 | 1.00E-144 | 296 | 306 | 96 -  | 7   | 310 | 175462 | 175766 |
| UN72194 | Rsa1.0.08846.1 | 823 | 6867   | 4.00E-74  | 201 | 213 | 94 -  | 554 | 759 | 4373   | 4585   |
| UN72195 | Rsa1.0.08717.1 | 789 | 7008   | 1.00E-86  | 166 | 167 | 99 +  | 42  | 208 | 370    | 536    |
| UN72196 | Rsa1.0.09299.1 | 783 | 6476   | 0         | 759 | 789 | 96 -  | 2   | 783 | 4067   | 4849   |
| UN72197 | Rsa1.0.03356.1 | 543 | 23487  | 1.00E-164 | 320 | 328 | 97 +  | 154 | 480 | 1225   | 1552   |
| UN72198 | Rsa1.0.00312.1 | 736 | 96765  | 0         | 466 | 480 | 97 +  | 166 | 645 | 57367  | 57846  |
| UN72199 | Rsa1.0.00343.1 | 691 | 93570  | 1.00E-149 | 331 | 349 | 94 -  | 135 | 481 | 89079  | 89423  |
| UN72200 | Rsa1.0.01370.1 | 226 | 47093  | 2.00E-73  | 152 | 156 | 97 +  | 3   | 158 | 8444   | 8599   |
| UN72201 | Rsa1.0.00890.1 | 764 | 323870 | 1.00E-170 | 346 | 357 | 96 -  | 3   | 359 | 201460 | 201811 |
| UN72202 | Rsa1.0.02840.1 | 737 | 27386  | 0         | 733 | 735 | 99 +  | 3   | 737 | 19686  | 20419  |
| UN72203 | Rsa1.0.00381.1 | 707 | 89718  | 1.00E-155 | 316 | 328 | 96 -  | 49  | 373 | 32508  | 32835  |
| UN72204 | Rsa1.0.18964.1 | 814 | 1503   | 1.00E-144 | 278 | 284 | 97 -  | 32  | 315 | 1220   | 1503   |
| UN72205 | Rsa1.0_13593.1 | 332 | 4685   | 1.00E-114 | 226 | 232 | 97 +  | 101 | 332 | 2590   | 2821   |
| UN72206 | #              | #   | #      | #         | #   | #   | #     | #   | #   | #      | #      |
| UN72207 | Rsa1.0.05541.1 | 663 | 139959 | 1.00E-159 | 293 | 296 | 98 -  | 3   | 298 | 134704 | 134999 |
| UN72208 | Rsa1.0.00270.1 | 426 | 101236 | 1.00E-126 | 256 | 265 | 96 -  | 162 | 426 | 496    | 760    |
| UN72209 | Rsa1.0.00108.1 | 499 | 478491 | 1.00E-125 | 249 | 256 | 97 +  | 2   | 257 | 283947 | 284202 |
| UN72210 | Rsa1.0.00527.1 | 714 | 77733  | 1.00E-73  | 174 | 185 | 94 -  | 249 | 433 | 55478  | 55662  |
| UN72211 | Rsa1.0.00016.1 | 394 | 831256 | 0         | 389 | 394 | 98 +  | 2   | 394 | 374480 | 374873 |
| UN72212 | Rsa1.0.00348.1 | 739 | 92818  | 1.00E-101 | 217 | 226 | 96 +  | 406 | 628 | 39112  | 39337  |
| UN72213 | Rsa1.0.00386.1 | 569 | 89134  | 2.00E-44  | 101 | 104 | 97 +  | 424 | 527 | 28362  | 28465  |
| UN72214 | Rsa1.0.02217.1 | 654 | 33812  | 0         | 651 | 655 | 99 -  | 1   | 654 | 31192  | 31845  |
| UN72215 | Rsa1.0.00002.1 | 772 | 601661 | 0         | 746 | 778 | 95 -  | 3   | 772 | 437228 | 438003 |
| UN72216 | Rsa1.0.00556.1 | 664 | 207212 | 0         | 654 | 663 | 98 +  | 2   | 664 | 179589 | 180251 |
| UN72217 | Rsa1.0.03552.1 | 671 | 22151  | 1.00E-129 | 255 | 262 | 97 +  | 3   | 264 | 11173  | 11434  |
| UN72218 | Rsa1.0.00341.1 | 770 | 249309 | 0         | 673 | 728 | 92 -  | 4   | 713 | 82409  | 83121  |
| UN72219 | Rsa1.0.00067.1 | 737 | 415055 | 1.00E-131 | 271 | 281 | 96 +  | 231 | 509 | 226623 | 226903 |
| UN72220 | Rsa1.0.02937.1 | 650 | 26605  | 1.00E-119 | 218 | 218 | 100 + | 145 | 362 | 8143   | 8360   |
| UN72221 | Rsa1.0.00168.1 | 667 | 115870 | 0         | 474 | 499 | 94 -  | 28  | 521 | 98954  | 99440  |
| UN72222 | Rsa1.0.01002.1 | 724 | 57063  | 0         | 691 | 716 | 96 +  | 3   | 718 | 2737   | 3449   |
| UN72223 | Rsa1.0.01435.1 | 722 | 45942  | 2.00E-91  | 208 | 218 | 95 +  | 504 | 718 | 42964  | 43181  |
| UN72224 | Rsa1.0.00042.1 | 715 | 171507 | 1.00E-30  | 89  | 93  | 95 +  | 624 | 715 | 90841  | 90932  |
| UN72225 | Rsa1.0.01138.1 | 670 | 190615 | 6.00E-85  | 166 | 168 | 98 -  | 3   | 170 | 15777  | 15944  |
| UN72226 | Rsa1.0.06518.1 | 600 | 10859  | 0         | 391 | 394 | 99 -  | 3   | 396 | 7554   | 7947   |

|         |                |     |        |           |     |     |       |     |     |        |        |
|---------|----------------|-----|--------|-----------|-----|-----|-------|-----|-----|--------|--------|
| UN72227 | Rsa1.0_04203.1 | 562 | 18479  | 1.00E-171 | 307 | 308 | 99 -  | 254 | 561 | 3545   | 3852   |
| UN72228 | Rsa1.0_01696.1 | 783 | 301850 | 0         | 716 | 734 | 97 +  | 51  | 783 | 38987  | 39720  |
| UN72229 | Rsa1.0_02600.1 | 497 | 29657  | 0         | 344 | 348 | 98 +  | 2   | 349 | 27377  | 27724  |
| UN72230 | Rsa1.0_01511.1 | 740 | 44235  | 0         | 614 | 616 | 99 -  | 41  | 656 | 7364   | 7979   |
| UN72231 | Rsa1.0_17794.1 | 442 | 1740   | 1.00E-126 | 273 | 285 | 95 +  | 159 | 442 | 1      | 284    |
| UN72232 | #              | #   | #      | #         | #   | #   | #     | #   | #   | #      | #      |
| UN72233 | Rsa1.0_00636.1 | 726 | 71113  | 0         | 684 | 692 | 98 +  | 36  | 723 | 15974  | 16665  |
| UN72234 | Rsa1.0_04107.1 | 639 | 19007  | 1.00E-118 | 328 | 366 | 89 +  | 280 | 638 | 14891  | 15256  |
| UN72235 | Rsa1.0_00082.1 | 646 | 237584 | 0         | 456 | 495 | 92 -  | 159 | 640 | 68502  | 68996  |
| UN72236 | Rsa1.0_00788.1 | 513 | 64237  | 0         | 487 | 516 | 94 -  | 1   | 513 | 43496  | 43999  |
| UN72237 | Rsa1.0_22703.1 | 379 | 1102   | 4.00E-97  | 189 | 192 | 98 +  | 18  | 209 | 600    | 791    |
| UN72238 | Rsa1.0_02287.1 | 442 | 32986  | 8.00E-65  | 138 | 142 | 97 +  | 80  | 221 | 7714   | 7855   |
| UN72239 | Rsa1.0_00930.1 | 426 | 59224  | 0         | 422 | 426 | 99 -  | 1   | 426 | 18860  | 19285  |
| UN72240 | Rsa1.0_00402.1 | 617 | 385315 | 0         | 615 | 615 | 100 - | 3   | 617 | 272802 | 273416 |
| UN72241 | Rsa1.0_01561.1 | 677 | 43227  | 5.00E-98  | 197 | 202 | 97 +  | 465 | 666 | 8897   | 9098   |
| UN72242 | Rsa1.0_00037.1 | 696 | 307838 | 1.00E-140 | 270 | 276 | 97 -  | 108 | 383 | 57552  | 57827  |
| UN72243 | Rsa1.0_00556.1 | 399 | 207212 | 1.00E-143 | 297 | 310 | 95 -  | 1   | 310 | 38117  | 38426  |
| UN72244 | #              | #   | #      | #         | #   | #   | #     | #   | #   | #      | #      |
| UN72245 | Rsa1.0_03159.1 | 808 | 24946  | 0         | 376 | 380 | 98 +  | 92  | 471 | 14982  | 15361  |
| UN72246 | Rsa1.0_00067.1 | 795 | 415055 | 1.00E-153 | 289 | 294 | 98 -  | 258 | 551 | 391818 | 392111 |
| UN72247 | Rsa1.0_00381.1 | 548 | 89718  | 1.00E-148 | 266 | 266 | 100 + | 3   | 268 | 63833  | 64098  |
| UN72248 | Rsa1.0_01620.1 | 576 | 42091  | 1.00E-152 | 487 | 558 | 87 +  | 2   | 559 | 15403  | 15951  |
| UN72249 | Rsa1.0_00507.1 | 658 | 79074  | 7.00E-94  | 219 | 233 | 93 -  | 204 | 436 | 11609  | 11838  |
| UN72250 | Rsa1.0_02212.1 | 712 | 33840  | 1.00E-157 | 320 | 334 | 95 -  | 2   | 335 | 23313  | 23638  |
| UN72251 | Rsa1.0_00308.1 | 606 | 96915  | 1.00E-79  | 226 | 252 | 89 +  | 366 | 602 | 80355  | 80603  |
| UN72252 | Rsa1.0_00154.1 | 702 | 189461 | 1.00E-101 | 187 | 187 | 100 - | 304 | 490 | 185304 | 185490 |
| UN72253 | Rsa1.0_00608.1 | 799 | 172672 | 1.00E-111 | 214 | 217 | 98 -  | 3   | 219 | 6409   | 6625   |
| UN72254 | Rsa1.0_00049.1 | 723 | 167018 | 0         | 414 | 418 | 99 +  | 10  | 427 | 19445  | 19862  |
| UN72255 | Rsa1.0_00016.1 | 692 | 831256 | 0         | 570 | 635 | 89 +  | 29  | 660 | 17350  | 17944  |
| UN72256 | Rsa1.0_02841.1 | 835 | 27383  | 1.00E-133 | 309 | 331 | 93 +  | 117 | 444 | 23270  | 23600  |
| UN72257 | #              | #   | #      | #         | #   | #   | #     | #   | #   | #      | #      |
| UN72258 | Rsa1.0_03216.1 | 801 | 24540  | 1.00E-55  | 117 | 119 | 98 -  | 465 | 583 | 12558  | 12676  |
| UN72259 | Rsa1.0_00204.1 | 766 | 109056 | 2.00E-73  | 199 | 216 | 92 -  | 249 | 460 | 95019  | 95230  |
| UN72260 | Rsa1.0_01860.1 | 778 | 38057  | 1.00E-74  | 161 | 167 | 96 -  | 556 | 722 | 23461  | 23627  |
| UN72261 | Rsa1.0_03326.1 | 159 | 23710  | 3.00E-68  | 153 | 159 | 96 +  | 2   | 159 | 17338  | 17496  |
| UN72262 | Rsa1.0_00451.1 | 558 | 322533 | 1.00E-101 | 193 | 195 | 98 -  | 364 | 558 | 283490 | 283684 |
| UN72263 | Rsa1.0_00802.1 | 675 | 63846  | 2.00E-85  | 190 | 198 | 95 -  | 450 | 642 | 10361  | 10558  |
| UN72264 | Rsa1.0_00497.1 | 592 | 79830  | 2.00E-72  | 256 | 291 | 87 +  | 283 | 562 | 65195  | 65483  |
| UN72265 | Rsa1.0_04073.1 | 760 | 19238  | 1.00E-124 | 226 | 226 | 100 + | 290 | 515 | 9240   | 9465   |

|         |                |     |        |           |     |     |      |     |     |        |        |
|---------|----------------|-----|--------|-----------|-----|-----|------|-----|-----|--------|--------|
| UN72266 | Rsa1.0.00502.1 | 615 | 204180 | 1.00E-143 | 293 | 302 | 97 + | 1   | 296 | 58455  | 58755  |
| UN72267 | Rsa1.0.02871.1 | 768 | 27085  | 2.00E-97  | 202 | 209 | 96 + | 200 | 408 | 4450   | 4658   |
| UN72268 | Rsa1.0.00467.1 | 728 | 156542 | 0         | 409 | 425 | 96 - | 304 | 728 | 104345 | 104769 |
| UN72269 | Rsa1.0.01028.1 | 218 | 56401  | 4.00E-74  | 205 | 226 | 90 - | 2   | 218 | 9806   | 10031  |
| UN72270 | Rsa1.0.01903.1 | 813 | 37451  | 1.00E-147 | 316 | 324 | 97 - | 497 | 813 | 32795  | 33118  |
| UN72271 | Rsa1.0.00759.1 | 172 | 65465  | 2.00E-29  | 153 | 179 | 85 - | 6   | 172 | 63284  | 63453  |
| UN72272 | Rsa1.0.01105.1 | 661 | 53958  | 1.00E-111 | 232 | 240 | 96 - | 422 | 661 | 7742   | 7980   |
| UN72273 | Rsa1.0.00121.1 | 646 | 278029 | 1.00E-170 | 396 | 427 | 92 - | 1   | 427 | 271267 | 271693 |
| UN72274 | Rsa1.0.02024.1 | 707 | 149168 | 2.00E-94  | 201 | 208 | 96 + | 4   | 211 | 134344 | 134550 |
| UN72275 | Rsa1.0.00651.1 | 607 | 247766 | 1.00E-119 | 241 | 250 | 96 + | 6   | 255 | 230989 | 231229 |
| UN72276 | Rsa1.0.04788.1 | 808 | 15984  | 0         | 689 | 728 | 94 + | 107 | 808 | 4118   | 4845   |
| UN72277 | Rsa1.0.01355.1 | 509 | 47303  | 3.00E-95  | 290 | 327 | 88 - | 187 | 509 | 25880  | 26192  |
| UN72278 | Rsa1.0.01466.1 | 820 | 45161  | 1.00E-172 | 328 | 334 | 98 - | 4   | 336 | 14126  | 14459  |
| UN72279 | Rsa1.0.02671.1 | 657 | 28887  | 1.00E-141 | 361 | 400 | 90 + | 1   | 395 | 3301   | 3679   |
| UN72280 | Rsa1.0.08326.1 | 395 | 7534   | 0         | 392 | 394 | 99 - | 2   | 395 | 2415   | 2808   |
| UN72281 | Rsa1.0.00296.1 | 748 | 97854  | 1.00E-179 | 439 | 478 | 91 + | 27  | 501 | 16704  | 17163  |
| UN72282 | Rsa1.0.07914.1 | 603 | 8294   | 1.00E-79  | 230 | 255 | 90 - | 268 | 518 | 6332   | 6579   |
| UN72283 | Rsa1.0.00168.1 | 110 | 115870 | 6.00E-22  | 59  | 61  | 96 + | 50  | 110 | 39481  | 39541  |
| UN72284 | Rsa1.0.00055.1 | 532 | 520193 | 4.00E-98  | 211 | 220 | 95 - | 4   | 220 | 395526 | 395745 |
| UN72285 | Rsa1.0.00085.1 | 655 | 142226 | 0         | 644 | 655 | 98 - | 1   | 655 | 7443   | 8097   |
| UN72286 | Rsa1.0.02891.1 | 795 | 27010  | 1.00E-135 | 269 | 273 | 98 + | 526 | 795 | 692    | 964    |
| UN72287 | Rsa1.0.14197.1 | 665 | 3674   | 1.00E-138 | 258 | 261 | 98 - | 18  | 278 | 2329   | 2589   |
| UN72288 | Rsa1.0.00804.1 | 778 | 63726  | 1.00E-180 | 411 | 428 | 96 - | 345 | 758 | 15940  | 16367  |
| UN72289 | Rsa1.0.01926.1 | 617 | 37206  | 1.00E-142 | 291 | 301 | 96 + | 319 | 617 | 6451   | 6748   |
| UN72290 | Rsa1.0.02367.1 | 749 | 32106  | 1.00E-177 | 317 | 318 | 99 + | 249 | 566 | 5463   | 5780   |
| UN72291 | Rsa1.0.02744.1 | 753 | 28268  | 1.00E-153 | 312 | 319 | 97 + | 408 | 722 | 20828  | 21146  |
| UN72292 | Rsa1.0.00599.1 | 801 | 73418  | 0         | 551 | 606 | 90 - | 222 | 801 | 60546  | 61145  |
| UN72293 | Rsa1.0.01898.1 | 781 | 37491  | 0         | 425 | 444 | 95 - | 342 | 781 | 1593   | 2036   |
| UN72294 | Rsa1.0.00648.1 | 462 | 70351  | 1.00E-125 | 247 | 252 | 98 - | 212 | 462 | 10103  | 10354  |
| UN72295 | Rsa1.0.00321.1 | 549 | 95671  | 1.00E-100 | 201 | 206 | 97 - | 344 | 549 | 82672  | 82877  |
| UN72296 | Rsa1.0.00632.1 | 343 | 183777 | 2.33E-156 | 302 | 310 | 97 + | 38  | 343 | 167237 | 167545 |
| UN72297 | Rsa1.0.26359.1 | 698 | 895    | 1.00E-121 | 259 | 271 | 95 + | 225 | 492 | 588    | 858    |
| UN72298 | Rsa1.0.09832.1 | 764 | 6129   | 0         | 445 | 471 | 94 + | 308 | 764 | 2536   | 3004   |
| UN72299 | Rsa1.0.05208.1 | 342 | 14504  | 1.00E-136 | 291 | 305 | 95 + | 37  | 341 | 3908   | 4210   |
| UN72300 | Rsa1.0.02183.1 | 561 | 34170  | 7.00E-32  | 80  | 83  | 96 - | 3   | 85  | 28624  | 28706  |
| UN72301 | Rsa1.0.00248.1 | 652 | 163568 | 0         | 447 | 457 | 97 + | 4   | 460 | 22615  | 23064  |
| UN72302 | Rsa1.0.00573.1 | 635 | 74821  | 0         | 396 | 415 | 95 - | 3   | 413 | 46214  | 46628  |
| UN72303 | Rsa1.0.00015.1 | 756 | 561803 | 0         | 356 | 362 | 98 - | 4   | 365 | 255040 | 255401 |
| UN72304 | Rsa1.0.00108.1 | 138 | 478491 | 3.00E-24  | 97  | 109 | 88 - | 32  | 137 | 59174  | 59279  |



|         |                |     |        |           |     |     |       |     |     |        |        |
|---------|----------------|-----|--------|-----------|-----|-----|-------|-----|-----|--------|--------|
| UN72305 | Rsa1.0_14063.1 | 428 | 3852   | 1.00E-179 | 399 | 425 | 93 +  | 5   | 428 | 2477   | 2901   |
| UN72306 | Rsa1.0_02347.1 | 759 | 32332  | 7.00E-88  | 189 | 197 | 95 -  | 139 | 335 | 20362  | 20558  |
| UN72307 | Rsa1.0_00008.1 | 627 | 358124 | 0         | 476 | 479 | 99 +  | 128 | 606 | 270334 | 270812 |
| UN72308 | Rsa1.0_00166.1 | 735 | 240912 | 0         | 384 | 394 | 97 -  | 342 | 735 | 128327 | 128720 |
| UN72309 | Rsa1.0_02189.1 | 578 | 34098  | 0         | 572 | 577 | 99 -  | 2   | 578 | 5185   | 5761   |
| UN72310 | Rsa1.0_01064.1 | 761 | 55295  | 6.00E-30  | 99  | 108 | 91 +  | 631 | 738 | 19865  | 19971  |
| UN72311 | Rsa1.0_00301.1 | 539 | 365315 | 0         | 453 | 461 | 98 -  | 1   | 458 | 320960 | 321420 |
| UN72312 | Rsa1.0_14689.1 | 765 | 3155   | 4.00E-74  | 172 | 182 | 94 -  | 433 | 614 | 2225   | 2406   |
| UN72313 | Rsa1.0_04998.1 | 773 | 15180  | 1.00E-151 | 356 | 383 | 92 +  | 3   | 383 | 14234  | 14607  |
| UN72314 | Rsa1.0_01537.1 | 771 | 187285 | 1.00E-154 | 331 | 347 | 95 -  | 374 | 715 | 175483 | 175826 |
| UN72315 | Rsa1.0_02494.1 | 513 | 132923 | 4.00E-76  | 181 | 189 | 95 -  | 321 | 508 | 6062   | 6248   |
| UN72316 | Rsa1.0_00409.1 | 268 | 146788 | 2.00E-58  | 151 | 163 | 92 -  | 96  | 258 | 146244 | 146406 |
| UN72317 | Rsa1.0_00047.1 | 534 | 168582 | 7.00E-78  | 197 | 209 | 94 -  | 321 | 527 | 165076 | 165279 |
| UN72318 | Rsa1.0_06764.1 | 806 | 10398  | 0         | 629 | 650 | 96 -  | 159 | 800 | 9363   | 10004  |
| UN72319 | Rsa1.0_00180.1 | 670 | 114581 | 1.00E-125 | 249 | 255 | 97 -  | 206 | 458 | 103588 | 103842 |
| UN72320 | Rsa1.0_01955.1 | 699 | 36850  | 0         | 586 | 597 | 98 +  | 93  | 688 | 18144  | 18739  |
| UN72321 | Rsa1.0_09599.1 | 656 | 6260   | 1.00E-121 | 245 | 249 | 98 -  | 411 | 656 | 4794   | 5042   |
| UN72322 | Rsa1.0_00384.1 | 518 | 89278  | 1.00E-155 | 296 | 302 | 98 +  | 217 | 518 | 71680  | 71981  |
| UN72323 | Rsa1.0_08203.1 | 732 | 7742   | 5.00E-98  | 211 | 220 | 95 -  | 409 | 625 | 6099   | 6318   |
| UN72324 | Rsa1.0_01704.1 | 641 | 40711  | 0         | 430 | 450 | 95 +  | 192 | 641 | 31626  | 32069  |
| UN72325 | Rsa1.0_00008.1 | 567 | 358124 | 2.00E-22  | 91  | 103 | 88 -  | 373 | 475 | 40522  | 40624  |
| UN72326 | Rsa1.0_05362.1 | 740 | 14049  | 0         | 716 | 743 | 96 -  | 3   | 740 | 4385   | 5124   |
| UN72327 | Rsa1.0_00119.1 | 675 | 467509 | 5.00E-73  | 152 | 156 | 97 +  | 389 | 544 | 330591 | 330746 |
| UN72328 | Rsa1.0_00100.1 | 699 | 249232 | 0         | 496 | 504 | 98 -  | 3   | 506 | 184859 | 185361 |
| UN72329 | Rsa1.0_01811.1 | 729 | 38977  | 3.00E-81  | 164 | 166 | 98 +  | 524 | 688 | 1187   | 1352   |
| UN72330 | Rsa1.0_31792.1 | 680 | 718    | 0         | 622 | 665 | 93 -  | 8   | 670 | 54     | 718    |
| UN72331 | Rsa1.0_02365.1 | 614 | 32118  | 0         | 485 | 493 | 98 +  | 55  | 541 | 22635  | 23126  |
| UN72332 | Rsa1.0_01077.1 | 708 | 54772  | 0         | 519 | 548 | 94 -  | 143 | 689 | 23790  | 24331  |
| UN72333 | Rsa1.0_01414.1 | 744 | 149508 | 6.00E-76  | 157 | 161 | 97 +  | 67  | 227 | 8113   | 8273   |
| UN72334 | Rsa1.0_01236.1 | 677 | 50156  | 1.00E-143 | 348 | 373 | 93 +  | 311 | 677 | 1967   | 2336   |
| UN72335 | Rsa1.0_02244.1 | 679 | 33494  | 1.00E-172 | 329 | 335 | 98 +  | 1   | 329 | 7413   | 7747   |
| UN72336 | Rsa1.0_00730.1 | 736 | 66673  | 0         | 697 | 712 | 97 -  | 28  | 732 | 7320   | 8031   |
| UN72337 | Rsa1.0_00324.1 | 554 | 218805 | 1.00E-104 | 211 | 217 | 97 +  | 338 | 554 | 37472  | 37688  |
| UN72338 | Rsa1.0_00888.1 | 474 | 60978  | 1.00E-175 | 373 | 391 | 95 -  | 86  | 474 | 54464  | 54854  |
| UN72339 | Rsa1.0_01450.1 | 712 | 144251 | 0         | 667 | 702 | 95 -  | 5   | 703 | 13836  | 14534  |
| UN72340 | Rsa1.0_01476.1 | 605 | 172928 | 5.00E-82  | 187 | 199 | 93 +  | 3   | 201 | 7914   | 8103   |
| UN72341 | Rsa1.0_11893.1 | 339 | 5379   | 6.00E-68  | 131 | 131 | 100 + | 1   | 131 | 1715   | 1845   |
| UN72342 | Rsa1.0_00425.1 | 745 | 147080 | 0         | 737 | 750 | 98 -  | 2   | 745 | 3362   | 4111   |
| UN72343 | Rsa1.0_14454.1 | 510 | 3372   | 0         | 428 | 431 | 99 +  | 80  | 510 | 2738   | 3168   |

|         |                |     |        |           |     |     |       |     |     |        |        |
|---------|----------------|-----|--------|-----------|-----|-----|-------|-----|-----|--------|--------|
| UN72344 | Rsa1.0.01666.1 | 751 | 173972 | 0         | 466 | 498 | 93 -  | 1   | 483 | 14751  | 15242  |
| UN72345 | Rsa1.0.00990.1 | 751 | 57445  | 0         | 714 | 770 | 92 +  | 2   | 749 | 56004  | 56759  |
| UN72346 | Rsa1.0.00665.1 | 588 | 69539  | 0         | 440 | 452 | 97 +  | 18  | 468 | 42293  | 42744  |
| UN72347 | Rsa1.0.02431.1 | 609 | 31504  | 0         | 498 | 533 | 93 -  | 79  | 609 | 17749  | 18264  |
| UN72348 | Rsa1.0.06376.1 | 659 | 11135  | 2.00E-72  | 146 | 147 | 99 -  | 513 | 658 | 818    | 964    |
| UN72349 | Rsa1.0.00065.1 | 419 | 454616 | 0         | 418 | 419 | 99 -  | 1   | 419 | 403584 | 404002 |
| UN72350 | Rsa1.0.00128.1 | 729 | 228675 | 0         | 413 | 441 | 93 +  | 289 | 726 | 65228  | 65668  |
| UN72351 | Rsa1.0.01136.1 | 741 | 52724  | 0         | 512 | 533 | 96 +  | 203 | 732 | 4772   | 5303   |
| UN72352 | Rsa1.0.01767.1 | 640 | 39615  | 1.00E-155 | 278 | 278 | 100 - | 3   | 280 | 15694  | 15971  |
| UN72353 | Rsa1.0.00028.1 | 794 | 293984 | 0         | 406 | 422 | 96 +  | 185 | 606 | 275174 | 275595 |
| UN72354 | Rsa1.0.01705.1 | 297 | 40710  | 3.00E-66  | 144 | 148 | 97 +  | 3   | 150 | 37221  | 37367  |
| UN72355 | Rsa1.0.00344.1 | 666 | 191774 | 0         | 613 | 615 | 99 +  | 2   | 616 | 117897 | 118511 |
| UN72356 | Rsa1.0.03751.1 | 624 | 21025  | 0         | 544 | 557 | 97 -  | 68  | 624 | 17740  | 18296  |
| UN72357 | Rsa1.0.00008.1 | 785 | 358124 | 1.00E-83  | 182 | 190 | 95 +  | 105 | 294 | 306947 | 307136 |
| UN72358 | Rsa1.0.01453.1 | 737 | 45449  | 0         | 708 | 738 | 95 -  | 2   | 730 | 7266   | 8003   |
| UN72359 | Rsa1.0.00571.1 | 674 | 329018 | 0         | 491 | 514 | 95 +  | 165 | 674 | 145042 | 145555 |
| UN72360 | Rsa1.0.00974.1 | 593 | 57893  | 1.00E-100 | 201 | 206 | 97 +  | 79  | 284 | 31389  | 31594  |
| UN72361 | Rsa1.0.00451.1 | 539 | 322533 | 1.00E-170 | 335 | 345 | 97 -  | 198 | 539 | 263709 | 264053 |
| UN72362 | Rsa1.0.02221.1 | 258 | 33796  | 4.00E-53  | 115 | 118 | 97 +  | 87  | 204 | 10684  | 10801  |
| UN72363 | Rsa1.0.02528.1 | 619 | 30452  | 1.00E-155 | 339 | 361 | 93 +  | 1   | 346 | 18580  | 18940  |
| UN72364 | Rsa1.0.00208.1 | 847 | 108565 | 0         | 724 | 740 | 97 -  | 6   | 744 | 63481  | 64220  |
| UN72365 | Rsa1.0.00008.1 | 689 | 358124 | 0         | 483 | 491 | 98 +  | 3   | 487 | 191629 | 192119 |
| UN72366 | Rsa1.0.00001.1 | 650 | 363028 | 1.00E-112 | 261 | 283 | 92 +  | 220 | 502 | 357259 | 357526 |
| UN72367 | Rsa1.0.02725.1 | 802 | 28404  | 1.00E-155 | 296 | 302 | 98 +  | 198 | 499 | 782    | 1083   |
| UN72368 | Rsa1.0.02223.1 | 479 | 152421 | 0         | 463 | 480 | 96 +  | 3   | 475 | 11558  | 12036  |
| UN72369 | Rsa1.0.00480.1 | 672 | 81325  | 1.00E-83  | 158 | 158 | 100 - | 284 | 441 | 53673  | 53830  |
| UN72370 | Rsa1.0.01789.1 | 635 | 39250  | 0         | 394 | 394 | 100 + | 242 | 635 | 9809   | 10202  |
| UN72371 | Rsa1.0.00642.1 | 758 | 201230 | 1.00E-67  | 154 | 159 | 96 -  | 595 | 751 | 62813  | 62971  |
| UN72372 | Rsa1.0.00857.1 | 463 | 61904  | 1.00E-177 | 439 | 481 | 91 -  | 2   | 463 | 15551  | 16028  |
| UN72373 | Rsa1.0.03007.1 | 627 | 26070  | 1.00E-129 | 283 | 299 | 94 -  | 47  | 345 | 3366   | 3664   |
| UN72374 | Rsa1.0.04142.1 | 836 | 18861  | 1.00E-154 | 300 | 308 | 97 +  | 455 | 762 | 1699   | 2006   |
| UN72375 | Rsa1.0.05823.1 | 659 | 12521  | 0         | 378 | 383 | 98 -  | 3   | 385 | 7458   | 7840   |
| UN72376 | Rsa1.0.00224.1 | 660 | 327530 | 1.00E-132 | 291 | 307 | 94 +  | 357 | 660 | 199796 | 200099 |
| UN72377 | Rsa1.0.01659.1 | 534 | 164577 | 8.00E-87  | 240 | 264 | 90 +  | 3   | 264 | 145486 | 145746 |
| UN72378 | Rsa1.0.00725.1 | 742 | 66757  | 1.00E-138 | 283 | 294 | 96 +  | 4   | 297 | 5313   | 5606   |
| UN72379 | Rsa1.0.08756.1 | 810 | 6955   | 6.00E-73  | 161 | 168 | 95 -  | 2   | 169 | 136    | 303    |
| UN72380 | Rsa1.0.32059.1 | 766 | 711    | 1.00E-117 | 256 | 269 | 95 -  | 263 | 531 | 37     | 302    |
| UN72381 | Rsa1.0.14655.1 | 754 | 3184   | 1.00E-126 | 278 | 290 | 95 -  | 468 | 754 | 2312   | 2601   |
| UN72382 | Rsa1.0.00473.1 | 699 | 212204 | 4.00E-86  | 180 | 186 | 96 -  | 237 | 422 | 48625  | 48810  |

|         |                |     |        |           |     |     |       |     |     |        |        |
|---------|----------------|-----|--------|-----------|-----|-----|-------|-----|-----|--------|--------|
| UN72383 | Rsa1.0.01691.1 | 784 | 40921  | 7.00E-79  | 153 | 154 | 99 -  | 149 | 302 | 16512  | 16665  |
| UN72384 | Rsa1.0.01180.1 | 754 | 51517  | 0         | 391 | 399 | 97 +  | 359 | 754 | 15191  | 15589  |
| UN72385 | Rsa1.0.00887.1 | 821 | 61048  | 1.00E-102 | 195 | 197 | 98 +  | 218 | 414 | 49405  | 49601  |
| UN72386 | Rsa1.0.00722.1 | 160 | 66840  | 1.00E-58  | 145 | 151 | 96 -  | 4   | 154 | 15932  | 16079  |
| UN72387 | Rsa1.0.00067.1 | 532 | 415055 | 1.00E-138 | 293 | 307 | 95 +  | 226 | 532 | 351902 | 352199 |
| UN72388 | Rsa1.0.01325.1 | 821 | 48131  | 0         | 419 | 427 | 98 +  | 2   | 428 | 16463  | 16887  |
| UN72389 | Rsa1.0.01610.1 | 693 | 42274  | 0         | 601 | 621 | 96 -  | 73  | 693 | 19040  | 19660  |
| UN72390 | Rsa1.0.00630.1 | 762 | 71281  | 1.00E-110 | 220 | 223 | 98 -  | 542 | 762 | 34436  | 34658  |
| UN72391 | Rsa1.0.00034.1 | 679 | 260119 | 1.00E-83  | 169 | 172 | 98 +  | 508 | 679 | 89248  | 89416  |
| UN72392 | Rsa1.0.07003.1 | 599 | 10045  | 0         | 534 | 590 | 90 +  | 28  | 599 | 592    | 1165   |
| UN72393 | Rsa1.0.00810.1 | 686 | 63289  | 0         | 427 | 447 | 95 +  | 242 | 686 | 6634   | 7077   |
| UN72394 | Rsa1.0.01355.1 | 514 | 47303  | 1.00E-138 | 249 | 249 | 100 + | 266 | 514 | 7405   | 7653   |
| UN72395 | Rsa1.0.01948.1 | 197 | 36966  | 2.00E-14  | 50  | 53  | 94 -  | 4   | 56  | 10236  | 10288  |
| UN72396 | Rsa1.0.08015.1 | 791 | 8078   | 1.00E-131 | 249 | 253 | 98 -  | 3   | 255 | 2281   | 2533   |
| UN72397 | Rsa1.0.00286.1 | 471 | 98709  | 3.00E-83  | 223 | 239 | 93 +  | 231 | 465 | 11606  | 11841  |
| UN72398 | Rsa1.0.00123.1 | 667 | 325650 | 1.00E-169 | 305 | 306 | 99 -  | 362 | 667 | 296370 | 296675 |
| UN72399 | Rsa1.0.00466.1 | 317 | 82132  | 1.00E-122 | 279 | 295 | 94 -  | 1   | 295 | 29534  | 29822  |
| UN72400 | Rsa1.0.00065.1 | 721 | 454616 | 0         | 388 | 405 | 95 -  | 3   | 405 | 440277 | 440681 |
| UN72401 | Rsa1.0.00034.1 | 650 | 260119 | 0         | 617 | 619 | 99 +  | 1   | 617 | 118782 | 119400 |
| UN72402 | #              | #   | #      | #         | #   | #   | #     | #   | #   | #      | #      |
| UN72403 | Rsa1.0.05045.1 | 629 | 15035  | 0         | 621 | 627 | 99 -  | 3   | 629 | 8401   | 9027   |
| UN72404 | Rsa1.0.03043.1 | 746 | 130531 | 1.00E-110 | 224 | 230 | 97 +  | 426 | 654 | 21857  | 22086  |
| UN72405 | Rsa1.0.01856.1 | 614 | 38181  | 1.00E-136 | 295 | 308 | 95 +  | 311 | 614 | 16610  | 16916  |
| UN72406 | Rsa1.0.01142.1 | 774 | 52464  | 0         | 491 | 511 | 96 +  | 3   | 505 | 48146  | 48656  |
| UN72407 | Rsa1.0.03766.1 | 737 | 20970  | 1.00E-168 | 486 | 545 | 89 -  | 3   | 522 | 1940   | 2478   |
| UN72408 | Rsa1.0.02045.1 | 100 | 35650  | 1.00E-25  | 93  | 102 | 91 -  | 2   | 100 | 9068   | 9169   |
| UN72409 | Rsa1.0.02046.1 | 650 | 162733 | 0         | 359 | 363 | 98 -  | 288 | 650 | 32777  | 33139  |
| UN72410 | Rsa1.0.05049.1 | 268 | 15025  | 1.00E-114 | 255 | 268 | 95 -  | 2   | 268 | 4603   | 4869   |
| UN72411 | Rsa1.0.00758.1 | 568 | 65477  | 0         | 508 | 512 | 99 +  | 3   | 514 | 23437  | 23945  |
| UN72412 | Rsa1.0.07738.1 | 503 | 8686   | 0         | 497 | 505 | 98 +  | 1   | 503 | 3766   | 4268   |
| UN72413 | Rsa1.0.00339.1 | 614 | 222974 | 1.00E-154 | 304 | 312 | 97 -  | 49  | 360 | 34096  | 34406  |
| UN72414 | Rsa1.0.07565.1 | 708 | 9122   | 1.00E-157 | 303 | 309 | 98 +  | 165 | 473 | 3720   | 4027   |
| UN72415 | Rsa1.0.05699.1 | 725 | 12889  | 0         | 591 | 601 | 98 -  | 126 | 725 | 11065  | 11665  |
| UN72416 | Rsa1.0.05176.1 | 526 | 14588  | 0         | 502 | 515 | 97 +  | 12  | 526 | 13776  | 14290  |
| UN72417 | Rsa1.0.01920.1 | 743 | 158533 | 3.00E-56  | 134 | 140 | 95 +  | 490 | 629 | 151015 | 151153 |
| UN72418 | Rsa1.0.00667.1 | 544 | 69460  | 1.00E-119 | 284 | 310 | 91 -  | 4   | 313 | 38799  | 39091  |
| UN72419 | Rsa1.0.00264.1 | 795 | 101674 | 1.00E-162 | 301 | 305 | 98 +  | 1   | 305 | 68816  | 69120  |
| UN72420 | Rsa1.0.00612.1 | 713 | 72376  | 1.00E-116 | 222 | 225 | 98 -  | 348 | 572 | 65151  | 65375  |
| UN72421 | Rsa1.0.00711.1 | 121 | 67223  | 4.00E-17  | 45  | 45  | 100 + | 75  | 119 | 26560  | 26604  |

|         |                |   |     |        |           |     |     |       |   |     |     |        |        |
|---------|----------------|---|-----|--------|-----------|-----|-----|-------|---|-----|-----|--------|--------|
| UN72422 | Rsa1.0_01442.1 |   | 540 | 45776  | 0         | 514 | 538 | 95 -  |   | 3   | 539 | 17939  | 18475  |
| UN72423 | #              | # | #   | #      | #         | #   | #   | #     | # | #   | #   | #      | #      |
| UN72424 | Rsa1.0_00222.1 |   | 769 | 172263 | 4.00E-80  | 152 | 152 | 100 + |   | 503 | 654 | 31294  | 31445  |
| UN72425 | Rsa1.0_06971.1 |   | 648 | 10085  | 5.00E-67  | 151 | 158 | 95 -  |   | 352 | 509 | 5075   | 5232   |
| UN72426 | Rsa1.0_01233.1 |   | 557 | 50184  | 0         | 539 | 557 | 96 -  |   | 5   | 557 | 8034   | 8590   |
| UN72427 | Rsa1.0_04280.1 |   | 569 | 18110  | 0         | 534 | 581 | 91 -  |   | 3   | 568 | 6156   | 6734   |
| UN72428 | Rsa1.0_06716.1 |   | 683 | 10482  | 1.00E-143 | 326 | 348 | 93 -  |   | 2   | 346 | 4074   | 4421   |
| UN72429 | Rsa1.0_00065.1 |   | 681 | 454616 | 0         | 413 | 414 | 99 -  |   | 26  | 439 | 145453 | 145866 |
| UN72430 | Rsa1.0_00632.1 |   | 487 | 183777 | 8.00E-99  | 225 | 239 | 94 -  |   | 249 | 487 | 146106 | 146344 |
| UN72431 | Rsa1.0_00672.1 |   | 629 | 69358  | 2.00E-91  | 186 | 191 | 97 +  |   | 439 | 629 | 37764  | 37954  |
| UN72432 | Rsa1.0_01365.1 |   | 690 | 47142  | 0         | 666 | 693 | 96 -  |   | 1   | 690 | 8771   | 9463   |
| UN72433 | Rsa1.0_00423.1 |   | 810 | 86138  | 1.00E-172 | 322 | 327 | 98 -  |   | 339 | 665 | 72588  | 72914  |
| UN72434 | Rsa1.0_01226.1 |   | 749 | 50316  | 0         | 595 | 659 | 90 -  |   | 64  | 713 | 9263   | 9892   |
| UN72435 | Rsa1.0_01544.1 |   | 621 | 185602 | 0         | 360 | 363 | 99 -  |   | 2   | 363 | 34190  | 34552  |
| UN72436 | Rsa1.0_00666.1 |   | 775 | 69505  | 1.00E-162 | 385 | 416 | 92 +  |   | 291 | 702 | 8565   | 8977   |
| UN72437 | Rsa1.0_03062.1 |   | 624 | 25678  | 1.00E-116 | 219 | 221 | 99 -  |   | 2   | 222 | 8175   | 8395   |
| UN72438 | Rsa1.0_02575.1 |   | 801 | 29944  | 0         | 416 | 431 | 96 +  |   | 6   | 436 | 18991  | 19421  |
| UN72439 | Rsa1.0_02198.1 |   | 621 | 33989  | 1.00E-106 | 199 | 200 | 99 +  |   | 407 | 606 | 15922  | 16121  |
| UN72440 | Rsa1.0_02319.1 |   | 543 | 32580  | 3.00E-86  | 218 | 231 | 94 -  |   | 317 | 543 | 6514   | 6740   |
| UN72441 | Rsa1.0_00051.1 |   | 659 | 258225 | 0         | 620 | 662 | 93 -  |   | 1   | 659 | 120116 | 120765 |
| UN72442 | Rsa1.0_00017.1 |   | 510 | 752458 | 0         | 486 | 516 | 94 +  |   | 1   | 510 | 248054 | 248562 |
| UN72443 | Rsa1.0_02268.1 |   | 267 | 33172  | 4.00E-93  | 203 | 213 | 95 +  |   | 55  | 267 | 16898  | 17110  |
| UN72444 | Rsa1.0_00131.1 |   | 531 | 432233 | 3.00E-71  | 158 | 165 | 95 +  |   | 269 | 433 | 10362  | 10526  |
| UN72445 | Rsa1.0_02262.1 |   | 378 | 33239  | 1.00E-151 | 282 | 286 | 98 +  |   | 2   | 287 | 10251  | 10536  |
| UN72446 | Rsa1.0_05344.1 |   | 587 | 14103  | 0         | 528 | 531 | 99 +  |   | 59  | 587 | 9309   | 9839   |
| UN72447 | Rsa1.0_20334.1 |   | 604 | 1316   | 1.00E-134 | 245 | 246 | 99 -  |   | 63  | 308 | 816    | 1061   |
| UN72448 | Rsa1.0_01731.1 |   | 533 | 40208  | 1.00E-91  | 196 | 204 | 96 +  |   | 165 | 368 | 30318  | 30517  |
| UN72449 | Rsa1.0_07823.1 |   | 400 | 8468   | 1.00E-120 | 275 | 293 | 93 +  |   | 112 | 400 | 4559   | 4848   |
| UN72450 | Rsa1.0_00960.1 |   | 635 | 58199  | 0         | 619 | 635 | 97 -  |   | 3   | 635 | 56282  | 56914  |
| UN72451 | Rsa1.0_00223.1 |   | 826 | 106231 | 1.00E-132 | 257 | 263 | 97 +  |   | 136 | 398 | 4493   | 4755   |
| UN72452 | Rsa1.0_00251.1 |   | 634 | 303968 | 1.00E-142 | 288 | 298 | 96 +  |   | 340 | 634 | 147121 | 147418 |
| UN72453 | Rsa1.0_47544.1 |   | 447 | 476    | 0         | 430 | 446 | 96 +  |   | 3   | 447 | 18     | 456    |
| UN72454 | Rsa1.0_00949.1 |   | 546 | 58549  | 0         | 537 | 545 | 98 +  |   | 2   | 546 | 51144  | 51680  |
| UN72455 | Rsa1.0_02295.1 |   | 608 | 149884 | 7.00E-35  | 96  | 102 | 94 +  |   | 449 | 547 | 137644 | 137745 |
| UN72456 | Rsa1.0_00032.1 |   | 663 | 306326 | 0         | 399 | 409 | 97 -  |   | 17  | 425 | 238497 | 238905 |
| UN72457 | Rsa1.0_00523.1 |   | 557 | 178770 | 0         | 420 | 430 | 97 +  |   | 6   | 433 | 129687 | 130116 |
| UN72458 | Rsa1.0_00025.1 |   | 630 | 277312 | 0         | 398 | 399 | 99 +  |   | 3   | 401 | 77638  | 78036  |
| UN72459 | Rsa1.0_76310.1 |   | 621 | 301    | 1.00E-155 | 295 | 301 | 98 -  |   | 198 | 498 | 1      | 301    |
| UN72460 | Rsa1.0_08874.1 |   | 137 | 6836   | 9.00E-65  | 134 | 137 | 97 -  |   | 1   | 137 | 700    | 836    |

|         |                |     |        |           |     |     |       |     |     |        |        |
|---------|----------------|-----|--------|-----------|-----|-----|-------|-----|-----|--------|--------|
| UN72461 | Rsa1.0_00933.1 | 668 | 59164  | 0         | 506 | 547 | 92 +  | 2   | 520 | 35594  | 36137  |
| UN72462 | #              | #   | #      | #         | #   | #   | #     | #   | #   | #      | #      |
| UN72463 | Rsa1.0_00987.1 | 823 | 57543  | 2.00E-63  | 236 | 268 | 88 +  | 418 | 683 | 36322  | 36587  |
| UN72464 | Rsa1.0_01191.1 | 609 | 51235  | 0         | 390 | 394 | 98 -  | 216 | 609 | 19928  | 20320  |
| UN72465 | Rsa1.0_04082.1 | 299 | 19180  | 1.00E-34  | 162 | 193 | 83 +  | 113 | 289 | 13083  | 13275  |
| UN72466 | Rsa1.0_19257.1 | 692 | 1455   | 1.00E-150 | 360 | 390 | 92 -  | 3   | 392 | 108    | 487    |
| UN72467 | Rsa1.0_00565.1 | 748 | 75420  | 1.00E-107 | 210 | 214 | 98 -  | 471 | 684 | 11414  | 11627  |
| UN72468 | Rsa1.0_02340.1 | 265 | 32388  | 1.00E-68  | 234 | 270 | 86 -  | 2   | 265 | 19776  | 20025  |
| UN72469 | Rsa1.0_01569.1 | 743 | 43029  | 0         | 614 | 641 | 95 -  | 90  | 727 | 24174  | 24814  |
| UN72470 | Rsa1.0_01948.1 | 711 | 36966  | 0         | 643 | 657 | 97 +  | 2   | 658 | 20609  | 21265  |
| UN72471 | #              | #   | #      | #         | #   | #   | #     | #   | #   | #      | #      |
| UN72472 | Rsa1.0_07098.1 | 669 | 9896   | 0         | 645 | 669 | 96 +  | 2   | 669 | 8600   | 9268   |
| UN72473 | Rsa1.0_02560.1 | 458 | 30091  | 0         | 452 | 458 | 98 -  | 1   | 458 | 2188   | 2645   |
| UN72474 | Rsa1.0_00586.1 | 471 | 163802 | 0         | 431 | 440 | 97 +  | 3   | 440 | 108203 | 108642 |
| UN72475 | Rsa1.0_01228.1 | 404 | 50238  | 1.00E-129 | 273 | 285 | 95 +  | 122 | 404 | 733    | 1017   |
| UN72476 | Rsa1.0_00123.1 | 610 | 325650 | 2.00E-84  | 165 | 167 | 98 +  | 186 | 352 | 254802 | 254968 |
| UN72477 | Rsa1.0_00019.1 | 577 | 301669 | 1.00E-73  | 168 | 177 | 94 -  | 3   | 179 | 285853 | 286029 |
| UN72478 | Rsa1.0_01518.1 | 592 | 141402 | 0         | 571 | 592 | 96 +  | 4   | 592 | 117712 | 118303 |
| UN72479 | Rsa1.0_00123.1 | 593 | 325650 | 1.00E-175 | 317 | 319 | 99 +  | 275 | 593 | 172233 | 172551 |
| UN72480 | Rsa1.0_00143.1 | 617 | 121313 | 0         | 407 | 409 | 99 -  | 41  | 449 | 91078  | 91486  |
| UN72481 | Rsa1.0_00047.1 | 606 | 168582 | 1.00E-124 | 235 | 238 | 98 -  | 369 | 606 | 34284  | 34521  |
| UN72482 | Rsa1.0_05077.1 | 492 | 14913  | 0         | 482 | 483 | 99 +  | 3   | 485 | 6975   | 7456   |
| UN72483 | Rsa1.0_00878.1 | 582 | 330303 | 0         | 351 | 355 | 98 -  | 3   | 357 | 168368 | 168721 |
| UN72484 | Rsa1.0_04776.1 | 769 | 16017  | 1.00E-144 | 302 | 316 | 95 -  | 5   | 320 | 971    | 1286   |
| UN72485 | Rsa1.0_00577.1 | 718 | 174827 | 0         | 354 | 358 | 98 +  | 193 | 550 | 174470 | 174827 |
| UN72486 | Rsa1.0_08069.1 | 629 | 7960   | 0         | 625 | 627 | 99 -  | 3   | 629 | 7148   | 7774   |
| UN72487 | Rsa1.0_00110.1 | 554 | 132719 | 1.00E-137 | 299 | 316 | 94 -  | 15  | 330 | 92532  | 92847  |
| UN72488 | Rsa1.0_00079.1 | 705 | 606987 | 1.00E-169 | 395 | 428 | 92 -  | 1   | 427 | 66614  | 67022  |
| UN72489 | Rsa1.0_00398.1 | 214 | 88007  | 3.00E-81  | 153 | 153 | 100 + | 62  | 214 | 62571  | 62723  |
| UN72490 | Rsa1.0_00273.1 | 493 | 326186 | 1.00E-100 | 186 | 186 | 100 - | 3   | 188 | 114809 | 114994 |
| UN72491 | Rsa1.0_00391.1 | 395 | 183853 | 1.00E-151 | 376 | 396 | 94 -  | 2   | 395 | 19753  | 20136  |
| UN72492 | Rsa1.0_00198.1 | 720 | 222963 | 1.00E-172 | 307 | 307 | 100 + | 3   | 309 | 183089 | 183395 |
| UN72493 | Rsa1.0_01105.1 | 787 | 53958  | 1.00E-151 | 289 | 292 | 98 +  | 498 | 787 | 12551  | 12842  |
| UN72494 | Rsa1.0_00053.1 | 807 | 263459 | 1.00E-135 | 265 | 272 | 97 +  | 341 | 612 | 63729  | 64000  |
| UN72495 | Rsa1.0_05463.1 | 706 | 13663  | 0         | 480 | 494 | 97 +  | 131 | 621 | 1452   | 1945   |
| UN72496 | Rsa1.0_00543.1 | 185 | 76788  | 5.00E-70  | 176 | 187 | 94 +  | 1   | 183 | 76272  | 76456  |
| UN72497 | #              | #   | #      | #         | #   | #   | #     | #   | #   | #      | #      |
| UN72498 | Rsa1.0_00522.1 | 813 | 78103  | 1.00E-105 | 209 | 214 | 97 +  | 354 | 567 | 48991  | 49204  |
| UN72499 | Rsa1.0_01806.1 | 660 | 39021  | 1.00E-98  | 186 | 187 | 99 -  | 77  | 263 | 32010  | 32196  |

|         |                |     |        |           |     |     |       |     |     |        |        |
|---------|----------------|-----|--------|-----------|-----|-----|-------|-----|-----|--------|--------|
| UN72500 | Rsa1.0.00718.1 | 805 | 279335 | 1.00E-108 | 211 | 215 | 98 -  | 339 | 553 | 24332  | 24546  |
| UN72501 | Rsa1.0.00084.1 | 661 | 142338 | 1.00E-104 | 196 | 197 | 99 +  | 465 | 661 | 71502  | 71698  |
| UN72502 | Rsa1.0.01306.1 | 668 | 48720  | 0         | 656 | 667 | 98 -  | 2   | 668 | 47304  | 47970  |
| UN72503 | Rsa1.0.07938.1 | 424 | 8225   | 0         | 417 | 423 | 98 +  | 2   | 424 | 2810   | 3231   |
| UN72504 | Rsa1.0.01899.1 | 594 | 37474  | 1.00E-140 | 262 | 265 | 98 +  | 142 | 406 | 32267  | 32531  |
| UN72505 | Rsa1.0.55571.1 | 625 | 411    | 3.00E-74  | 145 | 146 | 99 +  | 286 | 431 | 122    | 267    |
| UN72506 | Rsa1.0.01987.1 | 765 | 36446  | 1.00E-154 | 312 | 322 | 96 +  | 21  | 340 | 26870  | 27188  |
| UN72507 | Rsa1.0.00387.1 | 806 | 495407 | 0         | 778 | 806 | 96 +  | 2   | 803 | 27480  | 28285  |
| UN72508 | Rsa1.0.07945.1 | 652 | 8206   | 4.00E-86  | 168 | 170 | 98 -  | 483 | 652 | 2684   | 2853   |
| UN72509 | Rsa1.0.03352.1 | 748 | 23506  | 1.00E-73  | 147 | 149 | 98 +  | 250 | 398 | 16565  | 16713  |
| UN72510 | Rsa1.0.00351.1 | 508 | 413096 | 1.00E-168 | 299 | 299 | 100 - | 210 | 508 | 244469 | 244767 |
| UN72511 | Rsa1.0.01241.1 | 561 | 50067  | 1.00E-178 | 328 | 332 | 98 -  | 226 | 557 | 4033   | 4364   |
| UN72512 | Rsa1.0.00273.1 | 480 | 326186 | 1.00E-162 | 313 | 320 | 97 -  | 3   | 320 | 40601  | 40920  |
| UN72513 | Rsa1.0.01000.1 | 743 | 57140  | 2.00E-94  | 185 | 188 | 98 -  | 160 | 347 | 3798   | 3985   |
| UN72514 | Rsa1.0.00329.1 | 805 | 222544 | 2.00E-94  | 185 | 188 | 98 +  | 345 | 532 | 148408 | 148595 |
| UN72515 | Rsa1.0.30991.1 | 791 | 739    | 1.00E-128 | 235 | 236 | 99 -  | 5   | 240 | 1      | 236    |
| UN72516 | Rsa1.0.06693.1 | 729 | 10529  | 0         | 524 | 525 | 99 -  | 3   | 527 | 8122   | 8646   |
| UN72517 | Rsa1.0.00016.1 | 849 | 831256 | 1.00E-132 | 304 | 323 | 94 +  | 258 | 575 | 11856  | 12175  |
| UN72518 | Rsa1.0.05544.1 | 716 | 13381  | 0         | 705 | 715 | 98 -  | 2   | 716 | 7187   | 7901   |
| UN72519 | Rsa1.0.00025.1 | 420 | 277312 | 1.00E-130 | 263 | 270 | 97 -  | 152 | 420 | 80018  | 80284  |
| UN72520 | Rsa1.0.00065.1 | 811 | 454616 | 1.00E-118 | 222 | 224 | 99 -  | 3   | 226 | 202214 | 202437 |
| UN72521 | Rsa1.0.02295.1 | 746 | 149884 | 1.00E-49  | 110 | 113 | 97 +  | 509 | 621 | 9436   | 9548   |
| UN72522 | Rsa1.0.00668.1 | 781 | 69421  | 5.00E-92  | 229 | 248 | 92 +  | 197 | 444 | 6686   | 6933   |
| UN72523 | Rsa1.0.02241.1 | 699 | 33520  | 0         | 373 | 377 | 98 -  | 1   | 377 | 2796   | 3170   |
| UN72524 | Rsa1.0.02210.1 | 783 | 33857  | 0         | 667 | 696 | 95 -  | 1   | 692 | 30364  | 31059  |
| UN72525 | Rsa1.0.08080.1 | 725 | 137363 | 0         | 594 | 619 | 95 +  | 107 | 725 | 3359   | 3965   |
| UN72526 | Rsa1.0.00871.1 | 824 | 61539  | 0         | 523 | 536 | 97 -  | 142 | 675 | 44103  | 44638  |
| UN72527 | Rsa1.0.01132.1 | 823 | 52923  | 0         | 364 | 366 | 99 -  | 344 | 709 | 21001  | 21366  |
| UN72528 | Rsa1.0.02524.1 | 702 | 30496  | 0         | 369 | 372 | 99 +  | 67  | 438 | 11355  | 11726  |
| UN72529 | Rsa1.0.00473.1 | 844 | 212204 | 0         | 406 | 421 | 96 +  | 3   | 420 | 64280  | 64697  |
| UN72530 | Rsa1.0.00219.1 | 734 | 106983 | 0         | 728 | 738 | 98 +  | 2   | 734 | 20970  | 21705  |
| UN72531 | Rsa1.0.00311.1 | 808 | 96847  | 0         | 505 | 540 | 93 +  | 2   | 538 | 30375  | 30911  |
| UN72532 | Rsa1.0.00015.1 | 643 | 561803 | 0         | 443 | 444 | 99 +  | 2   | 445 | 17251  | 17694  |
| UN72533 | Rsa1.0.01543.1 | 797 | 43645  | 0         | 355 | 356 | 99 -  | 126 | 481 | 8632   | 8987   |
| UN72534 | Rsa1.0.00601.1 | 778 | 177045 | 3.00E-56  | 124 | 128 | 96 -  | 328 | 455 | 23119  | 23246  |
| UN72535 | Rsa1.0.00240.1 | 704 | 104175 | 1.00E-173 | 360 | 375 | 96 -  | 286 | 659 | 27637  | 28009  |
| UN72536 | Rsa1.0.01651.1 | 514 | 41586  | 0         | 510 | 518 | 98 -  | 3   | 514 | 22063  | 22580  |
| UN72537 | Rsa1.0.02948.1 | 512 | 26526  | 3.00E-61  | 142 | 149 | 95 +  | 72  | 220 | 5601   | 5745   |
| UN72538 | Rsa1.0.03785.1 | 542 | 20883  | 0         | 379 | 383 | 98 -  | 160 | 542 | 11329  | 11708  |

|         |                |     |        |           |     |     |       |     |     |        |        |
|---------|----------------|-----|--------|-----------|-----|-----|-------|-----|-----|--------|--------|
| UN72539 | Rsa1.0_04279.1 | 788 | 18113  | 1.00E-168 | 344 | 356 | 96 -  | 434 | 788 | 8643   | 8997   |
| UN72540 | Rsa1.0_02500.1 | 739 | 30768  | 1.00E-105 | 262 | 283 | 92 +  | 460 | 739 | 7770   | 8040   |
| UN72541 | Rsa1.0_13708.1 | 645 | 4447   | 0         | 641 | 644 | 99 -  | 3   | 645 | 2491   | 3134   |
| UN72542 | Rsa1.0_00248.1 | 773 | 163568 | 1.00E-152 | 288 | 293 | 98 -  | 387 | 679 | 40305  | 40597  |
| UN72543 | Rsa1.0_00224.1 | 741 | 327530 | 0         | 502 | 512 | 98 -  | 2   | 510 | 158213 | 158724 |
| UN72544 | Rsa1.0_07786.1 | 809 | 8569   | 1.00E-171 | 305 | 305 | 100 + | 3   | 307 | 6301   | 6605   |
| UN72545 | Rsa1.0_00272.1 | 776 | 447836 | 0         | 572 | 589 | 97 -  | 2   | 590 | 425805 | 426393 |
| UN72546 | Rsa1.0_00256.1 | 841 | 102426 | 0         | 800 | 823 | 97 -  | 6   | 822 | 8616   | 9438   |
| UN72547 | Rsa1.0_44480.1 | 262 | 506    | 1.00E-108 | 246 | 262 | 93 -  | 1   | 262 | 110    | 371    |
| UN72548 | Rsa1.0_02647.1 | 829 | 29120  | 0         | 829 | 829 | 100 - | 1   | 829 | 6575   | 7403   |
| UN72549 | Rsa1.0_05076.1 | 214 | 14916  | 7.00E-39  | 101 | 106 | 95 -  | 1   | 105 | 7017   | 7122   |
| UN72550 | Rsa1.0_01318.1 | 582 | 48275  | 0         | 468 | 479 | 97 -  | 1   | 476 | 13067  | 13545  |
| UN72551 | Rsa1.0_00662.1 | 229 | 192183 | 1.00E-114 | 224 | 229 | 97 +  | 1   | 229 | 5148   | 5376   |
| UN72552 | Rsa1.0_00149.1 | 160 | 305196 | 2.00E-47  | 141 | 156 | 90 -  | 1   | 156 | 104161 | 104316 |
| UN72553 | Rsa1.0_00351.1 | 490 | 413096 | 1.00E-125 | 296 | 318 | 93 +  | 1   | 310 | 410837 | 411149 |
| UN72554 | Rsa1.0_05563.1 | 771 | 13319  | 0         | 493 | 503 | 98 +  | 259 | 761 | 4417   | 4919   |
| UN72555 | Rsa1.0_00206.1 | 765 | 109040 | 0         | 454 | 461 | 98 -  | 1   | 458 | 14100  | 14558  |
| UN72556 | Rsa1.0_02855.1 | 786 | 27271  | 0         | 417 | 438 | 95 -  | 242 | 679 | 10502  | 10927  |
| UN72557 | Rsa1.0_03291.1 | 368 | 24000  | 7.00E-77  | 158 | 162 | 97 +  | 1   | 162 | 9554   | 9715   |
| UN72558 | Rsa1.0_01200.1 | 316 | 50895  | 8.00E-55  | 115 | 117 | 98 -  | 1   | 117 | 9971   | 10087  |
| UN72559 | Rsa1.0_00630.1 | 667 | 71281  | 0         | 469 | 469 | 100 + | 135 | 603 | 28489  | 28957  |
| UN72560 | Rsa1.0_02561.1 | 708 | 30080  | 0         | 687 | 706 | 97 +  | 3   | 708 | 23028  | 23728  |
| UN72561 | Rsa1.0_07790.1 | 358 | 8563   | 1.00E-166 | 344 | 358 | 96 -  | 3   | 358 | 745    | 1101   |
| UN72562 | Rsa1.0_03727.1 | 648 | 21158  | 1.00E-164 | 293 | 293 | 100 - | 356 | 648 | 2903   | 3195   |
| UN72563 | Rsa1.0_03889.1 | 300 | 20233  | 1.00E-139 | 287 | 299 | 95 -  | 2   | 300 | 7009   | 7307   |
| UN72564 | Rsa1.0_08359.1 | 749 | 7483   | 1.00E-52  | 112 | 114 | 98 +  | 448 | 561 | 1908   | 2021   |
| UN72565 | Rsa1.0_04963.1 | 355 | 15312  | 0         | 353 | 354 | 99 -  | 2   | 355 | 10139  | 10492  |
| UN72566 | Rsa1.0_46280.1 | 768 | 488    | 0         | 478 | 488 | 97 +  | 264 | 750 | 1      | 488    |
| UN72567 | Rsa1.0_01035.1 | 613 | 56019  | 1.00E-137 | 257 | 260 | 98 -  | 354 | 613 | 49248  | 49507  |
| UN72568 | Rsa1.0_07408.1 | 570 | 9445   | 0         | 396 | 401 | 98 -  | 171 | 570 | 6040   | 6440   |
| UN72569 | Rsa1.0_01045.1 | 748 | 55853  | 0         | 640 | 701 | 91 +  | 64  | 748 | 32847  | 33526  |
| UN72570 | Rsa1.0_01175.1 | 693 | 51674  | 0         | 525 | 529 | 99 +  | 166 | 693 | 27517  | 28045  |
| UN72571 | Rsa1.0_01882.1 | 752 | 37697  | 0         | 444 | 452 | 98 -  | 4   | 455 | 36182  | 36630  |
| UN72572 | Rsa1.0_05748.1 | 576 | 12749  | 1.00E-120 | 264 | 279 | 94 +  | 4   | 282 | 8253   | 8531   |
| UN72573 | Rsa1.0_16771.1 | 672 | 2040   | 0         | 425 | 435 | 97 -  | 4   | 437 | 1018   | 1451   |
| UN72574 | Rsa1.0_05985.1 | 790 | 12028  | 0         | 774 | 790 | 97 +  | 2   | 790 | 1059   | 1836   |
| UN72575 | Rsa1.0_00867.1 | 742 | 61635  | 1.00E-100 | 299 | 335 | 89 -  | 3   | 328 | 27352  | 27671  |
| UN72576 | Rsa1.0_01495.1 | 739 | 44613  | 0         | 565 | 610 | 92 -  | 131 | 730 | 19420  | 20014  |
| UN72577 | Rsa1.0_62848.1 | 503 | 365    | 1.00E-165 | 337 | 351 | 96 -  | 38  | 388 | 1      | 351    |

|         |                |     |        |           |     |     |       |     |     |        |        |
|---------|----------------|-----|--------|-----------|-----|-----|-------|-----|-----|--------|--------|
| UN72578 | Rsa1.0.01974.1 | 564 | 36583  | 0         | 551 | 564 | 97 +  | 1   | 564 | 417    | 977    |
| UN72579 | Rsa1.0.00075.1 | 738 | 146680 | 1.00E-121 | 288 | 308 | 93 +  | 433 | 738 | 26868  | 27164  |
| UN72580 | Rsa1.0.00039.1 | 163 | 296927 | 9.00E-50  | 149 | 162 | 91 +  | 1   | 162 | 110841 | 110997 |
| UN72581 | Rsa1.0.16327.1 | 436 | 2198   | 3.00E-67  | 139 | 142 | 97 -  | 144 | 285 | 1024   | 1165   |
| UN72582 | Rsa1.0.01909.1 | 542 | 37417  | 0         | 541 | 542 | 99 -  | 1   | 542 | 29596  | 30137  |
| UN72583 | Rsa1.0.00030.1 | 771 | 250988 | 1.00E-143 | 285 | 290 | 98 -  | 485 | 771 | 57517  | 57806  |
| UN72584 | Rsa1.0.02064.1 | 796 | 35476  | 1.00E-119 | 218 | 218 | 100 - | 187 | 404 | 17442  | 17659  |
| UN72585 | Rsa1.0.01105.1 | 809 | 53958  | 1.00E-140 | 253 | 253 | 100 + | 2   | 254 | 17402  | 17654  |
| UN72586 | Rsa1.0.00060.1 | 592 | 502678 | 0         | 496 | 508 | 97 +  | 88  | 592 | 483881 | 484388 |
| UN72587 | Rsa1.0.00222.1 | 311 | 172263 | 7.00E-49  | 99  | 99  | 100 - | 36  | 134 | 18433  | 18531  |
| UN72588 | Rsa1.0.05501.1 | 686 | 13513  | 3.00E-99  | 199 | 204 | 97 -  | 107 | 310 | 10851  | 11054  |
| UN72589 | Rsa1.0.01882.1 | 699 | 37697  | 0         | 493 | 513 | 96 +  | 184 | 692 | 11243  | 11755  |
| UN72590 | Rsa1.0.06194.1 | 199 | 11516  | 3.00E-53  | 112 | 114 | 98 -  | 1   | 114 | 7016   | 7129   |
| UN72591 | Rsa1.0.02762.1 | 774 | 28146  | 0         | 457 | 465 | 98 +  | 309 | 769 | 7047   | 7511   |
| UN72592 | Rsa1.0.00017.1 | 622 | 752458 | 0         | 559 | 575 | 97 +  | 3   | 571 | 313679 | 314244 |
| UN72593 | Rsa1.0.01274.1 | 527 | 49419  | 1.00E-130 | 271 | 283 | 95 -  | 245 | 527 | 28279  | 28561  |
| UN72594 | Rsa1.0.03925.1 | 776 | 20025  | 0         | 361 | 367 | 98 +  | 2   | 368 | 7266   | 7632   |
| UN72595 | Rsa1.0.05442.1 | 707 | 13741  | 0         | 704 | 707 | 99 -  | 2   | 707 | 12189  | 12895  |
| UN72596 | Rsa1.0.02601.1 | 744 | 29654  | 1.00E-116 | 242 | 249 | 97 -  | 498 | 744 | 21585  | 21833  |
| UN72597 | Rsa1.0.00056.1 | 799 | 332604 | 2.00E-63  | 139 | 144 | 96 -  | 477 | 620 | 83072  | 83215  |
| UN72598 | Rsa1.0.01658.1 | 548 | 41414  | 1.00E-137 | 301 | 316 | 95 +  | 214 | 527 | 16631  | 16946  |
| UN72599 | Rsa1.0.29258.1 | 769 | 788    | 1.00E-114 | 227 | 233 | 97 -  | 402 | 634 | 1      | 233    |
| UN72600 | Rsa1.0.05906.1 | 326 | 12270  | 1.00E-132 | 313 | 330 | 94 -  | 2   | 325 | 6490   | 6819   |
| UN72601 | Rsa1.0.00015.1 | 642 | 561803 | 0         | 639 | 643 | 99 +  | 1   | 642 | 406815 | 407457 |
| UN72602 | Rsa1.0.13791.1 | 616 | 4330   | 1.00E-111 | 217 | 220 | 98 +  | 278 | 497 | 2049   | 2267   |
| UN72603 | Rsa1.0.01026.1 | 415 | 171624 | 0         | 414 | 415 | 99 -  | 1   | 415 | 16954  | 17368  |
| UN72604 | Rsa1.0.05599.1 | 435 | 143653 | 1.00E-139 | 253 | 254 | 99 -  | 182 | 435 | 139736 | 139989 |
| UN72605 | Rsa1.0.07725.1 | 678 | 8707   | 4.00E-86  | 189 | 198 | 95 -  | 113 | 310 | 188    | 385    |
| UN72606 | Rsa1.0.09674.1 | 557 | 6219   | 0         | 531 | 536 | 99 +  | 2   | 537 | 948    | 1483   |
| UN72607 | Rsa1.0.00046.1 | 698 | 320315 | 2.33E-156 | 272 | 275 | 98 +  | 52  | 326 | 78545  | 78819  |
| UN72608 | Rsa1.0.00233.1 | 680 | 104918 | 0         | 645 | 677 | 95 +  | 4   | 680 | 44062  | 44719  |
| UN72609 | Rsa1.0.02675.1 | 635 | 28852  | 1.00E-144 | 272 | 276 | 98 -  | 154 | 429 | 19232  | 19507  |
| UN72610 | Rsa1.0.07426.1 | 128 | 9413   | 3.00E-30  | 117 | 126 | 92 -  | 1   | 126 | 7751   | 7869   |
| UN72611 | Rsa1.0.00322.1 | 308 | 212233 | 1.00E-105 | 282 | 311 | 90 +  | 1   | 308 | 79355  | 79649  |
| UN72612 | Rsa1.0.00545.1 | 650 | 189649 | 0         | 528 | 529 | 99 +  | 2   | 530 | 42289  | 42817  |
| UN72613 | Rsa1.0.02502.1 | 821 | 30740  | 0         | 424 | 427 | 99 +  | 104 | 530 | 8772   | 9198   |
| UN72614 | Rsa1.0.00863.1 | 737 | 254535 | 0         | 561 | 585 | 95 -  | 137 | 718 | 251985 | 252566 |
| UN72615 | Rsa1.0.00565.1 | 788 | 75420  | 0         | 747 | 761 | 98 -  | 3   | 753 | 21022  | 21781  |
| UN72616 | Rsa1.0.00642.1 | 702 | 201230 | 4.00E-77  | 165 | 171 | 96 +  | 529 | 699 | 179823 | 179993 |



|         |                |     |        |           |     |     |       |     |     |        |        |
|---------|----------------|-----|--------|-----------|-----|-----|-------|-----|-----|--------|--------|
| UN72617 | Rsa1.0_00403.1 | 616 | 87701  | 0         | 430 | 447 | 96 +  | 164 | 604 | 41873  | 42318  |
| UN72618 | Rsa1.0_04859.1 | 313 | 15699  | 1.00E-142 | 273 | 279 | 97 -  | 35  | 313 | 10905  | 11183  |
| UN72619 | Rsa1.0_06898.1 | 764 | 10191  | 3.00E-93  | 184 | 186 | 98 -  | 1   | 185 | 5050   | 5235   |
| UN72620 | Rsa1.0_06071.1 | 457 | 11813  | 0         | 375 | 376 | 99 +  | 82  | 457 | 2556   | 2931   |
| UN72621 | Rsa1.0_00218.1 | 291 | 201480 | 1.00E-106 | 195 | 195 | 100 - | 97  | 291 | 170996 | 171190 |
| UN72622 | Rsa1.0_00017.1 | 716 | 752458 | 0         | 388 | 401 | 96 +  | 181 | 581 | 37911  | 38310  |
| UN72623 | Rsa1.0_01381.1 | 666 | 46908  | 0         | 345 | 352 | 98 +  | 315 | 666 | 34959  | 35310  |
| UN72624 | Rsa1.0_01825.1 | 782 | 38725  | 0         | 382 | 392 | 97 -  | 48  | 439 | 27952  | 28343  |
| UN72625 | Rsa1.0_00803.1 | 366 | 144228 | 8.00E-83  | 225 | 243 | 92 -  | 3   | 241 | 44886  | 45122  |
| UN72626 | Rsa1.0_01316.1 | 618 | 48325  | 0         | 360 | 368 | 97 +  | 196 | 562 | 42403  | 42770  |
| UN72627 | Rsa1.0_00179.1 | 498 | 393324 | 0         | 432 | 443 | 97 -  | 60  | 498 | 277922 | 278363 |
| UN72628 | Rsa1.0_19831.1 | 701 | 1377   | 2.00E-48  | 129 | 139 | 92 +  | 1   | 134 | 930    | 1068   |
| UN72629 | Rsa1.0_00083.1 | 615 | 442773 | 1.00E-139 | 251 | 251 | 100 - | 355 | 605 | 123441 | 123691 |
| UN72630 | Rsa1.0_05698.1 | 698 | 12892  | 1.00E-112 | 259 | 277 | 93 -  | 125 | 401 | 10009  | 10285  |
| UN72631 | Rsa1.0_00094.1 | 700 | 139042 | 0         | 664 | 686 | 96 +  | 15  | 700 | 7744   | 8425   |
| UN72632 | Rsa1.0_01200.1 | 724 | 50895  | 1.00E-109 | 224 | 232 | 96 +  | 331 | 562 | 8991   | 9222   |
| UN72633 | Rsa1.0_05821.1 | 379 | 12531  | 1.00E-154 | 356 | 380 | 93 -  | 1   | 379 | 4201   | 4575   |
| UN72634 | Rsa1.0_02650.1 | 684 | 29047  | 1.00E-156 | 283 | 284 | 99 +  | 390 | 673 | 28637  | 28920  |
| UN72635 | Rsa1.0_00299.1 | 641 | 97770  | 0         | 550 | 561 | 98 -  | 81  | 641 | 42626  | 43185  |
| UN72636 | Rsa1.0_00912.1 | 689 | 59923  | 0         | 381 | 390 | 97 -  | 295 | 680 | 32491  | 32880  |
| UN72637 | Rsa1.0_01096.1 | 313 | 54266  | 2.00E-74  | 163 | 170 | 95 +  | 1   | 170 | 1604   | 1773   |
| UN72638 | Rsa1.0_01495.1 | 623 | 44613  | 0         | 362 | 371 | 97 +  | 4   | 373 | 18006  | 18376  |
| UN72639 | Rsa1.0_01974.1 | 660 | 36583  | 0         | 647 | 660 | 98 -  | 1   | 660 | 1474   | 2133   |
| UN72640 | Rsa1.0_02192.1 | 674 | 171291 | 1.00E-121 | 338 | 371 | 91 +  | 7   | 367 | 10129  | 10492  |
| UN72641 | Rsa1.0_01909.1 | 714 | 37417  | 0         | 712 | 712 | 100 + | 3   | 714 | 27213  | 27924  |
| UN72642 | Rsa1.0_00419.1 | 555 | 86562  | 1.00E-165 | 480 | 535 | 89 +  | 28  | 555 | 15452  | 15983  |
| UN72643 | Rsa1.0_05489.1 | 520 | 13562  | 2.00E-69  | 140 | 142 | 98 +  | 1   | 142 | 6322   | 6463   |
| UN72644 | Rsa1.0_00018.1 | 610 | 410899 | 5.00E-82  | 230 | 250 | 92 -  | 3   | 248 | 68920  | 69163  |
| UN72645 | Rsa1.0_00413.1 | 785 | 86921  | 8.00E-23  | 116 | 136 | 85 -  | 12  | 147 | 64048  | 64168  |
| UN72646 | Rsa1.0_00030.1 | 320 | 250988 | 1.00E-147 | 306 | 320 | 95 +  | 1   | 320 | 57418  | 57737  |
| UN72647 | Rsa1.0_00947.1 | 146 | 58664  | 6.00E-63  | 140 | 146 | 95 +  | 1   | 146 | 57526  | 57671  |
| UN72648 | Rsa1.0_59016.1 | 178 | 388    | 9.00E-41  | 103 | 109 | 94 +  | 2   | 110 | 116    | 224    |
| UN72649 | Rsa1.0_00324.1 | 442 | 218805 | 3.00E-58  | 127 | 131 | 96 -  | 312 | 442 | 188833 | 188963 |
| UN72650 | Rsa1.0_00052.1 | 628 | 162771 | 1.00E-178 | 557 | 634 | 87 -  | 3   | 627 | 122775 | 123401 |
| UN72651 | Rsa1.0_01274.1 | 581 | 49419  | 8.00E-84  | 197 | 210 | 93 +  | 1   | 205 | 26518  | 26727  |
| UN72652 | Rsa1.0_05599.1 | 238 | 143653 | 8.00E-79  | 170 | 177 | 96 +  | 60  | 236 | 140765 | 140941 |
| UN72653 | Rsa1.0_01769.1 | 186 | 39568  | 1.00E-61  | 159 | 172 | 92 +  | 15  | 186 | 32201  | 32372  |
| UN72654 | Rsa1.0_09178.1 | 613 | 6578   | 1.00E-114 | 220 | 223 | 98 +  | 391 | 613 | 2426   | 2645   |
| UN72655 | Rsa1.0_00545.1 | 373 | 189649 | 1.00E-115 | 281 | 305 | 92 -  | 12  | 305 | 44026  | 44330  |

|         |                |     |        |           |     |     |       |     |     |        |        |
|---------|----------------|-----|--------|-----------|-----|-----|-------|-----|-----|--------|--------|
| UN72656 | Rsa1.0_00486.1 | 430 | 80875  | 1.00E-108 | 211 | 215 | 98 -  | 216 | 430 | 24171  | 24385  |
| UN72657 | Rsa1.0_02231.1 | 473 | 33661  | 2.00E-47  | 103 | 105 | 98 +  | 223 | 327 | 20314  | 20418  |
| UN72658 | Rsa1.0_02948.1 | 446 | 26526  | 1.00E-121 | 256 | 264 | 96 +  | 1   | 262 | 6934   | 7196   |
| UN72659 | Rsa1.0_05140.1 | 772 | 14710  | 2.33E-156 | 305 | 316 | 96 -  | 1   | 316 | 5327   | 5636   |
| UN72660 | Rsa1.0_01054.1 | 110 | 55470  | 1.00E-29  | 99  | 110 | 90 +  | 1   | 110 | 23563  | 23672  |
| UN72661 | Rsa1.0_01075.1 | 449 | 156953 | 0         | 439 | 450 | 97 -  | 1   | 449 | 137106 | 137555 |
| UN72662 | Rsa1.0_00346.1 | 746 | 93130  | 0         | 370 | 373 | 99 +  | 1   | 373 | 39647  | 40019  |
| UN72663 | Rsa1.0_05653.1 | 601 | 13043  | 0         | 590 | 597 | 98 +  | 5   | 601 | 10811  | 11407  |
| UN72664 | Rsa1.0_00105.1 | 351 | 134138 | 1.00E-135 | 335 | 366 | 91 +  | 1   | 351 | 91830  | 92188  |
| UN72665 | Rsa1.0_00152.1 | 285 | 257730 | 1.00E-87  | 180 | 184 | 97 +  | 3   | 185 | 255980 | 256163 |
| UN72666 | Rsa1.0_00070.1 | 781 | 150321 | 0         | 716 | 777 | 92 +  | 14  | 770 | 88385  | 89158  |
| UN72667 | Rsa1.0_01528.1 | 785 | 43882  | 0         | 476 | 521 | 91 +  | 8   | 520 | 11370  | 11881  |
| UN72668 | Rsa1.0_00428.1 | 603 | 85599  | 1.00E-149 | 521 | 600 | 86 -  | 24  | 603 | 31934  | 32519  |
| UN72669 | Rsa1.0_00087.1 | 396 | 761073 | 1.00E-112 | 206 | 206 | 100 + | 3   | 208 | 580713 | 580918 |
| UN72670 | Rsa1.0_00651.1 | 102 | 247766 | 2.00E-46  | 100 | 102 | 98 +  | 1   | 102 | 195642 | 195743 |
| UN72671 | Rsa1.0_03141.1 | 252 | 25061  | 1.00E-119 | 230 | 233 | 98 -  | 7   | 238 | 8237   | 8469   |
| UN72672 | Rsa1.0_00380.1 | 362 | 89748  | 1.00E-107 | 203 | 205 | 99 -  | 158 | 362 | 48802  | 49006  |
| UN72673 | Rsa1.0_02910.1 | 739 | 26843  | 1.00E-160 | 296 | 298 | 99 -  | 443 | 739 | 24299  | 24596  |
| UN72674 | Rsa1.0_02869.1 | 763 | 27109  | 1.00E-140 | 276 | 284 | 97 +  | 33  | 316 | 10767  | 11050  |
| UN72675 | Rsa1.0_00078.1 | 650 | 175053 | 1.00E-142 | 278 | 283 | 98 +  | 3   | 285 | 6616   | 6895   |
| UN72676 | Rsa1.0_06303.1 | 706 | 11268  | 0         | 430 | 433 | 99 -  | 257 | 687 | 5225   | 5657   |
| UN72677 | Rsa1.0_02647.1 | 104 | 29120  | 9.00E-24  | 84  | 88  | 95 +  | 17  | 104 | 6796   | 6879   |
| UN72678 | Rsa1.0_03990.1 | 227 | 19676  | 4.00E-96  | 178 | 178 | 100 - | 2   | 179 | 8915   | 9092   |
| UN72679 | Rsa1.0_13838.1 | 596 | 4236   | 3.00E-68  | 170 | 183 | 92 +  | 256 | 438 | 2303   | 2479   |
| UN72680 | Rsa1.0_02955.1 | 727 | 26484  | 0         | 438 | 442 | 99 -  | 287 | 727 | 7194   | 7635   |
| UN72681 | #              | #   | #      | #         | #   | #   | #     | #   | #   | #      | #      |
| UN72682 | Rsa1.0_00523.1 | 569 | 178770 | 0         | 424 | 429 | 98 -  | 138 | 566 | 43281  | 43709  |
| UN72683 | Rsa1.0_00216.1 | 678 | 197563 | 1.00E-105 | 227 | 234 | 97 -  | 448 | 678 | 187966 | 188199 |
| UN72684 | Rsa1.0_13399.1 | 540 | 4866   | 1.00E-91  | 231 | 251 | 92 -  | 50  | 300 | 3707   | 3957   |
| UN72685 | Rsa1.0_00353.1 | 657 | 92242  | 0         | 477 | 478 | 99 -  | 2   | 479 | 19020  | 19497  |
| UN72686 | Rsa1.0_03506.1 | 770 | 22416  | 1.00E-129 | 234 | 234 | 100 - | 201 | 434 | 14927  | 15160  |
| UN72687 | Rsa1.0_00344.1 | 800 | 191774 | 0         | 685 | 709 | 96 +  | 95  | 792 | 102407 | 103114 |
| UN72688 | Rsa1.0_05322.1 | 782 | 14154  | 0         | 684 | 691 | 98 -  | 83  | 769 | 1521   | 2211   |
| UN72689 | Rsa1.0_02841.1 | 763 | 27383  | 1.00E-160 | 356 | 375 | 94 +  | 387 | 759 | 23198  | 23571  |
| UN72690 | Rsa1.0_42837.1 | 827 | 524    | 1.00E-122 | 229 | 230 | 99 -  | 497 | 725 | 1      | 230    |
| UN72691 | Rsa1.0_02750.1 | 776 | 28239  | 0         | 534 | 592 | 90 -  | 1   | 567 | 23986  | 24559  |
| UN72692 | Rsa1.0_00116.1 | 698 | 365886 | 0         | 697 | 700 | 99 +  | 1   | 698 | 215950 | 216649 |
| UN72693 | Rsa1.0_07645.1 | 668 | 8949   | 1.00E-160 | 295 | 298 | 98 -  | 1   | 298 | 4425   | 4722   |
| UN72694 | Rsa1.0_01891.1 | 628 | 37530  | 1.00E-169 | 305 | 306 | 99 +  | 152 | 457 | 6822   | 7127   |

|         |                |     |        |           |     |     |       |     |     |        |        |
|---------|----------------|-----|--------|-----------|-----|-----|-------|-----|-----|--------|--------|
| UN72695 | Rsa1.0.27704.1 | 727 | 842    | 2.33E-156 | 273 | 275 | 99 +  | 454 | 727 | 47     | 321    |
| UN72696 | Rsa1.0.03037.1 | 423 | 25825  | 1.00E-167 | 320 | 325 | 98 +  | 102 | 423 | 16353  | 16677  |
| UN72697 | Rsa1.0.00660.1 | 155 | 69688  | 2.00E-75  | 153 | 155 | 98 -  | 2   | 155 | 21963  | 22117  |
| UN72698 | Rsa1.0.00603.1 | 775 | 73299  | 0         | 764 | 773 | 98 -  | 3   | 775 | 42325  | 43091  |
| UN72699 | Rsa1.0.32167.1 | 425 | 708    | 1.00E-121 | 234 | 238 | 98 +  | 191 | 425 | 319    | 556    |
| UN72700 | Rsa1.0.00192.1 | 660 | 278200 | 1.00E-180 | 326 | 328 | 99 +  | 1   | 328 | 30333  | 30660  |
| UN72701 | Rsa1.0.04014.1 | 794 | 19572  | 0         | 778 | 800 | 97 +  | 3   | 794 | 11462  | 12258  |
| UN72702 | Rsa1.0.02346.1 | 599 | 32337  | 0         | 595 | 598 | 99 -  | 3   | 599 | 29934  | 30531  |
| UN72703 | Rsa1.0.00701.1 | 534 | 67691  | 3.00E-74  | 145 | 146 | 99 -  | 1   | 146 | 28659  | 28804  |
| UN72704 | Rsa1.0.01303.1 | 692 | 48853  | 1.00E-125 | 278 | 295 | 94 +  | 30  | 324 | 14117  | 14411  |
| UN72705 | Rsa1.0.00417.1 | 739 | 395068 | 0         | 374 | 377 | 99 +  | 351 | 726 | 228539 | 228913 |
| UN72706 | Rsa1.0.02401.1 | 726 | 138425 | 0         | 595 | 637 | 93 +  | 19  | 649 | 1005   | 1623   |
| UN72707 | Rsa1.0.00296.1 | 673 | 97854  | 0         | 431 | 434 | 99 +  | 241 | 673 | 20174  | 20607  |
| UN72708 | Rsa1.0.02064.1 | 711 | 35476  | 5.00E-92  | 236 | 252 | 93 -  | 3   | 252 | 9518   | 9762   |
| UN72709 | Rsa1.0.00683.1 | 727 | 68638  | 1.00E-143 | 329 | 353 | 93 -  | 30  | 382 | 27365  | 27717  |
| UN72710 | Rsa1.0.00274.1 | 802 | 210119 | 1.00E-164 | 296 | 297 | 99 +  | 289 | 585 | 186905 | 187201 |
| UN72711 | Rsa1.0.05533.1 | 770 | 13402  | 0         | 724 | 735 | 98 +  | 2   | 730 | 9905   | 10639  |
| UN72712 | Rsa1.0.02485.1 | 356 | 30968  | 0         | 354 | 356 | 99 +  | 1   | 356 | 8898   | 9253   |
| UN72713 | Rsa1.0.00652.1 | 749 | 70089  | 2.00E-69  | 159 | 165 | 96 +  | 568 | 731 | 1      | 163    |
| UN72714 | Rsa1.0.00447.1 | 773 | 84051  | 1.00E-137 | 289 | 300 | 96 -  | 363 | 660 | 26113  | 26408  |
| UN72715 | Rsa1.0.01149.1 | 696 | 160459 | 1.00E-132 | 246 | 248 | 99 +  | 449 | 696 | 43118  | 43365  |
| UN72716 | Rsa1.0.00878.1 | 456 | 330303 | 2.00E-31  | 104 | 114 | 91 -  | 39  | 152 | 118200 | 118312 |
| UN72717 | Rsa1.0.00541.1 | 718 | 76863  | 0         | 332 | 332 | 100 + | 4   | 335 | 33806  | 34137  |
| UN72718 | Rsa1.0.05652.1 | 748 | 13043  | 0         | 426 | 435 | 97 -  | 260 | 694 | 536    | 970    |
| UN72719 | Rsa1.0.00042.1 | 692 | 171507 | 0         | 403 | 412 | 97 -  | 281 | 689 | 133044 | 133455 |
| UN72720 | Rsa1.0.00638.1 | 808 | 71037  | 0         | 439 | 441 | 99 -  | 3   | 443 | 7718   | 8157   |
| UN72721 | Rsa1.0.13999.1 | 637 | 3934   | 0         | 526 | 554 | 94 -  | 19  | 565 | 2      | 555    |
| UN72722 | Rsa1.0.02074.1 | 695 | 35370  | 1.00E-131 | 248 | 250 | 99 -  | 180 | 428 | 28385  | 28634  |
| UN72723 | Rsa1.0.04029.1 | 461 | 19491  | 1.00E-121 | 221 | 221 | 100 - | 241 | 461 | 11904  | 12124  |
| UN72724 | Rsa1.0.00736.1 | 712 | 66455  | 0         | 675 | 706 | 95 -  | 2   | 705 | 36516  | 37221  |
| UN72725 | Rsa1.0.00015.1 | 738 | 561803 | 1.00E-156 | 321 | 335 | 95 +  | 13  | 347 | 428770 | 429104 |
| UN72726 | Rsa1.0.00002.1 | 643 | 601661 | 0         | 642 | 642 | 100 - | 2   | 643 | 267676 | 268317 |
| UN72727 | Rsa1.0.03926.1 | 827 | 20024  | 0         | 454 | 477 | 95 -  | 161 | 636 | 976    | 1451   |
| UN72728 | Rsa1.0.02127.1 | 764 | 34764  | 0         | 552 | 566 | 97 -  | 36  | 601 | 5360   | 5921   |
| UN72729 | Rsa1.0.02950.1 | 703 | 26506  | 0         | 497 | 499 | 99 -  | 205 | 703 | 9759   | 10257  |
| UN72730 | Rsa1.0.00035.1 | 823 | 176449 | 1.00E-137 | 256 | 258 | 99 +  | 167 | 422 | 35232  | 35489  |
| UN72731 | Rsa1.0.33029.1 | 764 | 688    | 2.00E-75  | 175 | 183 | 95 +  | 525 | 704 | 345    | 527    |
| UN72732 | Rsa1.0.00421.1 | 535 | 86365  | 0         | 380 | 390 | 97 -  | 44  | 433 | 18697  | 19086  |
| UN72733 | Rsa1.0.00750.1 | 659 | 190548 | 1.00E-129 | 269 | 280 | 96 +  | 2   | 272 | 8012   | 8291   |

|         |                |     |        |           |     |     |       |     |     |        |        |
|---------|----------------|-----|--------|-----------|-----|-----|-------|-----|-----|--------|--------|
| UN72734 | Rsa1.0.00806.1 | 799 | 63674  | 0         | 438 | 447 | 97 +  | 359 | 799 | 57249  | 57695  |
| UN72735 | Rsa1.0.06538.1 | 661 | 10820  | 0         | 466 | 472 | 98 +  | 3   | 471 | 10268  | 10739  |
| UN72736 | Rsa1.0.00190.1 | 687 | 318240 | 1.00E-70  | 142 | 144 | 98 -  | 265 | 408 | 194586 | 194729 |
| UN72737 | Rsa1.0.22747.1 | 781 | 1098   | 0         | 511 | 528 | 96 +  | 47  | 574 | 492    | 1017   |
| UN72738 | Rsa1.0.00457.1 | 827 | 337301 | 1.00E-179 | 389 | 407 | 95 +  | 429 | 827 | 197550 | 197956 |
| UN72739 | Rsa1.0.01508.1 | 688 | 44334  | 0         | 414 | 415 | 99 -  | 275 | 688 | 19198  | 19612  |
| UN72740 | Rsa1.0.00351.1 | 667 | 413096 | 0         | 518 | 538 | 96 +  | 3   | 540 | 232729 | 233259 |
| UN72741 | Rsa1.0.03037.1 | 809 | 25825  | 1.00E-142 | 265 | 268 | 98 +  | 3   | 270 | 5873   | 6140   |
| UN72742 | Rsa1.0.00190.1 | 810 | 318240 | 2.00E-82  | 165 | 168 | 98 -  | 3   | 170 | 214483 | 214650 |
| UN72743 | Rsa1.0.01075.1 | 639 | 156953 | 0         | 583 | 583 | 100 + | 2   | 584 | 136076 | 136658 |
| UN72744 | Rsa1.0.06390.1 | 582 | 11106  | 1.00E-143 | 405 | 457 | 88 +  | 78  | 533 | 8286   | 8725   |
| UN72745 | Rsa1.0.00471.1 | 785 | 81897  | 0         | 572 | 581 | 98 +  | 213 | 785 | 76439  | 77019  |
| UN72746 | Rsa1.0.00614.1 | 589 | 72276  | 1.00E-156 | 280 | 280 | 100 - | 310 | 589 | 43504  | 43783  |
| UN72747 | Rsa1.0.09817.1 | 761 | 6137   | 0         | 685 | 722 | 94 +  | 1   | 717 | 4828   | 5549   |
| UN72748 | Rsa1.0.00273.1 | 178 | 326186 | 1.00E-70  | 170 | 175 | 97 -  | 1   | 174 | 6811   | 6981   |
| UN72749 | Rsa1.0.14104.1 | 759 | 3807   | 1.00E-161 | 338 | 350 | 96 +  | 355 | 703 | 2533   | 2877   |
| UN72750 | Rsa1.0.03132.1 | 639 | 25142  | 0         | 407 | 428 | 95 -  | 69  | 496 | 22052  | 22479  |
| UN72751 | Rsa1.0.00012.1 | 196 | 222148 | 8.00E-97  | 191 | 195 | 97 +  | 2   | 196 | 58315  | 58509  |
| UN72752 | Rsa1.0.02288.1 | 407 | 32984  | 1.00E-81  | 154 | 154 | 100 + | 254 | 407 | 14096  | 14249  |
| UN72753 | Rsa1.0.00293.1 | 695 | 339294 | 0         | 615 | 628 | 97 +  | 68  | 695 | 313092 | 313716 |
| UN72754 | Rsa1.0.00152.1 | 473 | 257730 | 0         | 348 | 348 | 100 - | 126 | 473 | 203808 | 204155 |
| UN72755 | Rsa1.0.03981.1 | 476 | 19724  | 1.00E-151 | 353 | 376 | 93 +  | 105 | 476 | 17481  | 17848  |
| UN72756 | Rsa1.0.00210.1 | 548 | 108424 | 0         | 536 | 550 | 97 -  | 2   | 548 | 57689  | 58238  |
| UN72757 | Rsa1.0.00441.1 | 793 | 84607  | 1.00E-108 | 202 | 203 | 99 -  | 2   | 204 | 64074  | 64276  |
| UN72758 | Rsa1.0.05662.1 | 676 | 13011  | 1.00E-95  | 184 | 186 | 98 -  | 188 | 373 | 2646   | 2831   |
| UN72759 | Rsa1.0.04213.1 | 605 | 18437  | 2.00E-66  | 150 | 156 | 96 +  | 1   | 154 | 16979  | 17134  |
| UN72760 | Rsa1.0.03155.1 | 620 | 24958  | 0         | 604 | 620 | 97 -  | 2   | 620 | 7816   | 8434   |
| UN72761 | Rsa1.0.01033.1 | 613 | 56173  | 0         | 444 | 445 | 99 +  | 3   | 447 | 3882   | 4326   |
| UN72762 | Rsa1.0.00028.1 | 676 | 293984 | 0         | 658 | 682 | 96 +  | 1   | 676 | 290363 | 291043 |
| UN72763 | Rsa1.0.02599.1 | 729 | 29660  | 0         | 457 | 473 | 96 +  | 93  | 565 | 3517   | 3980   |
| UN72764 | Rsa1.0.00176.1 | 555 | 240984 | 0         | 528 | 550 | 96 +  | 12  | 555 | 232410 | 232959 |
| UN72765 | Rsa1.0.00160.1 | 774 | 346678 | 6.00E-76  | 145 | 145 | 100 - | 11  | 155 | 196792 | 196936 |
| UN72766 | Rsa1.0.03613.1 | 668 | 21773  | 1.00E-145 | 283 | 289 | 97 -  | 346 | 633 | 21243  | 21531  |
| UN72767 | Rsa1.0.03011.1 | 586 | 26048  | 0         | 522 | 545 | 95 -  | 52  | 586 | 25451  | 25995  |
| UN72768 | Rsa1.0.38780.1 | 673 | 580    | 6.00E-79  | 220 | 240 | 91 -  | 346 | 581 | 1      | 239    |
| UN72769 | Rsa1.0.00564.1 | 763 | 75428  | 0         | 414 | 419 | 98 -  | 60  | 478 | 44905  | 45323  |
| UN72770 | Rsa1.0.03089.1 | 715 | 25465  | 0         | 706 | 718 | 98 +  | 2   | 715 | 7804   | 8520   |
| UN72771 | Rsa1.0.02076.1 | 694 | 153121 | 1.00E-177 | 317 | 318 | 99 +  | 377 | 694 | 32925  | 33242  |
| UN72772 | Rsa1.0.00273.1 | 259 | 326186 | 3.00E-60  | 121 | 122 | 99 +  | 1   | 122 | 41963  | 42084  |

|         |                |     |        |           |     |     |       |     |     |        |        |
|---------|----------------|-----|--------|-----------|-----|-----|-------|-----|-----|--------|--------|
| UN72773 | Rsa1.0.00228.1 | 783 | 105511 | 0         | 384 | 395 | 97 -  | 391 | 783 | 25600  | 25994  |
| UN72774 | Rsa1.0.15667.1 | 723 | 2492   | 1.00E-101 | 187 | 187 | 100 + | 1   | 187 | 2120   | 2306   |
| UN72775 | Rsa1.0.34677.1 | 568 | 653    | 1.00E-150 | 287 | 293 | 97 +  | 46  | 338 | 2      | 294    |
| UN72776 | Rsa1.0.03122.1 | 442 | 25207  | 0         | 373 | 380 | 98 -  | 63  | 442 | 14316  | 14695  |
| UN72777 | Rsa1.0.02168.1 | 598 | 34367  | 0         | 597 | 600 | 99 +  | 1   | 598 | 7265   | 7863   |
| UN72778 | Rsa1.0.00533.1 | 814 | 77375  | 0         | 396 | 402 | 98 -  | 3   | 403 | 38603  | 39004  |
| UN72779 | Rsa1.0.00047.1 | 540 | 168582 | 0         | 461 | 462 | 99 +  | 79  | 540 | 122835 | 123296 |
| UN72780 | Rsa1.0.00017.1 | 693 | 752458 | 4.00E-52  | 231 | 269 | 85 +  | 331 | 581 | 724162 | 724425 |
| UN72781 | Rsa1.0.03638.1 | 780 | 21634  | 0         | 513 | 524 | 97 +  | 261 | 780 | 11326  | 11849  |
| UN72782 | Rsa1.0.13882.1 | 638 | 4156   | 0         | 489 | 533 | 91 +  | 108 | 638 | 1      | 515    |
| UN72783 | Rsa1.0.01727.1 | 832 | 40243  | 1.00E-147 | 301 | 311 | 96 +  | 3   | 312 | 5156   | 5463   |
| UN72784 | Rsa1.0.00713.1 | 705 | 158017 | 1.00E-131 | 287 | 304 | 94 +  | 2   | 305 | 150669 | 150965 |
| UN72785 | Rsa1.0.00796.1 | 562 | 63997  | 1.00E-106 | 206 | 208 | 99 -  | 355 | 562 | 58181  | 58387  |
| UN72786 | Rsa1.0.00968.1 | 631 | 58020  | 0         | 630 | 632 | 99 -  | 1   | 631 | 21468  | 22099  |
| UN72787 | Rsa1.0.00026.1 | 320 | 327835 | 1.00E-161 | 312 | 319 | 97 -  | 1   | 319 | 171739 | 172056 |
| UN72788 | Rsa1.0.02183.1 | 190 | 34170  | 3.00E-59  | 137 | 144 | 95 -  | 43  | 186 | 2158   | 2301   |
| UN72789 | Rsa1.0.07710.1 | 632 | 8736   | 0         | 627 | 631 | 99 +  | 2   | 632 | 5998   | 6628   |
| UN72790 | Rsa1.0.66369.1 | 400 | 345    | 1.00E-114 | 254 | 268 | 94 -  | 7   | 270 | 50     | 315    |
| UN72791 | Rsa1.0.00818.1 | 665 | 62939  | 0         | 623 | 679 | 91 +  | 3   | 660 | 35433  | 36105  |
| UN72792 | Rsa1.0.03063.1 | 661 | 25673  | 0         | 643 | 658 | 97 +  | 5   | 661 | 2143   | 2800   |
| UN72793 | Rsa1.0.01458.1 | 762 | 175719 | 5.00E-61  | 166 | 180 | 92 -  | 9   | 188 | 415    | 588    |
| UN72794 | Rsa1.0.00778.1 | 767 | 196751 | 1.00E-141 | 261 | 263 | 99 +  | 1   | 263 | 183918 | 184180 |
| UN72795 | #              | #   | #      | #         | #   | #   | #     | #   | #   | #      | #      |
| UN72796 | Rsa1.0.00502.1 | 168 | 204180 | 1.00E-58  | 151 | 163 | 92 +  | 6   | 168 | 64004  | 64166  |
| UN72797 | Rsa1.0.00080.1 | 783 | 190437 | 2.00E-57  | 148 | 159 | 93 +  | 9   | 167 | 112013 | 112167 |
| UN72798 | Rsa1.0.00053.1 | 764 | 263459 | 0         | 387 | 405 | 95 -  | 131 | 532 | 250291 | 250695 |
| UN72799 | Rsa1.0.00044.1 | 772 | 271658 | 0         | 738 | 777 | 94 -  | 2   | 772 | 16782  | 17555  |
| UN72800 | Rsa1.0.11824.1 | 407 | 5396   | 1.00E-72  | 142 | 143 | 99 -  | 196 | 338 | 66     | 208    |
| UN72801 | Rsa1.0.00221.1 | 611 | 106972 | 0         | 479 | 497 | 96 -  | 39  | 535 | 8699   | 9195   |
| UN72802 | Rsa1.0.01448.1 | 138 | 45645  | 2.00E-47  | 123 | 132 | 93 +  | 1   | 132 | 37885  | 38016  |
| UN72803 | Rsa1.0.01072.1 | 316 | 55068  | 1.00E-171 | 313 | 316 | 99 +  | 1   | 316 | 8267   | 8582   |
| UN72804 | #              | #   | #      | #         | #   | #   | #     | #   | #   | #      | #      |
| UN72805 | Rsa1.0.02835.1 | 750 | 27491  | 0         | 589 | 623 | 94 -  | 78  | 700 | 546    | 1166   |
| UN72806 | Rsa1.0.01660.1 | 489 | 41400  | 0         | 419 | 436 | 96 -  | 1   | 435 | 27246  | 27680  |
| UN72807 | Rsa1.0.02201.1 | 243 | 33981  | 1.00E-96  | 228 | 243 | 93 +  | 1   | 243 | 26813  | 27054  |
| UN72808 | Rsa1.0.05095.1 | 133 | 14869  | 2.00E-37  | 106 | 115 | 92 -  | 1   | 115 | 961    | 1075   |
| UN72809 | Rsa1.0.00324.1 | 794 | 218805 | 1.00E-95  | 187 | 190 | 98 +  | 477 | 666 | 188774 | 188963 |
| UN72810 | Rsa1.0.00820.1 | 249 | 62911  | 1.00E-122 | 242 | 249 | 97 -  | 1   | 249 | 6041   | 6289   |
| UN72811 | Rsa1.0.08230.1 | 115 | 7688   | 4.00E-23  | 67  | 71  | 94 -  | 45  | 115 | 5173   | 5243   |

|         |                |     |        |           |     |     |       |     |     |        |        |
|---------|----------------|-----|--------|-----------|-----|-----|-------|-----|-----|--------|--------|
| UN72812 | Rsa1.0.00391.1 | 350 | 183853 | 1.00E-155 | 332 | 350 | 94 +  | 1   | 350 | 19343  | 19692  |
| UN72813 | Rsa1.0.00398.1 | 832 | 88007  | 0         | 516 | 542 | 95 +  | 3   | 537 | 40983  | 41523  |
| UN72814 | Rsa1.0.00382.1 | 610 | 251946 | 1.00E-171 | 310 | 312 | 99 +  | 299 | 610 | 134716 | 135027 |
| UN72815 | Rsa1.0.10400.1 | 699 | 5859   | 1.00E-157 | 317 | 331 | 95 -  | 2   | 332 | 5314   | 5632   |
| UN72816 | Rsa1.0.41339.1 | 762 | 543    | 1.00E-140 | 337 | 363 | 92 +  | 11  | 360 | 33     | 394    |
| UN72817 | Rsa1.0.08472.1 | 538 | 7300   | 0         | 522 | 545 | 95 -  | 2   | 531 | 6360   | 6903   |
| UN72818 | Rsa1.0.02834.1 | 578 | 27493  | 0         | 371 | 376 | 98 +  | 49  | 424 | 6274   | 6648   |
| UN72819 | Rsa1.0.01315.1 | 677 | 48361  | 7.00E-63  | 123 | 123 | 100 - | 555 | 677 | 11642  | 11764  |
| UN72820 | Rsa1.0.00056.1 | 611 | 332604 | 1.00E-147 | 265 | 265 | 100 - | 301 | 565 | 21168  | 21432  |
| UN72821 | Rsa1.0.02555.1 | 658 | 30146  | 1.00E-151 | 299 | 307 | 97 -  | 353 | 658 | 6078   | 6384   |
| UN72822 | Rsa1.0.07931.1 | 783 | 8236   | 1.00E-100 | 189 | 190 | 99 +  | 41  | 230 | 418    | 607    |
| UN72823 | Rsa1.0.01554.1 | 834 | 43379  | 0         | 493 | 495 | 99 +  | 2   | 496 | 8646   | 9139   |
| UN72824 | Rsa1.0.02215.1 | 802 | 33822  | 0         | 495 | 516 | 95 -  | 295 | 802 | 28431  | 28946  |
| UN72825 | Rsa1.0.03292.1 | 699 | 23977  | 1.00E-123 | 267 | 277 | 96 +  | 3   | 278 | 2512   | 2786   |
| UN72826 | Rsa1.0.01920.1 | 672 | 158533 | 1.00E-52  | 121 | 126 | 96 +  | 547 | 672 | 151015 | 151140 |
| UN72827 | Rsa1.0.00417.1 | 697 | 395068 | 0         | 670 | 696 | 96 +  | 4   | 697 | 7936   | 8627   |
| UN72828 | Rsa1.0.02325.1 | 317 | 160025 | 7.00E-46  | 110 | 113 | 97 +  | 133 | 242 | 20253  | 20365  |
| UN72829 | Rsa1.0.00306.1 | 718 | 146760 | 0         | 675 | 689 | 97 -  | 3   | 689 | 138913 | 139598 |
| UN72830 | Rsa1.0.01369.1 | 105 | 47127  | 4.00E-35  | 75  | 75  | 100 - | 31  | 105 | 8425   | 8499   |
| UN72831 | Rsa1.0.27807.1 | 742 | 838    | 0         | 656 | 690 | 95 +  | 38  | 719 | 1      | 672    |
| UN72832 | Rsa1.0.04124.1 | 815 | 18945  | 2.00E-33  | 130 | 146 | 89 +  | 5   | 147 | 1811   | 1952   |
| UN72833 | Rsa1.0.00034.1 | 611 | 260119 | 1.00E-133 | 271 | 281 | 96 +  | 329 | 609 | 9111   | 9391   |
| UN72834 | Rsa1.0.01245.1 | 683 | 149868 | 1.00E-129 | 257 | 264 | 97 -  | 6   | 266 | 12242  | 12505  |
| UN72835 | Rsa1.0.00416.1 | 537 | 86772  | 0         | 501 | 543 | 92 +  | 1   | 537 | 73210  | 73746  |
| UN72836 | Rsa1.0.00121.1 | 790 | 278029 | 0         | 479 | 487 | 98 -  | 58  | 544 | 10217  | 10703  |
| UN72837 | Rsa1.0.01321.1 | 714 | 48248  | 0         | 391 | 394 | 99 -  | 4   | 397 | 19811  | 20204  |
| UN72838 | Rsa1.0.00919.1 | 802 | 59675  | 0         | 795 | 799 | 99 +  | 3   | 798 | 50360  | 51158  |
| UN72839 | Rsa1.0.01162.1 | 740 | 169104 | 0         | 355 | 360 | 98 -  | 20  | 379 | 146806 | 147165 |
| UN72840 | Rsa1.0.03798.1 | 650 | 20800  | 1.00E-103 | 190 | 190 | 100 + | 3   | 192 | 3958   | 4147   |
| UN72841 | Rsa1.0.01104.1 | 487 | 285480 | 9.00E-68  | 134 | 135 | 99 +  | 26  | 160 | 2638   | 2772   |
| UN72842 | Rsa1.0.00042.1 | 810 | 171507 | 0         | 799 | 821 | 97 +  | 2   | 810 | 143787 | 144607 |
| UN72843 | Rsa1.0.00016.1 | 799 | 831256 | 1.00E-103 | 194 | 195 | 99 +  | 213 | 407 | 430646 | 430840 |
| UN72844 | Rsa1.0.00127.1 | 183 | 127446 | 1.00E-52  | 124 | 129 | 96 -  | 56  | 183 | 103526 | 103654 |
| UN72845 | Rsa1.0.01578.1 | 472 | 42880  | 0         | 450 | 477 | 94 +  | 2   | 472 | 10785  | 11255  |
| UN72846 | Rsa1.0.27712.1 | 576 | 842    | 1.00E-79  | 151 | 151 | 100 + | 158 | 308 | 1      | 151    |
| UN72847 | Rsa1.0.04311.1 | 690 | 17984  | 0         | 372 | 384 | 96 -  | 289 | 671 | 2261   | 2640   |
| UN72848 | Rsa1.0.03063.1 | 728 | 25673  | 0         | 372 | 379 | 98 -  | 1   | 379 | 9387   | 9765   |
| UN72849 | Rsa1.0.00576.1 | 539 | 178949 | 1.00E-130 | 236 | 236 | 100 - | 304 | 539 | 39367  | 39602  |
| UN72850 | Rsa1.0.00233.1 | 623 | 104918 | 1.00E-161 | 341 | 357 | 95 -  | 3   | 354 | 34811  | 35167  |

|         |                |     |        |           |     |     |       |     |     |        |        |
|---------|----------------|-----|--------|-----------|-----|-----|-------|-----|-----|--------|--------|
| UN72851 | Rsa1.0.00128.1 | 724 | 228675 | 0         | 562 | 562 | 100 + | 158 | 719 | 7625   | 8186   |
| UN72852 | Rsa1.0.16503.1 | 644 | 2131   | 0         | 383 | 402 | 95 +  | 4   | 398 | 267    | 668    |
| UN72853 | Rsa1.0.02179.1 | 778 | 34188  | 1.00E-100 | 200 | 205 | 97 -  | 379 | 583 | 25696  | 25900  |
| UN72854 | Rsa1.0.01489.1 | 733 | 44764  | 1.00E-134 | 279 | 290 | 96 +  | 402 | 690 | 35064  | 35353  |
| UN72855 | Rsa1.0.00015.1 | 754 | 561803 | 0         | 697 | 727 | 95 +  | 3   | 723 | 228532 | 229258 |
| UN72856 | Rsa1.0.07936.1 | 612 | 8228   | 1.00E-110 | 202 | 202 | 100 + | 3   | 204 | 3329   | 3530   |
| UN72857 | Rsa1.0.05977.1 | 659 | 12056  | 0         | 383 | 385 | 99 -  | 4   | 387 | 10349  | 10733  |
| UN72858 | Rsa1.0.01012.1 | 795 | 56836  | 1.00E-141 | 255 | 255 | 100 - | 325 | 579 | 52997  | 53251  |
| UN72859 | Rsa1.0.13660.1 | 557 | 4542   | 0         | 331 | 333 | 99 -  | 2   | 334 | 1      | 333    |
| UN72860 | Rsa1.0.08361.1 | 741 | 7477   | 1.00E-171 | 312 | 313 | 99 -  | 428 | 739 | 5199   | 5511   |
| UN72861 | Rsa1.0.00068.1 | 266 | 151813 | 1.00E-127 | 255 | 263 | 96 +  | 1   | 263 | 43129  | 43391  |
| UN72862 | Rsa1.0.00230.1 | 104 | 105389 | 1.00E-32  | 71  | 71  | 100 + | 1   | 71  | 86365  | 86435  |
| UN72863 | Rsa1.0.00420.1 | 787 | 86496  | 1.00E-104 | 201 | 204 | 98 -  | 42  | 245 | 45120  | 45323  |
| UN72864 | Rsa1.0.02694.1 | 625 | 28610  | 0         | 396 | 405 | 97 +  | 30  | 434 | 6542   | 6943   |
| UN72865 | Rsa1.0.05639.1 | 753 | 13084  | 0         | 593 | 606 | 97 +  | 128 | 730 | 9525   | 10130  |
| UN72866 | Rsa1.0.00182.1 | 625 | 142305 | 1.00E-159 | 348 | 369 | 94 -  | 257 | 625 | 68319  | 68687  |
| UN72867 | Rsa1.0.01977.1 | 544 | 36559  | 1.00E-106 | 231 | 243 | 95 +  | 182 | 424 | 23106  | 23348  |
| UN72868 | Rsa1.0.03615.1 | 702 | 21766  | 0         | 341 | 344 | 99 +  | 350 | 692 | 6065   | 6408   |
| UN72869 | Rsa1.0.00453.1 | 629 | 83031  | 0         | 455 | 455 | 100 + | 175 | 629 | 7847   | 8301   |
| UN72870 | Rsa1.0.01848.1 | 666 | 38312  | 1.00E-151 | 289 | 294 | 98 +  | 3   | 294 | 1449   | 1742   |
| UN72871 | Rsa1.0.02295.1 | 395 | 149884 | 1.00E-120 | 284 | 304 | 93 -  | 1   | 304 | 12467  | 12765  |
| UN72872 | Rsa1.0.00758.1 | 366 | 65477  | 7.00E-68  | 207 | 231 | 89 -  | 4   | 228 | 49768  | 49998  |
| UN72873 | Rsa1.0.02210.1 | 433 | 33857  | 1.00E-163 | 398 | 431 | 92 +  | 4   | 429 | 30234  | 30662  |
| UN72874 | Rsa1.0.00067.1 | 180 | 415055 | 4.00E-43  | 162 | 182 | 89 +  | 2   | 177 | 241223 | 241403 |
| UN72875 | Rsa1.0.03185.1 | 383 | 24739  | 2.00E-65  | 211 | 235 | 89 +  | 2   | 233 | 2980   | 3214   |
| UN72876 | Rsa1.0.04288.1 | 747 | 18077  | 1.00E-137 | 262 | 267 | 98 +  | 266 | 532 | 8259   | 8525   |
| UN72877 | Rsa1.0.15860.1 | 489 | 2385   | 0         | 486 | 489 | 99 +  | 1   | 489 | 468    | 956    |
| UN72878 | Rsa1.0.00048.1 | 541 | 167185 | 0         | 517 | 541 | 95 -  | 1   | 541 | 162654 | 163188 |
| UN72879 | Rsa1.0.01086.1 | 490 | 54509  | 4.00E-73  | 239 | 267 | 89 +  | 4   | 266 | 49846  | 50111  |
| UN72880 | Rsa1.0.01543.1 | 516 | 43645  | 1.00E-113 | 295 | 324 | 91 +  | 12  | 335 | 7031   | 7345   |
| UN72881 | Rsa1.0.00592.1 | 176 | 73788  | 6.00E-88  | 173 | 176 | 98 +  | 1   | 176 | 61914  | 62089  |
| UN72882 | Rsa1.0.00248.1 | 166 | 163568 | 2.00E-23  | 86  | 96  | 89 +  | 70  | 165 | 40305  | 40400  |
| UN72883 | Rsa1.0.01163.1 | 645 | 51946  | 1.00E-143 | 273 | 276 | 98 -  | 1   | 273 | 16062  | 16337  |
| UN72884 | Rsa1.0.00968.1 | 160 | 58020  | 8.00E-81  | 158 | 160 | 98 +  | 1   | 160 | 21320  | 21479  |
| UN72885 | Rsa1.0.00818.1 | 442 | 62939  | 1.00E-177 | 410 | 439 | 93 -  | 5   | 442 | 36590  | 37007  |
| UN72886 | Rsa1.0.03063.1 | 665 | 25673  | 0         | 524 | 557 | 94 -  | 117 | 665 | 3169   | 3719   |
| UN72887 | Rsa1.0.05683.1 | 514 | 12944  | 7.00E-47  | 200 | 229 | 87 +  | 92  | 309 | 3761   | 3987   |
| UN72888 | Rsa1.0.00044.1 | 623 | 271658 | 0         | 600 | 626 | 95 +  | 1   | 623 | 15864  | 16485  |
| UN72889 | Rsa1.0.14327.1 | 614 | 3518   | 1.00E-177 | 394 | 414 | 95 +  | 202 | 614 | 231    | 639    |

|         |                |     |        |           |     |     |       |     |     |        |        |
|---------|----------------|-----|--------|-----------|-----|-----|-------|-----|-----|--------|--------|
| UN72890 | Rsa1.0_00147.1 | 807 | 249503 | 1.00E-140 | 256 | 257 | 99 +  | 3   | 259 | 233479 | 233735 |
| UN72891 | Rsa1.0_03761.1 | 783 | 20982  | 0         | 769 | 803 | 95 -  | 3   | 783 | 11574  | 12375  |
| UN72892 | Rsa1.0_00930.1 | 549 | 59224  | 1.00E-122 | 260 | 270 | 96 +  | 280 | 549 | 48406  | 48673  |
| UN72893 | Rsa1.0_03284.1 | 611 | 24069  | 1.00E-104 | 192 | 192 | 100 + | 356 | 547 | 6005   | 6196   |
| UN72894 | Rsa1.0_06303.1 | 680 | 11268  | 1.00E-141 | 255 | 255 | 100 - | 115 | 369 | 9873   | 10127  |
| UN72895 | Rsa1.0_03118.1 | 624 | 25288  | 0         | 574 | 626 | 91 +  | 8   | 624 | 2906   | 3504   |
| UN72896 | Rsa1.0_00412.1 | 691 | 86935  | 0         | 688 | 691 | 99 +  | 2   | 691 | 19188  | 19878  |
| UN72897 | Rsa1.0_01675.1 | 792 | 41155  | 1.00E-136 | 246 | 246 | 100 + | 4   | 249 | 12324  | 12569  |
| UN72898 | Rsa1.0_03347.1 | 178 | 23588  | 2.00E-87  | 176 | 179 | 98 -  | 1   | 178 | 17316  | 17494  |
| UN72899 | Rsa1.0_02298.1 | 724 | 32872  | 0         | 328 | 328 | 100 - | 397 | 724 | 7329   | 7656   |
| UN72900 | Rsa1.0_07811.1 | 580 | 8496   | 1.00E-101 | 202 | 207 | 97 +  | 2   | 208 | 4830   | 5036   |
| UN72901 | Rsa1.0_03191.1 | 591 | 145762 | 0         | 456 | 489 | 93 +  | 97  | 583 | 136997 | 137478 |
| UN72902 | Rsa1.0_01175.1 | 787 | 51674  | 1.00E-126 | 296 | 319 | 92 -  | 3   | 321 | 15647  | 15953  |
| UN72903 | Rsa1.0_01569.1 | 778 | 43029  | 0         | 645 | 662 | 97 -  | 106 | 767 | 24153  | 24814  |
| UN72904 | Rsa1.0_01059.1 | 709 | 55410  | 1.00E-174 | 388 | 413 | 93 -  | 298 | 709 | 15644  | 16056  |
| UN72905 | Rsa1.0_00017.1 | 587 | 752458 | 1.00E-104 | 198 | 200 | 99 -  | 121 | 320 | 304548 | 304747 |
| UN72906 | Rsa1.0_02571.1 | 736 | 29995  | 0         | 721 | 756 | 95 +  | 1   | 736 | 17236  | 17991  |
| UN72907 | Rsa1.0_00119.1 | 760 | 467509 | 1.00E-131 | 388 | 437 | 88 -  | 2   | 407 | 47686  | 48116  |
| UN72908 | Rsa1.0_01994.1 | 752 | 36374  | 0         | 734 | 747 | 98 +  | 3   | 745 | 461    | 1207   |
| UN72909 | Rsa1.0_32050.1 | 558 | 711    | 1.00E-143 | 264 | 266 | 99 +  | 17  | 282 | 1      | 266    |
| UN72910 | Rsa1.0_00630.1 | 653 | 71281  | 0         | 636 | 639 | 99 +  | 12  | 650 | 59449  | 60087  |
| UN72911 | Rsa1.0_02224.1 | 473 | 33758  | 0         | 470 | 472 | 99 +  | 2   | 473 | 4099   | 4570   |
| UN72912 | #              | #   | #      | #         | #   | #   | #     | #   | #   | #      | #      |
| UN72913 | Rsa1.0_01422.1 | 684 | 46172  | 1.00E-159 | 353 | 374 | 94 +  | 3   | 375 | 27069  | 27439  |
| UN72914 | Rsa1.0_00623.1 | 485 | 207630 | 3.00E-77  | 150 | 151 | 99 -  | 335 | 485 | 203428 | 203578 |
| UN72915 | Rsa1.0_11593.1 | 646 | 5464   | 0         | 612 | 621 | 98 -  | 27  | 646 | 4844   | 5464   |
| UN72916 | Rsa1.0_01506.1 | 490 | 44370  | 7.00E-50  | 140 | 153 | 91 -  | 8   | 160 | 31846  | 31998  |
| UN72917 | Rsa1.0_00057.1 | 538 | 160473 | 0         | 536 | 538 | 99 -  | 1   | 538 | 148143 | 148680 |
| UN72918 | Rsa1.0_00088.1 | 815 | 141341 | 1.00E-150 | 276 | 278 | 99 +  | 3   | 280 | 10112  | 10389  |
| UN72919 | Rsa1.0_00287.1 | 776 | 98687  | 0         | 346 | 352 | 98 -  | 3   | 354 | 30931  | 31282  |
| UN72920 | Rsa1.0_00794.1 | 442 | 64063  | 0         | 428 | 439 | 97 +  | 5   | 442 | 39649  | 40087  |
| UN72921 | Rsa1.0_14034.1 | 561 | 3890   | 1.00E-119 | 220 | 221 | 99 -  | 94  | 314 | 133    | 353    |
| UN72922 | Rsa1.0_00421.1 | 783 | 86365  | 1.00E-141 | 302 | 313 | 96 -  | 426 | 733 | 12826  | 13138  |
| UN72923 | Rsa1.0_00949.1 | 466 | 58549  | 0         | 441 | 450 | 98 -  | 17  | 466 | 43783  | 44232  |
| UN72924 | Rsa1.0_02694.1 | 764 | 28610  | 1.00E-172 | 378 | 402 | 94 +  | 157 | 552 | 6542   | 6943   |
| UN72925 | Rsa1.0_00740.1 | 781 | 215972 | 0         | 589 | 590 | 99 -  | 192 | 781 | 3054   | 3643   |
| UN72926 | Rsa1.0_00125.1 | 799 | 253043 | 0         | 690 | 720 | 95 +  | 66  | 766 | 185036 | 185754 |
| UN72927 | Rsa1.0_00025.1 | 780 | 277312 | 0         | 461 | 483 | 95 +  | 298 | 776 | 64911  | 65390  |
| UN72928 | Rsa1.0_08845.1 | 737 | 6867   | 0         | 590 | 608 | 97 -  | 112 | 708 | 4112   | 4719   |



|         |                |     |        |           |     |     |       |     |     |        |        |
|---------|----------------|-----|--------|-----------|-----|-----|-------|-----|-----|--------|--------|
| UN72929 | Rsa1.0.00921.1 | 759 | 59599  | 0         | 708 | 751 | 94 -  | 2   | 744 | 56935  | 57665  |
| UN72930 | Rsa1.0.00008.1 | 232 | 358124 | 2.00E-79  | 223 | 246 | 90 +  | 2   | 232 | 11311  | 11555  |
| UN72931 | Rsa1.0.03589.1 | 731 | 21893  | 1.00E-154 | 315 | 325 | 96 -  | 186 | 508 | 2117   | 2441   |
| UN72932 | Rsa1.0.00518.1 | 287 | 78360  | 1.00E-157 | 284 | 285 | 99 -  | 3   | 287 | 2127   | 2411   |
| UN72933 | Rsa1.0.00913.1 | 673 | 59914  | 0         | 355 | 357 | 99 +  | 317 | 673 | 10123  | 10479  |
| UN72934 | Rsa1.0.00056.1 | 682 | 332604 | 0         | 627 | 680 | 92 -  | 3   | 682 | 217314 | 217991 |
| UN72935 | Rsa1.0.04486.1 | 766 | 17161  | 0         | 711 | 753 | 94 +  | 1   | 745 | 12433  | 13173  |
| UN72936 | Rsa1.0.18634.1 | 484 | 1562   | 1.00E-155 | 284 | 286 | 99 -  | 199 | 484 | 681    | 966    |
| UN72937 | Rsa1.0.00635.1 | 581 | 175826 | 1.00E-112 | 235 | 245 | 95 +  | 337 | 581 | 108483 | 108727 |
| UN72938 | Rsa1.0.04484.1 | 731 | 17172  | 0         | 691 | 711 | 97 +  | 22  | 731 | 7336   | 8041   |
| UN72939 | Rsa1.0.02662.1 | 677 | 28956  | 0         | 446 | 446 | 100 + | 3   | 448 | 11942  | 12387  |
| UN72940 | Rsa1.0.01515.1 | 567 | 170864 | 0         | 465 | 468 | 99 -  | 102 | 567 | 158899 | 159366 |
| UN72941 | Rsa1.0.06430.1 | 253 | 11034  | 1.00E-140 | 252 | 252 | 100 - | 2   | 253 | 810    | 1061   |
| UN72942 | Rsa1.0.03309.1 | 771 | 23852  | 0         | 765 | 775 | 98 +  | 2   | 769 | 8033   | 8807   |
| UN72943 | Rsa1.0.01573.1 | 816 | 42964  | 0         | 401 | 404 | 99 -  | 108 | 511 | 16906  | 17309  |
| UN72944 | Rsa1.0.10909.1 | 592 | 5681   | 0         | 445 | 461 | 96 -  | 1   | 460 | 79     | 539    |
| UN72945 | Rsa1.0.04422.1 | 827 | 17423  | 0         | 804 | 829 | 96 +  | 5   | 827 | 7998   | 8826   |
| UN72946 | Rsa1.0.00733.1 | 726 | 66583  | 0         | 461 | 480 | 96 +  | 216 | 694 | 47557  | 48033  |
| UN72947 | Rsa1.0.01295.1 | 835 | 49040  | 1.00E-104 | 217 | 224 | 96 +  | 8   | 229 | 27544  | 27767  |
| UN72948 | Rsa1.0.03298.1 | 584 | 23956  | 1.00E-102 | 192 | 193 | 99 +  | 9   | 201 | 15641  | 15833  |
| UN72949 | Rsa1.0.00923.1 | 790 | 153678 | 0         | 571 | 615 | 92 +  | 160 | 761 | 45727  | 46340  |
| UN72950 | Rsa1.0.01419.1 | 792 | 167402 | 0         | 420 | 439 | 95 +  | 38  | 475 | 153924 | 154362 |
| UN72951 | Rsa1.0.42632.1 | 856 | 526    | 1.00E-147 | 366 | 395 | 92 -  | 1   | 392 | 122    | 503    |
| UN72952 | Rsa1.0.00354.1 | 819 | 232005 | 0         | 756 | 820 | 92 -  | 3   | 813 | 191273 | 192079 |
| UN72953 | Rsa1.0.00055.1 | 676 | 520193 | 7.00E-91  | 214 | 230 | 93 +  | 205 | 425 | 53758  | 53987  |
| UN72954 | Rsa1.0.00201.1 | 463 | 232851 | 1.00E-173 | 387 | 412 | 93 +  | 1   | 409 | 72586  | 72994  |
| UN72955 | Rsa1.0.08402.1 | 738 | 7417   | 1.00E-157 | 344 | 366 | 93 +  | 225 | 577 | 4202   | 4567   |
| UN72956 | Rsa1.0.01091.1 | 647 | 54383  | 0         | 423 | 424 | 99 -  | 224 | 647 | 8867   | 9290   |
| UN72957 | Rsa1.0.34981.1 | 603 | 647    | 0         | 476 | 477 | 99 -  | 3   | 479 | 25     | 501    |
| UN72958 | Rsa1.0.04308.1 | 601 | 17997  | 0         | 598 | 600 | 99 -  | 2   | 601 | 2694   | 3293   |
| UN72959 | Rsa1.0.04647.1 | 124 | 16541  | 5.00E-23  | 99  | 113 | 87 -  | 1   | 109 | 8743   | 8851   |
| UN72960 | Rsa1.0.00064.1 | 375 | 240927 | 1.00E-29  | 91  | 99  | 91 -  | 173 | 271 | 56374  | 56472  |
| UN72961 | Rsa1.0.00037.1 | 121 | 307838 | 1.00E-32  | 95  | 103 | 92 +  | 2   | 104 | 291972 | 292074 |
| UN72962 | Rsa1.0.03463.1 | 657 | 22724  | 1.00E-155 | 303 | 310 | 97 -  | 327 | 635 | 6487   | 6796   |
| UN72963 | Rsa1.0.07907.1 | 709 | 130399 | 0         | 369 | 375 | 98 +  | 3   | 377 | 3227   | 3598   |
| UN72964 | Rsa1.0.00265.1 | 199 | 220635 | 1.00E-36  | 91  | 94  | 96 -  | 84  | 177 | 160669 | 160761 |
| UN72965 | Rsa1.0.00741.1 | 338 | 66117  | 2.00E-80  | 199 | 212 | 93 -  | 129 | 338 | 19903  | 20114  |
| UN72966 | Rsa1.0.00571.1 | 688 | 329018 | 1.00E-131 | 311 | 329 | 94 -  | 361 | 687 | 2299   | 2623   |
| UN72967 | Rsa1.0.05520.1 | 819 | 13450  | 5.00E-12  | 83  | 98  | 84 +  | 380 | 477 | 2981   | 3078   |

|         |                |     |        |           |     |     |       |     |     |        |        |
|---------|----------------|-----|--------|-----------|-----|-----|-------|-----|-----|--------|--------|
| UN72968 | Rsa1.0.00016.1 | 728 | 831256 | 1.00E-137 | 248 | 248 | 100 + | 183 | 430 | 282700 | 282947 |
| UN72969 | Rsa1.0.03969.1 | 563 | 19797  | 1.00E-131 | 289 | 305 | 94 +  | 260 | 563 | 6974   | 7278   |
| UN72970 | Rsa1.0.00208.1 | 492 | 108565 | 0         | 487 | 492 | 98 +  | 1   | 492 | 100641 | 101132 |
| UN72971 | Rsa1.0.01196.1 | 236 | 51097  | 6.00E-98  | 224 | 237 | 94 +  | 1   | 236 | 19309  | 19545  |
| UN72972 | Rsa1.0.00778.1 | 738 | 196751 | 0         | 332 | 332 | 100 - | 40  | 371 | 186640 | 186971 |
| UN72973 | Rsa1.0.18364.1 | 750 | 1614   | 8.00E-63  | 166 | 178 | 93 -  | 574 | 750 | 720    | 895    |
| UN72974 | Rsa1.0.03890.1 | 605 | 20223  | 0         | 354 | 357 | 99 -  | 3   | 359 | 8045   | 8401   |
| UN72975 | Rsa1.0.00425.1 | 551 | 147080 | 1.00E-171 | 311 | 313 | 99 +  | 239 | 551 | 13682  | 13994  |
| UN72976 | Rsa1.0.00998.1 | 398 | 57168  | 0         | 387 | 392 | 98 +  | 3   | 394 | 28557  | 28948  |
| UN72977 | Rsa1.0.02358.1 | 611 | 32213  | 1.00E-166 | 353 | 372 | 94 -  | 236 | 607 | 23200  | 23571  |
| UN72978 | Rsa1.0.00131.1 | 529 | 432233 | 0         | 392 | 400 | 98 -  | 130 | 529 | 384533 | 384932 |
| UN72979 | Rsa1.0.00131.1 | 637 | 432233 | 0         | 503 | 514 | 97 -  | 126 | 637 | 384428 | 384941 |
| UN72980 | Rsa1.0.01270.1 | 802 | 49574  | 0         | 463 | 482 | 96 +  | 303 | 775 | 14104  | 14585  |
| UN72981 | Rsa1.0.00662.1 | 807 | 192183 | 0         | 465 | 479 | 97 +  | 327 | 803 | 180815 | 181290 |
| UN72982 | Rsa1.0.07780.1 | 800 | 8589   | 0         | 786 | 798 | 98 -  | 3   | 791 | 5783   | 6580   |
| UN72983 | Rsa1.0.00339.1 | 332 | 222974 | 1.00E-132 | 305 | 326 | 93 -  | 1   | 325 | 66740  | 67065  |
| UN72984 | Rsa1.0.01010.1 | 543 | 56906  | 0         | 371 | 373 | 99 -  | 46  | 418 | 33931  | 34303  |
| UN72985 | Rsa1.0.18896.1 | 769 | 1515   | 0         | 626 | 645 | 97 +  | 111 | 743 | 26     | 670    |
| UN72986 | Rsa1.0.01058.1 | 686 | 55430  | 3.00E-99  | 367 | 424 | 86 +  | 1   | 412 | 28079  | 28496  |
| UN72987 | Rsa1.0.00689.1 | 778 | 68305  | 2.00E-82  | 187 | 196 | 95 +  | 506 | 700 | 31587  | 31782  |
| UN72988 | Rsa1.0.14032.1 | 644 | 3893   | 0         | 385 | 385 | 100 - | 1   | 385 | 367    | 751    |
| UN72989 | Rsa1.0.00931.1 | 193 | 59210  | 4.00E-80  | 183 | 193 | 94 -  | 1   | 193 | 26926  | 27115  |
| UN72990 | Rsa1.0.00193.1 | 372 | 194198 | 1.00E-109 | 278 | 302 | 92 -  | 79  | 372 | 102943 | 103242 |
| UN72991 | Rsa1.0.00483.1 | 604 | 81102  | 1.00E-100 | 207 | 214 | 96 +  | 371 | 584 | 75566  | 75779  |
| UN72992 | Rsa1.0.03038.1 | 658 | 25824  | 0         | 473 | 493 | 95 +  | 68  | 560 | 13908  | 14395  |
| UN72993 | Rsa1.0.02003.1 | 780 | 36171  | 0         | 592 | 594 | 99 -  | 2   | 595 | 9805   | 10398  |
| UN72994 | Rsa1.0.01072.1 | 344 | 55068  | 1.00E-149 | 282 | 287 | 98 -  | 1   | 287 | 9067   | 9353   |
| UN72995 | Rsa1.0.00003.1 | 596 | 340054 | 0         | 589 | 595 | 98 +  | 3   | 596 | 181085 | 181678 |
| UN72996 | Rsa1.0.01510.1 | 794 | 44237  | 1.00E-148 | 340 | 363 | 93 +  | 384 | 745 | 18824  | 19186  |
| UN72997 | Rsa1.0.11448.1 | 761 | 5504   | 0         | 378 | 388 | 97 -  | 33  | 420 | 302    | 689    |
| UN72998 | Rsa1.0.00037.1 | 657 | 307838 | 7.00E-60  | 127 | 130 | 97 -  | 518 | 647 | 59470  | 59599  |
| UN72999 | Rsa1.0.00121.1 | 736 | 278029 | 1.00E-138 | 300 | 318 | 94 +  | 396 | 713 | 3405   | 3713   |
| UN73000 | Rsa1.0.00713.1 | 768 | 158017 | 0         | 746 | 767 | 97 +  | 2   | 768 | 43299  | 44065  |
| UN73001 | Rsa1.0.16260.1 | 672 | 2222   | 0         | 465 | 486 | 95 +  | 196 | 672 | 1      | 486    |
| UN73002 | Rsa1.0.01198.1 | 490 | 51029  | 4.00E-67  | 209 | 236 | 88 +  | 2   | 235 | 7660   | 7885   |
| UN73003 | #              | #   | #      | #         | #   | #   | #     | #   | #   | #      | #      |
| UN73004 | Rsa1.0.02373.1 | 625 | 32048  | 0         | 390 | 408 | 95 +  | 218 | 625 | 7685   | 8091   |
| UN73005 | Rsa1.0.00214.1 | 678 | 107508 | 1.00E-104 | 241 | 255 | 94 -  | 1   | 254 | 32701  | 32952  |
| UN73006 | Rsa1.0.14560.1 | 634 | 3267   | 4.00E-92  | 172 | 172 | 100 - | 329 | 500 | 2944   | 3115   |

|         |                |     |        |           |     |     |       |     |     |        |        |
|---------|----------------|-----|--------|-----------|-----|-----|-------|-----|-----|--------|--------|
| UN73007 | Rsa1.0.00891.1 | 724 | 60724  | 3.00E-90  | 215 | 225 | 95 +  | 496 | 716 | 20751  | 20975  |
| UN73008 | Rsa1.0.01975.1 | 552 | 36578  | 0         | 524 | 553 | 94 -  | 1   | 552 | 4293   | 4840   |
| UN73009 | Rsa1.0.00068.1 | 666 | 151813 | 7.00E-91  | 170 | 170 | 100 - | 497 | 666 | 121927 | 122096 |
| UN73010 | Rsa1.0.01022.1 | 703 | 56606  | 8.00E-26  | 145 | 169 | 85 +  | 409 | 574 | 13634  | 13802  |
| UN73011 | Rsa1.0.00948.1 | 760 | 58620  | 1.00E-89  | 181 | 184 | 98 +  | 567 | 749 | 1011   | 1194   |
| UN73012 | Rsa1.0.03177.1 | 652 | 24799  | 1.00E-101 | 208 | 215 | 96 +  | 198 | 412 | 2915   | 3129   |
| UN73013 | Rsa1.0.03836.1 | 826 | 20564  | 0         | 688 | 709 | 97 -  | 124 | 820 | 16827  | 17535  |
| UN73014 | #              | #   | #      | #         | #   | #   | #     | #   | #   | #      | #      |
| UN73015 | Rsa1.0.03092.1 | 632 | 25448  | 1.00E-112 | 211 | 213 | 99 -  | 420 | 632 | 7201   | 7413   |
| UN73016 | Rsa1.0.00108.1 | 653 | 478491 | 1.00E-172 | 330 | 338 | 97 +  | 316 | 653 | 114763 | 115100 |
| UN73017 | Rsa1.0.00802.1 | 618 | 63846  | 1.00E-79  | 151 | 151 | 100 + | 3   | 153 | 14295  | 14445  |
| UN73018 | Rsa1.0.00094.1 | 730 | 139042 | 1.00E-160 | 332 | 347 | 95 +  | 7   | 353 | 37898  | 38244  |
| UN73019 | Rsa1.0.02429.1 | 758 | 31527  | 1.00E-148 | 284 | 290 | 97 +  | 377 | 666 | 12481  | 12770  |
| UN73020 | Rsa1.0.05410.1 | 797 | 13840  | 1.00E-154 | 375 | 401 | 93 -  | 3   | 395 | 10681  | 11075  |
| UN73021 | Rsa1.0.00964.1 | 691 | 316648 | 2.33E-156 | 269 | 270 | 99 +  | 422 | 690 | 165354 | 165623 |
| UN73022 | Rsa1.0.02204.1 | 692 | 33930  | 7.00E-88  | 165 | 165 | 100 + | 370 | 534 | 21382  | 21546  |
| UN73023 | Rsa1.0.02769.1 | 689 | 28107  | 1.00E-125 | 474 | 553 | 85 -  | 157 | 689 | 16289  | 16841  |
| UN73024 | Rsa1.0.01169.1 | 793 | 51829  | 0         | 791 | 796 | 99 +  | 1   | 793 | 39058  | 39853  |
| UN73025 | Rsa1.0.00082.1 | 647 | 237584 | 0         | 634 | 675 | 93 +  | 3   | 644 | 39234  | 39908  |
| UN73026 | Rsa1.0.01237.1 | 453 | 50124  | 0         | 438 | 456 | 96 +  | 1   | 453 | 3399   | 3843   |
| UN73027 | Rsa1.0.08779.1 | 758 | 6929   | 0         | 615 | 639 | 96 +  | 126 | 758 | 2033   | 2671   |
| UN73028 | Rsa1.0.04634.1 | 714 | 16578  | 1.00E-131 | 251 | 255 | 98 +  | 2   | 253 | 8564   | 8818   |
| UN73029 | Rsa1.0.05610.1 | 577 | 13194  | 0         | 369 | 370 | 99 -  | 208 | 577 | 295    | 664    |
| UN73030 | Rsa1.0.01311.1 | 477 | 48456  | 0         | 453 | 471 | 96 -  | 1   | 469 | 29168  | 29638  |
| UN73031 | Rsa1.0.00261.1 | 378 | 151157 | 1.00E-105 | 203 | 206 | 98 +  | 173 | 378 | 3065   | 3270   |
| UN73032 | Rsa1.0.17011.1 | 689 | 1953   | 1.00E-114 | 215 | 217 | 99 -  | 302 | 518 | 952    | 1168   |
| UN73033 | Rsa1.0.00522.1 | 523 | 78103  | 1.00E-108 | 283 | 312 | 90 -  | 229 | 523 | 44703  | 45008  |
| UN73034 | Rsa1.0.00796.1 | 725 | 63997  | 0         | 539 | 585 | 92 -  | 122 | 694 | 58634  | 59216  |
| UN73035 | Rsa1.0.04806.1 | 546 | 15898  | 1.00E-160 | 328 | 343 | 95 +  | 204 | 546 | 7302   | 7636   |
| UN73036 | Rsa1.0.04835.1 | 737 | 15766  | 8.00E-97  | 186 | 188 | 98 -  | 244 | 431 | 14540  | 14727  |
| UN73037 | Rsa1.0.04646.1 | 626 | 16541  | 0         | 365 | 370 | 98 -  | 259 | 626 | 11839  | 12208  |
| UN73038 | Rsa1.0.01681.1 | 722 | 41092  | 0         | 446 | 479 | 93 +  | 252 | 722 | 11930  | 12393  |
| UN73039 | Rsa1.0.00094.1 | 817 | 139042 | 0         | 521 | 544 | 95 -  | 284 | 817 | 8393   | 8933   |
| UN73040 | Rsa1.0.01996.1 | 569 | 36327  | 2.33E-156 | 262 | 262 | 100 - | 23  | 284 | 888    | 1149   |
| UN73041 | Rsa1.0.05875.1 | 730 | 12348  | 0         | 708 | 726 | 97 -  | 1   | 726 | 10482  | 11203  |
| UN73042 | Rsa1.0.00023.1 | 417 | 194764 | 1.00E-169 | 395 | 426 | 92 -  | 1   | 417 | 118311 | 118736 |
| UN73043 | Rsa1.0.03786.1 | 615 | 20879  | 1.00E-148 | 298 | 306 | 97 +  | 3   | 306 | 14901  | 15206  |
| UN73044 | Rsa1.0.03229.1 | 495 | 24470  | 1.00E-117 | 284 | 310 | 91 -  | 1   | 310 | 12170  | 12461  |
| UN73045 | Rsa1.0.00065.1 | 594 | 454616 | 1.00E-149 | 273 | 275 | 99 +  | 306 | 580 | 162365 | 162639 |

|         |                |     |        |           |     |     |       |     |     |        |        |
|---------|----------------|-----|--------|-----------|-----|-----|-------|-----|-----|--------|--------|
| UN73046 | Rsa1.0.06775.1 | 460 | 10379  | 1.00E-66  | 169 | 181 | 93 +  | 3   | 182 | 6378   | 6558   |
| UN73047 | Rsa1.0.00363.1 | 808 | 90968  | 0         | 389 | 398 | 97 -  | 395 | 787 | 9383   | 9780   |
| UN73048 | Rsa1.0.05489.1 | 789 | 13562  | 0         | 378 | 388 | 97 -  | 244 | 631 | 6801   | 7188   |
| UN73049 | #              | #   | #      | #         | #   | #   | #     | #   | #   | #      | #      |
| UN73050 | Rsa1.0.00413.1 | 775 | 86921  | 0         | 533 | 590 | 90 +  | 70  | 650 | 63349  | 63927  |
| UN73051 | Rsa1.0.02534.1 | 750 | 30396  | 1.00E-107 | 198 | 198 | 100 - | 3   | 200 | 5455   | 5652   |
| UN73052 | Rsa1.0.00223.1 | 620 | 106231 | 1.00E-120 | 278 | 295 | 94 +  | 232 | 526 | 40246  | 40538  |
| UN73053 | Rsa1.0.04870.1 | 787 | 135142 | 0         | 407 | 420 | 96 -  | 244 | 660 | 4854   | 5273   |
| UN73054 | Rsa1.0.07025.1 | 692 | 10012  | 1.00E-170 | 318 | 323 | 98 -  | 185 | 507 | 8771   | 9093   |
| UN73055 | Rsa1.0.02951.1 | 718 | 26505  | 0         | 418 | 439 | 95 +  | 3   | 435 | 11380  | 11818  |
| UN73056 | Rsa1.0.01541.1 | 188 | 43682  | 6.00E-76  | 171 | 180 | 95 -  | 9   | 188 | 7085   | 7264   |
| UN73057 | Rsa1.0.01147.1 | 704 | 52391  | 3.00E-93  | 205 | 214 | 95 -  | 4   | 217 | 48611  | 48823  |
| UN73058 | Rsa1.0.00121.1 | 729 | 278029 | 1.00E-104 | 235 | 246 | 95 +  | 464 | 700 | 86219  | 86463  |
| UN73059 | Rsa1.0.02231.1 | 749 | 33661  | 1.00E-147 | 298 | 308 | 96 -  | 173 | 478 | 22003  | 22310  |
| UN73060 | Rsa1.0.02948.1 | 743 | 26526  | 8.00E-94  | 192 | 197 | 97 -  | 471 | 667 | 8083   | 8276   |
| UN73061 | Rsa1.0.00300.1 | 491 | 97747  | 2.33E-156 | 275 | 279 | 98 -  | 213 | 491 | 75929  | 76207  |
| UN73062 | Rsa1.0.00173.1 | 437 | 288743 | 1.00E-106 | 196 | 196 | 100 + | 1   | 196 | 282169 | 282364 |
| UN73063 | Rsa1.0.02935.1 | 540 | 26621  | 1.00E-134 | 260 | 266 | 97 +  | 1   | 266 | 18675  | 18940  |
| UN73064 | Rsa1.0.04862.1 | 767 | 15688  | 0         | 749 | 766 | 97 +  | 3   | 767 | 5042   | 5802   |
| UN73065 | Rsa1.0.02663.1 | 779 | 169243 | 1.00E-140 | 253 | 253 | 100 + | 3   | 255 | 167801 | 168053 |
| UN73066 | Rsa1.0.01839.1 | 465 | 38482  | 2.00E-93  | 373 | 438 | 85 -  | 27  | 463 | 9338   | 9775   |
| UN73067 | Rsa1.0.00121.1 | 717 | 278029 | 1.00E-109 | 201 | 201 | 100 + | 1   | 201 | 76626  | 76826  |
| UN73068 | Rsa1.0.05264.1 | 632 | 14327  | 1.00E-112 | 428 | 499 | 85 -  | 122 | 615 | 13225  | 13717  |
| UN73069 | Rsa1.0.00129.1 | 562 | 126831 | 0         | 446 | 447 | 99 +  | 3   | 448 | 87876  | 88322  |
| UN73070 | Rsa1.0.00136.1 | 822 | 122464 | 0         | 621 | 645 | 96 +  | 67  | 708 | 59232  | 59876  |
| UN73071 | Rsa1.0.05618.1 | 561 | 13165  | 3.00E-74  | 197 | 213 | 92 +  | 160 | 364 | 4478   | 4690   |
| UN73072 | Rsa1.0.32947.1 | 591 | 690    | 0         | 462 | 475 | 97 +  | 95  | 568 | 1      | 475    |
| UN73073 | Rsa1.0.00471.1 | 591 | 81897  | 1.00E-132 | 242 | 243 | 99 -  | 349 | 591 | 10578  | 10820  |
| UN73074 | Rsa1.0.00608.1 | 771 | 172672 | 0         | 660 | 699 | 94 +  | 85  | 771 | 111865 | 112560 |
| UN73075 | Rsa1.0.00013.1 | 747 | 292129 | 0         | 717 | 761 | 94 -  | 1   | 747 | 29282  | 30040  |
| UN73076 | Rsa1.0.00575.1 | 711 | 74791  | 0         | 690 | 707 | 97 -  | 3   | 708 | 16825  | 17531  |
| UN73077 | Rsa1.0.00827.1 | 161 | 62790  | 4.00E-67  | 144 | 149 | 96 +  | 13  | 161 | 33611  | 33759  |
| UN73078 | Rsa1.0.02202.1 | 677 | 33961  | 0         | 669 | 674 | 99 +  | 3   | 673 | 16967  | 17639  |
| UN73079 | Rsa1.0.00074.1 | 754 | 147591 | 0         | 734 | 752 | 97 +  | 3   | 752 | 72391  | 73142  |
| UN73080 | Rsa1.0.01638.1 | 804 | 41857  | 0         | 772 | 808 | 95 +  | 2   | 803 | 2610   | 3417   |
| UN73081 | Rsa1.0.02079.1 | 708 | 35306  | 0         | 701 | 707 | 99 +  | 2   | 708 | 31988  | 32694  |
| UN73082 | Rsa1.0.03394.1 | 565 | 23247  | 0         | 564 | 565 | 99 +  | 1   | 565 | 20037  | 20601  |
| UN73083 | Rsa1.0.00111.1 | 778 | 390088 | 0         | 721 | 748 | 96 -  | 4   | 747 | 189543 | 190290 |
| UN73084 | Rsa1.0.01413.1 | 668 | 46275  | 1.00E-144 | 295 | 307 | 96 +  | 2   | 308 | 20530  | 20836  |

|         |                |     |        |           |     |     |       |     |     |        |        |
|---------|----------------|-----|--------|-----------|-----|-----|-------|-----|-----|--------|--------|
| UN73085 | Rsa1.0_00925.1 | 547 | 59481  | 1.00E-127 | 231 | 231 | 100 + | 262 | 492 | 42656  | 42886  |
| UN73086 | Rsa1.0_00166.1 | 676 | 240912 | 0         | 567 | 595 | 95 -  | 84  | 676 | 128126 | 128720 |
| UN73087 | Rsa1.0_00382.1 | 119 | 251946 | 7.00E-56  | 119 | 121 | 98 -  | 1   | 119 | 244796 | 244916 |
| UN73088 | Rsa1.0_05943.1 | 247 | 12158  | 1.00E-59  | 135 | 141 | 95 -  | 107 | 247 | 3238   | 3378   |
| UN73089 | Rsa1.0_00155.1 | 619 | 118465 | 1.00E-108 | 261 | 280 | 93 +  | 6   | 278 | 51119  | 51395  |
| UN73090 | Rsa1.0_15469.1 | 636 | 2587   | 4.00E-86  | 226 | 246 | 91 -  | 112 | 356 | 234    | 479    |
| UN73091 | Rsa1.0_03037.1 | 690 | 25825  | 7.00E-91  | 182 | 185 | 98 +  | 3   | 185 | 7502   | 7686   |
| UN73092 | Rsa1.0_02210.1 | 522 | 33857  | 0         | 404 | 412 | 98 -  | 111 | 522 | 12177  | 12585  |
| UN73093 | Rsa1.0_00067.1 | 774 | 415055 | 0         | 718 | 745 | 96 +  | 3   | 741 | 296539 | 297283 |
| UN73094 | Rsa1.0_03141.1 | 239 | 25061  | 1.00E-119 | 231 | 235 | 98 -  | 5   | 239 | 19370  | 19602  |
| UN73095 | Rsa1.0_00407.1 | 606 | 191544 | 1.00E-132 | 347 | 383 | 90 +  | 3   | 385 | 178470 | 178827 |
| UN73096 | Rsa1.0_00006.1 | 141 | 396176 | 1.00E-57  | 134 | 141 | 95 -  | 1   | 141 | 2924   | 3064   |
| UN73097 | Rsa1.0_00300.1 | 396 | 97747  | 0         | 387 | 402 | 96 +  | 2   | 396 | 75785  | 76186  |
| UN73098 | Rsa1.0_02426.1 | 769 | 31564  | 0         | 415 | 430 | 96 +  | 13  | 442 | 5874   | 6296   |
| UN73099 | Rsa1.0_00034.1 | 791 | 260119 | 0         | 756 | 799 | 94 +  | 1   | 791 | 394    | 1183   |
| UN73100 | Rsa1.0_00422.1 | 635 | 86144  | 1.00E-143 | 301 | 315 | 95 -  | 2   | 316 | 84543  | 84854  |
| UN73101 | Rsa1.0_03894.1 | 682 | 20207  | 1.00E-119 | 239 | 245 | 97 -  | 3   | 247 | 19453  | 19696  |
| UN73102 | Rsa1.0_00556.1 | 531 | 207212 | 0         | 350 | 351 | 99 -  | 181 | 531 | 15470  | 15820  |
| UN73103 | Rsa1.0_02060.1 | 699 | 35528  | 0         | 404 | 410 | 98 -  | 289 | 698 | 4207   | 4616   |
| UN73104 | Rsa1.0_10341.1 | 330 | 5881   | 1.00E-154 | 319 | 331 | 96 -  | 2   | 330 | 5331   | 5661   |
| UN73105 | Rsa1.0_01670.1 | 630 | 41260  | 0         | 509 | 541 | 94 +  | 93  | 630 | 14491  | 15031  |
| UN73106 | Rsa1.0_09500.1 | 763 | 6330   | 0         | 691 | 693 | 99 +  | 2   | 693 | 1113   | 1805   |
| UN73107 | Rsa1.0_01045.1 | 780 | 55853  | 0         | 374 | 378 | 98 -  | 2   | 378 | 39314  | 39691  |
| UN73108 | Rsa1.0_00623.1 | 764 | 207630 | 0         | 419 | 432 | 96 -  | 334 | 764 | 152765 | 153196 |
| UN73109 | Rsa1.0_03191.1 | 668 | 145762 | 0         | 555 | 572 | 97 +  | 99  | 668 | 138126 | 138691 |
| UN73110 | Rsa1.0_03142.1 | 612 | 25043  | 0         | 611 | 612 | 99 -  | 1   | 612 | 4402   | 5013   |
| UN73111 | Rsa1.0_00479.1 | 681 | 81377  | 0         | 367 | 379 | 96 +  | 169 | 547 | 79515  | 79893  |
| UN73112 | Rsa1.0_00040.1 | 695 | 324196 | 0         | 523 | 529 | 98 -  | 3   | 531 | 219413 | 219941 |
| UN73113 | Rsa1.0_00790.1 | 210 | 148693 | 1.00E-108 | 208 | 210 | 99 +  | 1   | 210 | 19481  | 19689  |
| UN73114 | Rsa1.0_04299.1 | 123 | 18027  | 5.00E-63  | 122 | 122 | 100 + | 2   | 123 | 734    | 855    |
| UN73115 | Rsa1.0_00078.1 | 642 | 175053 | 0         | 616 | 641 | 96 -  | 2   | 642 | 79670  | 80310  |
| UN73116 | Rsa1.0_00015.1 | 534 | 561803 | 1.00E-176 | 322 | 324 | 99 +  | 209 | 532 | 323683 | 324004 |
| UN73117 | Rsa1.0_00692.1 | 757 | 68151  | 0         | 755 | 760 | 99 -  | 1   | 757 | 33519  | 34278  |
| UN73118 | Rsa1.0_02839.1 | 764 | 27391  | 0         | 465 | 511 | 90 +  | 277 | 764 | 15763  | 16270  |
| UN73119 | Rsa1.0_00462.1 | 788 | 82288  | 0         | 441 | 444 | 99 +  | 3   | 446 | 1093   | 1536   |
| UN73120 | Rsa1.0_00301.1 | 786 | 365315 | 1.00E-115 | 217 | 219 | 99 +  | 6   | 224 | 87944  | 88162  |
| UN73121 | Rsa1.0_00131.1 | 771 | 432233 | 1.00E-128 | 233 | 233 | 100 + | 539 | 771 | 268866 | 269098 |
| UN73122 | Rsa1.0_00875.1 | 789 | 61371  | 0         | 748 | 755 | 99 -  | 39  | 789 | 9931   | 10685  |
| UN73123 | Rsa1.0_01092.1 | 623 | 54348  | 2.00E-91  | 177 | 179 | 98 +  | 202 | 380 | 52547  | 52725  |

|         |                |     |        |           |     |     |       |     |     |        |        |
|---------|----------------|-----|--------|-----------|-----|-----|-------|-----|-----|--------|--------|
| UN73124 | Rsa1.0_00782.1 | 676 | 64468  | 1.00E-150 | 444 | 501 | 88 -  | 159 | 647 | 38348  | 38833  |
| UN73125 | Rsa1.0_05632.1 | 763 | 13120  | 2.00E-66  | 176 | 185 | 95 +  | 584 | 763 | 9507   | 9691   |
| UN73126 | Rsa1.0_06630.1 | 447 | 10633  | 1.00E-140 | 253 | 253 | 100 - | 195 | 447 | 1778   | 2030   |
| UN73127 | Rsa1.0_00136.1 | 364 | 122464 | 0         | 364 | 365 | 99 -  | 1   | 364 | 26005  | 26369  |
| UN73128 | Rsa1.0_00041.1 | 695 | 186197 | 0         | 386 | 391 | 98 +  | 310 | 695 | 39147  | 39537  |
| UN73129 | Rsa1.0_00070.1 | 794 | 150321 | 1.00E-116 | 221 | 224 | 98 -  | 18  | 241 | 101864 | 102087 |
| UN73130 | Rsa1.0_01402.1 | 785 | 46509  | 4.00E-83  | 175 | 180 | 97 +  | 1   | 180 | 2919   | 3096   |
| UN73131 | Rsa1.0_01367.1 | 633 | 47135  | 1.00E-112 | 215 | 218 | 98 +  | 376 | 593 | 2069   | 2286   |
| UN73132 | Rsa1.0_01578.1 | 766 | 42880  | 1.00E-105 | 248 | 266 | 93 +  | 319 | 584 | 41438  | 41703  |
| UN73133 | Rsa1.0_68499.1 | 768 | 335    | 1.00E-121 | 227 | 229 | 99 +  | 285 | 513 | 1      | 229    |
| UN73134 | Rsa1.0_13919.1 | 682 | 4093   | 1.00E-137 | 257 | 260 | 98 -  | 67  | 326 | 2225   | 2484   |
| UN73135 | Rsa1.0_00565.1 | 412 | 75420  | 0         | 410 | 417 | 98 +  | 1   | 412 | 20985  | 21401  |
| UN73136 | Rsa1.0_00642.1 | 555 | 201230 | 0         | 524 | 551 | 95 -  | 5   | 555 | 180130 | 180679 |
| UN73137 | Rsa1.0_00244.1 | 748 | 103590 | 0         | 562 | 566 | 99 +  | 1   | 563 | 83592  | 84157  |
| UN73138 | Rsa1.0_02719.1 | 220 | 28428  | 2.00E-57  | 190 | 218 | 87 -  | 3   | 220 | 10287  | 10492  |
| UN73139 | Rsa1.0_00233.1 | 742 | 104918 | 1.00E-141 | 254 | 254 | 100 + | 404 | 657 | 33041  | 33294  |
| UN73140 | Rsa1.0_00130.1 | 733 | 125737 | 1.00E-123 | 274 | 288 | 95 +  | 447 | 733 | 103102 | 103387 |
| UN73141 | Rsa1.0_05611.1 | 860 | 13193  | 0         | 562 | 562 | 100 + | 1   | 562 | 5085   | 5646   |
| UN73142 | Rsa1.0_49425.1 | 708 | 459    | 1.00E-89  | 191 | 198 | 96 +  | 2   | 196 | 262    | 459    |
| UN73143 | Rsa1.0_03613.1 | 304 | 21773  | 1.00E-115 | 254 | 268 | 94 +  | 6   | 270 | 19774  | 20041  |
| UN73144 | Rsa1.0_00338.1 | 662 | 94109  | 1.00E-150 | 270 | 270 | 100 + | 1   | 270 | 34848  | 35117  |
| UN73145 | Rsa1.0_05593.1 | 141 | 13235  | 3.00E-55  | 133 | 141 | 94 -  | 1   | 141 | 9774   | 9914   |
| UN73146 | Rsa1.0_02601.1 | 658 | 29654  | 0         | 429 | 444 | 96 +  | 1   | 439 | 19829  | 20269  |
| UN73147 | Rsa1.0_02076.1 | 300 | 153121 | 1.00E-141 | 287 | 298 | 96 -  | 3   | 300 | 33612  | 33909  |
| UN73148 | Rsa1.0_00079.1 | 309 | 606987 | 1.00E-75  | 162 | 168 | 96 +  | 1   | 168 | 198961 | 199128 |
| UN73149 | Rsa1.0_00273.1 | 490 | 326186 | 3.00E-89  | 179 | 183 | 97 -  | 1   | 183 | 44402  | 44584  |
| UN73150 | Rsa1.0_13399.1 | 617 | 4866   | 0         | 429 | 445 | 96 +  | 1   | 435 | 2365   | 2809   |
| UN73151 | Rsa1.0_02601.1 | 503 | 29654  | 1.00E-156 | 327 | 343 | 95 -  | 1   | 343 | 4759   | 5101   |
| UN73152 | Rsa1.0_06689.1 | 531 | 10535  | 0         | 484 | 514 | 94 +  | 18  | 531 | 5333   | 5845   |
| UN73153 | Rsa1.0_02168.1 | 791 | 34367  | 0         | 783 | 785 | 99 -  | 1   | 783 | 7888   | 8672   |
| UN73154 | Rsa1.0_00533.1 | 488 | 77375  | 0         | 467 | 478 | 97 +  | 1   | 476 | 36571  | 37048  |
| UN73155 | Rsa1.0_02784.1 | 703 | 27881  | 0         | 679 | 706 | 96 +  | 1   | 703 | 27079  | 27781  |
| UN73156 | Rsa1.0_00713.1 | 766 | 158017 | 5.00E-64  | 149 | 157 | 94 -  | 610 | 766 | 152241 | 152397 |
| UN73157 | #              | #   | #      | #         | #   | #   | #     | #   | #   | #      | #      |
| UN73158 | Rsa1.0_00128.1 | 444 | 228675 | 1.00E-125 | 237 | 240 | 98 -  | 205 | 444 | 9435   | 9674   |
| UN73159 | Rsa1.0_00010.1 | 500 | 294827 | 0         | 414 | 423 | 97 -  | 78  | 500 | 170150 | 170570 |
| UN73160 | Rsa1.0_00070.1 | 592 | 150321 | 1.00E-142 | 308 | 323 | 95 +  | 1   | 319 | 41826  | 42144  |
| UN73161 | Rsa1.0_05639.1 | 549 | 13084  | 1.00E-152 | 321 | 334 | 96 -  | 1   | 328 | 11728  | 12061  |
| UN73162 | Rsa1.0_01184.1 | 458 | 51452  | 0         | 445 | 458 | 97 -  | 1   | 458 | 50627  | 51083  |

|         |                |     |        |           |     |     |       |     |     |        |        |
|---------|----------------|-----|--------|-----------|-----|-----|-------|-----|-----|--------|--------|
| UN73163 | Rsa1.0_13944.1 | 585 | 4039   | 0         | 374 | 375 | 99 +  | 1   | 375 | 3665   | 4039   |
| UN73164 | Rsa1.0_00550.1 | 586 | 210790 | 1.00E-138 | 291 | 304 | 95 +  | 1   | 301 | 177884 | 178187 |
| UN73165 | Rsa1.0_00013.1 | 659 | 292129 | 0         | 647 | 663 | 97 +  | 1   | 659 | 28199  | 28861  |
| UN73166 | Rsa1.0_00575.1 | 681 | 74791  | 0         | 654 | 683 | 95 +  | 2   | 681 | 16069  | 16749  |
| UN73167 | Rsa1.0_00827.1 | 819 | 62790  | 1.00E-104 | 240 | 253 | 94 -  | 12  | 257 | 35313  | 35565  |
| UN73168 | Rsa1.0_48565.1 | 181 | 466    | 2.00E-38  | 150 | 173 | 86 +  | 4   | 176 | 145    | 317    |
| UN73169 | Rsa1.0_00757.1 | 164 | 65559  | 4.00E-64  | 154 | 164 | 93 -  | 1   | 164 | 41812  | 41975  |
| UN73170 | Rsa1.0_00126.1 | 148 | 127534 | 2.00E-35  | 85  | 88  | 96 +  | 1   | 88  | 114227 | 114314 |
| UN73171 | Rsa1.0_01413.1 | 522 | 46275  | 0         | 388 | 394 | 98 -  | 1   | 393 | 21598  | 21991  |
| UN73172 | Rsa1.0_00931.1 | 292 | 59210  | 1.00E-159 | 290 | 292 | 99 +  | 1   | 292 | 44757  | 45048  |
| UN73173 | Rsa1.0_00067.1 | 504 | 415055 | 0         | 471 | 505 | 93 -  | 4   | 504 | 297062 | 297565 |
| UN73174 | Rsa1.0_03141.1 | 507 | 25061  | 0         | 477 | 507 | 94 +  | 5   | 507 | 16317  | 16813  |
| UN73175 | Rsa1.0_00407.1 | 583 | 191544 | 0         | 427 | 434 | 98 -  | 10  | 440 | 181703 | 182136 |
| UN73176 | Rsa1.0_00422.1 | 145 | 86144  | 6.00E-32  | 120 | 134 | 89 +  | 12  | 145 | 82976  | 83102  |
| UN73177 | Rsa1.0_00511.1 | 776 | 78616  | 0         | 602 | 638 | 94 +  | 145 | 776 | 29458  | 30092  |
| UN73178 | Rsa1.0_07909.1 | 769 | 8315   | 0         | 443 | 457 | 96 -  | 276 | 732 | 5908   | 6361   |
| UN73179 | Rsa1.0_00921.1 | 707 | 59599  | 0         | 695 | 714 | 97 +  | 1   | 707 | 56008  | 56721  |
| UN73180 | Rsa1.0_05906.1 | 673 | 12270  | 0         | 624 | 660 | 94 +  | 3   | 646 | 5628   | 6286   |
| UN73181 | Rsa1.0_00015.1 | 601 | 561803 | 1.00E-174 | 309 | 309 | 100 - | 1   | 309 | 408125 | 408433 |
| UN73182 | Rsa1.0_00765.1 | 268 | 65029  | 1.00E-101 | 211 | 219 | 96 +  | 1   | 219 | 25110  | 25328  |
| UN73183 | Rsa1.0_00472.1 | 118 | 398134 | 5.00E-35  | 105 | 115 | 91 +  | 4   | 118 | 18832  | 18946  |
| UN73184 | Rsa1.0_01045.1 | 660 | 55853  | 0         | 410 | 428 | 95 +  | 1   | 422 | 25663  | 26087  |
| UN73185 | Rsa1.0_32106.1 | 490 | 710    | 0         | 470 | 489 | 96 +  | 5   | 490 | 200    | 687    |
| UN73186 | Rsa1.0_00635.1 | 530 | 175826 | 0         | 488 | 532 | 91 -  | 22  | 530 | 109263 | 109793 |
| UN73187 | Rsa1.0_00779.1 | 714 | 64568  | 0         | 700 | 714 | 98 -  | 1   | 714 | 19814  | 20527  |
| UN73188 | Rsa1.0_04484.1 | 753 | 17172  | 0         | 741 | 755 | 98 -  | 1   | 753 | 8512   | 9266   |
| UN73189 | Rsa1.0_00082.1 | 583 | 237584 | 0         | 565 | 585 | 96 -  | 2   | 583 | 106229 | 106813 |
| UN73190 | Rsa1.0_03782.1 | 721 | 20891  | 1.00E-111 | 251 | 265 | 94 +  | 2   | 265 | 14800  | 15060  |
| UN73191 | Rsa1.0_00915.1 | 690 | 194446 | 0         | 641 | 701 | 91 -  | 1   | 684 | 171033 | 171718 |
| UN73192 | Rsa1.0_02295.1 | 636 | 149884 | 0         | 325 | 326 | 99 +  | 3   | 328 | 145940 | 146265 |
| UN73193 | Rsa1.0_02207.1 | 445 | 33914  | 0         | 431 | 440 | 97 +  | 1   | 440 | 13572  | 14011  |
| UN73194 | Rsa1.0_00078.1 | 483 | 175053 | 1.00E-155 | 382 | 414 | 92 -  | 1   | 411 | 72060  | 72470  |
| UN73195 | Rsa1.0_00710.1 | 480 | 67325  | 4.00E-82  | 245 | 275 | 89 -  | 185 | 459 | 43976  | 44250  |
| UN73196 | Rsa1.0_03258.1 | 766 | 24302  | 0         | 474 | 503 | 94 -  | 277 | 766 | 11310  | 11812  |
| UN73197 | Rsa1.0_01049.1 | 598 | 55655  | 0         | 586 | 598 | 97 +  | 1   | 598 | 9376   | 9973   |
| UN73198 | Rsa1.0_01373.1 | 809 | 47052  | 0         | 796 | 800 | 99 +  | 3   | 802 | 8884   | 9683   |
| UN73199 | Rsa1.0_02742.1 | 752 | 28284  | 0         | 419 | 420 | 99 -  | 1   | 420 | 27033  | 27452  |
| UN73200 | Rsa1.0_00843.1 | 685 | 62411  | 1.00E-179 | 424 | 463 | 91 -  | 230 | 683 | 52677  | 53127  |
| UN73201 | Rsa1.0_02315.1 | 593 | 32618  | 1.00E-124 | 232 | 234 | 99 -  | 2   | 235 | 6932   | 7165   |

|         |                |     |        |           |     |     |      |     |     |        |        |
|---------|----------------|-----|--------|-----------|-----|-----|------|-----|-----|--------|--------|
| UN73202 | Rsa1.0.00763.1 | 268 | 65121  | 1.00E-117 | 252 | 265 | 95 + | 1   | 265 | 59141  | 59405  |
| UN73203 | Rsa1.0.08427.1 | 607 | 7371   | 1.00E-177 | 318 | 319 | 99 - | 2   | 320 | 1      | 319    |
| UN73204 | Rsa1.0.00014.1 | 224 | 348985 | 1.00E-86  | 208 | 222 | 93 - | 4   | 224 | 164935 | 165156 |
| UN73205 | Rsa1.0.01994.1 | 534 | 36374  | 0         | 532 | 533 | 99 - | 2   | 534 | 2047   | 2579   |
| UN73206 | Rsa1.0.57826.1 | 434 | 396    | 1.00E-115 | 244 | 255 | 95 - | 41  | 295 | 142    | 396    |
| UN73207 | Rsa1.0.00017.1 | 460 | 752458 | 0         | 437 | 457 | 95 + | 3   | 459 | 369464 | 369918 |
| UN73208 | Rsa1.0.14850.1 | 330 | 3014   | 1.00E-110 | 211 | 213 | 99 - | 3   | 213 | 542    | 754    |
| UN73209 | Rsa1.0.00351.1 | 103 | 413096 | 4.00E-38  | 98  | 103 | 95 + | 1   | 103 | 132552 | 132652 |
| UN73210 | Rsa1.0.00740.1 | 130 | 215972 | 7.00E-50  | 121 | 128 | 94 + | 3   | 130 | 3178   | 3305   |
| UN73211 | Rsa1.0.00125.1 | 747 | 253043 | 0         | 631 | 703 | 89 - | 56  | 747 | 186581 | 187256 |
| UN73212 | Rsa1.0.06312.1 | 181 | 11253  | 3.00E-77  | 174 | 182 | 95 - | 1   | 181 | 2644   | 2825   |
| UN73213 | Rsa1.0.00130.1 | 115 | 125737 | 1.00E-20  | 76  | 83  | 91 + | 1   | 82  | 32147  | 32229  |
| UN73214 | Rsa1.0.00459.1 | 669 | 82580  | 1.00E-135 | 262 | 268 | 97 + | 1   | 268 | 56659  | 56926  |
| UN73215 | Rsa1.0.66994.1 | 533 | 342    | 1.00E-170 | 327 | 335 | 97 - | 79  | 413 | 7      | 341    |
| UN73216 | Rsa1.0.00690.1 | 659 | 140527 | 0         | 392 | 407 | 96 - | 102 | 505 | 63111  | 63517  |
| UN73217 | Rsa1.0.00595.1 | 565 | 341648 | 1.00E-112 | 221 | 226 | 97 - | 274 | 499 | 3395   | 3620   |
| UN73218 | Rsa1.0.00657.1 | 715 | 69858  | 0         | 656 | 699 | 93 + | 27  | 715 | 1491   | 2188   |
| UN73219 | Rsa1.0.00461.1 | 357 | 82509  | 1.00E-47  | 130 | 141 | 92 + | 217 | 357 | 77042  | 77182  |
| UN73220 | Rsa1.0.00100.1 | 689 | 249232 | 0         | 364 | 376 | 96 - | 1   | 376 | 179062 | 179436 |
| UN73221 | Rsa1.0.02562.1 | 411 | 30061  | 2.00E-93  | 207 | 218 | 94 - | 1   | 218 | 10332  | 10549  |
| UN73222 | Rsa1.0.05599.1 | 126 | 143653 | 7.00E-50  | 118 | 124 | 95 + | 3   | 126 | 141278 | 141401 |
| UN73223 | Rsa1.0.00382.1 | 150 | 251946 | 3.00E-37  | 139 | 159 | 87 - | 1   | 150 | 111414 | 111571 |
| UN73224 | Rsa1.0.05900.1 | 543 | 12295  | 1.00E-156 | 282 | 283 | 99 + | 231 | 513 | 3588   | 3870   |
| UN73225 | Rsa1.0.01400.1 | 541 | 46560  | 0         | 410 | 430 | 95 - | 1   | 430 | 13162  | 13589  |
| UN73226 | Rsa1.0.00336.1 | 603 | 445051 | 0         | 530 | 566 | 93 + | 39  | 603 | 221187 | 221740 |
| UN73227 | Rsa1.0.00638.1 | 643 | 71037  | 0         | 406 | 408 | 99 + | 1   | 408 | 6138   | 6545   |
| UN73228 | Rsa1.0.01122.1 | 170 | 53369  | 3.00E-77  | 164 | 170 | 96 + | 1   | 170 | 52789  | 52958  |
| UN73229 | Rsa1.0.00069.1 | 674 | 403561 | 1.00E-158 | 303 | 309 | 98 - | 1   | 306 | 16156  | 16464  |
| UN73230 | Rsa1.0.00418.1 | 519 | 215377 | 0         | 500 | 521 | 95 + | 4   | 519 | 201867 | 202381 |
| UN73231 | Rsa1.0.00233.1 | 767 | 104918 | 1.00E-131 | 251 | 254 | 98 + | 370 | 622 | 33041  | 33294  |
| UN73232 | Rsa1.0.27849.1 | 788 | 837    | 0         | 526 | 546 | 96 + | 251 | 788 | 49     | 594    |
| UN73233 | Rsa1.0.18261.1 | 533 | 1633   | 0         | 507 | 534 | 94 - | 2   | 533 | 438    | 971    |
| UN73234 | Rsa1.0.00193.1 | 714 | 194198 | 0         | 623 | 665 | 93 - | 2   | 645 | 122857 | 123521 |
| UN73235 | Rsa1.0.00736.1 | 717 | 66455  | 0         | 452 | 478 | 94 + | 240 | 717 | 36021  | 36490  |
| UN73236 | Rsa1.0.00015.1 | 670 | 561803 | 1.00E-116 | 233 | 240 | 97 - | 201 | 440 | 429798 | 430037 |
| UN73237 | Rsa1.0.00265.1 | 336 | 220635 | 1.00E-140 | 284 | 293 | 96 - | 1   | 292 | 139882 | 140174 |
| UN73238 | Rsa1.0.00025.1 | 165 | 277312 | 2.00E-60  | 152 | 163 | 93 + | 3   | 165 | 231581 | 231739 |
| UN73239 | Rsa1.0.00895.1 | 872 | 60615  | 1.00E-157 | 306 | 314 | 97 - | 184 | 497 | 59916  | 60229  |
| UN73240 | Rsa1.0.00342.1 | 108 | 93695  | 2.00E-40  | 102 | 108 | 94 + | 1   | 108 | 79973  | 80080  |



|         |                |     |        |           |     |     |       |     |     |        |        |
|---------|----------------|-----|--------|-----------|-----|-----|-------|-----|-----|--------|--------|
| UN73241 | Rsa1.0.00657.1 | 159 | 69858  | 5.00E-11  | 59  | 67  | 88 +  | 78  | 144 | 58113  | 58179  |
| UN73242 | Rsa1.0.00037.1 | 251 | 307838 | 1.00E-93  | 232 | 250 | 92 +  | 3   | 251 | 56900  | 57149  |
| UN73243 | Rsa1.0.01112.1 | 737 | 310601 | 1.00E-101 | 223 | 235 | 94 -  | 180 | 414 | 292804 | 293038 |
| UN73244 | Rsa1.0.00713.1 | 798 | 158017 | 0         | 784 | 797 | 98 -  | 2   | 798 | 44038  | 44832  |
| UN73245 | Rsa1.0.00453.1 | 807 | 83031  | 0         | 804 | 806 | 99 -  | 2   | 807 | 8282   | 9087   |
| UN73246 | Rsa1.0.02374.1 | 112 | 32043  | 4.00E-20  | 97  | 112 | 86 +  | 3   | 111 | 25572  | 25683  |
| UN73247 | Rsa1.0.00142.1 | 381 | 121474 | 1.00E-100 | 215 | 225 | 95 -  | 4   | 228 | 62984  | 63208  |
| UN73248 | Rsa1.0.01384.1 | 244 | 46803  | 4.00E-96  | 223 | 238 | 93 -  | 2   | 239 | 20756  | 20993  |
| UN73249 | Rsa1.0.04308.1 | 507 | 17997  | 0         | 499 | 506 | 98 +  | 2   | 507 | 1595   | 2100   |
| UN73250 | Rsa1.0.02496.1 | 684 | 30814  | 1.00E-141 | 287 | 297 | 96 +  | 2   | 298 | 14690  | 14984  |
| UN73251 | Rsa1.0.00074.1 | 524 | 147591 | 0         | 494 | 523 | 94 -  | 4   | 518 | 73249  | 73771  |
| UN73252 | Rsa1.0.00868.1 | 287 | 61630  | 1.00E-81  | 254 | 287 | 88 +  | 1   | 287 | 58105  | 58387  |
| UN73253 | Rsa1.0.06151.1 | 844 | 11612  | 0         | 423 | 443 | 95 -  | 255 | 694 | 9739   | 10181  |
| UN73254 | Rsa1.0.01958.1 | 653 | 261128 | 1.00E-126 | 230 | 230 | 100 + | 1   | 230 | 119366 | 119595 |
| UN73255 | Rsa1.0.00741.1 | 779 | 66117  | 0         | 724 | 788 | 91 +  | 18  | 779 | 32567  | 33350  |
| UN73256 | Rsa1.0.01270.1 | 577 | 49574  | 1.00E-162 | 379 | 404 | 93 +  | 1   | 399 | 29169  | 29567  |
| UN73257 | Rsa1.0.07334.1 | 533 | 9547   | 1.00E-141 | 279 | 287 | 97 -  | 1   | 287 | 683    | 969    |
| UN73258 | Rsa1.0.00387.1 | 698 | 495407 | 0         | 665 | 699 | 95 -  | 2   | 698 | 28358  | 29051  |
| UN73259 | Rsa1.0.07945.1 | 243 | 8206   | 1.00E-102 | 240 | 259 | 92 +  | 1   | 243 | 2285   | 2543   |
| UN73260 | #              | #   | #      | #         | #   | #   | #     | #   | #   | #      | #      |
| UN73261 | Rsa1.0.03223.1 | 513 | 24512  | 0         | 466 | 500 | 93 +  | 14  | 510 | 9260   | 9757   |
| UN73262 | Rsa1.0.03778.1 | 249 | 20908  | 4.00E-96  | 217 | 230 | 94 -  | 1   | 230 | 8620   | 8849   |
| UN73263 | Rsa1.0.00374.1 | 673 | 165738 | 0         | 386 | 394 | 97 +  | 280 | 673 | 98215  | 98608  |
| UN73264 | Rsa1.0.00085.1 | 654 | 142226 | 0         | 531 | 566 | 93 -  | 1   | 566 | 56770  | 57317  |
| UN73265 | Rsa1.0.09840.1 | 388 | 6123   | 1.00E-149 | 279 | 283 | 98 +  | 106 | 388 | 5047   | 5329   |
| UN73266 | Rsa1.0.05812.1 | 470 | 12571  | 1.00E-110 | 304 | 332 | 91 -  | 58  | 386 | 2218   | 2545   |
| UN73267 | Rsa1.0.02686.1 | 685 | 28666  | 0         | 461 | 481 | 95 +  | 1   | 481 | 23414  | 23879  |
| UN73268 | Rsa1.0.00446.1 | 604 | 167829 | 0         | 589 | 603 | 97 +  | 1   | 603 | 138894 | 139496 |
| UN73269 | Rsa1.0.06493.1 | 726 | 10906  | 1.00E-174 | 370 | 389 | 95 +  | 339 | 726 | 1346   | 1734   |
| UN73270 | Rsa1.0.00153.1 | 658 | 192931 | 1.00E-128 | 274 | 288 | 95 -  | 375 | 656 | 143131 | 143418 |
| UN73271 | Rsa1.0.02602.1 | 707 | 29653  | 0         | 482 | 486 | 99 -  | 1   | 486 | 13712  | 14197  |
| UN73272 | Rsa1.0.00101.1 | 333 | 267193 | 1.00E-124 | 228 | 229 | 99 +  | 1   | 229 | 236805 | 237033 |
| UN73273 | Rsa1.0.00775.1 | 752 | 64793  | 0         | 699 | 750 | 93 -  | 5   | 752 | 55224  | 55946  |
| UN73274 | Rsa1.0.00707.1 | 338 | 190112 | 1.00E-87  | 178 | 182 | 97 +  | 1   | 179 | 187831 | 188012 |
| UN73275 | Rsa1.0.00033.1 | 501 | 515811 | 0         | 489 | 503 | 97 -  | 2   | 501 | 357669 | 358169 |
| UN73276 | Rsa1.0.02839.1 | 701 | 27391  | 0         | 685 | 710 | 96 -  | 1   | 701 | 16263  | 16969  |
| UN73277 | Rsa1.0.01913.1 | 686 | 37363  | 1.00E-152 | 296 | 304 | 97 -  | 1   | 304 | 27662  | 27965  |
| UN73278 | Rsa1.0.15062.1 | 523 | 2857   | 1.00E-169 | 359 | 376 | 95 -  | 139 | 513 | 1      | 374    |
| UN73279 | Rsa1.0.00087.1 | 165 | 761073 | 2.00E-50  | 146 | 160 | 91 -  | 5   | 162 | 581184 | 581343 |

|         |                |     |        |           |     |     |       |     |     |        |        |
|---------|----------------|-----|--------|-----------|-----|-----|-------|-----|-----|--------|--------|
| UN73280 | Rsa1.0_04088.1 | 240 | 19150  | 1.00E-108 | 230 | 238 | 96 -  | 1   | 236 | 18681  | 18917  |
| UN73281 | Rsa1.0_01605.1 | 188 | 42442  | 3.00E-74  | 175 | 185 | 94 +  | 1   | 184 | 7066   | 7250   |
| UN73282 | Rsa1.0_03141.1 | 762 | 25061  | 0         | 610 | 624 | 97 +  | 2   | 625 | 6573   | 7196   |
| UN73283 | Rsa1.0_00016.1 | 207 | 831256 | 8.00E-97  | 200 | 207 | 96 +  | 1   | 207 | 225553 | 225759 |
| UN73284 | Rsa1.0_00353.1 | 643 | 92242  | 0         | 361 | 362 | 99 +  | 1   | 362 | 16440  | 16801  |
| UN73285 | Rsa1.0_00344.1 | 734 | 191774 | 1.00E-168 | 384 | 407 | 94 -  | 1   | 404 | 104082 | 104476 |
| UN73286 | Rsa1.0_05322.1 | 768 | 14154  | 0         | 695 | 712 | 97 +  | 57  | 768 | 765    | 1474   |
| UN73287 | Rsa1.0_02841.1 | 315 | 27383  | 1.00E-129 | 269 | 281 | 95 -  | 35  | 315 | 19034  | 19314  |
| UN73288 | Rsa1.0_00878.1 | 247 | 330303 | 1.00E-12  | 96  | 114 | 84 +  | 106 | 219 | 118200 | 118312 |
| UN73289 | Rsa1.0_18628.1 | 536 | 1562   | 1.00E-134 | 252 | 255 | 98 +  | 1   | 255 | 488    | 742    |
| UN73290 | Rsa1.0_00317.1 | 214 | 218290 | 5.00E-89  | 202 | 214 | 94 +  | 1   | 214 | 72578  | 72791  |
| UN73291 | Rsa1.0_04124.1 | 510 | 18945  | 2.00E-71  | 161 | 169 | 95 -  | 39  | 207 | 3327   | 3495   |
| UN73292 | Rsa1.0_05569.1 | 556 | 13311  | 0         | 470 | 492 | 95 +  | 1   | 486 | 4098   | 4579   |
| UN73293 | Rsa1.0_05878.1 | 125 | 12344  | 3.00E-36  | 115 | 125 | 92 +  | 1   | 125 | 8244   | 8366   |
| UN73294 | Rsa1.0_02442.1 | 108 | 31355  | 7.00E-31  | 99  | 108 | 91 +  | 1   | 108 | 12583  | 12689  |
| UN73295 | Rsa1.0_04027.1 | 282 | 19501  | 7.00E-92  | 213 | 227 | 93 +  | 5   | 231 | 3004   | 3230   |
| UN73296 | Rsa1.0_16475.1 | 154 | 2143   | 1.00E-30  | 89  | 96  | 92 -  | 55  | 150 | 1195   | 1290   |
| UN73297 | Rsa1.0_04422.1 | 824 | 17423  | 0         | 822 | 826 | 99 -  | 1   | 824 | 8720   | 9545   |
| UN73298 | Rsa1.0_00168.1 | 612 | 115870 | 1.00E-144 | 263 | 264 | 99 -  | 1   | 264 | 36111  | 36374  |
| UN73299 | Rsa1.0_00265.1 | 603 | 220635 | 0         | 468 | 484 | 96 +  | 2   | 482 | 159678 | 160158 |
| UN73300 | Rsa1.0_00065.1 | 761 | 454616 | 0         | 713 | 735 | 97 +  | 29  | 761 | 414598 | 415327 |
| UN73301 | Rsa1.0_00165.1 | 655 | 116466 | 1.00E-137 | 302 | 318 | 94 -  | 1   | 317 | 7613   | 7928   |
| UN73302 | Rsa1.0_00301.1 | 355 | 365315 | 1.00E-145 | 338 | 358 | 94 +  | 1   | 350 | 320789 | 321146 |
| UN73303 | Rsa1.0_00912.1 | 167 | 59923  | 2.00E-29  | 75  | 78  | 96 +  | 59  | 136 | 37361  | 37438  |
| UN73304 | Rsa1.0_06677.1 | 190 | 10560  | 1.00E-86  | 184 | 190 | 96 +  | 1   | 190 | 10073  | 10261  |
| UN73305 | #              | #   | #      | #         | #   | #   | #     | #   | #   | #      | #      |
| UN73306 | Rsa1.0_00623.1 | 728 | 207630 | 0         | 691 | 728 | 94 +  | 2   | 728 | 159867 | 160582 |
| UN73307 | Rsa1.0_14001.1 | 150 | 3933   | 3.00E-31  | 84  | 89  | 94 -  | 1   | 89  | 1890   | 1978   |
| UN73308 | Rsa1.0_02670.1 | 282 | 28887  | 1.00E-105 | 264 | 284 | 92 +  | 1   | 280 | 3888   | 4170   |
| UN73309 | Rsa1.0_01002.1 | 565 | 57063  | 1.00E-144 | 320 | 340 | 94 -  | 226 | 565 | 4273   | 4612   |
| UN73310 | Rsa1.0_01045.1 | 504 | 55853  | 3.00E-92  | 188 | 192 | 97 +  | 56  | 246 | 37366  | 37557  |
| UN73311 | Rsa1.0_00078.1 | 770 | 175053 | 0         | 745 | 795 | 93 +  | 1   | 770 | 78763  | 79557  |
| UN73312 | Rsa1.0_00692.1 | 676 | 68151  | 0         | 676 | 677 | 99 +  | 1   | 676 | 32399  | 33075  |
| UN73313 | Rsa1.0_06302.1 | 367 | 11269  | 2.33E-156 | 339 | 363 | 93 +  | 5   | 367 | 2128   | 2489   |
| UN73314 | Rsa1.0_01232.1 | 326 | 155185 | 1.00E-87  | 194 | 204 | 95 +  | 123 | 326 | 108873 | 109076 |
| UN73315 | Rsa1.0_22290.1 | 535 | 1133   | 2.00E-84  | 159 | 159 | 100 + | 144 | 302 | 75     | 233    |
| UN73316 | #              | #   | #      | #         | #   | #   | #     | #   | #   | #      | #      |
| UN73317 | Rsa1.0_00919.1 | 747 | 59675  | 0         | 745 | 747 | 99 -  | 1   | 747 | 51215  | 51961  |
| UN73318 | Rsa1.0_01162.1 | 668 | 169104 | 0         | 351 | 360 | 97 +  | 1   | 360 | 144531 | 144890 |

|         |                |     |        |           |     |     |      |     |     |        |        |
|---------|----------------|-----|--------|-----------|-----|-----|------|-----|-----|--------|--------|
| UN73319 | Rsa1.0.03413.1 | 485 | 23137  | 0         | 470 | 485 | 96 - | 1   | 485 | 8344   | 8826   |
| UN73320 | Rsa1.0.00844.1 | 778 | 62403  | 0         | 530 | 546 | 97 - | 1   | 546 | 41735  | 42280  |
| UN73321 | Rsa1.0.00037.1 | 736 | 307838 | 1.00E-15  | 170 | 212 | 80 + | 525 | 736 | 234562 | 234773 |
| UN73322 | Rsa1.0.00802.1 | 659 | 63846  | 1.00E-156 | 283 | 284 | 99 - | 1   | 284 | 17081  | 17364  |
| UN73323 | Rsa1.0.00435.1 | 556 | 317579 | 1.00E-160 | 292 | 294 | 99 + | 1   | 294 | 2616   | 2909   |
| UN73324 | Rsa1.0.00083.1 | 726 | 442773 | 1.00E-77  | 432 | 524 | 82 + | 36  | 530 | 330924 | 331434 |
| UN73325 | Rsa1.0.00630.1 | 818 | 71281  | 0         | 430 | 436 | 98 - | 3   | 437 | 30565  | 31000  |
| UN73326 | Rsa1.0.00577.1 | 599 | 174827 | 8.00E-81  | 195 | 208 | 93 - | 4   | 211 | 148897 | 149102 |
| UN73327 | Rsa1.0.05410.1 | 556 | 13840  | 1.00E-180 | 362 | 376 | 96 + | 80  | 455 | 7861   | 8236   |
| UN73328 | Rsa1.0.00196.1 | 399 | 109960 | 2.00E-99  | 217 | 228 | 95 - | 1   | 228 | 51296  | 51523  |
| UN73329 | Rsa1.0.00277.1 | 249 | 100132 | 1.00E-106 | 219 | 227 | 96 - | 1   | 227 | 8930   | 9156   |
| UN73330 | Rsa1.0.00257.1 | 479 | 102407 | 0         | 467 | 486 | 96 + | 1   | 479 | 70218  | 70699  |
| UN73331 | Rsa1.0.04634.1 | 708 | 16578  | 0         | 687 | 708 | 97 - | 1   | 708 | 9858   | 10564  |
| UN73332 | Rsa1.0.02322.1 | 199 | 32555  | 5.00E-92  | 192 | 199 | 96 - | 1   | 199 | 6459   | 6657   |
| UN73333 | Rsa1.0.01270.1 | 811 | 49574  | 0         | 785 | 813 | 96 - | 2   | 811 | 14184  | 14994  |
| UN73334 | Rsa1.0.02097.1 | 269 | 35036  | 2.00E-70  | 144 | 147 | 97 - | 78  | 224 | 18920  | 19066  |
| UN73335 | Rsa1.0.02955.1 | 708 | 26484  | 0         | 560 | 577 | 97 + | 135 | 708 | 6158   | 6734   |
| UN73336 | Rsa1.0.18906.1 | 575 | 1514   | 0         | 431 | 439 | 98 + | 17  | 455 | 1      | 438    |
| UN73337 | Rsa1.0.02784.1 | 320 | 27881  | 1.00E-111 | 284 | 307 | 92 + | 15  | 320 | 27112  | 27416  |
| UN73338 | Rsa1.0.01891.1 | 601 | 37530  | 1.00E-152 | 275 | 276 | 99 - | 1   | 276 | 11913  | 12188  |
| UN73339 | Rsa1.0.02003.1 | 735 | 36171  | 0         | 716 | 740 | 96 + | 1   | 735 | 8872   | 9611   |
| UN73340 | Rsa1.0.00094.1 | 740 | 139042 | 9.00E-69  | 154 | 161 | 95 - | 493 | 653 | 135031 | 135191 |
| UN73341 | Rsa1.0.16260.1 | 916 | 2222   | 1.00E-135 | 253 | 256 | 98 - | 164 | 419 | 1967   | 2222   |
| UN73342 | Rsa1.0.03031.1 | 633 | 25839  | 1.00E-165 | 324 | 334 | 97 - | 207 | 540 | 24118  | 24451  |
| UN73343 | Rsa1.0.01148.1 | 707 | 52375  | 1.00E-135 | 284 | 297 | 95 - | 375 | 671 | 27117  | 27413  |
| UN73344 | Rsa1.0.02485.1 | 324 | 30968  | 1.00E-166 | 314 | 320 | 98 - | 5   | 324 | 9306   | 9625   |
| UN73345 | Rsa1.0.12091.1 | 588 | 5316   | 0         | 367 | 377 | 97 - | 4   | 380 | 3854   | 4230   |
| UN73346 | Rsa1.0.00891.1 | 198 | 60724  | 2.00E-63  | 184 | 201 | 91 - | 1   | 198 | 22439  | 22637  |
| UN73347 | Rsa1.0.00256.1 | 603 | 102426 | 0         | 586 | 603 | 97 + | 1   | 603 | 7901   | 8503   |
| UN73348 | Rsa1.0.01676.1 | 549 | 41140  | 0         | 520 | 563 | 92 + | 1   | 549 | 32396  | 32953  |
| UN73349 | Rsa1.0.01331.1 | 399 | 47944  | 0         | 384 | 402 | 95 + | 2   | 399 | 29246  | 29647  |
| UN73350 | Rsa1.0.01364.1 | 232 | 47172  | 4.00E-93  | 215 | 229 | 93 + | 1   | 229 | 43524  | 43752  |
| UN73351 | Rsa1.0.00750.1 | 589 | 190548 | 1.00E-113 | 220 | 224 | 98 - | 304 | 527 | 9895   | 10118  |
| UN73352 | Rsa1.0.04016.1 | 397 | 19570  | 5.00E-44  | 234 | 286 | 81 - | 130 | 397 | 14808  | 15093  |
| UN73353 | Rsa1.0.04254.1 | 387 | 18258  | 9.00E-92  | 210 | 223 | 94 - | 1   | 223 | 14780  | 15002  |
| UN73354 | Rsa1.0.02605.1 | 574 | 29637  | 0         | 542 | 560 | 96 - | 3   | 552 | 25931  | 26490  |
| UN73355 | Rsa1.0.00682.1 | 283 | 68680  | 2.00E-83  | 268 | 306 | 87 - | 1   | 283 | 10651  | 10951  |
| UN73356 | Rsa1.0.02619.1 | 511 | 29444  | 1.00E-170 | 315 | 319 | 98 + | 1   | 319 | 29126  | 29444  |
| UN73357 | Rsa1.0.02248.1 | 678 | 33414  | 0         | 671 | 677 | 99 + | 2   | 678 | 7017   | 7693   |

|         |                |     |        |           |     |     |       |     |     |        |        |
|---------|----------------|-----|--------|-----------|-----|-----|-------|-----|-----|--------|--------|
| UN73358 | Rsa1.0_00951.1 | 525 | 164588 | 1.00E-149 | 283 | 288 | 98 -  | 6   | 293 | 114506 | 114793 |
| UN73359 | Rsa1.0_00620.1 | 201 | 71985  | 2.00E-51  | 171 | 194 | 88 -  | 9   | 201 | 50355  | 50533  |
| UN73360 | Rsa1.0_35730.1 | 282 | 633    | 2.00E-92  | 175 | 176 | 99 +  | 1   | 176 | 23     | 198    |
| UN73361 | Rsa1.0_00248.1 | 609 | 163568 | 0         | 375 | 375 | 100 + | 1   | 375 | 1086   | 1460   |
| UN73362 | Rsa1.0_05338.1 | 748 | 144511 | 4.00E-86  | 254 | 280 | 90 +  | 2   | 279 | 9206   | 9476   |
| UN73363 | Rsa1.0_00659.1 | 550 | 69733  | 1.00E-135 | 337 | 369 | 91 -  | 1   | 366 | 55176  | 55524  |
| UN73364 | Rsa1.0_00088.1 | 722 | 141341 | 1.00E-89  | 171 | 172 | 99 -  | 3   | 174 | 13169  | 13340  |
| UN73365 | Rsa1.0_00689.1 | 572 | 68305  | 6.00E-94  | 296 | 333 | 88 -  | 2   | 324 | 33200  | 33522  |
| UN73366 | Rsa1.0_00527.1 | 224 | 77733  | 7.00E-73  | 197 | 214 | 92 +  | 8   | 220 | 57614  | 57825  |
| UN73367 | Rsa1.0_00434.1 | 708 | 85171  | 0         | 330 | 331 | 99 +  | 2   | 332 | 8229   | 8558   |
| UN73368 | Rsa1.0_00782.1 | 827 | 64468  | 1.00E-153 | 386 | 423 | 91 +  | 414 | 827 | 37791  | 38207  |
| UN73369 | Rsa1.0_00128.1 | 414 | 228675 | 0         | 378 | 392 | 96 +  | 3   | 393 | 200489 | 200880 |
| UN73370 | Rsa1.0_00136.1 | 529 | 122464 | 0         | 514 | 539 | 95 +  | 1   | 529 | 25118  | 25655  |
| UN73371 | Rsa1.0_00887.1 | 664 | 61048  | 3.00E-25  | 91  | 100 | 91 -  | 527 | 625 | 34456  | 34555  |
| UN73372 | Rsa1.0_00034.1 | 160 | 260119 | 2.00E-44  | 124 | 135 | 91 -  | 4   | 138 | 130302 | 130436 |
| UN73373 | Rsa1.0_00295.1 | 310 | 152597 | 1.00E-162 | 304 | 309 | 98 -  | 2   | 310 | 84046  | 84354  |
| UN73374 | Rsa1.0_00219.1 | 540 | 106983 | 0         | 540 | 541 | 99 -  | 1   | 540 | 21634  | 22174  |
| UN73375 | Rsa1.0_00120.1 | 289 | 277288 | 1.00E-127 | 273 | 287 | 95 -  | 3   | 289 | 121773 | 122059 |
| UN73376 | Rsa1.0_01367.1 | 511 | 47135  | 0         | 499 | 525 | 95 -  | 1   | 511 | 3848   | 4372   |
| UN73377 | Rsa1.0_01422.1 | 150 | 46172  | 3.00E-40  | 129 | 144 | 89 -  | 1   | 144 | 39508  | 39651  |
| UN73378 | Rsa1.0_00601.1 | 762 | 177045 | 0         | 414 | 430 | 96 +  | 1   | 429 | 20543  | 20970  |
| UN73379 | Rsa1.0_01521.1 | 519 | 142147 | 9.00E-99  | 201 | 207 | 97 +  | 249 | 455 | 7204   | 7410   |
| UN73380 | Rsa1.0_02846.1 | 464 | 27338  | 1.00E-109 | 221 | 227 | 97 +  | 3   | 229 | 27115  | 27338  |
| UN73381 | Rsa1.0_00060.1 | 726 | 502678 | 0         | 563 | 616 | 91 +  | 111 | 726 | 28855  | 29452  |
| UN73382 | Rsa1.0_00224.1 | 691 | 327530 | 1.00E-168 | 413 | 442 | 93 +  | 1   | 432 | 157088 | 157521 |
| UN73383 | Rsa1.0_01528.1 | 667 | 43882  | 1.00E-162 | 295 | 297 | 99 -  | 4   | 300 | 15041  | 15337  |
| UN73384 | Rsa1.0_00107.1 | 657 | 431659 | 1.00E-123 | 251 | 260 | 96 +  | 23  | 282 | 329800 | 330059 |
| UN73385 | Rsa1.0_00092.1 | 737 | 659932 | 1.00E-133 | 326 | 349 | 93 -  | 3   | 348 | 505878 | 506225 |
| UN73386 | Rsa1.0_00244.1 | 405 | 103590 | 9.00E-80  | 166 | 170 | 97 +  | 1   | 168 | 29938  | 30107  |
| UN73387 | Rsa1.0_02910.1 | 733 | 26843  | 1.00E-143 | 270 | 274 | 98 +  | 274 | 547 | 908    | 1181   |
| UN73388 | Rsa1.0_04264.1 | 187 | 18207  | 9.00E-78  | 171 | 179 | 95 -  | 9   | 187 | 5720   | 5898   |
| UN73389 | Rsa1.0_07528.1 | 534 | 9195   | 1.00E-101 | 191 | 192 | 99 -  | 8   | 199 | 6145   | 6336   |
| UN73390 | Rsa1.0_00383.1 | 606 | 398431 | 0         | 603 | 605 | 99 +  | 1   | 605 | 163327 | 163930 |
| UN73391 | Rsa1.0_26340.1 | 372 | 896    | 4.00E-54  | 108 | 108 | 100 - | 76  | 183 | 434    | 541    |
| UN73392 | Rsa1.0_00955.1 | 677 | 58358  | 1.00E-107 | 207 | 210 | 98 +  | 10  | 219 | 32730  | 32939  |
| UN73393 | Rsa1.0_09450.1 | 635 | 6360   | 1.00E-162 | 314 | 322 | 97 +  | 219 | 540 | 765    | 1086   |
| UN73394 | Rsa1.0_00294.1 | 428 | 144860 | 4.00E-79  | 153 | 154 | 99 -  | 275 | 428 | 65313  | 65466  |
| UN73395 | Rsa1.0_04741.1 | 547 | 16164  | 2.00E-69  | 152 | 158 | 96 +  | 317 | 474 | 2722   | 2879   |
| UN73396 | Rsa1.0_00458.1 | 752 | 82717  | 0         | 745 | 755 | 98 +  | 2   | 752 | 22804  | 23558  |

|         |                |     |        |           |     |     |       |     |     |        |        |
|---------|----------------|-----|--------|-----------|-----|-----|-------|-----|-----|--------|--------|
| UN73397 | Rsa1.0.00351.1 | 203 | 413096 | 2.00E-88  | 168 | 169 | 99 +  | 3   | 171 | 401309 | 401477 |
| UN73398 | Rsa1.0.00145.1 | 272 | 261008 | 5.00E-28  | 73  | 76  | 96 -  | 2   | 77  | 29294  | 29369  |
| UN73399 | Rsa1.0.00608.1 | 773 | 172672 | 0         | 579 | 582 | 99 -  | 194 | 773 | 120068 | 120649 |
| UN73400 | Rsa1.0.01649.1 | 204 | 41624  | 7.00E-91  | 200 | 207 | 96 +  | 2   | 204 | 39484  | 39689  |
| UN73401 | Rsa1.0.00230.1 | 577 | 105389 | 1.00E-169 | 363 | 381 | 95 +  | 9   | 385 | 810    | 1187   |
| UN73402 | Rsa1.0.01235.1 | 765 | 50180  | 0         | 352 | 359 | 98 +  | 399 | 756 | 19036  | 19394  |
| UN73403 | Rsa1.0.02358.1 | 501 | 32213  | 1.00E-136 | 437 | 497 | 87 +  | 14  | 501 | 4307   | 4784   |
| UN73404 | Rsa1.0.04153.1 | 432 | 18807  | 1.00E-109 | 231 | 241 | 95 +  | 192 | 432 | 16165  | 16405  |
| UN73405 | Rsa1.0.00325.1 | 526 | 95371  | 0         | 520 | 521 | 99 -  | 6   | 526 | 58281  | 58801  |
| UN73406 | Rsa1.0.00944.1 | 619 | 58733  | 1.00E-89  | 221 | 239 | 92 -  | 6   | 242 | 5223   | 5452   |
| UN73407 | Rsa1.0.03558.1 | 517 | 22102  | 0         | 503 | 518 | 97 -  | 1   | 516 | 3187   | 3700   |
| UN73408 | Rsa1.0.04399.1 | 671 | 17543  | 1.00E-117 | 301 | 330 | 91 +  | 266 | 595 | 9928   | 10257  |
| UN73409 | Rsa1.0.01556.1 | 837 | 163858 | 1.00E-168 | 385 | 406 | 94 +  | 341 | 740 | 24950  | 25349  |
| UN73410 | Rsa1.0.00015.1 | 138 | 561803 | 9.00E-71  | 135 | 135 | 100 - | 4   | 138 | 192583 | 192717 |
| UN73411 | Rsa1.0.00108.1 | 193 | 478491 | 2.00E-32  | 74  | 75  | 98 +  | 3   | 77  | 50044  | 50118  |
| UN73412 | Rsa1.0.19255.1 | 749 | 1456   | 1.00E-74  | 149 | 151 | 98 +  | 170 | 320 | 691    | 841    |
| UN73413 | Rsa1.0.00323.1 | 789 | 159650 | 0         | 749 | 789 | 94 -  | 3   | 789 | 135255 | 136038 |
| UN73414 | Rsa1.0.00045.1 | 591 | 328694 | 1.00E-155 | 283 | 285 | 99 -  | 146 | 430 | 177458 | 177742 |
| UN73415 | Rsa1.0.08939.1 | 768 | 6769   | 4.00E-43  | 117 | 126 | 92 +  | 506 | 631 | 3368   | 3493   |
| UN73416 | Rsa1.0.05818.1 | 558 | 12544  | 0         | 386 | 400 | 96 +  | 3   | 400 | 6711   | 7108   |
| UN73417 | Rsa1.0.00004.1 | 540 | 253996 | 1.00E-165 | 306 | 310 | 98 +  | 106 | 415 | 196631 | 196940 |
| UN73418 | Rsa1.0.07185.1 | 794 | 9772   | 0         | 453 | 473 | 95 +  | 4   | 473 | 5022   | 5485   |
| UN73419 | Rsa1.0.02686.1 | 722 | 28666  | 0         | 450 | 464 | 96 +  | 3   | 464 | 5198   | 5661   |
| UN73420 | Rsa1.0.00310.1 | 799 | 96852  | 0         | 777 | 802 | 96 -  | 2   | 799 | 4631   | 5432   |
| UN73421 | Rsa1.0.00040.1 | 602 | 324196 | 0         | 574 | 597 | 96 -  | 3   | 599 | 11206  | 11802  |
| UN73422 | Rsa1.0.05015.1 | 742 | 15125  | 3.00E-44  | 92  | 92  | 100 + | 236 | 327 | 14303  | 14394  |
| UN73423 | Rsa1.0.00684.1 | 798 | 141701 | 0         | 740 | 819 | 90 -  | 3   | 798 | 43564  | 44361  |
| UN73424 | Rsa1.0.00236.1 | 700 | 104771 | 0         | 386 | 400 | 96 +  | 299 | 697 | 49095  | 49494  |
| UN73425 | Rsa1.0.02805.1 | 809 | 27698  | 1.00E-172 | 310 | 311 | 99 -  | 121 | 431 | 15985  | 16295  |
| UN73426 | Rsa1.0.05517.1 | 641 | 13460  | 0         | 619 | 640 | 96 +  | 2   | 641 | 11912  | 12551  |
| UN73427 | Rsa1.0.01512.1 | 726 | 44234  | 0         | 381 | 401 | 95 -  | 3   | 403 | 32378  | 32769  |
| UN73428 | Rsa1.0.00153.1 | 821 | 192931 | 0         | 650 | 676 | 96 +  | 56  | 728 | 21257  | 21927  |
| UN73429 | Rsa1.0.00666.1 | 180 | 69505  | 2.00E-85  | 175 | 180 | 97 -  | 1   | 180 | 62891  | 63070  |
| UN73430 | Rsa1.0.04845.1 | 672 | 15747  | 2.00E-94  | 208 | 218 | 95 +  | 173 | 387 | 4176   | 4393   |
| UN73431 | Rsa1.0.00826.1 | 699 | 166736 | 0         | 484 | 490 | 98 +  | 1   | 490 | 154343 | 154832 |
| UN73432 | Rsa1.0.02368.1 | 693 | 32096  | 3.00E-50  | 255 | 300 | 85 -  | 136 | 430 | 26556  | 26853  |
| UN73433 | Rsa1.0.05264.1 | 667 | 14327  | 0         | 641 | 662 | 96 -  | 3   | 664 | 13501  | 14155  |
| UN73434 | Rsa1.0.01076.1 | 628 | 54835  | 1.00E-122 | 235 | 238 | 98 +  | 385 | 621 | 39978  | 40215  |
| UN73435 | Rsa1.0.02528.1 | 732 | 30452  | 1.00E-157 | 421 | 461 | 91 +  | 282 | 732 | 17071  | 17531  |

|         |                |     |        |           |     |     |       |     |     |        |        |
|---------|----------------|-----|--------|-----------|-----|-----|-------|-----|-----|--------|--------|
| UN73436 | Rsa1.0.00265.1 | 261 | 220635 | 3.00E-44  | 150 | 172 | 87 -  | 13  | 184 | 173135 | 173294 |
| UN73437 | Rsa1.0.00648.1 | 710 | 70351  | 1.00E-156 | 289 | 292 | 98 +  | 419 | 710 | 22840  | 23131  |
| UN73438 | Rsa1.0.08213.1 | 725 | 7711   | 1.00E-140 | 256 | 257 | 99 +  | 441 | 697 | 3285   | 3541   |
| UN73439 | Rsa1.0.00253.1 | 792 | 231292 | 3.00E-50  | 112 | 114 | 98 +  | 621 | 733 | 86232  | 86345  |
| UN73440 | Rsa1.0.35243.1 | 807 | 642    | 1.00E-105 | 198 | 199 | 99 -  | 410 | 608 | 228    | 426    |
| UN73441 | Rsa1.0.07915.1 | 618 | 8293   | 0         | 396 | 398 | 99 +  | 153 | 550 | 2556   | 2953   |
| UN73442 | Rsa1.0.00693.1 | 739 | 161311 | 0         | 699 | 724 | 96 -  | 1   | 715 | 41739  | 42462  |
| UN73443 | Rsa1.0.00504.1 | 548 | 79334  | 1.00E-79  | 217 | 240 | 90 -  | 3   | 242 | 29524  | 29750  |
| UN73444 | Rsa1.0.10606.1 | 811 | 5787   | 0         | 654 | 687 | 95 -  | 3   | 679 | 3538   | 4224   |
| UN73445 | Rsa1.0.00080.1 | 758 | 190437 | 0         | 534 | 561 | 95 -  | 199 | 752 | 108393 | 108947 |
| UN73446 | Rsa1.0.08622.1 | 708 | 7122   | 1.00E-142 | 295 | 308 | 95 +  | 346 | 653 | 3088   | 3395   |
| UN73447 | Rsa1.0.01070.1 | 740 | 55099  | 0         | 725 | 739 | 98 -  | 2   | 740 | 1794   | 2532   |
| UN73448 | Rsa1.0.03177.1 | 567 | 24799  | 1.00E-149 | 305 | 316 | 96 +  | 2   | 312 | 2244   | 2559   |
| UN73449 | Rsa1.0.14226.1 | 701 | 3644   | 0         | 671 | 709 | 94 -  | 3   | 686 | 71     | 779    |
| UN73450 | Rsa1.0.00131.1 | 731 | 432233 | 2.00E-72  | 142 | 143 | 99 -  | 113 | 255 | 282268 | 282410 |
| UN73451 | Rsa1.0.00720.1 | 332 | 66931  | 1.00E-164 | 322 | 332 | 96 -  | 1   | 332 | 9734   | 10065  |
| UN73452 | Rsa1.0.00417.1 | 623 | 395068 | 0         | 589 | 595 | 98 +  | 3   | 597 | 293990 | 294584 |
| UN73453 | Rsa1.0.04762.1 | 664 | 16101  | 0         | 613 | 654 | 93 -  | 11  | 647 | 4694   | 5334   |
| UN73454 | Rsa1.0.01013.1 | 644 | 56822  | 0         | 641 | 643 | 99 -  | 2   | 644 | 47282  | 47924  |
| UN73455 | Rsa1.0.00053.1 | 493 | 263459 | 1.00E-119 | 257 | 270 | 95 -  | 6   | 275 | 95872  | 96136  |
| UN73456 | Rsa1.0.00152.1 | 424 | 257730 | 0         | 421 | 424 | 99 +  | 1   | 424 | 112065 | 112488 |
| UN73457 | Rsa1.0.00015.1 | 332 | 561803 | 1.00E-107 | 230 | 239 | 96 +  | 43  | 279 | 252094 | 252330 |
| UN73458 | Rsa1.0.00991.1 | 595 | 143101 | 0         | 570 | 592 | 96 -  | 4   | 595 | 32330  | 32921  |
| UN73459 | Rsa1.0.00083.1 | 578 | 442773 | 0         | 426 | 434 | 98 -  | 26  | 458 | 252691 | 253124 |
| UN73460 | Rsa1.0.00071.1 | 503 | 345714 | 5.00E-23  | 83  | 92  | 90 -  | 9   | 100 | 325383 | 325474 |
| UN73461 | Rsa1.0.00341.1 | 637 | 249309 | 1.00E-163 | 328 | 338 | 97 +  | 308 | 637 | 16200  | 16537  |
| UN73462 | Rsa1.0.04407.1 | 671 | 17504  | 4.00E-95  | 192 | 197 | 97 -  | 209 | 405 | 6932   | 7128   |
| UN73463 | Rsa1.0.10199.1 | 548 | 5948   | 1.00E-133 | 258 | 264 | 97 +  | 285 | 548 | 5578   | 5841   |
| UN73464 | Rsa1.0.02662.1 | 684 | 28956  | 0         | 621 | 647 | 95 +  | 37  | 681 | 28063  | 28708  |
| UN73465 | Rsa1.0.02020.1 | 305 | 173211 | 1.00E-117 | 247 | 258 | 95 -  | 3   | 260 | 138526 | 138783 |
| UN73466 | Rsa1.0.03503.1 | 578 | 22445  | 0         | 504 | 524 | 96 -  | 23  | 546 | 21110  | 21621  |
| UN73467 | Rsa1.0.05888.1 | 654 | 12320  | 2.33E-156 | 291 | 298 | 97 +  | 1   | 295 | 9417   | 9714   |
| UN73468 | Rsa1.0.03809.1 | 793 | 20731  | 1.00E-177 | 351 | 363 | 96 +  | 3   | 365 | 18366  | 18728  |
| UN73469 | #              | #   | #      | #         | #   | #   | #     | #   | #   | #      | #      |
| UN73470 | Rsa1.0.04438.1 | 730 | 17361  | 2.00E-82  | 156 | 156 | 100 - | 129 | 284 | 4028   | 4183   |
| UN73471 | Rsa1.0.00105.1 | 628 | 134138 | 1.00E-167 | 411 | 446 | 92 -  | 181 | 625 | 74510  | 74949  |
| UN73472 | Rsa1.0.00064.1 | 600 | 240927 | 1.00E-45  | 183 | 210 | 87 +  | 280 | 487 | 228284 | 228493 |
| UN73473 | Rsa1.0.11558.1 | 501 | 5471   | 0         | 477 | 500 | 95 +  | 2   | 501 | 4682   | 5169   |
| UN73474 | Rsa1.0.03922.1 | 273 | 20060  | 1.00E-142 | 269 | 272 | 98 +  | 3   | 273 | 10007  | 10278  |

|         |                |     |        |           |     |     |       |     |     |        |        |
|---------|----------------|-----|--------|-----------|-----|-----|-------|-----|-----|--------|--------|
| UN73475 | Rsa1.0.00017.1 | 578 | 752458 | 0         | 561 | 582 | 96 +  | 1   | 578 | 65326  | 65907  |
| UN73476 | Rsa1.0.00451.1 | 368 | 322533 | 1.00E-123 | 318 | 351 | 90 -  | 38  | 368 | 250926 | 251276 |
| UN73477 | Rsa1.0.03191.1 | 211 | 145762 | 1.00E-15  | 179 | 218 | 82 +  | 1   | 211 | 16484  | 16687  |
| UN73478 | Rsa1.0.04331.1 | 511 | 140984 | 2.00E-16  | 111 | 134 | 82 -  | 1   | 134 | 17405  | 17530  |
| UN73479 | Rsa1.0.07290.1 | 794 | 9608   | 0         | 515 | 525 | 98 -  | 242 | 762 | 9084   | 9608   |
| UN73480 | Rsa1.0.00589.1 | 742 | 209965 | 1.00E-74  | 146 | 147 | 99 -  | 3   | 149 | 71253  | 71399  |
| UN73481 | #              | #   | #      | #         | #   | #   | #     | #   | #   | #      | #      |
| UN73482 | Rsa1.0.00662.1 | 612 | 192183 | 0         | 596 | 610 | 97 -  | 3   | 612 | 55469  | 56078  |
| UN73483 | Rsa1.0.00409.1 | 653 | 146788 | 0         | 358 | 363 | 98 -  | 8   | 370 | 127177 | 127539 |
| UN73484 | Rsa1.0.02180.1 | 687 | 34176  | 1.00E-151 | 298 | 307 | 97 +  | 381 | 687 | 8790   | 9096   |
| UN73485 | Rsa1.0.01181.1 | 810 | 51496  | 1.00E-159 | 381 | 409 | 93 +  | 342 | 748 | 32779  | 33186  |
| UN73486 | Rsa1.0.00101.1 | 674 | 267193 | 1.00E-133 | 274 | 285 | 96 -  | 128 | 412 | 258416 | 258700 |
| UN73487 | Rsa1.0.00653.1 | 809 | 70029  | 0         | 796 | 815 | 97 -  | 3   | 809 | 36139  | 36953  |
| UN73488 | Rsa1.0.02867.1 | 552 | 27121  | 0         | 530 | 556 | 95 -  | 2   | 549 | 9898   | 10453  |
| UN73489 | Rsa1.0.00601.1 | 694 | 177045 | 9.00E-72  | 210 | 230 | 91 -  | 3   | 219 | 143839 | 144068 |
| UN73490 | Rsa1.0.33152.1 | 736 | 685    | 0         | 530 | 534 | 99 -  | 3   | 536 | 1      | 534    |
| UN73491 | Rsa1.0.00037.1 | 669 | 307838 | 9.00E-81  | 156 | 157 | 99 +  | 218 | 374 | 21174  | 21330  |
| UN73492 | Rsa1.0.01750.1 | 430 | 39816  | 0         | 397 | 413 | 96 -  | 6   | 418 | 29296  | 29704  |
| UN73493 | Rsa1.0.03566.1 | 405 | 22050  | 1.00E-131 | 255 | 261 | 97 +  | 62  | 322 | 12515  | 12775  |
| UN73494 | Rsa1.0.05884.1 | 321 | 12337  | 1.00E-169 | 320 | 325 | 98 +  | 2   | 321 | 235    | 559    |
| UN73495 | Rsa1.0.01600.1 | 754 | 42537  | 0         | 479 | 483 | 99 +  | 261 | 741 | 5583   | 6065   |
| UN73496 | Rsa1.0.00341.1 | 615 | 249309 | 3.00E-59  | 193 | 214 | 90 -  | 16  | 223 | 88393  | 88600  |
| UN73497 | Rsa1.0.00284.1 | 489 | 323267 | 1.00E-169 | 346 | 356 | 97 +  | 139 | 489 | 296801 | 297156 |
| UN73498 | Rsa1.0.01153.1 | 720 | 52264  | 6.00E-76  | 145 | 145 | 100 - | 216 | 360 | 13487  | 13631  |
| UN73499 | Rsa1.0.00602.1 | 795 | 73302  | 5.00E-92  | 187 | 192 | 97 +  | 419 | 610 | 46825  | 47016  |
| UN73500 | Rsa1.0.14723.1 | 751 | 3126   | 1.00E-150 | 279 | 282 | 98 -  | 470 | 751 | 1476   | 1757   |
| UN73501 | Rsa1.0.01078.1 | 793 | 316910 | 2.00E-69  | 150 | 154 | 97 -  | 478 | 630 | 127605 | 127758 |
| UN73502 | Rsa1.0.00049.1 | 756 | 167018 | 0         | 481 | 505 | 95 -  | 185 | 687 | 115488 | 115991 |
| UN73503 | Rsa1.0.00964.1 | 817 | 316648 | 0         | 808 | 821 | 98 -  | 2   | 817 | 288285 | 289105 |
| UN73504 | Rsa1.0.04023.1 | 642 | 19522  | 0         | 638 | 640 | 99 -  | 3   | 642 | 16503  | 17142  |
| UN73505 | Rsa1.0.00391.1 | 640 | 183853 | 0         | 620 | 638 | 97 -  | 3   | 640 | 856    | 1493   |
| UN73506 | Rsa1.0.02384.1 | 717 | 31917  | 1.00E-168 | 345 | 358 | 96 +  | 363 | 717 | 5245   | 5601   |
| UN73507 | Rsa1.0.02927.1 | 535 | 26698  | 9.00E-93  | 386 | 457 | 84 +  | 1   | 457 | 6900   | 7356   |
| UN73508 | Rsa1.0.00160.1 | 590 | 346678 | 0         | 502 | 524 | 95 -  | 2   | 525 | 244951 | 245472 |
| UN73509 | Rsa1.0.18154.1 | 737 | 1655   | 5.00E-64  | 141 | 145 | 97 -  | 2   | 146 | 388    | 531    |
| UN73510 | Rsa1.0.02964.1 | 690 | 26407  | 1.00E-92  | 212 | 225 | 94 +  | 180 | 404 | 19004  | 19228  |
| UN73511 | Rsa1.0.03015.1 | 752 | 26006  | 2.00E-75  | 181 | 192 | 94 -  | 1   | 192 | 3192   | 3382   |
| UN73512 | Rsa1.0.00031.1 | 682 | 179862 | 0         | 647 | 684 | 94 -  | 1   | 682 | 60686  | 61351  |
| UN73513 | Rsa1.0.00019.1 | 609 | 301669 | 0         | 608 | 609 | 99 +  | 2   | 609 | 141379 | 141987 |

|         |                |     |        |           |     |     |       |     |     |        |        |
|---------|----------------|-----|--------|-----------|-----|-----|-------|-----|-----|--------|--------|
| UN73514 | Rsa1.0.00045.1 | 634 | 328694 | 1.00E-107 | 242 | 253 | 95 -  | 385 | 634 | 133210 | 133462 |
| UN73515 | Rsa1.0.02039.1 | 640 | 35699  | 0         | 349 | 351 | 99 +  | 291 | 640 | 8515   | 8865   |
| UN73516 | Rsa1.0.18033.1 | 803 | 1686   | 0         | 610 | 649 | 93 +  | 58  | 696 | 689    | 1327   |
| UN73517 | Rsa1.0.00897.1 | 526 | 60498  | 0         | 367 | 368 | 99 +  | 3   | 370 | 18517  | 18884  |
| UN73518 | Rsa1.0.02557.1 | 305 | 30127  | 1.00E-166 | 302 | 304 | 99 -  | 2   | 305 | 2442   | 2745   |
| UN73519 | Rsa1.0.03185.1 | 273 | 24739  | 3.00E-57  | 136 | 143 | 95 -  | 69  | 211 | 9603   | 9742   |
| UN73520 | Rsa1.0.01221.1 | 697 | 50421  | 1.00E-100 | 206 | 213 | 96 +  | 74  | 286 | 44786  | 44998  |
| UN73521 | Rsa1.0.00164.1 | 764 | 116642 | 1.00E-160 | 320 | 331 | 96 +  | 246 | 576 | 97058  | 97388  |
| UN73522 | Rsa1.0.21131.1 | 676 | 1232   | 1.00E-123 | 252 | 262 | 96 +  | 3   | 264 | 228    | 481    |
| UN73523 | Rsa1.0.00092.1 | 795 | 659932 | 0         | 722 | 752 | 96 -  | 2   | 747 | 238885 | 239635 |
| UN73524 | Rsa1.0.01814.1 | 728 | 38917  | 1.00E-128 | 279 | 294 | 94 -  | 180 | 470 | 2673   | 2966   |
| UN73525 | Rsa1.0.00324.1 | 559 | 218805 | 1.00E-165 | 297 | 298 | 99 -  | 262 | 559 | 125599 | 125896 |
| UN73526 | Rsa1.0.00124.1 | 673 | 262503 | 0         | 379 | 379 | 100 - | 3   | 381 | 21650  | 22028  |
| UN73527 | Rsa1.0.04029.1 | 242 | 19491  | 1.00E-105 | 229 | 241 | 95 +  | 2   | 242 | 6285   | 6525   |
| UN73528 | Rsa1.0.00016.1 | 730 | 831256 | 0         | 592 | 594 | 99 -  | 2   | 595 | 776582 | 777175 |
| UN73529 | Rsa1.0.00115.1 | 605 | 131321 | 1.00E-115 | 238 | 247 | 96 +  | 152 | 398 | 67479  | 67725  |
| UN73530 | Rsa1.0.00595.1 | 473 | 341648 | 0         | 426 | 436 | 97 -  | 9   | 444 | 194729 | 195164 |
| UN73531 | Rsa1.0.00529.1 | 386 | 77487  | 1.00E-53  | 135 | 143 | 94 -  | 225 | 366 | 25151  | 25293  |
| UN73532 | Rsa1.0.01743.1 | 772 | 39926  | 7.00E-48  | 101 | 102 | 99 +  | 201 | 302 | 15141  | 15242  |
| UN73533 | Rsa1.0.02542.1 | 738 | 30326  | 3.00E-13  | 109 | 132 | 82 -  | 448 | 579 | 5617   | 5748   |
| UN73534 | Rsa1.0.01050.1 | 589 | 55651  | 0         | 587 | 589 | 99 -  | 3   | 589 | 51241  | 51829  |
| UN73535 | Rsa1.0.01204.1 | 773 | 50843  | 0         | 480 | 496 | 96 +  | 222 | 714 | 9906   | 10401  |
| UN73536 | Rsa1.0.00662.1 | 677 | 192183 | 0         | 644 | 662 | 97 +  | 2   | 658 | 181342 | 182003 |
| UN73537 | Rsa1.0.00662.1 | 697 | 192183 | 0         | 674 | 697 | 96 +  | 1   | 695 | 59516  | 60212  |
| UN73538 | Rsa1.0.00913.1 | 658 | 59914  | 1.00E-115 | 244 | 255 | 95 -  | 404 | 658 | 2343   | 2597   |
| UN73539 | Rsa1.0.02360.1 | 665 | 32203  | 1.00E-141 | 324 | 347 | 93 -  | 155 | 495 | 14177  | 14514  |
| UN73540 | Rsa1.0.02846.1 | 786 | 27338  | 1.00E-158 | 283 | 283 | 100 + | 277 | 559 | 4895   | 5177   |
| UN73541 | Rsa1.0.01713.1 | 817 | 40564  | 2.00E-91  | 171 | 171 | 100 + | 469 | 639 | 28987  | 29157  |
| UN73542 | Rsa1.0.15981.1 | 822 | 2332   | 1.00E-165 | 301 | 303 | 99 -  | 4   | 306 | 400    | 702    |
| UN73543 | Rsa1.0.03101.1 | 796 | 25410  | 0         | 644 | 670 | 96 +  | 5   | 650 | 5645   | 6314   |
| UN73544 | Rsa1.0.01947.1 | 812 | 36977  | 0         | 350 | 350 | 100 + | 2   | 351 | 15694  | 16043  |
| UN73545 | Rsa1.0.03953.1 | 672 | 19889  | 0         | 662 | 672 | 98 -  | 1   | 672 | 6499   | 7170   |
| UN73546 | Rsa1.0.04386.1 | 854 | 17627  | 9.00E-94  | 175 | 175 | 100 + | 288 | 462 | 14221  | 14395  |
| UN73547 | Rsa1.0.03249.1 | 647 | 146254 | 0         | 480 | 497 | 96 -  | 153 | 647 | 11050  | 11546  |
| UN73548 | Rsa1.0.02975.1 | 628 | 26322  | 0         | 353 | 353 | 100 + | 2   | 354 | 15682  | 16034  |
| UN73549 | Rsa1.0.02656.1 | 646 | 29018  | 1.00E-175 | 353 | 367 | 96 +  | 207 | 573 | 15129  | 15495  |
| UN73550 | Rsa1.0.00354.1 | 801 | 232005 | 0         | 661 | 679 | 97 -  | 87  | 762 | 77364  | 78042  |
| UN73551 | Rsa1.0.00033.1 | 713 | 515811 | 3.00E-65  | 127 | 127 | 100 + | 355 | 481 | 468800 | 468926 |
| UN73552 | Rsa1.0.00176.1 | 846 | 240984 | 0         | 387 | 399 | 96 +  | 209 | 607 | 155819 | 156217 |



|         |                |     |        |           |     |     |       |     |     |        |        |
|---------|----------------|-----|--------|-----------|-----|-----|-------|-----|-----|--------|--------|
| UN73553 | Rsa1.0.00321.1 | 576 | 95671  | 1.00E-139 | 251 | 251 | 100 - | 2   | 252 | 55960  | 56210  |
| UN73554 | Rsa1.0.00067.1 | 727 | 415055 | 0         | 633 | 645 | 98 +  | 4   | 648 | 144919 | 145563 |
| UN73555 | Rsa1.0.01600.1 | 681 | 42537  | 0         | 607 | 639 | 94 +  | 41  | 676 | 5142   | 5771   |
| UN73556 | Rsa1.0.00979.1 | 676 | 57733  | 1.00E-129 | 250 | 255 | 98 -  | 418 | 672 | 1458   | 1712   |
| UN73557 | Rsa1.0.00616.1 | 107 | 195713 | 3.00E-51  | 105 | 106 | 99 -  | 2   | 107 | 177684 | 177789 |
| UN73558 | Rsa1.0.00047.1 | 112 | 168582 | 1.00E-29  | 97  | 109 | 88 +  | 3   | 101 | 64     | 172    |
| UN73559 | Rsa1.0.01870.1 | 758 | 37919  | 0         | 544 | 571 | 95 +  | 168 | 736 | 8037   | 8607   |
| UN73560 | Rsa1.0.15988.1 | 701 | 2330   | 4.00E-80  | 190 | 202 | 94 -  | 500 | 698 | 1287   | 1488   |
| UN73561 | Rsa1.0.00419.1 | 788 | 86562  | 0         | 324 | 325 | 99 -  | 167 | 491 | 45987  | 46311  |
| UN73562 | Rsa1.0.00476.1 | 656 | 280966 | 1.00E-145 | 334 | 359 | 93 -  | 3   | 358 | 156495 | 156839 |
| UN73563 | Rsa1.0.00805.1 | 821 | 63724  | 1.00E-126 | 265 | 273 | 97 +  | 481 | 749 | 43181  | 43453  |
| UN73564 | Rsa1.0.00497.1 | 825 | 79830  | 1.00E-110 | 224 | 231 | 96 +  | 266 | 496 | 40861  | 41091  |
| UN73565 | Rsa1.0.02009.1 | 751 | 36100  | 0         | 437 | 438 | 99 -  | 145 | 582 | 35107  | 35544  |
| UN73566 | #              | #   | #      | #         | #   | #   | #     | #   | #   | #      | #      |
| UN73567 | Rsa1.0.21831.1 | 815 | 1169   | 1.00E-128 | 233 | 233 | 100 + | 153 | 385 | 793    | 1025   |
| UN73568 | Rsa1.0.01806.1 | 385 | 39021  | 1.00E-180 | 383 | 407 | 94 -  | 3   | 385 | 29457  | 29863  |
| UN73569 | Rsa1.0.02367.1 | 535 | 32106  | 0         | 489 | 512 | 95 -  | 28  | 535 | 25432  | 25935  |
| UN73570 | Rsa1.0.00112.1 | 347 | 132199 | 0         | 343 | 348 | 98 -  | 1   | 347 | 56160  | 56507  |
| UN73571 | Rsa1.0.00017.1 | 471 | 752458 | 0         | 452 | 471 | 95 -  | 1   | 471 | 555514 | 555983 |
| UN73572 | Rsa1.0.00115.1 | 755 | 131321 | 1.00E-177 | 526 | 581 | 90 -  | 9   | 579 | 68836  | 69403  |
| UN73573 | Rsa1.0.00001.1 | 846 | 363028 | 0         | 344 | 351 | 98 -  | 4   | 354 | 226551 | 226901 |
| UN73574 | Rsa1.0.01313.1 | 839 | 48387  | 1.00E-119 | 220 | 221 | 99 -  | 127 | 347 | 19753  | 19973  |
| UN73575 | Rsa1.0.01921.1 | 757 | 168088 | 0         | 353 | 357 | 98 +  | 402 | 757 | 150633 | 150989 |
| UN73576 | Rsa1.0.01655.1 | 821 | 41508  | 1.00E-111 | 205 | 205 | 100 + | 412 | 616 | 5723   | 5927   |
| UN73577 | Rsa1.0.02962.1 | 409 | 26419  | 0         | 401 | 407 | 98 -  | 1   | 407 | 4256   | 4662   |
| UN73578 | Rsa1.0.01204.1 | 657 | 50843  | 4.00E-92  | 286 | 314 | 91 +  | 349 | 657 | 3687   | 3990   |
| UN73579 | #              | #   | #      | #         | #   | #   | #     | #   | #   | #      | #      |
| UN73580 | Rsa1.0.05174.1 | 821 | 14604  | 0         | 810 | 830 | 97 +  | 1   | 821 | 2615   | 3444   |
| UN73581 | Rsa1.0.02395.1 | 818 | 31785  | 1.00E-158 | 283 | 283 | 100 + | 192 | 474 | 15460  | 15742  |
| UN73582 | Rsa1.0.00630.1 | 793 | 71281  | 0         | 701 | 723 | 96 +  | 5   | 724 | 12355  | 13076  |
| UN73583 | Rsa1.0.03401.1 | 759 | 23191  | 3.00E-47  | 246 | 293 | 83 -  | 254 | 545 | 5986   | 6277   |
| UN73584 | Rsa1.0.07921.1 | 778 | 8259   | 0         | 353 | 361 | 97 +  | 251 | 611 | 1911   | 2271   |
| UN73585 | Rsa1.0.00473.1 | 646 | 212204 | 0         | 519 | 531 | 97 -  | 3   | 530 | 68283  | 68813  |
| UN73586 | Rsa1.0.00228.1 | 782 | 105511 | 0         | 515 | 523 | 98 -  | 3   | 525 | 27048  | 27570  |
| UN73587 | Rsa1.0.04911.1 | 747 | 15483  | 1.00E-114 | 233 | 241 | 96 -  | 394 | 634 | 8819   | 9059   |
| UN73588 | Rsa1.0.01777.1 | 670 | 39511  | 0         | 561 | 574 | 97 +  | 89  | 661 | 10148  | 10721  |
| UN73589 | Rsa1.0.04033.1 | 751 | 19481  | 1.00E-135 | 296 | 308 | 96 -  | 439 | 742 | 9405   | 9712   |
| UN73590 | Rsa1.0.00374.1 | 788 | 165738 | 1.00E-100 | 287 | 321 | 89 +  | 1   | 299 | 129390 | 129707 |
| UN73591 | Rsa1.0.01971.1 | 176 | 36641  | 5.00E-42  | 93  | 95  | 97 +  | 82  | 176 | 19087  | 19181  |

|         |                |     |        |           |     |     |      |     |     |        |        |
|---------|----------------|-----|--------|-----------|-----|-----|------|-----|-----|--------|--------|
| UN73592 | Rsa1.0.00031.1 | 791 | 179862 | 3.00E-53  | 195 | 223 | 87 - | 3   | 213 | 89257  | 89470  |
| UN73593 | Rsa1.0.02319.1 | 698 | 32580  | 0         | 550 | 608 | 90 - | 104 | 698 | 9242   | 9837   |
| UN73594 | Rsa1.0.50205.1 | 583 | 452    | 0         | 424 | 452 | 93 + | 39  | 490 | 1      | 452    |
| UN73595 | Rsa1.0.03944.1 | 788 | 19926  | 1.00E-111 | 207 | 208 | 99 - | 284 | 491 | 18604  | 18811  |
| UN73596 | Rsa1.0.00924.1 | 631 | 59524  | 0         | 613 | 630 | 97 + | 2   | 631 | 47970  | 48599  |
| UN73597 | Rsa1.0.07834.1 | 767 | 8453   | 0         | 718 | 749 | 95 + | 21  | 766 | 2579   | 3324   |
| UN73598 | Rsa1.0.00012.1 | 688 | 222148 | 1.00E-159 | 337 | 351 | 96 - | 343 | 688 | 83362  | 83712  |
| UN73599 | Rsa1.0.00204.1 | 620 | 109056 | 1.00E-152 | 296 | 304 | 97 - | 317 | 620 | 20428  | 20731  |
| UN73600 | Rsa1.0.01004.1 | 650 | 56975  | 0         | 619 | 640 | 96 + | 4   | 643 | 50015  | 50654  |
| UN73601 | Rsa1.0.02605.1 | 779 | 29637  | 1.00E-160 | 383 | 415 | 92 - | 2   | 412 | 17545  | 17944  |
| UN73602 | Rsa1.0.02158.1 | 571 | 154841 | 1.00E-155 | 293 | 298 | 98 + | 14  | 311 | 152114 | 152411 |
| UN73603 | Rsa1.0.01065.1 | 785 | 55264  | 3.00E-93  | 205 | 216 | 94 - | 3   | 211 | 4661   | 4876   |
| UN73604 | Rsa1.0.00632.1 | 822 | 183777 | 1.00E-58  | 125 | 128 | 97 - | 1   | 128 | 18658  | 18785  |
| UN73605 | Rsa1.0.00251.1 | 708 | 303968 | 1.00E-141 | 310 | 325 | 95 + | 388 | 708 | 147121 | 147440 |
| UN73606 | Rsa1.0.10352.1 | 731 | 5879   | 8.00E-60  | 146 | 154 | 94 - | 14  | 167 | 480    | 632    |
| UN73607 | Rsa1.0.04643.1 | 805 | 16546  | 0         | 428 | 449 | 95 - | 1   | 449 | 3402   | 3850   |
| UN73608 | Rsa1.0.00487.1 | 686 | 80674  | 3.00E-90  | 172 | 173 | 99 - | 407 | 579 | 38941  | 39113  |
| UN73609 | Rsa1.0.07052.1 | 790 | 9979   | 0         | 757 | 763 | 99 - | 2   | 760 | 224    | 986    |
| UN73610 | Rsa1.0.02991.1 | 662 | 26178  | 5.00E-98  | 237 | 255 | 92 + | 411 | 656 | 4393   | 4647   |
| UN73611 | Rsa1.0.04854.1 | 597 | 131560 | 4.00E-52  | 146 | 162 | 90 + | 3   | 152 | 9408   | 9569   |
| UN73612 | Rsa1.0.00803.1 | 764 | 144228 | 1.00E-134 | 256 | 260 | 98 + | 3   | 262 | 133602 | 133858 |
| UN73613 | Rsa1.0.05836.1 | 798 | 12480  | 0         | 791 | 811 | 97 + | 3   | 798 | 1515   | 2325   |
| UN73614 | Rsa1.0.00119.1 | 454 | 467509 | 1.00E-127 | 245 | 250 | 98 + | 1   | 250 | 72645  | 72894  |
| UN73615 | Rsa1.0.01247.1 | 247 | 49934  | 1.00E-77  | 150 | 151 | 99 + | 97  | 247 | 48036  | 48186  |
| UN73616 | #              | #   | #      | #         | #   | #   | #    | #   | #   | #      | #      |
| UN73617 | Rsa1.0.00168.1 | 707 | 115870 | 0         | 698 | 701 | 99 - | 3   | 703 | 23653  | 24350  |
| UN73618 | Rsa1.0.04331.1 | 185 | 140984 | 3.00E-19  | 112 | 134 | 83 - | 4   | 137 | 17405  | 17530  |
| UN73619 | Rsa1.0.00355.1 | 521 | 92038  | 2.00E-47  | 124 | 133 | 93 - | 28  | 160 | 16181  | 16313  |
| UN73620 | Rsa1.0.06362.1 | 670 | 11154  | 1.00E-119 | 232 | 236 | 98 - | 81  | 314 | 4291   | 4526   |
| UN73621 | Rsa1.0.00907.1 | 674 | 60062  | 1.00E-162 | 398 | 431 | 92 + | 75  | 505 | 38374  | 38789  |
| UN73622 | Rsa1.0.04212.1 | 782 | 18439  | 1.00E-108 | 214 | 219 | 97 - | 307 | 525 | 4680   | 4898   |
| UN73623 | Rsa1.0.01430.1 | 541 | 46034  | 0         | 512 | 540 | 94 - | 2   | 541 | 40602  | 41135  |
| UN73624 | Rsa1.0.00890.1 | 693 | 323870 | 1.00E-116 | 229 | 233 | 98 + | 258 | 490 | 213285 | 213516 |
| UN73625 | Rsa1.0.00018.1 | 501 | 410899 | 1.00E-120 | 312 | 344 | 90 + | 177 | 501 | 6100   | 6439   |
| UN73626 | Rsa1.0.06586.1 | 807 | 10712  | 1.00E-110 | 248 | 255 | 97 - | 554 | 802 | 8903   | 9157   |
| UN73627 | Rsa1.0.00172.1 | 779 | 115476 | 0         | 598 | 601 | 99 - | 181 | 779 | 27941  | 28541  |
| UN73628 | Rsa1.0.00380.1 | 646 | 89748  | 1.00E-113 | 234 | 240 | 97 - | 411 | 645 | 77784  | 78022  |
| UN73629 | Rsa1.0.02017.1 | 665 | 35999  | 2.00E-84  | 174 | 179 | 97 - | 236 | 414 | 35303  | 35481  |
| UN73630 | Rsa1.0.00083.1 | 796 | 442773 | 1.00E-103 | 199 | 202 | 98 - | 169 | 370 | 361204 | 361405 |

|         |                |     |        |           |     |     |       |     |     |        |        |
|---------|----------------|-----|--------|-----------|-----|-----|-------|-----|-----|--------|--------|
| UN73631 | Rsa1.0.00596.1 | 600 | 73578  | 8.00E-41  | 122 | 134 | 91 +  | 368 | 501 | 66008  | 66141  |
| UN73632 | Rsa1.0.04065.1 | 762 | 19275  | 0         | 695 | 705 | 98 -  | 3   | 703 | 4357   | 5061   |
| UN73633 | Rsa1.0.01214.1 | 779 | 50599  | 0         | 525 | 527 | 99 +  | 1   | 527 | 247    | 773    |
| UN73634 | Rsa1.0.05880.1 | 808 | 12343  | 0         | 796 | 810 | 98 +  | 3   | 805 | 8558   | 9367   |
| UN73635 | Rsa1.0.00257.1 | 639 | 102407 | 0         | 637 | 641 | 99 +  | 2   | 639 | 1491   | 2131   |
| UN73636 | Rsa1.0.02808.1 | 657 | 27677  | 0         | 437 | 453 | 96 +  | 207 | 657 | 19883  | 20335  |
| UN73637 | Rsa1.0.04984.1 | 643 | 15240  | 2.00E-84  | 179 | 185 | 96 -  | 3   | 184 | 608    | 792    |
| UN73638 | Rsa1.0.00827.1 | 560 | 62790  | 4.00E-98  | 194 | 198 | 97 -  | 208 | 405 | 22726  | 22923  |
| UN73639 | Rsa1.0.00004.1 | 644 | 253996 | 0         | 491 | 497 | 98 +  | 1   | 495 | 167547 | 168042 |
| UN73640 | Rsa1.0.07190.1 | 803 | 9757   | 0         | 691 | 696 | 99 -  | 1   | 695 | 3818   | 4513   |
| UN73641 | Rsa1.0.37944.1 | 781 | 594    | 0         | 402 | 415 | 96 -  | 3   | 417 | 144    | 555    |
| UN73642 | Rsa1.0.00774.1 | 697 | 64831  | 0         | 546 | 546 | 100 + | 4   | 549 | 45318  | 45863  |
| UN73643 | Rsa1.0.00298.1 | 665 | 349131 | 1.00E-160 | 313 | 322 | 97 +  | 3   | 324 | 42838  | 43159  |
| UN73644 | Rsa1.0.02288.1 | 666 | 32984  | 6.00E-82  | 161 | 163 | 98 +  | 382 | 544 | 17154  | 17316  |
| UN73645 | Rsa1.0.20578.1 | 679 | 1291   | 0         | 339 | 344 | 98 +  | 6   | 349 | 247    | 590    |
| UN73646 | Rsa1.0.00684.1 | 771 | 141701 | 0         | 578 | 594 | 97 -  | 4   | 597 | 9100   | 9693   |
| UN73647 | Rsa1.0.03849.1 | 794 | 20457  | 0         | 684 | 718 | 95 -  | 83  | 794 | 10373  | 11084  |
| UN73648 | Rsa1.0.00326.1 | 786 | 171955 | 1.00E-92  | 234 | 249 | 93 -  | 531 | 770 | 62168  | 62416  |
| UN73649 | Rsa1.0.00655.1 | 703 | 195840 | 0         | 521 | 548 | 95 -  | 150 | 693 | 147696 | 148243 |
| UN73650 | Rsa1.0.02579.1 | 779 | 29923  | 0         | 404 | 411 | 98 -  | 317 | 721 | 14689  | 15099  |
| UN73651 | Rsa1.0.01012.1 | 689 | 56836  | 0         | 636 | 690 | 92 -  | 5   | 689 | 25971  | 26640  |
| UN73652 | Rsa1.0.01005.1 | 763 | 56967  | 1.00E-128 | 256 | 264 | 96 -  | 392 | 655 | 19291  | 19554  |
| UN73653 | Rsa1.0.13458.1 | 795 | 4814   | 2.00E-91  | 180 | 183 | 98 +  | 155 | 337 | 1376   | 1558   |
| UN73654 | Rsa1.0.00046.1 | 146 | 320315 | 2.00E-65  | 141 | 146 | 96 +  | 1   | 146 | 20423  | 20568  |
| UN73655 | Rsa1.0.00483.1 | 606 | 81102  | 1.00E-110 | 240 | 250 | 96 +  | 358 | 606 | 51013  | 51260  |
| UN73656 | Rsa1.0.01419.1 | 773 | 167402 | 0         | 444 | 446 | 99 -  | 220 | 663 | 7107   | 7552   |
| UN73657 | Rsa1.0.04169.1 | 653 | 18712  | 0         | 348 | 348 | 100 - | 1   | 348 | 2537   | 2884   |
| UN73658 | Rsa1.0.46411.1 | 675 | 486    | 4.00E-92  | 172 | 172 | 100 - | 199 | 370 | 297    | 468    |
| UN73659 | Rsa1.0.00698.1 | 748 | 67816  | 1.00E-119 | 263 | 278 | 94 +  | 398 | 675 | 46344  | 46616  |
| UN73660 | Rsa1.0.02400.1 | 619 | 31750  | 0         | 591 | 616 | 95 +  | 3   | 614 | 14564  | 15176  |
| UN73661 | Rsa1.0.00040.1 | 759 | 324196 | 0         | 372 | 378 | 98 +  | 385 | 759 | 114552 | 114929 |
| UN73662 | Rsa1.0.01538.1 | 671 | 43733  | 1.00E-156 | 289 | 292 | 98 -  | 3   | 294 | 15799  | 16090  |
| UN73663 | Rsa1.0.08617.1 | 798 | 7124   | 0         | 702 | 733 | 95 -  | 2   | 711 | 538    | 1270   |
| UN73664 | Rsa1.0.08587.1 | 690 | 7157   | 1.00E-152 | 275 | 276 | 99 +  | 3   | 278 | 6311   | 6586   |
| UN73665 | Rsa1.0.01827.1 | 852 | 143321 | 3.00E-87  | 170 | 172 | 98 -  | 52  | 223 | 132636 | 132807 |
| UN73666 | #              | #   | #      | #         | #   | #   | #     | #   | #   | #      | #      |
| UN73667 | Rsa1.0.01262.1 | 655 | 178815 | 0         | 651 | 655 | 99 -  | 1   | 655 | 7435   | 8089   |
| UN73668 | Rsa1.0.04374.1 | 778 | 17670  | 1.00E-151 | 349 | 366 | 95 +  | 418 | 774 | 7853   | 8218   |
| UN73669 | Rsa1.0.00200.1 | 440 | 162016 | 4.00E-91  | 235 | 254 | 92 +  | 113 | 365 | 12912  | 13164  |

|         |                |     |        |           |     |     |       |     |     |        |        |
|---------|----------------|-----|--------|-----------|-----|-----|-------|-----|-----|--------|--------|
| UN73670 | Rsa1.0.00422.1 | 668 | 86144  | 0         | 662 | 663 | 99 +  | 3   | 664 | 5152   | 5814   |
| UN73671 | Rsa1.0.06602.1 | 724 | 10683  | 0         | 633 | 710 | 89 +  | 4   | 709 | 772    | 1481   |
| UN73672 | Rsa1.0.00186.1 | 738 | 112669 | 0         | 518 | 538 | 96 +  | 203 | 736 | 111868 | 112405 |
| UN73673 | Rsa1.0.01081.1 | 753 | 499226 | 2.00E-79  | 163 | 167 | 97 -  | 3   | 169 | 173875 | 174041 |
| UN73674 | Rsa1.0.04515.1 | 756 | 17021  | 0         | 502 | 505 | 99 +  | 2   | 505 | 7414   | 7918   |
| UN73675 | Rsa1.0.28114.1 | 713 | 827    | 3.00E-93  | 186 | 190 | 97 -  | 380 | 569 | 638    | 827    |
| UN73676 | Rsa1.0.00179.1 | 706 | 393324 | 0         | 401 | 403 | 99 -  | 210 | 612 | 257602 | 258004 |
| UN73677 | Rsa1.0.00224.1 | 738 | 327530 | 0         | 736 | 737 | 99 -  | 3   | 738 | 213885 | 214621 |
| UN73678 | Rsa1.0.02735.1 | 175 | 28344  | 4.00E-58  | 140 | 148 | 94 +  | 31  | 175 | 25414  | 25561  |
| UN73679 | Rsa1.0.00064.1 | 159 | 240927 | 2.00E-60  | 148 | 156 | 94 +  | 4   | 159 | 215367 | 215518 |
| UN73680 | Rsa1.0.00960.1 | 691 | 58199  | 1.00E-129 | 277 | 290 | 95 -  | 3   | 290 | 25915  | 26204  |
| UN73681 | Rsa1.0.00262.1 | 696 | 101906 | 7.00E-88  | 186 | 193 | 96 -  | 1   | 193 | 69587  | 69779  |
| UN73682 | Rsa1.0.00714.1 | 781 | 67187  | 0         | 756 | 792 | 95 +  | 5   | 781 | 3305   | 4095   |
| UN73683 | Rsa1.0.00100.1 | 533 | 249232 | 0         | 507 | 550 | 92 +  | 2   | 533 | 25830  | 26379  |
| UN73684 | Rsa1.0.00136.1 | 709 | 122464 | 1.00E-132 | 261 | 267 | 97 -  | 42  | 307 | 62177  | 62443  |
| UN73685 | Rsa1.0.07823.1 | 515 | 8468   | 1.00E-161 | 312 | 320 | 97 +  | 196 | 515 | 4586   | 4905   |
| UN73686 | Rsa1.0.00687.1 | 810 | 68494  | 5.00E-58  | 150 | 162 | 92 -  | 299 | 460 | 3690   | 3845   |
| UN73687 | Rsa1.0.00082.1 | 773 | 237584 | 0         | 352 | 352 | 100 - | 2   | 353 | 62734  | 63085  |
| UN73688 | Rsa1.0.03241.1 | 728 | 24423  | 0         | 437 | 440 | 99 +  | 3   | 442 | 13619  | 14058  |
| UN73689 | #              | #   | #      | #         | #   | #   | #     | #   | #   | #      | #      |
| UN73690 | Rsa1.0.01214.1 | 782 | 50599  | 2.00E-70  | 146 | 148 | 98 +  | 551 | 697 | 41186  | 41333  |
| UN73691 | Rsa1.0.00070.1 | 660 | 150321 | 0         | 446 | 448 | 99 +  | 213 | 660 | 94203  | 94649  |
| UN73692 | Rsa1.0.03290.1 | 719 | 24011  | 1.00E-124 | 321 | 352 | 91 +  | 1   | 352 | 7207   | 7555   |
| UN73693 | Rsa1.0.00048.1 | 583 | 167185 | 0         | 393 | 401 | 98 -  | 184 | 583 | 136468 | 136868 |
| UN73694 | Rsa1.0.01156.1 | 848 | 52147  | 0         | 677 | 715 | 94 +  | 11  | 707 | 28052  | 28754  |
| UN73695 | Rsa1.0.08728.1 | 642 | 6995   | 1.00E-132 | 325 | 350 | 92 -  | 296 | 642 | 3895   | 4238   |
| UN73696 | Rsa1.0.01467.1 | 702 | 45161  | 1.00E-113 | 251 | 263 | 95 +  | 5   | 267 | 13043  | 13303  |
| UN73697 | Rsa1.0.17399.1 | 678 | 1839   | 2.00E-66  | 144 | 149 | 96 -  | 263 | 411 | 1383   | 1531   |
| UN73698 | Rsa1.0.00001.1 | 690 | 363028 | 1.00E-101 | 200 | 204 | 98 +  | 230 | 433 | 90772  | 90975  |
| UN73699 | Rsa1.0.00132.1 | 676 | 124299 | 2.00E-91  | 171 | 171 | 100 - | 106 | 276 | 69356  | 69526  |
| UN73700 | Rsa1.0.00038.1 | 644 | 314568 | 1.00E-155 | 281 | 282 | 99 +  | 2   | 283 | 254981 | 255262 |
| UN73701 | Rsa1.0.00942.1 | 689 | 58873  | 0         | 390 | 404 | 96 -  | 34  | 436 | 30660  | 31062  |
| UN73702 | Rsa1.0.04633.1 | 375 | 16580  | 1.00E-102 | 203 | 208 | 97 +  | 168 | 375 | 6161   | 6368   |
| UN73703 | Rsa1.0.01663.1 | 783 | 168589 | 1.00E-140 | 253 | 253 | 100 - | 380 | 632 | 148222 | 148474 |
| UN73704 | Rsa1.0.00743.1 | 462 | 177459 | 0         | 382 | 389 | 98 +  | 2   | 390 | 145305 | 145693 |
| UN73705 | Rsa1.0.02109.1 | 284 | 34925  | 2.00E-67  | 166 | 178 | 93 +  | 107 | 284 | 19932  | 20109  |
| UN73706 | Rsa1.0.00038.1 | 646 | 314568 | 0         | 492 | 499 | 98 -  | 144 | 642 | 240989 | 241485 |
| UN73707 | Rsa1.0.00083.1 | 691 | 442773 | 0         | 606 | 631 | 96 -  | 8   | 637 | 363135 | 363762 |
| UN73708 | Rsa1.0.04139.1 | 760 | 18883  | 1.00E-175 | 388 | 411 | 94 -  | 346 | 749 | 8330   | 8740   |

|         |                |     |        |           |     |     |       |     |     |        |        |
|---------|----------------|-----|--------|-----------|-----|-----|-------|-----|-----|--------|--------|
| UN73709 | Rsa1.0.03223.1 | 357 | 24512  | 0         | 353 | 355 | 99 +  | 3   | 357 | 11363  | 11717  |
| UN73710 | Rsa1.0.00045.1 | 634 | 328694 | 4.00E-86  | 171 | 174 | 98 -  | 198 | 371 | 149182 | 149355 |
| UN73711 | Rsa1.0.46469.1 | 377 | 486    | 3.00E-45  | 111 | 117 | 94 +  | 38  | 154 | 370    | 486    |
| UN73712 | Rsa1.0.00991.1 | 108 | 143101 | 4.00E-35  | 101 | 107 | 94 -  | 3   | 108 | 30038  | 30143  |
| UN73713 | Rsa1.0.00310.1 | 287 | 96852  | 1.00E-113 | 264 | 282 | 93 +  | 7   | 287 | 4371   | 4652   |
| UN73714 | Rsa1.0.00001.1 | 424 | 363028 | 1.00E-136 | 272 | 281 | 96 -  | 1   | 281 | 329339 | 329619 |
| UN73715 | Rsa1.0.00040.1 | 708 | 324196 | 0         | 698 | 708 | 98 +  | 1   | 708 | 10104  | 10811  |
| UN73716 | Rsa1.0.38612.1 | 462 | 583    | 4.00E-45  | 99  | 101 | 98 +  | 1   | 101 | 84     | 184    |
| UN73717 | Rsa1.0.00236.1 | 273 | 104771 | 8.00E-67  | 159 | 169 | 94 -  | 103 | 271 | 50256  | 50424  |
| UN73718 | Rsa1.0.05595.1 | 524 | 13228  | 1.00E-106 | 237 | 251 | 94 +  | 1   | 251 | 3355   | 3599   |
| UN73719 | Rsa1.0.00389.1 | 531 | 88795  | 1.00E-122 | 250 | 259 | 96 +  | 3   | 261 | 29373  | 29631  |
| UN73720 | Rsa1.0.15251.1 | 401 | 2727   | 2.00E-71  | 149 | 153 | 97 -  | 249 | 401 | 596    | 748    |
| UN73721 | Rsa1.0.00221.1 | 645 | 106972 | 0         | 640 | 645 | 99 -  | 1   | 645 | 30588  | 31232  |
| UN73722 | Rsa1.0.02392.1 | 157 | 152517 | 9.00E-59  | 142 | 151 | 94 -  | 4   | 154 | 30117  | 30267  |
| UN73723 | #              | #   | #      | #         | #   | #   | #     | #   | #   | #      | #      |
| UN73724 | Rsa1.0.04438.1 | 126 | 17361  | 7.00E-53  | 120 | 125 | 96 +  | 2   | 126 | 2648   | 2772   |
| UN73725 | Rsa1.0.00748.1 | 796 | 65983  | 1.00E-117 | 214 | 214 | 100 - | 291 | 504 | 20167  | 20380  |
| UN73726 | Rsa1.0.01561.1 | 709 | 43227  | 8.00E-69  | 151 | 157 | 96 +  | 305 | 461 | 8061   | 8217   |
| UN73727 | Rsa1.0.00399.1 | 166 | 242951 | 4.00E-61  | 160 | 175 | 91 -  | 1   | 165 | 82084  | 82254  |
| UN73728 | Rsa1.0.18647.1 | 728 | 1560   | 1.00E-101 | 224 | 235 | 95 -  | 495 | 728 | 698    | 932    |
| UN73729 | Rsa1.0.00494.1 | 820 | 79967  | 1.00E-156 | 289 | 292 | 98 +  | 354 | 645 | 67486  | 67777  |
| UN73730 | Rsa1.0.00413.1 | 299 | 86921  | 1.00E-108 | 218 | 224 | 97 -  | 72  | 292 | 34746  | 34969  |
| UN73731 | Rsa1.0.00006.1 | 559 | 396176 | 1.00E-149 | 302 | 312 | 96 +  | 202 | 512 | 92547  | 92858  |
| UN73732 | Rsa1.0.01629.1 | 835 | 41917  | 0         | 494 | 498 | 99 -  | 102 | 599 | 17963  | 18460  |
| UN73733 | Rsa1.0.23058.1 | 485 | 1074   | 1.00E-152 | 300 | 308 | 97 -  | 43  | 349 | 206    | 513    |
| UN73734 | Rsa1.0.01183.1 | 799 | 51465  | 1.00E-153 | 354 | 369 | 95 +  | 334 | 692 | 41455  | 41823  |
| UN73735 | Rsa1.0.00016.1 | 814 | 831256 | 0         | 630 | 631 | 99 -  | 1   | 630 | 271099 | 271729 |
| UN73736 | #              | #   | #      | #         | #   | #   | #     | #   | #   | #      | #      |
| UN73737 | Rsa1.0.02281.1 | 699 | 292576 | 1.00E-102 | 189 | 189 | 100 + | 3   | 191 | 268749 | 268937 |
| UN73738 | Rsa1.0.00413.1 | 816 | 86921  | 0         | 678 | 701 | 96 -  | 5   | 696 | 38902  | 39596  |
| UN73739 | Rsa1.0.73555.1 | 752 | 311    | 1.00E-149 | 274 | 276 | 99 -  | 113 | 388 | 36     | 311    |
| UN73740 | Rsa1.0.00614.1 | 764 | 72276  | 0         | 652 | 679 | 96 -  | 1   | 666 | 43692  | 44366  |
| UN73741 | Rsa1.0.00262.1 | 772 | 101906 | 1.00E-83  | 230 | 249 | 92 +  | 451 | 694 | 33151  | 33399  |
| UN73742 | Rsa1.0.00116.1 | 542 | 365886 | 2.00E-87  | 232 | 252 | 92 +  | 291 | 541 | 33998  | 34243  |
| UN73743 | Rsa1.0.01792.1 | 659 | 39227  | 7.00E-63  | 123 | 123 | 100 - | 119 | 241 | 9873   | 9995   |
| UN73744 | Rsa1.0.00714.1 | 675 | 67187  | 0         | 581 | 591 | 98 +  | 85  | 675 | 19399  | 19989  |
| UN73745 | Rsa1.0.00978.1 | 761 | 57739  | 1.00E-147 | 270 | 272 | 99 +  | 1   | 272 | 57468  | 57739  |
| UN73746 | Rsa1.0.02667.1 | 719 | 28910  | 0         | 473 | 495 | 95 +  | 226 | 717 | 15394  | 15876  |
| UN73747 | Rsa1.0.00374.1 | 654 | 165738 | 1.00E-154 | 327 | 344 | 95 -  | 311 | 654 | 133188 | 133531 |

|         |                |     |        |           |     |     |       |     |     |        |        |
|---------|----------------|-----|--------|-----------|-----|-----|-------|-----|-----|--------|--------|
| UN73748 | Rsa1.0.07592.1 | 740 | 9059   | 0         | 471 | 484 | 97 -  | 54  | 537 | 439    | 922    |
| UN73749 | Rsa1.0.00195.1 | 560 | 251884 | 0         | 558 | 559 | 99 +  | 3   | 560 | 84421  | 84979  |
| UN73750 | Rsa1.0.00045.1 | 664 | 328694 | 1.00E-156 | 344 | 364 | 94 +  | 4   | 366 | 172058 | 172412 |
| UN73751 | Rsa1.0.00507.1 | 706 | 79074  | 1.00E-102 | 192 | 193 | 99 +  | 59  | 251 | 4329   | 4521   |
| UN73752 | Rsa1.0.00194.1 | 631 | 110851 | 0         | 412 | 434 | 94 +  | 198 | 630 | 13143  | 13569  |
| UN73753 | Rsa1.0.00261.1 | 421 | 151157 | 1.00E-122 | 226 | 227 | 99 +  | 116 | 342 | 108093 | 108319 |
| UN73754 | Rsa1.0.00218.1 | 722 | 201480 | 0         | 688 | 721 | 95 +  | 2   | 722 | 41806  | 42523  |
| UN73755 | Rsa1.0.00012.1 | 837 | 222148 | 0         | 581 | 600 | 96 +  | 167 | 754 | 110290 | 110889 |
| UN73756 | Rsa1.0.01173.1 | 676 | 51727  | 1.00E-109 | 222 | 229 | 96 +  | 273 | 501 | 624    | 852    |
| UN73757 | Rsa1.0.02223.1 | 786 | 152421 | 1.00E-132 | 257 | 263 | 97 +  | 331 | 593 | 17447  | 17709  |
| UN73758 | Rsa1.0.04090.1 | 651 | 19145  | 0         | 421 | 423 | 99 +  | 229 | 651 | 4518   | 4940   |
| UN73759 | Rsa1.0.00739.1 | 800 | 66155  | 1.00E-109 | 201 | 201 | 100 - | 2   | 202 | 61085  | 61285  |
| UN73760 | Rsa1.0.05611.1 | 687 | 13193  | 0         | 548 | 559 | 98 +  | 122 | 677 | 1      | 559    |
| UN73761 | Rsa1.0.00038.1 | 762 | 314568 | 1.00E-162 | 306 | 310 | 98 -  | 58  | 366 | 249454 | 249763 |
| UN73762 | Rsa1.0.19411.1 | 808 | 1436   | 0         | 772 | 787 | 98 -  | 3   | 783 | 121    | 907    |
| UN73763 | Rsa1.0.01274.1 | 756 | 49419  | 0         | 755 | 756 | 99 +  | 2   | 756 | 30709  | 31464  |
| UN73764 | Rsa1.0.01396.1 | 806 | 151624 | 1.00E-126 | 317 | 344 | 92 +  | 151 | 490 | 136369 | 136702 |
| UN73765 | Rsa1.0.03327.1 | 687 | 23707  | 0         | 664 | 689 | 96 +  | 2   | 687 | 17480  | 18168  |
| UN73766 | Rsa1.0.10780.1 | 645 | 5722   | 0         | 642 | 644 | 99 +  | 3   | 645 | 3960   | 4603   |
| UN73767 | Rsa1.0.00185.1 | 540 | 248445 | 1.00E-151 | 271 | 271 | 100 + | 270 | 540 | 238605 | 238875 |
| UN73768 | Rsa1.0.00235.1 | 677 | 154696 | 2.00E-47  | 220 | 261 | 84 -  | 123 | 383 | 134727 | 134987 |
| UN73769 | Rsa1.0.04945.1 | 381 | 15370  | 1.00E-178 | 370 | 388 | 95 +  | 3   | 381 | 9260   | 9646   |
| UN73770 | Rsa1.0.01834.1 | 613 | 38550  | 0         | 548 | 568 | 96 +  | 46  | 613 | 24064  | 24620  |
| UN73771 | Rsa1.0.04896.1 | 244 | 15552  | 6.00E-89  | 228 | 246 | 92 +  | 1   | 244 | 2673   | 2918   |
| UN73772 | Rsa1.0.00269.1 | 709 | 341668 | 0         | 695 | 714 | 97 -  | 3   | 709 | 308839 | 309551 |
| UN73773 | Rsa1.0.00031.1 | 770 | 179862 | 5.00E-95  | 180 | 181 | 99 +  | 471 | 651 | 49880  | 50060  |
| UN73774 | Rsa1.0.02798.1 | 574 | 27792  | 1.00E-116 | 228 | 233 | 97 -  | 3   | 235 | 4712   | 4944   |
| UN73775 | Rsa1.0.24740.1 | 736 | 969    | 1.00E-111 | 286 | 308 | 92 +  | 433 | 736 | 476    | 783    |
| UN73776 | Rsa1.0.01036.1 | 820 | 55978  | 0         | 391 | 392 | 99 +  | 3   | 393 | 10179  | 10570  |
| UN73777 | Rsa1.0.05338.1 | 436 | 144511 | 1.00E-97  | 234 | 251 | 93 -  | 189 | 436 | 7011   | 7261   |
| UN73778 | Rsa1.0.00576.1 | 372 | 178949 | 0         | 355 | 357 | 99 +  | 16  | 372 | 72202  | 72558  |
| UN73779 | Rsa1.0.02358.1 | 774 | 32213  | 0         | 464 | 485 | 95 -  | 239 | 719 | 23087  | 23571  |
| UN73780 | Rsa1.0.01836.1 | 653 | 38503  | 0         | 617 | 655 | 94 +  | 2   | 653 | 11913  | 12561  |
| UN73781 | Rsa1.0.00324.1 | 736 | 218805 | 1.00E-131 | 262 | 269 | 97 +  | 3   | 271 | 188015 | 188281 |
| UN73782 | Rsa1.0.02043.1 | 806 | 163754 | 0         | 649 | 649 | 100 + | 2   | 650 | 156142 | 156790 |
| UN73783 | Rsa1.0.00816.1 | 769 | 403350 | 1.00E-77  | 151 | 152 | 99 +  | 587 | 738 | 152917 | 153068 |
| UN73784 | Rsa1.0.00151.1 | 745 | 119541 | 1.00E-163 | 291 | 291 | 100 + | 1   | 291 | 43001  | 43291  |
| UN73785 | Rsa1.0.00212.1 | 814 | 108350 | 0         | 792 | 825 | 96 -  | 3   | 814 | 67526  | 68345  |
| UN73786 | Rsa1.0.03165.1 | 802 | 24866  | 2.00E-76  | 146 | 146 | 100 + | 288 | 433 | 20387  | 20532  |

|         |                |     |        |           |     |     |       |     |     |        |        |
|---------|----------------|-----|--------|-----------|-----|-----|-------|-----|-----|--------|--------|
| UN73787 | Rsa1.0.00383.1 | 673 | 398431 | 0         | 610 | 671 | 90 -  | 19  | 673 | 253619 | 254280 |
| UN73788 | Rsa1.0.00245.1 | 738 | 103569 | 0         | 363 | 373 | 97 -  | 3   | 375 | 55968  | 56334  |
| UN73789 | Rsa1.0.00867.1 | 686 | 61635  | 0         | 404 | 405 | 99 +  | 206 | 610 | 46044  | 46448  |
| UN73790 | Rsa1.0.02443.1 | 808 | 31353  | 0         | 682 | 696 | 97 -  | 116 | 808 | 8417   | 9112   |
| UN73791 | Rsa1.0.03780.1 | 307 | 20899  | 1.00E-172 | 306 | 306 | 100 - | 2   | 307 | 7912   | 8217   |
| UN73792 | Rsa1.0.01216.1 | 750 | 50580  | 0         | 745 | 752 | 99 -  | 2   | 749 | 4842   | 5593   |
| UN73793 | Rsa1.0.00657.1 | 775 | 69858  | 0         | 611 | 611 | 100 + | 3   | 613 | 296    | 906    |
| UN73794 | Rsa1.0.03292.1 | 759 | 23977  | 0         | 714 | 745 | 95 +  | 2   | 738 | 11381  | 12125  |
| UN73795 | Rsa1.0.00251.1 | 770 | 303968 | 0         | 765 | 771 | 99 -  | 3   | 770 | 159574 | 160344 |
| UN73796 | Rsa1.0.00306.1 | 655 | 146760 | 0         | 461 | 464 | 99 +  | 14  | 477 | 122222 | 122685 |
| UN73797 | Rsa1.0.00321.1 | 633 | 95671  | 4.00E-64  | 125 | 125 | 100 + | 363 | 487 | 59912  | 60036  |
| UN73798 | Rsa1.0.00784.1 | 820 | 64359  | 0         | 490 | 498 | 98 -  | 3   | 500 | 21036  | 21533  |
| UN73799 | Rsa1.0.00002.1 | 770 | 601661 | 0         | 480 | 481 | 99 +  | 3   | 483 | 448582 | 449062 |
| UN73800 | Rsa1.0.02903.1 | 860 | 26901  | 0         | 594 | 615 | 96 +  | 126 | 735 | 4750   | 5364   |
| UN73801 | Rsa1.0.00304.1 | 591 | 97429  | 6.00E-51  | 106 | 107 | 99 +  | 289 | 395 | 67087  | 67193  |
| UN73802 | Rsa1.0.04006.1 | 781 | 19585  | 0         | 528 | 541 | 97 -  | 3   | 543 | 1056   | 1596   |
| UN73803 | Rsa1.0.03997.1 | 747 | 19652  | 1.00E-155 | 287 | 290 | 98 +  | 3   | 292 | 2588   | 2877   |
| UN73804 | Rsa1.0.00523.1 | 529 | 178770 | 1.00E-122 | 254 | 263 | 96 -  | 2   | 263 | 31060  | 31322  |
| UN73805 | Rsa1.0.02003.1 | 807 | 36171  | 0         | 465 | 466 | 99 -  | 3   | 468 | 33665  | 34130  |
| UN73806 | Rsa1.0.00237.1 | 626 | 235974 | 1.00E-132 | 269 | 279 | 96 +  | 232 | 510 | 226925 | 227203 |
| UN73807 | Rsa1.0.03315.1 | 808 | 23797  | 5.00E-95  | 177 | 177 | 100 + | 192 | 368 | 1848   | 2024   |
| UN73808 | Rsa1.0.04264.1 | 778 | 18207  | 0         | 751 | 762 | 98 +  | 1   | 759 | 2880   | 3641   |
| UN73809 | Rsa1.0.00006.1 | 711 | 396176 | 1.00E-114 | 242 | 253 | 95 -  | 458 | 710 | 9191   | 9443   |
| UN73810 | Rsa1.0.04352.1 | 673 | 17779  | 0         | 670 | 673 | 99 +  | 1   | 673 | 2365   | 3037   |
| UN73811 | Rsa1.0.00920.1 | 694 | 601703 | 0         | 385 | 385 | 100 - | 2   | 386 | 586067 | 586451 |
| UN73812 | Rsa1.0.05573.1 | 767 | 13290  | 0         | 372 | 381 | 97 -  | 234 | 614 | 4829   | 5209   |
| UN73813 | Rsa1.0.08259.1 | 815 | 7641   | 4.00E-65  | 142 | 147 | 96 -  | 431 | 577 | 2535   | 2681   |
| UN73814 | Rsa1.0.45603.1 | 834 | 494    | 1.00E-119 | 223 | 225 | 99 -  | 3   | 227 | 1      | 225    |
| UN73815 | Rsa1.0.25958.1 | 559 | 912    | 0         | 462 | 463 | 99 -  | 97  | 559 | 450    | 912    |
| UN73816 | Rsa1.0.04092.1 | 722 | 19128  | 0         | 568 | 572 | 99 +  | 150 | 717 | 2657   | 3228   |
| UN73817 | Rsa1.0.01453.1 | 547 | 45449  | 5.00E-79  | 289 | 328 | 88 -  | 225 | 543 | 13264  | 13582  |
| UN73818 | Rsa1.0.01661.1 | 635 | 41400  | 7.00E-97  | 211 | 219 | 96 +  | 3   | 218 | 38563  | 38781  |
| UN73819 | Rsa1.0.01126.1 | 764 | 53127  | 0         | 548 | 561 | 97 +  | 151 | 708 | 35534  | 36093  |
| UN73820 | Rsa1.0.00237.1 | 789 | 235974 | 1.00E-100 | 186 | 186 | 100 - | 2   | 187 | 216119 | 216304 |
| UN73821 | Rsa1.0.00090.1 | 632 | 273859 | 0         | 500 | 504 | 99 -  | 129 | 632 | 265911 | 266414 |
| UN73822 | Rsa1.0.01904.1 | 454 | 37450  | 1.00E-142 | 379 | 419 | 90 +  | 3   | 394 | 1206   | 1620   |
| UN73823 | Rsa1.0.01613.1 | 739 | 182542 | 1.00E-124 | 226 | 226 | 100 + | 169 | 394 | 27799  | 28024  |
| UN73824 | Rsa1.0.04937.1 | 822 | 15401  | 0         | 576 | 614 | 93 +  | 205 | 803 | 11732  | 12344  |
| UN73825 | Rsa1.0.00160.1 | 756 | 346678 | 1.00E-134 | 242 | 242 | 100 - | 3   | 244 | 148360 | 148601 |

|         |                |     |        |           |     |     |       |     |     |        |        |
|---------|----------------|-----|--------|-----------|-----|-----|-------|-----|-----|--------|--------|
| UN73826 | Rsa1.0_01000.1 | 809 | 57140  | 0         | 806 | 809 | 99 +  | 2   | 809 | 6599   | 7407   |
| UN73827 | Rsa1.0_00092.1 | 585 | 659932 | 0         | 383 | 394 | 97 -  | 192 | 585 | 126250 | 126643 |
| UN73828 | Rsa1.0_02393.1 | 331 | 31795  | 1.00E-155 | 311 | 321 | 96 -  | 11  | 331 | 21803  | 22121  |
| UN73829 | Rsa1.0_00034.1 | 522 | 260119 | 0         | 514 | 516 | 99 -  | 3   | 518 | 157135 | 157650 |
| UN73830 | Rsa1.0_01984.1 | 638 | 36491  | 0         | 363 | 363 | 100 + | 1   | 363 | 26874  | 27236  |
| UN73831 | Rsa1.0_02136.1 | 800 | 34707  | 6.00E-64  | 128 | 129 | 99 +  | 3   | 131 | 601    | 729    |
| UN73832 | Rsa1.0_00417.1 | 581 | 395068 | 0         | 538 | 566 | 95 +  | 22  | 581 | 220606 | 221162 |
| UN73833 | Rsa1.0_02865.1 | 745 | 27133  | 0         | 730 | 751 | 97 +  | 1   | 745 | 18503  | 19253  |
| UN73834 | Rsa1.0_00579.1 | 760 | 148308 | 1.00E-135 | 253 | 256 | 98 +  | 475 | 730 | 70548  | 70803  |
| UN73835 | Rsa1.0_00316.1 | 647 | 96264  | 0         | 632 | 654 | 96 -  | 1   | 647 | 83037  | 83689  |
| UN73836 | Rsa1.0_00044.1 | 809 | 271658 | 3.00E-78  | 149 | 149 | 100 + | 487 | 635 | 117283 | 117431 |
| UN73837 | Rsa1.0_15251.1 | 434 | 2727   | 1.00E-142 | 280 | 288 | 97 +  | 147 | 434 | 1605   | 1892   |
| UN73838 | Rsa1.0_00353.1 | 720 | 92242  | 0         | 447 | 459 | 97 -  | 262 | 720 | 7321   | 7779   |
| UN73839 | Rsa1.0_00964.1 | 538 | 316648 | 0         | 526 | 537 | 97 -  | 3   | 538 | 167671 | 168206 |
| UN73840 | Rsa1.0_02070.1 | 700 | 158516 | 0         | 651 | 660 | 98 -  | 3   | 661 | 13233  | 13891  |
| UN73841 | Rsa1.0_01272.1 | 787 | 49553  | 0         | 723 | 736 | 98 +  | 2   | 736 | 17526  | 18261  |
| UN73842 | Rsa1.0_36016.1 | 634 | 627    | 1.00E-101 | 207 | 213 | 97 -  | 10  | 218 | 415    | 627    |
| UN73843 | Rsa1.0_00278.1 | 607 | 231896 | 4.00E-89  | 179 | 183 | 97 +  | 425 | 607 | 15864  | 16046  |
| UN73844 | Rsa1.0_03991.1 | 622 | 19675  | 0         | 390 | 406 | 96 +  | 217 | 622 | 4933   | 5338   |
| UN73845 | Rsa1.0_07295.1 | 784 | 9599   | 0         | 414 | 428 | 96 -  | 323 | 746 | 1264   | 1691   |
| UN73846 | Rsa1.0_09779.1 | 564 | 6154   | 1.00E-139 | 282 | 291 | 96 -  | 265 | 554 | 4717   | 5007   |
| UN73847 | Rsa1.0_00769.1 | 803 | 64911  | 0         | 691 | 696 | 99 -  | 3   | 695 | 32965  | 33660  |
| UN73848 | Rsa1.0_03969.1 | 715 | 19797  | 0         | 709 | 715 | 99 +  | 2   | 715 | 5869   | 6582   |
| UN73849 | Rsa1.0_02062.1 | 550 | 35485  | 0         | 378 | 388 | 97 +  | 3   | 385 | 16085  | 16471  |
| UN73850 | Rsa1.0_00724.1 | 720 | 66789  | 0         | 488 | 495 | 98 +  | 226 | 720 | 58788  | 59282  |
| UN73851 | Rsa1.0_04303.1 | 791 | 18007  | 0         | 515 | 531 | 96 -  | 3   | 527 | 11053  | 11583  |
| UN73852 | Rsa1.0_00593.1 | 680 | 143463 | 0         | 636 | 641 | 99 +  | 1   | 641 | 136215 | 136855 |
| UN73853 | Rsa1.0_00628.1 | 719 | 214360 | 0         | 412 | 421 | 97 +  | 2   | 420 | 179000 | 179417 |
| UN73854 | Rsa1.0_00355.1 | 695 | 92038  | 1.00E-176 | 316 | 317 | 99 -  | 159 | 475 | 57993  | 58309  |
| UN73855 | Rsa1.0_00005.1 | 697 | 353093 | 0         | 345 | 346 | 99 +  | 2   | 347 | 226451 | 226795 |
| UN73856 | Rsa1.0_00156.1 | 749 | 118383 | 0         | 567 | 572 | 99 +  | 176 | 742 | 56991  | 57562  |
| UN73857 | Rsa1.0_02867.1 | 621 | 27121  | 5.00E-76  | 282 | 331 | 85 +  | 299 | 615 | 3466   | 3780   |
| UN73858 | Rsa1.0_09186.1 | 692 | 6572   | 5.00E-58  | 143 | 151 | 94 -  | 2   | 151 | 5556   | 5706   |
| UN73859 | Rsa1.0_03407.1 | 657 | 23154  | 1.00E-138 | 259 | 262 | 98 +  | 3   | 264 | 3656   | 3917   |
| UN73860 | Rsa1.0_00154.1 | 723 | 189461 | 1.00E-147 | 268 | 269 | 99 +  | 455 | 723 | 151738 | 152006 |
| UN73861 | Rsa1.0_03264.1 | 590 | 145959 | 1.00E-153 | 281 | 283 | 99 +  | 292 | 574 | 134142 | 134424 |
| UN73862 | Rsa1.0_00181.1 | 594 | 114269 | 1.00E-150 | 312 | 325 | 96 +  | 3   | 326 | 42098  | 42422  |
| UN73863 | Rsa1.0_00438.1 | 568 | 84861  | 0         | 565 | 566 | 99 +  | 3   | 568 | 60587  | 61152  |
| UN73864 | Rsa1.0_08079.1 | 604 | 7942   | 1.00E-129 | 287 | 302 | 95 -  | 305 | 604 | 2865   | 3165   |



|         |                |     |        |           |     |     |       |     |     |        |        |
|---------|----------------|-----|--------|-----------|-----|-----|-------|-----|-----|--------|--------|
| UN73865 | Rsa1.0.00051.1 | 773 | 258225 | 0         | 619 | 663 | 93 -  | 120 | 773 | 162193 | 162849 |
| UN73866 | Rsa1.0.00541.1 | 758 | 76863  | 1.00E-168 | 320 | 324 | 98 +  | 434 | 755 | 34580  | 34903  |
| UN73867 | Rsa1.0.00019.1 | 762 | 301669 | 1.00E-154 | 276 | 276 | 100 + | 2   | 277 | 83569  | 83844  |
| UN73868 | Rsa1.0.15193.1 | 786 | 2768   | 1.00E-160 | 354 | 374 | 94 +  | 3   | 367 | 1298   | 1668   |
| UN73869 | Rsa1.0.01976.1 | 788 | 36570  | 1.00E-148 | 280 | 283 | 98 -  | 267 | 549 | 9059   | 9340   |
| UN73870 | Rsa1.0.00243.1 | 703 | 103651 | 0         | 515 | 536 | 96 -  | 168 | 700 | 79585  | 80120  |
| UN73871 | Rsa1.0.02991.1 | 587 | 26178  | 9.00E-90  | 174 | 176 | 98 +  | 412 | 587 | 4393   | 4568   |
| UN73872 | Rsa1.0.04786.1 | 685 | 15988  | 0         | 661 | 689 | 95 +  | 2   | 685 | 11410  | 12092  |
| UN73873 | Rsa1.0.18772.1 | 709 | 1537   | 0         | 662 | 699 | 94 +  | 5   | 702 | 597    | 1290   |
| UN73874 | Rsa1.0.00979.1 | 758 | 57733  | 1.00E-138 | 270 | 277 | 97 -  | 162 | 438 | 41925  | 42201  |
| UN73875 | Rsa1.0.03525.1 | 734 | 22296  | 0         | 368 | 370 | 99 +  | 365 | 734 | 20992  | 21361  |
| UN73876 | Rsa1.0.00548.1 | 654 | 76518  | 0         | 643 | 654 | 98 +  | 3   | 654 | 3477   | 4130   |
| UN73877 | Rsa1.0.00516.1 | 790 | 78417  | 0         | 779 | 791 | 98 +  | 3   | 790 | 73339  | 74129  |
| UN73878 | Rsa1.0.01361.1 | 762 | 47226  | 0         | 712 | 743 | 95 -  | 2   | 743 | 15806  | 16548  |
| UN73879 | Rsa1.0.01526.1 | 634 | 43919  | 2.00E-90  | 169 | 169 | 100 + | 466 | 634 | 34932  | 35100  |
| UN73880 | Rsa1.0.00705.1 | 681 | 67505  | 1.00E-162 | 331 | 344 | 96 +  | 338 | 681 | 10409  | 10749  |
| UN73881 | Rsa1.0.08954.1 | 713 | 6757   | 0         | 480 | 503 | 95 -  | 3   | 483 | 4357   | 4859   |
| UN73882 | Rsa1.0.01763.1 | 578 | 39659  | 0         | 533 | 588 | 90 +  | 19  | 578 | 37097  | 37680  |
| UN73883 | Rsa1.0.00867.1 | 652 | 61635  | 0         | 342 | 344 | 99 -  | 310 | 652 | 55972  | 56315  |
| UN73884 | Rsa1.0.00086.1 | 609 | 439854 | 1.00E-51  | 104 | 104 | 100 + | 3   | 106 | 369298 | 369401 |
| UN73885 | Rsa1.0.04237.1 | 798 | 18361  | 1.00E-114 | 281 | 305 | 92 -  | 122 | 426 | 7441   | 7745   |
| UN73886 | Rsa1.0.02860.1 | 787 | 27207  | 0         | 760 | 810 | 93 +  | 3   | 787 | 8311   | 9116   |
| UN73887 | Rsa1.0.00373.1 | 440 | 90296  | 3.00E-70  | 156 | 163 | 95 +  | 2   | 164 | 79177  | 79339  |
| UN73888 | Rsa1.0.00299.1 | 495 | 97770  | 1.00E-121 | 232 | 236 | 98 -  | 1   | 236 | 33397  | 33632  |
| UN73889 | Rsa1.0.00813.1 | 624 | 63202  | 1.00E-149 | 316 | 331 | 95 +  | 8   | 332 | 62872  | 63202  |
| UN73890 | Rsa1.0.02348.1 | 676 | 32316  | 0         | 566 | 567 | 99 -  | 110 | 676 | 4344   | 4910   |
| UN73891 | Rsa1.0.16822.1 | 384 | 2022   | 0         | 373 | 383 | 97 +  | 2   | 384 | 928    | 1310   |
| UN73892 | Rsa1.0.02763.1 | 411 | 28143  | 0         | 397 | 409 | 97 -  | 1   | 407 | 12431  | 12839  |
| UN73893 | Rsa1.0.00835.1 | 639 | 278058 | 1.00E-125 | 227 | 227 | 100 - | 77  | 303 | 139820 | 140046 |
| UN73894 | Rsa1.0.27360.1 | 643 | 856    | 0         | 511 | 527 | 96 -  | 117 | 643 | 330    | 856    |
| UN73895 | Rsa1.0.00394.1 | 571 | 148426 | 4.00E-92  | 208 | 220 | 94 -  | 3   | 222 | 107239 | 107458 |
| UN73896 | Rsa1.0.03626.1 | 190 | 160993 | 1.00E-98  | 188 | 190 | 98 -  | 1   | 190 | 139583 | 139772 |
| UN73897 | Rsa1.0.00017.1 | 622 | 752458 | 1.00E-161 | 419 | 455 | 92 -  | 10  | 451 | 66256  | 66702  |
| UN73898 | Rsa1.0.00516.1 | 559 | 78417  | 1.00E-121 | 255 | 265 | 96 +  | 1   | 264 | 35862  | 36126  |
| UN73899 | Rsa1.0.00272.1 | 377 | 447836 | 5.00E-72  | 141 | 142 | 99 +  | 87  | 228 | 307045 | 307186 |
| UN73900 | Rsa1.0.00003.1 | 624 | 340054 | 0         | 594 | 600 | 99 -  | 25  | 624 | 224241 | 224838 |
| UN73901 | Rsa1.0.00169.1 | 614 | 274298 | 0         | 358 | 368 | 97 -  | 3   | 370 | 271695 | 272062 |
| UN73902 | Rsa1.0.00025.1 | 356 | 277312 | 1.00E-166 | 341 | 356 | 95 -  | 1   | 356 | 141309 | 141664 |
| UN73903 | Rsa1.0.07290.1 | 842 | 9608   | 0         | 410 | 411 | 99 +  | 1   | 411 | 5514   | 5924   |

|         |                |     |        |           |     |     |       |     |     |        |        |
|---------|----------------|-----|--------|-----------|-----|-----|-------|-----|-----|--------|--------|
| UN73904 | Rsa1.0_04557.1 | 617 | 145048 | 2.00E-38  | 180 | 210 | 85 +  | 388 | 590 | 138733 | 138942 |
| UN73905 | Rsa1.0_00079.1 | 781 | 606987 | 0         | 349 | 355 | 98 +  | 278 | 632 | 55593  | 55947  |
| UN73906 | Rsa1.0_00589.1 | 650 | 209965 | 1.00E-169 | 314 | 318 | 98 +  | 143 | 460 | 69286  | 69603  |
| UN73907 | Rsa1.0_00585.1 | 685 | 74164  | 0         | 658 | 685 | 96 +  | 1   | 685 | 60681  | 61357  |
| UN73908 | Rsa1.0_02217.1 | 793 | 33812  | 0         | 765 | 800 | 95 +  | 1   | 793 | 30229  | 31027  |
| UN73909 | #              | #   | #      | #         | #   | #   | #     | #   | #   | #      | #      |
| UN73910 | Rsa1.0_00456.1 | 642 | 82826  | 0         | 496 | 500 | 99 +  | 146 | 642 | 18300  | 18799  |
| UN73911 | Rsa1.0_04568.1 | 723 | 16805  | 0         | 699 | 725 | 96 +  | 3   | 723 | 4947   | 5667   |
| UN73912 | Rsa1.0_00160.1 | 680 | 346678 | 1.00E-169 | 332 | 341 | 97 +  | 2   | 341 | 243052 | 243392 |
| UN73913 | Rsa1.0_14494.1 | 626 | 3331   | 9.00E-81  | 195 | 206 | 94 +  | 1   | 202 | 2626   | 2829   |
| UN73914 | Rsa1.0_08661.1 | 816 | 7068   | 0         | 491 | 498 | 98 +  | 323 | 813 | 5006   | 5503   |
| UN73915 | Rsa1.0_09094.1 | 796 | 6651   | 0         | 621 | 636 | 97 +  | 3   | 638 | 5936   | 6571   |
| UN73916 | Rsa1.0_00141.1 | 752 | 121494 | 0         | 377 | 387 | 97 -  | 54  | 440 | 104511 | 104897 |
| UN73917 | Rsa1.0_07619.1 | 794 | 9015   | 1.00E-177 | 345 | 354 | 97 +  | 131 | 484 | 3415   | 3766   |
| UN73918 | Rsa1.0_01895.1 | 634 | 37512  | 0         | 615 | 634 | 97 -  | 1   | 634 | 6588   | 7221   |
| UN73919 | Rsa1.0_02254.1 | 811 | 33344  | 0         | 426 | 450 | 94 +  | 2   | 451 | 28664  | 29107  |
| UN73920 | Rsa1.0_02246.1 | 624 | 33435  | 1.00E-132 | 245 | 247 | 99 +  | 1   | 247 | 22622  | 22868  |
| UN73921 | Rsa1.0_04194.1 | 749 | 132734 | 0         | 499 | 519 | 96 -  | 177 | 693 | 123470 | 123988 |
| UN73922 | Rsa1.0_00157.1 | 791 | 245832 | 0         | 549 | 561 | 97 +  | 2   | 560 | 77894  | 78452  |
| UN73923 | Rsa1.0_00449.1 | 823 | 83863  | 1.00E-180 | 347 | 356 | 97 -  | 3   | 358 | 56110  | 56465  |
| UN73924 | Rsa1.0_00104.1 | 801 | 368722 | 0         | 365 | 378 | 96 +  | 50  | 427 | 218004 | 218380 |
| UN73925 | Rsa1.0_02058.1 | 712 | 35532  | 1.00E-138 | 282 | 288 | 97 -  | 431 | 712 | 14663  | 14950  |
| UN73926 | Rsa1.0_08409.1 | 640 | 7407   | 0         | 543 | 559 | 97 -  | 7   | 565 | 6369   | 6927   |
| UN73927 | Rsa1.0_05771.1 | 591 | 12674  | 1.00E-172 | 322 | 327 | 98 +  | 269 | 591 | 9909   | 10235  |
| UN73928 | Rsa1.0_00078.1 | 639 | 175053 | 5.00E-79  | 153 | 154 | 99 -  | 225 | 378 | 67999  | 68152  |
| UN73929 | Rsa1.0_00190.1 | 795 | 318240 | 0         | 413 | 422 | 97 +  | 7   | 423 | 17906  | 18324  |
| UN73930 | Rsa1.0_00032.1 | 754 | 306326 | 1.00E-138 | 250 | 250 | 100 + | 120 | 369 | 252590 | 252839 |
| UN73931 | Rsa1.0_00017.1 | 796 | 752458 | 1.00E-129 | 268 | 278 | 96 -  | 3   | 280 | 292600 | 292875 |
| UN73932 | Rsa1.0_00420.1 | 603 | 86496  | 1.00E-158 | 313 | 322 | 97 -  | 263 | 582 | 65792  | 66113  |
| UN73933 | Rsa1.0_22969.1 | 336 | 1080   | 1.00E-180 | 332 | 335 | 99 +  | 2   | 336 | 369    | 702    |
| UN73934 | Rsa1.0_00017.1 | 732 | 752458 | 0         | 696 | 733 | 94 +  | 2   | 732 | 226628 | 227360 |
| UN73935 | Rsa1.0_00356.1 | 226 | 91521  | 6.00E-30  | 70  | 71  | 98 -  | 54  | 124 | 63155  | 63225  |
| UN73936 | Rsa1.0_00116.1 | 491 | 365886 | 1.00E-154 | 423 | 473 | 89 -  | 12  | 472 | 342074 | 342540 |
| UN73937 | Rsa1.0_00625.1 | 737 | 71672  | 0         | 554 | 574 | 96 -  | 3   | 570 | 47165  | 47738  |
| UN73938 | Rsa1.0_00016.1 | 791 | 831256 | 5.00E-89  | 170 | 171 | 99 +  | 3   | 173 | 223542 | 223712 |
| UN73939 | Rsa1.0_02222.1 | 579 | 152798 | 5.00E-51  | 106 | 107 | 99 +  | 204 | 310 | 694    | 800    |
| UN73940 | Rsa1.0_04925.1 | 790 | 15424  | 0         | 474 | 481 | 98 +  | 61  | 540 | 5177   | 5657   |
| UN73941 | Rsa1.0_00507.1 | 711 | 79074  | 6.00E-82  | 161 | 163 | 98 -  | 450 | 612 | 43470  | 43632  |
| UN73942 | Rsa1.0_05562.1 | 657 | 13323  | 0         | 643 | 653 | 98 +  | 5   | 657 | 8955   | 9607   |

|         |                |     |        |           |     |     |      |     |     |        |        |
|---------|----------------|-----|--------|-----------|-----|-----|------|-----|-----|--------|--------|
| UN73943 | Rsa1.0.07600.1 | 588 | 9052   | 1.00E-106 | 233 | 244 | 95 - | 3   | 246 | 181    | 419    |
| UN73944 | Rsa1.0.00997.1 | 711 | 57190  | 0         | 565 | 568 | 99 + | 144 | 711 | 35271  | 35838  |
| UN73945 | Rsa1.0.00415.1 | 524 | 86795  | 0         | 521 | 523 | 99 + | 2   | 524 | 9171   | 9693   |
| UN73946 | Rsa1.0.48892.1 | 588 | 463    | 1.00E-127 | 240 | 242 | 99 + | 3   | 242 | 17     | 258    |
| UN73947 | Rsa1.0_10516.1 | 524 | 5818   | 0         | 443 | 446 | 99 - | 3   | 448 | 4536   | 4981   |
| UN73948 | Rsa1.0_04036.1 | 514 | 19473  | 0         | 492 | 515 | 95 - | 1   | 514 | 15253  | 15767  |
| UN73949 | Rsa1.0.09577.1 | 593 | 6275   | 1.00E-154 | 297 | 304 | 97 - | 278 | 581 | 1629   | 1932   |
| UN73950 | Rsa1.0.08434.1 | 497 | 7362   | 4.00E-39  | 99  | 103 | 96 + | 14  | 115 | 5971   | 6073   |
| UN73951 | Rsa1.0.00827.1 | 837 | 62790  | 0         | 825 | 846 | 97 - | 2   | 837 | 46718  | 47563  |
| UN73952 | Rsa1.0.00148.1 | 818 | 120234 | 0         | 510 | 524 | 97 - | 127 | 649 | 73200  | 73723  |
| UN73953 | Rsa1.0.00190.1 | 840 | 318240 | 0         | 618 | 631 | 97 - | 213 | 840 | 295615 | 296245 |
| UN73954 | Rsa1.0.00467.1 | 729 | 156542 | 0         | 513 | 518 | 99 + | 214 | 729 | 77638  | 78154  |
| UN73955 | Rsa1.0.00636.1 | 623 | 71113  | 0         | 355 | 357 | 99 - | 267 | 623 | 56716  | 57072  |
| UN73956 | Rsa1.0.00168.1 | 764 | 115870 | 0         | 695 | 701 | 99 + | 3   | 700 | 38848  | 39548  |
| UN73957 | Rsa1.0.03415.1 | 273 | 23117  | 1.00E-135 | 266 | 272 | 97 - | 3   | 273 | 14197  | 14468  |
| UN73958 | Rsa1.0.00955.1 | 137 | 58358  | 2.00E-22  | 79  | 86  | 91 - | 42  | 127 | 34070  | 34154  |
| UN73959 | Rsa1.0.00294.1 | 381 | 144860 | 1.00E-151 | 329 | 345 | 95 + | 40  | 381 | 64162  | 64505  |
| UN73960 | Rsa1.0.00037.1 | 558 | 307838 | 1.00E-123 | 251 | 260 | 96 - | 1   | 260 | 23059  | 23318  |
| UN73961 | Rsa1.0.00458.1 | 584 | 82717  | 0         | 567 | 597 | 94 - | 1   | 584 | 23488  | 24084  |
| UN73962 | Rsa1.0.00363.1 | 176 | 90968  | 7.00E-60  | 164 | 178 | 92 + | 1   | 176 | 28298  | 28472  |
| UN73963 | Rsa1.0.00385.1 | 186 | 89160  | 1.00E-89  | 183 | 187 | 97 + | 1   | 186 | 22850  | 23036  |
| UN73964 | Rsa1.0.02358.1 | 137 | 32213  | 2.00E-41  | 124 | 136 | 91 - | 1   | 133 | 6011   | 6146   |
| UN73965 | Rsa1.0_00875.1 | 510 | 61371  | 1.00E-180 | 377 | 397 | 94 - | 1   | 389 | 5244   | 5640   |
| UN73966 | Rsa1.0.03820.1 | 478 | 20664  | 3.00E-83  | 172 | 177 | 97 + | 1   | 177 | 5413   | 5589   |
| UN73967 | Rsa1.0_14200.1 | 789 | 3671   | 0         | 625 | 634 | 98 - | 156 | 789 | 2959   | 3592   |
| UN73968 | Rsa1.0.06940.1 | 210 | 10137  | 5.00E-89  | 200 | 210 | 95 + | 1   | 210 | 8425   | 8633   |
| UN73969 | Rsa1.0.01494.1 | 401 | 44641  | 7.00E-65  | 213 | 240 | 88 + | 168 | 401 | 11175  | 11406  |
| UN73970 | Rsa1.0.07921.1 | 479 | 8259   | 0         | 467 | 481 | 97 - | 1   | 479 | 2666   | 3146   |
| UN73971 | Rsa1.0.00473.1 | 653 | 212204 | 1.00E-163 | 350 | 366 | 95 + | 1   | 361 | 66339  | 66700  |
| UN73972 | Rsa1.0.02585.1 | 122 | 29865  | 3.00E-33  | 106 | 116 | 91 + | 1   | 116 | 25269  | 25383  |
| UN73973 | Rsa1.0.00101.1 | 595 | 267193 | 1.00E-95  | 214 | 224 | 95 - | 1   | 224 | 180256 | 180475 |
| UN73974 | Rsa1.0.00307.1 | 771 | 199003 | 0         | 564 | 577 | 97 - | 2   | 578 | 157190 | 157761 |
| UN73975 | Rsa1.0.01971.1 | 839 | 36641  | 0         | 806 | 847 | 95 - | 2   | 833 | 20031  | 20875  |
| UN73976 | Rsa1.0.22685.1 | 624 | 1103   | 2.00E-88  | 175 | 178 | 98 + | 1   | 178 | 258    | 435    |
| UN73977 | Rsa1.0.01451.1 | 385 | 45459  | 1.00E-180 | 364 | 379 | 96 - | 3   | 381 | 19018  | 19396  |
| UN73978 | Rsa1.0.00355.1 | 653 | 92038  | 0         | 469 | 474 | 98 + | 2   | 475 | 56434  | 56907  |
| UN73979 | Rsa1.0.00156.1 | 429 | 118383 | 1.00E-127 | 293 | 312 | 93 - | 5   | 316 | 60208  | 60515  |
| UN73980 | Rsa1.0.02867.1 | 175 | 27121  | 1.00E-39  | 143 | 164 | 87 - | 12  | 175 | 3601   | 3756   |
| UN73981 | Rsa1.0_00292.1 | 362 | 98141  | 6.00E-62  | 124 | 125 | 99 + | 203 | 327 | 64532  | 64656  |

|         |                |     |        |           |     |     |       |     |     |        |        |
|---------|----------------|-----|--------|-----------|-----|-----|-------|-----|-----|--------|--------|
| UN73982 | Rsa1.0.05442.1 | 460 | 13741  | 1.00E-119 | 259 | 272 | 95 -  | 1   | 269 | 1778   | 2049   |
| UN73983 | Rsa1.0.02454.1 | 301 | 31263  | 1.00E-150 | 293 | 301 | 97 -  | 1   | 301 | 27394  | 27694  |
| UN73984 | Rsa1.0.00104.1 | 354 | 368722 | 1.00E-114 | 325 | 358 | 90 -  | 3   | 354 | 197698 | 198054 |
| UN73985 | Rsa1.0.00032.1 | 688 | 306326 | 1.00E-110 | 202 | 202 | 100 - | 487 | 688 | 256164 | 256365 |
| UN73986 | Rsa1.0.03015.1 | 761 | 26006  | 1.00E-113 | 217 | 219 | 99 +  | 1   | 219 | 517    | 734    |
| UN73987 | Rsa1.0.02963.1 | 573 | 26407  | 1.00E-127 | 258 | 267 | 96 +  | 1   | 267 | 12724  | 12990  |
| UN73988 | Rsa1.0.03091.1 | 681 | 25454  | 3.00E-50  | 151 | 166 | 90 -  | 327 | 491 | 83     | 248    |
| UN73989 | Rsa1.0.01461.1 | 416 | 45240  | 2.00E-96  | 243 | 263 | 92 -  | 108 | 370 | 7012   | 7273   |
| UN73990 | Rsa1.0.02557.1 | 594 | 30127  | 0         | 570 | 592 | 96 +  | 6   | 594 | 1866   | 2447   |
| UN73991 | Rsa1.0.04520.1 | 226 | 16995  | 8.00E-54  | 190 | 217 | 87 -  | 1   | 204 | 9719   | 9935   |
| UN73992 | Rsa1.0.05208.1 | 154 | 14504  | 3.00E-46  | 103 | 106 | 97 -  | 1   | 106 | 4129   | 4234   |
| UN73993 | Rsa1.0.01556.1 | 440 | 163858 | 1.00E-119 | 268 | 282 | 95 -  | 160 | 440 | 25175  | 25455  |
| UN73994 | Rsa1.0.00938.1 | 420 | 193891 | 0         | 413 | 425 | 97 -  | 1   | 420 | 172314 | 172737 |
| UN73995 | Rsa1.0.00303.1 | 537 | 97468  | 1.00E-122 | 222 | 222 | 100 + | 1   | 222 | 56972  | 57193  |
| UN73996 | Rsa1.0.07849.1 | 226 | 8425   | 4.00E-62  | 133 | 137 | 97 +  | 79  | 215 | 5970   | 6106   |
| UN73997 | Rsa1.0.07521.1 | 727 | 9206   | 0         | 459 | 464 | 98 +  | 1   | 464 | 6515   | 6978   |
| UN73998 | Rsa1.0.03997.1 | 158 | 19652  | 7.00E-35  | 131 | 146 | 89 -  | 12  | 153 | 4246   | 4391   |
| UN73999 | #              | #   | #      | #         | #   | #   | #     | #   | #   | #      | #      |
| UN74000 | Rsa1.0.00748.1 | 648 | 65983  | 1.00E-171 | 404 | 427 | 94 +  | 1   | 419 | 18079  | 18503  |
| UN74001 | Rsa1.0.25924.1 | 627 | 913    | 0         | 606 | 645 | 93 +  | 1   | 627 | 119    | 762    |
| UN74002 | Rsa1.0.02446.1 | 201 | 31330  | 5.00E-55  | 121 | 125 | 96 +  | 73  | 197 | 19906  | 20030  |
| UN74003 | Rsa1.0.02667.1 | 151 | 28910  | 9.00E-19  | 66  | 72  | 91 -  | 1   | 72  | 15867  | 15933  |
| UN74004 | Rsa1.0.04352.1 | 627 | 17779  | 0         | 622 | 627 | 99 -  | 1   | 627 | 3113   | 3739   |
| UN74005 | Rsa1.0.00045.1 | 624 | 328694 | 0         | 585 | 607 | 96 -  | 18  | 624 | 174156 | 174762 |
| UN74006 | Rsa1.0.00017.1 | 568 | 752458 | 0         | 518 | 581 | 89 -  | 1   | 568 | 268452 | 269007 |
| UN74007 | Rsa1.0.00920.1 | 773 | 601703 | 0         | 771 | 773 | 99 +  | 1   | 773 | 584891 | 585663 |
| UN74008 | Rsa1.0.00751.1 | 295 | 65759  | 2.00E-36  | 84  | 86  | 97 -  | 210 | 295 | 3615   | 3700   |
| UN74009 | Rsa1.0.05461.1 | 206 | 13674  | 9.00E-32  | 76  | 78  | 97 +  | 129 | 206 | 4648   | 4725   |
| UN74010 | Rsa1.0.00507.1 | 782 | 79074  | 0         | 763 | 769 | 99 -  | 1   | 767 | 5584   | 6352   |
| UN74011 | Rsa1.0.07827.1 | 705 | 8466   | 0         | 367 | 370 | 99 -  | 2   | 371 | 3606   | 3975   |
| UN74012 | Rsa1.0.02041.1 | 112 | 163634 | 2.00E-37  | 105 | 111 | 94 -  | 2   | 112 | 157635 | 157743 |
| UN74013 | Rsa1.0.06489.1 | 227 | 10917  | 6.00E-95  | 200 | 208 | 96 -  | 20  | 227 | 5114   | 5321   |
| UN74014 | Rsa1.0.02485.1 | 539 | 30968  | 0         | 505 | 514 | 98 +  | 1   | 514 | 26705  | 27215  |
| UN74015 | Rsa1.0.08079.1 | 721 | 7942   | 0         | 694 | 724 | 95 +  | 1   | 721 | 1998   | 2721   |
| UN74016 | Rsa1.0.00051.1 | 690 | 258225 | 0         | 558 | 578 | 96 +  | 1   | 578 | 160948 | 161520 |
| UN74017 | Rsa1.0.08011.1 | 698 | 8082   | 0         | 449 | 476 | 94 +  | 223 | 698 | 1908   | 2382   |
| UN74018 | Rsa1.0.01882.1 | 689 | 37697  | 0         | 653 | 688 | 94 -  | 9   | 689 | 11077  | 11755  |
| UN74019 | Rsa1.0.02652.1 | 586 | 29038  | 1.00E-21  | 150 | 176 | 85 -  | 408 | 578 | 24418  | 24591  |
| UN74020 | Rsa1.0.00096.1 | 112 | 198773 | 8.00E-40  | 95  | 98  | 96 +  | 17  | 112 | 15253  | 15350  |

|         |                |     |        |           |     |     |       |     |     |        |        |
|---------|----------------|-----|--------|-----------|-----|-----|-------|-----|-----|--------|--------|
| UN74021 | Rsa1.0.00614.1 | 701 | 72276  | 0         | 506 | 533 | 94 +  | 181 | 701 | 43628  | 44155  |
| UN74022 | Rsa1.0.00140.1 | 308 | 121541 | 4.00E-81  | 192 | 205 | 93 -  | 3   | 207 | 579    | 783    |
| UN74023 | Rsa1.0.00045.1 | 393 | 328694 | 9.00E-86  | 334 | 388 | 86 +  | 19  | 389 | 261070 | 261450 |
| UN74024 | Rsa1.0.02254.1 | 694 | 33344  | 0         | 503 | 527 | 95 -  | 1   | 527 | 30020  | 30546  |
| UN74025 | Rsa1.0.01190.1 | 305 | 194501 | 1.00E-136 | 294 | 308 | 95 +  | 1   | 305 | 44628  | 44934  |
| UN74026 | Rsa1.0.05070.1 | 561 | 14933  | 0         | 531 | 571 | 92 -  | 1   | 561 | 1686   | 2256   |
| UN74027 | Rsa1.0.00035.1 | 127 | 176449 | 1.00E-29  | 81  | 86  | 94 -  | 1   | 86  | 96531  | 96616  |
| UN74028 | Rsa1.0.00251.1 | 646 | 303968 | 9.00E-81  | 248 | 272 | 91 -  | 1   | 264 | 127337 | 127604 |
| UN74029 | Rsa1.0.00352.1 | 682 | 92266  | 0         | 643 | 689 | 93 -  | 1   | 680 | 89336  | 90020  |
| UN74030 | Rsa1.0.02593.1 | 788 | 29744  | 0         | 342 | 342 | 100 + | 317 | 658 | 4754   | 5095   |
| UN74031 | Rsa1.0.00748.1 | 577 | 65983  | 0         | 573 | 577 | 99 +  | 1   | 577 | 14443  | 15016  |
| UN74032 | Rsa1.0.21645.1 | 588 | 1184   | 0         | 567 | 593 | 95 -  | 3   | 587 | 581    | 1169   |
| UN74033 | Rsa1.0.01453.1 | 146 | 45449  | 1.00E-60  | 139 | 146 | 95 -  | 1   | 146 | 28765  | 28910  |
| UN74034 | Rsa1.0.55202.1 | 163 | 414    | 1.00E-70  | 156 | 163 | 95 +  | 1   | 163 | 133    | 295    |
| UN74035 | Rsa1.0.01214.1 | 235 | 50599  | 1.00E-119 | 232 | 236 | 98 -  | 1   | 235 | 1966   | 2201   |
| UN74036 | Rsa1.0.01713.1 | 728 | 40564  | 0         | 465 | 471 | 98 -  | 123 | 591 | 29485  | 29955  |
| UN74037 | Rsa1.0.00340.1 | 178 | 305782 | 1.00E-64  | 143 | 149 | 95 -  | 30  | 178 | 186574 | 186722 |
| UN74038 | Rsa1.0.01947.1 | 591 | 36977  | 0         | 324 | 324 | 100 - | 228 | 551 | 16135  | 16458  |
| UN74039 | Rsa1.0.00303.1 | 417 | 97468  | 2.00E-93  | 201 | 209 | 96 +  | 1   | 209 | 30881  | 31087  |
| UN74040 | Rsa1.0.00257.1 | 434 | 102407 | 0         | 414 | 433 | 95 -  | 1   | 433 | 2360   | 2789   |
| UN74041 | Rsa1.0.05995.1 | 611 | 11997  | 1.00E-121 | 274 | 287 | 95 +  | 101 | 385 | 9171   | 9454   |
| UN74042 | Rsa1.0.00668.1 | 479 | 69421  | 2.00E-77  | 207 | 225 | 92 -  | 212 | 433 | 54729  | 54947  |
| UN74043 | Rsa1.0.16170.1 | 156 | 2258   | 9.00E-53  | 141 | 153 | 92 +  | 4   | 156 | 1381   | 1533   |
| UN74044 | Rsa1.0.03981.1 | 524 | 19724  | 0         | 511 | 524 | 97 +  | 1   | 524 | 14315  | 14838  |
| UN74045 | Rsa1.0.01773.1 | 109 | 39546  | 3.00E-24  | 75  | 81  | 92 -  | 1   | 81  | 31652  | 31732  |
| UN74046 | Rsa1.0.00419.1 | 475 | 86562  | 0         | 415 | 437 | 94 +  | 1   | 436 | 43872  | 44307  |
| UN74047 | Rsa1.0.00497.1 | 125 | 79830  | 4.00E-39  | 103 | 110 | 93 -  | 14  | 123 | 41971  | 42080  |
| UN74048 | Rsa1.0.00146.1 | 531 | 149343 | 0         | 467 | 483 | 96 +  | 1   | 483 | 566    | 1048   |
| UN74049 | Rsa1.0.00335.1 | 582 | 94371  | 1.00E-36  | 82  | 83  | 98 -  | 500 | 582 | 43093  | 43175  |
| UN74050 | Rsa1.0.00316.1 | 714 | 96264  | 0         | 704 | 715 | 98 +  | 1   | 714 | 82256  | 82970  |
| UN74051 | Rsa1.0.00261.1 | 356 | 151157 | 1.00E-121 | 227 | 229 | 99 -  | 1   | 229 | 108843 | 109071 |
| UN74052 | Rsa1.0.00218.1 | 556 | 201480 | 1.00E-145 | 306 | 321 | 95 -  | 99  | 419 | 43203  | 43523  |
| UN74053 | Rsa1.0.08902.1 | 120 | 6805   | 1.00E-47  | 114 | 120 | 95 +  | 1   | 120 | 4676   | 4795   |
| UN74054 | Rsa1.0.01045.1 | 530 | 55853  | 1.00E-175 | 332 | 339 | 97 -  | 192 | 530 | 34105  | 34443  |
| UN74055 | Rsa1.0.07295.1 | 703 | 9599   | 2.00E-82  | 206 | 220 | 93 +  | 1   | 219 | 548    | 766    |
| UN74056 | Rsa1.0.00265.1 | 768 | 220635 | 0         | 473 | 500 | 94 +  | 5   | 497 | 171370 | 171865 |
| UN74057 | Rsa1.0.00418.1 | 543 | 215377 | 1.00E-155 | 323 | 334 | 96 -  | 1   | 333 | 45040  | 45371  |
| UN74058 | Rsa1.0.01422.1 | 348 | 46172  | 0         | 334 | 335 | 99 +  | 1   | 334 | 4053   | 4387   |
| UN74059 | Rsa1.0.00751.1 | 418 | 65759  | 1.00E-139 | 269 | 274 | 98 +  | 2   | 274 | 42533  | 42806  |

|         |                |     |        |           |     |     |      |     |     |        |        |
|---------|----------------|-----|--------|-----------|-----|-----|------|-----|-----|--------|--------|
| UN74060 | Rsa1.0_00504.1 | 880 | 79334  | 3.00E-81  | 166 | 170 | 97 + | 401 | 570 | 28356  | 28525  |
| UN74061 | Rsa1.0_10606.1 | 861 | 5787   | 1.00E-128 | 269 | 278 | 96 + | 61  | 334 | 2225   | 2501   |
| UN74062 | Rsa1.0_00011.1 | 121 | 225044 | 2.00E-50  | 116 | 121 | 95 - | 1   | 121 | 200210 | 200330 |
| UN74063 | Rsa1.0_00201.1 | 212 | 232851 | 2.00E-45  | 141 | 157 | 89 + | 12  | 163 | 72838  | 72994  |
| UN74064 | Rsa1.0_01070.1 | 613 | 55099  | 0         | 577 | 622 | 92 + | 1   | 613 | 1146   | 1754   |
| UN74065 | Rsa1.0_06683.1 | 190 | 10549  | 3.00E-31  | 99  | 109 | 90 + | 82  | 190 | 668    | 776    |
| UN74066 | Rsa1.0_00131.1 | 682 | 432233 | 0         | 381 | 383 | 99 + | 1   | 383 | 279741 | 280123 |
| UN74067 | Rsa1.0_03564.1 | 801 | 22068  | 1.00E-119 | 220 | 221 | 99 + | 311 | 531 | 14626  | 14846  |
| UN74068 | Rsa1.0_03359.1 | 706 | 23466  | 1.00E-174 | 341 | 349 | 97 + | 1   | 348 | 10681  | 11028  |
| UN74069 | Rsa1.0_00323.1 | 643 | 159650 | 0         | 564 | 607 | 92 + | 39  | 640 | 134664 | 135248 |
| UN74070 | Rsa1.0_09314.1 | 495 | 6461   | 0         | 394 | 408 | 96 - | 1   | 407 | 4885   | 5292   |
| UN74071 | Rsa1.0_00280.1 | 669 | 99966  | 0         | 333 | 336 | 99 + | 1   | 336 | 12148  | 12483  |
| UN74072 | Rsa1.0_00473.1 | 414 | 212204 | 0         | 381 | 388 | 98 - | 5   | 392 | 65456  | 65843  |
| UN74073 | Rsa1.0_00196.1 | 409 | 109960 | 0         | 392 | 409 | 95 - | 1   | 407 | 77962  | 78370  |
| UN74074 | Rsa1.0_00720.1 | 536 | 66931  | 0         | 465 | 515 | 90 + | 1   | 498 | 8115   | 8613   |
| UN74075 | Rsa1.0_00417.1 | 343 | 395068 | 1.00E-171 | 332 | 340 | 97 - | 4   | 343 | 295371 | 295709 |
| UN74076 | Rsa1.0_44548.1 | 679 | 505    | 1.00E-177 | 348 | 358 | 97 - | 7   | 364 | 148    | 504    |
| UN74077 | Rsa1.0_02139.1 | 730 | 34686  | 0         | 727 | 730 | 99 + | 2   | 730 | 27569  | 28298  |
| UN74078 | Rsa1.0_00152.1 | 602 | 257730 | 0         | 597 | 601 | 99 - | 2   | 602 | 113318 | 113918 |
| UN74079 | Rsa1.0_00015.1 | 306 | 561803 | 1.00E-141 | 294 | 307 | 95 - | 1   | 304 | 253448 | 253754 |
| UN74080 | Rsa1.0_00991.1 | 388 | 143101 | 1.00E-114 | 358 | 405 | 88 + | 1   | 388 | 31840  | 32239  |
| UN74081 | Rsa1.0_00083.1 | 719 | 442773 | 0         | 712 | 715 | 99 + | 1   | 715 | 251612 | 252326 |
| UN74082 | Rsa1.0_08025.1 | 484 | 8062   | 1.00E-127 | 233 | 234 | 99 - | 2   | 235 | 1      | 234    |
| UN74083 | Rsa1.0_00827.1 | 591 | 62790  | 0         | 488 | 520 | 93 + | 1   | 516 | 57627  | 58141  |
| UN74084 | Rsa1.0_06817.1 | 488 | 10307  | 1.00E-121 | 227 | 229 | 99 - | 237 | 465 | 6113   | 6341   |
| UN74085 | Rsa1.0_00352.1 | 371 | 92266  | 2.00E-89  | 179 | 183 | 97 - | 189 | 371 | 15179  | 15361  |
| UN74086 | Rsa1.0_00299.1 | 506 | 97770  | 1.00E-150 | 310 | 323 | 95 + | 187 | 506 | 32249  | 32571  |
| UN74087 | Rsa1.0_07348.1 | 589 | 9522   | 0         | 553 | 589 | 93 + | 1   | 589 | 3279   | 3845   |
| UN74088 | Rsa1.0_00913.1 | 797 | 59914  | 0         | 771 | 796 | 96 + | 3   | 797 | 698    | 1489   |
| UN74089 | Rsa1.0_02360.1 | 530 | 32203  | 1.00E-106 | 228 | 238 | 95 + | 13  | 250 | 11146  | 11380  |
| UN74090 | Rsa1.0_25688.1 | 619 | 925    | 1.00E-134 | 250 | 251 | 99 - | 2   | 252 | 134    | 383    |
| UN74091 | Rsa1.0_03249.1 | 534 | 146254 | 0         | 345 | 351 | 98 + | 184 | 534 | 9929   | 10276  |
| UN74092 | Rsa1.0_02656.1 | 641 | 29018  | 0         | 495 | 518 | 95 - | 125 | 641 | 15749  | 16266  |
| UN74093 | Rsa1.0_02411.1 | 717 | 31655  | 0         | 510 | 522 | 97 + | 196 | 717 | 27638  | 28159  |
| UN74094 | Rsa1.0_00863.1 | 394 | 254535 | 0         | 372 | 387 | 96 - | 2   | 388 | 213547 | 213932 |
| UN74095 | Rsa1.0_02398.1 | 470 | 31766  | 1.00E-157 | 431 | 478 | 90 - | 1   | 470 | 29932  | 30391  |
| UN74096 | Rsa1.0_00105.1 | 210 | 134138 | 8.00E-94  | 201 | 210 | 95 + | 1   | 210 | 122160 | 122369 |
| UN74097 | Rsa1.0_00245.1 | 135 | 103569 | 7.00E-47  | 125 | 135 | 92 - | 1   | 135 | 80644  | 80778  |
| UN74098 | Rsa1.0_00104.1 | 378 | 368722 | 1.00E-150 | 326 | 345 | 94 - | 3   | 345 | 219468 | 219804 |

|         |                |     |        |           |     |     |       |     |     |        |        |
|---------|----------------|-----|--------|-----------|-----|-----|-------|-----|-----|--------|--------|
| UN74099 | Rsa1.0.03325.1 | 569 | 23720  | 1.00E-159 | 345 | 361 | 95 +  | 1   | 359 | 6791   | 7150   |
| UN74100 | Rsa1.0.00293.1 | 579 | 339294 | 0         | 523 | 525 | 99 +  | 1   | 525 | 82305  | 82829  |
| UN74101 | Rsa1.0.03401.1 | 601 | 23191  | 4.00E-49  | 130 | 140 | 92 +  | 462 | 601 | 5207   | 5346   |
| UN74102 | Rsa1.0.00119.1 | 816 | 467509 | 1.00E-118 | 240 | 248 | 96 -  | 218 | 465 | 389910 | 390157 |
| UN74103 | Rsa1.0.01249.1 | 365 | 188432 | 1.00E-72  | 163 | 171 | 95 +  | 1   | 171 | 151144 | 151314 |
| UN74104 | Rsa1.0.00006.1 | 105 | 396176 | 5.00E-41  | 100 | 105 | 95 +  | 1   | 105 | 243735 | 243839 |
| UN74105 | Rsa1.0.00714.1 | 618 | 67187  | 0         | 606 | 626 | 96 -  | 1   | 618 | 4219   | 4844   |
| UN74106 | Rsa1.0.00019.1 | 691 | 301669 | 0         | 368 | 378 | 97 -  | 2   | 379 | 86442  | 86817  |
| UN74107 | Rsa1.0.00100.1 | 404 | 249232 | 0         | 393 | 404 | 97 -  | 1   | 404 | 26346  | 26746  |
| UN74108 | Rsa1.0.00687.1 | 708 | 68494  | 3.00E-65  | 148 | 155 | 95 +  | 523 | 677 | 3087   | 3241   |
| UN74109 | Rsa1.0.04786.1 | 775 | 15988  | 0         | 445 | 445 | 100 - | 3   | 447 | 12763  | 13207  |
| UN74110 | Rsa1.0.02547.1 | 387 | 30255  | 1.00E-105 | 229 | 240 | 95 +  | 5   | 244 | 24817  | 25054  |
| UN74111 | Rsa1.0.00016.1 | 183 | 831256 | 2.00E-94  | 181 | 183 | 98 +  | 1   | 183 | 391572 | 391754 |
| UN74112 | Rsa1.0.00592.1 | 146 | 73788  | 2.00E-65  | 141 | 146 | 96 +  | 1   | 146 | 22077  | 22222  |
| UN74113 | Rsa1.0.05745.1 | 213 | 12750  | 5.00E-86  | 198 | 210 | 94 +  | 1   | 206 | 2862   | 3071   |
| UN74114 | Rsa1.0.00808.1 | 617 | 63351  | 1.00E-136 | 280 | 290 | 96 -  | 1   | 290 | 36334  | 36622  |
| UN74115 | Rsa1.0.00106.1 | 289 | 133916 | 1.00E-139 | 277 | 286 | 96 -  | 1   | 286 | 7581   | 7866   |
| UN74116 | Rsa1.0.00119.1 | 574 | 467509 | 0         | 423 | 443 | 95 +  | 3   | 443 | 46324  | 46766  |
| UN74117 | Rsa1.0.14339.1 | 626 | 3501   | 1.00E-163 | 310 | 316 | 98 -  | 311 | 626 | 385    | 700    |
| UN74118 | Rsa1.0.03944.1 | 638 | 19926  | 1.00E-121 | 220 | 220 | 100 + | 402 | 621 | 18309  | 18528  |
| UN74119 | Rsa1.0.00924.1 | 537 | 59524  | 1.00E-127 | 239 | 242 | 98 -  | 296 | 537 | 48602  | 48843  |
| UN74120 | Rsa1.0.15282.1 | 502 | 2711   | 0         | 487 | 502 | 97 -  | 1   | 500 | 1018   | 1519   |
| UN74121 | Rsa1.0.05509.1 | 562 | 13472  | 1.00E-130 | 265 | 275 | 96 -  | 64  | 338 | 1      | 275    |
| UN74122 | Rsa1.0.00351.1 | 170 | 413096 | 7.00E-32  | 139 | 161 | 86 +  | 10  | 170 | 404857 | 405015 |
| UN74123 | Rsa1.0.00132.1 | 767 | 124299 | 1.00E-175 | 339 | 346 | 97 +  | 2   | 346 | 66258  | 66601  |
| UN74124 | Rsa1.0.00451.1 | 347 | 322533 | 6.00E-68  | 140 | 143 | 97 -  | 149 | 291 | 15235  | 15377  |
| UN74125 | Rsa1.0.01656.1 | 765 | 41494  | 0         | 673 | 708 | 95 +  | 1   | 701 | 14920  | 15624  |
| UN74126 | Rsa1.0.09179.1 | 700 | 6578   | 1.00E-172 | 517 | 587 | 88 +  | 11  | 595 | 3632   | 4190   |
| UN74127 | Rsa1.0.03889.1 | 594 | 20233  | 0         | 487 | 516 | 94 -  | 4   | 519 | 4493   | 5006   |
| UN74128 | Rsa1.0.00235.1 | 230 | 154696 | 4.00E-28  | 127 | 148 | 85 +  | 80  | 227 | 132873 | 133020 |
| UN74129 | Rsa1.0.01663.1 | 697 | 168589 | 0         | 371 | 377 | 98 +  | 1   | 377 | 145010 | 145382 |
| UN74130 | Rsa1.0.02128.1 | 293 | 34758  | 6.00E-77  | 164 | 170 | 96 -  | 1   | 170 | 16324  | 16493  |
| UN74131 | Rsa1.0.04139.1 | 743 | 18883  | 8.00E-57  | 179 | 200 | 89 +  | 9   | 208 | 5687   | 5884   |
| UN74132 | Rsa1.0.16067.1 | 598 | 2300   | 0         | 365 | 375 | 97 -  | 221 | 593 | 1252   | 1623   |
| UN74133 | Rsa1.0.00107.1 | 737 | 431659 | 1.00E-153 | 283 | 286 | 98 -  | 1   | 286 | 347678 | 347963 |
| UN74134 | Rsa1.0.00425.1 | 781 | 147080 | 0         | 502 | 504 | 99 -  | 241 | 744 | 111870 | 112373 |
| UN74135 | Rsa1.0.03223.1 | 842 | 24512  | 0         | 826 | 843 | 97 -  | 1   | 842 | 12651  | 13493  |
| UN74136 | Rsa1.0.00817.1 | 659 | 62961  | 0         | 469 | 490 | 95 +  | 1   | 490 | 53844  | 54331  |
| UN74137 | Rsa1.0.00272.1 | 567 | 447836 | 1.00E-151 | 301 | 311 | 96 -  | 257 | 567 | 308750 | 309060 |

|         |                |     |        |           |     |     |       |     |     |        |        |
|---------|----------------|-----|--------|-----------|-----|-----|-------|-----|-----|--------|--------|
| UN74138 | Rsa1.0.01679.1 | 665 | 146876 | 7.00E-97  | 189 | 192 | 98 -  | 308 | 499 | 134169 | 134360 |
| UN74139 | Rsa1.0.01512.1 | 580 | 44234  | 0         | 424 | 429 | 98 -  | 1   | 429 | 18073  | 18501  |
| UN74140 | Rsa1.0.04497.1 | 266 | 17103  | 1.00E-120 | 251 | 262 | 95 +  | 5   | 266 | 11196  | 11457  |
| UN74141 | Rsa1.0.00519.1 | 635 | 197864 | 0         | 615 | 632 | 97 -  | 4   | 635 | 192306 | 192937 |
| UN74142 | Rsa1.0.00094.1 | 135 | 139042 | 2.00E-13  | 121 | 149 | 81 +  | 1   | 135 | 97593  | 97733  |
| UN74143 | Rsa1.0.73245.1 | 138 | 313    | 1.00E-29  | 119 | 134 | 88 -  | 1   | 128 | 1      | 133    |
| UN74144 | Rsa1.0.00420.1 | 521 | 86496  | 0         | 512 | 521 | 98 +  | 1   | 521 | 64088  | 64608  |
| UN74145 | Rsa1.0.00116.1 | 601 | 365886 | 3.00E-80  | 489 | 599 | 81 +  | 1   | 598 | 341457 | 342028 |
| UN74146 | Rsa1.0.02222.1 | 235 | 152798 | 6.00E-98  | 217 | 229 | 94 -  | 1   | 229 | 1735   | 1963   |
| UN74147 | Rsa1.0.04925.1 | 815 | 15424  | 0         | 461 | 471 | 97 -  | 350 | 815 | 6095   | 6563   |
| UN74148 | Rsa1.0.00463.1 | 163 | 189177 | 2.00E-63  | 155 | 163 | 95 -  | 1   | 163 | 116614 | 116774 |
| UN74149 | Rsa1.0.19209.1 | 492 | 1464   | 0         | 490 | 492 | 99 -  | 1   | 492 | 789    | 1280   |
| UN74150 | Rsa1.0.00025.1 | 589 | 277312 | 1.00E-165 | 532 | 601 | 88 -  | 6   | 589 | 45017  | 45604  |
| UN74151 | Rsa1.0.01526.1 | 710 | 43919  | 1.00E-173 | 320 | 324 | 98 +  | 1   | 324 | 22362  | 22685  |
| UN74152 | Rsa1.0.00002.1 | 429 | 601661 | 0         | 423 | 428 | 98 +  | 2   | 429 | 213940 | 214367 |
| UN74153 | Rsa1.0.03698.1 | 457 | 21302  | 1.00E-131 | 339 | 362 | 93 +  | 18  | 375 | 7475   | 7832   |
| UN74154 | Rsa1.0.03205.1 | 822 | 24614  | 0         | 394 | 395 | 99 +  | 1   | 395 | 1662   | 2056   |
| UN74155 | Rsa1.0.00402.1 | 505 | 385315 | 1.00E-156 | 292 | 296 | 98 +  | 1   | 296 | 384496 | 384791 |
| UN74156 | Rsa1.0.04036.1 | 688 | 19473  | 0         | 473 | 517 | 91 +  | 1   | 501 | 14503  | 15014  |
| UN74157 | Rsa1.0.00038.1 | 114 | 314568 | 4.00E-48  | 100 | 101 | 99 +  | 11  | 111 | 293883 | 293983 |
| UN74158 | Rsa1.0.07190.1 | 177 | 9757   | 1.00E-39  | 83  | 83  | 100 + | 95  | 177 | 2812   | 2894   |
| UN74159 | Rsa1.0.00181.1 | 555 | 114269 | 1.00E-173 | 365 | 384 | 95 +  | 172 | 555 | 79260  | 79643  |
| UN74160 | Rsa1.0.00655.1 | 535 | 195840 | 1.00E-108 | 229 | 239 | 95 +  | 270 | 508 | 146640 | 146878 |
| UN74161 | Rsa1.0.00048.1 | 243 | 167185 | 3.00E-69  | 167 | 178 | 93 -  | 54  | 231 | 33623  | 33796  |
| UN74162 | Rsa1.0.00601.1 | 393 | 177045 | 0         | 379 | 393 | 96 +  | 1   | 393 | 134193 | 134585 |
| UN74163 | Rsa1.0.02878.1 | 421 | 27048  | 0         | 379 | 392 | 96 +  | 28  | 419 | 8374   | 8765   |
| UN74164 | Rsa1.0.00311.1 | 473 | 96847  | 2.00E-81  | 225 | 251 | 89 +  | 104 | 354 | 33654  | 33892  |
| UN74165 | Rsa1.0.00946.1 | 322 | 58666  | 1.00E-136 | 291 | 304 | 95 +  | 3   | 304 | 47003  | 47305  |
| UN74166 | Rsa1.0.00341.1 | 865 | 249309 | 4.00E-62  | 125 | 126 | 99 +  | 433 | 558 | 86602  | 86727  |
| UN74167 | Rsa1.0.00284.1 | 419 | 323267 | 0         | 412 | 416 | 99 -  | 1   | 416 | 297110 | 297524 |
| UN74168 | Rsa1.0.01153.1 | 740 | 52264  | 0         | 363 | 370 | 98 +  | 371 | 740 | 11626  | 11995  |
| UN74169 | Rsa1.0.01581.1 | 531 | 42833  | 0         | 512 | 538 | 95 -  | 1   | 531 | 1876   | 2408   |
| UN74170 | Rsa1.0.00049.1 | 747 | 167018 | 0         | 706 | 735 | 96 +  | 13  | 747 | 114904 | 115637 |
| UN74171 | Rsa1.0.00964.1 | 704 | 316648 | 0         | 693 | 704 | 98 +  | 1   | 704 | 286822 | 287525 |
| UN74172 | Rsa1.0.18007.1 | 585 | 1691   | 1.00E-103 | 223 | 233 | 95 -  | 46  | 276 | 872    | 1098   |
| UN74173 | Rsa1.0.04023.1 | 706 | 19522  | 0         | 704 | 705 | 99 +  | 3   | 706 | 15336  | 16040  |
| UN74174 | Rsa1.0.03338.1 | 684 | 136346 | 0         | 548 | 564 | 97 +  | 1   | 563 | 6793   | 7353   |
| UN74175 | Rsa1.0.04612.1 | 431 | 16647  | 0         | 395 | 396 | 99 -  | 1   | 395 | 15528  | 15923  |
| UN74176 | Rsa1.0.06791.1 | 264 | 10350  | 8.00E-73  | 219 | 243 | 90 -  | 16  | 258 | 7181   | 7421   |



|         |                |     |        |           |     |     |      |     |     |        |        |
|---------|----------------|-----|--------|-----------|-----|-----|------|-----|-----|--------|--------|
| UN74177 | Rsa1.0.02872.1 | 154 | 27080  | 3.00E-49  | 138 | 151 | 91 + | 1   | 151 | 11424  | 11574  |
| UN74178 | Rsa1.0.00409.1 | 289 | 146788 | 1.00E-103 | 217 | 225 | 96 + | 1   | 225 | 125441 | 125663 |
| UN74179 | Rsa1.0.02180.1 | 275 | 34176  | 1.00E-65  | 133 | 135 | 98 - | 1   | 135 | 10018  | 10152  |
| UN74180 | Rsa1.0.01005.1 | 592 | 56967  | 1.00E-173 | 341 | 351 | 97 - | 1   | 349 | 4490   | 4840   |
| UN74181 | Rsa1.0.00383.1 | 733 | 398431 | 1.00E-129 | 244 | 247 | 98 - | 384 | 630 | 2510   | 2756   |
| UN74182 | Rsa1.0.02178.1 | 331 | 156197 | 1.00E-175 | 326 | 331 | 98 + | 1   | 331 | 19704  | 20034  |
| UN74183 | Rsa1.0.03625.1 | 115 | 21692  | 4.00E-23  | 103 | 115 | 89 - | 3   | 115 | 15274  | 15382  |
| UN74184 | Rsa1.0.09538.1 | 496 | 6301   | 1.00E-163 | 330 | 341 | 96 + | 131 | 471 | 2516   | 2852   |
| UN74185 | Rsa1.0.01537.1 | 212 | 187285 | 2.00E-48  | 148 | 163 | 90 - | 44  | 206 | 1063   | 1220   |
| UN74186 | Rsa1.0.01076.1 | 806 | 54835  | 1.00E-122 | 265 | 274 | 96 - | 175 | 444 | 39978  | 40251  |
| UN74187 | Rsa1.0.04013.1 | 262 | 19573  | 2.00E-79  | 153 | 154 | 99 - | 1   | 154 | 10603  | 10756  |
| UN74188 | Rsa1.0.00551.1 | 577 | 76227  | 0         | 451 | 479 | 94 - | 17  | 492 | 20659  | 21118  |
| UN74189 | Rsa1.0.00314.1 | 701 | 96472  | 0         | 580 | 623 | 93 + | 1   | 607 | 22608  | 23230  |
| UN74190 | Rsa1.0.01717.1 | 739 | 143162 | 0         | 729 | 739 | 98 - | 1   | 739 | 125022 | 125760 |
| UN74191 | Rsa1.0.00512.1 | 734 | 200277 | 1.00E-163 | 312 | 319 | 97 - | 147 | 465 | 71437  | 71755  |
| UN74192 | Rsa1.0.02320.1 | 700 | 32575  | 0         | 460 | 490 | 93 - | 1   | 488 | 5336   | 5807   |
| UN74193 | Rsa1.0.00189.1 | 734 | 111830 | 0         | 708 | 736 | 96 + | 1   | 734 | 70323  | 71057  |
| UN74194 | Rsa1.0.00179.1 | 750 | 393324 | 0         | 597 | 601 | 99 + | 2   | 602 | 256368 | 256968 |
| UN74195 | Rsa1.0.00484.1 | 172 | 203294 | 3.00E-71  | 164 | 172 | 95 + | 1   | 172 | 40156  | 40326  |
| UN74196 | Rsa1.0.00059.1 | 587 | 159650 | 5.00E-85  | 173 | 176 | 98 + | 1   | 176 | 147791 | 147965 |
| UN74197 | Rsa1.0.00960.1 | 741 | 58199  | 0         | 428 | 442 | 96 + | 33  | 474 | 22864  | 23302  |
| UN74198 | Rsa1.0.00285.1 | 415 | 149638 | 1.00E-94  | 263 | 290 | 90 + | 1   | 290 | 52161  | 52441  |
| UN74199 | Rsa1.0.03490.1 | 700 | 22545  | 1.00E-177 | 368 | 385 | 95 + | 10  | 394 | 18934  | 19316  |
| UN74200 | Rsa1.0.00387.1 | 594 | 495407 | 0         | 400 | 407 | 98 + | 3   | 409 | 341891 | 342297 |
| UN74201 | Rsa1.0.00383.1 | 623 | 398431 | 1.00E-104 | 214 | 221 | 96 - | 194 | 414 | 5277   | 5497   |
| UN74202 | Rsa1.0.01501.1 | 705 | 44532  | 1.00E-168 | 337 | 348 | 96 + | 24  | 367 | 31806  | 32152  |
| UN74203 | Rsa1.0.00842.1 | 674 | 62493  | 0         | 643 | 674 | 95 + | 5   | 674 | 3732   | 4405   |
| UN74204 | Rsa1.0.05938.1 | 315 | 12173  | 1.00E-115 | 293 | 316 | 92 - | 4   | 315 | 3605   | 3918   |
| UN74205 | Rsa1.0.00601.1 | 262 | 177045 | 1.00E-116 | 253 | 264 | 95 + | 1   | 262 | 26144  | 26407  |
| UN74206 | Rsa1.0.02158.1 | 779 | 154841 | 1.00E-120 | 241 | 248 | 97 - | 343 | 590 | 153917 | 154164 |
| UN74207 | Rsa1.0.01065.1 | 742 | 55264  | 0         | 525 | 548 | 95 + | 2   | 547 | 2180   | 2713   |
| UN74208 | Rsa1.0.01272.1 | 684 | 49553  | 0         | 620 | 623 | 99 - | 1   | 622 | 18652  | 19274  |
| UN74209 | Rsa1.0.02026.1 | 604 | 35896  | 0         | 470 | 488 | 96 - | 3   | 481 | 29848  | 30333  |
| UN74210 | Rsa1.0.00019.1 | 733 | 301669 | 0         | 556 | 608 | 91 - | 1   | 602 | 25694  | 26277  |
| UN74211 | Rsa1.0.00699.1 | 641 | 184398 | 0         | 414 | 422 | 98 + | 1   | 422 | 146308 | 146729 |
| UN74212 | Rsa1.0.16859.1 | 574 | 2010   | 2.00E-93  | 205 | 214 | 95 + | 355 | 567 | 1      | 214    |
| UN74213 | Rsa1.0.07052.1 | 763 | 9979   | 0         | 397 | 399 | 99 + | 365 | 763 | 1      | 399    |
| UN74214 | Rsa1.0.02991.1 | 148 | 26178  | 1.00E-39  | 127 | 141 | 90 - | 9   | 146 | 4507   | 4647   |
| UN74215 | Rsa1.0.03969.1 | 139 | 19797  | 2.00E-44  | 124 | 135 | 91 - | 1   | 135 | 7121   | 7255   |

|         |                |     |        |           |     |     |      |     |     |        |        |
|---------|----------------|-----|--------|-----------|-----|-----|------|-----|-----|--------|--------|
| UN74216 | Rsa1.0.00178.1 | 483 | 114861 | 5.00E-88  | 205 | 217 | 94 - | 1   | 216 | 12165  | 12381  |
| UN74217 | Rsa1.0.00997.1 | 594 | 57190  | 1.00E-111 | 276 | 297 | 92 - | 1   | 295 | 52204  | 52496  |
| UN74218 | Rsa1.0.07483.1 | 533 | 9276   | 0         | 527 | 533 | 98 - | 1   | 533 | 8256   | 8788   |
| UN74219 | Rsa1.0.02846.1 | 619 | 27338  | 0         | 371 | 373 | 99 - | 2   | 374 | 5274   | 5646   |
| UN74220 | Rsa1.0.00008.1 | 163 | 358124 | 2.00E-75  | 158 | 163 | 96 - | 1   | 163 | 143057 | 143219 |
| UN74221 | Rsa1.0.00904.1 | 109 | 180594 | 3.00E-36  | 98  | 105 | 93 - | 1   | 105 | 19483  | 19587  |
| UN74222 | Rsa1.0.01005.1 | 235 | 56967  | 1.00E-104 | 224 | 235 | 95 - | 1   | 235 | 39926  | 40160  |
| UN74223 | Rsa1.0.03101.1 | 662 | 25410  | 0         | 375 | 387 | 96 - | 74  | 460 | 7075   | 7461   |
| UN74224 | Rsa1.0.00354.1 | 473 | 232005 | 0         | 456 | 479 | 95 + | 1   | 473 | 76222  | 76695  |
| UN74225 | Rsa1.0.00033.1 | 282 | 515811 | 2.00E-58  | 124 | 127 | 97 - | 127 | 253 | 468800 | 468926 |
| UN74226 | Rsa1.0.00176.1 | 756 | 240984 | 0         | 705 | 772 | 91 - | 3   | 756 | 156812 | 157556 |
| UN74227 | Rsa1.0.00104.1 | 743 | 368722 | 0         | 418 | 421 | 99 + | 323 | 743 | 274557 | 274977 |
| UN74228 | Rsa1.0.01727.1 | 235 | 40243  | 1.00E-116 | 231 | 236 | 97 + | 1   | 235 | 8466   | 8701   |
| UN74229 | Rsa1.0.01326.1 | 206 | 48072  | 1.00E-46  | 188 | 212 | 88 - | 2   | 206 | 40445  | 40649  |
| UN74230 | Rsa1.0.01535.1 | 353 | 43750  | 0         | 351 | 355 | 98 + | 1   | 353 | 21498  | 21852  |
| UN74231 | Rsa1.0.00447.1 | 240 | 84051  | 2.00E-45  | 105 | 109 | 96 - | 132 | 240 | 11542  | 11650  |
| UN74232 | Rsa1.0.08617.1 | 845 | 7124   | 0         | 830 | 851 | 97 + | 1   | 840 | 311    | 1161   |
| UN74233 | Rsa1.0.05431.1 | 597 | 13780  | 1.00E-108 | 268 | 287 | 93 - | 1   | 286 | 7915   | 8199   |
| UN74234 | Rsa1.0.01743.1 | 579 | 39926  | 0         | 572 | 579 | 98 - | 2   | 579 | 24676  | 25254  |
| UN74235 | Rsa1.0.00803.1 | 744 | 144228 | 0         | 383 | 393 | 97 - | 350 | 742 | 134625 | 135017 |
| UN74236 | Rsa1.0.05836.1 | 545 | 12480  | 0         | 351 | 358 | 98 - | 158 | 515 | 2392   | 2745   |
| UN74237 | Rsa1.0.01827.1 | 833 | 143321 | 1.00E-122 | 300 | 322 | 93 + | 6   | 324 | 130970 | 131280 |
| UN74238 | Rsa1.0.02962.1 | 548 | 26419  | 1.00E-155 | 325 | 338 | 96 + | 1   | 338 | 13792  | 14127  |
| UN74239 | Rsa1.0.00119.1 | 720 | 467509 | 0         | 618 | 645 | 95 - | 39  | 683 | 75538  | 76170  |
| UN74240 | Rsa1.0.01247.1 | 259 | 49934  | 1.00E-130 | 250 | 255 | 98 - | 1   | 255 | 48478  | 48732  |
| UN74241 | Rsa1.0.01476.1 | 697 | 172928 | 0         | 356 | 357 | 99 + | 341 | 697 | 140327 | 140683 |
| UN74242 | Rsa1.0.06265.1 | 475 | 11357  | 0         | 457 | 476 | 96 - | 3   | 475 | 958    | 1433   |
| UN74243 | Rsa1.0.01036.1 | 215 | 55978  | 1.00E-114 | 212 | 213 | 99 - | 3   | 215 | 11899  | 12111  |
| UN74244 | Rsa1.0.01896.1 | 458 | 37512  | 1.00E-169 | 322 | 329 | 97 - | 1   | 329 | 5287   | 5615   |
| UN74245 | Rsa1.0.00456.1 | 629 | 82826  | 0         | 603 | 642 | 93 + | 1   | 629 | 78631  | 79267  |
| UN74246 | Rsa1.0.01995.1 | 167 | 36347  | 4.00E-61  | 155 | 167 | 92 - | 1   | 167 | 28366  | 28532  |
| UN74247 | Rsa1.0.04025.1 | 546 | 19511  | 5.00E-11  | 81  | 95  | 85 - | 381 | 473 | 6458   | 6552   |
| UN74248 | Rsa1.0.01492.1 | 575 | 44704  | 1.00E-70  | 179 | 192 | 93 + | 1   | 192 | 26596  | 26786  |
| UN74249 | Rsa1.0.00061.1 | 592 | 218685 | 1.00E-138 | 313 | 336 | 93 - | 1   | 316 | 202138 | 202473 |
| UN74250 | Rsa1.0.00237.1 | 714 | 235974 | 0         | 388 | 390 | 99 - | 282 | 671 | 228973 | 229362 |
| UN74251 | Rsa1.0.08105.1 | 151 | 7894   | 1.00E-45  | 134 | 148 | 90 - | 4   | 151 | 5446   | 5587   |
| UN74252 | Rsa1.0.00745.1 | 862 | 66067  | 0         | 523 | 530 | 98 - | 2   | 531 | 20905  | 21431  |
| UN74253 | Rsa1.0.00907.1 | 731 | 60062  | 0         | 621 | 670 | 92 - | 5   | 673 | 42311  | 42958  |
| UN74254 | Rsa1.0.00055.1 | 633 | 520193 | 1.00E-92  | 176 | 177 | 99 - | 2   | 178 | 70791  | 70967  |

|         |                |     |        |           |     |     |      |     |     |        |        |
|---------|----------------|-----|--------|-----------|-----|-----|------|-----|-----|--------|--------|
| UN74255 | Rsa1.0.00135.1 | 562 | 178077 | 0         | 443 | 471 | 94 + | 92  | 562 | 175796 | 176257 |
| UN74256 | Rsa1.0.00525.1 | 421 | 78030  | 3.00E-36  | 115 | 126 | 91 - | 4   | 129 | 225    | 349    |
| UN74257 | Rsa1.0.01661.1 | 764 | 41400  | 0         | 392 | 397 | 98 - | 368 | 764 | 39385  | 39780  |
| UN74258 | Rsa1.0.00298.1 | 714 | 349131 | 0         | 700 | 718 | 97 - | 2   | 714 | 45189  | 45906  |
| UN74259 | Rsa1.0.03849.1 | 403 | 20457  | 1.00E-88  | 212 | 226 | 93 + | 1   | 224 | 9360   | 9581   |
| UN74260 | Rsa1.0.00676.1 | 543 | 69166  | 1.00E-144 | 263 | 264 | 99 + | 85  | 348 | 39232  | 39495  |
| UN74261 | Rsa1.0.05501.1 | 425 | 13513  | 1.00E-108 | 286 | 310 | 92 - | 1   | 310 | 1401   | 1706   |
| UN74262 | Rsa1.0.00072.1 | 512 | 148743 | 1.00E-178 | 349 | 357 | 97 - | 1   | 356 | 72748  | 73103  |
| UN74263 | Rsa1.0.22085.1 | 440 | 1150   | 0         | 430 | 434 | 99 + | 4   | 437 | 612    | 1045   |
| UN74264 | Rsa1.0.01262.1 | 157 | 178815 | 6.00E-63  | 146 | 154 | 94 + | 4   | 157 | 10671  | 10824  |
| UN74265 | Rsa1.0.02798.1 | 831 | 27792  | 1.00E-169 | 337 | 345 | 97 + | 1   | 343 | 2772   | 3114   |
| UN74266 | Rsa1.0.05449.1 | 556 | 13711  | 1.00E-124 | 255 | 265 | 96 + | 1   | 265 | 13217  | 13481  |
| UN74267 | Rsa1.0.00969.1 | 549 | 58014  | 0         | 535 | 549 | 97 + | 1   | 549 | 21461  | 22009  |
| UN74268 | Rsa1.0.04169.1 | 197 | 18712  | 8.00E-63  | 173 | 190 | 91 + | 5   | 194 | 1267   | 1456   |
| UN74269 | Rsa1.0.01836.1 | 673 | 38503  | 0         | 648 | 670 | 96 - | 4   | 673 | 12796  | 13464  |
| UN74270 | Rsa1.0.00816.1 | 148 | 403350 | 8.00E-47  | 135 | 147 | 91 - | 2   | 148 | 154382 | 154527 |
| UN74271 | Rsa1.0.01568.1 | 194 | 43077  | 2.00E-81  | 186 | 196 | 94 + | 1   | 194 | 505    | 700    |
| UN74272 | Rsa1.0.20165.1 | 564 | 1332   | 0         | 507 | 509 | 99 - | 2   | 510 | 327    | 835    |
| UN74273 | Rsa1.0.01674.1 | 485 | 168300 | 1.00E-150 | 300 | 310 | 96 - | 1   | 310 | 4084   | 4393   |
| UN74274 | Rsa1.0.02105.1 | 740 | 156953 | 1.00E-166 | 342 | 356 | 96 - | 2   | 357 | 151526 | 151880 |
| UN74275 | Rsa1.0.02003.1 | 717 | 36171  | 0         | 340 | 341 | 99 + | 1   | 341 | 31510  | 31850  |
| UN74276 | Rsa1.0.01262.1 | 291 | 178815 | 1.00E-158 | 289 | 291 | 99 + | 1   | 291 | 6946   | 7236   |
| UN74277 | Rsa1.0.00369.1 | 318 | 266462 | 9.00E-67  | 142 | 145 | 97 + | 4   | 147 | 146432 | 146576 |
| UN74278 | Rsa1.0.01958.1 | 238 | 261128 | 8.00E-51  | 153 | 169 | 90 - | 52  | 220 | 115205 | 115371 |
| UN74279 | Rsa1.0.04264.1 | 668 | 18207  | 0         | 659 | 664 | 99 - | 1   | 664 | 3616   | 4279   |
| UN74280 | Rsa1.0.00336.1 | 405 | 445051 | 1.00E-110 | 266 | 285 | 93 + | 1   | 282 | 205935 | 206219 |
| UN74281 | Rsa1.0.04092.1 | 220 | 19128  | 2.00E-54  | 123 | 128 | 96 - | 5   | 132 | 3830   | 3957   |
| UN74282 | Rsa1.0.00576.1 | 187 | 178949 | 1.00E-89  | 182 | 187 | 97 - | 1   | 187 | 73031  | 73217  |
| UN74283 | Rsa1.0.35937.1 | 743 | 629    | 1.00E-106 | 208 | 211 | 98 - | 3   | 211 | 303    | 513    |
| UN74284 | Rsa1.0.04937.1 | 486 | 15401  | 1.00E-137 | 281 | 290 | 96 - | 39  | 325 | 12475  | 12764  |
| UN74285 | Rsa1.0.01850.1 | 556 | 162224 | 1.00E-100 | 206 | 213 | 96 - | 323 | 535 | 34793  | 35005  |
| UN74286 | Rsa1.0.08388.1 | 335 | 7436   | 1.00E-139 | 301 | 317 | 94 + | 1   | 315 | 3247   | 3563   |
| UN74287 | Rsa1.0.02911.1 | 745 | 142461 | 1.00E-100 | 191 | 193 | 98 - | 205 | 397 | 8450   | 8642   |
| UN74288 | Rsa1.0.02020.1 | 160 | 173211 | 5.00E-76  | 156 | 160 | 97 + | 1   | 160 | 18882  | 19041  |
| UN74289 | Rsa1.0.01204.1 | 710 | 50843  | 1.00E-140 | 261 | 264 | 98 - | 3   | 266 | 11738  | 12001  |
| UN74290 | Rsa1.0.01105.1 | 454 | 53958  | 0         | 432 | 454 | 95 + | 3   | 454 | 19743  | 20196  |
| UN74291 | Rsa1.0.00260.1 | 122 | 102021 | 4.00E-51  | 114 | 118 | 96 - | 1   | 118 | 67280  | 67397  |
| UN74292 | Rsa1.0.00829.1 | 210 | 158305 | 7.00E-48  | 169 | 194 | 87 + | 5   | 198 | 47474  | 47654  |
| UN74293 | Rsa1.0.00666.1 | 551 | 69505  | 0         | 523 | 552 | 94 + | 1   | 551 | 61963  | 62509  |

|         |                |     |        |           |     |     |       |     |     |        |        |
|---------|----------------|-----|--------|-----------|-----|-----|-------|-----|-----|--------|--------|
| UN74294 | Rsa1.0_04845.1 | 272 | 15747  | 4.00E-25  | 83  | 90  | 92 -  | 3   | 90  | 6233   | 6322   |
| UN74295 | Rsa1.0_05264.1 | 745 | 14327  | 1.00E-141 | 322 | 342 | 94 +  | 11  | 351 | 12141  | 12481  |
| UN74296 | Rsa1.0_02528.1 | 663 | 30452  | 1.00E-178 | 441 | 472 | 93 -  | 2   | 470 | 17924  | 18384  |
| UN74297 | Rsa1.0_00561.1 | 669 | 75653  | 0         | 633 | 658 | 96 +  | 18  | 669 | 4280   | 4934   |
| UN74298 | Rsa1.0_04065.1 | 471 | 19275  | 0         | 461 | 462 | 99 +  | 1   | 462 | 3590   | 4051   |
| UN74299 | Rsa1.0_19831.1 | 663 | 1377   | 3.00E-65  | 154 | 163 | 94 +  | 4   | 161 | 906    | 1068   |
| UN74300 | Rsa1.0_01163.1 | 792 | 51946  | 1.00E-123 | 329 | 369 | 89 +  | 18  | 383 | 3217   | 3558   |
| UN74301 | Rsa1.0_01190.1 | 629 | 194501 | 1.00E-108 | 202 | 203 | 99 -  | 2   | 204 | 7177   | 7379   |
| UN74302 | Rsa1.0_07044.1 | 638 | 9986   | 1.00E-166 | 303 | 304 | 99 +  | 336 | 638 | 1086   | 1389   |
| UN74303 | Rsa1.0_00110.1 | 159 | 132719 | 5.00E-82  | 157 | 158 | 99 +  | 2   | 159 | 30373  | 30530  |
| UN74304 | Rsa1.0_01735.1 | 792 | 40128  | 0         | 620 | 633 | 97 -  | 113 | 743 | 29798  | 30430  |
| UN74305 | Rsa1.0_00585.1 | 657 | 74164  | 7.00E-57  | 137 | 145 | 94 -  | 268 | 412 | 46815  | 46959  |
| UN74306 | Rsa1.0_09260.1 | 657 | 6522   | 0         | 519 | 519 | 100 + | 3   | 521 | 1501   | 2019   |
| UN74307 | Rsa1.0_00798.1 | 707 | 63945  | 0         | 682 | 714 | 95 -  | 2   | 704 | 20027  | 20740  |
| UN74308 | Rsa1.0_52134.1 | 688 | 436    | 0         | 340 | 341 | 99 +  | 3   | 343 | 96     | 436    |
| UN74309 | Rsa1.0_00556.1 | 691 | 207212 | 1.00E-156 | 328 | 341 | 96 -  | 354 | 691 | 198712 | 199049 |
| UN74310 | Rsa1.0_10947.1 | 626 | 5668   | 0         | 625 | 625 | 100 + | 2   | 626 | 3118   | 3742   |
| UN74311 | Rsa1.0_03976.1 | 663 | 19759  | 1.00E-105 | 216 | 222 | 97 +  | 64  | 285 | 10193  | 10413  |
| UN74312 | Rsa1.0_29388.1 | 772 | 784    | 1.00E-111 | 208 | 209 | 99 +  | 1   | 209 | 576    | 784    |
| UN74313 | Rsa1.0_08740.1 | 633 | 6980   | 1.00E-149 | 268 | 268 | 100 - | 2   | 269 | 1988   | 2255   |
| UN74314 | Rsa1.0_00564.1 | 776 | 75428  | 0         | 685 | 710 | 96 -  | 70  | 764 | 71379  | 72088  |
| UN74315 | Rsa1.0_00372.1 | 764 | 90418  | 1.00E-137 | 287 | 299 | 95 +  | 467 | 764 | 44383  | 44681  |
| UN74316 | Rsa1.0_02129.1 | 529 | 34757  | 0         | 381 | 381 | 100 + | 149 | 529 | 29383  | 29763  |
| UN74317 | Rsa1.0_02117.1 | 736 | 34843  | 0         | 541 | 553 | 97 +  | 3   | 555 | 27959  | 28508  |
| UN74318 | Rsa1.0_01463.1 | 698 | 45213  | 0         | 431 | 441 | 97 +  | 10  | 448 | 35035  | 35475  |
| UN74319 | Rsa1.0_00228.1 | 597 | 105511 | 1.00E-135 | 244 | 244 | 100 + | 354 | 597 | 84499  | 84742  |
| UN74320 | #              | #   | #      | #         | #   | #   | #     | #   | #   | #      | #      |
| UN74321 | Rsa1.0_03162.1 | 790 | 24895  | 1.00E-179 | 324 | 326 | 99 -  | 134 | 459 | 7243   | 7568   |
| UN74322 | Rsa1.0_03073.1 | 792 | 25574  | 1.00E-150 | 302 | 309 | 97 +  | 463 | 768 | 8677   | 8985   |
| UN74323 | Rsa1.0_00018.1 | 716 | 410899 | 1.00E-142 | 290 | 296 | 97 +  | 425 | 716 | 140706 | 141001 |
| UN74324 | Rsa1.0_03713.1 | 248 | 21221  | 1.00E-103 | 242 | 250 | 96 -  | 6   | 248 | 11659  | 11908  |
| UN74325 | Rsa1.0_00711.1 | 451 | 67223  | 1.00E-180 | 333 | 336 | 99 -  | 3   | 338 | 53558  | 53892  |
| UN74326 | Rsa1.0_02457.1 | 725 | 31208  | 0         | 389 | 392 | 99 -  | 336 | 725 | 13322  | 13713  |
| UN74327 | Rsa1.0_13860.1 | 603 | 4190   | 0         | 578 | 620 | 93 -  | 3   | 603 | 3012   | 3629   |
| UN74328 | Rsa1.0_01318.1 | 653 | 48275  | 0         | 636 | 644 | 98 +  | 10  | 653 | 25488  | 26131  |
| UN74329 | Rsa1.0_00369.1 | 796 | 266462 | 1.00E-105 | 194 | 194 | 100 - | 5   | 198 | 147853 | 148046 |
| UN74330 | #              | #   | #      | #         | #   | #   | #     | #   | #   | #      | #      |
| UN74331 | Rsa1.0_15326.1 | 308 | 2683   | 6.00E-71  | 159 | 164 | 96 -  | 147 | 308 | 1171   | 1334   |
| UN74332 | Rsa1.0_02606.1 | 409 | 29635  | 1.00E-57  | 117 | 118 | 99 -  | 10  | 127 | 26820  | 26937  |

|         |                |     |        |           |     |     |       |     |     |        |        |
|---------|----------------|-----|--------|-----------|-----|-----|-------|-----|-----|--------|--------|
| UN74333 | Rsa1.0.00207.1 | 697 | 248736 | 0         | 387 | 404 | 95 +  | 153 | 549 | 70508  | 70904  |
| UN74334 | Rsa1.0.01244.1 | 707 | 50061  | 1.00E-159 | 287 | 288 | 99 +  | 2   | 289 | 28204  | 28491  |
| UN74335 | Rsa1.0.00127.1 | 736 | 127446 | 1.00E-104 | 268 | 292 | 91 -  | 259 | 544 | 17520  | 17811  |
| UN74336 | Rsa1.0.00024.1 | 676 | 188018 | 0         | 636 | 673 | 94 +  | 3   | 673 | 180627 | 181291 |
| UN74337 | Rsa1.0.02730.1 | 484 | 28385  | 0         | 378 | 393 | 96 -  | 1   | 393 | 984    | 1370   |
| UN74338 | Rsa1.0.00179.1 | 552 | 393324 | 1.00E-150 | 320 | 338 | 94 -  | 13  | 350 | 61348  | 61676  |
| UN74339 | Rsa1.0.00071.1 | 715 | 345714 | 0         | 681 | 715 | 95 -  | 3   | 715 | 318914 | 319612 |
| UN74340 | Rsa1.0.01594.1 | 706 | 42612  | 1.00E-80  | 153 | 153 | 100 + | 330 | 482 | 8391   | 8543   |
| UN74341 | Rsa1.0.01690.1 | 330 | 40939  | 1.00E-179 | 327 | 329 | 99 -  | 3   | 330 | 24584  | 24912  |
| UN74342 | Rsa1.0.00262.1 | 578 | 101906 | 0         | 576 | 578 | 99 -  | 1   | 578 | 80531  | 81108  |
| UN74343 | Rsa1.0.00014.1 | 598 | 348985 | 1.00E-131 | 256 | 262 | 97 +  | 107 | 368 | 27210  | 27471  |
| UN74344 | Rsa1.0.01478.1 | 628 | 44991  | 1.00E-158 | 301 | 307 | 98 +  | 3   | 309 | 30824  | 31130  |
| UN74345 | Rsa1.0.03127.1 | 757 | 25191  | 0         | 433 | 457 | 94 +  | 283 | 734 | 22256  | 22712  |
| UN74346 | Rsa1.0.14120.1 | 660 | 3784   | 1.00E-124 | 226 | 226 | 100 - | 208 | 433 | 155    | 380    |
| UN74347 | Rsa1.0.02658.1 | 187 | 28978  | 4.00E-52  | 162 | 172 | 94 -  | 1   | 171 | 17876  | 18041  |
| UN74348 | Rsa1.0.00089.1 | 795 | 406142 | 0         | 778 | 781 | 99 -  | 2   | 782 | 299996 | 300776 |
| UN74349 | Rsa1.0.00807.1 | 723 | 63607  | 2.00E-76  | 203 | 222 | 91 -  | 376 | 597 | 12769  | 12990  |
| UN74350 | Rsa1.0.16221.1 | 699 | 2239   | 0         | 653 | 659 | 99 +  | 2   | 659 | 339    | 994    |
| UN74351 | Rsa1.0.00120.1 | 705 | 277288 | 0         | 686 | 699 | 98 +  | 3   | 700 | 84697  | 85395  |
| UN74352 | Rsa1.0.00473.1 | 763 | 212204 | 2.00E-88  | 181 | 186 | 97 -  | 293 | 478 | 48625  | 48810  |
| UN74353 | Rsa1.0.00554.1 | 728 | 150953 | 0         | 573 | 611 | 93 -  | 106 | 704 | 145016 | 145626 |
| UN74354 | Rsa1.0.01588.1 | 600 | 42724  | 0         | 586 | 604 | 97 +  | 3   | 598 | 10018  | 10621  |
| UN74355 | Rsa1.0.03566.1 | 727 | 22050  | 0         | 357 | 364 | 98 -  | 217 | 580 | 17038  | 17401  |
| UN74356 | Rsa1.0.02411.1 | 726 | 31655  | 1.00E-153 | 278 | 279 | 99 -  | 1   | 279 | 17977  | 18255  |
| UN74357 | Rsa1.0.02970.1 | 702 | 26372  | 1.00E-122 | 222 | 222 | 100 - | 140 | 361 | 10854  | 11075  |
| UN74358 | Rsa1.0.02350.1 | 808 | 32309  | 0         | 746 | 763 | 97 -  | 2   | 759 | 4726   | 5485   |
| UN74359 | Rsa1.0.00372.1 | 730 | 90418  | 1.00E-129 | 237 | 238 | 99 -  | 3   | 240 | 17722  | 17959  |
| UN74360 | Rsa1.0.02253.1 | 794 | 33356  | 0         | 431 | 458 | 94 -  | 7   | 455 | 11611  | 12068  |
| UN74361 | Rsa1.0.00159.1 | 709 | 431686 | 1.00E-165 | 297 | 298 | 99 +  | 327 | 624 | 170435 | 170732 |
| UN74362 | Rsa1.0.00038.1 | 782 | 314568 | 0         | 582 | 611 | 95 +  | 180 | 782 | 27977  | 28575  |
| UN74363 | Rsa1.0.00018.1 | 786 | 410899 | 1.00E-126 | 312 | 342 | 91 +  | 80  | 421 | 5716   | 6040   |
| UN74364 | Rsa1.0.02801.1 | 762 | 27749  | 1.00E-175 | 321 | 323 | 99 +  | 1   | 322 | 9073   | 9395   |
| UN74365 | Rsa1.0.00121.1 | 639 | 278029 | 8.00E-72  | 156 | 162 | 96 -  | 1   | 162 | 60944  | 61105  |
| UN74366 | Rsa1.0.01749.1 | 823 | 39822  | 0         | 640 | 708 | 90 +  | 3   | 687 | 34594  | 35295  |
| UN74367 | Rsa1.0.02538.1 | 648 | 30364  | 1.00E-124 | 226 | 226 | 100 - | 1   | 226 | 30089  | 30314  |
| UN74368 | Rsa1.0.27096.1 | 822 | 866    | 1.00E-138 | 270 | 273 | 98 +  | 523 | 792 | 335    | 607    |
| UN74369 | Rsa1.0.02870.1 | 686 | 27102  | 7.00E-23  | 68  | 72  | 94 +  | 137 | 208 | 20026  | 20097  |
| UN74370 | Rsa1.0.00305.1 | 695 | 97308  | 0         | 606 | 610 | 99 +  | 84  | 690 | 37729  | 38338  |
| UN74371 | Rsa1.0.02480.1 | 730 | 31036  | 0         | 532 | 540 | 98 +  | 4   | 542 | 18473  | 19012  |

|         |                |     |        |           |     |     |       |     |     |        |        |
|---------|----------------|-----|--------|-----------|-----|-----|-------|-----|-----|--------|--------|
| UN74372 | Rsa1.0_00252.1 | 676 | 102760 | 1.00E-147 | 268 | 269 | 99 +  | 3   | 271 | 61520  | 61788  |
| UN74373 | Rsa1.0_01236.1 | 181 | 50156  | 4.00E-95  | 179 | 180 | 99 +  | 2   | 181 | 35568  | 35747  |
| UN74374 | Rsa1.0_00369.1 | 207 | 266462 | 8.00E-94  | 205 | 215 | 95 -  | 1   | 207 | 181475 | 181688 |
| UN74375 | Rsa1.0_03037.1 | 726 | 25825  | 1.00E-165 | 316 | 323 | 97 -  | 211 | 533 | 12066  | 12388  |
| UN74376 | Rsa1.0_04371.1 | 729 | 17700  | 1.00E-142 | 355 | 387 | 91 -  | 5   | 391 | 2476   | 2845   |
| UN74377 | Rsa1.0_02226.1 | 456 | 33726  | 8.00E-99  | 270 | 295 | 91 -  | 166 | 456 | 32388  | 32678  |
| UN74378 | Rsa1.0_09568.1 | 584 | 6284   | 1.00E-135 | 258 | 261 | 98 +  | 2   | 261 | 2861   | 3121   |
| UN74379 | Rsa1.0_06160.1 | 779 | 11596  | 0         | 568 | 573 | 99 +  | 210 | 779 | 9411   | 9983   |
| UN74380 | Rsa1.0_01531.1 | 358 | 43778  | 0         | 354 | 357 | 99 +  | 2   | 358 | 26529  | 26885  |
| UN74381 | Rsa1.0_00386.1 | 803 | 89134  | 0         | 758 | 768 | 98 -  | 1   | 765 | 54102  | 54869  |
| UN74382 | Rsa1.0_00212.1 | 741 | 108350 | 0         | 712 | 743 | 95 -  | 3   | 740 | 14821  | 15559  |
| UN74383 | Rsa1.0_00380.1 | 692 | 89748  | 0         | 359 | 362 | 99 +  | 333 | 692 | 88066  | 88427  |
| UN74384 | Rsa1.0_17675.1 | 797 | 1767   | 0         | 494 | 517 | 95 +  | 243 | 744 | 1251   | 1767   |
| UN74385 | Rsa1.0_06083.1 | 797 | 11780  | 1.00E-95  | 184 | 186 | 98 -  | 473 | 658 | 8981   | 9166   |
| UN74386 | Rsa1.0_00021.1 | 759 | 263655 | 0         | 557 | 564 | 98 -  | 2   | 565 | 37710  | 38273  |
| UN74387 | Rsa1.0_03169.1 | 679 | 24826  | 1.00E-109 | 225 | 233 | 96 -  | 284 | 516 | 17574  | 17806  |
| UN74388 | Rsa1.0_00042.1 | 784 | 171507 | 7.00E-85  | 195 | 200 | 97 +  | 468 | 662 | 161589 | 161788 |
| UN74389 | Rsa1.0_05509.1 | 749 | 13472  | 0         | 745 | 750 | 99 -  | 3   | 749 | 12246  | 12994  |
| UN74390 | Rsa1.0_00714.1 | 620 | 67187  | 0         | 438 | 453 | 96 +  | 3   | 449 | 1264   | 1716   |
| UN74391 | Rsa1.0_00295.1 | 431 | 152597 | 8.00E-68  | 131 | 131 | 100 + | 1   | 131 | 18724  | 18854  |
| UN74392 | Rsa1.0_00016.1 | 799 | 831256 | 1.00E-135 | 272 | 278 | 97 +  | 524 | 796 | 576482 | 576759 |
| UN74393 | Rsa1.0_00974.1 | 602 | 57893  | 0         | 602 | 602 | 100 - | 1   | 602 | 48414  | 49015  |
| UN74394 | Rsa1.0_02466.1 | 514 | 31142  | 5.00E-85  | 160 | 160 | 100 + | 1   | 160 | 26630  | 26789  |
| UN74395 | Rsa1.0_01221.1 | 648 | 50421  | 1.00E-106 | 199 | 200 | 99 +  | 1   | 200 | 42911  | 43110  |
| UN74396 | Rsa1.0_02925.1 | 744 | 26720  | 0         | 456 | 471 | 96 +  | 2   | 467 | 2289   | 2759   |
| UN74397 | Rsa1.0_00131.1 | 552 | 432233 | 4.00E-73  | 161 | 168 | 95 +  | 311 | 478 | 10362  | 10529  |
| UN74398 | Rsa1.0_00002.1 | 610 | 601661 | 0         | 450 | 470 | 95 -  | 150 | 610 | 407310 | 407779 |
| UN74399 | Rsa1.0_00138.1 | 761 | 247040 | 1.00E-143 | 500 | 580 | 86 +  | 119 | 695 | 76151  | 76730  |
| UN74400 | Rsa1.0_06603.1 | 585 | 10682  | 1.00E-152 | 276 | 277 | 99 +  | 3   | 279 | 6408   | 6684   |
| UN74401 | Rsa1.0_01168.1 | 185 | 153765 | 8.00E-66  | 130 | 131 | 99 +  | 1   | 131 | 39259  | 39389  |
| UN74402 | Rsa1.0_00148.1 | 696 | 120234 | 0         | 682 | 691 | 98 -  | 3   | 693 | 83998  | 84683  |
| UN74403 | Rsa1.0_00021.1 | 794 | 263655 | 7.00E-76  | 163 | 169 | 96 +  | 408 | 576 | 185794 | 185962 |
| UN74404 | Rsa1.0_09492.1 | 731 | 6334   | 0         | 460 | 469 | 98 -  | 268 | 731 | 5866   | 6334   |
| UN74405 | Rsa1.0_01971.1 | 789 | 36641  | 0         | 765 | 774 | 98 +  | 3   | 771 | 9039   | 9812   |
| UN74406 | Rsa1.0_00116.1 | 775 | 365886 | 0         | 613 | 617 | 99 +  | 162 | 775 | 141397 | 142013 |
| UN74407 | Rsa1.0_00033.1 | 827 | 515811 | 1.00E-179 | 375 | 392 | 95 -  | 3   | 389 | 336256 | 336642 |
| UN74408 | Rsa1.0_03131.1 | 687 | 25142  | 1.00E-112 | 244 | 254 | 96 +  | 3   | 255 | 9702   | 9954   |
| UN74409 | Rsa1.0_03280.1 | 774 | 145083 | 1.00E-140 | 267 | 272 | 98 -  | 211 | 482 | 121982 | 122253 |
| UN74410 | Rsa1.0_00753.1 | 758 | 65705  | 0         | 511 | 533 | 95 +  | 203 | 733 | 56735  | 57267  |

|         |                |     |        |           |     |     |       |     |     |        |        |
|---------|----------------|-----|--------|-----------|-----|-----|-------|-----|-----|--------|--------|
| UN74411 | Rsa1.0.03022.1 | 777 | 25968  | 1.00E-86  | 181 | 187 | 96 +  | 8   | 194 | 1619   | 1805   |
| UN74412 | Rsa1.0.00903.1 | 695 | 60228  | 1.00E-168 | 299 | 299 | 100 + | 117 | 415 | 7069   | 7367   |
| UN74413 | Rsa1.0.00743.1 | 702 | 177459 | 0         | 511 | 524 | 97 +  | 3   | 526 | 173910 | 174433 |
| UN74414 | Rsa1.0.00172.1 | 600 | 115476 | 1.00E-115 | 321 | 357 | 89 -  | 232 | 588 | 33     | 386    |
| UN74415 | Rsa1.0.01942.1 | 741 | 37048  | 0         | 717 | 742 | 96 +  | 1   | 741 | 284    | 1025   |
| UN74416 | Rsa1.0.00846.1 | 817 | 62342  | 1.00E-116 | 225 | 229 | 98 +  | 233 | 461 | 39992  | 40220  |
| UN74417 | Rsa1.0.02030.1 | 741 | 179909 | 1.00E-129 | 299 | 322 | 92 -  | 181 | 502 | 31734  | 32046  |
| UN74418 | Rsa1.0.00023.1 | 246 | 194764 | 1.00E-133 | 244 | 245 | 99 +  | 2   | 246 | 118529 | 118773 |
| UN74419 | Rsa1.0.00067.1 | 754 | 415055 | 0         | 480 | 495 | 96 +  | 154 | 639 | 226409 | 226903 |
| UN74420 | Rsa1.0.01448.1 | 649 | 45645  | 1.00E-103 | 191 | 191 | 100 - | 459 | 649 | 45376  | 45566  |
| UN74421 | Rsa1.0.00190.1 | 322 | 318240 | 1.00E-68  | 224 | 257 | 87 -  | 3   | 251 | 91485  | 91727  |
| UN74422 | Rsa1.0.00145.1 | 665 | 261008 | 0         | 560 | 612 | 91 -  | 61  | 665 | 29299  | 29900  |
| UN74423 | Rsa1.0.02163.1 | 564 | 34427  | 1.00E-148 | 269 | 270 | 99 +  | 295 | 564 | 9241   | 9510   |
| UN74424 | Rsa1.0.00139.1 | 704 | 357786 | 0         | 382 | 382 | 100 - | 320 | 701 | 344421 | 344802 |
| UN74425 | Rsa1.0.00170.1 | 312 | 179538 | 9.00E-30  | 139 | 162 | 85 +  | 40  | 194 | 178170 | 178331 |
| UN74426 | Rsa1.0.00782.1 | 802 | 64468  | 0         | 641 | 706 | 90 -  | 34  | 711 | 38071  | 38769  |
| UN74427 | Rsa1.0.01938.1 | 731 | 264018 | 1.00E-135 | 252 | 253 | 99 -  | 475 | 726 | 150253 | 150505 |
| UN74428 | Rsa1.0.13106.1 | 751 | 5009   | 1.00E-107 | 250 | 260 | 96 -  | 478 | 730 | 4510   | 4769   |
| UN74429 | Rsa1.0.00262.1 | 301 | 101906 | 1.00E-102 | 237 | 254 | 93 -  | 49  | 301 | 66819  | 67060  |
| UN74430 | Rsa1.0.00307.1 | 766 | 199003 | 0         | 396 | 416 | 95 -  | 354 | 766 | 6635   | 7050   |
| UN74431 | Rsa1.0.09397.1 | 663 | 6396   | 0         | 643 | 663 | 96 +  | 1   | 663 | 4407   | 5069   |
| UN74432 | Rsa1.0.01081.1 | 790 | 499226 | 2.00E-79  | 169 | 175 | 96 -  | 283 | 457 | 165070 | 165244 |
| UN74433 | Rsa1.0.00124.1 | 757 | 262503 | 1.00E-175 | 350 | 360 | 97 -  | 372 | 729 | 57220  | 57579  |
| UN74434 | Rsa1.0.00706.1 | 822 | 291570 | 4.00E-77  | 165 | 171 | 96 +  | 21  | 191 | 58083  | 58253  |
| UN74435 | Rsa1.0.00418.1 | 806 | 215377 | 1.00E-128 | 244 | 248 | 98 +  | 12  | 259 | 55274  | 55521  |
| UN74436 | Rsa1.0.18720.1 | 612 | 1547   | 0         | 608 | 612 | 99 -  | 1   | 612 | 350    | 960    |
| UN74437 | Rsa1.0.01543.1 | 783 | 43645  | 1.00E-100 | 241 | 251 | 96 -  | 517 | 758 | 7936   | 8186   |
| UN74438 | Rsa1.0.02494.1 | 762 | 132923 | 1.00E-137 | 250 | 251 | 99 +  | 203 | 453 | 639    | 889    |
| UN74439 | Rsa1.0.33529.1 | 781 | 676    | 0         | 382 | 387 | 98 -  | 400 | 781 | 44     | 430    |
| UN74440 | Rsa1.0.00417.1 | 745 | 395068 | 0         | 392 | 394 | 99 -  | 1   | 394 | 239717 | 240110 |
| UN74441 | Rsa1.0.01925.1 | 824 | 37220  | 1.00E-135 | 297 | 310 | 95 +  | 3   | 309 | 5430   | 5736   |
| UN74442 | Rsa1.0.04552.1 | 698 | 16878  | 3.00E-28  | 86  | 93  | 92 -  | 503 | 595 | 12061  | 12153  |
| UN74443 | Rsa1.0.13693.1 | 795 | 4469   | 0         | 772 | 781 | 98 +  | 2   | 777 | 2008   | 2788   |
| UN74444 | Rsa1.0.01386.1 | 812 | 46765  | 0         | 364 | 372 | 97 +  | 150 | 521 | 45628  | 45999  |
| UN74445 | Rsa1.0.02871.1 | 748 | 27085  | 0         | 371 | 381 | 97 -  | 22  | 402 | 24021  | 24401  |
| UN74446 | Rsa1.0.01768.1 | 709 | 138463 | 1.00E-154 | 277 | 277 | 100 + | 2   | 278 | 116874 | 117150 |
| UN74447 | Rsa1.0.03552.1 | 751 | 22151  | 0         | 511 | 526 | 97 -  | 31  | 556 | 15663  | 16188  |
| UN74448 | Rsa1.0.05723.1 | 678 | 12817  | 1.00E-159 | 291 | 293 | 99 +  | 303 | 595 | 4735   | 5027   |
| UN74449 | Rsa1.0.02596.1 | 710 | 29709  | 0         | 398 | 399 | 99 +  | 286 | 684 | 27545  | 27943  |

|         |                |     |        |           |     |     |       |     |     |        |        |
|---------|----------------|-----|--------|-----------|-----|-----|-------|-----|-----|--------|--------|
| UN74450 | Rsa1.0_13183.1 | 696 | 4979   | 0         | 495 | 500 | 99 -  | 1   | 500 | 4257   | 4756   |
| UN74451 | Rsa1.0_11602.1 | 681 | 5461   | 1.00E-117 | 270 | 289 | 93 +  | 13  | 301 | 4023   | 4305   |
| UN74452 | Rsa1.0_00498.1 | 642 | 79746  | 1.00E-135 | 281 | 293 | 95 +  | 274 | 566 | 21108  | 21400  |
| UN74453 | Rsa1.0_02136.1 | 798 | 34707  | 1.00E-102 | 199 | 201 | 99 -  | 3   | 202 | 11588  | 11788  |
| UN74454 | Rsa1.0_00069.1 | 614 | 403561 | 0         | 359 | 364 | 98 -  | 3   | 366 | 87684  | 88046  |
| UN74455 | Rsa1.0_34943.1 | 503 | 648    | 1.00E-167 | 336 | 349 | 96 +  | 155 | 503 | 1      | 349    |
| UN74456 | Rsa1.0_00087.1 | 402 | 761073 | 1.00E-151 | 289 | 295 | 97 -  | 2   | 296 | 325613 | 325907 |
| UN74457 | Rsa1.0_00525.1 | 773 | 78030  | 3.00E-81  | 247 | 276 | 89 -  | 33  | 299 | 25023  | 25288  |
| UN74458 | Rsa1.0_72627.1 | 640 | 315    | 1.00E-172 | 313 | 315 | 99 +  | 294 | 608 | 1      | 315    |
| UN74459 | Rsa1.0_00308.1 | 287 | 96915  | 1.00E-111 | 203 | 203 | 100 - | 85  | 287 | 71168  | 71370  |
| UN74460 | Rsa1.0_00001.1 | 652 | 363028 | 0         | 561 | 597 | 93 +  | 35  | 623 | 59648  | 60236  |
| UN74461 | Rsa1.0_00153.1 | 167 | 192931 | 1.00E-70  | 160 | 167 | 95 +  | 2   | 167 | 168758 | 168924 |
| UN74462 | Rsa1.0_01779.1 | 333 | 39448  | 1.00E-161 | 318 | 328 | 96 +  | 6   | 333 | 27828  | 28155  |
| UN74463 | Rsa1.0_02761.1 | 273 | 28151  | 5.00E-77  | 149 | 150 | 99 +  | 1   | 150 | 9918   | 10067  |
| UN74464 | Rsa1.0_01986.1 | 655 | 36489  | 1.00E-151 | 323 | 339 | 95 -  | 318 | 655 | 4290   | 4628   |
| UN74465 | Rsa1.0_54887.1 | 678 | 416    | 1.00E-172 | 320 | 323 | 99 -  | 3   | 324 | 1      | 323    |
| UN74466 | #              | #   | #      | #         | #   | #   | #     | #   | #   | #      | #      |
| UN74467 | Rsa1.0_00926.1 | 670 | 195072 | 0         | 478 | 482 | 99 +  | 1   | 482 | 40536  | 41016  |
| UN74468 | Rsa1.0_00861.1 | 548 | 61759  | 0         | 515 | 536 | 96 +  | 14  | 548 | 22926  | 23455  |
| UN74469 | Rsa1.0_00008.1 | 651 | 358124 | 0         | 634 | 652 | 97 +  | 2   | 651 | 62223  | 62874  |
| UN74470 | Rsa1.0_03477.1 | 187 | 22635  | 5.00E-33  | 78  | 80  | 97 -  | 108 | 187 | 7020   | 7099   |
| UN74471 | Rsa1.0_00851.1 | 755 | 62181  | 1.00E-114 | 219 | 221 | 99 +  | 3   | 222 | 27202  | 27422  |
| UN74472 | Rsa1.0_00329.1 | 802 | 222544 | 1.00E-180 | 407 | 442 | 92 +  | 4   | 417 | 175877 | 176318 |
| UN74473 | Rsa1.0_01199.1 | 701 | 163576 | 6.00E-85  | 225 | 247 | 91 -  | 445 | 684 | 124480 | 124717 |
| UN74474 | Rsa1.0_52876.1 | 799 | 431    | 1.00E-147 | 274 | 276 | 99 +  | 476 | 750 | 40     | 315    |
| UN74475 | Rsa1.0_01936.1 | 548 | 37151  | 0         | 545 | 546 | 99 +  | 3   | 548 | 27060  | 27605  |
| UN74476 | Rsa1.0_00236.1 | 762 | 104771 | 0         | 342 | 345 | 99 -  | 3   | 347 | 64349  | 64693  |
| UN74477 | Rsa1.0_00023.1 | 802 | 194764 | 8.00E-91  | 170 | 170 | 100 + | 248 | 417 | 51516  | 51685  |
| UN74478 | Rsa1.0_00483.1 | 699 | 81102  | 4.00E-86  | 206 | 223 | 92 -  | 20  | 242 | 79605  | 79815  |
| UN74479 | Rsa1.0_00745.1 | 384 | 66067  | 4.00E-32  | 95  | 99  | 95 +  | 287 | 382 | 37012  | 37110  |
| UN74480 | Rsa1.0_01346.1 | 665 | 47618  | 1.00E-109 | 203 | 204 | 99 -  | 89  | 292 | 7648   | 7851   |
| UN74481 | Rsa1.0_00476.1 | 195 | 280966 | 9.00E-38  | 87  | 88  | 98 -  | 3   | 89  | 222193 | 222280 |
| UN74482 | Rsa1.0_02044.1 | 745 | 35651  | 0         | 740 | 751 | 98 -  | 2   | 745 | 15017  | 15767  |
| UN74483 | Rsa1.0_00341.1 | 651 | 249309 | 4.00E-86  | 177 | 182 | 97 +  | 367 | 548 | 121074 | 121255 |
| UN74484 | Rsa1.0_00605.1 | 237 | 73199  | 1.00E-49  | 119 | 124 | 95 -  | 114 | 236 | 72602  | 72725  |
| UN74485 | Rsa1.0_02260.1 | 720 | 33260  | 0         | 712 | 733 | 97 +  | 1   | 717 | 25624  | 26356  |
| UN74486 | Rsa1.0_00055.1 | 658 | 520193 | 0         | 630 | 663 | 95 -  | 3   | 658 | 387929 | 388590 |
| UN74487 | Rsa1.0_00251.1 | 767 | 303968 | 3.00E-13  | 58  | 64  | 90 +  | 347 | 410 | 149154 | 149217 |
| UN74488 | Rsa1.0_00212.1 | 764 | 108350 | 0         | 746 | 764 | 97 +  | 2   | 762 | 81945  | 82708  |



|         |                |     |        |           |     |     |       |     |     |        |        |
|---------|----------------|-----|--------|-----------|-----|-----|-------|-----|-----|--------|--------|
| UN74489 | Rsa1.0.05469.1 | 276 | 13644  | 1.00E-149 | 274 | 275 | 99 -  | 3   | 276 | 2323   | 2597   |
| UN74490 | Rsa1.0.01313.1 | 572 | 48387  | 1.00E-144 | 266 | 268 | 99 -  | 305 | 572 | 8908   | 9175   |
| UN74491 | Rsa1.0.00116.1 | 801 | 365886 | 1.00E-132 | 239 | 239 | 100 - | 93  | 331 | 37389  | 37627  |
| UN74492 | Rsa1.0.09314.1 | 823 | 6461   | 0         | 720 | 727 | 99 +  | 79  | 799 | 4077   | 4803   |
| UN74493 | Rsa1.0.04057.1 | 688 | 19333  | 0         | 502 | 506 | 99 +  | 180 | 685 | 3402   | 3907   |
| UN74494 | Rsa1.0.00124.1 | 820 | 262503 | 0         | 740 | 767 | 96 -  | 2   | 760 | 194275 | 195035 |
| UN74495 | Rsa1.0.00232.1 | 827 | 104936 | 0         | 808 | 837 | 96 +  | 2   | 827 | 35039  | 35875  |
| UN74496 | Rsa1.0.07724.1 | 624 | 8708   | 0         | 354 | 355 | 99 -  | 270 | 624 | 3377   | 3731   |
| UN74497 | Rsa1.0.00002.1 | 701 | 601661 | 0         | 415 | 416 | 99 +  | 194 | 609 | 68497  | 68912  |
| UN74498 | Rsa1.0.02459.1 | 477 | 31185  | 0         | 439 | 439 | 100 - | 5   | 443 | 19818  | 20256  |
| UN74499 | Rsa1.0.00005.1 | 740 | 353093 | 0         | 475 | 487 | 97 +  | 1   | 479 | 260168 | 260654 |
| UN74500 | Rsa1.0.00252.1 | 730 | 102760 | 0         | 498 | 550 | 90 -  | 105 | 648 | 94671  | 95205  |
| UN74501 | Rsa1.0.02909.1 | 295 | 26856  | 2.00E-98  | 283 | 318 | 88 -  | 2   | 295 | 11248  | 11565  |
| UN74502 | Rsa1.0.03142.1 | 709 | 25043  | 1.00E-179 | 318 | 318 | 100 - | 392 | 709 | 24726  | 25043  |
| UN74503 | Rsa1.0.00909.1 | 767 | 59976  | 0         | 468 | 477 | 98 +  | 164 | 640 | 41345  | 41821  |
| UN74504 | Rsa1.0.07884.1 | 737 | 8359   | 0         | 732 | 741 | 98 -  | 3   | 737 | 3382   | 4122   |
| UN74505 | Rsa1.0.00170.1 | 593 | 179538 | 1.00E-138 | 291 | 305 | 95 -  | 60  | 364 | 26523  | 26827  |
| UN74506 | Rsa1.0.02383.1 | 732 | 31931  | 1.00E-167 | 304 | 306 | 99 -  | 427 | 732 | 16481  | 16786  |
| UN74507 | Rsa1.0.00006.1 | 162 | 396176 | 3.00E-74  | 153 | 157 | 97 +  | 6   | 162 | 266592 | 266748 |
| UN74508 | Rsa1.0.01640.1 | 762 | 41822  | 0         | 753 | 770 | 97 +  | 5   | 762 | 36298  | 37067  |
| UN74509 | Rsa1.0.04387.1 | 336 | 17625  | 2.00E-92  | 172 | 172 | 100 - | 165 | 336 | 13983  | 14154  |
| UN74510 | Rsa1.0.02299.1 | 682 | 32857  | 0         | 399 | 399 | 100 + | 284 | 682 | 27626  | 28024  |
| UN74511 | Rsa1.0.02340.1 | 665 | 32388  | 0         | 465 | 466 | 99 -  | 129 | 594 | 14485  | 14950  |
| UN74512 | Rsa1.0.00387.1 | 195 | 495407 | 1.00E-103 | 193 | 194 | 99 -  | 2   | 195 | 109135 | 109328 |
| UN74513 | Rsa1.0.00425.1 | 641 | 147080 | 1.00E-158 | 285 | 286 | 99 -  | 356 | 641 | 75404  | 75689  |
| UN74514 | Rsa1.0.00926.1 | 761 | 195072 | 0         | 661 | 662 | 99 -  | 2   | 663 | 190164 | 190825 |
| UN74515 | Rsa1.0.02382.1 | 738 | 31969  | 0         | 688 | 753 | 91 -  | 1   | 733 | 22554  | 23289  |
| UN74516 | Rsa1.0.02825.1 | 754 | 27568  | 1.00E-129 | 289 | 303 | 95 -  | 35  | 335 | 1476   | 1777   |
| UN74517 | Rsa1.0.08488.1 | 727 | 7284   | 1.00E-156 | 279 | 279 | 100 + | 3   | 281 | 6754   | 7032   |
| UN74518 | Rsa1.0.00991.1 | 759 | 143101 | 1.00E-159 | 285 | 285 | 100 - | 284 | 568 | 135667 | 135951 |
| UN74519 | Rsa1.0.00540.1 | 809 | 76895  | 1.00E-179 | 382 | 400 | 95 -  | 299 | 696 | 67777  | 68173  |
| UN74520 | Rsa1.0.00321.1 | 763 | 95671  | 1.00E-116 | 248 | 259 | 95 -  | 69  | 327 | 50187  | 50438  |
| UN74521 | Rsa1.0.01667.1 | 678 | 41315  | 1.00E-129 | 243 | 246 | 98 -  | 89  | 334 | 9678   | 9923   |
| UN74522 | Rsa1.0.01199.1 | 782 | 163576 | 1.00E-124 | 236 | 238 | 99 +  | 3   | 240 | 7856   | 8092   |
| UN74523 | Rsa1.0.08728.1 | 773 | 6995   | 1.00E-165 | 358 | 374 | 95 -  | 328 | 699 | 3891   | 4256   |
| UN74524 | Rsa1.0.00141.1 | 663 | 121494 | 0         | 388 | 388 | 100 + | 1   | 388 | 2773   | 3160   |
| UN74525 | Rsa1.0.00241.1 | 695 | 104000 | 1.00E-21  | 192 | 235 | 81 -  | 245 | 477 | 59638  | 59868  |
| UN74526 | Rsa1.0.32735.1 | 457 | 695    | 1.00E-102 | 188 | 188 | 100 - | 220 | 407 | 1      | 188    |
| UN74527 | Rsa1.0.05805.1 | 828 | 12585  | 1.00E-153 | 304 | 314 | 96 -  | 2   | 315 | 4241   | 4554   |

|         |                |     |        |           |     |     |       |     |     |        |        |
|---------|----------------|-----|--------|-----------|-----|-----|-------|-----|-----|--------|--------|
| UN74528 | Rsa1.0.01938.1 | 819 | 264018 | 2.33E-156 | 316 | 326 | 96 -  | 487 | 805 | 164699 | 165024 |
| UN74529 | Rsa1.0.00501.1 | 651 | 79545  | 0         | 384 | 385 | 99 -  | 268 | 651 | 58756  | 59140  |
| UN74530 | Rsa1.0.01700.1 | 813 | 40745  | 1.00E-152 | 301 | 308 | 97 -  | 3   | 310 | 31534  | 31838  |
| UN74531 | Rsa1.0.05692.1 | 799 | 12914  | 0         | 338 | 338 | 100 - | 293 | 630 | 10387  | 10724  |
| UN74532 | Rsa1.0.00069.1 | 774 | 403561 | 1.00E-145 | 343 | 370 | 92 -  | 123 | 492 | 354429 | 354798 |
| UN74533 | Rsa1.0.01219.1 | 267 | 50527  | 4.00E-87  | 175 | 179 | 97 +  | 89  | 267 | 21960  | 22138  |
| UN74534 | Rsa1.0.00060.1 | 770 | 502678 | 1.00E-159 | 296 | 299 | 98 -  | 156 | 452 | 335571 | 335869 |
| UN74535 | Rsa1.0.69677.1 | 689 | 329    | 1.00E-115 | 213 | 214 | 99 -  | 3   | 216 | 1      | 214    |
| UN74536 | Rsa1.0.09304.1 | 817 | 6469   | 0         | 418 | 422 | 99 -  | 3   | 424 | 4620   | 5041   |
| UN74537 | Rsa1.0.00382.1 | 714 | 251946 | 1.00E-102 | 203 | 207 | 98 -  | 2   | 205 | 117497 | 117703 |
| UN74538 | Rsa1.0.01400.1 | 690 | 46560  | 1.00E-117 | 217 | 218 | 99 +  | 2   | 219 | 35918  | 36135  |
| UN74539 | Rsa1.0.02820.1 | 505 | 27629  | 5.00E-94  | 181 | 183 | 98 -  | 3   | 185 | 23880  | 24062  |
| UN74540 | Rsa1.0.00114.1 | 787 | 131330 | 1.00E-132 | 293 | 310 | 94 +  | 106 | 415 | 20550  | 20856  |
| UN74541 | Rsa1.0.01409.1 | 785 | 151595 | 5.00E-89  | 197 | 207 | 95 +  | 4   | 210 | 115823 | 116029 |
| UN74542 | Rsa1.0.00026.1 | 804 | 327835 | 1.00E-120 | 241 | 247 | 97 -  | 447 | 692 | 242367 | 242613 |
| UN74543 | Rsa1.0.01110.1 | 715 | 195852 | 0         | 698 | 723 | 96 -  | 2   | 715 | 36490  | 37210  |
| UN74544 | Rsa1.0.01119.1 | 691 | 53459  | 0         | 666 | 692 | 96 -  | 6   | 691 | 11929  | 12616  |
| UN74545 | Rsa1.0.00205.1 | 455 | 193401 | 0         | 451 | 453 | 99 -  | 3   | 455 | 87972  | 88424  |
| UN74546 | Rsa1.0.07618.1 | 439 | 9015   | 1.00E-102 | 188 | 188 | 100 + | 38  | 225 | 4910   | 5097   |
| UN74547 | Rsa1.0.05590.1 | 753 | 13242  | 0         | 695 | 727 | 95 +  | 8   | 726 | 3142   | 3868   |
| UN74548 | Rsa1.0.00067.1 | 757 | 415055 | 1.00E-145 | 340 | 369 | 92 +  | 218 | 570 | 226537 | 226903 |
| UN74549 | Rsa1.0.00090.1 | 830 | 273859 | 0         | 674 | 676 | 99 -  | 85  | 759 | 153602 | 154277 |
| UN74550 | Rsa1.0.02470.1 | 683 | 31108  | 1.00E-180 | 323 | 324 | 99 +  | 342 | 665 | 4636   | 4959   |
| UN74551 | Rsa1.0.48315.1 | 786 | 469    | 0         | 457 | 466 | 98 -  | 249 | 711 | 4      | 469    |
| UN74552 | Rsa1.0.00380.1 | 677 | 89748  | 0         | 429 | 430 | 99 -  | 183 | 612 | 78274  | 78703  |
| UN74553 | Rsa1.0.00430.1 | 764 | 85453  | 1.00E-119 | 227 | 229 | 99 +  | 195 | 422 | 38769  | 38997  |
| UN74554 | Rsa1.0.00025.1 | 579 | 277312 | 0         | 355 | 356 | 99 -  | 220 | 575 | 60483  | 60838  |
| UN74555 | Rsa1.0.01635.1 | 630 | 41865  | 0         | 579 | 590 | 98 -  | 3   | 592 | 16007  | 16592  |
| UN74556 | Rsa1.0.14637.1 | 688 | 3201   | 0         | 559 | 608 | 91 +  | 83  | 686 | 2065   | 2670   |
| UN74557 | Rsa1.0.00066.1 | 426 | 152418 | 2.00E-65  | 133 | 135 | 98 -  | 119 | 253 | 140160 | 140294 |
| UN74558 | Rsa1.0.04984.1 | 485 | 15240  | 0         | 407 | 408 | 99 -  | 78  | 485 | 199    | 606    |
| UN74559 | Rsa1.0.00014.1 | 649 | 348985 | 7.00E-94  | 192 | 197 | 97 -  | 30  | 223 | 220714 | 220910 |
| UN74560 | Rsa1.0.17770.1 | 264 | 1744   | 1.00E-139 | 260 | 262 | 99 +  | 1   | 262 | 57     | 316    |
| UN74561 | Rsa1.0.00127.1 | 707 | 127446 | 0         | 631 | 646 | 97 -  | 62  | 707 | 103009 | 103654 |
| UN74562 | Rsa1.0.00053.1 | 617 | 263459 | 6.00E-94  | 193 | 199 | 96 +  | 344 | 542 | 203816 | 204014 |
| UN74563 | Rsa1.0.00874.1 | 435 | 179723 | 1.00E-91  | 174 | 175 | 99 -  | 114 | 288 | 179071 | 179245 |
| UN74564 | Rsa1.0.59025.1 | 772 | 388    | 1.00E-106 | 202 | 203 | 99 -  | 114 | 316 | 31     | 232    |
| UN74565 | Rsa1.0.00277.1 | 671 | 100132 | 0         | 670 | 670 | 100 + | 2   | 671 | 56093  | 56762  |
| UN74566 | Rsa1.0.06953.1 | 565 | 10116  | 1.00E-130 | 236 | 236 | 100 - | 1   | 236 | 1093   | 1328   |

|         |                |     |        |           |     |     |       |     |     |        |        |
|---------|----------------|-----|--------|-----------|-----|-----|-------|-----|-----|--------|--------|
| UN74567 | Rsa1.0.03953.1 | 814 | 19889  | 0         | 807 | 820 | 98 -  | 2   | 814 | 2655   | 3474   |
| UN74568 | Rsa1.0.00376.1 | 561 | 90101  | 1.00E-167 | 327 | 338 | 96 -  | 233 | 561 | 7215   | 7552   |
| UN74569 | Rsa1.0.55315.1 | 597 | 413    | 1.00E-116 | 275 | 297 | 92 +  | 1   | 284 | 117    | 413    |
| UN74570 | Rsa1.0.05755.1 | 778 | 12730  | 0         | 578 | 585 | 98 -  | 185 | 768 | 3876   | 4460   |
| UN74571 | Rsa1.0.02431.1 | 745 | 31504  | 0         | 691 | 744 | 92 +  | 18  | 743 | 26257  | 26997  |
| UN74572 | Rsa1.0.07458.1 | 737 | 9352   | 0         | 446 | 446 | 100 - | 3   | 448 | 796    | 1241   |
| UN74573 | Rsa1.0.00145.1 | 719 | 261008 | 0         | 386 | 393 | 98 +  | 327 | 718 | 241914 | 242306 |
| UN74574 | Rsa1.0.00302.1 | 230 | 97521  | 1.00E-101 | 219 | 228 | 96 +  | 3   | 230 | 36771  | 36993  |
| UN74575 | Rsa1.0.27763.1 | 487 | 840    | 1.00E-160 | 361 | 390 | 92 -  | 120 | 487 | 451    | 840    |
| UN74576 | Rsa1.0.00897.1 | 337 | 60498  | 1.00E-116 | 233 | 240 | 97 +  | 11  | 250 | 21952  | 22191  |
| UN74577 | Rsa1.0.00262.1 | 464 | 101906 | 0         | 405 | 407 | 99 +  | 3   | 409 | 78957  | 79363  |
| UN74578 | Rsa1.0.00014.1 | 447 | 348985 | 1.00E-121 | 239 | 244 | 97 -  | 1   | 243 | 28877  | 29120  |
| UN74579 | Rsa1.0.03127.1 | 682 | 25191  | 0         | 530 | 532 | 99 -  | 151 | 682 | 22755  | 23286  |
| UN74580 | Rsa1.0.01620.1 | 525 | 42091  | 1.00E-168 | 312 | 316 | 98 -  | 1   | 316 | 22919  | 23234  |
| UN74581 | Rsa1.0.05687.1 | 668 | 12932  | 0         | 572 | 596 | 95 -  | 2   | 596 | 3372   | 3954   |
| UN74582 | Rsa1.0.00120.1 | 738 | 277288 | 0         | 359 | 371 | 96 -  | 368 | 738 | 85540  | 85910  |
| UN74583 | Rsa1.0.02113.1 | 417 | 34890  | 1.00E-179 | 375 | 394 | 95 -  | 17  | 410 | 23116  | 23509  |
| UN74584 | Rsa1.0.00021.1 | 724 | 263655 | 0         | 669 | 676 | 98 +  | 49  | 724 | 36414  | 37089  |
| UN74585 | Rsa1.0.00295.1 | 485 | 152597 | 1.00E-176 | 414 | 446 | 92 -  | 1   | 433 | 20082  | 20526  |
| UN74586 | Rsa1.0.02299.1 | 777 | 32857  | 0         | 335 | 337 | 99 -  | 436 | 770 | 7687   | 8023   |
| UN74587 | Rsa1.0.00133.1 | 142 | 123768 | 1.00E-36  | 123 | 136 | 90 +  | 6   | 140 | 8667   | 8799   |
| UN74588 | Rsa1.0.02452.1 | 662 | 31280  | 0         | 659 | 661 | 99 -  | 2   | 662 | 8815   | 9475   |
| UN74589 | Rsa1.0.00021.1 | 801 | 263655 | 0         | 349 | 351 | 99 -  | 3   | 353 | 188994 | 189344 |
| UN74590 | Rsa1.0.01029.1 | 141 | 256254 | 4.00E-30  | 86  | 91  | 94 -  | 3   | 92  | 27661  | 27751  |
| UN74591 | Rsa1.0.00816.1 | 659 | 403350 | 0         | 648 | 661 | 98 -  | 2   | 659 | 264174 | 264834 |
| UN74592 | Rsa1.0.00202.1 | 648 | 185895 | 0         | 548 | 596 | 91 -  | 1   | 586 | 145143 | 145726 |
| UN74593 | Rsa1.0.00224.1 | 667 | 327530 | 1.00E-159 | 295 | 297 | 99 -  | 164 | 459 | 27870  | 28166  |
| UN74594 | Rsa1.0.01334.1 | 649 | 47904  | 0         | 637 | 644 | 98 -  | 3   | 646 | 9363   | 10005  |
| UN74595 | Rsa1.0.03527.1 | 435 | 22278  | 1.00E-69  | 180 | 194 | 92 +  | 84  | 277 | 6534   | 6726   |
| UN74596 | Rsa1.0.00425.1 | 625 | 147080 | 1.00E-151 | 289 | 295 | 97 +  | 3   | 297 | 87991  | 88285  |
| UN74597 | Rsa1.0.03193.1 | 537 | 24690  | 1.00E-163 | 297 | 299 | 99 -  | 3   | 301 | 9096   | 9394   |
| UN74598 | Rsa1.0.02870.1 | 748 | 27102  | 1.00E-104 | 218 | 224 | 97 +  | 467 | 688 | 12375  | 12598  |
| UN74599 | Rsa1.0.00086.1 | 693 | 439854 | 0         | 547 | 549 | 99 -  | 146 | 693 | 342245 | 342793 |
| UN74600 | Rsa1.0.00706.1 | 646 | 291570 | 0         | 598 | 626 | 95 -  | 33  | 646 | 57218  | 57839  |
| UN74601 | Rsa1.0.02321.1 | 724 | 32572  | 0         | 417 | 427 | 97 +  | 274 | 698 | 6149   | 6574   |
| UN74602 | Rsa1.0.00205.1 | 295 | 193401 | 1.00E-107 | 223 | 232 | 96 +  | 64  | 295 | 97462  | 97693  |
| UN74603 | Rsa1.0.00060.1 | 465 | 502678 | 0         | 436 | 463 | 94 -  | 3   | 463 | 44085  | 44543  |
| UN74604 | Rsa1.0.00056.1 | 738 | 332604 | 0         | 728 | 739 | 98 -  | 3   | 738 | 53897  | 54632  |
| UN74605 | Rsa1.0.00075.1 | 611 | 146680 | 0         | 560 | 586 | 95 +  | 37  | 611 | 25376  | 25960  |

|         |                |     |        |           |     |     |       |     |     |        |        |
|---------|----------------|-----|--------|-----------|-----|-----|-------|-----|-----|--------|--------|
| UN74606 | Rsa1.0_00965.1 | 659 | 58139  | 4.00E-49  | 109 | 112 | 97 +  | 163 | 274 | 7485   | 7596   |
| UN74607 | Rsa1.0_00178.1 | 810 | 114861 | 3.00E-90  | 212 | 226 | 93 -  | 3   | 228 | 32804  | 33020  |
| UN74608 | Rsa1.0_00382.1 | 463 | 251946 | 0         | 432 | 446 | 96 -  | 1   | 443 | 107858 | 108299 |
| UN74609 | Rsa1.0_02129.1 | 199 | 34757  | 1.00E-89  | 191 | 199 | 95 -  | 1   | 199 | 29565  | 29763  |
| UN74610 | Rsa1.0_00128.1 | 190 | 228675 | 1.00E-36  | 93  | 98  | 94 +  | 1   | 98  | 150923 | 151020 |
| UN74611 | Rsa1.0_00228.1 | 528 | 105511 | 0         | 508 | 518 | 98 -  | 1   | 518 | 85329  | 85846  |
| UN74612 | #              | #   | #      | #         | #   | #   | #     | #   | #   | #      | #      |
| UN74613 | Rsa1.0_00044.1 | 164 | 271658 | 8.00E-75  | 157 | 162 | 96 -  | 1   | 162 | 120123 | 120284 |
| UN74614 | Rsa1.0_03073.1 | 341 | 25574  | 1.00E-113 | 315 | 344 | 91 -  | 1   | 341 | 9386   | 9718   |
| UN74615 | Rsa1.0_00351.1 | 262 | 413096 | 1.00E-108 | 246 | 262 | 93 +  | 1   | 262 | 13876  | 14137  |
| UN74616 | Rsa1.0_02457.1 | 747 | 31208  | 0         | 399 | 399 | 100 + | 3   | 401 | 12516  | 12914  |
| UN74617 | Rsa1.0_16069.1 | 475 | 2298   | 1.00E-172 | 324 | 330 | 98 -  | 146 | 475 | 1969   | 2298   |
| UN74618 | Rsa1.0_00473.1 | 461 | 212204 | 0         | 432 | 456 | 94 -  | 1   | 456 | 15832  | 16278  |
| UN74619 | Rsa1.0_00369.1 | 448 | 266462 | 1.00E-122 | 255 | 266 | 95 +  | 1   | 256 | 146312 | 146576 |
| UN74620 | Rsa1.0_02222.1 | 458 | 152798 | 1.00E-161 | 287 | 287 | 100 - | 2   | 288 | 131032 | 131318 |
| UN74621 | Rsa1.0_00053.1 | 616 | 263459 | 2.00E-17  | 62  | 67  | 92 -  | 550 | 616 | 205068 | 205134 |
| UN74622 | Rsa1.0_02797.1 | 225 | 27800  | 1.00E-119 | 223 | 225 | 99 +  | 1   | 225 | 8976   | 9200   |
| UN74623 | Rsa1.0_16480.1 | 622 | 2141   | 0         | 598 | 599 | 99 -  | 24  | 622 | 1161   | 1759   |
| UN74624 | Rsa1.0_01509.1 | 241 | 44258  | 4.00E-71  | 181 | 194 | 93 -  | 26  | 219 | 17429  | 17618  |
| UN74625 | Rsa1.0_00191.1 | 809 | 316976 | 0         | 675 | 687 | 98 +  | 94  | 774 | 132309 | 132995 |
| UN74626 | Rsa1.0_57953.1 | 645 | 395    | 1.00E-123 | 243 | 247 | 98 -  | 2   | 247 | 1      | 245    |
| UN74627 | Rsa1.0_09321.1 | 745 | 6456   | 0         | 348 | 349 | 99 -  | 392 | 739 | 864    | 1212   |
| UN74628 | Rsa1.0_05715.1 | 707 | 12850  | 1.00E-120 | 226 | 228 | 99 +  | 5   | 232 | 11110  | 11337  |
| UN74629 | Rsa1.0_00027.1 | 776 | 283362 | 1.00E-130 | 267 | 275 | 97 -  | 444 | 718 | 118292 | 118563 |
| UN74630 | Rsa1.0_00433.1 | 649 | 85381  | 1.00E-112 | 214 | 217 | 98 +  | 251 | 467 | 64088  | 64304  |
| UN74631 | Rsa1.0_00342.1 | 715 | 93695  | 1.00E-100 | 440 | 522 | 84 +  | 37  | 557 | 90504  | 91024  |
| UN74632 | Rsa1.0_00154.1 | 552 | 189461 | 1.00E-100 | 201 | 206 | 97 -  | 3   | 208 | 43833  | 44038  |
| UN74633 | Rsa1.0_01302.1 | 716 | 48907  | 0         | 696 | 715 | 97 +  | 6   | 716 | 47053  | 47764  |
| UN74634 | Rsa1.0_00588.1 | 780 | 73939  | 0         | 649 | 665 | 97 +  | 2   | 663 | 39875  | 40539  |
| UN74635 | Rsa1.0_00192.1 | 777 | 278200 | 0         | 423 | 439 | 96 +  | 1   | 439 | 37941  | 38378  |
| UN74636 | Rsa1.0_04181.1 | 784 | 18615  | 0         | 526 | 535 | 98 +  | 258 | 784 | 936    | 1470   |
| UN74637 | Rsa1.0_24301.1 | 779 | 994    | 1.00E-114 | 239 | 247 | 96 +  | 12  | 256 | 751    | 994    |
| UN74638 | Rsa1.0_00024.1 | 577 | 188018 | 1.00E-137 | 504 | 592 | 85 -  | 1   | 577 | 60717  | 61266  |
| UN74639 | Rsa1.0_01031.1 | 722 | 56236  | 1.00E-108 | 205 | 207 | 99 -  | 4   | 210 | 41501  | 41707  |
| UN74640 | Rsa1.0_00649.1 | 820 | 70263  | 0         | 406 | 425 | 95 -  | 315 | 739 | 5699   | 6123   |
| UN74641 | Rsa1.0_00160.1 | 350 | 346678 | 1.00E-161 | 315 | 324 | 97 -  | 27  | 350 | 216752 | 217075 |
| UN74642 | Rsa1.0_00346.1 | 594 | 93130  | 0         | 342 | 342 | 100 - | 3   | 344 | 15126  | 15467  |
| UN74643 | Rsa1.0_00046.1 | 106 | 320315 | 3.00E-27  | 65  | 66  | 98 +  | 41  | 106 | 78901  | 78966  |
| UN74644 | Rsa1.0_00693.1 | 405 | 161311 | 1.00E-153 | 320 | 334 | 95 -  | 72  | 405 | 47054  | 47386  |

|         |                |     |        |           |     |     |       |     |     |        |        |
|---------|----------------|-----|--------|-----------|-----|-----|-------|-----|-----|--------|--------|
| UN74645 | Rsa1.0_01222.1 | 751 | 50398  | 1.00E-55  | 123 | 127 | 96 -  | 111 | 237 | 4033   | 4159   |
| UN74646 | Rsa1.0_06430.1 | 179 | 11034  | 6.00E-42  | 90  | 91  | 98 +  | 1   | 91  | 7184   | 7274   |
| UN74647 | Rsa1.0_01905.1 | 687 | 37450  | 0         | 684 | 688 | 99 +  | 1   | 687 | 28418  | 29105  |
| UN74648 | Rsa1.0_13611.1 | 669 | 4641   | 1.00E-117 | 324 | 358 | 90 +  | 330 | 665 | 4127   | 4484   |
| UN74649 | Rsa1.0_02544.1 | 507 | 30290  | 0         | 506 | 506 | 100 + | 2   | 507 | 18870  | 19375  |
| UN74650 | Rsa1.0_02573.1 | 657 | 29955  | 0         | 655 | 659 | 99 +  | 1   | 657 | 658    | 1315   |
| UN74651 | Rsa1.0_00335.1 | 774 | 94371  | 1.00E-123 | 265 | 277 | 95 +  | 51  | 326 | 42210  | 42486  |
| UN74652 | Rsa1.0_00149.1 | 791 | 305196 | 0         | 404 | 410 | 98 -  | 379 | 784 | 201703 | 202112 |
| UN74653 | Rsa1.0_00291.1 | 380 | 172129 | 1.00E-118 | 339 | 380 | 89 +  | 1   | 379 | 45610  | 45971  |
| UN74654 | Rsa1.0_00013.1 | 615 | 292129 | 0         | 614 | 614 | 100 - | 2   | 615 | 111441 | 112054 |
| UN74655 | Rsa1.0_02841.1 | 242 | 27383  | 6.00E-58  | 175 | 191 | 91 -  | 60  | 240 | 1903   | 2091   |
| UN74656 | Rsa1.0_01263.1 | 769 | 49703  | 3.00E-44  | 104 | 108 | 96 -  | 367 | 474 | 31312  | 31419  |
| UN74657 | Rsa1.0_00783.1 | 558 | 64459  | 0         | 340 | 345 | 98 -  | 3   | 347 | 20683  | 21027  |
| UN74658 | Rsa1.0_00792.1 | 599 | 64163  | 0         | 486 | 520 | 93 -  | 81  | 598 | 8850   | 9351   |
| UN74659 | Rsa1.0_00017.1 | 396 | 752458 | 5.00E-44  | 117 | 125 | 93 +  | 265 | 389 | 695109 | 695230 |
| UN74660 | Rsa1.0_04402.1 | 231 | 17511  | 3.00E-56  | 138 | 146 | 94 +  | 86  | 231 | 14886  | 15029  |
| UN74661 | Rsa1.0_01153.1 | 780 | 52264  | 0         | 725 | 776 | 93 +  | 1   | 758 | 49193  | 49968  |
| UN74662 | Rsa1.0_01062.1 | 775 | 55325  | 1.00E-100 | 195 | 198 | 98 +  | 313 | 510 | 37369  | 37566  |
| UN74663 | Rsa1.0_05646.1 | 409 | 13059  | 1.00E-100 | 189 | 190 | 99 -  | 6   | 195 | 3136   | 3325   |
| UN74664 | Rsa1.0_01000.1 | 838 | 57140  | 4.00E-74  | 142 | 142 | 100 - | 253 | 394 | 42100  | 42241  |
| UN74665 | Rsa1.0_09340.1 | 448 | 6443   | 1.00E-137 | 273 | 281 | 97 +  | 168 | 448 | 5945   | 6221   |
| UN74666 | Rsa1.0_00251.1 | 639 | 303968 | 1.00E-105 | 197 | 198 | 99 -  | 362 | 559 | 113345 | 113542 |
| UN74667 | Rsa1.0_01117.1 | 798 | 53465  | 0         | 337 | 337 | 100 + | 303 | 639 | 22937  | 23273  |
| UN74668 | Rsa1.0_06923.1 | 767 | 10158  | 0         | 731 | 780 | 93 +  | 10  | 762 | 288    | 1067   |
| UN74669 | Rsa1.0_00018.1 | 337 | 410899 | 3.00E-45  | 93  | 93  | 100 + | 245 | 337 | 244894 | 244986 |
| UN74670 | Rsa1.0_04275.1 | 639 | 18136  | 1.00E-126 | 247 | 253 | 97 +  | 386 | 638 | 515    | 767    |
| UN74671 | Rsa1.0_02966.1 | 776 | 135126 | 0         | 427 | 448 | 95 +  | 15  | 462 | 17403  | 17844  |
| UN74672 | Rsa1.0_03956.1 | 829 | 19872  | 0         | 824 | 834 | 98 +  | 3   | 829 | 13118  | 13951  |
| UN74673 | Rsa1.0_00022.1 | 809 | 200461 | 0         | 432 | 433 | 99 -  | 3   | 435 | 53652  | 54084  |
| UN74674 | Rsa1.0_00074.1 | 635 | 147591 | 0         | 577 | 593 | 97 +  | 1   | 589 | 127802 | 128394 |
| UN74675 | Rsa1.0_00414.1 | 679 | 202190 | 0         | 398 | 399 | 99 +  | 271 | 669 | 22123  | 22521  |
| UN74676 | Rsa1.0_00342.1 | 718 | 93695  | 0         | 454 | 454 | 100 - | 58  | 511 | 15020  | 15473  |
| UN74677 | Rsa1.0_04438.1 | 629 | 17361  | 0         | 513 | 514 | 99 +  | 116 | 629 | 13274  | 13787  |
| UN74678 | Rsa1.0_02125.1 | 776 | 34775  | 1.00E-126 | 266 | 273 | 97 +  | 470 | 738 | 17757  | 18029  |
| UN74679 | Rsa1.0_00213.1 | 779 | 108167 | 0         | 772 | 784 | 98 -  | 2   | 779 | 41939  | 42722  |
| UN74680 | Rsa1.0_00294.1 | 494 | 144860 | 8.00E-90  | 171 | 172 | 99 -  | 306 | 477 | 60801  | 60972  |
| UN74681 | Rsa1.0_00012.1 | 561 | 222148 | 0         | 439 | 464 | 94 +  | 61  | 517 | 101444 | 101901 |
| UN74682 | Rsa1.0_00336.1 | 784 | 445051 | 1.00E-95  | 190 | 194 | 97 +  | 412 | 605 | 217848 | 218041 |
| UN74683 | Rsa1.0_00890.1 | 817 | 323870 | 0         | 497 | 500 | 99 +  | 18  | 514 | 182323 | 182822 |

|         |                |     |        |           |     |     |       |     |     |        |        |
|---------|----------------|-----|--------|-----------|-----|-----|-------|-----|-----|--------|--------|
| UN74684 | Rsa1.0_00765.1 | 799 | 65029  | 0         | 766 | 786 | 97 -  | 3   | 786 | 30072  | 30857  |
| UN74685 | Rsa1.0_22749.1 | 203 | 1098   | 1.00E-104 | 200 | 203 | 98 -  | 1   | 203 | 243    | 445    |
| UN74686 | Rsa1.0_00205.1 | 341 | 193401 | 1.00E-101 | 301 | 335 | 89 -  | 8   | 341 | 38434  | 38757  |
| UN74687 | Rsa1.0_00138.1 | 460 | 247040 | 2.00E-16  | 69  | 77  | 89 -  | 166 | 242 | 93587  | 93663  |
| UN74688 | Rsa1.0_00845.1 | 497 | 62346  | 5.00E-91  | 176 | 178 | 98 -  | 1   | 178 | 13147  | 13324  |
| UN74689 | Rsa1.0_00266.1 | 123 | 163932 | 7.00E-59  | 121 | 123 | 98 +  | 1   | 123 | 128787 | 128909 |
| UN74690 | Rsa1.0_00753.1 | 502 | 65705  | 1.00E-153 | 446 | 502 | 88 -  | 1   | 502 | 58257  | 58747  |
| UN74691 | Rsa1.0_08285.1 | 492 | 7606   | 1.00E-153 | 366 | 395 | 92 -  | 2   | 383 | 6676   | 7068   |
| UN74692 | Rsa1.0_16475.1 | 381 | 2143   | 0         | 354 | 359 | 98 -  | 1   | 359 | 1084   | 1441   |
| UN74693 | Rsa1.0_00236.1 | 617 | 104771 | 0         | 608 | 615 | 98 +  | 3   | 617 | 82614  | 83228  |
| UN74694 | Rsa1.0_00046.1 | 379 | 320315 | 1.00E-170 | 354 | 370 | 95 -  | 8   | 376 | 16772  | 17141  |
| UN74695 | Rsa1.0_00711.1 | 124 | 67223  | 1.00E-51  | 118 | 123 | 95 +  | 2   | 124 | 6579   | 6701   |
| UN74696 | Rsa1.0_00035.1 | 781 | 176449 | 3.00E-99  | 277 | 308 | 89 -  | 45  | 341 | 5459   | 5757   |
| UN74697 | Rsa1.0_01717.1 | 782 | 143162 | 1.00E-169 | 335 | 341 | 98 -  | 446 | 782 | 29057  | 29397  |
| UN74698 | Rsa1.0_02662.1 | 559 | 28956  | 0         | 547 | 570 | 95 +  | 1   | 559 | 28091  | 28659  |
| UN74699 | Rsa1.0_15523.1 | 424 | 2559   | 0         | 405 | 422 | 95 -  | 3   | 424 | 476    | 896    |
| UN74700 | Rsa1.0_03656.1 | 701 | 21552  | 1.00E-154 | 276 | 276 | 100 - | 3   | 278 | 17631  | 17906  |
| UN74701 | Rsa1.0_01955.1 | 572 | 36850  | 1.00E-155 | 336 | 350 | 96 +  | 226 | 572 | 13035  | 13383  |
| UN74702 | Rsa1.0_01933.1 | 580 | 37172  | 1.00E-134 | 276 | 287 | 96 -  | 294 | 580 | 5387   | 5673   |
| UN74703 | Rsa1.0_00401.1 | 560 | 244410 | 1.00E-70  | 182 | 194 | 93 -  | 3   | 195 | 176762 | 176951 |
| UN74704 | Rsa1.0_01081.1 | 547 | 499226 | 1.00E-161 | 315 | 324 | 97 +  | 24  | 347 | 459695 | 460018 |
| UN74705 | Rsa1.0_02223.1 | 738 | 152421 | 1.00E-111 | 269 | 286 | 94 +  | 458 | 738 | 129665 | 129948 |
| UN74706 | Rsa1.0_00644.1 | 524 | 136881 | 0         | 412 | 421 | 97 +  | 77  | 496 | 28143  | 28562  |
| UN74707 | Rsa1.0_07813.1 | 641 | 8493   | 0         | 620 | 634 | 97 -  | 5   | 638 | 2485   | 3118   |
| UN74708 | Rsa1.0_00035.1 | 752 | 176449 | 1.00E-112 | 243 | 254 | 95 +  | 3   | 255 | 94181  | 94434  |
| UN74709 | #              | #   | #      | #         | #   | #   | #     | #   | #   | #      | #      |
| UN74710 | Rsa1.0_01145.1 | 826 | 149247 | 2.00E-70  | 136 | 136 | 100 - | 5   | 140 | 126174 | 126309 |
| UN74711 | Rsa1.0_01146.1 | 768 | 163455 | 0         | 559 | 575 | 97 -  | 3   | 577 | 37428  | 37996  |
| UN74712 | Rsa1.0_00516.1 | 567 | 78417  | 1.00E-161 | 306 | 310 | 98 -  | 1   | 306 | 37437  | 37746  |
| UN74713 | Rsa1.0_05884.1 | 158 | 12337  | 1.00E-73  | 152 | 156 | 97 +  | 3   | 158 | 282    | 437    |
| UN74714 | Rsa1.0_00707.1 | 715 | 190112 | 0         | 634 | 650 | 97 -  | 67  | 715 | 14060  | 14708  |
| UN74715 | Rsa1.0_00138.1 | 570 | 247040 | 1.00E-178 | 340 | 348 | 97 +  | 223 | 570 | 233764 | 234111 |
| UN74716 | Rsa1.0_00013.1 | 547 | 292129 | 1.00E-177 | 388 | 411 | 94 +  | 140 | 547 | 142609 | 143016 |
| UN74717 | #              | #   | #      | #         | #   | #   | #     | #   | #   | #      | #      |
| UN74718 | Rsa1.0_00046.1 | 729 | 320315 | 0         | 521 | 535 | 97 +  | 15  | 547 | 64750  | 65283  |
| UN74719 | Rsa1.0_00055.1 | 770 | 520193 | 1.00E-123 | 240 | 245 | 97 -  | 476 | 720 | 62033  | 62277  |
| UN74720 | Rsa1.0_16742.1 | 484 | 2049   | 1.00E-161 | 336 | 352 | 95 +  | 75  | 426 | 1698   | 2049   |
| UN74721 | Rsa1.0_00161.1 | 813 | 116891 | 1.00E-172 | 309 | 310 | 99 +  | 25  | 334 | 34748  | 35057  |
| UN74722 | Rsa1.0_00734.1 | 681 | 66508  | 1.00E-110 | 215 | 219 | 98 -  | 355 | 573 | 60083  | 60301  |

|         |                |     |        |           |     |     |       |     |     |        |        |
|---------|----------------|-----|--------|-----------|-----|-----|-------|-----|-----|--------|--------|
| UN74723 | Rsa1.0.01445.1 | 460 | 45671  | 7.00E-93  | 179 | 181 | 98 +  | 3   | 183 | 9893   | 10073  |
| UN74724 | Rsa1.0.03740.1 | 822 | 21065  | 0         | 590 | 600 | 98 +  | 3   | 602 | 15350  | 15949  |
| UN74725 | Rsa1.0.00354.1 | 777 | 232005 | 0         | 662 | 695 | 95 +  | 3   | 686 | 177805 | 178493 |
| UN74726 | Rsa1.0.01065.1 | 667 | 55264  | 0         | 663 | 667 | 99 +  | 1   | 667 | 28756  | 29422  |
| UN74727 | Rsa1.0.00292.1 | 786 | 98141  | 5.00E-86  | 201 | 213 | 94 -  | 3   | 213 | 64971  | 65183  |
| UN74728 | #              | #   | #      | #         | #   | #   | #     | #   | #   | #      | #      |
| UN74729 | Rsa1.0.00205.1 | 412 | 193401 | 2.00E-43  | 93  | 94  | 98 +  | 131 | 224 | 126552 | 126645 |
| UN74730 | Rsa1.0.00516.1 | 239 | 78417  | 1.00E-105 | 237 | 249 | 95 +  | 2   | 239 | 20126  | 20373  |
| UN74731 | Rsa1.0.13644.1 | 250 | 4580   | 1.00E-129 | 246 | 249 | 98 +  | 3   | 250 | 1408   | 1656   |
| UN74732 | Rsa1.0.02477.1 | 736 | 31058  | 0         | 728 | 739 | 98 -  | 3   | 736 | 10448  | 11185  |
| UN74733 | Rsa1.0.00581.1 | 686 | 163575 | 0         | 587 | 589 | 99 +  | 98  | 686 | 157546 | 158134 |
| UN74734 | Rsa1.0.03700.1 | 703 | 21299  | 0         | 659 | 667 | 98 -  | 31  | 697 | 7588   | 8254   |
| UN74735 | Rsa1.0.00004.1 | 667 | 253996 | 2.00E-75  | 156 | 160 | 97 -  | 507 | 666 | 44568  | 44727  |
| UN74736 | Rsa1.0.00780.1 | 811 | 147795 | 0         | 499 | 532 | 93 -  | 1   | 532 | 25606  | 26112  |
| UN74737 | Rsa1.0.00038.1 | 742 | 314568 | 1.00E-171 | 372 | 393 | 94 +  | 356 | 739 | 141728 | 142119 |
| UN74738 | Rsa1.0.00118.1 | 674 | 130637 | 0         | 574 | 599 | 95 +  | 3   | 595 | 28805  | 29403  |
| UN74739 | Rsa1.0.00075.1 | 535 | 146680 | 0         | 516 | 556 | 92 +  | 3   | 535 | 27629  | 28184  |
| UN74740 | Rsa1.0.01516.1 | 652 | 44196  | 0         | 404 | 425 | 95 -  | 1   | 425 | 36762  | 37184  |
| UN74741 | Rsa1.0.09098.1 | 598 | 6647   | 2.00E-94  | 190 | 194 | 97 +  | 249 | 442 | 5243   | 5433   |
| UN74742 | Rsa1.0.02409.1 | 632 | 31663  | 0         | 370 | 382 | 96 -  | 1   | 380 | 10497  | 10878  |
| UN74743 | Rsa1.0.00308.1 | 775 | 96915  | 1.00E-83  | 175 | 178 | 98 -  | 585 | 760 | 92282  | 92459  |
| UN74744 | Rsa1.0.01017.1 | 612 | 56714  | 1.00E-125 | 268 | 280 | 95 -  | 187 | 463 | 18548  | 18824  |
| UN74745 | Rsa1.0.01600.1 | 684 | 42537  | 1.00E-103 | 223 | 232 | 96 -  | 458 | 684 | 37538  | 37769  |
| UN74746 | Rsa1.0.02256.1 | 603 | 33329  | 1.00E-134 | 279 | 291 | 95 +  | 183 | 473 | 13813  | 14103  |
| UN74747 | Rsa1.0.01558.1 | 680 | 43287  | 0         | 656 | 681 | 96 -  | 4   | 680 | 22012  | 22692  |
| UN74748 | Rsa1.0.02487.1 | 682 | 30928  | 0         | 675 | 682 | 98 -  | 2   | 682 | 11361  | 12042  |
| UN74749 | Rsa1.0.01459.1 | 679 | 45277  | 5.00E-98  | 182 | 182 | 100 - | 2   | 183 | 3246   | 3427   |
| UN74750 | Rsa1.0.00273.1 | 736 | 326186 | 0         | 601 | 642 | 93 -  | 4   | 642 | 40305  | 40931  |
| UN74751 | Rsa1.0.08388.1 | 635 | 7436   | 0         | 501 | 531 | 94 -  | 109 | 635 | 5227   | 5745   |
| UN74752 | Rsa1.0.00206.1 | 701 | 109040 | 6.00E-85  | 248 | 275 | 90 +  | 411 | 677 | 14258  | 14532  |
| UN74753 | Rsa1.0.00727.1 | 762 | 66724  | 5.00E-92  | 205 | 212 | 96 -  | 522 | 730 | 49448  | 49659  |
| UN74754 | Rsa1.0.01595.1 | 701 | 175383 | 3.00E-31  | 265 | 330 | 80 -  | 357 | 686 | 161545 | 161874 |
| UN74755 | Rsa1.0.00961.1 | 651 | 58185  | 1.00E-159 | 331 | 346 | 95 +  | 2   | 344 | 14673  | 15018  |
| UN74756 | Rsa1.0.00457.1 | 807 | 337301 | 0         | 776 | 803 | 96 +  | 8   | 805 | 176509 | 177311 |
| UN74757 | Rsa1.0.07150.1 | 467 | 9817   | 0         | 466 | 467 | 99 -  | 1   | 467 | 7806   | 8272   |
| UN74758 | Rsa1.0.00381.1 | 818 | 89718  | 1.00E-115 | 220 | 223 | 98 -  | 291 | 513 | 86318  | 86540  |
| UN74759 | Rsa1.0.11741.1 | 816 | 5423   | 1.00E-156 | 445 | 500 | 89 -  | 193 | 692 | 4597   | 5096   |
| UN74760 | Rsa1.0.00485.1 | 790 | 80937  | 0         | 787 | 794 | 99 -  | 1   | 790 | 72041  | 72834  |
| UN74761 | Rsa1.0.01331.1 | 643 | 47944  | 0         | 381 | 386 | 98 +  | 3   | 388 | 19983  | 20368  |

|         |                |     |        |           |     |     |       |     |     |        |        |
|---------|----------------|-----|--------|-----------|-----|-----|-------|-----|-----|--------|--------|
| UN74762 | Rsa1.0.02368.1 | 769 | 32096  | 0         | 493 | 495 | 99 -  | 2   | 496 | 2917   | 3411   |
| UN74763 | Rsa1.0.24989.1 | 616 | 957    | 4.00E-86  | 177 | 182 | 97 +  | 337 | 518 | 157    | 338    |
| UN74764 | Rsa1.0.07880.1 | 335 | 8369   | 1.00E-113 | 219 | 223 | 98 +  | 2   | 224 | 6510   | 6732   |
| UN74765 | Rsa1.0.00238.1 | 759 | 193193 | 0         | 534 | 555 | 96 +  | 186 | 737 | 15040  | 15594  |
| UN74766 | Rsa1.0.00191.1 | 730 | 316976 | 0         | 359 | 366 | 98 -  | 370 | 730 | 124395 | 124760 |
| UN74767 | Rsa1.0.00294.1 | 745 | 144860 | 0         | 437 | 442 | 98 +  | 242 | 682 | 67251  | 67692  |
| UN74768 | Rsa1.0.00872.1 | 452 | 61495  | 1.00E-54  | 202 | 233 | 86 -  | 96  | 328 | 51208  | 51440  |
| UN74769 | Rsa1.0.00080.1 | 263 | 190437 | 1.00E-139 | 261 | 263 | 99 -  | 2   | 263 | 97186  | 97448  |
| UN74770 | Rsa1.0.00180.1 | 541 | 114581 | 4.00E-64  | 208 | 239 | 87 -  | 309 | 527 | 20895  | 21133  |
| UN74771 | Rsa1.0.00200.1 | 607 | 162016 | 1.00E-122 | 222 | 222 | 100 - | 3   | 224 | 137577 | 137798 |
| UN74772 | Rsa1.0.00182.1 | 800 | 142305 | 0         | 766 | 771 | 99 +  | 1   | 769 | 134959 | 135729 |
| UN74773 | Rsa1.0.66604.1 | 814 | 344    | 1.00E-120 | 231 | 235 | 98 -  | 447 | 681 | 1      | 235    |
| UN74774 | Rsa1.0.00017.1 | 811 | 752458 | 0         | 395 | 405 | 97 +  | 198 | 602 | 37911  | 38313  |
| UN74775 | Rsa1.0.00545.1 | 569 | 189649 | 0         | 444 | 453 | 98 -  | 3   | 455 | 57177  | 57629  |
| UN74776 | Rsa1.0.00104.1 | 757 | 368722 | 1.00E-119 | 279 | 295 | 94 +  | 454 | 745 | 201064 | 201355 |
| UN74777 | Rsa1.0.00989.1 | 205 | 57494  | 1.00E-105 | 196 | 197 | 99 -  | 9   | 205 | 15374  | 15570  |
| UN74778 | Rsa1.0.01928.1 | 723 | 37192  | 0         | 592 | 624 | 94 -  | 52  | 674 | 25252  | 25874  |
| UN74779 | Rsa1.0.00131.1 | 713 | 432233 | 1.00E-121 | 224 | 225 | 99 +  | 92  | 316 | 286479 | 286703 |
| UN74780 | Rsa1.0.08741.1 | 764 | 6977   | 0         | 719 | 758 | 94 +  | 5   | 760 | 5676   | 6418   |
| UN74781 | Rsa1.0.00792.1 | 742 | 64163  | 2.00E-60  | 297 | 355 | 83 -  | 262 | 610 | 4381   | 4735   |
| UN74782 | Rsa1.0.00055.1 | 684 | 520193 | 1.00E-113 | 225 | 231 | 97 +  | 200 | 430 | 53753  | 53983  |
| UN74783 | Rsa1.0.01609.1 | 443 | 42280  | 1.00E-123 | 251 | 260 | 96 +  | 184 | 443 | 29202  | 29461  |
| UN74784 | Rsa1.0.01537.1 | 647 | 187285 | 0         | 645 | 646 | 99 +  | 2   | 647 | 164431 | 165076 |
| UN74785 | Rsa1.0.01642.1 | 751 | 41772  | 0         | 570 | 597 | 95 +  | 67  | 652 | 8814   | 9410   |
| UN74786 | Rsa1.0.00447.1 | 405 | 84051  | 1.00E-88  | 184 | 190 | 96 +  | 186 | 375 | 32876  | 33065  |
| UN74787 | Rsa1.0.00062.1 | 145 | 299291 | 4.00E-39  | 85  | 86  | 98 -  | 60  | 145 | 261669 | 261754 |
| UN74788 | Rsa1.0.00157.1 | 552 | 245832 | 4.00E-33  | 99  | 105 | 94 +  | 290 | 393 | 165654 | 165757 |
| UN74789 | Rsa1.0.00562.1 | 527 | 75565  | 0         | 521 | 528 | 98 +  | 2   | 527 | 12298  | 12824  |
| UN74790 | Rsa1.0.01242.1 | 731 | 50066  | 0         | 722 | 731 | 98 -  | 1   | 731 | 38093  | 38823  |
| UN74791 | Rsa1.0.01195.1 | 730 | 147988 | 0         | 714 | 731 | 97 -  | 1   | 730 | 33944  | 34673  |
| UN74792 | Rsa1.0.01375.1 | 687 | 47038  | 1.00E-165 | 434 | 476 | 91 +  | 201 | 672 | 3676   | 4148   |
| UN74793 | Rsa1.0.01827.1 | 762 | 143321 | 0         | 463 | 475 | 97 -  | 289 | 762 | 118855 | 119329 |
| UN74794 | Rsa1.0.06035.1 | 195 | 11874  | 2.00E-41  | 99  | 102 | 97 -  | 95  | 195 | 8606   | 8707   |
| UN74795 | Rsa1.0.00339.1 | 796 | 222974 | 1.00E-149 | 271 | 272 | 99 +  | 3   | 274 | 210791 | 211062 |
| UN74796 | Rsa1.0.34500.1 | 710 | 656    | 0         | 456 | 460 | 99 -  | 24  | 483 | 200    | 656    |
| UN74797 | Rsa1.0.00273.1 | 618 | 326186 | 1.00E-103 | 249 | 268 | 92 +  | 149 | 416 | 309490 | 309754 |
| UN74798 | Rsa1.0.00087.1 | 748 | 761073 | 1.00E-120 | 219 | 219 | 100 - | 93  | 311 | 363305 | 363523 |
| UN74799 | Rsa1.0.00128.1 | 610 | 228675 | 1.00E-103 | 194 | 195 | 99 -  | 2   | 196 | 111148 | 111342 |
| UN74800 | Rsa1.0.14316.1 | 801 | 3538   | 0         | 710 | 726 | 97 +  | 65  | 782 | 2813   | 3538   |



|         |                |     |        |           |     |     |       |     |     |        |        |
|---------|----------------|-----|--------|-----------|-----|-----|-------|-----|-----|--------|--------|
| UN74801 | Rsa1.0.00038.1 | 711 | 314568 | 0         | 688 | 700 | 98 -  | 9   | 706 | 171475 | 172174 |
| UN74802 | Rsa1.0.04177.1 | 532 | 18646  | 0         | 427 | 434 | 98 +  | 99  | 532 | 6866   | 7299   |
| UN74803 | Rsa1.0.01085.1 | 738 | 54539  | 0         | 420 | 445 | 94 -  | 3   | 442 | 12013  | 12454  |
| UN74804 | Rsa1.0.02459.1 | 414 | 31185  | 1.00E-145 | 268 | 269 | 99 +  | 1   | 268 | 19566  | 19834  |
| UN74805 | Rsa1.0.00651.1 | 466 | 247766 | 1.00E-161 | 371 | 398 | 93 -  | 1   | 395 | 80988  | 81380  |
| UN74806 | Rsa1.0.00104.1 | 250 | 368722 | 9.00E-91  | 226 | 245 | 92 +  | 1   | 245 | 225020 | 225264 |
| UN74807 | Rsa1.0.00252.1 | 446 | 102760 | 0         | 429 | 448 | 95 +  | 1   | 444 | 93563  | 94010  |
| UN74808 | Rsa1.0.02909.1 | 207 | 26856  | 5.00E-55  | 132 | 139 | 94 +  | 64  | 199 | 11400  | 11538  |
| UN74809 | Rsa1.0.00909.1 | 600 | 59976  | 1.00E-135 | 316 | 338 | 93 -  | 107 | 433 | 43852  | 44186  |
| UN74810 | Rsa1.0.06803.1 | 372 | 10330  | 1.00E-176 | 360 | 375 | 96 +  | 1   | 372 | 4643   | 5017   |
| UN74811 | Rsa1.0.00207.1 | 451 | 248736 | 0         | 440 | 453 | 97 -  | 1   | 451 | 72411  | 72863  |
| UN74812 | Rsa1.0.04588.1 | 199 | 16739  | 1.00E-40  | 100 | 104 | 96 -  | 1   | 104 | 15917  | 16018  |
| UN74813 | Rsa1.0.00380.1 | 716 | 89748  | 0         | 372 | 376 | 98 -  | 2   | 377 | 88066  | 88441  |
| UN74814 | Rsa1.0.00179.1 | 611 | 393324 | 0         | 490 | 508 | 96 +  | 42  | 549 | 59303  | 59810  |
| UN74815 | Rsa1.0.01997.1 | 611 | 158416 | 8.00E-75  | 146 | 147 | 99 -  | 1   | 147 | 16696  | 16842  |
| UN74816 | Rsa1.0.00676.1 | 814 | 69166  | 1.00E-113 | 222 | 227 | 97 +  | 51  | 277 | 39269  | 39495  |
| UN74817 | Rsa1.0.06124.1 | 739 | 11681  | 0         | 455 | 457 | 99 +  | 284 | 739 | 6870   | 7326   |
| UN74818 | Rsa1.0.00019.1 | 438 | 301669 | 4.00E-76  | 183 | 196 | 93 +  | 76  | 265 | 181304 | 181499 |
| UN74819 | Rsa1.0.00221.1 | 494 | 106972 | 2.00E-84  | 159 | 159 | 100 - | 239 | 397 | 64179  | 64337  |
| UN74820 | Rsa1.0.00740.1 | 685 | 215972 | 5.00E-98  | 185 | 186 | 99 +  | 365 | 550 | 53784  | 53969  |
| UN74821 | Rsa1.0.00487.1 | 366 | 80674  | 2.00E-95  | 177 | 177 | 100 - | 66  | 242 | 65471  | 65647  |
| UN74822 | Rsa1.0.00028.1 | 585 | 293984 | 0         | 460 | 462 | 99 +  | 124 | 585 | 119853 | 120314 |
| UN74823 | Rsa1.0.02995.1 | 772 | 26163  | 0         | 365 | 375 | 97 +  | 395 | 768 | 24525  | 24899  |
| UN74824 | Rsa1.0.05336.1 | 418 | 14117  | 4.00E-48  | 98  | 98  | 100 + | 83  | 180 | 10601  | 10698  |
| UN74825 | Rsa1.0.02269.1 | 822 | 33168  | 0         | 446 | 468 | 95 -  | 23  | 479 | 32251  | 32715  |
| UN74826 | Rsa1.0.03978.1 | 631 | 19753  | 1.00E-76  | 146 | 146 | 100 + | 382 | 527 | 11542  | 11687  |
| UN74827 | Rsa1.0.00248.1 | 675 | 163568 | 1.00E-155 | 324 | 339 | 95 -  | 340 | 675 | 40343  | 40681  |
| UN74828 | Rsa1.0.00197.1 | 232 | 109714 | 1.00E-125 | 229 | 230 | 99 +  | 3   | 232 | 8614   | 8843   |
| UN74829 | Rsa1.0.00592.1 | 489 | 73788  | 3.00E-92  | 325 | 372 | 87 -  | 20  | 390 | 21332  | 21696  |
| UN74830 | Rsa1.0.04021.1 | 139 | 19536  | 3.00E-61  | 133 | 137 | 97 -  | 3   | 139 | 5010   | 5143   |
| UN74831 | Rsa1.0.01610.1 | 670 | 42274  | 0         | 403 | 410 | 98 -  | 266 | 670 | 11521  | 11930  |
| UN74832 | Rsa1.0.00580.1 | 647 | 74515  | 1.00E-145 | 261 | 261 | 100 - | 3   | 263 | 5772   | 6032   |
| UN74833 | Rsa1.0.01435.1 | 621 | 45942  | 2.33E-156 | 343 | 366 | 93 +  | 260 | 621 | 28028  | 28393  |
| UN74834 | Rsa1.0.02237.1 | 487 | 33544  | 0         | 485 | 486 | 99 -  | 2   | 487 | 25     | 510    |
| UN74835 | Rsa1.0.00305.1 | 487 | 97308  | 0         | 328 | 328 | 100 + | 159 | 486 | 91981  | 92308  |
| UN74836 | Rsa1.0.00083.1 | 479 | 442773 | 0         | 476 | 478 | 99 -  | 2   | 479 | 327427 | 327904 |
| UN74837 | Rsa1.0.00777.1 | 718 | 191865 | 0         | 470 | 473 | 99 -  | 246 | 718 | 143488 | 143960 |
| UN74838 | Rsa1.0.00126.1 | 431 | 127534 | 1.00E-142 | 294 | 307 | 95 -  | 118 | 424 | 114801 | 115107 |
| UN74839 | Rsa1.0.00789.1 | 486 | 64233  | 1.00E-151 | 289 | 295 | 97 -  | 192 | 486 | 38590  | 38884  |

| UN74840 | #              | #   | #      | #         | #   | #   | #     | #   | #   | #      | #      | # |
|---------|----------------|-----|--------|-----------|-----|-----|-------|-----|-----|--------|--------|---|
| UN74841 | Rsa1.0.00579.1 | 377 | 148308 | 0         | 375 | 377 | 99 -  | 1   | 377 | 15810  | 16186  |   |
| UN74842 | Rsa1.0.00701.1 | 425 | 67691  | 1.00E-124 | 249 | 257 | 96 -  | 3   | 259 | 6195   | 6451   |   |
| UN74843 | Rsa1.0.03387.1 | 811 | 23278  | 0         | 624 | 663 | 94 +  | 154 | 811 | 7459   | 8120   |   |
| UN74844 | Rsa1.0.03781.1 | 802 | 20891  | 0         | 562 | 580 | 96 +  | 166 | 741 | 11400  | 11979  |   |
| UN74845 | Rsa1.0.02057.1 | 422 | 35540  | 1.00E-180 | 329 | 332 | 99 +  | 3   | 334 | 6752   | 7083   |   |
| UN74846 | Rsa1.0.01783.1 | 749 | 39383  | 0         | 461 | 467 | 98 +  | 280 | 742 | 30740  | 31206  |   |
| UN74847 | Rsa1.0.02698.1 | 776 | 28593  | 0         | 488 | 503 | 97 -  | 3   | 505 | 1890   | 2379   |   |
| UN74848 | Rsa1.0.00202.1 | 194 | 185895 | 6.00E-42  | 102 | 107 | 95 +  | 49  | 155 | 131897 | 132003 |   |
| UN74849 | Rsa1.0.00744.1 | 618 | 66084  | 0         | 458 | 459 | 99 -  | 160 | 618 | 64878  | 65336  |   |
| UN74850 | Rsa1.0.00394.1 | 685 | 148426 | 0         | 532 | 556 | 95 -  | 4   | 559 | 67486  | 68033  |   |
| UN74851 | Rsa1.0.00427.1 | 795 | 189678 | 5.00E-92  | 172 | 172 | 100 + | 448 | 619 | 168324 | 168495 |   |
| UN74852 | Rsa1.0.01585.1 | 642 | 42806  | 1.00E-141 | 273 | 279 | 97 -  | 5   | 283 | 35     | 313    |   |
| UN74853 | Rsa1.0.08831.1 | 668 | 6887   | 1.00E-126 | 239 | 241 | 99 -  | 430 | 668 | 4463   | 4703   |   |
| UN74854 | Rsa1.0.04060.1 | 562 | 19313  | 1.00E-147 | 280 | 285 | 98 +  | 278 | 562 | 16471  | 16755  |   |
| UN74855 | Rsa1.0.00818.1 | 781 | 62939  | 0         | 723 | 788 | 91 +  | 3   | 761 | 35427  | 36205  |   |
| UN74856 | Rsa1.0.00301.1 | 198 | 365315 | 5.00E-55  | 109 | 109 | 100 - | 90  | 198 | 363329 | 363437 |   |
| UN74857 | Rsa1.0.01020.1 | 674 | 56619  | 1.00E-122 | 331 | 365 | 90 -  | 57  | 420 | 38069  | 38426  |   |
| UN74858 | Rsa1.0.00737.1 | 794 | 66432  | 0         | 367 | 368 | 99 +  | 174 | 541 | 29011  | 29378  |   |
| UN74859 | Rsa1.0.00531.1 | 727 | 77387  | 1.00E-152 | 287 | 289 | 99 -  | 441 | 727 | 57896  | 58184  |   |
| UN74860 | Rsa1.0.00280.1 | 784 | 99966  | 0         | 432 | 458 | 94 +  | 59  | 504 | 98620  | 99074  |   |
| UN74861 | Rsa1.0.01365.1 | 802 | 47142  | 0         | 627 | 659 | 95 -  | 139 | 793 | 18294  | 18943  |   |
| UN74862 | Rsa1.0.01503.1 | 812 | 44467  | 0         | 556 | 561 | 99 +  | 220 | 777 | 20727  | 21287  |   |
| UN74863 | Rsa1.0.01259.1 | 491 | 49754  | 8.00E-93  | 182 | 185 | 98 +  | 307 | 491 | 34296  | 34480  |   |
| UN74864 | Rsa1.0.01112.1 | 857 | 310601 | 1.00E-172 | 411 | 448 | 91 +  | 155 | 602 | 44499  | 44925  |   |
| UN74865 | Rsa1.0.00270.1 | 585 | 101236 | 0         | 426 | 439 | 97 -  | 147 | 585 | 94154  | 94592  |   |
| UN74866 | Rsa1.0.02258.1 | 684 | 33307  | 1.00E-112 | 216 | 219 | 98 -  | 3   | 221 | 26139  | 26354  |   |
| UN74867 | Rsa1.0.05871.1 | 428 | 12356  | 0         | 385 | 395 | 97 +  | 37  | 428 | 4511   | 4899   |   |
| UN74868 | Rsa1.0.01896.1 | 663 | 37512  | 1.00E-111 | 228 | 236 | 96 -  | 2   | 237 | 9975   | 10210  |   |
| UN74869 | Rsa1.0.00111.1 | 769 | 390088 | 8.00E-91  | 194 | 202 | 96 -  | 360 | 561 | 382359 | 382560 |   |
| UN74870 | Rsa1.0.07481.1 | 757 | 9280   | 0         | 483 | 502 | 96 -  | 126 | 616 | 4516   | 5016   |   |
| UN74871 | Rsa1.0.00421.1 | 814 | 86365  | 1.00E-105 | 240 | 255 | 94 -  | 257 | 511 | 81604  | 81858  |   |
| UN74872 | Rsa1.0.00476.1 | 574 | 280966 | 0         | 568 | 572 | 99 +  | 3   | 574 | 151105 | 151676 |   |
| UN74873 | Rsa1.0.17721.1 | 653 | 1757   | 1.00E-165 | 381 | 408 | 93 -  | 1   | 400 | 119    | 520    |   |
| UN74874 | Rsa1.0.00072.1 | 616 | 148743 | 1.00E-103 | 202 | 206 | 98 -  | 411 | 616 | 75109  | 75314  |   |
| UN74875 | Rsa1.0.00121.1 | 239 | 278029 | 5.00E-74  | 189 | 203 | 93 -  | 1   | 202 | 44990  | 45189  |   |
| UN74876 | Rsa1.0.01506.1 | 744 | 44370  | 2.00E-94  | 191 | 196 | 97 -  | 383 | 578 | 32953  | 33148  |   |
| UN74877 | Rsa1.0.02982.1 | 609 | 26270  | 0         | 565 | 566 | 99 +  | 3   | 568 | 8891   | 9456   |   |
| UN74878 | Rsa1.0.00525.1 | 735 | 78030  | 0         | 399 | 412 | 96 +  | 238 | 649 | 9537   | 9948   |   |

|         |                |     |        |           |     |     |       |     |     |        |        |
|---------|----------------|-----|--------|-----------|-----|-----|-------|-----|-----|--------|--------|
| UN74879 | Rsa1.0_14356.1 | 834 | 3485   | 0         | 479 | 499 | 95 +  | 294 | 789 | 1709   | 2207   |
| UN74880 | Rsa1.0_00056.1 | 777 | 332604 | 1.00E-135 | 244 | 244 | 100 + | 99  | 342 | 309265 | 309508 |
| UN74881 | Rsa1.0_04319.1 | 796 | 17944  | 0         | 524 | 532 | 98 -  | 3   | 534 | 16581  | 17112  |
| UN74882 | Rsa1.0_00236.1 | 795 | 104771 | 0         | 655 | 669 | 97 +  | 124 | 790 | 14512  | 15177  |
| UN74883 | Rsa1.0_00141.1 | 349 | 121494 | 2.00E-98  | 185 | 186 | 99 +  | 164 | 349 | 33901  | 34086  |
| UN74884 | Rsa1.0_00246.1 | 799 | 103541 | 0         | 699 | 723 | 96 -  | 5   | 724 | 71554  | 72276  |
| UN74885 | Rsa1.0_00179.1 | 781 | 393324 | 1.00E-119 | 292 | 317 | 92 -  | 12  | 328 | 281826 | 282136 |
| UN74886 | Rsa1.0_00194.1 | 742 | 110851 | 1.00E-116 | 254 | 265 | 95 -  | 466 | 728 | 97004  | 97268  |
| UN74887 | Rsa1.0_03368.1 | 779 | 23382  | 0         | 772 | 785 | 98 +  | 3   | 779 | 5225   | 6008   |
| UN74888 | Rsa1.0_00131.1 | 852 | 432233 | 2.00E-88  | 166 | 166 | 100 - | 537 | 702 | 48213  | 48378  |
| UN74889 | Rsa1.0_01716.1 | 669 | 40483  | 1.00E-172 | 383 | 410 | 93 +  | 276 | 669 | 11938  | 12339  |
| UN74890 | Rsa1.0_05204.1 | 783 | 14516  | 1.00E-147 | 283 | 289 | 97 -  | 185 | 473 | 6647   | 6935   |
| UN74891 | Rsa1.0_00376.1 | 641 | 90101  | 0         | 639 | 639 | 100 + | 3   | 641 | 13154  | 13792  |
| UN74892 | Rsa1.0_00079.1 | 783 | 606987 | 1.00E-154 | 304 | 313 | 97 +  | 159 | 471 | 55593  | 55905  |
| UN74893 | Rsa1.0_24497.1 | 775 | 985    | 0         | 440 | 460 | 95 +  | 1   | 454 | 273    | 729    |
| UN74894 | Rsa1.0_04478.1 | 709 | 17183  | 1.00E-120 | 235 | 240 | 97 +  | 430 | 669 | 2935   | 3174   |
| UN74895 | Rsa1.0_10543.1 | 678 | 5808   | 0         | 666 | 676 | 98 +  | 4   | 678 | 2605   | 3280   |
| UN74896 | Rsa1.0_00107.1 | 679 | 431659 | 1.00E-115 | 233 | 240 | 97 -  | 78  | 317 | 183555 | 183791 |
| UN74897 | Rsa1.0_02336.1 | 823 | 32397  | 1.00E-148 | 305 | 315 | 96 -  | 3   | 315 | 3835   | 4149   |
| UN74898 | Rsa1.0_04185.1 | 405 | 18589  | 1.00E-117 | 348 | 392 | 88 -  | 14  | 405 | 4366   | 4754   |
| UN74899 | Rsa1.0_00347.1 | 464 | 93048  | 0         | 383 | 387 | 98 -  | 81  | 464 | 66844  | 67230  |
| UN74900 | Rsa1.0_00224.1 | 721 | 327530 | 1.00E-129 | 235 | 235 | 100 + | 3   | 237 | 42011  | 42245  |
| UN74901 | Rsa1.0_05219.1 | 771 | 14455  | 1.00E-110 | 267 | 285 | 93 -  | 328 | 609 | 9101   | 9379   |
| UN74902 | Rsa1.0_43213.1 | 455 | 520    | 0         | 388 | 389 | 99 +  | 2   | 390 | 131    | 519    |
| UN74903 | Rsa1.0_01133.1 | 558 | 52916  | 0         | 328 | 328 | 100 + | 231 | 558 | 33533  | 33860  |
| UN74904 | Rsa1.0_00201.1 | 801 | 232851 | 4.00E-62  | 208 | 236 | 88 -  | 324 | 559 | 209398 | 209630 |
| UN74905 | Rsa1.0_00201.1 | 624 | 232851 | 1.00E-171 | 333 | 340 | 97 -  | 285 | 624 | 212055 | 212392 |
| UN74906 | Rsa1.0_03944.1 | 637 | 19926  | 1.00E-70  | 145 | 148 | 97 +  | 115 | 262 | 7185   | 7332   |
| UN74907 | Rsa1.0_03744.1 | 707 | 21053  | 0         | 673 | 699 | 96 -  | 1   | 697 | 9355   | 10052  |
| UN74908 | Rsa1.0_00204.1 | 782 | 109056 | 0         | 614 | 615 | 99 +  | 3   | 617 | 66528  | 67142  |
| UN74909 | Rsa1.0_00969.1 | 781 | 58014  | 0         | 778 | 782 | 99 -  | 3   | 781 | 14566  | 15347  |
| UN74910 | Rsa1.0_01544.1 | 664 | 185602 | 0         | 455 | 456 | 99 +  | 201 | 656 | 176544 | 176999 |
| UN74911 | Rsa1.0_00306.1 | 534 | 146760 | 0         | 397 | 409 | 97 +  | 126 | 534 | 55152  | 55560  |
| UN74912 | Rsa1.0_00278.1 | 815 | 231896 | 0         | 613 | 624 | 98 -  | 194 | 815 | 25915  | 26535  |
| UN74913 | Rsa1.0_21742.1 | 764 | 1176   | 1.00E-107 | 201 | 202 | 99 -  | 1   | 202 | 732    | 933    |
| UN74914 | Rsa1.0_02984.1 | 805 | 26263  | 0         | 412 | 418 | 98 +  | 305 | 722 | 19653  | 20070  |
| UN74915 | Rsa1.0_04048.1 | 284 | 19394  | 3.00E-97  | 180 | 180 | 100 - | 57  | 236 | 1312   | 1491   |
| UN74916 | Rsa1.0_01822.1 | 607 | 38784  | 0         | 584 | 597 | 97 +  | 2   | 598 | 22175  | 22771  |
| UN74917 | Rsa1.0_02471.1 | 798 | 31104  | 5.00E-89  | 211 | 224 | 94 -  | 3   | 226 | 5569   | 5787   |

|         |                |     |        |           |     |     |       |     |     |        |        |
|---------|----------------|-----|--------|-----------|-----|-----|-------|-----|-----|--------|--------|
| UN74918 | Rsa1.0.00020.1 | 805 | 283099 | 0         | 703 | 727 | 96 -  | 2   | 726 | 34400  | 35126  |
| UN74919 | Rsa1.0.00131.1 | 740 | 432233 | 0         | 506 | 537 | 94 -  | 3   | 539 | 289720 | 290253 |
| UN74920 | Rsa1.0.00016.1 | 673 | 831256 | 0         | 636 | 675 | 94 -  | 3   | 673 | 684771 | 685421 |
| UN74921 | Rsa1.0.00360.1 | 636 | 91190  | 1.00E-150 | 302 | 309 | 97 -  | 326 | 631 | 5050   | 5358   |
| UN74922 | Rsa1.0.01180.1 | 741 | 51517  | 1.00E-162 | 290 | 290 | 100 - | 4   | 293 | 34928  | 35217  |
| UN74923 | Rsa1.0.15036.1 | 749 | 2878   | 0         | 513 | 517 | 99 -  | 236 | 749 | 2362   | 2878   |
| UN74924 | Rsa1.0.01419.1 | 609 | 167402 | 0         | 509 | 539 | 94 -  | 73  | 609 | 132912 | 133439 |
| UN74925 | Rsa1.0.14454.1 | 761 | 3372   | 0         | 462 | 481 | 96 -  | 280 | 760 | 620    | 1100   |
| UN74926 | Rsa1.0.00006.1 | 643 | 396176 | 1.00E-119 | 253 | 262 | 96 -  | 383 | 643 | 261679 | 261939 |
| UN74927 | Rsa1.0.05874.1 | 765 | 12351  | 0         | 469 | 471 | 99 +  | 281 | 749 | 7097   | 7567   |
| UN74928 | Rsa1.0.26922.1 | 721 | 873    | 2.00E-57  | 126 | 130 | 96 +  | 254 | 383 | 178    | 307    |
| UN74929 | Rsa1.0.00200.1 | 503 | 162016 | 1.00E-85  | 185 | 193 | 95 -  | 177 | 369 | 72126  | 72318  |
| UN74930 | Rsa1.0.00096.1 | 707 | 198773 | 2.00E-75  | 150 | 152 | 98 +  | 248 | 399 | 157472 | 157623 |
| UN74931 | Rsa1.0.00029.1 | 612 | 272992 | 0         | 603 | 610 | 98 +  | 3   | 612 | 257525 | 258133 |
| UN74932 | Rsa1.0.00729.1 | 650 | 66690  | 1.00E-177 | 323 | 326 | 99 -  | 59  | 384 | 80     | 405    |
| UN74933 | Rsa1.0.05874.1 | 378 | 12351  | 1.00E-167 | 353 | 369 | 95 -  | 10  | 378 | 8456   | 8822   |
| UN74934 | Rsa1.0.10597.1 | 565 | 5790   | 9.00E-96  | 265 | 299 | 88 -  | 1   | 284 | 4703   | 4986   |
| UN74935 | Rsa1.0.05156.1 | 395 | 14648  | 1.00E-114 | 233 | 240 | 97 -  | 3   | 242 | 11409  | 11647  |
| UN74936 | Rsa1.0.01640.1 | 792 | 41822  | 1.00E-154 | 286 | 289 | 98 -  | 12  | 300 | 38060  | 38348  |
| UN74937 | Rsa1.0.00200.1 | 191 | 162016 | 9.00E-78  | 168 | 175 | 96 +  | 1   | 175 | 77854  | 78028  |
| UN74938 | Rsa1.0.04387.1 | 690 | 17625  | 2.00E-82  | 156 | 156 | 100 + | 443 | 598 | 12374  | 12529  |
| UN74939 | Rsa1.0.00421.1 | 547 | 86365  | 1.00E-133 | 324 | 349 | 92 +  | 8   | 356 | 75833  | 76174  |
| UN74940 | Rsa1.0.00013.1 | 525 | 292129 | 1.00E-120 | 259 | 273 | 94 -  | 78  | 350 | 281575 | 281840 |
| UN74941 | Rsa1.0.06140.1 | 703 | 11646  | 0         | 508 | 530 | 95 -  | 175 | 703 | 7007   | 7531   |
| UN74942 | Rsa1.0.00724.1 | 162 | 66789  | 2.00E-72  | 156 | 162 | 96 +  | 1   | 162 | 60696  | 60857  |
| UN74943 | Rsa1.0.02382.1 | 749 | 31969  | 0         | 662 | 677 | 97 +  | 73  | 749 | 21272  | 21946  |
| UN74944 | Rsa1.0.00013.1 | 428 | 292129 | 0         | 423 | 428 | 98 +  | 1   | 428 | 110753 | 111180 |
| UN74945 | Rsa1.0.00476.1 | 237 | 280966 | 9.00E-54  | 158 | 175 | 90 +  | 1   | 175 | 159830 | 160004 |
| UN74946 | Rsa1.0.00316.1 | 654 | 96264  | 0         | 498 | 541 | 92 +  | 117 | 654 | 83931  | 84460  |
| UN74947 | Rsa1.0.02477.1 | 639 | 31058  | 0         | 626 | 641 | 97 +  | 1   | 639 | 9186   | 9823   |
| UN74948 | Rsa1.0.00581.1 | 170 | 163575 | 1.00E-67  | 154 | 162 | 95 -  | 5   | 166 | 157969 | 158130 |
| UN74949 | Rsa1.0.00092.1 | 410 | 659932 | 0         | 405 | 410 | 98 -  | 1   | 410 | 354040 | 354449 |
| UN74950 | Rsa1.0.00152.1 | 364 | 257730 | 1.00E-109 | 282 | 309 | 91 +  | 1   | 305 | 203847 | 204155 |
| UN74951 | Rsa1.0.00004.1 | 573 | 253996 | 0         | 565 | 573 | 98 +  | 2   | 573 | 43835  | 44407  |
| UN74952 | Rsa1.0.00102.1 | 729 | 135497 | 0         | 695 | 723 | 96 +  | 3   | 711 | 39889  | 40611  |
| UN74953 | Rsa1.0.00324.1 | 216 | 218805 | 4.00E-65  | 138 | 142 | 97 +  | 1   | 142 | 167644 | 167785 |
| UN74954 | Rsa1.0.00703.1 | 507 | 67597  | 1.00E-141 | 267 | 270 | 98 -  | 3   | 271 | 194    | 463    |
| UN74955 | Rsa1.0.49554.1 | 127 | 458    | 4.00E-48  | 118 | 125 | 94 +  | 3   | 127 | 58     | 182    |
| UN74956 | Rsa1.0.00062.1 | 149 | 299291 | 3.00E-12  | 40  | 41  | 97 +  | 109 | 149 | 263778 | 263818 |

|         |                |     |        |           |     |     |       |     |     |        |        |
|---------|----------------|-----|--------|-----------|-----|-----|-------|-----|-----|--------|--------|
| UN74957 | Rsa1.0_00991.1 | 394 | 143101 | 0         | 390 | 394 | 98 +  | 2   | 394 | 135102 | 135495 |
| UN74958 | Rsa1.0_00030.1 | 758 | 250988 | 2.00E-97  | 217 | 228 | 95 -  | 11  | 238 | 156545 | 156770 |
| UN74959 | Rsa1.0_01092.1 | 430 | 54348  | 1.00E-164 | 334 | 348 | 95 -  | 1   | 348 | 53690  | 54037  |
| UN74960 | Rsa1.0_00972.1 | 101 | 57937  | 3.00E-36  | 92  | 97  | 94 -  | 1   | 97  | 50608  | 50704  |
| UN74961 | Rsa1.0_00931.1 | 222 | 59210  | 3.00E-44  | 118 | 127 | 92 +  | 9   | 135 | 6357   | 6483   |
| UN74962 | Rsa1.0_00792.1 | 581 | 64163  | 0         | 556 | 581 | 95 +  | 6   | 581 | 7600   | 8180   |
| UN74963 | Rsa1.0_00075.1 | 680 | 146680 | 0         | 664 | 680 | 97 -  | 1   | 680 | 28662  | 29341  |
| UN74964 | Rsa1.0_03566.1 | 634 | 22050  | 0         | 415 | 424 | 97 +  | 1   | 424 | 15974  | 16397  |
| UN74965 | Rsa1.0_08221.1 | 667 | 7700   | 0         | 487 | 492 | 98 -  | 16  | 507 | 6129   | 6619   |
| UN74966 | Rsa1.0_01153.1 | 458 | 52264  | 0         | 446 | 459 | 97 -  | 1   | 458 | 49942  | 50400  |
| UN74967 | Rsa1.0_00788.1 | 278 | 64237  | 1.00E-128 | 267 | 278 | 96 -  | 4   | 278 | 2191   | 2468   |
| UN74968 | Rsa1.0_00974.1 | 729 | 57893  | 0         | 727 | 729 | 99 +  | 1   | 729 | 47289  | 48017  |
| UN74969 | Rsa1.0_01221.1 | 625 | 50421  | 0         | 386 | 389 | 99 -  | 237 | 625 | 45050  | 45438  |
| UN74970 | Rsa1.0_02609.1 | 130 | 29600  | 2.00E-53  | 124 | 130 | 95 -  | 1   | 130 | 21194  | 21323  |
| UN74971 | Rsa1.0_00800.1 | 473 | 63868  | 8.00E-59  | 122 | 124 | 98 -  | 146 | 269 | 21908  | 22031  |
| UN74972 | Rsa1.0_01613.1 | 537 | 182542 | 0         | 452 | 466 | 96 -  | 1   | 466 | 162642 | 163100 |
| UN74973 | Rsa1.0_05467.1 | 691 | 13649  | 0         | 364 | 375 | 97 +  | 317 | 691 | 8720   | 9094   |
| UN74974 | Rsa1.0_00595.1 | 780 | 341648 | 1.00E-152 | 330 | 348 | 94 +  | 1   | 348 | 64926  | 65266  |
| UN74975 | Rsa1.0_02909.1 | 220 | 26856  | 5.00E-86  | 197 | 209 | 94 -  | 7   | 215 | 10912  | 11120  |
| UN74976 | Rsa1.0_00190.1 | 322 | 318240 | 3.00E-45  | 271 | 329 | 82 +  | 1   | 320 | 91421  | 91727  |
| UN74977 | Rsa1.0_03912.1 | 572 | 135266 | 1.00E-161 | 330 | 343 | 96 +  | 2   | 344 | 885    | 1225   |
| UN74978 | Rsa1.0_01882.1 | 149 | 37697  | 6.00E-60  | 141 | 149 | 94 +  | 1   | 149 | 30243  | 30391  |
| UN74979 | Rsa1.0_00524.1 | 286 | 169613 | 1.00E-111 | 259 | 274 | 94 +  | 17  | 286 | 129353 | 129626 |
| UN74980 | Rsa1.0_00782.1 | 522 | 64468  | 1.00E-114 | 249 | 260 | 95 +  | 6   | 265 | 37285  | 37541  |
| UN74981 | Rsa1.0_03662.1 | 428 | 21492  | 4.00E-85  | 181 | 188 | 96 +  | 184 | 371 | 11532  | 11719  |
| UN74982 | Rsa1.0_01938.1 | 429 | 264018 | 0         | 422 | 429 | 98 +  | 1   | 429 | 150013 | 150441 |
| UN74983 | Rsa1.0_13106.1 | 559 | 5009   | 0         | 409 | 428 | 95 +  | 1   | 428 | 4342   | 4769   |
| UN74984 | Rsa1.0_01118.1 | 722 | 53460  | 6.00E-82  | 164 | 167 | 98 +  | 553 | 719 | 13629  | 13795  |
| UN74985 | Rsa1.0_00258.1 | 211 | 102381 | 2.00E-82  | 194 | 207 | 93 +  | 1   | 207 | 45408  | 45614  |
| UN74986 | Rsa1.0_20987.1 | 528 | 1248   | 1.00E-118 | 252 | 263 | 95 -  | 1   | 262 | 11     | 273    |
| UN74987 | Rsa1.0_00023.1 | 332 | 194764 | 1.00E-160 | 319 | 330 | 96 -  | 3   | 332 | 52754  | 53079  |
| UN74988 | Rsa1.0_00483.1 | 707 | 81102  | 0         | 636 | 672 | 94 +  | 4   | 666 | 76931  | 77595  |
| UN74989 | Rsa1.0_00063.1 | 139 | 156150 | 1.00E-63  | 135 | 139 | 97 -  | 1   | 139 | 142617 | 142755 |
| UN74990 | Rsa1.0_00417.1 | 742 | 395068 | 0         | 739 | 742 | 99 +  | 1   | 742 | 375996 | 376737 |
| UN74991 | Rsa1.0_00745.1 | 525 | 66067  | 0         | 521 | 524 | 99 -  | 2   | 525 | 37086  | 37609  |
| UN74992 | Rsa1.0_00033.1 | 344 | 515811 | 1.00E-171 | 334 | 344 | 97 +  | 1   | 344 | 8091   | 8434   |
| UN74993 | Rsa1.0_07657.1 | 415 | 8896   | 1.00E-115 | 210 | 210 | 100 - | 206 | 415 | 7781   | 7990   |
| UN74994 | Rsa1.0_00056.1 | 705 | 332604 | 0         | 700 | 704 | 99 +  | 2   | 705 | 52490  | 53193  |
| UN74995 | Rsa1.0_02266.1 | 188 | 33195  | 7.00E-57  | 162 | 176 | 92 -  | 14  | 185 | 21051  | 21223  |

|         |                |     |        |           |     |     |       |     |     |        |        |
|---------|----------------|-----|--------|-----------|-----|-----|-------|-----|-----|--------|--------|
| UN74996 | Rsa1.0.27736.1 | 156 | 841    | 1.00E-48  | 128 | 138 | 92 +  | 19  | 156 | 282    | 419    |
| UN74997 | Rsa1.0.00666.1 | 267 | 69505  | 1.00E-130 | 254 | 260 | 97 -  | 8   | 267 | 27872  | 28131  |
| UN74998 | Rsa1.0.00903.1 | 393 | 60228  | 1.00E-147 | 359 | 389 | 92 -  | 3   | 389 | 52287  | 52672  |
| UN74999 | Rsa1.0.00308.1 | 565 | 96915  | 0         | 340 | 342 | 99 +  | 1   | 342 | 90096  | 90437  |
| UN75000 | Rsa1.0.01017.1 | 348 | 56714  | 1.00E-90  | 230 | 249 | 92 +  | 1   | 249 | 15991  | 16228  |
| UN75001 | Rsa1.0.12966.1 | 837 | 5062   | 0         | 834 | 838 | 99 +  | 1   | 837 | 779    | 1616   |
| UN75002 | Rsa1.0.01603.1 | 533 | 42468  | 1.00E-82  | 162 | 164 | 98 +  | 1   | 164 | 17008  | 17171  |
| UN75003 | Rsa1.0.03161.1 | 444 | 24905  | 1.00E-148 | 269 | 270 | 99 -  | 1   | 270 | 18209  | 18478  |
| UN75004 | Rsa1.0.01459.1 | 732 | 45277  | 0         | 376 | 377 | 99 +  | 1   | 377 | 1247   | 1623   |
| UN75005 | Rsa1.0.08388.1 | 241 | 7436   | 6.00E-55  | 167 | 182 | 91 +  | 5   | 183 | 4637   | 4814   |
| UN75006 | #              | #   | #      | #         | #   | #   | #     | #   | #   | #      | #      |
| UN75007 | Rsa1.0.03264.1 | 207 | 145959 | 5.00E-61  | 144 | 151 | 95 -  | 1   | 151 | 130936 | 131085 |
| UN75008 | Rsa1.0.04177.1 | 489 | 18646  | 0         | 422 | 447 | 94 -  | 1   | 447 | 6866   | 7312   |
| UN75009 | Rsa1.0.00141.1 | 810 | 121494 | 1.00E-131 | 237 | 237 | 100 - | 1   | 237 | 5036   | 5272   |
| UN75010 | Rsa1.0.01587.1 | 572 | 42789  | 0         | 561 | 574 | 97 -  | 1   | 571 | 14739  | 15311  |
| UN75011 | Rsa1.0.00644.1 | 642 | 136881 | 6.00E-82  | 173 | 179 | 96 +  | 357 | 535 | 63450  | 63628  |
| UN75012 | Rsa1.0.02589.1 | 506 | 300828 | 1.00E-144 | 314 | 330 | 95 -  | 8   | 335 | 16342  | 16670  |
| UN75013 | Rsa1.0.01976.1 | 524 | 36570  | 9.00E-65  | 150 | 158 | 94 -  | 291 | 448 | 747    | 904    |
| UN75014 | Rsa1.0.09304.1 | 606 | 6469   | 1.00E-73  | 156 | 161 | 96 +  | 445 | 605 | 4252   | 4412   |
| UN75015 | Rsa1.0.14974.1 | 159 | 2919   | 2.00E-60  | 133 | 138 | 96 -  | 4   | 141 | 2513   | 2650   |
| UN75016 | Rsa1.0.00105.1 | 211 | 134138 | 3.00E-96  | 202 | 210 | 96 +  | 1   | 210 | 122064 | 122273 |
| UN75017 | Rsa1.0.00114.1 | 378 | 131330 | 1.00E-114 | 265 | 286 | 92 -  | 3   | 288 | 22355  | 22623  |
| UN75018 | Rsa1.0.01409.1 | 578 | 151595 | 7.00E-75  | 261 | 299 | 87 -  | 1   | 293 | 117986 | 118284 |
| UN75019 | Rsa1.0.00435.1 | 773 | 317579 | 0         | 501 | 501 | 100 + | 273 | 773 | 27836  | 28336  |
| UN75020 | Rsa1.0.06726.1 | 807 | 10460  | 1.00E-154 | 277 | 277 | 100 + | 448 | 724 | 8223   | 8499   |
| UN75021 | Rsa1.0.04065.1 | 700 | 19275  | 0         | 378 | 378 | 100 - | 1   | 378 | 3173   | 3550   |
| UN75022 | Rsa1.0.00310.1 | 571 | 96852  | 0         | 456 | 465 | 98 -  | 3   | 465 | 71221  | 71685  |
| UN75023 | Rsa1.0.00390.1 | 546 | 88681  | 0         | 541 | 549 | 98 -  | 1   | 546 | 51415  | 51963  |
| UN75024 | Rsa1.0.08048.1 | 404 | 137630 | 1.00E-156 | 347 | 367 | 94 +  | 1   | 366 | 135302 | 135667 |
| UN75025 | Rsa1.0.00182.1 | 742 | 142305 | 0         | 741 | 743 | 99 -  | 1   | 742 | 136128 | 136870 |
| UN75026 | Rsa1.0.09943.1 | 545 | 6076   | 1.00E-103 | 275 | 303 | 90 +  | 243 | 545 | 1701   | 2003   |
| UN75027 | Rsa1.0.02605.1 | 269 | 29637  | 1.00E-102 | 236 | 248 | 95 -  | 12  | 258 | 8473   | 8717   |
| UN75028 | Rsa1.0.00350.1 | 533 | 92346  | 1.00E-120 | 222 | 223 | 99 -  | 2   | 224 | 15064  | 15286  |
| UN75029 | Rsa1.0.00409.1 | 470 | 146788 | 1.00E-109 | 235 | 243 | 96 +  | 232 | 470 | 145741 | 145982 |
| UN75030 | Rsa1.0.02378.1 | 682 | 31991  | 0         | 407 | 426 | 95 +  | 4   | 426 | 14209  | 14634  |
| UN75031 | Rsa1.0.02145.1 | 411 | 34628  | 1.00E-94  | 185 | 187 | 98 +  | 1   | 185 | 11120  | 11306  |
| UN75032 | Rsa1.0.00047.1 | 497 | 168582 | 0         | 474 | 489 | 96 +  | 3   | 490 | 92149  | 92634  |
| UN75033 | Rsa1.0.00131.1 | 133 | 432233 | 8.00E-22  | 59  | 61  | 96 -  | 57  | 117 | 288263 | 288323 |
| UN75034 | Rsa1.0.01938.1 | 530 | 264018 | 1.00E-126 | 235 | 237 | 99 +  | 294 | 530 | 164438 | 164674 |

|         |                |     |        |           |     |     |       |     |     |        |        |
|---------|----------------|-----|--------|-----------|-----|-----|-------|-----|-----|--------|--------|
| UN75035 | Rsa1.0.00741.1 | 155 | 66117  | 6.00E-60  | 150 | 159 | 94 -  | 1   | 155 | 51045  | 51203  |
| UN75036 | Rsa1.0.00119.1 | 122 | 467509 | 7.00E-59  | 118 | 119 | 99 +  | 1   | 119 | 46225  | 46343  |
| UN75037 | Rsa1.0.00001.1 | 371 | 363028 | 1.00E-129 | 249 | 253 | 98 +  | 116 | 367 | 208348 | 208600 |
| UN75038 | Rsa1.0.27044.1 | 572 | 868    | 0         | 426 | 440 | 96 -  | 1   | 440 | 279    | 714    |
| UN75039 | Rsa1.0.02150.1 | 446 | 34580  | 0         | 422 | 446 | 94 -  | 1   | 446 | 27763  | 28208  |
| UN75040 | Rsa1.0.00017.1 | 659 | 752458 | 2.00E-66  | 147 | 153 | 96 -  | 507 | 659 | 29181  | 29333  |
| UN75041 | Rsa1.0.00001.1 | 118 | 363028 | 3.00E-42  | 102 | 107 | 95 +  | 12  | 118 | 242359 | 242465 |
| UN75042 | Rsa1.0.01219.1 | 664 | 50527  | 1.00E-149 | 498 | 580 | 85 -  | 103 | 653 | 22169  | 22731  |
| UN75043 | Rsa1.0.01400.1 | 550 | 46560  | 0         | 526 | 529 | 99 -  | 2   | 529 | 37870  | 38398  |
| UN75044 | Rsa1.0.03606.1 | 756 | 21818  | 1.00E-98  | 210 | 219 | 95 +  | 320 | 538 | 2155   | 2373   |
| UN75045 | #              | #   | #      | #         | #   | #   | #     | #   | #   | #      | #      |
| UN75046 | Rsa1.0.00307.1 | 133 | 199003 | 3.00E-49  | 121 | 127 | 95 +  | 1   | 126 | 157783 | 157909 |
| UN75047 | Rsa1.0.05590.1 | 471 | 13242  | 0         | 451 | 488 | 92 -  | 3   | 471 | 4159   | 4643   |
| UN75048 | Rsa1.0.00476.1 | 157 | 280966 | 7.00E-35  | 78  | 79  | 98 +  | 1   | 79  | 220859 | 220937 |
| UN75049 | Rsa1.0.00055.1 | 561 | 520193 | 0         | 541 | 564 | 95 +  | 1   | 561 | 385976 | 386536 |
| UN75050 | Rsa1.0.00298.1 | 760 | 349131 | 2.00E-54  | 209 | 241 | 86 +  | 5   | 245 | 158541 | 158780 |
| UN75051 | Rsa1.0.01118.1 | 307 | 53460  | 2.00E-46  | 179 | 203 | 88 +  | 29  | 225 | 12685  | 12880  |
| UN75052 | Rsa1.0.04112.1 | 679 | 18989  | 1.00E-151 | 314 | 327 | 96 +  | 1   | 327 | 4075   | 4400   |
| UN75053 | Rsa1.0.03037.1 | 601 | 25825  | 0         | 503 | 516 | 97 +  | 4   | 519 | 10649  | 11164  |
| UN75054 | Rsa1.0.01144.1 | 104 | 52431  | 1.00E-10  | 58  | 66  | 87 -  | 1   | 66  | 42305  | 42370  |
| UN75055 | Rsa1.0.02179.1 | 531 | 34188  | 0         | 415 | 437 | 94 +  | 3   | 435 | 23606  | 24037  |
| UN75056 | Rsa1.0.09568.1 | 564 | 6284   | 8.00E-84  | 232 | 254 | 91 -  | 8   | 259 | 5564   | 5812   |
| UN75057 | Rsa1.0.00386.1 | 470 | 89134  | 0         | 468 | 472 | 99 +  | 1   | 470 | 53364  | 53834  |
| UN75058 | Rsa1.0.00387.1 | 722 | 495407 | 0         | 432 | 434 | 99 -  | 289 | 720 | 474970 | 475403 |
| UN75059 | Rsa1.0.01146.1 | 729 | 163455 | 1.00E-122 | 278 | 295 | 94 +  | 2   | 296 | 35110  | 35403  |
| UN75060 | Rsa1.0.04835.1 | 110 | 15766  | 3.00E-33  | 87  | 92  | 94 -  | 2   | 93  | 4608   | 4699   |
| UN75061 | Rsa1.0.01867.1 | 781 | 37960  | 1.00E-148 | 266 | 266 | 100 + | 433 | 698 | 19214  | 19479  |
| UN75062 | Rsa1.0.00064.1 | 523 | 240927 | 1.00E-108 | 230 | 239 | 96 -  | 1   | 239 | 35983  | 36220  |
| UN75063 | Rsa1.0.01396.1 | 728 | 151624 | 0         | 447 | 448 | 99 -  | 2   | 449 | 138955 | 139402 |
| UN75064 | Rsa1.0.00131.1 | 373 | 432233 | 1.00E-148 | 350 | 373 | 93 +  | 3   | 373 | 387654 | 388019 |
| UN75065 | Rsa1.0.02358.1 | 829 | 32213  | 1.00E-43  | 172 | 199 | 86 -  | 441 | 639 | 11707  | 11905  |
| UN75066 | Rsa1.0.01673.1 | 217 | 41197  | 1.00E-103 | 210 | 217 | 96 -  | 1   | 217 | 7545   | 7761   |
| UN75067 | Rsa1.0.02252.1 | 643 | 33375  | 0         | 620 | 644 | 96 +  | 2   | 643 | 9852   | 10490  |
| UN75068 | Rsa1.0.15634.1 | 201 | 2512   | 1.00E-55  | 140 | 150 | 93 -  | 3   | 152 | 1      | 150    |
| UN75069 | Rsa1.0.02625.1 | 313 | 139104 | 1.00E-133 | 292 | 308 | 94 -  | 6   | 313 | 8791   | 9096   |
| UN75070 | #              | #   | #      | #         | #   | #   | #     | #   | #   | #      | #      |
| UN75071 | Rsa1.0.00184.1 | 527 | 218748 | 1.00E-130 | 255 | 259 | 98 +  | 1   | 258 | 211429 | 211686 |
| UN75072 | Rsa1.0.00391.1 | 612 | 183853 | 1.00E-148 | 269 | 270 | 99 +  | 1   | 270 | 68894  | 69163  |
| UN75073 | Rsa1.0.05600.1 | 755 | 13222  | 0         | 737 | 755 | 97 +  | 1   | 755 | 4545   | 5284   |

|         |                |     |        |           |     |     |       |     |     |        |        |
|---------|----------------|-----|--------|-----------|-----|-----|-------|-----|-----|--------|--------|
| UN75074 | Rsa1.0.00592.1 | 117 | 73788  | 8.00E-37  | 100 | 106 | 94 +  | 13  | 117 | 21226  | 21331  |
| UN75075 | Rsa1.0.02208.1 | 601 | 33875  | 1.00E-117 | 220 | 222 | 99 +  | 1   | 222 | 26296  | 26517  |
| UN75076 | Rsa1.0.00031.1 | 432 | 179862 | 1.00E-144 | 271 | 275 | 98 +  | 1   | 275 | 159928 | 160202 |
| UN75077 | Rsa1.0.03589.1 | 751 | 21893  | 0         | 735 | 752 | 97 +  | 2   | 751 | 532    | 1279   |
| UN75078 | Rsa1.0.00816.1 | 296 | 403350 | 1.00E-154 | 291 | 296 | 98 +  | 1   | 296 | 139279 | 139574 |
| UN75079 | Rsa1.0.02761.1 | 787 | 28151  | 0         | 471 | 474 | 99 -  | 3   | 475 | 11537  | 12010  |
| UN75080 | Rsa1.0.01986.1 | 828 | 36489  | 1.00E-175 | 343 | 352 | 97 +  | 1   | 346 | 2610   | 2961   |
| UN75081 | Rsa1.0.32867.1 | 678 | 692    | 0         | 573 | 604 | 94 +  | 1   | 602 | 91     | 692    |
| UN75082 | Rsa1.0.01151.1 | 261 | 52268  | 2.00E-33  | 79  | 81  | 97 +  | 3   | 83  | 26312  | 26392  |
| UN75083 | Rsa1.0.00294.1 | 103 | 144860 | 7.00E-40  | 92  | 95  | 96 +  | 1   | 95  | 60397  | 60491  |
| UN75084 | Rsa1.0.01567.1 | 109 | 43090  | 8.00E-46  | 105 | 109 | 96 -  | 1   | 109 | 4881   | 4989   |
| UN75085 | Rsa1.0.00066.1 | 638 | 152418 | 0         | 631 | 636 | 99 -  | 1   | 636 | 112082 | 112717 |
| UN75086 | Rsa1.0.02651.1 | 135 | 29046  | 9.00E-71  | 135 | 135 | 100 - | 1   | 135 | 28762  | 28896  |
| UN75087 | Rsa1.0.00008.1 | 637 | 358124 | 0         | 619 | 635 | 97 -  | 3   | 637 | 63017  | 63651  |
| UN75088 | Rsa1.0.01609.1 | 401 | 42280  | 0         | 398 | 401 | 99 -  | 1   | 401 | 29525  | 29925  |
| UN75089 | Rsa1.0.03122.1 | 737 | 25207  | 3.00E-81  | 160 | 162 | 98 -  | 285 | 446 | 7333   | 7494   |
| UN75090 | Rsa1.0.00163.1 | 197 | 116847 | 3.00E-68  | 182 | 198 | 91 -  | 2   | 197 | 67127  | 67324  |
| UN75091 | Rsa1.0.00008.1 | 375 | 358124 | 2.00E-21  | 59  | 61  | 96 -  | 1   | 61  | 29548  | 29608  |
| UN75092 | Rsa1.0.00145.1 | 298 | 261008 | 1.00E-110 | 241 | 253 | 95 -  | 7   | 259 | 9578   | 9829   |
| UN75093 | Rsa1.0.40498.1 | 420 | 554    | 1.00E-132 | 269 | 279 | 96 -  | 142 | 420 | 276    | 554    |
| UN75094 | Rsa1.0.00492.1 | 491 | 80178  | 0         | 454 | 493 | 92 -  | 13  | 491 | 64059  | 64550  |
| UN75095 | Rsa1.0.00863.1 | 792 | 254535 | 0         | 688 | 698 | 98 -  | 96  | 792 | 127685 | 128382 |
| UN75096 | Rsa1.0.00067.1 | 253 | 415055 | 7.00E-67  | 135 | 137 | 98 -  | 117 | 253 | 301038 | 301174 |
| UN75097 | Rsa1.0.07895.1 | 636 | 8344   | 0         | 451 | 477 | 94 -  | 5   | 478 | 7079   | 7555   |
| UN75098 | Rsa1.0.01105.1 | 617 | 53958  | 1.00E-163 | 301 | 304 | 99 +  | 314 | 617 | 27951  | 28254  |
| UN75099 | Rsa1.0.17740.1 | 504 | 1752   | 1.00E-101 | 238 | 256 | 92 +  | 1   | 248 | 1240   | 1495   |
| UN75100 | Rsa1.0.00346.1 | 603 | 93130  | 1.00E-107 | 204 | 206 | 99 +  | 193 | 398 | 39814  | 40019  |
| UN75101 | Rsa1.0.00772.1 | 118 | 64856  | 1.00E-44  | 113 | 119 | 94 -  | 1   | 118 | 7633   | 7751   |
| UN75102 | Rsa1.0.00145.1 | 396 | 261008 | 0         | 393 | 396 | 99 -  | 1   | 396 | 244499 | 244894 |
| UN75103 | Rsa1.0.00471.1 | 665 | 81897  | 1.00E-162 | 299 | 302 | 99 +  | 325 | 626 | 3503   | 3804   |
| UN75104 | Rsa1.0.04744.1 | 374 | 16154  | 1.00E-160 | 340 | 358 | 94 -  | 1   | 358 | 7259   | 7616   |
| UN75105 | Rsa1.0.00253.1 | 371 | 231292 | 1.00E-116 | 224 | 228 | 98 -  | 4   | 231 | 124168 | 124395 |
| UN75106 | Rsa1.0.00019.1 | 797 | 301669 | 0         | 322 | 322 | 100 + | 476 | 797 | 149523 | 149844 |
| UN75107 | Rsa1.0.04493.1 | 742 | 17137  | 1.00E-123 | 235 | 237 | 99 -  | 1   | 236 | 4233   | 4469   |
| UN75108 | Rsa1.0.58032.1 | 403 | 394    | 4.00E-88  | 180 | 185 | 97 +  | 71  | 255 | 1      | 185    |
| UN75109 | Rsa1.0.00472.1 | 531 | 398134 | 1.00E-133 | 266 | 273 | 97 -  | 3   | 274 | 273297 | 273569 |
| UN75110 | Rsa1.0.00802.1 | 213 | 63846  | 9.00E-69  | 197 | 215 | 91 -  | 1   | 213 | 17159  | 17371  |
| UN75111 | Rsa1.0.00166.1 | 636 | 240912 | 0         | 633 | 635 | 99 -  | 2   | 636 | 209242 | 209876 |
| UN75112 | Rsa1.0.00528.1 | 596 | 164755 | 0         | 557 | 567 | 98 +  | 2   | 568 | 109455 | 110021 |



|         |                |     |        |           |     |     |       |     |     |        |        |
|---------|----------------|-----|--------|-----------|-----|-----|-------|-----|-----|--------|--------|
| UN75113 | Rsa1.0_00314.1 | 526 | 96472  | 0         | 409 | 414 | 98 -  | 1   | 414 | 37587  | 38000  |
| UN75114 | Rsa1.0_14865.1 | 529 | 3002   | 1.00E-113 | 226 | 232 | 97 +  | 190 | 421 | 2324   | 2555   |
| UN75115 | Rsa1.0_62560.1 | 755 | 367    | 0         | 330 | 333 | 99 -  | 6   | 338 | 1      | 333    |
| UN75116 | Rsa1.0_01117.1 | 545 | 53465  | 1.00E-171 | 307 | 308 | 99 -  | 1   | 308 | 32768  | 33075  |
| UN75117 | Rsa1.0_00642.1 | 560 | 201230 | 0         | 524 | 569 | 92 -  | 1   | 560 | 158385 | 158946 |
| UN75118 | Rsa1.0_03956.1 | 481 | 19872  | 0         | 469 | 473 | 99 -  | 2   | 473 | 14167  | 14639  |
| UN75119 | Rsa1.0_00022.1 | 700 | 200461 | 0         | 571 | 583 | 97 +  | 14  | 594 | 51497  | 52079  |
| UN75120 | Rsa1.0_00132.1 | 472 | 124299 | 1.00E-143 | 276 | 282 | 97 +  | 188 | 469 | 91186  | 91467  |
| UN75121 | Rsa1.0_00414.1 | 436 | 202190 | 1.00E-102 | 212 | 220 | 96 -  | 1   | 220 | 23226  | 23445  |
| UN75122 | Rsa1.0_00896.1 | 748 | 60509  | 0         | 369 | 383 | 96 +  | 2   | 382 | 19935  | 20317  |
| UN75123 | Rsa1.0_04438.1 | 705 | 17361  | 0         | 704 | 705 | 99 -  | 1   | 705 | 14242  | 14946  |
| UN75124 | Rsa1.0_00773.1 | 713 | 64839  | 0         | 699 | 713 | 98 -  | 1   | 713 | 25827  | 26538  |
| UN75125 | Rsa1.0_00017.1 | 641 | 752458 | 0         | 476 | 487 | 97 -  | 155 | 641 | 195537 | 196022 |
| UN75126 | Rsa1.0_00890.1 | 571 | 323870 | 0         | 570 | 572 | 99 -  | 1   | 571 | 184751 | 185322 |
| UN75127 | Rsa1.0_00833.1 | 114 | 62621  | 4.00E-51  | 105 | 106 | 99 -  | 1   | 106 | 32766  | 32871  |
| UN75128 | Rsa1.0_01259.1 | 367 | 49754  | 2.00E-86  | 174 | 178 | 97 -  | 112 | 289 | 34999  | 35176  |
| UN75129 | Rsa1.0_01112.1 | 613 | 310601 | 0         | 544 | 574 | 94 -  | 1   | 574 | 45495  | 46057  |
| UN75130 | Rsa1.0_02350.1 | 485 | 32309  | 0         | 368 | 373 | 98 +  | 113 | 485 | 4484   | 4856   |
| UN75131 | Rsa1.0_01494.1 | 508 | 44641  | 0         | 486 | 506 | 96 -  | 3   | 508 | 5960   | 6465   |
| UN75132 | Rsa1.0_00246.1 | 489 | 103541 | 0         | 447 | 466 | 95 +  | 5   | 470 | 70653  | 71118  |
| UN75133 | Rsa1.0_00179.1 | 733 | 393324 | 1.00E-178 | 410 | 440 | 93 +  | 1   | 425 | 280254 | 280692 |
| UN75134 | Rsa1.0_03940.1 | 164 | 19962  | 3.00E-74  | 159 | 164 | 96 -  | 1   | 164 | 12599  | 12760  |
| UN75135 | Rsa1.0_00018.1 | 785 | 410899 | 0         | 743 | 787 | 94 -  | 4   | 785 | 7400   | 8185   |
| UN75136 | Rsa1.0_19592.1 | 519 | 1410   | 1.00E-161 | 348 | 368 | 94 +  | 149 | 516 | 121    | 488    |
| UN75137 | Rsa1.0_00482.1 | 799 | 81162  | 1.00E-126 | 241 | 245 | 98 +  | 297 | 541 | 473    | 717    |
| UN75138 | Rsa1.0_08655.1 | 548 | 7078   | 1.00E-156 | 295 | 299 | 98 +  | 1   | 298 | 4145   | 4443   |
| UN75139 | Rsa1.0_05739.1 | 470 | 12778  | 0         | 352 | 359 | 98 +  | 112 | 470 | 2153   | 2511   |
| UN75140 | Rsa1.0_10873.1 | 511 | 5694   | 1.00E-156 | 415 | 458 | 90 +  | 1   | 432 | 2548   | 3002   |
| UN75141 | Rsa1.0_11289.1 | 665 | 5555   | 1.00E-114 | 212 | 213 | 99 +  | 2   | 214 | 5343   | 5555   |
| UN75142 | Rsa1.0_01803.1 | 427 | 173846 | 2.00E-99  | 377 | 432 | 87 -  | 1   | 427 | 137485 | 137909 |
| UN75143 | Rsa1.0_00576.1 | 180 | 178949 | 4.00E-58  | 154 | 166 | 92 -  | 1   | 166 | 63792  | 63956  |
| UN75144 | Rsa1.0_06001.1 | 161 | 11979  | 2.00E-81  | 159 | 161 | 98 +  | 1   | 161 | 174    | 334    |
| UN75145 | Rsa1.0_01749.1 | 685 | 39822  | 0         | 534 | 589 | 90 -  | 88  | 673 | 35149  | 35733  |
| UN75146 | Rsa1.0_04095.1 | 730 | 19095  | 1.00E-154 | 288 | 292 | 98 +  | 332 | 623 | 11515  | 11806  |
| UN75147 | Rsa1.0_00306.1 | 783 | 146760 | 0         | 746 | 783 | 95 -  | 2   | 783 | 55536  | 56309  |
| UN75148 | Rsa1.0_02538.1 | 866 | 30364  | 1.00E-165 | 295 | 295 | 100 + | 1   | 295 | 24068  | 24362  |
| UN75149 | Rsa1.0_37587.1 | 717 | 599    | 0         | 544 | 602 | 90 -  | 101 | 683 | 1      | 599    |
| UN75150 | Rsa1.0_27096.1 | 627 | 866    | 0         | 378 | 380 | 99 -  | 1   | 380 | 335    | 714    |
| UN75151 | Rsa1.0_02785.1 | 789 | 27881  | 2.00E-73  | 231 | 261 | 88 +  | 320 | 580 | 12346  | 12606  |

|         |                |     |        |           |     |     |       |     |     |        |        |
|---------|----------------|-----|--------|-----------|-----|-----|-------|-----|-----|--------|--------|
| UN75152 | Rsa1.0.00440.1 | 692 | 84723  | 0         | 690 | 692 | 99 +  | 1   | 692 | 33039  | 33730  |
| UN75153 | Rsa1.0.01606.1 | 722 | 42432  | 0         | 391 | 401 | 97 +  | 1   | 394 | 16040  | 16440  |
| UN75154 | Rsa1.0.00550.1 | 178 | 210790 | 3.00E-96  | 178 | 178 | 100 + | 1   | 178 | 429    | 606    |
| UN75155 | Rsa1.0.01905.1 | 542 | 37450  | 0         | 534 | 541 | 98 -  | 2   | 542 | 29097  | 29636  |
| UN75156 | Rsa1.0.00157.1 | 268 | 245832 | 7.00E-98  | 225 | 238 | 94 -  | 31  | 268 | 166252 | 166484 |
| UN75157 | Rsa1.0.00562.1 | 747 | 75565  | 0         | 454 | 477 | 95 -  | 108 | 578 | 13916  | 14392  |
| UN75158 | Rsa1.0.03305.1 | 776 | 147552 | 0         | 514 | 524 | 98 -  | 253 | 776 | 13319  | 13841  |
| UN75159 | Rsa1.0.01242.1 | 698 | 50066  | 0         | 360 | 370 | 97 +  | 43  | 412 | 37103  | 37472  |
| UN75160 | Rsa1.0.04293.1 | 761 | 18046  | 0         | 602 | 635 | 94 -  | 134 | 761 | 14155  | 14777  |
| UN75161 | Rsa1.0.00759.1 | 246 | 65465  | 4.00E-59  | 164 | 180 | 91 +  | 1   | 175 | 61762  | 61941  |
| UN75162 | Rsa1.0.08655.1 | 550 | 7078   | 1.00E-134 | 289 | 304 | 95 +  | 5   | 308 | 4143   | 4443   |
| UN75163 | Rsa1.0.00122.1 | 734 | 265937 | 0         | 734 | 734 | 100 + | 1   | 734 | 91772  | 92505  |
| UN75164 | Rsa1.0.01503.1 | 541 | 44467  | 1.00E-160 | 286 | 286 | 100 - | 1   | 286 | 21708  | 21993  |
| UN75165 | Rsa1.0.02910.1 | 534 | 26843  | 1.00E-127 | 260 | 270 | 96 +  | 1   | 270 | 23304  | 23573  |
| UN75166 | Rsa1.0.02982.1 | 154 | 26270  | 4.00E-70  | 149 | 154 | 96 -  | 1   | 154 | 10398  | 10551  |
| UN75167 | Rsa1.0.00427.1 | 694 | 189678 | 0         | 386 | 392 | 98 -  | 3   | 391 | 170424 | 170815 |
| UN75168 | Rsa1.0.03485.1 | 389 | 22606  | 0         | 383 | 388 | 98 +  | 2   | 389 | 18816  | 19203  |
| UN75169 | Rsa1.0.01298.1 | 298 | 48999  | 5.00E-65  | 135 | 138 | 97 -  | 113 | 250 | 8519   | 8656   |
| UN75170 | Rsa1.0.03327.1 | 749 | 23707  | 0         | 440 | 457 | 96 -  | 293 | 749 | 17398  | 17854  |
| UN75171 | Rsa1.0.01458.1 | 129 | 175719 | 4.00E-48  | 121 | 129 | 93 -  | 1   | 129 | 28366  | 28494  |
| UN75172 | Rsa1.0.00090.1 | 720 | 273859 | 0         | 717 | 719 | 99 +  | 2   | 720 | 153057 | 153775 |
| UN75173 | Rsa1.0.01184.1 | 285 | 51452  | 1.00E-128 | 266 | 276 | 96 -  | 5   | 280 | 27486  | 27760  |
| UN75174 | Rsa1.0.03362.1 | 148 | 23453  | 2.00E-50  | 135 | 145 | 93 +  | 4   | 148 | 13733  | 13876  |
| UN75175 | Rsa1.0.00301.1 | 275 | 365315 | 1.00E-135 | 267 | 275 | 97 -  | 1   | 275 | 161949 | 162223 |
| UN75176 | Rsa1.0.00533.1 | 528 | 77375  | 0         | 517 | 528 | 97 +  | 1   | 528 | 54266  | 54793  |
| UN75177 | Rsa1.0.01790.1 | 294 | 39248  | 1.00E-125 | 279 | 295 | 94 +  | 1   | 294 | 17018  | 17312  |
| UN75178 | Rsa1.0.00436.1 | 751 | 85008  | 0         | 516 | 550 | 93 +  | 1   | 541 | 81993  | 82542  |
| UN75179 | Rsa1.0.21659.1 | 164 | 1184   | 2.00E-44  | 97  | 99  | 97 -  | 1   | 99  | 627    | 725    |
| UN75180 | Rsa1.0.16170.1 | 186 | 2258   | 2.00E-75  | 168 | 175 | 96 +  | 10  | 183 | 1294   | 1468   |
| UN75181 | Rsa1.0.44370.1 | 148 | 507    | 6.00E-35  | 87  | 91  | 95 +  | 8   | 98  | 417    | 507    |
| UN75182 | Rsa1.0.00316.1 | 553 | 96264  | 0         | 543 | 553 | 98 +  | 1   | 553 | 2741   | 3291   |
| UN75183 | Rsa1.0.01544.1 | 515 | 185602 | 0         | 502 | 511 | 98 -  | 1   | 511 | 177615 | 178123 |
| UN75184 | Rsa1.0.00277.1 | 746 | 100132 | 0         | 734 | 745 | 98 -  | 2   | 746 | 57982  | 58726  |
| UN75185 | Rsa1.0.05995.1 | 355 | 11997  | 0         | 352 | 353 | 99 +  | 3   | 355 | 9061   | 9413   |
| UN75186 | Rsa1.0.00047.1 | 199 | 168582 | 1.00E-80  | 188 | 199 | 94 -  | 3   | 199 | 120210 | 120408 |
| UN75187 | Rsa1.0.01274.1 | 276 | 49419  | 1.00E-113 | 258 | 273 | 94 -  | 5   | 276 | 37208  | 37477  |
| UN75188 | Rsa1.0.03927.1 | 353 | 19997  | 0         | 349 | 353 | 98 -  | 1   | 353 | 18627  | 18979  |
| UN75189 | Rsa1.0.01175.1 | 280 | 51674  | 1.00E-108 | 236 | 246 | 95 +  | 36  | 280 | 38890  | 39134  |
| UN75190 | Rsa1.0.00376.1 | 565 | 90101  | 0         | 521 | 557 | 93 +  | 12  | 565 | 6342   | 6883   |

|         |                |     |        |           |     |     |       |     |     |        |        |
|---------|----------------|-----|--------|-----------|-----|-----|-------|-----|-----|--------|--------|
| UN75191 | Rsa1.0.05755.1 | 597 | 12730  | 0         | 591 | 597 | 98 +  | 1   | 597 | 3254   | 3850   |
| UN75192 | Rsa1.0.16727.1 | 722 | 2052   | 1.00E-100 | 194 | 197 | 98 -  | 1   | 197 | 150    | 346    |
| UN75193 | Rsa1.0.00151.1 | 519 | 119541 | 1.00E-117 | 347 | 393 | 88 -  | 4   | 366 | 45328  | 45720  |
| UN75194 | Rsa1.0.00145.1 | 270 | 261008 | 1.00E-102 | 247 | 265 | 93 -  | 1   | 265 | 242732 | 242995 |
| UN75195 | Rsa1.0.03560.1 | 655 | 22092  | 1.00E-156 | 280 | 280 | 100 - | 1   | 280 | 3354   | 3633   |
| UN75196 | Rsa1.0.27763.1 | 313 | 840    | 1.00E-139 | 295 | 310 | 95 +  | 1   | 310 | 171    | 480    |
| UN75197 | Rsa1.0.00018.1 | 245 | 410899 | 9.00E-91  | 226 | 243 | 93 -  | 7   | 245 | 51268  | 51510  |
| UN75198 | Rsa1.0.00638.1 | 364 | 71037  | 0         | 356 | 360 | 98 -  | 5   | 364 | 55     | 414    |
| UN75199 | Rsa1.0.37453.1 | 288 | 602    | 1.00E-130 | 275 | 288 | 95 +  | 1   | 288 | 201    | 488    |
| UN75200 | Rsa1.0.02904.1 | 144 | 26883  | 3.00E-52  | 132 | 140 | 94 -  | 1   | 140 | 6192   | 6330   |
| UN75201 | Rsa1.0.09527.1 | 611 | 6311   | 2.33E-156 | 298 | 310 | 96 +  | 265 | 574 | 5870   | 6179   |
| UN75202 | Rsa1.0.00557.1 | 286 | 75865  | 2.00E-89  | 201 | 211 | 95 -  | 76  | 286 | 69703  | 69912  |
| UN75203 | Rsa1.0.00401.1 | 246 | 244410 | 9.00E-51  | 102 | 102 | 100 + | 98  | 199 | 174897 | 174998 |
| UN75204 | Rsa1.0.01081.1 | 776 | 499226 | 0         | 583 | 605 | 96 -  | 1   | 600 | 461842 | 462445 |
| UN75205 | Rsa1.0.02252.1 | 298 | 33375  | 1.00E-117 | 278 | 298 | 93 +  | 1   | 298 | 27475  | 27771  |
| UN75206 | Rsa1.0.01081.1 | 483 | 499226 | 1.00E-115 | 246 | 257 | 95 +  | 49  | 302 | 164212 | 164468 |
| UN75207 | Rsa1.0.00336.1 | 251 | 445051 | 6.00E-55  | 212 | 247 | 85 +  | 27  | 251 | 174778 | 175024 |
| UN75208 | Rsa1.0.01250.1 | 562 | 49874  | 1.00E-118 | 230 | 235 | 97 +  | 205 | 439 | 31332  | 31566  |
| UN75209 | Rsa1.0.17069.1 | 830 | 1936   | 0         | 577 | 598 | 96 +  | 234 | 830 | 861    | 1440   |
| UN75210 | Rsa1.0.01543.1 | 525 | 43645  | 1.00E-169 | 373 | 396 | 94 +  | 3   | 398 | 6952   | 7345   |
| UN75211 | Rsa1.0.02494.1 | 617 | 132923 | 0         | 616 | 617 | 99 -  | 1   | 617 | 1343   | 1959   |
| UN75212 | Rsa1.0.06106.1 | 626 | 11735  | 1.00E-121 | 241 | 248 | 97 +  | 2   | 249 | 11223  | 11470  |
| UN75213 | Rsa1.0.00112.1 | 528 | 132199 | 2.00E-38  | 140 | 158 | 88 -  | 308 | 465 | 54009  | 54165  |
| UN75214 | Rsa1.0.00321.1 | 185 | 95671  | 2.00E-85  | 184 | 193 | 95 -  | 1   | 185 | 49761  | 49953  |
| UN75215 | Rsa1.0.00114.1 | 128 | 131330 | 1.00E-26  | 88  | 97  | 90 +  | 1   | 97  | 84514  | 84610  |
| UN75216 | Rsa1.0.08072.1 | 627 | 7955   | 1.00E-143 | 260 | 261 | 99 -  | 4   | 264 | 520    | 780    |
| UN75217 | Rsa1.0.00020.1 | 179 | 283099 | 3.00E-56  | 166 | 183 | 90 +  | 1   | 179 | 34186  | 34361  |
| UN75218 | Rsa1.0.00016.1 | 168 | 831256 | 8.00E-72  | 137 | 137 | 100 + | 30  | 166 | 684637 | 684773 |
| UN75219 | Rsa1.0.00069.1 | 259 | 403561 | 9.00E-82  | 199 | 215 | 92 +  | 1   | 202 | 148096 | 148310 |
| UN75220 | Rsa1.0.00360.1 | 313 | 91190  | 1.00E-165 | 310 | 314 | 98 +  | 1   | 313 | 3512   | 3825   |
| UN75221 | Rsa1.0.00487.1 | 190 | 80674  | 4.00E-40  | 135 | 150 | 90 +  | 43  | 190 | 64241  | 64383  |
| UN75222 | Rsa1.0.00107.1 | 155 | 431659 | 5.00E-54  | 143 | 155 | 92 +  | 1   | 155 | 82138  | 82292  |
| UN75223 | Rsa1.0.15036.1 | 486 | 2878   | 0         | 477 | 485 | 98 +  | 2   | 486 | 435    | 919    |
| UN75224 | Rsa1.0.00385.1 | 527 | 89160  | 1.00E-122 | 273 | 288 | 94 -  | 31  | 313 | 9411   | 9698   |
| UN75225 | Rsa1.0.01419.1 | 136 | 167402 | 5.00E-23  | 83  | 91  | 91 +  | 1   | 90  | 132911 | 133001 |
| UN75226 | Rsa1.0.03686.1 | 130 | 21387  | 2.00E-40  | 117 | 128 | 91 +  | 1   | 128 | 9188   | 9315   |
| UN75227 | Rsa1.0.00341.1 | 378 | 249309 | 1.00E-174 | 361 | 378 | 95 -  | 1   | 378 | 227421 | 227798 |
| UN75228 | Rsa1.0.02871.1 | 524 | 27085  | 0         | 506 | 514 | 98 +  | 2   | 515 | 22815  | 23328  |
| UN75229 | Rsa1.0.05723.1 | 731 | 12817  | 0         | 632 | 643 | 98 -  | 2   | 644 | 5257   | 5896   |

|         |                |     |        |           |     |     |      |     |     |        |        |
|---------|----------------|-----|--------|-----------|-----|-----|------|-----|-----|--------|--------|
| UN75230 | Rsa1.0.00029.1 | 621 | 272992 | 0         | 361 | 362 | 99 - | 1   | 362 | 23298  | 23659  |
| UN75231 | Rsa1.0.00201.1 | 717 | 232851 | 0         | 686 | 690 | 99 - | 1   | 690 | 102218 | 102907 |
| UN75232 | Rsa1.0.03195.1 | 588 | 24673  | 0         | 393 | 412 | 95 - | 1   | 412 | 9173   | 9577   |
| UN75233 | Rsa1.0.08838.1 | 725 | 6873   | 0         | 450 | 467 | 96 - | 106 | 572 | 2943   | 3408   |
| UN75234 | Rsa1.0.00848.1 | 832 | 152362 | 1.00E-122 | 228 | 230 | 99 - | 1   | 230 | 38270  | 38499  |
| UN75235 | Rsa1.0.00498.1 | 792 | 79746  | 1.00E-171 | 433 | 476 | 90 - | 222 | 681 | 22579  | 23054  |
| UN75236 | Rsa1.0.02136.1 | 602 | 34707  | 0         | 382 | 387 | 98 + | 6   | 392 | 9189   | 9575   |
| UN75237 | Rsa1.0.00451.1 | 666 | 322533 | 1.00E-138 | 252 | 253 | 99 + | 1   | 253 | 21614  | 21866  |
| UN75238 | Rsa1.0.02372.1 | 699 | 32053  | 1.00E-151 | 304 | 315 | 96 - | 1   | 315 | 24847  | 25161  |
| UN75239 | Rsa1.0.00184.1 | 556 | 218748 | 1.00E-76  | 152 | 154 | 98 + | 376 | 529 | 211775 | 211928 |
| UN75240 | Rsa1.0.00585.1 | 542 | 74164  | 1.00E-107 | 215 | 221 | 97 + | 255 | 475 | 44691  | 44911  |
| UN75241 | Rsa1.0.02911.1 | 606 | 142461 | 1.00E-102 | 221 | 230 | 96 - | 104 | 328 | 139387 | 139616 |
| UN75242 | Rsa1.0.00990.1 | 230 | 57445  | 2.00E-76  | 160 | 165 | 96 + | 1   | 165 | 41342  | 41506  |
| UN75243 | Rsa1.0.03264.1 | 413 | 145959 | 1.00E-170 | 389 | 411 | 94 - | 5   | 413 | 143284 | 143686 |
| UN75244 | Rsa1.0.00482.1 | 278 | 81162  | 3.00E-51  | 130 | 139 | 93 + | 83  | 221 | 80     | 218    |
| UN75245 | Rsa1.0.03976.1 | 486 | 19759  | 1.00E-107 | 203 | 205 | 99 - | 270 | 474 | 11928  | 12132  |
| UN75246 | Rsa1.0.00417.1 | 668 | 395068 | 1.00E-123 | 245 | 252 | 97 + | 416 | 667 | 14475  | 14726  |
| UN75247 | Rsa1.0.19740.1 | 680 | 1390   | 0         | 656 | 682 | 96 + | 1   | 680 | 648    | 1318   |
| UN75248 | Rsa1.0.05800.1 | 187 | 141392 | 9.00E-75  | 178 | 188 | 94 + | 1   | 187 | 133136 | 133320 |
| UN75249 | Rsa1.0.15687.1 | 554 | 2480   | 1.00E-118 | 242 | 250 | 96 - | 1   | 248 | 1      | 250    |
| UN75250 | Rsa1.0.00896.1 | 768 | 60509  | 0         | 611 | 614 | 99 - | 2   | 615 | 17628  | 18241  |
| UN75251 | Rsa1.0.00875.1 | 506 | 61371  | 0         | 490 | 506 | 96 + | 1   | 506 | 6976   | 7481   |
| UN75252 | Rsa1.0.22274.1 | 651 | 1135   | 1.00E-132 | 279 | 291 | 95 - | 3   | 292 | 388    | 678    |
| UN75253 | Rsa1.0.04293.1 | 386 | 18046  | 1.00E-127 | 259 | 267 | 97 - | 1   | 267 | 11123  | 11388  |
| UN75254 | Rsa1.0.07996.1 | 774 | 135291 | 1.00E-132 | 249 | 252 | 98 - | 1   | 252 | 134562 | 134813 |
| UN75255 | Rsa1.0.01683.1 | 726 | 41059  | 0         | 718 | 722 | 99 - | 5   | 726 | 24118  | 24839  |
| UN75256 | Rsa1.0.03368.1 | 833 | 23382  | 0         | 797 | 832 | 95 - | 2   | 831 | 6102   | 6930   |
| UN75257 | Rsa1.0.01195.1 | 774 | 147988 | 0         | 734 | 783 | 93 + | 17  | 774 | 33184  | 33960  |
| UN75258 | Rsa1.0.02438.1 | 808 | 31392  | 1.00E-162 | 296 | 298 | 99 + | 2   | 299 | 4328   | 4625   |
| UN75259 | Rsa1.0.54692.1 | 613 | 417    | 4.00E-64  | 142 | 147 | 96 + | 285 | 428 | 1      | 147    |
| UN75260 | Rsa1.0.00087.1 | 520 | 761073 | 1.00E-180 | 337 | 343 | 98 + | 3   | 345 | 533424 | 533766 |
| UN75261 | Rsa1.0.00207.1 | 164 | 248736 | 3.00E-71  | 154 | 160 | 96 + | 1   | 160 | 194552 | 194711 |
| UN75262 | Rsa1.0.00140.1 | 752 | 121541 | 0         | 744 | 752 | 98 + | 1   | 752 | 65160  | 65911  |
| UN75263 | Rsa1.0.06035.1 | 145 | 11874  | 6.00E-32  | 92  | 98  | 93 + | 1   | 97  | 8606   | 8703   |
| UN75264 | Rsa1.0.00071.1 | 553 | 345714 | 1.00E-132 | 270 | 277 | 97 + | 2   | 273 | 39359  | 39635  |
| UN75265 | Rsa1.0.00611.1 | 476 | 72410  | 3.00E-95  | 255 | 281 | 90 - | 14  | 279 | 1963   | 2243   |
| UN75266 | Rsa1.0.00273.1 | 761 | 326186 | 5.00E-61  | 129 | 132 | 97 + | 3   | 134 | 313495 | 313626 |
| UN75267 | Rsa1.0.04729.1 | 193 | 16201  | 2.00E-29  | 72  | 74  | 97 + | 120 | 193 | 12325  | 12398  |
| UN75268 | Rsa1.0.00133.1 | 134 | 123768 | 3.00E-24  | 121 | 136 | 88 - | 1   | 134 | 9963   | 10094  |

|         |                |     |        |           |     |     |       |     |     |        |        |
|---------|----------------|-----|--------|-----------|-----|-----|-------|-----|-----|--------|--------|
| UN75269 | Rsa1.0.00395.1 | 197 | 214466 | 3.00E-59  | 184 | 208 | 88 +  | 1   | 194 | 4372   | 4579   |
| UN75270 | Rsa1.0.02367.1 | 128 | 32106  | 2.00E-34  | 77  | 78  | 98 -  | 1   | 78  | 27233  | 27310  |
| UN75271 | Rsa1.0.00087.1 | 418 | 761073 | 1.00E-114 | 398 | 457 | 87 +  | 1   | 415 | 361989 | 362444 |
| UN75272 | Rsa1.0.01029.1 | 392 | 256254 | 4.00E-91  | 182 | 186 | 97 +  | 1   | 186 | 24462  | 24647  |
| UN75273 | Rsa1.0.02213.1 | 426 | 33824  | 0         | 407 | 423 | 96 +  | 2   | 424 | 16462  | 16884  |
| UN75274 | Rsa1.0.02185.1 | 474 | 34150  | 0         | 371 | 384 | 96 +  | 1   | 384 | 20652  | 21034  |
| UN75275 | Rsa1.0.01334.1 | 430 | 47904  | 5.00E-38  | 90  | 93  | 96 +  | 68  | 160 | 8684   | 8776   |
| UN75276 | Rsa1.0.00037.1 | 332 | 307838 | 1.00E-107 | 253 | 269 | 94 +  | 2   | 265 | 291598 | 291864 |
| UN75277 | Rsa1.0.02677.1 | 429 | 167801 | 2.00E-96  | 218 | 230 | 94 +  | 21  | 249 | 11916  | 12139  |
| UN75278 | Rsa1.0.00201.1 | 736 | 232851 | 1.00E-103 | 218 | 227 | 96 +  | 80  | 306 | 129786 | 130008 |
| UN75279 | Rsa1.0.07407.1 | 558 | 9451   | 1.00E-163 | 291 | 291 | 100 - | 268 | 558 | 9161   | 9451   |
| UN75280 | Rsa1.0.00013.1 | 232 | 292129 | 7.00E-36  | 114 | 124 | 91 -  | 111 | 232 | 144183 | 144305 |
| UN75281 | Rsa1.0.02229.1 | 528 | 33672  | 0         | 413 | 433 | 95 -  | 1   | 425 | 22889  | 23319  |
| UN75282 | Rsa1.0.03572.1 | 590 | 146346 | 5.00E-85  | 216 | 234 | 92 -  | 273 | 503 | 138849 | 139082 |
| UN75283 | Rsa1.0.00278.1 | 500 | 231896 | 0         | 365 | 373 | 97 -  | 1   | 373 | 60144  | 60512  |
| UN75284 | Rsa1.0.00351.1 | 530 | 413096 | 0         | 491 | 530 | 92 -  | 1   | 530 | 124412 | 124940 |
| UN75285 | Rsa1.0.03044.1 | 526 | 25791  | 0         | 374 | 375 | 99 +  | 2   | 376 | 7083   | 7457   |
| UN75286 | Rsa1.0.00019.1 | 311 | 301669 | 6.00E-77  | 189 | 200 | 94 -  | 1   | 200 | 182958 | 183152 |
| UN75287 | Rsa1.0.00740.1 | 399 | 215972 | 1.00E-139 | 253 | 254 | 99 -  | 39  | 292 | 54669  | 54922  |
| UN75288 | Rsa1.0.04991.1 | 197 | 15215  | 5.00E-55  | 175 | 197 | 88 -  | 1   | 197 | 10297  | 10483  |
| UN75289 | Rsa1.0.10038.1 | 528 | 6029   | 0         | 354 | 358 | 98 +  | 172 | 528 | 4706   | 5063   |
| UN75290 | Rsa1.0.02269.1 | 561 | 33168  | 1.00E-67  | 141 | 143 | 98 +  | 271 | 413 | 31000  | 31141  |
| UN75291 | Rsa1.0.01081.1 | 590 | 499226 | 0         | 536 | 541 | 99 -  | 1   | 541 | 322593 | 323133 |
| UN75292 | Rsa1.0.00083.1 | 404 | 442773 | 1.00E-131 | 273 | 281 | 97 +  | 3   | 282 | 326317 | 326594 |
| UN75293 | Rsa1.0.05629.1 | 191 | 13129  | 1.00E-89  | 185 | 191 | 96 -  | 1   | 191 | 9084   | 9274   |
| UN75294 | Rsa1.0.02144.1 | 440 | 34630  | 1.00E-154 | 339 | 358 | 94 +  | 1   | 354 | 8795   | 9152   |
| UN75295 | Rsa1.0.05379.1 | 317 | 13968  | 1.00E-161 | 306 | 311 | 98 +  | 1   | 310 | 7972   | 8282   |
| UN75296 | Rsa1.0.02571.1 | 502 | 29995  | 1.00E-180 | 340 | 347 | 97 +  | 14  | 360 | 20382  | 20728  |
| UN75297 | Rsa1.0.09321.1 | 290 | 6456   | 1.00E-158 | 288 | 290 | 99 +  | 1   | 290 | 859    | 1148   |
| UN75298 | Rsa1.0.00027.1 | 758 | 283362 | 1.00E-139 | 376 | 417 | 90 +  | 1   | 399 | 117166 | 117577 |
| UN75299 | Rsa1.0.00042.1 | 666 | 171507 | 1.00E-58  | 284 | 337 | 84 -  | 276 | 608 | 63073  | 63407  |
| UN75300 | Rsa1.0.00690.1 | 204 | 140527 | 6.00E-30  | 88  | 95  | 92 -  | 6   | 100 | 31841  | 31935  |
| UN75301 | Rsa1.0.00130.1 | 485 | 125737 | 3.00E-95  | 220 | 233 | 94 +  | 5   | 236 | 32158  | 32390  |
| UN75302 | Rsa1.0.00588.1 | 795 | 73939  | 0         | 795 | 795 | 100 - | 1   | 795 | 41705  | 42499  |
| UN75303 | Rsa1.0.02798.1 | 443 | 27792  | 1.00E-119 | 400 | 455 | 87 +  | 7   | 443 | 5322   | 5771   |
| UN75304 | Rsa1.0.00493.1 | 779 | 80007  | 1.00E-126 | 236 | 238 | 99 -  | 1   | 238 | 77685  | 77922  |
| UN75305 | Rsa1.0.26911.1 | 721 | 873    | 1.00E-103 | 203 | 207 | 98 -  | 283 | 489 | 248    | 454    |
| UN75306 | Rsa1.0.07880.1 | 776 | 8369   | 1.00E-161 | 343 | 359 | 95 -  | 3   | 361 | 7333   | 7683   |
| UN75307 | Rsa1.0.55885.1 | 825 | 409    | 1.00E-170 | 381 | 407 | 93 -  | 418 | 824 | 1      | 407    |

|         |                |     |        |           |     |     |      |     |     |        |        |
|---------|----------------|-----|--------|-----------|-----|-----|------|-----|-----|--------|--------|
| UN75308 | Rsa1.0.00485.1 | 177 | 80937  | 3.00E-74  | 168 | 177 | 94 + | 1   | 177 | 71099  | 71275  |
| UN75309 | Rsa1.0.01331.1 | 669 | 47944  | 0         | 549 | 574 | 95 - | 1   | 572 | 21832  | 22400  |
| UN75310 | Rsa1.0.00418.1 | 157 | 215377 | 2.00E-62  | 148 | 157 | 94 - | 1   | 157 | 4912   | 5068   |
| UN75311 | Rsa1.0.00622.1 | 215 | 71822  | 7.00E-85  | 201 | 215 | 93 - | 1   | 215 | 11617  | 11831  |
| UN75312 | Rsa1.0.04395.1 | 404 | 17570  | 1.00E-142 | 295 | 307 | 96 + | 2   | 307 | 9978   | 10284  |
| UN75313 | Rsa1.0.00187.1 | 523 | 393093 | 1.00E-124 | 253 | 262 | 96 + | 177 | 438 | 46569  | 46830  |
| UN75314 | Rsa1.0.00121.1 | 225 | 278029 | 5.00E-46  | 177 | 206 | 85 + | 2   | 205 | 43392  | 43575  |
| UN75315 | Rsa1.0.02582.1 | 565 | 29889  | 1.00E-120 | 248 | 256 | 96 - | 1   | 251 | 3887   | 4142   |
| UN75316 | Rsa1.0.00236.1 | 871 | 104771 | 0         | 468 | 470 | 99 - | 1   | 470 | 15770  | 16239  |
| UN75317 | Rsa1.0.13353.1 | 428 | 4894   | 0         | 426 | 427 | 99 - | 3   | 428 | 2455   | 2881   |
| UN75318 | Rsa1.0.10543.1 | 758 | 5808   | 0         | 503 | 506 | 99 - | 1   | 505 | 4307   | 4812   |
| UN75319 | Rsa1.0.00204.1 | 327 | 109056 | 2.00E-80  | 189 | 202 | 93 - | 126 | 327 | 68621  | 68815  |
| UN75320 | Rsa1.0.00940.1 | 579 | 179946 | 1.00E-168 | 318 | 324 | 98 - | 255 | 578 | 175916 | 176239 |
| UN75321 | Rsa1.0.01543.1 | 281 | 43645  | 8.00E-67  | 147 | 153 | 96 + | 1   | 153 | 455    | 607    |
| UN75322 | Rsa1.0.01453.1 | 254 | 45449  | 4.00E-90  | 237 | 257 | 92 + | 1   | 254 | 10665  | 10913  |
| UN75323 | Rsa1.0.02358.1 | 638 | 32213  | 1.00E-137 | 295 | 309 | 95 - | 330 | 635 | 759    | 1066   |
| UN75324 | Rsa1.0.03165.1 | 322 | 24866  | 2.00E-74  | 209 | 227 | 92 + | 98  | 322 | 2356   | 2577   |
| UN75325 | Rsa1.0.00003.1 | 611 | 340054 | 1.00E-174 | 340 | 349 | 97 - | 1   | 349 | 4541   | 4888   |
| UN75326 | Rsa1.0.08492.1 | 539 | 7277   | 0         | 537 | 539 | 99 - | 1   | 539 | 6597   | 7135   |
| UN75327 | Rsa1.0.04123.1 | 350 | 18947  | 1.00E-126 | 277 | 293 | 94 - | 58  | 350 | 15573  | 15865  |
| UN75328 | Rsa1.0.00881.1 | 470 | 61260  | 2.33E-156 | 285 | 292 | 97 + | 146 | 433 | 21218  | 21509  |
| UN75329 | Rsa1.0.03828.1 | 572 | 20588  | 0         | 479 | 480 | 99 + | 1   | 480 | 5902   | 6381   |
| UN75330 | Rsa1.0.00329.1 | 132 | 222544 | 3.00E-52  | 125 | 132 | 94 + | 1   | 132 | 89548  | 89679  |
| UN75331 | Rsa1.0.02510.1 | 696 | 30662  | 0         | 681 | 698 | 97 + | 2   | 696 | 850    | 1547   |
| UN75332 | Rsa1.0.01052.1 | 512 | 55548  | 1.00E-159 | 296 | 300 | 98 + | 3   | 302 | 43547  | 43846  |
| UN75333 | Rsa1.0.05839.1 | 677 | 12479  | 6.00E-88  | 318 | 366 | 86 - | 158 | 522 | 3987   | 4347   |
| UN75334 | Rsa1.0.02072.1 | 444 | 35401  | 0         | 432 | 452 | 95 - | 3   | 444 | 7188   | 7633   |
| UN75335 | Rsa1.0.00627.1 | 531 | 71566  | 1.00E-119 | 220 | 221 | 99 - | 1   | 221 | 23881  | 24101  |
| UN75336 | Rsa1.0.00116.1 | 580 | 365886 | 0         | 556 | 589 | 94 + | 1   | 580 | 7966   | 8544   |
| UN75337 | Rsa1.0.00278.1 | 280 | 231896 | 1.00E-139 | 271 | 278 | 97 - | 1   | 278 | 82795  | 83072  |
| UN75338 | Rsa1.0.05947.1 | 756 | 12142  | 0         | 578 | 625 | 92 - | 1   | 613 | 3191   | 3805   |
| UN75339 | Rsa1.0.00183.1 | 590 | 113277 | 0         | 585 | 588 | 99 + | 3   | 590 | 15768  | 16354  |
| UN75340 | Rsa1.0.51955.1 | 554 | 438    | 1.00E-140 | 262 | 265 | 98 - | 1   | 265 | 1      | 265    |
| UN75341 | Rsa1.0.07591.1 | 632 | 9060   | 0         | 604 | 634 | 95 + | 1   | 632 | 6571   | 7204   |
| UN75342 | Rsa1.0.01177.1 | 718 | 51572  | 1.00E-125 | 311 | 338 | 92 + | 18  | 342 | 47190  | 47527  |
| UN75343 | Rsa1.0.09343.1 | 479 | 6439   | 1.00E-162 | 338 | 353 | 95 + | 1   | 352 | 4344   | 4696   |
| UN75344 | Rsa1.0.00136.1 | 579 | 122464 | 0         | 367 | 369 | 99 - | 1   | 369 | 119347 | 119715 |
| UN75345 | Rsa1.0.05389.1 | 218 | 13943  | 3.00E-90  | 204 | 216 | 94 - | 3   | 218 | 8879   | 9094   |
| UN75346 | Rsa1.0.00433.1 | 559 | 85381  | 0         | 438 | 440 | 99 - | 3   | 440 | 19788  | 20227  |

|         |                |     |        |           |     |     |       |     |     |        |        |
|---------|----------------|-----|--------|-----------|-----|-----|-------|-----|-----|--------|--------|
| UN75347 | Rsa1.0_00417.1 | 511 | 395068 | 1.00E-157 | 310 | 318 | 97 +  | 77  | 393 | 296178 | 296491 |
| UN75348 | #              | #   | #      | #         | #   | #   | #     | #   | #   | #      | #      |
| UN75349 | Rsa1.0_06102.1 | 156 | 11740  | 5.00E-39  | 108 | 116 | 93 -  | 4   | 119 | 454    | 566    |
| UN75350 | Rsa1.0_00646.1 | 624 | 70473  | 1.00E-158 | 289 | 291 | 99 -  | 334 | 624 | 9178   | 9468   |
| UN75351 | Rsa1.0_00069.1 | 712 | 403561 | 7.00E-91  | 191 | 198 | 96 -  | 515 | 712 | 195153 | 195350 |
| UN75352 | Rsa1.0_00984.1 | 691 | 57580  | 1.00E-98  | 183 | 183 | 100 - | 509 | 691 | 6530   | 6712   |
| UN75353 | Rsa1.0_04039.1 | 595 | 19467  | 0         | 593 | 593 | 100 + | 3   | 595 | 8317   | 8909   |
| UN75354 | Rsa1.0_04205.1 | 271 | 138772 | 1.00E-125 | 260 | 271 | 95 +  | 1   | 271 | 133931 | 134201 |
| UN75355 | Rsa1.0_00842.1 | 143 | 62493  | 6.00E-66  | 139 | 143 | 97 +  | 1   | 143 | 38968  | 39110  |
| UN75356 | Rsa1.0_02433.1 | 761 | 158318 | 0         | 535 | 538 | 99 -  | 126 | 663 | 30463  | 31000  |
| UN75357 | Rsa1.0_00347.1 | 402 | 93048  | 1.00E-111 | 239 | 248 | 96 +  | 1   | 247 | 77690  | 77936  |
| UN75358 | Rsa1.0_01768.1 | 154 | 138463 | 2.00E-32  | 74  | 75  | 98 -  | 80  | 154 | 104042 | 104116 |
| UN75359 | Rsa1.0_00058.1 | 519 | 159921 | 0         | 475 | 511 | 92 +  | 18  | 519 | 81069  | 81569  |
| UN75360 | Rsa1.0_01578.1 | 195 | 42880  | 3.00E-47  | 105 | 108 | 97 +  | 17  | 124 | 9021   | 9128   |
| UN75361 | Rsa1.0_00679.1 | 365 | 68971  | 1.00E-157 | 295 | 300 | 98 -  | 1   | 300 | 34534  | 34833  |
| UN75362 | Rsa1.0_02395.1 | 110 | 31785  | 1.00E-44  | 103 | 107 | 96 -  | 1   | 107 | 20749  | 20855  |
| UN75363 | Rsa1.0_00749.1 | 603 | 65933  | 2.33E-156 | 272 | 275 | 98 +  | 327 | 601 | 21502  | 21776  |
| UN75364 | Rsa1.0_00115.1 | 687 | 131321 | 0         | 658 | 693 | 94 -  | 1   | 687 | 62424  | 63112  |
| UN75365 | Rsa1.0_01011.1 | 414 | 56883  | 3.00E-42  | 97  | 100 | 97 -  | 1   | 100 | 1108   | 1207   |
| UN75366 | Rsa1.0_00161.1 | 262 | 116891 | 1.00E-105 | 212 | 218 | 97 +  | 1   | 218 | 104465 | 104682 |
| UN75367 | Rsa1.0_01951.1 | 242 | 36941  | 3.00E-78  | 168 | 174 | 96 -  | 5   | 175 | 13558  | 13731  |
| UN75368 | Rsa1.0_09284.1 | 722 | 6496   | 1.00E-173 | 371 | 392 | 94 -  | 331 | 722 | 5819   | 6210   |
| UN75369 | Rsa1.0_01168.1 | 382 | 153765 | 1.00E-144 | 354 | 381 | 92 -  | 4   | 382 | 37394  | 37770  |
| UN75370 | Rsa1.0_13751.1 | 337 | 4383   | 1.00E-152 | 321 | 337 | 95 -  | 1   | 337 | 3026   | 3362   |
| UN75371 | Rsa1.0_00384.1 | 541 | 89278  | 1.00E-91  | 195 | 203 | 96 -  | 146 | 348 | 83652  | 83854  |
| UN75372 | Rsa1.0_03543.1 | 651 | 22185  | 0         | 618 | 663 | 93 +  | 5   | 651 | 5295   | 5957   |
| UN75373 | Rsa1.0_02792.1 | 628 | 27829  | 0         | 478 | 510 | 93 -  | 1   | 507 | 27315  | 27822  |
| UN75374 | Rsa1.0_16505.1 | 681 | 2130   | 0         | 625 | 649 | 96 +  | 36  | 681 | 950    | 1597   |
| UN75375 | Rsa1.0_05139.1 | 404 | 14718  | 1.00E-101 | 229 | 243 | 94 -  | 1   | 243 | 6706   | 6948   |
| UN75376 | Rsa1.0_00552.1 | 163 | 206757 | 1.00E-64  | 152 | 161 | 94 +  | 1   | 161 | 18286  | 18446  |
| UN75377 | Rsa1.0_00879.1 | 153 | 61297  | 5.00E-54  | 137 | 147 | 93 +  | 4   | 150 | 59355  | 59501  |
| UN75378 | Rsa1.0_09029.1 | 201 | 6700   | 1.00E-86  | 188 | 196 | 95 +  | 2   | 197 | 161    | 353    |
| UN75379 | Rsa1.0_01595.1 | 516 | 175383 | 0         | 506 | 516 | 98 +  | 1   | 516 | 9207   | 9722   |
| UN75380 | Rsa1.0_05030.1 | 320 | 15088  | 1.00E-157 | 302 | 308 | 98 +  | 1   | 307 | 10926  | 11233  |
| UN75381 | Rsa1.0_03083.1 | 556 | 25520  | 1.00E-167 | 383 | 405 | 94 +  | 2   | 399 | 12284  | 12684  |
| UN75382 | Rsa1.0_00113.1 | 453 | 131574 | 0         | 449 | 451 | 99 -  | 3   | 453 | 93006  | 93456  |
| UN75383 | Rsa1.0_00636.1 | 500 | 71113  | 1.00E-131 | 237 | 237 | 100 - | 243 | 479 | 2678   | 2914   |
| UN75384 | Rsa1.0_00020.1 | 683 | 283099 | 0         | 682 | 684 | 99 +  | 1   | 683 | 27197  | 27880  |
| UN75385 | Rsa1.0_00032.1 | 437 | 306326 | 1.00E-105 | 272 | 296 | 91 -  | 1   | 295 | 155775 | 156063 |

|         |                |     |        |           |     |     |       |     |     |        |        |
|---------|----------------|-----|--------|-----------|-----|-----|-------|-----|-----|--------|--------|
| UN75386 | Rsa1.0_73312.1 | 158 | 313    | 4.00E-73  | 155 | 159 | 97 -  | 1   | 158 | 74     | 232    |
| UN75387 | Rsa1.0_00387.1 | 129 | 495407 | 4.00E-48  | 121 | 129 | 93 +  | 1   | 129 | 1324   | 1452   |
| UN75388 | Rsa1.0_01718.1 | 129 | 40389  | 3.00E-49  | 120 | 127 | 94 +  | 3   | 129 | 35495  | 35621  |
| UN75389 | Rsa1.0_01416.1 | 677 | 46262  | 1.00E-175 | 346 | 356 | 97 -  | 211 | 565 | 16597  | 16952  |
| UN75390 | Rsa1.0_04215.1 | 682 | 18437  | 0         | 601 | 615 | 97 -  | 68  | 682 | 10311  | 10921  |
| UN75391 | Rsa1.0_00090.1 | 216 | 273859 | 5.00E-95  | 206 | 216 | 95 +  | 1   | 216 | 171759 | 171974 |
| UN75392 | Rsa1.0_00176.1 | 829 | 240984 | 0         | 587 | 611 | 96 -  | 216 | 824 | 188282 | 188892 |
| UN75393 | Rsa1.0_00067.1 | 556 | 415055 | 0         | 422 | 425 | 99 +  | 1   | 425 | 38330  | 38754  |
| UN75394 | Rsa1.0_14458.1 | 778 | 3368   | 1.00E-125 | 291 | 308 | 94 +  | 269 | 571 | 5      | 304    |
| UN75395 | Rsa1.0_00949.1 | 495 | 58549  | 0         | 486 | 495 | 98 +  | 1   | 495 | 4303   | 4797   |
| UN75396 | Rsa1.0_03609.1 | 708 | 21798  | 0         | 405 | 407 | 99 +  | 1   | 407 | 16885  | 17291  |
| UN75397 | Rsa1.0_01183.1 | 247 | 51465  | 1.00E-108 | 236 | 247 | 95 -  | 1   | 247 | 20371  | 20616  |
| UN75398 | Rsa1.0_00657.1 | 457 | 69858  | 1.00E-157 | 332 | 349 | 95 +  | 1   | 349 | 3208   | 3556   |
| UN75399 | Rsa1.0_05501.1 | 516 | 13513  | 1.00E-174 | 403 | 431 | 93 -  | 2   | 430 | 6241   | 6668   |
| UN75400 | Rsa1.0_02213.1 | 828 | 33824  | 0         | 806 | 829 | 97 -  | 2   | 828 | 15418  | 16243  |
| UN75401 | Rsa1.0_02224.1 | 479 | 33758  | 1.00E-163 | 291 | 291 | 100 + | 1   | 291 | 29839  | 30129  |
| UN75402 | Rsa1.0_02124.1 | 424 | 34780  | 0         | 407 | 424 | 95 +  | 2   | 424 | 4374   | 4795   |
| UN75403 | Rsa1.0_03001.1 | 104 | 26108  | 1.00E-35  | 94  | 100 | 94 +  | 1   | 100 | 5424   | 5523   |
| UN75404 | Rsa1.0_00363.1 | 520 | 90968  | 0         | 430 | 460 | 93 +  | 62  | 520 | 67294  | 67752  |
| UN75405 | Rsa1.0_01769.1 | 795 | 39568  | 0         | 532 | 533 | 99 +  | 1   | 533 | 25295  | 25827  |
| UN75406 | Rsa1.0_02183.1 | 432 | 34170  | 1.00E-172 | 398 | 426 | 93 -  | 4   | 428 | 21192  | 21611  |
| UN75407 | Rsa1.0_01728.1 | 633 | 40239  | 0         | 611 | 631 | 96 +  | 4   | 633 | 3985   | 4608   |
| UN75408 | Rsa1.0_00195.1 | 667 | 251884 | 0         | 463 | 483 | 95 +  | 3   | 473 | 232109 | 232588 |
| UN75409 | Rsa1.0_01526.1 | 814 | 43919  | 0         | 409 | 409 | 100 + | 6   | 414 | 506    | 914    |
| UN75410 | Rsa1.0_06694.1 | 770 | 10526  | 0         | 502 | 508 | 98 -  | 264 | 766 | 4230   | 4737   |
| UN75411 | Rsa1.0_12750.1 | 803 | 5138   | 0         | 795 | 797 | 99 +  | 7   | 803 | 4257   | 5053   |
| UN75412 | Rsa1.0_00487.1 | 654 | 80674  | 0         | 623 | 624 | 99 -  | 3   | 626 | 73818  | 74441  |
| UN75413 | Rsa1.0_00028.1 | 677 | 293984 | 0         | 619 | 664 | 93 -  | 3   | 665 | 72297  | 72935  |
| UN75414 | Rsa1.0_00221.1 | 808 | 106972 | 1.00E-125 | 385 | 444 | 86 -  | 3   | 426 | 50983  | 51397  |
| UN75415 | Rsa1.0_00053.1 | 713 | 263459 | 0         | 620 | 661 | 93 +  | 43  | 701 | 191162 | 191822 |
| UN75416 | Rsa1.0_00945.1 | 695 | 58714  | 0         | 544 | 564 | 96 -  | 124 | 687 | 1052   | 1609   |
| UN75417 | Rsa1.0_00294.1 | 716 | 144860 | 0         | 460 | 473 | 97 +  | 32  | 504 | 64093  | 64563  |
| UN75418 | Rsa1.0_04480.1 | 778 | 17180  | 0         | 409 | 420 | 97 +  | 2   | 421 | 358    | 776    |
| UN75419 | Rsa1.0_15165.1 | 105 | 2785   | 2.00E-43  | 101 | 105 | 96 -  | 1   | 105 | 1342   | 1446   |
| UN75420 | Rsa1.0_04238.1 | 356 | 18352  | 1.00E-152 | 292 | 297 | 98 -  | 61  | 356 | 8336   | 8632   |
| UN75421 | Rsa1.0_00228.1 | 502 | 105511 | 0         | 380 | 388 | 97 +  | 1   | 388 | 42267  | 42654  |
| UN75422 | Rsa1.0_01163.1 | 343 | 51946  | 1.00E-110 | 217 | 222 | 97 -  | 1   | 222 | 28824  | 29045  |
| UN75423 | Rsa1.0_02750.1 | 745 | 28239  | 0         | 695 | 698 | 99 +  | 2   | 698 | 388    | 1085   |
| UN75424 | Rsa1.0_01938.1 | 649 | 264018 | 1.00E-127 | 293 | 313 | 93 +  | 340 | 649 | 164438 | 164750 |



|         |                |     |        |           |     |     |       |     |     |        |        |
|---------|----------------|-----|--------|-----------|-----|-----|-------|-----|-----|--------|--------|
| UN75425 | Rsa1.0.05866.1 | 581 | 12376  | 0         | 443 | 464 | 95 -  | 120 | 581 | 5495   | 5952   |
| UN75426 | Rsa1.0.00157.1 | 521 | 245832 | 0         | 512 | 522 | 98 +  | 1   | 521 | 224414 | 224934 |
| UN75427 | Rsa1.0.00195.1 | 787 | 251884 | 0         | 775 | 787 | 98 -  | 1   | 787 | 233916 | 234700 |
| UN75428 | Rsa1.0.04488.1 | 314 | 17155  | 1.00E-158 | 306 | 314 | 97 +  | 1   | 314 | 12073  | 12386  |
| UN75429 | Rsa1.0.04594.1 | 426 | 16713  | 1.00E-162 | 295 | 297 | 99 +  | 1   | 297 | 3824   | 4120   |
| UN75430 | Rsa1.0.00916.1 | 359 | 59789  | 1.00E-161 | 346 | 362 | 95 -  | 1   | 359 | 15641  | 16001  |
| UN75431 | Rsa1.0.00487.1 | 651 | 80674  | 0         | 644 | 650 | 99 +  | 2   | 651 | 72596  | 73245  |
| UN75432 | Rsa1.0.00002.1 | 288 | 601661 | 6.00E-83  | 165 | 168 | 98 -  | 1   | 168 | 51054  | 51221  |
| UN75433 | Rsa1.0.00037.1 | 603 | 307838 | 0         | 579 | 606 | 95 +  | 2   | 603 | 16628  | 17229  |
| UN75434 | Rsa1.0.00053.1 | 714 | 263459 | 0         | 568 | 614 | 92 -  | 99  | 712 | 192679 | 193292 |
| UN75435 | Rsa1.0.00945.1 | 505 | 58714  | 0         | 434 | 450 | 96 +  | 55  | 501 | 1      | 446    |
| UN75436 | Rsa1.0.00715.1 | 710 | 67116  | 0         | 393 | 393 | 100 + | 318 | 710 | 34364  | 34756  |
| UN75437 | Rsa1.0.25049.1 | 281 | 953    | 1.00E-102 | 225 | 236 | 95 +  | 1   | 236 | 610    | 844    |
| UN75438 | Rsa1.0.00247.1 | 723 | 103408 | 1.00E-129 | 241 | 242 | 99 +  | 212 | 452 | 10284  | 10525  |
| UN75439 | Rsa1.0.00026.1 | 666 | 327835 | 0         | 460 | 461 | 99 +  | 206 | 666 | 43419  | 43879  |
| UN75440 | Rsa1.0.06272.1 | 310 | 11351  | 2.00E-46  | 113 | 119 | 94 -  | 1   | 119 | 3083   | 3201   |
| UN75441 | Rsa1.0.00362.1 | 643 | 299497 | 0         | 626 | 643 | 97 -  | 1   | 643 | 215018 | 215656 |
| UN75442 | Rsa1.0.02963.1 | 119 | 26407  | 4.00E-20  | 65  | 70  | 92 +  | 21  | 90  | 3793   | 3862   |
| UN75443 | Rsa1.0.00947.1 | 397 | 58664  | 1.00E-179 | 365 | 381 | 95 -  | 1   | 381 | 10169  | 10549  |
| UN75444 | Rsa1.0.00020.1 | 457 | 283099 | 1.00E-174 | 324 | 329 | 98 -  | 129 | 457 | 136505 | 136833 |
| UN75445 | Rsa1.0.00301.1 | 174 | 365315 | 3.00E-65  | 156 | 166 | 93 +  | 14  | 174 | 7858   | 8023   |
| UN75446 | Rsa1.0.00490.1 | 608 | 186713 | 0         | 459 | 474 | 96 +  | 1   | 474 | 183687 | 184156 |
| UN75447 | Rsa1.0.00181.1 | 618 | 114269 | 0         | 603 | 627 | 96 -  | 1   | 618 | 15830  | 16455  |
| UN75448 | Rsa1.0.00096.1 | 457 | 198773 | 0         | 441 | 448 | 98 +  | 2   | 443 | 126325 | 126772 |
| UN75449 | Rsa1.0.02642.1 | 116 | 29181  | 1.00E-17  | 76  | 86  | 88 -  | 28  | 113 | 14146  | 14231  |
| UN75450 | Rsa1.0.06521.1 | 541 | 10856  | 0         | 445 | 449 | 99 +  | 1   | 448 | 626    | 1074   |
| UN75451 | Rsa1.0.00373.1 | 680 | 90296  | 1.00E-132 | 312 | 332 | 93 +  | 35  | 364 | 72497  | 72827  |
| UN75452 | Rsa1.0.02276.1 | 109 | 33098  | 1.00E-41  | 101 | 106 | 95 +  | 1   | 106 | 23011  | 23116  |
| UN75453 | Rsa1.0.00701.1 | 576 | 67691  | 9.00E-87  | 188 | 195 | 96 +  | 381 | 574 | 15473  | 15667  |
| UN75454 | Rsa1.0.02493.1 | 165 | 30854  | 1.00E-54  | 144 | 156 | 92 +  | 10  | 165 | 2963   | 3118   |
| UN75455 | Rsa1.0.00073.1 | 574 | 240924 | 1.00E-168 | 355 | 373 | 95 +  | 3   | 375 | 224860 | 225228 |
| UN75456 | Rsa1.0.00030.1 | 270 | 250988 | 6.00E-83  | 195 | 208 | 93 +  | 6   | 213 | 44996  | 45203  |
| UN75457 | Rsa1.0.00321.1 | 486 | 95671  | 0         | 471 | 487 | 96 -  | 3   | 486 | 26257  | 26740  |
| UN75458 | Rsa1.0.00205.1 | 751 | 193401 | 1.00E-147 | 296 | 304 | 97 +  | 1   | 303 | 14412  | 14714  |
| UN75459 | Rsa1.0.00537.1 | 802 | 186980 | 0         | 772 | 804 | 96 -  | 1   | 802 | 165330 | 166122 |
| UN75460 | Rsa1.0.18835.1 | 348 | 1525   | 2.00E-28  | 144 | 169 | 85 -  | 43  | 210 | 1271   | 1439   |
| UN75461 | Rsa1.0.00829.1 | 678 | 158305 | 0         | 361 | 372 | 97 -  | 181 | 552 | 116040 | 116410 |
| UN75462 | Rsa1.0.00289.1 | 671 | 98620  | 1.00E-178 | 319 | 320 | 99 +  | 3   | 322 | 25684  | 26003  |
| UN75463 | Rsa1.0.00748.1 | 298 | 65983  | 4.00E-81  | 221 | 239 | 92 +  | 6   | 236 | 45115  | 45350  |

|         |                |     |        |           |     |     |       |     |     |        |        |
|---------|----------------|-----|--------|-----------|-----|-----|-------|-----|-----|--------|--------|
| UN75464 | Rsa1.0_01019.1 | 577 | 56636  | 0         | 577 | 577 | 100 - | 1   | 577 | 15030  | 15606  |
| UN75465 | Rsa1.0_00056.1 | 491 | 332604 | 0         | 469 | 487 | 96 +  | 8   | 491 | 14776  | 15262  |
| UN75466 | Rsa1.0_00059.1 | 556 | 159650 | 9.00E-90  | 326 | 380 | 85 -  | 76  | 421 | 106043 | 106422 |
| UN75467 | Rsa1.0_03878.1 | 403 | 20305  | 0         | 395 | 400 | 98 -  | 1   | 400 | 3639   | 4038   |
| UN75468 | Rsa1.0_00009.1 | 379 | 232558 | 1.00E-176 | 360 | 376 | 95 +  | 1   | 376 | 17491  | 17866  |
| UN75469 | Rsa1.0_03334.1 | 476 | 23659  | 1.00E-117 | 302 | 330 | 91 +  | 132 | 460 | 5192   | 5521   |
| UN75470 | Rsa1.0_16164.1 | 458 | 2261   | 2.00E-84  | 189 | 199 | 94 +  | 258 | 456 | 1      | 199    |
| UN75471 | Rsa1.0_03873.1 | 564 | 20360  | 8.00E-87  | 259 | 287 | 90 -  | 17  | 301 | 9247   | 9517   |
| UN75472 | Rsa1.0_00802.1 | 249 | 63846  | 1.00E-113 | 237 | 247 | 95 -  | 3   | 249 | 10022  | 10268  |
| UN75473 | Rsa1.0_17783.1 | 486 | 1741   | 1.00E-17  | 95  | 111 | 85 +  | 183 | 293 | 314    | 424    |
| UN75474 | Rsa1.0_00664.1 | 606 | 69573  | 0         | 555 | 555 | 100 - | 2   | 556 | 37109  | 37663  |
| UN75475 | Rsa1.0_03986.1 | 681 | 19703  | 0         | 631 | 668 | 94 -  | 1   | 668 | 654    | 1321   |
| UN75476 | Rsa1.0_00796.1 | 167 | 63997  | 4.00E-61  | 137 | 143 | 95 -  | 1   | 143 | 36559  | 36701  |
| UN75477 | Rsa1.0_01154.1 | 804 | 52249  | 0         | 455 | 456 | 99 +  | 1   | 456 | 9031   | 9486   |
| UN75478 | Rsa1.0_03625.1 | 766 | 21692  | 0         | 528 | 546 | 96 -  | 1   | 544 | 14755  | 15294  |
| UN75479 | Rsa1.0_00343.1 | 348 | 93570  | 1.00E-149 | 335 | 353 | 94 -  | 2   | 347 | 74643  | 74995  |
| UN75480 | Rsa1.0_02453.1 | 491 | 31271  | 0         | 489 | 491 | 99 +  | 1   | 491 | 4827   | 5317   |
| UN75481 | Rsa1.0_00146.1 | 358 | 149343 | 1.00E-118 | 328 | 361 | 90 +  | 1   | 358 | 53910  | 54261  |
| UN75482 | Rsa1.0_00182.1 | 289 | 142305 | 6.00E-80  | 255 | 291 | 87 +  | 2   | 269 | 52790  | 53079  |
| UN75483 | Rsa1.0_00646.1 | 420 | 70473  | 8.00E-34  | 171 | 201 | 85 +  | 51  | 248 | 6054   | 6254   |
| UN75484 | Rsa1.0_00465.1 | 765 | 82138  | 0         | 732 | 776 | 94 +  | 4   | 761 | 34222  | 34997  |
| UN75485 | Rsa1.0_00067.1 | 646 | 415055 | 1.00E-177 | 321 | 323 | 99 +  | 252 | 574 | 38763  | 39085  |
| UN75486 | Rsa1.0_00026.1 | 599 | 327835 | 0         | 546 | 585 | 93 +  | 18  | 593 | 175442 | 176017 |
| UN75487 | Rsa1.0_01282.1 | 503 | 49304  | 1.00E-138 | 381 | 421 | 90 -  | 6   | 412 | 26090  | 26496  |
| UN75488 | #              | #   | #      | #         | #   | #   | #     | #   | #   | #      | #      |
| UN75489 | Rsa1.0_01549.1 | 582 | 43543  | 1.00E-122 | 428 | 489 | 87 +  | 2   | 482 | 10440  | 10913  |
| UN75490 | Rsa1.0_02505.1 | 162 | 30703  | 3.00E-12  | 119 | 143 | 83 +  | 20  | 158 | 9950   | 10091  |
| UN75491 | Rsa1.0_00171.1 | 772 | 115622 | 1.00E-169 | 314 | 317 | 99 +  | 3   | 317 | 103105 | 103421 |
| UN75492 | Rsa1.0_00418.1 | 437 | 215377 | 1.00E-107 | 242 | 252 | 96 -  | 7   | 254 | 45040  | 45290  |
| UN75493 | Rsa1.0_00045.1 | 331 | 328694 | 1.00E-139 | 308 | 327 | 94 +  | 5   | 331 | 261163 | 261489 |
| UN75494 | Rsa1.0_01989.1 | 643 | 36439  | 1.00E-85  | 170 | 173 | 98 -  | 350 | 522 | 22104  | 22276  |
| UN75495 | Rsa1.0_35417.1 | 141 | 639    | 3.00E-49  | 114 | 119 | 95 +  | 10  | 128 | 20     | 138    |
| UN75496 | Rsa1.0_00333.1 | 742 | 94500  | 0         | 723 | 756 | 95 -  | 1   | 742 | 64869  | 65623  |
| UN75497 | Rsa1.0_03579.1 | 148 | 21969  | 3.00E-34  | 122 | 138 | 88 -  | 1   | 138 | 19279  | 19416  |
| UN75498 | Rsa1.0_01563.1 | 640 | 170823 | 1.00E-114 | 224 | 229 | 97 -  | 261 | 489 | 38791  | 39019  |
| UN75499 | Rsa1.0_00179.1 | 128 | 393324 | 2.00E-47  | 121 | 128 | 94 -  | 1   | 128 | 250838 | 250964 |
| UN75500 | Rsa1.0_00588.1 | 659 | 73939  | 0         | 636 | 652 | 97 +  | 8   | 659 | 32660  | 33307  |
| UN75501 | Rsa1.0_00127.1 | 509 | 127446 | 0         | 361 | 366 | 98 +  | 1   | 366 | 46529  | 46894  |
| UN75502 | Rsa1.0_13838.1 | 335 | 4236   | 1.00E-160 | 327 | 339 | 96 -  | 1   | 335 | 3402   | 3740   |

|         |                |     |        |           |     |     |       |     |     |        |        |
|---------|----------------|-----|--------|-----------|-----|-----|-------|-----|-----|--------|--------|
| UN75503 | Rsa1.0.01712.1 | 719 | 154210 | 0         | 656 | 705 | 93 +  | 20  | 719 | 19238  | 19923  |
| UN75504 | Rsa1.0.02905.1 | 298 | 26873  | 1.00E-56  | 170 | 194 | 87 -  | 120 | 294 | 24681  | 24874  |
| UN75505 | Rsa1.0.04281.1 | 480 | 18107  | 0         | 438 | 463 | 94 -  | 12  | 473 | 14748  | 15206  |
| UN75506 | Rsa1.0.00928.1 | 626 | 59293  | 1.00E-144 | 296 | 308 | 96 +  | 20  | 323 | 19273  | 19580  |
| UN75507 | Rsa1.0.00085.1 | 558 | 142226 | 3.00E-68  | 196 | 218 | 89 -  | 341 | 558 | 49867  | 50072  |
| UN75508 | Rsa1.0.01857.1 | 731 | 38103  | 1.00E-110 | 332 | 379 | 87 +  | 58  | 398 | 8791   | 9166   |
| UN75509 | Rsa1.0.00539.1 | 407 | 76926  | 2.00E-77  | 202 | 217 | 93 +  | 1   | 216 | 63682  | 63894  |
| UN75510 | Rsa1.0.01441.1 | 843 | 45790  | 0         | 574 | 586 | 97 +  | 1   | 579 | 44657  | 45242  |
| UN75511 | Rsa1.0.09551.1 | 606 | 6294   | 2.00E-47  | 133 | 145 | 91 -  | 287 | 431 | 6082   | 6226   |
| UN75512 | Rsa1.0.48617.1 | 267 | 466    | 1.00E-142 | 264 | 267 | 98 -  | 1   | 267 | 118    | 384    |
| UN75513 | Rsa1.0.23508.1 | 795 | 1043   | 0         | 466 | 504 | 92 +  | 128 | 625 | 28     | 525    |
| UN75514 | Rsa1.0.00973.1 | 659 | 57913  | 1.00E-121 | 221 | 221 | 100 - | 3   | 223 | 7144   | 7364   |
| UN75515 | Rsa1.0.05326.1 | 158 | 14139  | 2.00E-60  | 150 | 159 | 94 -  | 2   | 158 | 4013   | 4168   |
| UN75516 | Rsa1.0.00190.1 | 614 | 318240 | 0         | 595 | 610 | 97 +  | 7   | 614 | 294374 | 294983 |
| UN75517 | Rsa1.0.00033.1 | 675 | 515811 | 0         | 668 | 675 | 98 +  | 1   | 675 | 371700 | 372373 |
| UN75518 | Rsa1.0.01779.1 | 620 | 39448  | 0         | 552 | 565 | 97 +  | 56  | 620 | 8695   | 9259   |
| UN75519 | #              | #   | #      | #         | #   | #   | #     | #   | #   | #      | #      |
| UN75520 | Rsa1.0.00469.1 | 715 | 82084  | 0         | 446 | 468 | 95 -  | 1   | 466 | 3910   | 4375   |
| UN75521 | Rsa1.0.02097.1 | 656 | 35036  | 1.00E-109 | 278 | 300 | 92 -  | 1   | 296 | 19172  | 19471  |
| UN75522 | Rsa1.0.07426.1 | 729 | 9413   | 9.00E-69  | 190 | 205 | 92 +  | 13  | 216 | 1263   | 1465   |
| UN75523 | Rsa1.0.03281.1 | 169 | 143349 | 1.00E-64  | 158 | 169 | 93 +  | 1   | 169 | 2519   | 2687   |
| UN75524 | Rsa1.0.00344.1 | 731 | 191774 | 1.00E-141 | 273 | 279 | 97 +  | 453 | 731 | 129614 | 129892 |
| UN75525 | Rsa1.0.00669.1 | 197 | 69419  | 3.00E-81  | 183 | 193 | 94 +  | 3   | 195 | 15335  | 15527  |
| UN75526 | Rsa1.0.13644.1 | 275 | 4580   | 1.00E-127 | 260 | 270 | 96 -  | 6   | 275 | 3509   | 3778   |
| UN75527 | Rsa1.0.03842.1 | 456 | 20503  | 0         | 445 | 455 | 97 -  | 1   | 455 | 17620  | 18074  |
| UN75528 | Rsa1.0.00876.1 | 614 | 61328  | 0         | 581 | 599 | 96 +  | 16  | 614 | 8247   | 8844   |
| UN75529 | Rsa1.0.00678.1 | 201 | 193163 | 1.00E-100 | 197 | 201 | 98 +  | 1   | 201 | 182474 | 182674 |
| UN75530 | Rsa1.0.00607.1 | 623 | 73146  | 0         | 566 | 586 | 96 +  | 1   | 583 | 48103  | 48686  |
| UN75531 | Rsa1.0.00278.1 | 587 | 231896 | 1.00E-147 | 321 | 336 | 95 +  | 2   | 326 | 179676 | 180009 |
| UN75532 | Rsa1.0.00828.1 | 534 | 62744  | 1.00E-150 | 299 | 306 | 97 -  | 1   | 306 | 59133  | 59436  |
| UN75533 | Rsa1.0.01580.1 | 127 | 42852  | 2.00E-37  | 112 | 123 | 91 -  | 1   | 123 | 31167  | 31289  |
| UN75534 | Rsa1.0.07005.1 | 633 | 10044  | 0         | 602 | 631 | 95 -  | 10  | 633 | 4373   | 4986   |
| UN75535 | Rsa1.0.00678.1 | 610 | 193163 | 0         | 588 | 611 | 96 +  | 1   | 610 | 139136 | 139737 |
| UN75536 | Rsa1.0.00608.1 | 555 | 172672 | 1.00E-157 | 288 | 289 | 99 +  | 2   | 290 | 165836 | 166123 |
| UN75537 | Rsa1.0.00139.1 | 429 | 357786 | 1.00E-102 | 203 | 208 | 97 +  | 1   | 208 | 290739 | 290946 |
| UN75538 | Rsa1.0.00124.1 | 171 | 262503 | 7.00E-60  | 154 | 165 | 93 -  | 2   | 166 | 163340 | 163503 |
| UN75539 | Rsa1.0.00750.1 | 471 | 190548 | 0         | 384 | 400 | 96 -  | 1   | 400 | 18215  | 18614  |
| UN75540 | Rsa1.0.02387.1 | 517 | 31890  | 0         | 484 | 520 | 93 -  | 1   | 517 | 14238  | 14757  |
| UN75541 | Rsa1.0.01624.1 | 429 | 42064  | 1.00E-170 | 335 | 346 | 96 -  | 1   | 346 | 5016   | 5361   |

|         |                |     |        |           |     |     |       |     |     |        |        |
|---------|----------------|-----|--------|-----------|-----|-----|-------|-----|-----|--------|--------|
| UN75542 | Rsa1.0.00416.1 | 448 | 86772  | 1.00E-170 | 371 | 391 | 94 -  | 5   | 394 | 50850  | 51239  |
| UN75543 | Rsa1.0.10026.1 | 632 | 6034   | 1.00E-125 | 275 | 289 | 95 +  | 2   | 285 | 5747   | 6031   |
| UN75544 | Rsa1.0.00339.1 | 353 | 222974 | 1.00E-118 | 278 | 295 | 94 +  | 61  | 353 | 91260  | 91553  |
| UN75545 | Rsa1.0.00002.1 | 351 | 601661 | 1.00E-115 | 210 | 210 | 100 - | 1   | 210 | 290239 | 290448 |
| UN75546 | Rsa1.0.00078.1 | 102 | 175053 | 4.00E-29  | 92  | 101 | 91 -  | 2   | 102 | 52801  | 52901  |
| UN75547 | Rsa1.0.00138.1 | 685 | 247040 | 0         | 443 | 460 | 96 -  | 1   | 457 | 78332  | 78791  |
| UN75548 | Rsa1.0.00360.1 | 458 | 91190  | 1.00E-167 | 422 | 460 | 91 +  | 1   | 446 | 3513   | 3961   |
| UN75549 | Rsa1.0.00237.1 | 693 | 235974 | 1.00E-175 | 320 | 323 | 99 -  | 2   | 324 | 96581  | 96903  |
| UN75550 | Rsa1.0.20113.1 | 569 | 1339   | 1.00E-127 | 491 | 573 | 85 +  | 1   | 569 | 576    | 1132   |
| UN75551 | Rsa1.0.01091.1 | 831 | 54383  | 0         | 499 | 519 | 96 +  | 281 | 793 | 8775   | 9290   |
| UN75552 | Rsa1.0.01559.1 | 409 | 43262  | 3.00E-55  | 143 | 154 | 92 +  | 256 | 409 | 29743  | 29896  |
| UN75553 | Rsa1.0.00153.1 | 156 | 192931 | 2.00E-26  | 102 | 115 | 88 -  | 36  | 150 | 27177  | 27288  |
| UN75554 | Rsa1.0.01956.1 | 650 | 36847  | 0         | 482 | 496 | 97 +  | 158 | 650 | 21615  | 22110  |
| UN75555 | Rsa1.0.04783.1 | 834 | 15995  | 2.00E-73  | 153 | 157 | 97 -  | 147 | 303 | 4933   | 5089   |
| UN75556 | Rsa1.0.01760.1 | 805 | 39730  | 0         | 722 | 764 | 94 -  | 3   | 760 | 7019   | 7759   |
| UN75557 | Rsa1.0.00835.1 | 639 | 278058 | 1.00E-125 | 253 | 259 | 97 -  | 3   | 258 | 167456 | 167714 |
| UN75558 | Rsa1.0.01560.1 | 744 | 43256  | 0         | 607 | 658 | 92 -  | 15  | 670 | 1497   | 2148   |
| UN75559 | Rsa1.0.09928.1 | 796 | 6087   | 0         | 522 | 534 | 97 +  | 189 | 719 | 527    | 1060   |
| UN75560 | Rsa1.0.00017.1 | 784 | 752458 | 1.00E-137 | 282 | 292 | 96 +  | 96  | 386 | 122748 | 123039 |
| UN75561 | Rsa1.0.01376.1 | 797 | 47004  | 0         | 356 | 358 | 99 -  | 355 | 712 | 22866  | 23223  |
| UN75562 | Rsa1.0.02478.1 | 194 | 150183 | 3.00E-84  | 189 | 198 | 95 -  | 3   | 194 | 139233 | 139430 |
| UN75563 | Rsa1.0.08628.1 | 731 | 7109   | 0         | 575 | 620 | 92 -  | 9   | 628 | 2751   | 3355   |
| UN75564 | Rsa1.0.00785.1 | 612 | 64356  | 0         | 605 | 618 | 97 -  | 1   | 612 | 27153  | 27766  |
| UN75565 | Rsa1.0.00699.1 | 468 | 184398 | 0         | 372 | 376 | 98 -  | 2   | 376 | 177779 | 178154 |
| UN75566 | Rsa1.0.00358.1 | 371 | 91293  | 4.00E-91  | 212 | 226 | 93 +  | 5   | 230 | 9347   | 9572   |
| UN75567 | Rsa1.0.01710.1 | 429 | 40586  | 0         | 339 | 342 | 99 +  | 1   | 342 | 19405  | 19746  |
| UN75568 | Rsa1.0.02505.1 | 377 | 30703  | 1.00E-180 | 356 | 368 | 96 -  | 4   | 371 | 21682  | 22049  |
| UN75569 | Rsa1.0.00467.1 | 189 | 156542 | 9.00E-78  | 178 | 187 | 95 -  | 1   | 187 | 78018  | 78203  |
| UN75570 | Rsa1.0.19036.1 | 762 | 1492   | 1.00E-135 | 329 | 353 | 93 +  | 3   | 346 | 553    | 902    |
| UN75571 | Rsa1.0.00268.1 | 708 | 101470 | 0         | 528 | 545 | 96 +  | 164 | 708 | 268    | 812    |
| UN75572 | Rsa1.0.03418.1 | 662 | 147293 | 0         | 533 | 534 | 99 -  | 1   | 534 | 17570  | 18103  |
| UN75573 | Rsa1.0.00033.1 | 333 | 515811 | 2.00E-98  | 281 | 311 | 90 -  | 1   | 311 | 469201 | 469505 |
| UN75574 | Rsa1.0.00817.1 | 536 | 62961  | 0         | 509 | 536 | 94 +  | 1   | 536 | 23197  | 23726  |
| UN75575 | Rsa1.0.01701.1 | 153 | 162121 | 3.00E-55  | 139 | 149 | 93 -  | 5   | 153 | 7062   | 7210   |
| UN75576 | Rsa1.0.04563.1 | 768 | 16837  | 0         | 387 | 401 | 96 +  | 368 | 768 | 1988   | 2388   |
| UN75577 | Rsa1.0.01545.1 | 536 | 43599  | 1.00E-101 | 194 | 196 | 98 -  | 278 | 473 | 39724  | 39919  |
| UN75578 | Rsa1.0.03971.1 | 180 | 19788  | 2.00E-41  | 120 | 130 | 92 -  | 4   | 133 | 4066   | 4194   |
| UN75579 | Rsa1.0.00089.1 | 522 | 406142 | 0         | 511 | 518 | 98 +  | 5   | 522 | 153728 | 154244 |
| UN75580 | Rsa1.0.00661.1 | 815 | 213041 | 0         | 807 | 827 | 97 +  | 1   | 815 | 16972  | 17798  |

|         |                |     |        |           |     |     |       |     |     |        |        |
|---------|----------------|-----|--------|-----------|-----|-----|-------|-----|-----|--------|--------|
| UN75581 | Rsa1.0_00796.1 | 434 | 63997  | 4.00E-91  | 229 | 246 | 93 +  | 101 | 344 | 58142  | 58387  |
| UN75582 | Rsa1.0_03985.1 | 860 | 19704  | 0         | 836 | 862 | 96 -  | 3   | 860 | 15287  | 16147  |
| UN75583 | Rsa1.0_02336.1 | 146 | 32397  | 1.00E-39  | 132 | 147 | 89 +  | 1   | 146 | 459    | 605    |
| UN75584 | Rsa1.0_00047.1 | 781 | 168582 | 0         | 495 | 501 | 98 +  | 107 | 607 | 56123  | 56622  |
| UN75585 | Rsa1.0_03206.1 | 200 | 24614  | 3.00E-81  | 186 | 197 | 94 -  | 1   | 197 | 3747   | 3943   |
| UN75586 | Rsa1.0_02798.1 | 562 | 27792  | 0         | 455 | 469 | 97 -  | 1   | 469 | 26142  | 26608  |
| UN75587 | Rsa1.0_08105.1 | 437 | 7894   | 0         | 428 | 437 | 97 -  | 1   | 437 | 5230   | 5666   |
| UN75588 | Rsa1.0_03951.1 | 479 | 19894  | 4.00E-73  | 140 | 140 | 100 - | 141 | 280 | 1966   | 2105   |
| UN75589 | Rsa1.0_00675.1 | 737 | 145590 | 0         | 602 | 605 | 99 +  | 1   | 603 | 67441  | 68045  |
| UN75590 | Rsa1.0_03385.1 | 129 | 23280  | 1.00E-57  | 125 | 129 | 96 -  | 1   | 129 | 18506  | 18634  |
| UN75591 | Rsa1.0_02653.1 | 381 | 29030  | 0         | 368 | 381 | 96 -  | 1   | 381 | 18612  | 18987  |
| UN75592 | Rsa1.0_02710.1 | 282 | 28492  | 1.00E-111 | 266 | 281 | 94 +  | 1   | 276 | 23223  | 23500  |
| UN75593 | Rsa1.0_00461.1 | 573 | 82509  | 0         | 571 | 572 | 99 -  | 2   | 573 | 31887  | 32458  |
| UN75594 | Rsa1.0_00067.1 | 688 | 415055 | 1.00E-117 | 291 | 315 | 92 +  | 10  | 319 | 241243 | 241557 |
| UN75595 | Rsa1.0_02735.1 | 651 | 28344  | 0         | 630 | 631 | 99 +  | 2   | 632 | 11221  | 11851  |
| UN75596 | Rsa1.0_02505.1 | 646 | 30703  | 2.33E-156 | 269 | 271 | 99 -  | 2   | 272 | 17072  | 17342  |
| UN75597 | Rsa1.0_13979.1 | 369 | 3964   | 1.00E-132 | 287 | 301 | 95 -  | 70  | 369 | 2955   | 3253   |
| UN75598 | Rsa1.0_00069.1 | 211 | 403561 | 2.00E-94  | 202 | 211 | 95 -  | 1   | 211 | 48951  | 49161  |
| UN75599 | Rsa1.0_20226.1 | 584 | 1325   | 1.00E-180 | 319 | 319 | 100 + | 1   | 319 | 876    | 1194   |
| UN75600 | Rsa1.0_01875.1 | 536 | 37849  | 1.00E-122 | 277 | 295 | 93 +  | 242 | 536 | 12381  | 12675  |
| UN75601 | Rsa1.0_00079.1 | 453 | 606987 | 1.00E-125 | 258 | 268 | 96 +  | 165 | 432 | 189557 | 189824 |
| UN75602 | Rsa1.0_00703.1 | 266 | 67597  | 1.00E-104 | 222 | 232 | 95 +  | 22  | 253 | 27535  | 27766  |
| UN75603 | Rsa1.0_02185.1 | 352 | 34150  | 0         | 351 | 352 | 99 +  | 1   | 352 | 20578  | 20929  |
| UN75604 | Rsa1.0_01855.1 | 189 | 38204  | 2.00E-38  | 90  | 93  | 96 -  | 94  | 186 | 11931  | 12023  |
| UN75605 | Rsa1.0_01059.1 | 456 | 55410  | 1.00E-153 | 356 | 380 | 93 -  | 1   | 376 | 23429  | 23806  |
| UN75606 | Rsa1.0_03137.1 | 157 | 25105  | 4.00E-36  | 104 | 113 | 92 -  | 38  | 150 | 16887  | 16999  |
| UN75607 | Rsa1.0_05989.1 | 735 | 12014  | 2.00E-72  | 145 | 147 | 98 +  | 195 | 341 | 9283   | 9429   |
| UN75608 | Rsa1.0_01069.1 | 123 | 55113  | 2.00E-50  | 113 | 117 | 96 +  | 4   | 120 | 17689  | 17805  |
| UN75609 | Rsa1.0_00826.1 | 383 | 166736 | 0         | 376 | 385 | 97 -  | 1   | 383 | 159459 | 159842 |
| UN75610 | Rsa1.0_03706.1 | 515 | 21255  | 1.00E-155 | 340 | 361 | 94 -  | 1   | 361 | 12268  | 12628  |
| UN75611 | Rsa1.0_00050.1 | 247 | 237174 | 5.00E-74  | 228 | 257 | 88 +  | 1   | 247 | 85333  | 85589  |
| UN75612 | Rsa1.0_04651.1 | 341 | 16516  | 8.00E-86  | 310 | 355 | 87 +  | 1   | 338 | 12982  | 13332  |
| UN75613 | Rsa1.0_01803.1 | 132 | 173846 | 2.00E-59  | 128 | 132 | 96 -  | 1   | 132 | 18477  | 18608  |
| UN75614 | Rsa1.0_22499.1 | 150 | 1115   | 1.00E-64  | 140 | 145 | 96 -  | 1   | 145 | 1      | 145    |
| UN75615 | Rsa1.0_00116.1 | 191 | 365886 | 3.00E-34  | 159 | 185 | 85 +  | 1   | 184 | 348964 | 349146 |
| UN75616 | Rsa1.0_00001.1 | 220 | 363028 | 7.00E-82  | 206 | 221 | 93 -  | 2   | 220 | 322382 | 322601 |
| UN75617 | Rsa1.0_09193.1 | 573 | 6567   | 1.00E-162 | 328 | 341 | 96 +  | 230 | 570 | 754    | 1094   |
| UN75618 | Rsa1.0_00157.1 | 281 | 245832 | 1.00E-141 | 274 | 281 | 97 +  | 1   | 281 | 195725 | 196005 |
| UN75619 | Rsa1.0_71155.1 | 392 | 322    | 1.00E-131 | 284 | 297 | 95 -  | 2   | 298 | 1      | 294    |

|         |                |     |        |           |     |     |      |     |     |        |        |
|---------|----------------|-----|--------|-----------|-----|-----|------|-----|-----|--------|--------|
| UN75620 | Rsa1.0.00453.1 | 482 | 83031  | 0         | 473 | 476 | 99 - | 7   | 482 | 37389  | 37864  |
| UN75621 | Rsa1.0.00011.1 | 268 | 225044 | 6.00E-55  | 198 | 221 | 89 + | 1   | 217 | 50380  | 50594  |
| UN75622 | Rsa1.0.00905.1 | 617 | 60110  | 5.00E-67  | 256 | 299 | 85 - | 40  | 317 | 42621  | 42912  |
| UN75623 | Rsa1.0.08479.1 | 780 | 7293   | 0         | 715 | 766 | 93 + | 15  | 780 | 4039   | 4804   |
| UN75624 | Rsa1.0.01110.1 | 158 | 195852 | 2.00E-50  | 116 | 121 | 95 + | 1   | 121 | 178257 | 178377 |
| UN75625 | Rsa1.0.00790.1 | 449 | 148693 | 0         | 448 | 451 | 99 - | 1   | 449 | 19663  | 20113  |
| UN75626 | Rsa1.0.01902.1 | 284 | 37455  | 1.00E-135 | 270 | 279 | 96 + | 3   | 281 | 2810   | 3088   |
| UN75627 | Rsa1.0.00170.1 | 288 | 179538 | 1.00E-151 | 285 | 289 | 98 + | 2   | 288 | 145138 | 145426 |
| UN75628 | Rsa1.0.00377.1 | 473 | 90038  | 1.00E-158 | 339 | 357 | 94 + | 9   | 362 | 46197  | 46553  |
| UN75629 | Rsa1.0.10890.1 | 130 | 5688   | 2.00E-43  | 119 | 129 | 92 - | 1   | 129 | 4691   | 4819   |
| UN75630 | Rsa1.0.00294.1 | 720 | 144860 | 0         | 695 | 721 | 96 + | 2   | 720 | 80023  | 80740  |
| UN75631 | Rsa1.0.54418.1 | 301 | 419    | 4.00E-47  | 135 | 148 | 91 + | 51  | 198 | 82     | 229    |
| UN75632 | Rsa1.0.03169.1 | 739 | 24826  | 0         | 446 | 487 | 91 - | 1   | 472 | 10971  | 11438  |
| UN75633 | Rsa1.0.08666.1 | 656 | 7063   | 0         | 372 | 374 | 99 + | 1   | 374 | 3937   | 4310   |
| UN75634 | Rsa1.0.01801.1 | 627 | 39094  | 0         | 405 | 421 | 96 - | 1   | 417 | 29263  | 29681  |
| UN75635 | Rsa1.0.00609.1 | 687 | 72785  | 0         | 623 | 655 | 95 - | 47  | 687 | 69997  | 70649  |
| UN75636 | Rsa1.0.00547.1 | 620 | 76521  | 0         | 493 | 520 | 94 - | 19  | 532 | 55109  | 55627  |
| UN75637 | Rsa1.0.00307.1 | 476 | 199003 | 1.00E-153 | 336 | 359 | 93 - | 66  | 424 | 167925 | 168271 |
| UN75638 | Rsa1.0.00045.1 | 717 | 328694 | 0         | 459 | 464 | 98 + | 23  | 486 | 271504 | 271967 |
| UN75639 | Rsa1.0.01530.1 | 433 | 43820  | 0         | 420 | 432 | 97 - | 2   | 433 | 11715  | 12146  |
| UN75640 | Rsa1.0.02876.1 | 457 | 27062  | 0         | 451 | 459 | 98 - | 2   | 457 | 7134   | 7592   |
| UN75641 | Rsa1.0.01271.1 | 600 | 49569  | 1.00E-125 | 278 | 295 | 94 + | 21  | 315 | 21455  | 21749  |
| UN75642 | Rsa1.0.05749.1 | 433 | 12746  | 1.00E-114 | 359 | 407 | 88 - | 30  | 433 | 1449   | 1829   |
| UN75643 | Rsa1.0.00300.1 | 829 | 97747  | 0         | 805 | 828 | 97 + | 3   | 829 | 88802  | 89625  |
| UN75644 | Rsa1.0.00835.1 | 608 | 278058 | 1.00E-156 | 314 | 324 | 96 + | 1   | 324 | 163058 | 163380 |
| UN75645 | #              | #   | #      | #         | #   | #   | #    | #   | #   | #      | #      |
| UN75646 | Rsa1.0.00082.1 | 181 | 237584 | 3.00E-53  | 156 | 172 | 90 + | 6   | 177 | 68510  | 68678  |
| UN75647 | Rsa1.0.32504.1 | 837 | 700    | 0         | 610 | 630 | 96 + | 209 | 837 | 1      | 630    |
| UN75648 | Rsa1.0.00387.1 | 614 | 495407 | 1.00E-110 | 248 | 261 | 95 + | 1   | 256 | 389874 | 390130 |
| UN75649 | Rsa1.0.09142.1 | 529 | 6611   | 0         | 524 | 529 | 99 + | 1   | 529 | 1601   | 2129   |
| UN75650 | Rsa1.0.08133.1 | 153 | 7852   | 2.00E-62  | 145 | 153 | 94 - | 1   | 153 | 2015   | 2167   |
| UN75651 | Rsa1.0.02561.1 | 534 | 30080  | 1.00E-107 | 214 | 218 | 98 + | 1   | 217 | 13928  | 14145  |
| UN75652 | Rsa1.0.00090.1 | 591 | 273859 | 1.00E-132 | 326 | 353 | 92 + | 8   | 351 | 67884  | 68230  |
| UN75653 | Rsa1.0.01588.1 | 427 | 42724  | 0         | 410 | 434 | 94 - | 2   | 427 | 5118   | 5549   |
| UN75654 | Rsa1.0.00078.1 | 728 | 175053 | 1.00E-164 | 296 | 297 | 99 + | 2   | 298 | 42609  | 42905  |
| UN75655 | Rsa1.0.12838.1 | 699 | 5106   | 0         | 678 | 698 | 97 + | 2   | 699 | 4185   | 4869   |
| UN75656 | Rsa1.0.12442.1 | 761 | 5225   | 1.00E-144 | 262 | 263 | 99 + | 1   | 263 | 1016   | 1278   |
| UN75657 | Rsa1.0.04488.1 | 343 | 17155  | 7.00E-80  | 170 | 175 | 97 - | 169 | 343 | 61     | 234    |
| UN75658 | Rsa1.0.06034.1 | 764 | 11877  | 0         | 569 | 574 | 99 + | 5   | 578 | 5682   | 6255   |

|         |                |     |        |           |     |     |       |     |     |        |        |
|---------|----------------|-----|--------|-----------|-----|-----|-------|-----|-----|--------|--------|
| UN75659 | Rsa1.0.01172.1 | 498 | 51734  | 0         | 497 | 498 | 99 -  | 1   | 498 | 45408  | 45905  |
| UN75660 | Rsa1.0.02291.1 | 786 | 32959  | 3.00E-38  | 121 | 134 | 90 -  | 98  | 231 | 9232   | 9365   |
| UN75661 | Rsa1.0.08122.1 | 132 | 7873   | 3.00E-55  | 128 | 133 | 96 +  | 1   | 132 | 4270   | 4402   |
| UN75662 | Rsa1.0.00215.1 | 559 | 201775 | 1.00E-115 | 260 | 272 | 95 -  | 1   | 266 | 172377 | 172648 |
| UN75663 | Rsa1.0.00248.1 | 347 | 163568 | 1.00E-157 | 335 | 349 | 95 -  | 2   | 347 | 37193  | 37541  |
| UN75664 | Rsa1.0.00310.1 | 317 | 96852  | 6.00E-77  | 198 | 217 | 91 -  | 101 | 317 | 3662   | 3868   |
| UN75665 | Rsa1.0.00378.1 | 766 | 89892  | 3.00E-99  | 211 | 220 | 95 -  | 3   | 222 | 65322  | 65541  |
| UN75666 | Rsa1.0.01727.1 | 557 | 40243  | 0         | 392 | 398 | 98 -  | 1   | 398 | 27904  | 28300  |
| UN75667 | Rsa1.0.00727.1 | 640 | 66724  | 1.00E-122 | 228 | 230 | 99 -  | 386 | 615 | 30553  | 30782  |
| UN75668 | Rsa1.0.00384.1 | 612 | 89278  | 0         | 575 | 618 | 93 +  | 3   | 612 | 17392  | 18005  |
| UN75669 | Rsa1.0.09142.1 | 729 | 6611   | 0         | 382 | 383 | 99 -  | 2   | 384 | 2599   | 2981   |
| UN75670 | Rsa1.0.00190.1 | 214 | 318240 | 1.00E-111 | 212 | 214 | 99 +  | 3   | 214 | 201696 | 201909 |
| UN75671 | Rsa1.0.03876.1 | 823 | 20334  | 1.00E-119 | 221 | 222 | 99 +  | 306 | 527 | 6896   | 7117   |
| UN75672 | Rsa1.0.00119.1 | 188 | 467509 | 7.00E-88  | 182 | 188 | 96 +  | 1   | 188 | 383412 | 383599 |
| UN75673 | Rsa1.0.03593.1 | 740 | 21869  | 0         | 372 | 372 | 100 - | 2   | 373 | 2686   | 3057   |
| UN75674 | Rsa1.0.00139.1 | 147 | 357786 | 2.00E-66  | 144 | 148 | 97 +  | 1   | 147 | 274033 | 274180 |
| UN75675 | Rsa1.0.00107.1 | 318 | 431659 | 1.00E-127 | 274 | 287 | 95 -  | 1   | 287 | 347678 | 347963 |
| UN75676 | Rsa1.0.00604.1 | 498 | 146282 | 1.00E-114 | 243 | 253 | 96 +  | 247 | 498 | 2962   | 3214   |
| UN75677 | Rsa1.0.01883.1 | 683 | 37661  | 0         | 369 | 378 | 97 -  | 3   | 379 | 22302  | 22676  |
| UN75678 | Rsa1.0.02568.1 | 820 | 30015  | 1.00E-119 | 248 | 257 | 96 -  | 3   | 258 | 11243  | 11499  |
| UN75679 | Rsa1.0.00453.1 | 670 | 83031  | 0         | 665 | 671 | 99 +  | 2   | 670 | 37866  | 38536  |
| UN75680 | Rsa1.0.00912.1 | 453 | 59923  | 1.00E-122 | 293 | 311 | 94 +  | 1   | 307 | 36976  | 37282  |
| UN75681 | #              | #   | #      | #         | #   | #   | #     | #   | #   | #      | #      |
| UN75682 | Rsa1.0.00391.1 | 535 | 183853 | 1.00E-153 | 329 | 347 | 94 -  | 4   | 350 | 86965  | 87311  |
| UN75683 | Rsa1.0.02365.1 | 115 | 32118  | 2.00E-28  | 97  | 107 | 90 -  | 11  | 115 | 6508   | 6614   |
| UN75684 | Rsa1.0.03524.1 | 341 | 22297  | 1.00E-138 | 290 | 303 | 95 +  | 1   | 303 | 18659  | 18959  |
| UN75685 | Rsa1.0.16717.1 | 825 | 2055   | 4.00E-77  | 156 | 159 | 98 -  | 252 | 410 | 1896   | 2054   |
| UN75686 | Rsa1.0.00878.1 | 384 | 330303 | 1.00E-176 | 372 | 391 | 95 +  | 1   | 384 | 9081   | 9471   |
| UN75687 | Rsa1.0.00427.1 | 678 | 189678 | 0         | 609 | 614 | 99 -  | 3   | 616 | 110678 | 111291 |
| UN75688 | Rsa1.0.01638.1 | 725 | 41857  | 1.00E-109 | 241 | 253 | 95 -  | 471 | 722 | 13507  | 13755  |
| UN75689 | Rsa1.0.00045.1 | 288 | 328694 | 1.00E-159 | 287 | 288 | 99 +  | 1   | 288 | 307229 | 307516 |
| UN75690 | Rsa1.0.00016.1 | 447 | 831256 | 1.00E-112 | 274 | 298 | 91 +  | 156 | 447 | 430646 | 430931 |
| UN75691 | Rsa1.0.02750.1 | 774 | 28239  | 0         | 767 | 771 | 99 -  | 5   | 771 | 1304   | 2074   |
| UN75692 | Rsa1.0.03355.1 | 777 | 23489  | 1.00E-131 | 241 | 242 | 99 +  | 308 | 549 | 18255  | 18496  |
| UN75693 | Rsa1.0.00635.1 | 807 | 175826 | 1.00E-141 | 258 | 259 | 99 +  | 239 | 497 | 124757 | 125015 |
| UN75694 | Rsa1.0.00075.1 | 824 | 146680 | 0         | 792 | 827 | 95 -  | 3   | 822 | 2406   | 3232   |
| UN75695 | Rsa1.0.00689.1 | 736 | 68305  | 0         | 481 | 498 | 96 -  | 240 | 736 | 7112   | 7607   |
| UN75696 | Rsa1.0.03600.1 | 383 | 21857  | 5.00E-41  | 107 | 114 | 93 -  | 259 | 372 | 11660  | 11773  |
| UN75697 | Rsa1.0.00888.1 | 412 | 60978  | 1.00E-134 | 382 | 421 | 90 -  | 1   | 412 | 50592  | 51003  |

|         |                |     |        |           |     |     |       |     |     |        |        |
|---------|----------------|-----|--------|-----------|-----|-----|-------|-----|-----|--------|--------|
| UN75698 | Rsa1.0_00301.1 | 196 | 365315 | 4.00E-71  | 169 | 180 | 93 +  | 1   | 180 | 276888 | 277067 |
| UN75699 | #              | #   | #      | #         | #   | #   | #     | #   | #   | #      | #      |
| UN75700 | Rsa1.0_00182.1 | 416 | 142305 | 2.00E-77  | 156 | 159 | 98 +  | 167 | 325 | 125433 | 125591 |
| UN75701 | Rsa1.0_01626.1 | 503 | 41989  | 0         | 502 | 503 | 99 +  | 1   | 503 | 30874  | 31376  |
| UN75702 | Rsa1.0_23843.1 | 389 | 1022   | 6.00E-87  | 166 | 167 | 99 -  | 196 | 362 | 1      | 167    |
| UN75703 | Rsa1.0_61764.1 | 847 | 371    | 0         | 364 | 371 | 98 -  | 328 | 696 | 1      | 371    |
| UN75704 | Rsa1.0_00157.1 | 783 | 245832 | 1.00E-154 | 280 | 281 | 99 +  | 1   | 281 | 29213  | 29493  |
| UN75705 | Rsa1.0_03401.1 | 327 | 23191  | 1.00E-156 | 315 | 326 | 96 +  | 1   | 324 | 15968  | 16293  |
| UN75706 | Rsa1.0_01181.1 | 161 | 51496  | 6.00E-20  | 65  | 70  | 92 +  | 92  | 161 | 23538  | 23607  |
| UN75707 | Rsa1.0_00802.1 | 648 | 63846  | 0         | 400 | 408 | 98 +  | 3   | 410 | 6069   | 6476   |
| UN75708 | Rsa1.0_00306.1 | 705 | 146760 | 0         | 486 | 491 | 98 -  | 2   | 490 | 92285  | 92775  |
| UN75709 | Rsa1.0_00448.1 | 803 | 84048  | 0         | 800 | 804 | 99 -  | 3   | 803 | 43318  | 44121  |
| UN75710 | Rsa1.0_03625.1 | 270 | 21692  | 1.00E-123 | 260 | 271 | 95 +  | 1   | 270 | 13442  | 13712  |
| UN75711 | Rsa1.0_00412.1 | 274 | 86935  | 1.00E-136 | 260 | 262 | 99 -  | 3   | 262 | 25449  | 25710  |
| UN75712 | Rsa1.0_02757.1 | 602 | 28187  | 0         | 588 | 607 | 96 +  | 2   | 602 | 10174  | 10779  |
| UN75713 | Rsa1.0_02453.1 | 665 | 31271  | 1.00E-161 | 291 | 292 | 99 -  | 4   | 295 | 6162   | 6453   |
| UN75714 | Rsa1.0_00100.1 | 557 | 249232 | 0         | 443 | 472 | 93 -  | 90  | 557 | 221777 | 222245 |
| UN75715 | Rsa1.0_00146.1 | 658 | 149343 | 1.00E-95  | 193 | 198 | 97 -  | 422 | 619 | 54178  | 54375  |
| UN75716 | Rsa1.0_02360.1 | 527 | 32203  | 1.00E-94  | 230 | 245 | 93 -  | 79  | 317 | 24790  | 25034  |
| UN75717 | Rsa1.0_03616.1 | 535 | 21756  | 0         | 521 | 539 | 96 +  | 2   | 532 | 8817   | 9354   |
| UN75718 | Rsa1.0_00465.1 | 781 | 82138  | 0         | 705 | 799 | 88 -  | 3   | 781 | 34918  | 35715  |
| UN75719 | Rsa1.0_02473.1 | 540 | 31083  | 0         | 537 | 538 | 99 -  | 3   | 540 | 26522  | 27059  |
| UN75720 | Rsa1.0_00407.1 | 695 | 191544 | 0         | 396 | 401 | 98 -  | 295 | 695 | 166080 | 166479 |
| UN75721 | Rsa1.0_07933.1 | 805 | 8232   | 1.00E-162 | 317 | 326 | 97 +  | 3   | 328 | 2643   | 2968   |
| UN75722 | Rsa1.0_00621.1 | 259 | 71840  | 1.00E-110 | 226 | 232 | 97 -  | 3   | 230 | 67436  | 67667  |
| UN75723 | Rsa1.0_02961.1 | 673 | 26435  | 2.00E-32  | 144 | 168 | 85 +  | 316 | 483 | 3777   | 3944   |
| UN75724 | Rsa1.0_00160.1 | 555 | 346678 | 0         | 545 | 558 | 97 -  | 2   | 555 | 189827 | 190384 |
| UN75725 | Rsa1.0_04523.1 | 828 | 16985  | 0         | 690 | 703 | 98 -  | 3   | 705 | 5915   | 6617   |
| UN75726 | Rsa1.0_08465.1 | 633 | 7307   | 1.00E-157 | 372 | 401 | 92 +  | 233 | 633 | 1509   | 1908   |
| UN75727 | Rsa1.0_00164.1 | 781 | 116642 | 0         | 680 | 700 | 97 +  | 89  | 781 | 47430  | 48129  |
| UN75728 | Rsa1.0_00149.1 | 624 | 305196 | 0         | 609 | 623 | 97 +  | 3   | 624 | 132664 | 133286 |
| UN75729 | Rsa1.0_18189.1 | 568 | 1649   | 1.00E-156 | 444 | 496 | 89 +  | 23  | 510 | 790    | 1262   |
| UN75730 | Rsa1.0_00577.1 | 810 | 174827 | 1.00E-109 | 201 | 201 | 100 - | 86  | 286 | 169963 | 170163 |
| UN75731 | Rsa1.0_03070.1 | 760 | 25578  | 0         | 752 | 758 | 99 +  | 2   | 755 | 755    | 1512   |
| UN75732 | Rsa1.0_04757.1 | 738 | 16113  | 0         | 553 | 557 | 99 -  | 1   | 556 | 526    | 1080   |
| UN75733 | Rsa1.0_01349.1 | 637 | 47513  | 0         | 625 | 637 | 98 +  | 2   | 637 | 10923  | 11559  |
| UN75734 | Rsa1.0_02967.1 | 667 | 26395  | 0         | 412 | 422 | 97 -  | 246 | 667 | 1720   | 2139   |
| UN75735 | Rsa1.0_06319.1 | 776 | 11243  | 0         | 418 | 436 | 95 +  | 297 | 727 | 9996   | 10430  |
| UN75736 | Rsa1.0_02207.1 | 155 | 33914  | 6.00E-20  | 76  | 83  | 91 -  | 74  | 155 | 20846  | 20924  |



|         |                |     |        |           |     |     |      |     |     |        |        |
|---------|----------------|-----|--------|-----------|-----|-----|------|-----|-----|--------|--------|
| UN75737 | Rsa1.0.05047.1 | 843 | 15032  | 0         | 827 | 856 | 96 - | 2   | 843 | 11099  | 11954  |
| UN75738 | Rsa1.0.02505.1 | 698 | 30703  | 0         | 424 | 425 | 99 - | 128 | 552 | 10744  | 11168  |
| UN75739 | Rsa1.0.00290.1 | 701 | 225096 | 0         | 408 | 410 | 99 + | 291 | 700 | 1947   | 2356   |
| UN75740 | Rsa1.0.00019.1 | 572 | 301669 | 1.00E-138 | 307 | 322 | 95 - | 257 | 570 | 36775  | 37096  |
| UN75741 | Rsa1.0.00026.1 | 665 | 327835 | 1.00E-176 | 358 | 371 | 96 - | 278 | 647 | 79436  | 79803  |
| UN75742 | Rsa1.0.29723.1 | 743 | 774    | 1.00E-108 | 301 | 332 | 90 - | 411 | 735 | 171    | 483    |
| UN75743 | Rsa1.0.00038.1 | 727 | 314568 | 0         | 689 | 717 | 96 + | 16  | 724 | 145519 | 146235 |
| UN75744 | Rsa1.0.08492.1 | 230 | 7277   | 1.00E-125 | 229 | 230 | 99 + | 1   | 230 | 5857   | 6086   |
| UN75745 | Rsa1.0.00017.1 | 665 | 752458 | 0         | 448 | 449 | 99 + | 2   | 450 | 72213  | 72661  |
| UN75746 | Rsa1.0.03828.1 | 585 | 20588  | 1.00E-88  | 180 | 184 | 97 - | 15  | 198 | 7470   | 7650   |
| UN75747 | Rsa1.0.00329.1 | 699 | 222544 | 1.00E-130 | 239 | 240 | 99 - | 257 | 496 | 90677  | 90916  |
| UN75748 | Rsa1.0.00181.1 | 688 | 114269 | 0         | 373 | 386 | 96 + | 3   | 388 | 14768  | 15153  |
| UN75749 | Rsa1.0.00976.1 | 788 | 57809  | 4.00E-65  | 140 | 143 | 97 + | 3   | 144 | 46312  | 46454  |
| UN75750 | Rsa1.0.00006.1 | 806 | 396176 | 0         | 763 | 823 | 92 + | 1   | 806 | 366607 | 367429 |
| UN75751 | Rsa1.0.35727.1 | 609 | 633    | 1.00E-169 | 320 | 325 | 98 - | 285 | 609 | 166    | 489    |
| UN75752 | Rsa1.0.00096.1 | 755 | 198773 | 1.00E-169 | 311 | 313 | 99 - | 60  | 372 | 128006 | 128316 |
| UN75753 | Rsa1.0.00711.1 | 512 | 67223  | 0         | 507 | 512 | 99 - | 1   | 512 | 53416  | 53925  |
| UN75754 | Rsa1.0.01996.1 | 652 | 36327  | 2.33E-156 | 283 | 290 | 97 - | 95  | 384 | 28812  | 29101  |
| UN75755 | Rsa1.0.03788.1 | 693 | 20873  | 1.00E-130 | 253 | 256 | 98 + | 438 | 691 | 14273  | 14528  |
| UN75756 | Rsa1.0.00205.1 | 664 | 193401 | 1.00E-177 | 333 | 338 | 98 - | 2   | 338 | 86019  | 86356  |
| UN75757 | Rsa1.0.03206.1 | 782 | 24614  | 0         | 778 | 782 | 99 + | 3   | 782 | 2298   | 3079   |
| UN75758 | Rsa1.0.02798.1 | 722 | 27792  | 1.00E-177 | 380 | 400 | 95 + | 1   | 400 | 22171  | 22555  |
| UN75759 | Rsa1.0.00015.1 | 561 | 561803 | 1.00E-61  | 136 | 141 | 96 + | 1   | 141 | 301905 | 302045 |
| UN75760 | Rsa1.0.00116.1 | 253 | 365886 | 1.00E-136 | 252 | 253 | 99 - | 2   | 253 | 142631 | 142883 |
| UN75761 | Rsa1.0.00678.1 | 653 | 193163 | 0         | 611 | 655 | 93 - | 3   | 653 | 139713 | 140353 |
| UN75762 | Rsa1.0.14454.1 | 747 | 3372   | 0         | 507 | 521 | 97 - | 230 | 747 | 580    | 1100   |
| UN75763 | Rsa1.0.01143.1 | 735 | 52456  | 1.00E-109 | 238 | 250 | 95 - | 486 | 735 | 20240  | 20486  |
| UN75764 | Rsa1.0.00608.1 | 762 | 172672 | 0         | 511 | 539 | 94 - | 229 | 762 | 166837 | 167375 |
| UN75765 | Rsa1.0.02505.1 | 748 | 30703  | 0         | 374 | 376 | 99 - | 329 | 704 | 19444  | 19819  |
| UN75766 | Rsa1.0.00949.1 | 777 | 58549  | 0         | 534 | 536 | 99 - | 2   | 537 | 5091   | 5626   |
| UN75767 | Rsa1.0.13820.1 | 669 | 4264   | 1.00E-138 | 270 | 277 | 97 - | 393 | 669 | 1106   | 1382   |
| UN75768 | Rsa1.0.03609.1 | 532 | 21798  | 1.00E-134 | 249 | 251 | 99 - | 105 | 355 | 19650  | 19900  |
| UN75769 | Rsa1.0.00673.1 | 705 | 69325  | 1.00E-143 | 279 | 285 | 97 + | 420 | 702 | 8697   | 8981   |
| UN75770 | Rsa1.0.00033.1 | 522 | 515811 | 1.00E-155 | 329 | 341 | 96 - | 174 | 511 | 356574 | 356913 |
| UN75771 | Rsa1.0.06038.1 | 440 | 11867  | 0         | 369 | 370 | 99 + | 72  | 440 | 8497   | 8866   |
| UN75772 | Rsa1.0.00234.1 | 754 | 197060 | 0         | 442 | 470 | 94 - | 3   | 468 | 152696 | 153162 |
| UN75773 | Rsa1.0.01624.1 | 705 | 42064  | 1.00E-171 | 314 | 317 | 99 + | 389 | 705 | 3604   | 3920   |
| UN75774 | Rsa1.0.00339.1 | 614 | 222974 | 0         | 585 | 612 | 95 - | 2   | 610 | 91514  | 92125  |
| UN75775 | Rsa1.0.03089.1 | 653 | 25465  | 1.00E-117 | 217 | 218 | 99 + | 267 | 484 | 8405   | 8622   |

|         |                |     |        |           |     |     |       |     |     |        |        |
|---------|----------------|-----|--------|-----------|-----|-----|-------|-----|-----|--------|--------|
| UN75776 | Rsa1.0.00155.1 | 353 | 118465 | 1.00E-59  | 184 | 207 | 88 +  | 1   | 205 | 105477 | 105673 |
| UN75777 | Rsa1.0.00213.1 | 432 | 108167 | 6.00E-84  | 245 | 268 | 91 -  | 163 | 428 | 58566  | 58823  |
| UN75778 | Rsa1.0.00703.1 | 615 | 67597  | 1.00E-102 | 295 | 331 | 89 +  | 3   | 316 | 16503  | 16828  |
| UN75779 | Rsa1.0.00638.1 | 446 | 71037  | 0         | 405 | 408 | 99 +  | 2   | 407 | 38719  | 39125  |
| UN75780 | Rsa1.0.02731.1 | 771 | 28375  | 0         | 352 | 355 | 99 -  | 24  | 376 | 23686  | 24040  |
| UN75781 | Rsa1.0.00012.1 | 698 | 222148 | 0         | 458 | 476 | 96 -  | 80  | 555 | 180470 | 180945 |
| UN75782 | Rsa1.0.12442.1 | 745 | 5225   | 0         | 440 | 444 | 99 -  | 304 | 745 | 2767   | 3210   |
| UN75783 | Rsa1.0.02355.1 | 628 | 32260  | 1.00E-128 | 282 | 299 | 94 -  | 24  | 315 | 8537   | 8835   |
| UN75784 | Rsa1.0.01282.1 | 509 | 49304  | 0         | 480 | 505 | 95 +  | 4   | 505 | 25475  | 25976  |
| UN75785 | Rsa1.0.00896.1 | 809 | 60509  | 0         | 417 | 422 | 98 -  | 378 | 796 | 21186  | 21607  |
| UN75786 | Rsa1.0.05947.1 | 791 | 12142  | 0         | 401 | 428 | 93 +  | 270 | 697 | 2699   | 3111   |
| UN75787 | Rsa1.0.02950.1 | 786 | 26506  | 1.00E-108 | 200 | 200 | 100 - | 3   | 202 | 21005  | 21204  |
| UN75788 | Rsa1.0.08622.1 | 463 | 7122   | 1.00E-111 | 203 | 203 | 100 + | 218 | 420 | 1567   | 1769   |
| UN75789 | Rsa1.0.00077.1 | 324 | 145005 | 1.00E-151 | 295 | 303 | 97 -  | 22  | 324 | 69895  | 70197  |
| UN75790 | Rsa1.0.00108.1 | 672 | 478491 | 0         | 609 | 636 | 95 -  | 43  | 672 | 448627 | 449257 |
| UN75791 | Rsa1.0.00183.1 | 617 | 113277 | 0         | 359 | 361 | 99 -  | 257 | 617 | 16344  | 16704  |
| UN75792 | Rsa1.0.22382.1 | 695 | 1126   | 0         | 681 | 695 | 97 +  | 2   | 695 | 409    | 1103   |
| UN75793 | Rsa1.0.00002.1 | 302 | 601661 | 1.00E-105 | 197 | 198 | 99 +  | 105 | 302 | 523639 | 523836 |
| UN75794 | Rsa1.0.02093.1 | 729 | 35125  | 0         | 503 | 521 | 96 +  | 186 | 704 | 20234  | 20754  |
| UN75795 | Rsa1.0.00050.1 | 637 | 237174 | 1.00E-118 | 215 | 215 | 100 - | 423 | 637 | 190419 | 190633 |
| UN75796 | Rsa1.0.00158.1 | 645 | 117999 | 8.00E-75  | 243 | 271 | 89 -  | 337 | 605 | 7414   | 7682   |
| UN75797 | Rsa1.0.00514.1 | 779 | 78421  | 0         | 764 | 774 | 98 +  | 2   | 775 | 55979  | 56752  |
| UN75798 | Rsa1.0.00770.1 | 798 | 64900  | 1.00E-168 | 316 | 320 | 98 +  | 3   | 321 | 29037  | 29356  |
| UN75799 | Rsa1.0.00804.1 | 627 | 63726  | 0         | 337 | 339 | 99 +  | 53  | 391 | 34617  | 34955  |
| UN75800 | Rsa1.0.00363.1 | 598 | 90968  | 0         | 479 | 483 | 99 -  | 116 | 598 | 14264  | 14746  |
| UN75801 | Rsa1.0.00294.1 | 634 | 144860 | 0         | 378 | 389 | 97 +  | 3   | 385 | 79227  | 79615  |
| UN75802 | Rsa1.0.07591.1 | 652 | 9060   | 1.00E-179 | 395 | 418 | 94 -  | 239 | 652 | 7731   | 8145   |
| UN75803 | Rsa1.0.01177.1 | 679 | 51572  | 1.00E-103 | 292 | 326 | 89 -  | 3   | 321 | 49139  | 49451  |
| UN75804 | Rsa1.0.00119.1 | 509 | 467509 | 1.00E-51  | 139 | 151 | 92 -  | 264 | 414 | 384606 | 384750 |
| UN75805 | Rsa1.0.02019.1 | 525 | 35983  | 1.00E-143 | 290 | 298 | 97 -  | 207 | 504 | 14784  | 15079  |
| UN75806 | Rsa1.0.00136.1 | 652 | 122464 | 0         | 401 | 424 | 94 +  | 229 | 652 | 117572 | 117992 |
| UN75807 | Rsa1.0.01920.1 | 779 | 158533 | 0         | 467 | 486 | 96 +  | 3   | 486 | 125762 | 126241 |
| UN75808 | Rsa1.0.05199.1 | 649 | 14529  | 0         | 415 | 436 | 95 -  | 12  | 447 | 5287   | 5722   |
| UN75809 | Rsa1.0.01366.1 | 597 | 47139  | 0         | 354 | 359 | 98 -  | 3   | 361 | 35120  | 35478  |
| UN75810 | Rsa1.0.00376.1 | 606 | 90101  | 1.00E-144 | 265 | 267 | 99 +  | 134 | 400 | 63666  | 63932  |
| UN75811 | Rsa1.0.00588.1 | 815 | 73939  | 0         | 416 | 423 | 98 -  | 316 | 737 | 33134  | 33556  |
| UN75812 | Rsa1.0.01958.1 | 671 | 261128 | 0         | 649 | 687 | 94 -  | 2   | 671 | 138783 | 139469 |
| UN75813 | Rsa1.0.01526.1 | 307 | 43919  | 2.00E-52  | 117 | 121 | 96 -  | 179 | 299 | 4032   | 4152   |
| UN75814 | Rsa1.0.03123.1 | 619 | 25207  | 0         | 601 | 621 | 96 -  | 3   | 619 | 14217  | 14837  |

|         |                |     |        |           |     |     |       |     |     |        |        |
|---------|----------------|-----|--------|-----------|-----|-----|-------|-----|-----|--------|--------|
| UN75815 | Rsa1.0.46885.1 | 747 | 482    | 0         | 480 | 482 | 99 -  | 118 | 598 | 1      | 482    |
| UN75816 | Rsa1.0.01712.1 | 707 | 154210 | 0         | 373 | 380 | 98 -  | 333 | 707 | 20221  | 20600  |
| UN75817 | Rsa1.0.00187.1 | 471 | 393093 | 0         | 408 | 420 | 97 -  | 10  | 429 | 48682  | 49101  |
| UN75818 | Rsa1.0.00984.1 | 375 | 57580  | 1.00E-158 | 282 | 282 | 100 - | 94  | 375 | 53162  | 53443  |
| UN75819 | Rsa1.0.05081.1 | 690 | 136103 | 1.00E-173 | 342 | 352 | 97 +  | 3   | 353 | 4223   | 4574   |
| UN75820 | Rsa1.0.00314.1 | 518 | 96472  | 0         | 498 | 527 | 94 +  | 3   | 518 | 10688  | 11202  |
| UN75821 | Rsa1.0.21652.1 | 540 | 1184   | 0         | 506 | 535 | 94 +  | 1   | 535 | 7      | 524    |
| UN75822 | Rsa1.0.00090.1 | 154 | 273859 | 3.00E-46  | 146 | 161 | 90 -  | 1   | 154 | 68881  | 69040  |
| UN75823 | Rsa1.0.00595.1 | 613 | 341648 | 1.00E-180 | 361 | 375 | 96 -  | 3   | 377 | 143205 | 143573 |
| UN75824 | Rsa1.0.07094.1 | 611 | 9901   | 1.00E-159 | 291 | 293 | 99 +  | 2   | 294 | 300    | 592    |
| UN75825 | #              | #   | #      | #         | #   | #   | #     | #   | #   | #      | #      |
| UN75826 | Rsa1.0.06034.1 | 618 | 11877  | 4.00E-86  | 182 | 186 | 97 -  | 94  | 278 | 4221   | 4405   |
| UN75827 | Rsa1.0.03572.1 | 583 | 146346 | 0         | 499 | 507 | 98 +  | 3   | 509 | 18927  | 19433  |
| UN75828 | Rsa1.0.00384.1 | 617 | 89278  | 0         | 457 | 460 | 99 -  | 158 | 617 | 18002  | 18461  |
| UN75829 | Rsa1.0.01104.1 | 808 | 285480 | 1.00E-118 | 252 | 262 | 96 -  | 407 | 667 | 107189 | 107447 |
| UN75830 | Rsa1.0.10864.1 | 559 | 5697   | 0         | 392 | 403 | 97 -  | 2   | 404 | 900    | 1302   |
| UN75831 | Rsa1.0.00466.1 | 765 | 82132  | 0         | 561 | 585 | 95 -  | 152 | 732 | 56589  | 57173  |
| UN75832 | Rsa1.0.01150.1 | 539 | 52331  | 1.00E-94  | 195 | 200 | 97 -  | 341 | 539 | 243    | 442    |
| UN75833 | Rsa1.0.01743.1 | 444 | 39926  | 0         | 426 | 445 | 95 +  | 3   | 443 | 5138   | 5581   |
| UN75834 | Rsa1.0.00773.1 | 468 | 64839  | 0         | 465 | 465 | 100 - | 4   | 468 | 63309  | 63773  |
| UN75835 | #              | #   | #      | #         | #   | #   | #     | #   | #   | #      | #      |
| UN75836 | Rsa1.0.01419.1 | 636 | 167402 | 0         | 594 | 662 | 89 -  | 7   | 636 | 142590 | 143249 |
| UN75837 | Rsa1.0.02165.1 | 731 | 34423  | 1.00E-126 | 230 | 230 | 100 + | 180 | 409 | 10391  | 10620  |
| UN75838 | Rsa1.0.00010.1 | 570 | 294827 | 1.00E-103 | 215 | 222 | 96 -  | 93  | 314 | 123987 | 124207 |
| UN75839 | Rsa1.0.00722.1 | 767 | 66840  | 8.00E-94  | 184 | 187 | 98 +  | 476 | 662 | 19739  | 19925  |
| UN75840 | Rsa1.0.21688.1 | 541 | 1181   | 0         | 503 | 517 | 97 +  | 2   | 518 | 665    | 1181   |
| UN75841 | Rsa1.0.00324.1 | 757 | 218805 | 0         | 734 | 756 | 97 +  | 2   | 752 | 25768  | 26519  |
| UN75842 | Rsa1.0.01388.1 | 762 | 46741  | 1.00E-129 | 246 | 250 | 98 +  | 256 | 505 | 6365   | 6614   |
| UN75843 | Rsa1.0.00362.1 | 672 | 299497 | 0         | 517 | 525 | 98 +  | 138 | 658 | 214496 | 215020 |
| UN75844 | Rsa1.0.01540.1 | 545 | 151890 | 1.00E-116 | 218 | 220 | 99 -  | 145 | 364 | 145079 | 145298 |
| UN75845 | Rsa1.0.00014.1 | 156 | 348985 | 8.00E-81  | 155 | 156 | 99 +  | 1   | 156 | 20433  | 20588  |
| UN75846 | Rsa1.0.01573.1 | 557 | 42964  | 0         | 439 | 477 | 92 +  | 93  | 557 | 2031   | 2495   |
| UN75847 | Rsa1.0.00490.1 | 621 | 186713 | 0         | 592 | 604 | 98 -  | 18  | 621 | 185723 | 186326 |
| UN75848 | Rsa1.0.00138.1 | 654 | 247040 | 1.00E-163 | 330 | 341 | 96 +  | 3   | 341 | 76600  | 76937  |
| UN75849 | Rsa1.0.00237.1 | 738 | 235974 | 1.00E-95  | 178 | 178 | 100 + | 492 | 669 | 94506  | 94683  |
| UN75850 | Rsa1.0.00417.1 | 723 | 395068 | 0         | 569 | 601 | 94 -  | 121 | 717 | 387044 | 387638 |
| UN75851 | Rsa1.0.00116.1 | 152 | 365886 | 4.00E-30  | 70  | 71  | 98 +  | 3   | 73  | 35033  | 35103  |
| UN75852 | Rsa1.0.00678.1 | 611 | 193163 | 0         | 602 | 610 | 98 -  | 3   | 611 | 130286 | 130895 |
| UN75853 | Rsa1.0.01343.1 | 750 | 47735  | 3.00E-50  | 201 | 234 | 85 -  | 514 | 747 | 10168  | 10401  |

|         |                |     |        |           |     |     |       |     |     |        |        |
|---------|----------------|-----|--------|-----------|-----|-----|-------|-----|-----|--------|--------|
| UN75854 | Rsa1.0.00333.1 | 766 | 94500  | 1.00E-127 | 231 | 231 | 100 + | 1   | 231 | 48408  | 48638  |
| UN75855 | Rsa1.0.02355.1 | 760 | 32260  | 0         | 710 | 739 | 96 +  | 3   | 741 | 3335   | 4073   |
| UN75856 | Rsa1.0.00307.1 | 672 | 199003 | 1.00E-177 | 349 | 363 | 96 +  | 241 | 603 | 167921 | 168271 |
| UN75857 | Rsa1.0.00003.1 | 799 | 340054 | 0         | 703 | 723 | 97 -  | 2   | 719 | 1096   | 1817   |
| UN75858 | Rsa1.0.13892.1 | 652 | 4141   | 0         | 648 | 651 | 99 +  | 2   | 652 | 2993   | 3643   |
| UN75859 | Rsa1.0.02923.1 | 658 | 26736  | 1.00E-160 | 315 | 323 | 97 -  | 4   | 325 | 6012   | 6334   |
| UN75860 | Rsa1.0.02117.1 | 551 | 34843  | 0         | 531 | 549 | 96 -  | 3   | 551 | 24759  | 25295  |
| UN75861 | Rsa1.0.00139.1 | 452 | 357786 | 0         | 435 | 456 | 95 -  | 1   | 452 | 670    | 1120   |
| UN75862 | Rsa1.0.13751.1 | 599 | 4383   | 0         | 460 | 465 | 98 +  | 3   | 467 | 1442   | 1902   |
| UN75863 | Rsa1.0.01716.1 | 750 | 40483  | 1.00E-178 | 362 | 375 | 96 +  | 378 | 750 | 17964  | 18332  |
| UN75864 | Rsa1.0.00017.1 | 831 | 752458 | 1.00E-163 | 301 | 303 | 99 -  | 206 | 507 | 686521 | 686823 |
| UN75865 | Rsa1.0.44441.1 | 702 | 506    | 1.00E-175 | 358 | 373 | 95 +  | 3   | 375 | 136    | 499    |
| UN75866 | Rsa1.0.08558.1 | 589 | 7198   | 0         | 573 | 589 | 97 +  | 3   | 589 | 646    | 1232   |
| UN75867 | Rsa1.0.00356.1 | 429 | 91521  | 1.00E-168 | 346 | 358 | 96 -  | 68  | 424 | 42954  | 43308  |
| UN75868 | Rsa1.0.05950.1 | 747 | 12130  | 1.00E-113 | 223 | 228 | 97 -  | 270 | 497 | 2709   | 2936   |
| UN75869 | Rsa1.0.00301.1 | 615 | 365315 | 1.00E-138 | 271 | 278 | 97 -  | 276 | 553 | 67002  | 67279  |
| UN75870 | Rsa1.0.02879.1 | 599 | 27047  | 1.00E-107 | 204 | 206 | 99 -  | 3   | 208 | 26493  | 26698  |
| UN75871 | Rsa1.0.01595.1 | 735 | 175383 | 0         | 719 | 741 | 97 -  | 2   | 735 | 9560   | 10300  |
| UN75872 | Rsa1.0.00137.1 | 739 | 122457 | 1.00E-52  | 106 | 106 | 100 + | 77  | 182 | 3362   | 3467   |
| UN75873 | Rsa1.0.00205.1 | 820 | 193401 | 1.00E-104 | 250 | 261 | 95 -  | 526 | 781 | 14455  | 14714  |
| UN75874 | Rsa1.0.17347.1 | 738 | 1853   | 1.00E-116 | 219 | 220 | 99 +  | 520 | 738 | 124    | 343    |
| UN75875 | Rsa1.0.00067.1 | 733 | 415055 | 1.00E-161 | 291 | 292 | 99 -  | 242 | 533 | 48393  | 48684  |
| UN75876 | Rsa1.0.52341.1 | 775 | 435    | 0         | 429 | 432 | 99 -  | 1   | 432 | 1      | 432    |
| UN75877 | Rsa1.0.00898.1 | 191 | 202772 | 9.00E-72  | 137 | 137 | 100 + | 1   | 137 | 185576 | 185712 |
| UN75878 | Rsa1.0.00537.1 | 738 | 186980 | 0         | 514 | 548 | 93 +  | 200 | 738 | 163711 | 164249 |
| UN75879 | Rsa1.0.00045.1 | 561 | 328694 | 0         | 538 | 550 | 97 -  | 1   | 548 | 272485 | 273034 |
| UN75880 | Rsa1.0.00039.1 | 802 | 296927 | 8.00E-88  | 174 | 177 | 98 -  | 265 | 441 | 49432  | 49608  |
| UN75881 | Rsa1.0.00351.1 | 371 | 413096 | 1.00E-139 | 251 | 251 | 100 + | 121 | 371 | 269242 | 269492 |
| UN75882 | Rsa1.0.11923.1 | 515 | 5369   | 1.00E-128 | 296 | 315 | 93 +  | 7   | 321 | 795    | 1105   |
| UN75883 | Rsa1.0.29621.1 | 479 | 777    | 6.00E-41  | 98  | 102 | 96 -  | 160 | 261 | 188    | 289    |
| UN75884 | Rsa1.0.02876.1 | 639 | 27062  | 1.00E-143 | 260 | 261 | 99 +  | 322 | 582 | 5896   | 6156   |
| UN75885 | Rsa1.0.00984.1 | 521 | 57580  | 0         | 520 | 520 | 100 + | 2   | 521 | 5674   | 6193   |
| UN75886 | Rsa1.0.00253.1 | 613 | 231292 | 0         | 605 | 613 | 98 +  | 2   | 612 | 22887  | 23499  |
| UN75887 | Rsa1.0.04039.1 | 671 | 19467  | 0         | 665 | 670 | 99 -  | 3   | 671 | 9351   | 10020  |
| UN75888 | Rsa1.0.44865.1 | 276 | 502    | 1.00E-118 | 236 | 243 | 97 +  | 34  | 276 | 2      | 244    |
| UN75889 | Rsa1.0.00023.1 | 764 | 194764 | 0         | 584 | 614 | 95 -  | 144 | 736 | 39457  | 40070  |
| UN75890 | Rsa1.0.02433.1 | 375 | 158318 | 1.00E-121 | 242 | 248 | 97 +  | 85  | 331 | 29525  | 29772  |
| UN75891 | Rsa1.0.03668.1 | 491 | 21483  | 1.00E-157 | 284 | 285 | 99 -  | 207 | 491 | 12532  | 12816  |
| UN75892 | Rsa1.0.01578.1 | 717 | 42880  | 1.00E-76  | 153 | 154 | 99 -  | 338 | 490 | 9224   | 9377   |

|         |                |     |        |           |     |     |       |     |     |        |        |
|---------|----------------|-----|--------|-----------|-----|-----|-------|-----|-----|--------|--------|
| UN75893 | Rsa1.0_04140.1 | 457 | 18879  | 1.00E-162 | 296 | 298 | 99 +  | 154 | 451 | 3855   | 4152   |
| UN75894 | Rsa1.0_01088.1 | 145 | 54416  | 6.00E-72  | 143 | 145 | 98 -  | 1   | 145 | 35213  | 35357  |
| UN75895 | Rsa1.0_03944.1 | 286 | 19926  | 4.00E-56  | 141 | 150 | 94 -  | 2   | 151 | 10358  | 10505  |
| UN75896 | Rsa1.0_02653.1 | 670 | 29030  | 0         | 467 | 469 | 99 +  | 69  | 537 | 16741  | 17209  |
| UN75897 | Rsa1.0_02710.1 | 702 | 28492  | 1.00E-163 | 350 | 366 | 95 -  | 1   | 362 | 25405  | 25764  |
| UN75898 | Rsa1.0_00083.1 | 236 | 442773 | 9.00E-91  | 220 | 237 | 92 -  | 2   | 229 | 127727 | 127962 |
| UN75899 | Rsa1.0_00112.1 | 432 | 132199 | 1.00E-26  | 170 | 202 | 84 +  | 234 | 428 | 118993 | 119188 |
| UN75900 | Rsa1.0_00461.1 | 735 | 82509  | 1.00E-123 | 267 | 279 | 95 +  | 3   | 281 | 30451  | 30726  |
| UN75901 | Rsa1.0_02757.1 | 428 | 28187  | 0         | 425 | 428 | 99 +  | 1   | 428 | 3597   | 4024   |
| UN75902 | Rsa1.0_00015.1 | 597 | 561803 | 0         | 494 | 506 | 97 -  | 3   | 505 | 259145 | 259650 |
| UN75903 | Rsa1.0_00734.1 | 591 | 66508  | 1.00E-125 | 376 | 420 | 89 +  | 2   | 413 | 38106  | 38524  |
| UN75904 | Rsa1.0_00647.1 | 809 | 70440  | 3.00E-22  | 64  | 67  | 95 -  | 739 | 805 | 47757  | 47823  |
| UN75905 | Rsa1.0_02292.1 | 597 | 32955  | 1.00E-143 | 364 | 392 | 92 -  | 169 | 550 | 31775  | 32164  |
| UN75906 | Rsa1.0_00250.1 | 816 | 273771 | 0         | 403 | 410 | 98 +  | 3   | 411 | 31238  | 31647  |
| UN75907 | Rsa1.0_00721.1 | 766 | 66918  | 1.00E-131 | 241 | 242 | 99 +  | 292 | 533 | 56071  | 56312  |
| UN75908 | Rsa1.0_00274.1 | 792 | 210119 | 0         | 536 | 537 | 99 +  | 3   | 539 | 44408  | 44944  |
| UN75909 | Rsa1.0_02061.1 | 792 | 35487  | 1.00E-140 | 261 | 264 | 98 +  | 261 | 524 | 10892  | 11155  |
| UN75910 | Rsa1.0_00087.1 | 642 | 761073 | 0         | 343 | 350 | 98 +  | 290 | 639 | 321638 | 321987 |
| UN75911 | Rsa1.0_02945.1 | 784 | 26548  | 2.00E-76  | 149 | 150 | 99 -  | 453 | 602 | 17599  | 17748  |
| UN75912 | Rsa1.0_02927.1 | 814 | 26698  | 1.00E-55  | 288 | 347 | 82 -  | 12  | 358 | 6641   | 6987   |
| UN75913 | Rsa1.0_03297.1 | 660 | 23969  | 1.00E-160 | 350 | 369 | 94 +  | 256 | 624 | 21026  | 21391  |
| UN75914 | Rsa1.0_03137.1 | 784 | 25105  | 1.00E-108 | 212 | 216 | 98 +  | 3   | 218 | 12771  | 12986  |
| UN75915 | Rsa1.0_01196.1 | 698 | 51097  | 1.00E-112 | 213 | 214 | 99 -  | 319 | 531 | 27921  | 28134  |
| UN75916 | Rsa1.0_00502.1 | 819 | 204180 | 1.00E-142 | 257 | 257 | 100 - | 3   | 259 | 10567  | 10823  |
| UN75917 | Rsa1.0_01451.1 | 675 | 45459  | 1.00E-175 | 329 | 332 | 99 +  | 5   | 334 | 45048  | 45379  |
| UN75918 | Rsa1.0_00005.1 | 670 | 353093 | 3.00E-37  | 83  | 84  | 98 +  | 359 | 442 | 273048 | 273131 |
| UN75919 | Rsa1.0_00110.1 | 737 | 132719 | 0         | 686 | 705 | 97 +  | 1   | 705 | 96970  | 97674  |
| UN75920 | Rsa1.0_14833.1 | 819 | 3034   | 1.00E-108 | 236 | 248 | 95 -  | 277 | 524 | 5      | 252    |
| UN75921 | Rsa1.0_01799.1 | 770 | 39127  | 0         | 745 | 782 | 95 -  | 4   | 766 | 20850  | 21624  |
| UN75922 | Rsa1.0_06438.1 | 643 | 11017  | 0         | 354 | 356 | 99 +  | 147 | 502 | 1531   | 1886   |
| UN75923 | Rsa1.0_00112.1 | 817 | 132199 | 0         | 758 | 787 | 96 +  | 38  | 817 | 98396  | 99182  |
| UN75924 | Rsa1.0_06312.1 | 501 | 11253  | 1.00E-142 | 346 | 372 | 93 +  | 135 | 501 | 1      | 370    |
| UN75925 | Rsa1.0_00017.1 | 762 | 752458 | 0         | 389 | 393 | 98 +  | 373 | 762 | 187753 | 188145 |
| UN75926 | Rsa1.0_00826.1 | 240 | 166736 | 3.00E-84  | 167 | 170 | 98 +  | 3   | 172 | 157381 | 157550 |
| UN75927 | Rsa1.0_00894.1 | 546 | 269700 | 0         | 521 | 538 | 96 +  | 3   | 540 | 125202 | 125738 |
| UN75928 | Rsa1.0_03022.1 | 146 | 25968  | 9.00E-62  | 143 | 148 | 96 +  | 1   | 146 | 2096   | 2243   |
| UN75929 | Rsa1.0_01414.1 | 550 | 149508 | 0         | 530 | 551 | 96 +  | 3   | 550 | 143143 | 143693 |
| UN75930 | Rsa1.0_00181.1 | 608 | 114269 | 1.00E-144 | 267 | 268 | 99 +  | 3   | 269 | 73133  | 73400  |
| UN75931 | Rsa1.0_01414.1 | 746 | 149508 | 0         | 386 | 398 | 96 -  | 338 | 733 | 18747  | 19144  |

|         |                |     |        |           |     |     |       |     |     |        |        |
|---------|----------------|-----|--------|-----------|-----|-----|-------|-----|-----|--------|--------|
| UN75932 | Rsa1.0.03706.1 | 752 | 21255  | 1.00E-143 | 276 | 281 | 98 +  | 474 | 752 | 12268  | 12548  |
| UN75933 | Rsa1.0.00050.1 | 779 | 237174 | 0         | 335 | 336 | 99 -  | 3   | 338 | 87011  | 87346  |
| UN75934 | Rsa1.0.00207.1 | 303 | 248736 | 4.00E-81  | 162 | 165 | 98 -  | 139 | 303 | 32525  | 32689  |
| UN75935 | Rsa1.0.03561.1 | 367 | 22089  | 0         | 366 | 366 | 100 + | 2   | 367 | 6679   | 7044   |
| UN75936 | Rsa1.0.01155.1 | 520 | 52182  | 0         | 517 | 518 | 99 -  | 3   | 520 | 16333  | 16850  |
| UN75937 | Rsa1.0.00635.1 | 622 | 175826 | 1.00E-172 | 307 | 307 | 100 - | 2   | 308 | 126720 | 127026 |
| UN75938 | Rsa1.0.00075.1 | 628 | 146680 | 0         | 392 | 407 | 96 +  | 222 | 628 | 1894   | 2300   |
| UN75939 | Rsa1.0.00182.1 | 630 | 142305 | 0         | 413 | 415 | 99 +  | 2   | 414 | 117275 | 117689 |
| UN75940 | Rsa1.0.47560.1 | 561 | 475    | 0         | 362 | 369 | 98 -  | 90  | 458 | 107    | 475    |
| UN75941 | Rsa1.0.03001.1 | 607 | 26108  | 0         | 443 | 471 | 94 -  | 152 | 607 | 6011   | 6480   |
| UN75942 | Rsa1.0.02691.1 | 654 | 28628  | 0         | 624 | 659 | 94 +  | 1   | 654 | 8111   | 8767   |
| UN75943 | Rsa1.0.01218.1 | 686 | 50536  | 0         | 646 | 682 | 94 -  | 3   | 683 | 20200  | 20870  |
| UN75944 | Rsa1.0.01471.1 | 601 | 45101  | 0         | 578 | 600 | 96 -  | 1   | 600 | 19770  | 20369  |
| UN75945 | Rsa1.0.01351.1 | 604 | 47498  | 0         | 446 | 449 | 99 -  | 3   | 450 | 34328  | 34776  |
| UN75946 | Rsa1.0.00538.1 | 653 | 77149  | 1.00E-114 | 212 | 213 | 99 +  | 320 | 532 | 53955  | 54167  |
| UN75947 | Rsa1.0.01110.1 | 191 | 195852 | 4.00E-89  | 181 | 186 | 97 -  | 2   | 187 | 17517  | 17702  |
| UN75948 | Rsa1.0.01000.1 | 666 | 57140  | 0         | 606 | 659 | 91 -  | 18  | 666 | 28517  | 29171  |
| UN75949 | Rsa1.0.03138.1 | 675 | 25092  | 0         | 375 | 375 | 100 + | 301 | 675 | 7786   | 8160   |
| UN75950 | Rsa1.0.00082.1 | 522 | 237584 | 1.00E-136 | 286 | 296 | 96 -  | 228 | 522 | 42249  | 42541  |
| UN75951 | Rsa1.0.00001.1 | 785 | 363028 | 0         | 380 | 392 | 96 +  | 395 | 785 | 114402 | 114793 |
| UN75952 | Rsa1.0.00020.1 | 695 | 283099 | 0         | 662 | 694 | 95 +  | 3   | 695 | 197113 | 197796 |
| UN75953 | Rsa1.0.01728.1 | 649 | 40239  | 0         | 576 | 617 | 93 -  | 31  | 643 | 4647   | 5262   |
| UN75954 | Rsa1.0.00006.1 | 608 | 396176 | 9.00E-90  | 192 | 200 | 96 +  | 168 | 367 | 312060 | 312259 |
| UN75955 | Rsa1.0.13693.1 | 381 | 4469   | 0         | 369 | 375 | 98 +  | 2   | 375 | 2993   | 3367   |
| UN75956 | Rsa1.0.05311.1 | 521 | 14181  | 0         | 411 | 414 | 99 +  | 108 | 521 | 6590   | 7002   |
| UN75957 | Rsa1.0.14512.1 | 614 | 3316   | 0         | 513 | 528 | 97 -  | 74  | 601 | 2734   | 3261   |
| UN75958 | Rsa1.0.00090.1 | 667 | 273859 | 0         | 347 | 348 | 99 -  | 320 | 667 | 163762 | 164109 |
| UN75959 | Rsa1.0.00111.1 | 536 | 390088 | 2.00E-90  | 172 | 173 | 99 -  | 73  | 245 | 379950 | 380122 |
| UN75960 | Rsa1.0.00333.1 | 118 | 94500  | 8.00E-34  | 79  | 81  | 97 +  | 27  | 107 | 67553  | 67633  |
| UN75961 | Rsa1.0.03681.1 | 588 | 21405  | 0         | 440 | 447 | 98 -  | 142 | 588 | 944    | 1387   |
| UN75962 | Rsa1.0.03259.1 | 784 | 24290  | 0         | 686 | 727 | 94 +  | 43  | 762 | 10286  | 10995  |
| UN75963 | Rsa1.0.00071.1 | 524 | 345714 | 2.00E-90  | 175 | 177 | 98 -  | 132 | 308 | 312546 | 312722 |
| UN75964 | Rsa1.0.04395.1 | 562 | 17570  | 0         | 451 | 453 | 99 +  | 110 | 562 | 4828   | 5280   |
| UN75965 | #              | #   | #      | #         | #   | #   | #     | #   | #   | #      | #      |
| UN75966 | Rsa1.0.00111.1 | 789 | 390088 | 1.00E-114 | 212 | 213 | 99 -  | 3   | 215 | 79493  | 79705  |
| UN75967 | Rsa1.0.06521.1 | 816 | 10856  | 0         | 463 | 463 | 100 - | 2   | 464 | 1117   | 1579   |
| UN75968 | Rsa1.0.00248.1 | 778 | 163568 | 0         | 765 | 795 | 96 +  | 5   | 778 | 35997  | 36788  |
| UN75969 | Rsa1.0.00037.1 | 713 | 307838 | 1.00E-159 | 321 | 332 | 96 +  | 378 | 708 | 169463 | 169794 |
| UN75970 | Rsa1.0.00121.1 | 757 | 278029 | 0         | 411 | 412 | 99 -  | 146 | 557 | 241233 | 241644 |

|         |                |     |        |           |     |     |       |     |     |        |        |
|---------|----------------|-----|--------|-----------|-----|-----|-------|-----|-----|--------|--------|
| UN75971 | Rsa1.0.00681.1 | 614 | 68779  | 1.00E-154 | 288 | 292 | 98 -  | 267 | 558 | 44501  | 44792  |
| UN75972 | Rsa1.0.04819.1 | 643 | 140505 | 3.00E-71  | 143 | 145 | 98 +  | 100 | 244 | 4285   | 4429   |
| UN75973 | Rsa1.0.08649.1 | 690 | 7084   | 0         | 410 | 427 | 96 -  | 3   | 420 | 3951   | 4377   |
| UN75974 | Rsa1.0.02702.1 | 707 | 28572  | 0         | 682 | 714 | 95 +  | 2   | 700 | 4617   | 5325   |
| UN75975 | Rsa1.0.03743.1 | 789 | 21062  | 0         | 371 | 383 | 96 -  | 3   | 377 | 19196  | 19578  |
| UN75976 | Rsa1.0.04482.1 | 763 | 17175  | 0         | 742 | 754 | 98 +  | 1   | 748 | 5913   | 6666   |
| UN75977 | Rsa1.0.03280.1 | 723 | 145083 | 1.00E-102 | 189 | 189 | 100 - | 255 | 443 | 142113 | 142301 |
| UN75978 | Rsa1.0.00025.1 | 200 | 277312 | 7.00E-91  | 194 | 202 | 96 -  | 3   | 200 | 161007 | 161208 |
| UN75979 | Rsa1.0.14146.1 | 790 | 3737   | 1.00E-174 | 318 | 321 | 99 -  | 180 | 500 | 51     | 371    |
| UN75980 | Rsa1.0.00701.1 | 772 | 67691  | 0         | 760 | 775 | 98 -  | 2   | 772 | 16939  | 17713  |
| UN75981 | Rsa1.0.00546.1 | 701 | 76523  | 1.00E-134 | 245 | 246 | 99 +  | 448 | 693 | 39471  | 39716  |
| UN75982 | Rsa1.0.02365.1 | 446 | 32118  | 0         | 444 | 446 | 99 +  | 3   | 446 | 6266   | 6711   |
| UN75983 | Rsa1.0.05262.1 | 769 | 14334  | 0         | 512 | 522 | 98 -  | 2   | 523 | 12878  | 13390  |
| UN75984 | Rsa1.0.02833.1 | 694 | 27507  | 1.00E-128 | 238 | 240 | 99 +  | 2   | 241 | 3319   | 3558   |
| UN75985 | Rsa1.0.01313.1 | 772 | 48387  | 3.00E-84  | 203 | 215 | 94 +  | 549 | 761 | 16151  | 16365  |
| UN75986 | Rsa1.0.05117.1 | 798 | 14801  | 0         | 527 | 538 | 97 -  | 3   | 540 | 13785  | 14322  |
| UN75987 | Rsa1.0.00006.1 | 726 | 396176 | 1.00E-153 | 293 | 298 | 98 +  | 68  | 363 | 92561  | 92858  |
| UN75988 | Rsa1.0.06042.1 | 636 | 11860  | 7.00E-66  | 134 | 136 | 98 -  | 104 | 239 | 11279  | 11414  |
| UN75989 | Rsa1.0.08142.1 | 686 | 7836   | 1.00E-27  | 321 | 404 | 79 +  | 212 | 614 | 2880   | 3282   |
| UN75990 | Rsa1.0.00888.1 | 613 | 60978  | 0         | 585 | 613 | 95 +  | 2   | 613 | 49094  | 49703  |
| UN75991 | #              | #   | #      | #         | #   | #   | #     | #   | #   | #      | #      |
| UN75992 | Rsa1.0.00136.1 | 351 | 122464 | 1.00E-93  | 174 | 174 | 100 - | 3   | 176 | 111456 | 111629 |
| UN75993 | Rsa1.0.02870.1 | 585 | 27102  | 2.00E-96  | 203 | 211 | 96 +  | 125 | 335 | 11864  | 12074  |
| UN75994 | Rsa1.0.00161.1 | 700 | 116891 | 1.00E-166 | 299 | 300 | 99 -  | 1   | 300 | 106826 | 107125 |
| UN75995 | Rsa1.0.04819.1 | 807 | 140505 | 0         | 761 | 806 | 94 -  | 3   | 807 | 12082  | 12878  |
| UN75996 | Rsa1.0.03543.1 | 483 | 22185  | 0         | 455 | 481 | 94 -  | 1   | 481 | 5937   | 6416   |
| UN75997 | Rsa1.0.00448.1 | 639 | 84048  | 1.00E-55  | 230 | 266 | 86 +  | 146 | 408 | 69404  | 69663  |
| UN75998 | Rsa1.0.00011.1 | 494 | 225044 | 1.00E-177 | 390 | 413 | 94 -  | 2   | 413 | 223944 | 224348 |
| UN75999 | Rsa1.0.00002.1 | 654 | 601661 | 1.00E-134 | 257 | 261 | 98 +  | 201 | 461 | 229907 | 230164 |
| UN76000 | Rsa1.0.00570.1 | 696 | 75002  | 1.00E-178 | 320 | 321 | 99 -  | 376 | 696 | 35559  | 35879  |
| UN76001 | #              | #   | #      | #         | #   | #   | #     | #   | #   | #      | #      |
| UN76002 | Rsa1.0.00284.1 | 606 | 323267 | 1.00E-151 | 322 | 334 | 96 -  | 275 | 606 | 131930 | 132260 |
| UN76003 | Rsa1.0.21467.1 | 598 | 1200   | 0         | 384 | 393 | 97 -  | 202 | 594 | 271    | 663    |
| UN76004 | Rsa1.0.01960.1 | 683 | 36766  | 0         | 388 | 400 | 97 +  | 3   | 392 | 25782  | 26181  |
| UN76005 | Rsa1.0.00157.1 | 529 | 245832 | 0         | 353 | 353 | 100 - | 1   | 353 | 33074  | 33426  |
| UN76006 | Rsa1.0.01976.1 | 508 | 36570  | 0         | 388 | 388 | 100 - | 121 | 508 | 34836  | 35223  |
| UN76007 | Rsa1.0.00713.1 | 648 | 158017 | 0         | 637 | 643 | 99 -  | 3   | 644 | 24917  | 25559  |
| UN76008 | Rsa1.0.00552.1 | 573 | 206757 | 8.00E-44  | 94  | 95  | 98 -  | 379 | 473 | 18717  | 18811  |
| UN76009 | Rsa1.0.10304.1 | 722 | 5896   | 1.00E-95  | 178 | 178 | 100 - | 3   | 180 | 4940   | 5117   |

|         |                |     |        |           |     |     |       |     |     |        |        |
|---------|----------------|-----|--------|-----------|-----|-----|-------|-----|-----|--------|--------|
| UN76010 | Rsa1.0_04480.1 | 627 | 17180  | 6.00E-82  | 168 | 171 | 98 -  | 10  | 179 | 2548   | 2718   |
| UN76011 | Rsa1.0_04104.1 | 586 | 19043  | 0         | 357 | 359 | 99 -  | 230 | 586 | 1376   | 1734   |
| UN76012 | Rsa1.0_00540.1 | 614 | 76895  | 0         | 603 | 614 | 98 +  | 3   | 614 | 69199  | 69810  |
| UN76013 | Rsa1.0_00100.1 | 557 | 249232 | 0         | 520 | 575 | 90 -  | 1   | 557 | 181460 | 182022 |
| UN76014 | Rsa1.0_04238.1 | 515 | 18352  | 0         | 464 | 467 | 99 +  | 49  | 515 | 7745   | 8211   |
| UN76015 | Rsa1.0_00328.1 | 630 | 224661 | 0         | 562 | 573 | 98 -  | 4   | 576 | 213913 | 214485 |
| UN76016 | Rsa1.0_00191.1 | 748 | 316976 | 7.00E-91  | 201 | 210 | 95 -  | 32  | 241 | 51282  | 51490  |
| UN76017 | Rsa1.0_00104.1 | 261 | 368722 | 6.00E-49  | 117 | 123 | 95 +  | 4   | 126 | 171796 | 171918 |
| UN76018 | Rsa1.0_00230.1 | 608 | 105389 | 7.00E-29  | 164 | 194 | 84 +  | 58  | 251 | 15946  | 16137  |
| UN76019 | Rsa1.0_00944.1 | 300 | 58733  | 1.00E-116 | 215 | 216 | 99 -  | 2   | 217 | 5223   | 5438   |
| UN76020 | Rsa1.0_00006.1 | 440 | 396176 | 0         | 436 | 439 | 99 -  | 2   | 440 | 332024 | 332461 |
| UN76021 | Rsa1.0_01549.1 | 467 | 43543  | 0         | 467 | 469 | 99 -  | 1   | 467 | 11322  | 11790  |
| UN76022 | Rsa1.0_00897.1 | 402 | 60498  | 1.00E-168 | 372 | 396 | 93 +  | 7   | 402 | 42637  | 43032  |
| UN76023 | Rsa1.0_00002.1 | 574 | 601661 | 1.00E-107 | 198 | 198 | 100 + | 165 | 362 | 267751 | 267948 |
| UN76024 | Rsa1.0_00789.1 | 421 | 64233  | 1.00E-164 | 395 | 425 | 92 -  | 3   | 421 | 13137  | 13560  |
| UN76025 | Rsa1.0_00829.1 | 813 | 158305 | 1.00E-163 | 343 | 359 | 95 -  | 2   | 359 | 113403 | 113761 |
| UN76026 | Rsa1.0_00539.1 | 477 | 76926  | 0         | 459 | 466 | 98 -  | 2   | 467 | 65929  | 66394  |
| UN76027 | Rsa1.0_02419.1 | 509 | 31583  | 0         | 346 | 347 | 99 -  | 3   | 349 | 863    | 1209   |
| UN76028 | Rsa1.0_02648.1 | 649 | 29073  | 1.00E-142 | 256 | 256 | 100 - | 394 | 649 | 25970  | 26225  |
| UN76029 | Rsa1.0_06520.1 | 628 | 10857  | 0         | 343 | 344 | 99 -  | 3   | 345 | 5927   | 6270   |
| UN76030 | Rsa1.0_00807.1 | 840 | 63607  | 8.00E-88  | 180 | 185 | 97 -  | 460 | 644 | 18359  | 18543  |
| UN76031 | Rsa1.0_02259.1 | 539 | 33299  | 0         | 331 | 333 | 99 -  | 207 | 539 | 13723  | 14055  |
| UN76032 | Rsa1.0_22097.1 | 722 | 1150   | 0         | 445 | 445 | 100 - | 38  | 482 | 706    | 1150   |
| UN76033 | Rsa1.0_00577.1 | 653 | 174827 | 0         | 331 | 332 | 99 -  | 323 | 653 | 126803 | 127134 |
| UN76034 | #              | #   | #      | #         | #   | #   | #     | #   | #   | #      | #      |
| UN76035 | Rsa1.0_00469.1 | 557 | 82084  | 0         | 536 | 541 | 99 +  | 1   | 541 | 2246   | 2784   |
| UN76036 | Rsa1.0_00713.1 | 748 | 158017 | 1.00E-170 | 312 | 315 | 99 +  | 21  | 335 | 19367  | 19681  |
| UN76037 | Rsa1.0_00056.1 | 634 | 332604 | 0         | 617 | 634 | 97 -  | 1   | 634 | 15132  | 15764  |
| UN76038 | Rsa1.0_05590.1 | 548 | 13242  | 1.00E-107 | 274 | 298 | 91 -  | 258 | 548 | 12218  | 12511  |
| UN76039 | Rsa1.0_14575.1 | 620 | 3251   | 1.00E-127 | 348 | 387 | 89 +  | 206 | 589 | 802    | 1176   |
| UN76040 | Rsa1.0_00162.1 | 724 | 239935 | 0         | 384 | 385 | 99 +  | 333 | 717 | 12323  | 12707  |
| UN76041 | Rsa1.0_00033.1 | 798 | 515811 | 0         | 654 | 681 | 96 +  | 72  | 749 | 389250 | 389927 |
| UN76042 | Rsa1.0_02163.1 | 820 | 34427  | 0         | 377 | 385 | 97 +  | 8   | 392 | 26545  | 26929  |
| UN76043 | Rsa1.0_00876.1 | 649 | 61328  | 0         | 472 | 489 | 96 -  | 164 | 649 | 8844   | 9332   |
| UN76044 | Rsa1.0_00631.1 | 480 | 71277  | 1.00E-113 | 214 | 216 | 99 +  | 141 | 356 | 47587  | 47802  |
| UN76045 | #              | #   | #      | #         | #   | #   | #     | #   | #   | #      | #      |
| UN76046 | Rsa1.0_00035.1 | 778 | 176449 | 1.00E-113 | 230 | 239 | 96 +  | 13  | 242 | 94196  | 94434  |
| UN76047 | #              | #   | #      | #         | #   | #   | #     | #   | #   | #      | #      |
| UN76048 | Rsa1.0_00116.1 | 735 | 365886 | 2.00E-26  | 95  | 106 | 89 -  | 600 | 705 | 349522 | 349627 |



|         |                |     |        |           |     |     |       |     |     |        |        |
|---------|----------------|-----|--------|-----------|-----|-----|-------|-----|-----|--------|--------|
| UN76049 | Rsa1.0_00281.1 | 724 | 99908  | 1.00E-107 | 203 | 205 | 99 +  | 76  | 280 | 2637   | 2841   |
| UN76050 | Rsa1.0_01875.1 | 810 | 37849  | 1.00E-128 | 326 | 350 | 93 -  | 459 | 800 | 12495  | 12844  |
| UN76051 | Rsa1.0_05077.1 | 754 | 14913  | 0         | 752 | 757 | 99 -  | 1   | 754 | 10889  | 11645  |
| UN76052 | Rsa1.0_00480.1 | 719 | 81325  | 1.00E-149 | 296 | 304 | 97 +  | 3   | 306 | 3549   | 3851   |
| UN76053 | Rsa1.0_00191.1 | 713 | 316976 | 0         | 365 | 369 | 98 -  | 324 | 692 | 41753  | 42121  |
| UN76054 | Rsa1.0_00205.1 | 748 | 193401 | 1.00E-135 | 286 | 292 | 97 -  | 455 | 740 | 58048  | 58339  |
| UN76055 | Rsa1.0_00223.1 | 672 | 106231 | 1.00E-176 | 366 | 381 | 96 +  | 294 | 672 | 75607  | 75987  |
| UN76056 | Rsa1.0_00326.1 | 629 | 171955 | 1.00E-119 | 218 | 218 | 100 - | 3   | 220 | 20625  | 20842  |
| UN76057 | Rsa1.0_00703.1 | 820 | 67597  | 1.00E-144 | 296 | 308 | 96 -  | 194 | 501 | 28351  | 28658  |
| UN76058 | Rsa1.0_00479.1 | 788 | 81377  | 0         | 395 | 399 | 98 -  | 1   | 399 | 57763  | 58161  |
| UN76059 | Rsa1.0_09601.1 | 684 | 6259   | 1.00E-137 | 293 | 308 | 95 -  | 81  | 388 | 5948   | 6255   |
| UN76060 | Rsa1.0_02185.1 | 751 | 34150  | 0         | 521 | 523 | 99 -  | 202 | 724 | 21129  | 21651  |
| UN76061 | Rsa1.0_01855.1 | 757 | 38204  | 1.00E-125 | 267 | 280 | 95 +  | 14  | 293 | 9032   | 9311   |
| UN76062 | Rsa1.0_07814.1 | 550 | 8487   | 3.00E-37  | 104 | 112 | 92 -  | 297 | 408 | 743    | 854    |
| UN76063 | Rsa1.0_05544.1 | 803 | 13381  | 1.00E-103 | 211 | 218 | 96 +  | 366 | 583 | 594    | 811    |
| UN76064 | Rsa1.0_02977.1 | 494 | 26313  | 1.00E-179 | 391 | 409 | 95 -  | 91  | 494 | 13250  | 13658  |
| UN76065 | Rsa1.0_04161.1 | 604 | 18788  | 1.00E-147 | 273 | 276 | 98 +  | 145 | 420 | 9629   | 9904   |
| UN76066 | Rsa1.0_01453.1 | 751 | 45449  | 1.00E-140 | 275 | 283 | 97 -  | 433 | 715 | 11450  | 11726  |
| UN76067 | Rsa1.0_00017.1 | 733 | 752458 | 0         | 458 | 459 | 99 -  | 271 | 728 | 236145 | 236603 |
| UN76068 | Rsa1.0_00055.1 | 760 | 520193 | 1.00E-130 | 272 | 284 | 95 +  | 333 | 616 | 167999 | 168282 |
| UN76069 | Rsa1.0_02254.1 | 484 | 33344  | 5.00E-94  | 205 | 214 | 95 +  | 196 | 407 | 4755   | 4968   |
| UN76070 | Rsa1.0_00590.1 | 744 | 73835  | 4.00E-71  | 150 | 153 | 98 -  | 163 | 314 | 27001  | 27153  |
| UN76071 | Rsa1.0_01826.1 | 657 | 38700  | 1.00E-158 | 304 | 311 | 97 +  | 341 | 651 | 12694  | 13004  |
| UN76072 | Rsa1.0_00009.1 | 198 | 232558 | 1.00E-107 | 197 | 197 | 100 - | 2   | 198 | 31174  | 31370  |
| UN76073 | Rsa1.0_00997.1 | 548 | 57190  | 1.00E-116 | 240 | 249 | 96 +  | 26  | 274 | 50836  | 51084  |
| UN76074 | Rsa1.0_00253.1 | 517 | 231292 | 0         | 421 | 444 | 94 +  | 3   | 446 | 132010 | 132450 |
| UN76075 | Rsa1.0_09284.1 | 671 | 6496   | 0         | 571 | 597 | 95 +  | 61  | 654 | 5280   | 5864   |
| UN76076 | Rsa1.0_01168.1 | 717 | 153765 | 0         | 563 | 575 | 97 +  | 133 | 704 | 34054  | 34628  |
| UN76077 | Rsa1.0_13767.1 | 392 | 4361   | 1.00E-153 | 371 | 407 | 91 -  | 4   | 391 | 541    | 940    |
| UN76078 | Rsa1.0_00886.1 | 568 | 167350 | 0         | 372 | 388 | 95 -  | 181 | 568 | 13315  | 13702  |
| UN76079 | Rsa1.0_01544.1 | 468 | 185602 | 0         | 466 | 467 | 99 +  | 2   | 468 | 184485 | 184951 |
| UN76080 | Rsa1.0_00075.1 | 651 | 146680 | 0         | 619 | 650 | 95 -  | 2   | 651 | 128010 | 128659 |
| UN76081 | Rsa1.0_01311.1 | 638 | 48456  | 0         | 635 | 639 | 99 -  | 3   | 638 | 40130  | 40768  |
| UN76082 | Rsa1.0_00317.1 | 547 | 218290 | 1.00E-147 | 287 | 292 | 98 +  | 256 | 547 | 36786  | 37074  |
| UN76083 | Rsa1.0_00069.1 | 764 | 403561 | 1.00E-125 | 234 | 236 | 99 -  | 1   | 236 | 186912 | 187147 |
| UN76084 | Rsa1.0_00706.1 | 635 | 291570 | 0         | 621 | 634 | 97 -  | 2   | 635 | 23326  | 23959  |
| UN76085 | Rsa1.0_01366.1 | 578 | 47139  | 1.00E-168 | 300 | 300 | 100 - | 279 | 578 | 34208  | 34507  |
| UN76086 | Rsa1.0_63588.1 | 669 | 361    | 4.00E-49  | 100 | 100 | 100 + | 271 | 370 | 215    | 314    |
| UN76087 | Rsa1.0_03197.1 | 641 | 24643  | 0         | 637 | 642 | 99 +  | 1   | 641 | 10675  | 11316  |

|         |                |     |        |           |     |     |       |     |     |        |        |
|---------|----------------|-----|--------|-----------|-----|-----|-------|-----|-----|--------|--------|
| UN76088 | Rsa1.0.00078.1 | 783 | 175053 | 1.00E-111 | 211 | 213 | 99 +  | 1   | 213 | 72525  | 72737  |
| UN76089 | Rsa1.0.01484.1 | 460 | 44806  | 1.00E-125 | 280 | 297 | 94 +  | 14  | 306 | 20898  | 21185  |
| UN76090 | Rsa1.0.01023.1 | 524 | 56571  | 0         | 377 | 385 | 97 -  | 140 | 524 | 10337  | 10721  |
| UN76091 | Rsa1.0.00154.1 | 720 | 189461 | 1.00E-126 | 332 | 365 | 90 -  | 1   | 362 | 132203 | 132554 |
| UN76092 | Rsa1.0.01504.1 | 258 | 189978 | 1.00E-120 | 250 | 260 | 96 +  | 2   | 258 | 17292  | 17551  |
| UN76093 | Rsa1.0.00048.1 | 637 | 167185 | 1.00E-127 | 267 | 277 | 96 +  | 361 | 637 | 32731  | 33003  |
| UN76094 | Rsa1.0.05501.1 | 661 | 13513  | 2.00E-66  | 141 | 145 | 97 +  | 260 | 404 | 93     | 237    |
| UN76095 | Rsa1.0.05447.1 | 592 | 13713  | 1.00E-132 | 256 | 259 | 98 +  | 159 | 416 | 2447   | 2704   |
| UN76096 | Rsa1.0.00123.1 | 631 | 325650 | 0         | 536 | 548 | 97 +  | 6   | 550 | 183232 | 183779 |
| UN76097 | Rsa1.0.06336.1 | 558 | 11215  | 0         | 388 | 392 | 98 +  | 3   | 391 | 8233   | 8624   |
| UN76098 | Rsa1.0.00537.1 | 550 | 186980 | 0         | 492 | 493 | 99 -  | 2   | 494 | 176768 | 177260 |
| UN76099 | Rsa1.0.03506.1 | 550 | 22416  | 0         | 470 | 499 | 94 +  | 3   | 498 | 7392   | 7878   |
| UN76100 | Rsa1.0.08255.1 | 670 | 7652   | 1.00E-180 | 360 | 371 | 97 -  | 272 | 640 | 3887   | 4257   |
| UN76101 | Rsa1.0.00157.1 | 446 | 245832 | 1.00E-118 | 274 | 293 | 93 +  | 154 | 446 | 4309   | 4598   |
| UN76102 | Rsa1.0.00134.1 | 604 | 390219 | 0         | 410 | 423 | 96 +  | 183 | 602 | 44275  | 44697  |
| UN76103 | Rsa1.0.01412.1 | 444 | 46311  | 5.00E-72  | 176 | 184 | 95 -  | 234 | 412 | 10434  | 10616  |
| UN76104 | Rsa1.0.00414.1 | 576 | 202190 | 0         | 361 | 361 | 100 - | 1   | 361 | 197260 | 197620 |
| UN76105 | Rsa1.0.00959.1 | 376 | 58202  | 1.00E-81  | 213 | 232 | 91 +  | 149 | 376 | 2659   | 2881   |
| UN76106 | Rsa1.0.00026.1 | 634 | 327835 | 0         | 628 | 632 | 99 -  | 1   | 632 | 177366 | 177996 |
| UN76107 | Rsa1.0.02592.1 | 356 | 29751  | 1.00E-106 | 229 | 238 | 96 -  | 120 | 356 | 29035  | 29270  |
| UN76108 | Rsa1.0.00574.1 | 713 | 74797  | 0         | 483 | 492 | 98 +  | 218 | 706 | 25553  | 26044  |
| UN76109 | Rsa1.0.00045.1 | 663 | 328694 | 1.00E-149 | 367 | 397 | 92 +  | 240 | 624 | 314453 | 314846 |
| UN76110 | Rsa1.0.02418.1 | 569 | 31590  | 0         | 520 | 533 | 97 +  | 35  | 567 | 3396   | 3928   |
| UN76111 | Rsa1.0.00268.1 | 493 | 101470 | 0         | 383 | 403 | 95 -  | 75  | 474 | 1504   | 1906   |
| UN76112 | Rsa1.0.17517.1 | 811 | 1811   | 1.00E-142 | 269 | 273 | 98 +  | 292 | 564 | 361    | 633    |
| UN76113 | Rsa1.0.00089.1 | 683 | 406142 | 1.00E-164 | 350 | 369 | 94 -  | 315 | 683 | 154487 | 154855 |
| UN76114 | Rsa1.0.04527.1 | 541 | 16958  | 0         | 507 | 540 | 93 +  | 3   | 541 | 12073  | 12587  |
| UN76115 | Rsa1.0.05161.1 | 797 | 14631  | 1.00E-141 | 331 | 357 | 92 +  | 22  | 378 | 8351   | 8695   |
| UN76116 | Rsa1.0.00047.1 | 793 | 168582 | 1.00E-102 | 189 | 189 | 100 - | 158 | 346 | 58115  | 58303  |
| UN76117 | Rsa1.0.05366.1 | 790 | 14036  | 1.00E-119 | 218 | 218 | 100 + | 1   | 218 | 1567   | 1784   |
| UN76118 | Rsa1.0.00878.1 | 546 | 330303 | 1.00E-88  | 214 | 232 | 92 -  | 1   | 221 | 327480 | 327711 |
| UN76119 | Rsa1.0.00095.1 | 753 | 283384 | 0         | 423 | 440 | 96 -  | 250 | 689 | 26419  | 26848  |
| UN76120 | Rsa1.0.01755.1 | 631 | 155581 | 1.00E-100 | 226 | 242 | 93 -  | 390 | 631 | 17786  | 18014  |
| UN76121 | Rsa1.0.00321.1 | 714 | 95671  | 0         | 691 | 719 | 96 +  | 2   | 714 | 24871  | 25586  |
| UN76122 | Rsa1.0.00370.1 | 597 | 90472  | 0         | 564 | 623 | 90 -  | 3   | 597 | 43262  | 43880  |
| UN76123 | Rsa1.0.09193.1 | 640 | 6567   | 0         | 424 | 438 | 96 -  | 203 | 640 | 1164   | 1601   |
| UN76124 | Rsa1.0.27467.1 | 633 | 851    | 0         | 629 | 633 | 99 +  | 1   | 633 | 109    | 741    |
| UN76125 | Rsa1.0.04276.1 | 774 | 18134  | 0         | 702 | 724 | 96 +  | 56  | 774 | 17413  | 18132  |
| UN76126 | Rsa1.0.06120.1 | 776 | 11691  | 0         | 457 | 471 | 97 +  | 6   | 476 | 3812   | 4282   |

|         |                |     |        |           |     |     |       |     |     |        |        |
|---------|----------------|-----|--------|-----------|-----|-----|-------|-----|-----|--------|--------|
| UN76127 | Rsa1.0.33108.1 | 808 | 686    | 0         | 647 | 683 | 94 -  | 104 | 783 | 4      | 686    |
| UN76128 | Rsa1.0.02925.1 | 845 | 26720  | 7.00E-45  | 114 | 120 | 95 -  | 557 | 674 | 21797  | 21916  |
| UN76129 | Rsa1.0.00011.1 | 521 | 225044 | 2.00E-99  | 187 | 188 | 99 -  | 121 | 308 | 50685  | 50872  |
| UN76130 | Rsa1.0.04703.1 | 803 | 16302  | 0         | 523 | 530 | 98 +  | 258 | 783 | 14621  | 15150  |
| UN76131 | Rsa1.0.02116.1 | 627 | 34853  | 0         | 371 | 371 | 100 - | 3   | 373 | 31530  | 31900  |
| UN76132 | Rsa1.0.00429.1 | 766 | 85559  | 0         | 378 | 391 | 96 -  | 380 | 766 | 53799  | 54189  |
| UN76133 | Rsa1.0.00057.1 | 854 | 160473 | 8.00E-88  | 165 | 165 | 100 + | 445 | 609 | 49338  | 49502  |
| UN76134 | Rsa1.0.00221.1 | 687 | 106972 | 1.00E-107 | 207 | 210 | 98 +  | 96  | 305 | 105022 | 105231 |
| UN76135 | Rsa1.0.00246.1 | 720 | 103541 | 1.00E-177 | 345 | 355 | 97 +  | 357 | 711 | 29514  | 29868  |
| UN76136 | Rsa1.0.16374.1 | 492 | 2173   | 1.00E-17  | 112 | 131 | 85 -  | 307 | 436 | 1216   | 1345   |
| UN76137 | Rsa1.0.02931.1 | 798 | 26654  | 1.00E-116 | 221 | 224 | 98 -  | 387 | 610 | 1350   | 1573   |
| UN76138 | Rsa1.0.00294.1 | 844 | 144860 | 0         | 491 | 519 | 94 -  | 255 | 771 | 80446  | 80963  |
| UN76139 | Rsa1.0.00350.1 | 628 | 92346  | 1.00E-150 | 329 | 346 | 95 -  | 260 | 605 | 60769  | 61112  |
| UN76140 | Rsa1.0.00478.1 | 764 | 81419  | 1.00E-116 | 229 | 232 | 98 -  | 535 | 764 | 61075  | 61306  |
| UN76141 | Rsa1.0.00057.1 | 254 | 160473 | 3.00E-78  | 151 | 152 | 99 +  | 3   | 154 | 142920 | 143071 |
| UN76142 | Rsa1.0.00661.1 | 428 | 213041 | 0         | 426 | 427 | 99 -  | 2   | 428 | 18567  | 18993  |
| UN76143 | Rsa1.0.00116.1 | 414 | 365886 | 1.00E-115 | 225 | 230 | 97 +  | 185 | 414 | 18349  | 18578  |
| UN76144 | Rsa1.0.01185.1 | 678 | 149842 | 1.00E-136 | 282 | 294 | 95 +  | 342 | 635 | 12759  | 13052  |
| UN76145 | Rsa1.0.00381.1 | 782 | 89718  | 1.00E-156 | 291 | 295 | 98 +  | 80  | 374 | 29091  | 29385  |
| UN76146 | Rsa1.0.00171.1 | 729 | 115622 | 1.00E-140 | 255 | 256 | 99 -  | 30  | 285 | 107754 | 108009 |
| UN76147 | Rsa1.0.07560.1 | 669 | 9129   | 0         | 650 | 668 | 97 -  | 2   | 669 | 7830   | 8497   |
| UN76148 | Rsa1.0.01523.1 | 728 | 43959  | 6.00E-76  | 148 | 149 | 99 -  | 3   | 151 | 4505   | 4653   |
| UN76149 | Rsa1.0.01648.1 | 461 | 41635  | 1.00E-121 | 236 | 241 | 97 -  | 221 | 461 | 31373  | 31613  |
| UN76150 | Rsa1.0.03640.1 | 599 | 21624  | 1.00E-117 | 264 | 280 | 94 -  | 130 | 406 | 18689  | 18968  |
| UN76151 | Rsa1.0.01571.1 | 692 | 43000  | 0         | 664 | 685 | 96 -  | 2   | 680 | 5156   | 5840   |
| UN76152 | Rsa1.0.00119.1 | 544 | 467509 | 1.00E-133 | 281 | 292 | 96 -  | 102 | 391 | 230079 | 230370 |
| UN76153 | Rsa1.0.00349.1 | 786 | 92621  | 1.00E-163 | 350 | 370 | 94 -  | 3   | 366 | 45076  | 45445  |
| UN76154 | Rsa1.0.00127.1 | 482 | 127446 | 2.00E-84  | 159 | 159 | 100 - | 1   | 159 | 48439  | 48597  |
| UN76155 | Rsa1.0.01011.1 | 521 | 56883  | 1.00E-145 | 261 | 261 | 100 - | 261 | 521 | 26562  | 26822  |
| UN76156 | Rsa1.0.02686.1 | 729 | 28666  | 8.00E-26  | 97  | 109 | 88 -  | 87  | 195 | 24227  | 24335  |
| UN76157 | Rsa1.0.06052.1 | 716 | 11848  | 4.00E-86  | 162 | 162 | 100 - | 1   | 162 | 10495  | 10656  |
| UN76158 | Rsa1.0.00342.1 | 770 | 93695  | 0         | 363 | 363 | 100 - | 1   | 363 | 41314  | 41676  |
| UN76159 | Rsa1.0.00228.1 | 697 | 105511 | 1.00E-162 | 293 | 294 | 99 -  | 181 | 474 | 43292  | 43585  |
| UN76160 | Rsa1.0.00445.1 | 493 | 84317  | 8.00E-96  | 181 | 182 | 99 -  | 110 | 291 | 12745  | 12926  |
| UN76161 | Rsa1.0.18696.1 | 676 | 1550   | 1.00E-137 | 260 | 264 | 98 +  | 4   | 267 | 999    | 1262   |
| UN76162 | Rsa1.0.00841.1 | 574 | 183065 | 9.00E-59  | 119 | 120 | 99 -  | 423 | 542 | 1400   | 1519   |
| UN76163 | Rsa1.0.01134.1 | 639 | 52829  | 0         | 618 | 647 | 95 +  | 2   | 639 | 22573  | 23212  |
| UN76164 | Rsa1.0.00001.1 | 762 | 363028 | 0         | 394 | 395 | 99 +  | 3   | 397 | 128367 | 128761 |
| UN76165 | Rsa1.0.00091.1 | 355 | 139699 | 1.00E-63  | 130 | 132 | 98 -  | 105 | 236 | 16237  | 16368  |

|         |                |     |        |           |     |     |       |     |     |        |        |
|---------|----------------|-----|--------|-----------|-----|-----|-------|-----|-----|--------|--------|
| UN76166 | Rsa1.0.07005.1 | 534 | 10044  | 0         | 515 | 521 | 98 +  | 2   | 522 | 3463   | 3983   |
| UN76167 | Rsa1.0.00203.1 | 639 | 109129 | 1.00E-121 | 273 | 287 | 95 -  | 357 | 639 | 79763  | 80043  |
| UN76168 | Rsa1.0.00793.1 | 616 | 64103  | 1.00E-121 | 253 | 264 | 95 -  | 49  | 312 | 5308   | 5571   |
| UN76169 | Rsa1.0.06177.1 | 706 | 11561  | 1.00E-123 | 234 | 237 | 98 +  | 352 | 588 | 8407   | 8643   |
| UN76170 | Rsa1.0.00265.1 | 825 | 220635 | 0         | 473 | 506 | 93 +  | 48  | 553 | 175253 | 175758 |
| UN76171 | Rsa1.0.01690.1 | 801 | 40939  | 2.00E-97  | 210 | 220 | 95 -  | 218 | 431 | 8876   | 9095   |
| UN76172 | Rsa1.0.02097.1 | 506 | 35036  | 0         | 498 | 505 | 98 +  | 2   | 506 | 15095  | 15599  |
| UN76173 | Rsa1.0.00203.1 | 507 | 109129 | 1.00E-118 | 218 | 219 | 99 +  | 289 | 507 | 16883  | 17101  |
| UN76174 | Rsa1.0.00803.1 | 724 | 144228 | 0         | 507 | 520 | 97 -  | 205 | 724 | 137301 | 137820 |
| UN76175 | Rsa1.0.00020.1 | 778 | 283099 | 1.00E-126 | 284 | 297 | 95 +  | 486 | 778 | 58982  | 59278  |
| UN76176 | Rsa1.0.07657.1 | 588 | 8896   | 1.00E-162 | 319 | 326 | 97 +  | 264 | 588 | 2985   | 3309   |
| UN76177 | Rsa1.0.00114.1 | 755 | 131330 | 0         | 626 | 695 | 90 +  | 1   | 680 | 114314 | 114982 |
| UN76178 | Rsa1.0.63227.1 | 634 | 363    | 0         | 363 | 363 | 100 + | 50  | 412 | 1      | 363    |
| UN76179 | Rsa1.0.01938.1 | 740 | 264018 | 2.00E-72  | 230 | 261 | 88 -  | 4   | 247 | 166126 | 166386 |
| UN76180 | Rsa1.0.04651.1 | 820 | 16516  | 0         | 422 | 436 | 96 -  | 338 | 771 | 13953  | 14388  |
| UN76181 | Rsa1.0.21680.1 | 829 | 1182   | 0         | 580 | 639 | 90 -  | 1   | 617 | 1      | 627    |
| UN76182 | Rsa1.0.27037.1 | 634 | 868    | 1.00E-118 | 225 | 228 | 98 -  | 407 | 634 | 89     | 316    |
| UN76183 | Rsa1.0.01866.1 | 722 | 37961  | 0         | 696 | 723 | 96 -  | 3   | 719 | 3589   | 4310   |
| UN76184 | Rsa1.0.00190.1 | 528 | 318240 | 0         | 509 | 528 | 96 -  | 2   | 528 | 294947 | 295474 |
| UN76185 | Rsa1.0.04544.1 | 588 | 16917  | 1.00E-140 | 252 | 252 | 100 + | 51  | 302 | 4476   | 4727   |
| UN76186 | Rsa1.0.00460.1 | 785 | 206387 | 1.00E-64  | 171 | 186 | 91 +  | 356 | 541 | 37567  | 37752  |
| UN76187 | Rsa1.0.01779.1 | 485 | 39448  | 0         | 476 | 485 | 98 -  | 1   | 485 | 10041  | 10525  |
| UN76188 | Rsa1.0.00172.1 | 778 | 115476 | 0         | 501 | 502 | 99 -  | 4   | 505 | 70539  | 71039  |
| UN76189 | Rsa1.0.00048.1 | 505 | 167185 | 2.00E-78  | 186 | 197 | 94 +  | 309 | 505 | 4501   | 4696   |
| UN76190 | Rsa1.0.00669.1 | 769 | 69419  | 2.00E-57  | 124 | 126 | 98 -  | 480 | 604 | 18999  | 19124  |
| UN76191 | Rsa1.0.01634.1 | 753 | 41865  | 1.00E-104 | 241 | 257 | 93 -  | 167 | 423 | 29332  | 29588  |
| UN76192 | Rsa1.0.24509.1 | 558 | 984    | 0         | 500 | 539 | 92 +  | 12  | 542 | 27     | 558    |
| UN76193 | Rsa1.0.02072.1 | 822 | 35401  | 0         | 796 | 805 | 98 +  | 2   | 802 | 6366   | 7169   |
| UN76194 | Rsa1.0.04353.1 | 800 | 138437 | 0         | 751 | 758 | 99 +  | 1   | 757 | 125818 | 126575 |
| UN76195 | Rsa1.0.00678.1 | 755 | 193163 | 0         | 341 | 345 | 98 -  | 3   | 347 | 183526 | 183870 |
| UN76196 | Rsa1.0.01381.1 | 360 | 46908  | 1.00E-117 | 226 | 230 | 98 +  | 131 | 360 | 34959  | 35188  |
| UN76197 | Rsa1.0.03402.1 | 657 | 23188  | 7.00E-63  | 123 | 123 | 100 - | 254 | 376 | 12477  | 12599  |
| UN76198 | Rsa1.0.00278.1 | 784 | 231896 | 3.00E-75  | 150 | 152 | 98 -  | 97  | 248 | 182202 | 182353 |
| UN76199 | Rsa1.0.00417.1 | 638 | 395068 | 3.00E-93  | 209 | 220 | 95 +  | 3   | 219 | 258487 | 258706 |
| UN76200 | Rsa1.0.00002.1 | 799 | 601661 | 1.00E-172 | 323 | 326 | 99 +  | 476 | 799 | 48174  | 48499  |
| UN76201 | Rsa1.0.01004.1 | 668 | 56975  | 1.00E-52  | 133 | 142 | 93 +  | 88  | 229 | 23999  | 24140  |
| UN76202 | Rsa1.0.00377.1 | 648 | 90038  | 0         | 640 | 666 | 96 -  | 1   | 648 | 18942  | 19607  |
| UN76203 | Rsa1.0.02040.1 | 700 | 35684  | 1.00E-117 | 227 | 230 | 98 -  | 345 | 572 | 15056  | 15285  |
| UN76204 | Rsa1.0.65169.1 | 690 | 352    | 0         | 343 | 349 | 98 -  | 269 | 617 | 1      | 349    |

|         |                |     |        |           |     |     |       |     |     |        |        |
|---------|----------------|-----|--------|-----------|-----|-----|-------|-----|-----|--------|--------|
| UN76205 | Rsa1.0.00152.1 | 629 | 257730 | 1.00E-121 | 221 | 221 | 100 - | 3   | 223 | 251779 | 251999 |
| UN76206 | Rsa1.0.00031.1 | 631 | 179862 | 0         | 430 | 456 | 94 +  | 1   | 446 | 2572   | 3015   |
| UN76207 | Rsa1.0.00715.1 | 771 | 67116  | 0         | 502 | 502 | 100 - | 4   | 505 | 35383  | 35884  |
| UN76208 | Rsa1.0.00154.1 | 552 | 189461 | 0         | 535 | 554 | 96 +  | 2   | 552 | 10706  | 11256  |
| UN76209 | Rsa1.0.05338.1 | 778 | 144511 | 1.00E-86  | 172 | 175 | 98 -  | 292 | 466 | 6653   | 6827   |
| UN76210 | Rsa1.0.00680.1 | 214 | 68969  | 4.00E-31  | 75  | 77  | 97 +  | 5   | 81  | 60964  | 61040  |
| UN76211 | Rsa1.0.00049.1 | 591 | 167018 | 5.00E-79  | 188 | 200 | 94 -  | 3   | 199 | 80285  | 80484  |
| UN76212 | Rsa1.0.00120.1 | 427 | 277288 | 0         | 426 | 428 | 99 -  | 1   | 427 | 123907 | 124334 |
| UN76213 | Rsa1.0.07768.1 | 547 | 8608   | 1.00E-107 | 216 | 221 | 97 +  | 328 | 547 | 736    | 956    |
| UN76214 | Rsa1.0.33663.1 | 810 | 673    | 0         | 482 | 495 | 97 -  | 37  | 531 | 1      | 495    |
| UN76215 | Rsa1.0.01110.1 | 517 | 195852 | 0         | 502 | 517 | 97 -  | 1   | 517 | 178499 | 179015 |
| UN76216 | Rsa1.0.00329.1 | 449 | 222544 | 0         | 421 | 441 | 95 +  | 3   | 437 | 175882 | 176318 |
| UN76217 | Rsa1.0.00790.1 | 578 | 148693 | 0         | 527 | 557 | 94 +  | 5   | 559 | 17846  | 18400  |
| UN76218 | Rsa1.0.05963.1 | 662 | 12090  | 0         | 661 | 663 | 99 -  | 2   | 662 | 717    | 1379   |
| UN76219 | Rsa1.0.03169.1 | 614 | 24826  | 1.00E-124 | 284 | 300 | 94 +  | 323 | 614 | 9348   | 9646   |
| UN76220 | Rsa1.0.01801.1 | 582 | 39094  | 0         | 572 | 579 | 98 +  | 4   | 582 | 27202  | 27777  |
| UN76221 | Rsa1.0.00482.1 | 543 | 81162  | 1.00E-128 | 238 | 240 | 99 +  | 267 | 506 | 63861  | 64100  |
| UN76222 | Rsa1.0.00053.1 | 758 | 263459 | 5.00E-98  | 189 | 190 | 99 -  | 566 | 754 | 149295 | 149484 |
| UN76223 | Rsa1.0.15584.1 | 550 | 2534   | 0         | 549 | 550 | 99 +  | 1   | 550 | 1623   | 2172   |
| UN76224 | Rsa1.0.00058.1 | 554 | 159921 | 0         | 551 | 554 | 99 -  | 1   | 554 | 87623  | 88176  |
| UN76225 | Rsa1.0.00035.1 | 161 | 176449 | 5.00E-79  | 158 | 161 | 98 +  | 1   | 161 | 24065  | 24225  |
| UN76226 | Rsa1.0.01153.1 | 739 | 52264  | 0         | 503 | 511 | 98 -  | 5   | 514 | 22115  | 22625  |
| UN76227 | Rsa1.0.06952.1 | 356 | 10118  | 1.00E-160 | 286 | 286 | 100 - | 71  | 356 | 4846   | 5131   |
| UN76228 | Rsa1.0.01691.1 | 749 | 40921  | 0         | 743 | 752 | 98 -  | 1   | 749 | 11632  | 12383  |
| UN76229 | Rsa1.0.02964.1 | 356 | 26407  | 1.00E-123 | 233 | 236 | 98 -  | 1   | 236 | 20559  | 20794  |
| UN76230 | Rsa1.0.00112.1 | 669 | 132199 | 2.00E-29  | 313 | 389 | 80 +  | 113 | 490 | 14163  | 14530  |
| UN76231 | Rsa1.0.00965.1 | 548 | 58139  | 3.00E-55  | 113 | 114 | 99 -  | 242 | 355 | 9005   | 9118   |
| UN76232 | Rsa1.0.00663.1 | 693 | 164969 | 0         | 573 | 606 | 94 +  | 92  | 693 | 133304 | 133909 |
| UN76233 | Rsa1.0.15461.1 | 725 | 2591   | 0         | 663 | 708 | 93 -  | 24  | 725 | 961    | 1658   |
| UN76234 | Rsa1.0.01697.1 | 674 | 40837  | 0         | 639 | 666 | 95 +  | 2   | 666 | 27918  | 28577  |
| UN76235 | Rsa1.0.54316.1 | 551 | 420    | 1.00E-158 | 322 | 333 | 96 -  | 20  | 352 | 1      | 330    |
| UN76236 | Rsa1.0.00263.1 | 680 | 224968 | 0         | 662 | 681 | 97 +  | 1   | 680 | 178134 | 178812 |
| UN76237 | Rsa1.0.00879.1 | 163 | 61297  | 7.00E-66  | 154 | 163 | 94 +  | 1   | 163 | 34359  | 34521  |
| UN76238 | Rsa1.0.03292.1 | 748 | 23977  | 0         | 730 | 748 | 97 +  | 3   | 748 | 12433  | 13178  |
| UN76239 | Rsa1.0.00523.1 | 746 | 178770 | 0         | 396 | 418 | 94 -  | 3   | 416 | 161189 | 161594 |
| UN76240 | Rsa1.0.00827.1 | 693 | 62790  | 0         | 663 | 693 | 95 +  | 1   | 693 | 17372  | 18052  |
| UN76241 | Rsa1.0.01460.1 | 595 | 45255  | 1.00E-168 | 325 | 331 | 98 +  | 1   | 331 | 34313  | 34641  |
| UN76242 | Rsa1.0.00332.1 | 337 | 94575  | 1.00E-107 | 301 | 341 | 88 -  | 1   | 320 | 73467  | 73807  |
| UN76243 | Rsa1.0.01457.1 | 104 | 45337  | 2.00E-27  | 94  | 104 | 90 +  | 1   | 104 | 6433   | 6533   |

|         |                |     |        |           |     |     |      |     |     |        |        |
|---------|----------------|-----|--------|-----------|-----|-----|------|-----|-----|--------|--------|
| UN76244 | Rsa1.0.09478.1 | 528 | 6341   | 0         | 354 | 358 | 98 - | 3   | 360 | 18     | 375    |
| UN76245 | Rsa1.0.05076.1 | 690 | 14916  | 0         | 363 | 375 | 96 - | 316 | 690 | 602    | 976    |
| UN76246 | Rsa1.0.02385.1 | 155 | 31907  | 8.00E-47  | 141 | 155 | 90 + | 2   | 155 | 27210  | 27364  |
| UN76247 | Rsa1.0.04107.1 | 518 | 19007  | 1.00E-174 | 353 | 361 | 97 + | 1   | 359 | 6924   | 7280   |
| UN76248 | Rsa1.0.57556.1 | 375 | 397    | 1.00E-114 | 252 | 265 | 95 - | 111 | 375 | 130    | 393    |
| UN76249 | Rsa1.0.00391.1 | 507 | 183853 | 1.00E-180 | 466 | 509 | 91 + | 1   | 507 | 30672  | 31165  |
| UN76250 | Rsa1.0.08143.1 | 621 | 7836   | 0         | 579 | 581 | 99 + | 1   | 581 | 5824   | 6404   |
| UN76251 | Rsa1.0.18008.1 | 505 | 1691   | 1.00E-155 | 315 | 323 | 97 + | 3   | 321 | 243    | 563    |
| UN76252 | Rsa1.0.02179.1 | 156 | 34188  | 3.00E-71  | 151 | 156 | 96 + | 1   | 156 | 23823  | 23978  |
| UN76253 | Rsa1.0.10337.1 | 625 | 5882   | 0         | 565 | 571 | 98 + | 1   | 570 | 641    | 1209   |
| UN76254 | Rsa1.0.02909.1 | 216 | 26856  | 1.00E-107 | 211 | 216 | 97 - | 1   | 216 | 8373   | 8588   |
| UN76255 | Rsa1.0.00247.1 | 509 | 103408 | 0         | 476 | 500 | 95 - | 12  | 509 | 14634  | 15129  |
| UN76256 | Rsa1.0.02785.1 | 682 | 27881  | 0         | 613 | 669 | 91 + | 2   | 664 | 541    | 1186   |
| UN76257 | Rsa1.0.00574.1 | 471 | 74797  | 0         | 463 | 471 | 98 - | 1   | 471 | 70595  | 71065  |
| UN76258 | Rsa1.0.05303.1 | 720 | 14211  | 0         | 602 | 604 | 99 + | 117 | 720 | 6381   | 6984   |
| UN76259 | Rsa1.0.03299.1 | 494 | 23949  | 0         | 458 | 488 | 93 + | 7   | 494 | 15164  | 15639  |
| UN76260 | Rsa1.0.01865.1 | 691 | 37992  | 0         | 477 | 524 | 91 - | 192 | 687 | 30450  | 30971  |
| UN76261 | Rsa1.0.04179.1 | 816 | 18633  | 0         | 463 | 467 | 99 - | 1   | 467 | 16849  | 17313  |
| UN76262 | Rsa1.0.03065.1 | 456 | 25656  | 0         | 434 | 455 | 95 + | 2   | 456 | 16137  | 16585  |
| UN76263 | Rsa1.0.34706.1 | 712 | 652    | 1.00E-166 | 309 | 313 | 98 + | 400 | 712 | 264    | 576    |
| UN76264 | Rsa1.0.02422.1 | 286 | 161122 | 1.00E-113 | 260 | 275 | 94 - | 13  | 286 | 17380  | 17653  |
| UN76265 | Rsa1.0.00073.1 | 827 | 240924 | 1.00E-117 | 235 | 242 | 97 + | 395 | 636 | 144429 | 144670 |
| UN76266 | Rsa1.0.00111.1 | 157 | 390088 | 4.00E-70  | 149 | 154 | 96 + | 4   | 157 | 374003 | 374156 |
| UN76267 | Rsa1.0.09061.1 | 696 | 6678   | 1.00E-124 | 269 | 283 | 95 + | 8   | 281 | 348    | 630    |
| UN76268 | Rsa1.0.00608.1 | 588 | 172672 | 0         | 366 | 369 | 99 + | 220 | 588 | 119644 | 120012 |
| UN76269 | Rsa1.0.18507.1 | 688 | 1586   | 1.00E-153 | 316 | 330 | 95 + | 347 | 676 | 583    | 912    |
| UN76270 | Rsa1.0.04486.1 | 670 | 17161  | 0         | 392 | 411 | 95 - | 1   | 411 | 13725  | 14123  |
| UN76271 | Rsa1.0.01310.1 | 714 | 164719 | 0         | 372 | 373 | 99 - | 1   | 373 | 10508  | 10880  |
| UN76272 | Rsa1.0.02245.1 | 423 | 33478  | 0         | 398 | 419 | 94 + | 2   | 419 | 11271  | 11687  |
| UN76273 | Rsa1.0.00301.1 | 776 | 365315 | 0         | 617 | 649 | 95 + | 88  | 736 | 202386 | 203034 |
| UN76274 | Rsa1.0.01877.1 | 607 | 37789  | 0         | 592 | 607 | 97 - | 1   | 607 | 24908  | 25514  |
| UN76275 | Rsa1.0.00706.1 | 220 | 291570 | 1.00E-109 | 215 | 220 | 97 - | 1   | 220 | 242850 | 243069 |
| UN76276 | Rsa1.0.00020.1 | 793 | 283099 | 0         | 739 | 791 | 93 - | 3   | 792 | 118129 | 118915 |
| UN76277 | Rsa1.0.04954.1 | 698 | 15347  | 1.00E-142 | 262 | 264 | 99 - | 2   | 265 | 11672  | 11935  |
| UN76278 | Rsa1.0.01511.1 | 729 | 44235  | 0         | 624 | 629 | 99 - | 1   | 629 | 4367   | 4995   |
| UN76279 | Rsa1.0.09684.1 | 681 | 6213   | 0         | 452 | 470 | 96 - | 188 | 657 | 8      | 477    |
| UN76280 | Rsa1.0.00433.1 | 622 | 85381  | 0         | 596 | 604 | 98 - | 1   | 604 | 47344  | 47947  |
| UN76281 | Rsa1.0.01078.1 | 370 | 316910 | 1.00E-78  | 182 | 193 | 94 + | 178 | 370 | 290400 | 290592 |
| UN76282 | Rsa1.0.00343.1 | 628 | 93570  | 1.00E-123 | 230 | 232 | 99 - | 75  | 306 | 49115  | 49346  |

|         |                |     |        |           |     |     |      |     |     |        |        |
|---------|----------------|-----|--------|-----------|-----|-----|------|-----|-----|--------|--------|
| UN76283 | Rsa1.0.00113.1 | 795 | 131574 | 0         | 454 | 465 | 97 + | 1   | 465 | 123309 | 123773 |
| UN76284 | Rsa1.0.00821.1 | 467 | 62891  | 0         | 452 | 470 | 96 - | 1   | 467 | 50527  | 50991  |
| UN76285 | Rsa1.0.02248.1 | 469 | 33414  | 0         | 450 | 470 | 95 + | 2   | 468 | 7005   | 7467   |
| UN76286 | Rsa1.0.06701.1 | 563 | 10514  | 1.00E-165 | 336 | 350 | 96 - | 3   | 352 | 1318   | 1667   |
| UN76287 | Rsa1.0.08114.1 | 680 | 7883   | 0         | 644 | 693 | 92 - | 11  | 680 | 6611   | 7300   |
| UN76288 | Rsa1.0.00584.1 | 294 | 74295  | 1.00E-147 | 288 | 295 | 97 - | 1   | 294 | 31400  | 31694  |
| UN76289 | Rsa1.0.00144.1 | 221 | 120708 | 7.00E-79  | 204 | 220 | 92 - | 1   | 218 | 25509  | 25727  |
| UN76290 | Rsa1.0.01602.1 | 817 | 42503  | 0         | 426 | 447 | 95 - | 46  | 491 | 1709   | 2147   |
| UN76291 | Rsa1.0.00197.1 | 584 | 109714 | 1.00E-164 | 343 | 359 | 95 + | 149 | 505 | 99351  | 99709  |
| UN76292 | Rsa1.0.00019.1 | 464 | 301669 | 1.00E-141 | 327 | 346 | 94 - | 1   | 343 | 58793  | 59132  |
| UN76293 | Rsa1.0.25611.1 | 133 | 928    | 2.00E-38  | 122 | 133 | 91 + | 1   | 133 | 750    | 875    |
| UN76294 | Rsa1.0.00131.1 | 651 | 432233 | 0         | 440 | 465 | 94 + | 1   | 465 | 97541  | 98005  |
| UN76295 | Rsa1.0.23959.1 | 483 | 1014   | 1.00E-108 | 240 | 249 | 96 - | 1   | 249 | 152    | 395    |
| UN76296 | Rsa1.0.00063.1 | 643 | 156150 | 0         | 640 | 642 | 99 + | 2   | 643 | 62951  | 63592  |
| UN76297 | Rsa1.0.00484.1 | 498 | 203294 | 0         | 457 | 479 | 95 - | 2   | 479 | 19530  | 20004  |
| UN76298 | Rsa1.0.00851.1 | 473 | 62181  | 1.00E-131 | 300 | 318 | 94 + | 1   | 314 | 30600  | 30914  |
| UN76299 | Rsa1.0.00763.1 | 350 | 65121  | 0         | 344 | 349 | 98 - | 2   | 350 | 23869  | 24217  |
| UN76300 | Rsa1.0.01422.1 | 269 | 46172  | 6.00E-52  | 110 | 112 | 98 + | 87  | 198 | 34796  | 34907  |
| UN76301 | Rsa1.0.01368.1 | 228 | 47129  | 4.00E-77  | 208 | 228 | 91 - | 1   | 228 | 26648  | 26872  |
| UN76302 | Rsa1.0.01065.1 | 348 | 55264  | 2.00E-71  | 302 | 353 | 85 - | 1   | 348 | 30140  | 30459  |
| UN76303 | Rsa1.0.03162.1 | 297 | 24895  | 1.00E-145 | 275 | 279 | 98 - | 2   | 278 | 22626  | 22904  |
| UN76304 | Rsa1.0.02895.1 | 521 | 26979  | 3.00E-89  | 224 | 241 | 92 - | 1   | 237 | 11384  | 11619  |
| UN76305 | Rsa1.0.05719.1 | 659 | 12836  | 0         | 468 | 481 | 97 + | 183 | 659 | 10336  | 10816  |
| UN76306 | Rsa1.0.01964.1 | 692 | 36702  | 0         | 527 | 536 | 98 + | 157 | 692 | 25537  | 26072  |
| UN76307 | Rsa1.0.00019.1 | 109 | 301669 | 3.00E-24  | 95  | 105 | 90 - | 3   | 107 | 272447 | 272549 |
| UN76308 | Rsa1.0.00990.1 | 624 | 57445  | 1.00E-180 | 322 | 323 | 99 + | 1   | 323 | 31650  | 31972  |
| UN76309 | Rsa1.0.02433.1 | 247 | 158318 | 1.00E-107 | 232 | 244 | 95 + | 1   | 244 | 128459 | 128702 |
| UN76310 | Rsa1.0.00187.1 | 400 | 393093 | 0         | 394 | 408 | 96 + | 2   | 400 | 32698  | 33105  |
| UN76311 | Rsa1.0.03560.1 | 394 | 22092  | 0         | 392 | 394 | 99 - | 1   | 394 | 15964  | 16357  |
| UN76312 | Rsa1.0.03085.1 | 645 | 25500  | 0         | 397 | 405 | 98 - | 1   | 405 | 18540  | 18944  |
| UN76313 | Rsa1.0.01272.1 | 638 | 49553  | 0         | 613 | 638 | 96 + | 1   | 638 | 22186  | 22820  |
| UN76314 | Rsa1.0.00054.1 | 741 | 162053 | 0         | 546 | 567 | 96 - | 179 | 741 | 105894 | 106456 |
| UN76315 | Rsa1.0.15251.1 | 512 | 2727   | 1.00E-130 | 250 | 255 | 98 - | 252 | 506 | 494    | 748    |
| UN76316 | Rsa1.0.01402.1 | 129 | 46509  | 7.00E-13  | 53  | 58  | 91 - | 72  | 129 | 6519   | 6576   |
| UN76317 | Rsa1.0.00004.1 | 654 | 253996 | 0         | 498 | 527 | 94 + | 129 | 654 | 96411  | 96930  |
| UN76318 | Rsa1.0.10046.1 | 561 | 6026   | 1.00E-169 | 338 | 349 | 96 + | 1   | 348 | 1512   | 1860   |
| UN76319 | Rsa1.0.03895.1 | 147 | 20206  | 3.00E-46  | 121 | 130 | 93 + | 13  | 142 | 13977  | 14106  |
| UN76320 | Rsa1.0.02727.1 | 240 | 28404  | 4.00E-96  | 225 | 238 | 94 + | 1   | 236 | 293    | 530    |
| UN76321 | Rsa1.0.03352.1 | 748 | 23506  | 8.00E-97  | 255 | 277 | 92 - | 1   | 274 | 4054   | 4327   |

|         |                |     |        |           |     |     |       |     |     |        |        |
|---------|----------------|-----|--------|-----------|-----|-----|-------|-----|-----|--------|--------|
| UN76322 | Rsa1.0.00799.1 | 382 | 63918  | 0         | 366 | 375 | 97 +  | 8   | 382 | 31800  | 32174  |
| UN76323 | Rsa1.0.00090.1 | 141 | 273859 | 4.00E-67  | 138 | 141 | 97 -  | 1   | 141 | 187604 | 187744 |
| UN76324 | Rsa1.0.01150.1 | 765 | 52331  | 0         | 755 | 766 | 98 -  | 1   | 765 | 47474  | 48239  |
| UN76325 | Rsa1.0.02343.1 | 145 | 32374  | 1.00E-76  | 145 | 145 | 100 + | 1   | 145 | 18781  | 18925  |
| UN76326 | Rsa1.0.00454.1 | 710 | 216970 | 1.00E-165 | 347 | 362 | 95 -  | 3   | 363 | 183733 | 184093 |
| UN76327 | Rsa1.0.08994.1 | 200 | 6724   | 5.00E-64  | 148 | 156 | 94 -  | 1   | 156 | 3405   | 3560   |
| UN76328 | Rsa1.0.00668.1 | 718 | 69421  | 0         | 480 | 505 | 95 +  | 13  | 517 | 23933  | 24437  |
| UN76329 | Rsa1.0.36916.1 | 208 | 611    | 2.00E-39  | 128 | 143 | 89 +  | 44  | 186 | 29     | 171    |
| UN76330 | Rsa1.0.08062.1 | 301 | 7978   | 1.00E-166 | 299 | 300 | 99 -  | 2   | 301 | 6969   | 7268   |
| UN76331 | Rsa1.0.04247.1 | 704 | 18295  | 0         | 509 | 561 | 90 +  | 148 | 698 | 366    | 919    |
| UN76332 | Rsa1.0.03077.1 | 323 | 25558  | 8.00E-58  | 171 | 188 | 90 +  | 2   | 185 | 6800   | 6987   |
| UN76333 | Rsa1.0.17040.1 | 238 | 1944   | 7.00E-30  | 91  | 99  | 91 -  | 140 | 238 | 1366   | 1464   |
| UN76334 | Rsa1.0.03874.1 | 103 | 20360  | 5.00E-16  | 49  | 51  | 96 -  | 51  | 101 | 1516   | 1566   |
| UN76335 | Rsa1.0.53792.1 | 276 | 424    | 1.00E-116 | 264 | 275 | 96 -  | 3   | 276 | 33     | 302    |
| UN76336 | Rsa1.0.01129.1 | 675 | 52949  | 1.00E-139 | 257 | 259 | 99 -  | 2   | 260 | 34164  | 34422  |
| UN76337 | Rsa1.0.02029.1 | 184 | 35857  | 5.00E-67  | 147 | 153 | 96 +  | 1   | 153 | 15439  | 15591  |
| UN76338 | Rsa1.0.11424.1 | 695 | 5513   | 0         | 540 | 549 | 98 -  | 1   | 548 | 2320   | 2868   |
| UN76339 | Rsa1.0.02280.1 | 312 | 33063  | 1.00E-154 | 303 | 312 | 97 -  | 1   | 312 | 29537  | 29848  |
| UN76340 | Rsa1.0.00839.1 | 744 | 62533  | 0         | 708 | 748 | 94 -  | 3   | 744 | 8574   | 9311   |
| UN76341 | Rsa1.0.00223.1 | 283 | 106231 | 1.00E-119 | 238 | 245 | 97 +  | 39  | 283 | 103543 | 103787 |
| UN76342 | Rsa1.0.02707.1 | 753 | 28520  | 1.00E-175 | 338 | 346 | 97 -  | 411 | 753 | 12741  | 13086  |
| UN76343 | Rsa1.0.08512.1 | 583 | 7248   | 0         | 538 | 573 | 93 -  | 3   | 575 | 6588   | 7147   |
| UN76344 | Rsa1.0.01112.1 | 816 | 310601 | 0         | 573 | 601 | 95 +  | 1   | 590 | 154724 | 155321 |
| UN76345 | Rsa1.0.05049.1 | 159 | 15025  | 4.00E-24  | 72  | 77  | 93 +  | 1   | 77  | 9133   | 9209   |
| UN76346 | Rsa1.0.00660.1 | 403 | 69688  | 5.00E-72  | 153 | 158 | 96 -  | 242 | 399 | 17363  | 17520  |
| UN76347 | Rsa1.0.00149.1 | 595 | 305196 | 1.00E-82  | 217 | 233 | 93 +  | 3   | 234 | 45924  | 46150  |
| UN76348 | Rsa1.0.00199.1 | 143 | 249604 | 1.00E-51  | 133 | 143 | 93 +  | 1   | 143 | 13132  | 13274  |
| UN76349 | Rsa1.0.00136.1 | 566 | 122464 | 0         | 563 | 566 | 99 -  | 1   | 566 | 50636  | 51201  |
| UN76350 | Rsa1.0.13630.1 | 190 | 4607   | 4.00E-89  | 184 | 190 | 96 -  | 1   | 190 | 3567   | 3756   |
| UN76351 | Rsa1.0.00991.1 | 707 | 143101 | 0         | 674 | 735 | 91 +  | 3   | 707 | 6242   | 6974   |
| UN76352 | Rsa1.0.01818.1 | 698 | 38837  | 1.00E-159 | 320 | 332 | 96 -  | 3   | 334 | 4982   | 5313   |
| UN76353 | Rsa1.0.08928.1 | 594 | 6781   | 0         | 428 | 435 | 98 +  | 157 | 591 | 1      | 435    |
| UN76354 | Rsa1.0.00161.1 | 678 | 116891 | 0         | 542 | 561 | 96 -  | 128 | 678 | 55253  | 55807  |
| UN76355 | Rsa1.0.00025.1 | 431 | 277312 | 1.00E-162 | 335 | 347 | 96 -  | 1   | 343 | 78887  | 79231  |
| UN76356 | Rsa1.0.00903.1 | 712 | 60228  | 0         | 652 | 717 | 90 +  | 4   | 712 | 17015  | 17699  |
| UN76357 | Rsa1.0.00464.1 | 126 | 82253  | 8.00E-34  | 111 | 121 | 91 +  | 5   | 124 | 64410  | 64529  |
| UN76358 | Rsa1.0.13603.1 | 672 | 4659   | 1.00E-157 | 281 | 281 | 100 - | 173 | 453 | 3327   | 3607   |
| UN76359 | Rsa1.0.01605.1 | 271 | 42442  | 1.00E-99  | 250 | 270 | 92 -  | 2   | 271 | 22760  | 23025  |
| UN76360 | Rsa1.0.00004.1 | 362 | 253996 | 1.00E-175 | 356 | 368 | 96 -  | 1   | 362 | 177084 | 177451 |



|         |                |     |        |           |     |     |       |     |     |        |        |
|---------|----------------|-----|--------|-----------|-----|-----|-------|-----|-----|--------|--------|
| UN76361 | Rsa1.0.00833.1 | 697 | 62621  | 7.00E-51  | 103 | 103 | 100 + | 238 | 340 | 5552   | 5654   |
| UN76362 | Rsa1.0.00270.1 | 385 | 101236 | 2.00E-92  | 215 | 229 | 93 +  | 26  | 250 | 64886  | 65114  |
| UN76363 | Rsa1.0.44302.1 | 129 | 508    | 2.00E-50  | 122 | 129 | 94 +  | 1   | 129 | 179    | 307    |
| UN76364 | Rsa1.0.06955.1 | 707 | 10111  | 4.00E-55  | 133 | 140 | 95 +  | 482 | 618 | 8938   | 9077   |
| UN76365 | Rsa1.0.00039.1 | 666 | 296927 | 0         | 651 | 663 | 98 +  | 4   | 666 | 288696 | 289358 |
| UN76366 | Rsa1.0.01537.1 | 766 | 187285 | 0         | 378 | 382 | 98 +  | 3   | 384 | 28446  | 28827  |
| UN76367 | Rsa1.0.08072.1 | 693 | 7955   | 0         | 667 | 695 | 95 +  | 1   | 693 | 797    | 1485   |
| UN76368 | Rsa1.0.02916.1 | 632 | 26809  | 1.00E-161 | 387 | 420 | 92 -  | 7   | 414 | 5584   | 5991   |
| UN76369 | Rsa1.0.02168.1 | 130 | 34367  | 5.00E-63  | 128 | 130 | 98 +  | 1   | 130 | 13522  | 13651  |
| UN76370 | Rsa1.0.00128.1 | 706 | 228675 | 0         | 590 | 606 | 97 -  | 1   | 603 | 96919  | 97521  |
| UN76371 | Rsa1.0.00303.1 | 365 | 97468  | 0         | 362 | 365 | 99 -  | 1   | 365 | 27769  | 28133  |
| UN76372 | Rsa1.0.00089.1 | 360 | 406142 | 2.00E-83  | 250 | 281 | 88 +  | 80  | 360 | 208605 | 208885 |
| UN76373 | Rsa1.0.00627.1 | 661 | 71566  | 0         | 361 | 366 | 98 -  | 1   | 365 | 41766  | 42131  |
| UN76374 | Rsa1.0.05070.1 | 225 | 14933  | 6.00E-98  | 181 | 181 | 100 - | 2   | 182 | 12725  | 12905  |
| UN76375 | Rsa1.0.00087.1 | 787 | 761073 | 0         | 359 | 360 | 99 -  | 1   | 360 | 215731 | 216090 |
| UN76376 | Rsa1.0.00667.1 | 736 | 69460  | 0         | 674 | 714 | 94 +  | 6   | 719 | 46064  | 46777  |
| UN76377 | Rsa1.0.02431.1 | 572 | 31504  | 1.00E-150 | 405 | 443 | 91 -  | 1   | 422 | 2929   | 3369   |
| UN76378 | Rsa1.0.02500.1 | 250 | 30768  | 1.00E-107 | 236 | 248 | 95 -  | 3   | 250 | 4422   | 4667   |
| UN76379 | Rsa1.0.03169.1 | 470 | 24826  | 7.00E-93  | 222 | 236 | 94 -  | 4   | 237 | 1618   | 1847   |
| UN76380 | Rsa1.0.01843.1 | 123 | 265131 | 2.00E-40  | 111 | 120 | 92 -  | 4   | 123 | 10456  | 10575  |
| UN76381 | Rsa1.0.03909.1 | 139 | 20142  | 2.00E-68  | 137 | 139 | 98 +  | 1   | 139 | 8039   | 8177   |
| UN76382 | Rsa1.0.00564.1 | 498 | 75428  | 1.00E-107 | 209 | 213 | 98 +  | 1   | 213 | 57774  | 57986  |
| UN76383 | #              | #   | #      | #         | #   | #   | #     | #   | #   | #      | #      |
| UN76384 | Rsa1.0.00533.1 | 132 | 77375  | 7.00E-50  | 124 | 132 | 93 -  | 1   | 132 | 49878  | 50009  |
| UN76385 | Rsa1.0.00679.1 | 728 | 68971  | 1.00E-133 | 254 | 257 | 98 -  | 2   | 257 | 56844  | 57100  |
| UN76386 | Rsa1.0.02681.1 | 145 | 28711  | 1.00E-33  | 97  | 105 | 92 +  | 6   | 110 | 6504   | 6608   |
| UN76387 | Rsa1.0.35120.1 | 259 | 644    | 1.00E-90  | 175 | 177 | 98 +  | 4   | 180 | 468    | 644    |
| UN76388 | Rsa1.0.00304.1 | 679 | 97429  | 1.00E-122 | 247 | 254 | 97 +  | 1   | 253 | 81195  | 81448  |
| UN76389 | Rsa1.0.00099.1 | 543 | 159619 | 1.00E-135 | 247 | 248 | 99 +  | 2   | 249 | 5193   | 5440   |
| UN76390 | Rsa1.0.03264.1 | 718 | 145959 | 1.00E-135 | 247 | 248 | 99 -  | 1   | 248 | 140478 | 140725 |
| UN76391 | Rsa1.0.01541.1 | 510 | 43682  | 1.00E-100 | 214 | 221 | 96 -  | 1   | 220 | 25253  | 25472  |
| UN76392 | Rsa1.0.00240.1 | 312 | 104175 | 5.00E-22  | 132 | 158 | 83 -  | 150 | 307 | 18123  | 18280  |
| UN76393 | Rsa1.0.00833.1 | 840 | 62621  | 0         | 378 | 379 | 99 -  | 3   | 381 | 12548  | 12926  |
| UN76394 | Rsa1.0.00762.1 | 560 | 165246 | 0         | 516 | 565 | 91 -  | 2   | 560 | 33288  | 33839  |
| UN76395 | Rsa1.0.00571.1 | 301 | 329018 | 1.00E-156 | 298 | 302 | 98 +  | 1   | 301 | 50388  | 50687  |
| UN76396 | Rsa1.0.00413.1 | 814 | 86921  | 0         | 730 | 753 | 96 +  | 2   | 749 | 76260  | 77006  |
| UN76397 | Rsa1.0.00001.1 | 675 | 363028 | 1.00E-150 | 307 | 319 | 96 +  | 1   | 319 | 290737 | 291052 |
| UN76398 | Rsa1.0.00038.1 | 845 | 314568 | 0         | 357 | 362 | 98 -  | 2   | 363 | 167365 | 167726 |
| UN76399 | Rsa1.0.01207.1 | 647 | 141053 | 0         | 519 | 519 | 100 + | 1   | 519 | 108856 | 109374 |

|         |                |     |        |           |     |     |       |     |     |        |        |
|---------|----------------|-----|--------|-----------|-----|-----|-------|-----|-----|--------|--------|
| UN76400 | Rsa1.0.01089.1 | 685 | 142191 | 0         | 354 | 354 | 100 + | 280 | 633 | 99090  | 99443  |
| UN76401 | Rsa1.0.01122.1 | 175 | 53369  | 2.00E-54  | 150 | 164 | 91 +  | 11  | 174 | 52565  | 52728  |
| UN76402 | Rsa1.0.00112.1 | 510 | 132199 | 0         | 492 | 505 | 97 -  | 1   | 505 | 115465 | 115968 |
| UN76403 | Rsa1.0.00859.1 | 517 | 61795  | 0         | 449 | 460 | 97 -  | 58  | 517 | 16621  | 17080  |
| UN76404 | Rsa1.0.04928.1 | 174 | 15420  | 3.00E-80  | 166 | 171 | 97 +  | 4   | 174 | 9635   | 9805   |
| UN76405 | Rsa1.0.00125.1 | 629 | 253043 | 1.00E-100 | 271 | 295 | 91 +  | 1   | 290 | 146896 | 147189 |
| UN76406 | Rsa1.0.00314.1 | 641 | 96472  | 1.00E-175 | 397 | 422 | 94 +  | 5   | 425 | 14671  | 15089  |
| UN76407 | Rsa1.0.00645.1 | 819 | 189716 | 1.00E-162 | 384 | 413 | 92 +  | 12  | 423 | 184988 | 185388 |
| UN76408 | Rsa1.0.01249.1 | 782 | 188432 | 1.00E-180 | 347 | 355 | 97 +  | 2   | 354 | 173037 | 173391 |
| UN76409 | Rsa1.0.01844.1 | 532 | 38421  | 1.00E-155 | 481 | 546 | 88 -  | 3   | 532 | 10249  | 10794  |
| UN76410 | Rsa1.0.09317.1 | 172 | 6459   | 2.00E-72  | 164 | 172 | 95 -  | 1   | 172 | 5505   | 5673   |
| UN76411 | Rsa1.0.15458.1 | 838 | 2591   | 1.00E-153 | 277 | 278 | 99 +  | 1   | 278 | 980    | 1257   |
| UN76412 | Rsa1.0.01192.1 | 746 | 51150  | 0         | 353 | 359 | 98 -  | 3   | 361 | 23563  | 23921  |
| UN76413 | Rsa1.0.00089.1 | 744 | 406142 | 1.00E-143 | 283 | 290 | 97 -  | 1   | 289 | 231223 | 231512 |
| UN76414 | Rsa1.0.00446.1 | 756 | 167829 | 0         | 406 | 408 | 99 +  | 3   | 410 | 2600   | 3007   |
| UN76415 | Rsa1.0.02177.1 | 620 | 34262  | 0         | 600 | 627 | 95 +  | 1   | 620 | 18808  | 19426  |
| UN76416 | Rsa1.0.06482.1 | 831 | 10937  | 0         | 523 | 526 | 99 +  | 1   | 526 | 10406  | 10931  |
| UN76417 | Rsa1.0.13438.1 | 556 | 4828   | 0         | 542 | 557 | 97 +  | 1   | 556 | 3308   | 3861   |
| UN76418 | Rsa1.0.00479.1 | 191 | 81377  | 1.00E-70  | 177 | 191 | 92 -  | 1   | 191 | 27513  | 27703  |
| UN76419 | Rsa1.0.00552.1 | 787 | 206757 | 0         | 336 | 340 | 98 +  | 1   | 336 | 193046 | 193385 |
| UN76420 | Rsa1.0.04295.1 | 788 | 18040  | 6.00E-70  | 141 | 143 | 98 +  | 1   | 143 | 8951   | 9093   |
| UN76421 | Rsa1.0.00998.1 | 334 | 57168  | 4.00E-72  | 176 | 186 | 94 -  | 3   | 187 | 12257  | 12441  |
| UN76422 | Rsa1.0.02484.1 | 523 | 30976  | 0         | 416 | 425 | 97 -  | 99  | 523 | 13236  | 13660  |
| UN76423 | Rsa1.0.04230.1 | 768 | 18384  | 0         | 754 | 764 | 98 -  | 3   | 765 | 6388   | 7151   |
| UN76424 | Rsa1.0.01492.1 | 630 | 44704  | 1.00E-171 | 484 | 540 | 89 -  | 55  | 582 | 26435  | 26963  |
| UN76425 | Rsa1.0.00385.1 | 465 | 89160  | 0         | 460 | 466 | 98 -  | 1   | 465 | 78450  | 78913  |
| UN76426 | Rsa1.0.02396.1 | 551 | 31783  | 0         | 426 | 435 | 97 -  | 60  | 492 | 16638  | 17072  |
| UN76427 | Rsa1.0.00391.1 | 798 | 183853 | 0         | 773 | 796 | 97 -  | 2   | 791 | 60269  | 61064  |
| UN76428 | Rsa1.0.00270.1 | 301 | 101236 | 7.00E-55  | 219 | 260 | 84 -  | 3   | 241 | 66375  | 66632  |
| UN76429 | Rsa1.0.03890.1 | 471 | 20223  | 0         | 446 | 470 | 94 -  | 1   | 470 | 1825   | 2293   |
| UN76430 | #              | #   | #      | #         | #   | #   | #     | #   | #   | #      | #      |
| UN76431 | Rsa1.0.00666.1 | 457 | 69505  | 0         | 452 | 455 | 99 +  | 4   | 457 | 34155  | 34609  |
| UN76432 | Rsa1.0.01068.1 | 646 | 55208  | 9.00E-78  | 148 | 148 | 100 + | 3   | 150 | 5024   | 5171   |
| UN76433 | Rsa1.0.02845.1 | 482 | 27340  | 1.00E-123 | 227 | 228 | 99 +  | 3   | 230 | 2730   | 2957   |
| UN76434 | Rsa1.0.00009.1 | 730 | 232558 | 4.00E-86  | 181 | 186 | 97 +  | 1   | 185 | 103440 | 103625 |
| UN76435 | Rsa1.0.02585.1 | 238 | 29865  | 3.00E-87  | 219 | 237 | 92 +  | 5   | 238 | 25314  | 25550  |
| UN76436 | Rsa1.0.01280.1 | 504 | 49321  | 3.00E-74  | 190 | 204 | 93 +  | 3   | 206 | 37730  | 37929  |
| UN76437 | Rsa1.0.03299.1 | 258 | 23949  | 1.00E-108 | 249 | 265 | 93 -  | 1   | 258 | 16015  | 16279  |
| UN76438 | Rsa1.0.00810.1 | 616 | 63289  | 0         | 595 | 621 | 95 +  | 1   | 605 | 11749  | 12367  |

|         |                |     |        |           |     |     |       |     |     |        |        |
|---------|----------------|-----|--------|-----------|-----|-----|-------|-----|-----|--------|--------|
| UN76439 | Rsa1.0.05795.1 | 458 | 12609  | 1.00E-141 | 254 | 254 | 100 + | 37  | 290 | 3638   | 3891   |
| UN76440 | Rsa1.0.00538.1 | 798 | 77149  | 1.00E-134 | 257 | 259 | 99 +  | 434 | 691 | 70603  | 70860  |
| UN76441 | Rsa1.0.02267.1 | 649 | 33194  | 1.00E-115 | 225 | 230 | 97 -  | 318 | 547 | 30984  | 31213  |
| UN76442 | Rsa1.0.05634.1 | 162 | 13114  | 4.00E-70  | 149 | 154 | 96 -  | 6   | 159 | 7671   | 7824   |
| UN76443 | Rsa1.0.02422.1 | 644 | 161122 | 0         | 331 | 334 | 99 +  | 311 | 644 | 17125  | 17458  |
| UN76444 | Rsa1.0.00175.1 | 636 | 166121 | 0         | 602 | 629 | 95 +  | 4   | 632 | 84167  | 84792  |
| UN76445 | Rsa1.0.01877.1 | 674 | 37789  | 1.00E-147 | 330 | 352 | 93 +  | 285 | 636 | 23914  | 24265  |
| UN76446 | Rsa1.0.01492.1 | 579 | 44704  | 1.00E-126 | 256 | 265 | 96 +  | 8   | 272 | 29233  | 29497  |
| UN76447 | Rsa1.0.00070.1 | 861 | 150321 | 2.00E-85  | 173 | 176 | 98 +  | 3   | 178 | 33528  | 33701  |
| UN76448 | Rsa1.0.00062.1 | 786 | 299291 | 0         | 599 | 612 | 97 -  | 138 | 745 | 267170 | 267781 |
| UN76449 | Rsa1.0.00122.1 | 650 | 265937 | 0         | 632 | 650 | 97 -  | 1   | 650 | 107056 | 107695 |
| UN76450 | Rsa1.0.01749.1 | 569 | 39822  | 6.00E-57  | 119 | 121 | 98 -  | 73  | 193 | 9051   | 9171   |
| UN76451 | Rsa1.0.00301.1 | 804 | 365315 | 0         | 551 | 555 | 99 -  | 2   | 556 | 203259 | 203813 |
| UN76452 | Rsa1.0.00798.1 | 638 | 63945  | 0         | 499 | 506 | 98 -  | 57  | 561 | 1228   | 1733   |
| UN76453 | Rsa1.0.00020.1 | 788 | 283099 | 0         | 583 | 630 | 92 +  | 158 | 781 | 116903 | 117532 |
| UN76454 | Rsa1.0.00476.1 | 789 | 280966 | 0         | 469 | 473 | 99 +  | 3   | 474 | 147064 | 147535 |
| UN76455 | Rsa1.0.00001.1 | 539 | 363028 | 0         | 534 | 538 | 99 +  | 2   | 539 | 53837  | 54374  |
| UN76456 | Rsa1.0.04892.1 | 678 | 15573  | 0         | 425 | 455 | 93 -  | 3   | 436 | 10948  | 11402  |
| UN76457 | Rsa1.0.00433.1 | 502 | 85381  | 1.00E-177 | 376 | 401 | 93 +  | 102 | 502 | 46161  | 46543  |
| UN76458 | Rsa1.0.02593.1 | 656 | 29744  | 1.00E-140 | 253 | 253 | 100 - | 404 | 656 | 2912   | 3164   |
| UN76459 | Rsa1.0.10437.1 | 638 | 5851   | 0         | 433 | 442 | 97 -  | 187 | 627 | 238    | 679    |
| UN76460 | Rsa1.0.02274.1 | 582 | 33109  | 1.00E-176 | 348 | 360 | 96 +  | 63  | 411 | 12412  | 12771  |
| UN76461 | Rsa1.0.04935.1 | 759 | 15403  | 0         | 752 | 758 | 99 +  | 2   | 757 | 2565   | 3322   |
| UN76462 | Rsa1.0.02158.1 | 731 | 154841 | 1.00E-130 | 257 | 264 | 97 +  | 351 | 614 | 132153 | 132416 |
| UN76463 | Rsa1.0.04369.1 | 605 | 17703  | 1.00E-164 | 320 | 329 | 97 +  | 1   | 329 | 13406  | 13734  |
| UN76464 | Rsa1.0.01754.1 | 397 | 39792  | 7.00E-99  | 218 | 226 | 96 +  | 166 | 391 | 13606  | 13827  |
| UN76465 | Rsa1.0.05056.1 | 561 | 14981  | 1.00E-122 | 316 | 344 | 91 -  | 19  | 362 | 9075   | 9412   |
| UN76466 | Rsa1.0.01363.1 | 644 | 47195  | 1.00E-147 | 274 | 277 | 98 +  | 2   | 278 | 23104  | 23380  |
| UN76467 | Rsa1.0.00228.1 | 441 | 105511 | 3.00E-73  | 161 | 168 | 95 -  | 25  | 192 | 41526  | 41693  |
| UN76468 | Rsa1.0.00635.1 | 710 | 175826 | 0         | 707 | 710 | 99 +  | 1   | 710 | 174164 | 174873 |
| UN76469 | Rsa1.0.02186.1 | 722 | 34150  | 0         | 400 | 415 | 96 -  | 220 | 633 | 15913  | 16327  |
| UN76470 | Rsa1.0.15512.1 | 512 | 2565   | 0         | 361 | 361 | 100 + | 152 | 512 | 1609   | 1969   |
| UN76471 | Rsa1.0.08903.1 | 743 | 6805   | 0         | 407 | 416 | 97 +  | 334 | 743 | 1687   | 2101   |
| UN76472 | Rsa1.0.02859.1 | 644 | 162118 | 1.00E-166 | 348 | 363 | 95 -  | 86  | 442 | 26031  | 26390  |
| UN76473 | Rsa1.0.00017.1 | 674 | 752458 | 4.00E-52  | 193 | 221 | 87 +  | 465 | 674 | 224549 | 224769 |
| UN76474 | Rsa1.0.02079.1 | 632 | 35306  | 0         | 371 | 371 | 100 + | 130 | 500 | 6740   | 7110   |
| UN76475 | #              | #   | #      | #         | #   | #   | #     | #   | #   | #      | #      |
| UN76476 | Rsa1.0.00017.1 | 779 | 752458 | 1.00E-117 | 319 | 346 | 92 -  | 384 | 718 | 54030  | 54374  |
| UN76477 | Rsa1.0.02948.1 | 760 | 26526  | 0         | 536 | 537 | 99 +  | 1   | 537 | 14921  | 15457  |

|         |                |     |        |           |     |     |       |     |     |        |        |
|---------|----------------|-----|--------|-----------|-----|-----|-------|-----|-----|--------|--------|
| UN76478 | Rsa1.0_40165.1 | 750 | 559    | 2.00E-75  | 166 | 172 | 96 +  | 5   | 175 | 386    | 557    |
| UN76479 | Rsa1.0_00067.1 | 748 | 415055 | 0         | 721 | 756 | 95 -  | 1   | 748 | 251046 | 251791 |
| UN76480 | Rsa1.0_00653.1 | 556 | 70029  | 1.00E-177 | 387 | 409 | 94 -  | 15  | 419 | 48698  | 49096  |
| UN76481 | Rsa1.0_16044.1 | 717 | 2308   | 0         | 700 | 722 | 96 +  | 1   | 717 | 859    | 1580   |
| UN76482 | Rsa1.0_00192.1 | 562 | 278200 | 0         | 344 | 347 | 99 -  | 1   | 347 | 13714  | 14060  |
| UN76483 | Rsa1.0_00301.1 | 876 | 365315 | 1.00E-151 | 299 | 307 | 97 +  | 2   | 307 | 63703  | 64009  |
| UN76484 | Rsa1.0_01565.1 | 727 | 155447 | 0         | 623 | 636 | 97 +  | 1   | 634 | 33763  | 34396  |
| UN76485 | Rsa1.0_02231.1 | 705 | 33661  | 0         | 411 | 434 | 94 +  | 52  | 484 | 18252  | 18678  |
| UN76486 | Rsa1.0_00302.1 | 523 | 97521  | 1.00E-110 | 228 | 234 | 97 +  | 1   | 234 | 80563  | 80794  |
| UN76487 | Rsa1.0_00272.1 | 580 | 447836 | 0         | 564 | 578 | 97 +  | 3   | 580 | 425119 | 425694 |
| UN76488 | Rsa1.0_00438.1 | 229 | 84861  | 2.00E-30  | 139 | 160 | 86 +  | 32  | 190 | 62330  | 62483  |
| UN76489 | Rsa1.0_00265.1 | 392 | 220635 | 0         | 387 | 392 | 98 +  | 1   | 392 | 159682 | 160073 |
| UN76490 | Rsa1.0_04651.1 | 635 | 16516  | 2.00E-50  | 111 | 114 | 97 -  | 460 | 573 | 10962  | 11075  |
| UN76491 | Rsa1.0_00313.1 | 142 | 96745  | 6.00E-63  | 137 | 142 | 96 -  | 1   | 142 | 79840  | 79981  |
| UN76492 | Rsa1.0_03957.1 | 711 | 19868  | 0         | 694 | 711 | 97 -  | 1   | 711 | 3717   | 4427   |
| UN76493 | Rsa1.0_00481.1 | 577 | 81316  | 0         | 574 | 579 | 99 -  | 1   | 577 | 42113  | 42691  |
| UN76494 | Rsa1.0_00396.1 | 405 | 88242  | 1.00E-128 | 293 | 312 | 93 +  | 54  | 365 | 20231  | 20541  |
| UN76495 | Rsa1.0_03435.1 | 252 | 22958  | 1.00E-126 | 238 | 241 | 98 +  | 1   | 241 | 21297  | 21537  |
| UN76496 | Rsa1.0_02248.1 | 535 | 33414  | 1.00E-118 | 266 | 280 | 95 +  | 4   | 282 | 11892  | 12165  |
| UN76497 | Rsa1.0_00180.1 | 244 | 114581 | 1.00E-114 | 236 | 244 | 96 -  | 1   | 244 | 12822  | 13064  |
| UN76498 | Rsa1.0_13592.1 | 823 | 4685   | 0         | 506 | 523 | 96 -  | 305 | 822 | 1236   | 1758   |
| UN76499 | Rsa1.0_02358.1 | 581 | 32213  | 1.00E-111 | 291 | 312 | 93 +  | 270 | 574 | 21989  | 22296  |
| UN76500 | Rsa1.0_00096.1 | 116 | 198773 | 6.00E-50  | 109 | 112 | 97 -  | 5   | 116 | 53152  | 53263  |
| UN76501 | Rsa1.0_00171.1 | 668 | 115622 | 1.00E-86  | 163 | 163 | 100 + | 206 | 368 | 87971  | 88133  |
| UN76502 | Rsa1.0_00294.1 | 716 | 144860 | 0         | 554 | 572 | 96 +  | 145 | 716 | 67251  | 67819  |
| UN76503 | Rsa1.0_00037.1 | 662 | 307838 | 0         | 438 | 464 | 94 +  | 28  | 485 | 236250 | 236705 |
| UN76504 | Rsa1.0_25457.1 | 266 | 935    | 1.00E-132 | 261 | 267 | 97 -  | 1   | 266 | 122    | 388    |
| UN76505 | Rsa1.0_01679.1 | 311 | 146876 | 1.00E-149 | 301 | 311 | 96 -  | 1   | 311 | 142893 | 143202 |
| UN76506 | Rsa1.0_00240.1 | 615 | 104175 | 6.00E-57  | 194 | 221 | 87 +  | 55  | 275 | 17124  | 17344  |
| UN76507 | Rsa1.0_23643.1 | 324 | 1035   | 1.00E-106 | 195 | 195 | 100 + | 1   | 195 | 59     | 253    |
| UN76508 | Rsa1.0_00017.1 | 137 | 752458 | 4.00E-36  | 92  | 97  | 94 +  | 1   | 97  | 53103  | 53199  |
| UN76509 | Rsa1.0_00413.1 | 684 | 86921  | 1.00E-129 | 246 | 250 | 98 -  | 154 | 403 | 77937  | 78186  |
| UN76510 | Rsa1.0_00031.1 | 614 | 179862 | 5.00E-79  | 150 | 150 | 100 - | 5   | 154 | 131461 | 131610 |
| UN76511 | Rsa1.0_00370.1 | 140 | 90472  | 2.00E-59  | 134 | 140 | 95 +  | 1   | 140 | 73445  | 73584  |
| UN76512 | Rsa1.0_02372.1 | 747 | 32053  | 1.00E-61  | 131 | 133 | 98 +  | 611 | 742 | 23597  | 23729  |
| UN76513 | Rsa1.0_00767.1 | 822 | 64980  | 4.00E-74  | 181 | 195 | 92 -  | 1   | 187 | 18547  | 18741  |
| UN76514 | Rsa1.0_03865.1 | 190 | 20373  | 4.00E-77  | 176 | 186 | 94 -  | 5   | 190 | 3552   | 3737   |
| UN76515 | Rsa1.0_00186.1 | 114 | 112669 | 4.00E-51  | 111 | 114 | 97 +  | 1   | 114 | 75116  | 75229  |
| UN76516 | Rsa1.0_00839.1 | 313 | 62533  | 1.00E-133 | 280 | 292 | 95 +  | 12  | 302 | 7883   | 8174   |

|         |                |     |        |           |     |     |       |     |     |        |        |
|---------|----------------|-----|--------|-----------|-----|-----|-------|-----|-----|--------|--------|
| UN76517 | Rsa1.0.00223.1 | 741 | 106231 | 0         | 453 | 482 | 93 -  | 3   | 480 | 104386 | 104855 |
| UN76518 | Rsa1.0.01850.1 | 563 | 162224 | 0         | 352 | 357 | 98 -  | 2   | 358 | 2485   | 2841   |
| UN76519 | Rsa1.0.00068.1 | 720 | 151813 | 1.00E-141 | 301 | 314 | 95 +  | 396 | 709 | 71030  | 71340  |
| UN76520 | Rsa1.0.48466.1 | 663 | 467    | 0         | 367 | 373 | 98 -  | 290 | 662 | 96     | 467    |
| UN76521 | Rsa1.0.00929.1 | 542 | 137796 | 4.00E-24  | 100 | 114 | 87 -  | 343 | 456 | 82776  | 82889  |
| UN76522 | Rsa1.0.03572.1 | 419 | 146346 | 7.00E-96  | 205 | 214 | 95 +  | 199 | 412 | 141058 | 141271 |
| UN76523 | Rsa1.0.01421.1 | 789 | 46197  | 4.00E-80  | 263 | 296 | 88 +  | 134 | 428 | 22008  | 22301  |
| UN76524 | Rsa1.0.00016.1 | 580 | 831256 | 1.00E-70  | 142 | 144 | 98 +  | 161 | 304 | 434822 | 434965 |
| UN76525 | Rsa1.0.00017.1 | 603 | 752458 | 1.00E-180 | 538 | 608 | 88 -  | 1   | 603 | 326882 | 327468 |
| UN76526 | Rsa1.0.00040.1 | 647 | 324196 | 0         | 401 | 417 | 96 +  | 3   | 410 | 261728 | 262142 |
| UN76527 | Rsa1.0.01364.1 | 673 | 47172  | 0         | 391 | 397 | 98 +  | 277 | 673 | 34330  | 34726  |
| UN76528 | Rsa1.0.02406.1 | 203 | 145276 | 1.00E-103 | 199 | 202 | 98 -  | 2   | 203 | 13496  | 13697  |
| UN76529 | Rsa1.0.00608.1 | 716 | 172672 | 1.00E-115 | 214 | 215 | 99 +  | 3   | 217 | 115757 | 115971 |
| UN76530 | Rsa1.0.00585.1 | 735 | 74164  | 0         | 728 | 731 | 99 -  | 3   | 733 | 53412  | 54141  |
| UN76531 | Rsa1.0.00904.1 | 259 | 180594 | 2.00E-82  | 172 | 175 | 98 +  | 86  | 259 | 12046  | 12219  |
| UN76532 | Rsa1.0.59402.1 | 569 | 385    | 0         | 383 | 385 | 99 -  | 42  | 426 | 1      | 385    |
| UN76533 | Rsa1.0.02929.1 | 432 | 26673  | 1.00E-119 | 256 | 268 | 95 -  | 2   | 269 | 20275  | 20539  |
| UN76534 | Rsa1.0.00016.1 | 323 | 831256 | 1.00E-158 | 313 | 323 | 96 -  | 1   | 323 | 300506 | 300828 |
| UN76535 | Rsa1.0.03120.1 | 612 | 25269  | 0         | 571 | 616 | 92 +  | 3   | 612 | 9547   | 10149  |
| UN76536 | Rsa1.0.00314.1 | 704 | 96472  | 1.00E-113 | 235 | 243 | 96 -  | 462 | 703 | 15671  | 15913  |
| UN76537 | Rsa1.0.00070.1 | 341 | 150321 | 1.00E-99  | 311 | 351 | 88 -  | 3   | 341 | 84438  | 84772  |
| UN76538 | Rsa1.0.01648.1 | 327 | 41635  | 1.00E-156 | 315 | 327 | 96 +  | 1   | 327 | 16944  | 17270  |
| UN76539 | Rsa1.0.01844.1 | 473 | 38421  | 1.00E-158 | 318 | 330 | 96 +  | 144 | 473 | 8431   | 8760   |
| UN76540 | Rsa1.0.06915.1 | 727 | 10174  | 0         | 578 | 593 | 97 +  | 2   | 594 | 2330   | 2922   |
| UN76541 | Rsa1.0.10453.1 | 739 | 5845   | 0         | 686 | 707 | 97 -  | 35  | 739 | 48     | 753    |
| UN76542 | Rsa1.0.14737.1 | 601 | 3115   | 0         | 586 | 606 | 96 +  | 3   | 601 | 987    | 1589   |
| UN76543 | Rsa1.0.00075.1 | 635 | 146680 | 1.00E-148 | 309 | 320 | 96 +  | 314 | 632 | 141543 | 141858 |
| UN76544 | Rsa1.0.00467.1 | 778 | 156542 | 1.00E-106 | 196 | 196 | 100 + | 303 | 498 | 77373  | 77568  |
| UN76545 | Rsa1.0.07945.1 | 567 | 8206   | 6.00E-23  | 86  | 96  | 89 -  | 308 | 403 | 2457   | 2552   |
| UN76546 | Rsa1.0.01119.1 | 515 | 53459  | 1.00E-127 | 243 | 247 | 98 -  | 1   | 247 | 13988  | 14234  |
| UN76547 | Rsa1.0.04646.1 | 264 | 16541  | 3.00E-72  | 225 | 254 | 88 +  | 11  | 264 | 951    | 1204   |
| UN76548 | Rsa1.0.01153.1 | 712 | 52264  | 0         | 325 | 325 | 100 + | 21  | 345 | 20617  | 20941  |
| UN76549 | Rsa1.0.76012.1 | 617 | 302    | 1.00E-137 | 256 | 259 | 98 -  | 126 | 384 | 7      | 265    |
| UN76550 | Rsa1.0.01058.1 | 381 | 55430  | 1.00E-125 | 258 | 267 | 96 -  | 115 | 381 | 23511  | 23776  |
| UN76551 | #              | #   | #      | #         | #   | #   | #     | #   | #   | #      | #      |
| UN76552 | Rsa1.0.01893.1 | 641 | 37520  | 6.00E-85  | 189 | 198 | 95 +  | 7   | 204 | 8564   | 8758   |
| UN76553 | Rsa1.0.00965.1 | 570 | 58139  | 3.00E-49  | 109 | 112 | 97 +  | 204 | 315 | 7485   | 7596   |
| UN76554 | Rsa1.0.00079.1 | 487 | 606987 | 0         | 371 | 381 | 97 -  | 2   | 379 | 587243 | 587623 |
| UN76555 | Rsa1.0.00056.1 | 685 | 332604 | 0         | 478 | 478 | 100 + | 3   | 480 | 46942  | 47419  |

|         |                |     |        |           |     |     |       |     |     |        |        |
|---------|----------------|-----|--------|-----------|-----|-----|-------|-----|-----|--------|--------|
| UN76556 | Rsa1.0.02870.1 | 581 | 27102  | 0         | 561 | 580 | 96 +  | 2   | 581 | 7403   | 7982   |
| UN76557 | Rsa1.0.00663.1 | 705 | 164969 | 0         | 690 | 705 | 97 -  | 3   | 705 | 134172 | 134876 |
| UN76558 | Rsa1.0.01405.1 | 781 | 46445  | 0         | 720 | 731 | 98 -  | 8   | 730 | 37222  | 37952  |
| UN76559 | Rsa1.0.01474.1 | 665 | 45070  | 0         | 383 | 397 | 96 +  | 25  | 418 | 26147  | 26543  |
| UN76560 | Rsa1.0.00004.1 | 565 | 253996 | 0         | 540 | 566 | 95 -  | 2   | 565 | 97239  | 97797  |
| UN76561 | Rsa1.0.00799.1 | 560 | 63918  | 0         | 333 | 337 | 98 -  | 221 | 557 | 32529  | 32865  |
| UN76562 | Rsa1.0.00112.1 | 346 | 132199 | 1.00E-66  | 129 | 129 | 100 - | 1   | 129 | 47407  | 47535  |
| UN76563 | Rsa1.0.00514.1 | 505 | 78421  | 0         | 350 | 353 | 99 -  | 153 | 505 | 11377  | 11729  |
| UN76564 | Rsa1.0.00469.1 | 709 | 82084  | 1.00E-137 | 299 | 318 | 94 -  | 2   | 319 | 69939  | 70241  |
| UN76565 | Rsa1.0.00417.1 | 754 | 395068 | 0         | 737 | 758 | 97 +  | 1   | 754 | 237442 | 238199 |
| UN76566 | Rsa1.0.00706.1 | 573 | 291570 | 0         | 555 | 570 | 97 +  | 2   | 569 | 242108 | 242677 |
| UN76567 | Rsa1.0.03511.1 | 498 | 22373  | 0         | 493 | 495 | 99 +  | 4   | 498 | 19176  | 19670  |
| UN76568 | Rsa1.0.00134.1 | 520 | 390219 | 0         | 386 | 394 | 97 +  | 1   | 392 | 42784  | 43177  |
| UN76569 | Rsa1.0.00768.1 | 512 | 64969  | 1.00E-116 | 287 | 310 | 92 -  | 213 | 512 | 60638  | 60947  |
| UN76570 | Rsa1.0.36130.1 | 508 | 625    | 0         | 332 | 333 | 99 -  | 1   | 333 | 231    | 563    |
| UN76571 | Rsa1.0.00373.1 | 532 | 90296  | 1.00E-165 | 315 | 320 | 98 +  | 215 | 532 | 32052  | 32369  |
| UN76572 | Rsa1.0.00263.1 | 515 | 224968 | 0         | 386 | 399 | 96 -  | 117 | 515 | 178811 | 179206 |
| UN76573 | Rsa1.0.00335.1 | 570 | 94371  | 0         | 519 | 530 | 97 +  | 41  | 570 | 18628  | 19157  |
| UN76574 | Rsa1.0.00753.1 | 815 | 65705  | 0         | 505 | 539 | 93 +  | 197 | 726 | 56735  | 57267  |
| UN76575 | Rsa1.0.25158.1 | 588 | 949    | 0         | 355 | 365 | 97 -  | 3   | 367 | 2      | 366    |
| UN76576 | Rsa1.0.02910.1 | 175 | 26843  | 8.00E-75  | 145 | 146 | 99 +  | 3   | 148 | 20588  | 20733  |
| UN76577 | Rsa1.0.00464.1 | 320 | 82253  | 2.00E-77  | 159 | 163 | 97 -  | 132 | 294 | 61681  | 61843  |
| UN76578 | Rsa1.0.02521.1 | 350 | 30562  | 0         | 346 | 349 | 99 +  | 2   | 350 | 19469  | 19817  |
| UN76579 | Rsa1.0.00964.1 | 129 | 316648 | 6.00E-35  | 111 | 123 | 90 +  | 4   | 126 | 18376  | 18498  |
| UN76580 | Rsa1.0.00556.1 | 614 | 207212 | 0         | 612 | 612 | 100 - | 3   | 614 | 171051 | 171662 |
| UN76581 | Rsa1.0.04223.1 | 784 | 18407  | 1.00E-131 | 272 | 280 | 97 +  | 472 | 747 | 6198   | 6477   |
| UN76582 | Rsa1.0.05076.1 | 202 | 14916  | 2.00E-38  | 109 | 116 | 93 +  | 1   | 114 | 400    | 514    |
| UN76583 | Rsa1.0.00247.1 | 506 | 103408 | 0         | 487 | 505 | 96 +  | 2   | 506 | 77113  | 77617  |
| UN76584 | Rsa1.0.01073.1 | 795 | 55030  | 0         | 423 | 428 | 98 +  | 1   | 428 | 15513  | 15939  |
| UN76585 | Rsa1.0.00625.1 | 742 | 71672  | 0         | 718 | 748 | 95 -  | 3   | 741 | 13249  | 13990  |
| UN76586 | Rsa1.0.08018.1 | 566 | 8075   | 1.00E-178 | 331 | 333 | 99 +  | 218 | 549 | 5142   | 5473   |
| UN76587 | Rsa1.0.20636.1 | 739 | 1285   | 0         | 699 | 737 | 94 -  | 5   | 739 | 396    | 1132   |
| UN76588 | Rsa1.0.26429.1 | 493 | 892    | 1.00E-119 | 221 | 222 | 99 +  | 157 | 378 | 654    | 875    |
| UN76589 | Rsa1.0.00040.1 | 217 | 324196 | 8.00E-57  | 118 | 120 | 98 -  | 17  | 136 | 89946  | 90065  |
| UN76590 | Rsa1.0.00434.1 | 727 | 85171  | 2.00E-79  | 157 | 159 | 98 -  | 383 | 541 | 77826  | 77984  |
| UN76591 | Rsa1.0.00453.1 | 737 | 83031  | 0         | 696 | 740 | 94 -  | 7   | 737 | 77972  | 78711  |
| UN76592 | Rsa1.0.00145.1 | 763 | 261008 | 0         | 556 | 559 | 99 +  | 131 | 689 | 232353 | 232911 |
| UN76593 | Rsa1.0.03002.1 | 201 | 26107  | 9.00E-72  | 190 | 210 | 90 -  | 1   | 198 | 16553  | 16762  |
| UN76594 | Rsa1.0.00131.1 | 575 | 432233 | 1.00E-158 | 332 | 348 | 95 -  | 2   | 346 | 98837  | 99184  |

|         |                |     |        |           |     |     |       |     |     |        |        |
|---------|----------------|-----|--------|-----------|-----|-----|-------|-----|-----|--------|--------|
| UN76595 | Rsa1.0_00063.1 | 709 | 156150 | 1.00E-156 | 296 | 301 | 98 -  | 1   | 298 | 64298  | 64598  |
| UN76596 | Rsa1.0_00164.1 | 557 | 116642 | 0         | 407 | 414 | 98 +  | 3   | 414 | 43123  | 43536  |
| UN76597 | #              | #   | #      | #         | #   | #   | #     | #   | #   | #      | #      |
| UN76598 | Rsa1.0_00065.1 | 669 | 454616 | 1.00E-132 | 294 | 311 | 94 +  | 359 | 669 | 240976 | 241285 |
| UN76599 | Rsa1.0_00250.1 | 659 | 273771 | 4.00E-98  | 247 | 265 | 93 +  | 7   | 271 | 229111 | 229371 |
| UN76600 | Rsa1.0_03571.1 | 814 | 22030  | 0         | 706 | 747 | 94 -  | 34  | 779 | 1450   | 2195   |
| UN76601 | Rsa1.0_01376.1 | 773 | 47004  | 0         | 396 | 411 | 96 +  | 364 | 773 | 968    | 1375   |
| UN76602 | Rsa1.0_02397.1 | 816 | 31778  | 1.00E-119 | 232 | 237 | 97 +  | 187 | 423 | 24647  | 24883  |
| UN76603 | Rsa1.0_03233.1 | 678 | 24446  | 0         | 491 | 497 | 98 -  | 182 | 678 | 21904  | 22400  |
| UN76604 | Rsa1.0_00786.1 | 754 | 64285  | 0         | 565 | 571 | 98 +  | 2   | 572 | 19248  | 19818  |
| UN76605 | Rsa1.0_18032.1 | 598 | 1686   | 1.00E-106 | 205 | 207 | 99 +  | 144 | 348 | 1291   | 1497   |
| UN76606 | #              | #   | #      | #         | #   | #   | #     | #   | #   | #      | #      |
| UN76607 | Rsa1.0_00018.1 | 693 | 410899 | 0         | 676 | 693 | 97 +  | 2   | 693 | 7176   | 7868   |
| UN76608 | Rsa1.0_00653.1 | 711 | 70029  | 1.00E-149 | 282 | 287 | 98 +  | 207 | 493 | 45561  | 45847  |
| UN76609 | Rsa1.0_03692.1 | 286 | 21338  | 2.00E-64  | 215 | 234 | 91 +  | 65  | 286 | 3649   | 3882   |
| UN76610 | Rsa1.0_00991.1 | 731 | 143101 | 0         | 691 | 741 | 93 -  | 3   | 731 | 7826   | 8566   |
| UN76611 | Rsa1.0_01818.1 | 697 | 38837  | 0         | 660 | 697 | 94 +  | 2   | 697 | 3979   | 4675   |
| UN76612 | Rsa1.0_08928.1 | 771 | 6781   | 0         | 737 | 751 | 98 -  | 4   | 749 | 831    | 1581   |
| UN76613 | Rsa1.0_08048.1 | 241 | 137630 | 8.00E-42  | 98  | 101 | 97 +  | 144 | 241 | 1604   | 1704   |
| UN76614 | Rsa1.0_00037.1 | 484 | 307838 | 1.00E-121 | 260 | 276 | 94 -  | 3   | 265 | 150852 | 151127 |
| UN76615 | Rsa1.0_60775.1 | 137 | 377    | 1.00E-23  | 97  | 104 | 93 -  | 3   | 102 | 114    | 216    |
| UN76616 | Rsa1.0_00161.1 | 575 | 116891 | 0         | 536 | 573 | 93 +  | 2   | 571 | 54536  | 55084  |
| UN76617 | Rsa1.0_01701.1 | 590 | 162121 | 1.00E-101 | 190 | 191 | 99 -  | 165 | 355 | 26072  | 26262  |
| UN76618 | Rsa1.0_00025.1 | 747 | 277312 | 0         | 569 | 572 | 99 +  | 3   | 574 | 77638  | 78209  |
| UN76619 | #              | #   | #      | #         | #   | #   | #     | #   | #   | #      | #      |
| UN76620 | Rsa1.0_00195.1 | 603 | 251884 | 3.00E-99  | 207 | 214 | 96 +  | 2   | 215 | 82491  | 82701  |
| UN76621 | Rsa1.0_02975.1 | 722 | 26322  | 1.00E-163 | 361 | 383 | 94 +  | 228 | 610 | 15690  | 16061  |
| UN76622 | Rsa1.0_02349.1 | 635 | 32312  | 2.00E-13  | 101 | 120 | 84 -  | 476 | 595 | 2091   | 2204   |
| UN76623 | Rsa1.0_14043.1 | 357 | 3873   | 3.00E-91  | 176 | 178 | 98 +  | 3   | 180 | 2414   | 2591   |
| UN76624 | Rsa1.0_01286.1 | 551 | 49209  | 0         | 536 | 551 | 97 -  | 1   | 551 | 7132   | 7682   |
| UN76625 | Rsa1.0_01049.1 | 220 | 55655  | 2.00E-82  | 173 | 179 | 96 +  | 6   | 184 | 41128  | 41306  |
| UN76626 | Rsa1.0_00237.1 | 415 | 235974 | 0         | 415 | 415 | 100 - | 1   | 415 | 202346 | 202760 |
| UN76627 | Rsa1.0_06455.1 | 651 | 10983  | 1.00E-147 | 387 | 423 | 91 -  | 5   | 421 | 3384   | 3797   |
| UN76628 | Rsa1.0_00775.1 | 676 | 64793  | 0         | 545 | 563 | 96 -  | 114 | 676 | 7147   | 7709   |
| UN76629 | Rsa1.0_00646.1 | 317 | 70473  | 5.00E-65  | 159 | 170 | 93 +  | 148 | 317 | 4444   | 4613   |
| UN76630 | Rsa1.0_01632.1 | 505 | 181224 | 0         | 454 | 489 | 92 +  | 2   | 487 | 828    | 1304   |
| UN76631 | Rsa1.0_00898.1 | 360 | 202772 | 4.00E-69  | 262 | 300 | 87 -  | 25  | 322 | 174644 | 174935 |
| UN76632 | Rsa1.0_03631.1 | 409 | 21647  | 1.00E-176 | 375 | 395 | 94 -  | 18  | 409 | 2834   | 3228   |
| UN76633 | Rsa1.0_00086.1 | 325 | 439854 | 5.00E-90  | 180 | 184 | 97 +  | 1   | 184 | 375416 | 375599 |

|         |                |     |        |           |     |     |       |     |     |        |        |
|---------|----------------|-----|--------|-----------|-----|-----|-------|-----|-----|--------|--------|
| UN76634 | Rsa1.0.02174.1 | 442 | 34316  | 1.00E-91  | 192 | 198 | 96 -  | 48  | 243 | 13678  | 13875  |
| UN76635 | Rsa1.0.00398.1 | 713 | 88007  | 0         | 469 | 486 | 96 -  | 1   | 486 | 35201  | 35683  |
| UN76636 | Rsa1.0.00724.1 | 405 | 66789  | 0         | 405 | 405 | 100 + | 1   | 405 | 21954  | 22358  |
| UN76637 | Rsa1.0.00278.1 | 390 | 231896 | 1.00E-154 | 300 | 308 | 97 +  | 5   | 312 | 92915  | 93222  |
| UN76638 | Rsa1.0.00196.1 | 703 | 109960 | 0         | 531 | 536 | 99 -  | 3   | 538 | 60727  | 61262  |
| UN76639 | Rsa1.0.00268.1 | 394 | 101470 | 1.00E-145 | 332 | 356 | 93 -  | 40  | 394 | 5751   | 6092   |
| UN76640 | Rsa1.0.00085.1 | 335 | 142226 | 1.00E-109 | 296 | 333 | 88 -  | 3   | 335 | 56992  | 57304  |
| UN76641 | Rsa1.0.00083.1 | 595 | 442773 | 1.00E-159 | 303 | 308 | 98 +  | 290 | 595 | 326815 | 327122 |
| UN76642 | Rsa1.0.04200.1 | 593 | 18490  | 1.00E-85  | 164 | 165 | 99 +  | 357 | 521 | 15633  | 15797  |
| UN76643 | Rsa1.0.00549.1 | 719 | 76473  | 1.00E-123 | 240 | 245 | 97 +  | 472 | 716 | 37587  | 37831  |
| UN76644 | Rsa1.0.10565.1 | 620 | 5800   | 0         | 575 | 613 | 93 +  | 3   | 612 | 4433   | 5039   |
| UN76645 | Rsa1.0.00623.1 | 678 | 207630 | 1.00E-100 | 218 | 229 | 95 +  | 451 | 673 | 164904 | 165132 |
| UN76646 | Rsa1.0.04271.1 | 781 | 18148  | 0         | 654 | 660 | 99 -  | 122 | 776 | 14955  | 15614  |
| UN76647 | Rsa1.0.01157.1 | 600 | 52121  | 0         | 592 | 599 | 98 -  | 2   | 600 | 46312  | 46910  |
| UN76648 | Rsa1.0.00397.1 | 207 | 88189  | 1.00E-103 | 199 | 202 | 98 -  | 1   | 202 | 45310  | 45511  |
| UN76649 | Rsa1.0.02785.1 | 593 | 27881  | 1.00E-124 | 255 | 264 | 96 -  | 289 | 552 | 1970   | 2230   |
| UN76650 | Rsa1.0.00301.1 | 618 | 365315 | 9.00E-84  | 188 | 196 | 95 -  | 2   | 196 | 346832 | 347024 |
| UN76651 | Rsa1.0.27873.1 | 442 | 836    | 1.00E-102 | 192 | 193 | 99 -  | 6   | 198 | 148    | 340    |
| UN76652 | Rsa1.0.05303.1 | 765 | 14211  | 0         | 642 | 648 | 99 -  | 121 | 765 | 7436   | 8083   |
| UN76653 | Rsa1.0.02871.1 | 720 | 27085  | 1.00E-162 | 317 | 326 | 97 +  | 379 | 704 | 4928   | 5253   |
| UN76654 | Rsa1.0.01377.1 | 240 | 46967  | 1.00E-18  | 66  | 72  | 91 +  | 11  | 82  | 39486  | 39557  |
| UN76655 | Rsa1.0.00437.1 | 636 | 84879  | 0         | 550 | 559 | 98 +  | 3   | 561 | 27518  | 28073  |
| UN76656 | Rsa1.0.00194.1 | 185 | 110851 | 2.00E-81  | 177 | 184 | 96 +  | 1   | 182 | 68361  | 68544  |
| UN76657 | Rsa1.0.01817.1 | 657 | 38849  | 1.00E-176 | 325 | 329 | 98 +  | 285 | 613 | 31779  | 32107  |
| UN76658 | Rsa1.0.01865.1 | 806 | 37992  | 0         | 552 | 590 | 93 +  | 233 | 806 | 29197  | 29783  |
| UN76659 | Rsa1.0.04179.1 | 787 | 18633  | 1.00E-105 | 194 | 194 | 100 + | 182 | 375 | 16118  | 16311  |
| UN76660 | Rsa1.0.01089.1 | 583 | 142191 | 0         | 462 | 464 | 99 -  | 120 | 583 | 101675 | 102138 |
| UN76661 | Rsa1.0.01602.1 | 286 | 42503  | 1.00E-105 | 273 | 289 | 94 +  | 3   | 283 | 975    | 1263   |
| UN76662 | Rsa1.0.16336.1 | 641 | 2192   | 0         | 629 | 642 | 97 -  | 1   | 641 | 1344   | 1985   |
| UN76663 | Rsa1.0.00197.1 | 645 | 109714 | 2.00E-84  | 162 | 163 | 99 -  | 85  | 247 | 100879 | 101041 |
| UN76664 | Rsa1.0.00180.1 | 555 | 114581 | 3.00E-68  | 135 | 136 | 99 +  | 232 | 367 | 59368  | 59503  |
| UN76665 | Rsa1.0.00169.1 | 761 | 274298 | 0         | 506 | 525 | 96 -  | 231 | 748 | 21340  | 21864  |
| UN76666 | Rsa1.0.00302.1 | 710 | 97521  | 0         | 682 | 713 | 95 -  | 1   | 710 | 57626  | 58338  |
| UN76667 | Rsa1.0.01611.1 | 707 | 42269  | 0         | 395 | 402 | 98 -  | 147 | 548 | 5473   | 5874   |
| UN76668 | Rsa1.0.06892.1 | 826 | 10197  | 1.00E-126 | 295 | 306 | 96 +  | 488 | 785 | 5734   | 6039   |
| UN76669 | Rsa1.0.00067.1 | 651 | 415055 | 0         | 463 | 496 | 93 -  | 178 | 651 | 251822 | 252317 |
| UN76670 | Rsa1.0.00142.1 | 640 | 121474 | 1.00E-131 | 277 | 289 | 95 +  | 3   | 290 | 99487  | 99775  |
| UN76671 | Rsa1.0.02903.1 | 652 | 26901  | 0         | 572 | 631 | 90 +  | 4   | 634 | 4909   | 5503   |
| UN76672 | Rsa1.0.07591.1 | 673 | 9060   | 0         | 453 | 454 | 99 +  | 210 | 663 | 1287   | 1740   |



|         |                |     |        |           |     |     |       |     |     |        |        |
|---------|----------------|-----|--------|-----------|-----|-----|-------|-----|-----|--------|--------|
| UN76673 | Rsa1.0.02529.1 | 643 | 30437  | 1.00E-116 | 225 | 229 | 98 +  | 202 | 430 | 11363  | 11591  |
| UN76674 | Rsa1.0.00887.1 | 696 | 61048  | 0         | 605 | 627 | 96 -  | 73  | 695 | 47900  | 48526  |
| UN76675 | Rsa1.0.00451.1 | 572 | 322533 | 0         | 565 | 572 | 98 -  | 3   | 572 | 250738 | 251309 |
| UN76676 | Rsa1.0.00293.1 | 753 | 339294 | 2.00E-29  | 423 | 539 | 78 -  | 101 | 638 | 171265 | 171797 |
| UN76677 | Rsa1.0.03714.1 | 667 | 21217  | 1.00E-119 | 254 | 265 | 95 +  | 404 | 667 | 15452  | 15716  |
| UN76678 | Rsa1.0.00667.1 | 537 | 69460  | 0         | 502 | 526 | 95 -  | 12  | 537 | 47164  | 47689  |
| UN76679 | Rsa1.0.02016.1 | 845 | 36003  | 1.00E-122 | 231 | 233 | 99 +  | 271 | 501 | 23397  | 23629  |
| UN76680 | Rsa1.0.05321.1 | 785 | 14154  | 0         | 401 | 409 | 98 -  | 62  | 470 | 2553   | 2961   |
| UN76681 | Rsa1.0.00347.1 | 188 | 93048  | 6.00E-76  | 181 | 192 | 94 +  | 3   | 188 | 85137  | 85328  |
| UN76682 | Rsa1.0.00326.1 | 754 | 171955 | 1.00E-46  | 147 | 164 | 89 -  | 268 | 431 | 22073  | 22236  |
| UN76683 | Rsa1.0.04224.1 | 621 | 18402  | 0         | 460 | 502 | 91 +  | 119 | 614 | 78     | 564    |
| UN76684 | Rsa1.0.38780.1 | 731 | 580    | 3.00E-47  | 189 | 225 | 84 -  | 218 | 421 | 1      | 225    |
| UN76685 | Rsa1.0.05725.1 | 345 | 12809  | 3.00E-73  | 147 | 148 | 99 -  | 66  | 212 | 772    | 919    |
| UN76686 | Rsa1.0.01195.1 | 697 | 147988 | 0         | 558 | 587 | 95 -  | 125 | 697 | 9858   | 10444  |
| UN76687 | Rsa1.0.01721.1 | 760 | 40345  | 0         | 751 | 762 | 98 +  | 1   | 755 | 23089  | 23850  |
| UN76688 | Rsa1.0.01196.1 | 799 | 51097  | 1.00E-114 | 221 | 225 | 98 -  | 480 | 704 | 32613  | 32837  |
| UN76689 | Rsa1.0.05972.1 | 834 | 12067  | 1.00E-52  | 106 | 106 | 100 + | 535 | 640 | 11353  | 11458  |
| UN76690 | Rsa1.0.00564.1 | 660 | 75428  | 1.00E-121 | 236 | 241 | 97 -  | 3   | 243 | 59706  | 59946  |
| UN76691 | Rsa1.0.03302.1 | 215 | 23898  | 1.00E-83  | 208 | 225 | 92 -  | 1   | 215 | 7034   | 7258   |
| UN76692 | Rsa1.0.00065.1 | 278 | 454616 | 7.00E-95  | 197 | 204 | 96 -  | 73  | 276 | 171041 | 171244 |
| UN76693 | Rsa1.0.02006.1 | 758 | 36135  | 0         | 630 | 671 | 93 -  | 5   | 674 | 15573  | 16242  |
| UN76694 | Rsa1.0.02901.1 | 781 | 26909  | 1.00E-106 | 201 | 203 | 99 +  | 3   | 205 | 7728   | 7930   |
| UN76695 | Rsa1.0.00214.1 | 787 | 107508 | 0         | 673 | 682 | 98 +  | 3   | 678 | 26036  | 26715  |
| UN76696 | Rsa1.0.00087.1 | 555 | 761073 | 4.00E-67  | 160 | 169 | 94 +  | 243 | 409 | 292045 | 292213 |
| UN76697 | Rsa1.0.00029.1 | 692 | 272992 | 0         | 691 | 691 | 100 - | 2   | 692 | 108639 | 109329 |
| UN76698 | Rsa1.0.06189.1 | 306 | 11525  | 1.00E-138 | 292 | 306 | 95 +  | 5   | 306 | 9867   | 10172  |
| UN76699 | Rsa1.0.05056.1 | 592 | 14981  | 1.00E-124 | 273 | 289 | 94 +  | 78  | 360 | 7331   | 7614   |
| UN76700 | Rsa1.0.02186.1 | 877 | 34150  | 1.00E-153 | 335 | 351 | 95 +  | 1   | 348 | 13885  | 14231  |
| UN76701 | Rsa1.0.03019.1 | 775 | 25987  | 0         | 551 | 565 | 97 -  | 1   | 565 | 1534   | 2087   |
| UN76702 | Rsa1.0.00344.1 | 694 | 191774 | 1.00E-109 | 217 | 222 | 97 -  | 326 | 547 | 133438 | 133656 |
| UN76703 | Rsa1.0.03741.1 | 562 | 143933 | 8.00E-47  | 102 | 104 | 98 -  | 459 | 562 | 14515  | 14618  |
| UN76704 | Rsa1.0.18563.1 | 545 | 1574   | 0         | 334 | 337 | 99 -  | 1   | 337 | 528    | 864    |
| UN76705 | Rsa1.0.03805.1 | 424 | 20746  | 0         | 417 | 424 | 98 -  | 1   | 424 | 14534  | 14956  |
| UN76706 | Rsa1.0.02898.1 | 584 | 26958  | 0         | 350 | 356 | 98 -  | 166 | 521 | 6441   | 6796   |
| UN76707 | Rsa1.0.01056.1 | 494 | 55449  | 1.00E-127 | 361 | 407 | 88 -  | 1   | 406 | 15982  | 16366  |
| UN76708 | Rsa1.0.01510.1 | 338 | 44237  | 1.00E-111 | 268 | 287 | 93 -  | 19  | 303 | 19205  | 19486  |
| UN76709 | Rsa1.0.00492.1 | 611 | 80178  | 0         | 435 | 435 | 100 + | 2   | 436 | 60692  | 61126  |
| UN76710 | Rsa1.0.03647.1 | 641 | 21597  | 0         | 578 | 627 | 92 +  | 5   | 611 | 2405   | 3027   |
| UN76711 | Rsa1.0.00281.1 | 677 | 99908  | 0         | 621 | 682 | 91 -  | 2   | 677 | 97116  | 97790  |

|         |                |     |        |           |     |     |       |     |     |        |        |
|---------|----------------|-----|--------|-----------|-----|-----|-------|-----|-----|--------|--------|
| UN76712 | Rsa1.0.02991.1 | 763 | 26178  | 0         | 712 | 753 | 94 -  | 16  | 763 | 12068  | 12814  |
| UN76713 | Rsa1.0.02748.1 | 753 | 28242  | 0         | 586 | 622 | 94 -  | 129 | 750 | 18427  | 19048  |
| UN76714 | Rsa1.0.00226.1 | 354 | 105884 | 1.00E-106 | 214 | 220 | 97 +  | 2   | 221 | 103715 | 103934 |
| UN76715 | Rsa1.0.33019.1 | 263 | 688    | 1.00E-116 | 251 | 263 | 95 -  | 1   | 263 | 177    | 438    |
| UN76716 | Rsa1.0.00300.1 | 123 | 97747  | 4.00E-42  | 106 | 111 | 95 -  | 14  | 123 | 82577  | 82687  |
| UN76717 | Rsa1.0.03688.1 | 772 | 143676 | 0         | 719 | 756 | 95 -  | 4   | 759 | 1211   | 1963   |
| UN76718 | Rsa1.0.00625.1 | 259 | 71672  | 1.00E-107 | 241 | 253 | 95 +  | 8   | 259 | 14884  | 15135  |
| UN76719 | Rsa1.0.00077.1 | 246 | 145005 | 1.00E-108 | 234 | 246 | 95 -  | 1   | 246 | 1915   | 2160   |
| UN76720 | Rsa1.0.00752.1 | 752 | 65756  | 0         | 683 | 715 | 95 +  | 1   | 708 | 20361  | 21074  |
| UN76721 | Rsa1.0.02783.1 | 713 | 27927  | 0         | 705 | 715 | 98 +  | 1   | 713 | 21335  | 22047  |
| UN76722 | Rsa1.0.01272.1 | 771 | 49553  | 0         | 722 | 779 | 92 -  | 2   | 763 | 23240  | 24006  |
| UN76723 | Rsa1.0.02981.1 | 574 | 26285  | 1.00E-153 | 313 | 325 | 96 +  | 3   | 325 | 23215  | 23539  |
| UN76724 | Rsa1.0.00060.1 | 858 | 502678 | 1.00E-163 | 298 | 300 | 99 -  | 1   | 300 | 253608 | 253907 |
| UN76725 | Rsa1.0.12999.1 | 524 | 5050   | 1.00E-119 | 217 | 217 | 100 - | 2   | 218 | 1      | 217    |
| UN76726 | Rsa1.0.00501.1 | 808 | 79545  | 1.00E-131 | 241 | 242 | 99 +  | 4   | 245 | 17747  | 17988  |
| UN76727 | Rsa1.0.00130.1 | 710 | 125737 | 1.00E-116 | 219 | 220 | 99 -  | 1   | 220 | 18454  | 18672  |
| UN76728 | Rsa1.0.01403.1 | 430 | 46453  | 0         | 392 | 412 | 95 -  | 24  | 430 | 3746   | 4155   |
| UN76729 | Rsa1.0.01389.1 | 585 | 46716  | 1.00E-39  | 102 | 108 | 94 -  | 344 | 451 | 17542  | 17649  |
| UN76730 | Rsa1.0.01091.1 | 591 | 54383  | 0         | 582 | 591 | 98 -  | 2   | 591 | 49993  | 50583  |
| UN76731 | Rsa1.0.00881.1 | 641 | 61260  | 1.00E-166 | 342 | 357 | 95 +  | 285 | 641 | 18614  | 18970  |
| UN76732 | Rsa1.0.32288.1 | 710 | 705    | 0         | 639 | 654 | 97 -  | 1   | 654 | 4      | 657    |
| UN76733 | Rsa1.0.03181.1 | 806 | 24763  | 1.00E-151 | 329 | 343 | 95 -  | 406 | 744 | 19307  | 19649  |
| UN76734 | Rsa1.0.00077.1 | 564 | 145005 | 0         | 517 | 544 | 95 +  | 21  | 564 | 128662 | 129205 |
| UN76735 | Rsa1.0.00571.1 | 523 | 329018 | 1.00E-131 | 249 | 253 | 98 -  | 127 | 379 | 208194 | 208446 |
| UN76736 | Rsa1.0.00627.1 | 637 | 71566  | 2.00E-87  | 170 | 172 | 98 +  | 3   | 174 | 38974  | 39145  |
| UN76737 | Rsa1.0.02484.1 | 804 | 30976  | 1.00E-165 | 303 | 306 | 99 +  | 2   | 307 | 10850  | 11155  |
| UN76738 | Rsa1.0.15782.1 | 579 | 2423   | 0         | 509 | 509 | 100 + | 71  | 579 | 1026   | 1534   |
| UN76739 | Rsa1.0.05070.1 | 535 | 14933  | 0         | 523 | 532 | 98 +  | 4   | 535 | 11691  | 12220  |
| UN76740 | Rsa1.0.00016.1 | 255 | 831256 | 1.00E-132 | 251 | 255 | 98 -  | 1   | 255 | 271884 | 272134 |
| UN76741 | Rsa1.0.00385.1 | 640 | 89160  | 0         | 529 | 558 | 94 +  | 101 | 640 | 77876  | 78430  |
| UN76742 | Rsa1.0.02210.1 | 483 | 33857  | 8.00E-59  | 150 | 160 | 93 -  | 308 | 467 | 23094  | 23252  |
| UN76743 | Rsa1.0.00079.1 | 558 | 606987 | 1.00E-103 | 255 | 279 | 91 +  | 3   | 264 | 70264  | 70542  |
| UN76744 | Rsa1.0.03237.1 | 330 | 24434  | 1.00E-120 | 287 | 307 | 93 +  | 25  | 330 | 31     | 332    |
| UN76745 | Rsa1.0.04450.1 | 682 | 17297  | 0         | 556 | 588 | 94 +  | 95  | 682 | 11966  | 12550  |
| UN76746 | Rsa1.0.00878.1 | 510 | 330303 | 8.00E-87  | 172 | 175 | 98 +  | 3   | 177 | 130287 | 130461 |
| UN76747 | Rsa1.0.01028.1 | 630 | 56401  | 0         | 611 | 629 | 97 -  | 2   | 630 | 9240   | 9868   |
| UN76748 | Rsa1.0.07601.1 | 816 | 9051   | 0         | 792 | 828 | 95 +  | 2   | 814 | 1080   | 1907   |
| UN76749 | Rsa1.0.00156.1 | 573 | 118383 | 0         | 561 | 565 | 99 -  | 3   | 566 | 39959  | 40523  |
| UN76750 | Rsa1.0.01424.1 | 670 | 46139  | 0         | 648 | 669 | 96 +  | 2   | 670 | 40617  | 41285  |

|         |                |     |        |           |     |     |       |     |     |        |        |
|---------|----------------|-----|--------|-----------|-----|-----|-------|-----|-----|--------|--------|
| UN76751 | Rsa1.0.00309.1 | 718 | 96883  | 1.00E-122 | 228 | 230 | 99 +  | 5   | 234 | 86976  | 87205  |
| UN76752 | Rsa1.0.00310.1 | 774 | 96852  | 0         | 750 | 774 | 96 +  | 2   | 774 | 12640  | 13413  |
| UN76753 | Rsa1.0.00391.1 | 615 | 183853 | 0         | 605 | 614 | 98 -  | 2   | 615 | 31323  | 31931  |
| UN76754 | Rsa1.0.02122.1 | 506 | 34797  | 1.00E-108 | 208 | 211 | 98 -  | 168 | 378 | 29052  | 29262  |
| UN76755 | Rsa1.0.00668.1 | 694 | 69421  | 1.00E-163 | 315 | 322 | 97 -  | 3   | 324 | 27319  | 27637  |
| UN76756 | Rsa1.0.10976.1 | 714 | 5657   | 0         | 706 | 712 | 99 +  | 3   | 714 | 2977   | 3688   |
| UN76757 | Rsa1.0.00064.1 | 387 | 240927 | 1.00E-69  | 137 | 138 | 99 -  | 61  | 198 | 97127  | 97264  |
| UN76758 | Rsa1.0.14157.1 | 553 | 3726   | 1.00E-94  | 176 | 176 | 100 - | 298 | 473 | 3223   | 3398   |
| UN76759 | Rsa1.0.05694.1 | 749 | 12903  | 1.00E-83  | 181 | 186 | 97 -  | 55  | 239 | 9767   | 9951   |
| UN76760 | Rsa1.0.00870.1 | 569 | 61606  | 1.00E-135 | 248 | 249 | 99 +  | 3   | 251 | 48065  | 48313  |
| UN76761 | Rsa1.0.00159.1 | 238 | 431686 | 1.00E-109 | 227 | 236 | 96 +  | 3   | 238 | 344423 | 344658 |
| UN76762 | Rsa1.0.01489.1 | 627 | 44764  | 0         | 614 | 621 | 98 +  | 3   | 623 | 26715  | 27335  |
| UN76763 | Rsa1.0.00816.1 | 709 | 403350 | 1.00E-105 | 194 | 194 | 100 + | 21  | 214 | 1254   | 1447   |
| UN76764 | Rsa1.0.00604.1 | 814 | 146282 | 3.00E-87  | 188 | 196 | 95 +  | 263 | 458 | 13159  | 13354  |
| UN76765 | Rsa1.0.04383.1 | 684 | 17631  | 1.00E-117 | 227 | 230 | 98 -  | 316 | 544 | 11091  | 11320  |
| UN76766 | Rsa1.0.00498.1 | 798 | 79746  | 0         | 764 | 767 | 99 -  | 3   | 769 | 13851  | 14617  |
| UN76767 | Rsa1.0.04811.1 | 683 | 15885  | 1.00E-173 | 335 | 340 | 98 -  | 331 | 667 | 13468  | 13807  |
| UN76768 | Rsa1.0.00187.1 | 802 | 393093 | 0         | 631 | 646 | 97 -  | 1   | 646 | 208969 | 209614 |
| UN76769 | Rsa1.0.00626.1 | 688 | 71582  | 1.00E-123 | 225 | 225 | 100 - | 464 | 688 | 69601  | 69825  |
| UN76770 | Rsa1.0.00343.1 | 781 | 93570  | 1.00E-116 | 290 | 304 | 95 +  | 488 | 781 | 49115  | 49418  |
| UN76771 | Rsa1.0.05146.1 | 661 | 14678  | 1.00E-172 | 341 | 353 | 96 +  | 3   | 349 | 943    | 1295   |
| UN76772 | Rsa1.0.00423.1 | 474 | 86138  | 2.00E-84  | 188 | 197 | 95 -  | 281 | 474 | 39245  | 39441  |
| UN76773 | Rsa1.0.00205.1 | 672 | 193401 | 4.00E-58  | 124 | 126 | 98 -  | 547 | 672 | 14591  | 14714  |
| UN76774 | Rsa1.0.00990.1 | 526 | 57445  | 0         | 448 | 450 | 99 -  | 29  | 478 | 32451  | 32900  |
| UN76775 | Rsa1.0.02299.1 | 687 | 32857  | 4.00E-83  | 209 | 227 | 92 +  | 11  | 237 | 21295  | 21509  |
| UN76776 | Rsa1.0.01413.1 | 698 | 46275  | 0         | 456 | 462 | 98 +  | 238 | 698 | 39702  | 40163  |
| UN76777 | Rsa1.0.01023.1 | 510 | 56571  | 0         | 476 | 477 | 99 +  | 34  | 510 | 20370  | 20846  |
| UN76778 | Rsa1.0.00029.1 | 664 | 272992 | 0         | 525 | 526 | 99 +  | 3   | 528 | 106784 | 107309 |
| UN76779 | Rsa1.0.06189.1 | 584 | 11525  | 0         | 418 | 441 | 94 -  | 7   | 435 | 10413  | 10852  |
| UN76780 | Rsa1.0.00903.1 | 751 | 60228  | 0         | 709 | 753 | 94 -  | 3   | 751 | 18065  | 18799  |
| UN76781 | #              | #   | #      | #         | #   | #   | #     | #   | #   | #      | #      |
| UN76782 | Rsa1.0.00112.1 | 656 | 132199 | 0         | 475 | 485 | 97 +  | 1   | 485 | 114369 | 114844 |
| UN76783 | Rsa1.0.03969.1 | 604 | 19797  | 0         | 585 | 604 | 96 +  | 3   | 604 | 12915  | 13518  |
| UN76784 | Rsa1.0.03821.1 | 636 | 20643  | 1.00E-89  | 174 | 176 | 98 +  | 258 | 433 | 4155   | 4330   |
| UN76785 | Rsa1.0.00133.1 | 286 | 123768 | 2.00E-70  | 147 | 151 | 97 -  | 52  | 202 | 11639  | 11789  |
| UN76786 | Rsa1.0.00934.1 | 772 | 193516 | 0         | 571 | 579 | 98 -  | 3   | 581 | 176062 | 176640 |
| UN76787 | Rsa1.0.02681.1 | 377 | 28711  | 9.00E-49  | 105 | 107 | 98 -  | 36  | 142 | 6502   | 6608   |
| UN76788 | Rsa1.0.00799.1 | 717 | 63918  | 0         | 570 | 621 | 91 +  | 3   | 623 | 18330  | 18935  |
| UN76789 | Rsa1.0.00304.1 | 522 | 97429  | 1.00E-94  | 215 | 228 | 94 -  | 135 | 362 | 83069  | 83296  |

|         |                |     |        |           |     |     |       |     |     |        |        |
|---------|----------------|-----|--------|-----------|-----|-----|-------|-----|-----|--------|--------|
| UN76790 | Rsa1.0_70093.1 | 570 | 327    | 2.00E-19  | 59  | 62  | 95 -  | 483 | 544 | 13     | 74     |
| UN76791 | Rsa1.0_03264.1 | 634 | 145959 | 0         | 442 | 444 | 99 +  | 3   | 446 | 138222 | 138665 |
| UN76792 | Rsa1.0_27727.1 | 774 | 842    | 1.00E-145 | 261 | 261 | 100 - | 4   | 264 | 45     | 305    |
| UN76793 | Rsa1.0_01440.1 | 616 | 45807  | 0         | 485 | 504 | 96 -  | 106 | 609 | 13968  | 14471  |
| UN76794 | Rsa1.0_00645.1 | 747 | 189716 | 5.00E-98  | 195 | 198 | 98 -  | 199 | 395 | 187376 | 187573 |
| UN76795 | Rsa1.0_07130.1 | 697 | 9861   | 1.00E-171 | 305 | 305 | 100 + | 3   | 307 | 2625   | 2929   |
| UN76796 | Rsa1.0_09047.1 | 823 | 6684   | 1.00E-147 | 357 | 386 | 92 +  | 40  | 407 | 897    | 1281   |
| UN76797 | Rsa1.0_07919.1 | 663 | 8261   | 1.00E-172 | 351 | 365 | 96 -  | 111 | 475 | 250    | 611    |
| UN76798 | Rsa1.0_00446.1 | 821 | 167829 | 0         | 769 | 839 | 91 -  | 2   | 813 | 3945   | 4774   |
| UN76799 | Rsa1.0_07969.1 | 259 | 8157   | 1.00E-96  | 241 | 260 | 92 -  | 2   | 259 | 4825   | 5081   |
| UN76800 | Rsa1.0_03728.1 | 751 | 21147  | 2.00E-75  | 163 | 168 | 97 -  | 558 | 724 | 1684   | 1851   |
| UN76801 | Rsa1.0_00170.1 | 294 | 179538 | 6.00E-40  | 96  | 100 | 96 -  | 157 | 256 | 21161  | 21260  |
| UN76802 | Rsa1.0_00087.1 | 656 | 761073 | 1.00E-104 | 199 | 200 | 99 -  | 458 | 656 | 66928  | 67127  |
| UN76803 | Rsa1.0_00515.1 | 554 | 78417  | 0         | 549 | 553 | 99 -  | 2   | 554 | 72169  | 72721  |
| UN76804 | Rsa1.0_00065.1 | 597 | 454616 | 1.00E-158 | 283 | 283 | 100 + | 315 | 597 | 430326 | 430608 |
| UN76805 | Rsa1.0_00552.1 | 814 | 206757 | 1.00E-105 | 194 | 194 | 100 - | 372 | 565 | 193714 | 193907 |
| UN76806 | Rsa1.0_02769.1 | 656 | 28107  | 3.00E-96  | 191 | 195 | 97 -  | 302 | 496 | 12443  | 12637  |
| UN76807 | Rsa1.0_00504.1 | 763 | 79334  | 0         | 704 | 730 | 96 +  | 2   | 728 | 61783  | 62506  |
| UN76808 | Rsa1.0_09365.1 | 781 | 6423   | 3.00E-87  | 212 | 223 | 95 +  | 562 | 779 | 5061   | 5283   |
| UN76809 | Rsa1.0_04230.1 | 818 | 18384  | 0         | 387 | 394 | 98 +  | 2   | 394 | 5674   | 6067   |
| UN76810 | Rsa1.0_03109.1 | 817 | 25336  | 1.00E-122 | 283 | 298 | 94 +  | 382 | 673 | 1950   | 2244   |
| UN76811 | Rsa1.0_07066.1 | 413 | 9954   | 1.00E-72  | 139 | 139 | 100 - | 149 | 287 | 8112   | 8250   |
| UN76812 | Rsa1.0_07309.1 | 799 | 9572   | 5.00E-58  | 118 | 119 | 99 -  | 501 | 619 | 7996   | 8114   |
| UN76813 | Rsa1.0_02443.1 | 817 | 31353  | 5.00E-55  | 124 | 128 | 96 -  | 3   | 127 | 20043  | 20170  |
| UN76814 | Rsa1.0_00204.1 | 741 | 109056 | 1.00E-177 | 354 | 367 | 96 +  | 375 | 741 | 33783  | 34149  |
| UN76815 | Rsa1.0_00546.1 | 278 | 76523  | 1.00E-104 | 236 | 251 | 94 +  | 3   | 253 | 60812  | 61062  |
| UN76816 | Rsa1.0_00078.1 | 662 | 175053 | 0         | 367 | 381 | 96 +  | 3   | 383 | 97781  | 98161  |
| UN76817 | Rsa1.0_70093.1 | 285 | 327    | 3.00E-17  | 55  | 58  | 94 +  | 17  | 74  | 17     | 74     |
| UN76818 | Rsa1.0_00752.1 | 721 | 65756  | 0         | 372 | 383 | 97 +  | 1   | 380 | 58758  | 59137  |
| UN76819 | Rsa1.0_03990.1 | 165 | 19676  | 1.00E-82  | 161 | 163 | 98 +  | 3   | 165 | 12738  | 12900  |
| UN76820 | Rsa1.0_01743.1 | 536 | 39926  | 1.00E-104 | 256 | 271 | 94 -  | 1   | 266 | 15993  | 16261  |
| UN76821 | Rsa1.0_03046.1 | 611 | 25784  | 0         | 585 | 612 | 95 +  | 3   | 611 | 7344   | 7955   |
| UN76822 | Rsa1.0_00326.1 | 684 | 171955 | 1.00E-171 | 352 | 366 | 96 -  | 27  | 387 | 63280  | 63645  |
| UN76823 | Rsa1.0_36525.1 | 642 | 617    | 1.00E-122 | 223 | 223 | 100 + | 1   | 223 | 228    | 450    |
| UN76824 | Rsa1.0_02402.1 | 802 | 31710  | 0         | 529 | 534 | 99 -  | 3   | 536 | 11951  | 12483  |
| UN76825 | Rsa1.0_03957.1 | 597 | 19868  | 1.00E-127 | 263 | 274 | 95 +  | 320 | 593 | 2177   | 2450   |
| UN76826 | Rsa1.0_00977.1 | 807 | 198001 | 0         | 471 | 479 | 98 -  | 2   | 480 | 189582 | 190060 |
| UN76827 | Rsa1.0_02281.1 | 814 | 292576 | 1.00E-120 | 265 | 278 | 95 +  | 310 | 584 | 15443  | 15720  |
| UN76828 | Rsa1.0_00944.1 | 708 | 58733  | 0         | 694 | 711 | 97 +  | 4   | 703 | 52848  | 53558  |

|         |                |     |        |           |     |     |       |     |     |        |        |
|---------|----------------|-----|--------|-----------|-----|-----|-------|-----|-----|--------|--------|
| UN76829 | Rsa1.0.03435.1 | 370 | 22958  | 3.00E-88  | 174 | 177 | 98 -  | 194 | 370 | 21993  | 22169  |
| UN76830 | Rsa1.0.00918.1 | 275 | 59720  | 1.00E-90  | 232 | 249 | 93 -  | 2   | 247 | 4356   | 4599   |
| UN76831 | Rsa1.0.00198.1 | 640 | 222963 | 1.00E-122 | 248 | 254 | 97 -  | 1   | 253 | 64768  | 65020  |
| UN76832 | Rsa1.0.00467.1 | 537 | 156542 | 0         | 500 | 514 | 97 -  | 23  | 535 | 85497  | 86007  |
| UN76833 | #              | #   | #      | #         | #   | #   | #     | #   | #   | #      | #      |
| UN76834 | Rsa1.0.00096.1 | 669 | 198773 | 1.00E-171 | 305 | 305 | 100 + | 4   | 308 | 52292  | 52596  |
| UN76835 | Rsa1.0.00171.1 | 628 | 115622 | 1.00E-178 | 319 | 320 | 99 -  | 1   | 320 | 89577  | 89896  |
| UN76836 | Rsa1.0.20425.1 | 490 | 1306   | 0         | 483 | 491 | 98 +  | 1   | 490 | 560    | 1050   |
| UN76837 | Rsa1.0.00689.1 | 415 | 68305  | 1.00E-166 | 344 | 360 | 95 -  | 34  | 393 | 43611  | 43970  |
| UN76838 | Rsa1.0.00037.1 | 710 | 307838 | 1.00E-120 | 318 | 349 | 91 -  | 3   | 351 | 237974 | 238318 |
| UN76839 | Rsa1.0.26249.1 | 772 | 899    | 1.00E-120 | 222 | 223 | 99 -  | 25  | 247 | 319    | 541    |
| UN76840 | Rsa1.0.00373.1 | 592 | 90296  | 5.00E-73  | 257 | 295 | 87 -  | 3   | 288 | 80949  | 81240  |
| UN76841 | Rsa1.0.46437.1 | 784 | 486    | 1.00E-148 | 285 | 291 | 97 -  | 149 | 439 | 4      | 294    |
| UN76842 | Rsa1.0.00154.1 | 394 | 189461 | 0         | 393 | 393 | 100 - | 2   | 394 | 21747  | 22139  |
| UN76843 | Rsa1.0.00667.1 | 459 | 69460  | 0         | 432 | 446 | 96 -  | 1   | 439 | 56753  | 57197  |
| UN76844 | Rsa1.0.00786.1 | 447 | 64285  | 0         | 360 | 370 | 97 -  | 1   | 369 | 21214  | 21583  |
| UN76845 | Rsa1.0.00009.1 | 100 | 232558 | 5.00E-50  | 100 | 100 | 100 - | 1   | 100 | 124045 | 124144 |
| UN76846 | Rsa1.0.04793.1 | 603 | 15963  | 0         | 577 | 601 | 96 -  | 3   | 603 | 2203   | 2799   |
| UN76847 | Rsa1.0.01861.1 | 768 | 38031  | 0         | 484 | 519 | 93 +  | 38  | 556 | 29437  | 29937  |
| UN76848 | Rsa1.0.14277.1 | 548 | 3583   | 1.00E-167 | 303 | 305 | 99 -  | 1   | 305 | 653    | 957    |
| UN76849 | Rsa1.0.00159.1 | 802 | 431686 | 3.00E-87  | 164 | 164 | 100 + | 538 | 701 | 14362  | 14525  |
| UN76850 | Rsa1.0.26339.1 | 606 | 896    | 2.00E-97  | 184 | 185 | 99 -  | 223 | 407 | 442    | 626    |
| UN76851 | Rsa1.0.00010.1 | 811 | 294827 | 0         | 443 | 446 | 99 -  | 3   | 448 | 155247 | 155692 |
| UN76852 | Rsa1.0.06615.1 | 768 | 10659  | 0         | 626 | 662 | 94 -  | 113 | 758 | 9446   | 10107  |
| UN76853 | Rsa1.0.00205.1 | 601 | 193401 | 3.00E-83  | 197 | 209 | 94 -  | 394 | 601 | 49916  | 50124  |
| UN76854 | Rsa1.0.00472.1 | 710 | 398134 | 1.00E-141 | 314 | 330 | 95 +  | 1   | 326 | 1725   | 2050   |
| UN76855 | Rsa1.0.00097.1 | 170 | 138858 | 2.00E-66  | 160 | 168 | 95 -  | 1   | 168 | 92491  | 92656  |
| UN76856 | Rsa1.0.01014.1 | 627 | 56762  | 0         | 508 | 514 | 98 +  | 2   | 514 | 40415  | 40928  |
| UN76857 | Rsa1.0.63538.1 | 606 | 361    | 2.00E-63  | 130 | 132 | 98 -  | 408 | 539 | 153    | 284    |
| UN76858 | Rsa1.0.00071.1 | 388 | 345714 | 1.00E-118 | 256 | 267 | 95 +  | 123 | 388 | 209825 | 210089 |
| UN76859 | Rsa1.0.71737.1 | 653 | 319    | 1.00E-155 | 286 | 289 | 98 -  | 160 | 448 | 1      | 289    |
| UN76860 | Rsa1.0.00332.1 | 494 | 94575  | 8.00E-99  | 216 | 227 | 95 +  | 45  | 271 | 78765  | 78991  |
| UN76861 | Rsa1.0.51210.1 | 738 | 444    | 0         | 378 | 387 | 97 +  | 344 | 730 | 1      | 387    |
| UN76862 | Rsa1.0.04272.1 | 808 | 18144  | 1.00E-150 | 293 | 299 | 97 +  | 3   | 299 | 13030  | 13325  |
| UN76863 | Rsa1.0.01150.1 | 557 | 52331  | 0         | 500 | 503 | 99 +  | 3   | 505 | 44364  | 44866  |
| UN76864 | Rsa1.0.01947.1 | 651 | 36977  | 1.00E-171 | 311 | 313 | 99 +  | 1   | 313 | 18692  | 19004  |
| UN76865 | Rsa1.0.00055.1 | 366 | 520193 | 7.00E-37  | 82  | 83  | 98 +  | 251 | 333 | 96845  | 96927  |
| UN76866 | Rsa1.0.00136.1 | 151 | 122464 | 7.00E-38  | 101 | 108 | 93 +  | 41  | 148 | 81629  | 81736  |
| UN76867 | Rsa1.0.30247.1 | 657 | 759    | 1.00E-117 | 220 | 222 | 99 -  | 266 | 487 | 364    | 585    |

|         |                |     |        |           |     |     |       |     |     |        |        |
|---------|----------------|-----|--------|-----------|-----|-----|-------|-----|-----|--------|--------|
| UN76868 | Rsa1.0.00891.1 | 682 | 60724  | 0         | 670 | 686 | 97 -  | 2   | 682 | 50655  | 51340  |
| UN76869 | Rsa1.0.00581.1 | 506 | 163575 | 0         | 482 | 505 | 95 +  | 2   | 506 | 27212  | 27716  |
| UN76870 | Rsa1.0.01194.1 | 465 | 51113  | 1.00E-115 | 222 | 226 | 98 -  | 236 | 461 | 27141  | 27366  |
| UN76871 | Rsa1.0.04349.1 | 605 | 17794  | 1.00E-135 | 253 | 256 | 98 +  | 76  | 331 | 12432  | 12687  |
| UN76872 | Rsa1.0.05279.1 | 839 | 14277  | 0         | 340 | 344 | 98 +  | 1   | 343 | 417    | 760    |
| UN76873 | Rsa1.0.03042.1 | 756 | 25803  | 0         | 445 | 446 | 99 +  | 1   | 446 | 13529  | 13974  |
| UN76874 | Rsa1.0.04489.1 | 155 | 17145  | 9.00E-59  | 145 | 155 | 93 -  | 1   | 155 | 14275  | 14429  |
| UN76875 | Rsa1.0.01185.1 | 469 | 149842 | 5.00E-54  | 150 | 164 | 91 +  | 155 | 318 | 132178 | 132341 |
| UN76876 | Rsa1.0.00123.1 | 668 | 325650 | 0         | 638 | 668 | 95 +  | 2   | 668 | 183232 | 183879 |
| UN76877 | Rsa1.0.75173.1 | 781 | 305    | 6.00E-70  | 138 | 139 | 99 +  | 3   | 141 | 167    | 305    |
| UN76878 | Rsa1.0.00604.1 | 584 | 146282 | 0         | 436 | 436 | 100 + | 149 | 584 | 123280 | 123715 |
| UN76879 | Rsa1.0.03972.1 | 551 | 19787  | 1.00E-159 | 288 | 289 | 99 +  | 263 | 551 | 17753  | 18041  |
| UN76880 | Rsa1.0.00278.1 | 734 | 231896 | 0         | 625 | 658 | 94 -  | 1   | 648 | 154272 | 154909 |
| UN76881 | Rsa1.0.02112.1 | 575 | 34904  | 0         | 444 | 446 | 99 -  | 3   | 448 | 13838  | 14283  |
| UN76882 | Rsa1.0.01013.1 | 700 | 56822  | 0         | 639 | 696 | 91 -  | 5   | 700 | 7268   | 7963   |
| UN76883 | Rsa1.0.01311.1 | 660 | 48456  | 0         | 627 | 649 | 96 +  | 18  | 660 | 27583  | 28224  |
| UN76884 | Rsa1.0.08062.1 | 218 | 7978   | 1.00E-111 | 216 | 219 | 98 +  | 1   | 218 | 5528   | 5746   |
| UN76885 | Rsa1.0.04851.1 | 704 | 15719  | 0         | 680 | 691 | 98 +  | 3   | 690 | 772    | 1462   |
| UN76886 | Rsa1.0.00098.1 | 724 | 349239 | 0         | 716 | 726 | 98 -  | 3   | 724 | 241582 | 242304 |
| UN76887 | Rsa1.0.05496.1 | 692 | 13533  | 1.00E-142 | 299 | 312 | 95 -  | 207 | 518 | 2002   | 2307   |
| UN76888 | Rsa1.0.00139.1 | 437 | 357786 | 2.00E-99  | 193 | 195 | 98 -  | 3   | 195 | 130254 | 130448 |
| UN76889 | Rsa1.0.00037.1 | 853 | 307838 | 1.00E-95  | 197 | 202 | 97 +  | 653 | 853 | 136526 | 136727 |
| UN76890 | Rsa1.0.00087.1 | 774 | 761073 | 0         | 601 | 628 | 95 +  | 70  | 696 | 214427 | 215054 |
| UN76891 | Rsa1.0.03471.1 | 602 | 22678  | 1.00E-105 | 214 | 220 | 97 -  | 223 | 439 | 14969  | 15188  |
| UN76892 | Rsa1.0.26911.1 | 490 | 873    | 1.00E-100 | 200 | 205 | 97 -  | 286 | 490 | 250    | 454    |
| UN76893 | Rsa1.0.06465.1 | 891 | 10962  | 0         | 688 | 695 | 98 +  | 18  | 712 | 4224   | 4918   |
| UN76894 | Rsa1.0.00596.1 | 505 | 73578  | 0         | 487 | 490 | 99 -  | 3   | 491 | 8293   | 8782   |
| UN76895 | Rsa1.0.00463.1 | 281 | 189177 | 1.00E-50  | 123 | 130 | 94 +  | 152 | 281 | 169850 | 169979 |
| UN76896 | Rsa1.0.52744.1 | 212 | 432    | 1.00E-92  | 202 | 212 | 95 +  | 1   | 212 | 100    | 311    |
| UN76897 | Rsa1.0.04544.1 | 494 | 16917  | 0         | 491 | 494 | 99 -  | 1   | 494 | 13123  | 13615  |
| UN76898 | Rsa1.0.00301.1 | 541 | 365315 | 0         | 461 | 465 | 99 -  | 1   | 465 | 336618 | 337082 |
| UN76899 | Rsa1.0.01066.1 | 587 | 55235  | 0         | 384 | 385 | 99 +  | 1   | 385 | 19586  | 19970  |
| UN76900 | Rsa1.0.00302.1 | 794 | 97521  | 0         | 496 | 516 | 96 +  | 72  | 586 | 55526  | 56041  |
| UN76901 | Rsa1.0.29280.1 | 405 | 787    | 0         | 352 | 355 | 99 +  | 1   | 352 | 208    | 562    |
| UN76902 | Rsa1.0.00329.1 | 601 | 222544 | 1.00E-175 | 314 | 315 | 99 +  | 2   | 316 | 2646   | 2960   |
| UN76903 | Rsa1.0.00142.1 | 539 | 121474 | 0         | 425 | 441 | 96 -  | 4   | 443 | 101473 | 101912 |
| UN76904 | Rsa1.0.00181.1 | 122 | 114269 | 1.00E-41  | 113 | 122 | 92 +  | 1   | 122 | 93100  | 93221  |
| UN76905 | Rsa1.0.00016.1 | 688 | 831256 | 0         | 394 | 395 | 99 +  | 2   | 396 | 218858 | 219252 |
| UN76906 | Rsa1.0.00137.1 | 272 | 122457 | 2.00E-92  | 172 | 172 | 100 - | 1   | 172 | 92000  | 92171  |

|         |                |     |        |           |     |     |       |     |     |        |        |
|---------|----------------|-----|--------|-----------|-----|-----|-------|-----|-----|--------|--------|
| UN76907 | Rsa1.0.00411.1 | 209 | 86944  | 3.00E-75  | 187 | 199 | 93 -  | 13  | 209 | 14672  | 14870  |
| UN76908 | Rsa1.0.00028.1 | 301 | 293984 | 1.00E-96  | 191 | 195 | 97 -  | 1   | 195 | 54910  | 55104  |
| UN76909 | Rsa1.0.00365.1 | 568 | 90902  | 1.00E-123 | 227 | 228 | 99 +  | 5   | 232 | 25489  | 25716  |
| UN76910 | Rsa1.0.00065.1 | 575 | 454616 | 0         | 432 | 448 | 96 +  | 1   | 448 | 169944 | 170386 |
| UN76911 | Rsa1.0.02006.1 | 738 | 36135  | 0         | 629 | 713 | 88 +  | 1   | 712 | 14711  | 15423  |
| UN76912 | Rsa1.0.03627.1 | 501 | 21658  | 1.00E-139 | 277 | 285 | 97 +  | 2   | 283 | 699    | 983    |
| UN76913 | Rsa1.0.00067.1 | 522 | 415055 | 1.00E-106 | 242 | 253 | 95 +  | 1   | 246 | 174430 | 174682 |
| UN76914 | Rsa1.0.00153.1 | 273 | 192931 | 1.00E-103 | 202 | 206 | 98 +  | 1   | 206 | 86684  | 86889  |
| UN76915 | Rsa1.0.01294.1 | 753 | 49090  | 0         | 401 | 412 | 97 -  | 45  | 454 | 36747  | 37156  |
| UN76916 | Rsa1.0.01811.1 | 705 | 38977  | 1.00E-110 | 241 | 254 | 94 +  | 452 | 705 | 18630  | 18883  |
| UN76917 | Rsa1.0.00509.1 | 711 | 78829  | 1.00E-117 | 277 | 296 | 93 +  | 7   | 302 | 18836  | 19126  |
| UN76918 | Rsa1.0.18532.1 | 634 | 1581   | 0         | 626 | 631 | 99 -  | 4   | 634 | 508    | 1138   |
| UN76919 | Rsa1.0.00952.1 | 569 | 58450  | 6.00E-57  | 261 | 309 | 84 -  | 262 | 569 | 48351  | 48644  |
| UN76920 | Rsa1.0.00608.1 | 762 | 172672 | 0         | 634 | 642 | 98 -  | 90  | 727 | 119810 | 120451 |
| UN76921 | Rsa1.0.01165.1 | 664 | 51898  | 1.00E-135 | 356 | 391 | 91 -  | 7   | 388 | 51405  | 51786  |
| UN76922 | Rsa1.0.28863.1 | 686 | 801    | 1.00E-163 | 340 | 356 | 95 +  | 1   | 356 | 446    | 801    |
| UN76923 | Rsa1.0.01310.1 | 777 | 164719 | 0         | 644 | 647 | 99 +  | 134 | 777 | 8717   | 9363   |
| UN76924 | Rsa1.0.00136.1 | 739 | 122464 | 0         | 738 | 740 | 99 +  | 1   | 739 | 49024  | 49763  |
| UN76925 | Rsa1.0.02392.1 | 715 | 152517 | 1.00E-67  | 134 | 135 | 99 -  | 167 | 301 | 9193   | 9327   |
| UN76926 | Rsa1.0.00049.1 | 702 | 167018 | 0         | 650 | 651 | 99 +  | 3   | 653 | 159843 | 160492 |
| UN76927 | Rsa1.0.03452.1 | 804 | 22817  | 0         | 754 | 779 | 96 +  | 37  | 803 | 2147   | 2925   |
| UN76928 | Rsa1.0.00648.1 | 756 | 70351  | 1.00E-172 | 306 | 306 | 100 - | 451 | 756 | 12098  | 12403  |
| UN76929 | Rsa1.0.03560.1 | 718 | 22092  | 0         | 716 | 719 | 99 +  | 1   | 718 | 15104  | 15822  |
| UN76930 | Rsa1.0.23621.1 | 785 | 1036   | 0         | 764 | 782 | 97 -  | 2   | 782 | 13     | 794    |
| UN76931 | Rsa1.0.02244.1 | 790 | 33494  | 3.00E-93  | 187 | 190 | 98 -  | 2   | 191 | 15282  | 15470  |
| UN76932 | Rsa1.0.00829.1 | 600 | 158305 | 6.00E-60  | 130 | 134 | 97 -  | 43  | 176 | 39045  | 39178  |
| UN76933 | Rsa1.0.05739.1 | 569 | 12778  | 0         | 410 | 411 | 99 +  | 3   | 413 | 11297  | 11707  |
| UN76934 | Rsa1.0.01089.1 | 763 | 142191 | 1.00E-126 | 230 | 230 | 100 - | 1   | 230 | 100519 | 100748 |
| UN76935 | Rsa1.0.00078.1 | 141 | 175053 | 9.00E-62  | 135 | 140 | 96 +  | 2   | 141 | 29861  | 30000  |
| UN76936 | Rsa1.0.00019.1 | 684 | 301669 | 0         | 565 | 604 | 93 -  | 70  | 663 | 295450 | 296053 |
| UN76937 | Rsa1.0.00985.1 | 535 | 161950 | 8.00E-13  | 57  | 63  | 90 -  | 236 | 298 | 138969 | 139031 |
| UN76938 | Rsa1.0.01513.1 | 813 | 44234  | 0         | 446 | 450 | 99 +  | 360 | 806 | 29142  | 29591  |
| UN76939 | Rsa1.0.00191.1 | 669 | 316976 | 1.00E-124 | 226 | 226 | 100 - | 327 | 552 | 205056 | 205281 |
| UN76940 | Rsa1.0.02320.1 | 807 | 32575  | 2.00E-60  | 166 | 181 | 91 -  | 153 | 333 | 8479   | 8656   |
| UN76941 | Rsa1.0.11445.1 | 624 | 5505   | 0         | 491 | 508 | 96 +  | 58  | 562 | 4999   | 5505   |
| UN76942 | Rsa1.0.00060.1 | 128 | 502678 | 2.00E-53  | 118 | 122 | 96 +  | 7   | 128 | 398267 | 398388 |
| UN76943 | Rsa1.0.00035.1 | 570 | 176449 | 1.00E-130 | 244 | 247 | 98 -  | 115 | 361 | 25046  | 25292  |
| UN76944 | Rsa1.0.01459.1 | 522 | 45277  | 1.00E-125 | 252 | 259 | 97 -  | 25  | 281 | 23751  | 24009  |
| UN76945 | Rsa1.0.00740.1 | 525 | 215972 | 0         | 523 | 523 | 100 - | 3   | 525 | 10144  | 10666  |

|         |                |     |        |           |     |     |       |     |     |        |        |
|---------|----------------|-----|--------|-----------|-----|-----|-------|-----|-----|--------|--------|
| UN76946 | Rsa1.0.00169.1 | 777 | 274298 | 1.00E-55  | 155 | 168 | 92 +  | 3   | 167 | 29008  | 29173  |
| UN76947 | Rsa1.0.17160.1 | 692 | 1903   | 1.00E-143 | 264 | 266 | 99 +  | 38  | 303 | 166    | 431    |
| UN76948 | Rsa1.0.16771.1 | 639 | 2040   | 0         | 458 | 478 | 95 -  | 3   | 475 | 1014   | 1491   |
| UN76949 | Rsa1.0.19199.1 | 702 | 1466   | 1.00E-136 | 255 | 258 | 98 +  | 445 | 702 | 1      | 258    |
| UN76950 | Rsa1.0.06444.1 | 683 | 11008  | 0         | 545 | 562 | 96 +  | 117 | 678 | 4798   | 5359   |
| UN76951 | Rsa1.0.01750.1 | 621 | 39816  | 0         | 409 | 430 | 95 -  | 3   | 430 | 29367  | 29792  |
| UN76952 | Rsa1.0.00001.1 | 564 | 363028 | 1.00E-136 | 264 | 270 | 97 -  | 295 | 564 | 226586 | 226855 |
| UN76953 | Rsa1.0.02932.1 | 569 | 26647  | 2.00E-87  | 167 | 168 | 99 -  | 92  | 259 | 18855  | 19022  |
| UN76954 | Rsa1.0.02247.1 | 746 | 33427  | 0         | 477 | 527 | 90 -  | 204 | 717 | 2214   | 2737   |
| UN76955 | Rsa1.0.07597.1 | 673 | 9055   | 1.00E-95  | 197 | 202 | 97 -  | 11  | 212 | 487    | 687    |
| UN76956 | Rsa1.0.00198.1 | 713 | 222963 | 0         | 361 | 368 | 98 +  | 251 | 618 | 63039  | 63405  |
| UN76957 | Rsa1.0.00094.1 | 601 | 139042 | 0         | 412 | 430 | 95 -  | 3   | 428 | 44857  | 45286  |
| UN76958 | Rsa1.0.03120.1 | 485 | 25269  | 8.00E-99  | 192 | 195 | 98 -  | 155 | 349 | 10849  | 11043  |
| UN76959 | Rsa1.0.28061.1 | 365 | 829    | 1.00E-164 | 353 | 368 | 95 -  | 2   | 364 | 147    | 514    |
| UN76960 | Rsa1.0.00070.1 | 552 | 150321 | 9.00E-56  | 117 | 119 | 98 +  | 40  | 158 | 82703  | 82821  |
| UN76961 | Rsa1.0.05634.1 | 803 | 13114  | 0         | 786 | 806 | 97 +  | 3   | 803 | 7006   | 7811   |
| UN76962 | Rsa1.0.06455.1 | 783 | 10983  | 8.00E-97  | 248 | 268 | 92 +  | 7   | 273 | 1049   | 1315   |
| UN76963 | Rsa1.0.00775.1 | 627 | 64793  | 0         | 526 | 556 | 94 +  | 3   | 552 | 6524   | 7079   |
| UN76964 | Rsa1.0.00593.1 | 525 | 143463 | 1.00E-109 | 219 | 225 | 97 -  | 165 | 389 | 55065  | 55289  |
| UN76965 | Rsa1.0.00253.1 | 459 | 231292 | 1.00E-162 | 380 | 408 | 93 -  | 13  | 418 | 113106 | 113512 |
| UN76966 | Rsa1.0.03149.1 | 622 | 24983  | 1.00E-154 | 288 | 292 | 98 -  | 3   | 294 | 15975  | 16266  |
| UN76967 | Rsa1.0.03713.1 | 614 | 21221  | 4.00E-67  | 170 | 182 | 93 -  | 437 | 612 | 2573   | 2754   |
| UN76968 | Rsa1.0.01632.1 | 746 | 181224 | 1.00E-129 | 332 | 359 | 92 -  | 4   | 355 | 3094   | 3445   |
| UN76969 | Rsa1.0.00898.1 | 798 | 202772 | 1.00E-115 | 211 | 211 | 100 + | 71  | 281 | 171119 | 171329 |
| UN76970 | Rsa1.0.00398.1 | 620 | 88007  | 1.00E-130 | 269 | 280 | 96 +  | 337 | 616 | 34264  | 34543  |
| UN76971 | Rsa1.0.00724.1 | 559 | 66789  | 0         | 557 | 558 | 99 -  | 2   | 559 | 22679  | 23236  |
| UN76972 | Rsa1.0.00128.1 | 661 | 228675 | 1.00E-121 | 224 | 225 | 99 +  | 437 | 661 | 30290  | 30514  |
| UN76973 | Rsa1.0.01696.1 | 784 | 301850 | 0         | 526 | 529 | 99 -  | 258 | 784 | 279496 | 280024 |
| UN76974 | Rsa1.0.02991.1 | 691 | 26178  | 0         | 672 | 693 | 96 +  | 2   | 691 | 11143  | 11835  |
| UN76975 | Rsa1.0.00268.1 | 443 | 101470 | 0         | 442 | 443 | 99 +  | 2   | 443 | 5024   | 5466   |
| UN76976 | Rsa1.0.01932.1 | 591 | 37177  | 1.00E-98  | 186 | 187 | 99 -  | 241 | 427 | 12491  | 12677  |
| UN76977 | Rsa1.0.02748.1 | 498 | 28242  | 0         | 425 | 443 | 95 +  | 4   | 446 | 17585  | 18027  |
| UN76978 | Rsa1.0.00008.1 | 714 | 358124 | 1.00E-179 | 327 | 330 | 99 -  | 279 | 608 | 54899  | 55228  |
| UN76979 | Rsa1.0.00241.1 | 762 | 104000 | 0         | 423 | 435 | 97 +  | 30  | 464 | 11610  | 12041  |
| UN76980 | Rsa1.0.00089.1 | 687 | 406142 | 1.00E-171 | 337 | 348 | 96 -  | 340 | 687 | 58474  | 58821  |
| UN76981 | Rsa1.0.03688.1 | 621 | 143676 | 0         | 609 | 620 | 98 +  | 2   | 621 | 20     | 639    |
| UN76982 | Rsa1.0.00945.1 | 621 | 58714  | 0         | 593 | 620 | 95 +  | 2   | 619 | 23415  | 24030  |
| UN76983 | Rsa1.0.04253.1 | 798 | 18259  | 0         | 683 | 728 | 93 +  | 53  | 776 | 11268  | 11986  |
| UN76984 | Rsa1.0.00092.1 | 817 | 659932 | 1.00E-154 | 279 | 280 | 99 +  | 329 | 608 | 33334  | 33613  |



|         |                |     |        |           |     |     |       |     |     |        |        |
|---------|----------------|-----|--------|-----------|-----|-----|-------|-----|-----|--------|--------|
| UN76985 | Rsa1.0.01413.1 | 654 | 46275  | 0         | 651 | 655 | 99 +  | 1   | 654 | 38732  | 39386  |
| UN76986 | Rsa1.0.00817.1 | 396 | 62961  | 0         | 391 | 394 | 99 -  | 2   | 395 | 23197  | 23589  |
| UN76987 | Rsa1.0.05828.1 | 778 | 12499  | 0         | 378 | 380 | 99 +  | 3   | 382 | 12120  | 12499  |
| UN76988 | Rsa1.0.01920.1 | 577 | 158533 | 0         | 514 | 555 | 92 -  | 24  | 577 | 23106  | 23657  |
| UN76989 | Rsa1.0.25797.1 | 592 | 919    | 0         | 434 | 448 | 96 +  | 18  | 464 | 472    | 919    |
| UN76990 | #              | #   | #      | #         | #   | #   | #     | #   | #   | #      | #      |
| UN76991 | Rsa1.0.03133.1 | 551 | 25135  | 0         | 368 | 377 | 97 +  | 12  | 388 | 11855  | 12231  |
| UN76992 | Rsa1.0.01171.1 | 355 | 51752  | 1.00E-151 | 337 | 354 | 95 -  | 3   | 355 | 34391  | 34741  |
| UN76993 | Rsa1.0.01814.1 | 554 | 38917  | 1.00E-135 | 268 | 276 | 97 -  | 104 | 379 | 868    | 1143   |
| UN76994 | Rsa1.0.03002.1 | 550 | 26107  | 1.00E-117 | 243 | 255 | 95 +  | 308 | 550 | 16508  | 16762  |
| UN76995 | Rsa1.0.04646.1 | 604 | 16541  | 0         | 408 | 423 | 96 +  | 175 | 597 | 929    | 1351   |
| UN76996 | Rsa1.0.02804.1 | 604 | 27712  | 8.00E-81  | 153 | 153 | 100 - | 5   | 157 | 10205  | 10357  |
| UN76997 | Rsa1.0.02898.1 | 333 | 26958  | 1.00E-108 | 204 | 206 | 99 +  | 3   | 208 | 3405   | 3610   |
| UN76998 | Rsa1.0.02969.1 | 569 | 26390  | 9.00E-90  | 168 | 168 | 100 + | 3   | 170 | 11224  | 11391  |
| UN76999 | Rsa1.0.00390.1 | 493 | 88681  | 0         | 478 | 492 | 97 +  | 2   | 493 | 942    | 1433   |
| UN77000 | Rsa1.0.00752.1 | 544 | 65756  | 0         | 532 | 547 | 97 -  | 2   | 544 | 21995  | 22537  |
| UN77001 | Rsa1.0.01078.1 | 603 | 316910 | 0         | 576 | 603 | 95 +  | 3   | 599 | 131490 | 132092 |
| UN77002 | Rsa1.0.01046.1 | 466 | 152989 | 2.33E-156 | 281 | 287 | 97 -  | 180 | 466 | 100459 | 100745 |
| UN77003 | Rsa1.0.00870.1 | 631 | 61606  | 0         | 439 | 441 | 99 -  | 191 | 631 | 10630  | 11070  |
| UN77004 | Rsa1.0.00163.1 | 613 | 116847 | 0         | 442 | 456 | 96 +  | 146 | 601 | 84574  | 85029  |
| UN77005 | Rsa1.0.00089.1 | 739 | 406142 | 6.00E-73  | 149 | 152 | 98 +  | 293 | 444 | 228854 | 229005 |
| UN77006 | Rsa1.0.02981.1 | 655 | 26285  | 0         | 548 | 557 | 98 -  | 3   | 559 | 24725  | 25281  |
| UN77007 | Rsa1.0.00092.1 | 603 | 659932 | 1.00E-143 | 269 | 273 | 98 +  | 331 | 603 | 625640 | 625912 |
| UN77008 | Rsa1.0.09961.1 | 765 | 6064   | 0         | 348 | 351 | 99 -  | 2   | 352 | 1506   | 1856   |
| UN77009 | Rsa1.0.00119.1 | 748 | 467509 | 1.00E-159 | 310 | 317 | 97 -  | 24  | 339 | 208192 | 208508 |
| UN77010 | Rsa1.0.02874.1 | 736 | 27070  | 1.00E-120 | 234 | 239 | 97 -  | 322 | 560 | 462    | 700    |
| UN77011 | Rsa1.0.37757.1 | 615 | 597    | 1.00E-126 | 236 | 238 | 99 -  | 378 | 615 | 360    | 597    |
| UN77012 | Rsa1.0.01292.1 | 670 | 175783 | 3.00E-53  | 113 | 115 | 98 -  | 45  | 159 | 143420 | 143534 |
| UN77013 | Rsa1.0.02777.1 | 818 | 27986  | 1.00E-142 | 265 | 268 | 98 -  | 317 | 584 | 6968   | 7235   |
| UN77014 | Rsa1.0.02210.1 | 791 | 33857  | 0         | 767 | 799 | 95 -  | 1   | 791 | 30263  | 31059  |
| UN77015 | Rsa1.0.00107.1 | 365 | 431659 | 0         | 355 | 365 | 97 -  | 1   | 365 | 69464  | 69826  |
| UN77016 | Rsa1.0.00204.1 | 787 | 109056 | 1.00E-139 | 291 | 303 | 96 -  | 459 | 760 | 34383  | 34685  |
| UN77017 | Rsa1.0.00353.1 | 790 | 92242  | 1.00E-58  | 119 | 120 | 99 -  | 487 | 606 | 56357  | 56476  |
| UN77018 | Rsa1.0.01204.1 | 688 | 50843  | 1.00E-159 | 306 | 313 | 97 +  | 365 | 677 | 3687   | 3995   |
| UN77019 | Rsa1.0.03240.1 | 620 | 24429  | 1.00E-158 | 377 | 406 | 92 -  | 3   | 397 | 20695  | 21088  |
| UN77020 | Rsa1.0.00546.1 | 425 | 76523  | 1.00E-147 | 318 | 332 | 95 -  | 96  | 425 | 61708  | 62038  |
| UN77021 | Rsa1.0.00078.1 | 696 | 175053 | 0         | 596 | 622 | 95 -  | 9   | 626 | 99465  | 100072 |
| UN77022 | Rsa1.0.05776.1 | 419 | 12664  | 9.00E-77  | 158 | 162 | 97 +  | 1   | 162 | 10574  | 10735  |
| UN77023 | Rsa1.0.16771.1 | 780 | 2040   | 0         | 474 | 474 | 100 - | 3   | 476 | 1039   | 1512   |

|         |                |     |        |           |     |     |       |     |     |        |        |
|---------|----------------|-----|--------|-----------|-----|-----|-------|-----|-----|--------|--------|
| UN77024 | Rsa1.0.00817.1 | 637 | 62961  | 1.00E-173 | 358 | 372 | 96 +  | 273 | 637 | 35509  | 35880  |
| UN77025 | Rsa1.0.00178.1 | 339 | 114861 | 1.00E-143 | 317 | 329 | 96 +  | 15  | 337 | 40406  | 40734  |
| UN77026 | Rsa1.0.00387.1 | 557 | 495407 | 5.00E-85  | 160 | 160 | 100 + | 83  | 242 | 333609 | 333768 |
| UN77027 | Rsa1.0.00083.1 | 334 | 442773 | 0         | 332 | 334 | 99 -  | 1   | 334 | 327117 | 327450 |
| UN77028 | Rsa1.0.04200.1 | 549 | 18490  | 1.00E-141 | 266 | 270 | 98 -  | 3   | 272 | 16615  | 16884  |
| UN77029 | Rsa1.0.00325.1 | 656 | 95371  | 0         | 368 | 371 | 99 -  | 262 | 632 | 57594  | 57964  |
| UN77030 | Rsa1.0.03302.1 | 756 | 23898  | 0         | 364 | 372 | 97 -  | 142 | 513 | 21104  | 21475  |
| UN77031 | Rsa1.0.71605.1 | 628 | 320    | 1.00E-168 | 315 | 320 | 98 -  | 143 | 458 | 1      | 320    |
| UN77032 | Rsa1.0.00416.1 | 478 | 86772  | 0         | 472 | 479 | 98 -  | 1   | 478 | 8290   | 8768   |
| UN77033 | Rsa1.0.00551.1 | 568 | 76227  | 1.00E-122 | 225 | 226 | 99 +  | 334 | 559 | 61993  | 62218  |
| UN77034 | Rsa1.0.00329.1 | 693 | 222544 | 0         | 690 | 715 | 96 -  | 2   | 693 | 3696   | 4410   |
| UN77035 | Rsa1.0.00016.1 | 703 | 831256 | 0         | 565 | 575 | 98 -  | 122 | 695 | 220402 | 220976 |
| UN77036 | Rsa1.0.00015.1 | 623 | 561803 | 0         | 343 | 347 | 98 -  | 277 | 623 | 193444 | 193790 |
| UN77037 | Rsa1.0.01498.1 | 595 | 44558  | 1.00E-135 | 254 | 256 | 99 -  | 3   | 258 | 40974  | 41228  |
| UN77038 | Rsa1.0.33962.1 | 678 | 667    | 0         | 395 | 398 | 99 +  | 282 | 678 | 1      | 398    |
| UN77039 | Rsa1.0.00137.1 | 484 | 122457 | 1.00E-165 | 294 | 294 | 100 + | 3   | 296 | 90125  | 90418  |
| UN77040 | Rsa1.0.00081.1 | 710 | 143261 | 0         | 705 | 706 | 99 -  | 1   | 706 | 118854 | 119559 |
| UN77041 | Rsa1.0.02783.1 | 785 | 27927  | 0         | 773 | 777 | 99 -  | 3   | 777 | 22554  | 23330  |
| UN77042 | Rsa1.0.00347.1 | 498 | 93048  | 3.00E-89  | 198 | 207 | 95 -  | 3   | 208 | 82151  | 82357  |
| UN77043 | Rsa1.0.01009.1 | 512 | 56922  | 1.00E-79  | 169 | 175 | 96 +  | 4   | 178 | 1611   | 1785   |
| UN77044 | Rsa1.0.00079.1 | 636 | 606987 | 1.00E-24  | 75  | 79  | 94 -  | 72  | 149 | 197455 | 197533 |
| UN77045 | Rsa1.0.02891.1 | 576 | 27010  | 1.00E-107 | 225 | 234 | 96 +  | 223 | 456 | 144    | 377    |
| UN77046 | Rsa1.0.01799.1 | 708 | 39127  | 1.00E-172 | 318 | 322 | 98 -  | 19  | 340 | 20083  | 20404  |
| UN77047 | Rsa1.0.00332.1 | 535 | 94575  | 0         | 410 | 412 | 99 -  | 3   | 414 | 80152  | 80562  |
| UN77048 | Rsa1.0.30667.1 | 710 | 748    | 1.00E-172 | 383 | 408 | 93 +  | 5   | 399 | 1      | 407    |
| UN77049 | Rsa1.0.28133.1 | 664 | 826    | 0         | 413 | 419 | 98 -  | 6   | 424 | 1      | 419    |
| UN77050 | Rsa1.0.00510.1 | 583 | 78718  | 0         | 441 | 455 | 96 -  | 1   | 455 | 28980  | 29433  |
| UN77051 | Rsa1.0.00356.1 | 700 | 91521  | 0         | 666 | 707 | 94 +  | 5   | 700 | 3887   | 4582   |
| UN77052 | Rsa1.0.02262.1 | 624 | 33239  | 2.00E-90  | 232 | 253 | 91 +  | 139 | 391 | 8748   | 9000   |
| UN77053 | Rsa1.0.03042.1 | 669 | 25803  | 0         | 585 | 585 | 100 - | 85  | 669 | 15357  | 15941  |
| UN77054 | Rsa1.0.07115.1 | 650 | 9874   | 0         | 373 | 386 | 96 -  | 265 | 650 | 9501   | 9874   |
| UN77055 | Rsa1.0.00478.1 | 768 | 81419  | 0         | 762 | 767 | 99 -  | 3   | 768 | 44753  | 45519  |
| UN77056 | Rsa1.0.01411.1 | 811 | 46326  | 1.00E-150 | 272 | 273 | 99 -  | 4   | 276 | 25414  | 25686  |
| UN77057 | Rsa1.0.01881.1 | 615 | 37721  | 0         | 607 | 608 | 99 -  | 4   | 611 | 16909  | 17516  |
| UN77058 | Rsa1.0.00930.1 | 811 | 59224  | 0         | 630 | 699 | 90 +  | 1   | 676 | 36980  | 37663  |
| UN77059 | Rsa1.0.01756.1 | 612 | 39779  | 2.00E-72  | 145 | 147 | 98 -  | 3   | 149 | 10450  | 10596  |
| UN77060 | Rsa1.0.27096.1 | 576 | 866    | 1.00E-134 | 245 | 246 | 99 +  | 144 | 389 | 2      | 247    |
| UN77061 | Rsa1.0.00037.1 | 272 | 307838 | 6.00E-49  | 166 | 192 | 86 -  | 4   | 174 | 138521 | 138712 |
| UN77062 | Rsa1.0.01914.1 | 633 | 37354  | 5.00E-73  | 152 | 156 | 97 -  | 2   | 157 | 6652   | 6807   |

| UN77063 | #              | #   | #      | #         | #   | #   | #     | #   | #   | #      | #      | # |
|---------|----------------|-----|--------|-----------|-----|-----|-------|-----|-----|--------|--------|---|
| UN77064 | Rsa1.0_04298.1 | 315 | 147466 | 3.00E-91  | 185 | 190 | 97 -  | 5   | 194 | 10409  | 10598  |   |
| UN77065 | Rsa1.0_00104.1 | 583 | 368722 | 0         | 513 | 528 | 97 +  | 56  | 583 | 153014 | 153541 |   |
| UN77066 | Rsa1.0_06831.1 | 745 | 10294  | 0         | 334 | 335 | 99 -  | 412 | 745 | 4666   | 5000   |   |
| UN77067 | Rsa1.0_00752.1 | 688 | 65756  | 0         | 602 | 626 | 96 -  | 2   | 624 | 59778  | 60403  |   |
| UN77068 | Rsa1.0_00108.1 | 760 | 478491 | 0         | 712 | 758 | 93 -  | 15  | 758 | 460167 | 460913 |   |
| UN77069 | Rsa1.0_03315.1 | 691 | 23797  | 0         | 365 | 367 | 99 +  | 3   | 369 | 1658   | 2024   |   |
| UN77070 | Rsa1.0_00627.1 | 762 | 71566  | 0         | 526 | 544 | 96 +  | 220 | 762 | 18405  | 18948  |   |
| UN77071 | Rsa1.0_01763.1 | 746 | 39659  | 1.00E-171 | 353 | 368 | 95 +  | 3   | 370 | 39292  | 39658  |   |
| UN77072 | Rsa1.0_00364.1 | 652 | 90951  | 0         | 630 | 653 | 96 +  | 3   | 652 | 23873  | 24525  |   |
| UN77073 | Rsa1.0_04784.1 | 701 | 15995  | 0         | 439 | 452 | 97 +  | 2   | 452 | 3938   | 4386   |   |
| UN77074 | Rsa1.0_02803.1 | 673 | 27715  | 1.00E-104 | 217 | 225 | 96 -  | 211 | 435 | 8863   | 9087   |   |
| UN77075 | Rsa1.0_06976.1 | 124 | 10073  | 2.00E-46  | 113 | 118 | 95 -  | 7   | 124 | 1516   | 1632   |   |
| UN77076 | Rsa1.0_00009.1 | 756 | 232558 | 1.00E-49  | 101 | 101 | 100 - | 99  | 199 | 107077 | 107177 |   |
| UN77077 | Rsa1.0_01280.1 | 782 | 49321  | 4.00E-68  | 135 | 136 | 99 -  | 67  | 202 | 40537  | 40672  |   |
| UN77078 | Rsa1.0_00810.1 | 842 | 63289  | 0         | 811 | 858 | 94 -  | 3   | 842 | 13288  | 14144  |   |
| UN77079 | Rsa1.0_00040.1 | 753 | 324196 | 0         | 744 | 748 | 99 +  | 3   | 747 | 127850 | 128597 |   |
| UN77080 | Rsa1.0_04411.1 | 696 | 142979 | 1.00E-159 | 297 | 301 | 98 -  | 4   | 304 | 3418   | 3718   |   |
| UN77081 | Rsa1.0_02585.1 | 426 | 29865  | 1.00E-177 | 381 | 407 | 93 +  | 3   | 393 | 7725   | 8131   |   |
| UN77082 | Rsa1.0_01015.1 | 730 | 56752  | 1.00E-112 | 220 | 225 | 97 +  | 277 | 501 | 1763   | 1987   |   |
| UN77083 | Rsa1.0_00365.1 | 625 | 90902  | 7.00E-97  | 207 | 216 | 95 -  | 153 | 368 | 27949  | 28164  |   |
| UN77084 | Rsa1.0_00163.1 | 621 | 116847 | 0         | 441 | 450 | 98 -  | 3   | 451 | 110185 | 110634 |   |
| UN77085 | Rsa1.0_01844.1 | 726 | 38421  | 1.00E-178 | 355 | 368 | 96 +  | 3   | 370 | 14484  | 14851  |   |
| UN77086 | Rsa1.0_03524.1 | 700 | 22297  | 1.00E-156 | 299 | 304 | 98 -  | 398 | 700 | 20856  | 21159  |   |
| UN77087 | Rsa1.0_01509.1 | 678 | 44258  | 1.00E-104 | 215 | 221 | 97 -  | 404 | 623 | 36686  | 36906  |   |
| UN77088 | Rsa1.0_00186.1 | 732 | 112669 | 0         | 375 | 383 | 97 -  | 350 | 732 | 78906  | 79288  |   |
| UN77089 | Rsa1.0_06008.1 | 701 | 11950  | 1.00E-129 | 241 | 243 | 99 +  | 245 | 487 | 1578   | 1820   |   |
| UN77090 | Rsa1.0_00089.1 | 687 | 406142 | 1.00E-152 | 333 | 354 | 94 +  | 3   | 344 | 358378 | 358731 |   |
| UN77091 | Rsa1.0_01105.1 | 364 | 53958  | 4.00E-60  | 145 | 150 | 96 +  | 215 | 361 | 18431  | 18580  |   |
| UN77092 | Rsa1.0_08272.1 | 556 | 7617   | 0         | 555 | 556 | 99 +  | 1   | 556 | 6679   | 7234   |   |
| UN77093 | Rsa1.0_00672.1 | 754 | 69358  | 0         | 700 | 752 | 93 +  | 2   | 750 | 17122  | 17856  |   |
| UN77094 | Rsa1.0_00017.1 | 673 | 752458 | 0         | 651 | 667 | 97 +  | 7   | 673 | 326078 | 326744 |   |
| UN77095 | Rsa1.0_02406.1 | 548 | 145276 | 1.00E-100 | 188 | 189 | 99 +  | 301 | 489 | 12837  | 13025  |   |
| UN77096 | Rsa1.0_06604.1 | 630 | 10681  | 1.00E-115 | 214 | 215 | 99 +  | 1   | 215 | 1732   | 1946   |   |
| UN77097 | Rsa1.0_00001.1 | 266 | 363028 | 1.00E-127 | 257 | 266 | 96 +  | 1   | 266 | 140054 | 140319 |   |
| UN77098 | Rsa1.0_01896.1 | 611 | 37512  | 0         | 589 | 611 | 96 +  | 1   | 611 | 31690  | 32300  |   |
| UN77099 | Rsa1.0_04192.1 | 572 | 18572  | 0         | 363 | 366 | 99 -  | 3   | 368 | 7038   | 7403   |   |
| UN77100 | Rsa1.0_06392.1 | 632 | 11104  | 0         | 451 | 453 | 99 +  | 1   | 453 | 5141   | 5593   |   |
| UN77101 | Rsa1.0_07970.1 | 777 | 8156   | 0         | 383 | 395 | 96 -  | 27  | 421 | 370    | 764    |   |

|         |                |     |        |           |     |     |       |     |     |        |        |
|---------|----------------|-----|--------|-----------|-----|-----|-------|-----|-----|--------|--------|
| UN77102 | Rsa1.0_00215.1 | 612 | 201775 | 0         | 604 | 610 | 99 -  | 3   | 612 | 27212  | 27821  |
| UN77103 | Rsa1.0_08539.1 | 577 | 7219   | 0         | 435 | 439 | 99 +  | 1   | 439 | 1427   | 1865   |
| UN77104 | Rsa1.0_00546.1 | 366 | 76523  | 2.00E-98  | 248 | 268 | 92 -  | 1   | 264 | 74240  | 74507  |
| UN77105 | Rsa1.0_00162.1 | 223 | 239935 | 9.00E-63  | 134 | 138 | 97 -  | 1   | 138 | 12315  | 12452  |
| UN77106 | Rsa1.0_00955.1 | 760 | 58358  | 0         | 736 | 762 | 96 +  | 3   | 760 | 40885  | 41645  |
| UN77107 | Rsa1.0_00925.1 | 641 | 59481  | 1.00E-114 | 234 | 240 | 97 -  | 6   | 242 | 9082   | 9321   |
| UN77108 | Rsa1.0_00463.1 | 834 | 189177 | 1.00E-168 | 355 | 368 | 96 -  | 5   | 371 | 116365 | 116729 |
| UN77109 | Rsa1.0_05569.1 | 539 | 13311  | 0         | 496 | 505 | 98 +  | 1   | 504 | 4075   | 4579   |
| UN77110 | Rsa1.0_00087.1 | 238 | 761073 | 1.00E-107 | 196 | 196 | 100 - | 1   | 196 | 96049  | 96244  |
| UN77111 | Rsa1.0_01896.1 | 443 | 37512  | 1.00E-167 | 355 | 370 | 95 +  | 1   | 368 | 8724   | 9092   |
| UN77112 | Rsa1.0_00010.1 | 748 | 294827 | 1.00E-134 | 252 | 255 | 98 -  | 483 | 737 | 119168 | 119422 |
| UN77113 | Rsa1.0_00007.1 | 625 | 239325 | 0         | 383 | 398 | 96 +  | 56  | 453 | 119547 | 119941 |
| UN77114 | Rsa1.0_02334.1 | 202 | 32428  | 2.00E-88  | 198 | 210 | 94 -  | 1   | 202 | 16217  | 16426  |
| UN77115 | Rsa1.0_32652.1 | 472 | 697    | 1.00E-115 | 247 | 257 | 96 +  | 1   | 256 | 248    | 502    |
| UN77116 | Rsa1.0_00723.1 | 108 | 66806  | 1.00E-38  | 103 | 109 | 94 +  | 1   | 108 | 57992  | 58100  |
| UN77117 | Rsa1.0_14440.1 | 730 | 3390   | 8.00E-97  | 207 | 216 | 95 -  | 515 | 730 | 147    | 362    |
| UN77118 | Rsa1.0_00366.1 | 346 | 90880  | 1.00E-115 | 261 | 278 | 93 +  | 6   | 283 | 9279   | 9556   |
| UN77119 | Rsa1.0_00701.1 | 319 | 67691  | 1.00E-105 | 288 | 316 | 91 -  | 6   | 319 | 23315  | 23627  |
| UN77120 | Rsa1.0_00273.1 | 254 | 326186 | 1.00E-125 | 247 | 254 | 97 +  | 1   | 254 | 45992  | 46245  |
| UN77121 | Rsa1.0_00275.1 | 436 | 210104 | 7.00E-99  | 190 | 191 | 99 -  | 61  | 250 | 187122 | 187312 |
| UN77122 | Rsa1.0_00016.1 | 922 | 831256 | 0         | 711 | 743 | 95 +  | 188 | 922 | 828912 | 829654 |
| UN77123 | Rsa1.0_01701.1 | 695 | 162121 | 0         | 378 | 378 | 100 + | 2   | 379 | 3929   | 4306   |
| UN77124 | Rsa1.0_04528.1 | 619 | 16958  | 0         | 600 | 619 | 96 -  | 1   | 619 | 14964  | 15582  |
| UN77125 | Rsa1.0_03162.1 | 265 | 24895  | 1.00E-118 | 236 | 243 | 97 -  | 2   | 244 | 22626  | 22868  |
| UN77126 | Rsa1.0_00076.1 | 354 | 146021 | 1.00E-133 | 296 | 311 | 95 -  | 1   | 310 | 40702  | 41009  |
| UN77127 | Rsa1.0_00524.1 | 153 | 169613 | 2.00E-53  | 141 | 150 | 94 -  | 4   | 153 | 155630 | 155777 |
| UN77128 | Rsa1.0_01331.1 | 101 | 47944  | 4.00E-29  | 92  | 101 | 91 -  | 1   | 101 | 19263  | 19363  |
| UN77129 | Rsa1.0_00201.1 | 187 | 232851 | 1.00E-86  | 180 | 186 | 96 -  | 1   | 186 | 39541  | 39726  |
| UN77130 | Rsa1.0_02105.1 | 631 | 156953 | 0         | 624 | 631 | 98 +  | 1   | 631 | 18367  | 18997  |
| UN77131 | Rsa1.0_00128.1 | 258 | 228675 | 1.00E-134 | 254 | 258 | 98 +  | 1   | 258 | 68977  | 69234  |
| UN77132 | Rsa1.0_00552.1 | 467 | 206757 | 0         | 351 | 360 | 97 +  | 2   | 361 | 18152  | 18511  |
| UN77133 | Rsa1.0_00090.1 | 621 | 273859 | 0         | 495 | 504 | 98 -  | 1   | 504 | 226124 | 226627 |
| UN77134 | Rsa1.0_01316.1 | 624 | 48325  | 0         | 621 | 624 | 99 -  | 1   | 624 | 8923   | 9546   |
| UN77135 | Rsa1.0_01441.1 | 631 | 45790  | 0         | 370 | 377 | 98 +  | 1   | 377 | 26414  | 26789  |
| UN77136 | Rsa1.0_05864.1 | 631 | 12387  | 1.00E-129 | 302 | 326 | 92 +  | 127 | 437 | 5877   | 6202   |
| UN77137 | Rsa1.0_00285.1 | 691 | 149638 | 1.00E-171 | 335 | 343 | 97 +  | 1   | 340 | 146469 | 146811 |
| UN77138 | Rsa1.0_67316.1 | 220 | 341    | 1.00E-121 | 220 | 220 | 100 + | 1   | 220 | 25     | 244    |
| UN77139 | Rsa1.0_00268.1 | 660 | 101470 | 1.00E-112 | 230 | 237 | 97 +  | 1   | 237 | 59335  | 59569  |
| UN77140 | Rsa1.0_04262.1 | 876 | 18220  | 0         | 874 | 878 | 99 -  | 1   | 876 | 8784   | 9661   |

|         |                |     |        |           |     |     |       |     |     |        |        |
|---------|----------------|-----|--------|-----------|-----|-----|-------|-----|-----|--------|--------|
| UN77141 | Rsa1.0.00865.1 | 557 | 61686  | 0         | 532 | 565 | 94 +  | 7   | 557 | 20127  | 20691  |
| UN77142 | Rsa1.0.00038.1 | 703 | 314568 | 0         | 703 | 703 | 100 - | 1   | 703 | 309813 | 310515 |
| UN77143 | Rsa1.0.02944.1 | 482 | 26553  | 0         | 442 | 444 | 99 -  | 3   | 446 | 5279   | 5722   |
| UN77144 | Rsa1.0.00961.1 | 752 | 58185  | 8.00E-97  | 206 | 212 | 97 +  | 83  | 294 | 18155  | 18364  |
| UN77145 | Rsa1.0.01306.1 | 702 | 48720  | 2.00E-91  | 192 | 199 | 96 -  | 151 | 349 | 755    | 953    |
| UN77146 | Rsa1.0.00204.1 | 328 | 109056 | 3.00E-82  | 185 | 194 | 95 -  | 4   | 195 | 59835  | 60028  |
| UN77147 | Rsa1.0.00719.1 | 614 | 66952  | 1.00E-129 | 287 | 301 | 95 -  | 3   | 301 | 44599  | 44897  |
| UN77148 | Rsa1.0.08666.1 | 278 | 7063   | 1.00E-126 | 266 | 277 | 96 +  | 1   | 276 | 2693   | 2969   |
| UN77149 | Rsa1.0.00782.1 | 159 | 64468  | 2.00E-38  | 105 | 113 | 92 -  | 34  | 146 | 14970  | 15082  |
| UN77150 | Rsa1.0.04450.1 | 691 | 17297  | 5.00E-95  | 198 | 205 | 96 -  | 487 | 691 | 12781  | 12985  |
| UN77151 | Rsa1.0.04434.1 | 723 | 17377  | 0         | 721 | 722 | 99 +  | 1   | 722 | 7282   | 8003   |
| UN77152 | Rsa1.0.72748.1 | 640 | 315    | 1.00E-170 | 312 | 315 | 99 +  | 269 | 583 | 1      | 315    |
| UN77153 | Rsa1.0.02976.1 | 517 | 26315  | 1.00E-164 | 331 | 344 | 96 +  | 1   | 344 | 15698  | 16041  |
| UN77154 | Rsa1.0.02869.1 | 796 | 27109  | 0         | 792 | 796 | 99 +  | 1   | 796 | 23646  | 24439  |
| UN77155 | Rsa1.0.01023.1 | 202 | 56571  | 1.00E-107 | 199 | 200 | 99 +  | 3   | 202 | 44769  | 44968  |
| UN77156 | Rsa1.0.00104.1 | 539 | 368722 | 0         | 531 | 539 | 98 -  | 1   | 539 | 68929  | 69467  |
| UN77157 | Rsa1.0.00307.1 | 106 | 199003 | 5.00E-44  | 99  | 102 | 97 +  | 1   | 102 | 171062 | 171163 |
| UN77158 | Rsa1.0.05661.1 | 665 | 13011  | 0         | 659 | 663 | 99 -  | 3   | 665 | 1333   | 1995   |
| UN77159 | Rsa1.0.02494.1 | 765 | 132923 | 0         | 523 | 579 | 90 -  | 187 | 765 | 1229   | 1807   |
| UN77160 | Rsa1.0.00677.1 | 317 | 69159  | 4.00E-44  | 119 | 127 | 93 +  | 1   | 127 | 62979  | 63104  |
| UN77161 | Rsa1.0.00453.1 | 699 | 83031  | 0         | 699 | 699 | 100 - | 1   | 699 | 27584  | 28282  |
| UN77162 | Rsa1.0.00617.1 | 599 | 72199  | 1.00E-128 | 269 | 281 | 95 +  | 132 | 412 | 31502  | 31782  |
| UN77163 | Rsa1.0.01631.1 | 341 | 41882  | 1.00E-159 | 324 | 337 | 96 -  | 1   | 337 | 11729  | 12061  |
| UN77164 | Rsa1.0.02221.1 | 339 | 33796  | 6.00E-62  | 127 | 129 | 98 -  | 9   | 137 | 13010  | 13138  |
| UN77165 | Rsa1.0.00060.1 | 592 | 502678 | 0         | 576 | 590 | 97 +  | 3   | 592 | 223276 | 223865 |
| UN77166 | Rsa1.0.00211.1 | 818 | 228189 | 0         | 347 | 349 | 99 +  | 1   | 348 | 170007 | 170355 |
| UN77167 | Rsa1.0.05421.1 | 220 | 13806  | 6.00E-24  | 66  | 69  | 95 +  | 86  | 154 | 8188   | 8256   |
| UN77168 | Rsa1.0.04194.1 | 647 | 132734 | 1.00E-161 | 291 | 292 | 99 +  | 303 | 594 | 131500 | 131791 |
| UN77169 | Rsa1.0.00135.1 | 131 | 178077 | 2.00E-56  | 126 | 131 | 96 -  | 1   | 131 | 165812 | 165942 |
| UN77170 | Rsa1.0.03955.1 | 260 | 19884  | 1.00E-140 | 258 | 260 | 99 +  | 1   | 260 | 8399   | 8658   |
| UN77171 | Rsa1.0.01874.1 | 414 | 37853  | 0         | 400 | 414 | 96 -  | 1   | 414 | 21623  | 22036  |
| UN77172 | Rsa1.0.00278.1 | 482 | 231896 | 0         | 461 | 486 | 94 -  | 1   | 482 | 82607  | 83092  |
| UN77173 | Rsa1.0.01405.1 | 645 | 46445  | 0         | 630 | 647 | 97 +  | 1   | 645 | 37075  | 37721  |
| UN77174 | #              | #   | #      | #         | #   | #   | #     | #   | #   | #      | #      |
| UN77175 | Rsa1.0.02641.1 | 291 | 29191  | 3.00E-60  | 148 | 158 | 93 -  | 72  | 229 | 8894   | 9051   |
| UN77176 | Rsa1.0.00104.1 | 639 | 368722 | 0         | 401 | 404 | 99 +  | 1   | 404 | 239499 | 239902 |
| UN77177 | Rsa1.0.00246.1 | 739 | 103541 | 0         | 416 | 424 | 98 +  | 1   | 424 | 54253  | 54673  |
| UN77178 | Rsa1.0.00848.1 | 753 | 152362 | 0         | 587 | 611 | 96 +  | 146 | 753 | 54809  | 55419  |
| UN77179 | Rsa1.0.00660.1 | 724 | 69688  | 1.00E-147 | 283 | 289 | 97 +  | 3   | 291 | 52662  | 52946  |

|         |                |     |        |           |     |     |      |     |     |        |        |
|---------|----------------|-----|--------|-----------|-----|-----|------|-----|-----|--------|--------|
| UN77180 | Rsa1.0.06169.1 | 313 | 11578  | 1.00E-161 | 307 | 312 | 98 - | 1   | 312 | 1523   | 1833   |
| UN77181 | Rsa1.0.02888.1 | 623 | 27020  | 0         | 621 | 623 | 99 + | 1   | 623 | 521    | 1143   |
| UN77182 | Rsa1.0.00152.1 | 207 | 257730 | 2.00E-51  | 121 | 127 | 95 - | 1   | 127 | 229620 | 229746 |
| UN77183 | Rsa1.0.00019.1 | 564 | 301669 | 0         | 559 | 563 | 99 + | 2   | 564 | 240897 | 241458 |
| UN77184 | Rsa1.0.00582.1 | 454 | 74333  | 0         | 445 | 455 | 97 - | 1   | 454 | 23463  | 23917  |
| UN77185 | Rsa1.0.04689.1 | 717 | 16376  | 0         | 680 | 718 | 94 - | 1   | 717 | 666    | 1375   |
| UN77186 | Rsa1.0.01322.1 | 795 | 48166  | 1.00E-116 | 218 | 220 | 99 + | 2   | 221 | 899    | 1118   |
| UN77187 | Rsa1.0.08474.1 | 242 | 7298   | 1.00E-127 | 239 | 242 | 98 - | 1   | 242 | 4345   | 4586   |
| UN77188 | Rsa1.0.00006.1 | 568 | 396176 | 0         | 539 | 567 | 95 - | 3   | 568 | 99414  | 99970  |
| UN77189 | Rsa1.0.46217.1 | 304 | 488    | 3.00E-94  | 197 | 203 | 97 + | 88  | 289 | 1      | 203    |
| UN77190 | Rsa1.0.05984.1 | 584 | 12031  | 0         | 371 | 387 | 95 + | 1   | 387 | 8421   | 8807   |
| UN77191 | Rsa1.0.00789.1 | 401 | 64233  | 1.00E-111 | 213 | 216 | 98 + | 1   | 216 | 43058  | 43273  |
| UN77192 | Rsa1.0.00576.1 | 763 | 178949 | 0         | 746 | 767 | 97 + | 2   | 763 | 28617  | 29372  |
| UN77193 | Rsa1.0.00172.1 | 711 | 115476 | 0         | 677 | 707 | 95 - | 7   | 711 | 19365  | 20070  |
| UN77194 | Rsa1.0.00115.1 | 210 | 131321 | 1.00E-64  | 168 | 181 | 92 + | 1   | 181 | 51659  | 51833  |
| UN77195 | Rsa1.0.30803.1 | 775 | 744    | 1.00E-144 | 281 | 288 | 97 + | 1   | 288 | 342    | 629    |
| UN77196 | Rsa1.0.01092.1 | 466 | 54348  | 0         | 448 | 465 | 96 + | 3   | 466 | 22780  | 23233  |
| UN77197 | Rsa1.0.00100.1 | 776 | 249232 | 1.00E-180 | 352 | 360 | 97 + | 413 | 770 | 196182 | 196541 |
| UN77198 | Rsa1.0.08439.1 | 674 | 7353   | 0         | 613 | 677 | 90 - | 3   | 668 | 6621   | 7284   |
| UN77199 | Rsa1.0.00060.1 | 528 | 502678 | 1.00E-136 | 305 | 323 | 94 - | 211 | 528 | 41701  | 42023  |
| UN77200 | Rsa1.0.00025.1 | 820 | 277312 | 0         | 780 | 844 | 92 - | 1   | 820 | 44751  | 45583  |
| UN77201 | Rsa1.0.02545.1 | 795 | 30286  | 0         | 623 | 628 | 99 + | 1   | 624 | 332    | 959    |
| UN77202 | Rsa1.0.00895.1 | 499 | 60615  | 1.00E-125 | 285 | 303 | 94 - | 1   | 297 | 16603  | 16904  |
| UN77203 | Rsa1.0.02248.1 | 465 | 33414  | 0         | 437 | 467 | 93 + | 1   | 465 | 6914   | 7373   |
| UN77204 | Rsa1.0.00869.1 | 175 | 61627  | 2.00E-66  | 155 | 164 | 94 + | 1   | 164 | 54058  | 54221  |
| UN77205 | Rsa1.0.00464.1 | 355 | 82253  | 1.00E-69  | 223 | 253 | 88 + | 114 | 355 | 10656  | 10908  |
| UN77206 | Rsa1.0.00111.1 | 552 | 390088 | 1.00E-166 | 308 | 312 | 98 - | 1   | 312 | 91249  | 91560  |
| UN77207 | Rsa1.0.00115.1 | 479 | 131321 | 1.00E-76  | 182 | 194 | 93 - | 286 | 479 | 105033 | 105226 |
| UN77208 | Rsa1.0.00377.1 | 374 | 90038  | 2.33E-156 | 281 | 287 | 97 - | 2   | 288 | 18271  | 18557  |
| UN77209 | Rsa1.0.58793.1 | 732 | 389    | 1.00E-166 | 299 | 300 | 99 - | 203 | 502 | 1      | 300    |
| UN77210 | Rsa1.0.01039.1 | 861 | 55946  | 1.00E-100 | 192 | 194 | 98 + | 315 | 508 | 30281  | 30474  |
| UN77211 | #              | #   | #      | #         | #   | #   | #    | #   | #   | #      | #      |
| UN77212 | Rsa1.0.01865.1 | 753 | 37992  | 1.00E-139 | 260 | 263 | 98 - | 491 | 753 | 29856  | 30118  |
| UN77213 | Rsa1.0.02460.1 | 765 | 31169  | 0         | 473 | 478 | 98 + | 287 | 763 | 4093   | 4570   |
| UN77214 | Rsa1.0.03185.1 | 600 | 24739  | 1.00E-144 | 284 | 292 | 97 + | 1   | 292 | 2923   | 3214   |
| UN77215 | Rsa1.0.01081.1 | 802 | 499226 | 0         | 494 | 495 | 99 + | 1   | 495 | 332308 | 332802 |
| UN77216 | Rsa1.0.00053.1 | 345 | 263459 | 1.00E-166 | 335 | 346 | 96 + | 1   | 343 | 110022 | 110367 |
| UN77217 | Rsa1.0.02379.1 | 253 | 150705 | 1.00E-115 | 240 | 250 | 96 - | 4   | 253 | 147205 | 147454 |
| UN77218 | Rsa1.0.00351.1 | 765 | 413096 | 0         | 556 | 562 | 98 - | 2   | 562 | 404087 | 404648 |

|         |                |     |        |           |     |     |      |     |     |        |        |
|---------|----------------|-----|--------|-----------|-----|-----|------|-----|-----|--------|--------|
| UN77219 | Rsa1.0_00710.1 | 737 | 67325  | 0         | 397 | 410 | 96 - | 328 | 737 | 43520  | 43929  |
| UN77220 | Rsa1.0_08259.1 | 395 | 7641   | 4.00E-66  | 131 | 132 | 99 + | 165 | 296 | 2029   | 2160   |
| UN77221 | Rsa1.0_00028.1 | 690 | 293984 | 0         | 339 | 341 | 99 - | 1   | 341 | 259291 | 259631 |
| UN77222 | Rsa1.0_00328.1 | 447 | 224661 | 1.00E-125 | 246 | 252 | 97 - | 196 | 447 | 136539 | 136790 |
| UN77223 | Rsa1.0_09766.1 | 344 | 6162   | 1.00E-99  | 251 | 272 | 92 - | 3   | 274 | 1828   | 2098   |
| UN77224 | Rsa1.0_03723.1 | 204 | 21173  | 2.00E-94  | 193 | 199 | 96 - | 1   | 199 | 5563   | 5761   |
| UN77225 | Rsa1.0_04190.1 | 833 | 18581  | 0         | 378 | 379 | 99 - | 426 | 804 | 4889   | 5267   |
| UN77226 | Rsa1.0_00962.1 | 664 | 184909 | 0         | 663 | 664 | 99 - | 1   | 664 | 28010  | 28673  |
| UN77227 | Rsa1.0_15017.1 | 331 | 2889   | 1.00E-180 | 329 | 331 | 99 - | 1   | 331 | 1540   | 1869   |
| UN77228 | Rsa1.0_00036.1 | 723 | 176186 | 0         | 415 | 419 | 99 - | 1   | 419 | 172749 | 173167 |
| UN77229 | Rsa1.0_00370.1 | 465 | 90472  | 5.00E-57  | 189 | 212 | 89 + | 9   | 218 | 23216  | 23426  |
| UN77230 | Rsa1.0_00011.1 | 647 | 225044 | 0         | 442 | 455 | 97 + | 3   | 455 | 103660 | 104111 |
| UN77231 | Rsa1.0_01125.1 | 482 | 53193  | 1.00E-118 | 221 | 223 | 99 - | 1   | 223 | 1920   | 2142   |
| UN77232 | #              | #   | #      | #         | #   | #   | #    | #   | #   | #      | #      |
| UN77233 | Rsa1.0_00204.1 | 649 | 109056 | 1.00E-95  | 187 | 190 | 98 - | 214 | 403 | 45217  | 45406  |
| UN77234 | Rsa1.0_00023.1 | 179 | 194764 | 9.00E-78  | 171 | 179 | 95 - | 1   | 179 | 180506 | 180684 |
| UN77235 | Rsa1.0_06445.1 | 430 | 11008  | 0         | 392 | 394 | 99 - | 3   | 396 | 3583   | 3976   |
| UN77236 | Rsa1.0_00163.1 | 745 | 116847 | 0         | 721 | 733 | 98 - | 3   | 735 | 85412  | 86144  |
| UN77237 | Rsa1.0_08706.1 | 316 | 7018   | 1.00E-108 | 239 | 252 | 94 + | 1   | 244 | 5239   | 5490   |
| UN77238 | Rsa1.0_00921.1 | 215 | 59599  | 6.00E-67  | 144 | 149 | 96 - | 1   | 149 | 129    | 277    |
| UN77239 | #              | #   | #      | #         | #   | #   | #    | #   | #   | #      | #      |
| UN77240 | Rsa1.0_01727.1 | 450 | 40243  | 0         | 438 | 453 | 96 - | 3   | 450 | 24738  | 25190  |
| UN77241 | Rsa1.0_01159.1 | 132 | 52115  | 9.00E-31  | 77  | 80  | 96 - | 46  | 125 | 31989  | 32068  |
| UN77242 | Rsa1.0_02494.1 | 747 | 132923 | 0         | 357 | 364 | 98 - | 2   | 361 | 121412 | 121775 |
| UN77243 | Rsa1.0_00476.1 | 713 | 280966 | 1.00E-122 | 225 | 226 | 99 - | 404 | 629 | 24617  | 24842  |
| UN77244 | Rsa1.0_02941.1 | 699 | 26583  | 0         | 680 | 715 | 95 - | 1   | 699 | 17150  | 17862  |
| UN77245 | Rsa1.0_05505.1 | 632 | 13500  | 0         | 556 | 558 | 99 + | 2   | 559 | 7244   | 7801   |
| UN77246 | Rsa1.0_00012.1 | 535 | 222148 | 1.00E-118 | 250 | 260 | 96 - | 277 | 535 | 63253  | 63512  |
| UN77247 | Rsa1.0_00812.1 | 219 | 63233  | 6.00E-98  | 208 | 217 | 95 - | 3   | 219 | 17670  | 17886  |
| UN77248 | Rsa1.0_08643.1 | 622 | 7095   | 0         | 507 | 512 | 99 + | 12  | 522 | 6531   | 7041   |
| UN77249 | Rsa1.0_00080.1 | 361 | 190437 | 1.00E-161 | 344 | 361 | 95 + | 1   | 361 | 104335 | 104691 |
| UN77250 | Rsa1.0_02099.1 | 270 | 35030  | 1.00E-96  | 195 | 199 | 97 - | 17  | 214 | 2291   | 2489   |
| UN77251 | Rsa1.0_00896.1 | 701 | 60509  | 0         | 606 | 632 | 95 - | 1   | 631 | 46155  | 46777  |
| UN77252 | Rsa1.0_01474.1 | 187 | 45070  | 9.00E-78  | 184 | 191 | 96 + | 1   | 187 | 265    | 455    |
| UN77253 | Rsa1.0_01985.1 | 607 | 36491  | 0         | 535 | 542 | 98 - | 1   | 538 | 16516  | 17057  |
| UN77254 | Rsa1.0_01466.1 | 612 | 45161  | 0         | 325 | 326 | 99 + | 287 | 612 | 16726  | 17051  |
| UN77255 | Rsa1.0_05648.1 | 452 | 13049  | 0         | 445 | 447 | 99 - | 2   | 448 | 2105   | 2551   |
| UN77256 | Rsa1.0_04140.1 | 542 | 18879  | 0         | 541 | 542 | 99 + | 1   | 542 | 12414  | 12955  |
| UN77257 | Rsa1.0_00119.1 | 539 | 467509 | 0         | 502 | 507 | 99 + | 33  | 539 | 261946 | 262452 |

|         |                |     |        |           |     |     |       |     |     |        |        |
|---------|----------------|-----|--------|-----------|-----|-----|-------|-----|-----|--------|--------|
| UN77258 | Rsa1.0.01294.1 | 548 | 49090  | 1.00E-129 | 267 | 277 | 96 +  | 272 | 548 | 27765  | 28039  |
| UN77259 | Rsa1.0.22167.1 | 757 | 1145   | 0         | 483 | 485 | 99 +  | 275 | 757 | 1      | 485    |
| UN77260 | Rsa1.0.03026.1 | 617 | 25888  | 0         | 615 | 616 | 99 -  | 2   | 617 | 12116  | 12731  |
| UN77261 | Rsa1.0.03781.1 | 131 | 20891  | 2.00E-34  | 107 | 117 | 91 +  | 17  | 131 | 5061   | 5177   |
| UN77262 | Rsa1.0.05680.1 | 238 | 12958  | 1.00E-37  | 83  | 84  | 98 +  | 7   | 90  | 4412   | 4495   |
| UN77263 | Rsa1.0.00711.1 | 592 | 67223  | 0         | 590 | 592 | 99 +  | 1   | 592 | 58357  | 58948  |
| UN77264 | Rsa1.0.16128.1 | 785 | 2271   | 1.00E-106 | 298 | 330 | 90 +  | 98  | 420 | 523    | 851    |
| UN77265 | Rsa1.0.00686.1 | 635 | 68511  | 0         | 633 | 635 | 99 +  | 1   | 635 | 15157  | 15791  |
| UN77266 | Rsa1.0.00168.1 | 714 | 115870 | 0         | 693 | 719 | 96 -  | 1   | 714 | 94465  | 95182  |
| UN77267 | Rsa1.0.03679.1 | 762 | 21409  | 0         | 746 | 771 | 96 -  | 3   | 762 | 13837  | 14607  |
| UN77268 | Rsa1.0.00784.1 | 709 | 64359  | 0         | 488 | 490 | 99 -  | 1   | 490 | 30359  | 30848  |
| UN77269 | Rsa1.0.02060.1 | 310 | 35528  | 1.00E-129 | 291 | 310 | 93 +  | 1   | 310 | 3535   | 3844   |
| UN77270 | Rsa1.0.00218.1 | 471 | 201480 | 1.00E-123 | 254 | 264 | 96 -  | 1   | 264 | 32812  | 33075  |
| UN77271 | Rsa1.0.14210.1 | 653 | 3660   | 1.00E-145 | 306 | 321 | 95 -  | 219 | 539 | 1299   | 1619   |
| UN77272 | Rsa1.0.01154.1 | 633 | 52249  | 0         | 602 | 630 | 95 -  | 1   | 627 | 15299  | 15927  |
| UN77273 | Rsa1.0.04194.1 | 554 | 132734 | 0         | 485 | 499 | 97 -  | 1   | 499 | 116698 | 117196 |
| UN77274 | Rsa1.0.00582.1 | 338 | 74333  | 2.33E-156 | 320 | 338 | 94 -  | 1   | 338 | 69125  | 69461  |
| UN77275 | Rsa1.0.00006.1 | 620 | 396176 | 1.00E-101 | 250 | 266 | 93 +  | 6   | 267 | 275895 | 276159 |
| UN77276 | Rsa1.0.01639.1 | 202 | 41850  | 2.00E-88  | 195 | 204 | 95 +  | 1   | 202 | 12786  | 12989  |
| UN77277 | Rsa1.0.00008.1 | 295 | 358124 | 1.00E-161 | 293 | 295 | 99 +  | 1   | 295 | 47640  | 47934  |
| UN77278 | Rsa1.0.04612.1 | 767 | 16647  | 1.00E-132 | 296 | 311 | 95 -  | 56  | 363 | 15528  | 15837  |
| UN77279 | Rsa1.0.00098.1 | 452 | 349239 | 1.00E-149 | 271 | 272 | 99 -  | 1   | 272 | 138894 | 139165 |
| UN77280 | Rsa1.0.03609.1 | 771 | 21798  | 0         | 432 | 437 | 98 +  | 60  | 495 | 6606   | 7042   |
| UN77281 | Rsa1.0.54692.1 | 704 | 417    | 3.00E-84  | 159 | 159 | 100 + | 392 | 550 | 248    | 406    |
| UN77282 | Rsa1.0.00117.1 | 763 | 213118 | 0         | 580 | 581 | 99 +  | 1   | 581 | 70907  | 71487  |
| UN77283 | Rsa1.0.00517.1 | 455 | 142790 | 0         | 425 | 446 | 95 +  | 14  | 455 | 65137  | 65579  |
| UN77284 | Rsa1.0.02628.1 | 176 | 29369  | 1.00E-73  | 165 | 172 | 95 +  | 2   | 172 | 27706  | 27877  |
| UN77285 | Rsa1.0.00510.1 | 755 | 78718  | 0         | 752 | 754 | 99 -  | 3   | 755 | 56915  | 57668  |
| UN77286 | Rsa1.0.04355.1 | 494 | 146733 | 1.00E-162 | 295 | 297 | 99 -  | 198 | 494 | 9144   | 9440   |
| UN77287 | Rsa1.0.00965.1 | 332 | 58139  | 2.00E-70  | 190 | 207 | 91 -  | 3   | 207 | 9265   | 9462   |
| UN77288 | Rsa1.0.00549.1 | 738 | 76473  | 0         | 485 | 510 | 95 +  | 2   | 509 | 41782  | 42284  |
| UN77289 | Rsa1.0.00101.1 | 554 | 267193 | 1.00E-143 | 265 | 266 | 99 +  | 1   | 266 | 4444   | 4708   |
| UN77290 | Rsa1.0.04561.1 | 493 | 16849  | 0         | 361 | 361 | 100 + | 2   | 362 | 5303   | 5663   |
| UN77291 | Rsa1.0.01251.1 | 367 | 49873  | 1.00E-93  | 186 | 190 | 97 +  | 1   | 190 | 48266  | 48455  |
| UN77292 | Rsa1.0.00195.1 | 194 | 251884 | 2.00E-63  | 174 | 189 | 92 -  | 1   | 185 | 83583  | 83771  |
| UN77293 | Rsa1.0.00224.1 | 758 | 327530 | 0         | 726 | 759 | 95 -  | 3   | 758 | 86601  | 87355  |
| UN77294 | Rsa1.0.01674.1 | 661 | 168300 | 8.00E-35  | 152 | 176 | 86 +  | 104 | 279 | 135798 | 135972 |
| UN77295 | Rsa1.0.00177.1 | 671 | 143394 | 0         | 614 | 622 | 98 +  | 1   | 621 | 79833  | 80454  |
| UN77296 | Rsa1.0.00083.1 | 113 | 442773 | 1.00E-41  | 101 | 106 | 95 +  | 1   | 106 | 261688 | 261793 |



|         |                |     |        |           |     |     |       |     |     |        |        |
|---------|----------------|-----|--------|-----------|-----|-----|-------|-----|-----|--------|--------|
| UN77297 | Rsa1.0.01144.1 | 141 | 52431  | 3.00E-52  | 131 | 140 | 93 -  | 2   | 141 | 24911  | 25050  |
| UN77298 | Rsa1.0.01013.1 | 316 | 56822  | 1.00E-151 | 303 | 313 | 96 +  | 1   | 310 | 22981  | 23293  |
| UN77299 | Rsa1.0.04059.1 | 471 | 19323  | 1.00E-145 | 302 | 316 | 95 +  | 93  | 408 | 11967  | 12282  |
| UN77300 | Rsa1.0.00823.1 | 555 | 62889  | 1.00E-131 | 259 | 266 | 97 +  | 285 | 550 | 37005  | 37270  |
| UN77301 | Rsa1.0.00440.1 | 233 | 84723  | 2.00E-76  | 210 | 231 | 90 +  | 1   | 231 | 25114  | 25341  |
| UN77302 | Rsa1.0.01173.1 | 355 | 51727  | 6.00E-99  | 192 | 195 | 98 +  | 1   | 195 | 2171   | 2365   |
| UN77303 | Rsa1.0.41025.1 | 714 | 547    | 0         | 398 | 402 | 99 -  | 16  | 417 | 146    | 547    |
| UN77304 | Rsa1.0.00790.1 | 716 | 148693 | 5.00E-61  | 138 | 144 | 95 -  | 556 | 699 | 19897  | 20040  |
| UN77305 | Rsa1.0.00930.1 | 635 | 59224  | 1.00E-109 | 203 | 204 | 99 -  | 1   | 204 | 49934  | 50137  |
| UN77306 | Rsa1.0.00397.1 | 325 | 88189  | 2.00E-34  | 78  | 79  | 98 +  | 1   | 79  | 48821  | 48899  |
| UN77307 | Rsa1.0.07565.1 | 191 | 9122   | 6.00E-79  | 176 | 185 | 95 -  | 1   | 185 | 5133   | 5317   |
| UN77308 | Rsa1.0.01339.1 | 576 | 47813  | 1.00E-145 | 292 | 301 | 97 -  | 119 | 418 | 29690  | 29990  |
| UN77309 | Rsa1.0.00090.1 | 393 | 273859 | 0         | 375 | 386 | 97 -  | 8   | 393 | 232513 | 232898 |
| UN77310 | Rsa1.0.01660.1 | 294 | 41400  | 1.00E-120 | 272 | 290 | 93 +  | 4   | 293 | 34630  | 34919  |
| UN77311 | Rsa1.0.00087.1 | 171 | 761073 | 3.00E-68  | 161 | 171 | 94 +  | 1   | 171 | 239515 | 239685 |
| UN77312 | Rsa1.0.00295.1 | 816 | 152597 | 0         | 423 | 445 | 95 -  | 1   | 440 | 87629  | 88067  |
| UN77313 | Rsa1.0.28780.1 | 752 | 803    | 1.00E-153 | 283 | 286 | 98 -  | 1   | 286 | 1      | 286    |
| UN77314 | Rsa1.0.02526.1 | 741 | 30479  | 0         | 416 | 417 | 99 +  | 1   | 417 | 13242  | 13658  |
| UN77315 | Rsa1.0.10275.1 | 670 | 5907   | 0         | 485 | 486 | 99 -  | 1   | 486 | 4812   | 5297   |
| UN77316 | Rsa1.0.00481.1 | 150 | 81316  | 3.00E-52  | 137 | 148 | 92 -  | 3   | 150 | 42495  | 42642  |
| UN77317 | Rsa1.0.00484.1 | 207 | 203294 | 1.00E-30  | 71  | 72  | 98 +  | 29  | 100 | 51534  | 51605  |
| UN77318 | Rsa1.0.03044.1 | 790 | 25791  | 0         | 787 | 790 | 99 -  | 1   | 790 | 22685  | 23474  |
| UN77319 | Rsa1.0.00201.1 | 835 | 232851 | 1.00E-118 | 219 | 220 | 99 +  | 333 | 552 | 130816 | 131035 |
| UN77320 | Rsa1.0.00371.1 | 701 | 90463  | 1.00E-179 | 364 | 377 | 96 +  | 1   | 375 | 73351  | 73726  |
| UN77321 | Rsa1.0.01476.1 | 141 | 172928 | 6.00E-72  | 140 | 141 | 99 +  | 1   | 141 | 6320   | 6460   |
| UN77322 | Rsa1.0.00064.1 | 550 | 240927 | 0         | 549 | 549 | 100 + | 2   | 550 | 219806 | 220354 |
| UN77323 | Rsa1.0.01523.1 | 767 | 43959  | 0         | 594 | 600 | 99 +  | 1   | 600 | 26577  | 27173  |
| UN77324 | Rsa1.0.00347.1 | 592 | 93048  | 0         | 572 | 594 | 96 -  | 1   | 592 | 34325  | 34913  |
| UN77325 | Rsa1.0.00017.1 | 395 | 752458 | 0         | 393 | 395 | 99 -  | 1   | 395 | 361446 | 361840 |
| UN77326 | Rsa1.0.00097.1 | 785 | 138858 | 0         | 783 | 785 | 99 -  | 1   | 785 | 29983  | 30767  |
| UN77327 | Rsa1.0.04248.1 | 695 | 18287  | 1.00E-169 | 304 | 305 | 99 +  | 1   | 305 | 11657  | 11961  |
| UN77328 | Rsa1.0.00782.1 | 634 | 64468  | 0         | 377 | 394 | 95 -  | 74  | 464 | 28205  | 28598  |
| UN77329 | Rsa1.0.03302.1 | 739 | 23898  | 0         | 367 | 369 | 99 +  | 1   | 369 | 6059   | 6427   |
| UN77330 | Rsa1.0.26211.1 | 468 | 901    | 9.00E-71  | 192 | 208 | 92 -  | 33  | 235 | 696    | 901    |
| UN77331 | Rsa1.0.09598.1 | 615 | 6261   | 0         | 614 | 615 | 99 -  | 1   | 615 | 1407   | 2021   |
| UN77332 | Rsa1.0.00223.1 | 783 | 106231 | 1.00E-138 | 272 | 278 | 97 +  | 507 | 783 | 71137  | 71414  |
| UN77333 | Rsa1.0.03350.1 | 362 | 23522  | 9.00E-58  | 123 | 126 | 97 +  | 202 | 327 | 20513  | 20638  |
| UN77334 | Rsa1.0.00848.1 | 152 | 152362 | 1.00E-39  | 86  | 87  | 98 +  | 2   | 88  | 39699  | 39785  |
| UN77335 | Rsa1.0.02159.1 | 593 | 34471  | 1.00E-159 | 385 | 418 | 92 +  | 10  | 417 | 29809  | 30223  |

|         |                |     |        |           |     |     |       |     |     |        |        |
|---------|----------------|-----|--------|-----------|-----|-----|-------|-----|-----|--------|--------|
| UN77336 | Rsa1.0.02593.1 | 807 | 29744  | 1.00E-172 | 363 | 382 | 95 +  | 92  | 473 | 13584  | 13965  |
| UN77337 | Rsa1.0.07767.1 | 722 | 8609   | 1.00E-148 | 275 | 278 | 98 +  | 412 | 689 | 6083   | 6360   |
| UN77338 | Rsa1.0.00336.1 | 243 | 445051 | 1.00E-116 | 235 | 243 | 96 +  | 1   | 243 | 164250 | 164492 |
| UN77339 | Rsa1.0.01416.1 | 734 | 46262  | 1.00E-147 | 285 | 291 | 97 +  | 1   | 288 | 28738  | 29028  |
| UN77340 | Rsa1.0.00008.1 | 634 | 358124 | 0         | 615 | 632 | 97 -  | 3   | 634 | 63020  | 63651  |
| UN77341 | Rsa1.0.00089.1 | 631 | 406142 | 4.00E-86  | 215 | 230 | 93 -  | 1   | 226 | 342938 | 343164 |
| UN77342 | Rsa1.0.01005.1 | 489 | 56967  | 1.00E-168 | 330 | 340 | 97 +  | 120 | 459 | 5119   | 5458   |
| UN77343 | Rsa1.0.00582.1 | 629 | 74333  | 0         | 430 | 434 | 99 +  | 1   | 434 | 27653  | 28086  |
| UN77344 | Rsa1.0.00003.1 | 788 | 340054 | 0         | 787 | 788 | 99 +  | 1   | 788 | 276904 | 277691 |
| UN77345 | Rsa1.0.04428.1 | 415 | 17399  | 1.00E-137 | 359 | 395 | 90 +  | 21  | 415 | 10017  | 10390  |
| UN77346 | Rsa1.0.00976.1 | 386 | 57809  | 0         | 375 | 390 | 96 -  | 1   | 386 | 8269   | 8657   |
| UN77347 | Rsa1.0.00190.1 | 691 | 318240 | 0         | 669 | 698 | 95 -  | 3   | 691 | 94349  | 95046  |
| UN77348 | Rsa1.0.01405.1 | 578 | 46445  | 0         | 538 | 560 | 96 +  | 1   | 548 | 20680  | 21238  |
| UN77349 | Rsa1.0.00006.1 | 595 | 396176 | 1.00E-76  | 203 | 222 | 91 +  | 288 | 509 | 195777 | 195998 |
| UN77350 | Rsa1.0.04070.1 | 409 | 19244  | 0         | 401 | 409 | 98 -  | 1   | 409 | 2731   | 3139   |
| UN77351 | Rsa1.0.00914.1 | 654 | 59880  | 1.00E-174 | 316 | 317 | 99 +  | 1   | 316 | 3335   | 3651   |
| UN77352 | Rsa1.0.00303.1 | 172 | 97468  | 2.00E-57  | 134 | 141 | 95 +  | 1   | 141 | 8141   | 8281   |
| UN77353 | Rsa1.0.04808.1 | 445 | 15893  | 0         | 442 | 445 | 99 +  | 1   | 445 | 11475  | 11919  |
| UN77354 | Rsa1.0.00322.1 | 270 | 212233 | 1.00E-80  | 208 | 223 | 93 -  | 1   | 223 | 73895  | 74108  |
| UN77355 | Rsa1.0.00154.1 | 586 | 189461 | 0         | 468 | 485 | 96 -  | 105 | 586 | 171033 | 171515 |
| UN77356 | Rsa1.0.02663.1 | 290 | 169243 | 1.00E-126 | 268 | 280 | 95 +  | 9   | 287 | 26619  | 26898  |
| UN77357 | Rsa1.0.00139.1 | 141 | 357786 | 5.00E-60  | 135 | 141 | 95 +  | 1   | 141 | 16946  | 17086  |
| UN77358 | Rsa1.0.04674.1 | 645 | 139859 | 0         | 623 | 626 | 99 -  | 1   | 626 | 8514   | 9139   |
| UN77359 | Rsa1.0.11760.1 | 758 | 5417   | 0         | 361 | 363 | 99 +  | 200 | 562 | 5055   | 5417   |
| UN77360 | Rsa1.0.01854.1 | 781 | 38237  | 0         | 330 | 330 | 100 - | 344 | 673 | 19212  | 19541  |
| UN77361 | Rsa1.0.05360.1 | 280 | 14053  | 3.00E-51  | 115 | 119 | 96 +  | 83  | 201 | 13854  | 13972  |
| UN77362 | Rsa1.0.01996.1 | 717 | 36327  | 0         | 716 | 718 | 99 -  | 1   | 717 | 2555   | 3272   |
| UN77363 | Rsa1.0.00235.1 | 678 | 154696 | 0         | 410 | 410 | 100 + | 3   | 412 | 146397 | 146806 |
| UN77364 | Rsa1.0.00018.1 | 678 | 410899 | 0         | 597 | 616 | 96 +  | 1   | 616 | 50186  | 50801  |
| UN77365 | Rsa1.0.06445.1 | 686 | 11008  | 0         | 544 | 544 | 100 + | 3   | 546 | 2260   | 2803   |
| UN77366 | Rsa1.0.01279.1 | 707 | 180330 | 0         | 401 | 403 | 99 -  | 200 | 602 | 156343 | 156745 |
| UN77367 | Rsa1.0.01593.1 | 738 | 150996 | 5.00E-58  | 124 | 127 | 97 -  | 558 | 684 | 150168 | 150294 |
| UN77368 | Rsa1.0.00163.1 | 733 | 116847 | 0         | 571 | 574 | 99 +  | 119 | 692 | 84574  | 85147  |
| UN77369 | Rsa1.0.03263.1 | 694 | 24268  | 1.00E-124 | 229 | 230 | 99 -  | 465 | 694 | 3648   | 3877   |
| UN77370 | Rsa1.0.09124.1 | 748 | 6625   | 1.00E-161 | 335 | 350 | 95 -  | 4   | 350 | 5197   | 5546   |
| UN77371 | Rsa1.0.02550.1 | 686 | 291051 | 1.00E-129 | 278 | 291 | 95 +  | 148 | 432 | 4883   | 5173   |
| UN77372 | Rsa1.0.01946.1 | 740 | 36982  | 1.00E-112 | 219 | 222 | 98 -  | 520 | 740 | 36619  | 36840  |
| UN77373 | Rsa1.0.00782.1 | 559 | 64468  | 9.00E-53  | 109 | 110 | 99 +  | 68  | 177 | 14774  | 14883  |
| UN77374 | Rsa1.0.13825.1 | 810 | 4257   | 0         | 343 | 345 | 99 -  | 263 | 607 | 1661   | 2005   |

|         |                |     |        |           |     |     |       |     |     |        |        |
|---------|----------------|-----|--------|-----------|-----|-----|-------|-----|-----|--------|--------|
| UN77375 | Rsa1.0.01191.1 | 194 | 51235  | 2.00E-57  | 119 | 121 | 98 +  | 1   | 121 | 49940  | 50060  |
| UN77376 | Rsa1.0.01476.1 | 601 | 172928 | 0         | 464 | 485 | 95 -  | 117 | 601 | 12667  | 13151  |
| UN77377 | Rsa1.0.00816.1 | 717 | 403350 | 0         | 531 | 540 | 98 -  | 2   | 541 | 130934 | 131473 |
| UN77378 | Rsa1.0.00121.1 | 426 | 278029 | 0         | 421 | 432 | 97 -  | 3   | 426 | 57710  | 58140  |
| UN77379 | Rsa1.0.04450.1 | 679 | 17297  | 0         | 568 | 607 | 93 +  | 95  | 678 | 11963  | 12569  |
| UN77380 | Rsa1.0.22808.1 | 748 | 1092   | 0         | 441 | 448 | 98 +  | 305 | 748 | 1      | 448    |
| UN77381 | Rsa1.0.01740.1 | 744 | 39986  | 1.00E-172 | 321 | 326 | 98 +  | 419 | 744 | 13886  | 14211  |
| UN77382 | Rsa1.0.07481.1 | 608 | 9280   | 1.00E-124 | 279 | 294 | 94 -  | 95  | 381 | 4723   | 5016   |
| UN77383 | Rsa1.0.13348.1 | 744 | 4900   | 1.00E-151 | 625 | 743 | 84 +  | 2   | 744 | 4053   | 4795   |
| UN77384 | Rsa1.0.04931.1 | 495 | 15412  | 0         | 401 | 401 | 100 - | 95  | 495 | 8818   | 9218   |
| UN77385 | Rsa1.0.00605.1 | 670 | 73199  | 0         | 334 | 338 | 98 -  | 88  | 425 | 54435  | 54772  |
| UN77386 | Rsa1.0.02248.1 | 666 | 33414  | 0         | 389 | 390 | 99 -  | 63  | 452 | 8597   | 8986   |
| UN77387 | Rsa1.0.00464.1 | 747 | 82253  | 1.00E-117 | 229 | 234 | 97 -  | 354 | 587 | 11323  | 11556  |
| UN77388 | Rsa1.0.00014.1 | 670 | 348985 | 0         | 590 | 608 | 97 -  | 57  | 654 | 169147 | 169754 |
| UN77389 | Rsa1.0.01168.1 | 472 | 153765 | 1.00E-54  | 115 | 117 | 98 -  | 36  | 152 | 24410  | 24526  |
| UN77390 | Rsa1.0.00554.1 | 446 | 150953 | 1.00E-105 | 223 | 233 | 95 +  | 121 | 353 | 119528 | 119760 |
| UN77391 | Rsa1.0.00816.1 | 441 | 403350 | 1.00E-176 | 340 | 349 | 97 +  | 4   | 352 | 111934 | 112282 |
| UN77392 | Rsa1.0.00016.1 | 770 | 831256 | 0         | 769 | 771 | 99 -  | 2   | 770 | 378169 | 378939 |
| UN77393 | Rsa1.0.14400.1 | 587 | 3430   | 0         | 569 | 592 | 96 +  | 2   | 587 | 80     | 670    |
| UN77394 | Rsa1.0.02568.1 | 546 | 30015  | 1.00E-162 | 289 | 289 | 100 - | 258 | 546 | 10733  | 11021  |
| UN77395 | Rsa1.0.00098.1 | 737 | 349239 | 0         | 370 | 371 | 99 +  | 3   | 373 | 136750 | 137120 |
| UN77396 | Rsa1.0.08985.1 | 724 | 6734   | 0         | 722 | 723 | 99 +  | 2   | 724 | 4291   | 5013   |
| UN77397 | Rsa1.0.00198.1 | 760 | 222963 | 0         | 442 | 465 | 95 -  | 296 | 759 | 176403 | 176864 |
| UN77398 | Rsa1.0.02625.1 | 647 | 139104 | 0         | 642 | 646 | 99 -  | 2   | 647 | 22196  | 22841  |
| UN77399 | Rsa1.0.00163.1 | 420 | 116847 | 3.00E-67  | 184 | 200 | 92 +  | 3   | 198 | 10520  | 10719  |
| UN77400 | Rsa1.0.00848.1 | 724 | 152362 | 1.00E-157 | 406 | 442 | 91 -  | 6   | 431 | 12268  | 12701  |
| UN77401 | Rsa1.0.01090.1 | 747 | 54385  | 0         | 523 | 544 | 96 +  | 2   | 545 | 3241   | 3776   |
| UN77402 | Rsa1.0.00104.1 | 700 | 368722 | 0         | 437 | 437 | 100 - | 150 | 586 | 241249 | 241685 |
| UN77403 | Rsa1.0.00246.1 | 652 | 103541 | 0         | 582 | 621 | 93 -  | 54  | 652 | 55385  | 56005  |
| UN77404 | Rsa1.0.00848.1 | 709 | 152362 | 1.00E-158 | 283 | 283 | 100 - | 92  | 374 | 56229  | 56511  |
| UN77405 | Rsa1.0.05499.1 | 672 | 13520  | 0         | 632 | 661 | 95 +  | 13  | 672 | 4233   | 4889   |
| UN77406 | Rsa1.0.02687.1 | 613 | 28648  | 0         | 402 | 429 | 93 -  | 1   | 427 | 26276  | 26685  |
| UN77407 | Rsa1.0.29830.1 | 356 | 770    | 1.00E-133 | 326 | 356 | 91 -  | 1   | 356 | 195    | 535    |
| UN77408 | Rsa1.0.08661.1 | 152 | 7068   | 1.00E-60  | 142 | 150 | 94 -  | 1   | 150 | 5241   | 5390   |
| UN77409 | Rsa1.0.07584.1 | 837 | 9081   | 0         | 631 | 632 | 99 -  | 3   | 633 | 2681   | 3312   |
| UN77410 | Rsa1.0.00190.1 | 802 | 318240 | 2.00E-85  | 254 | 287 | 88 +  | 3   | 289 | 10034  | 10304  |
| UN77411 | Rsa1.0.00132.1 | 676 | 124299 | 0         | 578 | 581 | 99 +  | 96  | 676 | 65243  | 65823  |
| UN77412 | Rsa1.0.03423.1 | 220 | 23064  | 6.00E-61  | 128 | 131 | 97 -  | 89  | 219 | 11187  | 11317  |
| UN77413 | Rsa1.0.01762.1 | 674 | 39682  | 0         | 646 | 686 | 94 -  | 2   | 674 | 11228  | 11909  |

|         |                |     |        |           |     |     |       |     |     |        |        |
|---------|----------------|-----|--------|-----------|-----|-----|-------|-----|-----|--------|--------|
| UN77414 | Rsa1.0.02888.1 | 546 | 27020  | 0         | 520 | 547 | 95 -  | 1   | 546 | 1925   | 2467   |
| UN77415 | Rsa1.0.00234.1 | 735 | 197060 | 1.00E-115 | 268 | 287 | 93 +  | 348 | 634 | 79633  | 79919  |
| UN77416 | Rsa1.0.00042.1 | 598 | 171507 | 0         | 596 | 600 | 99 +  | 1   | 598 | 50990  | 51589  |
| UN77417 | Rsa1.0.00019.1 | 449 | 301669 | 1.00E-130 | 239 | 240 | 99 -  | 1   | 240 | 243058 | 243297 |
| UN77418 | Rsa1.0.28368.1 | 531 | 818    | 2.00E-84  | 187 | 195 | 95 -  | 338 | 531 | 512    | 706    |
| UN77419 | Rsa1.0.02579.1 | 667 | 29923  | 0         | 540 | 541 | 99 -  | 3   | 543 | 939    | 1479   |
| UN77420 | Rsa1.0.01316.1 | 665 | 48325  | 0         | 662 | 663 | 99 +  | 3   | 665 | 8099   | 8761   |
| UN77421 | Rsa1.0.00111.1 | 422 | 390088 | 0         | 409 | 429 | 95 -  | 2   | 422 | 374303 | 374731 |
| UN77422 | Rsa1.0.05864.1 | 578 | 12387  | 1.00E-113 | 231 | 239 | 96 -  | 2   | 240 | 7543   | 7781   |
| UN77423 | Rsa1.0.00268.1 | 619 | 101470 | 1.00E-159 | 285 | 285 | 100 - | 1   | 285 | 61574  | 61858  |
| UN77424 | Rsa1.0.00157.1 | 587 | 245832 | 2.33E-156 | 266 | 267 | 99 -  | 3   | 269 | 66739  | 67005  |
| UN77425 | Rsa1.0.01419.1 | 598 | 167402 | 1.00E-156 | 353 | 375 | 94 +  | 3   | 365 | 129693 | 130066 |
| UN77426 | Rsa1.0.03943.1 | 732 | 19931  | 0         | 444 | 445 | 99 +  | 288 | 732 | 7329   | 7773   |
| UN77427 | Rsa1.0.00601.1 | 351 | 177045 | 1.00E-155 | 349 | 361 | 96 +  | 1   | 351 | 167697 | 168057 |
| UN77428 | Rsa1.0.08474.1 | 680 | 7298   | 0         | 677 | 682 | 99 +  | 1   | 680 | 3134   | 3815   |
| UN77429 | Rsa1.0.01920.1 | 618 | 158533 | 3.00E-83  | 160 | 161 | 99 +  | 454 | 614 | 134427 | 134587 |
| UN77430 | Rsa1.0.02109.1 | 330 | 34925  | 1.00E-125 | 294 | 315 | 93 -  | 17  | 330 | 34611  | 34925  |
| UN77431 | Rsa1.0.00205.1 | 585 | 193401 | 0         | 357 | 360 | 99 -  | 3   | 359 | 60950  | 61309  |
| UN77432 | Rsa1.0.15290.1 | 482 | 2707   | 0         | 480 | 483 | 99 +  | 3   | 482 | 692    | 1174   |
| UN77433 | Rsa1.0.00838.1 | 667 | 153820 | 0         | 550 | 574 | 95 +  | 55  | 628 | 7812   | 8379   |
| UN77434 | Rsa1.0.08165.1 | 587 | 7806   | 0         | 340 | 341 | 99 +  | 3   | 343 | 3544   | 3884   |
| UN77435 | Rsa1.0.00211.1 | 641 | 228189 | 1.00E-180 | 322 | 323 | 99 -  | 61  | 383 | 145428 | 145750 |
| UN77436 | Rsa1.0.00617.1 | 645 | 72199  | 0         | 629 | 643 | 97 -  | 3   | 645 | 32230  | 32872  |
| UN77437 | Rsa1.0.00451.1 | 731 | 322533 | 1.00E-64  | 238 | 271 | 87 -  | 138 | 400 | 295575 | 295841 |
| UN77438 | Rsa1.0.00279.1 | 711 | 100039 | 7.00E-88  | 183 | 189 | 96 +  | 246 | 434 | 22217  | 22405  |
| UN77439 | Rsa1.0.04456.1 | 748 | 17260  | 5.00E-67  | 154 | 162 | 95 +  | 306 | 467 | 15066  | 15227  |
| UN77440 | Rsa1.0.46741.1 | 733 | 483    | 1.00E-144 | 263 | 264 | 99 +  | 275 | 538 | 2      | 265    |
| UN77441 | Rsa1.0.04483.1 | 563 | 17174  | 0         | 479 | 480 | 99 -  | 49  | 528 | 10674  | 11153  |
| UN77442 | Rsa1.0.04055.1 | 775 | 19354  | 0         | 465 | 466 | 99 -  | 3   | 468 | 12649  | 13114  |
| UN77443 | Rsa1.0.00295.1 | 774 | 152597 | 8.00E-91  | 247 | 274 | 90 +  | 139 | 412 | 139476 | 139725 |
| UN77444 | Rsa1.0.02732.1 | 413 | 28372  | 2.00E-87  | 167 | 168 | 99 -  | 246 | 413 | 6103   | 6270   |
| UN77445 | Rsa1.0.38122.1 | 776 | 591    | 2.33E-156 | 292 | 299 | 97 +  | 477 | 773 | 107    | 405    |
| UN77446 | Rsa1.0.03607.1 | 741 | 21817  | 1.00E-49  | 107 | 109 | 98 +  | 147 | 255 | 1914   | 2022   |
| UN77447 | Rsa1.0.01701.1 | 756 | 162121 | 0         | 464 | 472 | 98 -  | 291 | 756 | 4692   | 5163   |
| UN77448 | Rsa1.0.00107.1 | 649 | 431659 | 0         | 625 | 628 | 99 +  | 3   | 629 | 144954 | 145581 |
| UN77449 | Rsa1.0.00026.1 | 609 | 327835 | 1.00E-117 | 314 | 345 | 91 -  | 279 | 609 | 209479 | 209819 |
| UN77450 | Rsa1.0.02494.1 | 741 | 132923 | 8.00E-97  | 183 | 184 | 99 +  | 380 | 563 | 119928 | 120111 |
| UN77451 | Rsa1.0.00731.1 | 710 | 66638  | 3.00E-50  | 114 | 118 | 96 +  | 485 | 602 | 11796  | 11913  |
| UN77452 | Rsa1.0.00576.1 | 728 | 178949 | 1.00E-161 | 297 | 300 | 99 -  | 245 | 544 | 41064  | 41363  |

|         |                |     |        |           |     |     |       |     |     |        |        |
|---------|----------------|-----|--------|-----------|-----|-----|-------|-----|-----|--------|--------|
| UN77453 | Rsa1.0.01578.1 | 631 | 42880  | 1.00E-116 | 213 | 213 | 100 - | 3   | 215 | 5804   | 6016   |
| UN77454 | Rsa1.0.00748.1 | 755 | 65983  | 1.00E-166 | 406 | 442 | 91 -  | 2   | 439 | 11037  | 11464  |
| UN77455 | Rsa1.0.00096.1 | 628 | 198773 | 0         | 382 | 396 | 96 +  | 11  | 403 | 98879  | 99274  |
| UN77456 | Rsa1.0.00078.1 | 751 | 175053 | 0         | 718 | 738 | 97 +  | 2   | 732 | 35756  | 36493  |
| UN77457 | Rsa1.0.00582.1 | 438 | 74333  | 1.00E-144 | 313 | 331 | 94 +  | 11  | 341 | 56228  | 56558  |
| UN77458 | Rsa1.0.00848.1 | 747 | 152362 | 1.00E-77  | 154 | 156 | 98 +  | 90  | 245 | 36481  | 36636  |
| UN77459 | Rsa1.0.08349.1 | 646 | 7494   | 0         | 642 | 644 | 99 -  | 3   | 646 | 3027   | 3669   |
| UN77460 | Rsa1.0.02987.1 | 781 | 26196  | 0         | 394 | 408 | 96 +  | 3   | 410 | 20199  | 20606  |
| UN77461 | Rsa1.0.00090.1 | 665 | 273859 | 0         | 615 | 647 | 95 +  | 19  | 665 | 224720 | 225366 |
| UN77462 | Rsa1.0.00807.1 | 250 | 63607  | 2.00E-73  | 140 | 140 | 100 - | 1   | 140 | 56240  | 56379  |
| UN77463 | Rsa1.0.00252.1 | 764 | 102760 | 0         | 387 | 394 | 98 +  | 367 | 754 | 57256  | 57649  |
| UN77464 | Rsa1.0.00370.1 | 170 | 90472  | 4.00E-61  | 164 | 174 | 94 -  | 2   | 170 | 5554   | 5727   |
| UN77465 | Rsa1.0.15117.1 | 449 | 2814   | 4.00E-76  | 163 | 169 | 96 -  | 281 | 449 | 1603   | 1771   |
| UN77466 | Rsa1.0.21595.1 | 221 | 1188   | 1.00E-122 | 221 | 221 | 100 - | 1   | 221 | 2      | 222    |
| UN77467 | Rsa1.0.01110.1 | 557 | 195852 | 1.00E-101 | 187 | 187 | 100 - | 3   | 189 | 18911  | 19097  |
| UN77468 | Rsa1.0.02073.1 | 589 | 35386  | 0         | 585 | 588 | 99 +  | 3   | 589 | 20099  | 20686  |
| UN77469 | Rsa1.0.00154.1 | 557 | 189461 | 0         | 365 | 373 | 97 -  | 80  | 452 | 72024  | 72396  |
| UN77470 | Rsa1.0.01466.1 | 116 | 45161  | 3.00E-55  | 112 | 113 | 99 -  | 1   | 113 | 17935  | 18047  |
| UN77471 | Rsa1.0.05648.1 | 591 | 13049  | 1.00E-113 | 207 | 207 | 100 + | 3   | 209 | 445    | 651    |
| UN77472 | Rsa1.0.07287.1 | 167 | 9615   | 4.00E-52  | 111 | 112 | 99 -  | 57  | 167 | 8772   | 8883   |
| UN77473 | Rsa1.0.04440.1 | 622 | 17347  | 0         | 357 | 357 | 100 + | 183 | 539 | 12007  | 12363  |
| UN77474 | Rsa1.0.00727.1 | 446 | 66724  | 1.00E-121 | 244 | 252 | 96 +  | 159 | 404 | 45463  | 45714  |
| UN77475 | Rsa1.0.02339.1 | 793 | 32389  | 0         | 685 | 747 | 91 +  | 2   | 743 | 800    | 1545   |
| UN77476 | Rsa1.0.00621.1 | 263 | 71840  | 1.00E-124 | 252 | 261 | 96 +  | 3   | 263 | 56857  | 57117  |
| UN77477 | Rsa1.0.04140.1 | 710 | 18879  | 0         | 693 | 704 | 98 -  | 2   | 704 | 13291  | 13991  |
| UN77478 | Rsa1.0.00270.1 | 788 | 101236 | 0         | 341 | 345 | 98 +  | 129 | 473 | 41194  | 41538  |
| UN77479 | Rsa1.0.06694.1 | 147 | 10526  | 2.00E-75  | 146 | 147 | 99 -  | 1   | 147 | 3865   | 4011   |
| UN77480 | Rsa1.0.04439.1 | 724 | 17348  | 1.00E-109 | 249 | 261 | 95 -  | 466 | 724 | 8783   | 9042   |
| UN77481 | Rsa1.0.03426.1 | 765 | 23010  | 0         | 646 | 646 | 100 + | 117 | 762 | 5215   | 5860   |
| UN77482 | Rsa1.0.00690.1 | 788 | 140527 | 1.00E-109 | 201 | 201 | 100 + | 1   | 201 | 29939  | 30139  |
| UN77483 | Rsa1.0.00131.1 | 694 | 432233 | 1.00E-83  | 158 | 158 | 100 + | 10  | 167 | 119025 | 119182 |
| UN77484 | Rsa1.0.01294.1 | 752 | 49090  | 0         | 423 | 441 | 95 -  | 3   | 438 | 29163  | 29600  |
| UN77485 | Rsa1.0.00062.1 | 651 | 299291 | 0         | 501 | 514 | 97 -  | 136 | 648 | 267268 | 267781 |
| UN77486 | Rsa1.0.01264.1 | 724 | 49697  | 1.00E-164 | 352 | 371 | 94 +  | 286 | 653 | 25052  | 25422  |
| UN77487 | Rsa1.0.01322.1 | 684 | 48166  | 6.00E-82  | 170 | 175 | 97 -  | 1   | 175 | 3555   | 3729   |
| UN77488 | Rsa1.0.05984.1 | 235 | 12031  | 1.00E-125 | 233 | 234 | 99 -  | 3   | 235 | 10537  | 10770  |
| UN77489 | Rsa1.0.00217.1 | 143 | 107079 | 5.00E-51  | 137 | 142 | 96 +  | 7   | 143 | 99756  | 99897  |
| UN77490 | Rsa1.0.00263.1 | 548 | 224968 | 0         | 532 | 546 | 97 +  | 2   | 546 | 177319 | 177864 |
| UN77491 | Rsa1.0.03781.1 | 729 | 20891  | 0         | 437 | 461 | 94 -  | 260 | 714 | 5104   | 5562   |

|         |                |     |        |           |     |     |       |     |     |        |        |
|---------|----------------|-----|--------|-----------|-----|-----|-------|-----|-----|--------|--------|
| UN77492 | Rsa1.0.00015.1 | 762 | 561803 | 5.00E-95  | 231 | 249 | 92 -  | 221 | 469 | 180165 | 180413 |
| UN77493 | Rsa1.0.01997.1 | 696 | 158416 | 0         | 677 | 694 | 97 -  | 1   | 694 | 3921   | 4611   |
| UN77494 | Rsa1.0.00026.1 | 357 | 327835 | 2.00E-68  | 180 | 194 | 92 +  | 3   | 187 | 191709 | 191902 |
| UN77495 | Rsa1.0.03625.1 | 588 | 21692  | 0         | 580 | 590 | 98 -  | 1   | 588 | 14739  | 15328  |
| UN77496 | Rsa1.0.06375.1 | 513 | 11136  | 0         | 505 | 513 | 98 -  | 1   | 513 | 1356   | 1867   |
| UN77497 | Rsa1.0.04248.1 | 810 | 18287  | 0         | 791 | 811 | 97 -  | 1   | 807 | 9104   | 9905   |
| UN77498 | Rsa1.0.00108.1 | 183 | 478491 | 3.00E-56  | 162 | 179 | 90 +  | 1   | 179 | 304015 | 304193 |
| UN77499 | Rsa1.0.00037.1 | 691 | 307838 | 0         | 678 | 691 | 98 +  | 1   | 691 | 196581 | 197267 |
| UN77500 | Rsa1.0.00552.1 | 625 | 206757 | 0         | 609 | 628 | 96 +  | 1   | 625 | 190336 | 190960 |
| UN77501 | Rsa1.0.04845.1 | 368 | 15747  | 6.00E-56  | 120 | 123 | 97 -  | 229 | 351 | 5894   | 6016   |
| UN77502 | Rsa1.0.00413.1 | 699 | 86921  | 0         | 694 | 697 | 99 +  | 3   | 699 | 62619  | 63315  |
| UN77503 | Rsa1.0.00865.1 | 765 | 61686  | 0         | 745 | 768 | 97 -  | 3   | 765 | 20632  | 21396  |
| UN77504 | Rsa1.0.00876.1 | 756 | 61328  | 1.00E-164 | 296 | 297 | 99 +  | 51  | 347 | 49380  | 49676  |
| UN77505 | Rsa1.0.01679.1 | 274 | 146876 | 4.00E-81  | 153 | 153 | 100 - | 4   | 156 | 137497 | 137649 |
| UN77506 | Rsa1.0.08910.1 | 577 | 6798   | 9.00E-56  | 114 | 115 | 99 -  | 134 | 248 | 2631   | 2745   |
| UN77507 | Rsa1.0.00871.1 | 714 | 61539  | 1.00E-156 | 309 | 317 | 97 +  | 46  | 362 | 22918  | 23229  |
| UN77508 | Rsa1.0.16307.1 | 691 | 2206   | 2.00E-72  | 166 | 175 | 94 +  | 186 | 360 | 736    | 910    |
| UN77509 | Rsa1.0.02438.1 | 745 | 31392  | 1.00E-141 | 274 | 279 | 98 -  | 3   | 280 | 25130  | 25408  |
| UN77510 | Rsa1.0.02287.1 | 697 | 32986  | 1.00E-131 | 252 | 257 | 98 -  | 153 | 409 | 9407   | 9663   |
| UN77511 | Rsa1.0.01129.1 | 677 | 52949  | 0         | 600 | 610 | 98 +  | 3   | 612 | 13957  | 14560  |
| UN77512 | Rsa1.0.00065.1 | 726 | 454616 | 7.00E-88  | 165 | 165 | 100 - | 3   | 167 | 202214 | 202378 |
| UN77513 | Rsa1.0.00223.1 | 668 | 106231 | 1.00E-165 | 333 | 345 | 96 +  | 3   | 347 | 39814  | 40155  |
| UN77514 | Rsa1.0.00417.1 | 339 | 395068 | 0         | 337 | 338 | 99 +  | 2   | 339 | 10102  | 10439  |
| UN77515 | Rsa1.0.00103.1 | 691 | 135304 | 1.00E-150 | 552 | 645 | 85 -  | 36  | 679 | 15447  | 16091  |
| UN77516 | Rsa1.0.00013.1 | 700 | 292129 | 0         | 404 | 411 | 98 -  | 3   | 413 | 96084  | 96494  |
| UN77517 | Rsa1.0.03157.1 | 775 | 24955  | 1.00E-114 | 209 | 209 | 100 + | 3   | 211 | 958    | 1166   |
| UN77518 | Rsa1.0.00037.1 | 311 | 307838 | 1.00E-151 | 271 | 271 | 100 - | 41  | 311 | 253110 | 253380 |
| UN77519 | Rsa1.0.00127.1 | 760 | 127446 | 0         | 634 | 638 | 99 +  | 124 | 760 | 55236  | 55873  |
| UN77520 | Rsa1.0.00976.1 | 207 | 57809  | 3.00E-62  | 140 | 145 | 96 +  | 64  | 207 | 6518   | 6662   |
| UN77521 | Rsa1.0.04081.1 | 613 | 19193  | 2.33E-156 | 266 | 267 | 99 -  | 166 | 432 | 6290   | 6556   |
| UN77522 | Rsa1.0.11428.1 | 724 | 5511   | 1.00E-130 | 239 | 240 | 99 +  | 485 | 724 | 4231   | 4470   |
| UN77523 | Rsa1.0.00322.1 | 707 | 212233 | 4.00E-49  | 100 | 100 | 100 + | 195 | 294 | 72088  | 72187  |
| UN77524 | Rsa1.0.01319.1 | 694 | 48273  | 1.00E-171 | 323 | 328 | 98 +  | 366 | 692 | 11310  | 11637  |
| UN77525 | Rsa1.0.02976.1 | 751 | 26315  | 5.00E-98  | 207 | 214 | 96 -  | 318 | 530 | 16565  | 16778  |
| UN77526 | Rsa1.0.02869.1 | 792 | 27109  | 0         | 778 | 786 | 98 -  | 3   | 781 | 24257  | 25042  |
| UN77527 | Rsa1.0.00059.1 | 747 | 159650 | 1.00E-156 | 460 | 525 | 87 +  | 3   | 491 | 121107 | 121628 |
| UN77528 | Rsa1.0.00055.1 | 525 | 520193 | 1.00E-158 | 356 | 380 | 93 +  | 146 | 525 | 407399 | 407775 |
| UN77529 | Rsa1.0.01179.1 | 481 | 51549  | 0         | 369 | 374 | 98 -  | 110 | 481 | 42529  | 42902  |
| UN77530 | Rsa1.0.01786.1 | 808 | 133324 | 0         | 772 | 782 | 98 -  | 2   | 773 | 118370 | 119151 |

|         |                |     |        |           |     |     |       |     |     |        |        |
|---------|----------------|-----|--------|-----------|-----|-----|-------|-----|-----|--------|--------|
| UN77531 | Rsa1.0.01023.1 | 760 | 56571  | 0         | 527 | 563 | 93 -  | 3   | 562 | 46357  | 46905  |
| UN77532 | Rsa1.0.02082.1 | 642 | 35228  | 0         | 570 | 579 | 98 -  | 53  | 631 | 3120   | 3698   |
| UN77533 | Rsa1.0.00765.1 | 103 | 65029  | 7.00E-37  | 102 | 106 | 96 -  | 1   | 103 | 34019  | 34124  |
| UN77534 | Rsa1.0.04623.1 | 732 | 16617  | 1.00E-110 | 248 | 262 | 94 +  | 21  | 280 | 1669   | 1930   |
| UN77535 | Rsa1.0.05661.1 | 780 | 13011  | 0         | 563 | 582 | 96 +  | 94  | 672 | 664    | 1239   |
| UN77536 | Rsa1.0.00205.1 | 718 | 193401 | 1.00E-112 | 215 | 218 | 98 -  | 478 | 695 | 43355  | 43572  |
| UN77537 | Rsa1.0.00054.1 | 717 | 162053 | 1.00E-73  | 366 | 442 | 82 -  | 2   | 404 | 86454  | 86886  |
| UN77538 | Rsa1.0.00100.1 | 581 | 249232 | 0         | 580 | 581 | 99 +  | 1   | 581 | 138598 | 139178 |
| UN77539 | Rsa1.0.22948.1 | 631 | 1082   | 4.00E-83  | 173 | 176 | 98 -  | 3   | 176 | 176    | 350    |
| UN77540 | Rsa1.0.43374.1 | 425 | 518    | 1.00E-173 | 314 | 316 | 99 +  | 109 | 424 | 203    | 518    |
| UN77541 | Rsa1.0.01039.1 | 430 | 55946  | 1.00E-104 | 267 | 289 | 92 -  | 131 | 415 | 31616  | 31902  |
| UN77542 | Rsa1.0.00882.1 | 698 | 61249  | 0         | 329 | 329 | 100 + | 3   | 331 | 49079  | 49407  |
| UN77543 | Rsa1.0.15290.1 | 639 | 2707   | 1.00E-157 | 355 | 379 | 93 -  | 1   | 376 | 2162   | 2540   |
| UN77544 | Rsa1.0.08165.1 | 248 | 7806   | 1.00E-130 | 241 | 243 | 99 -  | 3   | 245 | 6948   | 7190   |
| UN77545 | Rsa1.0.01116.1 | 228 | 142088 | 2.00E-82  | 188 | 199 | 94 +  | 5   | 203 | 132931 | 133129 |
| UN77546 | Rsa1.0.01078.1 | 356 | 316910 | 0         | 354 | 357 | 99 -  | 1   | 356 | 293424 | 293780 |
| UN77547 | Rsa1.0.61764.1 | 870 | 371    | 0         | 359 | 371 | 96 -  | 265 | 635 | 1      | 371    |
| UN77548 | Rsa1.0.05467.1 | 687 | 13649  | 0         | 398 | 419 | 94 +  | 1   | 403 | 8197   | 8612   |
| UN77549 | Rsa1.0.01022.1 | 776 | 56606  | 1.00E-138 | 269 | 274 | 98 -  | 2   | 274 | 35569  | 35842  |
| UN77550 | Rsa1.0.00289.1 | 487 | 98620  | 1.00E-100 | 186 | 186 | 100 - | 194 | 379 | 14777  | 14962  |
| UN77551 | Rsa1.0.00460.1 | 792 | 206387 | 2.00E-88  | 194 | 202 | 96 -  | 72  | 272 | 199254 | 199455 |
| UN77552 | Rsa1.0.00025.1 | 531 | 277312 | 0         | 424 | 425 | 99 +  | 107 | 531 | 67419  | 67843  |
| UN77553 | Rsa1.0.00317.1 | 571 | 218290 | 0         | 405 | 407 | 99 -  | 3   | 409 | 94215  | 94621  |
| UN77554 | Rsa1.0.00377.1 | 410 | 90038  | 1.00E-164 | 296 | 297 | 99 -  | 3   | 299 | 27053  | 27349  |
| UN77555 | Rsa1.0.06825.1 | 645 | 10297  | 0         | 547 | 551 | 99 -  | 3   | 552 | 9262   | 9812   |
| UN77556 | Rsa1.0.02647.1 | 335 | 29120  | 1.00E-172 | 328 | 334 | 98 +  | 3   | 335 | 16146  | 16479  |
| UN77557 | Rsa1.0.11428.1 | 764 | 5511   | 3.00E-93  | 195 | 198 | 98 +  | 570 | 764 | 4231   | 4428   |
| UN77558 | Rsa1.0.00010.1 | 678 | 294827 | 3.00E-62  | 128 | 130 | 98 -  | 473 | 602 | 273335 | 273464 |
| UN77559 | Rsa1.0.00403.1 | 335 | 87701  | 1.00E-78  | 164 | 169 | 97 +  | 151 | 319 | 25279  | 25447  |
| UN77560 | Rsa1.0.20661.1 | 286 | 1282   | 4.00E-84  | 232 | 246 | 94 -  | 3   | 240 | 832    | 1077   |
| UN77561 | Rsa1.0.03550.1 | 580 | 22154  | 1.00E-124 | 237 | 241 | 98 -  | 3   | 243 | 6701   | 6941   |
| UN77562 | Rsa1.0.01824.1 | 652 | 38733  | 0         | 452 | 488 | 92 +  | 147 | 630 | 2400   | 2883   |
| UN77563 | Rsa1.0.01861.1 | 665 | 38031  | 1.00E-165 | 343 | 359 | 95 +  | 278 | 636 | 32331  | 32689  |
| UN77564 | Rsa1.0.02490.1 | 762 | 30885  | 1.00E-153 | 289 | 294 | 98 -  | 190 | 483 | 6530   | 6823   |
| UN77565 | Rsa1.0.00329.1 | 698 | 222544 | 1.00E-107 | 198 | 198 | 100 + | 131 | 328 | 24148  | 24345  |
| UN77566 | Rsa1.0.00346.1 | 548 | 93130  | 0         | 532 | 539 | 98 +  | 10  | 548 | 7091   | 7629   |
| UN77567 | Rsa1.0.02074.1 | 456 | 35370  | 0         | 451 | 452 | 99 +  | 3   | 454 | 2361   | 2812   |
| UN77568 | Rsa1.0.03741.1 | 504 | 143933 | 0         | 482 | 496 | 97 -  | 9   | 504 | 9239   | 9734   |
| UN77569 | Rsa1.0.01978.1 | 626 | 36546  | 0         | 605 | 619 | 97 -  | 3   | 621 | 32270  | 32888  |

|         |                |     |        |           |     |     |       |     |     |        |        |
|---------|----------------|-----|--------|-----------|-----|-----|-------|-----|-----|--------|--------|
| UN77570 | Rsa1.0.00896.1 | 710 | 60509  | 0         | 488 | 509 | 95 +  | 204 | 710 | 45461  | 45968  |
| UN77571 | Rsa1.0.00119.1 | 745 | 467509 | 1.00E-137 | 258 | 260 | 99 -  | 487 | 745 | 262511 | 262770 |
| UN77572 | Rsa1.0.01681.1 | 747 | 41092  | 1.00E-124 | 290 | 313 | 92 +  | 423 | 735 | 12145  | 12442  |
| UN77573 | Rsa1.0.14292.1 | 231 | 3569   | 4.00E-96  | 196 | 202 | 97 +  | 30  | 231 | 1      | 202    |
| UN77574 | Rsa1.0.03318.1 | 270 | 23780  | 1.00E-150 | 269 | 269 | 100 - | 2   | 270 | 2378   | 2646   |
| UN77575 | Rsa1.0.03309.1 | 737 | 23852  | 1.00E-168 | 312 | 316 | 98 +  | 422 | 737 | 11071  | 11386  |
| UN77576 | Rsa1.0.03037.1 | 231 | 25825  | 3.00E-72  | 145 | 146 | 99 -  | 3   | 147 | 5370   | 5515   |
| UN77577 | Rsa1.0.02756.1 | 691 | 28202  | 3.00E-87  | 190 | 199 | 95 -  | 279 | 471 | 19920  | 20118  |
| UN77578 | Rsa1.0.00510.1 | 729 | 78718  | 0         | 596 | 597 | 99 +  | 134 | 729 | 55870  | 56466  |
| UN77579 | Rsa1.0.06604.1 | 656 | 10681  | 0         | 354 | 356 | 99 -  | 301 | 656 | 3948   | 4303   |
| UN77580 | Rsa1.0.01203.1 | 732 | 50848  | 1.00E-67  | 137 | 139 | 98 -  | 154 | 292 | 50144  | 50282  |
| UN77581 | Rsa1.0.00820.1 | 597 | 62911  | 0         | 581 | 596 | 97 -  | 2   | 597 | 43143  | 43737  |
| UN77582 | Rsa1.0.35729.1 | 218 | 633    | 2.00E-88  | 212 | 230 | 92 -  | 1   | 218 | 24     | 253    |
| UN77583 | Rsa1.0.02356.1 | 767 | 141500 | 0         | 634 | 682 | 92 -  | 98  | 761 | 129130 | 129811 |
| UN77584 | Rsa1.0.00965.1 | 760 | 58139  | 1.00E-148 | 374 | 399 | 93 +  | 302 | 692 | 7701   | 8095   |
| UN77585 | Rsa1.0.01030.1 | 712 | 56290  | 1.00E-101 | 199 | 203 | 98 +  | 3   | 205 | 45275  | 45477  |
| UN77586 | Rsa1.0.02682.1 | 813 | 28711  | 0         | 771 | 833 | 92 -  | 3   | 806 | 10243  | 11073  |
| UN77587 | Rsa1.0.01243.1 | 568 | 50061  | 1.00E-168 | 500 | 567 | 88 -  | 2   | 568 | 17573  | 18139  |
| UN77588 | Rsa1.0.01729.1 | 804 | 304246 | 0         | 796 | 801 | 99 +  | 1   | 796 | 280397 | 281197 |
| UN77589 | Rsa1.0.04379.1 | 584 | 17646  | 1.00E-155 | 307 | 317 | 96 -  | 49  | 365 | 6861   | 7177   |
| UN77590 | Rsa1.0.00731.1 | 154 | 66638  | 3.00E-74  | 150 | 153 | 98 +  | 2   | 154 | 38804  | 38956  |
| UN77591 | Rsa1.0.03375.1 | 123 | 23332  | 3.00E-58  | 120 | 122 | 98 +  | 2   | 123 | 5227   | 5348   |
| UN77592 | Rsa1.0.02555.1 | 279 | 30146  | 1.00E-148 | 273 | 274 | 99 +  | 3   | 275 | 18047  | 18320  |
| UN77593 | Rsa1.0.00134.1 | 780 | 390219 | 1.00E-132 | 243 | 244 | 99 -  | 3   | 246 | 232067 | 232310 |
| UN77594 | Rsa1.0.02229.1 | 816 | 33672  | 0         | 409 | 421 | 97 +  | 3   | 421 | 12887  | 13303  |
| UN77595 | Rsa1.0.76165.1 | 312 | 301    | 1.00E-130 | 242 | 244 | 99 -  | 2   | 245 | 1      | 244    |
| UN77596 | Rsa1.0.02209.1 | 693 | 33873  | 1.00E-144 | 316 | 336 | 94 -  | 361 | 693 | 26633  | 26957  |
| UN77597 | Rsa1.0.10004.1 | 740 | 6042   | 1.00E-120 | 226 | 228 | 99 +  | 2   | 229 | 1003   | 1230   |
| UN77598 | Rsa1.0.00224.1 | 733 | 327530 | 0         | 437 | 460 | 95 +  | 277 | 730 | 85779  | 86238  |
| UN77599 | Rsa1.0.00247.1 | 772 | 103408 | 0         | 652 | 659 | 98 +  | 120 | 772 | 76818  | 77476  |
| UN77600 | Rsa1.0.01135.1 | 681 | 52799  | 1.00E-95  | 181 | 182 | 99 -  | 368 | 549 | 46969  | 47150  |
| UN77601 | Rsa1.0.00351.1 | 744 | 413096 | 3.00E-65  | 150 | 155 | 96 +  | 589 | 741 | 402821 | 402975 |
| UN77602 | Rsa1.0.01182.1 | 704 | 167304 | 2.00E-97  | 211 | 221 | 95 -  | 3   | 223 | 158058 | 158278 |
| UN77603 | Rsa1.0.05384.1 | 680 | 13960  | 0         | 404 | 404 | 100 - | 3   | 406 | 2988   | 3391   |
| UN77604 | Rsa1.0.01633.1 | 700 | 41868  | 0         | 697 | 699 | 99 +  | 2   | 700 | 40125  | 40823  |
| UN77605 | Rsa1.0.01016.1 | 327 | 181422 | 1.00E-120 | 232 | 234 | 99 +  | 4   | 235 | 17760  | 17993  |
| UN77606 | Rsa1.0.00710.1 | 689 | 67325  | 0         | 384 | 405 | 94 +  | 3   | 407 | 42088  | 42482  |
| UN77607 | Rsa1.0.00482.1 | 661 | 81162  | 4.00E-58  | 115 | 115 | 100 - | 442 | 556 | 5280   | 5394   |
| UN77608 | Rsa1.0.02287.1 | 717 | 32986  | 1.00E-101 | 242 | 260 | 93 -  | 2   | 261 | 9388   | 9647   |



|         |                |     |        |           |     |     |       |     |     |        |        |
|---------|----------------|-----|--------|-----------|-----|-----|-------|-----|-----|--------|--------|
| UN77609 | Rsa1.0.01078.1 | 294 | 316910 | 1.00E-133 | 290 | 299 | 96 +  | 3   | 294 | 292193 | 292491 |
| UN77610 | Rsa1.0.01581.1 | 615 | 42833  | 0         | 579 | 600 | 96 +  | 16  | 615 | 5053   | 5651   |
| UN77611 | Rsa1.0.44085.1 | 687 | 510    | 0         | 331 | 333 | 99 -  | 311 | 643 | 74     | 406    |
| UN77612 | Rsa1.0.00542.1 | 668 | 76831  | 3.00E-90  | 200 | 209 | 95 +  | 212 | 420 | 34681  | 34888  |
| UN77613 | Rsa1.0_20083.1 | 782 | 1343   | 0         | 371 | 376 | 98 -  | 320 | 692 | 968    | 1343   |
| UN77614 | Rsa1.0_28998.1 | 668 | 796    | 1.00E-82  | 181 | 188 | 96 +  | 482 | 668 | 435    | 622    |
| UN77615 | Rsa1.0.03114.1 | 771 | 25318  | 1.00E-139 | 334 | 355 | 94 +  | 408 | 757 | 8838   | 9192   |
| UN77616 | Rsa1.0.00156.1 | 490 | 118383 | 3.00E-61  | 134 | 138 | 97 -  | 5   | 139 | 36630  | 36767  |
| UN77617 | Rsa1.0.21467.1 | 310 | 1200   | 2.00E-98  | 200 | 204 | 98 -  | 1   | 203 | 753    | 953    |
| UN77618 | Rsa1.0.09583.1 | 608 | 6270   | 1.00E-153 | 275 | 275 | 100 + | 152 | 426 | 56     | 330    |
| UN77619 | Rsa1.0.01022.1 | 706 | 56606  | 1.00E-115 | 211 | 211 | 100 + | 353 | 563 | 32963  | 33173  |
| UN77620 | Rsa1.0.03633.1 | 665 | 21644  | 0         | 411 | 438 | 93 +  | 2   | 439 | 1763   | 2188   |
| UN77621 | Rsa1.0.75173.1 | 711 | 305    | 5.00E-70  | 138 | 139 | 99 +  | 3   | 141 | 167    | 305    |
| UN77622 | Rsa1.0.01105.1 | 653 | 53958  | 2.00E-91  | 191 | 195 | 97 +  | 86  | 280 | 10353  | 10545  |
| UN77623 | Rsa1.0.00268.1 | 698 | 101470 | 6.00E-82  | 299 | 343 | 87 -  | 6   | 347 | 15055  | 15380  |
| UN77624 | Rsa1.0.00838.1 | 714 | 153820 | 1.00E-129 | 245 | 248 | 98 +  | 3   | 247 | 8649   | 8896   |
| UN77625 | Rsa1.0.15017.1 | 607 | 2889   | 0         | 606 | 607 | 99 +  | 1   | 607 | 870    | 1476   |
| UN77626 | Rsa1.0.00176.1 | 691 | 240984 | 4.00E-46  | 122 | 131 | 93 +  | 378 | 508 | 18131  | 18261  |
| UN77627 | Rsa1.0.01274.1 | 346 | 49419  | 2.00E-80  | 198 | 208 | 95 +  | 140 | 346 | 21348  | 21552  |
| UN77628 | Rsa1.0.00123.1 | 761 | 325650 | 1.00E-109 | 218 | 224 | 97 -  | 314 | 537 | 222528 | 222751 |
| UN77629 | Rsa1.0.00999.1 | 659 | 57162  | 0         | 385 | 403 | 95 +  | 257 | 659 | 36704  | 37097  |
| UN77630 | Rsa1.0.07849.1 | 756 | 8425   | 1.00E-119 | 247 | 252 | 98 -  | 509 | 756 | 5630   | 5880   |
| UN77631 | Rsa1.0.35109.1 | 675 | 644    | 1.00E-83  | 158 | 158 | 100 - | 393 | 550 | 22     | 179    |
| UN77632 | Rsa1.0.14129.1 | 701 | 3769   | 1.00E-163 | 313 | 318 | 98 +  | 3   | 319 | 2703   | 3018   |
| UN77633 | Rsa1.0.01523.1 | 584 | 43959  | 0         | 528 | 591 | 89 -  | 3   | 584 | 27961  | 28518  |
| UN77634 | Rsa1.0.01838.1 | 647 | 38500  | 0         | 634 | 647 | 97 +  | 1   | 647 | 25965  | 26608  |
| UN77635 | Rsa1.0.08140.1 | 736 | 7845   | 1.00E-163 | 333 | 344 | 96 +  | 395 | 736 | 6704   | 7047   |
| UN77636 | Rsa1.0.00017.1 | 727 | 752458 | 0         | 334 | 337 | 99 -  | 314 | 649 | 726017 | 726353 |
| UN77637 | Rsa1.0.03828.1 | 743 | 20588  | 0         | 712 | 738 | 96 +  | 3   | 739 | 10639  | 11373  |
| UN77638 | Rsa1.0.00921.1 | 639 | 59599  | 1.00E-113 | 218 | 220 | 99 +  | 421 | 639 | 129    | 348    |
| UN77639 | Rsa1.0.00035.1 | 352 | 176449 | 1.00E-173 | 339 | 347 | 97 -  | 3   | 347 | 126172 | 126518 |
| UN77640 | Rsa1.0.01727.1 | 751 | 40243  | 0         | 347 | 350 | 99 +  | 3   | 352 | 23198  | 23547  |
| UN77641 | Rsa1.0.01159.1 | 474 | 52115  | 9.00E-68  | 149 | 155 | 96 +  | 1   | 155 | 31450  | 31604  |
| UN77642 | Rsa1.0.01553.1 | 733 | 43379  | 0         | 395 | 419 | 94 -  | 3   | 409 | 40833  | 41250  |
| UN77643 | Rsa1.0.00551.1 | 729 | 76227  | 1.00E-112 | 322 | 363 | 88 +  | 10  | 351 | 19151  | 19513  |
| UN77644 | Rsa1.0.00906.1 | 767 | 178966 | 0         | 560 | 560 | 100 + | 3   | 562 | 130168 | 130727 |
| UN77645 | Rsa1.0.00012.1 | 732 | 222148 | 0         | 717 | 741 | 96 +  | 3   | 732 | 62298  | 63036  |
| UN77646 | Rsa1.0.00205.1 | 640 | 193401 | 1.00E-159 | 374 | 401 | 93 -  | 2   | 389 | 60950  | 61346  |
| UN77647 | Rsa1.0.02377.1 | 638 | 31994  | 0         | 614 | 647 | 94 -  | 3   | 638 | 19525  | 20171  |

|         |                |     |        |           |     |     |       |     |     |        |        |
|---------|----------------|-----|--------|-----------|-----|-----|-------|-----|-----|--------|--------|
| UN77648 | Rsa1.0.02117.1 | 625 | 34843  | 1.00E-121 | 334 | 370 | 90 -  | 270 | 625 | 23598  | 23966  |
| UN77649 | Rsa1.0.01985.1 | 765 | 36491  | 1.00E-107 | 200 | 201 | 99 +  | 8   | 208 | 14309  | 14509  |
| UN77650 | Rsa1.0.05680.1 | 796 | 12958  | 2.00E-69  | 134 | 134 | 100 - | 518 | 651 | 5785   | 5918   |
| UN77651 | Rsa1.0.00087.1 | 763 | 761073 | 1.00E-176 | 371 | 385 | 96 +  | 383 | 763 | 359637 | 360021 |
| UN77652 | Rsa1.0.00029.1 | 641 | 272992 | 0         | 470 | 503 | 93 +  | 43  | 539 | 260779 | 261278 |
| UN77653 | Rsa1.0.00977.1 | 649 | 198001 | 0         | 574 | 652 | 88 -  | 2   | 649 | 163134 | 163785 |
| UN77654 | Rsa1.0.05983.1 | 679 | 12032  | 0         | 527 | 531 | 99 +  | 151 | 679 | 8665   | 9195   |
| UN77655 | Rsa1.0.00556.1 | 820 | 207212 | 1.00E-110 | 235 | 245 | 95 -  | 18  | 259 | 13311  | 13555  |
| UN77656 | Rsa1.0.00999.1 | 600 | 57162  | 1.00E-132 | 240 | 240 | 100 + | 3   | 242 | 22554  | 22793  |
| UN77657 | Rsa1.0.00097.1 | 710 | 138858 | 1.00E-172 | 320 | 322 | 99 -  | 391 | 710 | 111792 | 112113 |
| UN77658 | Rsa1.0.02159.1 | 646 | 34471  | 1.00E-113 | 302 | 333 | 90 -  | 3   | 331 | 32493  | 32810  |
| UN77659 | Rsa1.0.00008.1 | 660 | 358124 | 0         | 627 | 660 | 95 +  | 1   | 660 | 61743  | 62391  |
| UN77660 | Rsa1.0.01288.1 | 771 | 49188  | 0         | 665 | 697 | 95 -  | 80  | 771 | 22697  | 23387  |
| UN77661 | Rsa1.0.00033.1 | 735 | 515811 | 0         | 577 | 586 | 98 -  | 151 | 733 | 485425 | 486009 |
| UN77662 | Rsa1.0.00188.1 | 761 | 112020 | 0         | 444 | 460 | 96 -  | 214 | 670 | 74179  | 74638  |
| UN77663 | Rsa1.0.00183.1 | 555 | 113277 | 1.00E-106 | 236 | 247 | 95 -  | 311 | 555 | 69916  | 70162  |
| UN77664 | Rsa1.0.01865.1 | 596 | 37992  | 1.00E-106 | 211 | 216 | 97 +  | 181 | 396 | 28549  | 28764  |
| UN77665 | Rsa1.0.01081.1 | 748 | 499226 | 1.00E-153 | 277 | 278 | 99 -  | 3   | 280 | 334337 | 334614 |
| UN77666 | Rsa1.0.08102.1 | 731 | 7901   | 8.00E-60  | 118 | 118 | 100 - | 374 | 491 | 1629   | 1746   |
| UN77667 | Rsa1.0.00207.1 | 793 | 248736 | 1.00E-160 | 318 | 326 | 97 +  | 3   | 326 | 63127  | 63452  |
| UN77668 | Rsa1.0.02287.1 | 591 | 32986  | 1.00E-136 | 264 | 270 | 97 -  | 2   | 271 | 9388   | 9657   |
| UN77669 | Rsa1.0.02707.1 | 278 | 28520  | 1.00E-111 | 227 | 234 | 97 +  | 47  | 278 | 26163  | 26396  |
| UN77670 | Rsa1.0.01151.1 | 378 | 52268  | 1.00E-143 | 260 | 261 | 99 -  | 118 | 378 | 26261  | 26521  |
| UN77671 | Rsa1.0.00506.1 | 738 | 79106  | 1.00E-113 | 207 | 207 | 100 - | 482 | 688 | 13459  | 13665  |
| UN77672 | Rsa1.0.43420.1 | 695 | 517    | 0         | 507 | 507 | 100 - | 51  | 557 | 11     | 517    |
| UN77673 | Rsa1.0.01092.1 | 696 | 54348  | 0         | 532 | 550 | 96 -  | 126 | 673 | 44254  | 44800  |
| UN77674 | Rsa1.0.00022.1 | 538 | 200461 | 1.00E-143 | 359 | 391 | 91 +  | 116 | 496 | 142094 | 142479 |
| UN77675 | Rsa1.0.09735.1 | 696 | 6180   | 1.00E-67  | 131 | 131 | 100 - | 4   | 134 | 868    | 998    |
| UN77676 | Rsa1.0.01997.1 | 679 | 158416 | 0         | 564 | 585 | 96 +  | 101 | 679 | 3359   | 3940   |
| UN77677 | Rsa1.0.01454.1 | 777 | 45440  | 3.00E-78  | 155 | 157 | 98 -  | 345 | 501 | 14805  | 14961  |
| UN77678 | Rsa1.0.00033.1 | 555 | 515811 | 0         | 389 | 401 | 97 -  | 159 | 555 | 145969 | 146367 |
| UN77679 | Rsa1.0.01761.1 | 728 | 39717  | 1.00E-175 | 400 | 428 | 93 -  | 303 | 728 | 25265  | 25689  |
| UN77680 | Rsa1.0.15200.1 | 722 | 2765   | 0         | 365 | 369 | 98 -  | 3   | 369 | 1      | 369    |
| UN77681 | Rsa1.0.00615.1 | 431 | 72235  | 0         | 428 | 429 | 99 -  | 3   | 431 | 38882  | 39310  |
| UN77682 | Rsa1.0.00028.1 | 608 | 293984 | 0         | 463 | 463 | 100 + | 146 | 608 | 257892 | 258354 |
| UN77683 | Rsa1.0.00616.1 | 773 | 195713 | 1.00E-107 | 229 | 238 | 96 +  | 52  | 289 | 8470   | 8706   |
| UN77684 | Rsa1.0.00686.1 | 778 | 68511  | 0         | 447 | 448 | 99 -  | 3   | 450 | 16330  | 16777  |
| UN77685 | Rsa1.0.00102.1 | 654 | 135497 | 0         | 477 | 498 | 95 -  | 157 | 654 | 40877  | 41374  |
| UN77686 | Rsa1.0.01704.1 | 352 | 40711  | 1.00E-164 | 337 | 352 | 95 +  | 1   | 352 | 13211  | 13562  |

|         |                |     |        |           |     |     |       |     |     |        |        |
|---------|----------------|-----|--------|-----------|-----|-----|-------|-----|-----|--------|--------|
| UN77687 | Rsa1.0.00033.1 | 723 | 515811 | 0         | 529 | 540 | 97 +  | 184 | 723 | 350005 | 350544 |
| UN77688 | Rsa1.0.00962.1 | 669 | 184909 | 0         | 662 | 667 | 99 +  | 3   | 669 | 26959  | 27625  |
| UN77689 | Rsa1.0.01459.1 | 642 | 45277  | 1.00E-127 | 281 | 297 | 94 -  | 346 | 642 | 42971  | 43259  |
| UN77690 | Rsa1.0.00217.1 | 612 | 107079 | 0         | 592 | 596 | 99 +  | 20  | 612 | 98617  | 99211  |
| UN77691 | Rsa1.0.06375.1 | 651 | 11136  | 1.00E-100 | 191 | 193 | 98 +  | 224 | 416 | 104    | 296    |
| UN77692 | Rsa1.0.05081.1 | 770 | 136103 | 5.00E-58  | 149 | 155 | 96 -  | 608 | 758 | 2435   | 2589   |
| UN77693 | Rsa1.0.00048.1 | 652 | 167185 | 0         | 378 | 383 | 98 +  | 3   | 383 | 147921 | 148303 |
| UN77694 | Rsa1.0.00038.1 | 585 | 314568 | 1.00E-134 | 255 | 259 | 98 +  | 22  | 280 | 166217 | 166475 |
| UN77695 | Rsa1.0.00168.1 | 696 | 115870 | 1.00E-179 | 440 | 469 | 93 +  | 239 | 696 | 94124  | 94583  |
| UN77696 | Rsa1.0.03679.1 | 782 | 21409  | 0         | 535 | 540 | 99 +  | 246 | 782 | 13347  | 13886  |
| UN77697 | Rsa1.0.00055.1 | 737 | 520193 | 1.00E-89  | 225 | 241 | 93 -  | 496 | 735 | 333976 | 334211 |
| UN77698 | Rsa1.0.02870.1 | 337 | 27102  | 3.00E-82  | 193 | 204 | 94 +  | 3   | 202 | 5985   | 6187   |
| UN77699 | Rsa1.0.01461.1 | 519 | 45240  | 0         | 506 | 520 | 97 +  | 3   | 519 | 2641   | 3160   |
| UN77700 | Rsa1.0.01864.1 | 686 | 37998  | 0         | 330 | 332 | 99 -  | 355 | 686 | 36822  | 37153  |
| UN77701 | Rsa1.0.00090.1 | 733 | 273859 | 0         | 512 | 546 | 93 +  | 194 | 733 | 231858 | 232391 |
| UN77702 | Rsa1.0.00859.1 | 738 | 61795  | 0         | 375 | 385 | 97 -  | 60  | 444 | 61329  | 61712  |
| UN77703 | Rsa1.0.00663.1 | 781 | 164969 | 0         | 761 | 781 | 97 -  | 3   | 781 | 131654 | 132434 |
| UN77704 | Rsa1.0.00108.1 | 744 | 478491 | 0         | 472 | 499 | 94 -  | 240 | 733 | 304449 | 304947 |
| UN77705 | Rsa1.0.04564.1 | 694 | 16837  | 0         | 675 | 695 | 97 -  | 1   | 694 | 3714   | 4396   |
| UN77706 | Rsa1.0.01148.1 | 147 | 52375  | 4.00E-61  | 140 | 147 | 95 -  | 1   | 147 | 10883  | 11029  |
| UN77707 | Rsa1.0.03938.1 | 500 | 19965  | 1.00E-119 | 230 | 233 | 98 -  | 1   | 233 | 16849  | 17080  |
| UN77708 | Rsa1.0.00453.1 | 687 | 83031  | 0         | 684 | 687 | 99 +  | 2   | 687 | 26877  | 27563  |
| UN77709 | Rsa1.0.01148.1 | 593 | 52375  | 0         | 394 | 417 | 94 -  | 187 | 593 | 31513  | 31926  |
| UN77710 | Rsa1.0.01838.1 | 750 | 38500  | 1.00E-109 | 239 | 251 | 95 -  | 221 | 468 | 27357  | 27607  |
| UN77711 | Rsa1.0.02221.1 | 652 | 33796  | 4.00E-83  | 171 | 175 | 97 +  | 342 | 513 | 11916  | 12090  |
| UN77712 | Rsa1.0.02095.1 | 572 | 35071  | 6.00E-94  | 320 | 363 | 88 +  | 61  | 422 | 6511   | 6865   |
| UN77713 | Rsa1.0.00648.1 | 788 | 70351  | 1.00E-111 | 265 | 284 | 93 -  | 1   | 284 | 19476  | 19752  |
| UN77714 | Rsa1.0.04213.1 | 732 | 18437  | 2.00E-82  | 156 | 156 | 100 + | 554 | 709 | 18130  | 18285  |
| UN77715 | Rsa1.0.01078.1 | 861 | 316910 | 0         | 806 | 881 | 91 +  | 3   | 861 | 287563 | 288429 |
| UN77716 | Rsa1.0.01721.1 | 237 | 40345  | 5.00E-86  | 219 | 229 | 95 +  | 16  | 237 | 23096  | 23324  |
| UN77717 | Rsa1.0.00211.1 | 624 | 228189 | 1.00E-101 | 188 | 188 | 100 - | 289 | 476 | 173457 | 173644 |
| UN77718 | Rsa1.0.00772.1 | 732 | 64856  | 0         | 625 | 630 | 99 -  | 1   | 630 | 17209  | 17838  |
| UN77719 | Rsa1.0.04949.1 | 561 | 15356  | 1.00E-155 | 368 | 397 | 92 -  | 169 | 558 | 5846   | 6238   |
| UN77720 | Rsa1.0.00197.1 | 567 | 109714 | 1.00E-134 | 329 | 354 | 92 +  | 2   | 344 | 18536  | 18882  |
| UN77721 | Rsa1.0.07933.1 | 750 | 8232   | 0         | 744 | 746 | 99 -  | 5   | 750 | 3617   | 4362   |
| UN77722 | Rsa1.0.03448.1 | 674 | 22844  | 3.00E-74  | 151 | 154 | 98 -  | 336 | 489 | 11904  | 12057  |
| UN77723 | Rsa1.0.00476.1 | 718 | 280966 | 1.00E-109 | 263 | 284 | 92 -  | 3   | 280 | 166138 | 166421 |
| UN77724 | Rsa1.0.01092.1 | 240 | 54348  | 4.00E-96  | 219 | 230 | 95 +  | 8   | 236 | 7601   | 7829   |
| UN77725 | Rsa1.0.01405.1 | 699 | 46445  | 1.00E-115 | 220 | 222 | 99 -  | 479 | 699 | 38482  | 38703  |

|         |                |     |        |           |     |     |       |     |     |        |        |
|---------|----------------|-----|--------|-----------|-----|-----|-------|-----|-----|--------|--------|
| UN77726 | Rsa1.0.00560.1 | 733 | 75685  | 0         | 687 | 712 | 96 +  | 26  | 733 | 50954  | 51665  |
| UN77727 | Rsa1.0.02282.1 | 110 | 163951 | 2.00E-18  | 67  | 71  | 94 +  | 42  | 110 | 149562 | 149632 |
| UN77728 | Rsa1.0.01877.1 | 132 | 37789  | 2.00E-47  | 124 | 132 | 93 +  | 2   | 132 | 23174  | 23305  |
| UN77729 | Rsa1.0.03822.1 | 635 | 20640  | 9.00E-84  | 158 | 158 | 100 - | 52  | 209 | 14858  | 15015  |
| UN77730 | Rsa1.0_00323.1 | 782 | 159650 | 0         | 516 | 517 | 99 +  | 5   | 520 | 111456 | 111972 |
| UN77731 | Rsa1.0_00339.1 | 802 | 222974 | 1.00E-167 | 319 | 326 | 97 +  | 213 | 538 | 65177  | 65502  |
| UN77732 | Rsa1.0.04407.1 | 714 | 17504  | 1.00E-163 | 415 | 453 | 91 -  | 271 | 714 | 10589  | 11039  |
| UN77733 | Rsa1.0.01317.1 | 727 | 48287  | 0         | 364 | 364 | 100 + | 35  | 398 | 34074  | 34437  |
| UN77734 | Rsa1.0.04714.1 | 680 | 146738 | 0         | 373 | 381 | 97 +  | 301 | 680 | 139528 | 139908 |
| UN77735 | Rsa1.0.02166.1 | 684 | 34414  | 1.00E-174 | 315 | 317 | 99 -  | 368 | 684 | 14039  | 14355  |
| UN77736 | Rsa1.0.06160.1 | 659 | 11596  | 1.00E-114 | 272 | 293 | 92 +  | 71  | 363 | 11129  | 11421  |
| UN77737 | Rsa1.0.01566.1 | 720 | 43134  | 0         | 567 | 595 | 95 -  | 104 | 688 | 34068  | 34658  |
| UN77738 | Rsa1.0.00691.1 | 769 | 68212  | 1.00E-15  | 47  | 48  | 97 +  | 201 | 248 | 15589  | 15636  |
| UN77739 | Rsa1.0.00576.1 | 464 | 178949 | 0         | 332 | 332 | 100 - | 133 | 464 | 30858  | 31189  |
| UN77740 | Rsa1.0.00172.1 | 661 | 115476 | 0         | 637 | 659 | 96 +  | 3   | 661 | 18619  | 19277  |
| UN77741 | Rsa1.0.01092.1 | 681 | 54348  | 0         | 508 | 514 | 98 -  | 33  | 546 | 24851  | 25364  |
| UN77742 | Rsa1.0.01158.1 | 540 | 52121  | 0         | 424 | 430 | 98 -  | 111 | 540 | 16603  | 17032  |
| UN77743 | Rsa1.0.00816.1 | 762 | 403350 | 0         | 662 | 705 | 93 -  | 3   | 701 | 265436 | 266113 |
| UN77744 | Rsa1.0.24635.1 | 450 | 975    | 1.00E-128 | 235 | 236 | 99 +  | 215 | 450 | 292    | 527    |
| UN77745 | Rsa1.0.04863.1 | 721 | 15687  | 1.00E-179 | 393 | 415 | 94 +  | 3   | 414 | 1111   | 1522   |
| UN77746 | Rsa1.0.03191.1 | 772 | 145762 | 1.00E-175 | 319 | 320 | 99 +  | 454 | 772 | 20228  | 20547  |
| UN77747 | Rsa1.0.00069.1 | 142 | 403561 | 5.00E-48  | 131 | 141 | 92 -  | 3   | 142 | 179540 | 179680 |
| UN77748 | Rsa1.0.04456.1 | 731 | 17260  | 0         | 359 | 362 | 99 +  | 297 | 656 | 14866  | 15227  |
| UN77749 | Rsa1.0.07730.1 | 497 | 8698   | 0         | 496 | 497 | 99 -  | 1   | 497 | 5085   | 5581   |
| UN77750 | Rsa1.0.00636.1 | 766 | 71113  | 1.00E-100 | 206 | 213 | 96 +  | 21  | 233 | 694    | 900    |
| UN77751 | Rsa1.0.02060.1 | 792 | 35528  | 0         | 429 | 438 | 97 +  | 305 | 738 | 19474  | 19911  |
| UN77752 | Rsa1.0.00645.1 | 705 | 189716 | 0         | 411 | 423 | 97 +  | 287 | 705 | 6276   | 6696   |
| UN77753 | Rsa1.0.00362.1 | 547 | 299497 | 1.00E-176 | 345 | 353 | 97 -  | 1   | 352 | 228930 | 229281 |
| UN77754 | Rsa1.0.01274.1 | 484 | 49419  | 1.00E-137 | 319 | 341 | 93 +  | 7   | 343 | 30800  | 31140  |
| UN77755 | Rsa1.0.11046.1 | 153 | 5635   | 4.00E-33  | 78  | 80  | 97 -  | 74  | 153 | 2870   | 2949   |
| UN77756 | Rsa1.0.00725.1 | 530 | 66757  | 0         | 499 | 530 | 94 -  | 2   | 523 | 21535  | 22056  |
| UN77757 | Rsa1.0.00008.1 | 539 | 358124 | 1.00E-157 | 302 | 309 | 97 -  | 217 | 525 | 54138  | 54446  |
| UN77758 | Rsa1.0.00611.1 | 332 | 72410  | 2.00E-67  | 145 | 150 | 96 -  | 1   | 150 | 1963   | 2112   |
| UN77759 | Rsa1.0.01872.1 | 720 | 37908  | 0         | 378 | 380 | 99 +  | 3   | 382 | 7401   | 7780   |
| UN77760 | Rsa1.0.00317.1 | 638 | 218290 | 1.00E-172 | 306 | 306 | 100 + | 1   | 306 | 91656  | 91961  |
| UN77761 | Rsa1.0.01883.1 | 745 | 37661  | 2.00E-11  | 79  | 93  | 84 +  | 427 | 519 | 10638  | 10730  |
| UN77762 | Rsa1.0.00003.1 | 494 | 340054 | 0         | 350 | 356 | 98 -  | 3   | 358 | 4541   | 4896   |
| UN77763 | Rsa1.0.00010.1 | 604 | 294827 | 3.00E-83  | 249 | 283 | 87 +  | 1   | 258 | 270949 | 271226 |
| UN77764 | Rsa1.0.03926.1 | 331 | 20024  | 1.00E-120 | 228 | 230 | 99 -  | 103 | 331 | 10760  | 10989  |

|         |                |     |        |           |     |     |       |     |     |        |        |
|---------|----------------|-----|--------|-----------|-----|-----|-------|-----|-----|--------|--------|
| UN77765 | Rsa1.0.00028.1 | 691 | 293984 | 0         | 399 | 419 | 95 -  | 3   | 421 | 252760 | 253177 |
| UN77766 | Rsa1.0.03550.1 | 449 | 22154  | 0         | 370 | 382 | 96 +  | 3   | 384 | 5300   | 5681   |
| UN77767 | Rsa1.0.00706.1 | 182 | 291570 | 7.00E-60  | 161 | 175 | 92 -  | 8   | 182 | 24316  | 24487  |
| UN77768 | Rsa1.0.00067.1 | 533 | 415055 | 0         | 513 | 540 | 95 +  | 1   | 533 | 268378 | 268915 |
| UN77769 | Rsa1.0.01167.1 | 720 | 51859  | 0         | 345 | 353 | 97 -  | 1   | 353 | 13562  | 13914  |
| UN77770 | Rsa1.0.00469.1 | 708 | 82084  | 0         | 397 | 413 | 96 -  | 5   | 417 | 3910   | 4321   |
| UN77771 | Rsa1.0.19206.1 | 566 | 1465   | 2.00E-75  | 147 | 148 | 99 -  | 122 | 269 | 519    | 666    |
| UN77772 | Rsa1.0.00025.1 | 811 | 277312 | 2.00E-42  | 174 | 198 | 87 +  | 96  | 285 | 42550  | 42743  |
| UN77773 | Rsa1.0.00699.1 | 243 | 184398 | 2.00E-60  | 121 | 122 | 99 -  | 41  | 162 | 14793  | 14914  |
| UN77774 | Rsa1.0.01013.1 | 675 | 56822  | 0         | 393 | 394 | 99 -  | 3   | 396 | 29533  | 29926  |
| UN77775 | Rsa1.0.08721.1 | 295 | 7000   | 3.00E-66  | 208 | 226 | 92 -  | 73  | 289 | 6696   | 6921   |
| UN77776 | Rsa1.0.06865.1 | 601 | 10240  | 1.00E-153 | 284 | 287 | 98 -  | 150 | 436 | 9270   | 9556   |
| UN77777 | Rsa1.0.00170.1 | 389 | 179538 | 1.00E-105 | 228 | 237 | 96 -  | 155 | 389 | 141290 | 141525 |
| UN77778 | Rsa1.0.01896.1 | 505 | 37512  | 0         | 372 | 389 | 95 -  | 117 | 505 | 9889   | 10277  |
| UN77779 | Rsa1.0.04248.1 | 341 | 18287  | 1.00E-44  | 95  | 96  | 98 +  | 51  | 146 | 2671   | 2766   |
| UN77780 | Rsa1.0.13506.1 | 568 | 4760   | 1.00E-85  | 187 | 193 | 96 +  | 86  | 276 | 1964   | 2156   |
| UN77781 | Rsa1.0.04248.1 | 738 | 18287  | 0         | 613 | 628 | 97 +  | 47  | 674 | 8111   | 8738   |
| UN77782 | Rsa1.0.00016.1 | 737 | 831256 | 0         | 673 | 708 | 95 -  | 2   | 706 | 829267 | 829974 |
| UN77783 | Rsa1.0.04159.1 | 734 | 18795  | 1.00E-165 | 360 | 377 | 95 -  | 348 | 719 | 6239   | 6615   |
| UN77784 | Rsa1.0.03394.1 | 718 | 23247  | 1.00E-113 | 255 | 270 | 94 +  | 449 | 717 | 5938   | 6200   |
| UN77785 | Rsa1.0.00076.1 | 767 | 146021 | 8.00E-57  | 119 | 121 | 98 +  | 521 | 641 | 39762  | 39882  |
| UN77786 | Rsa1.0.03642.1 | 754 | 21609  | 1.00E-129 | 344 | 374 | 91 +  | 387 | 750 | 18068  | 18441  |
| UN77787 | Rsa1.0.00120.1 | 292 | 277288 | 5.00E-96  | 188 | 190 | 98 +  | 3   | 191 | 265621 | 265810 |
| UN77788 | Rsa1.0.00246.1 | 306 | 103541 | 3.00E-57  | 126 | 129 | 97 -  | 1   | 129 | 90696  | 90823  |
| UN77789 | Rsa1.0.00552.1 | 277 | 206757 | 1.00E-120 | 222 | 223 | 99 -  | 3   | 225 | 20128  | 20350  |
| UN77790 | Rsa1.0.00123.1 | 772 | 325650 | 1.00E-108 | 219 | 223 | 98 +  | 553 | 772 | 153387 | 153609 |
| UN77791 | Rsa1.0.01660.1 | 695 | 41400  | 0         | 410 | 420 | 97 -  | 76  | 495 | 35278  | 35697  |
| UN77792 | Rsa1.0.00043.1 | 769 | 264937 | 1.00E-98  | 183 | 183 | 100 - | 2   | 184 | 246463 | 246645 |
| UN77793 | Rsa1.0.00087.1 | 746 | 761073 | 2.00E-91  | 186 | 191 | 97 -  | 2   | 192 | 241492 | 241682 |
| UN77794 | Rsa1.0.00017.1 | 720 | 752458 | 0         | 349 | 356 | 98 +  | 179 | 534 | 316093 | 316448 |
| UN77795 | Rsa1.0.03728.1 | 531 | 21147  | 0         | 498 | 530 | 93 +  | 3   | 531 | 725    | 1245   |
| UN77796 | Rsa1.0.04357.1 | 668 | 17762  | 0         | 574 | 576 | 99 +  | 3   | 578 | 4089   | 4664   |
| UN77797 | Rsa1.0.07657.1 | 799 | 8896   | 1.00E-120 | 228 | 231 | 98 +  | 266 | 496 | 2985   | 3215   |
| UN77798 | Rsa1.0.01285.1 | 693 | 172709 | 0         | 455 | 457 | 99 +  | 237 | 693 | 25470  | 25926  |
| UN77799 | Rsa1.0.01232.1 | 486 | 155185 | 1.00E-176 | 325 | 329 | 98 -  | 158 | 486 | 153408 | 153736 |
| UN77800 | Rsa1.0.00327.1 | 730 | 94892  | 1.00E-73  | 144 | 145 | 99 -  | 126 | 270 | 27389  | 27533  |
| UN77801 | Rsa1.0.01376.1 | 742 | 47004  | 0         | 445 | 465 | 95 +  | 3   | 465 | 40118  | 40582  |
| UN77802 | Rsa1.0.00484.1 | 694 | 203294 | 1.00E-112 | 205 | 205 | 100 - | 3   | 207 | 54497  | 54701  |
| UN77803 | Rsa1.0.00911.1 | 617 | 59943  | 0         | 407 | 413 | 98 +  | 3   | 415 | 36571  | 36983  |

|         |                |     |        |           |     |     |       |     |     |        |        |
|---------|----------------|-----|--------|-----------|-----|-----|-------|-----|-----|--------|--------|
| UN77804 | Rsa1.0_03044.1 | 586 | 25791  | 0         | 585 | 585 | 100 + | 2   | 586 | 21068  | 21652  |
| UN77805 | Rsa1.0_03465.1 | 683 | 22700  | 4.00E-86  | 172 | 174 | 98 -  | 125 | 298 | 21374  | 21546  |
| UN77806 | Rsa1.0_00017.1 | 547 | 752458 | 0         | 397 | 399 | 99 +  | 150 | 547 | 532215 | 532613 |
| UN77807 | Rsa1.0_04248.1 | 635 | 18287  | 0         | 338 | 338 | 100 - | 3   | 340 | 13799  | 14136  |
| UN77808 | Rsa1.0_02377.1 | 646 | 31994  | 1.00E-133 | 326 | 355 | 91 +  | 309 | 646 | 18791  | 19140  |
| UN77809 | Rsa1.0_04192.1 | 707 | 18572  | 1.00E-155 | 285 | 286 | 99 +  | 419 | 703 | 5742   | 6027   |
| UN77810 | Rsa1.0_00645.1 | 648 | 189716 | 0         | 405 | 407 | 99 -  | 167 | 573 | 151483 | 151889 |
| UN77811 | Rsa1.0_00425.1 | 690 | 147080 | 3.00E-99  | 184 | 184 | 100 - | 215 | 398 | 5087   | 5270   |
| UN77812 | Rsa1.0_03026.1 | 800 | 25888  | 0         | 774 | 786 | 98 +  | 3   | 780 | 10546  | 11331  |
| UN77813 | Rsa1.0_00648.1 | 765 | 70351  | 0         | 563 | 609 | 92 +  | 165 | 761 | 16296  | 16886  |
| UN77814 | Rsa1.0_00274.1 | 672 | 210119 | 1.00E-148 | 266 | 266 | 100 + | 181 | 446 | 44679  | 44944  |
| UN77815 | Rsa1.0_03599.1 | 480 | 21857  | 0         | 349 | 351 | 99 -  | 130 | 480 | 3098   | 3448   |
| UN77816 | Rsa1.0_00480.1 | 742 | 81325  | 0         | 376 | 383 | 98 +  | 3   | 385 | 3549   | 3931   |
| UN77817 | Rsa1.0_00837.1 | 720 | 62568  | 0         | 659 | 690 | 95 -  | 1   | 686 | 23553  | 24239  |
| UN77818 | Rsa1.0_01010.1 | 625 | 56906  | 0         | 389 | 391 | 99 +  | 180 | 570 | 13553  | 13943  |
| UN77819 | Rsa1.0_00683.1 | 504 | 68638  | 0         | 484 | 514 | 94 -  | 1   | 504 | 2433   | 2944   |
| UN77820 | Rsa1.0_01824.1 | 781 | 38733  | 1.00E-129 | 287 | 306 | 93 -  | 3   | 299 | 16855  | 17154  |
| UN77821 | Rsa1.0_05153.1 | 431 | 14663  | 1.00E-81  | 186 | 198 | 93 +  | 93  | 290 | 1739   | 1927   |
| UN77822 | Rsa1.0_01416.1 | 580 | 46262  | 1.00E-137 | 251 | 252 | 99 -  | 144 | 395 | 31255  | 31506  |
| UN77823 | Rsa1.0_04161.1 | 745 | 18788  | 1.00E-151 | 285 | 287 | 99 +  | 232 | 517 | 2057   | 2342   |
| UN77824 | Rsa1.0_00525.1 | 452 | 78030  | 1.00E-136 | 266 | 273 | 97 +  | 163 | 435 | 25802  | 26074  |
| UN77825 | Rsa1.0_00087.1 | 675 | 761073 | 0         | 407 | 411 | 99 +  | 266 | 675 | 95100  | 95510  |
| UN77826 | Rsa1.0_00100.1 | 291 | 249232 | 1.00E-114 | 216 | 217 | 99 +  | 3   | 218 | 174024 | 174240 |
| UN77827 | Rsa1.0_00813.1 | 301 | 63202  | 1.00E-104 | 286 | 307 | 93 +  | 2   | 301 | 45888  | 46192  |
| UN77828 | Rsa1.0_00777.1 | 633 | 191865 | 1.00E-152 | 285 | 289 | 98 -  | 240 | 528 | 170223 | 170511 |
| UN77829 | Rsa1.0_00662.1 | 333 | 192183 | 9.00E-98  | 233 | 246 | 94 +  | 91  | 333 | 58372  | 58613  |
| UN77830 | Rsa1.0_23843.1 | 411 | 1022   | 0         | 404 | 410 | 98 +  | 2   | 411 | 317    | 726    |
| UN77831 | Rsa1.0_00197.1 | 811 | 109714 | 0         | 566 | 574 | 98 -  | 119 | 689 | 19948  | 20521  |
| UN77832 | Rsa1.0_07835.1 | 696 | 8453   | 1.00E-118 | 280 | 299 | 93 +  | 187 | 477 | 4944   | 5242   |
| UN77833 | Rsa1.0_00055.1 | 721 | 520193 | 0         | 544 | 584 | 93 +  | 144 | 718 | 407399 | 407979 |
| UN77834 | Rsa1.0_00701.1 | 733 | 67691  | 6.00E-70  | 141 | 143 | 98 +  | 162 | 304 | 21778  | 21920  |
| UN77835 | Rsa1.0_02411.1 | 456 | 31655  | 0         | 382 | 398 | 95 -  | 3   | 399 | 29075  | 29469  |
| UN77836 | Rsa1.0_00056.1 | 733 | 332604 | 1.00E-140 | 270 | 276 | 97 +  | 4   | 279 | 103790 | 104065 |
| UN77837 | Rsa1.0_00417.1 | 713 | 395068 | 0         | 345 | 351 | 98 -  | 364 | 713 | 235729 | 236079 |
| UN77838 | Rsa1.0_00344.1 | 743 | 191774 | 0         | 735 | 742 | 99 +  | 4   | 743 | 102236 | 102977 |
| UN77839 | Rsa1.0_07933.1 | 633 | 8232   | 0         | 385 | 386 | 99 +  | 1   | 386 | 2583   | 2968   |
| UN77840 | Rsa1.0_01687.1 | 443 | 40979  | 1.00E-136 | 269 | 277 | 97 +  | 2   | 278 | 24951  | 25227  |
| UN77841 | Rsa1.0_08516.1 | 582 | 7245   | 0         | 449 | 467 | 96 -  | 122 | 582 | 6331   | 6797   |
| UN77842 | Rsa1.0_00218.1 | 563 | 201480 | 1.00E-152 | 303 | 313 | 96 +  | 247 | 559 | 175000 | 175312 |

|         |                |     |        |           |     |     |       |     |     |        |        |
|---------|----------------|-----|--------|-----------|-----|-----|-------|-----|-----|--------|--------|
| UN77843 | Rsa1.0_01937.1 | 549 | 37147  | 1.00E-124 | 241 | 246 | 97 -  | 203 | 448 | 26246  | 26491  |
| UN77844 | #              | #   | #      | #         | #   | #   | #     | #   | #   | #      | #      |
| UN77845 | Rsa1.0_00113.1 | 674 | 131574 | 1.00E-163 | 300 | 303 | 99 -  | 283 | 585 | 14205  | 14507  |
| UN77846 | Rsa1.0_01092.1 | 634 | 54348  | 1.00E-165 | 325 | 333 | 97 -  | 303 | 634 | 7664   | 7993   |
| UN77847 | Rsa1.0_04310.1 | 771 | 17994  | 1.00E-135 | 366 | 402 | 91 -  | 4   | 385 | 2343   | 2742   |
| UN77848 | Rsa1.0_09500.1 | 618 | 6330   | 1.00E-126 | 281 | 296 | 94 +  | 21  | 316 | 5403   | 5695   |
| UN77849 | #              | #   | #      | #         | #   | #   | #     | #   | #   | #      | #      |
| UN77850 | Rsa1.0_00204.1 | 709 | 109056 | 0         | 373 | 383 | 97 +  | 326 | 708 | 44120  | 44502  |
| UN77851 | Rsa1.0_00274.1 | 678 | 210119 | 1.00E-150 | 292 | 298 | 97 +  | 261 | 558 | 186905 | 187201 |
| UN77852 | Rsa1.0_00067.1 | 777 | 415055 | 1.00E-71  | 166 | 173 | 95 +  | 218 | 388 | 249445 | 249616 |
| UN77853 | Rsa1.0_00385.1 | 640 | 89160  | 0         | 495 | 499 | 99 +  | 3   | 501 | 47346  | 47844  |
| UN77854 | Rsa1.0_00275.1 | 767 | 210104 | 1.00E-114 | 251 | 265 | 94 -  | 3   | 267 | 152106 | 152370 |
| UN77855 | Rsa1.0_00111.1 | 748 | 390088 | 1.00E-109 | 221 | 228 | 96 -  | 516 | 743 | 382037 | 382264 |
| UN77856 | Rsa1.0_00218.1 | 471 | 201480 | 1.00E-145 | 263 | 264 | 99 +  | 208 | 471 | 32812  | 33075  |
| UN77857 | Rsa1.0_02586.1 | 775 | 29856  | 1.00E-141 | 275 | 282 | 97 -  | 232 | 513 | 8030   | 8311   |
| UN77858 | Rsa1.0_00657.1 | 767 | 69858  | 4.00E-80  | 184 | 197 | 93 -  | 3   | 187 | 24294  | 24490  |
| UN77859 | Rsa1.0_01018.1 | 718 | 56685  | 1.00E-137 | 329 | 354 | 92 -  | 20  | 370 | 56037  | 56380  |
| UN77860 | Rsa1.0_13384.1 | 605 | 4873   | 1.00E-160 | 293 | 294 | 99 +  | 3   | 295 | 419    | 712    |
| UN77861 | Rsa1.0_01468.1 | 767 | 45146  | 6.00E-70  | 135 | 135 | 100 + | 3   | 137 | 12268  | 12402  |
| UN77862 | Rsa1.0_14210.1 | 664 | 3660   | 2.00E-94  | 200 | 208 | 96 +  | 457 | 664 | 654    | 861    |
| UN77863 | Rsa1.0_00694.1 | 576 | 68074  | 0         | 573 | 574 | 99 -  | 2   | 575 | 57492  | 58065  |
| UN77864 | Rsa1.0_02501.1 | 745 | 30764  | 0         | 713 | 741 | 96 -  | 3   | 740 | 16170  | 16909  |
| UN77865 | Rsa1.0_00233.1 | 771 | 104918 | 0         | 431 | 433 | 99 +  | 263 | 694 | 66048  | 66480  |
| UN77866 | Rsa1.0_03028.1 | 709 | 25872  | 0         | 693 | 708 | 97 -  | 2   | 709 | 11993  | 12700  |
| UN77867 | Rsa1.0_01154.1 | 679 | 52249  | 1.00E-176 | 325 | 329 | 98 +  | 3   | 331 | 13897  | 14225  |
| UN77868 | Rsa1.0_00035.1 | 561 | 176449 | 0         | 559 | 561 | 99 -  | 1   | 561 | 111685 | 112245 |
| UN77869 | Rsa1.0_00118.1 | 689 | 130637 | 0         | 561 | 592 | 94 -  | 2   | 593 | 70591  | 71181  |
| UN77870 | Rsa1.0_01173.1 | 729 | 51727  | 1.00E-168 | 343 | 356 | 96 -  | 198 | 553 | 3699   | 4048   |
| UN77871 | Rsa1.0_02949.1 | 731 | 26506  | 1.00E-104 | 223 | 232 | 96 +  | 2   | 232 | 1584   | 1815   |
| UN77872 | Rsa1.0_01235.1 | 725 | 50180  | 0         | 437 | 443 | 98 +  | 283 | 725 | 19036  | 19478  |
| UN77873 | Rsa1.0_02020.1 | 614 | 173211 | 0         | 588 | 614 | 95 +  | 1   | 614 | 139265 | 139878 |
| UN77874 | Rsa1.0_13976.1 | 673 | 3967   | 1.00E-112 | 261 | 277 | 94 +  | 393 | 663 | 1060   | 1335   |
| UN77875 | Rsa1.0_00724.1 | 769 | 66789  | 0         | 571 | 579 | 98 -  | 121 | 699 | 18154  | 18732  |
| UN77876 | Rsa1.0_01579.1 | 617 | 42860  | 0         | 481 | 491 | 97 +  | 2   | 486 | 20443  | 20933  |
| UN77877 | Rsa1.0_43698.1 | 675 | 514    | 1.00E-151 | 292 | 299 | 97 +  | 319 | 617 | 216    | 514    |
| UN77878 | Rsa1.0_00425.1 | 794 | 147080 | 1.00E-100 | 186 | 186 | 100 - | 337 | 522 | 129550 | 129735 |
| UN77879 | Rsa1.0_00291.1 | 720 | 172129 | 0         | 358 | 364 | 98 +  | 3   | 366 | 30228  | 30591  |
| UN77880 | Rsa1.0_00036.1 | 712 | 176186 | 0         | 704 | 713 | 98 -  | 1   | 712 | 109897 | 110609 |
| UN77881 | Rsa1.0_09125.1 | 625 | 6625   | 1.00E-144 | 259 | 259 | 100 - | 3   | 261 | 244    | 502    |

|         |                |     |        |           |     |     |       |     |     |        |        |
|---------|----------------|-----|--------|-----------|-----|-----|-------|-----|-----|--------|--------|
| UN77882 | Rsa1.0.00078.1 | 764 | 175053 | 0         | 692 | 700 | 98 -  | 71  | 764 | 79730  | 80429  |
| UN77883 | Rsa1.0.00930.1 | 765 | 59224  | 1.00E-150 | 270 | 270 | 100 + | 433 | 702 | 48406  | 48675  |
| UN77884 | Rsa1.0.04029.1 | 686 | 19491  | 0         | 681 | 686 | 99 +  | 1   | 686 | 5087   | 5771   |
| UN77885 | Rsa1.0.00015.1 | 628 | 561803 | 2.00E-94  | 188 | 192 | 97 -  | 437 | 628 | 481068 | 481259 |
| UN77886 | Rsa1.0.01123.1 | 625 | 53359  | 1.00E-79  | 157 | 159 | 98 -  | 4   | 162 | 32555  | 32713  |
| UN77887 | Rsa1.0.00552.1 | 707 | 206757 | 1.00E-98  | 189 | 191 | 98 -  | 3   | 193 | 192070 | 192260 |
| UN77888 | Rsa1.0.00196.1 | 578 | 109960 | 0         | 555 | 590 | 94 +  | 5   | 578 | 11418  | 12007  |
| UN77889 | Rsa1.0.00113.1 | 828 | 131574 | 0         | 460 | 462 | 99 +  | 11  | 472 | 6881   | 7342   |
| UN77890 | Rsa1.0.14764.1 | 120 | 3084   | 3.00E-36  | 111 | 121 | 91 +  | 1   | 120 | 2002   | 2122   |
| UN77891 | Rsa1.0.00298.1 | 797 | 349131 | 1.00E-163 | 292 | 292 | 100 + | 1   | 292 | 175854 | 176145 |
| UN77892 | Rsa1.0.00178.1 | 794 | 114861 | 5.00E-89  | 311 | 357 | 87 +  | 30  | 386 | 66273  | 66605  |
| UN77893 | Rsa1.0.01004.1 | 517 | 56975  | 0         | 496 | 517 | 95 +  | 1   | 517 | 18996  | 19512  |
| UN77894 | Rsa1.0.00096.1 | 230 | 198773 | 7.00E-73  | 166 | 175 | 94 -  | 56  | 230 | 99852  | 100026 |
| UN77895 | Rsa1.0.00078.1 | 764 | 175053 | 0         | 736 | 765 | 96 -  | 1   | 764 | 36701  | 37465  |
| UN77896 | Rsa1.0.04006.1 | 802 | 19585  | 0         | 402 | 403 | 99 +  | 1   | 403 | 399    | 801    |
| UN77897 | Rsa1.0.00017.1 | 684 | 752458 | 1.00E-150 | 353 | 376 | 93 -  | 3   | 373 | 292600 | 292970 |
| UN77898 | Rsa1.0.04286.1 | 533 | 18084  | 4.00E-64  | 125 | 125 | 100 - | 51  | 175 | 6107   | 6231   |
| UN77899 | Rsa1.0.19122.1 | 557 | 1477   | 1.00E-119 | 253 | 265 | 95 +  | 6   | 270 | 846    | 1110   |
| UN77900 | Rsa1.0.02258.1 | 661 | 33307  | 1.00E-135 | 250 | 252 | 99 -  | 7   | 258 | 26139  | 26390  |
| UN77901 | Rsa1.0.04625.1 | 797 | 16613  | 0         | 432 | 450 | 96 +  | 354 | 795 | 14784  | 15233  |
| UN77902 | Rsa1.0.04845.1 | 555 | 15747  | 4.00E-64  | 128 | 129 | 99 +  | 205 | 333 | 5894   | 6022   |
| UN77903 | Rsa1.0.07802.1 | 333 | 8513   | 2.00E-55  | 135 | 142 | 95 +  | 8   | 149 | 3608   | 3748   |
| UN77904 | Rsa1.0.02117.1 | 588 | 34843  | 1.00E-88  | 181 | 186 | 97 +  | 327 | 512 | 14937  | 15122  |
| UN77905 | Rsa1.0.03956.1 | 491 | 19872  | 1.00E-125 | 314 | 342 | 91 -  | 24  | 362 | 19138  | 19460  |
| UN77906 | Rsa1.0.00645.1 | 778 | 189716 | 5.00E-98  | 188 | 190 | 98 -  | 257 | 446 | 7108   | 7297   |
| UN77907 | Rsa1.0.01264.1 | 152 | 49697  | 2.00E-66  | 143 | 148 | 96 -  | 1   | 148 | 27118  | 27265  |
| UN77908 | Rsa1.0.02070.1 | 783 | 158516 | 6.00E-73  | 168 | 177 | 94 -  | 94  | 266 | 141340 | 141516 |
| UN77909 | Rsa1.0.15735.1 | 795 | 2455   | 1.00E-117 | 218 | 219 | 99 -  | 170 | 388 | 128    | 346    |
| UN77910 | Rsa1.0.00150.1 | 242 | 154416 | 6.00E-95  | 228 | 240 | 95 +  | 2   | 240 | 151967 | 152198 |
| UN77911 | Rsa1.0.00008.1 | 556 | 358124 | 0         | 532 | 555 | 95 +  | 3   | 556 | 65984  | 66529  |
| UN77912 | Rsa1.0.00719.1 | 149 | 66952  | 1.00E-51  | 136 | 147 | 92 -  | 3   | 149 | 25735  | 25881  |
| UN77913 | Rsa1.0.04025.1 | 758 | 19511  | 1.00E-144 | 265 | 267 | 99 +  | 204 | 470 | 1147   | 1413   |
| UN77914 | Rsa1.0.07426.1 | 749 | 9413   | 5.00E-92  | 172 | 172 | 100 - | 3   | 174 | 8808   | 8979   |
| UN77915 | Rsa1.0.00469.1 | 691 | 82084  | 0         | 658 | 705 | 93 +  | 4   | 691 | 2302   | 3000   |
| UN77916 | Rsa1.0.09218.1 | 615 | 6550   | 1.00E-163 | 298 | 300 | 99 -  | 2   | 301 | 1463   | 1762   |
| UN77917 | Rsa1.0.00254.1 | 795 | 102600 | 1.00E-147 | 296 | 305 | 97 -  | 467 | 770 | 53912  | 54216  |
| UN77918 | Rsa1.0.02625.1 | 694 | 139104 | 0         | 681 | 692 | 98 +  | 3   | 694 | 21335  | 22026  |
| UN77919 | Rsa1.0.00163.1 | 816 | 116847 | 1.00E-127 | 246 | 251 | 98 -  | 248 | 498 | 11140  | 11390  |
| UN77920 | Rsa1.0.00848.1 | 711 | 152362 | 0         | 430 | 459 | 93 +  | 261 | 711 | 11280  | 11738  |



|         |                |     |        |           |     |     |       |     |     |        |        |
|---------|----------------|-----|--------|-----------|-----|-----|-------|-----|-----|--------|--------|
| UN77921 | Rsa1.0.05499.1 | 643 | 13520  | 0         | 422 | 432 | 97 -  | 213 | 643 | 5285   | 5716   |
| UN77922 | Rsa1.0.02909.1 | 628 | 26856  | 1.00E-162 | 325 | 338 | 96 -  | 129 | 457 | 12685  | 13022  |
| UN77923 | Rsa1.0.00639.1 | 744 | 165873 | 0         | 468 | 470 | 99 +  | 3   | 472 | 106131 | 106600 |
| UN77924 | Rsa1.0.01562.1 | 686 | 43196  | 6.00E-14  | 112 | 133 | 84 +  | 91  | 221 | 30425  | 30557  |
| UN77925 | Rsa1.0.00519.1 | 636 | 197864 | 0         | 480 | 517 | 92 +  | 119 | 627 | 16695  | 17200  |
| UN77926 | Rsa1.0.01875.1 | 684 | 37849  | 1.00E-145 | 327 | 350 | 93 +  | 152 | 488 | 17495  | 17844  |
| UN77927 | Rsa1.0.01762.1 | 683 | 39682  | 0         | 656 | 684 | 95 +  | 2   | 683 | 10313  | 10993  |
| UN77928 | Rsa1.0.08250.1 | 657 | 7658   | 0         | 489 | 503 | 97 +  | 88  | 590 | 2620   | 3119   |
| UN77929 | Rsa1.0.01435.1 | 480 | 45942  | 1.00E-76  | 164 | 170 | 96 -  | 210 | 379 | 25796  | 25965  |
| UN77930 | Rsa1.0.14157.1 | 279 | 3726   | 1.00E-109 | 251 | 267 | 94 +  | 1   | 265 | 1019   | 1285   |
| UN77931 | Rsa1.0.00127.1 | 218 | 127446 | 2.00E-94  | 205 | 215 | 95 -  | 4   | 218 | 52640  | 52854  |
| UN77932 | Rsa1.0.04561.1 | 765 | 16849  | 0         | 639 | 655 | 97 -  | 113 | 765 | 4432   | 5084   |
| UN77933 | Rsa1.0.00039.1 | 126 | 296927 | 1.00E-14  | 96  | 112 | 85 -  | 16  | 119 | 283568 | 283679 |
| UN77934 | Rsa1.0.01119.1 | 517 | 53459  | 0         | 499 | 522 | 95 -  | 1   | 517 | 40715  | 41233  |
| UN77935 | Rsa1.0.00329.1 | 666 | 222544 | 0         | 633 | 664 | 95 +  | 5   | 666 | 151800 | 152462 |
| UN77936 | Rsa1.0.00446.1 | 115 | 167829 | 2.00E-49  | 111 | 115 | 96 +  | 1   | 115 | 120075 | 120189 |
| UN77937 | Rsa1.0.00336.1 | 252 | 445051 | 1.00E-109 | 239 | 252 | 94 -  | 1   | 252 | 145805 | 146056 |
| UN77938 | Rsa1.0.06369.1 | 646 | 11141  | 0         | 614 | 627 | 97 -  | 3   | 628 | 7028   | 7654   |
| UN77939 | Rsa1.0.03090.1 | 788 | 25464  | 0         | 667 | 701 | 95 +  | 32  | 730 | 1661   | 2357   |
| UN77940 | Rsa1.0.00165.1 | 517 | 116466 | 0         | 483 | 517 | 93 +  | 1   | 517 | 3600   | 4116   |
| UN77941 | Rsa1.0.00685.1 | 750 | 68515  | 0         | 472 | 502 | 94 -  | 1   | 498 | 9987   | 10480  |
| UN77942 | Rsa1.0.00610.1 | 550 | 72740  | 1.00E-124 | 279 | 297 | 93 -  | 1   | 287 | 36010  | 36306  |
| UN77943 | Rsa1.0.00002.1 | 450 | 601661 | 1.00E-140 | 285 | 296 | 96 -  | 155 | 450 | 578422 | 578717 |
| UN77944 | Rsa1.0.04594.1 | 543 | 16713  | 1.00E-111 | 293 | 326 | 89 +  | 206 | 531 | 4213   | 4523   |
| UN77945 | Rsa1.0.03271.1 | 486 | 24187  | 1.00E-171 | 387 | 418 | 92 +  | 1   | 396 | 1303   | 1716   |
| UN77946 | Rsa1.0.02365.1 | 270 | 32118  | 1.00E-139 | 267 | 271 | 98 -  | 1   | 270 | 4898   | 5168   |
| UN77947 | Rsa1.0.15342.1 | 156 | 2671   | 1.00E-39  | 95  | 99  | 95 -  | 1   | 99  | 979    | 1077   |
| UN77948 | Rsa1.0.00965.1 | 380 | 58139  | 2.00E-96  | 179 | 179 | 100 + | 3   | 181 | 26825  | 27003  |
| UN77949 | Rsa1.0.13646.1 | 573 | 4574   | 0         | 453 | 493 | 91 +  | 99  | 568 | 1295   | 1787   |
| UN77950 | Rsa1.0.00091.1 | 710 | 139699 | 1.00E-150 | 281 | 285 | 98 +  | 421 | 705 | 10187  | 10471  |
| UN77951 | Rsa1.0.02144.1 | 244 | 34630  | 1.00E-121 | 238 | 244 | 97 -  | 1   | 244 | 3265   | 3508   |
| UN77952 | Rsa1.0.07834.1 | 325 | 8453   | 1.00E-118 | 301 | 325 | 92 -  | 3   | 325 | 6829   | 7143   |
| UN77953 | Rsa1.0.00087.1 | 639 | 761073 | 1.00E-138 | 277 | 286 | 96 -  | 351 | 636 | 19218  | 19503  |
| UN77954 | Rsa1.0.11234.1 | 666 | 5574   | 1.00E-129 | 281 | 296 | 94 -  | 3   | 290 | 5117   | 5412   |
| UN77955 | Rsa1.0.00060.1 | 571 | 502678 | 1.00E-119 | 236 | 240 | 98 -  | 2   | 240 | 127388 | 127625 |
| UN77956 | Rsa1.0.04388.1 | 531 | 17614  | 1.00E-110 | 236 | 246 | 95 -  | 3   | 248 | 12205  | 12449  |
| UN77957 | Rsa1.0.06631.1 | 119 | 10632  | 3.00E-39  | 100 | 106 | 94 +  | 1   | 106 | 5249   | 5354   |
| UN77958 | Rsa1.0.00663.1 | 243 | 164969 | 3.00E-87  | 217 | 235 | 92 -  | 5   | 239 | 125501 | 125730 |
| UN77959 | Rsa1.0.00637.1 | 694 | 71038  | 0         | 486 | 494 | 98 -  | 202 | 694 | 3290   | 3783   |

|         |                |     |        |           |     |     |       |     |     |        |        |
|---------|----------------|-----|--------|-----------|-----|-----|-------|-----|-----|--------|--------|
| UN77960 | Rsa1.0_00285.1 | 738 | 149638 | 1.00E-131 | 310 | 331 | 93 +  | 126 | 451 | 95085  | 95414  |
| UN77961 | Rsa1.0_00038.1 | 364 | 314568 | 0         | 354 | 364 | 97 -  | 1   | 364 | 286537 | 286897 |
| UN77962 | Rsa1.0_00434.1 | 687 | 85171  | 1.00E-140 | 303 | 319 | 94 +  | 16  | 324 | 12816  | 13133  |
| UN77963 | Rsa1.0_00128.1 | 656 | 228675 | 1.00E-180 | 322 | 323 | 99 +  | 334 | 656 | 137849 | 138171 |
| UN77964 | Rsa1.0_00035.1 | 351 | 176449 | 1.00E-112 | 233 | 241 | 96 -  | 106 | 346 | 80799  | 81038  |
| UN77965 | Rsa1.0_00124.1 | 256 | 262503 | 1.00E-122 | 247 | 254 | 97 +  | 3   | 256 | 256924 | 257176 |
| UN77966 | Rsa1.0_00294.1 | 140 | 144860 | 3.00E-55  | 130 | 137 | 94 +  | 1   | 137 | 42976  | 43112  |
| UN77967 | Rsa1.0_05825.1 | 725 | 12509  | 0         | 391 | 402 | 97 -  | 324 | 725 | 7097   | 7498   |
| UN77968 | Rsa1.0_02383.1 | 631 | 31931  | 1.00E-117 | 230 | 234 | 98 -  | 2   | 235 | 12472  | 12704  |
| UN77969 | Rsa1.0_00326.1 | 187 | 171955 | 4.00E-52  | 168 | 188 | 89 +  | 1   | 186 | 89188  | 89371  |
| UN77970 | Rsa1.0_02114.1 | 721 | 34873  | 0         | 566 | 572 | 98 -  | 147 | 718 | 16957  | 17526  |
| UN77971 | Rsa1.0_00154.1 | 148 | 189461 | 2.00E-29  | 111 | 125 | 88 -  | 26  | 148 | 129488 | 129612 |
| UN77972 | Rsa1.0_02891.1 | 531 | 27010  | 0         | 513 | 529 | 96 -  | 3   | 531 | 21290  | 21815  |
| UN77973 | Rsa1.0_02205.1 | 453 | 33923  | 1.00E-168 | 379 | 402 | 94 +  | 3   | 395 | 686    | 1086   |
| UN77974 | Rsa1.0_01719.1 | 266 | 40388  | 4.00E-96  | 212 | 221 | 95 -  | 1   | 221 | 10529  | 10746  |
| UN77975 | Rsa1.0_04612.1 | 711 | 16647  | 2.00E-97  | 184 | 185 | 99 -  | 147 | 331 | 15528  | 15712  |
| UN77976 | Rsa1.0_23719.1 | 589 | 1029   | 1.00E-168 | 356 | 373 | 95 -  | 1   | 369 | 175    | 546    |
| UN77977 | Rsa1.0_04552.1 | 751 | 16878  | 0         | 519 | 522 | 99 +  | 1   | 522 | 11101  | 11622  |
| UN77978 | Rsa1.0_01368.1 | 606 | 47129  | 1.00E-140 | 267 | 272 | 98 -  | 59  | 330 | 10663  | 10934  |
| UN77979 | Rsa1.0_00092.1 | 562 | 659932 | 0         | 560 | 562 | 99 -  | 1   | 562 | 220551 | 221112 |
| UN77980 | Rsa1.0_00744.1 | 594 | 66084  | 4.00E-95  | 177 | 177 | 100 - | 343 | 519 | 43438  | 43614  |
| UN77981 | Rsa1.0_00025.1 | 540 | 277312 | 3.00E-89  | 199 | 209 | 95 -  | 325 | 533 | 15424  | 15629  |
| UN77982 | Rsa1.0_00033.1 | 222 | 515811 | 1.00E-104 | 214 | 220 | 97 +  | 3   | 221 | 497367 | 497586 |
| UN77983 | Rsa1.0_02319.1 | 596 | 32580  | 0         | 580 | 603 | 96 +  | 4   | 596 | 1118   | 1719   |
| UN77984 | Rsa1.0_01408.1 | 309 | 46383  | 1.00E-126 | 287 | 305 | 94 -  | 6   | 309 | 34693  | 34997  |
| UN77985 | Rsa1.0_02599.1 | 285 | 29660  | 5.00E-96  | 209 | 219 | 95 +  | 1   | 215 | 6486   | 6704   |
| UN77986 | Rsa1.0_05832.1 | 640 | 12491  | 1.00E-130 | 242 | 244 | 99 -  | 3   | 246 | 10411  | 10654  |
| UN77987 | Rsa1.0_00131.1 | 526 | 432233 | 1.00E-164 | 314 | 320 | 98 -  | 169 | 486 | 39516  | 39835  |
| UN77988 | Rsa1.0_00812.1 | 109 | 63233  | 2.00E-34  | 98  | 106 | 92 -  | 1   | 106 | 17698  | 17803  |
| UN77989 | Rsa1.0_03356.1 | 515 | 23487  | 0         | 487 | 504 | 96 +  | 5   | 506 | 10539  | 11038  |
| UN77990 | Rsa1.0_13204.1 | 317 | 4970   | 1.00E-117 | 228 | 233 | 97 +  | 85  | 317 | 1670   | 1902   |
| UN77991 | Rsa1.0_00057.1 | 136 | 160473 | 2.00E-50  | 129 | 137 | 94 -  | 1   | 136 | 98842  | 98978  |
| UN77992 | Rsa1.0_04881.1 | 697 | 15608  | 0         | 676 | 704 | 96 -  | 2   | 690 | 8531   | 9234   |
| UN77993 | Rsa1.0_00640.1 | 546 | 70979  | 0         | 540 | 544 | 99 -  | 1   | 544 | 28030  | 28573  |
| UN77994 | Rsa1.0_01042.1 | 261 | 293264 | 3.00E-81  | 235 | 258 | 91 +  | 7   | 258 | 141031 | 141287 |
| UN77995 | Rsa1.0_00038.1 | 550 | 314568 | 1.00E-141 | 336 | 360 | 93 -  | 2   | 354 | 167365 | 167721 |
| UN77996 | Rsa1.0_02008.1 | 366 | 36109  | 7.00E-74  | 151 | 153 | 98 +  | 2   | 154 | 9815   | 9966   |
| UN77997 | Rsa1.0_00291.1 | 558 | 172129 | 1.00E-100 | 265 | 286 | 92 -  | 1   | 286 | 12089  | 12370  |
| UN77998 | Rsa1.0_00122.1 | 826 | 265937 | 0         | 658 | 724 | 90 +  | 7   | 719 | 107077 | 107781 |

|         |                |     |        |           |     |     |      |     |     |        |        |
|---------|----------------|-----|--------|-----------|-----|-----|------|-----|-----|--------|--------|
| UN77999 | Rsa1.0.00024.1 | 246 | 188018 | 2.00E-67  | 191 | 207 | 92 - | 12  | 212 | 18170  | 18375  |
| UN78000 | Rsa1.0.00076.1 | 577 | 146021 | 0         | 517 | 540 | 95 + | 4   | 538 | 76788  | 77317  |
| UN78001 | Rsa1.0.05347.1 | 343 | 14096  | 1.00E-131 | 321 | 344 | 93 - | 1   | 343 | 9450   | 9779   |
| UN78002 | Rsa1.0.01932.1 | 214 | 37177  | 3.00E-84  | 203 | 216 | 93 + | 2   | 214 | 11000  | 11214  |
| UN78003 | Rsa1.0.05322.1 | 755 | 14154  | 0         | 730 | 755 | 96 + | 4   | 755 | 762    | 1514   |
| UN78004 | Rsa1.0.00394.1 | 804 | 148426 | 0         | 516 | 546 | 94 + | 14  | 546 | 135144 | 135687 |
| UN78005 | Rsa1.0.05389.1 | 717 | 13943  | 0         | 453 | 477 | 94 - | 2   | 474 | 8760   | 9233   |
| UN78006 | Rsa1.0.01029.1 | 532 | 256254 | 1.00E-152 | 336 | 359 | 93 - | 3   | 346 | 2337   | 2694   |
| UN78007 | Rsa1.0.00462.1 | 202 | 82288  | 5.00E-67  | 163 | 173 | 94 - | 1   | 172 | 36576  | 36748  |
| UN78008 | Rsa1.0.00033.1 | 395 | 515811 | 2.00E-52  | 241 | 282 | 85 - | 11  | 292 | 469201 | 469475 |
| UN78009 | Rsa1.0.01727.1 | 359 | 40243  | 1.00E-143 | 339 | 361 | 93 - | 2   | 359 | 27964  | 28322  |
| UN78010 | Rsa1.0.00955.1 | 325 | 58358  | 1.00E-160 | 315 | 325 | 96 + | 1   | 325 | 8483   | 8807   |
| UN78011 | Rsa1.0.00089.1 | 517 | 406142 | 1.00E-101 | 235 | 251 | 93 - | 198 | 448 | 360701 | 360951 |
| UN78012 | Rsa1.0.10544.1 | 367 | 5807   | 1.00E-132 | 281 | 294 | 95 + | 75  | 367 | 4750   | 5037   |
| UN78013 | Rsa1.0.00666.1 | 162 | 69505  | 3.00E-62  | 146 | 153 | 95 - | 11  | 162 | 27871  | 28023  |
| UN78014 | Rsa1.0.01703.1 | 762 | 40713  | 1.00E-167 | 364 | 382 | 95 - | 57  | 433 | 22097  | 22475  |
| UN78015 | Rsa1.0.02184.1 | 777 | 34166  | 0         | 749 | 778 | 96 + | 5   | 777 | 2261   | 3037   |
| UN78016 | Rsa1.0.00006.1 | 254 | 396176 | 9.00E-91  | 226 | 245 | 92 + | 4   | 248 | 368593 | 368837 |
| UN78017 | Rsa1.0.07727.1 | 336 | 8700   | 1.00E-158 | 313 | 323 | 96 + | 1   | 323 | 8378   | 8700   |
| UN78018 | Rsa1.0.01117.1 | 593 | 53465  | 0         | 549 | 556 | 98 - | 2   | 557 | 20333  | 20888  |
| UN78019 | Rsa1.0.00600.1 | 335 | 73395  | 1.00E-149 | 318 | 335 | 94 - | 1   | 335 | 26459  | 26793  |
| UN78020 | Rsa1.0.07381.1 | 131 | 9488   | 2.00E-56  | 123 | 127 | 96 + | 5   | 131 | 4036   | 4162   |
| UN78021 | Rsa1.0.23933.1 | 371 | 1016   | 1.00E-108 | 239 | 248 | 96 - | 39  | 283 | 195    | 439    |
| UN78022 | Rsa1.0.55981.1 | 367 | 408    | 0         | 360 | 367 | 98 - | 1   | 367 | 41     | 406    |
| UN78023 | Rsa1.0.00087.1 | 425 | 761073 | 1.00E-135 | 371 | 412 | 90 + | 19  | 425 | 9282   | 9692   |
| UN78024 | Rsa1.0.02181.1 | 280 | 34172  | 1.00E-120 | 265 | 280 | 94 - | 1   | 277 | 20299  | 20578  |
| UN78025 | Rsa1.0.13787.1 | 666 | 4338   | 1.00E-111 | 238 | 248 | 95 + | 1   | 242 | 3585   | 3832   |
| UN78026 | Rsa1.0.04835.1 | 100 | 15766  | 1.00E-41  | 95  | 98  | 96 + | 1   | 98  | 9375   | 9472   |
| UN78027 | Rsa1.0.02796.1 | 745 | 27805  | 1.00E-142 | 294 | 302 | 97 - | 1   | 298 | 16192  | 16491  |
| UN78028 | Rsa1.0.02267.1 | 139 | 33194  | 6.00E-32  | 110 | 122 | 90 + | 18  | 139 | 28602  | 28722  |
| UN78029 | Rsa1.0.00875.1 | 462 | 61371  | 0         | 421 | 435 | 96 + | 5   | 439 | 58197  | 58631  |
| UN78030 | Rsa1.0.03420.1 | 816 | 23090  | 1.00E-129 | 251 | 254 | 98 - | 2   | 253 | 668    | 921    |
| UN78031 | Rsa1.0.07528.1 | 305 | 9195   | 1.00E-155 | 300 | 306 | 98 - | 1   | 305 | 3578   | 3883   |
| UN78032 | Rsa1.0.00139.1 | 721 | 357786 | 0         | 418 | 419 | 99 + | 3   | 421 | 236267 | 236685 |
| UN78033 | Rsa1.0.12222.1 | 392 | 5285   | 0         | 376 | 392 | 95 - | 1   | 392 | 3539   | 3930   |
| UN78034 | Rsa1.0.00100.1 | 569 | 249232 | 0         | 449 | 480 | 93 + | 7   | 480 | 221767 | 222245 |
| UN78035 | Rsa1.0.03997.1 | 799 | 19652  | 1.00E-108 | 215 | 220 | 97 + | 220 | 439 | 6061   | 6280   |
| UN78036 | Rsa1.0.01481.1 | 782 | 184562 | 2.00E-76  | 155 | 158 | 98 + | 250 | 407 | 152080 | 152237 |
| UN78037 | Rsa1.0.09074.1 | 493 | 6670   | 1.00E-118 | 268 | 284 | 94 + | 27  | 310 | 2999   | 3277   |

|         |                |     |        |           |     |     |      |     |     |        |        |
|---------|----------------|-----|--------|-----------|-----|-----|------|-----|-----|--------|--------|
| UN78038 | Rsa1.0.08846.1 | 525 | 6867   | 1.00E-109 | 240 | 253 | 94 - | 1   | 253 | 3201   | 3453   |
| UN78039 | Rsa1.0.00032.1 | 342 | 306326 | 1.00E-158 | 327 | 339 | 96 - | 1   | 339 | 191383 | 191719 |
| UN78040 | Rsa1.0.02223.1 | 519 | 152421 | 1.00E-100 | 245 | 260 | 94 + | 2   | 258 | 18692  | 18949  |
| UN78041 | Rsa1.0.02480.1 | 609 | 31036  | 3.00E-99  | 190 | 192 | 98 - | 1   | 192 | 12697  | 12888  |
| UN78042 | Rsa1.0.04210.1 | 754 | 18442  | 0         | 401 | 413 | 97 - | 5   | 417 | 5871   | 6283   |
| UN78043 | Rsa1.0.00135.1 | 318 | 178077 | 1.00E-148 | 306 | 316 | 96 + | 2   | 314 | 112641 | 112955 |
| UN78044 | Rsa1.0.00251.1 | 444 | 303968 | 4.00E-88  | 193 | 201 | 96 + | 3   | 203 | 121022 | 121221 |
| UN78045 | Rsa1.0.00632.1 | 309 | 183777 | 3.00E-79  | 198 | 214 | 92 + | 5   | 218 | 15025  | 15238  |
| UN78046 | Rsa1.0.00150.1 | 207 | 154416 | 2.00E-94  | 199 | 207 | 96 + | 1   | 207 | 17287  | 17493  |
| UN78047 | Rsa1.0.00476.1 | 366 | 280966 | 2.33E-156 | 333 | 355 | 93 + | 9   | 362 | 213017 | 213371 |
| UN78048 | Rsa1.0.00190.1 | 465 | 318240 | 0         | 446 | 468 | 95 - | 1   | 465 | 94564  | 95031  |
| UN78049 | Rsa1.0.00017.1 | 178 | 752458 | 3.00E-37  | 88  | 91  | 96 + | 5   | 95  | 272318 | 272408 |
| UN78050 | Rsa1.0.00716.1 | 654 | 67078  | 2.00E-51  | 158 | 173 | 91 - | 487 | 654 | 30229  | 30400  |
| UN78051 | Rsa1.0.00040.1 | 421 | 324196 | 1.00E-178 | 396 | 419 | 94 + | 6   | 421 | 167261 | 167678 |
| UN78052 | Rsa1.0.01254.1 | 240 | 49801  | 1.00E-126 | 237 | 240 | 98 - | 1   | 240 | 2285   | 2524   |
| UN78053 | Rsa1.0.01717.1 | 788 | 143162 | 0         | 770 | 788 | 97 - | 1   | 788 | 114230 | 115017 |
| UN78054 | Rsa1.0.02458.1 | 398 | 31197  | 6.00E-90  | 192 | 200 | 96 + | 6   | 205 | 8233   | 8432   |
| UN78055 | Rsa1.0.00295.1 | 518 | 152597 | 0         | 479 | 508 | 94 + | 5   | 512 | 48276  | 48776  |
| UN78056 | Rsa1.0.10000.1 | 648 | 6043   | 0         | 608 | 654 | 92 - | 3   | 648 | 4463   | 5104   |
| UN78057 | Rsa1.0.00001.1 | 462 | 363028 | 1.00E-100 | 207 | 213 | 97 - | 4   | 216 | 14633  | 14844  |
| UN78058 | Rsa1.0.13979.1 | 444 | 3964   | 0         | 378 | 393 | 96 - | 8   | 400 | 2932   | 3324   |
| UN78059 | Rsa1.0.00480.1 | 485 | 81325  | 0         | 471 | 485 | 97 + | 1   | 485 | 62862  | 63342  |
| UN78060 | Rsa1.0.03992.1 | 733 | 19675  | 1.00E-131 | 249 | 253 | 98 - | 481 | 733 | 11719  | 11971  |
| UN78061 | Rsa1.0.12658.1 | 756 | 5161   | 7.00E-91  | 246 | 270 | 91 - | 54  | 322 | 33     | 302    |
| UN78062 | Rsa1.0.06073.1 | 731 | 11807  | 0         | 594 | 629 | 94 - | 1   | 629 | 4362   | 4978   |
| UN78063 | Rsa1.0.01286.1 | 760 | 49209  | 0         | 598 | 680 | 87 + | 2   | 649 | 12438  | 13092  |
| UN78064 | Rsa1.0.00669.1 | 676 | 69419  | 1.00E-123 | 236 | 240 | 98 + | 1   | 240 | 18555  | 18794  |
| UN78065 | Rsa1.0.06100.1 | 795 | 11746  | 2.00E-70  | 159 | 166 | 95 + | 546 | 708 | 189    | 354    |
| UN78066 | Rsa1.0.00228.1 | 203 | 105511 | 2.00E-60  | 158 | 170 | 92 + | 37  | 203 | 42088  | 42254  |
| UN78067 | Rsa1.0.02163.1 | 421 | 34427  | 4.00E-82  | 181 | 189 | 95 - | 2   | 187 | 5688   | 5876   |
| UN78068 | Rsa1.0.01847.1 | 648 | 38346  | 1.00E-113 | 220 | 224 | 98 - | 251 | 474 | 9939   | 10162  |
| UN78069 | Rsa1.0.01263.1 | 348 | 49703  | 2.00E-68  | 153 | 160 | 95 - | 176 | 335 | 39811  | 39970  |
| UN78070 | Rsa1.0.03261.1 | 667 | 24281  | 3.00E-90  | 184 | 189 | 97 - | 341 | 529 | 4757   | 4945   |
| UN78071 | Rsa1.0.00333.1 | 667 | 94500  | 1.00E-118 | 293 | 314 | 93 + | 181 | 491 | 41493  | 41804  |
| UN78072 | Rsa1.0.00363.1 | 564 | 90968  | 2.00E-87  | 193 | 203 | 95 - | 223 | 419 | 53874  | 54076  |
| UN78073 | Rsa1.0.07689.1 | 413 | 8790   | 1.00E-130 | 245 | 247 | 99 + | 167 | 413 | 137    | 382    |
| UN78074 | Rsa1.0.00251.1 | 191 | 303968 | 1.00E-30  | 80  | 84  | 95 - | 28  | 111 | 121720 | 121803 |
| UN78075 | Rsa1.0.00048.1 | 600 | 167185 | 1.00E-125 | 271 | 284 | 95 + | 322 | 600 | 4501   | 4784   |
| UN78076 | Rsa1.0.00905.1 | 704 | 60110  | 2.00E-69  | 236 | 270 | 87 - | 42  | 311 | 16034  | 16303  |

|         |                |     |        |           |     |     |       |     |     |        |        |
|---------|----------------|-----|--------|-----------|-----|-----|-------|-----|-----|--------|--------|
| UN78077 | Rsa1.0_01245.1 | 641 | 149868 | 0         | 445 | 464 | 95 +  | 181 | 641 | 26708  | 27168  |
| UN78078 | Rsa1.0_53602.1 | 510 | 425    | 1.00E-102 | 195 | 196 | 99 +  | 3   | 197 | 230    | 425    |
| UN78079 | Rsa1.0_00018.1 | 623 | 410899 | 6.00E-85  | 163 | 164 | 99 -  | 460 | 623 | 407444 | 407607 |
| UN78080 | Rsa1.0_00101.1 | 678 | 267193 | 0         | 446 | 460 | 96 +  | 221 | 678 | 219932 | 220391 |
| UN78081 | Rsa1.0_00435.1 | 447 | 317579 | 1.00E-121 | 234 | 237 | 98 -  | 4   | 239 | 4602   | 4838   |
| UN78082 | Rsa1.0_17623.1 | 396 | 1781   | 0         | 376 | 388 | 96 +  | 9   | 396 | 1044   | 1431   |
| UN78083 | Rsa1.0_00246.1 | 504 | 103541 | 0         | 459 | 485 | 94 -  | 20  | 504 | 78393  | 78877  |
| UN78084 | Rsa1.0_02951.1 | 714 | 26505  | 4.00E-74  | 148 | 150 | 98 -  | 223 | 372 | 3761   | 3910   |
| UN78085 | Rsa1.0_10759.1 | 445 | 5727   | 0         | 428 | 437 | 97 -  | 1   | 434 | 3456   | 3892   |
| UN78086 | Rsa1.0_00001.1 | 250 | 363028 | 1.00E-113 | 239 | 250 | 95 +  | 1   | 250 | 248322 | 248571 |
| UN78087 | Rsa1.0_01945.1 | 715 | 36989  | 0         | 687 | 722 | 95 -  | 1   | 715 | 26392  | 27113  |
| UN78088 | Rsa1.0_00033.1 | 105 | 515811 | 2.00E-24  | 72  | 77  | 93 +  | 1   | 77  | 371701 | 371777 |
| UN78089 | Rsa1.0_01484.1 | 545 | 44806  | 4.00E-67  | 173 | 182 | 95 -  | 1   | 180 | 27310  | 27489  |
| UN78090 | Rsa1.0_00722.1 | 156 | 66840  | 3.00E-28  | 94  | 104 | 90 -  | 53  | 156 | 21205  | 21308  |
| UN78091 | Rsa1.0_11720.1 | 103 | 5430   | 7.00E-40  | 98  | 103 | 95 +  | 1   | 103 | 2579   | 2681   |
| UN78092 | Rsa1.0_03088.1 | 362 | 25476  | 8.00E-83  | 187 | 196 | 95 -  | 1   | 195 | 671    | 866    |
| UN78093 | Rsa1.0_00047.1 | 522 | 168582 | 1.00E-129 | 314 | 336 | 93 -  | 1   | 332 | 99347  | 99680  |
| UN78094 | Rsa1.0_02264.1 | 583 | 33233  | 0         | 468 | 473 | 98 -  | 1   | 473 | 9397   | 9866   |
| UN78095 | Rsa1.0_10308.1 | 681 | 5894   | 1.00E-156 | 292 | 296 | 98 +  | 186 | 481 | 5439   | 5734   |
| UN78096 | Rsa1.0_08271.1 | 578 | 7620   | 4.00E-98  | 248 | 270 | 91 -  | 6   | 275 | 6754   | 7023   |
| UN78097 | Rsa1.0_09702.1 | 546 | 6201   | 0         | 523 | 552 | 94 +  | 13  | 546 | 1220   | 1771   |
| UN78098 | Rsa1.0_29259.1 | 535 | 788    | 1.00E-131 | 240 | 241 | 99 -  | 290 | 530 | 548    | 788    |
| UN78099 | Rsa1.0_03167.1 | 663 | 24858  | 1.00E-131 | 247 | 249 | 99 -  | 397 | 644 | 14503  | 14751  |
| UN78100 | Rsa1.0_01286.1 | 635 | 49209  | 1.00E-106 | 202 | 204 | 99 -  | 3   | 206 | 14946  | 15149  |
| UN78101 | Rsa1.0_03945.1 | 523 | 19924  | 1.00E-122 | 239 | 244 | 97 +  | 3   | 242 | 13762  | 14005  |
| UN78102 | Rsa1.0_00945.1 | 655 | 58714  | 0         | 569 | 572 | 99 -  | 2   | 573 | 7754   | 8325   |
| UN78103 | Rsa1.0_00646.1 | 385 | 70473  | 4.00E-91  | 208 | 220 | 94 +  | 104 | 323 | 8115   | 8331   |
| UN78104 | Rsa1.0_00007.1 | 515 | 239325 | 0         | 440 | 474 | 92 -  | 2   | 464 | 31577  | 32050  |
| UN78105 | Rsa1.0_07130.1 | 539 | 9861   | 1.00E-159 | 332 | 348 | 95 +  | 3   | 350 | 7834   | 8175   |
| UN78106 | Rsa1.0_00978.1 | 641 | 57739  | 0         | 476 | 499 | 95 +  | 143 | 641 | 1744   | 2237   |
| UN78107 | Rsa1.0_00228.1 | 638 | 105511 | 1.00E-134 | 282 | 295 | 95 -  | 125 | 419 | 43291  | 43585  |
| UN78108 | Rsa1.0_00661.1 | 643 | 213041 | 0         | 594 | 653 | 90 -  | 1   | 629 | 196972 | 197612 |
| UN78109 | Rsa1.0_11724.1 | 311 | 5428   | 1.00E-150 | 299 | 309 | 96 +  | 2   | 310 | 5025   | 5333   |
| UN78110 | Rsa1.0_00548.1 | 643 | 76518  | 0         | 603 | 663 | 90 +  | 1   | 643 | 63619  | 64254  |
| UN78111 | Rsa1.0_02479.1 | 588 | 31038  | 1.00E-156 | 304 | 310 | 98 -  | 1   | 307 | 12979  | 13287  |
| UN78112 | Rsa1.0_03037.1 | 272 | 25825  | 4.00E-93  | 248 | 269 | 92 +  | 1   | 267 | 10604  | 10871  |
| UN78113 | Rsa1.0_00415.1 | 597 | 86795  | 0         | 355 | 361 | 98 -  | 240 | 597 | 13193  | 13553  |
| UN78114 | Rsa1.0_02921.1 | 702 | 26779  | 9.00E-78  | 148 | 148 | 100 + | 555 | 702 | 6783   | 6930   |
| UN78115 | Rsa1.0_00209.1 | 588 | 108531 | 0         | 560 | 588 | 95 -  | 1   | 588 | 18723  | 19310  |

|         |                |     |        |           |     |     |      |     |     |        |        |
|---------|----------------|-----|--------|-----------|-----|-----|------|-----|-----|--------|--------|
| UN78116 | Rsa1.0.05283.1 | 577 | 14270  | 1.00E-88  | 215 | 230 | 93 + | 1   | 229 | 8556   | 8785   |
| UN78117 | Rsa1.0.03325.1 | 209 | 23720  | 7.00E-85  | 198 | 210 | 94 + | 2   | 209 | 14655  | 14864  |
| UN78118 | Rsa1.0.04788.1 | 507 | 15984  | 1.00E-126 | 256 | 265 | 96 - | 243 | 507 | 4757   | 5021   |
| UN78119 | Rsa1.0.01313.1 | 686 | 48387  | 1.00E-145 | 305 | 318 | 95 + | 1   | 318 | 8861   | 9173   |
| UN78120 | Rsa1.0.00087.1 | 177 | 761073 | 9.00E-81  | 171 | 177 | 96 - | 1   | 177 | 217410 | 217582 |
| UN78121 | Rsa1.0.09226.1 | 138 | 6545   | 6.00E-41  | 127 | 139 | 91 - | 1   | 135 | 52     | 190    |
| UN78122 | Rsa1.0.00035.1 | 509 | 176449 | 0         | 488 | 509 | 95 + | 1   | 509 | 51495  | 52003  |
| UN78123 | Rsa1.0.00017.1 | 437 | 752458 | 0         | 430 | 436 | 98 - | 3   | 437 | 465556 | 465991 |
| UN78124 | Rsa1.0.00459.1 | 510 | 82580  | 1.00E-170 | 342 | 354 | 96 - | 2   | 354 | 20821  | 21174  |
| UN78125 | Rsa1.0.01884.1 | 313 | 37659  | 3.00E-48  | 116 | 122 | 95 - | 134 | 255 | 32903  | 33024  |
| UN78126 | Rsa1.0.00789.1 | 861 | 64233  | 0         | 376 | 383 | 98 - | 1   | 379 | 53473  | 53854  |
| UN78127 | Rsa1.0.02783.1 | 875 | 27927  | 0         | 438 | 462 | 94 + | 377 | 831 | 7918   | 8379   |
| UN78128 | Rsa1.0.10942.1 | 286 | 5669   | 1.00E-120 | 261 | 274 | 95 + | 4   | 277 | 1132   | 1403   |
| UN78129 | Rsa1.0.00739.1 | 242 | 66155  | 1.00E-107 | 218 | 224 | 97 + | 1   | 224 | 52095  | 52317  |
| UN78130 | Rsa1.0.04843.1 | 645 | 15756  | 0         | 608 | 647 | 93 + | 1   | 645 | 14242  | 14872  |
| UN78131 | #              | #   | #      | #         | #   | #   | #    | #   | #   | #      | #      |
| UN78132 | Rsa1.0.00218.1 | 779 | 201480 | 0         | 534 | 565 | 94 + | 55  | 619 | 116182 | 116736 |
| UN78133 | Rsa1.0.00312.1 | 542 | 96765  | 0         | 518 | 540 | 95 + | 4   | 542 | 57935  | 58463  |
| UN78134 | Rsa1.0.00910.1 | 699 | 59975  | 0         | 678 | 708 | 95 - | 1   | 699 | 27569  | 28276  |
| UN78135 | Rsa1.0.12228.1 | 252 | 5281   | 3.00E-78  | 187 | 200 | 93 + | 1   | 200 | 4496   | 4695   |
| UN78136 | Rsa1.0.01955.1 | 473 | 36850  | 0         | 471 | 474 | 99 + | 1   | 473 | 33335  | 33808  |
| UN78137 | Rsa1.0.00107.1 | 565 | 431659 | 0         | 534 | 552 | 96 + | 16  | 565 | 14070  | 14619  |
| UN78138 | Rsa1.0.10601.1 | 202 | 5789   | 1.00E-43  | 183 | 206 | 88 - | 2   | 202 | 5066   | 5265   |
| UN78139 | Rsa1.0.00329.1 | 251 | 222544 | 3.00E-78  | 228 | 256 | 89 + | 1   | 251 | 30054  | 30300  |
| UN78140 | Rsa1.0.16086.1 | 539 | 2289   | 2.00E-72  | 172 | 183 | 93 - | 20  | 202 | 1078   | 1260   |
| UN78141 | Rsa1.0.00329.1 | 724 | 222544 | 0         | 479 | 505 | 94 - | 43  | 537 | 154475 | 154978 |
| UN78142 | Rsa1.0.01655.1 | 196 | 41508  | 3.00E-59  | 164 | 180 | 91 + | 1   | 180 | 1909   | 2088   |
| UN78143 | Rsa1.0.02161.1 | 558 | 34459  | 0         | 512 | 516 | 99 + | 43  | 558 | 21364  | 21879  |
| UN78144 | Rsa1.0.01504.1 | 163 | 189978 | 8.00E-47  | 137 | 148 | 92 - | 1   | 145 | 148299 | 148443 |
| UN78145 | #              | #   | #      | #         | #   | #   | #    | #   | #   | #      | #      |
| UN78146 | Rsa1.0.00048.1 | 590 | 167185 | 0         | 384 | 391 | 98 - | 1   | 391 | 100204 | 100592 |
| UN78147 | Rsa1.0.00426.1 | 558 | 85668  | 2.00E-84  | 177 | 183 | 96 - | 376 | 558 | 68013  | 68195  |
| UN78148 | Rsa1.0.02058.1 | 302 | 35532  | 8.00E-98  | 277 | 308 | 89 + | 2   | 302 | 14562  | 14869  |
| UN78149 | Rsa1.0.20971.1 | 558 | 1249   | 1.00E-176 | 384 | 401 | 95 - | 3   | 401 | 1      | 393    |
| UN78150 | Rsa1.0.00025.1 | 486 | 277312 | 4.00E-76  | 148 | 149 | 99 - | 338 | 486 | 130886 | 131034 |
| UN78151 | Rsa1.0.03771.1 | 788 | 20942  | 0         | 726 | 757 | 95 + | 32  | 788 | 20020  | 20776  |
| UN78152 | Rsa1.0.00478.1 | 726 | 81419  | 1.00E-165 | 477 | 533 | 89 + | 145 | 676 | 7680   | 8208   |
| UN78153 | Rsa1.0.00003.1 | 163 | 340054 | 7.00E-35  | 139 | 159 | 87 + | 8   | 163 | 136770 | 136925 |
| UN78154 | Rsa1.0.00604.1 | 395 | 146282 | 2.00E-96  | 221 | 234 | 94 - | 1   | 230 | 17895  | 18125  |

|         |                |     |        |           |     |     |       |     |     |        |        |
|---------|----------------|-----|--------|-----------|-----|-----|-------|-----|-----|--------|--------|
| UN78155 | Rsa1.0.00065.1 | 468 | 454616 | 1.00E-101 | 218 | 227 | 96 +  | 42  | 268 | 231288 | 231513 |
| UN78156 | Rsa1.0.00589.1 | 451 | 209965 | 2.00E-87  | 256 | 285 | 89 -  | 1   | 277 | 62065  | 62337  |
| UN78157 | Rsa1.0.00364.1 | 260 | 90951  | 1.00E-77  | 165 | 171 | 96 -  | 1   | 171 | 16823  | 16993  |
| UN78158 | Rsa1.0.15173.1 | 677 | 2779   | 1.00E-128 | 329 | 357 | 92 -  | 18  | 367 | 1651   | 2001   |
| UN78159 | Rsa1.0.01591.1 | 158 | 42718  | 2.00E-29  | 91  | 98  | 92 -  | 41  | 137 | 16746  | 16843  |
| UN78160 | Rsa1.0.04846.1 | 205 | 15739  | 4.00E-37  | 163 | 189 | 86 -  | 18  | 205 | 13621  | 13806  |
| UN78161 | Rsa1.0.00034.1 | 103 | 260119 | 2.00E-28  | 89  | 96  | 92 +  | 1   | 96  | 121381 | 121475 |
| UN78162 | Rsa1.0.02402.1 | 566 | 31710  | 1.00E-180 | 332 | 336 | 98 +  | 1   | 336 | 28969  | 29304  |
| UN78163 | Rsa1.0.00586.1 | 211 | 163802 | 8.00E-94  | 202 | 210 | 96 +  | 3   | 211 | 154475 | 154684 |
| UN78164 | Rsa1.0.01632.1 | 547 | 181224 | 1.00E-113 | 291 | 319 | 91 -  | 7   | 313 | 27928  | 28242  |
| UN78165 | Rsa1.0.00361.1 | 463 | 91181  | 0         | 451 | 463 | 97 +  | 1   | 463 | 69874  | 70334  |
| UN78166 | Rsa1.0.00377.1 | 715 | 90038  | 3.00E-87  | 311 | 357 | 87 +  | 44  | 374 | 28031  | 28387  |
| UN78167 | Rsa1.0.02811.1 | 198 | 27669  | 4.00E-49  | 118 | 123 | 95 +  | 77  | 198 | 21269  | 21391  |
| UN78168 | Rsa1.0.00329.1 | 607 | 222544 | 1.00E-135 | 290 | 305 | 95 +  | 280 | 584 | 84114  | 84418  |
| UN78169 | Rsa1.0.11549.1 | 422 | 5473   | 1.00E-180 | 354 | 364 | 97 +  | 39  | 402 | 4631   | 4993   |
| UN78170 | Rsa1.0.03506.1 | 550 | 22416  | 0         | 531 | 554 | 95 -  | 1   | 550 | 8426   | 8974   |
| UN78171 | Rsa1.0.01223.1 | 735 | 50392  | 1.00E-160 | 382 | 414 | 92 -  | 321 | 734 | 47158  | 47565  |
| UN78172 | Rsa1.0.00976.1 | 254 | 57809  | 6.00E-55  | 238 | 280 | 85 +  | 5   | 254 | 15507  | 15779  |
| UN78173 | Rsa1.0.00593.1 | 525 | 143463 | 0         | 511 | 514 | 99 +  | 1   | 513 | 135654 | 136167 |
| UN78174 | Rsa1.0.02451.1 | 166 | 31283  | 1.00E-24  | 109 | 126 | 86 -  | 1   | 126 | 2439   | 2564   |
| UN78175 | Rsa1.0.00526.1 | 696 | 169279 | 0         | 535 | 554 | 96 +  | 2   | 551 | 128355 | 128908 |
| UN78176 | Rsa1.0.00820.1 | 131 | 62911  | 8.00E-59  | 124 | 127 | 97 +  | 5   | 131 | 61923  | 62049  |
| UN78177 | Rsa1.0.00123.1 | 343 | 325650 | 9.00E-64  | 218 | 251 | 86 -  | 97  | 343 | 235850 | 236084 |
| UN78178 | Rsa1.0.00797.1 | 612 | 63959  | 0         | 499 | 515 | 96 -  | 97  | 609 | 60247  | 60759  |
| UN78179 | Rsa1.0.02193.1 | 292 | 34040  | 7.00E-15  | 69  | 77  | 89 +  | 200 | 276 | 5920   | 5994   |
| UN78180 | Rsa1.0.03099.1 | 466 | 139424 | 7.00E-56  | 111 | 111 | 100 - | 119 | 229 | 1853   | 1963   |
| UN78181 | Rsa1.0.03762.1 | 159 | 20976  | 4.00E-61  | 122 | 123 | 99 +  | 34  | 156 | 477    | 599    |
| UN78182 | Rsa1.0.02783.1 | 779 | 27927  | 0         | 424 | 444 | 95 -  | 275 | 709 | 8430   | 8873   |
| UN78183 | Rsa1.0.00471.1 | 648 | 81897  | 0         | 619 | 652 | 94 +  | 1   | 648 | 35962  | 36608  |
| UN78184 | #              | #   | #      | #         | #   | #   | #     | #   | #   | #      | #      |
| UN78185 | Rsa1.0.03777.1 | 628 | 20922  | 0         | 612 | 635 | 96 +  | 1   | 628 | 479    | 1109   |
| UN78186 | Rsa1.0.04843.1 | 630 | 15756  | 0         | 625 | 629 | 99 -  | 3   | 630 | 14936  | 15564  |
| UN78187 | Rsa1.0.00497.1 | 728 | 79830  | 5.00E-92  | 185 | 188 | 98 +  | 542 | 728 | 54334  | 54521  |
| UN78188 | Rsa1.0.00188.1 | 678 | 112020 | 0         | 560 | 578 | 96 -  | 107 | 678 | 99751  | 100323 |
| UN78189 | Rsa1.0.00002.1 | 605 | 601661 | 0         | 415 | 422 | 98 -  | 184 | 605 | 86260  | 86681  |
| UN78190 | Rsa1.0.00527.1 | 660 | 77733  | 1.00E-112 | 276 | 298 | 92 -  | 332 | 626 | 58087  | 58381  |
| UN78191 | Rsa1.0.00218.1 | 715 | 201480 | 0         | 508 | 512 | 99 -  | 2   | 513 | 118929 | 119440 |
| UN78192 | Rsa1.0.00092.1 | 710 | 659932 | 2.33E-156 | 320 | 336 | 95 -  | 373 | 704 | 517125 | 517458 |
| UN78193 | Rsa1.0.01673.1 | 813 | 41197  | 0         | 469 | 479 | 97 -  | 98  | 575 | 10059  | 10537  |

|         |                |     |        |           |     |     |      |     |     |        |        |
|---------|----------------|-----|--------|-----------|-----|-----|------|-----|-----|--------|--------|
| UN78194 | Rsa1.0.01429.1 | 215 | 46061  | 1.00E-111 | 212 | 215 | 98 - | 1   | 215 | 33385  | 33599  |
| UN78195 | Rsa1.0.00087.1 | 700 | 761073 | 0         | 565 | 592 | 95 - | 108 | 699 | 78764  | 79355  |
| UN78196 | Rsa1.0.00665.1 | 826 | 69539  | 1.00E-176 | 333 | 337 | 98 + | 488 | 821 | 64632  | 64968  |
| UN78197 | Rsa1.0.01217.1 | 689 | 50554  | 0         | 481 | 497 | 96 + | 182 | 678 | 22108  | 22604  |
| UN78198 | Rsa1.0.02753.1 | 559 | 28215  | 3.00E-74  | 157 | 162 | 96 + | 8   | 169 | 4177   | 4338   |
| UN78199 | Rsa1.0.02643.1 | 437 | 29176  | 1.00E-152 | 319 | 333 | 95 + | 1   | 332 | 4017   | 4349   |
| UN78200 | Rsa1.0.00032.1 | 289 | 306326 | 1.00E-117 | 272 | 290 | 93 + | 1   | 289 | 284940 | 285229 |
| UN78201 | Rsa1.0.00289.1 | 730 | 98620  | 0         | 673 | 694 | 96 - | 1   | 694 | 58970  | 59663  |
| UN78202 | Rsa1.0.01949.1 | 507 | 36960  | 1.00E-153 | 388 | 421 | 92 + | 31  | 445 | 20410  | 20826  |
| UN78203 | Rsa1.0.07441.1 | 701 | 9388   | 1.00E-148 | 272 | 274 | 99 - | 1   | 274 | 1725   | 1998   |
| UN78204 | Rsa1.0.01743.1 | 394 | 39926  | 0         | 390 | 393 | 99 + | 2   | 394 | 6754   | 7146   |
| UN78205 | Rsa1.0.02499.1 | 436 | 30774  | 1.00E-114 | 239 | 248 | 96 - | 1   | 247 | 18971  | 19218  |
| UN78206 | Rsa1.0.14207.1 | 687 | 3667   | 1.00E-172 | 321 | 326 | 98 - | 1   | 326 | 4      | 329    |
| UN78207 | Rsa1.0.01545.1 | 674 | 43599  | 0         | 663 | 680 | 97 + | 1   | 674 | 25147  | 25825  |
| UN78208 | Rsa1.0.00010.1 | 504 | 294827 | 0         | 449 | 482 | 93 - | 25  | 504 | 145665 | 146136 |
| UN78209 | Rsa1.0.00761.1 | 522 | 65133  | 1.00E-178 | 339 | 344 | 98 - | 1   | 342 | 62157  | 62500  |
| UN78210 | Rsa1.0.60987.1 | 454 | 376    | 3.00E-95  | 204 | 213 | 95 + | 119 | 331 | 164    | 376    |
| UN78211 | Rsa1.0.00045.1 | 626 | 328694 | 0         | 453 | 479 | 94 + | 1   | 472 | 163305 | 163782 |
| UN78212 | Rsa1.0.00855.1 | 376 | 62047  | 1.00E-127 | 275 | 290 | 94 - | 1   | 290 | 18514  | 18803  |
| UN78213 | Rsa1.0.03342.1 | 786 | 23600  | 1.00E-155 | 308 | 318 | 96 + | 120 | 427 | 7032   | 7349   |
| UN78214 | Rsa1.0.00131.1 | 532 | 432233 | 7.00E-78  | 167 | 172 | 97 + | 1   | 172 | 423680 | 423850 |
| UN78215 | Rsa1.0.09321.1 | 775 | 6456   | 0         | 444 | 458 | 96 + | 98  | 552 | 4640   | 5095   |
| UN78216 | Rsa1.0.08586.1 | 771 | 7157   | 1.00E-131 | 272 | 285 | 95 + | 487 | 771 | 1944   | 2219   |
| UN78217 | Rsa1.0.02022.1 | 463 | 35923  | 1.00E-118 | 270 | 288 | 93 - | 1   | 288 | 14054  | 14341  |
| UN78218 | Rsa1.0.18699.1 | 610 | 1549   | 0         | 376 | 379 | 99 + | 1   | 379 | 850    | 1227   |
| UN78219 | Rsa1.0.00221.1 | 584 | 106972 | 0         | 549 | 582 | 94 + | 1   | 578 | 51633  | 52212  |
| UN78220 | Rsa1.0.00646.1 | 131 | 70473  | 2.00E-28  | 101 | 111 | 90 + | 7   | 114 | 6054   | 6164   |
| UN78221 | Rsa1.0.00630.1 | 236 | 71281  | 1.00E-111 | 230 | 238 | 96 + | 1   | 236 | 66492  | 66729  |
| UN78222 | Rsa1.0.00964.1 | 640 | 316648 | 0         | 490 | 504 | 97 + | 1   | 503 | 264753 | 265255 |
| UN78223 | Rsa1.0.00124.1 | 339 | 262503 | 1.00E-166 | 328 | 339 | 96 + | 1   | 339 | 86602  | 86940  |
| UN78224 | Rsa1.0.03092.1 | 120 | 25448  | 1.00E-35  | 109 | 120 | 90 + | 1   | 120 | 8897   | 9016   |
| UN78225 | Rsa1.0.00722.1 | 628 | 66840  | 0         | 621 | 634 | 97 + | 1   | 628 | 19032  | 19663  |
| UN78226 | Rsa1.0.00332.1 | 770 | 94575  | 1.00E-138 | 312 | 335 | 93 + | 3   | 325 | 77802  | 78136  |
| UN78227 | Rsa1.0.01652.1 | 166 | 41579  | 2.00E-84  | 164 | 166 | 98 + | 1   | 166 | 985    | 1150   |
| UN78228 | Rsa1.0.00482.1 | 305 | 81162  | 1.00E-127 | 289 | 306 | 94 - | 1   | 305 | 66187  | 66490  |
| UN78229 | Rsa1.0.00519.1 | 401 | 197864 | 0         | 389 | 407 | 95 - | 1   | 401 | 68910  | 69313  |
| UN78230 | Rsa1.0.14584.1 | 359 | 3240   | 1.00E-148 | 293 | 302 | 97 - | 1   | 302 | 150    | 451    |
| UN78231 | Rsa1.0.00526.1 | 567 | 169279 | 0         | 374 | 383 | 97 - | 186 | 567 | 148177 | 148559 |
| UN78232 | Rsa1.0.00279.1 | 518 | 100039 | 1.00E-105 | 249 | 266 | 93 + | 224 | 489 | 83441  | 83705  |



|         |                |     |        |           |     |     |       |     |     |        |        |
|---------|----------------|-----|--------|-----------|-----|-----|-------|-----|-----|--------|--------|
| UN78233 | Rsa1.0_01219.1 | 590 | 50527  | 1.00E-122 | 226 | 227 | 99 +  | 42  | 268 | 43108  | 43334  |
| UN78234 | Rsa1.0_04462.1 | 707 | 17250  | 7.00E-23  | 164 | 200 | 82 +  | 214 | 413 | 13741  | 13940  |
| UN78235 | Rsa1.0_02556.1 | 777 | 30133  | 0         | 503 | 536 | 93 -  | 1   | 518 | 4196   | 4727   |
| UN78236 | Rsa1.0_04603.1 | 331 | 16682  | 1.00E-168 | 323 | 331 | 97 -  | 1   | 331 | 7849   | 8179   |
| UN78237 | Rsa1.0_00046.1 | 449 | 320315 | 0         | 434 | 450 | 96 -  | 1   | 449 | 27813  | 28262  |
| UN78238 | Rsa1.0_00455.1 | 729 | 224823 | 0         | 714 | 729 | 97 +  | 1   | 729 | 166377 | 167104 |
| UN78239 | Rsa1.0_02163.1 | 690 | 34427  | 1.00E-154 | 295 | 301 | 98 +  | 286 | 586 | 4861   | 5161   |
| UN78240 | #              | #   | #      | #         | #   | #   | #     | #   | #   | #      | #      |
| UN78241 | Rsa1.0_05867.1 | 312 | 12375  | 1.00E-166 | 308 | 312 | 98 -  | 1   | 312 | 9759   | 10070  |
| UN78242 | Rsa1.0_00273.1 | 720 | 326186 | 0         | 351 | 352 | 99 +  | 1   | 352 | 140179 | 140530 |
| UN78243 | Rsa1.0_00195.1 | 141 | 251884 | 1.00E-57  | 125 | 129 | 96 -  | 1   | 129 | 83744  | 83872  |
| UN78244 | Rsa1.0_00124.1 | 411 | 262503 | 0         | 366 | 376 | 97 -  | 2   | 374 | 84595  | 84968  |
| UN78245 | Rsa1.0_04428.1 | 593 | 17399  | 1.00E-158 | 363 | 390 | 93 +  | 204 | 593 | 12948  | 13331  |
| UN78246 | Rsa1.0_00941.1 | 525 | 58891  | 2.00E-90  | 193 | 200 | 96 +  | 328 | 525 | 44924  | 45123  |
| UN78247 | #              | #   | #      | #         | #   | #   | #     | #   | #   | #      | #      |
| UN78248 | Rsa1.0_00383.1 | 103 | 398431 | 7.00E-34  | 76  | 77  | 98 +  | 26  | 102 | 212467 | 212543 |
| UN78249 | Rsa1.0_00358.1 | 332 | 91293  | 1.00E-166 | 323 | 332 | 97 -  | 1   | 332 | 90098  | 90429  |
| UN78250 | Rsa1.0_00333.1 | 555 | 94500  | 0         | 510 | 554 | 92 -  | 3   | 555 | 42316  | 42845  |
| UN78251 | Rsa1.0_01242.1 | 475 | 50066  | 0         | 422 | 428 | 98 +  | 2   | 429 | 21731  | 22158  |
| UN78252 | Rsa1.0_03316.1 | 681 | 23785  | 0         | 360 | 369 | 97 -  | 309 | 677 | 23169  | 23537  |
| UN78253 | Rsa1.0_07834.1 | 691 | 8453   | 0         | 680 | 687 | 98 +  | 3   | 689 | 5013   | 5699   |
| UN78254 | Rsa1.0_08255.1 | 806 | 7652   | 0         | 415 | 440 | 94 -  | 30  | 466 | 2723   | 3162   |
| UN78255 | Rsa1.0_04947.1 | 759 | 15367  | 0         | 611 | 665 | 91 -  | 94  | 753 | 12517  | 13181  |
| UN78256 | Rsa1.0_00121.1 | 182 | 278029 | 2.00E-78  | 173 | 180 | 96 +  | 1   | 180 | 9638   | 9816   |
| UN78257 | Rsa1.0_00049.1 | 556 | 167018 | 3.00E-77  | 279 | 324 | 86 +  | 62  | 384 | 44743  | 45049  |
| UN78258 | Rsa1.0_03898.1 | 516 | 20183  | 1.00E-156 | 359 | 384 | 93 -  | 1   | 377 | 2513   | 2887   |
| UN78259 | Rsa1.0_17732.1 | 640 | 1754   | 0         | 377 | 384 | 98 -  | 109 | 492 | 1      | 384    |
| UN78260 | Rsa1.0_00273.1 | 760 | 326186 | 0         | 446 | 457 | 97 -  | 265 | 719 | 141471 | 141927 |
| UN78261 | Rsa1.0_00107.1 | 212 | 431659 | 1.00E-108 | 212 | 214 | 99 -  | 1   | 212 | 152564 | 152777 |
| UN78262 | Rsa1.0_00097.1 | 556 | 138858 | 0         | 406 | 420 | 96 +  | 1   | 415 | 111695 | 112113 |
| UN78263 | Rsa1.0_00981.1 | 522 | 57700  | 1.00E-121 | 264 | 276 | 95 +  | 87  | 361 | 13052  | 13326  |
| UN78264 | Rsa1.0_03278.1 | 594 | 24125  | 1.00E-134 | 242 | 242 | 100 + | 327 | 568 | 12984  | 13225  |
| UN78265 | Rsa1.0_01242.1 | 526 | 50066  | 5.00E-91  | 194 | 202 | 96 -  | 32  | 233 | 23252  | 23453  |
| UN78266 | Rsa1.0_00192.1 | 355 | 278200 | 1.00E-163 | 336 | 351 | 95 -  | 1   | 351 | 78283  | 78633  |
| UN78267 | Rsa1.0_00323.1 | 380 | 159650 | 1.00E-180 | 367 | 381 | 96 -  | 1   | 377 | 148155 | 148535 |
| UN78268 | Rsa1.0_02043.1 | 136 | 163754 | 8.00E-59  | 133 | 138 | 96 +  | 1   | 136 | 2765   | 2902   |
| UN78269 | Rsa1.0_05951.1 | 369 | 12128  | 5.00E-81  | 153 | 153 | 100 - | 60  | 212 | 11265  | 11417  |
| UN78270 | Rsa1.0_00407.1 | 409 | 191544 | 0         | 350 | 355 | 98 +  | 1   | 354 | 32821  | 33174  |
| UN78271 | Rsa1.0_00479.1 | 455 | 81377  | 1.00E-101 | 227 | 239 | 94 -  | 1   | 238 | 29011  | 29249  |

|         |                |     |        |           |     |     |       |     |     |        |        |
|---------|----------------|-----|--------|-----------|-----|-----|-------|-----|-----|--------|--------|
| UN78272 | Rsa1.0.03413.1 | 155 | 23137  | 6.00E-63  | 140 | 146 | 95 -  | 7   | 152 | 19391  | 19536  |
| UN78273 | Rsa1.0.01823.1 | 146 | 38765  | 3.00E-74  | 144 | 145 | 99 +  | 1   | 145 | 2091   | 2235   |
| UN78274 | Rsa1.0.00008.1 | 319 | 358124 | 1.00E-166 | 315 | 320 | 98 -  | 1   | 319 | 290796 | 291115 |
| UN78275 | Rsa1.0.02670.1 | 267 | 28887  | 1.00E-74  | 169 | 178 | 94 -  | 53  | 230 | 1836   | 2013   |
| UN78276 | Rsa1.0.04679.1 | 221 | 16430  | 1.00E-107 | 215 | 220 | 97 +  | 3   | 221 | 11426  | 11645  |
| UN78277 | Rsa1.0.01292.1 | 660 | 175783 | 1.00E-106 | 207 | 210 | 98 -  | 15  | 224 | 2295   | 2501   |
| UN78278 | Rsa1.0.04032.1 | 556 | 19489  | 0         | 415 | 437 | 94 +  | 7   | 442 | 6340   | 6776   |
| UN78279 | Rsa1.0.01893.1 | 535 | 37520  | 1.00E-163 | 301 | 303 | 99 -  | 1   | 303 | 11172  | 11473  |
| UN78280 | Rsa1.0.00516.1 | 653 | 78417  | 7.00E-66  | 202 | 224 | 90 +  | 72  | 293 | 6128   | 6351   |
| UN78281 | Rsa1.0.03490.1 | 360 | 22545  | 1.00E-126 | 323 | 358 | 90 +  | 3   | 360 | 12914  | 13245  |
| UN78282 | Rsa1.0.00207.1 | 708 | 248736 | 0         | 410 | 426 | 96 -  | 3   | 423 | 246022 | 246446 |
| UN78283 | Rsa1.0.00628.1 | 542 | 214360 | 1.00E-139 | 315 | 334 | 94 +  | 4   | 335 | 34426  | 34758  |
| UN78284 | Rsa1.0.00153.1 | 589 | 192931 | 1.00E-124 | 235 | 238 | 98 -  | 352 | 589 | 5526   | 5763   |
| UN78285 | Rsa1.0.17740.1 | 215 | 1752   | 8.00E-88  | 205 | 216 | 94 +  | 1   | 215 | 1242   | 1456   |
| UN78286 | Rsa1.0.00510.1 | 461 | 78718  | 0         | 448 | 466 | 96 -  | 3   | 461 | 57206  | 57668  |
| UN78287 | Rsa1.0.00470.1 | 670 | 81968  | 3.00E-31  | 91  | 98  | 92 -  | 452 | 549 | 1612   | 1709   |
| UN78288 | Rsa1.0.00469.1 | 488 | 82084  | 1.00E-66  | 309 | 362 | 85 -  | 128 | 487 | 11832  | 12176  |
| UN78289 | Rsa1.0.03581.1 | 690 | 21965  | 1.00E-52  | 115 | 118 | 97 -  | 320 | 437 | 15367  | 15484  |
| UN78290 | Rsa1.0.00077.1 | 592 | 145005 | 1.00E-134 | 280 | 290 | 96 -  | 2   | 290 | 43759  | 44046  |
| UN78291 | Rsa1.0.00356.1 | 654 | 91521  | 0         | 612 | 661 | 92 -  | 2   | 654 | 46775  | 47423  |
| UN78292 | Rsa1.0.00502.1 | 655 | 204180 | 3.00E-93  | 174 | 174 | 100 - | 148 | 321 | 77996  | 78169  |
| UN78293 | Rsa1.0.28365.1 | 774 | 818    | 0         | 604 | 645 | 93 +  | 5   | 643 | 189    | 818    |
| UN78294 | Rsa1.0.10407.1 | 718 | 5858   | 0         | 536 | 580 | 92 -  | 4   | 580 | 546    | 1113   |
| UN78295 | Rsa1.0.01220.1 | 679 | 161775 | 1.00E-107 | 205 | 206 | 99 +  | 188 | 392 | 122648 | 122853 |
| UN78296 | Rsa1.0.01293.1 | 398 | 49139  | 1.00E-120 | 249 | 258 | 96 +  | 141 | 398 | 28083  | 28339  |
| UN78297 | Rsa1.0.10503.1 | 214 | 5824   | 7.00E-48  | 124 | 133 | 93 +  | 1   | 133 | 2130   | 2262   |
| UN78298 | Rsa1.0.05156.1 | 137 | 14648  | 2.00E-22  | 69  | 74  | 93 -  | 64  | 137 | 11085  | 11158  |
| UN78299 | Rsa1.0.02074.1 | 365 | 35370  | 1.00E-110 | 318 | 354 | 89 +  | 16  | 364 | 12052  | 12393  |
| UN78300 | Rsa1.0.00241.1 | 476 | 104000 | 0         | 472 | 481 | 98 -  | 2   | 476 | 13624  | 14104  |
| UN78301 | Rsa1.0.15677.1 | 371 | 2486   | 1.00E-128 | 294 | 312 | 94 +  | 61  | 371 | 3      | 313    |
| UN78302 | Rsa1.0.02211.1 | 658 | 33857  | 1.00E-158 | 402 | 447 | 89 -  | 1   | 418 | 32613  | 33058  |
| UN78303 | Rsa1.0.00296.1 | 168 | 97854  | 2.00E-69  | 148 | 153 | 96 -  | 3   | 155 | 22585  | 22737  |
| UN78304 | Rsa1.0.00201.1 | 380 | 232851 | 1.00E-168 | 327 | 335 | 97 -  | 47  | 380 | 151387 | 151721 |
| UN78305 | Rsa1.0.00260.1 | 225 | 102021 | 1.00E-119 | 223 | 225 | 99 -  | 1   | 225 | 64583  | 64807  |
| UN78306 | Rsa1.0.00830.1 | 518 | 62685  | 0         | 434 | 449 | 96 +  | 71  | 518 | 49095  | 49543  |
| UN78307 | Rsa1.0.09469.1 | 416 | 6346   | 1.00E-125 | 242 | 244 | 99 +  | 1   | 244 | 305    | 546    |
| UN78308 | Rsa1.0.00711.1 | 599 | 67223  | 1.00E-155 | 311 | 321 | 96 -  | 99  | 419 | 22148  | 22466  |
| UN78309 | Rsa1.0.00944.1 | 346 | 58733  | 1.00E-157 | 333 | 350 | 95 +  | 1   | 346 | 276    | 625    |
| UN78310 | Rsa1.0.00484.1 | 693 | 203294 | 0         | 557 | 586 | 95 -  | 114 | 690 | 26626  | 27203  |

|         |                |     |        |           |     |     |       |     |     |        |        |
|---------|----------------|-----|--------|-----------|-----|-----|-------|-----|-----|--------|--------|
| UN78311 | Rsa1.0.02606.1 | 326 | 29635  | 2.00E-95  | 223 | 237 | 94 -  | 94  | 322 | 26044  | 26277  |
| UN78312 | Rsa1.0.01429.1 | 681 | 46061  | 0         | 642 | 650 | 98 +  | 3   | 651 | 32034  | 32683  |
| UN78313 | Rsa1.0.00087.1 | 798 | 761073 | 0         | 735 | 783 | 93 +  | 31  | 797 | 77341  | 78123  |
| UN78314 | Rsa1.0.00767.1 | 703 | 64980  | 0         | 609 | 621 | 98 -  | 3   | 613 | 50246  | 50866  |
| UN78315 | Rsa1.0.01005.1 | 721 | 56967  | 0         | 354 | 359 | 98 +  | 356 | 713 | 36763  | 37121  |
| UN78316 | Rsa1.0.01121.1 | 159 | 53407  | 2.00E-84  | 158 | 158 | 100 - | 2   | 159 | 28146  | 28303  |
| UN78317 | Rsa1.0.04923.1 | 460 | 15426  | 1.00E-106 | 204 | 207 | 98 -  | 25  | 231 | 6709   | 6915   |
| UN78318 | Rsa1.0.05156.1 | 745 | 14648  | 0         | 384 | 393 | 97 +  | 3   | 395 | 9929   | 10314  |
| UN78319 | Rsa1.0.04369.1 | 650 | 17703  | 2.33E-156 | 315 | 332 | 94 +  | 19  | 350 | 6542   | 6864   |
| UN78320 | Rsa1.0.02338.1 | 648 | 32390  | 0         | 606 | 641 | 94 +  | 9   | 648 | 16088  | 16726  |
| UN78321 | Rsa1.0.00065.1 | 692 | 454616 | 1.00E-141 | 294 | 307 | 95 +  | 3   | 309 | 172360 | 172666 |
| UN78322 | Rsa1.0.00363.1 | 596 | 90968  | 1.00E-153 | 286 | 290 | 98 -  | 262 | 551 | 10437  | 10726  |
| UN78323 | Rsa1.0.00183.1 | 700 | 113277 | 0         | 593 | 607 | 97 +  | 94  | 700 | 110521 | 111125 |
| UN78324 | #              | #   | #      | #         | #   | #   | #     | #   | #   | #      | #      |
| UN78325 | Rsa1.0.02748.1 | 627 | 28242  | 0         | 396 | 404 | 98 -  | 39  | 442 | 23669  | 24072  |
| UN78326 | Rsa1.0.00693.1 | 778 | 161311 | 0         | 760 | 777 | 97 +  | 2   | 775 | 36580  | 37356  |
| UN78327 | Rsa1.0.04735.1 | 769 | 16180  | 0         | 743 | 750 | 99 +  | 2   | 748 | 6837   | 7586   |
| UN78328 | Rsa1.0.06671.1 | 641 | 10563  | 1.00E-120 | 231 | 235 | 98 +  | 180 | 414 | 1364   | 1598   |
| UN78329 | Rsa1.0.15677.1 | 701 | 2486   | 1.00E-152 | 302 | 312 | 96 -  | 104 | 415 | 1655   | 1966   |
| UN78330 | Rsa1.0.02585.1 | 819 | 29865  | 1.00E-140 | 286 | 297 | 96 -  | 334 | 630 | 20510  | 20806  |
| UN78331 | Rsa1.0.00001.1 | 723 | 363028 | 1.00E-89  | 204 | 216 | 94 -  | 357 | 572 | 285546 | 285761 |
| UN78332 | Rsa1.0.00344.1 | 376 | 191774 | 1.00E-152 | 323 | 339 | 95 +  | 32  | 370 | 102407 | 102742 |
| UN78333 | Rsa1.0.00144.1 | 365 | 120708 | 1.00E-155 | 321 | 335 | 95 +  | 34  | 365 | 85247  | 85581  |
| UN78334 | Rsa1.0.00265.1 | 736 | 220635 | 0         | 523 | 532 | 98 -  | 207 | 736 | 152175 | 152706 |
| UN78335 | Rsa1.0.00346.1 | 812 | 93130  | 1.00E-167 | 394 | 424 | 92 -  | 3   | 413 | 41611  | 42033  |
| UN78336 | Rsa1.0.00425.1 | 760 | 147080 | 0         | 558 | 581 | 96 +  | 184 | 760 | 95758  | 96338  |
| UN78337 | Rsa1.0.00403.1 | 503 | 87701  | 0         | 487 | 506 | 96 -  | 1   | 503 | 67424  | 67920  |
| UN78338 | Rsa1.0.43909.1 | 214 | 512    | 5.00E-89  | 203 | 214 | 94 +  | 1   | 214 | 80     | 292    |
| UN78339 | Rsa1.0.02981.1 | 679 | 26285  | 1.00E-102 | 201 | 205 | 98 +  | 475 | 679 | 5587   | 5791   |
| UN78340 | Rsa1.0.00006.1 | 774 | 396176 | 1.00E-180 | 357 | 368 | 97 +  | 334 | 700 | 32186  | 32553  |
| UN78341 | Rsa1.0.00066.1 | 681 | 152418 | 0         | 648 | 679 | 95 -  | 3   | 681 | 74949  | 75612  |
| UN78342 | Rsa1.0.00215.1 | 680 | 201775 | 0         | 355 | 360 | 98 -  | 323 | 680 | 81299  | 81658  |
| UN78343 | Rsa1.0.00502.1 | 344 | 204180 | 1.00E-169 | 334 | 344 | 97 +  | 1   | 344 | 180525 | 180867 |
| UN78344 | Rsa1.0.01144.1 | 279 | 52431  | 1.00E-143 | 272 | 277 | 98 +  | 3   | 279 | 22915  | 23191  |
| UN78345 | Rsa1.0.02319.1 | 494 | 32580  | 1.00E-116 | 256 | 271 | 94 -  | 127 | 387 | 6827   | 7096   |
| UN78346 | Rsa1.0.02783.1 | 525 | 27927  | 0         | 388 | 396 | 97 +  | 130 | 525 | 14196  | 14591  |
| UN78347 | Rsa1.0.00688.1 | 448 | 68396  | 1.00E-121 | 273 | 290 | 94 +  | 144 | 427 | 7525   | 7812   |
| UN78348 | Rsa1.0.00053.1 | 550 | 263459 | 0         | 546 | 548 | 99 -  | 3   | 550 | 236400 | 236947 |
| UN78349 | Rsa1.0.00387.1 | 510 | 495407 | 1.00E-180 | 412 | 440 | 93 -  | 75  | 508 | 401063 | 401491 |

|         |                |     |        |           |     |     |       |     |     |        |        |
|---------|----------------|-----|--------|-----------|-----|-----|-------|-----|-----|--------|--------|
| UN78350 | Rsa1.0.01791.1 | 652 | 160383 | 0         | 635 | 654 | 97 -  | 2   | 652 | 34241  | 34894  |
| UN78351 | Rsa1.0.00939.1 | 629 | 185227 | 1.00E-175 | 359 | 375 | 95 -  | 218 | 592 | 52194  | 52568  |
| UN78352 | Rsa1.0.00058.1 | 578 | 159921 | 0         | 570 | 591 | 96 -  | 1   | 575 | 105348 | 105938 |
| UN78353 | Rsa1.0.07240.1 | 520 | 9676   | 1.00E-122 | 247 | 254 | 97 -  | 3   | 256 | 3296   | 3547   |
| UN78354 | Rsa1.0.02371.1 | 551 | 32069  | 0         | 541 | 551 | 98 +  | 2   | 551 | 27231  | 27779  |
| UN78355 | Rsa1.0.03100.1 | 553 | 25411  | 1.00E-116 | 263 | 279 | 94 -  | 229 | 507 | 19908  | 20183  |
| UN78356 | Rsa1.0.00065.1 | 607 | 454616 | 6.00E-57  | 197 | 223 | 88 -  | 9   | 231 | 202214 | 202432 |
| UN78357 | Rsa1.0.04872.1 | 720 | 15659  | 4.00E-43  | 101 | 104 | 97 -  | 2   | 102 | 283    | 386    |
| UN78358 | Rsa1.0.02241.1 | 446 | 33520  | 0         | 402 | 422 | 95 -  | 1   | 422 | 30511  | 30922  |
| UN78359 | Rsa1.0.04126.1 | 546 | 18939  | 1.00E-112 | 235 | 242 | 97 +  | 2   | 242 | 13223  | 13463  |
| UN78360 | Rsa1.0.00484.1 | 655 | 203294 | 1.00E-151 | 289 | 295 | 97 +  | 309 | 603 | 25449  | 25743  |
| UN78361 | Rsa1.0.03032.1 | 489 | 25836  | 2.00E-59  | 122 | 124 | 98 -  | 2   | 125 | 12592  | 12715  |
| UN78362 | Rsa1.0.01970.1 | 501 | 36648  | 0         | 497 | 501 | 99 +  | 1   | 501 | 1887   | 2387   |
| UN78363 | Rsa1.0.01382.1 | 403 | 46877  | 1.00E-130 | 282 | 298 | 94 -  | 2   | 299 | 38701  | 38991  |
| UN78364 | Rsa1.0.45348.1 | 278 | 497    | 3.00E-54  | 117 | 120 | 97 +  | 2   | 121 | 362    | 481    |
| UN78365 | Rsa1.0.04411.1 | 590 | 142979 | 1.00E-115 | 211 | 211 | 100 - | 209 | 419 | 130503 | 130713 |
| UN78366 | Rsa1.0.00493.1 | 805 | 80007  | 0         | 458 | 479 | 95 +  | 334 | 805 | 17635  | 18113  |
| UN78367 | Rsa1.0.00978.1 | 761 | 57739  | 0         | 610 | 640 | 95 +  | 3   | 639 | 41966  | 42599  |
| UN78368 | Rsa1.0.00716.1 | 519 | 67078  | 1.00E-135 | 380 | 416 | 91 +  | 2   | 415 | 28727  | 29137  |
| UN78369 | Rsa1.0.01484.1 | 632 | 44806  | 1.00E-134 | 318 | 340 | 93 +  | 2   | 338 | 25151  | 25478  |
| UN78370 | Rsa1.0.20222.1 | 469 | 1326   | 1.00E-113 | 223 | 228 | 97 +  | 242 | 469 | 1      | 228    |
| UN78371 | Rsa1.0.00010.1 | 549 | 294827 | 0         | 526 | 547 | 96 +  | 3   | 549 | 101519 | 102065 |
| UN78372 | Rsa1.0.00128.1 | 314 | 228675 | 8.00E-98  | 198 | 203 | 97 -  | 112 | 314 | 116158 | 116357 |
| UN78373 | Rsa1.0.00101.1 | 701 | 267193 | 5.00E-58  | 118 | 119 | 99 +  | 579 | 697 | 208637 | 208755 |
| UN78374 | Rsa1.0.01926.1 | 773 | 37206  | 0         | 382 | 390 | 97 +  | 184 | 573 | 13345  | 13734  |
| UN78375 | Rsa1.0.00612.1 | 483 | 72376  | 1.00E-82  | 156 | 156 | 100 - | 328 | 483 | 65220  | 65375  |
| UN78376 | Rsa1.0.00097.1 | 361 | 138858 | 2.00E-98  | 182 | 182 | 100 - | 139 | 320 | 74510  | 74691  |
| UN78377 | Rsa1.0.05205.1 | 594 | 14513  | 2.00E-63  | 127 | 128 | 99 +  | 103 | 230 | 12114  | 12241  |
| UN78378 | Rsa1.0.00610.1 | 649 | 72740  | 0         | 464 | 485 | 95 -  | 49  | 533 | 44623  | 45104  |
| UN78379 | Rsa1.0.01845.1 | 614 | 38415  | 1.00E-179 | 330 | 334 | 98 -  | 3   | 336 | 23596  | 23929  |
| UN78380 | Rsa1.0.03185.1 | 755 | 24739  | 2.00E-88  | 166 | 166 | 100 - | 359 | 524 | 4793   | 4958   |
| UN78381 | Rsa1.0.00104.1 | 517 | 368722 | 0         | 494 | 530 | 93 +  | 2   | 517 | 238878 | 239404 |
| UN78382 | Rsa1.0.00139.1 | 645 | 357786 | 1.00E-123 | 225 | 225 | 100 - | 41  | 265 | 137864 | 138088 |
| UN78383 | Rsa1.0.00675.1 | 737 | 145590 | 0         | 708 | 735 | 96 -  | 3   | 737 | 67782  | 68516  |
| UN78384 | Rsa1.0.00033.1 | 682 | 515811 | 1.00E-133 | 259 | 265 | 97 +  | 246 | 510 | 354853 | 355117 |
| UN78385 | Rsa1.0.03517.1 | 494 | 22337  | 1.00E-122 | 310 | 337 | 91 -  | 151 | 473 | 3877   | 4213   |
| UN78386 | Rsa1.0.00027.1 | 708 | 283362 | 0         | 698 | 707 | 98 -  | 3   | 708 | 122466 | 123172 |
| UN78387 | Rsa1.0.00092.1 | 684 | 659932 | 4.00E-21  | 101 | 116 | 87 -  | 228 | 343 | 475335 | 475448 |
| UN78388 | Rsa1.0.24295.1 | 511 | 994    | 2.00E-68  | 132 | 132 | 100 + | 72  | 203 | 1      | 132    |

|         |                |     |        |           |     |     |       |     |     |        |        |
|---------|----------------|-----|--------|-----------|-----|-----|-------|-----|-----|--------|--------|
| UN78389 | Rsa1.0_16460.1 | 566 | 2148   | 0         | 505 | 523 | 96 +  | 6   | 528 | 132    | 654    |
| UN78390 | Rsa1.0_01010.1 | 493 | 56906  | 6.00E-78  | 169 | 176 | 96 -  | 316 | 491 | 15736  | 15911  |
| UN78391 | Rsa1.0_01504.1 | 553 | 189978 | 0         | 535 | 554 | 96 +  | 3   | 553 | 147903 | 148447 |
| UN78392 | Rsa1.0_00048.1 | 784 | 167185 | 1.00E-125 | 237 | 240 | 98 +  | 332 | 571 | 99604  | 99843  |
| UN78393 | Rsa1.0_00426.1 | 790 | 85668  | 0         | 513 | 544 | 94 +  | 3   | 543 | 66994  | 67527  |
| UN78394 | Rsa1.0_02377.1 | 230 | 31994  | 9.00E-57  | 145 | 155 | 93 -  | 3   | 155 | 20012  | 20166  |
| UN78395 | Rsa1.0_02921.1 | 664 | 26779  | 2.00E-88  | 196 | 206 | 95 -  | 446 | 651 | 8691   | 8896   |
| UN78396 | Rsa1.0_00127.1 | 730 | 127446 | 5.00E-55  | 110 | 110 | 100 + | 474 | 583 | 20383  | 20492  |
| UN78397 | Rsa1.0_00407.1 | 631 | 191544 | 2.00E-97  | 181 | 181 | 100 - | 292 | 472 | 33645  | 33825  |
| UN78398 | Rsa1.0_01661.1 | 455 | 41400  | 1.00E-38  | 100 | 106 | 94 -  | 305 | 410 | 23510  | 23615  |
| UN78399 | Rsa1.0_10474.1 | 104 | 5835   | 2.00E-52  | 104 | 104 | 100 + | 1   | 104 | 5433   | 5536   |
| UN78400 | Rsa1.0_00825.1 | 551 | 62855  | 7.00E-78  | 168 | 174 | 96 +  | 179 | 349 | 49470  | 49643  |
| UN78401 | Rsa1.0_02058.1 | 302 | 35532  | 1.00E-121 | 287 | 308 | 93 -  | 1   | 301 | 14562  | 14869  |
| UN78402 | Rsa1.0_00025.1 | 746 | 277312 | 1.00E-110 | 239 | 250 | 95 +  | 221 | 464 | 129638 | 129887 |
| UN78403 | Rsa1.0_03413.1 | 779 | 23137  | 0         | 406 | 423 | 95 +  | 360 | 779 | 18957  | 19379  |
| UN78404 | Rsa1.0_11574.1 | 810 | 5468   | 0         | 629 | 664 | 94 -  | 160 | 810 | 3402   | 4065   |
| UN78405 | Rsa1.0_03360.1 | 449 | 23459  | 0         | 448 | 448 | 100 + | 2   | 449 | 6726   | 7173   |
| UN78406 | Rsa1.0_00036.1 | 686 | 176186 | 0         | 495 | 519 | 95 +  | 2   | 518 | 26279  | 26791  |
| UN78407 | Rsa1.0_00111.1 | 632 | 390088 | 1.00E-109 | 212 | 216 | 98 +  | 417 | 632 | 75782  | 75997  |
| UN78408 | Rsa1.0_02070.1 | 686 | 158516 | 1.00E-166 | 380 | 408 | 93 +  | 17  | 418 | 138407 | 138814 |
| UN78409 | Rsa1.0_01168.1 | 425 | 153765 | 3.00E-76  | 204 | 222 | 91 -  | 208 | 425 | 23513  | 23728  |
| UN78410 | Rsa1.0_03005.1 | 515 | 26082  | 0         | 425 | 444 | 95 -  | 3   | 440 | 12981  | 13418  |
| UN78411 | Rsa1.0_05694.1 | 724 | 12903  | 1.00E-73  | 174 | 185 | 94 -  | 138 | 322 | 9767   | 9951   |
| UN78412 | Rsa1.0_00116.1 | 522 | 365886 | 3.00E-83  | 166 | 169 | 98 -  | 168 | 336 | 53497  | 53665  |
| UN78413 | Rsa1.0_00237.1 | 614 | 235974 | 0         | 573 | 613 | 93 -  | 2   | 614 | 47862  | 48474  |
| UN78414 | Rsa1.0_00040.1 | 535 | 324196 | 0         | 534 | 535 | 99 -  | 2   | 535 | 62093  | 62627  |
| UN78415 | Rsa1.0_01292.1 | 518 | 175783 | 0         | 396 | 398 | 99 +  | 122 | 518 | 745    | 1142   |
| UN78416 | Rsa1.0_03330.1 | 797 | 23671  | 0         | 427 | 434 | 98 +  | 2   | 435 | 6628   | 7061   |
| UN78417 | Rsa1.0_01289.1 | 635 | 49181  | 0         | 474 | 482 | 98 -  | 2   | 483 | 11547  | 12028  |
| UN78418 | Rsa1.0_10607.1 | 773 | 5786   | 2.00E-66  | 150 | 157 | 95 +  | 121 | 277 | 1109   | 1265   |
| UN78419 | Rsa1.0_00124.1 | 423 | 262503 | 6.00E-87  | 166 | 167 | 99 +  | 67  | 233 | 162744 | 162910 |
| UN78420 | Rsa1.0_00251.1 | 635 | 303968 | 4.00E-49  | 109 | 112 | 97 +  | 444 | 555 | 123960 | 124071 |
| UN78421 | Rsa1.0_02208.1 | 595 | 33875  | 1.00E-101 | 225 | 239 | 94 -  | 366 | 595 | 26279  | 26517  |
| UN78422 | Rsa1.0_00277.1 | 772 | 100132 | 1.00E-108 | 232 | 242 | 95 -  | 492 | 733 | 88496  | 88735  |
| UN78423 | Rsa1.0_06062.1 | 502 | 11836  | 6.00E-75  | 149 | 151 | 98 -  | 352 | 502 | 6084   | 6234   |
| UN78424 | Rsa1.0_04772.1 | 772 | 16040  | 3.00E-99  | 187 | 188 | 99 -  | 199 | 386 | 7921   | 8108   |
| UN78425 | Rsa1.0_04911.1 | 768 | 15483  | 1.00E-114 | 213 | 214 | 99 -  | 3   | 216 | 9506   | 9719   |
| UN78426 | Rsa1.0_00111.1 | 651 | 390088 | 0         | 374 | 388 | 96 +  | 174 | 561 | 55537  | 55911  |
| UN78427 | Rsa1.0_00798.1 | 480 | 63945  | 0         | 459 | 480 | 95 +  | 3   | 480 | 61253  | 61729  |

|         |                |     |        |           |     |     |       |     |     |        |        |
|---------|----------------|-----|--------|-----------|-----|-----|-------|-----|-----|--------|--------|
| UN78428 | Rsa1.0.36521.1 | 514 | 617    | 4.00E-76  | 250 | 286 | 87 +  | 3   | 284 | 50     | 321    |
| UN78429 | Rsa1.0.02479.1 | 749 | 31038  | 1.00E-178 | 341 | 347 | 98 +  | 151 | 493 | 11724  | 12070  |
| UN78430 | Rsa1.0.00167.1 | 651 | 116000 | 1.00E-150 | 335 | 354 | 94 +  | 51  | 398 | 12145  | 12498  |
| UN78431 | Rsa1.0.02874.1 | 205 | 27070  | 2.00E-66  | 158 | 166 | 95 +  | 19  | 180 | 1723   | 1888   |
| UN78432 | Rsa1.0_01704.1 | 593 | 40711  | 0         | 520 | 542 | 95 +  | 55  | 593 | 31412  | 31950  |
| UN78433 | Rsa1.0_00923.1 | 787 | 153678 | 1.00E-120 | 275 | 293 | 93 -  | 1   | 285 | 19319  | 19611  |
| UN78434 | Rsa1.0.01752.1 | 655 | 39805  | 1.00E-92  | 206 | 217 | 94 +  | 248 | 464 | 3243   | 3459   |
| UN78435 | Rsa1.0.00121.1 | 507 | 278029 | 1.00E-147 | 307 | 320 | 95 -  | 136 | 454 | 6873   | 7187   |
| UN78436 | Rsa1.0.00260.1 | 617 | 102021 | 3.00E-59  | 123 | 125 | 98 +  | 381 | 505 | 63858  | 63982  |
| UN78437 | Rsa1.0.02114.1 | 628 | 34873  | 1.00E-113 | 221 | 224 | 98 +  | 270 | 493 | 11483  | 11705  |
| UN78438 | Rsa1.0.01178.1 | 681 | 51571  | 1.00E-83  | 219 | 238 | 92 +  | 445 | 681 | 25592  | 25829  |
| UN78439 | Rsa1.0.00741.1 | 716 | 66117  | 1.00E-111 | 216 | 220 | 98 -  | 119 | 338 | 21539  | 21758  |
| UN78440 | Rsa1.0.00228.1 | 750 | 105511 | 1.00E-83  | 158 | 158 | 100 + | 331 | 488 | 36177  | 36334  |
| UN78441 | Rsa1.0.00415.1 | 640 | 86795  | 0         | 495 | 524 | 94 +  | 3   | 523 | 11120  | 11643  |
| UN78442 | Rsa1.0_14624.1 | 799 | 3217   | 4.00E-71  | 251 | 286 | 87 -  | 3   | 284 | 1334   | 1602   |
| UN78443 | Rsa1.0.00660.1 | 720 | 69688  | 2.00E-88  | 201 | 210 | 95 -  | 500 | 707 | 3721   | 3930   |
| UN78444 | Rsa1.0.05107.1 | 779 | 14825  | 0         | 610 | 647 | 94 +  | 135 | 778 | 14164  | 14808  |
| UN78445 | Rsa1.0.02921.1 | 640 | 26779  | 1.00E-125 | 234 | 236 | 99 -  | 402 | 637 | 8082   | 8317   |
| UN78446 | Rsa1.0.01487.1 | 526 | 44784  | 1.00E-143 | 271 | 275 | 98 +  | 1   | 272 | 24848  | 25122  |
| UN78447 | Rsa1.0.00016.1 | 626 | 831256 | 0         | 484 | 492 | 98 +  | 135 | 626 | 505636 | 506123 |
| UN78448 | Rsa1.0.04788.1 | 659 | 15984  | 0         | 511 | 521 | 98 +  | 107 | 619 | 4118   | 4638   |
| UN78449 | Rsa1.0.01825.1 | 657 | 38725  | 0         | 630 | 656 | 96 -  | 2   | 657 | 27218  | 27873  |
| UN78450 | Rsa1.0_01313.1 | 501 | 48387  | 5.00E-51  | 112 | 115 | 97 -  | 387 | 501 | 11785  | 11899  |
| UN78451 | Rsa1.0.02195.1 | 618 | 34024  | 0         | 362 | 368 | 98 +  | 235 | 602 | 23820  | 24184  |
| UN78452 | Rsa1.0.03582.1 | 750 | 21963  | 0         | 465 | 472 | 98 +  | 282 | 750 | 10217  | 10686  |
| UN78453 | Rsa1.0.28478.1 | 722 | 814    | 0         | 342 | 345 | 99 -  | 376 | 720 | 438    | 779    |
| UN78454 | Rsa1.0.00658.1 | 739 | 69740  | 0         | 639 | 654 | 97 -  | 80  | 733 | 12727  | 13377  |
| UN78455 | Rsa1.0.00156.1 | 788 | 118383 | 0         | 624 | 640 | 97 -  | 104 | 742 | 90526  | 91162  |
| UN78456 | Rsa1.0.02343.1 | 113 | 32374  | 6.00E-19  | 57  | 60  | 95 -  | 46  | 105 | 11583  | 11642  |
| UN78457 | Rsa1.0.00028.1 | 576 | 293984 | 0         | 460 | 468 | 98 +  | 2   | 469 | 134759 | 135226 |
| UN78458 | Rsa1.0.00342.1 | 203 | 93695  | 1.00E-92  | 196 | 203 | 96 +  | 3   | 203 | 49437  | 49639  |
| UN78459 | Rsa1.0.00927.1 | 697 | 59312  | 0         | 459 | 461 | 99 -  | 1   | 461 | 16032  | 16492  |
| UN78460 | Rsa1.0.02499.1 | 660 | 30774  | 0         | 637 | 655 | 97 +  | 3   | 656 | 16947  | 17598  |
| UN78461 | Rsa1.0.00001.1 | 676 | 363028 | 1.00E-167 | 325 | 334 | 97 +  | 85  | 418 | 143874 | 144207 |
| UN78462 | Rsa1.0.01530.1 | 728 | 43820  | 0         | 516 | 533 | 96 -  | 156 | 687 | 12841  | 13373  |
| UN78463 | Rsa1.0.01887.1 | 661 | 37564  | 0         | 645 | 661 | 97 -  | 3   | 661 | 2342   | 2992   |
| UN78464 | Rsa1.0.00144.1 | 766 | 120708 | 0         | 740 | 761 | 97 +  | 2   | 759 | 82189  | 82947  |
| UN78465 | Rsa1.0_17784.1 | 624 | 1741   | 1.00E-172 | 313 | 314 | 99 +  | 3   | 315 | 1202   | 1515   |
| UN78466 | Rsa1.0_05748.1 | 347 | 12749  | 1.00E-155 | 328 | 345 | 95 +  | 3   | 347 | 10379  | 10723  |

|         |                |     |        |           |     |     |       |     |     |        |        |
|---------|----------------|-----|--------|-----------|-----|-----|-------|-----|-----|--------|--------|
| UN78467 | Rsa1.0_00797.1 | 669 | 63959  | 1.00E-112 | 236 | 244 | 96 -  | 301 | 542 | 60948  | 61189  |
| UN78468 | Rsa1.0_02916.1 | 549 | 26809  | 1.00E-101 | 188 | 188 | 100 - | 3   | 190 | 9144   | 9331   |
| UN78469 | Rsa1.0_03342.1 | 822 | 23600  | 1.00E-123 | 224 | 224 | 100 - | 357 | 580 | 7649   | 7872   |
| UN78470 | Rsa1.0_69178.1 | 266 | 331    | 4.00E-87  | 184 | 191 | 96 +  | 3   | 193 | 141    | 331    |
| UN78471 | Rsa1.0_00327.1 | 676 | 94892  | 5.00E-61  | 126 | 128 | 98 -  | 88  | 215 | 27389  | 27516  |
| UN78472 | Rsa1.0_00953.1 | 553 | 145012 | 1.00E-130 | 245 | 248 | 98 +  | 306 | 553 | 11750  | 11997  |
| UN78473 | Rsa1.0_01768.1 | 761 | 138463 | 1.00E-111 | 251 | 264 | 95 -  | 11  | 269 | 121794 | 122055 |
| UN78474 | Rsa1.0_01907.1 | 756 | 37431  | 4.00E-49  | 103 | 104 | 99 -  | 530 | 633 | 30886  | 30989  |
| UN78475 | Rsa1.0_03721.1 | 674 | 21185  | 0         | 635 | 687 | 92 +  | 4   | 674 | 13871  | 14557  |
| UN78476 | Rsa1.0_00087.1 | 540 | 761073 | 1.00E-118 | 259 | 272 | 95 -  | 3   | 274 | 121223 | 121488 |
| UN78477 | Rsa1.0_00099.1 | 697 | 159619 | 1.00E-136 | 266 | 270 | 98 -  | 430 | 697 | 79582  | 79851  |
| UN78478 | Rsa1.0_00097.1 | 142 | 138858 | 5.00E-60  | 136 | 141 | 96 -  | 2   | 142 | 113387 | 113526 |
| UN78479 | Rsa1.0_00598.1 | 587 | 73425  | 6.00E-14  | 86  | 100 | 86 +  | 92  | 191 | 38057  | 38154  |
| UN78480 | Rsa1.0_04574.1 | 756 | 16786  | 1.00E-101 | 226 | 237 | 95 -  | 239 | 475 | 10082  | 10314  |
| UN78481 | Rsa1.0_00291.1 | 587 | 172129 | 1.00E-132 | 263 | 270 | 97 +  | 3   | 270 | 13111  | 13380  |
| UN78482 | Rsa1.0_00891.1 | 586 | 60724  | 1.00E-171 | 357 | 372 | 95 -  | 2   | 370 | 42214  | 42580  |
| UN78483 | Rsa1.0_04325.1 | 615 | 17885  | 1.00E-135 | 265 | 272 | 97 -  | 6   | 277 | 11667  | 11938  |
| UN78484 | Rsa1.0_00059.1 | 763 | 159650 | 0         | 365 | 378 | 96 +  | 3   | 371 | 68247  | 68624  |
| UN78485 | Rsa1.0_00122.1 | 723 | 265937 | 4.00E-83  | 160 | 161 | 99 -  | 320 | 480 | 108401 | 108561 |
| UN78486 | Rsa1.0_00937.1 | 723 | 59061  | 0         | 716 | 718 | 99 -  | 7   | 723 | 14677  | 15394  |
| UN78487 | Rsa1.0_00043.1 | 338 | 264937 | 8.00E-55  | 144 | 154 | 93 +  | 112 | 265 | 8573   | 8721   |
| UN78488 | Rsa1.0_04497.1 | 659 | 17103  | 0         | 401 | 420 | 95 +  | 2   | 417 | 999    | 1417   |
| UN78489 | Rsa1.0_00067.1 | 787 | 415055 | 1.00E-144 | 275 | 280 | 98 -  | 210 | 489 | 35066  | 35345  |
| UN78490 | Rsa1.0_03546.1 | 664 | 22172  | 1.00E-137 | 381 | 423 | 90 +  | 256 | 661 | 14336  | 14747  |
| UN78491 | Rsa1.0_05624.1 | 555 | 13140  | 1.00E-100 | 265 | 291 | 91 -  | 265 | 555 | 3922   | 4199   |
| UN78492 | Rsa1.0_02336.1 | 619 | 32397  | 1.00E-162 | 295 | 297 | 99 -  | 285 | 581 | 9932   | 10228  |
| UN78493 | Rsa1.0_01760.1 | 558 | 39730  | 0         | 534 | 557 | 95 -  | 2   | 558 | 27828  | 28377  |
| UN78494 | Rsa1.0_00467.1 | 583 | 156542 | 1.00E-73  | 150 | 153 | 98 +  | 431 | 583 | 91617  | 91769  |
| UN78495 | Rsa1.0_03028.1 | 619 | 25872  | 3.00E-46  | 169 | 196 | 86 +  | 3   | 177 | 14640  | 14834  |
| UN78496 | Rsa1.0_05611.1 | 226 | 13193  | 9.00E-63  | 185 | 204 | 90 -  | 2   | 203 | 5170   | 5371   |
| UN78497 | Rsa1.0_18261.1 | 550 | 1633   | 0         | 522 | 549 | 95 +  | 2   | 550 | 425    | 971    |
| UN78498 | Rsa1.0_15995.1 | 631 | 2328   | 1.00E-156 | 295 | 300 | 98 -  | 332 | 631 | 1712   | 2011   |
| UN78499 | Rsa1.0_01041.1 | 505 | 55910  | 1.00E-112 | 235 | 243 | 96 -  | 220 | 458 | 9246   | 9488   |
| UN78500 | Rsa1.0_05919.1 | 644 | 12240  | 1.00E-180 | 334 | 339 | 98 -  | 2   | 340 | 9077   | 9415   |
| UN78501 | Rsa1.0_00964.1 | 656 | 316648 | 0         | 415 | 435 | 95 -  | 222 | 656 | 265416 | 265850 |
| UN78502 | Rsa1.0_04679.1 | 170 | 16430  | 2.00E-57  | 154 | 164 | 93 -  | 1   | 160 | 12732  | 12895  |
| UN78503 | Rsa1.0_00516.1 | 647 | 78417  | 0         | 496 | 522 | 95 -  | 5   | 526 | 7335   | 7856   |
| UN78504 | Rsa1.0_03490.1 | 569 | 22545  | 0         | 550 | 569 | 96 -  | 1   | 569 | 13673  | 14241  |
| UN78505 | Rsa1.0_00350.1 | 603 | 92346  | 2.00E-56  | 136 | 144 | 94 +  | 10  | 153 | 8721   | 8864   |

|         |                |     |        |           |     |     |       |     |     |        |        |
|---------|----------------|-----|--------|-----------|-----|-----|-------|-----|-----|--------|--------|
| UN78506 | Rsa1.0.00153.1 | 455 | 192931 | 0         | 443 | 458 | 96 +  | 1   | 455 | 5041   | 5498   |
| UN78507 | Rsa1.0.01829.1 | 537 | 166063 | 1.00E-133 | 290 | 307 | 94 -  | 237 | 537 | 135484 | 135790 |
| UN78508 | Rsa1.0.00481.1 | 579 | 81316  | 7.00E-69  | 185 | 201 | 92 -  | 300 | 500 | 38327  | 38526  |
| UN78509 | Rsa1.0.00262.1 | 713 | 101906 | 1.00E-144 | 272 | 276 | 98 +  | 254 | 529 | 2254   | 2529   |
| UN78510 | Rsa1.0.01432.1 | 148 | 45977  | 4.00E-33  | 100 | 108 | 92 +  | 20  | 126 | 34705  | 34812  |
| UN78511 | Rsa1.0.01727.1 | 517 | 40243  | 1.00E-51  | 116 | 120 | 96 +  | 172 | 291 | 27014  | 27133  |
| UN78512 | Rsa1.0.00071.1 | 581 | 345714 | 1.00E-140 | 324 | 347 | 93 -  | 3   | 349 | 317187 | 317530 |
| UN78513 | Rsa1.0.00160.1 | 819 | 346678 | 1.00E-119 | 316 | 340 | 92 -  | 489 | 819 | 186467 | 186806 |
| UN78514 | Rsa1.0.00069.1 | 703 | 403561 | 1.00E-157 | 293 | 297 | 98 -  | 151 | 447 | 209874 | 210170 |
| UN78515 | Rsa1.0.00666.1 | 721 | 69505  | 0         | 536 | 541 | 99 +  | 3   | 543 | 25986  | 26526  |
| UN78516 | Rsa1.0.00040.1 | 741 | 324196 | 0         | 486 | 506 | 96 -  | 226 | 731 | 167768 | 168273 |
| UN78517 | Rsa1.0.00362.1 | 562 | 299497 | 0         | 528 | 562 | 93 +  | 2   | 562 | 14835  | 15387  |
| UN78518 | Rsa1.0.03469.1 | 290 | 22681  | 1.00E-151 | 287 | 290 | 98 +  | 2   | 290 | 9714   | 10002  |
| UN78519 | Rsa1.0.01254.1 | 631 | 49801  | 0         | 606 | 624 | 97 +  | 8   | 631 | 284    | 907    |
| UN78520 | Rsa1.0.01717.1 | 760 | 143162 | 0         | 574 | 593 | 96 +  | 176 | 760 | 113443 | 114035 |
| UN78521 | Rsa1.0.00084.1 | 708 | 142338 | 0         | 578 | 582 | 99 -  | 125 | 705 | 5577   | 6158   |
| UN78522 | Rsa1.0.00428.1 | 471 | 85599  | 9.00E-68  | 152 | 159 | 95 -  | 313 | 471 | 7414   | 7572   |
| UN78523 | Rsa1.0.01137.1 | 573 | 52655  | 1.00E-121 | 229 | 232 | 98 +  | 144 | 375 | 51348  | 51579  |
| UN78524 | Rsa1.0.00295.1 | 789 | 152597 | 0         | 715 | 736 | 97 -  | 3   | 735 | 48887  | 49622  |
| UN78525 | Rsa1.0.04426.1 | 672 | 17399  | 3.00E-96  | 204 | 211 | 96 -  | 4   | 213 | 14213  | 14423  |
| UN78526 | Rsa1.0.24055.1 | 642 | 1009   | 1.00E-137 | 275 | 284 | 96 -  | 63  | 346 | 158    | 441    |
| UN78527 | Rsa1.0.05663.1 | 646 | 13005  | 1.00E-123 | 236 | 240 | 98 +  | 360 | 599 | 9152   | 9391   |
| UN78528 | Rsa1.0.00480.1 | 799 | 81325  | 0         | 677 | 701 | 96 -  | 103 | 799 | 63199  | 63899  |
| UN78529 | Rsa1.0.01422.1 | 404 | 46172  | 1.00E-117 | 214 | 214 | 100 - | 190 | 403 | 16412  | 16625  |
| UN78530 | Rsa1.0.00617.1 | 540 | 72199  | 1.00E-118 | 218 | 219 | 99 +  | 225 | 443 | 19957  | 20175  |
| UN78531 | Rsa1.0.02682.1 | 657 | 28711  | 0         | 631 | 653 | 96 -  | 5   | 657 | 9831   | 10483  |
| UN78532 | Rsa1.0.00029.1 | 615 | 272992 | 1.00E-162 | 296 | 298 | 99 -  | 318 | 615 | 147272 | 147569 |
| UN78533 | Rsa1.0.13829.1 | 791 | 4252   | 1.00E-177 | 405 | 425 | 95 +  | 343 | 758 | 1      | 425    |
| UN78534 | Rsa1.0.03992.1 | 111 | 19675  | 3.00E-48  | 106 | 109 | 97 +  | 3   | 111 | 10763  | 10871  |
| UN78535 | Rsa1.0.03977.1 | 787 | 19758  | 0         | 440 | 445 | 98 -  | 338 | 782 | 19314  | 19758  |
| UN78536 | Rsa1.0.06455.1 | 623 | 10983  | 0         | 348 | 355 | 98 +  | 269 | 623 | 3383   | 3737   |
| UN78537 | Rsa1.0.00469.1 | 513 | 82084  | 4.00E-67  | 157 | 166 | 94 +  | 343 | 508 | 44841  | 45006  |
| UN78538 | Rsa1.0.19562.1 | 691 | 1414   | 1.00E-86  | 188 | 196 | 95 -  | 5   | 196 | 1      | 196    |
| UN78539 | Rsa1.0.00296.1 | 632 | 97854  | 0         | 619 | 631 | 98 +  | 2   | 632 | 48634  | 49264  |
| UN78540 | Rsa1.0.00138.1 | 767 | 247040 | 0         | 378 | 379 | 99 -  | 3   | 380 | 5072   | 5450   |
| UN78541 | Rsa1.0.00573.1 | 686 | 74821  | 0         | 375 | 387 | 96 +  | 301 | 682 | 41334  | 41720  |
| UN78542 | Rsa1.0.00152.1 | 549 | 257730 | 1.00E-107 | 212 | 217 | 97 -  | 3   | 219 | 251779 | 251995 |
| UN78543 | Rsa1.0.00323.1 | 483 | 159650 | 0         | 437 | 457 | 95 +  | 3   | 459 | 16896  | 17352  |
| UN78544 | Rsa1.0.02753.1 | 445 | 28215  | 0         | 386 | 396 | 97 -  | 5   | 400 | 5055   | 5450   |



|         |                |     |        |           |     |     |       |     |     |        |        |
|---------|----------------|-----|--------|-----------|-----|-----|-------|-----|-----|--------|--------|
| UN78545 | Rsa1.0.00273.1 | 548 | 326186 | 1.00E-137 | 271 | 279 | 97 -  | 101 | 379 | 116435 | 116713 |
| UN78546 | Rsa1.0.00064.1 | 150 | 240927 | 6.00E-32  | 79  | 82  | 96 -  | 6   | 87  | 135242 | 135323 |
| UN78547 | Rsa1.0.01144.1 | 705 | 52431  | 4.00E-86  | 175 | 178 | 98 +  | 408 | 585 | 14758  | 14934  |
| UN78548 | Rsa1.0.01701.1 | 576 | 162121 | 1.00E-127 | 249 | 255 | 97 -  | 148 | 402 | 140313 | 140567 |
| UN78549 | Rsa1.0.02567.1 | 267 | 30016  | 7.00E-95  | 176 | 176 | 100 + | 34  | 209 | 22224  | 22399  |
| UN78550 | Rsa1.0.00079.1 | 618 | 606987 | 0         | 614 | 616 | 99 -  | 4   | 618 | 140831 | 141446 |
| UN78551 | Rsa1.0.08103.1 | 635 | 7900   | 0         | 567 | 579 | 97 -  | 3   | 574 | 1202   | 1780   |
| UN78552 | Rsa1.0.11760.1 | 736 | 5417   | 0         | 696 | 715 | 97 +  | 1   | 712 | 4409   | 5123   |
| UN78553 | Rsa1.0.00010.1 | 622 | 294827 | 0         | 595 | 629 | 94 +  | 3   | 622 | 145052 | 145674 |
| UN78554 | Rsa1.0.00045.1 | 232 | 328694 | 1.00E-61  | 159 | 168 | 94 -  | 68  | 232 | 164622 | 164789 |
| UN78555 | Rsa1.0.02370.1 | 704 | 32071  | 0         | 369 | 371 | 99 +  | 4   | 374 | 31029  | 31398  |
| UN78556 | Rsa1.0.06065.1 | 462 | 11828  | 0         | 362 | 365 | 99 -  | 3   | 367 | 5294   | 5658   |
| UN78557 | Rsa1.0.00131.1 | 523 | 432233 | 1.00E-167 | 348 | 365 | 95 -  | 10  | 374 | 426117 | 426481 |
| UN78558 | Rsa1.0.02488.1 | 815 | 30913  | 1.00E-151 | 319 | 331 | 96 -  | 426 | 753 | 29939  | 30269  |
| UN78559 | Rsa1.0.02664.1 | 733 | 28917  | 3.00E-84  | 165 | 167 | 98 +  | 310 | 476 | 5414   | 5580   |
| UN78560 | Rsa1.0.00253.1 | 723 | 231292 | 1.00E-117 | 217 | 218 | 99 +  | 332 | 549 | 149270 | 149487 |
| UN78561 | Rsa1.0.06133.1 | 676 | 11663  | 1.00E-140 | 296 | 306 | 96 +  | 2   | 305 | 7947   | 8248   |
| UN78562 | Rsa1.0.02282.1 | 710 | 163951 | 0         | 374 | 387 | 96 +  | 325 | 710 | 142819 | 143205 |
| UN78563 | Rsa1.0.00380.1 | 630 | 89748  | 0         | 503 | 533 | 94 -  | 4   | 533 | 16657  | 17189  |
| UN78564 | Rsa1.0.00035.1 | 772 | 176449 | 0         | 618 | 642 | 96 -  | 120 | 754 | 52278  | 52916  |
| UN78565 | Rsa1.0.00017.1 | 686 | 752458 | 0         | 489 | 517 | 94 +  | 174 | 686 | 463977 | 464487 |
| UN78566 | Rsa1.0.01453.1 | 711 | 45449  | 1.00E-103 | 210 | 215 | 97 -  | 3   | 216 | 45049  | 45263  |
| UN78567 | Rsa1.0.03037.1 | 529 | 25825  | 6.00E-69  | 148 | 153 | 96 +  | 373 | 525 | 8431   | 8583   |
| UN78568 | Rsa1.0.02996.1 | 545 | 26152  | 1.00E-128 | 291 | 303 | 96 -  | 5   | 301 | 23022  | 23323  |
| UN78569 | Rsa1.0.28756.1 | 573 | 804    | 1.00E-113 | 207 | 207 | 100 - | 367 | 573 | 177    | 383    |
| UN78570 | Rsa1.0.13369.1 | 583 | 4880   | 1.00E-152 | 281 | 284 | 98 +  | 300 | 583 | 3108   | 3391   |
| UN78571 | Rsa1.0.00077.1 | 655 | 145005 | 1.00E-150 | 347 | 374 | 92 +  | 296 | 655 | 30940  | 31313  |
| UN78572 | Rsa1.0.00630.1 | 807 | 71281  | 2.00E-94  | 188 | 192 | 97 -  | 33  | 224 | 36124  | 36315  |
| UN78573 | Rsa1.0.14732.1 | 614 | 3117   | 0         | 588 | 603 | 97 -  | 12  | 614 | 1255   | 1856   |
| UN78574 | Rsa1.0.20459.1 | 704 | 1303   | 0         | 622 | 655 | 94 -  | 60  | 702 | 180    | 831    |
| UN78575 | Rsa1.0.00221.1 | 782 | 106972 | 0         | 736 | 789 | 93 -  | 3   | 782 | 52123  | 52889  |
| UN78576 | Rsa1.0.11525.1 | 792 | 5479   | 0         | 603 | 647 | 93 +  | 45  | 690 | 4434   | 5080   |
| UN78577 | Rsa1.0.00035.1 | 613 | 176449 | 2.00E-78  | 155 | 157 | 98 +  | 305 | 461 | 155792 | 155948 |
| UN78578 | Rsa1.0.01978.1 | 608 | 36546  | 1.00E-127 | 255 | 259 | 98 -  | 353 | 608 | 8943   | 9201   |
| UN78579 | Rsa1.0.00340.1 | 740 | 305782 | 8.00E-94  | 227 | 242 | 93 -  | 50  | 288 | 160608 | 160849 |
| UN78580 | Rsa1.0.00698.1 | 309 | 67816  | 1.00E-62  | 232 | 265 | 87 +  | 49  | 309 | 32728  | 32982  |
| UN78581 | Rsa1.0.00127.1 | 213 | 127446 | 8.00E-88  | 202 | 214 | 94 +  | 8   | 213 | 51836  | 52049  |
| UN78582 | Rsa1.0.00524.1 | 707 | 169613 | 1.00E-107 | 290 | 320 | 90 +  | 3   | 309 | 153385 | 153694 |
| UN78583 | Rsa1.0.00039.1 | 559 | 296927 | 1.00E-167 | 336 | 348 | 96 +  | 212 | 559 | 282315 | 282659 |

|         |                |     |        |           |     |     |       |     |     |        |        |
|---------|----------------|-----|--------|-----------|-----|-----|-------|-----|-----|--------|--------|
| UN78584 | Rsa1.0.01726.1 | 342 | 40263  | 1.00E-126 | 249 | 256 | 97 -  | 87  | 342 | 7352   | 7607   |
| UN78585 | Rsa1.0.01540.1 | 250 | 151890 | 4.00E-99  | 186 | 187 | 99 -  | 64  | 250 | 144535 | 144721 |
| UN78586 | Rsa1.0.00305.1 | 327 | 97308  | 0         | 324 | 324 | 100 + | 4   | 327 | 63500  | 63823  |
| UN78587 | Rsa1.0.01360.1 | 413 | 47246  | 0         | 403 | 413 | 97 +  | 2   | 413 | 13298  | 13709  |
| UN78588 | Rsa1.0.03884.1 | 667 | 20274  | 1.00E-132 | 312 | 334 | 93 +  | 19  | 352 | 1982   | 2311   |
| UN78589 | Rsa1.0.01727.1 | 654 | 40243  | 2.00E-69  | 137 | 138 | 99 -  | 358 | 495 | 12313  | 12450  |
| UN78590 | Rsa1.0.00866.1 | 678 | 61676  | 2.00E-78  | 181 | 192 | 94 +  | 1   | 192 | 23261  | 23446  |
| UN78591 | Rsa1.0.00617.1 | 628 | 72199  | 1.00E-121 | 266 | 279 | 95 -  | 349 | 626 | 5539   | 5815   |
| UN78592 | Rsa1.0.00004.1 | 762 | 253996 | 0         | 429 | 443 | 96 +  | 312 | 744 | 9328   | 9770   |
| UN78593 | Rsa1.0.03090.1 | 763 | 25464  | 1.00E-110 | 271 | 285 | 95 -  | 483 | 758 | 2590   | 2874   |
| UN78594 | Rsa1.0.00116.1 | 675 | 365886 | 0         | 554 | 561 | 98 -  | 3   | 563 | 53488  | 54047  |
| UN78595 | Rsa1.0.14871.1 | 343 | 2999   | 4.00E-75  | 203 | 219 | 92 +  | 82  | 299 | 2735   | 2951   |
| UN78596 | Rsa1.0.03440.1 | 228 | 22928  | 1.00E-111 | 221 | 227 | 97 -  | 2   | 228 | 21640  | 21866  |
| UN78597 | Rsa1.0.01893.1 | 585 | 37520  | 1.00E-85  | 203 | 216 | 93 +  | 5   | 220 | 8534   | 8747   |
| UN78598 | Rsa1.0.01923.1 | 786 | 37233  | 1.00E-107 | 254 | 274 | 92 -  | 2   | 275 | 21932  | 22196  |
| UN78599 | Rsa1.0.02551.1 | 567 | 30196  | 1.00E-120 | 248 | 257 | 96 -  | 311 | 567 | 16655  | 16908  |
| UN78600 | Rsa1.0.00510.1 | 756 | 78718  | 0         | 578 | 621 | 93 +  | 120 | 724 | 55870  | 56487  |
| UN78601 | Rsa1.0.00153.1 | 733 | 192931 | 1.00E-143 | 281 | 289 | 97 -  | 373 | 661 | 17665  | 17953  |
| UN78602 | Rsa1.0.03832.1 | 756 | 20577  | 1.00E-175 | 390 | 417 | 93 +  | 353 | 756 | 8373   | 8789   |
| UN78603 | Rsa1.0.04865.1 | 622 | 15683  | 1.00E-135 | 250 | 252 | 99 +  | 2   | 253 | 10199  | 10450  |
| UN78604 | Rsa1.0.00371.1 | 419 | 90463  | 0         | 418 | 419 | 99 -  | 1   | 419 | 49900  | 50317  |
| UN78605 | Rsa1.0.00402.1 | 700 | 385315 | 0         | 698 | 699 | 99 -  | 3   | 700 | 82348  | 83046  |
| UN78606 | Rsa1.0.01217.1 | 768 | 50554  | 0         | 738 | 771 | 95 +  | 1   | 768 | 47101  | 47862  |
| UN78607 | Rsa1.0.01867.1 | 789 | 37960  | 0         | 344 | 345 | 99 -  | 446 | 789 | 17222  | 17566  |
| UN78608 | Rsa1.0.00269.1 | 698 | 341668 | 0         | 662 | 674 | 98 +  | 3   | 676 | 329077 | 329750 |
| UN78609 | Rsa1.0.02398.1 | 429 | 31766  | 1.00E-160 | 410 | 454 | 90 -  | 6   | 429 | 27107  | 27557  |
| UN78610 | Rsa1.0.00402.1 | 504 | 385315 | 0         | 478 | 507 | 94 +  | 1   | 504 | 119059 | 119556 |
| UN78611 | Rsa1.0.00124.1 | 736 | 262503 | 0         | 338 | 338 | 100 - | 395 | 732 | 257394 | 257731 |
| UN78612 | Rsa1.0.05825.1 | 816 | 12509  | 0         | 651 | 684 | 95 +  | 91  | 768 | 6525   | 7207   |
| UN78613 | #              | #   | #      | #         | #   | #   | #     | #   | #   | #      | #      |
| UN78614 | Rsa1.0.01993.1 | 633 | 36384  | 1.00E-124 | 244 | 250 | 97 -  | 1   | 250 | 2704   | 2953   |
| UN78615 | Rsa1.0.02383.1 | 770 | 31931  | 1.00E-100 | 347 | 400 | 86 +  | 3   | 381 | 10266  | 10653  |
| UN78616 | Rsa1.0.00326.1 | 349 | 171955 | 1.00E-153 | 329 | 346 | 95 -  | 6   | 349 | 89188  | 89529  |
| UN78617 | Rsa1.0.00394.1 | 773 | 148426 | 2.00E-97  | 187 | 189 | 98 -  | 100 | 288 | 123689 | 123877 |
| UN78618 | Rsa1.0.00154.1 | 757 | 189461 | 1.00E-153 | 339 | 356 | 95 +  | 406 | 756 | 129259 | 129612 |
| UN78619 | Rsa1.0.02891.1 | 742 | 27010  | 0         | 393 | 414 | 94 +  | 2   | 415 | 20165  | 20575  |
| UN78620 | Rsa1.0.63243.1 | 515 | 363    | 5.00E-94  | 187 | 191 | 97 +  | 182 | 372 | 162    | 352    |
| UN78621 | Rsa1.0.00435.1 | 357 | 317579 | 0         | 351 | 356 | 98 -  | 2   | 357 | 37444  | 37798  |
| UN78622 | Rsa1.0.15897.1 | 603 | 2369   | 1.00E-107 | 241 | 255 | 94 -  | 4   | 258 | 675    | 926    |

|         |                |     |        |           |     |     |       |     |     |        |        |
|---------|----------------|-----|--------|-----------|-----|-----|-------|-----|-----|--------|--------|
| UN78623 | Rsa1.0.00722.1 | 817 | 66840  | 0         | 809 | 830 | 97 -  | 1   | 817 | 19244  | 20070  |
| UN78624 | Rsa1.0.00332.1 | 802 | 94575  | 1.00E-92  | 213 | 226 | 94 -  | 2   | 223 | 80487  | 80712  |
| UN78625 | Rsa1.0.00081.1 | 683 | 143261 | 0         | 429 | 441 | 97 +  | 245 | 683 | 85804  | 86244  |
| UN78626 | Rsa1.0.21260.1 | 276 | 1220   | 7.00E-18  | 54  | 55  | 98 -  | 2   | 56  | 307    | 360    |
| UN78627 | Rsa1.0.08846.1 | 126 | 6867   | 4.00E-51  | 122 | 126 | 96 +  | 3   | 126 | 715    | 840    |
| UN78628 | Rsa1.0.00978.1 | 654 | 57739  | 0         | 622 | 653 | 95 +  | 2   | 645 | 19377  | 20029  |
| UN78629 | Rsa1.0.03584.1 | 507 | 21931  | 1.00E-110 | 248 | 262 | 94 +  | 3   | 264 | 19911  | 20171  |
| UN78630 | Rsa1.0.00079.1 | 294 | 606987 | 1.00E-104 | 214 | 220 | 97 +  | 76  | 294 | 489177 | 489396 |
| UN78631 | Rsa1.0.00497.1 | 640 | 79830  | 0         | 415 | 434 | 95 -  | 211 | 640 | 3413   | 3846   |
| UN78632 | Rsa1.0.01439.1 | 703 | 45841  | 0         | 694 | 720 | 96 +  | 1   | 702 | 27652  | 28371  |
| UN78633 | Rsa1.0.00706.1 | 411 | 291570 | 4.00E-94  | 188 | 191 | 98 -  | 3   | 192 | 17194  | 17384  |
| UN78634 | Rsa1.0.04563.1 | 812 | 16837  | 5.00E-95  | 183 | 185 | 98 +  | 3   | 187 | 12910  | 13094  |
| UN78635 | Rsa1.0.03344.1 | 585 | 23593  | 3.00E-62  | 164 | 174 | 94 +  | 5   | 176 | 10839  | 11011  |
| UN78636 | Rsa1.0.01145.1 | 597 | 149247 | 3.00E-74  | 142 | 142 | 100 - | 1   | 142 | 126174 | 126315 |
| UN78637 | Rsa1.0.00639.1 | 157 | 165873 | 1.00E-54  | 125 | 128 | 97 -  | 9   | 136 | 104883 | 105008 |
| UN78638 | Rsa1.0.03201.1 | 690 | 157656 | 0         | 508 | 520 | 97 -  | 171 | 690 | 15632  | 16148  |
| UN78639 | Rsa1.0.03978.1 | 750 | 19753  | 1.00E-126 | 252 | 258 | 97 +  | 437 | 693 | 17138  | 17395  |
| UN78640 | Rsa1.0.01339.1 | 731 | 47813  | 0         | 728 | 729 | 99 -  | 3   | 731 | 25527  | 26255  |
| UN78641 | Rsa1.0.00281.1 | 664 | 99908  | 1.00E-127 | 293 | 313 | 93 +  | 352 | 664 | 96693  | 97002  |
| UN78642 | Rsa1.0.02846.1 | 677 | 27338  | 0         | 455 | 472 | 96 -  | 1   | 472 | 12508  | 12979  |
| UN78643 | Rsa1.0.05322.1 | 670 | 14154  | 0         | 459 | 474 | 96 -  | 192 | 665 | 1687   | 2160   |
| UN78644 | Rsa1.0.05612.1 | 637 | 13193  | 1.00E-175 | 327 | 332 | 98 +  | 160 | 491 | 1      | 332    |
| UN78645 | Rsa1.0.15114.1 | 653 | 2815   | 0         | 434 | 437 | 99 +  | 2   | 438 | 2188   | 2624   |
| UN78646 | Rsa1.0.07481.1 | 586 | 9280   | 0         | 484 | 522 | 92 -  | 2   | 510 | 6905   | 7426   |
| UN78647 | Rsa1.0.00418.1 | 650 | 215377 | 2.00E-84  | 197 | 211 | 93 -  | 2   | 203 | 77791  | 78001  |
| UN78648 | Rsa1.0.03235.1 | 566 | 24442  | 0         | 383 | 385 | 99 +  | 2   | 386 | 21166  | 21550  |
| UN78649 | Rsa1.0.00502.1 | 647 | 204180 | 0         | 478 | 503 | 95 +  | 1   | 503 | 76247  | 76743  |
| UN78650 | Rsa1.0.25490.1 | 726 | 934    | 0         | 527 | 569 | 92 -  | 3   | 555 | 1      | 564    |
| UN78651 | Rsa1.0.00477.1 | 462 | 81556  | 0         | 413 | 414 | 99 -  | 49  | 462 | 10435  | 10848  |
| UN78652 | Rsa1.0.00015.1 | 756 | 561803 | 0         | 433 | 445 | 97 +  | 3   | 442 | 261955 | 262398 |
| UN78653 | Rsa1.0.00050.1 | 207 | 237174 | 4.00E-37  | 100 | 107 | 93 +  | 1   | 107 | 86704  | 86810  |
| UN78654 | Rsa1.0.00049.1 | 610 | 167018 | 0         | 590 | 610 | 96 -  | 2   | 610 | 106454 | 107062 |
| UN78655 | Rsa1.0.00503.1 | 667 | 79468  | 0         | 447 | 464 | 96 -  | 210 | 667 | 61003  | 61463  |
| UN78656 | Rsa1.0.01220.1 | 757 | 161775 | 1.00E-61  | 127 | 129 | 98 -  | 528 | 656 | 124240 | 124368 |
| UN78657 | Rsa1.0.39909.1 | 259 | 563    | 1.00E-130 | 250 | 255 | 98 -  | 2   | 256 | 22     | 276    |
| UN78658 | Rsa1.0.00341.1 | 765 | 249309 | 1.00E-167 | 322 | 328 | 98 +  | 3   | 330 | 241672 | 241995 |
| UN78659 | Rsa1.0.01173.1 | 718 | 51727  | 0         | 692 | 716 | 96 -  | 2   | 710 | 204    | 916    |
| UN78660 | Rsa1.0.00208.1 | 766 | 108565 | 6.00E-67  | 150 | 157 | 95 -  | 59  | 215 | 9312   | 9462   |
| UN78661 | Rsa1.0.01305.1 | 478 | 48730  | 2.00E-71  | 140 | 141 | 99 -  | 338 | 478 | 11875  | 12015  |

|         |                |     |        |           |     |     |       |     |     |        |        |
|---------|----------------|-----|--------|-----------|-----|-----|-------|-----|-----|--------|--------|
| UN78662 | Rsa1.0_00753.1 | 358 | 65705  | 8.00E-86  | 167 | 169 | 98 +  | 2   | 170 | 14745  | 14913  |
| UN78663 | Rsa1.0_04039.1 | 486 | 19467  | 8.00E-56  | 135 | 143 | 94 -  | 220 | 362 | 15589  | 15731  |
| UN78664 | Rsa1.0_00329.1 | 646 | 222544 | 1.00E-103 | 232 | 243 | 95 -  | 3   | 244 | 2056   | 2297   |
| UN78665 | Rsa1.0_04264.1 | 244 | 18207  | 1.00E-116 | 220 | 223 | 98 -  | 3   | 225 | 2000   | 2222   |
| UN78666 | Rsa1.0_00411.1 | 597 | 86944  | 1.00E-129 | 252 | 258 | 97 +  | 340 | 597 | 45544  | 45801  |
| UN78667 | Rsa1.0_00180.1 | 765 | 114581 | 3.00E-87  | 199 | 210 | 94 +  | 3   | 209 | 13303  | 13512  |
| UN78668 | Rsa1.0_00312.1 | 722 | 96765  | 0         | 417 | 423 | 98 -  | 14  | 435 | 60754  | 61175  |
| UN78669 | Rsa1.0_05019.1 | 682 | 15114  | 3.00E-90  | 206 | 216 | 95 -  | 451 | 665 | 12141  | 12354  |
| UN78670 | Rsa1.0_01183.1 | 669 | 51465  | 0         | 409 | 416 | 98 +  | 3   | 416 | 45512  | 45927  |
| UN78671 | Rsa1.0_01955.1 | 596 | 36850  | 0         | 364 | 364 | 100 - | 233 | 596 | 34311  | 34674  |
| UN78672 | Rsa1.0_00190.1 | 714 | 318240 | 1.00E-167 | 316 | 322 | 98 -  | 270 | 591 | 192464 | 192785 |
| UN78673 | Rsa1.0_00972.1 | 612 | 57937  | 2.00E-75  | 150 | 152 | 98 -  | 352 | 503 | 11090  | 11241  |
| UN78674 | Rsa1.0_00926.1 | 662 | 195072 | 2.00E-97  | 184 | 185 | 99 -  | 478 | 662 | 14495  | 14679  |
| UN78675 | Rsa1.0_01126.1 | 669 | 53127  | 1.00E-162 | 401 | 437 | 91 +  | 234 | 669 | 7606   | 8022   |
| UN78676 | Rsa1.0_00451.1 | 266 | 322533 | 2.00E-52  | 123 | 129 | 95 -  | 3   | 131 | 2067   | 2195   |
| UN78677 | Rsa1.0_00101.1 | 641 | 267193 | 0         | 363 | 367 | 98 +  | 276 | 641 | 73554  | 73920  |
| UN78678 | Rsa1.0_00107.1 | 112 | 431659 | 5.00E-38  | 96  | 100 | 96 +  | 2   | 100 | 337505 | 337604 |
| UN78679 | Rsa1.0_01975.1 | 531 | 36578  | 0         | 516 | 529 | 97 -  | 3   | 531 | 4325   | 4848   |
| UN78680 | Rsa1.0_00124.1 | 769 | 262503 | 0         | 341 | 342 | 99 -  | 3   | 344 | 87669  | 88010  |
| UN78681 | Rsa1.0_00376.1 | 488 | 90101  | 1.00E-147 | 294 | 304 | 96 -  | 33  | 336 | 2298   | 2595   |
| UN78682 | Rsa1.0_08586.1 | 772 | 7157   | 1.00E-117 | 345 | 393 | 87 -  | 3   | 392 | 2495   | 2856   |
| UN78683 | Rsa1.0_00745.1 | 279 | 66067  | 8.00E-73  | 156 | 161 | 96 -  | 122 | 279 | 23760  | 23920  |
| UN78684 | Rsa1.0_00738.1 | 715 | 66322  | 1.00E-141 | 260 | 262 | 99 -  | 3   | 264 | 53922  | 54183  |
| UN78685 | Rsa1.0_00017.1 | 805 | 752458 | 1.00E-142 | 352 | 387 | 90 +  | 213 | 581 | 441161 | 441541 |
| UN78686 | Rsa1.0_00480.1 | 809 | 81325  | 1.00E-136 | 284 | 294 | 96 +  | 429 | 720 | 4466   | 4759   |
| UN78687 | Rsa1.0_00699.1 | 642 | 184398 | 0         | 416 | 422 | 98 -  | 222 | 642 | 31024  | 31444  |
| UN78688 | Rsa1.0_00035.1 | 563 | 176449 | 2.00E-69  | 149 | 154 | 96 +  | 206 | 359 | 155795 | 155948 |
| UN78689 | Rsa1.0_02070.1 | 158 | 158516 | 6.00E-63  | 147 | 155 | 94 -  | 4   | 158 | 18783  | 18933  |
| UN78690 | Rsa1.0_00369.1 | 598 | 266462 | 0         | 485 | 531 | 91 -  | 74  | 590 | 144494 | 145003 |
| UN78691 | Rsa1.0_00009.1 | 479 | 232558 | 4.00E-48  | 98  | 98  | 100 - | 275 | 372 | 41992  | 42089  |
| UN78692 | Rsa1.0_07243.1 | 663 | 9673   | 7.00E-63  | 123 | 123 | 100 + | 210 | 332 | 979    | 1101   |
| UN78693 | Rsa1.0_00923.1 | 560 | 153678 | 1.00E-148 | 360 | 394 | 91 -  | 185 | 560 | 45823  | 46216  |
| UN78694 | Rsa1.0_00336.1 | 580 | 445051 | 1.00E-144 | 334 | 350 | 95 -  | 238 | 580 | 166536 | 166884 |
| UN78695 | Rsa1.0_02622.1 | 573 | 142402 | 1.00E-160 | 323 | 337 | 95 +  | 3   | 329 | 6672   | 7008   |
| UN78696 | Rsa1.0_00105.1 | 750 | 134138 | 1.00E-108 | 279 | 305 | 91 +  | 17  | 318 | 53783  | 54087  |
| UN78697 | Rsa1.0_00519.1 | 622 | 197864 | 0         | 597 | 622 | 95 +  | 2   | 622 | 68049  | 68665  |
| UN78698 | Rsa1.0_00112.1 | 566 | 132199 | 0         | 555 | 576 | 96 +  | 2   | 566 | 720    | 1293   |
| UN78699 | Rsa1.0_04852.1 | 624 | 15712  | 1.00E-101 | 200 | 203 | 98 +  | 3   | 203 | 8250   | 8452   |
| UN78700 | Rsa1.0_01397.1 | 596 | 183276 | 0         | 579 | 597 | 96 -  | 3   | 596 | 175927 | 176522 |

|         |                |     |        |           |     |     |      |     |     |        |        |
|---------|----------------|-----|--------|-----------|-----|-----|------|-----|-----|--------|--------|
| UN78701 | Rsa1.0_00260.1 | 223 | 102021 | 2.00E-66  | 174 | 186 | 93 + | 3   | 188 | 62691  | 62866  |
| UN78702 | Rsa1.0_00355.1 | 497 | 92038  | 0         | 409 | 414 | 98 + | 87  | 497 | 50039  | 50452  |
| UN78703 | Rsa1.0_01282.1 | 758 | 49304  | 1.00E-64  | 135 | 138 | 97 - | 199 | 336 | 29165  | 29302  |
| UN78704 | Rsa1.0_00090.1 | 586 | 273859 | 0         | 584 | 585 | 99 + | 2   | 586 | 260298 | 260882 |
| UN78705 | Rsa1.0_00580.1 | 738 | 74515  | 1.00E-164 | 328 | 337 | 97 + | 388 | 723 | 9661   | 9996   |
| UN78706 | Rsa1.0_00783.1 | 683 | 64459  | 0         | 669 | 679 | 98 - | 3   | 680 | 20363  | 21041  |
| UN78707 | Rsa1.0_00107.1 | 619 | 431659 | 1.00E-121 | 233 | 237 | 98 - | 75  | 311 | 183555 | 183791 |
| UN78708 | Rsa1.0_00527.1 | 599 | 77733  | 1.00E-127 | 277 | 292 | 94 - | 311 | 599 | 58090  | 58381  |
| UN78709 | Rsa1.0_02365.1 | 779 | 32118  | 3.00E-93  | 195 | 202 | 96 + | 425 | 626 | 4220   | 4421   |
| UN78710 | Rsa1.0_00560.1 | 636 | 75685  | 0         | 629 | 634 | 99 + | 3   | 636 | 53840  | 54473  |
| UN78711 | Rsa1.0_18435.1 | 701 | 1600   | 4.00E-92  | 181 | 184 | 98 - | 510 | 693 | 536    | 719    |
| UN78712 | Rsa1.0_01811.1 | 706 | 38977  | 1.00E-126 | 255 | 262 | 97 + | 446 | 706 | 18627  | 18888  |
| UN78713 | Rsa1.0_00017.1 | 543 | 752458 | 2.00E-78  | 181 | 194 | 93 + | 3   | 184 | 204600 | 204793 |
| UN78714 | Rsa1.0_01719.1 | 775 | 40388  | 7.00E-82  | 213 | 223 | 95 + | 560 | 775 | 10001  | 10223  |
| UN78715 | Rsa1.0_24745.1 | 769 | 969    | 0         | 384 | 387 | 99 + | 1   | 387 | 70     | 456    |
| UN78716 | Rsa1.0_00341.1 | 746 | 249309 | 0         | 448 | 476 | 94 + | 277 | 746 | 189541 | 190016 |
| UN78717 | Rsa1.0_02184.1 | 525 | 34166  | 0         | 505 | 523 | 96 - | 3   | 525 | 3342   | 3864   |
| UN78718 | Rsa1.0_00115.1 | 611 | 131321 | 1.00E-109 | 214 | 217 | 98 + | 2   | 217 | 8988   | 9204   |
| UN78719 | Rsa1.0_00163.1 | 716 | 116847 | 1.00E-116 | 221 | 224 | 98 + | 67  | 290 | 82068  | 82291  |
| UN78720 | Rsa1.0_00006.1 | 750 | 396176 | 1.00E-153 | 295 | 298 | 98 - | 449 | 743 | 368739 | 369036 |
| UN78721 | Rsa1.0_03506.1 | 642 | 22416  | 1.00E-129 | 280 | 294 | 95 + | 314 | 606 | 8006   | 8299   |
| UN78722 | Rsa1.0_04264.1 | 670 | 18207  | 0         | 537 | 567 | 94 - | 2   | 563 | 902    | 1467   |
| UN78723 | Rsa1.0_00340.1 | 694 | 305782 | 1.00E-130 | 248 | 252 | 98 + | 3   | 254 | 188904 | 189155 |
| UN78724 | Rsa1.0_01423.1 | 601 | 46170  | 1.00E-111 | 227 | 234 | 97 - | 2   | 232 | 4731   | 4964   |
| UN78725 | Rsa1.0_00855.1 | 550 | 62047  | 5.00E-88  | 185 | 191 | 96 - | 195 | 385 | 4342   | 4529   |
| UN78726 | Rsa1.0_00002.1 | 601 | 601661 | 0         | 536 | 585 | 91 + | 23  | 601 | 577414 | 577998 |
| UN78727 | Rsa1.0_02053.1 | 793 | 35554  | 0         | 403 | 407 | 99 + | 3   | 407 | 24535  | 24941  |
| UN78728 | Rsa1.0_00979.1 | 756 | 57733  | 0         | 398 | 407 | 97 - | 352 | 756 | 999    | 1404   |
| UN78729 | Rsa1.0_03770.1 | 600 | 20952  | 1.00E-152 | 305 | 313 | 97 + | 3   | 315 | 4534   | 4839   |
| UN78730 | Rsa1.0_00607.1 | 684 | 73146  | 7.00E-20  | 57  | 59  | 96 + | 43  | 101 | 55126  | 55184  |
| UN78731 | Rsa1.0_03170.1 | 447 | 24824  | 4.00E-79  | 223 | 246 | 90 + | 133 | 373 | 4523   | 4762   |
| UN78732 | Rsa1.0_02451.1 | 379 | 31283  | 1.00E-118 | 313 | 346 | 90 + | 3   | 346 | 2293   | 2623   |
| UN78733 | Rsa1.0_05760.1 | 643 | 12720  | 1.00E-126 | 239 | 242 | 98 + | 390 | 631 | 4670   | 4911   |
| UN78734 | Rsa1.0_00990.1 | 392 | 57445  | 3.00E-24  | 64  | 66  | 96 - | 289 | 354 | 54190  | 54255  |
| UN78735 | Rsa1.0_01998.1 | 646 | 36276  | 0         | 560 | 610 | 91 + | 6   | 596 | 10091  | 10684  |
| UN78736 | Rsa1.0_00110.1 | 357 | 132719 | 1.00E-143 | 340 | 367 | 92 + | 4   | 357 | 93087  | 93453  |
| UN78737 | Rsa1.0_00265.1 | 560 | 220635 | 0         | 547 | 582 | 93 + | 3   | 560 | 24230  | 24811  |
| UN78738 | Rsa1.0_01318.1 | 729 | 48275  | 0         | 546 | 568 | 96 + | 153 | 720 | 13067  | 13633  |
| UN78739 | Rsa1.0_00092.1 | 608 | 659932 | 0         | 588 | 607 | 96 + | 2   | 608 | 220089 | 220695 |

|         |                |     |        |           |     |     |       |     |     |        |        |
|---------|----------------|-----|--------|-----------|-----|-----|-------|-----|-----|--------|--------|
| UN78740 | Rsa1.0.06168.1 | 646 | 11580  | 1.00E-138 | 287 | 299 | 95 +  | 26  | 321 | 9698   | 9996   |
| UN78741 | Rsa1.0.02651.1 | 586 | 29046  | 5.00E-85  | 223 | 243 | 91 +  | 85  | 325 | 26027  | 26269  |
| UN78742 | Rsa1.0.03213.1 | 738 | 24568  | 1.00E-73  | 218 | 241 | 90 -  | 437 | 670 | 11505  | 11745  |
| UN78743 | Rsa1.0.00087.1 | 483 | 761073 | 1.00E-97  | 193 | 197 | 97 -  | 49  | 245 | 302736 | 302932 |
| UN78744 | Rsa1.0.07542.1 | 694 | 9160   | 1.00E-101 | 197 | 200 | 98 +  | 492 | 691 | 2708   | 2907   |
| UN78745 | Rsa1.0.07739.1 | 622 | 8684   | 1.00E-167 | 316 | 322 | 98 -  | 171 | 492 | 7417   | 7738   |
| UN78746 | Rsa1.0.01058.1 | 726 | 55430  | 0         | 363 | 363 | 100 + | 345 | 707 | 17664  | 18026  |
| UN78747 | Rsa1.0.08164.1 | 662 | 7811   | 0         | 359 | 364 | 98 -  | 157 | 520 | 5890   | 6253   |
| UN78748 | Rsa1.0.08027.1 | 690 | 8058   | 1.00E-159 | 305 | 312 | 97 +  | 379 | 690 | 6693   | 7004   |
| UN78749 | Rsa1.0.01752.1 | 524 | 39805  | 2.33E-156 | 288 | 294 | 97 +  | 233 | 524 | 4489   | 4782   |
| UN78750 | Rsa1.0.00764.1 | 694 | 65056  | 1.00E-138 | 299 | 316 | 94 +  | 3   | 315 | 19986  | 20292  |
| UN78751 | Rsa1.0.00046.1 | 759 | 320315 | 0         | 347 | 354 | 98 +  | 267 | 620 | 27231  | 27584  |
| UN78752 | Rsa1.0.05034.1 | 584 | 15064  | 0         | 500 | 536 | 93 +  | 2   | 537 | 710    | 1245   |
| UN78753 | Rsa1.0.02951.1 | 802 | 26505  | 1.00E-137 | 337 | 368 | 91 +  | 17  | 384 | 1001   | 1359   |
| UN78754 | Rsa1.0.00057.1 | 489 | 160473 | 0         | 387 | 389 | 99 +  | 2   | 390 | 96462  | 96850  |
| UN78755 | Rsa1.0.00044.1 | 650 | 271658 | 0         | 434 | 466 | 93 -  | 186 | 650 | 69595  | 70051  |
| UN78756 | Rsa1.0.02285.1 | 735 | 33001  | 1.00E-95  | 178 | 178 | 100 - | 3   | 180 | 8      | 185    |
| UN78757 | Rsa1.0.00653.1 | 715 | 70029  | 0         | 404 | 405 | 99 +  | 1   | 405 | 52182  | 52586  |
| UN78758 | Rsa1.0.15461.1 | 655 | 2591   | 0         | 629 | 658 | 95 +  | 1   | 655 | 436    | 1093   |
| UN78759 | Rsa1.0.00016.1 | 647 | 831256 | 5.00E-70  | 213 | 236 | 90 -  | 3   | 229 | 811038 | 811271 |
| UN78760 | Rsa1.0.01196.1 | 357 | 51097  | 6.00E-93  | 185 | 189 | 97 -  | 162 | 350 | 28241  | 28429  |
| UN78761 | Rsa1.0.00001.1 | 621 | 363028 | 0         | 588 | 606 | 97 -  | 1   | 606 | 248652 | 249256 |
| UN78762 | Rsa1.0.04179.1 | 712 | 18633  | 2.00E-42  | 260 | 316 | 82 -  | 301 | 614 | 5867   | 6182   |
| UN78763 | Rsa1.0.00123.1 | 703 | 325650 | 1.00E-159 | 383 | 409 | 93 +  | 303 | 700 | 262756 | 263161 |
| UN78764 | Rsa1.0.00561.1 | 696 | 75653  | 1.00E-165 | 310 | 314 | 98 -  | 384 | 696 | 67007  | 67320  |
| UN78765 | Rsa1.0.04960.1 | 588 | 15321  | 3.00E-40  | 85  | 85  | 100 - | 301 | 385 | 9851   | 9935   |
| UN78766 | Rsa1.0.00645.1 | 587 | 189716 | 1.00E-109 | 230 | 240 | 95 -  | 204 | 443 | 151484 | 151723 |
| UN78767 | Rsa1.0.03646.1 | 773 | 21598  | 1.00E-166 | 303 | 305 | 99 -  | 200 | 504 | 11504  | 11808  |
| UN78768 | Rsa1.0.02299.1 | 665 | 32857  | 0         | 620 | 646 | 95 -  | 3   | 648 | 245    | 878    |
| UN78769 | Rsa1.0.00287.1 | 551 | 98687  | 0         | 540 | 550 | 98 -  | 2   | 551 | 75498  | 76047  |
| UN78770 | Rsa1.0.00870.1 | 379 | 61606  | 0         | 373 | 377 | 98 +  | 3   | 379 | 2421   | 2797   |
| UN78771 | Rsa1.0.13471.1 | 519 | 4802   | 1.00E-104 | 208 | 212 | 98 +  | 99  | 308 | 2431   | 2642   |
| UN78772 | Rsa1.0.02826.1 | 564 | 27560  | 0         | 428 | 451 | 94 -  | 12  | 461 | 15254  | 15699  |
| UN78773 | Rsa1.0.00090.1 | 269 | 273859 | 1.00E-105 | 258 | 279 | 92 -  | 2   | 269 | 141691 | 141962 |
| UN78774 | Rsa1.0.00437.1 | 369 | 84879  | 1.00E-126 | 312 | 336 | 92 -  | 36  | 369 | 50695  | 51028  |
| UN78775 | Rsa1.0.00501.1 | 153 | 79545  | 6.00E-66  | 146 | 151 | 96 +  | 3   | 153 | 58699  | 58848  |
| UN78776 | Rsa1.0.00281.1 | 535 | 99908  | 0         | 523 | 554 | 94 -  | 3   | 535 | 9441   | 9994   |
| UN78777 | #              | #   | #      | #         | #   | #   | #     | #   | #   | #      | #      |
| UN78778 | Rsa1.0.04679.1 | 695 | 16430  | 0         | 680 | 698 | 97 -  | 3   | 695 | 2108   | 2803   |

|         |                |     |        |           |     |     |      |     |     |        |        |
|---------|----------------|-----|--------|-----------|-----|-----|------|-----|-----|--------|--------|
| UN78779 | Rsa1.0.01113.1 | 743 | 53616  | 0         | 689 | 762 | 90 - | 11  | 743 | 49058  | 49802  |
| UN78780 | Rsa1.0.00529.1 | 713 | 77487  | 1.00E-124 | 331 | 363 | 91 - | 5   | 365 | 65173  | 65521  |
| UN78781 | Rsa1.0.01315.1 | 564 | 48361  | 0         | 519 | 538 | 96 - | 27  | 564 | 29196  | 29733  |
| UN78782 | Rsa1.0.10036.1 | 767 | 6030   | 1.00E-131 | 375 | 422 | 88 - | 1   | 401 | 496    | 915    |
| UN78783 | Rsa1.0.03044.1 | 673 | 25791  | 0         | 444 | 473 | 93 + | 1   | 461 | 6990   | 7457   |
| UN78784 | Rsa1.0.11131.1 | 768 | 5607   | 1.00E-113 | 236 | 245 | 96 - | 1   | 245 | 4542   | 4782   |
| UN78785 | Rsa1.0.00034.1 | 435 | 260119 | 1.00E-139 | 295 | 310 | 95 - | 1   | 310 | 9111   | 9420   |
| UN78786 | Rsa1.0.01651.1 | 488 | 41586  | 2.00E-75  | 193 | 208 | 92 + | 1   | 207 | 34517  | 34724  |
| UN78787 | Rsa1.0.02774.1 | 467 | 28038  | 0         | 402 | 420 | 95 + | 48  | 467 | 15164  | 15582  |
| UN78788 | Rsa1.0.05894.1 | 158 | 12306  | 4.00E-70  | 152 | 158 | 96 + | 1   | 158 | 7151   | 7308   |
| UN78789 | Rsa1.0.00253.1 | 534 | 231292 | 1.00E-136 | 311 | 330 | 94 + | 1   | 323 | 126624 | 126949 |
| UN78790 | Rsa1.0.01139.1 | 450 | 52601  | 8.00E-62  | 284 | 337 | 84 + | 24  | 357 | 17483  | 17816  |
| UN78791 | Rsa1.0.00067.1 | 561 | 415055 | 5.00E-85  | 175 | 180 | 97 + | 382 | 561 | 175081 | 175260 |
| UN78792 | Rsa1.0.05004.1 | 377 | 15172  | 3.00E-73  | 176 | 188 | 93 - | 182 | 369 | 4843   | 5030   |
| UN78793 | Rsa1.0.03733.1 | 833 | 21108  | 0         | 394 | 406 | 97 + | 318 | 723 | 3885   | 4287   |
| UN78794 | Rsa1.0.00065.1 | 370 | 454616 | 1.00E-156 | 352 | 372 | 94 + | 1   | 370 | 195162 | 195528 |
| UN78795 | Rsa1.0.00050.1 | 253 | 237174 | 2.00E-61  | 230 | 259 | 88 - | 1   | 253 | 5014   | 5266   |
| UN78796 | Rsa1.0.00235.1 | 509 | 154696 | 0         | 500 | 509 | 98 + | 1   | 509 | 121354 | 121862 |
| UN78797 | Rsa1.0.05153.1 | 638 | 14663  | 1.00E-130 | 304 | 322 | 94 - | 1   | 316 | 2743   | 3059   |
| UN78798 | Rsa1.0.00943.1 | 786 | 58862  | 0         | 398 | 404 | 98 + | 38  | 441 | 6678   | 7081   |
| UN78799 | Rsa1.0.01402.1 | 599 | 46509  | 0         | 551 | 595 | 92 - | 5   | 599 | 18433  | 19027  |
| UN78800 | Rsa1.0.00088.1 | 746 | 141341 | 3.00E-87  | 167 | 168 | 99 + | 46  | 213 | 106712 | 106879 |
| UN78801 | Rsa1.0.03539.1 | 419 | 22199  | 3.00E-92  | 200 | 208 | 96 - | 50  | 256 | 7072   | 7279   |
| UN78802 | Rsa1.0.00148.1 | 154 | 120234 | 4.00E-67  | 150 | 156 | 96 - | 1   | 154 | 9172   | 9327   |
| UN78803 | Rsa1.0.00402.1 | 854 | 385315 | 0         | 644 | 668 | 96 + | 190 | 854 | 225460 | 226127 |
| UN78804 | Rsa1.0.00364.1 | 464 | 90951  | 1.00E-167 | 349 | 365 | 95 - | 3   | 366 | 63260  | 63624  |
| UN78805 | Rsa1.0.00305.1 | 180 | 97308  | 2.00E-88  | 180 | 185 | 97 + | 1   | 180 | 23069  | 23253  |
| UN78806 | Rsa1.0.09917.1 | 582 | 6091   | 1.00E-162 | 313 | 321 | 97 - | 1   | 321 | 934    | 1254   |
| UN78807 | Rsa1.0.01049.1 | 714 | 55655  | 6.00E-73  | 176 | 188 | 93 - | 204 | 391 | 43175  | 43362  |
| UN78808 | Rsa1.0.00710.1 | 295 | 67325  | 6.00E-83  | 253 | 276 | 91 + | 1   | 270 | 28247  | 28516  |
| UN78809 | Rsa1.0.20172.1 | 764 | 1331   | 0         | 634 | 660 | 96 + | 105 | 764 | 655    | 1308   |
| UN78810 | Rsa1.0.02826.1 | 787 | 27560  | 0         | 455 | 464 | 98 + | 305 | 767 | 9083   | 9545   |
| UN78811 | Rsa1.0.01567.1 | 147 | 43090  | 5.00E-54  | 131 | 139 | 94 + | 3   | 141 | 25783  | 25921  |
| UN78812 | Rsa1.0.00329.1 | 636 | 222544 | 8.00E-69  | 207 | 232 | 89 + | 318 | 549 | 32453  | 32678  |
| UN78813 | Rsa1.0.01051.1 | 156 | 55577  | 5.00E-51  | 143 | 156 | 91 - | 1   | 156 | 4004   | 4156   |
| UN78814 | Rsa1.0.00713.1 | 790 | 158017 | 0         | 743 | 789 | 94 - | 5   | 772 | 24782  | 25570  |
| UN78815 | Rsa1.0.00646.1 | 820 | 70473  | 0         | 535 | 567 | 94 - | 217 | 770 | 1851   | 2417   |
| UN78816 | #              | #   | #      | #         | #   | #   | #    | #   | #   | #      | #      |
| UN78817 | Rsa1.0.00522.1 | 518 | 78103  | 1.00E-103 | 232 | 243 | 95 - | 1   | 237 | 58360  | 58601  |

|         |                |     |        |           |     |     |      |     |     |        |        |
|---------|----------------|-----|--------|-----------|-----|-----|------|-----|-----|--------|--------|
| UN78818 | Rsa1.0.03967.1 | 768 | 19815  | 1.00E-110 | 367 | 413 | 88 - | 1   | 405 | 15647  | 16054  |
| UN78819 | Rsa1.0.00105.1 | 496 | 134138 | 0         | 463 | 471 | 98 + | 2   | 472 | 84467  | 84935  |
| UN78820 | Rsa1.0.00979.1 | 518 | 57733  | 2.00E-62  | 159 | 169 | 94 + | 1   | 168 | 40295  | 40461  |
| UN78821 | Rsa1.0.00685.1 | 706 | 68515  | 1.00E-103 | 215 | 223 | 96 + | 303 | 525 | 8208   | 8430   |
| UN78822 | Rsa1.0.04497.1 | 436 | 17103  | 0         | 420 | 437 | 96 + | 2   | 436 | 9786   | 10220  |
| UN78823 | Rsa1.0.01474.1 | 664 | 45070  | 0         | 409 | 437 | 93 + | 187 | 607 | 165    | 601    |
| UN78824 | Rsa1.0.00497.1 | 833 | 79830  | 0         | 772 | 845 | 91 + | 1   | 833 | 6235   | 7066   |
| UN78825 | Rsa1.0.00107.1 | 729 | 431659 | 0         | 514 | 536 | 95 - | 3   | 536 | 146548 | 147082 |
| UN78826 | #              | #   | #      | #         | #   | #   | #    | #   | #   | #      | #      |
| UN78827 | Rsa1.0.06663.1 | 631 | 10576  | 0         | 604 | 625 | 96 + | 7   | 631 | 6948   | 7567   |
| UN78828 | Rsa1.0.00266.1 | 538 | 163932 | 0         | 527 | 551 | 95 + | 3   | 538 | 109372 | 109922 |
| UN78829 | Rsa1.0.02474.1 | 114 | 31076  | 2.00E-40  | 105 | 112 | 93 - | 1   | 112 | 1655   | 1766   |
| UN78830 | Rsa1.0.01534.1 | 591 | 43764  | 0         | 571 | 592 | 96 + | 1   | 591 | 10801  | 11391  |
| UN78831 | Rsa1.0.00019.1 | 512 | 301669 | 0         | 449 | 479 | 93 - | 11  | 481 | 99010  | 99487  |
| UN78832 | Rsa1.0.02831.1 | 678 | 27533  | 2.33E-156 | 344 | 369 | 93 + | 7   | 373 | 16835  | 17202  |
| UN78833 | Rsa1.0.00087.1 | 698 | 761073 | 1.00E-143 | 264 | 266 | 99 - | 230 | 495 | 274293 | 274558 |
| UN78834 | Rsa1.0.00375.1 | 788 | 90207  | 2.00E-88  | 175 | 178 | 98 - | 611 | 788 | 62599  | 62776  |
| UN78835 | Rsa1.0.01405.1 | 769 | 46445  | 0         | 397 | 416 | 95 + | 1   | 412 | 37017  | 37432  |
| UN78836 | Rsa1.0.00994.1 | 638 | 165189 | 1.00E-115 | 221 | 223 | 99 + | 1   | 222 | 615    | 837    |
| UN78837 | Rsa1.0.00550.1 | 779 | 210790 | 0         | 459 | 475 | 96 + | 11  | 483 | 177713 | 178187 |
| UN78838 | Rsa1.0.00134.1 | 224 | 390219 | 2.00E-57  | 168 | 184 | 91 - | 6   | 187 | 6179   | 6361   |
| UN78839 | Rsa1.0.00187.1 | 425 | 393093 | 1.00E-158 | 332 | 347 | 95 + | 1   | 346 | 233649 | 233995 |
| UN78840 | Rsa1.0.04882.1 | 656 | 15606  | 0         | 470 | 491 | 95 + | 7   | 497 | 14117  | 14604  |
| UN78841 | Rsa1.0.00204.1 | 689 | 109056 | 0         | 594 | 610 | 97 - | 2   | 610 | 84137  | 84746  |
| UN78842 | Rsa1.0.00069.1 | 613 | 403561 | 0         | 435 | 456 | 95 + | 158 | 613 | 46995  | 47450  |
| UN78843 | Rsa1.0.00786.1 | 719 | 64285  | 1.00E-102 | 198 | 201 | 98 + | 316 | 516 | 41596  | 41796  |
| UN78844 | Rsa1.0.01397.1 | 600 | 183276 | 0         | 557 | 587 | 94 + | 31  | 600 | 182504 | 183079 |
| UN78845 | Rsa1.0.02675.1 | 761 | 28852  | 5.00E-61  | 166 | 180 | 92 - | 517 | 695 | 27132  | 27311  |
| UN78846 | Rsa1.0.00525.1 | 676 | 78030  | 0         | 656 | 676 | 97 + | 1   | 676 | 52170  | 52845  |
| UN78847 | Rsa1.0.00636.1 | 702 | 71113  | 3.00E-96  | 197 | 203 | 97 + | 4   | 206 | 16477  | 16679  |
| UN78848 | Rsa1.0.00190.1 | 738 | 318240 | 8.00E-94  | 178 | 179 | 99 - | 343 | 521 | 8786   | 8964   |
| UN78849 | Rsa1.0.00071.1 | 799 | 345714 | 0         | 450 | 456 | 98 - | 1   | 456 | 44652  | 45107  |
| UN78850 | Rsa1.0.00247.1 | 757 | 103408 | 1.00E-126 | 277 | 292 | 94 - | 1   | 289 | 9307   | 9598   |
| UN78851 | Rsa1.0.00341.1 | 582 | 249309 | 0         | 432 | 444 | 97 + | 140 | 582 | 190299 | 190740 |
| UN78852 | Rsa1.0.05665.1 | 635 | 13003  | 5.00E-79  | 168 | 174 | 96 - | 310 | 483 | 11754  | 11927  |
| UN78853 | Rsa1.0.04657.1 | 556 | 16489  | 0         | 356 | 363 | 98 + | 194 | 556 | 6873   | 7233   |
| UN78854 | Rsa1.0.04286.1 | 450 | 18084  | 1.00E-123 | 266 | 279 | 95 + | 174 | 450 | 13076  | 13354  |
| UN78855 | Rsa1.0.00594.1 | 645 | 73729  | 0         | 476 | 500 | 95 - | 1   | 497 | 36888  | 37380  |
| UN78856 | Rsa1.0.00340.1 | 166 | 305782 | 1.00E-14  | 84  | 97  | 86 + | 7   | 103 | 32302  | 32397  |



|         |                |     |        |           |     |     |      |     |     |        |        |
|---------|----------------|-----|--------|-----------|-----|-----|------|-----|-----|--------|--------|
| UN78857 | Rsa1.0.03073.1 | 395 | 25574  | 0         | 380 | 396 | 95 - | 1   | 395 | 15109  | 15501  |
| UN78858 | Rsa1.0.03658.1 | 463 | 21549  | 1.00E-161 | 361 | 383 | 94 + | 89  | 463 | 8749   | 9131   |
| UN78859 | Rsa1.0.00680.1 | 556 | 68969  | 2.00E-72  | 214 | 239 | 89 + | 317 | 555 | 38212  | 38450  |
| UN78860 | Rsa1.0.00805.1 | 703 | 63724  | 0         | 425 | 442 | 96 - | 1   | 442 | 43192  | 43623  |
| UN78861 | Rsa1.0.02222.1 | 700 | 152798 | 1.00E-176 | 381 | 402 | 94 - | 1   | 402 | 4280   | 4676   |
| UN78862 | Rsa1.0.00848.1 | 687 | 152362 | 1.00E-101 | 205 | 211 | 97 + | 1   | 211 | 39219  | 39429  |
| UN78863 | Rsa1.0.56060.1 | 464 | 408    | 2.00E-74  | 163 | 170 | 95 + | 1   | 170 | 239    | 408    |
| UN78864 | Rsa1.0.01015.1 | 425 | 56752  | 3.00E-64  | 140 | 145 | 96 - | 206 | 350 | 3052   | 3196   |
| UN78865 | Rsa1.0.05767.1 | 566 | 12701  | 0         | 546 | 566 | 96 - | 1   | 566 | 4172   | 4732   |
| UN78866 | Rsa1.0.01074.1 | 528 | 54987  | 2.00E-53  | 147 | 159 | 92 + | 107 | 264 | 22942  | 23100  |
| UN78867 | Rsa1.0.00019.1 | 340 | 301669 | 4.00E-72  | 199 | 217 | 91 + | 5   | 220 | 238093 | 238307 |
| UN78868 | Rsa1.0.05326.1 | 341 | 14139  | 2.00E-92  | 224 | 238 | 94 - | 2   | 232 | 3934   | 4168   |
| UN78869 | Rsa1.0.04235.1 | 419 | 18373  | 0         | 379 | 392 | 96 + | 11  | 401 | 11400  | 11790  |
| UN78870 | Rsa1.0.04271.1 | 634 | 18148  | 0         | 581 | 601 | 96 + | 1   | 601 | 12426  | 13021  |
| UN78871 | Rsa1.0.03257.1 | 383 | 24305  | 1.00E-109 | 297 | 329 | 90 + | 6   | 317 | 13705  | 14031  |
| UN78872 | Rsa1.0.00757.1 | 235 | 65559  | 3.00E-53  | 202 | 234 | 86 - | 1   | 231 | 41839  | 42065  |
| UN78873 | Rsa1.0.01924.1 | 738 | 37226  | 0         | 476 | 502 | 94 - | 46  | 544 | 23204  | 23704  |
| UN78874 | Rsa1.0.00547.1 | 398 | 76521  | 1.00E-149 | 316 | 328 | 96 - | 1   | 327 | 60981  | 61301  |
| UN78875 | Rsa1.0.00413.1 | 494 | 86921  | 0         | 471 | 496 | 94 + | 1   | 494 | 76263  | 76754  |
| UN78876 | Rsa1.0.02959.1 | 415 | 26441  | 8.00E-68  | 155 | 163 | 95 - | 253 | 415 | 21381  | 21543  |
| UN78877 | Rsa1.0.10708.1 | 214 | 5750   | 7.00E-79  | 201 | 215 | 93 - | 4   | 214 | 1932   | 2145   |
| UN78878 | Rsa1.0.05365.1 | 795 | 14040  | 0         | 542 | 560 | 96 - | 2   | 552 | 11967  | 12524  |
| UN78879 | Rsa1.0.00581.1 | 587 | 163575 | 0         | 547 | 560 | 97 - | 31  | 587 | 15618  | 16177  |
| UN78880 | Rsa1.0.01610.1 | 408 | 42274  | 1.00E-156 | 381 | 412 | 92 - | 1   | 408 | 10767  | 11171  |
| UN78881 | Rsa1.0.00055.1 | 543 | 520193 | 0         | 519 | 556 | 93 + | 5   | 543 | 77956  | 78507  |
| UN78882 | Rsa1.0.00797.1 | 334 | 63959  | 1.00E-152 | 322 | 337 | 95 + | 3   | 334 | 12392  | 12728  |
| UN78883 | Rsa1.0.00773.1 | 829 | 64839  | 0         | 457 | 489 | 93 + | 8   | 486 | 52181  | 52661  |
| UN78884 | Rsa1.0.61361.1 | 728 | 373    | 1.00E-126 | 245 | 250 | 98 - | 479 | 728 | 124    | 373    |
| UN78885 | Rsa1.0.05890.1 | 498 | 12317  | 1.00E-110 | 245 | 258 | 94 - | 169 | 425 | 465    | 722    |
| UN78886 | Rsa1.0.00003.1 | 556 | 340054 | 1.00E-128 | 266 | 276 | 96 - | 1   | 276 | 328131 | 328404 |
| UN78887 | Rsa1.0.00045.1 | 129 | 328694 | 7.00E-16  | 111 | 130 | 85 + | 1   | 129 | 245188 | 245314 |
| UN78888 | Rsa1.0.01403.1 | 700 | 46453  | 0         | 477 | 499 | 95 + | 1   | 495 | 32133  | 32628  |
| UN78889 | Rsa1.0.02470.1 | 108 | 31108  | 1.00E-23  | 90  | 98  | 91 - | 10  | 106 | 26169  | 26262  |
| UN78890 | Rsa1.0.00157.1 | 475 | 245832 | 0         | 433 | 461 | 93 + | 20  | 475 | 146817 | 147270 |
| UN78891 | Rsa1.0.00611.1 | 452 | 72410  | 1.00E-168 | 360 | 379 | 94 + | 1   | 379 | 40486  | 40863  |
| UN78892 | Rsa1.0.02774.1 | 731 | 28038  | 0         | 714 | 728 | 98 - | 4   | 731 | 11544  | 12269  |
| UN78893 | Rsa1.0.00273.1 | 579 | 326186 | 1.00E-112 | 248 | 260 | 95 + | 4   | 263 | 2544   | 2799   |
| UN78894 | Rsa1.0.04881.1 | 485 | 15608  | 0         | 461 | 486 | 94 + | 1   | 485 | 8307   | 8792   |
| UN78895 | Rsa1.0.00878.1 | 588 | 330303 | 1.00E-133 | 305 | 325 | 93 + | 195 | 516 | 148578 | 148899 |

|         |                |     |        |           |     |     |      |     |     |        |        |
|---------|----------------|-----|--------|-----------|-----|-----|------|-----|-----|--------|--------|
| UN78896 | Rsa1.0.00192.1 | 411 | 278200 | 1.00E-161 | 300 | 303 | 99 - | 3   | 305 | 13714  | 14015  |
| UN78897 | Rsa1.0.01679.1 | 622 | 146876 | 1.00E-145 | 315 | 331 | 95 - | 6   | 333 | 134606 | 134930 |
| UN78898 | Rsa1.0.00027.1 | 744 | 283362 | 1.00E-119 | 227 | 230 | 98 - | 511 | 740 | 136818 | 137047 |
| UN78899 | Rsa1.0.04086.1 | 686 | 19166  | 1.00E-180 | 405 | 429 | 94 + | 1   | 426 | 10498  | 10923  |
| UN78900 | Rsa1.0.05590.1 | 696 | 13242  | 0         | 388 | 399 | 97 - | 298 | 696 | 3896   | 4294   |
| UN78901 | Rsa1.0.00632.1 | 529 | 183777 | 0         | 389 | 405 | 96 + | 1   | 404 | 20007  | 20411  |
| UN78902 | Rsa1.0.01405.1 | 496 | 46445  | 0         | 346 | 354 | 97 - | 143 | 496 | 27877  | 28230  |
| UN78903 | Rsa1.0.00089.1 | 695 | 406142 | 0         | 451 | 461 | 97 - | 1   | 459 | 184161 | 184621 |
| UN78904 | Rsa1.0.00683.1 | 601 | 68638  | 1.00E-115 | 306 | 337 | 90 + | 1   | 331 | 8474   | 8804   |
| UN78905 | Rsa1.0.00568.1 | 748 | 75219  | 1.00E-158 | 304 | 311 | 97 + | 436 | 746 | 59068  | 59378  |
| UN78906 | Rsa1.0.02319.1 | 725 | 32580  | 0         | 463 | 476 | 97 - | 1   | 475 | 19606  | 20080  |
| UN78907 | Rsa1.0.02267.1 | 109 | 33194  | 2.00E-18  | 84  | 94  | 89 + | 19  | 109 | 22435  | 22528  |
| UN78908 | Rsa1.0.00888.1 | 101 | 60978  | 2.00E-37  | 94  | 99  | 94 - | 1   | 99  | 19676  | 19774  |
| UN78909 | Rsa1.0.03337.1 | 127 | 23632  | 2.00E-19  | 70  | 77  | 90 - | 5   | 81  | 21208  | 21284  |
| UN78910 | Rsa1.0.00136.1 | 611 | 122464 | 0         | 579 | 606 | 95 - | 15  | 611 | 8627   | 9232   |
| UN78911 | Rsa1.0.01373.1 | 739 | 47052  | 1.00E-134 | 298 | 313 | 95 - | 99  | 408 | 5281   | 5591   |
| UN78912 | Rsa1.0.01155.1 | 727 | 52182  | 0         | 671 | 750 | 89 - | 1   | 725 | 13040  | 13779  |
| UN78913 | Rsa1.0.00381.1 | 457 | 89718  | 0         | 408 | 421 | 96 - | 3   | 423 | 29797  | 30216  |
| UN78914 | Rsa1.0.01458.1 | 236 | 175719 | 1.00E-102 | 226 | 235 | 96 + | 1   | 233 | 33189  | 33421  |
| UN78915 | Rsa1.0.00014.1 | 322 | 348985 | 2.33E-156 | 301 | 314 | 95 + | 5   | 318 | 236794 | 237107 |
| UN78916 | Rsa1.0.08496.1 | 259 | 7271   | 3.00E-97  | 241 | 260 | 92 - | 1   | 259 | 2392   | 2651   |
| UN78917 | Rsa1.0.00440.1 | 249 | 84723  | 2.00E-76  | 163 | 169 | 96 - | 36  | 204 | 47885  | 48053  |
| UN78918 | Rsa1.0.00008.1 | 517 | 358124 | 1.00E-159 | 377 | 413 | 91 + | 4   | 416 | 54836  | 55228  |
| UN78919 | Rsa1.0.02719.1 | 411 | 28428  | 0         | 396 | 410 | 96 - | 2   | 411 | 10120  | 10529  |
| UN78920 | Rsa1.0.01859.1 | 631 | 38073  | 0         | 618 | 641 | 96 - | 2   | 631 | 6651   | 7291   |
| UN78921 | Rsa1.0.01112.1 | 737 | 310601 | 1.00E-163 | 422 | 461 | 91 + | 1   | 448 | 48481  | 48932  |
| UN78922 | Rsa1.0.00381.1 | 148 | 89718  | 1.00E-23  | 62  | 64  | 96 + | 79  | 142 | 54546  | 54609  |
| UN78923 | #              | #   | #      | #         | #   | #   | #    | #   | #   | #      | #      |
| UN78924 | Rsa1.0.01668.1 | 822 | 41299  | 1.00E-137 | 301 | 318 | 94 + | 2   | 316 | 20208  | 20525  |
| UN78925 | Rsa1.0.01215.1 | 405 | 166813 | 1.00E-140 | 314 | 334 | 94 + | 6   | 336 | 9673   | 10006  |
| UN78926 | Rsa1.0.00480.1 | 272 | 81325  | 1.00E-104 | 231 | 244 | 94 - | 1   | 244 | 1285   | 1528   |
| UN78927 | Rsa1.0.00179.1 | 491 | 393324 | 1.00E-121 | 252 | 261 | 96 + | 3   | 263 | 213991 | 214250 |
| UN78928 | Rsa1.0.00187.1 | 766 | 393093 | 1.00E-140 | 255 | 256 | 99 + | 188 | 443 | 207308 | 207563 |
| UN78929 | Rsa1.0.11073.1 | 774 | 5625   | 1.00E-165 | 319 | 327 | 97 + | 448 | 774 | 4853   | 5179   |
| UN78930 | Rsa1.0.00017.1 | 196 | 752458 | 8.00E-26  | 172 | 211 | 81 + | 3   | 193 | 719238 | 719448 |
| UN78931 | Rsa1.0.03517.1 | 741 | 22337  | 0         | 700 | 736 | 95 + | 21  | 741 | 2966   | 3698   |
| UN78932 | Rsa1.0.01586.1 | 705 | 42804  | 8.00E-97  | 204 | 211 | 96 - | 1   | 209 | 1229   | 1439   |
| UN78933 | Rsa1.0.00708.1 | 197 | 67366  | 3.00E-53  | 164 | 185 | 88 - | 22  | 196 | 63367  | 63551  |
| UN78934 | Rsa1.0.00417.1 | 636 | 395068 | 0         | 560 | 563 | 99 - | 74  | 636 | 5201   | 5763   |

|         |                |     |        |           |     |     |       |     |     |        |        |
|---------|----------------|-----|--------|-----------|-----|-----|-------|-----|-----|--------|--------|
| UN78935 | Rsa1.0.02165.1 | 148 | 34423  | 6.00E-29  | 92  | 100 | 92 +  | 39  | 136 | 3037   | 3136   |
| UN78936 | Rsa1.0.03122.1 | 593 | 25207  | 1.00E-95  | 338 | 388 | 87 +  | 1   | 378 | 9487   | 9859   |
| UN78937 | Rsa1.0.03682.1 | 753 | 21396  | 0         | 679 | 726 | 93 -  | 28  | 753 | 9638   | 10360  |
| UN78938 | Rsa1.0.09755.1 | 250 | 6166   | 6.00E-86  | 232 | 252 | 92 -  | 1   | 250 | 1474   | 1723   |
| UN78939 | Rsa1.0.00883.1 | 185 | 61230  | 1.00E-12  | 41  | 42  | 97 -  | 80  | 121 | 54568  | 54609  |
| UN78940 | Rsa1.0.02304.1 | 529 | 32793  | 0         | 503 | 536 | 93 -  | 1   | 529 | 29278  | 29806  |
| UN78941 | Rsa1.0.00201.1 | 571 | 232851 | 4.00E-92  | 187 | 192 | 97 +  | 380 | 571 | 211    | 402    |
| UN78942 | Rsa1.0.00048.1 | 430 | 167185 | 1.00E-155 | 319 | 333 | 95 -  | 95  | 427 | 103223 | 103555 |
| UN78943 | Rsa1.0.01986.1 | 793 | 36489  | 0         | 751 | 793 | 94 -  | 1   | 793 | 30967  | 31741  |
| UN78944 | Rsa1.0.02906.1 | 710 | 26866  | 1.00E-141 | 266 | 270 | 98 -  | 411 | 680 | 23258  | 23527  |
| UN78945 | Rsa1.0.00114.1 | 829 | 131330 | 1.00E-131 | 265 | 273 | 97 +  | 260 | 532 | 7926   | 8197   |
| UN78946 | Rsa1.0.01214.1 | 633 | 50599  | 1.00E-177 | 462 | 505 | 91 -  | 23  | 505 | 1680   | 2180   |
| UN78947 | Rsa1.0.00646.1 | 438 | 70473  | 1.00E-154 | 323 | 339 | 95 +  | 100 | 438 | 4443   | 4781   |
| UN78948 | Rsa1.0.00195.1 | 421 | 251884 | 9.00E-80  | 205 | 225 | 91 -  | 1   | 225 | 83583  | 83796  |
| UN78949 | Rsa1.0.00336.1 | 758 | 445051 | 1.00E-103 | 297 | 329 | 90 +  | 1   | 318 | 439520 | 439835 |
| UN78950 | Rsa1.0.06757.1 | 650 | 10411  | 0         | 623 | 650 | 95 +  | 1   | 650 | 3161   | 3810   |
| UN78951 | Rsa1.0.01118.1 | 580 | 53460  | 1.00E-100 | 191 | 193 | 98 +  | 272 | 464 | 13141  | 13333  |
| UN78952 | Rsa1.0.01094.1 | 513 | 167285 | 0         | 423 | 441 | 95 -  | 9   | 449 | 12558  | 12993  |
| UN78953 | Rsa1.0.00331.1 | 636 | 176754 | 0         | 614 | 637 | 96 +  | 2   | 636 | 22253  | 22889  |
| UN78954 | Rsa1.0.00288.1 | 605 | 98659  | 1.00E-165 | 341 | 355 | 96 +  | 10  | 362 | 52892  | 53243  |
| UN78955 | Rsa1.0.01377.1 | 774 | 46967  | 0         | 512 | 558 | 91 +  | 2   | 545 | 13143  | 13695  |
| UN78956 | Rsa1.0.01540.1 | 550 | 151890 | 0         | 476 | 497 | 95 -  | 6   | 500 | 111905 | 112397 |
| UN78957 | Rsa1.0.00007.1 | 654 | 239325 | 1.00E-106 | 205 | 208 | 98 +  | 436 | 643 | 108295 | 108502 |
| UN78958 | Rsa1.0.07217.1 | 286 | 9703   | 3.00E-69  | 258 | 298 | 86 -  | 12  | 286 | 5265   | 5560   |
| UN78959 | Rsa1.0.01970.1 | 633 | 36648  | 0         | 485 | 506 | 95 -  | 138 | 633 | 30532  | 31035  |
| UN78960 | Rsa1.0.01274.1 | 609 | 49419  | 1.00E-113 | 269 | 287 | 93 +  | 130 | 413 | 27810  | 28096  |
| UN78961 | Rsa1.0.00093.1 | 362 | 214962 | 2.00E-65  | 148 | 155 | 95 +  | 186 | 340 | 98055  | 98209  |
| UN78962 | Rsa1.0.00119.1 | 527 | 467509 | 1.00E-142 | 323 | 344 | 93 -  | 7   | 349 | 346154 | 346497 |
| UN78963 | Rsa1.0.00294.1 | 145 | 144860 | 1.00E-36  | 84  | 86  | 97 +  | 60  | 145 | 115618 | 115703 |
| UN78964 | Rsa1.0.01035.1 | 472 | 56019  | 0         | 444 | 472 | 94 +  | 1   | 471 | 43885  | 44355  |
| UN78965 | Rsa1.0.02659.1 | 442 | 28971  | 0         | 425 | 442 | 96 +  | 3   | 442 | 22703  | 23143  |
| UN78966 | Rsa1.0.01543.1 | 665 | 43645  | 1.00E-101 | 208 | 215 | 96 +  | 177 | 391 | 7131   | 7345   |
| UN78967 | Rsa1.0.00016.1 | 364 | 831256 | 3.00E-85  | 223 | 238 | 93 -  | 1   | 233 | 19574  | 19809  |
| UN78968 | Rsa1.0.03695.1 | 499 | 21329  | 5.00E-91  | 216 | 230 | 93 -  | 1   | 230 | 7409   | 7637   |
| UN78969 | Rsa1.0.00153.1 | 801 | 192931 | 0         | 429 | 450 | 95 -  | 1   | 447 | 191754 | 192200 |
| UN78970 | Rsa1.0.02234.1 | 619 | 33618  | 7.00E-60  | 151 | 162 | 93 -  | 265 | 426 | 2559   | 2720   |
| UN78971 | Rsa1.0.00067.1 | 375 | 415055 | 1.00E-111 | 342 | 385 | 88 +  | 2   | 375 | 241174 | 241554 |
| UN78972 | Rsa1.0.01412.1 | 647 | 46311  | 2.00E-63  | 124 | 124 | 100 - | 407 | 530 | 46188  | 46311  |
| UN78973 | Rsa1.0.03420.1 | 546 | 23090  | 0         | 497 | 516 | 96 +  | 1   | 516 | 7501   | 8013   |

|         |                |     |        |           |     |     |      |     |     |        |        |
|---------|----------------|-----|--------|-----------|-----|-----|------|-----|-----|--------|--------|
| UN78974 | Rsa1.0.00751.1 | 479 | 65759  | 0         | 431 | 459 | 93 + | 2   | 458 | 42564  | 43012  |
| UN78975 | Rsa1.0.00153.1 | 432 | 192931 | 2.00E-74  | 327 | 380 | 86 - | 3   | 373 | 166016 | 166375 |
| UN78976 | Rsa1.0.00519.1 | 303 | 197864 | 1.00E-110 | 256 | 274 | 93 - | 1   | 274 | 192606 | 192879 |
| UN78977 | Rsa1.0.00586.1 | 611 | 163802 | 1.00E-111 | 278 | 300 | 92 + | 3   | 301 | 124914 | 125212 |
| UN78978 | Rsa1.0.00030.1 | 739 | 250988 | 1.00E-103 | 283 | 308 | 91 - | 2   | 300 | 148127 | 148431 |
| UN78979 | Rsa1.0.00262.1 | 692 | 101906 | 1.00E-112 | 224 | 230 | 97 - | 284 | 513 | 69557  | 69786  |
| UN78980 | Rsa1.0.00682.1 | 644 | 68680  | 0         | 382 | 392 | 97 - | 1   | 392 | 9215   | 9602   |
| UN78981 | Rsa1.0.01400.1 | 614 | 46560  | 0         | 381 | 398 | 95 - | 28  | 420 | 37870  | 38267  |
| UN78982 | Rsa1.0.00744.1 | 289 | 66084  | 1.00E-127 | 275 | 290 | 94 + | 1   | 285 | 64879  | 65168  |
| UN78983 | Rsa1.0.00979.1 | 651 | 57733  | 1.00E-124 | 241 | 246 | 97 + | 353 | 598 | 26229  | 26474  |
| UN78984 | Rsa1.0.01273.1 | 814 | 49464  | 2.00E-82  | 186 | 196 | 94 - | 129 | 324 | 19120  | 19315  |
| UN78985 | Rsa1.0.01706.1 | 657 | 40694  | 1.00E-137 | 327 | 353 | 92 - | 15  | 367 | 24223  | 24556  |
| UN78986 | Rsa1.0.00107.1 | 764 | 431659 | 0         | 591 | 636 | 92 + | 15  | 639 | 313220 | 313840 |
| UN78987 | Rsa1.0.00204.1 | 461 | 109056 | 0         | 436 | 461 | 94 + | 1   | 461 | 83000  | 83456  |
| UN78988 | Rsa1.0.00088.1 | 615 | 141341 | 0         | 590 | 615 | 95 + | 1   | 615 | 44537  | 45149  |
| UN78989 | Rsa1.0.02758.1 | 447 | 28186  | 0         | 414 | 432 | 95 - | 1   | 430 | 13847  | 14274  |
| UN78990 | Rsa1.0.00306.1 | 181 | 146760 | 4.00E-55  | 165 | 184 | 89 + | 1   | 178 | 135906 | 136089 |
| UN78991 | Rsa1.0.01682.1 | 689 | 41090  | 1.00E-175 | 352 | 364 | 96 - | 15  | 377 | 10171  | 10534  |
| UN78992 | Rsa1.0.00380.1 | 185 | 89748  | 4.00E-18  | 87  | 100 | 87 - | 4   | 103 | 79070  | 79160  |
| UN78993 | Rsa1.0.04860.1 | 791 | 15696  | 1.00E-116 | 228 | 232 | 98 + | 443 | 673 | 328    | 559    |
| UN78994 | Rsa1.0.10745.1 | 613 | 5736   | 1.00E-144 | 289 | 299 | 96 - | 4   | 302 | 3266   | 3564   |
| UN78995 | Rsa1.0.00092.1 | 664 | 659932 | 1.00E-129 | 306 | 329 | 93 + | 12  | 338 | 347962 | 348279 |
| UN78996 | Rsa1.0.00390.1 | 683 | 88681  | 6.00E-48  | 173 | 193 | 89 - | 482 | 672 | 68593  | 68777  |
| UN78997 | Rsa1.0.05160.1 | 758 | 14637  | 1.00E-116 | 259 | 274 | 94 + | 371 | 641 | 13102  | 13375  |
| UN78998 | Rsa1.0.00001.1 | 595 | 363028 | 0         | 402 | 416 | 96 + | 30  | 445 | 303196 | 303611 |
| UN78999 | Rsa1.0.00758.1 | 591 | 65477  | 1.00E-115 | 279 | 302 | 92 + | 4   | 305 | 33858  | 34149  |
| UN79000 | Rsa1.0.00626.1 | 807 | 71582  | 0         | 579 | 599 | 96 + | 9   | 606 | 8371   | 8968   |
| UN79001 | Rsa1.0.02223.1 | 142 | 152421 | 2.00E-16  | 104 | 125 | 83 + | 11  | 120 | 16847  | 16968  |
| UN79002 | Rsa1.0.01997.1 | 559 | 158416 | 1.00E-98  | 222 | 234 | 94 + | 3   | 234 | 5410   | 5643   |
| UN79003 | Rsa1.0.00385.1 | 652 | 89160  | 1.00E-148 | 567 | 657 | 86 + | 1   | 652 | 66993  | 67645  |
| UN79004 | Rsa1.0.01846.1 | 497 | 38367  | 1.00E-145 | 350 | 375 | 93 - | 128 | 497 | 28347  | 28720  |
| UN79005 | Rsa1.0.01321.1 | 763 | 48248  | 0         | 400 | 422 | 94 + | 87  | 499 | 6404   | 6825   |
| UN79006 | Rsa1.0.01441.1 | 799 | 45790  | 8.00E-91  | 176 | 178 | 98 + | 178 | 355 | 30012  | 30189  |
| UN79007 | Rsa1.0.01258.1 | 120 | 49755  | 7.00E-28  | 84  | 91  | 92 + | 30  | 120 | 22329  | 22419  |
| UN79008 | Rsa1.0.09912.1 | 665 | 6092   | 0         | 589 | 645 | 91 - | 31  | 659 | 1      | 632    |
| UN79009 | Rsa1.0.03981.1 | 496 | 19724  | 1.00E-117 | 232 | 238 | 97 + | 116 | 353 | 17481  | 17718  |
| UN79010 | Rsa1.0.00497.1 | 783 | 79830  | 1.00E-102 | 244 | 261 | 93 + | 3   | 263 | 50810  | 51069  |
| UN79011 | Rsa1.0.00419.1 | 711 | 86562  | 1.00E-109 | 322 | 351 | 91 - | 377 | 711 | 41846  | 42191  |
| UN79012 | Rsa1.0.00032.1 | 786 | 306326 | 1.00E-141 | 329 | 351 | 93 - | 394 | 743 | 198009 | 198358 |

|         |                |     |        |           |     |     |      |     |     |        |        |
|---------|----------------|-----|--------|-----------|-----|-----|------|-----|-----|--------|--------|
| UN79013 | Rsa1.0_13838.1 | 699 | 4236   | 0         | 620 | 644 | 96 - | 2   | 633 | 3281   | 3919   |
| UN79014 | Rsa1.0_00111.1 | 540 | 390088 | 0         | 507 | 534 | 94 + | 10  | 540 | 383673 | 384199 |
| UN79015 | Rsa1.0_16562.1 | 689 | 2111   | 0         | 655 | 698 | 93 - | 1   | 689 | 1062   | 1756   |
| UN79016 | Rsa1.0_02399.1 | 519 | 31763  | 0         | 474 | 508 | 93 - | 13  | 519 | 13208  | 13711  |
| UN79017 | Rsa1.0_01000.1 | 824 | 57140  | 6.00E-98  | 233 | 248 | 93 + | 34  | 273 | 37925  | 38171  |
| UN79018 | Rsa1.0_03662.1 | 472 | 21492  | 7.00E-90  | 183 | 188 | 97 + | 219 | 406 | 11532  | 11719  |
| UN79019 | Rsa1.0_00822.1 | 145 | 62891  | 6.00E-35  | 87  | 91  | 95 - | 54  | 144 | 47348  | 47438  |
| UN79020 | Rsa1.0_02648.1 | 668 | 29073  | 1.00E-143 | 272 | 277 | 98 - | 392 | 668 | 25949  | 26225  |
| UN79021 | Rsa1.0_00485.1 | 791 | 80937  | 1.00E-154 | 286 | 289 | 98 + | 446 | 734 | 37393  | 37681  |
| UN79022 | Rsa1.0_02241.1 | 585 | 33520  | 1.00E-180 | 372 | 389 | 95 - | 189 | 577 | 20923  | 21308  |
| UN79023 | Rsa1.0_00888.1 | 114 | 60978  | 7.00E-28  | 93  | 103 | 90 + | 12  | 114 | 54512  | 54614  |
| UN79024 | Rsa1.0_00979.1 | 253 | 57733  | 1.00E-126 | 247 | 252 | 98 - | 3   | 253 | 26912  | 27163  |
| UN79025 | Rsa1.0_02179.1 | 644 | 34188  | 0         | 437 | 451 | 96 - | 1   | 451 | 7098   | 7542   |
| UN79026 | Rsa1.0_00094.1 | 637 | 139042 | 0         | 555 | 567 | 97 + | 5   | 570 | 120130 | 120696 |
| UN79027 | Rsa1.0_00161.1 | 427 | 116891 | 1.00E-126 | 256 | 265 | 96 - | 163 | 427 | 26339  | 26603  |
| UN79028 | Rsa1.0_02952.1 | 633 | 26492  | 0         | 602 | 620 | 97 - | 3   | 622 | 20478  | 21097  |
| UN79029 | Rsa1.0_00197.1 | 660 | 109714 | 1.00E-171 | 343 | 356 | 96 + | 10  | 365 | 36533  | 36888  |
| UN79030 | Rsa1.0_02911.1 | 757 | 142461 | 1.00E-92  | 213 | 225 | 94 - | 50  | 273 | 129556 | 129780 |
| UN79031 | Rsa1.0_02001.1 | 589 | 36198  | 0         | 463 | 490 | 94 - | 1   | 487 | 31940  | 32422  |
| UN79032 | Rsa1.0_08988.1 | 613 | 6732   | 1.00E-163 | 403 | 442 | 91 + | 2   | 431 | 815    | 1243   |
| UN79033 | Rsa1.0_00381.1 | 160 | 89718  | 1.00E-42  | 112 | 120 | 93 + | 41  | 160 | 87953  | 88072  |
| UN79034 | Rsa1.0_00451.1 | 446 | 322533 | 1.00E-121 | 270 | 285 | 94 + | 58  | 341 | 993    | 1277   |
| UN79035 | Rsa1.0_00487.1 | 509 | 80674  | 1.00E-115 | 284 | 305 | 93 + | 1   | 303 | 59392  | 59694  |
| UN79036 | Rsa1.0_01730.1 | 686 | 40223  | 0         | 654 | 690 | 94 - | 1   | 686 | 35837  | 36512  |
| UN79037 | Rsa1.0_04034.1 | 482 | 19481  | 1.00E-107 | 203 | 205 | 99 - | 278 | 482 | 13457  | 13661  |
| UN79038 | Rsa1.0_00060.1 | 719 | 502678 | 0         | 612 | 627 | 97 - | 23  | 649 | 490793 | 491419 |
| UN79039 | Rsa1.0_00058.1 | 123 | 159921 | 4.00E-42  | 114 | 123 | 92 + | 1   | 123 | 150878 | 151000 |
| UN79040 | Rsa1.0_01245.1 | 688 | 149868 | 0         | 529 | 551 | 96 - | 138 | 688 | 21474  | 22024  |
| UN79041 | Rsa1.0_00123.1 | 225 | 325650 | 1.00E-55  | 186 | 209 | 88 - | 19  | 225 | 268117 | 268324 |
| UN79042 | Rsa1.0_00254.1 | 288 | 102600 | 1.00E-47  | 129 | 137 | 94 + | 13  | 147 | 77465  | 77601  |
| UN79043 | Rsa1.0_02722.1 | 299 | 28417  | 7.00E-52  | 137 | 144 | 95 - | 37  | 179 | 1350   | 1491   |
| UN79044 | Rsa1.0_00632.1 | 753 | 183777 | 0         | 430 | 462 | 93 - | 12  | 471 | 157543 | 157998 |
| UN79045 | Rsa1.0_03093.1 | 780 | 25445  | 0         | 761 | 782 | 97 - | 1   | 780 | 10202  | 10980  |
| UN79046 | Rsa1.0_04378.1 | 293 | 17651  | 1.00E-117 | 270 | 289 | 93 - | 1   | 289 | 4666   | 4954   |
| UN79047 | Rsa1.0_01147.1 | 152 | 52391  | 4.00E-21  | 91  | 102 | 89 + | 1   | 102 | 46152  | 46249  |
| UN79048 | Rsa1.0_00045.1 | 274 | 328694 | 7.00E-55  | 158 | 173 | 91 - | 1   | 172 | 189602 | 189774 |
| UN79049 | Rsa1.0_00396.1 | 165 | 88242  | 3.00E-74  | 160 | 165 | 96 - | 1   | 165 | 49409  | 49572  |
| UN79050 | Rsa1.0_00743.1 | 779 | 177459 | 0         | 742 | 804 | 92 + | 3   | 779 | 6012   | 6799   |
| UN79051 | Rsa1.0_00931.1 | 115 | 59210  | 6.00E-47  | 111 | 115 | 96 + | 1   | 115 | 8540   | 8653   |

|         |                |     |        |           |     |     |      |     |     |        |        |
|---------|----------------|-----|--------|-----------|-----|-----|------|-----|-----|--------|--------|
| UN79052 | Rsa1.0.03077.1 | 497 | 25558  | 1.00E-112 | 288 | 308 | 93 + | 1   | 303 | 6682   | 6987   |
| UN79053 | Rsa1.0.03263.1 | 658 | 24268  | 0         | 625 | 670 | 93 + | 1   | 658 | 21907  | 22571  |
| UN79054 | Rsa1.0.00294.1 | 787 | 144860 | 0         | 566 | 582 | 97 - | 206 | 787 | 57864  | 58442  |
| UN79055 | Rsa1.0.13498.1 | 239 | 4764   | 3.00E-84  | 211 | 228 | 92 - | 1   | 228 | 1758   | 1982   |
| UN79056 | Rsa1.0.01529.1 | 756 | 43871  | 0         | 728 | 769 | 94 - | 1   | 756 | 24147  | 24908  |
| UN79057 | Rsa1.0.18326.1 | 601 | 1620   | 0         | 523 | 542 | 96 - | 61  | 601 | 1083   | 1620   |
| UN79058 | Rsa1.0.00166.1 | 607 | 240912 | 1.00E-128 | 241 | 244 | 98 + | 364 | 607 | 191237 | 191480 |
| UN79059 | Rsa1.0.00019.1 | 437 | 301669 | 1.00E-109 | 360 | 414 | 86 + | 25  | 437 | 293057 | 293444 |
| UN79060 | Rsa1.0.33317.1 | 666 | 681    | 9.00E-81  | 280 | 320 | 87 - | 54  | 364 | 86     | 401    |
| UN79061 | Rsa1.0.00051.1 | 489 | 258225 | 0         | 476 | 496 | 95 - | 1   | 489 | 34408  | 34903  |
| UN79062 | Rsa1.0.13010.1 | 206 | 5047   | 1.00E-98  | 197 | 202 | 97 + | 1   | 202 | 2378   | 2579   |
| UN79063 | Rsa1.0.04783.1 | 354 | 15995  | 2.00E-83  | 290 | 330 | 87 - | 20  | 342 | 2984   | 3308   |
| UN79064 | Rsa1.0.00939.1 | 175 | 185227 | 1.00E-73  | 156 | 160 | 97 + | 17  | 175 | 170392 | 170551 |
| UN79065 | Rsa1.0.00190.1 | 781 | 318240 | 1.00E-156 | 307 | 315 | 97 + | 468 | 781 | 8210   | 8524   |
| UN79066 | Rsa1.0.00216.1 | 740 | 197563 | 1.00E-111 | 281 | 304 | 92 + | 76  | 379 | 11154  | 11444  |
| UN79067 | Rsa1.0.00412.1 | 403 | 86935  | 0         | 386 | 403 | 95 + | 1   | 403 | 34471  | 34871  |
| UN79068 | Rsa1.0.00088.1 | 184 | 141341 | 5.00E-24  | 72  | 77  | 93 + | 108 | 184 | 19042  | 19118  |
| UN79069 | Rsa1.0.21244.1 | 277 | 1222   | 2.00E-82  | 234 | 259 | 90 + | 19  | 277 | 577    | 829    |
| UN79070 | Rsa1.0.00681.1 | 310 | 68779  | 5.00E-90  | 218 | 232 | 93 - | 23  | 252 | 57460  | 57691  |
| UN79071 | Rsa1.0.00158.1 | 350 | 117999 | 1.00E-115 | 265 | 281 | 94 - | 4   | 278 | 100334 | 100612 |
| UN79072 | Rsa1.0.02262.1 | 807 | 33239  | 2.00E-33  | 150 | 174 | 86 - | 114 | 286 | 11528  | 11701  |
| UN79073 | Rsa1.0.02860.1 | 229 | 27207  | 7.00E-39  | 167 | 195 | 85 - | 3   | 197 | 12720  | 12910  |
| UN79074 | Rsa1.0.00075.1 | 689 | 146680 | 3.00E-65  | 165 | 175 | 94 + | 157 | 331 | 142072 | 142244 |
| UN79075 | Rsa1.0.02019.1 | 204 | 35983  | 3.00E-78  | 192 | 204 | 94 + | 1   | 204 | 13307  | 13503  |
| UN79076 | Rsa1.0.01708.1 | 678 | 40622  | 0         | 648 | 675 | 96 + | 1   | 675 | 2751   | 3425   |
| UN79077 | Rsa1.0.03634.1 | 762 | 145192 | 0         | 742 | 762 | 97 + | 3   | 761 | 128061 | 128814 |
| UN79078 | Rsa1.0.00223.1 | 648 | 106231 | 0         | 604 | 649 | 93 - | 1   | 648 | 3397   | 4035   |
| UN79079 | Rsa1.0.00273.1 | 493 | 326186 | 0         | 441 | 455 | 96 + | 45  | 493 | 237453 | 237907 |
| UN79080 | Rsa1.0.00015.1 | 628 | 561803 | 1.00E-137 | 350 | 384 | 91 - | 95  | 475 | 359573 | 359944 |
| UN79081 | Rsa1.0.08116.1 | 794 | 7881   | 0         | 777 | 806 | 96 + | 1   | 794 | 4928   | 5733   |
| UN79082 | Rsa1.0.01900.1 | 720 | 37473  | 0         | 690 | 718 | 96 + | 3   | 720 | 26580  | 27277  |
| UN79083 | Rsa1.0.03523.1 | 174 | 22299  | 8.00E-75  | 166 | 174 | 95 - | 1   | 174 | 10212  | 10385  |
| UN79084 | Rsa1.0.00228.1 | 251 | 105511 | 1.00E-104 | 236 | 251 | 94 - | 1   | 251 | 82664  | 82914  |
| UN79085 | Rsa1.0.00033.1 | 632 | 515811 | 0         | 595 | 632 | 94 + | 1   | 632 | 392018 | 392637 |
| UN79086 | Rsa1.0.02893.1 | 127 | 26999  | 9.00E-40  | 110 | 119 | 92 + | 4   | 122 | 24943  | 25061  |
| UN79087 | Rsa1.0.02772.1 | 661 | 28047  | 1.00E-107 | 262 | 283 | 92 + | 20  | 295 | 2794   | 3074   |
| UN79088 | Rsa1.0.00686.1 | 640 | 68511  | 0         | 471 | 510 | 92 + | 9   | 513 | 27894  | 28402  |
| UN79089 | Rsa1.0.01955.1 | 727 | 36850  | 2.00E-76  | 261 | 297 | 87 - | 443 | 727 | 13240  | 13535  |
| UN79090 | Rsa1.0.03860.1 | 440 | 20407  | 1.00E-149 | 342 | 366 | 93 - | 28  | 390 | 13514  | 13879  |

|         |                |     |        |           |     |     |      |     |     |        |        |
|---------|----------------|-----|--------|-----------|-----|-----|------|-----|-----|--------|--------|
| UN79091 | Rsa1.0_10640.1 | 134 | 5772   | 1.00E-32  | 116 | 131 | 88 - | 4   | 134 | 1624   | 1754   |
| UN79092 | Rsa1.0_00107.1 | 560 | 431659 | 0         | 448 | 471 | 95 - | 2   | 470 | 146548 | 147015 |
| UN79093 | Rsa1.0_07441.1 | 640 | 9388   | 2.00E-87  | 182 | 188 | 96 - | 450 | 637 | 770    | 957    |
| UN79094 | Rsa1.0_00088.1 | 189 | 141341 | 4.00E-74  | 177 | 189 | 93 + | 1   | 189 | 56687  | 56875  |
| UN79095 | Rsa1.0_08194.1 | 147 | 7757   | 1.00E-48  | 127 | 137 | 92 + | 11  | 147 | 5566   | 5696   |
| UN79096 | Rsa1.0_00276.1 | 436 | 100160 | 1.00E-148 | 280 | 285 | 98 - | 149 | 433 | 95528  | 95812  |
| UN79097 | Rsa1.0_00299.1 | 632 | 97770  | 0         | 425 | 431 | 98 + | 70  | 500 | 2342   | 2772   |
| UN79098 | Rsa1.0_00032.1 | 323 | 306326 | 6.00E-71  | 194 | 212 | 91 + | 10  | 215 | 284767 | 284978 |
| UN79099 | Rsa1.0_00116.1 | 479 | 365886 | 1.00E-168 | 453 | 500 | 90 - | 1   | 477 | 324552 | 325047 |
| UN79100 | Rsa1.0_04291.1 | 720 | 18055  | 2.00E-54  | 209 | 241 | 86 - | 413 | 652 | 2260   | 2500   |
| UN79101 | Rsa1.0_01176.1 | 554 | 51638  | 2.00E-69  | 143 | 146 | 97 + | 92  | 237 | 47428  | 47573  |
| UN79102 | Rsa1.0_00244.1 | 671 | 103590 | 2.00E-41  | 134 | 149 | 89 - | 8   | 156 | 73674  | 73819  |
| UN79103 | Rsa1.0_01668.1 | 772 | 41299  | 0         | 720 | 780 | 92 - | 1   | 768 | 21279  | 22043  |
| UN79104 | Rsa1.0_11073.1 | 507 | 5625   | 0         | 381 | 392 | 97 - | 116 | 507 | 5231   | 5622   |
| UN79105 | Rsa1.0_04272.1 | 214 | 18144  | 3.00E-41  | 95  | 98  | 96 + | 88  | 185 | 14215  | 14312  |
| UN79106 | Rsa1.0_03448.1 | 750 | 22844  | 1.00E-132 | 269 | 279 | 96 - | 468 | 746 | 19654  | 19932  |
| UN79107 | Rsa1.0_00805.1 | 231 | 63724  | 2.00E-63  | 141 | 147 | 95 + | 5   | 151 | 4928   | 5074   |
| UN79108 | Rsa1.0_00057.1 | 670 | 160473 | 0         | 656 | 670 | 97 - | 1   | 670 | 25084  | 25753  |
| UN79109 | Rsa1.0_07898.1 | 785 | 8339   | 1.00E-137 | 293 | 303 | 96 - | 4   | 303 | 1316   | 1617   |
| UN79110 | Rsa1.0_03517.1 | 667 | 22337  | 1.00E-141 | 347 | 376 | 92 - | 301 | 667 | 3774   | 4143   |
| UN79111 | Rsa1.0_15250.1 | 410 | 2727   | 1.00E-84  | 222 | 242 | 91 - | 163 | 403 | 1092   | 1327   |
| UN79112 | Rsa1.0_00626.1 | 361 | 71582  | 1.00E-145 | 336 | 360 | 93 - | 1   | 359 | 9986   | 10345  |
| UN79113 | Rsa1.0_00039.1 | 596 | 296927 | 1.00E-61  | 192 | 217 | 88 - | 200 | 414 | 223486 | 223690 |
| UN79114 | Rsa1.0_04375.1 | 205 | 141717 | 1.00E-92  | 196 | 205 | 95 + | 1   | 205 | 3488   | 3684   |
| UN79115 | Rsa1.0_37225.1 | 805 | 605    | 0         | 456 | 477 | 95 + | 107 | 583 | 114    | 590    |
| UN79116 | Rsa1.0_02335.1 | 866 | 32400  | 0         | 718 | 746 | 96 + | 13  | 757 | 19619  | 20362  |
| UN79117 | Rsa1.0_00608.1 | 621 | 172672 | 1.00E-159 | 330 | 341 | 96 - | 1   | 341 | 106254 | 106591 |
| UN79118 | Rsa1.0_00198.1 | 377 | 222963 | 0         | 365 | 377 | 96 + | 1   | 377 | 176266 | 176642 |
| UN79119 | Rsa1.0_00786.1 | 598 | 64285  | 1.00E-98  | 225 | 236 | 95 + | 1   | 231 | 52476  | 52710  |
| UN79120 | Rsa1.0_02223.1 | 546 | 152421 | 0         | 436 | 455 | 95 - | 1   | 449 | 17952  | 18405  |
| UN79121 | Rsa1.0_22413.1 | 429 | 1123   | 1.00E-171 | 308 | 309 | 99 + | 1   | 309 | 284    | 592    |
| UN79122 | Rsa1.0_01321.1 | 608 | 48248  | 0         | 588 | 614 | 95 - | 1   | 608 | 8219   | 8828   |
| UN79123 | Rsa1.0_02118.1 | 244 | 34839  | 1.00E-104 | 225 | 236 | 95 - | 1   | 236 | 7761   | 7996   |
| UN79124 | Rsa1.0_03252.1 | 621 | 24338  | 1.00E-159 | 373 | 403 | 92 - | 3   | 402 | 15911  | 16300  |
| UN79125 | Rsa1.0_00646.1 | 291 | 70473  | 1.00E-19  | 53  | 54  | 98 + | 238 | 291 | 6367   | 6420   |
| UN79126 | Rsa1.0_02528.1 | 500 | 30452  | 1.00E-136 | 319 | 340 | 93 - | 17  | 353 | 21646  | 21984  |
| UN79127 | Rsa1.0_00087.1 | 284 | 761073 | 1.00E-65  | 148 | 155 | 95 - | 130 | 284 | 224983 | 225137 |
| UN79128 | Rsa1.0_06683.1 | 614 | 10549  | 0         | 386 | 402 | 96 - | 2   | 403 | 8848   | 9249   |
| UN79129 | Rsa1.0_00429.1 | 206 | 85559  | 2.00E-85  | 197 | 207 | 95 - | 1   | 205 | 61650  | 61855  |

|         |                |     |        |           |     |     |      |     |     |        |        |
|---------|----------------|-----|--------|-----------|-----|-----|------|-----|-----|--------|--------|
| UN79130 | Rsa1.0.00010.1 | 120 | 294827 | 4.00E-17  | 107 | 129 | 82 + | 3   | 117 | 247477 | 247605 |
| UN79131 | Rsa1.0.00243.1 | 701 | 103651 | 1.00E-92  | 176 | 177 | 99 - | 1   | 177 | 26911  | 27087  |
| UN79132 | Rsa1.0.02792.1 | 499 | 27829  | 0         | 451 | 488 | 92 - | 19  | 499 | 21393  | 21876  |
| UN79133 | Rsa1.0.00172.1 | 738 | 115476 | 1.00E-178 | 326 | 328 | 99 + | 411 | 738 | 48895  | 49221  |
| UN79134 | Rsa1.0.00161.1 | 699 | 116891 | 1.00E-166 | 344 | 360 | 95 + | 226 | 585 | 25631  | 25990  |
| UN79135 | Rsa1.0.00148.1 | 203 | 120234 | 2.00E-82  | 191 | 203 | 94 - | 1   | 203 | 8997   | 9199   |
| UN79136 | Rsa1.0.01126.1 | 816 | 53127  | 0         | 781 | 805 | 97 - | 1   | 804 | 36492  | 37296  |
| UN79137 | Rsa1.0.03781.1 | 323 | 20891  | 1.00E-125 | 297 | 316 | 93 - | 10  | 323 | 11843  | 12153  |
| UN79138 | Rsa1.0.04837.1 | 395 | 15764  | 0         | 382 | 394 | 96 + | 2   | 395 | 6080   | 6471   |
| UN79139 | Rsa1.0.00246.1 | 235 | 103541 | 8.00E-88  | 201 | 212 | 94 + | 1   | 212 | 4630   | 4835   |
| UN79140 | Rsa1.0.16480.1 | 643 | 2141   | 0         | 577 | 588 | 98 + | 56  | 643 | 425    | 1012   |
| UN79141 | Rsa1.0.00025.1 | 709 | 277312 | 1.00E-111 | 235 | 244 | 96 + | 39  | 282 | 149673 | 149915 |
| UN79142 | Rsa1.0.05713.1 | 584 | 12855  | 0         | 392 | 407 | 96 + | 1   | 407 | 6785   | 7189   |
| UN79143 | Rsa1.0.00294.1 | 590 | 144860 | 0         | 437 | 472 | 92 + | 25  | 482 | 64093  | 64563  |
| UN79144 | Rsa1.0.02422.1 | 550 | 161122 | 0         | 538 | 550 | 97 - | 1   | 550 | 28614  | 29163  |
| UN79145 | Rsa1.0.02515.1 | 709 | 30616  | 1.00E-121 | 311 | 337 | 92 + | 4   | 331 | 27661  | 27993  |
| UN79146 | Rsa1.0.02807.1 | 683 | 27680  | 1.00E-177 | 357 | 370 | 96 + | 68  | 437 | 5096   | 5464   |
| UN79147 | Rsa1.0.01543.1 | 750 | 43645  | 0         | 559 | 588 | 95 - | 3   | 581 | 15007  | 15592  |
| UN79148 | Rsa1.0.04630.1 | 831 | 16595  | 0         | 461 | 479 | 96 - | 356 | 831 | 13415  | 13893  |
| UN79149 | Rsa1.0.00292.1 | 174 | 98141  | 4.00E-27  | 68  | 70  | 97 - | 35  | 104 | 6880   | 6949   |
| UN79150 | Rsa1.0.00642.1 | 775 | 201230 | 1.00E-115 | 271 | 292 | 92 + | 2   | 285 | 28087  | 28378  |
| UN79151 | Rsa1.0.02001.1 | 773 | 36198  | 0         | 486 | 520 | 93 - | 1   | 517 | 31940  | 32450  |
| UN79152 | Rsa1.0.00888.1 | 620 | 60978  | 1.00E-27  | 117 | 131 | 89 + | 337 | 462 | 39051  | 39177  |
| UN79153 | Rsa1.0.00005.1 | 507 | 353093 | 1.00E-132 | 294 | 308 | 95 - | 1   | 302 | 130794 | 131100 |
| UN79154 | Rsa1.0.01986.1 | 507 | 36489  | 1.00E-176 | 450 | 494 | 91 - | 7   | 495 | 21467  | 21945  |
| UN79155 | Rsa1.0.00565.1 | 727 | 75420  | 1.00E-152 | 276 | 277 | 99 + | 195 | 471 | 65983  | 66259  |
| UN79156 | Rsa1.0.00116.1 | 766 | 365886 | 3.00E-93  | 219 | 234 | 93 + | 425 | 658 | 325752 | 325985 |
| UN79157 | Rsa1.0.00301.1 | 524 | 365315 | 0         | 502 | 526 | 95 + | 1   | 524 | 197537 | 198059 |
| UN79158 | Rsa1.0.00668.1 | 444 | 69421  | 1.00E-100 | 233 | 249 | 93 - | 182 | 430 | 54455  | 54703  |
| UN79159 | Rsa1.0.00715.1 | 599 | 67116  | 1.00E-109 | 319 | 358 | 89 + | 37  | 392 | 16405  | 16756  |
| UN79160 | Rsa1.0.01497.1 | 734 | 44559  | 0         | 436 | 453 | 96 + | 1   | 450 | 8181   | 8631   |
| UN79161 | Rsa1.0.02399.1 | 758 | 31763  | 0         | 598 | 629 | 95 - | 1   | 629 | 12962  | 13590  |
| UN79162 | Rsa1.0.03431.1 | 481 | 22974  | 0         | 442 | 473 | 93 + | 23  | 481 | 16404  | 16873  |
| UN79163 | Rsa1.0.00875.1 | 737 | 61371  | 0         | 711 | 753 | 94 + | 1   | 737 | 58228  | 58977  |
| UN79164 | Rsa1.0.01488.1 | 688 | 44766  | 0         | 549 | 576 | 95 + | 3   | 576 | 6347   | 6922   |
| UN79165 | Rsa1.0.00745.1 | 486 | 66067  | 1.00E-176 | 359 | 372 | 96 - | 115 | 486 | 43147  | 43516  |
| UN79166 | Rsa1.0.00248.1 | 640 | 163568 | 1.00E-143 | 294 | 305 | 96 + | 3   | 305 | 41533  | 41837  |
| UN79167 | Rsa1.0.01412.1 | 348 | 46311  | 1.00E-137 | 317 | 340 | 93 - | 1   | 340 | 2369   | 2708   |
| UN79168 | Rsa1.0.00078.1 | 771 | 175053 | 2.00E-94  | 244 | 263 | 92 + | 3   | 262 | 42649  | 42905  |



|         |                |     |        |           |     |     |       |     |     |        |        |
|---------|----------------|-----|--------|-----------|-----|-----|-------|-----|-----|--------|--------|
| UN79169 | Rsa1.0_04098.1 | 408 | 19078  | 1.00E-113 | 302 | 326 | 92 +  | 3   | 322 | 11234  | 11553  |
| UN79170 | Rsa1.0_00632.1 | 425 | 183777 | 3.00E-95  | 239 | 257 | 92 +  | 1   | 256 | 149183 | 149438 |
| UN79171 | Rsa1.0_00065.1 | 342 | 454616 | 1.00E-124 | 318 | 343 | 92 +  | 3   | 342 | 26190  | 26527  |
| UN79172 | Rsa1.0_01020.1 | 233 | 56619  | 5.00E-49  | 108 | 111 | 97 -  | 56  | 166 | 34192  | 34302  |
| UN79173 | Rsa1.0_02444.1 | 642 | 31350  | 0         | 628 | 648 | 96 -  | 1   | 642 | 4195   | 4842   |
| UN79174 | Rsa1.0_14752.1 | 195 | 3100   | 9.00E-69  | 182 | 196 | 92 -  | 1   | 195 | 50     | 244    |
| UN79175 | Rsa1.0_00350.1 | 488 | 92346  | 1.00E-124 | 309 | 338 | 91 +  | 27  | 364 | 61927  | 62250  |
| UN79176 | Rsa1.0_01130.1 | 782 | 52929  | 0         | 522 | 531 | 98 -  | 1   | 529 | 34567  | 35097  |
| UN79177 | Rsa1.0_01431.1 | 578 | 167877 | 0         | 424 | 434 | 97 -  | 1   | 434 | 21463  | 21893  |
| UN79178 | Rsa1.0_01814.1 | 222 | 38917  | 1.00E-107 | 218 | 224 | 97 +  | 1   | 222 | 37168  | 37391  |
| UN79179 | Rsa1.0_00585.1 | 241 | 74164  | 1.00E-74  | 217 | 241 | 90 +  | 1   | 241 | 47844  | 48082  |
| UN79180 | Rsa1.0_02931.1 | 340 | 26654  | 1.00E-132 | 310 | 331 | 93 -  | 1   | 331 | 6184   | 6508   |
| UN79181 | Rsa1.0_00045.1 | 608 | 328694 | 0         | 538 | 578 | 93 -  | 34  | 608 | 16229  | 16792  |
| UN79182 | Rsa1.0_00962.1 | 151 | 184909 | 2.00E-47  | 115 | 120 | 95 +  | 33  | 151 | 51825  | 51944  |
| UN79183 | Rsa1.0_08412.1 | 295 | 7404   | 1.00E-99  | 267 | 291 | 91 +  | 10  | 291 | 4359   | 4644   |
| UN79184 | Rsa1.0_01524.1 | 711 | 43949  | 0         | 639 | 704 | 90 -  | 42  | 709 | 8396   | 9092   |
| UN79185 | Rsa1.0_03502.1 | 809 | 22446  | 0         | 731 | 755 | 96 +  | 1   | 754 | 16475  | 17223  |
| UN79186 | Rsa1.0_00066.1 | 123 | 152418 | 5.00E-26  | 87  | 96  | 90 +  | 28  | 123 | 139775 | 139870 |
| UN79187 | Rsa1.0_00525.1 | 474 | 78030  | 6.00E-75  | 152 | 155 | 98 +  | 253 | 407 | 48823  | 48977  |
| UN79188 | Rsa1.0_03694.1 | 186 | 21336  | 1.00E-76  | 179 | 188 | 95 -  | 1   | 186 | 983    | 1169   |
| UN79189 | Rsa1.0_01656.1 | 658 | 41494  | 0         | 586 | 631 | 92 +  | 19  | 629 | 27640  | 28269  |
| UN79190 | Rsa1.0_05428.1 | 699 | 13789  | 0         | 455 | 482 | 94 +  | 41  | 522 | 611    | 1084   |
| UN79191 | Rsa1.0_00200.1 | 649 | 162016 | 0         | 605 | 623 | 97 +  | 27  | 648 | 122498 | 123120 |
| UN79192 | Rsa1.0_01206.1 | 403 | 50772  | 1.00E-177 | 382 | 403 | 94 -  | 1   | 403 | 35373  | 35774  |
| UN79193 | Rsa1.0_03845.1 | 289 | 20486  | 6.00E-49  | 99  | 99  | 100 - | 184 | 282 | 11680  | 11778  |
| UN79194 | Rsa1.0_00844.1 | 331 | 62403  | 7.00E-83  | 223 | 244 | 91 -  | 89  | 331 | 19218  | 19461  |
| UN79195 | Rsa1.0_00926.1 | 731 | 195072 | 1.00E-135 | 260 | 265 | 98 +  | 467 | 731 | 176938 | 177202 |
| UN79196 | Rsa1.0_03808.1 | 262 | 20732  | 1.00E-120 | 253 | 262 | 96 +  | 1   | 262 | 410    | 669    |
| UN79197 | Rsa1.0_02859.1 | 203 | 162118 | 9.00E-72  | 187 | 203 | 92 +  | 1   | 203 | 24574  | 24773  |
| UN79198 | Rsa1.0_01583.1 | 630 | 156297 | 0         | 606 | 636 | 95 -  | 3   | 630 | 151216 | 151839 |
| UN79199 | Rsa1.0_00596.1 | 503 | 73578  | 0         | 410 | 424 | 96 +  | 3   | 426 | 42104  | 42527  |
| UN79200 | Rsa1.0_04915.1 | 852 | 15461  | 0         | 430 | 449 | 95 +  | 1   | 447 | 8183   | 8630   |
| UN79201 | Rsa1.0_02041.1 | 426 | 163634 | 2.00E-49  | 149 | 162 | 91 +  | 113 | 270 | 12331  | 12491  |
| UN79202 | Rsa1.0_03624.1 | 650 | 21706  | 1.00E-105 | 285 | 310 | 91 -  | 5   | 310 | 9250   | 9559   |
| UN79203 | Rsa1.0_00190.1 | 385 | 318240 | 8.00E-74  | 167 | 175 | 95 +  | 1   | 175 | 4028   | 4199   |
| UN79204 | #              | #   | #      | #         | #   | #   | #     | #   | #   | #      | #      |
| UN79205 | Rsa1.0_65233.1 | 109 | 352    | 6.00E-19  | 69  | 76  | 90 -  | 1   | 76  | 1      | 76     |
| UN79206 | Rsa1.0_00698.1 | 339 | 67816  | 1.00E-115 | 316 | 347 | 91 +  | 1   | 339 | 21763  | 22109  |
| UN79207 | Rsa1.0_00202.1 | 357 | 185895 | 1.00E-149 | 330 | 350 | 94 -  | 8   | 357 | 4810   | 5151   |

|         |                |     |        |           |     |     |      |     |     |        |        |
|---------|----------------|-----|--------|-----------|-----|-----|------|-----|-----|--------|--------|
| UN79208 | Rsa1.0.06753.1 | 517 | 10416  | 2.00E-71  | 245 | 277 | 88 + | 62  | 335 | 9430   | 9696   |
| UN79209 | Rsa1.0.00362.1 | 118 | 299497 | 3.00E-21  | 55  | 56  | 98 + | 57  | 112 | 268227 | 268282 |
| UN79210 | Rsa1.0.49062.1 | 404 | 462    | 1.00E-127 | 265 | 276 | 96 - | 5   | 280 | 191    | 462    |
| UN79211 | Rsa1.0.01400.1 | 689 | 46560  | 0         | 420 | 433 | 96 - | 6   | 438 | 13162  | 13592  |
| UN79212 | Rsa1.0.03407.1 | 472 | 23154  | 1.00E-133 | 251 | 253 | 99 + | 1   | 253 | 8209   | 8460   |
| UN79213 | Rsa1.0.00169.1 | 421 | 274298 | 1.00E-109 | 272 | 295 | 92 + | 1   | 295 | 267909 | 268191 |
| UN79214 | Rsa1.0.00220.1 | 693 | 192936 | 1.00E-153 | 284 | 287 | 98 - | 407 | 693 | 111055 | 111341 |
| UN79215 | Rsa1.0.00006.1 | 597 | 396176 | 1.00E-125 | 254 | 260 | 97 - | 1   | 259 | 250588 | 250846 |
| UN79216 | Rsa1.0.00641.1 | 231 | 208241 | 1.00E-86  | 211 | 227 | 92 - | 1   | 227 | 147815 | 148037 |
| UN79217 | Rsa1.0.10284.1 | 555 | 5904   | 0         | 522 | 531 | 98 - | 2   | 532 | 1260   | 1790   |
| UN79218 | Rsa1.0.02485.1 | 442 | 30968  | 0         | 436 | 449 | 97 + | 1   | 442 | 26755  | 27203  |
| UN79219 | Rsa1.0.00051.1 | 216 | 258225 | 4.00E-62  | 194 | 216 | 89 + | 1   | 216 | 47509  | 47716  |
| UN79220 | Rsa1.0.00764.1 | 847 | 65056  | 1.00E-127 | 258 | 266 | 96 - | 1   | 266 | 21209  | 21472  |
| UN79221 | Rsa1.0.01232.1 | 635 | 155185 | 1.00E-178 | 357 | 369 | 96 - | 2   | 370 | 150401 | 150763 |
| UN79222 | Rsa1.0.02399.1 | 719 | 31763  | 0         | 684 | 718 | 95 - | 2   | 719 | 12992  | 13707  |
| UN79223 | Rsa1.0.08937.1 | 645 | 6769   | 0         | 568 | 633 | 89 + | 11  | 634 | 4829   | 5456   |
| UN79224 | Rsa1.0.03746.1 | 797 | 21050  | 1.00E-148 | 329 | 346 | 95 - | 1   | 345 | 15114  | 15456  |
| UN79225 | Rsa1.0.00046.1 | 516 | 320315 | 3.00E-58  | 198 | 224 | 88 - | 108 | 323 | 126782 | 127003 |
| UN79226 | Rsa1.0.06052.1 | 462 | 11848  | 4.00E-45  | 114 | 121 | 94 + | 306 | 426 | 7027   | 7147   |
| UN79227 | Rsa1.0.00205.1 | 722 | 193401 | 1.00E-140 | 309 | 328 | 94 - | 114 | 430 | 171708 | 172035 |
| UN79228 | Rsa1.0.04082.1 | 391 | 19180  | 1.00E-154 | 306 | 316 | 96 + | 3   | 318 | 18371  | 18686  |
| UN79229 | Rsa1.0.03761.1 | 677 | 20982  | 0         | 364 | 368 | 98 + | 310 | 677 | 10831  | 11198  |
| UN79230 | Rsa1.0.00347.1 | 195 | 93048  | 5.00E-64  | 172 | 185 | 92 + | 12  | 195 | 66839  | 67018  |
| UN79231 | Rsa1.0.00136.1 | 762 | 122464 | 0         | 541 | 571 | 94 + | 7   | 577 | 60392  | 60962  |
| UN79232 | Rsa1.0.01384.1 | 583 | 46803  | 3.00E-74  | 157 | 161 | 97 + | 2   | 160 | 32829  | 32989  |
| UN79233 | Rsa1.0.00416.1 | 721 | 86772  | 1.00E-104 | 228 | 239 | 95 - | 486 | 721 | 43880  | 44118  |
| UN79234 | Rsa1.0.01296.1 | 352 | 49035  | 1.00E-170 | 344 | 356 | 96 + | 1   | 352 | 35532  | 35887  |
| UN79235 | Rsa1.0.02757.1 | 372 | 28187  | 8.00E-86  | 179 | 185 | 96 + | 188 | 372 | 27444  | 27628  |
| UN79236 | Rsa1.0.07344.1 | 654 | 9528   | 0         | 453 | 466 | 97 + | 1   | 465 | 4822   | 5287   |
| UN79237 | Rsa1.0.03781.1 | 584 | 20891  | 0         | 391 | 412 | 94 + | 173 | 584 | 11400  | 11811  |
| UN79238 | Rsa1.0.01860.1 | 683 | 38057  | 1.00E-136 | 267 | 274 | 97 - | 404 | 677 | 26806  | 27079  |
| UN79239 | Rsa1.0.00533.1 | 767 | 77375  | 1.00E-112 | 263 | 281 | 93 + | 2   | 282 | 63800  | 64078  |
| UN79240 | Rsa1.0.00029.1 | 514 | 272992 | 1.00E-126 | 307 | 330 | 93 - | 188 | 514 | 249681 | 250007 |
| UN79241 | Rsa1.0.00396.1 | 331 | 88242  | 1.00E-103 | 196 | 198 | 98 + | 58  | 255 | 9529   | 9726   |
| UN79242 | Rsa1.0.19050.1 | 532 | 1488   | 1.00E-94  | 206 | 216 | 95 + | 305 | 520 | 255    | 470    |
| UN79243 | Rsa1.0.02422.1 | 205 | 161122 | 3.00E-93  | 198 | 205 | 96 + | 2   | 205 | 27330  | 27534  |
| UN79244 | Rsa1.0.00711.1 | 423 | 67223  | 1.00E-44  | 107 | 112 | 95 - | 312 | 423 | 11412  | 11523  |
| UN79245 | Rsa1.0.01076.1 | 630 | 54835  | 1.00E-144 | 269 | 272 | 98 + | 1   | 272 | 44200  | 44471  |
| UN79246 | Rsa1.0.02345.1 | 546 | 32337  | 0         | 518 | 547 | 94 + | 1   | 546 | 21139  | 21676  |

|         |                |     |        |           |     |     |      |     |     |        |        |
|---------|----------------|-----|--------|-----------|-----|-----|------|-----|-----|--------|--------|
| UN79247 | Rsa1.0_12949.1 | 719 | 5067   | 0         | 459 | 479 | 95 - | 3   | 480 | 4589   | 5064   |
| UN79248 | Rsa1.0_01543.1 | 715 | 43645  | 1.00E-100 | 253 | 273 | 92 + | 426 | 697 | 14105  | 14375  |
| UN79249 | Rsa1.0_00487.1 | 597 | 80674  | 0         | 578 | 599 | 96 + | 3   | 597 | 2922   | 3518   |
| UN79250 | Rsa1.0_00939.1 | 681 | 185227 | 2.00E-91  | 186 | 191 | 97 - | 491 | 681 | 22073  | 22263  |
| UN79251 | Rsa1.0_01986.1 | 755 | 36489  | 1.00E-173 | 425 | 468 | 90 + | 32  | 496 | 20617  | 21060  |
| UN79252 | Rsa1.0_00565.1 | 628 | 75420  | 0         | 571 | 576 | 99 - | 4   | 579 | 67086  | 67661  |
| UN79253 | Rsa1.0_00301.1 | 654 | 365315 | 0         | 620 | 655 | 94 - | 2   | 653 | 198902 | 199556 |
| UN79254 | Rsa1.0_00668.1 | 514 | 69421  | 1.00E-103 | 378 | 436 | 86 + | 90  | 514 | 53479  | 53909  |
| UN79255 | Rsa1.0_02421.1 | 704 | 31579  | 1.00E-73  | 298 | 347 | 85 - | 349 | 695 | 29564  | 29900  |
| UN79256 | Rsa1.0_00476.1 | 714 | 280966 | 0         | 607 | 628 | 96 - | 3   | 626 | 214536 | 215163 |
| UN79257 | Rsa1.0_01214.1 | 570 | 50599  | 1.00E-140 | 345 | 374 | 92 - | 5   | 364 | 46274  | 46646  |
| UN79258 | Rsa1.0_05256.1 | 486 | 14350  | 1.00E-118 | 245 | 255 | 96 + | 212 | 466 | 7102   | 7356   |
| UN79259 | Rsa1.0_02826.1 | 791 | 27560  | 0         | 698 | 721 | 96 + | 2   | 716 | 14403  | 15116  |
| UN79260 | Rsa1.0_02178.1 | 516 | 156197 | 0         | 491 | 517 | 94 + | 7   | 516 | 19487  | 19994  |
| UN79261 | Rsa1.0_00929.1 | 566 | 137796 | 1.00E-121 | 238 | 243 | 97 - | 2   | 244 | 99706  | 99946  |
| UN79262 | Rsa1.0_01302.1 | 650 | 48907  | 0         | 387 | 405 | 95 + | 246 | 650 | 1159   | 1560   |
| UN79263 | Rsa1.0_01883.1 | 753 | 37661  | 0         | 447 | 481 | 92 - | 229 | 705 | 35790  | 36270  |
| UN79264 | Rsa1.0_00509.1 | 751 | 78829  | 1.00E-143 | 387 | 422 | 91 + | 27  | 437 | 76454  | 76870  |
| UN79265 | Rsa1.0_03434.1 | 720 | 22960  | 0         | 675 | 730 | 92 + | 1   | 720 | 12818  | 13530  |
| UN79266 | Rsa1.0_00166.1 | 185 | 240912 | 9.00E-38  | 168 | 196 | 85 + | 1   | 185 | 153131 | 153326 |
| UN79267 | #              | #   | #      | #         | #   | #   | #    | #   | #   | #      | #      |
| UN79268 | Rsa1.0_00176.1 | 307 | 240984 | 1.00E-120 | 282 | 300 | 94 - | 9   | 303 | 232661 | 232960 |
| UN79269 | Rsa1.0_06222.1 | 312 | 11452  | 1.00E-142 | 300 | 314 | 95 - | 1   | 312 | 2187   | 2500   |
| UN79270 | Rsa1.0_01035.1 | 250 | 56019  | 8.00E-76  | 212 | 230 | 92 + | 1   | 228 | 48217  | 48442  |
| UN79271 | Rsa1.0_00155.1 | 695 | 118465 | 0         | 681 | 695 | 97 - | 1   | 695 | 89809  | 90503  |
| UN79272 | Rsa1.0_00133.1 | 484 | 123768 | 1.00E-106 | 245 | 260 | 94 - | 1   | 259 | 29742  | 30001  |
| UN79273 | Rsa1.0_00237.1 | 566 | 235974 | 1.00E-167 | 361 | 377 | 95 + | 1   | 374 | 58365  | 58740  |
| UN79274 | Rsa1.0_00070.1 | 350 | 150321 | 1.00E-170 | 341 | 350 | 97 - | 3   | 350 | 68084  | 68432  |
| UN79275 | Rsa1.0_00017.1 | 305 | 752458 | 1.00E-126 | 261 | 270 | 96 + | 1   | 267 | 604983 | 605251 |
| UN79276 | Rsa1.0_06336.1 | 154 | 11215  | 1.00E-64  | 148 | 155 | 95 - | 1   | 152 | 7283   | 7437   |
| UN79277 | Rsa1.0_06819.1 | 612 | 10302  | 0         | 413 | 424 | 97 - | 189 | 612 | 1677   | 2100   |
| UN79278 | Rsa1.0_00005.1 | 302 | 353093 | 5.00E-65  | 246 | 283 | 86 + | 19  | 298 | 138056 | 138330 |
| UN79279 | Rsa1.0_07130.1 | 633 | 9861   | 1.00E-149 | 394 | 436 | 90 + | 36  | 468 | 155    | 578    |
| UN79280 | Rsa1.0_00007.1 | 382 | 239325 | 1.00E-145 | 302 | 316 | 95 - | 1   | 316 | 118578 | 118893 |
| UN79281 | Rsa1.0_00008.1 | 392 | 358124 | 5.00E-84  | 223 | 244 | 91 - | 148 | 388 | 29219  | 29462  |
| UN79282 | Rsa1.0_11795.1 | 758 | 5406   | 1.00E-95  | 229 | 246 | 93 - | 250 | 495 | 5051   | 5296   |
| UN79283 | Rsa1.0_00833.1 | 509 | 62621  | 0         | 496 | 510 | 97 - | 1   | 509 | 38190  | 38699  |
| UN79284 | Rsa1.0_00032.1 | 114 | 306326 | 4.00E-29  | 104 | 115 | 90 - | 1   | 114 | 279186 | 279297 |
| UN79285 | Rsa1.0_00104.1 | 637 | 368722 | 3.00E-65  | 189 | 211 | 89 - | 160 | 361 | 14485  | 14695  |

|         |                |     |        |           |     |     |      |     |     |        |        |
|---------|----------------|-----|--------|-----------|-----|-----|------|-----|-----|--------|--------|
| UN79286 | Rsa1.0_03718.1 | 498 | 21195  | 1.00E-122 | 267 | 282 | 94 + | 211 | 492 | 654    | 935    |
| UN79287 | #              | #   | #      | #         | #   | #   | #    | #   | #   | #      | #      |
| UN79288 | Rsa1.0_10606.1 | 762 | 5787   | 0         | 741 | 779 | 95 + | 1   | 762 | 2165   | 2939   |
| UN79289 | Rsa1.0_00485.1 | 524 | 80937  | 1.00E-76  | 226 | 249 | 90 + | 34  | 279 | 15212  | 15459  |
| UN79290 | Rsa1.0_01105.1 | 119 | 53958  | 9.00E-46  | 112 | 117 | 95 + | 3   | 119 | 27484  | 27599  |
| UN79291 | Rsa1.0_03164.1 | 111 | 24887  | 3.00E-45  | 107 | 111 | 96 - | 1   | 111 | 11855  | 11963  |
| UN79292 | Rsa1.0_04504.1 | 671 | 17069  | 0         | 386 | 393 | 98 + | 279 | 671 | 7932   | 8324   |
| UN79293 | Rsa1.0_00152.1 | 439 | 257730 | 1.00E-88  | 229 | 247 | 92 + | 1   | 245 | 98770  | 99012  |
| UN79294 | Rsa1.0_00017.1 | 624 | 752458 | 3.00E-80  | 286 | 324 | 88 - | 308 | 624 | 297276 | 297586 |
| UN79295 | Rsa1.0_01377.1 | 473 | 46967  | 4.00E-82  | 182 | 191 | 95 - | 88  | 278 | 14175  | 14365  |
| UN79296 | Rsa1.0_01191.1 | 429 | 51235  | 3.00E-70  | 157 | 163 | 96 - | 29  | 191 | 23358  | 23519  |
| UN79297 | Rsa1.0_00041.1 | 537 | 186197 | 1.00E-107 | 293 | 325 | 90 + | 2   | 326 | 38315  | 38639  |
| UN79298 | Rsa1.0_09859.1 | 560 | 6115   | 2.33E-156 | 342 | 367 | 93 + | 123 | 488 | 5753   | 6115   |
| UN79299 | Rsa1.0_03634.1 | 452 | 145192 | 2.33E-156 | 317 | 335 | 94 - | 3   | 337 | 584    | 918    |
| UN79300 | Rsa1.0_02335.1 | 754 | 32400  | 0         | 408 | 413 | 98 - | 101 | 513 | 22324  | 22736  |
| UN79301 | Rsa1.0_00136.1 | 622 | 122464 | 6.00E-91  | 312 | 356 | 87 - | 276 | 622 | 81415  | 81754  |
| UN79302 | Rsa1.0_00789.1 | 792 | 64233  | 1.00E-141 | 308 | 323 | 95 + | 3   | 320 | 21834  | 22154  |
| UN79303 | Rsa1.0_05647.1 | 610 | 13055  | 1.00E-85  | 220 | 238 | 92 + | 386 | 609 | 12422  | 12658  |
| UN79304 | Rsa1.0_02241.1 | 329 | 33520  | 2.00E-46  | 141 | 155 | 90 - | 104 | 257 | 919    | 1073   |
| UN79305 | Rsa1.0_02874.1 | 254 | 27070  | 6.00E-55  | 156 | 171 | 91 + | 1   | 168 | 1720   | 1890   |
| UN79306 | Rsa1.0_00637.1 | 630 | 71038  | 8.00E-72  | 152 | 156 | 97 - | 339 | 491 | 25495  | 25650  |
| UN79307 | Rsa1.0_00614.1 | 255 | 72276  | 3.00E-81  | 168 | 173 | 97 - | 83  | 255 | 27761  | 27933  |
| UN79308 | Rsa1.0_01359.1 | 637 | 47271  | 0         | 373 | 381 | 97 - | 257 | 637 | 32457  | 32836  |
| UN79309 | Rsa1.0_00899.1 | 806 | 60404  | 3.00E-59  | 123 | 125 | 98 - | 536 | 660 | 13539  | 13663  |
| UN79310 | Rsa1.0_00305.1 | 697 | 97308  | 1.00E-128 | 254 | 261 | 97 - | 239 | 499 | 39688  | 39948  |
| UN79311 | Rsa1.0_01126.1 | 789 | 53127  | 0         | 511 | 542 | 94 + | 161 | 691 | 35534  | 36075  |
| UN79312 | Rsa1.0_00231.1 | 510 | 105381 | 0         | 425 | 439 | 96 - | 30  | 468 | 28173  | 28608  |
| UN79313 | Rsa1.0_02622.1 | 450 | 142402 | 1.00E-166 | 330 | 339 | 97 + | 3   | 340 | 6672   | 7008   |
| UN79314 | Rsa1.0_16480.1 | 358 | 2141   | 1.00E-173 | 346 | 357 | 96 - | 2   | 358 | 1392   | 1744   |
| UN79315 | Rsa1.0_03733.1 | 660 | 21108  | 2.00E-63  | 177 | 193 | 91 + | 472 | 655 | 723    | 914    |
| UN79316 | Rsa1.0_69352.1 | 684 | 330    | 9.00E-78  | 154 | 156 | 98 - | 375 | 530 | 175    | 330    |
| UN79317 | Rsa1.0_00784.1 | 692 | 64359  | 1.00E-173 | 453 | 493 | 91 + | 226 | 692 | 30357  | 30845  |
| UN79318 | Rsa1.0_02726.1 | 747 | 28404  | 0         | 411 | 443 | 92 + | 1   | 443 | 21468  | 21891  |
| UN79319 | Rsa1.0_00168.1 | 734 | 115870 | 0         | 389 | 405 | 96 + | 300 | 701 | 39841  | 40242  |
| UN79320 | Rsa1.0_00105.1 | 681 | 134138 | 1.00E-114 | 266 | 283 | 93 - | 403 | 681 | 86453  | 86735  |
| UN79321 | Rsa1.0_01924.1 | 781 | 37226  | 1.00E-143 | 270 | 274 | 98 + | 262 | 535 | 15462  | 15735  |
| UN79322 | Rsa1.0_02105.1 | 750 | 156953 | 0         | 350 | 359 | 97 - | 262 | 620 | 149700 | 150058 |
| UN79323 | Rsa1.0_08937.1 | 661 | 6769   | 0         | 590 | 661 | 89 - | 4   | 661 | 5627   | 6287   |
| UN79324 | Rsa1.0_06868.1 | 615 | 10234  | 0         | 598 | 615 | 97 - | 3   | 615 | 3862   | 4476   |

|         |                |     |        |           |     |     |      |     |     |        |        |
|---------|----------------|-----|--------|-----------|-----|-----|------|-----|-----|--------|--------|
| UN79325 | Rsa1.0.36974.1 | 782 | 610    | 0         | 564 | 592 | 95 - | 133 | 710 | 22     | 610    |
| UN79326 | Rsa1.0.00029.1 | 638 | 272992 | 0         | 382 | 400 | 95 + | 185 | 584 | 247799 | 248198 |
| UN79327 | Rsa1.0.03162.1 | 642 | 24895  | 0         | 401 | 402 | 99 + | 207 | 608 | 4499   | 4900   |
| UN79328 | Rsa1.0.01549.1 | 500 | 43543  | 0         | 484 | 503 | 96 + | 2   | 500 | 41758  | 42260  |
| UN79329 | Rsa1.0.00351.1 | 368 | 413096 | 1.00E-106 | 208 | 212 | 98 + | 2   | 213 | 1779   | 1990   |
| UN79330 | Rsa1.0.01316.1 | 671 | 48325  | 0         | 644 | 667 | 96 + | 2   | 665 | 40159  | 40820  |
| UN79331 | Rsa1.0.01139.1 | 197 | 52601  | 5.00E-58  | 169 | 186 | 90 - | 9   | 193 | 1458   | 1643   |
| UN79332 | Rsa1.0.00067.1 | 674 | 415055 | 0         | 614 | 660 | 93 - | 24  | 674 | 175509 | 176159 |
| UN79333 | Rsa1.0.01960.1 | 673 | 36766  | 0         | 465 | 473 | 98 + | 39  | 509 | 4125   | 4597   |
| UN79334 | Rsa1.0.00099.1 | 715 | 159619 | 0         | 573 | 649 | 88 + | 3   | 610 | 28236  | 28879  |
| UN79335 | Rsa1.0.16494.1 | 325 | 2134   | 2.00E-80  | 181 | 188 | 96 - | 138 | 325 | 1753   | 1938   |
| UN79336 | Rsa1.0.00620.1 | 527 | 71985  | 0         | 497 | 527 | 94 + | 3   | 527 | 49747  | 50272  |
| UN79337 | Rsa1.0.00533.1 | 608 | 77375  | 0         | 589 | 606 | 97 + | 3   | 607 | 728    | 1333   |
| UN79338 | Rsa1.0.02888.1 | 703 | 27020  | 1.00E-140 | 275 | 280 | 98 - | 424 | 701 | 4184   | 4463   |
| UN79339 | Rsa1.0.01113.1 | 465 | 53616  | 1.00E-118 | 262 | 277 | 94 + | 15  | 291 | 2898   | 3171   |
| UN79340 | Rsa1.0.03028.1 | 758 | 25872  | 3.00E-65  | 141 | 145 | 97 - | 178 | 319 | 21997  | 22141  |
| UN79341 | Rsa1.0.00635.1 | 634 | 175826 | 1.00E-115 | 231 | 238 | 97 - | 265 | 502 | 14504  | 14741  |
| UN79342 | Rsa1.0.03786.1 | 754 | 20879  | 0         | 725 | 758 | 95 + | 2   | 754 | 14112  | 14868  |
| UN79343 | Rsa1.0.00526.1 | 750 | 169279 | 1.00E-134 | 337 | 364 | 92 - | 400 | 750 | 111210 | 111570 |
| UN79344 | Rsa1.0.00006.1 | 395 | 396176 | 1.00E-168 | 335 | 346 | 96 + | 2   | 347 | 210463 | 210805 |
| UN79345 | Rsa1.0.00558.1 | 384 | 75819  | 1.00E-124 | 346 | 388 | 89 - | 4   | 366 | 10340  | 10726  |
| UN79346 | Rsa1.0.08430.1 | 754 | 7367   | 0         | 357 | 365 | 97 + | 60  | 424 | 624    | 988    |
| UN79347 | Rsa1.0.01382.1 | 675 | 46877  | 1.00E-128 | 276 | 289 | 95 - | 388 | 675 | 16797  | 17085  |
| UN79348 | Rsa1.0.00383.1 | 315 | 398431 | 1.00E-124 | 301 | 324 | 92 + | 1   | 315 | 25094  | 25413  |
| UN79349 | Rsa1.0.00954.1 | 756 | 189536 | 1.00E-102 | 213 | 221 | 96 + | 7   | 227 | 3112   | 3332   |
| UN79350 | Rsa1.0.05523.1 | 289 | 13438  | 5.00E-31  | 119 | 135 | 88 - | 3   | 137 | 10491  | 10612  |
| UN79351 | Rsa1.0.01720.1 | 734 | 40358  | 1.00E-143 | 293 | 303 | 96 - | 4   | 306 | 35191  | 35489  |
| UN79352 | Rsa1.0.70078.1 | 799 | 327    | 1.00E-149 | 274 | 276 | 99 - | 98  | 373 | 1      | 276    |
| UN79353 | Rsa1.0.01730.1 | 619 | 40223  | 1.00E-148 | 299 | 310 | 96 + | 310 | 619 | 35176  | 35485  |
| UN79354 | Rsa1.0.01881.1 | 612 | 37721  | 1.00E-143 | 320 | 337 | 94 - | 281 | 612 | 22780  | 23113  |
| UN79355 | Rsa1.0.00060.1 | 704 | 502678 | 1.00E-150 | 330 | 348 | 94 + | 355 | 701 | 489773 | 490117 |
| UN79356 | Rsa1.0.01245.1 | 788 | 149868 | 1.00E-71  | 141 | 142 | 99 + | 170 | 311 | 17557  | 17698  |
| UN79357 | Rsa1.0.00094.1 | 627 | 139042 | 1.00E-164 | 367 | 388 | 94 - | 3   | 389 | 129799 | 130183 |
| UN79358 | Rsa1.0.00529.1 | 754 | 77487  | 0         | 513 | 557 | 92 + | 3   | 548 | 69328  | 69863  |
| UN79359 | Rsa1.0.00381.1 | 589 | 89718  | 0         | 539 | 576 | 93 - | 18  | 587 | 88422  | 88997  |
| UN79360 | Rsa1.0.03940.1 | 794 | 19962  | 0         | 406 | 417 | 97 + | 371 | 784 | 11919  | 12335  |
| UN79361 | Rsa1.0.00953.1 | 537 | 145012 | 1.00E-166 | 349 | 362 | 96 - | 176 | 535 | 127156 | 127513 |
| UN79362 | Rsa1.0.00362.1 | 515 | 299497 | 1.00E-115 | 222 | 226 | 98 + | 135 | 360 | 253813 | 254038 |
| UN79363 | Rsa1.0.00002.1 | 400 | 601661 | 3.00E-67  | 148 | 154 | 96 - | 247 | 400 | 29206  | 29359  |

|         |                |     |        |           |     |     |       |     |     |        |        |
|---------|----------------|-----|--------|-----------|-----|-----|-------|-----|-----|--------|--------|
| UN79364 | Rsa1.0.01438.1 | 797 | 45882  | 1.00E-148 | 299 | 305 | 98 +  | 474 | 773 | 12913  | 13217  |
| UN79365 | Rsa1.0.00181.1 | 767 | 114269 | 0         | 533 | 549 | 97 -  | 133 | 681 | 80559  | 81107  |
| UN79366 | Rsa1.0.03263.1 | 742 | 24268  | 0         | 610 | 635 | 96 -  | 1   | 635 | 23319  | 23953  |
| UN79367 | Rsa1.0.00025.1 | 760 | 277312 | 6.00E-39  | 83  | 83  | 100 + | 302 | 384 | 43600  | 43682  |
| UN79368 | Rsa1.0.04160.1 | 719 | 18795  | 0         | 654 | 682 | 95 +  | 3   | 684 | 7703   | 8372   |
| UN79369 | Rsa1.0.00092.1 | 679 | 659932 | 1.00E-104 | 345 | 393 | 87 +  | 273 | 660 | 502432 | 502803 |
| UN79370 | Rsa1.0.01251.1 | 111 | 49873  | 2.00E-19  | 99  | 108 | 91 +  | 5   | 106 | 4820   | 4926   |
| UN79371 | Rsa1.0.00707.1 | 669 | 190112 | 0         | 637 | 662 | 96 -  | 1   | 662 | 52354  | 53009  |
| UN79372 | Rsa1.0.00886.1 | 591 | 167350 | 2.00E-75  | 159 | 164 | 96 +  | 195 | 358 | 11556  | 11719  |
| UN79373 | Rsa1.0.03820.1 | 666 | 20664  | 7.00E-57  | 131 | 137 | 95 -  | 159 | 295 | 8341   | 8477   |
| UN79374 | Rsa1.0.02859.1 | 667 | 162118 | 3.00E-93  | 329 | 381 | 86 -  | 76  | 441 | 26031  | 26390  |
| UN79375 | Rsa1.0.01244.1 | 250 | 50061  | 1.00E-129 | 245 | 249 | 98 -  | 2   | 250 | 33307  | 33555  |
| UN79376 | Rsa1.0.02057.1 | 744 | 35540  | 2.00E-72  | 183 | 194 | 94 -  | 555 | 744 | 22364  | 22557  |
| UN79377 | Rsa1.0.00220.1 | 609 | 192936 | 1.00E-171 | 322 | 327 | 98 +  | 2   | 328 | 107204 | 107528 |
| UN79378 | Rsa1.0.00006.1 | 646 | 396176 | 1.00E-85  | 283 | 318 | 88 +  | 338 | 644 | 249803 | 250118 |
| UN79379 | Rsa1.0.02356.1 | 163 | 141500 | 2.00E-75  | 158 | 163 | 96 -  | 1   | 163 | 129595 | 129757 |
| UN79380 | Rsa1.0.00205.1 | 850 | 193401 | 1.00E-165 | 415 | 454 | 91 +  | 304 | 750 | 158353 | 158792 |
| UN79381 | Rsa1.0.01737.1 | 722 | 40101  | 1.00E-121 | 239 | 245 | 97 -  | 5   | 249 | 17336  | 17580  |
| UN79382 | Rsa1.0.00531.1 | 178 | 77387  | 9.00E-44  | 97  | 98  | 98 +  | 3   | 99  | 37514  | 37611  |
| UN79383 | Rsa1.0.00015.1 | 570 | 561803 | 1.00E-144 | 305 | 318 | 95 +  | 227 | 543 | 445991 | 446305 |
| UN79384 | Rsa1.0.04291.1 | 572 | 18055  | 8.00E-41  | 104 | 110 | 94 +  | 181 | 290 | 1681   | 1790   |
| UN79385 | Rsa1.0.01945.1 | 166 | 36989  | 4.00E-58  | 132 | 138 | 95 +  | 9   | 146 | 7738   | 7875   |
| UN79386 | Rsa1.0.00826.1 | 758 | 166736 | 1.00E-120 | 244 | 251 | 97 -  | 488 | 737 | 153678 | 153928 |
| UN79387 | Rsa1.0.00166.1 | 531 | 240912 | 0         | 484 | 503 | 96 -  | 29  | 531 | 153851 | 154346 |
| UN79388 | Rsa1.0.00748.1 | 559 | 65983  | 0         | 533 | 571 | 93 +  | 2   | 559 | 33452  | 34020  |
| UN79389 | Rsa1.0.01824.1 | 755 | 38733  | 1.00E-107 | 222 | 230 | 96 -  | 205 | 434 | 8413   | 8642   |
| UN79390 | Rsa1.0.01537.1 | 773 | 187285 | 0         | 474 | 511 | 92 +  | 3   | 505 | 14812  | 15313  |
| UN79391 | Rsa1.0.04520.1 | 479 | 16995  | 2.00E-90  | 240 | 258 | 93 +  | 192 | 443 | 11580  | 11835  |
| UN79392 | Rsa1.0.00064.1 | 746 | 240927 | 1.00E-131 | 284 | 295 | 96 +  | 453 | 746 | 30039  | 30328  |
| UN79393 | Rsa1.0.01238.1 | 645 | 50120  | 1.00E-125 | 326 | 359 | 90 +  | 8   | 366 | 24157  | 24515  |
| UN79394 | Rsa1.0.01651.1 | 732 | 41586  | 1.00E-129 | 273 | 286 | 95 -  | 1   | 286 | 30453  | 30738  |
| UN79395 | Rsa1.0.00608.1 | 692 | 172672 | 0         | 460 | 476 | 96 -  | 210 | 685 | 166900 | 167375 |
| UN79396 | Rsa1.0.11048.1 | 757 | 5634   | 4.00E-71  | 209 | 231 | 90 +  | 271 | 498 | 237    | 466    |
| UN79397 | Rsa1.0.00070.1 | 447 | 150321 | 0         | 430 | 447 | 96 +  | 1   | 447 | 67306  | 67752  |
| UN79398 | Rsa1.0.01571.1 | 754 | 43000  | 1.00E-115 | 240 | 247 | 97 +  | 510 | 754 | 5417   | 5663   |
| UN79399 | Rsa1.0.03986.1 | 732 | 19703  | 0         | 403 | 405 | 99 -  | 330 | 732 | 6251   | 6655   |
| UN79400 | Rsa1.0.06819.1 | 565 | 10302  | 0         | 549 | 561 | 97 +  | 2   | 562 | 785    | 1345   |
| UN79401 | Rsa1.0.00243.1 | 613 | 103651 | 0         | 546 | 581 | 93 -  | 51  | 613 | 77872  | 78446  |
| UN79402 | Rsa1.0.04697.1 | 757 | 16336  | 3.00E-96  | 191 | 195 | 97 +  | 1   | 195 | 11767  | 11961  |

|         |                |     |        |           |     |     |      |     |     |        |        |
|---------|----------------|-----|--------|-----------|-----|-----|------|-----|-----|--------|--------|
| UN79403 | Rsa1.0.00153.1 | 821 | 192931 | 0         | 348 | 353 | 98 + | 339 | 689 | 190082 | 190433 |
| UN79404 | Rsa1.0.00067.1 | 505 | 415055 | 1.00E-140 | 276 | 284 | 97 - | 3   | 286 | 244191 | 244474 |
| UN79405 | Rsa1.0.00051.1 | 783 | 258225 | 1.00E-106 | 217 | 224 | 96 - | 153 | 376 | 57865  | 58088  |
| UN79406 | Rsa1.0_51850.1 | 612 | 438    | 1.00E-79  | 178 | 186 | 95 + | 23  | 206 | 84     | 269    |
| UN79407 | Rsa1.0_00136.1 | 724 | 122464 | 1.00E-134 | 258 | 263 | 98 - | 12  | 274 | 62177  | 62439  |
| UN79408 | Rsa1.0_00416.1 | 594 | 86772  | 1.00E-106 | 236 | 248 | 95 + | 350 | 594 | 43593  | 43837  |
| UN79409 | Rsa1.0.08250.1 | 657 | 7658   | 0         | 594 | 622 | 95 + | 3   | 618 | 2502   | 3120   |
| UN79410 | Rsa1.0.00101.1 | 614 | 267193 | 1.00E-129 | 312 | 341 | 91 + | 3   | 343 | 2802   | 3123   |
| UN79411 | Rsa1.0.01417.1 | 672 | 46252  | 2.33E-156 | 268 | 270 | 99 + | 3   | 272 | 38508  | 38777  |
| UN79412 | Rsa1.0.01301.1 | 453 | 169072 | 0         | 391 | 402 | 97 - | 48  | 446 | 20062  | 20463  |
| UN79413 | Rsa1.0.00612.1 | 701 | 72376  | 1.00E-112 | 220 | 225 | 97 - | 402 | 626 | 65151  | 65375  |
| UN79414 | Rsa1.0.00711.1 | 602 | 67223  | 1.00E-118 | 287 | 311 | 92 + | 51  | 355 | 10501  | 10811  |
| UN79415 | Rsa1.0.01076.1 | 641 | 54835  | 1.00E-156 | 314 | 324 | 96 - | 319 | 641 | 45143  | 45466  |
| UN79416 | Rsa1.0.00095.1 | 612 | 283384 | 0         | 395 | 401 | 98 - | 212 | 612 | 21634  | 22034  |
| UN79417 | Rsa1.0.33827.1 | 520 | 670    | 0         | 436 | 454 | 96 - | 41  | 488 | 217    | 670    |
| UN79418 | Rsa1.0.00487.1 | 581 | 80674  | 0         | 349 | 357 | 97 - | 9   | 365 | 5689   | 6045   |
| UN79419 | Rsa1.0.00034.1 | 164 | 260119 | 2.00E-44  | 115 | 121 | 95 + | 3   | 120 | 87765  | 87884  |
| UN79420 | Rsa1.0.23642.1 | 650 | 1035   | 0         | 525 | 541 | 97 + | 83  | 623 | 15     | 553    |
| UN79421 | Rsa1.0.02966.1 | 599 | 135126 | 0         | 450 | 463 | 97 + | 3   | 465 | 17388  | 17844  |
| UN79422 | Rsa1.0.03195.1 | 322 | 24673  | 8.00E-98  | 219 | 231 | 94 + | 1   | 223 | 6584   | 6814   |
| UN79423 | Rsa1.0.01166.1 | 586 | 51877  | 1.00E-132 | 246 | 248 | 99 - | 2   | 249 | 11365  | 11612  |
| UN79424 | Rsa1.0.00930.1 | 745 | 59224  | 6.00E-79  | 160 | 162 | 98 - | 2   | 162 | 41001  | 41162  |
| UN79425 | Rsa1.0_01027.1 | 669 | 56402  | 0         | 663 | 668 | 99 - | 3   | 669 | 627    | 1294   |
| UN79426 | Rsa1.0.06009.1 | 722 | 11950  | 0         | 471 | 497 | 94 - | 211 | 707 | 8830   | 9326   |
| UN79427 | Rsa1.0.04600.1 | 591 | 16694  | 2.00E-94  | 224 | 239 | 93 - | 350 | 584 | 12656  | 12891  |
| UN79428 | Rsa1.0.00046.1 | 628 | 320315 | 1.00E-124 | 305 | 330 | 92 + | 3   | 332 | 124646 | 124974 |
| UN79429 | Rsa1.0.00032.1 | 645 | 306326 | 0         | 617 | 646 | 95 - | 3   | 645 | 192477 | 193121 |
| UN79430 | Rsa1.0.00253.1 | 594 | 231292 | 1.00E-73  | 153 | 157 | 97 - | 229 | 385 | 212149 | 212305 |
| UN79431 | Rsa1.0.00273.1 | 656 | 326186 | 2.00E-94  | 217 | 232 | 93 - | 242 | 473 | 10008  | 10230  |
| UN79432 | Rsa1.0.08309.1 | 625 | 7565   | 0         | 550 | 579 | 94 + | 1   | 579 | 5469   | 6039   |
| UN79433 | Rsa1.0.00930.1 | 629 | 59224  | 1.00E-166 | 333 | 345 | 96 - | 285 | 629 | 41462  | 41806  |
| UN79434 | Rsa1.0.00340.1 | 650 | 305782 | 0         | 405 | 419 | 96 - | 235 | 650 | 32532  | 32950  |
| UN79435 | Rsa1.0.03073.1 | 552 | 25574  | 0         | 534 | 552 | 96 + | 2   | 552 | 13972  | 14523  |
| UN79436 | Rsa1.0.00752.1 | 306 | 65756  | 1.00E-109 | 275 | 297 | 92 + | 6   | 299 | 12984  | 13277  |
| UN79437 | Rsa1.0.69040.1 | 344 | 332    | 2.00E-64  | 134 | 137 | 97 - | 173 | 309 | 4      | 140    |
| UN79438 | Rsa1.0.02681.1 | 727 | 28711  | 1.00E-64  | 194 | 215 | 90 + | 3   | 215 | 19490  | 19701  |
| UN79439 | Rsa1.0.01610.1 | 687 | 42274  | 0         | 427 | 450 | 94 + | 241 | 687 | 10602  | 11045  |
| UN79440 | Rsa1.0.01072.1 | 757 | 55068  | 1.00E-125 | 250 | 255 | 98 - | 485 | 737 | 43401  | 43655  |
| UN79441 | Rsa1.0_00341.1 | 784 | 249309 | 2.00E-35  | 83  | 85  | 97 - | 250 | 334 | 224896 | 224980 |

|         |                |     |        |           |     |     |       |     |     |        |        |
|---------|----------------|-----|--------|-----------|-----|-----|-------|-----|-----|--------|--------|
| UN79442 | Rsa1.0.00387.1 | 578 | 495407 | 1.00E-79  | 160 | 163 | 98 +  | 411 | 573 | 396754 | 396916 |
| UN79443 | Rsa1.0.00427.1 | 503 | 189678 | 1.00E-112 | 242 | 253 | 95 -  | 258 | 503 | 11907  | 12159  |
| UN79444 | Rsa1.0.00312.1 | 760 | 96765  | 1.00E-70  | 142 | 144 | 98 -  | 394 | 537 | 89466  | 89609  |
| UN79445 | Rsa1.0.00019.1 | 688 | 301669 | 1.00E-117 | 261 | 276 | 94 -  | 402 | 677 | 238714 | 238986 |
| UN79446 | Rsa1.0.01028.1 | 360 | 56401  | 1.00E-166 | 346 | 362 | 95 +  | 2   | 360 | 47694  | 48050  |
| UN79447 | Rsa1.0.00190.1 | 558 | 318240 | 1.00E-144 | 280 | 287 | 97 +  | 44  | 330 | 28703  | 28989  |
| UN79448 | Rsa1.0.36127.1 | 798 | 625    | 9.00E-63  | 137 | 141 | 97 +  | 369 | 509 | 210    | 347    |
| UN79449 | Rsa1.0.09385.1 | 679 | 6405   | 1.00E-139 | 311 | 327 | 95 +  | 10  | 332 | 881    | 1203   |
| UN79450 | Rsa1.0.00198.1 | 722 | 222963 | 8.00E-97  | 200 | 206 | 97 -  | 3   | 208 | 42326  | 42528  |
| UN79451 | Rsa1.0.00382.1 | 680 | 251946 | 0         | 457 | 490 | 93 -  | 3   | 486 | 173998 | 174475 |
| UN79452 | Rsa1.0.00681.1 | 782 | 68779  | 1.00E-143 | 334 | 356 | 93 +  | 19  | 370 | 55502  | 55852  |
| UN79453 | Rsa1.0.01783.1 | 727 | 39383  | 1.00E-110 | 218 | 223 | 97 -  | 3   | 225 | 11472  | 11694  |
| UN79454 | Rsa1.0.01893.1 | 503 | 37520  | 2.00E-90  | 237 | 255 | 92 -  | 4   | 255 | 7294   | 7545   |
| UN79455 | Rsa1.0.00439.1 | 805 | 142776 | 1.00E-167 | 319 | 326 | 97 +  | 319 | 644 | 63131  | 63456  |
| UN79456 | Rsa1.0.00863.1 | 613 | 254535 | 0         | 506 | 544 | 93 +  | 82  | 613 | 109804 | 110345 |
| UN79457 | Rsa1.0.02514.1 | 769 | 30642  | 0         | 711 | 758 | 93 -  | 2   | 752 | 20084  | 20838  |
| UN79458 | Rsa1.0.27220.1 | 680 | 861    | 1.00E-160 | 407 | 447 | 91 +  | 12  | 445 | 1      | 436    |
| UN79459 | Rsa1.0.09321.1 | 691 | 6456   | 1.00E-135 | 307 | 324 | 94 -  | 379 | 691 | 891    | 1212   |
| UN79460 | Rsa1.0.00273.1 | 316 | 326186 | 1.00E-129 | 276 | 288 | 95 -  | 30  | 316 | 239456 | 239740 |
| UN79461 | Rsa1.0.00019.1 | 827 | 301669 | 1.00E-86  | 181 | 187 | 96 +  | 116 | 302 | 181313 | 181499 |
| UN79462 | Rsa1.0.00324.1 | 587 | 218805 | 1.00E-117 | 243 | 249 | 97 +  | 341 | 587 | 14281  | 14527  |
| UN79463 | Rsa1.0.00064.1 | 663 | 240927 | 1.00E-135 | 244 | 244 | 100 + | 31  | 274 | 28829  | 29072  |
| UN79464 | Rsa1.0.01924.1 | 708 | 37226  | 8.00E-97  | 198 | 204 | 97 +  | 505 | 708 | 22415  | 22618  |
| UN79465 | Rsa1.0.00978.1 | 573 | 57739  | 1.00E-112 | 230 | 238 | 96 +  | 336 | 573 | 14018  | 14255  |
| UN79466 | Rsa1.0.00487.1 | 708 | 80674  | 0         | 694 | 701 | 99 -  | 3   | 701 | 62109  | 62809  |
| UN79467 | Rsa1.0.08415.1 | 501 | 7398   | 1.00E-141 | 304 | 316 | 96 +  | 5   | 319 | 266    | 576    |
| UN79468 | Rsa1.0.21970.1 | 564 | 1159   | 4.00E-64  | 128 | 129 | 99 -  | 263 | 391 | 137    | 265    |
| UN79469 | Rsa1.0.01115.1 | 690 | 183545 | 1.00E-171 | 357 | 374 | 95 +  | 3   | 372 | 174027 | 174400 |
| UN79470 | Rsa1.0.02784.1 | 245 | 27881  | 4.00E-71  | 172 | 182 | 94 -  | 4   | 185 | 5133   | 5310   |
| UN79471 | Rsa1.0.01685.1 | 608 | 175033 | 0         | 580 | 610 | 95 +  | 3   | 608 | 31903  | 32511  |
| UN79472 | Rsa1.0.00079.1 | 524 | 606987 | 3.00E-58  | 136 | 143 | 95 -  | 3   | 145 | 465527 | 465669 |
| UN79473 | Rsa1.0.00328.1 | 662 | 224661 | 0         | 467 | 482 | 96 +  | 181 | 662 | 207122 | 207603 |
| UN79474 | Rsa1.0.03546.1 | 694 | 22172  | 1.00E-123 | 252 | 260 | 96 +  | 436 | 694 | 14336  | 14595  |
| UN79475 | Rsa1.0.01195.1 | 682 | 147988 | 0         | 651 | 703 | 92 -  | 2   | 682 | 9220   | 9910   |
| UN79476 | Rsa1.0.01904.1 | 537 | 37450  | 0         | 393 | 410 | 95 -  | 104 | 510 | 4257   | 4666   |
| UN79477 | Rsa1.0.01031.1 | 412 | 56236  | 4.00E-45  | 236 | 277 | 85 -  | 128 | 400 | 42375  | 42645  |
| UN79478 | Rsa1.0.11048.1 | 575 | 5634   | 2.00E-66  | 187 | 205 | 91 +  | 345 | 549 | 263    | 466    |
| UN79479 | Rsa1.0.00331.1 | 719 | 176754 | 1.00E-109 | 240 | 248 | 96 -  | 202 | 444 | 109645 | 109892 |
| UN79480 | Rsa1.0.00602.1 | 588 | 73302  | 2.00E-87  | 185 | 192 | 96 +  | 238 | 429 | 46825  | 47016  |



|         |                |     |        |           |     |     |       |     |     |        |        |
|---------|----------------|-----|--------|-----------|-----|-----|-------|-----|-----|--------|--------|
| UN79481 | Rsa1.0.02550.1 | 673 | 291051 | 1.00E-103 | 209 | 214 | 97 -  | 1   | 214 | 21427  | 21639  |
| UN79482 | Rsa1.0.02660.1 | 680 | 28969  | 0         | 661 | 679 | 97 +  | 2   | 680 | 17390  | 18068  |
| UN79483 | Rsa1.0.00016.1 | 416 | 831256 | 5.00E-63  | 123 | 123 | 100 + | 95  | 217 | 662306 | 662428 |
| UN79484 | Rsa1.0.00287.1 | 610 | 98687  | 0         | 596 | 611 | 97 -  | 2   | 610 | 85418  | 86025  |
| UN79485 | Rsa1.0.00909.1 | 426 | 59976  | 1.00E-150 | 310 | 323 | 95 +  | 5   | 319 | 43864  | 44186  |
| UN79486 | Rsa1.0.30032.1 | 704 | 765    | 5.00E-61  | 163 | 177 | 92 +  | 93  | 260 | 1      | 177    |
| UN79487 | Rsa1.0.02485.1 | 620 | 30968  | 0         | 406 | 424 | 95 -  | 194 | 615 | 27560  | 27981  |
| UN79488 | Rsa1.0.03738.1 | 565 | 21071  | 1.00E-140 | 282 | 291 | 96 +  | 7   | 297 | 19581  | 19868  |
| UN79489 | Rsa1.0.08864.1 | 667 | 6845   | 4.00E-80  | 209 | 226 | 92 -  | 13  | 234 | 408    | 633    |
| UN79490 | Rsa1.0.00589.1 | 685 | 209965 | 1.00E-162 | 349 | 365 | 95 -  | 324 | 685 | 9930   | 10294  |
| UN79491 | Rsa1.0.02356.1 | 726 | 141500 | 1.00E-165 | 415 | 448 | 92 +  | 281 | 720 | 4010   | 4457   |
| UN79492 | Rsa1.0.32955.1 | 754 | 690    | 0         | 584 | 606 | 96 -  | 2   | 607 | 1      | 600    |
| UN79493 | Rsa1.0.00717.1 | 726 | 67051  | 1.00E-108 | 291 | 317 | 91 +  | 5   | 315 | 22747  | 23053  |
| UN79494 | Rsa1.0.08849.1 | 254 | 6864   | 2.00E-95  | 205 | 211 | 97 -  | 3   | 211 | 3      | 210    |
| UN79495 | Rsa1.0.04092.1 | 598 | 19128  | 1.00E-101 | 222 | 230 | 96 -  | 3   | 229 | 11028  | 11256  |
| UN79496 | Rsa1.0.09419.1 | 734 | 6383   | 8.00E-97  | 195 | 200 | 97 -  | 226 | 425 | 4592   | 4791   |
| UN79497 | Rsa1.0.00246.1 | 760 | 103541 | 1.00E-171 | 403 | 426 | 94 -  | 344 | 760 | 54249  | 54673  |
| UN79498 | Rsa1.0.03865.1 | 465 | 20373  | 1.00E-125 | 236 | 239 | 98 +  | 184 | 422 | 1944   | 2182   |
| UN79499 | Rsa1.0.09098.1 | 715 | 6647   | 0         | 666 | 714 | 93 +  | 16  | 715 | 5550   | 6259   |
| UN79500 | Rsa1.0.00254.1 | 780 | 102600 | 8.00E-97  | 183 | 184 | 99 -  | 459 | 642 | 77858  | 78041  |
| UN79501 | Rsa1.0.02220.1 | 740 | 176031 | 1.00E-148 | 279 | 282 | 98 -  | 2   | 283 | 345    | 625    |
| UN79502 | Rsa1.0.00825.1 | 179 | 62855  | 1.00E-79  | 168 | 174 | 96 +  | 2   | 175 | 34822  | 34995  |
| UN79503 | Rsa1.0.08619.1 | 638 | 7123   | 6.00E-51  | 122 | 126 | 96 -  | 516 | 638 | 5594   | 5719   |
| UN79504 | Rsa1.0.02812.1 | 604 | 27660  | 1.00E-119 | 247 | 257 | 96 +  | 348 | 604 | 2540   | 2796   |
| UN79505 | Rsa1.0.01363.1 | 203 | 47195  | 3.00E-90  | 197 | 204 | 96 -  | 2   | 203 | 42873  | 43076  |
| UN79506 | Rsa1.0.00632.1 | 749 | 183777 | 1.00E-117 | 226 | 230 | 98 +  | 386 | 615 | 156932 | 157161 |
| UN79507 | Rsa1.0.00300.1 | 529 | 97747  | 1.00E-118 | 278 | 296 | 93 +  | 2   | 297 | 31301  | 31590  |
| UN79508 | Rsa1.0.02479.1 | 789 | 31038  | 4.00E-68  | 222 | 251 | 88 +  | 182 | 423 | 14246  | 14493  |
| UN79509 | Rsa1.0.00817.1 | 604 | 62961  | 0         | 517 | 540 | 95 -  | 2   | 541 | 23405  | 23942  |
| UN79510 | Rsa1.0.00017.1 | 566 | 752458 | 1.00E-179 | 509 | 570 | 89 +  | 9   | 565 | 743103 | 743648 |
| UN79511 | Rsa1.0.02551.1 | 711 | 30196  | 1.00E-159 | 332 | 343 | 96 -  | 3   | 345 | 27817  | 28154  |
| UN79512 | Rsa1.0.00329.1 | 753 | 222544 | 4.00E-77  | 219 | 236 | 92 -  | 525 | 751 | 32883  | 33118  |
| UN79513 | Rsa1.0.00128.1 | 773 | 228675 | 0         | 480 | 488 | 98 -  | 2   | 489 | 159174 | 159661 |
| UN79514 | Rsa1.0.02608.1 | 777 | 29613  | 0         | 363 | 376 | 96 -  | 3   | 378 | 4361   | 4736   |
| UN79515 | Rsa1.0.00762.1 | 264 | 165246 | 3.00E-75  | 163 | 169 | 96 +  | 3   | 171 | 46783  | 46948  |
| UN79516 | Rsa1.0.00491.1 | 611 | 80219  | 1.00E-128 | 250 | 256 | 97 +  | 105 | 360 | 33332  | 33587  |
| UN79517 | Rsa1.0.03162.1 | 747 | 24895  | 5.00E-98  | 185 | 186 | 99 +  | 310 | 495 | 19385  | 19570  |
| UN79518 | Rsa1.0.01552.1 | 596 | 43396  | 0         | 388 | 400 | 97 +  | 2   | 401 | 15649  | 16048  |
| UN79519 | Rsa1.0.03574.1 | 433 | 22004  | 1.00E-148 | 286 | 292 | 97 -  | 142 | 433 | 17890  | 18178  |

|         |                |     |        |           |     |     |       |     |     |        |        |
|---------|----------------|-----|--------|-----------|-----|-----|-------|-----|-----|--------|--------|
| UN79520 | Rsa1.0.06488.1 | 677 | 141774 | 2.33E-156 | 336 | 358 | 93 -  | 6   | 354 | 446    | 799    |
| UN79521 | Rsa1.0.00507.1 | 776 | 79074  | 1.00E-118 | 222 | 224 | 99 +  | 105 | 328 | 3306   | 3529   |
| UN79522 | Rsa1.0.08429.1 | 778 | 7370   | 2.00E-57  | 117 | 118 | 99 -  | 165 | 282 | 7070   | 7187   |
| UN79523 | Rsa1.0.04365.1 | 756 | 17732  | 6.00E-73  | 201 | 220 | 91 +  | 483 | 701 | 6700   | 6919   |
| UN79524 | Rsa1.0.00179.1 | 788 | 393324 | 1.00E-148 | 308 | 319 | 96 -  | 3   | 321 | 326969 | 327281 |
| UN79525 | Rsa1.0.14868.1 | 601 | 3001   | 2.00E-50  | 102 | 102 | 100 + | 500 | 601 | 1      | 102    |
| UN79526 | Rsa1.0.01783.1 | 417 | 39383  | 3.00E-27  | 81  | 87  | 93 -  | 57  | 143 | 20357  | 20443  |
| UN79527 | Rsa1.0.00117.1 | 796 | 213118 | 9.00E-66  | 208 | 234 | 88 +  | 317 | 541 | 54139  | 54363  |
| UN79528 | Rsa1.0.00636.1 | 384 | 71113  | 1.00E-166 | 362 | 383 | 94 +  | 2   | 384 | 11361  | 11741  |
| UN79529 | Rsa1.0.02831.1 | 572 | 27533  | 1.00E-135 | 278 | 288 | 96 -  | 285 | 571 | 17766  | 18053  |
| UN79530 | Rsa1.0.04370.1 | 584 | 17701  | 0         | 390 | 400 | 97 -  | 17  | 416 | 8593   | 8992   |
| UN79531 | Rsa1.0.02962.1 | 641 | 26419  | 0         | 552 | 603 | 91 +  | 48  | 640 | 15753  | 16352  |
| UN79532 | Rsa1.0.00201.1 | 549 | 232851 | 0         | 398 | 419 | 94 -  | 135 | 549 | 476    | 894    |
| UN79533 | Rsa1.0.00013.1 | 484 | 292129 | 3.00E-89  | 268 | 304 | 88 +  | 47  | 344 | 279770 | 280052 |
| UN79534 | Rsa1.0.00896.1 | 502 | 60509  | 0         | 477 | 504 | 94 +  | 2   | 494 | 17669  | 18172  |
| UN79535 | Rsa1.0.00016.1 | 625 | 831256 | 1.00E-126 | 320 | 344 | 93 +  | 282 | 618 | 260581 | 260919 |
| UN79536 | Rsa1.0.00978.1 | 564 | 57739  | 1.00E-107 | 228 | 238 | 95 +  | 327 | 564 | 14018  | 14255  |
| UN79537 | Rsa1.0.00048.1 | 769 | 167185 | 0         | 722 | 757 | 95 +  | 3   | 755 | 102603 | 103358 |
| UN79538 | Rsa1.0.01338.1 | 525 | 155644 | 1.00E-173 | 326 | 332 | 98 -  | 66  | 397 | 123367 | 123698 |
| UN79539 | Rsa1.0.00580.1 | 627 | 74515  | 2.00E-97  | 220 | 233 | 94 -  | 229 | 461 | 34358  | 34590  |
| UN79540 | Rsa1.0.01675.1 | 465 | 41155  | 1.00E-143 | 349 | 374 | 93 -  | 3   | 373 | 844    | 1206   |
| UN79541 | Rsa1.0.00294.1 | 451 | 144860 | 5.00E-63  | 132 | 135 | 97 +  | 215 | 349 | 28240  | 28374  |
| UN79542 | Rsa1.0.19050.1 | 761 | 1488   | 1.00E-101 | 209 | 216 | 96 +  | 333 | 548 | 255    | 470    |
| UN79543 | Rsa1.0.01666.1 | 781 | 173972 | 1.00E-132 | 289 | 304 | 95 +  | 447 | 749 | 3477   | 3780   |
| UN79544 | Rsa1.0.04630.1 | 797 | 16595  | 0         | 545 | 564 | 96 +  | 238 | 797 | 12551  | 13114  |
| UN79545 | Rsa1.0.05453.1 | 197 | 13696  | 4.00E-71  | 145 | 148 | 97 -  | 50  | 197 | 13067  | 13214  |
| UN79546 | Rsa1.0.00116.1 | 531 | 365886 | 0         | 429 | 452 | 94 -  | 43  | 491 | 326469 | 326920 |
| UN79547 | Rsa1.0.05217.1 | 761 | 142938 | 1.00E-178 | 370 | 386 | 95 +  | 20  | 402 | 136379 | 136763 |
| UN79548 | Rsa1.0.03074.1 | 594 | 25568  | 1.00E-108 | 250 | 267 | 93 -  | 6   | 272 | 21332  | 21598  |
| UN79549 | Rsa1.0.00066.1 | 765 | 152418 | 0         | 382 | 396 | 96 +  | 361 | 754 | 112082 | 112477 |
| UN79550 | Rsa1.0.06213.1 | 297 | 11478  | 1.00E-113 | 282 | 300 | 94 -  | 4   | 297 | 1707   | 2004   |
| UN79551 | Rsa1.0.02515.1 | 595 | 30616  | 8.00E-81  | 165 | 169 | 97 +  | 161 | 329 | 1184   | 1352   |
| UN79552 | Rsa1.0.00715.1 | 630 | 67116  | 1.00E-149 | 463 | 528 | 87 -  | 35  | 559 | 20292  | 20813  |
| UN79553 | Rsa1.0.00104.1 | 823 | 368722 | 5.00E-92  | 172 | 172 | 100 - | 81  | 252 | 336166 | 336337 |
| UN79554 | Rsa1.0.01886.1 | 569 | 155422 | 0         | 381 | 386 | 98 +  | 3   | 388 | 30198  | 30583  |
| UN79555 | Rsa1.0.00571.1 | 595 | 329018 | 1.00E-124 | 244 | 250 | 97 +  | 10  | 259 | 158850 | 159099 |
| UN79556 | Rsa1.0.02796.1 | 311 | 27805  | 2.00E-12  | 78  | 90  | 86 +  | 191 | 280 | 19559  | 19647  |
| UN79557 | Rsa1.0.04450.1 | 801 | 17297  | 0         | 530 | 556 | 95 +  | 238 | 787 | 11966  | 12518  |
| UN79558 | Rsa1.0.00837.1 | 584 | 62568  | 1.00E-175 | 330 | 336 | 98 -  | 172 | 507 | 47728  | 48063  |

|         |                |     |        |           |     |     |       |     |     |        |        |
|---------|----------------|-----|--------|-----------|-----|-----|-------|-----|-----|--------|--------|
| UN79559 | Rsa1.0_00040.1 | 605 | 324196 | 0         | 487 | 514 | 94 -  | 3   | 510 | 175165 | 175670 |
| UN79560 | Rsa1.0_02244.1 | 676 | 33494  | 1.00E-157 | 325 | 336 | 96 -  | 336 | 668 | 10292  | 10626  |
| UN79561 | Rsa1.0_00153.1 | 699 | 192931 | 0         | 486 | 508 | 95 -  | 195 | 699 | 171974 | 172473 |
| UN79562 | Rsa1.0_00221.1 | 543 | 106972 | 8.00E-87  | 166 | 167 | 99 +  | 64  | 230 | 47387  | 47553  |
| UN79563 | Rsa1.0_07521.1 | 707 | 9206   | 0         | 491 | 521 | 94 -  | 47  | 564 | 7907   | 8411   |
| UN79564 | Rsa1.0_00061.1 | 436 | 218685 | 4.00E-94  | 283 | 320 | 88 +  | 117 | 435 | 82682  | 82979  |
| UN79565 | Rsa1.0_00192.1 | 605 | 278200 | 0         | 338 | 338 | 100 - | 268 | 605 | 26727  | 27064  |
| UN79566 | Rsa1.0_00153.1 | 771 | 192931 | 1.00E-125 | 290 | 310 | 93 +  | 9   | 315 | 163275 | 163584 |
| UN79567 | Rsa1.0_00087.1 | 732 | 761073 | 1.00E-89  | 184 | 188 | 97 -  | 86  | 272 | 294730 | 294917 |
| UN79568 | Rsa1.0_02604.1 | 691 | 29638  | 1.00E-134 | 264 | 271 | 97 -  | 217 | 487 | 26678  | 26948  |
| UN79569 | Rsa1.0_08925.1 | 286 | 6784   | 1.00E-136 | 276 | 286 | 96 -  | 1   | 286 | 490    | 775    |
| UN79570 | Rsa1.0_00127.1 | 673 | 127446 | 1.00E-175 | 372 | 387 | 96 -  | 290 | 672 | 110335 | 110716 |
| UN79571 | Rsa1.0_00178.1 | 329 | 114861 | 1.00E-78  | 180 | 189 | 95 +  | 138 | 326 | 12280  | 12467  |
| UN79572 | Rsa1.0_01356.1 | 690 | 47287  | 0         | 668 | 679 | 98 +  | 16  | 690 | 8053   | 8731   |
| UN79573 | Rsa1.0_00194.1 | 680 | 110851 | 1.00E-103 | 233 | 247 | 94 -  | 434 | 680 | 97022  | 97268  |
| UN79574 | Rsa1.0_00163.1 | 644 | 116847 | 0         | 608 | 647 | 93 -  | 1   | 639 | 74058  | 74692  |
| UN79575 | Rsa1.0_00166.1 | 749 | 240912 | 0         | 713 | 726 | 98 -  | 1   | 721 | 191323 | 192048 |
| UN79576 | Rsa1.0_00881.1 | 565 | 61260  | 1.00E-91  | 255 | 282 | 90 -  | 284 | 562 | 21292  | 21564  |
| UN79577 | Rsa1.0_01900.1 | 743 | 37473  | 1.00E-142 | 315 | 330 | 95 -  | 410 | 735 | 27348  | 27670  |
| UN79578 | Rsa1.0_01510.1 | 694 | 44237  | 1.00E-115 | 234 | 242 | 96 +  | 252 | 493 | 26276  | 26517  |
| UN79579 | Rsa1.0_00744.1 | 520 | 66084  | 0         | 426 | 442 | 96 -  | 1   | 442 | 59940  | 60381  |
| UN79580 | Rsa1.0_02500.1 | 522 | 30768  | 1.00E-166 | 323 | 332 | 97 -  | 1   | 332 | 11477  | 11808  |
| UN79581 | Rsa1.0_04783.1 | 418 | 15995  | 9.00E-83  | 200 | 213 | 93 +  | 207 | 418 | 1650   | 1858   |
| UN79582 | Rsa1.0_00939.1 | 760 | 185227 | 0         | 484 | 526 | 92 -  | 220 | 742 | 171546 | 172059 |
| UN79583 | Rsa1.0_21718.1 | 233 | 1178   | 1.00E-74  | 213 | 229 | 93 -  | 5   | 233 | 125    | 346    |
| UN79584 | Rsa1.0_00228.1 | 597 | 105511 | 0         | 371 | 375 | 98 +  | 191 | 565 | 81684  | 82058  |
| UN79585 | Rsa1.0_00030.1 | 731 | 250988 | 1.00E-95  | 213 | 224 | 95 +  | 350 | 573 | 152739 | 152959 |
| UN79586 | Rsa1.0_00216.1 | 664 | 197563 | 2.00E-75  | 162 | 168 | 96 -  | 178 | 345 | 13885  | 14052  |
| UN79587 | Rsa1.0_04201.1 | 142 | 18487  | 9.00E-65  | 137 | 141 | 97 +  | 2   | 142 | 4104   | 4244   |
| UN79588 | Rsa1.0_02951.1 | 537 | 26505  | 0         | 419 | 446 | 93 +  | 1   | 440 | 11374  | 11818  |
| UN79589 | Rsa1.0_02503.1 | 477 | 30709  | 8.00E-65  | 135 | 138 | 97 +  | 87  | 224 | 26114  | 26251  |
| UN79590 | Rsa1.0_11741.1 | 751 | 5423   | 1.00E-92  | 283 | 317 | 89 -  | 430 | 745 | 4781   | 5096   |
| UN79591 | Rsa1.0_03046.1 | 636 | 25784  | 3.00E-40  | 102 | 107 | 95 -  | 10  | 116 | 16811  | 16914  |
| UN79592 | Rsa1.0_15227.1 | 113 | 2741   | 4.00E-23  | 96  | 103 | 93 -  | 2   | 100 | 798    | 899    |
| UN79593 | Rsa1.0_00407.1 | 677 | 191544 | 1.00E-131 | 253 | 258 | 98 -  | 3   | 260 | 25043  | 25300  |
| UN79594 | Rsa1.0_00049.1 | 629 | 167018 | 1.00E-100 | 241 | 256 | 94 -  | 377 | 629 | 79427  | 79681  |
| UN79595 | #              | #   | #      | #         | #   | #   | #     | #   | #   | #      | #      |
| UN79596 | Rsa1.0_02931.1 | 677 | 26654  | 1.00E-122 | 250 | 259 | 96 +  | 404 | 662 | 3238   | 3496   |
| UN79597 | Rsa1.0_00877.1 | 816 | 61305  | 1.00E-138 | 285 | 296 | 96 -  | 3   | 291 | 19524  | 19819  |

|         |                |     |        |           |     |     |      |     |     |        |        |
|---------|----------------|-----|--------|-----------|-----|-----|------|-----|-----|--------|--------|
| UN79598 | Rsa1.0_00205.1 | 698 | 193401 | 1.00E-132 | 313 | 334 | 93 - | 3   | 334 | 86019  | 86349  |
| UN79599 | Rsa1.0_07510.1 | 574 | 9230   | 0         | 517 | 522 | 99 + | 53  | 574 | 6166   | 6685   |
| UN79600 | Rsa1.0_04935.1 | 288 | 15403  | 1.00E-84  | 180 | 187 | 96 - | 2   | 188 | 13660  | 13846  |
| UN79601 | Rsa1.0_01008.1 | 555 | 56924  | 1.00E-158 | 325 | 336 | 96 + | 6   | 335 | 3705   | 4040   |
| UN79602 | Rsa1.0_04282.1 | 501 | 18100  | 1.00E-151 | 370 | 401 | 92 + | 66  | 463 | 8780   | 9179   |
| UN79603 | Rsa1.0_10640.1 | 780 | 5772   | 1.00E-108 | 222 | 227 | 97 + | 502 | 726 | 1603   | 1829   |
| UN79604 | Rsa1.0_01035.1 | 625 | 56019  | 2.00E-57  | 117 | 118 | 99 - | 264 | 381 | 51680  | 51797  |
| UN79605 | Rsa1.0_00155.1 | 760 | 118465 | 0         | 564 | 573 | 98 + | 4   | 576 | 88679  | 89249  |
| UN79606 | Rsa1.0_02272.1 | 746 | 33131  | 1.00E-108 | 240 | 250 | 96 + | 3   | 250 | 22187  | 22434  |
| UN79607 | Rsa1.0_00137.1 | 615 | 122457 | 3.00E-74  | 177 | 188 | 94 + | 190 | 377 | 28416  | 28600  |
| UN79608 | Rsa1.0_64410.1 | 755 | 356    | 1.00E-167 | 338 | 350 | 96 - | 338 | 686 | 5      | 354    |
| UN79609 | Rsa1.0_01683.1 | 690 | 41059  | 1.00E-123 | 272 | 284 | 95 + | 2   | 279 | 22043  | 22323  |
| UN79610 | Rsa1.0_00088.1 | 637 | 141341 | 1.00E-130 | 346 | 380 | 91 - | 127 | 496 | 58508  | 58885  |
| UN79611 | Rsa1.0_09720.1 | 792 | 6190   | 2.00E-94  | 185 | 188 | 98 - | 434 | 621 | 5444   | 5631   |
| UN79612 | Rsa1.0_16561.1 | 673 | 2111   | 6.00E-76  | 154 | 157 | 98 - | 175 | 331 | 1092   | 1248   |
| UN79613 | Rsa1.0_01768.1 | 669 | 138463 | 8.00E-72  | 144 | 146 | 98 - | 145 | 290 | 124510 | 124655 |
| UN79614 | Rsa1.0_00044.1 | 356 | 271658 | 1.00E-106 | 204 | 207 | 98 + | 12  | 218 | 121725 | 121931 |
| UN79615 | Rsa1.0_02457.1 | 692 | 31208  | 0         | 662 | 694 | 95 - | 1   | 692 | 4300   | 4989   |
| UN79616 | Rsa1.0_00383.1 | 129 | 398431 | 8.00E-28  | 98  | 107 | 91 - | 7   | 111 | 154414 | 154520 |
| UN79617 | Rsa1.0_02384.1 | 350 | 31917  | 3.00E-57  | 282 | 332 | 84 + | 3   | 315 | 11726  | 12045  |
| UN79618 | Rsa1.0_00371.1 | 198 | 90463  | 1.00E-83  | 191 | 200 | 95 - | 2   | 198 | 50017  | 50216  |
| UN79619 | Rsa1.0_00017.1 | 696 | 752458 | 1.00E-117 | 240 | 246 | 97 - | 452 | 696 | 684888 | 685131 |
| UN79620 | Rsa1.0_01263.1 | 682 | 49703  | 1.00E-152 | 367 | 401 | 91 + | 51  | 436 | 530    | 927    |
| UN79621 | Rsa1.0_14003.1 | 502 | 3930   | 1.00E-167 | 325 | 334 | 97 + | 152 | 485 | 2895   | 3228   |
| UN79622 | Rsa1.0_00694.1 | 562 | 68074  | 5.00E-88  | 171 | 173 | 98 - | 203 | 375 | 4978   | 5150   |
| UN79623 | Rsa1.0_00299.1 | 637 | 97770  | 0         | 435 | 448 | 97 - | 191 | 637 | 3090   | 3537   |
| UN79624 | Rsa1.0_00032.1 | 808 | 306326 | 1.00E-114 | 263 | 276 | 95 - | 461 | 730 | 285126 | 285401 |
| UN79625 | Rsa1.0_00116.1 | 758 | 365886 | 0         | 600 | 631 | 95 + | 6   | 623 | 323520 | 324147 |
| UN79626 | Rsa1.0_00079.1 | 720 | 606987 | 0         | 619 | 680 | 91 + | 1   | 665 | 488377 | 489055 |
| UN79627 | Rsa1.0_00198.1 | 704 | 222963 | 1.00E-144 | 293 | 303 | 96 - | 7   | 309 | 22767  | 23067  |
| UN79628 | Rsa1.0_05713.1 | 718 | 12855  | 1.00E-109 | 222 | 229 | 96 - | 152 | 380 | 8176   | 8404   |
| UN79629 | Rsa1.0_00092.1 | 716 | 659932 | 3.00E-99  | 233 | 248 | 93 - | 404 | 650 | 127591 | 127838 |
| UN79630 | Rsa1.0_00048.1 | 809 | 167185 | 1.00E-147 | 331 | 344 | 96 + | 473 | 809 | 35754  | 36097  |
| UN79631 | Rsa1.0_00354.1 | 246 | 232005 | 4.00E-59  | 165 | 177 | 93 - | 70  | 241 | 193390 | 193564 |
| UN79632 | Rsa1.0_01679.1 | 817 | 146876 | 1.00E-104 | 242 | 258 | 93 + | 27  | 283 | 132830 | 133080 |
| UN79633 | Rsa1.0_00913.1 | 726 | 59914  | 1.00E-103 | 279 | 311 | 89 - | 165 | 463 | 55793  | 56103  |
| UN79634 | Rsa1.0_00425.1 | 718 | 147080 | 1.00E-157 | 344 | 362 | 95 + | 359 | 718 | 95758  | 96119  |
| UN79635 | Rsa1.0_00597.1 | 759 | 73445  | 0         | 699 | 724 | 96 + | 2   | 720 | 10524  | 11247  |
| UN79636 | Rsa1.0_11119.1 | 724 | 5610   | 0         | 529 | 552 | 95 + | 164 | 713 | 4490   | 5038   |

|         |                |     |        |           |     |     |       |     |     |        |        |
|---------|----------------|-----|--------|-----------|-----|-----|-------|-----|-----|--------|--------|
| UN79637 | Rsa1.0_04086.1 | 818 | 19166  | 1.00E-135 | 260 | 265 | 98 -  | 226 | 490 | 17296  | 17560  |
| UN79638 | Rsa1.0_02816.1 | 771 | 27649  | 1.00E-153 | 334 | 349 | 95 -  | 393 | 736 | 5402   | 5750   |
| UN79639 | Rsa1.0_05590.1 | 591 | 13242  | 0         | 550 | 575 | 95 +  | 1   | 575 | 3151   | 3719   |
| UN79640 | Rsa1.0_08919.1 | 784 | 6788   | 3.00E-99  | 205 | 212 | 96 +  | 174 | 385 | 6028   | 6239   |
| UN79641 | Rsa1.0_00632.1 | 687 | 183777 | 1.00E-117 | 237 | 243 | 97 -  | 86  | 327 | 21735  | 21977  |
| UN79642 | Rsa1.0_15225.1 | 572 | 2742   | 0         | 431 | 443 | 97 +  | 130 | 572 | 2245   | 2686   |
| UN79643 | Rsa1.0_00107.1 | 707 | 431659 | 0         | 517 | 544 | 95 +  | 42  | 576 | 313297 | 313840 |
| UN79644 | Rsa1.0_02016.1 | 815 | 36003  | 1.00E-114 | 227 | 233 | 97 +  | 280 | 512 | 33274  | 33506  |
| UN79645 | Rsa1.0_04482.1 | 750 | 17175  | 2.00E-75  | 151 | 152 | 99 -  | 302 | 452 | 10208  | 10359  |
| UN79646 | Rsa1.0_00440.1 | 733 | 84723  | 2.00E-69  | 181 | 193 | 93 -  | 541 | 731 | 25208  | 25398  |
| UN79647 | Rsa1.0_00683.1 | 747 | 68638  | 1.00E-64  | 153 | 162 | 94 -  | 489 | 650 | 9824   | 9985   |
| UN79648 | Rsa1.0_00778.1 | 688 | 196751 | 1.00E-18  | 98  | 113 | 86 +  | 28  | 140 | 139161 | 139272 |
| UN79649 | Rsa1.0_02546.1 | 425 | 137227 | 2.00E-77  | 223 | 252 | 88 -  | 186 | 425 | 132168 | 132410 |
| UN79650 | Rsa1.0_00218.1 | 790 | 201480 | 1.00E-153 | 293 | 299 | 97 +  | 404 | 702 | 179386 | 179684 |
| UN79651 | Rsa1.0_00025.1 | 595 | 277312 | 0         | 578 | 599 | 96 -  | 2   | 595 | 64562  | 65154  |
| UN79652 | Rsa1.0_00079.1 | 557 | 606987 | 1.00E-154 | 303 | 312 | 97 -  | 2   | 313 | 540027 | 540338 |
| UN79653 | Rsa1.0_04405.1 | 701 | 17508  | 1.00E-120 | 394 | 447 | 88 -  | 262 | 689 | 14189  | 14619  |
| UN79654 | Rsa1.0_03916.1 | 733 | 20117  | 0         | 403 | 404 | 99 -  | 1   | 404 | 17349  | 17752  |
| UN79655 | Rsa1.0_00643.1 | 667 | 70658  | 4.00E-43  | 90  | 90  | 100 - | 8   | 97  | 37701  | 37790  |
| UN79656 | Rsa1.0_45280.1 | 748 | 498    | 2.00E-75  | 154 | 156 | 98 -  | 557 | 711 | 138    | 293    |
| UN79657 | Rsa1.0_01951.1 | 595 | 36941  | 0         | 460 | 489 | 94 -  | 3   | 470 | 4662   | 5150   |
| UN79658 | Rsa1.0_00964.1 | 796 | 316648 | 1.00E-124 | 235 | 238 | 98 -  | 137 | 374 | 267341 | 267578 |
| UN79659 | Rsa1.0_00194.1 | 541 | 110851 | 1.00E-104 | 242 | 256 | 94 +  | 288 | 541 | 56294  | 56548  |
| UN79660 | Rsa1.0_00514.1 | 505 | 78421  | 1.00E-136 | 450 | 512 | 87 -  | 7   | 505 | 64186  | 64693  |
| UN79661 | Rsa1.0_00001.1 | 122 | 363028 | 1.00E-23  | 79  | 86  | 91 +  | 36  | 118 | 39309  | 39394  |
| UN79662 | Rsa1.0_00104.1 | 628 | 368722 | 0         | 579 | 626 | 92 +  | 3   | 628 | 11789  | 12399  |
| UN79663 | Rsa1.0_04193.1 | 722 | 18571  | 0         | 710 | 724 | 98 -  | 1   | 722 | 11413  | 12136  |
| UN79664 | Rsa1.0_00502.1 | 231 | 204180 | 1.00E-108 | 224 | 231 | 96 -  | 2   | 231 | 162578 | 162808 |
| UN79665 | Rsa1.0_10012.1 | 723 | 6039   | 0         | 663 | 688 | 96 -  | 2   | 685 | 5152   | 5838   |
| UN79666 | Rsa1.0_00273.1 | 726 | 326186 | 5.00E-64  | 137 | 141 | 97 -  | 181 | 321 | 161300 | 161440 |
| UN79667 | Rsa1.0_04918.1 | 421 | 15441  | 6.00E-44  | 100 | 103 | 97 +  | 117 | 219 | 13870  | 13972  |
| UN79668 | Rsa1.0_02320.1 | 814 | 32575  | 1.00E-106 | 256 | 276 | 92 +  | 124 | 399 | 22169  | 22444  |
| UN79669 | Rsa1.0_00645.1 | 782 | 189716 | 0         | 448 | 463 | 96 +  | 322 | 782 | 13883  | 14345  |
| UN79670 | Rsa1.0_05019.1 | 798 | 15114  | 1.00E-110 | 206 | 207 | 99 -  | 507 | 713 | 13928  | 14134  |
| UN79671 | Rsa1.0_00055.1 | 640 | 520193 | 1.00E-143 | 341 | 366 | 93 -  | 279 | 640 | 78678  | 79040  |
| UN79672 | Rsa1.0_02168.1 | 538 | 34367  | 1.00E-134 | 249 | 251 | 99 -  | 3   | 253 | 32717  | 32967  |
| UN79673 | Rsa1.0_01495.1 | 653 | 44613  | 6.00E-91  | 179 | 182 | 98 -  | 2   | 183 | 19013  | 19194  |
| UN79674 | Rsa1.0_00543.1 | 644 | 76788  | 0         | 600 | 637 | 94 +  | 12  | 638 | 60625  | 61254  |
| UN79675 | Rsa1.0_00797.1 | 695 | 63959  | 1.00E-113 | 213 | 215 | 99 -  | 313 | 527 | 12998  | 13212  |

|         |                |     |        |           |     |     |      |     |     |        |        |
|---------|----------------|-----|--------|-----------|-----|-----|------|-----|-----|--------|--------|
| UN79676 | Rsa1.0_04004.1 | 766 | 19594  | 0         | 465 | 480 | 96 + | 3   | 476 | 8246   | 8725   |
| UN79677 | Rsa1.0_00291.1 | 706 | 172129 | 1.00E-124 | 229 | 230 | 99 - | 352 | 581 | 48333  | 48562  |
| UN79678 | Rsa1.0_00727.1 | 697 | 66724  | 1.00E-170 | 359 | 377 | 95 + | 3   | 371 | 4949   | 5325   |
| UN79679 | Rsa1.0_01373.1 | 616 | 47052  | 0         | 584 | 609 | 95 - | 8   | 616 | 9176   | 9781   |
| UN79680 | Rsa1.0_00773.1 | 575 | 64839  | 0         | 549 | 570 | 96 - | 2   | 571 | 53338  | 53907  |
| UN79681 | Rsa1.0_20973.1 | 764 | 1249   | 0         | 688 | 749 | 91 - | 19  | 764 | 501    | 1249   |
| UN79682 | Rsa1.0_00030.1 | 522 | 250988 | 3.00E-83  | 163 | 165 | 98 - | 298 | 462 | 27754  | 27918  |
| UN79683 | Rsa1.0_00358.1 | 700 | 91293  | 2.33E-156 | 316 | 332 | 95 + | 2   | 327 | 32211  | 32539  |
| UN79684 | Rsa1.0_01400.1 | 628 | 46560  | 1.00E-163 | 334 | 348 | 95 + | 127 | 474 | 34843  | 35180  |
| UN79685 | Rsa1.0_00091.1 | 738 | 139699 | 0         | 652 | 697 | 93 - | 3   | 699 | 85481  | 86177  |
| UN79686 | Rsa1.0_01986.1 | 754 | 36489  | 0         | 724 | 762 | 95 + | 2   | 754 | 30031  | 30783  |
| UN79687 | Rsa1.0_02906.1 | 756 | 26866  | 8.00E-94  | 202 | 210 | 96 + | 235 | 442 | 21763  | 21972  |
| UN79688 | Rsa1.0_00383.1 | 107 | 398431 | 1.00E-23  | 68  | 71  | 95 - | 13  | 81  | 212456 | 212526 |
| UN79689 | Rsa1.0_00114.1 | 744 | 131330 | 1.00E-73  | 260 | 298 | 87 - | 16  | 290 | 10782  | 11077  |
| UN79690 | Rsa1.0_00065.1 | 656 | 454616 | 0         | 361 | 372 | 97 - | 15  | 383 | 191624 | 191995 |
| UN79691 | Rsa1.0_00541.1 | 492 | 76863  | 0         | 451 | 473 | 95 + | 22  | 492 | 13931  | 14397  |
| UN79692 | Rsa1.0_01214.1 | 722 | 50599  | 0         | 478 | 495 | 96 + | 7   | 500 | 282    | 773    |
| UN79693 | Rsa1.0_02267.1 | 744 | 33194  | 4.00E-71  | 168 | 177 | 94 + | 1   | 176 | 14455  | 14631  |
| UN79694 | Rsa1.0_02216.1 | 468 | 33816  | 1.00E-123 | 283 | 301 | 94 + | 161 | 457 | 30306  | 30600  |
| UN79695 | Rsa1.0_00119.1 | 662 | 467509 | 1.00E-138 | 390 | 437 | 89 - | 6   | 419 | 47686  | 48115  |
| UN79696 | Rsa1.0_01118.1 | 661 | 53460  | 2.00E-88  | 216 | 235 | 91 - | 3   | 225 | 14781  | 15015  |
| UN79697 | Rsa1.0_21118.1 | 742 | 1233   | 1.00E-158 | 301 | 307 | 98 - | 116 | 422 | 1      | 307    |
| UN79698 | Rsa1.0_02722.1 | 792 | 28417  | 6.00E-73  | 164 | 172 | 95 + | 234 | 405 | 15844  | 16015  |
| UN79699 | Rsa1.0_01081.1 | 640 | 499226 | 5.00E-76  | 161 | 165 | 97 + | 329 | 492 | 321927 | 322091 |
| UN79700 | Rsa1.0_00153.1 | 524 | 192931 | 1.00E-133 | 247 | 248 | 99 + | 3   | 249 | 29345  | 29592  |
| UN79701 | Rsa1.0_00816.1 | 759 | 403350 | 2.00E-63  | 136 | 140 | 97 + | 420 | 559 | 3460   | 3599   |
| UN79702 | Rsa1.0_01338.1 | 789 | 155644 | 0         | 727 | 776 | 93 - | 3   | 771 | 123749 | 124507 |
| UN79703 | Rsa1.0_02814.1 | 198 | 27656  | 3.00E-99  | 196 | 199 | 98 - | 1   | 198 | 24209  | 24407  |
| UN79704 | Rsa1.0_01713.1 | 709 | 40564  | 2.00E-72  | 163 | 169 | 96 - | 3   | 170 | 33199  | 33364  |
| UN79705 | Rsa1.0_01198.1 | 671 | 51029  | 0         | 374 | 387 | 96 - | 285 | 671 | 25800  | 26181  |
| UN79706 | Rsa1.0_00123.1 | 593 | 325650 | 1.00E-145 | 270 | 273 | 98 - | 2   | 274 | 316363 | 316635 |
| UN79707 | Rsa1.0_00701.1 | 700 | 67691  | 0         | 464 | 473 | 98 - | 229 | 696 | 7710   | 8182   |
| UN79708 | Rsa1.0_00929.1 | 738 | 137796 | 5.00E-61  | 123 | 124 | 99 + | 521 | 644 | 98358  | 98481  |
| UN79709 | Rsa1.0_53230.1 | 769 | 428    | 3.00E-90  | 240 | 268 | 89 - | 243 | 492 | 71     | 338    |
| UN79710 | Rsa1.0_01553.1 | 776 | 43379  | 0         | 679 | 703 | 96 - | 47  | 746 | 27243  | 27945  |
| UN79711 | Rsa1.0_00424.1 | 548 | 86005  | 1.00E-133 | 255 | 260 | 98 + | 9   | 268 | 67598  | 67857  |
| UN79712 | Rsa1.0_00732.1 | 676 | 66631  | 0         | 442 | 471 | 93 + | 3   | 466 | 301    | 768    |
| UN79713 | Rsa1.0_00522.1 | 777 | 78103  | 1.00E-108 | 234 | 243 | 96 + | 71  | 312 | 57158  | 57399  |
| UN79714 | Rsa1.0_00253.1 | 683 | 231292 | 7.00E-88  | 174 | 177 | 98 - | 154 | 330 | 130097 | 130273 |

|         |                |     |        |           |     |     |      |     |     |        |        |
|---------|----------------|-----|--------|-----------|-----|-----|------|-----|-----|--------|--------|
| UN79715 | Rsa1.0_14639.1 | 625 | 3198   | 4.00E-55  | 136 | 144 | 94 - | 6   | 146 | 2211   | 2354   |
| UN79716 | Rsa1.0_00708.1 | 428 | 67366  | 1.00E-177 | 387 | 413 | 93 + | 2   | 399 | 63139  | 63551  |
| UN79717 | Rsa1.0_43909.1 | 614 | 512    | 0         | 389 | 395 | 98 + | 3   | 397 | 80     | 473    |
| UN79718 | Rsa1.0_00497.1 | 245 | 79830  | 1.00E-99  | 227 | 240 | 94 - | 1   | 239 | 7176   | 7415   |
| UN79719 | Rsa1.0_05758.1 | 764 | 12721  | 0         | 368 | 373 | 98 + | 395 | 764 | 1062   | 1434   |
| UN79720 | Rsa1.0_00381.1 | 681 | 89718  | 1.00E-49  | 180 | 208 | 86 + | 5   | 192 | 60635  | 60842  |
| UN79721 | Rsa1.0_01847.1 | 543 | 38346  | 1.00E-161 | 393 | 426 | 92 - | 52  | 470 | 12249  | 12657  |
| UN79722 | Rsa1.0_03981.1 | 724 | 19724  | 0         | 592 | 660 | 89 - | 3   | 648 | 15908  | 16536  |
| UN79723 | Rsa1.0_00417.1 | 719 | 395068 | 0         | 430 | 459 | 93 + | 204 | 653 | 3646   | 4104   |
| UN79724 | Rsa1.0_00085.1 | 709 | 142226 | 0         | 679 | 696 | 97 - | 4   | 699 | 73232  | 73926  |
| UN79725 | Rsa1.0_03213.1 | 665 | 24568  | 1.00E-61  | 168 | 181 | 92 - | 465 | 638 | 11565  | 11745  |
| UN79726 | Rsa1.0_32890.1 | 755 | 691    | 1.00E-153 | 304 | 313 | 97 - | 3   | 315 | 1      | 311    |
| UN79727 | Rsa1.0_00107.1 | 760 | 431659 | 0         | 495 | 507 | 97 + | 113 | 619 | 145075 | 145581 |
| UN79728 | Rsa1.0_03517.1 | 776 | 22337  | 1.00E-83  | 196 | 208 | 94 - | 412 | 616 | 15970  | 16177  |
| UN79729 | Rsa1.0_06900.1 | 566 | 131268 | 2.00E-96  | 223 | 239 | 93 - | 280 | 509 | 130016 | 130254 |
| UN79730 | Rsa1.0_00235.1 | 778 | 154696 | 0         | 553 | 568 | 97 - | 75  | 638 | 123067 | 123634 |
| UN79731 | Rsa1.0_00277.1 | 447 | 100132 | 1.00E-150 | 297 | 305 | 97 + | 46  | 350 | 34160  | 34463  |
| UN79732 | Rsa1.0_05748.1 | 460 | 12749  | 0         | 394 | 408 | 96 - | 58  | 460 | 6545   | 6951   |
| UN79733 | Rsa1.0_02165.1 | 764 | 34423  | 1.00E-174 | 384 | 406 | 94 - | 361 | 764 | 3231   | 3636   |
| UN79734 | Rsa1.0_08380.1 | 779 | 7446   | 0         | 370 | 382 | 96 - | 231 | 610 | 2517   | 2898   |
| UN79735 | Rsa1.0_09741.1 | 747 | 6177   | 0         | 556 | 573 | 97 + | 8   | 580 | 2244   | 2816   |
| UN79736 | Rsa1.0_03736.1 | 801 | 21081  | 6.00E-67  | 136 | 138 | 98 - | 327 | 464 | 10511  | 10648  |
| UN79737 | Rsa1.0_03639.1 | 585 | 21629  | 0         | 409 | 425 | 96 - | 159 | 575 | 277    | 701    |
| UN79738 | Rsa1.0_13608.1 | 773 | 4645   | 0         | 479 | 493 | 97 - | 289 | 772 | 3124   | 3616   |
| UN79739 | Rsa1.0_07959.1 | 413 | 8173   | 1.00E-171 | 347 | 359 | 96 + | 1   | 359 | 5566   | 5921   |
| UN79740 | Rsa1.0_02651.1 | 715 | 29046  | 0         | 426 | 440 | 96 + | 157 | 596 | 25063  | 25502  |
| UN79741 | Rsa1.0_15187.1 | 737 | 2772   | 1.00E-152 | 338 | 359 | 94 + | 1   | 359 | 1668   | 2013   |
| UN79742 | Rsa1.0_03122.1 | 741 | 25207  | 1.00E-150 | 296 | 305 | 97 - | 324 | 628 | 11322  | 11626  |
| UN79743 | Rsa1.0_00002.1 | 805 | 601661 | 0         | 409 | 425 | 96 + | 4   | 428 | 238281 | 238705 |
| UN79744 | Rsa1.0_07217.1 | 609 | 9703   | 1.00E-100 | 205 | 210 | 97 + | 401 | 609 | 4498   | 4707   |
| UN79745 | Rsa1.0_00881.1 | 785 | 61260  | 0         | 520 | 541 | 96 - | 141 | 676 | 1793   | 2330   |
| UN79746 | Rsa1.0_00012.1 | 614 | 222148 | 4.00E-55  | 116 | 118 | 98 - | 105 | 222 | 50707  | 50824  |
| UN79747 | Rsa1.0_00402.1 | 693 | 385315 | 0         | 516 | 548 | 94 - | 152 | 693 | 226106 | 226653 |
| UN79748 | Rsa1.0_00305.1 | 105 | 97308  | 1.00E-32  | 74  | 75  | 98 - | 2   | 76  | 26354  | 26428  |
| UN79749 | Rsa1.0_00055.1 | 612 | 520193 | 0         | 546 | 577 | 94 + | 41  | 612 | 388021 | 388596 |
| UN79750 | Rsa1.0_00051.1 | 604 | 258225 | 1.00E-152 | 324 | 339 | 95 + | 1   | 337 | 30361  | 30697  |
| UN79751 | Rsa1.0_00136.1 | 680 | 122464 | 0         | 590 | 616 | 95 + | 77  | 680 | 8043   | 8658   |
| UN79752 | Rsa1.0_01717.1 | 683 | 143162 | 2.00E-26  | 168 | 202 | 83 + | 25  | 226 | 26971  | 27171  |
| UN79753 | Rsa1.0_01014.1 | 807 | 56762  | 0         | 753 | 805 | 93 - | 2   | 786 | 27927  | 28722  |

|         |                |     |        |           |     |     |      |     |     |        |        |
|---------|----------------|-----|--------|-----------|-----|-----|------|-----|-----|--------|--------|
| UN79754 | Rsa1.0.01373.1 | 792 | 47052  | 1.00E-150 | 312 | 325 | 96 + | 3   | 327 | 3590   | 3913   |
| UN79755 | Rsa1.0.00381.1 | 800 | 89718  | 1.00E-153 | 286 | 290 | 98 + | 245 | 534 | 29091  | 29380  |
| UN79756 | Rsa1.0.01431.1 | 737 | 167877 | 0         | 505 | 517 | 97 + | 1   | 517 | 20288  | 20804  |
| UN79757 | Rsa1.0.00159.1 | 729 | 431686 | 0         | 574 | 597 | 96 - | 114 | 708 | 350466 | 351059 |
| UN79758 | Rsa1.0.00014.1 | 579 | 348985 | 1.00E-101 | 259 | 282 | 91 - | 276 | 547 | 238366 | 238644 |
| UN79759 | Rsa1.0.02591.1 | 783 | 29751  | 7.00E-88  | 187 | 193 | 96 - | 532 | 724 | 4668   | 4859   |
| UN79760 | Rsa1.0.15332.1 | 625 | 2680   | 0         | 575 | 635 | 90 + | 2   | 625 | 615    | 1245   |
| UN79761 | Rsa1.0.00010.1 | 792 | 294827 | 0         | 687 | 754 | 91 - | 2   | 735 | 210912 | 211649 |
| UN79762 | Rsa1.0.03502.1 | 677 | 22446  | 0         | 493 | 510 | 96 - | 2   | 510 | 17970  | 18477  |
| UN79763 | Rsa1.0.00190.1 | 724 | 318240 | 0         | 484 | 495 | 97 + | 231 | 724 | 191681 | 192175 |
| UN79764 | Rsa1.0.03845.1 | 576 | 20486  | 1.00E-143 | 283 | 290 | 97 + | 287 | 575 | 10622  | 10911  |
| UN79765 | Rsa1.0.01039.1 | 686 | 55946  | 0         | 660 | 691 | 95 - | 2   | 686 | 37386  | 38064  |
| UN79766 | Rsa1.0.02402.1 | 827 | 31710  | 0         | 435 | 452 | 96 - | 244 | 692 | 25296  | 25747  |
| UN79767 | Rsa1.0.01112.1 | 788 | 310601 | 1.00E-171 | 567 | 657 | 86 - | 122 | 739 | 49612  | 50249  |
| UN79768 | Rsa1.0.01516.1 | 794 | 44196  | 1.00E-98  | 186 | 187 | 99 - | 2   | 188 | 37369  | 37555  |
| UN79769 | Rsa1.0.01299.1 | 529 | 162028 | 1.00E-147 | 280 | 285 | 98 + | 3   | 287 | 42543  | 42827  |
| UN79770 | Rsa1.0.00055.1 | 708 | 520193 | 1.00E-109 | 230 | 238 | 96 + | 3   | 238 | 103862 | 104097 |
| UN79771 | Rsa1.0.00381.1 | 465 | 89718  | 0         | 424 | 452 | 93 - | 14  | 465 | 55808  | 56259  |
| UN79772 | Rsa1.0.00112.1 | 624 | 132199 | 1.00E-147 | 307 | 318 | 96 + | 307 | 619 | 65812  | 66129  |
| UN79773 | Rsa1.0.00472.1 | 740 | 398134 | 0         | 458 | 470 | 97 - | 274 | 740 | 332826 | 333295 |
| UN79774 | Rsa1.0.30502.1 | 429 | 752    | 1.00E-110 | 269 | 289 | 93 - | 83  | 362 | 1      | 285    |
| UN79775 | Rsa1.0.03455.1 | 786 | 22804  | 0         | 760 | 805 | 94 + | 3   | 786 | 1286   | 2082   |
| UN79776 | Rsa1.0.01697.1 | 691 | 40837  | 0         | 531 | 553 | 96 + | 139 | 691 | 16638  | 17180  |
| UN79777 | Rsa1.0.03314.1 | 365 | 23804  | 1.00E-113 | 214 | 215 | 99 + | 152 | 365 | 16525  | 16739  |
| UN79778 | Rsa1.0.25085.1 | 735 | 952    | 0         | 688 | 708 | 97 - | 24  | 726 | 248    | 952    |
| UN79779 | Rsa1.0.00009.1 | 642 | 232558 | 1.00E-82  | 171 | 176 | 97 + | 403 | 578 | 141800 | 141975 |
| UN79780 | Rsa1.0.00888.1 | 729 | 60978  | 0         | 463 | 476 | 97 + | 259 | 729 | 19316  | 19791  |
| UN79781 | Rsa1.0.05114.1 | 777 | 14804  | 0         | 406 | 429 | 94 + | 3   | 427 | 9094   | 9522   |
| UN79782 | Rsa1.0.00153.1 | 732 | 192931 | 0         | 412 | 429 | 96 + | 300 | 724 | 157109 | 157537 |
| UN79783 | Rsa1.0.03086.1 | 353 | 25495  | 3.00E-42  | 119 | 128 | 92 + | 1   | 127 | 709    | 836    |
| UN79784 | Rsa1.0.00429.1 | 702 | 85559  | 1.00E-112 | 233 | 242 | 96 - | 3   | 244 | 18599  | 18840  |
| UN79785 | Rsa1.0.00925.1 | 712 | 59481  | 0         | 426 | 444 | 95 + | 199 | 631 | 56296  | 56739  |
| UN79786 | Rsa1.0.14734.1 | 740 | 3116   | 0         | 466 | 505 | 92 - | 43  | 526 | 139    | 643    |
| UN79787 | Rsa1.0.00123.1 | 721 | 325650 | 3.00E-99  | 249 | 266 | 93 - | 460 | 717 | 216442 | 216704 |
| UN79788 | Rsa1.0.02860.1 | 493 | 27207  | 1.00E-139 | 313 | 332 | 94 + | 163 | 493 | 12720  | 13047  |
| UN79789 | Rsa1.0.01541.1 | 262 | 43682  | 1.00E-110 | 254 | 266 | 95 - | 1   | 262 | 1746   | 2011   |
| UN79790 | Rsa1.0.00509.1 | 770 | 78829  | 7.00E-85  | 172 | 176 | 97 - | 130 | 305 | 45093  | 45268  |
| UN79791 | Rsa1.0.00829.1 | 424 | 158305 | 1.00E-164 | 377 | 405 | 93 + | 17  | 417 | 123408 | 123791 |
| UN79792 | Rsa1.0.01087.1 | 710 | 54508  | 0         | 385 | 386 | 99 - | 325 | 710 | 22929  | 23314  |



|         |                |     |        |           |     |     |       |     |     |        |        |
|---------|----------------|-----|--------|-----------|-----|-----|-------|-----|-----|--------|--------|
| UN79793 | Rsa1.0.00697.1 | 764 | 67913  | 1.00E-128 | 264 | 273 | 96 -  | 3   | 275 | 34223  | 34494  |
| UN79794 | Rsa1.0.00087.1 | 738 | 761073 | 0         | 367 | 380 | 96 +  | 360 | 738 | 35915  | 36294  |
| UN79795 | Rsa1.0.00533.1 | 678 | 77375  | 1.00E-141 | 272 | 278 | 97 -  | 171 | 448 | 66092  | 66369  |
| UN79796 | Rsa1.0.02254.1 | 398 | 33344  | 3.00E-61  | 129 | 132 | 97 +  | 134 | 265 | 13458  | 13589  |
| UN79797 | Rsa1.0.23691.1 | 205 | 1031   | 2.00E-23  | 56  | 56  | 100 + | 10  | 65  | 974    | 1029   |
| UN79798 | Rsa1.0.16562.1 | 696 | 2111   | 0         | 673 | 699 | 96 +  | 2   | 696 | 121    | 813    |
| UN79799 | Rsa1.0.06294.1 | 647 | 11291  | 1.00E-27  | 143 | 168 | 85 +  | 346 | 513 | 1041   | 1207   |
| UN79800 | Rsa1.0.01334.1 | 766 | 47904  | 0         | 524 | 548 | 95 -  | 3   | 546 | 576    | 1119   |
| UN79801 | Rsa1.0.12765.1 | 578 | 5133   | 0         | 442 | 456 | 96 -  | 5   | 460 | 1      | 456    |
| UN79802 | Rsa1.0.02447.1 | 282 | 31325  | 5.00E-65  | 166 | 179 | 92 -  | 4   | 178 | 21164  | 21342  |
| UN79803 | Rsa1.0.00485.1 | 332 | 80937  | 1.00E-132 | 312 | 334 | 93 -  | 2   | 332 | 72276  | 72600  |
| UN79804 | Rsa1.0.00273.1 | 625 | 326186 | 1.00E-109 | 233 | 243 | 95 +  | 26  | 268 | 123709 | 123949 |
| UN79805 | Rsa1.0.03997.1 | 278 | 19652  | 5.00E-99  | 261 | 286 | 91 +  | 2   | 278 | 4506   | 4788   |
| UN79806 | Rsa1.0.01388.1 | 506 | 46741  | 1.00E-104 | 204 | 208 | 98 -  | 86  | 293 | 10242  | 10449  |
| UN79807 | Rsa1.0.00059.1 | 634 | 159650 | 0         | 599 | 632 | 94 -  | 3   | 634 | 26700  | 27310  |
| UN79808 | #              | #   | #      | #         | #   | #   | #     | #   | #   | #      | #      |
| UN79809 | Rsa1.0.02430.1 | 717 | 31506  | 1.00E-108 | 220 | 227 | 96 +  | 52  | 278 | 11527  | 11753  |
| UN79810 | Rsa1.0.00098.1 | 673 | 349239 | 1.00E-168 | 315 | 320 | 98 -  | 3   | 322 | 115140 | 115459 |
| UN79811 | Rsa1.0.00337.1 | 693 | 143174 | 7.00E-91  | 203 | 212 | 95 -  | 127 | 338 | 141486 | 141693 |
| UN79812 | Rsa1.0.00178.1 | 327 | 114861 | 1.00E-154 | 315 | 327 | 96 +  | 1   | 327 | 100540 | 100859 |
| UN79813 | Rsa1.0.10606.1 | 683 | 5787   | 0         | 656 | 682 | 96 -  | 1   | 672 | 3012   | 3693   |
| UN79814 | Rsa1.0.00130.1 | 184 | 125737 | 4.00E-80  | 164 | 167 | 98 -  | 19  | 184 | 82258  | 82424  |
| UN79815 | Rsa1.0.04504.1 | 602 | 17069  | 0         | 536 | 551 | 97 -  | 52  | 602 | 8909   | 9452   |
| UN79816 | Rsa1.0.00096.1 | 703 | 198773 | 1.00E-150 | 342 | 366 | 93 -  | 5   | 360 | 138020 | 138385 |
| UN79817 | Rsa1.0.00634.1 | 688 | 71222  | 1.00E-157 | 474 | 539 | 87 -  | 22  | 534 | 70502  | 71034  |
| UN79818 | Rsa1.0.00833.1 | 601 | 62621  | 2.00E-69  | 149 | 154 | 96 -  | 201 | 354 | 9523   | 9676   |
| UN79819 | Rsa1.0.00013.1 | 727 | 292129 | 1.00E-110 | 291 | 317 | 91 +  | 8   | 312 | 74142  | 74450  |
| UN79820 | Rsa1.0.02248.1 | 728 | 33414  | 1.00E-134 | 344 | 376 | 91 +  | 1   | 367 | 26036  | 26406  |
| UN79821 | Rsa1.0.00375.1 | 695 | 90207  | 2.00E-72  | 148 | 151 | 98 +  | 322 | 472 | 59480  | 59630  |
| UN79822 | Rsa1.0.01553.1 | 694 | 43379  | 4.00E-89  | 188 | 195 | 96 +  | 438 | 632 | 9345   | 9539   |
| UN79823 | Rsa1.0.00994.1 | 692 | 165189 | 1.00E-163 | 340 | 355 | 95 -  | 339 | 692 | 1456   | 1810   |
| UN79824 | Rsa1.0.24210.1 | 674 | 1000   | 1.00E-160 | 323 | 335 | 96 -  | 26  | 360 | 520    | 854    |
| UN79825 | Rsa1.0.00463.1 | 691 | 189177 | 1.00E-144 | 296 | 308 | 96 +  | 4   | 311 | 114377 | 114684 |
| UN79826 | Rsa1.0.02034.1 | 751 | 35823  | 1.00E-160 | 330 | 341 | 96 -  | 2   | 338 | 11733  | 12072  |
| UN79827 | Rsa1.0.00033.1 | 604 | 515811 | 0         | 575 | 603 | 95 -  | 2   | 604 | 393730 | 394332 |
| UN79828 | Rsa1.0.02893.1 | 595 | 26999  | 1.00E-115 | 275 | 290 | 94 -  | 311 | 595 | 24325  | 24614  |
| UN79829 | Rsa1.0.01090.1 | 759 | 54385  | 0         | 614 | 636 | 96 +  | 9   | 644 | 44296  | 44931  |
| UN79830 | Rsa1.0.00758.1 | 499 | 65477  | 0         | 480 | 509 | 94 -  | 1   | 499 | 36541  | 37046  |
| UN79831 | Rsa1.0.00580.1 | 295 | 74515  | 1.00E-71  | 236 | 265 | 89 +  | 49  | 295 | 29100  | 29364  |

|         |                |     |        |           |     |     |      |     |     |        |        |
|---------|----------------|-----|--------|-----------|-----|-----|------|-----|-----|--------|--------|
| UN79832 | Rsa1.0.00190.1 | 709 | 318240 | 4.00E-80  | 173 | 180 | 96 - | 343 | 522 | 213086 | 213265 |
| UN79833 | Rsa1.0.01200.1 | 608 | 50895  | 2.00E-69  | 161 | 170 | 94 - | 66  | 235 | 11922  | 12091  |
| UN79834 | Rsa1.0.01088.1 | 641 | 54416  | 0         | 572 | 577 | 99 - | 3   | 579 | 34363  | 34939  |
| UN79835 | Rsa1.0.00589.1 | 638 | 209965 | 1.00E-101 | 232 | 247 | 93 - | 228 | 474 | 188963 | 189209 |
| UN79836 | Rsa1.0.00825.1 | 624 | 62855  | 0         | 592 | 626 | 94 + | 2   | 624 | 34618  | 35234  |
| UN79837 | Rsa1.0.02444.1 | 751 | 31350  | 0         | 475 | 493 | 96 + | 255 | 744 | 3614   | 4106   |
| UN79838 | Rsa1.0.00350.1 | 689 | 92346  | 1.00E-135 | 298 | 315 | 94 - | 3   | 307 | 65731  | 66043  |
| UN79839 | Rsa1.0.02159.1 | 765 | 34471  | 1.00E-107 | 279 | 307 | 90 - | 8   | 308 | 32493  | 32783  |
| UN79840 | Rsa1.0.00066.1 | 745 | 152418 | 3.00E-87  | 179 | 184 | 97 - | 3   | 186 | 143576 | 143759 |
| UN79841 | Rsa1.0.00662.1 | 686 | 192183 | 0         | 391 | 400 | 97 + | 4   | 403 | 67054  | 67452  |
| UN79842 | Rsa1.0.01388.1 | 724 | 46741  | 1.00E-89  | 171 | 172 | 99 + | 374 | 545 | 17367  | 17538  |
| UN79843 | Rsa1.0.05771.1 | 718 | 12674  | 7.00E-11  | 48  | 52  | 92 - | 183 | 234 | 12196  | 12247  |
| UN79844 | Rsa1.0.00008.1 | 719 | 358124 | 0         | 615 | 645 | 95 - | 69  | 709 | 64619  | 65257  |
| UN79845 | Rsa1.0.00048.1 | 743 | 167185 | 1.00E-178 | 364 | 377 | 96 - | 3   | 373 | 31363  | 31739  |
| UN79846 | Rsa1.0.21165.1 | 365 | 1229   | 5.00E-75  | 164 | 171 | 95 + | 89  | 259 | 1      | 171    |
| UN79847 | Rsa1.0.00764.1 | 710 | 65056  | 1.00E-118 | 283 | 307 | 92 + | 18  | 321 | 19998  | 20292  |
| UN79848 | Rsa1.0.00059.1 | 574 | 159650 | 1.00E-163 | 436 | 482 | 90 + | 3   | 469 | 121146 | 121624 |
| UN79849 | Rsa1.0.01415.1 | 681 | 46263  | 0         | 507 | 523 | 96 - | 2   | 524 | 20348  | 20870  |
| UN79850 | Rsa1.0.00045.1 | 274 | 328694 | 1.00E-128 | 262 | 272 | 96 + | 3   | 274 | 15114  | 15385  |
| UN79851 | Rsa1.0.00031.1 | 796 | 179862 | 1.00E-161 | 379 | 411 | 92 + | 6   | 416 | 166005 | 166400 |
| UN79852 | Rsa1.0.01696.1 | 573 | 301850 | 0         | 393 | 409 | 96 - | 132 | 540 | 160836 | 161239 |
| UN79853 | Rsa1.0.00165.1 | 733 | 116466 | 1.00E-116 | 225 | 229 | 98 - | 157 | 385 | 49721  | 49949  |
| UN79854 | Rsa1.0.17721.1 | 612 | 1757   | 1.00E-121 | 298 | 325 | 91 - | 1   | 322 | 123    | 426    |
| UN79855 | Rsa1.0.09666.1 | 709 | 6225   | 5.00E-95  | 183 | 185 | 98 + | 333 | 517 | 4045   | 4229   |
| UN79856 | Rsa1.0.00360.1 | 423 | 91190  | 1.00E-142 | 294 | 304 | 96 - | 3   | 306 | 78998  | 79299  |
| UN79857 | Rsa1.0.00042.1 | 378 | 171507 | 1.00E-157 | 324 | 338 | 95 + | 27  | 361 | 3359   | 3696   |
| UN79858 | Rsa1.0.00300.1 | 682 | 97747  | 0         | 544 | 572 | 95 + | 98  | 662 | 81512  | 82074  |
| UN79859 | Rsa1.0.04019.1 | 662 | 19550  | 1.00E-180 | 380 | 398 | 95 + | 259 | 656 | 14029  | 14422  |
| UN79860 | Rsa1.0.00772.1 | 643 | 64856  | 1.00E-159 | 347 | 364 | 95 + | 1   | 358 | 27862  | 28223  |
| UN79861 | Rsa1.0.01656.1 | 775 | 41494  | 1.00E-171 | 326 | 332 | 98 - | 1   | 331 | 28308  | 28639  |
| UN79862 | Rsa1.0.00657.1 | 552 | 69858  | 8.00E-81  | 168 | 173 | 97 + | 380 | 552 | 53356  | 53528  |
| UN79863 | Rsa1.0.01523.1 | 642 | 43959  | 7.00E-60  | 130 | 134 | 97 - | 303 | 436 | 3644   | 3777   |
| UN79864 | Rsa1.0.00053.1 | 785 | 263459 | 0         | 392 | 407 | 96 - | 135 | 541 | 250289 | 250695 |
| UN79865 | Rsa1.0.01280.1 | 665 | 49321  | 0         | 472 | 495 | 95 + | 170 | 661 | 37113  | 37606  |
| UN79866 | Rsa1.0.00611.1 | 205 | 72410  | 1.00E-40  | 91  | 93  | 97 - | 4   | 96  | 41961  | 42053  |
| UN79867 | Rsa1.0.27204.1 | 368 | 862    | 1.00E-112 | 287 | 313 | 91 + | 34  | 345 | 1      | 313    |
| UN79868 | Rsa1.0.01556.1 | 745 | 163858 | 0         | 377 | 386 | 97 + | 98  | 483 | 159418 | 159803 |
| UN79869 | Rsa1.0.00271.1 | 561 | 101125 | 1.00E-39  | 93  | 96  | 96 + | 3   | 98  | 24074  | 24169  |
| UN79870 | Rsa1.0.00492.1 | 750 | 80178  | 4.00E-80  | 181 | 188 | 96 + | 531 | 716 | 7978   | 8165   |

|         |                |     |        |           |     |     |       |     |     |        |        |
|---------|----------------|-----|--------|-----------|-----|-----|-------|-----|-----|--------|--------|
| UN79871 | Rsa1.0.03624.1 | 681 | 21706  | 6.00E-76  | 145 | 145 | 100 + | 487 | 631 | 7630   | 7774   |
| UN79872 | Rsa1.0.00826.1 | 772 | 166736 | 1.00E-175 | 372 | 391 | 95 -  | 317 | 706 | 131985 | 132375 |
| UN79873 | Rsa1.0.00006.1 | 702 | 396176 | 0         | 479 | 502 | 95 -  | 2   | 500 | 271218 | 271719 |
| UN79874 | Rsa1.0.00006.1 | 376 | 396176 | 4.00E-94  | 266 | 296 | 89 +  | 10  | 301 | 64536  | 64831  |
| UN79875 | Rsa1.0.00169.1 | 752 | 274298 | 5.00E-55  | 155 | 167 | 92 +  | 3   | 165 | 29009  | 29173  |
| UN79876 | Rsa1.0.00233.1 | 265 | 104918 | 6.00E-89  | 226 | 242 | 93 +  | 26  | 265 | 31459  | 31699  |
| UN79877 | Rsa1.0.00202.1 | 663 | 185895 | 1.00E-162 | 341 | 358 | 95 +  | 15  | 372 | 3766   | 4123   |
| UN79878 | Rsa1.0.02030.1 | 442 | 179909 | 1.00E-105 | 202 | 205 | 98 -  | 238 | 442 | 18731  | 18935  |
| UN79879 | Rsa1.0.38418.1 | 679 | 586    | 7.00E-94  | 187 | 191 | 97 -  | 241 | 431 | 146    | 336    |
| UN79880 | Rsa1.0.00152.1 | 729 | 257730 | 0         | 677 | 767 | 88 -  | 3   | 719 | 76757  | 77513  |
| UN79881 | Rsa1.0.02774.1 | 796 | 28038  | 0         | 385 | 388 | 99 +  | 331 | 718 | 11504  | 11890  |
| UN79882 | Rsa1.0.00273.1 | 703 | 326186 | 1.00E-153 | 338 | 359 | 94 -  | 3   | 359 | 4768   | 5119   |
| UN79883 | Rsa1.0.03057.1 | 715 | 25724  | 1.00E-114 | 254 | 264 | 96 -  | 6   | 264 | 860    | 1122   |
| UN79884 | Rsa1.0.00169.1 | 766 | 274298 | 0         | 728 | 763 | 95 +  | 9   | 761 | 93195  | 93954  |
| UN79885 | Rsa1.0.18990.1 | 554 | 1499   | 0         | 527 | 551 | 95 -  | 2   | 548 | 182    | 728    |
| UN79886 | Rsa1.0.01035.1 | 488 | 56019  | 1.00E-149 | 440 | 496 | 88 -  | 1   | 488 | 44401  | 44888  |
| UN79887 | Rsa1.0.02659.1 | 637 | 28971  | 1.00E-163 | 316 | 324 | 97 -  | 2   | 325 | 26617  | 26936  |
| UN79888 | Rsa1.0.03695.1 | 689 | 21329  | 1.00E-111 | 247 | 260 | 95 +  | 432 | 688 | 7      | 263    |
| UN79889 | Rsa1.0.03407.1 | 736 | 23154  | 0         | 662 | 701 | 94 -  | 1   | 697 | 9574   | 10266  |
| UN79890 | Rsa1.0.01302.1 | 593 | 48907  | 1.00E-171 | 350 | 365 | 95 +  | 229 | 593 | 1161   | 1525   |
| UN79891 | Rsa1.0.01578.1 | 679 | 42880  | 1.00E-119 | 226 | 229 | 98 -  | 4   | 232 | 12934  | 13162  |
| UN79892 | Rsa1.0.00169.1 | 703 | 274298 | 1.00E-116 | 239 | 248 | 96 -  | 355 | 602 | 268750 | 268997 |
| UN79893 | Rsa1.0.00329.1 | 587 | 222544 | 1.00E-33  | 116 | 130 | 89 -  | 239 | 368 | 143962 | 144091 |
| UN79894 | Rsa1.0.00296.1 | 365 | 97854  | 1.00E-104 | 232 | 244 | 95 -  | 123 | 365 | 46794  | 47037  |
| UN79895 | Rsa1.0.23487.1 | 664 | 1045   | 0         | 545 | 573 | 95 +  | 93  | 664 | 278    | 850    |
| UN79896 | Rsa1.0.01139.1 | 622 | 52601  | 0         | 427 | 444 | 96 +  | 136 | 579 | 48424  | 48864  |
| UN79897 | Rsa1.0.00457.1 | 736 | 337301 | 0         | 711 | 736 | 96 -  | 2   | 736 | 330450 | 331185 |
| UN79898 | Rsa1.0.03682.1 | 655 | 21396  | 1.00E-136 | 315 | 335 | 94 +  | 3   | 327 | 7934   | 8262   |
| UN79899 | Rsa1.0.00031.1 | 742 | 179862 | 0         | 610 | 667 | 91 +  | 86  | 742 | 85356  | 86015  |
| UN79900 | Rsa1.0.02313.1 | 698 | 32653  | 1.00E-161 | 353 | 372 | 94 -  | 328 | 698 | 797    | 1167   |
| UN79901 | Rsa1.0.02510.1 | 677 | 30662  | 1.00E-156 | 319 | 333 | 95 +  | 345 | 677 | 17208  | 17532  |
| UN79902 | Rsa1.0.00888.1 | 608 | 60978  | 3.00E-34  | 91  | 95  | 95 -  | 160 | 253 | 38632  | 38726  |
| UN79903 | Rsa1.0.01002.1 | 749 | 57063  | 0         | 615 | 624 | 98 +  | 2   | 624 | 17528  | 18151  |
| UN79904 | Rsa1.0.33945.1 | 491 | 667    | 3.00E-89  | 227 | 245 | 92 -  | 82  | 323 | 424    | 667    |
| UN79905 | Rsa1.0.00127.1 | 741 | 127446 | 0         | 625 | 645 | 96 -  | 97  | 741 | 103012 | 103656 |
| UN79906 | Rsa1.0.00997.1 | 559 | 57190  | 0         | 524 | 582 | 90 +  | 1   | 557 | 56579  | 57144  |
| UN79907 | Rsa1.0.03735.1 | 521 | 21087  | 1.00E-169 | 363 | 383 | 94 +  | 142 | 521 | 3643   | 4025   |
| UN79908 | Rsa1.0.03568.1 | 745 | 22048  | 0         | 667 | 700 | 95 +  | 49  | 745 | 12493  | 13192  |
| UN79909 | Rsa1.0.02304.1 | 620 | 32793  | 0         | 439 | 456 | 96 +  | 174 | 620 | 28804  | 29259  |

|         |                |     |        |           |     |     |      |     |     |        |        |
|---------|----------------|-----|--------|-----------|-----|-----|------|-----|-----|--------|--------|
| UN79910 | Rsa1.0.01497.1 | 762 | 44559  | 0         | 492 | 502 | 98 - | 2   | 503 | 9646   | 10147  |
| UN79911 | Rsa1.0.02399.1 | 719 | 31763  | 1.00E-180 | 362 | 376 | 96 + | 344 | 719 | 12071  | 12446  |
| UN79912 | Rsa1.0.00645.1 | 742 | 189716 | 1.00E-177 | 386 | 409 | 94 + | 51  | 459 | 33308  | 33713  |
| UN79913 | Rsa1.0.01896.1 | 435 | 37512  | 0         | 415 | 434 | 95 - | 2   | 435 | 32358  | 32791  |
| UN79914 | Rsa1.0.01612.1 | 602 | 42255  | 0         | 488 | 494 | 98 - | 103 | 595 | 35355  | 35848  |
| UN79915 | Rsa1.0.00049.1 | 554 | 167018 | 2.00E-59  | 143 | 151 | 94 - | 322 | 469 | 79531  | 79681  |
| UN79916 | Rsa1.0.01488.1 | 711 | 44766  | 0         | 510 | 535 | 95 - | 166 | 700 | 7344   | 7878   |
| UN79917 | Rsa1.0.01279.1 | 552 | 180330 | 1.00E-97  | 187 | 189 | 98 + | 3   | 191 | 23995  | 24183  |
| UN79918 | Rsa1.0.02165.1 | 766 | 34423  | 1.00E-158 | 312 | 321 | 97 + | 379 | 696 | 12523  | 12843  |
| UN79919 | Rsa1.0.00509.1 | 732 | 78829  | 3.00E-68  | 147 | 152 | 96 - | 303 | 454 | 44236  | 44387  |
| UN79920 | Rsa1.0.05665.1 | 280 | 13003  | 2.00E-85  | 203 | 212 | 95 + | 1   | 211 | 11150  | 11358  |
| UN79921 | Rsa1.0.00023.1 | 738 | 194764 | 0         | 416 | 436 | 95 - | 307 | 738 | 86081  | 86516  |
| UN79922 | Rsa1.0.02516.1 | 617 | 30608  | 0         | 434 | 463 | 93 - | 4   | 466 | 9147   | 9605   |
| UN79923 | Rsa1.0.00890.1 | 700 | 323870 | 2.00E-60  | 122 | 123 | 99 + | 15  | 137 | 171364 | 171486 |
| UN79924 | Rsa1.0.03258.1 | 688 | 24302  | 2.00E-88  | 169 | 170 | 99 - | 391 | 560 | 11405  | 11574  |
| UN79925 | Rsa1.0.02917.1 | 513 | 159058 | 1.00E-149 | 300 | 311 | 96 - | 203 | 513 | 133617 | 133927 |
| UN79926 | Rsa1.0.00128.1 | 771 | 228675 | 0         | 750 | 776 | 96 - | 1   | 771 | 155380 | 156150 |
| UN79927 | Rsa1.0.04098.1 | 255 | 19078  | 5.00E-83  | 239 | 259 | 92 - | 1   | 253 | 11234  | 11486  |
| UN79928 | Rsa1.0.02698.1 | 663 | 28593  | 1.00E-105 | 215 | 222 | 96 + | 84  | 305 | 9033   | 9254   |
| UN79929 | Rsa1.0.02222.1 | 648 | 152798 | 1.00E-177 | 336 | 343 | 97 + | 149 | 491 | 2624   | 2966   |
| UN79930 | Rsa1.0.01015.1 | 761 | 56752  | 1.00E-100 | 210 | 218 | 96 + | 332 | 549 | 2746   | 2963   |
| UN79931 | Rsa1.0.05767.1 | 652 | 12701  | 0         | 504 | 518 | 97 + | 135 | 652 | 2743   | 3260   |
| UN79932 | Rsa1.0.05130.1 | 156 | 14758  | 2.00E-69  | 148 | 153 | 96 + | 2   | 154 | 11779  | 11931  |
| UN79933 | Rsa1.0.01854.1 | 724 | 38237  | 1.00E-148 | 318 | 332 | 95 - | 303 | 634 | 19215  | 19541  |
| UN79934 | Rsa1.0.02124.1 | 259 | 34780  | 1.00E-111 | 245 | 259 | 94 - | 1   | 259 | 5407   | 5665   |
| UN79935 | Rsa1.0.23355.1 | 653 | 1055   | 1.00E-178 | 343 | 351 | 97 + | 300 | 648 | 502    | 852    |
| UN79936 | Rsa1.0.01524.1 | 789 | 43949  | 0         | 659 | 712 | 92 + | 102 | 789 | 7292   | 7993   |
| UN79937 | Rsa1.0.00031.1 | 540 | 179862 | 1.00E-161 | 316 | 325 | 97 + | 219 | 540 | 145912 | 146236 |
| UN79938 | Rsa1.0.02605.1 | 733 | 29637  | 5.00E-67  | 154 | 161 | 95 + | 2   | 162 | 5973   | 6131   |
| UN79939 | Rsa1.0.01004.1 | 624 | 56975  | 0         | 620 | 624 | 99 - | 3   | 624 | 17274  | 17897  |
| UN79940 | Rsa1.0.00894.1 | 766 | 269700 | 3.00E-62  | 137 | 142 | 96 - | 158 | 299 | 130217 | 130358 |
| UN79941 | Rsa1.0.03418.1 | 394 | 147293 | 2.00E-86  | 210 | 226 | 92 + | 1   | 226 | 10112  | 10337  |
| UN79942 | Rsa1.0.00216.1 | 291 | 197563 | 1.00E-56  | 160 | 175 | 91 + | 11  | 185 | 50518  | 50690  |
| UN79943 | Rsa1.0.00626.1 | 360 | 71582  | 1.00E-111 | 238 | 248 | 95 - | 1   | 248 | 53383  | 53629  |
| UN79944 | Rsa1.0.00191.1 | 802 | 316976 | 0         | 468 | 488 | 95 - | 1   | 481 | 180955 | 181442 |
| UN79945 | Rsa1.0.23692.1 | 483 | 1031   | 1.00E-125 | 289 | 307 | 94 - | 1   | 304 | 37     | 343    |
| UN79946 | Rsa1.0.07358.1 | 232 | 9516   | 5.00E-80  | 196 | 211 | 92 - | 2   | 212 | 2199   | 2409   |
| UN79947 | Rsa1.0.23867.1 | 711 | 1021   | 0         | 463 | 476 | 97 + | 237 | 711 | 1      | 472    |
| UN79948 | Rsa1.0.00481.1 | 766 | 81316  | 0         | 647 | 656 | 98 - | 1   | 655 | 33825  | 34480  |

|         |                |     |        |           |     |     |       |     |     |        |        |
|---------|----------------|-----|--------|-----------|-----|-----|-------|-----|-----|--------|--------|
| UN79949 | Rsa1.0.00009.1 | 718 | 232558 | 3.00E-62  | 170 | 186 | 91 -  | 409 | 594 | 7461   | 7646   |
| UN79950 | Rsa1.0.00231.1 | 776 | 105381 | 0         | 768 | 776 | 98 +  | 1   | 776 | 22817  | 23592  |
| UN79951 | Rsa1.0.01005.1 | 692 | 56967  | 1.00E-149 | 276 | 279 | 98 -  | 3   | 281 | 53316  | 53594  |
| UN79952 | Rsa1.0.07851.1 | 607 | 8423   | 1.00E-116 | 222 | 225 | 98 -  | 236 | 460 | 5363   | 5587   |
| UN79953 | Rsa1.0.03520.1 | 651 | 22327  | 0         | 649 | 652 | 99 +  | 1   | 651 | 2785   | 3436   |
| UN79954 | Rsa1.0.02658.1 | 191 | 28978  | 2.00E-45  | 99  | 101 | 98 +  | 1   | 101 | 17633  | 17733  |
| UN79955 | Rsa1.0.00651.1 | 752 | 247766 | 1.00E-121 | 245 | 253 | 96 -  | 66  | 318 | 206077 | 206329 |
| UN79956 | Rsa1.0.07426.1 | 264 | 9413   | 5.00E-34  | 83  | 86  | 96 +  | 135 | 220 | 1699   | 1784   |
| UN79957 | Rsa1.0.02606.1 | 730 | 29635  | 1.00E-140 | 299 | 313 | 95 -  | 5   | 316 | 13308  | 13620  |
| UN79958 | Rsa1.0.02480.1 | 698 | 31036  | 0         | 667 | 695 | 95 +  | 1   | 694 | 25525  | 26218  |
| UN79959 | Rsa1.0.04411.1 | 381 | 142979 | 1.00E-167 | 372 | 400 | 93 +  | 1   | 381 | 137818 | 138217 |
| UN79960 | Rsa1.0.00963.1 | 363 | 58176  | 1.00E-151 | 313 | 327 | 95 -  | 1   | 327 | 44669  | 44995  |
| UN79961 | Rsa1.0.08523.1 | 144 | 7238   | 1.00E-54  | 117 | 120 | 97 -  | 19  | 138 | 562    | 681    |
| UN79962 | Rsa1.0.00107.1 | 271 | 431659 | 1.00E-117 | 255 | 269 | 94 +  | 1   | 269 | 291934 | 292202 |
| UN79963 | Rsa1.0.00094.1 | 762 | 139042 | 2.00E-88  | 300 | 343 | 87 +  | 3   | 340 | 27549  | 27876  |
| UN79964 | Rsa1.0.09709.1 | 683 | 6198   | 4.00E-92  | 175 | 176 | 99 +  | 1   | 176 | 5139   | 5314   |
| UN79965 | Rsa1.0.01357.1 | 406 | 47280  | 1.00E-50  | 128 | 134 | 95 +  | 6   | 138 | 2515   | 2647   |
| UN79966 | Rsa1.0.01193.1 | 194 | 51147  | 2.00E-75  | 188 | 198 | 94 +  | 1   | 194 | 27508  | 27704  |
| UN79967 | Rsa1.0.04292.1 | 777 | 18050  | 3.00E-99  | 217 | 226 | 96 -  | 1   | 222 | 9365   | 9590   |
| UN79968 | Rsa1.0.00549.1 | 554 | 76473  | 1.00E-105 | 194 | 194 | 100 + | 195 | 388 | 42091  | 42284  |
| UN79969 | Rsa1.0.00251.1 | 118 | 303968 | 1.00E-26  | 106 | 120 | 88 +  | 1   | 118 | 111551 | 111670 |
| UN79970 | Rsa1.0.00447.1 | 110 | 84051  | 6.00E-16  | 58  | 63  | 92 +  | 4   | 66  | 34735  | 34797  |
| UN79971 | Rsa1.0.00389.1 | 704 | 88795  | 0         | 640 | 652 | 98 +  | 1   | 645 | 40610  | 41261  |
| UN79972 | Rsa1.0.00010.1 | 198 | 294827 | 2.00E-17  | 93  | 109 | 85 +  | 90  | 198 | 81331  | 81428  |
| UN79973 | Rsa1.0.00037.1 | 565 | 307838 | 1.00E-118 | 264 | 279 | 94 +  | 14  | 286 | 236296 | 236574 |
| UN79974 | Rsa1.0.09074.1 | 625 | 6670   | 1.00E-127 | 352 | 387 | 90 +  | 1   | 379 | 2902   | 3277   |
| UN79975 | Rsa1.0.03073.1 | 525 | 25574  | 1.00E-122 | 269 | 281 | 95 +  | 2   | 279 | 10066  | 10345  |
| UN79976 | Rsa1.0.01466.1 | 411 | 45161  | 1.00E-176 | 357 | 372 | 95 -  | 1   | 372 | 25169  | 25540  |
| UN79977 | Rsa1.0.02413.1 | 708 | 31628  | 0         | 686 | 710 | 96 -  | 1   | 708 | 30197  | 30906  |
| UN79978 | Rsa1.0.05707.1 | 735 | 12872  | 0         | 707 | 734 | 96 +  | 5   | 735 | 428    | 1153   |
| UN79979 | Rsa1.0.00078.1 | 804 | 175053 | 1.00E-95  | 238 | 256 | 92 +  | 1   | 252 | 30587  | 30842  |
| UN79980 | Rsa1.0.00497.1 | 739 | 79830  | 0         | 427 | 448 | 95 -  | 1   | 445 | 41564  | 42004  |
| UN79981 | Rsa1.0.01657.1 | 178 | 41436  | 2.00E-84  | 173 | 178 | 97 -  | 1   | 178 | 19237  | 19414  |
| UN79982 | Rsa1.0.00104.1 | 754 | 368722 | 0         | 713 | 746 | 95 +  | 1   | 738 | 57705  | 58446  |
| UN79983 | Rsa1.0.00211.1 | 481 | 228189 | 1.00E-101 | 223 | 234 | 95 +  | 59  | 292 | 146603 | 146834 |
| UN79984 | Rsa1.0.00611.1 | 161 | 72410  | 9.00E-56  | 149 | 161 | 92 +  | 1   | 161 | 15140  | 15298  |
| UN79985 | Rsa1.0.12396.1 | 748 | 5237   | 0         | 408 | 429 | 95 +  | 1   | 429 | 197    | 625    |
| UN79986 | Rsa1.0.04332.1 | 719 | 17869  | 0         | 689 | 714 | 96 +  | 6   | 719 | 15863  | 16575  |
| UN79987 | Rsa1.0.13802.1 | 739 | 4311   | 0         | 694 | 739 | 93 -  | 1   | 739 | 3015   | 3753   |

|         |                |     |        |           |     |     |       |     |     |        |        |
|---------|----------------|-----|--------|-----------|-----|-----|-------|-----|-----|--------|--------|
| UN79988 | Rsa1.0.01115.1 | 813 | 183545 | 0         | 503 | 510 | 98 +  | 1   | 509 | 155023 | 155532 |
| UN79989 | Rsa1.0.00911.1 | 324 | 59943  | 1.00E-117 | 275 | 292 | 94 -  | 1   | 286 | 12111  | 12399  |
| UN79990 | Rsa1.0.01825.1 | 776 | 38725  | 7.00E-82  | 164 | 167 | 98 +  | 453 | 619 | 15205  | 15371  |
| UN79991 | Rsa1.0.00484.1 | 291 | 203294 | 2.00E-61  | 123 | 124 | 99 +  | 44  | 167 | 51800  | 51923  |
| UN79992 | Rsa1.0.02160.1 | 470 | 34468  | 1.00E-155 | 379 | 406 | 93 +  | 71  | 470 | 6227   | 6628   |
| UN79993 | Rsa1.0.14032.1 | 668 | 3893   | 5.00E-98  | 248 | 267 | 92 +  | 1   | 261 | 1497   | 1763   |
| UN79994 | Rsa1.0.01632.1 | 415 | 181224 | 4.00E-51  | 103 | 103 | 100 + | 313 | 415 | 6952   | 7054   |
| UN79995 | #              | #   | #      | #         | #   | #   | #     | #   | #   | #      | #      |
| UN79996 | Rsa1.0.00740.1 | 556 | 215972 | 0         | 434 | 447 | 97 +  | 110 | 556 | 9379   | 9825   |
| UN79997 | Rsa1.0.22366.1 | 618 | 1127   | 0         | 375 | 386 | 97 -  | 1   | 385 | 380    | 764    |
| UN79998 | Rsa1.0.03474.1 | 384 | 147790 | 4.00E-17  | 164 | 197 | 83 +  | 43  | 235 | 134752 | 134941 |
| UN79999 | Rsa1.0.00245.1 | 802 | 103569 | 0         | 532 | 552 | 96 -  | 44  | 594 | 12077  | 12616  |
| UN80000 | Rsa1.0.00023.1 | 398 | 194764 | 1.00E-150 | 372 | 404 | 92 -  | 2   | 398 | 84528  | 84925  |
| UN80001 | Rsa1.0.00891.1 | 849 | 60724  | 1.00E-103 | 281 | 310 | 90 -  | 512 | 812 | 21605  | 21911  |
| UN80002 | Rsa1.0.08924.1 | 759 | 6785   | 0         | 562 | 615 | 91 +  | 149 | 756 | 6078   | 6691   |
| UN80003 | Rsa1.0.01099.1 | 514 | 158481 | 0         | 365 | 367 | 99 -  | 1   | 367 | 132317 | 132683 |
| UN80004 | Rsa1.0.00141.1 | 737 | 121494 | 0         | 435 | 454 | 95 +  | 139 | 589 | 67501  | 67954  |
| UN80005 | Rsa1.0.00128.1 | 365 | 228675 | 2.00E-61  | 218 | 246 | 88 +  | 1   | 245 | 86713  | 86953  |
| UN80006 | Rsa1.0.00301.1 | 764 | 365315 | 1.00E-135 | 305 | 324 | 94 -  | 1   | 324 | 189263 | 189585 |
| UN80007 | Rsa1.0.00246.1 | 445 | 103541 | 0         | 403 | 422 | 95 +  | 1   | 422 | 70698  | 71118  |
| UN80008 | Rsa1.0.00087.1 | 157 | 761073 | 4.00E-67  | 151 | 157 | 96 -  | 1   | 157 | 315039 | 315194 |
| UN80009 | Rsa1.0.00805.1 | 159 | 63724  | 1.00E-58  | 148 | 159 | 93 -  | 1   | 159 | 43431  | 43589  |
| UN80010 | Rsa1.0.00369.1 | 387 | 266462 | 2.00E-93  | 235 | 254 | 92 +  | 17  | 268 | 146327 | 146576 |
| UN80011 | Rsa1.0.00075.1 | 563 | 146680 | 0         | 502 | 527 | 95 +  | 35  | 560 | 127746 | 128272 |
| UN80012 | Rsa1.0.02070.1 | 556 | 158516 | 0         | 544 | 557 | 97 +  | 3   | 556 | 8462   | 9016   |
| UN80013 | Rsa1.0.03818.1 | 546 | 20668  | 3.00E-89  | 223 | 238 | 93 +  | 1   | 235 | 6683   | 6919   |
| UN80014 | Rsa1.0.00175.1 | 458 | 166121 | 1.00E-140 | 394 | 445 | 88 +  | 50  | 457 | 67450  | 67894  |
| UN80015 | Rsa1.0.01864.1 | 781 | 37998  | 1.00E-135 | 304 | 328 | 92 -  | 450 | 777 | 13771  | 14080  |
| UN80016 | Rsa1.0.02373.1 | 394 | 32048  | 1.00E-167 | 371 | 393 | 94 +  | 3   | 394 | 8627   | 9018   |
| UN80017 | Rsa1.0.00100.1 | 609 | 249232 | 1.00E-152 | 296 | 302 | 98 -  | 3   | 301 | 137496 | 137796 |
| UN80018 | Rsa1.0.00362.1 | 760 | 299497 | 0         | 740 | 773 | 95 -  | 1   | 760 | 292476 | 293243 |
| UN80019 | Rsa1.0.01468.1 | 314 | 45146  | 1.00E-125 | 281 | 299 | 93 +  | 16  | 314 | 28205  | 28503  |
| UN80020 | Rsa1.0.00218.1 | 797 | 201480 | 1.00E-168 | 385 | 409 | 94 -  | 3   | 402 | 153355 | 153761 |
| UN80021 | Rsa1.0.01331.1 | 542 | 47944  | 0         | 346 | 348 | 99 -  | 1   | 348 | 43800  | 44147  |
| UN80022 | Rsa1.0.00235.1 | 786 | 154696 | 0         | 720 | 767 | 93 +  | 24  | 786 | 140015 | 140764 |
| UN80023 | Rsa1.0.00886.1 | 458 | 167350 | 1.00E-175 | 429 | 464 | 92 +  | 5   | 458 | 12564  | 13020  |
| UN80024 | Rsa1.0.03949.1 | 821 | 19899  | 0         | 813 | 820 | 99 +  | 3   | 821 | 5141   | 5960   |
| UN80025 | Rsa1.0.02396.1 | 576 | 31783  | 0         | 425 | 435 | 97 -  | 76  | 506 | 16638  | 17072  |
| UN80026 | Rsa1.0.02516.1 | 584 | 30608  | 3.00E-62  | 339 | 410 | 82 +  | 110 | 519 | 9470   | 9878   |

|         |                |     |        |           |     |     |      |     |     |        |        |
|---------|----------------|-----|--------|-----------|-----|-----|------|-----|-----|--------|--------|
| UN80027 | Rsa1.0.05398.1 | 469 | 13885  | 1.00E-149 | 360 | 387 | 93 - | 1   | 382 | 12836  | 13213  |
| UN80028 | Rsa1.0.00418.1 | 373 | 215377 | 1.00E-114 | 230 | 236 | 97 - | 3   | 237 | 45040  | 45275  |
| UN80029 | Rsa1.0.00119.1 | 549 | 467509 | 0         | 529 | 567 | 93 + | 1   | 549 | 118474 | 119038 |
| UN80030 | Rsa1.0.04293.1 | 743 | 18046  | 0         | 646 | 666 | 96 - | 78  | 741 | 14118  | 14777  |
| UN80031 | Rsa1.0.01190.1 | 170 | 194501 | 3.00E-31  | 90  | 97  | 92 + | 57  | 153 | 186983 | 187079 |
| UN80032 | Rsa1.0.00646.1 | 737 | 70473  | 0         | 554 | 567 | 97 + | 171 | 737 | 4441   | 5007   |
| UN80033 | Rsa1.0.00496.1 | 228 | 79834  | 4.00E-77  | 203 | 222 | 91 - | 6   | 227 | 56211  | 56432  |
| UN80034 | Rsa1.0.03921.1 | 597 | 20080  | 0         | 535 | 558 | 95 - | 41  | 597 | 3943   | 4498   |
| UN80035 | Rsa1.0.00012.1 | 543 | 222148 | 0         | 503 | 552 | 91 + | 1   | 537 | 74766  | 75313  |
| UN80036 | Rsa1.0.00693.1 | 355 | 161311 | 1.00E-145 | 322 | 339 | 94 - | 18  | 355 | 37383  | 37718  |
| UN80037 | Rsa1.0.01242.1 | 627 | 50066  | 1.00E-179 | 328 | 330 | 99 - | 1   | 329 | 21410  | 21739  |
| UN80038 | Rsa1.0.00876.1 | 654 | 61328  | 1.00E-107 | 287 | 313 | 91 - | 23  | 331 | 51226  | 51528  |
| UN80039 | Rsa1.0.01009.1 | 646 | 56922  | 7.00E-94  | 262 | 290 | 90 + | 2   | 282 | 34693  | 34979  |
| UN80040 | Rsa1.0.00202.1 | 766 | 185895 | 1.00E-145 | 294 | 303 | 97 - | 1   | 302 | 11171  | 11469  |
| UN80041 | Rsa1.0.02849.1 | 683 | 27327  | 3.00E-65  | 185 | 203 | 91 + | 187 | 388 | 21184  | 21386  |
| UN80042 | Rsa1.0.64139.1 | 770 | 357    | 0         | 344 | 348 | 98 + | 286 | 633 | 2      | 349    |
| UN80043 | Rsa1.0.05161.1 | 497 | 14631  | 3.00E-77  | 160 | 163 | 98 - | 125 | 287 | 10045  | 10206  |
| UN80044 | Rsa1.0.03935.1 | 727 | 19983  | 1.00E-155 | 284 | 286 | 99 + | 3   | 288 | 7856   | 8141   |
| UN80045 | Rsa1.0.00936.1 | 774 | 59078  | 0         | 648 | 673 | 96 + | 10  | 680 | 22845  | 23515  |
| UN80046 | Rsa1.0.05669.1 | 757 | 12993  | 0         | 750 | 757 | 99 + | 1   | 757 | 9668   | 10424  |
| UN80047 | Rsa1.0.15089.1 | 353 | 2840   | 1.00E-114 | 256 | 272 | 94 + | 82  | 353 | 302    | 573    |
| UN80048 | Rsa1.0.00538.1 | 590 | 77149  | 0         | 587 | 590 | 99 + | 1   | 590 | 24050  | 24639  |
| UN80049 | Rsa1.0.02735.1 | 739 | 28344  | 0         | 715 | 738 | 96 + | 3   | 739 | 12681  | 13418  |
| UN80050 | Rsa1.0.03233.1 | 825 | 24446  | 0         | 797 | 831 | 95 + | 1   | 825 | 20227  | 21057  |
| UN80051 | Rsa1.0.05090.1 | 191 | 14879  | 3.00E-65  | 180 | 194 | 92 - | 1   | 191 | 3998   | 4186   |
| UN80052 | #              | #   | #      | #         | #   | #   | #    | #   | #   | #      | #      |
| UN80053 | Rsa1.0.01961.1 | 669 | 36761  | 0         | 631 | 644 | 97 - | 31  | 669 | 26125  | 26768  |
| UN80054 | Rsa1.0.03984.1 | 191 | 19709  | 1.00E-18  | 86  | 98  | 87 + | 6   | 100 | 9607   | 9704   |
| UN80055 | Rsa1.0.01540.1 | 673 | 151890 | 0         | 643 | 679 | 94 + | 1   | 673 | 142497 | 143171 |
| UN80056 | Rsa1.0.00517.1 | 758 | 142790 | 1.00E-132 | 246 | 248 | 99 - | 344 | 591 | 106233 | 106480 |
| UN80057 | Rsa1.0.04134.1 | 286 | 149811 | 3.00E-91  | 213 | 226 | 94 - | 4   | 228 | 8952   | 9177   |
| UN80058 | Rsa1.0.01002.1 | 592 | 57063  | 0         | 515 | 537 | 95 - | 54  | 590 | 3995   | 4531   |
| UN80059 | Rsa1.0.00130.1 | 715 | 125737 | 0         | 633 | 644 | 98 - | 72  | 715 | 54382  | 55025  |
| UN80060 | Rsa1.0.01484.1 | 469 | 44806  | 0         | 438 | 455 | 96 - | 16  | 469 | 40820  | 41274  |
| UN80061 | Rsa1.0.01258.1 | 628 | 49755  | 7.00E-69  | 146 | 149 | 97 - | 126 | 273 | 3480   | 3628   |
| UN80062 | Rsa1.0.02411.1 | 136 | 31655  | 1.00E-45  | 99  | 101 | 98 + | 4   | 104 | 24458  | 24558  |
| UN80063 | Rsa1.0.01578.1 | 400 | 42880  | 2.00E-89  | 236 | 259 | 91 - | 140 | 398 | 41449  | 41707  |
| UN80064 | #              | #   | #      | #         | #   | #   | #    | #   | #   | #      | #      |
| UN80065 | Rsa1.0.00514.1 | 797 | 78421  | 1.00E-166 | 316 | 321 | 98 - | 1   | 321 | 64024  | 64343  |

|         |                |     |        |           |     |     |      |     |     |        |        |
|---------|----------------|-----|--------|-----------|-----|-----|------|-----|-----|--------|--------|
| UN80066 | Rsa1.0.00483.1 | 731 | 81102  | 0         | 463 | 483 | 95 + | 1   | 480 | 27493  | 27970  |
| UN80067 | Rsa1.0.00675.1 | 604 | 145590 | 0         | 584 | 604 | 96 + | 2   | 604 | 30707  | 31310  |
| UN80068 | Rsa1.0.00414.1 | 515 | 202190 | 0         | 486 | 516 | 94 - | 2   | 515 | 11612  | 12108  |
| UN80069 | Rsa1.0.00119.1 | 573 | 467509 | 1.00E-103 | 215 | 222 | 96 - | 354 | 573 | 50446  | 50667  |
| UN80070 | Rsa1.0.00066.1 | 546 | 152418 | 1.00E-132 | 366 | 406 | 90 - | 130 | 527 | 66561  | 66951  |
| UN80071 | Rsa1.0.02965.1 | 750 | 26402  | 0         | 743 | 753 | 98 - | 1   | 750 | 4190   | 4942   |
| UN80072 | Rsa1.0.00408.1 | 668 | 176752 | 1.00E-131 | 255 | 260 | 98 - | 1   | 260 | 33263  | 33520  |
| UN80073 | Rsa1.0.00376.1 | 108 | 90101  | 4.00E-26  | 93  | 104 | 89 - | 1   | 104 | 69826  | 69929  |
| UN80074 | Rsa1.0.30763.1 | 219 | 745    | 1.00E-104 | 212 | 219 | 96 - | 1   | 219 | 261    | 479    |
| UN80075 | Rsa1.0.00398.1 | 744 | 88007  | 0         | 467 | 489 | 95 - | 1   | 483 | 63410  | 63897  |
| UN80076 | Rsa1.0.00111.1 | 186 | 390088 | 3.00E-53  | 166 | 186 | 89 - | 1   | 186 | 75650  | 75835  |
| UN80077 | Rsa1.0.02976.1 | 712 | 26315  | 0         | 493 | 526 | 93 + | 191 | 712 | 7199   | 7724   |
| UN80078 | Rsa1.0.00249.1 | 743 | 153740 | 0         | 726 | 744 | 97 + | 1   | 743 | 39106  | 39849  |
| UN80079 | Rsa1.0.00525.1 | 466 | 78030  | 0         | 459 | 466 | 98 - | 1   | 466 | 40012  | 40477  |
| UN80080 | Rsa1.0.02036.1 | 749 | 35731  | 1.00E-125 | 268 | 284 | 94 - | 245 | 528 | 8134   | 8405   |
| UN80081 | Rsa1.0.16955.1 | 720 | 1976   | 0         | 640 | 643 | 99 - | 1   | 643 | 1      | 643    |
| UN80082 | Rsa1.0.01403.1 | 331 | 46453  | 1.00E-165 | 321 | 330 | 97 - | 1   | 330 | 24972  | 25301  |
| UN80083 | Rsa1.0.00010.1 | 768 | 294827 | 0         | 473 | 498 | 94 + | 1   | 485 | 124595 | 125089 |
| UN80084 | Rsa1.0.00527.1 | 443 | 77733  | 2.00E-87  | 242 | 263 | 92 + | 1   | 260 | 57570  | 57830  |
| UN80085 | Rsa1.0.03426.1 | 716 | 23010  | 1.00E-175 | 355 | 367 | 96 - | 1   | 366 | 13073  | 13438  |
| UN80086 | Rsa1.0.00152.1 | 473 | 257730 | 0         | 462 | 476 | 97 - | 1   | 473 | 84904  | 85379  |
| UN80087 | #              | #   | #      | #         | #   | #   | #    | #   | #   | #      | #      |
| UN80088 | Rsa1.0.07972.1 | 724 | 8151   | 2.00E-60  | 167 | 182 | 91 - | 416 | 595 | 3877   | 4058   |
| UN80089 | Rsa1.0.13790.1 | 499 | 4331   | 0         | 469 | 506 | 92 - | 2   | 499 | 177    | 676    |
| UN80090 | Rsa1.0.03009.1 | 410 | 26065  | 1.00E-57  | 159 | 174 | 91 - | 237 | 410 | 19445  | 19618  |
| UN80091 | Rsa1.0.02143.1 | 564 | 34632  | 1.00E-144 | 340 | 367 | 92 + | 198 | 564 | 13042  | 13408  |
| UN80092 | Rsa1.0.13838.1 | 282 | 4236   | 1.00E-153 | 280 | 281 | 99 - | 2   | 282 | 3497   | 3776   |
| UN80093 | Rsa1.0.01242.1 | 722 | 50066  | 1.00E-142 | 309 | 322 | 95 - | 1   | 316 | 21407  | 21728  |
| UN80094 | Rsa1.0.00947.1 | 510 | 58664  | 1.00E-100 | 214 | 223 | 95 + | 287 | 509 | 57858  | 58077  |
| UN80095 | Rsa1.0.00016.1 | 586 | 831256 | 1.00E-128 | 247 | 252 | 98 - | 1   | 252 | 763413 | 763664 |
| UN80096 | Rsa1.0.21524.1 | 204 | 1195   | 2.00E-42  | 103 | 108 | 95 + | 1   | 108 | 1042   | 1149   |
| UN80097 | Rsa1.0.01146.1 | 122 | 163455 | 4.00E-20  | 98  | 109 | 89 - | 1   | 107 | 162872 | 162977 |
| UN80098 | Rsa1.0.01236.1 | 518 | 50156  | 3.00E-37  | 113 | 123 | 91 - | 167 | 289 | 43426  | 43546  |
| UN80099 | Rsa1.0.00045.1 | 737 | 328694 | 0         | 457 | 467 | 97 - | 269 | 735 | 289290 | 289756 |
| UN80100 | Rsa1.0.00849.1 | 348 | 62212  | 1.00E-135 | 298 | 314 | 94 + | 13  | 323 | 9787   | 10099  |
| UN80101 | Rsa1.0.01171.1 | 296 | 51752  | 1.00E-110 | 258 | 276 | 93 + | 23  | 296 | 50662  | 50937  |
| UN80102 | Rsa1.0.02267.1 | 314 | 33194  | 1.00E-144 | 301 | 313 | 96 + | 1   | 310 | 22256  | 22567  |
| UN80103 | Rsa1.0.08026.1 | 450 | 8061   | 0         | 408 | 423 | 96 - | 28  | 450 | 796    | 1218   |
| UN80104 | Rsa1.0.14063.1 | 803 | 3852   | 0         | 635 | 638 | 99 - | 168 | 803 | 2168   | 2805   |



|         |                |     |        |           |     |     |      |     |     |        |        |
|---------|----------------|-----|--------|-----------|-----|-----|------|-----|-----|--------|--------|
| UN80105 | Rsa1.0.27666.1 | 610 | 844    | 0         | 361 | 366 | 98 - | 2   | 367 | 1      | 366    |
| UN80106 | Rsa1.0.01728.1 | 695 | 40239  | 0         | 664 | 702 | 94 - | 1   | 695 | 3247   | 3948   |
| UN80107 | Rsa1.0.00642.1 | 271 | 201230 | 1.00E-128 | 263 | 272 | 96 - | 1   | 271 | 158451 | 158722 |
| UN80108 | Rsa1.0.00684.1 | 452 | 141701 | 0         | 379 | 388 | 97 - | 1   | 385 | 39451  | 39837  |
| UN80109 | Rsa1.0.03740.1 | 741 | 21065  | 1.00E-117 | 363 | 419 | 86 - | 2   | 385 | 16278  | 16696  |
| UN80110 | Rsa1.0.00015.1 | 323 | 561803 | 1.00E-104 | 303 | 337 | 89 - | 1   | 323 | 351257 | 351592 |
| UN80111 | Rsa1.0.00758.1 | 776 | 65477  | 1.00E-158 | 302 | 308 | 98 + | 1   | 308 | 37890  | 38193  |
| UN80112 | Rsa1.0.01442.1 | 744 | 45776  | 0         | 722 | 744 | 97 + | 1   | 744 | 3595   | 4338   |
| UN80113 | Rsa1.0.00369.1 | 424 | 266462 | 1.00E-149 | 314 | 328 | 95 + | 102 | 424 | 9460   | 9787   |
| UN80114 | Rsa1.0.00377.1 | 732 | 90038  | 0         | 378 | 380 | 99 + | 3   | 382 | 51757  | 52136  |
| UN80115 | Rsa1.0.00694.1 | 640 | 68074  | 0         | 444 | 456 | 97 - | 188 | 640 | 27099  | 27553  |
| UN80116 | Rsa1.0.02723.1 | 759 | 28408  | 0         | 537 | 540 | 99 + | 1   | 540 | 7667   | 8206   |
| UN80117 | Rsa1.0.03666.1 | 794 | 21485  | 0         | 444 | 459 | 96 - | 3   | 461 | 14758  | 15213  |
| UN80118 | Rsa1.0.01005.1 | 475 | 56967  | 1.00E-179 | 334 | 338 | 98 - | 139 | 475 | 27852  | 28189  |
| UN80119 | Rsa1.0.00113.1 | 733 | 131574 | 0         | 698 | 727 | 96 + | 1   | 724 | 70591  | 71317  |
| UN80120 | Rsa1.0.16553.1 | 417 | 2115   | 1.00E-78  | 158 | 161 | 98 + | 81  | 241 | 109    | 269    |
| UN80121 | Rsa1.0.00182.1 | 734 | 142305 | 1.00E-80  | 183 | 193 | 94 + | 484 | 676 | 98126  | 98318  |
| UN80122 | Rsa1.0.05208.1 | 137 | 14504  | 3.00E-55  | 124 | 129 | 96 - | 4   | 132 | 4079   | 4207   |
| UN80123 | Rsa1.0.05030.1 | 105 | 15088  | 3.00E-33  | 99  | 107 | 92 + | 1   | 105 | 10969  | 11075  |
| UN80124 | Rsa1.0.00491.1 | 234 | 80219  | 1.00E-105 | 224 | 234 | 95 - | 1   | 234 | 36682  | 36915  |
| UN80125 | Rsa1.0.00103.1 | 171 | 135304 | 6.00E-54  | 155 | 168 | 92 + | 7   | 171 | 45653  | 45817  |
| UN80126 | Rsa1.0.00912.1 | 790 | 59923  | 1.00E-122 | 287 | 304 | 94 + | 1   | 300 | 36982  | 37282  |
| UN80127 | Rsa1.0.02155.1 | 761 | 34522  | 1.00E-128 | 251 | 257 | 97 - | 349 | 605 | 7801   | 8057   |
| UN80128 | Rsa1.0.00402.1 | 451 | 385315 | 0         | 438 | 448 | 97 + | 1   | 448 | 228286 | 228733 |
| UN80129 | Rsa1.0.02129.1 | 778 | 34757  | 1.00E-156 | 339 | 357 | 94 - | 1   | 349 | 6496   | 6850   |
| UN80130 | Rsa1.0.04602.1 | 237 | 16684  | 5.00E-86  | 222 | 236 | 94 + | 1   | 235 | 12250  | 12480  |
| UN80131 | Rsa1.0.01054.1 | 206 | 55470  | 1.00E-105 | 204 | 207 | 98 - | 3   | 206 | 26242  | 26448  |
| UN80132 | Rsa1.0.02274.1 | 690 | 33109  | 1.00E-86  | 189 | 197 | 95 + | 1   | 194 | 25476  | 25672  |
| UN80133 | Rsa1.0.00527.1 | 408 | 77733  | 0         | 400 | 410 | 97 + | 1   | 408 | 26326  | 26735  |
| UN80134 | Rsa1.0.01798.1 | 476 | 173909 | 1.00E-125 | 292 | 313 | 93 + | 154 | 463 | 162338 | 162650 |
| UN80135 | Rsa1.0.15766.1 | 130 | 2435   | 2.00E-50  | 122 | 128 | 95 + | 1   | 126 | 1080   | 1207   |
| UN80136 | Rsa1.0.09568.1 | 118 | 6284   | 4.00E-23  | 58  | 59  | 98 - | 60  | 118 | 5409   | 5467   |
| UN80137 | Rsa1.0.01838.1 | 660 | 38500  | 0         | 422 | 446 | 94 - | 1   | 443 | 17537  | 17978  |
| UN80138 | Rsa1.0.01058.1 | 501 | 55430  | 1.00E-91  | 227 | 242 | 93 - | 4   | 244 | 29543  | 29781  |
| UN80139 | Rsa1.0.08592.1 | 727 | 7150   | 0         | 700 | 724 | 96 + | 3   | 723 | 1276   | 1999   |
| UN80140 | Rsa1.0.02584.1 | 723 | 29877  | 0         | 411 | 435 | 94 - | 2   | 431 | 806    | 1240   |
| UN80141 | Rsa1.0.00191.1 | 736 | 316976 | 0         | 709 | 737 | 96 + | 1   | 736 | 212063 | 212787 |
| UN80142 | Rsa1.0.00111.1 | 802 | 390088 | 1.00E-162 | 341 | 357 | 95 - | 1   | 356 | 139323 | 139679 |
| UN80143 | Rsa1.0.00026.1 | 654 | 327835 | 6.00E-82  | 171 | 175 | 97 - | 268 | 442 | 165729 | 165902 |

| UN80144 | #              | #   | #      | #         | #   | #   | #     | #   | #   | #      | #      | # |
|---------|----------------|-----|--------|-----------|-----|-----|-------|-----|-----|--------|--------|---|
| UN80145 | Rsa1.0.08102.1 | 547 | 7901   | 1.00E-150 | 275 | 277 | 99 +  | 1   | 277 | 6157   | 6433   |   |
| UN80146 | Rsa1.0.01484.1 | 716 | 44806  | 0         | 516 | 537 | 96 -  | 97  | 632 | 21799  | 22329  |   |
| UN80147 | Rsa1.0.00990.1 | 767 | 57445  | 0         | 386 | 387 | 99 +  | 1   | 387 | 44943  | 45329  |   |
| UN80148 | Rsa1.0.00609.1 | 485 | 72785  | 0         | 478 | 485 | 98 -  | 1   | 485 | 61589  | 62073  |   |
| UN80149 | Rsa1.0.02373.1 | 223 | 32048  | 9.00E-97  | 212 | 223 | 95 -  | 1   | 223 | 30225  | 30447  |   |
| UN80150 | Rsa1.0.08255.1 | 368 | 7652   | 7.00E-34  | 77  | 78  | 98 -  | 258 | 335 | 2295   | 2372   |   |
| UN80151 | Rsa1.0.00454.1 | 796 | 216970 | 1.00E-102 | 189 | 189 | 100 - | 339 | 527 | 164199 | 164387 |   |
| UN80152 | Rsa1.0.00082.1 | 798 | 237584 | 1.00E-74  | 146 | 147 | 99 -  | 551 | 697 | 138054 | 138200 |   |
| UN80153 | Rsa1.0.01257.1 | 785 | 49766  | 0         | 351 | 355 | 98 -  | 3   | 357 | 38760  | 39114  |   |
| UN80154 | Rsa1.0.00476.1 | 296 | 280966 | 2.00E-49  | 151 | 170 | 88 +  | 1   | 159 | 233094 | 233263 |   |
| UN80155 | Rsa1.0.00005.1 | 808 | 353093 | 1.00E-142 | 532 | 623 | 85 -  | 1   | 607 | 67367  | 67983  |   |
| UN80156 | Rsa1.0.02170.1 | 626 | 34352  | 0         | 550 | 611 | 90 -  | 16  | 626 | 1678   | 2288   |   |
| UN80157 | Rsa1.0.00138.1 | 772 | 247040 | 1.00E-135 | 251 | 253 | 99 +  | 27  | 279 | 15002  | 15254  |   |
| UN80158 | Rsa1.0.00037.1 | 607 | 307838 | 1.00E-151 | 319 | 334 | 95 +  | 1   | 334 | 236248 | 236574 |   |
| UN80159 | Rsa1.0.00415.1 | 554 | 86795  | 0         | 517 | 541 | 95 -  | 9   | 548 | 9008   | 9548   |   |
| UN80160 | Rsa1.0.00330.1 | 621 | 94666  | 0         | 511 | 518 | 98 -  | 104 | 621 | 14206  | 14723  |   |
| UN80161 | Rsa1.0.01397.1 | 495 | 183276 | 0         | 493 | 495 | 99 -  | 1   | 495 | 16905  | 17399  |   |
| UN80162 | Rsa1.0.01863.1 | 252 | 38010  | 1.00E-103 | 241 | 253 | 95 -  | 1   | 252 | 27174  | 27422  |   |
| UN80163 | Rsa1.0.00254.1 | 475 | 102600 | 0         | 456 | 475 | 96 -  | 1   | 475 | 89698  | 90172  |   |
| UN80164 | Rsa1.0.11291.1 | 610 | 5555   | 0         | 607 | 610 | 99 +  | 1   | 610 | 275    | 884    |   |
| UN80165 | Rsa1.0.00323.1 | 703 | 159650 | 0         | 656 | 679 | 96 +  | 1   | 677 | 35893  | 36569  |   |
| UN80166 | Rsa1.0.00180.1 | 720 | 114581 | 0         | 673 | 724 | 92 +  | 3   | 720 | 8162   | 8879   |   |
| UN80167 | Rsa1.0.10577.1 | 736 | 5796   | 0         | 479 | 487 | 98 -  | 3   | 489 | 535    | 1020   |   |
| UN80168 | Rsa1.0.00817.1 | 714 | 62961  | 0         | 377 | 392 | 96 -  | 1   | 392 | 20948  | 21336  |   |
| UN80169 | Rsa1.0.00003.1 | 176 | 340054 | 1.00E-67  | 163 | 174 | 93 -  | 3   | 176 | 4596   | 4769   |   |
| UN80170 | Rsa1.0.00084.1 | 143 | 142338 | 2.00E-28  | 73  | 76  | 96 -  | 68  | 143 | 30664  | 30739  |   |
| UN80171 | Rsa1.0.00013.1 | 613 | 292129 | 1.00E-169 | 367 | 383 | 95 -  | 2   | 380 | 196597 | 196976 |   |
| UN80172 | Rsa1.0.00528.1 | 181 | 164755 | 7.00E-54  | 156 | 171 | 91 -  | 7   | 177 | 149638 | 149807 |   |
| UN80173 | Rsa1.0.01722.1 | 765 | 40320  | 0         | 762 | 765 | 99 +  | 1   | 765 | 18680  | 19444  |   |
| UN80174 | #              | #   | #      | #         | #   | #   | #     | #   | #   | #      | #      | # |
| UN80175 | Rsa1.0.00131.1 | 311 | 432233 | 1.00E-105 | 281 | 309 | 90 -  | 1   | 309 | 430087 | 430383 |   |
| UN80176 | Rsa1.0.00185.1 | 718 | 248445 | 1.00E-110 | 270 | 289 | 93 -  | 4   | 288 | 4378   | 4665   |   |
| UN80177 | Rsa1.0.02526.1 | 526 | 30479  | 0         | 455 | 459 | 99 -  | 1   | 459 | 9547   | 10005  |   |
| UN80178 | Rsa1.0.00951.1 | 758 | 164588 | 0         | 710 | 757 | 93 -  | 1   | 757 | 8030   | 8778   |   |
| UN80179 | Rsa1.0.00046.1 | 671 | 320315 | 0         | 664 | 675 | 98 +  | 1   | 671 | 154507 | 155180 |   |
| UN80180 | Rsa1.0.01484.1 | 502 | 44806  | 2.33E-156 | 308 | 322 | 95 -  | 50  | 370 | 9694   | 10015  |   |
| UN80181 | Rsa1.0.01164.1 | 647 | 51934  | 0         | 620 | 665 | 93 -  | 4   | 647 | 49642  | 50298  |   |
| UN80182 | Rsa1.0.06388.1 | 433 | 11110  | 0         | 405 | 430 | 94 +  | 7   | 430 | 5865   | 6289   |   |

|         |                |     |        |           |     |     |       |     |     |        |        |
|---------|----------------|-----|--------|-----------|-----|-----|-------|-----|-----|--------|--------|
| UN80183 | Rsa1.0_00336.1 | 453 | 445051 | 1.00E-130 | 290 | 306 | 94 -  | 1   | 306 | 218905 | 219207 |
| UN80184 | Rsa1.0_01675.1 | 608 | 41155  | 1.00E-82  | 199 | 212 | 93 +  | 79  | 289 | 39013  | 39224  |
| UN80185 | Rsa1.0_03782.1 | 454 | 20891  | 1.00E-156 | 304 | 312 | 97 -  | 143 | 454 | 11281  | 11592  |
| UN80186 | Rsa1.0_00237.1 | 440 | 235974 | 0         | 431 | 443 | 97 +  | 1   | 440 | 34259  | 34701  |
| UN80187 | Rsa1.0_02931.1 | 112 | 26654  | 1.00E-29  | 99  | 109 | 90 -  | 4   | 112 | 6331   | 6437   |
| UN80188 | Rsa1.0_00400.1 | 626 | 87858  | 4.00E-55  | 113 | 114 | 99 -  | 513 | 626 | 60287  | 60400  |
| UN80189 | Rsa1.0_00287.1 | 595 | 98687  | 0         | 591 | 595 | 99 +  | 1   | 595 | 64544  | 65138  |
| UN80190 | Rsa1.0_05876.1 | 634 | 12348  | 2.00E-78  | 192 | 205 | 93 +  | 237 | 440 | 3822   | 4026   |
| UN80191 | Rsa1.0_00396.1 | 482 | 88242  | 0         | 381 | 400 | 95 -  | 1   | 397 | 5961   | 6360   |
| UN80192 | Rsa1.0_04515.1 | 228 | 17021  | 6.00E-67  | 201 | 219 | 91 -  | 6   | 224 | 2746   | 2957   |
| UN80193 | Rsa1.0_23101.1 | 253 | 1071   | 2.00E-58  | 208 | 234 | 88 +  | 24  | 253 | 6      | 233    |
| UN80194 | Rsa1.0_00590.1 | 722 | 73835  | 0         | 404 | 408 | 99 -  | 1   | 408 | 319    | 726    |
| UN80195 | Rsa1.0_00123.1 | 397 | 325650 | 1.00E-122 | 335 | 372 | 90 -  | 12  | 380 | 256008 | 256379 |
| UN80196 | Rsa1.0_00104.1 | 441 | 368722 | 1.00E-82  | 233 | 259 | 89 +  | 1   | 257 | 33258  | 33507  |
| UN80197 | Rsa1.0_00017.1 | 456 | 752458 | 0         | 423 | 456 | 92 +  | 1   | 456 | 375182 | 375625 |
| UN80198 | Rsa1.0_01773.1 | 487 | 39546  | 1.00E-138 | 336 | 363 | 92 -  | 108 | 464 | 18285  | 18644  |
| UN80199 | Rsa1.0_01220.1 | 189 | 161775 | 6.00E-82  | 183 | 190 | 96 +  | 1   | 189 | 122621 | 122809 |
| UN80200 | Rsa1.0_10632.1 | 505 | 5776   | 0         | 495 | 505 | 98 -  | 1   | 505 | 3761   | 4265   |
| UN80201 | Rsa1.0_00932.1 | 758 | 59185  | 1.00E-177 | 364 | 378 | 96 +  | 1   | 378 | 30646  | 31020  |
| UN80202 | Rsa1.0_06602.1 | 187 | 10683  | 6.00E-85  | 180 | 187 | 96 -  | 1   | 187 | 9380   | 9566   |
| UN80203 | Rsa1.0_00645.1 | 666 | 189716 | 1.00E-79  | 178 | 187 | 95 +  | 63  | 249 | 9170   | 9356   |
| UN80204 | Rsa1.0_00798.1 | 559 | 63945  | 0         | 547 | 557 | 98 -  | 1   | 557 | 43711  | 44267  |
| UN80205 | Rsa1.0_00289.1 | 581 | 98620  | 1.00E-119 | 298 | 323 | 92 +  | 1   | 323 | 25691  | 26003  |
| UN80206 | Rsa1.0_00457.1 | 326 | 337301 | 1.00E-137 | 310 | 330 | 93 +  | 1   | 324 | 161355 | 161683 |
| UN80207 | Rsa1.0_05778.1 | 213 | 12656  | 5.00E-86  | 197 | 209 | 94 +  | 5   | 213 | 370    | 578    |
| UN80208 | Rsa1.0_03572.1 | 719 | 146346 | 1.00E-174 | 377 | 395 | 95 +  | 2   | 396 | 129462 | 129850 |
| UN80209 | Rsa1.0_00322.1 | 585 | 212233 | 0         | 582 | 584 | 99 +  | 2   | 585 | 211410 | 211993 |
| UN80210 | Rsa1.0_01027.1 | 738 | 56402  | 0         | 547 | 580 | 94 +  | 1   | 568 | 17157  | 17736  |
| UN80211 | Rsa1.0_00026.1 | 371 | 327835 | 1.00E-158 | 354 | 374 | 94 -  | 1   | 371 | 45885  | 46252  |
| UN80212 | Rsa1.0_01175.1 | 603 | 51674  | 3.00E-80  | 192 | 204 | 94 +  | 88  | 290 | 36098  | 36301  |
| UN80213 | Rsa1.0_06707.1 | 331 | 10503  | 4.00E-66  | 134 | 136 | 98 -  | 172 | 307 | 10     | 145    |
| UN80214 | Rsa1.0_01947.1 | 149 | 36977  | 1.00E-30  | 86  | 90  | 95 -  | 62  | 148 | 22116  | 22204  |
| UN80215 | Rsa1.0_01153.1 | 802 | 52264  | 0         | 723 | 758 | 95 -  | 35  | 787 | 49634  | 50388  |
| UN80216 | Rsa1.0_00006.1 | 738 | 396176 | 1.00E-107 | 210 | 213 | 98 -  | 1   | 213 | 290623 | 290834 |
| UN80217 | Rsa1.0_00685.1 | 804 | 68515  | 0         | 571 | 587 | 97 -  | 1   | 584 | 2271   | 2857   |
| UN80218 | Rsa1.0_00917.1 | 161 | 182012 | 1.00E-76  | 154 | 157 | 98 -  | 5   | 161 | 156104 | 156260 |
| UN80219 | Rsa1.0_02518.1 | 580 | 30586  | 1.00E-165 | 294 | 294 | 100 + | 3   | 296 | 25544  | 25837  |
| UN80220 | Rsa1.0_00789.1 | 114 | 64233  | 3.00E-42  | 102 | 107 | 95 -  | 3   | 109 | 34606  | 34712  |
| UN80221 | Rsa1.0_00247.1 | 764 | 103408 | 0         | 731 | 765 | 95 -  | 8   | 764 | 77975  | 78729  |

|         |                |     |        |           |     |     |      |     |     |        |        |
|---------|----------------|-----|--------|-----------|-----|-----|------|-----|-----|--------|--------|
| UN80222 | Rsa1.0.00383.1 | 710 | 398431 | 0         | 495 | 532 | 93 + | 102 | 633 | 284018 | 284530 |
| UN80223 | Rsa1.0.02287.1 | 726 | 32986  | 0         | 695 | 730 | 95 - | 1   | 726 | 23993  | 24715  |
| UN80224 | #              | #   | #      | #         | #   | #   | #    | #   | #   | #      | #      |
| UN80225 | Rsa1.0.00981.1 | 688 | 57700  | 1.00E-137 | 269 | 275 | 97 + | 139 | 412 | 13052  | 13326  |
| UN80226 | Rsa1.0.00039.1 | 446 | 296927 | 6.00E-78  | 333 | 394 | 84 + | 53  | 446 | 219251 | 219641 |
| UN80227 | Rsa1.0.00262.1 | 729 | 101906 | 1.00E-165 | 318 | 326 | 97 + | 285 | 610 | 27481  | 27806  |
| UN80228 | Rsa1.0.02750.1 | 536 | 28239  | 2.00E-78  | 200 | 217 | 92 + | 306 | 522 | 23215  | 23431  |
| UN80229 | Rsa1.0.76398.1 | 515 | 300    | 1.00E-150 | 285 | 290 | 98 - | 167 | 456 | 11     | 300    |
| UN80230 | Rsa1.0.03790.1 | 358 | 20844  | 7.00E-74  | 195 | 213 | 91 - | 137 | 349 | 2269   | 2481   |
| UN80231 | Rsa1.0.00050.1 | 760 | 237174 | 0         | 365 | 376 | 97 - | 1   | 374 | 33432  | 33806  |
| UN80232 | Rsa1.0.00017.1 | 679 | 752458 | 0         | 676 | 679 | 99 - | 2   | 679 | 376034 | 376712 |
| UN80233 | Rsa1.0.00329.1 | 714 | 222544 | 0         | 585 | 631 | 92 + | 17  | 629 | 195379 | 196002 |
| UN80234 | Rsa1.0.03884.1 | 758 | 20274  | 1.00E-141 | 354 | 385 | 91 + | 377 | 758 | 19654  | 20022  |
| UN80235 | Rsa1.0.03640.1 | 108 | 21624  | 3.00E-45  | 104 | 108 | 96 - | 1   | 108 | 663    | 770    |
| UN80236 | Rsa1.0.02984.1 | 729 | 26263  | 1.00E-144 | 280 | 287 | 97 - | 2   | 288 | 22601  | 22887  |
| UN80237 | Rsa1.0.01569.1 | 788 | 43029  | 1.00E-130 | 264 | 272 | 97 + | 416 | 687 | 37369  | 37639  |
| UN80238 | Rsa1.0.00100.1 | 702 | 249232 | 1.00E-92  | 200 | 209 | 95 + | 490 | 698 | 136197 | 136405 |
| UN80239 | Rsa1.0.07812.1 | 223 | 8496   | 1.00E-120 | 222 | 223 | 99 + | 1   | 223 | 31     | 253    |
| UN80240 | Rsa1.0.14240.1 | 197 | 3629   | 7.00E-85  | 192 | 199 | 96 + | 1   | 197 | 613    | 810    |
| UN80241 | Rsa1.0.00728.1 | 768 | 66704  | 1.00E-108 | 257 | 275 | 93 - | 149 | 420 | 62572  | 62837  |
| UN80242 | Rsa1.0.01468.1 | 674 | 45146  | 1.00E-107 | 200 | 201 | 99 - | 138 | 338 | 31162  | 31362  |
| UN80243 | Rsa1.0.21200.1 | 702 | 1226   | 0         | 678 | 703 | 96 + | 1   | 702 | 287    | 988    |
| UN80244 | Rsa1.0.00416.1 | 686 | 86772  | 1.00E-100 | 226 | 238 | 94 + | 386 | 617 | 43883  | 44120  |
| UN80245 | Rsa1.0.05518.1 | 766 | 13459  | 0         | 397 | 404 | 98 + | 364 | 766 | 4937   | 5340   |
| UN80246 | Rsa1.0.00108.1 | 289 | 478491 | 7.00E-98  | 184 | 185 | 99 - | 1   | 185 | 123660 | 123844 |
| UN80247 | Rsa1.0.00600.1 | 706 | 73395  | 0         | 387 | 409 | 94 + | 218 | 626 | 29420  | 29828  |
| UN80248 | Rsa1.0.00200.1 | 688 | 162016 | 4.00E-18  | 103 | 119 | 86 - | 12  | 129 | 13280  | 13396  |
| UN80249 | Rsa1.0.02848.1 | 347 | 27329  | 0         | 346 | 348 | 99 - | 1   | 347 | 9382   | 9729   |
| UN80250 | Rsa1.0.00512.1 | 690 | 200277 | 5.00E-98  | 209 | 218 | 95 - | 9   | 226 | 25123  | 25340  |
| UN80251 | Rsa1.0.01413.1 | 747 | 46275  | 1.00E-177 | 439 | 479 | 91 + | 270 | 747 | 39702  | 40165  |
| UN80252 | Rsa1.0.01622.1 | 695 | 42071  | 5.00E-95  | 189 | 193 | 97 + | 1   | 193 | 30162  | 30354  |
| UN80253 | Rsa1.0.00527.1 | 786 | 77733  | 1.00E-155 | 389 | 424 | 91 - | 6   | 415 | 28102  | 28515  |
| UN80254 | Rsa1.0.04205.1 | 694 | 138772 | 1.00E-143 | 338 | 364 | 92 - | 344 | 694 | 133890 | 134249 |
| UN80255 | Rsa1.0.01798.1 | 551 | 173909 | 0         | 534 | 551 | 96 - | 1   | 551 | 164350 | 164900 |
| UN80256 | Rsa1.0.00940.1 | 731 | 179946 | 1.00E-112 | 227 | 234 | 97 + | 392 | 625 | 175916 | 176149 |
| UN80257 | Rsa1.0.00131.1 | 407 | 432233 | 9.00E-86  | 173 | 177 | 97 + | 231 | 407 | 410706 | 410882 |
| UN80258 | Rsa1.0.00160.1 | 756 | 346678 | 0         | 385 | 395 | 97 + | 38  | 432 | 2224   | 2618   |
| UN80259 | Rsa1.0.02413.1 | 760 | 31628  | 0         | 382 | 383 | 99 + | 134 | 516 | 28741  | 29123  |
| UN80260 | Rsa1.0.04022.1 | 655 | 19534  | 1.00E-107 | 236 | 249 | 94 - | 326 | 574 | 2133   | 2381   |

|         |                |     |        |           |     |     |       |     |     |        |        |
|---------|----------------|-----|--------|-----------|-----|-----|-------|-----|-----|--------|--------|
| UN80261 | Rsa1.0_16653.1 | 568 | 2077   | 0         | 515 | 517 | 99 -  | 54  | 568 | 599    | 1115   |
| UN80262 | Rsa1.0_03728.1 | 396 | 21147  | 6.00E-96  | 211 | 222 | 95 -  | 174 | 395 | 15867  | 16088  |
| UN80263 | Rsa1.0_00806.1 | 692 | 63674  | 0         | 676 | 695 | 97 -  | 2   | 692 | 43346  | 44039  |
| UN80264 | Rsa1.0_00480.1 | 317 | 81325  | 1.00E-111 | 207 | 208 | 99 -  | 110 | 317 | 53618  | 53825  |
| UN80265 | Rsa1.0_01913.1 | 753 | 37363  | 2.00E-82  | 224 | 246 | 91 +  | 459 | 695 | 27662  | 27903  |
| UN80266 | Rsa1.0_02756.1 | 744 | 28202  | 1.00E-89  | 194 | 202 | 96 -  | 237 | 438 | 19920  | 20118  |
| UN80267 | Rsa1.0_00257.1 | 721 | 102407 | 0         | 464 | 464 | 100 - | 1   | 464 | 15721  | 16184  |
| UN80268 | Rsa1.0_08323.1 | 730 | 7540   | 0         | 461 | 483 | 95 +  | 249 | 730 | 2112   | 2594   |
| UN80269 | Rsa1.0_00116.1 | 689 | 365886 | 0         | 529 | 546 | 96 +  | 144 | 689 | 154724 | 155269 |
| UN80270 | Rsa1.0_02400.1 | 552 | 31750  | 3.00E-68  | 132 | 132 | 100 + | 421 | 552 | 9129   | 9260   |
| UN80271 | Rsa1.0_00526.1 | 582 | 169279 | 1.00E-152 | 318 | 333 | 95 +  | 2   | 334 | 148198 | 148530 |
| UN80272 | Rsa1.0_09880.1 | 137 | 6106   | 1.00E-45  | 102 | 105 | 97 -  | 1   | 105 | 45     | 149    |
| UN80273 | Rsa1.0_00307.1 | 545 | 199003 | 6.00E-66  | 134 | 136 | 98 -  | 83  | 218 | 186432 | 186567 |
| UN80274 | Rsa1.0_00144.1 | 715 | 120708 | 1.00E-163 | 348 | 365 | 95 +  | 1   | 361 | 45209  | 45567  |
| UN80275 | Rsa1.0_05321.1 | 615 | 14154  | 1.00E-160 | 292 | 294 | 99 +  | 275 | 568 | 13071  | 13364  |
| UN80276 | Rsa1.0_03022.1 | 295 | 25968  | 1.00E-115 | 281 | 300 | 93 +  | 1   | 295 | 2675   | 2972   |
| UN80277 | Rsa1.0_00722.1 | 748 | 66840  | 0         | 439 | 461 | 95 -  | 2   | 459 | 65531  | 65988  |
| UN80278 | Rsa1.0_01622.1 | 639 | 42071  | 0         | 538 | 552 | 97 +  | 34  | 585 | 1291   | 1842   |
| UN80279 | Rsa1.0_02161.1 | 411 | 34459  | 0         | 406 | 408 | 99 +  | 4   | 411 | 32562  | 32969  |
| UN80280 | Rsa1.0_04470.1 | 670 | 17204  | 1.00E-67  | 137 | 139 | 98 +  | 460 | 598 | 3848   | 3986   |
| UN80281 | Rsa1.0_23175.1 | 735 | 1066   | 1.00E-117 | 234 | 239 | 97 -  | 22  | 259 | 34     | 272    |
| UN80282 | Rsa1.0_01058.1 | 754 | 55430  | 2.00E-60  | 157 | 170 | 92 +  | 226 | 395 | 28333  | 28496  |
| UN80283 | Rsa1.0_02401.1 | 710 | 138425 | 0         | 501 | 505 | 99 -  | 1   | 505 | 27715  | 28219  |
| UN80284 | Rsa1.0_01955.1 | 456 | 36850  | 1.00E-148 | 338 | 361 | 93 -  | 96  | 456 | 15522  | 15875  |
| UN80285 | Rsa1.0_05643.1 | 458 | 13065  | 1.00E-155 | 330 | 344 | 95 -  | 1   | 342 | 9500   | 9841   |
| UN80286 | Rsa1.0_04049.1 | 282 | 19385  | 1.00E-135 | 278 | 288 | 96 +  | 1   | 282 | 17964  | 18251  |
| UN80287 | Rsa1.0_09117.1 | 275 | 6637   | 1.00E-134 | 266 | 274 | 97 -  | 2   | 275 | 3279   | 3552   |
| UN80288 | Rsa1.0_00668.1 | 754 | 69421  | 0         | 732 | 751 | 97 +  | 1   | 750 | 22063  | 22813  |
| UN80289 | Rsa1.0_00741.1 | 701 | 66117  | 1.00E-49  | 113 | 117 | 96 -  | 469 | 585 | 48083  | 48199  |
| UN80290 | Rsa1.0_00645.1 | 645 | 189716 | 0         | 611 | 651 | 93 +  | 1   | 645 | 28924  | 29574  |
| UN80291 | Rsa1.0_00316.1 | 264 | 96264  | 1.00E-68  | 142 | 144 | 98 -  | 1   | 143 | 85542  | 85685  |
| UN80292 | Rsa1.0_00131.1 | 604 | 432233 | 1.00E-103 | 209 | 215 | 97 +  | 284 | 498 | 410706 | 410920 |
| UN80293 | Rsa1.0_00136.1 | 762 | 122464 | 1.00E-129 | 261 | 270 | 96 -  | 52  | 321 | 62177  | 62441  |
| UN80294 | Rsa1.0_00497.1 | 727 | 79830  | 1.00E-134 | 276 | 287 | 96 +  | 2   | 288 | 50795  | 51081  |
| UN80295 | Rsa1.0_00734.1 | 722 | 66508  | 0         | 409 | 440 | 92 +  | 274 | 713 | 38631  | 39048  |
| UN80296 | Rsa1.0_00108.1 | 581 | 478491 | 0         | 549 | 562 | 97 -  | 22  | 581 | 154232 | 154793 |
| UN80297 | Rsa1.0_38450.1 | 550 | 585    | 1.00E-139 | 251 | 251 | 100 + | 300 | 550 | 172    | 422    |
| UN80298 | Rsa1.0_00019.1 | 728 | 301669 | 1.00E-89  | 174 | 176 | 98 -  | 512 | 687 | 113298 | 113473 |
| UN80299 | Rsa1.0_00881.1 | 774 | 61260  | 0         | 373 | 381 | 97 -  | 158 | 538 | 2549   | 2929   |

|         |                |     |        |           |     |     |       |     |     |        |        |
|---------|----------------|-----|--------|-----------|-----|-----|-------|-----|-----|--------|--------|
| UN80300 | Rsa1.0_01626.1 | 714 | 41989  | 4.00E-89  | 167 | 167 | 100 - | 157 | 323 | 18034  | 18200  |
| UN80301 | Rsa1.0_00055.1 | 721 | 520193 | 1.00E-104 | 271 | 291 | 93 -  | 431 | 721 | 333928 | 334211 |
| UN80302 | Rsa1.0_00344.1 | 663 | 191774 | 0         | 480 | 489 | 98 +  | 172 | 660 | 181684 | 182170 |
| UN80303 | Rsa1.0_25408.1 | 640 | 937    | 0         | 431 | 435 | 99 +  | 206 | 640 | 1      | 435    |
| UN80304 | Rsa1.0_00740.1 | 492 | 215972 | 0         | 453 | 467 | 97 -  | 4   | 470 | 10201  | 10664  |
| UN80305 | Rsa1.0_01273.1 | 727 | 49464  | 1.00E-122 | 235 | 239 | 98 -  | 47  | 285 | 24253  | 24491  |
| UN80306 | Rsa1.0_25258.1 | 772 | 944    | 1.00E-140 | 278 | 286 | 97 -  | 375 | 660 | 660    | 942    |
| UN80307 | Rsa1.0_00082.1 | 747 | 237584 | 2.00E-91  | 214 | 226 | 94 +  | 4   | 227 | 37296  | 37520  |
| UN80308 | Rsa1.0_02150.1 | 407 | 34580  | 1.00E-120 | 337 | 365 | 92 +  | 1   | 353 | 16662  | 17022  |
| UN80309 | Rsa1.0_00023.1 | 571 | 194764 | 1.00E-88  | 181 | 186 | 97 +  | 173 | 358 | 83184  | 83369  |
| UN80310 | Rsa1.0_11921.1 | 760 | 5369   | 1.00E-109 | 303 | 330 | 91 +  | 425 | 751 | 4572   | 4896   |
| UN80311 | Rsa1.0_01070.1 | 665 | 55099  | 1.00E-164 | 452 | 503 | 89 +  | 164 | 665 | 36247  | 36726  |
| UN80312 | Rsa1.0_00066.1 | 679 | 152418 | 1.00E-103 | 206 | 211 | 97 -  | 1   | 211 | 73601  | 73811  |
| UN80313 | Rsa1.0_02098.1 | 744 | 35032  | 8.00E-60  | 128 | 130 | 98 -  | 601 | 729 | 19844  | 19973  |
| UN80314 | Rsa1.0_01008.1 | 668 | 56924  | 0         | 575 | 656 | 87 -  | 9   | 664 | 9492   | 10138  |
| UN80315 | Rsa1.0_04400.1 | 658 | 17529  | 0         | 600 | 625 | 96 +  | 34  | 658 | 16666  | 17284  |
| UN80316 | Rsa1.0_02222.1 | 559 | 152798 | 1.00E-155 | 307 | 317 | 96 +  | 220 | 536 | 149189 | 149505 |
| UN80317 | Rsa1.0_00681.1 | 821 | 68779  | 1.00E-55  | 120 | 123 | 97 -  | 110 | 232 | 54308  | 54430  |
| UN80318 | Rsa1.0_00828.1 | 505 | 62744  | 4.00E-82  | 219 | 238 | 92 +  | 189 | 425 | 55356  | 55586  |
| UN80319 | Rsa1.0_00476.1 | 746 | 280966 | 1.00E-100 | 216 | 225 | 96 -  | 3   | 226 | 235338 | 235562 |
| UN80320 | Rsa1.0_00005.1 | 774 | 353093 | 0         | 584 | 657 | 88 +  | 16  | 671 | 66444  | 67096  |
| UN80321 | Rsa1.0_00153.1 | 509 | 192931 | 0         | 332 | 334 | 99 +  | 175 | 508 | 87766  | 88098  |
| UN80322 | Rsa1.0_00579.1 | 506 | 148308 | 1.00E-137 | 289 | 299 | 96 -  | 216 | 506 | 63824  | 64121  |
| UN80323 | #              | #   | #      | #         | #   | #   | #     | #   | #   | #      | #      |
| UN80324 | Rsa1.0_00221.1 | 667 | 106972 | 2.00E-85  | 178 | 184 | 96 -  | 309 | 492 | 50983  | 51160  |
| UN80325 | Rsa1.0_06575.1 | 720 | 10732  | 0         | 694 | 703 | 98 -  | 1   | 701 | 9973   | 10675  |
| UN80326 | Rsa1.0_14624.1 | 459 | 3217   | 0         | 441 | 466 | 94 -  | 3   | 459 | 2598   | 3063   |
| UN80327 | Rsa1.0_03927.1 | 747 | 19997  | 1.00E-162 | 351 | 369 | 95 -  | 2   | 366 | 12463  | 12828  |
| UN80328 | Rsa1.0_00216.1 | 660 | 197563 | 0         | 537 | 538 | 99 +  | 123 | 660 | 67482  | 68019  |
| UN80329 | Rsa1.0_00159.1 | 565 | 431686 | 0         | 558 | 563 | 99 +  | 3   | 565 | 402819 | 403380 |
| UN80330 | Rsa1.0_03782.1 | 693 | 20891  | 0         | 523 | 558 | 93 +  | 103 | 648 | 9788   | 10345  |
| UN80331 | Rsa1.0_04026.1 | 679 | 19508  | 1.00E-131 | 312 | 333 | 93 -  | 4   | 335 | 5129   | 5459   |
| UN80332 | Rsa1.0_02327.1 | 594 | 32497  | 0         | 571 | 593 | 96 -  | 2   | 594 | 822    | 1414   |
| UN80333 | Rsa1.0_01651.1 | 752 | 41586  | 0         | 680 | 712 | 95 -  | 52  | 752 | 39004  | 39715  |
| UN80334 | Rsa1.0_00447.1 | 713 | 84051  | 7.00E-51  | 112 | 115 | 97 -  | 317 | 431 | 36831  | 36945  |
| UN80335 | Rsa1.0_00389.1 | 752 | 88795  | 0         | 739 | 749 | 98 -  | 3   | 750 | 42161  | 42909  |
| UN80336 | Rsa1.0_09074.1 | 809 | 6670   | 0         | 551 | 581 | 94 -  | 223 | 792 | 4110   | 4690   |
| UN80337 | Rsa1.0_03073.1 | 786 | 25574  | 4.00E-77  | 179 | 189 | 94 -  | 142 | 330 | 11450  | 11635  |
| UN80338 | Rsa1.0_02396.1 | 767 | 31783  | 0         | 400 | 423 | 94 +  | 25  | 446 | 15438  | 15860  |

|         |                |     |        |           |     |     |       |     |     |        |        |
|---------|----------------|-----|--------|-----------|-----|-----|-------|-----|-----|--------|--------|
| UN80339 | Rsa1.0.02516.1 | 788 | 30608  | 1.00E-179 | 538 | 611 | 88 -  | 70  | 680 | 10363  | 10973  |
| UN80340 | Rsa1.0.00218.1 | 579 | 201480 | 1.00E-121 | 230 | 233 | 98 +  | 347 | 579 | 52378  | 52610  |
| UN80341 | Rsa1.0.17354.1 | 409 | 1851   | 3.00E-95  | 186 | 189 | 98 -  | 221 | 409 | 365    | 553    |
| UN80342 | Rsa1.0.05595.1 | 764 | 13228  | 0         | 554 | 574 | 96 -  | 15  | 584 | 5046   | 5615   |
| UN80343 | Rsa1.0.02247.1 | 596 | 33427  | 1.00E-165 | 295 | 295 | 100 - | 302 | 596 | 8514   | 8808   |
| UN80344 | Rsa1.0.00015.1 | 456 | 561803 | 0         | 436 | 463 | 94 -  | 1   | 456 | 478353 | 478815 |
| UN80345 | Rsa1.0.16267.1 | 678 | 2220   | 0         | 443 | 463 | 95 -  | 216 | 678 | 1016   | 1477   |
| UN80346 | Rsa1.0.00012.1 | 552 | 222148 | 1.00E-151 | 274 | 275 | 99 -  | 278 | 552 | 75543  | 75817  |
| UN80347 | Rsa1.0.03529.1 | 740 | 22277  | 0         | 585 | 608 | 96 -  | 134 | 740 | 16008  | 16615  |
| UN80348 | Rsa1.0.00693.1 | 620 | 161311 | 1.00E-166 | 334 | 346 | 96 +  | 2   | 344 | 36580  | 36925  |
| UN80349 | Rsa1.0.01016.1 | 672 | 181422 | 0         | 456 | 483 | 94 +  | 189 | 669 | 155897 | 156379 |
| UN80350 | Rsa1.0.01242.1 | 773 | 50066  | 1.00E-101 | 212 | 220 | 96 +  | 317 | 536 | 19654  | 19873  |
| UN80351 | Rsa1.0.01519.1 | 696 | 44144  | 0         | 546 | 566 | 96 -  | 2   | 565 | 40675  | 41238  |
| UN80352 | Rsa1.0.00082.1 | 217 | 237584 | 3.00E-81  | 185 | 195 | 94 -  | 23  | 217 | 56483  | 56674  |
| UN80353 | Rsa1.0.00040.1 | 695 | 324196 | 2.00E-88  | 265 | 298 | 88 +  | 243 | 518 | 69834  | 70128  |
| UN80354 | Rsa1.0.01009.1 | 679 | 56922  | 5.00E-70  | 144 | 147 | 97 -  | 357 | 503 | 37407  | 37553  |
| UN80355 | Rsa1.0.02348.1 | 691 | 32316  | 1.00E-157 | 298 | 302 | 98 +  | 391 | 691 | 17380  | 17681  |
| UN80356 | Rsa1.0.02070.1 | 780 | 158516 | 0         | 355 | 362 | 98 -  | 411 | 769 | 22264  | 22625  |
| UN80357 | Rsa1.0.01536.1 | 779 | 43747  | 1.00E-167 | 319 | 326 | 97 -  | 112 | 437 | 22573  | 22898  |
| UN80358 | Rsa1.0.00036.1 | 751 | 176186 | 1.00E-133 | 265 | 273 | 97 +  | 221 | 493 | 148175 | 148447 |
| UN80359 | Rsa1.0.00236.1 | 753 | 104771 | 8.00E-97  | 180 | 180 | 100 - | 176 | 355 | 22547  | 22726  |
| UN80360 | Rsa1.0.08424.1 | 752 | 7375   | 0         | 405 | 412 | 98 -  | 342 | 752 | 4122   | 4533   |
| UN80361 | Rsa1.0.00484.1 | 706 | 203294 | 3.00E-93  | 201 | 210 | 95 -  | 13  | 222 | 54497  | 54706  |
| UN80362 | Rsa1.0.02160.1 | 575 | 34468  | 1.00E-125 | 273 | 288 | 94 -  | 288 | 575 | 7309   | 7592   |
| UN80363 | Rsa1.0.01403.1 | 509 | 46453  | 0         | 493 | 511 | 96 +  | 2   | 509 | 24165  | 24672  |
| UN80364 | Rsa1.0.00010.1 | 762 | 294827 | 1.00E-128 | 256 | 264 | 96 -  | 192 | 455 | 129503 | 129766 |
| UN80365 | Rsa1.0.00080.1 | 346 | 190437 | 1.00E-169 | 340 | 352 | 96 +  | 1   | 346 | 66692  | 67043  |
| UN80366 | Rsa1.0.00184.1 | 726 | 218748 | 1.00E-116 | 277 | 295 | 93 -  | 356 | 648 | 90424  | 90715  |
| UN80367 | Rsa1.0.02185.1 | 583 | 34150  | 0         | 366 | 374 | 97 -  | 2   | 373 | 27396  | 27769  |
| UN80368 | Rsa1.0.00370.1 | 606 | 90472  | 0         | 389 | 409 | 95 +  | 136 | 538 | 25553  | 25961  |
| UN80369 | Rsa1.0.05168.1 | 759 | 14621  | 0         | 739 | 765 | 96 -  | 1   | 758 | 12375  | 13139  |
| UN80370 | Rsa1.0.00341.1 | 691 | 249309 | 0         | 639 | 695 | 91 +  | 1   | 683 | 113275 | 113966 |
| UN80371 | Rsa1.0.01661.1 | 662 | 41400  | 0         | 360 | 363 | 99 +  | 301 | 662 | 14125  | 14486  |
| UN80372 | Rsa1.0.00960.1 | 672 | 58199  | 5.00E-98  | 185 | 186 | 99 -  | 295 | 480 | 15841  | 16026  |
| UN80373 | Rsa1.0.00387.1 | 519 | 495407 | 1.00E-107 | 214 | 219 | 97 -  | 108 | 323 | 392287 | 392505 |
| UN80374 | Rsa1.0.00104.1 | 439 | 368722 | 3.00E-73  | 224 | 250 | 89 +  | 192 | 439 | 348992 | 349239 |
| UN80375 | Rsa1.0.05961.1 | 415 | 12101  | 6.00E-47  | 116 | 120 | 96 -  | 292 | 411 | 932    | 1049   |
| UN80376 | Rsa1.0.00417.1 | 623 | 395068 | 1.00E-100 | 207 | 213 | 97 +  | 408 | 620 | 279138 | 279349 |
| UN80377 | Rsa1.0.06625.1 | 763 | 10641  | 3.00E-22  | 91  | 103 | 88 -  | 540 | 642 | 4932   | 5034   |

|         |                |     |        |           |     |     |       |     |     |        |        |
|---------|----------------|-----|--------|-----------|-----|-----|-------|-----|-----|--------|--------|
| UN80378 | Rsa1.0.48423.1 | 271 | 468    | 5.00E-77  | 155 | 158 | 98 +  | 1   | 158 | 208    | 365    |
| UN80379 | Rsa1.0.00175.1 | 657 | 166121 | 1.00E-118 | 230 | 235 | 97 +  | 307 | 541 | 151998 | 152232 |
| UN80380 | Rsa1.0.00909.1 | 727 | 59976  | 0         | 357 | 360 | 99 -  | 134 | 490 | 13054  | 13413  |
| UN80381 | Rsa1.0.03501.1 | 724 | 22458  | 1.00E-129 | 271 | 280 | 96 +  | 188 | 465 | 19302  | 19578  |
| UN80382 | Rsa1.0.22303.1 | 654 | 1132   | 0         | 639 | 653 | 97 +  | 2   | 654 | 382    | 1034   |
| UN80383 | Rsa1.0.01828.1 | 606 | 38681  | 0         | 574 | 614 | 93 +  | 2   | 606 | 36412  | 37025  |
| UN80384 | Rsa1.0.09173.1 | 761 | 6582   | 1.00E-132 | 281 | 294 | 95 +  | 3   | 296 | 1227   | 1512   |
| UN80385 | Rsa1.0.00119.1 | 535 | 467509 | 0         | 512 | 546 | 93 +  | 2   | 535 | 49023  | 49565  |
| UN80386 | Rsa1.0.00325.1 | 728 | 95371  | 1.00E-105 | 256 | 276 | 92 +  | 306 | 581 | 79215  | 79487  |
| UN80387 | Rsa1.0.00022.1 | 140 | 200461 | 2.00E-34  | 94  | 98  | 95 -  | 45  | 140 | 124362 | 124459 |
| UN80388 | Rsa1.0.02412.1 | 746 | 31643  | 0         | 399 | 415 | 96 +  | 276 | 688 | 4832   | 5246   |
| UN80389 | Rsa1.0.05593.1 | 668 | 13235  | 1.00E-171 | 355 | 372 | 95 +  | 22  | 393 | 5007   | 5378   |
| UN80390 | Rsa1.0.01327.1 | 384 | 48033  | 6.00E-53  | 115 | 118 | 97 -  | 198 | 315 | 16238  | 16355  |
| UN80391 | Rsa1.0.01194.1 | 110 | 51113  | 6.00E-19  | 95  | 110 | 86 -  | 13  | 109 | 28422  | 28531  |
| UN80392 | Rsa1.0.00066.1 | 202 | 152418 | 9.00E-66  | 177 | 190 | 93 +  | 3   | 191 | 65099  | 65285  |
| UN80393 | Rsa1.0.34806.1 | 687 | 650    | 6.00E-79  | 168 | 174 | 96 -  | 369 | 542 | 232    | 405    |
| UN80394 | Rsa1.0.00300.1 | 578 | 97747  | 0         | 561 | 591 | 94 -  | 3   | 578 | 35695  | 36279  |
| UN80395 | Rsa1.0.00524.1 | 698 | 169613 | 1.00E-100 | 300 | 328 | 91 +  | 2   | 317 | 153403 | 153727 |
| UN80396 | Rsa1.0.01459.1 | 351 | 45277  | 1.00E-131 | 280 | 293 | 95 -  | 2   | 294 | 38027  | 38318  |
| UN80397 | Rsa1.0.00128.1 | 730 | 228675 | 1.00E-107 | 256 | 271 | 94 -  | 3   | 270 | 87723  | 87990  |
| UN80398 | Rsa1.0.00706.1 | 750 | 291570 | 0         | 478 | 488 | 97 +  | 5   | 492 | 30639  | 31126  |
| UN80399 | Rsa1.0.01226.1 | 588 | 50316  | 1.00E-169 | 307 | 309 | 99 +  | 280 | 588 | 8839   | 9147   |
| UN80400 | Rsa1.0.11291.1 | 551 | 5555   | 0         | 543 | 554 | 98 -  | 1   | 551 | 1131   | 1684   |
| UN80401 | Rsa1.0.00149.1 | 631 | 305196 | 1.00E-152 | 362 | 382 | 94 +  | 252 | 631 | 102071 | 102443 |
| UN80402 | Rsa1.0.06747.1 | 647 | 10426  | 1.00E-116 | 292 | 319 | 91 -  | 241 | 557 | 9712   | 10016  |
| UN80403 | Rsa1.0.00180.1 | 701 | 114581 | 2.00E-78  | 180 | 189 | 95 -  | 499 | 686 | 8843   | 9031   |
| UN80404 | Rsa1.0.00608.1 | 289 | 172672 | 1.00E-114 | 267 | 285 | 93 +  | 5   | 289 | 111977 | 112255 |
| UN80405 | Rsa1.0.00084.1 | 511 | 142338 | 0         | 421 | 429 | 98 +  | 83  | 511 | 29371  | 29799  |
| UN80406 | Rsa1.0.00408.1 | 685 | 176752 | 0         | 327 | 328 | 99 +  | 310 | 637 | 30973  | 31300  |
| UN80407 | Rsa1.0.00301.1 | 683 | 365315 | 1.00E-143 | 293 | 305 | 96 -  | 2   | 306 | 319265 | 319569 |
| UN80408 | Rsa1.0.00107.1 | 435 | 431659 | 1.00E-171 | 346 | 360 | 96 +  | 1   | 360 | 334696 | 335055 |
| UN80409 | Rsa1.0.14434.1 | 708 | 3394   | 3.00E-96  | 179 | 179 | 100 - | 3   | 181 | 311    | 489    |
| UN80410 | Rsa1.0.01230.1 | 762 | 50221  | 2.00E-82  | 159 | 160 | 99 -  | 450 | 609 | 21283  | 21442  |
| UN80411 | Rsa1.0.00919.1 | 479 | 59675  | 3.00E-21  | 71  | 77  | 92 +  | 227 | 303 | 33641  | 33717  |
| UN80412 | Rsa1.0.00131.1 | 610 | 432233 | 1.00E-122 | 248 | 255 | 97 +  | 113 | 366 | 429046 | 429300 |
| UN80413 | Rsa1.0.00185.1 | 666 | 248445 | 5.00E-67  | 186 | 201 | 92 +  | 3   | 201 | 886    | 1084   |
| UN80414 | Rsa1.0.00339.1 | 755 | 222974 | 0         | 494 | 511 | 96 -  | 176 | 686 | 52482  | 52992  |
| UN80415 | Rsa1.0.00490.1 | 777 | 186713 | 0         | 763 | 785 | 97 +  | 2   | 777 | 77913  | 78696  |
| UN80416 | Rsa1.0.00216.1 | 765 | 197563 | 1.00E-106 | 201 | 203 | 99 +  | 448 | 650 | 47251  | 47453  |



|         |                |     |        |           |     |     |      |     |     |        |        |
|---------|----------------|-----|--------|-----------|-----|-----|------|-----|-----|--------|--------|
| UN80417 | Rsa1.0_25026.1 | 773 | 955    | 0         | 566 | 606 | 93 + | 165 | 767 | 1      | 589    |
| UN80418 | Rsa1.0_01164.1 | 650 | 51934  | 0         | 335 | 337 | 99 + | 315 | 650 | 48471  | 48807  |
| UN80419 | Rsa1.0_01675.1 | 686 | 41155  | 1.00E-133 | 298 | 314 | 94 - | 1   | 308 | 9381   | 9694   |
| UN80420 | Rsa1.0_00526.1 | 654 | 169279 | 0         | 508 | 539 | 94 - | 122 | 654 | 110900 | 111426 |
| UN80421 | Rsa1.0_00249.1 | 766 | 153740 | 0         | 495 | 515 | 96 - | 1   | 512 | 40506  | 41020  |
| UN80422 | Rsa1.0_01454.1 | 804 | 45440  | 1.00E-92  | 211 | 217 | 97 + | 592 | 804 | 32801  | 33016  |
| UN80423 | Rsa1.0_03306.1 | 671 | 23873  | 0         | 419 | 439 | 95 - | 3   | 431 | 15713  | 16150  |
| UN80424 | Rsa1.0_11065.1 | 668 | 5628   | 3.00E-93  | 189 | 194 | 97 + | 150 | 343 | 930    | 1123   |
| UN80425 | Rsa1.0_02036.1 | 726 | 35731  | 1.00E-86  | 181 | 187 | 96 + | 125 | 311 | 6103   | 6289   |
| UN80426 | Rsa1.0_47812.1 | 504 | 473    | 9.00E-68  | 143 | 147 | 97 - | 154 | 300 | 261    | 407    |
| UN80427 | Rsa1.0_06356.1 | 142 | 11178  | 2.00E-32  | 77  | 79  | 97 - | 61  | 139 | 9548   | 9626   |
| UN80428 | Rsa1.0_02157.1 | 647 | 149652 | 1.00E-67  | 134 | 135 | 99 - | 151 | 285 | 134347 | 134481 |
| UN80429 | Rsa1.0_02910.1 | 675 | 26843  | 0         | 674 | 676 | 99 - | 1   | 675 | 23617  | 24292  |
| UN80430 | Rsa1.0_00123.1 | 797 | 325650 | 6.00E-67  | 139 | 142 | 97 + | 190 | 331 | 47096  | 47237  |
| UN80431 | Rsa1.0_00048.1 | 758 | 167185 | 1.00E-154 | 325 | 340 | 95 + | 2   | 340 | 34608  | 34947  |
| UN80432 | Rsa1.0_00026.1 | 774 | 327835 | 0         | 660 | 707 | 93 + | 71  | 773 | 163507 | 164198 |
| UN80433 | #              | #   | #      | #         | #   | #   | #    | #   | #   | #      | #      |
| UN80434 | Rsa1.0_00565.1 | 635 | 75420  | 0         | 618 | 634 | 97 + | 2   | 635 | 62674  | 63307  |
| UN80435 | Rsa1.0_08102.1 | 672 | 7901   | 0         | 454 | 472 | 96 - | 3   | 473 | 7281   | 7752   |
| UN80436 | Rsa1.0_08303.1 | 650 | 7574   | 0         | 363 | 372 | 97 + | 275 | 646 | 3069   | 3440   |
| UN80437 | Rsa1.0_00032.1 | 692 | 306326 | 0         | 664 | 688 | 96 - | 2   | 688 | 270886 | 271573 |
| UN80438 | Rsa1.0_00010.1 | 609 | 294827 | 1.00E-144 | 311 | 327 | 95 + | 2   | 326 | 115045 | 115371 |
| UN80439 | Rsa1.0_00677.1 | 618 | 69159  | 0         | 605 | 628 | 96 + | 1   | 618 | 45165  | 45792  |
| UN80440 | Rsa1.0_00928.1 | 758 | 59293  | 0         | 707 | 716 | 98 - | 5   | 719 | 9856   | 10571  |
| UN80441 | Rsa1.0_00664.1 | 655 | 69573  | 6.00E-82  | 158 | 159 | 99 + | 2   | 160 | 48502  | 48660  |
| UN80442 | Rsa1.0_04332.1 | 677 | 17869  | 0         | 619 | 648 | 95 - | 30  | 677 | 16574  | 17215  |
| UN80443 | Rsa1.0_03111.1 | 652 | 25327  | 0         | 596 | 604 | 98 - | 51  | 652 | 5812   | 6415   |
| UN80444 | Rsa1.0_21164.1 | 711 | 1229   | 1.00E-125 | 316 | 343 | 92 + | 379 | 711 | 836    | 1171   |
| UN80445 | Rsa1.0_00914.1 | 720 | 59880  | 1.00E-119 | 238 | 244 | 97 - | 8   | 248 | 22842  | 23085  |
| UN80446 | Rsa1.0_01825.1 | 639 | 38725  | 1.00E-149 | 331 | 349 | 94 - | 110 | 451 | 16950  | 17295  |
| UN80447 | Rsa1.0_03981.1 | 753 | 19724  | 0         | 484 | 508 | 95 - | 244 | 750 | 14959  | 15464  |
| UN80448 | Rsa1.0_01728.1 | 749 | 40239  | 0         | 596 | 617 | 96 + | 134 | 749 | 1770   | 2386   |
| UN80449 | Rsa1.0_00288.1 | 550 | 98659  | 3.00E-89  | 183 | 188 | 97 - | 1   | 188 | 55765  | 55948  |
| UN80450 | Rsa1.0_00341.1 | 605 | 249309 | 6.00E-57  | 128 | 133 | 96 - | 175 | 307 | 127846 | 127978 |
| UN80451 | Rsa1.0_00622.1 | 151 | 71822  | 2.00E-35  | 92  | 95  | 96 - | 25  | 119 | 26898  | 26989  |
| UN80452 | Rsa1.0_01442.1 | 402 | 45776  | 0         | 397 | 411 | 96 - | 1   | 402 | 4704   | 5114   |
| UN80453 | Rsa1.0_00218.1 | 654 | 201480 | 0         | 545 | 566 | 96 - | 1   | 566 | 181139 | 181704 |
| UN80454 | Rsa1.0_00002.1 | 665 | 601661 | 1.00E-120 | 360 | 402 | 89 + | 270 | 661 | 181130 | 181530 |
| UN80455 | Rsa1.0_02995.1 | 760 | 26163  | 0         | 575 | 633 | 90 + | 128 | 756 | 9832   | 10463  |

|         |                |     |        |           |     |     |       |     |     |        |        |
|---------|----------------|-----|--------|-----------|-----|-----|-------|-----|-----|--------|--------|
| UN80456 | Rsa1.0.09011.1 | 699 | 6711   | 0         | 467 | 469 | 99 -  | 3   | 471 | 1      | 469    |
| UN80457 | Rsa1.0.02274.1 | 597 | 33109  | 0         | 585 | 595 | 98 -  | 1   | 594 | 19739  | 20332  |
| UN80458 | Rsa1.0.00246.1 | 699 | 103541 | 0         | 656 | 682 | 96 -  | 3   | 681 | 71561  | 72242  |
| UN80459 | Rsa1.0.16486.1 | 706 | 2139   | 1.00E-111 | 236 | 247 | 95 -  | 460 | 706 | 507    | 747    |
| UN80460 | Rsa1.0.02228.1 | 734 | 33688  | 0         | 689 | 743 | 92 +  | 3   | 734 | 401    | 1130   |
| UN80461 | Rsa1.0.00829.1 | 724 | 158305 | 1.00E-114 | 248 | 261 | 95 -  | 345 | 605 | 49059  | 49319  |
| UN80462 | Rsa1.0.00075.1 | 602 | 146680 | 0         | 433 | 457 | 94 -  | 147 | 602 | 128517 | 128969 |
| UN80463 | Rsa1.0.00744.1 | 215 | 66084  | 5.00E-86  | 212 | 221 | 95 -  | 1   | 215 | 34317  | 34537  |
| UN80464 | Rsa1.0.00108.1 | 614 | 478491 | 0         | 571 | 596 | 95 -  | 25  | 614 | 271791 | 272386 |
| UN80465 | Rsa1.0.00087.1 | 674 | 761073 | 2.00E-51  | 107 | 108 | 99 -  | 213 | 320 | 746355 | 746462 |
| UN80466 | Rsa1.0.00119.1 | 654 | 467509 | 1.00E-160 | 390 | 426 | 91 -  | 3   | 404 | 47686  | 48111  |
| UN80467 | Rsa1.0.02085.1 | 732 | 35198  | 0         | 643 | 718 | 89 -  | 2   | 704 | 18373  | 19055  |
| UN80468 | Rsa1.0.00045.1 | 675 | 328694 | 2.00E-85  | 170 | 173 | 98 +  | 130 | 302 | 12393  | 12565  |
| UN80469 | Rsa1.0.06141.1 | 779 | 11644  | 1.00E-178 | 404 | 433 | 93 -  | 282 | 695 | 8012   | 8444   |
| UN80470 | Rsa1.0.06912.1 | 783 | 10177  | 1.00E-108 | 200 | 200 | 100 + | 5   | 204 | 1714   | 1913   |
| UN80471 | Rsa1.0.08909.1 | 465 | 6799   | 2.00E-77  | 240 | 265 | 90 +  | 207 | 461 | 5389   | 5646   |
| UN80472 | Rsa1.0.00092.1 | 486 | 659932 | 1.00E-110 | 246 | 258 | 95 +  | 163 | 419 | 40989  | 41245  |
| UN80473 | Rsa1.0.01489.1 | 528 | 44764  | 0         | 525 | 527 | 99 +  | 2   | 528 | 20918  | 21443  |
| UN80474 | Rsa1.0.02231.1 | 334 | 33661  | 1.00E-84  | 217 | 237 | 91 -  | 115 | 334 | 33349  | 33585  |
| UN80475 | Rsa1.0.00119.1 | 389 | 467509 | 1.00E-148 | 291 | 299 | 97 -  | 6   | 304 | 120331 | 120626 |
| UN80476 | Rsa1.0.00327.1 | 683 | 94892  | 8.00E-69  | 143 | 145 | 98 -  | 86  | 229 | 27389  | 27533  |
| UN80477 | Rsa1.0.00496.1 | 279 | 79834  | 1.00E-90  | 208 | 221 | 94 +  | 2   | 222 | 56211  | 56431  |
| UN80478 | Rsa1.0.08039.1 | 667 | 8030   | 0         | 355 | 359 | 98 -  | 46  | 401 | 4542   | 4900   |
| UN80479 | #              | #   | #      | #         | #   | #   | #     | #   | #   | #      | #      |
| UN80480 | Rsa1.0.02185.1 | 660 | 34150  | 0         | 591 | 610 | 96 -  | 3   | 609 | 27396  | 27997  |
| UN80481 | Rsa1.0.00382.1 | 709 | 251946 | 0         | 684 | 708 | 96 -  | 3   | 709 | 108870 | 109577 |
| UN80482 | Rsa1.0.02526.1 | 774 | 30479  | 0         | 767 | 774 | 99 +  | 3   | 774 | 8665   | 9438   |
| UN80483 | Rsa1.0.00144.1 | 755 | 120708 | 0         | 687 | 707 | 97 +  | 8   | 711 | 63828  | 64533  |
| UN80484 | Rsa1.0.00951.1 | 734 | 164588 | 0         | 553 | 582 | 95 +  | 156 | 734 | 7261   | 7842   |
| UN80485 | Rsa1.0.07185.1 | 816 | 9772   | 1.00E-145 | 321 | 340 | 94 +  | 59  | 396 | 7324   | 7663   |
| UN80486 | #              | #   | #      | #         | #   | #   | #     | #   | #   | #      | #      |
| UN80487 | Rsa1.0.00001.1 | 723 | 363028 | 6.00E-73  | 202 | 220 | 91 -  | 7   | 219 | 255791 | 256010 |
| UN80488 | Rsa1.0.03193.1 | 775 | 24690  | 0         | 536 | 561 | 95 -  | 2   | 556 | 21087  | 21638  |
| UN80489 | Rsa1.0.00114.1 | 505 | 131330 | 0         | 472 | 488 | 96 +  | 3   | 479 | 53524  | 54011  |
| UN80490 | Rsa1.0.12205.1 | 519 | 5289   | 1.00E-115 | 231 | 238 | 97 -  | 282 | 519 | 397    | 634    |
| UN80491 | Rsa1.0.01027.1 | 712 | 56402  | 0         | 675 | 707 | 95 -  | 7   | 711 | 40453  | 41159  |
| UN80492 | Rsa1.0.02237.1 | 802 | 33544  | 0         | 385 | 397 | 96 +  | 318 | 714 | 17873  | 18269  |
| UN80493 | Rsa1.0.00211.1 | 718 | 228189 | 3.00E-90  | 184 | 188 | 97 -  | 109 | 294 | 147827 | 148014 |
| UN80494 | Rsa1.0.00427.1 | 632 | 189678 | 2.00E-51  | 116 | 120 | 96 -  | 291 | 410 | 39945  | 40064  |

|         |                |     |        |           |     |     |       |     |     |        |        |
|---------|----------------|-----|--------|-----------|-----|-----|-------|-----|-----|--------|--------|
| UN80495 | Rsa1.0.00328.1 | 763 | 224661 | 1.00E-103 | 210 | 215 | 97 -  | 214 | 428 | 144259 | 144472 |
| UN80496 | Rsa1.0.04407.1 | 728 | 17504  | 0         | 706 | 730 | 96 -  | 1   | 728 | 12433  | 13158  |
| UN80497 | Rsa1.0.00410.1 | 660 | 86957  | 0         | 443 | 456 | 97 +  | 3   | 458 | 42089  | 42544  |
| UN80498 | Rsa1.0.03307.1 | 614 | 23872  | 1.00E-79  | 174 | 181 | 96 +  | 172 | 349 | 16139  | 16319  |
| UN80499 | Rsa1.0.04515.1 | 612 | 17021  | 0         | 594 | 614 | 96 +  | 1   | 612 | 1295   | 1908   |
| UN80500 | Rsa1.0.01115.1 | 775 | 183545 | 5.00E-92  | 181 | 184 | 98 -  | 567 | 750 | 156423 | 156606 |
| UN80501 | Rsa1.0.00009.1 | 815 | 232558 | 0         | 405 | 426 | 95 +  | 12  | 431 | 6438   | 6860   |
| UN80502 | Rsa1.0.02655.1 | 431 | 29027  | 1.00E-130 | 280 | 294 | 95 -  | 1   | 291 | 13789  | 14082  |
| UN80503 | Rsa1.0.03722.1 | 687 | 21184  | 0         | 486 | 515 | 94 +  | 3   | 517 | 19983  | 20495  |
| UN80504 | Rsa1.0.38721.1 | 595 | 581    | 1.00E-140 | 255 | 256 | 99 +  | 38  | 293 | 326    | 581    |
| UN80505 | Rsa1.0.00058.1 | 182 | 159921 | 2.00E-66  | 168 | 180 | 93 +  | 2   | 178 | 117148 | 117324 |
| UN80506 | Rsa1.0.02411.1 | 676 | 31655  | 1.00E-159 | 308 | 316 | 97 -  | 3   | 318 | 25654  | 25969  |
| UN80507 | Rsa1.0.00437.1 | 726 | 84879  | 5.00E-58  | 124 | 127 | 97 -  | 256 | 382 | 15044  | 15170  |
| UN80508 | Rsa1.0.03754.1 | 614 | 21005  | 1.00E-161 | 303 | 308 | 98 +  | 307 | 614 | 15596  | 15903  |
| UN80509 | Rsa1.0.01005.1 | 417 | 56967  | 1.00E-102 | 188 | 188 | 100 + | 144 | 331 | 49026  | 49213  |
| UN80510 | Rsa1.0.01488.1 | 688 | 44766  | 1.00E-100 | 223 | 236 | 94 -  | 144 | 370 | 30415  | 30647  |
| UN80511 | Rsa1.0.00121.1 | 659 | 278029 | 1.00E-164 | 316 | 323 | 97 +  | 337 | 659 | 54300  | 54619  |
| UN80512 | Rsa1.0.00037.1 | 646 | 307838 | 5.00E-64  | 146 | 153 | 95 -  | 365 | 517 | 237313 | 237465 |
| UN80513 | Rsa1.0.00078.1 | 763 | 175053 | 0         | 458 | 459 | 99 -  | 40  | 497 | 41422  | 41880  |
| UN80514 | Rsa1.0.00196.1 | 771 | 109960 | 0         | 596 | 611 | 97 +  | 161 | 765 | 90120  | 90730  |
| UN80515 | Rsa1.0.00231.1 | 634 | 105381 | 0         | 633 | 634 | 99 -  | 1   | 634 | 23664  | 24296  |
| UN80516 | Rsa1.0.00336.1 | 741 | 445051 | 3.00E-93  | 186 | 190 | 97 -  | 75  | 264 | 163125 | 163314 |
| UN80517 | Rsa1.0.00593.1 | 435 | 143463 | 0         | 412 | 438 | 94 +  | 7   | 435 | 141785 | 142222 |
| UN80518 | Rsa1.0.26764.1 | 771 | 879    | 1.00E-143 | 260 | 261 | 99 -  | 410 | 670 | 619    | 879    |
| UN80519 | Rsa1.0.07560.1 | 488 | 9129   | 0         | 465 | 488 | 95 -  | 2   | 488 | 8012   | 8497   |
| UN80520 | Rsa1.0.00060.1 | 731 | 502678 | 0         | 706 | 735 | 96 +  | 2   | 730 | 484703 | 485434 |
| UN80521 | Rsa1.0.01742.1 | 564 | 39962  | 0         | 498 | 523 | 95 +  | 1   | 523 | 19962  | 20484  |
| UN80522 | Rsa1.0.00165.1 | 345 | 116466 | 1.00E-167 | 307 | 309 | 99 -  | 37  | 345 | 11463  | 11770  |
| UN80523 | Rsa1.0.01696.1 | 696 | 301850 | 0         | 654 | 715 | 91 -  | 2   | 696 | 28130  | 28832  |
| UN80524 | Rsa1.0.09419.1 | 371 | 6383   | 1.00E-161 | 356 | 374 | 95 -  | 3   | 371 | 5482   | 5854   |
| UN80525 | Rsa1.0.02480.1 | 533 | 31036  | 1.00E-107 | 254 | 270 | 94 -  | 3   | 265 | 27048  | 27312  |
| UN80526 | Rsa1.0.00772.1 | 759 | 64856  | 0         | 386 | 402 | 96 +  | 365 | 759 | 28598  | 28998  |
| UN80527 | Rsa1.0.06303.1 | 753 | 11268  | 1.00E-114 | 237 | 246 | 96 -  | 184 | 429 | 9882   | 10127  |
| UN80528 | Rsa1.0.20326.1 | 767 | 1317   | 1.00E-114 | 252 | 266 | 94 +  | 18  | 277 | 297    | 558    |
| UN80529 | Rsa1.0.00107.1 | 746 | 431659 | 0         | 470 | 494 | 95 -  | 233 | 722 | 14794  | 15287  |
| UN80530 | Rsa1.0.00920.1 | 671 | 601703 | 0         | 632 | 660 | 95 -  | 28  | 671 | 13984  | 14643  |
| UN80531 | Rsa1.0.53341.1 | 737 | 427    | 7.00E-88  | 168 | 169 | 99 +  | 322 | 490 | 147    | 315    |
| UN80532 | Rsa1.0.02148.1 | 564 | 34610  | 1.00E-106 | 226 | 236 | 95 -  | 138 | 373 | 25637  | 25872  |
| UN80533 | Rsa1.0.00251.1 | 720 | 303968 | 3.00E-81  | 175 | 182 | 96 -  | 284 | 465 | 113349 | 113530 |

|         |                |     |        |           |     |     |       |     |     |        |        |
|---------|----------------|-----|--------|-----------|-----|-----|-------|-----|-----|--------|--------|
| UN80534 | Rsa1.0_14114.1 | 785 | 3792   | 0         | 577 | 607 | 95 -  | 15  | 618 | 2499   | 3096   |
| UN80535 | Rsa1.0_02871.1 | 104 | 27085  | 3.00E-30  | 79  | 83  | 95 +  | 19  | 101 | 4736   | 4818   |
| UN80536 | Rsa1.0_01168.1 | 771 | 153765 | 0         | 730 | 783 | 93 +  | 2   | 771 | 20908  | 21690  |
| UN80537 | Rsa1.0_00940.1 | 735 | 179946 | 0         | 657 | 762 | 86 +  | 2   | 735 | 41328  | 42063  |
| UN80538 | Rsa1.0_03015.1 | 656 | 26006  | 1.00E-155 | 372 | 406 | 91 +  | 260 | 653 | 12215  | 12620  |
| UN80539 | Rsa1.0_15164.1 | 558 | 2786   | 2.00E-93  | 204 | 214 | 95 -  | 343 | 556 | 2017   | 2230   |
| UN80540 | Rsa1.0_07377.1 | 605 | 9494   | 1.00E-180 | 352 | 363 | 96 +  | 95  | 457 | 5175   | 5537   |
| UN80541 | Rsa1.0_02981.1 | 213 | 26285  | 1.00E-58  | 133 | 139 | 95 -  | 1   | 139 | 24725  | 24863  |
| UN80542 | Rsa1.0_00120.1 | 770 | 277288 | 0         | 372 | 374 | 99 -  | 385 | 756 | 272483 | 272856 |
| UN80543 | Rsa1.0_03491.1 | 552 | 22541  | 1.00E-140 | 366 | 404 | 90 -  | 1   | 404 | 9065   | 9468   |
| UN80544 | Rsa1.0_00258.1 | 793 | 102381 | 2.00E-79  | 151 | 151 | 100 - | 460 | 610 | 45890  | 46040  |
| UN80545 | Rsa1.0_11825.1 | 664 | 5396   | 0         | 641 | 656 | 97 -  | 5   | 660 | 3758   | 4410   |
| UN80546 | Rsa1.0_06189.1 | 742 | 11525  | 1.00E-118 | 246 | 254 | 96 -  | 230 | 481 | 11274  | 11525  |
| UN80547 | Rsa1.0_03807.1 | 805 | 20740  | 0         | 756 | 793 | 95 +  | 1   | 786 | 16226  | 17018  |
| UN80548 | Rsa1.0_02299.1 | 664 | 32857  | 1.00E-154 | 294 | 300 | 98 -  | 120 | 419 | 1599   | 1898   |
| UN80549 | Rsa1.0_02004.1 | 705 | 169138 | 0         | 435 | 452 | 96 +  | 254 | 705 | 168039 | 168490 |
| UN80550 | Rsa1.0_00083.1 | 631 | 442773 | 0         | 619 | 630 | 98 -  | 2   | 631 | 437945 | 438574 |
| UN80551 | Rsa1.0_00113.1 | 756 | 131574 | 1.00E-168 | 378 | 397 | 95 -  | 360 | 753 | 71660  | 72050  |
| UN80552 | Rsa1.0_00875.1 | 787 | 61371  | 3.00E-84  | 183 | 191 | 95 +  | 402 | 592 | 18473  | 18663  |
| UN80553 | Rsa1.0_00087.1 | 744 | 761073 | 1.00E-105 | 194 | 194 | 100 - | 41  | 234 | 292665 | 292858 |
| UN80554 | Rsa1.0_31685.1 | 679 | 721    | 1.00E-103 | 193 | 194 | 99 -  | 392 | 585 | 515    | 708    |
| UN80555 | Rsa1.0_00872.1 | 745 | 61495  | 1.00E-101 | 216 | 224 | 96 +  | 3   | 225 | 27701  | 27920  |
| UN80556 | Rsa1.0_01917.1 | 718 | 37303  | 1.00E-167 | 448 | 492 | 91 -  | 164 | 645 | 17774  | 18263  |
| UN80557 | Rsa1.0_00197.1 | 628 | 109714 | 0         | 423 | 426 | 99 -  | 146 | 571 | 73904  | 74328  |
| UN80558 | Rsa1.0_00423.1 | 787 | 86138  | 1.00E-177 | 324 | 327 | 99 -  | 342 | 668 | 72588  | 72914  |
| UN80559 | Rsa1.0_00069.1 | 769 | 403561 | 0         | 743 | 770 | 96 -  | 3   | 769 | 29772  | 30541  |
| UN80560 | Rsa1.0_00556.1 | 698 | 207212 | 0         | 668 | 701 | 95 +  | 3   | 694 | 43742  | 44438  |
| UN80561 | Rsa1.0_02883.1 | 795 | 27035  | 2.00E-73  | 173 | 183 | 94 -  | 128 | 307 | 10115  | 10297  |
| UN80562 | Rsa1.0_01064.1 | 470 | 55295  | 0         | 413 | 436 | 94 +  | 43  | 469 | 38358  | 38783  |
| UN80563 | Rsa1.0_05669.1 | 703 | 12993  | 0         | 681 | 705 | 96 -  | 2   | 700 | 10663  | 11359  |
| UN80564 | Rsa1.0_00837.1 | 545 | 62568  | 0         | 437 | 437 | 100 - | 109 | 545 | 47631  | 48067  |
| UN80565 | Rsa1.0_00737.1 | 733 | 66432  | 1.00E-159 | 322 | 333 | 96 +  | 211 | 537 | 1290   | 1622   |
| UN80566 | Rsa1.0_00016.1 | 694 | 831256 | 0         | 368 | 373 | 98 +  | 1   | 372 | 760218 | 760590 |
| UN80567 | Rsa1.0_00538.1 | 608 | 77149  | 0         | 558 | 616 | 90 -  | 1   | 608 | 25111  | 25711  |
| UN80568 | Rsa1.0_00476.1 | 755 | 280966 | 1.00E-128 | 256 | 264 | 96 -  | 3   | 266 | 218202 | 218465 |
| UN80569 | Rsa1.0_11545.1 | 720 | 5474   | 0         | 536 | 583 | 91 +  | 30  | 592 | 4900   | 5474   |
| UN80570 | Rsa1.0_04892.1 | 728 | 15573  | 0         | 471 | 518 | 90 -  | 142 | 635 | 10948  | 11465  |
| UN80571 | Rsa1.0_02646.1 | 771 | 29123  | 0         | 593 | 641 | 92 +  | 2   | 642 | 13867  | 14507  |
| UN80572 | Rsa1.0_01401.1 | 792 | 142441 | 1.00E-135 | 254 | 257 | 98 +  | 398 | 654 | 30565  | 30821  |

|         |                |     |        |           |     |     |      |     |     |        |        |
|---------|----------------|-----|--------|-----------|-----|-----|------|-----|-----|--------|--------|
| UN80573 | Rsa1.0_00309.1 | 684 | 96883  | 1.00E-92  | 204 | 213 | 95 - | 114 | 325 | 66985  | 67197  |
| UN80574 | Rsa1.0_03233.1 | 732 | 24446  | 0         | 709 | 732 | 96 - | 1   | 732 | 21133  | 21864  |
| UN80575 | Rsa1.0_19203.1 | 632 | 1465   | 4.00E-86  | 180 | 186 | 96 + | 261 | 446 | 221    | 406    |
| UN80576 | Rsa1.0_02236.1 | 825 | 33558  | 0         | 442 | 460 | 96 - | 1   | 459 | 14207  | 14666  |
| UN80577 | Rsa1.0_05864.1 | 195 | 12387  | 1.00E-33  | 93  | 97  | 95 - | 90  | 185 | 10070  | 10165  |
| UN80578 | #              | #   | #      | #         | #   | #   | #    | #   | #   | #      | #      |
| UN80579 | Rsa1.0_01171.1 | 560 | 51752  | 1.00E-91  | 290 | 324 | 89 - | 243 | 560 | 51043  | 51354  |
| UN80580 | Rsa1.0_02817.1 | 769 | 27644  | 0         | 767 | 772 | 99 - | 1   | 769 | 9731   | 10502  |
| UN80581 | Rsa1.0_00077.1 | 730 | 145005 | 1.00E-170 | 351 | 367 | 95 - | 283 | 649 | 137240 | 137606 |
| UN80582 | Rsa1.0_14302.1 | 688 | 3558   | 1.00E-153 | 350 | 370 | 94 + | 326 | 688 | 1428   | 1795   |
| UN80583 | Rsa1.0_01680.1 | 752 | 41122  | 4.00E-37  | 113 | 124 | 91 + | 434 | 557 | 20389  | 20512  |
| UN80584 | Rsa1.0_01540.1 | 256 | 151890 | 1.00E-113 | 243 | 254 | 95 - | 3   | 256 | 143534 | 143786 |
| UN80585 | Rsa1.0_00517.1 | 634 | 142790 | 1.00E-159 | 325 | 337 | 96 + | 295 | 631 | 105182 | 105517 |
| UN80586 | Rsa1.0_01199.1 | 551 | 163576 | 1.00E-109 | 218 | 224 | 97 - | 328 | 551 | 153489 | 153712 |
| UN80587 | Rsa1.0_36141.1 | 662 | 625    | 1.00E-174 | 312 | 313 | 99 - | 141 | 453 | 313    | 625    |
| UN80588 | Rsa1.0_05628.1 | 723 | 13130  | 0         | 384 | 393 | 97 - | 2   | 394 | 2577   | 2969   |
| UN80589 | Rsa1.0_31821.1 | 668 | 717    | 1.00E-104 | 259 | 276 | 93 - | 199 | 469 | 329    | 599    |
| UN80590 | Rsa1.0_13663.1 | 725 | 4540   | 1.00E-73  | 150 | 153 | 98 - | 388 | 540 | 355    | 507    |
| UN80591 | Rsa1.0_00067.1 | 562 | 415055 | 2.00E-69  | 146 | 150 | 97 + | 123 | 272 | 164942 | 165091 |
| UN80592 | Rsa1.0_01484.1 | 679 | 44806  | 1.00E-135 | 256 | 260 | 98 + | 94  | 353 | 20037  | 20296  |
| UN80593 | Rsa1.0_27162.1 | 588 | 863    | 2.00E-41  | 96  | 99  | 96 - | 151 | 249 | 506    | 604    |
| UN80594 | Rsa1.0_00112.1 | 642 | 132199 | 0         | 497 | 507 | 98 - | 3   | 509 | 89613  | 90119  |
| UN80595 | Rsa1.0_00827.1 | 785 | 62790  | 0         | 425 | 449 | 94 - | 308 | 753 | 22691  | 23118  |
| UN80596 | Rsa1.0_01021.1 | 451 | 56610  | 2.00E-43  | 244 | 291 | 83 + | 73  | 354 | 24758  | 25045  |
| UN80597 | Rsa1.0_03134.1 | 711 | 145023 | 1.00E-175 | 347 | 359 | 96 + | 300 | 658 | 2329   | 2687   |
| UN80598 | Rsa1.0_01257.1 | 685 | 49766  | 1.00E-138 | 262 | 265 | 98 + | 176 | 438 | 36829  | 37093  |
| UN80599 | Rsa1.0_02680.1 | 214 | 28721  | 2.00E-97  | 204 | 212 | 96 - | 3   | 214 | 15540  | 15751  |
| UN80600 | Rsa1.0_01198.1 | 681 | 51029  | 0         | 640 | 691 | 92 + | 2   | 674 | 10036  | 10724  |
| UN80601 | Rsa1.0_02609.1 | 727 | 29600  | 1.00E-117 | 221 | 223 | 99 + | 418 | 640 | 20610  | 20832  |
| UN80602 | Rsa1.0_03735.1 | 708 | 21087  | 0         | 511 | 531 | 96 + | 135 | 662 | 3647   | 4177   |
| UN80603 | Rsa1.0_00286.1 | 539 | 98709  | 1.00E-158 | 294 | 297 | 98 + | 246 | 539 | 29363  | 29659  |
| UN80604 | Rsa1.0_06575.1 | 754 | 10732  | 0         | 443 | 445 | 99 - | 2   | 446 | 9504   | 9948   |
| UN80605 | Rsa1.0_00201.1 | 545 | 232851 | 1.00E-159 | 316 | 328 | 96 - | 227 | 545 | 43092  | 43419  |
| UN80606 | Rsa1.0_00017.1 | 655 | 752458 | 1.00E-104 | 204 | 208 | 98 - | 318 | 525 | 276875 | 277082 |
| UN80607 | Rsa1.0_00009.1 | 749 | 232558 | 0         | 581 | 609 | 95 + | 5   | 609 | 121501 | 122097 |
| UN80608 | Rsa1.0_00202.1 | 653 | 185895 | 1.00E-113 | 237 | 246 | 96 + | 64  | 306 | 7683   | 7928   |
| UN80609 | Rsa1.0_00339.1 | 676 | 222974 | 0         | 425 | 444 | 95 + | 233 | 676 | 88569  | 89012  |
| UN80610 | Rsa1.0_06455.1 | 332 | 10983  | 2.00E-24  | 61  | 62  | 98 - | 271 | 332 | 9649   | 9710   |
| UN80611 | Rsa1.0_02593.1 | 717 | 29744  | 3.00E-93  | 189 | 194 | 97 - | 524 | 717 | 5217   | 5410   |

|         |                |     |        |           |     |     |      |     |     |        |        |
|---------|----------------|-----|--------|-----------|-----|-----|------|-----|-----|--------|--------|
| UN80612 | Rsa1.0_00283.1 | 598 | 183797 | 0         | 428 | 431 | 99 + | 168 | 598 | 66296  | 66726  |
| UN80613 | Rsa1.0_20222.1 | 608 | 1326   | 0         | 388 | 404 | 96 + | 205 | 608 | 1      | 404    |
| UN80614 | Rsa1.0_00237.1 | 322 | 235974 | 1.00E-167 | 316 | 322 | 98 - | 1   | 322 | 34868  | 35189  |
| UN80615 | Rsa1.0_00287.1 | 643 | 98687  | 1.00E-110 | 221 | 226 | 97 - | 418 | 643 | 65400  | 65623  |
| UN80616 | Rsa1.0_00040.1 | 291 | 324196 | 5.00E-96  | 216 | 226 | 95 + | 65  | 289 | 265642 | 265866 |
| UN80617 | Rsa1.0_00377.1 | 767 | 90038  | 1.00E-137 | 331 | 355 | 93 - | 430 | 767 | 55468  | 55820  |
| UN80618 | Rsa1.0_06443.1 | 773 | 11008  | 1.00E-120 | 256 | 268 | 95 - | 466 | 733 | 6287   | 6554   |
| UN80619 | Rsa1.0_01263.1 | 500 | 49703  | 3.00E-80  | 158 | 160 | 98 + | 72  | 231 | 39811  | 39970  |
| UN80620 | Rsa1.0_00010.1 | 650 | 294827 | 1.00E-113 | 255 | 271 | 94 - | 277 | 547 | 259398 | 259668 |
| UN80621 | Rsa1.0_02532.1 | 685 | 30403  | 0         | 465 | 480 | 96 + | 206 | 685 | 26787  | 27266  |
| UN80622 | Rsa1.0_04081.1 | 768 | 19193  | 1.00E-178 | 330 | 333 | 99 + | 1   | 332 | 9696   | 10028  |
| UN80623 | Rsa1.0_00396.1 | 555 | 88242  | 0         | 435 | 446 | 97 + | 3   | 447 | 4203   | 4646   |
| UN80624 | Rsa1.0_00355.1 | 284 | 92038  | 1.00E-121 | 235 | 240 | 97 - | 45  | 284 | 77924  | 78163  |
| UN80625 | Rsa1.0_00065.1 | 578 | 454616 | 0         | 390 | 413 | 94 - | 3   | 406 | 445009 | 445421 |
| UN80626 | Rsa1.0_01016.1 | 759 | 181422 | 0         | 560 | 590 | 94 + | 170 | 759 | 155897 | 156486 |
| UN80627 | Rsa1.0_02155.1 | 711 | 34522  | 3.00E-90  | 205 | 217 | 94 + | 4   | 220 | 6299   | 6515   |
| UN80628 | Rsa1.0_00547.1 | 714 | 76521  | 0         | 695 | 734 | 94 - | 2   | 714 | 56129  | 56852  |
| UN80629 | Rsa1.0_00198.1 | 120 | 222963 | 2.00E-31  | 72  | 73  | 98 - | 1   | 73  | 156896 | 156968 |
| UN80630 | Rsa1.0_00679.1 | 728 | 68971  | 2.00E-69  | 146 | 150 | 97 - | 579 | 728 | 65951  | 66100  |
| UN80631 | Rsa1.0_00549.1 | 767 | 76473  | 0         | 575 | 596 | 96 - | 132 | 718 | 42435  | 43027  |
| UN80632 | Rsa1.0_04602.1 | 781 | 16684  | 1.00E-137 | 339 | 367 | 92 - | 2   | 365 | 13650  | 14007  |
| UN80633 | Rsa1.0_00127.1 | 673 | 127446 | 0         | 604 | 628 | 96 - | 46  | 673 | 103029 | 103656 |
| UN80634 | Rsa1.0_02460.1 | 626 | 31169  | 0         | 606 | 632 | 95 - | 3   | 626 | 6442   | 7071   |
| UN80635 | Rsa1.0_00053.1 | 135 | 263459 | 4.00E-39  | 134 | 142 | 94 + | 1   | 135 | 138897 | 139038 |
| UN80636 | Rsa1.0_00369.1 | 221 | 266462 | 1.00E-105 | 213 | 219 | 97 - | 3   | 221 | 10203  | 10417  |
| UN80637 | Rsa1.0_10701.1 | 100 | 5752   | 4.00E-35  | 94  | 99  | 94 - | 3   | 100 | 2041   | 2139   |
| UN80638 | Rsa1.0_01549.1 | 706 | 43543  | 0         | 407 | 425 | 95 - | 267 | 691 | 7747   | 8159   |
| UN80639 | Rsa1.0_00694.1 | 598 | 68074  | 1.00E-149 | 292 | 300 | 97 + | 159 | 458 | 26247  | 26546  |
| UN80640 | #              | #   | #      | #         | #   | #   | #    | #   | #   | #      | #      |
| UN80641 | Rsa1.0_01192.1 | 431 | 51150  | 5.00E-69  | 178 | 191 | 93 - | 151 | 340 | 36316  | 36503  |
| UN80642 | Rsa1.0_01005.1 | 765 | 56967  | 0         | 670 | 679 | 98 + | 75  | 753 | 27117  | 27795  |
| UN80643 | Rsa1.0_00459.1 | 742 | 82580  | 6.00E-70  | 165 | 174 | 94 + | 251 | 422 | 19383  | 19556  |
| UN80644 | Rsa1.0_01844.1 | 706 | 38421  | 0         | 454 | 460 | 98 + | 107 | 565 | 8409   | 8868   |
| UN80645 | Rsa1.0_55799.1 | 723 | 409    | 0         | 394 | 408 | 96 - | 3   | 404 | 1      | 408    |
| UN80646 | Rsa1.0_01560.1 | 638 | 43256  | 1.00E-177 | 342 | 351 | 97 + | 2   | 352 | 22615  | 22965  |
| UN80647 | Rsa1.0_00045.1 | 432 | 328694 | 0         | 429 | 433 | 99 - | 3   | 432 | 192823 | 193255 |
| UN80648 | Rsa1.0_00592.1 | 754 | 73788  | 0         | 379 | 395 | 95 - | 73  | 467 | 62638  | 63032  |
| UN80649 | Rsa1.0_00083.1 | 772 | 442773 | 0         | 506 | 530 | 95 + | 224 | 748 | 319657 | 320183 |
| UN80650 | Rsa1.0_03554.1 | 667 | 22137  | 0         | 646 | 666 | 96 + | 1   | 666 | 10362  | 11018  |

|         |                |     |        |           |     |     |       |     |     |        |        |
|---------|----------------|-----|--------|-----------|-----|-----|-------|-----|-----|--------|--------|
| UN80651 | Rsa1.0.07679.1 | 767 | 8811   | 2.00E-76  | 153 | 154 | 99 +  | 349 | 501 | 8506   | 8659   |
| UN80652 | Rsa1.0.00182.1 | 214 | 142305 | 2.00E-39  | 83  | 83  | 100 - | 8   | 90  | 99601  | 99683  |
| UN80653 | Rsa1.0.08740.1 | 698 | 6980   | 0         | 509 | 522 | 97 -  | 17  | 535 | 3120   | 3640   |
| UN80654 | Rsa1.0.01182.1 | 669 | 167304 | 7.00E-94  | 191 | 195 | 97 -  | 467 | 661 | 866    | 1059   |
| UN80655 | Rsa1.0.00182.1 | 595 | 142305 | 0         | 447 | 461 | 96 +  | 135 | 595 | 94201  | 94661  |
| UN80656 | Rsa1.0.01972.1 | 662 | 36634  | 0         | 535 | 579 | 92 +  | 79  | 657 | 1226   | 1795   |
| UN80657 | Rsa1.0.00491.1 | 712 | 80219  | 0         | 419 | 445 | 94 +  | 271 | 712 | 35508  | 35948  |
| UN80658 | Rsa1.0.01610.1 | 712 | 42274  | 0         | 606 | 639 | 94 -  | 73  | 711 | 19022  | 19660  |
| UN80659 | Rsa1.0.01397.1 | 592 | 183276 | 0         | 590 | 592 | 99 +  | 1   | 592 | 16319  | 16910  |
| UN80660 | Rsa1.0.00978.1 | 514 | 57739  | 1.00E-153 | 314 | 327 | 96 +  | 5   | 331 | 38499  | 38825  |
| UN80661 | Rsa1.0.00040.1 | 661 | 324196 | 0         | 636 | 662 | 96 -  | 2   | 661 | 62185  | 62845  |
| UN80662 | Rsa1.0.39342.1 | 728 | 572    | 0         | 514 | 522 | 98 +  | 1   | 522 | 51     | 572    |
| UN80663 | Rsa1.0.01474.1 | 521 | 45070  | 2.00E-99  | 184 | 184 | 100 + | 178 | 361 | 21227  | 21410  |
| UN80664 | Rsa1.0.01863.1 | 649 | 38010  | 1.00E-180 | 343 | 348 | 98 +  | 243 | 588 | 25327  | 25674  |
| UN80665 | Rsa1.0.03027.1 | 726 | 25883  | 3.00E-68  | 147 | 152 | 96 -  | 62  | 213 | 6436   | 6587   |
| UN80666 | Rsa1.0.00457.1 | 758 | 337301 | 0         | 713 | 754 | 94 -  | 2   | 742 | 161588 | 162337 |
| UN80667 | Rsa1.0.32130.1 | 171 | 709    | 3.00E-28  | 74  | 76  | 97 +  | 97  | 171 | 525    | 600    |
| UN80668 | Rsa1.0.00905.1 | 595 | 60110  | 0         | 514 | 539 | 95 -  | 15  | 553 | 19296  | 19820  |
| UN80669 | Rsa1.0.04251.1 | 378 | 18263  | 1.00E-108 | 205 | 207 | 99 +  | 2   | 208 | 10345  | 10551  |
| UN80670 | Rsa1.0.00323.1 | 787 | 159650 | 0         | 759 | 803 | 94 -  | 1   | 787 | 36899  | 37701  |
| UN80671 | Rsa1.0.00360.1 | 745 | 91190  | 8.00E-94  | 223 | 234 | 95 +  | 512 | 741 | 45386  | 45618  |
| UN80672 | Rsa1.0.00528.1 | 780 | 164755 | 1.00E-180 | 662 | 771 | 85 +  | 9   | 776 | 148379 | 149148 |
| UN80673 | Rsa1.0.01149.1 | 646 | 160459 | 1.00E-129 | 371 | 416 | 89 -  | 161 | 551 | 25295  | 25706  |
| UN80674 | Rsa1.0.12292.1 | 644 | 5263   | 1.00E-11  | 52  | 57  | 91 -  | 358 | 414 | 3838   | 3894   |
| UN80675 | Rsa1.0.00124.1 | 795 | 262503 | 1.00E-153 | 304 | 311 | 97 +  | 452 | 761 | 245339 | 245648 |
| UN80676 | Rsa1.0.00514.1 | 734 | 78421  | 1.00E-122 | 226 | 227 | 99 +  | 2   | 228 | 62057  | 62283  |
| UN80677 | Rsa1.0.10881.1 | 800 | 5691   | 0         | 765 | 817 | 93 +  | 24  | 797 | 3848   | 4664   |
| UN80678 | Rsa1.0.00857.1 | 658 | 61904  | 1.00E-129 | 250 | 255 | 98 +  | 3   | 257 | 27159  | 27413  |
| UN80679 | Rsa1.0.01798.1 | 739 | 173909 | 1.00E-126 | 254 | 262 | 96 +  | 2   | 263 | 2796   | 3057   |
| UN80680 | Rsa1.0.03645.1 | 765 | 21599  | 3.00E-84  | 162 | 163 | 99 -  | 321 | 483 | 12595  | 12757  |
| UN80681 | Rsa1.0.01535.1 | 562 | 43750  | 0         | 368 | 381 | 96 +  | 182 | 562 | 23629  | 24009  |
| UN80682 | Rsa1.0.00409.1 | 812 | 146788 | 0         | 659 | 662 | 99 +  | 3   | 664 | 107451 | 108112 |
| UN80683 | Rsa1.0.02605.1 | 686 | 29637  | 1.00E-107 | 296 | 325 | 91 +  | 1   | 313 | 5809   | 6131   |
| UN80684 | Rsa1.0.02592.1 | 406 | 29751  | 0         | 389 | 398 | 97 +  | 3   | 398 | 6014   | 6410   |
| UN80685 | Rsa1.0.00758.1 | 783 | 65477  | 0         | 748 | 776 | 96 -  | 1   | 764 | 36583  | 37358  |
| UN80686 | Rsa1.0.00881.1 | 674 | 61260  | 0         | 408 | 433 | 94 +  | 241 | 673 | 18614  | 19046  |
| UN80687 | Rsa1.0.30291.1 | 659 | 758    | 0         | 331 | 334 | 99 +  | 51  | 384 | 49     | 382    |
| UN80688 | Rsa1.0.01682.1 | 787 | 41090  | 1.00E-128 | 291 | 307 | 94 +  | 422 | 726 | 10171  | 10475  |
| UN80689 | Rsa1.0.00014.1 | 566 | 348985 | 0         | 490 | 506 | 96 +  | 62  | 566 | 279240 | 279742 |

|         |                |     |        |           |     |     |       |     |     |        |        |
|---------|----------------|-----|--------|-----------|-----|-----|-------|-----|-----|--------|--------|
| UN80690 | Rsa1.0.01773.1 | 779 | 39546  | 0         | 716 | 765 | 93 +  | 30  | 779 | 17250  | 18009  |
| UN80691 | Rsa1.0.00211.1 | 788 | 228189 | 1.00E-134 | 260 | 266 | 97 +  | 225 | 490 | 200351 | 200616 |
| UN80692 | Rsa1.0.02707.1 | 782 | 28520  | 0         | 564 | 580 | 97 +  | 3   | 582 | 13826  | 14405  |
| UN80693 | Rsa1.0.02085.1 | 607 | 35198  | 4.00E-58  | 121 | 123 | 98 +  | 120 | 242 | 16346  | 16468  |
| UN80694 | Rsa1.0.00645.1 | 623 | 189716 | 1.00E-139 | 273 | 279 | 97 -  | 3   | 280 | 11246  | 11524  |
| UN80695 | Rsa1.0.00211.1 | 456 | 228189 | 0         | 429 | 455 | 94 +  | 4   | 454 | 140050 | 140504 |
| UN80696 | Rsa1.0.00577.1 | 742 | 174827 | 1.00E-86  | 183 | 187 | 97 +  | 3   | 189 | 116900 | 117084 |
| UN80697 | Rsa1.0.00427.1 | 726 | 189678 | 0         | 449 | 463 | 96 -  | 2   | 464 | 24692  | 25151  |
| UN80698 | Rsa1.0.00356.1 | 778 | 91521  | 1.00E-106 | 224 | 232 | 96 +  | 5   | 236 | 29542  | 29772  |
| UN80699 | Rsa1.0.01442.1 | 580 | 45776  | 0         | 415 | 433 | 95 -  | 145 | 577 | 16804  | 17236  |
| UN80700 | Rsa1.0.00798.1 | 600 | 63945  | 0         | 568 | 601 | 94 +  | 2   | 600 | 42855  | 43437  |
| UN80701 | Rsa1.0.64894.1 | 683 | 353    | 2.33E-156 | 280 | 286 | 97 -  | 29  | 314 | 1      | 286    |
| UN80702 | Rsa1.0.14210.1 | 711 | 3660   | 1.00E-109 | 206 | 208 | 99 +  | 504 | 711 | 654    | 861    |
| UN80703 | Rsa1.0.03188.1 | 710 | 24722  | 0         | 706 | 712 | 99 -  | 2   | 710 | 21090  | 21801  |
| UN80704 | Rsa1.0.00329.1 | 788 | 222544 | 1.00E-121 | 233 | 237 | 98 +  | 241 | 477 | 19586  | 19822  |
| UN80705 | Rsa1.0.03572.1 | 599 | 146346 | 0         | 580 | 611 | 94 -  | 3   | 599 | 131055 | 131661 |
| UN80706 | Rsa1.0.18395.1 | 684 | 1607   | 0         | 528 | 560 | 94 +  | 3   | 562 | 1061   | 1607   |
| UN80707 | Rsa1.0.30381.1 | 661 | 755    | 0         | 560 | 563 | 99 -  | 96  | 657 | 193    | 755    |
| UN80708 | Rsa1.0.07880.1 | 666 | 8369   | 1.00E-120 | 220 | 220 | 100 + | 447 | 666 | 7317   | 7536   |
| UN80709 | Rsa1.0.01539.1 | 380 | 43698  | 8.00E-40  | 84  | 84  | 100 - | 72  | 155 | 5827   | 5910   |
| UN80710 | Rsa1.0.04033.1 | 683 | 19481  | 0         | 418 | 427 | 97 -  | 59  | 485 | 9206   | 9632   |
| UN80711 | Rsa1.0.00214.1 | 569 | 107508 | 1.00E-45  | 106 | 110 | 96 +  | 306 | 415 | 14490  | 14599  |
| UN80712 | Rsa1.0.01749.1 | 722 | 39822  | 0         | 408 | 416 | 98 +  | 308 | 722 | 7472   | 7884   |
| UN80713 | Rsa1.0.01806.1 | 718 | 39021  | 2.00E-66  | 135 | 137 | 98 -  | 1   | 137 | 32378  | 32514  |
| UN80714 | Rsa1.0.00167.1 | 702 | 116000 | 0         | 673 | 702 | 95 -  | 2   | 702 | 111865 | 112560 |
| UN80715 | Rsa1.0.02666.1 | 267 | 28915  | 1.00E-80  | 209 | 224 | 93 +  | 10  | 226 | 22817  | 23039  |
| UN80716 | Rsa1.0.23658.1 | 508 | 1033   | 0         | 449 | 482 | 93 +  | 1   | 479 | 134    | 615    |
| UN80717 | Rsa1.0.01961.1 | 272 | 36761  | 1.00E-152 | 272 | 272 | 100 + | 1   | 272 | 25069  | 25340  |
| UN80718 | #              | #   | #      | #         | #   | #   | #     | #   | #   | #      | #      |
| UN80719 | Rsa1.0.02748.1 | 766 | 28242  | 0         | 744 | 761 | 97 +  | 5   | 763 | 17503  | 18263  |
| UN80720 | Rsa1.0.00205.1 | 759 | 193401 | 1.00E-179 | 383 | 401 | 95 +  | 37  | 431 | 180465 | 180862 |
| UN80721 | Rsa1.0.00876.1 | 706 | 61328  | 1.00E-157 | 305 | 313 | 97 +  | 3   | 315 | 44787  | 45099  |
| UN80722 | Rsa1.0.06734.1 | 584 | 10445  | 0         | 578 | 583 | 99 +  | 2   | 584 | 9344   | 9926   |
| UN80723 | Rsa1.0.01153.1 | 647 | 52264  | 0         | 628 | 647 | 97 +  | 2   | 647 | 49062  | 49708  |
| UN80724 | Rsa1.0.00066.1 | 601 | 152418 | 1.00E-118 | 219 | 220 | 99 -  | 207 | 426 | 147736 | 147955 |
| UN80725 | Rsa1.0.03790.1 | 707 | 20844  | 0         | 655 | 700 | 93 +  | 2   | 700 | 1564   | 2263   |
| UN80726 | Rsa1.0.00050.1 | 781 | 237174 | 1.00E-114 | 225 | 230 | 97 +  | 229 | 458 | 31291  | 31520  |
| UN80727 | Rsa1.0.37342.1 | 707 | 604    | 1.00E-166 | 347 | 364 | 95 +  | 2   | 365 | 85     | 448    |
| UN80728 | Rsa1.0.00651.1 | 651 | 247766 | 0         | 600 | 648 | 92 +  | 2   | 645 | 202838 | 203479 |



|         |                |     |        |           |     |     |      |     |     |        |        |
|---------|----------------|-----|--------|-----------|-----|-----|------|-----|-----|--------|--------|
| UN80729 | Rsa1.0_14575.1 | 585 | 3251   | 1.00E-166 | 411 | 445 | 92 + | 3   | 445 | 742    | 1176   |
| UN80730 | Rsa1.0_07692.1 | 741 | 132338 | 0         | 549 | 597 | 91 + | 164 | 741 | 130735 | 131317 |
| UN80731 | Rsa1.0_00564.1 | 677 | 75428  | 8.00E-72  | 141 | 142 | 99 + | 66  | 207 | 66663  | 66804  |
| UN80732 | Rsa1.0_00088.1 | 705 | 141341 | 1.00E-156 | 302 | 309 | 97 + | 3   | 311 | 61089  | 61393  |
| UN80733 | Rsa1.0_62931.1 | 772 | 364    | 0         | 358 | 364 | 98 + | 194 | 557 | 1      | 364    |
| UN80734 | Rsa1.0_00654.1 | 527 | 70012  | 1.00E-125 | 345 | 379 | 91 + | 1   | 377 | 40143  | 40513  |
| UN80735 | Rsa1.0_01027.1 | 718 | 56402  | 0         | 590 | 621 | 95 - | 104 | 718 | 17838  | 18458  |
| UN80736 | Rsa1.0_02667.1 | 554 | 28910  | 9.00E-59  | 192 | 220 | 87 + | 347 | 548 | 22757  | 22976  |
| UN80737 | Rsa1.0_00007.1 | 739 | 239325 | 1.00E-177 | 320 | 322 | 99 + | 418 | 739 | 53387  | 53708  |
| UN80738 | Rsa1.0_02097.1 | 723 | 35036  | 1.00E-136 | 249 | 250 | 99 + | 287 | 536 | 14535  | 14784  |
| UN80739 | Rsa1.0_04411.1 | 545 | 142979 | 0         | 393 | 411 | 95 - | 135 | 545 | 138212 | 138622 |
| UN80740 | Rsa1.0_01175.1 | 657 | 51674  | 1.00E-102 | 277 | 301 | 92 - | 367 | 656 | 36004  | 36301  |
| UN80741 | Rsa1.0_00476.1 | 752 | 280966 | 1.00E-177 | 329 | 334 | 98 - | 100 | 433 | 260832 | 261165 |
| UN80742 | Rsa1.0_02110.1 | 507 | 34919  | 1.00E-104 | 211 | 217 | 97 - | 295 | 507 | 26302  | 26518  |
| UN80743 | Rsa1.0_00335.1 | 524 | 94371  | 2.00E-69  | 149 | 154 | 96 + | 12  | 165 | 28538  | 28691  |
| UN80744 | Rsa1.0_01947.1 | 677 | 36977  | 0         | 646 | 681 | 94 + | 3   | 677 | 21477  | 22150  |
| UN80745 | Rsa1.0_00006.1 | 703 | 396176 | 1.00E-154 | 382 | 411 | 92 + | 7   | 407 | 286324 | 286728 |
| UN80746 | Rsa1.0_00041.1 | 726 | 186197 | 5.00E-24  | 87  | 96  | 90 + | 134 | 229 | 113912 | 114004 |
| UN80747 | Rsa1.0_36504.1 | 739 | 618    | 5.00E-61  | 129 | 132 | 97 + | 19  | 150 | 481    | 612    |
| UN80748 | Rsa1.0_02281.1 | 757 | 292576 | 0         | 567 | 595 | 95 + | 42  | 632 | 14503  | 15094  |
| UN80749 | Rsa1.0_03264.1 | 706 | 145959 | 0         | 666 | 696 | 95 + | 3   | 696 | 125094 | 125777 |
| UN80750 | Rsa1.0_00191.1 | 680 | 316976 | 1.00E-120 | 228 | 231 | 98 + | 185 | 415 | 179051 | 179281 |
| UN80751 | Rsa1.0_00036.1 | 527 | 176186 | 1.00E-166 | 339 | 352 | 96 + | 17  | 368 | 171557 | 171907 |
| UN80752 | Rsa1.0_00001.1 | 623 | 363028 | 1.00E-122 | 234 | 238 | 98 + | 226 | 463 | 13063  | 13300  |
| UN80753 | Rsa1.0_54751.1 | 535 | 417    | 1.00E-114 | 218 | 221 | 98 - | 315 | 535 | 197    | 417    |
| UN80754 | Rsa1.0_00117.1 | 481 | 213118 | 5.00E-94  | 193 | 199 | 96 + | 283 | 481 | 177370 | 177568 |
| UN80755 | Rsa1.0_00247.1 | 712 | 103408 | 0         | 637 | 660 | 96 + | 59  | 712 | 76823  | 77481  |
| UN80756 | Rsa1.0_00383.1 | 696 | 398431 | 2.00E-79  | 169 | 175 | 96 - | 386 | 560 | 285568 | 285742 |
| UN80757 | Rsa1.0_02287.1 | 801 | 32986  | 0         | 583 | 603 | 96 + | 201 | 801 | 23412  | 24014  |
| UN80758 | Rsa1.0_03613.1 | 602 | 21773  | 0         | 590 | 605 | 97 - | 2   | 602 | 19534  | 20135  |
| UN80759 | Rsa1.0_00398.1 | 638 | 88007  | 0         | 352 | 362 | 97 + | 277 | 638 | 62692  | 63053  |
| UN80760 | Rsa1.0_11355.1 | 789 | 5535   | 0         | 446 | 474 | 94 - | 13  | 486 | 1022   | 1490   |
| UN80761 | Rsa1.0_18391.1 | 664 | 1608   | 1.00E-100 | 245 | 263 | 93 - | 1   | 249 | 1270   | 1531   |
| UN80762 | Rsa1.0_00175.1 | 630 | 166121 | 0         | 415 | 434 | 95 - | 197 | 630 | 68012  | 68438  |
| UN80763 | Rsa1.0_00649.1 | 436 | 70263  | 1.00E-137 | 385 | 436 | 88 - | 1   | 436 | 15184  | 15594  |
| UN80764 | Rsa1.0_02296.1 | 450 | 32920  | 1.00E-176 | 337 | 344 | 97 - | 97  | 438 | 17251  | 17594  |
| UN80765 | Rsa1.0_00128.1 | 752 | 228675 | 0         | 748 | 753 | 99 - | 2   | 752 | 161385 | 162136 |
| UN80766 | Rsa1.0_07358.1 | 495 | 9516   | 0         | 475 | 516 | 92 + | 1   | 494 | 1896   | 2409   |
| UN80767 | Rsa1.0_23867.1 | 602 | 1021   | 1.00E-172 | 398 | 428 | 92 - | 178 | 594 | 597    | 1021   |

|         |                |     |        |           |     |     |      |     |     |        |        |
|---------|----------------|-----|--------|-----------|-----|-----|------|-----|-----|--------|--------|
| UN80768 | Rsa1.0.01448.1 | 274 | 45645  | 1.00E-121 | 263 | 276 | 95 + | 1   | 274 | 20893  | 21168  |
| UN80769 | Rsa1.0.00128.1 | 638 | 228675 | 1.00E-154 | 377 | 406 | 92 + | 11  | 404 | 200479 | 200880 |
| UN80770 | Rsa1.0.02709.1 | 223 | 28513  | 9.00E-63  | 134 | 138 | 97 + | 1   | 138 | 26803  | 26940  |
| UN80771 | Rsa1.0.00863.1 | 130 | 254535 | 1.00E-51  | 118 | 123 | 95 + | 3   | 125 | 239562 | 239684 |
| UN80772 | Rsa1.0.02680.1 | 700 | 28721  | 0         | 667 | 706 | 94 + | 7   | 700 | 19082  | 19785  |
| UN80773 | Rsa1.0.01427.1 | 436 | 46083  | 0         | 427 | 436 | 97 - | 1   | 435 | 36964  | 37399  |
| UN80774 | Rsa1.0.00111.1 | 730 | 390088 | 0         | 678 | 723 | 93 - | 22  | 730 | 60686  | 61400  |
| UN80775 | Rsa1.0.03884.1 | 777 | 20274  | 0         | 444 | 465 | 95 - | 1   | 465 | 19654  | 20107  |
| UN80776 | Rsa1.0.52240.1 | 794 | 436    | 0         | 434 | 436 | 99 - | 282 | 717 | 1      | 436    |
| UN80777 | Rsa1.0.06869.1 | 194 | 10234  | 1.00E-36  | 84  | 86  | 97 - | 3   | 88  | 276    | 361    |
| UN80778 | Rsa1.0.42601.1 | 540 | 527    | 1.00E-133 | 308 | 326 | 94 - | 2   | 325 | 33     | 353    |
| UN80779 | Rsa1.0.00308.1 | 380 | 96915  | 1.00E-103 | 241 | 259 | 93 - | 1   | 250 | 76598  | 76856  |
| UN80780 | Rsa1.0.00694.1 | 610 | 68074  | 0         | 606 | 610 | 99 - | 1   | 610 | 27111  | 27720  |
| UN80781 | Rsa1.0.00204.1 | 249 | 109056 | 8.00E-42  | 151 | 175 | 86 + | 1   | 172 | 47145  | 47304  |
| UN80782 | Rsa1.0.01029.1 | 752 | 256254 | 0         | 420 | 441 | 95 - | 1   | 438 | 2337   | 2771   |
| UN80783 | Rsa1.0.03695.1 | 785 | 21329  | 0         | 425 | 448 | 94 + | 1   | 430 | 9680   | 10125  |
| UN80784 | Rsa1.0.00170.1 | 653 | 179538 | 0         | 374 | 384 | 97 + | 1   | 384 | 42273  | 42656  |
| UN80785 | Rsa1.0.02606.1 | 716 | 29635  | 1.00E-143 | 291 | 301 | 96 - | 69  | 368 | 13316  | 13616  |
| UN80786 | Rsa1.0.31076.1 | 558 | 737    | 0         | 476 | 499 | 95 - | 61  | 558 | 37     | 534    |
| UN80787 | Rsa1.0.04569.1 | 780 | 16798  | 1.00E-162 | 320 | 328 | 97 - | 1   | 325 | 8448   | 8775   |
| UN80788 | Rsa1.0.00015.1 | 619 | 561803 | 0         | 512 | 530 | 96 - | 2   | 529 | 171191 | 171716 |
| UN80789 | Rsa1.0.00104.1 | 795 | 368722 | 0         | 430 | 439 | 97 + | 1   | 439 | 41580  | 42018  |
| UN80790 | Rsa1.0.00709.1 | 811 | 67329  | 1.00E-175 | 361 | 375 | 96 - | 2   | 376 | 13836  | 14208  |
| UN80791 | Rsa1.0.08183.1 | 765 | 7775   | 0         | 565 | 581 | 97 + | 1   | 579 | 4922   | 5500   |
| UN80792 | Rsa1.0.01309.1 | 248 | 48556  | 1.00E-119 | 240 | 248 | 96 + | 1   | 248 | 16427  | 16674  |
| UN80793 | Rsa1.0.00111.1 | 316 | 390088 | 3.00E-76  | 161 | 165 | 97 - | 114 | 278 | 159257 | 159420 |
| UN80794 | Rsa1.0.00181.1 | 754 | 114269 | 0         | 638 | 663 | 96 - | 94  | 754 | 15720  | 16381  |
| UN80795 | Rsa1.0.03391.1 | 345 | 23251  | 1.00E-160 | 333 | 348 | 95 + | 1   | 345 | 2460   | 2807   |
| UN80796 | Rsa1.0.02269.1 | 577 | 33168  | 1.00E-106 | 233 | 243 | 95 - | 3   | 243 | 18242  | 18484  |
| UN80797 | Rsa1.0.02623.1 | 197 | 29409  | 1.00E-100 | 191 | 193 | 98 + | 5   | 197 | 19827  | 20019  |
| UN80798 | Rsa1.0.03985.1 | 770 | 19704  | 0         | 374 | 390 | 95 - | 381 | 770 | 4072   | 4461   |
| UN80799 | Rsa1.0.39987.1 | 496 | 562    | 0         | 355 | 362 | 98 - | 129 | 490 | 201    | 562    |
| UN80800 | Rsa1.0.00604.1 | 769 | 146282 | 2.00E-79  | 181 | 191 | 94 - | 470 | 660 | 80065  | 80255  |
| UN80801 | Rsa1.0.04023.1 | 652 | 19522  | 7.00E-60  | 133 | 138 | 96 + | 515 | 652 | 7312   | 7449   |
| UN80802 | Rsa1.0.03631.1 | 782 | 21647  | 1.00E-100 | 311 | 349 | 89 + | 180 | 527 | 19212  | 19557  |
| UN80803 | Rsa1.0.00480.1 | 176 | 81325  | 1.00E-76  | 166 | 173 | 95 + | 1   | 173 | 59595  | 59767  |
| UN80804 | Rsa1.0.04898.1 | 257 | 15545  | 1.00E-108 | 240 | 249 | 96 - | 2   | 249 | 10973  | 11217  |
| UN80805 | Rsa1.0.00133.1 | 165 | 123768 | 1.00E-18  | 89  | 102 | 87 - | 67  | 165 | 36283  | 36384  |
| UN80806 | Rsa1.0.00552.1 | 676 | 206757 | 5.00E-98  | 201 | 206 | 97 - | 1   | 205 | 187345 | 187550 |

|         |                |     |        |           |     |     |      |     |     |        |        |
|---------|----------------|-----|--------|-----------|-----|-----|------|-----|-----|--------|--------|
| UN80807 | Rsa1.0.00156.1 | 442 | 118383 | 1.00E-114 | 327 | 372 | 87 + | 71  | 442 | 90210  | 90554  |
| UN80808 | Rsa1.0.39889.1 | 691 | 563    | 1.00E-106 | 208 | 211 | 98 + | 256 | 464 | 104    | 314    |
| UN80809 | Rsa1.0.00490.1 | 694 | 186713 | 1.00E-152 | 285 | 289 | 98 - | 265 | 553 | 39542  | 39830  |
| UN80810 | Rsa1.0.00759.1 | 196 | 65465  | 6.00E-76  | 180 | 192 | 93 - | 1   | 192 | 56107  | 56298  |
| UN80811 | Rsa1.0.01377.1 | 230 | 46967  | 6.00E-58  | 129 | 134 | 96 + | 1   | 134 | 10091  | 10224  |
| UN80812 | Rsa1.0.00636.1 | 733 | 71113  | 0         | 468 | 471 | 99 - | 17  | 487 | 65895  | 66365  |
| UN80813 | Rsa1.0.00034.1 | 752 | 260119 | 1.00E-121 | 230 | 233 | 98 + | 446 | 678 | 30072  | 30304  |
| UN80814 | Rsa1.0.00464.1 | 395 | 82253  | 4.00E-94  | 266 | 292 | 91 + | 1   | 290 | 14664  | 14950  |
| UN80815 | Rsa1.0.04026.1 | 185 | 19508  | 2.00E-41  | 149 | 166 | 89 - | 19  | 177 | 11099  | 11263  |
| UN80816 | Rsa1.0.19660.1 | 465 | 1400   | 1.00E-115 | 280 | 304 | 92 - | 76  | 370 | 99     | 393    |
| UN80817 | Rsa1.0.00654.1 | 600 | 70012  | 1.00E-58  | 478 | 596 | 80 + | 1   | 595 | 50609  | 51203  |
| UN80818 | Rsa1.0.00696.1 | 616 | 68010  | 0         | 361 | 364 | 99 - | 1   | 363 | 38729  | 39091  |
| UN80819 | Rsa1.0.00002.1 | 121 | 601661 | 8.00E-37  | 109 | 118 | 92 + | 4   | 120 | 113214 | 113331 |
| UN80820 | Rsa1.0.03362.1 | 673 | 23453  | 0         | 522 | 534 | 97 - | 141 | 673 | 1334   | 1867   |
| UN80821 | Rsa1.0.00382.1 | 551 | 251946 | 0         | 423 | 432 | 97 - | 4   | 433 | 107859 | 108290 |
| UN80822 | Rsa1.0.03029.1 | 814 | 25858  | 0         | 375 | 388 | 96 + | 169 | 556 | 19494  | 19881  |
| UN80823 | Rsa1.0.00029.1 | 777 | 272992 | 0         | 662 | 679 | 97 - | 100 | 777 | 248604 | 249282 |
| UN80824 | Rsa1.0.24496.1 | 562 | 985    | 0         | 506 | 515 | 98 - | 3   | 515 | 228    | 742    |
| UN80825 | Rsa1.0.34770.1 | 716 | 651    | 1.00E-144 | 289 | 299 | 96 + | 6   | 304 | 44     | 342    |
| UN80826 | Rsa1.0.02959.1 | 280 | 26441  | 9.00E-76  | 214 | 235 | 91 - | 49  | 280 | 19780  | 20014  |
| UN80827 | Rsa1.0.03292.1 | 776 | 23977  | 0         | 750 | 783 | 95 + | 2   | 776 | 12439  | 13220  |
| UN80828 | Rsa1.0.00463.1 | 533 | 189177 | 0         | 506 | 513 | 98 - | 17  | 529 | 116184 | 116694 |
| UN80829 | Rsa1.0.02032.1 | 577 | 35830  | 1.00E-145 | 333 | 353 | 94 - | 1   | 351 | 3825   | 4176   |
| UN80830 | Rsa1.0.00027.1 | 587 | 283362 | 0         | 564 | 589 | 95 + | 1   | 586 | 42815  | 43402  |
| UN80831 | Rsa1.0.00940.1 | 718 | 179946 | 0         | 481 | 531 | 90 - | 1   | 524 | 40414  | 40935  |
| UN80832 | Rsa1.0.00048.1 | 680 | 167185 | 0         | 663 | 684 | 96 - | 1   | 678 | 17527  | 18207  |
| UN80833 | Rsa1.0.01774.1 | 622 | 39528  | 0         | 344 | 347 | 99 + | 2   | 347 | 20705  | 21051  |
| UN80834 | Rsa1.0.02022.1 | 401 | 35923  | 1.00E-158 | 362 | 386 | 93 + | 1   | 386 | 18363  | 18746  |
| UN80835 | Rsa1.0.05746.1 | 771 | 12750  | 1.00E-112 | 215 | 218 | 98 + | 370 | 587 | 5467   | 5684   |
| UN80836 | Rsa1.0.02231.1 | 315 | 33661  | 1.00E-134 | 279 | 289 | 96 - | 26  | 313 | 6323   | 6609   |
| UN80837 | Rsa1.0.00685.1 | 772 | 68515  | 1.00E-170 | 435 | 478 | 91 - | 2   | 475 | 9987   | 10441  |
| UN80838 | Rsa1.0.00739.1 | 329 | 66155  | 2.00E-52  | 126 | 133 | 94 + | 49  | 181 | 4240   | 4372   |
| UN80839 | Rsa1.0.02581.1 | 851 | 29896  | 0         | 790 | 847 | 93 - | 1   | 844 | 28406  | 29250  |
| UN80840 | Rsa1.0.00050.1 | 380 | 237174 | 1.00E-122 | 353 | 398 | 88 - | 1   | 380 | 7785   | 8176   |
| UN80841 | Rsa1.0.04399.1 | 564 | 17543  | 5.00E-85  | 288 | 330 | 87 - | 183 | 509 | 9928   | 10257  |
| UN80842 | Rsa1.0.00484.1 | 724 | 203294 | 0         | 532 | 545 | 97 + | 4   | 548 | 49807  | 50347  |
| UN80843 | Rsa1.0.01971.1 | 637 | 36641  | 0         | 617 | 640 | 96 + | 2   | 635 | 21068  | 21703  |
| UN80844 | Rsa1.0.02004.1 | 705 | 169138 | 0         | 664 | 696 | 95 - | 11  | 705 | 156602 | 157279 |
| UN80845 | Rsa1.0.02239.1 | 849 | 33534  | 1.00E-177 | 331 | 335 | 98 - | 3   | 336 | 3409   | 3743   |

|         |                |     |        |           |     |     |      |     |     |        |        |
|---------|----------------|-----|--------|-----------|-----|-----|------|-----|-----|--------|--------|
| UN80846 | Rsa1.0.02116.1 | 572 | 34853  | 1.00E-152 | 310 | 321 | 96 + | 252 | 572 | 14502  | 14821  |
| UN80847 | Rsa1.0.00157.1 | 832 | 245832 | 0         | 605 | 606 | 99 + | 1   | 606 | 147057 | 147662 |
| UN80848 | Rsa1.0.03075.1 | 678 | 25560  | 1.00E-159 | 312 | 320 | 97 - | 289 | 607 | 14646  | 14965  |
| UN80849 | Rsa1.0.00477.1 | 110 | 81556  | 3.00E-39  | 103 | 110 | 93 - | 1   | 110 | 22635  | 22744  |
| UN80850 | Rsa1.0.00146.1 | 541 | 149343 | 2.00E-81  | 179 | 186 | 96 + | 356 | 540 | 2408   | 2593   |
| UN80851 | Rsa1.0.00149.1 | 717 | 305196 | 0         | 575 | 604 | 95 + | 1   | 596 | 26585  | 27186  |
| UN80852 | Rsa1.0.00844.1 | 820 | 62403  | 1.00E-175 | 373 | 392 | 95 - | 239 | 629 | 19070  | 19461  |
| UN80853 | Rsa1.0.00596.1 | 678 | 73578  | 0         | 657 | 669 | 98 - | 3   | 670 | 1885   | 2553   |
| UN80854 | Rsa1.0.00898.1 | 777 | 202772 | 1.00E-141 | 384 | 428 | 89 + | 214 | 629 | 175395 | 175811 |
| UN80855 | Rsa1.0.18069.1 | 340 | 1678   | 1.00E-153 | 315 | 325 | 96 - | 3   | 327 | 197    | 517    |
| UN80856 | Rsa1.0.00687.1 | 717 | 68494  | 1.00E-137 | 305 | 322 | 94 + | 7   | 328 | 22744  | 23061  |
| UN80857 | Rsa1.0.00029.1 | 638 | 272992 | 0         | 487 | 532 | 91 + | 4   | 512 | 257520 | 258045 |
| UN80858 | Rsa1.0.03960.1 | 601 | 19864  | 1.00E-130 | 347 | 381 | 91 + | 2   | 378 | 4884   | 5257   |
| UN80859 | Rsa1.0.00898.1 | 558 | 202772 | 0         | 555 | 558 | 99 + | 1   | 558 | 168529 | 169086 |
| UN80860 | Rsa1.0.00477.1 | 635 | 81556  | 0         | 449 | 462 | 97 + | 1   | 458 | 53842  | 54300  |
| UN80861 | Rsa1.0.00520.1 | 738 | 78226  | 0         | 657 | 669 | 98 + | 70  | 738 | 1875   | 2543   |
| UN80862 | Rsa1.0.04154.1 | 424 | 18802  | 7.00E-96  | 210 | 218 | 96 - | 1   | 217 | 15466  | 15682  |
| UN80863 | Rsa1.0.01456.1 | 416 | 45372  | 2.00E-99  | 225 | 238 | 94 + | 9   | 246 | 20825  | 21059  |
| UN80864 | Rsa1.0.00515.1 | 527 | 78417  | 1.00E-103 | 216 | 223 | 96 - | 3   | 225 | 59161  | 59382  |
| UN80865 | Rsa1.0.07588.1 | 767 | 9070   | 0         | 626 | 674 | 92 + | 98  | 767 | 203    | 873    |
| UN80866 | Rsa1.0.00387.1 | 793 | 495407 | 1.00E-114 | 284 | 307 | 92 - | 1   | 302 | 134727 | 135033 |
| UN80867 | Rsa1.0.03503.1 | 696 | 22445  | 1.00E-106 | 480 | 573 | 83 + | 131 | 696 | 381    | 950    |
| UN80868 | Rsa1.0.00079.1 | 645 | 606987 | 3.00E-77  | 162 | 167 | 97 + | 246 | 412 | 40728  | 40894  |
| UN80869 | Rsa1.0.00355.1 | 653 | 92038  | 0         | 506 | 547 | 92 + | 2   | 539 | 77903  | 78429  |
| UN80870 | Rsa1.0.00104.1 | 261 | 368722 | 1.00E-108 | 243 | 254 | 95 + | 9   | 261 | 154807 | 155057 |
| UN80871 | Rsa1.0.00040.1 | 750 | 324196 | 0         | 728 | 778 | 93 - | 1   | 750 | 239964 | 240738 |
| UN80872 | Rsa1.0.13080.1 | 684 | 5018   | 1.00E-154 | 286 | 289 | 98 + | 1   | 289 | 4730   | 5018   |
| UN80873 | Rsa1.0.02384.1 | 737 | 31917  | 0         | 471 | 520 | 90 + | 236 | 737 | 13168  | 13675  |
| UN80874 | Rsa1.0.00085.1 | 640 | 142226 | 1.00E-150 | 344 | 368 | 93 + | 246 | 601 | 50813  | 51180  |
| UN80875 | Rsa1.0.00808.1 | 410 | 63351  | 0         | 383 | 395 | 96 + | 16  | 410 | 39387  | 39781  |
| UN80876 | Rsa1.0.02338.1 | 787 | 32390  | 0         | 735 | 746 | 98 - | 3   | 747 | 16484  | 17229  |
| UN80877 | Rsa1.0.00116.1 | 769 | 365886 | 1.00E-132 | 242 | 243 | 99 + | 354 | 596 | 239724 | 239966 |
| UN80878 | Rsa1.0.00252.1 | 829 | 102760 | 0         | 795 | 825 | 96 - | 3   | 825 | 87376  | 88198  |
| UN80879 | Rsa1.0.00001.1 | 754 | 363028 | 1.00E-147 | 353 | 378 | 93 + | 12  | 383 | 192536 | 192912 |
| UN80880 | Rsa1.0.00225.1 | 694 | 105892 | 1.00E-164 | 308 | 313 | 98 + | 161 | 473 | 98398  | 98710  |
| UN80881 | Rsa1.0.01712.1 | 794 | 154210 | 0         | 777 | 795 | 97 - | 1   | 794 | 9784   | 10577  |
| UN80882 | Rsa1.0.01675.1 | 657 | 41155  | 1.00E-178 | 383 | 405 | 94 - | 105 | 509 | 29587  | 29987  |
| UN80883 | #              | #   | #      | #         | #   | #   | #    | #   | #   | #      | #      |
| UN80884 | Rsa1.0.01696.1 | 656 | 301850 | 7.00E-60  | 245 | 288 | 85 - | 97  | 370 | 40237  | 40521  |

|         |                |     |        |           |     |     |      |     |     |        |        |
|---------|----------------|-----|--------|-----------|-----|-----|------|-----|-----|--------|--------|
| UN80885 | Rsa1.0.00091.1 | 574 | 139699 | 0         | 382 | 398 | 95 + | 11  | 407 | 15260  | 15657  |
| UN80886 | Rsa1.0.02226.1 | 705 | 33726  | 1.00E-141 | 281 | 288 | 97 + | 3   | 285 | 10108  | 10395  |
| UN80887 | Rsa1.0.00829.1 | 632 | 158305 | 0         | 619 | 633 | 97 + | 2   | 632 | 131003 | 131626 |
| UN80888 | Rsa1.0.01070.1 | 120 | 55099  | 2.00E-25  | 68  | 71  | 95 + | 1   | 71  | 31725  | 31795  |
| UN80889 | Rsa1.0.00153.1 | 191 | 192931 | 2.00E-38  | 102 | 109 | 93 - | 3   | 111 | 144194 | 144302 |
| UN80890 | Rsa1.0.00096.1 | 747 | 198773 | 0         | 678 | 703 | 96 + | 45  | 747 | 167791 | 168493 |
| UN80891 | Rsa1.0.02820.1 | 197 | 27629  | 2.00E-38  | 165 | 185 | 89 + | 19  | 192 | 19486  | 19670  |
| UN80892 | Rsa1.0.04145.1 | 746 | 18834  | 9.00E-29  | 90  | 98  | 91 - | 351 | 448 | 2562   | 2659   |
| UN80893 | Rsa1.0.00048.1 | 709 | 167185 | 1.00E-164 | 337 | 349 | 96 - | 1   | 347 | 2594   | 2942   |
| UN80894 | Rsa1.0.00167.1 | 620 | 116000 | 0         | 534 | 549 | 97 - | 73  | 620 | 46367  | 46915  |
| UN80895 | Rsa1.0.07528.1 | 309 | 9195   | 2.00E-43  | 105 | 110 | 95 - | 76  | 185 | 738    | 847    |
| UN80896 | Rsa1.0.00128.1 | 431 | 228675 | 4.00E-57  | 176 | 197 | 89 - | 3   | 199 | 217589 | 217785 |
| UN80897 | Rsa1.0.00307.1 | 706 | 199003 | 0         | 371 | 373 | 99 + | 213 | 585 | 40489  | 40861  |
| UN80898 | Rsa1.0.02896.1 | 563 | 26970  | 1.00E-157 | 404 | 444 | 90 - | 1   | 427 | 15291  | 15729  |
| UN80899 | Rsa1.0.00363.1 | 777 | 90968  | 7.00E-85  | 181 | 188 | 96 - | 112 | 299 | 31971  | 32158  |
| UN80900 | Rsa1.0.00078.1 | 177 | 175053 | 1.00E-58  | 155 | 167 | 92 + | 8   | 173 | 78916  | 79082  |
| UN80901 | Rsa1.0.01835.1 | 382 | 38542  | 1.00E-148 | 348 | 373 | 93 + | 3   | 368 | 21282  | 21654  |
| UN80902 | Rsa1.0.05289.1 | 779 | 14259  | 0         | 744 | 770 | 96 + | 13  | 779 | 2170   | 2939   |
| UN80903 | Rsa1.0.02074.1 | 711 | 35370  | 0         | 448 | 480 | 93 + | 27  | 503 | 12060  | 12527  |
| UN80904 | Rsa1.0.00393.1 | 682 | 158674 | 1.00E-179 | 336 | 342 | 98 - | 341 | 682 | 110831 | 111172 |
| UN80905 | Rsa1.0.02374.1 | 628 | 32043  | 0         | 612 | 639 | 95 + | 2   | 628 | 4803   | 5438   |
| UN80906 | Rsa1.0.00121.1 | 429 | 278029 | 1.00E-115 | 240 | 250 | 96 + | 144 | 393 | 37626  | 37875  |
| UN80907 | Rsa1.0.00139.1 | 518 | 357786 | 0         | 496 | 518 | 95 - | 1   | 518 | 141674 | 142191 |
| UN80908 | Rsa1.0.01232.1 | 804 | 155185 | 1.00E-152 | 282 | 285 | 98 - | 2   | 286 | 132136 | 132420 |
| UN80909 | Rsa1.0.00065.1 | 292 | 454616 | 2.00E-36  | 81  | 82  | 98 + | 96  | 177 | 39525  | 39606  |
| UN80910 | Rsa1.0.02518.1 | 721 | 30586  | 0         | 516 | 538 | 95 - | 3   | 538 | 21523  | 22049  |
| UN80911 | Rsa1.0.01696.1 | 702 | 301850 | 1.00E-130 | 273 | 282 | 96 - | 162 | 438 | 9738   | 10019  |
| UN80912 | Rsa1.0.08598.1 | 798 | 7143   | 0         | 563 | 613 | 91 - | 1   | 604 | 1      | 607    |
| UN80913 | Rsa1.0.02131.1 | 344 | 34754  | 1.00E-161 | 330 | 344 | 95 - | 1   | 344 | 7040   | 7383   |
| UN80914 | Rsa1.0.01264.1 | 481 | 49697  | 0         | 455 | 491 | 92 - | 12  | 481 | 30858  | 31345  |
| UN80915 | Rsa1.0.15839.1 | 702 | 2397   | 0         | 490 | 507 | 96 + | 56  | 562 | 1897   | 2397   |
| UN80916 | Rsa1.0.06247.1 | 588 | 11395  | 4.00E-70  | 194 | 210 | 92 - | 82  | 287 | 9409   | 9618   |
| UN80917 | Rsa1.0.00890.1 | 202 | 323870 | 4.00E-49  | 108 | 111 | 97 - | 88  | 198 | 162367 | 162477 |
| UN80918 | Rsa1.0.00868.1 | 686 | 61630  | 0         | 592 | 598 | 98 - | 90  | 686 | 5977   | 6574   |
| UN80919 | Rsa1.0.16891.1 | 664 | 1999   | 0         | 652 | 664 | 98 + | 1   | 664 | 1237   | 1900   |
| UN80920 | Rsa1.0.05134.1 | 453 | 143181 | 1.00E-130 | 278 | 291 | 95 + | 28  | 312 | 6130   | 6420   |
| UN80921 | Rsa1.0.01133.1 | 633 | 52916  | 0         | 624 | 638 | 97 + | 2   | 633 | 36225  | 36861  |
| UN80922 | Rsa1.0.05134.1 | 489 | 143181 | 1.00E-131 | 308 | 325 | 94 + | 1   | 318 | 6100   | 6420   |
| UN80923 | Rsa1.0.00136.1 | 713 | 122464 | 0         | 546 | 575 | 94 + | 1   | 575 | 60389  | 60962  |

|         |                |     |        |           |     |     |       |     |     |        |        |
|---------|----------------|-----|--------|-----------|-----|-----|-------|-----|-----|--------|--------|
| UN80924 | Rsa1.0.01447.1 | 789 | 45654  | 0         | 767 | 789 | 97 -  | 1   | 789 | 2491   | 3278   |
| UN80925 | Rsa1.0.00005.1 | 799 | 353093 | 1.00E-131 | 241 | 242 | 99 -  | 380 | 621 | 329302 | 329543 |
| UN80926 | Rsa1.0.00457.1 | 636 | 337301 | 0         | 580 | 601 | 96 +  | 2   | 599 | 317282 | 317875 |
| UN80927 | Rsa1.0.04407.1 | 766 | 17504  | 0         | 423 | 453 | 93 +  | 10  | 438 | 4171   | 4623   |
| UN80928 | Rsa1.0.05410.1 | 642 | 13840  | 0         | 364 | 376 | 96 +  | 239 | 613 | 7861   | 8236   |
| UN80929 | Rsa1.0.00422.1 | 566 | 86144  | 0         | 437 | 465 | 93 -  | 1   | 463 | 16094  | 16557  |
| UN80930 | Rsa1.0.02129.1 | 186 | 34757  | 5.00E-73  | 172 | 183 | 93 -  | 1   | 183 | 29603  | 29785  |
| UN80931 | Rsa1.0.01275.1 | 544 | 49405  | 1.00E-157 | 296 | 301 | 98 +  | 3   | 303 | 8118   | 8418   |
| UN80932 | Rsa1.0.05081.1 | 718 | 136103 | 1.00E-145 | 333 | 355 | 93 -  | 3   | 356 | 5006   | 5357   |
| UN80933 | Rsa1.0.03181.1 | 483 | 24763  | 1.00E-142 | 315 | 334 | 94 +  | 12  | 340 | 15032  | 15363  |
| UN80934 | Rsa1.0.00307.1 | 520 | 199003 | 2.00E-87  | 177 | 180 | 98 -  | 3   | 182 | 50566  | 50744  |
| UN80935 | Rsa1.0.00065.1 | 443 | 454616 | 1.00E-152 | 322 | 337 | 95 +  | 1   | 331 | 223111 | 223442 |
| UN80936 | Rsa1.0.03869.1 | 461 | 20365  | 0         | 449 | 474 | 94 -  | 1   | 461 | 4061   | 4534   |
| UN80937 | Rsa1.0.00833.1 | 178 | 62621  | 6.00E-17  | 60  | 65  | 92 +  | 1   | 65  | 5350   | 5414   |
| UN80938 | Rsa1.0.00001.1 | 414 | 363028 | 0         | 393 | 410 | 95 -  | 3   | 412 | 281981 | 282390 |
| UN80939 | Rsa1.0.02646.1 | 614 | 29123  | 1.00E-145 | 276 | 281 | 98 -  | 330 | 610 | 14583  | 14863  |
| UN80940 | Rsa1.0.00967.1 | 665 | 58049  | 0         | 474 | 482 | 98 +  | 184 | 665 | 3513   | 3994   |
| UN80941 | Rsa1.0.00030.1 | 238 | 250988 | 7.00E-39  | 94  | 98  | 95 -  | 141 | 238 | 124035 | 124132 |
| UN80942 | Rsa1.0.01963.1 | 766 | 36719  | 0         | 753 | 767 | 98 -  | 1   | 766 | 5677   | 6442   |
| UN80943 | Rsa1.0.00742.1 | 480 | 66106  | 4.00E-42  | 143 | 160 | 89 +  | 214 | 373 | 13157  | 13315  |
| UN80944 | Rsa1.0.00802.1 | 168 | 63846  | 2.00E-81  | 162 | 165 | 98 -  | 1   | 165 | 29430  | 29594  |
| UN80945 | Rsa1.0.03012.1 | 282 | 26042  | 5.00E-71  | 154 | 160 | 96 +  | 3   | 162 | 8250   | 8409   |
| UN80946 | Rsa1.0.01096.1 | 843 | 54266  | 1.00E-150 | 461 | 520 | 88 +  | 87  | 590 | 1268   | 1773   |
| UN80947 | Rsa1.0.00890.1 | 746 | 323870 | 0         | 737 | 743 | 99 -  | 1   | 742 | 308878 | 309619 |
| UN80948 | Rsa1.0.00124.1 | 555 | 262503 | 0         | 449 | 479 | 93 +  | 30  | 504 | 56753  | 57221  |
| UN80949 | Rsa1.0.00053.1 | 595 | 263459 | 4.00E-89  | 191 | 199 | 95 +  | 397 | 595 | 95872  | 96065  |
| UN80950 | Rsa1.0.02362.1 | 366 | 32190  | 4.00E-63  | 123 | 123 | 100 + | 234 | 356 | 23753  | 23875  |
| UN80951 | Rsa1.0.00738.1 | 803 | 66322  | 0         | 716 | 748 | 95 -  | 73  | 803 | 25754  | 26501  |
| UN80952 | Rsa1.0.01818.1 | 694 | 38837  | 0         | 680 | 694 | 97 -  | 1   | 694 | 32716  | 33407  |
| UN80953 | Rsa1.0.28747.1 | 705 | 804    | 2.00E-11  | 109 | 133 | 81 +  | 243 | 375 | 47     | 179    |
| UN80954 | Rsa1.0.00120.1 | 316 | 277288 | 8.00E-61  | 155 | 167 | 92 -  | 46  | 212 | 14024  | 14190  |
| UN80955 | Rsa1.0.00457.1 | 342 | 337301 | 1.00E-81  | 214 | 234 | 91 +  | 109 | 342 | 201304 | 201537 |
| UN80956 | Rsa1.0.46994.1 | 520 | 481    | 0         | 392 | 405 | 96 -  | 1   | 400 | 1      | 400    |
| UN80957 | Rsa1.0.04203.1 | 212 | 18479  | 4.00E-65  | 193 | 209 | 92 -  | 1   | 207 | 11430  | 11634  |
| UN80958 | Rsa1.0.01806.1 | 381 | 39021  | 0         | 373 | 378 | 98 -  | 4   | 381 | 9226   | 9603   |
| UN80959 | Rsa1.0.00363.1 | 787 | 90968  | 0         | 757 | 795 | 95 +  | 2   | 787 | 64169  | 64952  |
| UN80960 | Rsa1.0.25138.1 | 665 | 950    | 3.00E-87  | 188 | 196 | 95 -  | 454 | 649 | 463    | 658    |
| UN80961 | Rsa1.0.30408.1 | 225 | 754    | 4.00E-40  | 141 | 160 | 88 -  | 66  | 225 | 31     | 190    |
| UN80962 | Rsa1.0.01451.1 | 507 | 45459  | 2.33E-156 | 298 | 310 | 96 -  | 15  | 324 | 6618   | 6927   |

|         |                |     |        |           |     |     |       |     |     |        |        |
|---------|----------------|-----|--------|-----------|-----|-----|-------|-----|-----|--------|--------|
| UN80963 | Rsa1.0.00087.1 | 313 | 761073 | 1.00E-129 | 265 | 274 | 96 +  | 3   | 275 | 533426 | 533699 |
| UN80964 | Rsa1.0.20355.1 | 544 | 1314   | 1.00E-174 | 327 | 333 | 98 -  | 212 | 544 | 607    | 939    |
| UN80965 | Rsa1.0.10853.1 | 389 | 5700   | 1.00E-120 | 258 | 270 | 95 +  | 1   | 269 | 1684   | 1953   |
| UN80966 | Rsa1.0.03504.1 | 220 | 22443  | 1.00E-92  | 208 | 220 | 94 +  | 1   | 220 | 4027   | 4246   |
| UN80967 | Rsa1.0.00651.1 | 624 | 247766 | 0         | 455 | 469 | 97 +  | 7   | 470 | 224105 | 224573 |
| UN80968 | Rsa1.0.01453.1 | 663 | 45449  | 1.00E-131 | 321 | 345 | 93 -  | 229 | 564 | 11444  | 11788  |
| UN80969 | Rsa1.0.00655.1 | 244 | 195840 | 1.00E-102 | 230 | 244 | 94 +  | 1   | 244 | 166430 | 166673 |
| UN80970 | Rsa1.0.02478.1 | 784 | 150183 | 2.00E-88  | 169 | 170 | 99 +  | 600 | 769 | 149398 | 149567 |
| UN80971 | Rsa1.0.00327.1 | 717 | 94892  | 0         | 411 | 412 | 99 +  | 4   | 415 | 66312  | 66723  |
| UN80972 | Rsa1.0.02202.1 | 818 | 33961  | 1.00E-131 | 237 | 237 | 100 - | 1   | 237 | 22964  | 23200  |
| UN80973 | Rsa1.0.50553.1 | 587 | 449    | 1.00E-134 | 252 | 255 | 98 +  | 244 | 498 | 195    | 449    |
| UN80974 | Rsa1.0.04911.1 | 556 | 15483  | 1.00E-136 | 305 | 324 | 94 -  | 236 | 556 | 6259   | 6582   |
| UN80975 | #              | #   | #      | #         | #   | #   | #     | #   | #   | #      | #      |
| UN80976 | Rsa1.0.00058.1 | 596 | 159921 | 1.00E-154 | 334 | 352 | 94 +  | 1   | 352 | 54223  | 54573  |
| UN80977 | Rsa1.0.00643.1 | 238 | 70658  | 1.00E-110 | 229 | 238 | 96 -  | 1   | 238 | 27872  | 28109  |
| UN80978 | Rsa1.0.17174.1 | 519 | 1901   | 1.00E-136 | 269 | 277 | 97 +  | 1   | 277 | 769    | 1045   |
| UN80979 | Rsa1.0.01159.1 | 691 | 52115  | 0         | 676 | 691 | 97 +  | 1   | 691 | 11872  | 12562  |
| UN80980 | Rsa1.0.01600.1 | 731 | 42537  | 0         | 694 | 735 | 94 -  | 2   | 731 | 5841   | 6567   |
| UN80981 | Rsa1.0.00042.1 | 693 | 171507 | 1.00E-116 | 231 | 237 | 97 +  | 316 | 552 | 41039  | 41275  |
| UN80982 | Rsa1.0.00161.1 | 745 | 116891 | 1.00E-166 | 344 | 360 | 95 +  | 337 | 696 | 25631  | 25990  |
| UN80983 | Rsa1.0.03728.1 | 725 | 21147  | 1.00E-160 | 403 | 437 | 92 +  | 54  | 484 | 3567   | 4003   |
| UN80984 | Rsa1.0.00045.1 | 101 | 328694 | 1.00E-19  | 81  | 91  | 89 -  | 10  | 97  | 14594  | 14684  |
| UN80985 | Rsa1.0.04651.1 | 245 | 16516  | 3.00E-41  | 113 | 121 | 93 +  | 50  | 168 | 4145   | 4265   |
| UN80986 | Rsa1.0.06771.1 | 598 | 10388  | 0         | 380 | 388 | 97 -  | 1   | 387 | 2887   | 3274   |
| UN80987 | Rsa1.0.00054.1 | 779 | 162053 | 1.00E-111 | 248 | 259 | 95 +  | 521 | 776 | 148185 | 148442 |
| UN80988 | Rsa1.0.05462.1 | 130 | 13671  | 3.00E-58  | 126 | 130 | 96 +  | 1   | 130 | 5222   | 5351   |
| UN80989 | Rsa1.0.06750.1 | 803 | 10421  | 0         | 545 | 548 | 99 -  | 210 | 757 | 2143   | 2689   |
| UN80990 | Rsa1.0.14577.1 | 128 | 3250   | 1.00E-42  | 112 | 120 | 93 -  | 5   | 124 | 963    | 1082   |
| UN80991 | Rsa1.0.00015.1 | 357 | 561803 | 1.00E-130 | 242 | 244 | 99 +  | 1   | 244 | 549004 | 549247 |
| UN80992 | Rsa1.0.00609.1 | 731 | 72785  | 1.00E-180 | 387 | 410 | 94 +  | 1   | 402 | 60296  | 60702  |
| UN80993 | Rsa1.0.01112.1 | 144 | 310601 | 4.00E-30  | 82  | 87  | 94 +  | 1   | 87  | 32329  | 32415  |
| UN80994 | Rsa1.0.01996.1 | 112 | 36327  | 4.00E-26  | 96  | 108 | 88 +  | 5   | 112 | 28884  | 28991  |
| UN80995 | Rsa1.0.27781.1 | 627 | 840    | 0         | 343 | 346 | 99 -  | 1   | 346 | 373    | 718    |
| UN80996 | Rsa1.0.01632.1 | 685 | 181224 | 0         | 339 | 340 | 99 +  | 2   | 340 | 36862  | 37201  |
| UN80997 | Rsa1.0.18167.1 | 646 | 1654   | 0         | 393 | 398 | 98 +  | 249 | 646 | 1217   | 1614   |
| UN80998 | Rsa1.0.00348.1 | 137 | 92818  | 4.00E-42  | 118 | 127 | 92 +  | 11  | 137 | 62310  | 62435  |
| UN80999 | Rsa1.0.00044.1 | 500 | 271658 | 0         | 460 | 499 | 92 -  | 11  | 500 | 25126  | 25624  |
| UN81000 | Rsa1.0.01068.1 | 491 | 55208  | 0         | 457 | 476 | 96 -  | 1   | 468 | 35984  | 36459  |
| UN81001 | Rsa1.0.00060.1 | 469 | 502678 | 1.00E-66  | 147 | 153 | 96 -  | 227 | 379 | 495990 | 496142 |

|         |                |     |        |           |     |     |      |     |     |        |        |
|---------|----------------|-----|--------|-----------|-----|-----|------|-----|-----|--------|--------|
| UN81002 | Rsa1.0.00017.1 | 696 | 752458 | 1.00E-141 | 260 | 262 | 99 + | 1   | 262 | 453789 | 454050 |
| UN81003 | Rsa1.0.02321.1 | 816 | 32572  | 0         | 705 | 755 | 93 - | 7   | 755 | 20709  | 21444  |
| UN81004 | Rsa1.0.10563.1 | 738 | 5800   | 0         | 613 | 674 | 90 - | 67  | 738 | 4554   | 5204   |
| UN81005 | Rsa1.0.00199.1 | 582 | 249604 | 1.00E-103 | 227 | 238 | 95 + | 184 | 414 | 13041  | 13278  |
| UN81006 | Rsa1.0.02207.1 | 742 | 33914  | 0         | 594 | 597 | 99 + | 1   | 597 | 33318  | 33914  |
| UN81007 | Rsa1.0.01204.1 | 708 | 50843  | 2.00E-41  | 152 | 169 | 89 - | 3   | 158 | 11832  | 11997  |
| UN81008 | Rsa1.0.00110.1 | 210 | 132719 | 6.00E-67  | 159 | 169 | 94 - | 4   | 172 | 32257  | 32425  |
| UN81009 | Rsa1.0.01992.1 | 540 | 36424  | 0         | 524 | 540 | 97 + | 1   | 540 | 5521   | 6060   |
| UN81010 | Rsa1.0.02442.1 | 211 | 31355  | 1.00E-80  | 197 | 211 | 93 + | 1   | 211 | 12545  | 12753  |
| UN81011 | Rsa1.0.03471.1 | 715 | 22678  | 1.00E-98  | 222 | 235 | 94 + | 88  | 322 | 6430   | 6664   |
| UN81012 | Rsa1.0.09781.1 | 459 | 6153   | 0         | 441 | 456 | 96 + | 4   | 459 | 4657   | 5110   |
| UN81013 | Rsa1.0.03647.1 | 102 | 21597  | 7.00E-37  | 94  | 98  | 95 + | 5   | 102 | 2405   | 2501   |
| UN81014 | Rsa1.0.06004.1 | 678 | 11961  | 0         | 634 | 647 | 97 + | 1   | 637 | 113    | 759    |
| UN81015 | Rsa1.0.06677.1 | 551 | 10560  | 1.00E-159 | 375 | 407 | 92 + | 160 | 551 | 1479   | 1875   |
| UN81016 | Rsa1.0.02841.1 | 481 | 27383  | 2.00E-84  | 193 | 202 | 95 + | 1   | 202 | 287    | 485    |
| UN81017 | Rsa1.0.00207.1 | 805 | 248736 | 1.00E-144 | 341 | 362 | 94 - | 4   | 360 | 238530 | 238889 |
| UN81018 | Rsa1.0.00623.1 | 173 | 207630 | 2.00E-60  | 148 | 158 | 93 - | 16  | 173 | 192282 | 192439 |
| UN81019 | Rsa1.0.00201.1 | 768 | 232851 | 1.00E-153 | 311 | 323 | 96 + | 444 | 766 | 4812   | 5134   |
| UN81020 | Rsa1.0.02768.1 | 765 | 28110  | 0         | 394 | 398 | 98 - | 2   | 399 | 26304  | 26701  |
| UN81021 | Rsa1.0.05453.1 | 531 | 13696  | 1.00E-171 | 380 | 405 | 93 + | 2   | 404 | 10379  | 10771  |
| UN81022 | Rsa1.0.00041.1 | 736 | 186197 | 4.00E-83  | 348 | 417 | 83 - | 1   | 391 | 53418  | 53804  |
| UN81023 | Rsa1.0.03545.1 | 442 | 147543 | 9.00E-80  | 228 | 251 | 90 - | 2   | 251 | 138427 | 138676 |
| UN81024 | Rsa1.0.00298.1 | 747 | 349131 | 4.00E-80  | 237 | 264 | 89 + | 71  | 334 | 175888 | 176145 |
| UN81025 | Rsa1.0.02853.1 | 774 | 27281  | 1.00E-111 | 220 | 224 | 98 + | 372 | 594 | 13833  | 14056  |
| UN81026 | Rsa1.0.03577.1 | 102 | 143993 | 3.00E-33  | 90  | 96  | 93 + | 1   | 96  | 8767   | 8862   |
| UN81027 | Rsa1.0.01593.1 | 542 | 150996 | 0         | 485 | 494 | 98 + | 3   | 495 | 126045 | 126538 |
| UN81028 | Rsa1.0.00161.1 | 654 | 116891 | 0         | 638 | 654 | 97 - | 1   | 654 | 16548  | 17196  |
| UN81029 | Rsa1.0.01540.1 | 238 | 151890 | 7.00E-67  | 141 | 145 | 97 - | 94  | 238 | 119977 | 120121 |
| UN81030 | Rsa1.0.00269.1 | 743 | 341668 | 0         | 701 | 749 | 93 + | 1   | 743 | 290353 | 291095 |
| UN81031 | Rsa1.0.02451.1 | 809 | 31283  | 1.00E-179 | 328 | 331 | 99 + | 330 | 660 | 29307  | 29637  |
| UN81032 | Rsa1.0.01750.1 | 742 | 39816  | 1.00E-131 | 253 | 257 | 98 + | 105 | 360 | 25486  | 25742  |
| UN81033 | Rsa1.0.03280.1 | 551 | 145083 | 1.00E-174 | 349 | 361 | 96 + | 2   | 362 | 130867 | 131226 |
| UN81034 | Rsa1.0.00041.1 | 113 | 186197 | 2.00E-43  | 107 | 113 | 94 + | 1   | 113 | 132816 | 132928 |
| UN81035 | Rsa1.0.02556.1 | 480 | 30133  | 1.00E-141 | 428 | 481 | 88 - | 5   | 480 | 4324   | 4784   |
| UN81036 | Rsa1.0.00777.1 | 729 | 191865 | 0         | 504 | 513 | 98 + | 1   | 513 | 169413 | 169925 |
| UN81037 | Rsa1.0.00107.1 | 203 | 431659 | 1.00E-33  | 97  | 105 | 92 + | 78  | 182 | 149037 | 149141 |
| UN81038 | Rsa1.0.01390.1 | 615 | 46695  | 0         | 397 | 400 | 99 - | 218 | 615 | 16286  | 16685  |
| UN81039 | Rsa1.0.00068.1 | 614 | 151813 | 0         | 529 | 545 | 97 - | 1   | 545 | 104236 | 104777 |
| UN81040 | Rsa1.0.00737.1 | 139 | 66432  | 7.00E-44  | 108 | 114 | 94 + | 12  | 125 | 31890  | 32003  |



|         |                |     |        |           |     |     |       |     |     |        |        |
|---------|----------------|-----|--------|-----------|-----|-----|-------|-----|-----|--------|--------|
| UN81041 | Rsa1.0.00813.1 | 682 | 63202  | 1.00E-95  | 199 | 206 | 96 -  | 330 | 535 | 14295  | 14500  |
| UN81042 | Rsa1.0.01220.1 | 510 | 161775 | 0         | 482 | 505 | 95 +  | 1   | 490 | 11315  | 11819  |
| UN81043 | Rsa1.0.00116.1 | 830 | 365886 | 1.00E-135 | 322 | 351 | 91 +  | 483 | 818 | 76509  | 76859  |
| UN81044 | Rsa1.0.00097.1 | 804 | 138858 | 0         | 401 | 405 | 99 -  | 391 | 795 | 46362  | 46766  |
| UN81045 | Rsa1.0.01489.1 | 779 | 44764  | 1.00E-170 | 321 | 327 | 98 -  | 453 | 779 | 9614   | 9940   |
| UN81046 | Rsa1.0.01137.1 | 586 | 52655  | 0         | 561 | 587 | 95 -  | 1   | 586 | 20221  | 20804  |
| UN81047 | Rsa1.0.00342.1 | 438 | 93695  | 0         | 403 | 420 | 95 +  | 1   | 420 | 79993  | 80412  |
| UN81048 | Rsa1.0.00430.1 | 767 | 85453  | 0         | 464 | 481 | 96 -  | 2   | 473 | 28948  | 29428  |
| UN81049 | Rsa1.0.00328.1 | 534 | 224661 | 1.00E-123 | 241 | 246 | 97 -  | 292 | 534 | 136545 | 136790 |
| UN81050 | Rsa1.0.07767.1 | 208 | 8609   | 2.00E-88  | 198 | 207 | 95 -  | 1   | 206 | 4714   | 4917   |
| UN81051 | Rsa1.0.00478.1 | 515 | 81419  | 0         | 504 | 513 | 98 +  | 3   | 515 | 41903  | 42415  |
| UN81052 | Rsa1.0.17040.1 | 488 | 1944   | 0         | 378 | 396 | 95 -  | 3   | 395 | 1207   | 1602   |
| UN81053 | Rsa1.0.00484.1 | 667 | 203294 | 1.00E-140 | 331 | 355 | 93 +  | 11  | 354 | 135723 | 136074 |
| UN81054 | Rsa1.0.01641.1 | 716 | 188213 | 0         | 448 | 459 | 97 +  | 12  | 470 | 180390 | 180843 |
| UN81055 | Rsa1.0.07519.1 | 745 | 9209   | 0         | 339 | 341 | 99 -  | 405 | 745 | 7434   | 7774   |
| UN81056 | Rsa1.0.23431.1 | 553 | 1049   | 0         | 521 | 527 | 98 +  | 1   | 527 | 234    | 760    |
| UN81057 | Rsa1.0.00414.1 | 355 | 202190 | 1.00E-160 | 337 | 353 | 95 +  | 3   | 355 | 14843  | 15194  |
| UN81058 | Rsa1.0.00356.1 | 666 | 91521  | 1.00E-174 | 397 | 419 | 94 +  | 252 | 666 | 35062  | 35476  |
| UN81059 | Rsa1.0.00203.1 | 816 | 109129 | 2.00E-97  | 181 | 181 | 100 - | 224 | 404 | 65800  | 65980  |
| UN81060 | Rsa1.0.05192.1 | 692 | 136195 | 2.00E-91  | 177 | 179 | 98 +  | 514 | 692 | 124686 | 124864 |
| UN81061 | Rsa1.0.01997.1 | 742 | 158416 | 0         | 657 | 678 | 96 +  | 32  | 707 | 3354   | 4022   |
| UN81062 | Rsa1.0.04488.1 | 273 | 17155  | 6.00E-80  | 157 | 159 | 98 -  | 1   | 159 | 14880  | 15038  |
| UN81063 | Rsa1.0.03900.1 | 188 | 133221 | 7.00E-88  | 182 | 188 | 96 -  | 1   | 188 | 3919   | 4106   |
| UN81064 | Rsa1.0.03005.1 | 390 | 26082  | 1.00E-158 | 340 | 359 | 94 +  | 5   | 363 | 25726  | 26080  |
| UN81065 | Rsa1.0.01997.1 | 688 | 158416 | 1.00E-133 | 263 | 270 | 97 +  | 1   | 266 | 17620  | 17889  |
| UN81066 | Rsa1.0.03965.1 | 758 | 19828  | 1.00E-140 | 262 | 265 | 98 -  | 1   | 265 | 14987  | 15251  |
| UN81067 | Rsa1.0.07914.1 | 493 | 8294   | 1.00E-151 | 380 | 415 | 91 +  | 76  | 489 | 7659   | 8073   |
| UN81068 | Rsa1.0.00748.1 | 599 | 65983  | 0         | 410 | 422 | 97 -  | 1   | 413 | 41402  | 41823  |
| UN81069 | Rsa1.0.00203.1 | 304 | 109129 | 6.00E-77  | 266 | 304 | 87 +  | 3   | 304 | 64483  | 64774  |
| UN81070 | Rsa1.0.00180.1 | 278 | 114581 | 1.00E-124 | 268 | 282 | 95 -  | 1   | 278 | 42169  | 42450  |
| UN81071 | Rsa1.0.00424.1 | 555 | 86005  | 8.00E-81  | 189 | 203 | 93 +  | 35  | 237 | 75620  | 75811  |
| UN81072 | Rsa1.0.00134.1 | 620 | 390219 | 0         | 444 | 448 | 99 -  | 2   | 448 | 5772   | 6218   |
| UN81073 | Rsa1.0.04133.1 | 249 | 18907  | 8.00E-79  | 191 | 205 | 93 +  | 36  | 240 | 8292   | 8496   |
| UN81074 | Rsa1.0.00147.1 | 597 | 249503 | 2.33E-156 | 284 | 291 | 97 -  | 1   | 287 | 130965 | 131255 |
| UN81075 | Rsa1.0.03560.1 | 697 | 22092  | 0         | 491 | 512 | 95 -  | 1   | 511 | 379    | 884    |
| UN81076 | Rsa1.0.00085.1 | 772 | 142226 | 0         | 694 | 701 | 99 -  | 73  | 772 | 19422  | 20119  |
| UN81077 | Rsa1.0.00200.1 | 470 | 162016 | 1.00E-122 | 254 | 262 | 96 -  | 3   | 263 | 104953 | 105212 |
| UN81078 | Rsa1.0.00588.1 | 130 | 73939  | 2.00E-22  | 116 | 134 | 86 -  | 1   | 130 | 19365  | 19495  |
| UN81079 | Rsa1.0.00108.1 | 215 | 478491 | 1.00E-108 | 208 | 211 | 98 -  | 5   | 215 | 12629  | 12839  |

|         |                |     |        |           |     |     |       |     |     |        |        |
|---------|----------------|-----|--------|-----------|-----|-----|-------|-----|-----|--------|--------|
| UN81080 | Rsa1.0.01452.1 | 738 | 45459  | 1.00E-109 | 203 | 204 | 99 -  | 2   | 205 | 39627  | 39830  |
| UN81081 | Rsa1.0.04281.1 | 766 | 18107  | 0         | 594 | 632 | 93 +  | 135 | 766 | 15672  | 16303  |
| UN81082 | Rsa1.0.01648.1 | 161 | 41635  | 2.00E-66  | 152 | 160 | 95 -  | 1   | 160 | 11180  | 11339  |
| UN81083 | Rsa1.0.00156.1 | 676 | 118383 | 0         | 438 | 449 | 97 -  | 227 | 672 | 54587  | 55035  |
| UN81084 | Rsa1.0.00087.1 | 722 | 761073 | 0         | 647 | 652 | 99 -  | 72  | 722 | 535470 | 536121 |
| UN81085 | Rsa1.0.01010.1 | 688 | 56906  | 1.00E-135 | 287 | 301 | 95 -  | 392 | 688 | 15611  | 15911  |
| UN81086 | Rsa1.0.01867.1 | 785 | 37960  | 2.33E-156 | 299 | 311 | 96 -  | 475 | 785 | 17256  | 17566  |
| UN81087 | Rsa1.0.00215.1 | 730 | 201775 | 1.00E-154 | 280 | 281 | 99 +  | 448 | 728 | 26873  | 27153  |
| UN81088 | Rsa1.0.01958.1 | 636 | 261128 | 0         | 504 | 515 | 97 -  | 3   | 517 | 130974 | 131488 |
| UN81089 | #              | #   | #      | #         | #   | #   | #     | #   | #   | #      | #      |
| UN81090 | Rsa1.0.01893.1 | 741 | 37520  | 1.00E-102 | 207 | 213 | 97 -  | 489 | 701 | 6363   | 6575   |
| UN81091 | Rsa1.0.01855.1 | 421 | 38204  | 1.00E-106 | 214 | 220 | 97 -  | 202 | 421 | 31825  | 32044  |
| UN81092 | Rsa1.0.08939.1 | 796 | 6769   | 5.00E-98  | 229 | 244 | 93 +  | 2   | 245 | 3992   | 4232   |
| UN81093 | Rsa1.0.00087.1 | 730 | 761073 | 1.00E-105 | 240 | 250 | 96 -  | 482 | 728 | 274310 | 274558 |
| UN81094 | Rsa1.0.18530.1 | 411 | 1581   | 7.00E-68  | 138 | 139 | 99 -  | 134 | 271 | 1      | 139    |
| UN81095 | Rsa1.0.00881.1 | 692 | 61260  | 0         | 421 | 427 | 98 +  | 267 | 692 | 33608  | 34034  |
| UN81096 | Rsa1.0.02215.1 | 436 | 33822  | 2.00E-99  | 203 | 208 | 97 +  | 4   | 211 | 15415  | 15621  |
| UN81097 | Rsa1.0.00086.1 | 746 | 439854 | 0         | 447 | 462 | 96 +  | 285 | 746 | 318961 | 319422 |
| UN81098 | Rsa1.0.00539.1 | 755 | 76926  | 0         | 753 | 756 | 99 +  | 1   | 755 | 41486  | 42241  |
| UN81099 | Rsa1.0.02903.1 | 779 | 26901  | 0         | 683 | 706 | 96 +  | 2   | 707 | 4750   | 5446   |
| UN81100 | Rsa1.0.00115.1 | 472 | 131321 | 3.00E-92  | 191 | 196 | 97 -  | 1   | 196 | 73636  | 73830  |
| UN81101 | Rsa1.0.07448.1 | 710 | 9379   | 0         | 482 | 497 | 96 -  | 215 | 710 | 2044   | 2540   |
| UN81102 | Rsa1.0.00029.1 | 697 | 272992 | 0         | 565 | 600 | 94 -  | 107 | 697 | 232228 | 232824 |
| UN81103 | Rsa1.0.00252.1 | 736 | 102760 | 0         | 632 | 656 | 96 +  | 72  | 721 | 86707  | 87362  |
| UN81104 | Rsa1.0.01069.1 | 647 | 55113  | 1.00E-138 | 267 | 273 | 97 -  | 375 | 647 | 17792  | 18064  |
| UN81105 | Rsa1.0.03860.1 | 682 | 20407  | 0         | 649 | 686 | 94 +  | 2   | 682 | 12347  | 13014  |
| UN81106 | Rsa1.0.00796.1 | 771 | 63997  | 0         | 373 | 373 | 100 - | 3   | 375 | 38566  | 38938  |
| UN81107 | Rsa1.0.01607.1 | 714 | 42328  | 2.00E-41  | 102 | 107 | 95 -  | 339 | 445 | 30702  | 30808  |
| UN81108 | Rsa1.0.00253.1 | 124 | 231292 | 1.00E-44  | 115 | 119 | 96 +  | 3   | 118 | 153606 | 153724 |
| UN81109 | Rsa1.0.00417.1 | 519 | 395068 | 1.00E-135 | 256 | 260 | 98 -  | 2   | 261 | 376217 | 376476 |
| UN81110 | Rsa1.0.00480.1 | 728 | 81325  | 1.00E-116 | 254 | 268 | 94 -  | 241 | 502 | 61897  | 62164  |
| UN81111 | Rsa1.0.00636.1 | 771 | 71113  | 1.00E-128 | 254 | 261 | 97 +  | 248 | 508 | 63532  | 63792  |
| UN81112 | Rsa1.0.00263.1 | 445 | 224968 | 0         | 358 | 360 | 99 -  | 85  | 443 | 47450  | 47809  |
| UN81113 | Rsa1.0.02121.1 | 299 | 34813  | 6.00E-80  | 160 | 163 | 98 -  | 2   | 164 | 19496  | 19658  |
| UN81114 | #              | #   | #      | #         | #   | #   | #     | #   | #   | #      | #      |
| UN81115 | Rsa1.0.00170.1 | 714 | 179538 | 0         | 543 | 555 | 97 -  | 3   | 557 | 44288  | 44842  |
| UN81116 | Rsa1.0.09231.1 | 547 | 6542   | 0         | 467 | 483 | 96 +  | 3   | 485 | 3003   | 3479   |
| UN81117 | Rsa1.0.02595.1 | 211 | 29715  | 2.00E-70  | 138 | 139 | 99 -  | 2   | 140 | 226    | 364    |
| UN81118 | Rsa1.0.08471.1 | 447 | 7302   | 1.00E-170 | 318 | 322 | 98 +  | 125 | 445 | 6330   | 6651   |

|         |                |     |        |           |     |     |       |     |     |        |        |
|---------|----------------|-----|--------|-----------|-----|-----|-------|-----|-----|--------|--------|
| UN81119 | Rsa1.0_04478.1 | 807 | 17183  | 1.00E-123 | 230 | 232 | 99 +  | 218 | 449 | 2620   | 2851   |
| UN81120 | Rsa1.0_01636.1 | 649 | 41863  | 0         | 387 | 396 | 97 -  | 255 | 649 | 24483  | 24878  |
| UN81121 | Rsa1.0_01932.1 | 784 | 37177  | 0         | 707 | 755 | 93 +  | 2   | 752 | 18809  | 19554  |
| UN81122 | Rsa1.0_29944.1 | 615 | 767    | 0         | 488 | 491 | 99 -  | 125 | 615 | 135    | 625    |
| UN81123 | Rsa1.0_00104.1 | 699 | 368722 | 2.00E-91  | 180 | 183 | 98 +  | 248 | 430 | 196335 | 196517 |
| UN81124 | Rsa1.0_07657.1 | 720 | 8896   | 1.00E-128 | 262 | 271 | 96 +  | 445 | 713 | 3515   | 3785   |
| UN81125 | Rsa1.0_03956.1 | 529 | 19872  | 5.00E-45  | 136 | 151 | 90 -  | 114 | 264 | 19644  | 19782  |
| UN81126 | Rsa1.0_00333.1 | 493 | 94500  | 0         | 423 | 441 | 95 -  | 53  | 493 | 44472  | 44905  |
| UN81127 | Rsa1.0_31552.1 | 751 | 724    | 8.00E-94  | 203 | 211 | 96 +  | 219 | 428 | 47     | 257    |
| UN81128 | Rsa1.0_00071.1 | 753 | 345714 | 0         | 733 | 754 | 97 -  | 2   | 753 | 318283 | 319036 |
| UN81129 | Rsa1.0_00005.1 | 449 | 353093 | 1.00E-106 | 231 | 244 | 94 +  | 3   | 238 | 142546 | 142789 |
| UN81130 | Rsa1.0_02565.1 | 785 | 30046  | 1.00E-126 | 296 | 317 | 93 +  | 1   | 311 | 25175  | 25485  |
| UN81131 | Rsa1.0_08286.1 | 360 | 7605   | 0         | 342 | 344 | 99 +  | 5   | 348 | 4485   | 4828   |
| UN81132 | Rsa1.0_02407.1 | 309 | 31684  | 1.00E-169 | 307 | 309 | 99 -  | 1   | 309 | 9423   | 9731   |
| UN81133 | Rsa1.0_00104.1 | 682 | 368722 | 0         | 502 | 515 | 97 -  | 169 | 677 | 43203  | 43717  |
| UN81134 | Rsa1.0_03231.1 | 529 | 24456  | 1.00E-116 | 246 | 257 | 95 +  | 270 | 526 | 22443  | 22699  |
| UN81135 | Rsa1.0_01370.1 | 666 | 47093  | 5.00E-61  | 126 | 128 | 98 +  | 388 | 515 | 4775   | 4902   |
| UN81136 | Rsa1.0_07001.1 | 714 | 10048  | 5.00E-70  | 161 | 167 | 96 -  | 543 | 707 | 6560   | 6726   |
| UN81137 | Rsa1.0_02711.1 | 665 | 28475  | 1.00E-103 | 211 | 218 | 96 -  | 302 | 519 | 7078   | 7295   |
| UN81138 | Rsa1.0_01616.1 | 547 | 42137  | 1.00E-178 | 386 | 408 | 94 +  | 156 | 547 | 24589  | 24995  |
| UN81139 | Rsa1.0_10113.1 | 685 | 5992   | 1.00E-125 | 236 | 239 | 98 -  | 189 | 427 | 3727   | 3965   |
| UN81140 | Rsa1.0_00001.1 | 758 | 363028 | 1.00E-161 | 297 | 300 | 99 +  | 357 | 656 | 208174 | 208473 |
| UN81141 | Rsa1.0_00863.1 | 686 | 254535 | 1.00E-109 | 204 | 205 | 99 -  | 4   | 208 | 246839 | 247043 |
| UN81142 | Rsa1.0_02896.1 | 663 | 26970  | 1.00E-109 | 283 | 308 | 91 +  | 11  | 318 | 13901  | 14200  |
| UN81143 | Rsa1.0_02074.1 | 555 | 35370  | 0         | 532 | 554 | 96 +  | 2   | 555 | 29467  | 30017  |
| UN81144 | Rsa1.0_08183.1 | 789 | 7775   | 1.00E-174 | 354 | 369 | 95 -  | 377 | 745 | 5974   | 6342   |
| UN81145 | Rsa1.0_00457.1 | 628 | 337301 | 0         | 600 | 631 | 95 -  | 3   | 628 | 318208 | 318835 |
| UN81146 | Rsa1.0_00131.1 | 575 | 432233 | 1.00E-95  | 262 | 285 | 91 +  | 268 | 543 | 412408 | 412691 |
| UN81147 | Rsa1.0_00002.1 | 299 | 601661 | 1.00E-137 | 294 | 308 | 95 +  | 2   | 299 | 544234 | 544541 |
| UN81148 | Rsa1.0_00648.1 | 679 | 70351  | 1.00E-118 | 297 | 321 | 92 +  | 3   | 314 | 21679  | 21992  |
| UN81149 | Rsa1.0_02016.1 | 252 | 36003  | 1.00E-139 | 251 | 251 | 100 - | 2   | 252 | 6182   | 6432   |
| UN81150 | Rsa1.0_02020.1 | 160 | 173211 | 4.00E-64  | 143 | 148 | 96 -  | 14  | 160 | 21581  | 21728  |
| UN81151 | Rsa1.0_00348.1 | 687 | 92818  | 0         | 652 | 696 | 93 -  | 1   | 687 | 5677   | 6369   |
| UN81152 | Rsa1.0_00133.1 | 558 | 123768 | 1.00E-113 | 295 | 323 | 91 +  | 248 | 558 | 36170  | 36492  |
| UN81153 | Rsa1.0_14129.1 | 374 | 3769   | 1.00E-107 | 213 | 217 | 98 +  | 136 | 352 | 3092   | 3307   |
| UN81154 | #              | #   | #      | #         | #   | #   | #     | #   | #   | #      | #      |
| UN81155 | Rsa1.0_07528.1 | 172 | 9195   | 8.00E-38  | 83  | 84  | 98 +  | 1   | 84  | 245    | 328    |
| UN81156 | Rsa1.0_02179.1 | 594 | 34188  | 0         | 574 | 595 | 96 -  | 1   | 594 | 24299  | 24893  |
| UN81157 | Rsa1.0_10936.1 | 462 | 5671   | 1.00E-111 | 207 | 208 | 99 +  | 255 | 462 | 5458   | 5665   |

|         |                |     |        |           |     |     |       |     |     |        |        |
|---------|----------------|-----|--------|-----------|-----|-----|-------|-----|-----|--------|--------|
| UN81158 | Rsa1.0_00128.1 | 141 | 228675 | 3.00E-21  | 94  | 100 | 94 +  | 1   | 94  | 216315 | 216414 |
| UN81159 | Rsa1.0_00385.1 | 348 | 89160  | 6.00E-59  | 143 | 152 | 94 +  | 54  | 205 | 44629  | 44780  |
| UN81160 | Rsa1.0_00263.1 | 697 | 224968 | 0         | 389 | 401 | 97 +  | 296 | 695 | 140880 | 141280 |
| UN81161 | Rsa1.0_00307.1 | 532 | 199003 | 1.00E-108 | 202 | 203 | 99 -  | 10  | 212 | 42466  | 42668  |
| UN81162 | Rsa1.0_00337.1 | 784 | 143174 | 2.00E-97  | 231 | 247 | 93 -  | 186 | 432 | 141486 | 141719 |
| UN81163 | Rsa1.0_00216.1 | 547 | 197563 | 2.00E-72  | 145 | 147 | 98 +  | 227 | 373 | 184278 | 184424 |
| UN81164 | Rsa1.0_00696.1 | 522 | 68010  | 0         | 517 | 524 | 98 +  | 2   | 522 | 37398  | 37921  |
| UN81165 | Rsa1.0_05289.1 | 546 | 14259  | 1.00E-139 | 304 | 321 | 94 -  | 226 | 546 | 2964   | 3281   |
| UN81166 | Rsa1.0_00239.1 | 443 | 104332 | 1.00E-118 | 284 | 307 | 92 +  | 141 | 441 | 28808  | 29114  |
| UN81167 | Rsa1.0_01308.1 | 475 | 48596  | 2.00E-34  | 87  | 91  | 95 +  | 383 | 473 | 4835   | 4925   |
| UN81168 | Rsa1.0_01180.1 | 742 | 51517  | 1.00E-119 | 238 | 245 | 97 -  | 189 | 433 | 32773  | 33017  |
| UN81169 | Rsa1.0_16891.1 | 174 | 1999   | 2.00E-53  | 120 | 122 | 98 -  | 51  | 170 | 1876   | 1997   |
| UN81170 | Rsa1.0_22443.1 | 763 | 1120   | 1.00E-145 | 302 | 315 | 95 +  | 359 | 673 | 771    | 1081   |
| UN81171 | Rsa1.0_01133.1 | 727 | 52916  | 0         | 714 | 728 | 98 -  | 2   | 727 | 37080  | 37806  |
| UN81172 | Rsa1.0_00136.1 | 729 | 122464 | 1.00E-118 | 235 | 240 | 97 -  | 3   | 241 | 62178  | 62417  |
| UN81173 | Rsa1.0_00865.1 | 295 | 61686  | 8.00E-98  | 257 | 277 | 92 -  | 20  | 292 | 36358  | 36634  |
| UN81174 | Rsa1.0_06117.1 | 725 | 11709  | 1.00E-98  | 201 | 205 | 98 -  | 518 | 718 | 1530   | 1734   |
| UN81175 | Rsa1.0_33988.1 | 494 | 666    | 1.00E-116 | 233 | 240 | 97 +  | 255 | 494 | 145    | 384    |
| UN81176 | Rsa1.0_00727.1 | 645 | 66724  | 0         | 622 | 646 | 96 +  | 3   | 642 | 45015  | 45660  |
| UN81177 | Rsa1.0_00765.1 | 784 | 65029  | 1.00E-104 | 241 | 255 | 94 -  | 492 | 744 | 33530  | 33783  |
| UN81178 | Rsa1.0_00031.1 | 786 | 179862 | 1.00E-140 | 255 | 256 | 99 +  | 392 | 647 | 49880  | 50135  |
| UN81179 | Rsa1.0_01356.1 | 659 | 47287  | 0         | 442 | 458 | 96 +  | 1   | 458 | 6739   | 7188   |
| UN81180 | Rsa1.0_00139.1 | 720 | 357786 | 1.00E-154 | 428 | 474 | 90 +  | 238 | 704 | 39167  | 39640  |
| UN81181 | Rsa1.0_02032.1 | 579 | 35830  | 1.00E-134 | 324 | 352 | 92 +  | 4   | 355 | 1278   | 1617   |
| UN81182 | Rsa1.0_04444.1 | 460 | 17320  | 0         | 453 | 458 | 98 +  | 3   | 460 | 14131  | 14588  |
| UN81183 | Rsa1.0_00048.1 | 123 | 167185 | 9.00E-37  | 117 | 125 | 93 +  | 4   | 123 | 16905  | 17029  |
| UN81184 | Rsa1.0_01544.1 | 657 | 185602 | 0         | 362 | 366 | 98 -  | 292 | 657 | 32183  | 32548  |
| UN81185 | Rsa1.0_01199.1 | 601 | 163576 | 1.00E-147 | 282 | 288 | 97 -  | 90  | 377 | 131768 | 132055 |
| UN81186 | Rsa1.0_05410.1 | 228 | 13840  | 5.00E-89  | 178 | 181 | 98 -  | 48  | 228 | 1987   | 2165   |
| UN81187 | Rsa1.0_02411.1 | 333 | 31655  | 1.00E-173 | 326 | 331 | 98 +  | 2   | 332 | 6118   | 6447   |
| UN81188 | Rsa1.0_00079.1 | 668 | 606987 | 0         | 386 | 397 | 97 -  | 272 | 668 | 23206  | 23602  |
| UN81189 | Rsa1.0_25427.1 | 130 | 936    | 6.00E-41  | 85  | 85  | 100 + | 6   | 90  | 102    | 186    |
| UN81190 | Rsa1.0_02208.1 | 746 | 33875  | 0         | 719 | 740 | 97 +  | 4   | 739 | 13210  | 13946  |
| UN81191 | Rsa1.0_00007.1 | 141 | 239325 | 5.00E-20  | 114 | 125 | 91 -  | 1   | 116 | 108358 | 108482 |
| UN81192 | Rsa1.0_00328.1 | 711 | 224661 | 1.00E-151 | 318 | 334 | 95 +  | 378 | 711 | 136232 | 136559 |
| UN81193 | Rsa1.0_00478.1 | 703 | 81419  | 0         | 341 | 342 | 99 -  | 2   | 343 | 42876  | 43217  |
| UN81194 | Rsa1.0_01641.1 | 142 | 188213 | 3.00E-46  | 94  | 94  | 100 - | 2   | 95  | 182250 | 182343 |
| UN81195 | Rsa1.0_05648.1 | 691 | 13049  | 1.00E-178 | 468 | 521 | 89 +  | 173 | 691 | 1990   | 2485   |
| UN81196 | Rsa1.0_01719.1 | 733 | 40388  | 1.00E-173 | 364 | 383 | 95 +  | 31  | 413 | 20742  | 21118  |

|         |                |     |        |           |     |     |       |     |     |        |        |
|---------|----------------|-----|--------|-----------|-----|-----|-------|-----|-----|--------|--------|
| UN81197 | Rsa1.0.00001.1 | 632 | 363028 | 1.00E-128 | 309 | 331 | 93 +  | 300 | 628 | 119840 | 120167 |
| UN81198 | Rsa1.0.00084.1 | 712 | 142338 | 1.00E-147 | 278 | 282 | 98 -  | 267 | 548 | 137362 | 137640 |
| UN81199 | Rsa1.0.06602.1 | 695 | 10683  | 4.00E-74  | 195 | 212 | 91 +  | 52  | 260 | 791    | 1002   |
| UN81200 | Rsa1.0.07727.1 | 593 | 8700   | 0         | 443 | 446 | 99 -  | 148 | 593 | 3761   | 4206   |
| UN81201 | Rsa1.0.02955.1 | 651 | 26484  | 4.00E-83  | 160 | 161 | 99 +  | 321 | 481 | 15914  | 16074  |
| UN81202 | Rsa1.0.02228.1 | 419 | 33688  | 5.00E-66  | 167 | 180 | 92 -  | 89  | 268 | 29540  | 29719  |
| UN81203 | Rsa1.0.00214.1 | 700 | 107508 | 1.00E-158 | 292 | 295 | 98 -  | 174 | 468 | 41899  | 42193  |
| UN81204 | Rsa1.0.00273.1 | 759 | 326186 | 6.00E-73  | 200 | 212 | 94 +  | 534 | 740 | 37563  | 37773  |
| UN81205 | Rsa1.0.02321.1 | 104 | 32572  | 8.00E-43  | 101 | 104 | 97 +  | 2   | 104 | 19876  | 19979  |
| UN81206 | Rsa1.0.00142.1 | 504 | 121474 | 2.00E-71  | 149 | 153 | 97 +  | 225 | 377 | 62768  | 62920  |
| UN81207 | Rsa1.0.04133.1 | 483 | 18907  | 0         | 402 | 417 | 96 -  | 1   | 416 | 8292   | 8708   |
| UN81208 | Rsa1.0.00817.1 | 692 | 62961  | 1.00E-159 | 332 | 343 | 96 -  | 3   | 342 | 32942  | 33281  |
| UN81209 | Rsa1.0.00221.1 | 489 | 106972 | 5.00E-97  | 241 | 261 | 92 -  | 238 | 489 | 51591  | 51851  |
| UN81210 | Rsa1.0.01513.1 | 332 | 44234  | 1.00E-106 | 259 | 282 | 91 -  | 1   | 267 | 41227  | 41507  |
| UN81211 | Rsa1.0.00101.1 | 746 | 267193 | 8.00E-57  | 113 | 113 | 100 + | 513 | 625 | 208435 | 208547 |
| UN81212 | Rsa1.0.03870.1 | 694 | 20362  | 2.00E-97  | 184 | 185 | 99 -  | 167 | 351 | 20080  | 20264  |
| UN81213 | Rsa1.0.01204.1 | 696 | 50843  | 0         | 624 | 676 | 92 +  | 2   | 639 | 9930   | 10605  |
| UN81214 | Rsa1.0.01230.1 | 609 | 50221  | 0         | 462 | 470 | 98 -  | 64  | 533 | 6711   | 7180   |
| UN81215 | Rsa1.0.03471.1 | 798 | 22678  | 1.00E-110 | 294 | 310 | 94 -  | 497 | 795 | 7198   | 7507   |
| UN81216 | Rsa1.0.03089.1 | 740 | 25465  | 1.00E-126 | 313 | 342 | 91 +  | 3   | 338 | 7372   | 7701   |
| UN81217 | Rsa1.0.00493.1 | 217 | 80007  | 6.00E-70  | 173 | 185 | 93 +  | 35  | 217 | 3787   | 3971   |
| UN81218 | Rsa1.0.00350.1 | 595 | 92346  | 0         | 576 | 599 | 96 +  | 1   | 595 | 42517  | 43115  |
| UN81219 | Rsa1.0.03317.1 | 605 | 23782  | 0         | 518 | 528 | 98 -  | 17  | 544 | 7686   | 8213   |
| UN81220 | Rsa1.0.00806.1 | 514 | 63674  | 1.00E-63  | 139 | 144 | 96 +  | 370 | 513 | 5003   | 5146   |
| UN81221 | Rsa1.0.00028.1 | 764 | 293984 | 0         | 377 | 380 | 99 +  | 3   | 381 | 162796 | 163175 |
| UN81222 | Rsa1.0.01456.1 | 786 | 45372  | 0         | 734 | 778 | 94 -  | 26  | 784 | 21508  | 22285  |
| UN81223 | Rsa1.0.03089.1 | 755 | 25465  | 1.00E-166 | 338 | 348 | 97 +  | 409 | 755 | 11805  | 12149  |
| UN81224 | Rsa1.0.00623.1 | 739 | 207630 | 0         | 681 | 737 | 92 +  | 21  | 739 | 191182 | 191915 |
| UN81225 | Rsa1.0.00303.1 | 739 | 97468  | 5.00E-92  | 187 | 192 | 97 +  | 377 | 568 | 29465  | 29656  |
| UN81226 | Rsa1.0.13537.1 | 716 | 4746   | 8.00E-29  | 72  | 74  | 97 -  | 82  | 155 | 4646   | 4719   |
| UN81227 | Rsa1.0.00898.1 | 605 | 202772 | 0         | 587 | 613 | 95 -  | 2   | 605 | 175942 | 176554 |
| UN81228 | Rsa1.0.00902.1 | 642 | 60241  | 0         | 406 | 414 | 98 +  | 1   | 414 | 5476   | 5889   |
| UN81229 | Rsa1.0.00616.1 | 629 | 195713 | 1.00E-124 | 280 | 293 | 95 -  | 338 | 628 | 167867 | 168157 |
| UN81230 | Rsa1.0.01285.1 | 763 | 172709 | 0         | 746 | 763 | 97 +  | 3   | 763 | 149147 | 149908 |
| UN81231 | Rsa1.0.05092.1 | 712 | 14878  | 1.00E-166 | 310 | 313 | 99 -  | 401 | 712 | 1487   | 1799   |
| UN81232 | Rsa1.0.05217.1 | 122 | 142938 | 2.00E-16  | 61  | 64  | 95 -  | 47  | 109 | 130942 | 131004 |
| UN81233 | Rsa1.0.00705.1 | 345 | 67505  | 1.00E-101 | 224 | 233 | 96 +  | 93  | 322 | 45288  | 45518  |
| UN81234 | Rsa1.0.03132.1 | 629 | 25142  | 1.00E-117 | 220 | 222 | 99 -  | 270 | 491 | 22052  | 22273  |
| UN81235 | Rsa1.0.05355.1 | 637 | 14069  | 0         | 422 | 428 | 98 -  | 4   | 430 | 2576   | 2999   |

|         |                |     |        |           |     |     |       |     |     |        |        |
|---------|----------------|-----|--------|-----------|-----|-----|-------|-----|-----|--------|--------|
| UN81236 | Rsa1.0.03133.1 | 605 | 25135  | 1.00E-148 | 380 | 420 | 90 +  | 190 | 605 | 11284  | 11686  |
| UN81237 | Rsa1.0.08945.1 | 601 | 6764   | 1.00E-152 | 302 | 312 | 96 -  | 2   | 313 | 4504   | 4809   |
| UN81238 | Rsa1.0.00217.1 | 688 | 107079 | 1.00E-113 | 211 | 212 | 99 +  | 477 | 688 | 71018  | 71229  |
| UN81239 | Rsa1.0.00169.1 | 592 | 274298 | 1.00E-88  | 166 | 166 | 100 - | 3   | 168 | 2661   | 2826   |
| UN81240 | Rsa1.0.04169.1 | 711 | 18712  | 1.00E-147 | 340 | 360 | 94 -  | 3   | 355 | 2537   | 2893   |
| UN81241 | Rsa1.0.00048.1 | 632 | 167185 | 2.00E-47  | 166 | 190 | 87 +  | 2   | 188 | 164094 | 164268 |
| UN81242 | Rsa1.0.00773.1 | 757 | 64839  | 0         | 489 | 513 | 95 -  | 180 | 682 | 10897  | 11406  |
| UN81243 | Rsa1.0.03694.1 | 563 | 21336  | 1.00E-171 | 323 | 329 | 98 +  | 235 | 563 | 6237   | 6565   |
| UN81244 | Rsa1.0.03387.1 | 709 | 23278  | 1.00E-89  | 189 | 196 | 96 +  | 22  | 217 | 358    | 553    |
| UN81245 | Rsa1.0.00520.1 | 758 | 78226  | 0         | 742 | 771 | 96 -  | 2   | 758 | 2548   | 3318   |
| UN81246 | Rsa1.0.01350.1 | 740 | 47503  | 2.00E-78  | 149 | 149 | 100 - | 182 | 330 | 15683  | 15831  |
| UN81247 | Rsa1.0.02662.1 | 714 | 28956  | 0         | 392 | 405 | 96 +  | 3   | 406 | 11888  | 12287  |
| UN81248 | Rsa1.0.01247.1 | 322 | 49934  | 3.00E-88  | 211 | 220 | 95 -  | 107 | 322 | 7853   | 8070   |
| UN81249 | Rsa1.0.01029.1 | 763 | 256254 | 1.00E-107 | 233 | 245 | 95 +  | 311 | 555 | 245115 | 245359 |
| UN81250 | Rsa1.0.01633.1 | 380 | 41868  | 2.00E-77  | 184 | 195 | 94 +  | 8   | 201 | 6789   | 6983   |
| UN81251 | Rsa1.0.00004.1 | 132 | 253996 | 2.00E-56  | 126 | 131 | 96 +  | 1   | 131 | 38022  | 38152  |
| UN81252 | Rsa1.0.00366.1 | 586 | 90880  | 1.00E-158 | 313 | 323 | 96 -  | 260 | 582 | 59170  | 59492  |
| UN81253 | Rsa1.0.00197.1 | 691 | 109714 | 0         | 360 | 372 | 96 -  | 3   | 374 | 19948  | 20319  |
| UN81254 | Rsa1.0.00050.1 | 794 | 237174 | 0         | 472 | 487 | 96 +  | 229 | 714 | 7595   | 8076   |
| UN81255 | Rsa1.0.03728.1 | 654 | 21147  | 2.00E-75  | 162 | 168 | 96 -  | 466 | 633 | 4722   | 4889   |
| UN81256 | Rsa1.0.00564.1 | 445 | 75428  | 1.00E-109 | 239 | 249 | 95 -  | 3   | 250 | 59706  | 59948  |
| UN81257 | Rsa1.0.21217.1 | 629 | 1224   | 0         | 415 | 425 | 97 +  | 1   | 425 | 145    | 568    |
| UN81258 | Rsa1.0.02154.1 | 809 | 34528  | 7.00E-76  | 145 | 145 | 100 + | 432 | 576 | 23929  | 24073  |
| UN81259 | Rsa1.0.04561.1 | 619 | 16849  | 1.00E-101 | 200 | 204 | 98 -  | 396 | 599 | 7364   | 7567   |
| UN81260 | Rsa1.0.00782.1 | 765 | 64468  | 0         | 350 | 357 | 98 -  | 2   | 358 | 2531   | 2887   |
| UN81261 | Rsa1.0.00611.1 | 616 | 72410  | 1.00E-119 | 463 | 534 | 86 -  | 3   | 528 | 2876   | 3389   |
| UN81262 | Rsa1.0.02518.1 | 620 | 30586  | 5.00E-76  | 145 | 145 | 100 + | 11  | 155 | 19709  | 19853  |
| UN81263 | Rsa1.0.00165.1 | 291 | 116466 | 2.00E-80  | 171 | 176 | 97 +  | 117 | 291 | 1195   | 1370   |
| UN81264 | Rsa1.0.00940.1 | 175 | 179946 | 2.00E-75  | 166 | 171 | 97 -  | 2   | 170 | 14591  | 14761  |
| UN81265 | Rsa1.0.02298.1 | 613 | 32872  | 1.00E-104 | 293 | 328 | 89 -  | 280 | 597 | 7742   | 8060   |
| UN81266 | Rsa1.0.06750.1 | 761 | 10421  | 1.00E-119 | 218 | 218 | 100 + | 474 | 691 | 1677   | 1894   |
| UN81267 | Rsa1.0.14856.1 | 776 | 3010   | 0         | 763 | 778 | 98 -  | 3   | 776 | 1839   | 2615   |
| UN81268 | Rsa1.0.04016.1 | 727 | 19570  | 0         | 712 | 728 | 97 +  | 2   | 727 | 14438  | 15164  |
| UN81269 | Rsa1.0.01264.1 | 459 | 49697  | 1.00E-108 | 278 | 304 | 91 +  | 156 | 459 | 30584  | 30883  |
| UN81270 | Rsa1.0.00870.1 | 630 | 61606  | 0         | 616 | 628 | 98 +  | 3   | 630 | 36992  | 37619  |
| UN81271 | Rsa1.0.02343.1 | 722 | 32374  | 1.00E-113 | 237 | 243 | 97 -  | 482 | 722 | 27931  | 28172  |
| UN81272 | Rsa1.0.01112.1 | 739 | 310601 | 0         | 718 | 744 | 96 -  | 2   | 739 | 32443  | 33183  |
| UN81273 | Rsa1.0.07861.1 | 683 | 8406   | 0         | 658 | 687 | 95 +  | 3   | 683 | 6127   | 6812   |
| UN81274 | Rsa1.0.03613.1 | 779 | 21773  | 0         | 402 | 424 | 94 -  | 8   | 424 | 8837   | 9258   |

|         |                |     |        |           |     |     |       |     |     |        |        |
|---------|----------------|-----|--------|-----------|-----|-----|-------|-----|-----|--------|--------|
| UN81275 | Rsa1.0.00023.1 | 620 | 194764 | 7.00E-60  | 133 | 138 | 96 +  | 3   | 140 | 182540 | 182677 |
| UN81276 | Rsa1.0.00336.1 | 754 | 445051 | 1.00E-129 | 302 | 319 | 94 -  | 437 | 749 | 166568 | 166884 |
| UN81277 | Rsa1.0.00198.1 | 315 | 222963 | 1.00E-118 | 287 | 309 | 92 +  | 11  | 305 | 128664 | 128972 |
| UN81278 | Rsa1.0.02623.1 | 713 | 29409  | 0         | 676 | 690 | 97 -  | 2   | 691 | 4086   | 4775   |
| UN81279 | Rsa1.0.01951.1 | 787 | 36941  | 2.00E-76  | 156 | 158 | 98 +  | 3   | 159 | 8448   | 8605   |
| UN81280 | Rsa1.0.00094.1 | 754 | 139042 | 5.00E-95  | 189 | 193 | 97 -  | 302 | 494 | 129532 | 129724 |
| UN81281 | Rsa1.0.00021.1 | 251 | 263655 | 1.00E-110 | 241 | 252 | 95 -  | 2   | 251 | 64841  | 65090  |
| UN81282 | Rsa1.0.00065.1 | 469 | 454616 | 0         | 451 | 476 | 94 +  | 3   | 469 | 439314 | 439789 |
| UN81283 | Rsa1.0.01248.1 | 499 | 154103 | 0         | 466 | 501 | 93 -  | 2   | 499 | 30816  | 31303  |
| UN81284 | Rsa1.0.00327.1 | 812 | 94892  | 1.00E-98  | 186 | 187 | 99 -  | 285 | 471 | 67857  | 68043  |
| UN81285 | Rsa1.0.00929.1 | 766 | 137796 | 6.00E-76  | 151 | 153 | 98 +  | 106 | 258 | 97512  | 97664  |
| UN81286 | Rsa1.0.05841.1 | 659 | 12465  | 0         | 621 | 648 | 95 -  | 3   | 642 | 5733   | 6377   |
| UN81287 | Rsa1.0.06177.1 | 723 | 11561  | 0         | 696 | 717 | 97 -  | 7   | 723 | 5341   | 6054   |
| UN81288 | Rsa1.0.00782.1 | 207 | 64468  | 3.00E-87  | 197 | 207 | 95 -  | 1   | 207 | 48703  | 48908  |
| UN81289 | Rsa1.0.00187.1 | 693 | 393093 | 0         | 491 | 510 | 96 +  | 186 | 693 | 214572 | 215081 |
| UN81290 | Rsa1.0.00605.1 | 746 | 73199  | 1.00E-160 | 324 | 335 | 96 +  | 7   | 340 | 918    | 1252   |
| UN81291 | Rsa1.0.02991.1 | 695 | 26178  | 9.00E-78  | 266 | 304 | 87 +  | 267 | 564 | 872    | 1160   |
| UN81292 | Rsa1.0.02509.1 | 402 | 30668  | 1.00E-167 | 377 | 402 | 93 -  | 3   | 399 | 25147  | 25547  |
| UN81293 | Rsa1.0.07339.1 | 485 | 9534   | 5.00E-51  | 112 | 115 | 97 -  | 2   | 116 | 38     | 152    |
| UN81294 | Rsa1.0.05180.1 | 763 | 14575  | 2.00E-57  | 185 | 209 | 88 -  | 488 | 691 | 5287   | 5479   |
| UN81295 | Rsa1.0.00194.1 | 738 | 110851 | 0         | 327 | 328 | 99 -  | 326 | 653 | 18149  | 18476  |
| UN81296 | Rsa1.0.00369.1 | 718 | 266462 | 1.00E-159 | 326 | 340 | 95 -  | 5   | 344 | 206030 | 206369 |
| UN81297 | Rsa1.0.00434.1 | 729 | 85171  | 1.00E-171 | 374 | 397 | 94 +  | 1   | 397 | 84694  | 85090  |
| UN81298 | Rsa1.0.00005.1 | 756 | 353093 | 0         | 405 | 408 | 99 +  | 350 | 756 | 324070 | 324477 |
| UN81299 | #              | #   | #      | #         | #   | #   | #     | #   | #   | #      | #      |
| UN81300 | #              | #   | #      | #         | #   | #   | #     | #   | #   | #      | #      |
| UN81301 | Rsa1.0.00437.1 | 714 | 84879  | 0         | 451 | 470 | 95 +  | 42  | 508 | 57385  | 57854  |
| UN81302 | Rsa1.0.14307.1 | 519 | 3553   | 1.00E-141 | 324 | 347 | 93 +  | 173 | 519 | 330    | 676    |
| UN81303 | Rsa1.0.00556.1 | 709 | 207212 | 2.00E-69  | 134 | 134 | 100 + | 198 | 331 | 5087   | 5220   |
| UN81304 | Rsa1.0.00355.1 | 653 | 92038  | 0         | 506 | 547 | 92 -  | 115 | 652 | 77903  | 78429  |
| UN81305 | Rsa1.0.06215.1 | 756 | 11478  | 0         | 444 | 473 | 93 +  | 48  | 518 | 3074   | 3535   |
| UN81306 | Rsa1.0.00091.1 | 699 | 139699 | 4.00E-86  | 234 | 253 | 92 +  | 433 | 684 | 80307  | 80555  |
| UN81307 | Rsa1.0.00294.1 | 129 | 144860 | 8.00E-31  | 81  | 84  | 96 +  | 3   | 85  | 27546  | 27629  |
| UN81308 | Rsa1.0.00203.1 | 567 | 109129 | 1.00E-129 | 306 | 325 | 94 -  | 3   | 326 | 80231  | 80546  |
| UN81309 | Rsa1.0.00550.1 | 732 | 210790 | 4.00E-74  | 166 | 174 | 95 -  | 383 | 556 | 178403 | 178576 |
| UN81310 | Rsa1.0.00604.1 | 605 | 146282 | 0         | 579 | 605 | 95 -  | 1   | 603 | 84281  | 84883  |
| UN81311 | Rsa1.0.00055.1 | 738 | 520193 | 1.00E-125 | 258 | 268 | 96 -  | 346 | 613 | 207861 | 208128 |
| UN81312 | Rsa1.0.19487.1 | 719 | 1425   | 1.00E-145 | 277 | 281 | 98 +  | 2   | 281 | 649    | 929    |
| UN81313 | Rsa1.0.04961.1 | 595 | 15316  | 1.00E-153 | 284 | 286 | 99 +  | 311 | 595 | 13226  | 13511  |

|         |                |     |        |           |     |     |       |     |     |        |        |
|---------|----------------|-----|--------|-----------|-----|-----|-------|-----|-----|--------|--------|
| UN81314 | Rsa1.0.02527.1 | 723 | 177225 | 2.00E-97  | 190 | 193 | 98 -  | 210 | 402 | 152190 | 152382 |
| UN81315 | Rsa1.0.02805.1 | 761 | 27698  | 1.00E-111 | 226 | 233 | 96 +  | 2   | 234 | 25675  | 25907  |
| UN81316 | Rsa1.0.11241.1 | 631 | 5572   | 0         | 389 | 394 | 98 -  | 1   | 394 | 1      | 394    |
| UN81317 | Rsa1.0.01338.1 | 563 | 155644 | 2.00E-69  | 146 | 150 | 97 +  | 401 | 550 | 128152 | 128301 |
| UN81318 | Rsa1.0.00022.1 | 727 | 200461 | 0         | 479 | 527 | 90 +  | 217 | 721 | 155495 | 156020 |
| UN81319 | Rsa1.0.02531.1 | 713 | 266414 | 0         | 367 | 376 | 97 +  | 340 | 713 | 128453 | 128822 |
| UN81320 | Rsa1.0.00213.1 | 278 | 108167 | 1.00E-65  | 168 | 181 | 92 -  | 97  | 276 | 58572  | 58745  |
| UN81321 | Rsa1.0.16411.1 | 551 | 2164   | 0         | 436 | 472 | 92 -  | 3   | 452 | 195    | 661    |
| UN81322 | Rsa1.0.04410.1 | 487 | 17495  | 0         | 471 | 484 | 97 -  | 5   | 487 | 2646   | 3128   |
| UN81323 | Rsa1.0.01281.1 | 399 | 49313  | 1.00E-143 | 319 | 338 | 94 +  | 58  | 395 | 27126  | 27452  |
| UN81324 | Rsa1.0.01293.1 | 686 | 49139  | 2.00E-78  | 164 | 169 | 97 +  | 228 | 396 | 31510  | 31678  |
| UN81325 | Rsa1.0.06373.1 | 165 | 11138  | 9.00E-87  | 162 | 162 | 100 - | 3   | 164 | 6731   | 6892   |
| UN81326 | Rsa1.0.05954.1 | 120 | 12119  | 7.00E-62  | 120 | 120 | 100 + | 1   | 120 | 6624   | 6743   |
| UN81327 | Rsa1.0.03131.1 | 650 | 25142  | 1.00E-106 | 208 | 212 | 98 -  | 1   | 212 | 12033  | 12244  |
| UN81328 | Rsa1.0.02018.1 | 242 | 35994  | 1.00E-89  | 202 | 211 | 95 +  | 34  | 242 | 4800   | 5010   |
| UN81329 | Rsa1.0.02022.1 | 571 | 35923  | 0         | 552 | 584 | 94 -  | 3   | 571 | 18363  | 18944  |
| UN81330 | Rsa1.0.00890.1 | 656 | 323870 | 0         | 652 | 655 | 99 +  | 2   | 656 | 308134 | 308788 |
| UN81331 | Rsa1.0.00039.1 | 625 | 296927 | 1.00E-121 | 220 | 220 | 100 - | 1   | 220 | 213446 | 213665 |
| UN81332 | Rsa1.0.03949.1 | 700 | 19899  | 0         | 371 | 377 | 98 +  | 76  | 452 | 1      | 377    |
| UN81333 | Rsa1.0.01357.1 | 672 | 47280  | 7.00E-20  | 138 | 167 | 82 +  | 358 | 524 | 7108   | 7274   |
| UN81334 | Rsa1.0.00521.1 | 668 | 78191  | 4.00E-77  | 171 | 179 | 95 +  | 79  | 257 | 35263  | 35441  |
| UN81335 | Rsa1.0.00062.1 | 308 | 299291 | 1.00E-127 | 290 | 306 | 94 -  | 3   | 305 | 248364 | 248669 |
| UN81336 | Rsa1.0.00738.1 | 688 | 66322  | 1.00E-166 | 309 | 313 | 98 +  | 2   | 314 | 24863  | 25175  |
| UN81337 | Rsa1.0.00948.1 | 667 | 58620  | 0         | 398 | 399 | 99 +  | 269 | 667 | 20661  | 21059  |
| UN81338 | Rsa1.0.07182.1 | 611 | 9777   | 1.00E-161 | 352 | 367 | 95 -  | 251 | 611 | 7019   | 7381   |
| UN81339 | Rsa1.0.10575.1 | 619 | 5797   | 1.00E-51  | 122 | 128 | 95 -  | 426 | 553 | 985    | 1112   |
| UN81340 | Rsa1.0.00098.1 | 671 | 349239 | 0         | 515 | 545 | 94 -  | 132 | 671 | 234691 | 235222 |
| UN81341 | Rsa1.0.00663.1 | 646 | 164969 | 0         | 492 | 527 | 93 +  | 109 | 612 | 125123 | 125649 |
| UN81342 | Rsa1.0.00552.1 | 525 | 206757 | 1.00E-57  | 168 | 185 | 90 +  | 3   | 182 | 185095 | 185277 |
| UN81343 | Rsa1.0.02295.1 | 670 | 149884 | 0         | 652 | 668 | 97 +  | 3   | 670 | 121516 | 122180 |
| UN81344 | Rsa1.0.00156.1 | 606 | 118383 | 0         | 475 | 493 | 96 -  | 114 | 606 | 90643  | 91126  |
| UN81345 | Rsa1.0.46563.1 | 836 | 485    | 2.00E-60  | 133 | 135 | 98 +  | 54  | 186 | 1      | 135    |
| UN81346 | Rsa1.0.00467.1 | 765 | 156542 | 0         | 573 | 599 | 95 +  | 1   | 598 | 142261 | 142847 |
| UN81347 | Rsa1.0.01377.1 | 576 | 46967  | 1.00E-127 | 268 | 279 | 96 -  | 301 | 576 | 11426  | 11702  |
| UN81348 | Rsa1.0.00426.1 | 558 | 85668  | 0         | 417 | 435 | 95 -  | 108 | 542 | 31242  | 31676  |
| UN81349 | Rsa1.0.49110.1 | 731 | 462    | 0         | 401 | 421 | 95 -  | 57  | 477 | 57     | 462    |
| UN81350 | #              | #   | #      | #         | #   | #   | #     | #   | #   | #      | #      |
| UN81351 | Rsa1.0.08386.1 | 745 | 7438   | 0         | 742 | 749 | 99 +  | 1   | 745 | 1400   | 2148   |
| UN81352 | Rsa1.0.22975.1 | 597 | 1080   | 0         | 334 | 334 | 100 - | 2   | 335 | 29     | 362    |



|         |                |     |        |           |     |     |       |     |     |        |        |
|---------|----------------|-----|--------|-----------|-----|-----|-------|-----|-----|--------|--------|
| UN81353 | Rsa1.0.00014.1 | 633 | 348985 | 0         | 619 | 632 | 97 +  | 2   | 633 | 229909 | 230540 |
| UN81354 | Rsa1.0.19149.1 | 744 | 1472   | 1.00E-147 | 298 | 309 | 96 -  | 240 | 548 | 257    | 565    |
| UN81355 | Rsa1.0.02330.1 | 769 | 32452  | 0         | 694 | 711 | 97 -  | 2   | 712 | 2456   | 3166   |
| UN81356 | Rsa1.0.00079.1 | 630 | 606987 | 1.00E-172 | 340 | 351 | 96 -  | 2   | 352 | 4648   | 4998   |
| UN81357 | Rsa1.0.04008.1 | 800 | 19584  | 1.00E-167 | 301 | 302 | 99 +  | 302 | 603 | 4686   | 4987   |
| UN81358 | Rsa1.0.01299.1 | 558 | 162028 | 1.00E-128 | 298 | 318 | 93 +  | 18  | 332 | 160813 | 161124 |
| UN81359 | Rsa1.0.04346.1 | 691 | 17813  | 1.00E-159 | 296 | 299 | 98 -  | 115 | 413 | 14808  | 15104  |
| UN81360 | Rsa1.0.00005.1 | 331 | 353093 | 1.00E-154 | 275 | 275 | 100 + | 57  | 331 | 334794 | 335068 |
| UN81361 | Rsa1.0.02123.1 | 569 | 149053 | 1.00E-155 | 309 | 318 | 97 +  | 3   | 315 | 17008  | 17325  |
| UN81362 | Rsa1.0.02036.1 | 742 | 35731  | 0         | 455 | 459 | 99 -  | 195 | 653 | 14244  | 14702  |
| UN81363 | Rsa1.0.00115.1 | 751 | 131321 | 0         | 368 | 368 | 100 + | 1   | 368 | 8837   | 9204   |
| UN81364 | Rsa1.0.00001.1 | 597 | 363028 | 1.00E-91  | 171 | 171 | 100 - | 36  | 206 | 194681 | 194851 |
| UN81365 | Rsa1.0.02860.1 | 557 | 27207  | 0         | 389 | 391 | 99 -  | 56  | 446 | 17298  | 17688  |
| UN81366 | Rsa1.0.03843.1 | 754 | 20496  | 0         | 400 | 429 | 93 +  | 10  | 417 | 6093   | 6521   |
| UN81367 | Rsa1.0.00363.1 | 726 | 90968  | 5.00E-98  | 182 | 182 | 100 - | 118 | 299 | 66191  | 66372  |
| UN81368 | Rsa1.0.15868.1 | 759 | 2382   | 0         | 507 | 526 | 96 -  | 121 | 646 | 1      | 526    |
| UN81369 | Rsa1.0.00413.1 | 659 | 86921  | 0         | 637 | 653 | 97 +  | 8   | 659 | 12204  | 12856  |
| UN81370 | Rsa1.0.00784.1 | 798 | 64359  | 0         | 783 | 805 | 97 +  | 2   | 798 | 51696  | 52500  |
| UN81371 | Rsa1.0.00450.1 | 327 | 139397 | 1.00E-124 | 236 | 238 | 99 -  | 3   | 239 | 22106  | 22343  |
| UN81372 | Rsa1.0.02971.1 | 771 | 26363  | 0         | 706 | 727 | 97 +  | 1   | 725 | 24958  | 25684  |
| UN81373 | Rsa1.0.00480.1 | 740 | 81325  | 0         | 599 | 628 | 95 +  | 3   | 630 | 7037   | 7646   |
| UN81374 | Rsa1.0.21957.1 | 796 | 1160   | 0         | 651 | 672 | 96 +  | 2   | 669 | 501    | 1160   |
| UN81375 | Rsa1.0.02435.1 | 538 | 31454  | 1.00E-107 | 217 | 223 | 97 -  | 2   | 224 | 19490  | 19709  |
| UN81376 | Rsa1.0.10699.1 | 708 | 5752   | 1.00E-158 | 341 | 353 | 96 -  | 361 | 708 | 4104   | 4453   |
| UN81377 | Rsa1.0.00517.1 | 657 | 142790 | 0         | 650 | 654 | 99 -  | 4   | 657 | 7659   | 8312   |
| UN81378 | Rsa1.0.42831.1 | 718 | 524    | 0         | 378 | 384 | 98 -  | 46  | 429 | 134    | 517    |
| UN81379 | Rsa1.0.00694.1 | 717 | 68074  | 1.00E-134 | 265 | 271 | 97 +  | 448 | 717 | 26247  | 26517  |
| UN81380 | Rsa1.0.04426.1 | 783 | 17399  | 1.00E-108 | 209 | 212 | 98 +  | 163 | 374 | 4047   | 4258   |
| UN81381 | Rsa1.0.10910.1 | 677 | 5681   | 0         | 642 | 666 | 96 +  | 1   | 664 | 4997   | 5662   |
| UN81382 | Rsa1.0.02572.1 | 490 | 29961  | 1.00E-165 | 353 | 369 | 95 -  | 117 | 481 | 24747  | 25115  |
| UN81383 | Rsa1.0.19490.1 | 747 | 1424   | 1.00E-124 | 226 | 226 | 100 + | 2   | 227 | 1199   | 1424   |
| UN81384 | Rsa1.0.03642.1 | 710 | 21609  | 1.00E-108 | 283 | 305 | 92 -  | 408 | 710 | 5234   | 5528   |
| UN81385 | Rsa1.0.00013.1 | 602 | 292129 | 2.00E-84  | 186 | 195 | 95 +  | 121 | 315 | 242207 | 242401 |
| UN81386 | Rsa1.0.28524.1 | 622 | 812    | 1.00E-129 | 240 | 242 | 99 -  | 277 | 518 | 534    | 775    |
| UN81387 | Rsa1.0.31498.1 | 426 | 726    | 1.00E-97  | 199 | 205 | 97 +  | 132 | 336 | 522    | 726    |
| UN81388 | Rsa1.0.02136.1 | 717 | 34707  | 1.00E-144 | 270 | 272 | 99 +  | 447 | 717 | 3079   | 3350   |
| UN81389 | Rsa1.0.00659.1 | 525 | 69733  | 2.00E-59  | 129 | 133 | 96 +  | 393 | 525 | 20655  | 20787  |
| UN81390 | Rsa1.0.00838.1 | 553 | 153820 | 1.00E-151 | 301 | 311 | 96 -  | 2   | 312 | 52805  | 53115  |
| UN81391 | Rsa1.0.00538.1 | 213 | 77149  | 7.00E-45  | 112 | 116 | 96 +  | 100 | 213 | 16195  | 16310  |

|         |                |     |        |           |     |     |       |     |     |        |        |
|---------|----------------|-----|--------|-----------|-----|-----|-------|-----|-----|--------|--------|
| UN81392 | Rsa1.0_04684.1 | 557 | 16397  | 9.00E-25  | 165 | 198 | 83 +  | 129 | 324 | 15352  | 15548  |
| UN81393 | Rsa1.0_00900.1 | 684 | 60367  | 4.00E-92  | 186 | 190 | 97 -  | 43  | 229 | 28087  | 28276  |
| UN81394 | Rsa1.0_00045.1 | 615 | 328694 | 1.00E-171 | 329 | 335 | 98 +  | 3   | 336 | 309568 | 309900 |
| UN81395 | Rsa1.0_01540.1 | 720 | 151890 | 0         | 521 | 532 | 97 +  | 190 | 720 | 119493 | 120024 |
| UN81396 | Rsa1.0_08008.1 | 232 | 8086   | 1.00E-25  | 79  | 84  | 94 -  | 1   | 84  | 3535   | 3617   |
| UN81397 | Rsa1.0_00107.1 | 388 | 431659 | 3.00E-61  | 176 | 191 | 92 -  | 206 | 388 | 148756 | 148945 |
| UN81398 | Rsa1.0_28989.1 | 700 | 797    | 1.00E-119 | 241 | 250 | 96 -  | 3   | 252 | 213    | 453    |
| UN81399 | Rsa1.0_15610.1 | 153 | 2520   | 9.00E-62  | 146 | 151 | 96 -  | 6   | 153 | 14     | 163    |
| UN81400 | Rsa1.0_00189.1 | 716 | 111830 | 1.00E-135 | 247 | 248 | 99 -  | 1   | 248 | 57719  | 57966  |
| UN81401 | Rsa1.0_06521.1 | 728 | 10856  | 0         | 463 | 468 | 98 -  | 68  | 535 | 6201   | 6668   |
| UN81402 | Rsa1.0_00136.1 | 735 | 122464 | 1.00E-172 | 365 | 382 | 95 -  | 356 | 735 | 65533  | 65908  |
| UN81403 | Rsa1.0_00041.1 | 779 | 186197 | 1.00E-112 | 206 | 206 | 100 + | 142 | 347 | 50650  | 50855  |
| UN81404 | Rsa1.0_00825.1 | 690 | 62855  | 1.00E-125 | 570 | 676 | 84 +  | 3   | 663 | 59723  | 60397  |
| UN81405 | Rsa1.0_01251.1 | 244 | 49873  | 1.00E-116 | 236 | 244 | 96 +  | 1   | 244 | 36506  | 36749  |
| UN81406 | Rsa1.0_00824.1 | 151 | 188447 | 1.00E-54  | 121 | 124 | 97 +  | 29  | 151 | 156071 | 156194 |
| UN81407 | Rsa1.0_00115.1 | 110 | 131321 | 5.00E-35  | 102 | 110 | 92 -  | 1   | 110 | 99008  | 99115  |
| UN81408 | Rsa1.0_00937.1 | 593 | 59061  | 1.00E-133 | 269 | 277 | 97 +  | 318 | 593 | 21301  | 21577  |
| UN81409 | Rsa1.0_00344.1 | 701 | 191774 | 0         | 697 | 700 | 99 -  | 3   | 701 | 156527 | 157226 |
| UN81410 | Rsa1.0_00719.1 | 707 | 66952  | 0         | 376 | 379 | 99 +  | 2   | 380 | 24562  | 24940  |
| UN81411 | Rsa1.0_01198.1 | 624 | 51029  | 0         | 447 | 451 | 99 -  | 174 | 624 | 21072  | 21522  |
| UN81412 | Rsa1.0_01123.1 | 236 | 53359  | 2.00E-67  | 155 | 162 | 95 -  | 1   | 162 | 14738  | 14898  |
| UN81413 | Rsa1.0_07654.1 | 283 | 8917   | 1.00E-117 | 275 | 292 | 94 +  | 1   | 283 | 3878   | 4169   |
| UN81414 | Rsa1.0_02004.1 | 697 | 169138 | 0         | 489 | 502 | 97 +  | 3   | 504 | 155149 | 155649 |
| UN81415 | Rsa1.0_00040.1 | 748 | 324196 | 0         | 455 | 469 | 97 -  | 3   | 471 | 323206 | 323671 |
| UN81416 | Rsa1.0_01801.1 | 747 | 39094  | 0         | 654 | 704 | 92 -  | 53  | 747 | 21721  | 22403  |
| UN81417 | Rsa1.0_00094.1 | 732 | 139042 | 1.00E-167 | 331 | 342 | 96 -  | 391 | 732 | 29200  | 29541  |
| UN81418 | Rsa1.0_00382.1 | 594 | 251946 | 0         | 355 | 362 | 98 -  | 27  | 388 | 67083  | 67442  |
| UN81419 | Rsa1.0_02239.1 | 678 | 33534  | 0         | 612 | 676 | 90 +  | 2   | 671 | 2325   | 2986   |
| UN81420 | Rsa1.0_01779.1 | 116 | 39448  | 9.00E-43  | 112 | 116 | 96 +  | 1   | 116 | 11673  | 11785  |
| UN81421 | Rsa1.0_04023.1 | 508 | 19522  | 0         | 504 | 507 | 99 -  | 3   | 508 | 7867   | 8373   |
| UN81422 | Rsa1.0_75906.1 | 468 | 302    | 1.00E-160 | 295 | 298 | 98 +  | 126 | 423 | 5      | 302    |
| UN81423 | #              | #   | #      | #         | #   | #   | #     | #   | #   | #      | #      |
| UN81424 | Rsa1.0_00190.1 | 761 | 318240 | 1.00E-159 | 331 | 346 | 95 -  | 9   | 354 | 283349 | 283691 |
| UN81425 | Rsa1.0_02358.1 | 710 | 32213  | 0         | 592 | 607 | 97 -  | 2   | 608 | 14118  | 14724  |
| UN81426 | Rsa1.0_01137.1 | 741 | 52655  | 0         | 436 | 452 | 96 +  | 1   | 452 | 17699  | 18150  |
| UN81427 | Rsa1.0_15328.1 | 753 | 2683   | 1.00E-104 | 213 | 220 | 96 +  | 332 | 551 | 1677   | 1896   |
| UN81428 | Rsa1.0_00012.1 | 605 | 222148 | 1.00E-180 | 362 | 376 | 96 -  | 230 | 605 | 52419  | 52794  |
| UN81429 | Rsa1.0_00576.1 | 688 | 178949 | 0         | 673 | 686 | 98 -  | 2   | 686 | 160549 | 161234 |
| UN81430 | Rsa1.0_04852.1 | 565 | 15712  | 3.00E-89  | 173 | 175 | 98 -  | 341 | 515 | 10235  | 10409  |

|         |                |     |        |           |     |     |       |     |     |        |        |
|---------|----------------|-----|--------|-----------|-----|-----|-------|-----|-----|--------|--------|
| UN81431 | Rsa1.0_01092.1 | 662 | 54348  | 1.00E-159 | 299 | 304 | 98 -  | 7   | 310 | 4777   | 5080   |
| UN81432 | Rsa1.0_01068.1 | 754 | 55208  | 0         | 465 | 497 | 93 +  | 4   | 490 | 34527  | 35017  |
| UN81433 | Rsa1.0_00351.1 | 752 | 413096 | 0         | 527 | 546 | 96 +  | 5   | 535 | 376149 | 376694 |
| UN81434 | Rsa1.0_00128.1 | 732 | 228675 | 0         | 635 | 684 | 92 -  | 28  | 695 | 139631 | 140305 |
| UN81435 | Rsa1.0_00208.1 | 466 | 108565 | 8.00E-96  | 178 | 178 | 100 - | 6   | 183 | 68892  | 69069  |
| UN81436 | Rsa1.0_00664.1 | 439 | 69573  | 1.00E-127 | 282 | 295 | 95 +  | 143 | 433 | 1721   | 2012   |
| UN81437 | Rsa1.0_00218.1 | 791 | 201480 | 0         | 737 | 766 | 96 -  | 2   | 762 | 45555  | 46320  |
| UN81438 | Rsa1.0_00020.1 | 740 | 283099 | 0         | 447 | 462 | 96 -  | 149 | 607 | 11470  | 11931  |
| UN81439 | Rsa1.0_02317.1 | 573 | 32600  | 0         | 561 | 580 | 96 -  | 1   | 573 | 12847  | 13422  |
| UN81440 | Rsa1.0_05948.1 | 746 | 12142  | 1.00E-101 | 205 | 211 | 97 +  | 355 | 565 | 3691   | 3901   |
| UN81441 | #              | #   | #      | #         | #   | #   | #     | #   | #   | #      | #      |
| UN81442 | Rsa1.0_02267.1 | 580 | 33194  | 1.00E-116 | 225 | 229 | 98 -  | 333 | 561 | 30985  | 31213  |
| UN81443 | Rsa1.0_01176.1 | 176 | 51638  | 4.00E-58  | 163 | 173 | 94 -  | 3   | 169 | 28362  | 28534  |
| UN81444 | Rsa1.0_00020.1 | 565 | 283099 | 1.00E-117 | 247 | 258 | 95 -  | 106 | 363 | 76615  | 76872  |
| UN81445 | Rsa1.0_62130.1 | 622 | 369    | 0         | 367 | 369 | 99 -  | 130 | 498 | 1      | 369    |
| UN81446 | Rsa1.0_00002.1 | 670 | 601661 | 5.00E-98  | 209 | 218 | 95 -  | 1   | 218 | 558227 | 558444 |
| UN81447 | Rsa1.0_00437.1 | 761 | 84879  | 1.00E-107 | 250 | 267 | 93 -  | 154 | 417 | 71069  | 71335  |
| UN81448 | Rsa1.0_00173.1 | 722 | 288743 | 5.00E-67  | 139 | 142 | 97 +  | 168 | 309 | 43547  | 43688  |
| UN81449 | Rsa1.0_00434.1 | 109 | 85171  | 5.00E-50  | 107 | 108 | 99 +  | 3   | 109 | 74761  | 74868  |
| UN81450 | Rsa1.0_00928.1 | 452 | 59293  | 6.00E-44  | 106 | 111 | 95 +  | 205 | 315 | 6782   | 6892   |
| UN81451 | Rsa1.0_01992.1 | 762 | 36424  | 0         | 460 | 466 | 98 -  | 300 | 762 | 5867   | 6332   |
| UN81452 | Rsa1.0_42857.1 | 737 | 524    | 1.00E-120 | 247 | 256 | 96 -  | 461 | 716 | 99     | 354    |
| UN81453 | #              | #   | #      | #         | #   | #   | #     | #   | #   | #      | #      |
| UN81454 | Rsa1.0_01600.1 | 678 | 42537  | 0         | 649 | 667 | 97 +  | 5   | 667 | 5071   | 5737   |
| UN81455 | Rsa1.0_01450.1 | 702 | 144251 | 0         | 614 | 655 | 93 +  | 3   | 653 | 36503  | 37155  |
| UN81456 | Rsa1.0_02312.1 | 774 | 32675  | 0         | 379 | 384 | 98 -  | 2   | 385 | 21804  | 22187  |
| UN81457 | #              | #   | #      | #         | #   | #   | #     | #   | #   | #      | #      |
| UN81458 | Rsa1.0_04635.1 | 597 | 16569  | 1.00E-135 | 334 | 361 | 92 +  | 201 | 559 | 6513   | 6873   |
| UN81459 | Rsa1.0_00275.1 | 766 | 210104 | 1.00E-139 | 309 | 327 | 94 -  | 166 | 491 | 152106 | 152432 |
| UN81460 | Rsa1.0_33878.1 | 777 | 669    | 7.00E-79  | 162 | 165 | 98 +  | 416 | 578 | 161    | 325    |
| UN81461 | Rsa1.0_00042.1 | 645 | 171507 | 1.00E-144 | 337 | 362 | 93 -  | 275 | 633 | 41757  | 42118  |
| UN81462 | Rsa1.0_09200.1 | 682 | 6562   | 1.00E-141 | 255 | 255 | 100 - | 428 | 682 | 6059   | 6313   |
| UN81463 | Rsa1.0_10047.1 | 784 | 6026   | 1.00E-109 | 204 | 205 | 99 -  | 451 | 655 | 3      | 207    |
| UN81464 | Rsa1.0_00863.1 | 699 | 254535 | 1.00E-104 | 207 | 212 | 97 -  | 177 | 388 | 243379 | 243590 |
| UN81465 | Rsa1.0_02680.1 | 710 | 28721  | 7.00E-91  | 184 | 188 | 97 -  | 170 | 354 | 20871  | 21058  |
| UN81466 | Rsa1.0_04213.1 | 606 | 18437  | 2.00E-66  | 144 | 148 | 97 +  | 1   | 146 | 16985  | 17132  |
| UN81467 | Rsa1.0_01021.1 | 718 | 56610  | 0         | 644 | 673 | 95 -  | 49  | 718 | 39749  | 40417  |
| UN81468 | Rsa1.0_00111.1 | 662 | 390088 | 1.00E-147 | 321 | 339 | 94 +  | 321 | 659 | 5357   | 5688   |
| UN81469 | Rsa1.0_15757.1 | 796 | 2442   | 1.00E-139 | 251 | 251 | 100 + | 424 | 674 | 482    | 732    |

|         |                |     |        |           |     |     |       |     |     |        |        |
|---------|----------------|-----|--------|-----------|-----|-----|-------|-----|-----|--------|--------|
| UN81470 | Rsa1.0.00181.1 | 766 | 114269 | 1.00E-172 | 337 | 347 | 97 +  | 1   | 347 | 14807  | 15153  |
| UN81471 | Rsa1.0.01055.1 | 689 | 55466  | 0         | 669 | 702 | 95 +  | 1   | 689 | 11164  | 11853  |
| UN81472 | Rsa1.0.03565.1 | 718 | 22062  | 1.00E-175 | 361 | 379 | 95 -  | 36  | 405 | 3777   | 4155   |
| UN81473 | Rsa1.0.06978.1 | 643 | 10073  | 1.00E-151 | 289 | 295 | 97 -  | 121 | 415 | 2434   | 2728   |
| UN81474 | Rsa1.0.00725.1 | 634 | 66757  | 0         | 609 | 630 | 96 +  | 5   | 634 | 38950  | 39579  |
| UN81475 | Rsa1.0.00155.1 | 763 | 118465 | 1.00E-153 | 299 | 307 | 97 +  | 389 | 695 | 30835  | 31141  |
| UN81476 | Rsa1.0.01233.1 | 500 | 50184  | 1.00E-79  | 160 | 163 | 98 -  | 3   | 165 | 47505  | 47667  |
| UN81477 | Rsa1.0.03218.1 | 696 | 24539  | 1.00E-58  | 125 | 128 | 97 -  | 203 | 330 | 7308   | 7435   |
| UN81478 | Rsa1.0.04578.1 | 630 | 16774  | 6.00E-48  | 424 | 532 | 79 +  | 90  | 618 | 2996   | 3527   |
| UN81479 | Rsa1.0.00588.1 | 690 | 73939  | 1.00E-110 | 215 | 219 | 98 +  | 442 | 660 | 73721  | 73939  |
| UN81480 | Rsa1.0.00059.1 | 342 | 159650 | 1.00E-103 | 278 | 307 | 90 +  | 3   | 303 | 121125 | 121422 |
| UN81481 | Rsa1.0.00017.1 | 663 | 752458 | 1.00E-101 | 212 | 220 | 96 +  | 104 | 323 | 350959 | 351178 |
| UN81482 | #              | #   | #      | #         | #   | #   | #     | #   | #   | #      | #      |
| UN81483 | Rsa1.0.00121.1 | 697 | 278029 | 2.00E-66  | 141 | 145 | 97 -  | 427 | 571 | 35361  | 35505  |
| UN81484 | Rsa1.0.00348.1 | 737 | 92818  | 0         | 606 | 642 | 94 +  | 2   | 641 | 26382  | 27023  |
| UN81485 | Rsa1.0.01924.1 | 750 | 37226  | 0         | 407 | 413 | 98 +  | 8   | 420 | 22723  | 23135  |
| UN81486 | Rsa1.0.03504.1 | 677 | 22443  | 1.00E-109 | 219 | 225 | 97 -  | 453 | 677 | 6247   | 6471   |
| UN81487 | Rsa1.0.00120.1 | 316 | 277288 | 4.00E-84  | 173 | 178 | 97 +  | 94  | 271 | 14013  | 14190  |
| UN81488 | Rsa1.0.00087.1 | 641 | 761073 | 1.00E-169 | 316 | 321 | 98 -  | 199 | 519 | 68500  | 68820  |
| UN81489 | Rsa1.0.00651.1 | 621 | 247766 | 0         | 437 | 449 | 97 -  | 10  | 458 | 225035 | 225483 |
| UN81490 | Rsa1.0.00039.1 | 723 | 296927 | 1.00E-67  | 143 | 147 | 97 +  | 204 | 350 | 10914  | 11060  |
| UN81491 | Rsa1.0.49520.1 | 703 | 458    | 1.00E-145 | 303 | 315 | 96 +  | 61  | 367 | 1      | 314    |
| UN81492 | Rsa1.0.01633.1 | 704 | 41868  | 0         | 436 | 447 | 97 +  | 215 | 661 | 7255   | 7700   |
| UN81493 | Rsa1.0.04139.1 | 238 | 18883  | 9.00E-97  | 231 | 243 | 95 +  | 3   | 238 | 17802  | 18042  |
| UN81494 | Rsa1.0.00097.1 | 757 | 138858 | 0         | 487 | 505 | 96 +  | 247 | 742 | 45049  | 45553  |
| UN81495 | Rsa1.0.10577.1 | 730 | 5796   | 0         | 511 | 511 | 100 + | 1   | 511 | 332    | 842    |
| UN81496 | Rsa1.0.24740.1 | 761 | 969    | 1.00E-173 | 366 | 383 | 95 +  | 382 | 761 | 476    | 858    |
| UN81497 | Rsa1.0.00085.1 | 694 | 142226 | 0         | 680 | 692 | 98 +  | 3   | 694 | 18364  | 19049  |
| UN81498 | Rsa1.0.01303.1 | 728 | 48853  | 1.00E-174 | 353 | 367 | 96 +  | 4   | 370 | 14048  | 14411  |
| UN81499 | Rsa1.0.20026.1 | 792 | 1350   | 5.00E-95  | 203 | 211 | 96 +  | 154 | 364 | 253    | 460    |
| UN81500 | Rsa1.0.57594.1 | 690 | 397    | 1.00E-170 | 376 | 399 | 94 -  | 51  | 445 | 1      | 397    |
| UN81501 | Rsa1.0.01375.1 | 695 | 47038  | 1.00E-103 | 255 | 277 | 92 -  | 172 | 437 | 13353  | 13629  |
| UN81502 | Rsa1.0.00119.1 | 629 | 467509 | 0         | 609 | 636 | 95 +  | 1   | 629 | 91672  | 92300  |
| UN81503 | Rsa1.0.00476.1 | 736 | 280966 | 1.00E-106 | 340 | 390 | 87 -  | 3   | 383 | 156495 | 156858 |
| UN81504 | Rsa1.0.01712.1 | 381 | 154210 | 0         | 371 | 381 | 97 +  | 1   | 381 | 9171   | 9551   |
| UN81505 | Rsa1.0.01675.1 | 584 | 41155  | 1.00E-139 | 300 | 318 | 94 +  | 3   | 320 | 28354  | 28656  |
| UN81506 | Rsa1.0.00434.1 | 703 | 85171  | 0         | 462 | 476 | 97 -  | 233 | 703 | 1594   | 2069   |
| UN81507 | Rsa1.0.03448.1 | 567 | 22844  | 0         | 499 | 519 | 96 +  | 3   | 514 | 2160   | 2677   |
| UN81508 | Rsa1.0.00300.1 | 734 | 97747  | 1.00E-173 | 562 | 643 | 87 +  | 94  | 731 | 1555   | 2193   |

|         |                |     |        |           |     |     |       |     |     |        |        |
|---------|----------------|-----|--------|-----------|-----|-----|-------|-----|-----|--------|--------|
| UN81509 | Rsa1.0.02883.1 | 777 | 27035  | 1.00E-109 | 226 | 233 | 96 -  | 518 | 749 | 9456   | 9688   |
| UN81510 | Rsa1.0.17834.1 | 801 | 1729   | 0         | 418 | 430 | 97 +  | 270 | 698 | 422    | 851    |
| UN81511 | Rsa1.0.00013.1 | 639 | 292129 | 0         | 446 | 446 | 100 - | 194 | 639 | 225802 | 226247 |
| UN81512 | Rsa1.0.00418.1 | 443 | 215377 | 0         | 435 | 443 | 98 -  | 1   | 443 | 16448  | 16888  |
| UN81513 | Rsa1.0.04142.1 | 512 | 18861  | 1.00E-110 | 206 | 207 | 99 -  | 306 | 512 | 12682  | 12888  |
| UN81514 | Rsa1.0.11024.1 | 615 | 5644   | 1.00E-174 | 332 | 339 | 97 -  | 45  | 379 | 5010   | 5348   |
| UN81515 | Rsa1.0.02281.1 | 610 | 292576 | 1.00E-143 | 273 | 278 | 98 +  | 39  | 316 | 15443  | 15720  |
| UN81516 | Rsa1.0.14686.1 | 651 | 3157   | 0         | 514 | 534 | 96 +  | 3   | 533 | 2542   | 3070   |
| UN81517 | #              | #   | #      | #         | #   | #   | #     | #   | #   | #      | #      |
| UN81518 | Rsa1.0.00722.1 | 197 | 66840  | 1.00E-92  | 193 | 199 | 96 -  | 1   | 197 | 50241  | 50439  |
| UN81519 | Rsa1.0.00722.1 | 199 | 66840  | 1.00E-109 | 199 | 199 | 100 - | 1   | 199 | 50241  | 50439  |
| UN81520 | Rsa1.0.00062.1 | 123 | 299291 | 3.00E-61  | 119 | 119 | 100 - | 1   | 119 | 22765  | 22883  |
| UN81521 | Rsa1.0.00198.1 | 343 | 222963 | 6.00E-99  | 270 | 294 | 91 -  | 1   | 291 | 131420 | 131711 |
| UN81522 | #              | #   | #      | #         | #   | #   | #     | #   | #   | #      | #      |
| UN81523 | Rsa1.0.02711.1 | 101 | 28475  | 5.00E-50  | 100 | 100 | 100 - | 1   | 100 | 20294  | 20393  |
| UN81524 | Rsa1.0.57530.1 | 125 | 398    | 3.00E-24  | 60  | 61  | 98 -  | 65  | 125 | 131    | 191    |
| UN81525 | Rsa1.0.02331.1 | 362 | 32449  | 1.00E-102 | 203 | 207 | 98 -  | 159 | 362 | 2239   | 2445   |
| UN81526 | Rsa1.0.04941.1 | 109 | 15382  | 4.00E-54  | 107 | 107 | 100 + | 1   | 107 | 12198  | 12304  |
| UN81527 | Rsa1.0.00921.1 | 153 | 59599  | 5.00E-76  | 147 | 148 | 99 +  | 6   | 153 | 23862  | 24009  |
| UN81528 | Rsa1.0.03306.1 | 352 | 23873  | 0         | 349 | 352 | 99 -  | 1   | 352 | 13676  | 14027  |
| UN81529 | Rsa1.0.03111.1 | 293 | 25327  | 1.00E-114 | 212 | 213 | 99 -  | 81  | 293 | 6517   | 6729   |
| UN81530 | Rsa1.0.00631.1 | 549 | 71277  | 0         | 548 | 549 | 99 +  | 1   | 549 | 1123   | 1670   |
| UN81531 | Rsa1.0.03253.1 | 484 | 24321  | 0         | 483 | 485 | 99 +  | 1   | 484 | 9570   | 10054  |
| UN81532 | Rsa1.0.00491.1 | 461 | 80219  | 1.00E-136 | 248 | 249 | 99 +  | 1   | 249 | 40741  | 40989  |
| UN81533 | Rsa1.0.08162.1 | 545 | 7813   | 0         | 545 | 545 | 100 - | 1   | 545 | 6408   | 6952   |
| UN81534 | Rsa1.0.00911.1 | 365 | 59943  | 1.00E-176 | 355 | 368 | 96 +  | 1   | 365 | 51440  | 51804  |
| UN81535 | Rsa1.0.00401.1 | 562 | 244410 | 0         | 470 | 488 | 96 -  | 1   | 488 | 173159 | 173643 |
| UN81536 | Rsa1.0.05503.1 | 240 | 13510  | 3.00E-66  | 135 | 136 | 99 +  | 1   | 136 | 3095   | 3229   |
| UN81537 | Rsa1.0.00003.1 | 104 | 340054 | 4.00E-38  | 98  | 104 | 94 +  | 1   | 104 | 292799 | 292902 |
| UN81538 | Rsa1.0.04318.1 | 391 | 17947  | 0         | 391 | 391 | 100 + | 1   | 391 | 8906   | 9296   |
| UN81539 | Rsa1.0.00217.1 | 556 | 107079 | 3.00E-68  | 132 | 132 | 100 - | 289 | 420 | 60333  | 60464  |
| UN81540 | Rsa1.0.02671.1 | 517 | 28887  | 0         | 512 | 517 | 99 -  | 1   | 517 | 4717   | 5233   |
| UN81541 | Rsa1.0.00015.1 | 544 | 561803 | 0         | 542 | 543 | 99 +  | 1   | 543 | 221970 | 222512 |
| UN81542 | Rsa1.0.01951.1 | 307 | 36941  | 1.00E-168 | 305 | 307 | 99 -  | 1   | 307 | 14463  | 14769  |
| UN81543 | Rsa1.0.01898.1 | 490 | 37491  | 1.00E-164 | 350 | 365 | 95 -  | 1   | 364 | 33926  | 34288  |
| UN81544 | Rsa1.0.00094.1 | 266 | 139042 | 2.00E-64  | 188 | 201 | 93 -  | 70  | 266 | 60576  | 60774  |
| UN81545 | Rsa1.0.02053.1 | 507 | 35554  | 5.00E-48  | 98  | 98  | 100 + | 171 | 268 | 2146   | 2243   |
| UN81546 | Rsa1.0.00087.1 | 449 | 761073 | 1.00E-110 | 229 | 239 | 95 -  | 202 | 440 | 532060 | 532293 |
| UN81547 | Rsa1.0.01005.1 | 351 | 56967  | 4.00E-97  | 296 | 331 | 89 +  | 21  | 351 | 37715  | 38031  |

|         |                |     |        |           |     |     |       |     |     |        |        |
|---------|----------------|-----|--------|-----------|-----|-----|-------|-----|-----|--------|--------|
| UN81548 | Rsa1.0.01022.1 | 348 | 56606  | 7.00E-80  | 183 | 194 | 94 +  | 140 | 333 | 29620  | 29813  |
| UN81549 | Rsa1.0.01373.1 | 360 | 47052  | 1.00E-178 | 350 | 361 | 96 +  | 1   | 360 | 31682  | 32034  |
| UN81550 | Rsa1.0.12326.1 | 519 | 5255   | 0         | 355 | 360 | 98 +  | 160 | 519 | 4448   | 4807   |
| UN81551 | Rsa1.0.00069.1 | 500 | 403561 | 5.00E-88  | 187 | 193 | 96 -  | 261 | 452 | 134941 | 135133 |
| UN81552 | Rsa1.0.00355.1 | 515 | 92038  | 1.00E-106 | 357 | 411 | 86 -  | 85  | 484 | 77872  | 78261  |
| UN81553 | Rsa1.0.02713.1 | 534 | 28470  | 0         | 344 | 344 | 100 - | 84  | 427 | 26027  | 26370  |
| UN81554 | Rsa1.0.32049.1 | 421 | 711    | 0         | 391 | 410 | 95 +  | 12  | 421 | 249    | 656    |
| UN81555 | Rsa1.0.01418.1 | 658 | 46237  | 0         | 643 | 653 | 98 +  | 9   | 655 | 6815   | 7467   |
| UN81556 | Rsa1.0.03058.1 | 623 | 25715  | 0         | 494 | 512 | 96 +  | 113 | 623 | 4691   | 5202   |
| UN81557 | Rsa1.0.02474.1 | 574 | 31076  | 7.00E-66  | 131 | 132 | 99 +  | 412 | 543 | 27939  | 28070  |
| UN81558 | Rsa1.0.00019.1 | 513 | 301669 | 0         | 492 | 505 | 97 -  | 9   | 513 | 120222 | 120722 |
| UN81559 | Rsa1.0.00939.1 | 513 | 185227 | 1.00E-170 | 303 | 303 | 100 - | 211 | 513 | 41193  | 41495  |
| UN81560 | Rsa1.0.02237.1 | 426 | 33544  | 1.00E-128 | 232 | 232 | 100 + | 195 | 426 | 3506   | 3737   |
| UN81561 | Rsa1.0.49765.1 | 348 | 456    | 3.00E-57  | 119 | 121 | 98 +  | 228 | 348 | 294    | 414    |
| UN81562 | Rsa1.0.03347.1 | 868 | 23588  | 0         | 862 | 862 | 100 - | 7   | 868 | 18219  | 19080  |
| UN81563 | Rsa1.0.01656.1 | 859 | 41494  | 0         | 405 | 405 | 100 - | 9   | 413 | 37155  | 37559  |
| UN81564 | Rsa1.0.05995.1 | 809 | 11997  | 0         | 374 | 374 | 100 - | 9   | 382 | 10944  | 11317  |
| UN81565 | Rsa1.0.01898.1 | 806 | 37491  | 0         | 566 | 571 | 99 -  | 9   | 579 | 3293   | 3863   |
| UN81566 | Rsa1.0.06386.1 | 803 | 140583 | 0         | 719 | 720 | 99 -  | 84  | 803 | 134580 | 135299 |
| UN81567 | Rsa1.0.00679.1 | 801 | 68971  | 0         | 593 | 602 | 98 -  | 195 | 796 | 19280  | 19881  |
| UN81568 | Rsa1.0.67954.1 | 785 | 337    | 1.00E-157 | 282 | 282 | 100 + | 145 | 426 | 10     | 291    |
| UN81569 | Rsa1.0.03037.1 | 771 | 25825  | 0         | 682 | 717 | 95 -  | 59  | 760 | 15334  | 16047  |
| UN81570 | Rsa1.0.00341.1 | 782 | 249309 | 0         | 671 | 691 | 97 +  | 9   | 699 | 247314 | 247989 |
| UN81571 | Rsa1.0.01990.1 | 781 | 36431  | 0         | 493 | 494 | 99 -  | 288 | 781 | 27819  | 28312  |
| UN81572 | Rsa1.0.36932.1 | 780 | 610    | 0         | 466 | 469 | 99 +  | 9   | 477 | 142    | 610    |
| UN81573 | Rsa1.0.05594.1 | 780 | 13229  | 0         | 760 | 772 | 98 +  | 9   | 780 | 10809  | 11580  |
| UN81574 | Rsa1.0.00890.1 | 778 | 323870 | 1.00E-113 | 222 | 227 | 97 +  | 547 | 773 | 190588 | 190814 |
| UN81575 | Rsa1.0.00593.1 | 773 | 143463 | 0         | 544 | 594 | 91 -  | 9   | 586 | 61480  | 62058  |
| UN81576 | Rsa1.0.00016.1 | 769 | 831256 | 0         | 748 | 755 | 99 +  | 15  | 769 | 651135 | 651889 |
| UN81577 | Rsa1.0.01394.1 | 746 | 46641  | 0         | 460 | 460 | 100 - | 173 | 632 | 21971  | 22430  |
| UN81578 | Rsa1.0.00132.1 | 759 | 124299 | 0         | 750 | 750 | 100 + | 10  | 759 | 45750  | 46499  |
| UN81579 | Rsa1.0.00414.1 | 725 | 202190 | 0         | 369 | 370 | 99 +  | 9   | 378 | 66401  | 66770  |
| UN81580 | Rsa1.0.01126.1 | 749 | 53127  | 1.00E-106 | 233 | 245 | 95 -  | 140 | 384 | 15539  | 15780  |
| UN81581 | Rsa1.0.01273.1 | 747 | 49464  | 4.00E-43  | 114 | 122 | 93 +  | 577 | 698 | 31058  | 31179  |
| UN81582 | Rsa1.0.00937.1 | 747 | 59061  | 0         | 717 | 743 | 96 +  | 9   | 747 | 22589  | 23329  |
| UN81583 | Rsa1.0.00286.1 | 722 | 98709  | 1.00E-122 | 229 | 231 | 99 +  | 492 | 722 | 13001  | 13231  |
| UN81584 | Rsa1.0.46823.1 | 725 | 482    | 1.00E-153 | 280 | 282 | 99 -  | 444 | 725 | 133    | 414    |
| UN81585 | Rsa1.0.01593.1 | 722 | 150996 | 0         | 590 | 620 | 95 +  | 100 | 719 | 109422 | 110041 |
| UN81586 | Rsa1.0.01600.1 | 696 | 42537  | 0         | 665 | 678 | 98 -  | 9   | 685 | 4827   | 5501   |

|         |                |     |        |           |     |     |       |     |     |        |        |
|---------|----------------|-----|--------|-----------|-----|-----|-------|-----|-----|--------|--------|
| UN81587 | Rsa1.0_00612.1 | 652 | 72376  | 1.00E-165 | 294 | 294 | 100 - | 359 | 652 | 35407  | 35700  |
| UN81588 | Rsa1.0_01458.1 | 634 | 175719 | 1.00E-160 | 388 | 421 | 92 -  | 214 | 634 | 28273  | 28686  |
| UN81589 | Rsa1.0_00068.1 | 638 | 151813 | 0         | 416 | 430 | 96 +  | 212 | 638 | 134543 | 134964 |
| UN81590 | Rsa1.0_02930.1 | 622 | 26668  | 0         | 618 | 622 | 99 -  | 1   | 622 | 1691   | 2312   |
| UN81591 | Rsa1.0_01110.1 | 629 | 195852 | 1.00E-103 | 283 | 312 | 90 -  | 313 | 623 | 175780 | 176078 |
| UN81592 | Rsa1.0_01478.1 | 615 | 44991  | 0         | 498 | 500 | 99 +  | 116 | 615 | 31257  | 31756  |
| UN81593 | Rsa1.0_00082.1 | 583 | 237584 | 1.00E-104 | 374 | 433 | 86 -  | 145 | 577 | 68551  | 68982  |
| UN81594 | Rsa1.0_00245.1 | 373 | 103569 | 6.00E-22  | 90  | 102 | 88 +  | 228 | 329 | 80584  | 80685  |
| UN81595 | Rsa1.0_00777.1 | 256 | 191865 | 3.00E-38  | 187 | 217 | 86 +  | 3   | 215 | 180705 | 180921 |
| UN81596 | Rsa1.0_00404.1 | 207 | 87635  | 2.00E-38  | 159 | 182 | 87 -  | 26  | 201 | 87454  | 87635  |
| UN81597 | Rsa1.0_00078.1 | 246 | 175053 | 3.00E-35  | 120 | 132 | 90 -  | 116 | 246 | 66716  | 66846  |
| UN81598 | Rsa1.0_07516.1 | 211 | 9218   | 6.00E-27  | 162 | 192 | 84 -  | 10  | 192 | 6759   | 6949   |
| UN81599 | #              | #   | #      | #         | #   | #   | #     | #   | #   | #      | #      |
| UN81600 | Rsa1.0_27986.1 | 344 | 831    | 4.00E-29  | 85  | 90  | 94 +  | 245 | 333 | 142    | 231    |
| UN81601 | Rsa1.0_05931.1 | 306 | 12210  | 1.00E-44  | 116 | 124 | 93 +  | 135 | 258 | 2641   | 2764   |
| UN81602 | Rsa1.0_00143.1 | 246 | 121313 | 2.00E-64  | 181 | 192 | 94 +  | 1   | 186 | 64158  | 64348  |
| UN81603 | #              | #   | #      | #         | #   | #   | #     | #   | #   | #      | #      |
| UN81604 | Rsa1.0_00090.1 | 270 | 273859 | 5.00E-74  | 199 | 217 | 91 +  | 1   | 216 | 219008 | 219224 |
| UN81605 | #              | #   | #      | #         | #   | #   | #     | #   | #   | #      | #      |
| UN81606 | #              | #   | #      | #         | #   | #   | #     | #   | #   | #      | #      |
| UN81607 | Rsa1.0_12650.1 | 330 | 5164   | 3.00E-48  | 150 | 161 | 93 +  | 1   | 150 | 149    | 309    |
| UN81608 | Rsa1.0_07516.1 | 185 | 9218   | 3.00E-59  | 147 | 152 | 96 -  | 11  | 158 | 6719   | 6870   |
| UN81609 | Rsa1.0_00142.1 | 253 | 121474 | 6.00E-15  | 51  | 54  | 94 +  | 50  | 103 | 82856  | 82909  |
| UN81610 | Rsa1.0_00087.1 | 230 | 761073 | 3.00E-13  | 54  | 59  | 91 -  | 172 | 230 | 99413  | 99471  |
| UN81611 | #              | #   | #      | #         | #   | #   | #     | #   | #   | #      | #      |
| UN81612 | Rsa1.0_00001.1 | 208 | 363028 | 1.00E-30  | 162 | 188 | 86 -  | 24  | 208 | 155604 | 155790 |
| UN81613 | Rsa1.0_00620.1 | 240 | 71985  | 2.00E-24  | 106 | 118 | 89 -  | 15  | 129 | 58404  | 58521  |
| UN81614 | #              | #   | #      | #         | #   | #   | #     | #   | #   | #      | #      |
| UN81615 | #              | #   | #      | #         | #   | #   | #     | #   | #   | #      | #      |
| UN81616 | #              | #   | #      | #         | #   | #   | #     | #   | #   | #      | #      |
| UN81617 | #              | #   | #      | #         | #   | #   | #     | #   | #   | #      | #      |
| UN81618 | Rsa1.0_02199.1 | 173 | 33982  | 4.00E-15  | 60  | 66  | 90 -  | 40  | 105 | 30771  | 30836  |
| UN81619 | #              | #   | #      | #         | #   | #   | #     | #   | #   | #      | #      |
| UN81620 | Rsa1.0_04991.1 | 492 | 15215  | 1.00E-143 | 270 | 274 | 98 -  | 219 | 492 | 9771   | 10044  |
| UN81621 | #              | #   | #      | #         | #   | #   | #     | #   | #   | #      | #      |
| UN81622 | Rsa1.0_00077.1 | 331 | 145005 | 2.33E-156 | 326 | 339 | 96 +  | 2   | 331 | 129103 | 129440 |
| UN81623 | #              | #   | #      | #         | #   | #   | #     | #   | #   | #      | #      |
| UN81624 | Rsa1.0_01510.1 | 245 | 44237  | 1.00E-46  | 185 | 210 | 88 +  | 18  | 224 | 4379   | 4586   |
| UN81625 | Rsa1.0_01559.1 | 267 | 43262  | 6.00E-12  | 58  | 65  | 89 -  | 203 | 267 | 35688  | 35752  |







|         |                |     |        |          |     |     |      |     |     |        |        |
|---------|----------------|-----|--------|----------|-----|-----|------|-----|-----|--------|--------|
| UN81704 | Rsa1.0_00407.1 | 252 | 191544 | 6.00E-18 | 69  | 75  | 92 - | 139 | 212 | 186783 | 186857 |
| UN81705 | #              | #   | #      | #        | #   | #   | #    | #   | #   | #      | #      |
| UN81706 | #              | #   | #      | #        | #   | #   | #    | #   | #   | #      | #      |
| UN81707 | Rsa1.0_23887.1 | 222 | 1019   | 1.00E-21 | 107 | 120 | 89 + | 4   | 118 | 672    | 791    |
| UN81708 | Rsa1.0_00253.1 | 290 | 231292 | 1.00E-50 | 127 | 133 | 95 + | 66  | 195 | 97350  | 97482  |
| UN81709 | Rsa1.0_00464.1 | 231 | 82253  | 9.00E-20 | 96  | 109 | 88 - | 14  | 119 | 12262  | 12370  |
| UN81710 | Rsa1.0_05211.1 | 213 | 14493  | 7.00E-11 | 63  | 71  | 88 - | 144 | 213 | 6330   | 6400   |
| UN81711 | Rsa1.0_10856.1 | 251 | 5700   | 1.00E-12 | 44  | 46  | 95 - | 14  | 59  | 141    | 186    |
| UN81712 | Rsa1.0_00451.1 | 181 | 322533 | 2.00E-14 | 82  | 93  | 88 - | 84  | 174 | 245689 | 245781 |
| UN81713 | #              | #   | #      | #        | #   | #   | #    | #   | #   | #      | #      |
| UN81714 | Rsa1.0_33317.1 | 222 | 681    | 2.00E-42 | 117 | 124 | 94 + | 18  | 139 | 217    | 340    |
| UN81715 | Rsa1.0_00714.1 | 188 | 67187  | 7.00E-20 | 99  | 110 | 90 - | 67  | 172 | 49197  | 49306  |
| UN81716 | Rsa1.0_00162.1 | 164 | 239935 | 6.00E-14 | 78  | 88  | 88 - | 79  | 164 | 113098 | 113185 |
| UN81717 | #              | #   | #      | #        | #   | #   | #    | #   | #   | #      | #      |
| UN81718 | Rsa1.0_26735.1 | 241 | 880    | 8.00E-11 | 62  | 70  | 88 + | 174 | 241 | 332    | 401    |
| UN81719 | Rsa1.0_00110.1 | 229 | 132719 | 5.00E-18 | 161 | 188 | 85 - | 1   | 171 | 92107  | 92294  |
| UN81720 | Rsa1.0_02961.1 | 268 | 26435  | 1.00E-62 | 177 | 186 | 95 + | 86  | 264 | 15359  | 15544  |
| UN81721 | #              | #   | #      | #        | #   | #   | #    | #   | #   | #      | #      |
| UN81722 | Rsa1.0_00023.1 | 219 | 194764 | 1.00E-12 | 81  | 90  | 90 - | 134 | 219 | 4308   | 4397   |
| UN81723 | #              | #   | #      | #        | #   | #   | #    | #   | #   | #      | #      |
| UN81724 | #              | #   | #      | #        | #   | #   | #    | #   | #   | #      | #      |
| UN81725 | #              | #   | #      | #        | #   | #   | #    | #   | #   | #      | #      |
| UN81726 | Rsa1.0_07914.1 | 169 | 8294   | 6.00E-20 | 71  | 74  | 95 - | 99  | 169 | 4245   | 4318   |
| UN81727 | Rsa1.0_03837.1 | 158 | 20559  | 8.00E-13 | 81  | 90  | 90 + | 39  | 124 | 19922  | 20011  |
| UN81728 | Rsa1.0_03263.1 | 225 | 24268  | 1.00E-12 | 48  | 50  | 96 - | 83  | 131 | 7534   | 7583   |
| UN81729 | #              | #   | #      | #        | #   | #   | #    | #   | #   | #      | #      |
| UN81730 | #              | #   | #      | #        | #   | #   | #    | #   | #   | #      | #      |
| UN81731 | Rsa1.0_00344.1 | 182 | 191774 | 7.00E-17 | 58  | 61  | 95 - | 3   | 63  | 126872 | 126931 |
| UN81732 | #              | #   | #      | #        | #   | #   | #    | #   | #   | #      | #      |
| UN81733 | Rsa1.0_01352.1 | 190 | 47443  | 3.00E-13 | 78  | 87  | 89 + | 84  | 168 | 4739   | 4824   |
| UN81734 | #              | #   | #      | #        | #   | #   | #    | #   | #   | #      | #      |
| UN81735 | Rsa1.0_01929.1 | 230 | 37191  | 5.00E-12 | 60  | 65  | 92 + | 149 | 211 | 21248  | 21312  |
| UN81736 | Rsa1.0_00484.1 | 280 | 203294 | 2.00E-21 | 107 | 119 | 89 - | 169 | 280 | 191052 | 191170 |
| UN81737 | #              | #   | #      | #        | #   | #   | #    | #   | #   | #      | #      |
| UN81738 | #              | #   | #      | #        | #   | #   | #    | #   | #   | #      | #      |
| UN81739 | #              | #   | #      | #        | #   | #   | #    | #   | #   | #      | #      |
| UN81740 | Rsa1.0_00991.1 | 184 | 143101 | 6.00E-14 | 53  | 56  | 94 + | 124 | 178 | 41863  | 41918  |
| UN81741 | Rsa1.0_00905.1 | 190 | 60110  | 5.00E-21 | 55  | 56  | 98 + | 122 | 177 | 26632  | 26687  |
| UN81742 | Rsa1.0_01352.1 | 217 | 47443  | 7.00E-11 | 57  | 62  | 91 - | 28  | 86  | 16569  | 16630  |

| UN81743 | #              | # | #   | #      | #         | #   | #   | #     | # | #   | #   | #      | #      |
|---------|----------------|---|-----|--------|-----------|-----|-----|-------|---|-----|-----|--------|--------|
| UN81744 | #              | # | #   | #      | #         | #   | #   | #     | # | #   | #   | #      | #      |
| UN81745 | Rsa1.0_00942.1 |   | 874 | 58873  | 0         | 870 | 870 | 100 + |   | 5   | 874 | 48961  | 49830  |
| UN81746 | Rsa1.0_02276.1 |   | 827 | 33098  | 0         | 827 | 827 | 100 + |   | 1   | 827 | 5546   | 6372   |
| UN81747 | Rsa1.0_00121.1 |   | 688 | 278029 | 0         | 688 | 688 | 100 - |   | 1   | 688 | 124965 | 125652 |
| UN81748 | Rsa1.0_03431.1 |   | 834 | 22974  | 0         | 812 | 812 | 100 - |   | 23  | 834 | 18078  | 18889  |
| UN81749 | Rsa1.0_00087.1 |   | 622 | 761073 | 1.00E-115 | 231 | 238 | 97 +  |   | 4   | 241 | 11778  | 12015  |
| UN81750 | Rsa1.0_00302.1 |   | 889 | 97521  | 0         | 451 | 451 | 100 + |   | 1   | 451 | 9732   | 10182  |
| UN81751 | Rsa1.0_02749.1 |   | 858 | 28241  | 0         | 543 | 544 | 99 -  |   | 1   | 544 | 15923  | 16465  |
| UN81752 | Rsa1.0_00053.1 |   | 842 | 263459 | 0         | 829 | 842 | 98 -  |   | 1   | 842 | 157223 | 158064 |
| UN81753 | Rsa1.0_04474.1 |   | 858 | 17191  | 3.00E-81  | 224 | 246 | 91 -  |   | 57  | 301 | 14574  | 14819  |
| UN81754 | Rsa1.0_00424.1 |   | 834 | 86005  | 0         | 834 | 834 | 100 - |   | 1   | 834 | 73721  | 74554  |
| UN81755 | Rsa1.0_00107.1 |   | 774 | 431659 | 0         | 771 | 771 | 100 + |   | 4   | 774 | 129868 | 130638 |
| UN81756 | Rsa1.0_05687.1 |   | 510 | 12932  | 1.00E-180 | 319 | 319 | 100 - |   | 192 | 510 | 4236   | 4554   |
| UN81757 | Rsa1.0_01651.1 |   | 837 | 41586  | 1.00E-86  | 163 | 163 | 100 + |   | 156 | 318 | 40502  | 40664  |
| UN81758 | Rsa1.0_00724.1 |   | 860 | 66789  | 0         | 685 | 693 | 98 -  |   | 1   | 692 | 12453  | 13143  |
| UN81759 | Rsa1.0_00563.1 |   | 457 | 75491  | 1.00E-157 | 281 | 281 | 100 - |   | 177 | 457 | 70918  | 71198  |
| UN81760 | Rsa1.0_00045.1 |   | 810 | 328694 | 1.00E-123 | 225 | 225 | 100 + |   | 1   | 225 | 16965  | 17189  |
| UN81761 | Rsa1.0_00285.1 |   | 846 | 149638 | 1.00E-176 | 323 | 325 | 99 -  |   | 523 | 846 | 71540  | 71864  |
| UN81762 | Rsa1.0_01741.1 |   | 874 | 39976  | 7.00E-33  | 91  | 97  | 93 -  |   | 145 | 241 | 9296   | 9392   |
| UN81763 | Rsa1.0_02043.1 |   | 875 | 163754 | 0         | 874 | 876 | 99 +  |   | 1   | 875 | 152542 | 153417 |
| UN81764 | Rsa1.0_01957.1 |   | 777 | 36844  | 0         | 407 | 422 | 96 -  |   | 348 | 769 | 27271  | 27692  |
| UN81765 | Rsa1.0_02532.1 |   | 787 | 30403  | 2.00E-72  | 148 | 151 | 98 +  |   | 35  | 185 | 15473  | 15623  |
| UN81766 | Rsa1.0_01022.1 |   | 508 | 56606  | 0         | 508 | 508 | 100 - |   | 1   | 508 | 22316  | 22823  |
| UN81767 | Rsa1.0_02953.1 |   | 396 | 26487  | 1.00E-167 | 370 | 393 | 94 -  |   | 1   | 392 | 18574  | 18966  |
| UN81768 | Rsa1.0_03882.1 |   | 882 | 20290  | 0         | 875 | 875 | 100 + |   | 8   | 882 | 19006  | 19880  |
| UN81769 | Rsa1.0_03904.1 |   | 872 | 20162  | 0         | 510 | 545 | 93 -  |   | 341 | 872 | 5439   | 5983   |
| UN81770 | Rsa1.0_00519.1 |   | 764 | 197864 | 0         | 763 | 764 | 99 +  |   | 1   | 764 | 190920 | 191683 |
| UN81771 | Rsa1.0_00249.1 |   | 515 | 153740 | 0         | 384 | 401 | 95 -  |   | 115 | 515 | 31206  | 31606  |
| UN81772 | Rsa1.0_00320.1 |   | 660 | 95784  | 0         | 385 | 397 | 96 -  |   | 32  | 425 | 23367  | 23763  |
| UN81773 | Rsa1.0_00016.1 |   | 196 | 831256 | 1.00E-102 | 194 | 196 | 98 +  |   | 1   | 196 | 773582 | 773777 |
| UN81774 | Rsa1.0_06270.1 |   | 461 | 11351  | 0         | 460 | 462 | 99 +  |   | 1   | 461 | 2739   | 3200   |
| UN81775 | Rsa1.0_01294.1 |   | 715 | 49090  | 1.00E-162 | 290 | 290 | 100 - |   | 426 | 715 | 16913  | 17202  |
| UN81776 | Rsa1.0_00195.1 |   | 636 | 251884 | 0         | 634 | 636 | 99 +  |   | 1   | 636 | 246500 | 247135 |
| UN81777 | Rsa1.0_00451.1 |   | 837 | 322533 | 1.00E-166 | 323 | 332 | 97 -  |   | 506 | 837 | 52530  | 52861  |
| UN81778 | Rsa1.0_15596.1 |   | 839 | 2529   | 2.00E-73  | 161 | 165 | 97 -  |   | 1   | 163 | 1406   | 1570   |
| UN81779 | Rsa1.0_01960.1 |   | 838 | 36766  | 0         | 838 | 839 | 99 +  |   | 1   | 838 | 26200  | 27038  |
| UN81780 | Rsa1.0_00170.1 |   | 827 | 179538 | 0         | 824 | 827 | 99 -  |   | 1   | 827 | 34243  | 35068  |
| UN81781 | Rsa1.0_00083.1 |   | 828 | 442773 | 1.00E-115 | 211 | 211 | 100 + |   | 150 | 360 | 306825 | 307035 |

|         |                |     |        |           |     |     |       |     |     |        |        |
|---------|----------------|-----|--------|-----------|-----|-----|-------|-----|-----|--------|--------|
| UN81782 | Rsa1.0_00202.1 | 844 | 185895 | 0         | 549 | 550 | 99 +  | 295 | 844 | 8512   | 9061   |
| UN81783 | Rsa1.0_00194.1 | 863 | 110851 | 0         | 862 | 863 | 99 +  | 1   | 863 | 83925  | 84786  |
| UN81784 | Rsa1.0_02722.1 | 836 | 28417  | 0         | 835 | 836 | 99 -  | 1   | 836 | 7542   | 8377   |
| UN81785 | Rsa1.0_00498.1 | 883 | 79746  | 0         | 371 | 371 | 100 - | 1   | 371 | 52529  | 52899  |
| UN81786 | Rsa1.0_00549.1 | 841 | 76473  | 0         | 841 | 841 | 100 + | 1   | 841 | 28733  | 29573  |
| UN81787 | Rsa1.0_02398.1 | 844 | 31766  | 0         | 640 | 641 | 99 +  | 204 | 844 | 1020   | 1660   |
| UN81788 | Rsa1.0_01418.1 | 754 | 46237  | 0         | 747 | 755 | 98 +  | 1   | 754 | 36704  | 37458  |
| UN81789 | Rsa1.0_06739.1 | 531 | 10441  | 0         | 531 | 532 | 99 -  | 1   | 531 | 6492   | 7023   |
| UN81790 | Rsa1.0_00207.1 | 846 | 248736 | 0         | 413 | 435 | 94 +  | 187 | 617 | 64089  | 64519  |
| UN81791 | #              | #   | #      | #         | #   | #   | #     | #   | #   | #      | #      |
| UN81792 | Rsa1.0_00546.1 | 842 | 76523  | 1.00E-104 | 193 | 193 | 100 - | 252 | 444 | 64725  | 64917  |
| UN81793 | Rsa1.0_06134.1 | 324 | 11662  | 1.00E-164 | 308 | 312 | 98 -  | 14  | 324 | 10050  | 10361  |
| UN81794 | Rsa1.0_00780.1 | 897 | 147795 | 0         | 897 | 897 | 100 - | 1   | 897 | 145601 | 146497 |
| UN81795 | Rsa1.0_05726.1 | 841 | 12809  | 0         | 841 | 841 | 100 - | 1   | 841 | 4096   | 4936   |
| UN81796 | Rsa1.0_00952.1 | 834 | 58450  | 0         | 789 | 790 | 99 +  | 1   | 790 | 57662  | 58450  |
| UN81797 | Rsa1.0_00015.1 | 617 | 561803 | 0         | 617 | 617 | 100 - | 1   | 617 | 235655 | 236271 |
| UN81798 | Rsa1.0_01300.1 | 163 | 48942  | 2.00E-87  | 163 | 163 | 100 + | 1   | 163 | 20253  | 20415  |
| UN81799 | Rsa1.0_01753.1 | 828 | 39794  | 0         | 412 | 414 | 99 -  | 8   | 419 | 26972  | 27385  |
| UN81800 | Rsa1.0_00526.1 | 775 | 169279 | 1.00E-175 | 329 | 332 | 99 -  | 1   | 330 | 146461 | 146792 |
| UN81801 | Rsa1.0_02528.1 | 627 | 30452  | 1.00E-168 | 339 | 352 | 96 -  | 95  | 446 | 29188  | 29539  |
| UN81802 | Rsa1.0_01646.1 | 840 | 41735  | 0         | 529 | 530 | 99 -  | 1   | 529 | 26289  | 26818  |
| UN81803 | Rsa1.0_03485.1 | 849 | 22606  | 0         | 549 | 575 | 95 +  | 4   | 577 | 9640   | 10203  |
| UN81804 | Rsa1.0_01921.1 | 793 | 168088 | 0         | 514 | 515 | 99 +  | 3   | 517 | 152324 | 152838 |
| UN81805 | Rsa1.0_00860.1 | 877 | 61789  | 0         | 876 | 877 | 99 +  | 1   | 877 | 14568  | 15444  |
| UN81806 | Rsa1.0_55354.1 | 826 | 413    | 0         | 413 | 413 | 100 + | 25  | 437 | 1      | 413    |
| UN81807 | Rsa1.0_16652.1 | 851 | 2078   | 1.00E-104 | 455 | 537 | 84 +  | 111 | 644 | 434    | 969    |
| UN81808 | Rsa1.0_11160.1 | 666 | 5600   | 1.00E-134 | 251 | 254 | 98 -  | 1   | 254 | 134    | 387    |
| UN81809 | Rsa1.0_00196.1 | 345 | 109960 | 0         | 341 | 345 | 98 -  | 1   | 345 | 90503  | 90844  |
| UN81810 | Rsa1.0_00071.1 | 204 | 345714 | 1.00E-111 | 204 | 204 | 100 - | 1   | 204 | 105611 | 105814 |
| UN81811 | Rsa1.0_01410.1 | 909 | 46345  | 1.00E-89  | 168 | 168 | 100 - | 245 | 412 | 27862  | 28029  |
| UN81812 | Rsa1.0_10153.1 | 896 | 5974   | 0         | 831 | 880 | 94 +  | 17  | 896 | 5089   | 5953   |
| UN81813 | Rsa1.0_00116.1 | 788 | 365886 | 0         | 328 | 328 | 100 + | 8   | 335 | 167250 | 167577 |
| UN81814 | Rsa1.0_00144.1 | 794 | 120708 | 0         | 328 | 330 | 99 +  | 465 | 794 | 114417 | 114746 |
| UN81815 | Rsa1.0_01044.1 | 837 | 55861  | 0         | 802 | 837 | 95 -  | 1   | 837 | 15933  | 16751  |
| UN81816 | Rsa1.0_01484.1 | 258 | 44806  | 3.00E-41  | 161 | 184 | 87 +  | 44  | 226 | 14382  | 14562  |
| UN81817 | Rsa1.0_00347.1 | 841 | 93048  | 0         | 473 | 477 | 99 -  | 366 | 841 | 65961  | 66437  |
| UN81818 | Rsa1.0_00035.1 | 832 | 176449 | 0         | 528 | 531 | 99 -  | 302 | 832 | 114973 | 115502 |
| UN81819 | Rsa1.0_00556.1 | 845 | 207212 | 0         | 549 | 582 | 94 -  | 237 | 815 | 32109  | 32669  |
| UN81820 | Rsa1.0_04859.1 | 829 | 15699  | 9.00E-94  | 181 | 183 | 98 -  | 63  | 245 | 5687   | 5869   |

|         |                |     |        |           |     |     |       |     |     |        |        |
|---------|----------------|-----|--------|-----------|-----|-----|-------|-----|-----|--------|--------|
| UN81821 | Rsa1.0.03702.1 | 830 | 21292  | 0         | 830 | 831 | 99 -  | 1   | 830 | 12683  | 13513  |
| UN81822 | Rsa1.0.00293.1 | 888 | 339294 | 0         | 888 | 888 | 100 + | 1   | 888 | 286625 | 287512 |
| UN81823 | Rsa1.0.04986.1 | 863 | 15229  | 0         | 453 | 453 | 100 + | 242 | 694 | 4388   | 4840   |
| UN81824 | Rsa1.0.06503.1 | 838 | 10881  | 0         | 766 | 790 | 96 -  | 49  | 838 | 6488   | 7274   |
| UN81825 | Rsa1.0.01234.1 | 813 | 50183  | 0         | 813 | 813 | 100 + | 1   | 813 | 8101   | 8913   |
| UN81826 | #              | #   | #      | #         | #   | #   | #     | #   | #   | #      | #      |
| UN81827 | Rsa1.0.00682.1 | 777 | 68680  | 1.00E-153 | 298 | 306 | 97 +  | 9   | 314 | 11203  | 11508  |
| UN81828 | Rsa1.0.02518.1 | 890 | 30586  | 0         | 888 | 891 | 99 +  | 2   | 890 | 23579  | 24469  |
| UN81829 | Rsa1.0.05013.1 | 852 | 15131  | 1.00E-155 | 278 | 278 | 100 - | 6   | 283 | 14497  | 14774  |
| UN81830 | Rsa1.0.24532.1 | 804 | 982    | 1.00E-165 | 295 | 295 | 100 + | 375 | 669 | 250    | 544    |
| UN81831 | Rsa1.0.05399.1 | 199 | 13879  | 6.00E-73  | 172 | 183 | 93 +  | 1   | 183 | 13269  | 13451  |
| UN81832 | Rsa1.0.00498.1 | 874 | 79746  | 0         | 364 | 364 | 100 - | 7   | 370 | 66593  | 66956  |
| UN81833 | Rsa1.0.01579.1 | 565 | 42860  | 0         | 561 | 568 | 98 -  | 1   | 565 | 32318  | 32885  |
| UN81834 | Rsa1.0.00108.1 | 643 | 478491 | 0         | 641 | 644 | 99 -  | 1   | 643 | 108472 | 109115 |
| UN81835 | Rsa1.0.00019.1 | 499 | 301669 | 1.00E-131 | 352 | 385 | 91 +  | 128 | 499 | 109894 | 110272 |
| UN81836 | Rsa1.0.02349.1 | 397 | 32312  | 0         | 383 | 398 | 96 -  | 1   | 397 | 967    | 1363   |
| UN81837 | Rsa1.0.03001.1 | 413 | 26108  | 0         | 405 | 406 | 99 -  | 1   | 406 | 5577   | 5982   |
| UN81838 | Rsa1.0.00925.1 | 522 | 59481  | 0         | 483 | 499 | 96 -  | 11  | 503 | 25571  | 26069  |
| UN81839 | Rsa1.0.01466.1 | 539 | 45161  | 0         | 408 | 408 | 100 + | 9   | 416 | 15324  | 15731  |
| UN81840 | Rsa1.0.01846.1 | 420 | 38367  | 0         | 393 | 408 | 96 -  | 14  | 420 | 16564  | 16971  |
| UN81841 | Rsa1.0.00647.1 | 418 | 70440  | 0         | 418 | 418 | 100 - | 1   | 418 | 35879  | 36296  |
| UN81842 | Rsa1.0.05289.1 | 509 | 14259  | 0         | 485 | 514 | 94 +  | 1   | 507 | 2133   | 2643   |
| UN81843 | Rsa1.0.00675.1 | 218 | 145590 | 9.00E-63  | 128 | 130 | 98 -  | 89  | 218 | 143650 | 143779 |
| UN81844 | Rsa1.0.00085.1 | 488 | 142226 | 0         | 382 | 384 | 99 -  | 1   | 383 | 72425  | 72808  |
| UN81845 | Rsa1.0.00789.1 | 449 | 64233  | 2.00E-87  | 164 | 164 | 100 + | 212 | 375 | 51989  | 52152  |
| UN81846 | Rsa1.0.03911.1 | 530 | 20133  | 0         | 381 | 381 | 100 - | 1   | 381 | 16985  | 17365  |
| UN81847 | Rsa1.0.15510.1 | 488 | 2565   | 0         | 422 | 430 | 98 -  | 14  | 443 | 1      | 430    |
| UN81848 | Rsa1.0.00009.1 | 521 | 232558 | 0         | 393 | 407 | 96 +  | 1   | 404 | 6466   | 6863   |
| UN81849 | Rsa1.0.03773.1 | 524 | 20937  | 0         | 514 | 516 | 99 +  | 11  | 524 | 1191   | 1706   |
| UN81850 | Rsa1.0.05789.1 | 406 | 12620  | 0         | 403 | 405 | 99 +  | 1   | 404 | 9369   | 9772   |
| UN81851 | Rsa1.0.04080.1 | 454 | 19198  | 0         | 454 | 454 | 100 + | 1   | 454 | 16183  | 16636  |
| UN81852 | Rsa1.0.01282.1 | 384 | 49304  | 0         | 384 | 384 | 100 + | 1   | 384 | 26605  | 26988  |
| UN81853 | Rsa1.0.01219.1 | 423 | 50527  | 0         | 410 | 410 | 100 + | 1   | 410 | 30554  | 30963  |
| UN81854 | Rsa1.0.00027.1 | 507 | 283362 | 0         | 427 | 436 | 97 +  | 72  | 507 | 115850 | 116285 |
| UN81855 | Rsa1.0.04550.1 | 428 | 16893  | 1.00E-143 | 257 | 257 | 100 - | 172 | 428 | 829    | 1085   |
| UN81856 | Rsa1.0.02185.1 | 547 | 34150  | 0         | 519 | 550 | 94 +  | 1   | 547 | 27260  | 27795  |
| UN81857 | Rsa1.0.00099.1 | 317 | 159619 | 1.00E-179 | 317 | 317 | 100 + | 1   | 317 | 28100  | 28416  |
| UN81858 | Rsa1.0.00145.1 | 477 | 261008 | 1.00E-115 | 263 | 280 | 93 +  | 12  | 281 | 24169  | 24445  |
| UN81859 | Rsa1.0.04934.1 | 567 | 143962 | 0         | 532 | 561 | 94 -  | 11  | 567 | 12186  | 12741  |

|         |                |     |        |           |     |     |       |     |     |        |        |
|---------|----------------|-----|--------|-----------|-----|-----|-------|-----|-----|--------|--------|
| UN81860 | Rsa1.0.00685.1 | 423 | 68515  | 1.00E-125 | 239 | 243 | 98 +  | 181 | 423 | 64023  | 64265  |
| UN81861 | Rsa1.0.01212.1 | 424 | 50622  | 0         | 393 | 405 | 97 -  | 16  | 420 | 5970   | 6374   |
| UN81862 | Rsa1.0.00912.1 | 604 | 59923  | 1.00E-76  | 152 | 154 | 98 -  | 246 | 399 | 38790  | 38943  |
| UN81863 | Rsa1.0.13624.1 | 474 | 4617   | 0         | 474 | 475 | 99 +  | 1   | 474 | 3018   | 3492   |
| UN81864 | Rsa1.0.03360.1 | 391 | 23459  | 0         | 391 | 391 | 100 - | 1   | 391 | 15412  | 15802  |
| UN81865 | Rsa1.0.73658.1 | 235 | 311    | 1.00E-126 | 235 | 236 | 99 -  | 1   | 235 | 71     | 306    |
| UN81866 | Rsa1.0.00874.1 | 521 | 179723 | 0         | 499 | 500 | 99 +  | 23  | 521 | 23587  | 24086  |
| UN81867 | Rsa1.0.00571.1 | 766 | 329018 | 0         | 766 | 766 | 100 - | 1   | 766 | 4247   | 5012   |
| UN81868 | Rsa1.0.01908.1 | 155 | 37427  | 2.00E-78  | 155 | 156 | 99 -  | 1   | 155 | 26710  | 26865  |
| UN81869 | Rsa1.0.00064.1 | 828 | 240927 | 0         | 828 | 828 | 100 - | 1   | 828 | 21205  | 22032  |
| UN81870 | Rsa1.0.09006.1 | 861 | 6715   | 0         | 721 | 753 | 95 -  | 122 | 861 | 5619   | 6371   |
| UN81871 | Rsa1.0.00355.1 | 840 | 92038  | 2.00E-91  | 171 | 171 | 100 + | 665 | 835 | 48102  | 48272  |
| UN81872 | Rsa1.0.02727.1 | 414 | 28404  | 0         | 412 | 414 | 99 +  | 2   | 414 | 4173   | 4586   |
| UN81873 | Rsa1.0.06159.1 | 840 | 11596  | 0         | 668 | 677 | 98 -  | 164 | 840 | 5843   | 6519   |
| UN81874 | Rsa1.0.00016.1 | 891 | 831256 | 0         | 666 | 666 | 100 + | 226 | 891 | 392173 | 392838 |
| UN81875 | Rsa1.0.00154.1 | 846 | 189461 | 0         | 845 | 846 | 99 +  | 1   | 846 | 178997 | 179842 |
| UN81876 | Rsa1.0.00217.1 | 846 | 107079 | 0         | 364 | 364 | 100 + | 483 | 846 | 93394  | 93757  |
| UN81877 | Rsa1.0.02524.1 | 856 | 30496  | 0         | 852 | 869 | 98 -  | 1   | 856 | 20916  | 21784  |
| UN81878 | Rsa1.0.02987.1 | 859 | 26196  | 0         | 844 | 845 | 99 +  | 15  | 859 | 16338  | 17182  |
| UN81879 | Rsa1.0.09191.1 | 836 | 6570   | 0         | 805 | 837 | 96 +  | 1   | 836 | 4022   | 4858   |
| UN81880 | Rsa1.0.01001.1 | 181 | 57077  | 7.00E-94  | 181 | 182 | 99 +  | 1   | 181 | 25790  | 25971  |
| UN81881 | Rsa1.0.01007.1 | 766 | 56933  | 0         | 766 | 768 | 99 -  | 1   | 766 | 40537  | 41304  |
| UN81882 | Rsa1.0.00688.1 | 856 | 68396  | 0         | 853 | 856 | 99 -  | 1   | 856 | 41679  | 42534  |
| UN81883 | Rsa1.0.00025.1 | 837 | 277312 | 0         | 743 | 829 | 89 +  | 13  | 829 | 49290  | 50095  |
| UN81884 | Rsa1.0.00322.1 | 672 | 212233 | 0         | 672 | 673 | 99 -  | 1   | 672 | 65167  | 65839  |
| UN81885 | Rsa1.0.01380.1 | 591 | 155003 | 0         | 573 | 591 | 96 -  | 1   | 591 | 18396  | 18986  |
| UN81886 | Rsa1.0.00324.1 | 801 | 218805 | 0         | 376 | 377 | 99 -  | 1   | 376 | 23873  | 24249  |
| UN81887 | Rsa1.0.00953.1 | 824 | 145012 | 0         | 803 | 824 | 97 +  | 1   | 824 | 8501   | 9322   |
| UN81888 | Rsa1.0.02949.1 | 864 | 26506  | 0         | 558 | 589 | 94 +  | 280 | 864 | 21140  | 21725  |
| UN81889 | Rsa1.0.00215.1 | 856 | 201775 | 0         | 476 | 497 | 95 -  | 169 | 663 | 9801   | 10296  |
| UN81890 | Rsa1.0.04674.1 | 812 | 139859 | 0         | 810 | 815 | 99 -  | 1   | 812 | 6324   | 7138   |
| UN81891 | Rsa1.0.00096.1 | 779 | 198773 | 0         | 593 | 595 | 99 +  | 1   | 595 | 109637 | 110231 |
| UN81892 | Rsa1.0.04646.1 | 860 | 16541  | 0         | 422 | 422 | 100 + | 4   | 425 | 11787  | 12208  |
| UN81893 | Rsa1.0.02343.1 | 853 | 32374  | 0         | 851 | 851 | 100 + | 3   | 853 | 29517  | 30367  |
| UN81894 | Rsa1.0.00720.1 | 811 | 66931  | 0         | 803 | 807 | 99 -  | 5   | 811 | 47532  | 48338  |
| UN81895 | Rsa1.0.00620.1 | 206 | 71985  | 1.00E-113 | 206 | 206 | 100 + | 1   | 206 | 38988  | 39193  |
| UN81896 | Rsa1.0.00051.1 | 826 | 258225 | 0         | 751 | 753 | 99 +  | 74  | 826 | 22971  | 23723  |
| UN81897 | Rsa1.0.00234.1 | 364 | 197060 | 3.00E-85  | 170 | 172 | 98 -  | 192 | 363 | 102725 | 102895 |
| UN81898 | Rsa1.0.00114.1 | 841 | 131330 | 0         | 605 | 607 | 99 +  | 210 | 816 | 109486 | 110092 |

|         |                |     |        |           |     |     |       |     |     |        |        |
|---------|----------------|-----|--------|-----------|-----|-----|-------|-----|-----|--------|--------|
| UN81899 | Rsa1.0.03941.1 | 826 | 19960  | 0         | 388 | 390 | 99 -  | 1   | 388 | 12860  | 13249  |
| UN81900 | Rsa1.0.02345.1 | 789 | 32337  | 0         | 789 | 789 | 100 + | 1   | 789 | 2841   | 3629   |
| UN81901 | Rsa1.0.00541.1 | 418 | 76863  | 2.00E-87  | 355 | 422 | 84 +  | 1   | 418 | 53439  | 53819  |
| UN81902 | Rsa1.0.00087.1 | 827 | 761073 | 0         | 783 | 830 | 94 +  | 5   | 827 | 295755 | 296583 |
| UN81903 | Rsa1.0.00079.1 | 874 | 606987 | 0         | 874 | 874 | 100 + | 1   | 874 | 96747  | 97620  |
| UN81904 | Rsa1.0.35196.1 | 824 | 643    | 3.00E-41  | 133 | 147 | 90 +  | 264 | 410 | 215    | 360    |
| UN81905 | Rsa1.0.05618.1 | 851 | 13165  | 0         | 627 | 628 | 99 +  | 1   | 628 | 4455   | 5082   |
| UN81906 | Rsa1.0.00318.1 | 871 | 96094  | 0         | 871 | 873 | 99 -  | 1   | 871 | 81667  | 82539  |
| UN81907 | Rsa1.0.10728.1 | 384 | 5745   | 1.00E-133 | 295 | 312 | 94 +  | 4   | 301 | 5378   | 5687   |
| UN81908 | Rsa1.0.00144.1 | 745 | 120708 | 0         | 726 | 746 | 97 +  | 1   | 745 | 111390 | 112135 |
| UN81909 | Rsa1.0.03664.1 | 353 | 21487  | 1.00E-148 | 335 | 358 | 93 -  | 5   | 353 | 6072   | 6428   |
| UN81910 | #              | #   | #      | #         | #   | #   | #     | #   | #   | #      | #      |
| UN81911 | Rsa1.0.00077.1 | 445 | 145005 | 1.00E-69  | 134 | 134 | 100 + | 94  | 227 | 28617  | 28750  |
| UN81912 | Rsa1.0.01478.1 | 827 | 44991  | 0         | 572 | 614 | 93 -  | 1   | 611 | 17611  | 18216  |
| UN81913 | Rsa1.0.00145.1 | 734 | 261008 | 0         | 715 | 732 | 97 -  | 4   | 734 | 237481 | 238212 |
| UN81914 | Rsa1.0.04768.1 | 829 | 16066  | 1.00E-134 | 242 | 242 | 100 + | 406 | 647 | 1316   | 1557   |
| UN81915 | Rsa1.0.05199.1 | 143 | 14529  | 6.00E-32  | 112 | 126 | 88 -  | 1   | 126 | 8341   | 8466   |
| UN81916 | Rsa1.0.00743.1 | 783 | 177459 | 0         | 622 | 655 | 94 +  | 135 | 783 | 6223   | 6868   |
| UN81917 | Rsa1.0.00592.1 | 850 | 73788  | 5.00E-80  | 152 | 152 | 100 + | 317 | 468 | 56283  | 56434  |
| UN81918 | Rsa1.0.00903.1 | 817 | 60228  | 1.00E-113 | 216 | 219 | 98 +  | 209 | 427 | 15137  | 15355  |
| UN81919 | Rsa1.0.04488.1 | 467 | 17155  | 1.00E-139 | 398 | 447 | 89 -  | 19  | 465 | 14565  | 15011  |
| UN81920 | Rsa1.0.04186.1 | 249 | 18589  | 6.00E-92  | 171 | 171 | 100 - | 1   | 171 | 4573   | 4743   |
| UN81921 | Rsa1.0.13488.1 | 705 | 4777   | 0         | 704 | 707 | 99 +  | 1   | 705 | 2307   | 3013   |
| UN81922 | Rsa1.0.02536.1 | 833 | 30368  | 1.00E-113 | 210 | 211 | 99 -  | 220 | 430 | 303    | 513    |
| UN81923 | Rsa1.0.01116.1 | 807 | 142088 | 0         | 767 | 803 | 95 +  | 8   | 807 | 110761 | 111560 |
| UN81924 | Rsa1.0.05168.1 | 137 | 14621  | 6.00E-72  | 137 | 137 | 100 - | 1   | 137 | 13224  | 13360  |
| UN81925 | Rsa1.0.00483.1 | 872 | 81102  | 4.00E-62  | 222 | 252 | 88 -  | 621 | 867 | 32652  | 32903  |
| UN81926 | Rsa1.0.00743.1 | 510 | 177459 | 1.00E-63  | 133 | 136 | 97 +  | 142 | 277 | 613    | 748    |
| UN81927 | Rsa1.0.01516.1 | 896 | 44196  | 0         | 583 | 613 | 95 -  | 140 | 752 | 36762  | 37372  |
| UN81928 | Rsa1.0.00183.1 | 836 | 113277 | 0         | 822 | 836 | 98 +  | 2   | 836 | 84218  | 85053  |
| UN81929 | Rsa1.0.00642.1 | 853 | 201230 | 0         | 853 | 854 | 99 +  | 1   | 853 | 63230  | 64083  |
| UN81930 | Rsa1.0.01133.1 | 823 | 52916  | 0         | 818 | 824 | 99 -  | 1   | 823 | 9081   | 9904   |
| UN81931 | Rsa1.0.00304.1 | 215 | 97429  | 1.00E-112 | 211 | 213 | 99 -  | 3   | 215 | 12107  | 12319  |
| UN81932 | Rsa1.0.00581.1 | 117 | 163575 | 4.00E-60  | 117 | 117 | 100 + | 1   | 117 | 67446  | 67562  |
| UN81933 | Rsa1.0.01516.1 | 452 | 44196  | 3.00E-89  | 197 | 207 | 95 +  | 123 | 329 | 23667  | 23873  |
| UN81934 | Rsa1.0.04839.1 | 922 | 15762  | 0         | 922 | 922 | 100 + | 1   | 922 | 4835   | 5756   |
| UN81935 | Rsa1.0.01184.1 | 759 | 51452  | 8.00E-97  | 180 | 180 | 100 - | 79  | 258 | 4869   | 5048   |
| UN81936 | Rsa1.0.19219.1 | 873 | 1462   | 0         | 633 | 633 | 100 + | 55  | 687 | 830    | 1462   |
| UN81937 | Rsa1.0.00964.1 | 839 | 316648 | 1.00E-149 | 268 | 268 | 100 - | 423 | 690 | 132524 | 132791 |

|         |                |     |        |           |     |     |       |     |     |        |        |
|---------|----------------|-----|--------|-----------|-----|-----|-------|-----|-----|--------|--------|
| UN81938 | Rsa1.0_04835.1 | 779 | 15766  | 0         | 457 | 457 | 100 - | 323 | 779 | 15310  | 15766  |
| UN81939 | Rsa1.0_01699.1 | 856 | 40816  | 0         | 855 | 859 | 99 +  | 1   | 856 | 30938  | 31796  |
| UN81940 | Rsa1.0_03658.1 | 883 | 21549  | 0         | 883 | 885 | 99 -  | 1   | 883 | 8625   | 9509   |
| UN81941 | Rsa1.0_10615.1 | 880 | 5783   | 0         | 838 | 880 | 95 +  | 1   | 880 | 202    | 1068   |
| UN81942 | Rsa1.0_49425.1 | 536 | 459    | 3.00E-55  | 142 | 153 | 92 +  | 1   | 153 | 313    | 459    |
| UN81943 | Rsa1.0_41642.1 | 862 | 539    | 0         | 367 | 376 | 97 +  | 488 | 862 | 1      | 376    |
| UN81944 | Rsa1.0_00683.1 | 569 | 68638  | 1.00E-145 | 330 | 353 | 93 +  | 176 | 528 | 27365  | 27717  |
| UN81945 | Rsa1.0_01762.1 | 833 | 39682  | 4.00E-74  | 142 | 142 | 100 - | 95  | 236 | 8592   | 8733   |
| UN81946 | Rsa1.0_06013.1 | 688 | 11931  | 0         | 678 | 687 | 98 -  | 4   | 688 | 7763   | 8449   |
| UN81947 | Rsa1.0_00875.1 | 472 | 61371  | 0         | 338 | 338 | 100 + | 135 | 472 | 46462  | 46799  |
| UN81948 | Rsa1.0_02703.1 | 874 | 28544  | 1.00E-125 | 255 | 264 | 96 -  | 106 | 369 | 6830   | 7093   |
| UN81949 | Rsa1.0_03009.1 | 862 | 26065  | 0         | 770 | 775 | 99 +  | 3   | 774 | 14943  | 15717  |
| UN81950 | Rsa1.0_11611.1 | 790 | 5459   | 0         | 753 | 772 | 97 -  | 20  | 790 | 158    | 929    |
| UN81951 | Rsa1.0_00064.1 | 772 | 240927 | 0         | 771 | 774 | 99 -  | 1   | 772 | 89522  | 90294  |
| UN81952 | Rsa1.0_02346.1 | 672 | 32337  | 0         | 621 | 656 | 94 -  | 22  | 672 | 10648  | 11288  |
| UN81953 | Rsa1.0_00122.1 | 800 | 265937 | 0         | 763 | 780 | 97 +  | 1   | 780 | 62573  | 63343  |
| UN81954 | Rsa1.0_02071.1 | 660 | 35409  | 0         | 377 | 388 | 97 +  | 273 | 660 | 3627   | 4009   |
| UN81955 | Rsa1.0_01489.1 | 698 | 44764  | 0         | 430 | 434 | 99 +  | 1   | 434 | 38028  | 38460  |
| UN81956 | Rsa1.0_00082.1 | 837 | 237584 | 0         | 837 | 837 | 100 - | 1   | 837 | 50467  | 51303  |
| UN81957 | Rsa1.0_07107.1 | 825 | 9882   | 0         | 594 | 594 | 100 + | 232 | 825 | 9141   | 9734   |
| UN81958 | Rsa1.0_03414.1 | 868 | 23125  | 0         | 739 | 740 | 99 +  | 1   | 740 | 12608  | 13347  |
| UN81959 | Rsa1.0_00812.1 | 161 | 63233  | 2.00E-72  | 157 | 162 | 96 -  | 1   | 161 | 35485  | 35646  |
| UN81960 | Rsa1.0_00273.1 | 809 | 326186 | 0         | 809 | 810 | 99 +  | 1   | 809 | 14472  | 15281  |
| UN81961 | Rsa1.0_00604.1 | 842 | 146282 | 0         | 346 | 353 | 98 +  | 490 | 842 | 34114  | 34466  |
| UN81962 | Rsa1.0_04962.1 | 862 | 15312  | 6.00E-95  | 196 | 201 | 97 -  | 380 | 579 | 2164   | 2364   |
| UN81963 | Rsa1.0_02555.1 | 420 | 30146  | 0         | 350 | 352 | 99 +  | 69  | 420 | 23036  | 23387  |
| UN81964 | Rsa1.0_00585.1 | 844 | 74164  | 9.00E-94  | 213 | 225 | 94 +  | 623 | 844 | 59736  | 59960  |
| UN81965 | Rsa1.0_00173.1 | 836 | 288743 | 0         | 836 | 836 | 100 - | 1   | 836 | 252277 | 253112 |
| UN81966 | Rsa1.0_02559.1 | 829 | 30096  | 0         | 386 | 386 | 100 + | 6   | 391 | 16334  | 16719  |
| UN81967 | Rsa1.0_02848.1 | 270 | 27329  | 1.00E-132 | 270 | 278 | 97 +  | 1   | 270 | 25119  | 25396  |
| UN81968 | Rsa1.0_10563.1 | 866 | 5800   | 0         | 836 | 863 | 96 +  | 4   | 866 | 3632   | 4494   |
| UN81969 | Rsa1.0_00028.1 | 161 | 293984 | 2.00E-47  | 135 | 148 | 91 -  | 7   | 154 | 72502  | 72649  |
| UN81970 | Rsa1.0_01281.1 | 457 | 49313  | 0         | 409 | 409 | 100 - | 49  | 457 | 7175   | 7583   |
| UN81971 | Rsa1.0_00026.1 | 889 | 327835 | 0         | 510 | 510 | 100 + | 99  | 608 | 100989 | 101498 |
| UN81972 | Rsa1.0_05068.1 | 872 | 14940  | 0         | 776 | 779 | 99 -  | 1   | 777 | 8315   | 9093   |
| UN81973 | Rsa1.0_00084.1 | 862 | 142338 | 0         | 862 | 862 | 100 - | 1   | 862 | 68759  | 69620  |
| UN81974 | Rsa1.0_27171.1 | 635 | 863    | 0         | 621 | 637 | 97 +  | 1   | 635 | 94     | 730    |
| UN81975 | Rsa1.0_00920.1 | 683 | 601703 | 1.00E-172 | 313 | 314 | 99 -  | 5   | 317 | 297085 | 297398 |
| UN81976 | Rsa1.0_01938.1 | 807 | 264018 | 1.00E-175 | 312 | 312 | 100 + | 1   | 312 | 138129 | 138440 |



|         |                |     |        |           |     |     |       |     |     |        |        |
|---------|----------------|-----|--------|-----------|-----|-----|-------|-----|-----|--------|--------|
| UN81977 | Rsa1.0_11215.1 | 836 | 5580   | 0         | 632 | 644 | 98 +  | 144 | 787 | 1      | 644    |
| UN81978 | Rsa1.0_15030.1 | 835 | 2881   | 0         | 721 | 743 | 97 -  | 5   | 746 | 745    | 1482   |
| UN81979 | Rsa1.0_01188.1 | 885 | 51362  | 0         | 808 | 839 | 96 +  | 5   | 839 | 18231  | 19065  |
| UN81980 | Rsa1.0_00816.1 | 834 | 403350 | 0         | 372 | 372 | 100 + | 1   | 372 | 257052 | 257423 |
| UN81981 | Rsa1.0_07377.1 | 877 | 9494   | 0         | 615 | 636 | 96 -  | 15  | 650 | 7948   | 8583   |
| UN81982 | Rsa1.0_02901.1 | 794 | 26909  | 3.00E-75  | 153 | 156 | 98 -  | 609 | 764 | 14666  | 14821  |
| UN81983 | Rsa1.0_08389.1 | 801 | 7435   | 0         | 801 | 801 | 100 - | 1   | 801 | 5296   | 6096   |
| UN81984 | Rsa1.0_62053.1 | 644 | 369    | 5.00E-42  | 88  | 88  | 100 - | 16  | 103 | 215    | 302    |
| UN81985 | Rsa1.0_00879.1 | 853 | 61297  | 0         | 323 | 323 | 100 - | 531 | 853 | 34412  | 34734  |
| UN81986 | Rsa1.0_00385.1 | 810 | 89160  | 1.00E-110 | 241 | 252 | 95 +  | 562 | 810 | 45744  | 45994  |
| UN81987 | Rsa1.0_02884.1 | 793 | 27034  | 1.00E-134 | 262 | 266 | 98 +  | 1   | 265 | 18888  | 19152  |
| UN81988 | Rsa1.0_07551.1 | 823 | 9146   | 0         | 727 | 765 | 95 -  | 40  | 802 | 3768   | 4528   |
| UN81989 | Rsa1.0_02985.1 | 907 | 26256  | 0         | 906 | 910 | 99 +  | 1   | 907 | 17417  | 18326  |
| UN81990 | Rsa1.0_08188.1 | 801 | 7765   | 0         | 478 | 484 | 98 +  | 199 | 682 | 3371   | 3854   |
| UN81991 | Rsa1.0_01344.1 | 865 | 142535 | 0         | 789 | 801 | 98 -  | 66  | 865 | 133917 | 134716 |
| UN81992 | Rsa1.0_00040.1 | 924 | 324196 | 0         | 762 | 871 | 87 +  | 75  | 924 | 128009 | 128876 |
| UN81993 | Rsa1.0_01498.1 | 862 | 44558  | 0         | 833 | 856 | 97 +  | 7   | 862 | 11451  | 12300  |
| UN81994 | Rsa1.0_02057.1 | 645 | 35540  | 1.00E-122 | 228 | 230 | 99 -  | 416 | 645 | 18535  | 18764  |
| UN81995 | Rsa1.0_00082.1 | 789 | 237584 | 0         | 788 | 797 | 98 +  | 2   | 789 | 39372  | 40168  |
| UN81996 | Rsa1.0_01908.1 | 884 | 37427  | 0         | 865 | 886 | 97 -  | 1   | 884 | 34582  | 35461  |
| UN81997 | Rsa1.0_01302.1 | 899 | 48907  | 0         | 322 | 322 | 100 - | 578 | 899 | 12585  | 12906  |
| UN81998 | Rsa1.0_03414.1 | 848 | 23125  | 0         | 617 | 625 | 98 -  | 224 | 848 | 14946  | 15570  |
| UN81999 | Rsa1.0_01973.1 | 875 | 36598  | 0         | 874 | 876 | 99 -  | 1   | 875 | 12657  | 13532  |
| UN82000 | Rsa1.0_01151.1 | 831 | 52268  | 0         | 831 | 832 | 99 -  | 1   | 831 | 42018  | 42849  |
| UN82001 | Rsa1.0_00033.1 | 653 | 515811 | 3.00E-99  | 184 | 184 | 100 + | 187 | 370 | 149539 | 149722 |
| UN82002 | Rsa1.0_01438.1 | 205 | 45882  | 5.00E-52  | 104 | 104 | 100 - | 20  | 123 | 30099  | 30202  |
| UN82003 | Rsa1.0_01485.1 | 419 | 44797  | 1.00E-111 | 215 | 219 | 98 -  | 25  | 243 | 28624  | 28842  |
| UN82004 | Rsa1.0_00821.1 | 823 | 62891  | 0         | 818 | 821 | 99 -  | 4   | 823 | 50180  | 51000  |
| UN82005 | Rsa1.0_00883.1 | 878 | 61230  | 1.00E-163 | 345 | 359 | 96 +  | 1   | 358 | 54781  | 55132  |
| UN82006 | Rsa1.0_00020.1 | 324 | 283099 | 0         | 323 | 324 | 99 +  | 1   | 324 | 127638 | 127961 |
| UN82007 | Rsa1.0_02102.1 | 856 | 35009  | 1.00E-154 | 277 | 277 | 100 + | 552 | 828 | 11886  | 12162  |
| UN82008 | Rsa1.0_00756.1 | 850 | 65628  | 1.00E-150 | 276 | 278 | 99 -  | 64  | 341 | 5693   | 5970   |
| UN82009 | Rsa1.0_06519.1 | 847 | 10858  | 0         | 572 | 572 | 100 - | 276 | 847 | 789    | 1360   |
| UN82010 | Rsa1.0_01397.1 | 847 | 183276 | 0         | 847 | 847 | 100 + | 1   | 847 | 154611 | 155457 |
| UN82011 | Rsa1.0_35039.1 | 668 | 646    | 0         | 407 | 411 | 99 +  | 1   | 411 | 236    | 646    |
| UN82012 | Rsa1.0_00052.1 | 766 | 162771 | 0         | 738 | 778 | 94 +  | 1   | 766 | 118619 | 119386 |
| UN82013 | Rsa1.0_00343.1 | 893 | 93570  | 0         | 884 | 885 | 99 +  | 10  | 893 | 41476  | 42360  |
| UN82014 | Rsa1.0_00017.1 | 864 | 752458 | 0         | 419 | 419 | 100 - | 446 | 864 | 745677 | 746095 |
| UN82015 | Rsa1.0_13891.1 | 824 | 4144   | 0         | 818 | 819 | 99 -  | 7   | 824 | 1988   | 2806   |

|         |                |     |        |           |     |     |       |     |     |        |        |
|---------|----------------|-----|--------|-----------|-----|-----|-------|-----|-----|--------|--------|
| UN82016 | Rsa1.0.00111.1 | 744 | 390088 | 0         | 744 | 744 | 100 + | 1   | 744 | 17967  | 18710  |
| UN82017 | Rsa1.0.04383.1 | 852 | 17631  | 0         | 852 | 852 | 100 + | 1   | 852 | 16184  | 17035  |
| UN82018 | Rsa1.0.00078.1 | 881 | 175053 | 0         | 881 | 882 | 99 -  | 1   | 881 | 76627  | 77508  |
| UN82019 | Rsa1.0.08937.1 | 845 | 6769   | 0         | 827 | 857 | 96 +  | 4   | 845 | 1996   | 2852   |
| UN82020 | Rsa1.0.01839.1 | 833 | 38482  | 0         | 833 | 833 | 100 - | 1   | 833 | 14801  | 15633  |
| UN82021 | Rsa1.0.00218.1 | 824 | 201480 | 0         | 410 | 412 | 99 +  | 1   | 412 | 140922 | 141333 |
| UN82022 | Rsa1.0.27850.1 | 860 | 837    | 0         | 763 | 766 | 99 -  | 1   | 766 | 1      | 766    |
| UN82023 | Rsa1.0.00848.1 | 789 | 152362 | 0         | 518 | 518 | 100 + | 1   | 518 | 57348  | 57865  |
| UN82024 | Rsa1.0.11566.1 | 830 | 5470   | 0         | 799 | 826 | 96 -  | 5   | 830 | 86     | 911    |
| UN82025 | Rsa1.0.00697.1 | 828 | 67913  | 2.00E-91  | 186 | 191 | 97 -  | 523 | 713 | 14729  | 14919  |
| UN82026 | Rsa1.0.00243.1 | 847 | 103651 | 0         | 794 | 794 | 100 + | 54  | 847 | 84697  | 85490  |
| UN82027 | Rsa1.0.10722.1 | 811 | 5745   | 0         | 592 | 597 | 99 +  | 215 | 811 | 1      | 597    |
| UN82028 | Rsa1.0.02412.1 | 885 | 31643  | 0         | 640 | 660 | 96 -  | 3   | 660 | 14287  | 14946  |
| UN82029 | Rsa1.0.00016.1 | 876 | 831256 | 0         | 332 | 335 | 99 +  | 542 | 876 | 576392 | 576726 |
| UN82030 | Rsa1.0.01516.1 | 823 | 44196  | 0         | 583 | 613 | 95 -  | 159 | 771 | 36762  | 37372  |
| UN82031 | Rsa1.0.62534.1 | 842 | 367    | 0         | 361 | 373 | 96 -  | 85  | 457 | 1      | 367    |
| UN82032 | Rsa1.0.02772.1 | 783 | 28047  | 0         | 569 | 632 | 90 -  | 1   | 614 | 20795  | 21419  |
| UN82033 | Rsa1.0.07507.1 | 857 | 9231   | 0         | 429 | 432 | 99 -  | 1   | 431 | 8462   | 8893   |
| UN82034 | Rsa1.0.02420.1 | 821 | 31580  | 0         | 382 | 382 | 100 - | 260 | 641 | 1877   | 2258   |
| UN82035 | Rsa1.0.00042.1 | 840 | 171507 | 0         | 799 | 859 | 93 -  | 1   | 840 | 51621  | 52471  |
| UN82036 | Rsa1.0.00234.1 | 782 | 197060 | 0         | 404 | 415 | 97 +  | 371 | 782 | 42211  | 42625  |
| UN82037 | Rsa1.0.05911.1 | 886 | 12261  | 0         | 569 | 571 | 99 +  | 1   | 570 | 8734   | 9304   |
| UN82038 | Rsa1.0.00002.1 | 731 | 601661 | 0         | 403 | 420 | 95 -  | 1   | 419 | 579168 | 579583 |
| UN82039 | Rsa1.0.00104.1 | 840 | 368722 | 0         | 807 | 839 | 96 +  | 2   | 840 | 65053  | 65868  |
| UN82040 | Rsa1.0.02633.1 | 795 | 29315  | 0         | 418 | 418 | 100 - | 378 | 795 | 354    | 771    |
| UN82041 | Rsa1.0.22278.1 | 826 | 1134   | 0         | 801 | 802 | 99 +  | 1   | 802 | 333    | 1134   |
| UN82042 | Rsa1.0.13702.1 | 199 | 4456   | 7.00E-88  | 190 | 198 | 95 +  | 2   | 199 | 393    | 587    |
| UN82043 | Rsa1.0.00422.1 | 830 | 86144  | 0         | 824 | 832 | 99 +  | 1   | 830 | 34813  | 35643  |
| UN82044 | Rsa1.0.01099.1 | 884 | 158481 | 1.00E-159 | 465 | 524 | 88 -  | 378 | 884 | 44487  | 44995  |
| UN82045 | Rsa1.0.15420.1 | 874 | 2614   | 0         | 823 | 878 | 93 -  | 1   | 874 | 1585   | 2444   |
| UN82046 | Rsa1.0.00644.1 | 391 | 136881 | 1.00E-111 | 269 | 291 | 92 -  | 1   | 291 | 41427  | 41717  |
| UN82047 | Rsa1.0.00688.1 | 859 | 68396  | 0         | 659 | 672 | 98 +  | 191 | 859 | 30972  | 31643  |
| UN82048 | Rsa1.0.00234.1 | 577 | 197060 | 0         | 566 | 569 | 99 +  | 1   | 569 | 29707  | 30274  |
| UN82049 | Rsa1.0.03468.1 | 805 | 22686  | 0         | 702 | 799 | 87 -  | 25  | 805 | 434    | 1230   |
| UN82050 | Rsa1.0.01675.1 | 855 | 41155  | 1.00E-135 | 244 | 244 | 100 + | 353 | 596 | 13023  | 13266  |
| UN82051 | Rsa1.0.01798.1 | 871 | 173909 | 0         | 357 | 365 | 97 +  | 349 | 713 | 169450 | 169811 |
| UN82052 | Rsa1.0.02028.1 | 560 | 35857  | 2.00E-90  | 187 | 193 | 96 -  | 78  | 270 | 35011  | 35203  |
| UN82053 | Rsa1.0.18600.1 | 858 | 1566   | 0         | 647 | 648 | 99 +  | 211 | 858 | 608    | 1255   |
| UN82054 | Rsa1.0.01046.1 | 819 | 152989 | 0         | 789 | 831 | 94 -  | 1   | 819 | 129805 | 130635 |

|         |                |     |        |           |     |     |       |     |     |        |        |
|---------|----------------|-----|--------|-----------|-----|-----|-------|-----|-----|--------|--------|
| UN82055 | Rsa1.0_00201.1 | 873 | 232851 | 7.00E-39  | 175 | 202 | 86 -  | 167 | 368 | 54490  | 54687  |
| UN82056 | Rsa1.0_12064.1 | 468 | 5328   | 0         | 422 | 434 | 97 -  | 35  | 468 | 4582   | 5015   |
| UN82057 | Rsa1.0_00888.1 | 806 | 60978  | 0         | 350 | 350 | 100 + | 172 | 521 | 6607   | 6956   |
| UN82058 | Rsa1.0_05653.1 | 411 | 13043  | 1.00E-120 | 263 | 278 | 94 -  | 134 | 411 | 5640   | 5911   |
| UN82059 | Rsa1.0_00472.1 | 875 | 398134 | 0         | 371 | 371 | 100 + | 36  | 406 | 303355 | 303725 |
| UN82060 | Rsa1.0_01183.1 | 862 | 51465  | 0         | 815 | 865 | 94 +  | 1   | 862 | 49117  | 49964  |
| UN82061 | Rsa1.0_00037.1 | 781 | 307838 | 0         | 440 | 466 | 94 +  | 1   | 460 | 236250 | 236705 |
| UN82062 | Rsa1.0_00040.1 | 883 | 324196 | 0         | 869 | 883 | 98 -  | 1   | 883 | 275392 | 276274 |
| UN82063 | Rsa1.0_00123.1 | 854 | 325650 | 0         | 852 | 852 | 100 - | 3   | 854 | 35835  | 36686  |
| UN82064 | Rsa1.0_26689.1 | 872 | 881    | 0         | 492 | 530 | 92 -  | 316 | 844 | 140    | 669    |
| UN82065 | Rsa1.0_00015.1 | 582 | 561803 | 0         | 327 | 327 | 100 - | 1   | 327 | 229974 | 230300 |
| UN82066 | Rsa1.0_05241.1 | 898 | 14405  | 0         | 746 | 749 | 99 +  | 147 | 893 | 91     | 839    |
| UN82067 | Rsa1.0_01422.1 | 126 | 46172  | 2.00E-34  | 93  | 99  | 93 -  | 32  | 126 | 26396  | 26494  |
| UN82068 | Rsa1.0_02165.1 | 853 | 34423  | 1.00E-113 | 217 | 220 | 98 +  | 183 | 402 | 17137  | 17356  |
| UN82069 | Rsa1.0_01029.1 | 874 | 256254 | 1.00E-139 | 252 | 252 | 100 + | 257 | 508 | 130650 | 130901 |
| UN82070 | Rsa1.0_10115.1 | 817 | 5991   | 0         | 815 | 815 | 100 + | 3   | 817 | 725    | 1539   |
| UN82071 | Rsa1.0_00523.1 | 859 | 178770 | 0         | 781 | 844 | 92 -  | 1   | 816 | 115008 | 115841 |
| UN82072 | Rsa1.0_00215.1 | 374 | 201775 | 0         | 354 | 354 | 100 + | 1   | 354 | 3124   | 3477   |
| UN82073 | Rsa1.0_07819.1 | 910 | 8476   | 0         | 657 | 669 | 98 -  | 246 | 910 | 4182   | 4850   |
| UN82074 | Rsa1.0_02962.1 | 872 | 26419  | 0         | 704 | 714 | 98 -  | 1   | 712 | 23389  | 24101  |
| UN82075 | Rsa1.0_02515.1 | 818 | 30616  | 1.00E-145 | 264 | 265 | 99 +  | 195 | 459 | 3934   | 4198   |
| UN82076 | Rsa1.0_00194.1 | 901 | 110851 | 0         | 401 | 401 | 100 - | 292 | 692 | 70383  | 70783  |
| UN82077 | Rsa1.0_04166.1 | 250 | 18757  | 1.00E-132 | 249 | 251 | 99 +  | 1   | 250 | 8134   | 8384   |
| UN82078 | Rsa1.0_04396.1 | 939 | 17561  | 0         | 501 | 527 | 95 +  | 121 | 640 | 15239  | 15762  |
| UN82079 | Rsa1.0_00108.1 | 840 | 478491 | 0         | 840 | 840 | 100 + | 1   | 840 | 107520 | 108359 |
| UN82080 | Rsa1.0_00835.1 | 817 | 278058 | 0         | 369 | 378 | 97 +  | 1   | 378 | 163059 | 163435 |
| UN82081 | Rsa1.0_49892.1 | 882 | 455    | 0         | 406 | 431 | 94 -  | 127 | 557 | 8      | 437    |
| UN82082 | Rsa1.0_02766.1 | 809 | 28128  | 0         | 809 | 810 | 99 -  | 1   | 809 | 16915  | 17724  |
| UN82083 | Rsa1.0_00020.1 | 828 | 283099 | 0         | 420 | 421 | 99 +  | 9   | 429 | 102906 | 103325 |
| UN82084 | Rsa1.0_00293.1 | 418 | 339294 | 1.00E-141 | 300 | 316 | 94 +  | 6   | 309 | 54150  | 54465  |
| UN82085 | Rsa1.0_04483.1 | 929 | 17174  | 0         | 448 | 487 | 91 -  | 42  | 519 | 10674  | 11142  |
| UN82086 | Rsa1.0_04747.1 | 875 | 16147  | 0         | 668 | 668 | 100 + | 208 | 875 | 2161   | 2828   |
| UN82087 | Rsa1.0_10052.1 | 550 | 6023   | 0         | 498 | 521 | 95 +  | 30  | 550 | 5021   | 5541   |
| UN82088 | Rsa1.0_00387.1 | 524 | 495407 | 0         | 523 | 526 | 99 -  | 1   | 524 | 325241 | 325766 |
| UN82089 | Rsa1.0_00415.1 | 456 | 86795  | 4.00E-91  | 176 | 178 | 98 -  | 1   | 178 | 80     | 257    |
| UN82090 | Rsa1.0_15751.1 | 420 | 2446   | 0         | 414 | 419 | 98 +  | 2   | 420 | 314    | 732    |
| UN82091 | Rsa1.0_00997.1 | 245 | 57190  | 8.00E-76  | 210 | 232 | 90 -  | 14  | 245 | 26154  | 26385  |
| UN82092 | Rsa1.0_10267.1 | 515 | 5910   | 0         | 357 | 357 | 100 + | 159 | 515 | 2476   | 2832   |
| UN82093 | Rsa1.0_00373.1 | 425 | 90296  | 2.00E-99  | 184 | 184 | 100 - | 242 | 425 | 49245  | 49428  |

|         |                |     |        |           |     |     |       |     |     |        |        |
|---------|----------------|-----|--------|-----------|-----|-----|-------|-----|-----|--------|--------|
| UN82094 | Rsa1.0.01331.1 | 490 | 47944  | 0         | 469 | 485 | 96 -  | 1   | 484 | 23100  | 23578  |
| UN82095 | Rsa1.0.01928.1 | 442 | 37192  | 1.00E-160 | 379 | 408 | 92 -  | 38  | 442 | 25462  | 25868  |
| UN82096 | Rsa1.0.00217.1 | 337 | 107079 | 1.00E-165 | 334 | 343 | 97 +  | 1   | 337 | 50719  | 51060  |
| UN82097 | Rsa1.0.01649.1 | 437 | 41624  | 1.00E-112 | 206 | 206 | 100 - | 121 | 326 | 41419  | 41624  |
| UN82098 | Rsa1.0.03543.1 | 617 | 22185  | 0         | 590 | 612 | 96 -  | 9   | 617 | 6360   | 6960   |
| UN82099 | Rsa1.0.03901.1 | 452 | 20170  | 1.00E-153 | 275 | 275 | 100 - | 2   | 276 | 16815  | 17089  |
| UN82100 | Rsa1.0.02289.1 | 697 | 32981  | 1.00E-86  | 163 | 163 | 100 + | 535 | 697 | 15197  | 15359  |
| UN82101 | Rsa1.0.00478.1 | 882 | 81419  | 8.00E-45  | 195 | 230 | 84 -  | 299 | 528 | 27513  | 27724  |
| UN82102 | Rsa1.0.36621.1 | 878 | 616    | 0         | 509 | 509 | 100 + | 370 | 878 | 1      | 509    |
| UN82103 | Rsa1.0.01166.1 | 852 | 51877  | 0         | 385 | 385 | 100 + | 1   | 385 | 41497  | 41881  |
| UN82104 | Rsa1.0.01703.1 | 827 | 40713  | 0         | 394 | 394 | 100 + | 1   | 394 | 22412  | 22805  |
| UN82105 | Rsa1.0.00119.1 | 880 | 467509 | 1.00E-68  | 149 | 153 | 97 -  | 664 | 816 | 69430  | 69581  |
| UN82106 | Rsa1.0.02814.1 | 345 | 27656  | 1.00E-87  | 204 | 216 | 94 +  | 5   | 219 | 23494  | 23709  |
| UN82107 | Rsa1.0.02281.1 | 856 | 292576 | 0         | 725 | 728 | 99 +  | 9   | 735 | 275180 | 275907 |
| UN82108 | Rsa1.0.00026.1 | 856 | 327835 | 1.00E-164 | 355 | 377 | 94 -  | 230 | 606 | 79436  | 79803  |
| UN82109 | Rsa1.0.00572.1 | 896 | 74969  | 0         | 678 | 701 | 96 +  | 199 | 896 | 50283  | 50980  |
| UN82110 | Rsa1.0.00112.1 | 845 | 132199 | 0         | 706 | 706 | 100 - | 140 | 845 | 75075  | 75780  |
| UN82111 | Rsa1.0.00025.1 | 685 | 277312 | 0         | 599 | 599 | 100 + | 87  | 685 | 11301  | 11899  |
| UN82112 | Rsa1.0.01460.1 | 815 | 45255  | 0         | 486 | 492 | 98 -  | 324 | 815 | 30570  | 31061  |
| UN82113 | Rsa1.0.00571.1 | 687 | 329018 | 0         | 687 | 688 | 99 +  | 1   | 687 | 183592 | 184279 |
| UN82114 | Rsa1.0.00092.1 | 825 | 659932 | 0         | 396 | 413 | 95 -  | 4   | 414 | 505878 | 506289 |
| UN82115 | Rsa1.0.03469.1 | 806 | 22681  | 0         | 476 | 508 | 93 +  | 5   | 506 | 8685   | 9183   |
| UN82116 | Rsa1.0.05199.1 | 120 | 14529  | 1.00E-29  | 111 | 122 | 90 -  | 1   | 120 | 8708   | 8828   |
| UN82117 | Rsa1.0.01028.1 | 845 | 56401  | 0         | 845 | 846 | 99 +  | 1   | 845 | 8290   | 9135   |
| UN82118 | Rsa1.0.03304.1 | 828 | 23883  | 0         | 804 | 828 | 97 -  | 1   | 828 | 12865  | 13692  |
| UN82119 | Rsa1.0.07350.1 | 827 | 9520   | 0         | 374 | 374 | 100 - | 264 | 637 | 9147   | 9520   |
| UN82120 | Rsa1.0.06902.1 | 238 | 10186  | 1.00E-132 | 238 | 238 | 100 + | 1   | 238 | 3916   | 4153   |
| UN82121 | Rsa1.0.03238.1 | 631 | 24432  | 0         | 631 | 632 | 99 +  | 1   | 631 | 7841   | 8472   |
| UN82122 | Rsa1.0.00002.1 | 811 | 601661 | 0         | 596 | 617 | 96 +  | 196 | 811 | 538864 | 539476 |
| UN82123 | Rsa1.0.01719.1 | 836 | 40388  | 0         | 654 | 655 | 99 -  | 1   | 654 | 16967  | 17621  |
| UN82124 | Rsa1.0.03439.1 | 135 | 22930  | 2.00E-50  | 101 | 101 | 100 - | 35  | 135 | 15354  | 15454  |
| UN82125 | Rsa1.0.00385.1 | 824 | 89160  | 1.00E-138 | 506 | 586 | 86 +  | 283 | 824 | 82179  | 82755  |
| UN82126 | Rsa1.0.00196.1 | 729 | 109960 | 0         | 729 | 729 | 100 + | 1   | 729 | 17237  | 17965  |
| UN82127 | Rsa1.0.10795.1 | 607 | 5718   | 0         | 583 | 607 | 96 -  | 1   | 607 | 4363   | 4969   |
| UN82128 | Rsa1.0.00289.1 | 169 | 98620  | 6.00E-91  | 169 | 169 | 100 + | 1   | 169 | 12319  | 12487  |
| UN82129 | #              | #   | #      | #         | #   | #   | #     | #   | #   | #      | #      |
| UN82130 | Rsa1.0.05874.1 | 785 | 12351  | 0         | 640 | 670 | 95 +  | 1   | 669 | 7451   | 8120   |
| UN82131 | Rsa1.0.20968.1 | 765 | 1249   | 0         | 347 | 349 | 99 -  | 120 | 468 | 901    | 1249   |
| UN82132 | Rsa1.0.00115.1 | 819 | 131321 | 0         | 396 | 396 | 100 + | 424 | 819 | 36126  | 36521  |

|         |                |     |        |           |     |     |       |     |     |        |        |
|---------|----------------|-----|--------|-----------|-----|-----|-------|-----|-----|--------|--------|
| UN82133 | Rsa1.0_15634.1 | 845 | 2512   | 0         | 845 | 845 | 100 + | 1   | 845 | 983    | 1827   |
| UN82134 | Rsa1.0_01392.1 | 799 | 46665  | 0         | 797 | 799 | 99 -  | 1   | 799 | 36134  | 36932  |
| UN82135 | Rsa1.0_00301.1 | 834 | 365315 | 0         | 677 | 689 | 98 +  | 7   | 688 | 307979 | 308667 |
| UN82136 | Rsa1.0_00007.1 | 801 | 239325 | 0         | 489 | 507 | 96 +  | 87  | 592 | 125513 | 126018 |
| UN82137 | Rsa1.0_00682.1 | 838 | 68680  | 0         | 600 | 661 | 90 +  | 113 | 762 | 14817  | 15458  |
| UN82138 | Rsa1.0_05415.1 | 484 | 13830  | 0         | 472 | 484 | 97 +  | 1   | 484 | 6226   | 6709   |
| UN82139 | Rsa1.0_27807.1 | 281 | 838    | 1.00E-22  | 58  | 59  | 98 +  | 12  | 70  | 780    | 838    |
| UN82140 | Rsa1.0_02922.1 | 865 | 26753  | 0         | 625 | 626 | 99 -  | 1   | 625 | 21058  | 21683  |
| UN82141 | Rsa1.0_04281.1 | 817 | 18107  | 1.00E-116 | 234 | 241 | 97 -  | 577 | 817 | 6837   | 7077   |
| UN82142 | Rsa1.0_03601.1 | 794 | 21850  | 0         | 497 | 499 | 99 -  | 1   | 498 | 17446  | 17944  |
| UN82143 | Rsa1.0_01112.1 | 756 | 310601 | 0         | 576 | 578 | 99 +  | 6   | 583 | 48357  | 48932  |
| UN82144 | Rsa1.0_17438.1 | 837 | 1830   | 0         | 611 | 628 | 97 -  | 213 | 837 | 1126   | 1752   |
| UN82145 | Rsa1.0_00735.1 | 283 | 66503  | 3.00E-72  | 138 | 138 | 100 + | 1   | 138 | 2896   | 3033   |
| UN82146 | Rsa1.0_00318.1 | 782 | 96094  | 0         | 652 | 655 | 99 -  | 128 | 782 | 48915  | 49569  |
| UN82147 | Rsa1.0_11332.1 | 863 | 5541   | 0         | 461 | 461 | 100 + | 234 | 694 | 5081   | 5541   |
| UN82148 | Rsa1.0_00054.1 | 667 | 162053 | 0         | 339 | 339 | 100 - | 329 | 667 | 100090 | 100428 |
| UN82149 | Rsa1.0_05397.1 | 793 | 13892  | 0         | 793 | 793 | 100 + | 1   | 793 | 6810   | 7602   |
| UN82150 | Rsa1.0_05449.1 | 870 | 13711  | 0         | 562 | 562 | 100 + | 173 | 734 | 13150  | 13711  |
| UN82151 | Rsa1.0_00130.1 | 745 | 125737 | 0         | 376 | 376 | 100 + | 4   | 379 | 102302 | 102677 |
| UN82152 | Rsa1.0_04918.1 | 853 | 15441  | 0         | 851 | 861 | 98 -  | 1   | 853 | 10799  | 11659  |
| UN82153 | Rsa1.0_01145.1 | 457 | 149247 | 0         | 418 | 418 | 100 - | 40  | 457 | 123333 | 123750 |
| UN82154 | Rsa1.0_00985.1 | 323 | 161950 | 1.00E-139 | 250 | 250 | 100 - | 1   | 250 | 46247  | 46496  |
| UN82155 | Rsa1.0_03249.1 | 136 | 146254 | 2.00E-71  | 136 | 136 | 100 - | 1   | 136 | 4177   | 4312   |
| UN82156 | Rsa1.0_13371.1 | 392 | 4879   | 1.00E-161 | 288 | 288 | 100 + | 105 | 392 | 1      | 288    |
| UN82157 | Rsa1.0_00291.1 | 698 | 172129 | 1.00E-131 | 342 | 377 | 90 -  | 1   | 369 | 43259  | 43622  |
| UN82158 | Rsa1.0_11043.1 | 479 | 5636   | 1.00E-141 | 263 | 266 | 98 -  | 1   | 266 | 5215   | 5480   |
| UN82159 | Rsa1.0_00038.1 | 866 | 314568 | 0         | 865 | 867 | 99 +  | 2   | 866 | 189317 | 190183 |
| UN82160 | Rsa1.0_00329.1 | 730 | 222544 | 0         | 730 | 732 | 99 -  | 1   | 730 | 203766 | 204497 |
| UN82161 | Rsa1.0_00196.1 | 830 | 109960 | 0         | 828 | 833 | 99 -  | 1   | 830 | 76149  | 76981  |
| UN82162 | Rsa1.0_01301.1 | 843 | 169072 | 1.00E-173 | 355 | 365 | 97 -  | 1   | 361 | 18684  | 19044  |
| UN82163 | Rsa1.0_03806.1 | 794 | 20745  | 0         | 579 | 579 | 100 - | 1   | 579 | 1      | 579    |
| UN82164 | Rsa1.0_00051.1 | 774 | 258225 | 0         | 421 | 421 | 100 - | 354 | 774 | 118364 | 118784 |
| UN82165 | Rsa1.0_08800.1 | 827 | 6912   | 0         | 774 | 774 | 100 + | 5   | 778 | 4824   | 5597   |
| UN82166 | Rsa1.0_01448.1 | 787 | 45645  | 4.00E-65  | 192 | 202 | 95 +  | 106 | 307 | 39422  | 39613  |
| UN82167 | #              | #   | #      | #         | #   | #   | #     | #   | #   | #      | #      |
| UN82168 | Rsa1.0_03522.1 | 243 | 22304  | 2.00E-88  | 184 | 189 | 97 +  | 55  | 243 | 3      | 190    |
| UN82169 | Rsa1.0_02432.1 | 761 | 31499  | 1.00E-152 | 273 | 273 | 100 + | 2   | 274 | 11822  | 12094  |
| UN82170 | Rsa1.0_06830.1 | 810 | 10295  | 0         | 797 | 810 | 98 -  | 1   | 810 | 6725   | 7534   |
| UN82171 | Rsa1.0_00363.1 | 201 | 90968  | 1.00E-106 | 201 | 202 | 99 -  | 1   | 201 | 7949   | 8150   |

|         |                |     |        |           |     |     |       |     |     |        |        |
|---------|----------------|-----|--------|-----------|-----|-----|-------|-----|-----|--------|--------|
| UN82172 | Rsa1.0.02218.1 | 686 | 33809  | 0         | 657 | 687 | 95 +  | 1   | 686 | 11492  | 12171  |
| UN82173 | Rsa1.0.00055.1 | 807 | 520193 | 1.00E-92  | 173 | 173 | 100 - | 83  | 255 | 67475  | 67647  |
| UN82174 | Rsa1.0.01230.1 | 797 | 50221  | 0         | 797 | 797 | 100 + | 1   | 797 | 28988  | 29784  |
| UN82175 | Rsa1.0.08410.1 | 845 | 7406   | 0         | 696 | 696 | 100 - | 150 | 845 | 6711   | 7406   |
| UN82176 | Rsa1.0.01497.1 | 797 | 44559  | 4.00E-43  | 108 | 114 | 94 -  | 219 | 332 | 19658  | 19771  |
| UN82177 | Rsa1.0.00028.1 | 390 | 293984 | 1.00E-155 | 363 | 390 | 93 -  | 1   | 390 | 66975  | 67363  |
| UN82178 | Rsa1.0.13424.1 | 752 | 4844   | 1.00E-130 | 236 | 236 | 100 - | 325 | 560 | 1      | 236    |
| UN82179 | Rsa1.0.00426.1 | 829 | 85668  | 0         | 768 | 808 | 95 +  | 8   | 807 | 67081  | 67887  |
| UN82180 | Rsa1.0.00475.1 | 836 | 81678  | 0         | 832 | 832 | 100 + | 5   | 836 | 4007   | 4838   |
| UN82181 | Rsa1.0.00071.1 | 566 | 345714 | 0         | 379 | 380 | 99 +  | 1   | 379 | 58385  | 58764  |
| UN82182 | Rsa1.0.00039.1 | 851 | 296927 | 2.00E-54  | 157 | 172 | 91 +  | 664 | 833 | 223486 | 223657 |
| UN82183 | Rsa1.0.00191.1 | 818 | 316976 | 0         | 397 | 412 | 96 -  | 3   | 414 | 47555  | 47966  |
| UN82184 | Rsa1.0.00612.1 | 816 | 72376  | 0         | 566 | 575 | 98 -  | 1   | 574 | 37278  | 37852  |
| UN82185 | Rsa1.0.14798.1 | 323 | 3060   | 2.00E-52  | 123 | 129 | 95 -  | 147 | 275 | 218    | 346    |
| UN82186 | Rsa1.0.00273.1 | 855 | 326186 | 0         | 753 | 761 | 98 +  | 2   | 761 | 312019 | 312776 |
| UN82187 | Rsa1.0.00019.1 | 853 | 301669 | 0         | 853 | 853 | 100 + | 1   | 853 | 276455 | 277307 |
| UN82188 | Rsa1.0.10495.1 | 613 | 5827   | 0         | 466 | 468 | 99 -  | 146 | 613 | 5159   | 5626   |
| UN82189 | Rsa1.0.02197.1 | 769 | 33996  | 1.00E-168 | 352 | 369 | 95 -  | 27  | 394 | 4504   | 4864   |
| UN82190 | Rsa1.0.17152.1 | 859 | 1907   | 0         | 434 | 434 | 100 - | 1   | 434 | 1177   | 1610   |
| UN82191 | Rsa1.0.02716.1 | 810 | 28465  | 0         | 750 | 750 | 100 - | 61  | 810 | 26967  | 27716  |
| UN82192 | Rsa1.0.04709.1 | 866 | 16285  | 0         | 550 | 550 | 100 - | 317 | 866 | 15736  | 16285  |
| UN82193 | Rsa1.0.00277.1 | 862 | 100132 | 0         | 862 | 862 | 100 - | 1   | 862 | 39423  | 40284  |
| UN82194 | Rsa1.0.00407.1 | 551 | 191544 | 0         | 543 | 551 | 98 +  | 1   | 551 | 181195 | 181745 |
| UN82195 | Rsa1.0.05397.1 | 807 | 13892  | 0         | 807 | 807 | 100 + | 1   | 807 | 1841   | 2647   |
| UN82196 | Rsa1.0.00017.1 | 552 | 752458 | 1.00E-14  | 45  | 46  | 97 +  | 113 | 158 | 204871 | 204916 |
| UN82197 | Rsa1.0.01472.1 | 285 | 45099  | 1.00E-155 | 285 | 286 | 99 -  | 1   | 285 | 14764  | 15049  |
| UN82198 | Rsa1.0.02379.1 | 798 | 150705 | 0         | 664 | 664 | 100 + | 135 | 798 | 146545 | 147208 |
| UN82199 | Rsa1.0.00190.1 | 815 | 318240 | 9.00E-60  | 127 | 130 | 97 +  | 660 | 789 | 53982  | 54111  |
| UN82200 | Rsa1.0.00131.1 | 870 | 432233 | 0         | 467 | 478 | 97 +  | 1   | 478 | 267850 | 268327 |
| UN82201 | Rsa1.0.01016.1 | 581 | 181422 | 1.00E-110 | 238 | 246 | 96 -  | 326 | 569 | 44045  | 44289  |
| UN82202 | Rsa1.0.06148.1 | 836 | 11616  | 0         | 807 | 829 | 97 -  | 9   | 836 | 4258   | 5083   |
| UN82203 | Rsa1.0.03462.1 | 796 | 22725  | 0         | 796 | 796 | 100 + | 1   | 796 | 4607   | 5402   |
| UN82204 | Rsa1.0.00134.1 | 841 | 390219 | 0         | 841 | 841 | 100 + | 1   | 841 | 150013 | 150853 |
| UN82205 | Rsa1.0.39816.1 | 825 | 564    | 0         | 564 | 564 | 100 + | 171 | 734 | 1      | 564    |
| UN82206 | Rsa1.0.41918.1 | 764 | 535    | 0         | 432 | 432 | 100 - | 1   | 432 | 1      | 432    |
| UN82207 | Rsa1.0.03504.1 | 859 | 22443  | 0         | 493 | 493 | 100 - | 1   | 493 | 18929  | 19421  |
| UN82208 | Rsa1.0.00137.1 | 814 | 122457 | 0         | 813 | 814 | 99 -  | 1   | 814 | 104115 | 104928 |
| UN82209 | Rsa1.0.04525.1 | 870 | 16965  | 0         | 870 | 870 | 100 - | 1   | 870 | 2625   | 3494   |
| UN82210 | Rsa1.0.03853.1 | 793 | 20447  | 0         | 791 | 791 | 100 - | 3   | 793 | 14736  | 15526  |

|         |                |     |        |           |     |     |       |     |     |        |        |
|---------|----------------|-----|--------|-----------|-----|-----|-------|-----|-----|--------|--------|
| UN82211 | Rsa1.0.00167.1 | 873 | 116000 | 0         | 779 | 807 | 96 -  | 67  | 873 | 38313  | 39119  |
| UN82212 | Rsa1.0.03964.1 | 836 | 19835  | 0         | 721 | 767 | 94 -  | 91  | 836 | 2327   | 3093   |
| UN82213 | Rsa1.0.00748.1 | 830 | 65983  | 0         | 424 | 453 | 93 +  | 383 | 830 | 29105  | 29547  |
| UN82214 | Rsa1.0.01133.1 | 884 | 52916  | 0         | 608 | 608 | 100 + | 277 | 884 | 32989  | 33596  |
| UN82215 | Rsa1.0.02223.1 | 857 | 152421 | 0         | 682 | 725 | 94 +  | 138 | 857 | 147903 | 148619 |
| UN82216 | Rsa1.0.00285.1 | 840 | 149638 | 0         | 839 | 841 | 99 -  | 1   | 840 | 145445 | 146285 |
| UN82217 | Rsa1.0.01055.1 | 536 | 55466  | 1.00E-165 | 295 | 295 | 100 + | 124 | 418 | 27822  | 28116  |
| UN82218 | Rsa1.0.00016.1 | 874 | 831256 | 0         | 874 | 874 | 100 + | 1   | 874 | 794863 | 795736 |
| UN82219 | Rsa1.0.04662.1 | 875 | 16477  | 0         | 843 | 863 | 97 +  | 15  | 875 | 3042   | 3897   |
| UN82220 | Rsa1.0.17949.1 | 840 | 1704   | 0         | 523 | 528 | 99 +  | 313 | 840 | 1      | 526    |
| UN82221 | Rsa1.0.00073.1 | 885 | 240924 | 0         | 424 | 435 | 97 -  | 453 | 885 | 65963  | 66394  |
| UN82222 | Rsa1.0.01789.1 | 839 | 39250  | 0         | 748 | 750 | 99 -  | 1   | 750 | 9785   | 10534  |
| UN82223 | Rsa1.0.00288.1 | 660 | 98659  | 0         | 659 | 660 | 99 -  | 1   | 660 | 19255  | 19914  |
| UN82224 | Rsa1.0.00006.1 | 838 | 396176 | 0         | 766 | 766 | 100 + | 1   | 766 | 289324 | 290089 |
| UN82225 | Rsa1.0.00065.1 | 577 | 454616 | 1.00E-58  | 128 | 132 | 96 -  | 181 | 312 | 190841 | 190972 |
| UN82226 | Rsa1.0.00708.1 | 404 | 67366  | 0         | 398 | 405 | 98 -  | 1   | 404 | 5375   | 5779   |
| UN82227 | Rsa1.0.00145.1 | 891 | 261008 | 0         | 695 | 707 | 98 -  | 1   | 705 | 29294  | 30000  |
| UN82228 | Rsa1.0.19683.1 | 851 | 1397   | 0         | 793 | 850 | 93 -  | 1   | 849 | 102    | 950    |
| UN82229 | Rsa1.0.00069.1 | 759 | 403561 | 0         | 461 | 461 | 100 + | 299 | 759 | 162099 | 162559 |
| UN82230 | Rsa1.0.00904.1 | 870 | 180594 | 0         | 800 | 879 | 91 -  | 7   | 870 | 17759  | 18604  |
| UN82231 | Rsa1.0.01712.1 | 897 | 154210 | 0         | 853 | 873 | 97 +  | 12  | 881 | 137243 | 138115 |
| UN82232 | Rsa1.0.00039.1 | 507 | 296927 | 2.00E-93  | 186 | 190 | 97 -  | 154 | 343 | 113194 | 113383 |
| UN82233 | Rsa1.0.03609.1 | 311 | 21798  | 1.00E-136 | 301 | 316 | 95 -  | 1   | 311 | 11750  | 12065  |
| UN82234 | Rsa1.0.06519.1 | 851 | 10858  | 0         | 460 | 460 | 100 + | 1   | 460 | 351    | 810    |
| UN82235 | Rsa1.0.06021.1 | 851 | 11911  | 0         | 851 | 851 | 100 - | 1   | 851 | 1603   | 2453   |
| UN82236 | Rsa1.0.00203.1 | 847 | 109129 | 0         | 846 | 848 | 99 +  | 1   | 847 | 22012  | 22858  |
| UN82237 | Rsa1.0.08016.1 | 257 | 8077   | 1.00E-129 | 251 | 257 | 97 -  | 1   | 257 | 1079   | 1335   |
| UN82238 | Rsa1.0.07406.1 | 859 | 9452   | 0         | 772 | 854 | 90 +  | 3   | 853 | 7943   | 8793   |
| UN82239 | Rsa1.0.00133.1 | 880 | 123768 | 0         | 880 | 881 | 99 -  | 1   | 880 | 39599  | 40479  |
| UN82240 | Rsa1.0.00871.1 | 826 | 61539  | 0         | 826 | 826 | 100 - | 1   | 826 | 48625  | 49450  |
| UN82241 | Rsa1.0.00064.1 | 106 | 240927 | 2.00E-46  | 94  | 94  | 100 - | 13  | 106 | 134797 | 134890 |
| UN82242 | Rsa1.0.01067.1 | 807 | 55230  | 2.00E-42  | 89  | 89  | 100 + | 124 | 212 | 26955  | 27043  |
| UN82243 | Rsa1.0.04919.1 | 601 | 15440  | 1.00E-132 | 252 | 255 | 98 -  | 347 | 601 | 4635   | 4888   |
| UN82244 | Rsa1.0.02655.1 | 866 | 29027  | 1.00E-109 | 255 | 271 | 94 -  | 79  | 340 | 18609  | 18879  |
| UN82245 | Rsa1.0.00093.1 | 847 | 214962 | 0         | 450 | 450 | 100 - | 398 | 847 | 92646  | 93095  |
| UN82246 | Rsa1.0.00190.1 | 722 | 318240 | 0         | 698 | 748 | 93 +  | 1   | 722 | 153013 | 153760 |
| UN82247 | Rsa1.0.06521.1 | 937 | 10856  | 0         | 404 | 406 | 99 +  | 153 | 557 | 9083   | 9488   |
| UN82248 | Rsa1.0.03275.1 | 871 | 24159  | 0         | 864 | 872 | 99 +  | 2   | 871 | 10612  | 11483  |
| UN82249 | Rsa1.0.05743.1 | 487 | 12768  | 1.00E-118 | 227 | 231 | 98 +  | 136 | 366 | 9994   | 10224  |

|         |                |     |        |           |     |     |       |     |     |        |        |
|---------|----------------|-----|--------|-----------|-----|-----|-------|-----|-----|--------|--------|
| UN82250 | Rsa1.0.00045.1 | 206 | 328694 | 7.00E-48  | 97  | 97  | 100 + | 110 | 206 | 14590  | 14686  |
| UN82251 | Rsa1.0.04398.1 | 841 | 17550  | 0         | 704 | 727 | 96 -  | 1   | 722 | 14902  | 15627  |
| UN82252 | Rsa1.0.00194.1 | 793 | 110851 | 0         | 793 | 794 | 99 +  | 1   | 793 | 90613  | 91406  |
| UN82253 | Rsa1.0.02714.1 | 819 | 28470  | 0         | 816 | 819 | 99 -  | 1   | 819 | 26024  | 26842  |
| UN82254 | Rsa1.0.00293.1 | 115 | 339294 | 7.00E-59  | 115 | 115 | 100 - | 1   | 115 | 299665 | 299779 |
| UN82255 | Rsa1.0.00564.1 | 843 | 75428  | 0         | 840 | 843 | 99 -  | 1   | 842 | 43570  | 44412  |
| UN82256 | Rsa1.0.00339.1 | 807 | 222974 | 0         | 805 | 805 | 100 - | 3   | 807 | 40056  | 40860  |
| UN82257 | Rsa1.0.02585.1 | 823 | 29865  | 1.00E-125 | 235 | 236 | 99 +  | 1   | 235 | 18527  | 18762  |
| UN82258 | Rsa1.0.05336.1 | 626 | 14117  | 0         | 566 | 572 | 98 -  | 55  | 626 | 13198  | 13769  |
| UN82259 | Rsa1.0.00942.1 | 878 | 58873  | 0         | 751 | 823 | 91 +  | 72  | 878 | 11573  | 12389  |
| UN82260 | Rsa1.0.03448.1 | 869 | 22844  | 0         | 869 | 869 | 100 + | 1   | 869 | 12216  | 13084  |
| UN82261 | Rsa1.0.00098.1 | 852 | 349239 | 0         | 825 | 856 | 96 +  | 2   | 852 | 229212 | 230059 |
| UN82262 | Rsa1.0.01005.1 | 254 | 56967  | 1.00E-49  | 103 | 104 | 99 +  | 63  | 166 | 10343  | 10446  |
| UN82263 | Rsa1.0.00387.1 | 890 | 495407 | 0         | 876 | 890 | 98 +  | 1   | 890 | 27930  | 28819  |
| UN82264 | Rsa1.0.00622.1 | 822 | 71822  | 0         | 822 | 822 | 100 - | 1   | 822 | 26013  | 26834  |
| UN82265 | Rsa1.0.00104.1 | 450 | 368722 | 1.00E-105 | 265 | 288 | 92 +  | 1   | 285 | 33229  | 33507  |
| UN82266 | Rsa1.0.21630.1 | 879 | 1185   | 0         | 480 | 499 | 96 +  | 1   | 487 | 687    | 1185   |
| UN82267 | Rsa1.0.28309.1 | 820 | 820    | 0         | 783 | 786 | 99 -  | 8   | 793 | 1      | 785    |
| UN82268 | Rsa1.0.01731.1 | 861 | 40208  | 0         | 324 | 324 | 100 - | 441 | 764 | 31791  | 32114  |
| UN82269 | Rsa1.0.00507.1 | 871 | 79074  | 0         | 823 | 884 | 93 -  | 1   | 871 | 59446  | 60308  |
| UN82270 | Rsa1.0.03502.1 | 880 | 22446  | 1.00E-126 | 274 | 289 | 94 +  | 264 | 552 | 7395   | 7683   |
| UN82271 | Rsa1.0.00326.1 | 857 | 171955 | 0         | 506 | 506 | 100 + | 1   | 506 | 3068   | 3573   |
| UN82272 | Rsa1.0.02921.1 | 527 | 26779  | 0         | 527 | 527 | 100 + | 1   | 527 | 9851   | 10377  |
| UN82273 | Rsa1.0.01827.1 | 704 | 143321 | 1.00E-131 | 238 | 238 | 100 - | 467 | 704 | 128505 | 128742 |
| UN82274 | Rsa1.0.04424.1 | 834 | 17415  | 0         | 806 | 828 | 97 -  | 11  | 834 | 11185  | 12012  |
| UN82275 | Rsa1.0.00107.1 | 682 | 431659 | 0         | 674 | 683 | 98 +  | 1   | 682 | 320373 | 321055 |
| UN82276 | Rsa1.0.00206.1 | 858 | 109040 | 0         | 810 | 860 | 94 -  | 12  | 858 | 59781  | 60625  |
| UN82277 | Rsa1.0.01794.1 | 863 | 39215  | 0         | 859 | 863 | 99 -  | 2   | 863 | 17870  | 18732  |
| UN82278 | Rsa1.0.02474.1 | 881 | 31076  | 0         | 846 | 879 | 96 +  | 8   | 881 | 15563  | 16432  |
| UN82279 | Rsa1.0.00111.1 | 160 | 390088 | 3.00E-71  | 154 | 160 | 96 -  | 1   | 160 | 374653 | 374812 |
| UN82280 | Rsa1.0.00707.1 | 275 | 190112 | 1.00E-130 | 266 | 275 | 96 -  | 1   | 275 | 126334 | 126607 |
| UN82281 | Rsa1.0.01786.1 | 858 | 133324 | 0         | 535 | 536 | 99 +  | 5   | 540 | 118215 | 118750 |
| UN82282 | Rsa1.0.04355.1 | 470 | 146733 | 1.00E-138 | 287 | 296 | 96 +  | 175 | 470 | 140983 | 141274 |
| UN82283 | Rsa1.0.01431.1 | 882 | 167877 | 1.00E-139 | 359 | 393 | 91 +  | 470 | 844 | 147914 | 148304 |
| UN82284 | Rsa1.0.01217.1 | 207 | 50554  | 1.00E-101 | 202 | 207 | 97 -  | 1   | 207 | 12804  | 13010  |
| UN82285 | Rsa1.0.00979.1 | 331 | 57733  | 3.00E-97  | 183 | 184 | 99 -  | 113 | 296 | 42016  | 42199  |
| UN82286 | Rsa1.0.08922.1 | 851 | 6788   | 0         | 373 | 383 | 97 +  | 1   | 382 | 3761   | 4140   |
| UN82287 | Rsa1.0.00235.1 | 798 | 154696 | 0         | 789 | 793 | 99 -  | 6   | 798 | 59769  | 60559  |
| UN82288 | Rsa1.0.00013.1 | 565 | 292129 | 0         | 458 | 458 | 100 + | 108 | 565 | 155634 | 156091 |



|         |                |     |        |           |     |     |       |     |     |        |        |
|---------|----------------|-----|--------|-----------|-----|-----|-------|-----|-----|--------|--------|
| UN82289 | Rsa1.0_00269.1 | 820 | 341668 | 0         | 819 | 820 | 99 +  | 1   | 820 | 282405 | 283224 |
| UN82290 | Rsa1.0_23478.1 | 740 | 1046   | 0         | 481 | 487 | 98 +  | 254 | 740 | 346    | 832    |
| UN82291 | Rsa1.0_00196.1 | 711 | 109960 | 0         | 699 | 709 | 98 -  | 3   | 711 | 11292  | 11998  |
| UN82292 | Rsa1.0_00749.1 | 702 | 65933  | 0         | 575 | 588 | 97 -  | 116 | 702 | 44849  | 45434  |
| UN82293 | Rsa1.0_01035.1 | 835 | 56019  | 0         | 488 | 488 | 100 - | 6   | 493 | 47064  | 47551  |
| UN82294 | Rsa1.0_01864.1 | 790 | 37998  | 1.00E-153 | 274 | 274 | 100 + | 239 | 512 | 29363  | 29636  |
| UN82295 | Rsa1.0_01364.1 | 838 | 47172  | 1.00E-114 | 255 | 269 | 94 +  | 14  | 279 | 18354  | 18619  |
| UN82296 | Rsa1.0_00102.1 | 853 | 135497 | 0         | 597 | 598 | 99 +  | 4   | 600 | 72030  | 72627  |
| UN82297 | Rsa1.0_00502.1 | 854 | 204180 | 1.00E-145 | 262 | 262 | 100 - | 364 | 625 | 184771 | 185032 |
| UN82298 | Rsa1.0_00116.1 | 803 | 365886 | 0         | 803 | 803 | 100 + | 1   | 803 | 142909 | 143711 |
| UN82299 | Rsa1.0_03545.1 | 719 | 147543 | 0         | 516 | 516 | 100 - | 204 | 719 | 21428  | 21943  |
| UN82300 | Rsa1.0_00468.1 | 877 | 82095  | 0         | 854 | 878 | 97 -  | 1   | 877 | 17600  | 18455  |
| UN82301 | Rsa1.0_00257.1 | 223 | 102407 | 2.00E-48  | 161 | 182 | 88 +  | 47  | 223 | 95763  | 95944  |
| UN82302 | Rsa1.0_00037.1 | 819 | 307838 | 0         | 815 | 819 | 99 +  | 1   | 819 | 186276 | 187094 |
| UN82303 | Rsa1.0_02855.1 | 851 | 27271  | 0         | 479 | 480 | 99 +  | 61  | 540 | 10359  | 10838  |
| UN82304 | #              | #   | #      | #         | #   | #   | #     | #   | #   | #      | #      |
| UN82305 | Rsa1.0_03399.1 | 763 | 23204  | 0         | 750 | 761 | 98 -  | 6   | 763 | 19810  | 20570  |
| UN82306 | Rsa1.0_00892.1 | 843 | 60703  | 0         | 506 | 506 | 100 + | 338 | 843 | 4267   | 4772   |
| UN82307 | Rsa1.0_04223.1 | 782 | 18407  | 0         | 780 | 780 | 100 + | 3   | 782 | 16223  | 17002  |
| UN82308 | Rsa1.0_01611.1 | 854 | 42269  | 0         | 847 | 856 | 98 +  | 1   | 854 | 39004  | 39859  |
| UN82309 | Rsa1.0_00942.1 | 710 | 58873  | 0         | 692 | 713 | 97 -  | 1   | 710 | 24149  | 24858  |
| UN82310 | Rsa1.0_08961.1 | 460 | 6750   | 0         | 445 | 461 | 96 -  | 1   | 460 | 5054   | 5509   |
| UN82311 | Rsa1.0_03353.1 | 806 | 23496  | 0         | 349 | 357 | 97 +  | 1   | 357 | 14924  | 15280  |
| UN82312 | Rsa1.0_00122.1 | 671 | 265937 | 0         | 651 | 664 | 98 -  | 1   | 663 | 252872 | 253535 |
| UN82313 | Rsa1.0_00796.1 | 832 | 63997  | 0         | 827 | 827 | 100 - | 1   | 827 | 46758  | 47584  |
| UN82314 | Rsa1.0_01755.1 | 509 | 155581 | 1.00E-109 | 270 | 293 | 92 +  | 227 | 509 | 2013   | 2305   |
| UN82315 | Rsa1.0_00632.1 | 815 | 183777 | 0         | 815 | 815 | 100 - | 1   | 815 | 176180 | 176994 |
| UN82316 | Rsa1.0_01731.1 | 503 | 40208  | 0         | 472 | 472 | 100 + | 1   | 472 | 31053  | 31524  |
| UN82317 | Rsa1.0_11424.1 | 846 | 5513   | 0         | 547 | 549 | 99 -  | 298 | 846 | 4965   | 5513   |
| UN82318 | Rsa1.0_00326.1 | 812 | 171955 | 0         | 812 | 813 | 99 +  | 1   | 812 | 69617  | 70429  |
| UN82319 | Rsa1.0_00151.1 | 847 | 119541 | 1.00E-137 | 351 | 383 | 91 -  | 8   | 382 | 85430  | 85797  |
| UN82320 | Rsa1.0_01581.1 | 413 | 42833  | 1.00E-131 | 367 | 410 | 89 -  | 4   | 413 | 1999   | 2408   |
| UN82321 | Rsa1.0_01292.1 | 712 | 175783 | 0         | 669 | 690 | 96 -  | 25  | 712 | 145980 | 146660 |
| UN82322 | Rsa1.0_00087.1 | 831 | 761073 | 0         | 831 | 831 | 100 - | 1   | 831 | 332489 | 333319 |
| UN82323 | Rsa1.0_00009.1 | 774 | 232558 | 0         | 754 | 771 | 97 +  | 1   | 771 | 130947 | 131717 |
| UN82324 | Rsa1.0_01125.1 | 866 | 53193  | 0         | 398 | 398 | 100 - | 1   | 398 | 20384  | 20781  |
| UN82325 | Rsa1.0_02808.1 | 859 | 27677  | 0         | 824 | 859 | 95 +  | 1   | 859 | 13396  | 14250  |
| UN82326 | Rsa1.0_00205.1 | 563 | 193401 | 1.00E-113 | 207 | 207 | 100 - | 356 | 562 | 130139 | 130345 |
| UN82327 | Rsa1.0_46102.1 | 442 | 489    | 1.00E-60  | 174 | 193 | 90 +  | 251 | 442 | 167    | 348    |

|         |                |     |        |           |     |     |       |     |     |        |        |
|---------|----------------|-----|--------|-----------|-----|-----|-------|-----|-----|--------|--------|
| UN82328 | Rsa1.0.00071.1 | 733 | 345714 | 0         | 709 | 734 | 96 +  | 2   | 733 | 334642 | 335369 |
| UN82329 | Rsa1.0.00040.1 | 182 | 324196 | 1.00E-98  | 182 | 182 | 100 + | 1   | 182 | 208449 | 208630 |
| UN82330 | Rsa1.0.01571.1 | 672 | 43000  | 0         | 413 | 420 | 98 -  | 2   | 421 | 13732  | 14151  |
| UN82331 | Rsa1.0.00016.1 | 828 | 831256 | 1.00E-138 | 250 | 250 | 100 + | 485 | 734 | 50170  | 50419  |
| UN82332 | Rsa1.0.00481.1 | 779 | 81316  | 0         | 470 | 490 | 95 -  | 290 | 779 | 53385  | 53862  |
| UN82333 | Rsa1.0.03673.1 | 778 | 21448  | 0         | 366 | 366 | 100 - | 413 | 778 | 4224   | 4589   |
| UN82334 | Rsa1.0.06915.1 | 145 | 10174  | 2.00E-75  | 143 | 143 | 100 + | 1   | 143 | 1452   | 1594   |
| UN82335 | Rsa1.0.05904.1 | 190 | 12279  | 3.00E-16  | 80  | 92  | 86 -  | 45  | 136 | 815    | 906    |
| UN82336 | Rsa1.0.06209.1 | 805 | 11484  | 0         | 430 | 431 | 99 +  | 1   | 431 | 2289   | 2719   |
| UN82337 | Rsa1.0.00354.1 | 857 | 232005 | 1.00E-162 | 289 | 289 | 100 - | 218 | 506 | 56454  | 56742  |
| UN82338 | Rsa1.0.00596.1 | 838 | 73578  | 1.00E-111 | 212 | 213 | 99 -  | 11  | 222 | 66874  | 67086  |
| UN82339 | Rsa1.0.01170.1 | 890 | 161131 | 0         | 885 | 885 | 100 + | 6   | 890 | 3829   | 4713   |
| UN82340 | Rsa1.0.10992.1 | 849 | 5653   | 0         | 838 | 838 | 100 + | 1   | 838 | 3257   | 4094   |
| UN82341 | Rsa1.0.00699.1 | 814 | 184398 | 0         | 811 | 815 | 99 -  | 1   | 814 | 166020 | 166834 |
| UN82342 | Rsa1.0.00686.1 | 818 | 68511  | 0         | 613 | 629 | 97 +  | 192 | 818 | 13837  | 14458  |
| UN82343 | Rsa1.0.02462.1 | 866 | 31158  | 1.00E-110 | 244 | 258 | 94 -  | 467 | 724 | 9780   | 10037  |
| UN82344 | Rsa1.0.00222.1 | 839 | 172263 | 0         | 418 | 427 | 97 -  | 1   | 426 | 36815  | 37239  |
| UN82345 | Rsa1.0.00288.1 | 850 | 98659  | 0         | 501 | 525 | 95 -  | 1   | 523 | 89852  | 90372  |
| UN82346 | Rsa1.0.02879.1 | 867 | 27047  | 0         | 785 | 803 | 97 +  | 23  | 825 | 6667   | 7469   |
| UN82347 | Rsa1.0.01516.1 | 836 | 44196  | 1.00E-180 | 406 | 433 | 93 +  | 45  | 468 | 25249  | 25680  |
| UN82348 | Rsa1.0.00144.1 | 755 | 120708 | 0         | 739 | 754 | 98 -  | 2   | 755 | 23779  | 24532  |
| UN82349 | Rsa1.0.01260.1 | 671 | 49750  | 0         | 404 | 420 | 96 -  | 12  | 431 | 25858  | 26277  |
| UN82350 | Rsa1.0.00003.1 | 842 | 340054 | 0         | 487 | 521 | 93 -  | 3   | 510 | 18413  | 18932  |
| UN82351 | Rsa1.0.06157.1 | 827 | 11605  | 0         | 827 | 828 | 99 +  | 1   | 827 | 7327   | 8154   |
| UN82352 | Rsa1.0.02032.1 | 544 | 35830  | 0         | 540 | 541 | 99 +  | 5   | 544 | 31493  | 32033  |
| UN82353 | Rsa1.0.07694.1 | 621 | 8776   | 0         | 386 | 388 | 99 +  | 235 | 621 | 8243   | 8630   |
| UN82354 | Rsa1.0.00692.1 | 790 | 68151  | 0         | 567 | 567 | 100 + | 224 | 790 | 61517  | 62083  |
| UN82355 | Rsa1.0.00221.1 | 866 | 106972 | 0         | 866 | 866 | 100 + | 1   | 866 | 16339  | 17204  |
| UN82356 | Rsa1.0.03884.1 | 839 | 20274  | 0         | 324 | 324 | 100 + | 104 | 427 | 18985  | 19308  |
| UN82357 | Rsa1.0.42785.1 | 872 | 525    | 1.00E-55  | 114 | 115 | 99 -  | 265 | 379 | 9      | 123    |
| UN82358 | Rsa1.0.00786.1 | 877 | 64285  | 1.00E-165 | 376 | 397 | 94 +  | 488 | 877 | 59915  | 60311  |
| UN82359 | Rsa1.0.00477.1 | 674 | 81556  | 0         | 605 | 666 | 90 +  | 1   | 650 | 13738  | 14384  |
| UN82360 | Rsa1.0.00739.1 | 514 | 66155  | 0         | 359 | 366 | 98 +  | 149 | 513 | 18599  | 18963  |
| UN82361 | Rsa1.0.00164.1 | 644 | 116642 | 0         | 643 | 643 | 100 + | 2   | 644 | 52890  | 53532  |
| UN82362 | Rsa1.0.10795.1 | 804 | 5718   | 0         | 731 | 793 | 92 -  | 1   | 771 | 4188   | 4979   |
| UN82363 | Rsa1.0.03557.1 | 872 | 22115  | 0         | 868 | 872 | 99 -  | 1   | 872 | 16905  | 17776  |
| UN82364 | Rsa1.0.00076.1 | 860 | 146021 | 0         | 847 | 876 | 96 -  | 1   | 860 | 71054  | 71927  |
| UN82365 | Rsa1.0.00062.1 | 824 | 299291 | 0         | 737 | 737 | 100 - | 88  | 824 | 293546 | 294282 |
| UN82366 | Rsa1.0.01516.1 | 503 | 44196  | 1.00E-160 | 341 | 358 | 95 +  | 66  | 422 | 24091  | 24448  |

|         |                |     |        |           |     |     |       |     |     |        |        |
|---------|----------------|-----|--------|-----------|-----|-----|-------|-----|-----|--------|--------|
| UN82367 | Rsa1.0.01791.1 | 847 | 160383 | 0         | 700 | 710 | 98 -  | 1   | 704 | 151288 | 151997 |
| UN82368 | Rsa1.0.01811.1 | 683 | 38977  | 1.00E-149 | 268 | 268 | 100 + | 416 | 683 | 18619  | 18886  |
| UN82369 | Rsa1.0.01343.1 | 605 | 47735  | 0         | 490 | 499 | 98 +  | 3   | 498 | 5094   | 5592   |
| UN82370 | Rsa1.0.00359.1 | 671 | 91256  | 0         | 638 | 678 | 94 +  | 1   | 671 | 55206  | 55861  |
| UN82371 | Rsa1.0.11694.1 | 134 | 131228 | 4.00E-51  | 118 | 122 | 96 -  | 1   | 122 | 127845 | 127965 |
| UN82372 | Rsa1.0.04907.1 | 582 | 15490  | 0         | 582 | 582 | 100 + | 1   | 582 | 8363   | 8944   |
| UN82373 | Rsa1.0.01406.1 | 527 | 46439  | 0         | 527 | 528 | 99 +  | 1   | 527 | 32538  | 33065  |
| UN82374 | Rsa1.0.05123.1 | 101 | 14790  | 4.00E-41  | 97  | 101 | 96 +  | 1   | 101 | 13412  | 13512  |
| UN82375 | Rsa1.0.00127.1 | 493 | 127446 | 3.00E-89  | 220 | 233 | 94 +  | 262 | 493 | 25365  | 25592  |
| UN82376 | Rsa1.0.03435.1 | 589 | 22958  | 0         | 355 | 360 | 98 -  | 1   | 360 | 20721  | 21078  |
| UN82377 | Rsa1.0.05804.1 | 540 | 12586  | 0         | 488 | 515 | 94 -  | 6   | 513 | 9743   | 10257  |
| UN82378 | Rsa1.0.04762.1 | 377 | 16101  | 0         | 377 | 377 | 100 - | 1   | 377 | 14564  | 14940  |
| UN82379 | Rsa1.0.73123.1 | 545 | 313    | 1.00E-151 | 292 | 295 | 98 -  | 254 | 545 | 19     | 313    |
| UN82380 | Rsa1.0.00620.1 | 900 | 71985  | 0         | 448 | 448 | 100 - | 1   | 448 | 58404  | 58851  |
| UN82381 | Rsa1.0.00682.1 | 758 | 68680  | 0         | 365 | 373 | 97 +  | 1   | 372 | 1977   | 2349   |
| UN82382 | Rsa1.0.01710.1 | 907 | 40586  | 0         | 784 | 794 | 98 +  | 116 | 907 | 23702  | 24495  |
| UN82383 | Rsa1.0.00331.1 | 919 | 176754 | 4.00E-16  | 96  | 113 | 84 -  | 807 | 919 | 22961  | 23073  |
| UN82384 | #              | #   | #      | #         | #   | #   | #     | #   | #   | #      | #      |
| UN82385 | Rsa1.0.01523.1 | 806 | 43959  | 0         | 583 | 585 | 99 -  | 8   | 592 | 27960  | 28542  |
| UN82386 | Rsa1.0.01882.1 | 870 | 37697  | 0         | 534 | 534 | 100 - | 1   | 534 | 9325   | 9858   |
| UN82387 | Rsa1.0.00385.1 | 852 | 89160  | 0         | 811 | 857 | 94 +  | 7   | 852 | 27828  | 28676  |
| UN82388 | Rsa1.0.02110.1 | 887 | 34919  | 0         | 440 | 440 | 100 - | 26  | 465 | 28812  | 29251  |
| UN82389 | Rsa1.0.00019.1 | 832 | 301669 | 0         | 793 | 841 | 94 +  | 1   | 832 | 119738 | 120555 |
| UN82390 | Rsa1.0.00383.1 | 875 | 398431 | 0         | 830 | 870 | 95 +  | 6   | 875 | 176075 | 176933 |
| UN82391 | Rsa1.0.31450.1 | 832 | 727    | 1.00E-107 | 235 | 247 | 95 +  | 499 | 737 | 1      | 247    |
| UN82392 | Rsa1.0.00178.1 | 864 | 114861 | 0         | 526 | 537 | 97 -  | 1   | 537 | 38681  | 39217  |
| UN82393 | Rsa1.0.13834.1 | 796 | 4246   | 4.00E-77  | 295 | 343 | 86 +  | 110 | 451 | 1714   | 2056   |
| UN82394 | Rsa1.0.02477.1 | 849 | 31058  | 0         | 778 | 800 | 97 +  | 11  | 810 | 13030  | 13823  |
| UN82395 | Rsa1.0.00370.1 | 716 | 90472  | 0         | 398 | 398 | 100 + | 319 | 716 | 18524  | 18921  |
| UN82396 | Rsa1.0.00987.1 | 817 | 57543  | 1.00E-123 | 258 | 269 | 95 +  | 1   | 269 | 416    | 684    |
| UN82397 | Rsa1.0.03138.1 | 853 | 25092  | 1.00E-118 | 216 | 216 | 100 + | 201 | 416 | 6030   | 6245   |
| UN82398 | Rsa1.0.04974.1 | 820 | 15264  | 1.00E-116 | 213 | 213 | 100 - | 1   | 213 | 8164   | 8376   |
| UN82399 | Rsa1.0.00648.1 | 568 | 70351  | 1.00E-173 | 315 | 316 | 99 +  | 254 | 568 | 16350  | 16665  |
| UN82400 | Rsa1.0.04567.1 | 503 | 16819  | 0         | 503 | 503 | 100 + | 1   | 503 | 7245   | 7747   |
| UN82401 | #              | #   | #      | #         | #   | #   | #     | #   | #   | #      | #      |
| UN82402 | Rsa1.0.00223.1 | 703 | 106231 | 0         | 404 | 404 | 100 - | 1   | 404 | 104386 | 104789 |
| UN82403 | Rsa1.0.00835.1 | 751 | 278058 | 0         | 747 | 752 | 99 +  | 1   | 751 | 5387   | 6138   |
| UN82404 | Rsa1.0.00044.1 | 446 | 271658 | 0         | 425 | 425 | 100 - | 22  | 446 | 157837 | 158261 |
| UN82405 | Rsa1.0.00751.1 | 736 | 65759  | 0         | 734 | 734 | 100 - | 3   | 736 | 57586  | 58319  |

|         |                |     |        |           |     |     |       |     |     |        |        |
|---------|----------------|-----|--------|-----------|-----|-----|-------|-----|-----|--------|--------|
| UN82406 | Rsa1.0.01557.1 | 353 | 43291  | 1.00E-154 | 275 | 275 | 100 - | 79  | 353 | 690    | 964    |
| UN82407 | Rsa1.0.00160.1 | 665 | 346678 | 7.00E-97  | 180 | 180 | 100 + | 13  | 192 | 318676 | 318855 |
| UN82408 | Rsa1.0.12064.1 | 339 | 5328   | 3.00E-60  | 133 | 138 | 96 -  | 202 | 339 | 444    | 581    |
| UN82409 | Rsa1.0.06054.1 | 527 | 11847  | 2.00E-93  | 197 | 201 | 98 +  | 300 | 496 | 1351   | 1551   |
| UN82410 | Rsa1.0.01931.1 | 451 | 37187  | 0         | 451 | 451 | 100 - | 1   | 451 | 27520  | 27970  |
| UN82411 | Rsa1.0.06169.1 | 862 | 11578  | 1.00E-62  | 161 | 173 | 93 +  | 435 | 604 | 7112   | 7284   |
| UN82412 | Rsa1.0.01245.1 | 892 | 149868 | 0         | 871 | 886 | 98 +  | 8   | 892 | 15056  | 15934  |
| UN82413 | Rsa1.0.08744.1 | 212 | 6970   | 1.00E-112 | 212 | 213 | 99 -  | 1   | 212 | 15     | 227    |
| UN82414 | Rsa1.0.05823.1 | 237 | 12521  | 1.00E-119 | 232 | 237 | 97 +  | 1   | 237 | 5670   | 5906   |
| UN82415 | Rsa1.0.00928.1 | 865 | 59293  | 1.00E-99  | 202 | 207 | 97 -  | 659 | 865 | 30981  | 31184  |
| UN82416 | Rsa1.0.01430.1 | 409 | 46034  | 1.00E-103 | 285 | 314 | 90 -  | 33  | 345 | 25511  | 25823  |
| UN82417 | Rsa1.0.01691.1 | 829 | 40921  | 0         | 817 | 830 | 98 -  | 1   | 829 | 21617  | 22446  |
| UN82418 | Rsa1.0.00893.1 | 873 | 60626  | 0         | 832 | 903 | 92 -  | 1   | 873 | 26988  | 27876  |
| UN82419 | Rsa1.0.00115.1 | 472 | 131321 | 0         | 472 | 472 | 100 + | 1   | 472 | 42977  | 43448  |
| UN82420 | Rsa1.0.00023.1 | 859 | 194764 | 0         | 833 | 869 | 95 -  | 1   | 859 | 95918  | 96783  |
| UN82421 | Rsa1.0.02297.1 | 851 | 160804 | 0         | 641 | 641 | 100 + | 211 | 851 | 149293 | 149933 |
| UN82422 | Rsa1.0.00344.1 | 321 | 191774 | 1.00E-72  | 160 | 167 | 95 +  | 123 | 289 | 119598 | 119764 |
| UN82423 | Rsa1.0.00191.1 | 376 | 316976 | 1.00E-63  | 131 | 132 | 99 +  | 1   | 131 | 19818  | 19949  |
| UN82424 | Rsa1.0.01824.1 | 266 | 38733  | 1.00E-117 | 256 | 267 | 95 -  | 5   | 266 | 7154   | 7419   |
| UN82425 | Rsa1.0.03553.1 | 518 | 22150  | 0         | 500 | 518 | 96 -  | 6   | 513 | 18243  | 18760  |
| UN82426 | Rsa1.0.00829.1 | 480 | 158305 | 0         | 450 | 485 | 92 +  | 1   | 480 | 144379 | 144857 |
| UN82427 | Rsa1.0.00052.1 | 527 | 162771 | 1.00E-138 | 249 | 249 | 100 - | 1   | 249 | 58551  | 58799  |
| UN82428 | Rsa1.0.03694.1 | 516 | 21336  | 1.00E-126 | 250 | 257 | 97 +  | 147 | 403 | 549    | 805    |
| UN82429 | Rsa1.0.06508.1 | 316 | 10874  | 1.00E-157 | 280 | 280 | 100 - | 1   | 280 | 3150   | 3429   |
| UN82430 | Rsa1.0.19311.1 | 523 | 1449   | 2.00E-87  | 272 | 307 | 88 -  | 66  | 372 | 335    | 639    |
| UN82431 | Rsa1.0.01355.1 | 554 | 47303  | 0         | 545 | 555 | 98 -  | 1   | 554 | 19826  | 20374  |
| UN82432 | Rsa1.0.19836.1 | 471 | 1377   | 0         | 441 | 470 | 93 +  | 2   | 471 | 190    | 659    |
| UN82433 | Rsa1.0.00121.1 | 588 | 278029 | 0         | 540 | 549 | 98 +  | 1   | 549 | 88766  | 89311  |
| UN82434 | Rsa1.0.12538.1 | 838 | 5199   | 0         | 361 | 363 | 99 +  | 435 | 797 | 2138   | 2500   |
| UN82435 | Rsa1.0.00168.1 | 843 | 115870 | 0         | 842 | 843 | 99 +  | 2   | 843 | 36877  | 37719  |
| UN82436 | Rsa1.0.00003.1 | 851 | 340054 | 0         | 600 | 644 | 93 +  | 237 | 851 | 168580 | 169223 |
| UN82437 | #              | #   | #      | #         | #   | #   | #     | #   | #   | #      | #      |
| UN82438 | Rsa1.0.02871.1 | 864 | 27085  | 0         | 831 | 867 | 95 -  | 1   | 864 | 25211  | 26077  |
| UN82439 | Rsa1.0.18464.1 | 673 | 1594   | 0         | 498 | 498 | 100 + | 176 | 673 | 1      | 498    |
| UN82440 | Rsa1.0.04395.1 | 395 | 17570  | 1.00E-132 | 239 | 239 | 100 + | 157 | 395 | 9572   | 9810   |
| UN82441 | Rsa1.0.00304.1 | 812 | 97429  | 1.00E-131 | 237 | 237 | 100 - | 448 | 684 | 25354  | 25590  |
| UN82442 | Rsa1.0.00207.1 | 878 | 248736 | 0         | 497 | 509 | 97 -  | 370 | 878 | 32766  | 33274  |
| UN82443 | Rsa1.0.06349.1 | 401 | 11199  | 0         | 359 | 362 | 99 -  | 41  | 401 | 7023   | 7384   |
| UN82444 | Rsa1.0.01092.1 | 408 | 54348  | 0         | 373 | 380 | 98 +  | 1   | 379 | 3736   | 4115   |

|         |                |     |        |           |     |     |       |     |     |        |        |
|---------|----------------|-----|--------|-----------|-----|-----|-------|-----|-----|--------|--------|
| UN82445 | Rsa1.0.00040.1 | 205 | 324196 | 7.00E-85  | 159 | 159 | 100 - | 47  | 205 | 54391  | 54549  |
| UN82446 | Rsa1.0.06170.1 | 116 | 11575  | 2.00E-59  | 116 | 116 | 100 - | 1   | 116 | 4985   | 5100   |
| UN82447 | Rsa1.0.00628.1 | 557 | 214360 | 1.00E-109 | 207 | 208 | 99 -  | 332 | 539 | 17600  | 17806  |
| UN82448 | Rsa1.0.05599.1 | 521 | 143653 | 0         | 510 | 523 | 97 -  | 1   | 521 | 131440 | 131955 |
| UN82449 | Rsa1.0.00300.1 | 339 | 97747  | 0         | 337 | 339 | 99 +  | 1   | 339 | 9921   | 10258  |
| UN82450 | Rsa1.0.00728.1 | 268 | 66704  | 2.00E-58  | 143 | 151 | 94 +  | 7   | 156 | 18475  | 18625  |
| UN82451 | Rsa1.0.00178.1 | 493 | 114861 | 0         | 479 | 498 | 96 -  | 2   | 493 | 29232  | 29726  |
| UN82452 | Rsa1.0.01101.1 | 599 | 54031  | 1.00E-171 | 373 | 393 | 94 +  | 198 | 589 | 6785   | 7176   |
| UN82453 | Rsa1.0.00019.1 | 481 | 301669 | 0         | 404 | 404 | 100 - | 1   | 404 | 295015 | 295418 |
| UN82454 | Rsa1.0.02429.1 | 657 | 31527  | 1.00E-150 | 285 | 290 | 98 +  | 365 | 654 | 12481  | 12770  |
| UN82455 | Rsa1.0.56381.1 | 524 | 406    | 0         | 348 | 350 | 99 +  | 11  | 359 | 29     | 378    |
| UN82456 | Rsa1.0.01644.1 | 520 | 41754  | 0         | 425 | 426 | 99 -  | 96  | 520 | 40774  | 41199  |
| UN82457 | Rsa1.0.13379.1 | 853 | 4876   | 0         | 553 | 562 | 98 +  | 12  | 573 | 4318   | 4876   |
| UN82458 | Rsa1.0.00801.1 | 931 | 63861  | 0         | 930 | 933 | 99 -  | 1   | 931 | 61594  | 62525  |
| UN82459 | Rsa1.0.00539.1 | 757 | 76926  | 0         | 466 | 478 | 97 +  | 278 | 755 | 67748  | 68222  |
| UN82460 | Rsa1.0.00076.1 | 780 | 146021 | 0         | 594 | 594 | 100 + | 1   | 594 | 126685 | 127278 |
| UN82461 | Rsa1.0.00051.1 | 601 | 258225 | 1.00E-115 | 211 | 211 | 100 + | 391 | 601 | 119097 | 119307 |
| UN82462 | Rsa1.0.38134.1 | 594 | 591    | 1.00E-165 | 371 | 399 | 92 +  | 1   | 377 | 14     | 412    |
| UN82463 | Rsa1.0.00979.1 | 889 | 57733  | 0         | 888 | 889 | 99 -  | 1   | 889 | 32332  | 33219  |
| UN82464 | Rsa1.0.06185.1 | 381 | 11540  | 1.00E-124 | 232 | 233 | 99 -  | 1   | 232 | 4583   | 4815   |
| UN82465 | Rsa1.0.10866.1 | 837 | 5697   | 0         | 740 | 818 | 90 +  | 8   | 805 | 682    | 1474   |
| UN82466 | Rsa1.0.14278.1 | 814 | 3582   | 1.00E-153 | 275 | 275 | 100 + | 540 | 814 | 24     | 298    |
| UN82467 | Rsa1.0.02732.1 | 776 | 28372  | 0         | 714 | 771 | 92 -  | 6   | 769 | 27433  | 28192  |
| UN82468 | Rsa1.0.36664.1 | 820 | 615    | 0         | 615 | 615 | 100 - | 75  | 689 | 1      | 615    |
| UN82469 | Rsa1.0.01182.1 | 835 | 167304 | 0         | 546 | 547 | 99 -  | 1   | 546 | 26261  | 26807  |
| UN82470 | Rsa1.0.17287.1 | 856 | 1871   | 0         | 833 | 856 | 97 +  | 1   | 856 | 581    | 1436   |
| UN82471 | Rsa1.0.00005.1 | 559 | 353093 | 0         | 492 | 517 | 95 +  | 16  | 532 | 348222 | 348738 |
| UN82472 | Rsa1.0.00381.1 | 720 | 89718  | 1.00E-156 | 323 | 337 | 95 -  | 1   | 334 | 75167  | 75503  |
| UN82473 | Rsa1.0.00053.1 | 814 | 263459 | 1.00E-179 | 319 | 319 | 100 + | 1   | 319 | 158980 | 159298 |
| UN82474 | Rsa1.0.05058.1 | 881 | 14977  | 0         | 840 | 893 | 94 -  | 1   | 881 | 13530  | 14412  |
| UN82475 | Rsa1.0.05918.1 | 521 | 12244  | 1.00E-144 | 259 | 259 | 100 - | 263 | 521 | 3491   | 3749   |
| UN82476 | Rsa1.0.01651.1 | 818 | 41586  | 0         | 492 | 494 | 99 -  | 325 | 818 | 41093  | 41586  |
| UN82477 | Rsa1.0.00435.1 | 866 | 317579 | 0         | 825 | 868 | 95 -  | 1   | 866 | 68712  | 69562  |
| UN82478 | Rsa1.0.04022.1 | 877 | 19534  | 1.00E-111 | 215 | 217 | 99 +  | 624 | 839 | 12548  | 12764  |
| UN82479 | Rsa1.0.08841.1 | 698 | 6870   | 0         | 668 | 698 | 95 +  | 1   | 698 | 737    | 1431   |
| UN82480 | Rsa1.0.02656.1 | 818 | 29018  | 0         | 817 | 818 | 99 -  | 2   | 818 | 946    | 1763   |
| UN82481 | Rsa1.0.00682.1 | 677 | 68680  | 0         | 646 | 661 | 97 +  | 17  | 677 | 13393  | 14049  |
| UN82482 | Rsa1.0.00944.1 | 835 | 58733  | 2.00E-66  | 156 | 165 | 94 -  | 447 | 611 | 38468  | 38632  |
| UN82483 | Rsa1.0.02960.1 | 865 | 26440  | 0         | 435 | 443 | 98 +  | 98  | 540 | 22638  | 23080  |

|         |                |     |        |           |     |     |       |     |     |        |        |
|---------|----------------|-----|--------|-----------|-----|-----|-------|-----|-----|--------|--------|
| UN82484 | Rsa1.0.00524.1 | 871 | 169613 | 0         | 863 | 864 | 99 +  | 9   | 871 | 158925 | 159788 |
| UN82485 | Rsa1.0.01941.1 | 637 | 37069  | 1.00E-103 | 200 | 203 | 98 +  | 435 | 637 | 33221  | 33423  |
| UN82486 | Rsa1.0.00378.1 | 788 | 89892  | 0         | 479 | 479 | 100 - | 1   | 479 | 72856  | 73334  |
| UN82487 | Rsa1.0.00049.1 | 851 | 167018 | 0         | 623 | 639 | 97 +  | 15  | 651 | 146059 | 146695 |
| UN82488 | Rsa1.0.00915.1 | 787 | 194446 | 0         | 759 | 784 | 96 -  | 10  | 787 | 31771  | 32554  |
| UN82489 | Rsa1.0.46616.1 | 880 | 484    | 0         | 445 | 446 | 99 -  | 435 | 880 | 39     | 484    |
| UN82490 | Rsa1.0.01509.1 | 732 | 44258  | 0         | 732 | 732 | 100 - | 1   | 732 | 30648  | 31379  |
| UN82491 | Rsa1.0.03347.1 | 720 | 23588  | 0         | 681 | 708 | 96 -  | 20  | 720 | 18393  | 19097  |
| UN82492 | Rsa1.0.02365.1 | 919 | 32118  | 0         | 919 | 921 | 99 +  | 1   | 919 | 26908  | 27828  |
| UN82493 | Rsa1.0.03684.1 | 853 | 21392  | 0         | 545 | 545 | 100 - | 1   | 545 | 20410  | 20954  |
| UN82494 | Rsa1.0.01566.1 | 361 | 43134  | 0         | 356 | 358 | 99 +  | 4   | 361 | 38492  | 38848  |
| UN82495 | Rsa1.0.02767.1 | 853 | 28111  | 0         | 853 | 853 | 100 - | 1   | 853 | 10799  | 11651  |
| UN82496 | Rsa1.0.00198.1 | 829 | 222963 | 0         | 819 | 829 | 98 -  | 1   | 829 | 81309  | 82137  |
| UN82497 | Rsa1.0.00610.1 | 718 | 72740  | 0         | 657 | 678 | 96 -  | 41  | 718 | 44430  | 45104  |
| UN82498 | Rsa1.0.01992.1 | 879 | 36424  | 0         | 878 | 880 | 99 -  | 1   | 879 | 8102   | 8981   |
| UN82499 | Rsa1.0.01731.1 | 457 | 40208  | 1.00E-119 | 225 | 226 | 99 +  | 1   | 225 | 34923  | 35148  |
| UN82500 | Rsa1.0.00504.1 | 841 | 79334  | 5.00E-86  | 162 | 162 | 100 - | 391 | 552 | 28812  | 28973  |
| UN82501 | Rsa1.0.17678.1 | 756 | 1766   | 0         | 707 | 743 | 95 -  | 1   | 741 | 712    | 1449   |
| UN82502 | Rsa1.0.36653.1 | 802 | 615    | 0         | 615 | 615 | 100 - | 94  | 708 | 1      | 615    |
| UN82503 | Rsa1.0.00944.1 | 886 | 58733  | 0         | 874 | 880 | 99 +  | 8   | 886 | 20478  | 21357  |
| UN82504 | Rsa1.0.00305.1 | 777 | 97308  | 0         | 538 | 539 | 99 -  | 1   | 539 | 93260  | 93797  |
| UN82505 | Rsa1.0.00228.1 | 340 | 105511 | 4.00E-75  | 185 | 194 | 95 +  | 2   | 193 | 59578  | 59768  |
| UN82506 | Rsa1.0.09276.1 | 880 | 6505   | 0         | 397 | 407 | 97 -  | 477 | 880 | 2347   | 2753   |
| UN82507 | Rsa1.0.06570.1 | 459 | 10751  | 0         | 455 | 460 | 98 -  | 1   | 459 | 8109   | 8568   |
| UN82508 | Rsa1.0.07042.1 | 336 | 9987   | 0         | 335 | 336 | 99 +  | 1   | 336 | 4894   | 5229   |
| UN82509 | Rsa1.0.03669.1 | 551 | 147114 | 0         | 544 | 550 | 98 -  | 2   | 551 | 12173  | 12722  |
| UN82510 | Rsa1.0.04716.1 | 859 | 16262  | 0         | 715 | 719 | 99 +  | 1   | 717 | 3202   | 3920   |
| UN82511 | Rsa1.0.02400.1 | 881 | 31750  | 0         | 877 | 881 | 99 +  | 1   | 881 | 28574  | 29454  |
| UN82512 | Rsa1.0.00010.1 | 205 | 294827 | 1.00E-86  | 191 | 200 | 95 +  | 6   | 205 | 272977 | 273173 |
| UN82513 | Rsa1.0.05325.1 | 854 | 14141  | 0         | 789 | 856 | 92 +  | 4   | 854 | 4835   | 5663   |
| UN82514 | Rsa1.0.02745.1 | 833 | 28263  | 0         | 833 | 833 | 100 + | 1   | 833 | 17060  | 17892  |
| UN82515 | Rsa1.0.23881.1 | 350 | 1020   | 0         | 350 | 351 | 99 +  | 1   | 350 | 309    | 659    |
| UN82516 | Rsa1.0.01512.1 | 705 | 44234  | 0         | 454 | 468 | 97 -  | 1   | 468 | 34074  | 34541  |
| UN82517 | Rsa1.0.00195.1 | 887 | 251884 | 1.00E-157 | 290 | 293 | 98 +  | 382 | 674 | 98251  | 98543  |
| UN82518 | Rsa1.0.01215.1 | 846 | 166813 | 0         | 369 | 381 | 96 +  | 1   | 376 | 41922  | 42301  |
| UN82519 | Rsa1.0.03406.1 | 864 | 23159  | 3.00E-44  | 227 | 272 | 83 -  | 543 | 814 | 733    | 1004   |
| UN82520 | Rsa1.0.04159.1 | 498 | 18795  | 0         | 472 | 497 | 94 +  | 2   | 497 | 12149  | 12636  |
| UN82521 | Rsa1.0.07743.1 | 627 | 8670   | 0         | 341 | 341 | 100 + | 287 | 627 | 6545   | 6885   |
| UN82522 | Rsa1.0.13702.1 | 782 | 4456   | 0         | 732 | 747 | 97 +  | 1   | 745 | 984    | 1728   |

|         |                |     |        |           |     |     |       |     |     |        |        |
|---------|----------------|-----|--------|-----------|-----|-----|-------|-----|-----|--------|--------|
| UN82523 | Rsa1.0.03436.1 | 514 | 22958  | 0         | 472 | 472 | 100 - | 43  | 514 | 3745   | 4216   |
| UN82524 | Rsa1.0.03681.1 | 859 | 21405  | 0         | 858 | 858 | 100 + | 2   | 859 | 12332  | 13189  |
| UN82525 | Rsa1.0.05709.1 | 844 | 12867  | 0         | 844 | 846 | 99 +  | 1   | 844 | 7655   | 8500   |
| UN82526 | Rsa1.0.02951.1 | 863 | 26505  | 0         | 482 | 482 | 100 + | 2   | 483 | 11337  | 11818  |
| UN82527 | Rsa1.0.00144.1 | 858 | 120708 | 1.00E-179 | 324 | 326 | 99 +  | 5   | 330 | 45242  | 45567  |
| UN82528 | Rsa1.0.00795.1 | 520 | 64022  | 0         | 518 | 521 | 99 -  | 1   | 520 | 608    | 1128   |
| UN82529 | Rsa1.0.27327.1 | 542 | 857    | 0         | 449 | 449 | 100 - | 1   | 449 | 1      | 449    |
| UN82530 | Rsa1.0.13918.1 | 427 | 4094   | 1.00E-131 | 238 | 238 | 100 + | 1   | 238 | 424    | 661    |
| UN82531 | Rsa1.0.00527.1 | 703 | 77733  | 0         | 568 | 568 | 100 + | 10  | 577 | 48093  | 48660  |
| UN82532 | Rsa1.0.00173.1 | 564 | 288743 | 0         | 555 | 562 | 98 -  | 3   | 564 | 277289 | 277850 |
| UN82533 | Rsa1.0.02774.1 | 448 | 28038  | 0         | 367 | 368 | 99 -  | 78  | 445 | 3945   | 4312   |
| UN82534 | Rsa1.0.00416.1 | 849 | 86772  | 0         | 760 | 786 | 96 +  | 69  | 849 | 45873  | 46655  |
| UN82535 | Rsa1.0.00173.1 | 514 | 288743 | 0         | 329 | 330 | 99 +  | 1   | 329 | 39260  | 39589  |
| UN82536 | #              | #   | #      | #         | #   | #   | #     | #   | #   | #      | #      |
| UN82537 | Rsa1.0.03582.1 | 776 | 21963  | 5.00E-58  | 133 | 139 | 95 -  | 638 | 776 | 5111   | 5249   |
| UN82538 | Rsa1.0.00646.1 | 114 | 70473  | 3.00E-58  | 114 | 114 | 100 + | 1   | 114 | 9968   | 10081  |
| UN82539 | Rsa1.0.01489.1 | 828 | 44764  | 0         | 554 | 554 | 100 - | 1   | 554 | 1372   | 1925   |
| UN82540 | Rsa1.0.13488.1 | 733 | 4777   | 0         | 647 | 721 | 89 +  | 1   | 717 | 2307   | 3005   |
| UN82541 | Rsa1.0.00888.1 | 867 | 60978  | 0         | 807 | 830 | 97 -  | 1   | 821 | 9104   | 9933   |
| UN82542 | Rsa1.0.31254.1 | 810 | 732    | 0         | 635 | 663 | 95 +  | 148 | 810 | 1      | 648    |
| UN82543 | Rsa1.0.02287.1 | 848 | 32986  | 0         | 839 | 855 | 98 +  | 1   | 846 | 25235  | 26089  |
| UN82544 | Rsa1.0.00195.1 | 774 | 251884 | 0         | 711 | 765 | 92 -  | 10  | 774 | 215692 | 216423 |
| UN82545 | Rsa1.0.09735.1 | 883 | 6180   | 1.00E-18  | 88  | 101 | 87 -  | 651 | 751 | 294    | 394    |
| UN82546 | Rsa1.0.00573.1 | 755 | 74821  | 0         | 375 | 381 | 98 -  | 1   | 381 | 46214  | 46594  |
| UN82547 | Rsa1.0.00873.1 | 863 | 61459  | 0         | 826 | 843 | 97 +  | 1   | 841 | 18315  | 19157  |
| UN82548 | Rsa1.0.02538.1 | 857 | 30364  | 1.00E-171 | 420 | 461 | 91 +  | 1   | 459 | 2776   | 3211   |
| UN82549 | Rsa1.0.01302.1 | 810 | 48907  | 0         | 806 | 809 | 99 -  | 2   | 810 | 34704  | 35512  |
| UN82550 | Rsa1.0.00037.1 | 837 | 307838 | 0         | 567 | 592 | 95 +  | 250 | 837 | 80408  | 80999  |
| UN82551 | Rsa1.0.01761.1 | 865 | 39717  | 0         | 772 | 772 | 100 - | 1   | 772 | 15829  | 16600  |
| UN82552 | Rsa1.0.00125.1 | 884 | 253043 | 0         | 349 | 357 | 97 -  | 395 | 751 | 186651 | 187007 |
| UN82553 | Rsa1.0.00293.1 | 925 | 339294 | 0         | 922 | 927 | 99 +  | 1   | 925 | 302296 | 303221 |
| UN82554 | Rsa1.0.03070.1 | 832 | 25578  | 0         | 526 | 572 | 91 -  | 1   | 569 | 668    | 1234   |
| UN82555 | Rsa1.0.16147.1 | 837 | 2267   | 0         | 732 | 832 | 87 -  | 9   | 834 | 215    | 1029   |
| UN82556 | Rsa1.0.01794.1 | 157 | 39215  | 1.00E-39  | 90  | 91  | 98 +  | 1   | 90  | 31310  | 31400  |
| UN82557 | Rsa1.0.00198.1 | 801 | 222963 | 0         | 396 | 403 | 98 -  | 21  | 423 | 25601  | 26003  |
| UN82558 | Rsa1.0.00048.1 | 839 | 167185 | 0         | 668 | 685 | 97 -  | 155 | 839 | 107444 | 108128 |
| UN82559 | Rsa1.0.02079.1 | 871 | 35306  | 0         | 603 | 618 | 97 -  | 136 | 753 | 9390   | 10004  |
| UN82560 | Rsa1.0.03261.1 | 790 | 24281  | 0         | 376 | 376 | 100 + | 151 | 526 | 4757   | 5132   |
| UN82561 | Rsa1.0.00414.1 | 854 | 202190 | 0         | 379 | 379 | 100 + | 1   | 379 | 200296 | 200674 |

|         |                |     |        |           |     |     |       |     |     |        |        |
|---------|----------------|-----|--------|-----------|-----|-----|-------|-----|-----|--------|--------|
| UN82562 | Rsa1.0_00264.1 | 832 | 101674 | 0         | 832 | 832 | 100 + | 1   | 832 | 39519  | 40350  |
| UN82563 | Rsa1.0_00124.1 | 802 | 262503 | 0         | 785 | 804 | 97 -  | 5   | 802 | 27387  | 28186  |
| UN82564 | Rsa1.0_00237.1 | 872 | 235974 | 0         | 870 | 872 | 99 -  | 1   | 872 | 200367 | 201238 |
| UN82565 | Rsa1.0_01932.1 | 868 | 37177  | 0         | 868 | 869 | 99 +  | 1   | 868 | 28193  | 29061  |
| UN82566 | Rsa1.0_00316.1 | 853 | 96264  | 0         | 851 | 851 | 100 + | 3   | 853 | 80838  | 81688  |
| UN82567 | Rsa1.0_00085.1 | 855 | 142226 | 0         | 854 | 855 | 99 +  | 1   | 855 | 29022  | 29875  |
| UN82568 | Rsa1.0_00473.1 | 857 | 212204 | 0         | 384 | 402 | 95 -  | 1   | 393 | 79061  | 79461  |
| UN82569 | Rsa1.0_02616.1 | 531 | 29542  | 1.00E-136 | 251 | 253 | 99 +  | 12  | 264 | 19618  | 19870  |
| UN82570 | Rsa1.0_12857.1 | 345 | 5096   | 5.00E-84  | 245 | 274 | 89 -  | 7   | 280 | 2329   | 2602   |
| UN82571 | Rsa1.0_00114.1 | 423 | 131330 | 3.00E-18  | 72  | 80  | 90 +  | 220 | 299 | 67043  | 67122  |
| UN82572 | Rsa1.0_02247.1 | 881 | 33427  | 0         | 466 | 466 | 100 + | 416 | 881 | 11477  | 11942  |
| UN82573 | Rsa1.0_00037.1 | 888 | 307838 | 0         | 422 | 424 | 99 +  | 466 | 888 | 239665 | 240088 |
| UN82574 | Rsa1.0_00123.1 | 776 | 325650 | 0         | 366 | 377 | 97 -  | 15  | 391 | 247023 | 247396 |
| UN82575 | Rsa1.0_00474.1 | 776 | 81731  | 0         | 608 | 616 | 98 +  | 1   | 616 | 1153   | 1767   |
| UN82576 | Rsa1.0_04112.1 | 573 | 18989  | 0         | 546 | 570 | 95 -  | 5   | 573 | 3166   | 3734   |
| UN82577 | Rsa1.0_00985.1 | 887 | 161950 | 0         | 584 | 584 | 100 - | 1   | 584 | 23197  | 23780  |
| UN82578 | Rsa1.0_01400.1 | 858 | 46560  | 1.00E-131 | 341 | 370 | 92 -  | 334 | 688 | 11678  | 12043  |
| UN82579 | Rsa1.0_05156.1 | 533 | 14648  | 1.00E-172 | 313 | 314 | 99 +  | 220 | 533 | 1      | 313    |
| UN82580 | Rsa1.0_00959.1 | 824 | 58202  | 0         | 817 | 817 | 100 - | 4   | 820 | 57210  | 58026  |
| UN82581 | Rsa1.0_08403.1 | 822 | 7416   | 0         | 819 | 822 | 99 -  | 1   | 822 | 1085   | 1903   |
| UN82582 | Rsa1.0_06619.1 | 686 | 10650  | 1.00E-175 | 324 | 327 | 99 +  | 7   | 331 | 545    | 871    |
| UN82583 | Rsa1.0_00029.1 | 144 | 272992 | 5.00E-57  | 136 | 144 | 94 +  | 1   | 144 | 10362  | 10505  |
| UN82584 | Rsa1.0_00018.1 | 816 | 410899 | 0         | 412 | 412 | 100 - | 405 | 816 | 235692 | 236103 |
| UN82585 | Rsa1.0_00176.1 | 832 | 240984 | 0         | 396 | 399 | 99 +  | 193 | 591 | 155819 | 156217 |
| UN82586 | Rsa1.0_00040.1 | 547 | 324196 | 0         | 547 | 549 | 99 +  | 1   | 547 | 163988 | 164536 |
| UN82587 | Rsa1.0_00771.1 | 666 | 64870  | 0         | 662 | 666 | 99 -  | 1   | 666 | 62048  | 62713  |
| UN82588 | Rsa1.0_18069.1 | 809 | 1678   | 1.00E-141 | 254 | 254 | 100 - | 556 | 809 | 872    | 1125   |
| UN82589 | Rsa1.0_07604.1 | 808 | 9041   | 0         | 789 | 809 | 97 -  | 1   | 808 | 5294   | 6102   |
| UN82590 | Rsa1.0_00129.1 | 360 | 126831 | 0         | 360 | 367 | 98 -  | 1   | 360 | 114947 | 115313 |
| UN82591 | Rsa1.0_00612.1 | 805 | 72376  | 0         | 546 | 575 | 94 -  | 1   | 563 | 37278  | 37848  |
| UN82592 | Rsa1.0_07280.1 | 841 | 9624   | 0         | 533 | 533 | 100 + | 104 | 636 | 1      | 533    |
| UN82593 | Rsa1.0_00092.1 | 857 | 659932 | 0         | 854 | 854 | 100 + | 4   | 857 | 48566  | 49419  |
| UN82594 | Rsa1.0_01555.1 | 854 | 166456 | 0         | 818 | 847 | 96 -  | 1   | 837 | 31888  | 32731  |
| UN82595 | Rsa1.0_07556.1 | 836 | 9136   | 0         | 592 | 592 | 100 - | 5   | 596 | 1      | 592    |
| UN82596 | Rsa1.0_00059.1 | 855 | 159650 | 0         | 848 | 848 | 100 + | 1   | 848 | 21453  | 22300  |
| UN82597 | Rsa1.0_04778.1 | 808 | 16010  | 0         | 795 | 809 | 98 -  | 1   | 808 | 9635   | 10443  |
| UN82598 | Rsa1.0_01047.1 | 834 | 55705  | 0         | 380 | 380 | 100 - | 1   | 380 | 14992  | 15371  |
| UN82599 | Rsa1.0_00007.1 | 764 | 239325 | 1.00E-140 | 253 | 253 | 100 - | 512 | 764 | 30264  | 30516  |
| UN82600 | Rsa1.0_02031.1 | 879 | 35833  | 0         | 879 | 880 | 99 +  | 1   | 879 | 13679  | 14558  |



|         |                |     |        |           |     |     |       |     |     |        |        |
|---------|----------------|-----|--------|-----------|-----|-----|-------|-----|-----|--------|--------|
| UN82601 | Rsa1.0.00384.1 | 702 | 89278  | 0         | 697 | 702 | 99 -  | 1   | 702 | 20301  | 21002  |
| UN82602 | Rsa1.0.03333.1 | 820 | 23662  | 1.00E-144 | 259 | 259 | 100 - | 1   | 259 | 19376  | 19634  |
| UN82603 | Rsa1.0.00271.1 | 872 | 101125 | 0         | 332 | 332 | 100 - | 413 | 744 | 63541  | 63872  |
| UN82604 | Rsa1.0.00017.1 | 857 | 752458 | 0         | 538 | 538 | 100 + | 1   | 538 | 691495 | 692032 |
| UN82605 | Rsa1.0.00094.1 | 778 | 139042 | 0         | 389 | 396 | 98 -  | 2   | 397 | 97239  | 97633  |
| UN82606 | #              | #   | #      | #         | #   | #   | #     | #   | #   | #      | #      |
| UN82607 | Rsa1.0.05410.1 | 607 | 13840  | 0         | 585 | 625 | 93 -  | 6   | 607 | 6103   | 6725   |
| UN82608 | Rsa1.0.01348.1 | 770 | 47569  | 0         | 768 | 770 | 99 +  | 1   | 770 | 16706  | 17475  |
| UN82609 | Rsa1.0.00308.1 | 807 | 96915  | 1.00E-171 | 304 | 304 | 100 + | 1   | 304 | 9498   | 9801   |
| UN82610 | Rsa1.0.01488.1 | 749 | 44766  | 0         | 559 | 576 | 97 +  | 4   | 577 | 6347   | 6922   |
| UN82611 | Rsa1.0.03880.1 | 853 | 20293  | 1.00E-131 | 238 | 238 | 100 + | 230 | 467 | 18509  | 18746  |
| UN82612 | Rsa1.0.00205.1 | 780 | 193401 | 0         | 402 | 406 | 99 -  | 1   | 406 | 15834  | 16235  |
| UN82613 | Rsa1.0.03813.1 | 884 | 20708  | 1.00E-169 | 302 | 302 | 100 - | 203 | 504 | 17460  | 17761  |
| UN82614 | Rsa1.0.01504.1 | 878 | 189978 | 0         | 878 | 878 | 100 + | 1   | 878 | 166120 | 166997 |
| UN82615 | #              | #   | #      | #         | #   | #   | #     | #   | #   | #      | #      |
| UN82616 | Rsa1.0.02369.1 | 877 | 32075  | 0         | 814 | 879 | 92 +  | 1   | 877 | 479    | 1327   |
| UN82617 | Rsa1.0.01899.1 | 328 | 37474  | 5.00E-93  | 173 | 173 | 100 - | 37  | 209 | 32267  | 32439  |
| UN82618 | Rsa1.0.50308.1 | 861 | 451    | 1.00E-167 | 307 | 310 | 99 +  | 3   | 312 | 142    | 451    |
| UN82619 | Rsa1.0.00016.1 | 852 | 831256 | 0         | 340 | 340 | 100 - | 436 | 775 | 251373 | 251712 |
| UN82620 | Rsa1.0.06573.1 | 873 | 10742  | 0         | 838 | 874 | 95 -  | 1   | 873 | 60     | 933    |
| UN82621 | Rsa1.0.29369.1 | 845 | 785    | 1.00E-174 | 348 | 358 | 97 -  | 1   | 358 | 1      | 356    |
| UN82622 | Rsa1.0.03357.1 | 900 | 23478  | 0         | 865 | 896 | 96 -  | 17  | 900 | 18285  | 19175  |
| UN82623 | Rsa1.0.21950.1 | 870 | 1160   | 0         | 574 | 576 | 99 -  | 295 | 870 | 585    | 1160   |
| UN82624 | Rsa1.0.56368.1 | 739 | 406    | 1.00E-166 | 303 | 304 | 99 +  | 328 | 631 | 1      | 303    |
| UN82625 | Rsa1.0.01516.1 | 120 | 44196  | 2.00E-40  | 111 | 120 | 92 -  | 1   | 120 | 25246  | 25365  |
| UN82626 | Rsa1.0.01845.1 | 374 | 38415  | 3.00E-82  | 158 | 159 | 99 +  | 216 | 374 | 14533  | 14691  |
| UN82627 | Rsa1.0.01884.1 | 795 | 37659  | 0         | 427 | 455 | 93 -  | 143 | 594 | 25379  | 25833  |
| UN82628 | Rsa1.0.00117.1 | 778 | 213118 | 3.00E-75  | 159 | 164 | 96 +  | 553 | 716 | 54612  | 54775  |
| UN82629 | Rsa1.0.00226.1 | 857 | 105884 | 0         | 597 | 597 | 100 - | 1   | 597 | 78553  | 79149  |
| UN82630 | Rsa1.0.07742.1 | 813 | 8670   | 0         | 791 | 824 | 95 +  | 1   | 813 | 6359   | 7179   |
| UN82631 | Rsa1.0.01160.1 | 534 | 52068  | 1.00E-158 | 309 | 316 | 97 -  | 222 | 534 | 42504  | 42817  |
| UN82632 | Rsa1.0.00019.1 | 175 | 301669 | 2.00E-88  | 165 | 165 | 100 + | 11  | 175 | 209195 | 209359 |
| UN82633 | Rsa1.0.00113.1 | 435 | 131574 | 1.00E-114 | 208 | 208 | 100 + | 3   | 210 | 36552  | 36759  |
| UN82634 | Rsa1.0.00525.1 | 434 | 78030  | 0         | 434 | 436 | 99 -  | 1   | 434 | 9015   | 9450   |
| UN82635 | Rsa1.0.01450.1 | 456 | 144251 | 4.00E-17  | 55  | 57  | 96 -  | 143 | 197 | 11849  | 11905  |
| UN82636 | Rsa1.0.07945.1 | 519 | 8206   | 0         | 500 | 506 | 98 -  | 13  | 517 | 3126   | 3631   |
| UN82637 | Rsa1.0.07004.1 | 519 | 10045  | 0         | 409 | 409 | 100 - | 1   | 409 | 1347   | 1755   |
| UN82638 | Rsa1.0.00079.1 | 448 | 606987 | 1.00E-122 | 223 | 223 | 100 - | 46  | 268 | 567826 | 568048 |
| UN82639 | Rsa1.0.00773.1 | 458 | 64839  | 0         | 458 | 458 | 100 - | 1   | 458 | 53837  | 54294  |

|         |                |   |     |        |           |     |     |       |   |     |     |        |        |
|---------|----------------|---|-----|--------|-----------|-----|-----|-------|---|-----|-----|--------|--------|
| UN82640 | Rsa1.0_02179.1 |   | 516 | 34188  | 0         | 493 | 506 | 97 -  |   | 12  | 516 | 20415  | 20917  |
| UN82641 | #              | # | #   | #      | #         | #   | #   | #     | # | #   | #   | #      | #      |
| UN82642 | Rsa1.0_00813.1 |   | 496 | 63202  | 1.00E-106 | 209 | 212 | 98 +  |   | 11  | 222 | 43283  | 43493  |
| UN82643 | Rsa1.0_04876.1 |   | 368 | 15631  | 1.00E-143 | 272 | 277 | 98 -  |   | 92  | 368 | 7199   | 7475   |
| UN82644 | Rsa1.0_01004.1 |   | 448 | 56975  | 0         | 431 | 446 | 96 -  |   | 1   | 446 | 10683  | 11128  |
| UN82645 | Rsa1.0_02991.1 |   | 459 | 26178  | 0         | 449 | 449 | 100 + |   | 11  | 459 | 8749   | 9197   |
| UN82646 | Rsa1.0_04034.1 |   | 389 | 19481  | 0         | 389 | 389 | 100 + |   | 1   | 389 | 9118   | 9506   |
| UN82647 | Rsa1.0_00308.1 |   | 544 | 96915  | 0         | 544 | 544 | 100 - |   | 1   | 544 | 33049  | 33592  |
| UN82648 | Rsa1.0_02197.1 |   | 476 | 33996  | 1.00E-102 | 201 | 205 | 98 -  |   | 199 | 403 | 4504   | 4708   |
| UN82649 | Rsa1.0_00127.1 |   | 455 | 127446 | 0         | 444 | 447 | 99 +  |   | 1   | 447 | 74789  | 75235  |
| UN82650 | Rsa1.0_01495.1 |   | 468 | 44613  | 1.00E-154 | 341 | 358 | 95 +  |   | 116 | 468 | 18012  | 18368  |
| UN82651 | Rsa1.0_07959.1 |   | 566 | 8173   | 1.00E-175 | 321 | 324 | 99 +  |   | 117 | 440 | 5596   | 5919   |
| UN82652 | Rsa1.0_07265.1 |   | 420 | 9642   | 1.00E-155 | 292 | 297 | 98 +  |   | 3   | 299 | 133    | 429    |
| UN82653 | Rsa1.0_01566.1 |   | 449 | 43134  | 0         | 448 | 449 | 99 -  |   | 2   | 449 | 34607  | 35055  |
| UN82654 | Rsa1.0_30035.1 |   | 451 | 764    | 0         | 342 | 342 | 100 + |   | 3   | 344 | 423    | 764    |
| UN82655 | Rsa1.0_00017.1 |   | 648 | 752458 | 0         | 632 | 644 | 98 +  |   | 7   | 648 | 362738 | 363381 |
| UN82656 | Rsa1.0_01538.1 |   | 476 | 43733  | 0         | 379 | 392 | 96 +  |   | 4   | 394 | 28498  | 28886  |
| UN82657 | Rsa1.0_00017.1 |   | 584 | 752458 | 0         | 584 | 584 | 100 - |   | 1   | 584 | 553794 | 554377 |
| UN82658 | Rsa1.0_00550.1 |   | 664 | 210790 | 1.00E-108 | 199 | 199 | 100 + |   | 100 | 298 | 183114 | 183312 |
| UN82659 | Rsa1.0_01153.1 |   | 597 | 52264  | 0         | 585 | 587 | 99 +  |   | 11  | 596 | 18282  | 18868  |
| UN82660 | Rsa1.0_02944.1 |   | 571 | 26553  | 0         | 335 | 335 | 100 - |   | 215 | 549 | 10557  | 10891  |
| UN82661 | Rsa1.0_01516.1 |   | 245 | 44196  | 1.00E-59  | 132 | 137 | 96 -  |   | 32  | 168 | 37236  | 37372  |
| UN82662 | Rsa1.0_00087.1 |   | 525 | 761073 | 0         | 381 | 390 | 97 +  |   | 136 | 525 | 437482 | 437869 |
| UN82663 | Rsa1.0_00947.1 |   | 480 | 58664  | 1.00E-161 | 287 | 287 | 100 + |   | 1   | 287 | 9541   | 9827   |
| UN82664 | Rsa1.0_02905.1 |   | 465 | 26873  | 0         | 452 | 465 | 97 +  |   | 1   | 463 | 3425   | 3889   |
| UN82665 | Rsa1.0_00804.1 |   | 210 | 63726  | 2.00E-85  | 190 | 200 | 95 -  |   | 11  | 210 | 53200  | 53399  |
| UN82666 | Rsa1.0_17173.1 |   | 483 | 1902   | 3.00E-77  | 147 | 147 | 100 - |   | 270 | 416 | 1664   | 1810   |
| UN82667 | Rsa1.0_00536.1 |   | 523 | 77199  | 0         | 508 | 515 | 98 +  |   | 9   | 523 | 22859  | 23373  |
| UN82668 | Rsa1.0_01106.1 |   | 378 | 53916  | 0         | 378 | 378 | 100 + |   | 1   | 378 | 5560   | 5937   |
| UN82669 | Rsa1.0_00116.1 |   | 488 | 365886 | 1.00E-131 | 244 | 245 | 99 -  |   | 1   | 244 | 244253 | 244497 |
| UN82670 | Rsa1.0_00472.1 |   | 522 | 398134 | 0         | 522 | 522 | 100 - |   | 1   | 522 | 277660 | 278181 |
| UN82671 | Rsa1.0_01771.1 |   | 431 | 172709 | 1.00E-127 | 236 | 238 | 99 +  |   | 190 | 427 | 8310   | 8547   |
| UN82672 | Rsa1.0_03362.1 |   | 514 | 23453  | 1.00E-170 | 302 | 302 | 100 + |   | 22  | 323 | 10897  | 11198  |
| UN82673 | Rsa1.0_03790.1 |   | 503 | 20844  | 1.00E-147 | 294 | 301 | 97 +  |   | 130 | 429 | 6656   | 6955   |
| UN82674 | Rsa1.0_00300.1 |   | 463 | 97747  | 1.00E-79  | 182 | 193 | 94 -  |   | 173 | 358 | 86824  | 87016  |
| UN82675 | Rsa1.0_03773.1 |   | 452 | 20937  | 0         | 420 | 420 | 100 + |   | 33  | 452 | 4347   | 4766   |
| UN82676 | Rsa1.0_00722.1 |   | 481 | 66840  | 0         | 458 | 481 | 95 +  |   | 1   | 481 | 12573  | 13035  |
| UN82677 | Rsa1.0_00013.1 |   | 819 | 292129 | 0         | 423 | 423 | 100 + |   | 1   | 423 | 114371 | 114793 |
| UN82678 | Rsa1.0_00033.1 |   | 884 | 515811 | 0         | 555 | 564 | 98 +  |   | 3   | 565 | 489958 | 490521 |

|         |                |     |        |           |     |     |       |     |     |        |        |
|---------|----------------|-----|--------|-----------|-----|-----|-------|-----|-----|--------|--------|
| UN82679 | Rsa1.0_00240.1 | 862 | 104175 | 0         | 859 | 859 | 100 + | 4   | 862 | 22157  | 23015  |
| UN82680 | Rsa1.0_00752.1 | 792 | 65756  | 1.00E-137 | 289 | 304 | 95 +  | 489 | 792 | 14186  | 14481  |
| UN82681 | Rsa1.0_00205.1 | 504 | 193401 | 2.00E-99  | 214 | 224 | 95 -  | 281 | 504 | 155363 | 155586 |
| UN82682 | Rsa1.0_01798.1 | 804 | 173909 | 0         | 692 | 730 | 94 +  | 78  | 804 | 171521 | 172244 |
| UN82683 | Rsa1.0_02829.1 | 827 | 27541  | 0         | 827 | 827 | 100 + | 1   | 827 | 3456   | 4282   |
| UN82684 | Rsa1.0_00591.1 | 576 | 73789  | 1.00E-155 | 284 | 286 | 99 -  | 21  | 306 | 19369  | 19654  |
| UN82685 | Rsa1.0_02409.1 | 852 | 31663  | 0         | 828 | 830 | 99 +  | 23  | 852 | 5446   | 6275   |
| UN82686 | Rsa1.0_00048.1 | 539 | 167185 | 3.00E-89  | 173 | 175 | 98 -  | 2   | 176 | 164982 | 165156 |
| UN82687 | Rsa1.0_00865.1 | 597 | 61686  | 0         | 597 | 597 | 100 - | 1   | 597 | 11071  | 11667  |
| UN82688 | Rsa1.0_00727.1 | 113 | 66724  | 9.00E-49  | 112 | 114 | 98 -  | 1   | 113 | 26846  | 26958  |
| UN82689 | Rsa1.0_04817.1 | 877 | 15869  | 1.00E-135 | 318 | 340 | 93 +  | 305 | 643 | 14595  | 14928  |
| UN82690 | Rsa1.0_00023.1 | 821 | 194764 | 0         | 821 | 821 | 100 - | 1   | 821 | 52355  | 53175  |
| UN82691 | Rsa1.0_00106.1 | 852 | 133916 | 0         | 797 | 848 | 93 -  | 1   | 848 | 38716  | 39563  |
| UN82692 | #              | #   | #      | #         | #   | #   | #     | #   | #   | #      | #      |
| UN82693 | Rsa1.0_01063.1 | 171 | 55301  | 6.00E-88  | 167 | 168 | 99 -  | 1   | 168 | 35167  | 35334  |
| UN82694 | Rsa1.0_09698.1 | 884 | 6203   | 0         | 542 | 576 | 94 -  | 309 | 884 | 4825   | 5400   |
| UN82695 | Rsa1.0_00593.1 | 793 | 143463 | 0         | 446 | 446 | 100 - | 348 | 793 | 142939 | 143384 |
| UN82696 | Rsa1.0_00614.1 | 641 | 72276  | 1.00E-119 | 268 | 282 | 95 -  | 8   | 289 | 44076  | 44351  |
| UN82697 | Rsa1.0_01214.1 | 572 | 50599  | 0         | 468 | 490 | 95 +  | 5   | 494 | 289    | 773    |
| UN82698 | Rsa1.0_01154.1 | 767 | 52249  | 0         | 767 | 767 | 100 - | 1   | 767 | 16256  | 17022  |
| UN82699 | Rsa1.0_00552.1 | 655 | 206757 | 1.00E-101 | 209 | 216 | 96 -  | 264 | 479 | 21760  | 21975  |
| UN82700 | Rsa1.0_02662.1 | 470 | 28956  | 0         | 458 | 470 | 97 +  | 1   | 470 | 6849   | 7318   |
| UN82701 | Rsa1.0_03624.1 | 466 | 21706  | 0         | 369 | 369 | 100 + | 98  | 466 | 5298   | 5666   |
| UN82702 | Rsa1.0_04117.1 | 360 | 18968  | 1.00E-145 | 332 | 356 | 93 +  | 5   | 360 | 1211   | 1566   |
| UN82703 | Rsa1.0_06079.1 | 498 | 11794  | 0         | 488 | 510 | 95 -  | 1   | 498 | 10640  | 11147  |
| UN82704 | Rsa1.0_00056.1 | 712 | 332604 | 1.00E-113 | 211 | 212 | 99 +  | 1   | 212 | 312591 | 312802 |
| UN82705 | #              | #   | #      | #         | #   | #   | #     | #   | #   | #      | #      |
| UN82706 | Rsa1.0_00196.1 | 668 | 109960 | 0         | 381 | 385 | 98 +  | 2   | 385 | 10145  | 10529  |
| UN82707 | Rsa1.0_02812.1 | 513 | 27660  | 0         | 512 | 513 | 99 -  | 1   | 513 | 15784  | 16296  |
| UN82708 | #              | #   | #      | #         | #   | #   | #     | #   | #   | #      | #      |
| UN82709 | Rsa1.0_01377.1 | 691 | 46967  | 0         | 684 | 694 | 98 -  | 2   | 691 | 1798   | 2489   |
| UN82710 | Rsa1.0_13534.1 | 670 | 4747   | 1.00E-86  | 163 | 163 | 100 - | 230 | 392 | 1      | 163    |
| UN82711 | Rsa1.0_01352.1 | 576 | 47443  | 1.00E-156 | 282 | 283 | 99 +  | 4   | 286 | 671    | 953    |
| UN82712 | Rsa1.0_00327.1 | 185 | 94892  | 3.00E-93  | 182 | 185 | 98 -  | 1   | 185 | 73542  | 73726  |
| UN82713 | Rsa1.0_00041.1 | 540 | 186197 | 2.00E-87  | 187 | 192 | 97 -  | 2   | 191 | 160984 | 161175 |
| UN82714 | #              | #   | #      | #         | #   | #   | #     | #   | #   | #      | #      |
| UN82715 | Rsa1.0_16674.1 | 746 | 2069   | 0         | 728 | 746 | 97 +  | 1   | 746 | 298    | 1042   |
| UN82716 | Rsa1.0_06990.1 | 433 | 10060  | 3.00E-76  | 145 | 145 | 100 - | 1   | 145 | 2496   | 2640   |
| UN82717 | Rsa1.0_02504.1 | 590 | 30706  | 0         | 351 | 352 | 99 +  | 240 | 590 | 4800   | 5151   |

|         |                |     |        |           |     |     |       |     |     |        |        |
|---------|----------------|-----|--------|-----------|-----|-----|-------|-----|-----|--------|--------|
| UN82718 | Rsa1.0.00426.1 | 538 | 85668  | 0         | 507 | 530 | 95 -  | 1   | 529 | 45499  | 46028  |
| UN82719 | Rsa1.0.05653.1 | 104 | 13043  | 6.00E-19  | 60  | 64  | 93 +  | 1   | 64  | 11333  | 11396  |
| UN82720 | Rsa1.0.00618.1 | 816 | 72195  | 0         | 436 | 437 | 99 +  | 380 | 816 | 17113  | 17549  |
| UN82721 | Rsa1.0.01215.1 | 532 | 166813 | 1.00E-123 | 315 | 346 | 91 +  | 142 | 487 | 5754   | 6092   |
| UN82722 | Rsa1.0.01473.1 | 808 | 45094  | 0         | 405 | 405 | 100 + | 1   | 405 | 30748  | 31152  |
| UN82723 | Rsa1.0.22962.1 | 437 | 1081   | 0         | 437 | 438 | 99 -  | 1   | 437 | 32     | 469    |
| UN82724 | Rsa1.0.00383.1 | 866 | 398431 | 1.00E-130 | 297 | 317 | 93 -  | 43  | 358 | 3111   | 3414   |
| UN82725 | Rsa1.0.02584.1 | 827 | 29877  | 0         | 796 | 816 | 97 +  | 13  | 827 | 5343   | 6157   |
| UN82726 | Rsa1.0.00192.1 | 820 | 278200 | 0         | 726 | 734 | 98 +  | 87  | 820 | 99539  | 100272 |
| UN82727 | Rsa1.0.00978.1 | 355 | 57739  | 1.00E-126 | 229 | 229 | 100 + | 1   | 229 | 3942   | 4170   |
| UN82728 | Rsa1.0.06803.1 | 849 | 10330  | 1.00E-108 | 230 | 239 | 96 +  | 1   | 239 | 7305   | 7542   |
| UN82729 | Rsa1.0.00185.1 | 866 | 248445 | 0         | 376 | 380 | 98 -  | 3   | 382 | 4378   | 4756   |
| UN82730 | Rsa1.0.03669.1 | 404 | 147114 | 0         | 404 | 404 | 100 + | 1   | 404 | 7497   | 7900   |
| UN82731 | Rsa1.0.01215.1 | 539 | 166813 | 1.00E-174 | 309 | 309 | 100 - | 95  | 403 | 160028 | 160336 |
| UN82732 | Rsa1.0.00740.1 | 910 | 215972 | 0         | 710 | 723 | 98 -  | 19  | 739 | 12009  | 12731  |
| UN82733 | Rsa1.0.01110.1 | 340 | 195852 | 4.00E-63  | 129 | 131 | 98 -  | 164 | 294 | 21586  | 21716  |
| UN82734 | Rsa1.0.02949.1 | 845 | 26506  | 0         | 422 | 444 | 95 -  | 406 | 845 | 24784  | 25223  |
| UN82735 | Rsa1.0.00344.1 | 872 | 191774 | 0         | 594 | 596 | 99 -  | 1   | 595 | 159720 | 160315 |
| UN82736 | Rsa1.0.07057.1 | 754 | 9966   | 0         | 680 | 754 | 90 +  | 1   | 754 | 2501   | 3242   |
| UN82737 | Rsa1.0.01113.1 | 827 | 53616  | 0         | 821 | 827 | 99 -  | 1   | 827 | 14612  | 15438  |
| UN82738 | Rsa1.0.10548.1 | 892 | 5805   | 0         | 553 | 554 | 99 +  | 169 | 722 | 5252   | 5805   |
| UN82739 | Rsa1.0.01616.1 | 855 | 42137  | 0         | 560 | 561 | 99 -  | 1   | 560 | 24392  | 24952  |
| UN82740 | Rsa1.0.00841.1 | 169 | 183065 | 2.00E-84  | 168 | 170 | 98 +  | 1   | 169 | 47211  | 47380  |
| UN82741 | Rsa1.0.00089.1 | 110 | 406142 | 6.00E-56  | 110 | 110 | 100 + | 1   | 110 | 97805  | 97914  |
| UN82742 | Rsa1.0.00472.1 | 789 | 398134 | 0         | 756 | 778 | 97 +  | 1   | 776 | 18511  | 19283  |
| UN82743 | Rsa1.0.10447.1 | 859 | 5848   | 0         | 853 | 855 | 99 +  | 7   | 859 | 875    | 1729   |
| UN82744 | Rsa1.0.01248.1 | 800 | 154103 | 0         | 800 | 800 | 100 + | 1   | 800 | 152380 | 153179 |
| UN82745 | Rsa1.0.00413.1 | 573 | 86921  | 0         | 572 | 572 | 100 + | 2   | 573 | 25996  | 26567  |
| UN82746 | Rsa1.0.02885.1 | 874 | 27029  | 0         | 821 | 874 | 93 +  | 3   | 874 | 201    | 1066   |
| UN82747 | Rsa1.0.02684.1 | 827 | 28676  | 0         | 348 | 348 | 100 + | 363 | 710 | 21006  | 21353  |
| UN82748 | Rsa1.0.01282.1 | 814 | 49304  | 3.00E-75  | 255 | 290 | 87 -  | 463 | 749 | 32350  | 32633  |
| UN82749 | Rsa1.0.01211.1 | 848 | 50646  | 1.00E-172 | 316 | 319 | 99 +  | 530 | 848 | 41800  | 42118  |
| UN82750 | Rsa1.0.02054.1 | 428 | 35548  | 0         | 428 | 428 | 100 + | 1   | 428 | 17721  | 18148  |
| UN82751 | Rsa1.0.16343.1 | 778 | 2187   | 0         | 638 | 682 | 93 +  | 1   | 680 | 834    | 1492   |
| UN82752 | Rsa1.0.00253.1 | 842 | 231292 | 0         | 835 | 860 | 97 +  | 1   | 842 | 130886 | 131745 |
| UN82753 | Rsa1.0.00266.1 | 841 | 163932 | 0         | 345 | 349 | 98 +  | 7   | 354 | 8951   | 9296   |
| UN82754 | Rsa1.0.00504.1 | 773 | 79334  | 0         | 521 | 521 | 100 - | 4   | 524 | 27053  | 27573  |
| UN82755 | Rsa1.0.03870.1 | 794 | 20362  | 0         | 777 | 777 | 100 + | 17  | 793 | 10672  | 11448  |
| UN82756 | Rsa1.0.03730.1 | 884 | 21139  | 0         | 862 | 890 | 96 +  | 1   | 884 | 19014  | 19903  |

|         |                |     |        |           |     |     |       |     |     |        |        |   |
|---------|----------------|-----|--------|-----------|-----|-----|-------|-----|-----|--------|--------|---|
| UN82757 | #              | #   | #      | #         | #   | #   | #     | #   | #   | #      | #      | # |
| UN82758 | Rsa1.0_00358.1 | 853 | 91293  | 0         | 853 | 853 | 100 + | 1   | 853 | 6213   | 7065   |   |
| UN82759 | #              | #   | #      | #         | #   | #   | #     | #   | #   | #      | #      |   |
| UN82760 | Rsa1.0_00324.1 | 873 | 218805 | 0         | 873 | 873 | 100 - | 1   | 873 | 142069 | 142941 |   |
| UN82761 | Rsa1.0_03529.1 | 746 | 22277  | 2.00E-29  | 115 | 131 | 87 +  | 616 | 746 | 16021  | 16151  |   |
| UN82762 | Rsa1.0_03890.1 | 440 | 20223  | 0         | 440 | 440 | 100 - | 1   | 440 | 18872  | 19311  |   |
| UN82763 | #              | #   | #      | #         | #   | #   | #     | #   | #   | #      | #      |   |
| UN82764 | Rsa1.0_02858.1 | 596 | 27246  | 0         | 413 | 415 | 99 +  | 6   | 420 | 2266   | 2679   |   |
| UN82765 | Rsa1.0_01129.1 | 594 | 52949  | 1.00E-125 | 257 | 267 | 96 -  | 328 | 594 | 31999  | 32260  |   |
| UN82766 | Rsa1.0_00611.1 | 300 | 72410  | 1.00E-93  | 269 | 300 | 89 -  | 1   | 300 | 15417  | 15713  |   |
| UN82767 | #              | #   | #      | #         | #   | #   | #     | #   | #   | #      | #      |   |
| UN82768 | Rsa1.0_00803.1 | 794 | 144228 | 0         | 776 | 801 | 96 +  | 1   | 794 | 58938  | 59732  |   |
| UN82769 | Rsa1.0_01166.1 | 795 | 51877  | 1.00E-121 | 221 | 221 | 100 + | 10  | 230 | 46729  | 46949  |   |
| UN82770 | Rsa1.0_00019.1 | 719 | 301669 | 1.00E-86  | 166 | 167 | 99 +  | 274 | 440 | 113991 | 114157 |   |
| UN82771 | Rsa1.0_03746.1 | 514 | 21050  | 0         | 500 | 500 | 100 + | 1   | 500 | 320    | 819    |   |
| UN82772 | Rsa1.0_01827.1 | 492 | 143321 | 0         | 492 | 492 | 100 - | 1   | 492 | 119    | 610    |   |
| UN82773 | Rsa1.0_00773.1 | 831 | 64839  | 0         | 830 | 830 | 100 + | 1   | 830 | 28707  | 29536  |   |
| UN82774 | #              | #   | #      | #         | #   | #   | #     | #   | #   | #      | #      |   |
| UN82775 | Rsa1.0_00673.1 | 454 | 69325  | 0         | 382 | 382 | 100 + | 73  | 454 | 48207  | 48588  |   |
| UN82776 | Rsa1.0_26135.1 | 797 | 905    | 7.00E-48  | 152 | 170 | 89 -  | 628 | 797 | 198    | 367    |   |
| UN82777 | Rsa1.0_03359.1 | 864 | 23466  | 0         | 864 | 864 | 100 + | 1   | 864 | 14756  | 15619  |   |
| UN82778 | Rsa1.0_03572.1 | 855 | 146346 | 1.00E-132 | 240 | 240 | 100 + | 420 | 659 | 138843 | 139082 |   |
| UN82779 | Rsa1.0_00043.1 | 842 | 264937 | 0         | 842 | 842 | 100 - | 1   | 842 | 150159 | 151000 |   |
| UN82780 | Rsa1.0_02283.1 | 140 | 33024  | 1.00E-66  | 137 | 140 | 97 -  | 1   | 140 | 18474  | 18613  |   |
| UN82781 | #              | #   | #      | #         | #   | #   | #     | #   | #   | #      | #      |   |
| UN82782 | Rsa1.0_06281.1 | 755 | 11317  | 0         | 723 | 731 | 98 +  | 26  | 755 | 3268   | 3998   |   |
| UN82783 | Rsa1.0_01920.1 | 863 | 158533 | 1.00E-119 | 217 | 217 | 100 + | 1   | 217 | 153813 | 154029 |   |
| UN82784 | Rsa1.0_03506.1 | 815 | 22416  | 0         | 594 | 596 | 99 -  | 221 | 815 | 18871  | 19466  |   |
| UN82785 | #              | #   | #      | #         | #   | #   | #     | #   | #   | #      | #      |   |
| UN82786 | Rsa1.0_00935.1 | 848 | 59079  | 0         | 818 | 847 | 96 +  | 1   | 846 | 6427   | 7270   |   |
| UN82787 | Rsa1.0_02829.1 | 864 | 27541  | 0         | 864 | 864 | 100 - | 1   | 864 | 10241  | 11104  |   |
| UN82788 | #              | #   | #      | #         | #   | #   | #     | #   | #   | #      | #      |   |
| UN82789 | Rsa1.0_00832.1 | 861 | 62622  | 1.00E-170 | 404 | 442 | 91 -  | 288 | 728 | 54342  | 54761  |   |
| UN82790 | Rsa1.0_00073.1 | 393 | 240924 | 0         | 393 | 393 | 100 + | 1   | 393 | 17497  | 17889  |   |
| UN82791 | Rsa1.0_00067.1 | 468 | 415055 | 0         | 464 | 464 | 100 + | 5   | 468 | 227541 | 228004 |   |
| UN82792 | Rsa1.0_08472.1 | 442 | 7300   | 1.00E-108 | 202 | 203 | 99 -  | 240 | 442 | 7098   | 7300   |   |
| UN82793 | Rsa1.0_16652.1 | 227 | 2078   | 2.00E-64  | 159 | 169 | 94 -  | 1   | 168 | 1300   | 1468   |   |
| UN82794 | Rsa1.0_00299.1 | 440 | 97770  | 0         | 428 | 448 | 95 -  | 1   | 440 | 43280  | 43723  |   |
| UN82795 | Rsa1.0_00734.1 | 834 | 66508  | 0         | 531 | 587 | 90 -  | 1   | 586 | 9580   | 10123  |   |

|         |                |     |        |           |     |     |       |     |     |        |        |
|---------|----------------|-----|--------|-----------|-----|-----|-------|-----|-----|--------|--------|
| UN82796 | Rsa1.0.00006.1 | 813 | 396176 | 0         | 793 | 816 | 97 +  | 1   | 813 | 229613 | 230425 |
| UN82797 | Rsa1.0.00116.1 | 679 | 365886 | 0         | 574 | 581 | 98 +  | 2   | 582 | 53085  | 53665  |
| UN82798 | Rsa1.0.02935.1 | 660 | 26621  | 0         | 617 | 668 | 92 +  | 1   | 659 | 15078  | 15745  |
| UN82799 | #              | #   | #      | #         | #   | #   | #     | #   | #   | #      | #      |
| UN82800 | Rsa1.0.05689.1 | 679 | 12927  | 0         | 465 | 493 | 94 -  | 185 | 677 | 9823   | 10303  |
| UN82801 | #              | #   | #      | #         | #   | #   | #     | #   | #   | #      | #      |
| UN82802 | Rsa1.0.01677.1 | 892 | 41140  | 0         | 421 | 422 | 99 -  | 471 | 892 | 36620  | 37041  |
| UN82803 | #              | #   | #      | #         | #   | #   | #     | #   | #   | #      | #      |
| UN82804 | Rsa1.0.00910.1 | 379 | 59975  | 4.00E-66  | 194 | 204 | 95 -  | 129 | 332 | 23345  | 23539  |
| UN82805 | Rsa1.0.01695.1 | 630 | 40848  | 0         | 630 | 630 | 100 + | 1   | 630 | 15369  | 15998  |
| UN82806 | Rsa1.0.00159.1 | 750 | 431686 | 0         | 684 | 684 | 100 + | 67  | 750 | 31535  | 32218  |
| UN82807 | Rsa1.0.00118.1 | 800 | 130637 | 0         | 553 | 553 | 100 + | 5   | 557 | 98393  | 98945  |
| UN82808 | #              | #   | #      | #         | #   | #   | #     | #   | #   | #      | #      |
| UN82809 | Rsa1.0.02276.1 | 849 | 33098  | 0         | 768 | 768 | 100 + | 82  | 849 | 12207  | 12974  |
| UN82810 | #              | #   | #      | #         | #   | #   | #     | #   | #   | #      | #      |
| UN82811 | Rsa1.0.00083.1 | 680 | 442773 | 0         | 679 | 681 | 99 -  | 1   | 680 | 373099 | 373779 |
| UN82812 | Rsa1.0.01452.1 | 782 | 45459  | 0         | 773 | 774 | 99 -  | 9   | 782 | 17420  | 18193  |
| UN82813 | Rsa1.0.00116.1 | 861 | 365886 | 2.00E-57  | 123 | 126 | 97 -  | 446 | 571 | 5793   | 5918   |
| UN82814 | Rsa1.0.00160.1 | 878 | 346678 | 0         | 873 | 874 | 99 -  | 5   | 878 | 144987 | 145860 |
| UN82815 | Rsa1.0.01196.1 | 609 | 51097  | 1.00E-158 | 330 | 343 | 96 +  | 3   | 343 | 32495  | 32837  |
| UN82816 | Rsa1.0.10012.1 | 856 | 6039   | 0         | 836 | 867 | 96 -  | 1   | 856 | 1626   | 2491   |
| UN82817 | Rsa1.0.05979.1 | 874 | 12051  | 0         | 872 | 877 | 99 -  | 1   | 874 | 9656   | 10532  |
| UN82818 | Rsa1.0.07880.1 | 841 | 8369   | 0         | 830 | 843 | 98 +  | 1   | 841 | 1909   | 2749   |
| UN82819 | #              | #   | #      | #         | #   | #   | #     | #   | #   | #      | #      |
| UN82820 | Rsa1.0.00100.1 | 862 | 249232 | 0         | 688 | 702 | 98 +  | 161 | 862 | 128908 | 129609 |
| UN82821 | #              | #   | #      | #         | #   | #   | #     | #   | #   | #      | #      |
| UN82822 | Rsa1.0.00947.1 | 917 | 58664  | 0         | 657 | 658 | 99 +  | 1   | 658 | 31298  | 31955  |
| UN82823 | Rsa1.0.17794.1 | 614 | 1740   | 1.00E-112 | 244 | 253 | 96 +  | 356 | 607 | 1      | 250    |
| UN82824 | Rsa1.0.08106.1 | 883 | 7893   | 0         | 326 | 326 | 100 + | 423 | 748 | 122    | 447    |
| UN82825 | Rsa1.0.00868.1 | 484 | 61630  | 1.00E-164 | 301 | 303 | 99 +  | 1   | 301 | 23746  | 24048  |
| UN82826 | Rsa1.0.01732.1 | 507 | 40194  | 1.00E-101 | 187 | 187 | 100 - | 76  | 262 | 40008  | 40194  |
| UN82827 | Rsa1.0.03799.1 | 892 | 20775  | 0         | 892 | 892 | 100 + | 1   | 892 | 18517  | 19408  |
| UN82828 | Rsa1.0.05410.1 | 604 | 13840  | 0         | 585 | 609 | 96 +  | 1   | 604 | 1386   | 1994   |
| UN82829 | #              | #   | #      | #         | #   | #   | #     | #   | #   | #      | #      |
| UN82830 | Rsa1.0.00145.1 | 832 | 261008 | 1.00E-86  | 292 | 336 | 86 +  | 511 | 832 | 24462  | 24778  |
| UN82831 | Rsa1.0.20996.1 | 834 | 1247   | 0         | 447 | 455 | 98 -  | 380 | 831 | 70     | 524    |
| UN82832 | #              | #   | #      | #         | #   | #   | #     | #   | #   | #      | #      |
| UN82833 | Rsa1.0.00059.1 | 775 | 159650 | 0         | 767 | 775 | 98 +  | 1   | 775 | 101574 | 102345 |
| UN82834 | Rsa1.0.21524.1 | 624 | 1195   | 0         | 351 | 352 | 99 +  | 211 | 562 | 844    | 1195   |

|         |                |     |        |           |     |     |       |     |     |        |        |   |   |
|---------|----------------|-----|--------|-----------|-----|-----|-------|-----|-----|--------|--------|---|---|
| UN82835 | #              | #   | #      | #         | #   | #   | #     | #   | #   | #      | #      | # | # |
| UN82836 | #              | #   | #      | #         | #   | #   | #     | #   | #   | #      | #      | # | # |
| UN82837 | #              | #   | #      | #         | #   | #   | #     | #   | #   | #      | #      | # | # |
| UN82838 | Rsa1.0_00448.1 | 464 | 84048  | 0         | 461 | 465 | 99 -  | 1   | 464 | 83056  | 83520  |   |   |
| UN82839 | Rsa1.0_00020.1 | 355 | 283099 | 0         | 355 | 355 | 100 + | 1   | 355 | 19851  | 20205  |   |   |
| UN82840 | Rsa1.0_02432.1 | 826 | 31499  | 0         | 560 | 560 | 100 + | 267 | 826 | 18016  | 18575  |   |   |
| UN82841 | Rsa1.0_01702.1 | 852 | 40722  | 0         | 849 | 850 | 99 -  | 3   | 852 | 37094  | 37943  |   |   |
| UN82842 | Rsa1.0_00239.1 | 880 | 104332 | 0         | 458 | 458 | 100 - | 423 | 880 | 20135  | 20592  |   |   |
| UN82843 | Rsa1.0_01400.1 | 787 | 46560  | 1.00E-160 | 318 | 328 | 96 -  | 460 | 787 | 37215  | 37539  |   |   |
| UN82844 | Rsa1.0_06254.1 | 857 | 11384  | 0         | 847 | 858 | 98 -  | 1   | 857 | 10444  | 11301  |   |   |
| UN82845 | Rsa1.0_04398.1 | 763 | 17550  | 0         | 758 | 767 | 98 -  | 1   | 763 | 3977   | 4743   |   |   |
| UN82846 | Rsa1.0_02150.1 | 869 | 34580  | 0         | 380 | 389 | 97 -  | 476 | 861 | 20205  | 20593  |   |   |
| UN82847 | Rsa1.0_00224.1 | 576 | 327530 | 1.00E-164 | 335 | 346 | 96 +  | 233 | 575 | 25471  | 25814  |   |   |
| UN82848 | Rsa1.0_07780.1 | 573 | 8589   | 1.00E-104 | 199 | 201 | 99 -  | 167 | 367 | 6005   | 6205   |   |   |
| UN82849 | Rsa1.0_02212.1 | 392 | 33840  | 0         | 391 | 391 | 100 + | 2   | 392 | 14631  | 15021  |   |   |
| UN82850 | Rsa1.0_00825.1 | 365 | 62855  | 1.00E-174 | 352 | 365 | 96 +  | 1   | 365 | 33634  | 33992  |   |   |
| UN82851 | Rsa1.0_01920.1 | 599 | 158533 | 0         | 575 | 581 | 98 +  | 9   | 589 | 153637 | 154216 |   |   |
| UN82852 | Rsa1.0_04795.1 | 812 | 15950  | 0         | 812 | 812 | 100 - | 1   | 812 | 13060  | 13871  |   |   |
| UN82853 | Rsa1.0_01979.1 | 649 | 36545  | 0         | 625 | 646 | 96 +  | 1   | 646 | 33215  | 33860  |   |   |
| UN82854 | Rsa1.0_01074.1 | 645 | 54987  | 1.00E-160 | 287 | 287 | 100 - | 356 | 642 | 22814  | 23100  |   |   |
| UN82855 | Rsa1.0_16214.1 | 876 | 2243   | 0         | 557 | 573 | 97 -  | 241 | 806 | 1671   | 2243   |   |   |
| UN82856 | Rsa1.0_23688.1 | 852 | 1031   | 0         | 703 | 708 | 99 +  | 7   | 714 | 326    | 1031   |   |   |
| UN82857 | Rsa1.0_01603.1 | 752 | 42468  | 1.00E-132 | 245 | 247 | 99 -  | 1   | 247 | 1835   | 2081   |   |   |
| UN82858 | Rsa1.0_03503.1 | 109 | 22445  | 3.00E-42  | 107 | 111 | 96 -  | 1   | 109 | 11885  | 11995  |   |   |
| UN82859 | Rsa1.0_00050.1 | 383 | 237174 | 1.00E-167 | 310 | 314 | 98 -  | 1   | 314 | 82605  | 82918  |   |   |
| UN82860 | Rsa1.0_00019.1 | 807 | 301669 | 0         | 795 | 816 | 97 -  | 1   | 807 | 115736 | 116547 |   |   |
| UN82861 | Rsa1.0_01641.1 | 569 | 188213 | 0         | 545 | 568 | 95 +  | 2   | 569 | 161019 | 161586 |   |   |
| UN82862 | Rsa1.0_01189.1 | 726 | 51358  | 1.00E-105 | 197 | 198 | 99 -  | 348 | 545 | 16611  | 16808  |   |   |
| UN82863 | Rsa1.0_09160.1 | 114 | 6599   | 2.00E-53  | 113 | 114 | 99 -  | 2   | 114 | 457    | 570    |   |   |
| UN82864 | Rsa1.0_00727.1 | 308 | 66724  | 4.00E-84  | 158 | 158 | 100 + | 151 | 308 | 60725  | 60882  |   |   |
| UN82865 | Rsa1.0_04552.1 | 762 | 16878  | 2.00E-11  | 46  | 49  | 93 -  | 179 | 227 | 12376  | 12424  |   |   |
| UN82866 | Rsa1.0_09807.1 | 150 | 6140   | 1.00E-79  | 150 | 150 | 100 + | 1   | 150 | 3049   | 3198   |   |   |
| UN82867 | Rsa1.0_00383.1 | 846 | 398431 | 1.00E-178 | 316 | 316 | 100 - | 531 | 846 | 368192 | 368507 |   |   |
| UN82868 | #              | #   | #      | #         | #   | #   | #     | #   | #   | #      | #      |   |   |
| UN82869 | Rsa1.0_00456.1 | 884 | 82826  | 0         | 701 | 701 | 100 + | 184 | 884 | 59436  | 60136  |   |   |
| UN82870 | #              | #   | #      | #         | #   | #   | #     | #   | #   | #      | #      |   |   |
| UN82871 | Rsa1.0_00253.1 | 743 | 231292 | 0         | 736 | 737 | 99 -  | 7   | 743 | 27660  | 28396  |   |   |
| UN82872 | Rsa1.0_01408.1 | 880 | 46383  | 0         | 502 | 503 | 99 -  | 74  | 576 | 2126   | 2628   |   |   |
| UN82873 | Rsa1.0_00762.1 | 720 | 165246 | 0         | 720 | 720 | 100 - | 1   | 720 | 49512  | 50231  |   |   |

|         |                |     |        |           |     |     |       |     |     |        |        |
|---------|----------------|-----|--------|-----------|-----|-----|-------|-----|-----|--------|--------|
| UN82874 | Rsa1.0_01524.1 | 789 | 43949  | 0         | 356 | 357 | 99 +  | 2   | 358 | 22958  | 23314  |
| UN82875 | Rsa1.0_00067.1 | 830 | 415055 | 0         | 830 | 830 | 100 + | 1   | 830 | 151681 | 152510 |
| UN82876 | #              | #   | #      | #         | #   | #   | #     | #   | #   | #      | #      |
| UN82877 | Rsa1.0_05787.1 | 811 | 12625  | 1.00E-150 | 292 | 298 | 97 +  | 5   | 302 | 985    | 1281   |
| UN82878 | Rsa1.0_04869.1 | 814 | 15668  | 0         | 736 | 775 | 94 -  | 42  | 814 | 6103   | 6874   |
| UN82879 | Rsa1.0_00190.1 | 873 | 318240 | 0         | 707 | 707 | 100 - | 155 | 861 | 33549  | 34255  |
| UN82880 | Rsa1.0_14013.1 | 159 | 3919   | 5.00E-73  | 139 | 139 | 100 + | 1   | 139 | 3781   | 3919   |
| UN82881 | Rsa1.0_00451.1 | 854 | 322533 | 0         | 533 | 552 | 96 -  | 2   | 551 | 138717 | 139265 |
| UN82882 | Rsa1.0_00537.1 | 867 | 186980 | 0         | 865 | 867 | 99 +  | 1   | 867 | 130423 | 131289 |
| UN82883 | Rsa1.0_01168.1 | 733 | 153765 | 0         | 336 | 336 | 100 + | 398 | 733 | 43285  | 43620  |
| UN82884 | Rsa1.0_00093.1 | 825 | 214962 | 0         | 454 | 454 | 100 - | 3   | 456 | 117743 | 118196 |
| UN82885 | Rsa1.0_10281.1 | 778 | 5905   | 0         | 360 | 360 | 100 + | 419 | 778 | 543    | 902    |
| UN82886 | Rsa1.0_13967.1 | 770 | 3979   | 0         | 767 | 770 | 99 +  | 1   | 770 | 2456   | 3225   |
| UN82887 | #              | #   | #      | #         | #   | #   | #     | #   | #   | #      | #      |
| UN82888 | Rsa1.0_11859.1 | 840 | 5389   | 0         | 321 | 321 | 100 - | 1   | 321 | 3937   | 4257   |
| UN82889 | Rsa1.0_00005.1 | 879 | 353093 | 1.00E-117 | 215 | 215 | 100 - | 665 | 879 | 122794 | 123008 |
| UN82890 | Rsa1.0_01039.1 | 711 | 55946  | 0         | 660 | 675 | 97 -  | 34  | 702 | 37719  | 38392  |
| UN82891 | Rsa1.0_00253.1 | 400 | 231292 | 0         | 400 | 400 | 100 + | 1   | 400 | 132059 | 132458 |
| UN82892 | Rsa1.0_20510.1 | 831 | 1298   | 0         | 734 | 802 | 91 +  | 27  | 828 | 426    | 1216   |
| UN82893 | Rsa1.0_00040.1 | 849 | 324196 | 0         | 673 | 673 | 100 + | 1   | 673 | 39300  | 39972  |
| UN82894 | Rsa1.0_00366.1 | 279 | 90880  | 1.00E-144 | 274 | 279 | 98 -  | 1   | 279 | 89505  | 89783  |
| UN82895 | Rsa1.0_09723.1 | 651 | 6187   | 0         | 419 | 421 | 99 +  | 6   | 426 | 3734   | 4154   |
| UN82896 | Rsa1.0_09266.1 | 871 | 6516   | 0         | 357 | 358 | 99 +  | 213 | 570 | 1      | 358    |
| UN82897 | Rsa1.0_12138.1 | 432 | 5304   | 1.00E-176 | 325 | 329 | 98 -  | 1   | 329 | 146    | 474    |
| UN82898 | Rsa1.0_00883.1 | 872 | 61230  | 0         | 815 | 853 | 95 -  | 1   | 840 | 41494  | 42338  |
| UN82899 | Rsa1.0_08168.1 | 856 | 7802   | 0         | 811 | 813 | 99 -  | 1   | 813 | 5488   | 6300   |
| UN82900 | Rsa1.0_01663.1 | 865 | 168589 | 0         | 865 | 865 | 100 + | 1   | 865 | 138759 | 139623 |
| UN82901 | Rsa1.0_00385.1 | 522 | 89160  | 0         | 505 | 546 | 92 -  | 1   | 522 | 36277  | 36820  |
| UN82902 | Rsa1.0_04070.1 | 350 | 19244  | 1.00E-180 | 346 | 353 | 98 +  | 1   | 350 | 6854   | 7205   |
| UN82903 | Rsa1.0_03808.1 | 148 | 20732  | 3.00E-74  | 148 | 149 | 99 +  | 1   | 148 | 18144  | 18292  |
| UN82904 | Rsa1.0_04978.1 | 524 | 15258  | 2.00E-22  | 67  | 71  | 94 +  | 452 | 522 | 10605  | 10675  |
| UN82905 | Rsa1.0_01881.1 | 443 | 37721  | 1.00E-132 | 255 | 258 | 98 +  | 7   | 263 | 37448  | 37703  |
| UN82906 | Rsa1.0_10864.1 | 671 | 5697   | 0         | 569 | 589 | 96 -  | 83  | 671 | 1275   | 1857   |
| UN82907 | Rsa1.0_00072.1 | 569 | 148743 | 0         | 569 | 571 | 99 +  | 1   | 569 | 124105 | 124675 |
| UN82908 | Rsa1.0_00051.1 | 480 | 258225 | 1.00E-102 | 188 | 188 | 100 + | 163 | 350 | 118597 | 118784 |
| UN82909 | Rsa1.0_06362.1 | 634 | 11154  | 1.00E-177 | 314 | 314 | 100 + | 1   | 314 | 8879   | 9192   |
| UN82910 | Rsa1.0_00237.1 | 425 | 235974 | 0         | 405 | 426 | 95 -  | 1   | 425 | 36857  | 37263  |
| UN82911 | Rsa1.0_03762.1 | 447 | 20976  | 0         | 446 | 447 | 99 -  | 1   | 447 | 18570  | 19016  |
| UN82912 | Rsa1.0_11952.1 | 531 | 5362   | 1.00E-168 | 310 | 312 | 99 +  | 1   | 311 | 124    | 435    |



|         |                |     |        |           |     |     |       |     |     |        |        |
|---------|----------------|-----|--------|-----------|-----|-----|-------|-----|-----|--------|--------|
| UN82913 | Rsa1.0_00006.1 | 513 | 396176 | 1.00E-104 | 199 | 200 | 99 -  | 303 | 501 | 312060 | 312259 |
| UN82914 | Rsa1.0_02706.1 | 380 | 28522  | 3.00E-82  | 170 | 175 | 97 +  | 86  | 260 | 12286  | 12460  |
| UN82915 | Rsa1.0_01936.1 | 498 | 37151  | 0         | 486 | 498 | 97 -  | 3   | 498 | 18241  | 18735  |
| UN82916 | Rsa1.0_00418.1 | 469 | 215377 | 0         | 469 | 470 | 99 -  | 1   | 469 | 214323 | 214792 |
| UN82917 | Rsa1.0_07931.1 | 593 | 8236   | 0         | 572 | 579 | 98 -  | 1   | 579 | 7512   | 8090   |
| UN82918 | Rsa1.0_12767.1 | 533 | 5133   | 0         | 349 | 355 | 98 -  | 135 | 489 | 1      | 355    |
| UN82919 | Rsa1.0_04935.1 | 574 | 15403  | 0         | 568 | 572 | 99 +  | 1   | 571 | 7085   | 7654   |
| UN82920 | Rsa1.0_08546.1 | 513 | 7214   | 1.00E-142 | 265 | 267 | 99 -  | 1   | 267 | 6867   | 7131   |
| UN82921 | Rsa1.0_00248.1 | 472 | 163568 | 0         | 448 | 474 | 94 -  | 1   | 472 | 149272 | 149736 |
| UN82922 | Rsa1.0_22220.1 | 755 | 1140   | 1.00E-134 | 277 | 288 | 96 +  | 1   | 285 | 853    | 1140   |
| UN82923 | Rsa1.0_03923.1 | 403 | 20057  | 1.00E-175 | 311 | 311 | 100 + | 2   | 312 | 14215  | 14525  |
| UN82924 | Rsa1.0_01170.1 | 481 | 161131 | 0         | 467 | 467 | 100 - | 1   | 467 | 5472   | 5938   |
| UN82925 | Rsa1.0_02280.1 | 542 | 33063  | 1.00E-112 | 440 | 515 | 85 +  | 43  | 531 | 2553   | 3053   |
| UN82926 | Rsa1.0_00489.1 | 318 | 80434  | 1.00E-179 | 318 | 318 | 100 - | 1   | 318 | 44679  | 44996  |
| UN82927 | Rsa1.0_00322.1 | 519 | 212233 | 0         | 519 | 519 | 100 - | 1   | 519 | 30550  | 31068  |
| UN82928 | Rsa1.0_03306.1 | 445 | 23873  | 0         | 426 | 440 | 96 -  | 5   | 441 | 14336  | 14775  |
| UN82929 | Rsa1.0_03697.1 | 572 | 21304  | 7.00E-75  | 191 | 207 | 92 -  | 338 | 544 | 14935  | 15141  |
| UN82930 | Rsa1.0_03707.1 | 858 | 21252  | 0         | 851 | 855 | 99 +  | 5   | 858 | 18072  | 18926  |
| UN82931 | Rsa1.0_00054.1 | 830 | 162053 | 0         | 830 | 831 | 99 -  | 1   | 830 | 86468  | 87298  |
| UN82932 | Rsa1.0_00092.1 | 867 | 659932 | 0         | 586 | 617 | 94 -  | 257 | 867 | 531309 | 531925 |
| UN82933 | #              | #   | #      | #         | #   | #   | #     | #   | #   | #      | #      |
| UN82934 | Rsa1.0_02544.1 | 843 | 30290  | 0         | 566 | 566 | 100 + | 1   | 566 | 465    | 1030   |
| UN82935 | Rsa1.0_00254.1 | 849 | 102600 | 0         | 405 | 427 | 94 -  | 6   | 432 | 87763  | 88177  |
| UN82936 | Rsa1.0_00332.1 | 854 | 94575  | 0         | 510 | 511 | 99 +  | 1   | 510 | 19825  | 20335  |
| UN82937 | Rsa1.0_00015.1 | 780 | 561803 | 1.00E-131 | 253 | 257 | 98 +  | 1   | 255 | 215163 | 215419 |
| UN82938 | Rsa1.0_00300.1 | 828 | 97747  | 0         | 828 | 828 | 100 - | 1   | 828 | 4025   | 4852   |
| UN82939 | Rsa1.0_00454.1 | 817 | 216970 | 0         | 775 | 777 | 99 +  | 41  | 817 | 160559 | 161334 |
| UN82940 | Rsa1.0_00905.1 | 650 | 60110  | 0         | 457 | 457 | 100 - | 7   | 463 | 44042  | 44498  |
| UN82941 | Rsa1.0_00997.1 | 824 | 57190  | 0         | 796 | 824 | 96 +  | 8   | 824 | 55948  | 56767  |
| UN82942 | Rsa1.0_07096.1 | 859 | 9899   | 0         | 744 | 760 | 97 -  | 101 | 859 | 4793   | 5552   |
| UN82943 | Rsa1.0_00017.1 | 847 | 752458 | 5.00E-92  | 172 | 172 | 100 + | 129 | 300 | 682934 | 683105 |
| UN82944 | Rsa1.0_00157.1 | 816 | 245832 | 0         | 791 | 816 | 96 +  | 1   | 816 | 156467 | 157282 |
| UN82945 | Rsa1.0_05743.1 | 596 | 12768  | 1.00E-172 | 341 | 351 | 97 +  | 247 | 596 | 10204  | 10554  |
| UN82946 | Rsa1.0_03415.1 | 854 | 23117  | 0         | 813 | 830 | 97 +  | 27  | 854 | 20216  | 21045  |
| UN82947 | Rsa1.0_00108.1 | 853 | 478491 | 0         | 837 | 839 | 99 +  | 1   | 837 | 268035 | 268873 |
| UN82948 | Rsa1.0_01237.1 | 532 | 50124  | 1.00E-164 | 306 | 308 | 99 +  | 227 | 532 | 2364   | 2671   |
| UN82949 | Rsa1.0_00838.1 | 420 | 153820 | 0         | 420 | 421 | 99 +  | 1   | 420 | 46184  | 46604  |
| UN82950 | Rsa1.0_01938.1 | 223 | 264018 | 7.00E-42  | 93  | 95  | 97 -  | 22  | 116 | 140468 | 140562 |
| UN82951 | Rsa1.0_03090.1 | 649 | 25464  | 0         | 648 | 649 | 99 +  | 1   | 649 | 1591   | 2239   |

|         |                |     |        |           |     |     |       |     |     |        |        |
|---------|----------------|-----|--------|-----------|-----|-----|-------|-----|-----|--------|--------|
| UN82952 | Rsa1.0.00055.1 | 528 | 520193 | 0         | 482 | 503 | 95 +  | 16  | 516 | 86496  | 86993  |
| UN82953 | Rsa1.0.03956.1 | 350 | 19872  | 1.00E-119 | 232 | 237 | 97 +  | 27  | 263 | 19557  | 19793  |
| UN82954 | Rsa1.0.11589.1 | 185 | 5464   | 3.00E-96  | 185 | 186 | 99 -  | 1   | 185 | 1691   | 1876   |
| UN82955 | Rsa1.0.06802.1 | 450 | 10330  | 1.00E-133 | 240 | 240 | 100 + | 199 | 438 | 8962   | 9201   |
| UN82956 | Rsa1.0.00126.1 | 484 | 127534 | 0         | 484 | 484 | 100 + | 1   | 484 | 94231  | 94714  |
| UN82957 | Rsa1.0.01405.1 | 566 | 46445  | 0         | 566 | 566 | 100 - | 1   | 566 | 35036  | 35601  |
| UN82958 | Rsa1.0.06054.1 | 507 | 11847  | 1.00E-100 | 186 | 186 | 100 + | 1   | 186 | 10454  | 10639  |
| UN82959 | Rsa1.0.00008.1 | 415 | 358124 | 1.00E-159 | 346 | 366 | 94 -  | 58  | 415 | 14779  | 15144  |
| UN82960 | Rsa1.0.02173.1 | 420 | 34318  | 0         | 414 | 420 | 98 -  | 1   | 420 | 21236  | 21655  |
| UN82961 | #              | #   | #      | #         | #   | #   | #     | #   | #   | #      | #      |
| UN82962 | Rsa1.0.08415.1 | 624 | 7398   | 0         | 549 | 558 | 98 -  | 69  | 624 | 1562   | 2117   |
| UN82963 | Rsa1.0.00806.1 | 497 | 63674  | 1.00E-117 | 214 | 214 | 100 + | 234 | 447 | 19968  | 20181  |
| UN82964 | Rsa1.0.01295.1 | 258 | 49040  | 1.00E-104 | 210 | 216 | 97 +  | 6   | 221 | 40758  | 40973  |
| UN82965 | Rsa1.0.01157.1 | 551 | 52121  | 0         | 510 | 541 | 94 +  | 13  | 550 | 44798  | 45334  |
| UN82966 | Rsa1.0.00091.1 | 471 | 139699 | 0         | 465 | 465 | 100 + | 7   | 471 | 51463  | 51927  |
| UN82967 | Rsa1.0.19447.1 | 436 | 1430   | 0         | 427 | 428 | 99 +  | 1   | 428 | 914    | 1341   |
| UN82968 | Rsa1.0.15098.1 | 451 | 2831   | 5.00E-97  | 254 | 276 | 92 +  | 102 | 377 | 2153   | 2426   |
| UN82969 | Rsa1.0.08675.1 | 466 | 7054   | 1.00E-130 | 250 | 255 | 98 -  | 1   | 255 | 2416   | 2670   |
| UN82970 | Rsa1.0.04252.1 | 483 | 18262  | 0         | 480 | 484 | 99 -  | 1   | 483 | 4971   | 5451   |
| UN82971 | Rsa1.0.07832.1 | 622 | 8456   | 0         | 617 | 625 | 98 -  | 1   | 622 | 4872   | 5496   |
| UN82972 | Rsa1.0.00457.1 | 536 | 337301 | 0         | 524 | 536 | 97 -  | 1   | 536 | 137777 | 138312 |
| UN82973 | Rsa1.0.00108.1 | 577 | 478491 | 1.00E-109 | 200 | 200 | 100 - | 1   | 200 | 457135 | 457334 |
| UN82974 | Rsa1.0.00662.1 | 568 | 192183 | 1.00E-151 | 285 | 287 | 99 +  | 1   | 285 | 179607 | 179893 |
| UN82975 | Rsa1.0.07278.1 | 447 | 9627   | 2.00E-90  | 169 | 169 | 100 - | 279 | 447 | 5003   | 5171   |
| UN82976 | Rsa1.0.00144.1 | 670 | 120708 | 0         | 663 | 670 | 98 +  | 1   | 670 | 22304  | 22973  |
| UN82977 | Rsa1.0.01976.1 | 282 | 36570  | 1.00E-158 | 282 | 282 | 100 + | 1   | 282 | 27789  | 28070  |
| UN82978 | Rsa1.0.00087.1 | 535 | 761073 | 0         | 523 | 533 | 98 -  | 1   | 531 | 312870 | 313402 |
| UN82979 | Rsa1.0.18259.1 | 588 | 1634   | 1.00E-180 | 323 | 324 | 99 +  | 2   | 325 | 258    | 581    |
| UN82980 | #              | #   | #      | #         | #   | #   | #     | #   | #   | #      | #      |
| UN82981 | Rsa1.0.01493.1 | 475 | 44670  | 1.00E-145 | 278 | 284 | 97 -  | 66  | 349 | 21292  | 21575  |
| UN82982 | Rsa1.0.18480.1 | 649 | 1591   | 0         | 641 | 646 | 99 +  | 6   | 649 | 78     | 723    |
| UN82983 | Rsa1.0.01796.1 | 882 | 39154  | 0         | 509 | 509 | 100 - | 5   | 513 | 7310   | 7818   |
| UN82984 | Rsa1.0.03136.1 | 846 | 25113  | 0         | 346 | 347 | 99 -  | 1   | 346 | 11003  | 11349  |
| UN82985 | Rsa1.0.02177.1 | 901 | 34262  | 0         | 797 | 842 | 94 -  | 1   | 827 | 24414  | 25252  |
| UN82986 | Rsa1.0.00421.1 | 445 | 86365  | 1.00E-117 | 213 | 213 | 100 + | 233 | 445 | 42866  | 43078  |
| UN82987 | Rsa1.0.17275.1 | 881 | 1874   | 0         | 713 | 714 | 99 -  | 1   | 713 | 1      | 714    |
| UN82988 | Rsa1.0.02779.1 | 856 | 27968  | 1.00E-108 | 208 | 211 | 98 -  | 646 | 856 | 4898   | 5108   |
| UN82989 | Rsa1.0.01422.1 | 674 | 46172  | 0         | 653 | 677 | 96 +  | 1   | 674 | 42513  | 43189  |
| UN82990 | Rsa1.0.00089.1 | 297 | 406142 | 1.00E-155 | 294 | 298 | 98 -  | 1   | 297 | 349143 | 349440 |

|         |                |     |        |           |     |     |       |     |     |        |        |
|---------|----------------|-----|--------|-----------|-----|-----|-------|-----|-----|--------|--------|
| UN82991 | Rsa1.0.00196.1 | 870 | 109960 | 0         | 512 | 512 | 100 - | 285 | 796 | 62386  | 62897  |
| UN82992 | Rsa1.0.06468.1 | 524 | 10958  | 0         | 500 | 524 | 95 -  | 1   | 524 | 6618   | 7140   |
| UN82993 | Rsa1.0.00683.1 | 834 | 68638  | 0         | 834 | 834 | 100 + | 1   | 834 | 63169  | 64002  |
| UN82994 | Rsa1.0.24332.1 | 767 | 992    | 0         | 376 | 382 | 98 +  | 386 | 767 | 323    | 703    |
| UN82995 | Rsa1.0.06936.1 | 779 | 10143  | 1.00E-158 | 295 | 299 | 98 -  | 173 | 471 | 3174   | 3472   |
| UN82996 | #              | #   | #      | #         | #   | #   | #     | #   | #   | #      | #      |
| UN82997 | Rsa1.0.04026.1 | 884 | 19508  | 0         | 884 | 884 | 100 + | 1   | 884 | 11988  | 12871  |
| UN82998 | Rsa1.0.02101.1 | 853 | 35017  | 0         | 457 | 458 | 99 +  | 1   | 458 | 26490  | 26947  |
| UN82999 | Rsa1.0.07863.1 | 815 | 8404   | 1.00E-116 | 251 | 264 | 95 +  | 202 | 465 | 1680   | 1943   |
| UN83000 | Rsa1.0.03191.1 | 157 | 145762 | 2.00E-81  | 156 | 157 | 99 +  | 1   | 157 | 9795   | 9951   |
| UN83001 | Rsa1.0.01576.1 | 412 | 42923  | 0         | 412 | 412 | 100 - | 1   | 412 | 24614  | 25025  |
| UN83002 | Rsa1.0.00017.1 | 834 | 752458 | 1.00E-121 | 221 | 221 | 100 + | 2   | 222 | 682603 | 682823 |
| UN83003 | Rsa1.0.03062.1 | 601 | 25678  | 0         | 589 | 595 | 98 -  | 7   | 601 | 8048   | 8641   |
| UN83004 | Rsa1.0.09961.1 | 899 | 6064   | 0         | 880 | 895 | 98 +  | 1   | 893 | 217    | 1109   |
| UN83005 | Rsa1.0.00850.1 | 278 | 62193  | 1.00E-156 | 278 | 278 | 100 - | 1   | 278 | 27157  | 27434  |
| UN83006 | Rsa1.0.02423.1 | 702 | 31576  | 0         | 364 | 364 | 100 - | 231 | 594 | 2541   | 2904   |
| UN83007 | Rsa1.0.02946.1 | 736 | 26537  | 0         | 481 | 482 | 99 +  | 255 | 736 | 1      | 482    |
| UN83008 | Rsa1.0.03834.1 | 827 | 20572  | 0         | 724 | 734 | 98 -  | 94  | 827 | 3357   | 4090   |
| UN83009 | Rsa1.0.00615.1 | 886 | 72235  | 0         | 883 | 886 | 99 +  | 1   | 886 | 17316  | 18201  |
| UN83010 | Rsa1.0.00636.1 | 191 | 71113  | 2.00E-97  | 183 | 184 | 99 +  | 8   | 191 | 38171  | 38354  |
| UN83011 | Rsa1.0.12142.1 | 842 | 5302   | 6.00E-95  | 177 | 177 | 100 - | 594 | 770 | 1527   | 1703   |
| UN83012 | Rsa1.0.03921.1 | 861 | 20080  | 0         | 861 | 861 | 100 - | 1   | 861 | 18971  | 19831  |
| UN83013 | Rsa1.0.00229.1 | 558 | 105471 | 0         | 558 | 558 | 100 + | 1   | 558 | 39471  | 40028  |
| UN83014 | Rsa1.0.53574.1 | 854 | 425    | 1.00E-120 | 243 | 251 | 96 +  | 604 | 854 | 69     | 319    |
| UN83015 | Rsa1.0.01899.1 | 775 | 37474  | 0         | 738 | 756 | 97 +  | 20  | 775 | 3101   | 3856   |
| UN83016 | Rsa1.0.23752.1 | 866 | 1027   | 1.00E-108 | 200 | 200 | 100 + | 1   | 200 | 109    | 308    |
| UN83017 | Rsa1.0.00265.1 | 849 | 220635 | 1.00E-138 | 297 | 313 | 94 +  | 537 | 849 | 175101 | 175413 |
| UN83018 | Rsa1.0.00131.1 | 663 | 432233 | 0         | 373 | 373 | 100 + | 291 | 663 | 257414 | 257786 |
| UN83019 | Rsa1.0.00752.1 | 843 | 65756  | 0         | 810 | 834 | 97 -  | 5   | 836 | 10786  | 11619  |
| UN83020 | Rsa1.0.00099.1 | 875 | 159619 | 1.00E-175 | 311 | 311 | 100 - | 565 | 875 | 85881  | 86191  |
| UN83021 | Rsa1.0.00926.1 | 884 | 195072 | 1.00E-102 | 190 | 190 | 100 + | 477 | 666 | 194883 | 195072 |
| UN83022 | Rsa1.0.01998.1 | 845 | 36276  | 0         | 629 | 634 | 99 +  | 212 | 845 | 10886  | 11519  |
| UN83023 | Rsa1.0.00017.1 | 546 | 752458 | 0         | 375 | 386 | 97 +  | 1   | 384 | 47167  | 47552  |
| UN83024 | Rsa1.0.00742.1 | 466 | 66106  | 0         | 462 | 462 | 100 + | 5   | 466 | 38195  | 38656  |
| UN83025 | Rsa1.0.00181.1 | 749 | 114269 | 0         | 748 | 749 | 99 +  | 1   | 749 | 42150  | 42898  |
| UN83026 | Rsa1.0.13944.1 | 226 | 4039   | 8.00E-88  | 179 | 184 | 97 +  | 1   | 184 | 61     | 244    |
| UN83027 | Rsa1.0.01899.1 | 599 | 37474  | 1.00E-111 | 204 | 204 | 100 - | 396 | 599 | 35942  | 36145  |
| UN83028 | Rsa1.0.03798.1 | 886 | 20800  | 0         | 886 | 886 | 100 - | 1   | 886 | 2035   | 2920   |
| UN83029 | Rsa1.0.01902.1 | 543 | 37455  | 3.00E-74  | 204 | 222 | 91 -  | 324 | 543 | 26473  | 26694  |

|         |                |     |        |           |     |     |       |   |     |     |        |        |
|---------|----------------|-----|--------|-----------|-----|-----|-------|---|-----|-----|--------|--------|
| UN83030 | Rsa1.0.02694.1 | 858 | 28610  | 0         | 395 | 405 | 97 +  |   | 125 | 529 | 6542   | 6943   |
| UN83031 | Rsa1.0.00200.1 | 762 | 162016 | 0         | 545 | 545 | 100 - |   | 218 | 762 | 101072 | 101616 |
| UN83032 | #              | #   | #      | #         | #   | #   | #     | # | #   | #   | #      | #      |
| UN83033 | Rsa1.0.00124.1 | 821 | 262503 | 0         | 787 | 822 | 95 -  |   | 1   | 821 | 41016  | 41828  |
| UN83034 | Rsa1.0.00134.1 | 825 | 390219 | 0         | 418 | 418 | 100 - |   | 408 | 825 | 189469 | 189886 |
| UN83035 | Rsa1.0.06920.1 | 249 | 10161  | 1.00E-138 | 249 | 249 | 100 + |   | 1   | 249 | 6365   | 6613   |
| UN83036 | #              | #   | #      | #         | #   | #   | #     | # | #   | #   | #      | #      |
| UN83037 | Rsa1.0.28472.1 | 881 | 814    | 0         | 449 | 456 | 98 +  |   | 433 | 881 | 1      | 456    |
| UN83038 | Rsa1.0.00879.1 | 839 | 61297  | 0         | 565 | 565 | 100 - |   | 275 | 839 | 48685  | 49249  |
| UN83039 | #              | #   | #      | #         | #   | #   | #     | # | #   | #   | #      | #      |
| UN83040 | Rsa1.0.00007.1 | 845 | 239325 | 0         | 447 | 448 | 99 -  |   | 398 | 845 | 21153  | 21600  |
| UN83041 | Rsa1.0.00618.1 | 882 | 72195  | 1.00E-62  | 126 | 127 | 99 -  |   | 344 | 470 | 7537   | 7663   |
| UN83042 | Rsa1.0.00476.1 | 834 | 280966 | 0         | 808 | 808 | 100 - |   | 27  | 834 | 2241   | 3048   |
| UN83043 | Rsa1.0.00973.1 | 884 | 57913  | 0         | 792 | 813 | 97 +  |   | 75  | 884 | 40856  | 41668  |
| UN83044 | #              | #   | #      | #         | #   | #   | #     | # | #   | #   | #      | #      |
| UN83045 | Rsa1.0.00040.1 | 765 | 324196 | 0         | 363 | 363 | 100 + |   | 1   | 363 | 105570 | 105932 |
| UN83046 | #              | #   | #      | #         | #   | #   | #     | # | #   | #   | #      | #      |
| UN83047 | Rsa1.0.00029.1 | 848 | 272992 | 0         | 338 | 338 | 100 + |   | 1   | 338 | 149362 | 149699 |
| UN83048 | #              | #   | #      | #         | #   | #   | #     | # | #   | #   | #      | #      |
| UN83049 | Rsa1.0.02024.1 | 868 | 149168 | 0         | 404 | 409 | 98 -  |   | 287 | 695 | 118219 | 118627 |
| UN83050 | Rsa1.0.03119.1 | 815 | 25270  | 0         | 758 | 793 | 95 -  |   | 1   | 793 | 7778   | 8570   |
| UN83051 | Rsa1.0.01338.1 | 515 | 155644 | 2.00E-90  | 169 | 169 | 100 - |   | 347 | 515 | 13941  | 14109  |
| UN83052 | Rsa1.0.14462.1 | 624 | 3365   | 0         | 368 | 368 | 100 - |   | 257 | 624 | 915    | 1282   |
| UN83053 | Rsa1.0.07430.1 | 814 | 9409   | 1.00E-159 | 477 | 540 | 88 -  |   | 259 | 765 | 2525   | 3060   |
| UN83054 | Rsa1.0.00900.1 | 348 | 60367  | 2.00E-95  | 244 | 267 | 91 -  |   | 77  | 343 | 40014  | 40268  |
| UN83055 | Rsa1.0.02148.1 | 463 | 34610  | 0         | 392 | 392 | 100 - |   | 2   | 393 | 22799  | 23190  |
| UN83056 | Rsa1.0.00191.1 | 827 | 316976 | 0         | 809 | 822 | 98 -  |   | 6   | 827 | 120155 | 120976 |
| UN83057 | #              | #   | #      | #         | #   | #   | #     | # | #   | #   | #      | #      |
| UN83058 | Rsa1.0.00820.1 | 803 | 62911  | 0         | 799 | 804 | 99 +  |   | 1   | 803 | 35130  | 35933  |
| UN83059 | Rsa1.0.00070.1 | 878 | 150321 | 4.00E-93  | 205 | 214 | 95 +  |   | 32  | 244 | 61588  | 61801  |
| UN83060 | #              | #   | #      | #         | #   | #   | #     | # | #   | #   | #      | #      |
| UN83061 | Rsa1.0.02540.1 | 860 | 30344  | 0         | 860 | 860 | 100 - |   | 1   | 860 | 22493  | 23352  |
| UN83062 | Rsa1.0.03034.1 | 299 | 157864 | 1.00E-114 | 208 | 208 | 100 - |   | 6   | 213 | 7041   | 7248   |
| UN83063 | Rsa1.0.03457.1 | 393 | 22796  | 0         | 393 | 393 | 100 - |   | 1   | 393 | 8375   | 8767   |
| UN83064 | Rsa1.0.09855.1 | 830 | 6118   | 0         | 562 | 562 | 100 + |   | 9   | 570 | 577    | 1138   |
| UN83065 | Rsa1.0.02244.1 | 552 | 33494  | 0         | 552 | 552 | 100 + |   | 1   | 552 | 32716  | 33267  |
| UN83066 | Rsa1.0.17179.1 | 860 | 1900   | 0         | 492 | 494 | 99 +  |   | 1   | 494 | 1279   | 1770   |
| UN83067 | Rsa1.0.04153.1 | 839 | 18807  | 0         | 839 | 839 | 100 + |   | 1   | 839 | 8987   | 9825   |
| UN83068 | Rsa1.0.01703.1 | 859 | 40713  | 0         | 856 | 861 | 99 -  |   | 1   | 859 | 13694  | 14554  |

|         |                |     |        |           |     |     |       |     |     |        |        |   |   |
|---------|----------------|-----|--------|-----------|-----|-----|-------|-----|-----|--------|--------|---|---|
| UN83069 | #              | #   | #      | #         | #   | #   | #     | #   | #   | #      | #      | # | # |
| UN83070 | Rsa1.0_21959.1 | 820 | 1160   | 0         | 752 | 804 | 93 +  | 17  | 820 | 168    | 971    |   |   |
| UN83071 | #              | #   | #      | #         | #   | #   | #     | #   | #   | #      | #      | # | # |
| UN83072 | Rsa1.0_00395.1 | 406 | 214466 | 0         | 406 | 406 | 100 - | 1   | 406 | 203749 | 204154 |   |   |
| UN83073 | Rsa1.0_02821.1 | 635 | 27602  | 4.00E-46  | 237 | 283 | 83 -  | 304 | 573 | 10920  | 11199  |   |   |
| UN83074 | Rsa1.0_00341.1 | 785 | 249309 | 0         | 771 | 788 | 97 +  | 1   | 785 | 180921 | 181704 |   |   |
| UN83075 | Rsa1.0_01555.1 | 841 | 166456 | 1.00E-120 | 248 | 256 | 96 -  | 3   | 258 | 18572  | 18826  |   |   |
| UN83076 | Rsa1.0_00627.1 | 872 | 71566  | 0         | 867 | 872 | 99 -  | 1   | 872 | 6900   | 7771   |   |   |
| UN83077 | Rsa1.0_02870.1 | 735 | 27102  | 1.00E-131 | 238 | 238 | 100 + | 386 | 623 | 12375  | 12612  |   |   |
| UN83078 | #              | #   | #      | #         | #   | #   | #     | #   | #   | #      | #      | # | # |
| UN83079 | Rsa1.0_00017.1 | 811 | 752458 | 0         | 798 | 804 | 99 -  | 8   | 811 | 343908 | 344711 |   |   |
| UN83080 | Rsa1.0_01313.1 | 390 | 48387  | 3.00E-67  | 172 | 184 | 93 +  | 28  | 211 | 17084  | 17258  |   |   |
| UN83081 | Rsa1.0_00191.1 | 439 | 316976 | 1.00E-117 | 287 | 310 | 92 +  | 18  | 318 | 204973 | 205281 |   |   |
| UN83082 | Rsa1.0_00256.1 | 879 | 102426 | 0         | 362 | 362 | 100 - | 1   | 362 | 80569  | 80930  |   |   |
| UN83083 | #              | #   | #      | #         | #   | #   | #     | #   | #   | #      | #      | # | # |
| UN83084 | Rsa1.0_05909.1 | 833 | 12265  | 0         | 455 | 460 | 98 -  | 7   | 464 | 9036   | 9494   |   |   |
| UN83085 | #              | #   | #      | #         | #   | #   | #     | #   | #   | #      | #      | # | # |
| UN83086 | Rsa1.0_06488.1 | 847 | 141774 | 0         | 476 | 493 | 96 -  | 355 | 847 | 133995 | 134480 |   |   |
| UN83087 | Rsa1.0_04928.1 | 641 | 15420  | 0         | 457 | 465 | 98 -  | 3   | 465 | 892    | 1356   |   |   |
| UN83088 | Rsa1.0_00224.1 | 500 | 327530 | 0         | 497 | 497 | 100 + | 4   | 500 | 91134  | 91630  |   |   |
| UN83089 | #              | #   | #      | #         | #   | #   | #     | #   | #   | #      | #      | # | # |
| UN83090 | Rsa1.0_14384.1 | 905 | 3446   | 0         | 890 | 895 | 99 -  | 11  | 905 | 1786   | 2680   |   |   |
| UN83091 | Rsa1.0_00054.1 | 735 | 162053 | 0         | 524 | 543 | 96 -  | 196 | 735 | 105921 | 106460 |   |   |
| UN83092 | Rsa1.0_05393.1 | 827 | 13919  | 3.00E-44  | 113 | 120 | 94 -  | 708 | 827 | 5897   | 6016   |   |   |
| UN83093 | Rsa1.0_00248.1 | 851 | 163568 | 0         | 798 | 799 | 99 -  | 50  | 848 | 55993  | 56791  |   |   |
| UN83094 | Rsa1.0_00092.1 | 827 | 659932 | 0         | 385 | 386 | 99 -  | 1   | 385 | 189480 | 189865 |   |   |
| UN83095 | #              | #   | #      | #         | #   | #   | #     | #   | #   | #      | #      | # | # |
| UN83096 | Rsa1.0_00027.1 | 439 | 283362 | 1.00E-154 | 345 | 367 | 94 -  | 37  | 397 | 269839 | 270200 |   |   |
| UN83097 | Rsa1.0_01156.1 | 825 | 52147  | 0         | 503 | 513 | 98 -  | 313 | 825 | 29321  | 29832  |   |   |
| UN83098 | Rsa1.0_02294.1 | 862 | 32940  | 0         | 862 | 862 | 100 + | 1   | 862 | 24092  | 24953  |   |   |
| UN83099 | #              | #   | #      | #         | #   | #   | #     | #   | #   | #      | #      | # | # |
| UN83100 | Rsa1.0_04745.1 | 716 | 16153  | 0         | 700 | 714 | 98 +  | 1   | 713 | 5341   | 6054   |   |   |
| UN83101 | #              | #   | #      | #         | #   | #   | #     | #   | #   | #      | #      | # | # |
| UN83102 | Rsa1.0_03002.1 | 467 | 26107  | 1.00E-109 | 200 | 200 | 100 + | 268 | 467 | 16508  | 16707  |   |   |
| UN83103 | Rsa1.0_03029.1 | 257 | 25858  | 1.00E-65  | 139 | 143 | 97 -  | 107 | 249 | 14527  | 14669  |   |   |
| UN83104 | Rsa1.0_00204.1 | 593 | 109056 | 0         | 591 | 593 | 99 +  | 1   | 593 | 26530  | 27122  |   |   |
| UN83105 | Rsa1.0_02316.1 | 856 | 32608  | 0         | 855 | 857 | 99 -  | 1   | 856 | 4738   | 5594   |   |   |
| UN83106 | Rsa1.0_01537.1 | 848 | 187285 | 1.00E-178 | 316 | 316 | 100 + | 1   | 316 | 21891  | 22206  |   |   |
| UN83107 | Rsa1.0_00157.1 | 842 | 245832 | 0         | 812 | 838 | 96 -  | 6   | 842 | 205957 | 206792 |   |   |

|         |                |     |        |           |     |     |       |     |     |        |        |
|---------|----------------|-----|--------|-----------|-----|-----|-------|-----|-----|--------|--------|
| UN83108 | Rsa1.0_00548.1 | 835 | 76518  | 1.00E-179 | 330 | 334 | 98 -  | 165 | 498 | 65913  | 66246  |
| UN83109 | #              | #   | #      | #         | #   | #   | #     | #   | #   | #      | #      |
| UN83110 | #              | #   | #      | #         | #   | #   | #     | #   | #   | #      | #      |
| UN83111 | Rsa1.0_01588.1 | 801 | 42724  | 0         | 619 | 619 | 100 - | 1   | 619 | 27509  | 28127  |
| UN83112 | Rsa1.0_03447.1 | 880 | 22857  | 0         | 880 | 881 | 99 -  | 1   | 880 | 8617   | 9497   |
| UN83113 | Rsa1.0_05000.1 | 107 | 15178  | 9.00E-52  | 106 | 107 | 99 -  | 1   | 107 | 2644   | 2750   |
| UN83114 | Rsa1.0_00002.1 | 837 | 601661 | 0         | 829 | 837 | 99 +  | 1   | 837 | 88014  | 88850  |
| UN83115 | Rsa1.0_13917.1 | 630 | 4095   | 3.00E-19  | 159 | 191 | 83 +  | 442 | 626 | 176    | 365    |
| UN83116 | #              | #   | #      | #         | #   | #   | #     | #   | #   | #      | #      |
| UN83117 | Rsa1.0_08304.1 | 787 | 7574   | 0         | 764 | 784 | 97 -  | 4   | 787 | 2414   | 3195   |
| UN83118 | Rsa1.0_00187.1 | 883 | 393093 | 0         | 699 | 717 | 97 +  | 3   | 716 | 372783 | 373499 |
| UN83119 | Rsa1.0_05394.1 | 170 | 13918  | 1.00E-73  | 143 | 144 | 99 +  | 27  | 170 | 3250   | 3393   |
| UN83120 | Rsa1.0_00204.1 | 308 | 109056 | 1.00E-117 | 213 | 213 | 100 + | 1   | 213 | 27631  | 27843  |
| UN83121 | Rsa1.0_00098.1 | 827 | 349239 | 0         | 815 | 833 | 97 +  | 1   | 827 | 255469 | 256301 |
| UN83122 | Rsa1.0_00111.1 | 833 | 390088 | 0         | 833 | 842 | 98 -  | 1   | 833 | 296328 | 297169 |
| UN83123 | Rsa1.0_01078.1 | 856 | 316910 | 0         | 830 | 831 | 99 +  | 1   | 831 | 287676 | 288505 |
| UN83124 | Rsa1.0_00082.1 | 672 | 237584 | 1.00E-177 | 330 | 335 | 98 -  | 41  | 375 | 54496  | 54830  |
| UN83125 | Rsa1.0_00946.1 | 854 | 58666  | 0         | 422 | 424 | 99 +  | 2   | 425 | 21923  | 22346  |
| UN83126 | Rsa1.0_00297.1 | 862 | 97836  | 1.00E-132 | 239 | 239 | 100 + | 358 | 596 | 52054  | 52292  |
| UN83127 | Rsa1.0_00007.1 | 821 | 239325 | 1.00E-126 | 341 | 372 | 91 +  | 15  | 384 | 182932 | 183294 |
| UN83128 | Rsa1.0_29387.1 | 866 | 784    | 0         | 513 | 522 | 98 +  | 1   | 522 | 263    | 784    |
| UN83129 | Rsa1.0_00215.1 | 880 | 201775 | 0         | 827 | 827 | 100 + | 54  | 880 | 44537  | 45363  |
| UN83130 | Rsa1.0_08956.1 | 881 | 6754   | 0         | 419 | 419 | 100 + | 1   | 419 | 4649   | 5067   |
| UN83131 | #              | #   | #      | #         | #   | #   | #     | #   | #   | #      | #      |
| UN83132 | Rsa1.0_08260.1 | 879 | 7640   | 0         | 630 | 630 | 100 + | 14  | 643 | 6092   | 6721   |
| UN83133 | #              | #   | #      | #         | #   | #   | #     | #   | #   | #      | #      |
| UN83134 | Rsa1.0_00098.1 | 564 | 349239 | 0         | 422 | 422 | 100 - | 143 | 564 | 235925 | 236346 |
| UN83135 | Rsa1.0_00579.1 | 855 | 148308 | 0         | 854 | 856 | 99 +  | 1   | 855 | 48839  | 49693  |
| UN83136 | Rsa1.0_02417.1 | 869 | 31592  | 0         | 868 | 869 | 99 +  | 1   | 869 | 6007   | 6875   |
| UN83137 | Rsa1.0_34282.1 | 774 | 660    | 0         | 379 | 384 | 98 +  | 2   | 383 | 278    | 660    |
| UN83138 | Rsa1.0_02505.1 | 856 | 30703  | 0         | 617 | 617 | 100 - | 240 | 856 | 2359   | 2975   |
| UN83139 | Rsa1.0_03304.1 | 831 | 23883  | 0         | 831 | 831 | 100 - | 1   | 831 | 10474  | 11304  |
| UN83140 | Rsa1.0_00340.1 | 522 | 305782 | 0         | 522 | 522 | 100 - | 1   | 522 | 31222  | 31743  |
| UN83141 | #              | #   | #      | #         | #   | #   | #     | #   | #   | #      | #      |
| UN83142 | Rsa1.0_51431.1 | 864 | 442    | 1.00E-157 | 290 | 293 | 98 -  | 136 | 428 | 150    | 442    |
| UN83143 | #              | #   | #      | #         | #   | #   | #     | #   | #   | #      | #      |
| UN83144 | Rsa1.0_18516.1 | 499 | 1584   | 0         | 397 | 397 | 100 - | 103 | 499 | 1188   | 1584   |
| UN83145 | Rsa1.0_01230.1 | 872 | 50221  | 8.00E-11  | 42  | 44  | 95 -  | 291 | 334 | 6864   | 6907   |
| UN83146 | Rsa1.0_07855.1 | 860 | 8417   | 1.00E-171 | 308 | 309 | 99 -  | 289 | 597 | 380    | 688    |

|         |                |     |        |           |     |     |       |     |     |        |        |
|---------|----------------|-----|--------|-----------|-----|-----|-------|-----|-----|--------|--------|
| UN83147 | Rsa1.0.02333.1 | 904 | 32431  | 1.00E-144 | 260 | 260 | 100 - | 645 | 904 | 8232   | 8491   |
| UN83148 | Rsa1.0.00155.1 | 856 | 118465 | 0         | 856 | 856 | 100 + | 1   | 856 | 44024  | 44879  |
| UN83149 | Rsa1.0.46053.1 | 835 | 490    | 0         | 341 | 342 | 99 -  | 1   | 342 | 1      | 342    |
| UN83150 | Rsa1.0.10300.1 | 862 | 5899   | 0         | 860 | 862 | 99 +  | 1   | 862 | 2350   | 3211   |
| UN83151 | Rsa1.0.00153.1 | 718 | 192931 | 0         | 543 | 543 | 100 - | 176 | 718 | 171931 | 172473 |
| UN83152 | #              | #   | #      | #         | #   | #   | #     | #   | #   | #      | #      |
| UN83153 | Rsa1.0.03469.1 | 877 | 22681  | 0         | 678 | 722 | 93 +  | 161 | 877 | 11058  | 11778  |
| UN83154 | Rsa1.0.00860.1 | 901 | 61789  | 0         | 864 | 893 | 96 +  | 1   | 891 | 45089  | 45980  |
| UN83155 | Rsa1.0.08050.1 | 866 | 8008   | 0         | 865 | 866 | 99 +  | 1   | 866 | 4404   | 5269   |
| UN83156 | Rsa1.0.04571.1 | 434 | 16792  | 1.00E-161 | 294 | 296 | 99 +  | 1   | 296 | 9156   | 9451   |
| UN83157 | Rsa1.0.02180.1 | 706 | 34176  | 0         | 563 | 585 | 96 -  | 122 | 706 | 9373   | 9957   |
| UN83158 | Rsa1.0.04475.1 | 884 | 17190  | 0         | 773 | 776 | 99 -  | 109 | 884 | 14965  | 15740  |
| UN83159 | Rsa1.0.00033.1 | 922 | 515811 | 1.00E-154 | 286 | 289 | 98 -  | 1   | 289 | 20266  | 20554  |
| UN83160 | Rsa1.0.01281.1 | 854 | 49313  | 0         | 684 | 696 | 98 +  | 1   | 691 | 42590  | 43283  |
| UN83161 | Rsa1.0.09954.1 | 877 | 6068   | 2.00E-88  | 178 | 182 | 97 -  | 517 | 698 | 4465   | 4646   |
| UN83162 | Rsa1.0.00046.1 | 709 | 320315 | 0         | 358 | 358 | 100 + | 352 | 709 | 29574  | 29931  |
| UN83163 | Rsa1.0.07281.1 | 881 | 9624   | 0         | 877 | 882 | 99 +  | 1   | 881 | 8374   | 9255   |
| UN83164 | #              | #   | #      | #         | #   | #   | #     | #   | #   | #      | #      |
| UN83165 | Rsa1.0.03552.1 | 443 | 22151  | 1.00E-167 | 337 | 349 | 96 +  | 95  | 443 | 20099  | 20446  |
| UN83166 | Rsa1.0.01763.1 | 870 | 39659  | 0         | 447 | 447 | 100 - | 143 | 589 | 35071  | 35517  |
| UN83167 | Rsa1.0.21495.1 | 566 | 1198   | 0         | 561 | 569 | 98 +  | 1   | 566 | 155    | 723    |
| UN83168 | Rsa1.0.00027.1 | 873 | 283362 | 0         | 839 | 880 | 95 -  | 1   | 873 | 56954  | 57832  |
| UN83169 | Rsa1.0.01935.1 | 741 | 37152  | 0         | 461 | 462 | 99 +  | 6   | 467 | 36371  | 36832  |
| UN83170 | Rsa1.0.00500.1 | 449 | 272308 | 1.00E-160 | 409 | 449 | 91 -  | 1   | 449 | 157271 | 157717 |
| UN83171 | Rsa1.0.00944.1 | 884 | 58733  | 0         | 600 | 622 | 96 +  | 263 | 878 | 10748  | 11362  |
| UN83172 | Rsa1.0.02244.1 | 886 | 33494  | 0         | 886 | 886 | 100 + | 1   | 886 | 16159  | 17044  |
| UN83173 | Rsa1.0.54418.1 | 858 | 419    | 1.00E-126 | 229 | 229 | 100 + | 134 | 362 | 1      | 229    |
| UN83174 | Rsa1.0.00010.1 | 461 | 294827 | 0         | 439 | 442 | 99 +  | 2   | 443 | 200943 | 201383 |
| UN83175 | Rsa1.0.00041.1 | 520 | 186197 | 0         | 357 | 361 | 98 -  | 2   | 362 | 157120 | 157480 |
| UN83176 | Rsa1.0.00018.1 | 866 | 410899 | 0         | 841 | 873 | 96 -  | 5   | 866 | 68248  | 69116  |
| UN83177 | Rsa1.0.00663.1 | 573 | 164969 | 0         | 373 | 373 | 100 - | 1   | 373 | 98301  | 98673  |
| UN83178 | #              | #   | #      | #         | #   | #   | #     | #   | #   | #      | #      |
| UN83179 | Rsa1.0.00159.1 | 366 | 431686 | 1.00E-167 | 349 | 366 | 95 +  | 1   | 366 | 351805 | 352170 |
| UN83180 | Rsa1.0.00107.1 | 884 | 431659 | 0         | 869 | 911 | 95 +  | 1   | 884 | 135961 | 136870 |
| UN83181 | Rsa1.0.10862.1 | 872 | 5698   | 1.00E-12  | 42  | 43  | 97 +  | 187 | 229 | 3748   | 3790   |
| UN83182 | Rsa1.0.06009.1 | 880 | 11950  | 0         | 873 | 876 | 99 +  | 5   | 880 | 10385  | 11260  |
| UN83183 | #              | #   | #      | #         | #   | #   | #     | #   | #   | #      | #      |
| UN83184 | Rsa1.0.01640.1 | 865 | 41822  | 1.00E-175 | 311 | 311 | 100 - | 1   | 311 | 38060  | 38370  |
| UN83185 | Rsa1.0.04067.1 | 619 | 19256  | 0         | 619 | 619 | 100 + | 1   | 619 | 858    | 1476   |

|         |                |     |        |           |     |     |       |     |     |        |        |
|---------|----------------|-----|--------|-----------|-----|-----|-------|-----|-----|--------|--------|
| UN83186 | Rsa1.0_00014.1 | 830 | 348985 | 2.00E-70  | 176 | 187 | 94 +  | 652 | 830 | 215021 | 215207 |
| UN83187 | Rsa1.0_00275.1 | 864 | 210104 | 0         | 451 | 451 | 100 - | 340 | 790 | 171982 | 172432 |
| UN83188 | #              | #   | #      | #         | #   | #   | #     | #   | #   | #      | #      |
| UN83189 | Rsa1.0_00273.1 | 815 | 326186 | 0         | 748 | 796 | 93 +  | 41  | 815 | 274595 | 275386 |
| UN83190 | #              | #   | #      | #         | #   | #   | #     | #   | #   | #      | #      |
| UN83191 | #              | #   | #      | #         | #   | #   | #     | #   | #   | #      | #      |
| UN83192 | #              | #   | #      | #         | #   | #   | #     | #   | #   | #      | #      |
| UN83193 | Rsa1.0_00448.1 | 861 | 84048  | 1.00E-137 | 297 | 308 | 96 -  | 1   | 306 | 3277   | 3582   |
| UN83194 | Rsa1.0_02248.1 | 844 | 33414  | 0         | 502 | 502 | 100 + | 1   | 502 | 11893  | 12394  |
| UN83195 | Rsa1.0_02935.1 | 363 | 26621  | 1.00E-170 | 340 | 350 | 97 +  | 16  | 363 | 15885  | 16234  |
| UN83196 | Rsa1.0_00451.1 | 664 | 322533 | 0         | 664 | 664 | 100 + | 1   | 664 | 249804 | 250467 |
| UN83197 | Rsa1.0_01519.1 | 828 | 44144  | 0         | 828 | 828 | 100 - | 1   | 828 | 27674  | 28501  |
| UN83198 | Rsa1.0_01467.1 | 880 | 45161  | 0         | 376 | 377 | 99 +  | 504 | 880 | 30387  | 30763  |
| UN83199 | Rsa1.0_03649.1 | 807 | 21589  | 0         | 807 | 807 | 100 - | 1   | 807 | 4549   | 5355   |
| UN83200 | Rsa1.0_00293.1 | 863 | 339294 | 0         | 860 | 863 | 99 -  | 1   | 863 | 288320 | 289182 |
| UN83201 | Rsa1.0_06318.1 | 633 | 11243  | 0         | 632 | 633 | 99 -  | 1   | 633 | 5069   | 5701   |
| UN83202 | Rsa1.0_08628.1 | 716 | 7109   | 0         | 615 | 616 | 99 +  | 101 | 716 | 2751   | 3366   |
| UN83203 | Rsa1.0_31364.1 | 870 | 729    | 0         | 618 | 672 | 91 +  | 199 | 870 | 1      | 668    |
| UN83204 | Rsa1.0_02673.1 | 638 | 28877  | 0         | 489 | 513 | 95 +  | 129 | 638 | 10291  | 10800  |
| UN83205 | Rsa1.0_01987.1 | 657 | 36446  | 0         | 657 | 657 | 100 - | 1   | 657 | 14671  | 15327  |
| UN83206 | Rsa1.0_00787.1 | 466 | 64239  | 0         | 458 | 458 | 100 + | 9   | 466 | 50561  | 51018  |
| UN83207 | Rsa1.0_00042.1 | 861 | 171507 | 0         | 861 | 861 | 100 + | 1   | 861 | 122654 | 123514 |
| UN83208 | Rsa1.0_00273.1 | 375 | 326186 | 2.00E-71  | 173 | 185 | 93 -  | 54  | 238 | 40267  | 40451  |
| UN83209 | Rsa1.0_00059.1 | 874 | 159650 | 1.00E-133 | 241 | 241 | 100 - | 1   | 241 | 72856  | 73096  |
| UN83210 | Rsa1.0_53334.1 | 759 | 427    | 0         | 426 | 427 | 99 -  | 71  | 497 | 1      | 427    |
| UN83211 | #              | #   | #      | #         | #   | #   | #     | #   | #   | #      | #      |
| UN83212 | Rsa1.0_00382.1 | 360 | 251946 | 0         | 360 | 360 | 100 + | 1   | 360 | 134174 | 134533 |
| UN83213 | Rsa1.0_00131.1 | 878 | 432233 | 0         | 875 | 878 | 99 +  | 2   | 878 | 174549 | 175426 |
| UN83214 | Rsa1.0_00046.1 | 810 | 320315 | 0         | 513 | 513 | 100 - | 6   | 518 | 22409  | 22921  |
| UN83215 | Rsa1.0_01388.1 | 136 | 46741  | 1.00E-66  | 134 | 136 | 98 -  | 1   | 136 | 12577  | 12712  |
| UN83216 | Rsa1.0_01552.1 | 361 | 43396  | 1.00E-142 | 273 | 279 | 97 -  | 83  | 361 | 35230  | 35508  |
| UN83217 | Rsa1.0_02840.1 | 902 | 27386  | 0         | 901 | 901 | 100 - | 2   | 902 | 15932  | 16832  |
| UN83218 | Rsa1.0_20171.1 | 828 | 1332   | 0         | 761 | 799 | 95 -  | 11  | 808 | 1      | 799    |
| UN83219 | Rsa1.0_01321.1 | 843 | 48248  | 0         | 422 | 422 | 100 + | 130 | 551 | 6404   | 6825   |
| UN83220 | Rsa1.0_02588.1 | 882 | 29840  | 0         | 881 | 881 | 100 - | 2   | 882 | 12793  | 13673  |
| UN83221 | Rsa1.0_02713.1 | 879 | 28470  | 0         | 878 | 881 | 99 -  | 1   | 879 | 27566  | 28446  |
| UN83222 | Rsa1.0_29200.1 | 906 | 789    | 0         | 495 | 546 | 90 +  | 105 | 650 | 69     | 599    |
| UN83223 | Rsa1.0_08124.1 | 835 | 7869   | 0         | 704 | 733 | 96 -  | 96  | 822 | 1      | 733    |
| UN83224 | Rsa1.0_00153.1 | 853 | 192931 | 0         | 849 | 853 | 99 +  | 1   | 853 | 143150 | 144002 |



|         |                |     |        |           |     |     |       |     |     |        |        |
|---------|----------------|-----|--------|-----------|-----|-----|-------|-----|-----|--------|--------|
| UN83225 | Rsa1.0_02754.1 | 802 | 28213  | 0         | 801 | 802 | 99 +  | 2   | 802 | 7000   | 7801   |
| UN83226 | #              | #   | #      | #         | #   | #   | #     | #   | #   | #      | #      |
| UN83227 | Rsa1.0_14520.1 | 570 | 3307   | 0         | 559 | 569 | 98 -  | 2   | 570 | 868    | 1427   |
| UN83228 | Rsa1.0_03308.1 | 782 | 23859  | 0         | 385 | 387 | 99 +  | 6   | 390 | 21507  | 21893  |
| UN83229 | Rsa1.0_00303.1 | 857 | 97468  | 0         | 371 | 371 | 100 + | 487 | 857 | 29741  | 30111  |
| UN83230 | Rsa1.0_01530.1 | 850 | 43820  | 1.00E-148 | 300 | 310 | 96 +  | 173 | 480 | 3574   | 3883   |
| UN83231 | Rsa1.0_02532.1 | 618 | 30403  | 0         | 607 | 619 | 98 -  | 1   | 618 | 27292  | 27910  |
| UN83232 | Rsa1.0_00203.1 | 475 | 109129 | 1.00E-150 | 269 | 269 | 100 - | 1   | 269 | 80231  | 80499  |
| UN83233 | Rsa1.0_00745.1 | 469 | 66067  | 0         | 464 | 464 | 100 - | 6   | 469 | 32312  | 32775  |
| UN83234 | Rsa1.0_17699.1 | 515 | 1763   | 1.00E-110 | 217 | 222 | 97 +  | 1   | 222 | 1277   | 1498   |
| UN83235 | Rsa1.0_06965.1 | 528 | 10099  | 0         | 520 | 527 | 98 -  | 1   | 526 | 5206   | 5727   |
| UN83236 | Rsa1.0_03664.1 | 530 | 21487  | 1.00E-94  | 205 | 216 | 94 +  | 4   | 210 | 7048   | 7263   |
| UN83237 | Rsa1.0_70529.1 | 928 | 325    | 2.00E-21  | 149 | 178 | 83 -  | 44  | 219 | 109    | 286    |
| UN83238 | Rsa1.0_04441.1 | 833 | 17341  | 1.00E-171 | 305 | 305 | 100 + | 1   | 305 | 5836   | 6140   |
| UN83239 | Rsa1.0_01865.1 | 528 | 37992  | 0         | 520 | 528 | 98 +  | 1   | 528 | 25982  | 26509  |
| UN83240 | Rsa1.0_00706.1 | 846 | 291570 | 0         | 818 | 838 | 97 +  | 9   | 846 | 229148 | 229972 |
| UN83241 | Rsa1.0_00788.1 | 853 | 64237  | 1.00E-136 | 246 | 246 | 100 - | 382 | 627 | 59100  | 59345  |
| UN83242 | Rsa1.0_00365.1 | 197 | 90902  | 1.00E-105 | 196 | 197 | 99 -  | 1   | 197 | 65836  | 66032  |
| UN83243 | Rsa1.0_05239.1 | 574 | 14410  | 0         | 434 | 434 | 100 - | 141 | 574 | 11688  | 12121  |
| UN83244 | Rsa1.0_23397.1 | 775 | 1052   | 1.00E-171 | 384 | 405 | 94 +  | 3   | 403 | 1      | 401    |
| UN83245 | Rsa1.0_00243.1 | 897 | 103651 | 0         | 896 | 897 | 99 -  | 1   | 897 | 20960  | 21856  |
| UN83246 | Rsa1.0_00385.1 | 473 | 89160  | 1.00E-178 | 331 | 335 | 98 -  | 1   | 333 | 48424  | 48758  |
| UN83247 | Rsa1.0_00609.1 | 512 | 72785  | 0         | 378 | 378 | 100 + | 1   | 378 | 48747  | 49124  |
| UN83248 | Rsa1.0_00554.1 | 688 | 150953 | 1.00E-103 | 305 | 349 | 87 +  | 2   | 335 | 119424 | 119760 |
| UN83249 | Rsa1.0_02428.1 | 209 | 31542  | 3.00E-75  | 182 | 193 | 94 -  | 1   | 189 | 20904  | 21096  |
| UN83250 | Rsa1.0_00923.1 | 712 | 153678 | 1.00E-164 | 340 | 353 | 96 -  | 350 | 700 | 18539  | 18886  |
| UN83251 | Rsa1.0_01779.1 | 198 | 39448  | 1.00E-83  | 191 | 198 | 96 -  | 1   | 198 | 17177  | 17367  |
| UN83252 | Rsa1.0_01583.1 | 745 | 156297 | 1.00E-111 | 205 | 205 | 100 - | 541 | 745 | 129335 | 129539 |
| UN83253 | Rsa1.0_00296.1 | 720 | 97854  | 0         | 718 | 719 | 99 +  | 3   | 720 | 27860  | 28578  |
| UN83254 | Rsa1.0_19134.1 | 832 | 1474   | 3.00E-16  | 45  | 45  | 100 + | 788 | 832 | 1106   | 1150   |
| UN83255 | Rsa1.0_03221.1 | 837 | 24535  | 0         | 826 | 838 | 98 +  | 1   | 837 | 2857   | 3684   |
| UN83256 | Rsa1.0_04643.1 | 528 | 16546  | 1.00E-171 | 307 | 308 | 99 +  | 1   | 308 | 121    | 428    |
| UN83257 | Rsa1.0_00069.1 | 594 | 403561 | 2.00E-93  | 174 | 174 | 100 - | 274 | 447 | 178478 | 178651 |
| UN83258 | Rsa1.0_13945.1 | 828 | 4035   | 0         | 685 | 685 | 100 + | 1   | 685 | 165    | 849    |
| UN83259 | Rsa1.0_03673.1 | 797 | 21448  | 0         | 797 | 797 | 100 - | 1   | 797 | 5064   | 5860   |
| UN83260 | Rsa1.0_03087.1 | 908 | 25478  | 0         | 693 | 765 | 90 -  | 1   | 756 | 21624  | 22388  |
| UN83261 | Rsa1.0_00008.1 | 827 | 358124 | 0         | 611 | 612 | 99 -  | 216 | 827 | 190143 | 190754 |
| UN83262 | Rsa1.0_00290.1 | 811 | 225096 | 1.00E-138 | 267 | 273 | 97 +  | 389 | 661 | 157656 | 157928 |
| UN83263 | Rsa1.0_00863.1 | 853 | 254535 | 0         | 823 | 854 | 96 -  | 1   | 853 | 217829 | 218682 |

|         |                |     |        |           |     |     |       |     |     |        |        |
|---------|----------------|-----|--------|-----------|-----|-----|-------|-----|-----|--------|--------|
| UN83264 | Rsa1.0.06928.1 | 837 | 10147  | 0         | 621 | 632 | 98 +  | 14  | 643 | 9517   | 10147  |
| UN83265 | Rsa1.0.00600.1 | 862 | 73395  | 0         | 847 | 862 | 98 -  | 1   | 862 | 59318  | 60178  |
| UN83266 | Rsa1.0.00377.1 | 873 | 90038  | 1.00E-127 | 244 | 248 | 98 +  | 1   | 248 | 540    | 783    |
| UN83267 | Rsa1.0.05299.1 | 818 | 14229  | 0         | 812 | 818 | 99 +  | 1   | 818 | 1549   | 2360   |
| UN83268 | Rsa1.0.00246.1 | 828 | 103541 | 1.00E-129 | 267 | 278 | 96 -  | 1   | 278 | 96064  | 96341  |
| UN83269 | Rsa1.0.22680.1 | 201 | 130241 | 1.00E-107 | 196 | 196 | 100 - | 6   | 201 | 600    | 795    |
| UN83270 | Rsa1.0.00169.1 | 836 | 274298 | 0         | 818 | 837 | 97 +  | 1   | 836 | 52603  | 53431  |
| UN83271 | Rsa1.0.01827.1 | 826 | 143321 | 0         | 578 | 579 | 99 +  | 248 | 826 | 14052  | 14630  |
| UN83272 | Rsa1.0.02228.1 | 863 | 33688  | 0         | 574 | 574 | 100 - | 111 | 684 | 16770  | 17343  |
| UN83273 | Rsa1.0.02496.1 | 648 | 30814  | 1.00E-114 | 221 | 225 | 98 +  | 302 | 526 | 15075  | 15299  |
| UN83274 | Rsa1.0.01363.1 | 885 | 47195  | 0         | 464 | 465 | 99 +  | 1   | 465 | 13351  | 13814  |
| UN83275 | Rsa1.0.04317.1 | 840 | 17967  | 0         | 798 | 798 | 100 - | 1   | 798 | 2094   | 2891   |
| UN83276 | Rsa1.0.42878.1 | 802 | 524    | 1.00E-132 | 239 | 239 | 100 + | 379 | 617 | 140    | 378    |
| UN83277 | Rsa1.0.03223.1 | 806 | 24512  | 0         | 806 | 806 | 100 - | 1   | 806 | 15016  | 15821  |
| UN83278 | Rsa1.0.32974.1 | 843 | 689    | 0         | 658 | 674 | 97 +  | 178 | 843 | 1      | 674    |
| UN83279 | Rsa1.0.00303.1 | 855 | 97468  | 0         | 364 | 364 | 100 - | 283 | 646 | 45704  | 46067  |
| UN83280 | Rsa1.0.08468.1 | 824 | 135984 | 0         | 824 | 825 | 99 -  | 1   | 824 | 996    | 1820   |
| UN83281 | Rsa1.0.01093.1 | 428 | 54312  | 0         | 357 | 357 | 100 - | 72  | 428 | 24580  | 24936  |
| UN83282 | Rsa1.0.02589.1 | 879 | 300828 | 0         | 879 | 880 | 99 +  | 1   | 879 | 152176 | 153055 |
| UN83283 | Rsa1.0.02808.1 | 875 | 27677  | 1.00E-178 | 334 | 340 | 98 -  | 340 | 679 | 7731   | 8070   |
| UN83284 | Rsa1.0.02283.1 | 847 | 33024  | 2.33E-156 | 278 | 283 | 98 +  | 146 | 428 | 26492  | 26774  |
| UN83285 | Rsa1.0.04265.1 | 825 | 18199  | 0         | 825 | 825 | 100 - | 1   | 825 | 8804   | 9628   |
| UN83286 | Rsa1.0.00358.1 | 837 | 91293  | 0         | 837 | 838 | 99 +  | 1   | 837 | 65918  | 66755  |
| UN83287 | Rsa1.0.00596.1 | 379 | 73578  | 0         | 374 | 374 | 100 + | 6   | 379 | 35330  | 35703  |
| UN83288 | Rsa1.0.00038.1 | 837 | 314568 | 1.00E-150 | 279 | 282 | 98 +  | 440 | 721 | 265491 | 265772 |
| UN83289 | Rsa1.0.01960.1 | 416 | 36766  | 1.00E-131 | 240 | 241 | 99 +  | 47  | 287 | 7984   | 8224   |
| UN83290 | Rsa1.0.06111.1 | 814 | 11723  | 1.00E-177 | 340 | 347 | 97 -  | 1   | 346 | 11188  | 11534  |
| UN83291 | Rsa1.0.55861.1 | 832 | 409    | 1.00E-123 | 271 | 286 | 94 +  | 219 | 504 | 132    | 409    |
| UN83292 | Rsa1.0.17535.1 | 880 | 1803   | 0         | 381 | 384 | 99 +  | 104 | 487 | 387    | 770    |
| UN83293 | Rsa1.0.02675.1 | 856 | 28852  | 0         | 856 | 856 | 100 + | 1   | 856 | 26944  | 27799  |
| UN83294 | Rsa1.0.02104.1 | 909 | 34985  | 1.00E-179 | 440 | 475 | 92 +  | 438 | 909 | 25340  | 25808  |
| UN83295 | Rsa1.0.04042.1 | 874 | 19428  | 0         | 650 | 650 | 100 + | 1   | 650 | 11075  | 11724  |
| UN83296 | Rsa1.0.00688.1 | 273 | 68396  | 1.00E-153 | 273 | 273 | 100 - | 1   | 273 | 49352  | 49624  |
| UN83297 | Rsa1.0.15160.1 | 840 | 2789   | 0         | 585 | 585 | 100 - | 26  | 610 | 1      | 585    |
| UN83298 | #              | #   | #      | #         | #   | #   | #     | #   | #   | #      | #      |
| UN83299 | Rsa1.0.02992.1 | 681 | 26176  | 0         | 323 | 323 | 100 - | 359 | 681 | 1552   | 1874   |
| UN83300 | Rsa1.0.00016.1 | 217 | 831256 | 6.00E-61  | 119 | 119 | 100 + | 3   | 121 | 514480 | 514598 |
| UN83301 | Rsa1.0.03253.1 | 766 | 24321  | 0         | 601 | 601 | 100 - | 1   | 601 | 13387  | 13987  |
| UN83302 | Rsa1.0.00153.1 | 266 | 192931 | 1.00E-148 | 266 | 266 | 100 + | 1   | 266 | 174626 | 174891 |

|         |                |     |        |           |     |     |       |     |     |        |        |
|---------|----------------|-----|--------|-----------|-----|-----|-------|-----|-----|--------|--------|
| UN83303 | Rsa1.0.06206.1 | 596 | 11494  | 1.00E-177 | 315 | 315 | 100 - | 282 | 596 | 9267   | 9581   |
| UN83304 | Rsa1.0.00315.1 | 876 | 96426  | 0         | 874 | 874 | 100 - | 3   | 876 | 17168  | 18041  |
| UN83305 | Rsa1.0.02040.1 | 822 | 35684  | 0         | 801 | 810 | 98 +  | 14  | 822 | 22479  | 23283  |
| UN83306 | Rsa1.0.00430.1 | 830 | 85453  | 1.00E-172 | 306 | 306 | 100 - | 1   | 306 | 53361  | 53666  |
| UN83307 | Rsa1.0.02896.1 | 315 | 26970  | 1.00E-173 | 315 | 316 | 99 -  | 1   | 315 | 9028   | 9343   |
| UN83308 | Rsa1.0.00281.1 | 882 | 99908  | 0         | 861 | 903 | 95 -  | 1   | 882 | 17362  | 18264  |
| UN83309 | Rsa1.0.19122.1 | 853 | 1477   | 0         | 330 | 330 | 100 - | 524 | 853 | 781    | 1110   |
| UN83310 | #              | #   | #      | #         | #   | #   | #     | #   | #   | #      | #      |
| UN83311 | Rsa1.0.00063.1 | 455 | 156150 | 0         | 455 | 455 | 100 - | 1   | 455 | 126278 | 126732 |
| UN83312 | Rsa1.0.02956.1 | 850 | 26483  | 0         | 663 | 668 | 99 +  | 1   | 668 | 7150   | 7813   |
| UN83313 | Rsa1.0.01122.1 | 836 | 53369  | 1.00E-100 | 189 | 190 | 99 +  | 647 | 836 | 2476   | 2665   |
| UN83314 | Rsa1.0.01215.1 | 821 | 166813 | 1.00E-163 | 317 | 325 | 97 -  | 76  | 397 | 43845  | 44169  |
| UN83315 | Rsa1.0.00239.1 | 883 | 104332 | 0         | 883 | 885 | 99 -  | 1   | 883 | 20557  | 21441  |
| UN83316 | Rsa1.0.01619.1 | 780 | 42117  | 1.00E-166 | 325 | 333 | 97 -  | 1   | 332 | 1      | 333    |
| UN83317 | Rsa1.0.01962.1 | 827 | 153412 | 1.00E-129 | 244 | 247 | 98 +  | 581 | 827 | 16620  | 16866  |
| UN83318 | Rsa1.0.15656.1 | 812 | 2500   | 0         | 664 | 666 | 99 +  | 1   | 666 | 544    | 1209   |
| UN83319 | Rsa1.0.08717.1 | 113 | 7008   | 5.00E-41  | 97  | 101 | 96 -  | 13  | 113 | 1100   | 1200   |
| UN83320 | Rsa1.0.00110.1 | 842 | 132719 | 0         | 521 | 546 | 95 -  | 297 | 842 | 36508  | 37047  |
| UN83321 | Rsa1.0.00037.1 | 742 | 307838 | 1.00E-151 | 274 | 275 | 99 -  | 1   | 275 | 237974 | 238248 |
| UN83322 | Rsa1.0.17114.1 | 856 | 1919   | 0         | 622 | 623 | 99 +  | 1   | 623 | 692    | 1314   |
| UN83323 | Rsa1.0.00686.1 | 634 | 68511  | 0         | 342 | 343 | 99 -  | 292 | 634 | 57480  | 57821  |
| UN83324 | #              | #   | #      | #         | #   | #   | #     | #   | #   | #      | #      |
| UN83325 | Rsa1.0.00423.1 | 819 | 86138  | 0         | 788 | 819 | 96 -  | 1   | 819 | 78521  | 79330  |
| UN83326 | Rsa1.0.00015.1 | 753 | 561803 | 1.00E-153 | 418 | 470 | 88 +  | 30  | 492 | 483083 | 483532 |
| UN83327 | Rsa1.0.00116.1 | 473 | 365886 | 0         | 473 | 473 | 100 - | 1   | 473 | 165408 | 165880 |
| UN83328 | Rsa1.0.00032.1 | 646 | 306326 | 0         | 397 | 397 | 100 + | 1   | 397 | 192410 | 192806 |
| UN83329 | Rsa1.0.01198.1 | 825 | 51029  | 1.00E-106 | 196 | 196 | 100 - | 630 | 825 | 38154  | 38349  |
| UN83330 | Rsa1.0.41690.1 | 307 | 539    | 1.00E-143 | 264 | 265 | 99 -  | 43  | 307 | 52     | 315    |
| UN83331 | #              | #   | #      | #         | #   | #   | #     | #   | #   | #      | #      |
| UN83332 | Rsa1.0.01193.1 | 885 | 51147  | 0         | 403 | 403 | 100 + | 371 | 773 | 41318  | 41720  |
| UN83333 | Rsa1.0.00790.1 | 862 | 148693 | 0         | 862 | 862 | 100 + | 1   | 862 | 15592  | 16453  |
| UN83334 | Rsa1.0.00246.1 | 563 | 103541 | 0         | 540 | 570 | 94 +  | 2   | 563 | 93313  | 93874  |
| UN83335 | Rsa1.0.01204.1 | 663 | 50843  | 1.00E-103 | 262 | 282 | 92 +  | 395 | 663 | 11719  | 11999  |
| UN83336 | Rsa1.0.00307.1 | 861 | 199003 | 0         | 842 | 868 | 97 -  | 1   | 861 | 45846  | 46713  |
| UN83337 | #              | #   | #      | #         | #   | #   | #     | #   | #   | #      | #      |
| UN83338 | #              | #   | #      | #         | #   | #   | #     | #   | #   | #      | #      |
| UN83339 | Rsa1.0.22408.1 | 362 | 1124   | 1.00E-155 | 321 | 334 | 96 -  | 32  | 362 | 493    | 823    |
| UN83340 | #              | #   | #      | #         | #   | #   | #     | #   | #   | #      | #      |
| UN83341 | Rsa1.0.00437.1 | 649 | 84879  | 0         | 627 | 649 | 96 -  | 1   | 649 | 6002   | 6650   |

|         |                |     |        |           |     |     |       |   |     |     |        |        |
|---------|----------------|-----|--------|-----------|-----|-----|-------|---|-----|-----|--------|--------|
| UN83342 | Rsa1.0.08380.1 | 844 | 7446   | 0         | 461 | 461 | 100 - |   | 384 | 844 | 2704   | 3164   |
| UN83343 | Rsa1.0.00168.1 | 868 | 115870 | 0         | 868 | 868 | 100 - |   | 1   | 868 | 30515  | 31382  |
| UN83344 | Rsa1.0.00419.1 | 851 | 86562  | 0         | 847 | 852 | 99 -  |   | 1   | 851 | 38816  | 39667  |
| UN83345 | Rsa1.0.00048.1 | 832 | 167185 | 1.00E-160 | 294 | 295 | 99 -  |   | 1   | 294 | 151139 | 151433 |
| UN83346 | #              | #   | #      | #         | #   | #   | #     | # | #   | #   | #      | #      |
| UN83347 | Rsa1.0.00108.1 | 884 | 478491 | 0         | 685 | 706 | 97 +  |   | 2   | 706 | 404997 | 405701 |
| UN83348 | Rsa1.0.01341.1 | 853 | 47764  | 0         | 429 | 430 | 99 -  |   | 8   | 436 | 14274  | 14703  |
| UN83349 | Rsa1.0.07926.1 | 878 | 8245   | 0         | 358 | 358 | 100 + |   | 399 | 756 | 6848   | 7205   |
| UN83350 | Rsa1.0.00280.1 | 859 | 99966  | 0         | 416 | 416 | 100 + |   | 1   | 416 | 97483  | 97898  |
| UN83351 | Rsa1.0.00290.1 | 875 | 225096 | 0         | 842 | 878 | 95 +  |   | 1   | 875 | 168607 | 169484 |
| UN83352 | Rsa1.0.02613.1 | 623 | 29557  | 1.00E-138 | 266 | 270 | 98 -  |   | 355 | 623 | 21103  | 21372  |
| UN83353 | Rsa1.0.02018.1 | 107 | 35994  | 8.00E-46  | 107 | 109 | 98 +  |   | 1   | 107 | 6288   | 6396   |
| UN83354 | Rsa1.0.18097.1 | 537 | 1669   | 1.00E-174 | 321 | 325 | 98 +  |   | 155 | 479 | 1      | 325    |
| UN83355 | #              | #   | #      | #         | #   | #   | #     | # | #   | #   | #      | #      |
| UN83356 | Rsa1.0.07916.1 | 849 | 8288   | 0         | 455 | 469 | 97 -  |   | 5   | 471 | 3964   | 4429   |
| UN83357 | Rsa1.0.05918.1 | 391 | 12244  | 1.00E-155 | 278 | 278 | 100 - |   | 114 | 391 | 3470   | 3747   |
| UN83358 | Rsa1.0.03210.1 | 584 | 24592  | 0         | 416 | 429 | 96 +  |   | 156 | 584 | 1860   | 2283   |
| UN83359 | Rsa1.0.00287.1 | 704 | 98687  | 1.00E-125 | 288 | 308 | 93 +  |   | 292 | 599 | 50189  | 50496  |
| UN83360 | Rsa1.0.00694.1 | 921 | 68074  | 0         | 878 | 910 | 96 +  |   | 12  | 921 | 60974  | 61875  |
| UN83361 | Rsa1.0.00022.1 | 530 | 200461 | 0         | 366 | 370 | 98 -  |   | 4   | 370 | 28222  | 28591  |
| UN83362 | Rsa1.0.04237.1 | 816 | 18361  | 0         | 804 | 806 | 99 +  |   | 11  | 816 | 7441   | 8246   |
| UN83363 | Rsa1.0.00945.1 | 813 | 58714  | 0         | 813 | 813 | 100 - |   | 1   | 813 | 52947  | 53759  |
| UN83364 | #              | #   | #      | #         | #   | #   | #     | # | #   | #   | #      | #      |
| UN83365 | Rsa1.0.00687.1 | 694 | 68494  | 3.00E-62  | 292 | 348 | 83 -  |   | 343 | 690 | 42451  | 42795  |
| UN83366 | Rsa1.0.00016.1 | 828 | 831256 | 0         | 510 | 510 | 100 - |   | 319 | 828 | 798871 | 799380 |
| UN83367 | Rsa1.0.00077.1 | 399 | 145005 | 0         | 399 | 400 | 99 +  |   | 1   | 399 | 73713  | 74112  |
| UN83368 | Rsa1.0.08841.1 | 626 | 6870   | 0         | 488 | 502 | 97 -  |   | 7   | 508 | 1013   | 1513   |
| UN83369 | Rsa1.0.00139.1 | 773 | 357786 | 0         | 719 | 719 | 100 - |   | 7   | 725 | 1806   | 2524   |
| UN83370 | Rsa1.0.01493.1 | 572 | 44670  | 0         | 448 | 452 | 99 +  |   | 122 | 572 | 19246  | 19697  |
| UN83371 | Rsa1.0.02618.1 | 755 | 29526  | 1.00E-174 | 317 | 318 | 99 +  |   | 439 | 755 | 171    | 488    |
| UN83372 | Rsa1.0.01847.1 | 868 | 38346  | 4.00E-99  | 184 | 184 | 100 - |   | 473 | 656 | 20169  | 20352  |
| UN83373 | #              | #   | #      | #         | #   | #   | #     | # | #   | #   | #      | #      |
| UN83374 | Rsa1.0.00898.1 | 795 | 202772 | 0         | 613 | 613 | 100 + |   | 1   | 613 | 36655  | 37267  |
| UN83375 | Rsa1.0.00270.1 | 666 | 101236 | 0         | 659 | 665 | 99 +  |   | 2   | 666 | 25036  | 25700  |
| UN83376 | Rsa1.0.01641.1 | 118 | 188213 | 8.00E-37  | 78  | 78  | 100 + |   | 41  | 118 | 7608   | 7685   |
| UN83377 | Rsa1.0.20974.1 | 815 | 1249   | 0         | 458 | 458 | 100 - |   | 1   | 458 | 1      | 458    |
| UN83378 | Rsa1.0.00145.1 | 845 | 261008 | 0         | 544 | 562 | 96 +  |   | 214 | 775 | 232353 | 232914 |
| UN83379 | Rsa1.0.04169.1 | 830 | 18712  | 0         | 776 | 777 | 99 +  |   | 1   | 777 | 1006   | 1782   |
| UN83380 | Rsa1.0.06039.1 | 871 | 11867  | 0         | 864 | 874 | 98 +  |   | 1   | 871 | 203    | 1076   |

|         |                |     |        |           |     |     |       |     |     |        |        |
|---------|----------------|-----|--------|-----------|-----|-----|-------|-----|-----|--------|--------|
| UN83381 | Rsa1.0_05204.1 | 585 | 14516  | 1.00E-140 | 280 | 289 | 96 -  | 69  | 357 | 6647   | 6935   |
| UN83382 | #              | #   | #      | #         | #   | #   | #     | #   | #   | #      | #      |
| UN83383 | Rsa1.0_01582.1 | 883 | 42815  | 0         | 883 | 883 | 100 - | 1   | 883 | 30087  | 30969  |
| UN83384 | #              | #   | #      | #         | #   | #   | #     | #   | #   | #      | #      |
| UN83385 | #              | #   | #      | #         | #   | #   | #     | #   | #   | #      | #      |
| UN83386 | Rsa1.0_00683.1 | 838 | 68638  | 0         | 838 | 838 | 100 + | 1   | 838 | 11704  | 12541  |
| UN83387 | Rsa1.0_00158.1 | 840 | 117999 | 0         | 488 | 502 | 97 +  | 95  | 591 | 28549  | 29050  |
| UN83388 | #              | #   | #      | #         | #   | #   | #     | #   | #   | #      | #      |
| UN83389 | Rsa1.0_00294.1 | 804 | 144860 | 0         | 518 | 528 | 98 -  | 277 | 804 | 44826  | 45353  |
| UN83390 | Rsa1.0_01602.1 | 552 | 42503  | 0         | 542 | 542 | 100 + | 7   | 548 | 5780   | 6321   |
| UN83391 | Rsa1.0_00922.1 | 765 | 59588  | 1.00E-162 | 289 | 289 | 100 + | 281 | 569 | 51450  | 51738  |
| UN83392 | #              | #   | #      | #         | #   | #   | #     | #   | #   | #      | #      |
| UN83393 | Rsa1.0_25630.1 | 751 | 928    | 0         | 649 | 675 | 96 +  | 1   | 675 | 256    | 928    |
| UN83394 | Rsa1.0_08800.1 | 627 | 6912   | 0         | 627 | 629 | 99 -  | 1   | 627 | 5056   | 5684   |
| UN83395 | Rsa1.0_00851.1 | 807 | 62181  | 0         | 772 | 801 | 96 +  | 3   | 803 | 12582  | 13382  |
| UN83396 | Rsa1.0_00356.1 | 866 | 91521  | 0         | 777 | 777 | 100 - | 1   | 777 | 37813  | 38589  |
| UN83397 | Rsa1.0_03284.1 | 779 | 24069  | 0         | 439 | 451 | 97 -  | 299 | 748 | 18400  | 18847  |
| UN83398 | #              | #   | #      | #         | #   | #   | #     | #   | #   | #      | #      |
| UN83399 | Rsa1.0_00844.1 | 849 | 62403  | 0         | 842 | 842 | 100 + | 8   | 849 | 20298  | 21139  |
| UN83400 | Rsa1.0_07752.1 | 857 | 8640   | 0         | 598 | 645 | 92 -  | 4   | 648 | 7399   | 8043   |
| UN83401 | #              | #   | #      | #         | #   | #   | #     | #   | #   | #      | #      |
| UN83402 | Rsa1.0_01077.1 | 776 | 54772  | 0         | 775 | 776 | 99 -  | 1   | 776 | 53275  | 54050  |
| UN83403 | Rsa1.0_04124.1 | 663 | 18945  | 0         | 658 | 661 | 99 -  | 1   | 661 | 13059  | 13719  |
| UN83404 | #              | #   | #      | #         | #   | #   | #     | #   | #   | #      | #      |
| UN83405 | Rsa1.0_70106.1 | 838 | 327    | 1.00E-162 | 289 | 289 | 100 - | 292 | 580 | 39     | 327    |
| UN83406 | Rsa1.0_17339.1 | 901 | 1855   | 0         | 587 | 588 | 99 +  | 314 | 901 | 518    | 1105   |
| UN83407 | Rsa1.0_00216.1 | 722 | 197563 | 1.00E-160 | 286 | 286 | 100 - | 221 | 506 | 17305  | 17590  |
| UN83408 | Rsa1.0_03100.1 | 806 | 25411  | 0         | 806 | 806 | 100 + | 1   | 806 | 14947  | 15752  |
| UN83409 | Rsa1.0_00244.1 | 819 | 103590 | 0         | 819 | 819 | 100 + | 1   | 819 | 88606  | 89424  |
| UN83410 | Rsa1.0_06181.1 | 868 | 11547  | 0         | 854 | 855 | 99 +  | 15  | 868 | 3421   | 4275   |
| UN83411 | Rsa1.0_00790.1 | 375 | 148693 | 4.00E-97  | 183 | 184 | 99 +  | 192 | 375 | 136297 | 136480 |
| UN83412 | Rsa1.0_00159.1 | 742 | 431686 | 0         | 742 | 742 | 100 + | 1   | 742 | 175056 | 175797 |
| UN83413 | Rsa1.0_00823.1 | 557 | 62889  | 0         | 557 | 557 | 100 + | 1   | 557 | 8054   | 8610   |
| UN83414 | #              | #   | #      | #         | #   | #   | #     | #   | #   | #      | #      |
| UN83415 | Rsa1.0_01076.1 | 341 | 54835  | 7.00E-80  | 157 | 159 | 98 -  | 11  | 169 | 53310  | 53468  |
| UN83416 | Rsa1.0_03278.1 | 836 | 24125  | 0         | 821 | 836 | 98 +  | 1   | 836 | 856    | 1690   |
| UN83417 | #              | #   | #      | #         | #   | #   | #     | #   | #   | #      | #      |
| UN83418 | Rsa1.0_00451.1 | 806 | 322533 | 2.00E-97  | 199 | 205 | 97 -  | 161 | 365 | 23958  | 24162  |
| UN83419 | Rsa1.0_00107.1 | 853 | 431659 | 1.00E-164 | 311 | 317 | 98 +  | 255 | 571 | 367587 | 367903 |

|         |                |     |        |           |     |     |       |     |     |        |        |
|---------|----------------|-----|--------|-----------|-----|-----|-------|-----|-----|--------|--------|
| UN83420 | Rsa1.0_04420.1 | 823 | 17430  | 0         | 369 | 374 | 98 +  | 417 | 788 | 13757  | 14130  |
| UN83421 | Rsa1.0_04655.1 | 593 | 16495  | 0         | 328 | 328 | 100 - | 266 | 593 | 7188   | 7515   |
| UN83422 | Rsa1.0_00185.1 | 872 | 248445 | 0         | 382 | 382 | 100 - | 386 | 767 | 171330 | 171711 |
| UN83423 | #              | #   | #      | #         | #   | #   | #     | #   | #   | #      | #      |
| UN83424 | Rsa1.0_00173.1 | 533 | 288743 | 5.00E-88  | 290 | 331 | 87 +  | 5   | 335 | 220404 | 220731 |
| UN83425 | Rsa1.0_00339.1 | 884 | 222974 | 0         | 884 | 884 | 100 + | 1   | 884 | 91900  | 92783  |
| UN83426 | Rsa1.0_01585.1 | 830 | 42806  | 0         | 373 | 374 | 99 +  | 4   | 376 | 20177  | 20550  |
| UN83427 | Rsa1.0_00016.1 | 561 | 831256 | 0         | 525 | 548 | 95 +  | 14  | 561 | 684545 | 685092 |
| UN83428 | Rsa1.0_00042.1 | 771 | 171507 | 0         | 770 | 771 | 99 +  | 1   | 771 | 2943   | 3713   |
| UN83429 | Rsa1.0_01516.1 | 189 | 44196  | 4.00E-52  | 116 | 120 | 96 +  | 63  | 182 | 25547  | 25666  |
| UN83430 | Rsa1.0_00016.1 | 816 | 831256 | 0         | 814 | 815 | 99 +  | 3   | 816 | 763678 | 764492 |
| UN83431 | Rsa1.0_05850.1 | 618 | 12425  | 4.00E-30  | 145 | 171 | 84 -  | 180 | 350 | 9180   | 9339   |
| UN83432 | Rsa1.0_01898.1 | 243 | 37491  | 4.00E-93  | 231 | 247 | 93 -  | 1   | 243 | 1536   | 1781   |
| UN83433 | Rsa1.0_00008.1 | 605 | 358124 | 0         | 428 | 439 | 97 -  | 1   | 439 | 224064 | 224502 |
| UN83434 | Rsa1.0_02104.1 | 344 | 34985  | 1.00E-165 | 337 | 347 | 97 +  | 1   | 344 | 7672   | 8014   |
| UN83435 | Rsa1.0_00963.1 | 832 | 58176  | 0         | 832 | 833 | 99 +  | 1   | 832 | 20299  | 21131  |
| UN83436 | Rsa1.0_03962.1 | 255 | 19860  | 1.00E-102 | 239 | 254 | 94 -  | 5   | 255 | 5258   | 5510   |
| UN83437 | Rsa1.0_00683.1 | 796 | 68638  | 0         | 488 | 489 | 99 +  | 3   | 491 | 24109  | 24597  |
| UN83438 | Rsa1.0_13458.1 | 853 | 4814   | 0         | 851 | 852 | 99 -  | 2   | 853 | 78     | 929    |
| UN83439 | Rsa1.0_02467.1 | 629 | 31141  | 0         | 629 | 629 | 100 + | 1   | 629 | 27763  | 28391  |
| UN83440 | Rsa1.0_23144.1 | 647 | 1068   | 1.00E-139 | 296 | 311 | 95 -  | 153 | 463 | 758    | 1068   |
| UN83441 | Rsa1.0_07889.1 | 543 | 8354   | 1.00E-157 | 314 | 325 | 96 -  | 219 | 543 | 2646   | 2970   |
| UN83442 | Rsa1.0_08112.1 | 476 | 7885   | 0         | 476 | 489 | 97 -  | 1   | 476 | 4761   | 5249   |
| UN83443 | Rsa1.0_00888.1 | 863 | 60978  | 1.00E-122 | 222 | 222 | 100 + | 455 | 676 | 52557  | 52778  |
| UN83444 | Rsa1.0_00237.1 | 840 | 235974 | 0         | 822 | 840 | 97 -  | 1   | 840 | 21053  | 21889  |
| UN83445 | Rsa1.0_01419.1 | 915 | 167402 | 0         | 589 | 596 | 98 +  | 320 | 915 | 152458 | 153053 |
| UN83446 | Rsa1.0_00124.1 | 845 | 262503 | 1.00E-162 | 334 | 349 | 95 +  | 497 | 845 | 80397  | 80745  |
| UN83447 | Rsa1.0_02384.1 | 830 | 31917  | 0         | 813 | 828 | 98 +  | 5   | 830 | 377    | 1202   |
| UN83448 | Rsa1.0_03714.1 | 893 | 21217  | 0         | 377 | 377 | 100 - | 445 | 821 | 18230  | 18606  |
| UN83449 | Rsa1.0_00396.1 | 574 | 88242  | 0         | 478 | 508 | 94 -  | 1   | 508 | 65902  | 66398  |
| UN83450 | Rsa1.0_00029.1 | 675 | 272992 | 0         | 379 | 388 | 97 +  | 1   | 388 | 10182  | 10568  |
| UN83451 | Rsa1.0_08912.1 | 549 | 6797   | 0         | 548 | 550 | 99 -  | 1   | 549 | 5635   | 6184   |
| UN83452 | Rsa1.0_00292.1 | 737 | 98141  | 4.00E-46  | 101 | 103 | 98 +  | 123 | 225 | 21062  | 21164  |
| UN83453 | Rsa1.0_00491.1 | 743 | 80219  | 0         | 436 | 443 | 98 +  | 5   | 447 | 15752  | 16192  |
| UN83454 | Rsa1.0_03996.1 | 666 | 19654  | 0         | 495 | 496 | 99 -  | 1   | 496 | 1693   | 2188   |
| UN83455 | #              | #   | #      | #         | #   | #   | #     | #   | #   | #      | #      |
| UN83456 | Rsa1.0_02567.1 | 836 | 30016  | 0         | 836 | 837 | 99 -  | 1   | 836 | 12018  | 12854  |
| UN83457 | Rsa1.0_56047.1 | 761 | 408    | 0         | 408 | 408 | 100 + | 43  | 450 | 1      | 408    |
| UN83458 | Rsa1.0_02305.1 | 539 | 32783  | 5.00E-11  | 43  | 44  | 97 +  | 282 | 325 | 31860  | 31902  |

|         |                |     |        |           |     |     |       |     |     |        |        |
|---------|----------------|-----|--------|-----------|-----|-----|-------|-----|-----|--------|--------|
| UN83459 | Rsa1.0_14369.1 | 574 | 3472   | 1.00E-151 | 382 | 416 | 91 +  | 183 | 574 | 2627   | 3040   |
| UN83460 | Rsa1.0_00192.1 | 830 | 278200 | 0         | 830 | 830 | 100 - | 1   | 830 | 264730 | 265559 |
| UN83461 | Rsa1.0_02026.1 | 524 | 35896  | 1.00E-143 | 414 | 465 | 89 -  | 47  | 493 | 16752  | 17208  |
| UN83462 | Rsa1.0_02725.1 | 603 | 28404  | 0         | 591 | 603 | 98 +  | 1   | 603 | 11585  | 12187  |
| UN83463 | Rsa1.0_03673.1 | 826 | 21448  | 1.00E-145 | 265 | 266 | 99 +  | 231 | 496 | 1762   | 2027   |
| UN83464 | Rsa1.0_04068.1 | 349 | 19253  | 0         | 345 | 345 | 100 + | 5   | 349 | 13863  | 14207  |
| UN83465 | Rsa1.0_01264.1 | 638 | 49697  | 0         | 527 | 569 | 92 +  | 74  | 638 | 19119  | 19687  |
| UN83466 | Rsa1.0_01232.1 | 446 | 155185 | 1.00E-145 | 278 | 284 | 97 +  | 4   | 287 | 137603 | 137886 |
| UN83467 | #              | #   | #      | #         | #   | #   | #     | #   | #   | #      | #      |
| UN83468 | Rsa1.0_07706.1 | 274 | 8752   | 1.00E-149 | 274 | 275 | 99 +  | 1   | 274 | 221    | 495    |
| UN83469 | Rsa1.0_00178.1 | 317 | 114861 | 1.00E-145 | 261 | 261 | 100 + | 1   | 261 | 91176  | 91436  |
| UN83470 | Rsa1.0_04940.1 | 832 | 15384  | 2.00E-97  | 181 | 181 | 100 + | 652 | 832 | 6914   | 7094   |
| UN83471 | #              | #   | #      | #         | #   | #   | #     | #   | #   | #      | #      |
| UN83472 | Rsa1.0_01380.1 | 606 | 155003 | 0         | 574 | 577 | 99 -  | 1   | 577 | 18401  | 18974  |
| UN83473 | Rsa1.0_04806.1 | 427 | 15898  | 1.00E-160 | 286 | 286 | 100 + | 1   | 286 | 9321   | 9606   |
| UN83474 | Rsa1.0_00032.1 | 842 | 306326 | 0         | 842 | 842 | 100 - | 1   | 842 | 229285 | 230126 |
| UN83475 | #              | #   | #      | #         | #   | #   | #     | #   | #   | #      | #      |
| UN83476 | Rsa1.0_03296.1 | 873 | 23969  | 0         | 872 | 873 | 99 -  | 1   | 873 | 7495   | 8367   |
| UN83477 | Rsa1.0_03626.1 | 829 | 160993 | 0         | 827 | 829 | 99 -  | 1   | 829 | 149288 | 150115 |
| UN83478 | #              | #   | #      | #         | #   | #   | #     | #   | #   | #      | #      |
| UN83479 | #              | #   | #      | #         | #   | #   | #     | #   | #   | #      | #      |
| UN83480 | Rsa1.0_02365.1 | 839 | 32118  | 0         | 394 | 394 | 100 - | 446 | 839 | 18322  | 18715  |
| UN83481 | Rsa1.0_01195.1 | 890 | 147988 | 0         | 890 | 890 | 100 + | 1   | 890 | 137312 | 138201 |
| UN83482 | Rsa1.0_01261.1 | 548 | 49744  | 0         | 372 | 372 | 100 - | 1   | 372 | 2970   | 3341   |
| UN83483 | Rsa1.0_00358.1 | 601 | 91293  | 0         | 601 | 601 | 100 + | 1   | 601 | 37056  | 37656  |
| UN83484 | Rsa1.0_00104.1 | 865 | 368722 | 0         | 848 | 862 | 98 +  | 8   | 865 | 272720 | 273581 |
| UN83485 | Rsa1.0_00006.1 | 553 | 396176 | 0         | 553 | 553 | 100 + | 1   | 553 | 18627  | 19179  |
| UN83486 | Rsa1.0_15112.1 | 845 | 2818   | 8.00E-11  | 42  | 44  | 95 -  | 335 | 378 | 589    | 632    |
| UN83487 | Rsa1.0_02302.1 | 480 | 32823  | 1.00E-103 | 193 | 194 | 99 +  | 287 | 480 | 14583  | 14776  |
| UN83488 | Rsa1.0_00092.1 | 907 | 659932 | 1.00E-170 | 340 | 350 | 97 +  | 540 | 886 | 622239 | 622587 |
| UN83489 | Rsa1.0_31576.1 | 871 | 724    | 1.00E-122 | 222 | 222 | 100 - | 650 | 871 | 412    | 633    |
| UN83490 | Rsa1.0_01517.1 | 512 | 44170  | 1.00E-163 | 291 | 291 | 100 - | 222 | 512 | 17647  | 17937  |
| UN83491 | Rsa1.0_00635.1 | 904 | 175826 | 0         | 336 | 340 | 98 -  | 12  | 351 | 17935  | 18274  |
| UN83492 | Rsa1.0_00010.1 | 851 | 294827 | 5.00E-12  | 47  | 50  | 94 +  | 143 | 192 | 207268 | 207317 |
| UN83493 | #              | #   | #      | #         | #   | #   | #     | #   | #   | #      | #      |
| UN83494 | Rsa1.0_05354.1 | 805 | 14073  | 0         | 805 | 805 | 100 - | 1   | 805 | 6304   | 7108   |
| UN83495 | #              | #   | #      | #         | #   | #   | #     | #   | #   | #      | #      |
| UN83496 | Rsa1.0_01828.1 | 272 | 38681  | 1.00E-101 | 252 | 271 | 92 +  | 8   | 272 | 33037  | 33302  |
| UN83497 | Rsa1.0_00989.1 | 191 | 57494  | 2.00E-54  | 108 | 108 | 100 - | 2   | 109 | 8291   | 8398   |

|         |                |     |        |           |     |     |       |     |     |        |        |
|---------|----------------|-----|--------|-----------|-----|-----|-------|-----|-----|--------|--------|
| UN83498 | Rsa1.0_00934.1 | 886 | 193516 | 0         | 834 | 862 | 96 +  | 32  | 886 | 150104 | 150964 |
| UN83499 | Rsa1.0_01772.1 | 847 | 39557  | 0         | 327 | 329 | 99 -  | 1   | 329 | 26827  | 27155  |
| UN83500 | Rsa1.0_02950.1 | 872 | 26506  | 0         | 527 | 544 | 96 -  | 242 | 785 | 5272   | 5809   |
| UN83501 | Rsa1.0_00009.1 | 844 | 232558 | 0         | 794 | 847 | 93 -  | 1   | 844 | 30937  | 31771  |
| UN83502 | Rsa1.0_03836.1 | 873 | 20564  | 0         | 732 | 732 | 100 - | 1   | 732 | 6964   | 7695   |
| UN83503 | Rsa1.0_00697.1 | 858 | 67913  | 0         | 829 | 861 | 96 +  | 1   | 854 | 5723   | 6579   |
| UN83504 | Rsa1.0_00007.1 | 896 | 239325 | 2.00E-98  | 238 | 250 | 95 -  | 321 | 567 | 41905  | 42151  |
| UN83505 | Rsa1.0_26841.1 | 715 | 876    | 0         | 426 | 457 | 93 +  | 8   | 443 | 229    | 685    |
| UN83506 | Rsa1.0_04010.1 | 703 | 19576  | 1.00E-147 | 265 | 265 | 100 + | 116 | 380 | 6329   | 6593   |
| UN83507 | Rsa1.0_00100.1 | 890 | 249232 | 0         | 457 | 477 | 95 -  | 414 | 890 | 183150 | 183626 |
| UN83508 | Rsa1.0_02513.1 | 785 | 30643  | 0         | 672 | 783 | 85 +  | 17  | 779 | 18978  | 19755  |
| UN83509 | Rsa1.0_00066.1 | 824 | 152418 | 0         | 801 | 821 | 97 -  | 6   | 824 | 2649   | 3469   |
| UN83510 | Rsa1.0_00341.1 | 475 | 249309 | 0         | 471 | 476 | 98 +  | 1   | 475 | 180303 | 180778 |
| UN83511 | Rsa1.0_01168.1 | 833 | 153765 | 0         | 750 | 759 | 98 +  | 81  | 833 | 20887  | 21645  |
| UN83512 | Rsa1.0_00329.1 | 909 | 222544 | 0         | 909 | 909 | 100 + | 1   | 909 | 195314 | 196222 |
| UN83513 | Rsa1.0_01760.1 | 886 | 39730  | 2.00E-98  | 203 | 209 | 97 +  | 226 | 434 | 35551  | 35756  |
| UN83514 | Rsa1.0_00471.1 | 816 | 81897  | 1.00E-142 | 257 | 257 | 100 + | 262 | 518 | 8014   | 8270   |
| UN83515 | Rsa1.0_00340.1 | 821 | 305782 | 0         | 821 | 821 | 100 - | 1   | 821 | 136001 | 136821 |
| UN83516 | Rsa1.0_00033.1 | 805 | 515811 | 0         | 776 | 806 | 96 +  | 2   | 805 | 497367 | 498168 |
| UN83517 | Rsa1.0_03002.1 | 100 | 26107  | 1.00E-47  | 99  | 100 | 99 +  | 1   | 100 | 19544  | 19643  |
| UN83518 | Rsa1.0_00017.1 | 470 | 752458 | 0         | 455 | 471 | 96 -  | 1   | 470 | 96940  | 97409  |
| UN83519 | Rsa1.0_15125.1 | 817 | 2810   | 0         | 588 | 589 | 99 -  | 10  | 598 | 1      | 589    |
| UN83520 | Rsa1.0_00990.1 | 855 | 57445  | 0         | 835 | 860 | 97 -  | 9   | 855 | 47689  | 48547  |
| UN83521 | Rsa1.0_02635.1 | 856 | 29296  | 0         | 835 | 849 | 98 +  | 10  | 856 | 18462  | 19310  |
| UN83522 | Rsa1.0_06024.1 | 853 | 11905  | 0         | 803 | 853 | 94 +  | 1   | 853 | 7098   | 7950   |
| UN83523 | Rsa1.0_03244.1 | 382 | 24413  | 0         | 375 | 375 | 100 + | 8   | 382 | 20602  | 20976  |
| UN83524 | Rsa1.0_01905.1 | 849 | 37450  | 0         | 848 | 848 | 100 + | 2   | 849 | 4509   | 5356   |
| UN83525 | Rsa1.0_03556.1 | 726 | 22121  | 0         | 723 | 726 | 99 +  | 1   | 726 | 4747   | 5472   |
| UN83526 | Rsa1.0_01208.1 | 215 | 50718  | 1.00E-118 | 215 | 215 | 100 + | 1   | 215 | 28301  | 28515  |
| UN83527 | Rsa1.0_08001.1 | 911 | 8095   | 0         | 882 | 911 | 96 -  | 1   | 911 | 612    | 1503   |
| UN83528 | Rsa1.0_04535.1 | 829 | 136600 | 0         | 827 | 827 | 100 + | 3   | 829 | 125859 | 126685 |
| UN83529 | Rsa1.0_02908.1 | 824 | 26859  | 1.00E-153 | 274 | 274 | 100 + | 34  | 307 | 6875   | 7148   |
| UN83530 | Rsa1.0_07878.1 | 842 | 8371   | 0         | 577 | 591 | 97 -  | 252 | 842 | 703    | 1287   |
| UN83531 | Rsa1.0_00054.1 | 797 | 162053 | 0         | 704 | 704 | 100 + | 94  | 797 | 22427  | 23130  |
| UN83532 | Rsa1.0_02589.1 | 169 | 300828 | 6.00E-91  | 169 | 169 | 100 - | 1   | 169 | 154396 | 154564 |
| UN83533 | Rsa1.0_02916.1 | 813 | 26809  | 0         | 345 | 350 | 98 -  | 250 | 599 | 16043  | 16392  |
| UN83534 | Rsa1.0_07311.1 | 821 | 9567   | 0         | 819 | 822 | 99 +  | 1   | 821 | 3849   | 4670   |
| UN83535 | Rsa1.0_00025.1 | 839 | 277312 | 0         | 609 | 625 | 97 -  | 215 | 839 | 143748 | 144369 |
| UN83536 | Rsa1.0_00215.1 | 807 | 201775 | 0         | 804 | 808 | 99 -  | 1   | 807 | 21146  | 21953  |



|         |                |     |        |           |     |     |       |     |     |        |        |
|---------|----------------|-----|--------|-----------|-----|-----|-------|-----|-----|--------|--------|
| UN83537 | Rsa1.0.01327.1 | 637 | 48033  | 0         | 399 | 399 | 100 - | 1   | 399 | 40846  | 41244  |
| UN83538 | Rsa1.0.08737.1 | 820 | 6983   | 0         | 592 | 628 | 94 +  | 187 | 814 | 6073   | 6700   |
| UN83539 | Rsa1.0.00785.1 | 796 | 64356  | 1.00E-151 | 304 | 315 | 96 -  | 325 | 639 | 48851  | 49165  |
| UN83540 | Rsa1.0.00348.1 | 825 | 92818  | 0         | 806 | 827 | 97 -  | 1   | 825 | 5520   | 6343   |
| UN83541 | Rsa1.0.03875.1 | 803 | 20355  | 1.00E-144 | 385 | 420 | 91 -  | 4   | 416 | 18863  | 19280  |
| UN83542 | Rsa1.0.00017.1 | 853 | 752458 | 0         | 392 | 402 | 97 +  | 168 | 569 | 37912  | 38312  |
| UN83543 | Rsa1.0.00137.1 | 840 | 122457 | 0         | 839 | 841 | 99 +  | 1   | 840 | 69050  | 69889  |
| UN83544 | Rsa1.0.00017.1 | 881 | 752458 | 0         | 877 | 878 | 99 -  | 5   | 881 | 661863 | 662740 |
| UN83545 | Rsa1.0.00740.1 | 827 | 215972 | 0         | 648 | 667 | 97 +  | 1   | 664 | 34062  | 34723  |
| UN83546 | Rsa1.0.00296.1 | 889 | 97854  | 0         | 886 | 888 | 99 +  | 3   | 889 | 14583  | 15469  |
| UN83547 | Rsa1.0.00068.1 | 828 | 151813 | 0         | 817 | 828 | 98 -  | 1   | 828 | 22787  | 23612  |
| UN83548 | Rsa1.0.01081.1 | 877 | 499226 | 0         | 872 | 874 | 99 +  | 4   | 877 | 335489 | 336362 |
| UN83549 | Rsa1.0.01833.1 | 798 | 38555  | 1.00E-176 | 313 | 313 | 100 + | 486 | 798 | 10585  | 10897  |
| UN83550 | #              | #   | #      | #         | #   | #   | #     | #   | #   | #      | #      |
| UN83551 | Rsa1.0.02928.1 | 271 | 26680  | 1.00E-139 | 264 | 267 | 98 +  | 6   | 271 | 16640  | 16906  |
| UN83552 | Rsa1.0.00009.1 | 853 | 232558 | 0         | 448 | 456 | 98 -  | 1   | 456 | 50435  | 50887  |
| UN83553 | Rsa1.0.19417.1 | 500 | 1435   | 0         | 497 | 501 | 99 +  | 1   | 500 | 820    | 1319   |
| UN83554 | Rsa1.0.00103.1 | 873 | 135304 | 0         | 359 | 359 | 100 + | 252 | 610 | 127011 | 127369 |
| UN83555 | Rsa1.0.02218.1 | 838 | 33809  | 0         | 837 | 838 | 99 -  | 1   | 838 | 32615  | 33452  |
| UN83556 | Rsa1.0.01068.1 | 836 | 55208  | 0         | 404 | 409 | 98 -  | 3   | 410 | 47784  | 48192  |
| UN83557 | Rsa1.0.00724.1 | 801 | 66789  | 0         | 551 | 555 | 99 +  | 82  | 636 | 58679  | 59233  |
| UN83558 | #              | #   | #      | #         | #   | #   | #     | #   | #   | #      | #      |
| UN83559 | Rsa1.0.00537.1 | 683 | 186980 | 0         | 555 | 555 | 100 + | 129 | 683 | 163711 | 164265 |
| UN83560 | Rsa1.0.02010.1 | 816 | 36096  | 0         | 784 | 784 | 100 - | 1   | 784 | 29421  | 30204  |
| UN83561 | Rsa1.0.07565.1 | 812 | 9122   | 0         | 502 | 502 | 100 - | 6   | 507 | 7882   | 8383   |
| UN83562 | Rsa1.0.00999.1 | 843 | 57162  | 0         | 838 | 838 | 100 - | 6   | 843 | 32075  | 32912  |
| UN83563 | Rsa1.0.46508.1 | 831 | 485    | 0         | 485 | 485 | 100 + | 145 | 629 | 1      | 485    |
| UN83564 | Rsa1.0.00782.1 | 822 | 64468  | 1.00E-134 | 313 | 330 | 94 +  | 3   | 326 | 39455  | 39780  |
| UN83565 | #              | #   | #      | #         | #   | #   | #     | #   | #   | #      | #      |
| UN83566 | Rsa1.0.02681.1 | 865 | 28711  | 0         | 857 | 858 | 99 +  | 8   | 865 | 13659  | 14516  |
| UN83567 | Rsa1.0.00841.1 | 687 | 183065 | 0         | 324 | 324 | 100 - | 364 | 687 | 158088 | 158411 |
| UN83568 | Rsa1.0.37576.1 | 863 | 600    | 5.00E-15  | 94  | 111 | 84 -  | 551 | 661 | 252    | 362    |
| UN83569 | Rsa1.0.00051.1 | 888 | 258225 | 0         | 887 | 889 | 99 +  | 1   | 888 | 120371 | 121259 |
| UN83570 | Rsa1.0.00004.1 | 274 | 253996 | 1.00E-131 | 269 | 280 | 96 -  | 1   | 274 | 214026 | 214305 |
| UN83571 | Rsa1.0.00010.1 | 790 | 294827 | 1.00E-178 | 329 | 333 | 98 +  | 1   | 333 | 178036 | 178368 |
| UN83572 | Rsa1.0.00020.1 | 429 | 283099 | 0         | 429 | 429 | 100 + | 1   | 429 | 60205  | 60633  |
| UN83573 | Rsa1.0.02554.1 | 850 | 30187  | 0         | 719 | 736 | 97 +  | 113 | 848 | 29373  | 30108  |
| UN83574 | Rsa1.0.14058.1 | 403 | 3860   | 3.00E-70  | 138 | 139 | 99 +  | 1   | 139 | 2226   | 2364   |
| UN83575 | Rsa1.0.00818.1 | 878 | 62939  | 1.00E-111 | 207 | 208 | 99 +  | 1   | 208 | 60728  | 60935  |

|         |                |     |        |           |     |     |       |     |     |        |        |
|---------|----------------|-----|--------|-----------|-----|-----|-------|-----|-----|--------|--------|
| UN83576 | Rsa1.0.00812.1 | 891 | 63233  | 1.00E-153 | 320 | 335 | 95 +  | 416 | 750 | 32518  | 32852  |
| UN83577 | Rsa1.0.09484.1 | 556 | 6337   | 0         | 556 | 556 | 100 + | 1   | 556 | 794    | 1349   |
| UN83578 | Rsa1.0.06842.1 | 343 | 10285  | 0         | 341 | 341 | 100 - | 3   | 343 | 6943   | 7283   |
| UN83579 | Rsa1.0.02922.1 | 825 | 26753  | 0         | 825 | 825 | 100 - | 1   | 825 | 23854  | 24678  |
| UN83580 | Rsa1.0.00228.1 | 726 | 105511 | 0         | 641 | 641 | 100 - | 1   | 641 | 1945   | 2585   |
| UN83581 | Rsa1.0.00017.1 | 788 | 752458 | 0         | 392 | 402 | 97 +  | 61  | 462 | 37912  | 38312  |
| UN83582 | Rsa1.0.20159.1 | 677 | 1333   | 1.00E-132 | 270 | 280 | 96 -  | 200 | 479 | 1054   | 1333   |
| UN83583 | Rsa1.0.04365.1 | 676 | 17732  | 1.00E-107 | 262 | 281 | 93 +  | 220 | 499 | 16578  | 16856  |
| UN83584 | Rsa1.0.02143.1 | 218 | 34632  | 1.00E-103 | 211 | 218 | 96 +  | 1   | 218 | 15571  | 15788  |
| UN83585 | Rsa1.0.01794.1 | 433 | 39215  | 1.00E-142 | 267 | 271 | 98 +  | 1   | 271 | 36810  | 37080  |
| UN83586 | Rsa1.0.01712.1 | 640 | 154210 | 1.00E-154 | 276 | 276 | 100 - | 1   | 276 | 7857   | 8132   |
| UN83587 | Rsa1.0.01913.1 | 720 | 37363  | 0         | 430 | 432 | 99 -  | 1   | 431 | 1      | 432    |
| UN83588 | Rsa1.0.00414.1 | 747 | 202190 | 0         | 467 | 468 | 99 -  | 1   | 468 | 183769 | 184236 |
| UN83589 | Rsa1.0.02673.1 | 756 | 28877  | 0         | 634 | 673 | 94 +  | 13  | 680 | 9233   | 9898   |
| UN83590 | Rsa1.0.06645.1 | 647 | 10607  | 1.00E-123 | 258 | 269 | 95 +  | 27  | 295 | 1956   | 2224   |
| UN83591 | Rsa1.0.00497.1 | 327 | 79830  | 0         | 326 | 326 | 100 - | 1   | 326 | 3940   | 4265   |
| UN83592 | Rsa1.0.01262.1 | 807 | 178815 | 0         | 788 | 821 | 95 -  | 1   | 807 | 133150 | 133970 |
| UN83593 | Rsa1.0.01541.1 | 850 | 43682  | 0         | 510 | 528 | 96 -  | 1   | 528 | 42206  | 42715  |
| UN83594 | Rsa1.0.03668.1 | 605 | 21483  | 0         | 492 | 539 | 91 -  | 63  | 590 | 16491  | 17028  |
| UN83595 | Rsa1.0.05864.1 | 416 | 12387  | 1.00E-167 | 319 | 326 | 97 +  | 60  | 385 | 5877   | 6202   |
| UN83596 | Rsa1.0.00017.1 | 878 | 752458 | 0         | 324 | 324 | 100 - | 208 | 531 | 751088 | 751411 |
| UN83597 | Rsa1.0.02951.1 | 866 | 26505  | 0         | 340 | 340 | 100 + | 1   | 340 | 1020   | 1359   |
| UN83598 | Rsa1.0.01179.1 | 863 | 51549  | 0         | 854 | 865 | 98 +  | 1   | 863 | 23784  | 24648  |
| UN83599 | Rsa1.0.01110.1 | 855 | 195852 | 0         | 764 | 790 | 96 +  | 66  | 855 | 27303  | 28092  |
| UN83600 | Rsa1.0.00119.1 | 870 | 467509 | 0         | 870 | 870 | 100 - | 1   | 870 | 362239 | 363108 |
| UN83601 | Rsa1.0.00188.1 | 196 | 112020 | 1.00E-61  | 177 | 196 | 90 -  | 1   | 196 | 72080  | 72275  |
| UN83602 | Rsa1.0.03317.1 | 240 | 23782  | 2.00E-70  | 135 | 135 | 100 - | 106 | 240 | 15482  | 15616  |
| UN83603 | Rsa1.0.00037.1 | 822 | 307838 | 0         | 768 | 768 | 100 - | 55  | 822 | 289646 | 290413 |
| UN83604 | Rsa1.0.00020.1 | 787 | 283099 | 0         | 377 | 378 | 99 -  | 1   | 377 | 129849 | 130226 |
| UN83605 | Rsa1.0.00096.1 | 838 | 198773 | 1.00E-170 | 303 | 303 | 100 + | 279 | 581 | 114553 | 114855 |
| UN83606 | Rsa1.0.00611.1 | 798 | 72410  | 1.00E-131 | 237 | 237 | 100 - | 562 | 798 | 18732  | 18968  |
| UN83607 | Rsa1.0.03496.1 | 813 | 22492  | 1.00E-170 | 310 | 311 | 99 -  | 1   | 310 | 17374  | 17684  |
| UN83608 | Rsa1.0.09031.1 | 799 | 6699   | 1.00E-152 | 279 | 281 | 99 -  | 316 | 596 | 6405   | 6685   |
| UN83609 | Rsa1.0.00514.1 | 779 | 78421  | 0         | 673 | 673 | 100 + | 99  | 771 | 7709   | 8381   |
| UN83610 | Rsa1.0.00874.1 | 870 | 179723 | 0         | 541 | 542 | 99 +  | 296 | 837 | 4488   | 5029   |
| UN83611 | Rsa1.0.00108.1 | 843 | 478491 | 0         | 840 | 843 | 99 -  | 1   | 843 | 140588 | 141430 |
| UN83612 | Rsa1.0.00015.1 | 894 | 561803 | 0         | 894 | 894 | 100 + | 1   | 894 | 352255 | 353148 |
| UN83613 | Rsa1.0.22508.1 | 649 | 1115   | 0         | 407 | 408 | 99 -  | 242 | 649 | 708    | 1115   |
| UN83614 | Rsa1.0.00663.1 | 824 | 164969 | 9.00E-97  | 187 | 188 | 99 +  | 1   | 187 | 106043 | 106230 |

|         |                |     |        |           |     |     |       |     |     |        |        |
|---------|----------------|-----|--------|-----------|-----|-----|-------|-----|-----|--------|--------|
| UN83615 | Rsa1.0_01018.1 | 830 | 56685  | 0         | 830 | 830 | 100 - | 1   | 830 | 41648  | 42477  |
| UN83616 | Rsa1.0_02273.1 | 778 | 140964 | 0         | 362 | 363 | 99 -  | 1   | 363 | 28474  | 28836  |
| UN83617 | Rsa1.0_04014.1 | 899 | 19572  | 0         | 661 | 674 | 98 -  | 1   | 674 | 14852  | 15525  |
| UN83618 | Rsa1.0_00468.1 | 827 | 82095  | 0         | 668 | 700 | 95 -  | 5   | 687 | 36367  | 37066  |
| UN83619 | Rsa1.0_01803.1 | 795 | 173846 | 1.00E-177 | 344 | 352 | 97 -  | 5   | 352 | 170833 | 171184 |
| UN83620 | Rsa1.0_00121.1 | 838 | 278029 | 0         | 375 | 375 | 100 - | 464 | 838 | 11815  | 12189  |
| UN83621 | Rsa1.0_00139.1 | 808 | 357786 | 0         | 636 | 641 | 99 -  | 1   | 641 | 26009  | 26649  |
| UN83622 | #              | #   | #      | #         | #   | #   | #     | #   | #   | #      | #      |
| UN83623 | Rsa1.0_05164.1 | 192 | 14628  | 3.00E-93  | 189 | 193 | 97 -  | 1   | 192 | 9834   | 10026  |
| UN83624 | Rsa1.0_00876.1 | 132 | 61328  | 2.00E-31  | 72  | 73  | 98 +  | 1   | 73  | 33235  | 33307  |
| UN83625 | Rsa1.0_02452.1 | 745 | 31280  | 0         | 730 | 742 | 98 +  | 4   | 745 | 12661  | 13399  |
| UN83626 | Rsa1.0_00087.1 | 350 | 761073 | 0         | 348 | 351 | 99 +  | 1   | 350 | 180906 | 181256 |
| UN83627 | Rsa1.0_00936.1 | 877 | 59078  | 0         | 867 | 869 | 99 -  | 9   | 877 | 42105  | 42973  |
| UN83628 | Rsa1.0_00396.1 | 877 | 88242  | 0         | 864 | 880 | 98 +  | 1   | 877 | 8087   | 8966   |
| UN83629 | Rsa1.0_00079.1 | 838 | 606987 | 0         | 838 | 838 | 100 + | 1   | 838 | 131364 | 132201 |
| UN83630 | Rsa1.0_07542.1 | 809 | 9160   | 1.00E-161 | 288 | 288 | 100 - | 406 | 693 | 7520   | 7807   |
| UN83631 | Rsa1.0_00867.1 | 359 | 61635  | 1.00E-130 | 236 | 236 | 100 - | 124 | 359 | 27766  | 28001  |
| UN83632 | Rsa1.0_00583.1 | 884 | 74309  | 2.33E-156 | 263 | 263 | 100 + | 517 | 779 | 19294  | 19556  |
| UN83633 | Rsa1.0_01090.1 | 132 | 54385  | 6.00E-69  | 132 | 132 | 100 + | 1   | 132 | 2505   | 2636   |
| UN83634 | Rsa1.0_00857.1 | 821 | 61904  | 0         | 411 | 414 | 99 +  | 12  | 425 | 39886  | 40299  |
| UN83635 | Rsa1.0_40817.1 | 842 | 550    | 0         | 502 | 509 | 98 -  | 46  | 554 | 1      | 506    |
| UN83636 | Rsa1.0_01298.1 | 858 | 48999  | 0         | 821 | 821 | 100 - | 38  | 858 | 44100  | 44920  |
| UN83637 | Rsa1.0_00071.1 | 819 | 345714 | 1.00E-133 | 241 | 241 | 100 + | 1   | 241 | 18738  | 18978  |
| UN83638 | Rsa1.0_01877.1 | 103 | 37789  | 8.00E-52  | 103 | 103 | 100 - | 1   | 103 | 26749  | 26851  |
| UN83639 | Rsa1.0_03252.1 | 519 | 24338  | 1.00E-60  | 128 | 131 | 97 -  | 389 | 519 | 11560  | 11690  |
| UN83640 | Rsa1.0_00046.1 | 847 | 320315 | 1.00E-160 | 290 | 291 | 99 +  | 185 | 475 | 187069 | 187359 |
| UN83641 | Rsa1.0_00326.1 | 842 | 171955 | 0         | 820 | 845 | 97 +  | 1   | 842 | 78933  | 79777  |
| UN83642 | Rsa1.0_01827.1 | 860 | 143321 | 0         | 347 | 347 | 100 - | 273 | 619 | 116230 | 116576 |
| UN83643 | Rsa1.0_13934.1 | 767 | 4061   | 0         | 527 | 548 | 96 +  | 163 | 699 | 3513   | 4059   |
| UN83644 | Rsa1.0_56469.1 | 817 | 405    | 1.00E-177 | 314 | 314 | 100 - | 92  | 405 | 1      | 314    |
| UN83645 | Rsa1.0_00138.1 | 844 | 247040 | 0         | 632 | 632 | 100 + | 1   | 632 | 43374  | 44005  |
| UN83646 | Rsa1.0_02568.1 | 812 | 30015  | 0         | 811 | 812 | 99 +  | 1   | 812 | 7494   | 8305   |
| UN83647 | Rsa1.0_01026.1 | 772 | 171624 | 0         | 695 | 695 | 100 - | 1   | 695 | 45515  | 46209  |
| UN83648 | Rsa1.0_05305.1 | 783 | 14207  | 0         | 463 | 463 | 100 - | 1   | 463 | 13315  | 13777  |
| UN83649 | Rsa1.0_21736.1 | 814 | 1176   | 0         | 779 | 814 | 95 +  | 1   | 814 | 106    | 914    |
| UN83650 | Rsa1.0_02221.1 | 805 | 33796  | 0         | 666 | 702 | 94 -  | 6   | 705 | 18434  | 19130  |
| UN83651 | Rsa1.0_00030.1 | 843 | 250988 | 1.00E-125 | 228 | 228 | 100 + | 7   | 234 | 109025 | 109252 |
| UN83652 | Rsa1.0_02120.1 | 867 | 34819  | 0         | 489 | 490 | 99 +  | 379 | 867 | 11526  | 12015  |
| UN83653 | Rsa1.0_02295.1 | 344 | 149884 | 1.00E-161 | 334 | 350 | 95 -  | 1   | 344 | 19917  | 20266  |



|         |                |     |        |           |     |     |       |     |     |        |        |
|---------|----------------|-----|--------|-----------|-----|-----|-------|-----|-----|--------|--------|
| UN83693 | Rsa1.0.01169.1 | 936 | 51829  | 0         | 935 | 938 | 99 +  | 1   | 936 | 18839  | 19775  |
| UN83694 | Rsa1.0.09029.1 | 366 | 6700   | 1.00E-152 | 272 | 272 | 100 - | 95  | 366 | 190    | 461    |
| UN83695 | Rsa1.0.01913.1 | 758 | 37363  | 0         | 515 | 553 | 93 -  | 1   | 546 | 24442  | 24982  |
| UN83696 | #              | #   | #      | #         | #   | #   | #     | #   | #   | #      | #      |
| UN83697 | Rsa1.0.00937.1 | 902 | 59061  | 8.00E-85  | 196 | 208 | 94 +  | 310 | 517 | 10693  | 10900  |
| UN83698 | Rsa1.0.01679.1 | 828 | 146876 | 0         | 817 | 817 | 100 + | 8   | 824 | 112733 | 113549 |
| UN83699 | Rsa1.0.05194.1 | 564 | 14536  | 0         | 368 | 368 | 100 - | 1   | 368 | 12917  | 13284  |
| UN83700 | Rsa1.0.04852.1 | 186 | 15712  | 1.00E-55  | 167 | 186 | 89 -  | 1   | 186 | 270    | 455    |
| UN83701 | Rsa1.0.47469.1 | 406 | 476    | 2.00E-86  | 162 | 162 | 100 + | 245 | 406 | 192    | 353    |
| UN83702 | Rsa1.0.01388.1 | 679 | 46741  | 0         | 669 | 678 | 98 -  | 2   | 679 | 31587  | 32263  |
| UN83703 | Rsa1.0.02364.1 | 480 | 32137  | 0         | 480 | 480 | 100 + | 1   | 480 | 14358  | 14837  |
| UN83704 | Rsa1.0.00103.1 | 895 | 135304 | 0         | 492 | 501 | 98 +  | 395 | 895 | 31023  | 31522  |
| UN83705 | Rsa1.0.06940.1 | 414 | 10137  | 0         | 414 | 414 | 100 + | 1   | 414 | 7933   | 8346   |
| UN83706 | Rsa1.0.00262.1 | 818 | 101906 | 0         | 788 | 816 | 96 +  | 8   | 818 | 25274  | 26089  |
| UN83707 | #              | #   | #      | #         | #   | #   | #     | #   | #   | #      | #      |
| UN83708 | Rsa1.0.02232.1 | 628 | 33659  | 1.00E-142 | 256 | 256 | 100 + | 373 | 628 | 4151   | 4406   |
| UN83709 | #              | #   | #      | #         | #   | #   | #     | #   | #   | #      | #      |
| UN83710 | Rsa1.0.14486.1 | 850 | 3339   | 0         | 822 | 850 | 96 +  | 1   | 850 | 1094   | 1943   |
| UN83711 | Rsa1.0.00227.1 | 884 | 105849 | 0         | 357 | 358 | 99 +  | 8   | 364 | 62920  | 63277  |
| UN83712 | Rsa1.0.00067.1 | 465 | 415055 | 0         | 465 | 465 | 100 + | 1   | 465 | 312543 | 313007 |
| UN83713 | Rsa1.0.02169.1 | 840 | 34367  | 1.00E-119 | 217 | 217 | 100 + | 26  | 242 | 30082  | 30298  |
| UN83714 | Rsa1.0.00395.1 | 420 | 214466 | 7.00E-62  | 256 | 301 | 85 +  | 3   | 303 | 82351  | 82651  |
| UN83715 | Rsa1.0.01676.1 | 886 | 41140  | 0         | 884 | 885 | 99 +  | 2   | 886 | 11012  | 11896  |
| UN83716 | Rsa1.0.00342.1 | 857 | 93695  | 0         | 583 | 592 | 98 -  | 269 | 857 | 53717  | 54308  |
| UN83717 | Rsa1.0.00099.1 | 823 | 159619 | 0         | 819 | 819 | 100 + | 5   | 823 | 137070 | 137888 |
| UN83718 | Rsa1.0.00195.1 | 863 | 251884 | 0         | 795 | 801 | 99 -  | 1   | 799 | 106096 | 106896 |
| UN83719 | Rsa1.0.00210.1 | 814 | 108424 | 1.00E-154 | 352 | 377 | 93 +  | 1   | 377 | 65955  | 66331  |
| UN83720 | #              | #   | #      | #         | #   | #   | #     | #   | #   | #      | #      |
| UN83721 | Rsa1.0.13975.1 | 880 | 3968   | 0         | 873 | 881 | 99 +  | 1   | 880 | 2089   | 2966   |
| UN83722 | Rsa1.0.02693.1 | 667 | 28617  | 0         | 666 | 666 | 100 + | 2   | 667 | 21170  | 21835  |
| UN83723 | Rsa1.0.08220.1 | 891 | 7701   | 0         | 673 | 746 | 90 -  | 146 | 891 | 3652   | 4364   |
| UN83724 | Rsa1.0.00218.1 | 595 | 201480 | 0         | 595 | 596 | 99 -  | 1   | 595 | 43614  | 44209  |
| UN83725 | Rsa1.0.00071.1 | 849 | 345714 | 0         | 346 | 347 | 99 +  | 1   | 347 | 23495  | 23841  |
| UN83726 | Rsa1.0.04541.1 | 380 | 16931  | 0         | 376 | 376 | 100 + | 5   | 380 | 6283   | 6658   |
| UN83727 | Rsa1.0.02650.1 | 408 | 29047  | 0         | 408 | 408 | 100 - | 1   | 408 | 3139   | 3546   |
| UN83728 | Rsa1.0.00483.1 | 692 | 81102  | 0         | 670 | 693 | 96 +  | 1   | 692 | 44038  | 44722  |
| UN83729 | Rsa1.0.02596.1 | 100 | 29709  | 5.00E-50  | 100 | 100 | 100 - | 1   | 100 | 12534  | 12633  |
| UN83730 | Rsa1.0.00553.1 | 841 | 75983  | 0         | 834 | 834 | 100 + | 8   | 841 | 39420  | 40253  |
| UN83731 | Rsa1.0.02792.1 | 821 | 27829  | 0         | 616 | 617 | 99 -  | 1   | 616 | 21307  | 21923  |

|         |                |     |        |           |     |     |       |     |     |        |        |
|---------|----------------|-----|--------|-----------|-----|-----|-------|-----|-----|--------|--------|
| UN83732 | Rsa1.0.00452.1 | 782 | 83201  | 0         | 782 | 782 | 100 - | 1   | 782 | 57373  | 58154  |
| UN83733 | Rsa1.0.00070.1 | 837 | 150321 | 0         | 540 | 540 | 100 + | 298 | 837 | 19080  | 19619  |
| UN83734 | Rsa1.0.00339.1 | 800 | 222974 | 0         | 799 | 800 | 99 +  | 1   | 800 | 36719  | 37518  |
| UN83735 | Rsa1.0.06154.1 | 911 | 11610  | 0         | 886 | 909 | 97 -  | 3   | 911 | 193    | 1099   |
| UN83736 | Rsa1.0.09422.1 | 895 | 6381   | 0         | 551 | 558 | 98 -  | 338 | 895 | 4573   | 5130   |
| UN83737 | Rsa1.0.00359.1 | 826 | 91256  | 0         | 784 | 815 | 96 +  | 12  | 826 | 76263  | 77071  |
| UN83738 | Rsa1.0.00252.1 | 786 | 102760 | 1.00E-120 | 268 | 285 | 94 -  | 1   | 283 | 64924  | 65198  |
| UN83739 | #              | #   | #      | #         | #   | #   | #     | #   | #   | #      | #      |
| UN83740 | #              | #   | #      | #         | #   | #   | #     | #   | #   | #      | #      |
| UN83741 | #              | #   | #      | #         | #   | #   | #     | #   | #   | #      | #      |
| UN83742 | Rsa1.0.44602.1 | 601 | 505    | 0         | 414 | 422 | 98 +  | 180 | 601 | 1      | 420    |
| UN83743 | Rsa1.0.01210.1 | 797 | 50663  | 1.00E-154 | 399 | 434 | 91 -  | 1   | 432 | 32069  | 32476  |
| UN83744 | #              | #   | #      | #         | #   | #   | #     | #   | #   | #      | #      |
| UN83745 | Rsa1.0.00018.1 | 914 | 410899 | 0         | 409 | 423 | 96 -  | 491 | 910 | 377994 | 378410 |
| UN83746 | Rsa1.0.02801.1 | 596 | 27749  | 0         | 345 | 351 | 98 +  | 6   | 354 | 6474   | 6824   |
| UN83747 | Rsa1.0.01410.1 | 422 | 46345  | 1.00E-126 | 254 | 260 | 97 +  | 159 | 415 | 30706  | 30965  |
| UN83748 | #              | #   | #      | #         | #   | #   | #     | #   | #   | #      | #      |
| UN83749 | Rsa1.0.02948.1 | 112 | 26526  | 6.00E-53  | 108 | 109 | 99 -  | 4   | 112 | 14637  | 14745  |
| UN83750 | #              | #   | #      | #         | #   | #   | #     | #   | #   | #      | #      |
| UN83751 | Rsa1.0.01768.1 | 401 | 138463 | 0         | 401 | 402 | 99 +  | 1   | 401 | 137645 | 138046 |
| UN83752 | Rsa1.0.14039.1 | 876 | 3883   | 0         | 536 | 539 | 99 +  | 1   | 539 | 2115   | 2652   |
| UN83753 | Rsa1.0.00620.1 | 819 | 71985  | 0         | 540 | 540 | 100 - | 1   | 540 | 40154  | 40693  |
| UN83754 | Rsa1.0.00057.1 | 780 | 160473 | 0         | 439 | 460 | 95 +  | 187 | 637 | 10225  | 10683  |
| UN83755 | Rsa1.0.04415.1 | 737 | 147889 | 1.00E-153 | 286 | 290 | 98 +  | 1   | 290 | 141066 | 141355 |
| UN83756 | Rsa1.0.03620.1 | 887 | 21731  | 0         | 473 | 505 | 93 -  | 10  | 492 | 21140  | 21644  |
| UN83757 | Rsa1.0.02073.1 | 849 | 35386  | 0         | 646 | 668 | 96 -  | 18  | 685 | 3051   | 3718   |
| UN83758 | #              | #   | #      | #         | #   | #   | #     | #   | #   | #      | #      |
| UN83759 | Rsa1.0.11912.1 | 725 | 5372   | 0         | 353 | 358 | 98 +  | 1   | 357 | 457    | 810    |
| UN83760 | Rsa1.0.00019.1 | 702 | 301669 | 0         | 550 | 585 | 94 +  | 1   | 577 | 119737 | 120307 |
| UN83761 | Rsa1.0.03104.1 | 836 | 25374  | 0         | 830 | 832 | 99 -  | 5   | 836 | 11812  | 12643  |
| UN83762 | Rsa1.0.14068.1 | 587 | 3844   | 1.00E-177 | 314 | 314 | 100 + | 274 | 587 | 1251   | 1564   |
| UN83763 | #              | #   | #      | #         | #   | #   | #     | #   | #   | #      | #      |
| UN83764 | Rsa1.0.00002.1 | 844 | 601661 | 0         | 843 | 844 | 99 -  | 1   | 844 | 494230 | 495073 |
| UN83765 | Rsa1.0.01411.1 | 807 | 46326  | 1.00E-144 | 298 | 310 | 96 -  | 1   | 307 | 7472   | 7781   |
| UN83766 | Rsa1.0.00084.1 | 538 | 142338 | 1.00E-104 | 246 | 264 | 93 +  | 1   | 264 | 127582 | 127845 |
| UN83767 | Rsa1.0.00022.1 | 528 | 200461 | 0         | 525 | 528 | 99 +  | 1   | 528 | 59690  | 60217  |
| UN83768 | Rsa1.0.00146.1 | 626 | 149343 | 0         | 622 | 626 | 99 +  | 1   | 626 | 139062 | 139684 |
| UN83769 | Rsa1.0.02215.1 | 817 | 33822  | 0         | 563 | 565 | 99 -  | 1   | 564 | 20442  | 21006  |
| UN83770 | Rsa1.0.00115.1 | 877 | 131321 | 0         | 877 | 878 | 99 -  | 1   | 877 | 110664 | 111541 |

|         |                |     |        |           |     |     |       |     |     |        |        |
|---------|----------------|-----|--------|-----------|-----|-----|-------|-----|-----|--------|--------|
| UN83771 | Rsa1.0.00961.1 | 887 | 58185  | 0         | 884 | 887 | 99 +  | 3   | 887 | 16366  | 17252  |
| UN83772 | Rsa1.0.00065.1 | 850 | 454616 | 1.00E-149 | 271 | 272 | 99 -  | 1   | 272 | 241908 | 242179 |
| UN83773 | Rsa1.0.00477.1 | 516 | 81556  | 4.00E-67  | 149 | 154 | 96 -  | 363 | 516 | 10596  | 10748  |
| UN83774 | #              | #   | #      | #         | #   | #   | #     | #   | #   | #      | #      |
| UN83775 | Rsa1.0.17358.1 | 864 | 1851   | 0         | 769 | 769 | 100 - | 96  | 864 | 1083   | 1851   |
| UN83776 | Rsa1.0.00040.1 | 853 | 324196 | 0         | 586 | 586 | 100 + | 1   | 586 | 209656 | 210241 |
| UN83777 | Rsa1.0.00182.1 | 207 | 142305 | 2.00E-97  | 202 | 208 | 97 -  | 1   | 207 | 119878 | 120085 |
| UN83778 | Rsa1.0.00277.1 | 854 | 100132 | 0         | 821 | 833 | 98 -  | 1   | 833 | 34574  | 35402  |
| UN83779 | Rsa1.0.00020.1 | 818 | 283099 | 0         | 814 | 816 | 99 -  | 3   | 818 | 63614  | 64429  |
| UN83780 | Rsa1.0.00646.1 | 574 | 70473  | 0         | 558 | 576 | 96 +  | 1   | 574 | 58326  | 58900  |
| UN83781 | Rsa1.0.00729.1 | 842 | 66690  | 0         | 841 | 841 | 100 - | 2   | 842 | 27222  | 28062  |
| UN83782 | Rsa1.0.16156.1 | 400 | 2263   | 1.00E-167 | 301 | 302 | 99 +  | 99  | 400 | 1582   | 1883   |
| UN83783 | Rsa1.0.01437.1 | 854 | 45887  | 0         | 824 | 855 | 96 +  | 1   | 854 | 95     | 943    |
| UN83784 | Rsa1.0.00449.1 | 894 | 83863  | 0         | 332 | 332 | 100 - | 8   | 339 | 56110  | 56441  |
| UN83785 | Rsa1.0.01344.1 | 451 | 142535 | 0         | 405 | 405 | 100 - | 47  | 451 | 134313 | 134717 |
| UN83786 | Rsa1.0.00013.1 | 934 | 292129 | 0         | 566 | 566 | 100 + | 150 | 715 | 226736 | 227301 |
| UN83787 | Rsa1.0.01855.1 | 785 | 38204  | 0         | 766 | 781 | 98 +  | 1   | 780 | 20320  | 21097  |
| UN83788 | Rsa1.0.00032.1 | 272 | 306326 | 1.00E-119 | 260 | 273 | 95 +  | 1   | 272 | 279508 | 279771 |
| UN83789 | Rsa1.0.06727.1 | 505 | 10455  | 0         | 394 | 394 | 100 - | 112 | 505 | 5047   | 5440   |
| UN83790 | Rsa1.0.05573.1 | 504 | 13290  | 0         | 497 | 497 | 100 - | 1   | 497 | 4157   | 4653   |
| UN83791 | Rsa1.0.03550.1 | 768 | 22154  | 0         | 710 | 736 | 96 +  | 36  | 768 | 13365  | 14096  |
| UN83792 | Rsa1.0.00372.1 | 868 | 90418  | 0         | 865 | 869 | 99 -  | 1   | 868 | 5514   | 6382   |
| UN83793 | Rsa1.0.00734.1 | 553 | 66508  | 0         | 553 | 553 | 100 + | 1   | 553 | 35286  | 35838  |
| UN83794 | Rsa1.0.04834.1 | 859 | 15769  | 0         | 403 | 405 | 99 +  | 455 | 859 | 6326   | 6730   |
| UN83795 | Rsa1.0.11824.1 | 822 | 5396   | 0         | 507 | 541 | 93 -  | 1   | 537 | 3315   | 3847   |
| UN83796 | #              | #   | #      | #         | #   | #   | #     | #   | #   | #      | #      |
| UN83797 | #              | #   | #      | #         | #   | #   | #     | #   | #   | #      | #      |
| UN83798 | Rsa1.0.01909.1 | 793 | 37417  | 3.00E-81  | 437 | 524 | 83 -  | 35  | 550 | 29574  | 30087  |
| UN83799 | Rsa1.0.00699.1 | 840 | 184398 | 0         | 774 | 856 | 90 -  | 3   | 840 | 40641  | 41463  |
| UN83800 | Rsa1.0.01460.1 | 838 | 45255  | 1.00E-109 | 245 | 258 | 94 -  | 1   | 254 | 25454  | 25710  |
| UN83801 | Rsa1.0.01771.1 | 686 | 172709 | 0         | 460 | 460 | 100 + | 227 | 686 | 164615 | 165074 |
| UN83802 | #              | #   | #      | #         | #   | #   | #     | #   | #   | #      | #      |
| UN83803 | Rsa1.0.00366.1 | 819 | 90880  | 1.00E-161 | 327 | 340 | 96 -  | 480 | 819 | 35455  | 35794  |
| UN83804 | Rsa1.0.69180.1 | 362 | 331    | 1.00E-81  | 175 | 182 | 96 +  | 173 | 354 | 80     | 261    |
| UN83805 | #              | #   | #      | #         | #   | #   | #     | #   | #   | #      | #      |
| UN83806 | Rsa1.0.01555.1 | 820 | 166456 | 0         | 810 | 821 | 98 +  | 1   | 820 | 39664  | 40484  |
| UN83807 | Rsa1.0.00078.1 | 819 | 175053 | 0         | 432 | 459 | 94 +  | 215 | 672 | 124277 | 124735 |
| UN83808 | Rsa1.0.00697.1 | 870 | 67913  | 1.00E-123 | 230 | 232 | 99 +  | 575 | 806 | 32936  | 33167  |
| UN83809 | Rsa1.0.00157.1 | 827 | 245832 | 0         | 823 | 828 | 99 +  | 1   | 827 | 29168  | 29993  |

|         |                |     |        |           |     |     |       |     |     |        |        |
|---------|----------------|-----|--------|-----------|-----|-----|-------|-----|-----|--------|--------|
| UN83810 | Rsa1.0.01422.1 | 742 | 46172  | 1.00E-177 | 402 | 431 | 93 -  | 201 | 628 | 14023  | 14447  |
| UN83811 | Rsa1.0.01376.1 | 780 | 47004  | 0         | 767 | 797 | 96 -  | 4   | 780 | 19264  | 20060  |
| UN83812 | Rsa1.0.00525.1 | 806 | 78030  | 0         | 806 | 806 | 100 + | 1   | 806 | 38916  | 39721  |
| UN83813 | #              | #   | #      | #         | #   | #   | #     | #   | #   | #      | #      |
| UN83814 | Rsa1.0.00083.1 | 842 | 442773 | 1.00E-135 | 245 | 245 | 100 - | 393 | 637 | 334662 | 334906 |
| UN83815 | Rsa1.0.00371.1 | 169 | 90463  | 5.00E-45  | 95  | 96  | 98 +  | 74  | 169 | 51743  | 51838  |
| UN83816 | Rsa1.0.00066.1 | 431 | 152418 | 0         | 430 | 431 | 99 +  | 1   | 431 | 90299  | 90729  |
| UN83817 | #              | #   | #      | #         | #   | #   | #     | #   | #   | #      | #      |
| UN83818 | Rsa1.0.00295.1 | 854 | 152597 | 1.00E-52  | 182 | 205 | 88 -  | 393 | 597 | 39751  | 39947  |
| UN83819 | Rsa1.0.02595.1 | 840 | 29715  | 0         | 836 | 837 | 99 +  | 5   | 840 | 13777  | 14613  |
| UN83820 | Rsa1.0.00056.1 | 824 | 332604 | 0         | 386 | 390 | 98 -  | 184 | 573 | 89109  | 89498  |
| UN83821 | Rsa1.0.04552.1 | 249 | 16878  | 1.00E-119 | 241 | 249 | 96 +  | 1   | 249 | 6821   | 7069   |
| UN83822 | Rsa1.0.00240.1 | 509 | 104175 | 0         | 509 | 510 | 99 -  | 1   | 509 | 23367  | 23876  |
| UN83823 | #              | #   | #      | #         | #   | #   | #     | #   | #   | #      | #      |
| UN83824 | Rsa1.0.00022.1 | 744 | 200461 | 0         | 535 | 554 | 96 -  | 59  | 606 | 34978  | 35531  |
| UN83825 | #              | #   | #      | #         | #   | #   | #     | #   | #   | #      | #      |
| UN83826 | Rsa1.0.02615.1 | 638 | 29547  | 1.00E-149 | 268 | 268 | 100 - | 371 | 638 | 15679  | 15946  |
| UN83827 | Rsa1.0.01732.1 | 550 | 40194  | 0         | 548 | 548 | 100 + | 3   | 550 | 37265  | 37812  |
| UN83828 | Rsa1.0.00055.1 | 814 | 520193 | 0         | 643 | 643 | 100 - | 1   | 643 | 369497 | 370139 |
| UN83829 | Rsa1.0.00460.1 | 851 | 206387 | 0         | 807 | 861 | 93 -  | 2   | 851 | 200119 | 200967 |
| UN83830 | Rsa1.0.00300.1 | 781 | 97747  | 0         | 754 | 784 | 96 +  | 3   | 776 | 82406  | 83188  |
| UN83831 | Rsa1.0.01735.1 | 855 | 40128  | 0         | 855 | 871 | 98 -  | 1   | 855 | 12348  | 13218  |
| UN83832 | Rsa1.0.03529.1 | 817 | 22277  | 1.00E-102 | 447 | 533 | 83 -  | 99  | 631 | 16018  | 16550  |
| UN83833 | Rsa1.0.00307.1 | 852 | 199003 | 0         | 850 | 852 | 99 -  | 1   | 852 | 59279  | 60130  |
| UN83834 | Rsa1.0.01868.1 | 844 | 150904 | 0         | 518 | 546 | 94 -  | 300 | 844 | 23723  | 24264  |
| UN83835 | Rsa1.0.00293.1 | 795 | 339294 | 0         | 554 | 554 | 100 - | 2   | 555 | 314779 | 315332 |
| UN83836 | Rsa1.0.02659.1 | 740 | 28971  | 0         | 392 | 392 | 100 + | 5   | 396 | 10822  | 11213  |
| UN83837 | Rsa1.0.00162.1 | 814 | 239935 | 0         | 803 | 813 | 98 +  | 2   | 814 | 26630  | 27442  |
| UN83838 | Rsa1.0.00332.1 | 874 | 94575  | 0         | 491 | 498 | 98 -  | 1   | 496 | 59905  | 60402  |
| UN83839 | Rsa1.0.02269.1 | 372 | 33168  | 0         | 372 | 373 | 99 -  | 1   | 372 | 8972   | 9344   |
| UN83840 | #              | #   | #      | #         | #   | #   | #     | #   | #   | #      | #      |
| UN83841 | Rsa1.0.23904.1 | 850 | 1018   | 0         | 798 | 838 | 95 -  | 29  | 850 | 59     | 882    |
| UN83842 | Rsa1.0.01677.1 | 617 | 41140  | 0         | 418 | 434 | 96 +  | 3   | 436 | 36608  | 37041  |
| UN83843 | Rsa1.0.03754.1 | 857 | 21005  | 0         | 547 | 556 | 98 +  | 309 | 857 | 7138   | 7692   |
| UN83844 | Rsa1.0.02663.1 | 864 | 169243 | 0         | 647 | 647 | 100 + | 218 | 864 | 20800  | 21446  |
| UN83845 | Rsa1.0.03938.1 | 659 | 19965  | 0         | 637 | 661 | 96 -  | 1   | 659 | 7624   | 8284   |
| UN83846 | #              | #   | #      | #         | #   | #   | #     | #   | #   | #      | #      |
| UN83847 | Rsa1.0.00438.1 | 844 | 84861  | 1.00E-134 | 258 | 263 | 98 -  | 15  | 277 | 49353  | 49615  |
| UN83848 | Rsa1.0.03921.1 | 829 | 20080  | 0         | 829 | 829 | 100 - | 1   | 829 | 3644   | 4472   |



|         |                |     |        |           |     |     |       |     |     |        |        |   |   |
|---------|----------------|-----|--------|-----------|-----|-----|-------|-----|-----|--------|--------|---|---|
| UN83849 | #              | #   | #      | #         | #   | #   | #     | #   | #   | #      | #      | # | # |
| UN83850 | Rsa1.0_01411.1 | 883 | 46326  | 1.00E-165 | 310 | 315 | 98 -  | 569 | 883 | 6452   | 6766   |   |   |
| UN83851 | #              | #   | #      | #         | #   | #   | #     | #   | #   | #      | #      | # | # |
| UN83852 | Rsa1.0_01602.1 | 544 | 42503  | 0         | 540 | 544 | 99 +  | 1   | 544 | 35795  | 36336  |   |   |
| UN83853 | Rsa1.0_02301.1 | 792 | 32835  | 0         | 765 | 789 | 96 -  | 9   | 792 | 4567   | 5355   |   |   |
| UN83854 | Rsa1.0_00807.1 | 754 | 63607  | 0         | 521 | 562 | 92 +  | 209 | 754 | 61592  | 62144  |   |   |
| UN83855 | Rsa1.0_01937.1 | 807 | 37147  | 0         | 468 | 469 | 99 -  | 2   | 470 | 17520  | 17988  |   |   |
| UN83856 | Rsa1.0_39138.1 | 795 | 575    | 0         | 390 | 390 | 100 - | 1   | 390 | 1      | 390    |   |   |
| UN83857 | Rsa1.0_00715.1 | 861 | 67116  | 0         | 438 | 470 | 93 -  | 408 | 861 | 30497  | 30965  |   |   |
| UN83858 | #              | #   | #      | #         | #   | #   | #     | #   | #   | #      | #      | # | # |
| UN83859 | Rsa1.0_00674.1 | 888 | 193753 | 0         | 357 | 359 | 99 +  | 25  | 383 | 180793 | 181151 |   |   |
| UN83860 | Rsa1.0_00220.1 | 498 | 192936 | 0         | 413 | 413 | 100 - | 86  | 498 | 152957 | 153369 |   |   |
| UN83861 | Rsa1.0_00286.1 | 860 | 98709  | 0         | 666 | 718 | 92 +  | 139 | 848 | 64240  | 64931  |   |   |
| UN83862 | Rsa1.0_00249.1 | 843 | 153740 | 0         | 791 | 792 | 99 -  | 52  | 843 | 30801  | 31592  |   |   |
| UN83863 | #              | #   | #      | #         | #   | #   | #     | #   | #   | #      | #      | # | # |
| UN83864 | Rsa1.0_13633.1 | 518 | 4605   | 1.00E-123 | 224 | 224 | 100 + | 295 | 518 | 1778   | 2001   |   |   |
| UN83865 | Rsa1.0_44589.1 | 921 | 505    | 1.00E-162 | 375 | 402 | 93 +  | 368 | 768 | 34     | 435    |   |   |
| UN83866 | Rsa1.0_01004.1 | 630 | 56975  | 0         | 474 | 474 | 100 + | 157 | 630 | 2624   | 3097   |   |   |
| UN83867 | Rsa1.0_00884.1 | 557 | 61150  | 0         | 556 | 558 | 99 +  | 1   | 557 | 20338  | 20895  |   |   |
| UN83868 | Rsa1.0_00127.1 | 921 | 127446 | 0         | 886 | 930 | 95 -  | 1   | 921 | 40223  | 41141  |   |   |
| UN83869 | Rsa1.0_00224.1 | 501 | 327530 | 1.00E-23  | 99  | 113 | 87 +  | 294 | 406 | 192706 | 192818 |   |   |
| UN83870 | Rsa1.0_07930.1 | 830 | 8239   | 0         | 826 | 828 | 99 +  | 3   | 830 | 6979   | 7806   |   |   |
| UN83871 | Rsa1.0_01923.1 | 754 | 37233  | 0         | 754 | 755 | 99 -  | 1   | 754 | 23421  | 24175  |   |   |
| UN83872 | Rsa1.0_01919.1 | 887 | 37272  | 0         | 885 | 887 | 99 +  | 1   | 887 | 19825  | 20710  |   |   |
| UN83873 | Rsa1.0_13955.1 | 856 | 4013   | 0         | 847 | 848 | 99 +  | 10  | 856 | 1246   | 2093   |   |   |
| UN83874 | #              | #   | #      | #         | #   | #   | #     | #   | #   | #      | #      | # | # |
| UN83875 | Rsa1.0_22508.1 | 847 | 1115   | 0         | 434 | 435 | 99 -  | 61  | 495 | 671    | 1105   |   |   |
| UN83876 | Rsa1.0_00038.1 | 847 | 314568 | 0         | 778 | 809 | 96 -  | 40  | 847 | 261796 | 262604 |   |   |
| UN83877 | Rsa1.0_02273.1 | 819 | 140964 | 1.00E-104 | 192 | 192 | 100 + | 475 | 666 | 9669   | 9860   |   |   |
| UN83878 | Rsa1.0_00904.1 | 866 | 180594 | 0         | 429 | 438 | 97 -  | 1   | 437 | 177571 | 178008 |   |   |
| UN83879 | Rsa1.0_03799.1 | 841 | 20775  | 0         | 329 | 330 | 99 +  | 512 | 841 | 5590   | 5919   |   |   |
| UN83880 | #              | #   | #      | #         | #   | #   | #     | #   | #   | #      | #      | # | # |
| UN83881 | Rsa1.0_01059.1 | 786 | 55410  | 1.00E-126 | 253 | 260 | 97 +  | 398 | 654 | 14510  | 14769  |   |   |
| UN83882 | Rsa1.0_00102.1 | 773 | 135497 | 0         | 581 | 585 | 99 -  | 4   | 588 | 26433  | 27017  |   |   |
| UN83883 | Rsa1.0_00119.1 | 792 | 467509 | 0         | 514 | 524 | 98 -  | 7   | 530 | 56932  | 57453  |   |   |
| UN83884 | Rsa1.0_01575.1 | 533 | 42924  | 0         | 509 | 531 | 95 +  | 8   | 533 | 1067   | 1597   |   |   |
| UN83885 | Rsa1.0_00002.1 | 700 | 601661 | 0         | 700 | 702 | 99 -  | 1   | 700 | 288715 | 289416 |   |   |
| UN83886 | #              | #   | #      | #         | #   | #   | #     | #   | #   | #      | #      | # | # |
| UN83887 | Rsa1.0_01409.1 | 812 | 151595 | 0         | 811 | 813 | 99 +  | 1   | 812 | 117331 | 118143 |   |   |



|         |                |     |        |           |     |     |       |     |     |        |        |
|---------|----------------|-----|--------|-----------|-----|-----|-------|-----|-----|--------|--------|
| UN83927 | Rsa1.0_05925.1 | 846 | 12221  | 1.00E-110 | 232 | 242 | 95 -  | 375 | 616 | 9967   | 10208  |
| UN83928 | Rsa1.0_00816.1 | 693 | 403350 | 1.00E-166 | 400 | 435 | 91 -  | 265 | 693 | 120884 | 121303 |
| UN83929 | #              | #   | #      | #         | #   | #   | #     | #   | #   | #      | #      |
| UN83930 | Rsa1.0_00059.1 | 866 | 159650 | 0         | 748 | 760 | 98 -  | 113 | 866 | 133925 | 134684 |
| UN83931 | Rsa1.0_07490.1 | 818 | 9261   | 0         | 811 | 811 | 100 - | 8   | 818 | 5279   | 6089   |
| UN83932 | Rsa1.0_03600.1 | 712 | 21857  | 0         | 480 | 480 | 100 + | 233 | 712 | 1928   | 2407   |
| UN83933 | Rsa1.0_00064.1 | 831 | 240927 | 0         | 829 | 829 | 100 - | 3   | 831 | 27692  | 28520  |
| UN83934 | Rsa1.0_00546.1 | 791 | 76523  | 0         | 785 | 785 | 100 + | 7   | 791 | 45707  | 46491  |
| UN83935 | Rsa1.0_00271.1 | 779 | 101125 | 1.00E-175 | 311 | 311 | 100 - | 469 | 779 | 26755  | 27065  |
| UN83936 | Rsa1.0_01017.1 | 812 | 56714  | 0         | 581 | 585 | 99 -  | 228 | 812 | 31353  | 31937  |
| UN83937 | Rsa1.0_06130.1 | 450 | 11667  | 2.00E-53  | 190 | 217 | 87 +  | 158 | 373 | 5313   | 5522   |
| UN83938 | Rsa1.0_01575.1 | 750 | 42924  | 0         | 750 | 751 | 99 -  | 1   | 750 | 37045  | 37795  |
| UN83939 | Rsa1.0_08427.1 | 735 | 7371   | 0         | 364 | 364 | 100 + | 10  | 373 | 5378   | 5741   |
| UN83940 | #              | #   | #      | #         | #   | #   | #     | #   | #   | #      | #      |
| UN83941 | Rsa1.0_00261.1 | 638 | 151157 | 0         | 633 | 638 | 99 -  | 1   | 638 | 70333  | 70970  |
| UN83942 | Rsa1.0_04067.1 | 656 | 19256  | 0         | 654 | 654 | 100 + | 3   | 656 | 18505  | 19158  |
| UN83943 | Rsa1.0_02191.1 | 519 | 34078  | 0         | 519 | 519 | 100 - | 1   | 519 | 4454   | 4972   |
| UN83944 | Rsa1.0_00783.1 | 855 | 64459  | 0         | 832 | 851 | 97 +  | 5   | 855 | 8421   | 9271   |
| UN83945 | Rsa1.0_00392.1 | 306 | 88523  | 1.00E-157 | 302 | 307 | 98 -  | 1   | 306 | 79613  | 79917  |
| UN83946 | Rsa1.0_00087.1 | 804 | 761073 | 1.00E-123 | 225 | 225 | 100 + | 301 | 525 | 224913 | 225137 |
| UN83947 | Rsa1.0_02562.1 | 859 | 30061  | 1.00E-160 | 289 | 290 | 99 +  | 79  | 368 | 26310  | 26599  |
| UN83948 | Rsa1.0_00100.1 | 839 | 249232 | 0         | 424 | 424 | 100 + | 1   | 424 | 134969 | 135392 |
| UN83949 | Rsa1.0_06392.1 | 535 | 11104  | 0         | 531 | 536 | 99 +  | 1   | 535 | 38     | 573    |
| UN83950 | Rsa1.0_06757.1 | 698 | 10411  | 0         | 665 | 666 | 99 +  | 33  | 698 | 3120   | 3785   |
| UN83951 | Rsa1.0_00007.1 | 816 | 239325 | 5.00E-89  | 223 | 237 | 94 +  | 304 | 539 | 183063 | 183294 |
| UN83952 | Rsa1.0_11330.1 | 846 | 5542   | 1.00E-141 | 254 | 254 | 100 - | 280 | 533 | 564    | 817    |
| UN83953 | Rsa1.0_14203.1 | 903 | 3670   | 0         | 436 | 441 | 98 +  | 300 | 740 | 1903   | 2342   |
| UN83954 | Rsa1.0_04208.1 | 868 | 18444  | 0         | 346 | 346 | 100 + | 1   | 346 | 16931  | 17276  |
| UN83955 | Rsa1.0_06521.1 | 905 | 10856  | 0         | 753 | 756 | 99 +  | 1   | 754 | 8732   | 9487   |
| UN83956 | Rsa1.0_01376.1 | 878 | 47004  | 0         | 358 | 358 | 100 - | 392 | 749 | 22866  | 23223  |
| UN83957 | Rsa1.0_01134.1 | 843 | 52829  | 0         | 806 | 844 | 95 +  | 1   | 843 | 31025  | 31856  |
| UN83958 | Rsa1.0_08149.1 | 872 | 7833   | 1.00E-122 | 222 | 222 | 100 - | 2   | 223 | 6005   | 6226   |
| UN83959 | Rsa1.0_01967.1 | 831 | 36672  | 1.00E-169 | 304 | 305 | 99 +  | 1   | 305 | 12946  | 13250  |
| UN83960 | Rsa1.0_00615.1 | 859 | 72235  | 0         | 434 | 435 | 99 +  | 392 | 826 | 40336  | 40770  |
| UN83961 | Rsa1.0_00416.1 | 846 | 86772  | 0         | 523 | 523 | 100 + | 238 | 760 | 64686  | 65208  |
| UN83962 | Rsa1.0_01553.1 | 855 | 43379  | 0         | 409 | 409 | 100 + | 371 | 779 | 12672  | 13080  |
| UN83963 | Rsa1.0_13716.1 | 861 | 4433   | 0         | 843 | 861 | 97 +  | 1   | 861 | 327    | 1181   |
| UN83964 | Rsa1.0_01473.1 | 808 | 45094  | 0         | 515 | 515 | 100 + | 146 | 660 | 14934  | 15448  |
| UN83965 | Rsa1.0_05354.1 | 868 | 14073  | 0         | 490 | 490 | 100 + | 326 | 815 | 1333   | 1822   |

|         |                |     |        |           |     |     |       |     |     |        |        |
|---------|----------------|-----|--------|-----------|-----|-----|-------|-----|-----|--------|--------|
| UN83966 | Rsa1.0_04021.1 | 846 | 19536  | 0         | 819 | 866 | 94 -  | 1   | 846 | 12137  | 12994  |
| UN83967 | Rsa1.0_00413.1 | 822 | 86921  | 0         | 790 | 816 | 96 -  | 1   | 814 | 39015  | 39817  |
| UN83968 | Rsa1.0_00085.1 | 901 | 142226 | 0         | 847 | 847 | 100 - | 55  | 901 | 80557  | 81403  |
| UN83969 | Rsa1.0_35196.1 | 868 | 643    | 0         | 409 | 427 | 95 +  | 172 | 585 | 217    | 643    |
| UN83970 | Rsa1.0_01645.1 | 887 | 41748  | 0         | 356 | 357 | 99 +  | 1   | 356 | 34803  | 35159  |
| UN83971 | Rsa1.0_21539.1 | 583 | 1194   | 1.00E-143 | 290 | 301 | 96 -  | 256 | 556 | 404    | 704    |
| UN83972 | Rsa1.0_02353.1 | 664 | 32300  | 0         | 624 | 631 | 98 -  | 34  | 664 | 30078  | 30701  |
| UN83973 | Rsa1.0_00015.1 | 893 | 561803 | 0         | 880 | 894 | 98 -  | 2   | 893 | 222926 | 223819 |
| UN83974 | Rsa1.0_00963.1 | 800 | 58176  | 0         | 800 | 800 | 100 - | 1   | 800 | 30872  | 31671  |
| UN83975 | Rsa1.0_07913.1 | 850 | 8303   | 0         | 325 | 325 | 100 + | 1   | 325 | 1121   | 1445   |
| UN83976 | Rsa1.0_00947.1 | 874 | 58664  | 0         | 493 | 493 | 100 + | 1   | 493 | 47319  | 47811  |
| UN83977 | Rsa1.0_01316.1 | 828 | 48325  | 0         | 828 | 829 | 99 -  | 1   | 828 | 18314  | 19142  |
| UN83978 | Rsa1.0_04755.1 | 841 | 16121  | 0         | 723 | 784 | 92 -  | 64  | 841 | 14809  | 15592  |
| UN83979 | Rsa1.0_01958.1 | 145 | 261128 | 1.00E-51  | 109 | 111 | 98 +  | 35  | 145 | 118912 | 119022 |
| UN83980 | Rsa1.0_00209.1 | 872 | 108531 | 1.00E-149 | 268 | 268 | 100 + | 302 | 569 | 65934  | 66201  |
| UN83981 | Rsa1.0_01243.1 | 872 | 50061  | 0         | 484 | 490 | 98 +  | 1   | 488 | 45920  | 46409  |
| UN83982 | Rsa1.0_02963.1 | 824 | 26407  | 1.00E-15  | 56  | 60  | 93 -  | 412 | 471 | 4660   | 4719   |
| UN83983 | Rsa1.0_00077.1 | 804 | 145005 | 0         | 378 | 384 | 98 +  | 162 | 545 | 134031 | 134411 |
| UN83984 | Rsa1.0_00605.1 | 865 | 73199  | 0         | 380 | 380 | 100 + | 83  | 462 | 19132  | 19511  |
| UN83985 | Rsa1.0_01001.1 | 864 | 57077  | 0         | 588 | 591 | 99 +  | 238 | 828 | 21030  | 21620  |
| UN83986 | Rsa1.0_00124.1 | 284 | 262503 | 2.00E-89  | 202 | 213 | 94 -  | 63  | 275 | 78169  | 78378  |
| UN83987 | Rsa1.0_00361.1 | 862 | 91181  | 0         | 862 | 864 | 99 +  | 1   | 862 | 35918  | 36781  |
| UN83988 | Rsa1.0_00228.1 | 903 | 105511 | 0         | 575 | 575 | 100 - | 329 | 903 | 1277   | 1851   |
| UN83989 | Rsa1.0_00801.1 | 407 | 63861  | 1.00E-173 | 307 | 307 | 100 - | 1   | 307 | 24598  | 24904  |
| UN83990 | Rsa1.0_00108.1 | 698 | 478491 | 0         | 367 | 367 | 100 + | 130 | 496 | 166692 | 167058 |
| UN83991 | Rsa1.0_00040.1 | 822 | 324196 | 0         | 822 | 822 | 100 - | 1   | 822 | 62741  | 63562  |
| UN83992 | Rsa1.0_00340.1 | 840 | 305782 | 1.00E-128 | 233 | 233 | 100 - | 121 | 353 | 16175  | 16407  |
| UN83993 | Rsa1.0_00885.1 | 891 | 61088  | 0         | 550 | 571 | 96 -  | 333 | 891 | 7647   | 8217   |
| UN83994 | Rsa1.0_00606.1 | 146 | 73150  | 2.00E-53  | 136 | 146 | 93 +  | 1   | 146 | 30466  | 30611  |
| UN83995 | Rsa1.0_00700.1 | 841 | 67699  | 0         | 840 | 841 | 99 -  | 1   | 841 | 12356  | 13196  |
| UN83996 | Rsa1.0_01759.1 | 881 | 39745  | 1.00E-89  | 174 | 176 | 98 -  | 2   | 177 | 12411  | 12586  |
| UN83997 | Rsa1.0_00102.1 | 844 | 135497 | 0         | 484 | 487 | 99 -  | 7   | 493 | 28590  | 29076  |
| UN83998 | Rsa1.0_00069.1 | 129 | 403561 | 9.00E-34  | 79  | 81  | 97 +  | 3   | 83  | 77289  | 77369  |
| UN83999 | Rsa1.0_10379.1 | 287 | 5866   | 1.00E-161 | 287 | 287 | 100 - | 1   | 287 | 43     | 329    |
| UN84000 | Rsa1.0_00527.1 | 886 | 77733  | 0         | 413 | 413 | 100 + | 1   | 413 | 3663   | 4075   |
| UN84001 | Rsa1.0_00009.1 | 832 | 232558 | 0         | 824 | 833 | 98 +  | 3   | 832 | 186499 | 187327 |
| UN84002 | Rsa1.0_06272.1 | 869 | 11351  | 1.00E-24  | 194 | 239 | 81 -  | 189 | 427 | 10037  | 10275  |
| UN84003 | Rsa1.0_02481.1 | 694 | 31035  | 1.00E-64  | 169 | 182 | 92 -  | 1   | 181 | 30266  | 30447  |
| UN84004 | Rsa1.0_00094.1 | 704 | 139042 | 0         | 573 | 581 | 98 +  | 124 | 704 | 90319  | 90899  |

|         |                |     |        |           |     |     |       |     |     |        |        |
|---------|----------------|-----|--------|-----------|-----|-----|-------|-----|-----|--------|--------|
| UN84005 | Rsa1.0_01244.1 | 286 | 50061  | 1.00E-160 | 286 | 286 | 100 + | 1   | 286 | 40434  | 40719  |
| UN84006 | Rsa1.0_46620.1 | 558 | 484    | 7.00E-78  | 174 | 180 | 96 -  | 1   | 178 | 1      | 180    |
| UN84007 | Rsa1.0_00701.1 | 700 | 67691  | 0         | 405 | 405 | 100 + | 1   | 405 | 21569  | 21973  |
| UN84008 | Rsa1.0_01488.1 | 565 | 44766  | 0         | 447 | 460 | 97 -  | 106 | 565 | 7414   | 7873   |
| UN84009 | Rsa1.0_00939.1 | 633 | 185227 | 0         | 450 | 450 | 100 + | 169 | 618 | 44321  | 44770  |
| UN84010 | Rsa1.0_03194.1 | 635 | 24674  | 1.00E-163 | 390 | 422 | 92 -  | 235 | 635 | 2760   | 3180   |
| UN84011 | Rsa1.0_04422.1 | 732 | 17423  | 0         | 722 | 722 | 100 - | 11  | 732 | 1879   | 2600   |
| UN84012 | Rsa1.0_01310.1 | 738 | 164719 | 0         | 642 | 660 | 97 +  | 1   | 656 | 8732   | 9391   |
| UN84013 | Rsa1.0_00613.1 | 708 | 209993 | 0         | 704 | 706 | 99 +  | 3   | 708 | 190879 | 191584 |
| UN84014 | Rsa1.0_00001.1 | 712 | 363028 | 0         | 611 | 611 | 100 - | 102 | 712 | 291454 | 292064 |
| UN84015 | Rsa1.0_00281.1 | 650 | 99908  | 1.00E-165 | 295 | 295 | 100 + | 1   | 295 | 82499  | 82793  |
| UN84016 | #              | #   | #      | #         | #   | #   | #     | #   | #   | #      | #      |
| UN84017 | Rsa1.0_00338.1 | 680 | 94109  | 2.00E-82  | 223 | 244 | 91 -  | 436 | 678 | 4625   | 4868   |
| UN84018 | Rsa1.0_14100.1 | 666 | 3809   | 1.00E-180 | 329 | 331 | 99 -  | 11  | 340 | 1137   | 1467   |
| UN84019 | Rsa1.0_00649.1 | 606 | 70263  | 0         | 396 | 396 | 100 - | 211 | 606 | 5728   | 6123   |
| UN84020 | Rsa1.0_00006.1 | 644 | 396176 | 1.00E-159 | 284 | 284 | 100 - | 1   | 284 | 305844 | 306127 |
| UN84021 | Rsa1.0_00251.1 | 682 | 303968 | 1.00E-175 | 311 | 311 | 100 - | 322 | 632 | 53534  | 53844  |
| UN84022 | Rsa1.0_01424.1 | 757 | 46139  | 0         | 718 | 753 | 95 +  | 1   | 752 | 40545  | 41297  |
| UN84023 | Rsa1.0_06852.1 | 576 | 10265  | 0         | 457 | 458 | 99 +  | 119 | 576 | 4327   | 4784   |
| UN84024 | Rsa1.0_04538.1 | 108 | 16940  | 5.00E-41  | 102 | 107 | 95 +  | 5   | 108 | 8007   | 8113   |
| UN84025 | Rsa1.0_03035.1 | 705 | 25827  | 0         | 393 | 393 | 100 + | 1   | 393 | 967    | 1359   |
| UN84026 | Rsa1.0_00663.1 | 490 | 164969 | 0         | 377 | 377 | 100 + | 114 | 490 | 98452  | 98828  |
| UN84027 | Rsa1.0_01749.1 | 525 | 39822  | 1.00E-156 | 366 | 393 | 93 +  | 1   | 392 | 35329  | 35713  |
| UN84028 | Rsa1.0_00019.1 | 739 | 301669 | 0         | 336 | 339 | 99 -  | 401 | 739 | 110629 | 110967 |
| UN84029 | Rsa1.0_00782.1 | 773 | 64468  | 0         | 679 | 679 | 100 + | 95  | 773 | 29571  | 30249  |
| UN84030 | Rsa1.0_00458.1 | 140 | 82717  | 1.00E-54  | 114 | 116 | 98 +  | 2   | 117 | 21531  | 21646  |
| UN84031 | Rsa1.0_02977.1 | 196 | 26313  | 4.00E-43  | 123 | 129 | 95 -  | 72  | 196 | 15109  | 15237  |
| UN84032 | Rsa1.0_25426.1 | 615 | 936    | 0         | 360 | 360 | 100 - | 1   | 360 | 1      | 360    |
| UN84033 | Rsa1.0_00213.1 | 779 | 108167 | 0         | 491 | 491 | 100 - | 289 | 779 | 23193  | 23683  |
| UN84034 | #              | #   | #      | #         | #   | #   | #     | #   | #   | #      | #      |
| UN84035 | Rsa1.0_00452.1 | 256 | 83201  | 5.00E-46  | 106 | 110 | 96 -  | 4   | 113 | 16704  | 16813  |
| UN84036 | Rsa1.0_00158.1 | 637 | 117999 | 0         | 607 | 632 | 96 +  | 6   | 637 | 22738  | 23352  |
| UN84037 | Rsa1.0_00394.1 | 484 | 148426 | 0         | 464 | 491 | 94 +  | 1   | 484 | 138972 | 139459 |
| UN84038 | Rsa1.0_04184.1 | 219 | 18598  | 1.00E-24  | 73  | 78  | 93 +  | 48  | 125 | 4010   | 4087   |
| UN84039 | Rsa1.0_21800.1 | 149 | 1172   | 2.00E-75  | 143 | 143 | 100 + | 7   | 149 | 681    | 823    |
| UN84040 | Rsa1.0_00476.1 | 639 | 280966 | 0         | 636 | 640 | 99 -  | 1   | 639 | 230572 | 231210 |
| UN84041 | Rsa1.0_22202.1 | 750 | 1142   | 0         | 701 | 735 | 95 -  | 1   | 727 | 375    | 1104   |
| UN84042 | Rsa1.0_04425.1 | 268 | 17406  | 1.00E-136 | 263 | 268 | 98 -  | 1   | 268 | 10049  | 10314  |
| UN84043 | Rsa1.0_09508.1 | 892 | 6326   | 0         | 859 | 861 | 99 -  | 1   | 861 | 4846   | 5706   |

|         |                |     |        |           |     |     |       |     |     |        |        |
|---------|----------------|-----|--------|-----------|-----|-----|-------|-----|-----|--------|--------|
| UN84044 | Rsa1.0.06064.1 | 704 | 11832  | 0         | 681 | 706 | 96 +  | 1   | 704 | 1906   | 2610   |
| UN84045 | Rsa1.0.05654.1 | 787 | 13042  | 0         | 787 | 788 | 99 -  | 1   | 787 | 8223   | 9010   |
| UN84046 | Rsa1.0.00671.1 | 871 | 397884 | 0         | 647 | 647 | 100 - | 1   | 647 | 246549 | 247195 |
| UN84047 | Rsa1.0.01316.1 | 428 | 48325  | 1.00E-175 | 311 | 311 | 100 + | 118 | 428 | 37901  | 38211  |
| UN84048 | Rsa1.0.00007.1 | 923 | 239325 | 0         | 923 | 924 | 99 -  | 1   | 923 | 29842  | 30765  |
| UN84049 | Rsa1.0.02983.1 | 874 | 26268  | 0         | 872 | 876 | 99 +  | 1   | 874 | 1528   | 2403   |
| UN84050 | Rsa1.0.07437.1 | 494 | 9394   | 0         | 492 | 492 | 100 + | 3   | 494 | 5291   | 5782   |
| UN84051 | Rsa1.0.00433.1 | 735 | 85381  | 1.00E-166 | 296 | 296 | 100 - | 440 | 735 | 65182  | 65477  |
| UN84052 | Rsa1.0.00601.1 | 618 | 177045 | 0         | 338 | 338 | 100 - | 281 | 618 | 126611 | 126948 |
| UN84053 | Rsa1.0.00892.1 | 873 | 60703  | 0         | 872 | 885 | 98 +  | 1   | 873 | 17199  | 18083  |
| UN84054 | Rsa1.0.00188.1 | 465 | 112020 | 0         | 465 | 467 | 99 -  | 1   | 465 | 93706  | 94172  |
| UN84055 | Rsa1.0.01556.1 | 914 | 163858 | 0         | 712 | 714 | 99 +  | 202 | 914 | 24949  | 25662  |
| UN84056 | Rsa1.0.04290.1 | 418 | 18063  | 0         | 418 | 418 | 100 + | 1   | 418 | 6308   | 6725   |
| UN84057 | Rsa1.0.00518.1 | 852 | 78360  | 1.00E-58  | 119 | 120 | 99 +  | 665 | 784 | 17278  | 17397  |
| UN84058 | #              | #   | #      | #         | #   | #   | #     | #   | #   | #      | #      |
| UN84059 | Rsa1.0.00089.1 | 484 | 406142 | 0         | 484 | 484 | 100 - | 1   | 484 | 288728 | 289211 |
| UN84060 | #              | #   | #      | #         | #   | #   | #     | #   | #   | #      | #      |
| UN84061 | Rsa1.0.03997.1 | 858 | 19652  | 1.00E-142 | 348 | 382 | 91 -  | 1   | 361 | 11457  | 11838  |
| UN84062 | Rsa1.0.04938.1 | 660 | 15398  | 0         | 648 | 653 | 99 +  | 8   | 660 | 14437  | 15086  |
| UN84063 | Rsa1.0.59256.1 | 545 | 386    | 3.00E-86  | 201 | 214 | 93 +  | 109 | 322 | 1      | 214    |
| UN84064 | #              | #   | #      | #         | #   | #   | #     | #   | #   | #      | #      |
| UN84065 | Rsa1.0.02209.1 | 878 | 33873  | 0         | 878 | 879 | 99 -  | 1   | 878 | 10302  | 11180  |
| UN84066 | Rsa1.0.00257.1 | 857 | 102407 | 0         | 596 | 607 | 98 +  | 252 | 857 | 47317  | 47923  |
| UN84067 | Rsa1.0.00362.1 | 802 | 299497 | 0         | 556 | 587 | 94 +  | 7   | 587 | 222685 | 223271 |
| UN84068 | Rsa1.0.03027.1 | 462 | 25883  | 8.00E-62  | 206 | 232 | 88 -  | 16  | 232 | 24444  | 24672  |
| UN84069 | Rsa1.0.01707.1 | 853 | 40686  | 0         | 537 | 539 | 99 +  | 315 | 853 | 7184   | 7722   |
| UN84070 | Rsa1.0.09180.1 | 901 | 6578   | 0         | 581 | 581 | 100 + | 1   | 581 | 4354   | 4934   |
| UN84071 | Rsa1.0.02468.1 | 820 | 31122  | 0         | 817 | 818 | 99 -  | 3   | 820 | 25989  | 26805  |
| UN84072 | Rsa1.0.00753.1 | 616 | 65705  | 0         | 616 | 616 | 100 + | 1   | 616 | 30028  | 30643  |
| UN84073 | Rsa1.0.04789.1 | 550 | 15981  | 0         | 527 | 544 | 96 +  | 11  | 550 | 10016  | 10559  |
| UN84074 | Rsa1.0.00016.1 | 355 | 831256 | 1.00E-166 | 340 | 355 | 95 +  | 1   | 355 | 244982 | 245336 |
| UN84075 | Rsa1.0.00368.1 | 573 | 90669  | 0         | 565 | 565 | 100 + | 9   | 573 | 85141  | 85705  |
| UN84076 | #              | #   | #      | #         | #   | #   | #     | #   | #   | #      | #      |
| UN84077 | Rsa1.0.00333.1 | 821 | 94500  | 0         | 812 | 813 | 99 +  | 9   | 821 | 76358  | 77170  |
| UN84078 | Rsa1.0.00457.1 | 827 | 337301 | 0         | 808 | 828 | 97 +  | 1   | 827 | 143580 | 144407 |
| UN84079 | Rsa1.0.02362.1 | 640 | 32190  | 1.00E-163 | 292 | 292 | 100 - | 349 | 640 | 24854  | 25145  |
| UN84080 | Rsa1.0.01179.1 | 818 | 51549  | 0         | 818 | 818 | 100 - | 1   | 818 | 24857  | 25674  |
| UN84081 | Rsa1.0.03258.1 | 244 | 24302  | 1.00E-128 | 241 | 244 | 98 +  | 1   | 244 | 8003   | 8246   |
| UN84082 | Rsa1.0.02273.1 | 775 | 140964 | 1.00E-105 | 194 | 194 | 100 + | 481 | 674 | 9669   | 9862   |

|         |                |     |        |           |     |     |       |     |     |        |        |
|---------|----------------|-----|--------|-----------|-----|-----|-------|-----|-----|--------|--------|
| UN84083 | Rsa1.0.06438.1 | 578 | 11017  | 0         | 461 | 492 | 93 +  | 65  | 547 | 1531   | 2018   |
| UN84084 | Rsa1.0.02960.1 | 900 | 26440  | 0         | 562 | 562 | 100 + | 339 | 900 | 8454   | 9015   |
| UN84085 | Rsa1.0.01555.1 | 842 | 166456 | 0         | 783 | 846 | 92 +  | 1   | 842 | 13571  | 14403  |
| UN84086 | Rsa1.0.01501.1 | 847 | 44532  | 1.00E-129 | 235 | 235 | 100 - | 275 | 509 | 37739  | 37973  |
| UN84087 | Rsa1.0.07959.1 | 554 | 8173   | 1.00E-138 | 314 | 334 | 94 -  | 221 | 554 | 5587   | 5919   |
| UN84088 | Rsa1.0.00878.1 | 904 | 330303 | 0         | 904 | 905 | 99 -  | 1   | 904 | 19810  | 20714  |
| UN84089 | Rsa1.0.38047.1 | 781 | 592    | 0         | 338 | 338 | 100 + | 100 | 437 | 255    | 592    |
| UN84090 | Rsa1.0.00991.1 | 896 | 143101 | 0         | 827 | 827 | 100 + | 70  | 896 | 32146  | 32972  |
| UN84091 | Rsa1.0.11311.1 | 832 | 5548   | 0         | 777 | 805 | 96 -  | 34  | 832 | 2813   | 3616   |
| UN84092 | Rsa1.0.01510.1 | 344 | 44237  | 1.00E-143 | 326 | 345 | 94 -  | 1   | 344 | 31934  | 32270  |
| UN84093 | Rsa1.0.21111.1 | 767 | 1233   | 0         | 448 | 448 | 100 + | 1   | 448 | 786    | 1233   |
| UN84094 | Rsa1.0.01963.1 | 780 | 36719  | 0         | 766 | 779 | 98 +  | 1   | 779 | 413    | 1180   |
| UN84095 | Rsa1.0.01431.1 | 825 | 167877 | 0         | 807 | 828 | 97 +  | 1   | 825 | 29519  | 30344  |
| UN84096 | Rsa1.0.01204.1 | 845 | 50843  | 0         | 845 | 845 | 100 + | 1   | 845 | 33826  | 34670  |
| UN84097 | Rsa1.0.02072.1 | 516 | 35401  | 1.00E-164 | 292 | 292 | 100 + | 225 | 516 | 24694  | 24985  |
| UN84098 | Rsa1.0.05578.1 | 486 | 13284  | 0         | 431 | 442 | 97 -  | 1   | 442 | 2692   | 3133   |
| UN84099 | Rsa1.0.04462.1 | 314 | 17250  | 2.00E-70  | 225 | 255 | 88 +  | 51  | 305 | 13637  | 13891  |
| UN84100 | Rsa1.0.00093.1 | 914 | 214962 | 0         | 550 | 551 | 99 +  | 365 | 914 | 172892 | 173442 |
| UN84101 | Rsa1.0.03160.1 | 880 | 24916  | 0         | 789 | 807 | 97 +  | 77  | 880 | 1010   | 1813   |
| UN84102 | #              | #   | #      | #         | #   | #   | #     | #   | #   | #      | #      |
| UN84103 | Rsa1.0.01980.1 | 137 | 36544  | 1.00E-57  | 132 | 137 | 96 -  | 1   | 137 | 31521  | 31656  |
| UN84104 | Rsa1.0.00246.1 | 600 | 103541 | 0         | 600 | 600 | 100 + | 1   | 600 | 42071  | 42670  |
| UN84105 | #              | #   | #      | #         | #   | #   | #     | #   | #   | #      | #      |
| UN84106 | Rsa1.0.00048.1 | 684 | 167185 | 0         | 368 | 368 | 100 - | 155 | 522 | 136501 | 136868 |
| UN84107 | Rsa1.0.04852.1 | 644 | 15712  | 0         | 631 | 644 | 97 -  | 1   | 644 | 48     | 691    |
| UN84108 | Rsa1.0.04027.1 | 501 | 19501  | 0         | 498 | 498 | 100 - | 4   | 501 | 8210   | 8707   |
| UN84109 | #              | #   | #      | #         | #   | #   | #     | #   | #   | #      | #      |
| UN84110 | Rsa1.0.06993.1 | 809 | 10059  | 0         | 519 | 519 | 100 + | 3   | 521 | 6391   | 6909   |
| UN84111 | Rsa1.0.00713.1 | 806 | 158017 | 0         | 561 | 583 | 96 -  | 226 | 806 | 4197   | 4774   |
| UN84112 | Rsa1.0.02607.1 | 836 | 29629  | 1.00E-12  | 51  | 55  | 92 -  | 26  | 80  | 29254  | 29308  |
| UN84113 | Rsa1.0.02054.1 | 615 | 35548  | 1.00E-180 | 319 | 319 | 100 + | 1   | 319 | 34829  | 35147  |
| UN84114 | Rsa1.0.01753.1 | 871 | 39794  | 0         | 869 | 871 | 99 -  | 1   | 871 | 21530  | 22400  |
| UN84115 | Rsa1.0.00720.1 | 519 | 66931  | 0         | 519 | 519 | 100 - | 1   | 519 | 23158  | 23676  |
| UN84116 | Rsa1.0.01047.1 | 351 | 55705  | 0         | 351 | 352 | 99 -  | 1   | 351 | 12647  | 12998  |
| UN84117 | Rsa1.0.03334.1 | 839 | 23659  | 0         | 833 | 849 | 98 +  | 1   | 839 | 19352  | 20199  |
| UN84118 | #              | #   | #      | #         | #   | #   | #     | #   | #   | #      | #      |
| UN84119 | Rsa1.0.00285.1 | 846 | 149638 | 0         | 490 | 490 | 100 - | 7   | 496 | 109701 | 110190 |
| UN84120 | Rsa1.0.00352.1 | 899 | 92266  | 0         | 898 | 899 | 99 -  | 1   | 899 | 40696  | 41594  |
| UN84121 | Rsa1.0.02377.1 | 525 | 31994  | 0         | 520 | 521 | 99 +  | 5   | 525 | 19535  | 20055  |

|         |                |   |     |        |           |     |     |       |   |     |     |        |        |
|---------|----------------|---|-----|--------|-----------|-----|-----|-------|---|-----|-----|--------|--------|
| UN84122 | #              | # | #   | #      | #         | #   | #   | #     | # | #   | #   | #      | #      |
| UN84123 | Rsa1.0.02746.1 |   | 632 | 28256  | 0         | 630 | 632 | 99 -  |   | 1   | 632 | 904    | 1535   |
| UN84124 | Rsa1.0.03127.1 |   | 158 | 25191  | 4.00E-70  | 150 | 154 | 97 -  |   | 5   | 158 | 11381  | 11533  |
| UN84125 | #              | # | #   | #      | #         | #   | #   | #     | # | #   | #   | #      | #      |
| UN84126 | Rsa1.0.04806.1 |   | 375 | 15898  | 1.00E-149 | 268 | 268 | 100 + |   | 1   | 268 | 9338   | 9605   |
| UN84127 | Rsa1.0.01605.1 |   | 886 | 42442  | 0         | 627 | 627 | 100 + |   | 88  | 714 | 34371  | 34997  |
| UN84128 | Rsa1.0.00093.1 |   | 880 | 214962 | 0         | 840 | 840 | 100 + |   | 41  | 880 | 115518 | 116357 |
| UN84129 | Rsa1.0.00235.1 |   | 486 | 154696 | 1.00E-106 | 210 | 212 | 99 +  |   | 24  | 235 | 143836 | 144045 |
| UN84130 | Rsa1.0.00255.1 |   | 694 | 204967 | 0         | 677 | 695 | 97 -  |   | 1   | 694 | 164986 | 165679 |
| UN84131 | Rsa1.0.00165.1 |   | 675 | 116466 | 1.00E-140 | 260 | 261 | 99 +  |   | 8   | 267 | 75122  | 75382  |
| UN84132 | Rsa1.0.03414.1 |   | 694 | 23125  | 0         | 654 | 655 | 99 +  |   | 40  | 694 | 20779  | 21433  |
| UN84133 | Rsa1.0.21880.1 |   | 615 | 1167   | 0         | 354 | 354 | 100 - |   | 1   | 354 | 1      | 354    |
| UN84134 | Rsa1.0.04488.1 |   | 745 | 17155  | 0         | 720 | 735 | 97 +  |   | 11  | 745 | 12157  | 12891  |
| UN84135 | Rsa1.0.00185.1 |   | 683 | 248445 | 0         | 494 | 496 | 99 +  |   | 188 | 683 | 214700 | 215195 |
| UN84136 | Rsa1.0.01190.1 |   | 830 | 194501 | 1.00E-145 | 271 | 274 | 98 +  |   | 557 | 830 | 27501  | 27774  |
| UN84137 | Rsa1.0.03626.1 |   | 330 | 160993 | 1.00E-59  | 222 | 257 | 86 -  |   | 1   | 257 | 7202   | 7458   |
| UN84138 | Rsa1.0.03001.1 |   | 106 | 26108  | 2.00E-15  | 65  | 69  | 94 -  |   | 31  | 99  | 7156   | 7220   |
| UN84139 | Rsa1.0.02496.1 |   | 749 | 30814  | 0         | 717 | 755 | 94 +  |   | 12  | 749 | 12435  | 13189  |
| UN84140 | Rsa1.0.00963.1 |   | 556 | 58176  | 0         | 367 | 367 | 100 - |   | 1   | 367 | 8415   | 8781   |
| UN84141 | Rsa1.0.00807.1 |   | 887 | 63607  | 0         | 337 | 337 | 100 - |   | 139 | 475 | 22594  | 22930  |
| UN84142 | Rsa1.0.26052.1 |   | 463 | 908    | 1.00E-153 | 277 | 278 | 99 +  |   | 186 | 463 | 1      | 278    |
| UN84143 | Rsa1.0.00630.1 |   | 771 | 71281  | 0         | 372 | 373 | 99 +  |   | 1   | 372 | 68952  | 69324  |
| UN84144 | Rsa1.0.04507.1 |   | 869 | 17045  | 0         | 868 | 869 | 99 +  |   | 1   | 869 | 6728   | 7596   |
| UN84145 | Rsa1.0.01377.1 |   | 827 | 46967  | 0         | 526 | 532 | 98 +  |   | 6   | 537 | 13170  | 13695  |
| UN84146 | Rsa1.0.00173.1 |   | 849 | 288743 | 5.00E-43  | 96  | 98  | 97 -  |   | 500 | 597 | 36963  | 37060  |
| UN84147 | Rsa1.0.04128.1 |   | 820 | 18927  | 0         | 798 | 820 | 97 +  |   | 1   | 820 | 17638  | 18454  |
| UN84148 | Rsa1.0.00181.1 |   | 547 | 114269 | 0         | 543 | 546 | 99 -  |   | 4   | 547 | 94455  | 95000  |
| UN84149 | Rsa1.0.03795.1 |   | 486 | 20818  | 1.00E-121 | 220 | 220 | 100 + |   | 267 | 486 | 1274   | 1493   |
| UN84150 | Rsa1.0.31340.1 |   | 813 | 729    | 0         | 713 | 729 | 97 -  |   | 39  | 767 | 1      | 729    |
| UN84151 | Rsa1.0.00320.1 |   | 355 | 95784  | 1.00E-168 | 341 | 355 | 96 +  |   | 1   | 355 | 48328  | 48682  |
| UN84152 | #              | # | #   | #      | #         | #   | #   | #     | # | #   | #   | #      | #      |
| UN84153 | Rsa1.0.04049.1 |   | 502 | 19385  | 0         | 496 | 496 | 100 + |   | 7   | 502 | 17909  | 18404  |
| UN84154 | Rsa1.0.00428.1 |   | 877 | 85599  | 0         | 758 | 761 | 99 +  |   | 4   | 764 | 3561   | 4321   |
| UN84155 | Rsa1.0.00085.1 |   | 424 | 142226 | 0         | 424 | 424 | 100 + |   | 1   | 424 | 26808  | 27231  |
| UN84156 | Rsa1.0.00538.1 |   | 608 | 77149  | 0         | 464 | 509 | 91 +  |   | 1   | 488 | 63975  | 64483  |
| UN84157 | Rsa1.0.01006.1 |   | 823 | 163670 | 0         | 822 | 836 | 98 -  |   | 1   | 823 | 136438 | 137273 |
| UN84158 | Rsa1.0.00078.1 |   | 364 | 175053 | 1.00E-164 | 347 | 364 | 95 +  |   | 1   | 364 | 66482  | 66844  |
| UN84159 | Rsa1.0.00296.1 |   | 780 | 97854  | 0         | 633 | 633 | 100 + |   | 1   | 633 | 93327  | 93959  |
| UN84160 | Rsa1.0.04970.1 |   | 457 | 15277  | 0         | 439 | 462 | 95 +  |   | 1   | 457 | 10634  | 11087  |



|         |                |     |        |           |     |     |       |     |     |        |        |
|---------|----------------|-----|--------|-----------|-----|-----|-------|-----|-----|--------|--------|
| UN84161 | Rsa1.0.22400.1 | 784 | 1124   | 0         | 637 | 637 | 100 + | 1   | 637 | 483    | 1119   |
| UN84162 | Rsa1.0.03590.1 | 813 | 21889  | 0         | 401 | 403 | 99 -  | 1   | 403 | 16129  | 16531  |
| UN84163 | Rsa1.0.05577.1 | 610 | 13284  | 1.00E-149 | 274 | 276 | 99 -  | 95  | 370 | 201    | 476    |
| UN84164 | Rsa1.0.00550.1 | 685 | 210790 | 0         | 370 | 370 | 100 + | 11  | 380 | 182037 | 182406 |
| UN84165 | Rsa1.0.02569.1 | 416 | 30002  | 1.00E-136 | 248 | 249 | 99 +  | 168 | 416 | 25185  | 25433  |
| UN84166 | Rsa1.0.00978.1 | 747 | 57739  | 0         | 609 | 652 | 93 +  | 6   | 630 | 37245  | 37895  |
| UN84167 | Rsa1.0.07712.1 | 650 | 8731   | 0         | 422 | 424 | 99 -  | 7   | 430 | 7583   | 8006   |
| UN84168 | Rsa1.0.02592.1 | 679 | 29751  | 4.00E-83  | 157 | 157 | 100 - | 1   | 157 | 11182  | 11338  |
| UN84169 | Rsa1.0.00201.1 | 751 | 232851 | 0         | 751 | 751 | 100 - | 1   | 751 | 19105  | 19855  |
| UN84170 | Rsa1.0.01104.1 | 708 | 285480 | 1.00E-164 | 351 | 371 | 94 +  | 5   | 366 | 125096 | 125463 |
| UN84171 | Rsa1.0.01854.1 | 774 | 38237  | 0         | 758 | 774 | 97 -  | 1   | 774 | 11446  | 12219  |
| UN84172 | Rsa1.0.00136.1 | 620 | 122464 | 1.00E-128 | 297 | 315 | 94 +  | 1   | 313 | 107830 | 108141 |
| UN84173 | Rsa1.0.00439.1 | 655 | 142776 | 0         | 629 | 666 | 94 -  | 11  | 648 | 117607 | 118272 |
| UN84174 | Rsa1.0.02734.1 | 708 | 28344  | 0         | 707 | 708 | 99 +  | 2   | 708 | 1089   | 1796   |
| UN84175 | Rsa1.0.00001.1 | 128 | 363028 | 8.00E-28  | 73  | 75  | 97 -  | 23  | 96  | 266935 | 267009 |
| UN84176 | Rsa1.0.02245.1 | 692 | 33478  | 0         | 485 | 502 | 96 +  | 191 | 692 | 9971   | 10471  |
| UN84177 | Rsa1.0.00340.1 | 897 | 305782 | 0         | 889 | 903 | 98 +  | 5   | 897 | 268772 | 269674 |
| UN84178 | Rsa1.0.02792.1 | 115 | 27829  | 1.00E-54  | 115 | 116 | 99 -  | 1   | 115 | 6254   | 6369   |
| UN84179 | #              | #   | #      | #         | #   | #   | #     | #   | #   | #      | #      |
| UN84180 | Rsa1.0.00831.1 | 525 | 62673  | 0         | 475 | 488 | 97 +  | 1   | 487 | 44406  | 44893  |
| UN84181 | Rsa1.0.74750.1 | 173 | 307    | 2.00E-87  | 163 | 163 | 100 + | 11  | 173 | 2      | 164    |
| UN84182 | #              | #   | #      | #         | #   | #   | #     | #   | #   | #      | #      |
| UN84183 | Rsa1.0.00252.1 | 862 | 102760 | 0         | 861 | 862 | 99 -  | 1   | 862 | 10139  | 11000  |
| UN84184 | Rsa1.0.00635.1 | 843 | 175826 | 1.00E-71  | 147 | 150 | 98 +  | 282 | 431 | 896    | 1045   |
| UN84185 | Rsa1.0.10708.1 | 764 | 5750   | 0         | 764 | 765 | 99 +  | 1   | 764 | 4705   | 5469   |
| UN84186 | Rsa1.0.02273.1 | 858 | 140964 | 0         | 605 | 606 | 99 +  | 1   | 606 | 23069  | 23674  |
| UN84187 | Rsa1.0.05087.1 | 797 | 14885  | 1.00E-165 | 330 | 341 | 96 -  | 7   | 346 | 2360   | 2694   |
| UN84188 | #              | #   | #      | #         | #   | #   | #     | #   | #   | #      | #      |
| UN84189 | #              | #   | #      | #         | #   | #   | #     | #   | #   | #      | #      |
| UN84190 | Rsa1.0.00205.1 | 656 | 193401 | 0         | 655 | 656 | 99 +  | 1   | 656 | 168730 | 169384 |
| UN84191 | Rsa1.0.00384.1 | 153 | 89278  | 2.00E-69  | 148 | 153 | 96 -  | 1   | 153 | 24237  | 24389  |
| UN84192 | Rsa1.0.00686.1 | 282 | 68511  | 1.00E-151 | 271 | 271 | 100 - | 12  | 282 | 47308  | 47578  |
| UN84193 | Rsa1.0.14512.1 | 450 | 3316   | 0         | 436 | 450 | 96 -  | 1   | 450 | 2853   | 3301   |
| UN84194 | Rsa1.0.02505.1 | 756 | 30703  | 0         | 730 | 768 | 95 -  | 1   | 756 | 29668  | 30420  |
| UN84195 | #              | #   | #      | #         | #   | #   | #     | #   | #   | #      | #      |
| UN84196 | Rsa1.0.00128.1 | 657 | 228675 | 0         | 359 | 359 | 100 + | 299 | 657 | 16085  | 16443  |
| UN84197 | Rsa1.0.02340.1 | 700 | 32388  | 0         | 454 | 466 | 97 -  | 62  | 527 | 14485  | 14950  |
| UN84198 | Rsa1.0.01511.1 | 681 | 44235  | 0         | 662 | 663 | 99 -  | 20  | 681 | 20104  | 20766  |
| UN84199 | Rsa1.0.01409.1 | 702 | 151595 | 0         | 701 | 701 | 100 + | 2   | 702 | 136644 | 137344 |

|         |                |     |        |           |     |     |       |     |     |        |        |
|---------|----------------|-----|--------|-----------|-----|-----|-------|-----|-----|--------|--------|
| UN84200 | Rsa1.0.01410.1 | 680 | 46345  | 1.00E-168 | 300 | 300 | 100 + | 1   | 300 | 7183   | 7482   |
| UN84201 | Rsa1.0.00006.1 | 749 | 396176 | 0         | 732 | 761 | 96 -  | 1   | 749 | 192981 | 193741 |
| UN84202 | Rsa1.0.02939.1 | 671 | 26595  | 0         | 627 | 627 | 100 + | 1   | 627 | 19927  | 20553  |
| UN84203 | Rsa1.0.01134.1 | 733 | 52829  | 0         | 588 | 601 | 97 -  | 10  | 610 | 20719  | 21319  |
| UN84204 | Rsa1.0.00037.1 | 618 | 307838 | 1.00E-100 | 185 | 185 | 100 - | 8   | 192 | 307235 | 307419 |
| UN84205 | Rsa1.0.02655.1 | 209 | 29027  | 5.00E-52  | 129 | 136 | 94 +  | 1   | 135 | 16873  | 17008  |
| UN84206 | Rsa1.0.00497.1 | 723 | 79830  | 0         | 633 | 634 | 99 +  | 90  | 723 | 72725  | 73358  |
| UN84207 | Rsa1.0.00100.1 | 676 | 249232 | 0         | 676 | 677 | 99 +  | 1   | 676 | 30588  | 31264  |
| UN84208 | Rsa1.0.03753.1 | 850 | 21010  | 0         | 479 | 479 | 100 + | 276 | 754 | 15055  | 15533  |
| UN84209 | Rsa1.0.00493.1 | 854 | 80007  | 0         | 449 | 449 | 100 - | 8   | 456 | 17635  | 18083  |
| UN84210 | Rsa1.0.00518.1 | 816 | 78360  | 0         | 528 | 554 | 95 -  | 2   | 549 | 14875  | 15422  |
| UN84211 | Rsa1.0.00279.1 | 466 | 100039 | 1.00E-153 | 293 | 299 | 97 -  | 1   | 299 | 44227  | 44525  |
| UN84212 | Rsa1.0.00690.1 | 566 | 140527 | 1.00E-134 | 305 | 319 | 95 +  | 5   | 320 | 34111  | 34427  |
| UN84213 | Rsa1.0.04298.1 | 586 | 147466 | 1.00E-156 | 298 | 304 | 98 +  | 1   | 304 | 138315 | 138618 |
| UN84214 | Rsa1.0.03288.1 | 663 | 24016  | 1.00E-113 | 213 | 215 | 99 -  | 233 | 447 | 15408  | 15622  |
| UN84215 | Rsa1.0.02004.1 | 808 | 169138 | 0         | 644 | 645 | 99 -  | 1   | 644 | 154394 | 155038 |
| UN84216 | Rsa1.0.00221.1 | 833 | 106972 | 0         | 833 | 833 | 100 + | 1   | 833 | 26671  | 27503  |
| UN84217 | #              | #   | #      | #         | #   | #   | #     | #   | #   | #      | #      |
| UN84218 | #              | #   | #      | #         | #   | #   | #     | #   | #   | #      | #      |
| UN84219 | #              | #   | #      | #         | #   | #   | #     | #   | #   | #      | #      |
| UN84220 | Rsa1.0.00071.1 | 849 | 345714 | 0         | 599 | 602 | 99 +  | 248 | 849 | 147966 | 148567 |
| UN84221 | Rsa1.0.00596.1 | 841 | 73578  | 0         | 840 | 841 | 99 +  | 1   | 841 | 64081  | 64921  |
| UN84222 | Rsa1.0.00230.1 | 186 | 105389 | 9.00E-81  | 181 | 189 | 95 +  | 3   | 186 | 82520  | 82708  |
| UN84223 | Rsa1.0.00629.1 | 705 | 71381  | 0         | 704 | 705 | 99 +  | 1   | 705 | 58006  | 58709  |
| UN84224 | Rsa1.0.00723.1 | 686 | 66806  | 0         | 556 | 589 | 94 +  | 115 | 686 | 58940  | 59525  |
| UN84225 | Rsa1.0.00486.1 | 343 | 80875  | 1.00E-116 | 212 | 212 | 100 + | 132 | 343 | 47580  | 47791  |
| UN84226 | Rsa1.0.01740.1 | 571 | 39986  | 0         | 381 | 381 | 100 + | 17  | 397 | 29287  | 29667  |
| UN84227 | Rsa1.0.02985.1 | 721 | 26256  | 0         | 720 | 721 | 99 +  | 1   | 721 | 5822   | 6541   |
| UN84228 | Rsa1.0.55247.1 | 753 | 414    | 0         | 364 | 364 | 100 + | 193 | 556 | 51     | 414    |
| UN84229 | Rsa1.0.10522.1 | 728 | 5816   | 0         | 398 | 398 | 100 + | 16  | 413 | 4436   | 4833   |
| UN84230 | Rsa1.0.00097.1 | 645 | 138858 | 0         | 557 | 559 | 99 +  | 1   | 558 | 71352  | 71910  |
| UN84231 | Rsa1.0.02434.1 | 778 | 31464  | 0         | 681 | 681 | 100 + | 5   | 685 | 21168  | 21848  |
| UN84232 | Rsa1.0.02215.1 | 598 | 33822  | 0         | 384 | 387 | 99 -  | 200 | 586 | 18220  | 18606  |
| UN84233 | Rsa1.0.04097.1 | 670 | 19090  | 3.00E-87  | 167 | 168 | 99 -  | 269 | 436 | 17493  | 17660  |
| UN84234 | Rsa1.0.02069.1 | 624 | 35425  | 1.00E-119 | 217 | 217 | 100 - | 261 | 477 | 8883   | 9099   |
| UN84235 | Rsa1.0.00298.1 | 732 | 349131 | 0         | 502 | 531 | 94 +  | 1   | 530 | 7515   | 8041   |
| UN84236 | Rsa1.0.02663.1 | 759 | 169243 | 0         | 729 | 771 | 94 -  | 1   | 759 | 142612 | 143376 |
| UN84237 | Rsa1.0.00115.1 | 692 | 131321 | 1.00E-134 | 250 | 251 | 99 +  | 343 | 592 | 67468  | 67718  |
| UN84238 | Rsa1.0.03018.1 | 487 | 25991  | 0         | 358 | 368 | 97 -  | 1   | 367 | 3252   | 3619   |

|         |                |     |        |           |     |     |       |     |     |        |        |
|---------|----------------|-----|--------|-----------|-----|-----|-------|-----|-----|--------|--------|
| UN84239 | Rsa1.0_14624.1 | 420 | 3217   | 0         | 380 | 389 | 97 -  | 36  | 420 | 2598   | 2986   |
| UN84240 | Rsa1.0_26044.1 | 599 | 908    | 0         | 388 | 403 | 96 -  | 1   | 399 | 1      | 403    |
| UN84241 | Rsa1.0_02085.1 | 848 | 35198  | 1.00E-127 | 238 | 239 | 99 -  | 1   | 238 | 32382  | 32620  |
| UN84242 | Rsa1.0_02462.1 | 863 | 31158  | 0         | 587 | 598 | 98 -  | 261 | 855 | 16521  | 17118  |
| UN84243 | Rsa1.0_08823.1 | 863 | 6895   | 2.00E-20  | 88  | 100 | 88 +  | 272 | 371 | 6467   | 6566   |
| UN84244 | Rsa1.0_01063.1 | 676 | 55301  | 0         | 661 | 694 | 95 +  | 1   | 676 | 1508   | 2199   |
| UN84245 | Rsa1.0_02022.1 | 421 | 35923  | 1.00E-165 | 332 | 343 | 96 +  | 69  | 411 | 14068  | 14409  |
| UN84246 | Rsa1.0_04339.1 | 827 | 17836  | 0         | 547 | 563 | 97 -  | 1   | 563 | 1      | 557    |
| UN84247 | #              | #   | #      | #         | #   | #   | #     | #   | #   | #      | #      |
| UN84248 | Rsa1.0_00043.1 | 844 | 264937 | 0         | 821 | 843 | 97 +  | 6   | 844 | 17564  | 18400  |
| UN84249 | Rsa1.0_01964.1 | 809 | 36702  | 0         | 783 | 806 | 97 -  | 4   | 809 | 836    | 1639   |
| UN84250 | #              | #   | #      | #         | #   | #   | #     | #   | #   | #      | #      |
| UN84251 | Rsa1.0_00064.1 | 518 | 240927 | 0         | 518 | 518 | 100 + | 1   | 518 | 133545 | 134062 |
| UN84252 | Rsa1.0_00123.1 | 873 | 325650 | 0         | 872 | 873 | 99 +  | 1   | 873 | 270034 | 270906 |
| UN84253 | Rsa1.0_03568.1 | 857 | 22048  | 1.00E-173 | 345 | 357 | 96 +  | 501 | 857 | 12495  | 12851  |
| UN84254 | Rsa1.0_00613.1 | 723 | 209993 | 0         | 426 | 435 | 97 -  | 291 | 723 | 46723  | 47157  |
| UN84255 | Rsa1.0_00760.1 | 494 | 65267  | 0         | 494 | 494 | 100 + | 1   | 494 | 9831   | 10324  |
| UN84256 | Rsa1.0_00135.1 | 861 | 178077 | 0         | 773 | 774 | 99 +  | 1   | 774 | 72705  | 73478  |
| UN84257 | Rsa1.0_00018.1 | 421 | 410899 | 1.00E-148 | 322 | 340 | 94 +  | 83  | 421 | 260194 | 260527 |
| UN84258 | Rsa1.0_00298.1 | 481 | 349131 | 1.00E-155 | 278 | 278 | 100 - | 204 | 481 | 32681  | 32958  |
| UN84259 | Rsa1.0_00418.1 | 786 | 215377 | 0         | 391 | 391 | 100 - | 1   | 391 | 36889  | 37279  |
| UN84260 | Rsa1.0_08539.1 | 708 | 7219   | 0         | 455 | 455 | 100 - | 203 | 657 | 1      | 455    |
| UN84261 | Rsa1.0_00034.1 | 733 | 260119 | 0         | 606 | 606 | 100 - | 16  | 621 | 136266 | 136871 |
| UN84262 | #              | #   | #      | #         | #   | #   | #     | #   | #   | #      | #      |
| UN84263 | Rsa1.0_14120.1 | 672 | 3784   | 0         | 670 | 672 | 99 -  | 1   | 672 | 154    | 824    |
| UN84264 | Rsa1.0_01709.1 | 331 | 40587  | 3.00E-88  | 165 | 165 | 100 + | 167 | 331 | 8628   | 8792   |
| UN84265 | Rsa1.0_01338.1 | 716 | 155644 | 0         | 422 | 422 | 100 - | 5   | 426 | 124034 | 124455 |
| UN84266 | Rsa1.0_04269.1 | 775 | 18181  | 0         | 765 | 766 | 99 -  | 10  | 775 | 9047   | 9812   |
| UN84267 | Rsa1.0_14775.1 | 654 | 3074   | 0         | 352 | 358 | 98 +  | 1   | 354 | 886    | 1243   |
| UN84268 | Rsa1.0_00049.1 | 693 | 167018 | 0         | 650 | 679 | 95 -  | 11  | 689 | 31480  | 32158  |
| UN84269 | Rsa1.0_07480.1 | 719 | 9281   | 0         | 506 | 507 | 99 +  | 213 | 719 | 6461   | 6966   |
| UN84270 | Rsa1.0_08162.1 | 723 | 7813   | 0         | 392 | 395 | 99 -  | 103 | 497 | 7422   | 7813   |
| UN84271 | Rsa1.0_00293.1 | 737 | 339294 | 1.00E-171 | 314 | 317 | 99 +  | 421 | 737 | 53646  | 53962  |
| UN84272 | Rsa1.0_00003.1 | 507 | 340054 | 0         | 455 | 469 | 97 -  | 13  | 479 | 163888 | 164350 |
| UN84273 | #              | #   | #      | #         | #   | #   | #     | #   | #   | #      | #      |
| UN84274 | Rsa1.0_02100.1 | 755 | 35024  | 0         | 580 | 581 | 99 +  | 1   | 581 | 4942   | 5522   |
| UN84275 | Rsa1.0_00382.1 | 693 | 251946 | 1.00E-151 | 271 | 271 | 100 + | 268 | 538 | 134046 | 134316 |
| UN84276 | Rsa1.0_01835.1 | 533 | 38542  | 0         | 522 | 535 | 97 +  | 1   | 533 | 4704   | 5236   |
| UN84277 | Rsa1.0_00197.1 | 690 | 109714 | 1.00E-175 | 345 | 356 | 96 -  | 327 | 682 | 36533  | 36888  |

|         |                |     |        |           |     |     |       |     |     |        |        |
|---------|----------------|-----|--------|-----------|-----|-----|-------|-----|-----|--------|--------|
| UN84278 | Rsa1.0.05948.1 | 751 | 12142  | 1.00E-154 | 333 | 351 | 94 -  | 249 | 599 | 1066   | 1414   |
| UN84279 | Rsa1.0.00373.1 | 688 | 90296  | 0         | 344 | 344 | 100 - | 1   | 344 | 89659  | 90002  |
| UN84280 | Rsa1.0.00363.1 | 702 | 90968  | 1.00E-160 | 287 | 287 | 100 - | 147 | 433 | 68449  | 68735  |
| UN84281 | Rsa1.0.00352.1 | 659 | 92266  | 1.00E-141 | 255 | 255 | 100 + | 1   | 255 | 63664  | 63918  |
| UN84282 | Rsa1.0.32978.1 | 315 | 689    | 1.00E-156 | 307 | 315 | 97 -  | 1   | 315 | 354    | 667    |
| UN84283 | Rsa1.0.06513.1 | 646 | 10869  | 0         | 646 | 647 | 99 -  | 1   | 646 | 9906   | 10552  |
| UN84284 | Rsa1.0.00382.1 | 664 | 251946 | 0         | 664 | 664 | 100 - | 1   | 664 | 108882 | 109545 |
| UN84285 | Rsa1.0.49461.1 | 754 | 458    | 8.00E-94  | 220 | 234 | 94 +  | 1   | 232 | 72     | 305    |
| UN84286 | Rsa1.0.01361.1 | 718 | 47226  | 0         | 569 | 569 | 100 + | 1   | 569 | 4354   | 4922   |
| UN84287 | Rsa1.0.00722.1 | 660 | 66840  | 1.00E-21  | 96  | 110 | 87 -  | 113 | 222 | 4312   | 4421   |
| UN84288 | Rsa1.0.00644.1 | 595 | 136881 | 1.00E-172 | 309 | 310 | 99 +  | 263 | 572 | 58423  | 58732  |
| UN84289 | Rsa1.0.00773.1 | 717 | 64839  | 0         | 714 | 715 | 99 -  | 4   | 717 | 27628  | 28342  |
| UN84290 | Rsa1.0.00350.1 | 684 | 92346  | 0         | 683 | 684 | 99 +  | 2   | 684 | 57682  | 58365  |
| UN84291 | Rsa1.0.05602.1 | 693 | 13210  | 0         | 339 | 339 | 100 - | 355 | 693 | 2852   | 3190   |
| UN84292 | Rsa1.0.04046.1 | 600 | 19399  | 0         | 596 | 596 | 100 + | 5   | 600 | 15964  | 16559  |
| UN84293 | #              | #   | #      | #         | #   | #   | #     | #   | #   | #      | #      |
| UN84294 | Rsa1.0.00960.1 | 715 | 58199  | 0         | 567 | 580 | 97 +  | 33  | 612 | 19393  | 19969  |
| UN84295 | Rsa1.0.01633.1 | 773 | 41868  | 0         | 755 | 772 | 97 +  | 1   | 769 | 18119  | 18890  |
| UN84296 | Rsa1.0.00520.1 | 841 | 78226  | 0         | 839 | 841 | 99 +  | 1   | 841 | 15534  | 16374  |
| UN84297 | Rsa1.0.01543.1 | 101 | 43645  | 5.00E-13  | 45  | 46  | 97 +  | 26  | 71  | 28037  | 28081  |
| UN84298 | Rsa1.0.03304.1 | 804 | 23883  | 0         | 377 | 377 | 100 + | 428 | 804 | 10759  | 11135  |
| UN84299 | Rsa1.0.02187.1 | 818 | 34113  | 0         | 526 | 526 | 100 - | 1   | 526 | 4193   | 4718   |
| UN84300 | #              | #   | #      | #         | #   | #   | #     | #   | #   | #      | #      |
| UN84301 | Rsa1.0.00030.1 | 839 | 250988 | 0         | 801 | 805 | 99 -  | 1   | 804 | 184544 | 185348 |
| UN84302 | Rsa1.0.00635.1 | 781 | 175826 | 0         | 545 | 565 | 96 +  | 5   | 569 | 115081 | 115630 |
| UN84303 | Rsa1.0.02063.1 | 750 | 35484  | 0         | 657 | 680 | 96 +  | 1   | 674 | 29750  | 30426  |
| UN84304 | Rsa1.0.00409.1 | 757 | 146788 | 1.00E-125 | 235 | 236 | 99 +  | 519 | 753 | 110864 | 111099 |
| UN84305 | Rsa1.0.00872.1 | 634 | 61495  | 0         | 409 | 411 | 99 +  | 5   | 415 | 14769  | 15179  |
| UN84306 | Rsa1.0.10399.1 | 727 | 5860   | 0         | 472 | 472 | 100 - | 86  | 557 | 1026   | 1497   |
| UN84307 | Rsa1.0.12798.1 | 680 | 5122   | 8.00E-29  | 138 | 162 | 85 -  | 499 | 660 | 220    | 381    |
| UN84308 | Rsa1.0.02888.1 | 745 | 27020  | 0         | 554 | 555 | 99 +  | 191 | 745 | 20004  | 20557  |
| UN84309 | Rsa1.0.01832.1 | 768 | 38581  | 0         | 483 | 512 | 94 -  | 2   | 512 | 4499   | 5009   |
| UN84310 | Rsa1.0.00265.1 | 816 | 220635 | 0         | 615 | 615 | 100 + | 141 | 755 | 137321 | 137935 |
| UN84311 | Rsa1.0.06222.1 | 752 | 11452  | 1.00E-153 | 310 | 322 | 96 +  | 405 | 726 | 10355  | 10676  |
| UN84312 | Rsa1.0.19438.1 | 282 | 1432   | 3.00E-66  | 147 | 152 | 96 -  | 44  | 194 | 1178   | 1329   |
| UN84313 | Rsa1.0.00036.1 | 657 | 176186 | 3.00E-59  | 126 | 129 | 97 +  | 482 | 610 | 100154 | 100282 |
| UN84314 | #              | #   | #      | #         | #   | #   | #     | #   | #   | #      | #      |
| UN84315 | Rsa1.0.53247.1 | 607 | 428    | 1.00E-150 | 270 | 270 | 100 - | 1   | 270 | 1      | 270    |
| UN84316 | Rsa1.0.01611.1 | 707 | 42269  | 0         | 702 | 730 | 96 -  | 1   | 707 | 16642  | 17369  |

|         |                |     |        |           |     |     |       |     |     |        |        |
|---------|----------------|-----|--------|-----------|-----|-----|-------|-----|-----|--------|--------|
| UN84317 | Rsa1.0.03646.1 | 661 | 21598  | 1.00E-135 | 252 | 253 | 99 -  | 1   | 252 | 9980   | 10232  |
| UN84318 | Rsa1.0.00053.1 | 820 | 263459 | 1.00E-131 | 284 | 298 | 95 +  | 1   | 297 | 32154  | 32451  |
| UN84319 | Rsa1.0.00913.1 | 717 | 59914  | 0         | 717 | 717 | 100 - | 1   | 717 | 17779  | 18495  |
| UN84320 | Rsa1.0.01155.1 | 540 | 52182  | 1.00E-135 | 262 | 268 | 97 +  | 51  | 318 | 9260   | 9527   |
| UN84321 | Rsa1.0.00114.1 | 736 | 131330 | 1.00E-175 | 311 | 311 | 100 + | 117 | 427 | 125072 | 125382 |
| UN84322 | Rsa1.0.03548.1 | 832 | 22164  | 0         | 335 | 335 | 100 - | 324 | 658 | 3942   | 4276   |
| UN84323 | Rsa1.0.00657.1 | 860 | 69858  | 1.00E-86  | 172 | 175 | 98 +  | 329 | 503 | 25936  | 26110  |
| UN84324 | Rsa1.0.00476.1 | 788 | 280966 | 0         | 788 | 789 | 99 -  | 1   | 788 | 267987 | 268775 |
| UN84325 | Rsa1.0.00829.1 | 859 | 158305 | 1.00E-145 | 261 | 261 | 100 - | 353 | 613 | 49059  | 49319  |
| UN84326 | Rsa1.0.00461.1 | 851 | 82509  | 0         | 677 | 679 | 99 +  | 1   | 679 | 54121  | 54799  |
| UN84327 | Rsa1.0.05206.1 | 865 | 138208 | 0         | 861 | 870 | 98 -  | 1   | 865 | 123814 | 124683 |
| UN84328 | Rsa1.0.14593.1 | 852 | 3236   | 1.00E-169 | 307 | 309 | 99 +  | 188 | 496 | 2695   | 3003   |
| UN84329 | Rsa1.0.00617.1 | 651 | 72199  | 0         | 598 | 614 | 97 -  | 38  | 651 | 32307  | 32920  |
| UN84330 | Rsa1.0.55822.1 | 843 | 409    | 0         | 409 | 409 | 100 + | 300 | 708 | 1      | 409    |
| UN84331 | Rsa1.0.00662.1 | 633 | 192183 | 1.00E-176 | 313 | 313 | 100 - | 321 | 633 | 7948   | 8260   |
| UN84332 | Rsa1.0.00806.1 | 838 | 63674  | 0         | 835 | 838 | 99 +  | 1   | 838 | 47174  | 48011  |
| UN84333 | Rsa1.0.00054.1 | 811 | 162053 | 0         | 356 | 356 | 100 - | 1   | 356 | 153867 | 154222 |
| UN84334 | Rsa1.0.04806.1 | 765 | 15898  | 0         | 765 | 766 | 99 +  | 1   | 765 | 6464   | 7229   |
| UN84335 | Rsa1.0.01436.1 | 839 | 45894  | 1.00E-105 | 194 | 194 | 100 + | 564 | 757 | 14569  | 14762  |
| UN84336 | Rsa1.0.13737.1 | 866 | 4403   | 0         | 419 | 421 | 99 +  | 446 | 866 | 1459   | 1879   |
| UN84337 | Rsa1.0.00932.1 | 830 | 59185  | 0         | 828 | 830 | 99 +  | 1   | 830 | 19326  | 20155  |
| UN84338 | Rsa1.0.00307.1 | 876 | 199003 | 0         | 854 | 877 | 97 -  | 1   | 876 | 57840  | 58716  |
| UN84339 | Rsa1.0.01266.1 | 862 | 49680  | 0         | 858 | 863 | 99 +  | 1   | 862 | 40489  | 41351  |
| UN84340 | Rsa1.0.00683.1 | 575 | 68638  | 0         | 445 | 457 | 97 -  | 119 | 575 | 402    | 858    |
| UN84341 | Rsa1.0.01732.1 | 847 | 40194  | 0         | 694 | 695 | 99 -  | 153 | 847 | 28093  | 28787  |
| UN84342 | Rsa1.0.00968.1 | 832 | 58020  | 1.00E-28  | 117 | 133 | 87 -  | 4   | 134 | 37407  | 37539  |
| UN84343 | Rsa1.0.00065.1 | 284 | 454616 | 1.00E-151 | 270 | 270 | 100 + | 15  | 284 | 144527 | 144796 |
| UN84344 | Rsa1.0.00011.1 | 817 | 225044 | 0         | 816 | 817 | 99 +  | 1   | 817 | 93665  | 94481  |
| UN84345 | Rsa1.0.00512.1 | 855 | 200277 | 0         | 854 | 855 | 99 -  | 1   | 855 | 33113  | 33967  |
| UN84346 | Rsa1.0.01026.1 | 791 | 171624 | 0         | 497 | 510 | 97 -  | 106 | 615 | 6001   | 6510   |
| UN84347 | Rsa1.0.15148.1 | 839 | 2797   | 1.00E-120 | 232 | 236 | 98 +  | 604 | 839 | 1196   | 1431   |
| UN84348 | Rsa1.0.00176.1 | 863 | 240984 | 0         | 854 | 856 | 99 -  | 8   | 863 | 144310 | 145164 |
| UN84349 | Rsa1.0.06503.1 | 807 | 10881  | 0         | 382 | 382 | 100 + | 426 | 807 | 1880   | 2261   |
| UN84350 | Rsa1.0.02532.1 | 298 | 30403  | 1.00E-167 | 298 | 298 | 100 + | 1   | 298 | 25871  | 26168  |
| UN84351 | Rsa1.0.02396.1 | 896 | 31783  | 0         | 423 | 423 | 100 + | 370 | 792 | 15438  | 15860  |
| UN84352 | Rsa1.0.00449.1 | 220 | 83863  | 1.00E-111 | 217 | 220 | 98 -  | 1   | 220 | 68968  | 69186  |
| UN84353 | Rsa1.0.00013.1 | 148 | 292129 | 2.00E-78  | 148 | 148 | 100 + | 1   | 148 | 225171 | 225318 |
| UN84354 | Rsa1.0.00118.1 | 849 | 130637 | 0         | 675 | 675 | 100 + | 18  | 692 | 119182 | 119856 |
| UN84355 | Rsa1.0.00204.1 | 873 | 109056 | 0         | 872 | 874 | 99 -  | 1   | 873 | 30864  | 31737  |

|         |                |     |        |           |     |     |       |     |     |        |        |
|---------|----------------|-----|--------|-----------|-----|-----|-------|-----|-----|--------|--------|
| UN84356 | Rsa1.0_03938.1 | 888 | 19965  | 9.00E-91  | 187 | 190 | 98 +  | 2   | 189 | 13253  | 13442  |
| UN84357 | #              | #   | #      | #         | #   | #   | #     | #   | #   | #      | #      |
| UN84358 | Rsa1.0_01173.1 | 844 | 51727  | 0         | 790 | 809 | 97 -  | 42  | 844 | 20272  | 21080  |
| UN84359 | Rsa1.0_00195.1 | 882 | 251884 | 0         | 469 | 478 | 98 +  | 166 | 639 | 82857  | 83334  |
| UN84360 | Rsa1.0_01006.1 | 870 | 163670 | 0         | 407 | 408 | 99 +  | 433 | 840 | 119248 | 119655 |
| UN84361 | Rsa1.0_07559.1 | 743 | 9131   | 0         | 727 | 743 | 97 +  | 2   | 743 | 8315   | 9056   |
| UN84362 | Rsa1.0_01768.1 | 729 | 138463 | 0         | 683 | 724 | 94 +  | 1   | 717 | 118808 | 119516 |
| UN84363 | Rsa1.0_00263.1 | 118 | 224968 | 1.00E-60  | 118 | 118 | 100 + | 1   | 118 | 151748 | 151865 |
| UN84364 | Rsa1.0_00616.1 | 836 | 195713 | 1.00E-176 | 314 | 314 | 100 - | 1   | 314 | 171710 | 172023 |
| UN84365 | Rsa1.0_03517.1 | 545 | 22337  | 0         | 350 | 351 | 99 -  | 195 | 545 | 8956   | 9306   |
| UN84366 | Rsa1.0_00142.1 | 880 | 121474 | 1.00E-177 | 315 | 315 | 100 - | 1   | 315 | 110235 | 110549 |
| UN84367 | Rsa1.0_00001.1 | 867 | 363028 | 1.00E-170 | 303 | 303 | 100 + | 7   | 309 | 131715 | 132017 |
| UN84368 | Rsa1.0_00244.1 | 827 | 103590 | 0         | 444 | 444 | 100 - | 384 | 827 | 71545  | 71988  |
| UN84369 | Rsa1.0_00990.1 | 867 | 57445  | 1.00E-111 | 204 | 204 | 100 - | 198 | 401 | 28401  | 28604  |
| UN84370 | Rsa1.0_02609.1 | 818 | 29600  | 0         | 818 | 818 | 100 - | 1   | 818 | 4216   | 5033   |
| UN84371 | Rsa1.0_00064.1 | 810 | 240927 | 1.00E-159 | 284 | 284 | 100 - | 232 | 515 | 87257  | 87540  |
| UN84372 | #              | #   | #      | #         | #   | #   | #     | #   | #   | #      | #      |
| UN84373 | Rsa1.0_41531.1 | 846 | 541    | 0         | 526 | 541 | 97 +  | 20  | 557 | 1      | 541    |
| UN84374 | Rsa1.0_04103.1 | 865 | 19048  | 0         | 685 | 686 | 99 +  | 180 | 865 | 13473  | 14158  |
| UN84375 | Rsa1.0_04286.1 | 831 | 18084  | 0         | 597 | 597 | 100 - | 235 | 831 | 8042   | 8638   |
| UN84376 | Rsa1.0_11035.1 | 820 | 5639   | 3.00E-87  | 171 | 172 | 99 -  | 2   | 172 | 585    | 756    |
| UN84377 | Rsa1.0_00777.1 | 887 | 191865 | 0         | 442 | 458 | 96 -  | 1   | 456 | 131066 | 131519 |
| UN84378 | Rsa1.0_02387.1 | 804 | 31890  | 0         | 487 | 493 | 98 +  | 8   | 499 | 25626  | 26118  |
| UN84379 | Rsa1.0_00377.1 | 735 | 90038  | 0         | 424 | 437 | 97 +  | 1   | 436 | 70447  | 70877  |
| UN84380 | Rsa1.0_00006.1 | 864 | 396176 | 0         | 864 | 865 | 99 +  | 1   | 864 | 82404  | 83268  |
| UN84381 | Rsa1.0_00694.1 | 930 | 68074  | 1.00E-168 | 300 | 300 | 100 + | 409 | 708 | 26247  | 26546  |
| UN84382 | Rsa1.0_15452.1 | 878 | 2597   | 0         | 876 | 877 | 99 +  | 2   | 878 | 1567   | 2443   |
| UN84383 | Rsa1.0_00087.1 | 846 | 761073 | 0         | 757 | 780 | 97 -  | 67  | 846 | 184615 | 185388 |
| UN84384 | Rsa1.0_01088.1 | 867 | 54416  | 0         | 867 | 867 | 100 + | 1   | 867 | 12718  | 13584  |
| UN84385 | Rsa1.0_00153.1 | 850 | 192931 | 0         | 850 | 850 | 100 + | 1   | 850 | 4422   | 5271   |
| UN84386 | Rsa1.0_00016.1 | 835 | 831256 | 1.00E-177 | 315 | 315 | 100 + | 199 | 513 | 405716 | 406030 |
| UN84387 | Rsa1.0_00233.1 | 854 | 104918 | 1.00E-139 | 252 | 252 | 100 - | 366 | 617 | 34256  | 34507  |
| UN84388 | Rsa1.0_00411.1 | 857 | 86944  | 0         | 855 | 858 | 99 +  | 1   | 857 | 41591  | 42446  |
| UN84389 | Rsa1.0_00433.1 | 829 | 85381  | 0         | 414 | 420 | 98 -  | 408 | 827 | 11412  | 11831  |
| UN84390 | Rsa1.0_01739.1 | 852 | 40068  | 0         | 843 | 854 | 98 -  | 1   | 852 | 14739  | 15589  |
| UN84391 | Rsa1.0_03244.1 | 820 | 24413  | 0         | 820 | 820 | 100 + | 1   | 820 | 4704   | 5523   |
| UN84392 | Rsa1.0_00927.1 | 261 | 59312  | 7.00E-61  | 119 | 119 | 100 - | 143 | 261 | 42076  | 42194  |
| UN84393 | Rsa1.0_01049.1 | 884 | 55655  | 0         | 774 | 781 | 99 +  | 73  | 853 | 31804  | 32584  |
| UN84394 | Rsa1.0_03957.1 | 845 | 19868  | 0         | 503 | 504 | 99 -  | 1   | 503 | 6107   | 6610   |

|         |                |     |        |           |     |     |       |     |     |        |        |
|---------|----------------|-----|--------|-----------|-----|-----|-------|-----|-----|--------|--------|
| UN84395 | Rsa1.0.01136.1 | 851 | 52724  | 0         | 850 | 852 | 99 +  | 1   | 851 | 47148  | 47999  |
| UN84396 | Rsa1.0.07052.1 | 876 | 9979   | 0         | 543 | 543 | 100 - | 71  | 613 | 8399   | 8941   |
| UN84397 | Rsa1.0.01494.1 | 806 | 44641  | 0         | 454 | 454 | 100 - | 353 | 806 | 24030  | 24483  |
| UN84398 | Rsa1.0.28849.1 | 737 | 801    | 0         | 737 | 737 | 100 - | 1   | 737 | 49     | 785    |
| UN84399 | #              | #   | #      | #         | #   | #   | #     | #   | #   | #      | #      |
| UN84400 | Rsa1.0.01059.1 | 774 | 55410  | 1.00E-113 | 214 | 216 | 99 +  | 66  | 281 | 3758   | 3973   |
| UN84401 | Rsa1.0.00395.1 | 722 | 214466 | 0         | 430 | 430 | 100 + | 1   | 430 | 76843  | 77272  |
| UN84402 | Rsa1.0.00032.1 | 822 | 306326 | 1.00E-163 | 403 | 439 | 91 -  | 1   | 435 | 275398 | 275823 |
| UN84403 | Rsa1.0.09339.1 | 563 | 6444   | 0         | 542 | 564 | 96 -  | 1   | 563 | 5734   | 6282   |
| UN84404 | Rsa1.0.00067.1 | 807 | 415055 | 0         | 368 | 380 | 96 +  | 1   | 379 | 375948 | 376327 |
| UN84405 | Rsa1.0.00100.1 | 817 | 249232 | 1.00E-113 | 223 | 228 | 97 +  | 8   | 235 | 125730 | 125957 |
| UN84406 | Rsa1.0.23822.1 | 374 | 1023   | 0         | 373 | 374 | 99 +  | 1   | 374 | 642    | 1015   |
| UN84407 | Rsa1.0.43392.1 | 790 | 518    | 0         | 434 | 434 | 100 + | 357 | 790 | 1      | 434    |
| UN84408 | Rsa1.0.00945.1 | 773 | 58714  | 0         | 502 | 502 | 100 + | 272 | 773 | 22734  | 23235  |
| UN84409 | Rsa1.0.02601.1 | 779 | 29654  | 1.00E-119 | 275 | 294 | 93 -  | 159 | 452 | 3968   | 4261   |
| UN84410 | Rsa1.0.00139.1 | 805 | 357786 | 0         | 799 | 805 | 99 -  | 1   | 805 | 16144  | 16945  |
| UN84411 | Rsa1.0.21645.1 | 816 | 1184   | 1.00E-131 | 240 | 241 | 99 -  | 576 | 816 | 154    | 394    |
| UN84412 | Rsa1.0.00934.1 | 782 | 193516 | 1.00E-124 | 284 | 301 | 94 -  | 63  | 363 | 189529 | 189827 |
| UN84413 | Rsa1.0.07073.1 | 793 | 9944   | 1.00E-120 | 263 | 278 | 94 +  | 463 | 740 | 5100   | 5370   |
| UN84414 | Rsa1.0.05267.1 | 501 | 14319  | 1.00E-119 | 217 | 217 | 100 + | 155 | 371 | 11583  | 11799  |
| UN84415 | Rsa1.0.00646.1 | 814 | 70473  | 0         | 800 | 814 | 98 -  | 1   | 814 | 50188  | 50999  |
| UN84416 | Rsa1.0.01223.1 | 698 | 50392  | 0         | 500 | 516 | 96 +  | 185 | 698 | 4837   | 5351   |
| UN84417 | Rsa1.0.00955.1 | 819 | 58358  | 0         | 775 | 775 | 100 + | 45  | 819 | 31654  | 32428  |
| UN84418 | Rsa1.0.00875.1 | 588 | 61371  | 0         | 588 | 588 | 100 - | 1   | 588 | 12706  | 13293  |
| UN84419 | Rsa1.0.00010.1 | 893 | 294827 | 0         | 872 | 893 | 97 +  | 1   | 893 | 93212  | 94084  |
| UN84420 | Rsa1.0.01297.1 | 870 | 49029  | 5.00E-18  | 81  | 92  | 88 -  | 776 | 867 | 31019  | 31110  |
| UN84421 | Rsa1.0.04048.1 | 767 | 19394  | 0         | 354 | 354 | 100 - | 140 | 493 | 3385   | 3738   |
| UN84422 | Rsa1.0.08359.1 | 846 | 7483   | 1.00E-173 | 308 | 308 | 100 + | 185 | 492 | 818    | 1125   |
| UN84423 | Rsa1.0.00123.1 | 820 | 325650 | 0         | 330 | 330 | 100 - | 247 | 576 | 313889 | 314218 |
| UN84424 | Rsa1.0.00055.1 | 399 | 520193 | 1.00E-174 | 327 | 330 | 99 -  | 66  | 393 | 72946  | 73275  |
| UN84425 | Rsa1.0.00775.1 | 796 | 64793  | 0         | 351 | 351 | 100 - | 108 | 458 | 31423  | 31773  |
| UN84426 | Rsa1.0.03384.1 | 814 | 23291  | 0         | 363 | 363 | 100 - | 13  | 375 | 15018  | 15380  |
| UN84427 | Rsa1.0.09005.1 | 708 | 6716   | 0         | 586 | 603 | 97 +  | 106 | 708 | 4801   | 5403   |
| UN84428 | #              | #   | #      | #         | #   | #   | #     | #   | #   | #      | #      |
| UN84429 | Rsa1.0.00116.1 | 856 | 365886 | 1.00E-151 | 359 | 383 | 93 +  | 324 | 697 | 11790  | 12172  |
| UN84430 | Rsa1.0.01845.1 | 594 | 38415  | 2.00E-57  | 114 | 114 | 100 + | 194 | 307 | 6445   | 6558   |
| UN84431 | Rsa1.0.02937.1 | 839 | 26605  | 0         | 366 | 366 | 100 - | 1   | 366 | 16373  | 16738  |
| UN84432 | Rsa1.0.02298.1 | 823 | 32872  | 0         | 635 | 639 | 99 -  | 185 | 823 | 25892  | 26530  |
| UN84433 | Rsa1.0.00025.1 | 839 | 277312 | 0         | 445 | 464 | 95 +  | 1   | 462 | 267801 | 268264 |

|         |                |     |        |           |     |     |       |     |     |        |        |
|---------|----------------|-----|--------|-----------|-----|-----|-------|-----|-----|--------|--------|
| UN84434 | Rsa1.0_00623.1 | 428 | 207630 | 1.00E-177 | 392 | 411 | 95 +  | 2   | 411 | 189250 | 189656 |
| UN84435 | Rsa1.0_01587.1 | 819 | 42789  | 1.00E-98  | 411 | 483 | 85 -  | 25  | 504 | 28525  | 29002  |
| UN84436 | Rsa1.0_03005.1 | 767 | 26082  | 0         | 583 | 588 | 99 +  | 1   | 588 | 7790   | 8373   |
| UN84437 | Rsa1.0_00163.1 | 867 | 116847 | 0         | 867 | 867 | 100 + | 1   | 867 | 7911   | 8777   |
| UN84438 | Rsa1.0_00329.1 | 647 | 222544 | 1.00E-138 | 252 | 253 | 99 +  | 16  | 268 | 166230 | 166482 |
| UN84439 | Rsa1.0_01618.1 | 832 | 42118  | 0         | 827 | 832 | 99 +  | 1   | 832 | 29981  | 30812  |
| UN84440 | Rsa1.0_02748.1 | 786 | 28242  | 0         | 786 | 786 | 100 + | 1   | 786 | 22773  | 23558  |
| UN84441 | Rsa1.0_00002.1 | 814 | 601661 | 1.00E-142 | 346 | 380 | 91 +  | 1   | 359 | 238327 | 238705 |
| UN84442 | Rsa1.0_05680.1 | 866 | 12958  | 0         | 855 | 857 | 99 +  | 10  | 866 | 8323   | 9179   |
| UN84443 | Rsa1.0_00595.1 | 280 | 341648 | 1.00E-105 | 261 | 281 | 92 -  | 1   | 280 | 193457 | 193725 |
| UN84444 | Rsa1.0_01397.1 | 821 | 183276 | 1.00E-171 | 305 | 305 | 100 - | 1   | 305 | 153041 | 153345 |
| UN84445 | Rsa1.0_00015.1 | 814 | 561803 | 0         | 772 | 819 | 94 +  | 1   | 814 | 205515 | 206328 |
| UN84446 | Rsa1.0_00008.1 | 840 | 358124 | 0         | 813 | 841 | 96 +  | 7   | 840 | 221615 | 222454 |
| UN84447 | Rsa1.0_01236.1 | 850 | 50156  | 0         | 359 | 359 | 100 - | 492 | 850 | 19466  | 19824  |
| UN84448 | Rsa1.0_40801.1 | 755 | 550    | 0         | 536 | 550 | 97 +  | 146 | 692 | 1      | 550    |
| UN84449 | Rsa1.0_00414.1 | 802 | 202190 | 0         | 334 | 335 | 99 +  | 468 | 802 | 22123  | 22457  |
| UN84450 | Rsa1.0_00047.1 | 814 | 168582 | 0         | 336 | 336 | 100 + | 479 | 814 | 1283   | 1618   |
| UN84451 | Rsa1.0_04511.1 | 696 | 17032  | 0         | 585 | 591 | 98 +  | 106 | 696 | 7941   | 8531   |
| UN84452 | Rsa1.0_01696.1 | 831 | 301850 | 5.00E-58  | 115 | 115 | 100 - | 657 | 771 | 149121 | 149235 |
| UN84453 | Rsa1.0_01006.1 | 759 | 163670 | 1.00E-140 | 267 | 271 | 98 -  | 1   | 271 | 34619  | 34887  |
| UN84454 | #              | #   | #      | #         | #   | #   | #     | #   | #   | #      | #      |
| UN84455 | Rsa1.0_07775.1 | 786 | 8594   | 0         | 537 | 538 | 99 +  | 1   | 537 | 7617   | 8154   |
| UN84456 | Rsa1.0_00018.1 | 787 | 410899 | 0         | 494 | 498 | 99 +  | 290 | 787 | 362957 | 363454 |
| UN84457 | Rsa1.0_00039.1 | 869 | 296927 | 1.00E-125 | 227 | 227 | 100 - | 34  | 260 | 78033  | 78259  |
| UN84458 | Rsa1.0_02359.1 | 797 | 32211  | 1.00E-127 | 273 | 287 | 95 -  | 254 | 540 | 23667  | 23953  |
| UN84459 | Rsa1.0_01145.1 | 667 | 149247 | 0         | 390 | 390 | 100 + | 27  | 416 | 113564 | 113953 |
| UN84460 | Rsa1.0_01307.1 | 798 | 48685  | 0         | 382 | 398 | 95 +  | 1   | 397 | 34623  | 35018  |
| UN84461 | Rsa1.0_34287.1 | 358 | 660    | 1.00E-59  | 127 | 129 | 98 +  | 36  | 164 | 1      | 128    |
| UN84462 | Rsa1.0_13356.1 | 809 | 4890   | 2.00E-14  | 87  | 102 | 85 +  | 21  | 122 | 115    | 216    |
| UN84463 | Rsa1.0_00913.1 | 828 | 59914  | 5.00E-46  | 175 | 203 | 86 -  | 383 | 576 | 1580   | 1782   |
| UN84464 | Rsa1.0_01937.1 | 810 | 37147  | 1.00E-116 | 333 | 373 | 89 +  | 238 | 610 | 1090   | 1462   |
| UN84465 | Rsa1.0_01133.1 | 799 | 52916  | 0         | 781 | 811 | 96 +  | 4   | 799 | 2441   | 3251   |
| UN84466 | Rsa1.0_03774.1 | 854 | 20932  | 0         | 853 | 854 | 99 -  | 1   | 854 | 18646  | 19499  |
| UN84467 | Rsa1.0_00250.1 | 822 | 273771 | 1.00E-176 | 313 | 313 | 100 + | 510 | 822 | 243035 | 243347 |
| UN84468 | Rsa1.0_00089.1 | 803 | 406142 | 0         | 404 | 404 | 100 + | 400 | 803 | 40782  | 41185  |
| UN84469 | Rsa1.0_08056.1 | 894 | 7992   | 0         | 844 | 893 | 94 -  | 1   | 892 | 1419   | 2305   |
| UN84470 | Rsa1.0_39164.1 | 839 | 574    | 0         | 572 | 574 | 99 +  | 169 | 742 | 1      | 574    |
| UN84471 | Rsa1.0_00038.1 | 857 | 314568 | 0         | 352 | 352 | 100 - | 139 | 490 | 195340 | 195691 |
| UN84472 | Rsa1.0_01032.1 | 861 | 56189  | 0         | 403 | 403 | 100 + | 8   | 410 | 22671  | 23073  |



|         |                |     |        |           |     |     |       |     |     |        |        |
|---------|----------------|-----|--------|-----------|-----|-----|-------|-----|-----|--------|--------|
| UN84473 | Rsa1.0_00737.1 | 868 | 66432  | 1.00E-134 | 242 | 242 | 100 - | 443 | 684 | 33899  | 34140  |
| UN84474 | Rsa1.0_13896.1 | 179 | 4134   | 7.00E-97  | 179 | 179 | 100 + | 1   | 179 | 3890   | 4068   |
| UN84475 | Rsa1.0_00211.1 | 844 | 228189 | 0         | 426 | 448 | 95 -  | 387 | 834 | 26440  | 26887  |
| UN84476 | Rsa1.0_00762.1 | 825 | 165246 | 1.00E-179 | 319 | 319 | 100 - | 1   | 319 | 7093   | 7411   |
| UN84477 | Rsa1.0_02949.1 | 276 | 26506  | 1.00E-138 | 272 | 277 | 98 +  | 1   | 276 | 11750  | 12025  |
| UN84478 | Rsa1.0_00233.1 | 851 | 104918 | 1.00E-31  | 83  | 87  | 95 -  | 589 | 675 | 1959   | 2045   |
| UN84479 | Rsa1.0_01094.1 | 812 | 167285 | 0         | 809 | 812 | 99 +  | 1   | 812 | 13884  | 14695  |
| UN84480 | Rsa1.0_01352.1 | 766 | 47443  | 1.00E-113 | 208 | 208 | 100 + | 286 | 493 | 2325   | 2532   |
| UN84481 | Rsa1.0_00413.1 | 841 | 86921  | 0         | 393 | 398 | 98 +  | 208 | 605 | 30898  | 31295  |
| UN84482 | Rsa1.0_00931.1 | 475 | 59210  | 0         | 413 | 433 | 95 -  | 50  | 475 | 40479  | 40908  |
| UN84483 | Rsa1.0_00123.1 | 826 | 325650 | 0         | 825 | 826 | 99 +  | 1   | 826 | 93820  | 94645  |
| UN84484 | Rsa1.0_03199.1 | 820 | 24640  | 0         | 607 | 609 | 99 -  | 213 | 820 | 137    | 744    |
| UN84485 | Rsa1.0_03044.1 | 809 | 25791  | 2.00E-94  | 176 | 176 | 100 + | 186 | 361 | 21155  | 21330  |
| UN84486 | Rsa1.0_02298.1 | 841 | 32872  | 1.00E-105 | 200 | 202 | 99 -  | 2   | 203 | 10158  | 10359  |
| UN84487 | Rsa1.0_02461.1 | 802 | 31166  | 0         | 538 | 538 | 100 - | 265 | 802 | 20913  | 21450  |
| UN84488 | Rsa1.0_03232.1 | 849 | 24450  | 1.00E-134 | 242 | 242 | 100 - | 1   | 242 | 9903   | 10144  |
| UN84489 | Rsa1.0_00374.1 | 851 | 165738 | 0         | 815 | 876 | 93 -  | 1   | 851 | 133545 | 134420 |
| UN84490 | Rsa1.0_00306.1 | 793 | 146760 | 0         | 461 | 463 | 99 +  | 1   | 463 | 79856  | 80316  |
| UN84491 | Rsa1.0_00211.1 | 802 | 228189 | 1.00E-136 | 324 | 349 | 92 +  | 68  | 408 | 220317 | 220656 |
| UN84492 | Rsa1.0_00662.1 | 862 | 192183 | 0         | 392 | 392 | 100 + | 471 | 862 | 182411 | 182802 |
| UN84493 | Rsa1.0_04014.1 | 818 | 19572  | 0         | 818 | 818 | 100 + | 1   | 818 | 5108   | 5925   |
| UN84494 | Rsa1.0_02383.1 | 836 | 31931  | 6.00E-33  | 76  | 77  | 98 +  | 170 | 246 | 11862  | 11938  |
| UN84495 | Rsa1.0_00190.1 | 858 | 318240 | 4.00E-74  | 142 | 142 | 100 - | 89  | 230 | 198961 | 199102 |
| UN84496 | Rsa1.0_00564.1 | 452 | 75428  | 1.00E-168 | 310 | 313 | 99 -  | 143 | 452 | 44467  | 44779  |
| UN84497 | Rsa1.0_00740.1 | 844 | 215972 | 0         | 832 | 841 | 98 -  | 1   | 840 | 24599  | 25439  |
| UN84498 | Rsa1.0_13386.1 | 748 | 4873   | 0         | 431 | 431 | 100 - | 318 | 748 | 998    | 1428   |
| UN84499 | Rsa1.0_03639.1 | 837 | 21629  | 1.00E-162 | 333 | 346 | 96 -  | 350 | 694 | 2692   | 3037   |
| UN84500 | #              | #   | #      | #         | #   | #   | #     | #   | #   | #      | #      |
| UN84501 | Rsa1.0_00043.1 | 857 | 264937 | 0         | 330 | 331 | 99 +  | 1   | 331 | 252866 | 253196 |
| UN84502 | Rsa1.0_21553.1 | 826 | 1192   | 0         | 616 | 619 | 99 +  | 208 | 826 | 350    | 968    |
| UN84503 | Rsa1.0_01231.1 | 790 | 50208  | 1.00E-145 | 269 | 270 | 99 -  | 1   | 269 | 7147   | 7416   |
| UN84504 | Rsa1.0_03782.1 | 833 | 20891  | 0         | 540 | 558 | 96 +  | 197 | 742 | 9788   | 10345  |
| UN84505 | Rsa1.0_00324.1 | 844 | 218805 | 0         | 357 | 357 | 100 + | 278 | 634 | 188607 | 188963 |
| UN84506 | Rsa1.0_01175.1 | 645 | 51674  | 1.00E-123 | 294 | 317 | 92 -  | 243 | 554 | 40408  | 40724  |
| UN84507 | Rsa1.0_01256.1 | 530 | 49770  | 0         | 500 | 530 | 94 -  | 1   | 530 | 23474  | 23987  |
| UN84508 | Rsa1.0_00095.1 | 845 | 283384 | 0         | 829 | 829 | 100 + | 1   | 829 | 11861  | 12689  |
| UN84509 | #              | #   | #      | #         | #   | #   | #     | #   | #   | #      | #      |
| UN84510 | Rsa1.0_00804.1 | 833 | 63726  | 0         | 515 | 521 | 98 +  | 1   | 515 | 13033  | 13553  |
| UN84511 | Rsa1.0_00321.1 | 820 | 95671  | 0         | 813 | 836 | 97 +  | 2   | 820 | 25027  | 25862  |

|         |                |     |        |           |     |     |       |     |     |        |        |
|---------|----------------|-----|--------|-----------|-----|-----|-------|-----|-----|--------|--------|
| UN84512 | Rsa1.0.04555.1 | 881 | 16873  | 0         | 880 | 883 | 99 -  | 1   | 881 | 15766  | 16648  |
| UN84513 | Rsa1.0.00725.1 | 832 | 66757  | 0         | 817 | 834 | 97 +  | 2   | 832 | 39707  | 40540  |
| UN84514 | Rsa1.0.09150.1 | 859 | 6608   | 1.00E-115 | 211 | 211 | 100 - | 418 | 628 | 1813   | 2023   |
| UN84515 | Rsa1.0.00037.1 | 864 | 307838 | 0         | 447 | 450 | 99 -  | 415 | 864 | 253743 | 254192 |
| UN84516 | Rsa1.0.17311.1 | 877 | 1863   | 0         | 357 | 357 | 100 - | 216 | 572 | 350    | 706    |
| UN84517 | Rsa1.0.00302.1 | 785 | 97521  | 5.00E-98  | 191 | 194 | 98 +  | 159 | 352 | 84056  | 84249  |
| UN84518 | Rsa1.0.01555.1 | 694 | 166456 | 0         | 578 | 600 | 96 +  | 99  | 694 | 14378  | 14977  |
| UN84519 | Rsa1.0.00055.1 | 833 | 520193 | 1.00E-152 | 299 | 307 | 97 +  | 1   | 304 | 55650  | 55956  |
| UN84520 | Rsa1.0.02383.1 | 830 | 31931  | 6.00E-33  | 76  | 77  | 98 +  | 172 | 248 | 11862  | 11938  |
| UN84521 | Rsa1.0.02383.1 | 399 | 31931  | 3.00E-27  | 72  | 75  | 96 +  | 76  | 150 | 11863  | 11937  |
| UN84522 | Rsa1.0.00025.1 | 908 | 277312 | 0         | 905 | 905 | 100 - | 4   | 908 | 160201 | 161105 |
| UN84523 | Rsa1.0.02985.1 | 843 | 26256  | 0         | 507 | 507 | 100 + | 1   | 507 | 5851   | 6357   |
| UN84524 | Rsa1.0.00250.1 | 811 | 273771 | 0         | 807 | 811 | 99 +  | 1   | 811 | 235423 | 236233 |
| UN84525 | Rsa1.0.02115.1 | 848 | 34858  | 1.00E-159 | 285 | 285 | 100 + | 564 | 848 | 20230  | 20514  |
| UN84526 | Rsa1.0.01744.1 | 514 | 39910  | 0         | 514 | 514 | 100 - | 1   | 514 | 16525  | 17038  |
| UN84527 | Rsa1.0.00091.1 | 864 | 139699 | 0         | 692 | 757 | 91 -  | 1   | 739 | 131231 | 131963 |
| UN84528 | Rsa1.0.00300.1 | 850 | 97747  | 0         | 726 | 726 | 100 - | 125 | 850 | 58989  | 59714  |
| UN84529 | Rsa1.0.05122.1 | 872 | 14791  | 0         | 865 | 872 | 99 +  | 1   | 872 | 505    | 1376   |
| UN84530 | Rsa1.0.02343.1 | 888 | 32374  | 1.00E-164 | 293 | 293 | 100 + | 1   | 293 | 17188  | 17480  |
| UN84531 | Rsa1.0.04279.1 | 831 | 18113  | 6.00E-98  | 194 | 198 | 97 -  | 388 | 585 | 7083   | 7280   |
| UN84532 | Rsa1.0.00041.1 | 369 | 186197 | 3.00E-88  | 179 | 181 | 98 -  | 1   | 179 | 134947 | 135127 |
| UN84533 | Rsa1.0.03568.1 | 625 | 22048  | 0         | 607 | 626 | 96 +  | 1   | 625 | 18044  | 18657  |
| UN84534 | Rsa1.0.00500.1 | 734 | 272308 | 1.00E-126 | 254 | 262 | 96 -  | 467 | 728 | 5253   | 5514   |
| UN84535 | Rsa1.0.00284.1 | 670 | 323267 | 1.00E-159 | 299 | 304 | 98 +  | 1   | 304 | 278573 | 278876 |
| UN84536 | Rsa1.0.02365.1 | 644 | 32118  | 0         | 642 | 646 | 99 -  | 1   | 644 | 30158  | 30803  |
| UN84537 | Rsa1.0.00373.1 | 585 | 90296  | 0         | 332 | 332 | 100 + | 1   | 332 | 79008  | 79339  |
| UN84538 | Rsa1.0.02937.1 | 711 | 26605  | 0         | 710 | 711 | 99 -  | 1   | 711 | 15123  | 15833  |
| UN84539 | Rsa1.0.01589.1 | 745 | 42721  | 0         | 336 | 341 | 98 +  | 255 | 595 | 33422  | 33762  |
| UN84540 | Rsa1.0.01965.1 | 688 | 36698  | 1.00E-169 | 311 | 313 | 99 +  | 1   | 312 | 26620  | 26932  |
| UN84541 | Rsa1.0.06516.1 | 765 | 10866  | 0         | 441 | 441 | 100 - | 1   | 441 | 8524   | 8964   |
| UN84542 | Rsa1.0.00585.1 | 720 | 74164  | 1.00E-149 | 267 | 267 | 100 - | 389 | 655 | 13475  | 13741  |
| UN84543 | Rsa1.0.16965.1 | 767 | 1971   | 0         | 577 | 579 | 99 +  | 189 | 767 | 338    | 916    |
| UN84544 | Rsa1.0.00741.1 | 848 | 66117  | 0         | 840 | 844 | 99 +  | 5   | 848 | 32491  | 33334  |
| UN84545 | Rsa1.0.00111.1 | 190 | 390088 | 3.00E-50  | 101 | 101 | 100 - | 90  | 190 | 210916 | 211016 |
| UN84546 | Rsa1.0.05607.1 | 776 | 13200  | 0         | 368 | 368 | 100 - | 1   | 368 | 7043   | 7410   |
| UN84547 | Rsa1.0.01497.1 | 758 | 44559  | 0         | 744 | 756 | 98 +  | 7   | 758 | 6195   | 6950   |
| UN84548 | Rsa1.0.03037.1 | 703 | 25825  | 1.00E-133 | 265 | 273 | 97 +  | 224 | 496 | 2420   | 2692   |
| UN84549 | Rsa1.0.00400.1 | 801 | 87858  | 0         | 702 | 748 | 93 -  | 15  | 748 | 20483  | 21227  |
| UN84550 | Rsa1.0.01046.1 | 807 | 152989 | 0         | 807 | 807 | 100 - | 1   | 807 | 125788 | 126594 |

|         |                |     |        |           |     |     |       |     |     |        |        |
|---------|----------------|-----|--------|-----------|-----|-----|-------|-----|-----|--------|--------|
| UN84551 | Rsa1.0.03702.1 | 800 | 21292  | 0         | 767 | 796 | 96 +  | 5   | 800 | 239    | 1034   |
| UN84552 | Rsa1.0.00903.1 | 824 | 60228  | 1.00E-152 | 291 | 297 | 97 -  | 1   | 297 | 54997  | 55293  |
| UN84553 | Rsa1.0.02283.1 | 737 | 33024  | 1.00E-117 | 237 | 242 | 97 +  | 5   | 245 | 12955  | 13195  |
| UN84554 | Rsa1.0.00089.1 | 794 | 406142 | 0         | 338 | 338 | 100 - | 1   | 338 | 101439 | 101776 |
| UN84555 | Rsa1.0.00017.1 | 858 | 752458 | 0         | 673 | 673 | 100 + | 1   | 673 | 204640 | 205312 |
| UN84556 | Rsa1.0.01985.1 | 767 | 36491  | 0         | 442 | 443 | 99 +  | 325 | 767 | 25439  | 25881  |
| UN84557 | Rsa1.0.03843.1 | 750 | 20496  | 0         | 705 | 767 | 91 +  | 1   | 749 | 2890   | 3630   |
| UN84558 | Rsa1.0.03037.1 | 818 | 25825  | 3.00E-93  | 259 | 290 | 89 +  | 531 | 802 | 9108   | 9397   |
| UN84559 | Rsa1.0.00387.1 | 767 | 495407 | 1.00E-122 | 249 | 257 | 96 +  | 511 | 767 | 396750 | 397003 |
| UN84560 | Rsa1.0.00559.1 | 822 | 190486 | 0         | 473 | 476 | 99 +  | 348 | 822 | 175712 | 176186 |
| UN84561 | Rsa1.0.00021.1 | 202 | 263655 | 1.00E-110 | 202 | 202 | 100 + | 1   | 202 | 36167  | 36368  |
| UN84562 | Rsa1.0.00039.1 | 854 | 296927 | 0         | 504 | 504 | 100 - | 351 | 854 | 165242 | 165745 |
| UN84563 | Rsa1.0.00519.1 | 572 | 197864 | 1.00E-174 | 313 | 314 | 99 -  | 109 | 422 | 67032  | 67345  |
| UN84564 | Rsa1.0.00341.1 | 622 | 249309 | 1.00E-118 | 249 | 259 | 96 +  | 1   | 259 | 109980 | 110237 |
| UN84565 | Rsa1.0.03673.1 | 811 | 21448  | 0         | 716 | 716 | 100 - | 96  | 811 | 9012   | 9727   |
| UN84566 | Rsa1.0.01263.1 | 666 | 49703  | 1.00E-152 | 396 | 440 | 90 +  | 62  | 481 | 491    | 927    |
| UN84567 | Rsa1.0.19643.1 | 591 | 1404   | 0         | 466 | 466 | 100 + | 1   | 466 | 939    | 1404   |
| UN84568 | Rsa1.0.00627.1 | 689 | 71566  | 6.00E-76  | 151 | 153 | 98 +  | 120 | 272 | 61693  | 61845  |
| UN84569 | Rsa1.0.00934.1 | 708 | 193516 | 0         | 653 | 676 | 96 +  | 1   | 675 | 152394 | 153066 |
| UN84570 | Rsa1.0.04450.1 | 681 | 17297  | 0         | 628 | 629 | 99 +  | 54  | 681 | 11966  | 12594  |
| UN84571 | Rsa1.0.00200.1 | 752 | 162016 | 0         | 751 | 752 | 99 -  | 1   | 752 | 127435 | 128186 |
| UN84572 | Rsa1.0.01569.1 | 749 | 43029  | 0         | 421 | 421 | 100 + | 6   | 426 | 22868  | 23288  |
| UN84573 | Rsa1.0.00106.1 | 807 | 133916 | 0         | 495 | 496 | 99 -  | 246 | 741 | 66508  | 67003  |
| UN84574 | Rsa1.0.00356.1 | 449 | 91521  | 1.00E-149 | 344 | 374 | 91 -  | 94  | 449 | 81083  | 81456  |
| UN84575 | Rsa1.0.03407.1 | 755 | 23154  | 0         | 745 | 746 | 99 -  | 11  | 755 | 9586   | 10331  |
| UN84576 | Rsa1.0.00234.1 | 705 | 197060 | 0         | 699 | 699 | 100 - | 7   | 705 | 14441  | 15139  |
| UN84577 | Rsa1.0.01942.1 | 737 | 37048  | 0         | 737 | 738 | 99 +  | 1   | 737 | 2226   | 2963   |
| UN84578 | Rsa1.0.00792.1 | 732 | 64163  | 0         | 596 | 616 | 96 -  | 107 | 722 | 4341   | 4956   |
| UN84579 | Rsa1.0.00082.1 | 766 | 237584 | 0         | 766 | 766 | 100 - | 1   | 766 | 73215  | 73980  |
| UN84580 | Rsa1.0.00131.1 | 740 | 432233 | 1.00E-178 | 316 | 316 | 100 + | 1   | 316 | 33939  | 34254  |
| UN84581 | Rsa1.0.01104.1 | 263 | 285480 | 2.00E-88  | 198 | 204 | 97 -  | 1   | 199 | 265323 | 265526 |
| UN84582 | Rsa1.0.01270.1 | 478 | 49574  | 2.00E-50  | 102 | 102 | 100 - | 233 | 334 | 29466  | 29567  |
| UN84583 | Rsa1.0.17517.1 | 708 | 1811   | 7.00E-91  | 170 | 170 | 100 + | 59  | 228 | 1508   | 1677   |
| UN84584 | Rsa1.0.01591.1 | 650 | 42718  | 2.00E-97  | 237 | 257 | 92 +  | 403 | 650 | 7693   | 7949   |
| UN84585 | Rsa1.0.00965.1 | 736 | 58139  | 0         | 736 | 736 | 100 + | 1   | 736 | 199    | 934    |
| UN84586 | Rsa1.0.00661.1 | 813 | 213041 | 0         | 809 | 815 | 99 -  | 1   | 813 | 48410  | 49223  |
| UN84587 | Rsa1.0.00352.1 | 522 | 92266  | 0         | 433 | 434 | 99 -  | 1   | 433 | 26300  | 26733  |
| UN84588 | Rsa1.0.00485.1 | 718 | 80937  | 0         | 508 | 530 | 95 +  | 13  | 540 | 3410   | 3937   |
| UN84589 | Rsa1.0.00049.1 | 626 | 167018 | 1.00E-147 | 307 | 320 | 95 +  | 1   | 320 | 131930 | 132243 |

|         |                |     |        |           |     |     |       |     |     |        |        |
|---------|----------------|-----|--------|-----------|-----|-----|-------|-----|-----|--------|--------|
| UN84590 | Rsa1.0.01021.1 | 722 | 56610  | 0         | 721 | 722 | 99 +  | 2   | 722 | 19287  | 20008  |
| UN84591 | Rsa1.0.00006.1 | 676 | 396176 | 2.00E-88  | 181 | 186 | 97 -  | 371 | 556 | 225571 | 225756 |
| UN84592 | Rsa1.0.04332.1 | 738 | 17869  | 0         | 738 | 738 | 100 - | 1   | 738 | 16471  | 17208  |
| UN84593 | Rsa1.0.00376.1 | 572 | 90101  | 0         | 553 | 585 | 94 +  | 1   | 572 | 13156  | 13740  |
| UN84594 | Rsa1.0.00307.1 | 685 | 199003 | 3.00E-87  | 182 | 188 | 96 +  | 371 | 558 | 47637  | 47824  |
| UN84595 | Rsa1.0.02288.1 | 704 | 32984  | 0         | 682 | 687 | 99 -  | 18  | 704 | 1606   | 2287   |
| UN84596 | Rsa1.0.00757.1 | 733 | 65559  | 0         | 726 | 726 | 100 - | 8   | 733 | 51254  | 51979  |
| UN84597 | Rsa1.0.02529.1 | 678 | 30437  | 0         | 636 | 638 | 99 +  | 1   | 637 | 20010  | 20646  |
| UN84598 | Rsa1.0.01214.1 | 600 | 50599  | 0         | 452 | 462 | 97 +  | 1   | 455 | 38536  | 38997  |
| UN84599 | Rsa1.0.02186.1 | 720 | 34150  | 0         | 601 | 609 | 98 +  | 1   | 604 | 7338   | 7945   |
| UN84600 | Rsa1.0.00413.1 | 730 | 86921  | 0         | 697 | 736 | 94 +  | 1   | 730 | 47327  | 48049  |
| UN84601 | Rsa1.0.00246.1 | 115 | 103541 | 4.00E-54  | 114 | 115 | 99 +  | 2   | 115 | 17760  | 17874  |
| UN84602 | Rsa1.0.36478.1 | 701 | 618    | 1.00E-100 | 204 | 210 | 97 -  | 442 | 651 | 209    | 418    |
| UN84603 | Rsa1.0.09317.1 | 655 | 6459   | 2.33E-156 | 311 | 326 | 95 -  | 1   | 323 | 165    | 481    |
| UN84604 | Rsa1.0.02070.1 | 715 | 158516 | 0         | 403 | 414 | 97 -  | 302 | 715 | 16626  | 17031  |
| UN84605 | Rsa1.0.01081.1 | 724 | 499226 | 0         | 456 | 461 | 98 -  | 264 | 724 | 186252 | 186712 |
| UN84606 | Rsa1.0.00425.1 | 212 | 147080 | 2.00E-20  | 72  | 75  | 96 +  | 57  | 131 | 145466 | 145537 |
| UN84607 | Rsa1.0.03437.1 | 215 | 22947  | 1.00E-113 | 213 | 214 | 99 +  | 3   | 215 | 18923  | 19136  |
| UN84608 | Rsa1.0.02726.1 | 764 | 28404  | 0         | 633 | 633 | 100 + | 11  | 643 | 14259  | 14891  |
| UN84609 | Rsa1.0.00980.1 | 649 | 57729  | 6.00E-88  | 278 | 314 | 88 +  | 334 | 645 | 38886  | 39191  |
| UN84610 | Rsa1.0.01828.1 | 689 | 38681  | 0         | 671 | 686 | 97 +  | 4   | 689 | 9664   | 10347  |
| UN84611 | Rsa1.0.02228.1 | 642 | 33688  | 0         | 370 | 371 | 99 +  | 1   | 371 | 7756   | 8126   |
| UN84612 | Rsa1.0.00001.1 | 749 | 363028 | 1.00E-155 | 292 | 294 | 99 +  | 1   | 292 | 309422 | 309715 |
| UN84613 | Rsa1.0.02728.1 | 679 | 28400  | 0         | 675 | 680 | 99 -  | 1   | 679 | 18967  | 19644  |
| UN84614 | Rsa1.0.05593.1 | 711 | 13235  | 0         | 437 | 438 | 99 +  | 2   | 438 | 5021   | 5458   |
| UN84615 | Rsa1.0.00549.1 | 650 | 76473  | 1.00E-116 | 227 | 232 | 97 +  | 419 | 650 | 37587  | 37813  |
| UN84616 | Rsa1.0.02706.1 | 568 | 28522  | 1.00E-165 | 309 | 311 | 99 +  | 260 | 568 | 12758  | 13068  |
| UN84617 | Rsa1.0.01180.1 | 599 | 51517  | 1.00E-137 | 253 | 255 | 99 +  | 218 | 472 | 43475  | 43729  |
| UN84618 | Rsa1.0.00734.1 | 724 | 66508  | 1.00E-138 | 250 | 250 | 100 - | 283 | 532 | 57134  | 57383  |
| UN84619 | Rsa1.0.00253.1 | 595 | 231292 | 1.00E-95  | 178 | 178 | 100 - | 1   | 178 | 209975 | 210152 |
| UN84620 | Rsa1.0.00859.1 | 497 | 61795  | 1.00E-23  | 147 | 177 | 83 +  | 227 | 403 | 25094  | 25270  |
| UN84621 | Rsa1.0.00591.1 | 582 | 73789  | 0         | 375 | 380 | 98 -  | 1   | 379 | 67153  | 67532  |
| UN84622 | Rsa1.0.01836.1 | 642 | 38503  | 0         | 464 | 464 | 100 + | 1   | 464 | 33120  | 33583  |
| UN84623 | Rsa1.0.00352.1 | 261 | 92266  | 1.00E-110 | 248 | 262 | 94 -  | 1   | 261 | 24879  | 25140  |
| UN84624 | Rsa1.0.00486.1 | 577 | 80875  | 0         | 370 | 370 | 100 + | 8   | 377 | 45302  | 45671  |
| UN84625 | Rsa1.0.02626.1 | 618 | 29387  | 0         | 558 | 561 | 99 +  | 58  | 618 | 21200  | 21758  |
| UN84626 | Rsa1.0.03229.1 | 555 | 24470  | 1.00E-85  | 164 | 165 | 99 +  | 234 | 398 | 10322  | 10486  |
| UN84627 | Rsa1.0.00150.1 | 506 | 154416 | 0         | 504 | 504 | 100 - | 3   | 506 | 40020  | 40523  |
| UN84628 | Rsa1.0.03100.1 | 573 | 25411  | 0         | 561 | 574 | 97 +  | 1   | 573 | 14634  | 15202  |

|         |                |     |        |           |     |     |       |     |     |        |        |
|---------|----------------|-----|--------|-----------|-----|-----|-------|-----|-----|--------|--------|
| UN84629 | Rsa1.0.03325.1 | 741 | 23720  | 1.00E-153 | 277 | 278 | 99 -  | 363 | 640 | 11839  | 12116  |
| UN84630 | Rsa1.0.04275.1 | 680 | 18136  | 1.00E-130 | 236 | 236 | 100 - | 217 | 452 | 15201  | 15436  |
| UN84631 | Rsa1.0.04220.1 | 716 | 18421  | 1.00E-178 | 392 | 419 | 93 -  | 2   | 399 | 13895  | 14313  |
| UN84632 | Rsa1.0.00777.1 | 538 | 191865 | 0         | 341 | 344 | 99 -  | 195 | 538 | 134732 | 135075 |
| UN84633 | Rsa1.0.00118.1 | 574 | 130637 | 1.00E-105 | 201 | 202 | 99 -  | 2   | 202 | 45828  | 46029  |
| UN84634 | Rsa1.0.00520.1 | 491 | 78226  | 0         | 473 | 474 | 99 -  | 1   | 473 | 21613  | 22086  |
| UN84635 | Rsa1.0.00237.1 | 633 | 235974 | 0         | 347 | 348 | 99 +  | 1   | 348 | 60506  | 60853  |
| UN84636 | Rsa1.0.00890.1 | 576 | 323870 | 0         | 519 | 559 | 92 -  | 11  | 558 | 200895 | 201448 |
| UN84637 | Rsa1.0.00040.1 | 536 | 324196 | 0         | 536 | 536 | 100 - | 1   | 536 | 216139 | 216674 |
| UN84638 | Rsa1.0.03989.1 | 575 | 19680  | 0         | 449 | 449 | 100 + | 114 | 562 | 897    | 1345   |
| UN84639 | Rsa1.0.02030.1 | 621 | 179909 | 0         | 525 | 552 | 95 -  | 74  | 621 | 19207  | 19748  |
| UN84640 | Rsa1.0.05692.1 | 555 | 12914  | 0         | 332 | 332 | 100 - | 205 | 536 | 10889  | 11220  |
| UN84641 | Rsa1.0.01276.1 | 547 | 49384  | 0         | 489 | 491 | 99 +  | 57  | 547 | 5316   | 5805   |
| UN84642 | Rsa1.0.01103.1 | 602 | 53974  | 0         | 405 | 405 | 100 + | 1   | 405 | 34305  | 34709  |
| UN84643 | Rsa1.0.00037.1 | 610 | 307838 | 1.00E-159 | 308 | 314 | 98 -  | 1   | 311 | 201310 | 201622 |
| UN84644 | Rsa1.0.00915.1 | 635 | 194446 | 0         | 381 | 381 | 100 - | 1   | 381 | 181873 | 182253 |
| UN84645 | Rsa1.0.02846.1 | 544 | 27338  | 0         | 501 | 508 | 98 -  | 1   | 507 | 22700  | 23207  |
| UN84646 | Rsa1.0.03916.1 | 550 | 20117  | 0         | 548 | 550 | 99 -  | 1   | 550 | 14435  | 14983  |
| UN84647 | Rsa1.0.14588.1 | 837 | 3238   | 0         | 448 | 448 | 100 + | 1   | 448 | 1468   | 1915   |
| UN84648 | Rsa1.0.00017.1 | 816 | 752458 | 0         | 595 | 596 | 99 +  | 1   | 596 | 464073 | 464668 |
| UN84649 | Rsa1.0.00322.1 | 856 | 212233 | 0         | 855 | 856 | 99 +  | 1   | 856 | 192710 | 193565 |
| UN84650 | Rsa1.0.03188.1 | 842 | 24722  | 0         | 530 | 530 | 100 + | 313 | 842 | 10418  | 10947  |
| UN84651 | Rsa1.0.00082.1 | 829 | 237584 | 0         | 827 | 830 | 99 +  | 1   | 829 | 28269  | 29097  |
| UN84652 | Rsa1.0.09490.1 | 555 | 6335   | 0         | 494 | 518 | 95 -  | 1   | 516 | 1      | 517    |
| UN84653 | Rsa1.0.00340.1 | 824 | 305782 | 0         | 821 | 828 | 99 -  | 1   | 824 | 120246 | 121073 |
| UN84654 | Rsa1.0.00551.1 | 587 | 76227  | 0         | 587 | 587 | 100 - | 1   | 587 | 66542  | 67128  |
| UN84655 | Rsa1.0.01537.1 | 858 | 187285 | 0         | 652 | 653 | 99 -  | 206 | 858 | 42669  | 43321  |
| UN84656 | Rsa1.0.00477.1 | 833 | 81556  | 0         | 806 | 825 | 97 +  | 1   | 825 | 19344  | 20168  |
| UN84657 | Rsa1.0.03231.1 | 836 | 24456  | 0         | 342 | 343 | 99 +  | 231 | 573 | 19934  | 20276  |
| UN84658 | Rsa1.0.01468.1 | 342 | 45146  | 0         | 342 | 343 | 99 -  | 1   | 342 | 31510  | 31852  |
| UN84659 | Rsa1.0.01792.1 | 890 | 39227  | 0         | 890 | 891 | 99 -  | 1   | 890 | 35079  | 35969  |
| UN84660 | Rsa1.0.00100.1 | 832 | 249232 | 0         | 586 | 587 | 99 +  | 1   | 586 | 19438  | 20024  |
| UN84661 | Rsa1.0.01553.1 | 615 | 43379  | 1.00E-159 | 285 | 285 | 100 - | 194 | 478 | 39596  | 39880  |
| UN84662 | Rsa1.0.03686.1 | 773 | 21387  | 0         | 763 | 763 | 100 + | 11  | 773 | 13482  | 14244  |
| UN84663 | Rsa1.0.00031.1 | 668 | 179862 | 0         | 385 | 385 | 100 + | 99  | 483 | 137430 | 137814 |
| UN84664 | Rsa1.0.01244.1 | 731 | 50061  | 0         | 731 | 731 | 100 + | 1   | 731 | 2790   | 3520   |
| UN84665 | Rsa1.0.00010.1 | 726 | 294827 | 0         | 724 | 726 | 99 -  | 1   | 726 | 103196 | 103920 |
| UN84666 | Rsa1.0.00526.1 | 628 | 169279 | 1.00E-42  | 161 | 185 | 87 -  | 440 | 624 | 145451 | 145635 |
| UN84667 | Rsa1.0.00514.1 | 817 | 78421  | 0         | 803 | 806 | 99 -  | 12  | 817 | 70903  | 71708  |

|         |                |     |        |           |     |     |       |     |     |        |        |
|---------|----------------|-----|--------|-----------|-----|-----|-------|-----|-----|--------|--------|
| UN84668 | Rsa1.0.09446.1 | 701 | 6362   | 1.00E-150 | 273 | 274 | 99 +  | 238 | 511 | 1344   | 1617   |
| UN84669 | Rsa1.0.00527.1 | 694 | 77733  | 0         | 402 | 402 | 100 - | 1   | 402 | 28102  | 28503  |
| UN84670 | Rsa1.0.00032.1 | 700 | 306326 | 1.00E-163 | 291 | 291 | 100 - | 9   | 299 | 179688 | 179978 |
| UN84671 | Rsa1.0.01189.1 | 706 | 51358  | 0         | 431 | 435 | 99 +  | 1   | 434 | 8560   | 8994   |
| UN84672 | Rsa1.0.00881.1 | 710 | 61260  | 0         | 368 | 368 | 100 + | 343 | 710 | 18614  | 18981  |
| UN84673 | Rsa1.0.06584.1 | 526 | 10719  | 0         | 388 | 389 | 99 -  | 138 | 526 | 898    | 1286   |
| UN84674 | Rsa1.0.10140.1 | 889 | 5979   | 0         | 463 | 491 | 94 +  | 401 | 889 | 498    | 988    |
| UN84675 | Rsa1.0.00186.1 | 795 | 112669 | 3.00E-81  | 163 | 166 | 98 +  | 213 | 378 | 8180   | 8345   |
| UN84676 | Rsa1.0.00062.1 | 804 | 299291 | 0         | 802 | 802 | 100 - | 3   | 804 | 142784 | 143585 |
| UN84677 | Rsa1.0.70106.1 | 794 | 327    | 1.00E-162 | 289 | 289 | 100 - | 271 | 559 | 39     | 327    |
| UN84678 | Rsa1.0.01394.1 | 794 | 46641  | 0         | 793 | 794 | 99 +  | 1   | 794 | 45205  | 45997  |
| UN84679 | Rsa1.0.01176.1 | 789 | 51638  | 1.00E-124 | 429 | 497 | 86 -  | 288 | 783 | 47693  | 48154  |
| UN84680 | Rsa1.0.00336.1 | 825 | 445051 | 1.00E-169 | 373 | 397 | 93 -  | 16  | 406 | 221235 | 221622 |
| UN84681 | Rsa1.0.14744.1 | 762 | 3111   | 1.00E-156 | 426 | 475 | 89 -  | 266 | 740 | 724    | 1198   |
| UN84682 | Rsa1.0.00023.1 | 767 | 194764 | 0         | 767 | 768 | 99 -  | 1   | 767 | 67819  | 68586  |
| UN84683 | Rsa1.0.00469.1 | 570 | 82084  | 1.00E-130 | 258 | 267 | 96 -  | 209 | 475 | 31483  | 31740  |
| UN84684 | Rsa1.0.00064.1 | 870 | 240927 | 1.00E-117 | 214 | 214 | 100 + | 8   | 221 | 227340 | 227553 |
| UN84685 | Rsa1.0.00013.1 | 799 | 292129 | 0         | 791 | 795 | 99 +  | 7   | 799 | 177087 | 177881 |
| UN84686 | Rsa1.0.00127.1 | 816 | 127446 | 1.00E-172 | 348 | 361 | 96 -  | 273 | 633 | 38680  | 39037  |
| UN84687 | Rsa1.0.06281.1 | 854 | 11317  | 0         | 622 | 627 | 99 -  | 1   | 627 | 5263   | 5889   |
| UN84688 | Rsa1.0.03437.1 | 757 | 22947  | 0         | 340 | 340 | 100 - | 1   | 340 | 19974  | 20313  |
| UN84689 | Rsa1.0.03040.1 | 765 | 25812  | 0         | 335 | 335 | 100 - | 1   | 335 | 4195   | 4529   |
| UN84690 | Rsa1.0.00736.1 | 713 | 66455  | 0         | 562 | 563 | 99 -  | 1   | 562 | 52746  | 53308  |
| UN84691 | Rsa1.0.00047.1 | 683 | 168582 | 1.00E-124 | 265 | 281 | 94 -  | 2   | 282 | 115947 | 116213 |
| UN84692 | Rsa1.0.00017.1 | 785 | 752458 | 0         | 374 | 374 | 100 + | 226 | 599 | 192051 | 192424 |
| UN84693 | Rsa1.0.01679.1 | 463 | 146876 | 1.00E-102 | 237 | 246 | 96 +  | 1   | 238 | 132833 | 133078 |
| UN84694 | Rsa1.0.00179.1 | 660 | 393324 | 0         | 660 | 661 | 99 +  | 1   | 660 | 318164 | 318824 |
| UN84695 | Rsa1.0.00944.1 | 611 | 58733  | 0         | 422 | 422 | 100 + | 190 | 611 | 45223  | 45644  |
| UN84696 | Rsa1.0.00886.1 | 781 | 167350 | 0         | 781 | 782 | 99 -  | 1   | 781 | 161105 | 161886 |
| UN84697 | Rsa1.0.02911.1 | 707 | 142461 | 0         | 415 | 417 | 99 +  | 2   | 417 | 25126  | 25542  |
| UN84698 | Rsa1.0.00078.1 | 668 | 175053 | 1.00E-164 | 358 | 381 | 93 -  | 288 | 668 | 67539  | 67910  |
| UN84699 | Rsa1.0.00111.1 | 776 | 390088 | 1.00E-119 | 529 | 632 | 83 -  | 144 | 772 | 374162 | 374793 |
| UN84700 | Rsa1.0.24202.1 | 774 | 1000   | 0         | 509 | 539 | 94 -  | 240 | 774 | 50     | 570    |
| UN84701 | Rsa1.0.03953.1 | 708 | 19889  | 0         | 666 | 696 | 95 -  | 14  | 708 | 15434  | 16127  |
| UN84702 | Rsa1.0.01545.1 | 664 | 43599  | 0         | 658 | 660 | 99 +  | 5   | 664 | 32317  | 32976  |
| UN84703 | Rsa1.0.52873.1 | 547 | 431    | 0         | 392 | 392 | 100 - | 106 | 497 | 40     | 431    |
| UN84704 | Rsa1.0.03826.1 | 757 | 20614  | 0         | 460 | 481 | 95 -  | 296 | 757 | 2992   | 3472   |
| UN84705 | Rsa1.0.00589.1 | 641 | 209965 | 0         | 631 | 631 | 100 - | 11  | 641 | 165114 | 165744 |
| UN84706 | Rsa1.0.01556.1 | 704 | 163858 | 0         | 449 | 449 | 100 - | 256 | 704 | 143109 | 143557 |

|         |                |     |        |           |     |     |       |     |     |        |        |
|---------|----------------|-----|--------|-----------|-----|-----|-------|-----|-----|--------|--------|
| UN84707 | Rsa1.0.02651.1 | 593 | 29046  | 0         | 588 | 592 | 99 -  | 2   | 593 | 12493  | 13084  |
| UN84708 | Rsa1.0.00543.1 | 689 | 76788  | 0         | 423 | 423 | 100 - | 267 | 689 | 53746  | 54168  |
| UN84709 | Rsa1.0.07913.1 | 682 | 8303   | 0         | 543 | 543 | 100 + | 2   | 544 | 903    | 1445   |
| UN84710 | Rsa1.0.01090.1 | 700 | 54385  | 0         | 512 | 512 | 100 - | 1   | 512 | 14858  | 15369  |
| UN84711 | Rsa1.0.01321.1 | 703 | 48248  | 0         | 703 | 704 | 99 -  | 1   | 703 | 5992   | 6695   |
| UN84712 | Rsa1.0.46470.1 | 600 | 486    | 0         | 477 | 486 | 98 -  | 85  | 570 | 1      | 486    |
| UN84713 | Rsa1.0.00324.1 | 333 | 218805 | 1.00E-131 | 240 | 241 | 99 -  | 93  | 333 | 217169 | 217409 |
| UN84714 | Rsa1.0.00086.1 | 707 | 439854 | 0         | 707 | 708 | 99 +  | 1   | 707 | 317764 | 318471 |
| UN84715 | #              | #   | #      | #         | #   | #   | #     | #   | #   | #      | #      |
| UN84716 | Rsa1.0.00033.1 | 694 | 515811 | 1.00E-116 | 213 | 213 | 100 + | 1   | 213 | 454529 | 454741 |
| UN84717 | Rsa1.0.00655.1 | 656 | 195840 | 0         | 502 | 505 | 99 -  | 1   | 503 | 137203 | 137707 |
| UN84718 | Rsa1.0.00273.1 | 698 | 326186 | 1.00E-139 | 251 | 251 | 100 - | 188 | 438 | 10008  | 10258  |
| UN84719 | Rsa1.0.00175.1 | 586 | 166121 | 1.00E-118 | 233 | 239 | 97 -  | 93  | 331 | 146916 | 147154 |
| UN84720 | Rsa1.0.01450.1 | 695 | 144251 | 1.00E-166 | 297 | 297 | 100 + | 169 | 465 | 26735  | 27031  |
| UN84721 | Rsa1.0.00020.1 | 631 | 283099 | 0         | 598 | 599 | 99 -  | 34  | 631 | 95733  | 96331  |
| UN84722 | Rsa1.0.06841.1 | 279 | 10286  | 1.00E-147 | 278 | 280 | 99 +  | 1   | 279 | 5648   | 5926   |
| UN84723 | Rsa1.0.01262.1 | 382 | 178815 | 0         | 375 | 378 | 99 -  | 1   | 377 | 14053  | 14430  |
| UN84724 | Rsa1.0.75532.1 | 747 | 304    | 1.00E-171 | 304 | 304 | 100 - | 135 | 438 | 1      | 304    |
| UN84725 | Rsa1.0.03612.1 | 556 | 21784  | 0         | 551 | 552 | 99 +  | 5   | 556 | 2324   | 2875   |
| UN84726 | Rsa1.0.01307.1 | 622 | 48685  | 0         | 390 | 392 | 99 +  | 1   | 391 | 26105  | 26496  |
| UN84727 | Rsa1.0.02653.1 | 687 | 29030  | 0         | 432 | 462 | 93 +  | 77  | 535 | 16754  | 17209  |
| UN84728 | Rsa1.0.04146.1 | 183 | 18833  | 3.00E-99  | 183 | 183 | 100 + | 1   | 183 | 2666   | 2848   |
| UN84729 | Rsa1.0.00856.1 | 533 | 62037  | 0         | 427 | 427 | 100 - | 107 | 533 | 29397  | 29823  |
| UN84730 | Rsa1.0.02331.1 | 704 | 32449  | 0         | 704 | 704 | 100 + | 1   | 704 | 12480  | 13183  |
| UN84731 | Rsa1.0.00948.1 | 662 | 58620  | 0         | 357 | 360 | 99 +  | 1   | 357 | 39721  | 40080  |
| UN84732 | Rsa1.0.01206.1 | 646 | 50772  | 0         | 507 | 514 | 98 -  | 9   | 521 | 5344   | 5857   |
| UN84733 | Rsa1.0.00316.1 | 562 | 96264  | 1.00E-144 | 278 | 282 | 98 -  | 161 | 439 | 58304  | 58585  |
| UN84734 | Rsa1.0.11159.1 | 629 | 5600   | 0         | 623 | 630 | 98 +  | 1   | 628 | 145    | 773    |
| UN84735 | Rsa1.0.00033.1 | 598 | 515811 | 0         | 520 | 521 | 99 +  | 7   | 526 | 454523 | 455043 |
| UN84736 | Rsa1.0.00525.1 | 654 | 78030  | 1.00E-176 | 320 | 321 | 99 -  | 1   | 320 | 11722  | 12042  |
| UN84737 | Rsa1.0.00076.1 | 531 | 146021 | 1.00E-171 | 304 | 304 | 100 - | 1   | 304 | 48673  | 48976  |
| UN84738 | Rsa1.0.40679.1 | 540 | 552    | 1.00E-160 | 314 | 322 | 97 +  | 4   | 324 | 4      | 325    |
| UN84739 | Rsa1.0.03140.1 | 342 | 25081  | 3.00E-51  | 103 | 103 | 100 + | 1   | 103 | 3851   | 3953   |
| UN84740 | Rsa1.0.00854.1 | 552 | 62100  | 0         | 444 | 448 | 99 -  | 1   | 448 | 11665  | 12109  |
| UN84741 | Rsa1.0.01026.1 | 593 | 171624 | 1.00E-174 | 317 | 318 | 99 -  | 1   | 317 | 144081 | 144398 |
| UN84742 | Rsa1.0.00337.1 | 698 | 143174 | 1.00E-12  | 123 | 151 | 81 +  | 208 | 358 | 4355   | 4505   |
| UN84743 | Rsa1.0.01806.1 | 589 | 39021  | 1.00E-176 | 533 | 599 | 88 -  | 1   | 586 | 32297  | 32870  |
| UN84744 | Rsa1.0.00583.1 | 604 | 74309  | 0         | 579 | 600 | 96 +  | 1   | 598 | 58583  | 59179  |
| UN84745 | Rsa1.0.00123.1 | 445 | 325650 | 0         | 369 | 369 | 100 + | 77  | 445 | 252673 | 253041 |

|         |                |     |        |           |     |     |       |     |     |        |        |
|---------|----------------|-----|--------|-----------|-----|-----|-------|-----|-----|--------|--------|
| UN84746 | Rsa1.0.00033.1 | 466 | 515811 | 0         | 460 | 466 | 98 +  | 1   | 466 | 474676 | 475135 |
| UN84747 | Rsa1.0.53609.1 | 531 | 425    | 2.00E-96  | 186 | 187 | 99 +  | 323 | 508 | 1      | 187    |
| UN84748 | Rsa1.0.00415.1 | 587 | 86795  | 1.00E-113 | 207 | 207 | 100 + | 219 | 425 | 49105  | 49311  |
| UN84749 | Rsa1.0.06344.1 | 502 | 11205  | 0         | 445 | 445 | 100 + | 1   | 445 | 10754  | 11198  |
| UN84750 | Rsa1.0_11073.1 | 701 | 5625   | 0         | 571 | 581 | 98 -  | 119 | 699 | 5045   | 5625   |
| UN84751 | #              | #   | #      | #         | #   | #   | #     | #   | #   | #      | #      |
| UN84752 | Rsa1.0.04033.1 | 546 | 19481  | 0         | 366 | 375 | 97 +  | 1   | 372 | 14600  | 14974  |
| UN84753 | Rsa1.0.01317.1 | 516 | 48287  | 0         | 500 | 517 | 96 +  | 1   | 516 | 34169  | 34675  |
| UN84754 | Rsa1.0.01544.1 | 170 | 185602 | 8.00E-75  | 164 | 170 | 96 -  | 1   | 170 | 9663   | 9831   |
| UN84755 | Rsa1.0.04566.1 | 656 | 16828  | 0         | 370 | 374 | 98 -  | 1   | 374 | 10062  | 10435  |
| UN84756 | Rsa1.0.00663.1 | 651 | 164969 | 0         | 642 | 653 | 98 -  | 1   | 651 | 131769 | 132412 |
| UN84757 | Rsa1.0_13838.1 | 579 | 4236   | 4.00E-95  | 177 | 177 | 100 + | 115 | 291 | 2303   | 2479   |
| UN84758 | Rsa1.0.16469.1 | 613 | 2144   | 1.00E-160 | 359 | 385 | 93 -  | 2   | 361 | 1238   | 1622   |
| UN84759 | Rsa1.0.18524.1 | 108 | 1582   | 5.00E-50  | 100 | 100 | 100 - | 9   | 108 | 384    | 483    |
| UN84760 | Rsa1.0.01436.1 | 657 | 45894  | 1.00E-177 | 338 | 342 | 98 -  | 1   | 339 | 16901  | 17241  |
| UN84761 | Rsa1.0.00159.1 | 517 | 431686 | 1.00E-134 | 243 | 243 | 100 - | 199 | 441 | 349496 | 349738 |
| UN84762 | Rsa1.0.00473.1 | 481 | 212204 | 1.00E-111 | 204 | 204 | 100 - | 1   | 204 | 73604  | 73807  |
| UN84763 | Rsa1.0_11525.1 | 644 | 5479   | 0         | 532 | 536 | 99 +  | 97  | 631 | 4285   | 4820   |
| UN84764 | Rsa1.0.05517.1 | 704 | 13460  | 0         | 667 | 668 | 99 +  | 1   | 667 | 5249   | 5916   |
| UN84765 | Rsa1.0.00087.1 | 640 | 761073 | 6.00E-91  | 202 | 211 | 95 +  | 1   | 210 | 186489 | 186695 |
| UN84766 | Rsa1.0.00892.1 | 543 | 60703  | 0         | 538 | 540 | 99 +  | 1   | 538 | 25319  | 25858  |
| UN84767 | Rsa1.0.48980.1 | 692 | 463    | 1.00E-160 | 336 | 347 | 96 -  | 1   | 339 | 43     | 389    |
| UN84768 | Rsa1.0.00293.1 | 668 | 339294 | 0         | 668 | 669 | 99 +  | 1   | 668 | 195725 | 196393 |
| UN84769 | Rsa1.0.00149.1 | 619 | 305196 | 0         | 380 | 381 | 99 -  | 170 | 549 | 137551 | 137931 |
| UN84770 | Rsa1.0.00516.1 | 682 | 78417  | 0         | 410 | 421 | 97 -  | 1   | 421 | 37183  | 37601  |
| UN84771 | Rsa1.0.00175.1 | 567 | 166121 | 0         | 478 | 485 | 98 -  | 84  | 567 | 141609 | 142090 |
| UN84772 | Rsa1.0.00839.1 | 782 | 62533  | 0         | 780 | 782 | 99 -  | 1   | 782 | 29878  | 30659  |
| UN84773 | Rsa1.0.00105.1 | 639 | 134138 | 0         | 590 | 609 | 96 +  | 31  | 639 | 80589  | 81197  |
| UN84774 | Rsa1.0.21539.1 | 572 | 1194   | 1.00E-123 | 272 | 284 | 95 -  | 272 | 552 | 435    | 718    |
| UN84775 | Rsa1.0.01649.1 | 504 | 41624  | 1.00E-176 | 312 | 312 | 100 + | 193 | 504 | 39800  | 40111  |
| UN84776 | Rsa1.0.08564.1 | 628 | 7193   | 0         | 330 | 330 | 100 + | 1   | 330 | 1696   | 2025   |
| UN84777 | Rsa1.0.01437.1 | 604 | 45887  | 4.00E-24  | 85  | 94  | 90 +  | 168 | 261 | 13084  | 13177  |
| UN84778 | Rsa1.0.00215.1 | 628 | 201775 | 0         | 391 | 397 | 98 +  | 24  | 420 | 77091  | 77487  |
| UN84779 | Rsa1.0.00087.1 | 610 | 761073 | 1.00E-161 | 344 | 359 | 95 +  | 252 | 610 | 594412 | 594761 |
| UN84780 | Rsa1.0.08927.1 | 811 | 6782   | 1.00E-168 | 354 | 371 | 95 -  | 6   | 375 | 87     | 457    |
| UN84781 | Rsa1.0.00031.1 | 365 | 179862 | 1.00E-120 | 222 | 223 | 99 -  | 1   | 223 | 107274 | 107496 |
| UN84782 | Rsa1.0.00962.1 | 827 | 184909 | 0         | 364 | 365 | 99 +  | 289 | 653 | 23843  | 24207  |
| UN84783 | Rsa1.0.04574.1 | 854 | 16786  | 1.00E-136 | 358 | 396 | 90 +  | 467 | 853 | 5374   | 5766   |
| UN84784 | Rsa1.0.03070.1 | 871 | 25578  | 0         | 813 | 867 | 93 -  | 3   | 868 | 18810  | 19676  |



|         |                |     |        |           |     |     |       |     |     |        |        |
|---------|----------------|-----|--------|-----------|-----|-----|-------|-----|-----|--------|--------|
| UN84785 | Rsa1.0.00143.1 | 836 | 121313 | 0         | 329 | 329 | 100 - | 288 | 616 | 42967  | 43295  |
| UN84786 | Rsa1.0.02319.1 | 737 | 32580  | 1.00E-102 | 189 | 189 | 100 - | 309 | 497 | 28970  | 29158  |
| UN84787 | Rsa1.0.00848.1 | 852 | 152362 | 0         | 564 | 565 | 99 +  | 96  | 660 | 11280  | 11844  |
| UN84788 | Rsa1.0.00126.1 | 814 | 127534 | 0         | 388 | 406 | 95 +  | 363 | 757 | 242    | 646    |
| UN84789 | Rsa1.0.00069.1 | 778 | 403561 | 0         | 778 | 779 | 99 +  | 1   | 778 | 17193  | 17971  |
| UN84790 | Rsa1.0.09446.1 | 823 | 6362   | 1.00E-120 | 226 | 228 | 99 +  | 518 | 745 | 2014   | 2241   |
| UN84791 | #              | #   | #      | #         | #   | #   | #     | #   | #   | #      | #      |
| UN84792 | Rsa1.0.01028.1 | 828 | 56401  | 0         | 828 | 828 | 100 + | 1   | 828 | 46344  | 47171  |
| UN84793 | Rsa1.0.00142.1 | 861 | 121474 | 0         | 374 | 374 | 100 - | 488 | 861 | 104359 | 104732 |
| UN84794 | Rsa1.0.00518.1 | 825 | 78360  | 0         | 398 | 398 | 100 + | 54  | 451 | 74548  | 74945  |
| UN84795 | Rsa1.0.00146.1 | 831 | 149343 | 0         | 747 | 751 | 99 -  | 1   | 747 | 34334  | 35084  |
| UN84796 | Rsa1.0.01043.1 | 829 | 55893  | 0         | 441 | 442 | 99 +  | 3   | 443 | 52328  | 52769  |
| UN84797 | #              | #   | #      | #         | #   | #   | #     | #   | #   | #      | #      |
| UN84798 | Rsa1.0.02748.1 | 743 | 28242  | 0         | 736 | 736 | 100 - | 8   | 743 | 3559   | 4294   |
| UN84799 | Rsa1.0.07598.1 | 857 | 9054   | 0         | 369 | 369 | 100 + | 3   | 371 | 403    | 771    |
| UN84800 | Rsa1.0.00204.1 | 615 | 109056 | 1.00E-178 | 324 | 325 | 99 +  | 292 | 615 | 46701  | 47025  |
| UN84801 | Rsa1.0.00905.1 | 855 | 60110  | 0         | 590 | 614 | 96 -  | 1   | 611 | 9254   | 9867   |
| UN84802 | Rsa1.0.03775.1 | 918 | 20927  | 5.00E-86  | 168 | 170 | 98 -  | 81  | 250 | 14651  | 14820  |
| UN84803 | Rsa1.0.01632.1 | 837 | 181224 | 0         | 467 | 469 | 99 -  | 369 | 837 | 2607   | 3075   |
| UN84804 | #              | #   | #      | #         | #   | #   | #     | #   | #   | #      | #      |
| UN84805 | Rsa1.0.00565.1 | 835 | 75420  | 0         | 330 | 330 | 100 - | 159 | 488 | 18348  | 18677  |
| UN84806 | Rsa1.0.14283.1 | 722 | 3580   | 0         | 673 | 674 | 99 -  | 1   | 673 | 139    | 812    |
| UN84807 | Rsa1.0.00516.1 | 835 | 78417  | 0         | 600 | 604 | 99 +  | 1   | 604 | 17793  | 18396  |
| UN84808 | Rsa1.0.00601.1 | 660 | 177045 | 3.00E-68  | 132 | 132 | 100 - | 529 | 660 | 142317 | 142448 |
| UN84809 | Rsa1.0.00077.1 | 880 | 145005 | 0         | 865 | 880 | 98 +  | 1   | 880 | 133789 | 134665 |
| UN84810 | Rsa1.0.02881.1 | 896 | 27041  | 1.00E-156 | 279 | 279 | 100 - | 1   | 279 | 11026  | 11304  |
| UN84811 | Rsa1.0.06385.1 | 809 | 11115  | 0         | 787 | 818 | 96 +  | 2   | 809 | 1297   | 2114   |
| UN84812 | Rsa1.0.00032.1 | 857 | 306326 | 0         | 404 | 404 | 100 + | 211 | 614 | 138030 | 138433 |
| UN84813 | Rsa1.0.00917.1 | 753 | 182012 | 1.00E-140 | 253 | 253 | 100 - | 108 | 360 | 7459   | 7711   |
| UN84814 | Rsa1.0.00654.1 | 858 | 70012  | 0         | 497 | 497 | 100 - | 1   | 497 | 31309  | 31805  |
| UN84815 | Rsa1.0.05995.1 | 851 | 11997  | 1.00E-143 | 264 | 266 | 99 +  | 586 | 851 | 3839   | 4104   |
| UN84816 | Rsa1.0.17340.1 | 853 | 1855   | 1.00E-108 | 210 | 212 | 99 -  | 643 | 853 | 1272   | 1483   |
| UN84817 | Rsa1.0.00385.1 | 849 | 89160  | 1.00E-161 | 381 | 416 | 91 +  | 96  | 511 | 5594   | 5987   |
| UN84818 | Rsa1.0.00419.1 | 837 | 86562  | 0         | 632 | 632 | 100 - | 161 | 792 | 16334  | 16965  |
| UN84819 | Rsa1.0.02228.1 | 858 | 33688  | 0         | 646 | 646 | 100 - | 1   | 646 | 16775  | 17420  |
| UN84820 | Rsa1.0.00571.1 | 852 | 329018 | 0         | 699 | 700 | 99 -  | 145 | 844 | 18049  | 18748  |
| UN84821 | Rsa1.0.40791.1 | 887 | 550    | 1.00E-159 | 292 | 293 | 99 -  | 1   | 292 | 1      | 293    |
| UN84822 | Rsa1.0.01679.1 | 880 | 146876 | 0         | 558 | 562 | 99 -  | 1   | 562 | 124581 | 125142 |
| UN84823 | Rsa1.0.00381.1 | 798 | 89718  | 0         | 735 | 735 | 100 - | 1   | 735 | 55578  | 56312  |

|         |                |     |        |           |     |     |       |     |     |        |        |
|---------|----------------|-----|--------|-----------|-----|-----|-------|-----|-----|--------|--------|
| UN84824 | Rsa1.0_00606.1 | 818 | 73150  | 0         | 651 | 651 | 100 + | 166 | 816 | 30196  | 30846  |
| UN84825 | Rsa1.0_00373.1 | 824 | 90296  | 0         | 383 | 383 | 100 + | 95  | 477 | 47117  | 47499  |
| UN84826 | Rsa1.0_02870.1 | 862 | 27102  | 0         | 692 | 702 | 98 +  | 161 | 862 | 6395   | 7096   |
| UN84827 | Rsa1.0_04439.1 | 856 | 17348  | 0         | 336 | 340 | 98 -  | 426 | 765 | 8718   | 9057   |
| UN84828 | Rsa1.0_00275.1 | 510 | 210104 | 1.00E-113 | 208 | 208 | 100 - | 1   | 208 | 152106 | 152313 |
| UN84829 | #              | #   | #      | #         | #   | #   | #     | #   | #   | #      | #      |
| UN84830 | #              | #   | #      | #         | #   | #   | #     | #   | #   | #      | #      |
| UN84831 | Rsa1.0_00293.1 | 865 | 339294 | 0         | 592 | 592 | 100 - | 203 | 794 | 307360 | 307951 |
| UN84832 | Rsa1.0_01089.1 | 197 | 142191 | 1.00E-103 | 196 | 197 | 99 +  | 1   | 197 | 95704  | 95899  |
| UN84833 | Rsa1.0_00015.1 | 895 | 561803 | 0         | 895 | 895 | 100 + | 1   | 895 | 288422 | 289316 |
| UN84834 | Rsa1.0_00974.1 | 871 | 57893  | 0         | 551 | 551 | 100 + | 1   | 551 | 34974  | 35524  |
| UN84835 | Rsa1.0_01029.1 | 128 | 256254 | 8.00E-31  | 75  | 76  | 98 -  | 2   | 76  | 21335  | 21410  |
| UN84836 | Rsa1.0_01434.1 | 880 | 45951  | 0         | 836 | 836 | 100 - | 1   | 836 | 9824   | 10659  |
| UN84837 | Rsa1.0_03067.1 | 880 | 25651  | 9.00E-94  | 175 | 175 | 100 + | 1   | 175 | 1959   | 2133   |
| UN84838 | Rsa1.0_00102.1 | 865 | 135497 | 0         | 865 | 865 | 100 - | 1   | 865 | 96279  | 97143  |
| UN84839 | Rsa1.0_04125.1 | 662 | 18944  | 1.00E-149 | 271 | 272 | 99 +  | 180 | 451 | 18673  | 18944  |
| UN84840 | Rsa1.0_03999.1 | 558 | 19645  | 0         | 556 | 558 | 99 -  | 1   | 558 | 9119   | 9676   |
| UN84841 | Rsa1.0_30002.1 | 835 | 765    | 0         | 555 | 576 | 96 -  | 133 | 708 | 1      | 576    |
| UN84842 | Rsa1.0_03543.1 | 840 | 22185  | 0         | 840 | 841 | 99 -  | 1   | 840 | 6101   | 6941   |
| UN84843 | Rsa1.0_00931.1 | 845 | 59210  | 0         | 790 | 795 | 99 -  | 51  | 845 | 8897   | 9691   |
| UN84844 | Rsa1.0_00350.1 | 552 | 92346  | 1.00E-149 | 277 | 280 | 98 -  | 273 | 552 | 79598  | 79877  |
| UN84845 | Rsa1.0_00068.1 | 833 | 151813 | 1.00E-126 | 248 | 254 | 97 -  | 520 | 773 | 52960  | 53213  |
| UN84846 | Rsa1.0_01923.1 | 841 | 37233  | 0         | 414 | 414 | 100 - | 334 | 747 | 25125  | 25538  |
| UN84847 | Rsa1.0_02635.1 | 855 | 29296  | 1.00E-117 | 228 | 231 | 98 +  | 2   | 232 | 12369  | 12598  |
| UN84848 | Rsa1.0_02100.1 | 557 | 35024  | 1.00E-113 | 207 | 207 | 100 + | 181 | 387 | 6516   | 6722   |
| UN84849 | Rsa1.0_00663.1 | 871 | 164969 | 0         | 870 | 871 | 99 -  | 1   | 871 | 137399 | 138269 |
| UN84850 | Rsa1.0_02375.1 | 805 | 32026  | 0         | 805 | 805 | 100 - | 1   | 805 | 6005   | 6809   |
| UN84851 | Rsa1.0_52835.1 | 855 | 431    | 0         | 431 | 431 | 100 - | 336 | 766 | 1      | 431    |
| UN84852 | Rsa1.0_04504.1 | 813 | 17069  | 0         | 685 | 705 | 97 -  | 112 | 813 | 8751   | 9452   |
| UN84853 | #              | #   | #      | #         | #   | #   | #     | #   | #   | #      | #      |
| UN84854 | Rsa1.0_75692.1 | 838 | 303    | 1.00E-129 | 235 | 235 | 100 - | 461 | 695 | 52     | 286    |
| UN84855 | Rsa1.0_02395.1 | 881 | 31785  | 1.00E-160 | 287 | 287 | 100 + | 595 | 881 | 1899   | 2185   |
| UN84856 | Rsa1.0_01939.1 | 786 | 37124  | 0         | 727 | 727 | 100 + | 60  | 786 | 1142   | 1868   |
| UN84857 | Rsa1.0_18450.1 | 853 | 1596   | 0         | 394 | 403 | 97 -  | 127 | 529 | 636    | 1035   |
| UN84858 | Rsa1.0_00213.1 | 813 | 108167 | 0         | 748 | 748 | 100 + | 1   | 748 | 6781   | 7528   |
| UN84859 | Rsa1.0_00022.1 | 884 | 200461 | 0         | 421 | 421 | 100 + | 1   | 421 | 196425 | 196845 |
| UN84860 | Rsa1.0_01234.1 | 796 | 50183  | 0         | 618 | 626 | 98 -  | 68  | 693 | 32076  | 32698  |
| UN84861 | Rsa1.0_00034.1 | 125 | 260119 | 8.00E-65  | 125 | 125 | 100 + | 1   | 125 | 238575 | 238699 |
| UN84862 | Rsa1.0_01260.1 | 850 | 49750  | 5.00E-89  | 167 | 167 | 100 + | 384 | 550 | 21209  | 21375  |

|         |                |     |        |           |     |     |       |     |     |        |        |
|---------|----------------|-----|--------|-----------|-----|-----|-------|-----|-----|--------|--------|
| UN84863 | Rsa1.0_17564.1 | 822 | 1796   | 3.00E-78  | 164 | 169 | 97 +  | 580 | 748 | 630    | 798    |
| UN84864 | Rsa1.0_01527.1 | 870 | 43905  | 0         | 702 | 702 | 100 + | 169 | 870 | 18492  | 19193  |
| UN84865 | Rsa1.0_00127.1 | 854 | 127446 | 8.00E-82  | 203 | 220 | 92 +  | 1   | 207 | 95046  | 95265  |
| UN84866 | Rsa1.0_01194.1 | 836 | 51113  | 0         | 834 | 836 | 99 +  | 2   | 836 | 1796   | 2631   |
| UN84867 | Rsa1.0_01023.1 | 804 | 56571  | 0         | 802 | 804 | 99 -  | 1   | 804 | 21741  | 22544  |
| UN84868 | Rsa1.0_00165.1 | 805 | 116466 | 1.00E-135 | 244 | 244 | 100 + | 211 | 454 | 65040  | 65283  |
| UN84869 | Rsa1.0_00003.1 | 800 | 340054 | 0         | 677 | 682 | 99 +  | 3   | 684 | 153543 | 154224 |
| UN84870 | Rsa1.0_00975.1 | 763 | 57865  | 0         | 351 | 355 | 98 +  | 1   | 355 | 47796  | 48150  |
| UN84871 | Rsa1.0_02219.1 | 835 | 33798  | 0         | 780 | 800 | 97 +  | 36  | 835 | 3732   | 4531   |
| UN84872 | Rsa1.0_26474.1 | 368 | 890    | 0         | 363 | 364 | 99 -  | 6   | 368 | 504    | 867    |
| UN84873 | Rsa1.0_00666.1 | 830 | 69505  | 0         | 407 | 408 | 99 +  | 1   | 408 | 27001  | 27407  |
| UN84874 | Rsa1.0_04293.1 | 844 | 18046  | 1.00E-172 | 307 | 307 | 100 + | 6   | 312 | 12344  | 12650  |
| UN84875 | Rsa1.0_00033.1 | 829 | 515811 | 1.00E-178 | 316 | 316 | 100 + | 165 | 480 | 142609 | 142924 |
| UN84876 | Rsa1.0_02045.1 | 831 | 35650  | 0         | 831 | 831 | 100 + | 1   | 831 | 2688   | 3518   |
| UN84877 | Rsa1.0_06803.1 | 824 | 10330  | 0         | 516 | 537 | 96 -  | 1   | 537 | 3599   | 4131   |
| UN84878 | Rsa1.0_02688.1 | 869 | 28644  | 0         | 647 | 671 | 96 -  | 31  | 701 | 3339   | 4009   |
| UN84879 | Rsa1.0_03962.1 | 771 | 19860  | 0         | 461 | 470 | 98 +  | 302 | 771 | 7208   | 7677   |
| UN84880 | Rsa1.0_01838.1 | 565 | 38500  | 1.00E-98  | 195 | 199 | 97 +  | 114 | 312 | 16385  | 16583  |
| UN84881 | Rsa1.0_00027.1 | 831 | 283362 | 0         | 621 | 656 | 94 -  | 177 | 831 | 166527 | 167182 |
| UN84882 | Rsa1.0_05076.1 | 851 | 14916  | 0         | 568 | 568 | 100 + | 284 | 851 | 11483  | 12050  |
| UN84883 | Rsa1.0_26879.1 | 811 | 874    | 1.00E-49  | 101 | 101 | 100 - | 323 | 423 | 7      | 107    |
| UN84884 | Rsa1.0_03554.1 | 828 | 22137  | 0         | 801 | 829 | 96 -  | 1   | 828 | 16898  | 17720  |
| UN84885 | Rsa1.0_00545.1 | 287 | 189649 | 1.00E-160 | 286 | 286 | 100 + | 2   | 287 | 56755  | 57040  |
| UN84886 | Rsa1.0_04164.1 | 801 | 18767  | 1.00E-163 | 303 | 307 | 98 -  | 495 | 801 | 11798  | 12104  |
| UN84887 | Rsa1.0_00484.1 | 198 | 203294 | 6.00E-79  | 152 | 153 | 99 +  | 1   | 153 | 139435 | 139587 |
| UN84888 | Rsa1.0_00556.1 | 120 | 207212 | 2.00E-59  | 119 | 120 | 99 -  | 1   | 120 | 37253  | 37372  |
| UN84889 | Rsa1.0_05166.1 | 770 | 14624  | 1.00E-149 | 268 | 268 | 100 + | 352 | 619 | 13754  | 14021  |
| UN84890 | Rsa1.0_00813.1 | 815 | 63202  | 0         | 474 | 487 | 97 +  | 4   | 487 | 37358  | 37843  |
| UN84891 | Rsa1.0_00128.1 | 799 | 228675 | 2.00E-54  | 127 | 133 | 95 +  | 623 | 755 | 186865 | 186997 |
| UN84892 | Rsa1.0_03536.1 | 874 | 22232  | 0         | 446 | 446 | 100 + | 429 | 874 | 7055   | 7500   |
| UN84893 | Rsa1.0_00626.1 | 512 | 71582  | 0         | 396 | 399 | 99 -  | 1   | 399 | 65582  | 65980  |
| UN84894 | Rsa1.0_19977.1 | 396 | 1357   | 1.00E-81  | 304 | 354 | 85 -  | 1   | 354 | 55     | 408    |
| UN84895 | Rsa1.0_00417.1 | 843 | 395068 | 0         | 842 | 844 | 99 -  | 1   | 843 | 273036 | 273879 |
| UN84896 | Rsa1.0_01204.1 | 864 | 50843  | 0         | 823 | 862 | 95 -  | 6   | 864 | 21088  | 21940  |
| UN84897 | Rsa1.0_02197.1 | 795 | 33996  | 0         | 545 | 561 | 97 +  | 56  | 613 | 5867   | 6427   |
| UN84898 | Rsa1.0_00189.1 | 227 | 111830 | 1.00E-119 | 223 | 224 | 99 +  | 5   | 227 | 7153   | 7376   |
| UN84899 | Rsa1.0_25740.1 | 847 | 922    | 0         | 841 | 843 | 99 +  | 1   | 843 | 80     | 922    |
| UN84900 | Rsa1.0_01390.1 | 555 | 46695  | 0         | 522 | 555 | 94 -  | 1   | 555 | 38006  | 38560  |
| UN84901 | Rsa1.0_00563.1 | 861 | 75491  | 0         | 855 | 864 | 98 +  | 1   | 861 | 72702  | 73564  |

|         |                |     |        |           |     |     |       |     |     |        |        |
|---------|----------------|-----|--------|-----------|-----|-----|-------|-----|-----|--------|--------|
| UN84902 | Rsa1.0_04370.1 | 808 | 17701  | 0         | 380 | 380 | 100 - | 1   | 380 | 8593   | 8972   |
| UN84903 | Rsa1.0_08933.1 | 848 | 6772   | 0         | 737 | 816 | 90 +  | 75  | 848 | 4359   | 5166   |
| UN84904 | Rsa1.0_00019.1 | 849 | 301669 | 1.00E-119 | 269 | 285 | 94 +  | 566 | 849 | 267967 | 268251 |
| UN84905 | Rsa1.0_00066.1 | 804 | 152418 | 0         | 725 | 805 | 90 +  | 7   | 804 | 1719   | 2487   |
| UN84906 | Rsa1.0_01386.1 | 849 | 46765  | 0         | 844 | 845 | 99 +  | 5   | 849 | 6842   | 7685   |
| UN84907 | Rsa1.0_01350.1 | 840 | 47503  | 0         | 354 | 354 | 100 - | 154 | 507 | 29251  | 29604  |
| UN84908 | Rsa1.0_00279.1 | 845 | 100039 | 0         | 844 | 844 | 100 - | 2   | 845 | 23043  | 23886  |
| UN84909 | Rsa1.0_01484.1 | 788 | 44806  | 5.00E-89  | 174 | 175 | 99 +  | 1   | 174 | 42961  | 43135  |
| UN84910 | Rsa1.0_01949.1 | 851 | 36960  | 1.00E-163 | 292 | 292 | 100 - | 299 | 590 | 21094  | 21385  |
| UN84911 | Rsa1.0_01798.1 | 896 | 173909 | 0         | 612 | 612 | 100 - | 285 | 896 | 164591 | 165202 |
| UN84912 | Rsa1.0_00110.1 | 872 | 132719 | 0         | 851 | 859 | 99 -  | 14  | 872 | 83379  | 84237  |
| UN84913 | Rsa1.0_01458.1 | 872 | 175719 | 0         | 860 | 882 | 97 +  | 13  | 872 | 1375   | 2256   |
| UN84914 | Rsa1.0_00022.1 | 827 | 200461 | 0         | 827 | 828 | 99 -  | 1   | 827 | 194130 | 194957 |
| UN84915 | Rsa1.0_00377.1 | 889 | 90038  | 0         | 526 | 566 | 92 +  | 351 | 886 | 17523  | 18088  |
| UN84916 | Rsa1.0_07974.1 | 828 | 8147   | 0         | 805 | 840 | 95 -  | 1   | 828 | 6682   | 7510   |
| UN84917 | Rsa1.0_02821.1 | 870 | 27602  | 2.00E-82  | 238 | 264 | 90 -  | 608 | 870 | 11165  | 11428  |
| UN84918 | Rsa1.0_00271.1 | 864 | 101125 | 0         | 424 | 424 | 100 + | 291 | 714 | 99837  | 100260 |
| UN84919 | Rsa1.0_00655.1 | 866 | 195840 | 0         | 821 | 869 | 94 +  | 1   | 866 | 6619   | 7472   |
| UN84920 | Rsa1.0_00575.1 | 830 | 74791  | 0         | 424 | 438 | 96 +  | 392 | 829 | 54877  | 55311  |
| UN84921 | Rsa1.0_01638.1 | 488 | 41857  | 7.00E-90  | 201 | 212 | 94 +  | 100 | 311 | 35702  | 35913  |
| UN84922 | Rsa1.0_00034.1 | 823 | 260119 | 0         | 823 | 823 | 100 + | 1   | 823 | 100628 | 101450 |
| UN84923 | Rsa1.0_00798.1 | 859 | 63945  | 0         | 742 | 812 | 91 -  | 9   | 807 | 21539  | 22320  |
| UN84924 | Rsa1.0_14316.1 | 903 | 3538   | 0         | 725 | 728 | 99 +  | 95  | 822 | 2811   | 3538   |
| UN84925 | Rsa1.0_00202.1 | 856 | 185895 | 0         | 779 | 779 | 100 + | 1   | 779 | 9031   | 9809   |
| UN84926 | Rsa1.0_01013.1 | 877 | 56822  | 1.00E-144 | 300 | 312 | 96 -  | 566 | 877 | 45895  | 46205  |
| UN84927 | Rsa1.0_02798.1 | 855 | 27792  | 0         | 852 | 853 | 99 -  | 4   | 855 | 11025  | 11877  |
| UN84928 | Rsa1.0_04264.1 | 812 | 18207  | 2.00E-70  | 142 | 144 | 98 -  | 587 | 730 | 11107  | 11250  |
| UN84929 | Rsa1.0_00534.1 | 855 | 77361  | 0         | 391 | 392 | 99 +  | 1   | 392 | 51922  | 52313  |
| UN84930 | Rsa1.0_00081.1 | 631 | 143261 | 0         | 631 | 631 | 100 + | 1   | 631 | 78021  | 78651  |
| UN84931 | Rsa1.0_00821.1 | 919 | 62891  | 0         | 914 | 921 | 99 +  | 1   | 919 | 51390  | 52308  |
| UN84932 | Rsa1.0_01937.1 | 862 | 37147  | 1.00E-144 | 259 | 259 | 100 - | 604 | 862 | 25440  | 25698  |
| UN84933 | Rsa1.0_06677.1 | 807 | 10560  | 0         | 807 | 807 | 100 - | 1   | 807 | 5705   | 6511   |
| UN84934 | Rsa1.0_00016.1 | 849 | 831256 | 0         | 849 | 849 | 100 - | 1   | 849 | 499256 | 500104 |
| UN84935 | Rsa1.0_04544.1 | 830 | 16917  | 1.00E-144 | 293 | 304 | 96 +  | 527 | 830 | 11713  | 12016  |
| UN84936 | Rsa1.0_00427.1 | 870 | 189678 | 0         | 339 | 339 | 100 + | 178 | 516 | 37190  | 37528  |
| UN84937 | Rsa1.0_04536.1 | 306 | 16947  | 1.00E-118 | 284 | 303 | 93 -  | 5   | 306 | 7151   | 7451   |
| UN84938 | Rsa1.0_00198.1 | 836 | 222963 | 2.33E-156 | 308 | 324 | 95 +  | 3   | 313 | 105083 | 105406 |
| UN84939 | Rsa1.0_00294.1 | 827 | 144860 | 1.00E-104 | 212 | 218 | 97 -  | 77  | 294 | 62616  | 62830  |
| UN84940 | Rsa1.0_01726.1 | 814 | 40263  | 0         | 401 | 402 | 99 +  | 1   | 401 | 26695  | 27096  |





|         |                |     |        |          |     |     |      |   |    |     |        |        |   |
|---------|----------------|-----|--------|----------|-----|-----|------|---|----|-----|--------|--------|---|
| UN85019 | #              | #   | #      | #        | #   | #   | #    | # | #  | #   | #      | #      | # |
| UN85020 | #              | #   | #      | #        | #   | #   | #    | # | #  | #   | #      | #      | # |
| UN85021 | #              | #   | #      | #        | #   | #   | #    | # | #  | #   | #      | #      | # |
| UN85022 | #              | #   | #      | #        | #   | #   | #    | # | #  | #   | #      | #      | # |
| UN85023 | #              | #   | #      | #        | #   | #   | #    | # | #  | #   | #      | #      | # |
| UN85024 | #              | #   | #      | #        | #   | #   | #    | # | #  | #   | #      | #      | # |
| UN85025 | #              | #   | #      | #        | #   | #   | #    | # | #  | #   | #      | #      | # |
| UN85026 | #              | #   | #      | #        | #   | #   | #    | # | #  | #   | #      | #      | # |
| UN85027 | Rsa1.0_01236.1 | 197 | 50156  | 1.00E-21 | 120 | 132 | 90 - |   | 4  | 126 | 45216  | 45347  |   |
| UN85028 | Rsa1.0_00083.1 | 153 | 442773 | 2.00E-22 | 81  | 90  | 90 + |   | 64 | 153 | 400412 | 400501 |   |
| UN85029 | Rsa1.0_02329.1 | 184 | 32474  | 1.00E-18 | 76  | 83  | 91 + |   | 67 | 146 | 10311  | 10393  |   |
| UN85030 | Rsa1.0_02064.1 | 196 | 35476  | 8.00E-29 | 118 | 130 | 90 - |   | 8  | 129 | 16728  | 16857  |   |
| UN85031 | #              | #   | #      | #        | #   | #   | #    | # | #  | #   | #      | #      | # |
| UN85032 | #              | #   | #      | #        | #   | #   | #    | # | #  | #   | #      | #      | # |
| UN85033 | #              | #   | #      | #        | #   | #   | #    | # | #  | #   | #      | #      | # |
| UN85034 | Rsa1.0_02516.1 | 193 | 30608  | 6.00E-11 | 57  | 63  | 90 + |   | 1  | 62  | 20229  | 20291  |   |
| UN85035 | Rsa1.0_00143.1 | 184 | 121313 | 2.00E-69 | 173 | 181 | 95 + |   | 8  | 184 | 64287  | 64467  |   |
| UN85036 | Rsa1.0_09876.1 | 236 | 6108   | 3.00E-75 | 217 | 231 | 93 + |   | 17 | 236 | 2311   | 2539   |   |
| UN85037 | Rsa1.0_04352.1 | 173 | 17779  | 3.00E-19 | 75  | 81  | 92 + |   | 14 | 92  | 3268   | 3348   |   |
| UN85038 | Rsa1.0_05269.1 | 144 | 14311  | 8.00E-13 | 67  | 73  | 91 - |   | 21 | 89  | 6821   | 6893   |   |
| UN85039 | #              | #   | #      | #        | #   | #   | #    | # | #  | #   | #      | #      | # |
| UN85040 | #              | #   | #      | #        | #   | #   | #    | # | #  | #   | #      | #      | # |
| UN85041 | #              | #   | #      | #        | #   | #   | #    | # | #  | #   | #      | #      | # |
| UN85042 | Rsa1.0_01004.1 | 185 | 56975  | 1.00E-30 | 159 | 180 | 88 + |   | 1  | 168 | 3683   | 3862   |   |
| UN85043 | #              | #   | #      | #        | #   | #   | #    | # | #  | #   | #      | #      | # |
| UN85044 | #              | #   | #      | #        | #   | #   | #    | # | #  | #   | #      | #      | # |
| UN85045 | Rsa1.0_20497.1 | 218 | 1299   | 7.00E-42 | 144 | 157 | 91 + |   | 52 | 201 | 306    | 462    |   |
| UN85046 | Rsa1.0_00169.1 | 154 | 274298 | 4.00E-33 | 144 | 160 | 90 + |   | 1  | 154 | 94746  | 94905  |   |
| UN85047 | #              | #   | #      | #        | #   | #   | #    | # | #  | #   | #      | #      | # |
| UN85048 | #              | #   | #      | #        | #   | #   | #    | # | #  | #   | #      | #      | # |
| UN85049 | #              | #   | #      | #        | #   | #   | #    | # | #  | #   | #      | #      | # |
| UN85050 | #              | #   | #      | #        | #   | #   | #    | # | #  | #   | #      | #      | # |
| UN85051 | #              | #   | #      | #        | #   | #   | #    | # | #  | #   | #      | #      | # |
| UN85052 | #              | #   | #      | #        | #   | #   | #    | # | #  | #   | #      | #      | # |
| UN85053 | #              | #   | #      | #        | #   | #   | #    | # | #  | #   | #      | #      | # |
| UN85054 | #              | #   | #      | #        | #   | #   | #    | # | #  | #   | #      | #      | # |
| UN85055 | #              | #   | #      | #        | #   | #   | #    | # | #  | #   | #      | #      | # |
| UN85056 | #              | #   | #      | #        | #   | #   | #    | # | #  | #   | #      | #      | # |
| UN85057 | Rsa1.0_00814.1 | 201 | 63073  | 9.00E-35 | 184 | 210 | 87 + |   | 1  | 201 | 3198   | 3407   |   |
